# Supplementary material for: Transcriptomic and proteomic landscape of mitochondrial dysfunction reveals secondary coenzyme Q deficiency in mammals
Source: eLife journal article supplement (doi:10.7554/elife.30952), 2017-11-13

## Supplementary File 9: Differential expression time-curve per protein Kühl *et al.*

Time curves of differential expression analysis of each protein on the *Lrpprc* time point analysis

Time curves represent the log<sub>2</sub> fold change of L/L, cre / L/L

/ A0A0A6YXD3; adj.p value: 0.36144

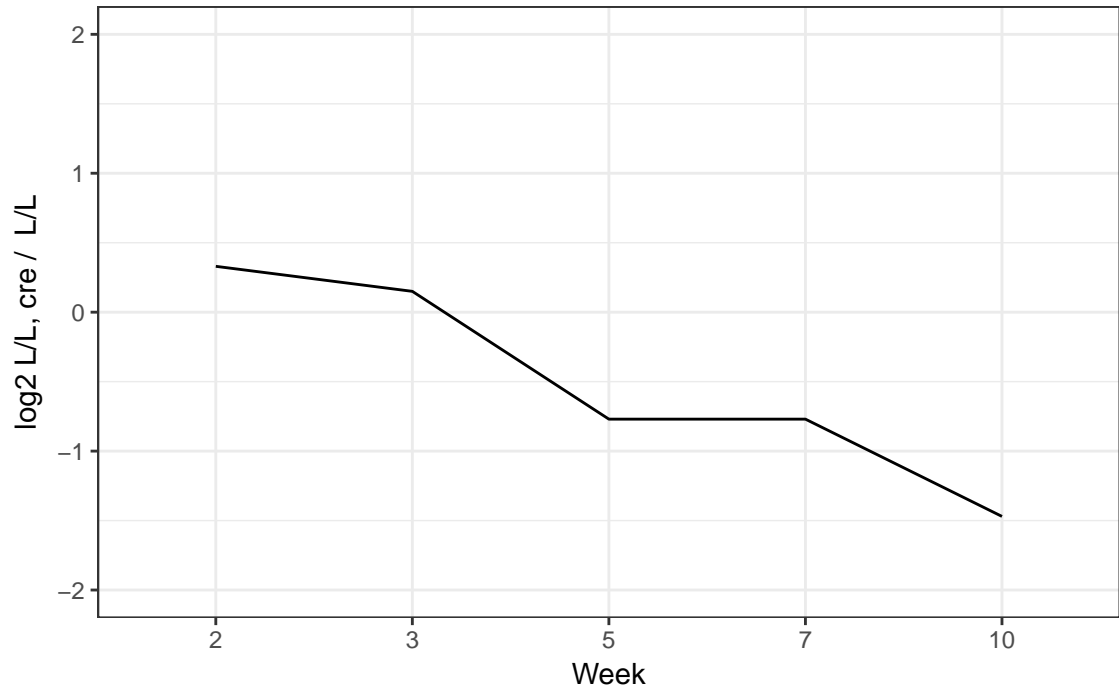

/ Q3UNZ8; adj.p value: 0.32279

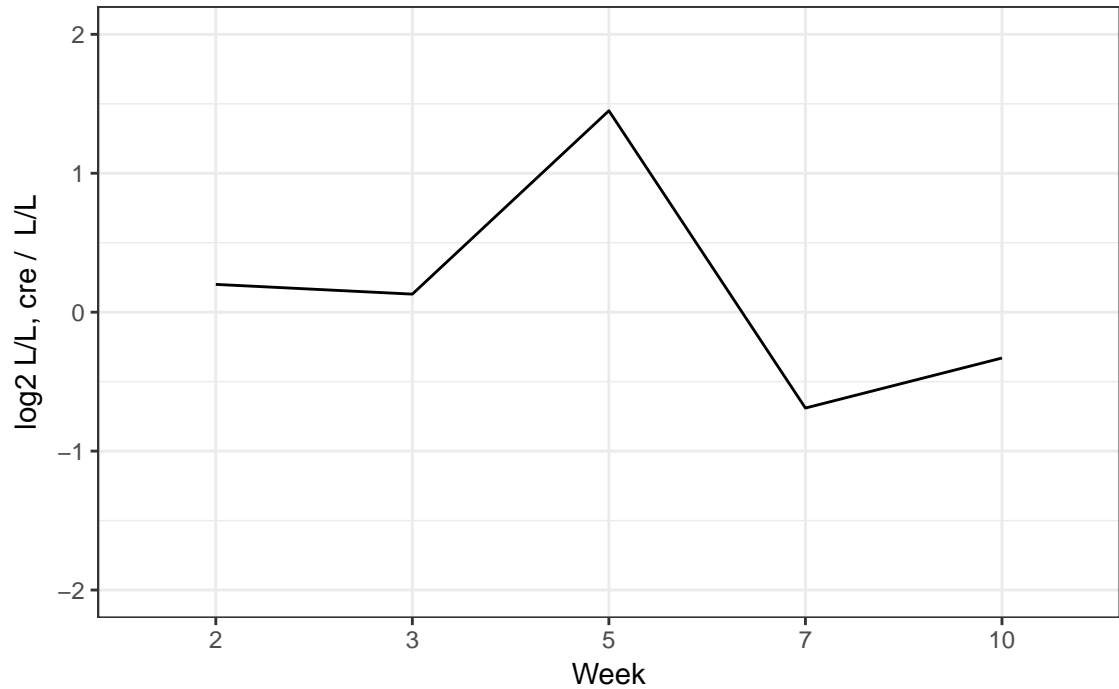

/ Q80VP5; adj.p value: 0.0122

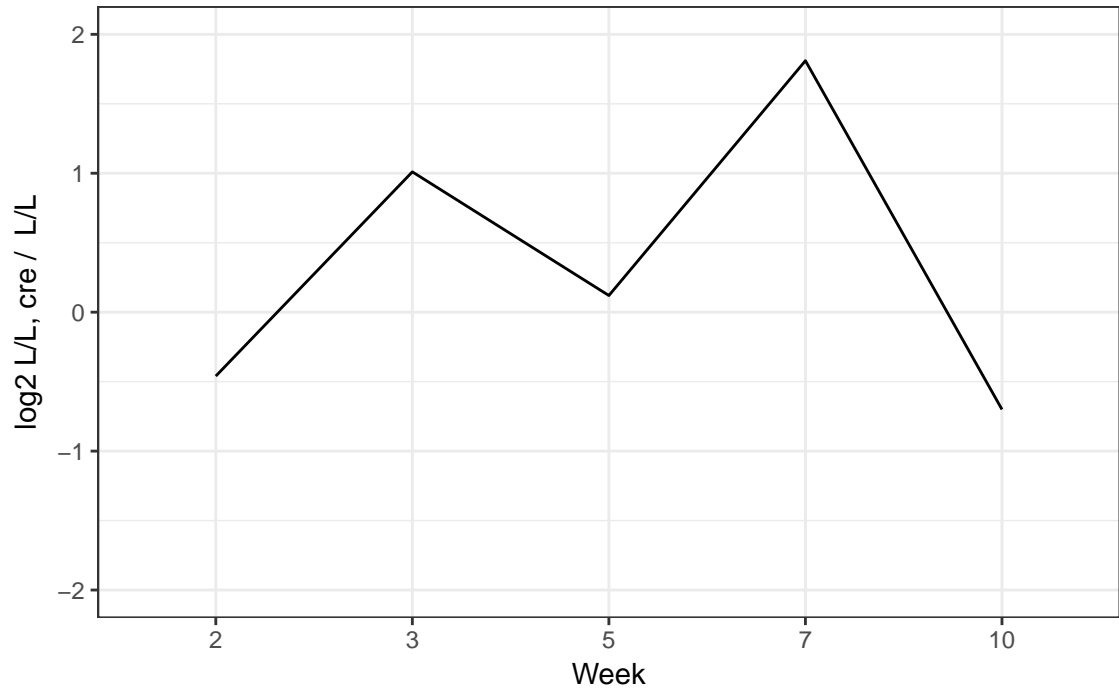

/ Q8BHE8; adj.p value: 0.00732

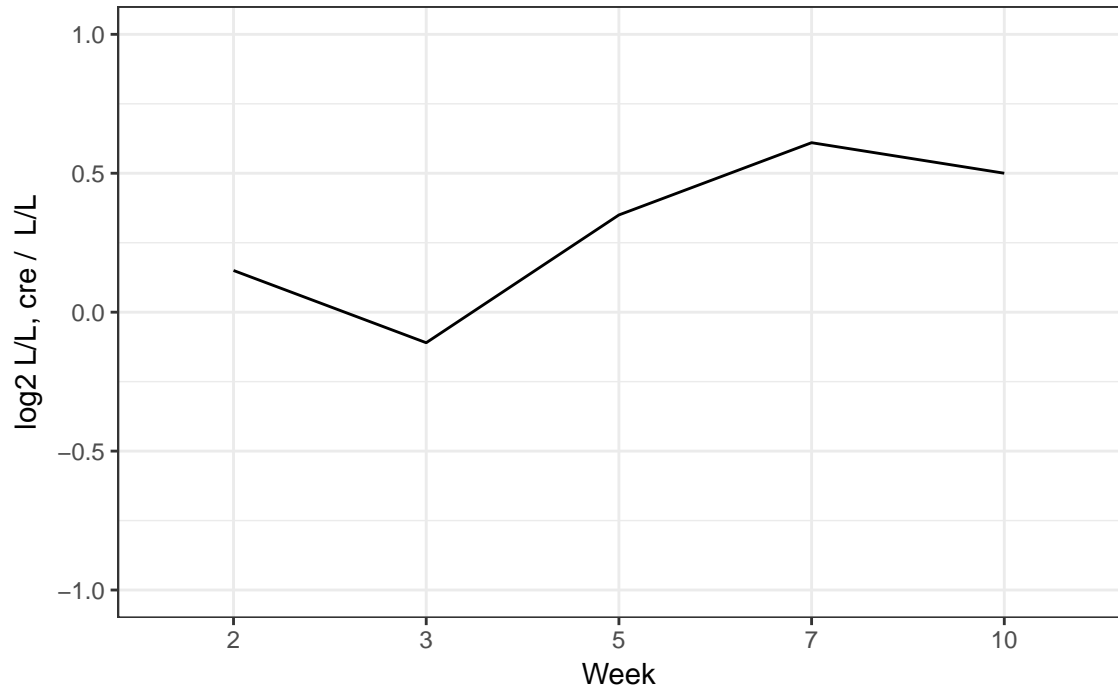

/ Q8BTE0; adj.p value: 0.1569

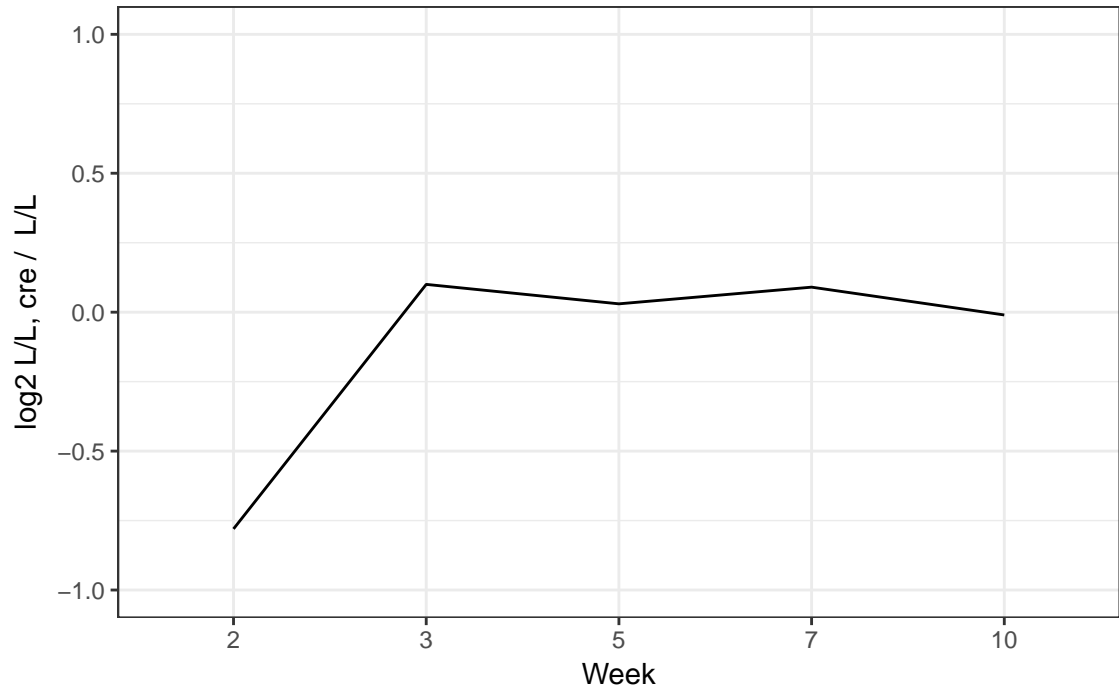

/ Q9CR13; adj.p value: 0.35082

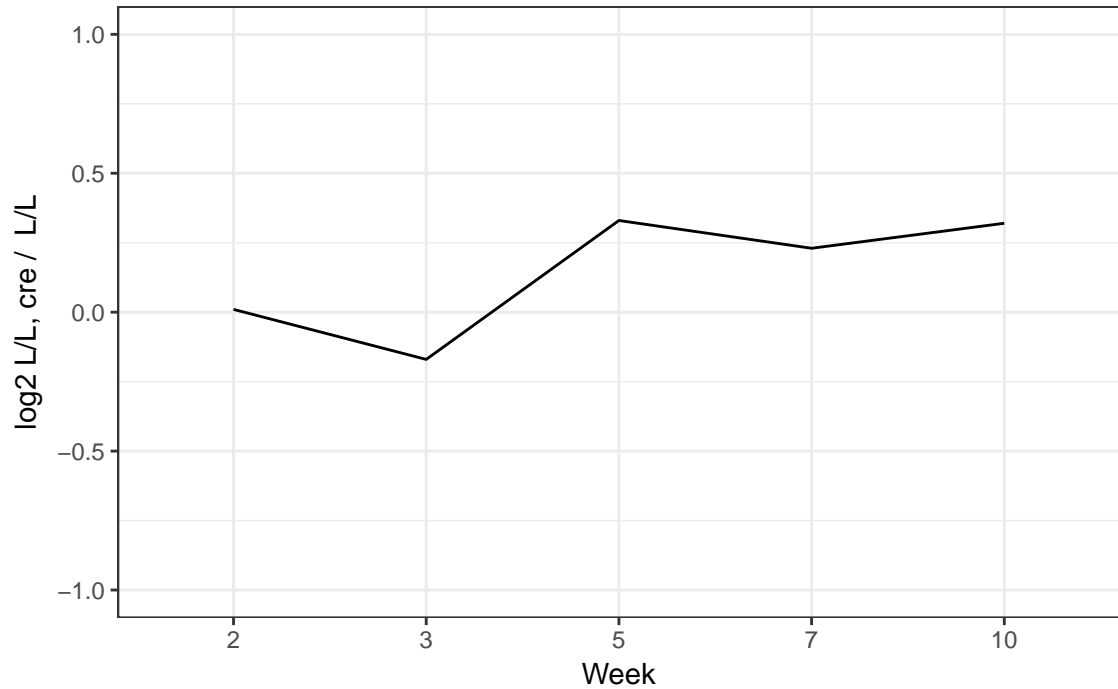

1700021F05RIK / Q9CQF4; adj.p value: 0.00016

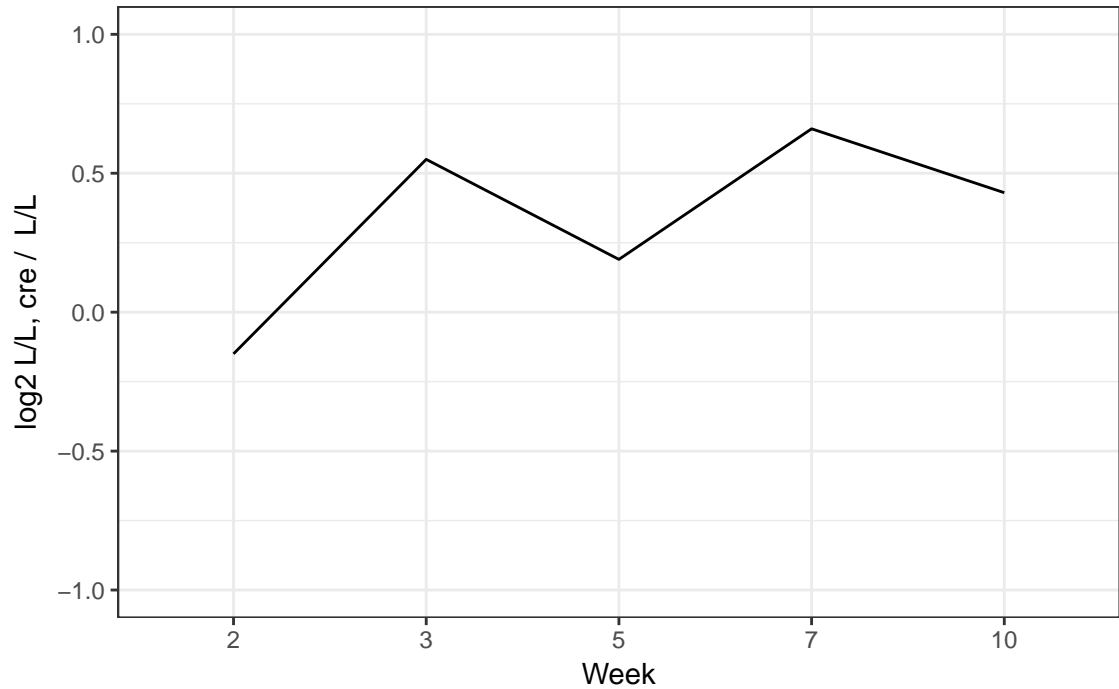



2310061104RIK / B8JJ66; adj.p value: 0.00047

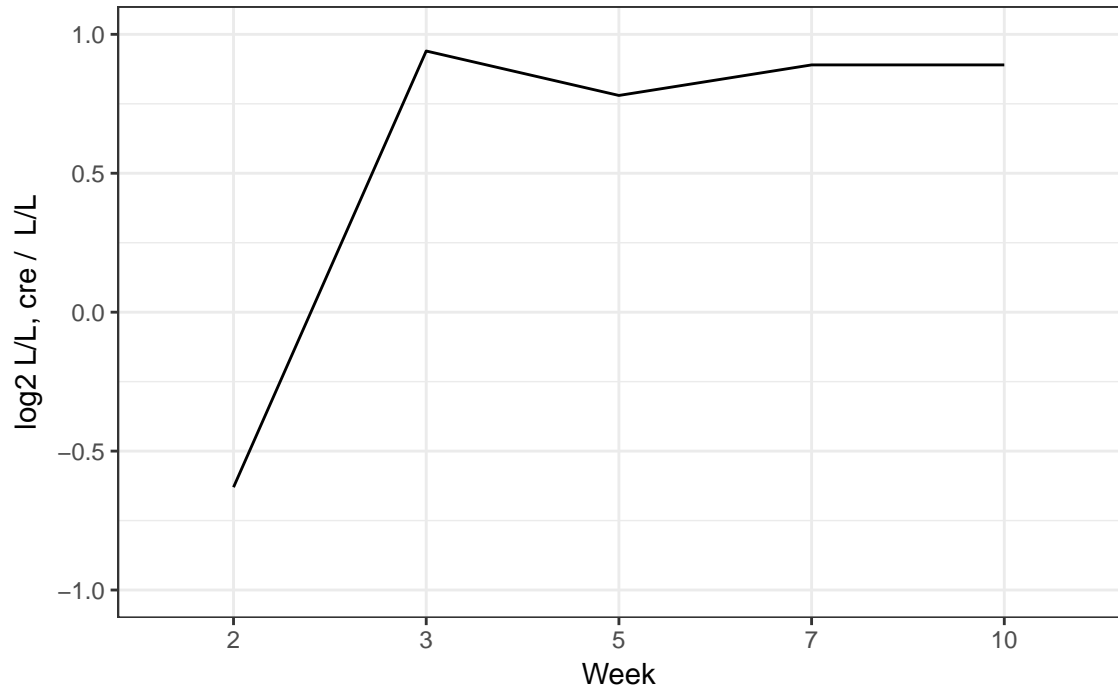

9030617O03RIK / E9QMK9; adj.p value: 6e-05

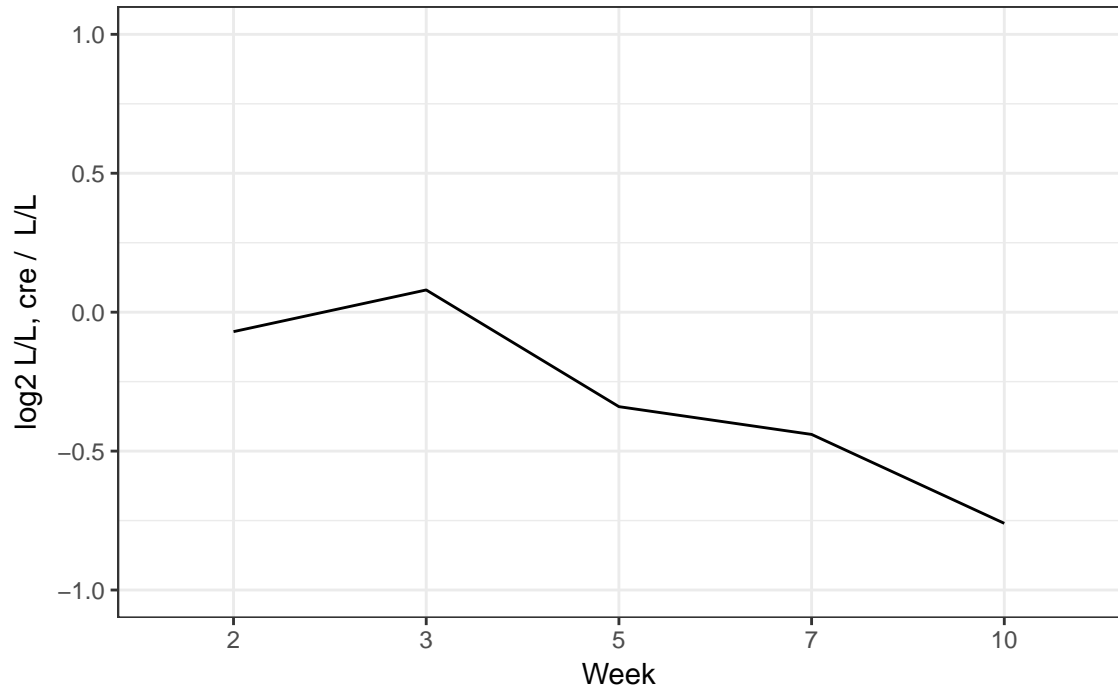

AARS2 / Q14CH7; adj.p value: 2e-05

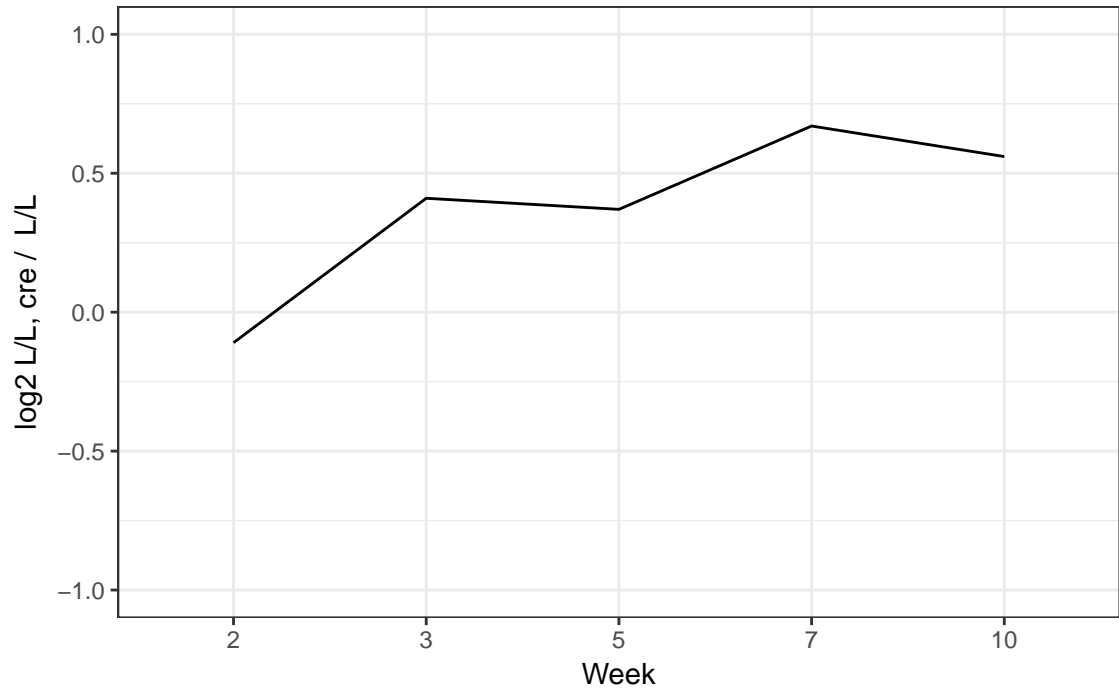

ABAT / P61922; adj.p value: 0.09005

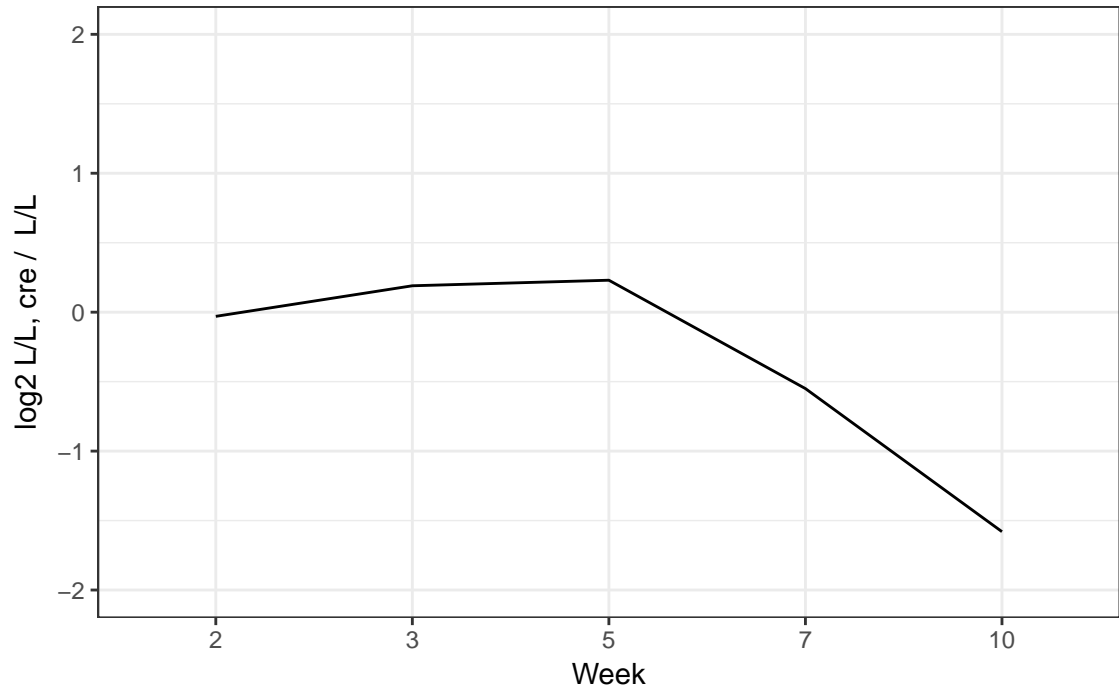

ABCB10 / Q9JI39; adj.p value: 0.04778

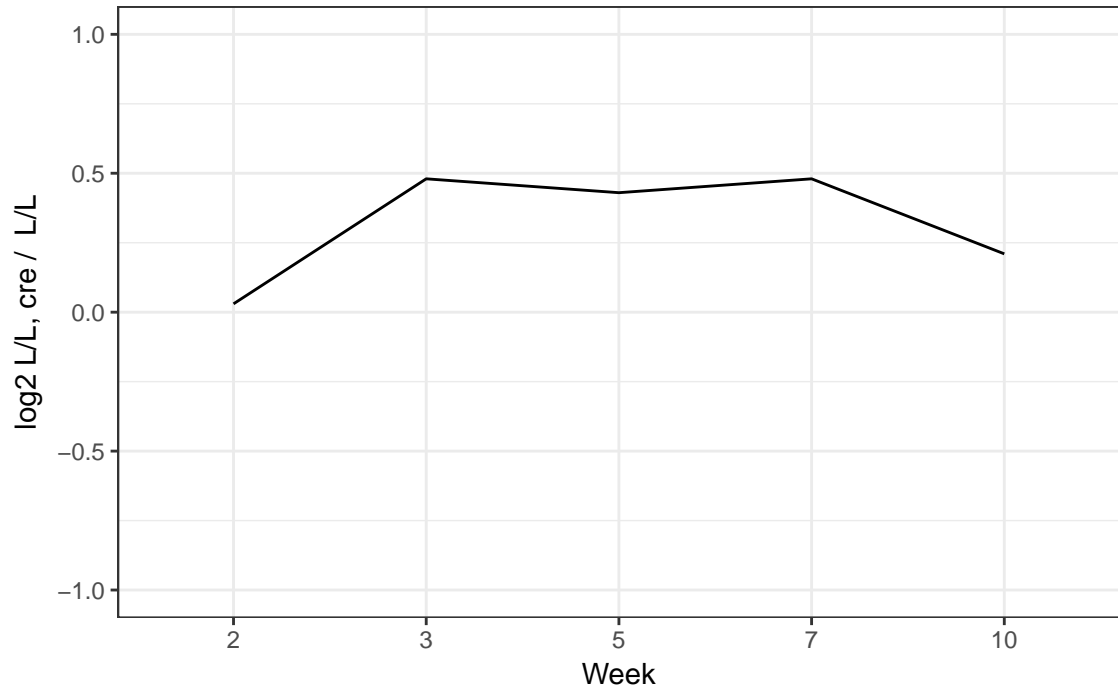

ABCB7 / Q61102; adj.p value: 0.00075

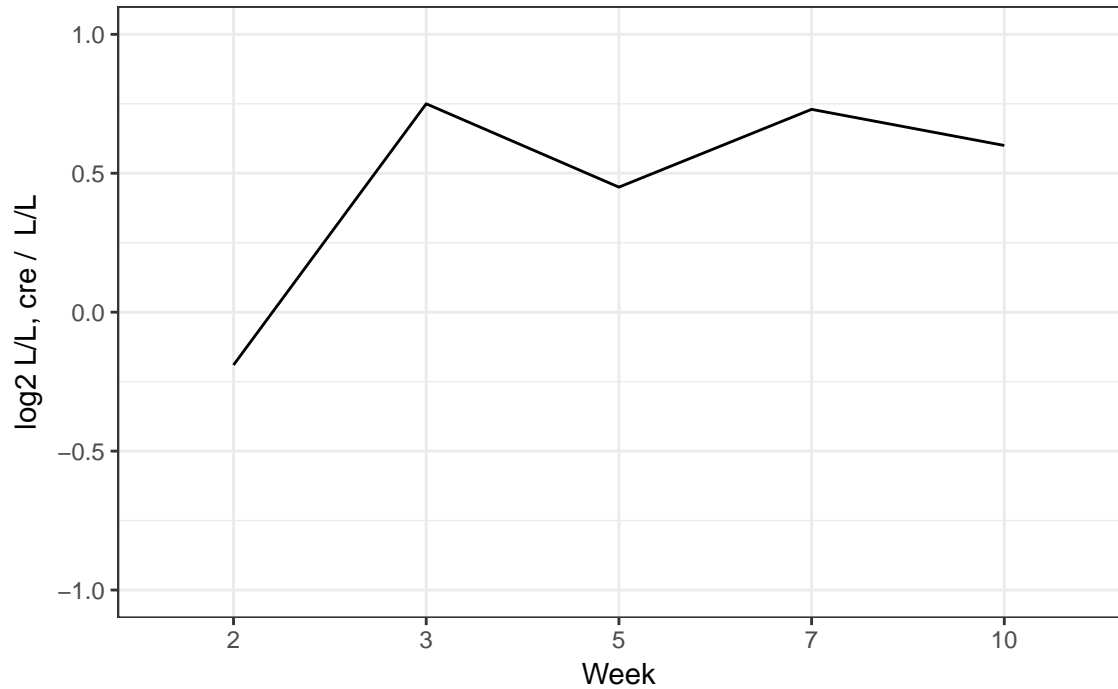

ABCB8 / Q9CXJ4; adj.p value: 0.06638

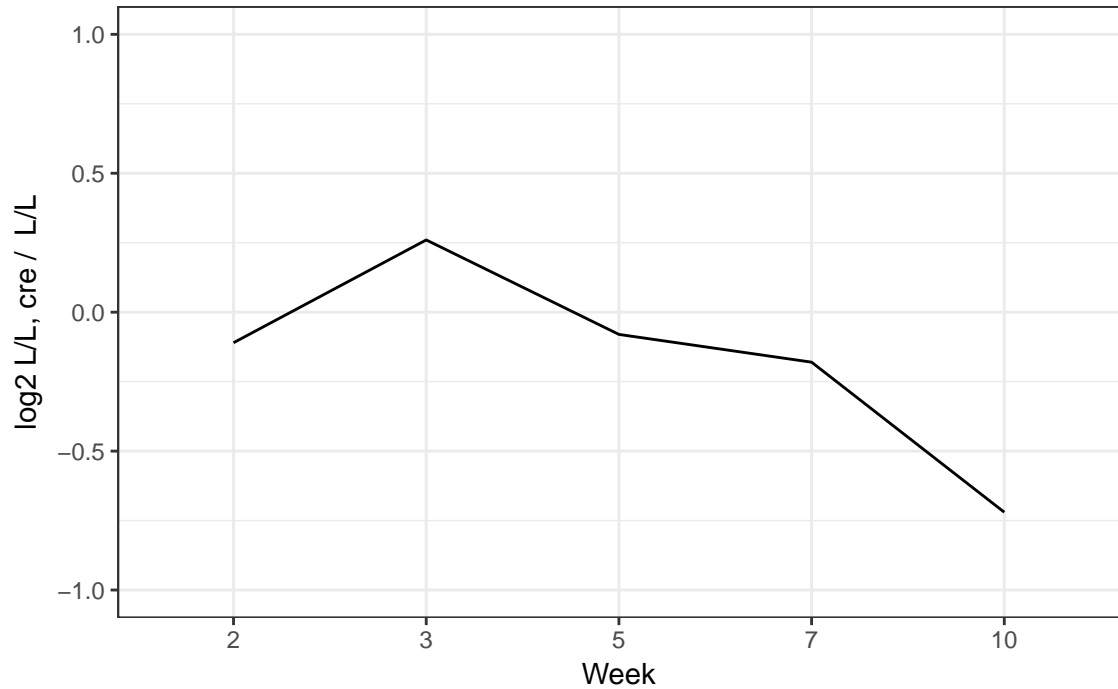

ABCD3 / A0A0G2JDI9; adj.p value: 0.2161

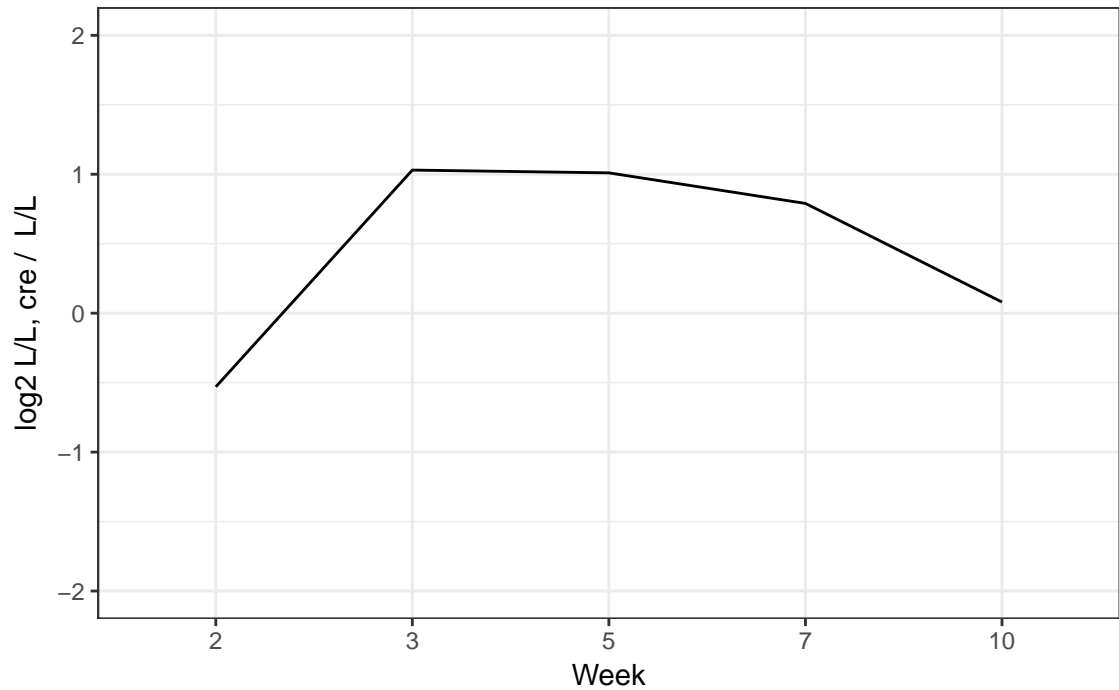



ABHD10 / Q6PE15; adj.p value: 0.14067

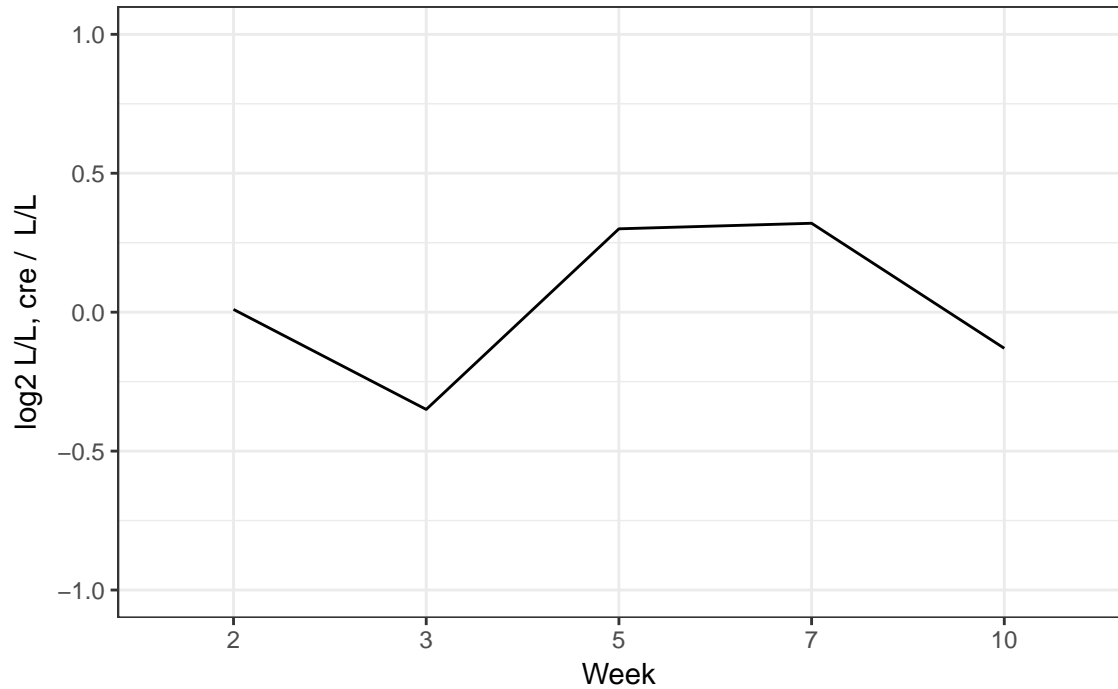

ABHD11 / Q8K4F5; adj.p value: 0.61409

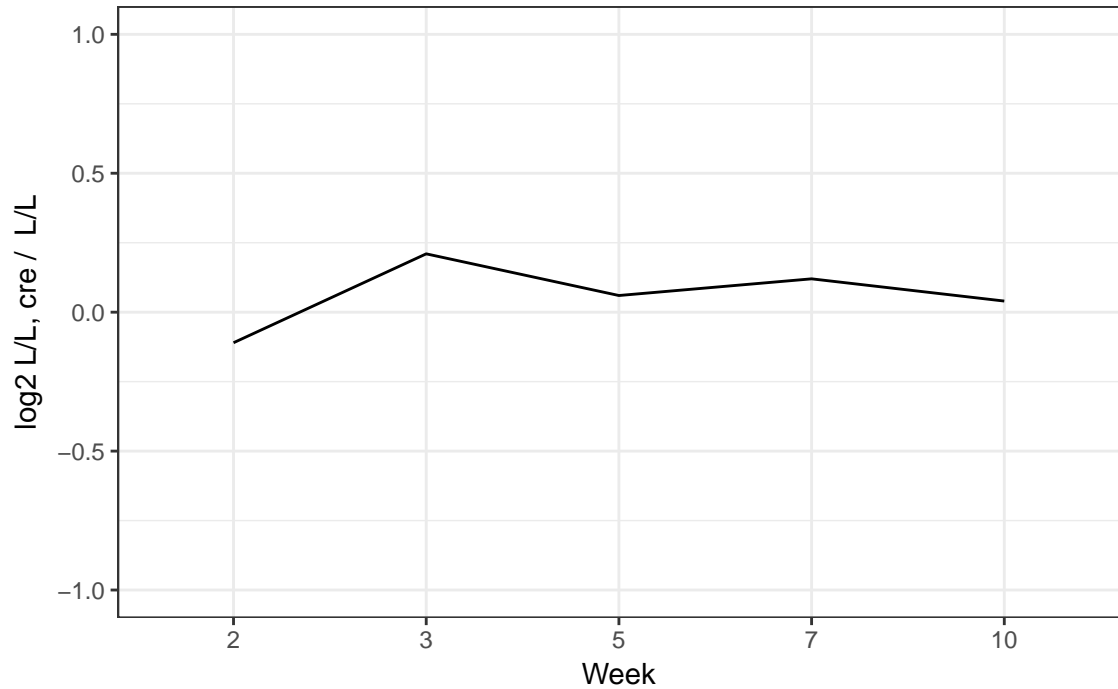

ACAA1A / Q921H8; adj.p value: 0.05131

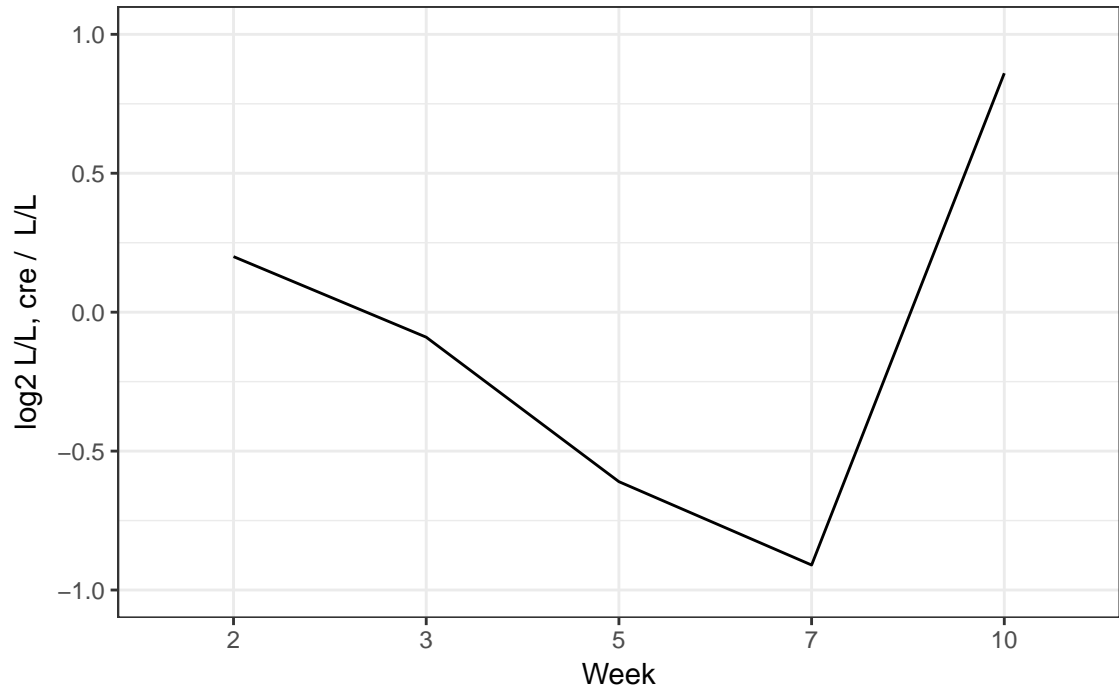

ACAA2 / Q8BWT1; adj.p value: 0.00028

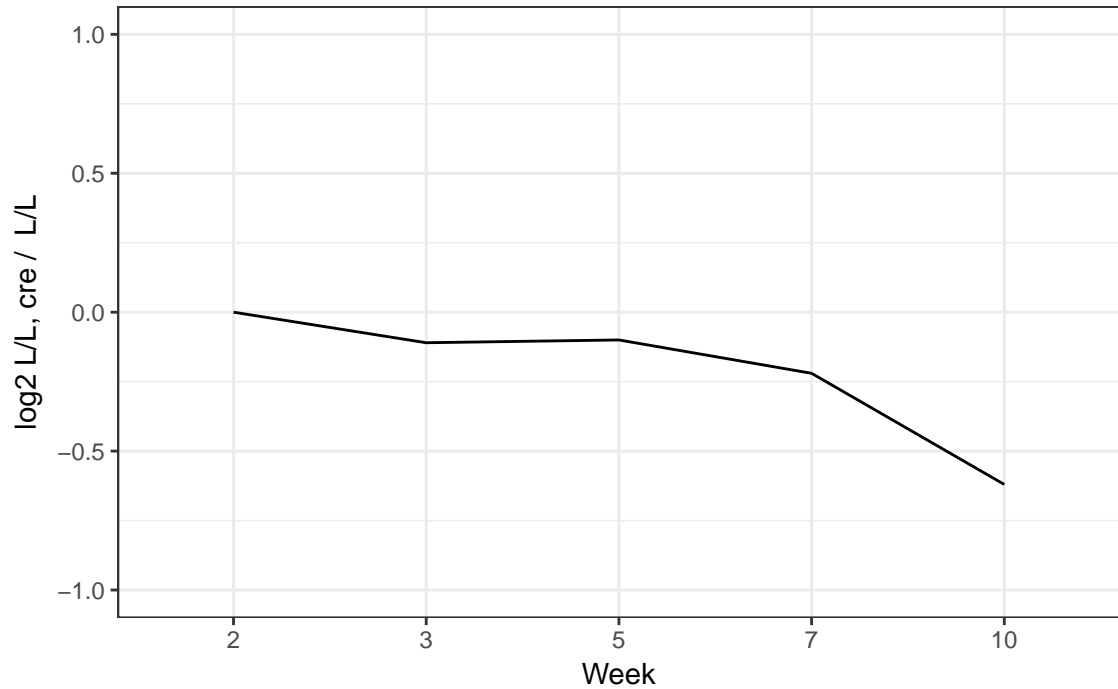

ACAD10 / Q8K370; adj.p value: 0.00169

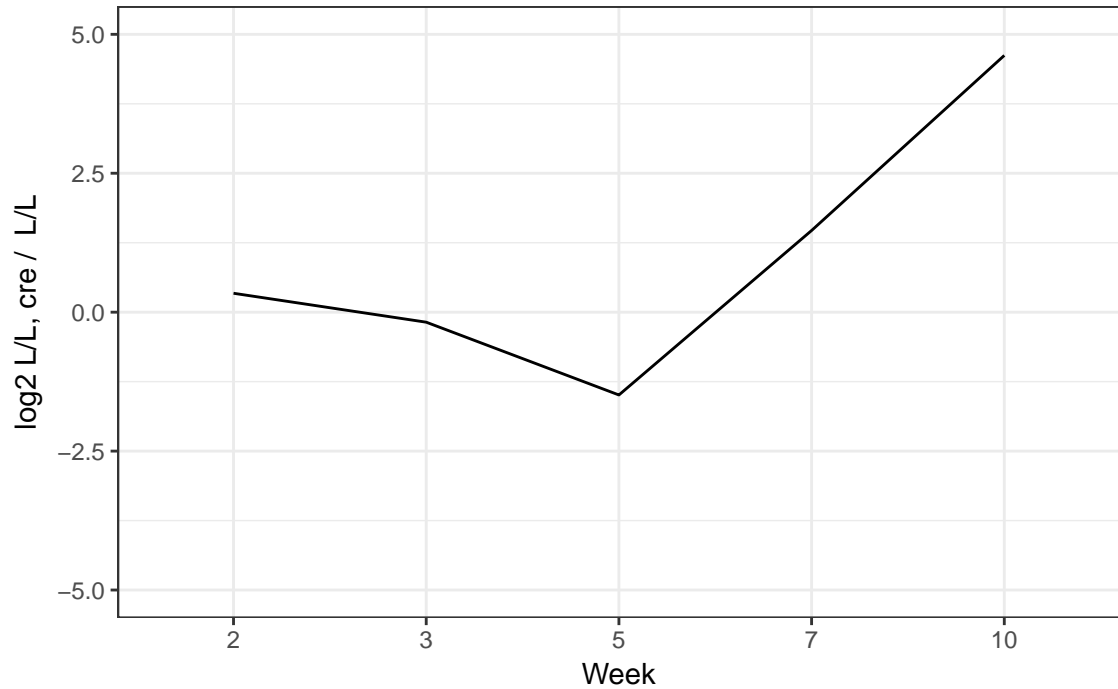

ACAD12 / D3Z7X0; adj.p value: 0.03186

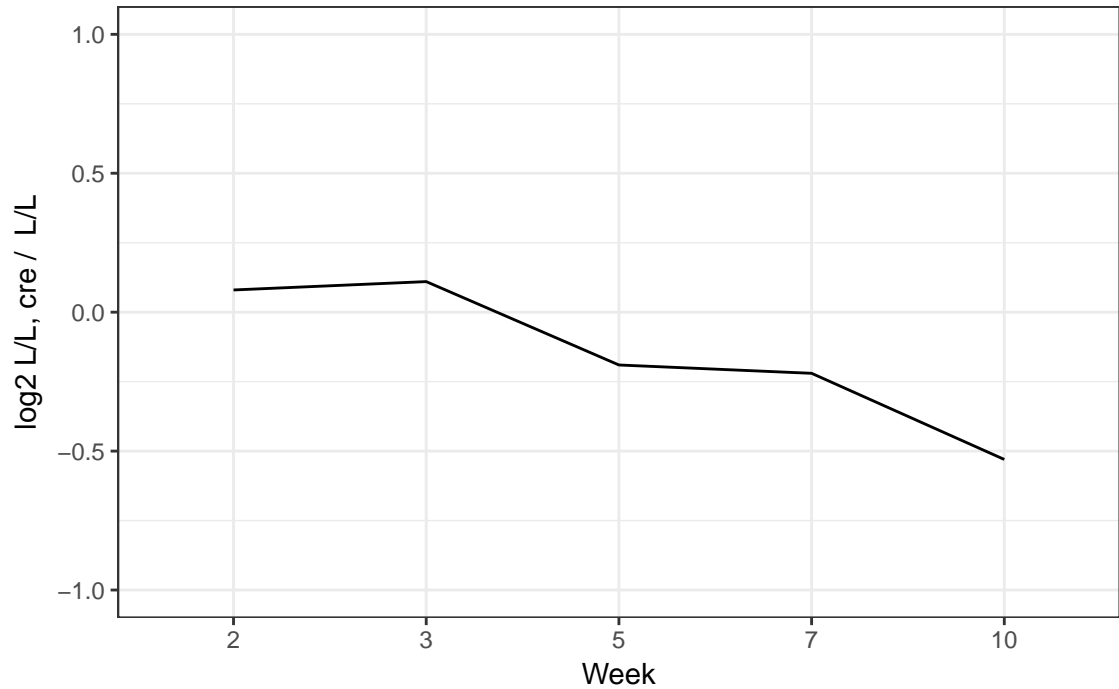

ACAD8 / Q9D7B6; adj.p value: 0.00027

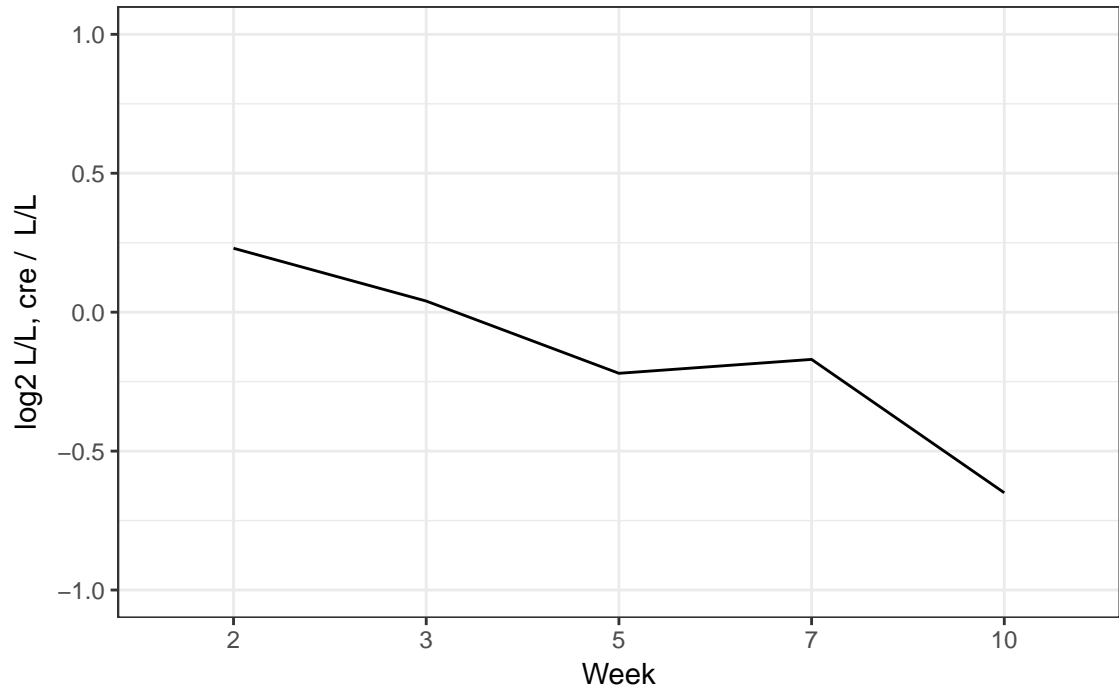

ACAD9 / Q8JZN5; adj.p value: 0.14551

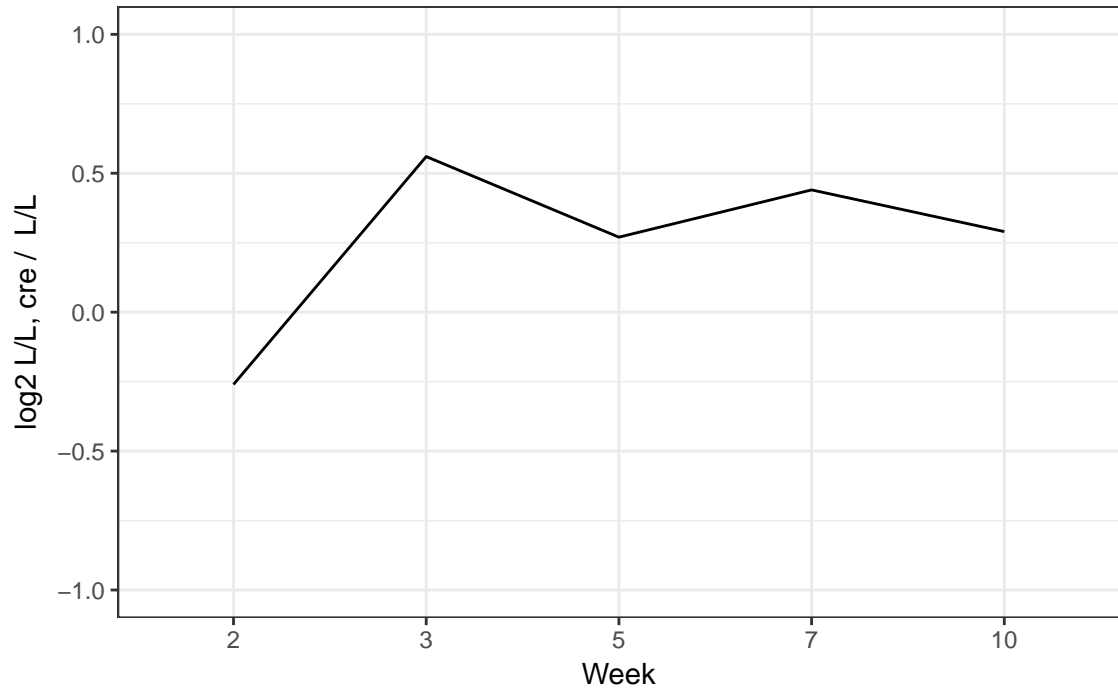



ACADL / P51174; adj.p value: 0.31815

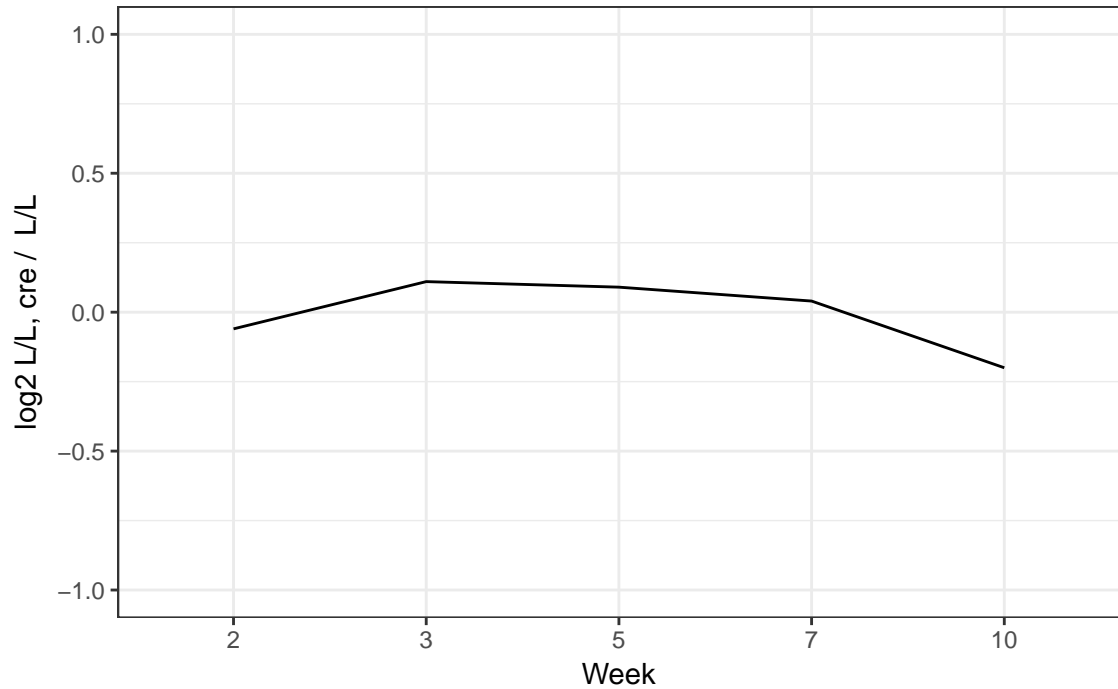

ACADM / P45952; adj.p value: 0.00068

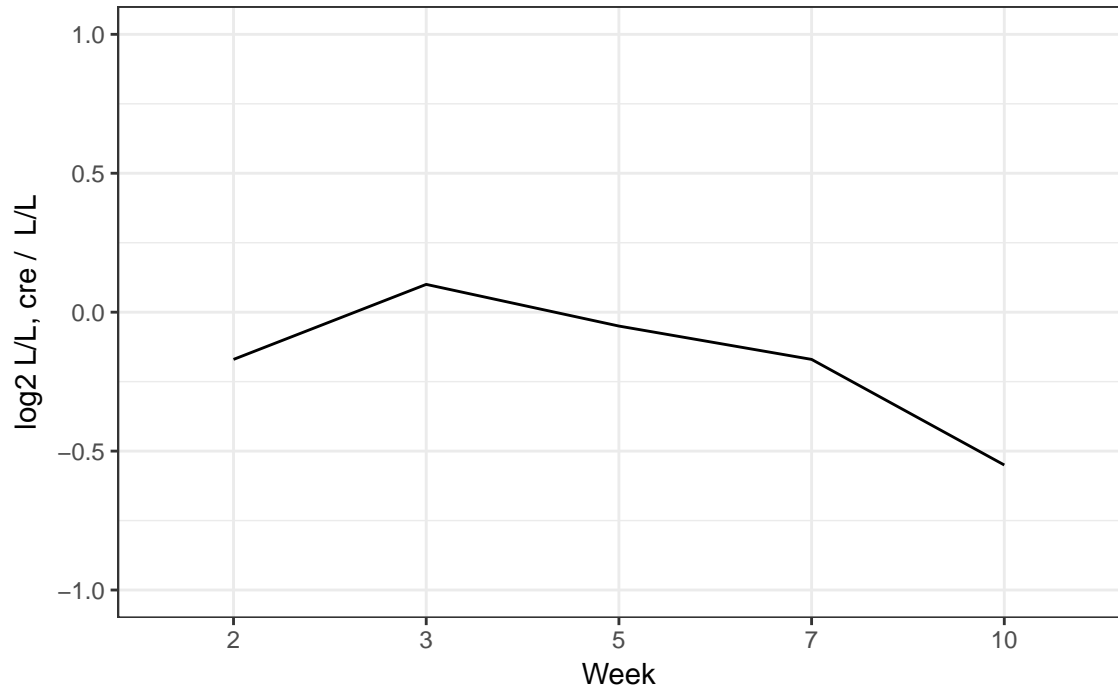

ACADS / Q07417; adj.p value: 0.14374

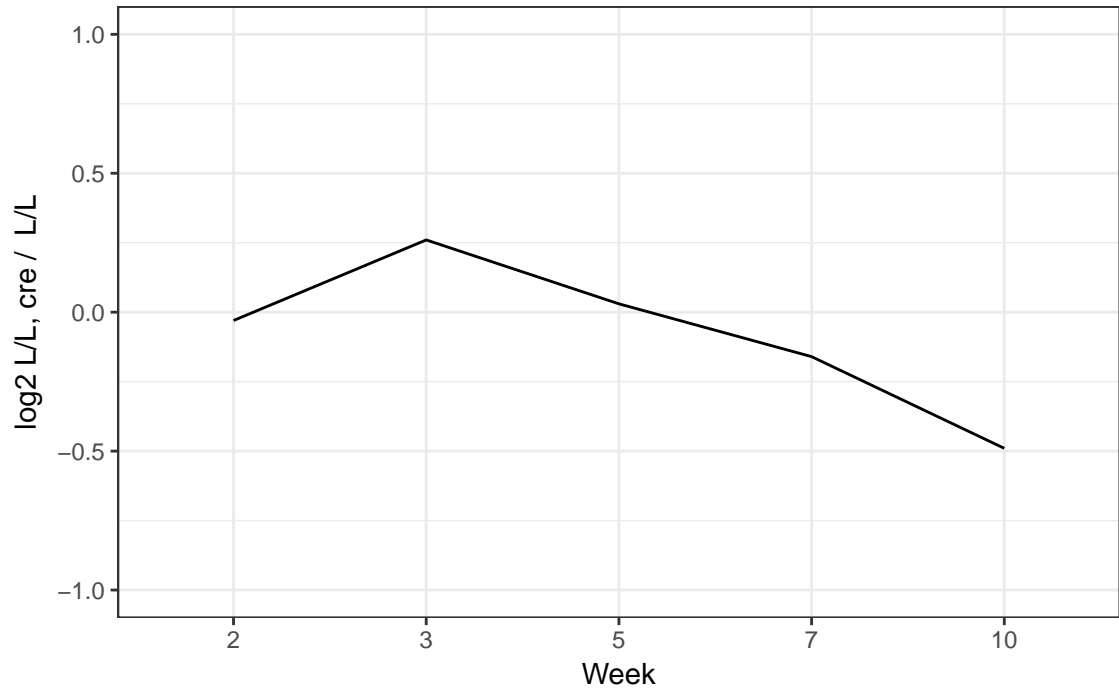

ACADSB / Q9DBL1; adj.p value: 0.03859

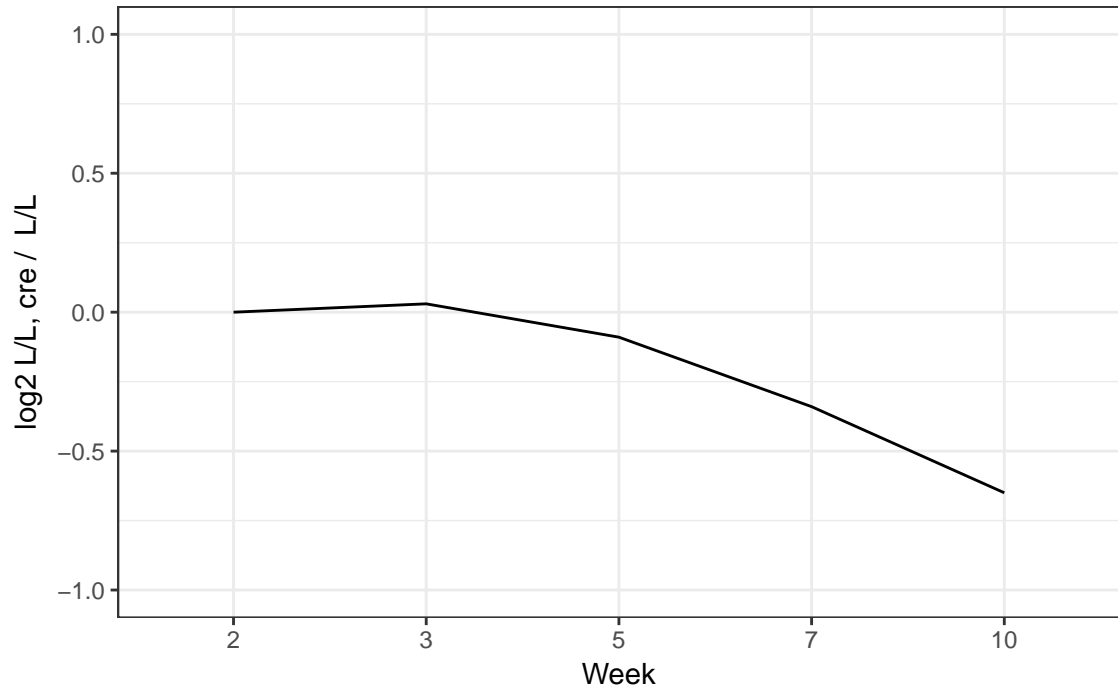

ACADV L / P50544; adj.p value: 0.00022

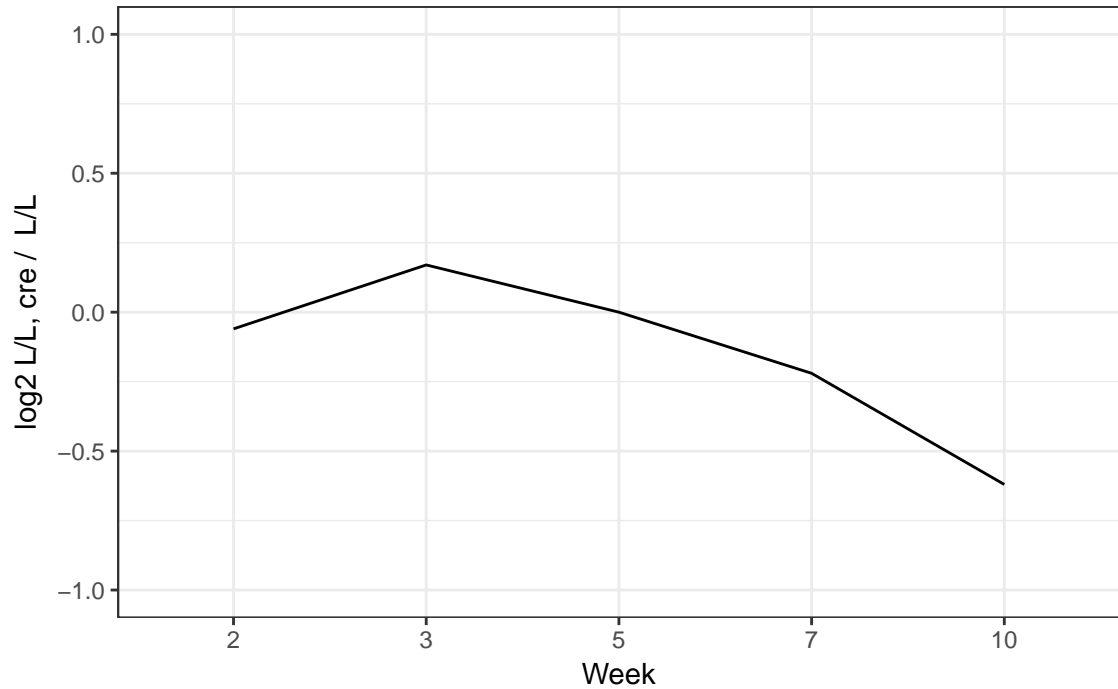

ACAT1 / Q8QZT1; adj.p value: 1e-05

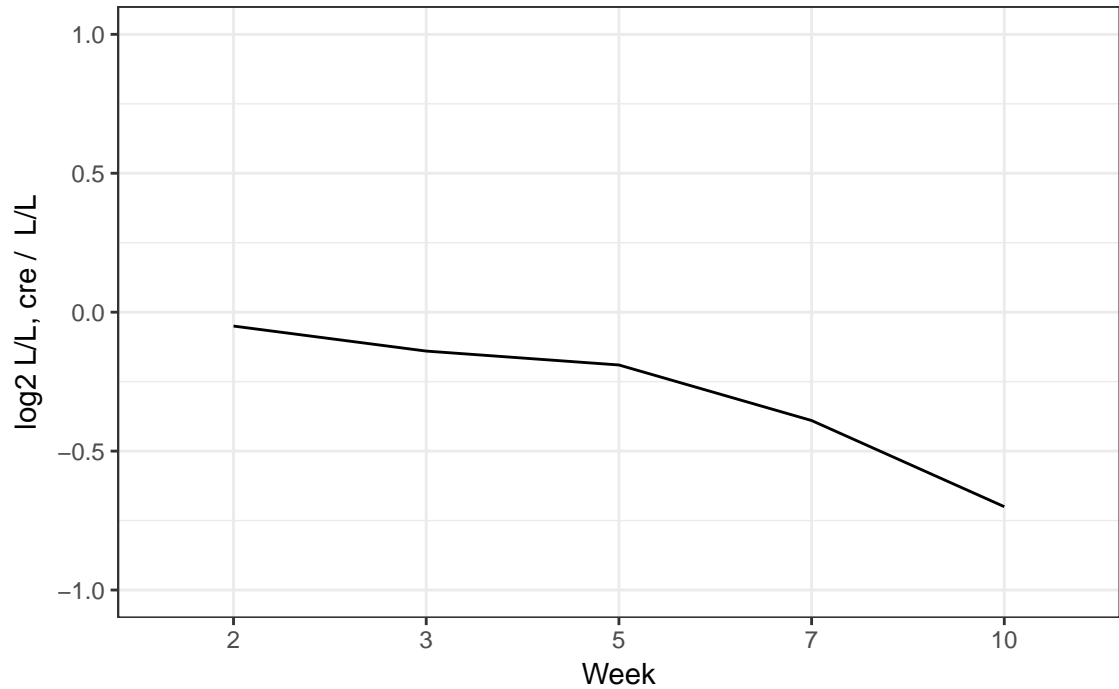

ACN9 / Q8BQU3; adj.p value: 0.11858

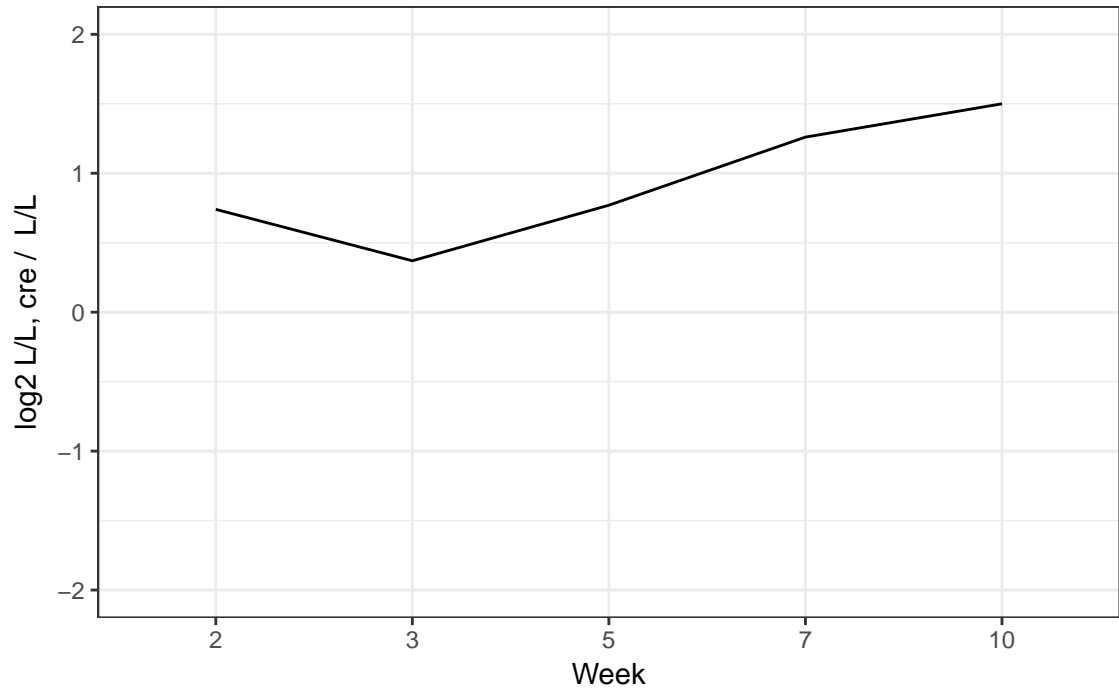

ACO2 / Q99KI0; adj.p value: 0.15081

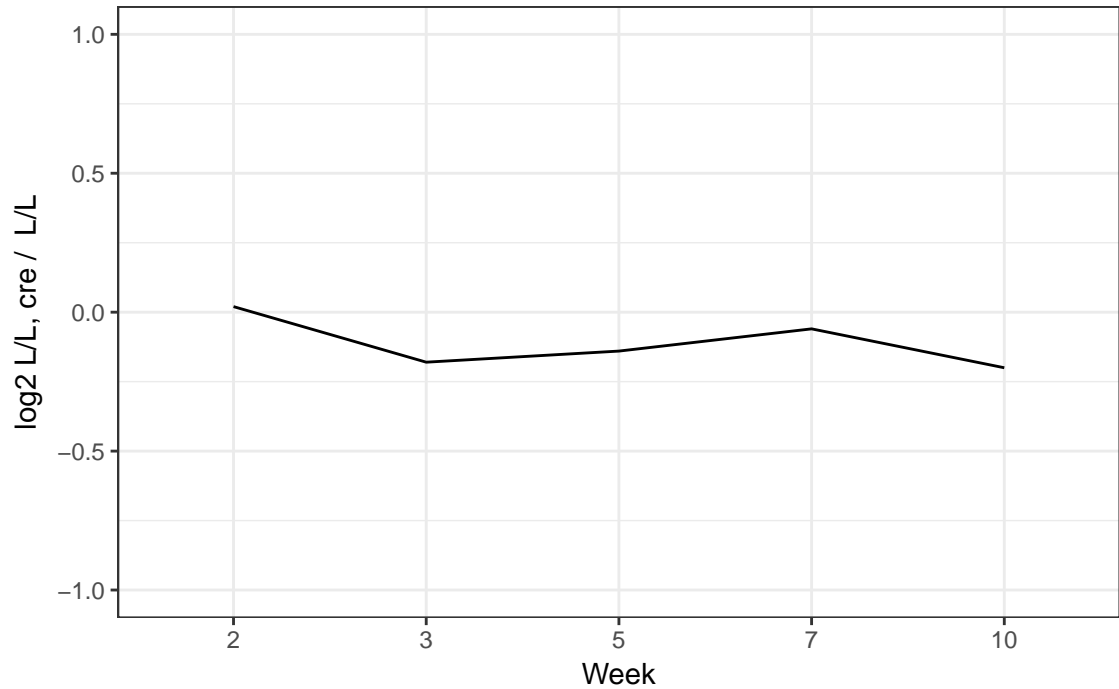



ACOT13 / Q9CQR4; adj.p value: 0.08899

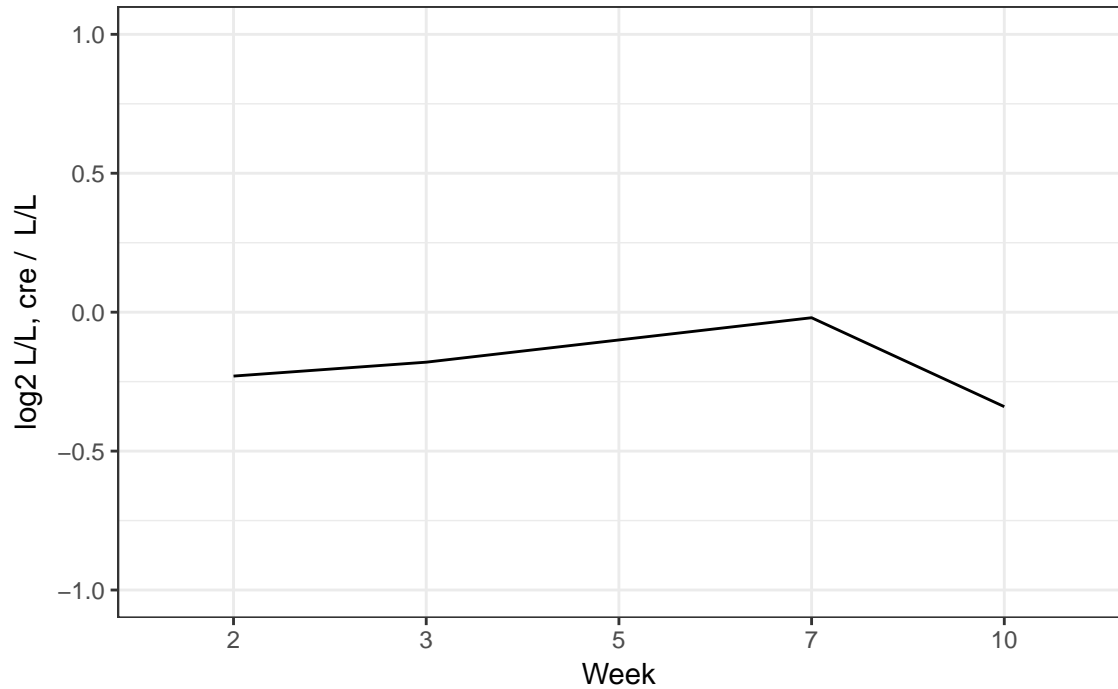

ACOT2 / Q9QYR9; adj.p value: 0

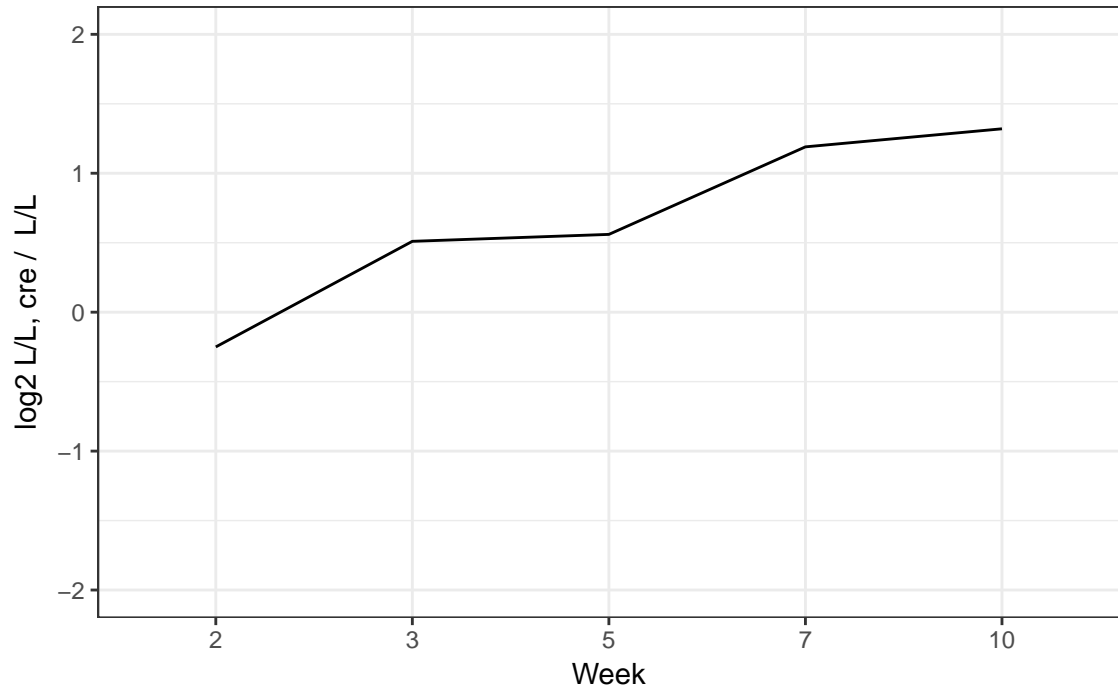

ACOT9 / Q9R0X4; adj.p value: 0

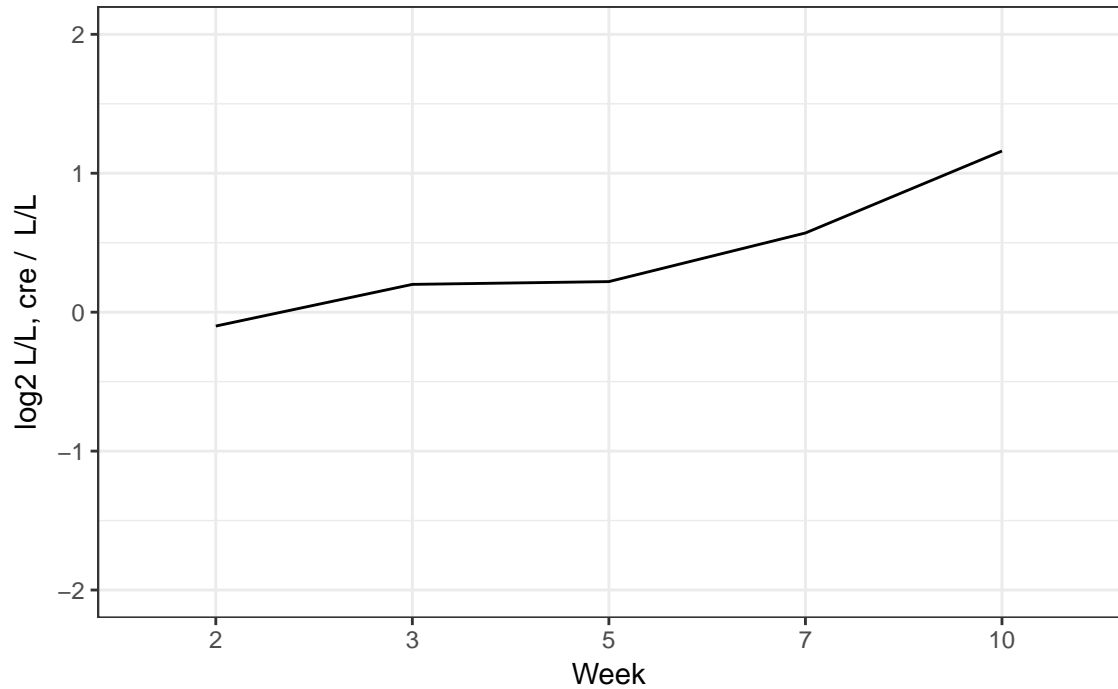

ACOX1 / Q9R0H0-2; adj.p value: 0.21265

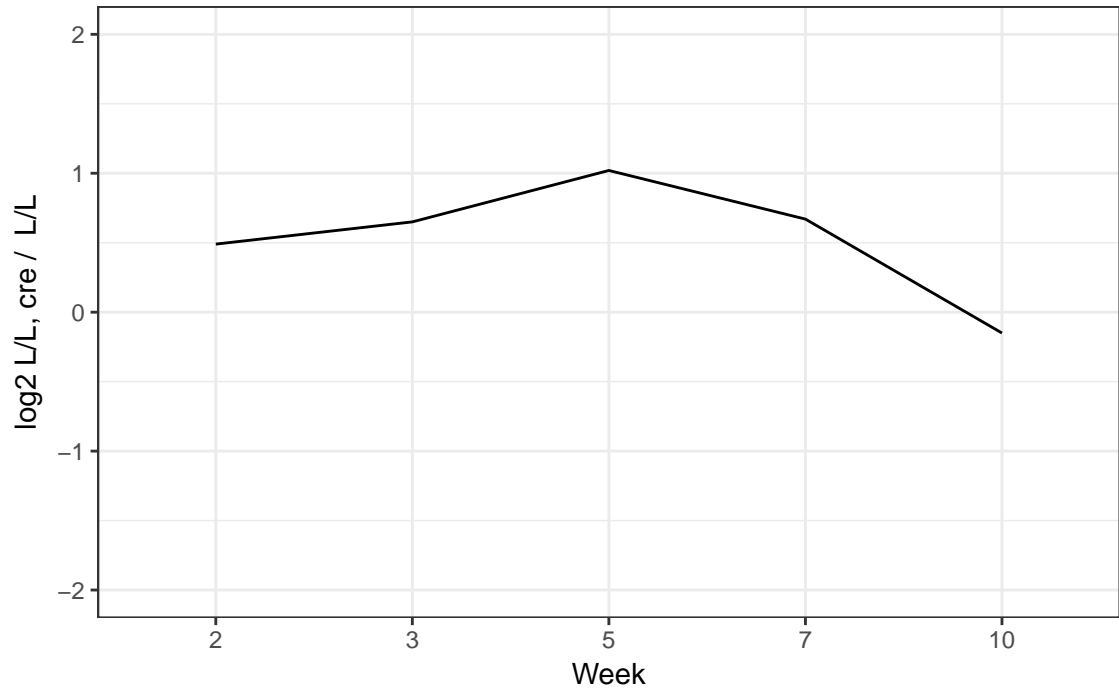

ACP6 / Q8BP40; adj.p value: 0.47125

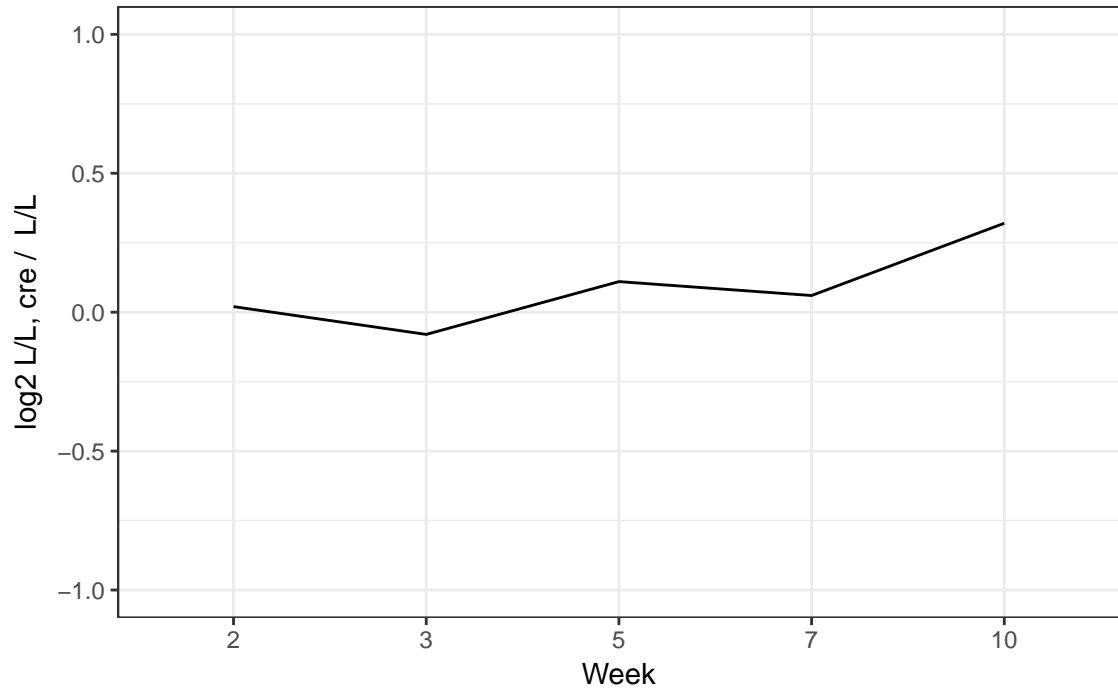

ACSF2 / Q8VCW8; adj.p value: 0

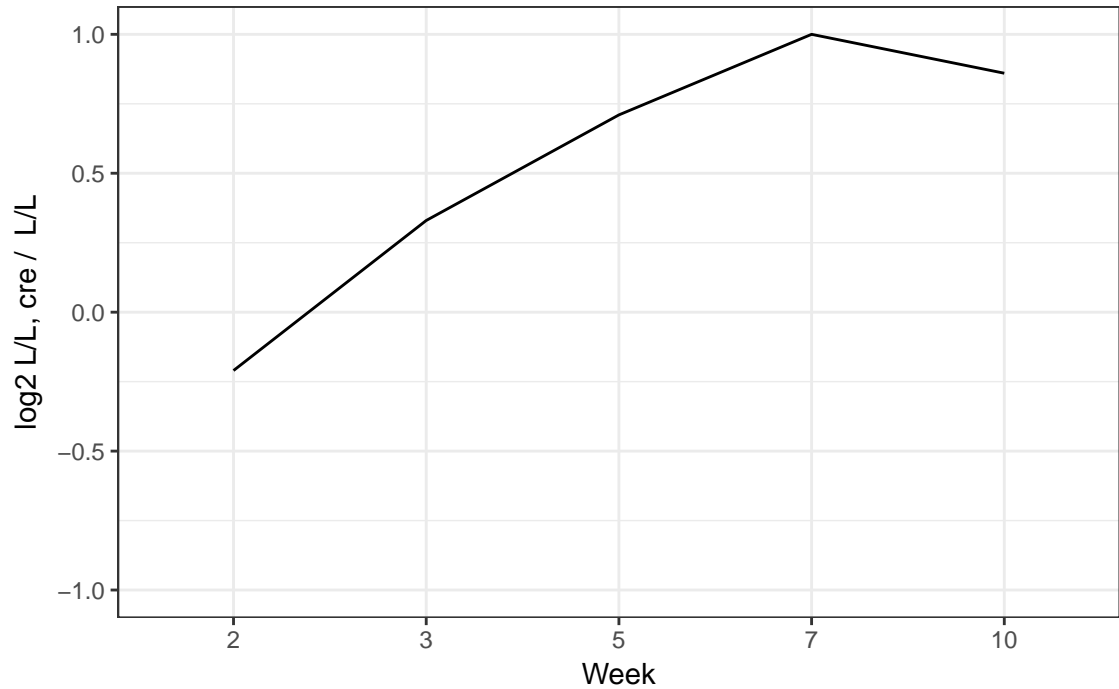

ACSF3 / Q3URE1; adj.p value: 0.1807

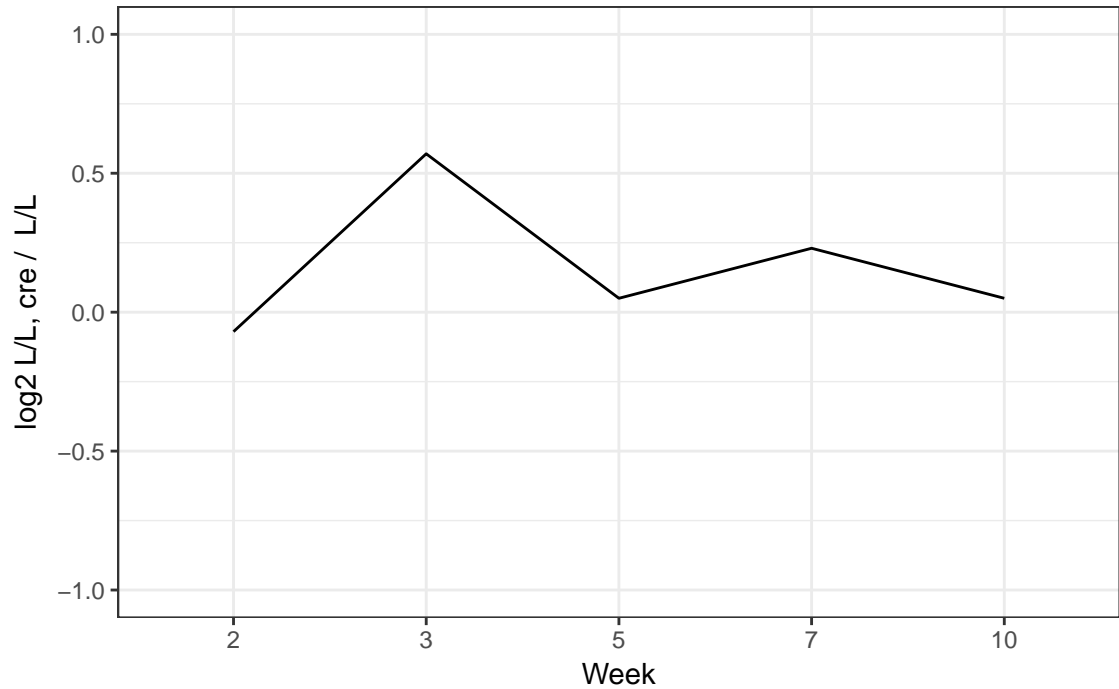

ACSL1 / P41216; adj.p value: 0.00514

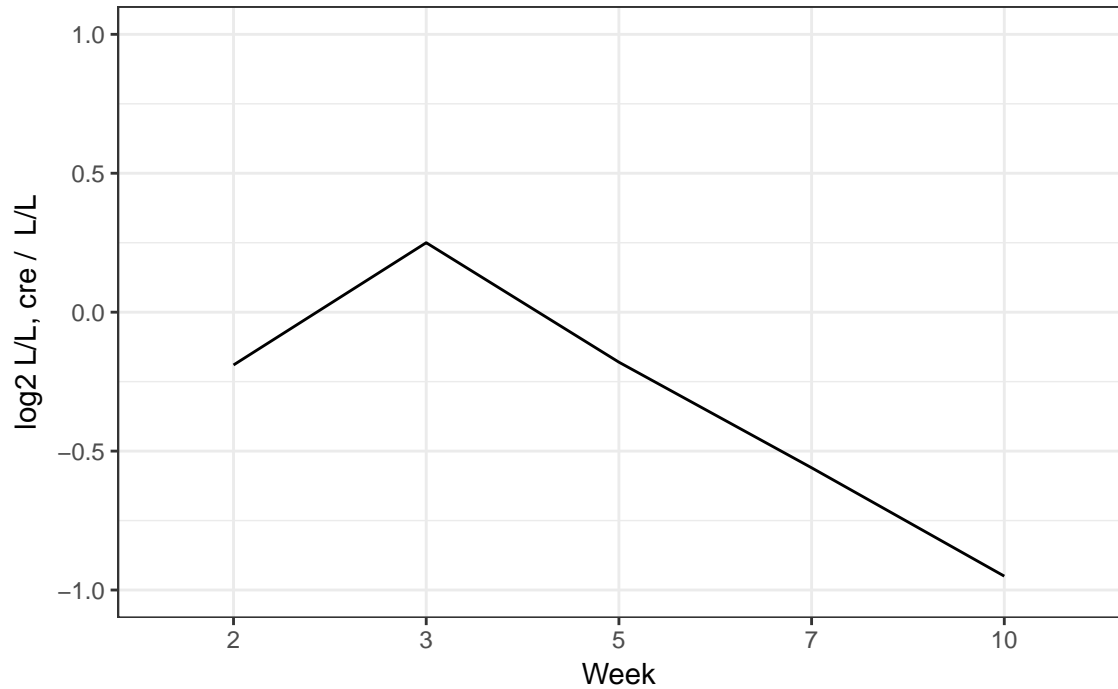



ACSS1 / Q99NB1; adj.p value: 0.7976

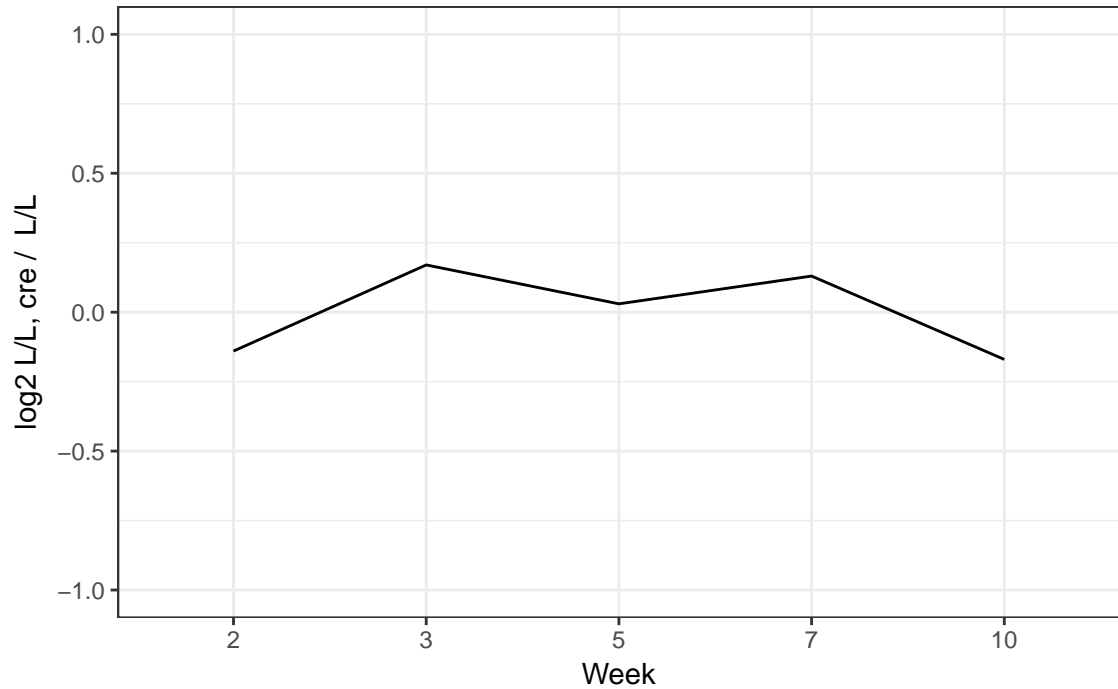

ACYP2 / P56375; adj.p value: 0.89515

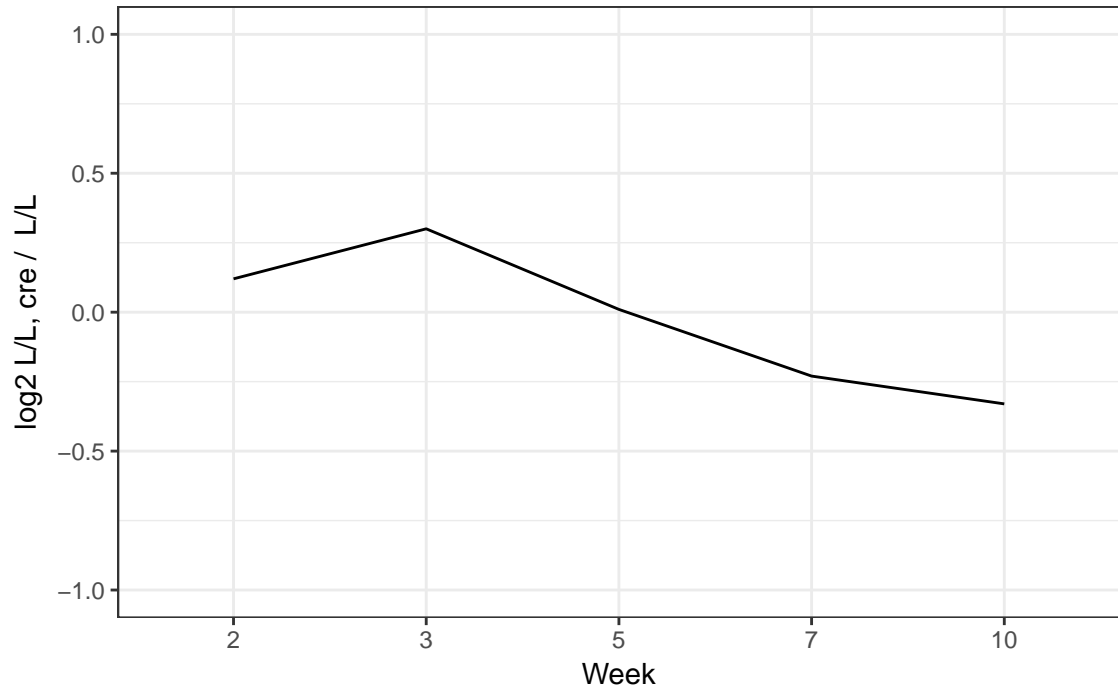

ADCK1 / Q9D0L4; adj.p value: 0.03087

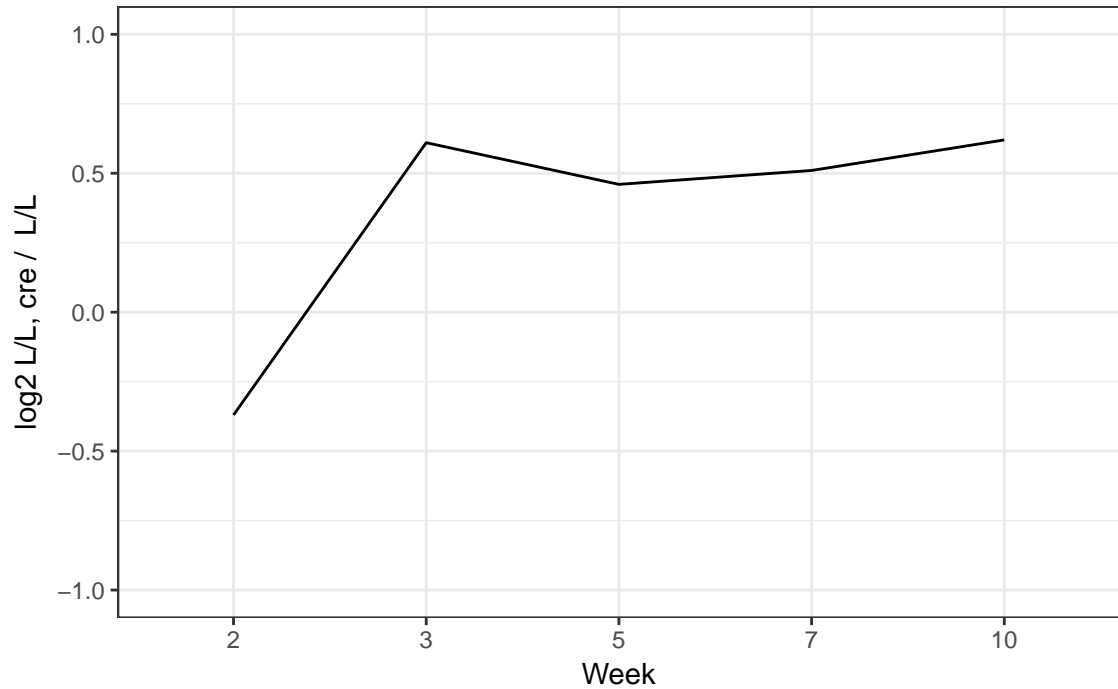

ADCK3 / Q60936; adj.p value: 0

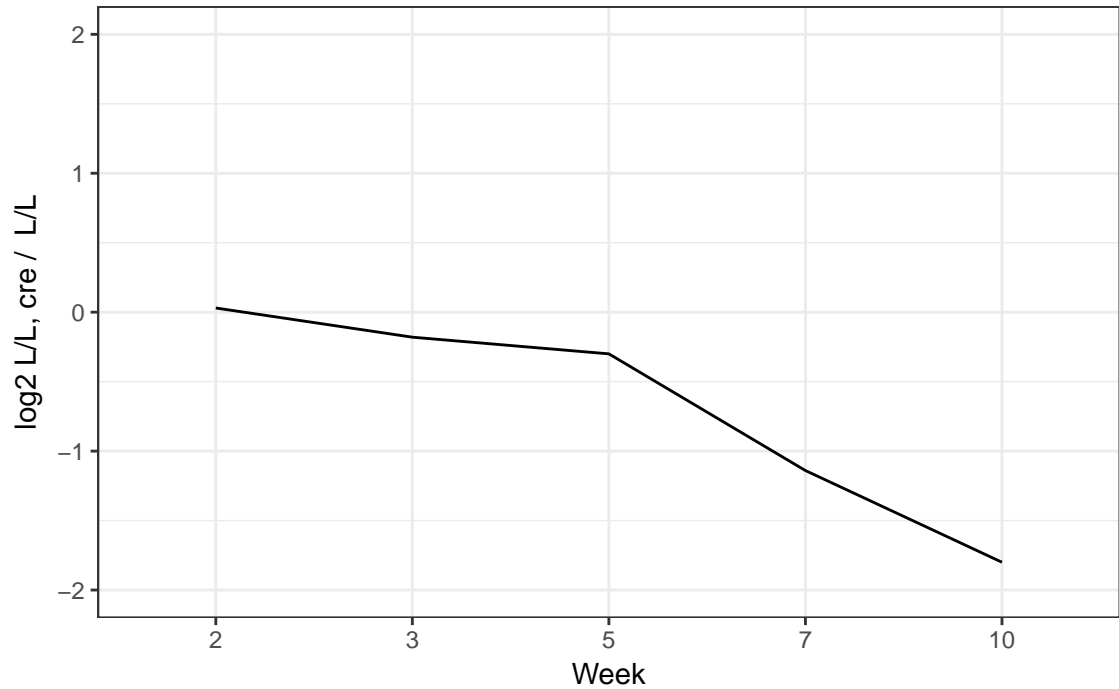

ADCK4 / E9QLB8; adj.p value: 0.04608

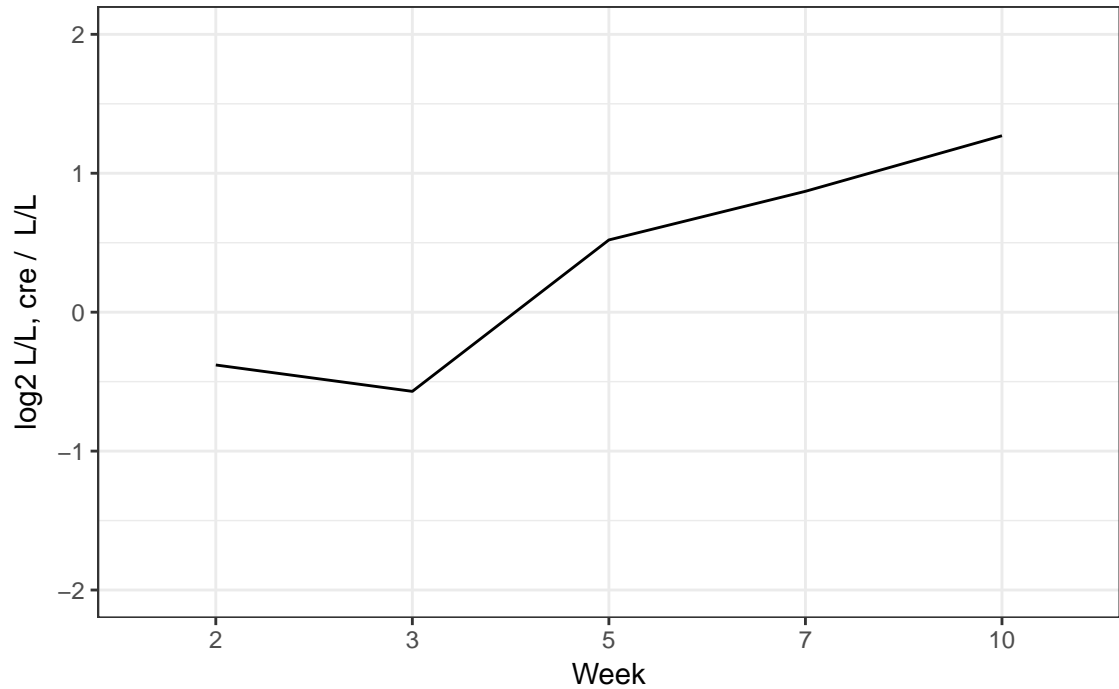

ADHFE1 / A0A087WRE7; adj.p value: 0.2729

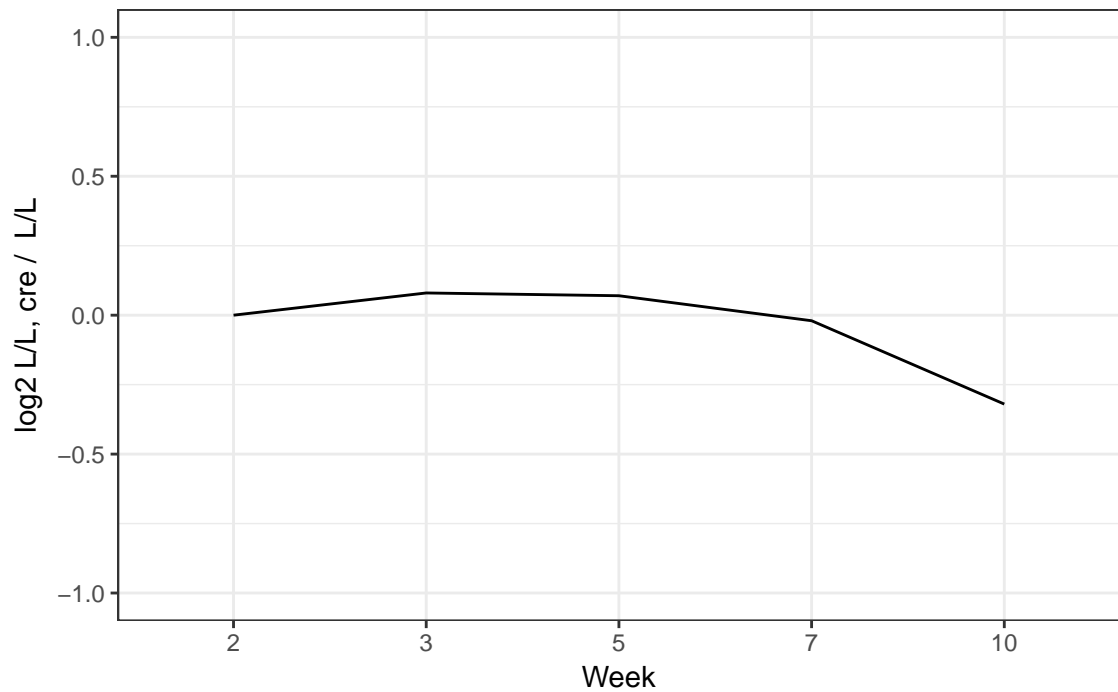

AFG3L1 / Q920A7; adj.p value: 0

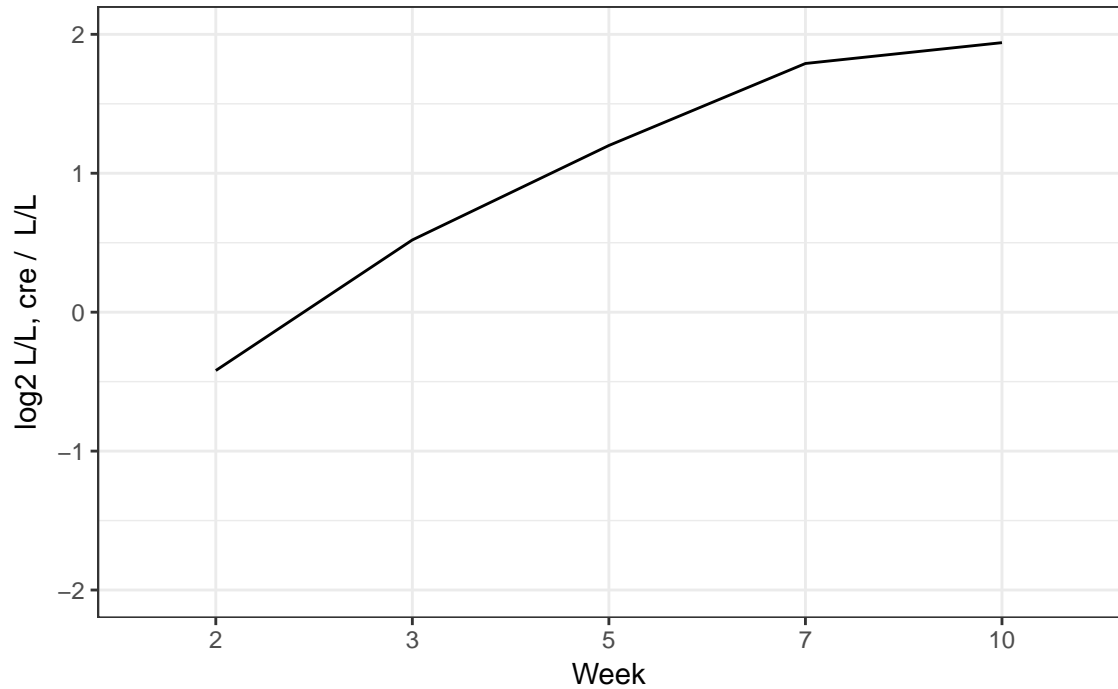

AFG3L2 / Q8JZQ2; adj.p value: 0

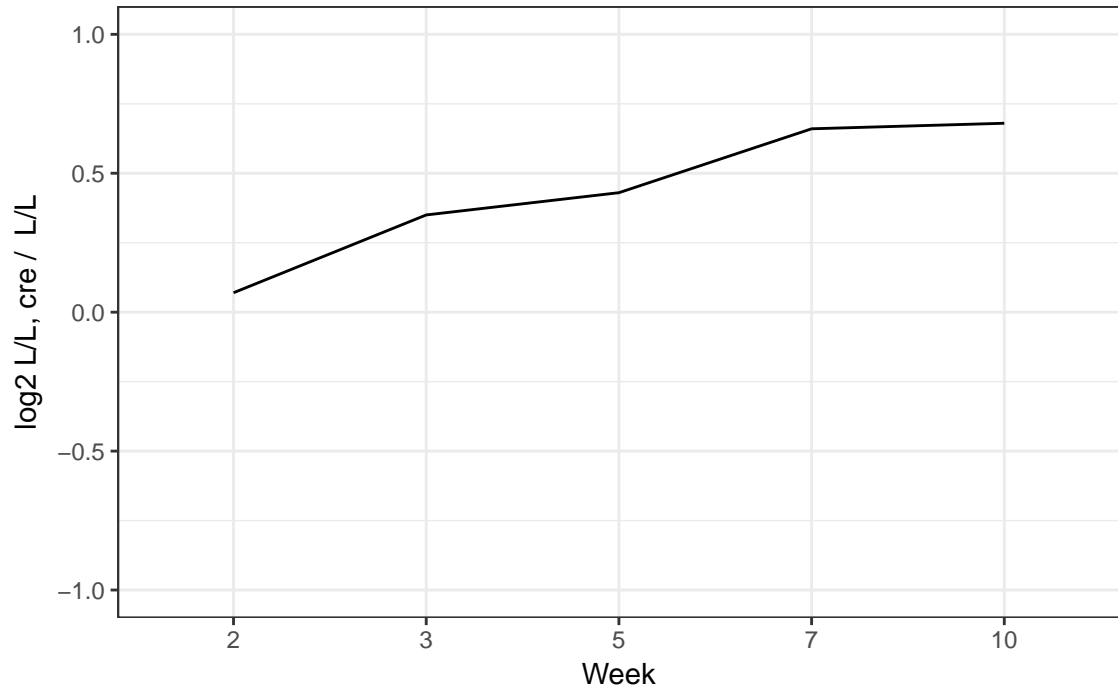



AGK / Q9ESW4; adj.p value: 0.18375

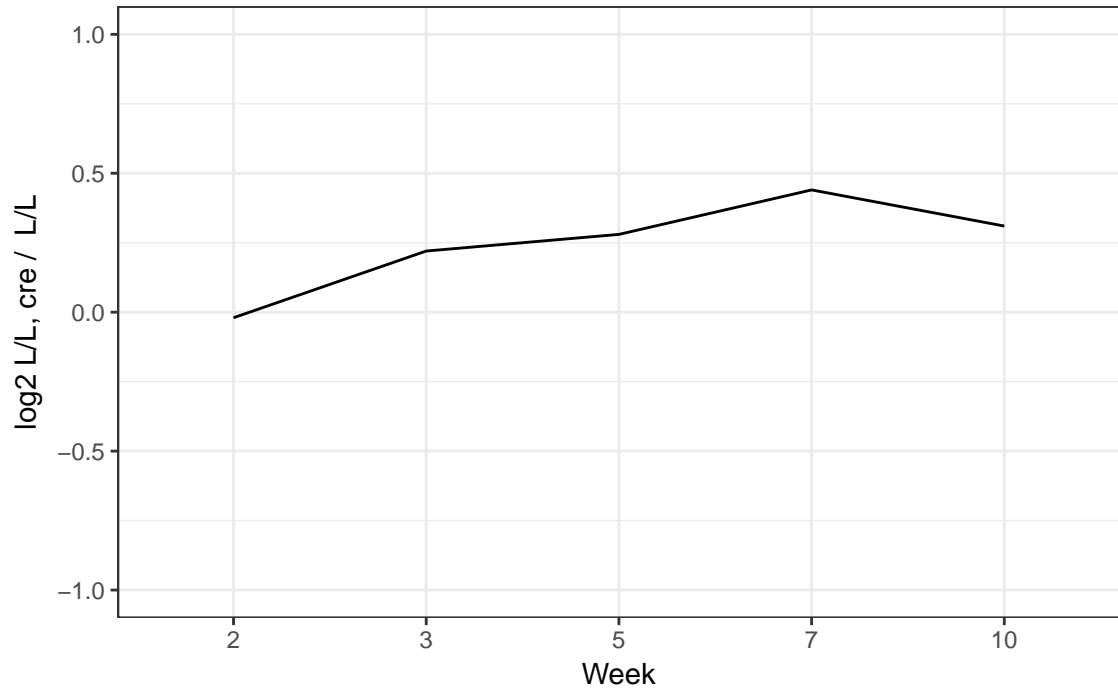

AIFM1 / Q9Z0X1; adj.p value: 0.23245

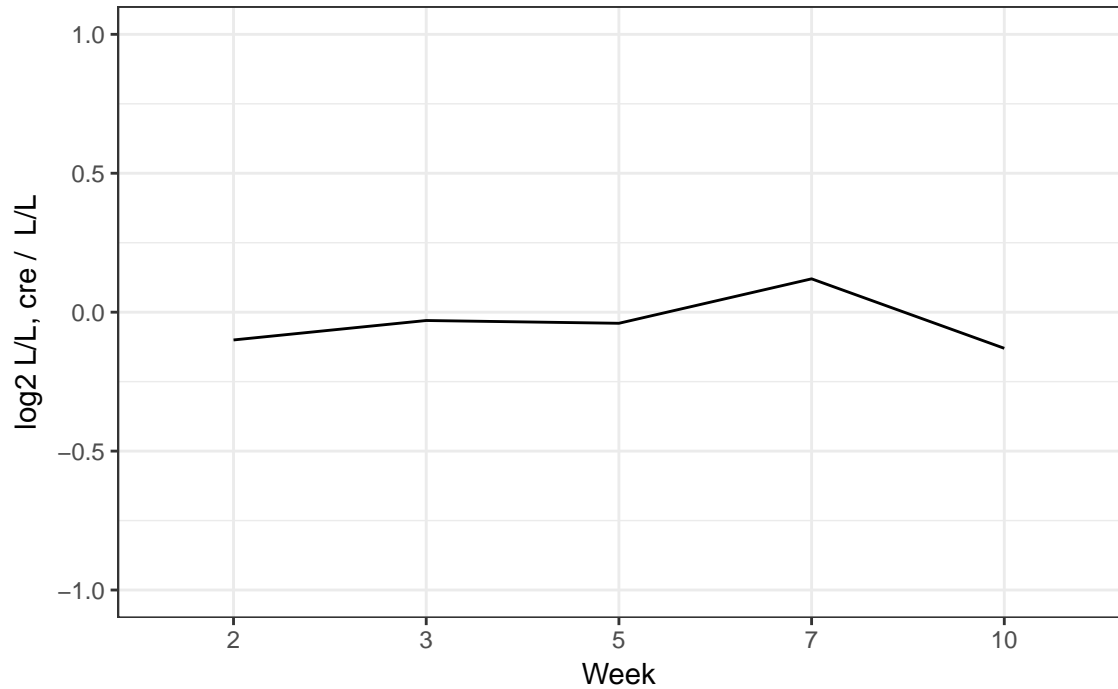

AK157302 / I3ITR1; adj.p value: 0.04638

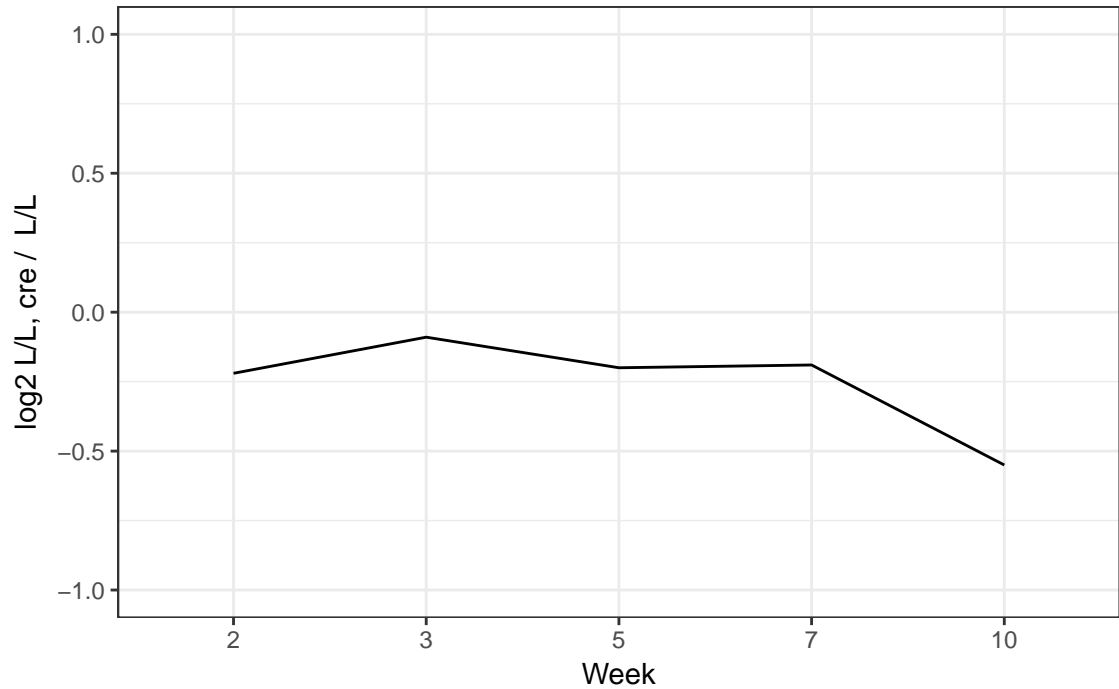

AK2 / Q9WTP6-2; adj.p value: 0.00078

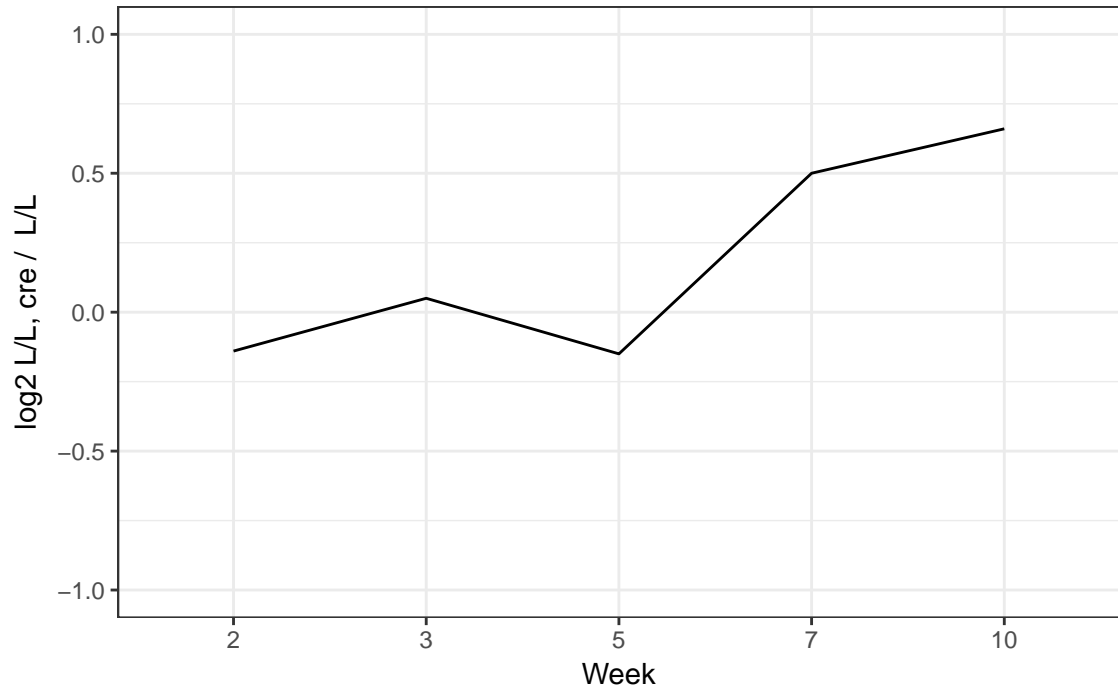

AK3 / Q9WTP7; adj.p value: 0.08518

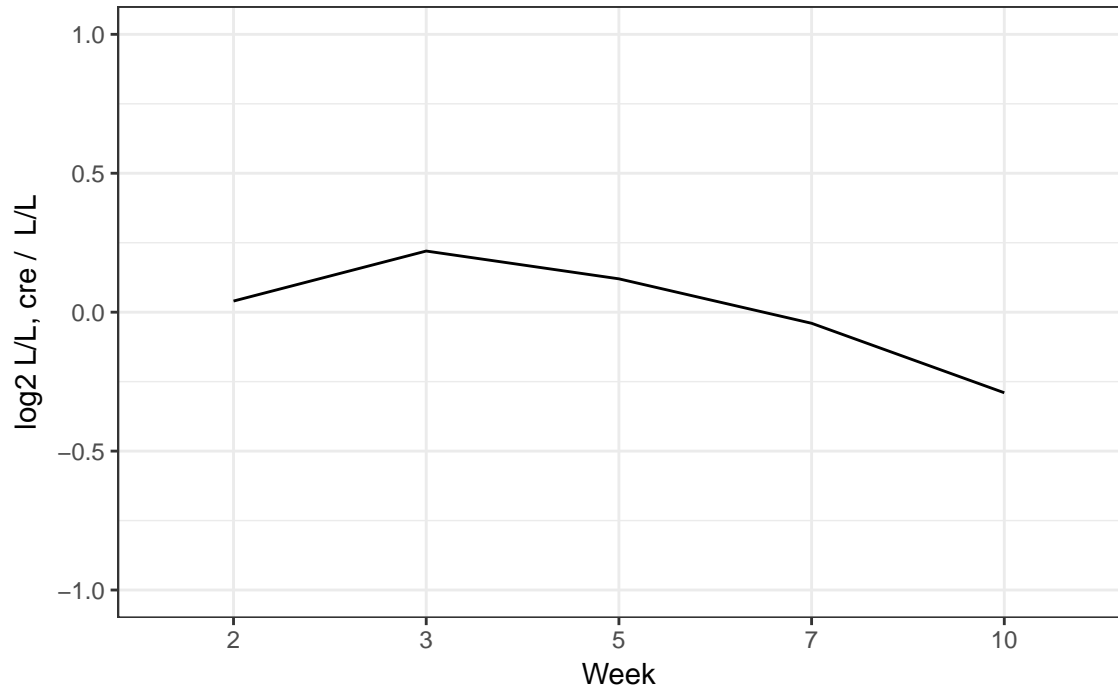

AK4 / Q9WUR9; adj.p value: 2e-05

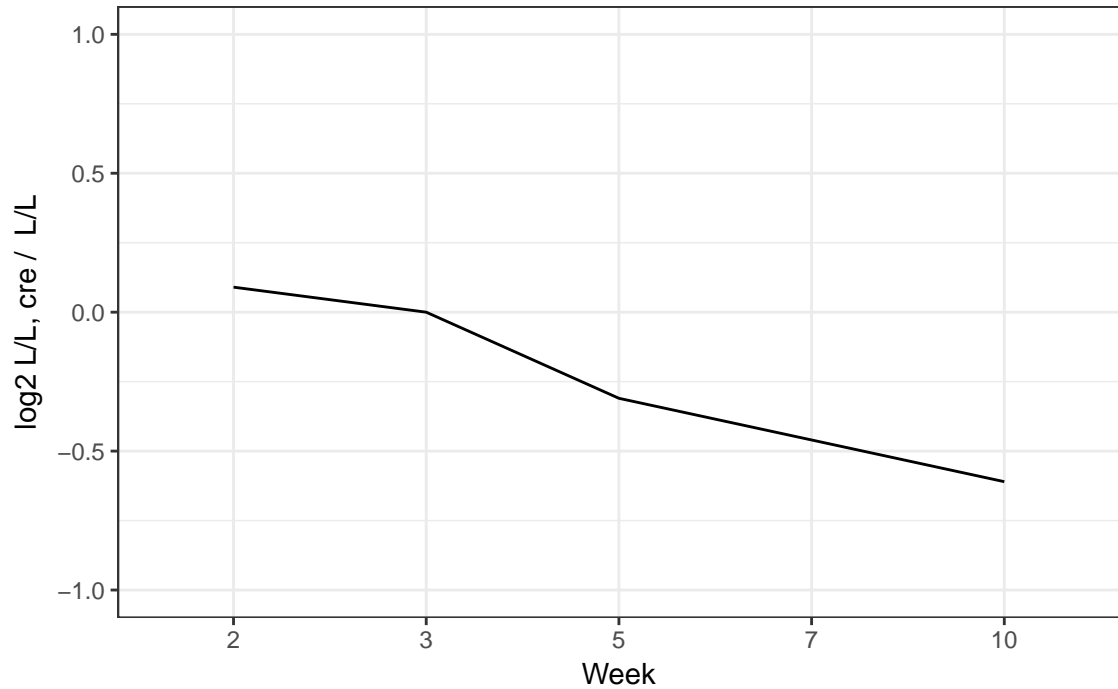

AKAP1 / O08715; adj.p value: 0.9356

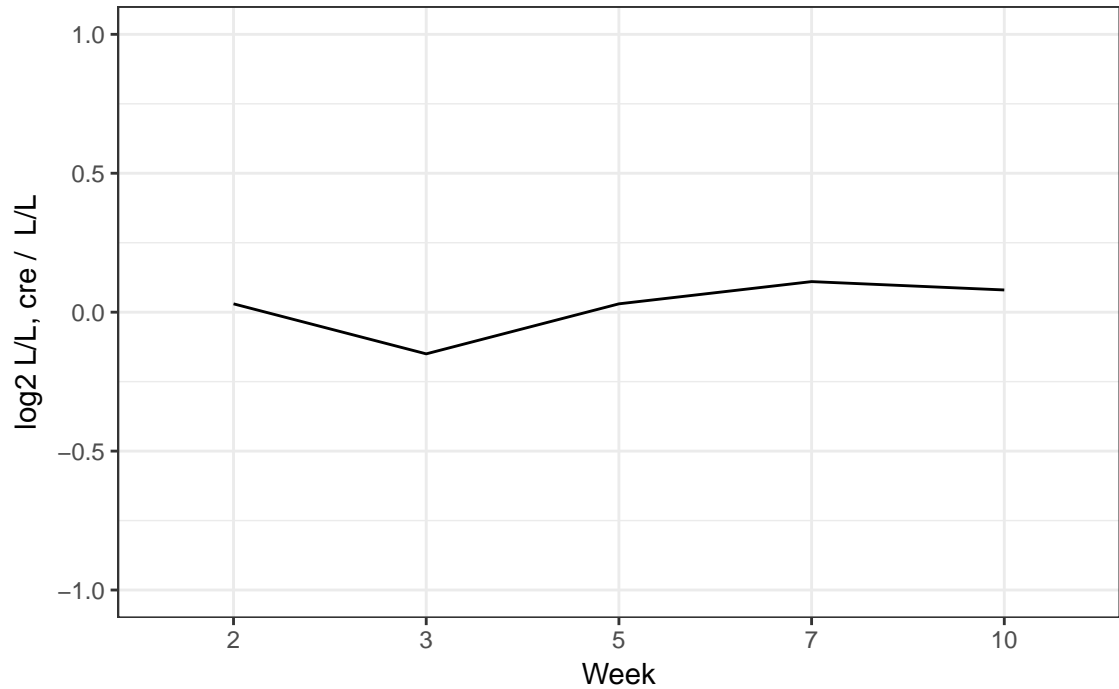

AKR1B10 / G5E895; adj.p value: 0.09635

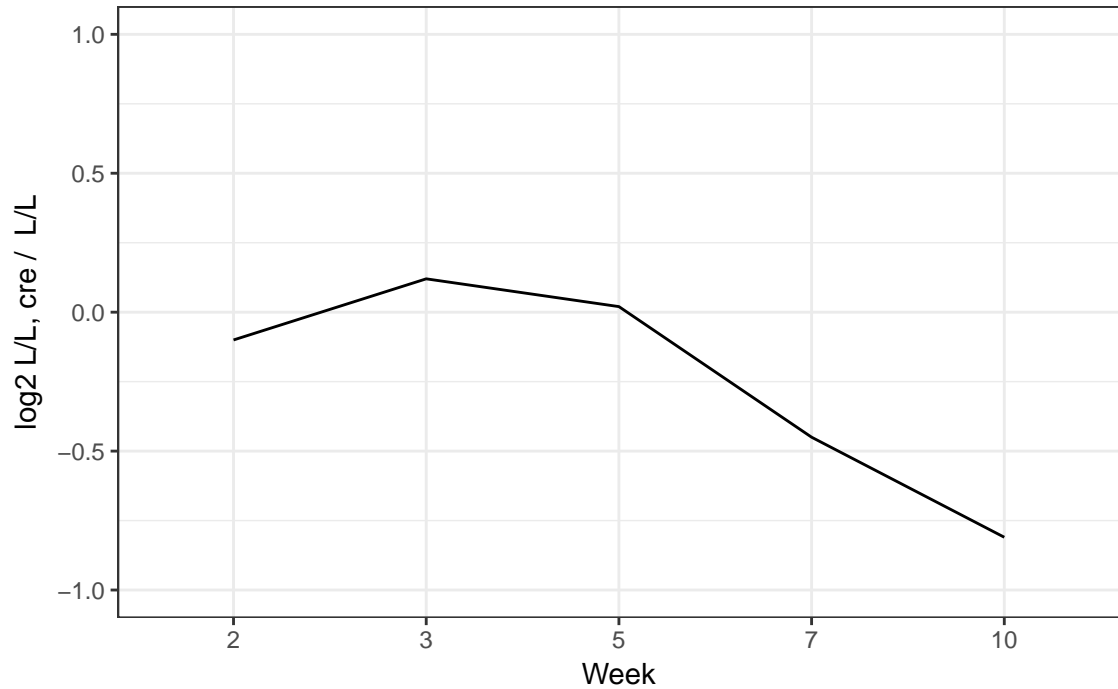



AKR1B7 / P21300; adj.p value: 0.33347

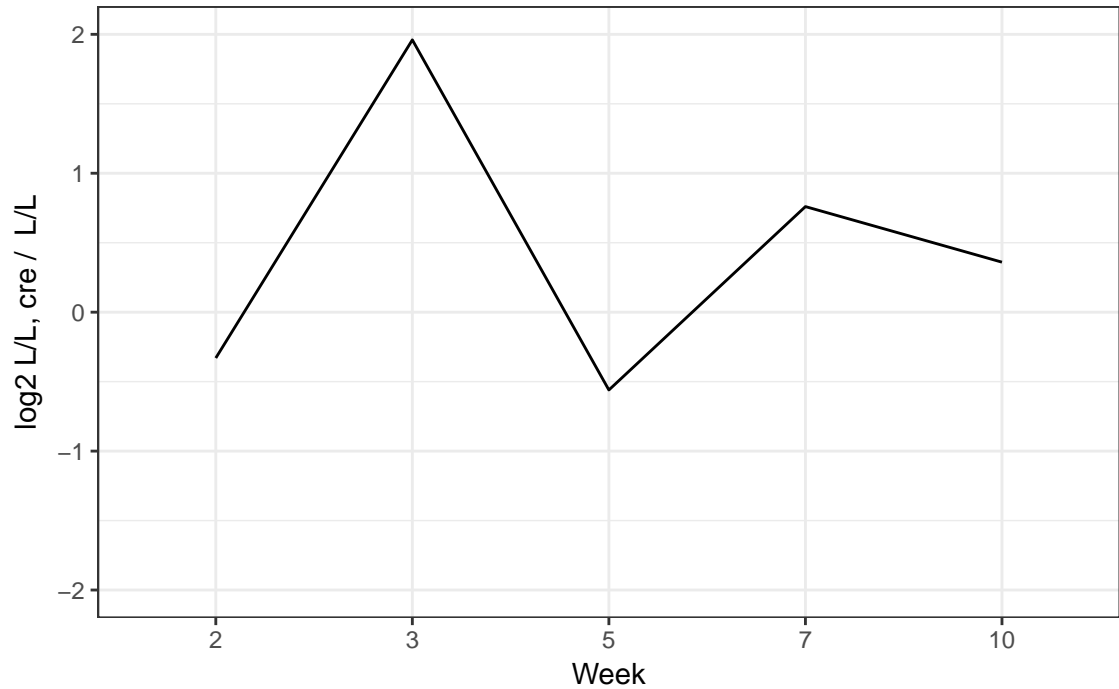

AKR7A2 / Q8CG76; adj.p value: 0.0062

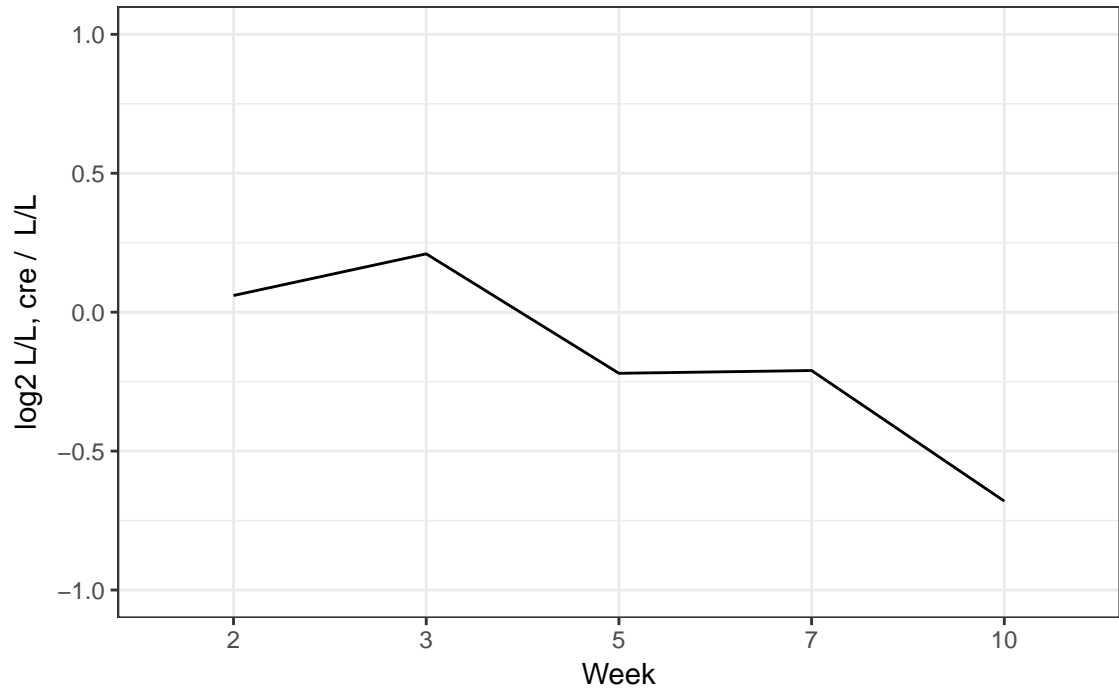

# ALAS1 / Q8VC19; adj.p value: 0

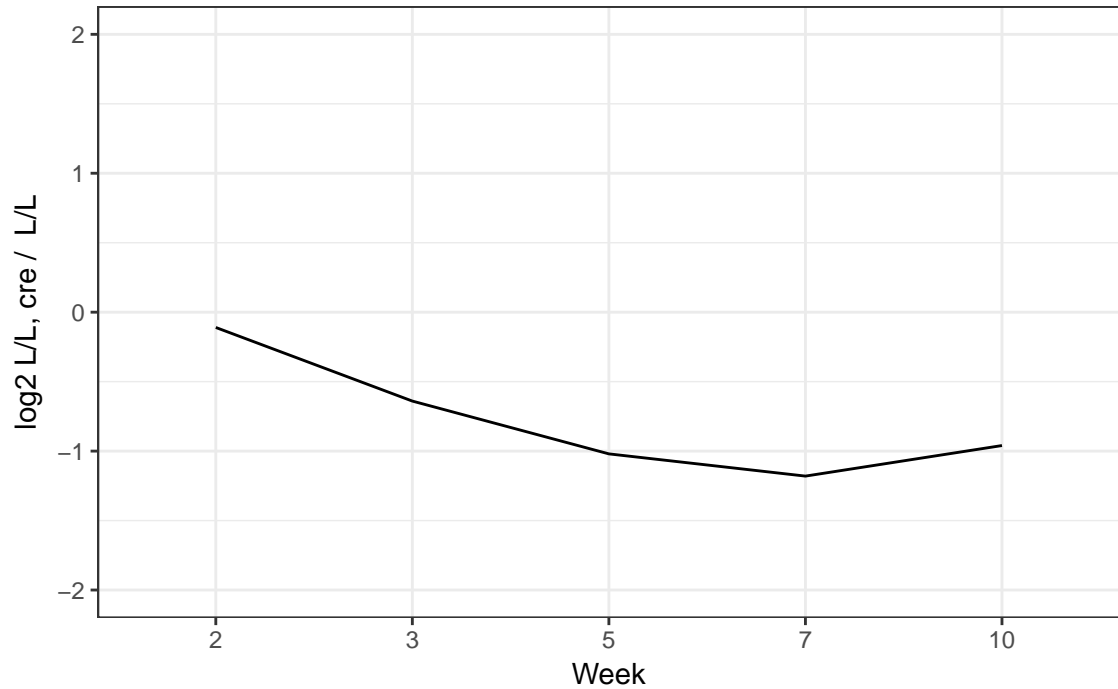

ALDH18A1 / Q9Z110-2; adj.p value: 0

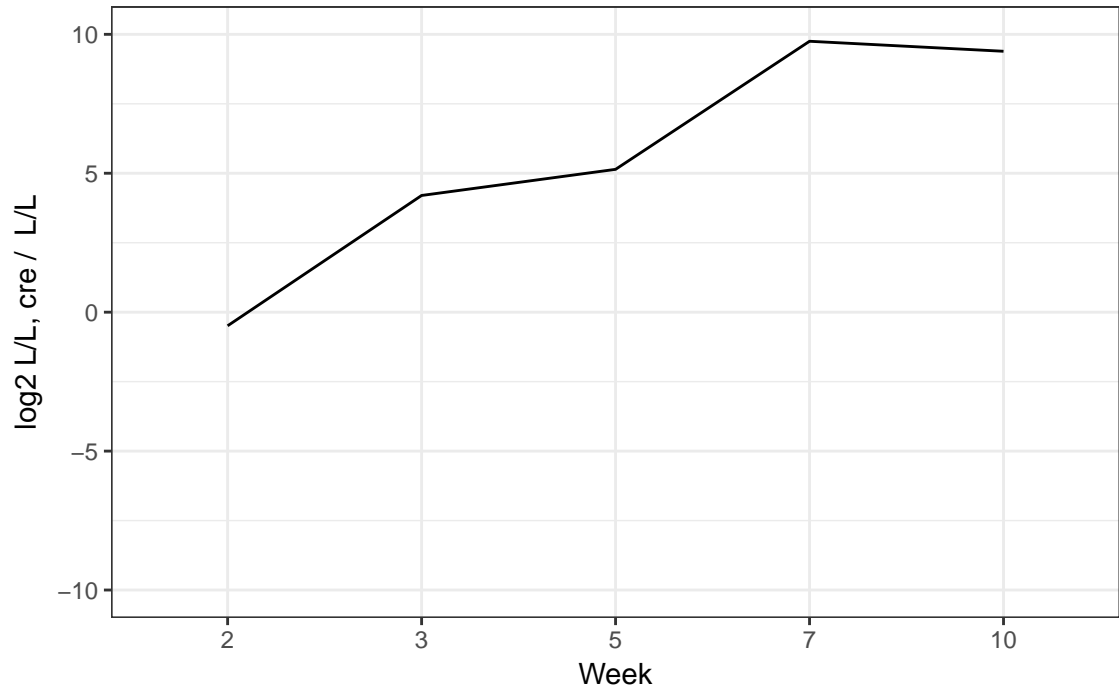

# ALDH1B1 / Q9CZS1; adj.p value: 0

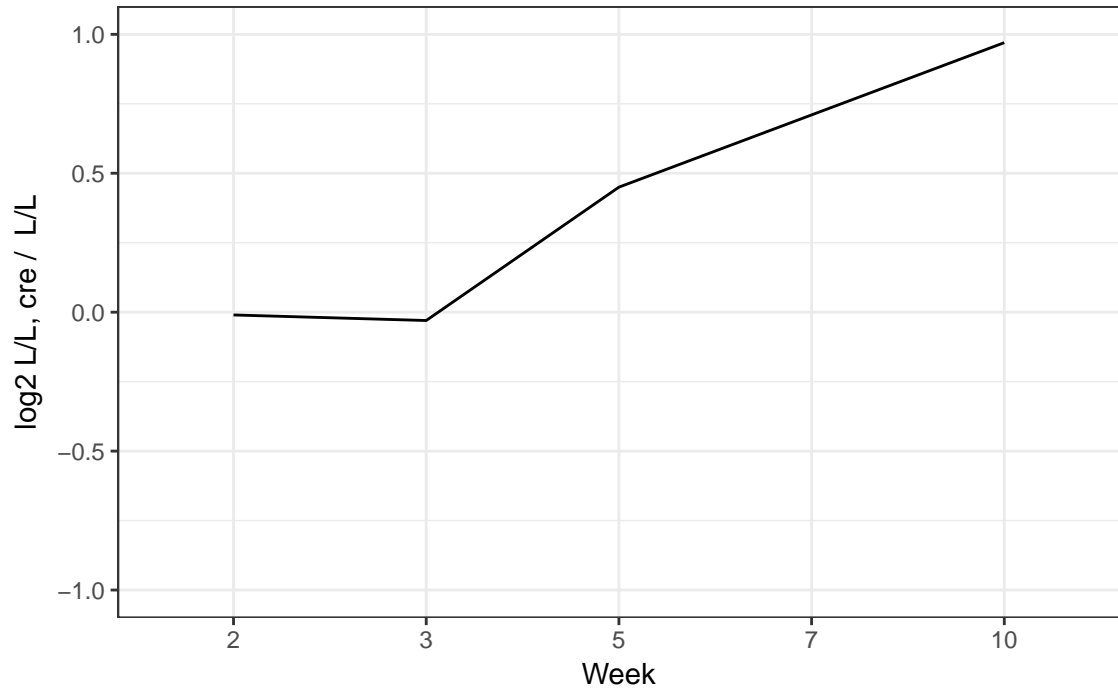

ALDH1L2 / Q8K009; adj.p value: 0

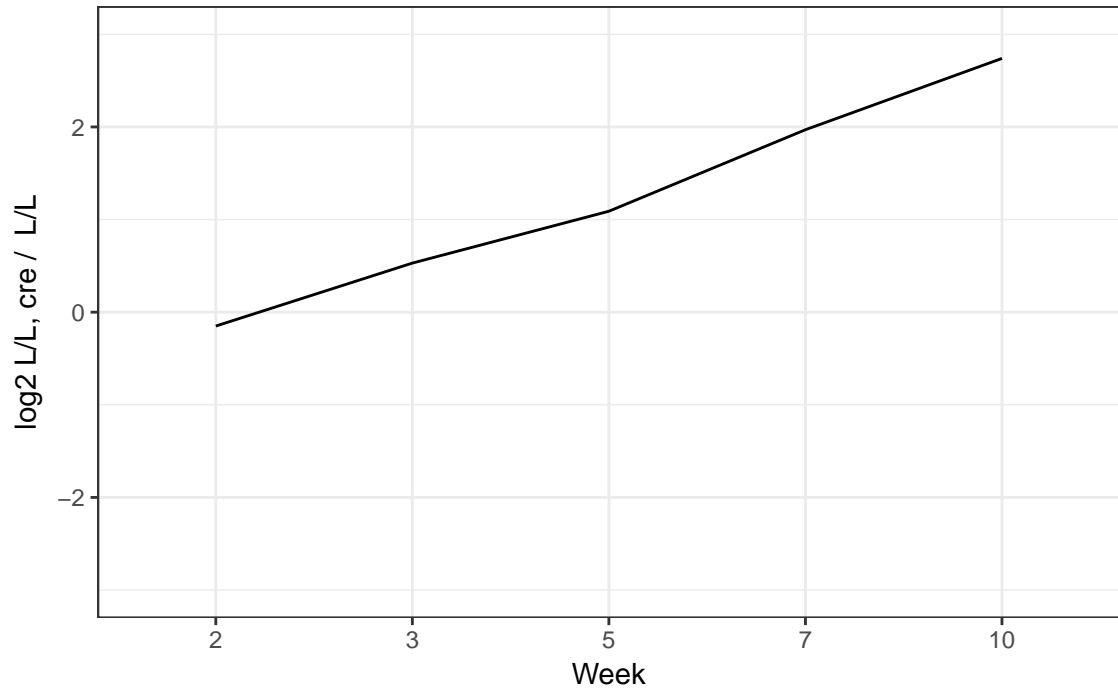

ALDH2 / P47738; adj.p value: 0.0771

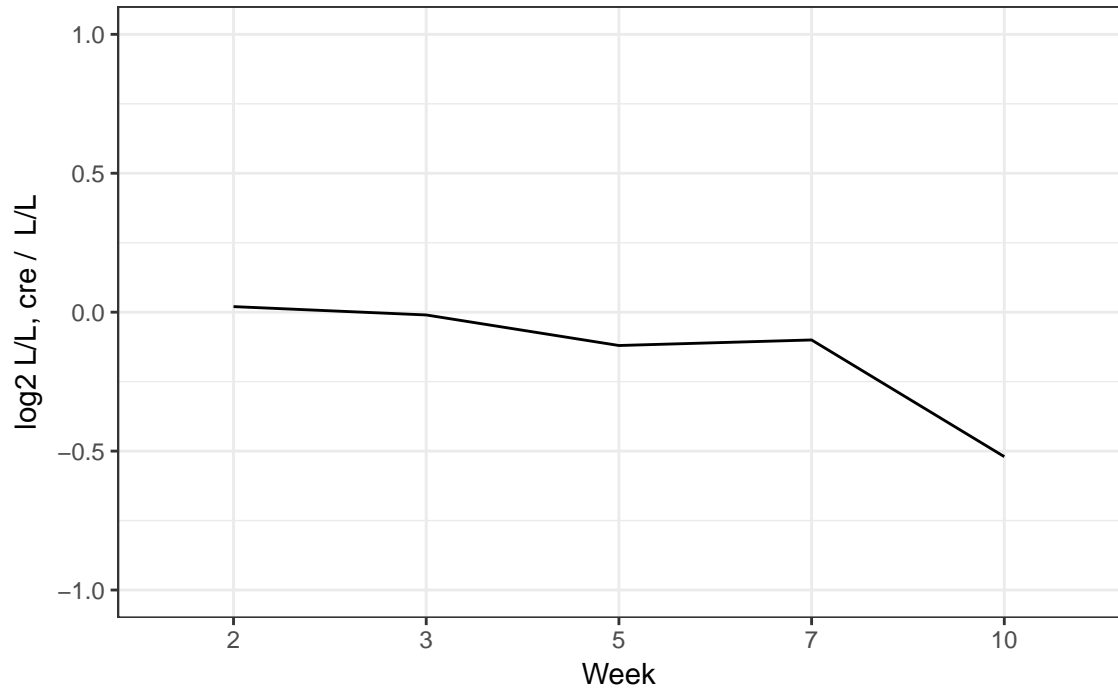

ALDH3A2 / B1AV77; adj.p value: 5e-05

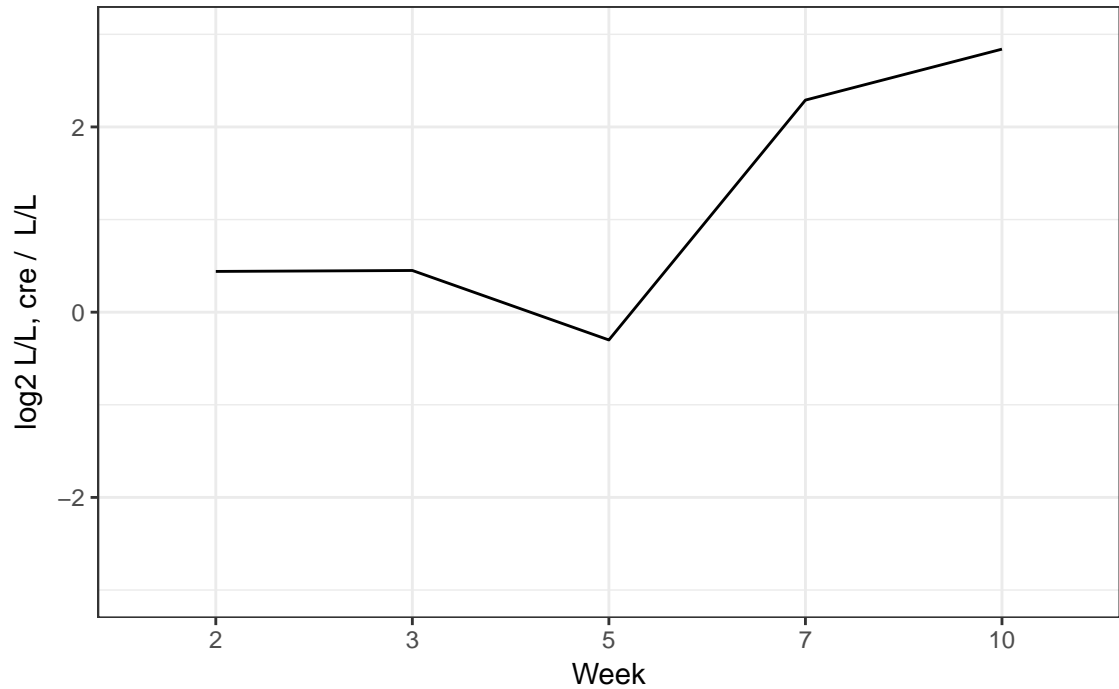



# ALDH4A1 / Q8CHT0; adj.p value: 0

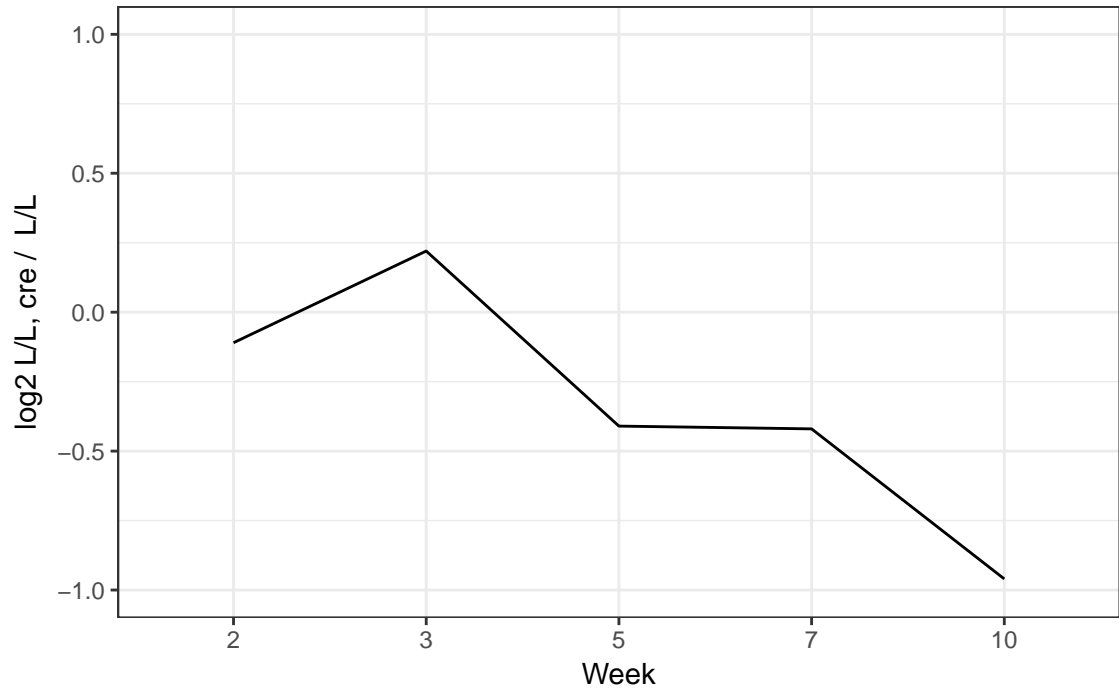

ALDH5A1 / Q8BWF0; adj.p value: 0.02132

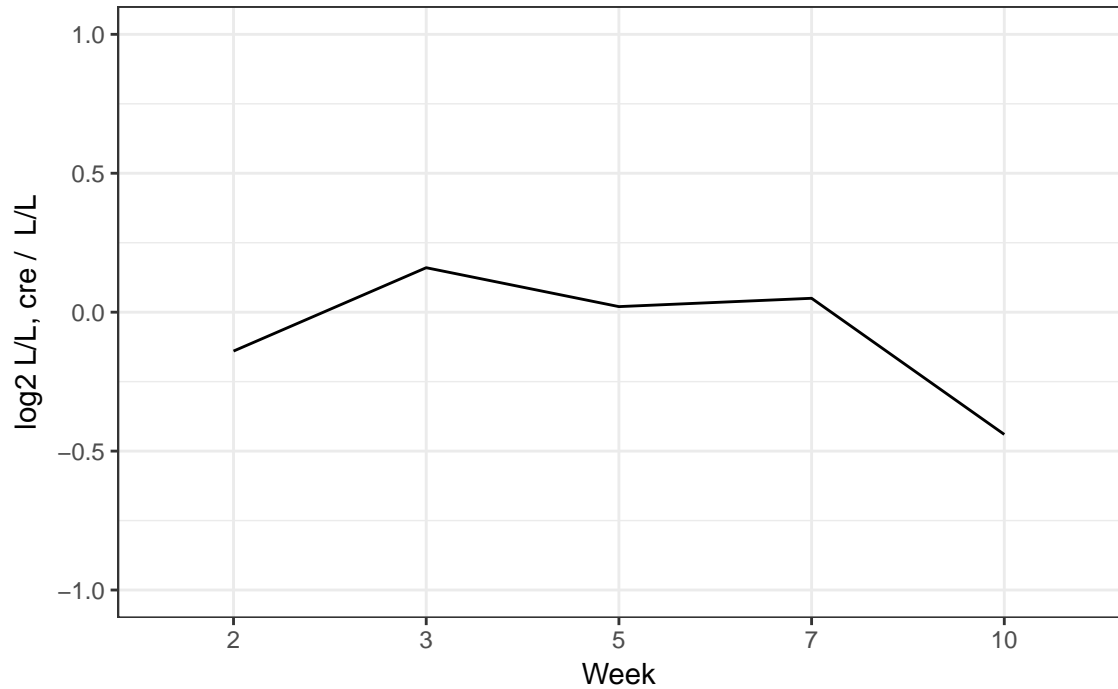

ALDH6A1 / Q9EQ20; adj.p value: 0.00078

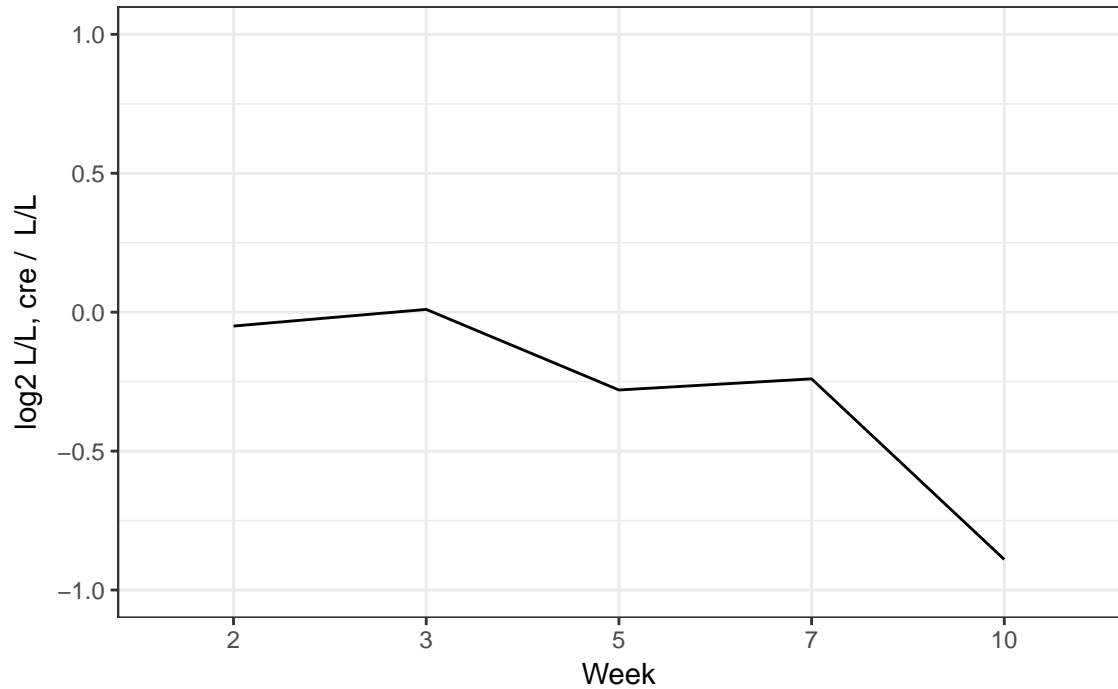

ALDH7A1 / Q9DBF1-2; adj.p value: 0.00502

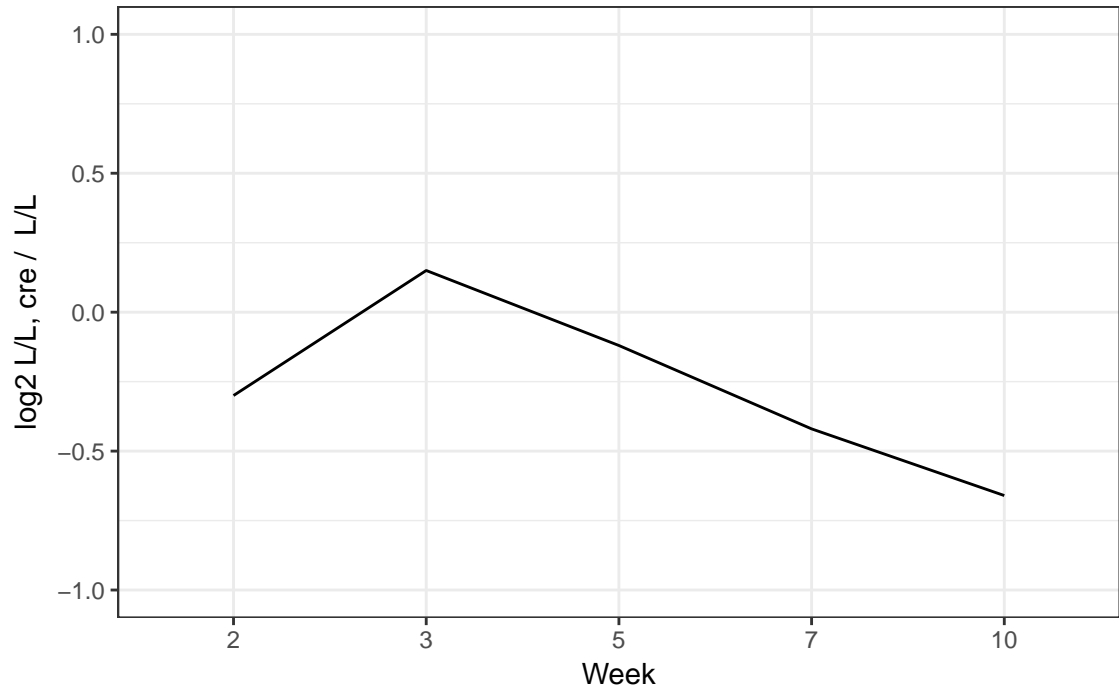

ALDH9A1 / Q9JLJ2; adj.p value: 0.00029

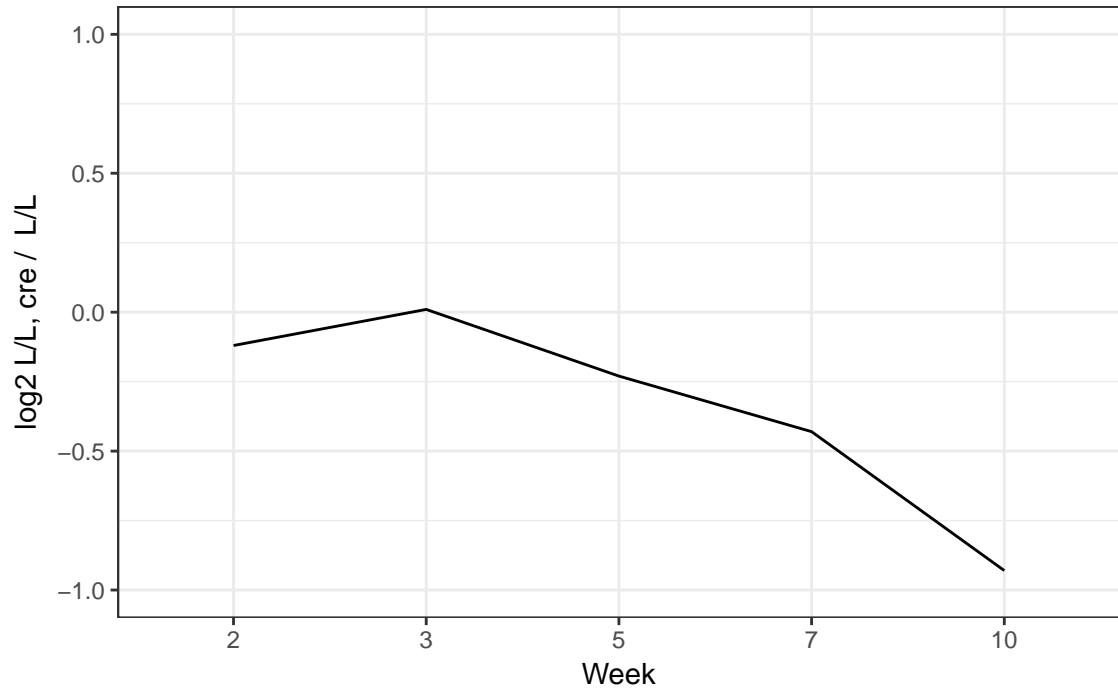

ALKBH7 / Q9D6Z0; adj.p value: 0.48329

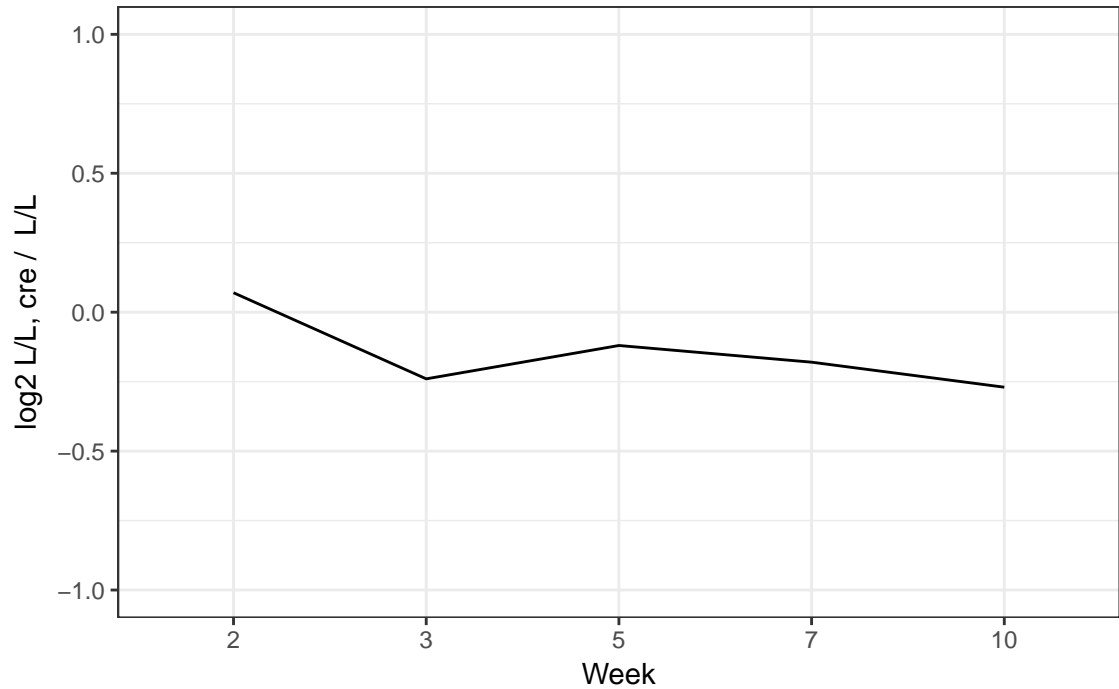

AMACR / O09174; adj.p value: 0.36594

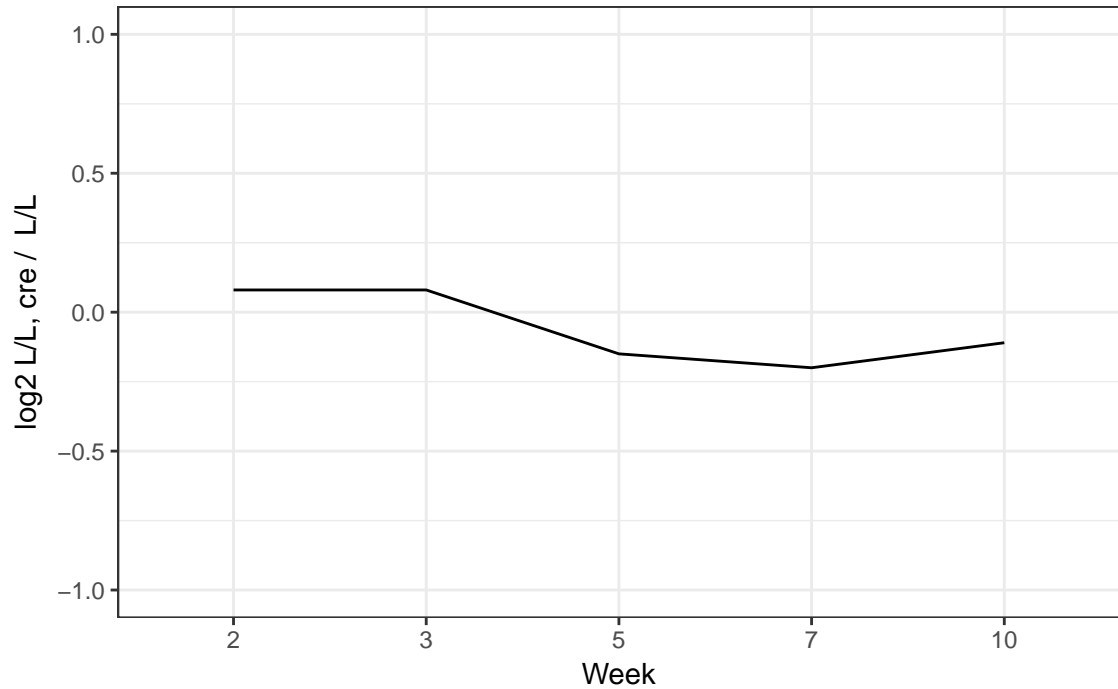

ANGEL2 / Q8K1C0-3; adj.p value: 0.28609

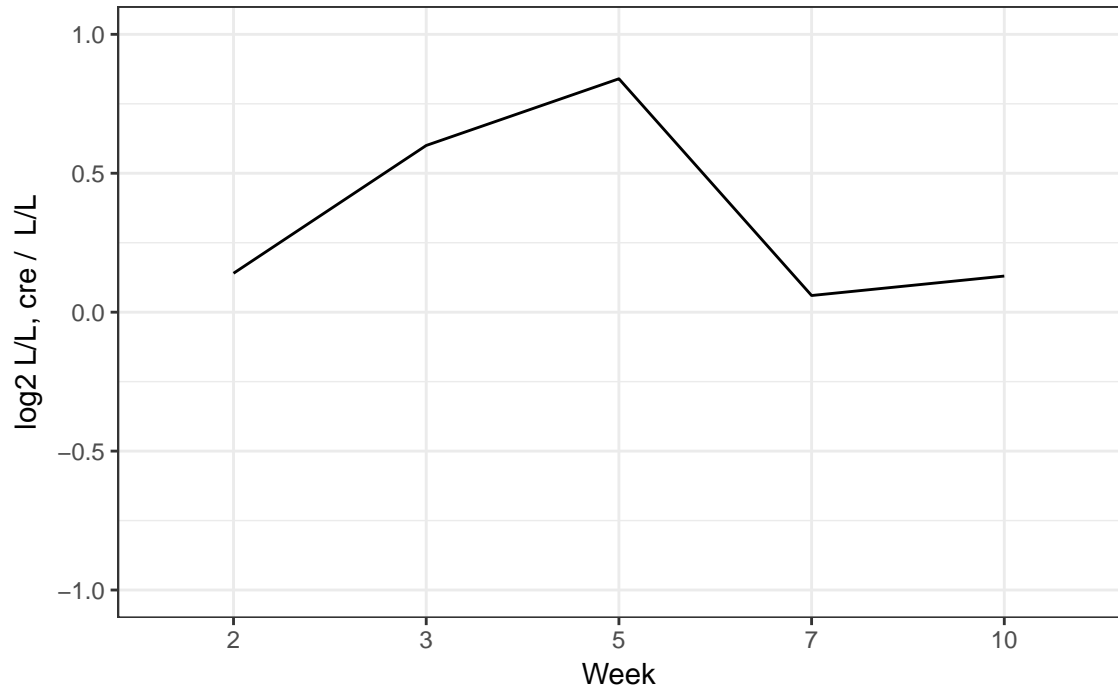



APOA1BP / Q8K4Z3; adj.p value: 0.2784

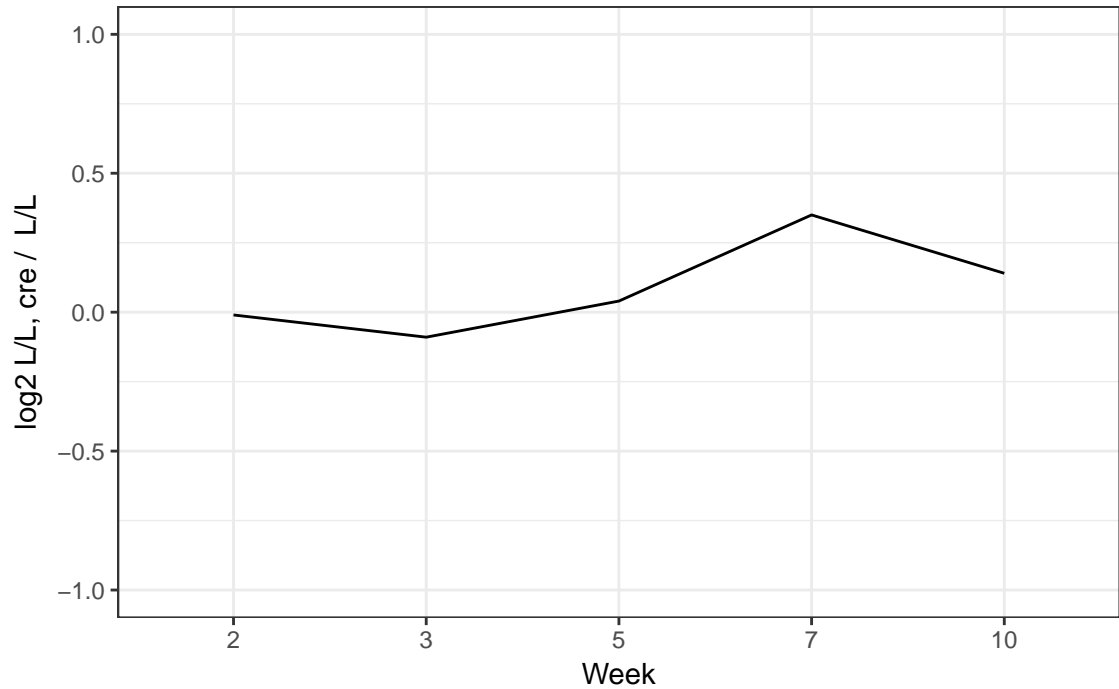

APOO / Q9DCZ4; adj.p value: 0.52047

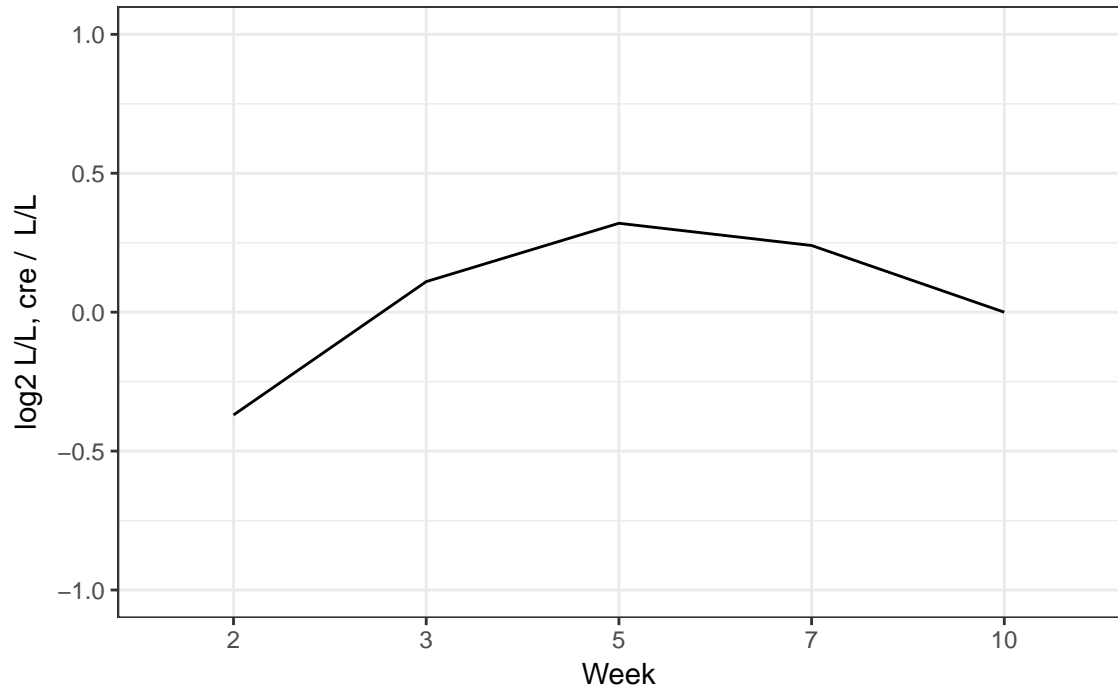

APOOL / Q78IK4; adj.p value: 0.00527

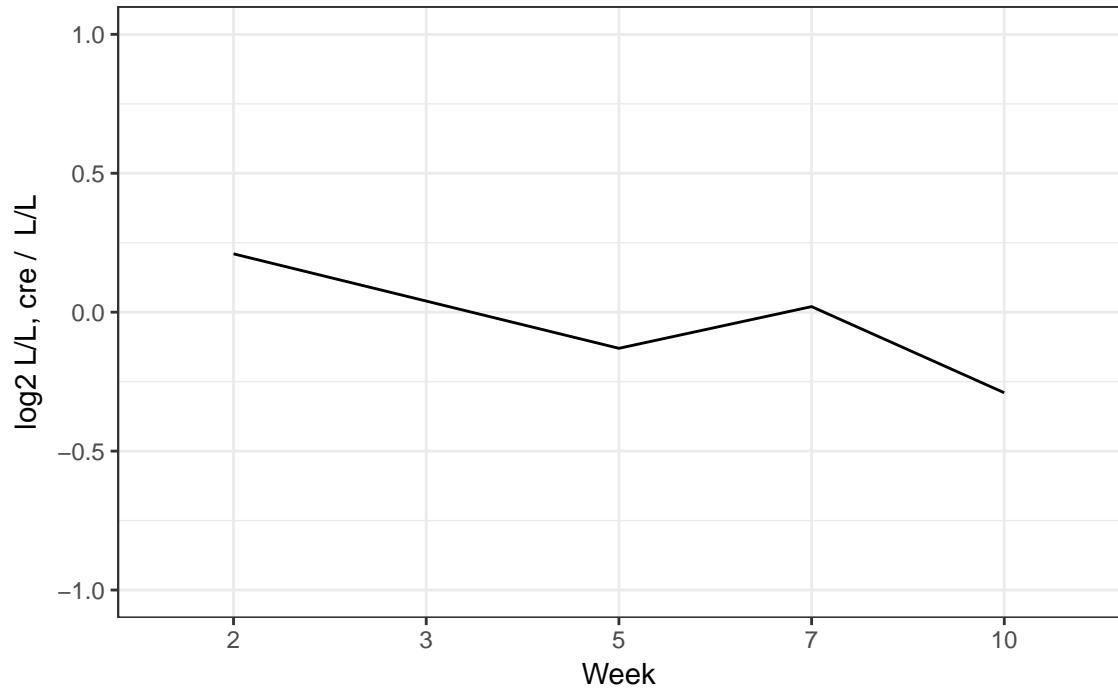

ARMC10 / Q9D0L7-2; adj.p value: 0.05661

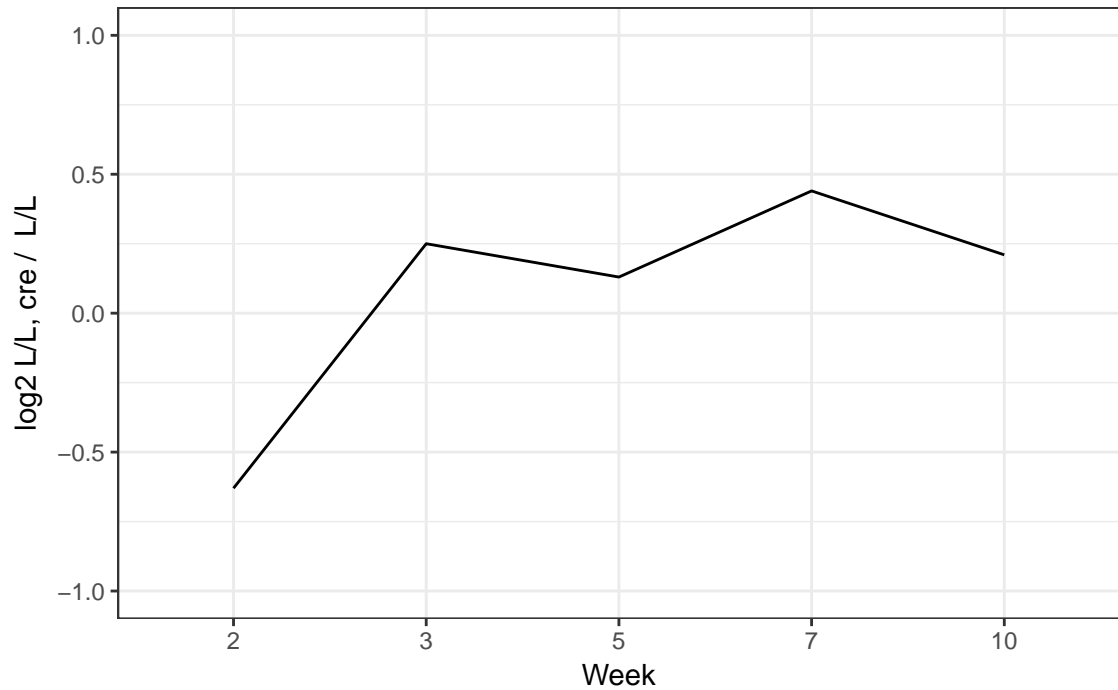

ATAD1 / Q9D5T0; adj.p value: 0.0761

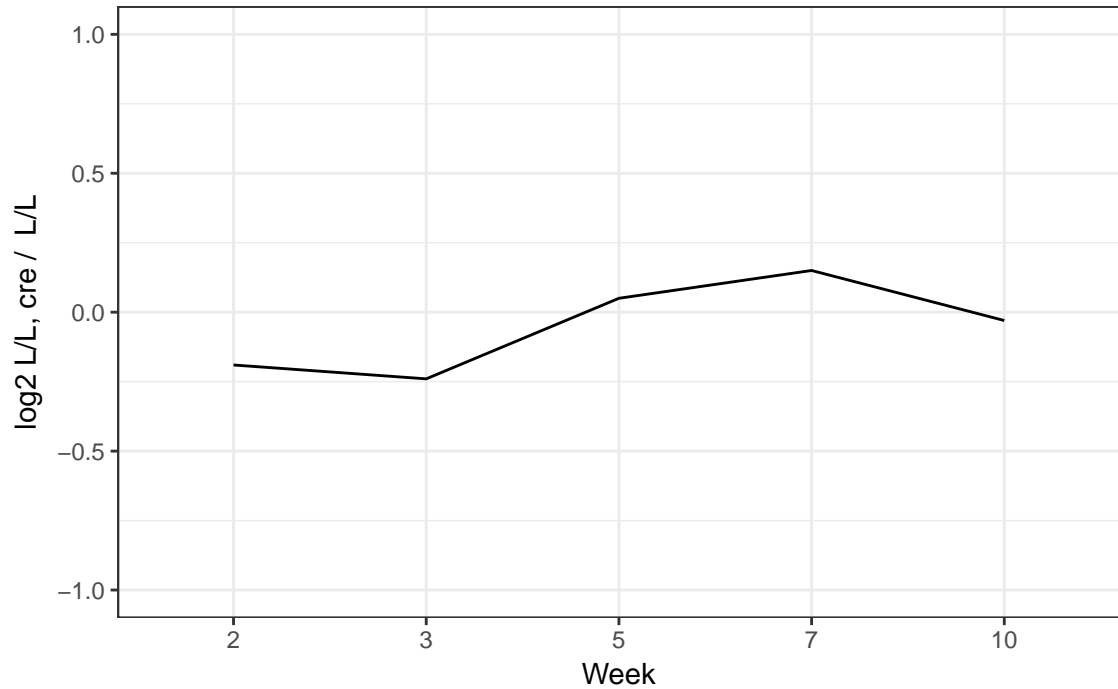

ATAD3 / Q925I1; adj.p value: 0

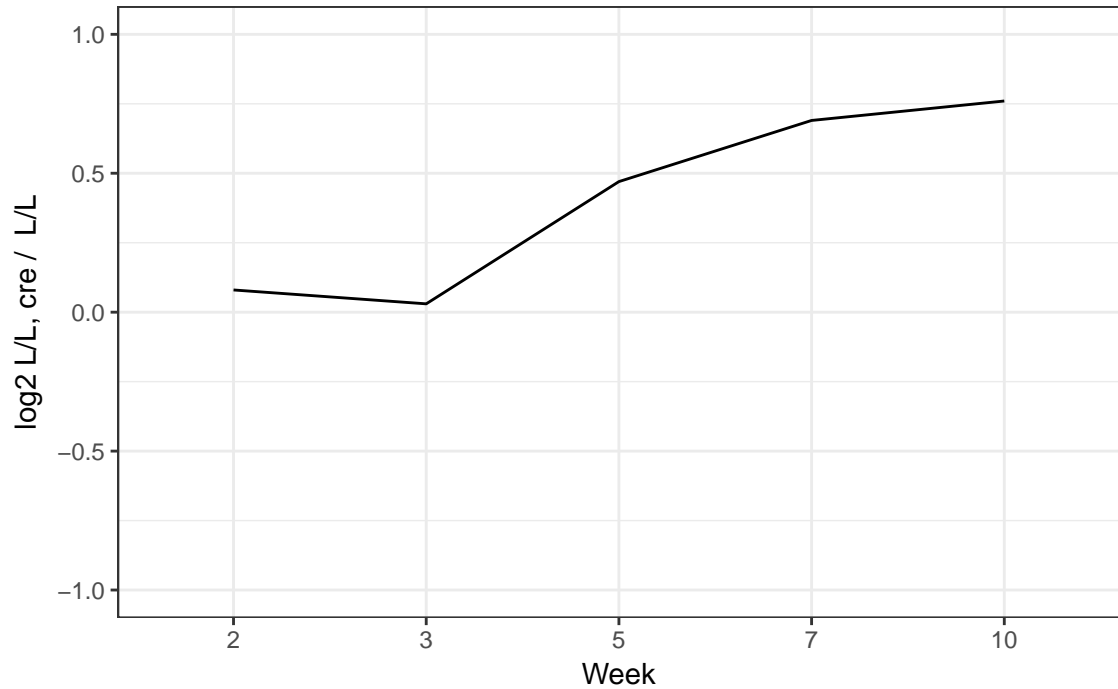

ATP5A1 / Q03265; adj.p value: 0.02922

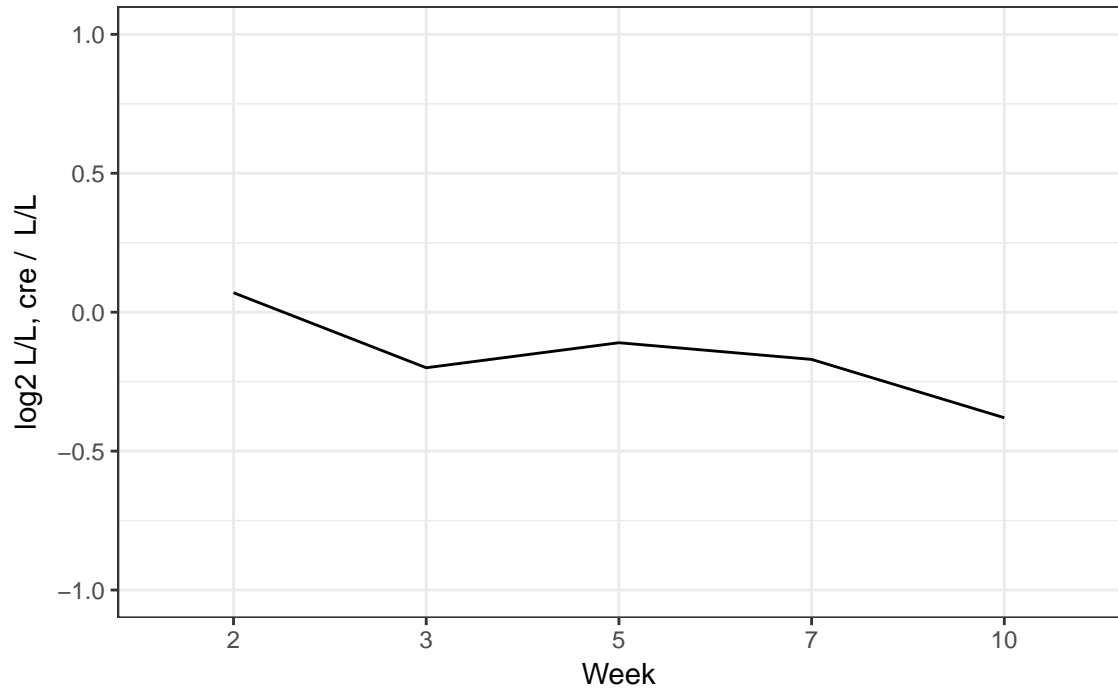

ATP5B / P56480; adj.p value: 0.03505

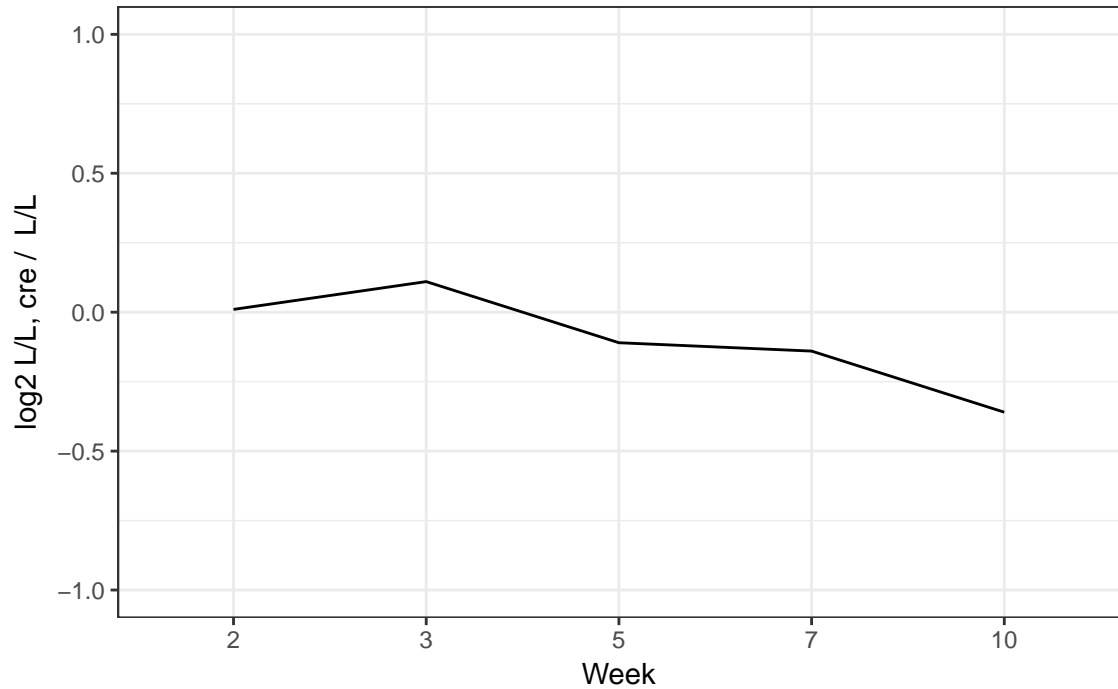



ATP5C1 / A2AKU9; adj.p value: 0.20098

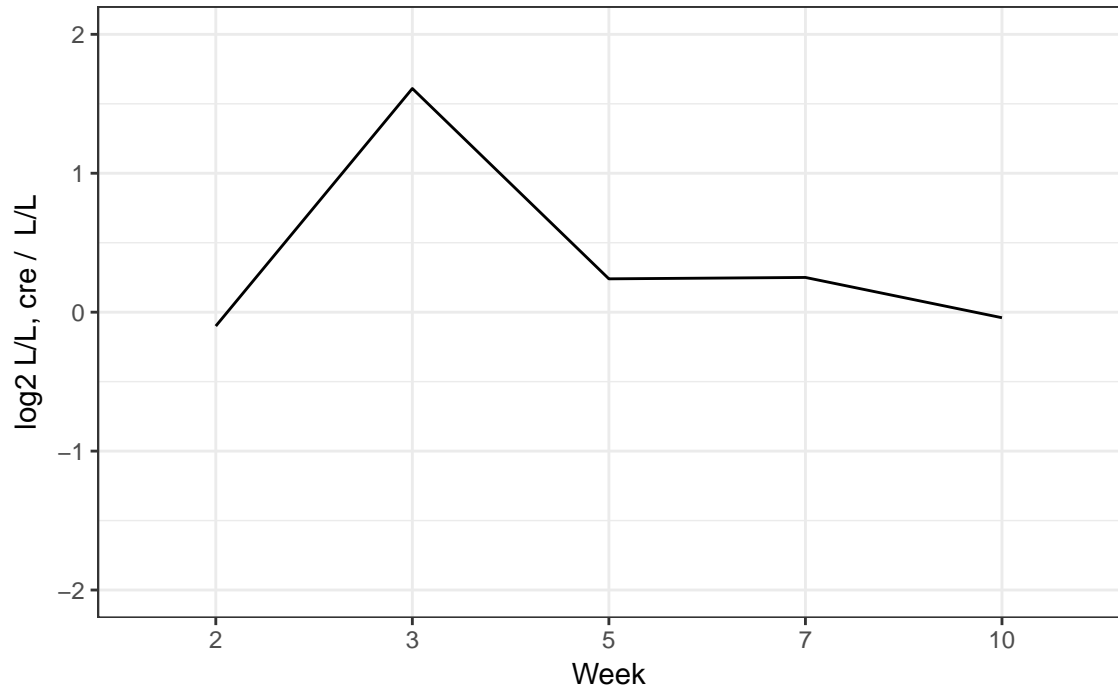

ATP5C1 / Q8C2Q8; adj.p value: 0.61409

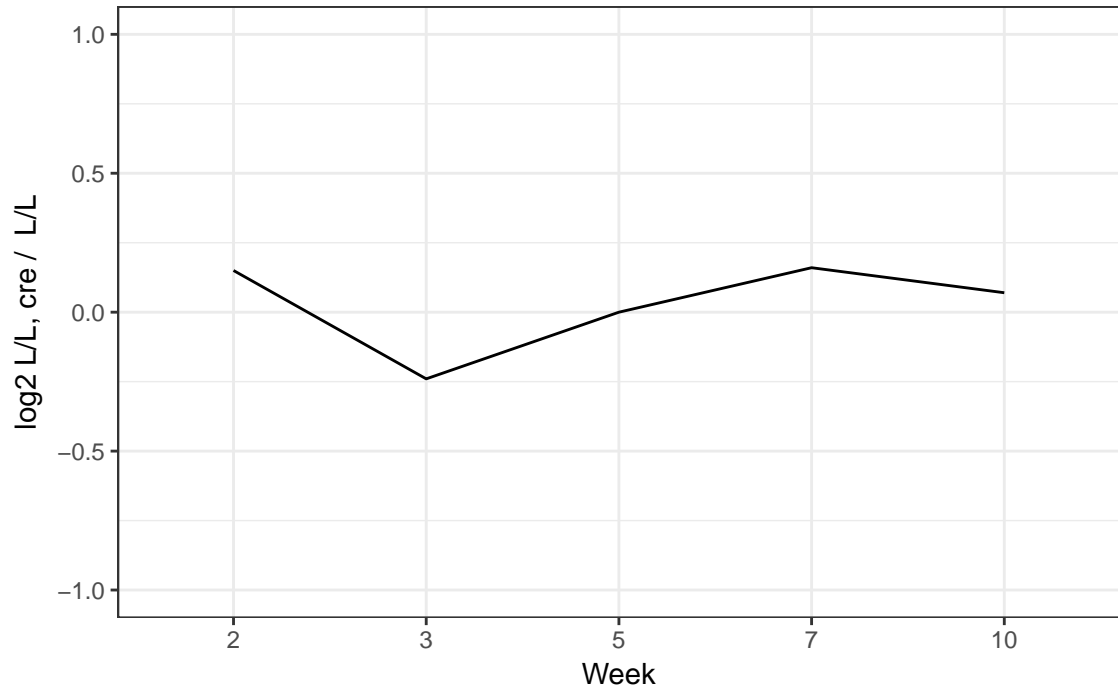

ATP5D / Q9D3D9; adj.p value: 0.50779

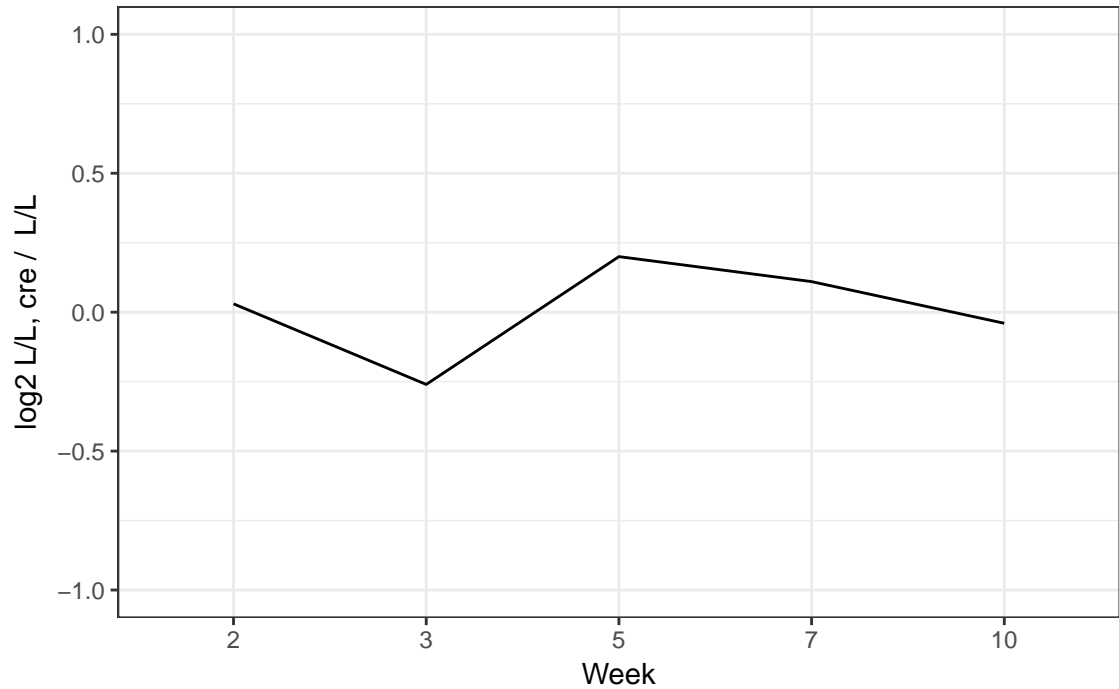

ATP5E / P56382; adj.p value: 0.60708

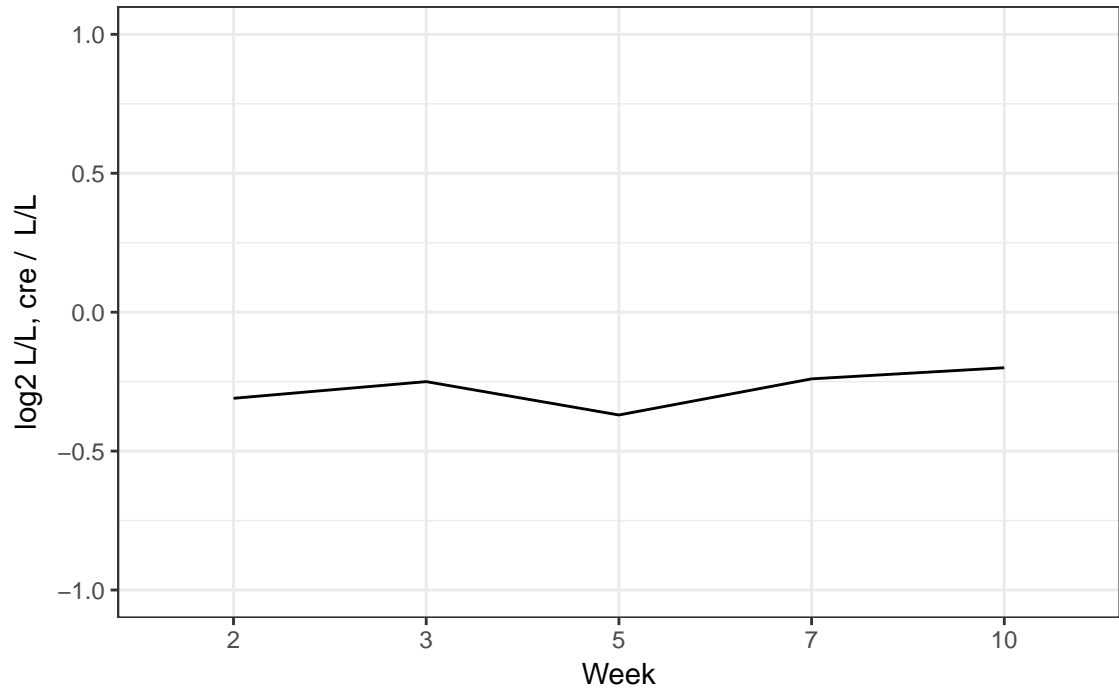

ATP5F1 / Q9CQQ7; adj.p value: 0.00156

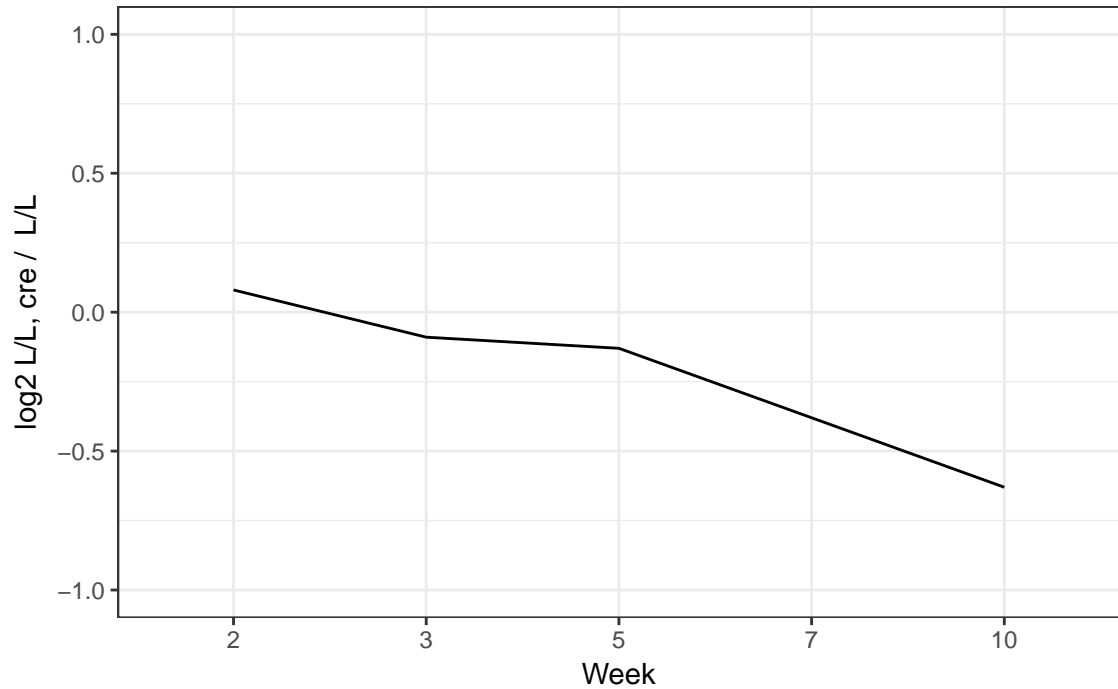

ATP5H / Q9DCX2; adj.p value: 0

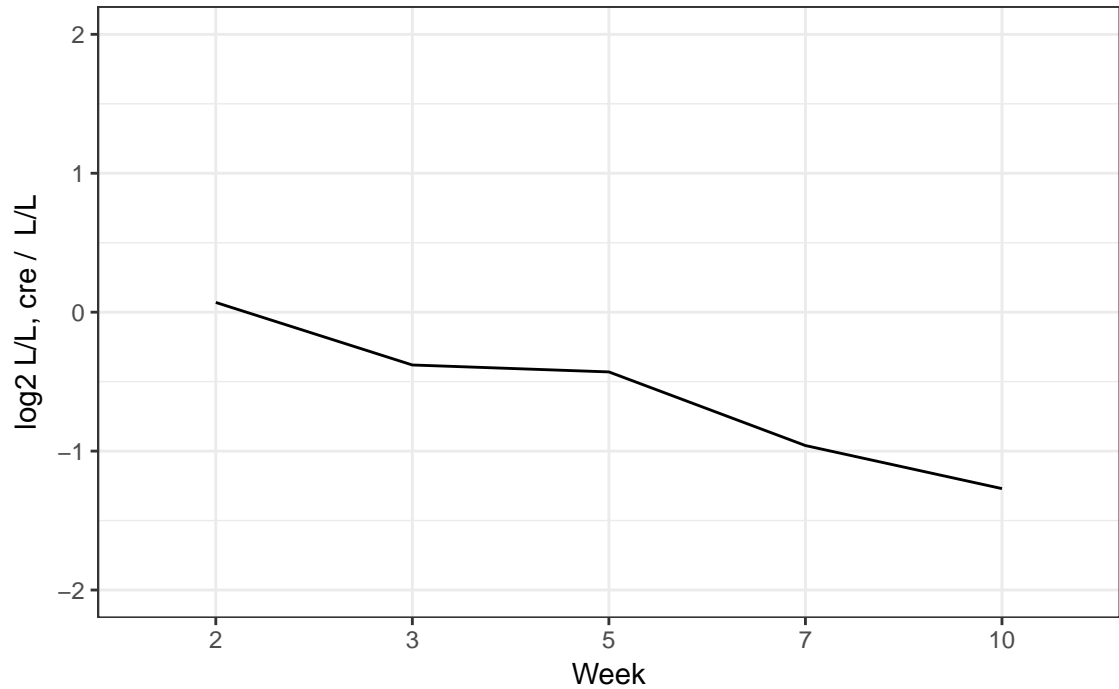

ATP5I / Q06185; adj.p value: 0.00035

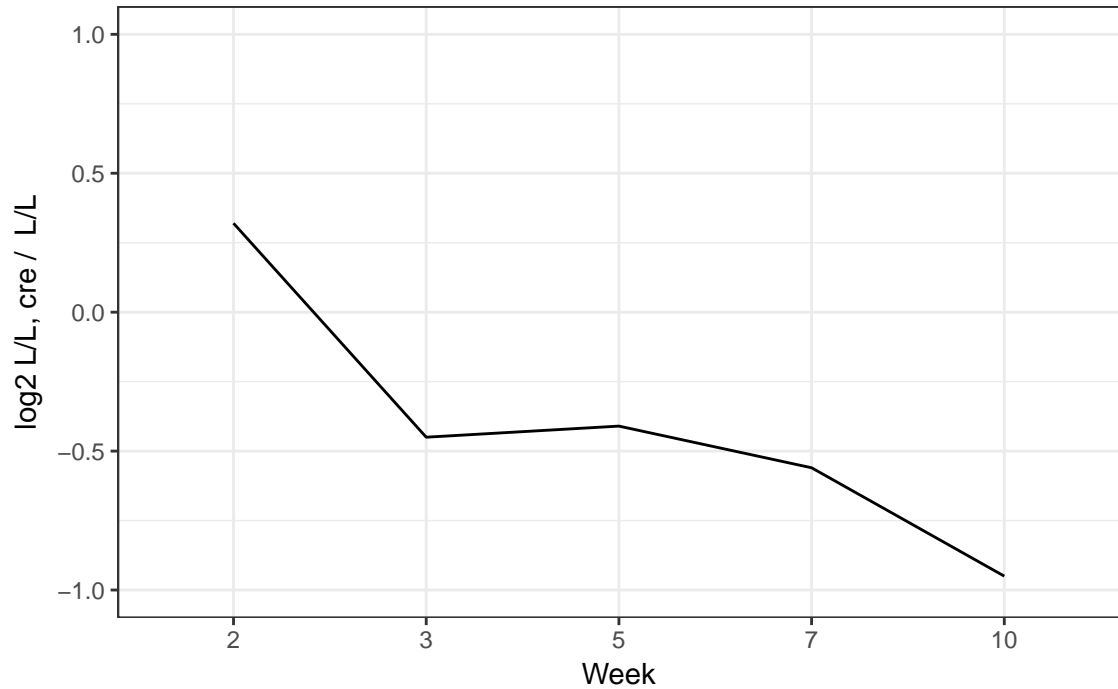

ATP5J / P97450; adj.p value: 0

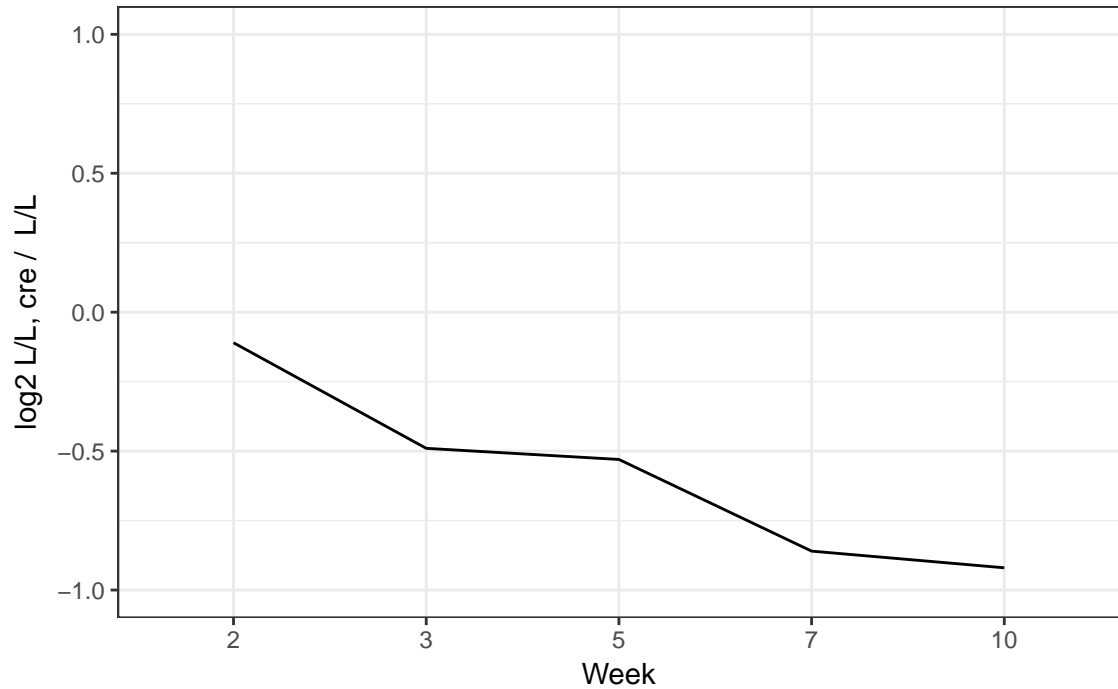



ATP5J2 / P56135; adj.p value: 2e-05

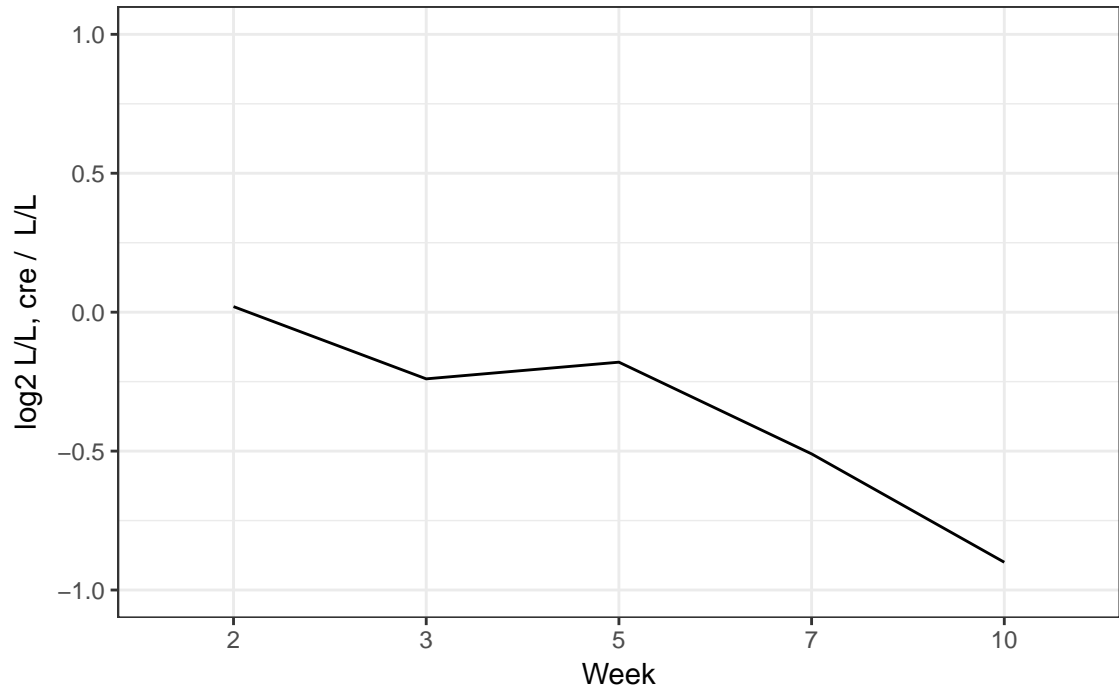

ATP5L / Q9CPQ8; adj.p value: 0

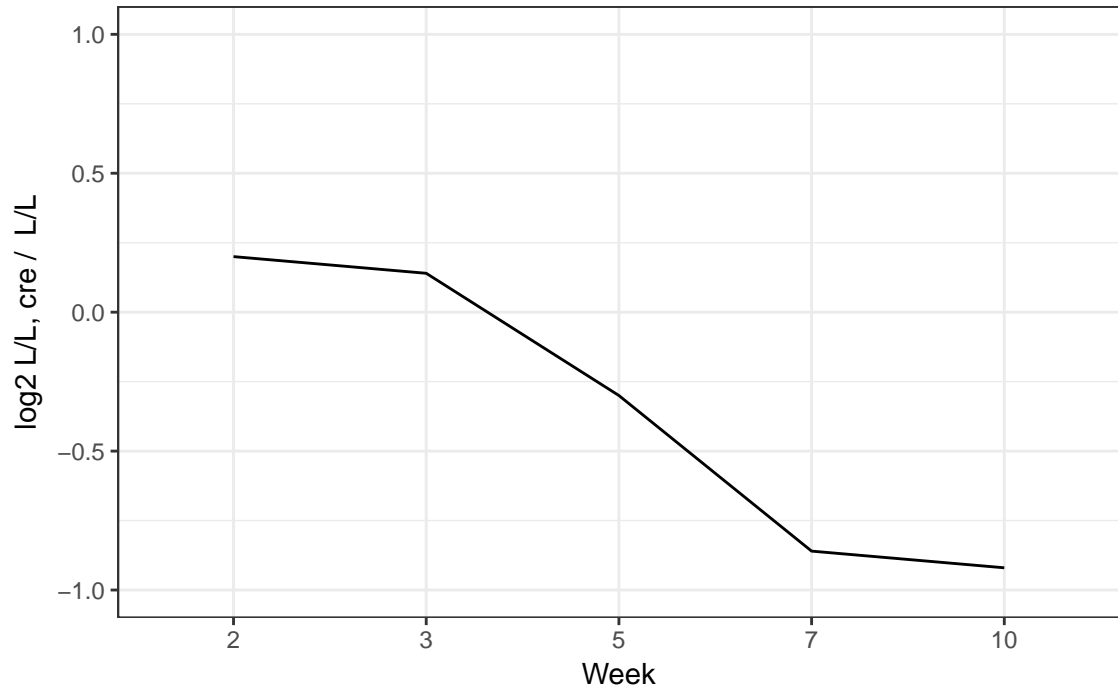

ATP5O / Q9DB20; adj.p value: 0.00011

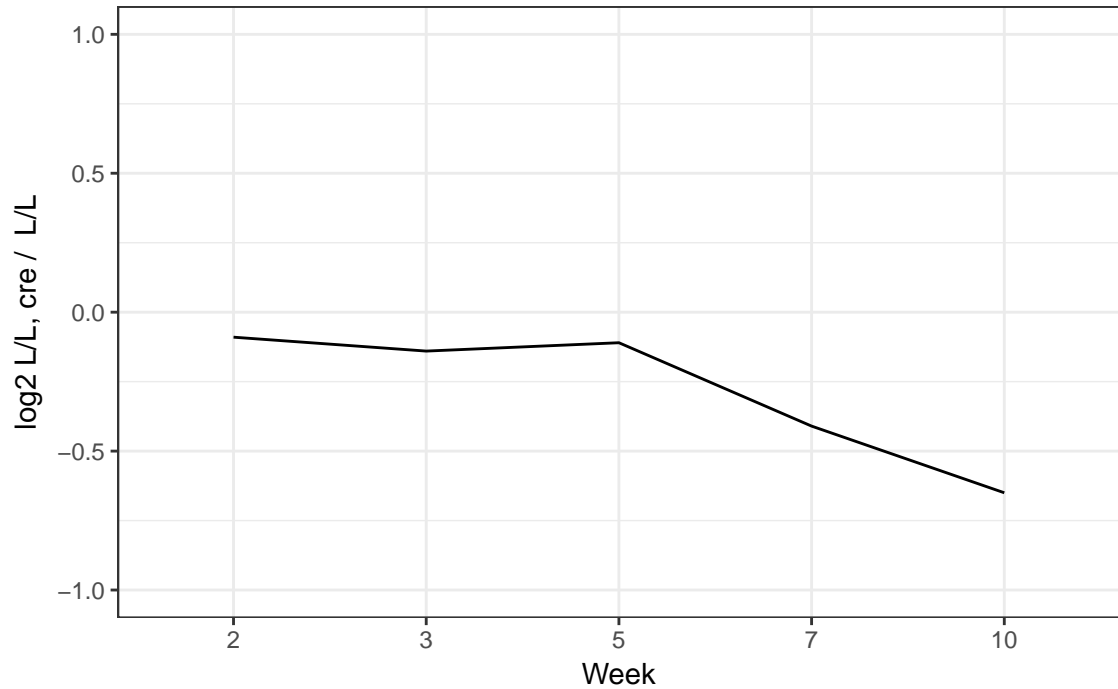

ATP5S / Q9CRA7; adj.p value: 0.03087

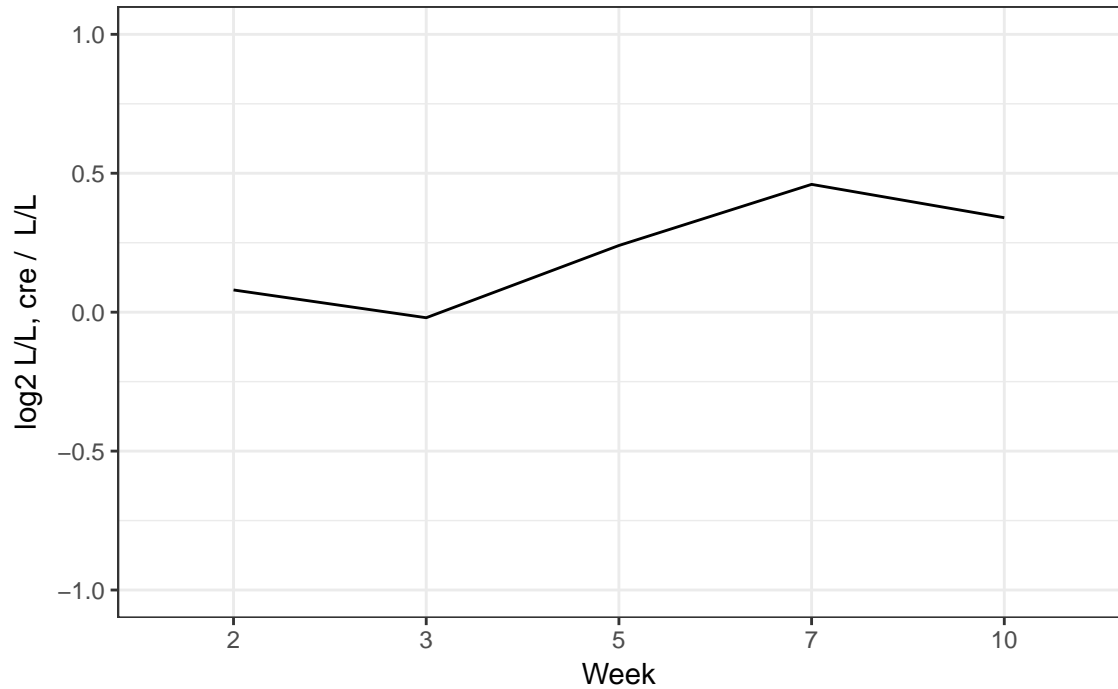

ATPAF1 / H3BLL2; adj.p value: 0.00036

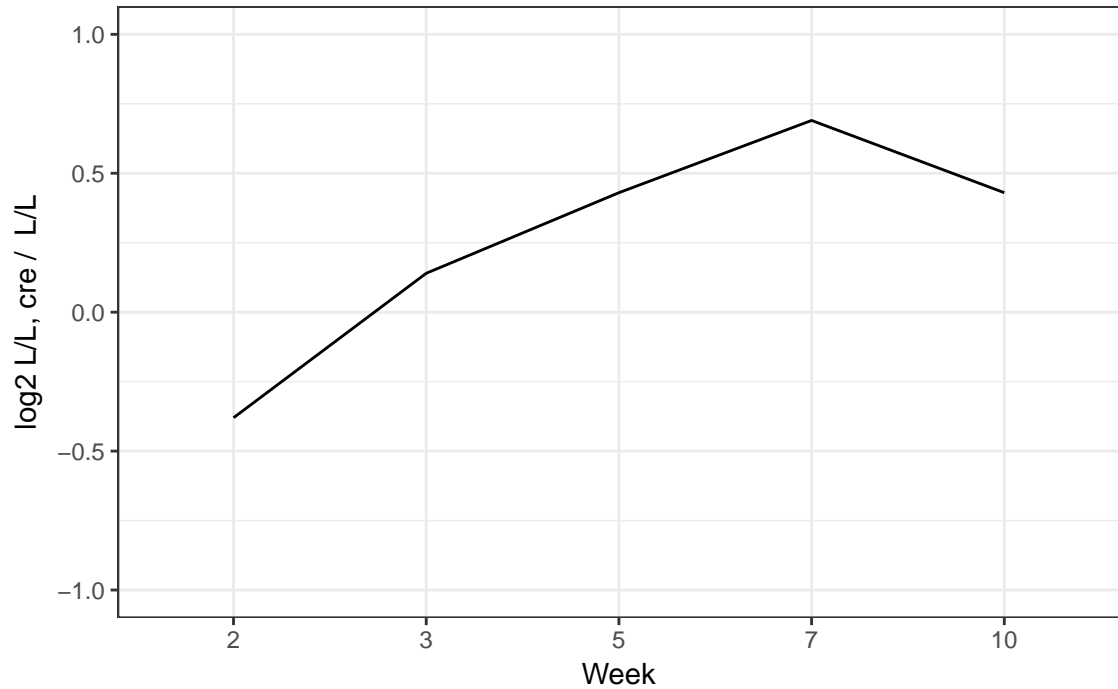

ATPAF2 / Q91YY4; adj.p value: 0.3453

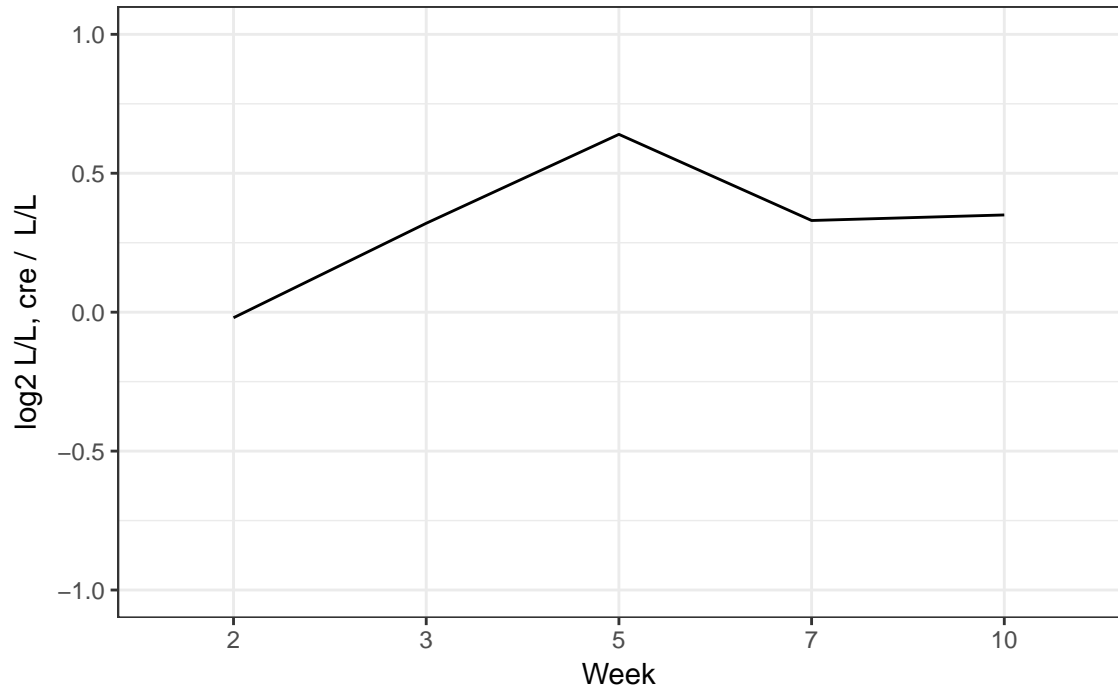

ATPIF1 / E9PV44; adj.p value: 0.00292

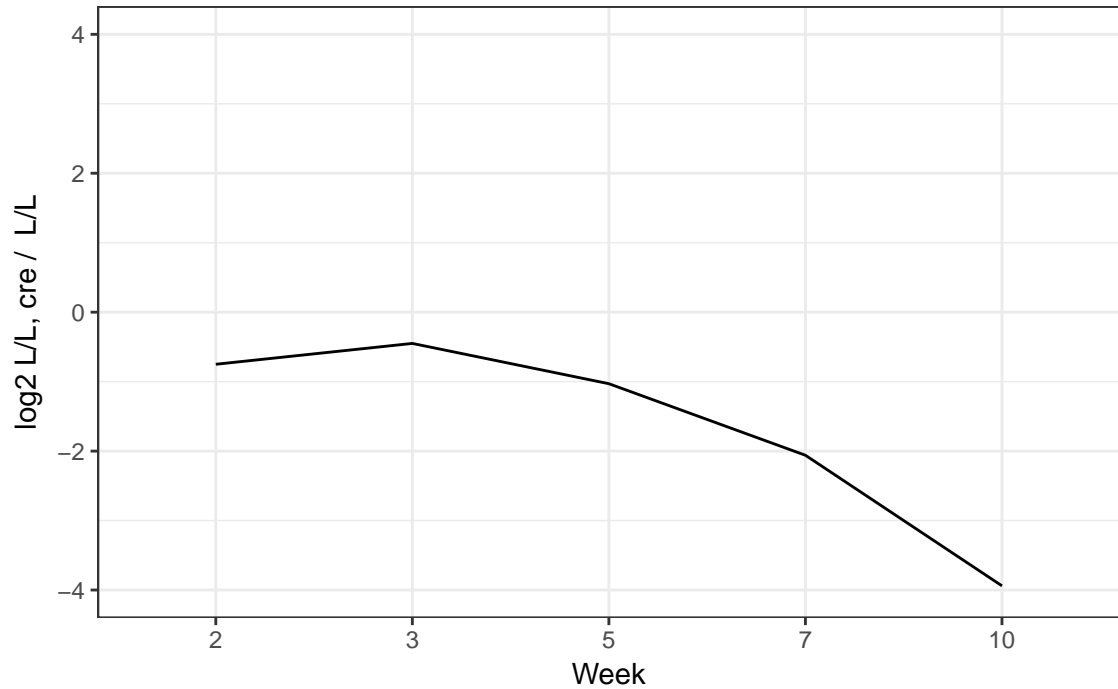

ATPIF1 / O35143; adj.p value: 0.37919

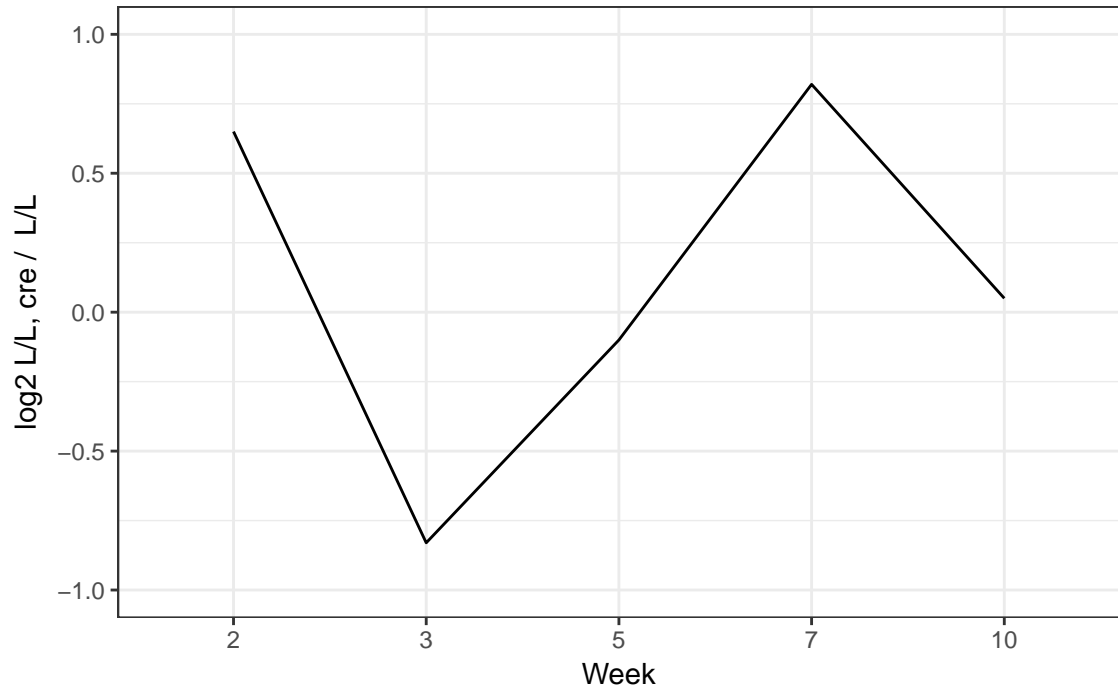



AUH / Q9JLZ3; adj.p value: 0.00146

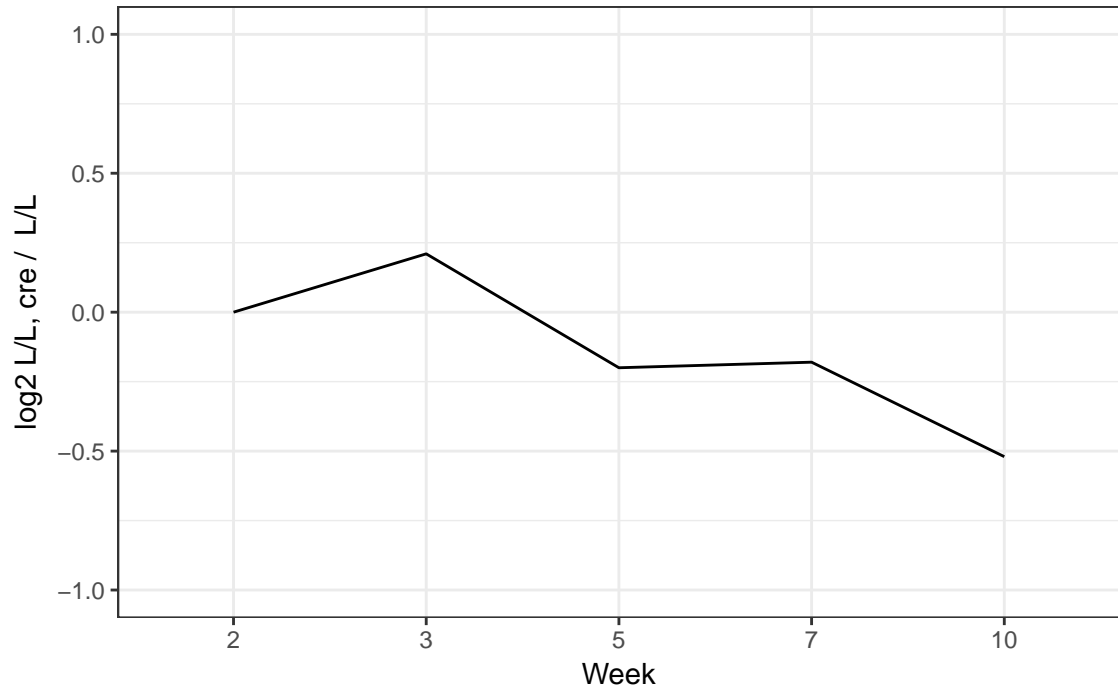

BAK1 / O08734; adj.p value: 0.77932

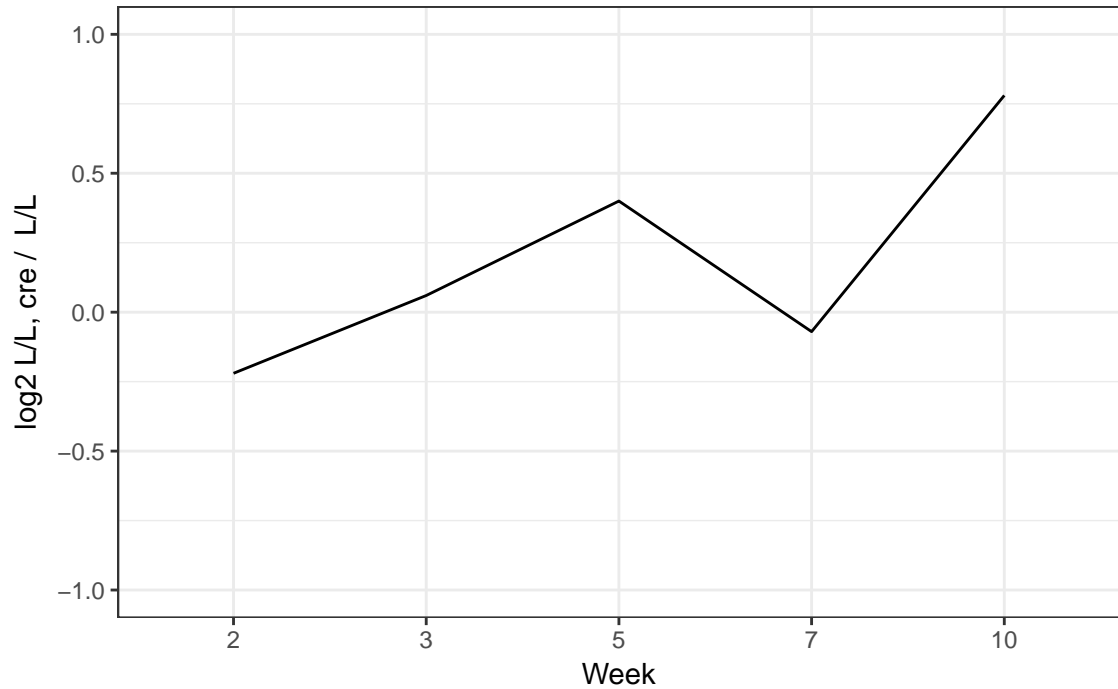

BCAT2 / O35855; adj.p value: 0.22254

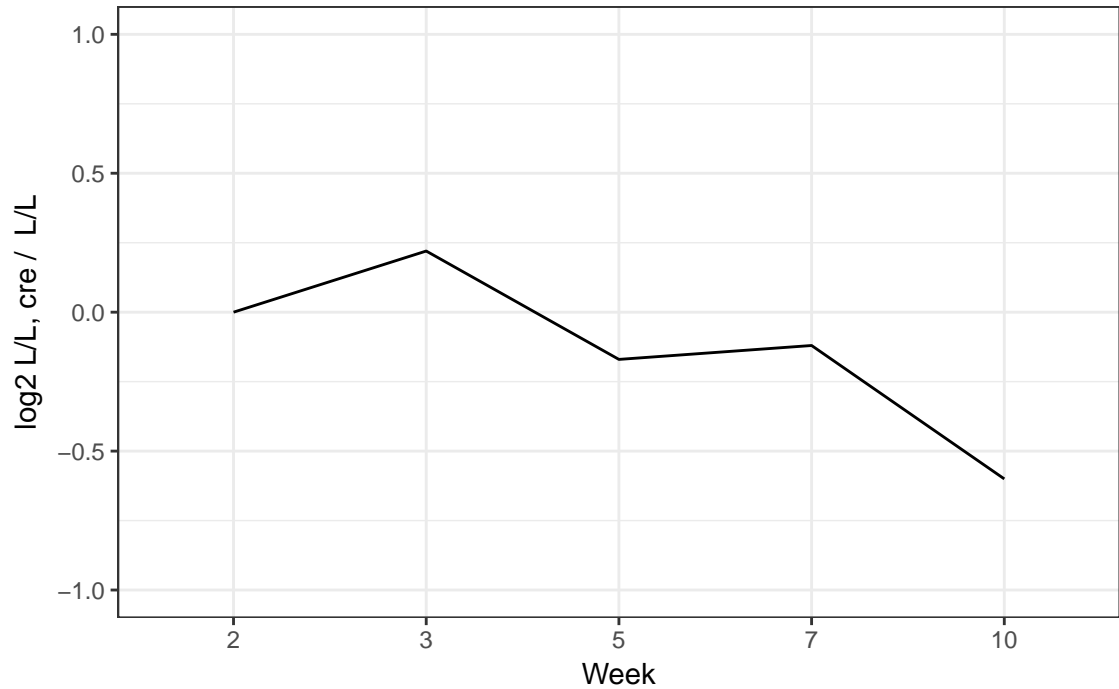

BCKDHA / Q3U3J1; adj.p value: 0.05008

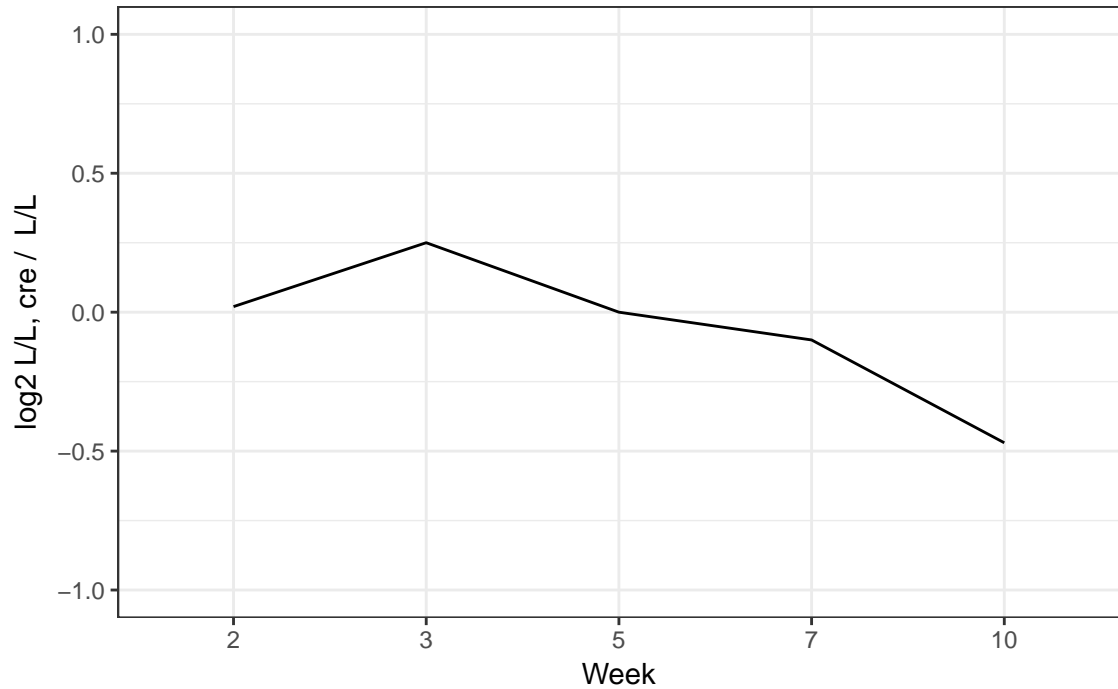

BCKDHB / Q6P3A8; adj.p value: 0.22094

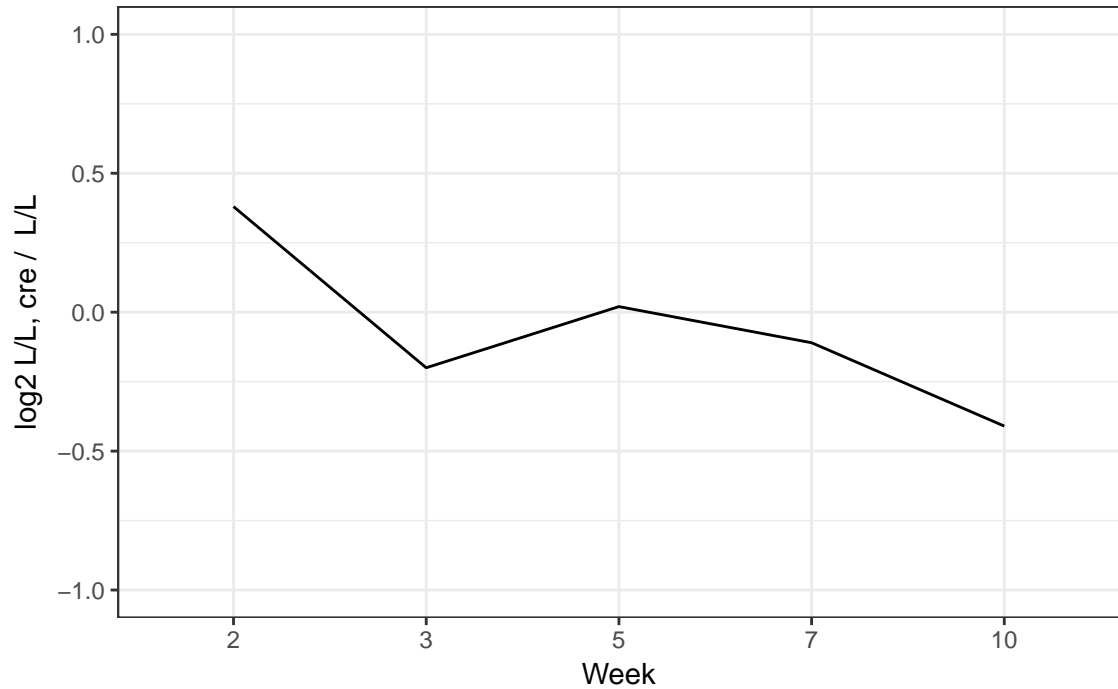

BCKDK / O55028; adj.p value: 0.30707

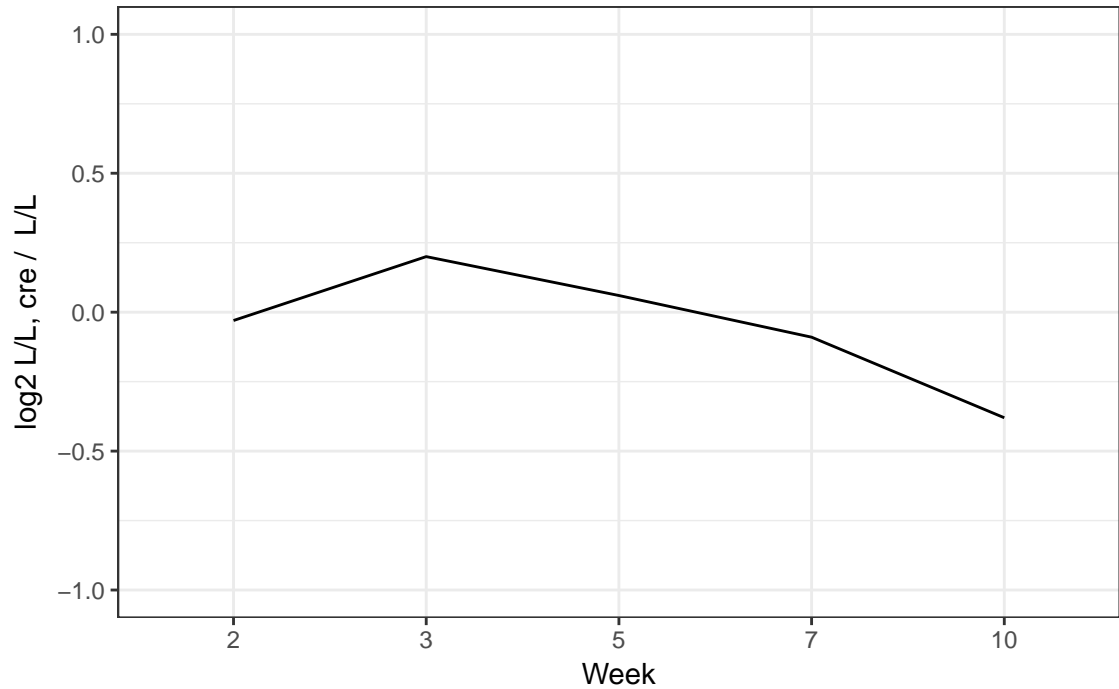

BCL2L13 / P59017; adj.p value: 0.50134

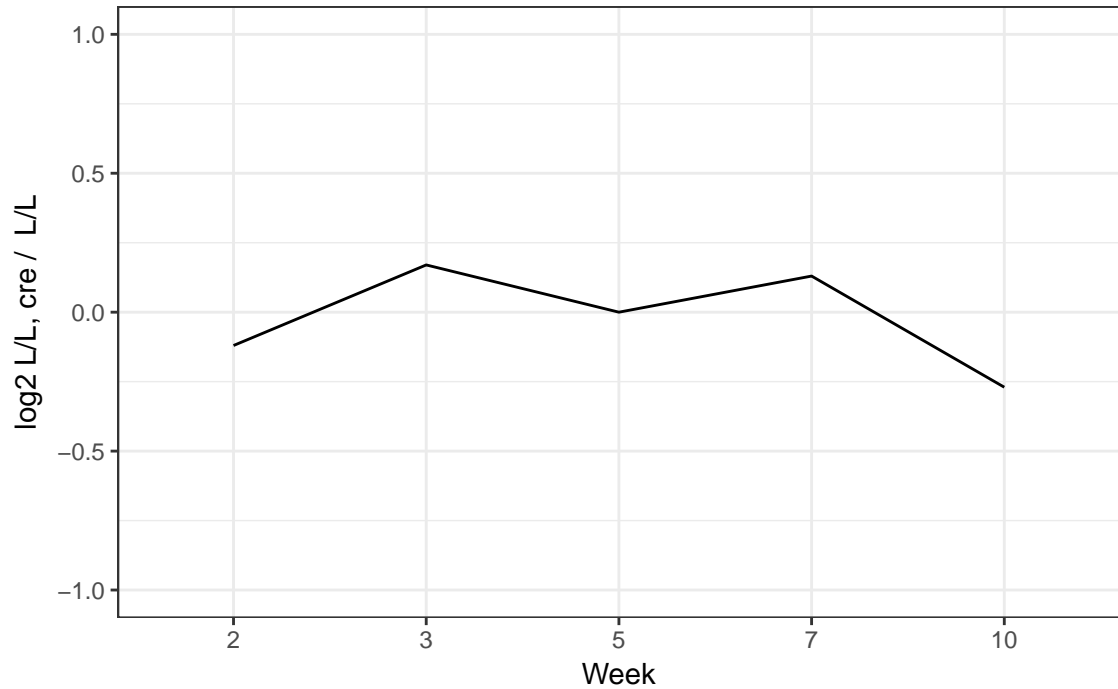

BCS1L / Q9CZP5; adj.p value: 0.30801

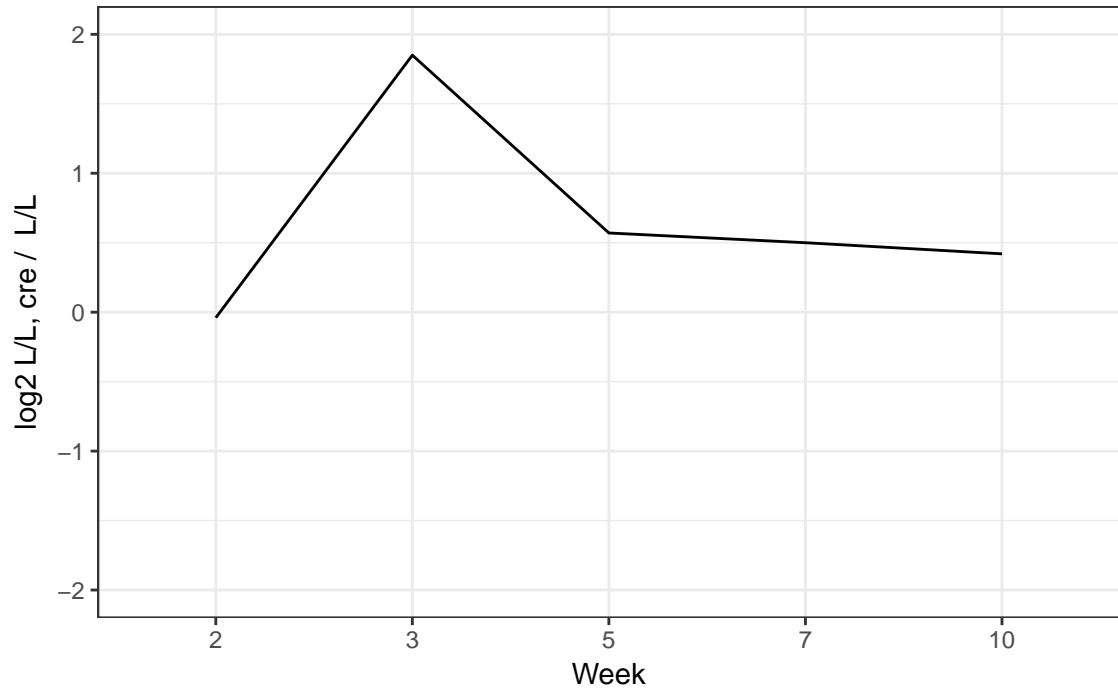



BDH1 / Q80XN0; adj.p value: 0.51989

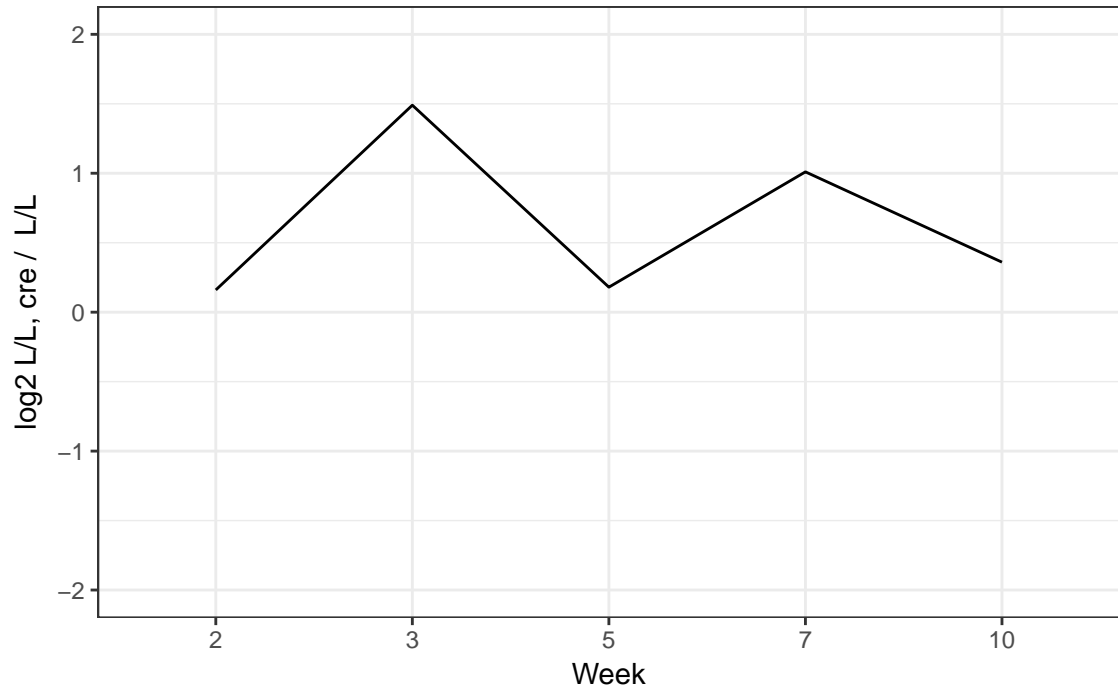

BNIP3 / O55003; adj.p value: 0.05022

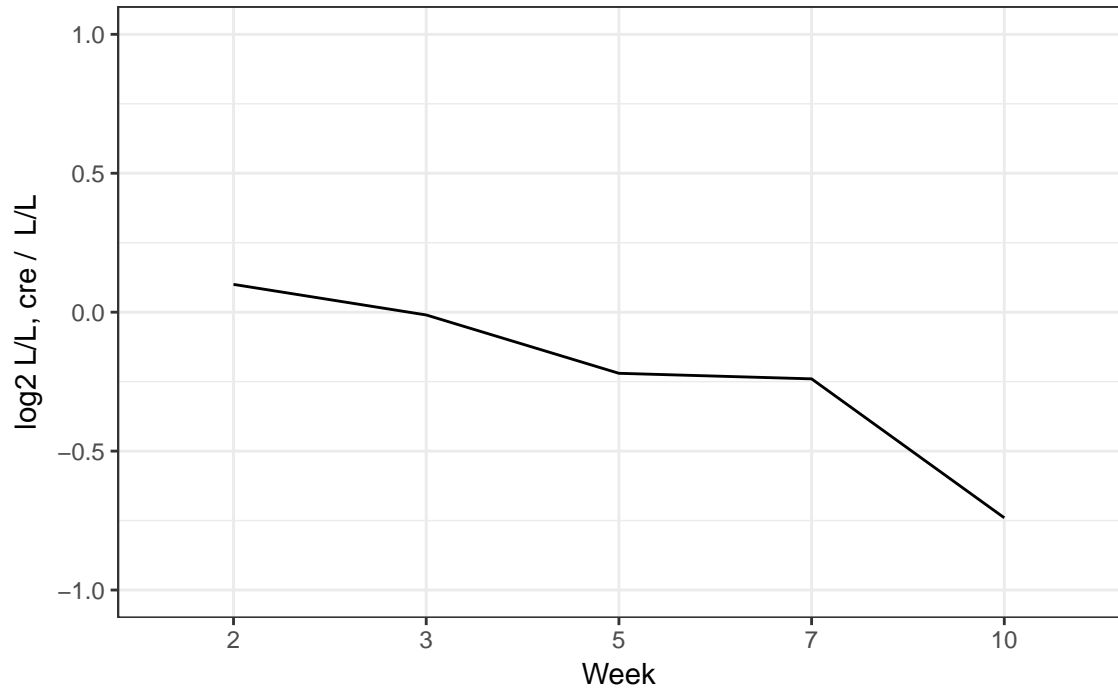

BOLA1 / Q9D8S9; adj.p value: 0.00469

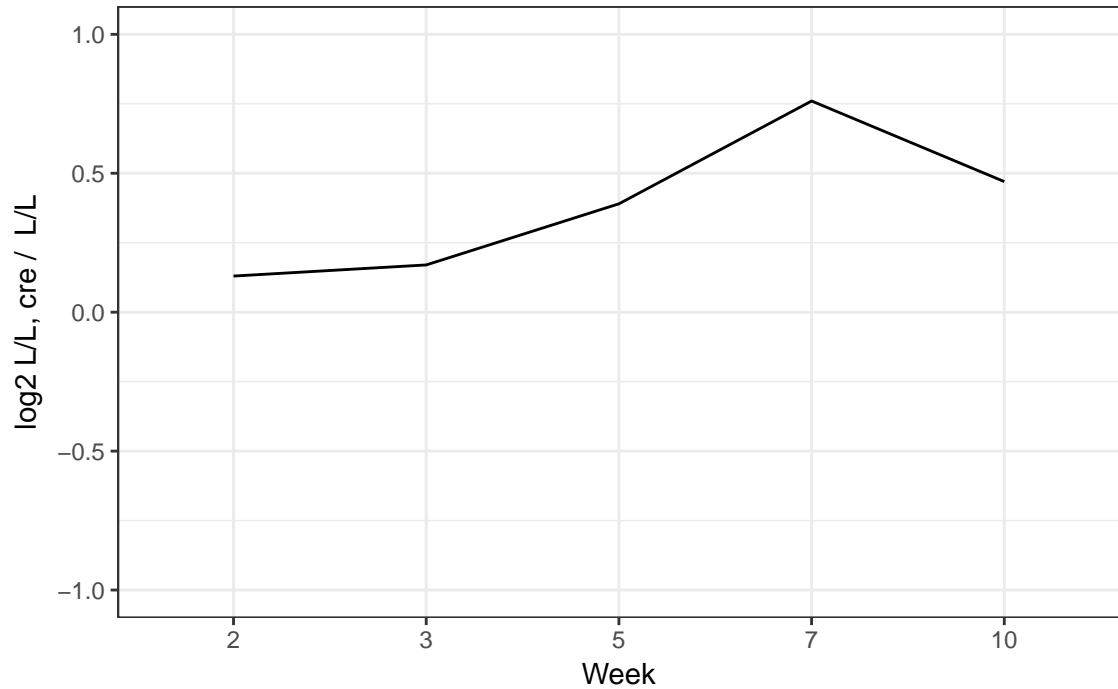

BPHL / Q8R164; adj.p value: 0.29589

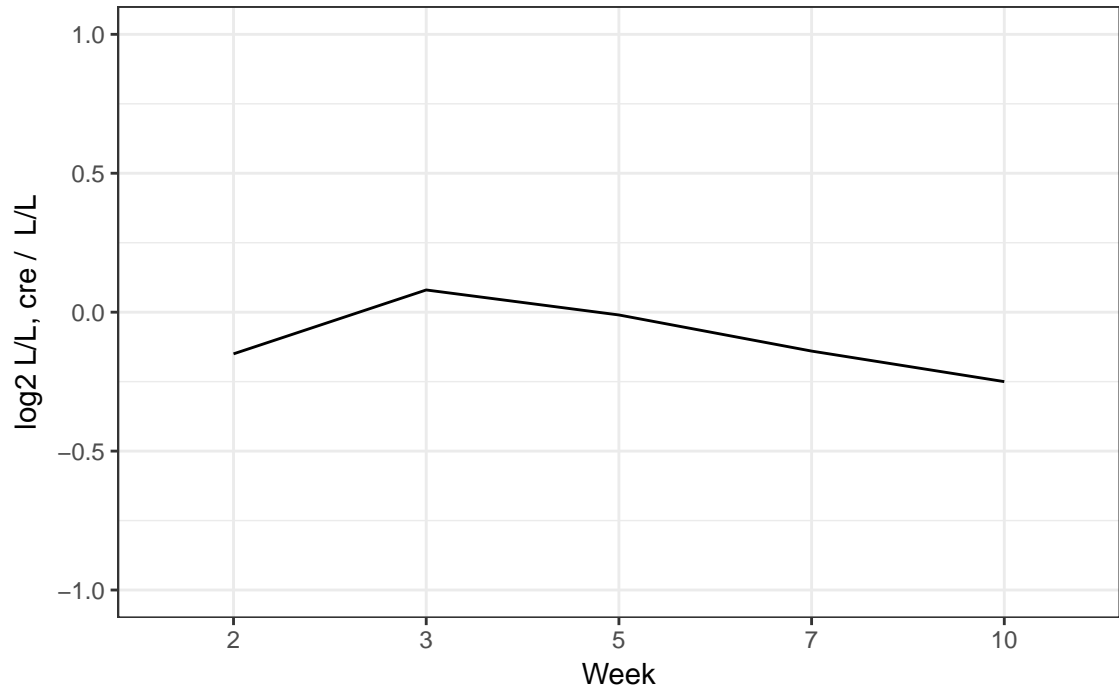

C1QBP / Q8R5L1; adj.p value: 0.00025

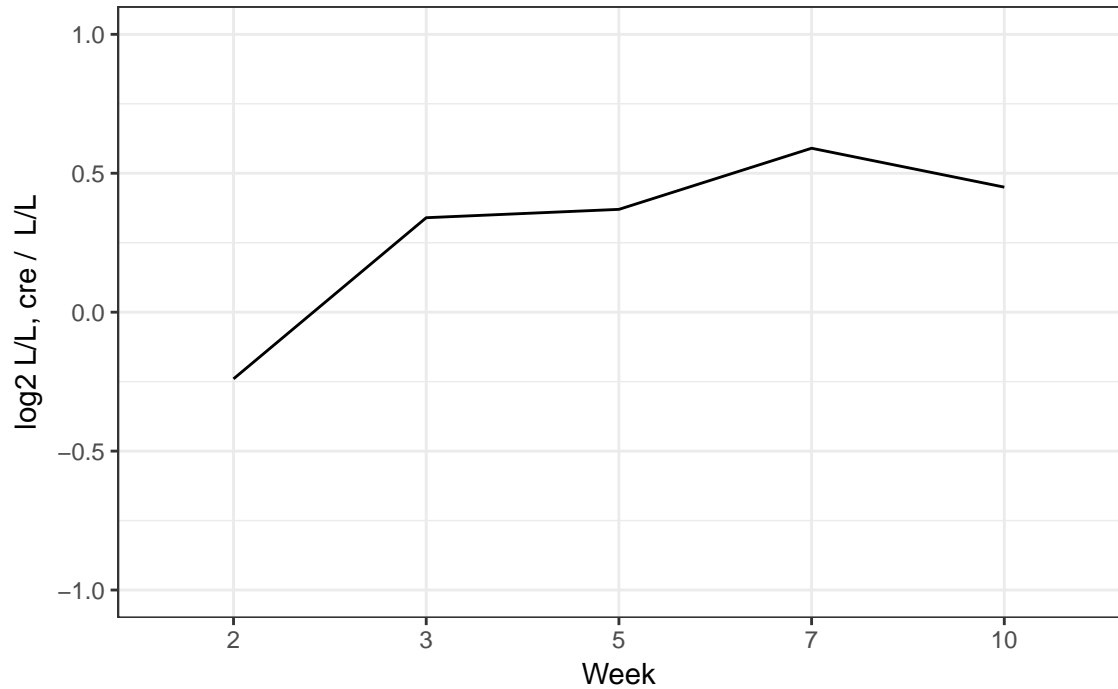

CARKD / J3QMM7; adj.p value: 0.23058

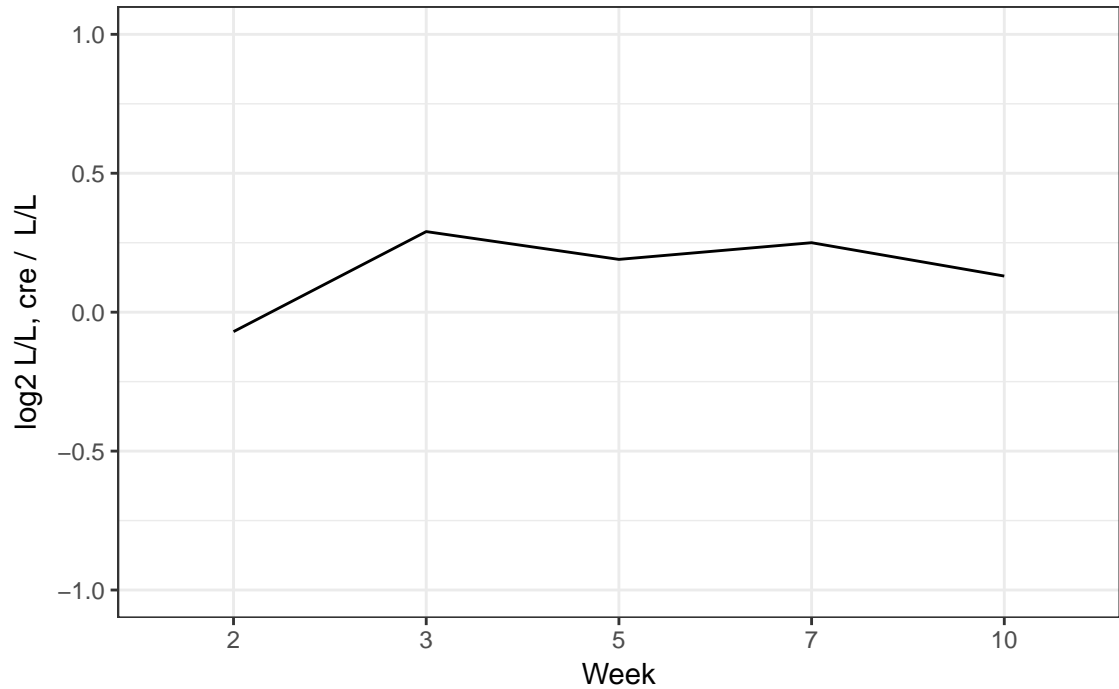

CARS2 / Q8BYM8; adj.p value: 0.31626

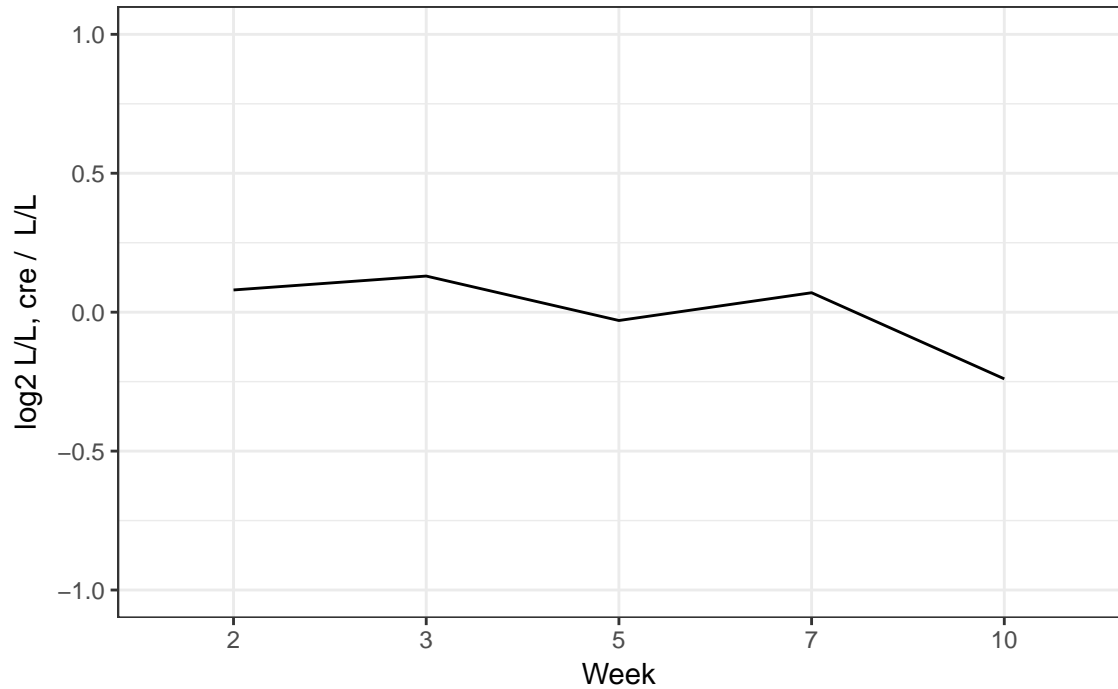

CAT / P24270; adj.p value: 0.06229

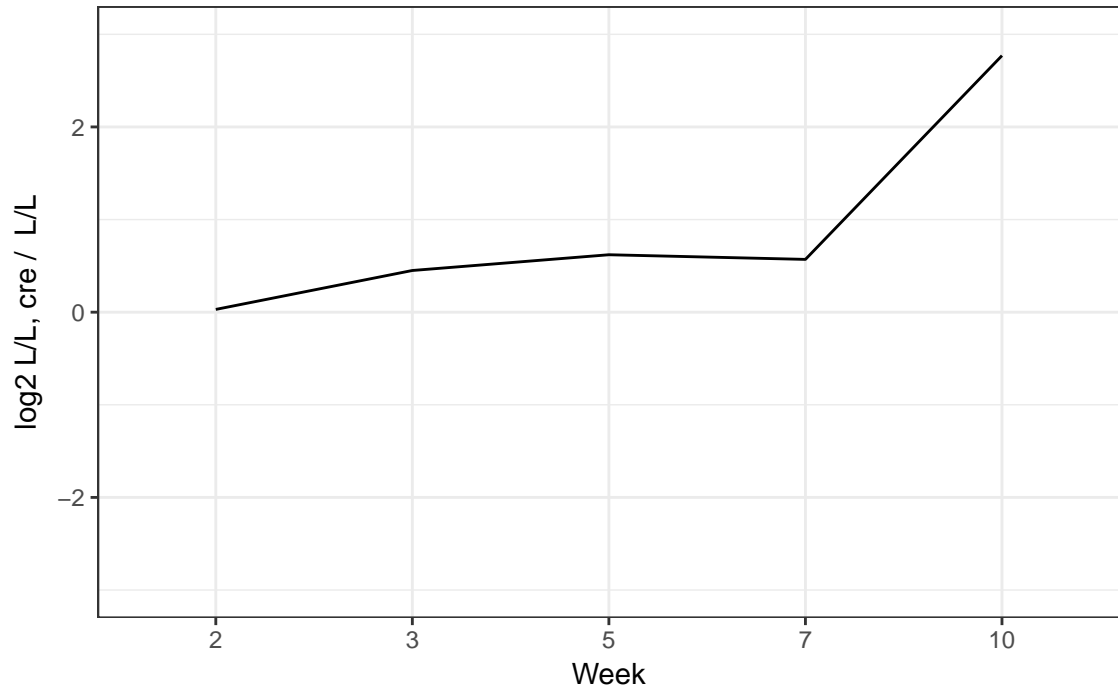



CBR2 / P08074; adj.p value: 0

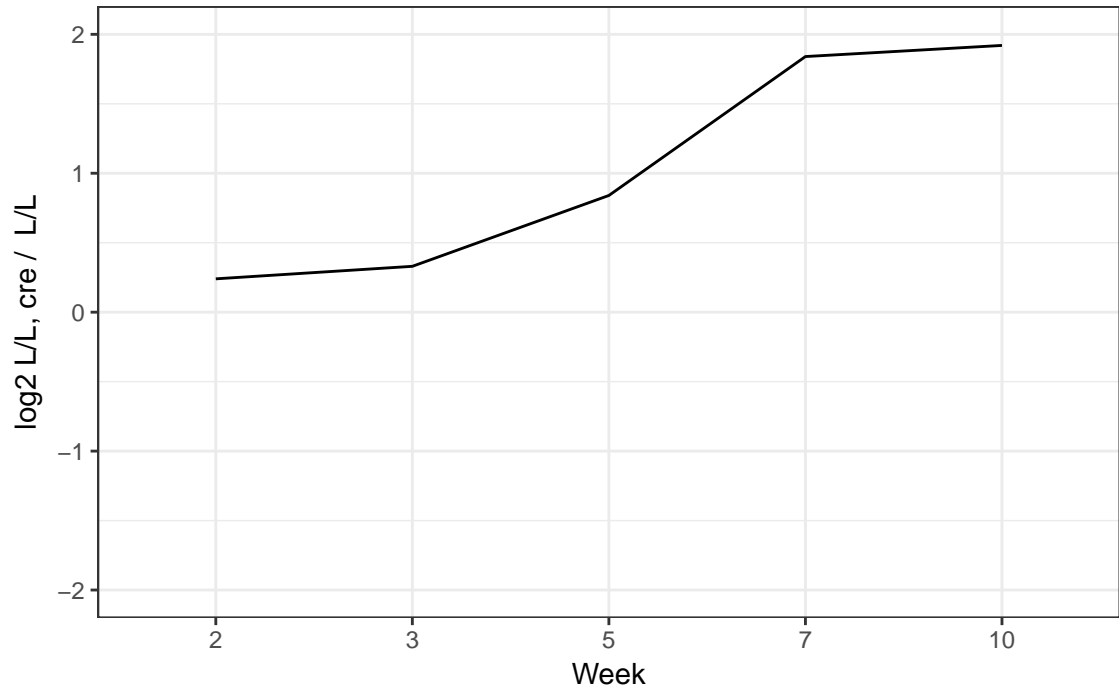

CBR4 / Q91VT4; adj.p value: 0.12059

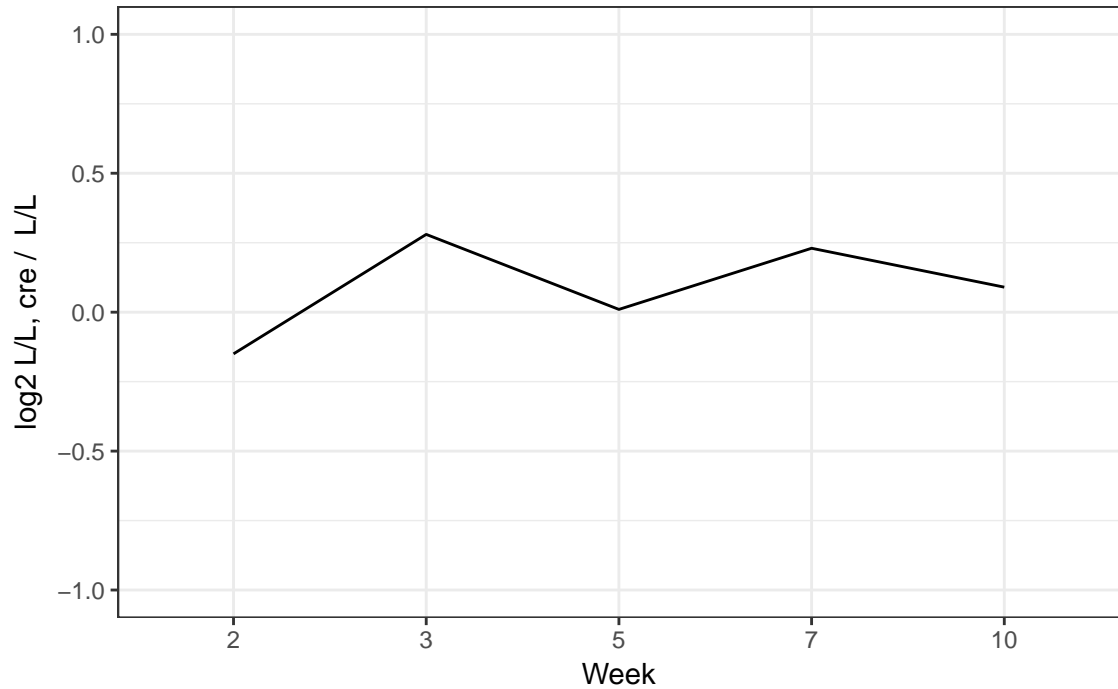

CCBL2 / Q71RI9-2; adj.p value: 0.8405

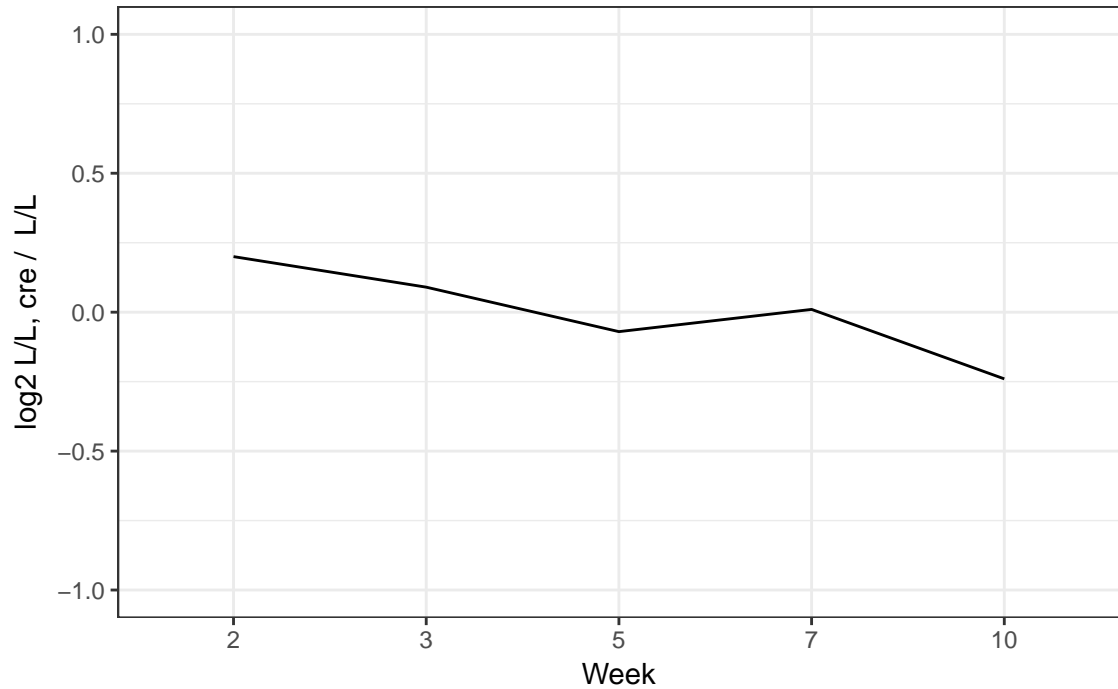

CCDC127 / Q3TC33; adj.p value: 0.27458

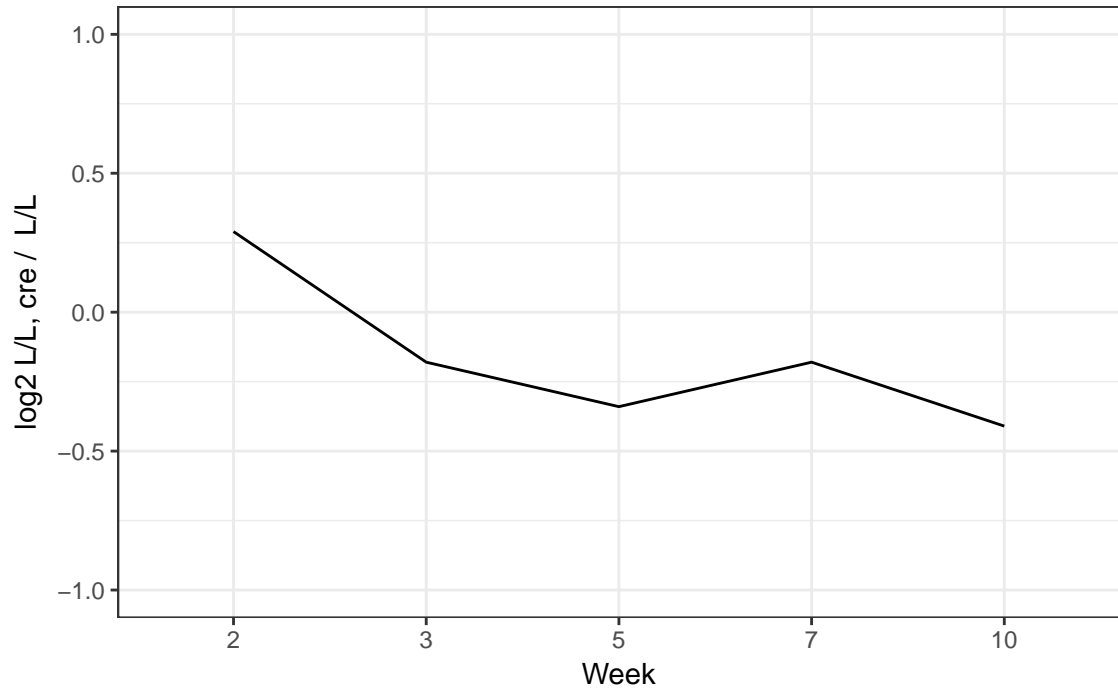

CCDC51 / Q3URS9-2; adj.p value: 3e-05

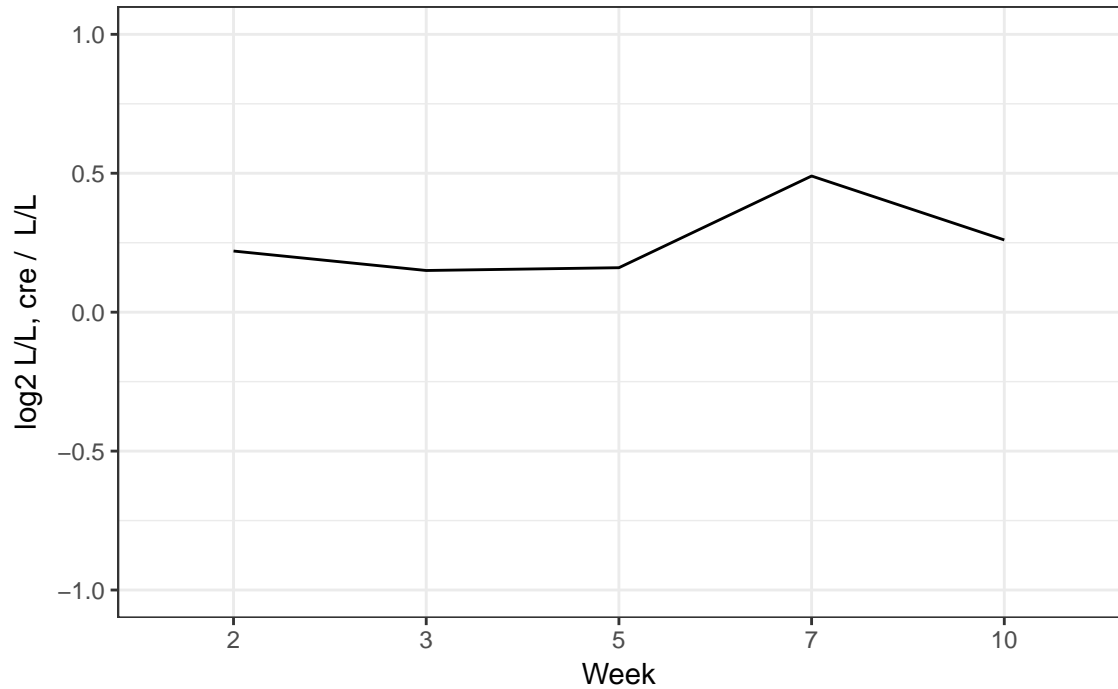

CCDC58 / F8WJ13; adj.p value: 0.3453

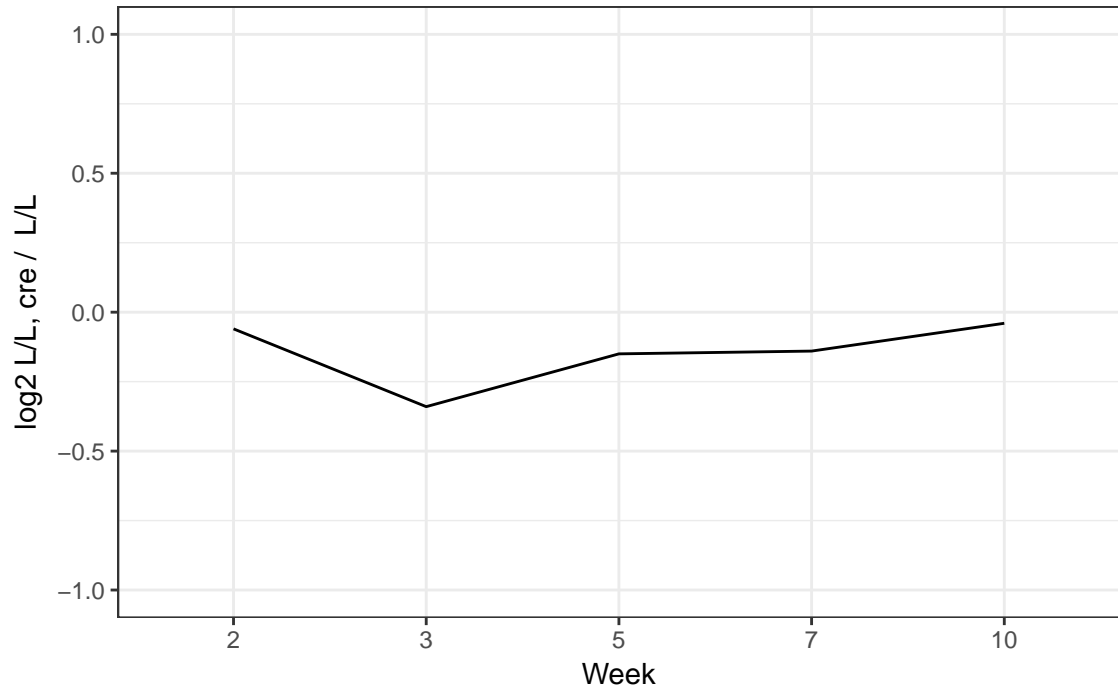

CCDC90B / Q8C3X2; adj.p value: 0.00404

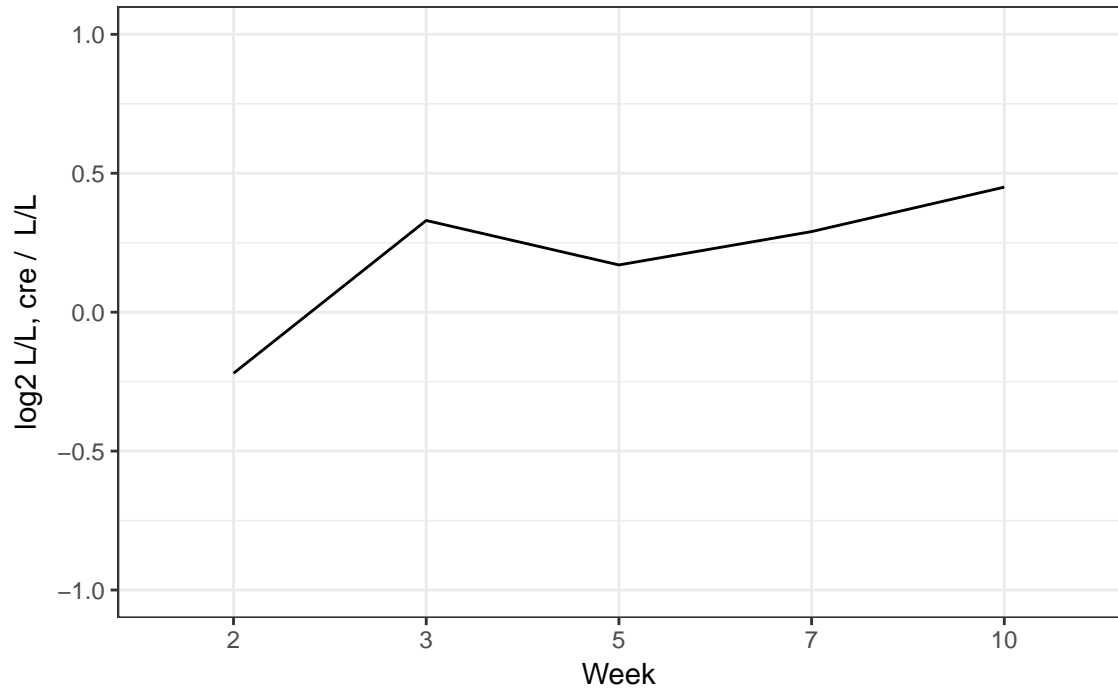

CCSMST1 / Q6RUT7; adj.p value: 0.06173

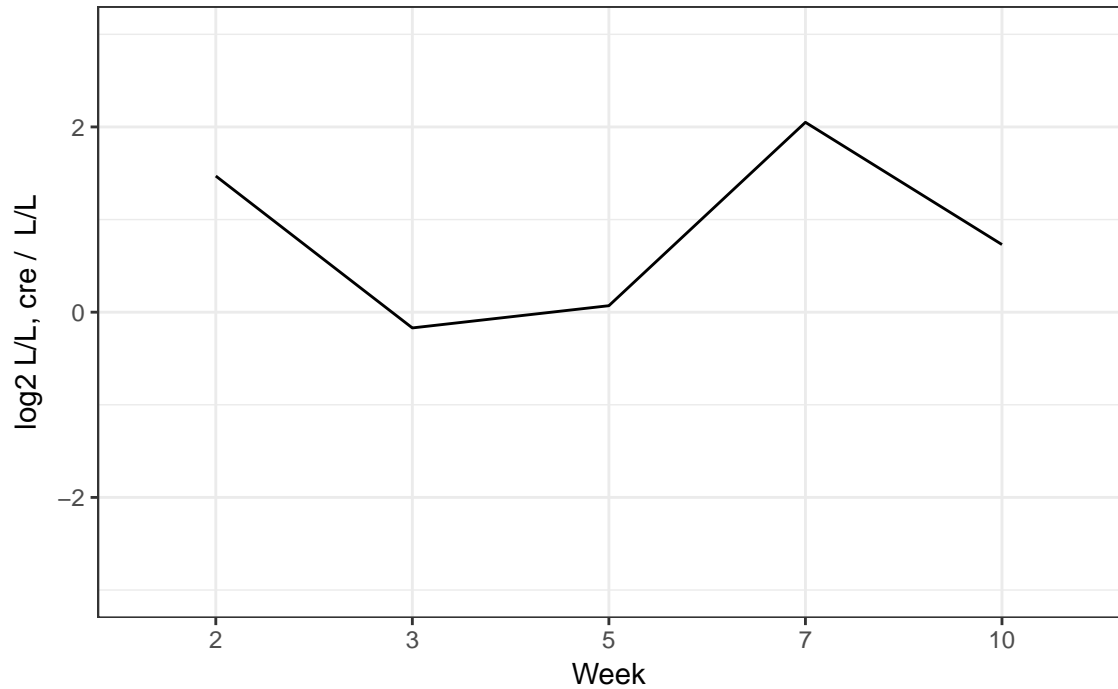



CEBPZOS / Q8BTE5; adj.p value: 0.32548

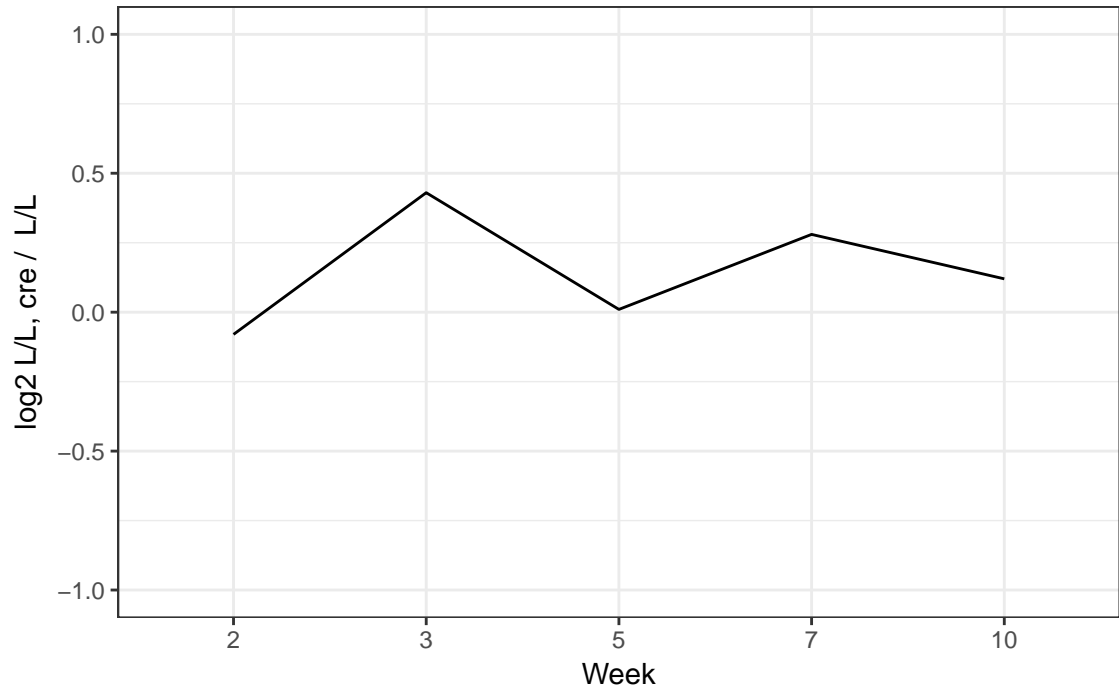

CECR5 / Q91WM2; adj.p value: 0.31754

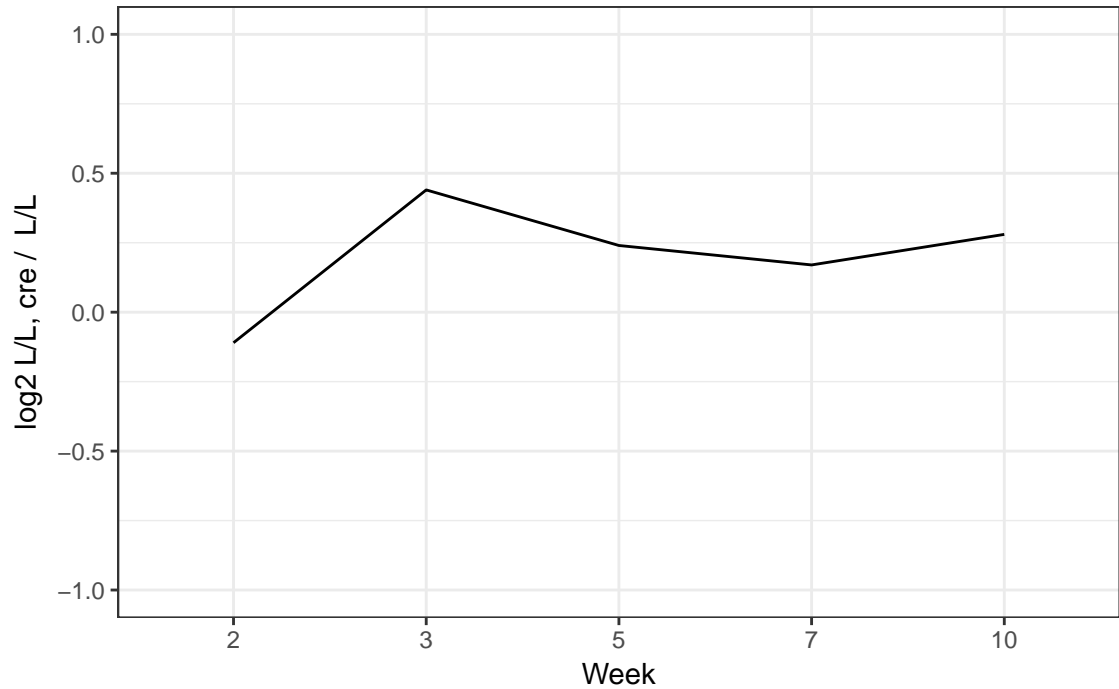

CHCHD10 / Q7TNL9; adj.p value: 0.67032

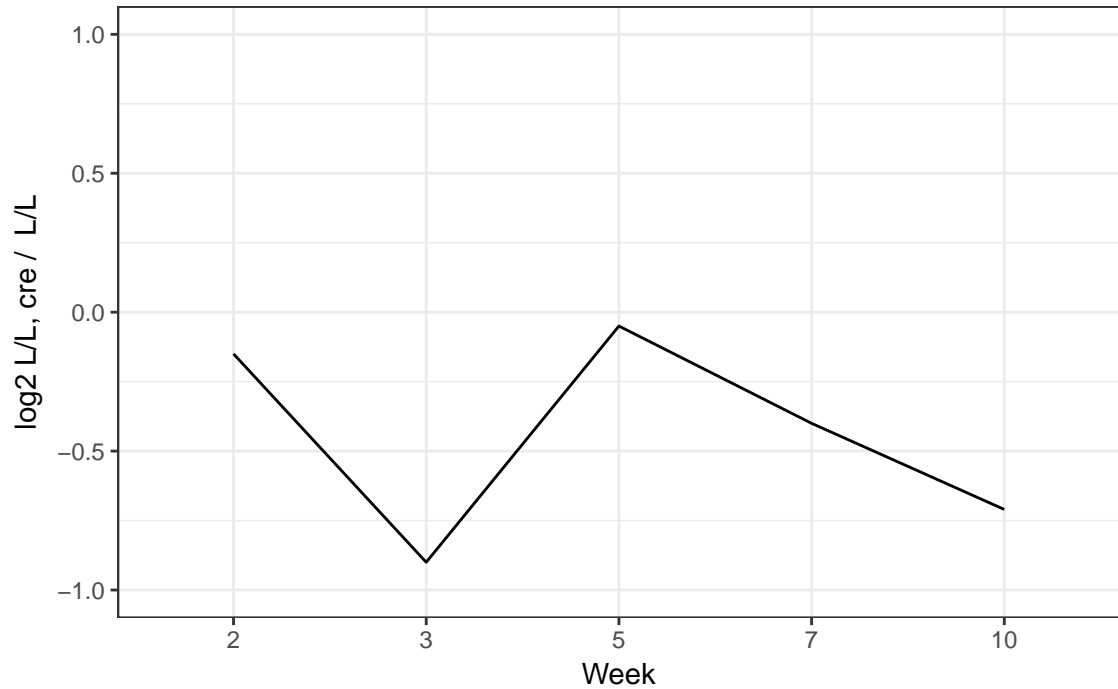

CHCHD2 / Q9D1L0; adj.p value: 1e-05

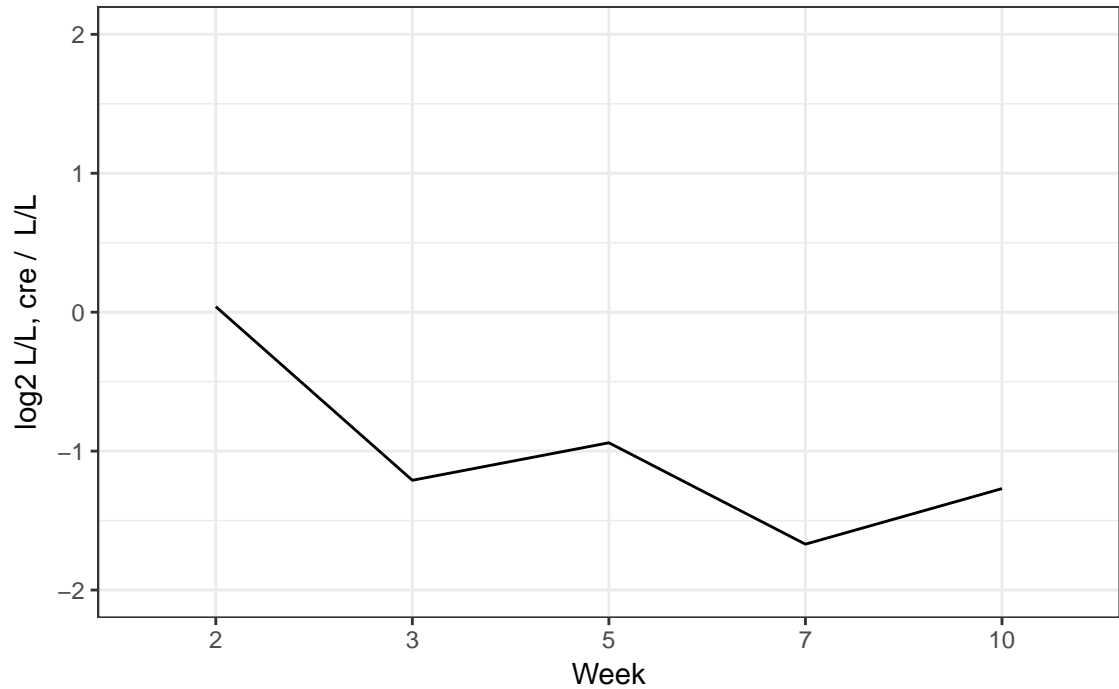

CHCHD3 / Q9CRB9; adj.p value: 0.67826

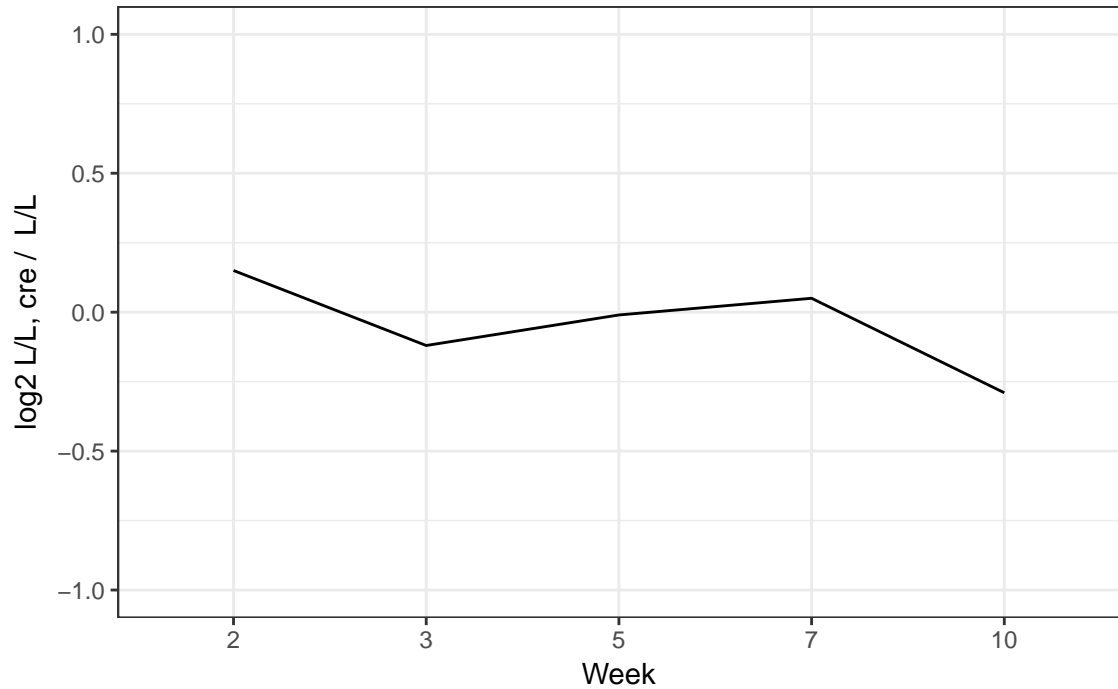

CHCHD4 / Q8VEA4; adj.p value: 0.15879

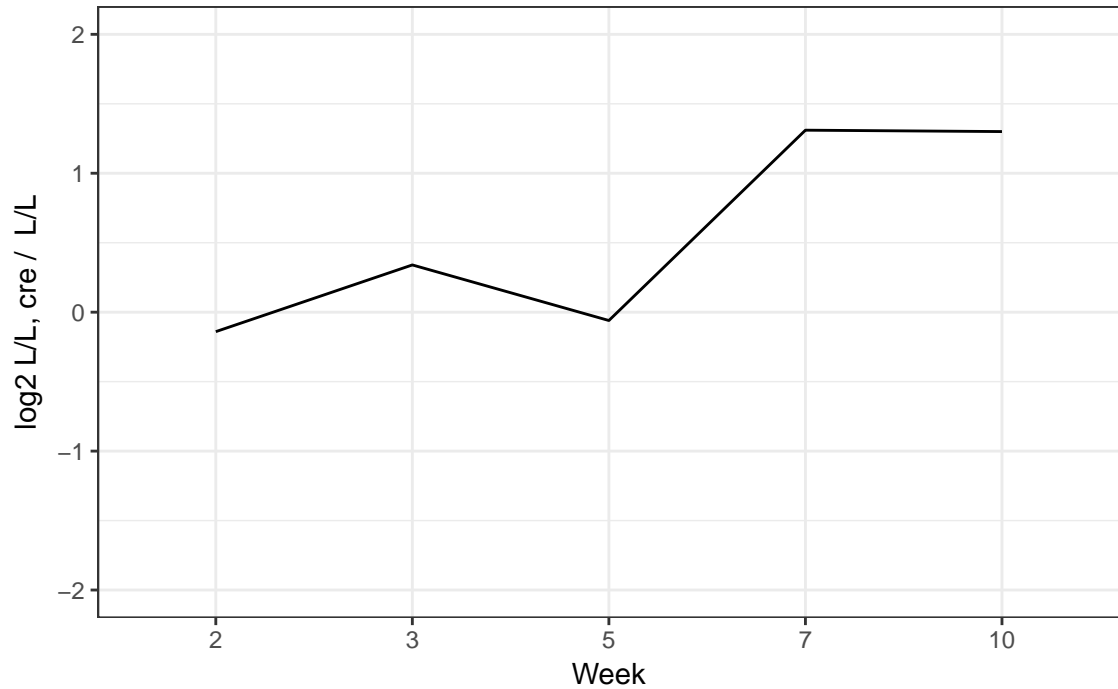

CHCHD6 / Q91VN4; adj.p value: 0

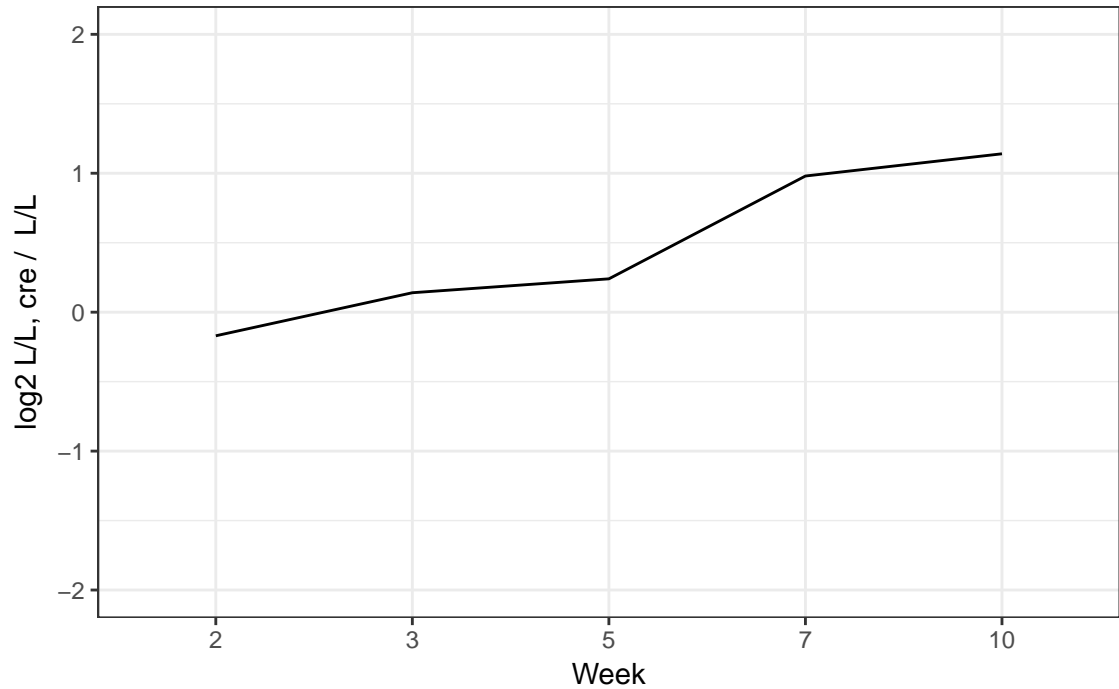

CHCHD7 / Q8K2Q5; adj.p value: 0.02799

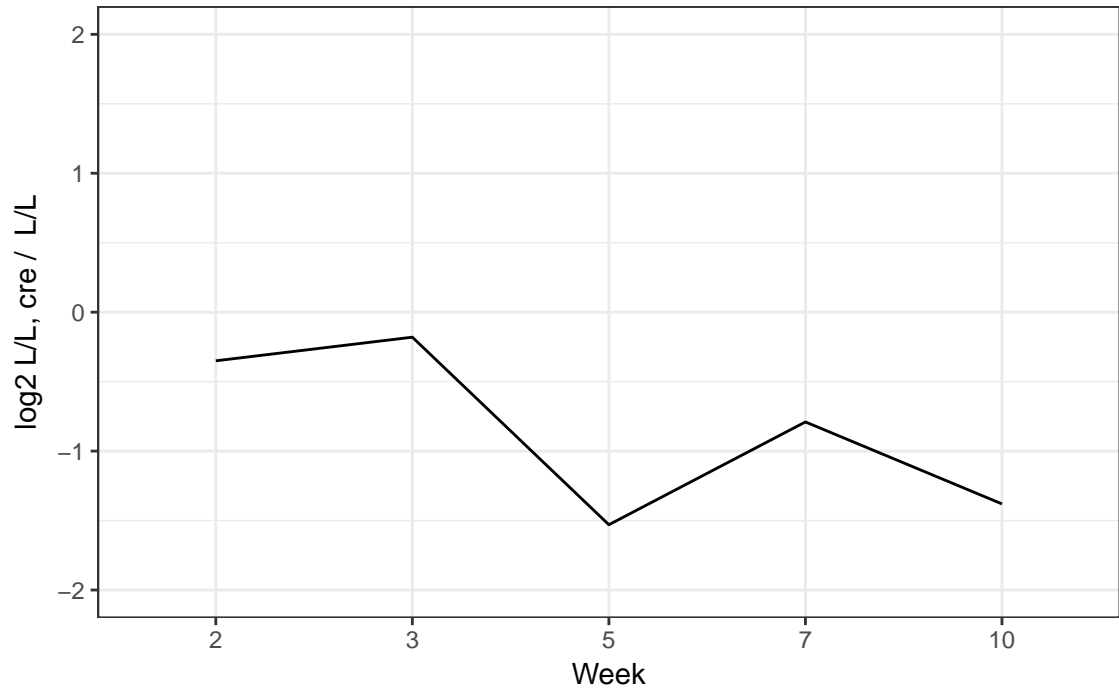



CISD1 / Q91WS0; adj.p value: 0.21722

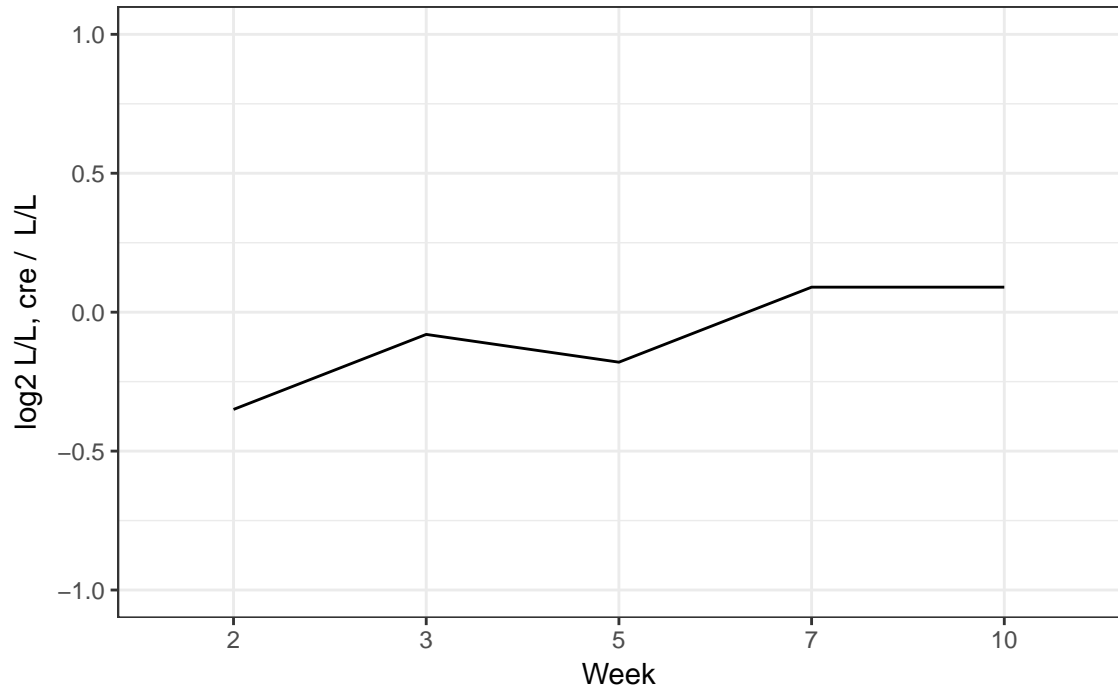

CISD3 / Z4YKM2; adj.p value: 0.00095

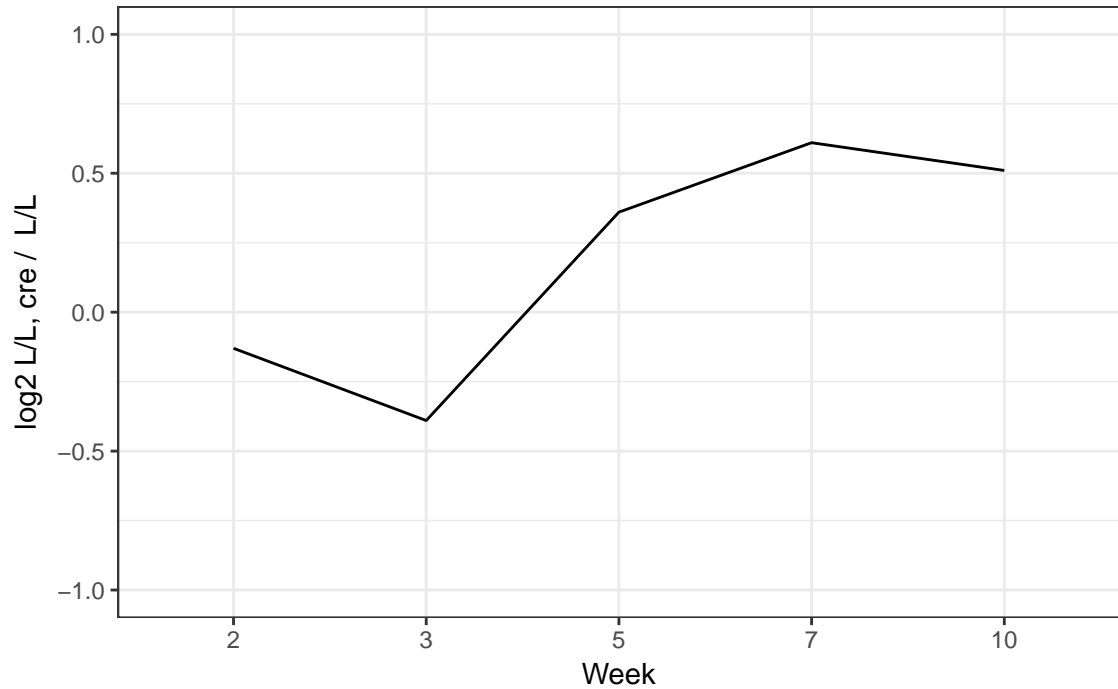

CKMT2 / Q6P8J7; adj.p value: 0.11651

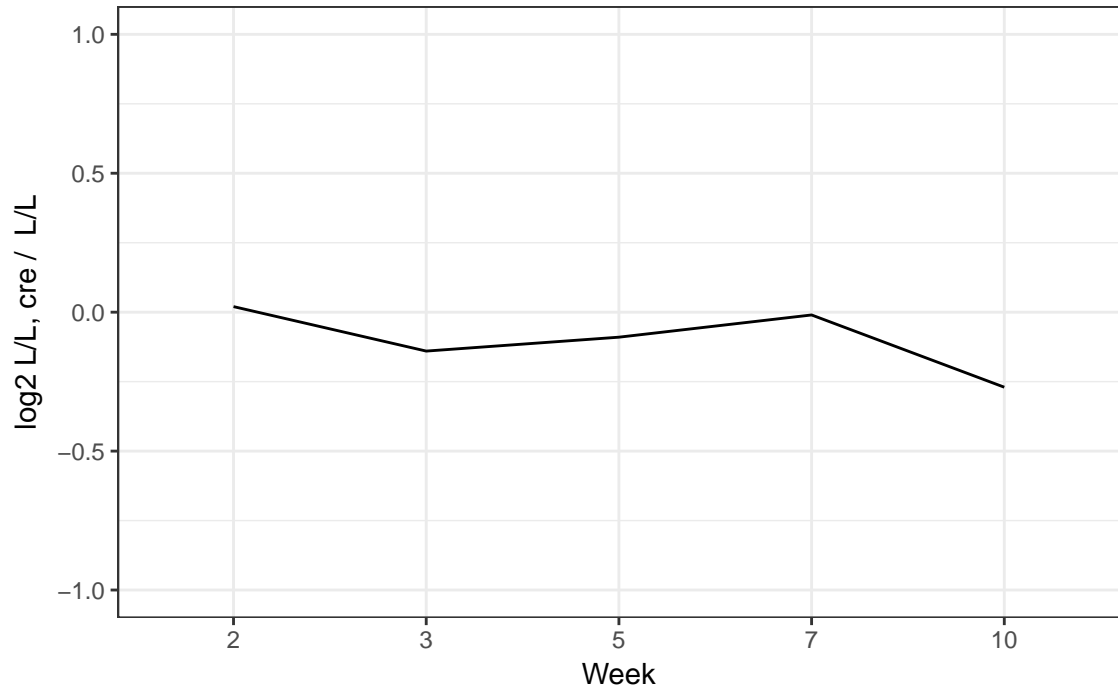

CLPB / Q60649; adj.p value: 4e-05

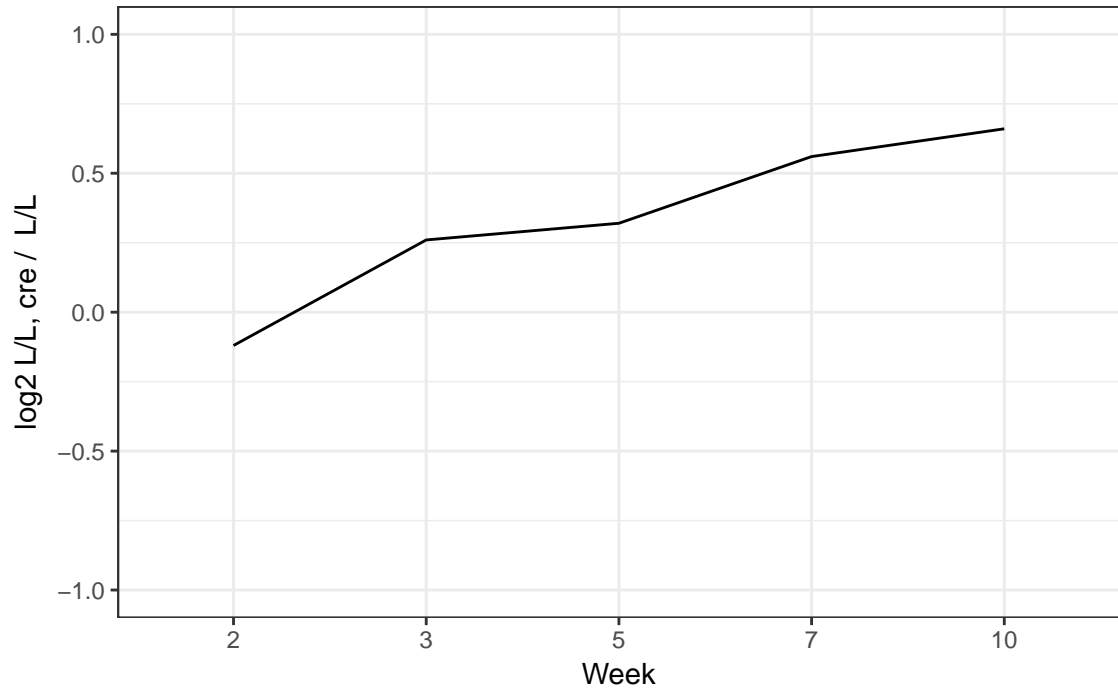

CLPP / O88696; adj.p value: 0.68736

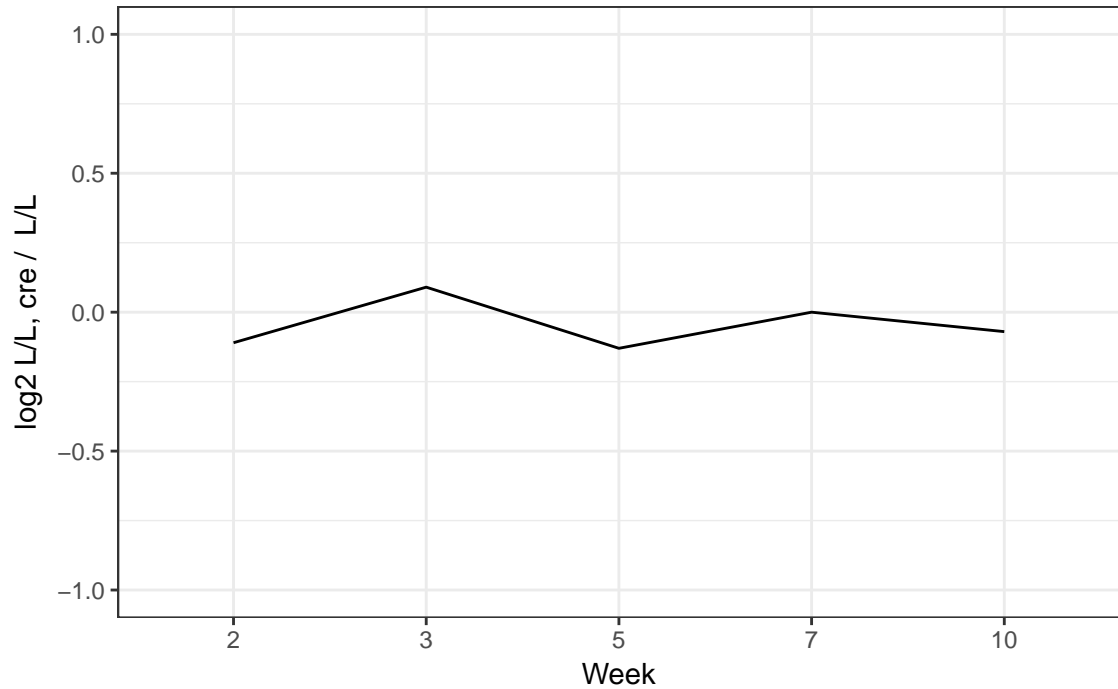

CLPX / Q9JHS4; adj.p value: 0

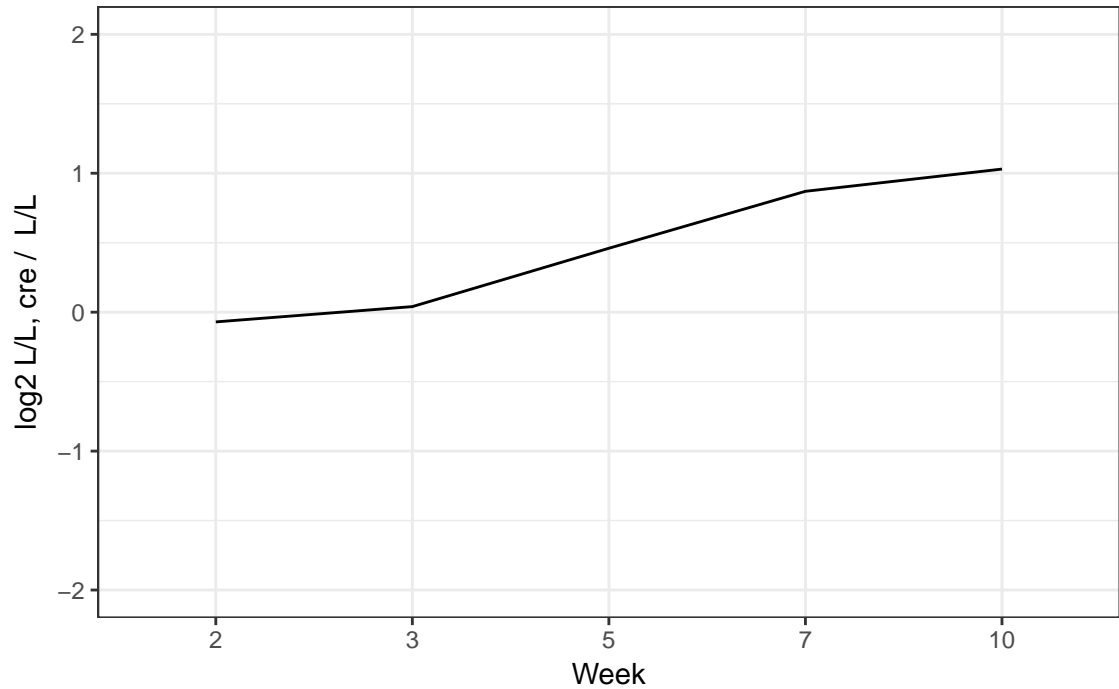

CLYBL / Q8R4N0; adj.p value: 0.25076

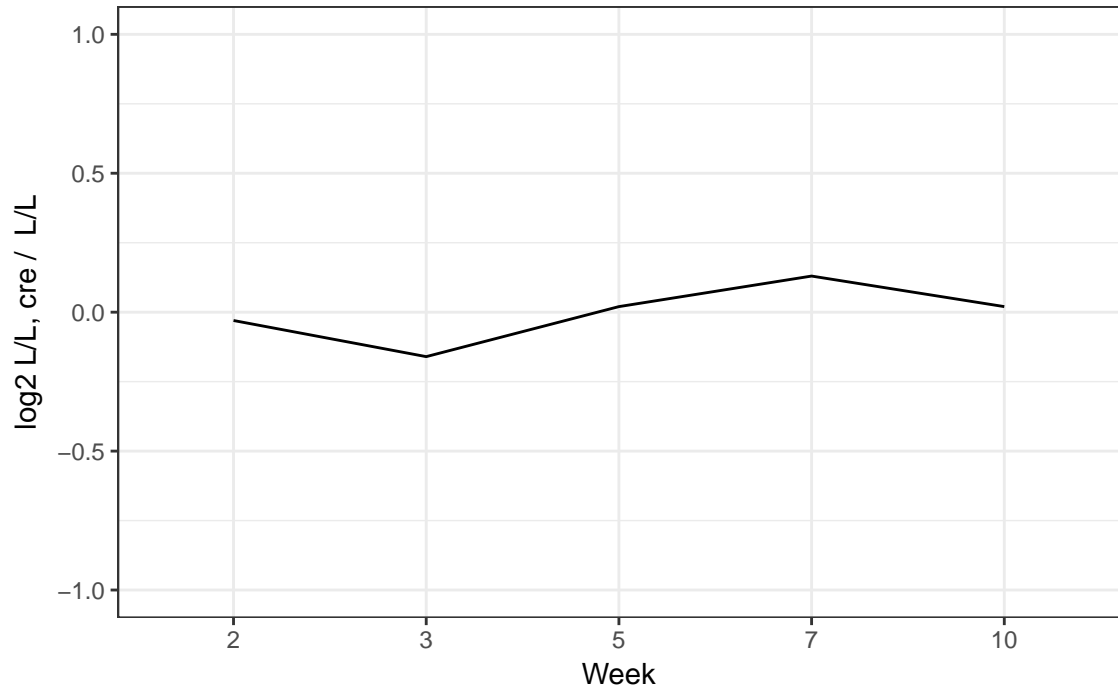

CMC1 / Q9CPZ8; adj.p value: 0.07613

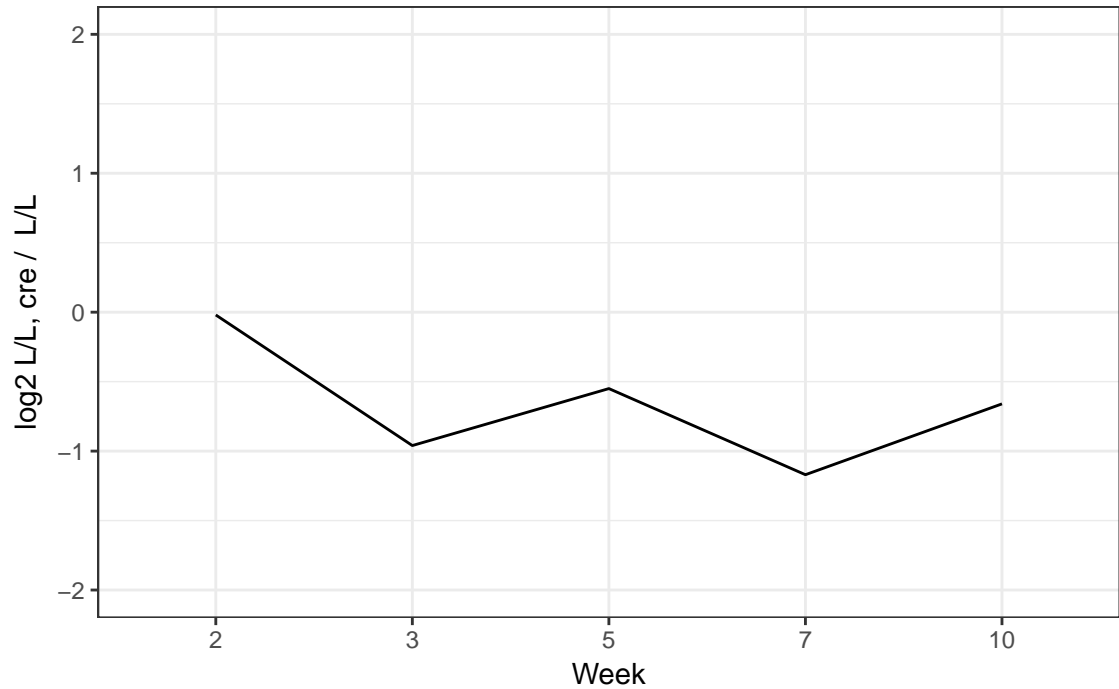



CMC2 / Q8K199; adj.p value: 0.07774

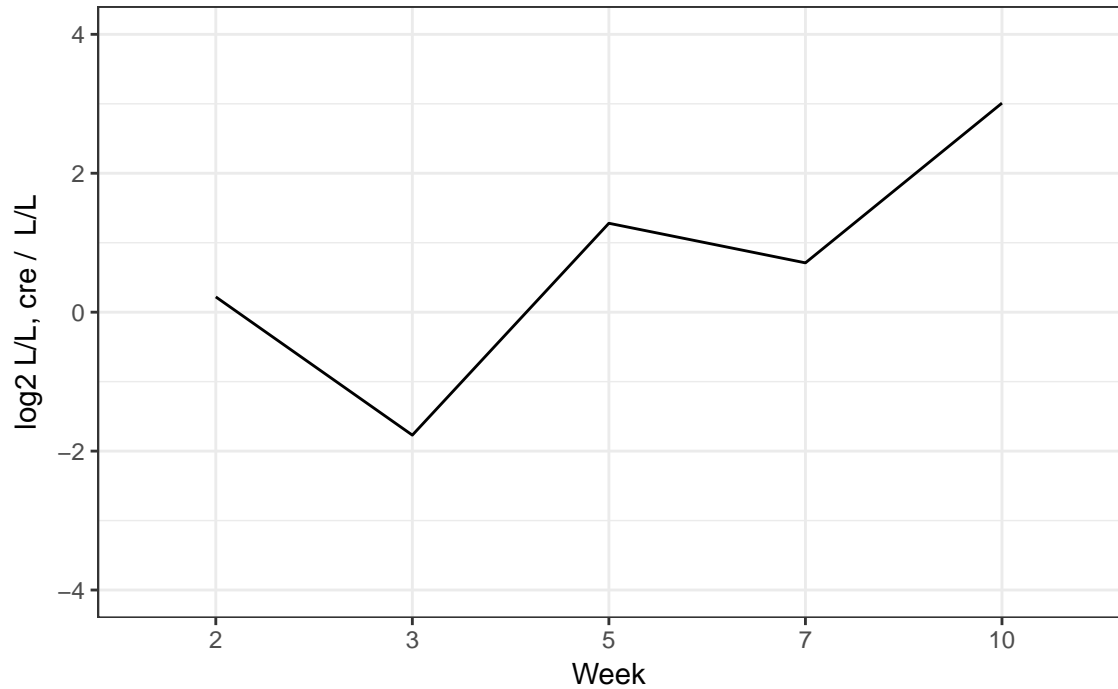

COA3 / Q9D2R6; adj.p value: 0.00469

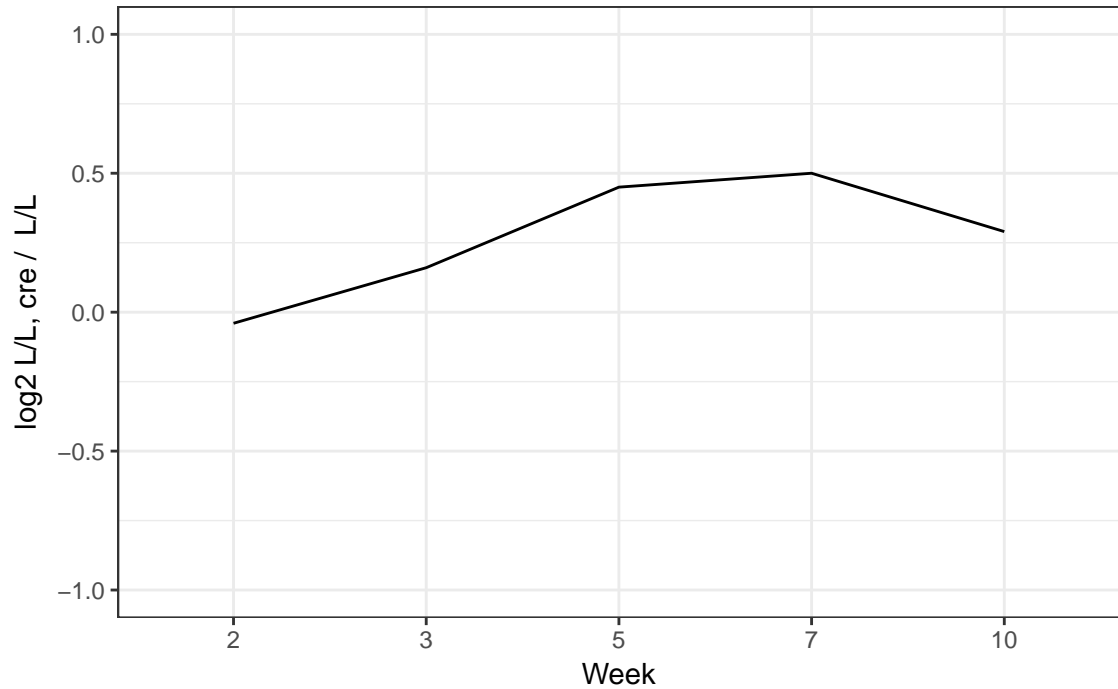

COA6 / Q8BGD8; adj.p value: 0.3438

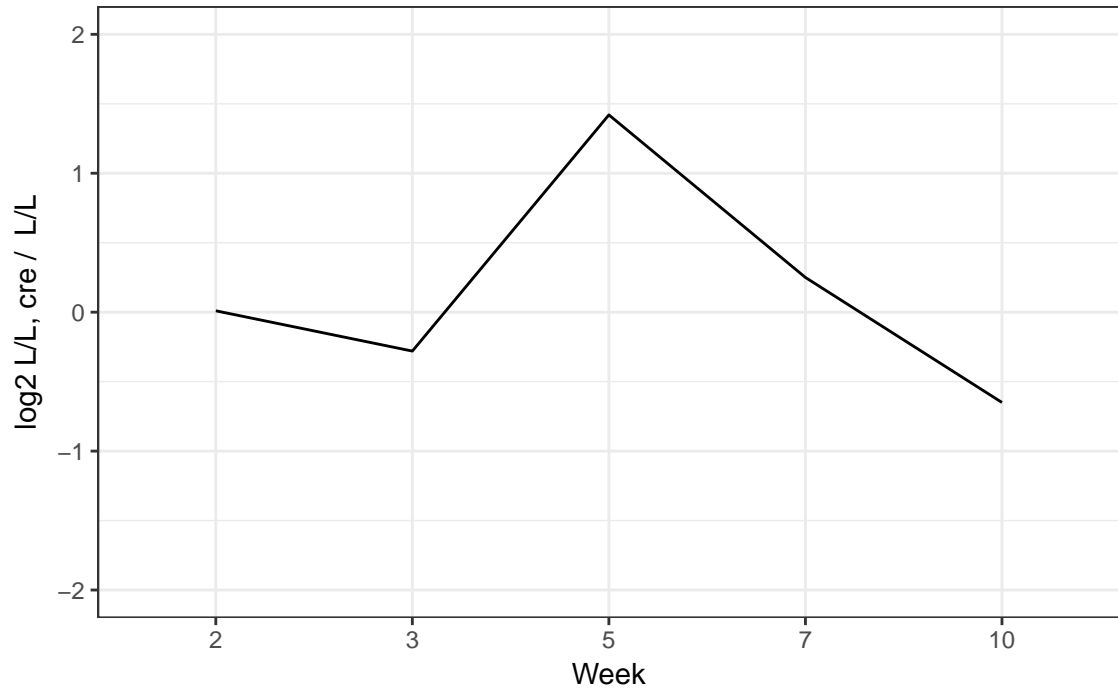

COA7 / Q921H9; adj.p value: 0.64662

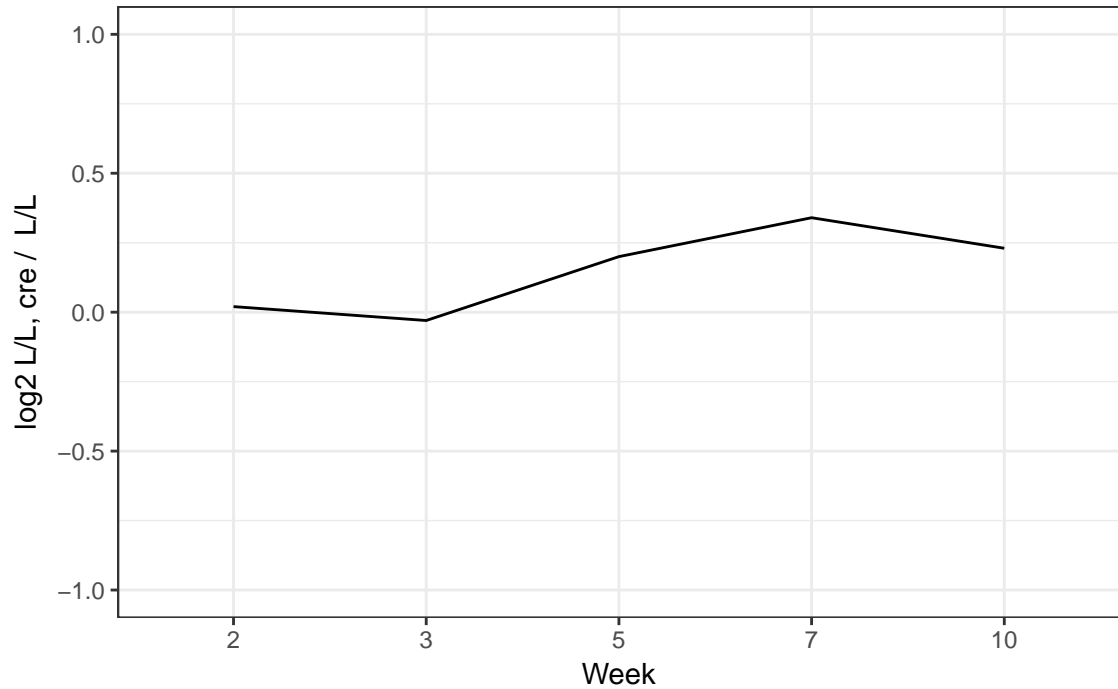

COASY / Q9DBL7; adj.p value: 9e-05

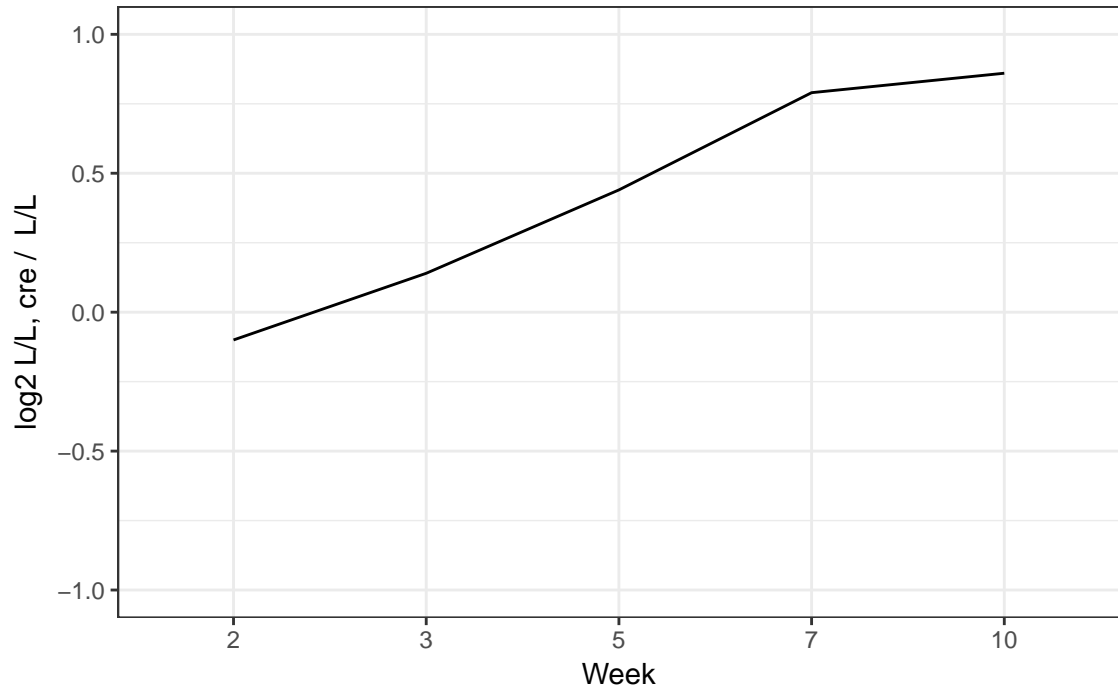

# COMTD1 / Q8BIG7; adj.p value: 0

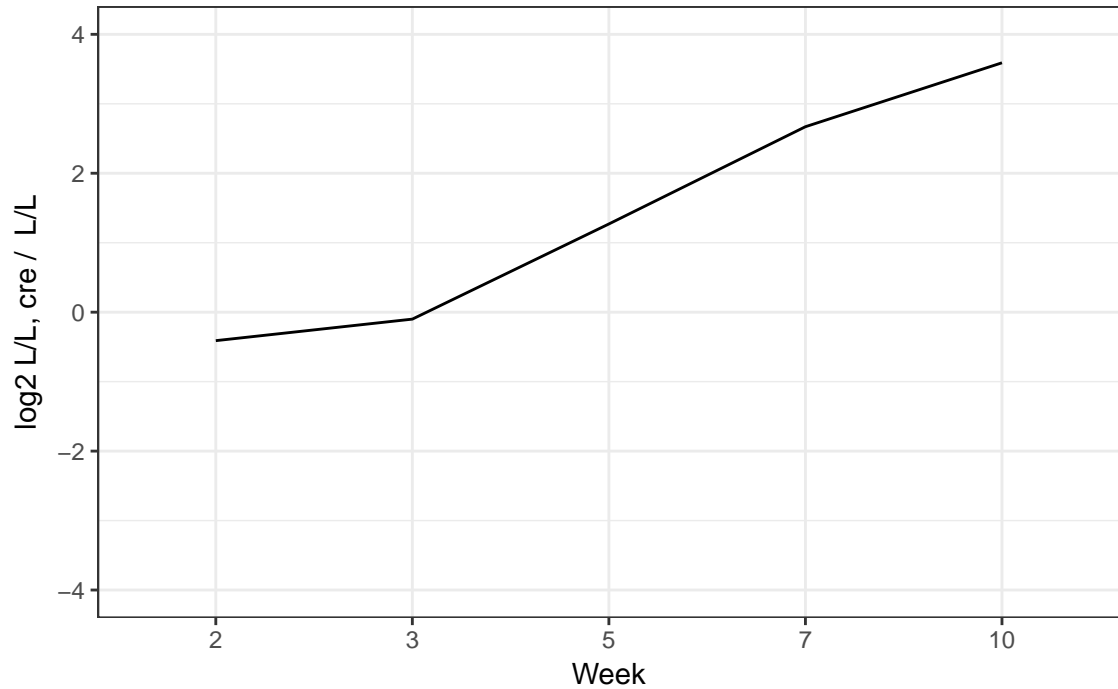

# COQ10A / E9Q3H6; adj.p value: 0

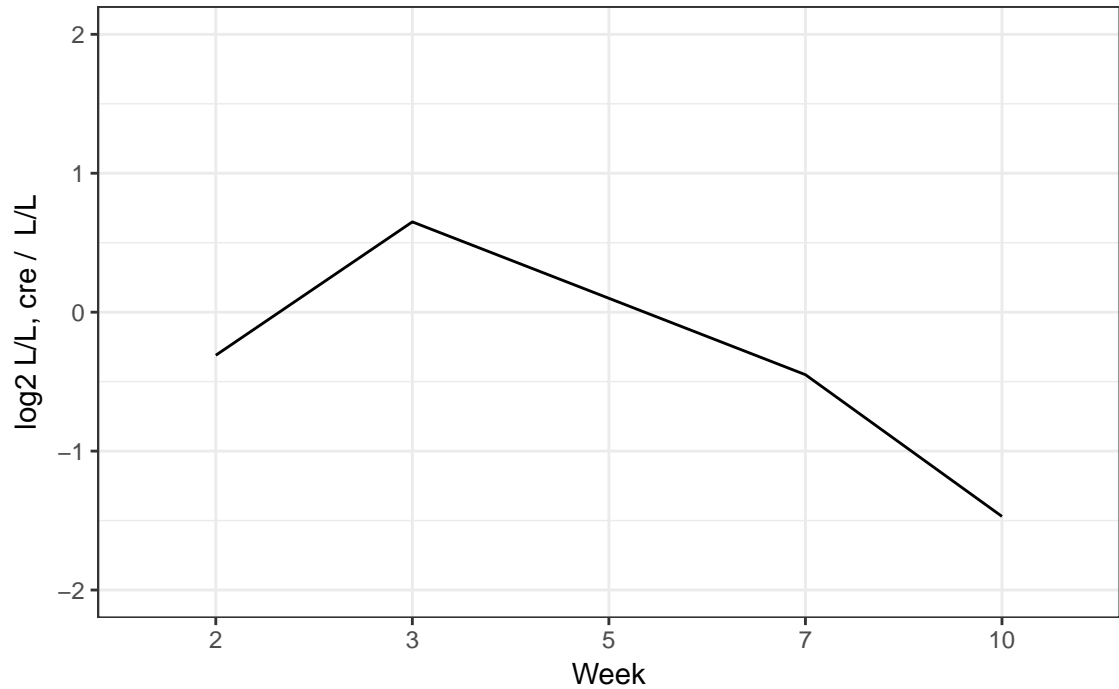

COQ10B / Q3THF9; adj.p value: 0.49416

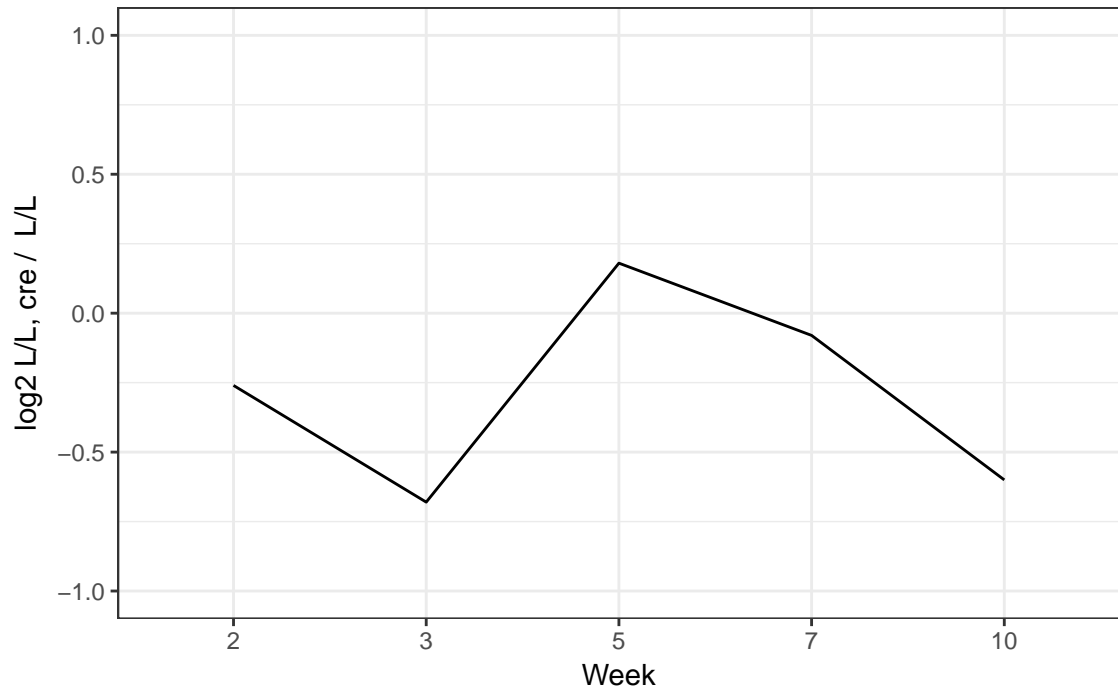



COQ3 / Q8BMS4; adj.p value: 0

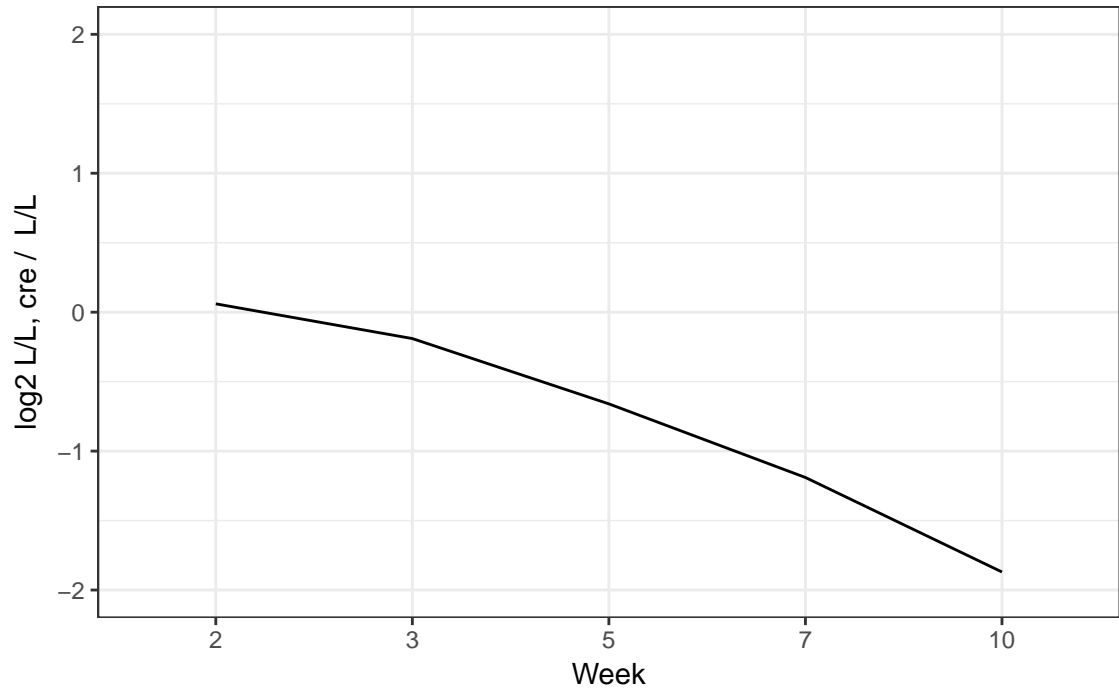

COQ4 / Q8BGB8; adj.p value: 0.33356

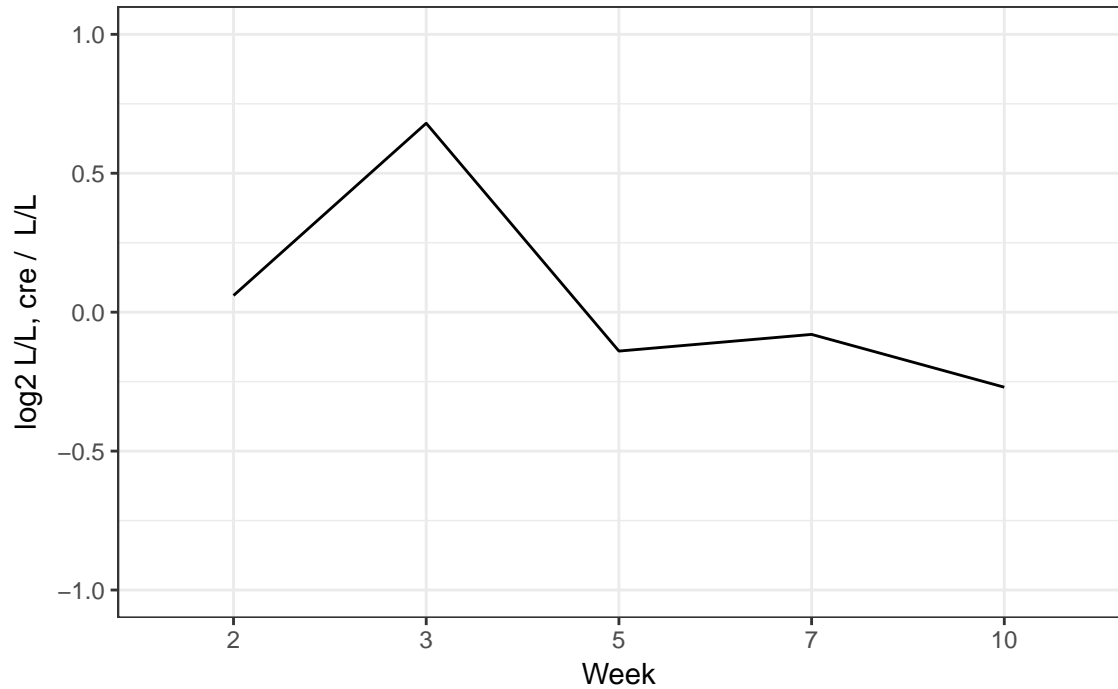

COQ5 / Q9CXI0; adj.p value: 0

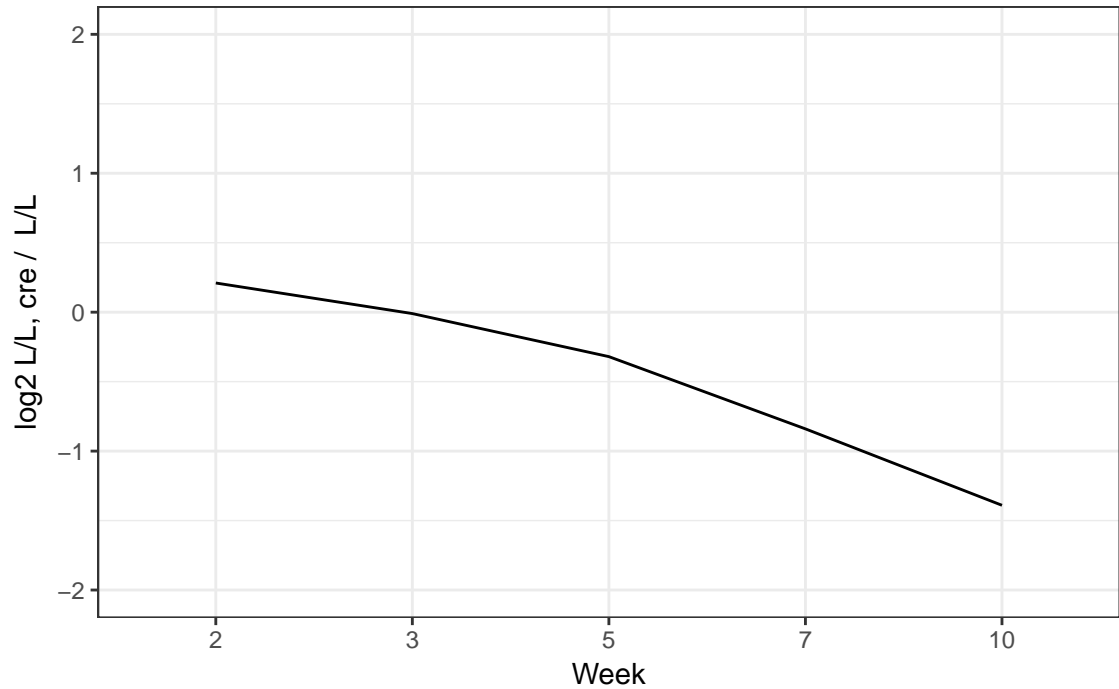

COQ6 / Q8R1S0; adj.p value: 0

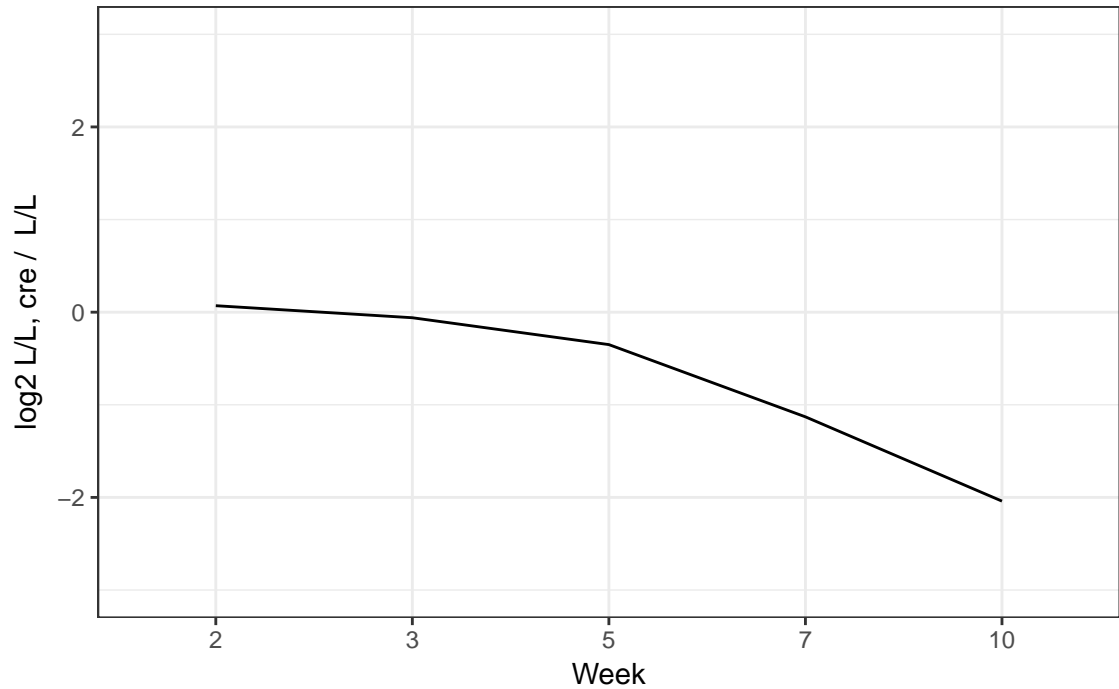

COQ7 / P97478; adj.p value: 0

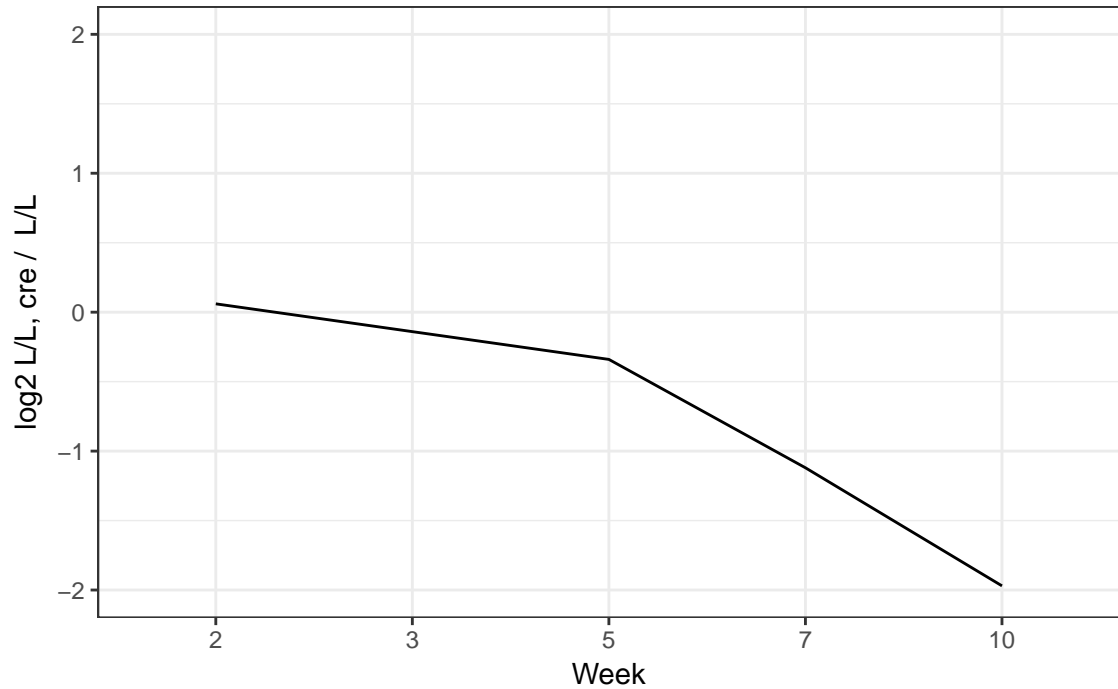

COQ9 / Q8K1Z0; adj.p value: 0

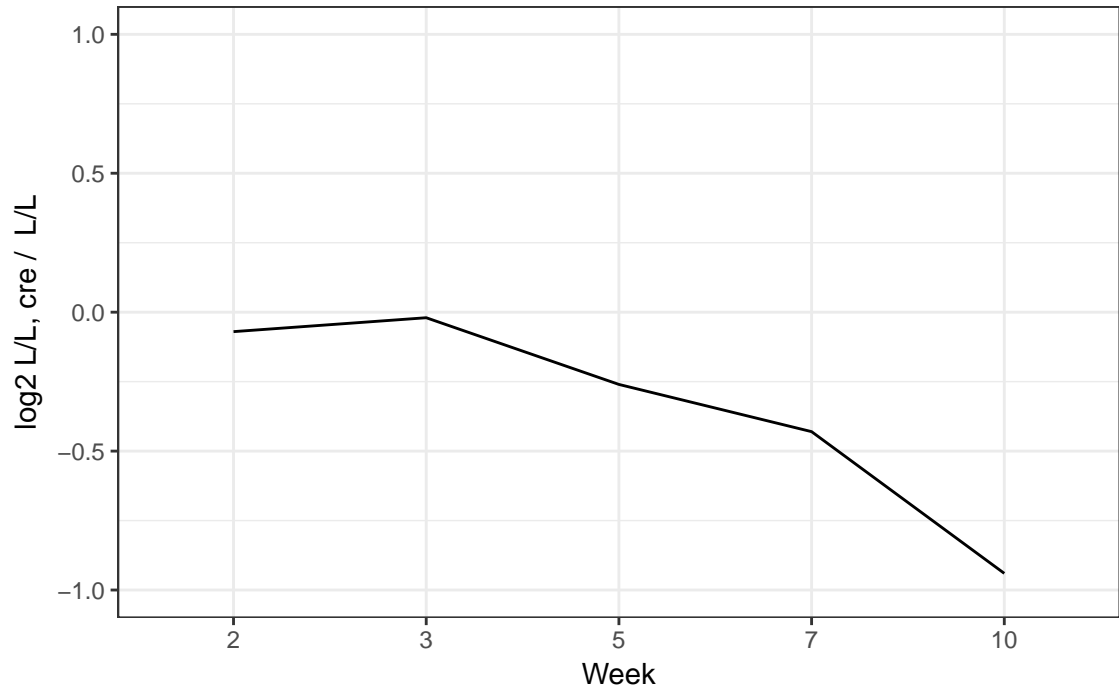

COX10 / Q8CFY5; adj.p value: 0.04032

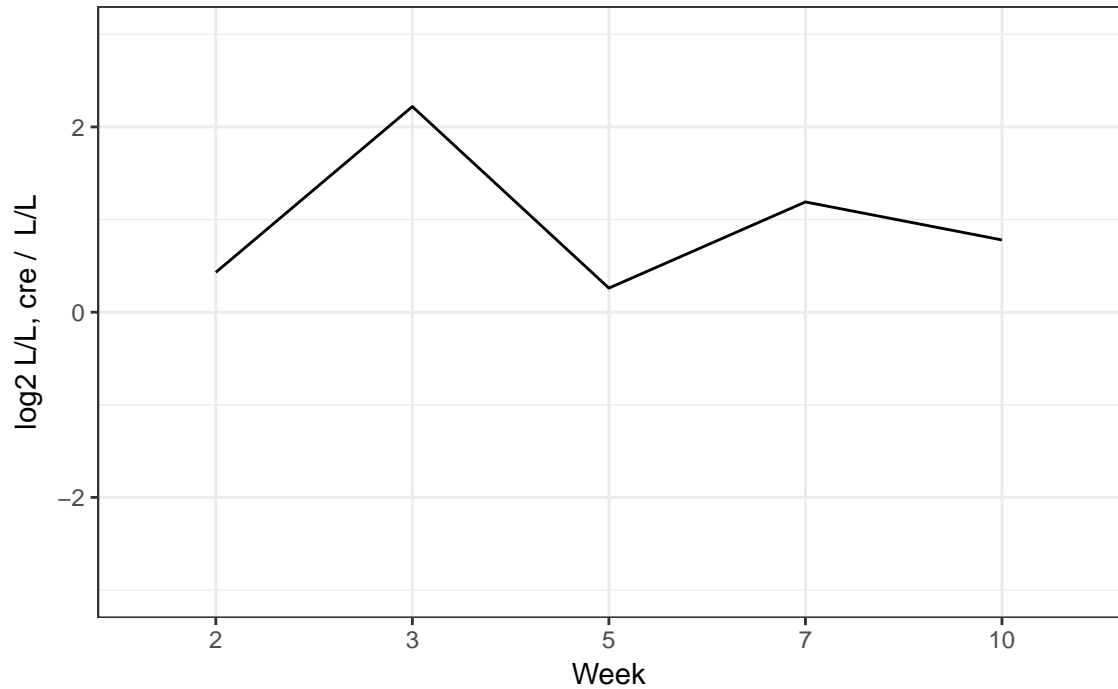

COX11 / Q6P8I6; adj.p value: 0.83156

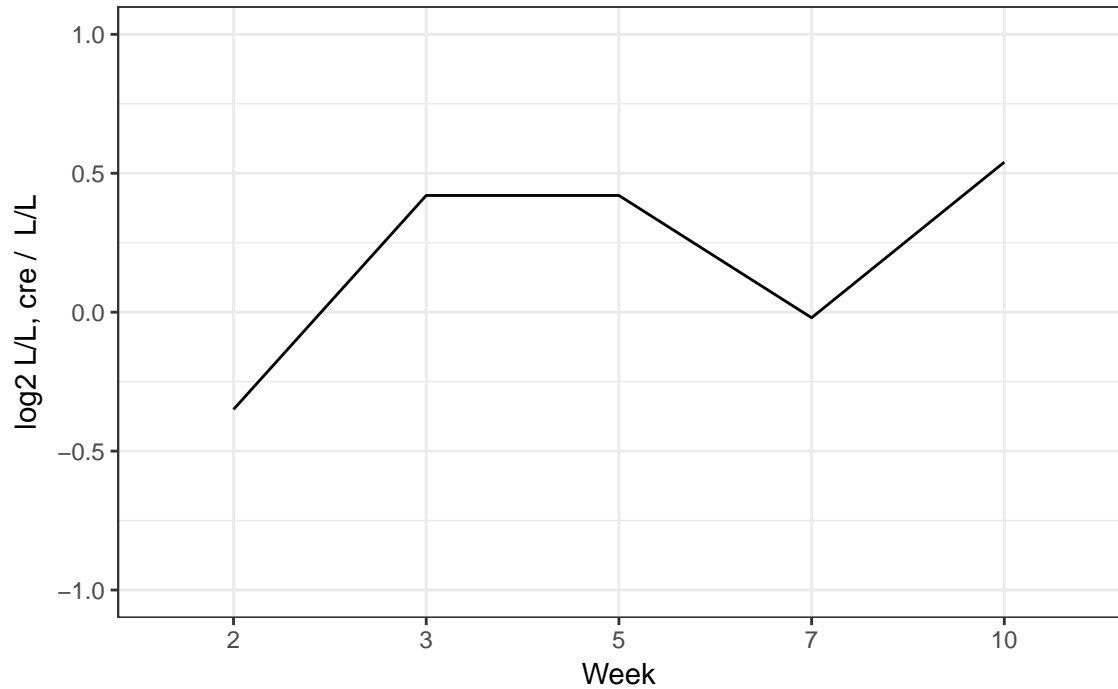



COX15 / Q8BJ03-2; adj.p value: 0.02562

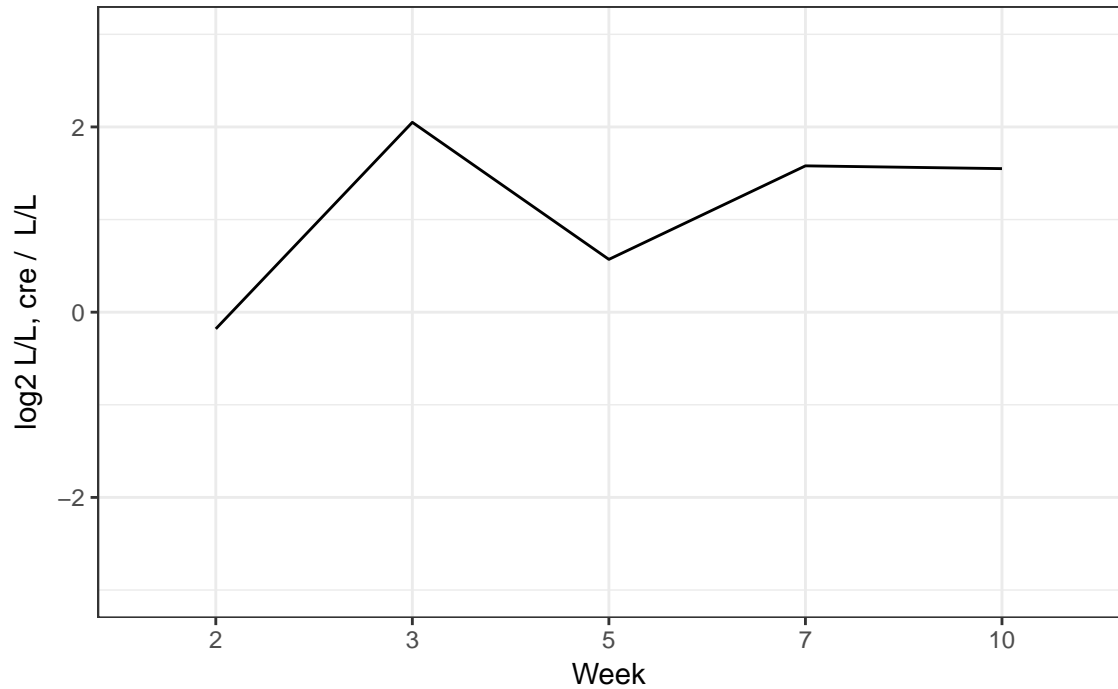

COX16 / Q9CR63; adj.p value: 0.6482

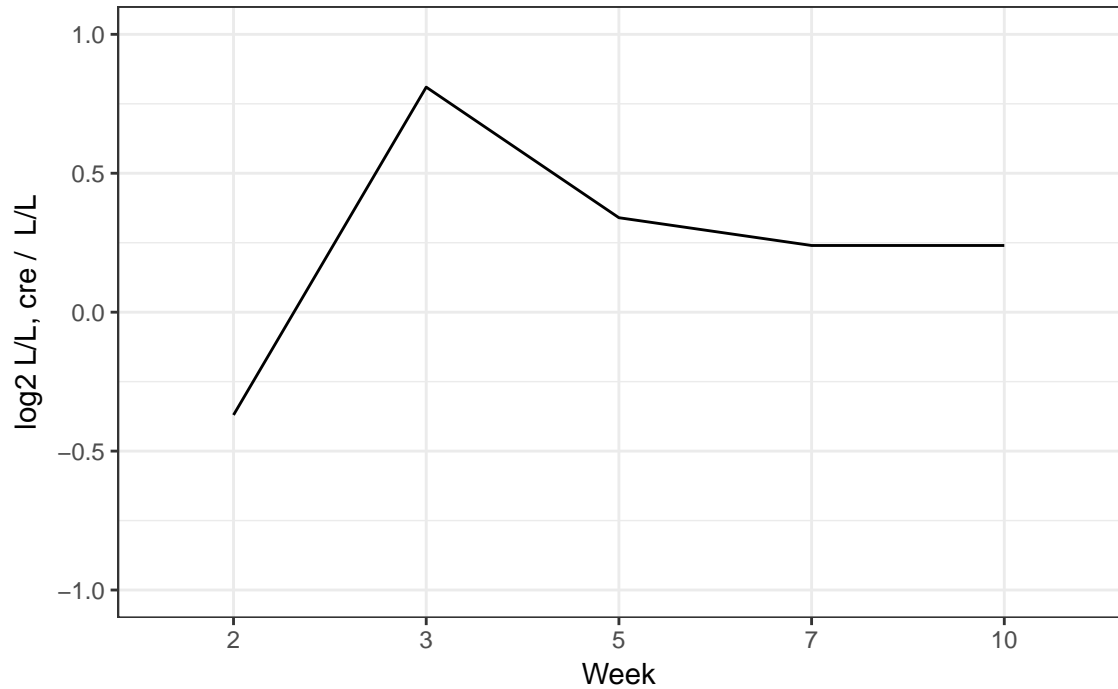

COX17 / P56394; adj.p value: 0.00135

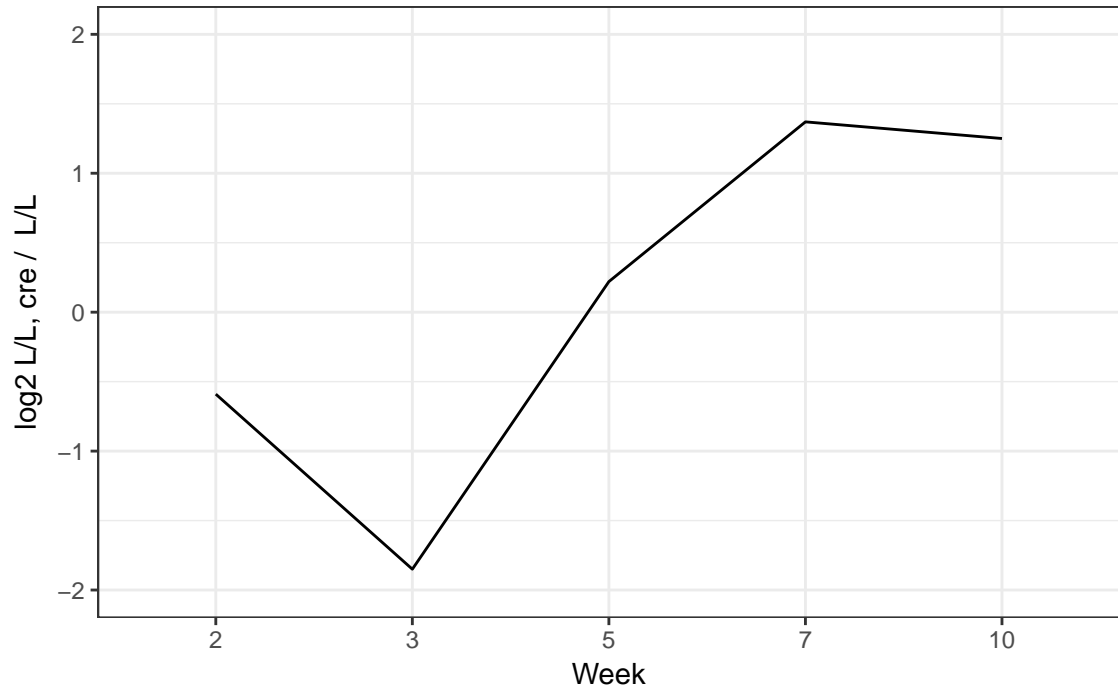

COX19 / Q8K0C8; adj.p value: 0.32182

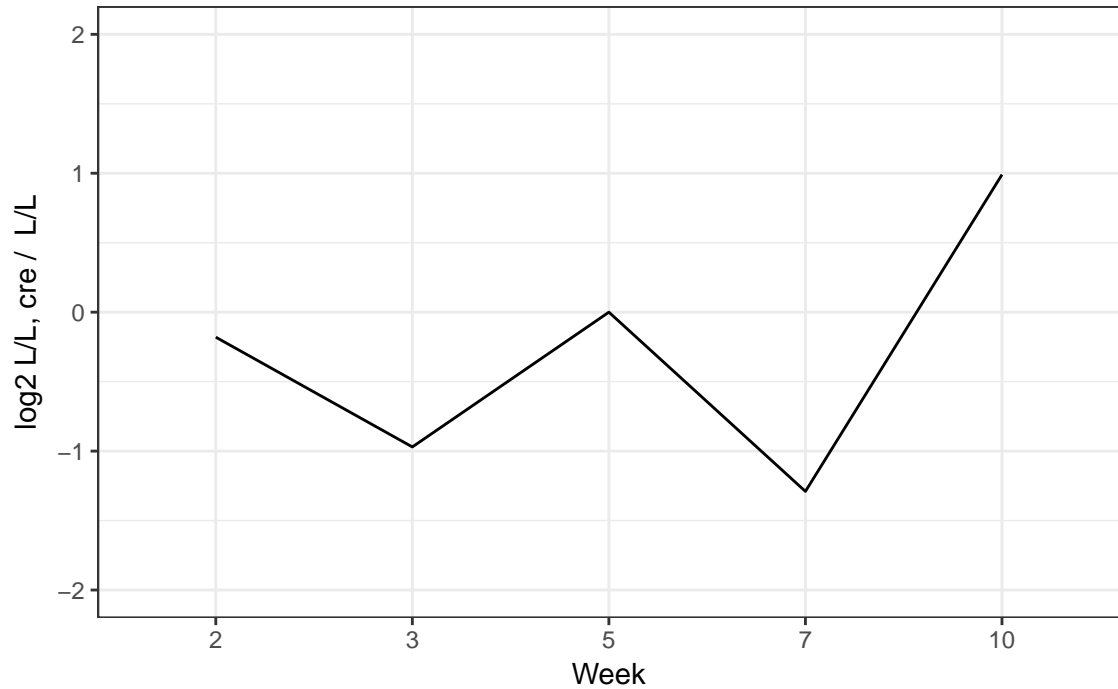

COX20 / Q9D7J4; adj.p value: 0.16298

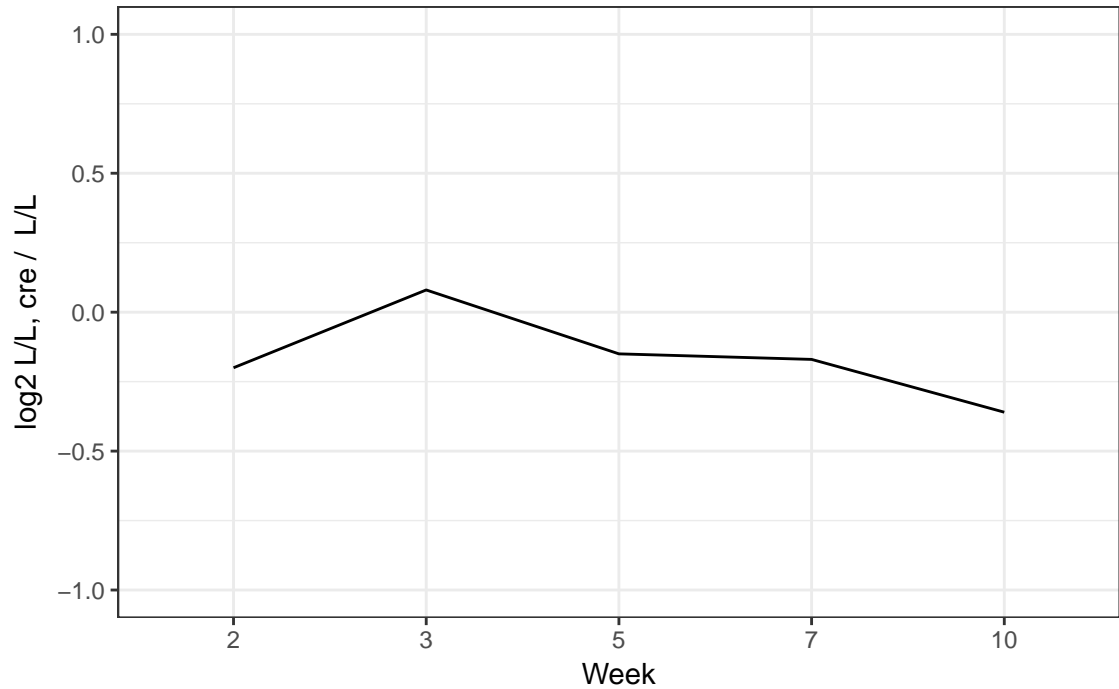

COX411 / P19783; adj.p value: 0

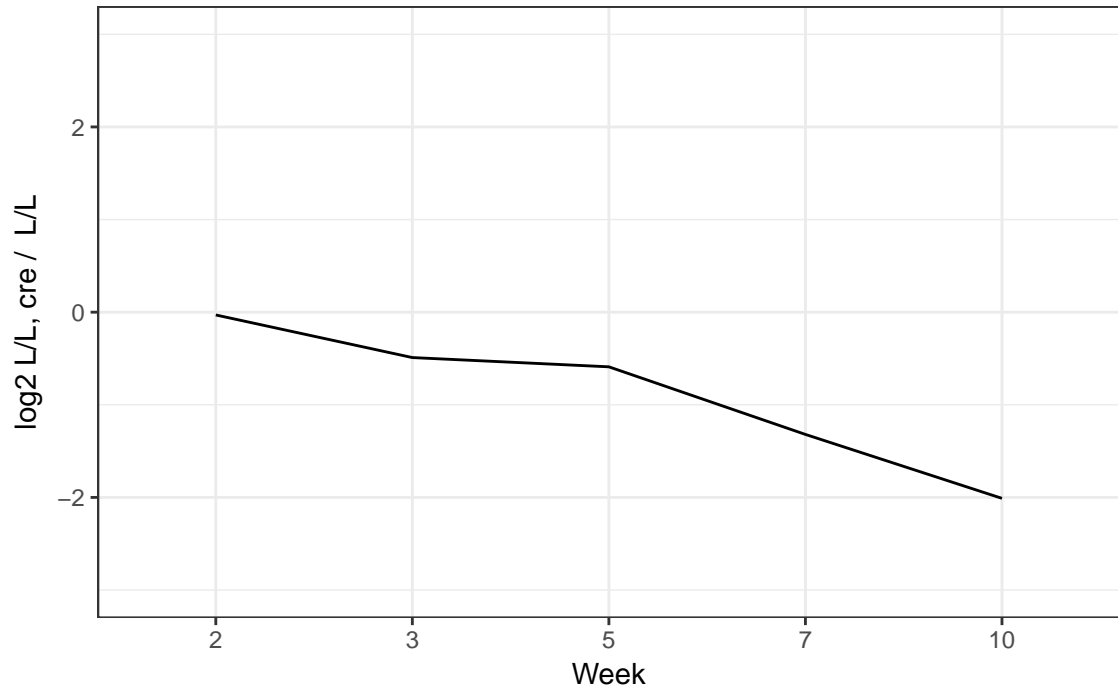

COX5A / P12787; adj.p value: 0

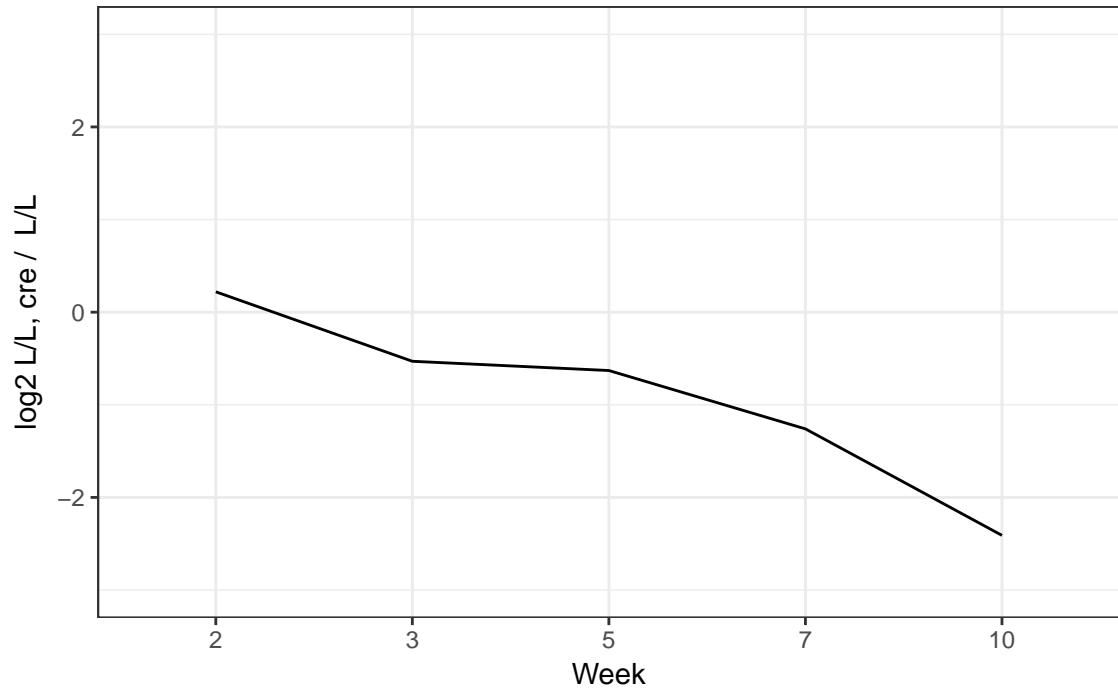

COX5B / Q9D881; adj.p value: 0

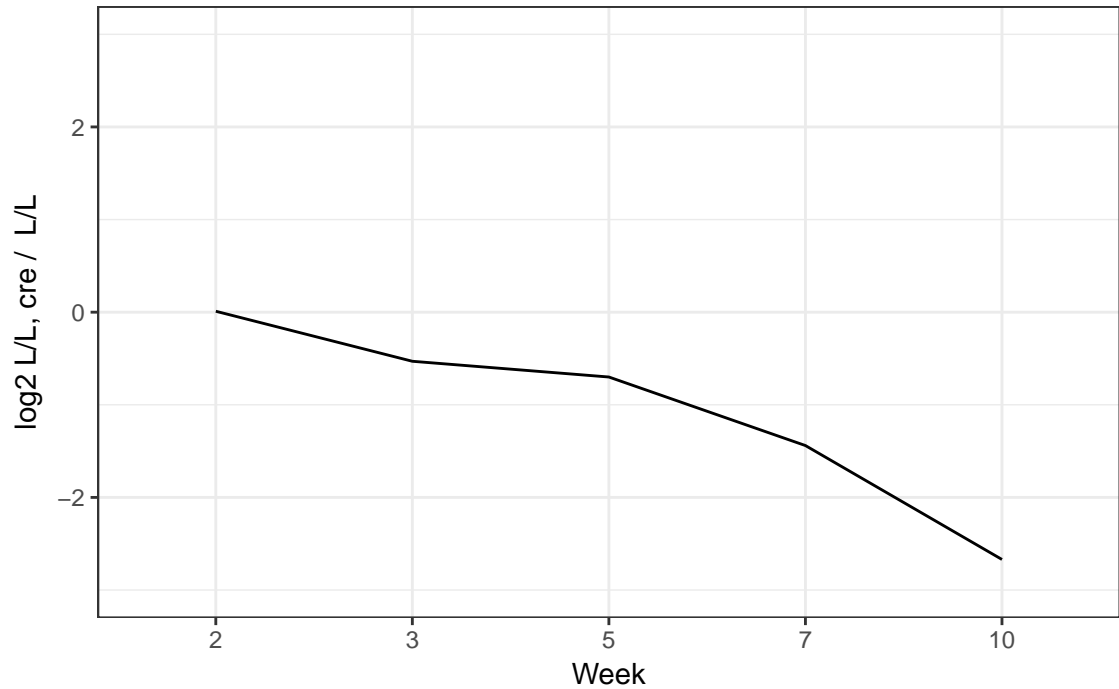



COX6A1 / Q9DCW5; adj.p value: 0.01192

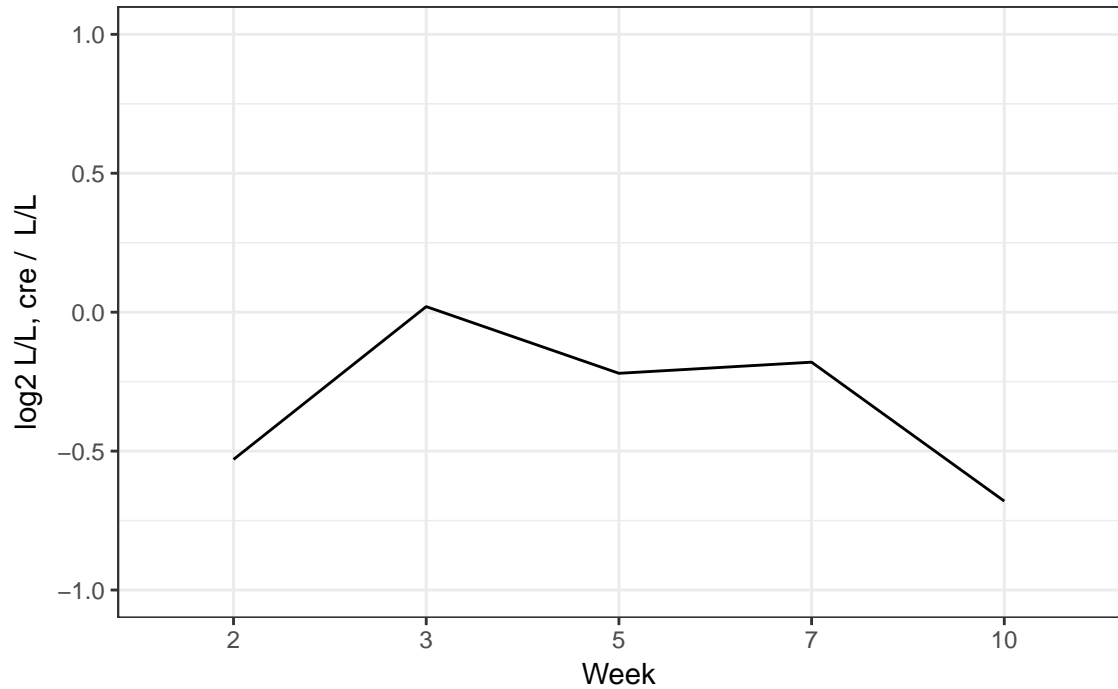

COX6A2 / P43023; adj.p value: 0

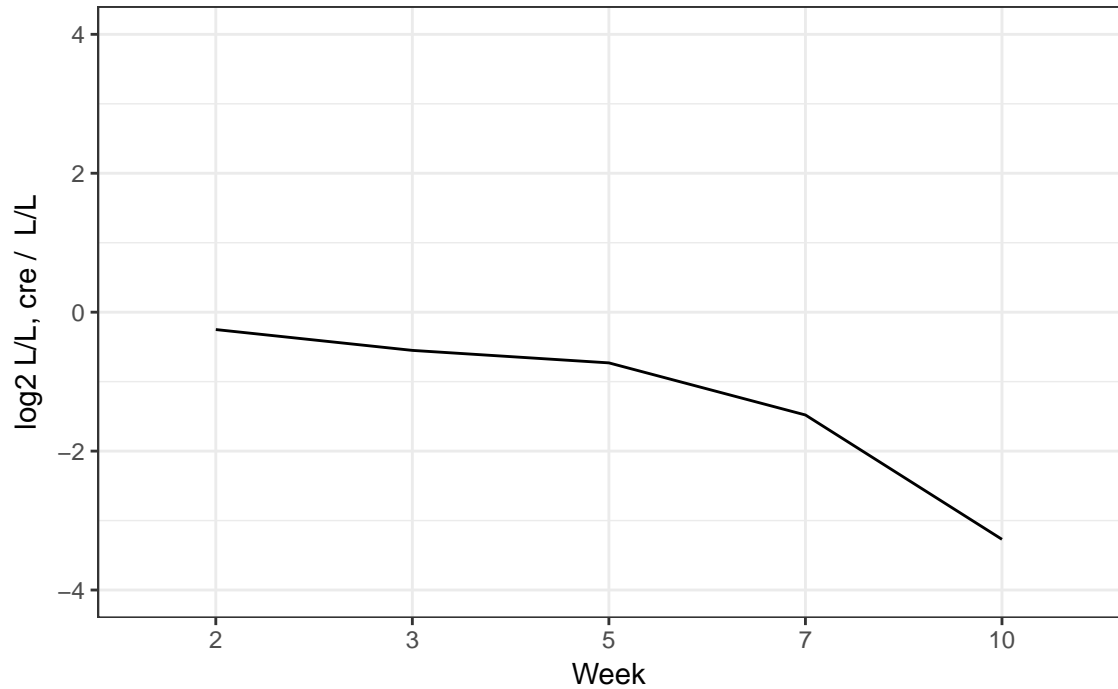

COX6B1 / P56391; adj.p value: 0

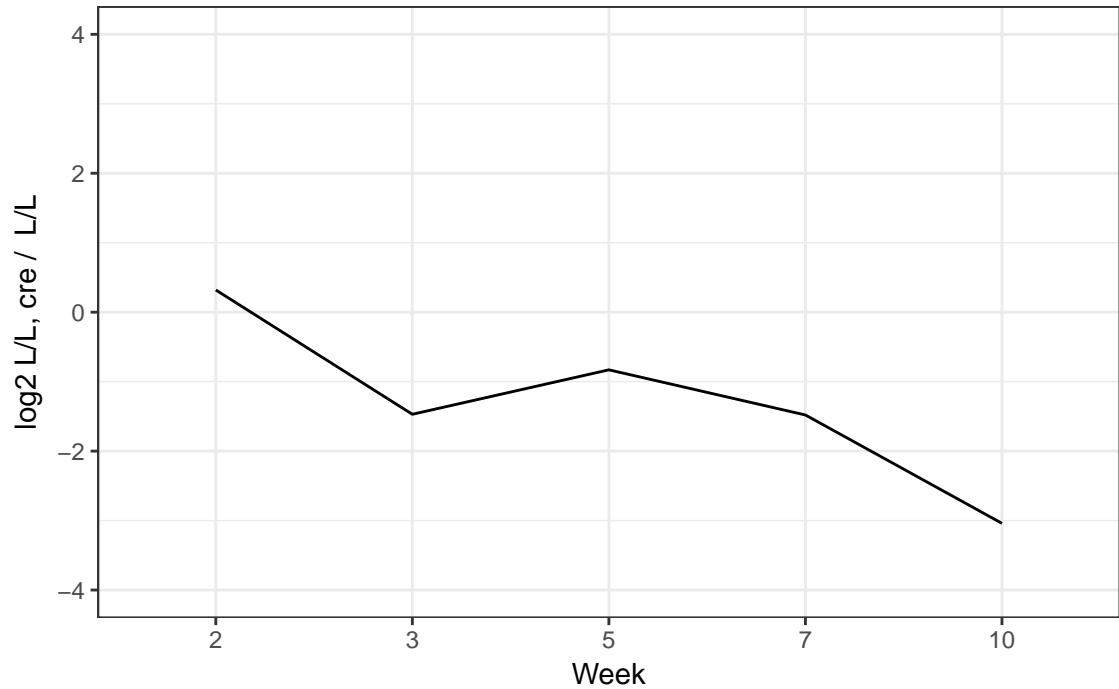

COX6C / Q9CPQ1; adj.p value: 0

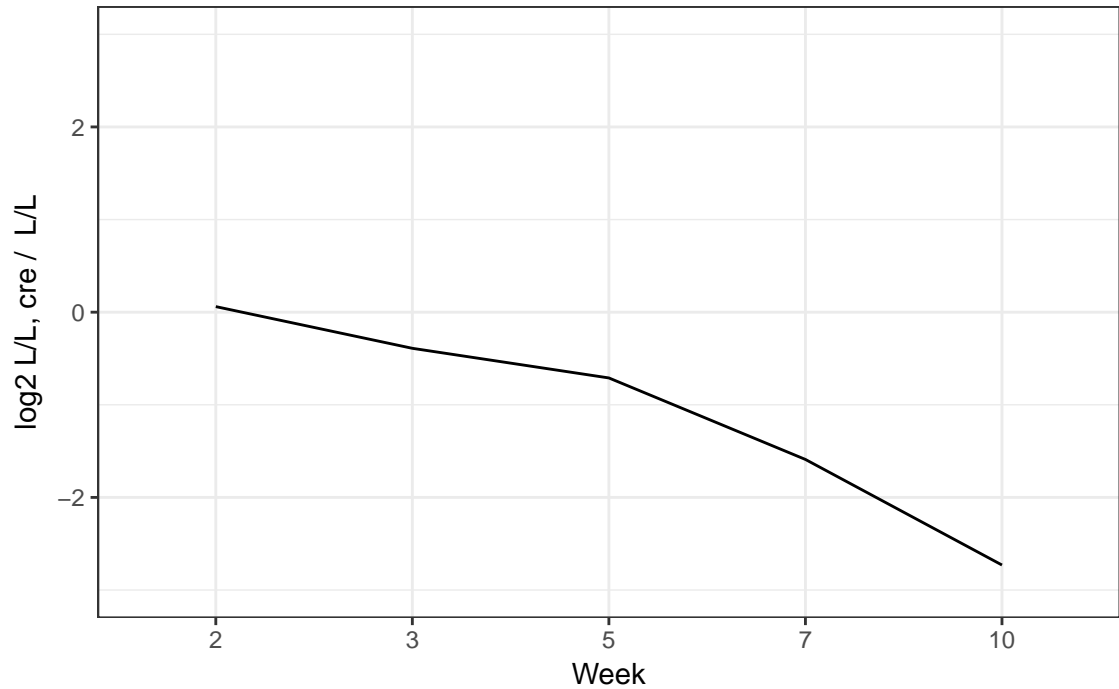

COX7A1 / P56392; adj.p value: 0

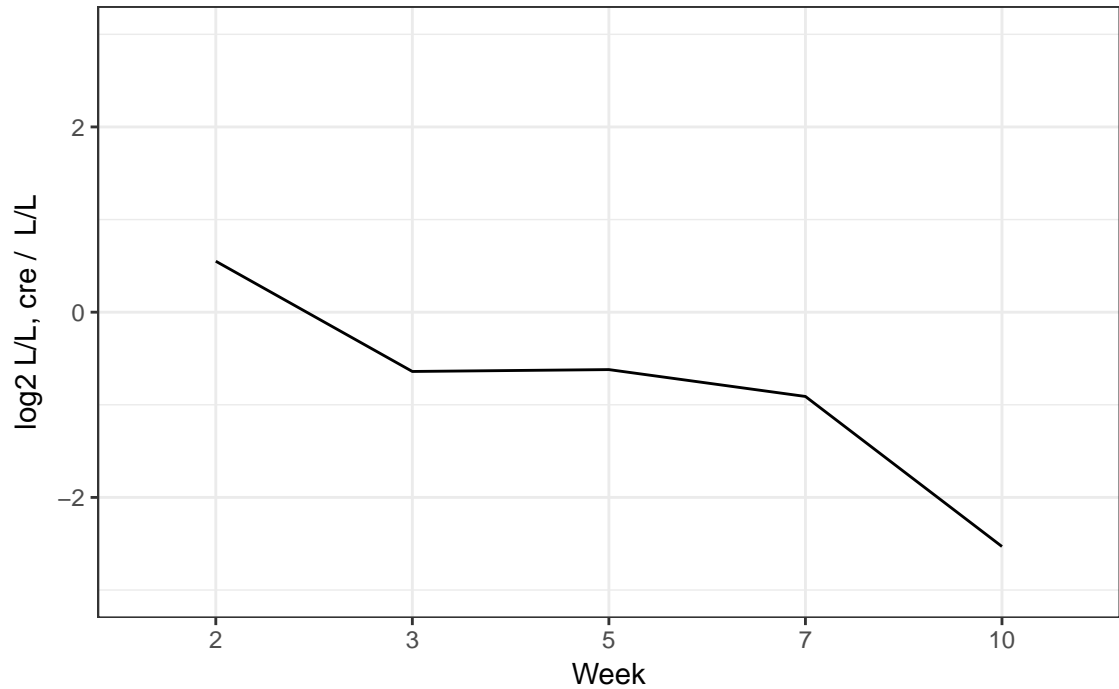

COX7A2 / P48771; adj.p value: 0

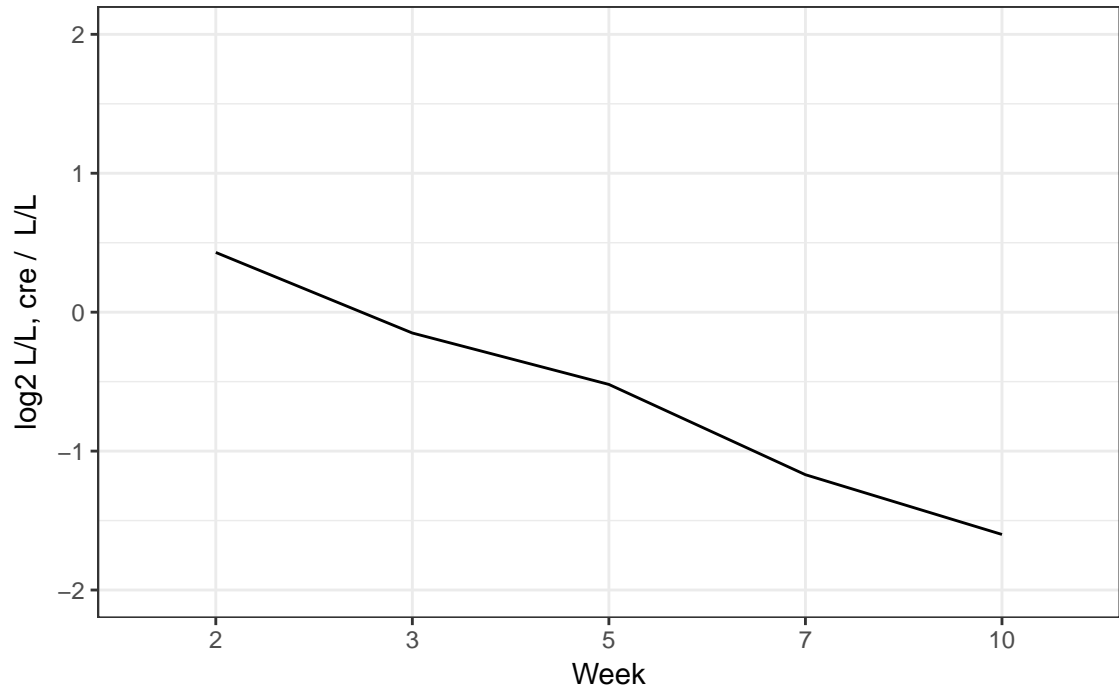

COX7A2L / E9PZS8; adj.p value: 0

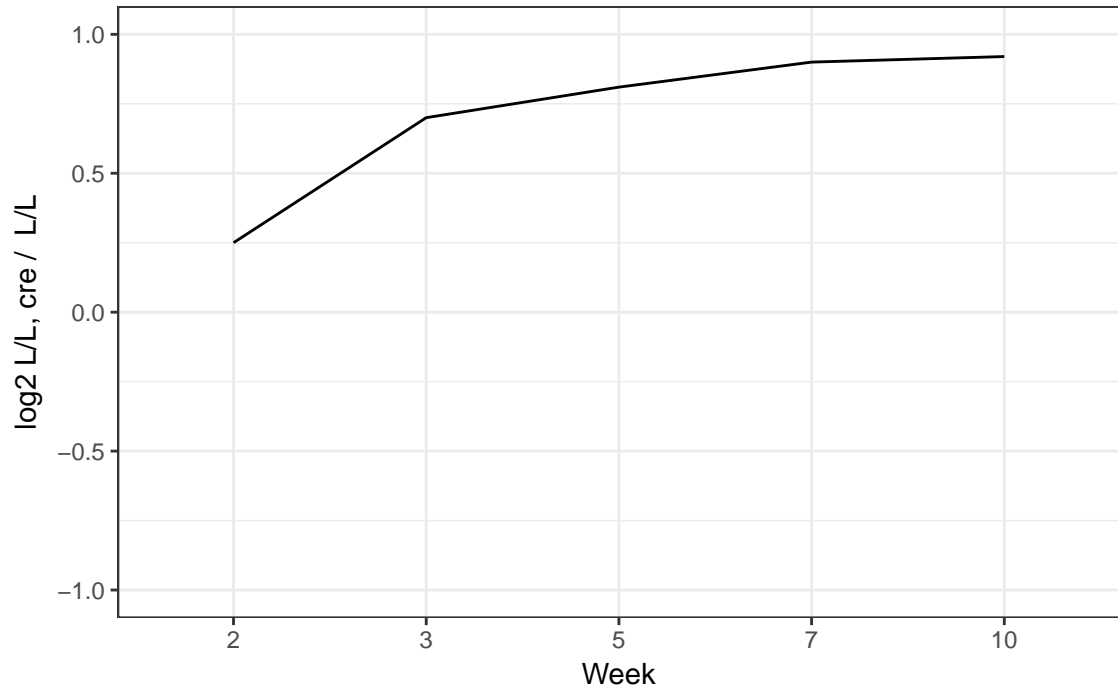

COX7B / P56393; adj.p value: 0

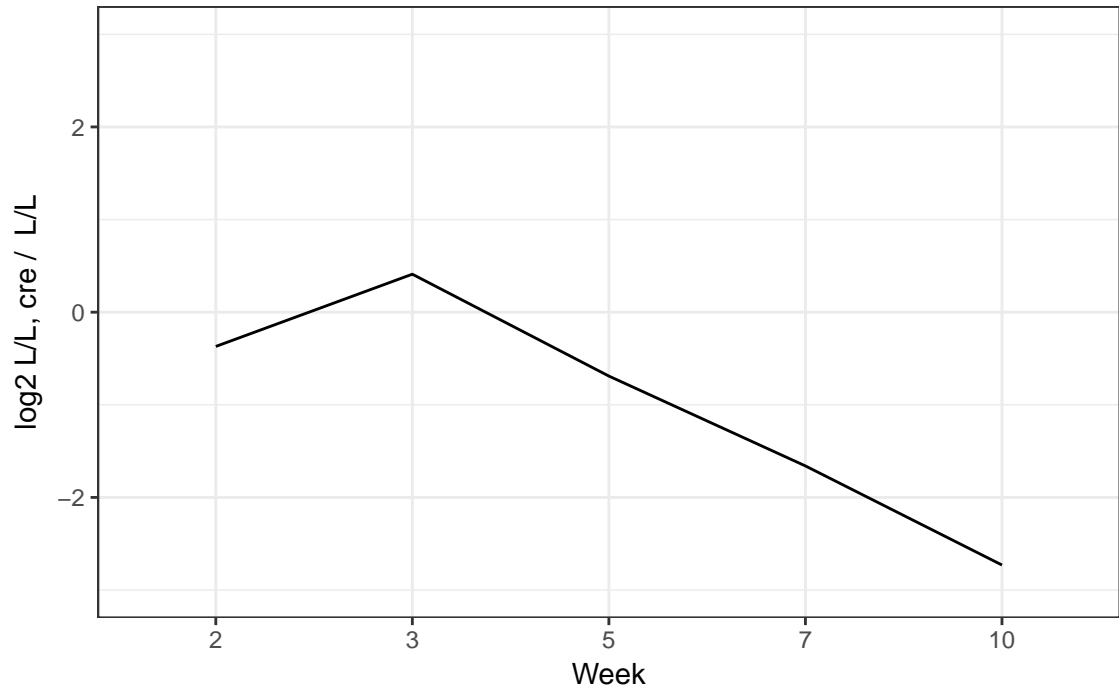



COX7C / P17665; adj.p value: 0

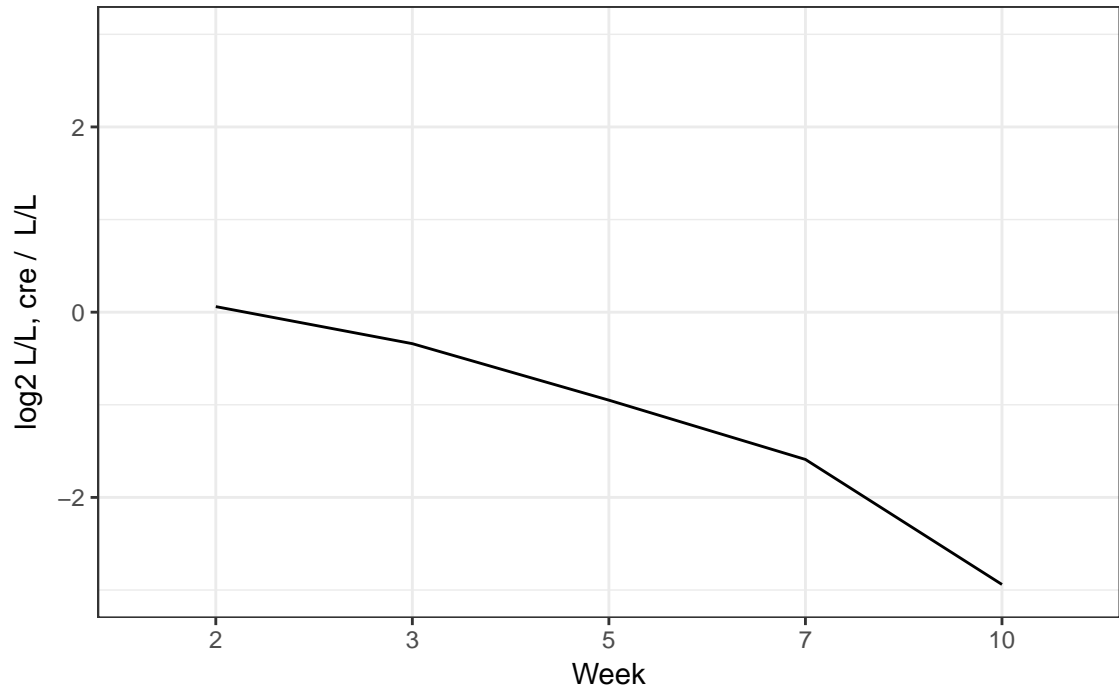

COX8B / P48772; adj.p value: 0.00019

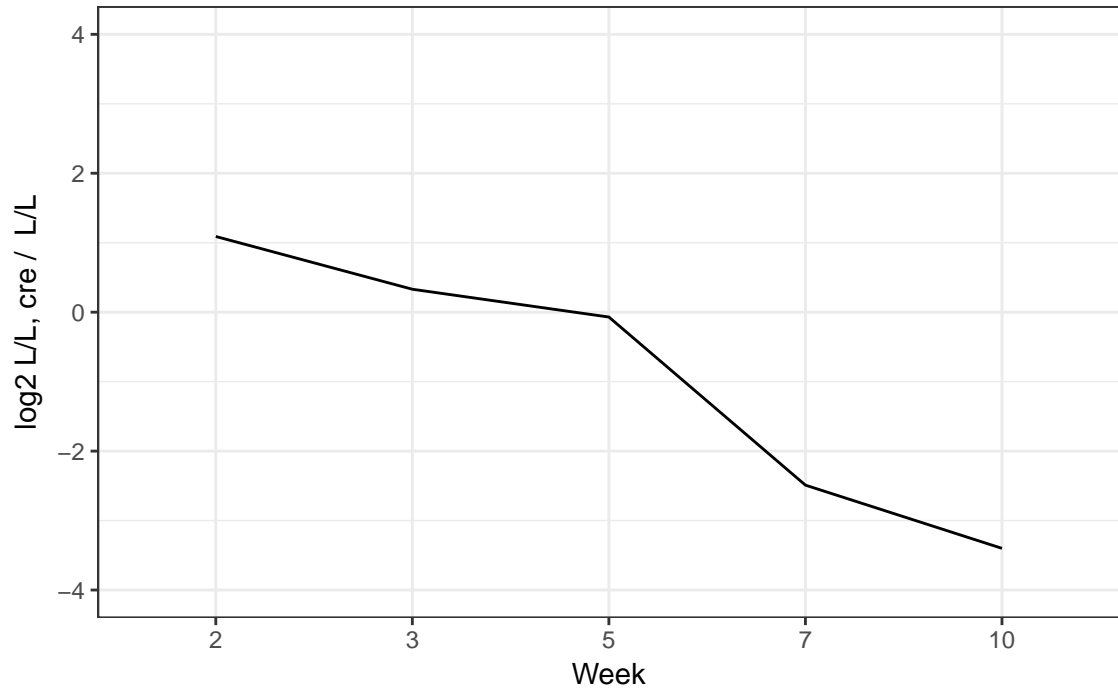

CPOX / P36552; adj.p value: 0.87116

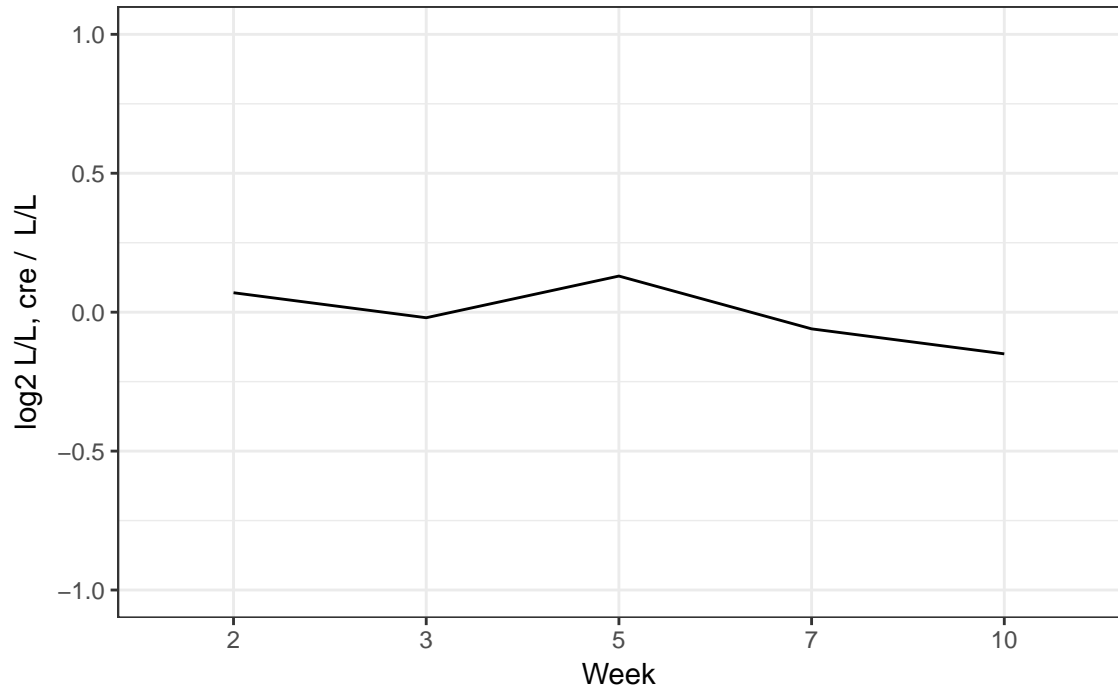

CPT1A / P97742; adj.p value: 0.64174

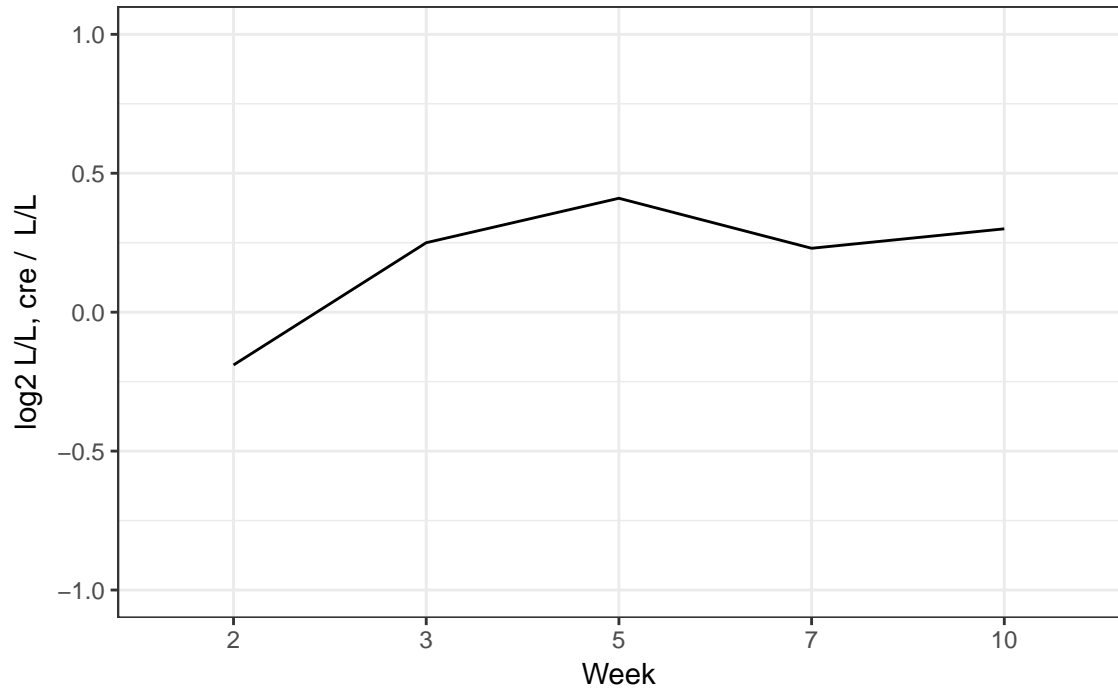

CPT1B / Q924X2; adj.p value: 0.67826

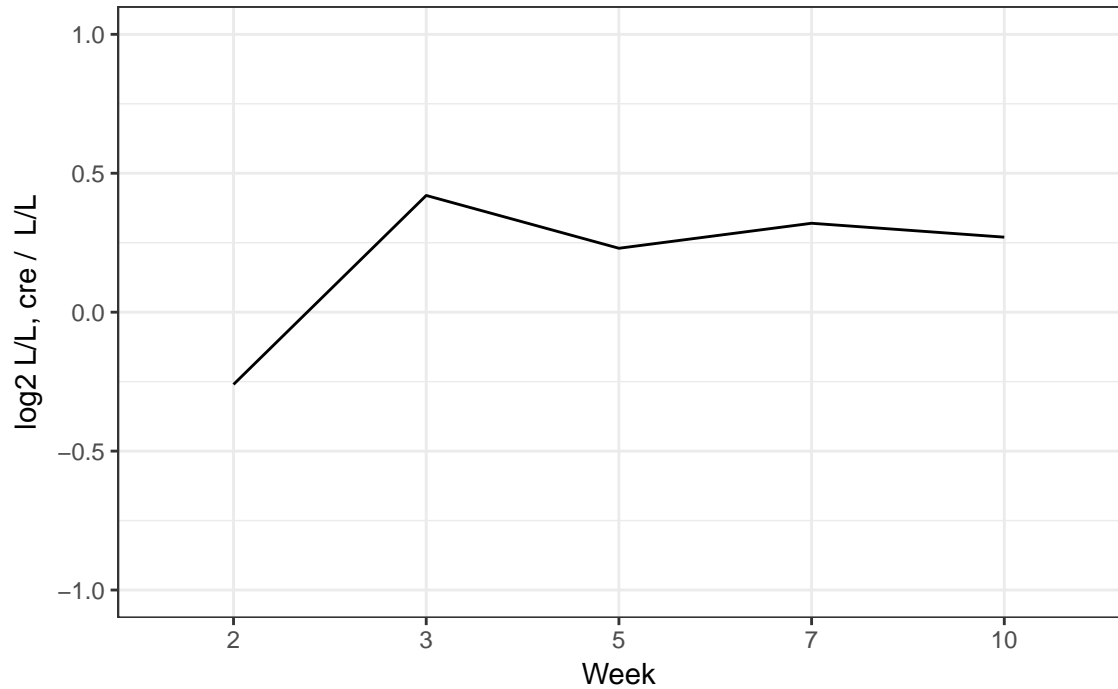

CPT2 / P52825; adj.p value: 0.02891

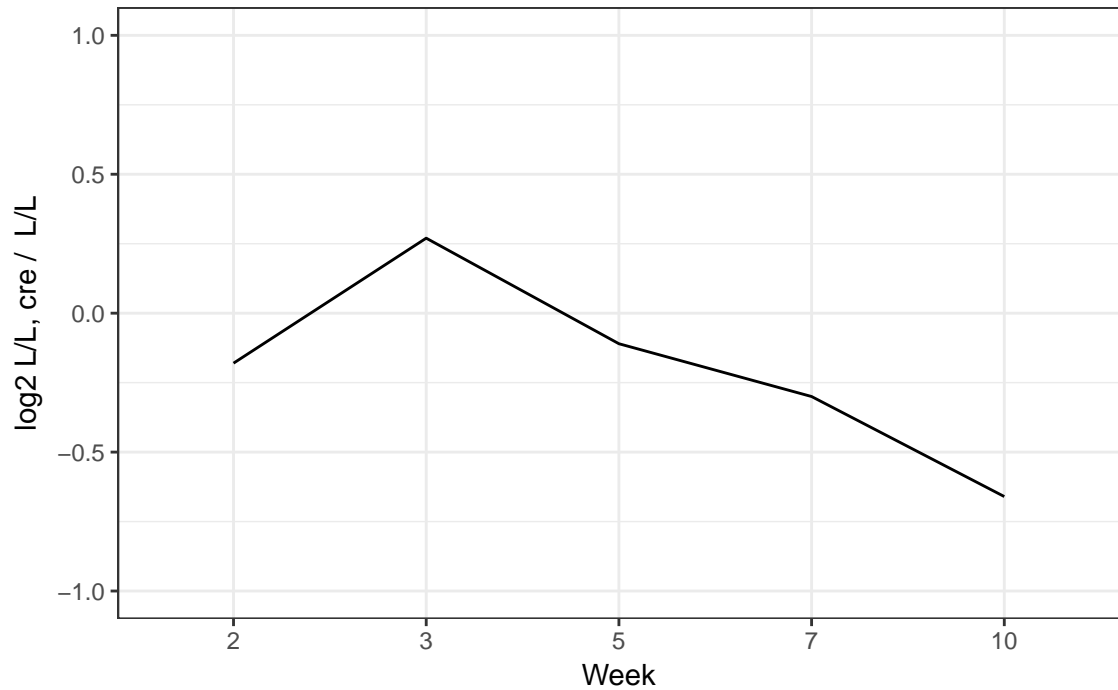

CRAT / H7BX88; adj.p value: 0.02541

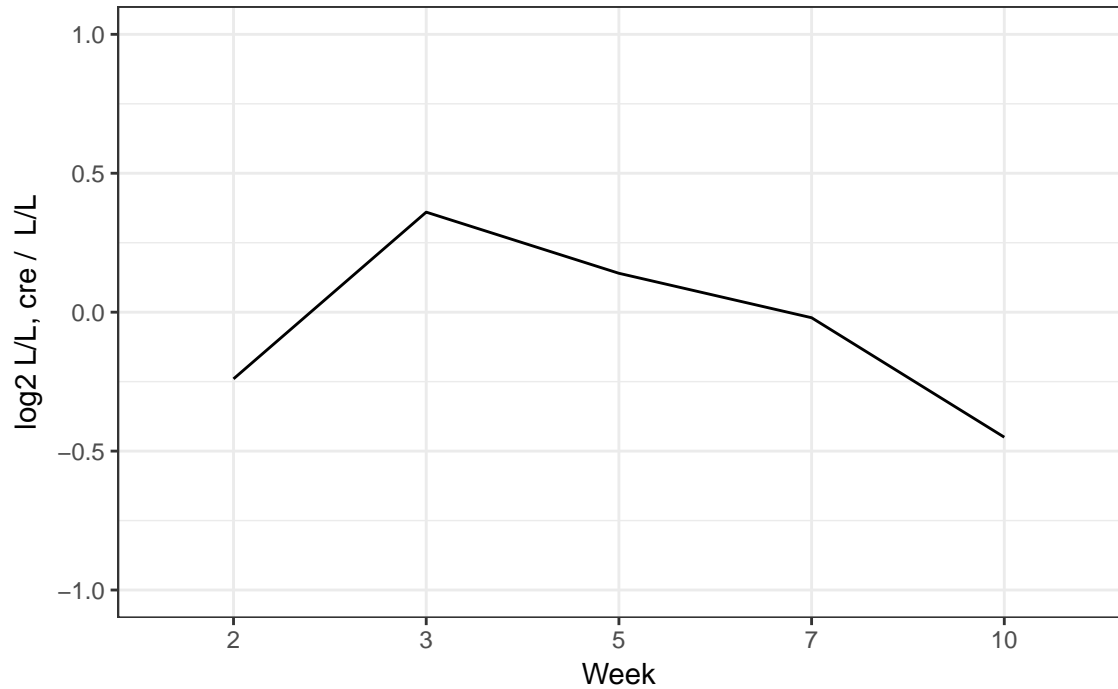

CRYZ / P47199; adj.p value: 0.79445

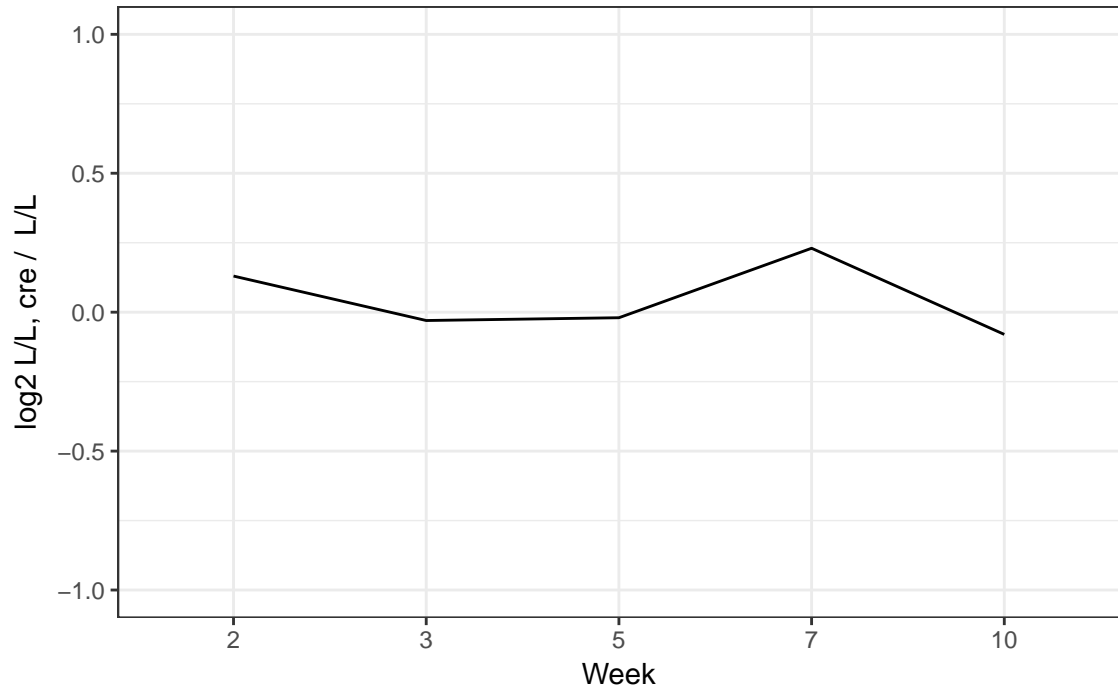



CS / Q9CZU6; adj.p value: 0.37638

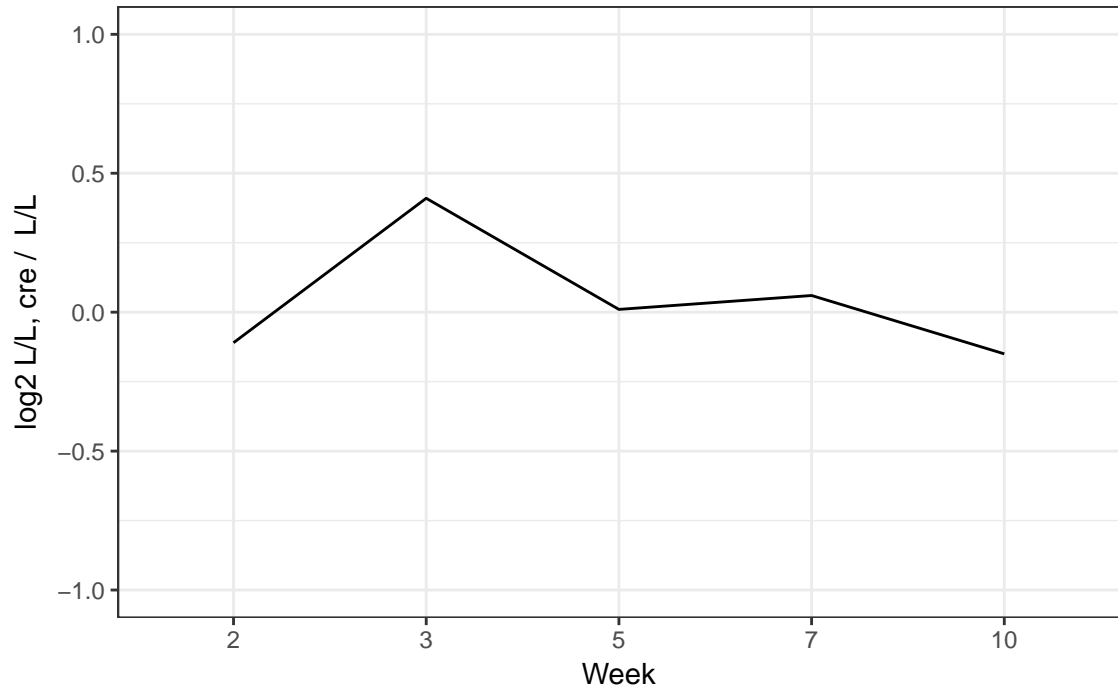

CSL / Q80X68; adj.p value: 0.07058

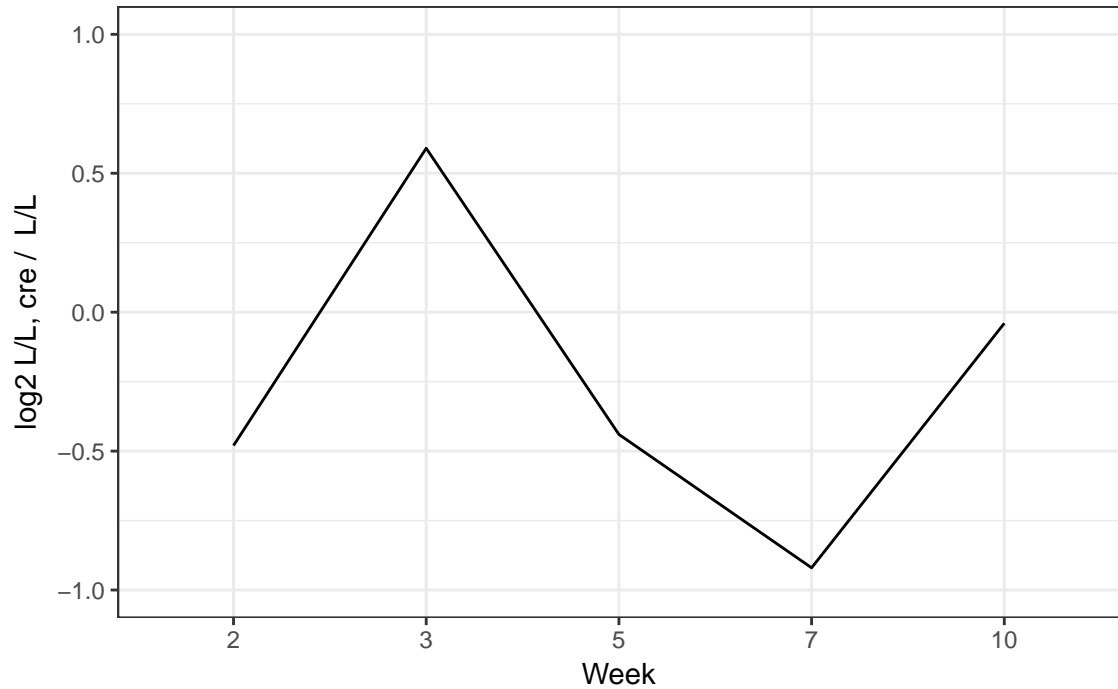

CYB5A / G5E850; adj.p value: 0.60239

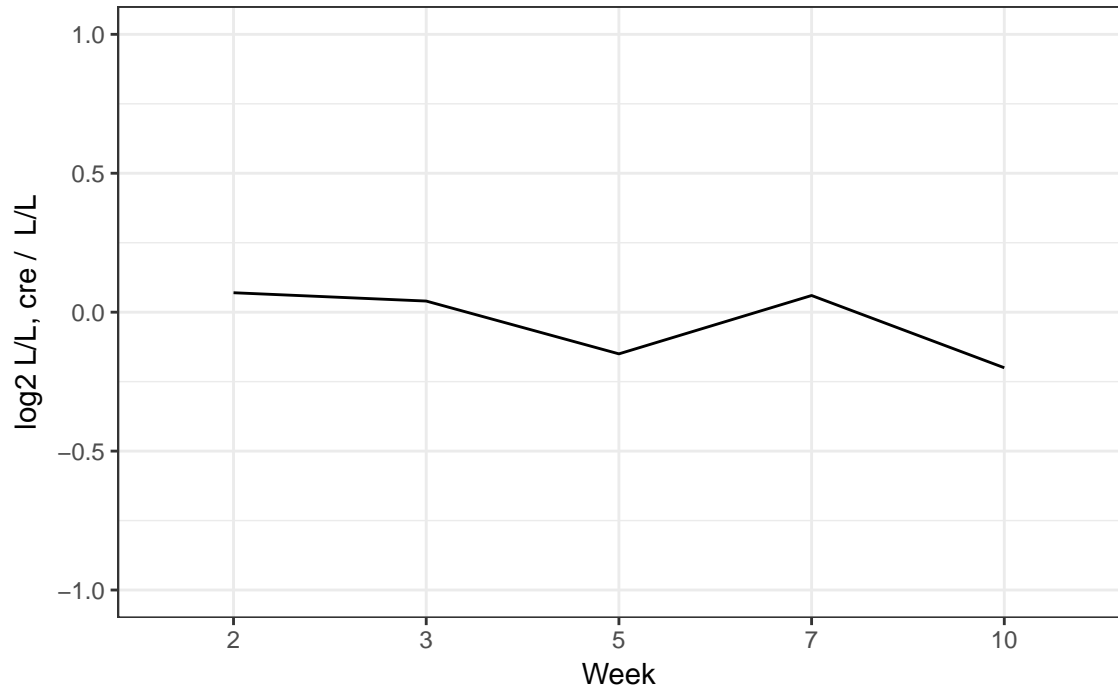

CYB5B / Q9CQX2; adj.p value: 0.38452

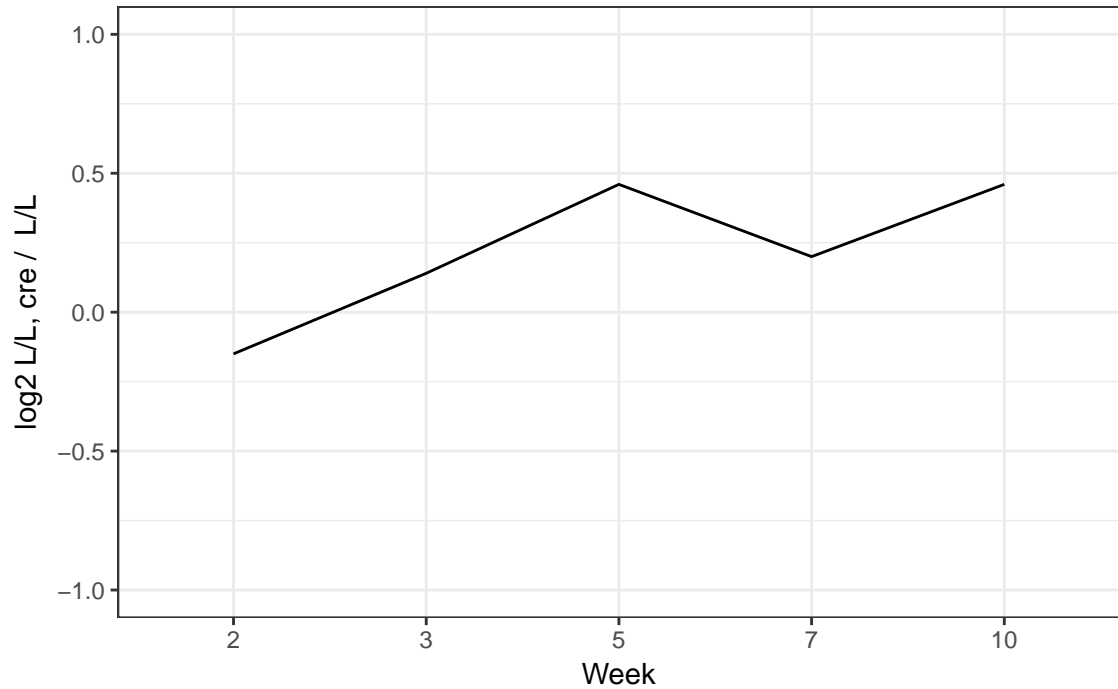

CYB5R1 / Q9DB73; adj.p value: 0

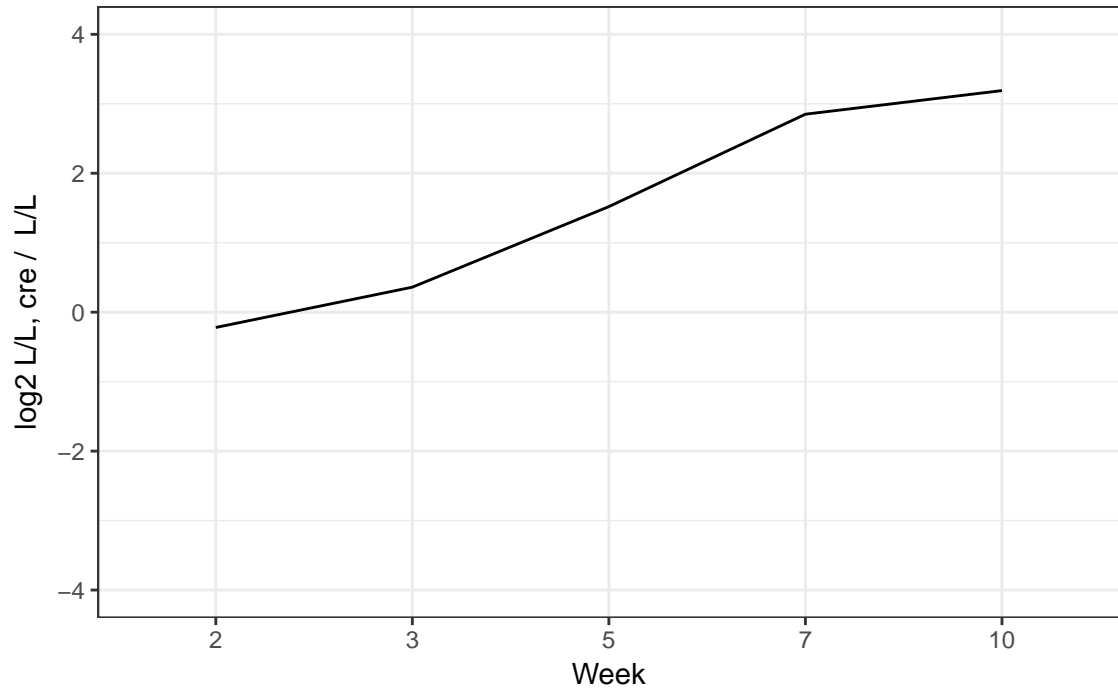

CYB5R3 / Q9DCN2-2; adj.p value: 0.00029

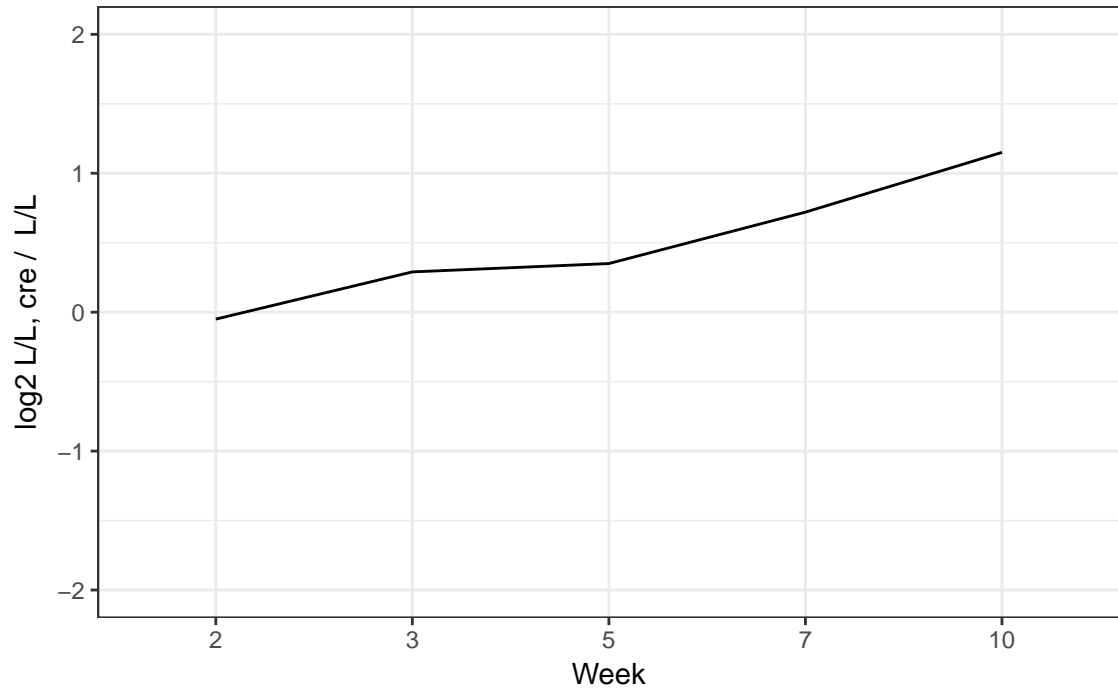

CYC1 / Q9D0M3-2; adj.p value: 0

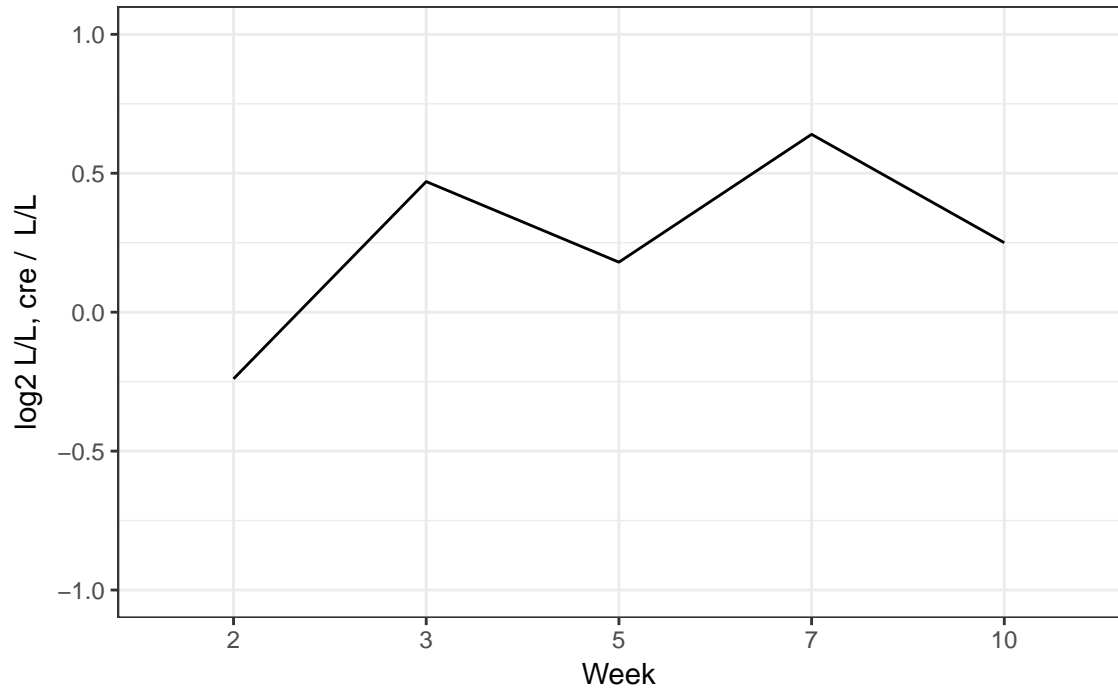

D10JHU81E / Q9D172; adj.p value: 0.06274

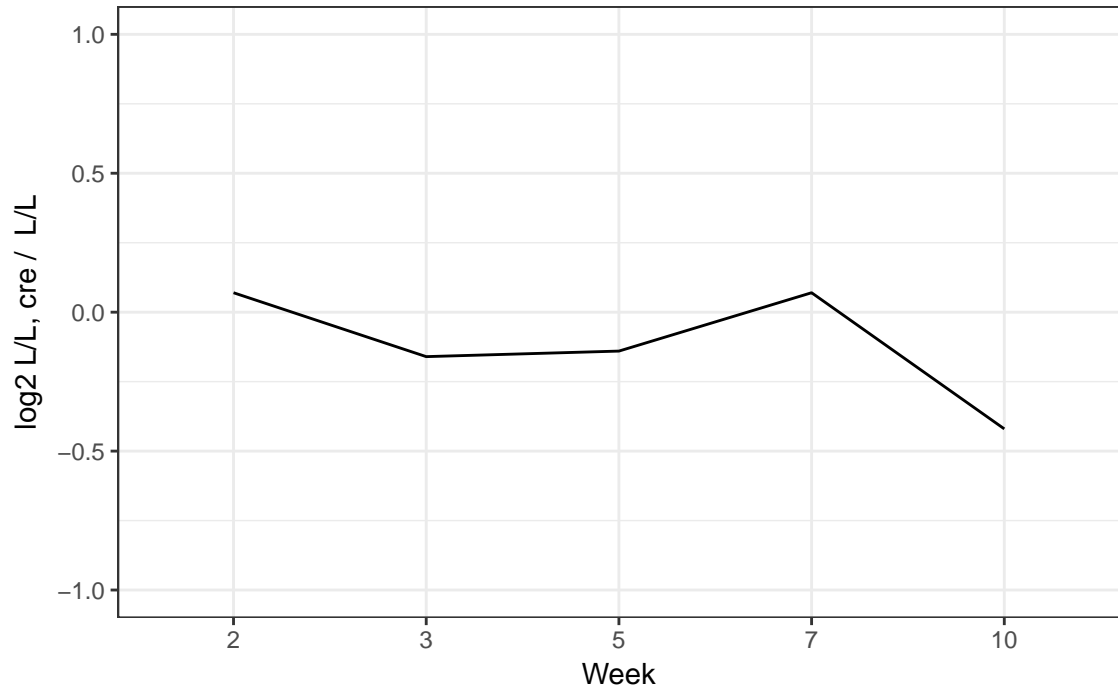



D2HGDH / E9QN44; adj.p value: 0.44479

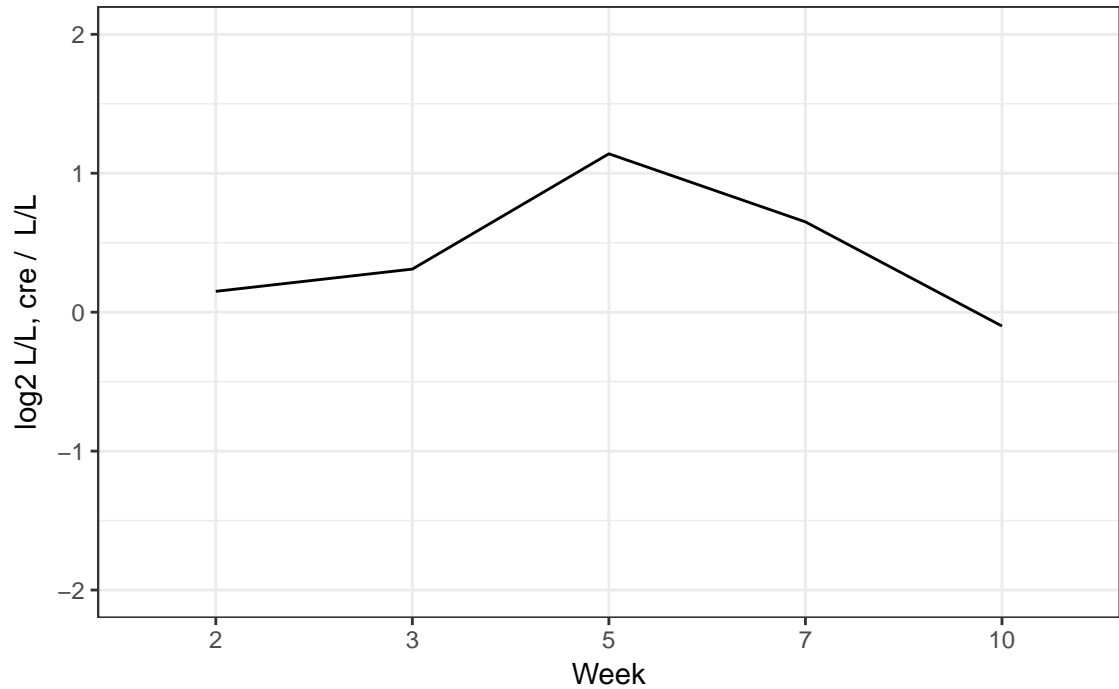

DARS2 / Q8BIP0; adj.p value: 0.11112

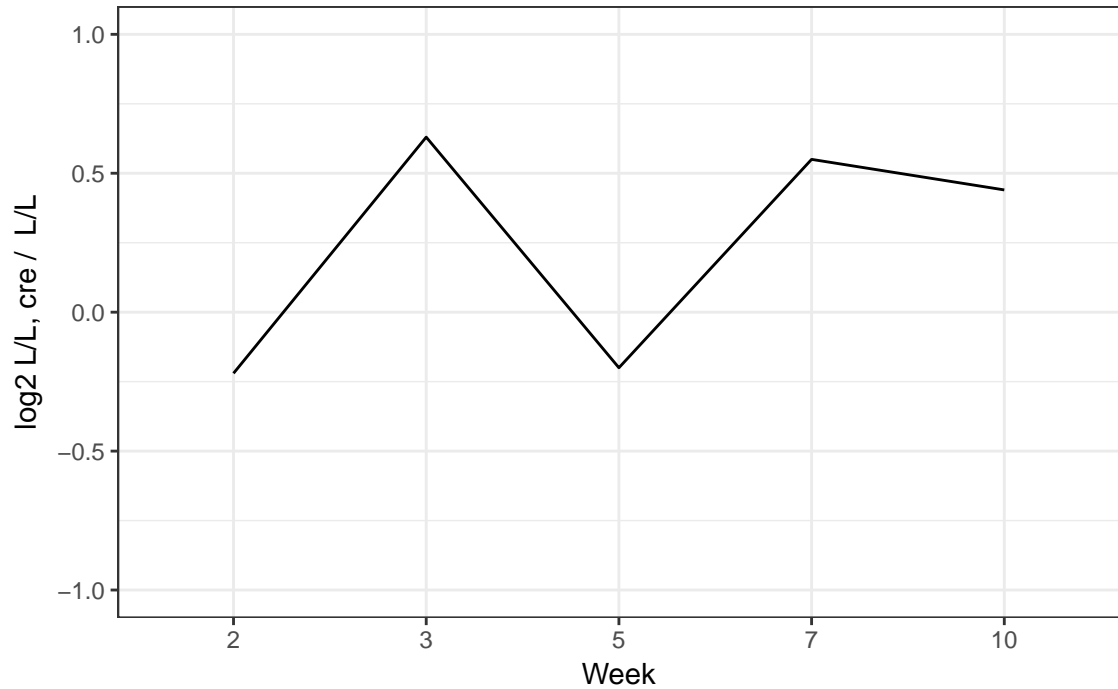

DBI / P31786; adj.p value: 0.00052

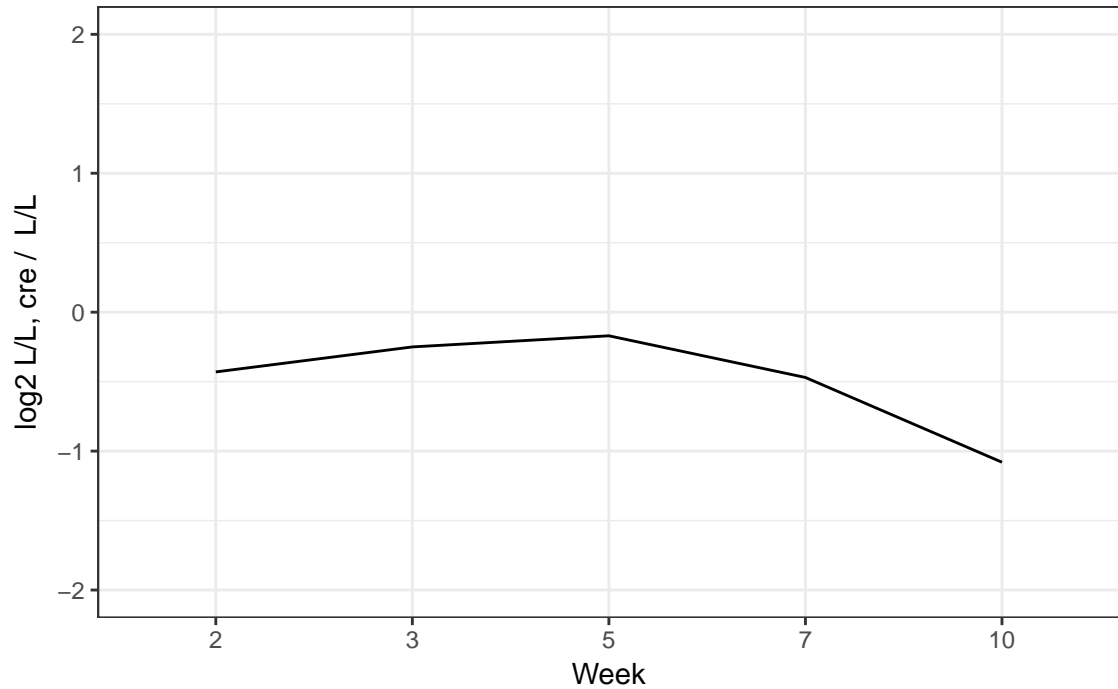

DBT / P53395; adj.p value: 0.00472

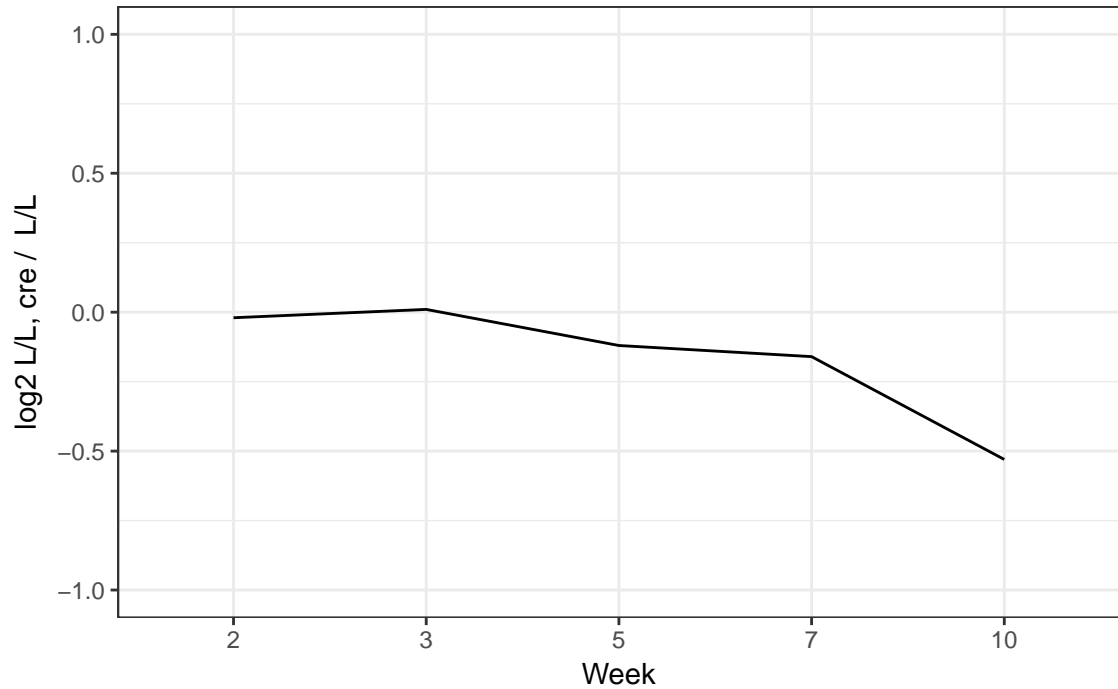

DCAKD / Q8BHC4; adj.p value: 5e-04

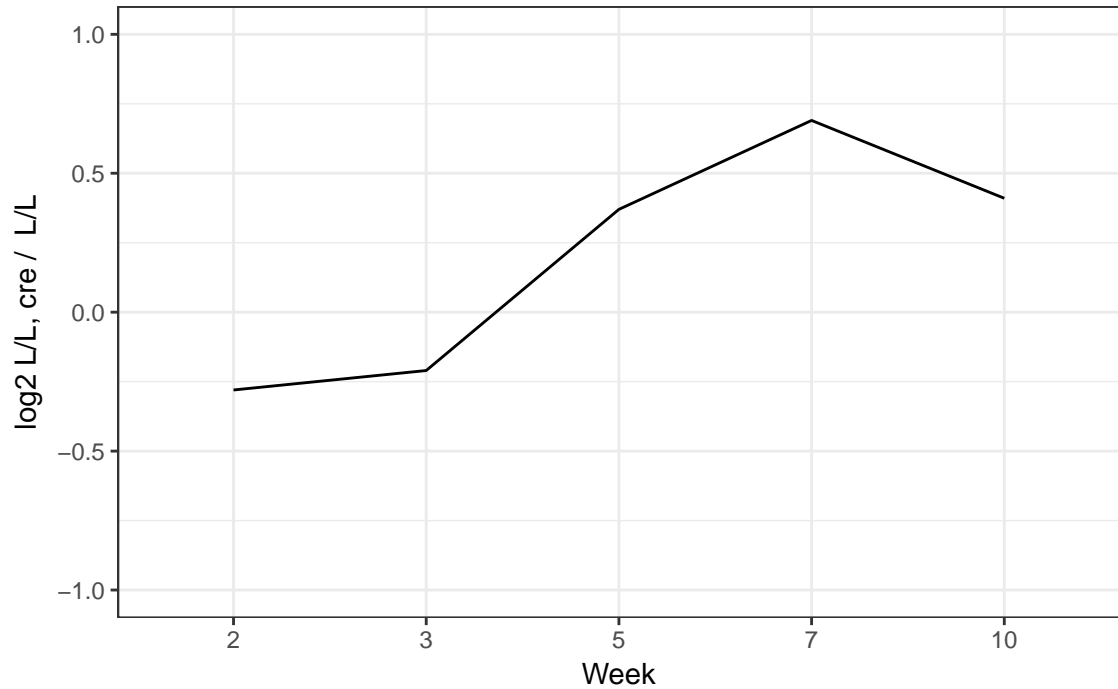

DECR1 / Q9CQ62; adj.p value: 0.01062

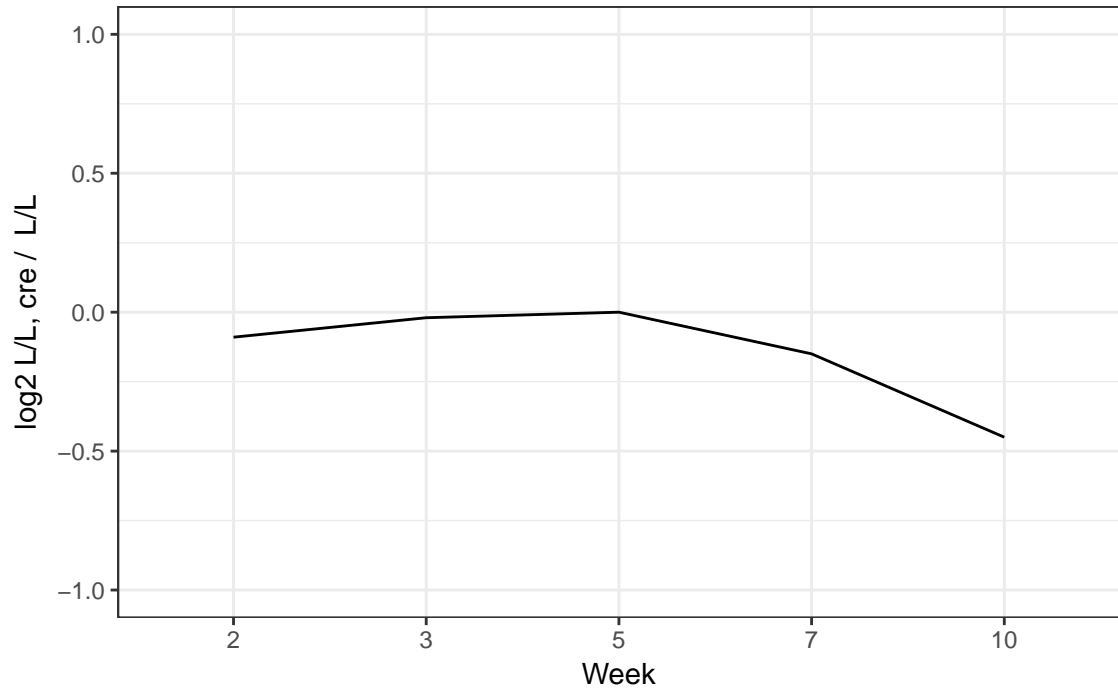

DGUOK / Q9QX60-2; adj.p value: 0.52196

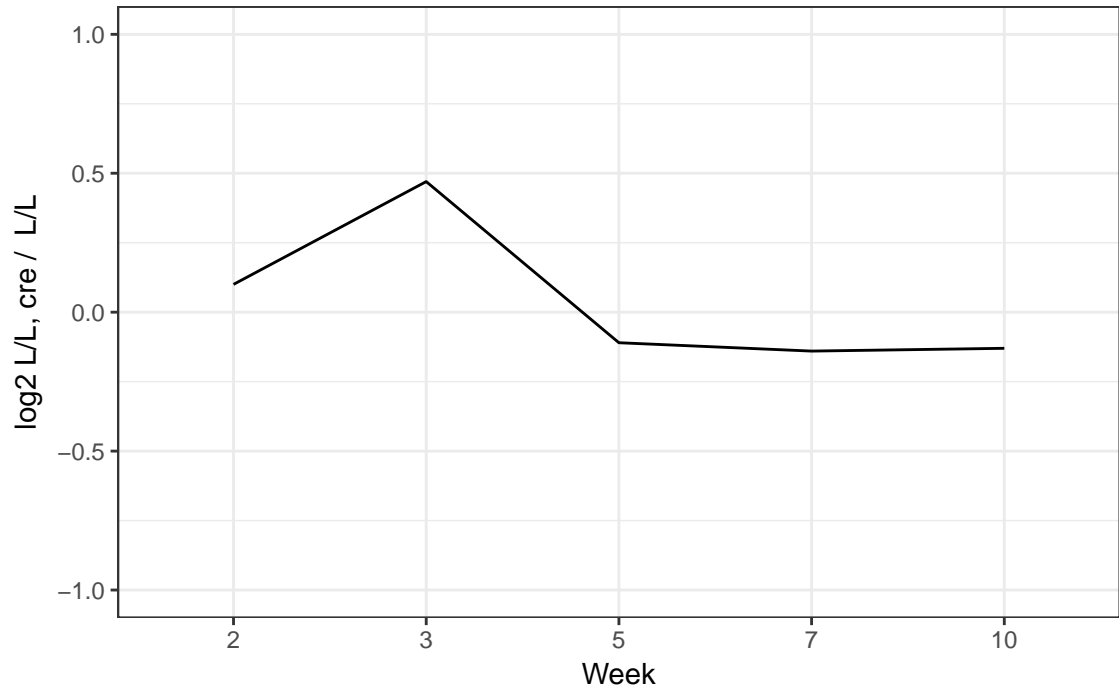

DHODH / O35435; adj.p value: 0.64787

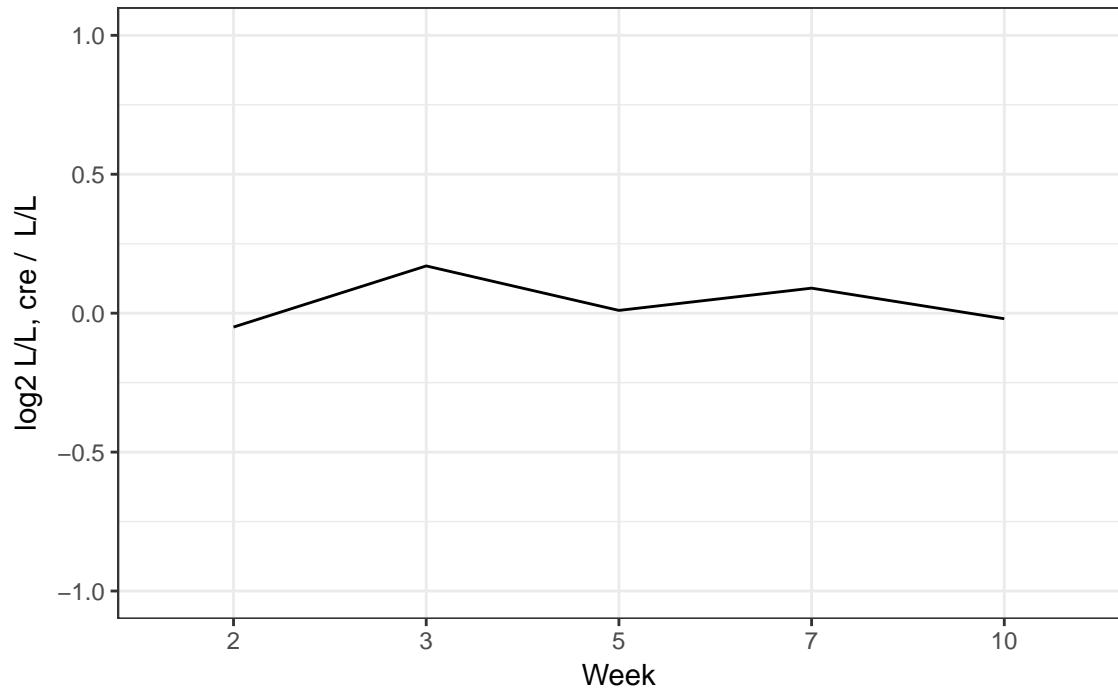



DHRS1 / Q99L04; adj.p value: 0.04951

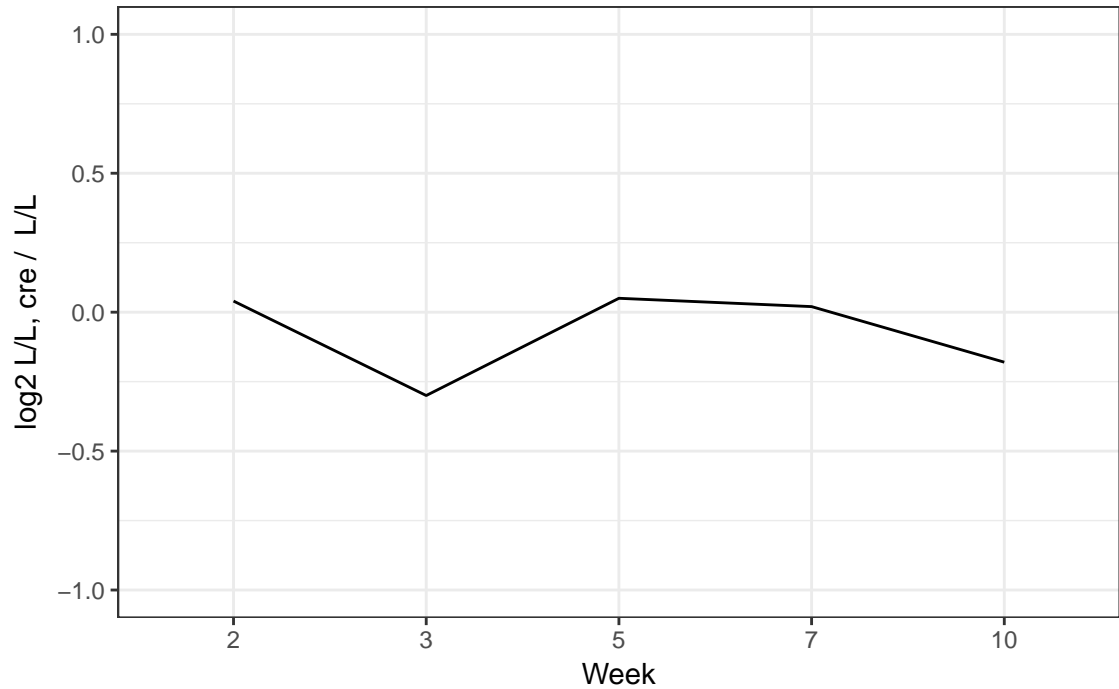

DHRS4 / Q99LB2; adj.p value: 0

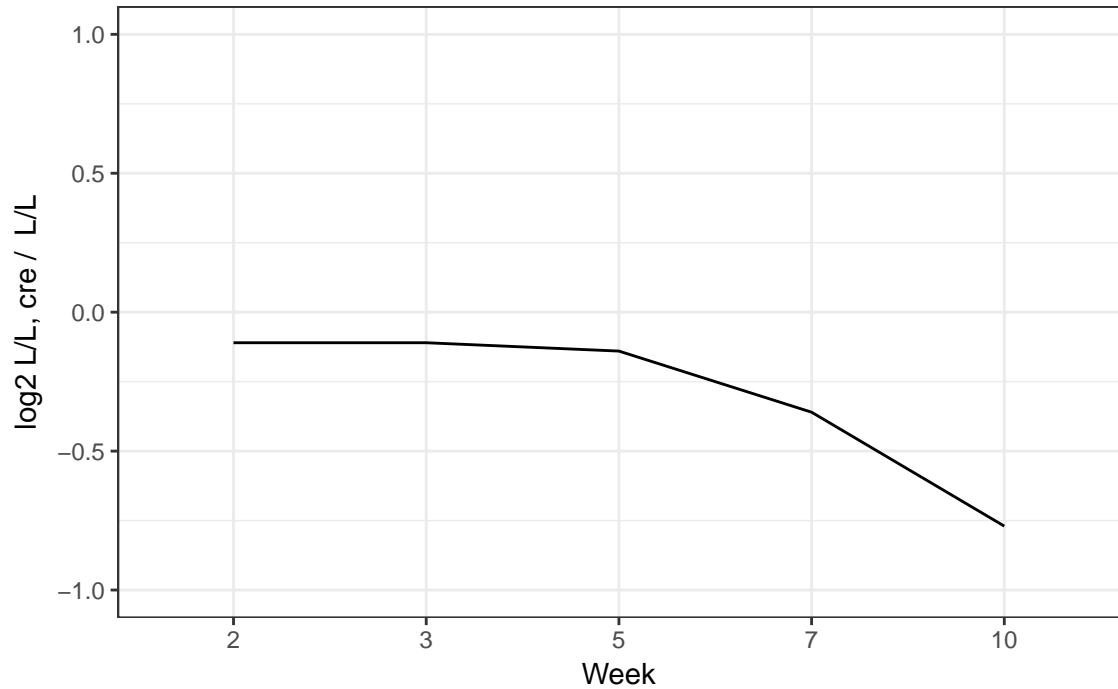

DHRS7B / Z4YKT6; adj.p value: 0.47382

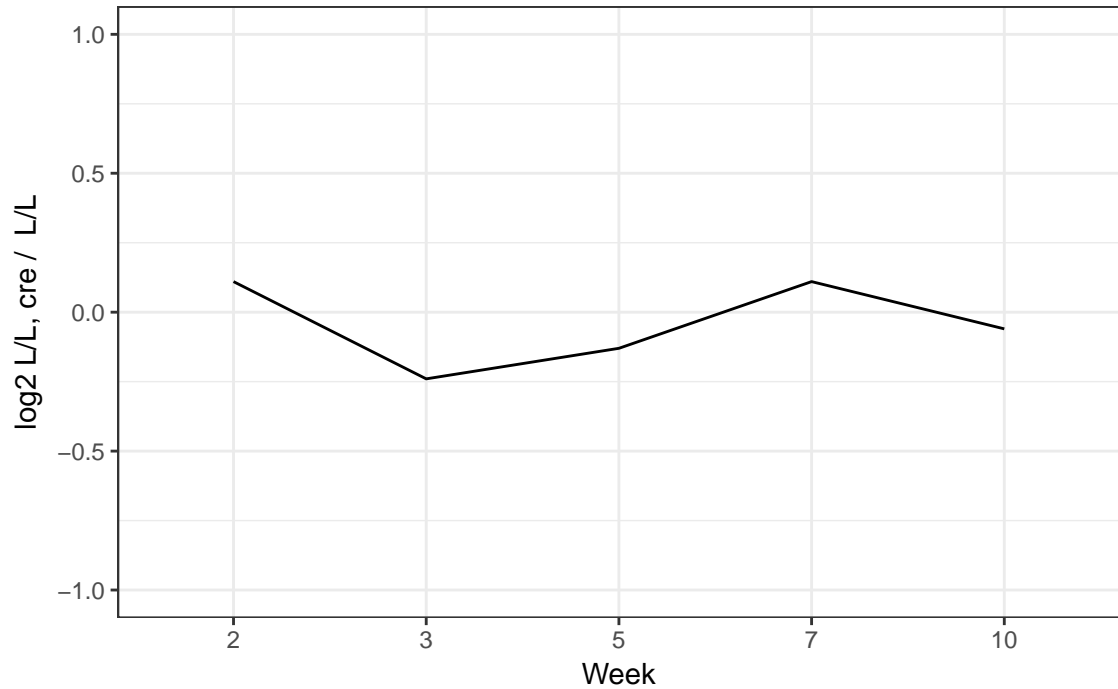

DHX30 / A0A0G2JGL8; adj.p value: 0.00063

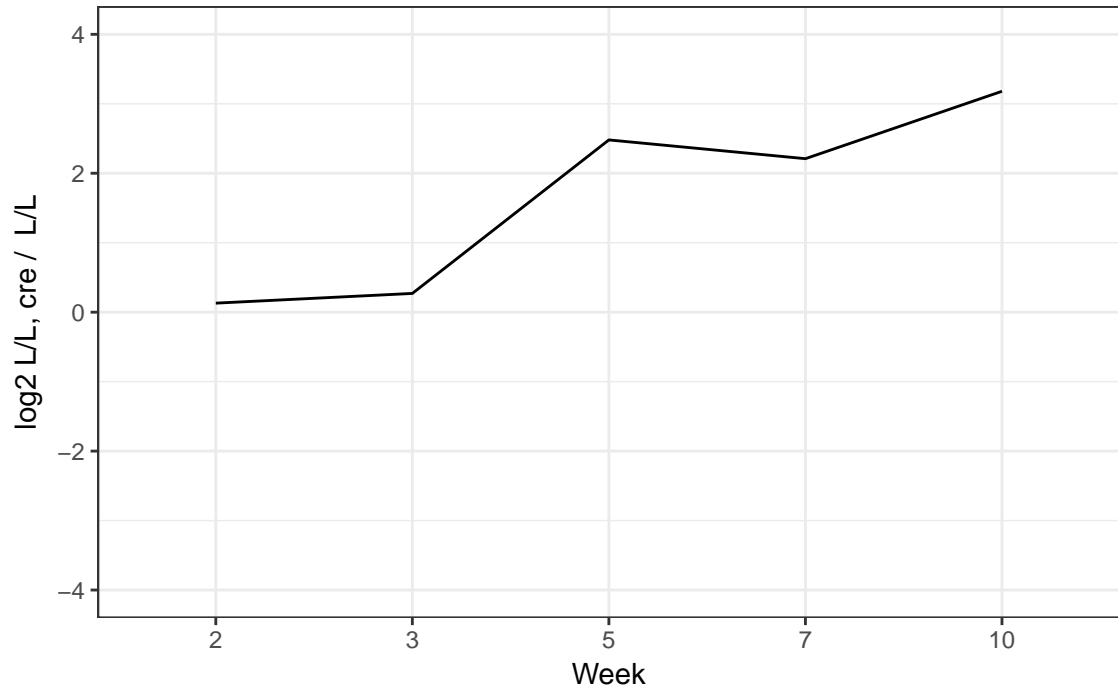

DIABLO / Q9JIQ3; adj.p value: 0

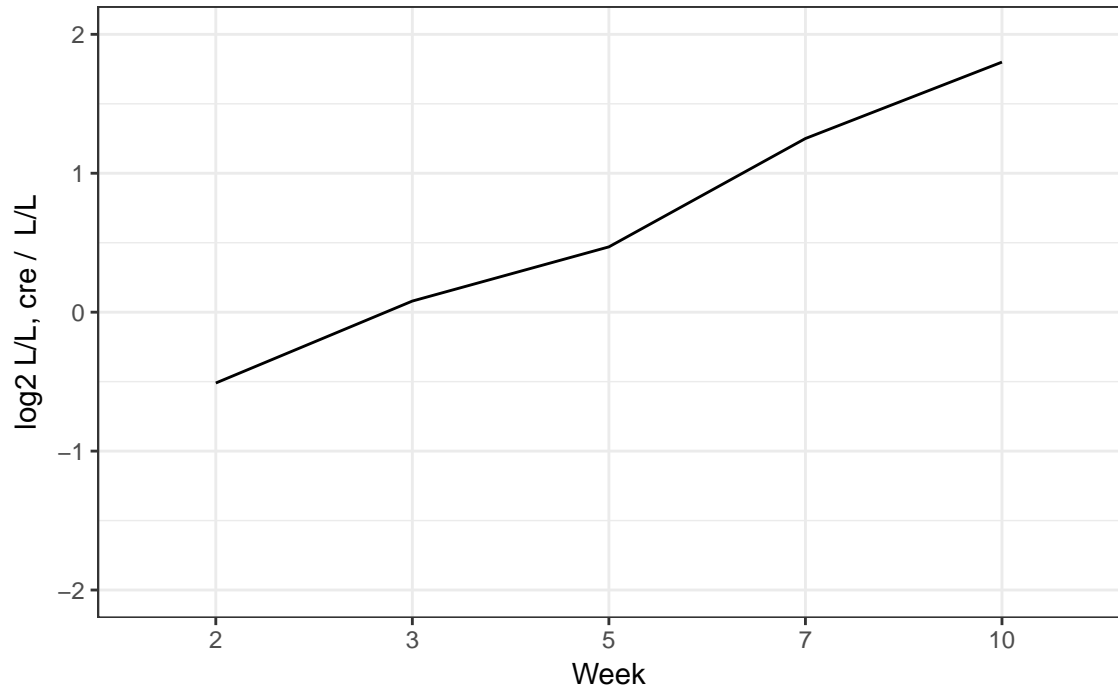

DLAT / Q8BMF4; adj.p value: 0.40282

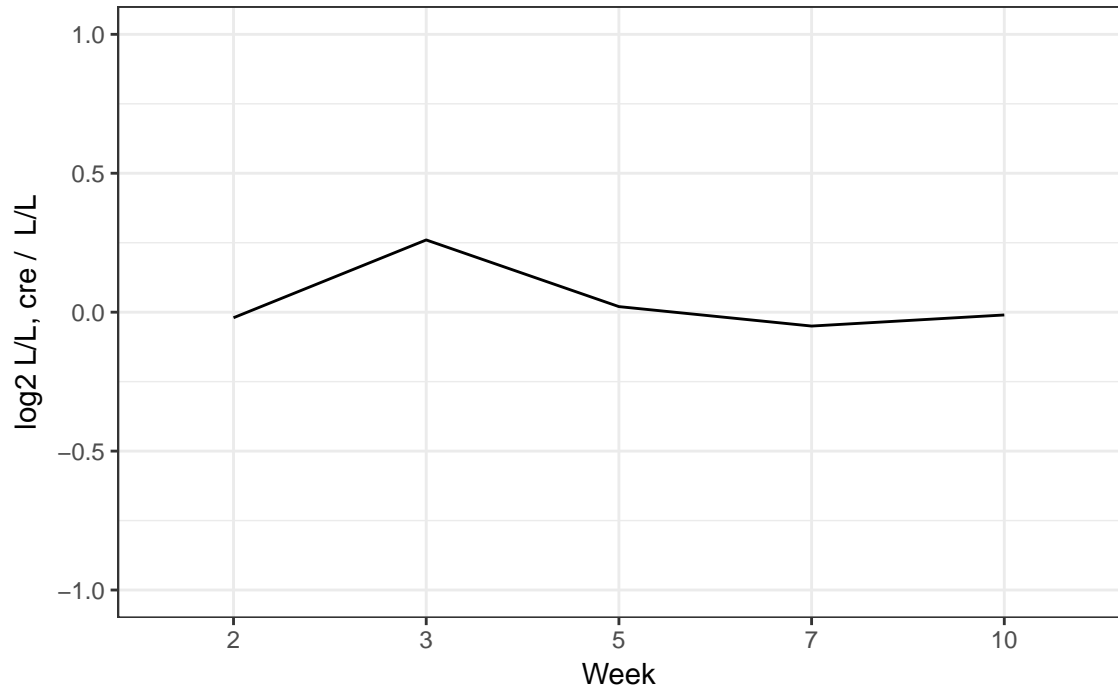

DLD / O08749; adj.p value: 0.0362

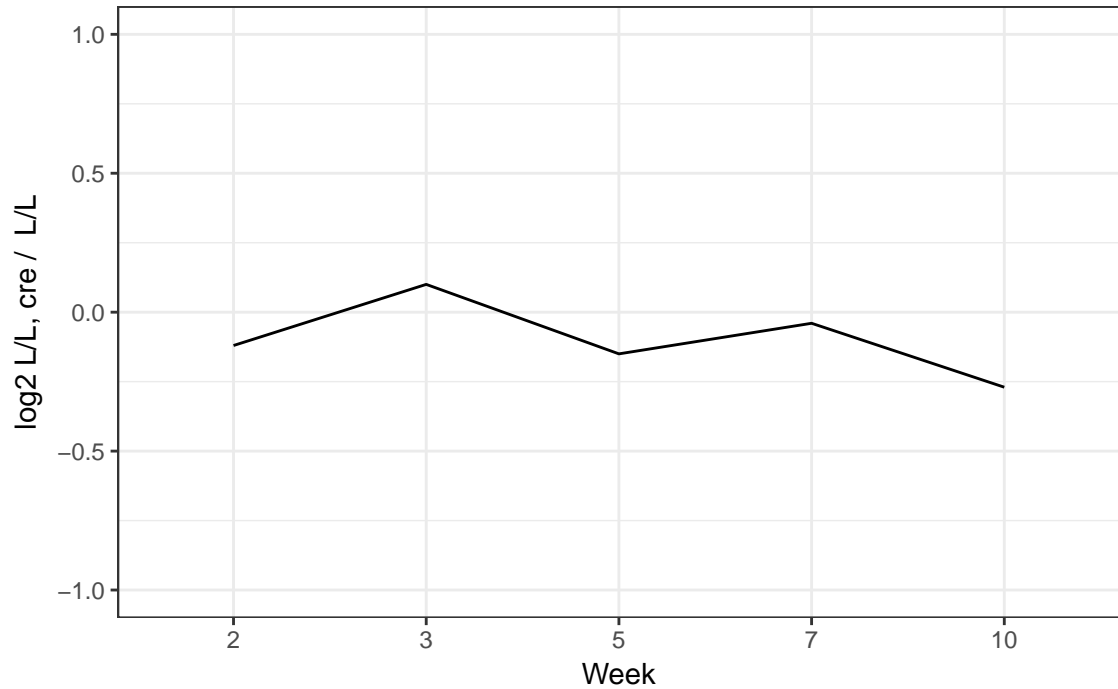

DLST / Q9D2G2; adj.p value: 0.18477

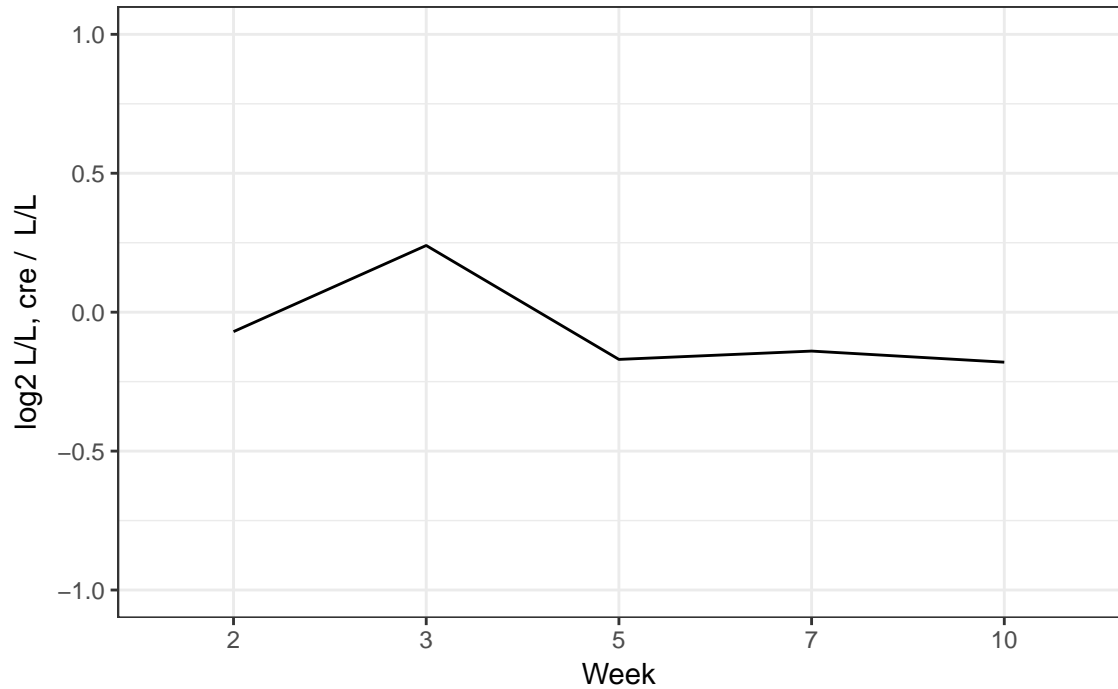



DNAJA3 / Q99M87; adj.p value: 0

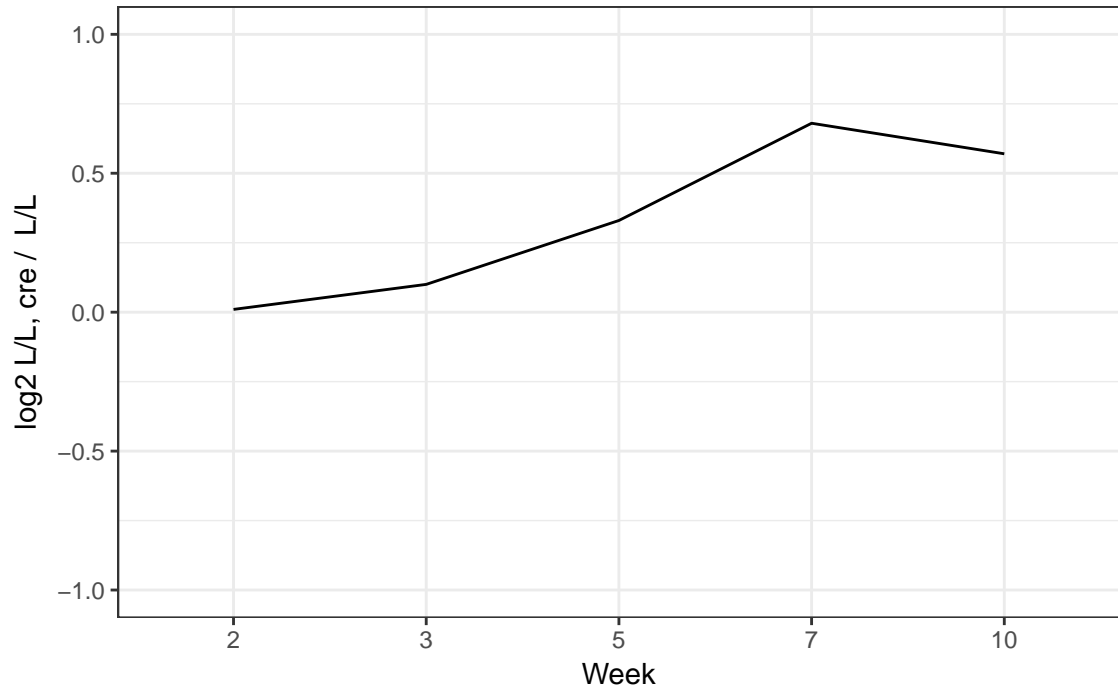

DNAJC11 / Q5U458; adj.p value: 0.00017

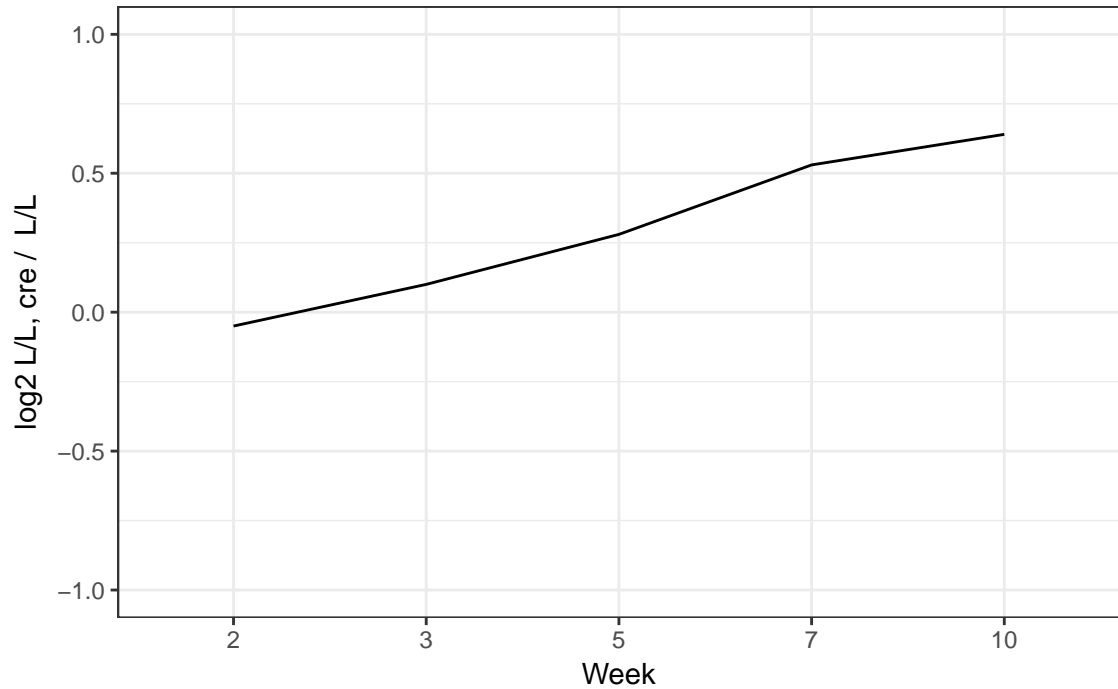

DNAJC15 / Q78YY6; adj.p value: 0.00118

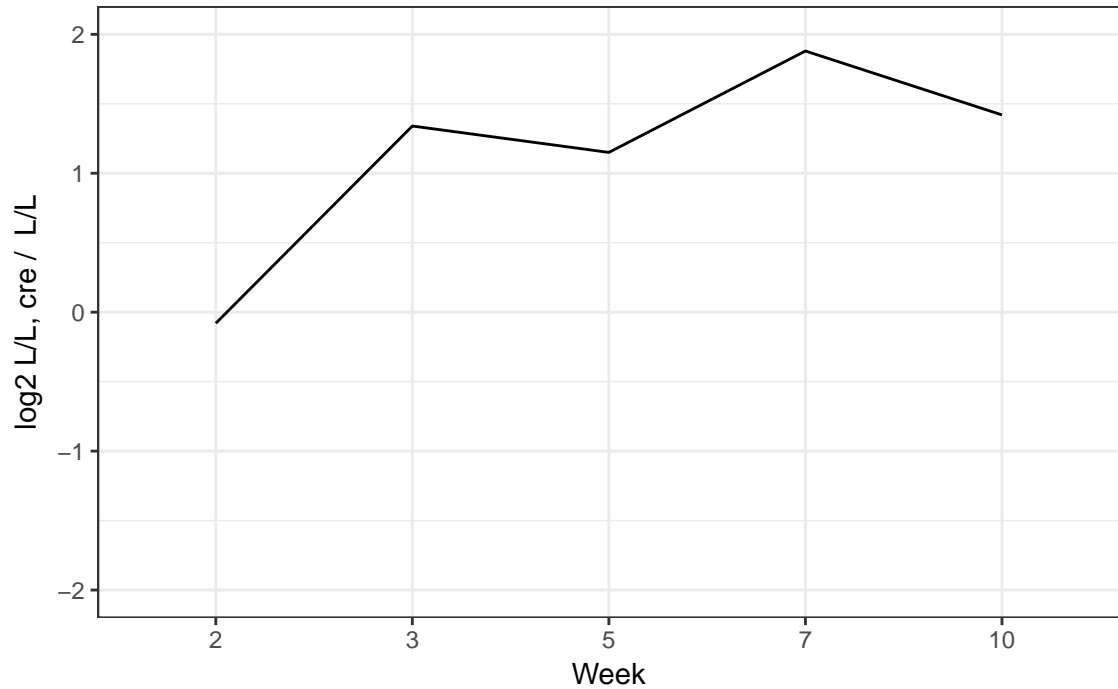

DNAJC19 / Q9CQV7; adj.p value: 0.29332

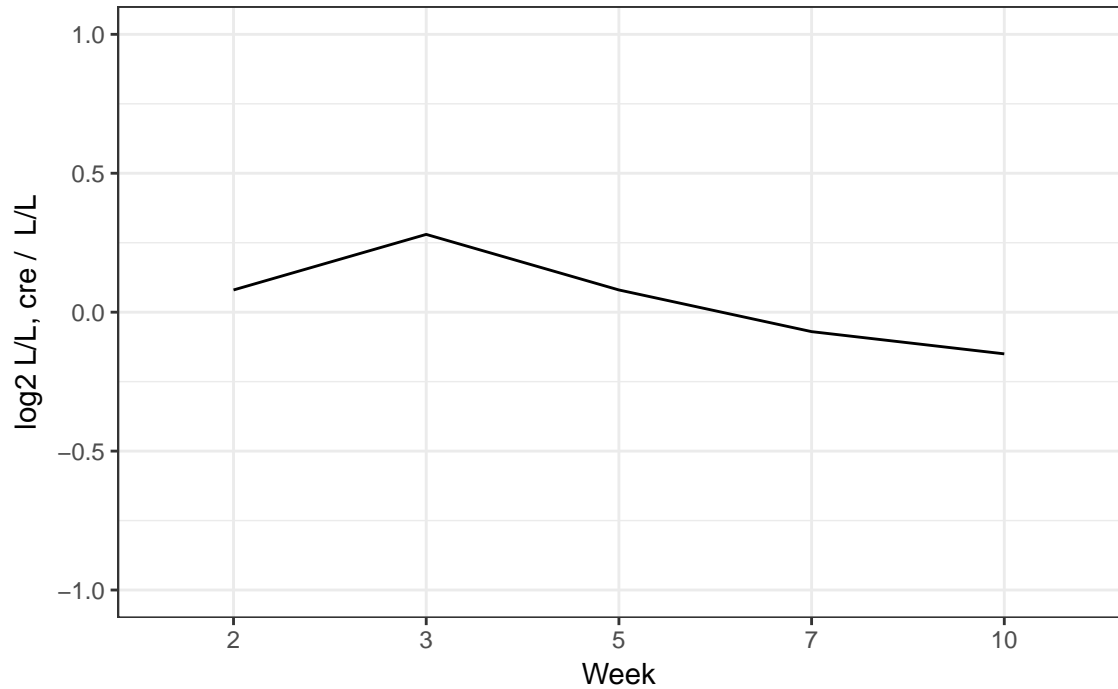

DNAJC28 / E9Q1L7; adj.p value: 1e-05

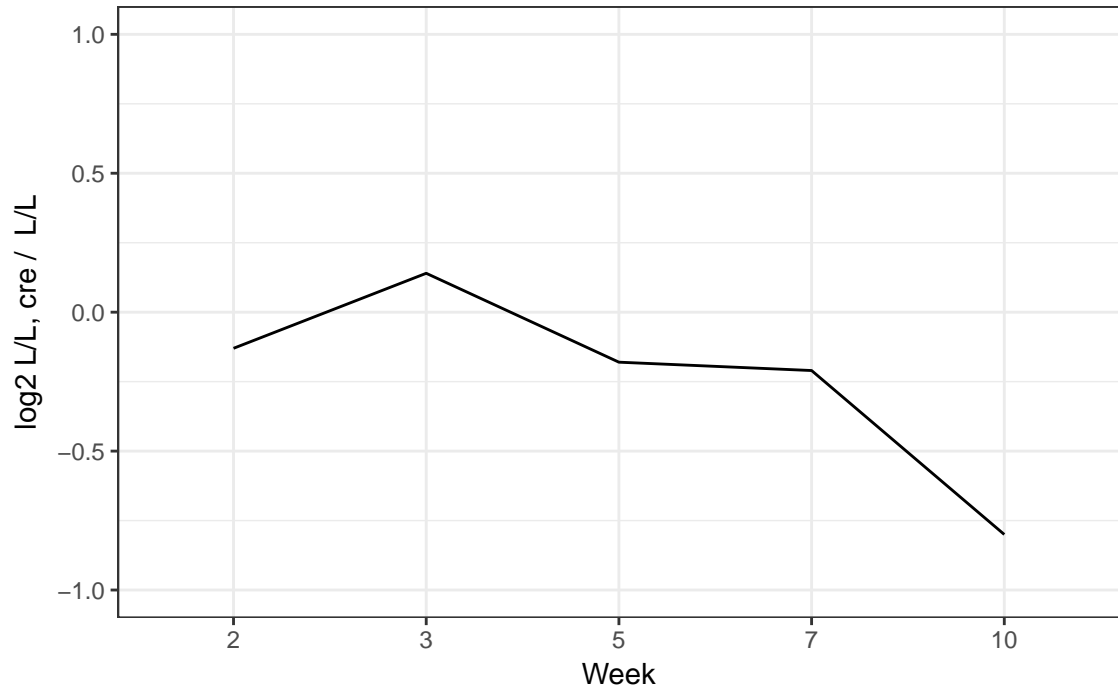

DNAJC30 / P59041; adj.p value: 0.09905

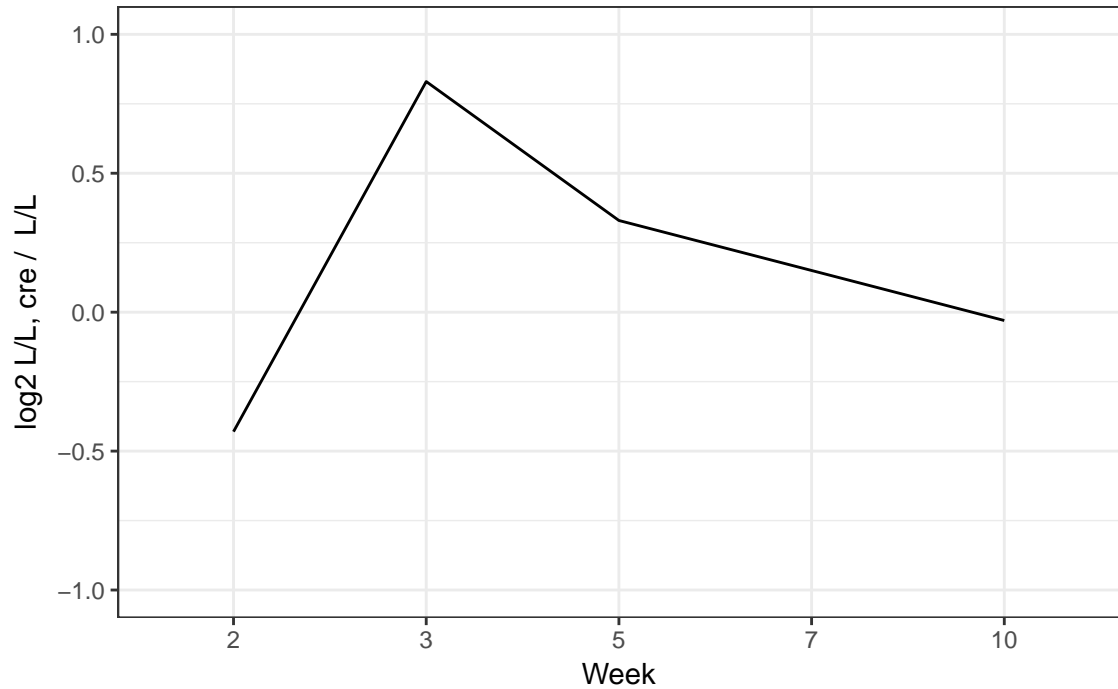

DNAJC4 / Q6GTN1; adj.p value: 0.07353

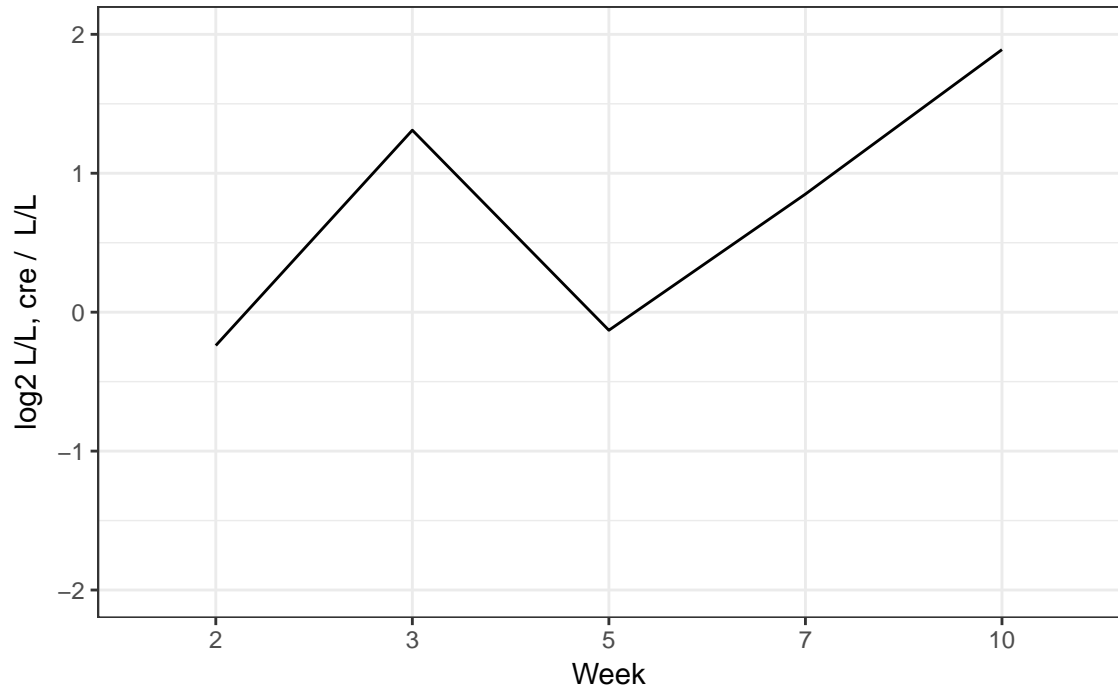

DNM1L / E9PUD2; adj.p value: 0.07985

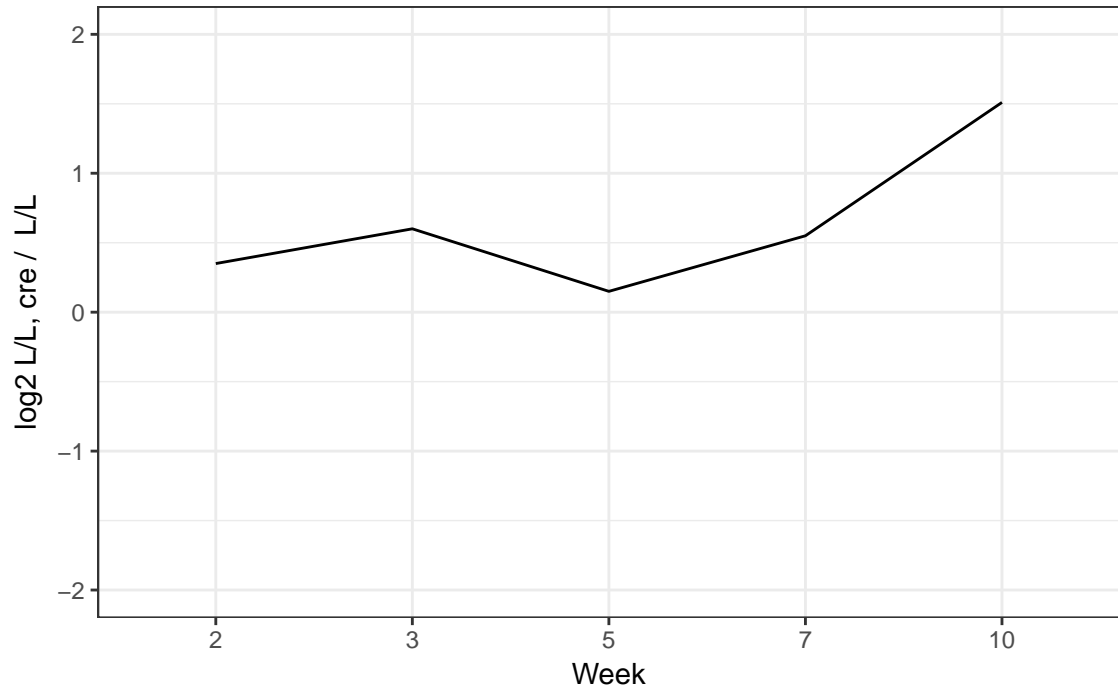



DUT / Q8VCG1; adj.p value: 3e-05

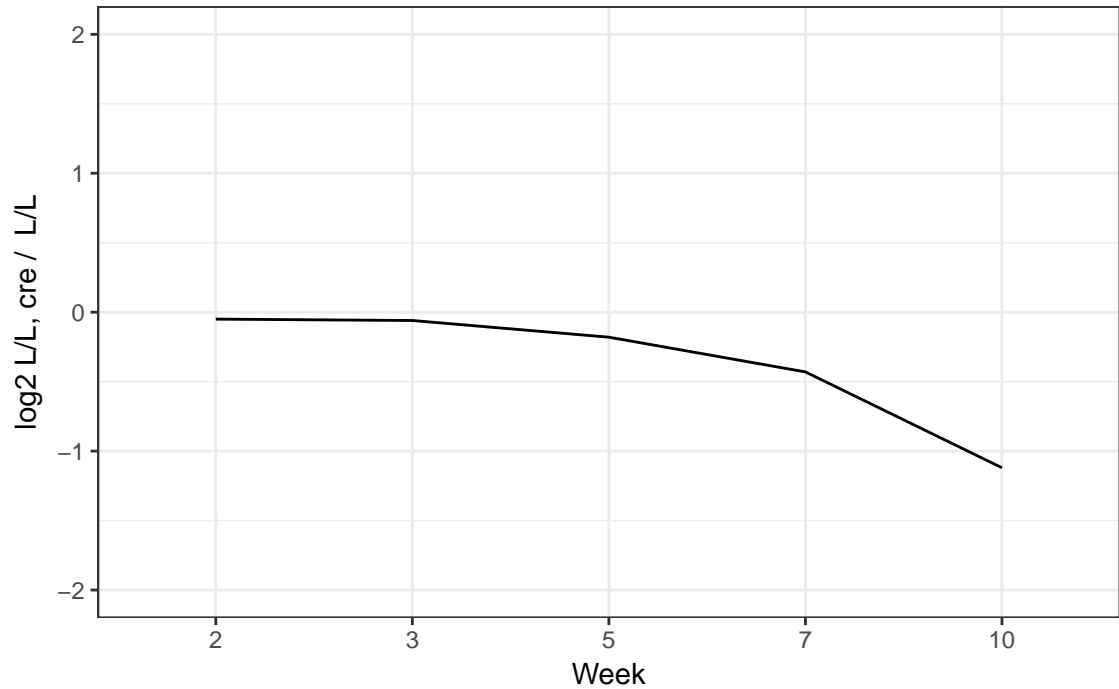

EARS2 / Q9CXJ1; adj.p value: 0

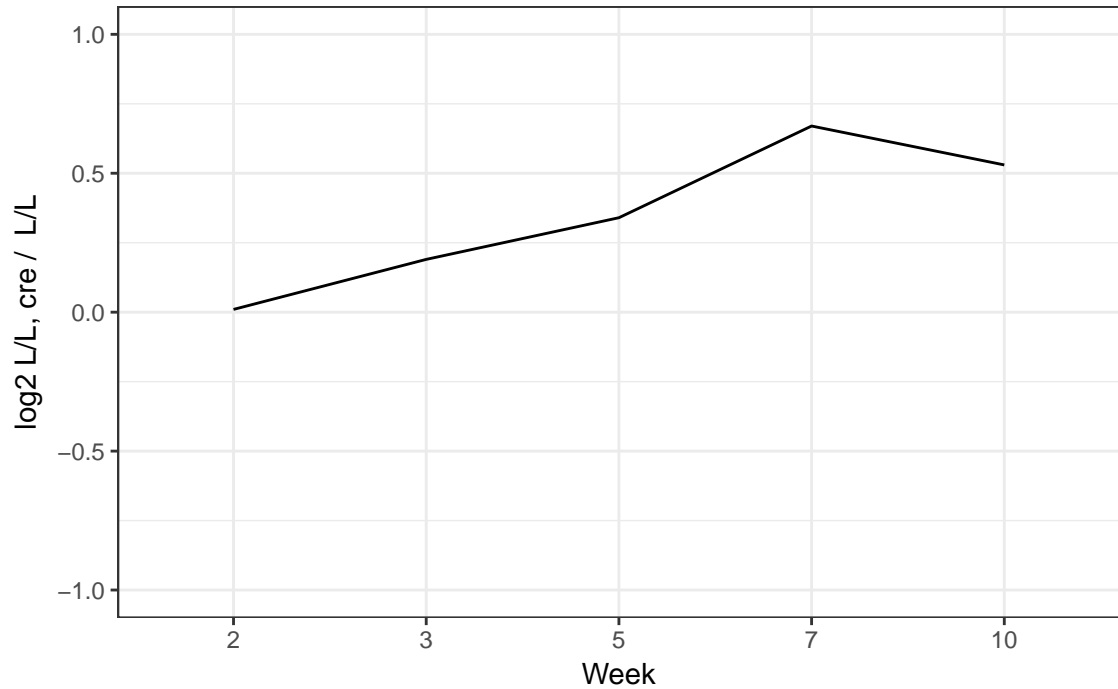

ECH1 / O35459; adj.p value: 0.00024

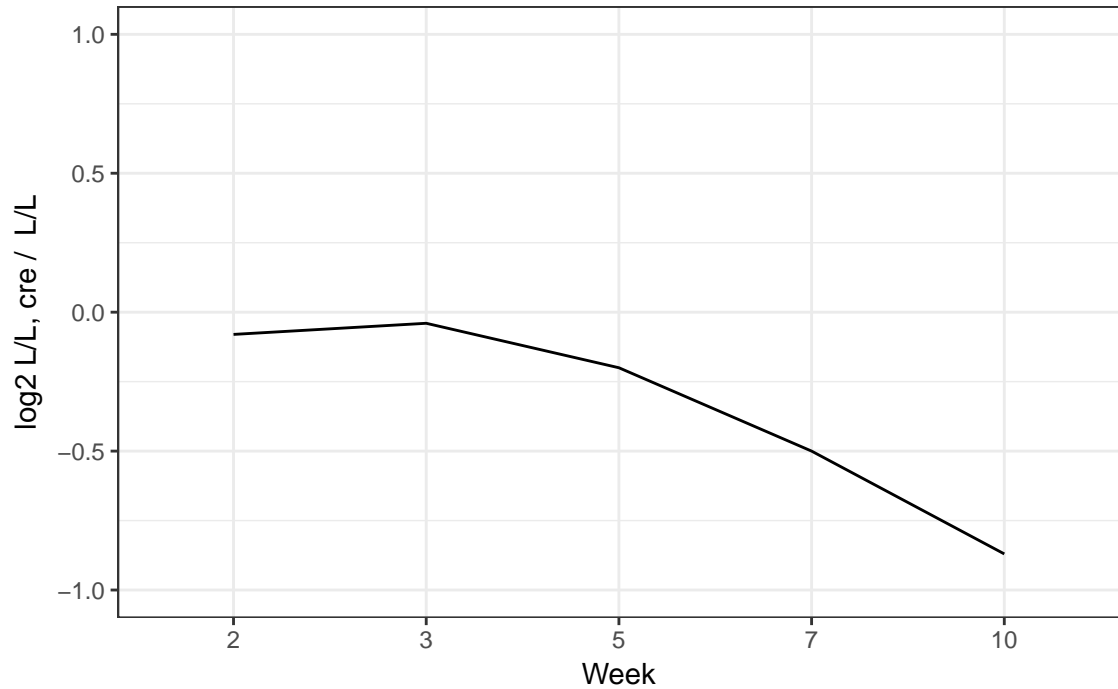

ECHDC1 / Q9D9V3-2; adj.p value: 0.86859

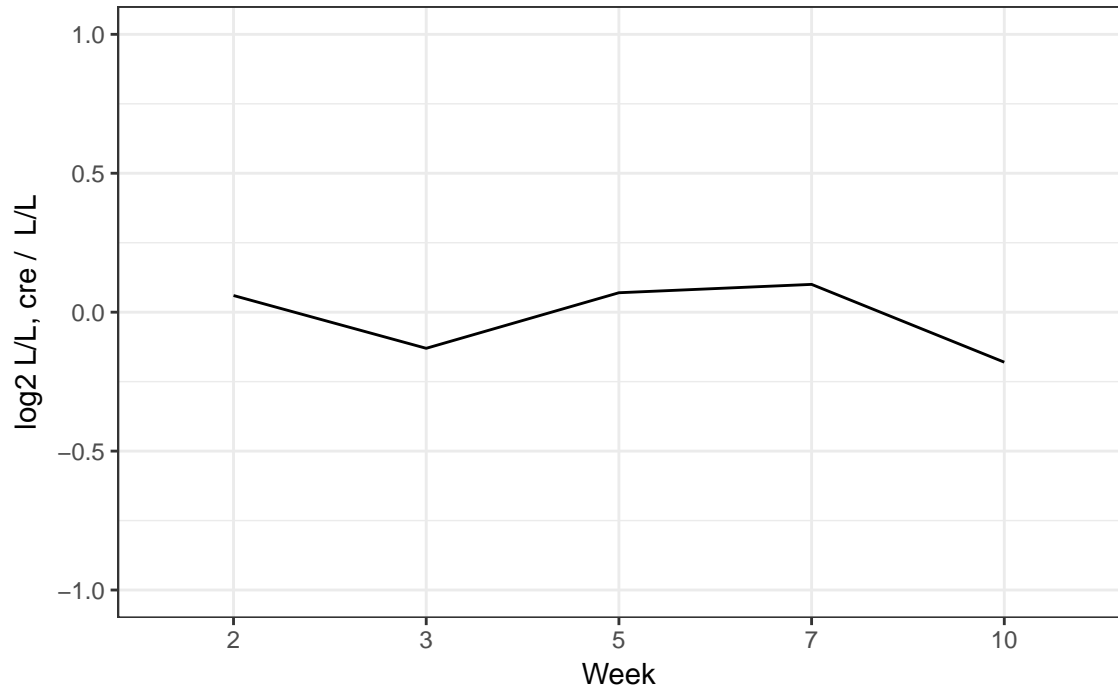

ECHDC2 / Q3TLP5; adj.p value: 0.00208

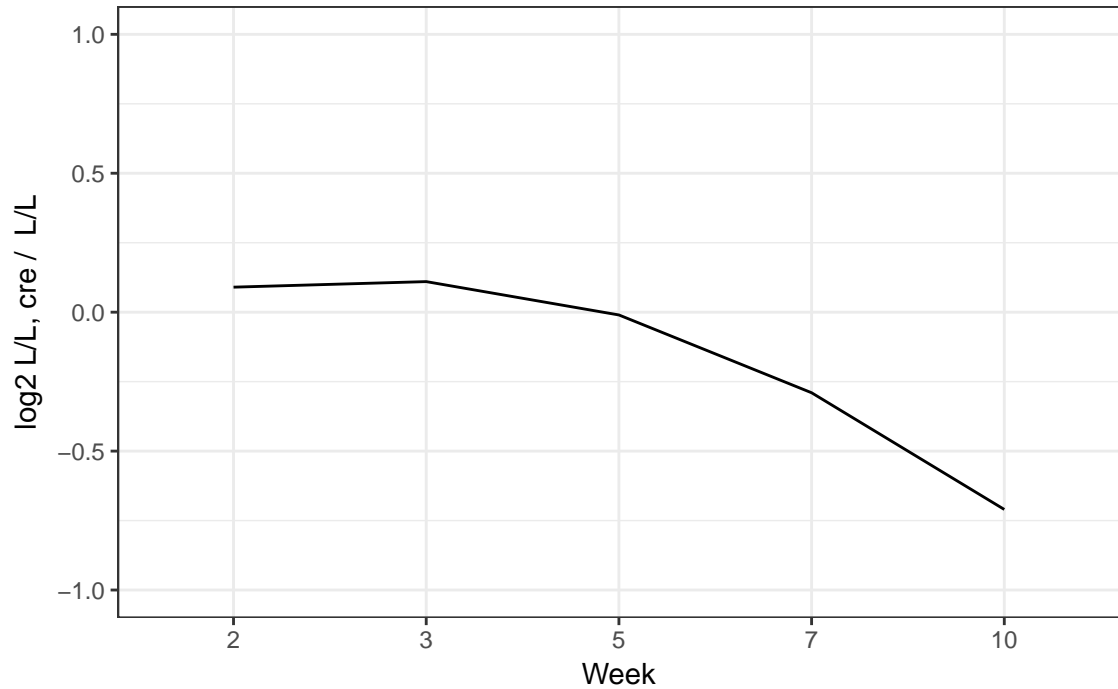

ECHDC3 / Q9D7J9; adj.p value: 1e-05

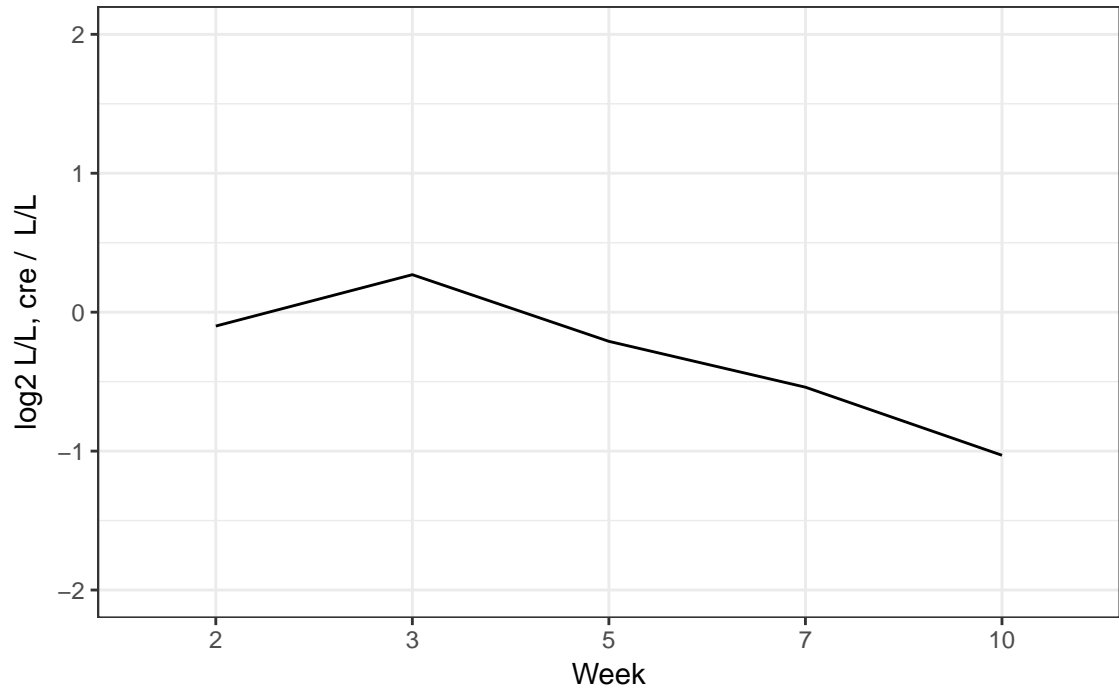

ECHS1 / Q8BH95; adj.p value: 0.12127

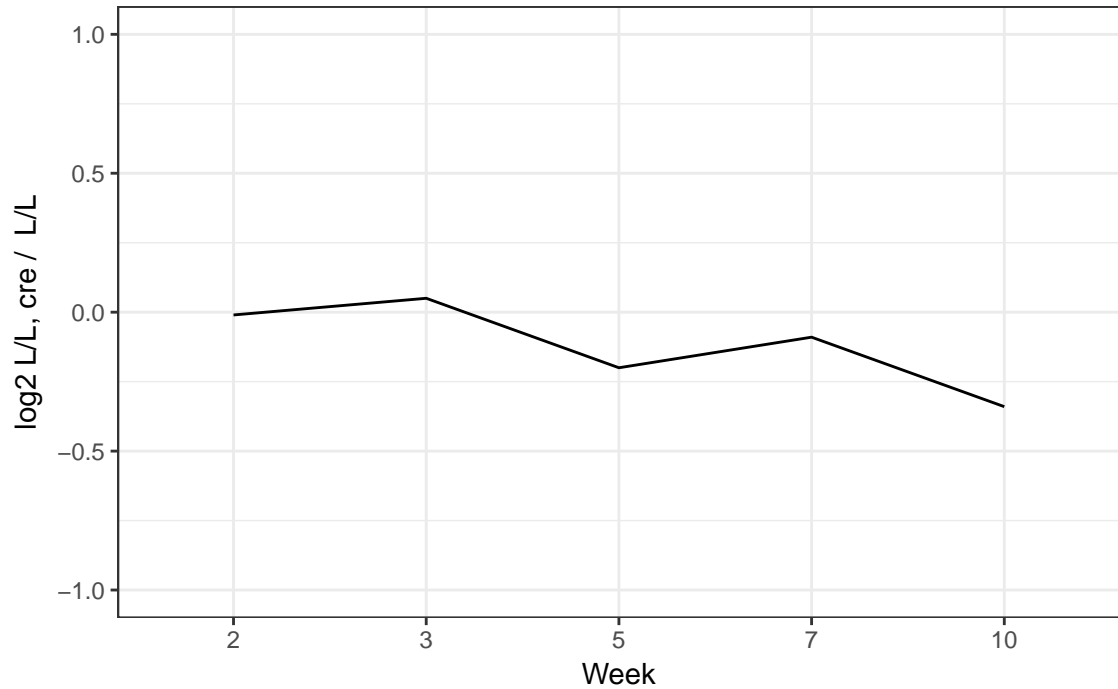

ECI1 / P42125; adj.p value: 0.1807

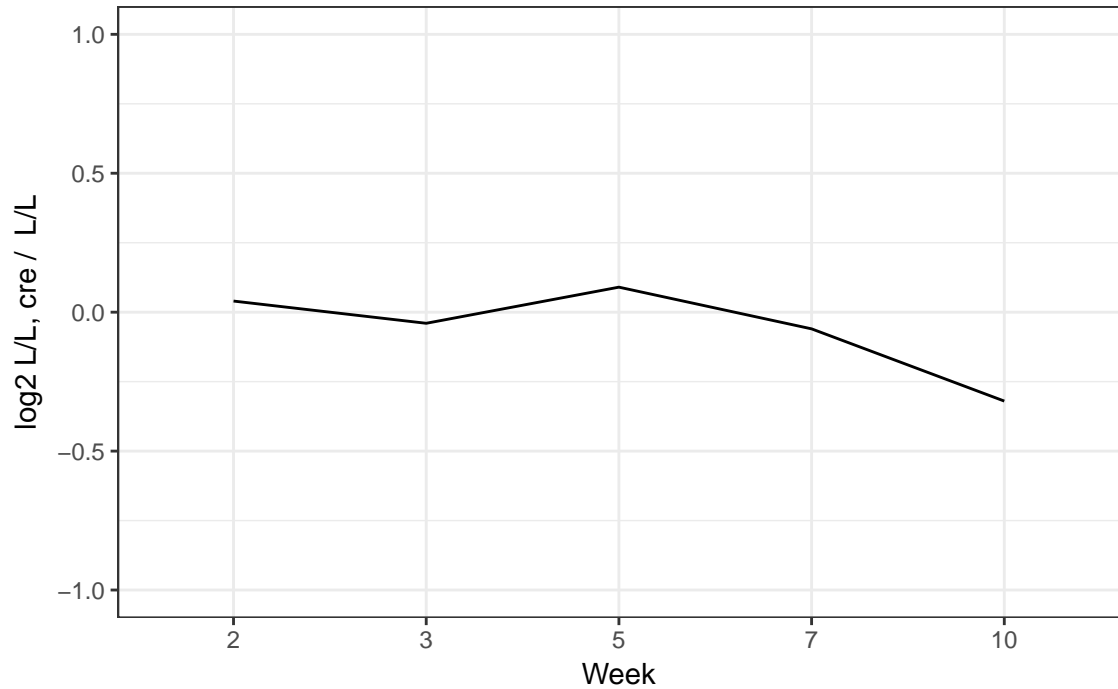



ECI2 / Q9WUR2-2; adj.p value: 0.1568

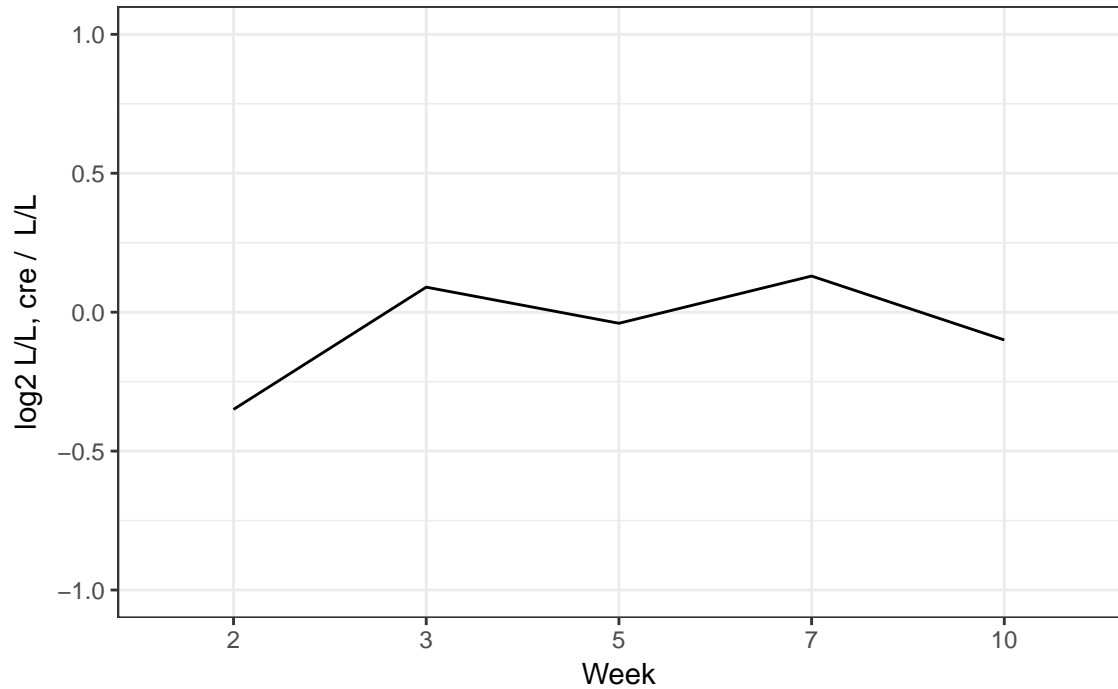

ECSIT / Q9QZH6; adj.p value: 0.00038

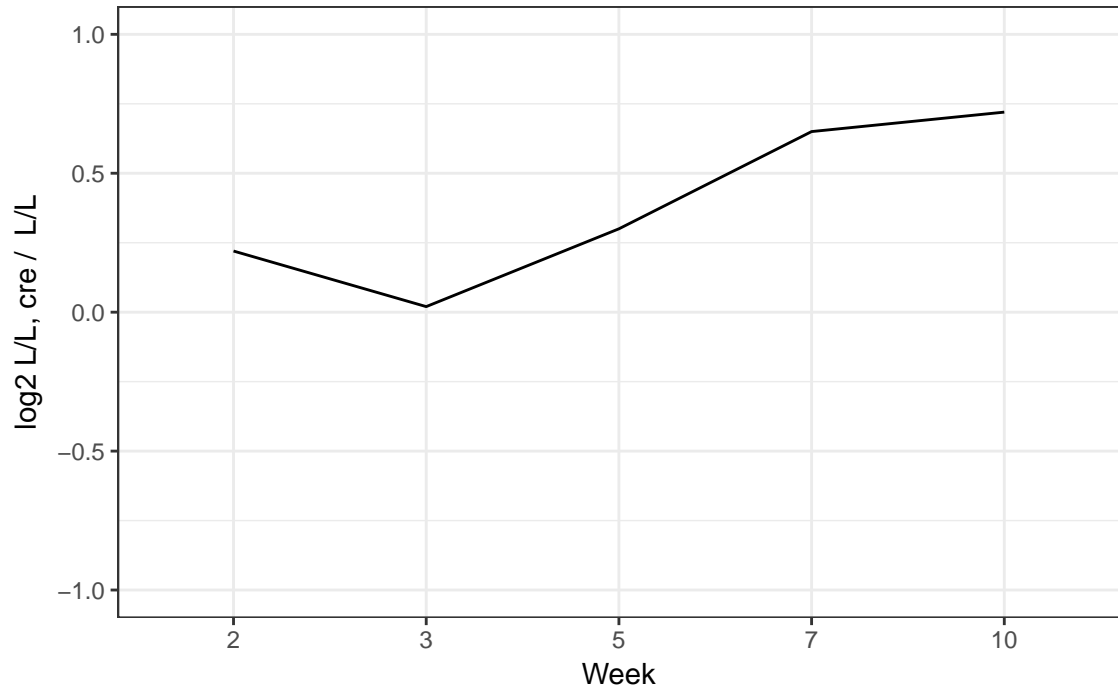

ENDOG / O08600; adj.p value: 0

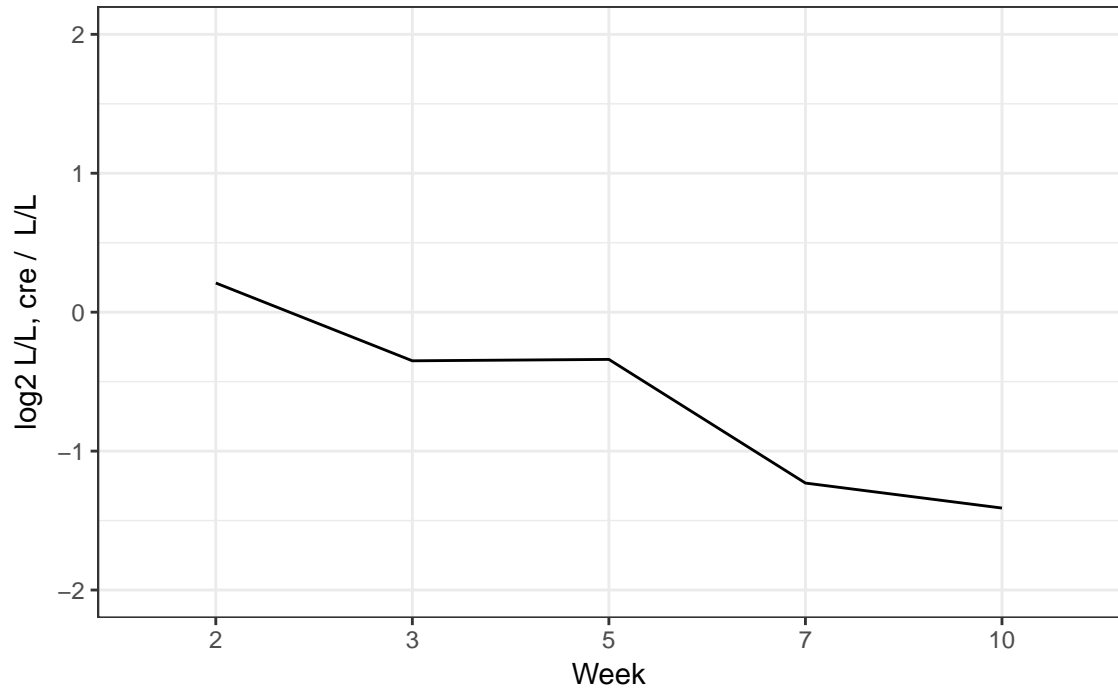

EPHX2 / P34914; adj.p value: 0.31641

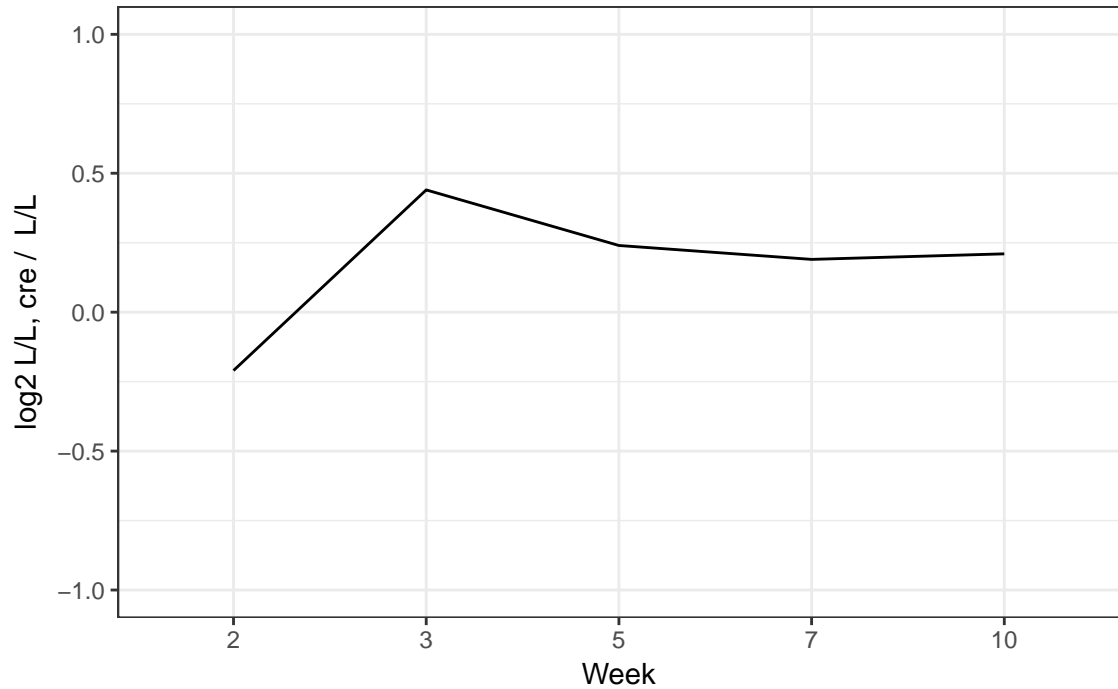

ERAL1 / Q9CZU4; adj.p value: 0.00029

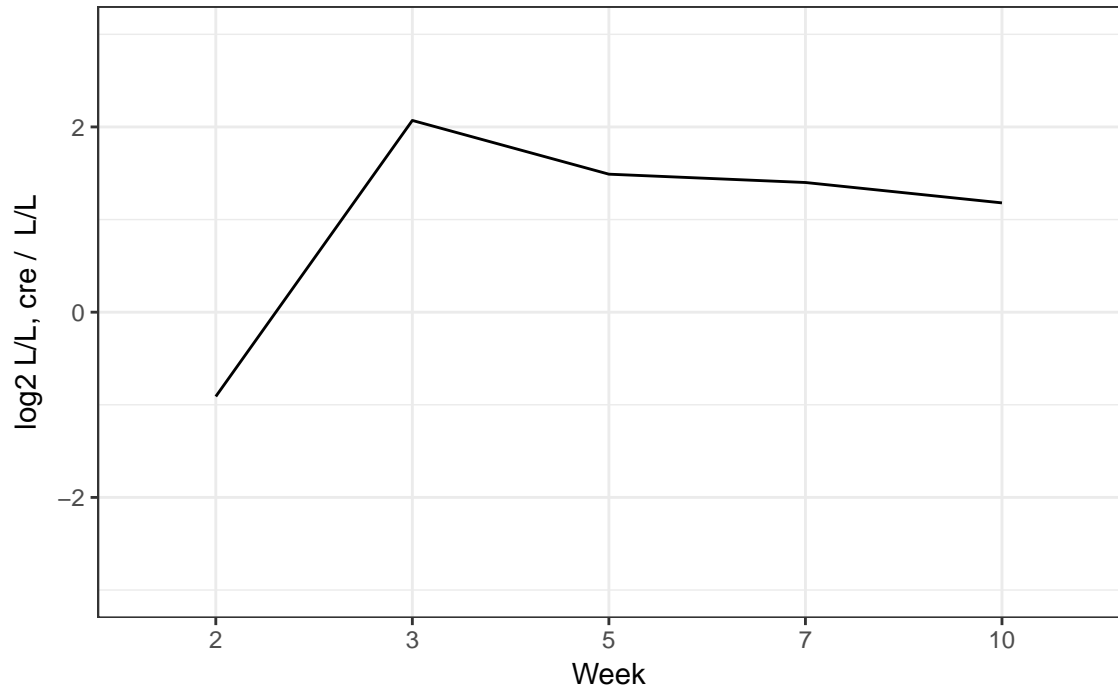

ETFA / Q99LC5; adj.p value: 7e-04

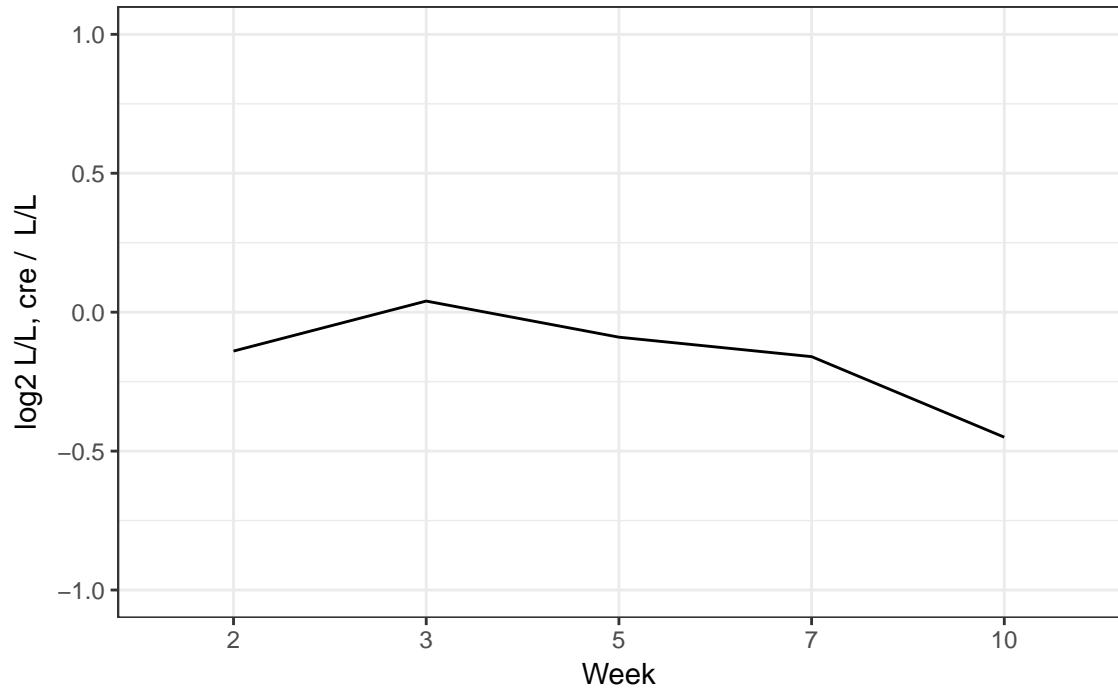

ETFb / Q9DCW4; adj.p value: 0.08029

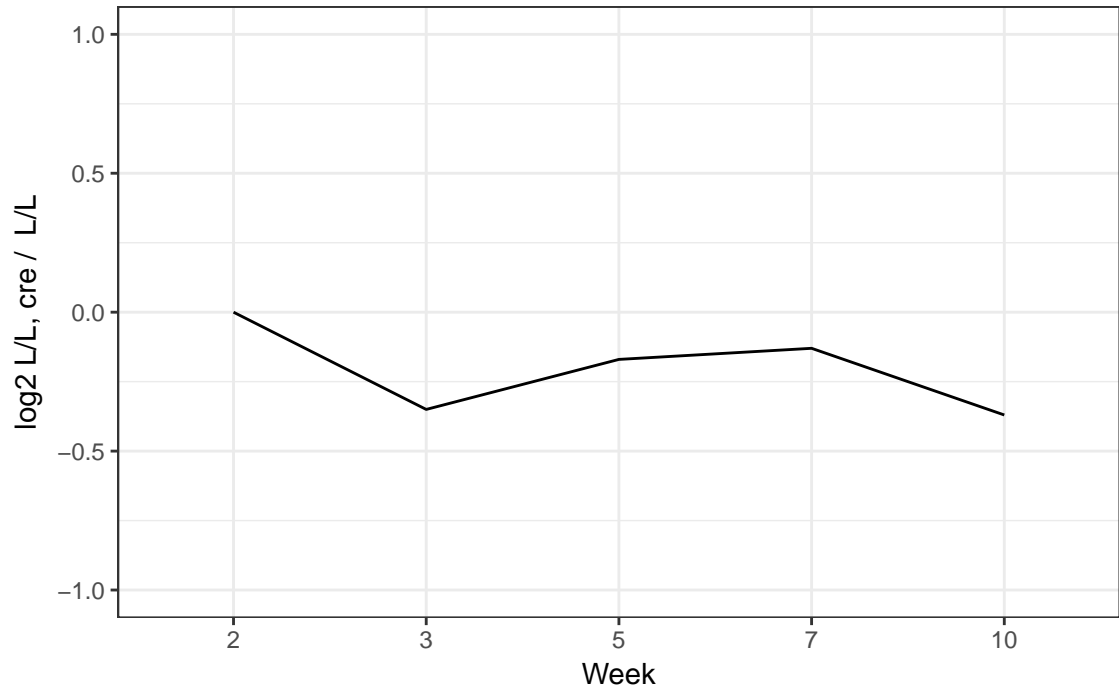

ETFDH / Q921G7; adj.p value: 1e-05

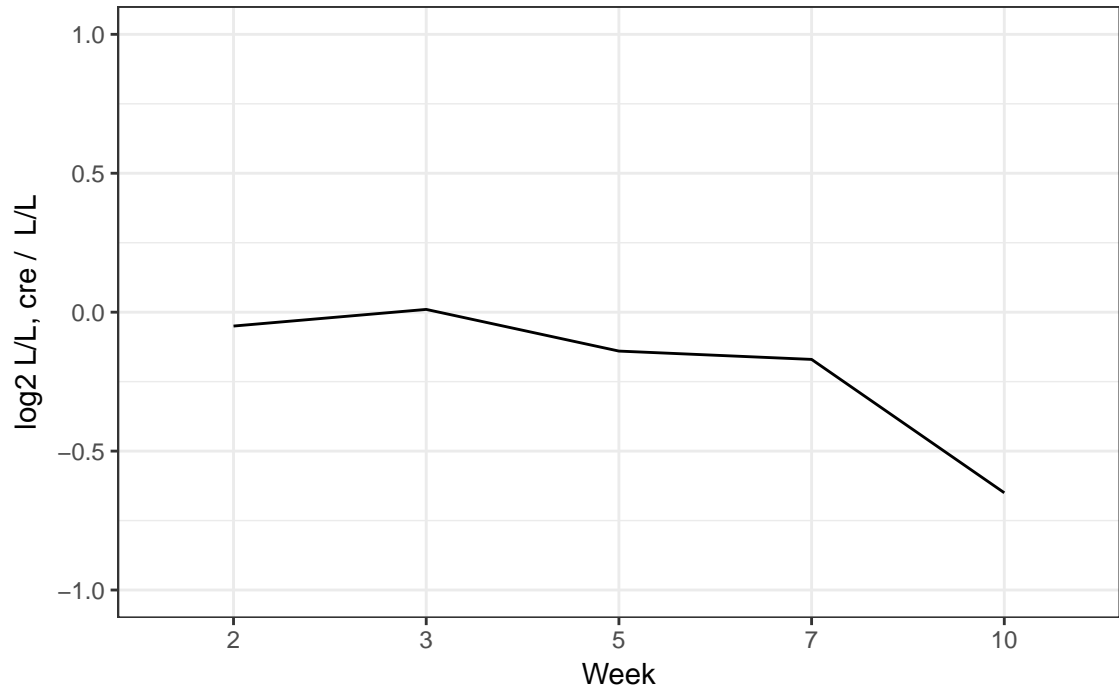



ETHE1 / Q9DCM0; adj.p value: 0.07372

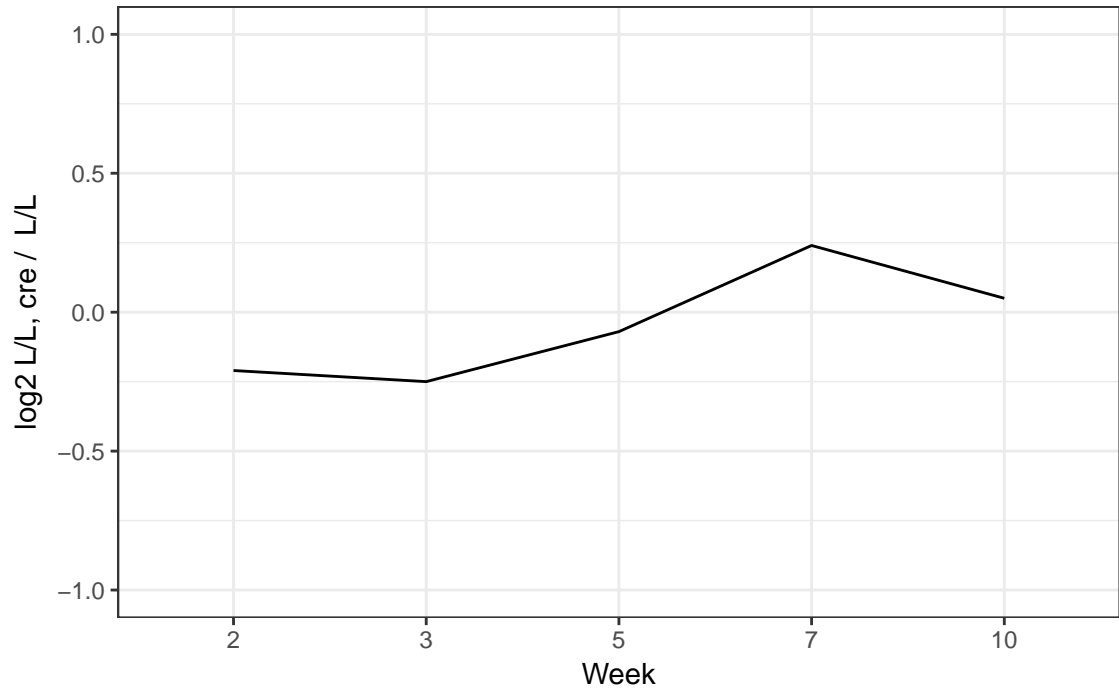

EXOG / Q8C163; adj.p value: 0.49015

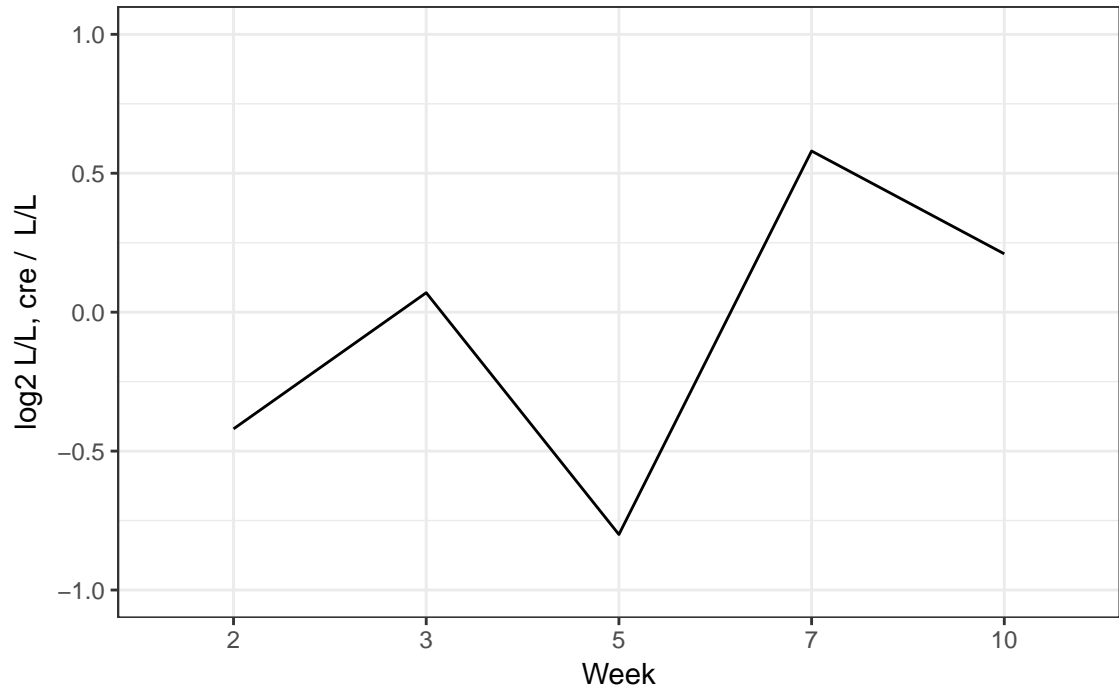

FAHD1 / Q8R0F8; adj.p value: 0.01781

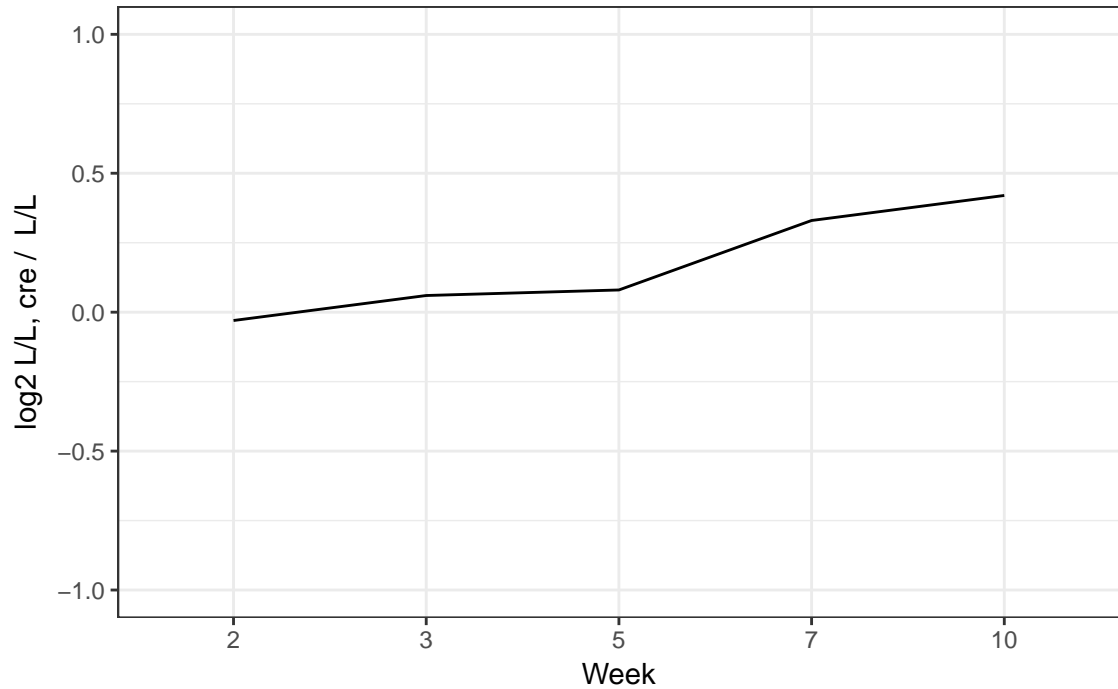

FAHD2 / Q3TC72; adj.p value: 0.53394

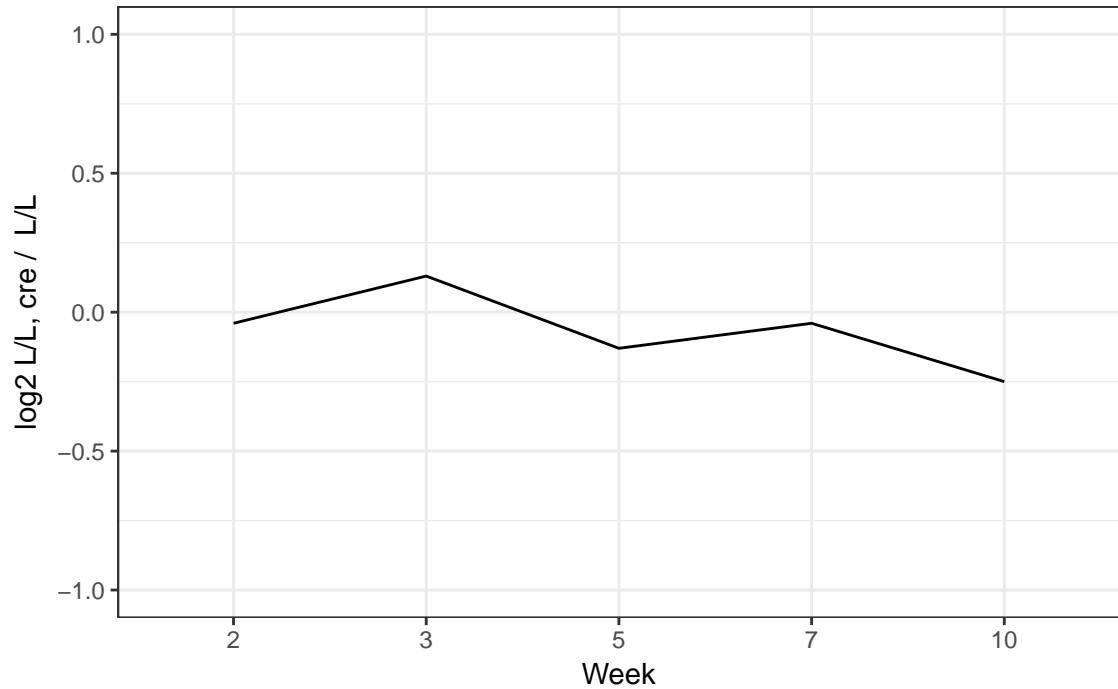

FAM136A / Q9CR98; adj.p value: 0.20403

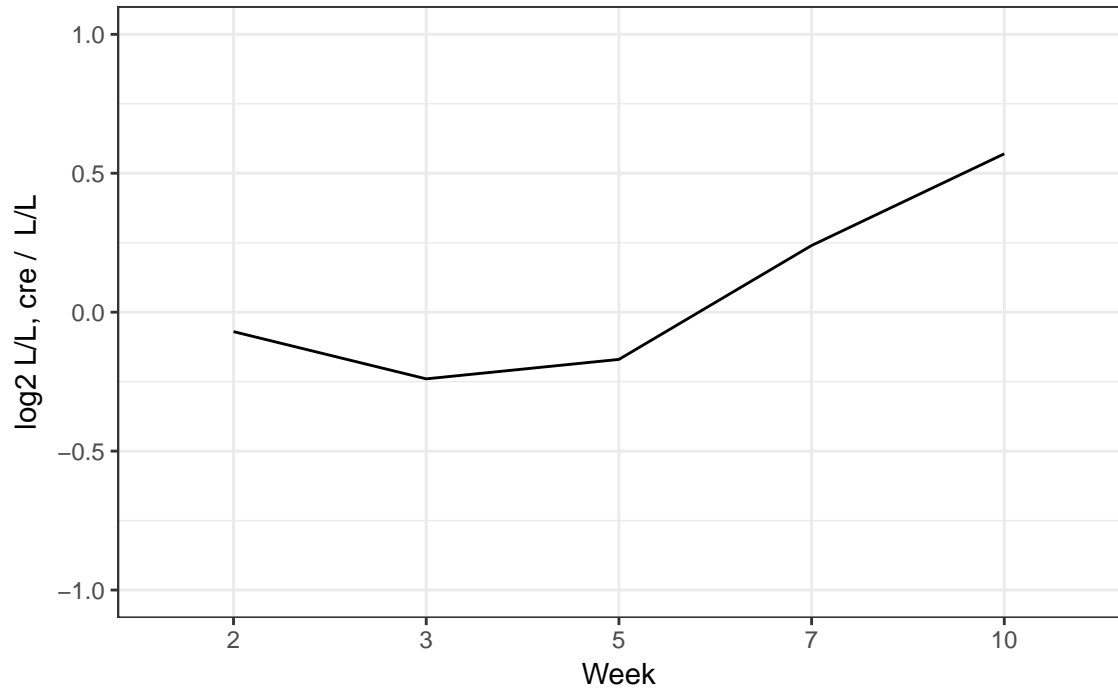

FAM162A / Q9D6U8; adj.p value: 0.6482

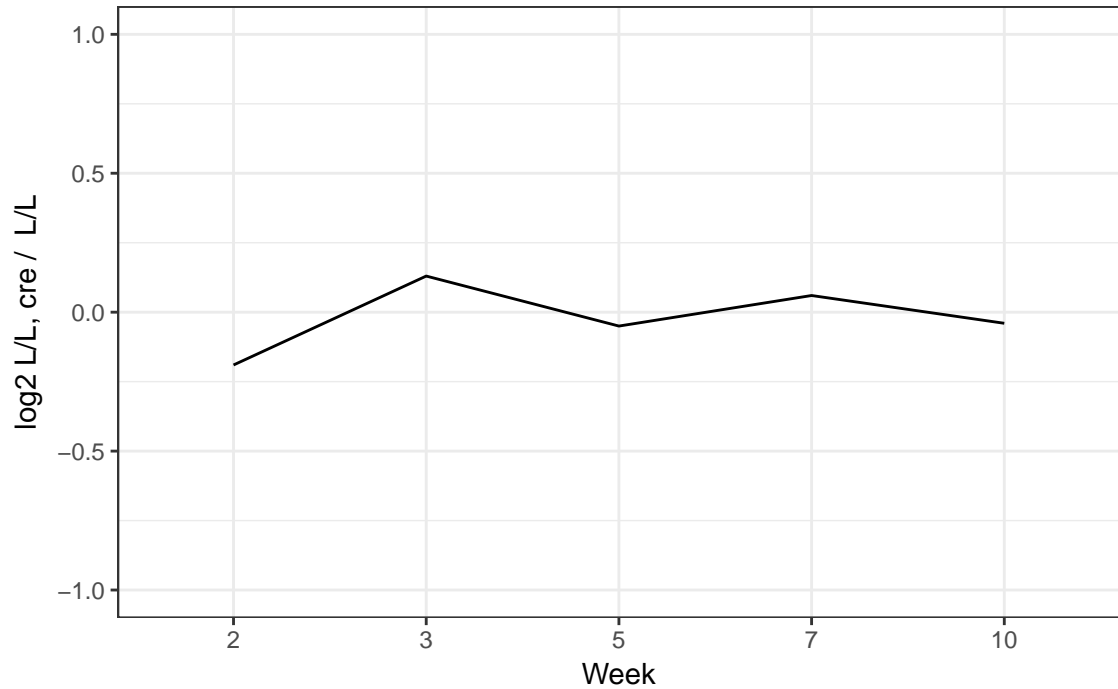

FAM185A / Q7TPD2; adj.p value: 0.08239

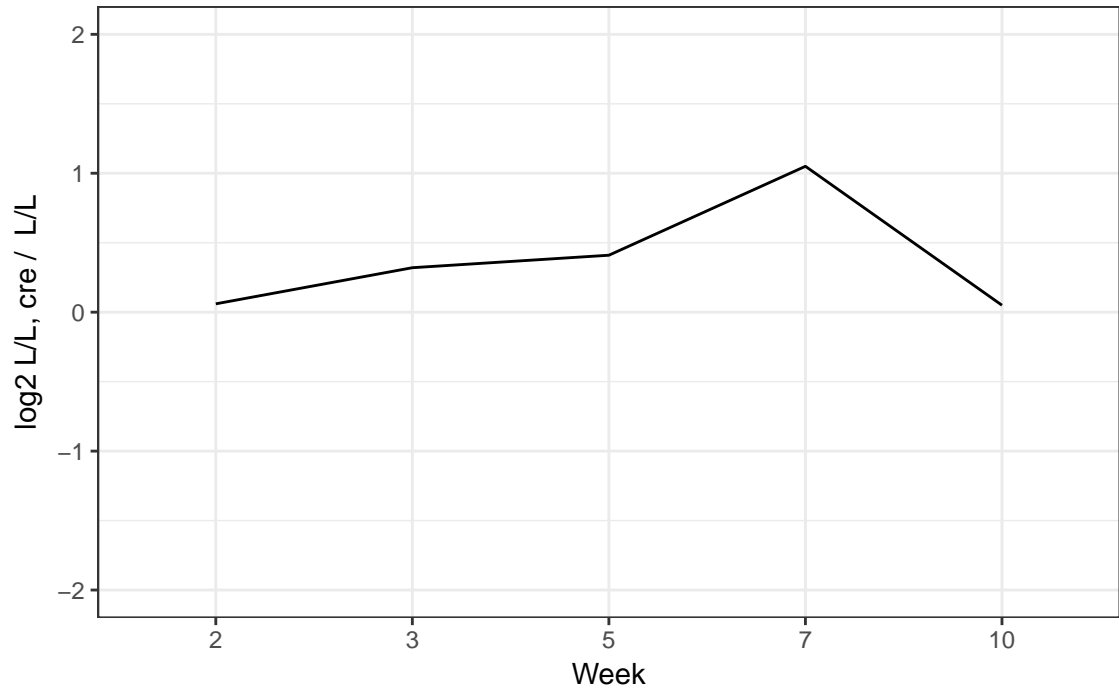

FAM210A / Q8BGY7; adj.p value: 0.04088

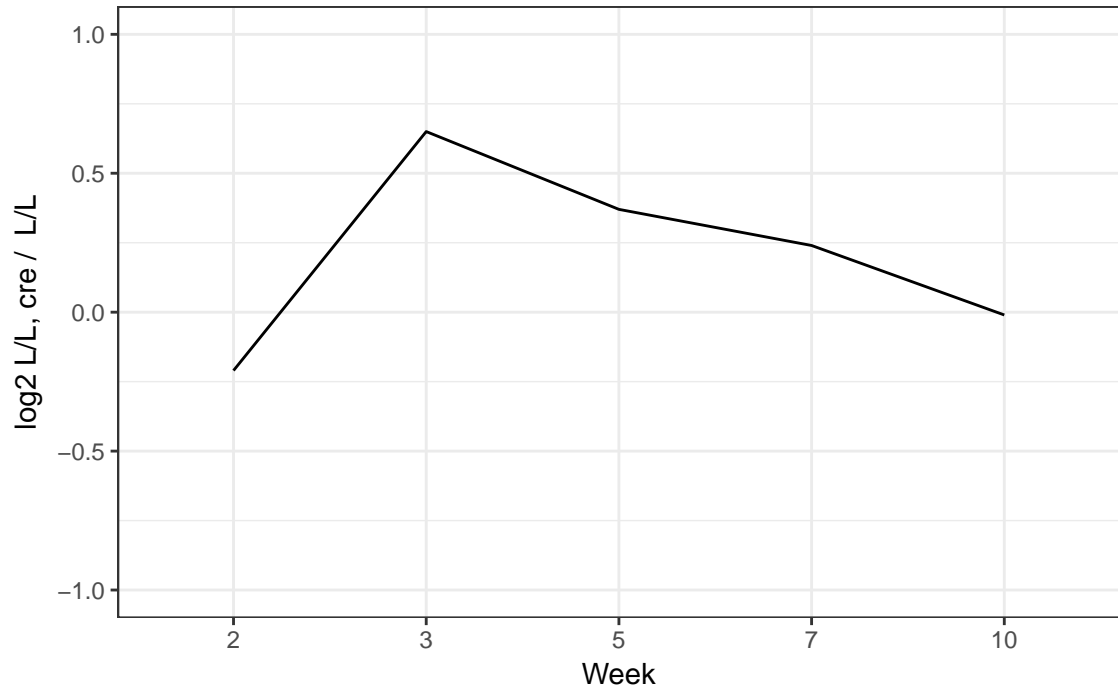



FARS2 / Q99M01; adj.p value: 0.42738

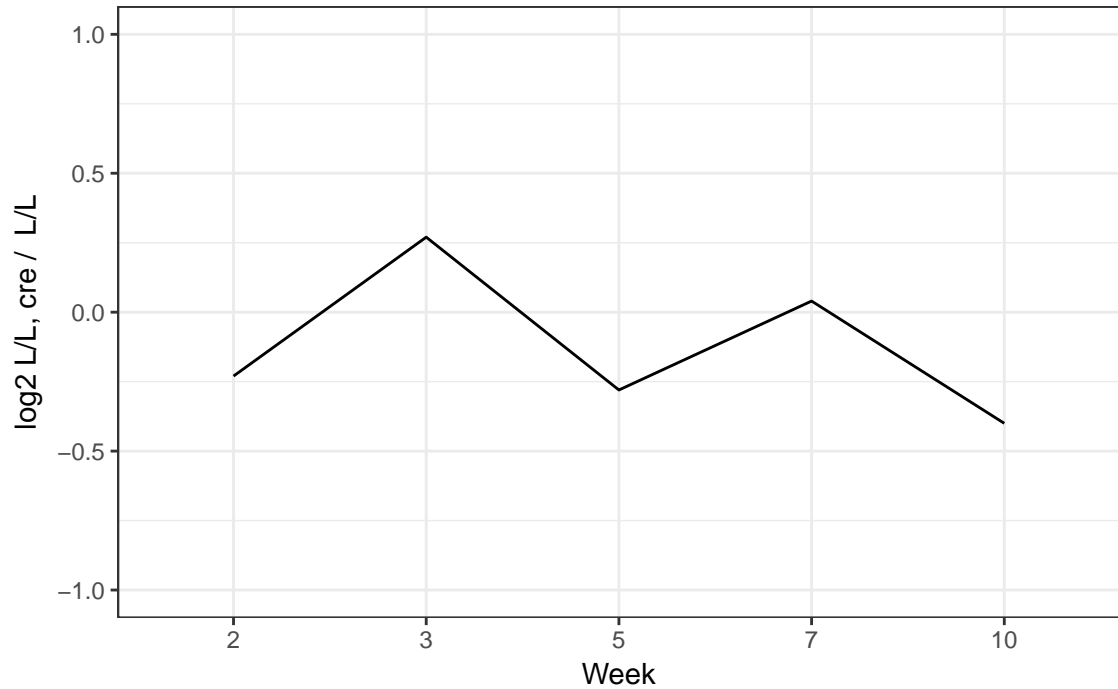

FASTKD2 / Q922E6; adj.p value: 0.11654

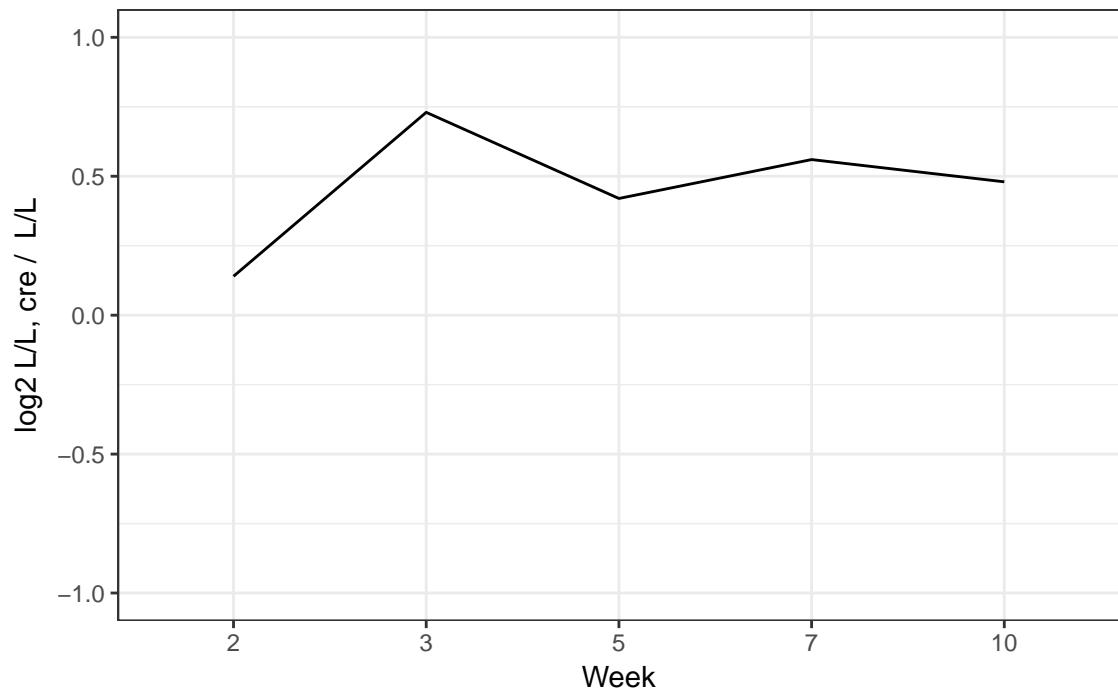

FDX1 / P46656; adj.p value: 0.72699

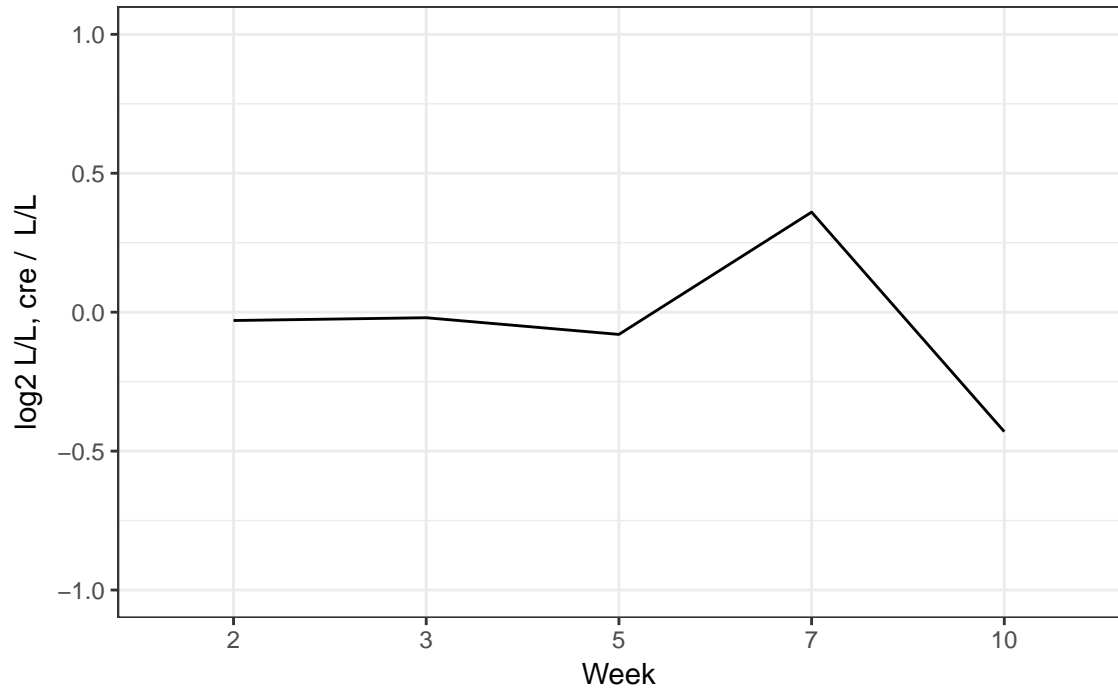

FDX1L / Q9CPW2; adj.p value: 0.06025

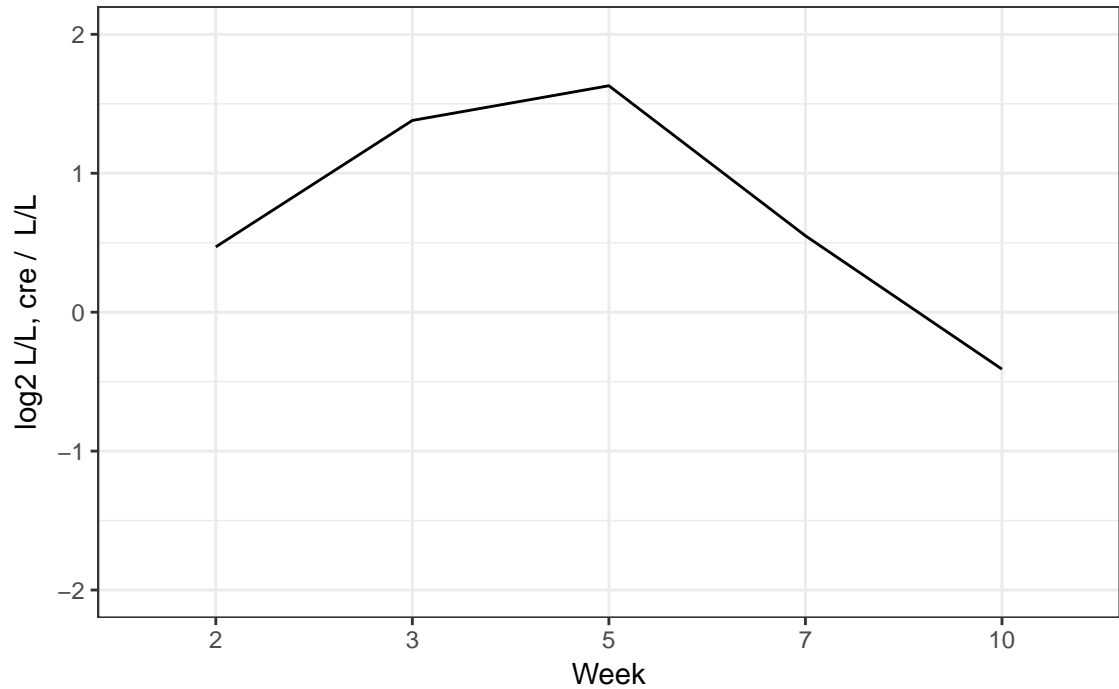

FDXR / Q61578; adj.p value: 0

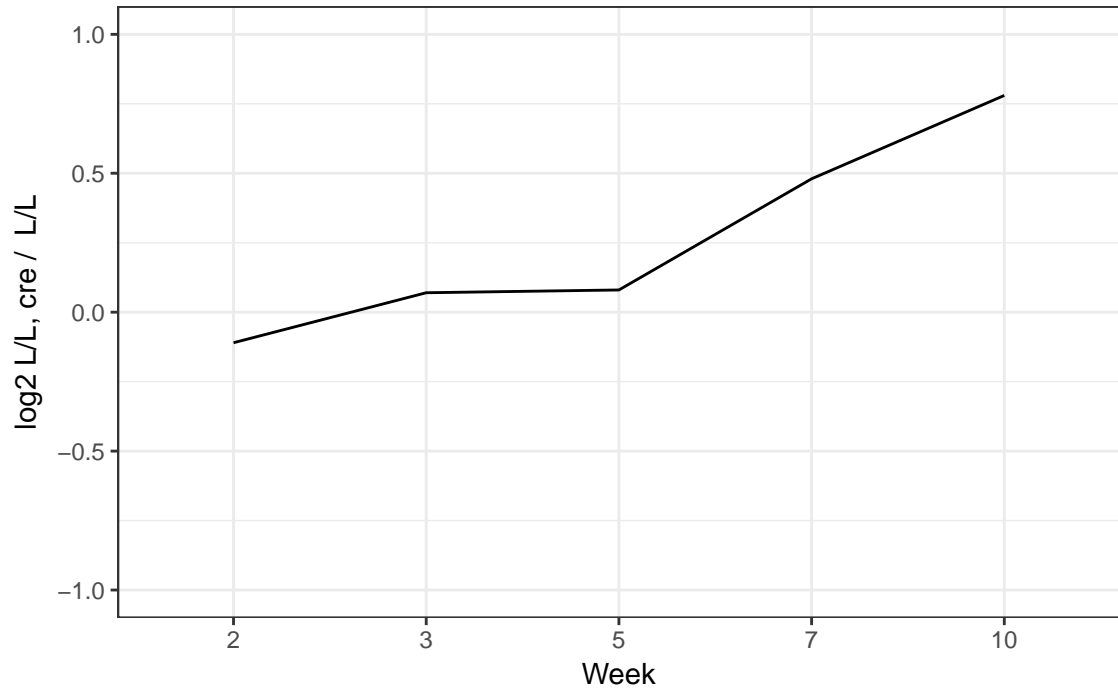

FECH / Q544X6; adj.p value: 0.00668

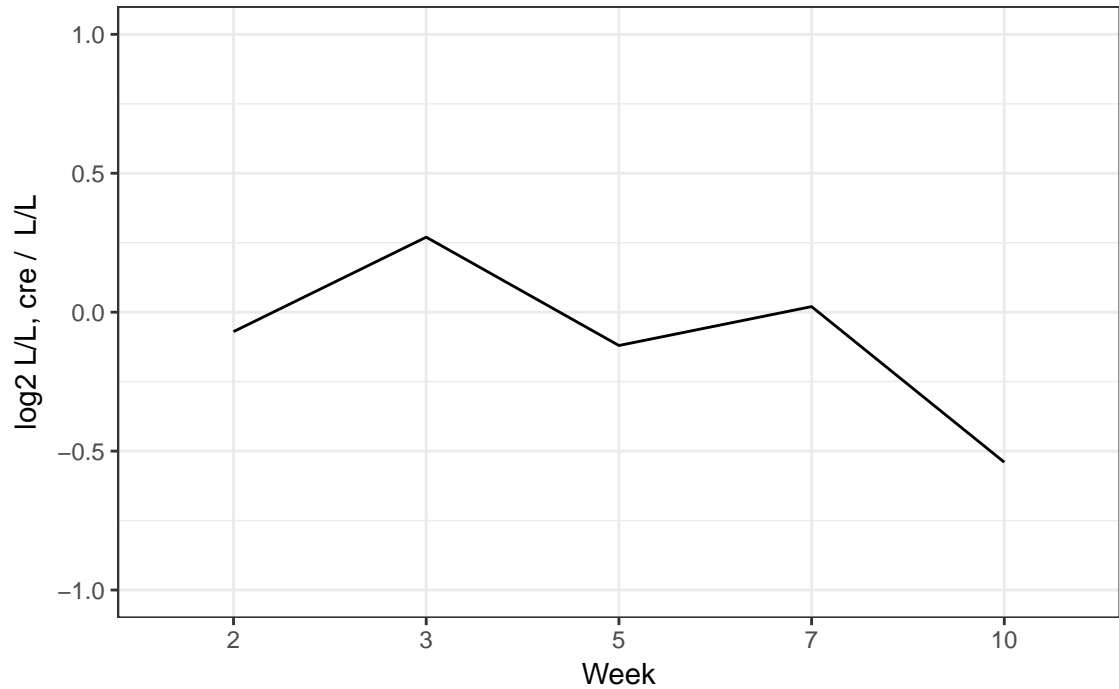

FH / P97807-2; adj.p value: 0.1742

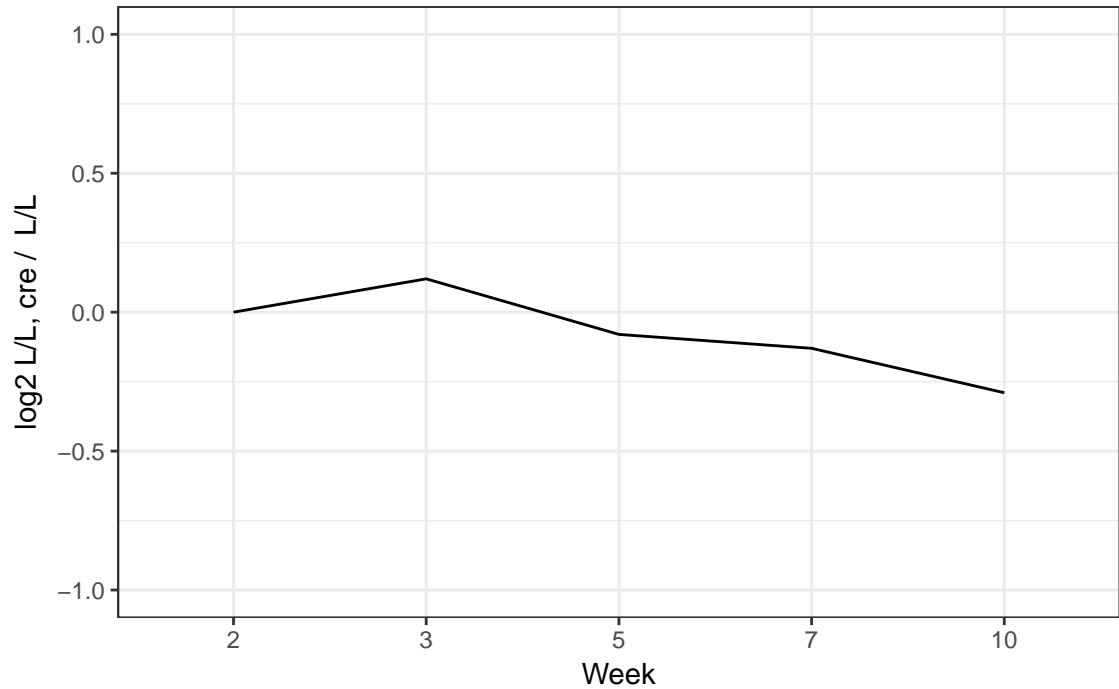

FHIT / E9PZ91; adj.p value: 0.07356

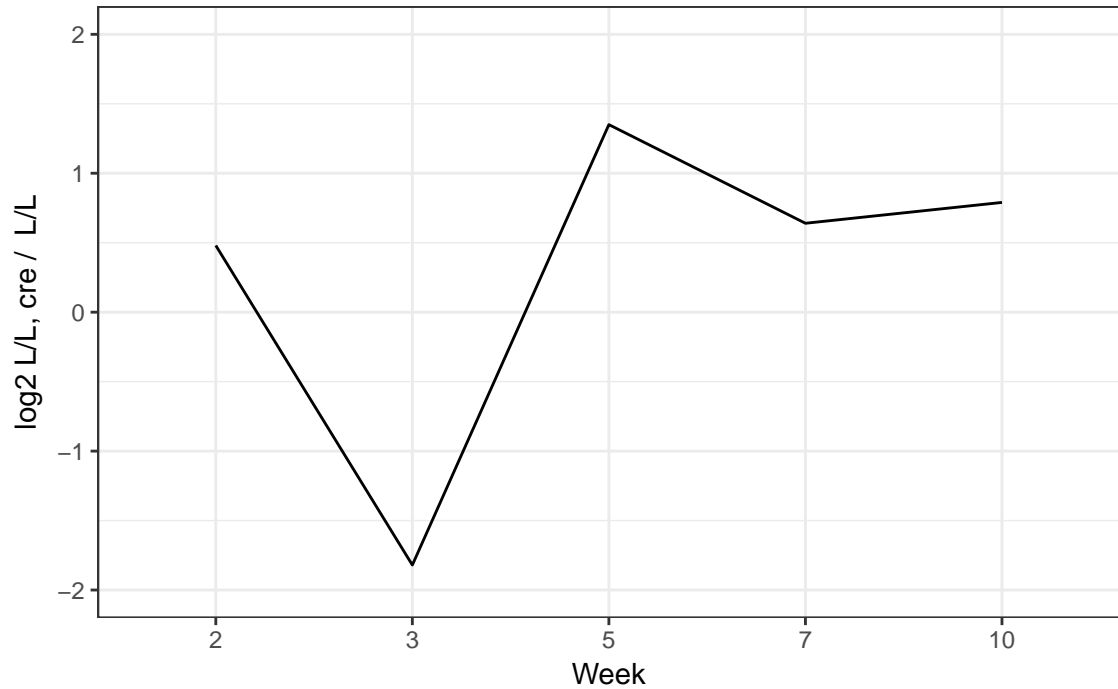



FIS1 / Q9CQ92; adj.p value: 0.51994

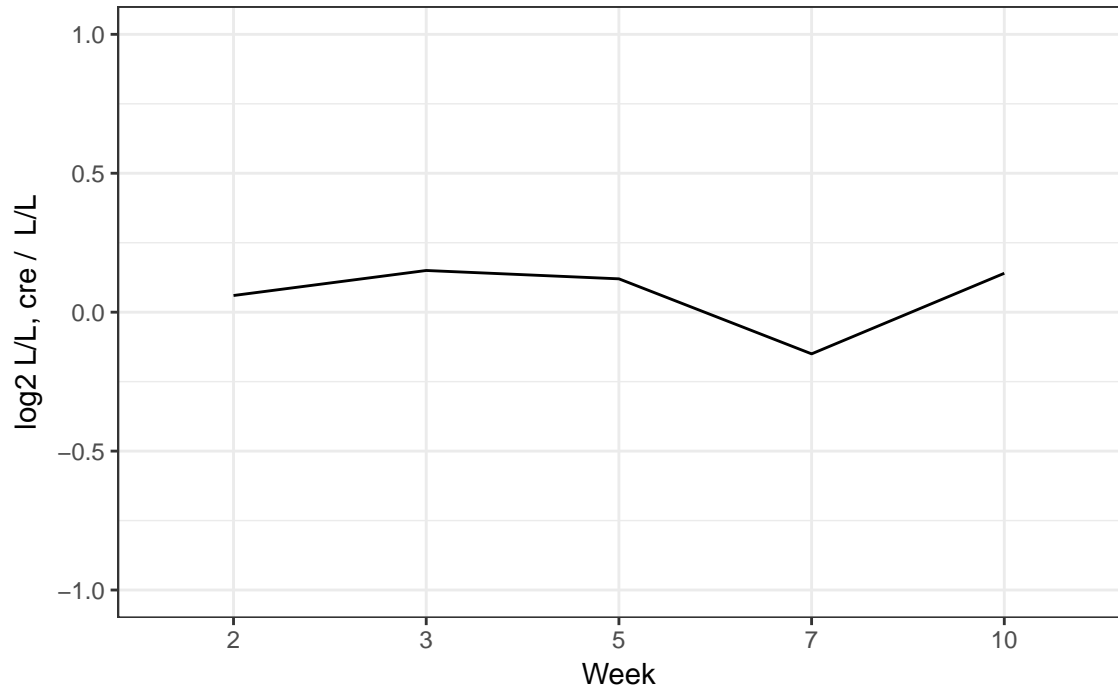

FKBP8 / O35465-2; adj.p value: 0.31356

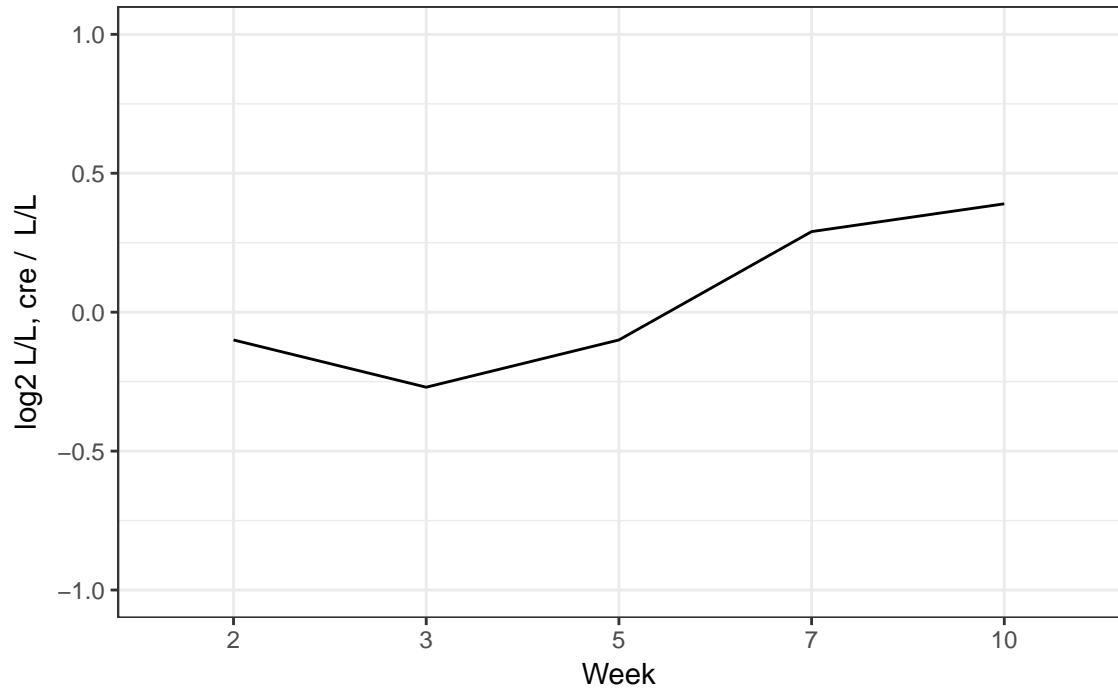

FLAD1 / Q8R123; adj.p value: 0.00197

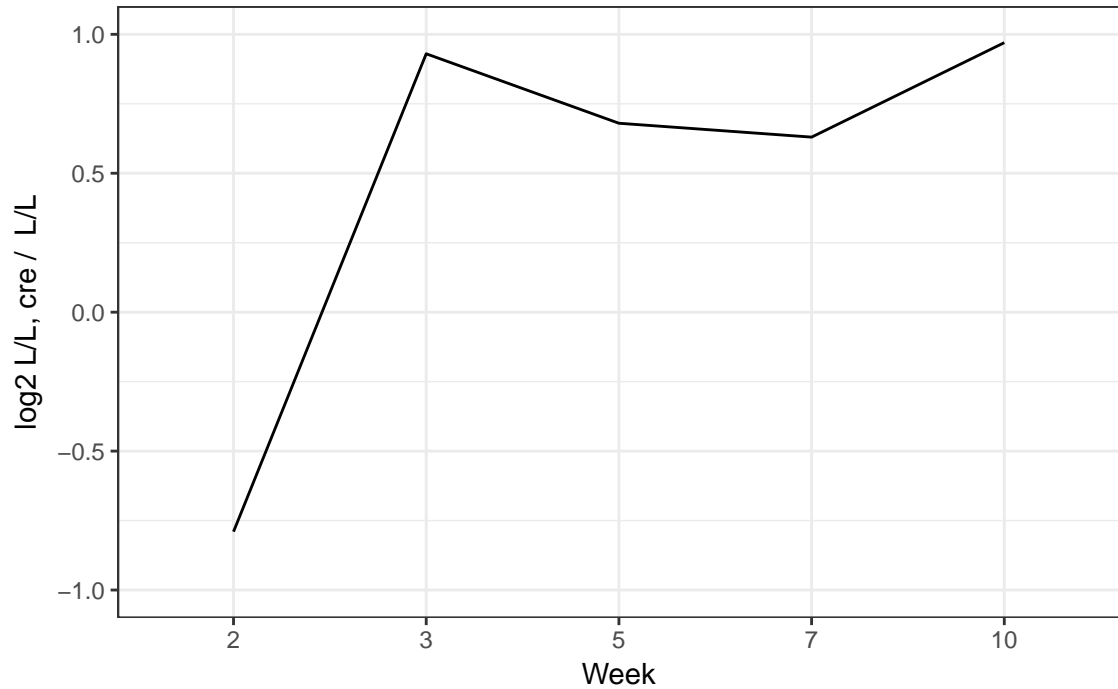

FOXRED1 / Q3TQB2; adj.p value: 0.27111

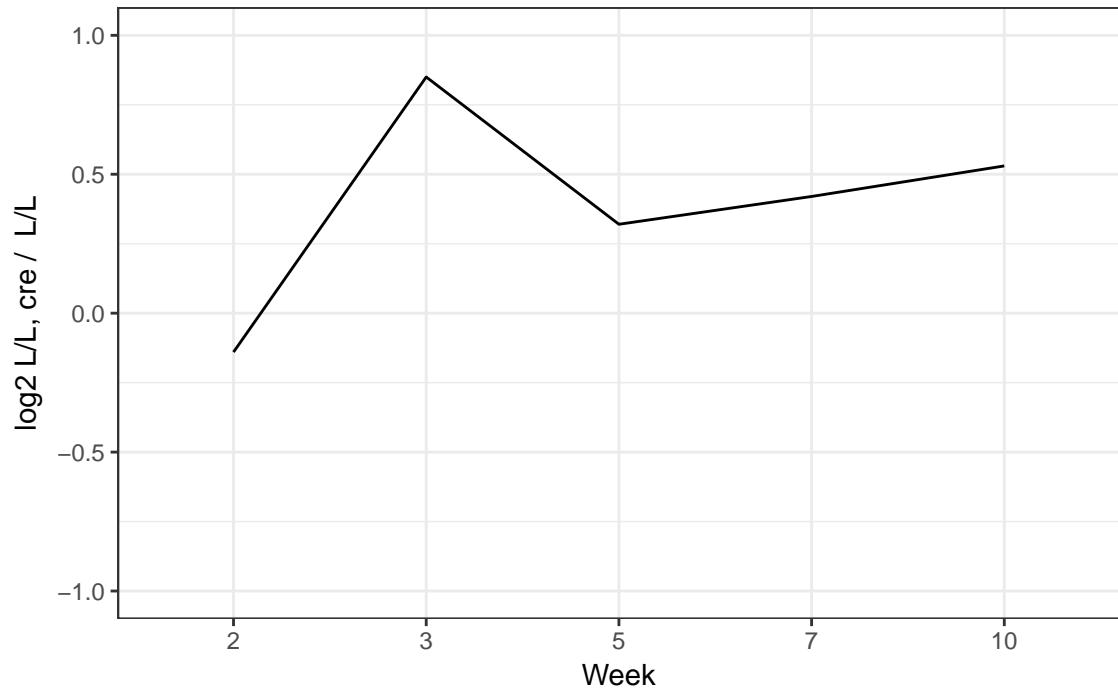

FTSJ2 / Q9CPY0; adj.p value: 0.38111

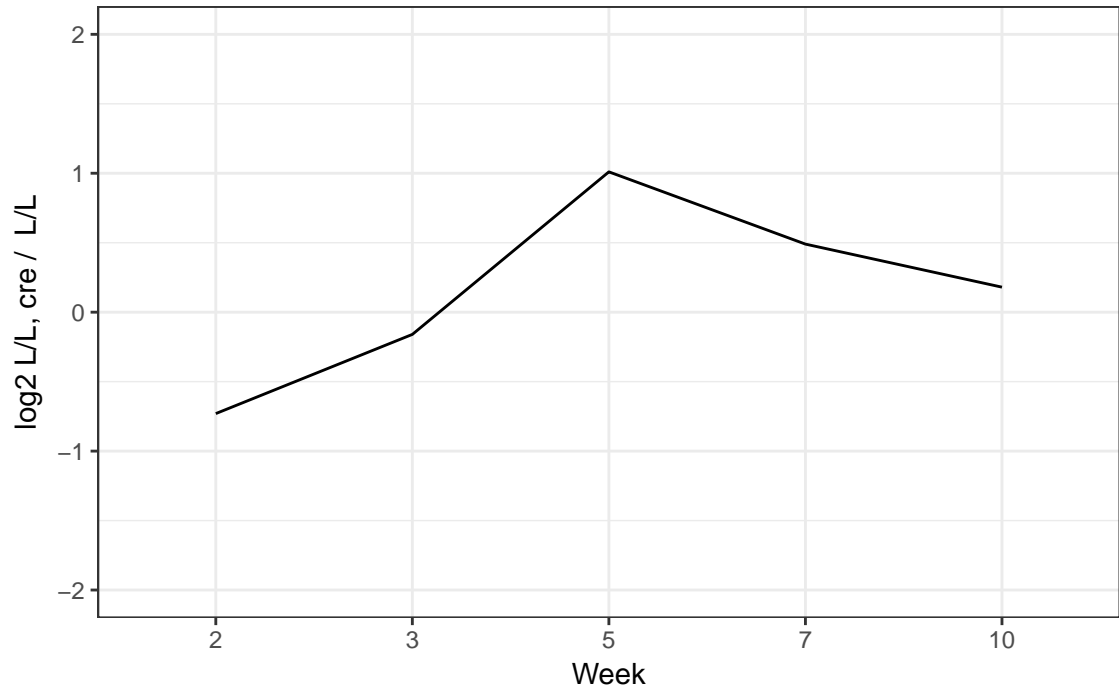

FUNDC1 / Q9DB70; adj.p value: 0.46231

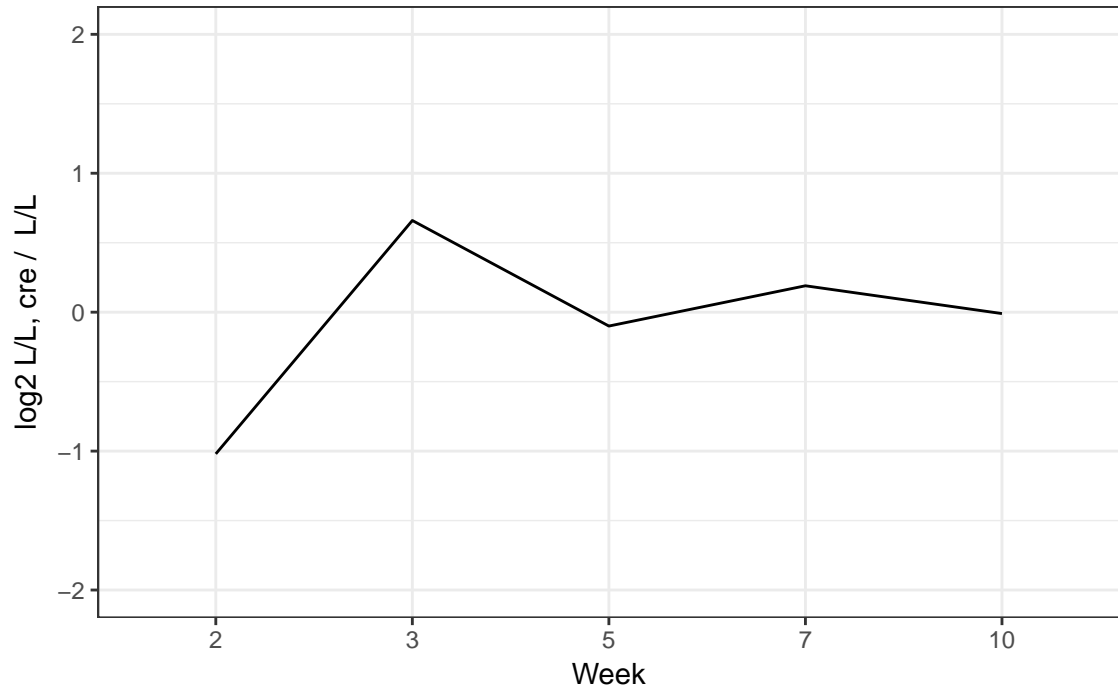

FUNDC2 / Q9D6K8; adj.p value: 0.36678

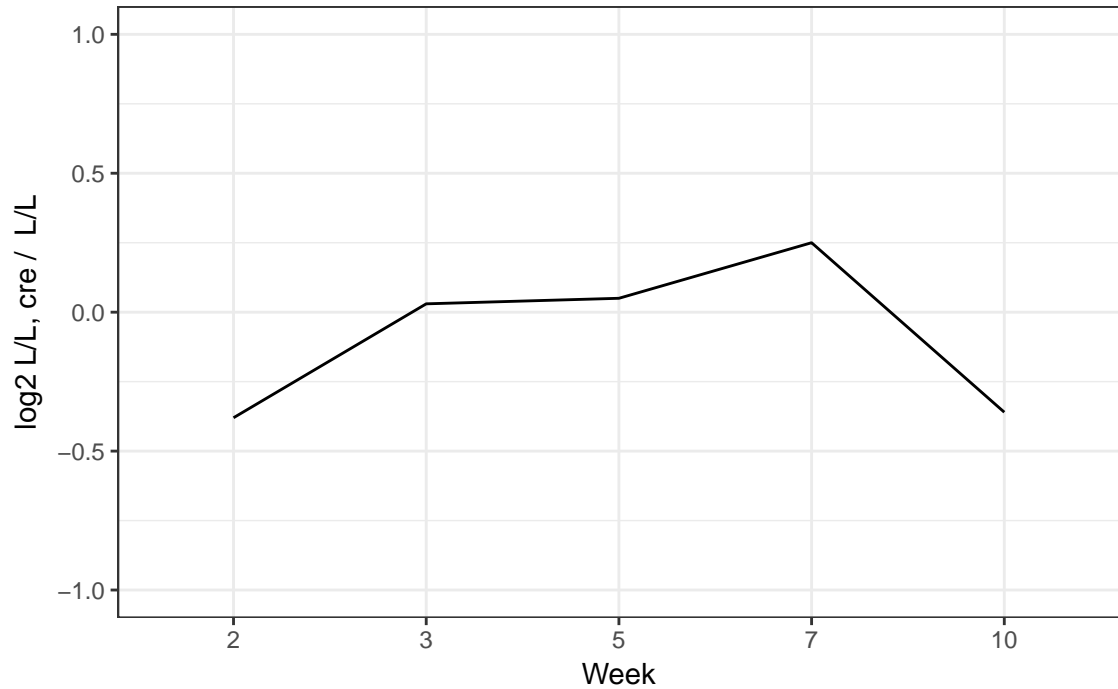

FXN / O35943; adj.p value: 0.2353

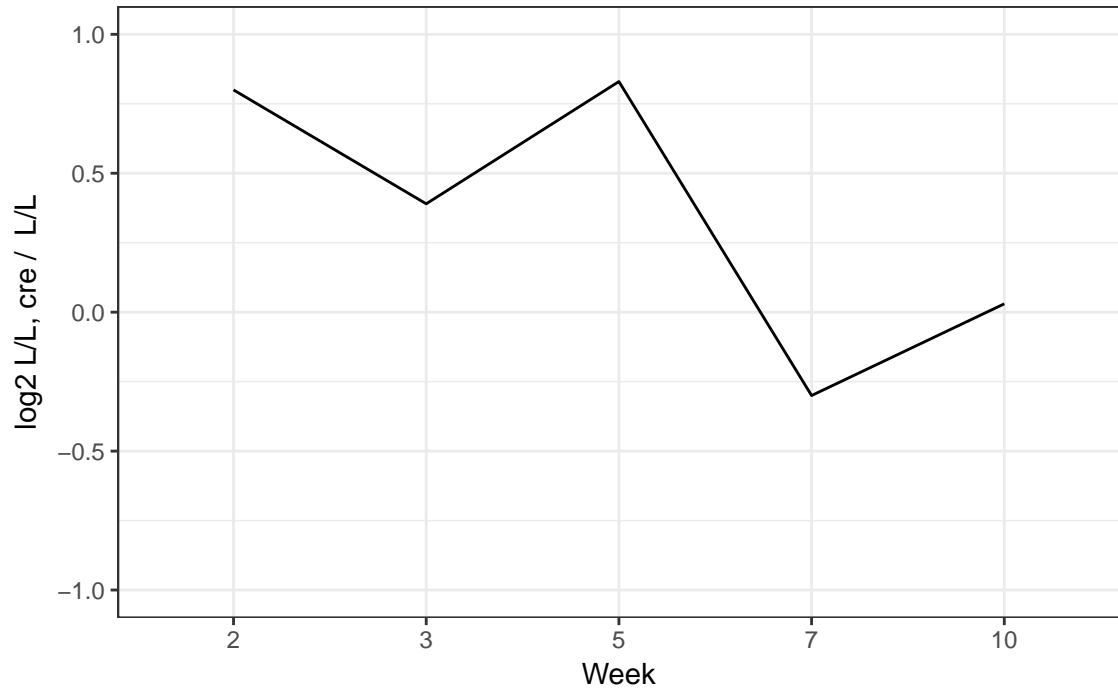



GAPDH / P16858; adj.p value: 0.03333

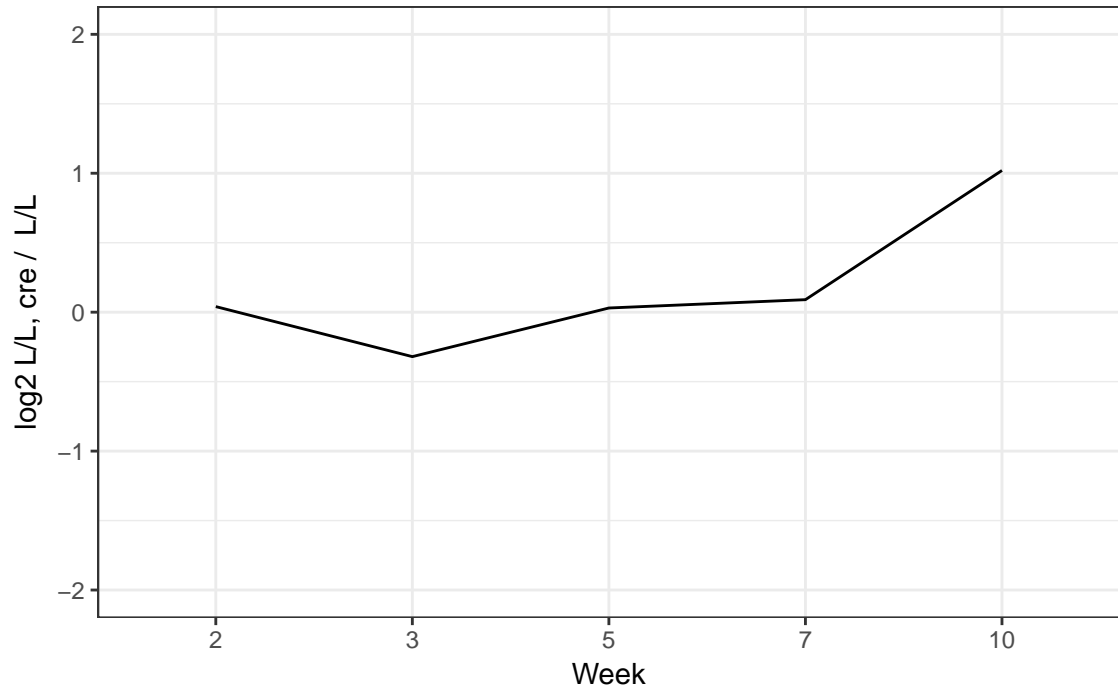

GARS / Q9CZD3; adj.p value: 0

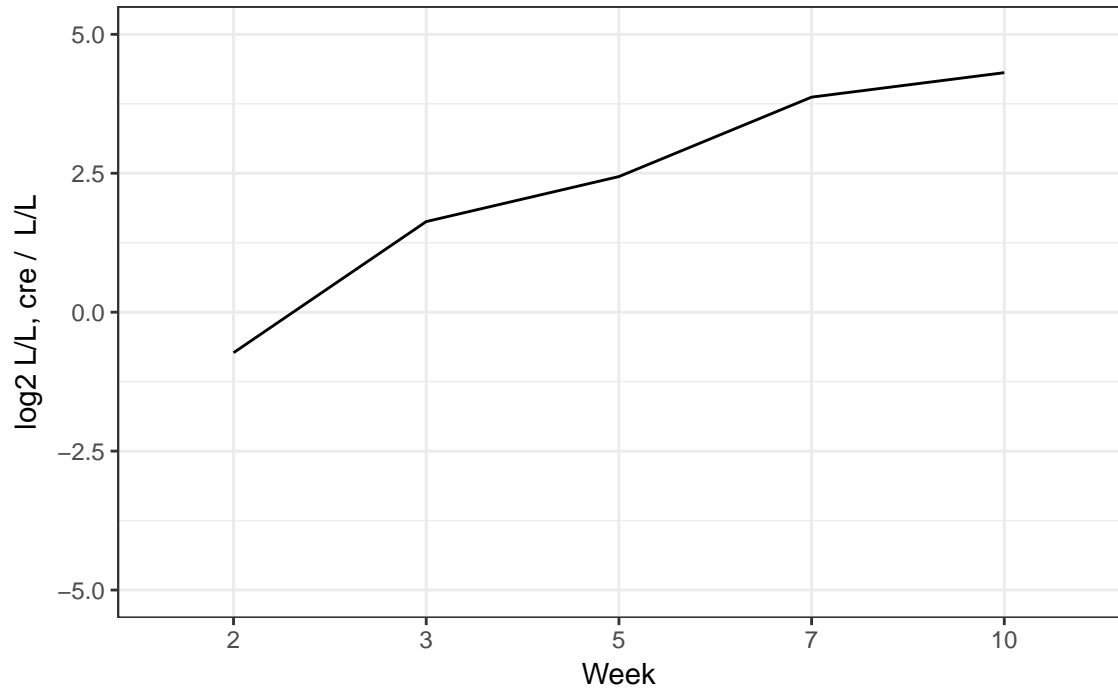

GATC / Q8CBY0; adj.p value: 0.8237

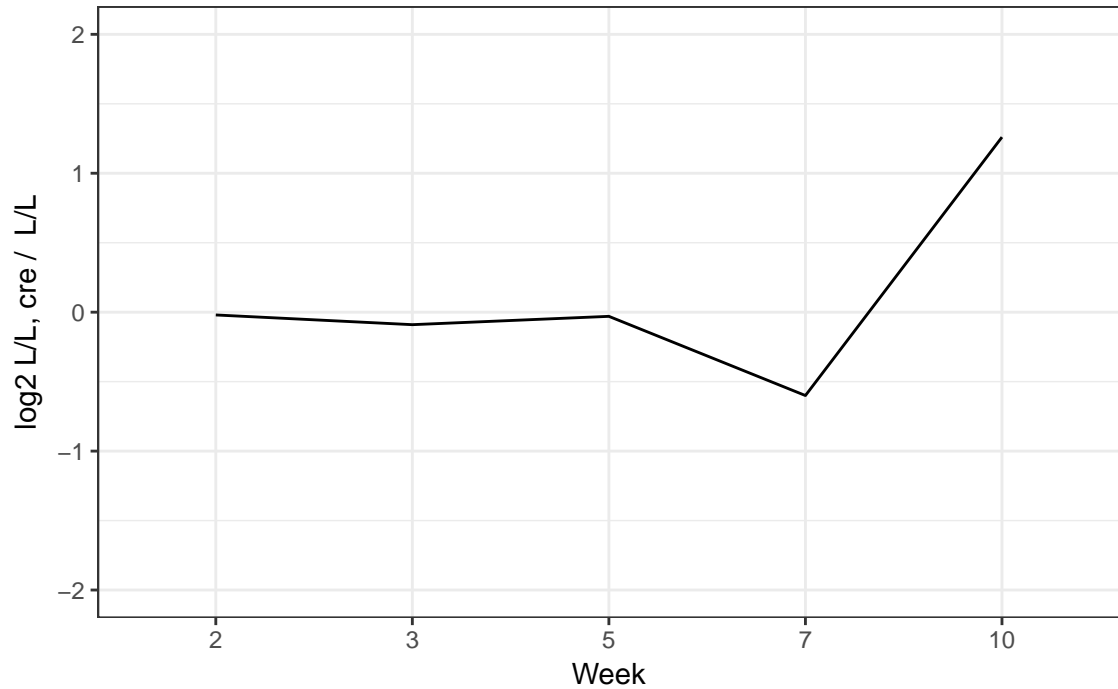

GBAS / Q7TMG8; adj.p value: 0.1742

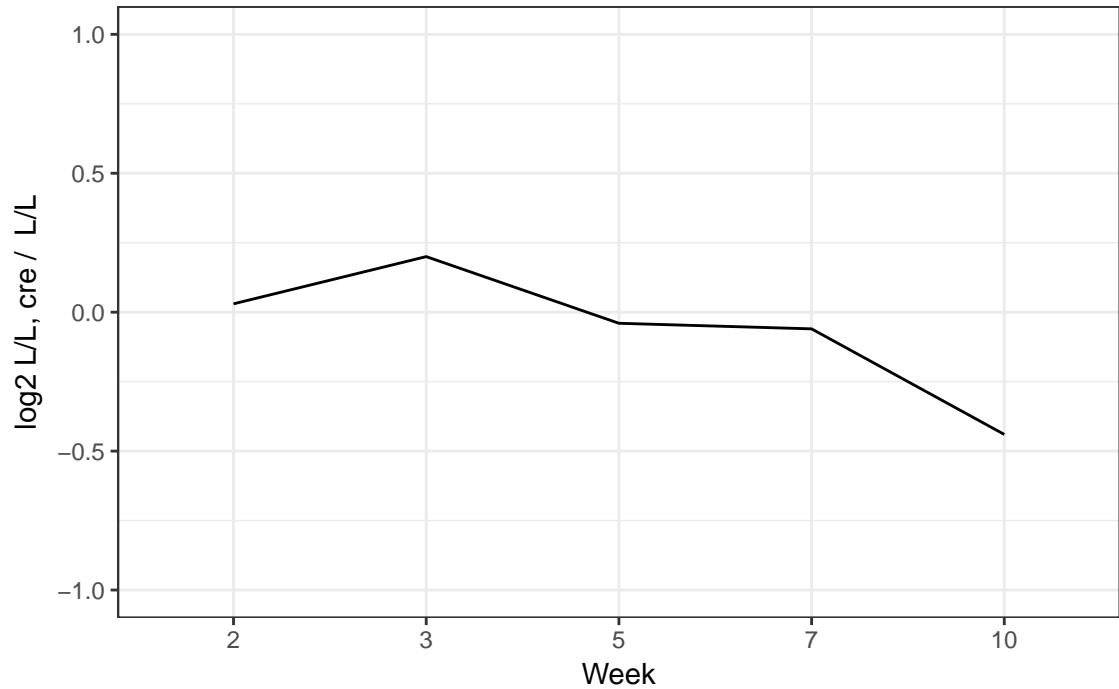

GCAT / O88986; adj.p value: 0.07308

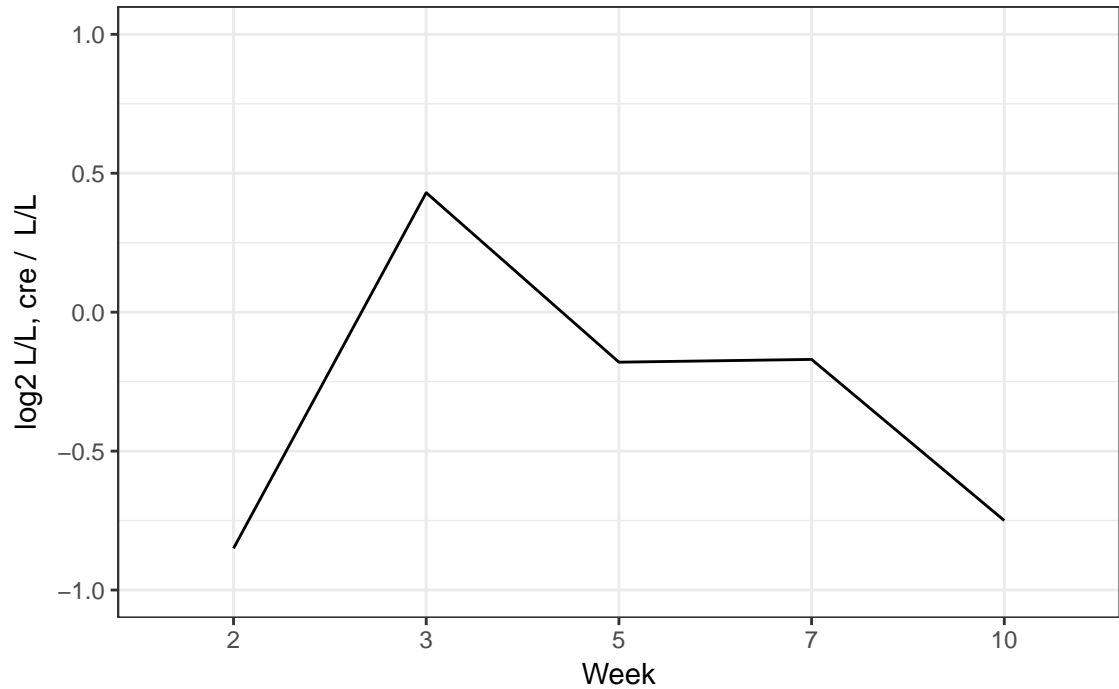

GCDH / A0A0A0MQ68; adj.p value: 3e-05

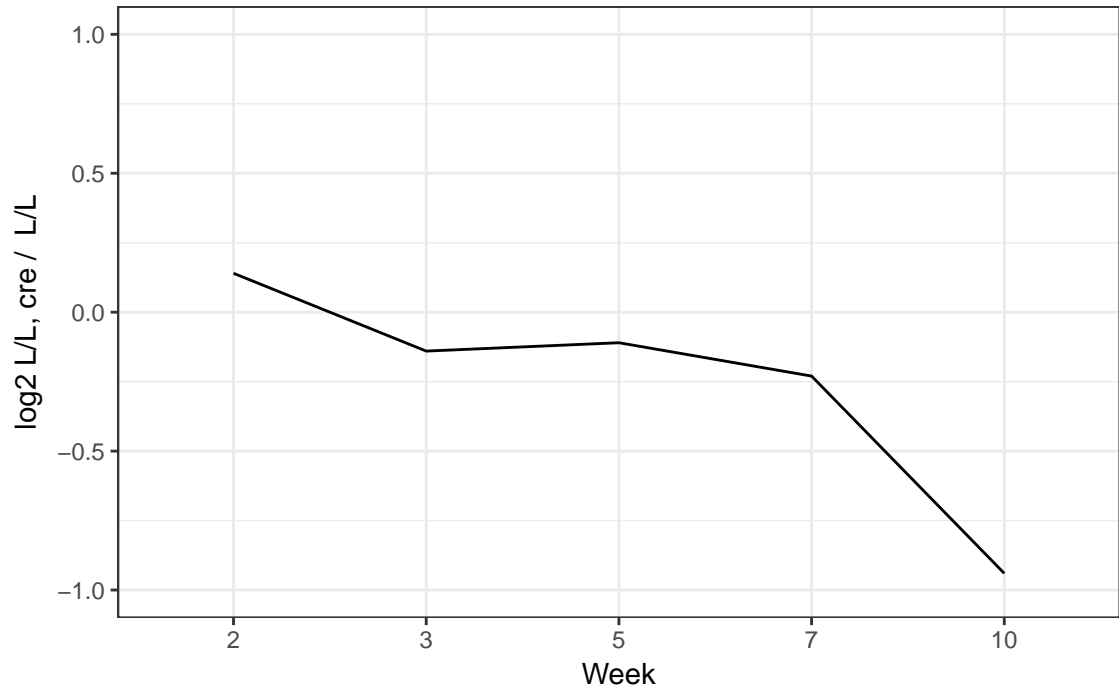

GCSH / Q91WK5; adj.p value: 0.62208

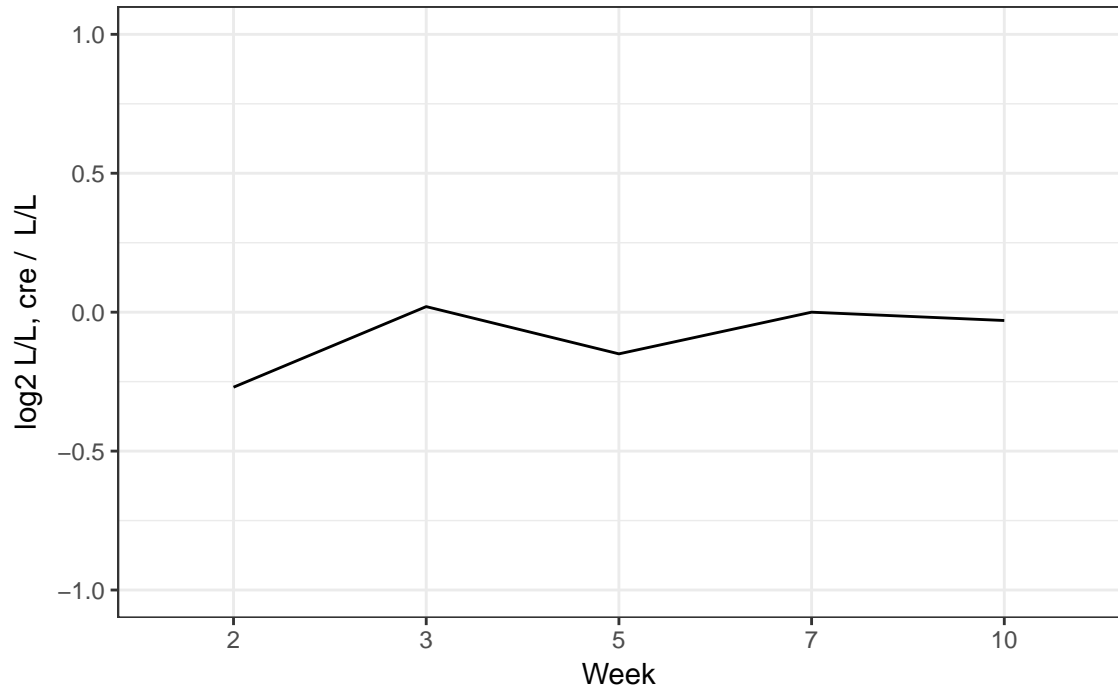

GFER / P56213; adj.p value: 0.20278

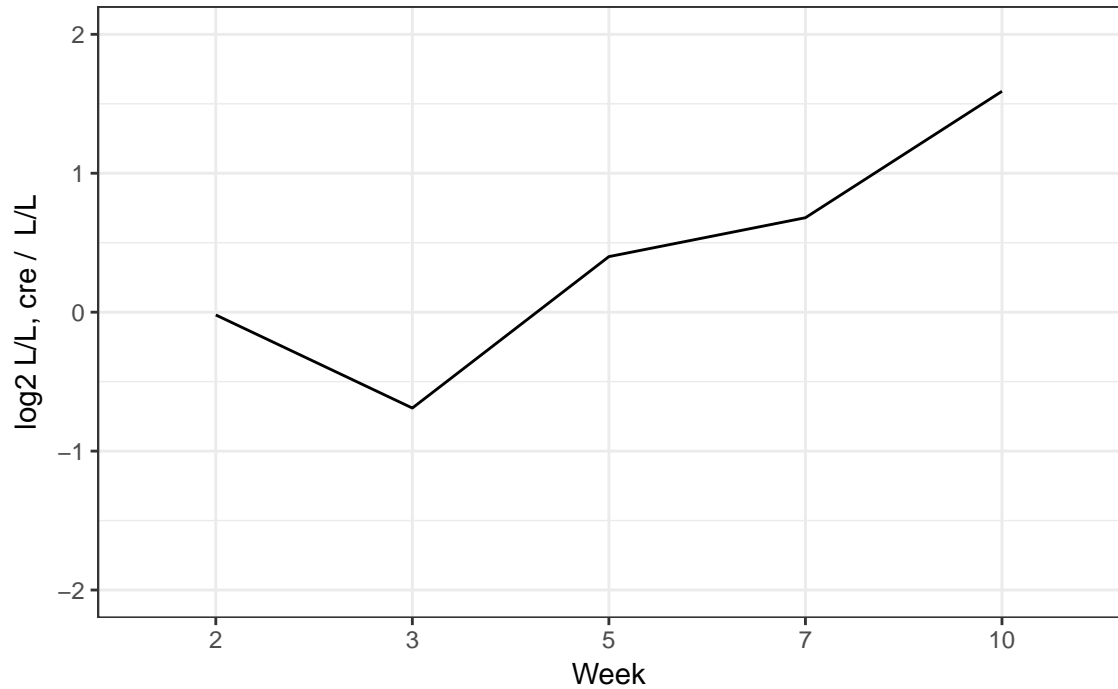



GFM1 / Q8K0D5; adj.p value: 0.18973

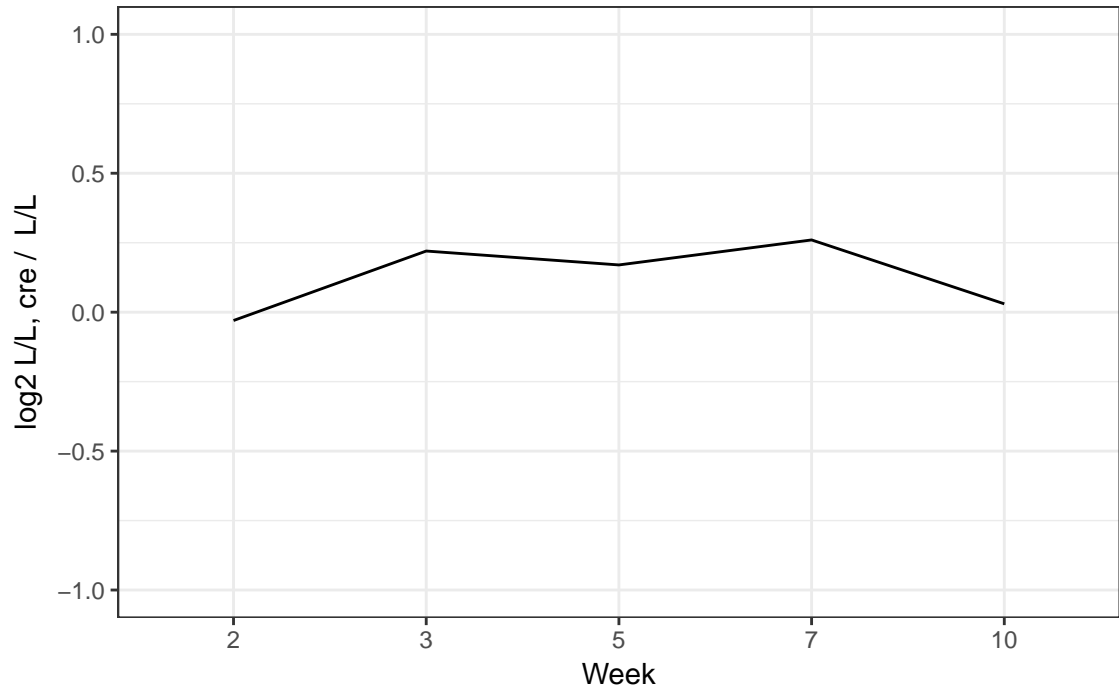

GFM2 / Q8R2Q4-2; adj.p value: 1e-05

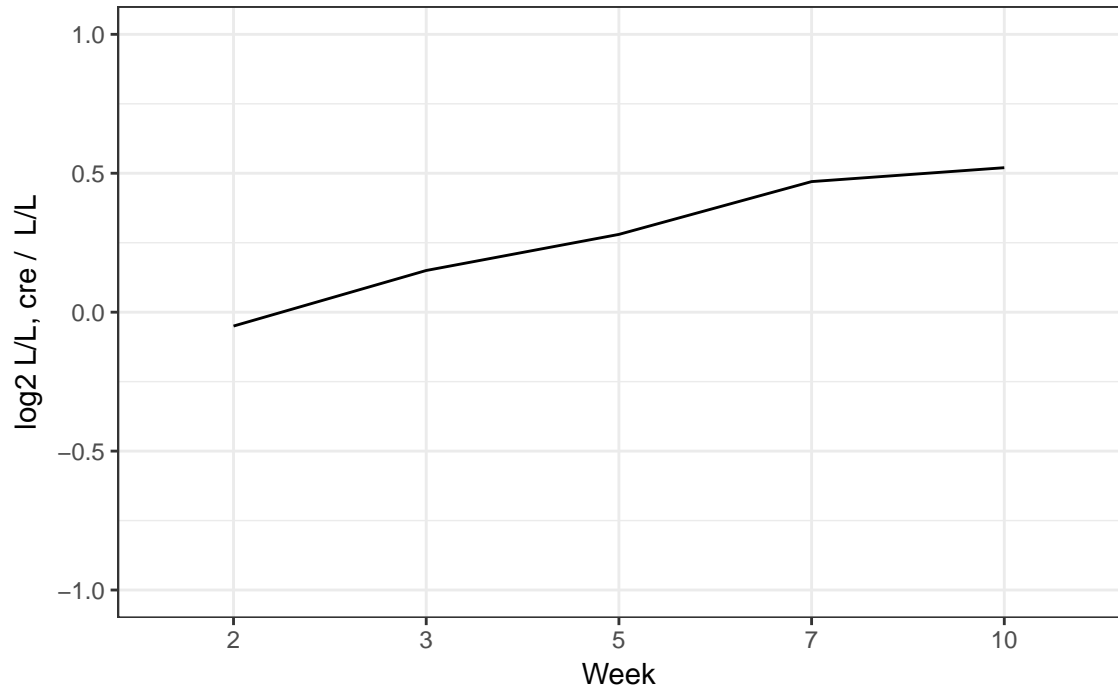

GHITM / Q91VC9; adj.p value: 0.09346

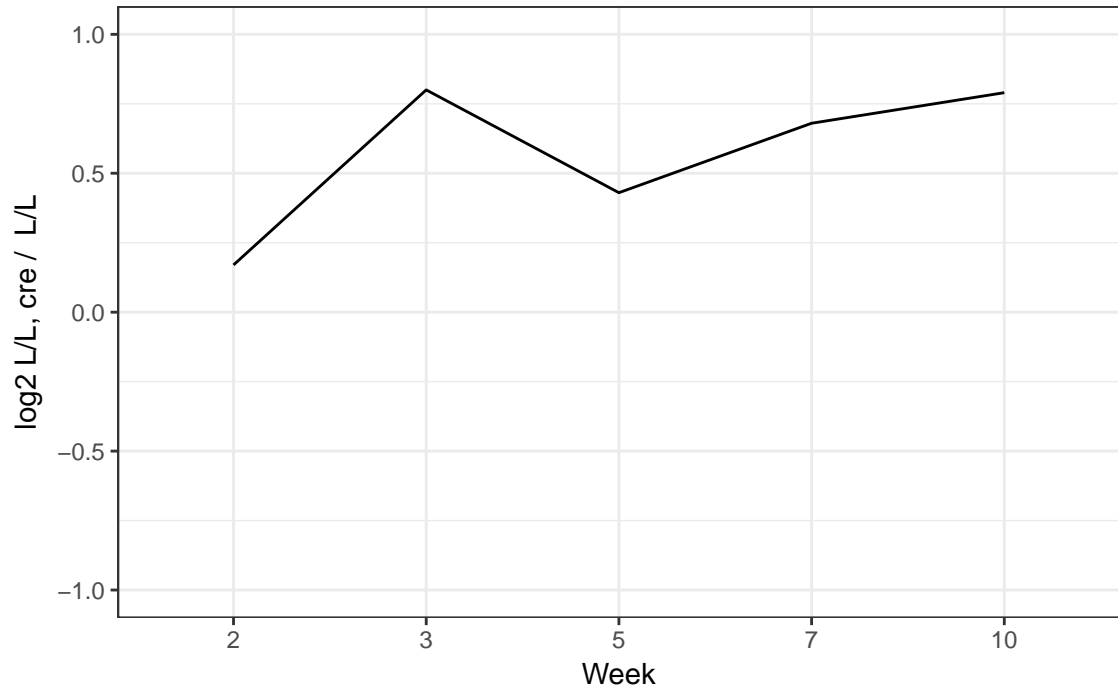

GK / Q64516-1; adj.p value: 0.00089

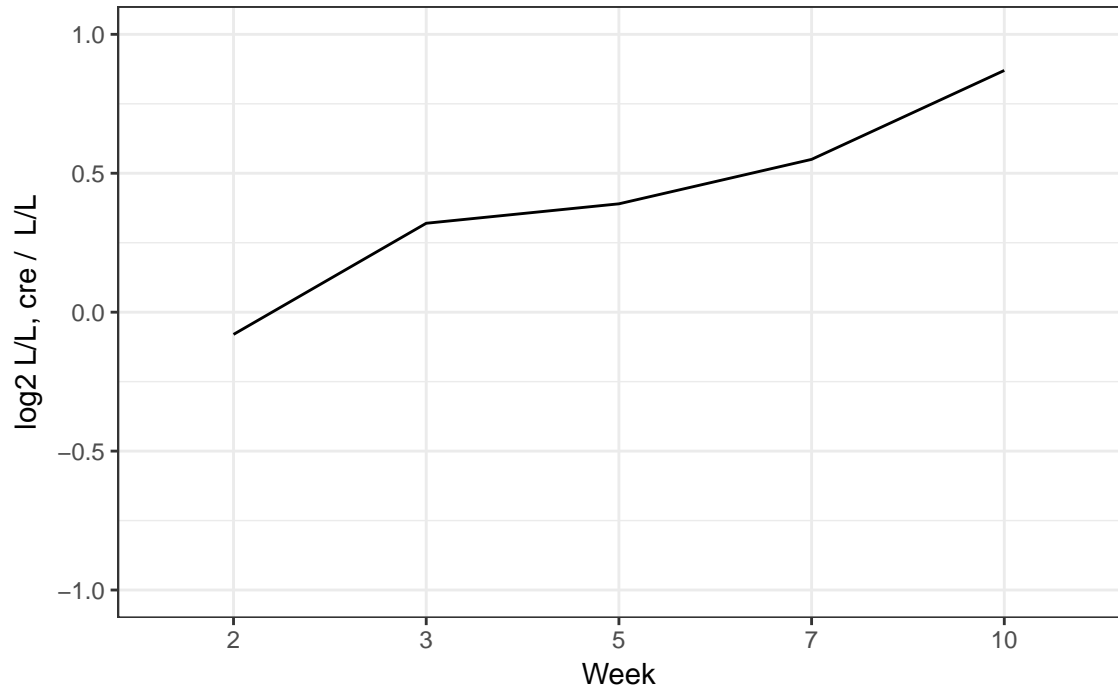

GLOD4 / Q9CPV4; adj.p value: 0.6482

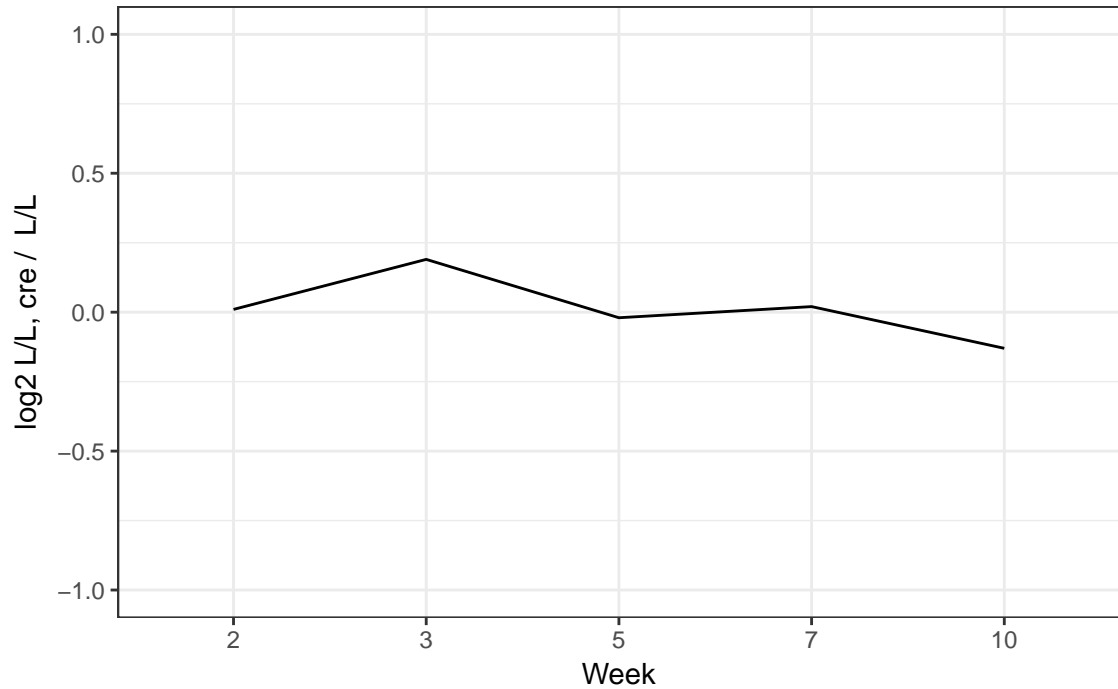

GLRX2 / Q923X4-2; adj.p value: 0.03108

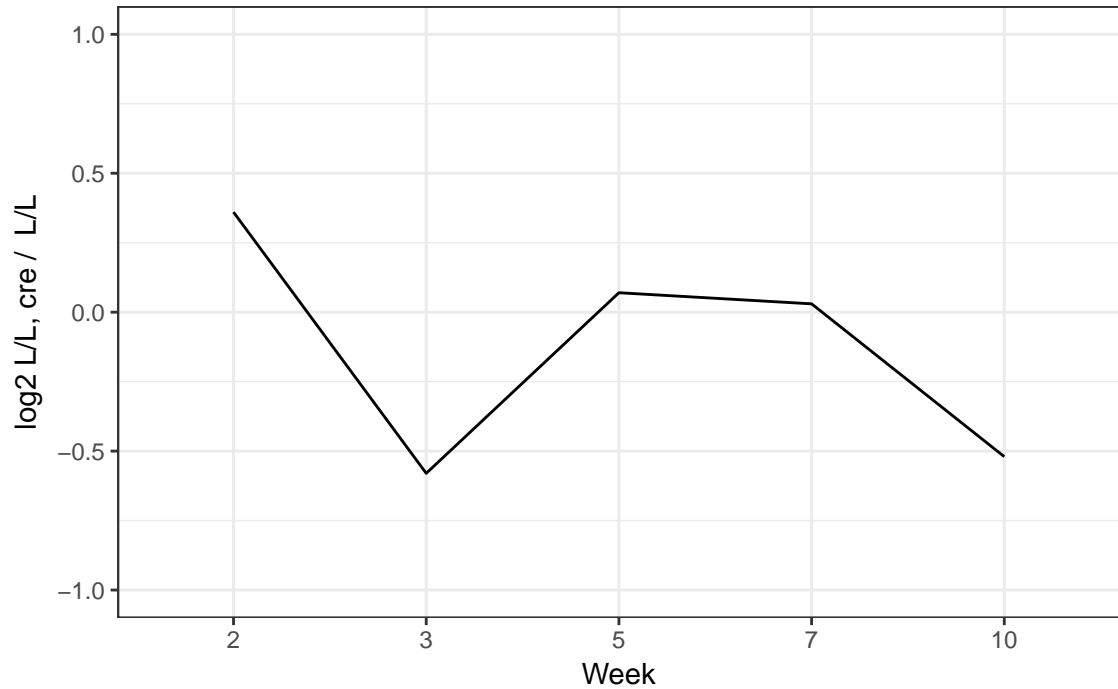

GLRX5 / Q80Y14; adj.p value: 0.96242

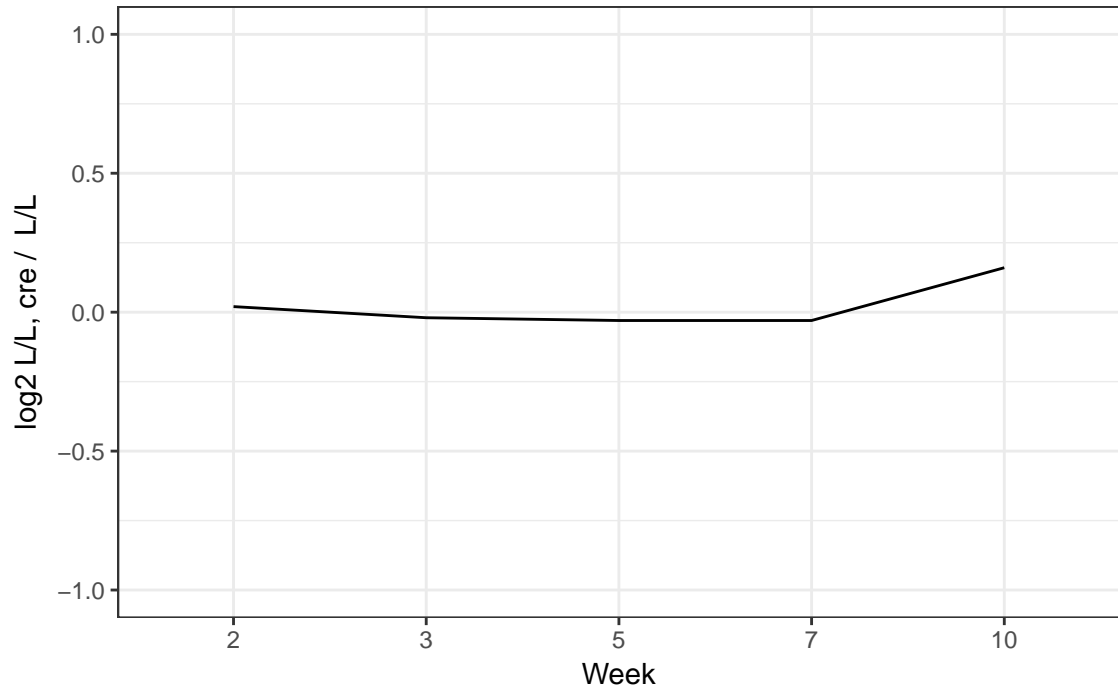

GLS / D3Z7P3-2; adj.p value: 0.00071

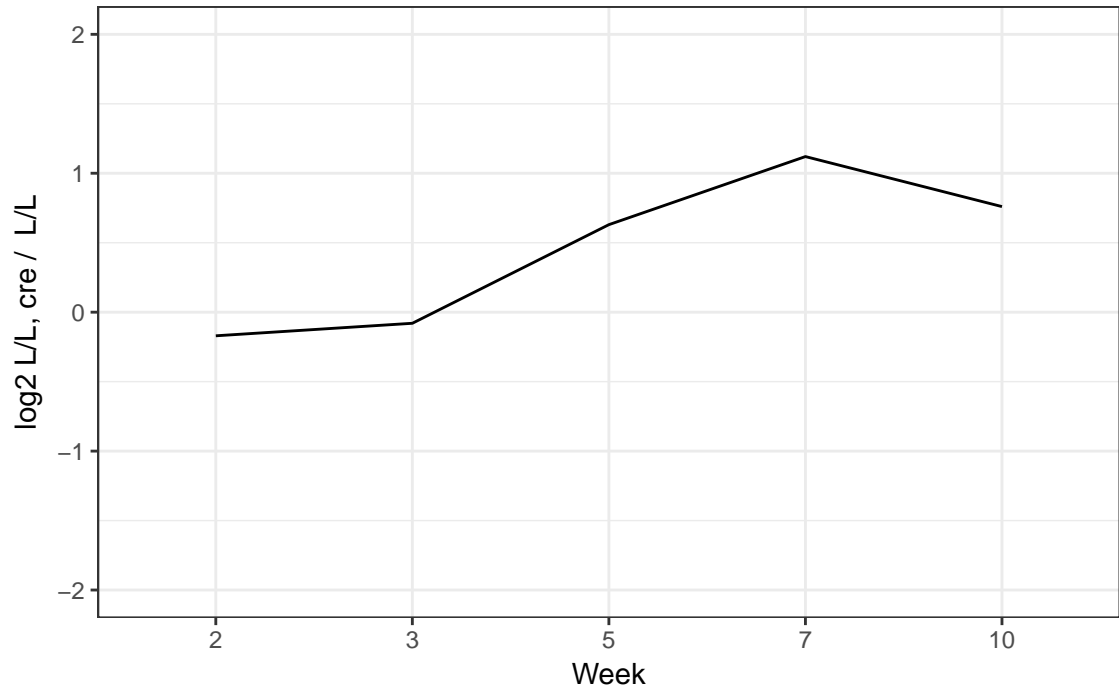



GLS / D3Z7P3; adj.p value: 0

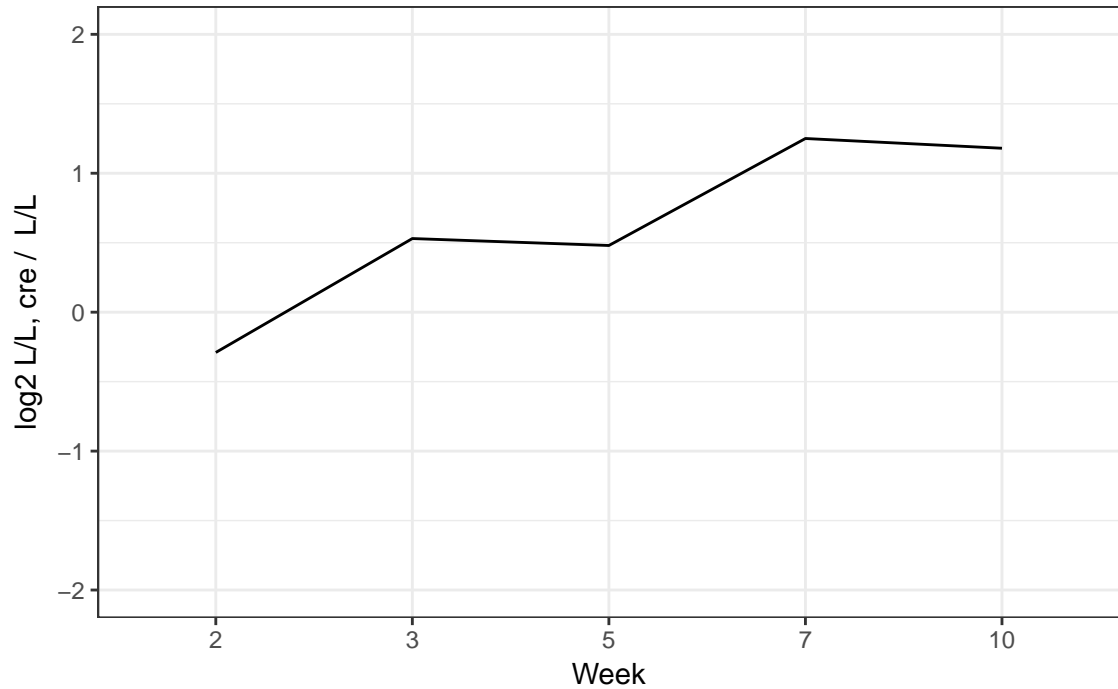

GLUD1 / P26443; adj.p value: 0.00098

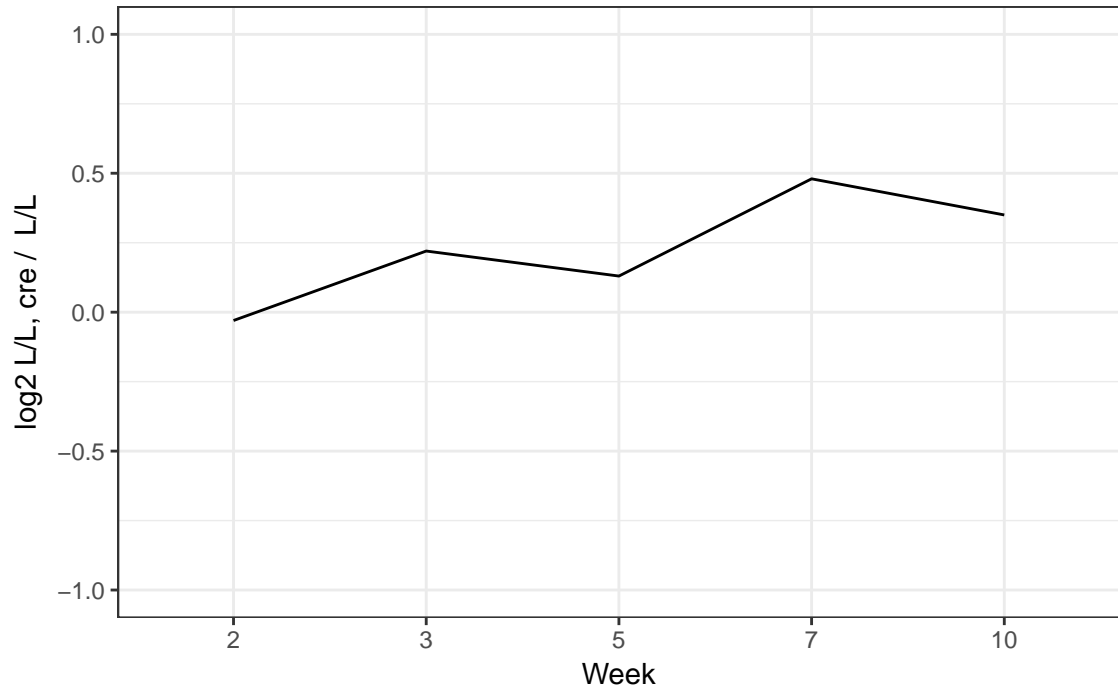

GM10260 / F6YVP7; adj.p value: 0.33365

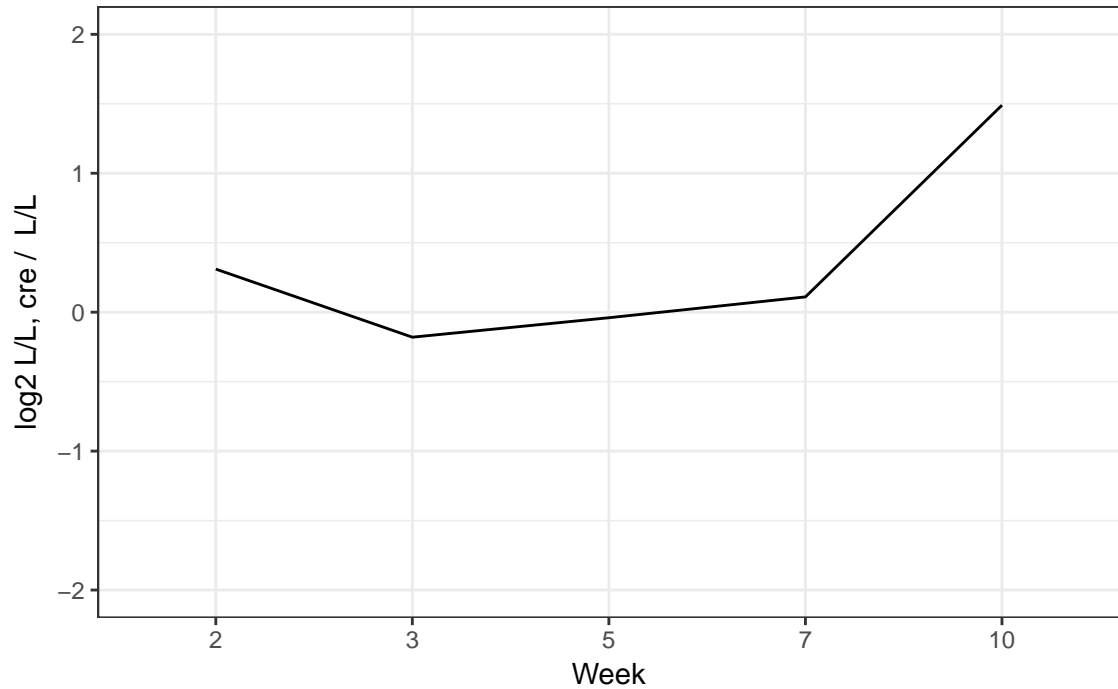

GM1818 / E9Q4A5; adj.p value: 0.03083

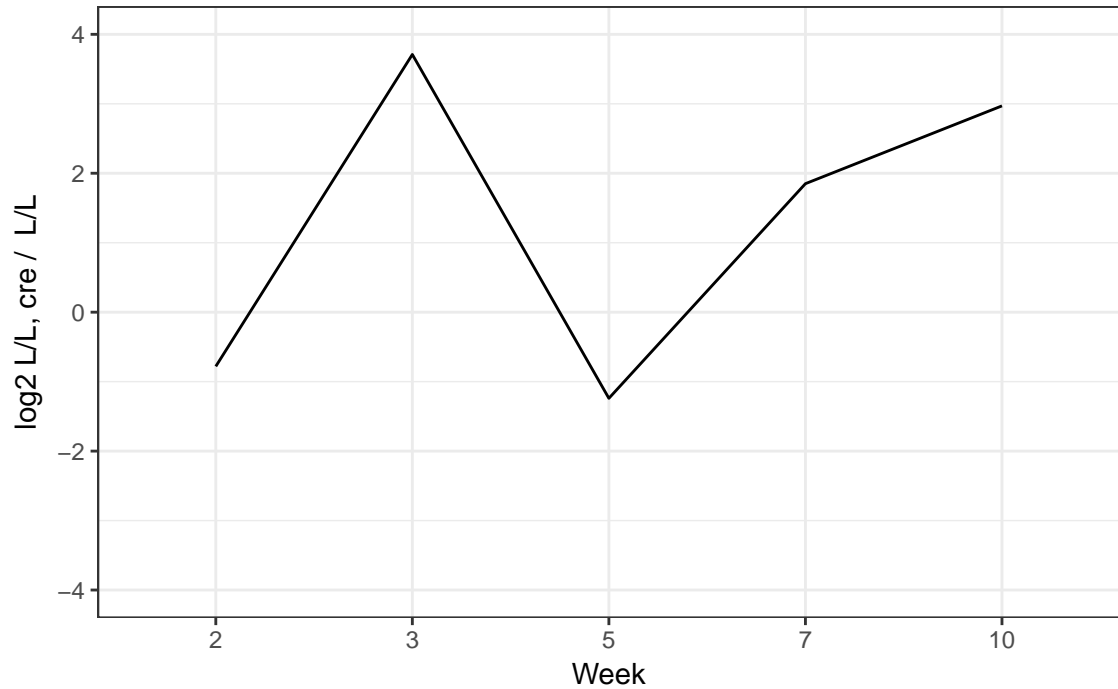

GM20498 / E9PVN6; adj.p value: 0.0284

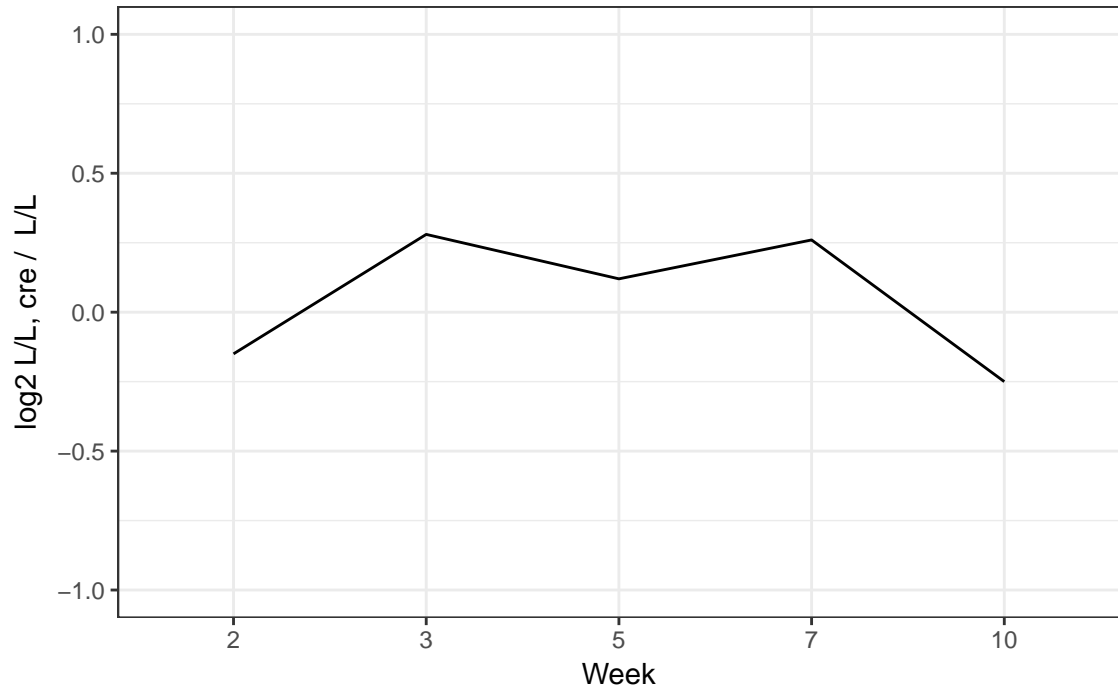

GM20671 / F6TVX7; adj.p value: 0

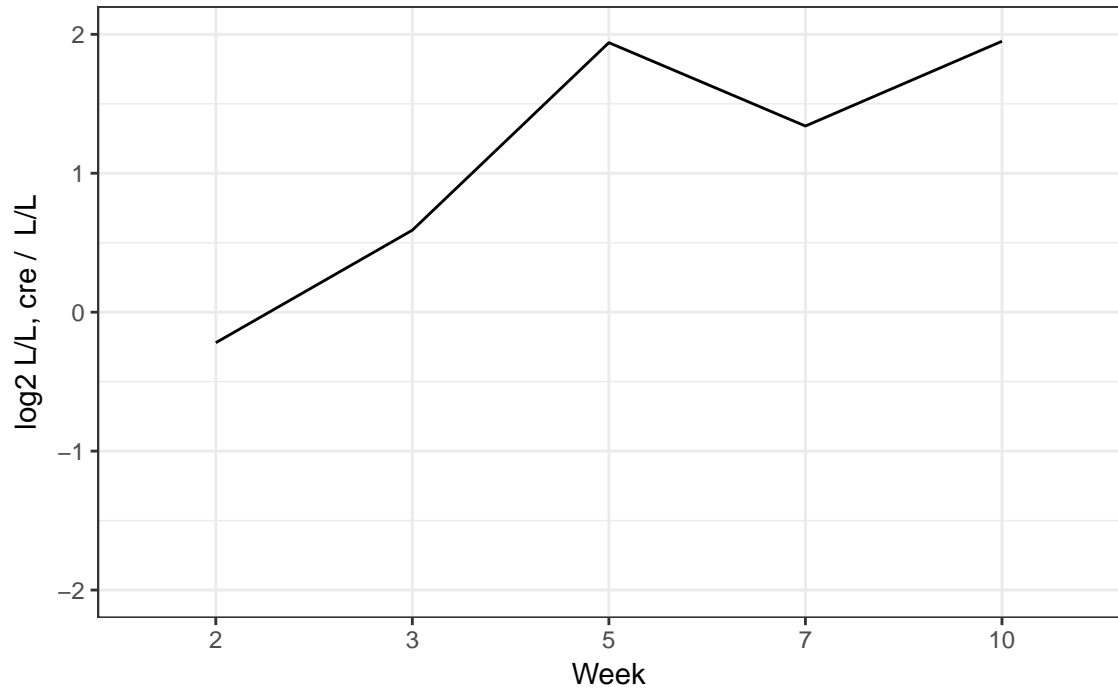

GM561 / Q3V460; adj.p value: 0.01747

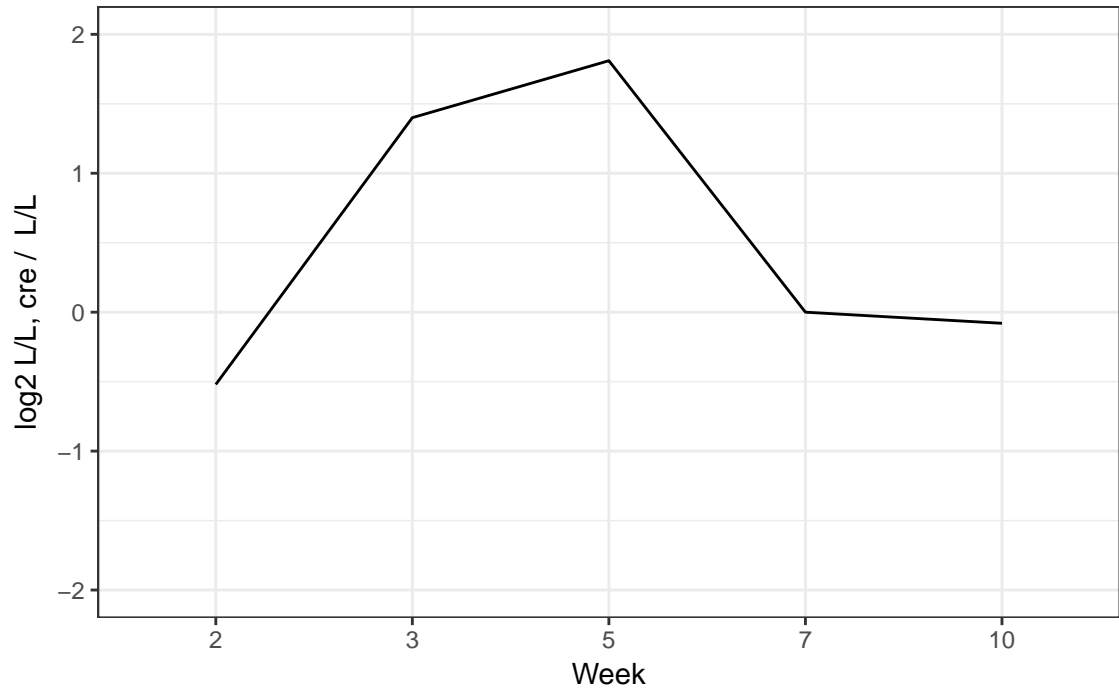

GOT2 / P05202; adj.p value: 0.56364

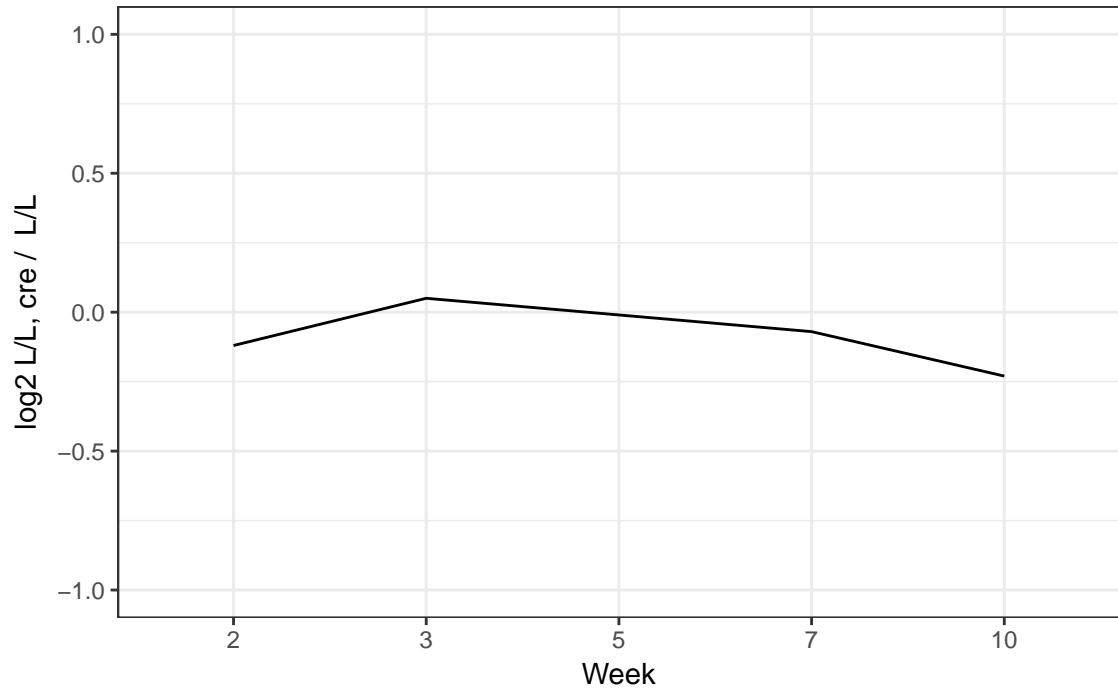



GPAM / Q61586; adj.p value: 0.61233

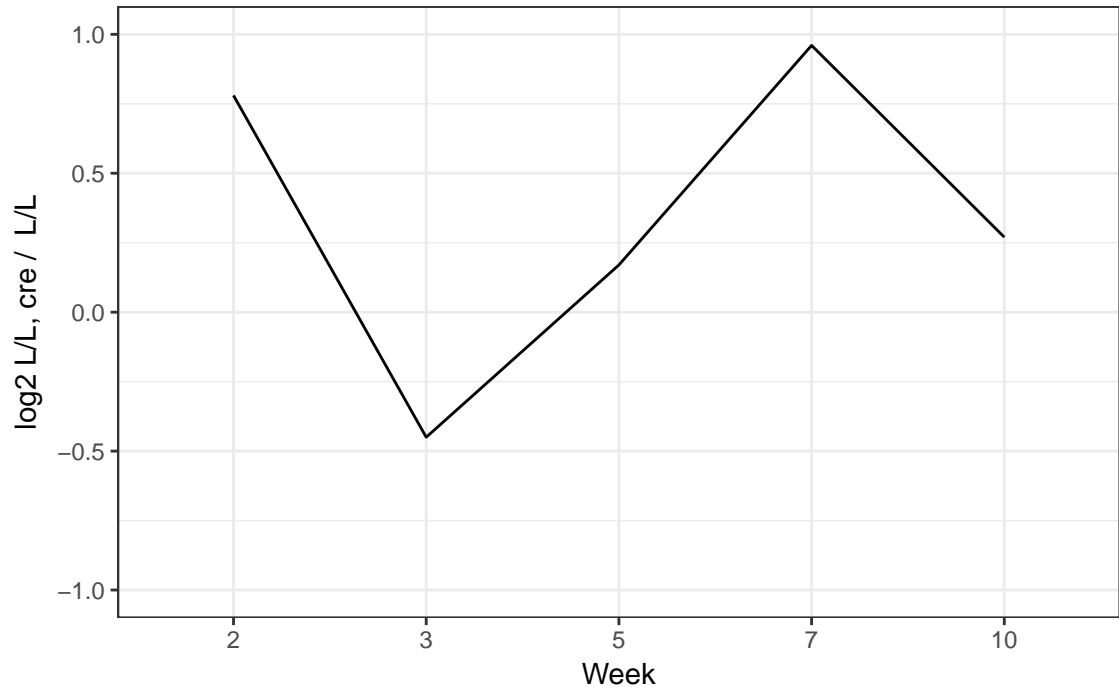

GPD2 / Q64521; adj.p value: 0.35309

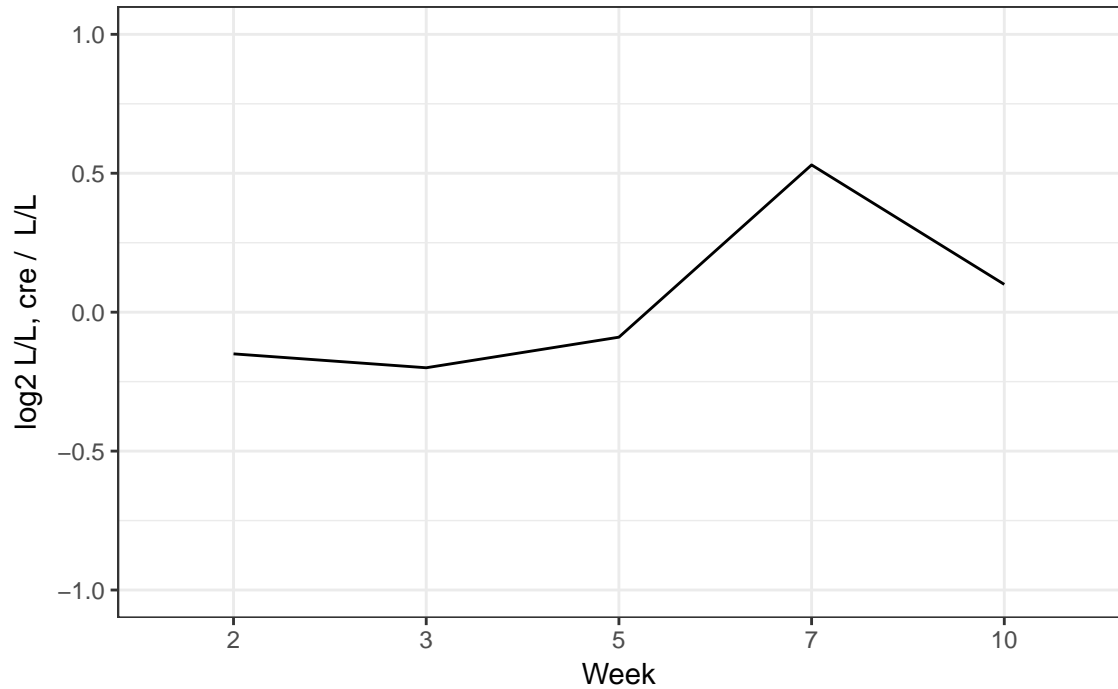

GPI / P06745; adj.p value: 0.0249

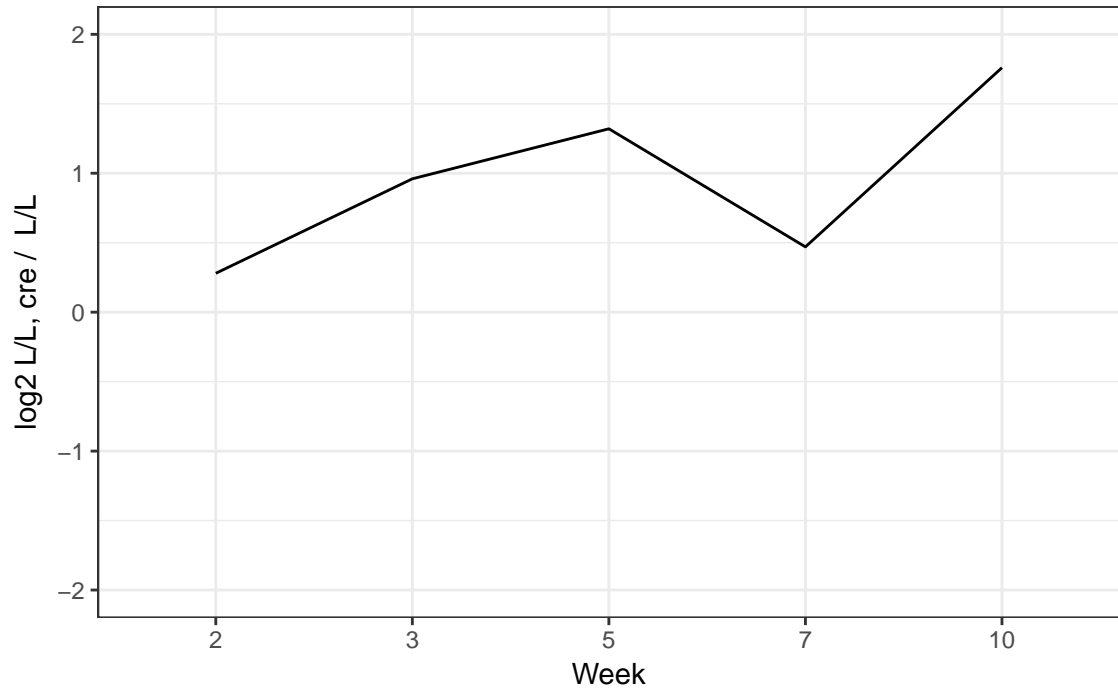

GPT2 / Q8BGT5; adj.p value: 1e-05

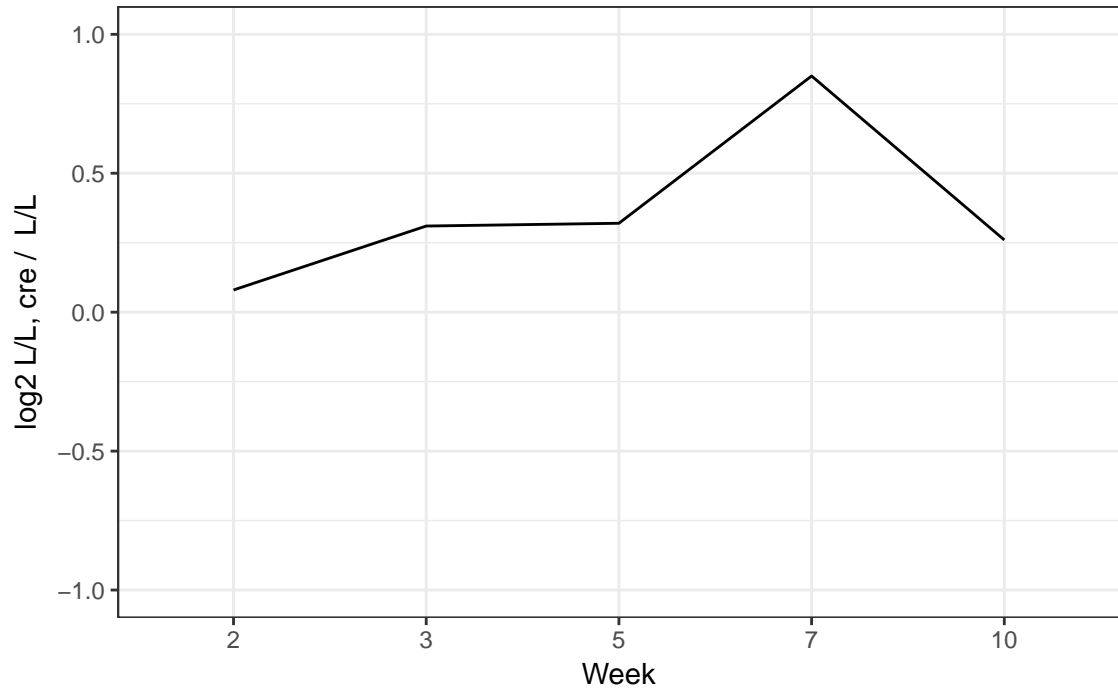

GPX1 / P11352; adj.p value: 0.02352

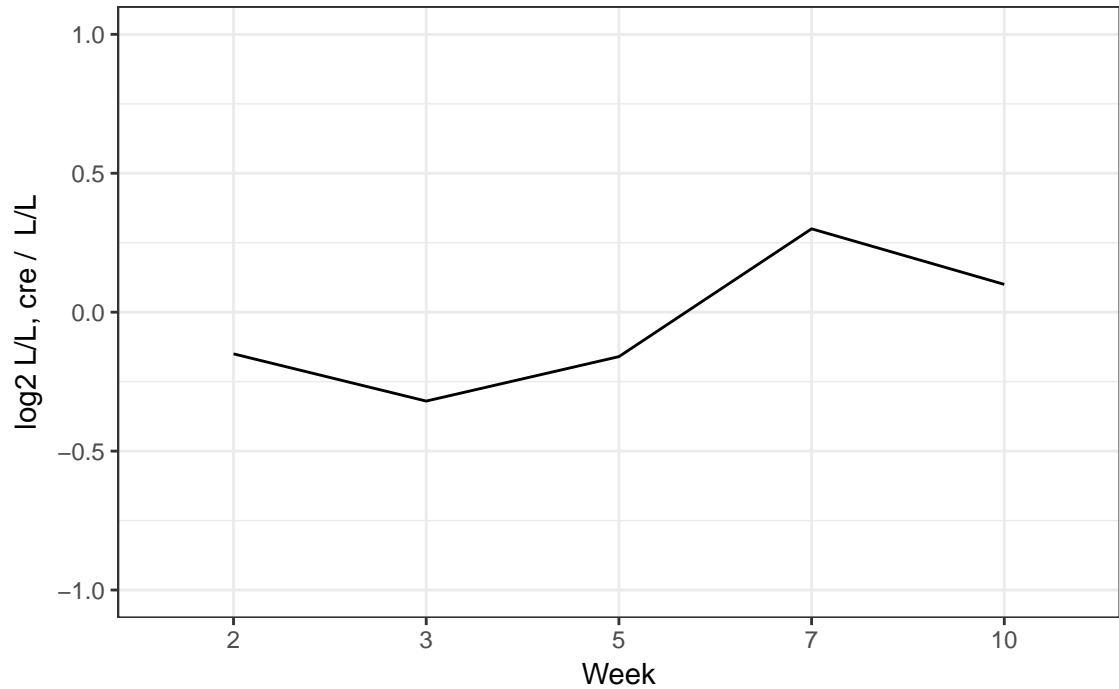

GPX4 / Q76LV0; adj.p value: 0.00774

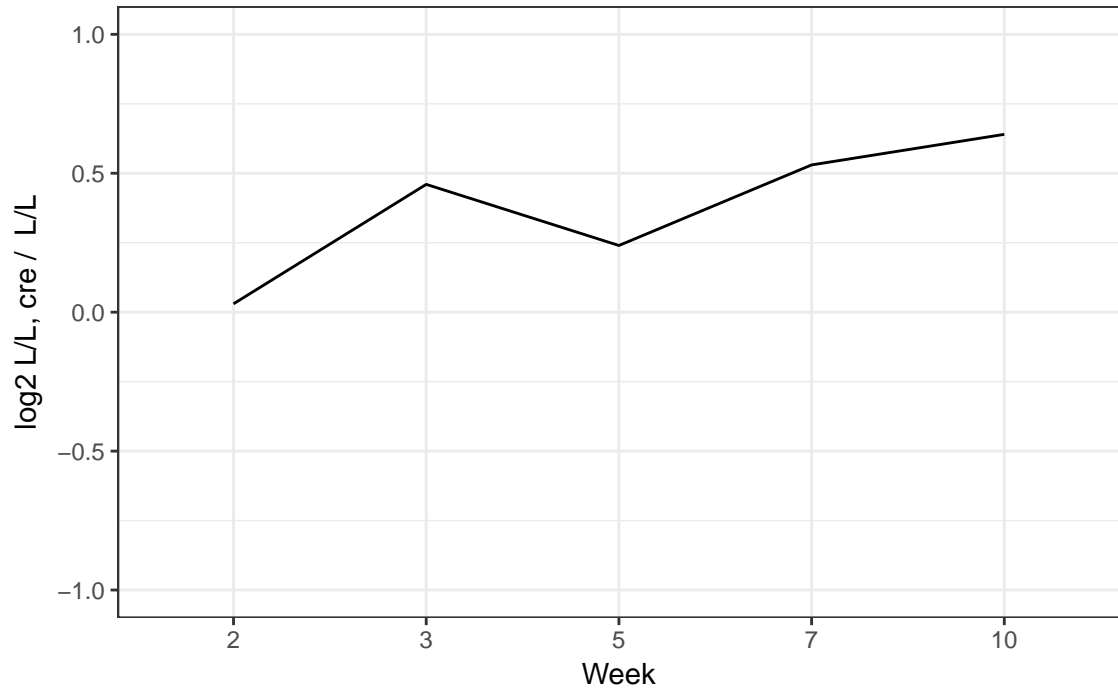

GRHPR / Q91Z53; adj.p value: 0.16301

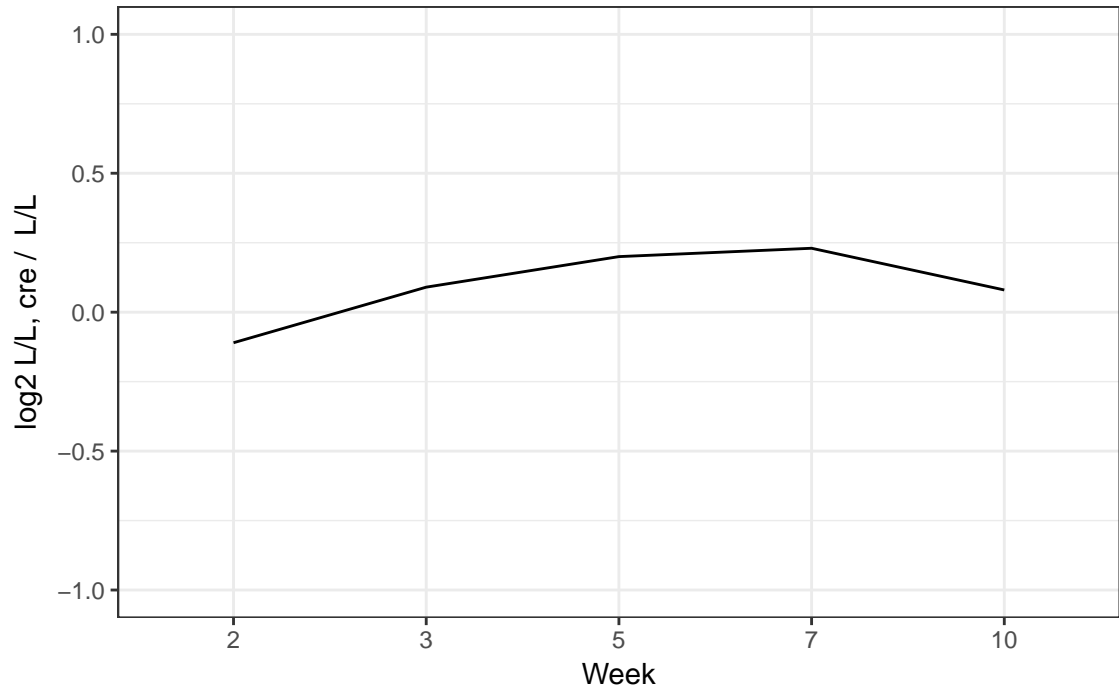

GRPEL1 / Q99LP6; adj.p value: 0.00118

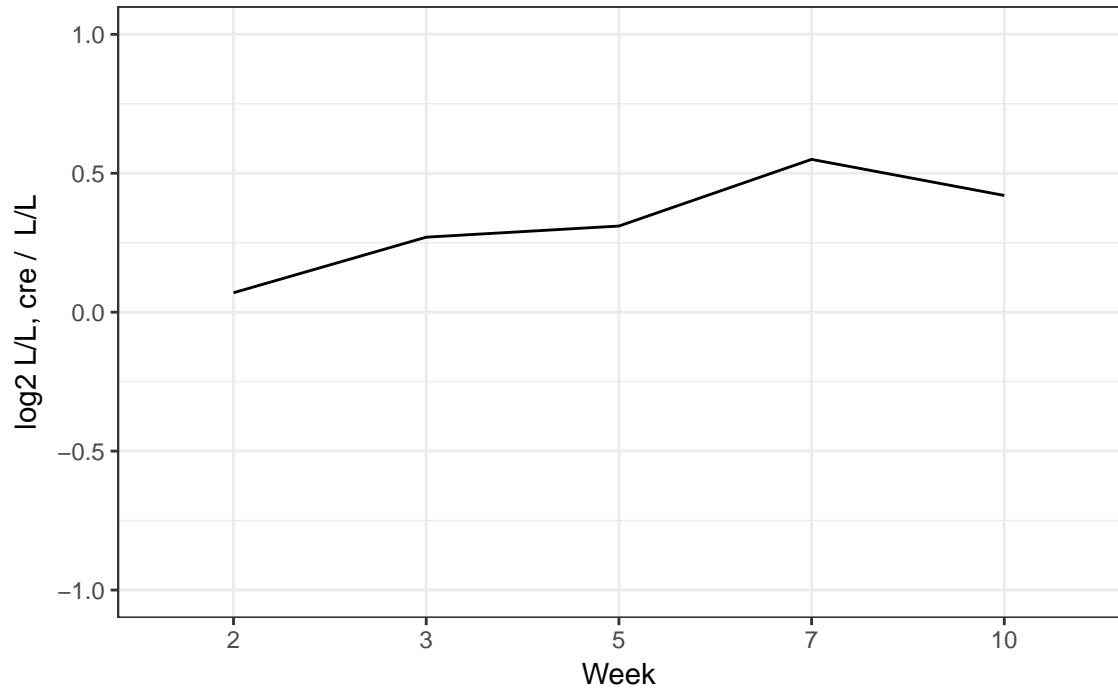



# GRSF1 / E9Q179; adj.p value: 0

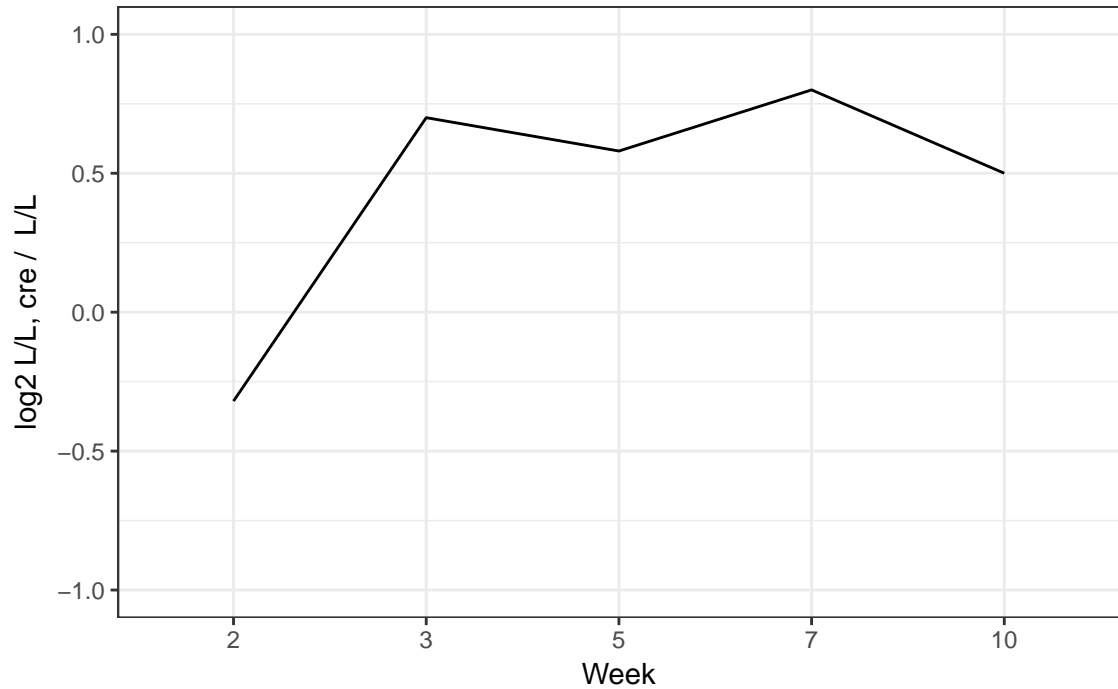

GSR / P47791-2; adj.p value: 3e-05

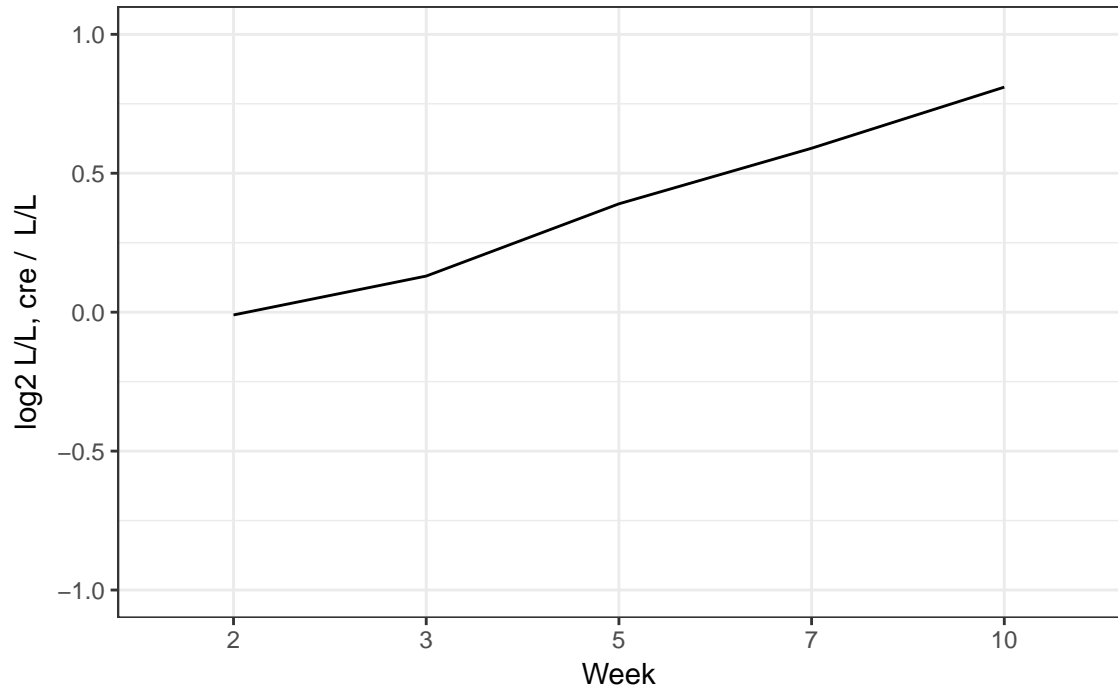

GSTK1 / Q9DCM2; adj.p value: 0.03402

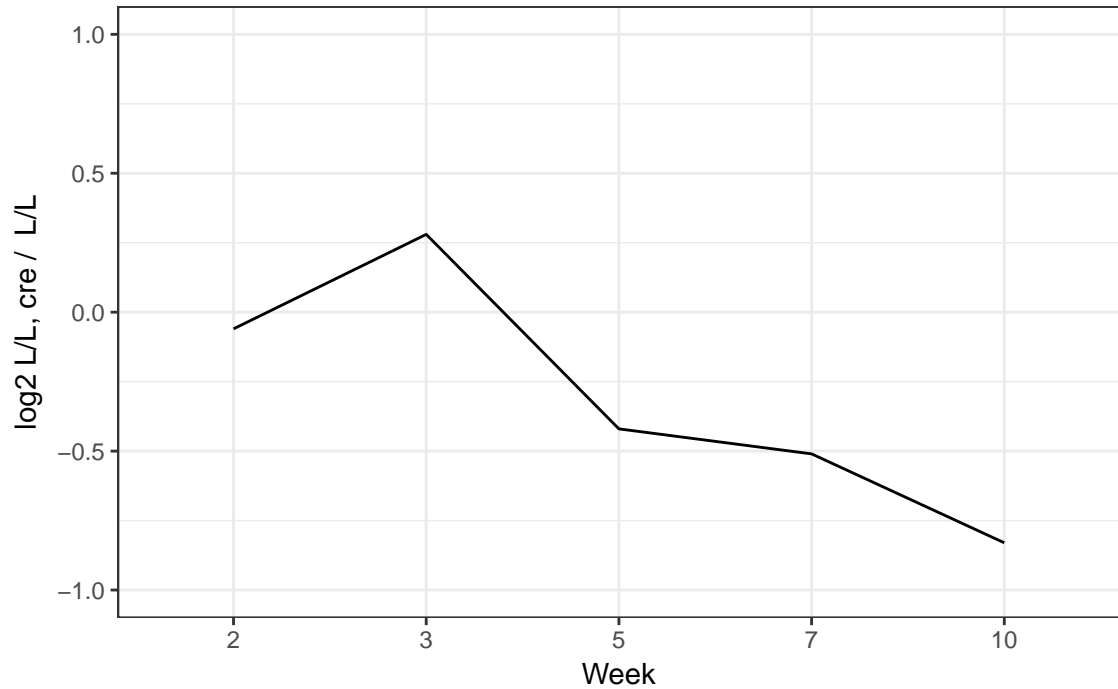

GSTZ1 / Q9WVL0; adj.p value: 0.23345

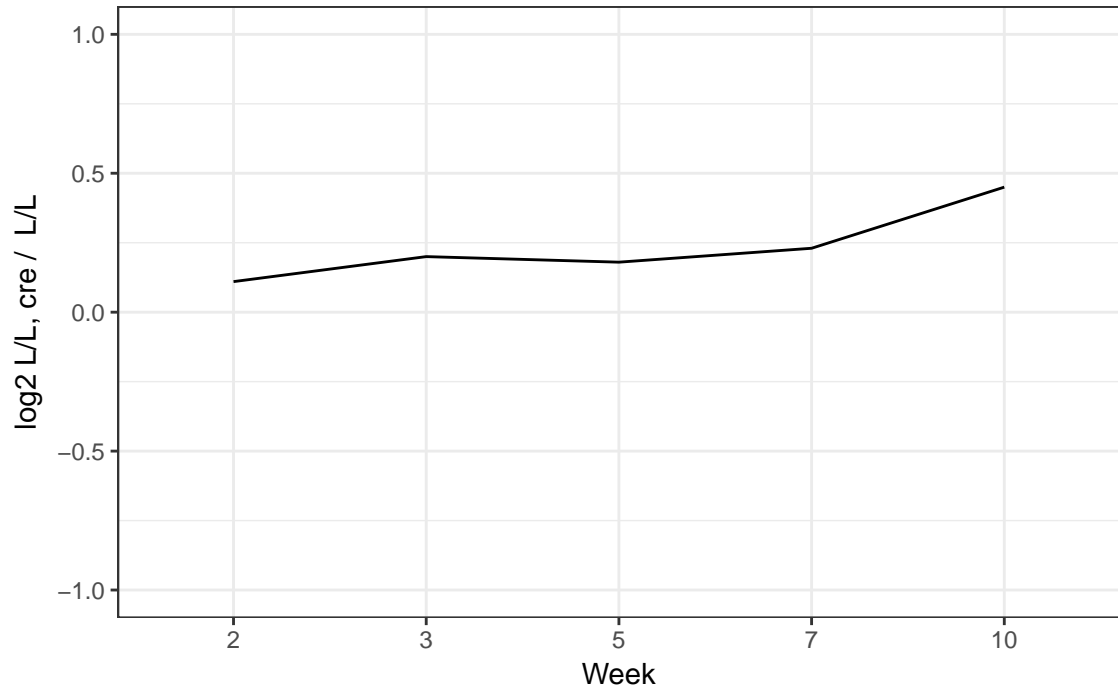

GUF1 / Q8C3X4; adj.p value: 0.47189

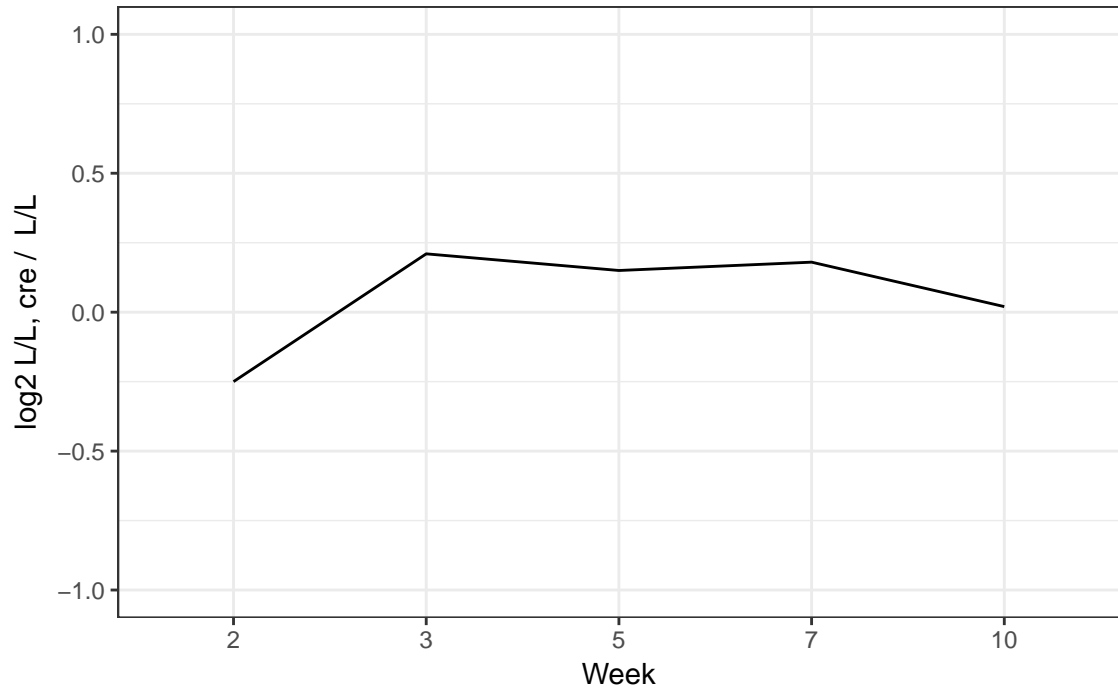

GUK1 / Q564G0; adj.p value: 0.61409

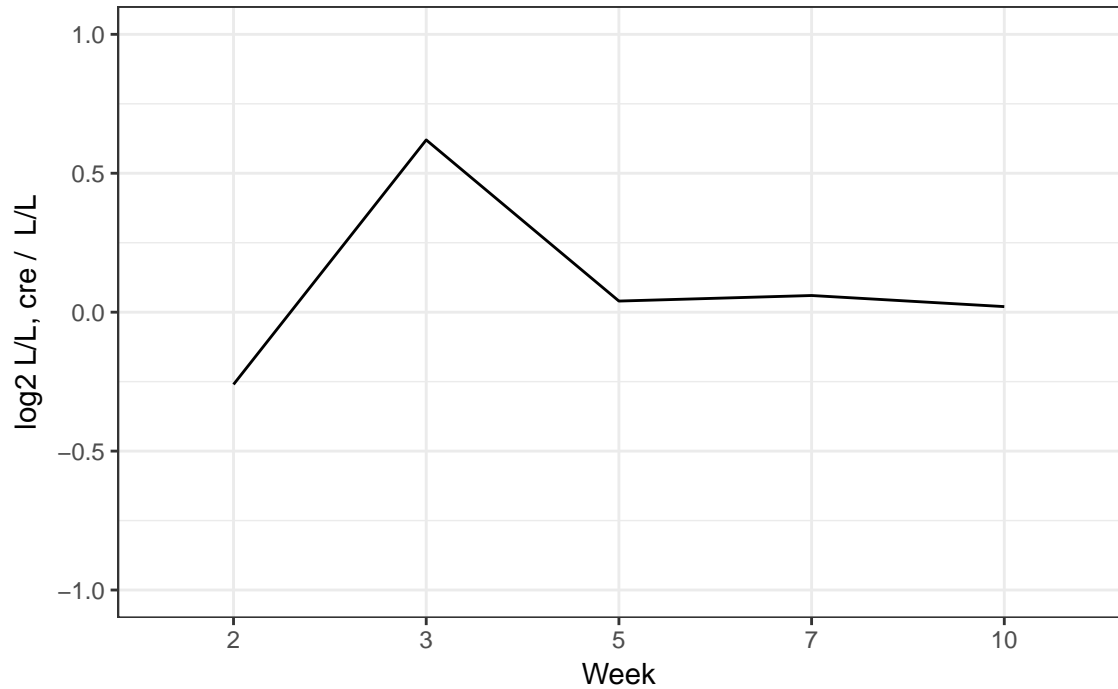

HADH / Q61425; adj.p value: 0.01422

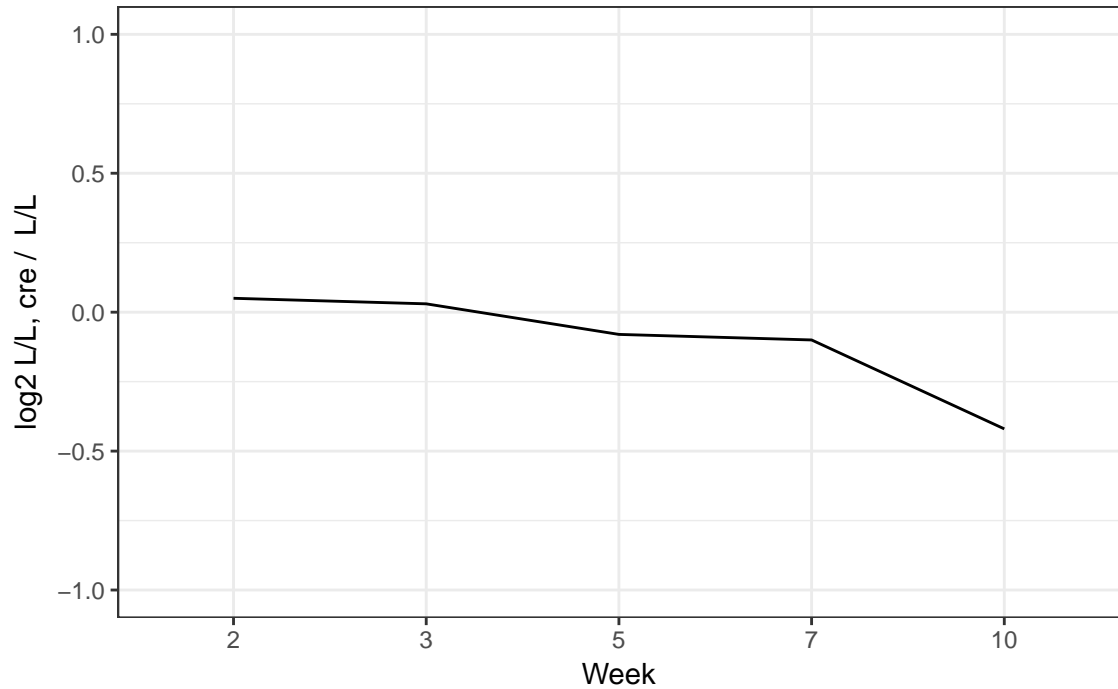

HADHA / Q8BMS1; adj.p value: 0.00358

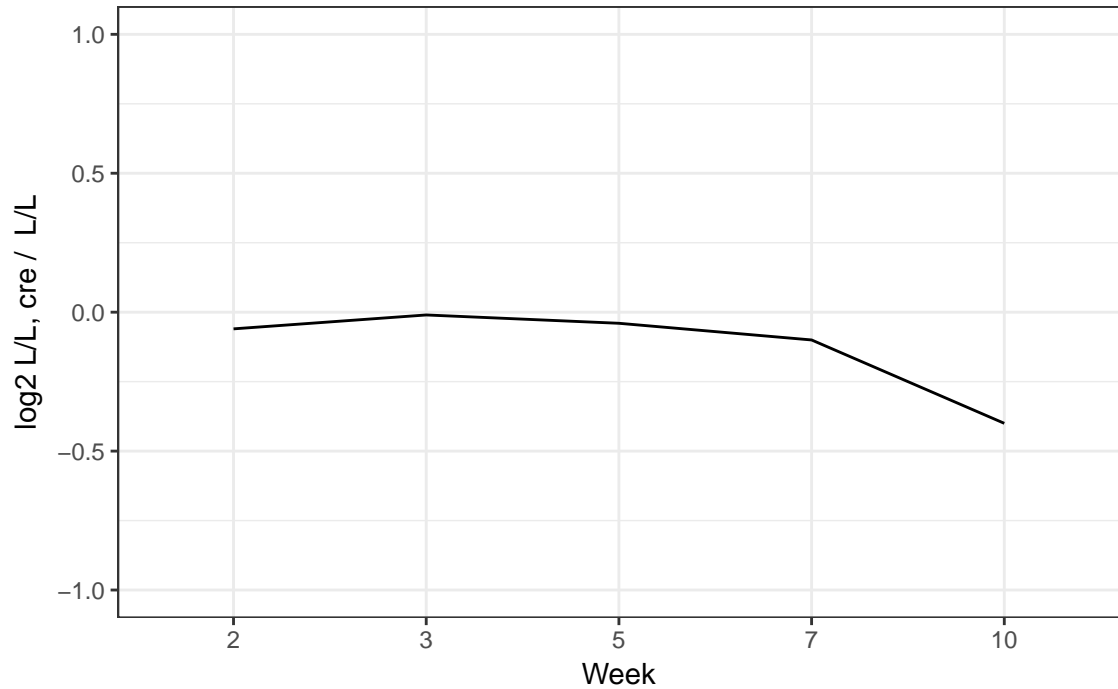



HADHB / Q99JY0; adj.p value: 0.1353

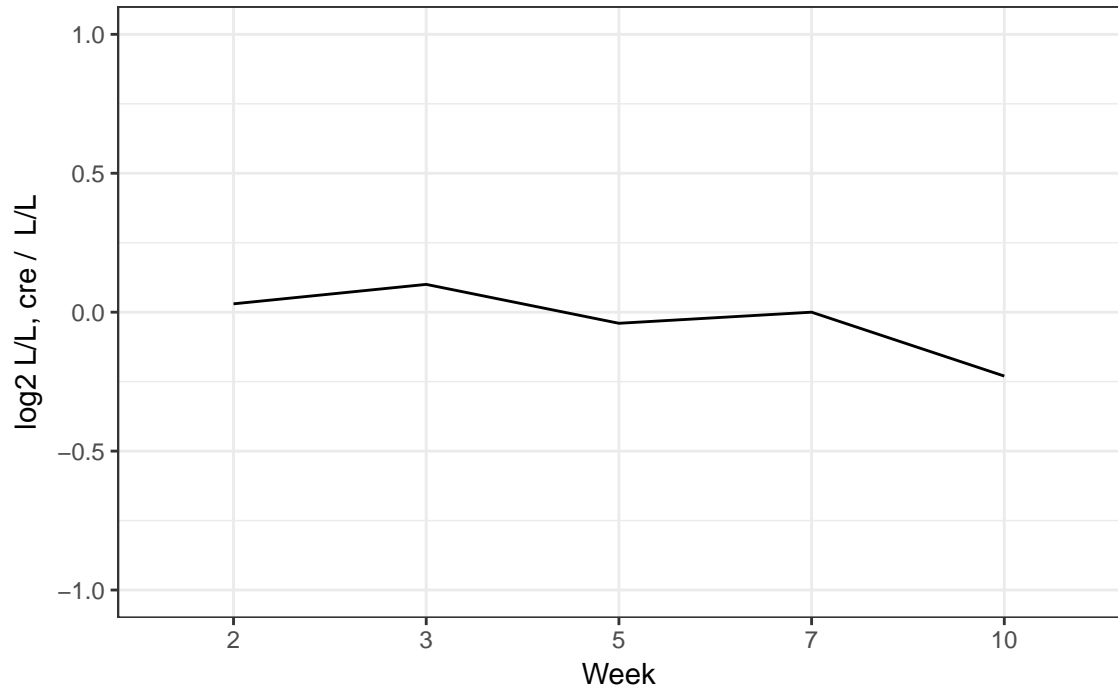

HAGH / G5E8T9; adj.p value: 0.00125

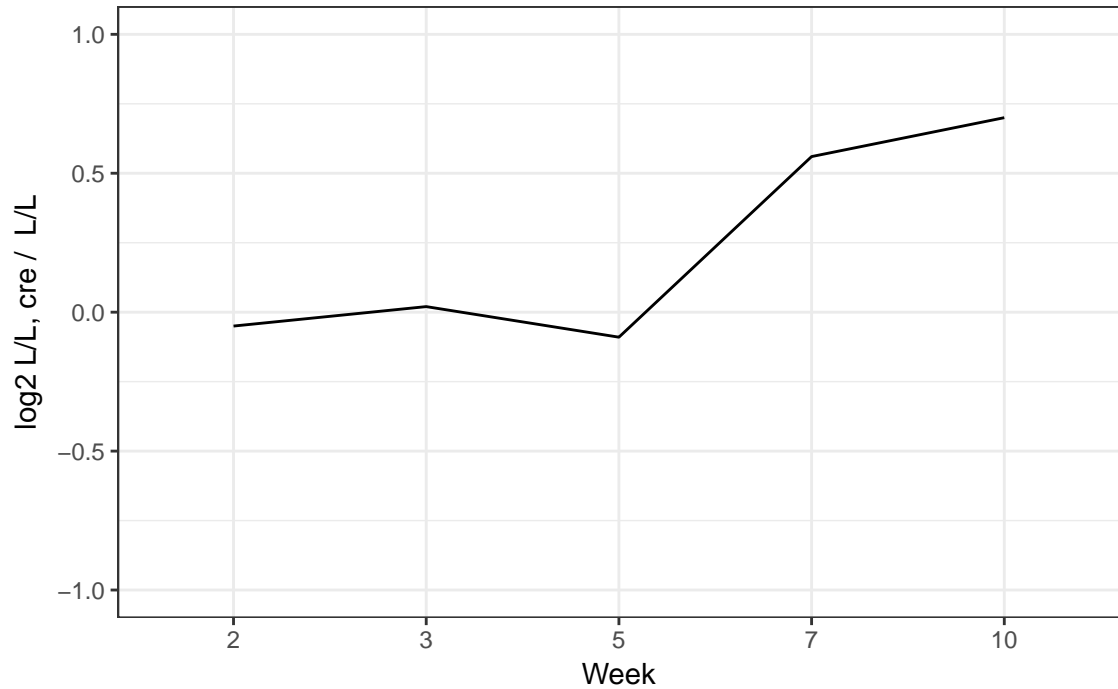

HARS2 / Q99KK9; adj.p value: 0.00583

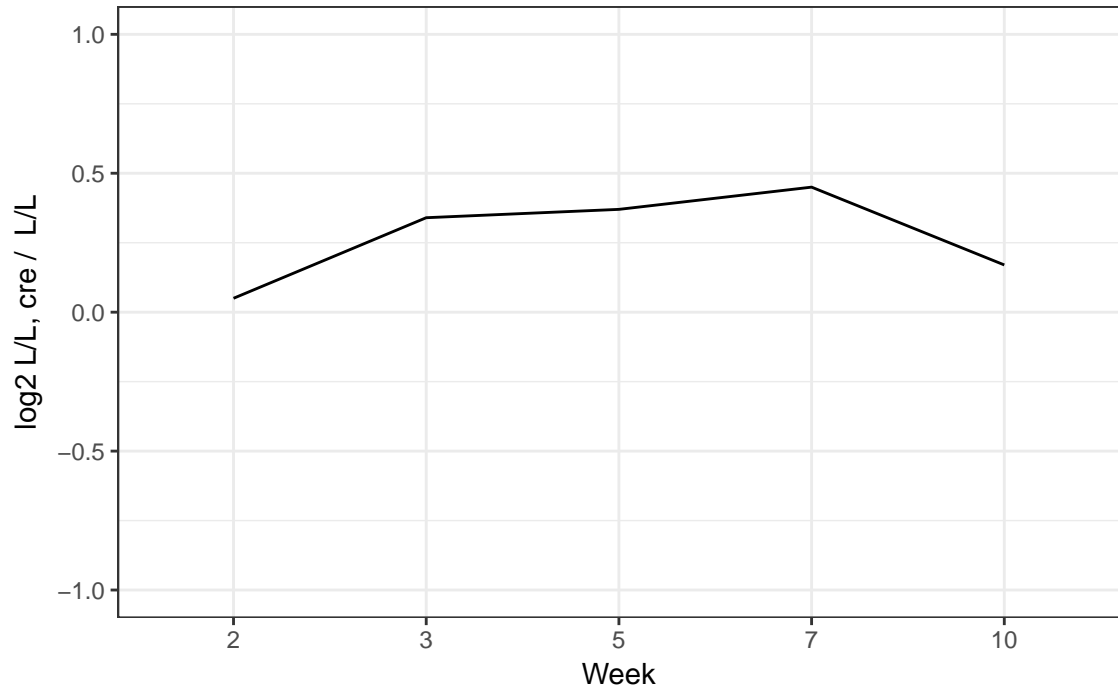

HCCS / P53702; adj.p value: 0.15293

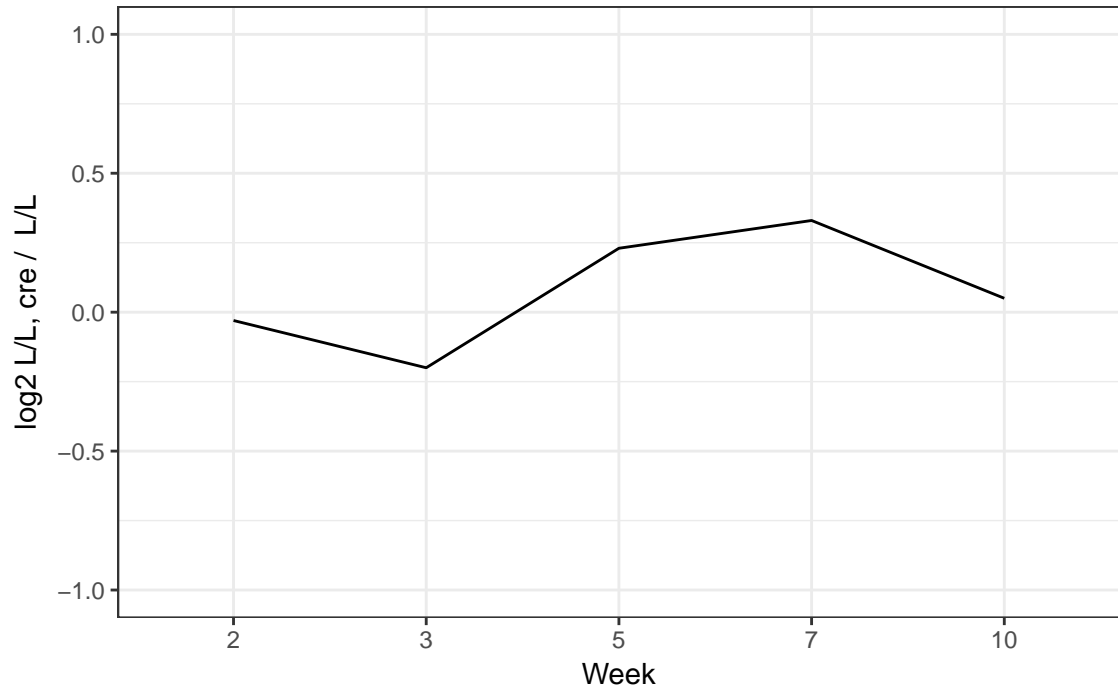

HDHD3 / Q9CYW4; adj.p value: 0.28957

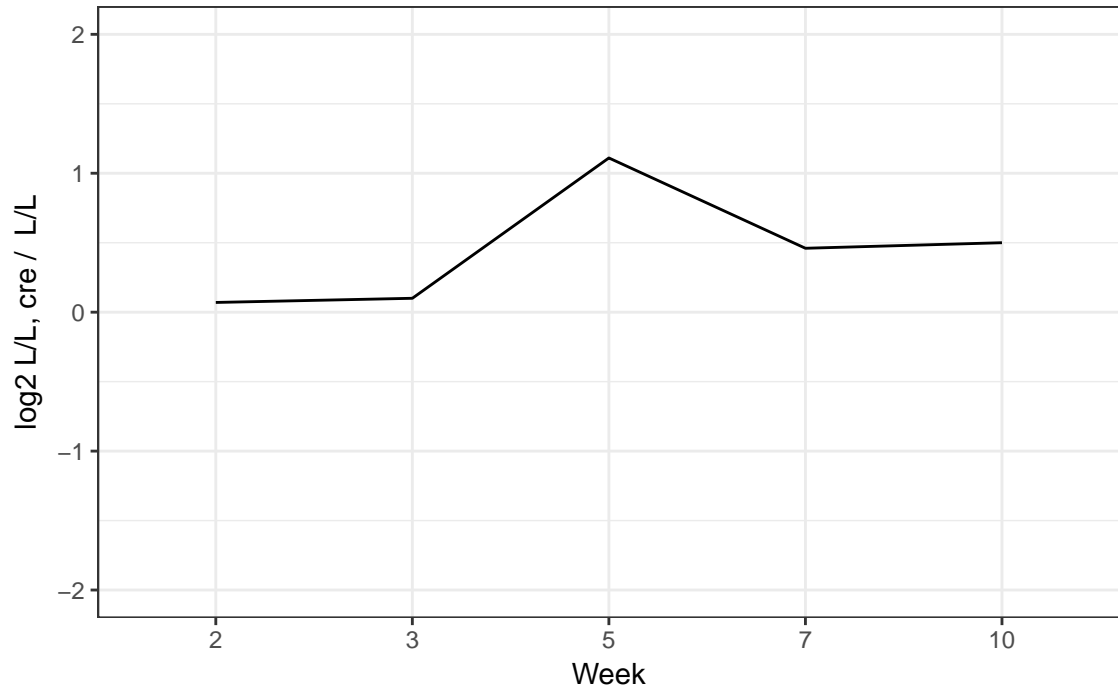

HEBP1 / Q9R257; adj.p value: 0.1569

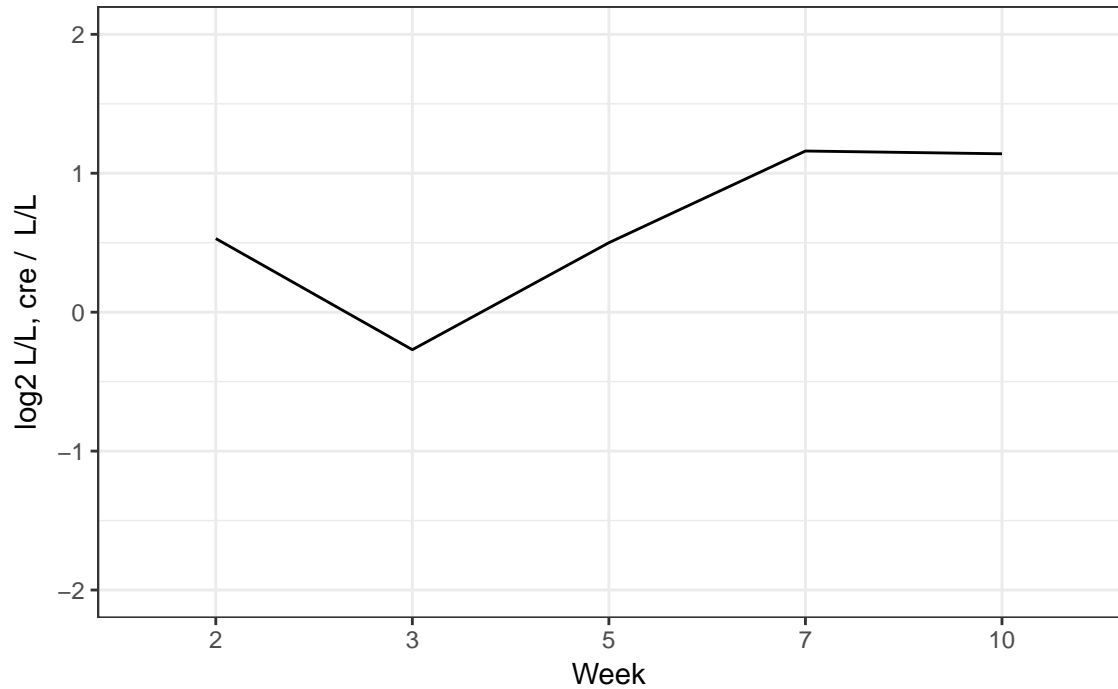

# HIBADH / Q99L13; adj.p value: 0

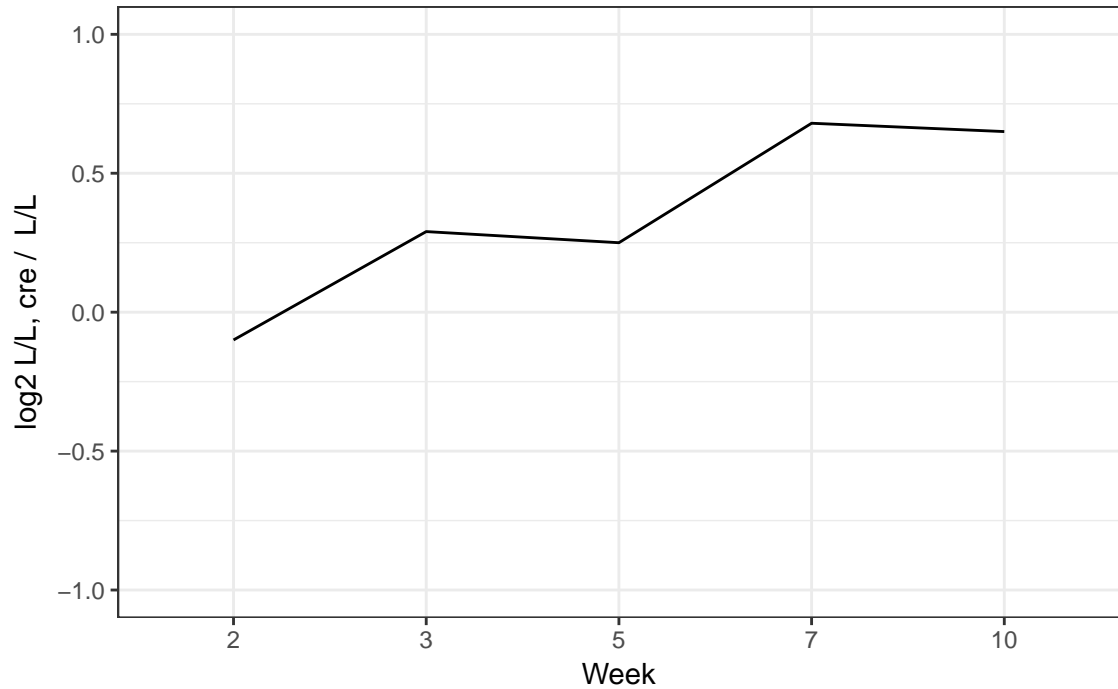

HIBCH / Q8QZS1; adj.p value: 0.05242

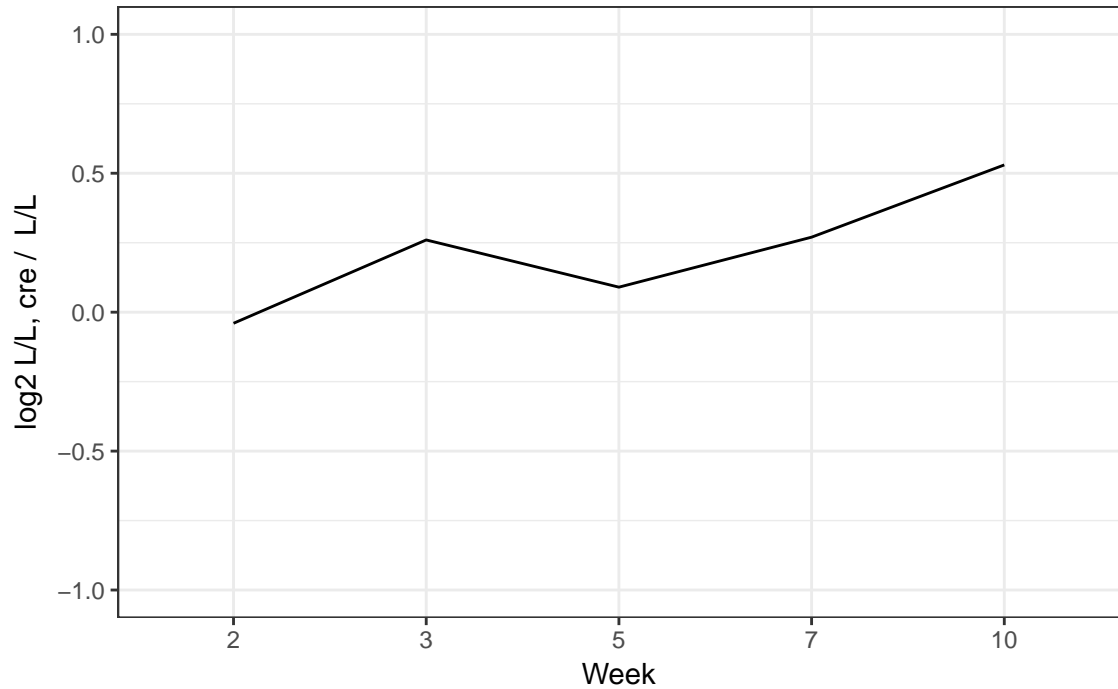



HIGD1A / Q9JLR9; adj.p value: 0.31542

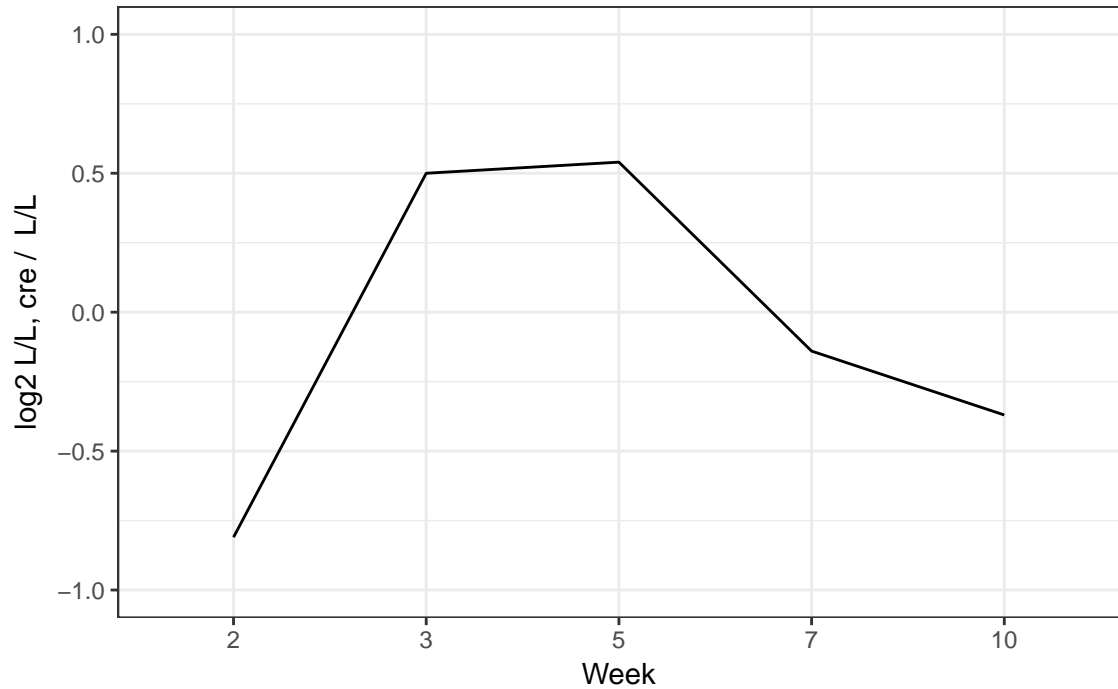

HIGD2A / Q9CQJ1; adj.p value: 0.99819

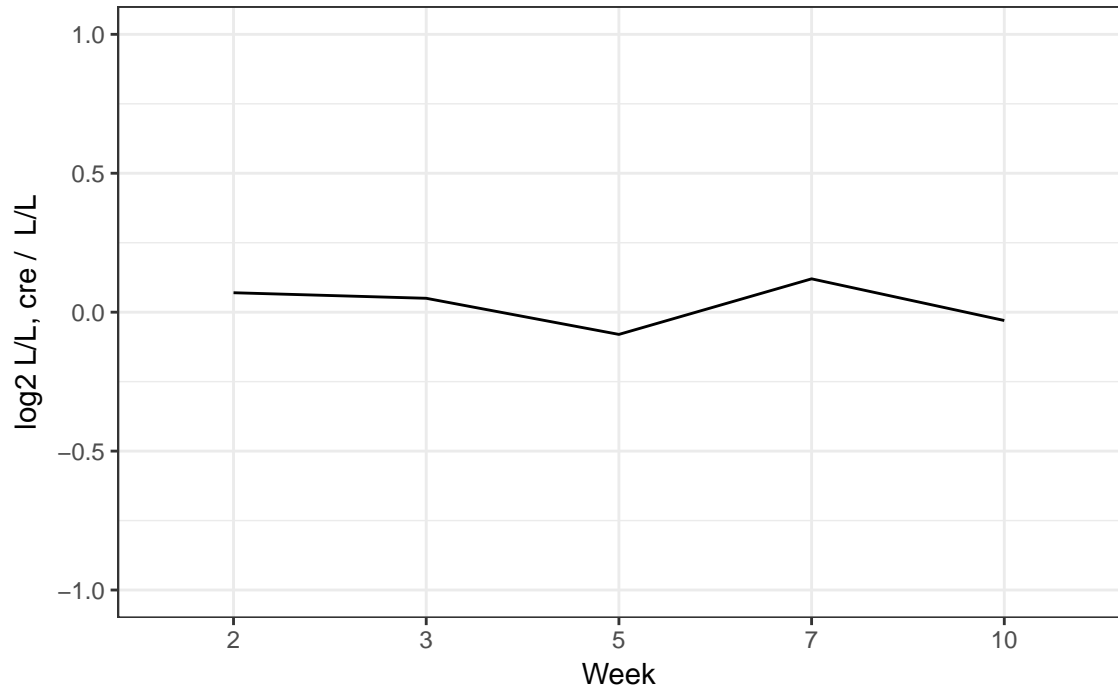

HINT2 / Q9D0S9; adj.p value: 0.13286

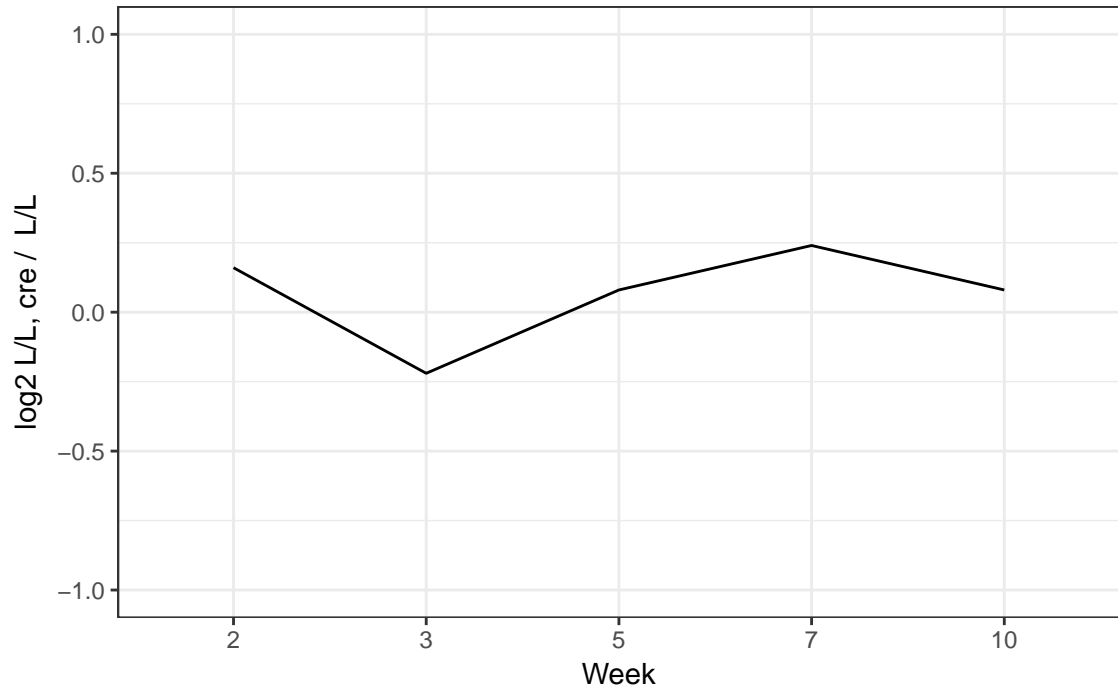

HK1 / P17710-3; adj.p value: 0

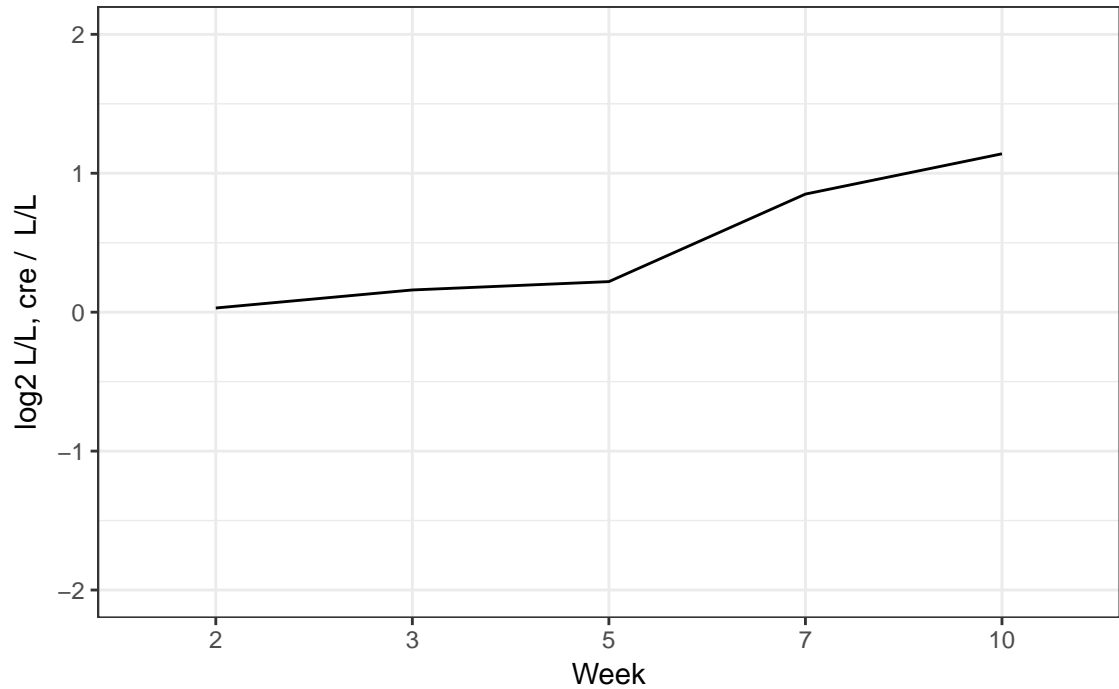

HK2 / O08528; adj.p value: 0

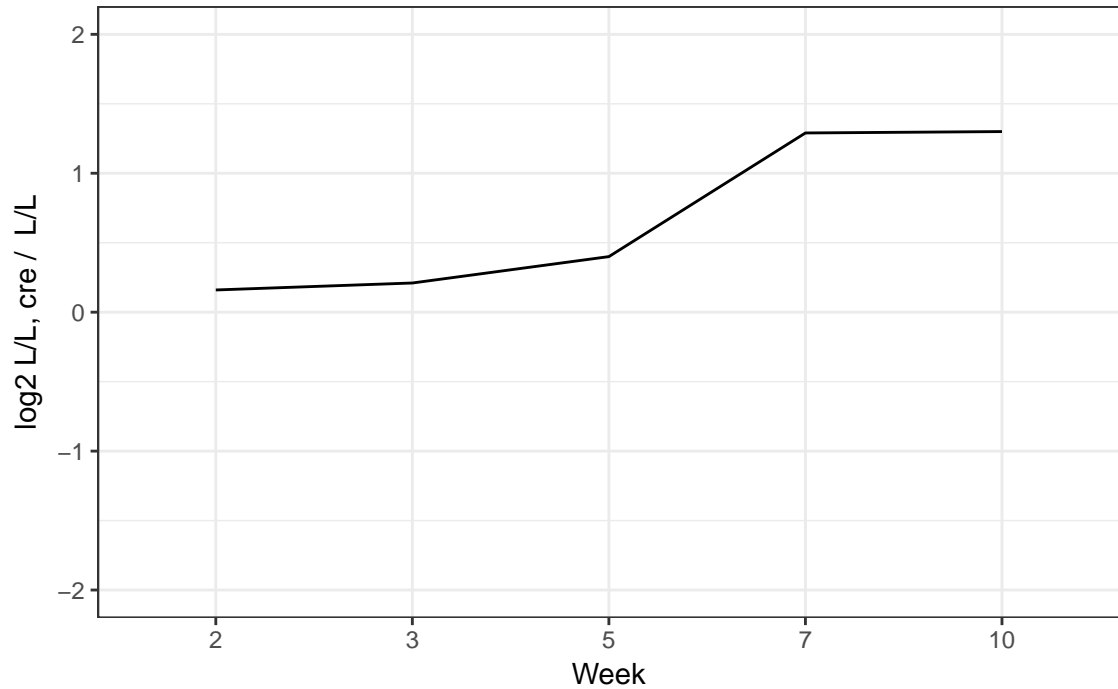

HMGCL / P38060; adj.p value: 0.11407

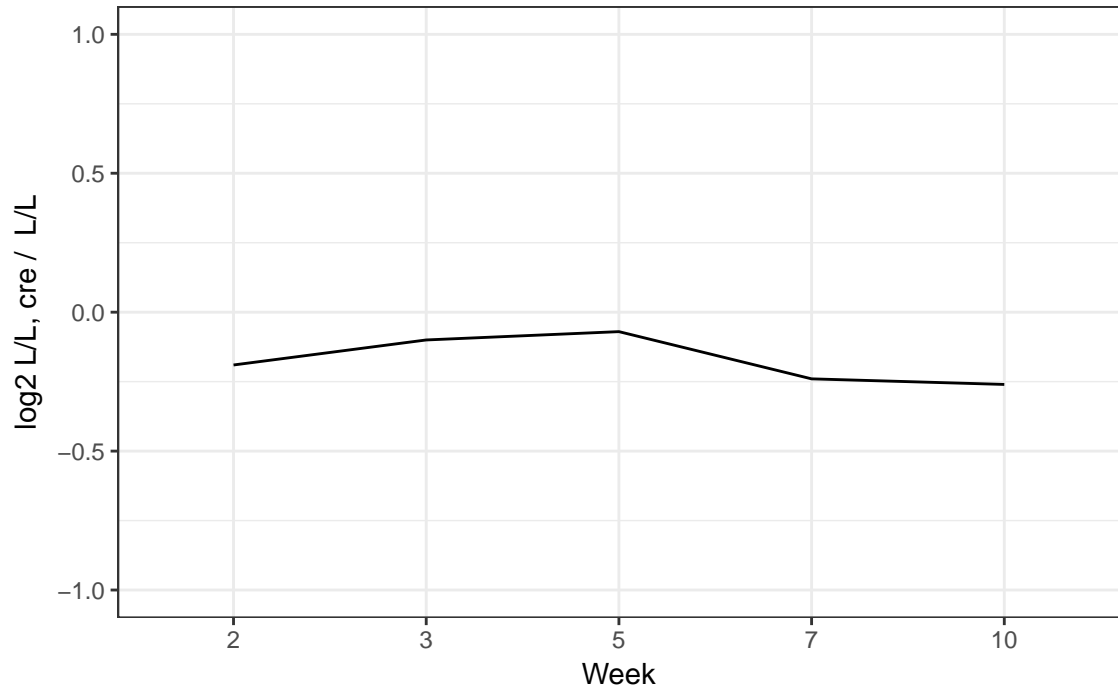

HMGCS2 / P54869; adj.p value: 0.36417

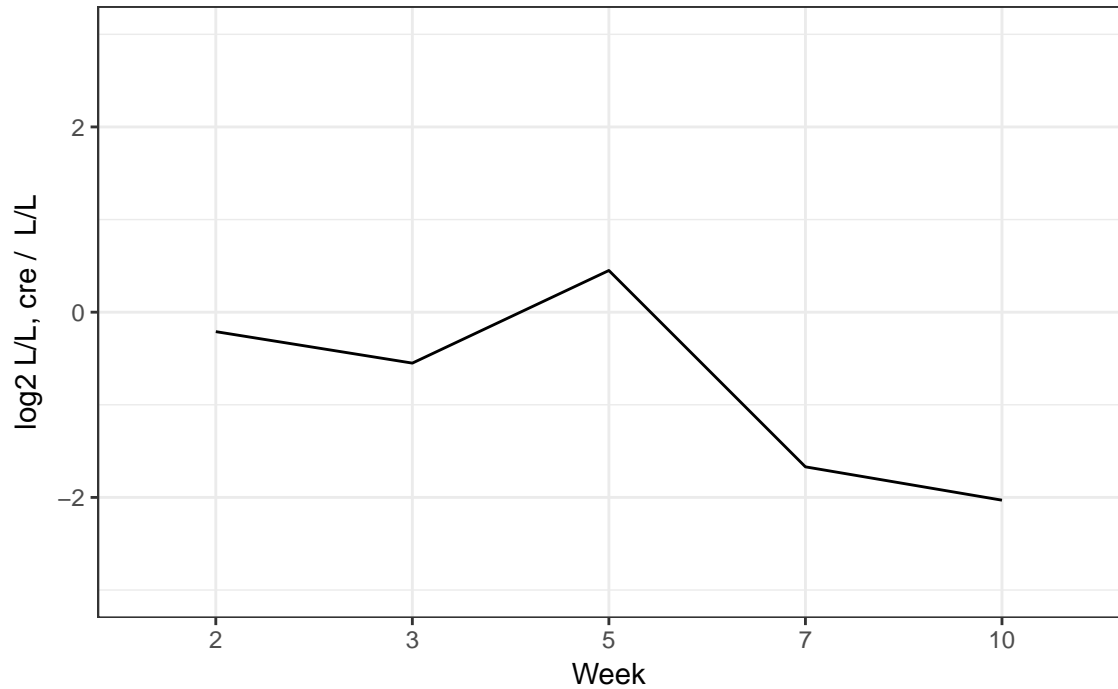

HSCB / Q8K3A0; adj.p value: 0.7976

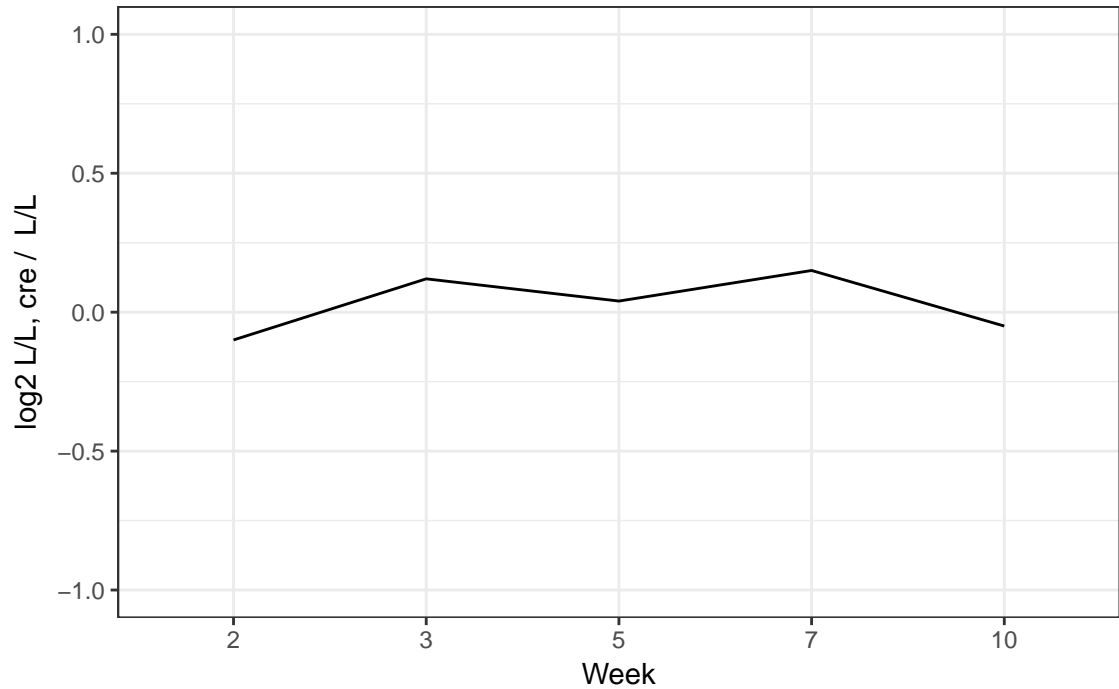



HSD17B10 / Q99N15; adj.p value: 0.31626

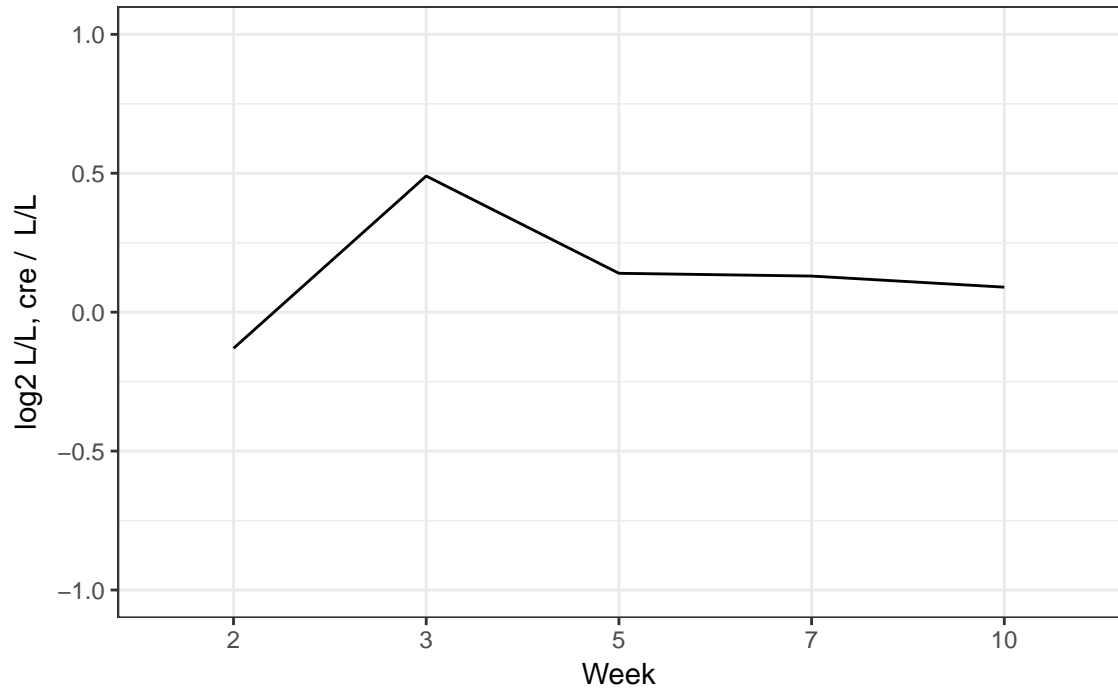

HSD17B4 / P51660; adj.p value: 0.29346

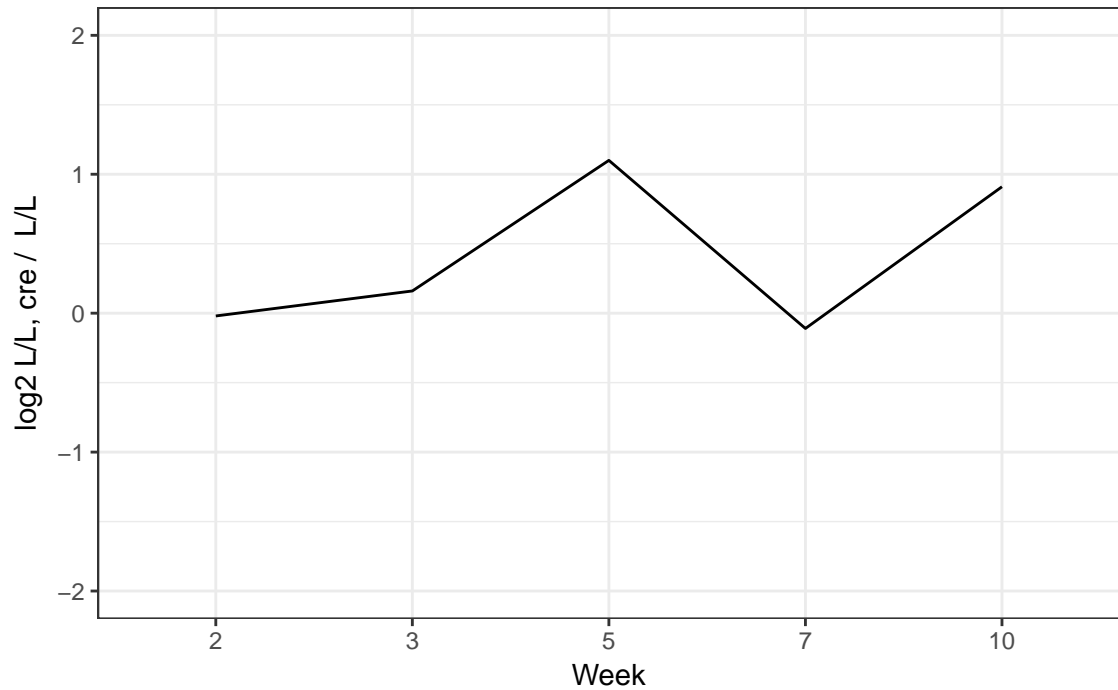

HSD17B8 / P50171; adj.p value: 0.68943

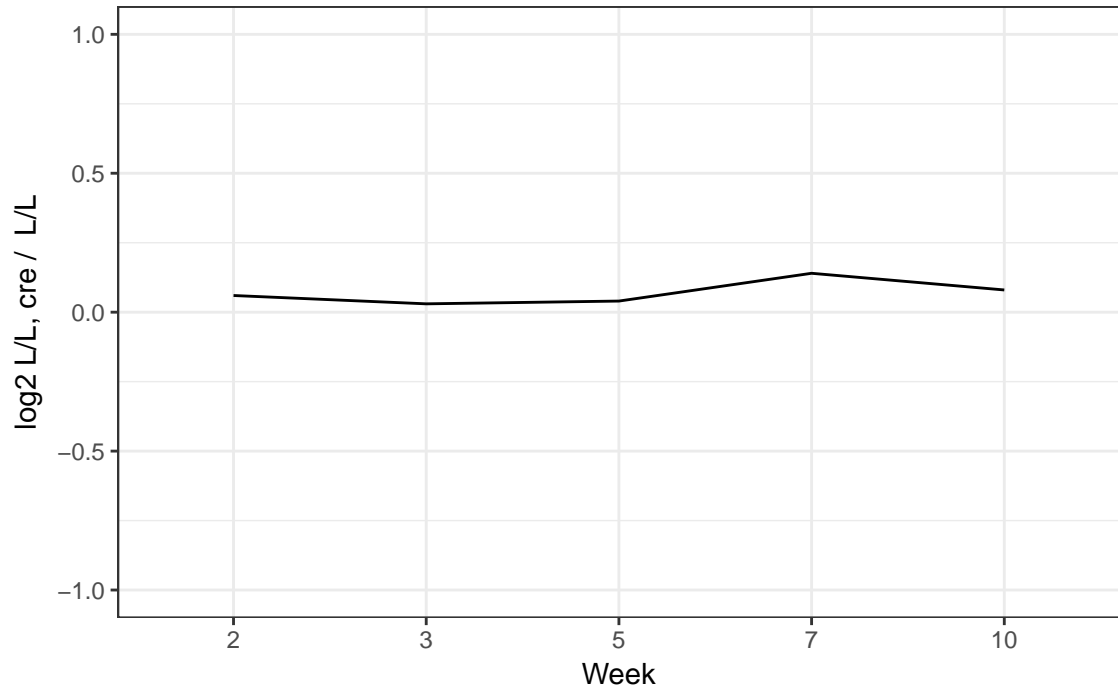

HSDL1 / Q8BTX9; adj.p value: 0.93428

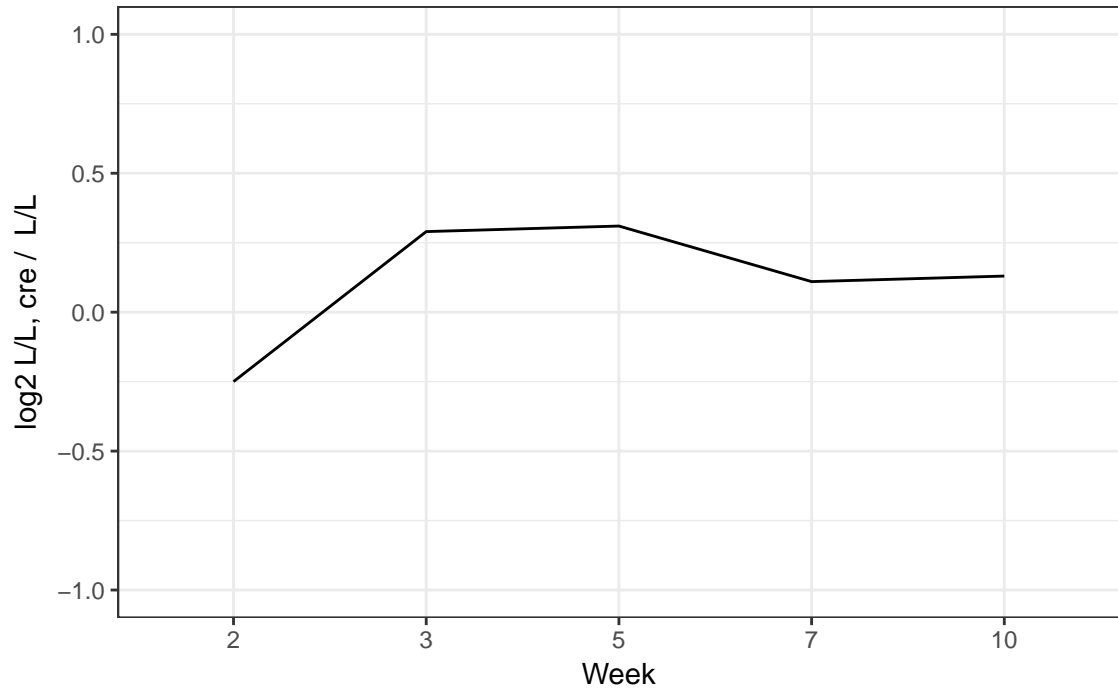

HSDL2 / Q2TPA8; adj.p value: 0.07912

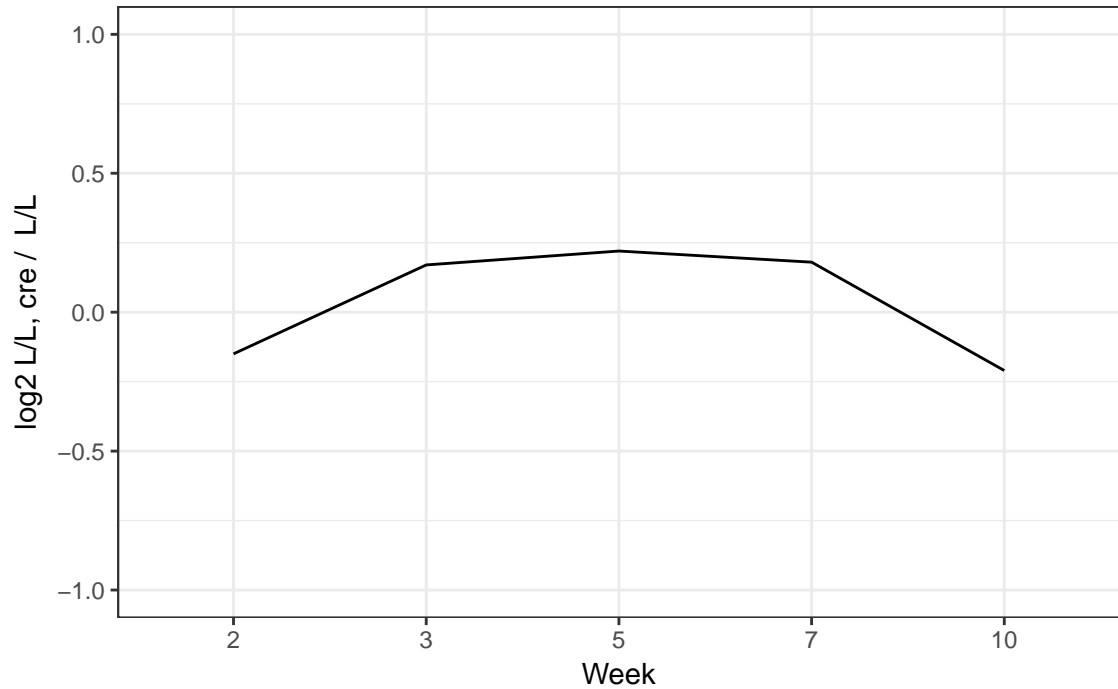

HSPA9 / P38647; adj.p value: 0

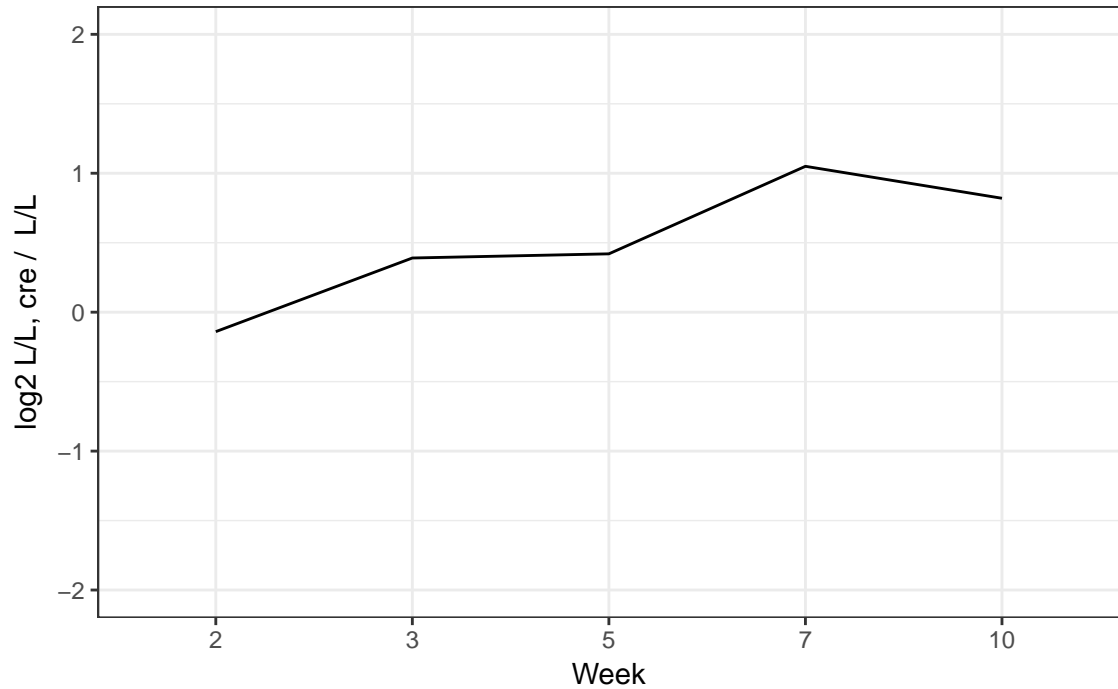

HSPD1 / P63038; adj.p value:  $3e-05$

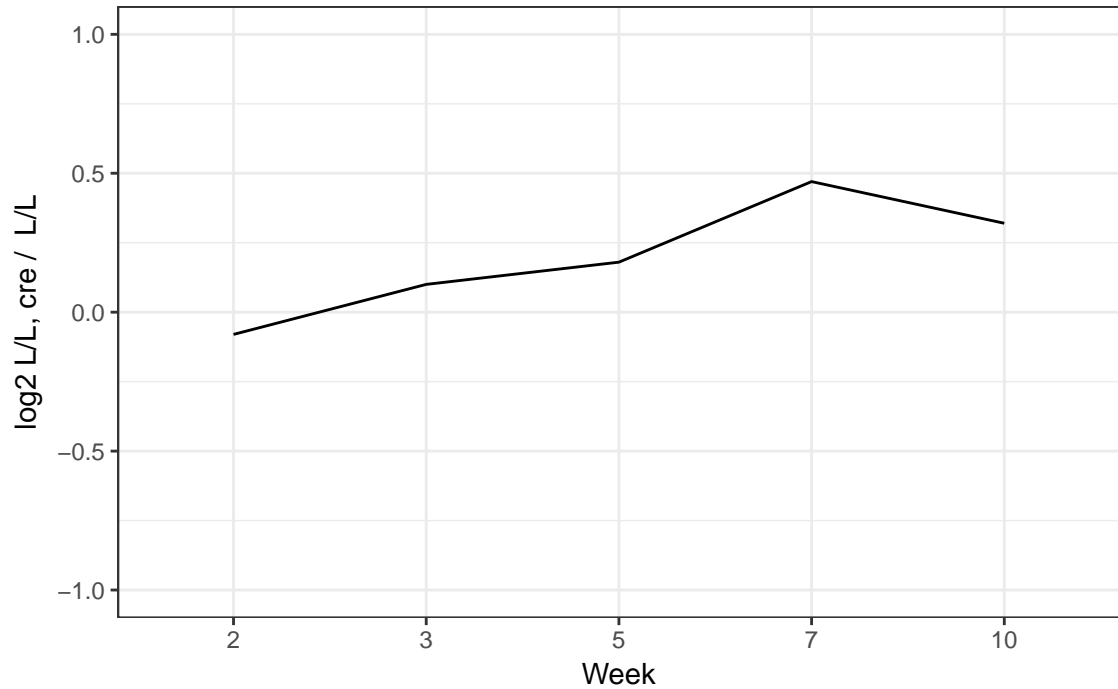

HSPE1 / Q64433; adj.p value: 0.05022

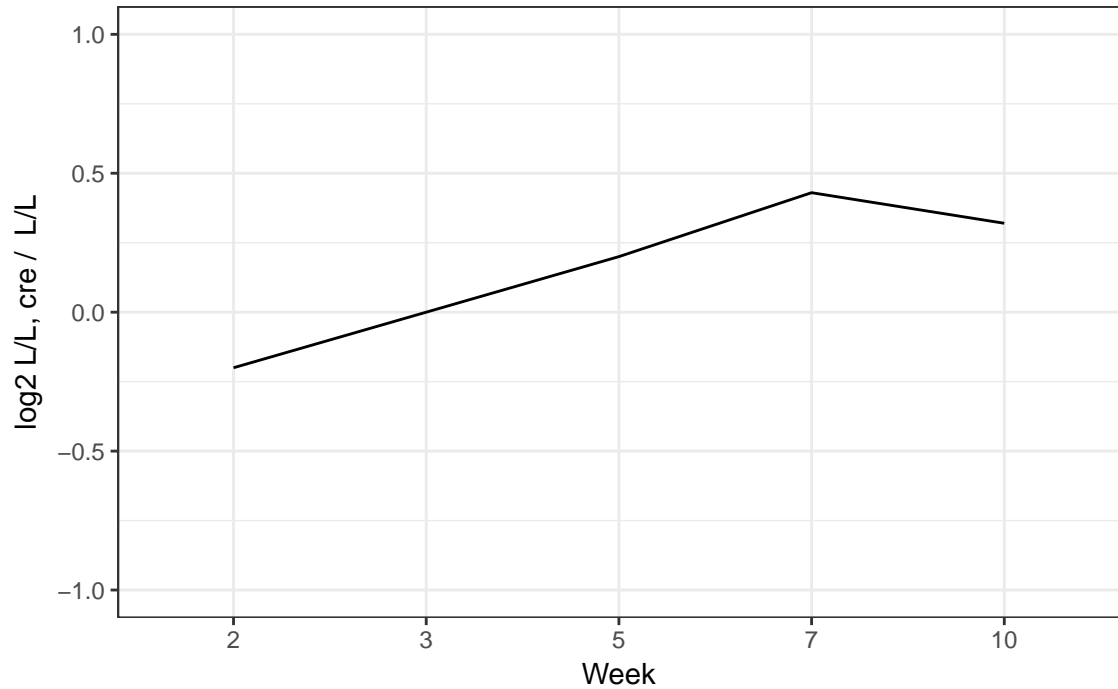



HTATIP2 / Q9Z2G9; adj.p value: 3e-05

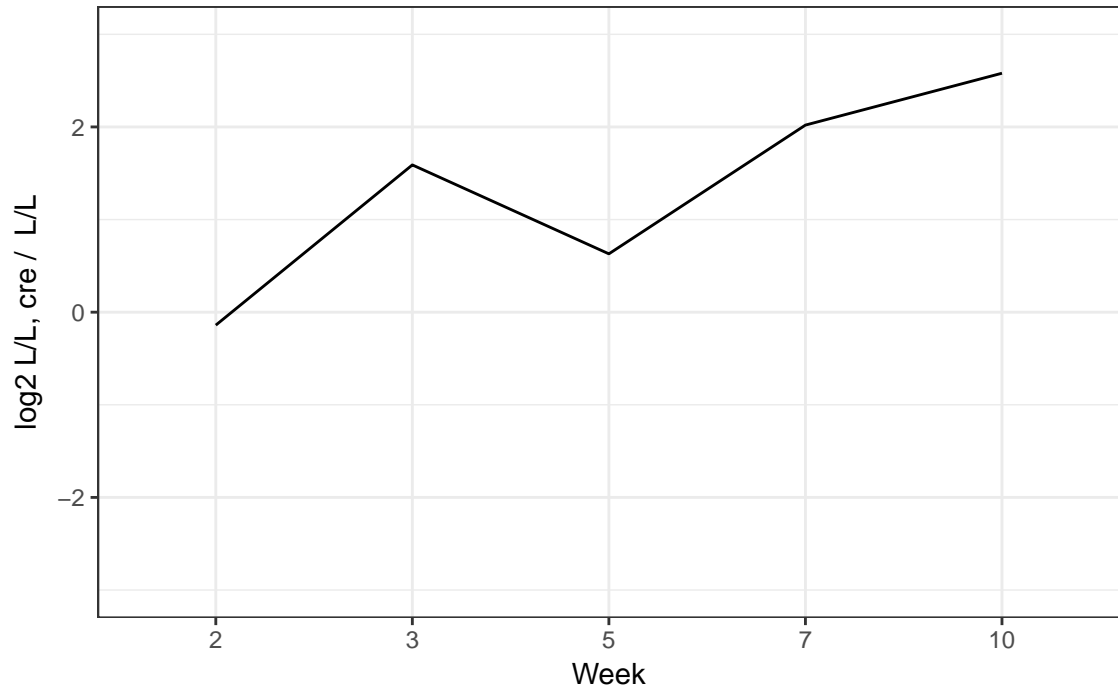

HTRA2 / Q9JIY5; adj.p value: 0.00932

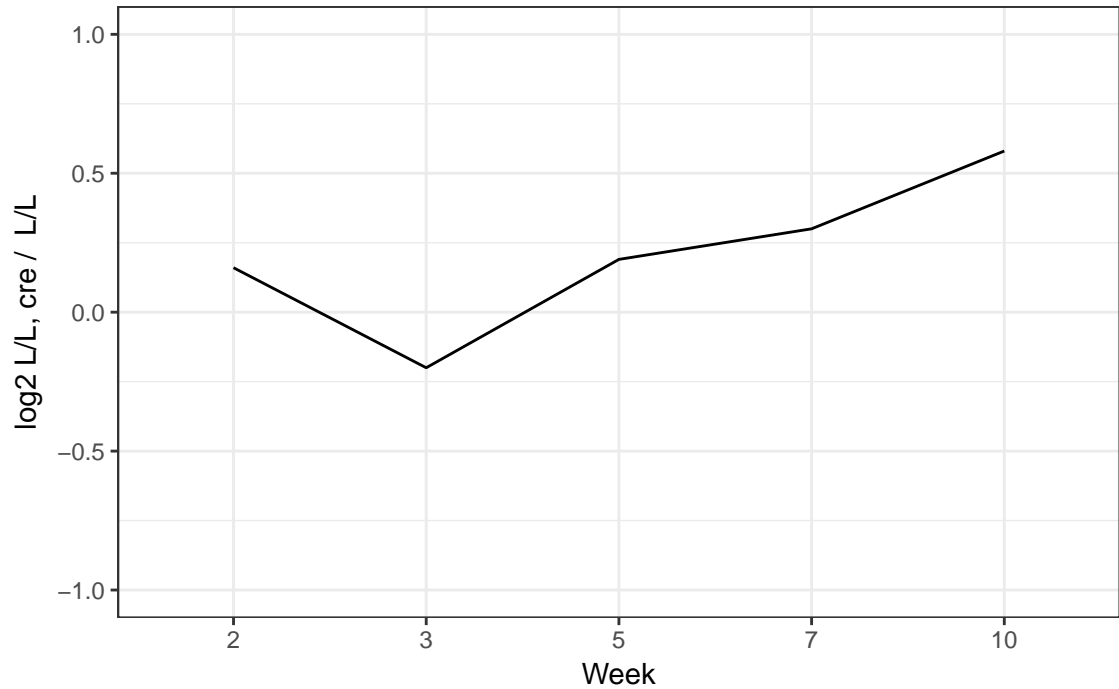

IARS2 / Q8BIJ6; adj.p value: 0.61581

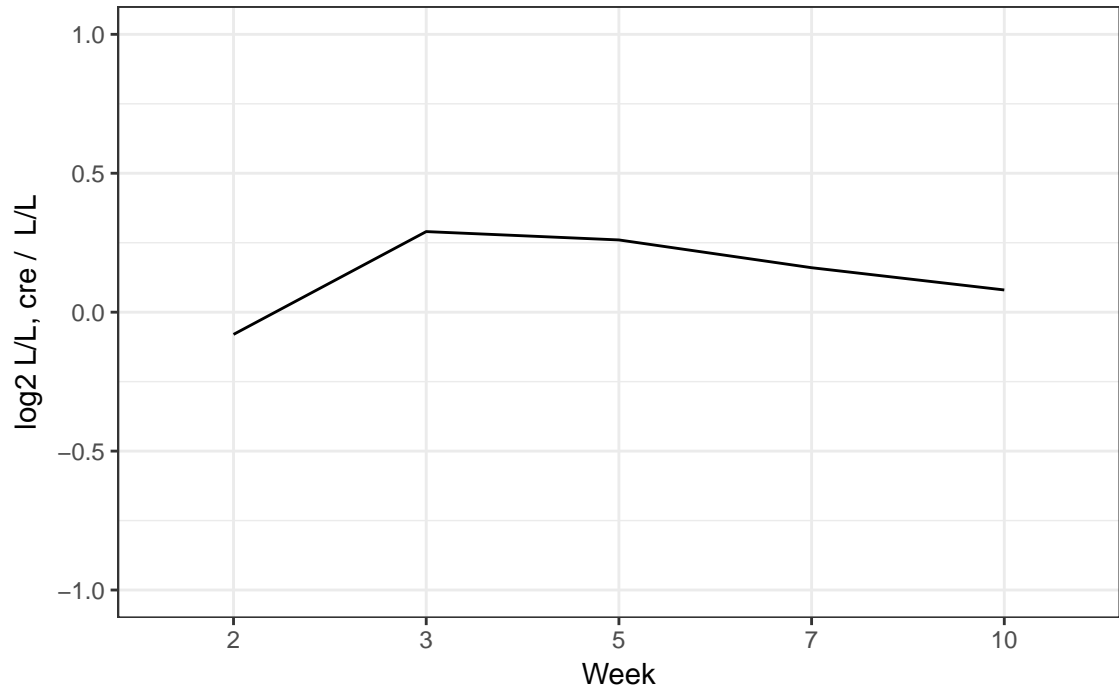

IBA57 / Q8CAK1; adj.p value: 0.33356

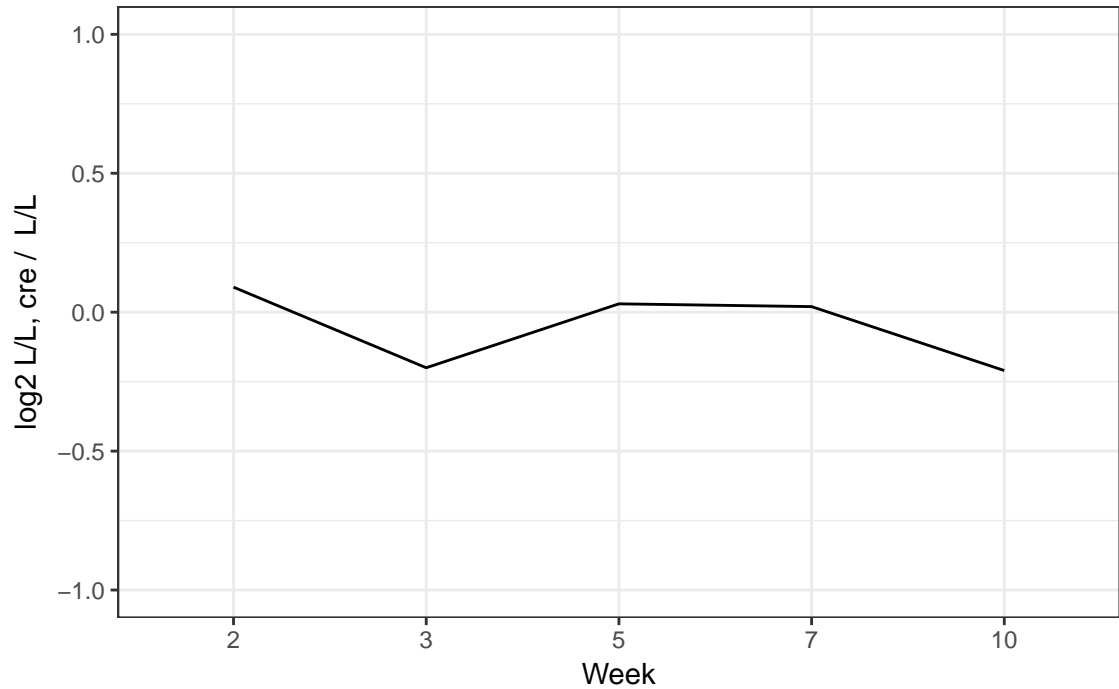

IDH2 / P54071; adj.p value: 0.03087

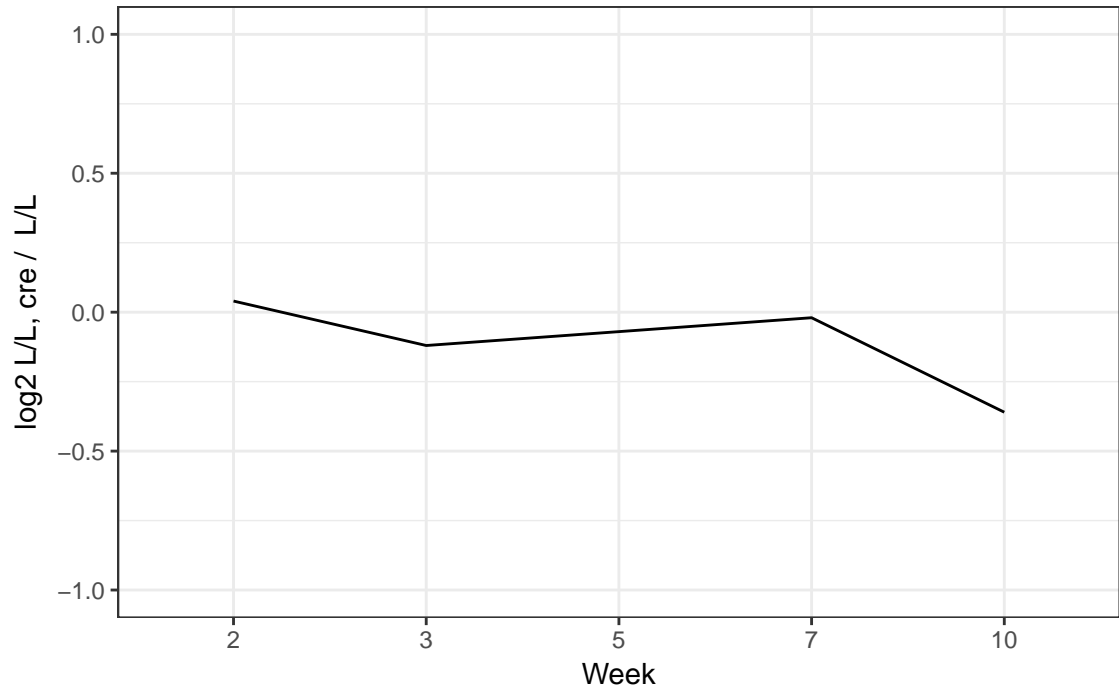

IDH3A / Q9D6R2; adj.p value: 0.65154

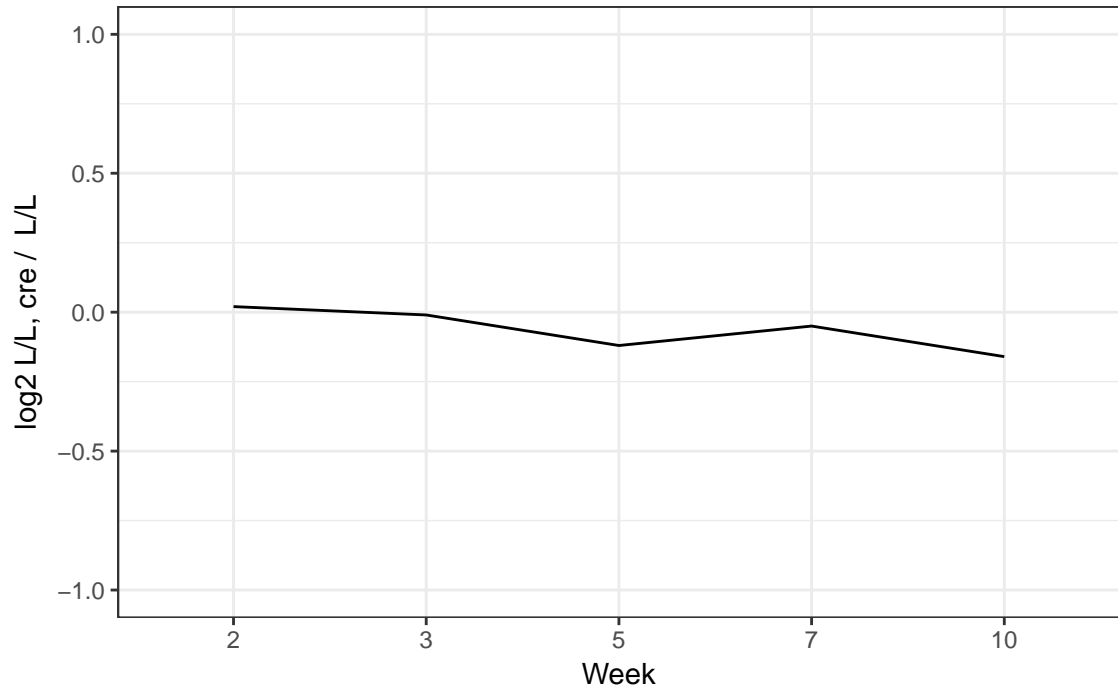

IDH3B / Q91VA7; adj.p value: 0.60311

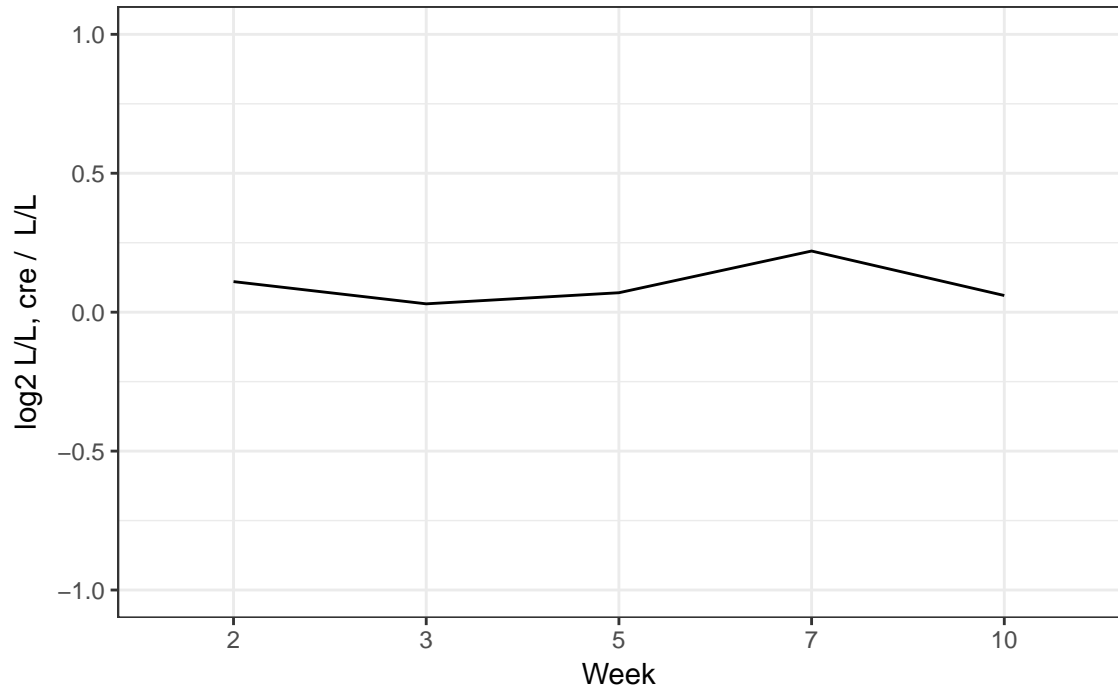

IDH3G / P70404; adj.p value: 0.94963

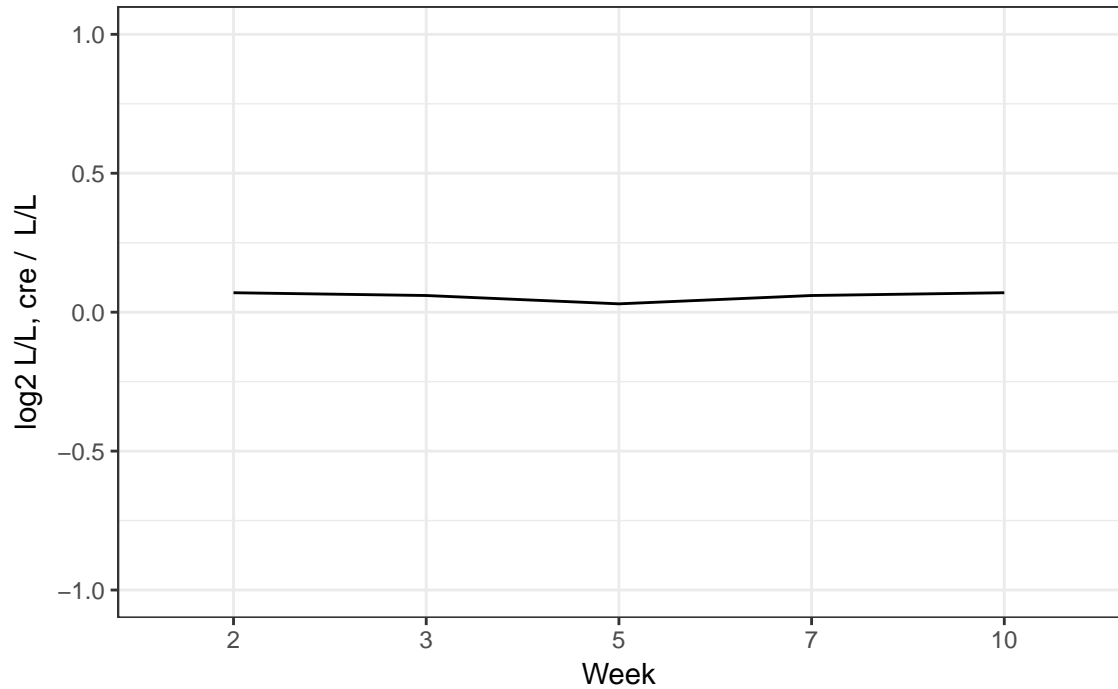



IMMT / E9Q800; adj.p value: 0.71404

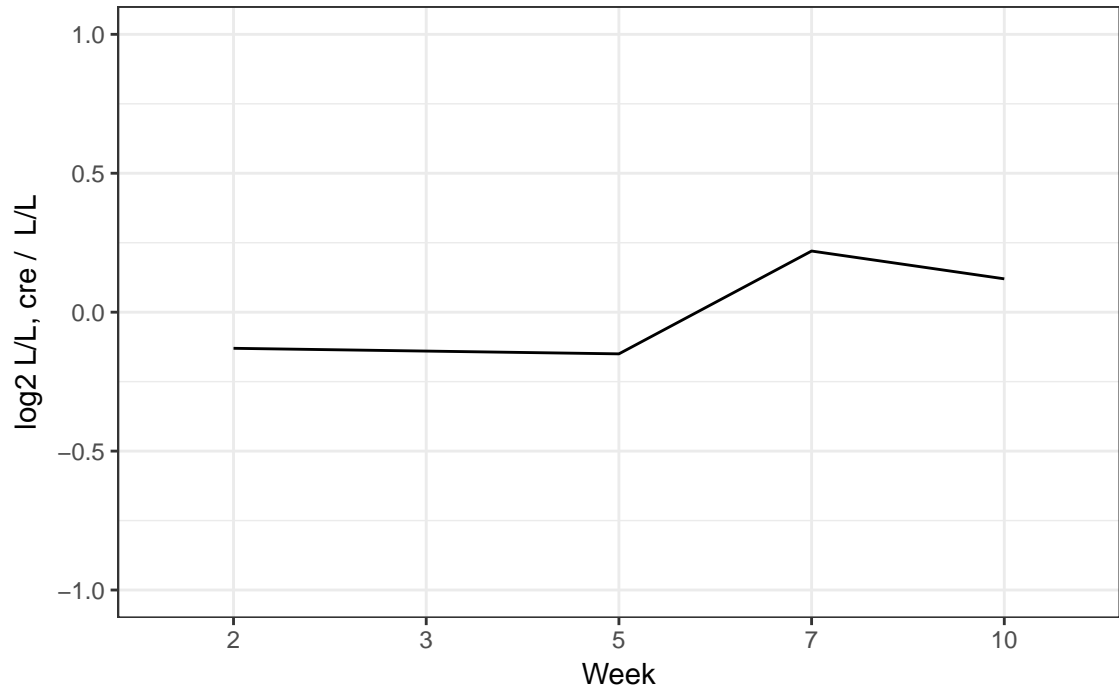

IMMT / Q8CAQ8-2; adj.p value: 0.51032

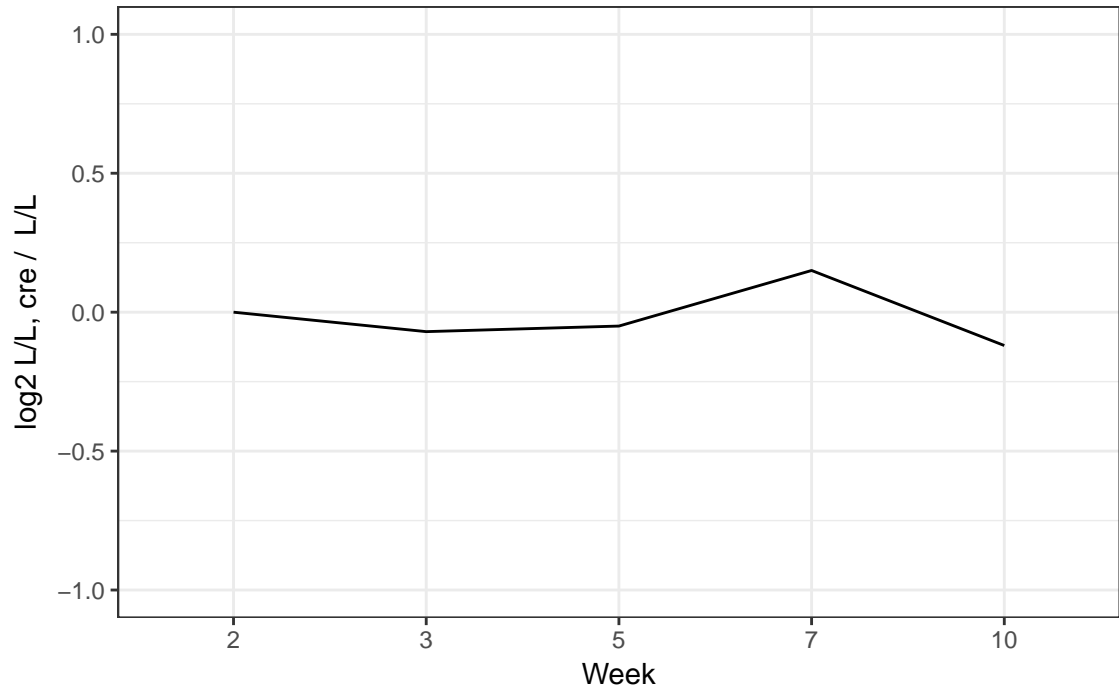

ISCA2 / Q9DCB8; adj.p value: 0.08068

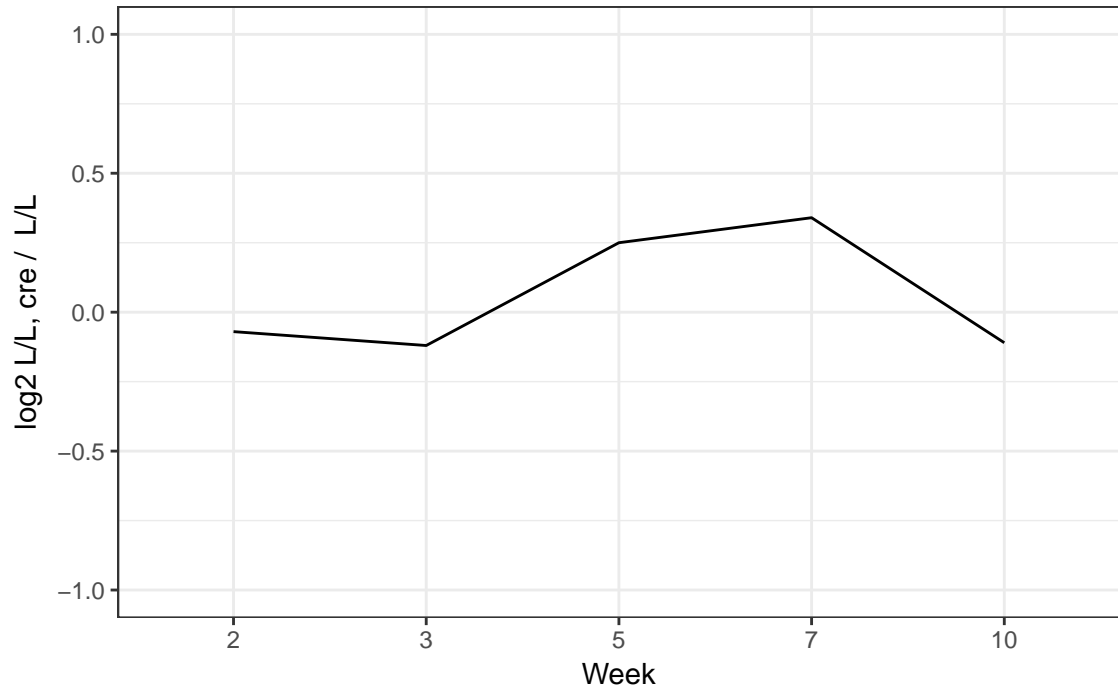

ISCU / Q9D7P6; adj.p value: 0.00014

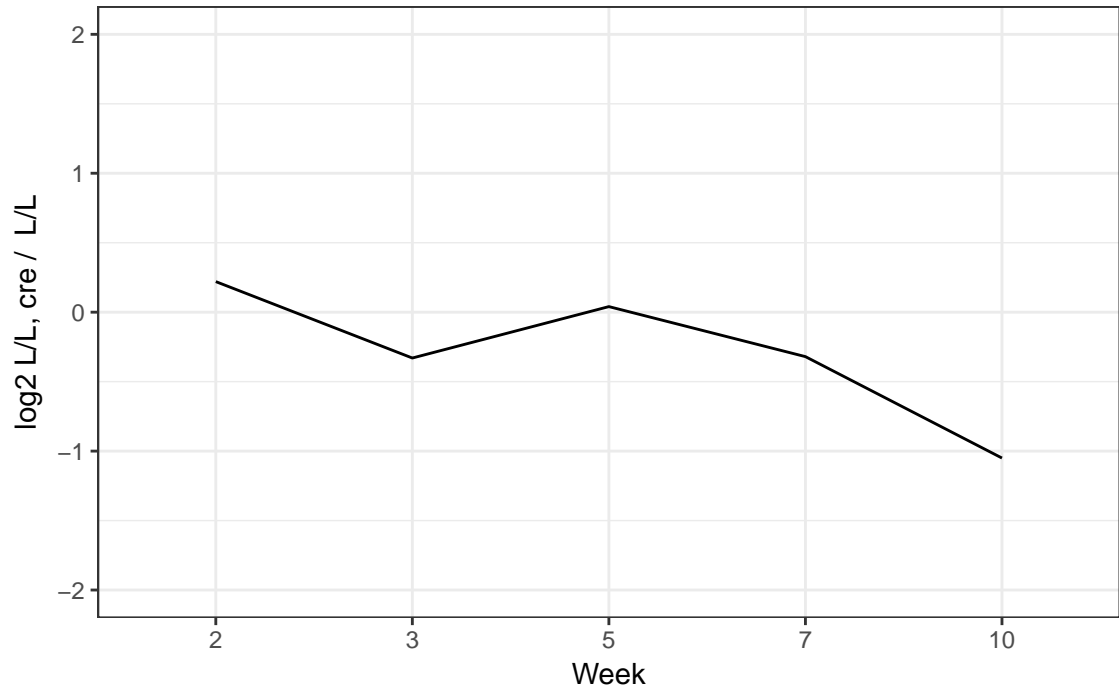

ISOC2A / P85094; adj.p value: 0.72368

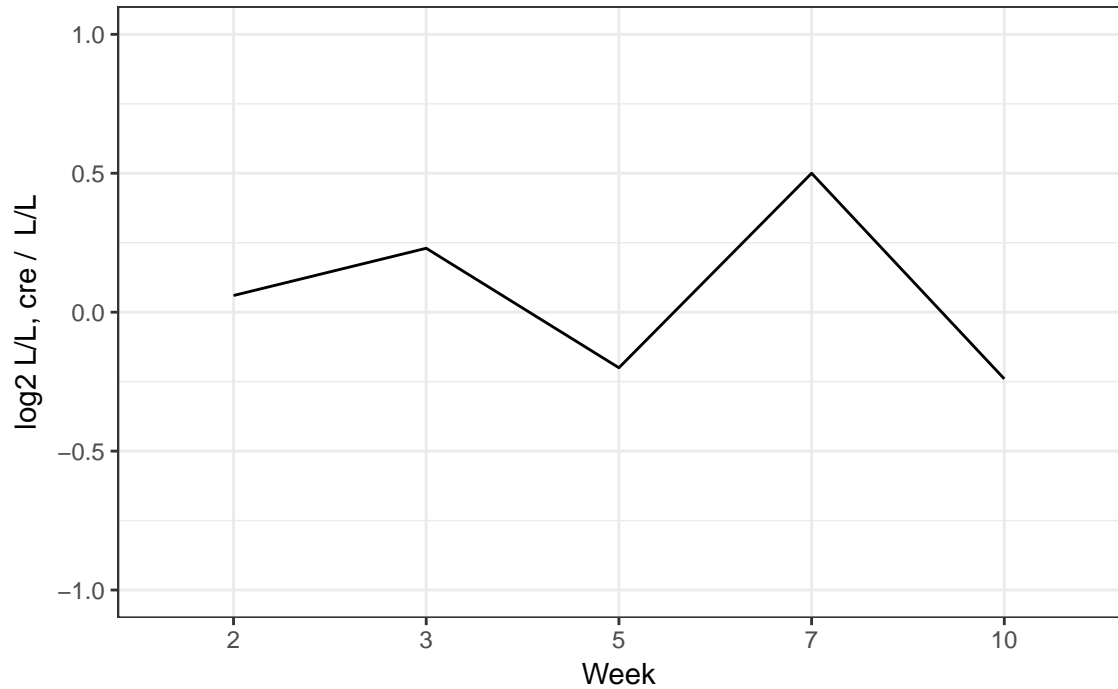

IVD / Q9JHI5; adj.p value: 0

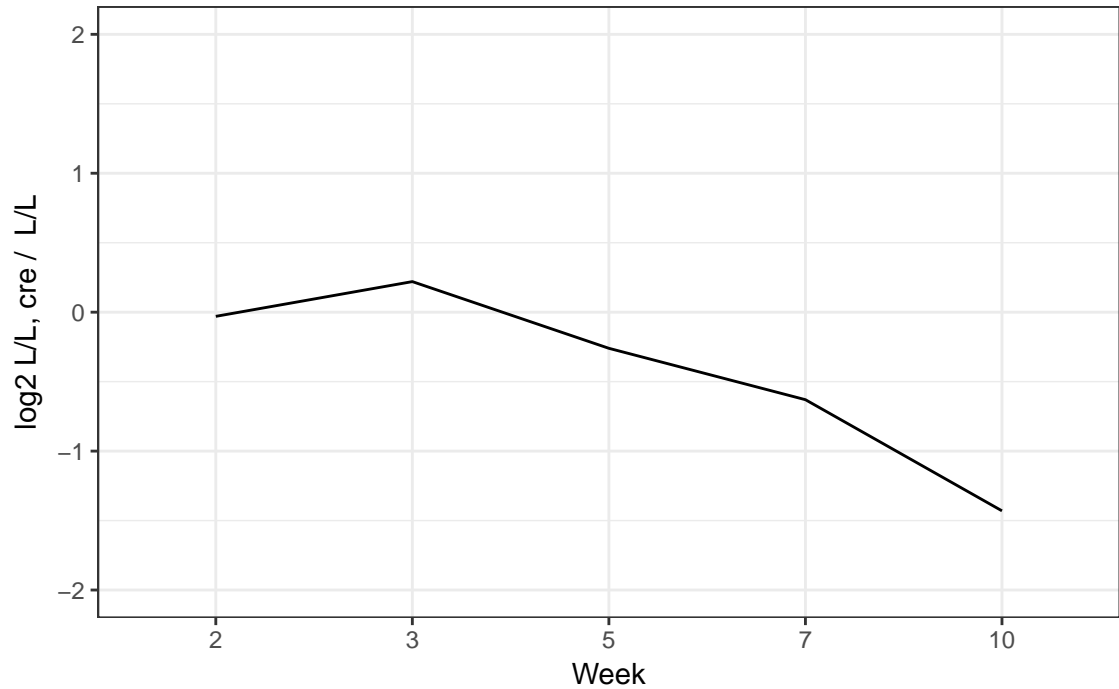

KARS / Q8R2P8; adj.p value: 0.08167

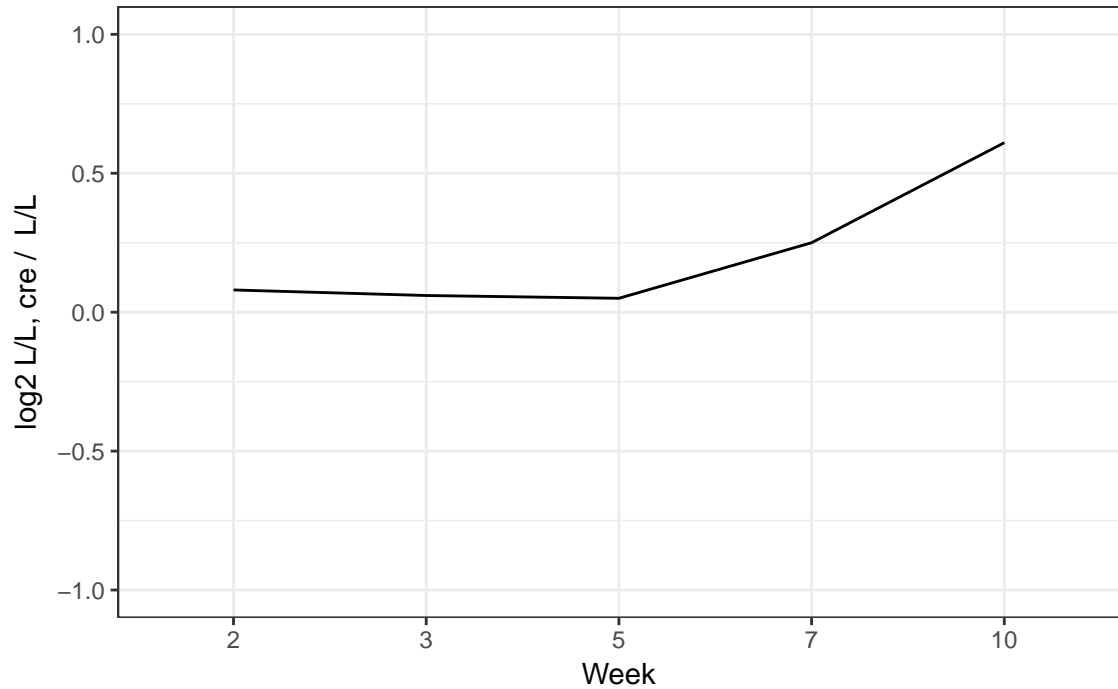

KIAA0391 / Q8JZY4; adj.p value: 0.27769

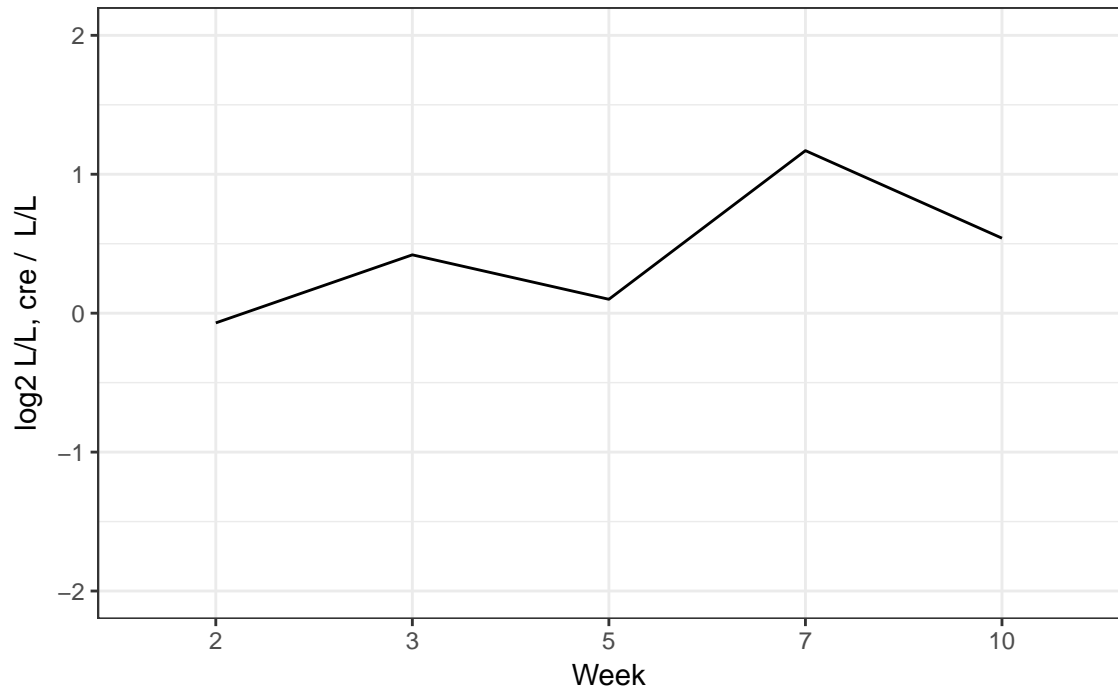



L2HGDH / Q91YP0; adj.p value: 0.17372

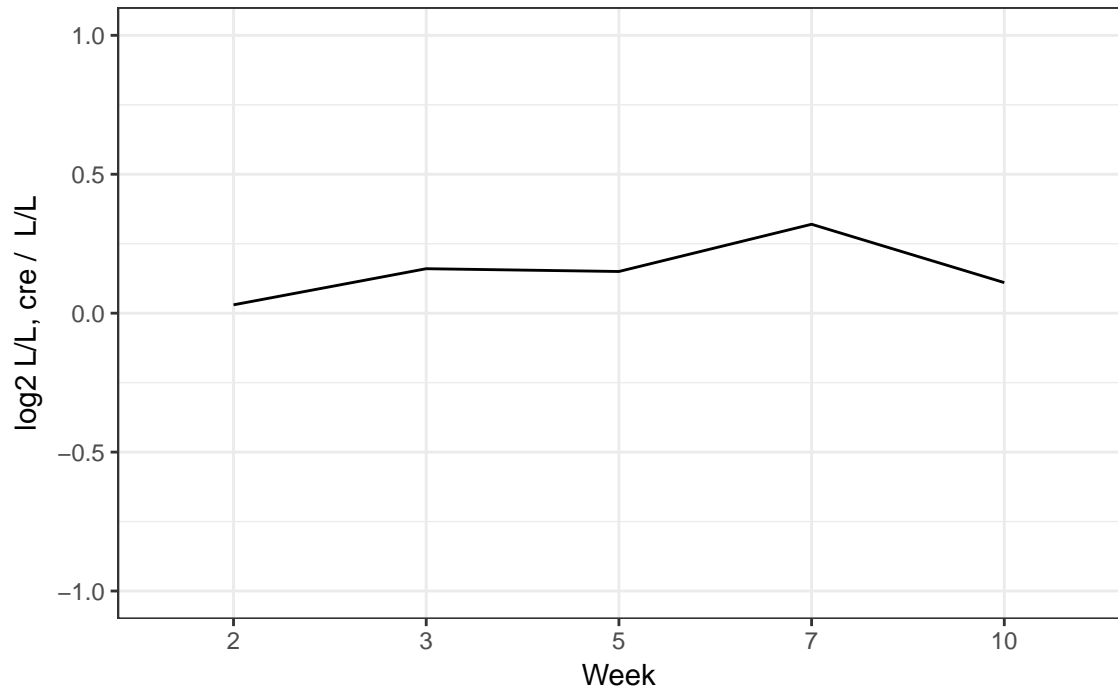

LACE1 / Q3V384; adj.p value: 0.00197

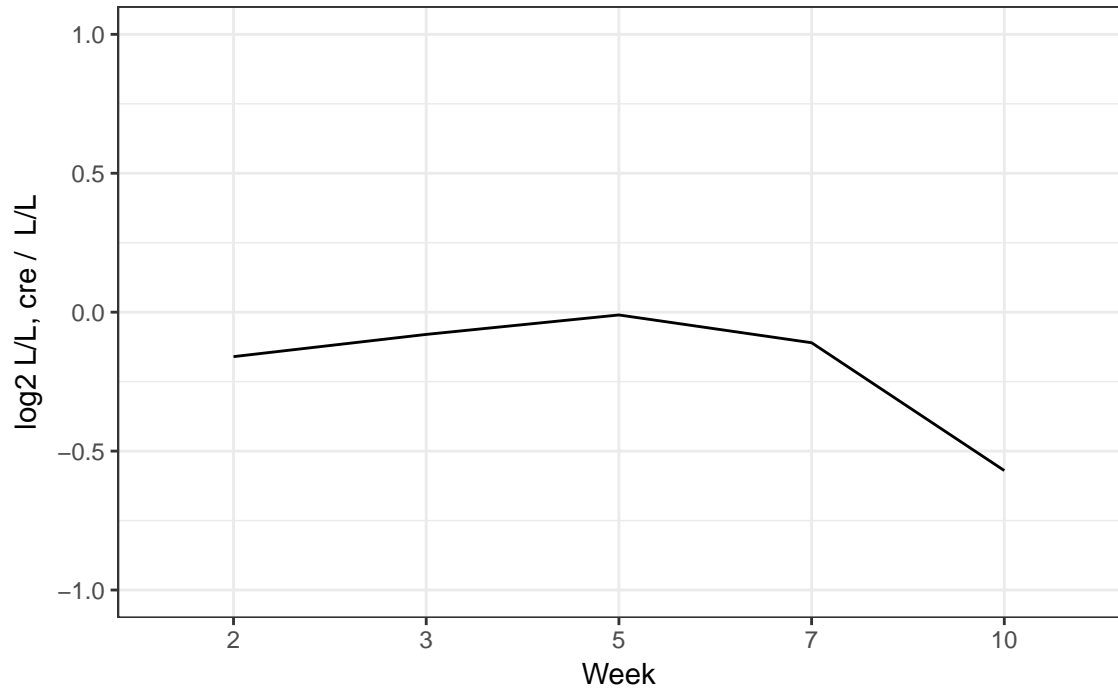

LACTB / Q9EP89; adj.p value: 0.03465

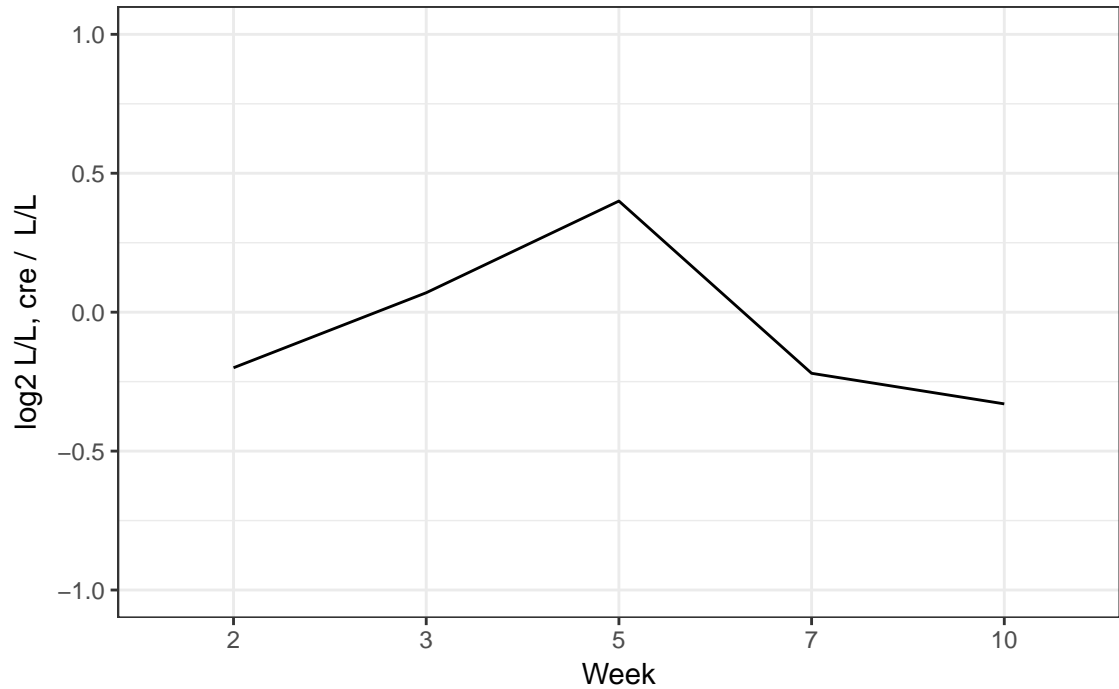

LAP3 / Q9CPY7; adj.p value: 0

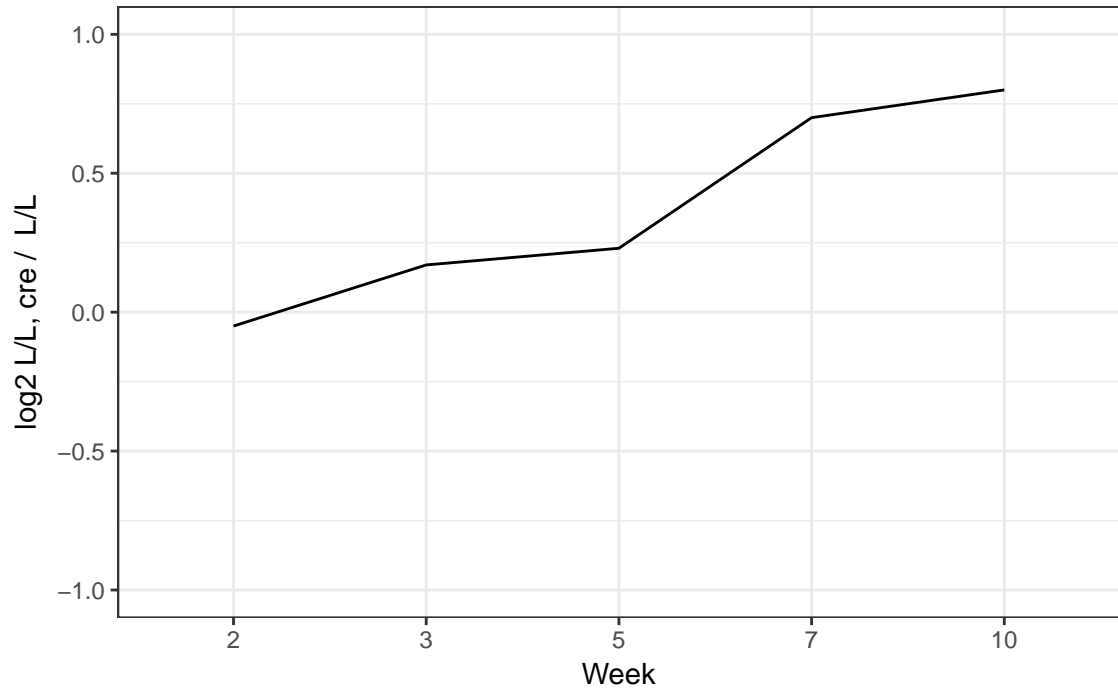

LARS2 / Q8VDC0; adj.p value: 0.00027

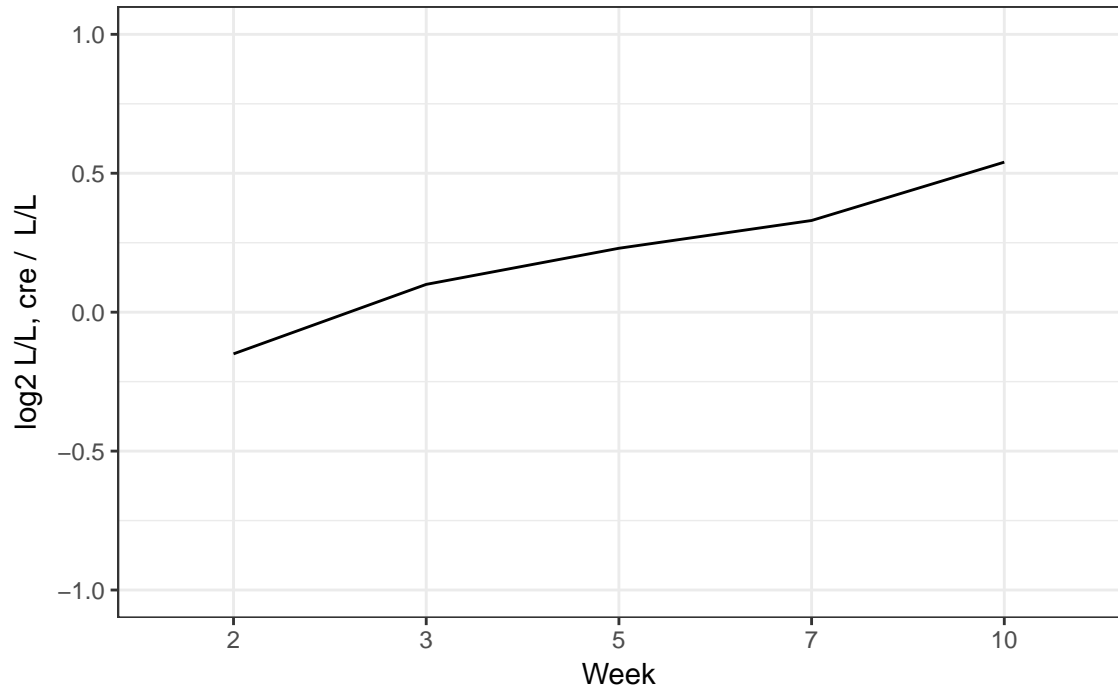

LDHD / Q7TNG8; adj.p value: 0.03465

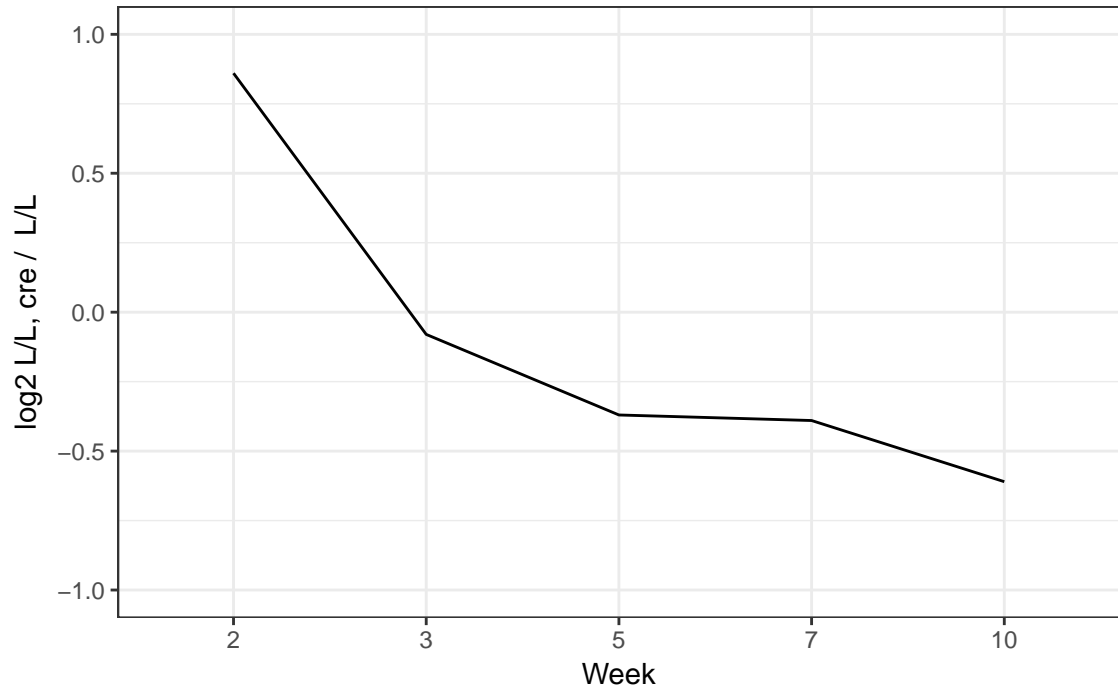

LETM1 / Q9Z2I0; adj.p value: 0.00037

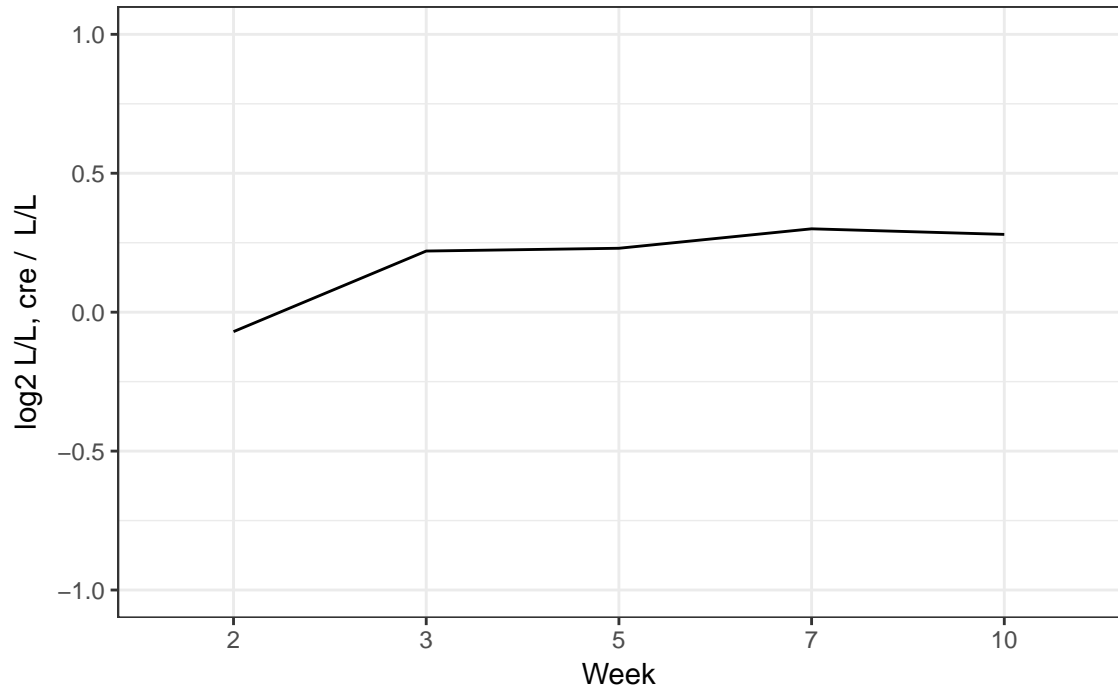

LETMD1 / Q924L1-2; adj.p value: 0.00327

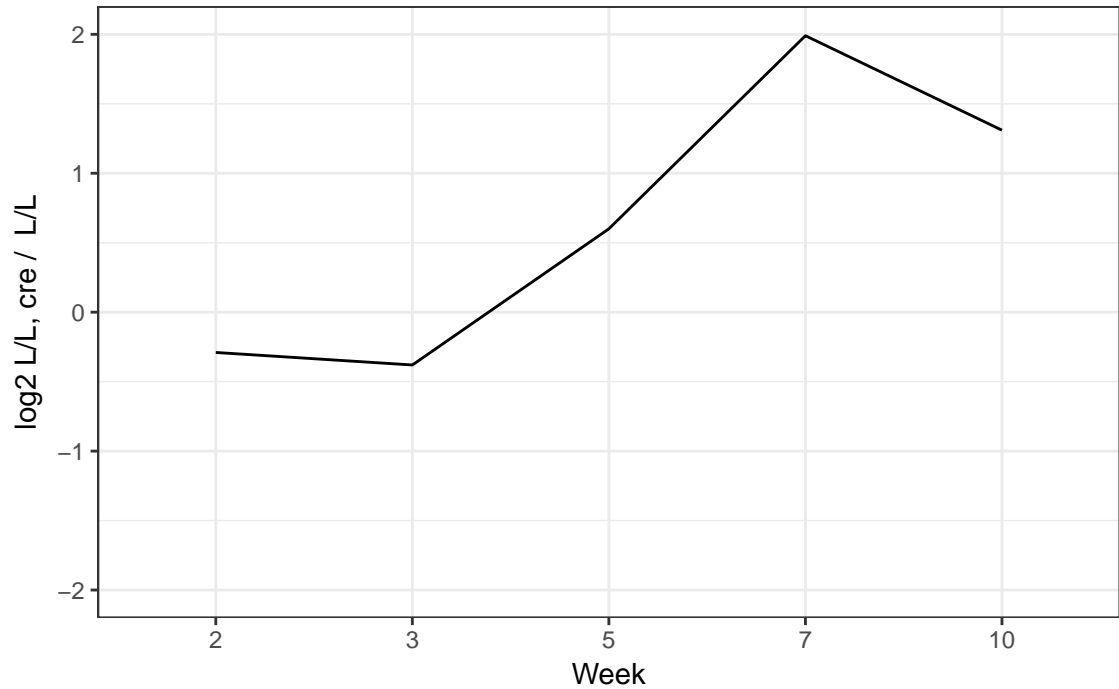



LIAS / Q99M04; adj.p value: 0.131

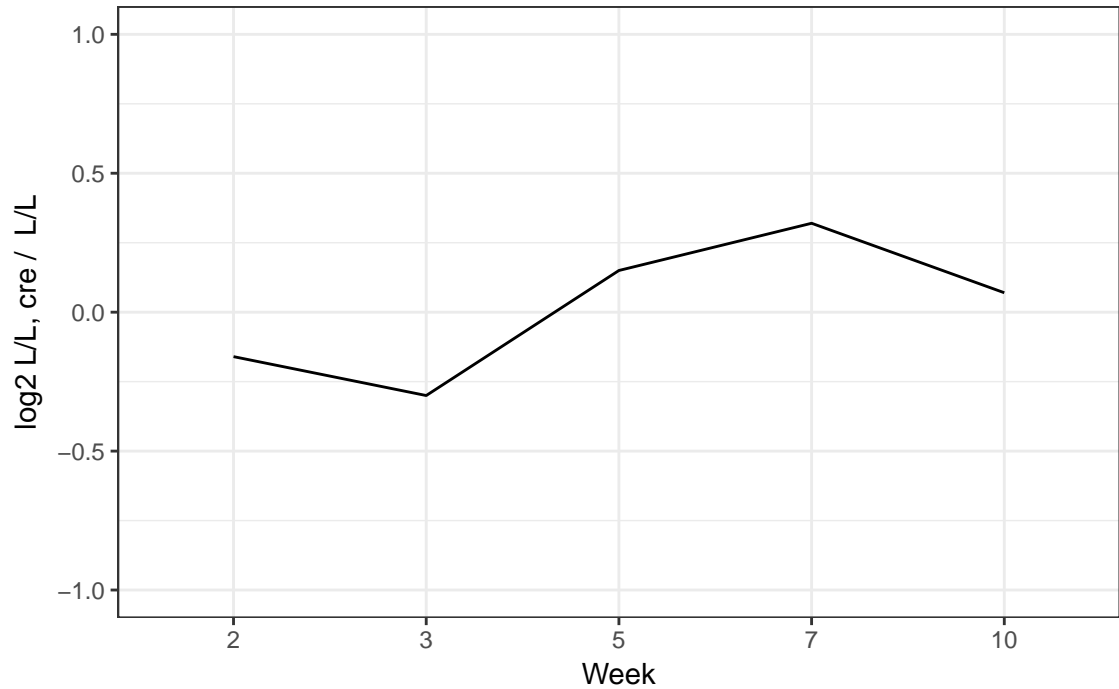

LIPT1 / Q8VCM4; adj.p value: 0.34658

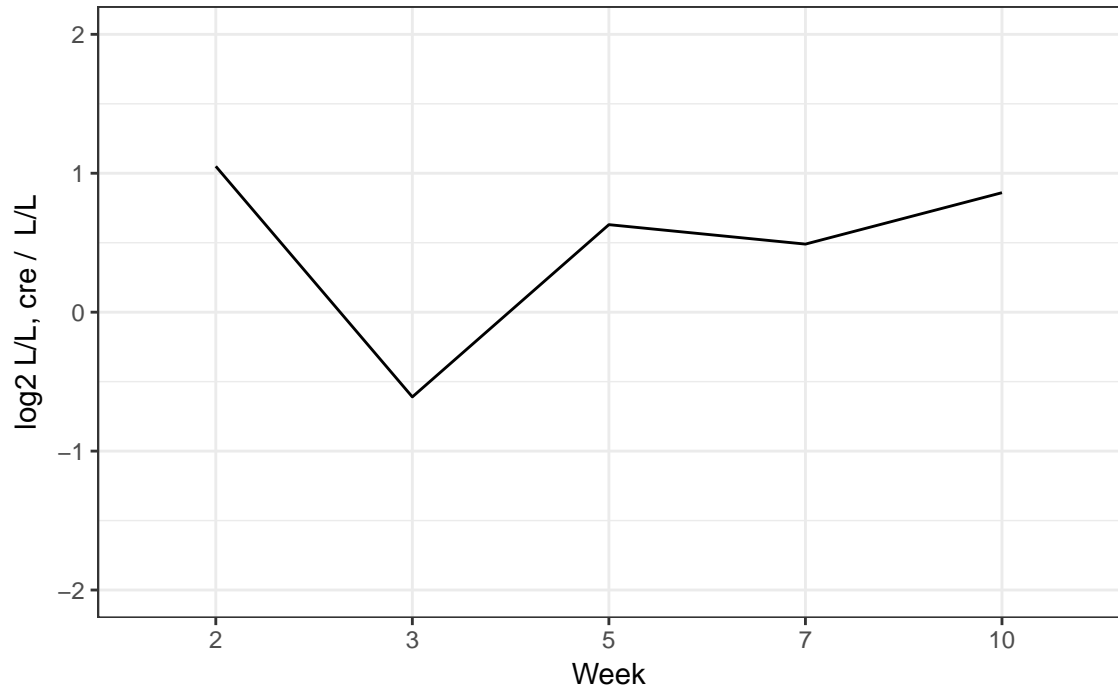

LIPT2 / Q9D009; adj.p value: 0.68319

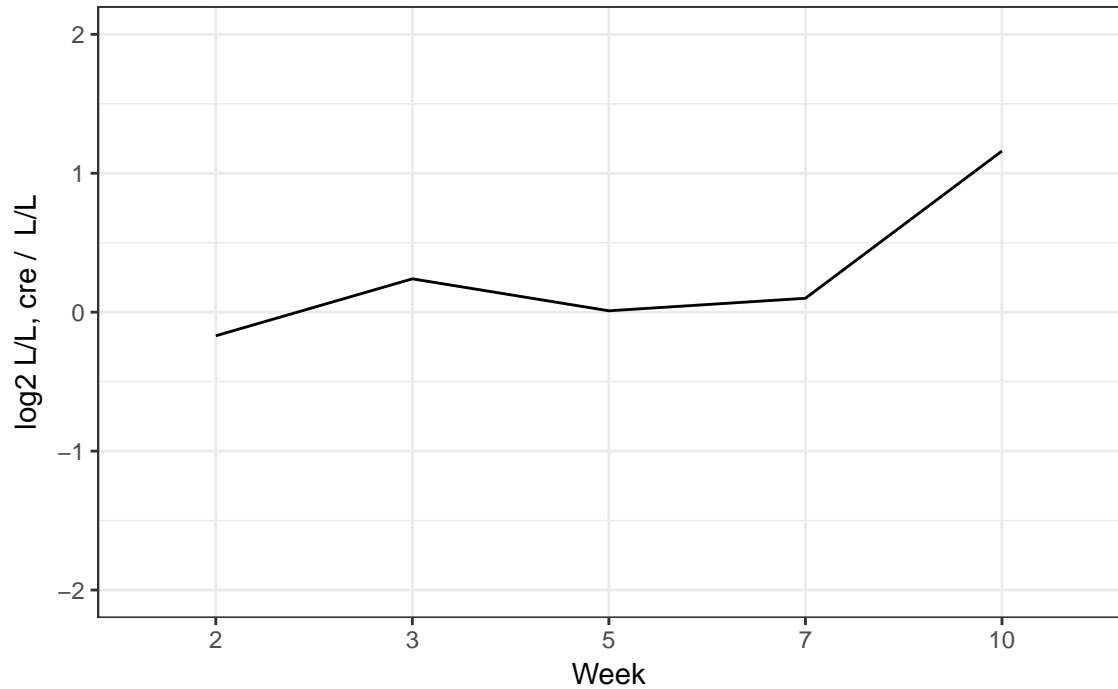

LONP1 / Q8CGK3; adj.p value: 0

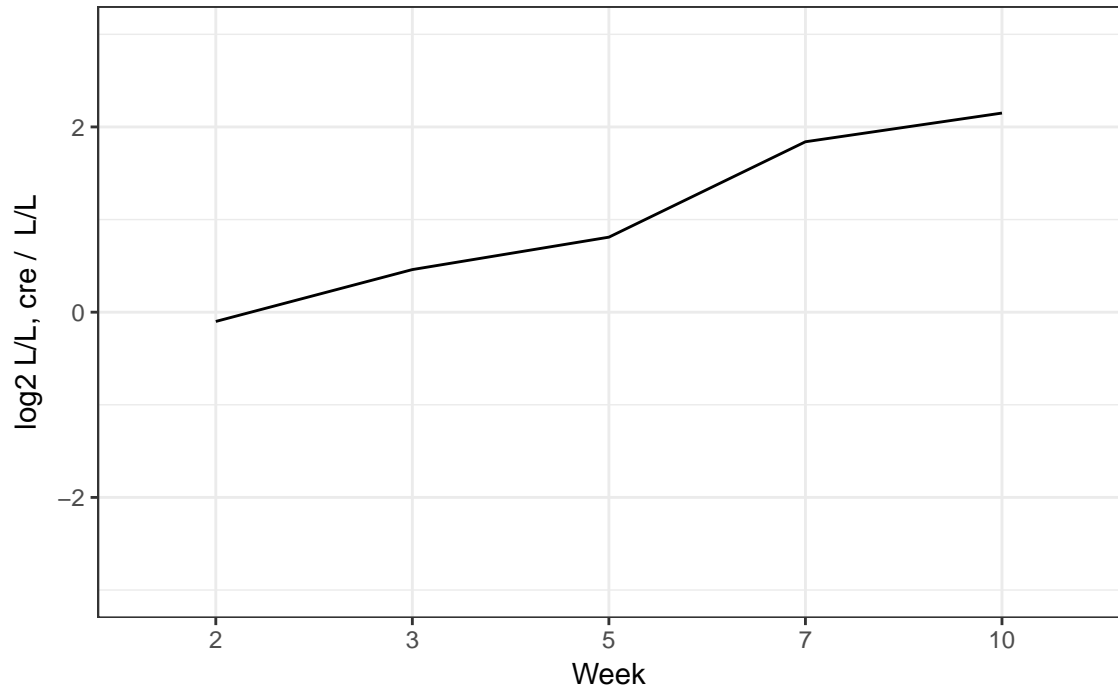

LRPPRC / Q6PB66; adj.p value: 0

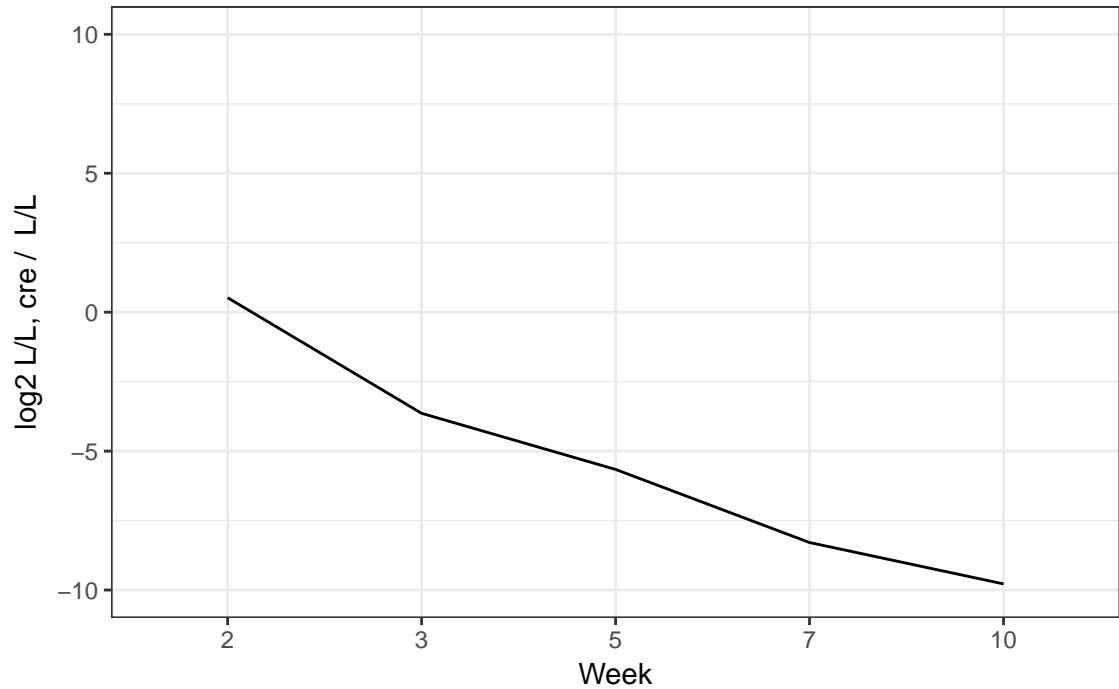

LYPLA1 / P97823; adj.p value: 0.88018

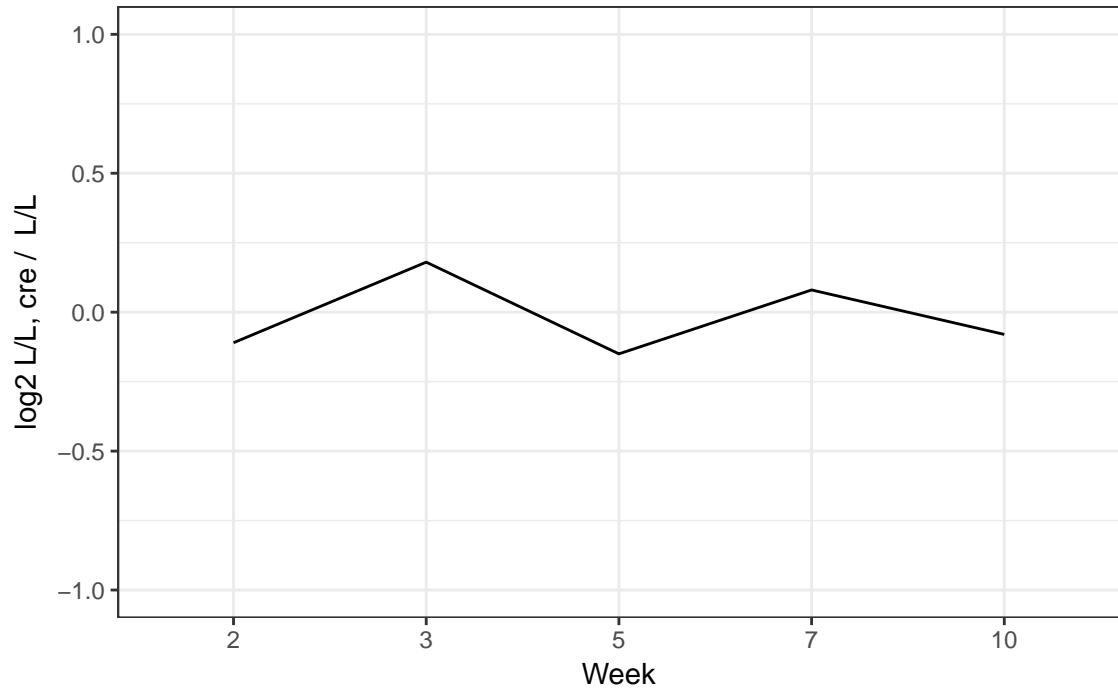

LYRM2 / Q8R033; adj.p value: 0

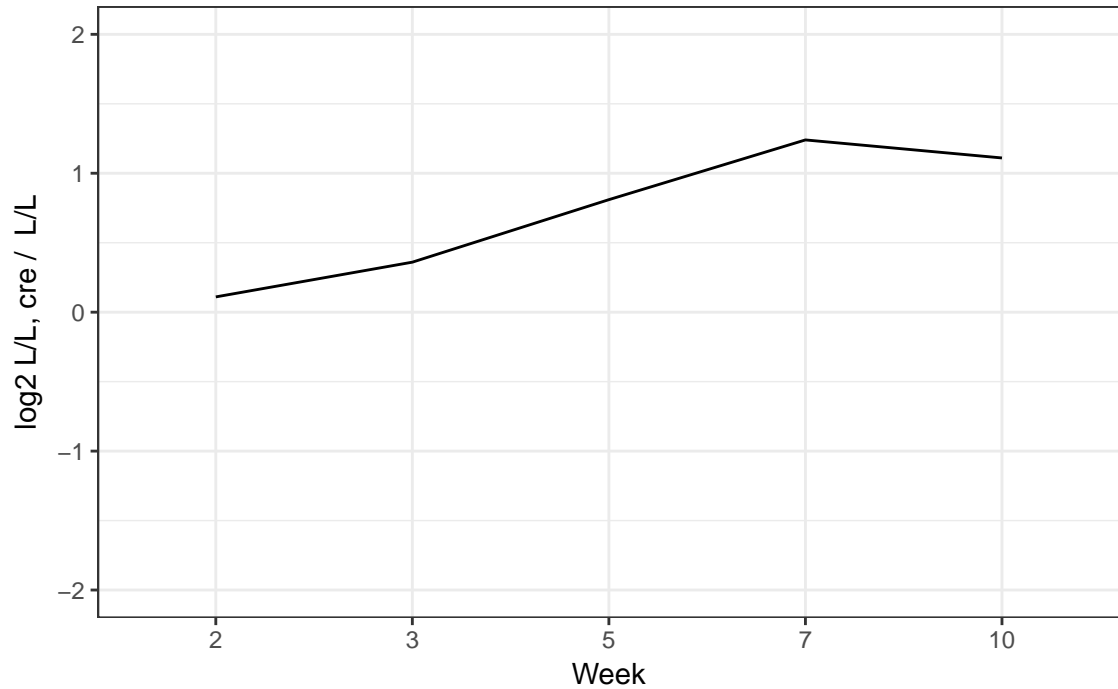

LYRM4 / Q8K215; adj.p value: 0.02337

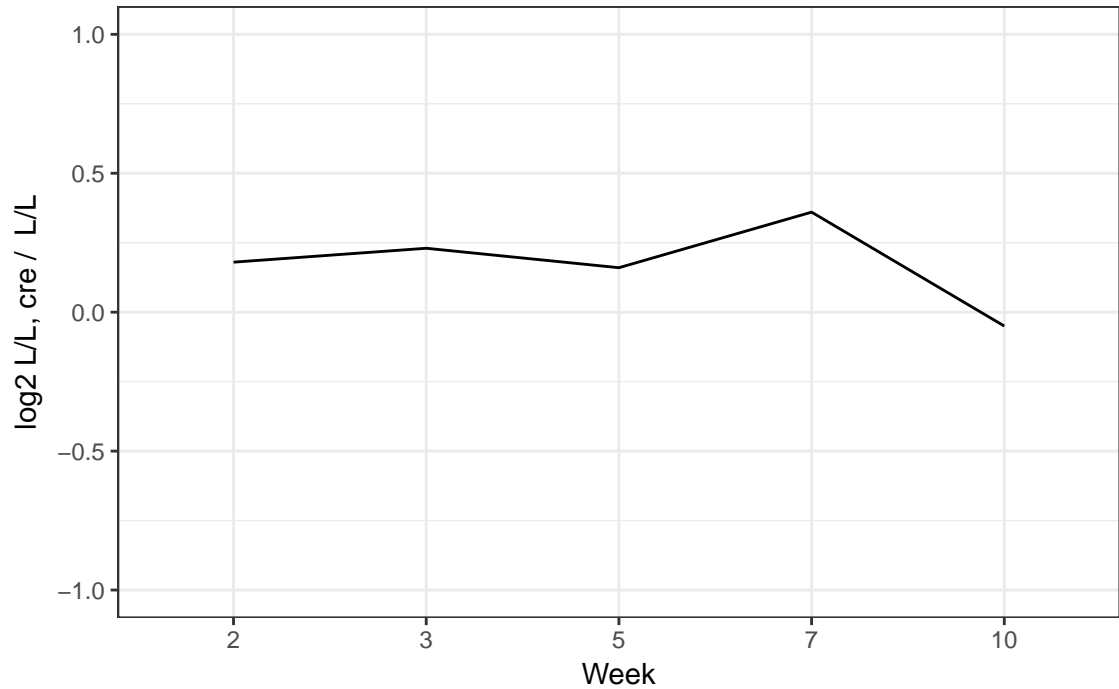



LYRM5 / Q91V16; adj.p value: 0.03079

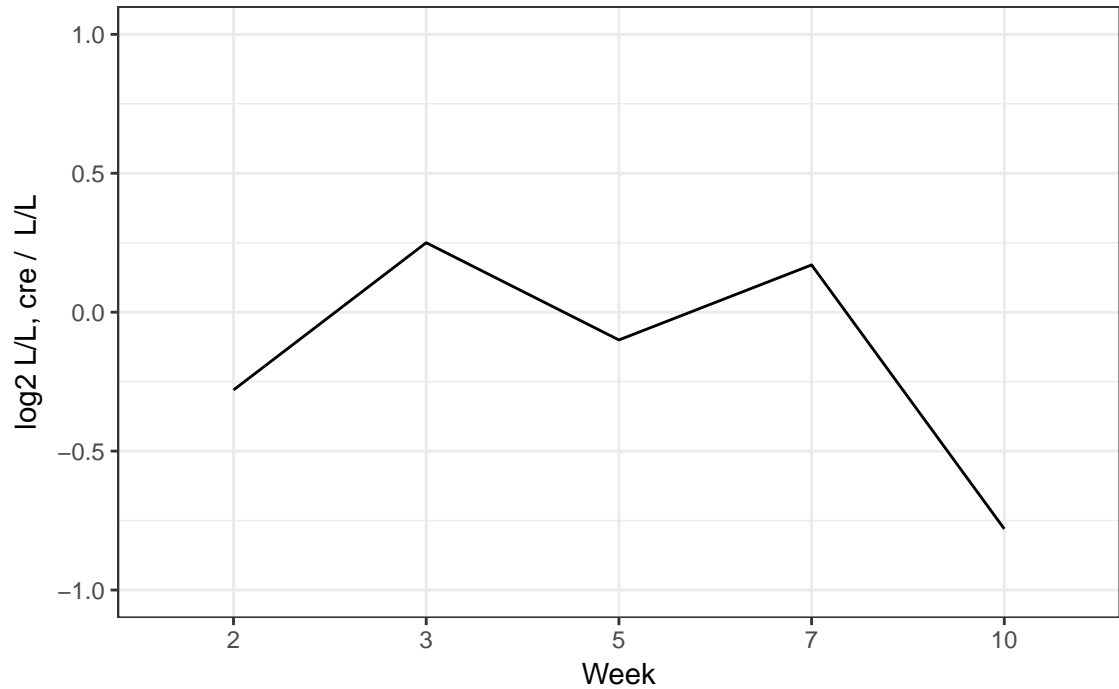

LYRM7 / Q9DA03; adj.p value: 0.75384

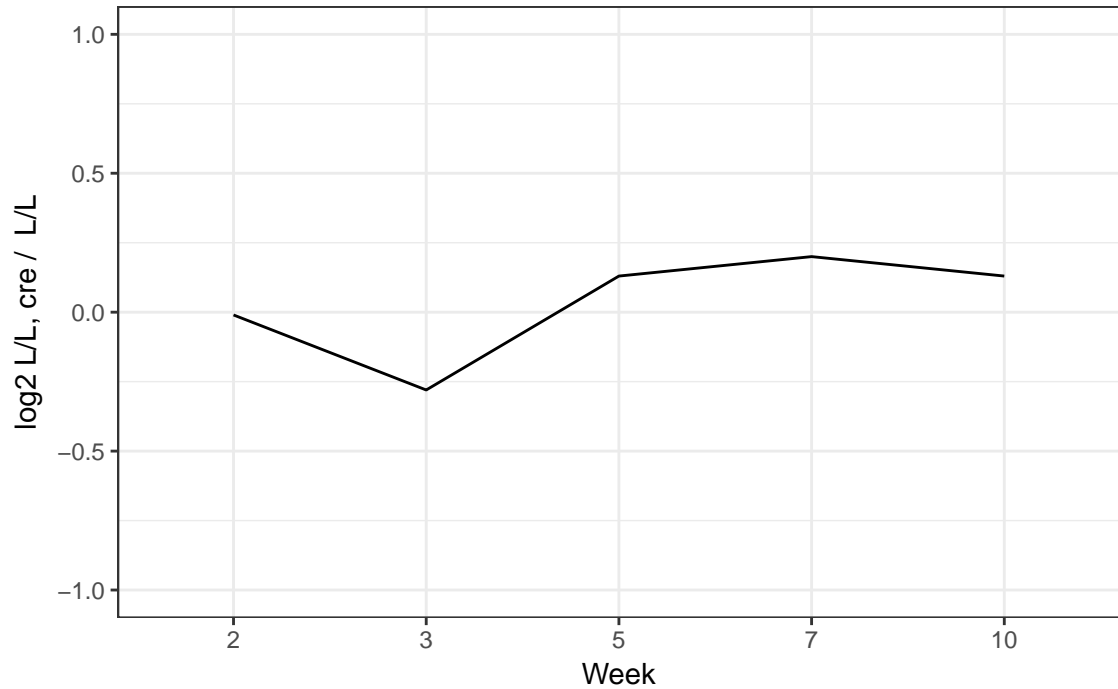

MACROD1 / Q922B1; adj.p value: 0.01147

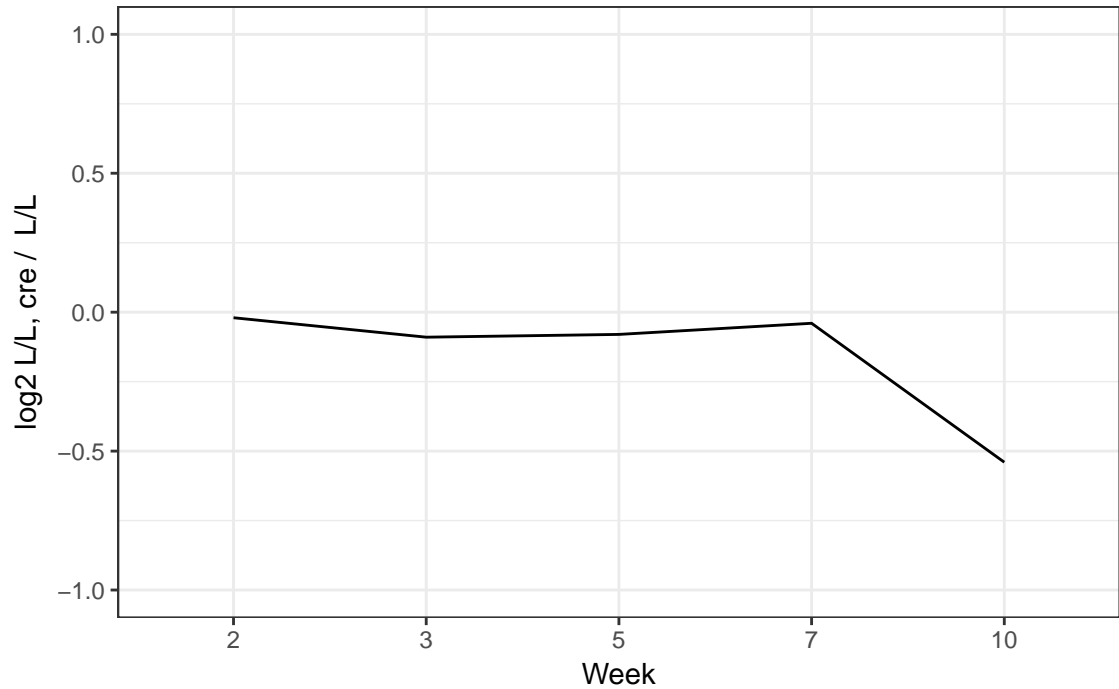

MALSU1 / F7ASG0; adj.p value: 0.00146

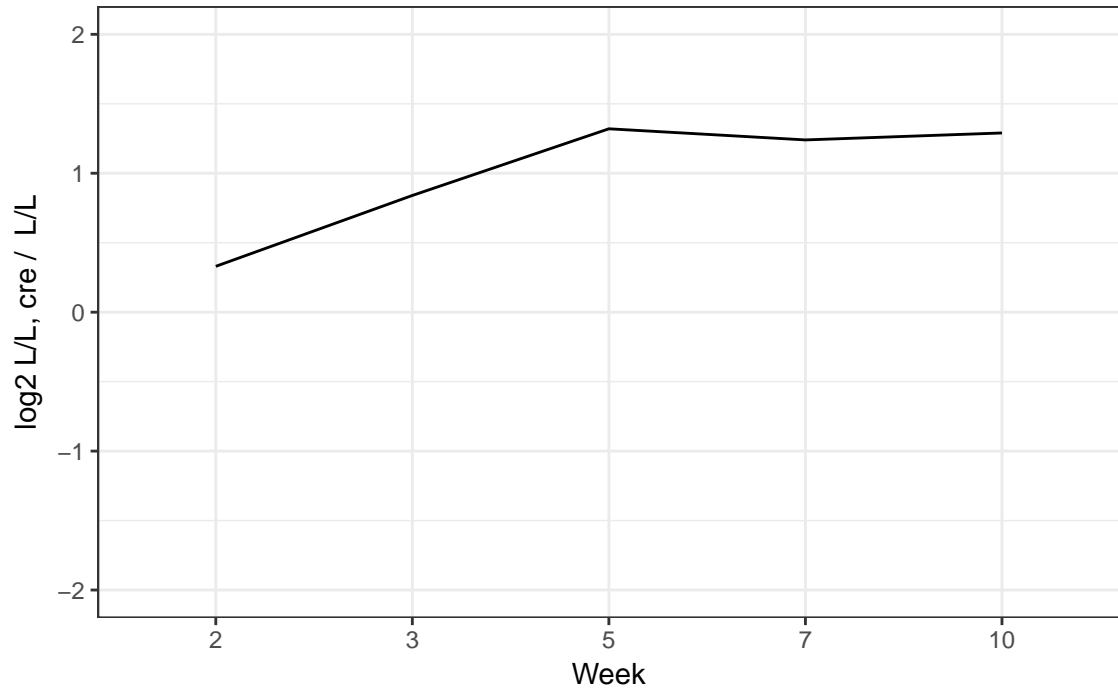

MAOA / Q64133; adj.p value: 0

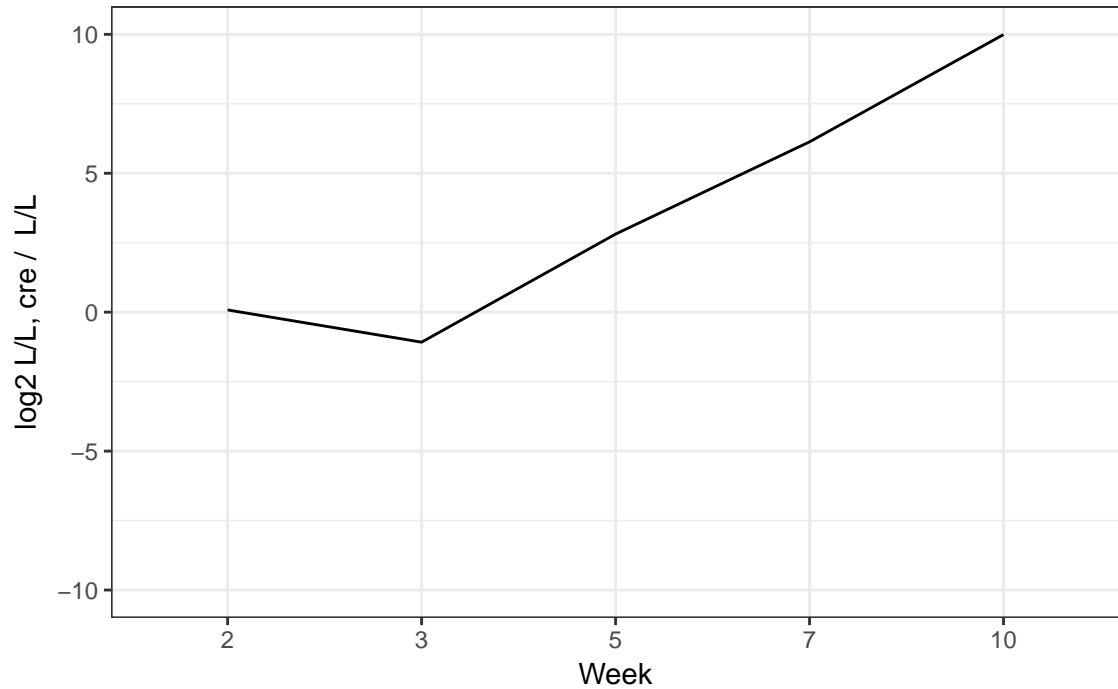

MAOB / Q8BW75; adj.p value: 0.03482

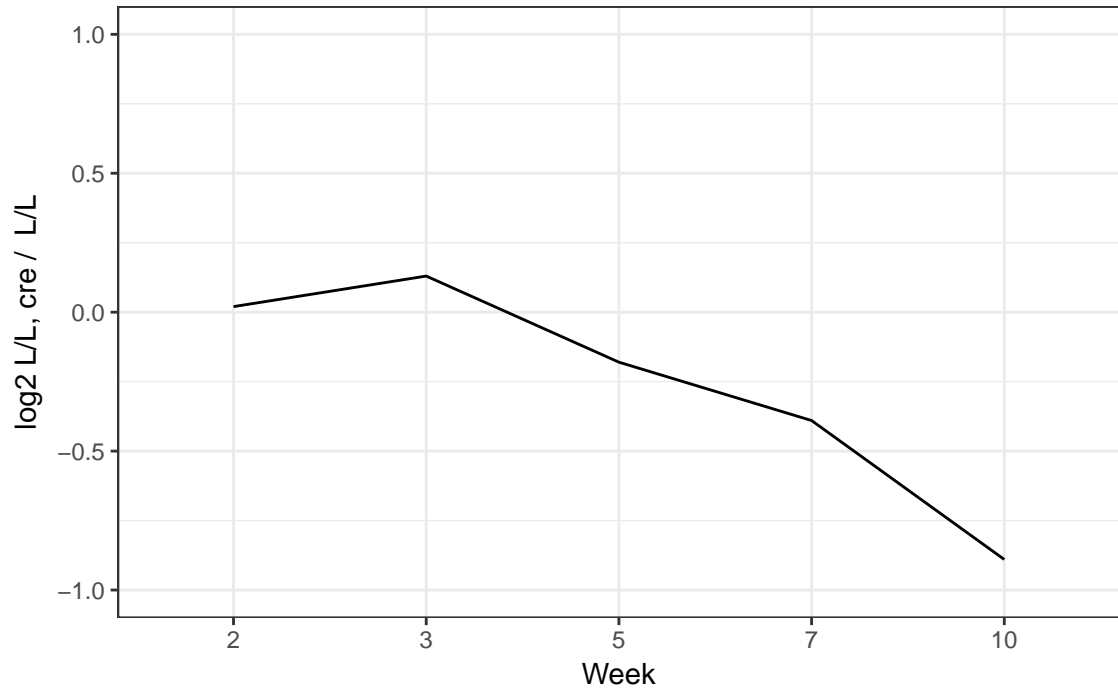

MARC2 / Q922Q1; adj.p value: 0.23245

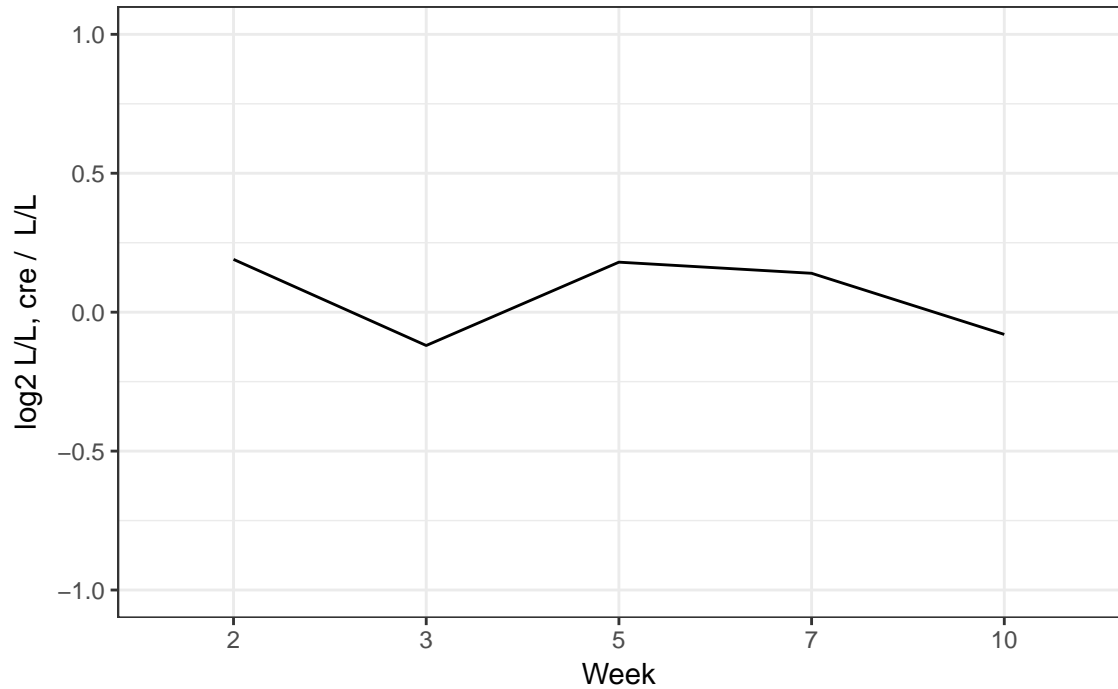

MARCH5 / Q3KNM2; adj.p value: 0.09457

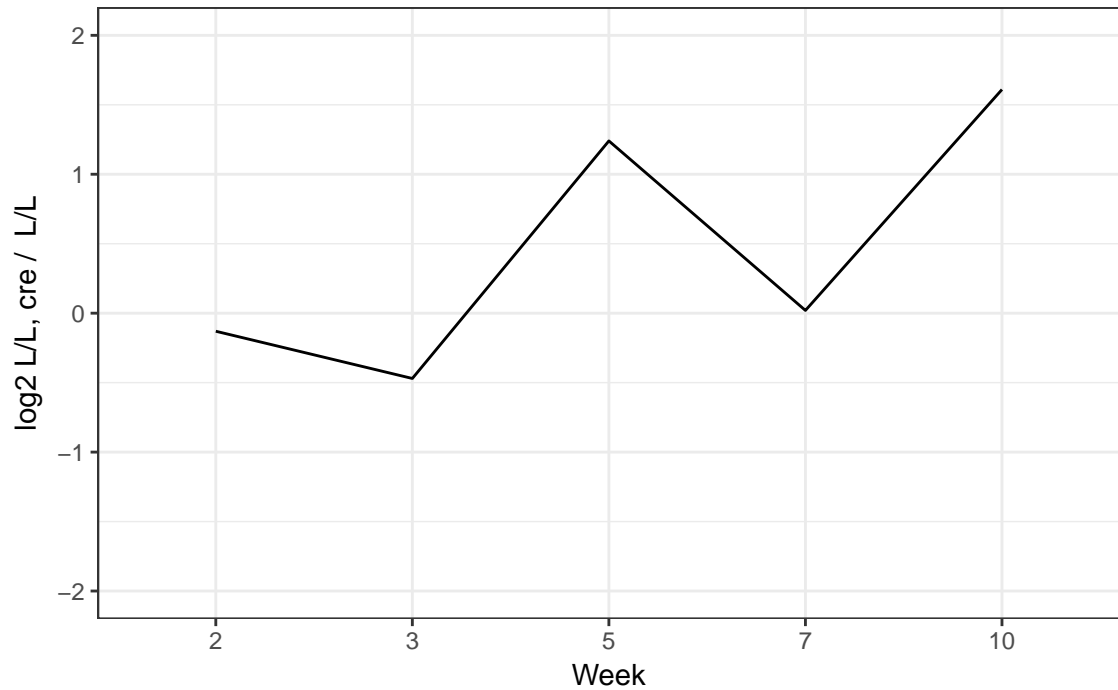



MARS2 / Q499X9; adj.p value: 0.44047

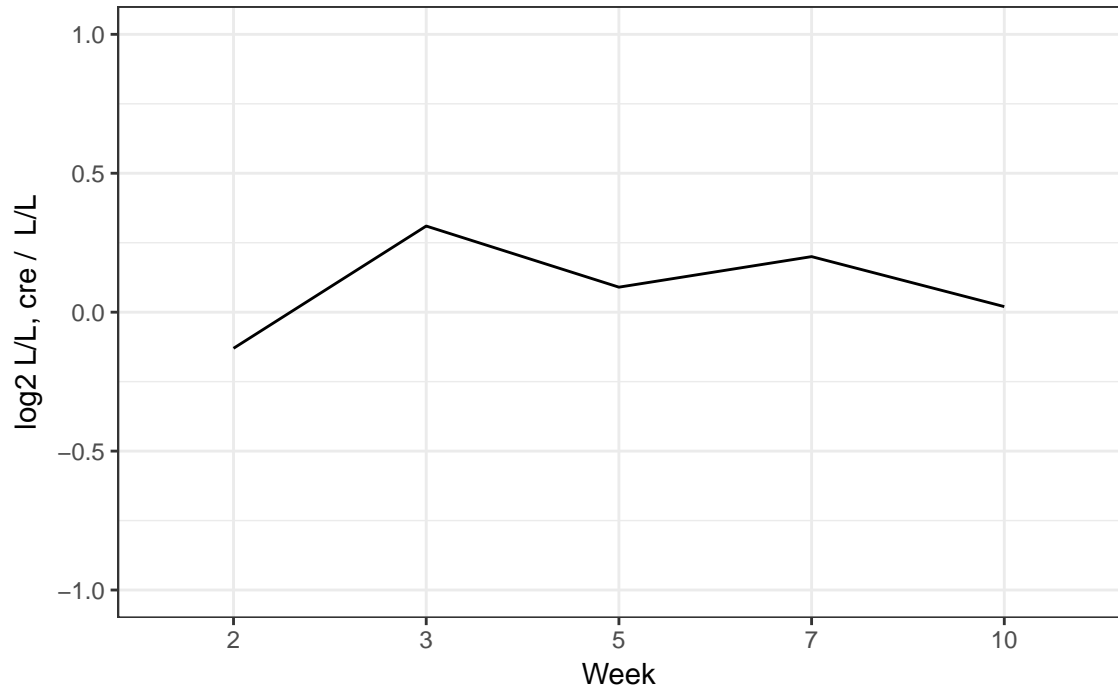

MAVS / Q8VCF0; adj.p value: 0.06105

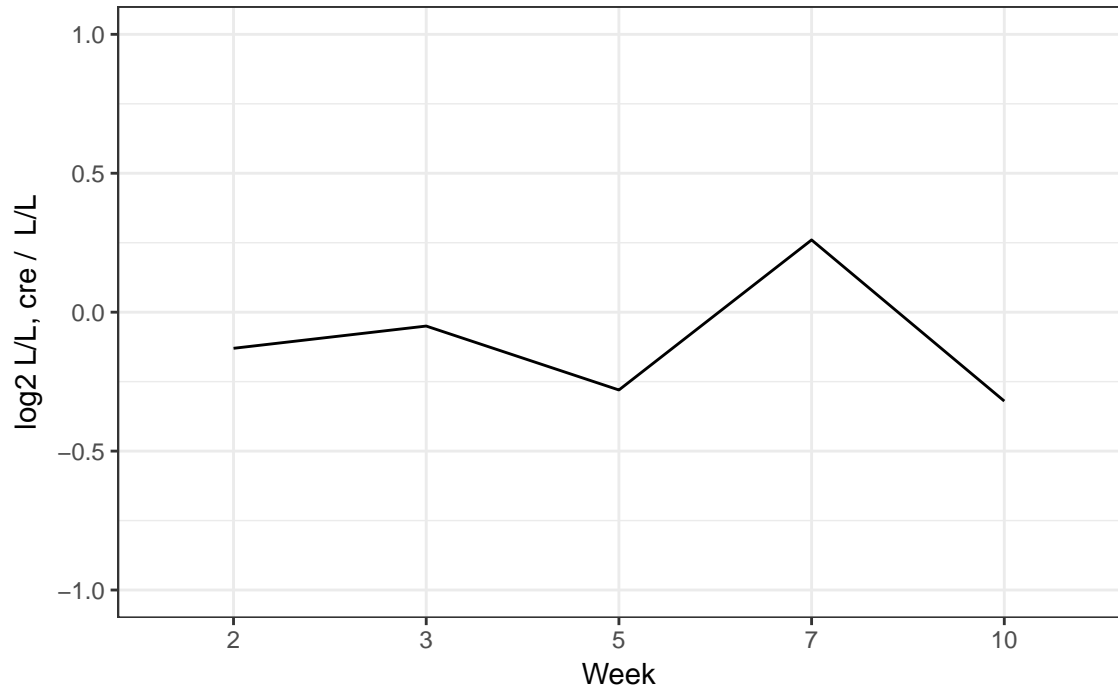

MCAT / Q8R3F5; adj.p value: 0.0023

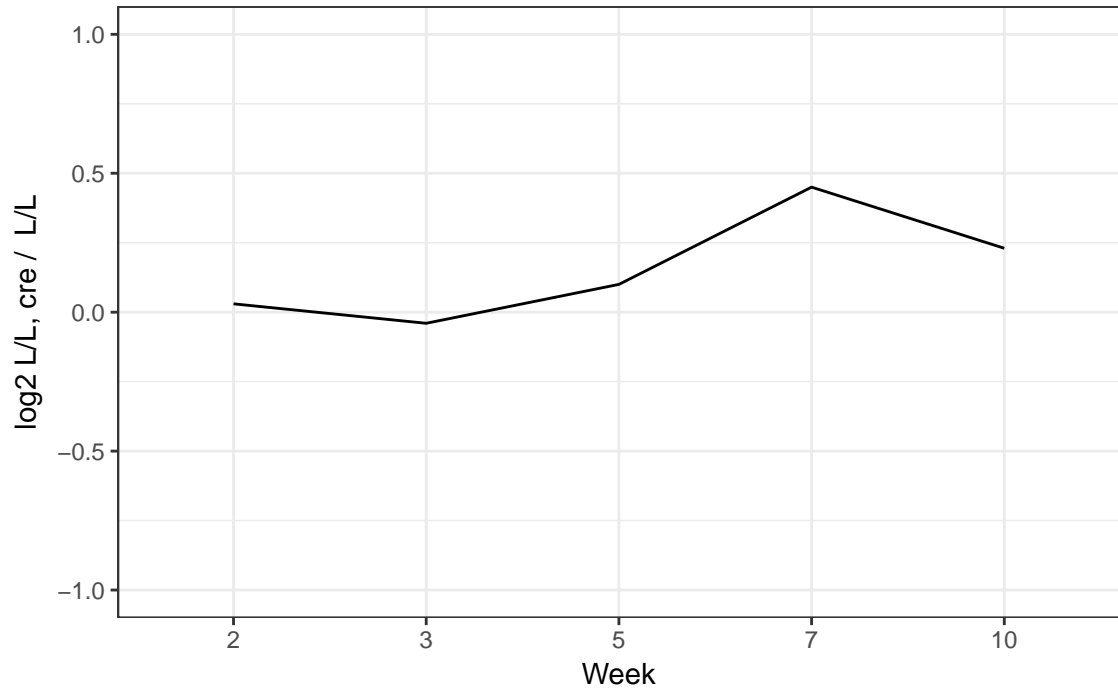

MCCC1 / Q99MR8; adj.p value: 0.04638

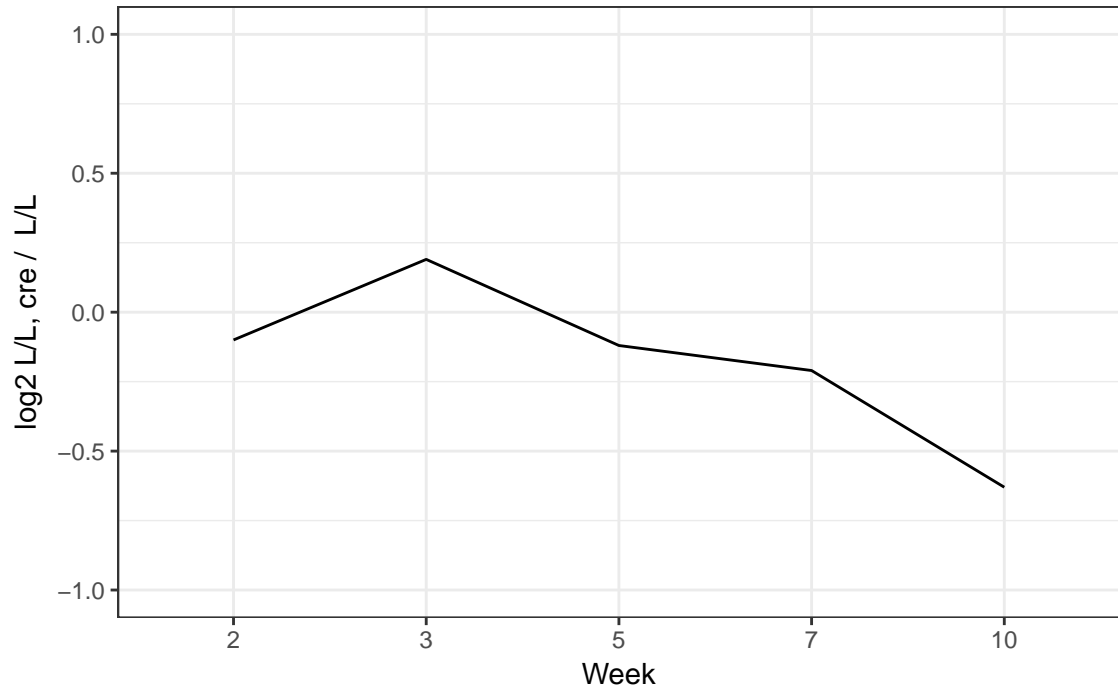

MCCC2 / Q3ULD5; adj.p value: 0.00044

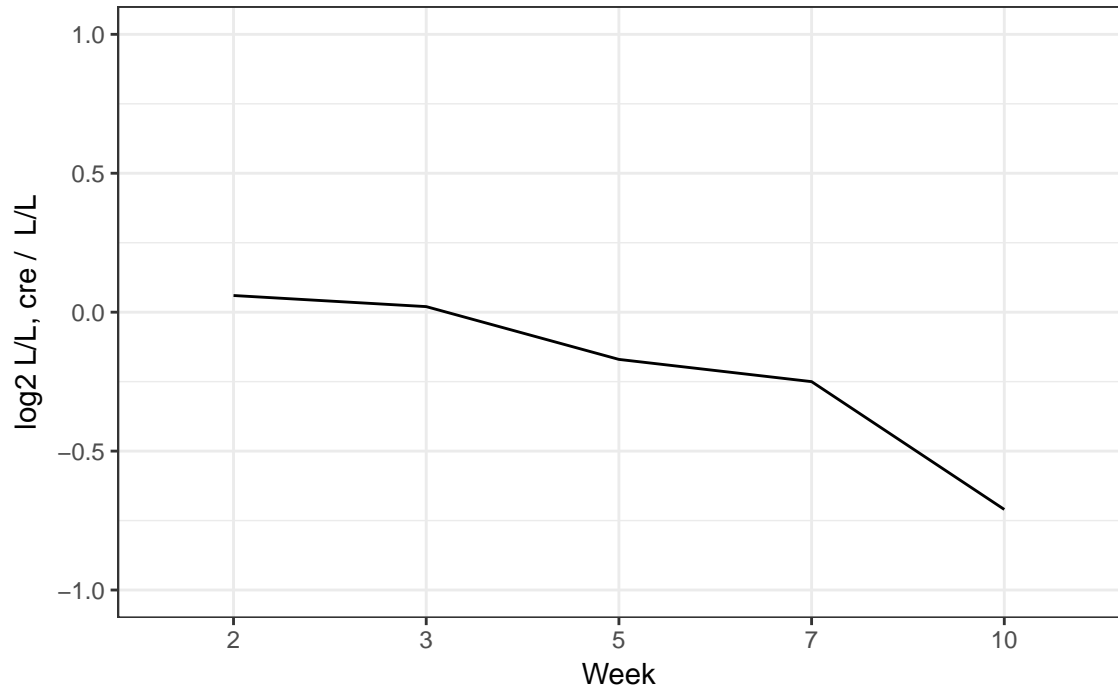

MCEE / Q9D1I5; adj.p value: 0

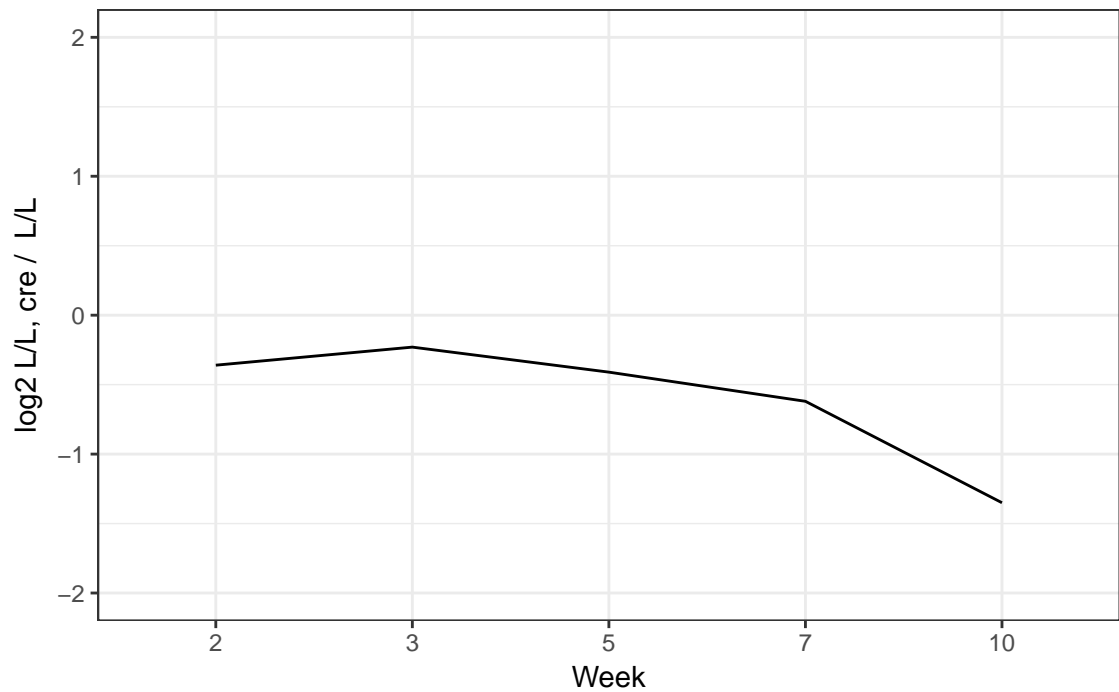

MCU / Q3UMR5; adj.p value: 0

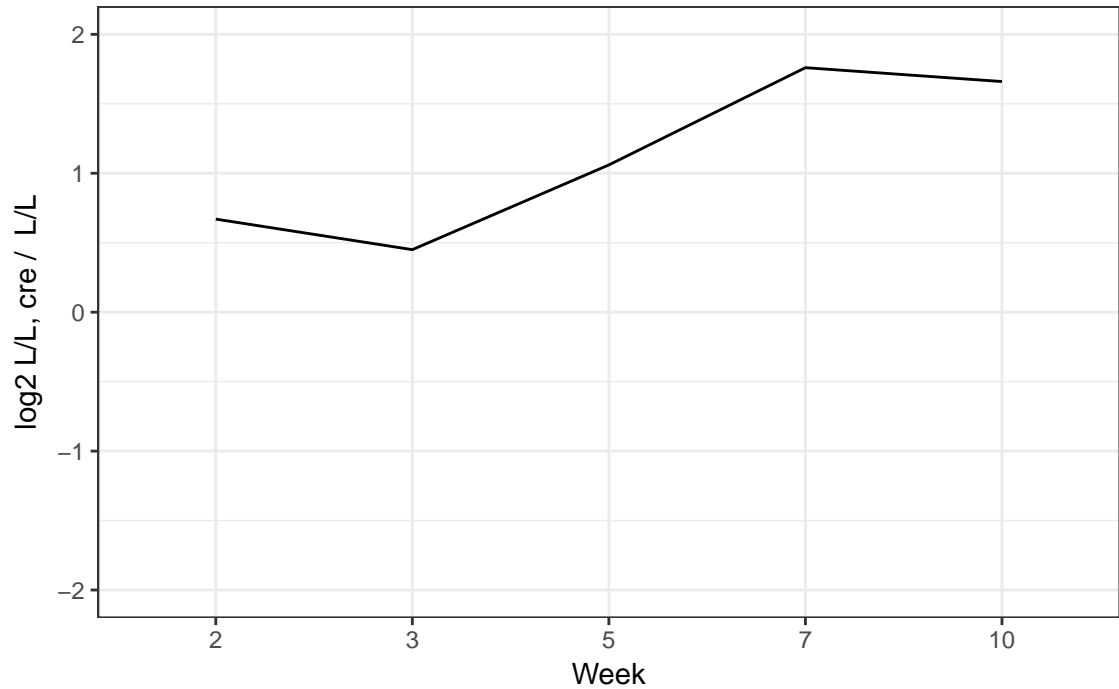

MCUR1 / Q9CXD6; adj.p value: 5e-05

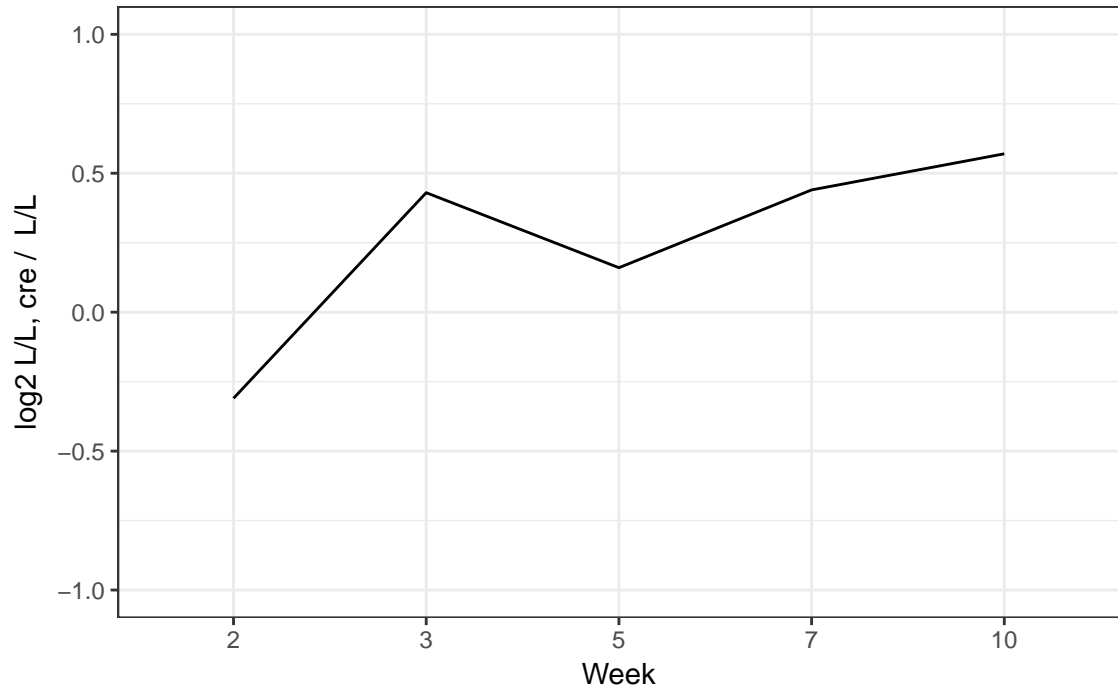



MDH1 / P14152; adj.p value: 0.08212

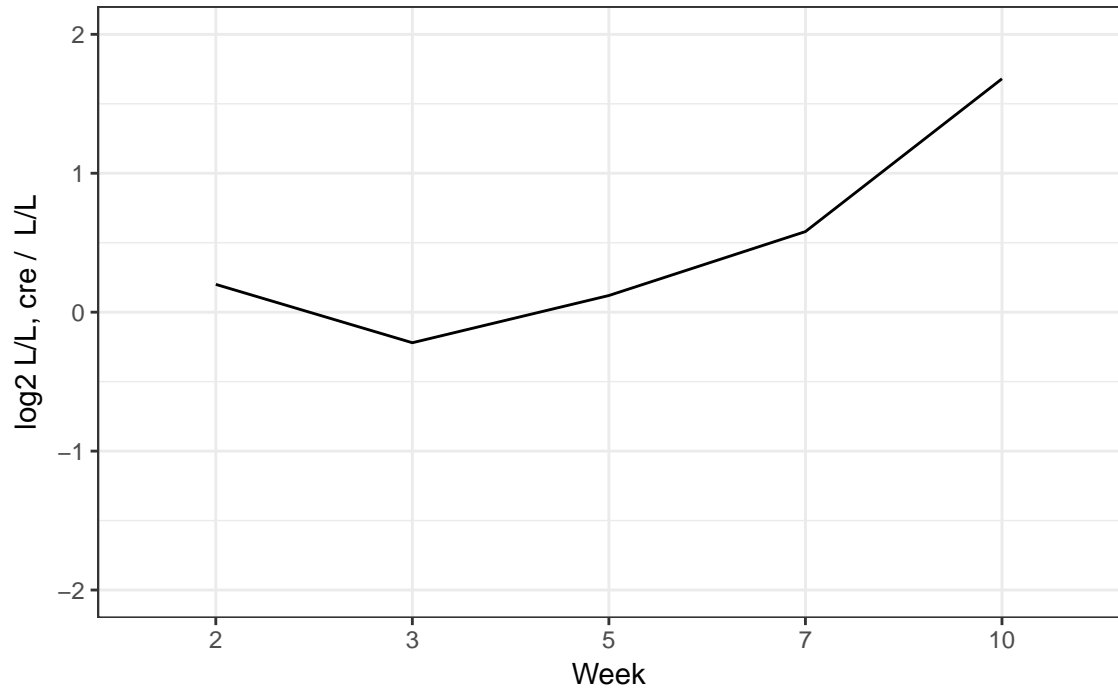

MDH2 / P08249; adj.p value: 0.1686

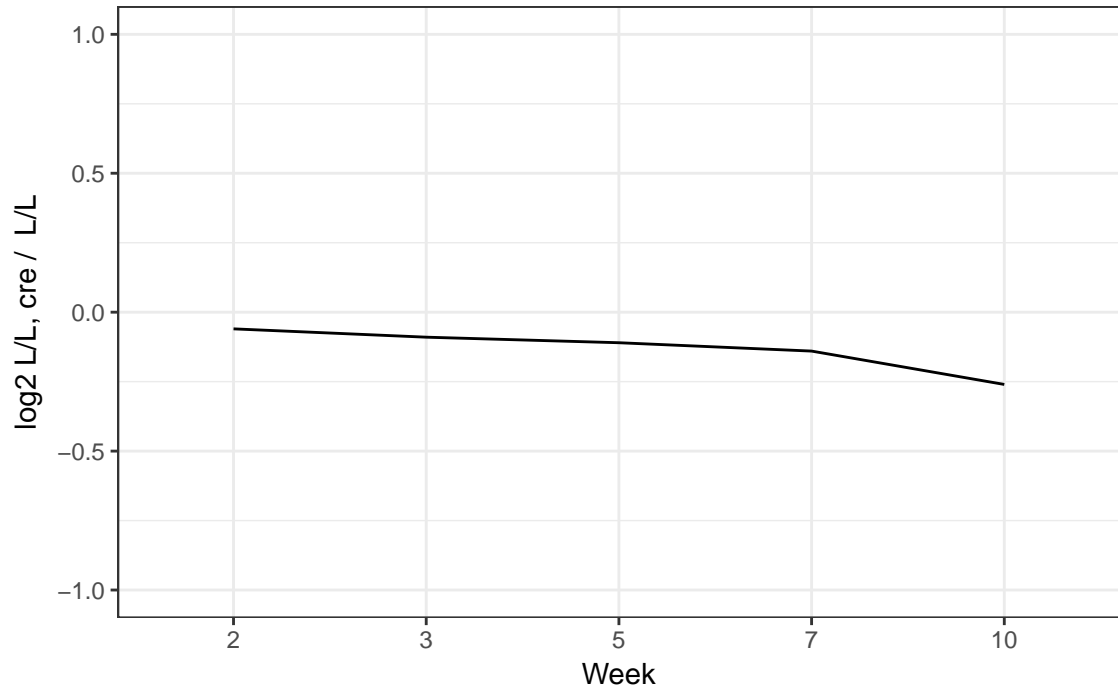

ME3 / Q8BMF3; adj.p value: 0.36615

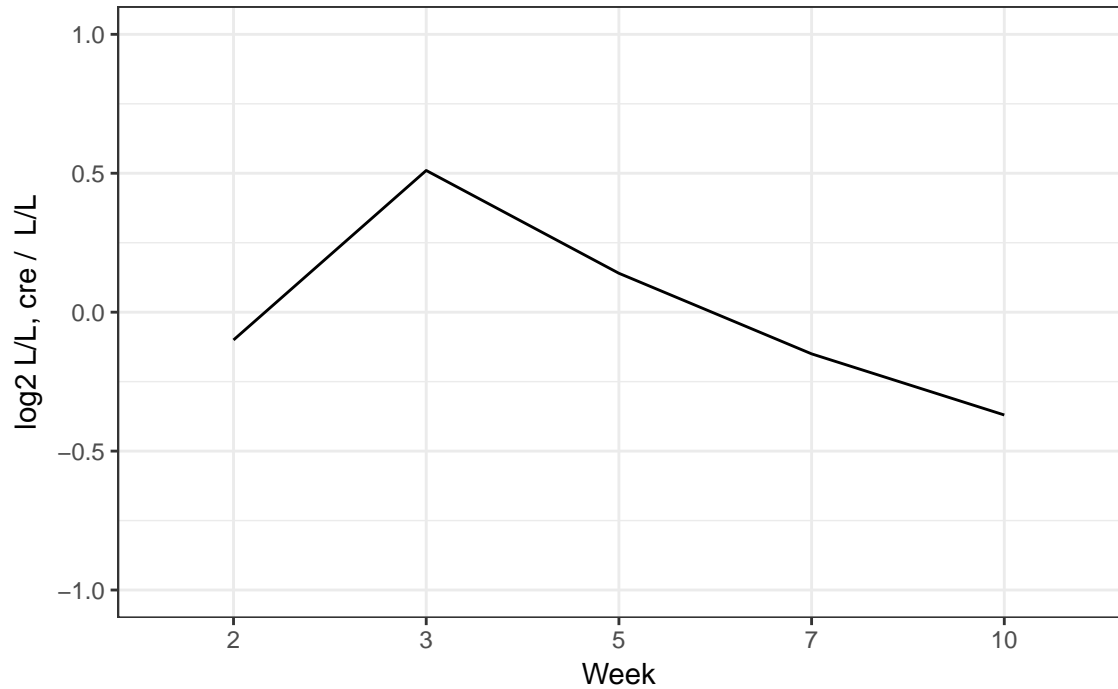

MECR / Q9DCS3; adj.p value: 0.00164

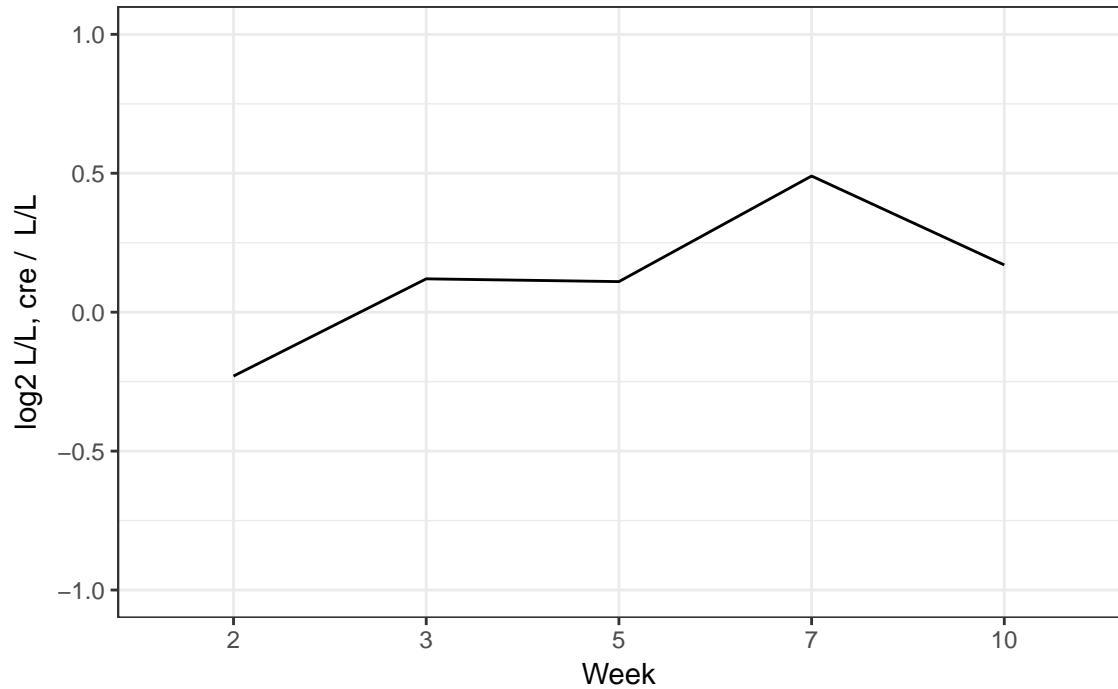

METAP1D / Q9CPW9; adj.p value: 0.12175

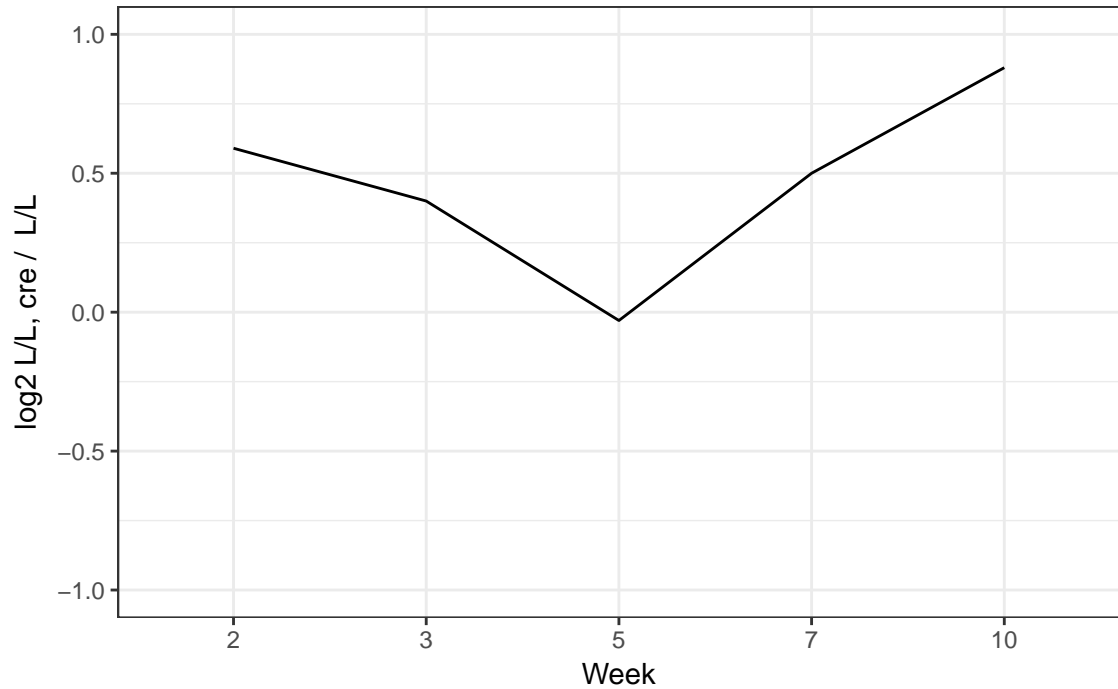

METTL15 / Q9DCL4; adj.p value: 0

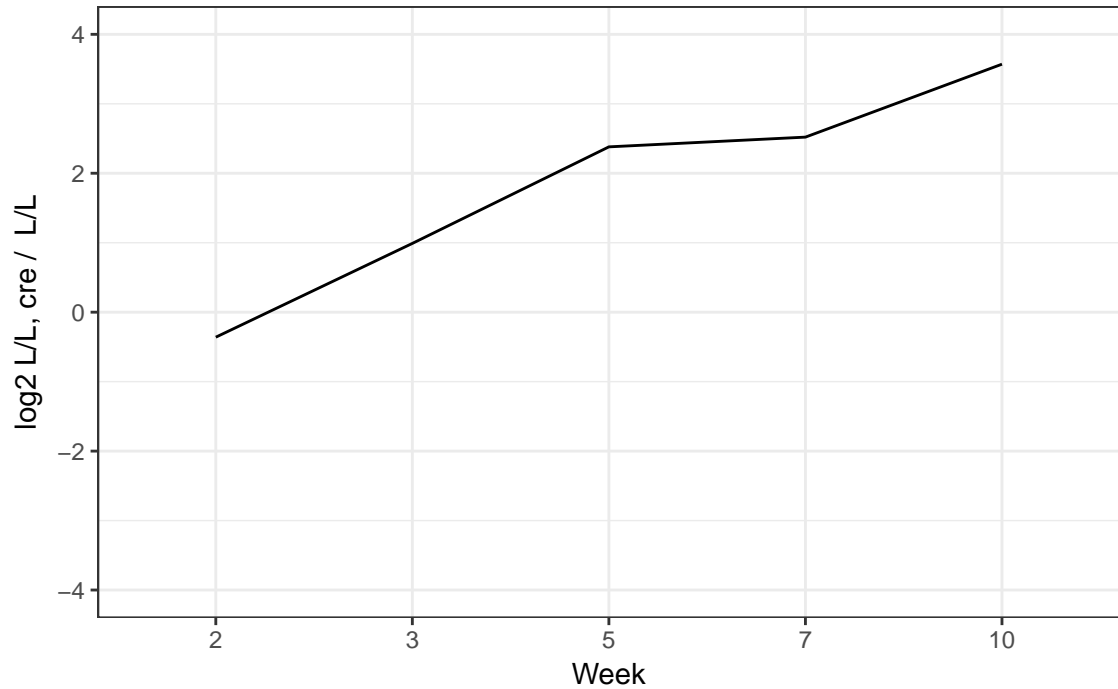

METTL17 / E9Q7K9; adj.p value: 0.04684

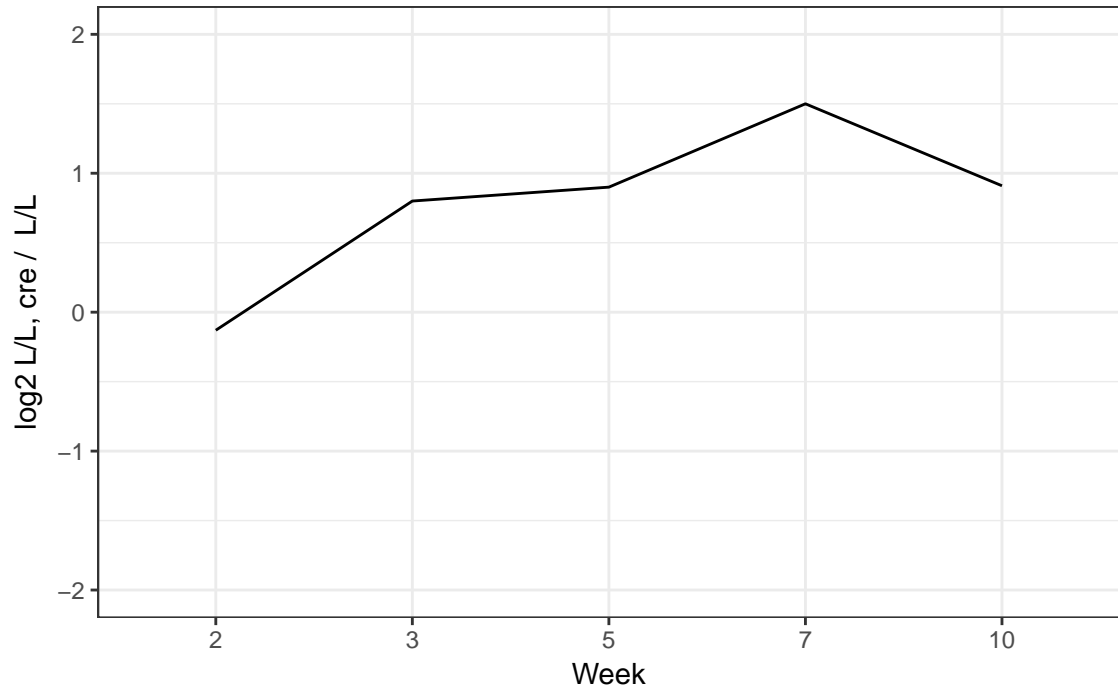

MFF / Q6PCP5; adj.p value: 0.01216

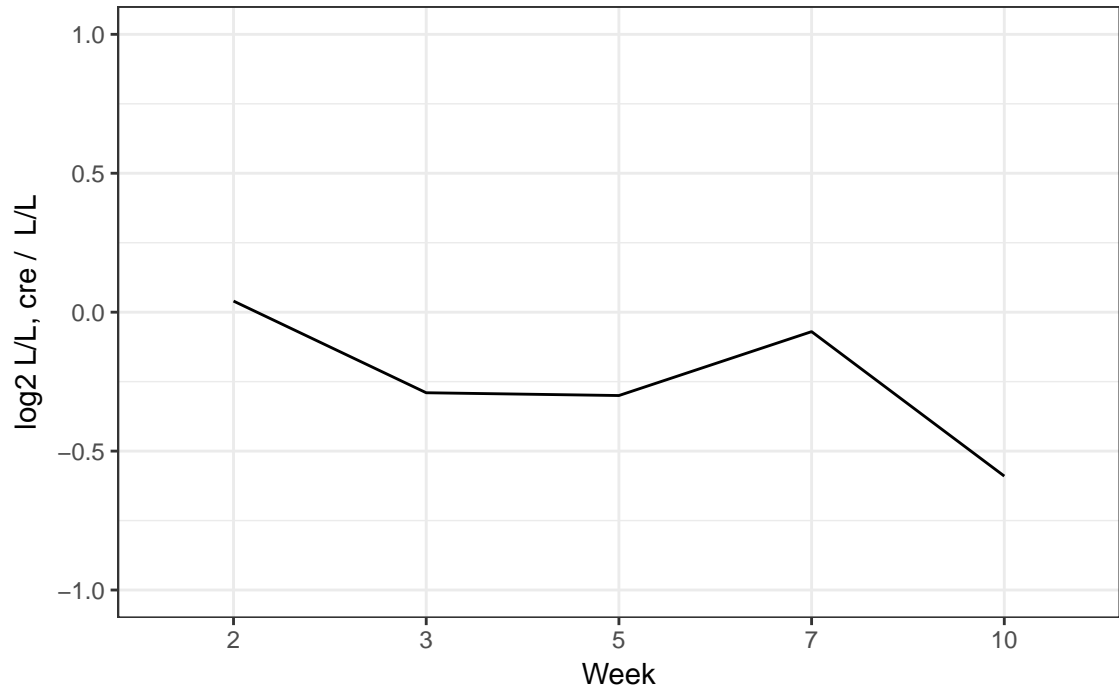



MFN1 / Q811U4; adj.p value: 3e-05

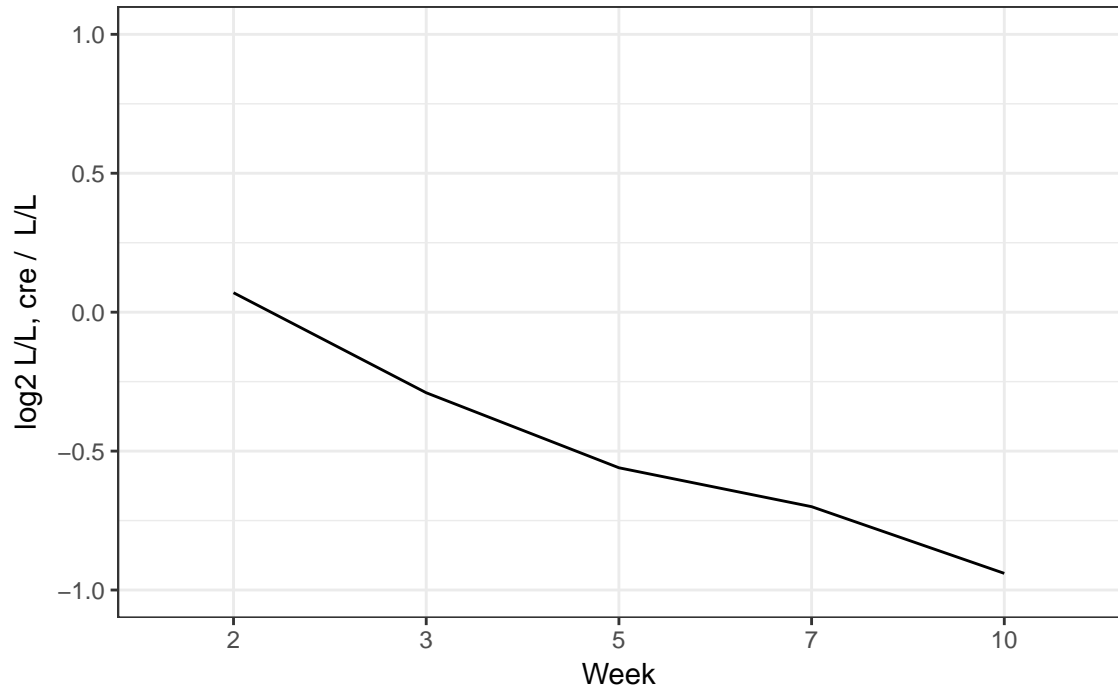

MFN2 / Q80U63; adj.p value: 0.71404

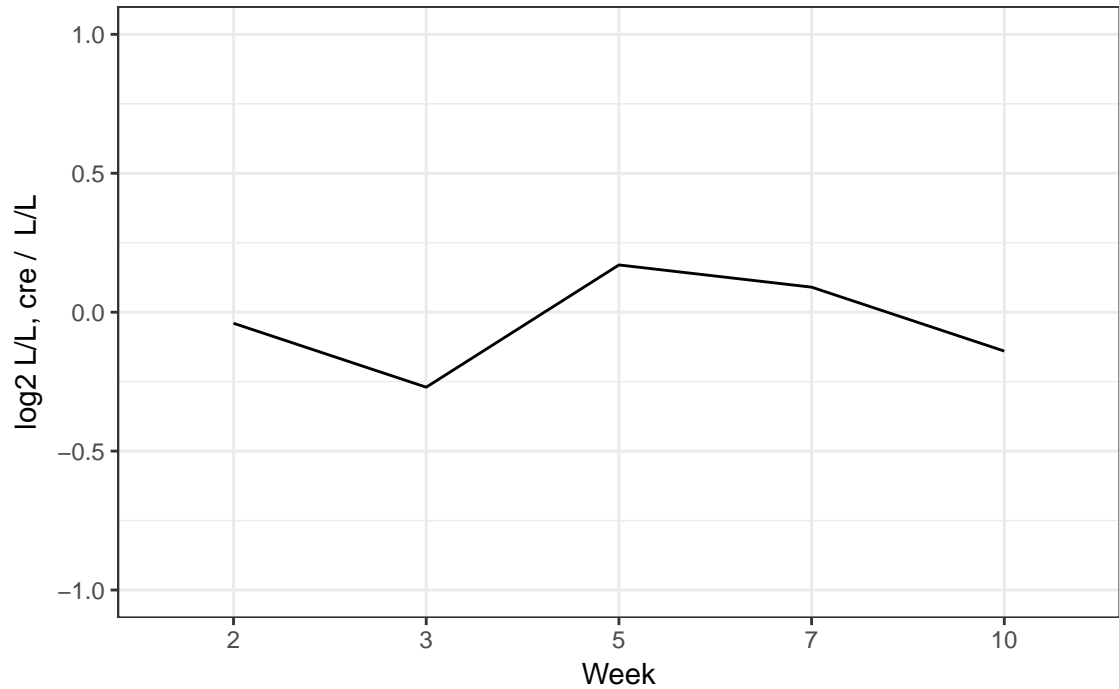

MGST3 / Q9CPU4; adj.p value: 0.35755

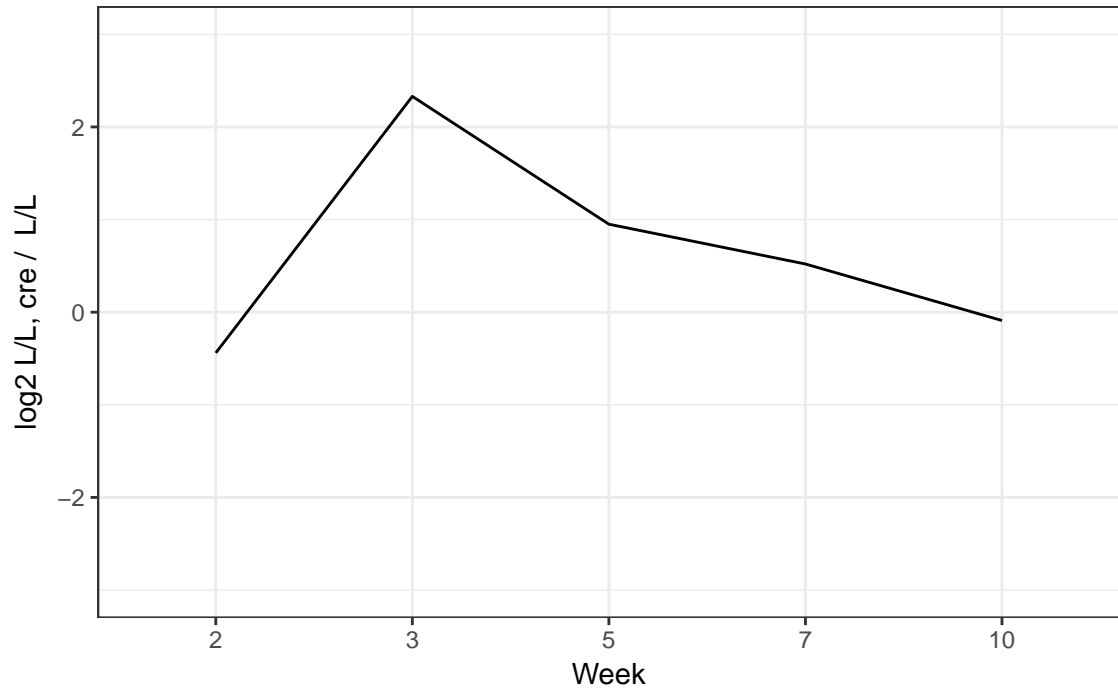

MINOS1 / Q7TNS2; adj.p value: 0.13515

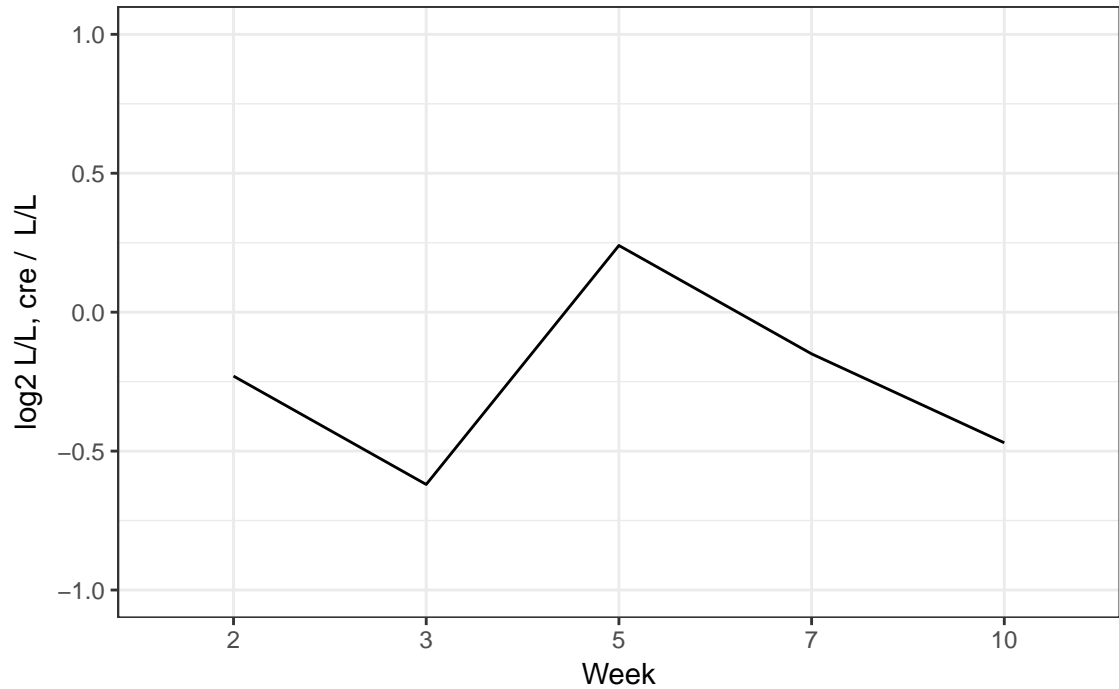

MIPEP / A6H611; adj.p value: 0.71404

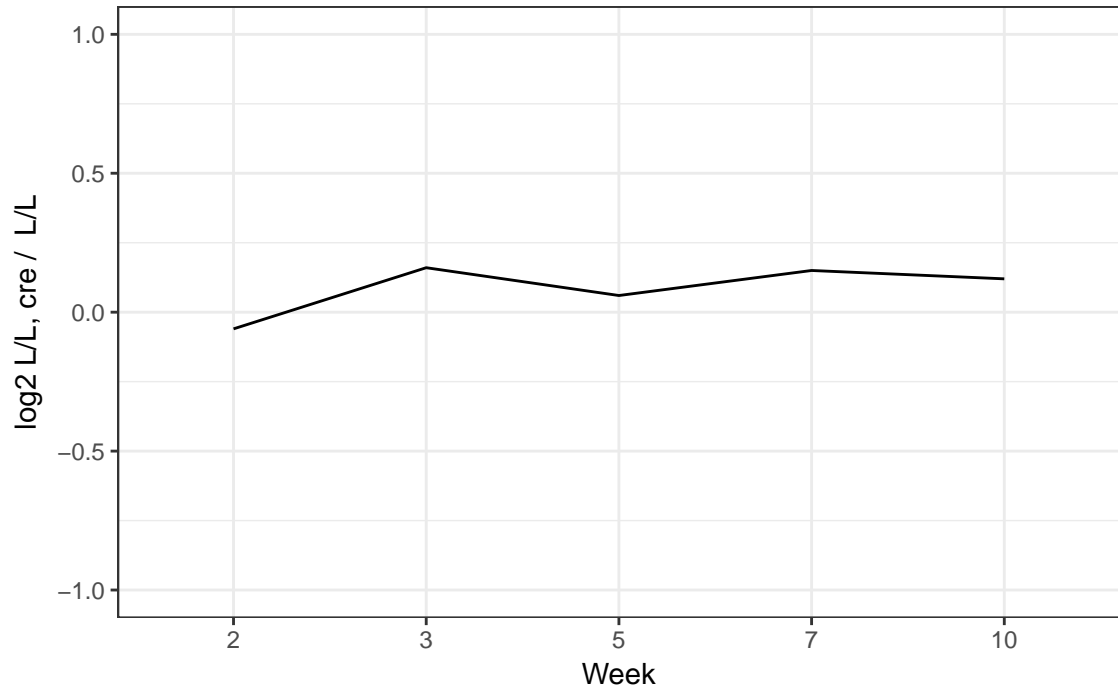

MLYCD / Q99J39-2; adj.p value: 0.41048

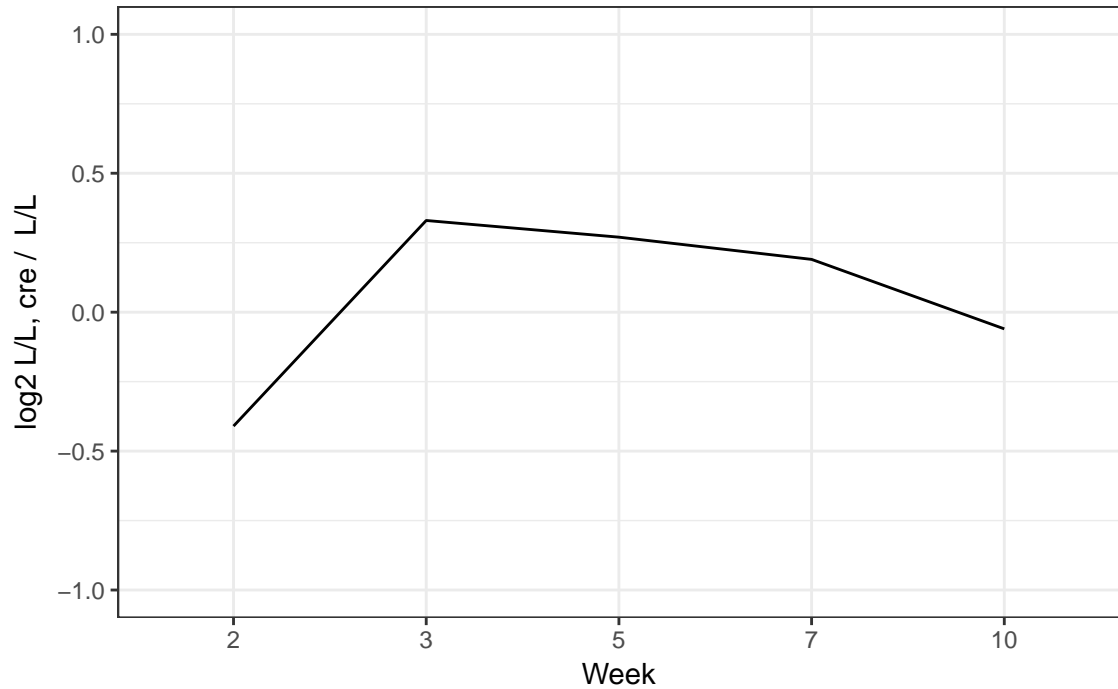

MMAB / Q9D273; adj.p value: 0.18529

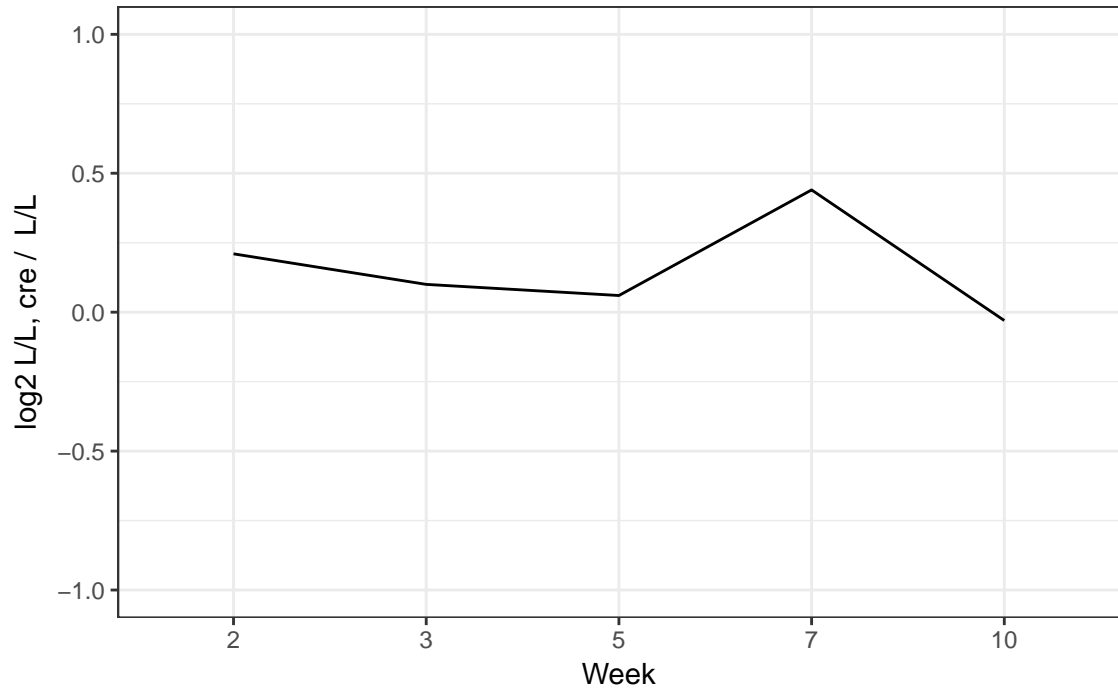

MOCS1 / Q5RKZ7; adj.p value: 0.16368

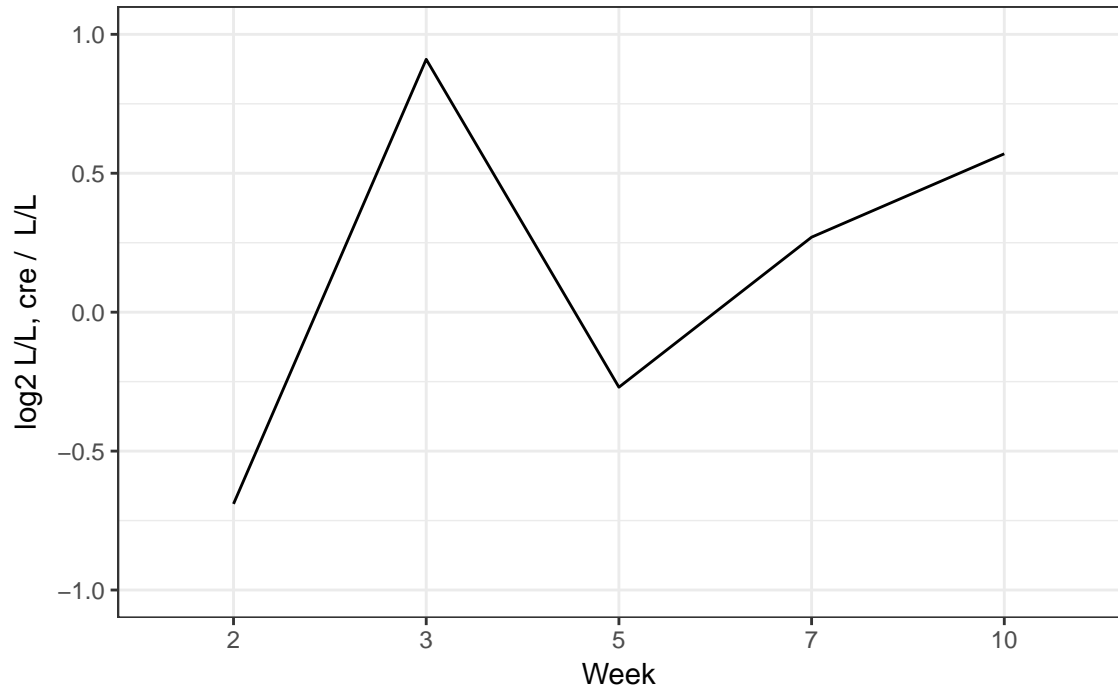



MP68 / P56379; adj.p value: 0.00787

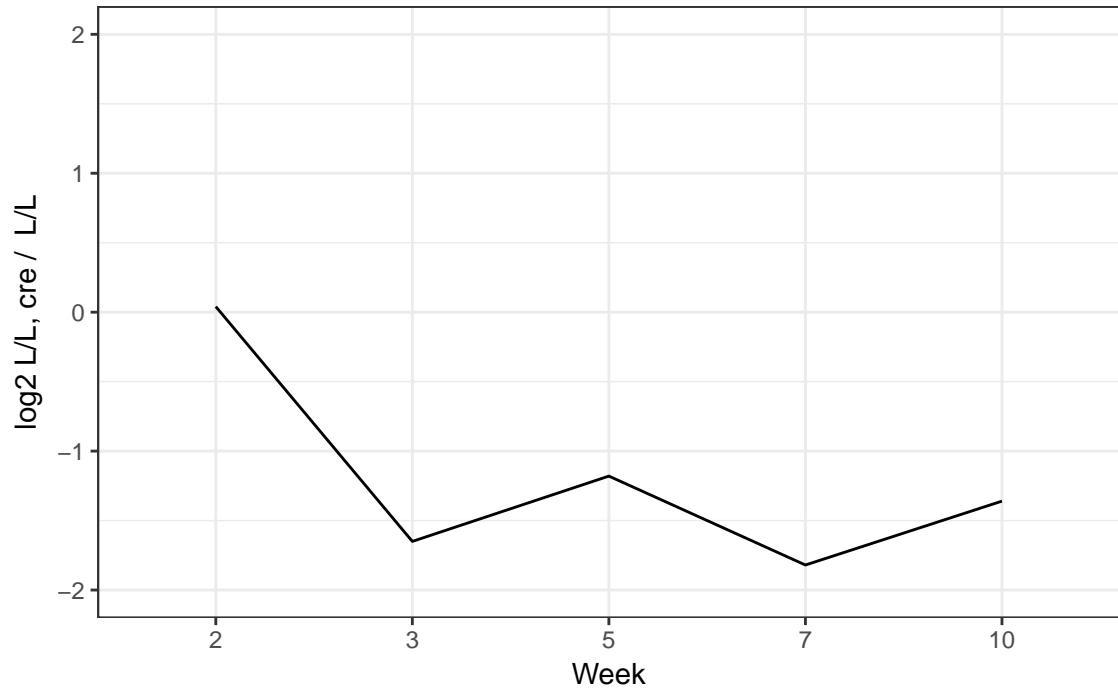

MPC1 / P63030; adj.p value: 0.01616

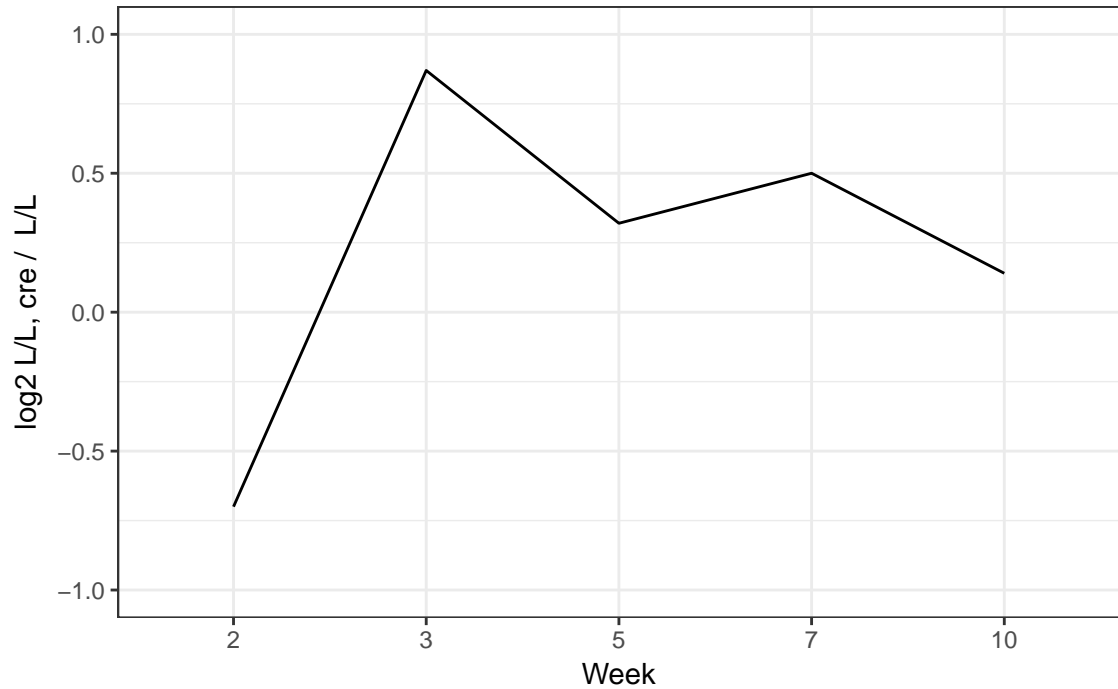

MPC2 / Q9D023; adj.p value: 0.35329

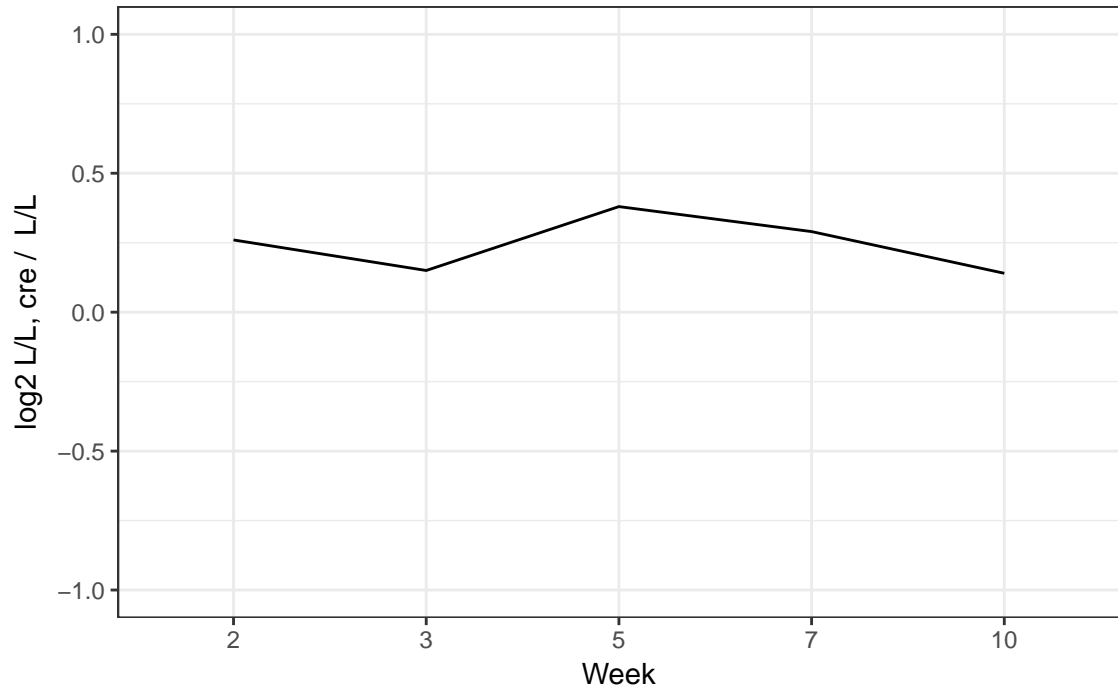

MPST / Q3UW66; adj.p value: 3e-05

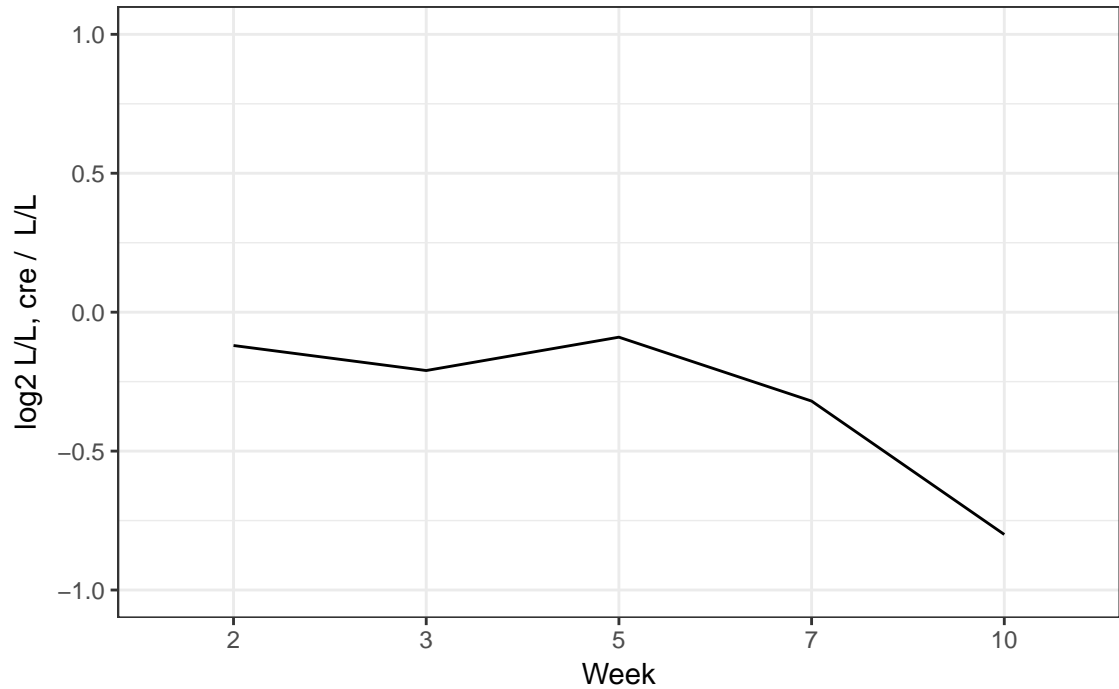

MPV17 / D3YWI4; adj.p value: 0.28875

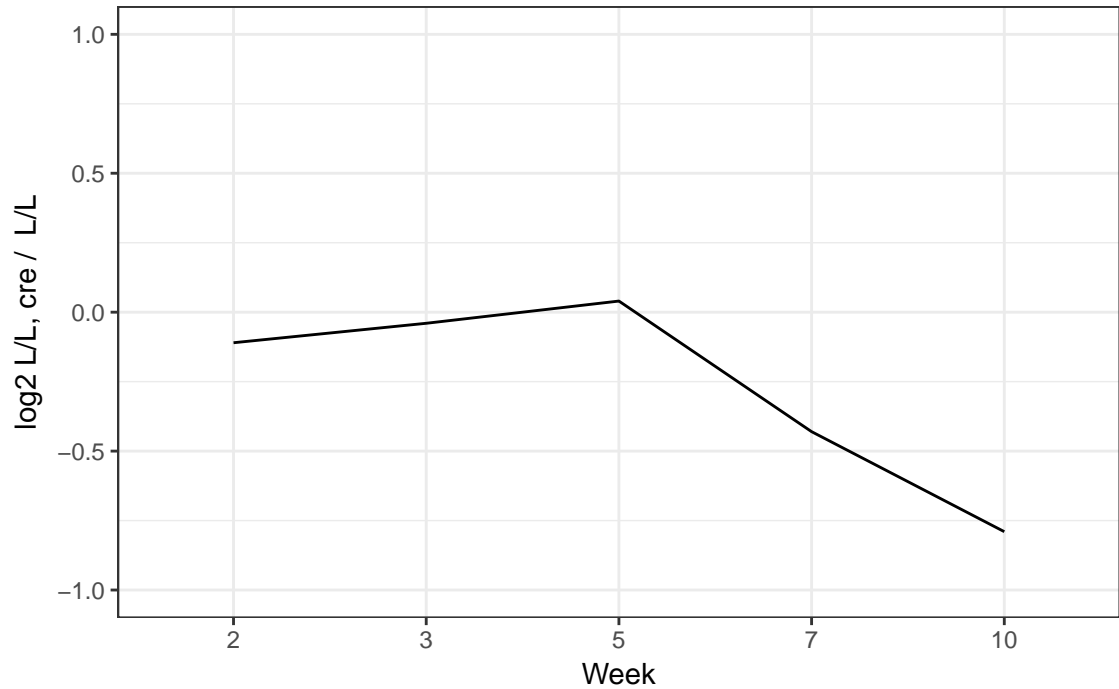

MRM1 / Q99J25; adj.p value: 0.04074

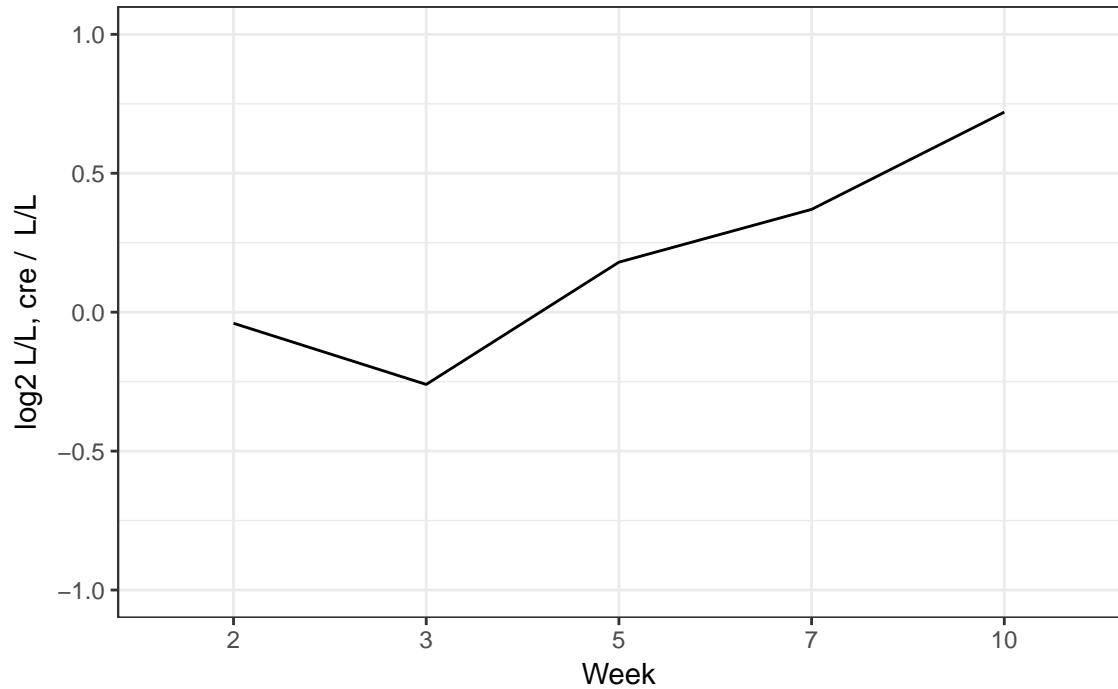

MRPL1 / Q99N96; adj.p value: 0.00023

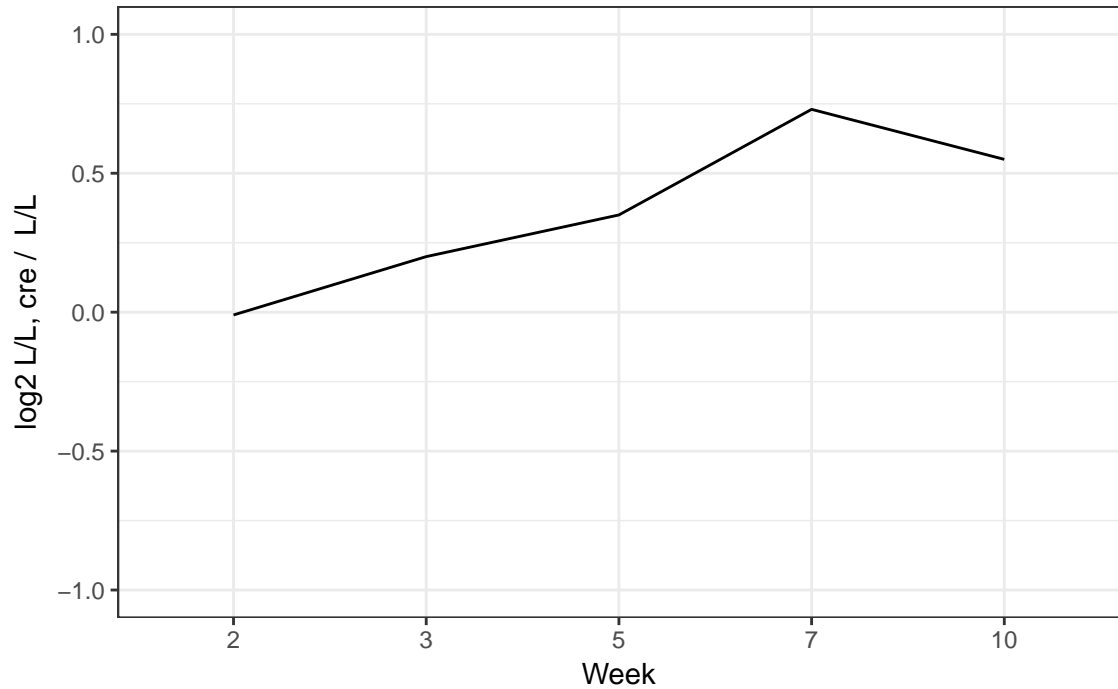

MRPL10 / Q3TBW2; adj.p value: 0.00301

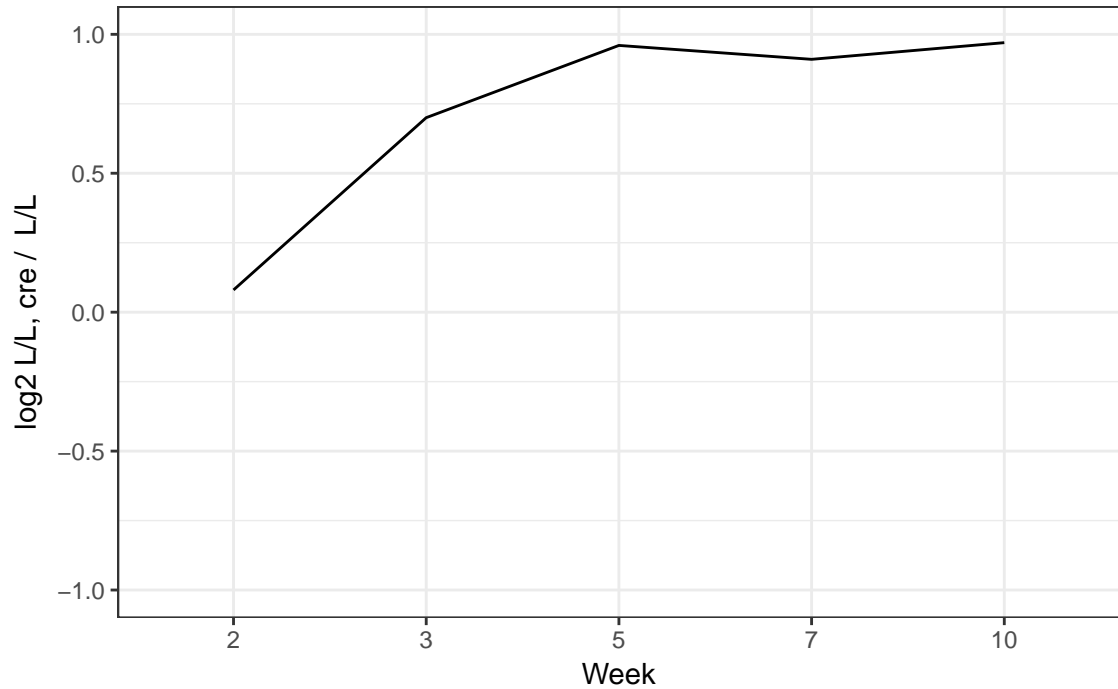



MRPL11 / Q9CQF0; adj.p value: 0.01545

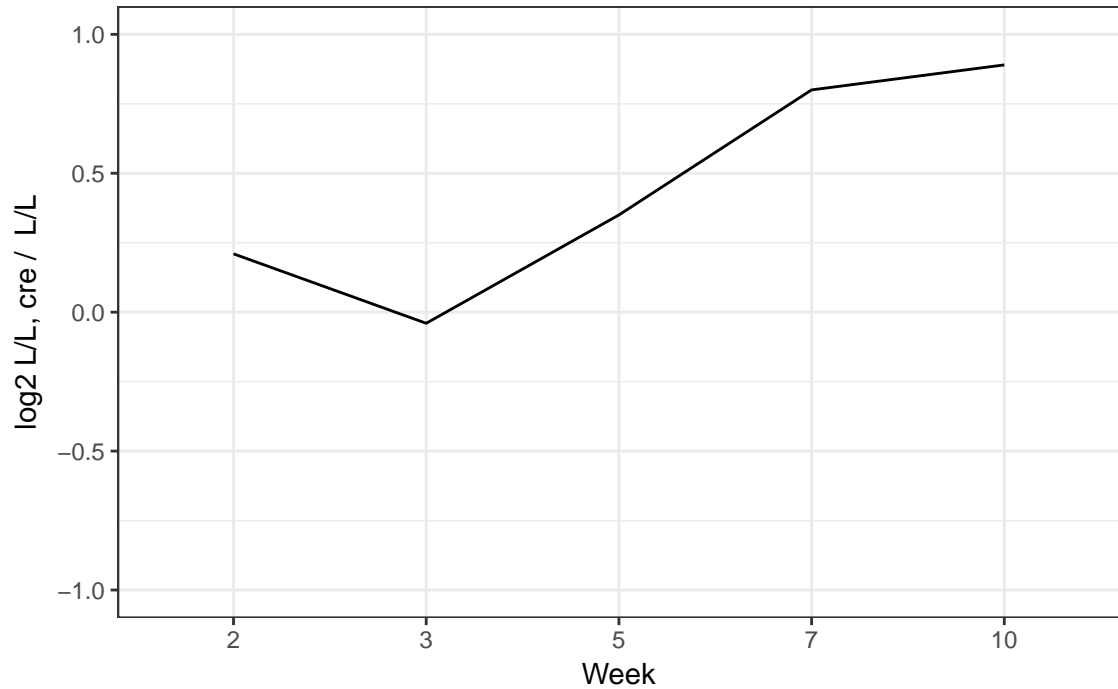

MRPL12 / Q9DB15; adj.p value: 0

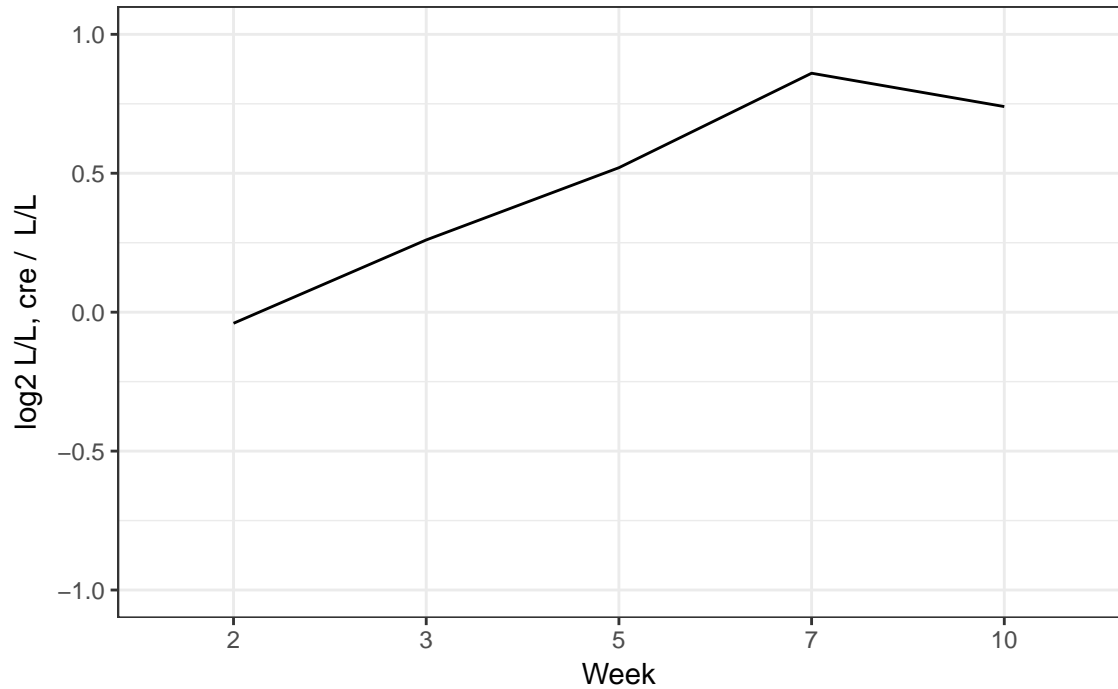

MRPL13 / Q9D1P0; adj.p value: 0

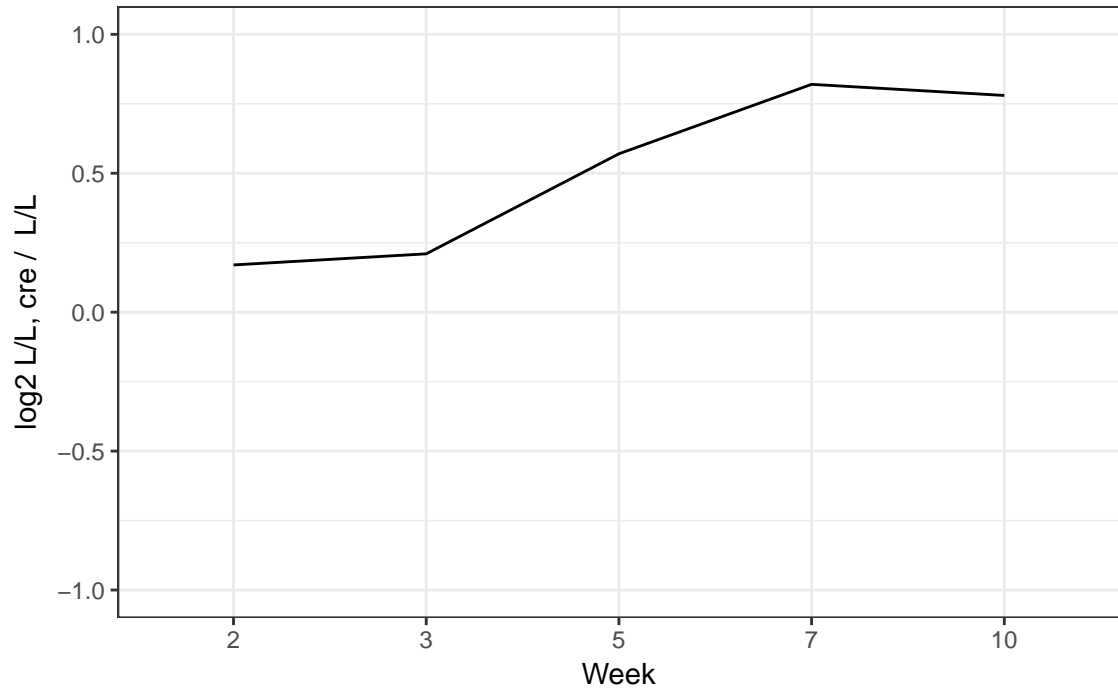

MRPL14 / Q9D1I6; adj.p value: 0

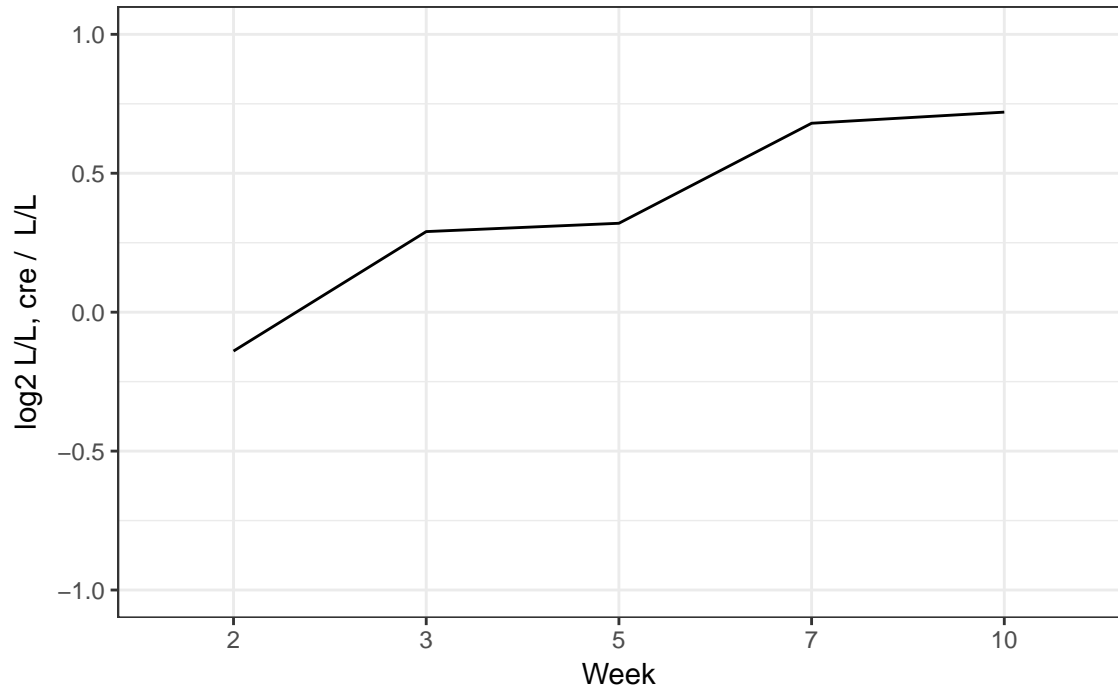

MRPL15 / Q9CPR5; adj.p value: 0

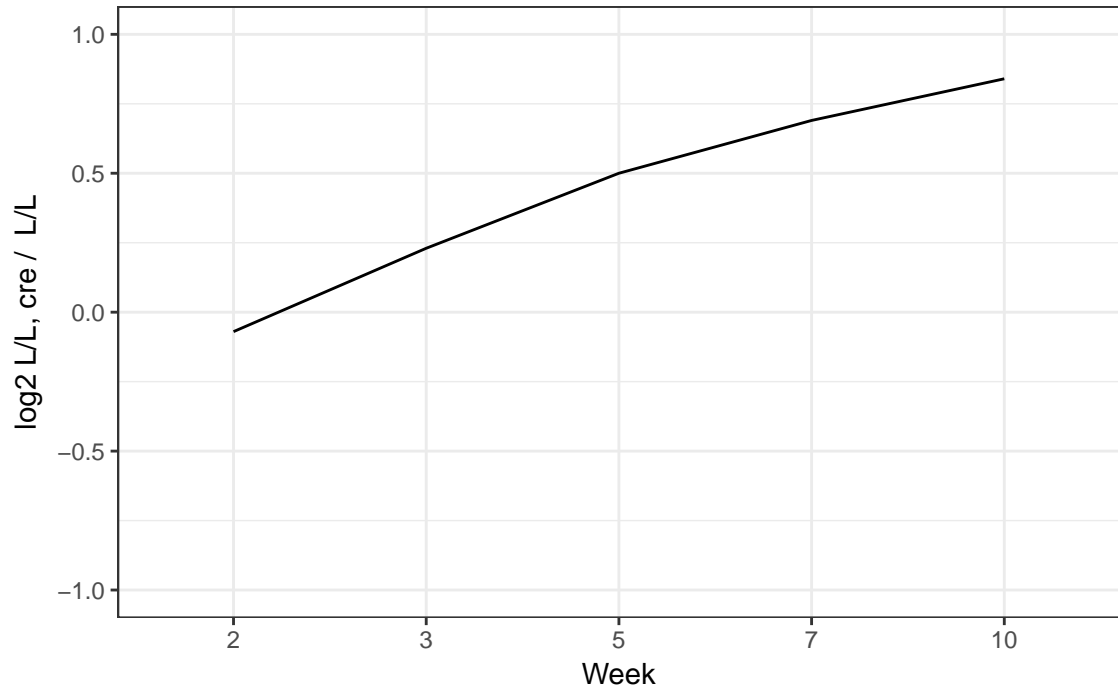

MRPL16 / Q99N93; adj.p value: 0

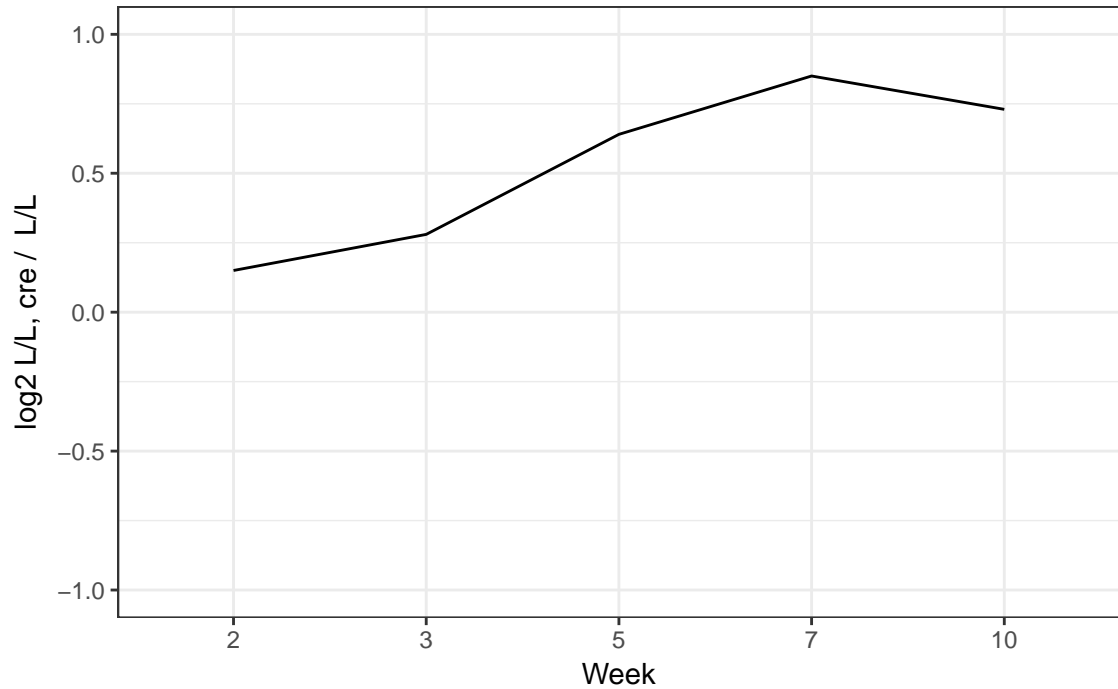

MRPL17 / Q9D8P4; adj.p value: 1e-05

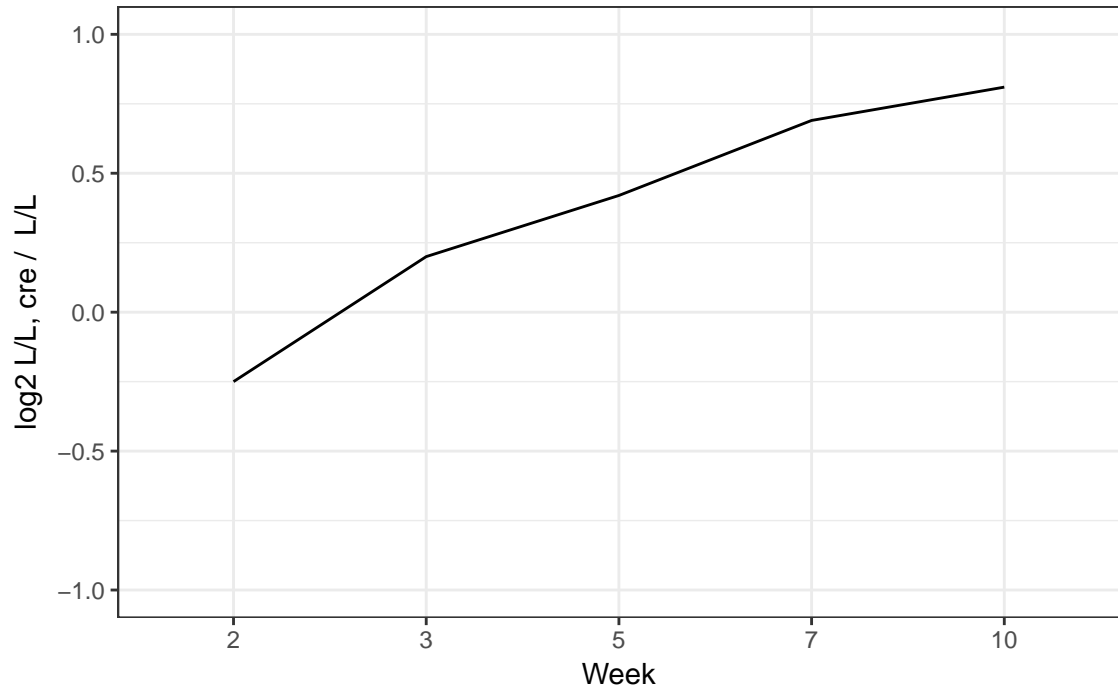

MRPL18 / Q9CQL5; adj.p value: 0.00012

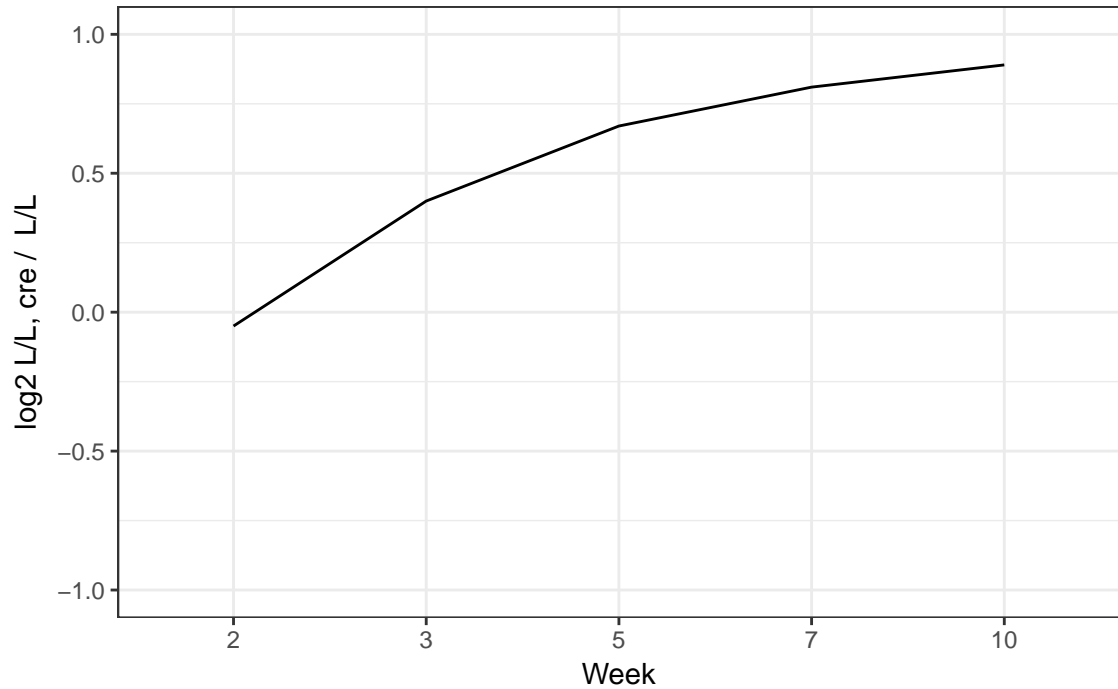



MRPL19 / Q9D338; adj.p value: 0

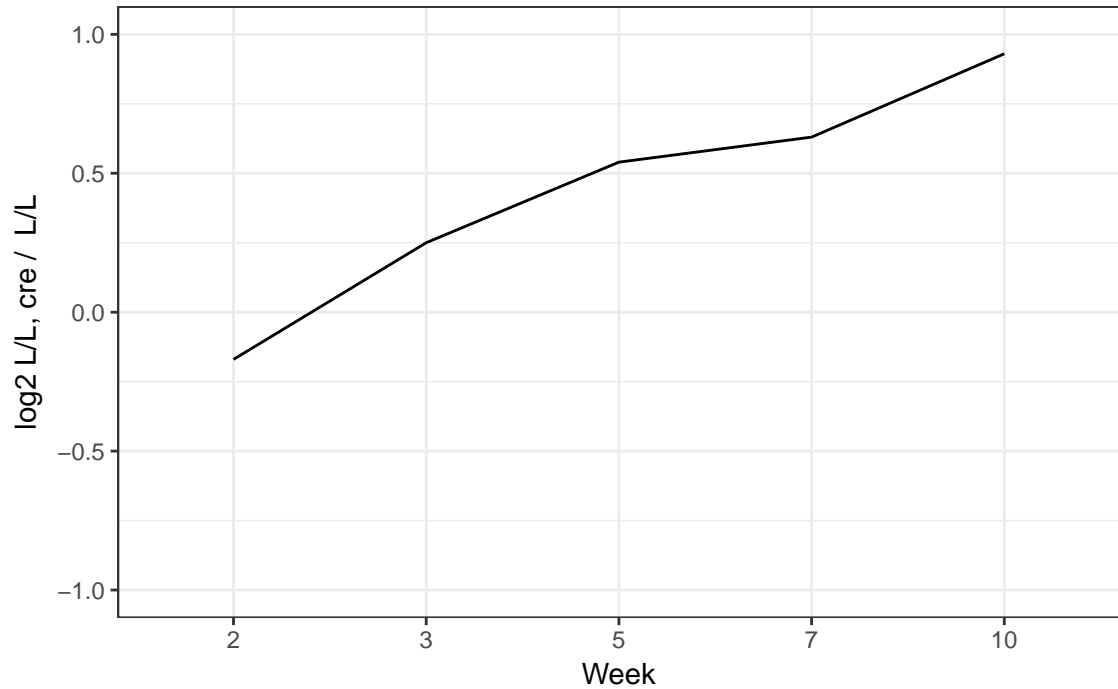

MRPL2 / B1B1D8; adj.p value: 0.00404

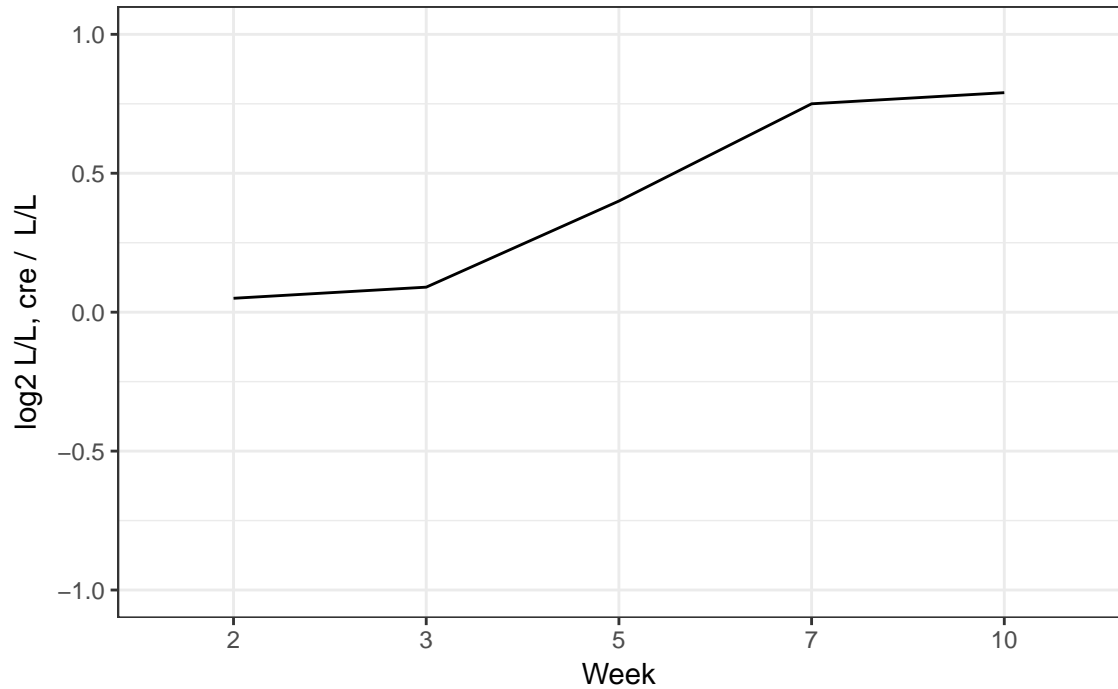

MRPL20 / V9GX17; adj.p value: 0.00241

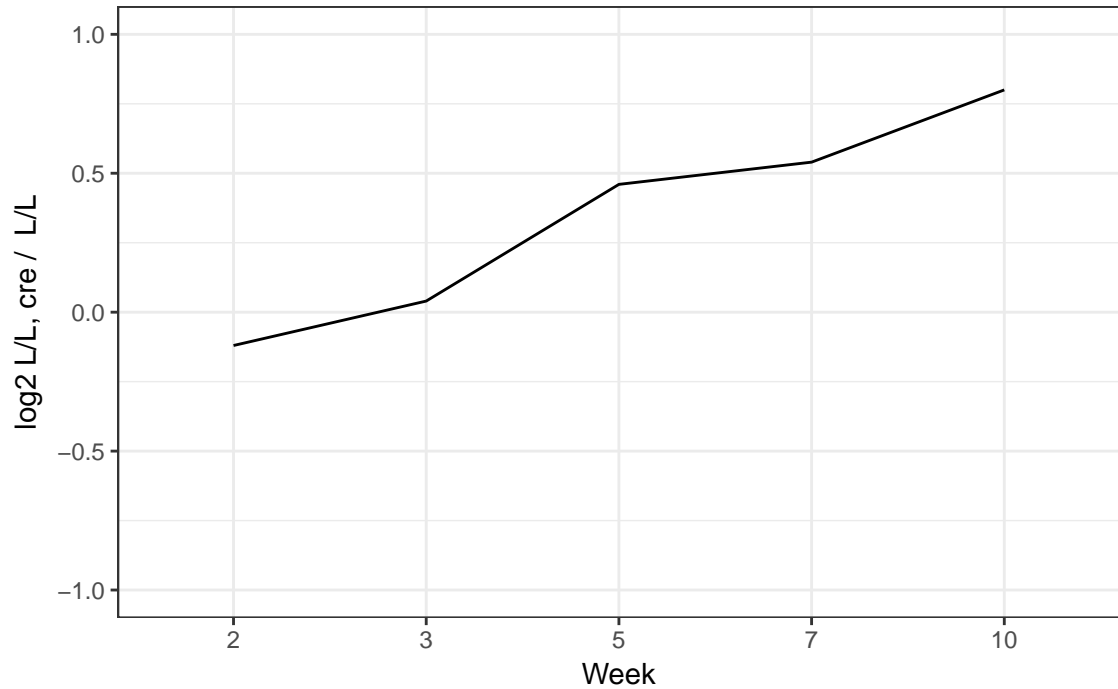

MRPL21 / Q9D1N9; adj.p value: 0.00596

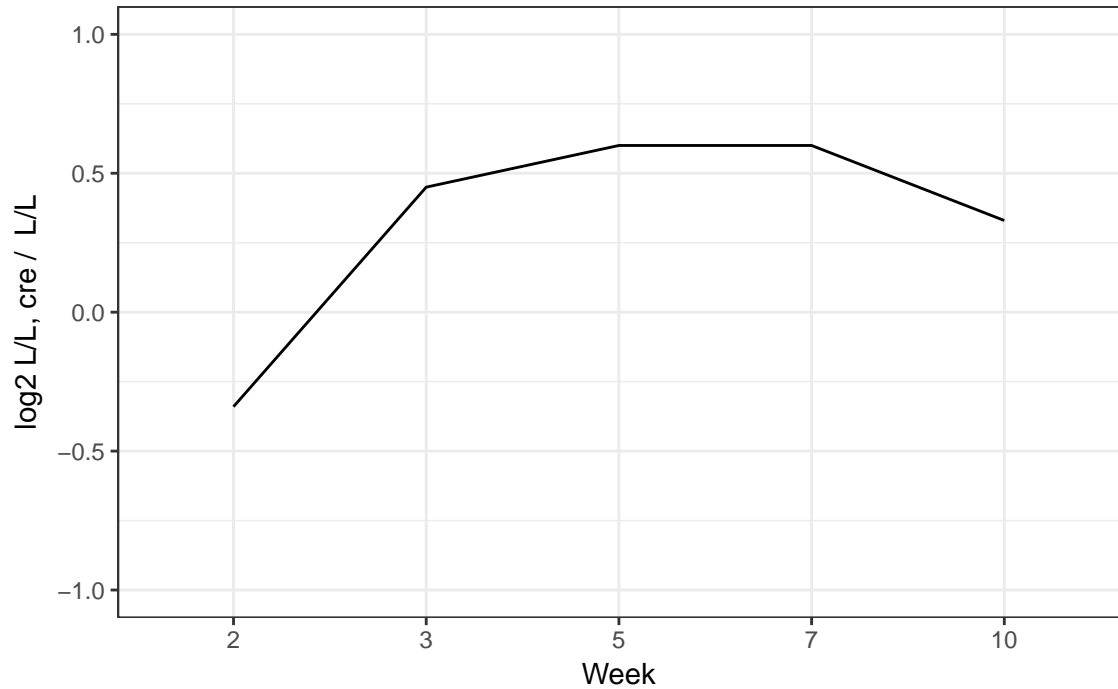

MRPL22 / Q8BU88; adj.p value: 0

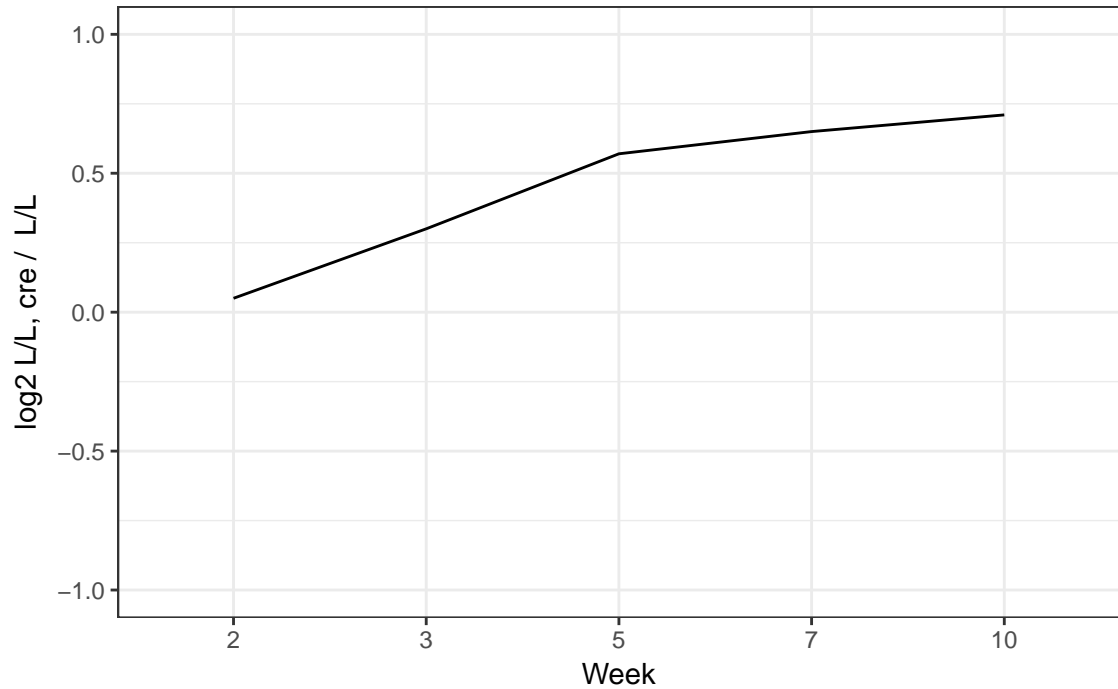

MRPL23 / O35972; adj.p value: 0

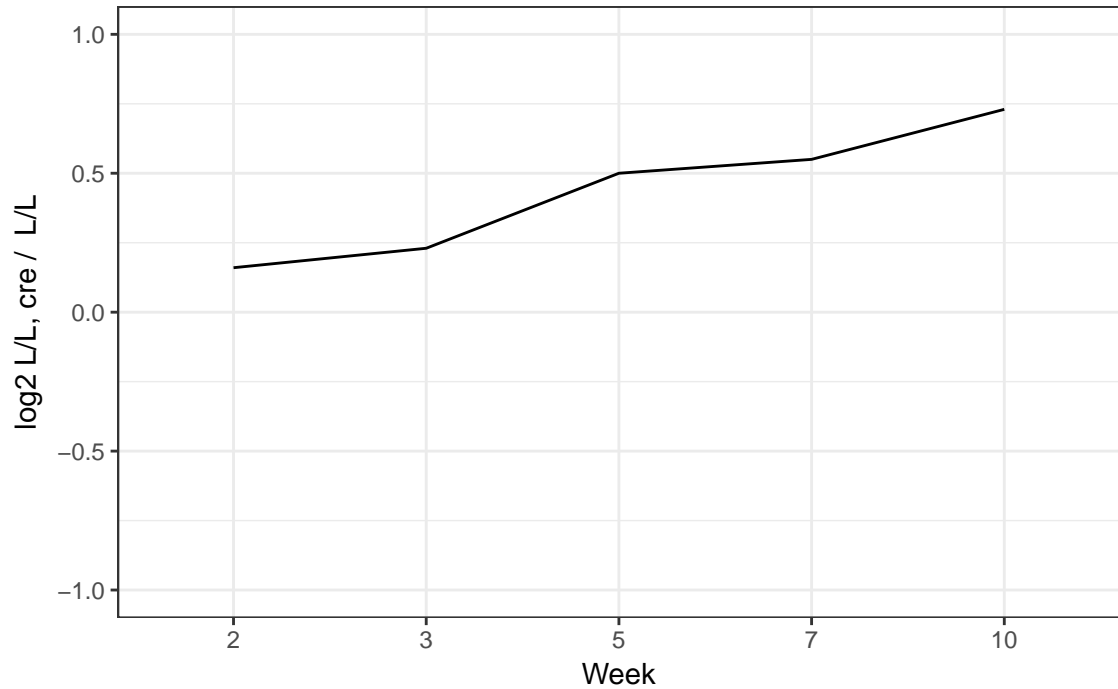

MRPL24 / Q9CQ06; adj.p value: 0

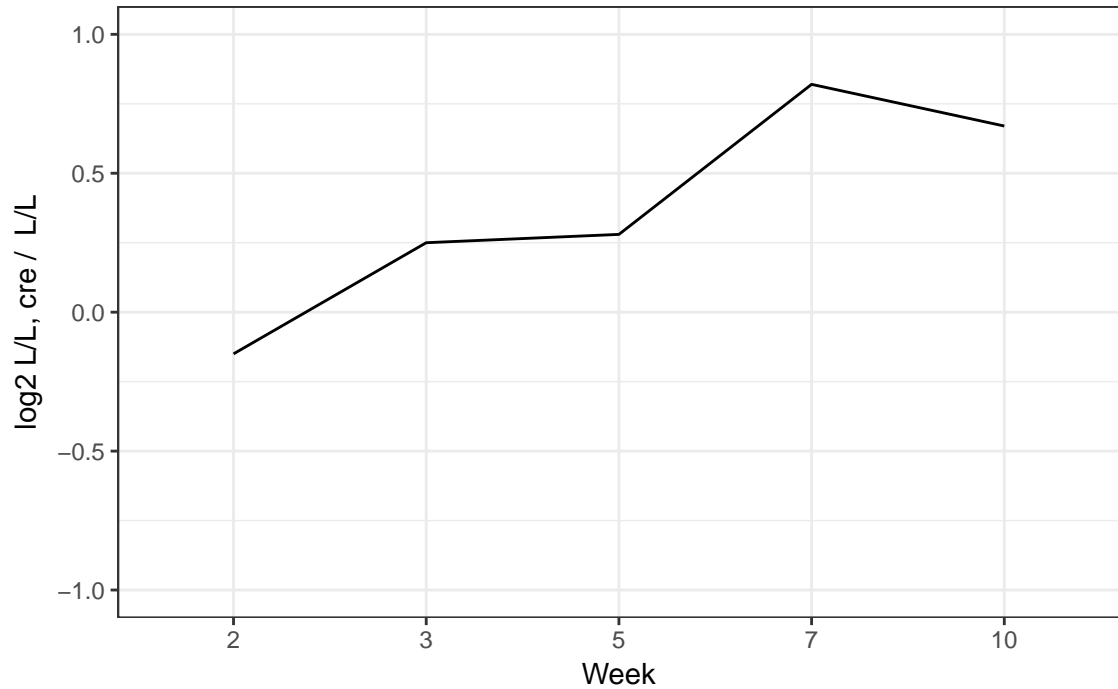

MRPL27 / Q99N92; adj.p value: 0.00169

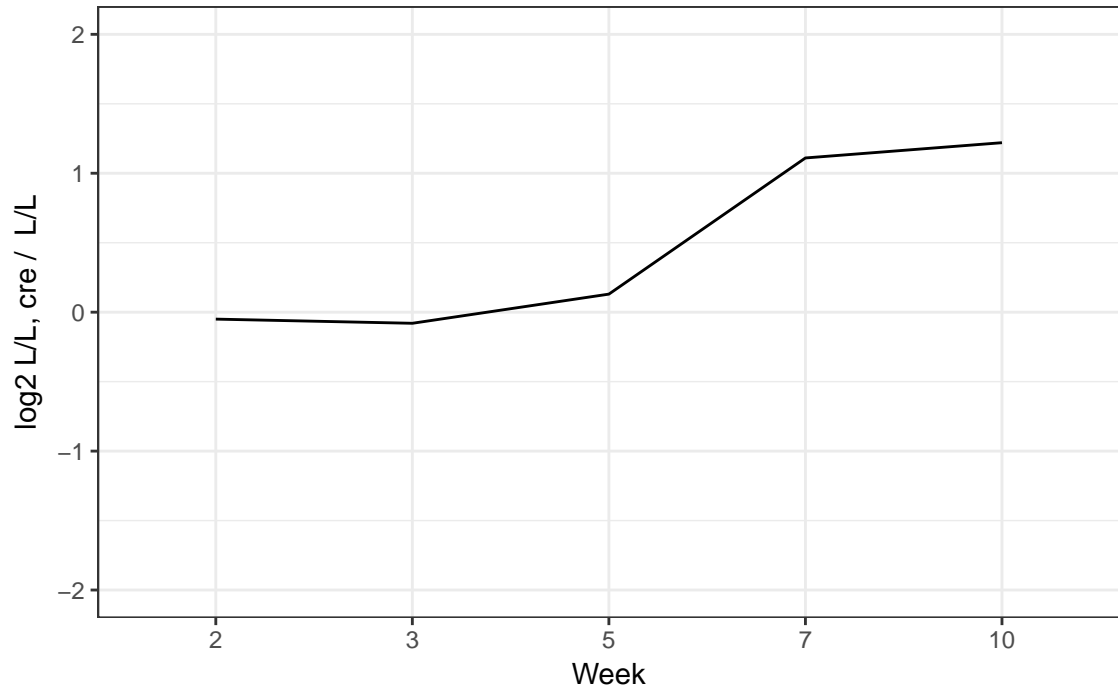



MRPL28 / Q9D1B9; adj.p value: 0

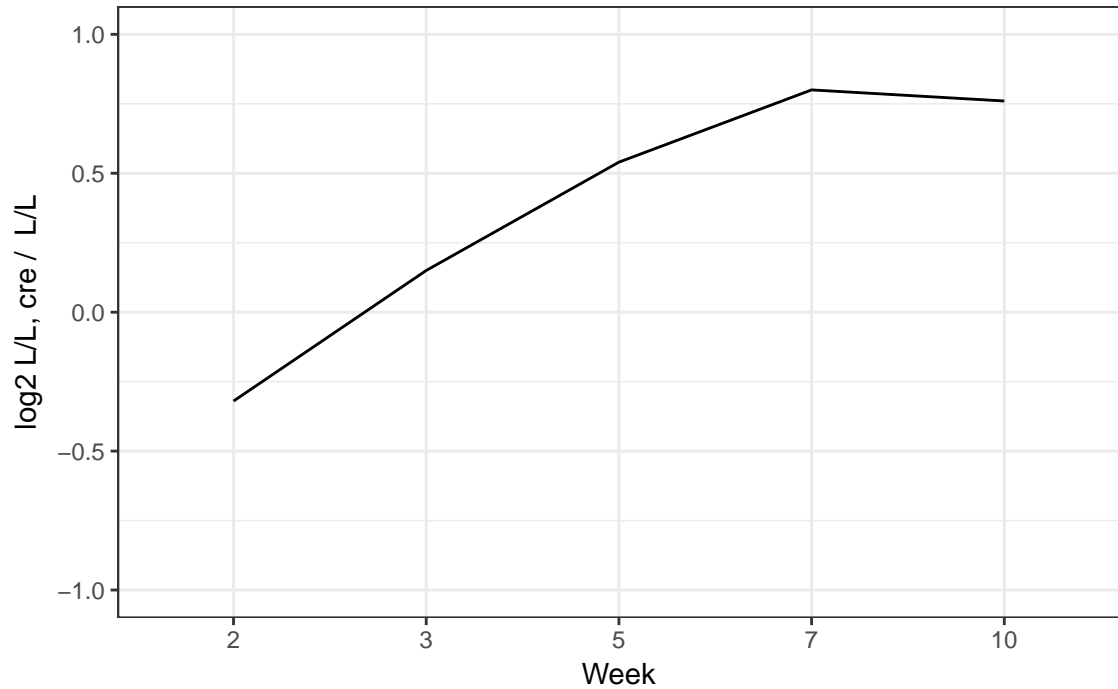

# MRPL3 / Q99N95; adj.p value: 0

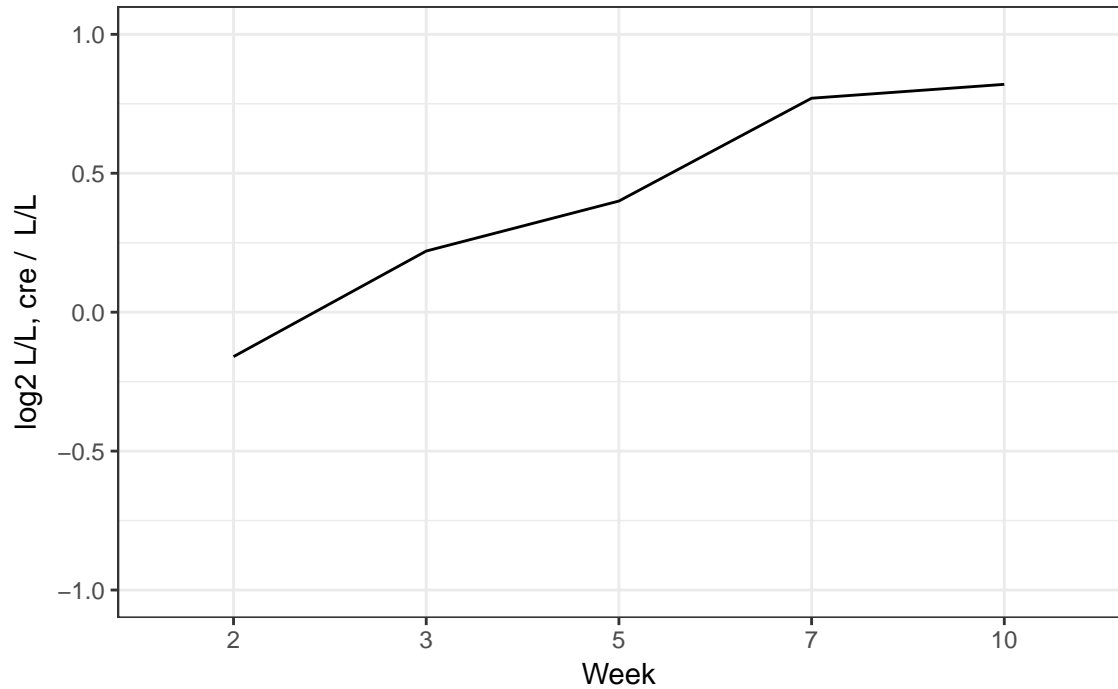

MRPL30 / Q9D7N6; adj.p value: 1e-05

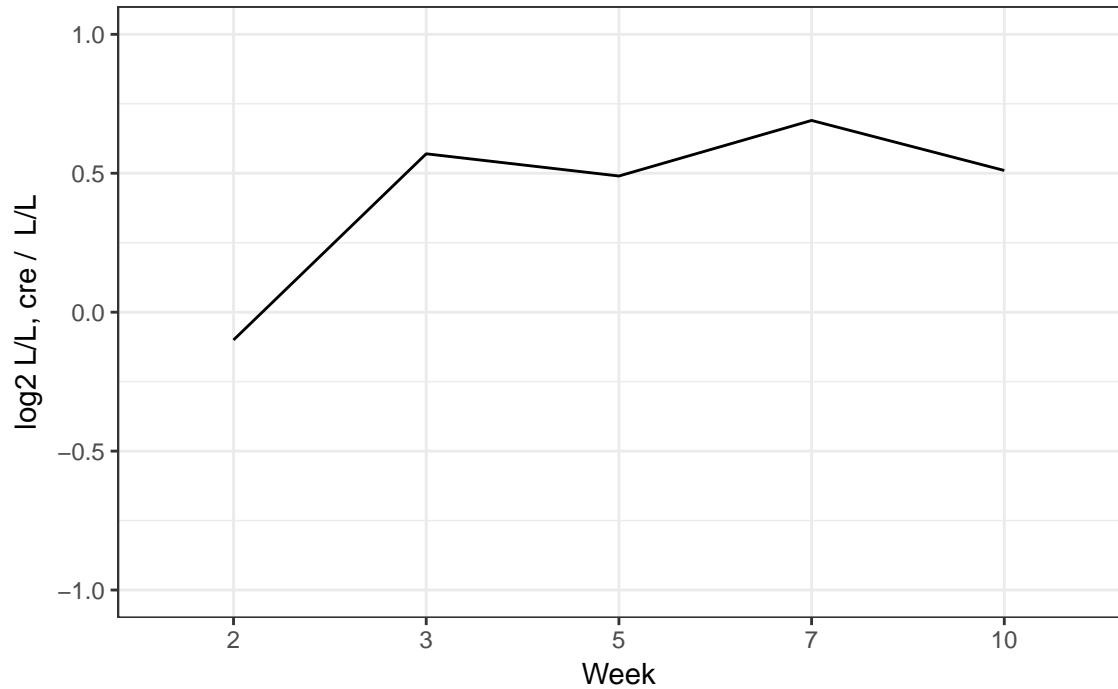

MRPL32 / Q9DCI9; adj.p value: 0.00568

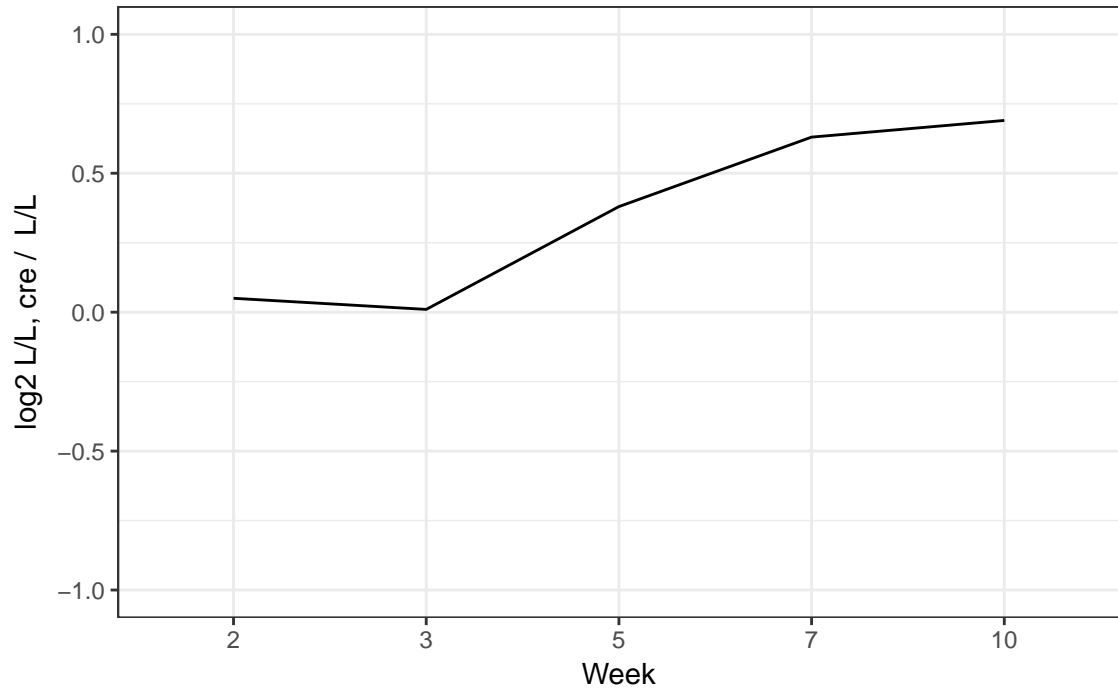

MRPL33 / Q9CQP0; adj.p value: 0.00093

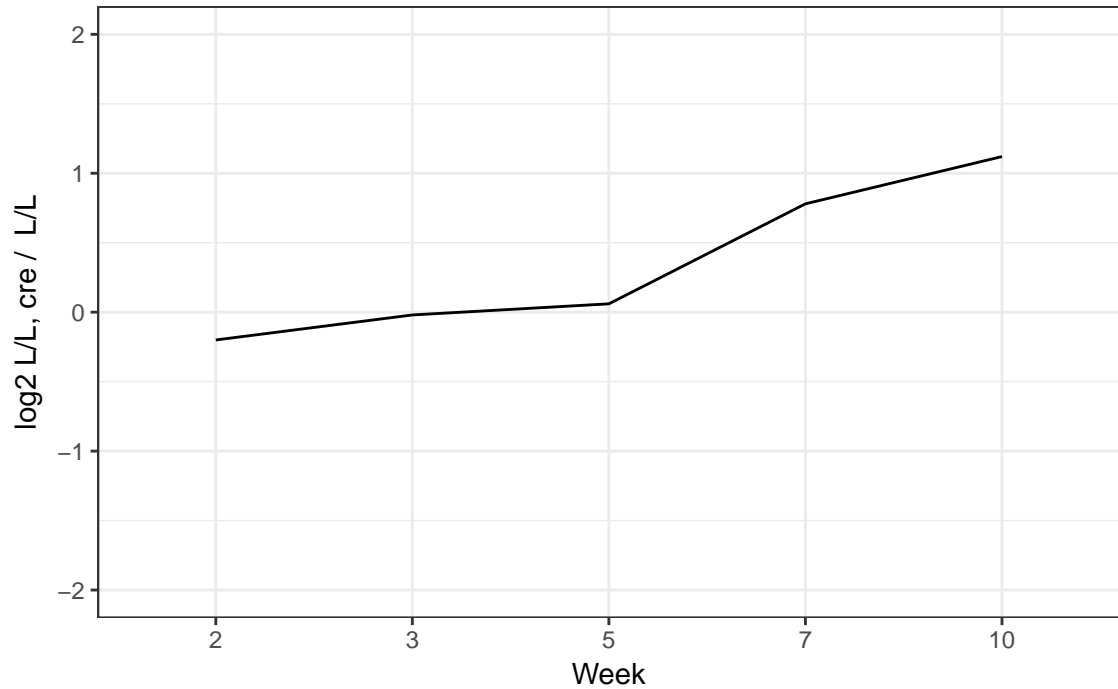

MRPL34 / Q99N91; adj.p value: 0.17918

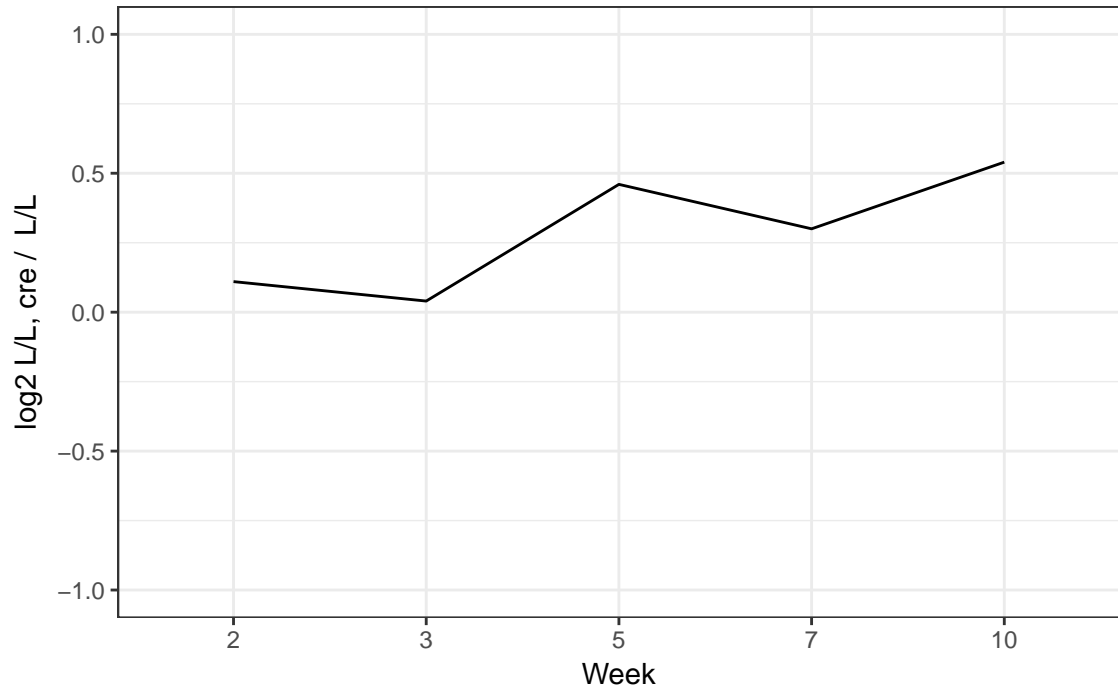

MRPL35 / Q9CQL6; adj.p value: 2e-05

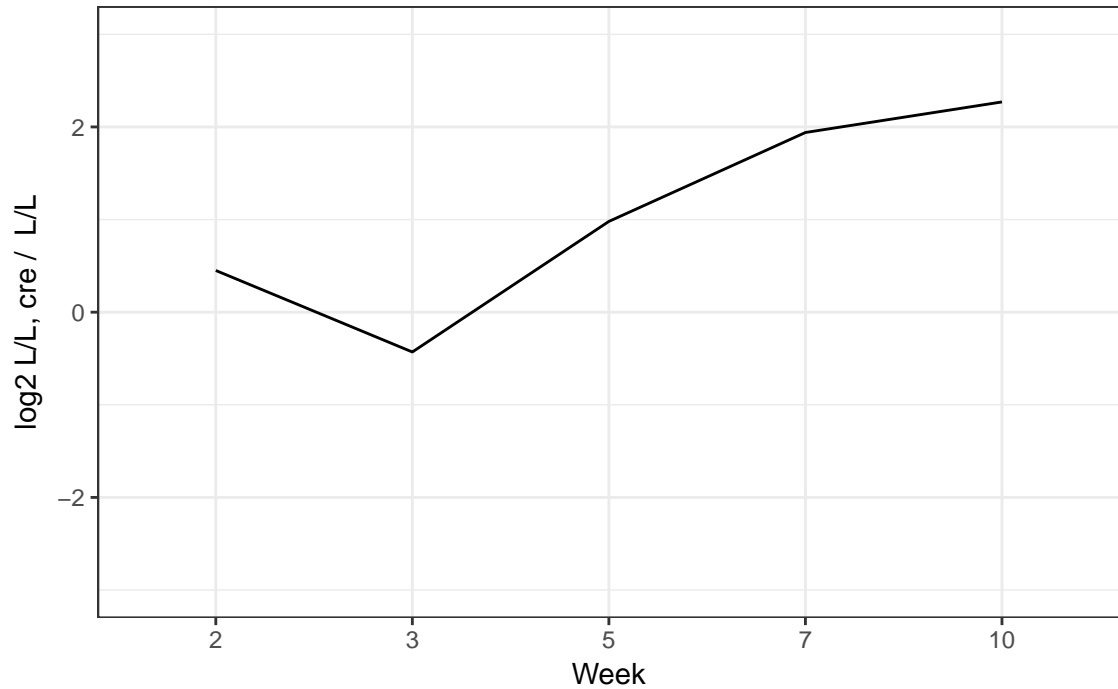

MRPL37 / Q921S7; adj.p value: 5e-05

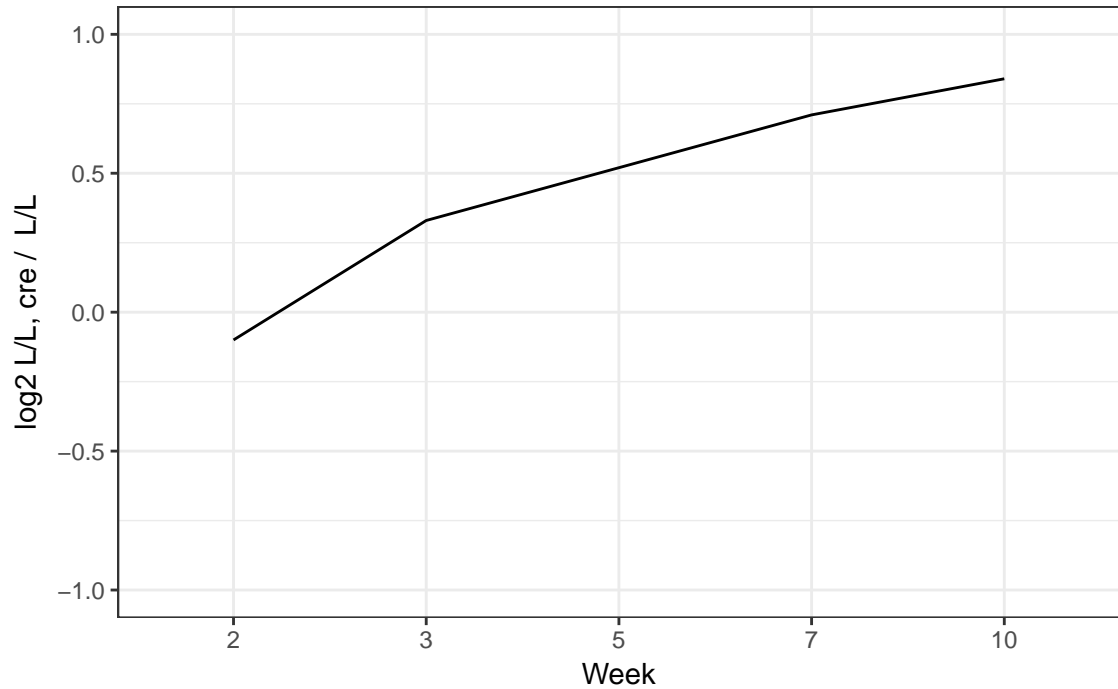



MRPL38 / Q8K2M0; adj.p value: 0.00033

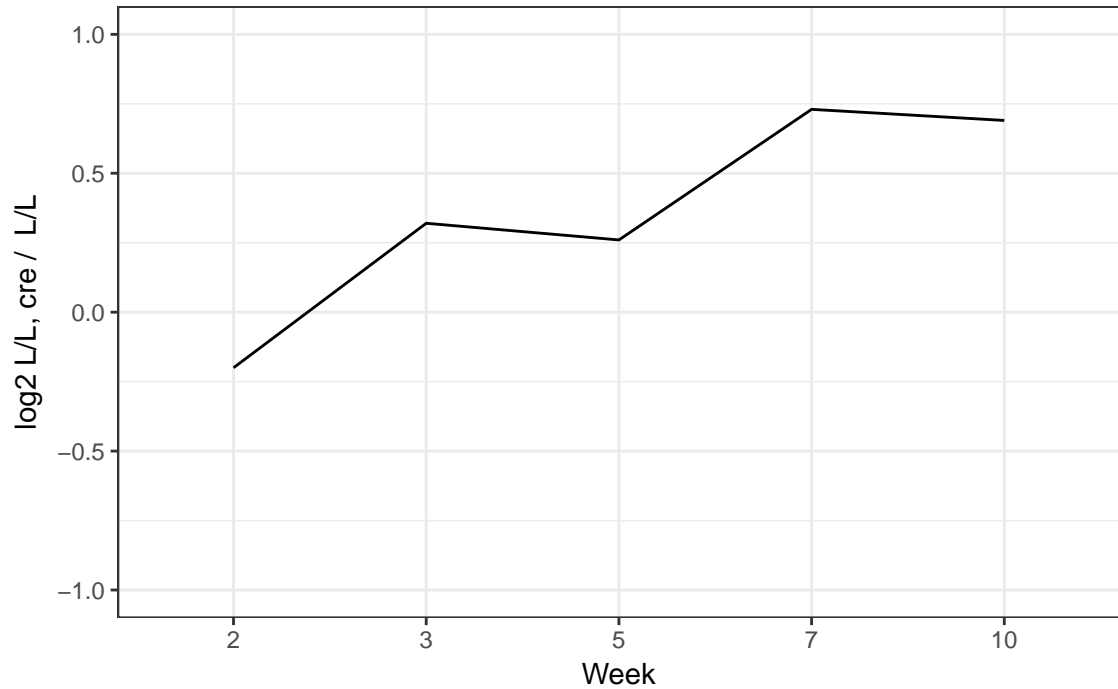

MRPL39 / Q9JKF7; adj.p value: 0

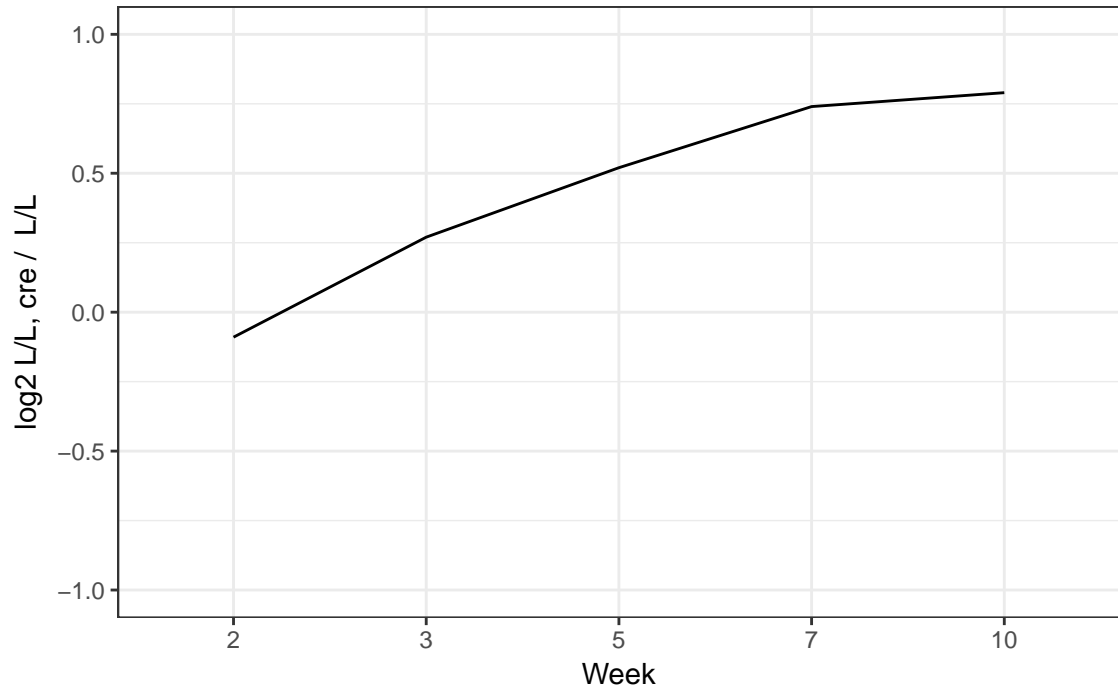

MRPL4 / Q9DCU6; adj.p value: 0.00035

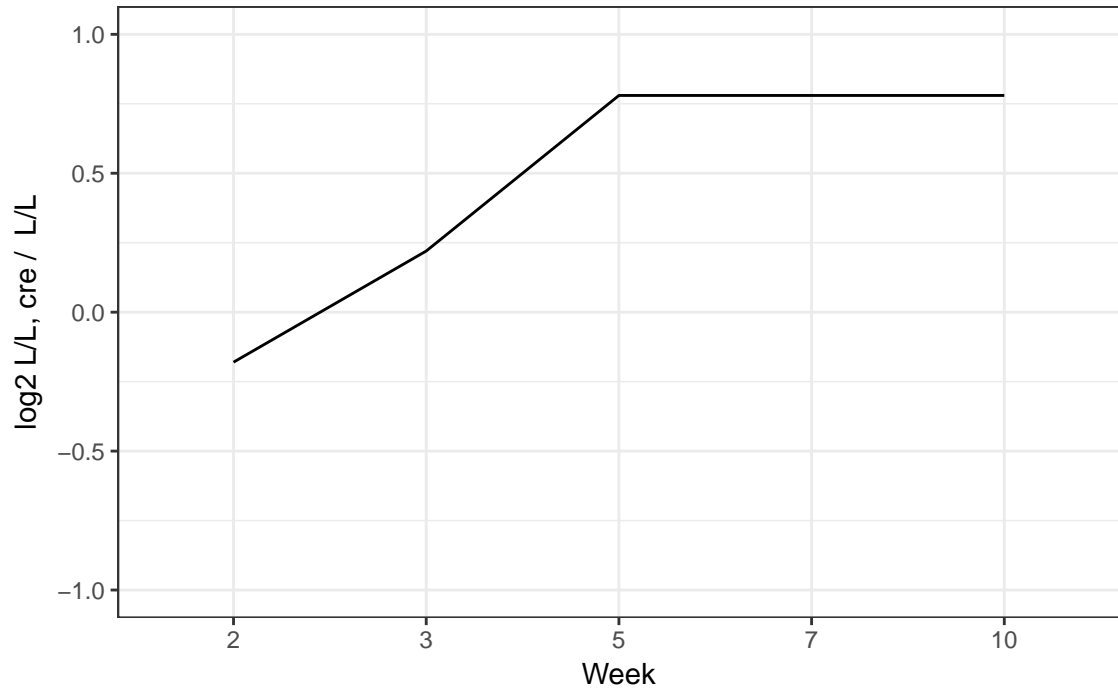

MRPL40 / D3Z7C0; adj.p value: 0.00031

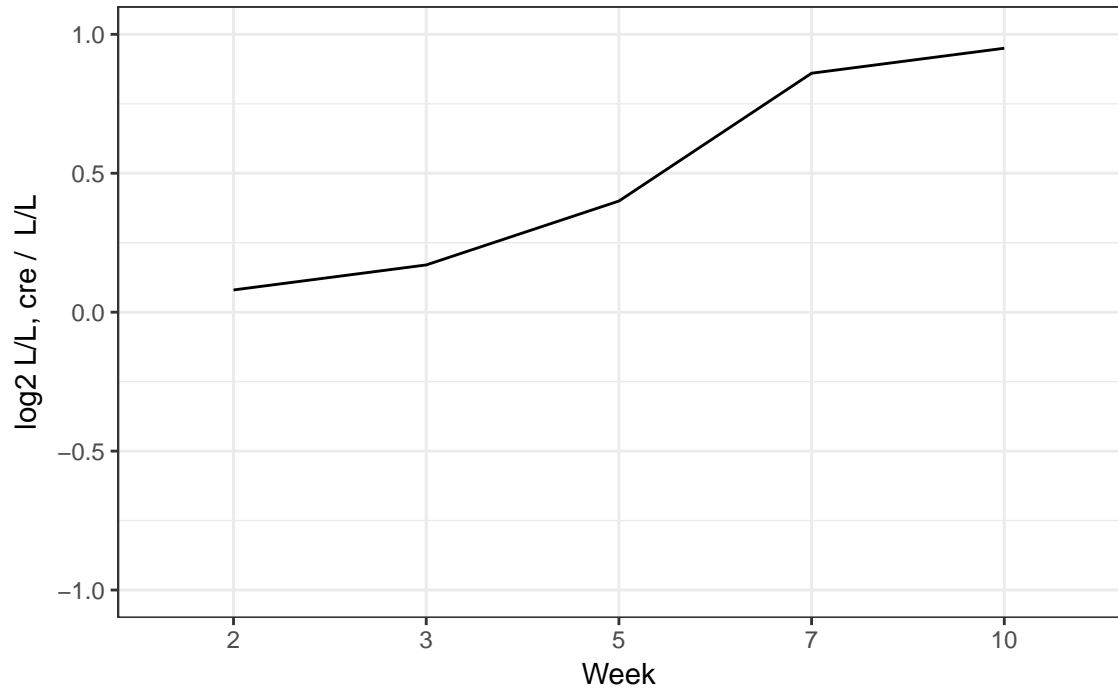

MRPL41 / Q9CQN7; adj.p value: 0.01356

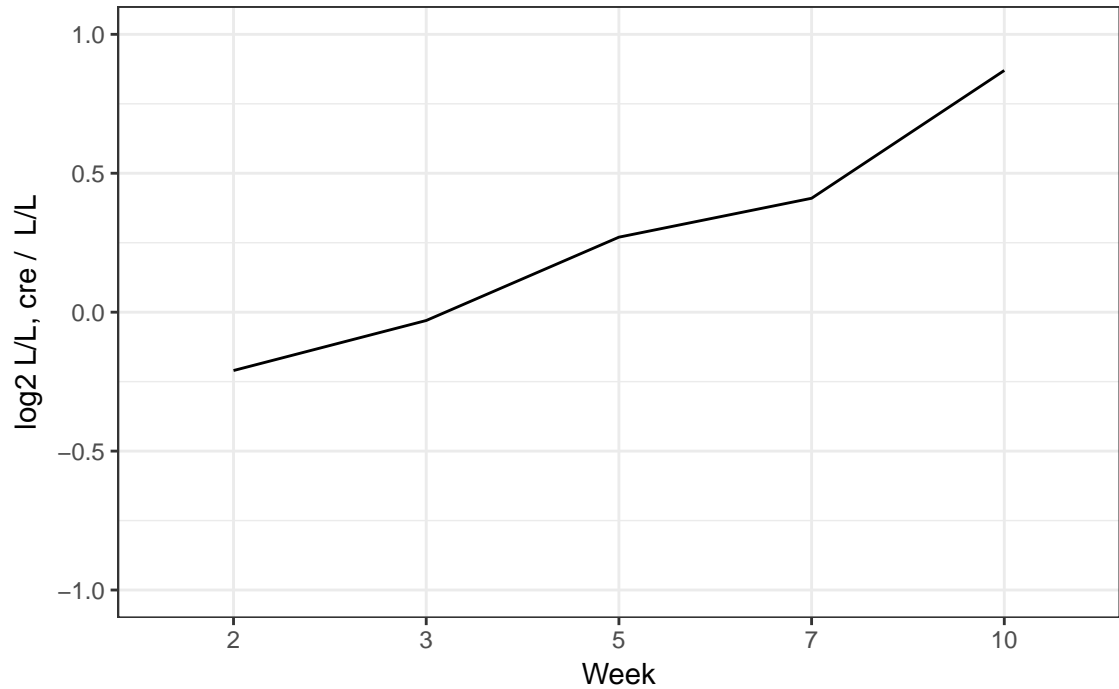

MRPL42 / Q9CPV3; adj.p value: 0.10029

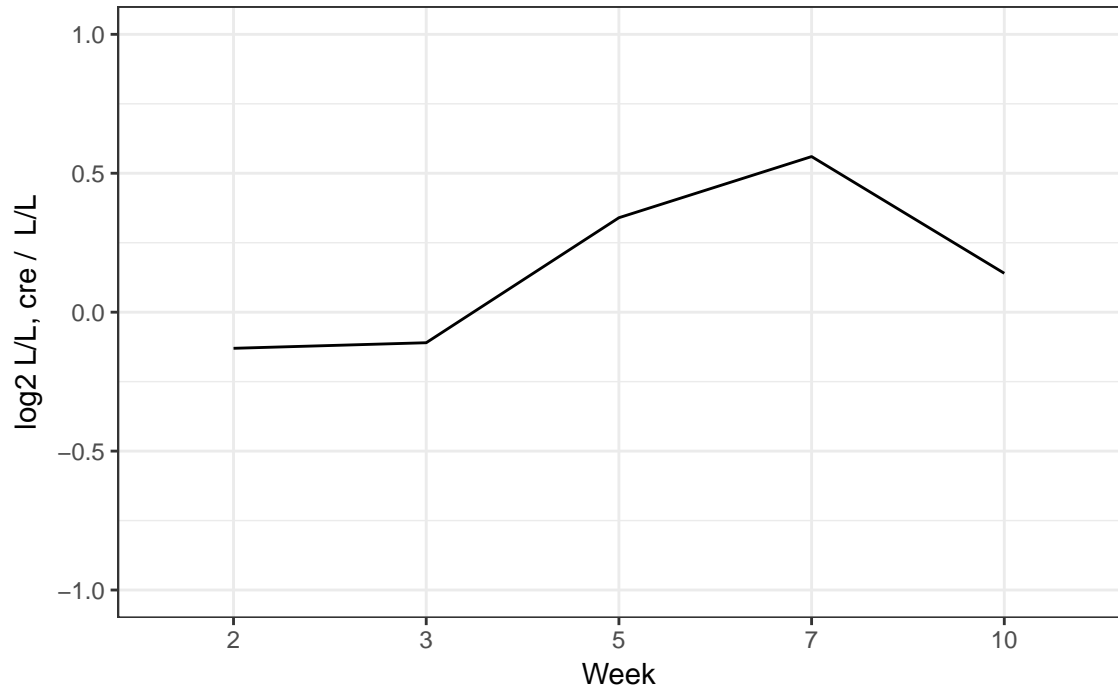

MRPL43 / Q5RL20; adj.p value: 0.00157

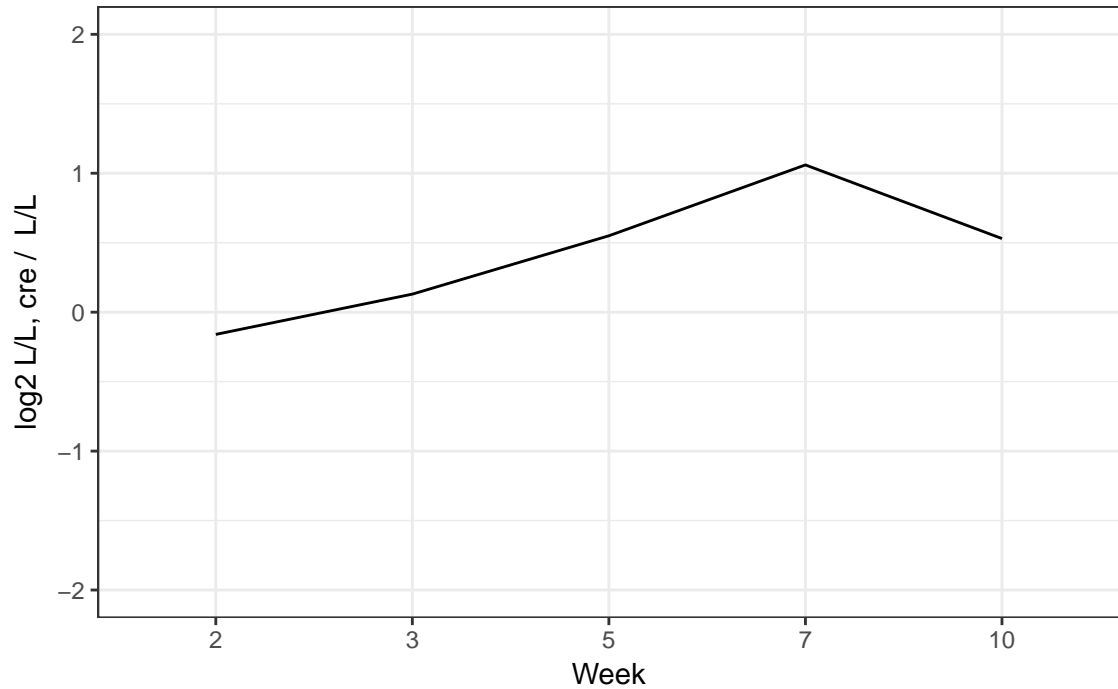

MRPL44 / Q9CY73; adj.p value: 0

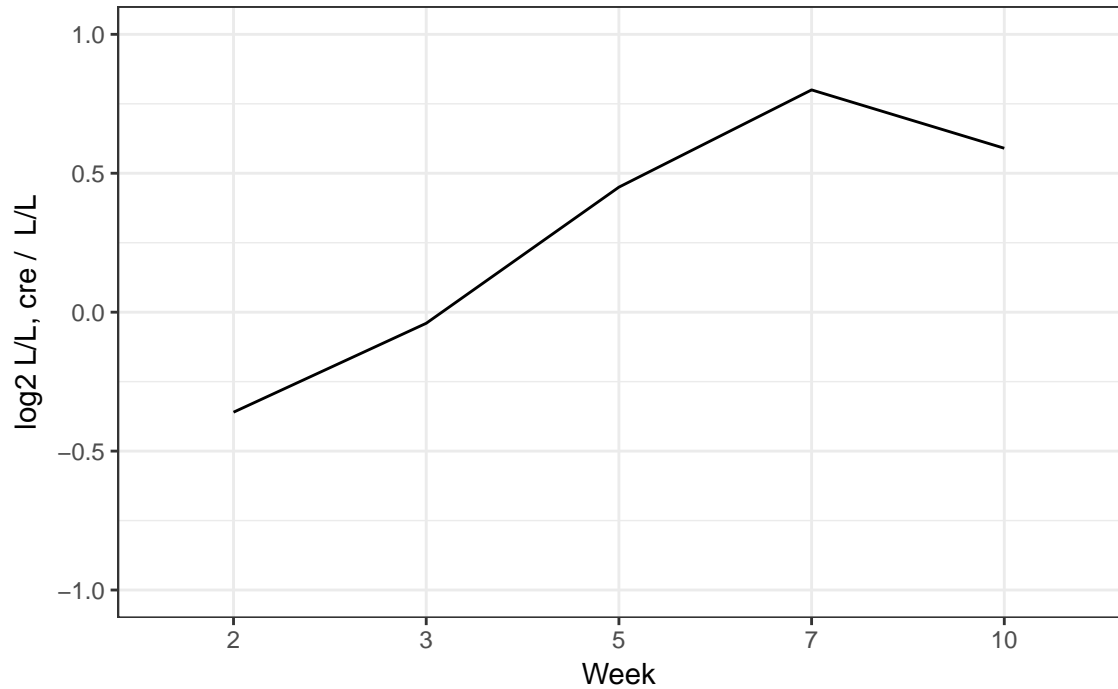



MRPL45 / Q9D0Q7; adj.p value: 1e-05

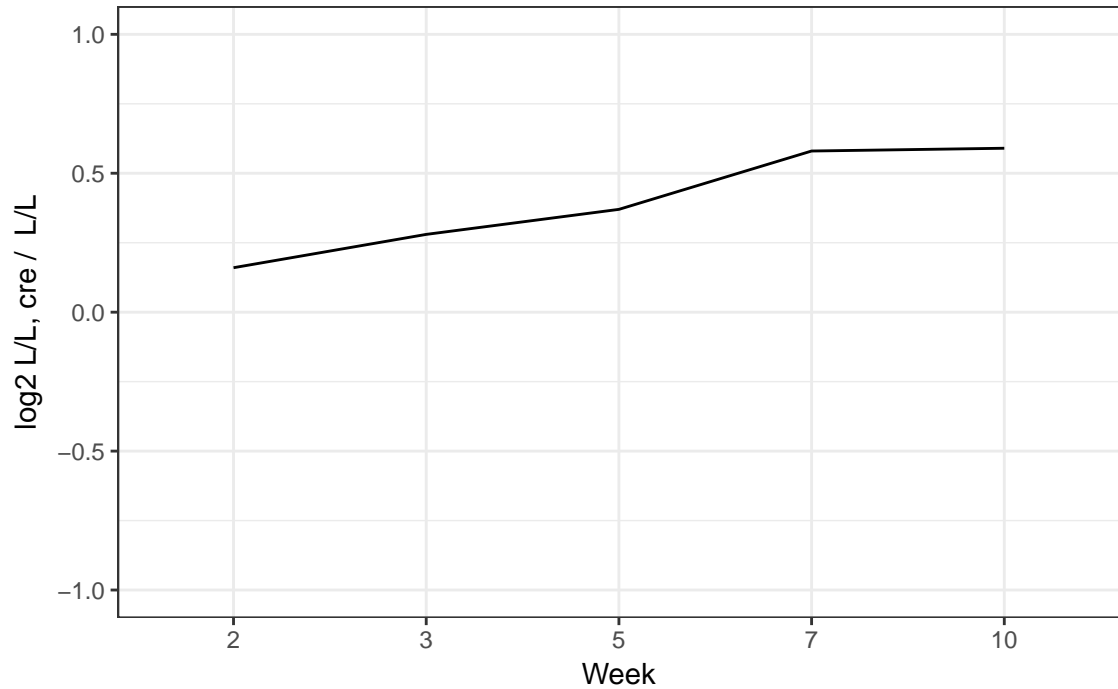

MRPL46 / Q9EQI8; adj.p value: 0

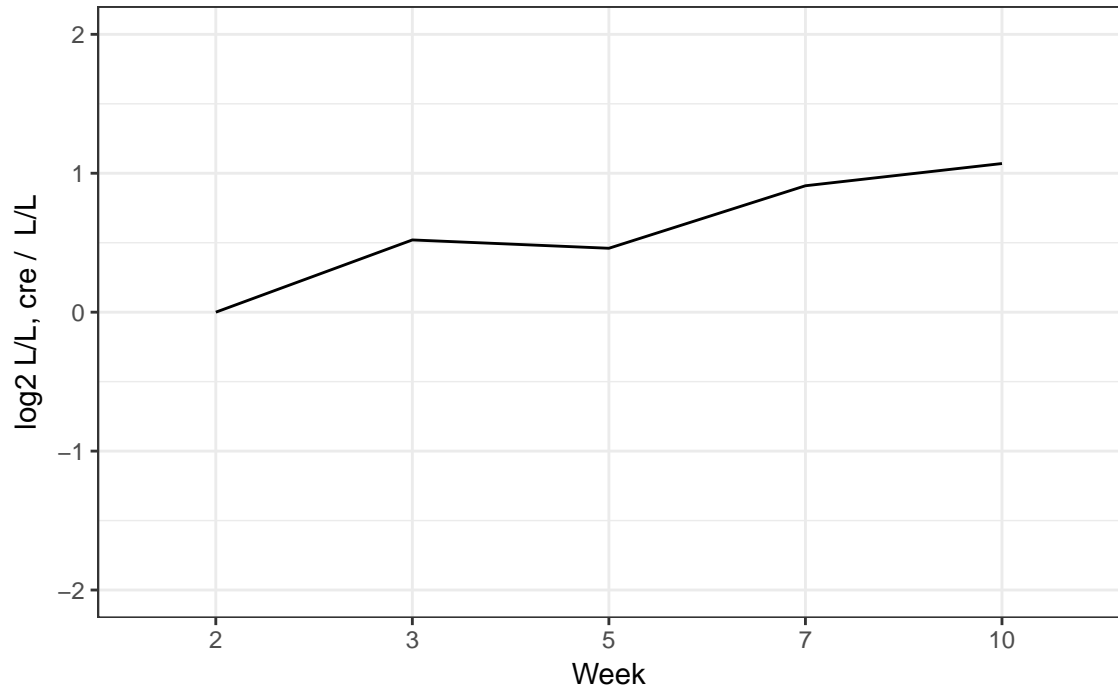

MRPL47 / Q8K2Y7; adj.p value: 0

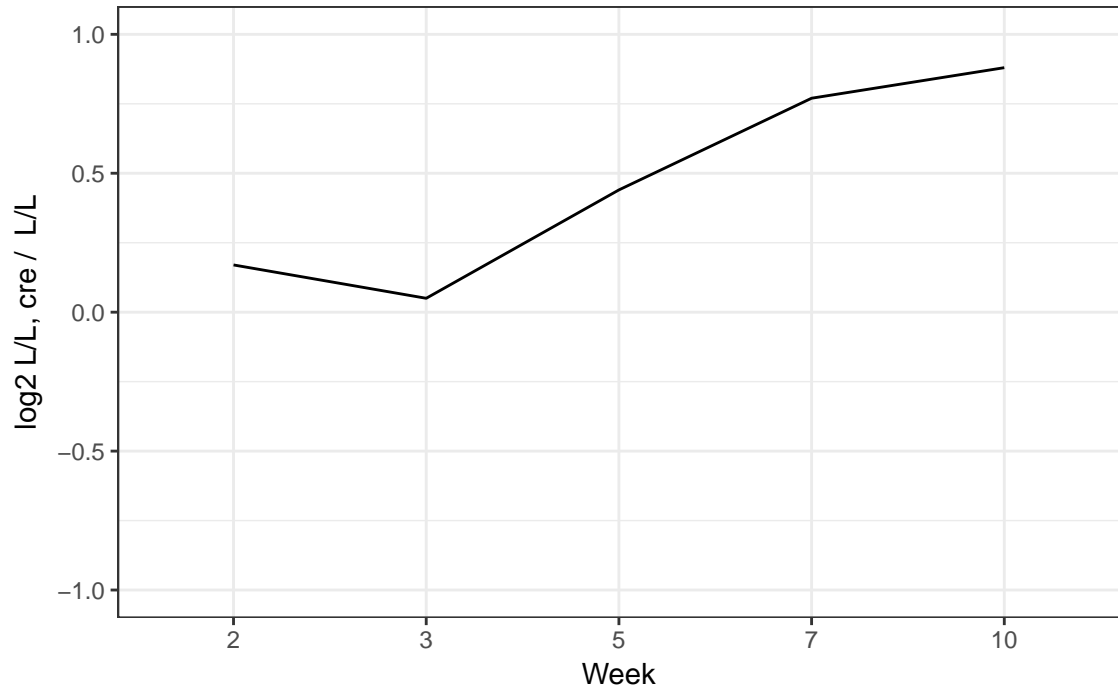

MRPL48 / E9QPQ8; adj.p value: 1e-05

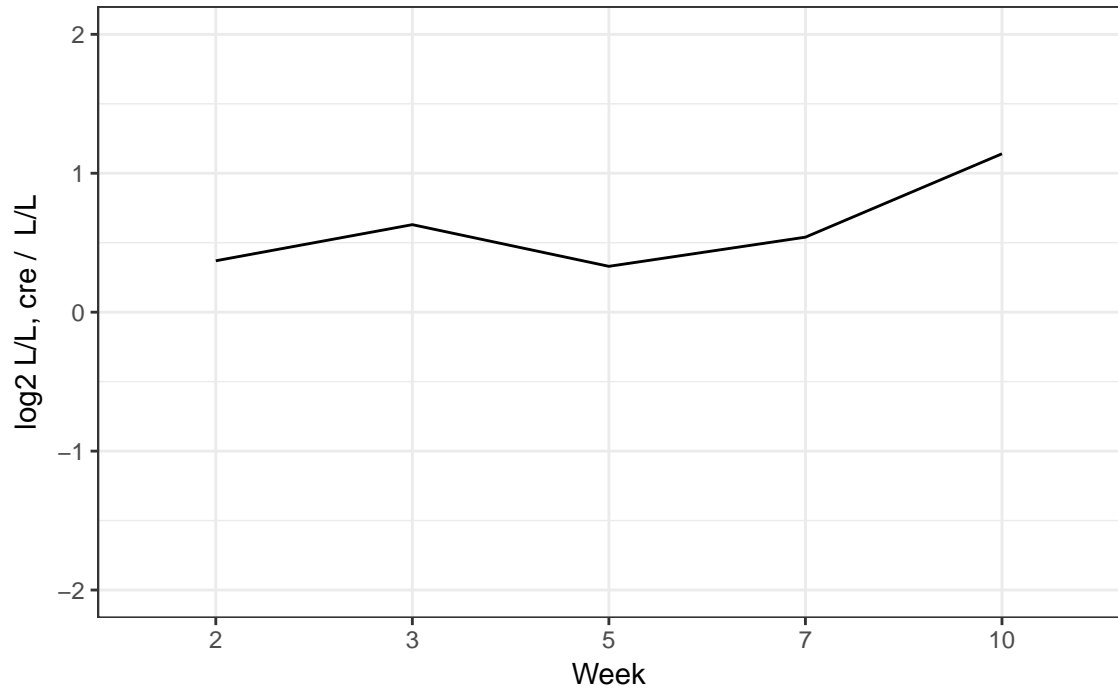

MRPL49 / Q9CQ40; adj.p value: 0.00875

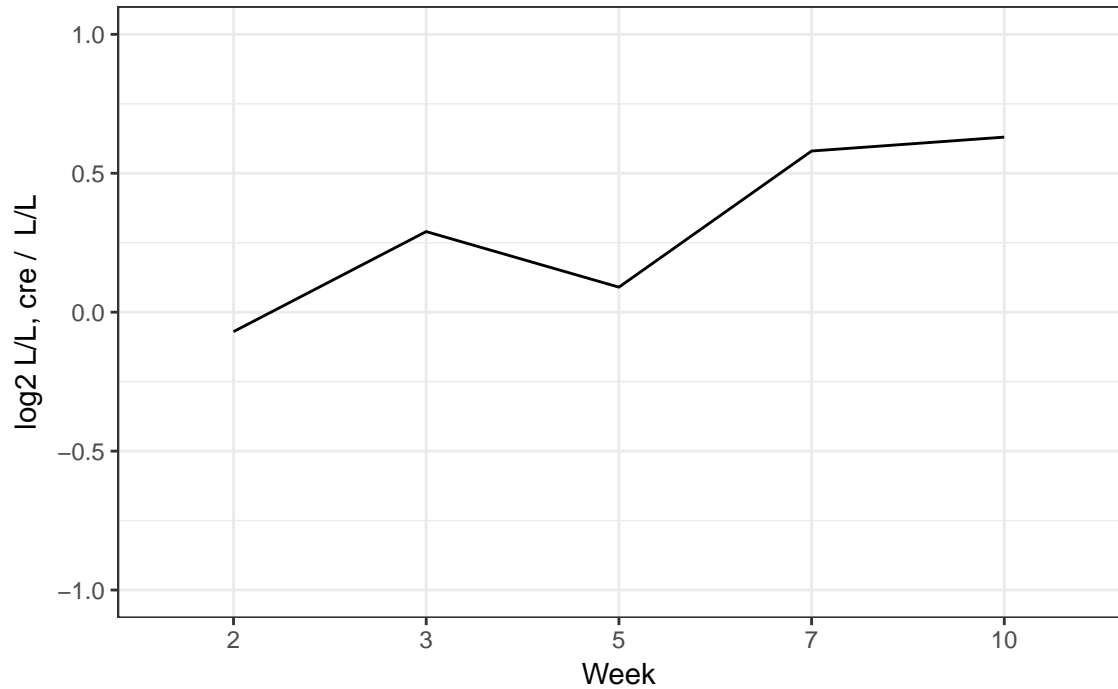

MRPL50 / Q8VDT9; adj.p value: 0.00012

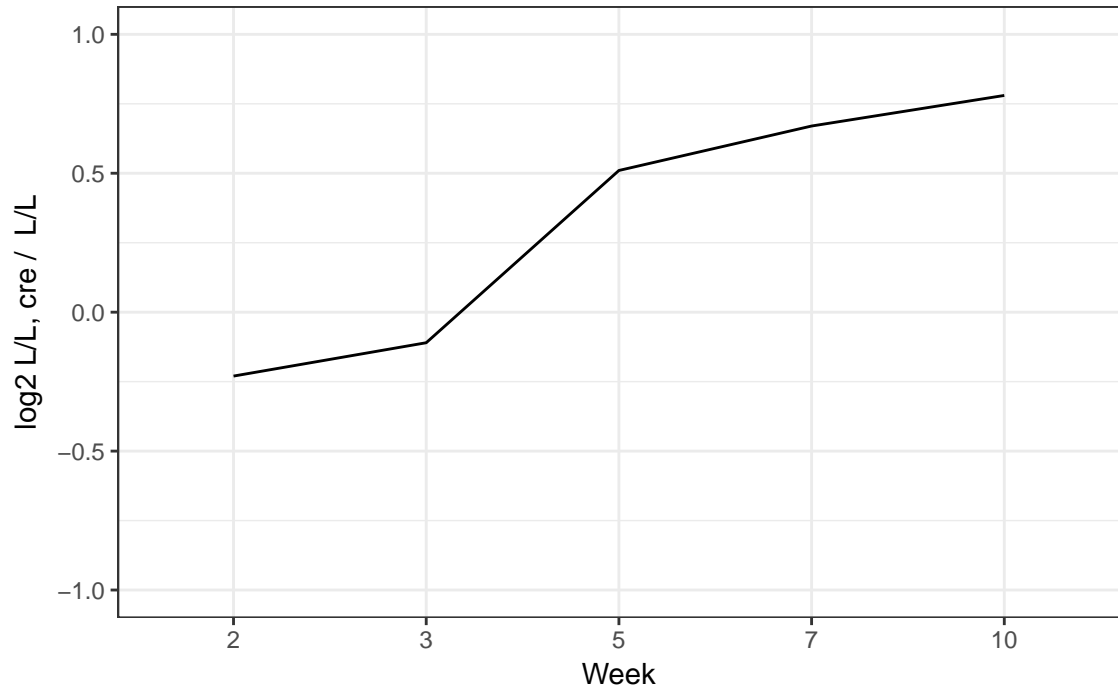

MRPL51 / Q9CPY1; adj.p value: 0.124

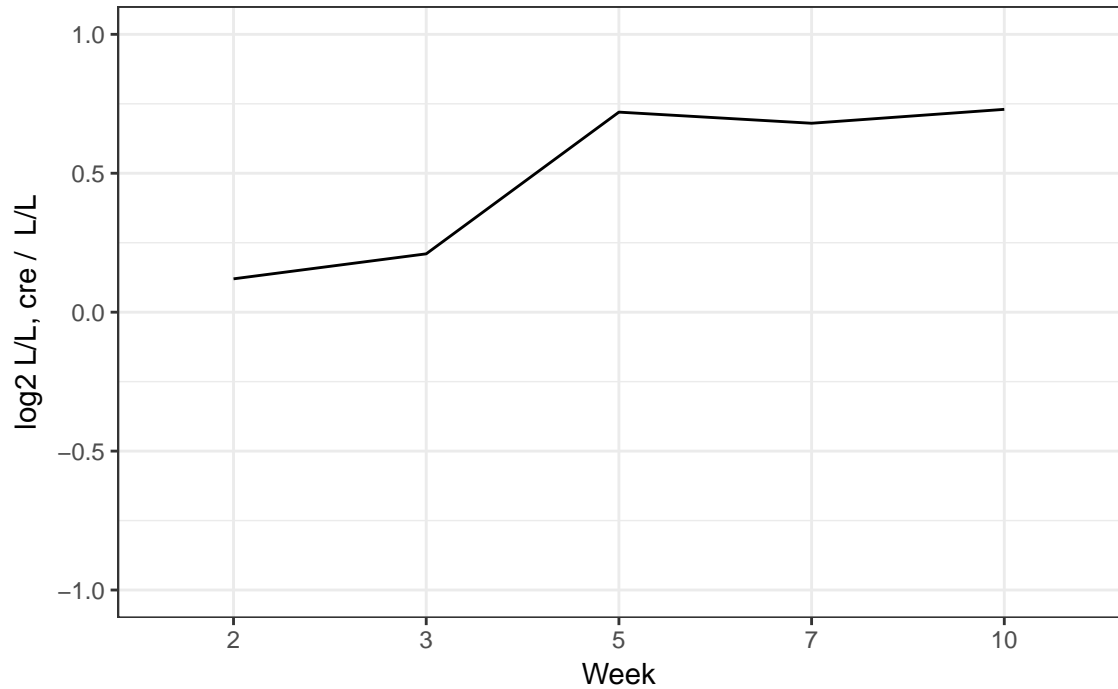

MRPL52 / Q9D0Y8; adj.p value: 0.22553

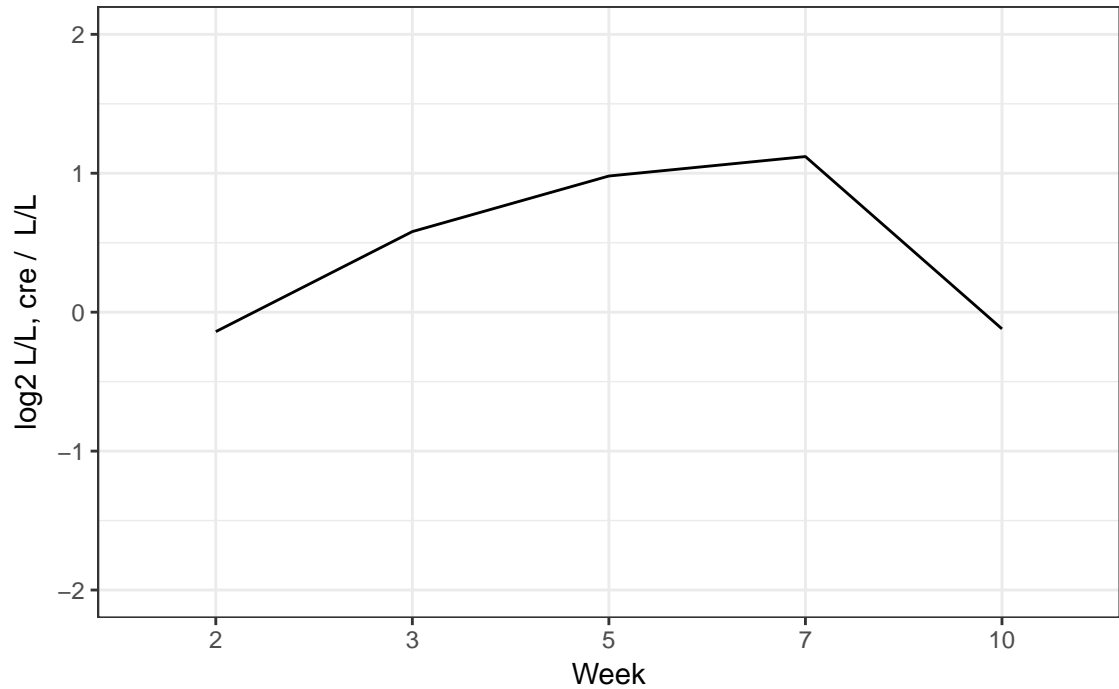



MRPL53 / Q9D1H8; adj.p value: 0.00019

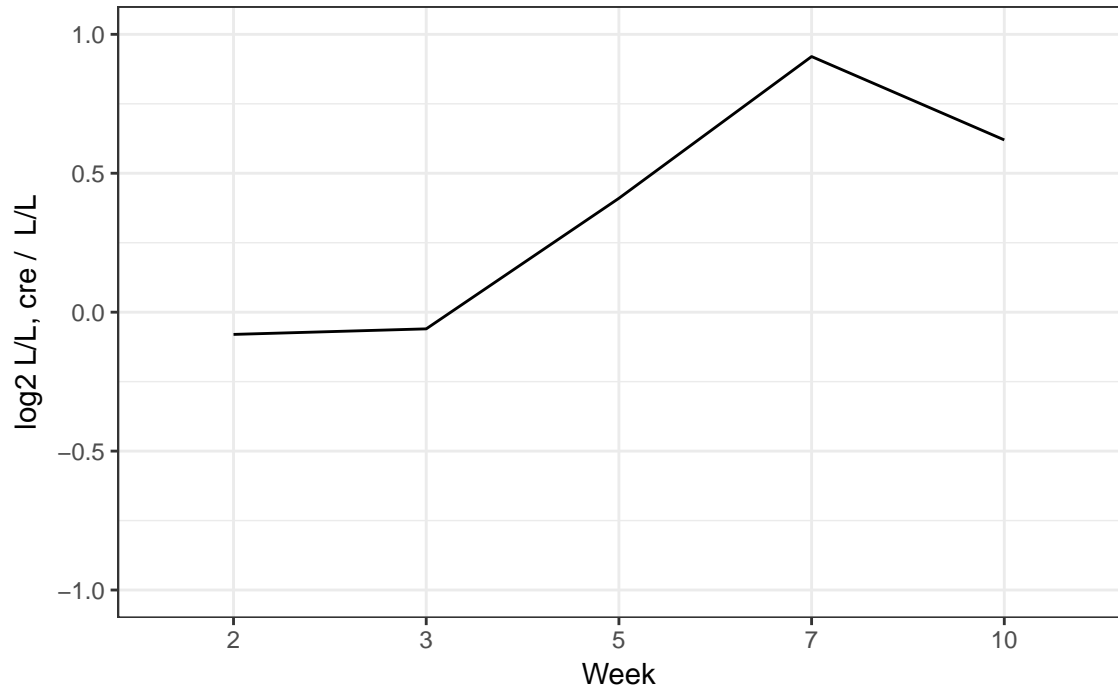

MRPL54 / Q9CPW3; adj.p value: 0

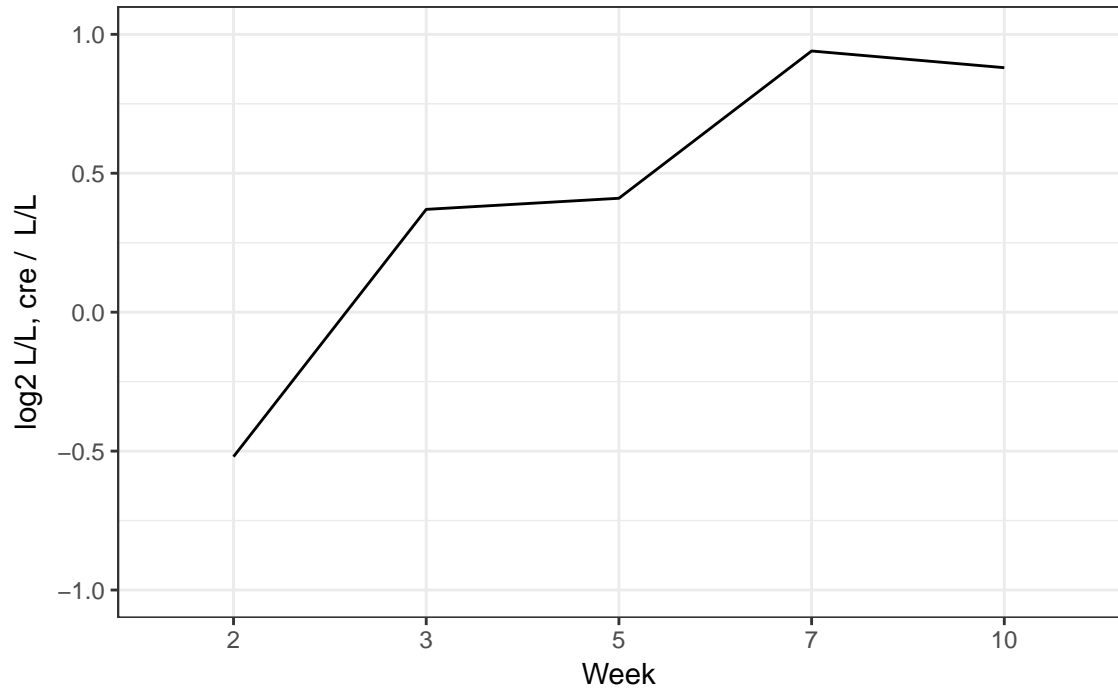

MRPL55 / Q9CZ83; adj.p value: 7e-05

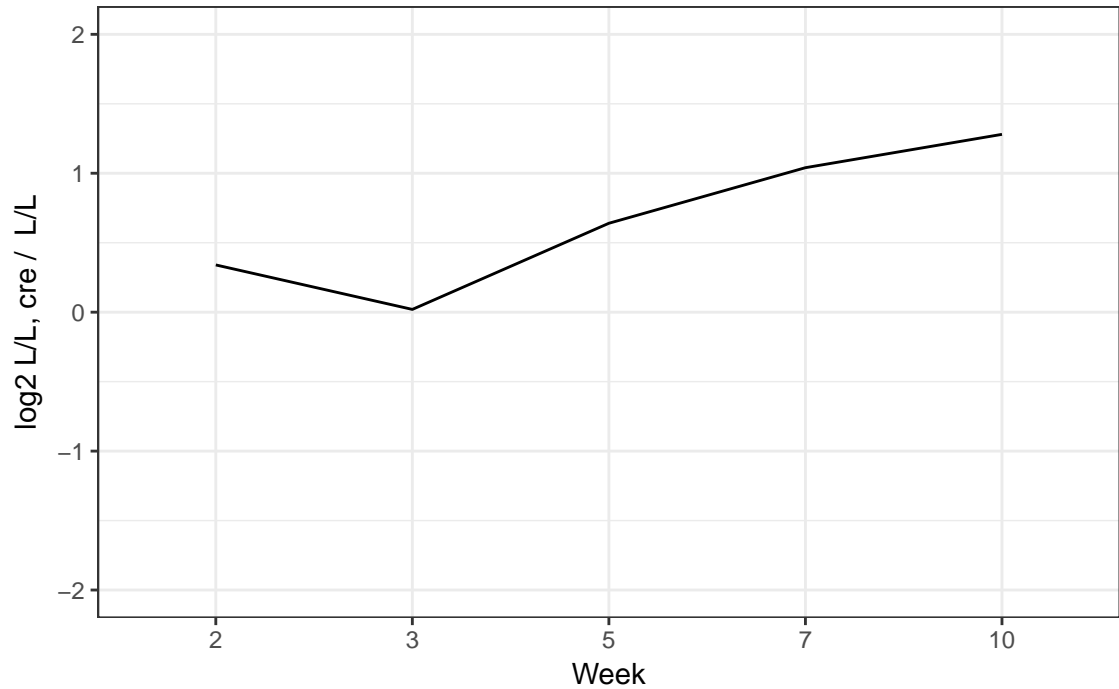

MRPL57 / Q9CQF8; adj.p value: 0.00037

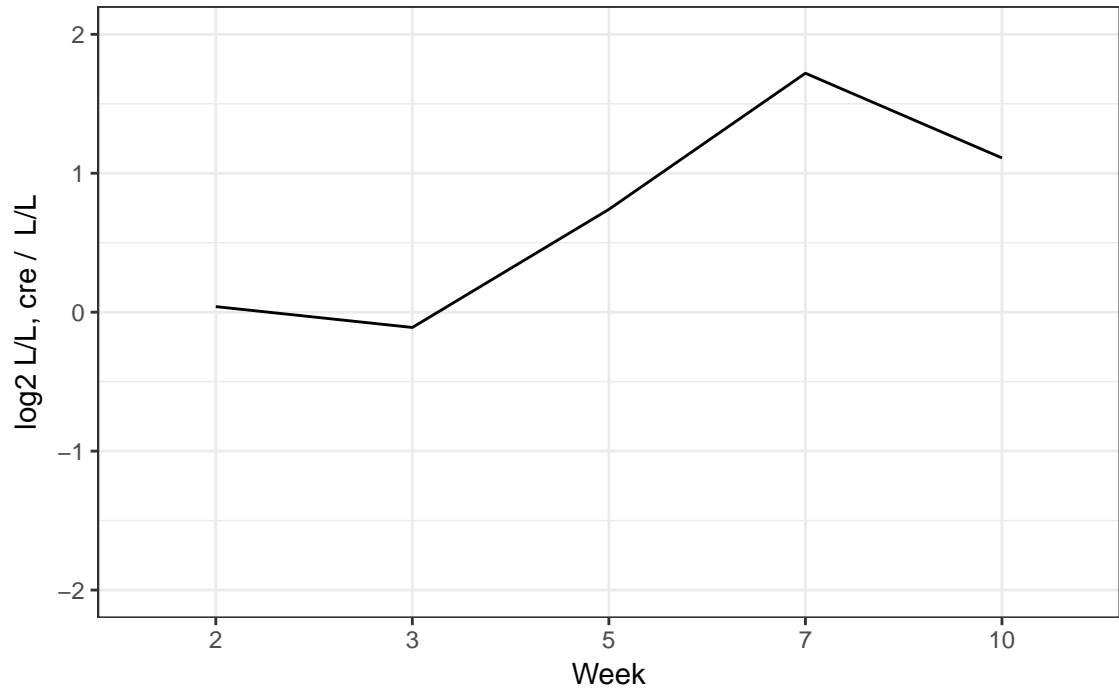

MRPL58 / Q8R035; adj.p value: 0.00517

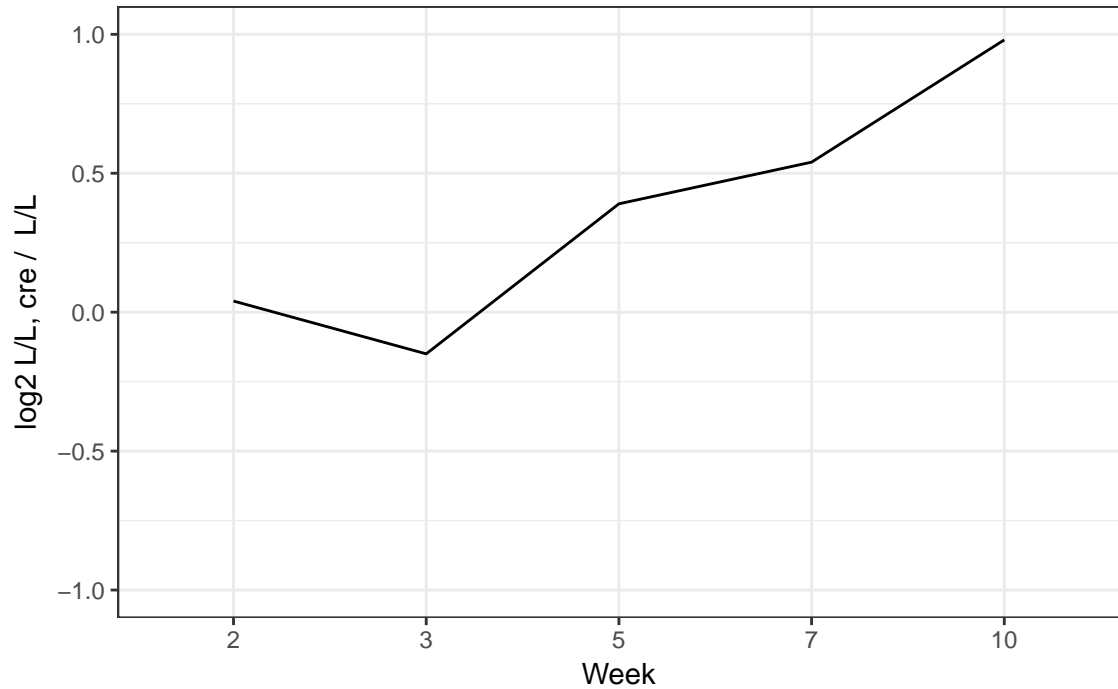

MRPL59 / Q9CR59; adj.p value: 0.00093

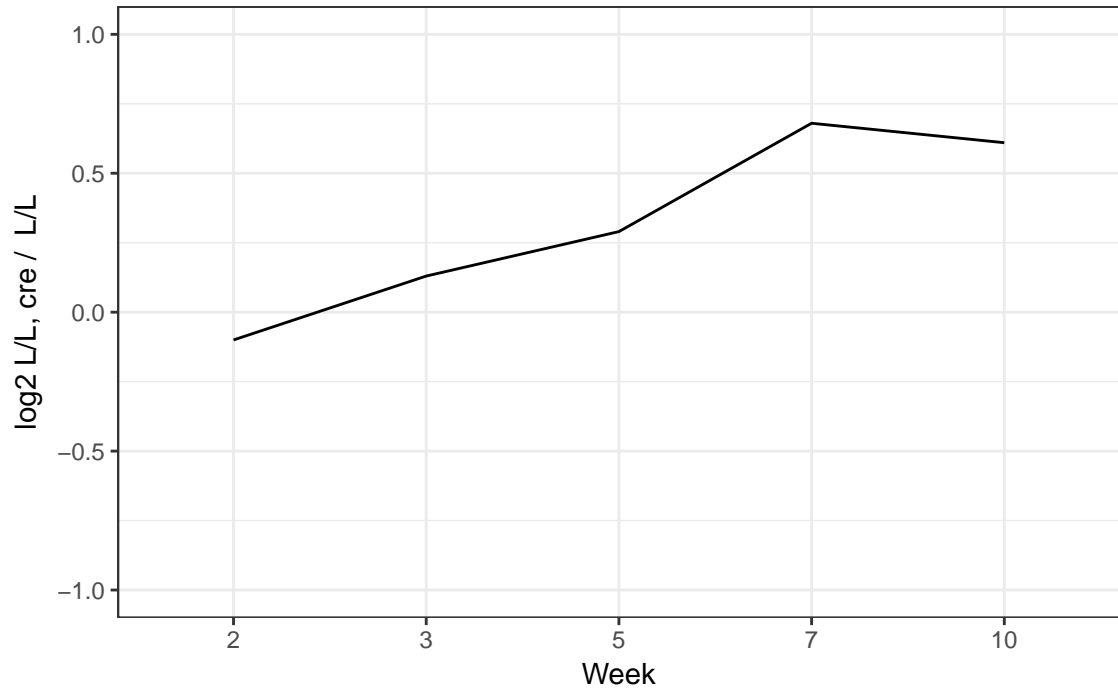

MRPL9 / Q99N94; adj.p value: 2e-05

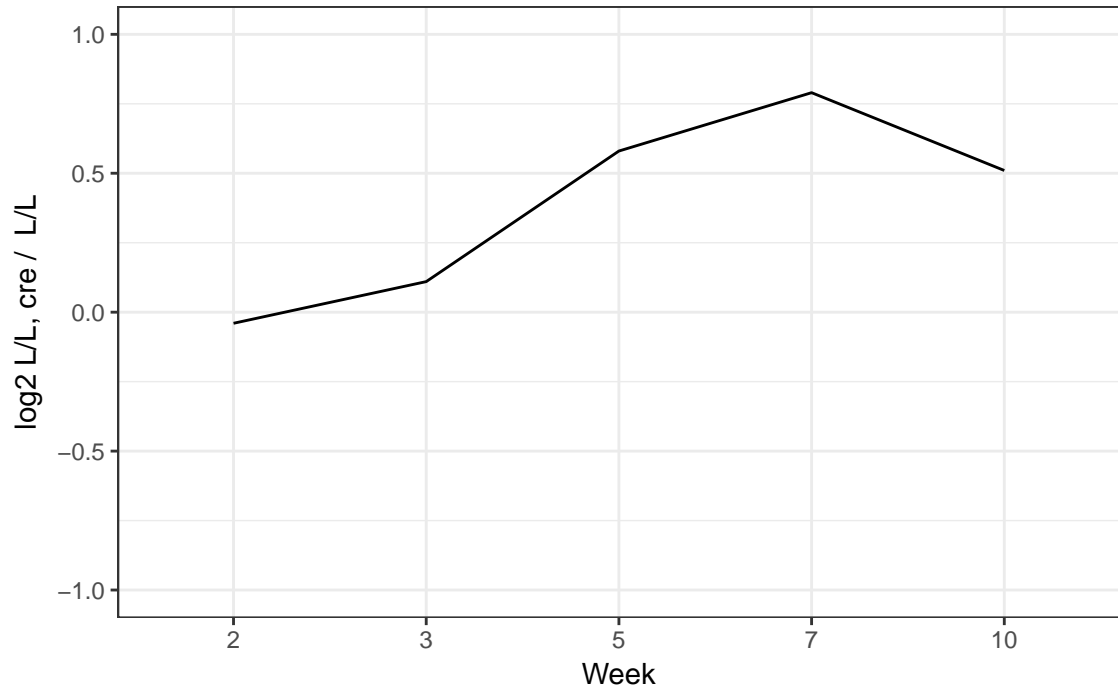

MRPS10 / E9QJS0; adj.p value: 0

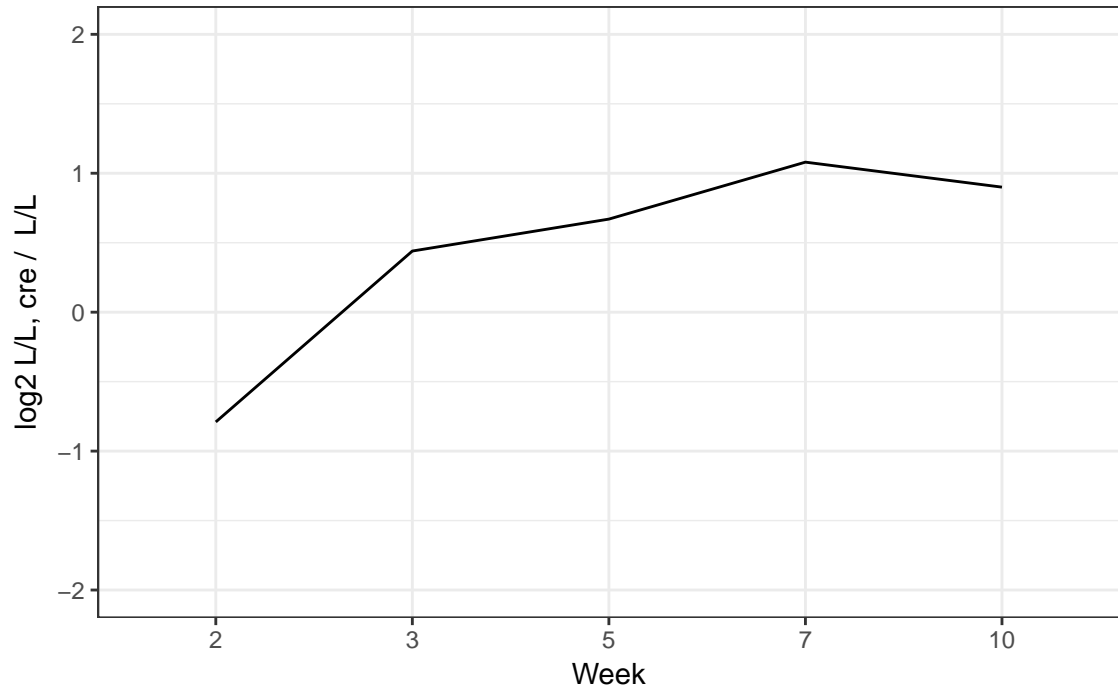



MRPS11 / Q3U8Y1; adj.p value: 2e-05

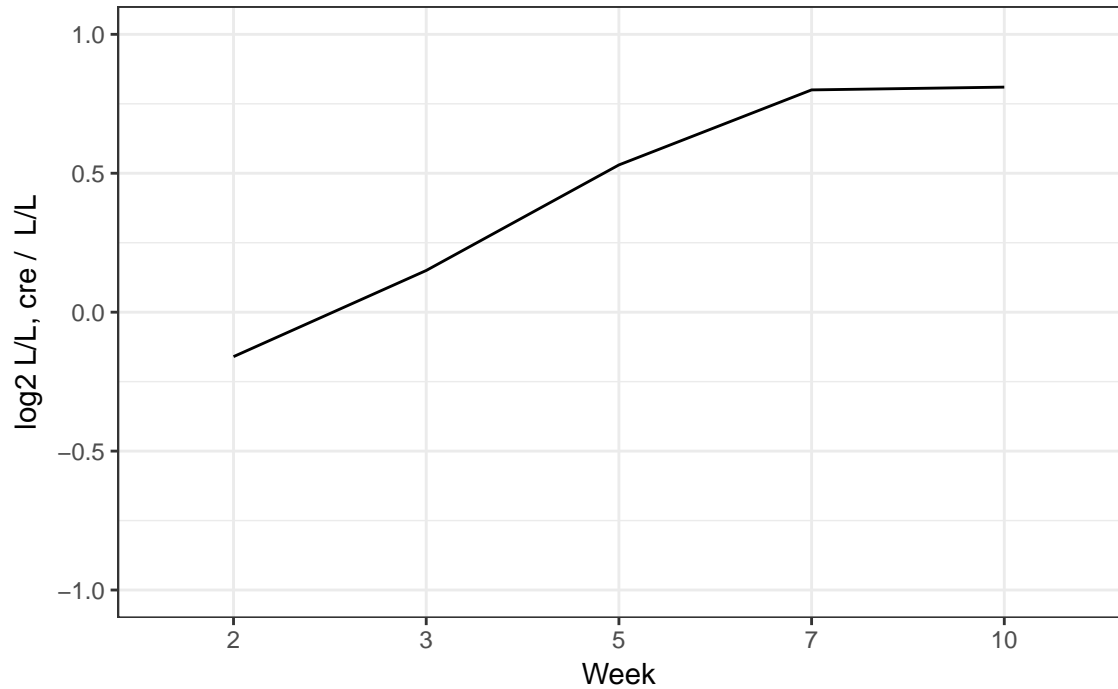

MRPS12 / O35680; adj.p value: 0.01033

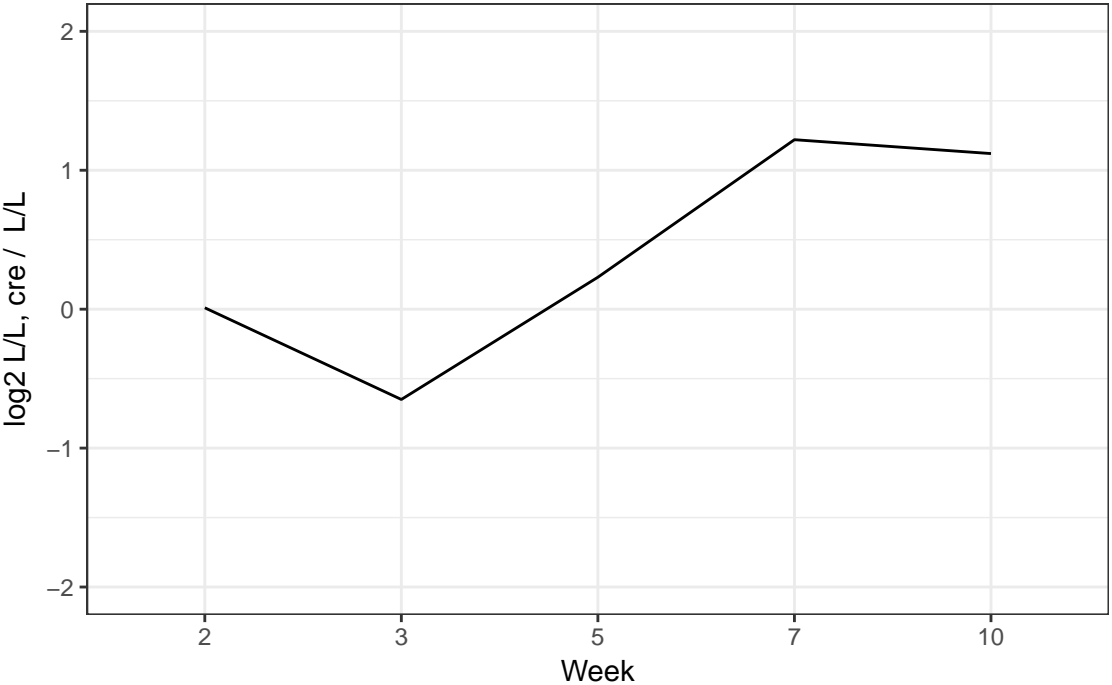

MRPS14 / D3Z2K2; adj.p value: 0

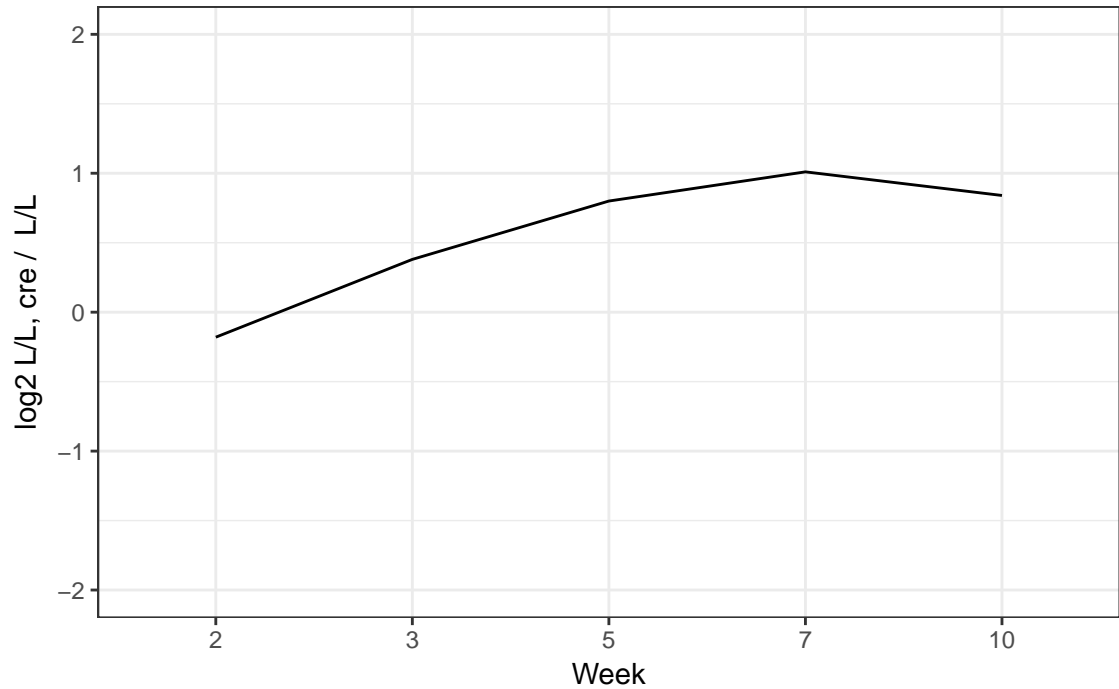

MRPS15 / Q9DC71; adj.p value: 0

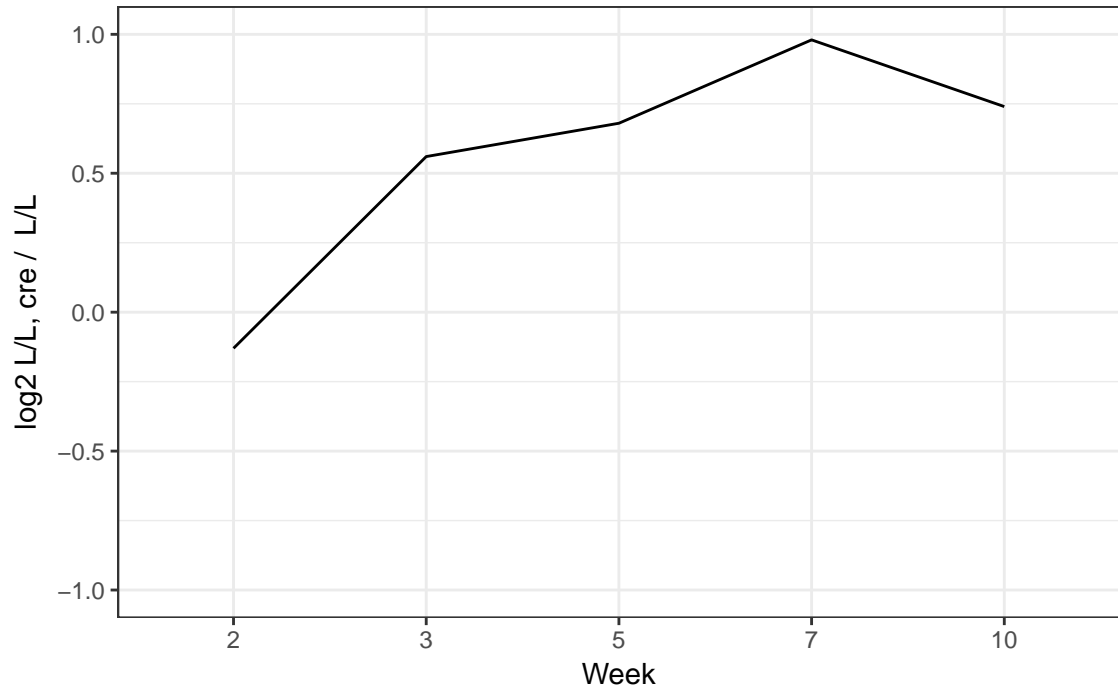

MRPS16 / Q9CPX7; adj.p value: 0.00026

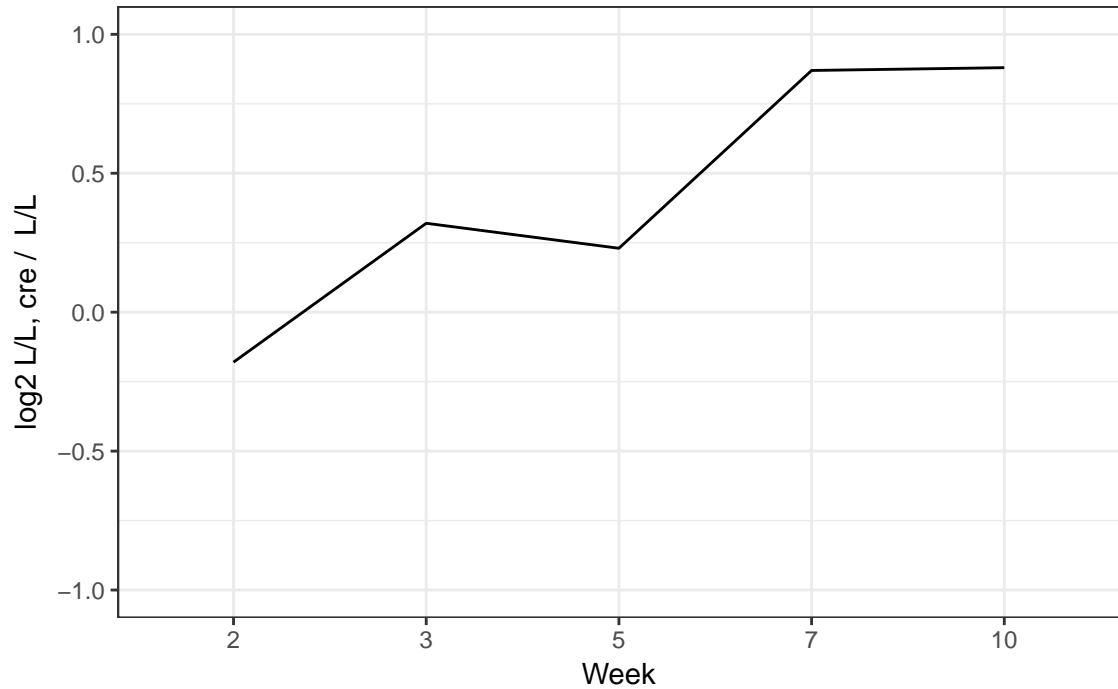

MRPS17 / Q9CQE3; adj.p value: 0

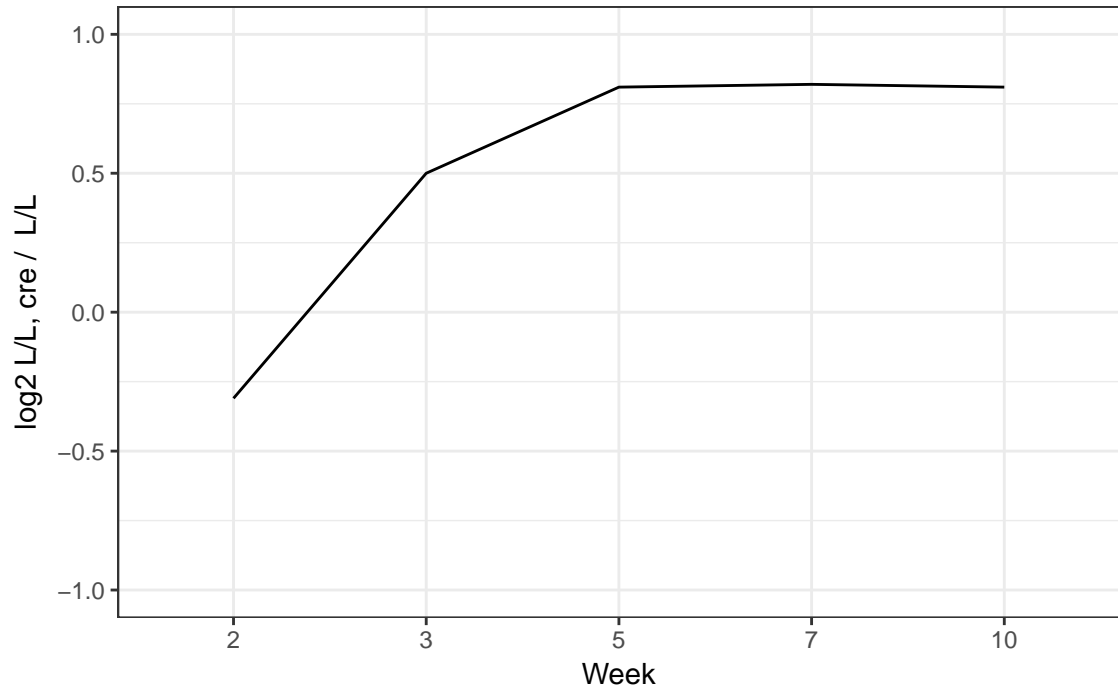

MRPS18A / Q5U5I3; adj.p value: 0.03087

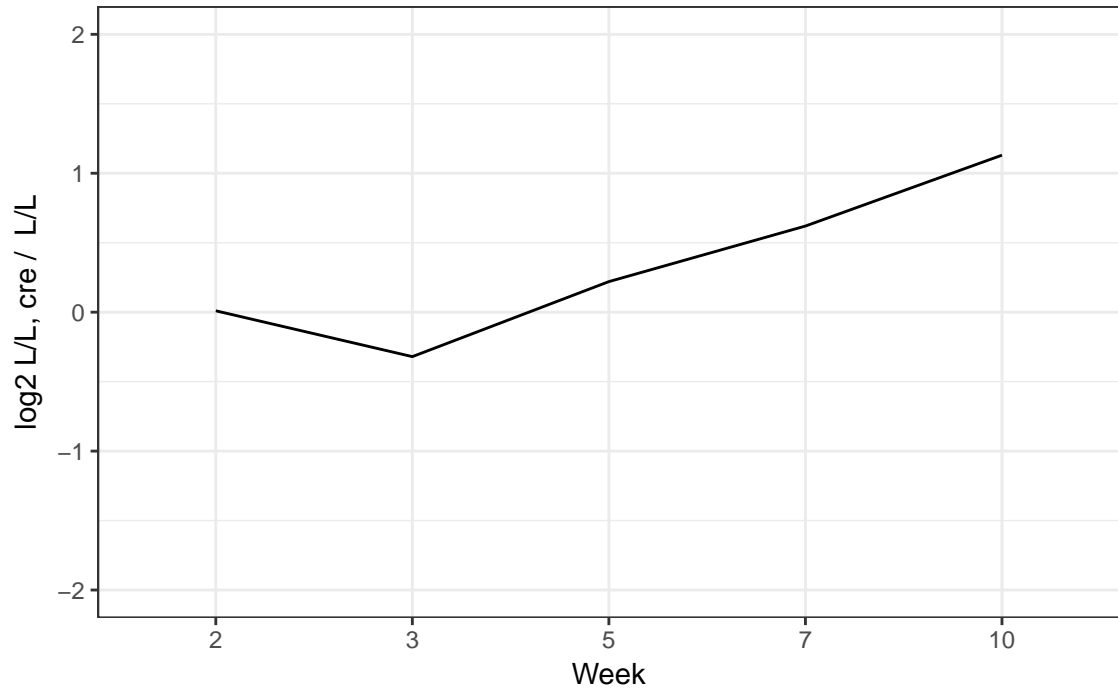

MRPS18B / Q99N84; adj.p value: 0

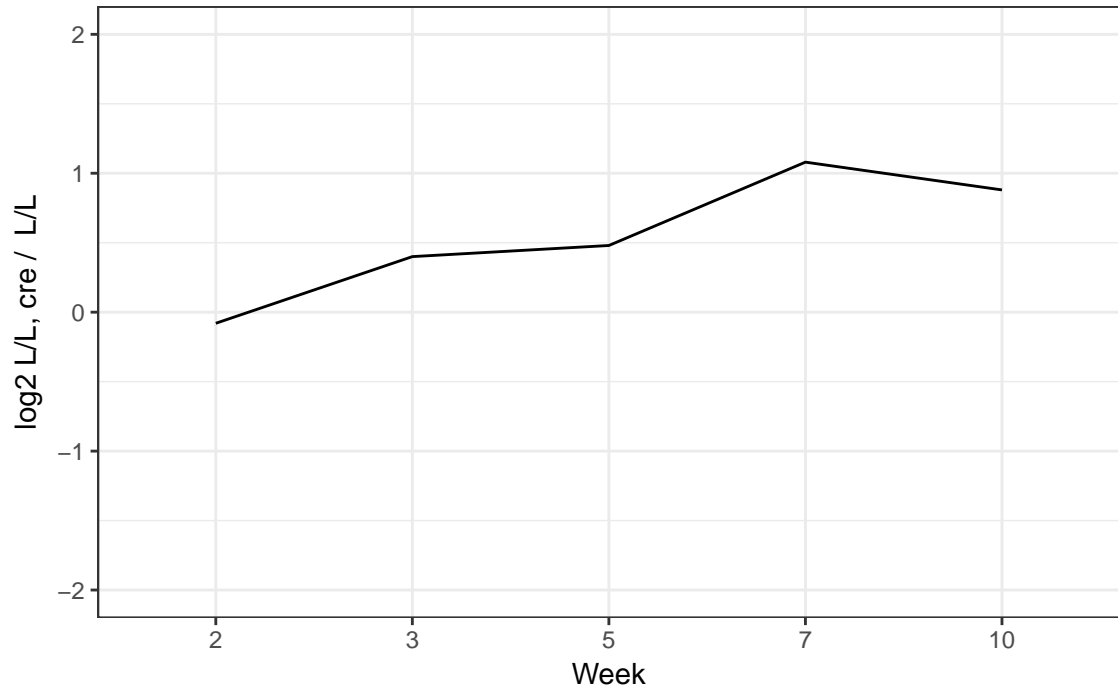



MRPS18C / Q8R2L5; adj.p value: 0.00278

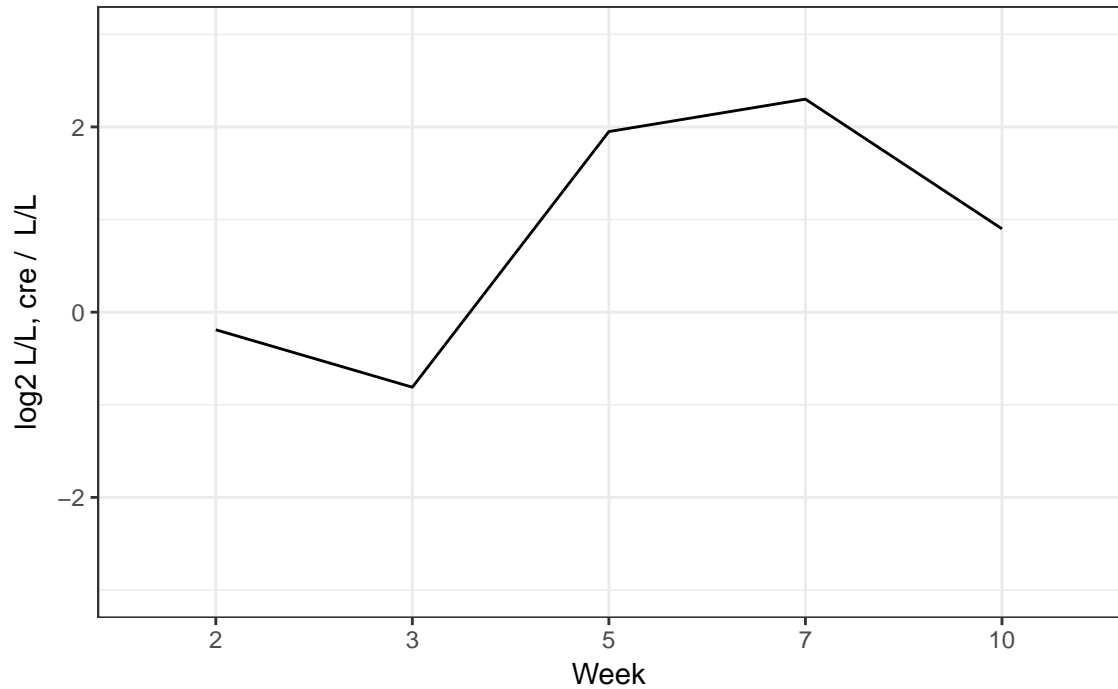

MRPS2 / Q924T2; adj.p value: 0

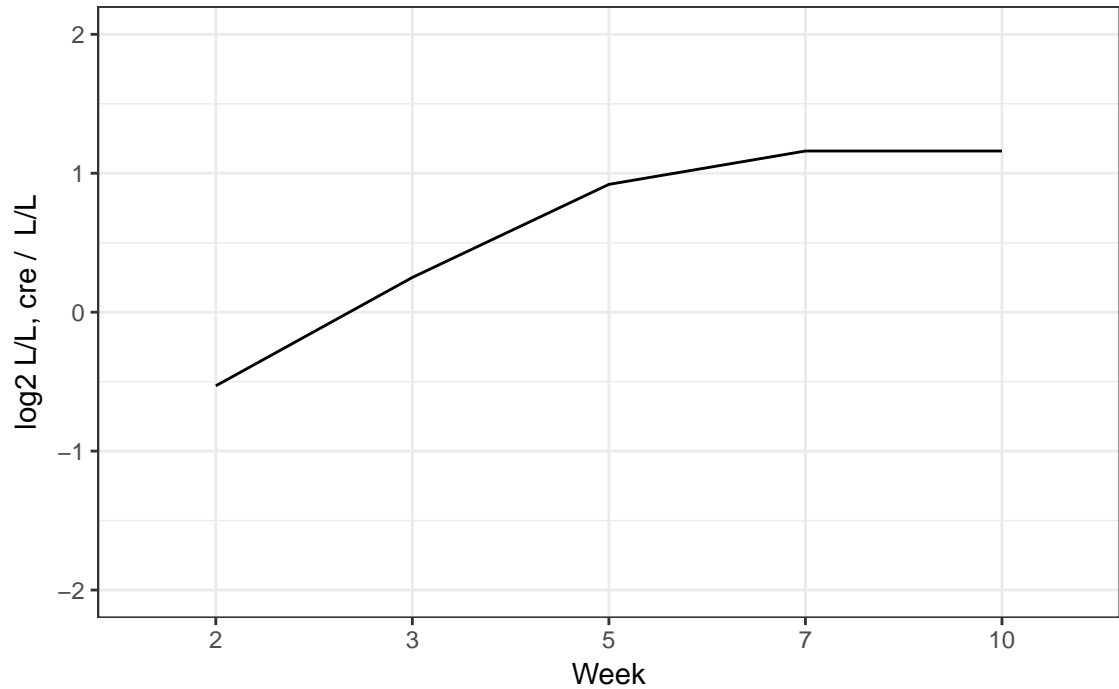

MRPS21 / P58059; adj.p value: 2e-05

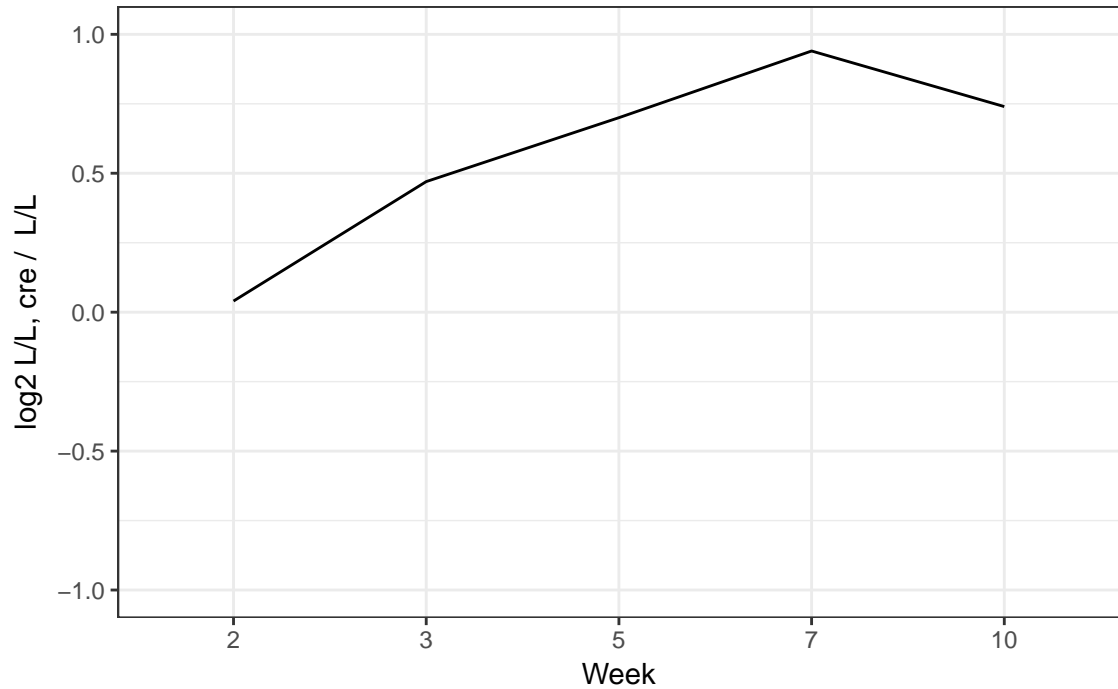

MRPS22 / Q9CXW2; adj.p value: 0

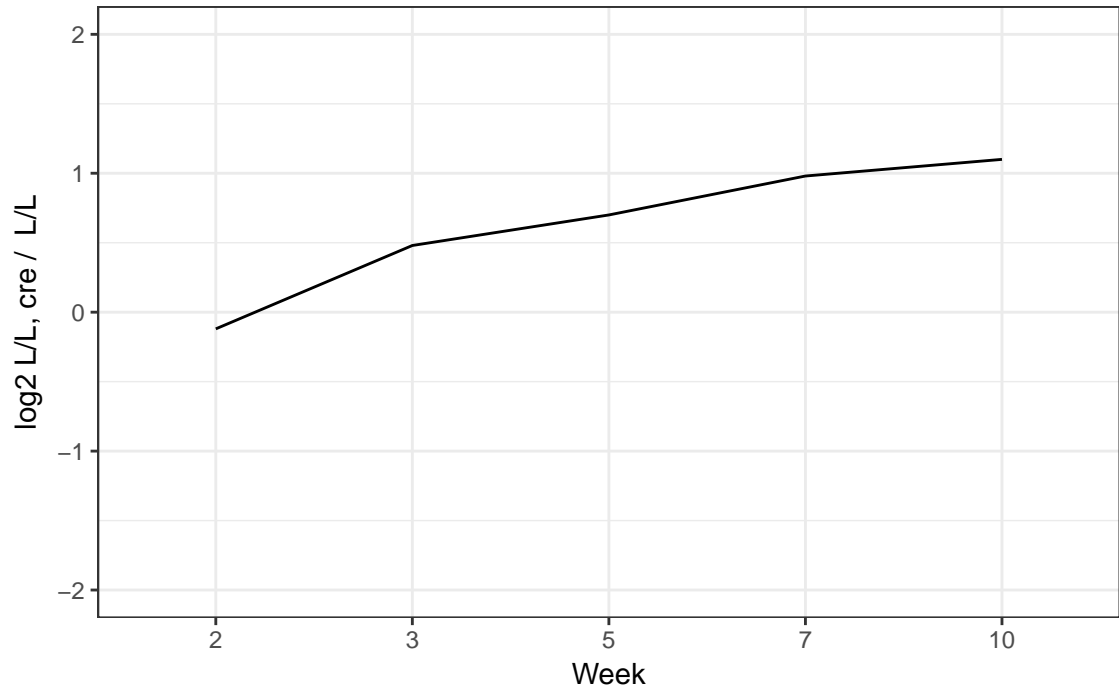

MRPS23 / Q8VE22; adj.p value: 0

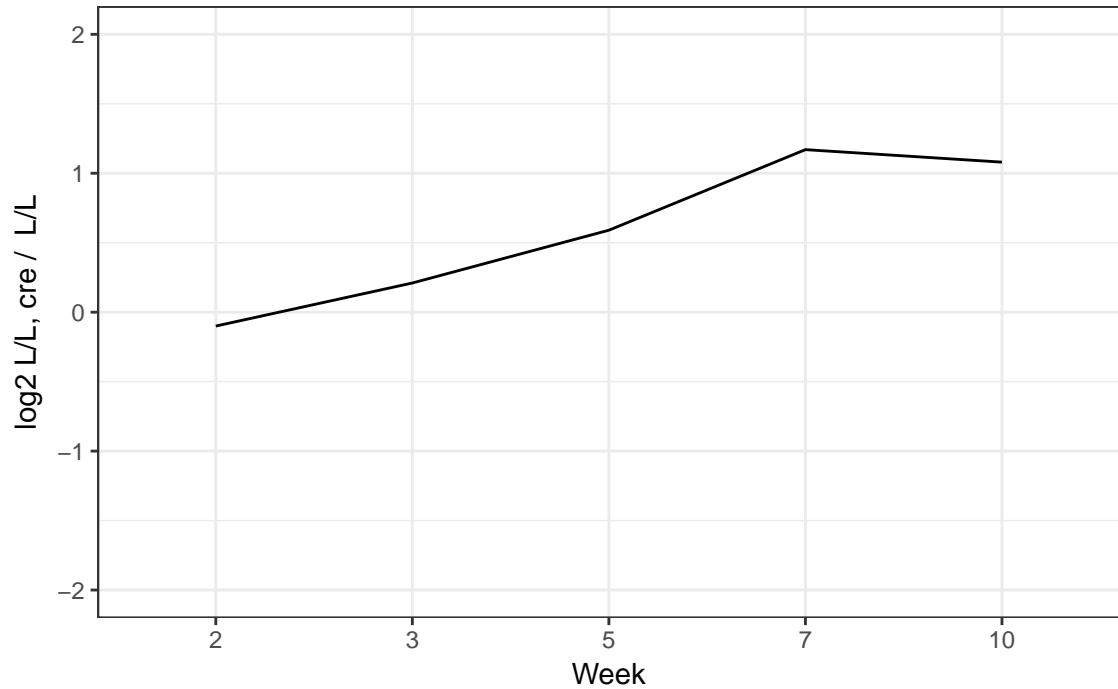

MRPS24 / Q9CQV5; adj.p value: 0

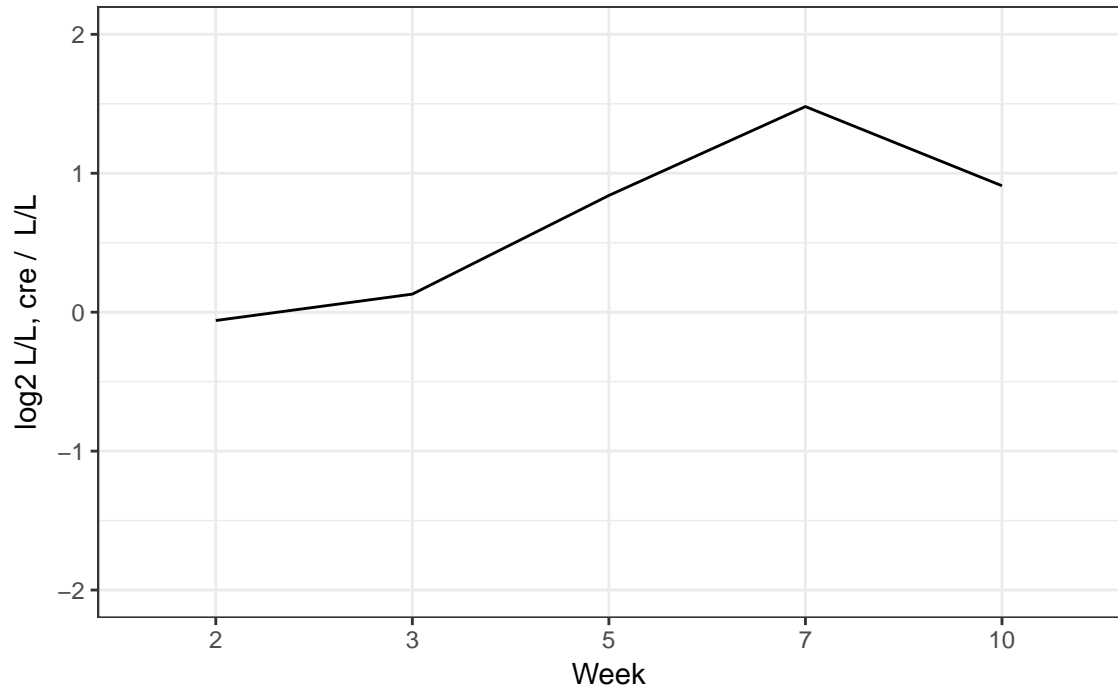

MRPS25 / Q9D125; adj.p value: 0

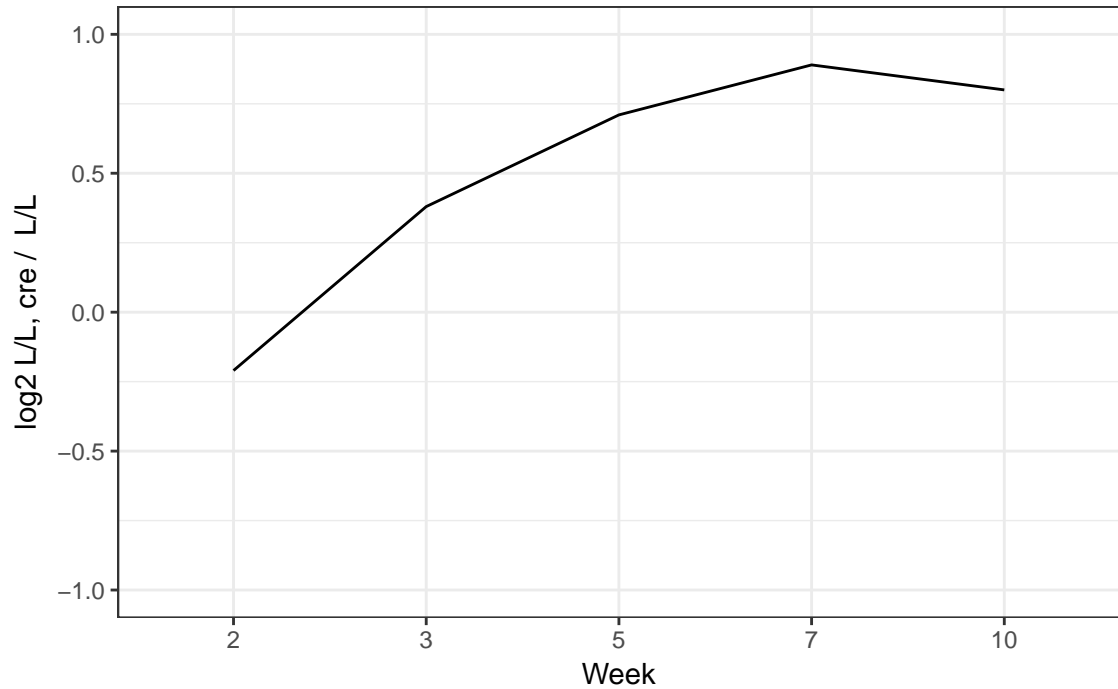

MRPS26 / Q80ZS3; adj.p value: 0

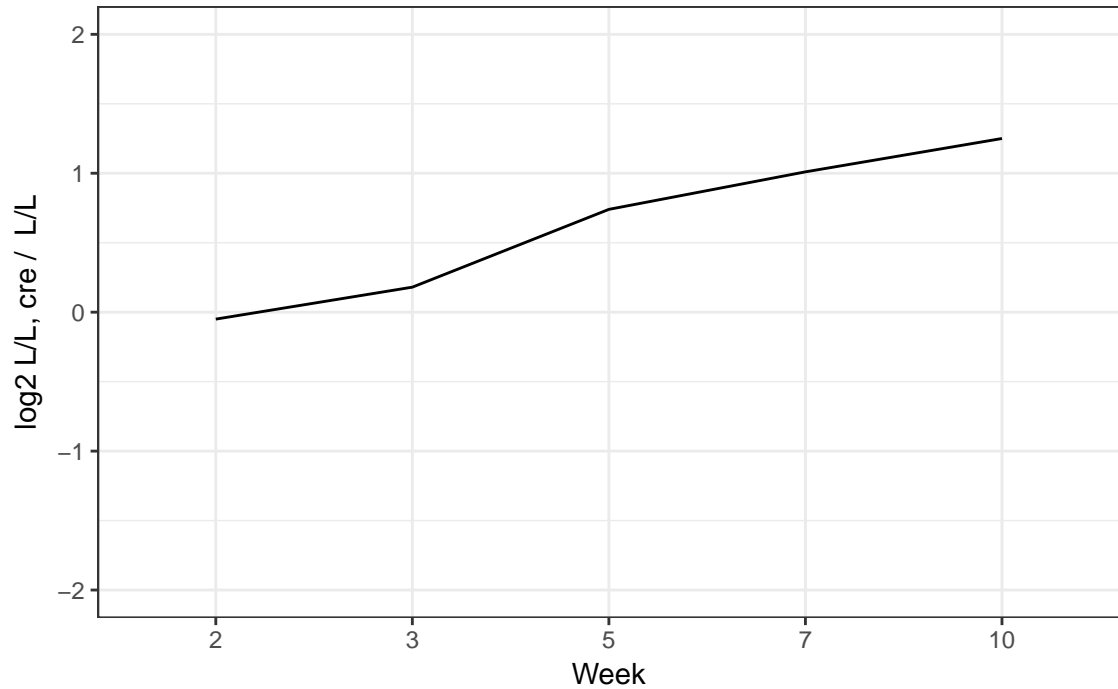



MRPS27 / Q8BK72; adj.p value: 0

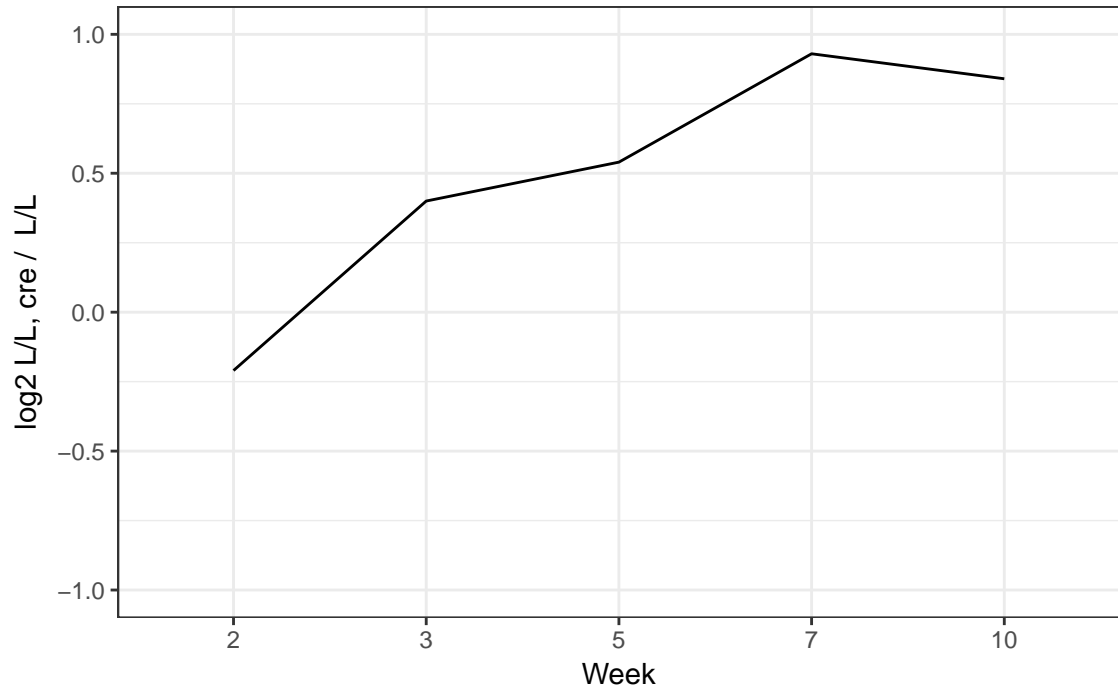

MRPS28 / Q9CY16; adj.p value: 0

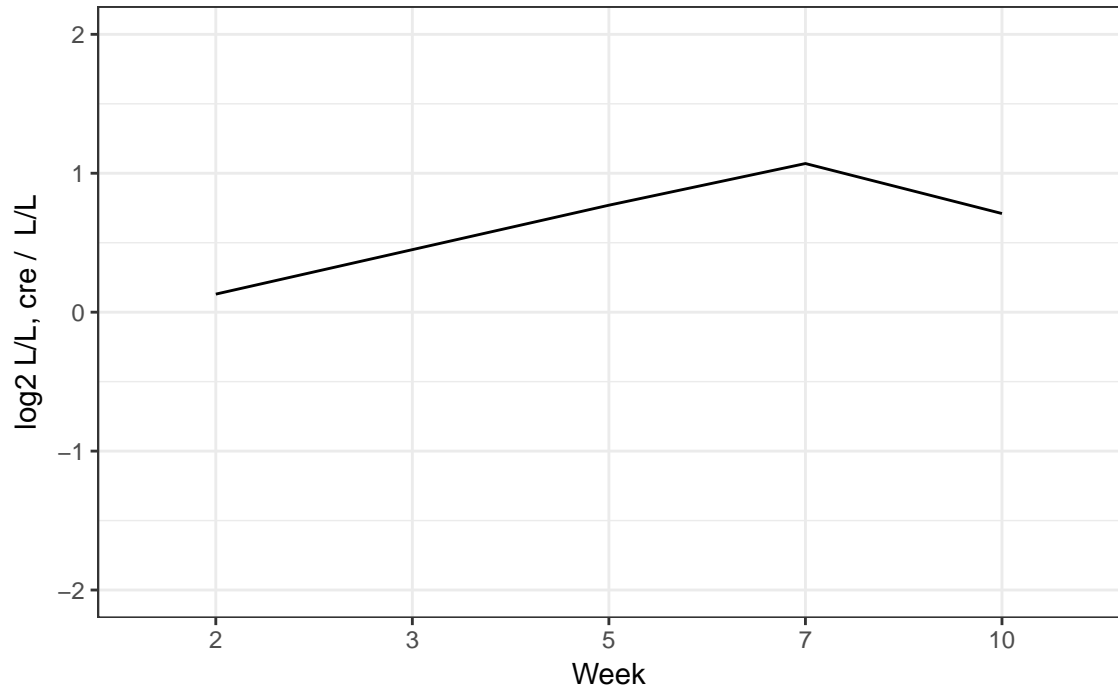

MRPS29 / G3X9M0; adj.p value: 0

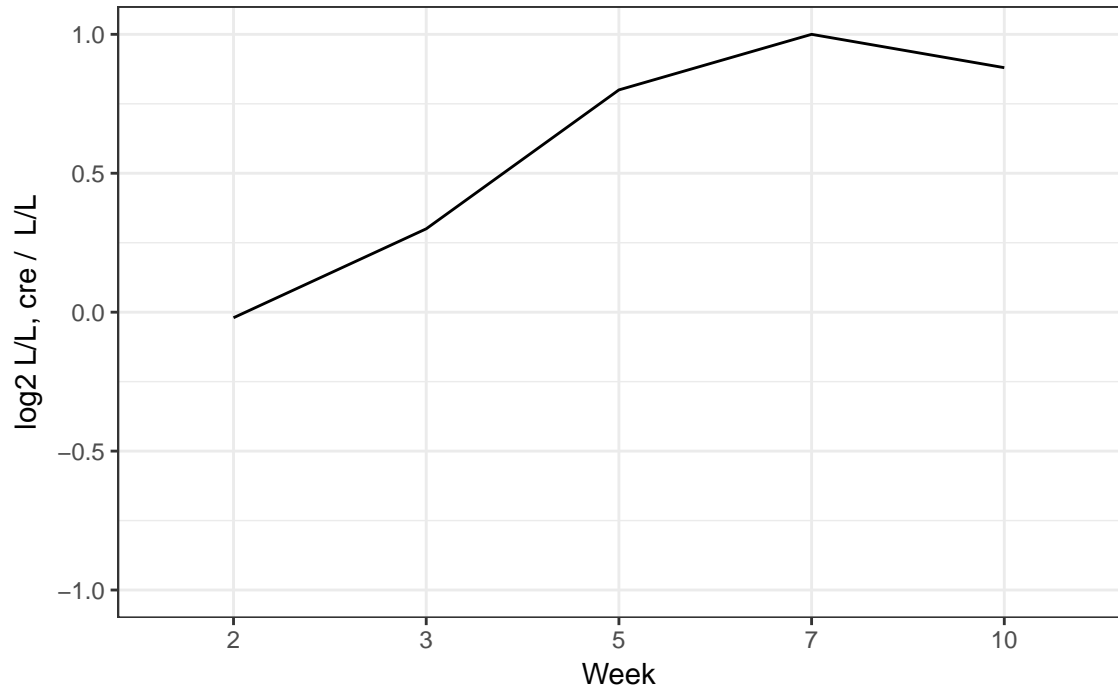

MRPS30 / Q9D0G0; adj.p value: 0

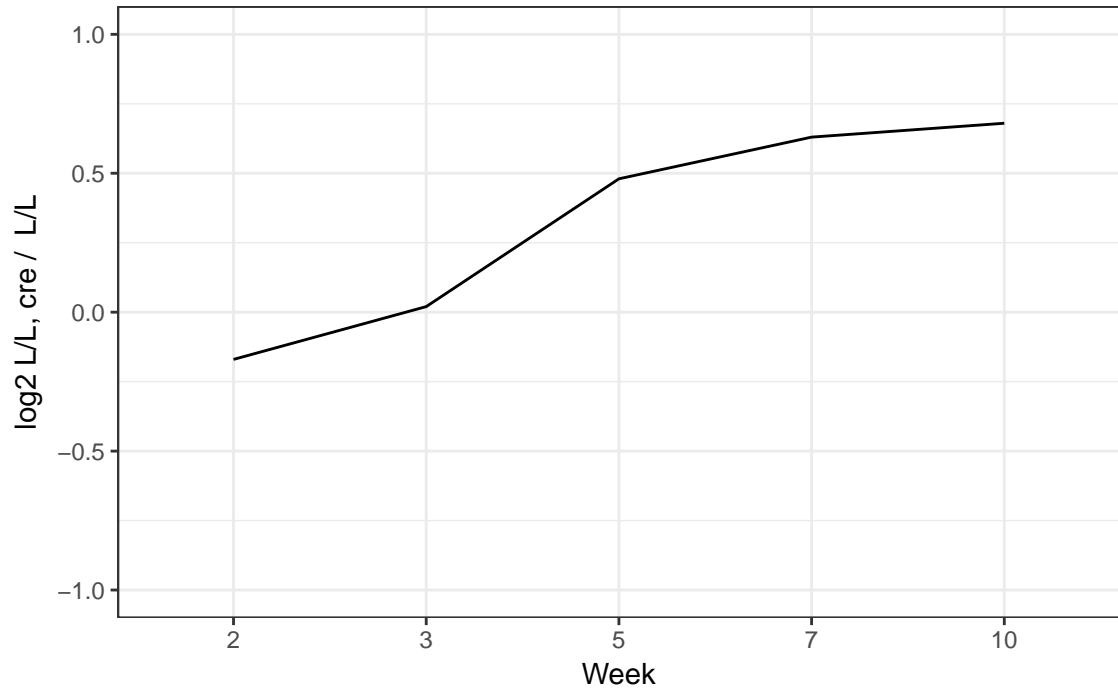

MRPS31 / Q61733; adj.p value: 0

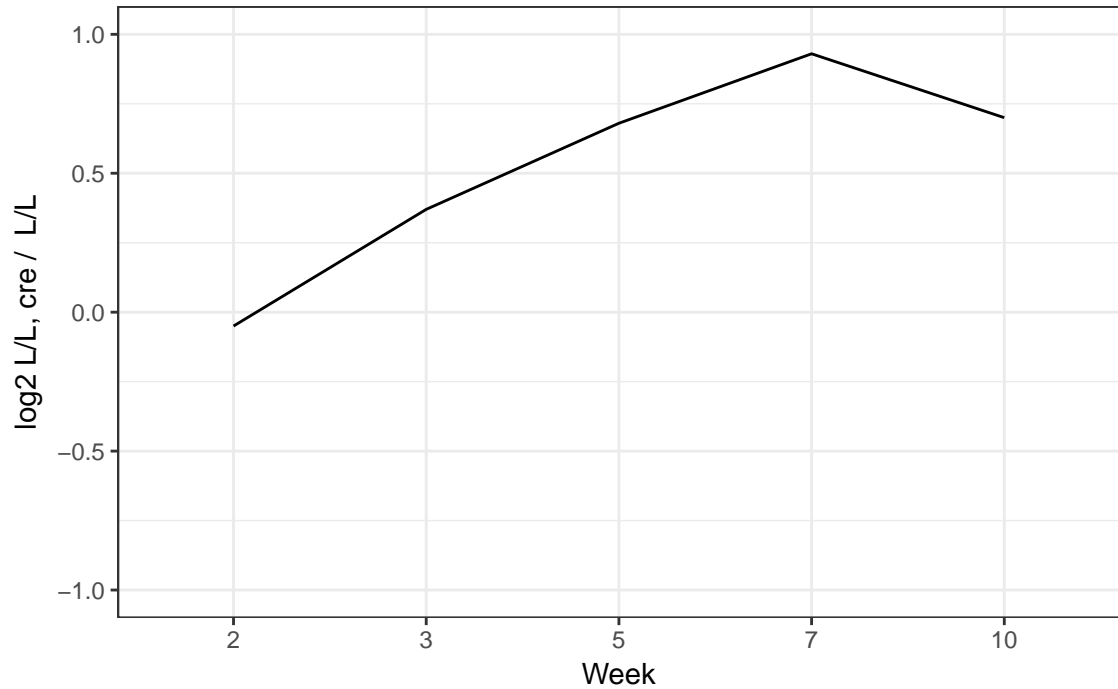

MRPS33 / Q9D2R8; adj.p value: 0

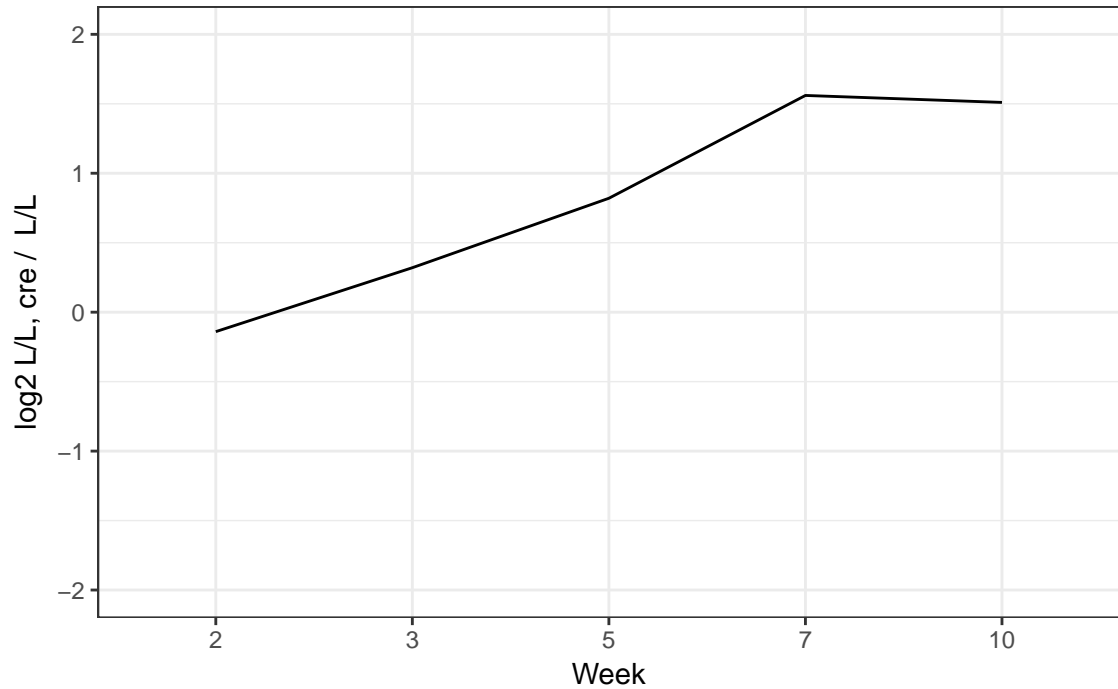

MRPS34 / Q9JIK9; adj.p value: 0

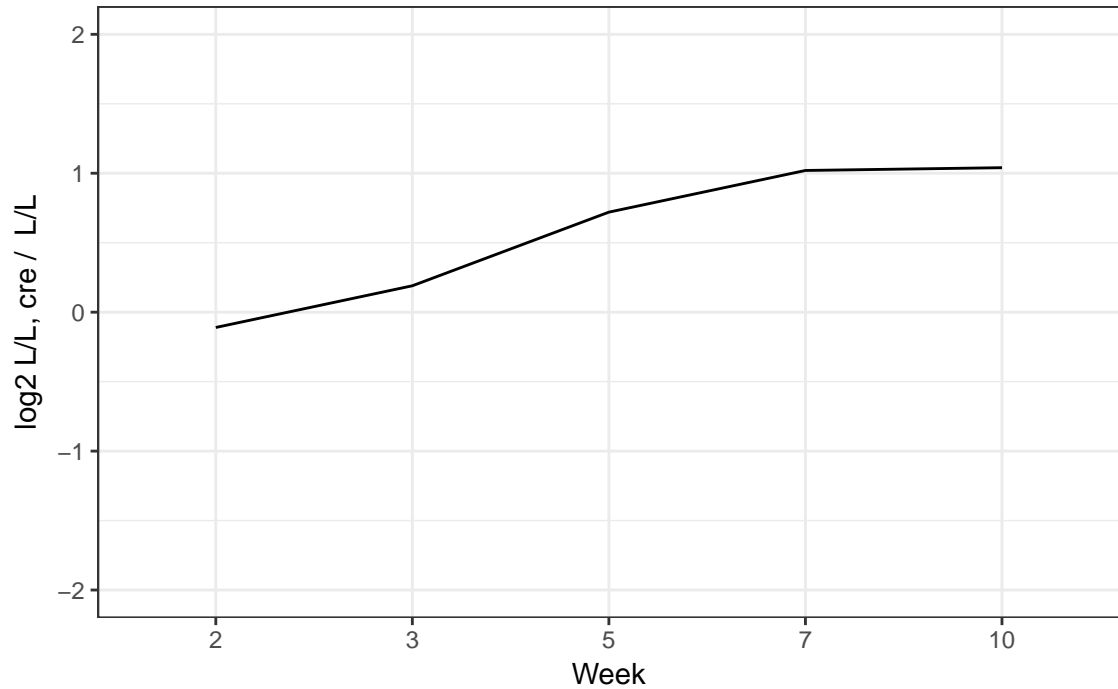

MRPS35 / Q8BJZ4; adj.p value: 0

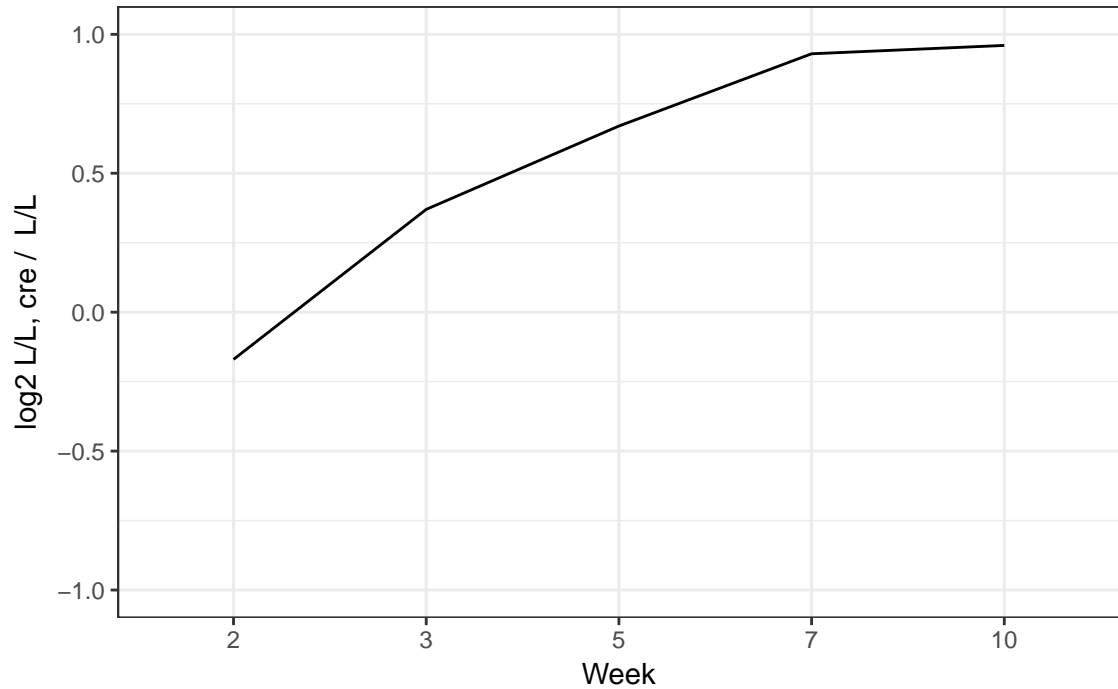



MRPS36 / Q9CQX8; adj.p value: 0.00677

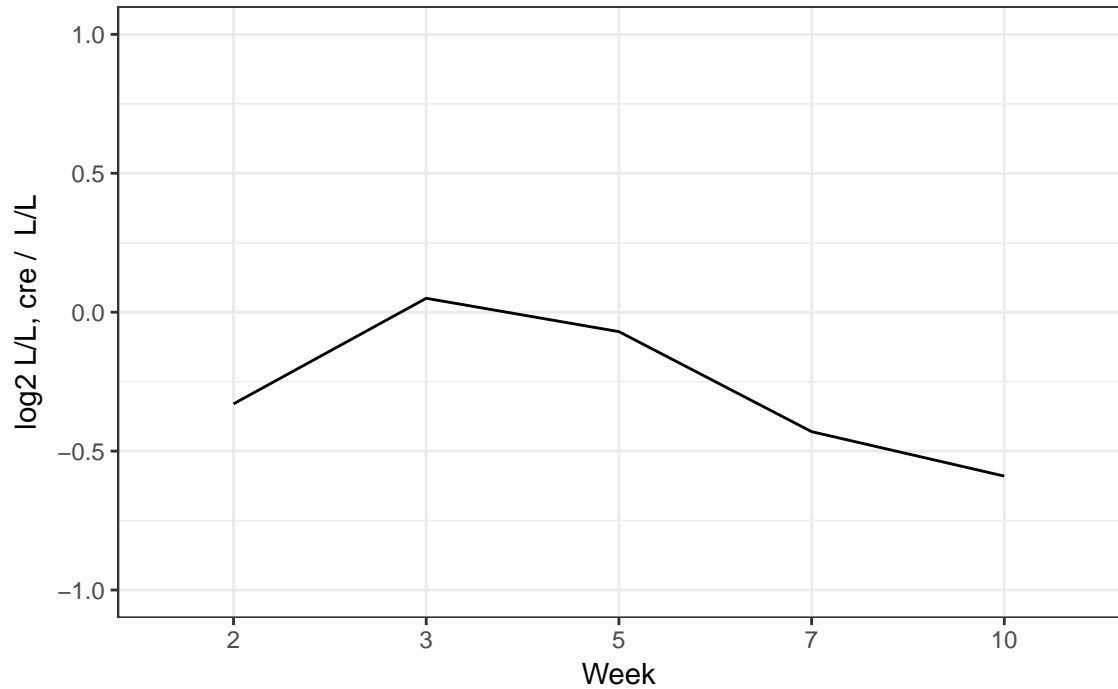

MRPS36 / Q9D6T9; adj.p value: 0.04467

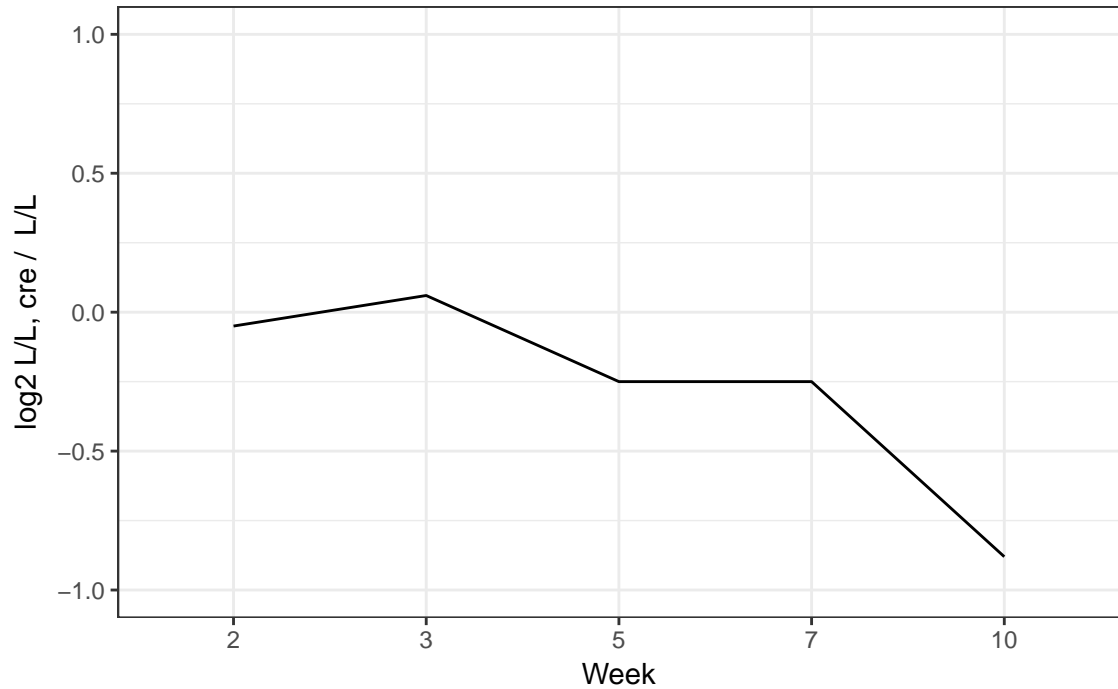

MRPS37 / Q9CQA6; adj.p value: 0.01513

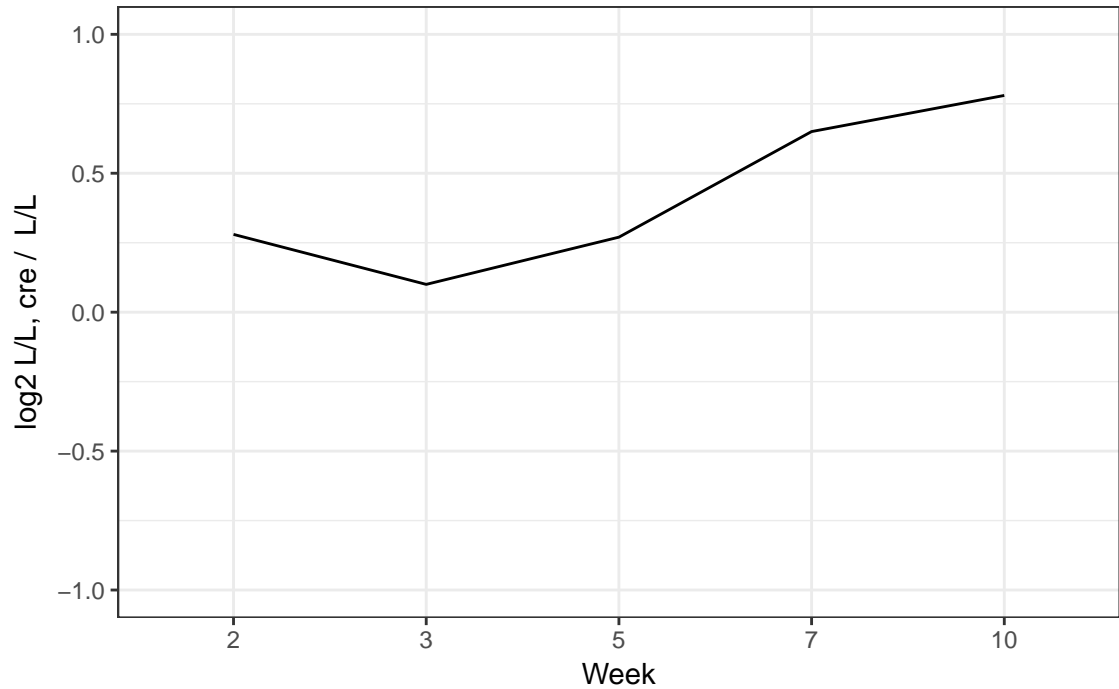

MRPS39 / Q14C51; adj.p value: 0

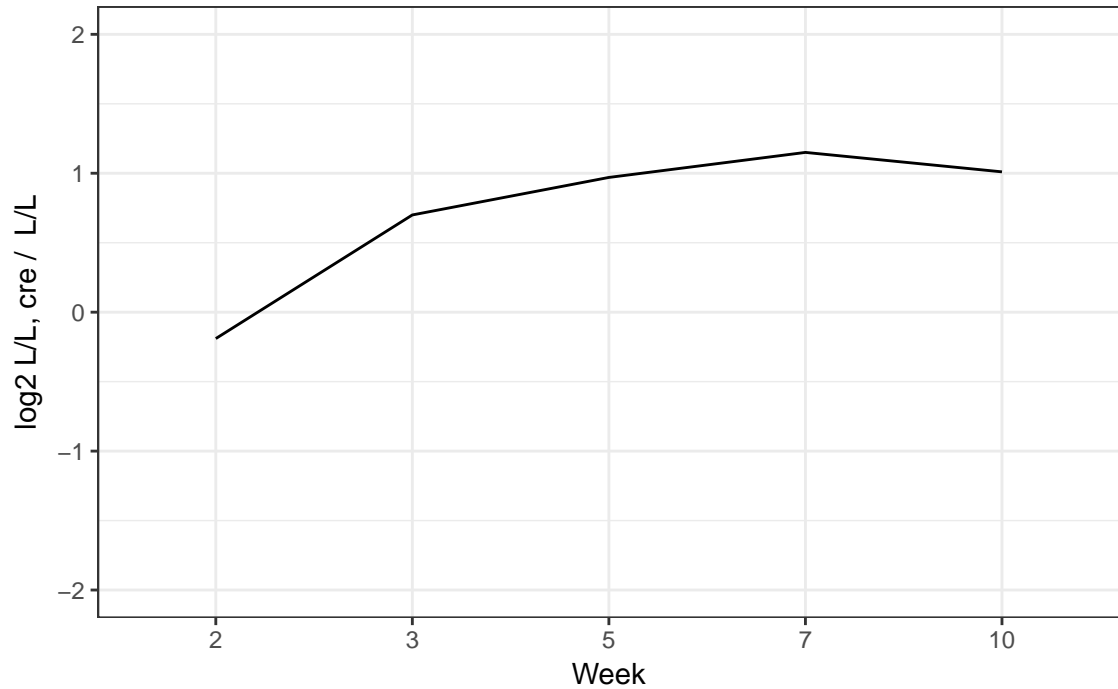

MRPS5 / Q99N87; adj.p value: 0

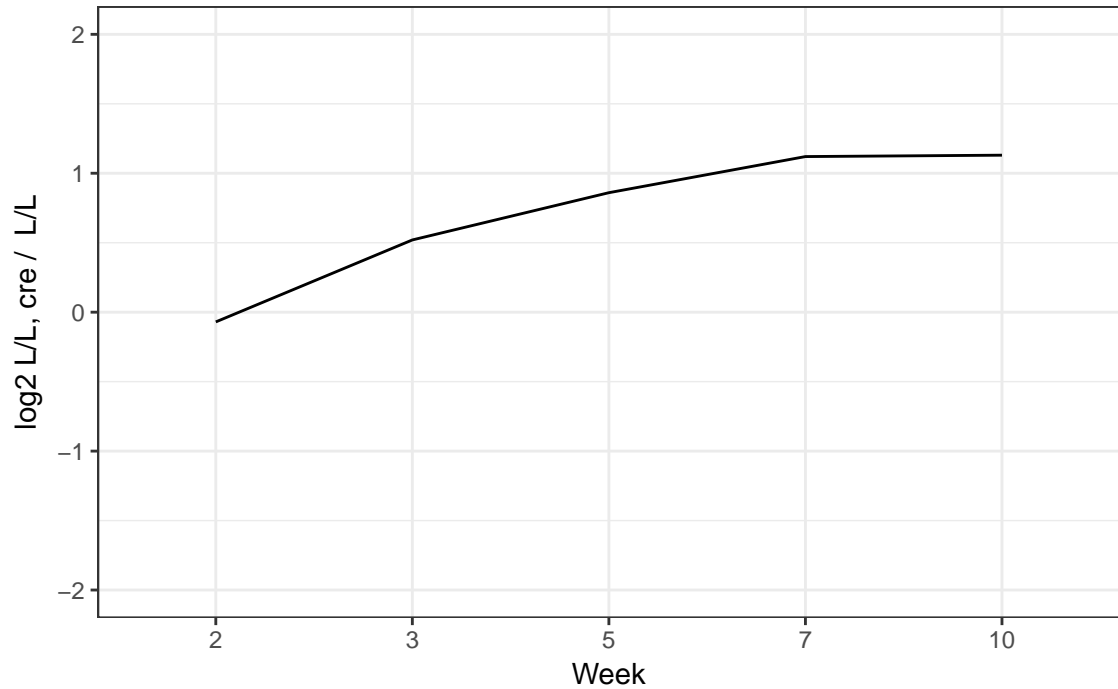

MRPS6 / P58064; adj.p value: 0

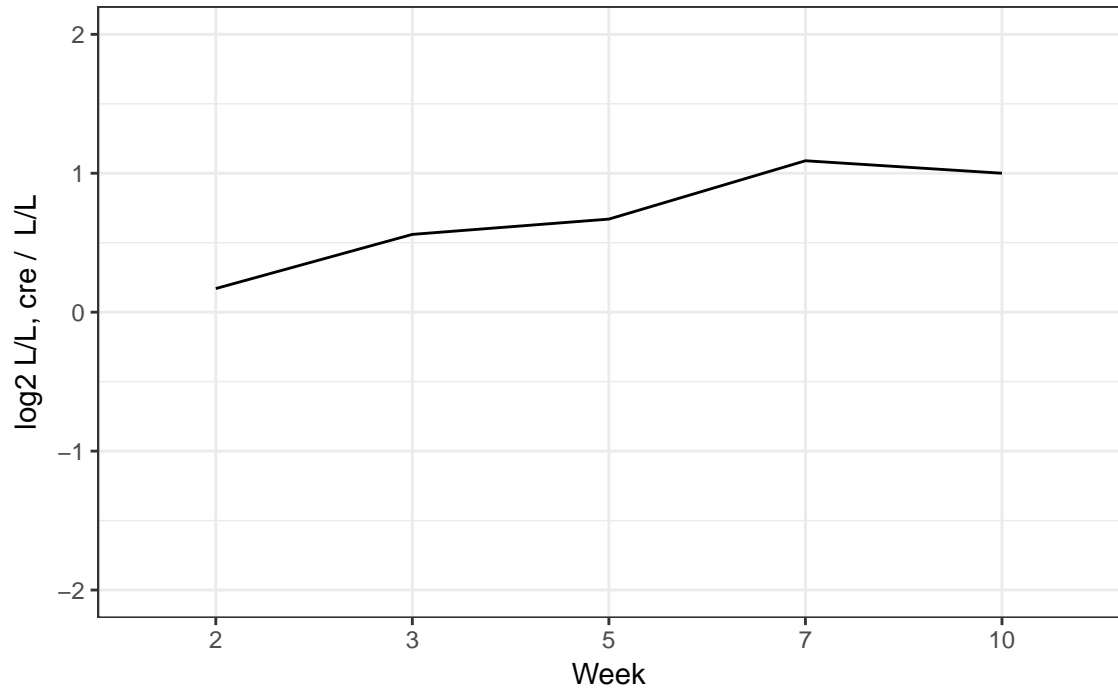

MRPS7 / Q80X85; adj.p value: 0

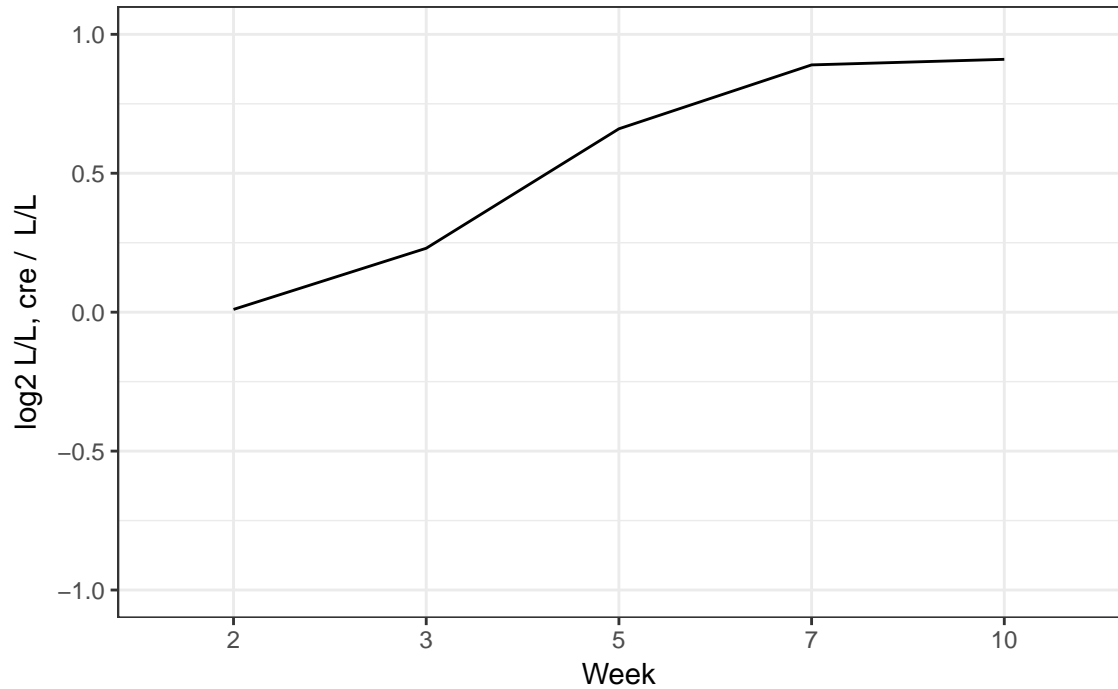

MRPS9 / Q9D7N3; adj.p value: 0

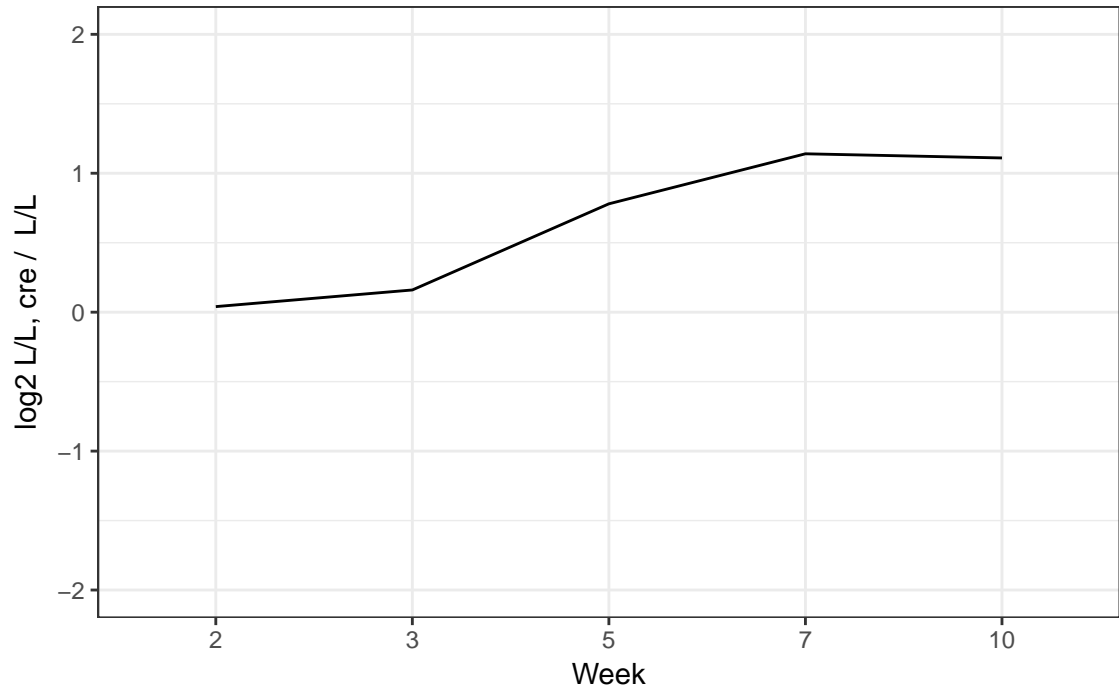



MRRF / Q9D6S7; adj.p value: 0.01229

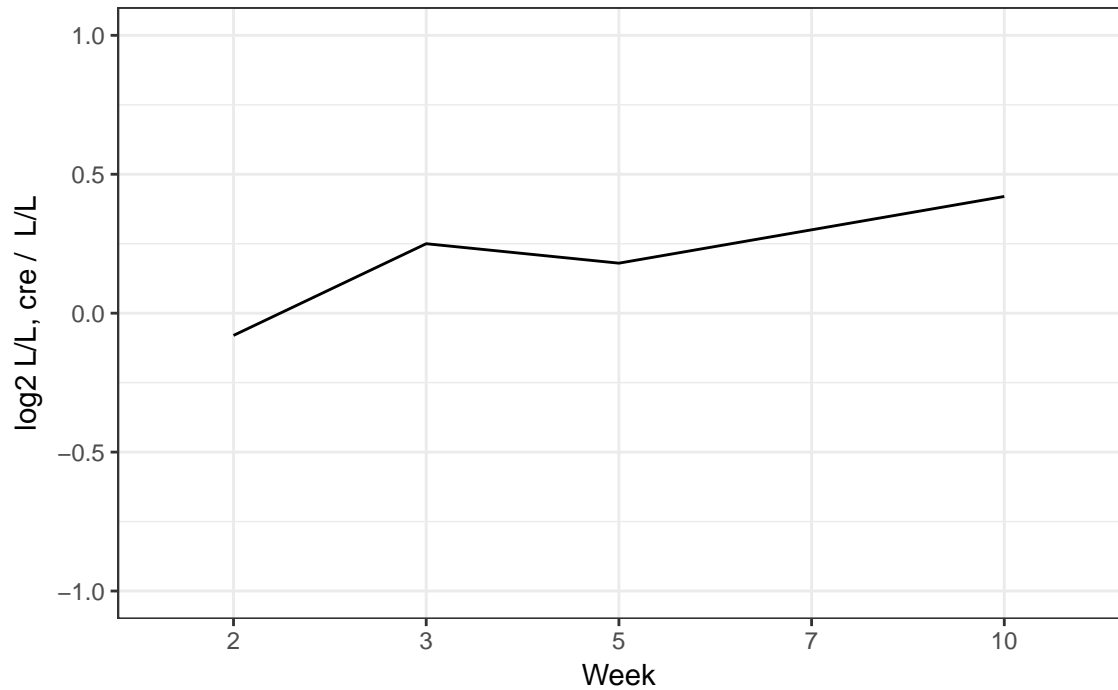

MRS2 / Q5NCE8; adj.p value: 0.00012

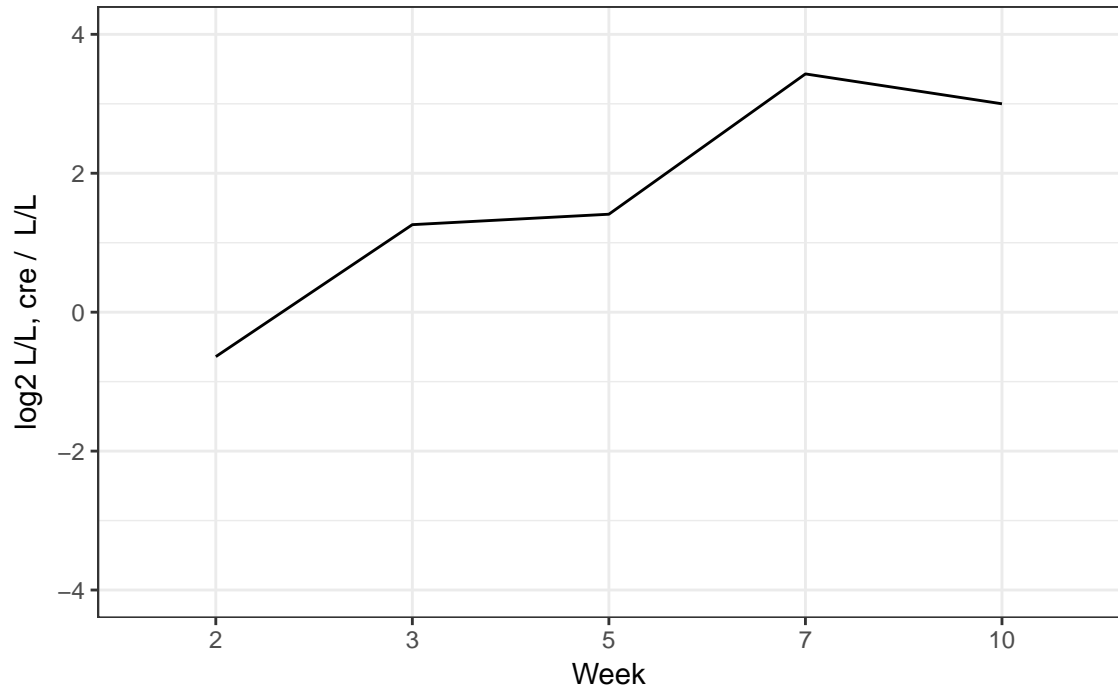

MSRA / Q9D6Y7-2; adj.p value: 0.18477

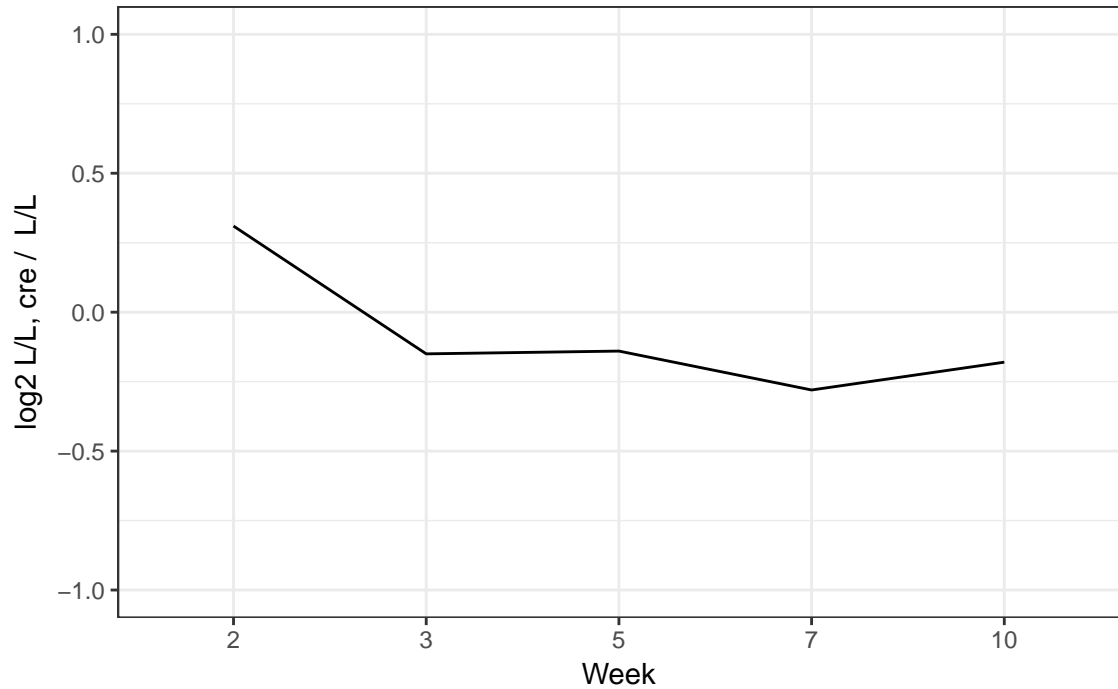

MSRB2 / Q78J03; adj.p value: 0

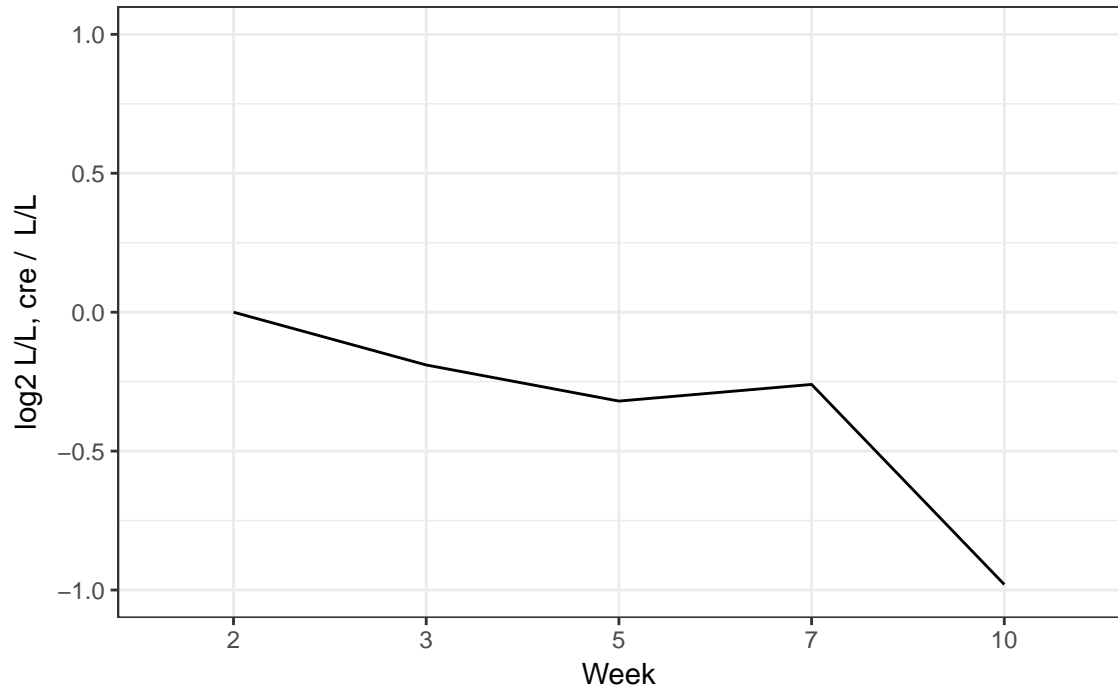

MT-CO3 / P00416; adj.p value: 0.06332

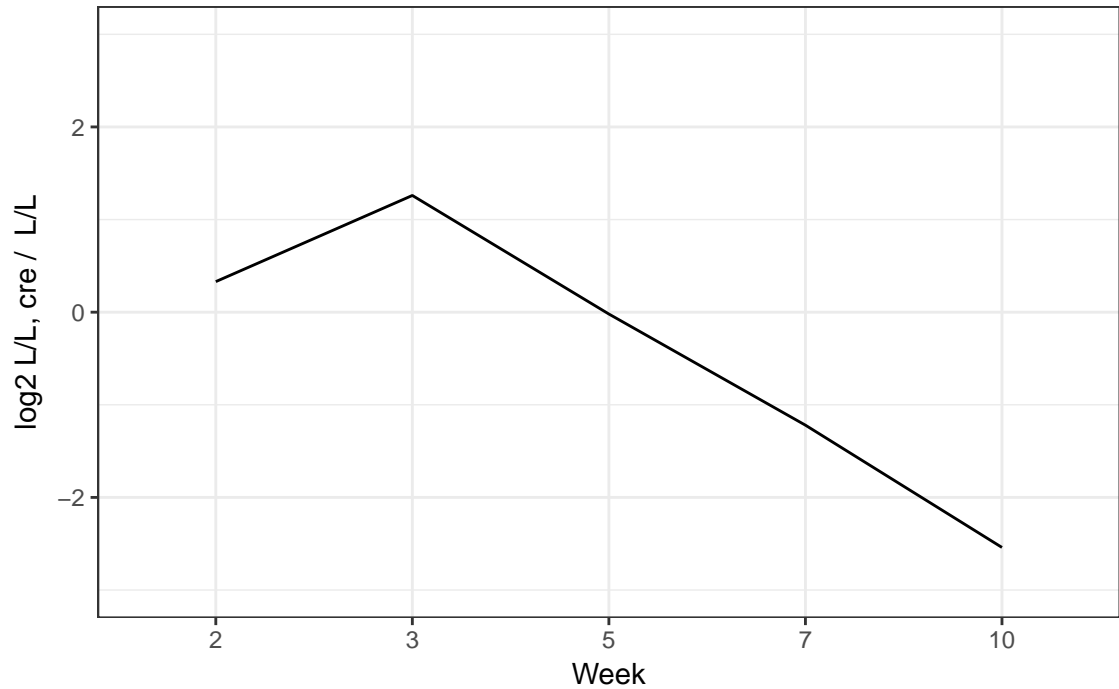

MT-CYB / P00158; adj.p value: 0.16857

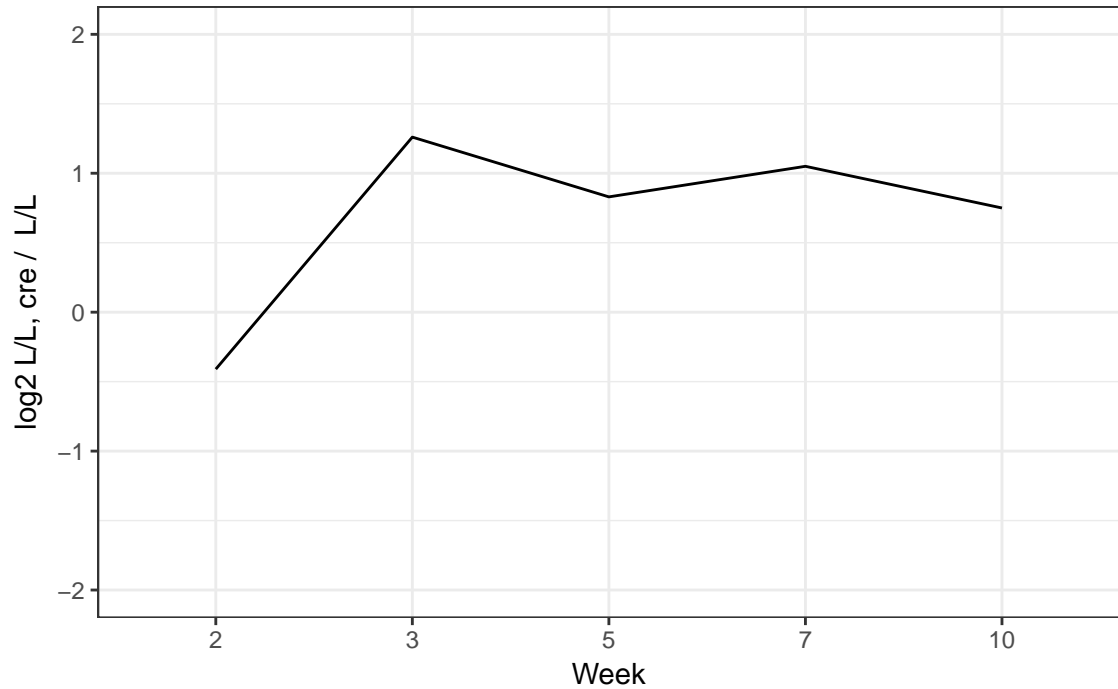

MTATP6 / P00848; adj.p value: 0.27482

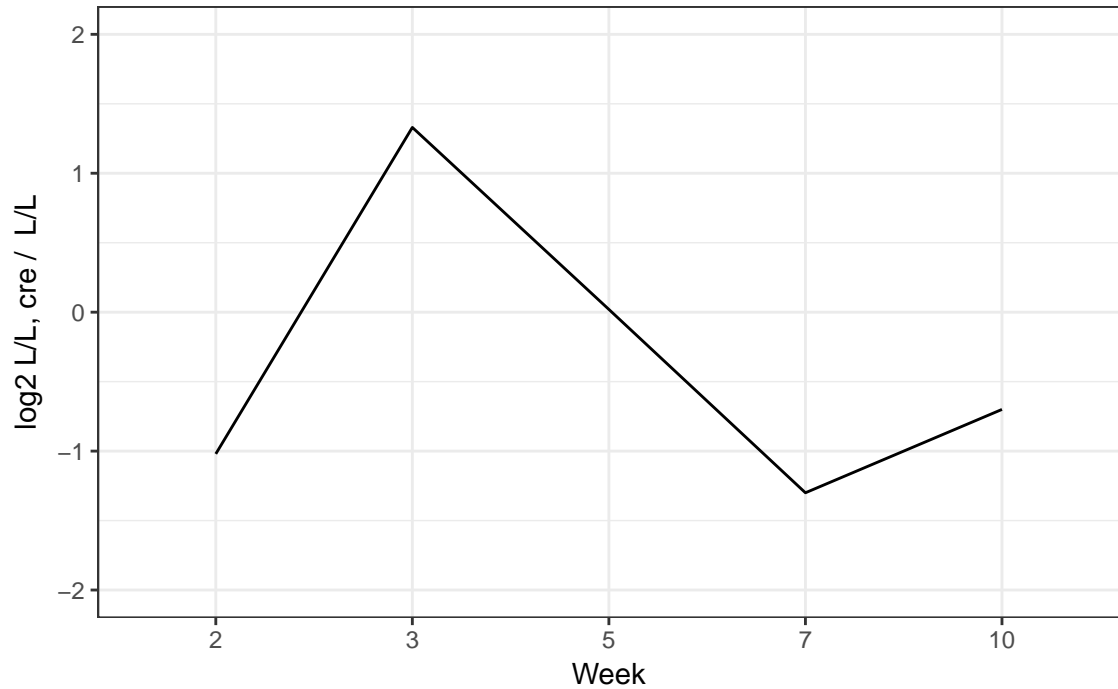

MTATP8 / P03930; adj.p value: 3e-05

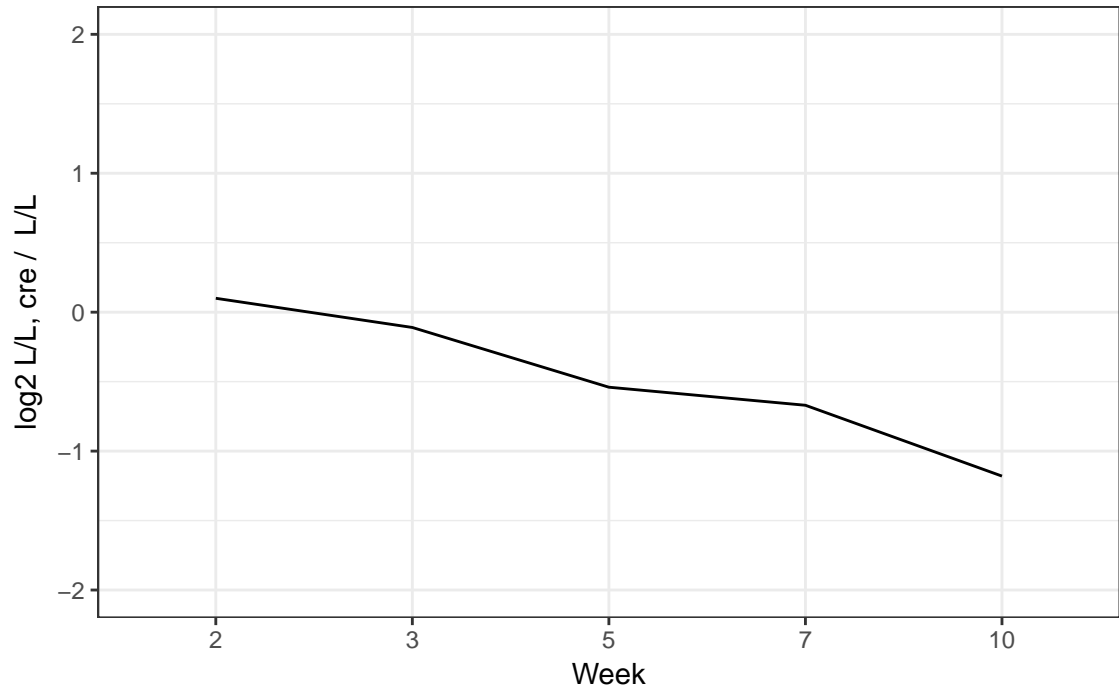



MTCH1 / Q791T5-2; adj.p value: 0.12457

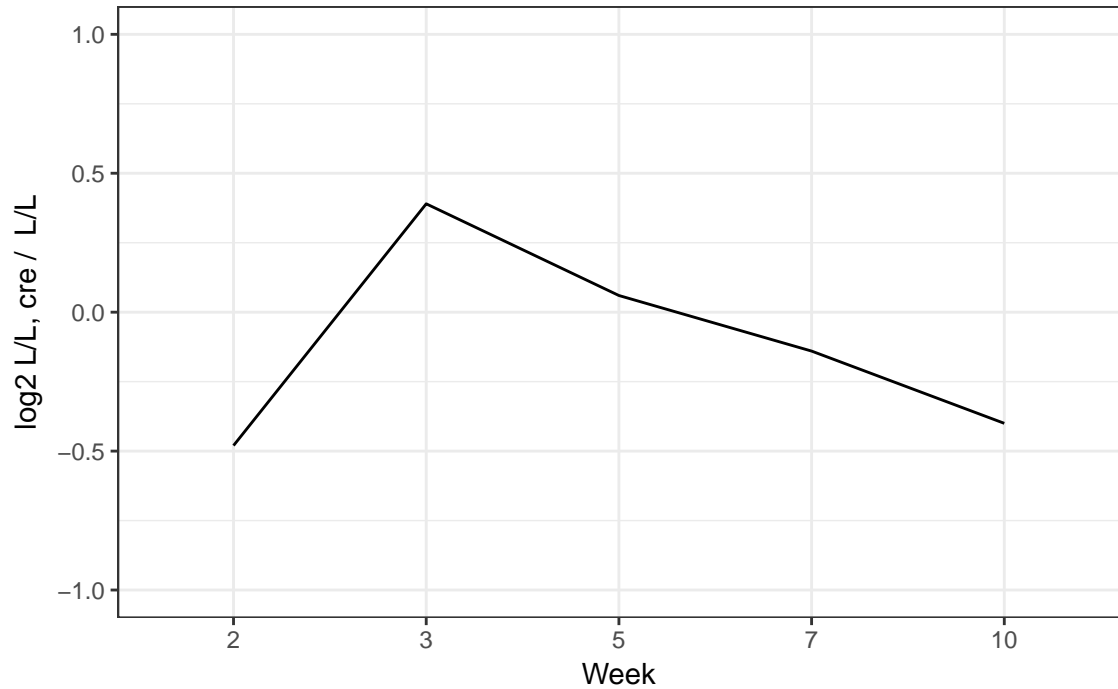

MTCH2 / Q791V5; adj.p value: 0.79221

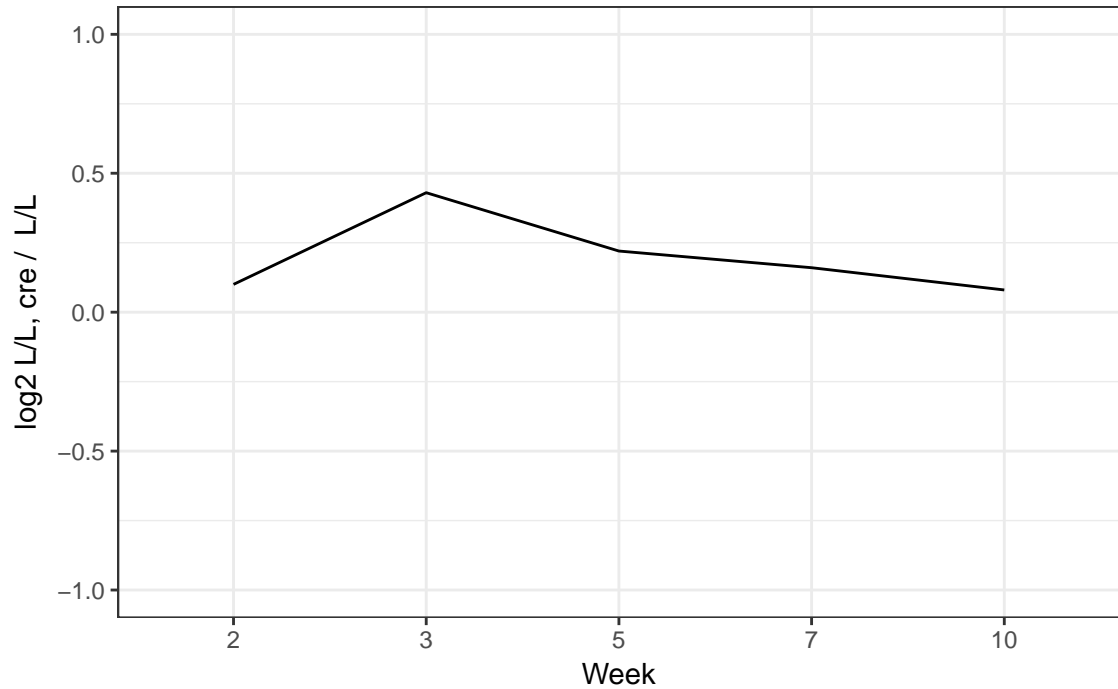

MTCO1 / P00397; adj.p value: 0.44367

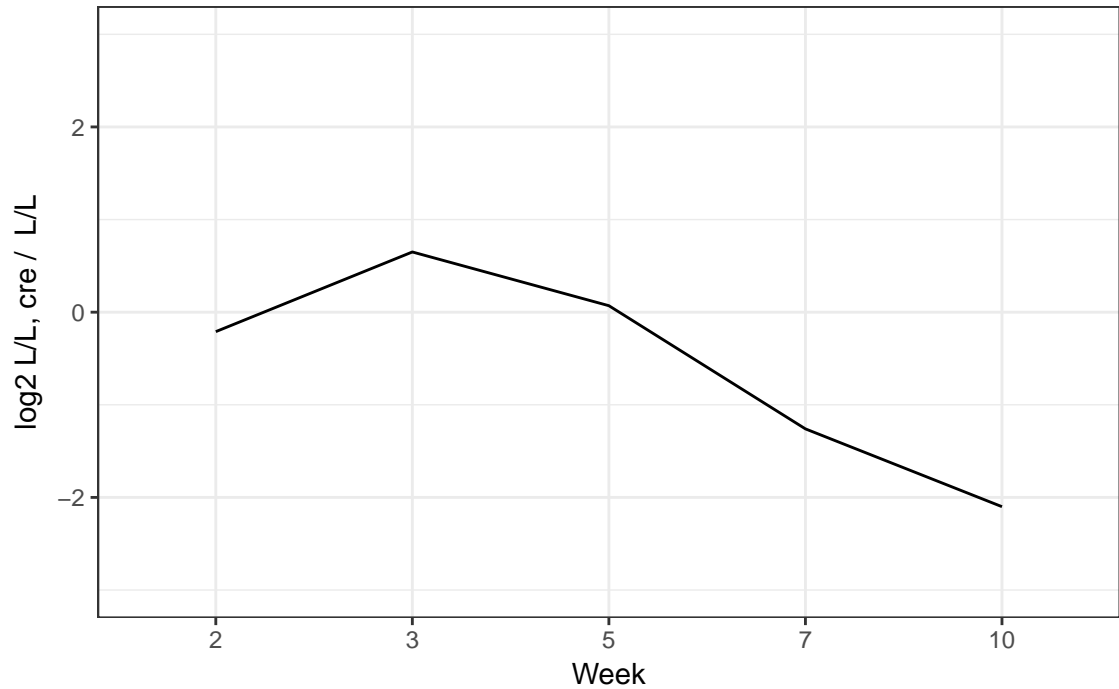

MTCO2 / P00405; adj.p value: 0

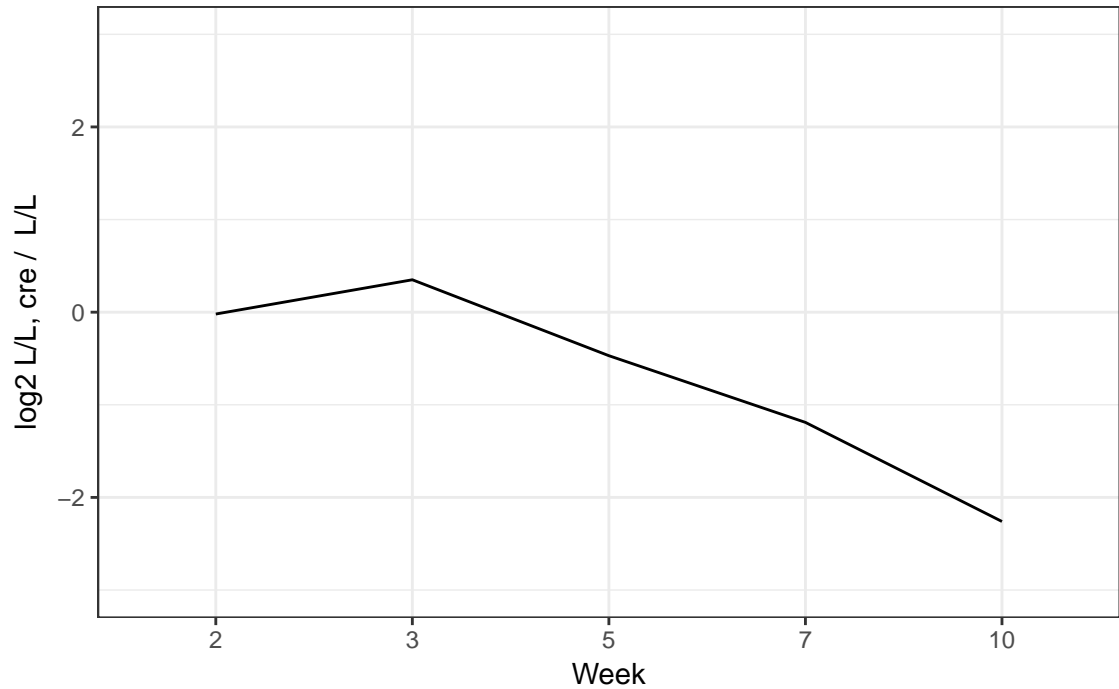

MTERF2 / Q8BKY8; adj.p value: 0.04924

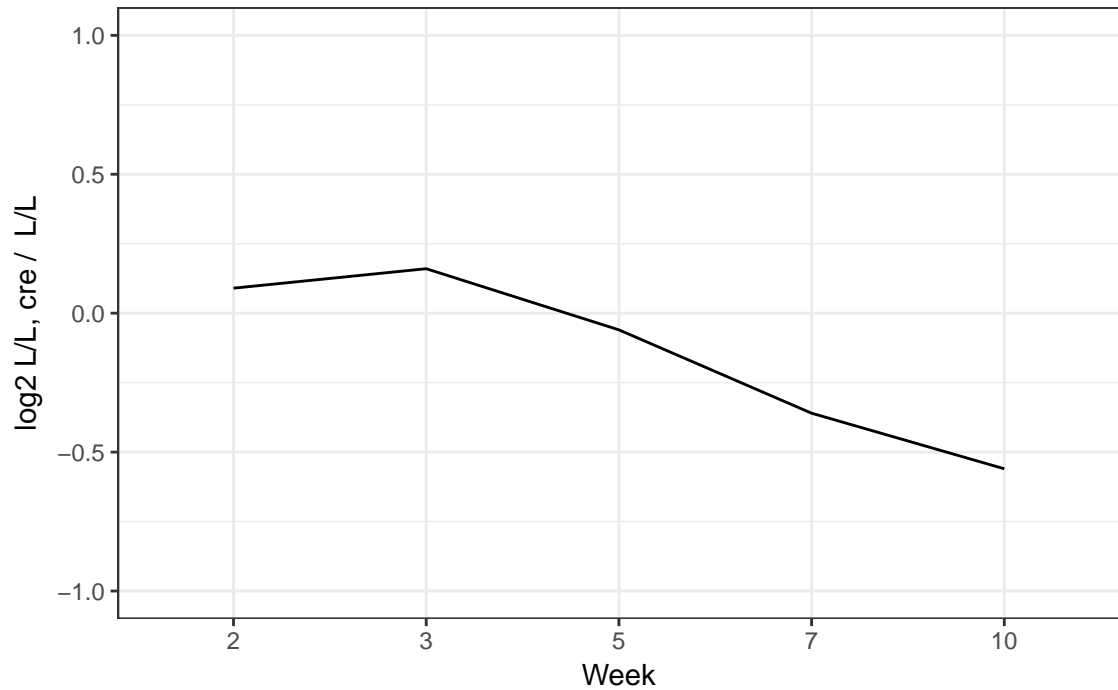

MTFMT / Q9D799; adj.p value: 0.15443

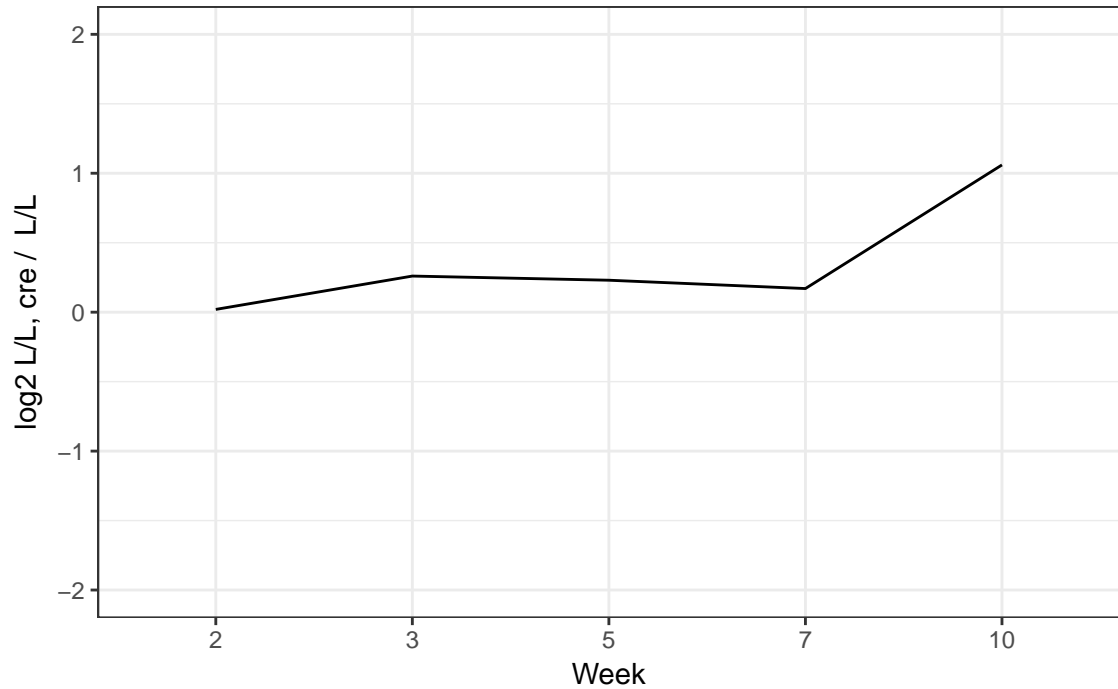

MTFP1 / Q9CRB8; adj.p value: 0.00221

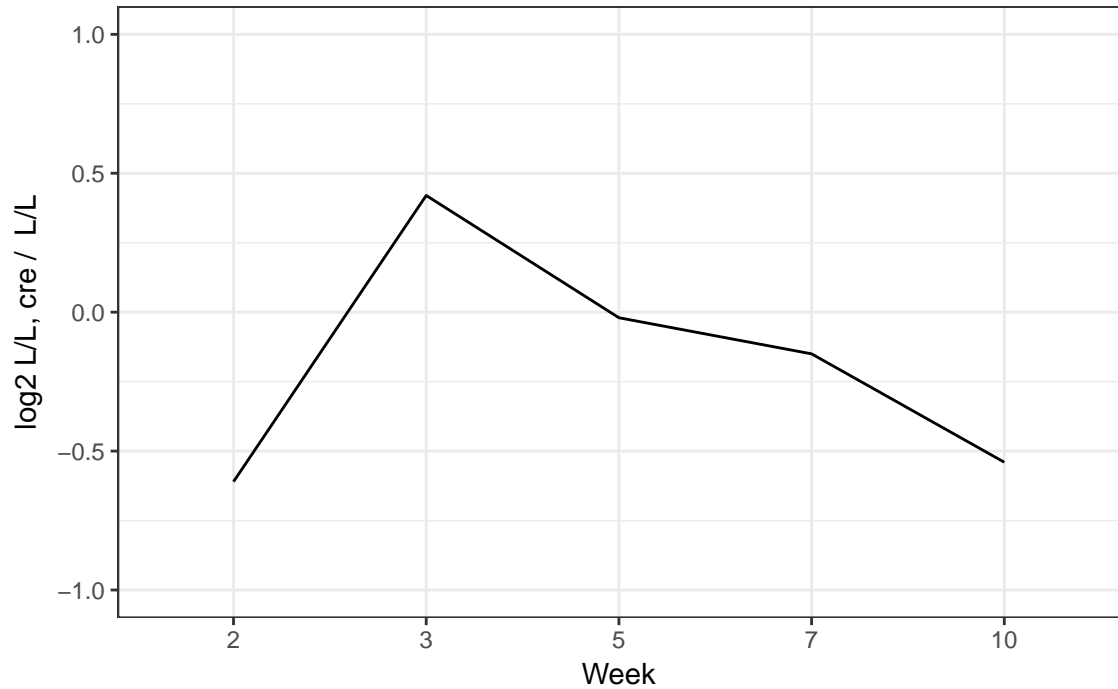

MTFR1L / Q9CWE0; adj.p value: 0.28865

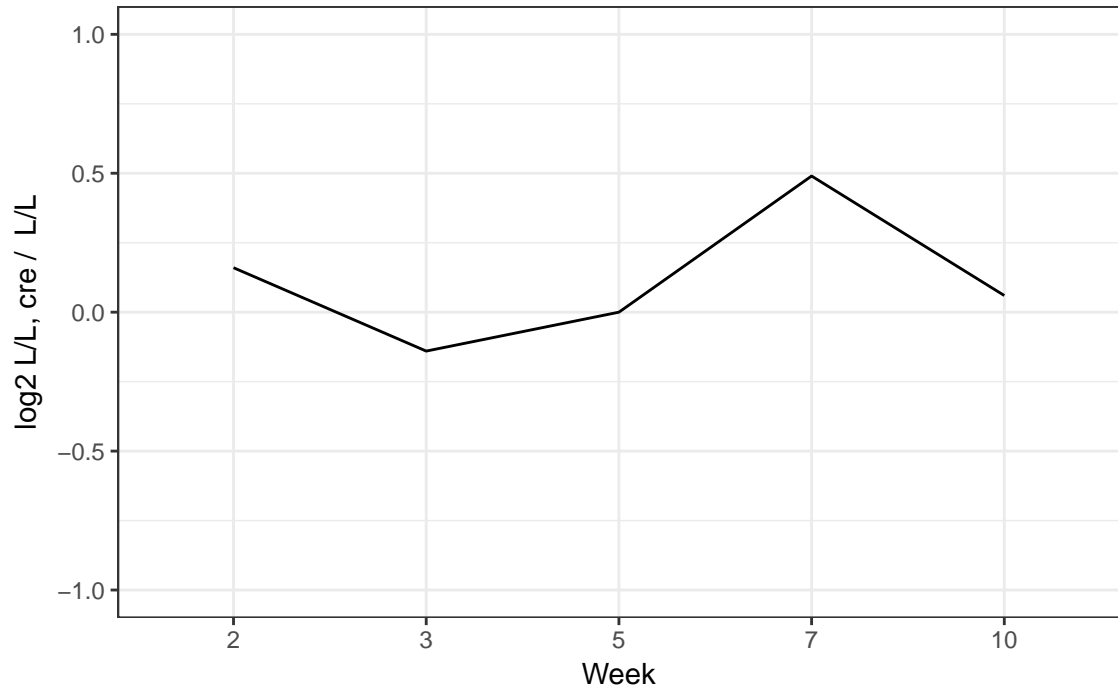



MTG1 / Q8R2R6; adj.p value: 0.3133

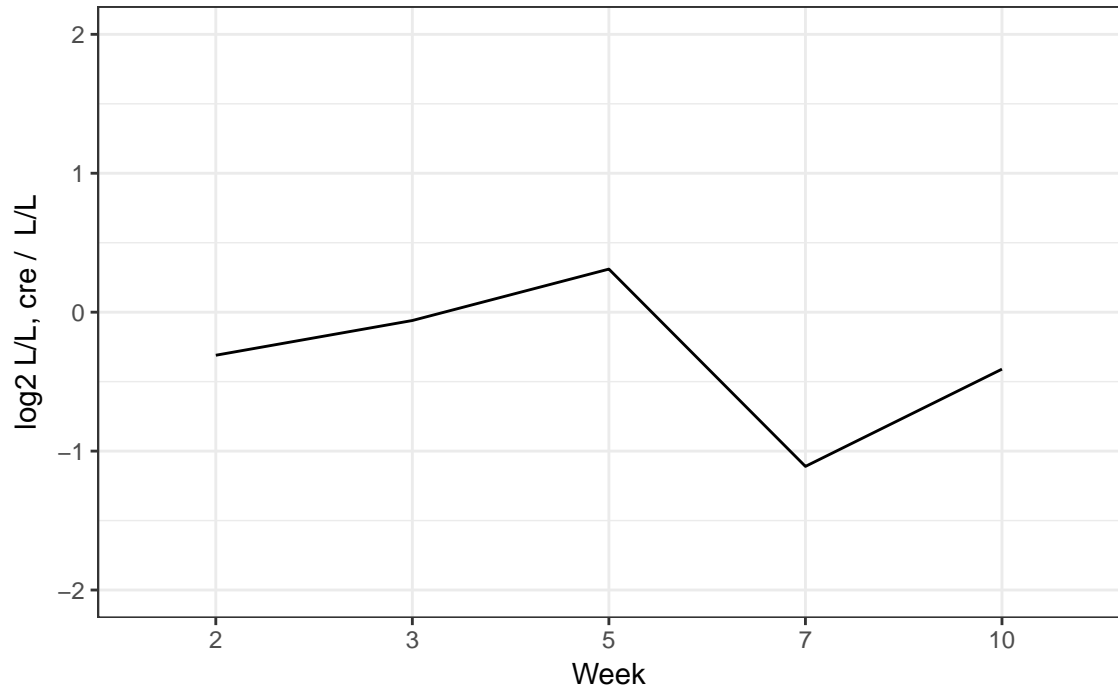

MTHFD1L / Q3V3R1; adj.p value: 0

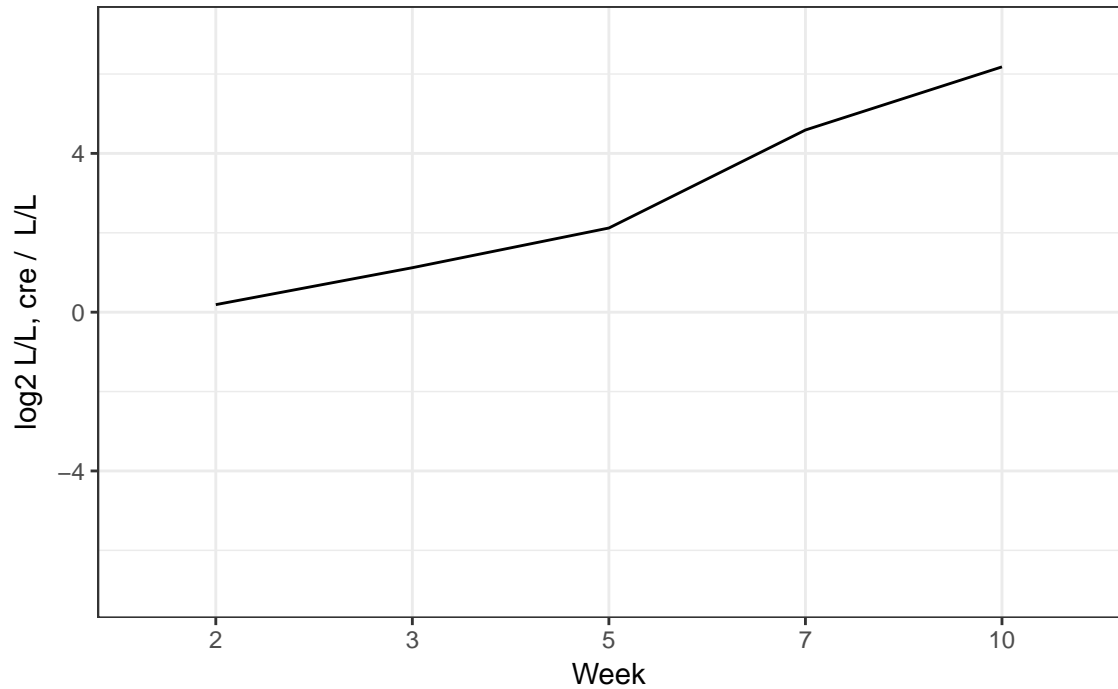

MTHFD2 / P18155; adj.p value: 0

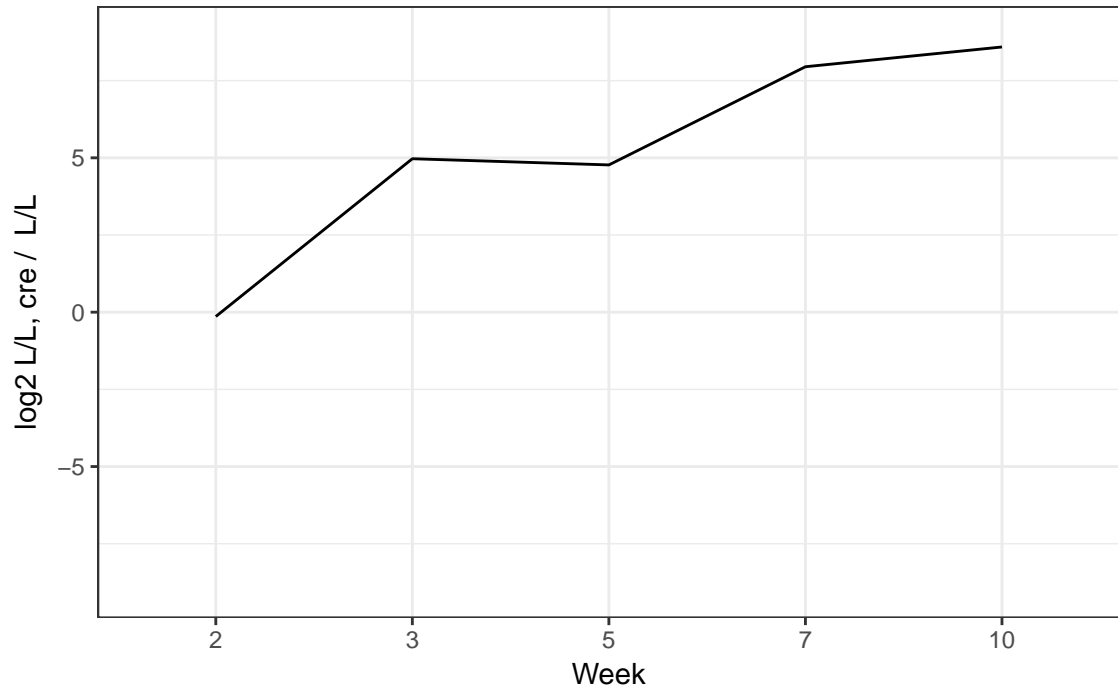

MTHFD2L / D3YZG8; adj.p value: 0.47332

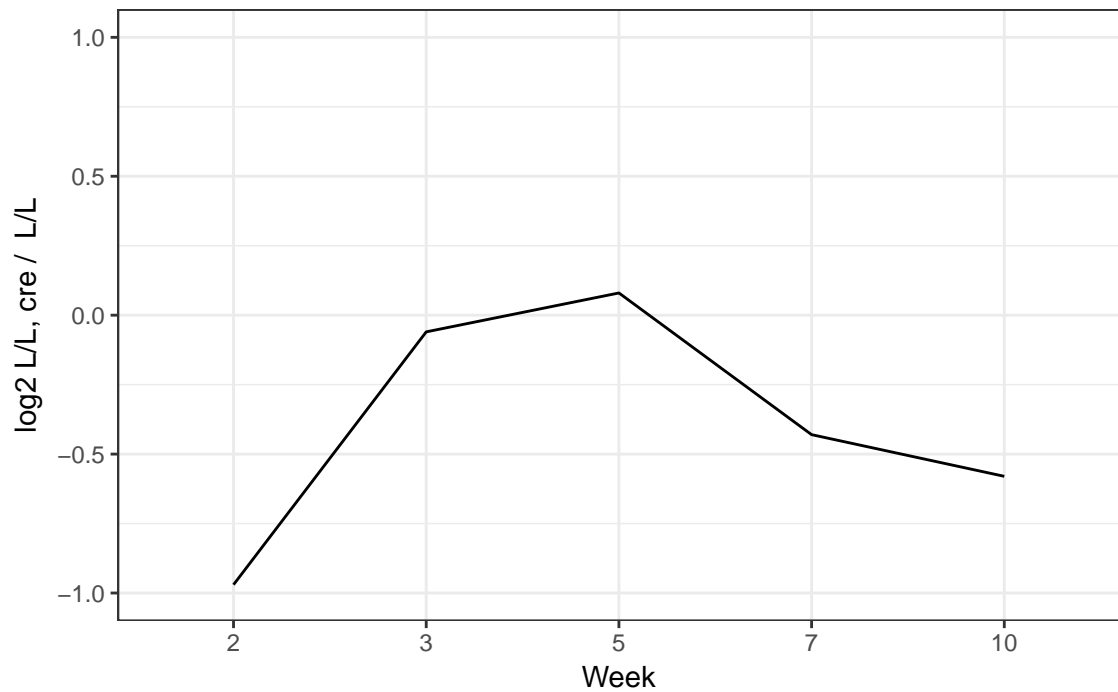

MTIF2 / Q91YJ5; adj.p value: 0

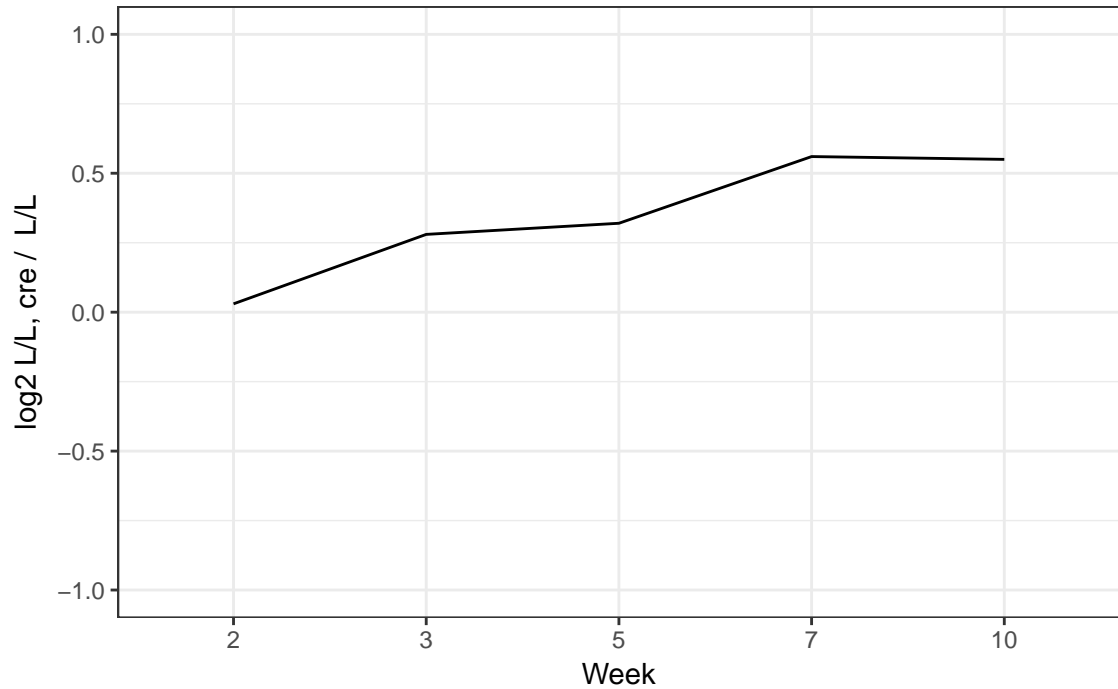

MTIF3 / Q9CZD5; adj.p value: 0.13791

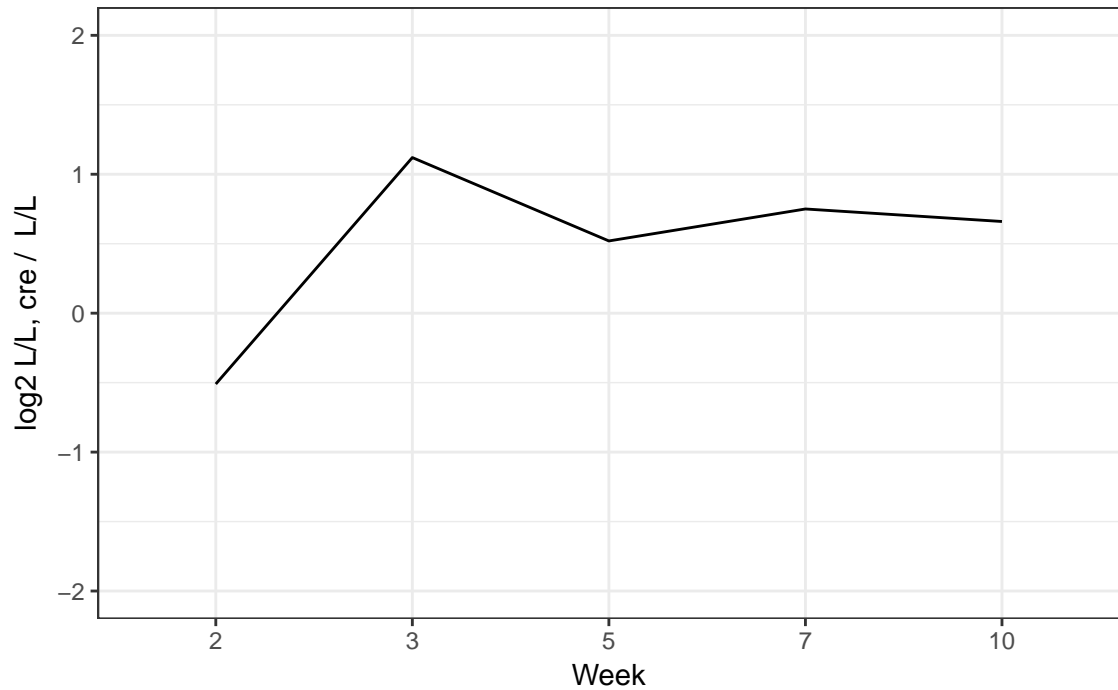

MTND1 / P03888; adj.p value: 0.57438

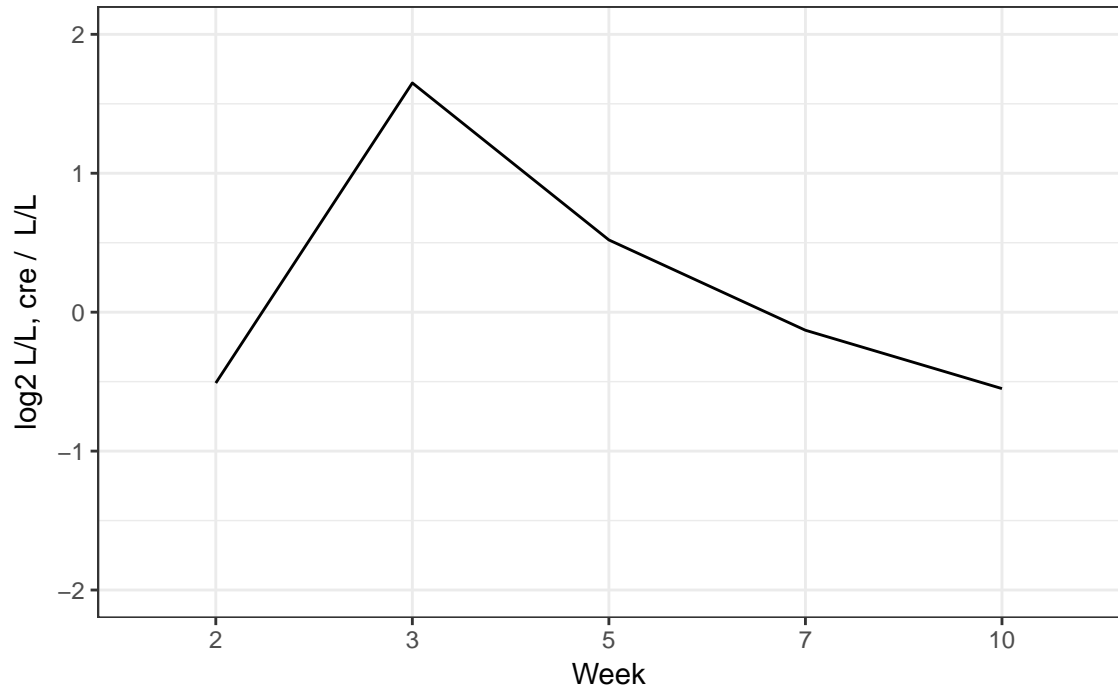

MTND2 / P03893; adj.p value: 0.4156

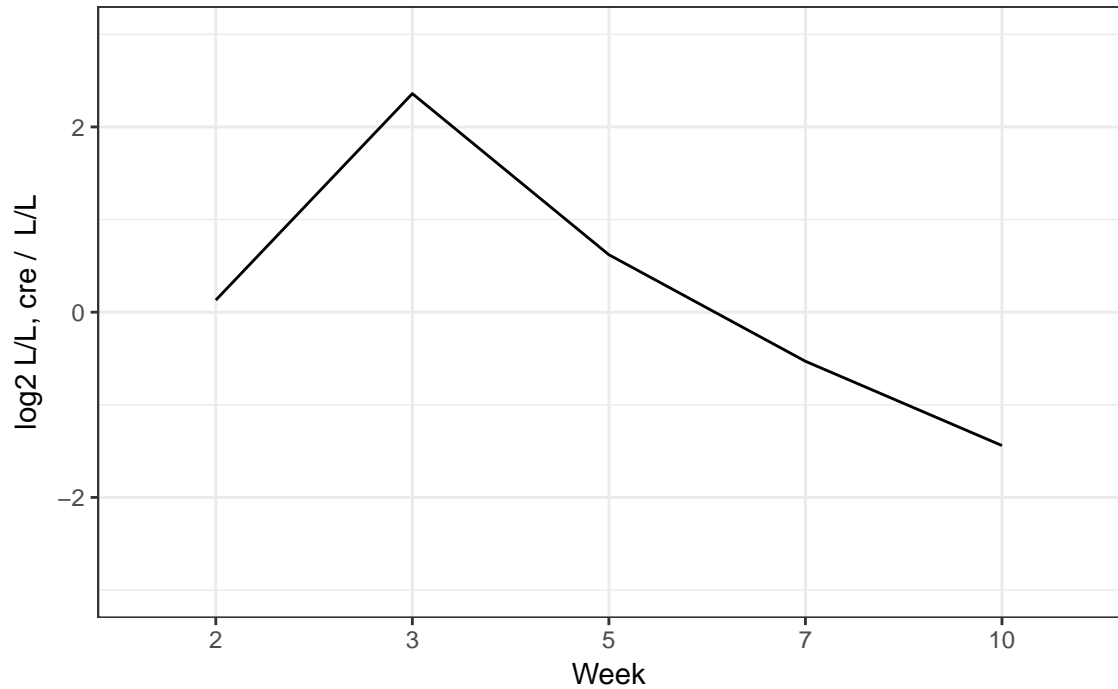



MTND4 / P03911; adj.p value: 0.893

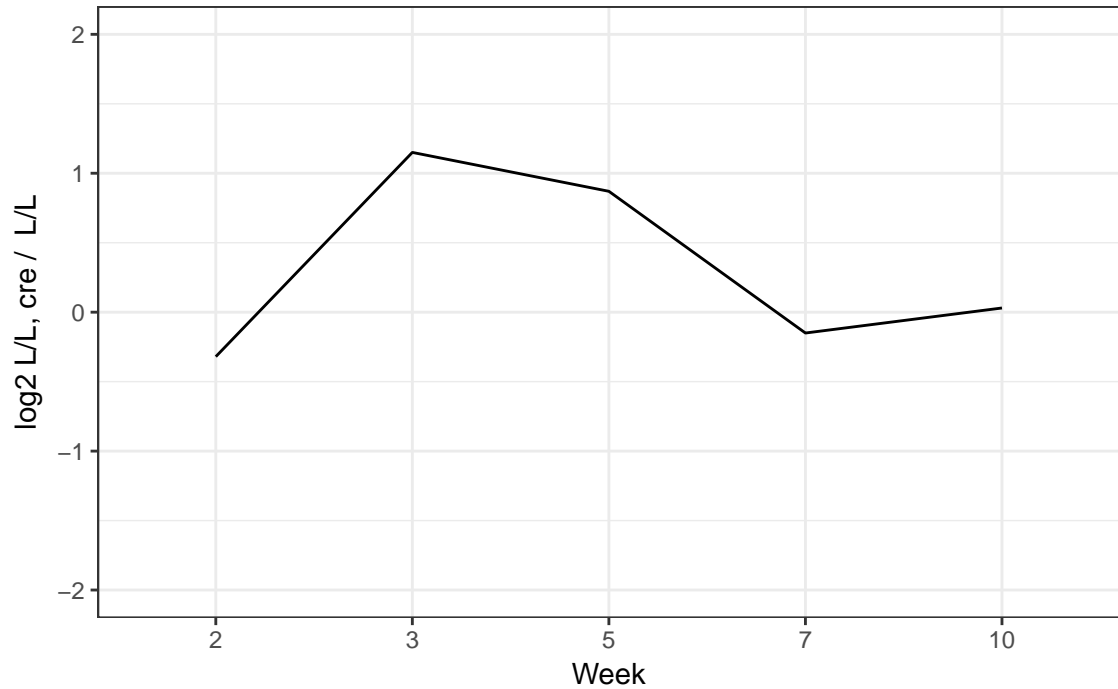

MTND5 / P03921; adj.p value: 0.49908

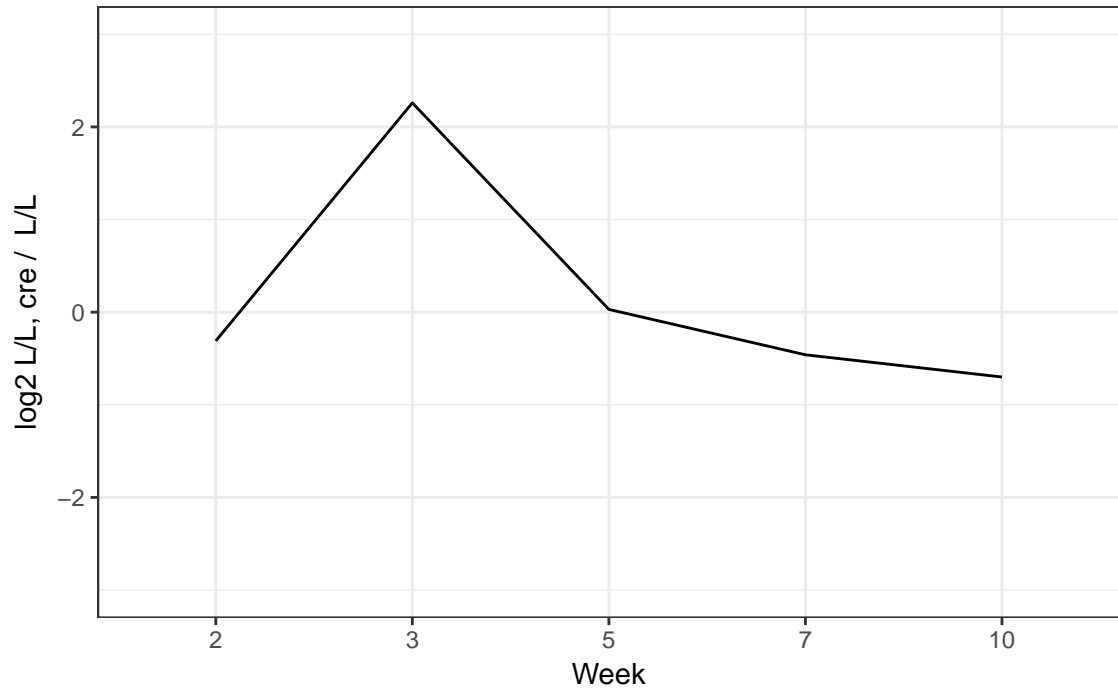

MTO1 / G5E889; adj.p value: 0.08001

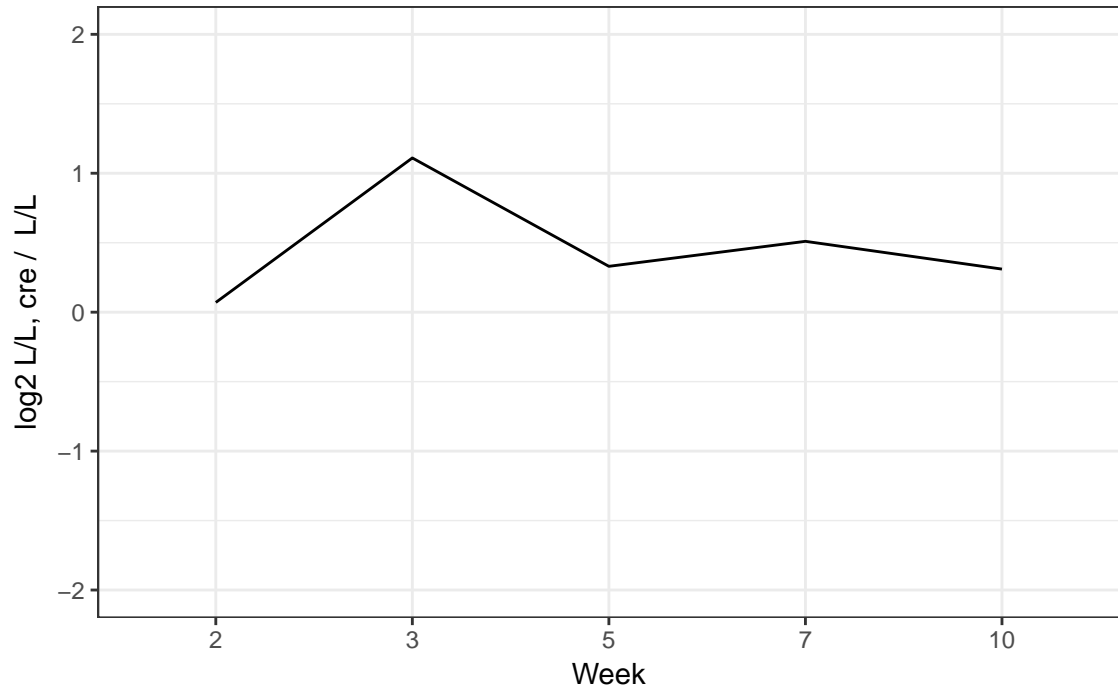

MTPAP / Q9D0D3; adj.p value: 0.18784

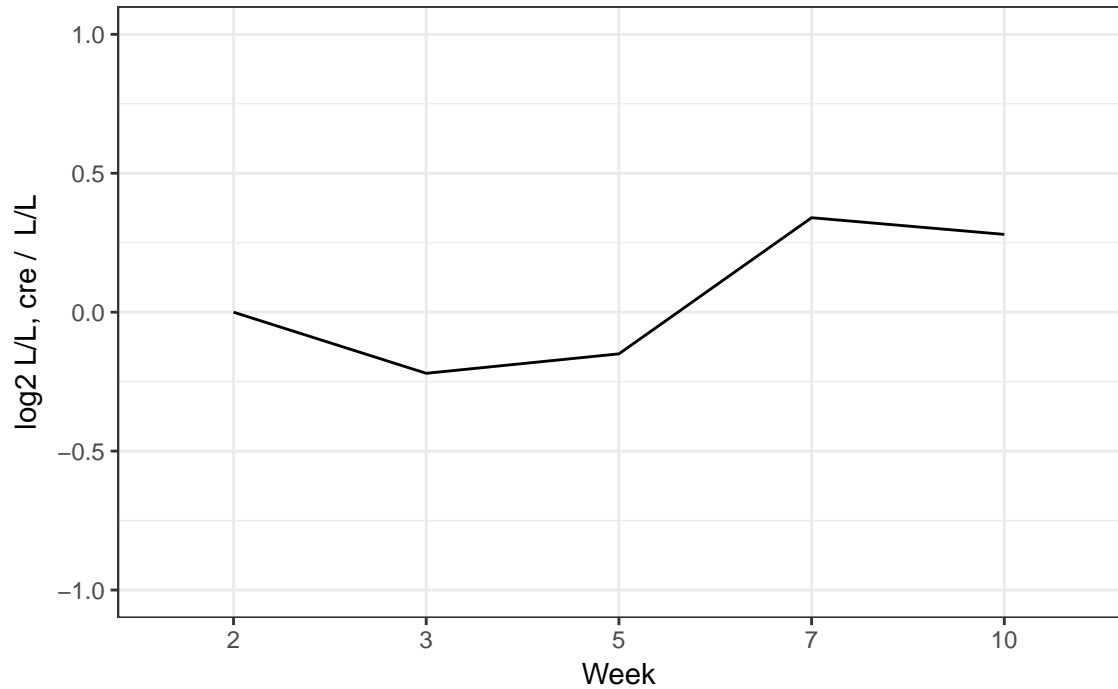

MTRF1 / Q8K126; adj.p value: 0.13426

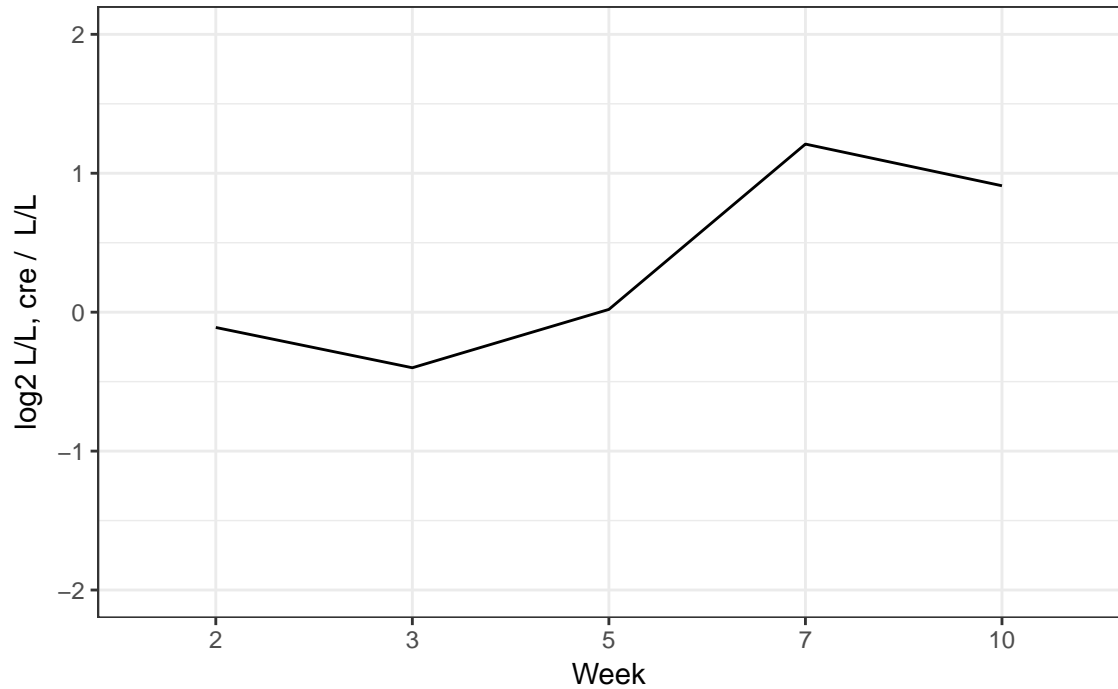

MTRF1L / Q8BJU9; adj.p value: 0.00785

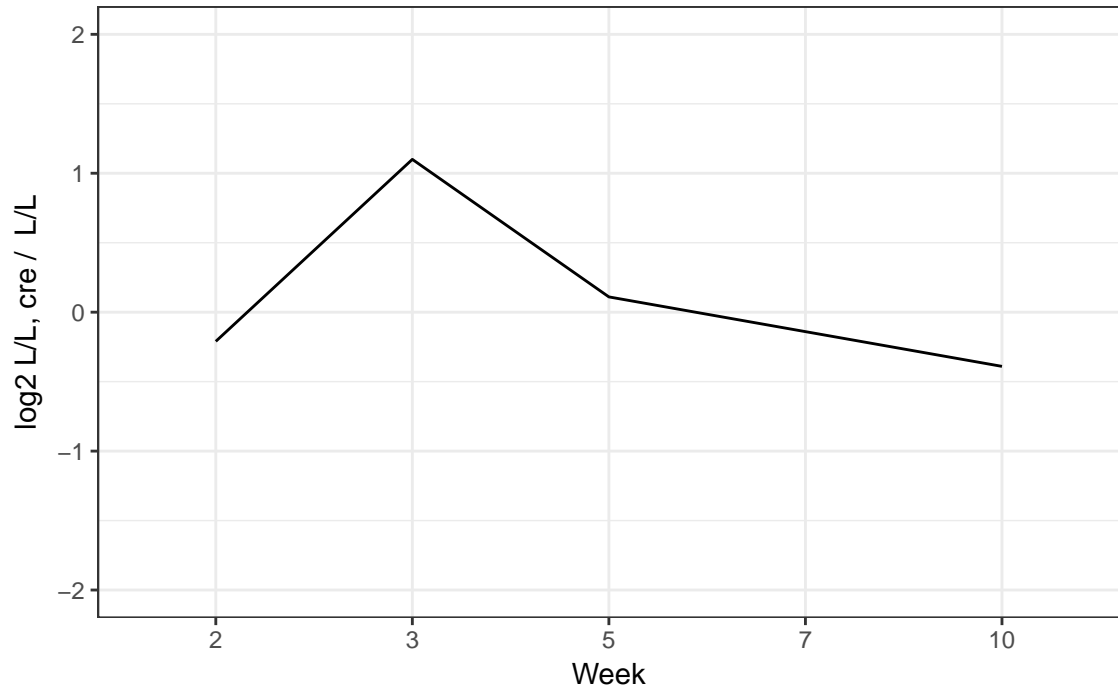

MTX1 / F7C846; adj.p value: 0.63905

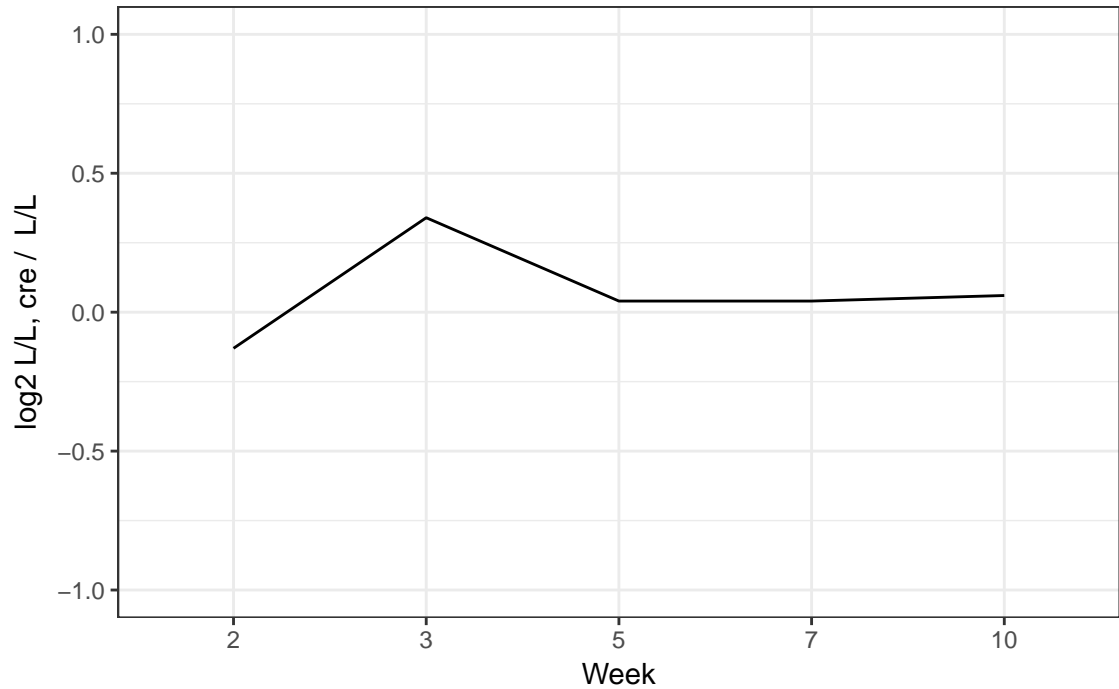

MTX2 / O88441; adj.p value: 0.7152

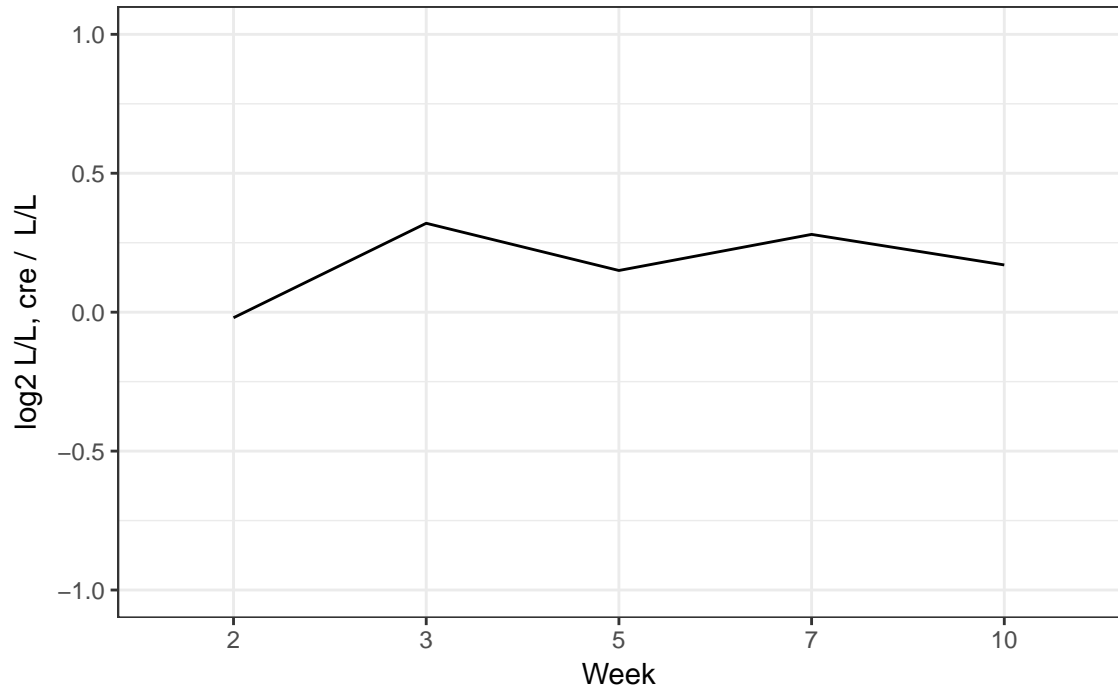



MUL1 / Q8VCM5; adj.p value: 0.97399

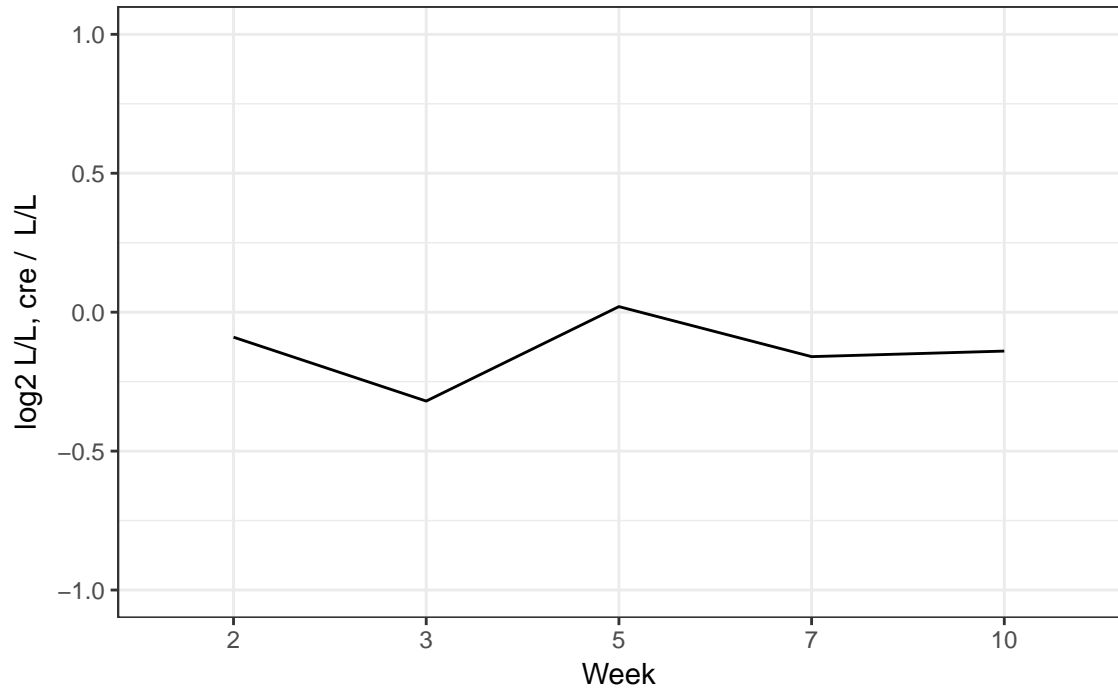

MUT / P16332; adj.p value: 0

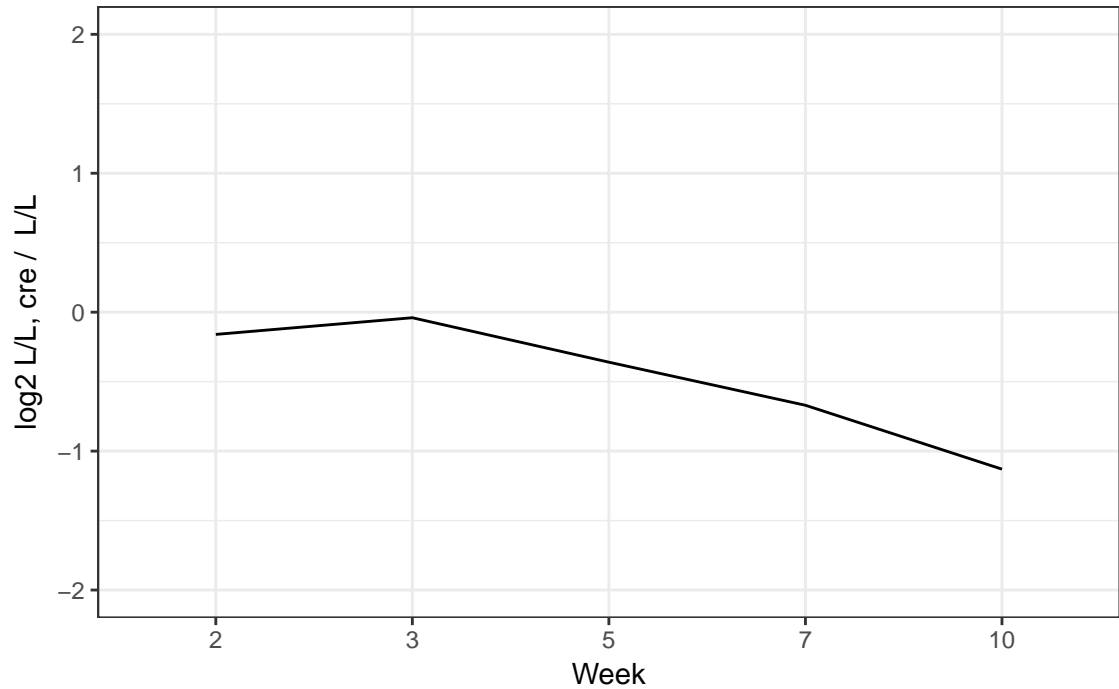

NADK2 / Q8C5H8; adj.p value: 0.95451

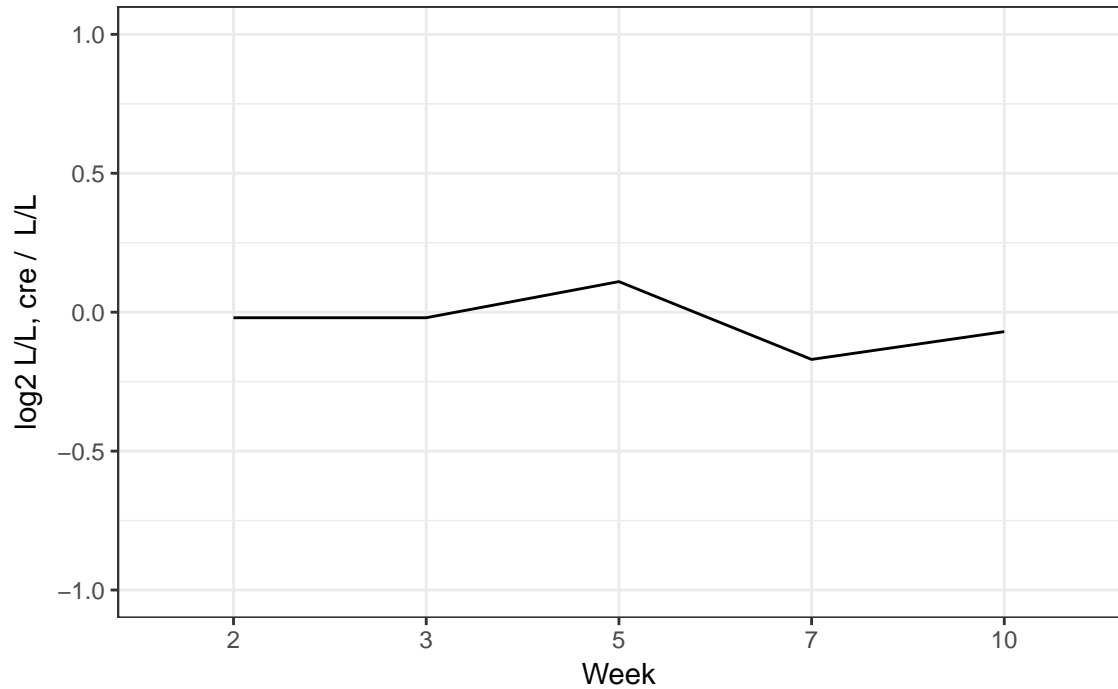

NARS2 / Q8BGV0; adj.p value: 1e-05

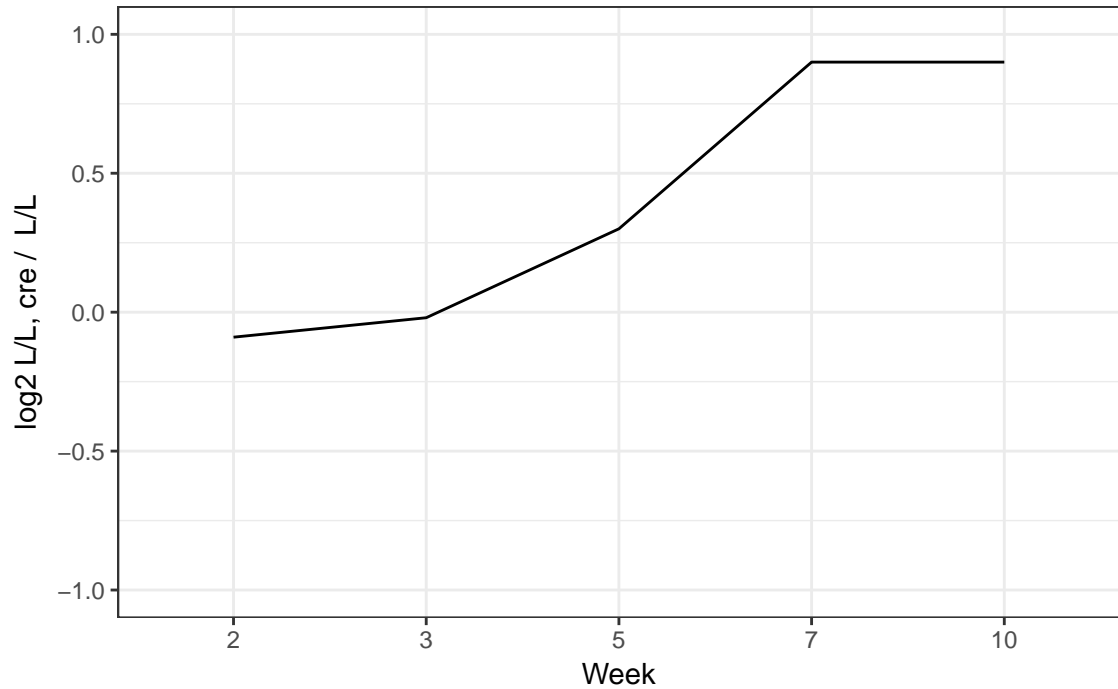

NDUFA1 / O35683; adj.p value: 0.00188

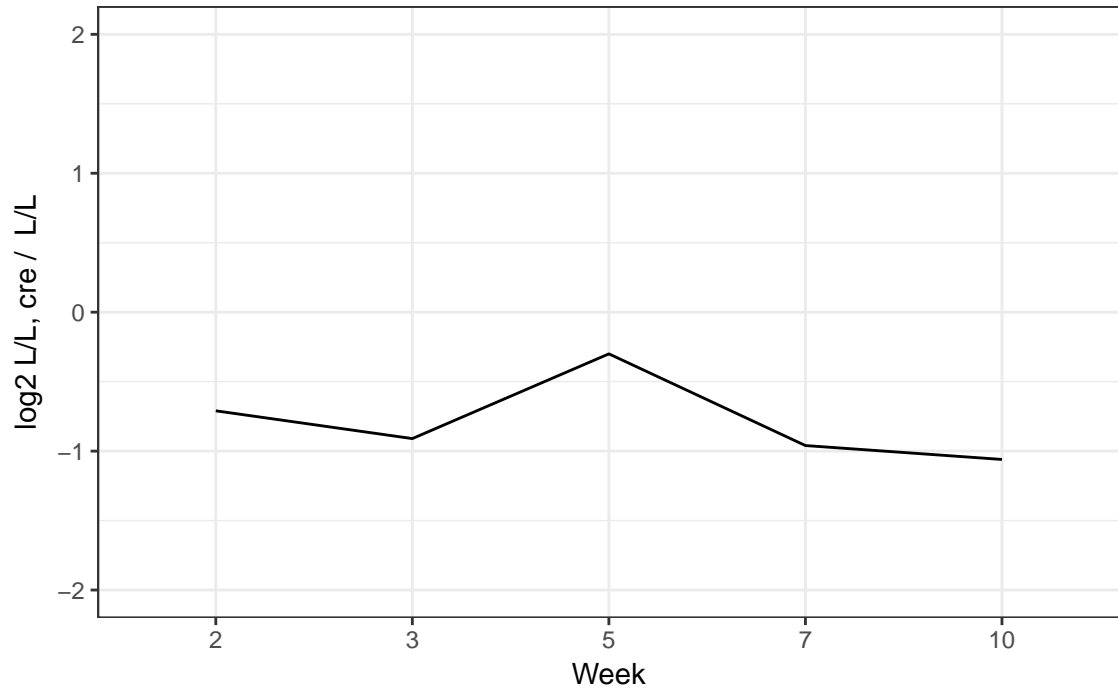

NDUFA10 / Q99LC3; adj.p value: 0.00324

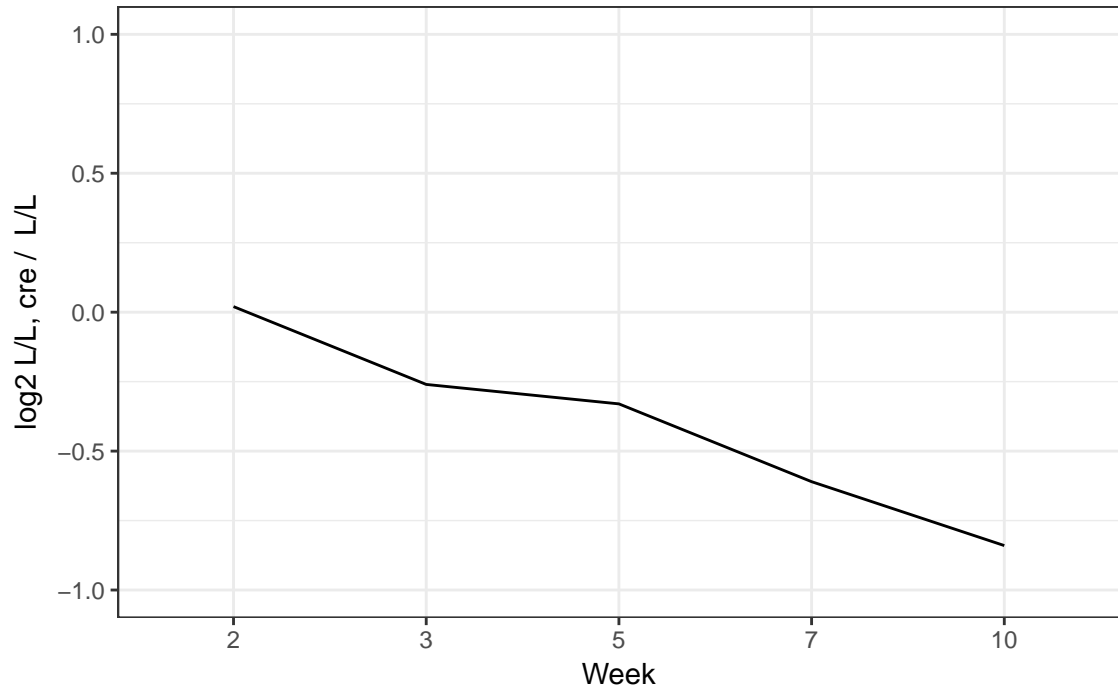

NDUFA11 / G5E814; adj.p value: 0.04485

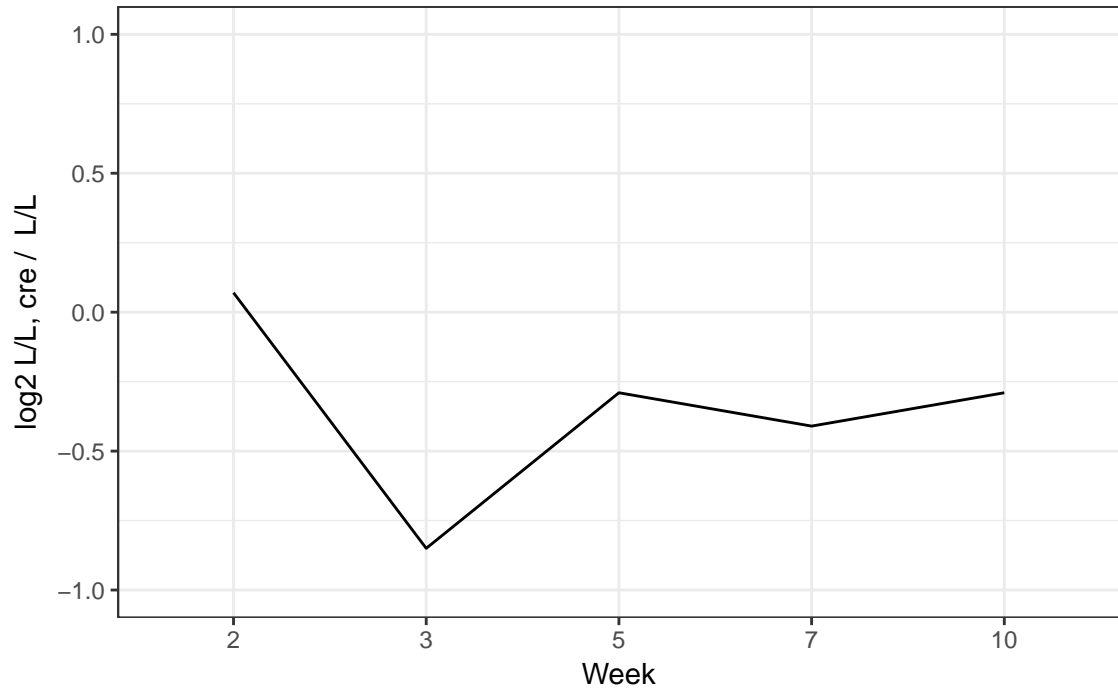

NDUFA12 / Q7TMF3; adj.p value: 0

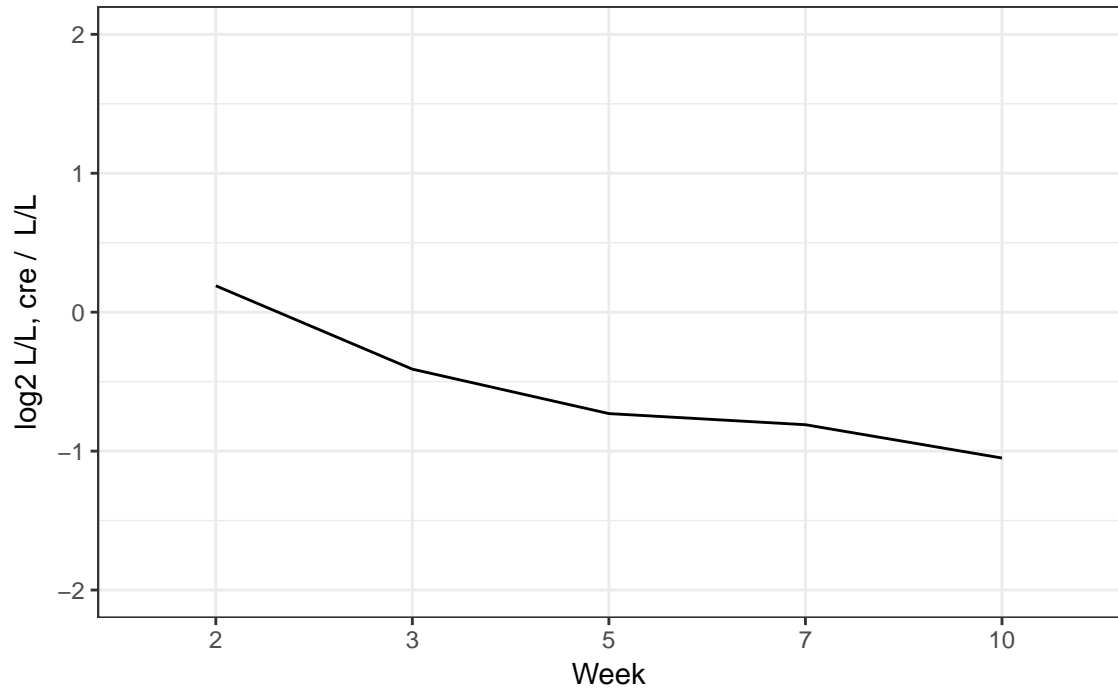



# NDUFA13 / Q9ERS2; adj.p value: 0

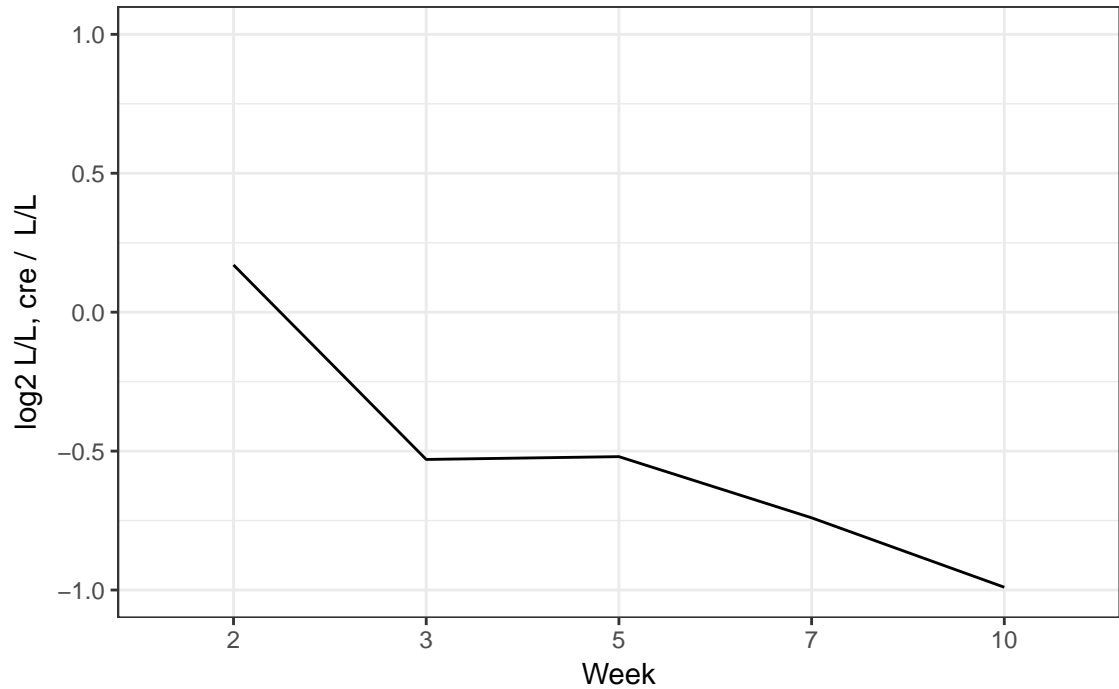

NDUFA2 / Q9CQ75; adj.p value: 0

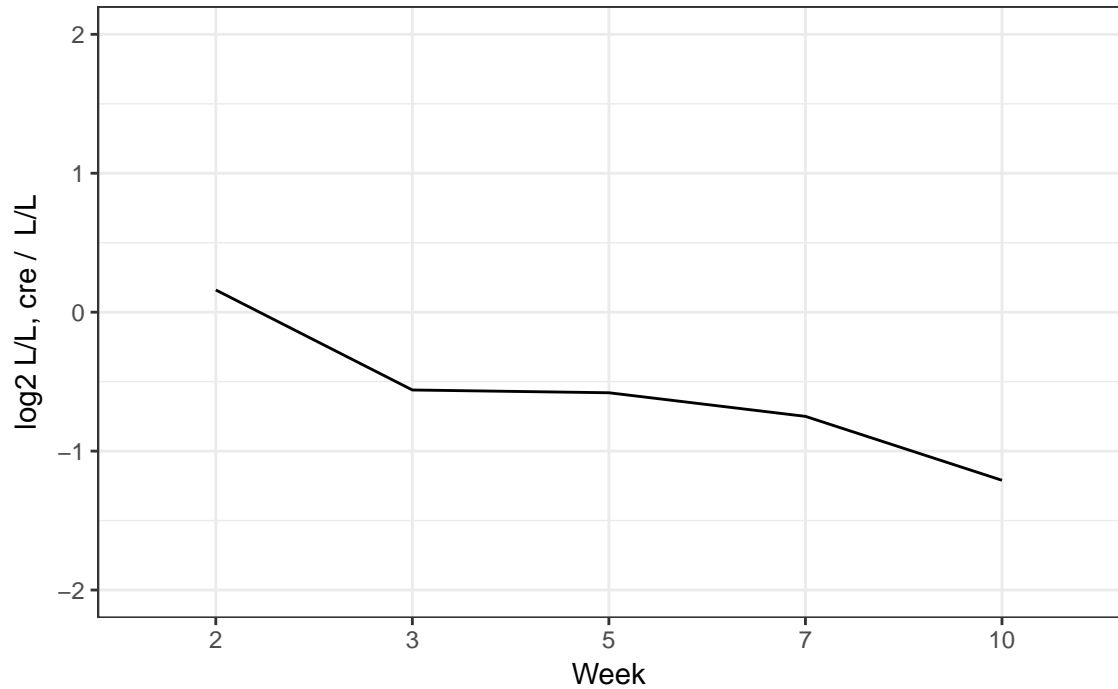

NDUFA3 / Q9CQ91; adj.p value: 0.09047

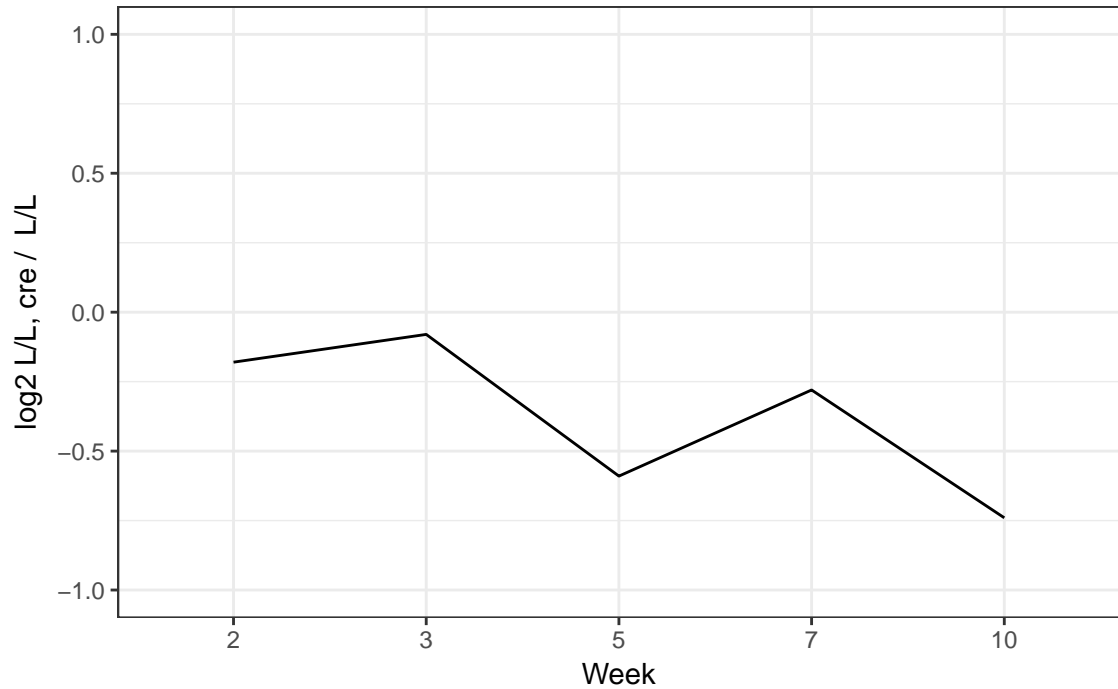

NDUFA4 / Q62425; adj.p value: 0

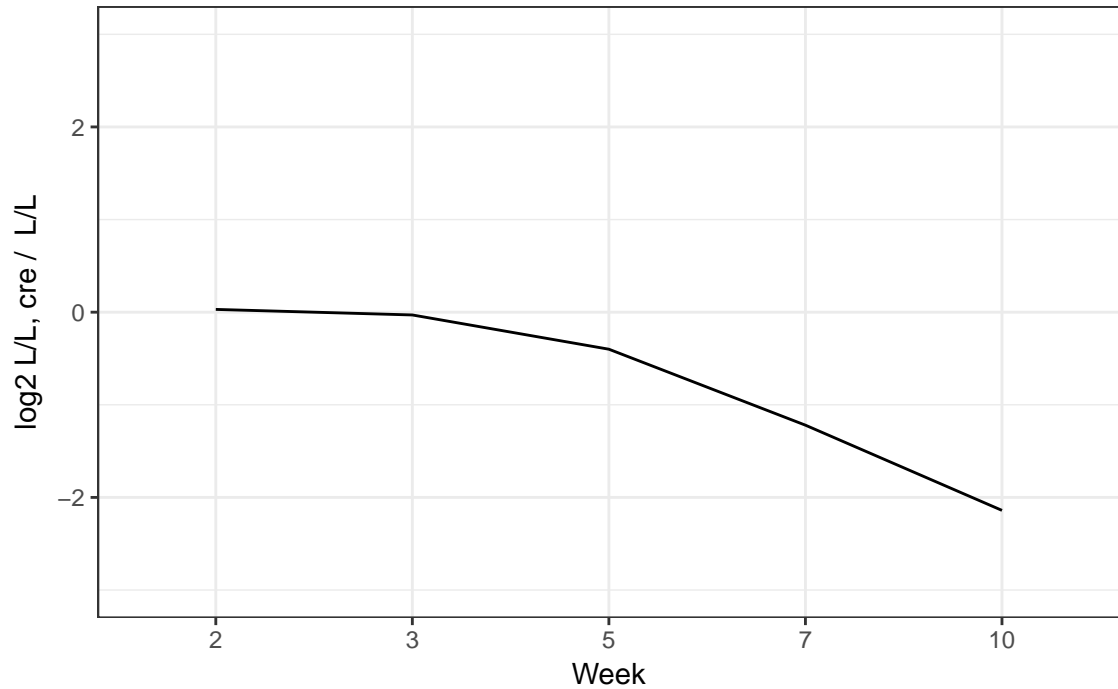

NDUFA5 / Q9CPP6; adj.p value: 0.00076

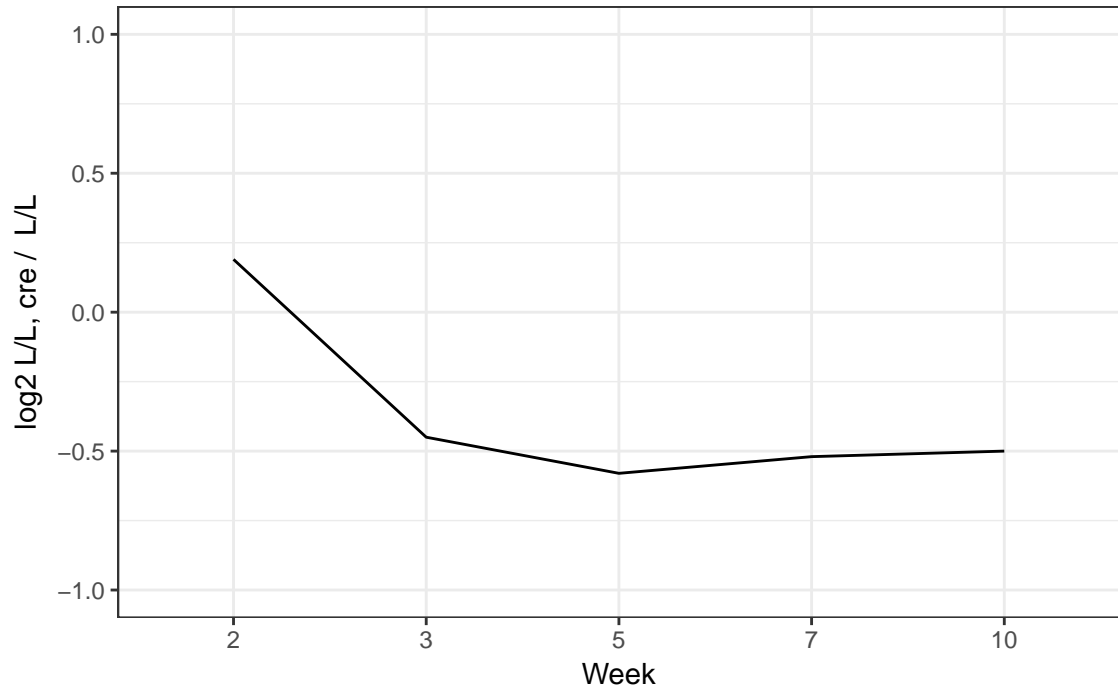

NDUFA6 / Q9CQZ5; adj.p value: 3e-05

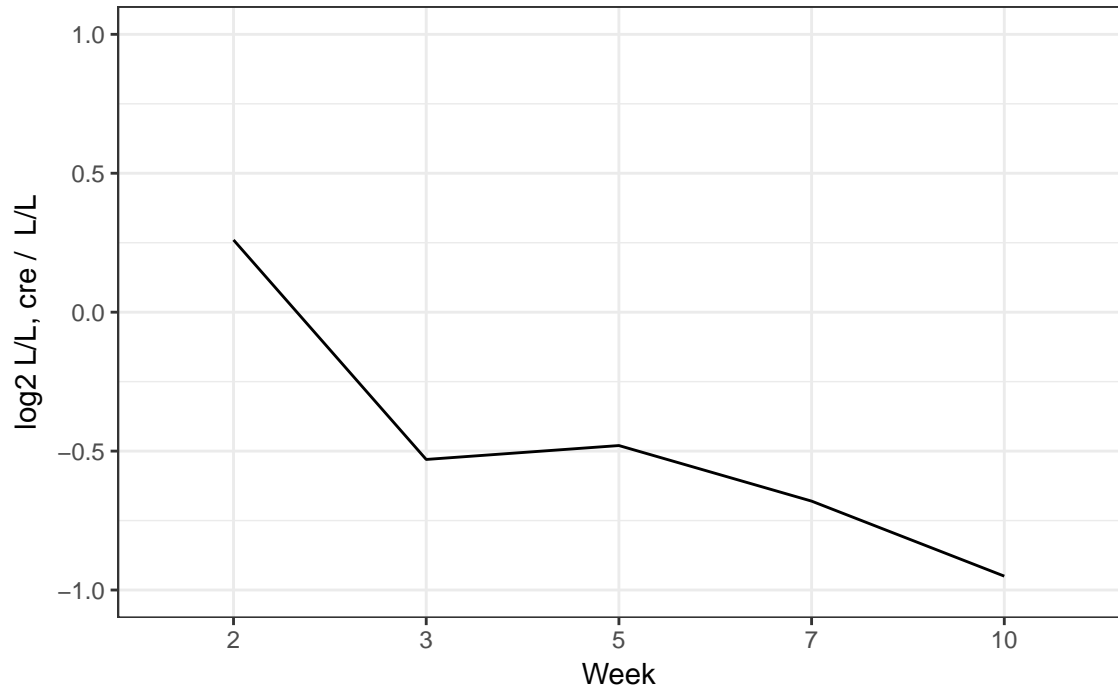

NDUFA7 / Q9Z1P6; adj.p value: 5e-04

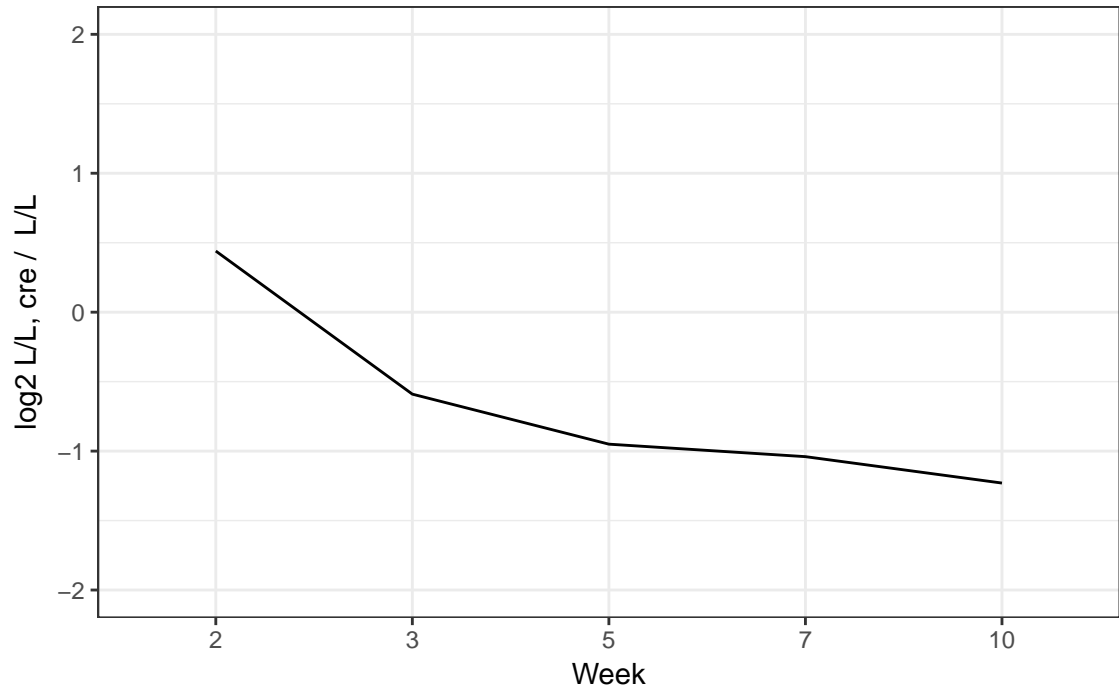

NDUFA8 / Q9DCJ5; adj.p value: 0

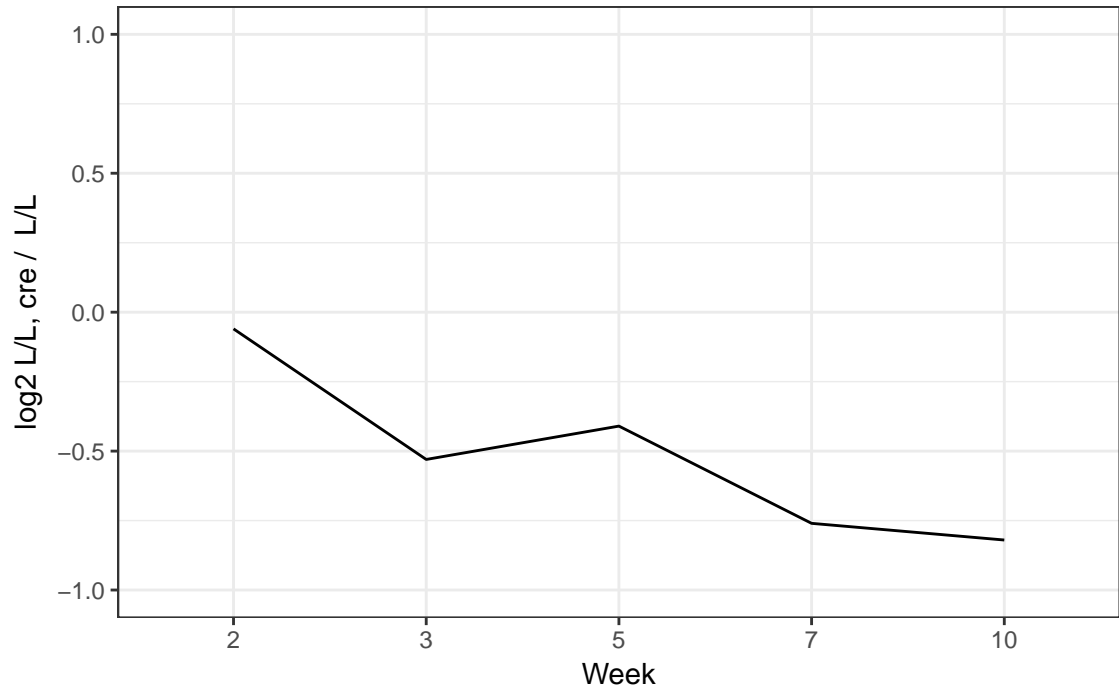



NDUFA9 / Q9DC69; adj.p value: 0.21452

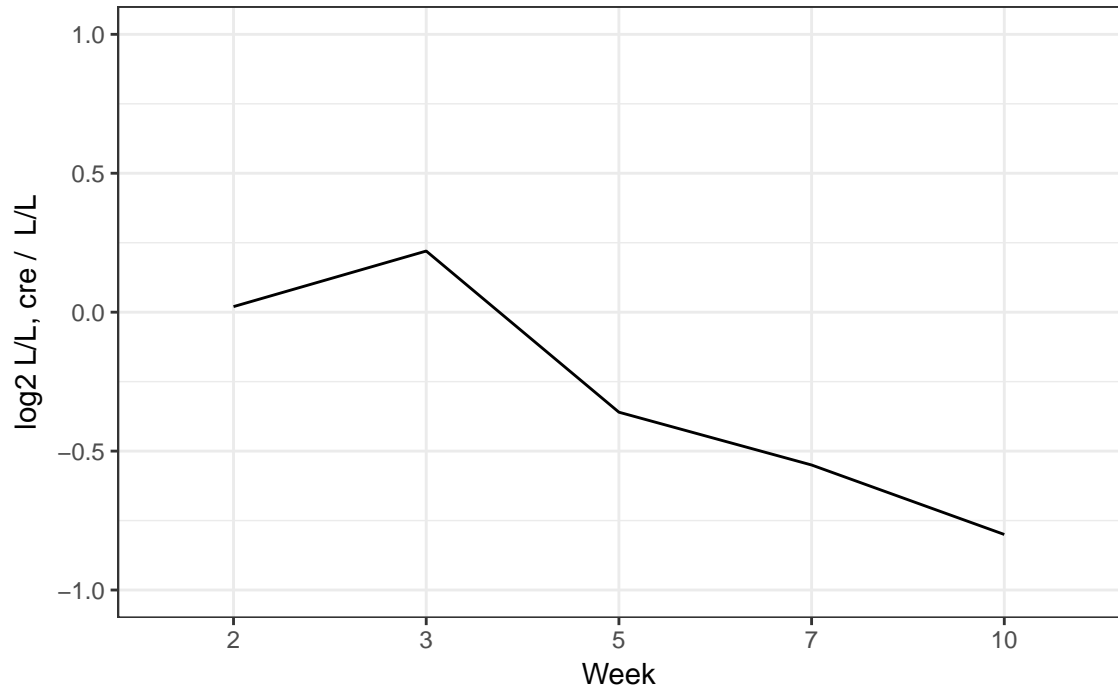

NDUFAB1 / F6ZFT1; adj.p value: 0.11557

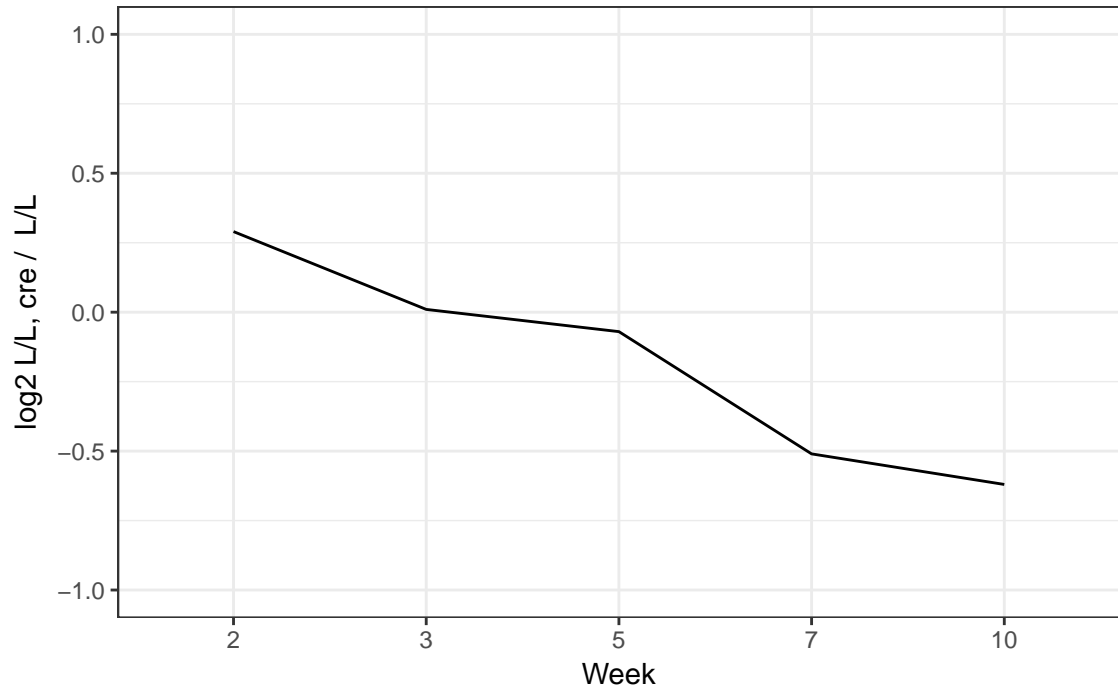

NDUFAF1 / A2AQ17; adj.p value: 0.00695

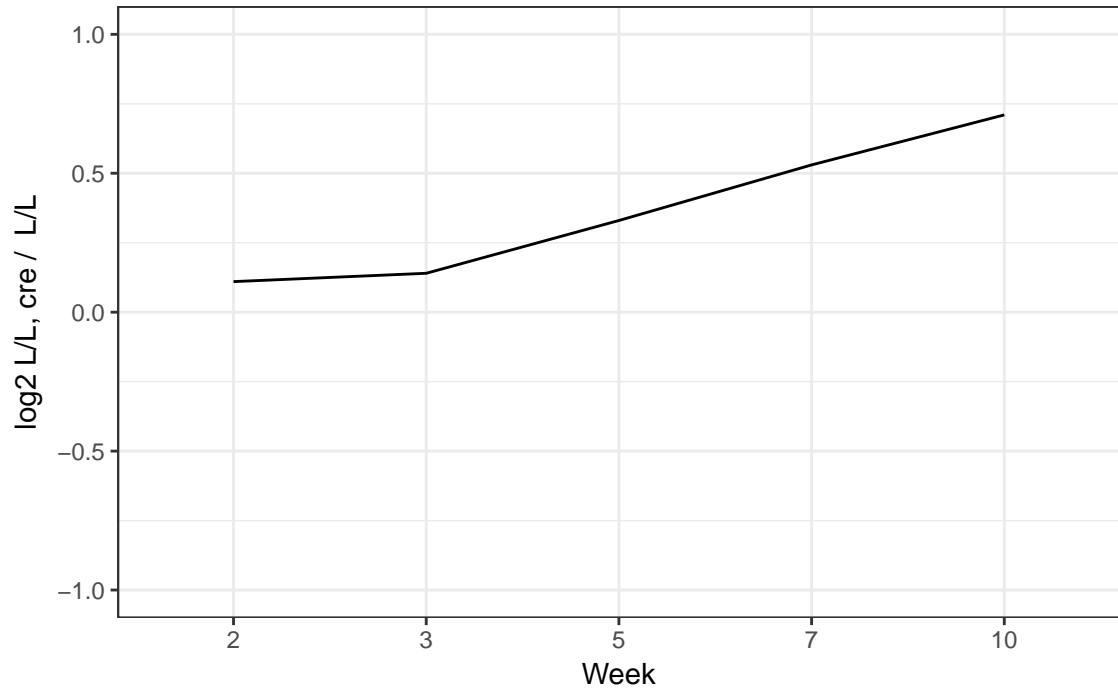

NDUFAF2 / Q59J78; adj.p value: 0.01465

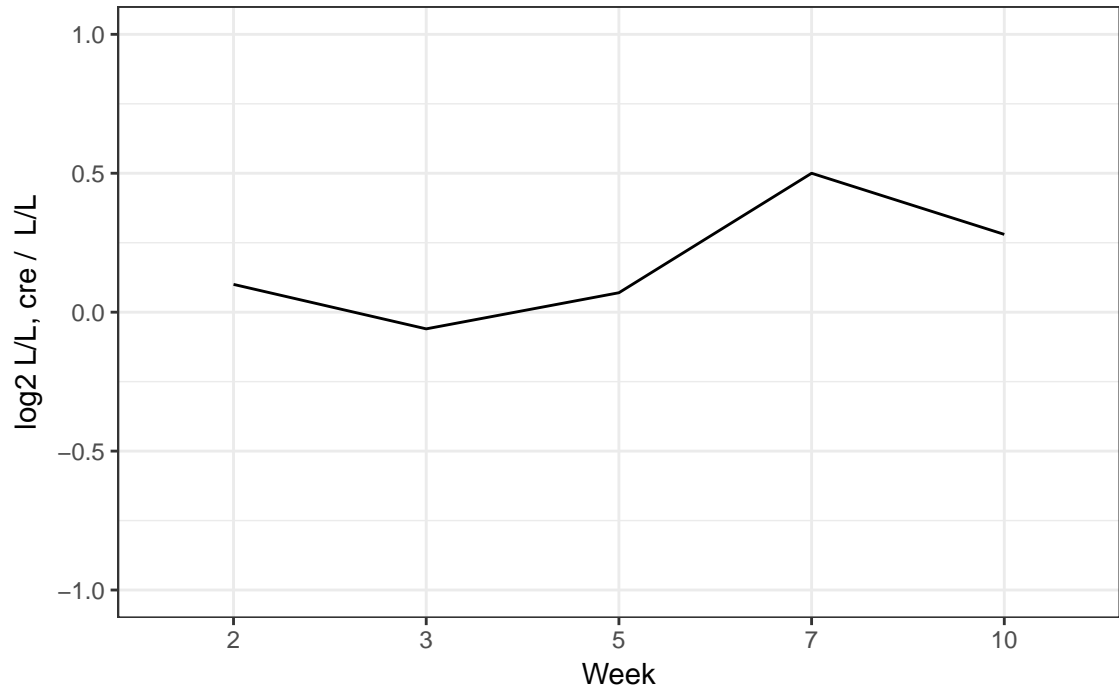

NDUFAF3 / Q9JKL4; adj.p value: 0.07841

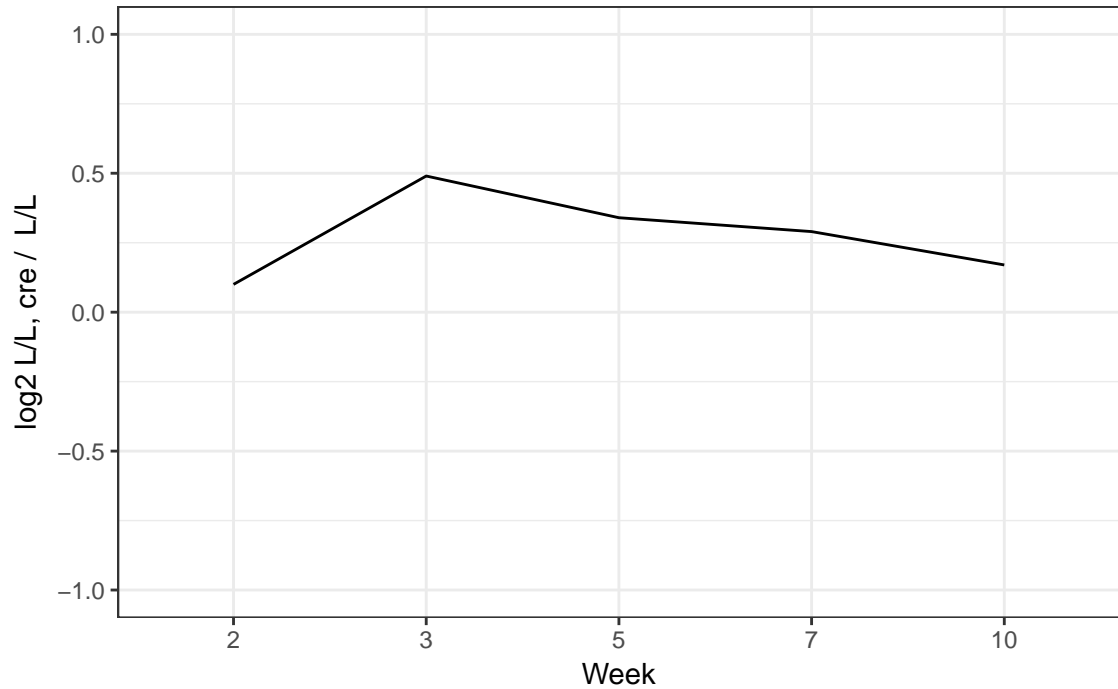

NDUFAF4 / Q9D1H6; adj.p value: 0.04702

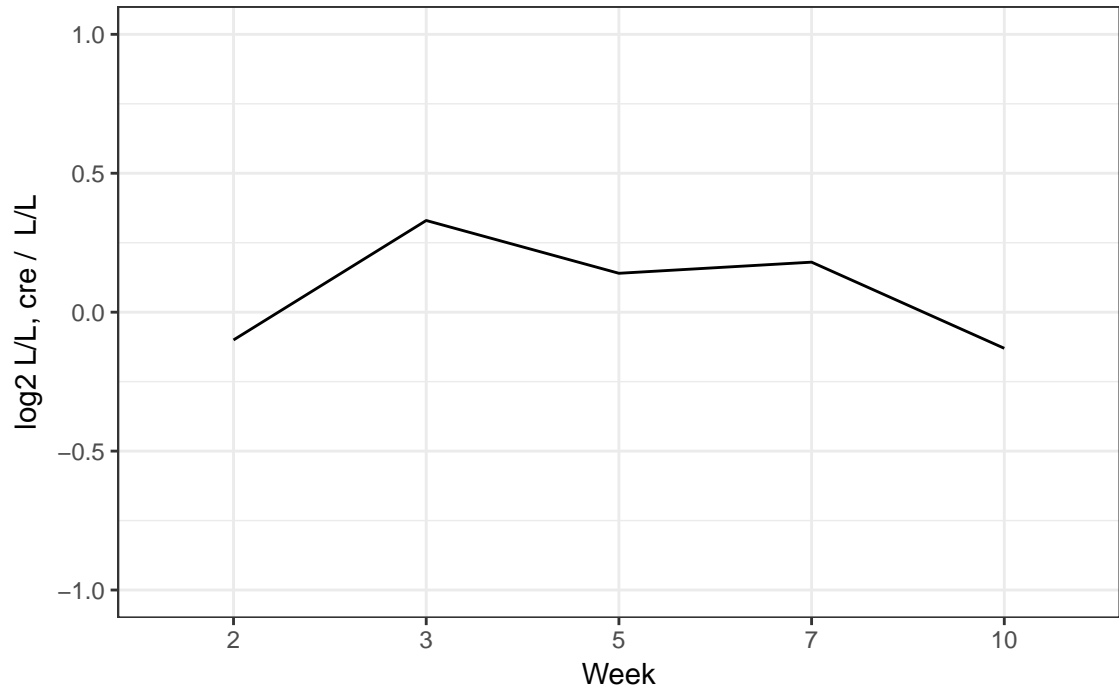

NDUFAF5 / A2APY7; adj.p value: 0.57276

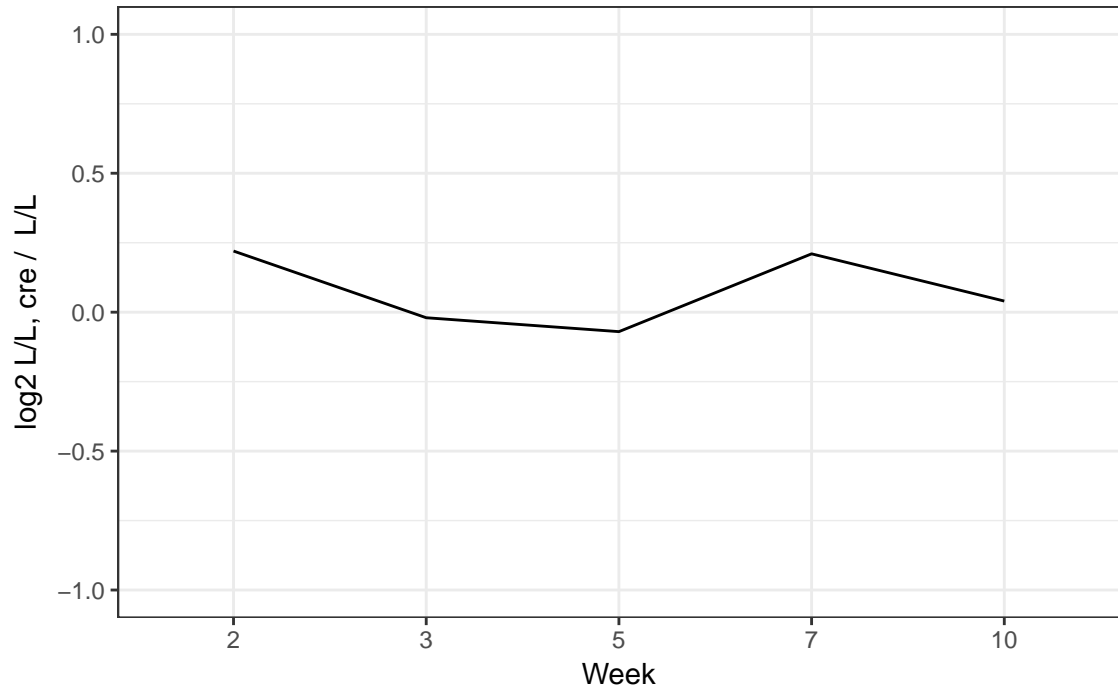

NDUFAF6 / A2AIL4; adj.p value: 0.00627

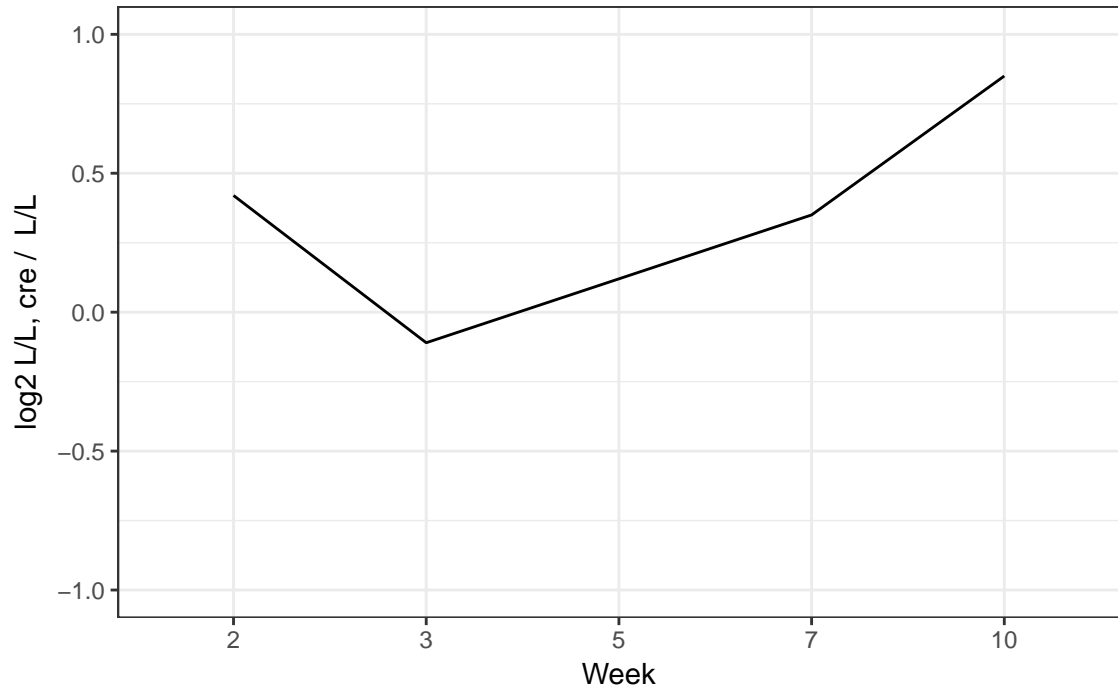



NDUFAF7 / Q9CWG8; adj.p value: 0.46231

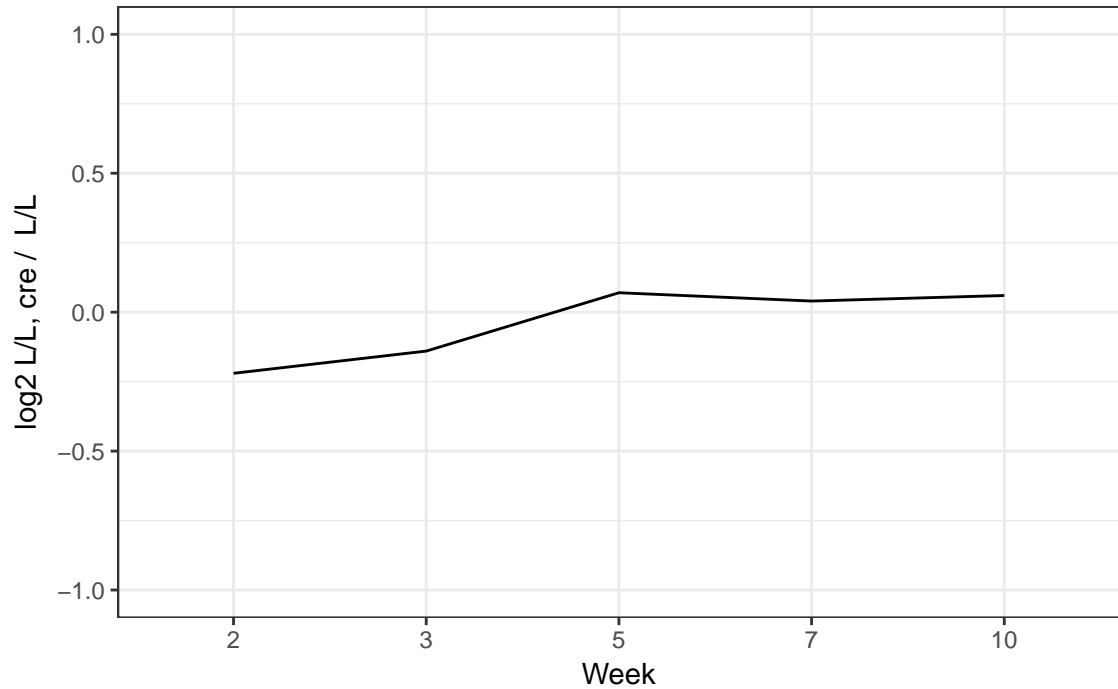

NDUFB10 / Q9DCS9; adj.p value: 0

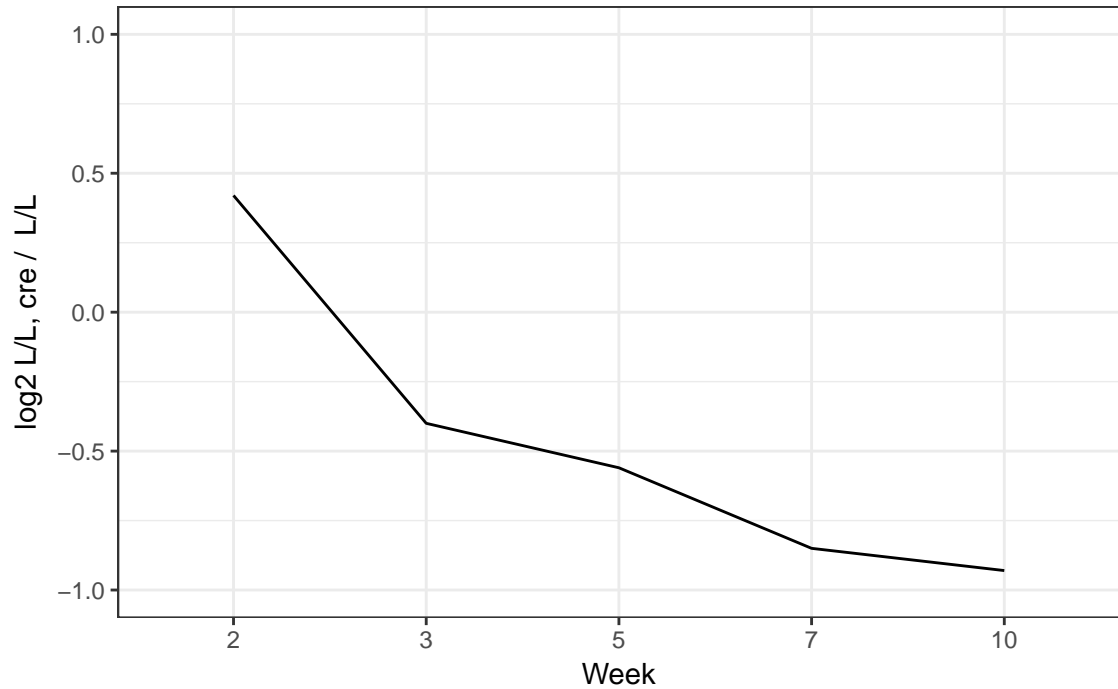

NDUFB11 / O09111; adj.p value: 0.00016

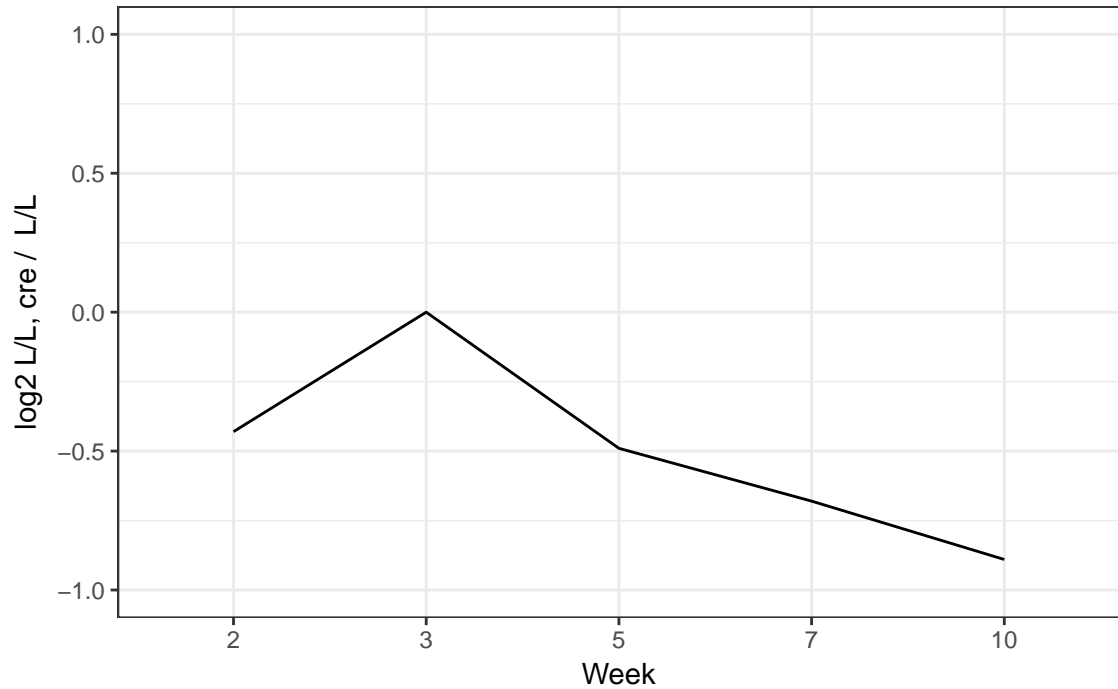

NDUFB2 / Q9CPU2; adj.p value: 0.00042

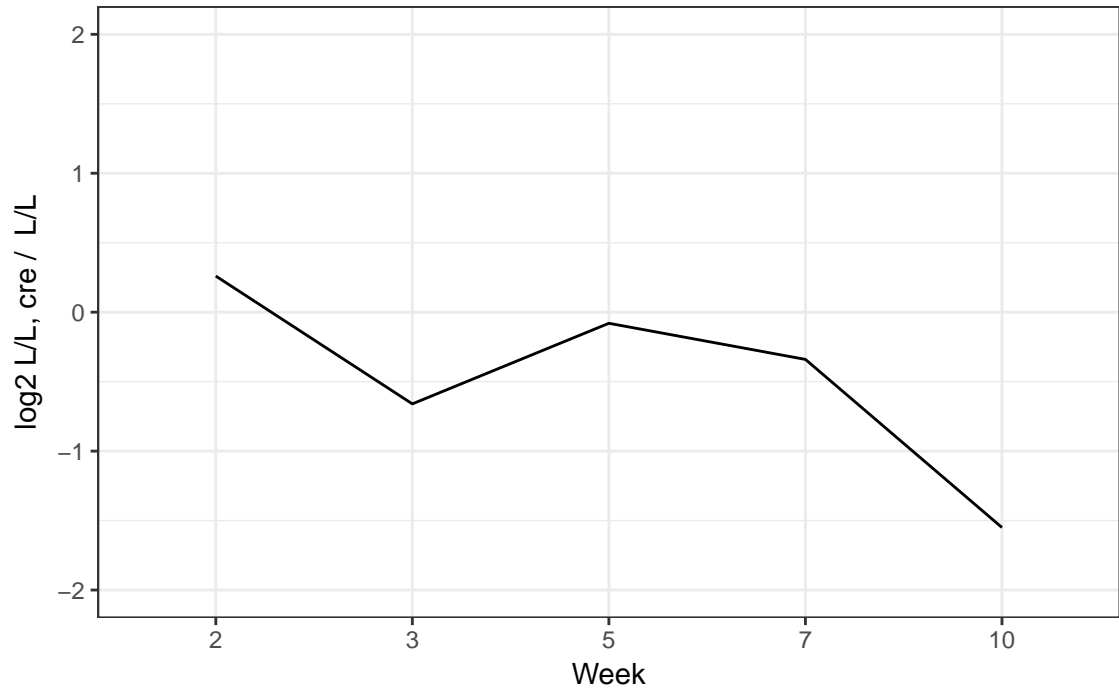

NDUFB3 / Q9CQZ6; adj.p value: 0

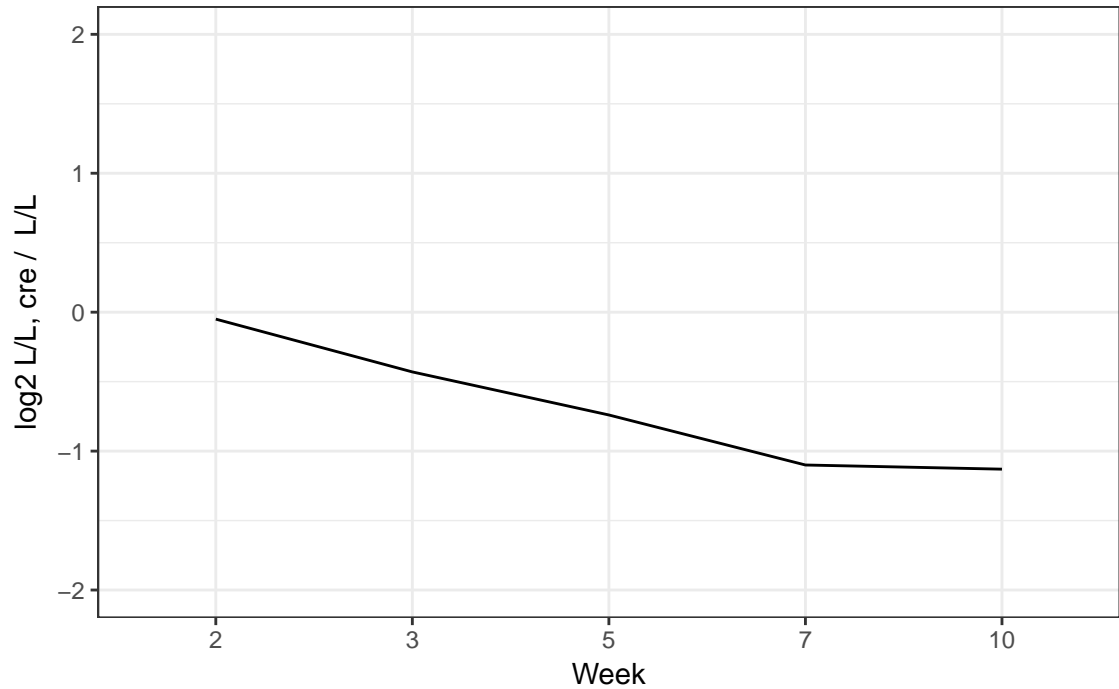

NDUFB4 / Q9CQC7; adj.p value: 0

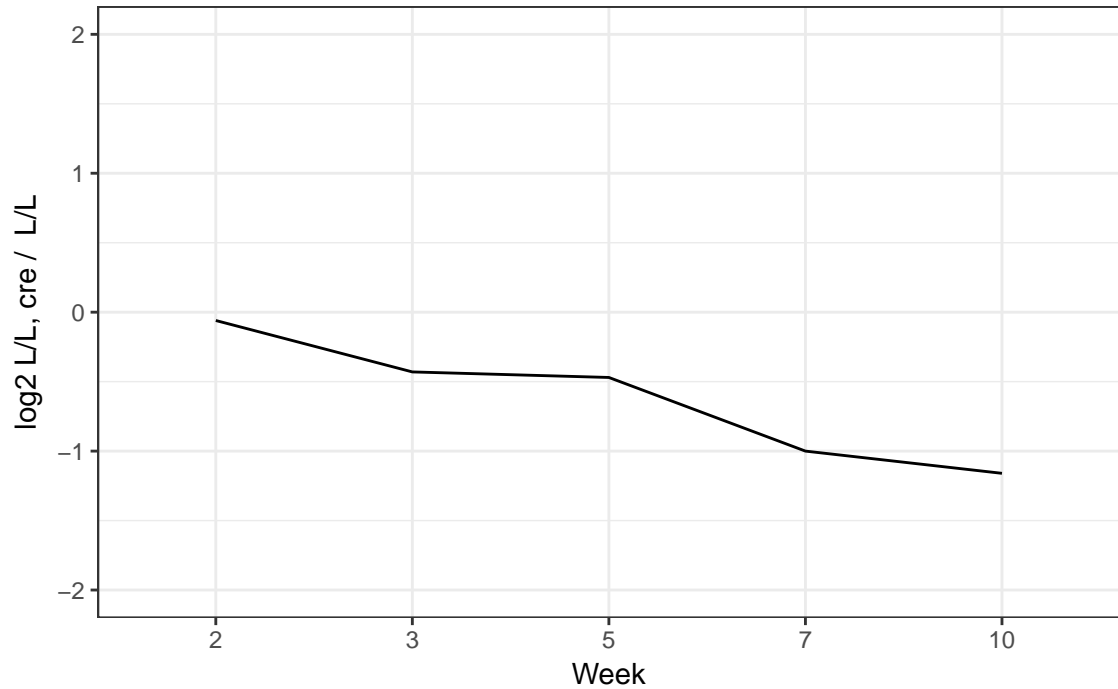

NDUFB5 / Q9CQH3; adj.p value: 0.00155

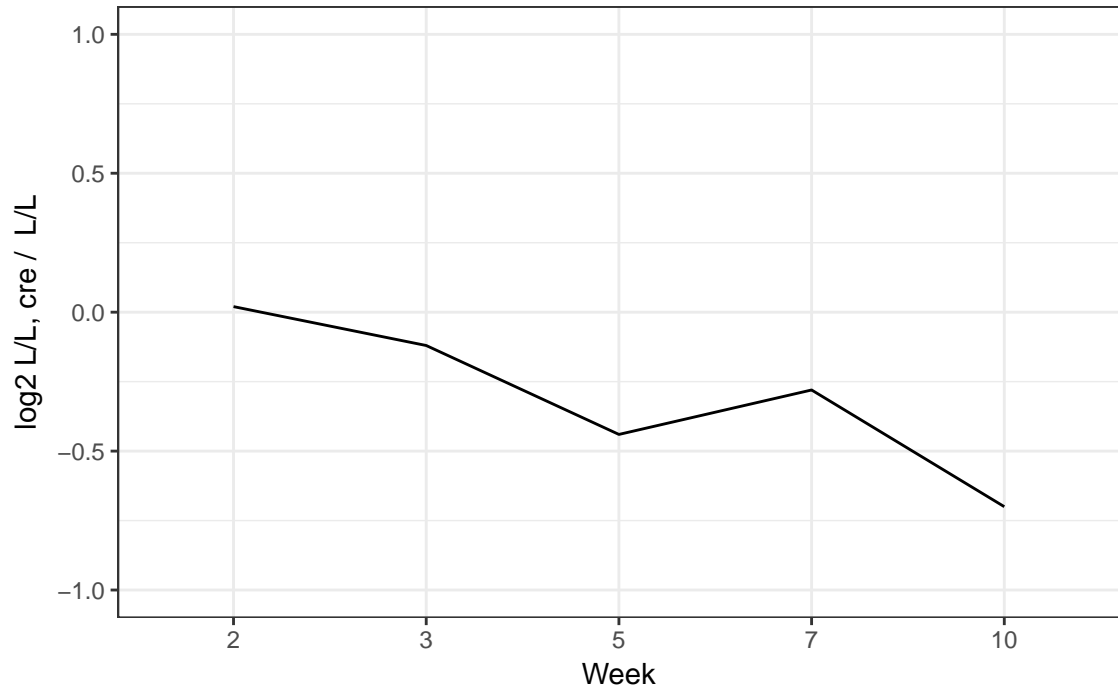

NDUFB6 / Q3UIU2; adj.p value: 0.0095

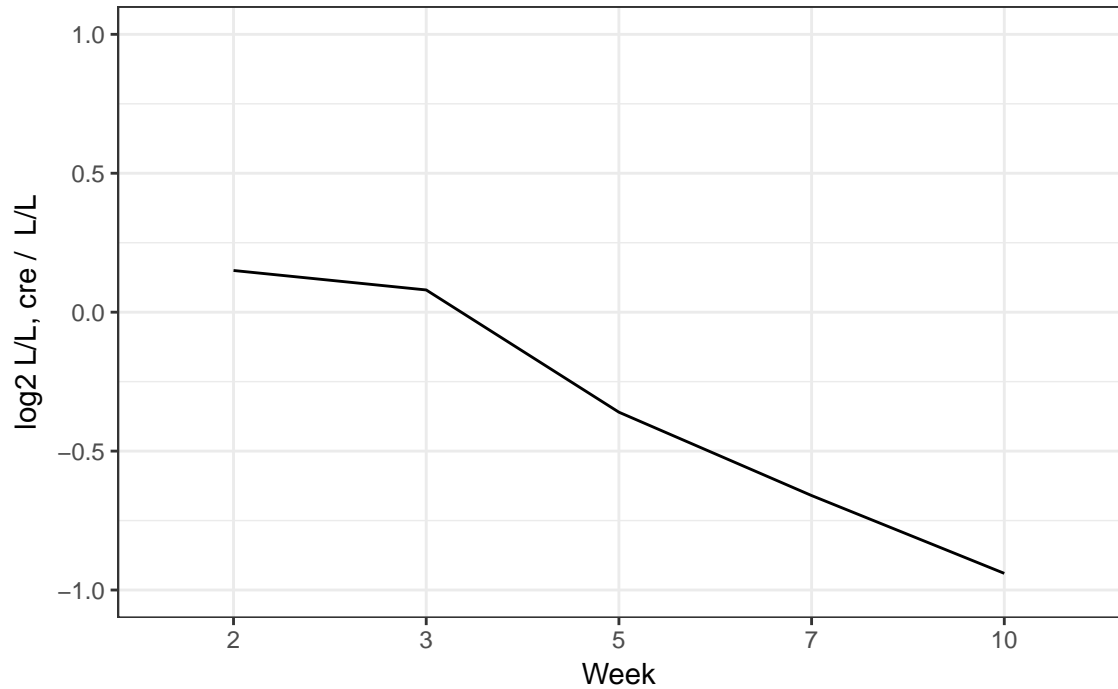



NDUFB7 / Q9CR61; adj.p value: 0

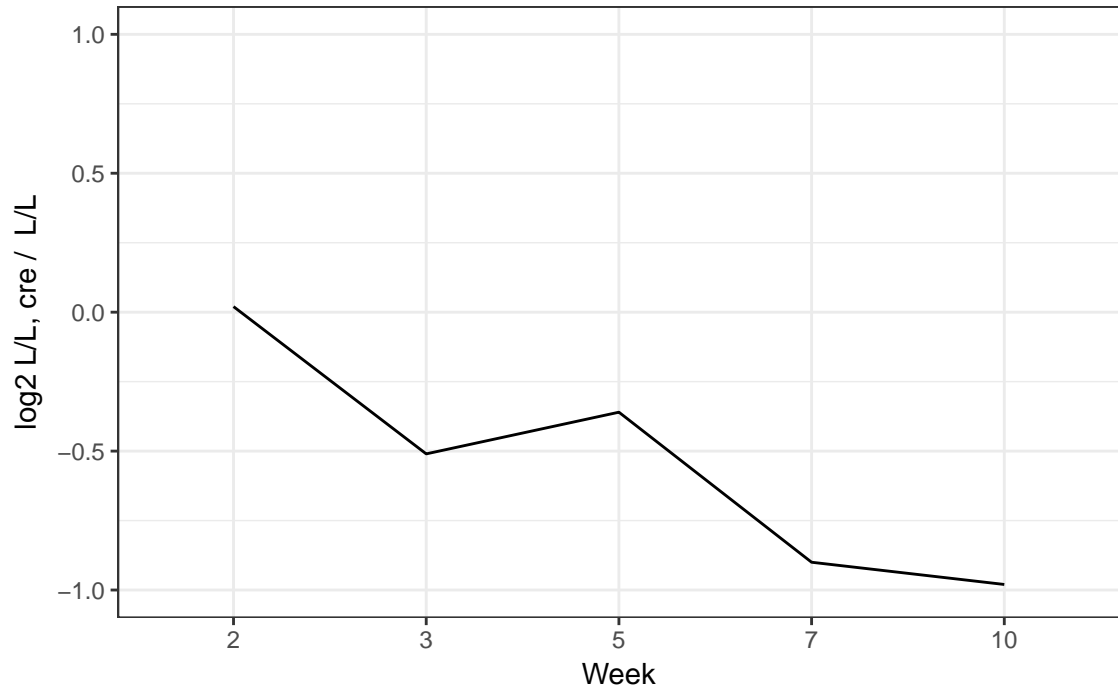

NDUFB8 / Q9D6J5; adj.p value: 0.00064

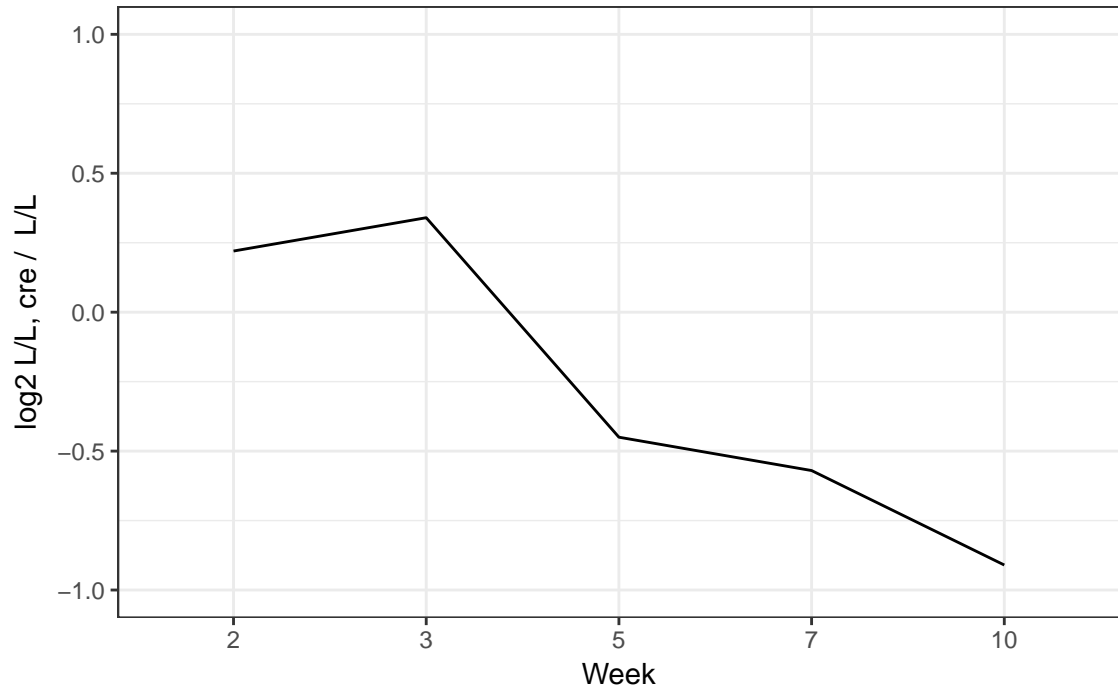

NDUFB9 / Q9CQJ8; adj.p value: 0

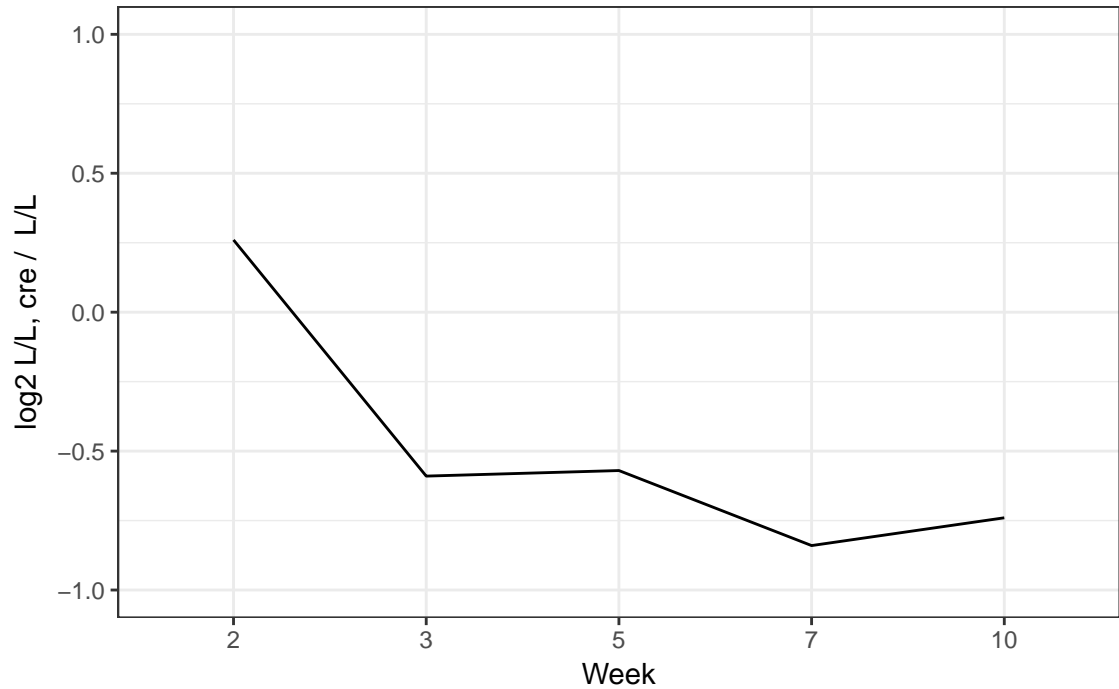

NDUFC1 / Q9CQY9; adj.p value: 0.08217

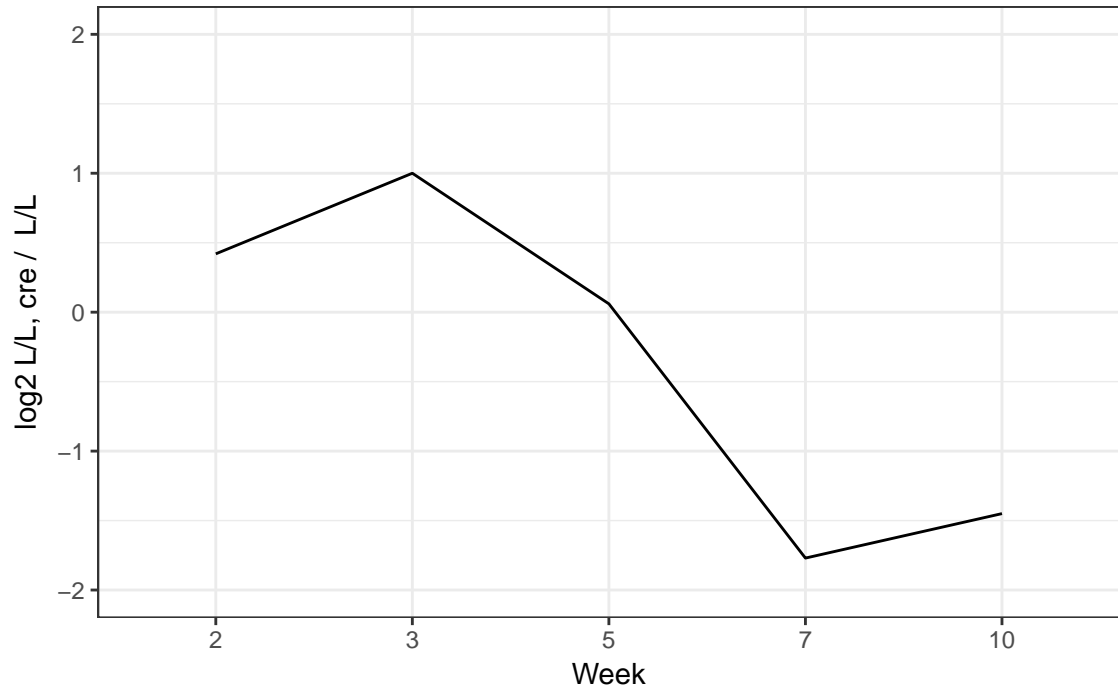

NDUFC2 / Q9CQ54; adj.p value: 0.00021

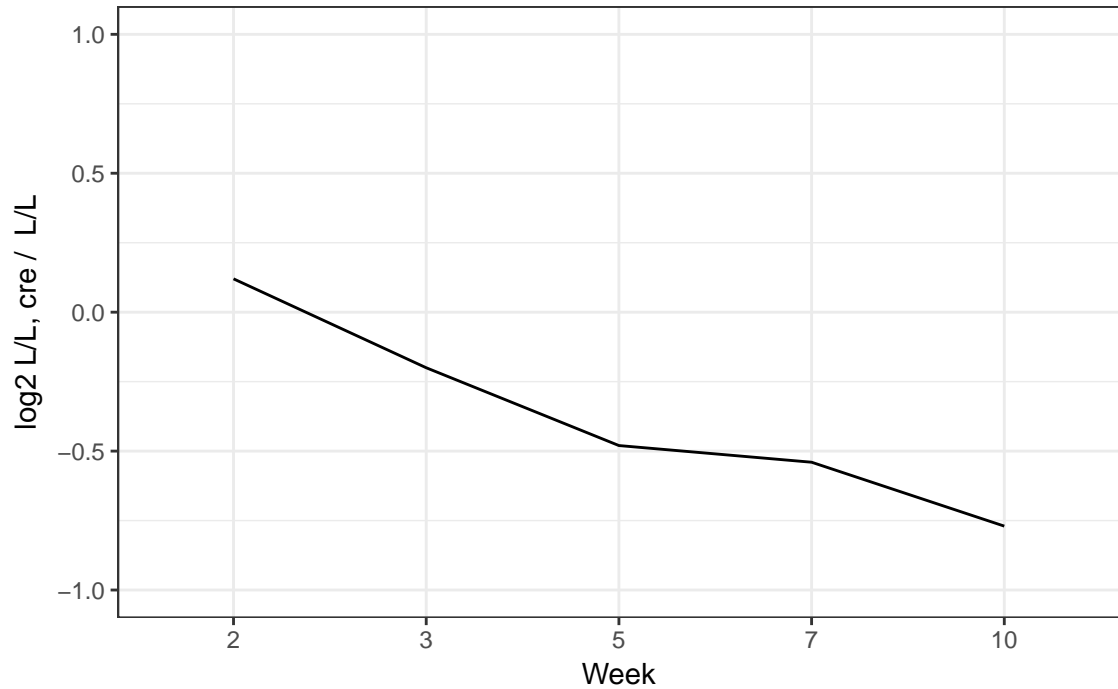

NDUFS1 / Q91VD9; adj.p value: 0

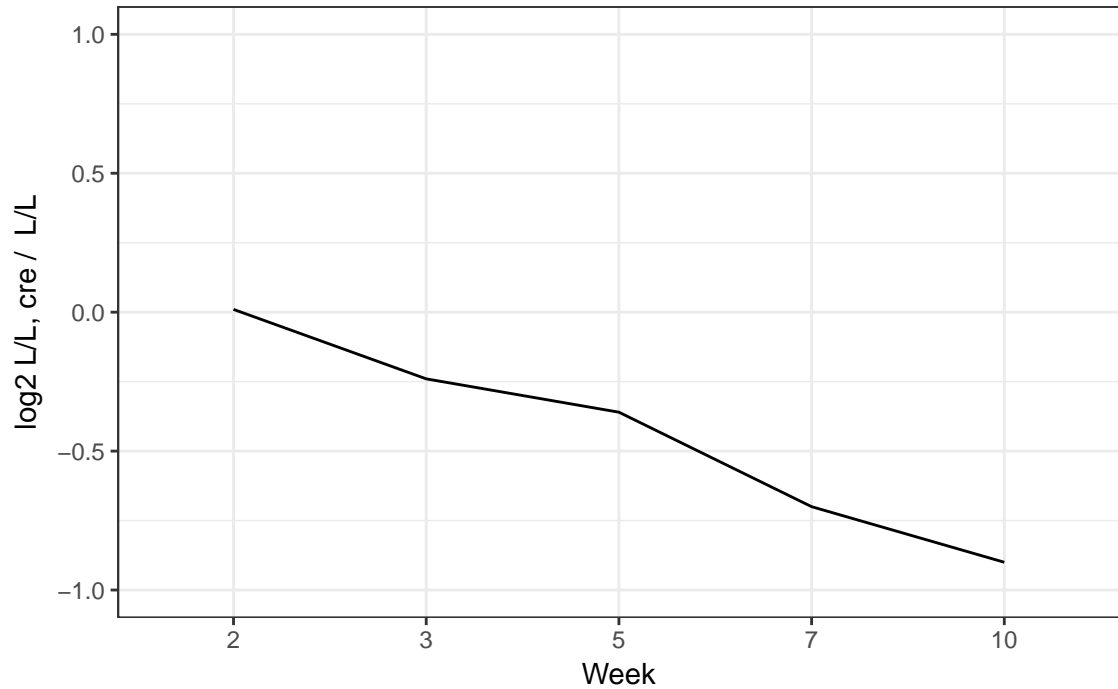

NDUFS2 / Q91WD5; adj.p value: 0.01087

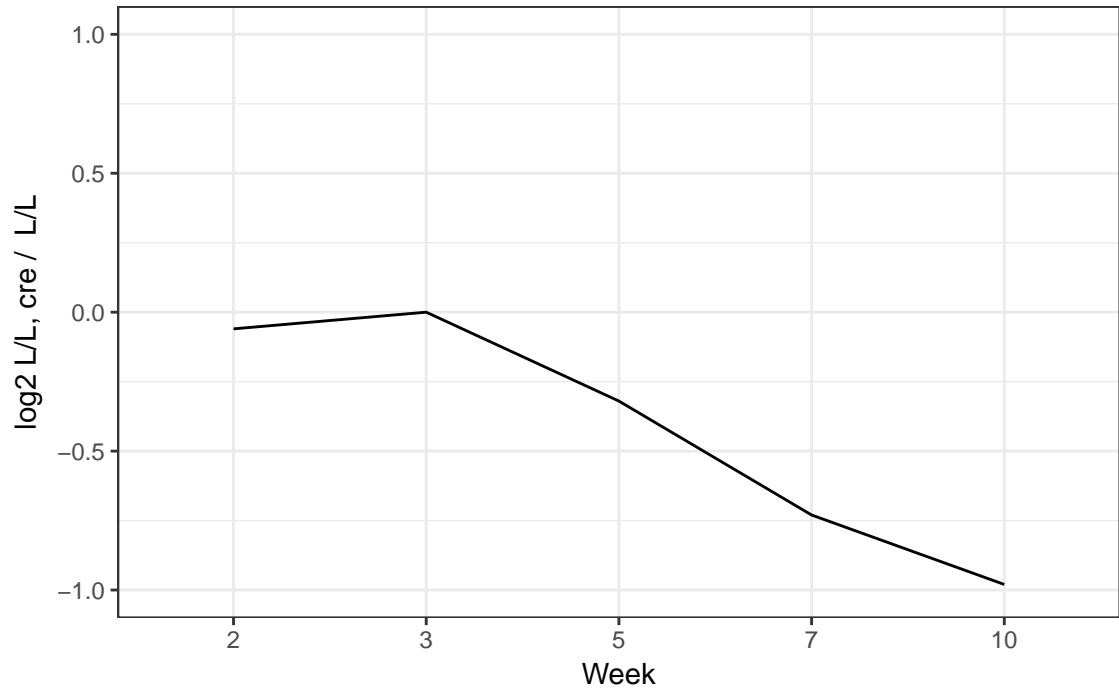

NDUFS3 / Q9DCT2; adj.p value: 0.00012

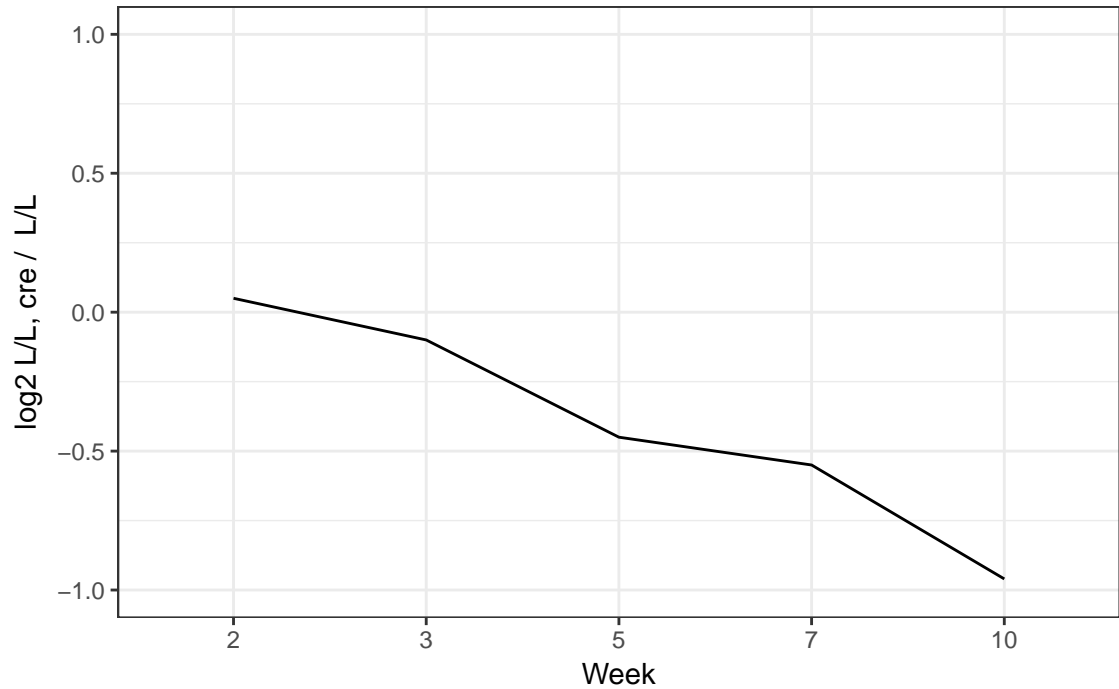



NDUFS4 / E9QPX3; adj.p value: 0

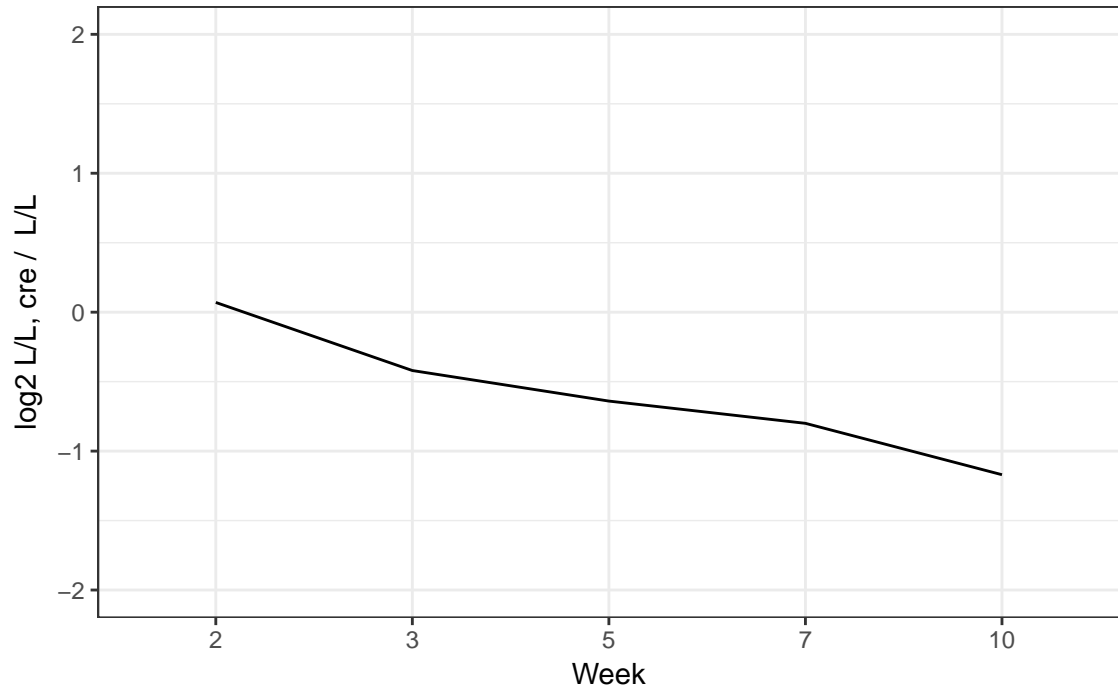

NDUFS5 / Q99LY9; adj.p value: 8e-05

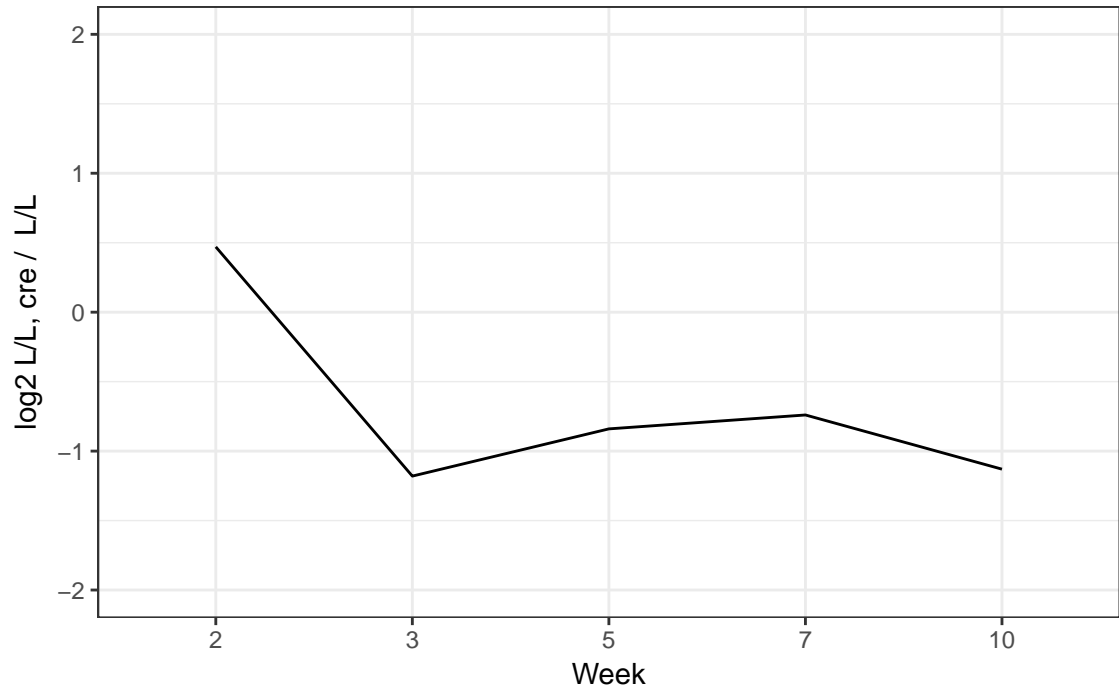

NDUFS6 / P52503; adj.p value: 0.00012

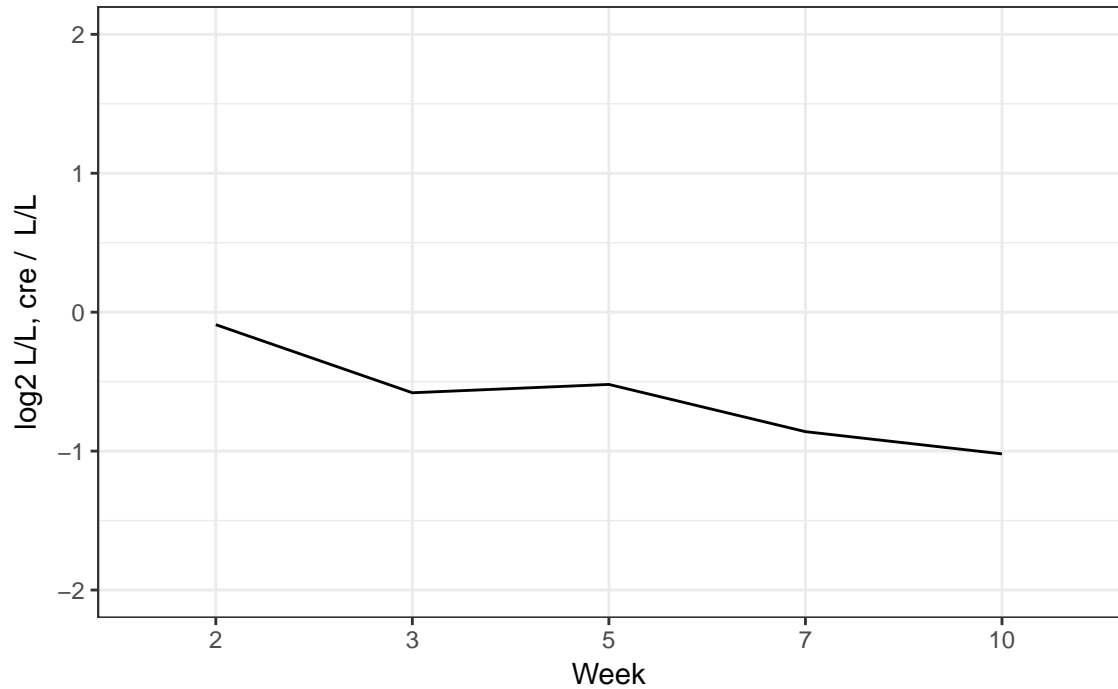

NDUFS7 / Q9DC70; adj.p value: 0.00088

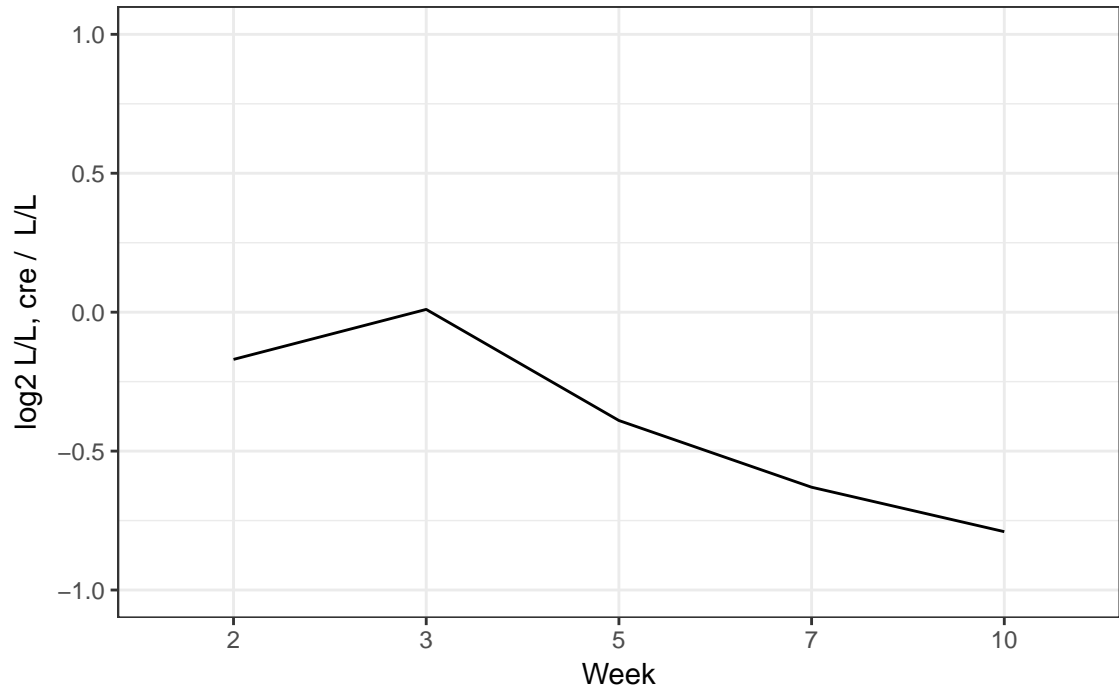

# NDUFS8 / Q8K3J1; adj.p value: 0

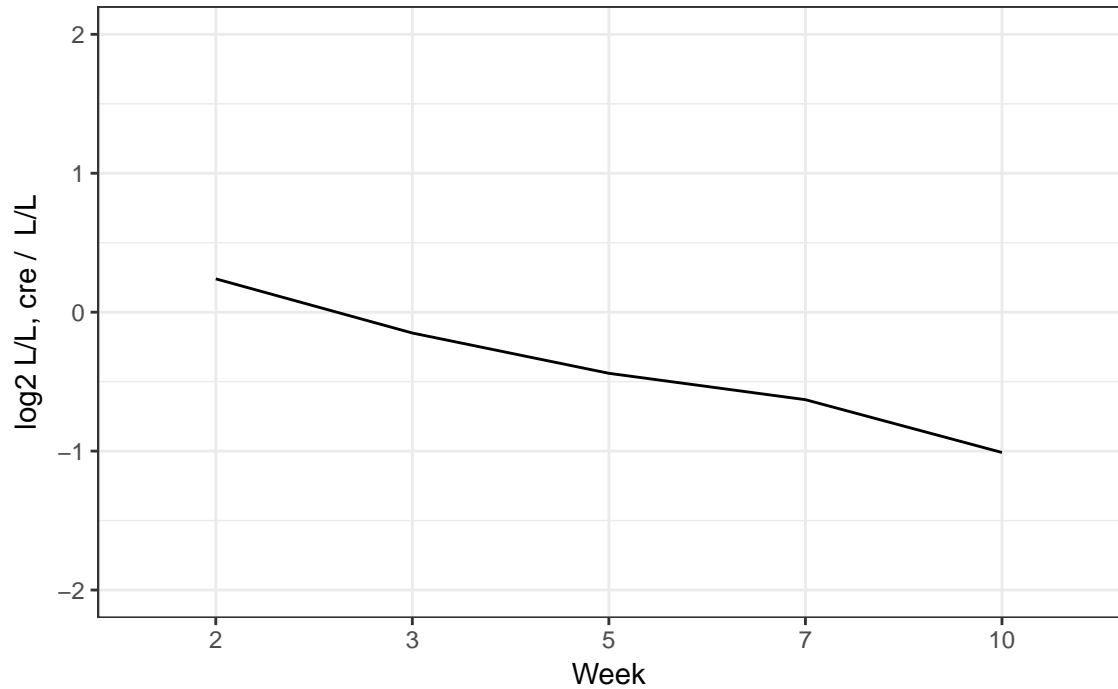

NDUFV1 / D3YUM1; adj.p value: 0

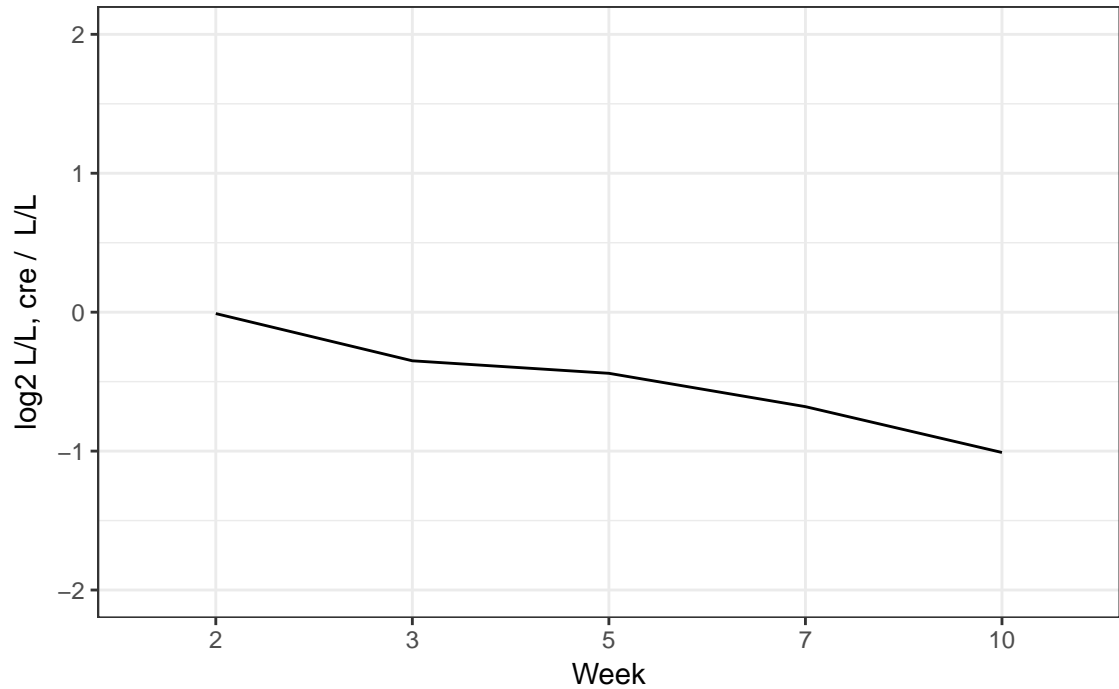

NDUFV2 / Q9D6J6; adj.p value: 0

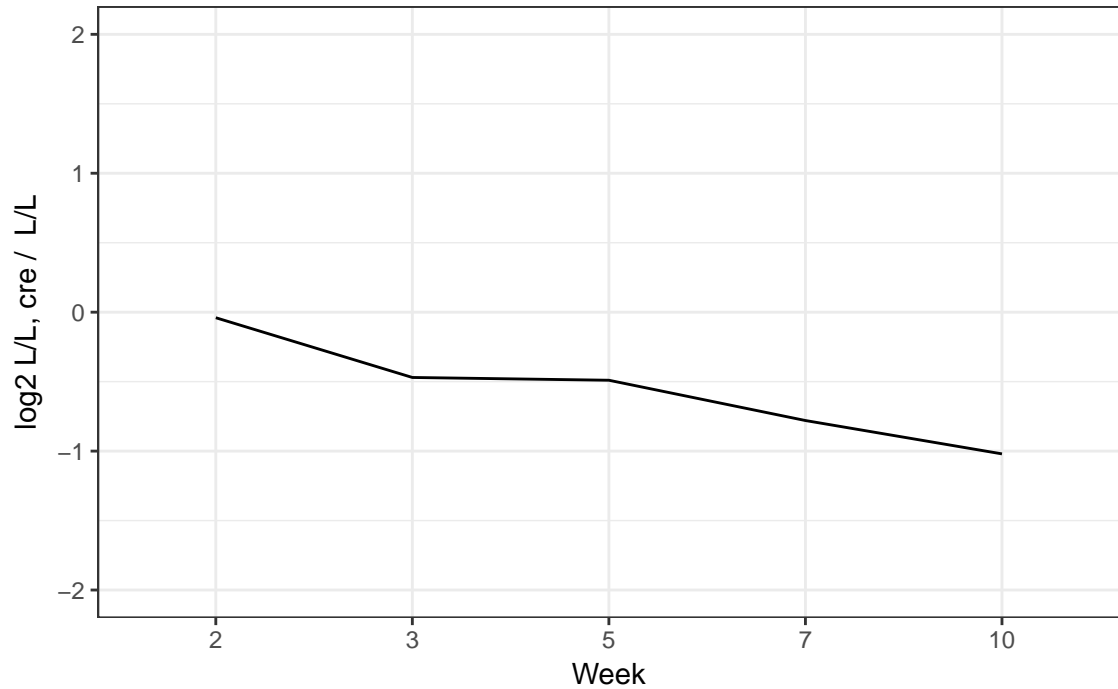

NDUFV3 / Q3U422; adj.p value: 0.18438

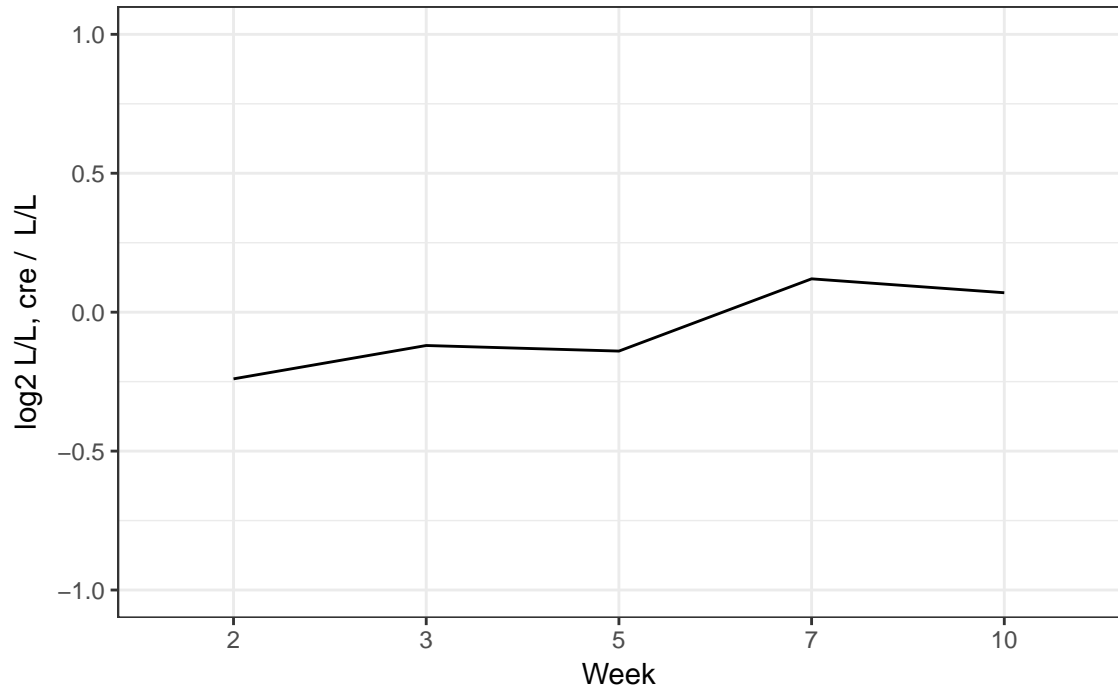



NDUFV3 / Q8BK30; adj.p value: 0

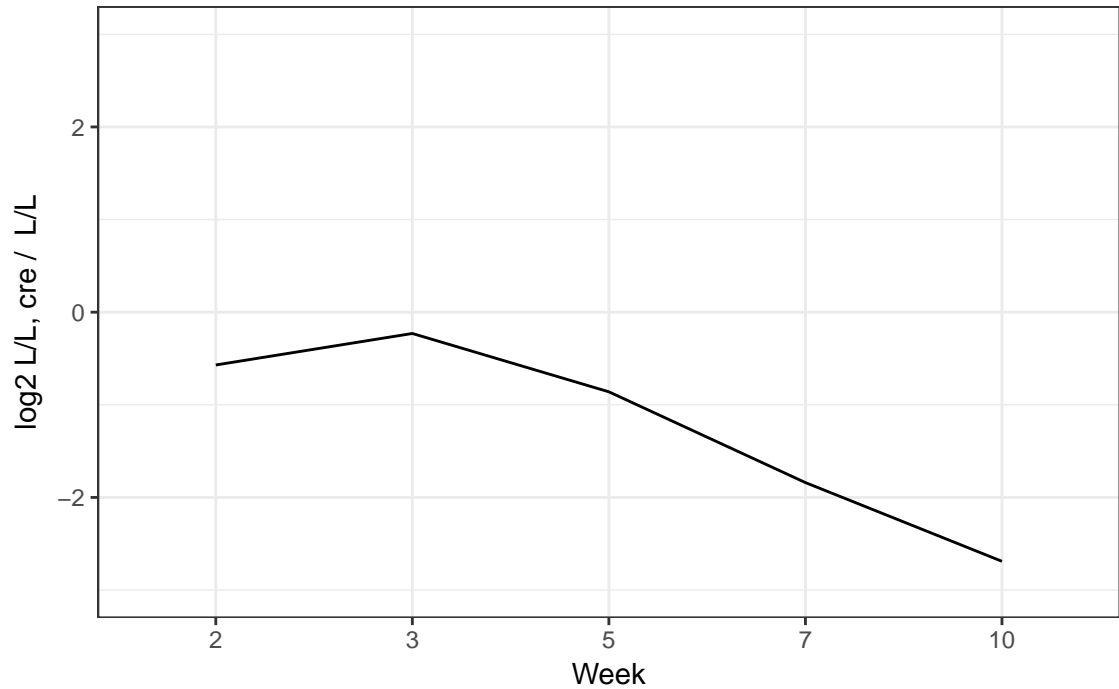

NFS1 / Q9Z1J3-2; adj.p value: 0.06219

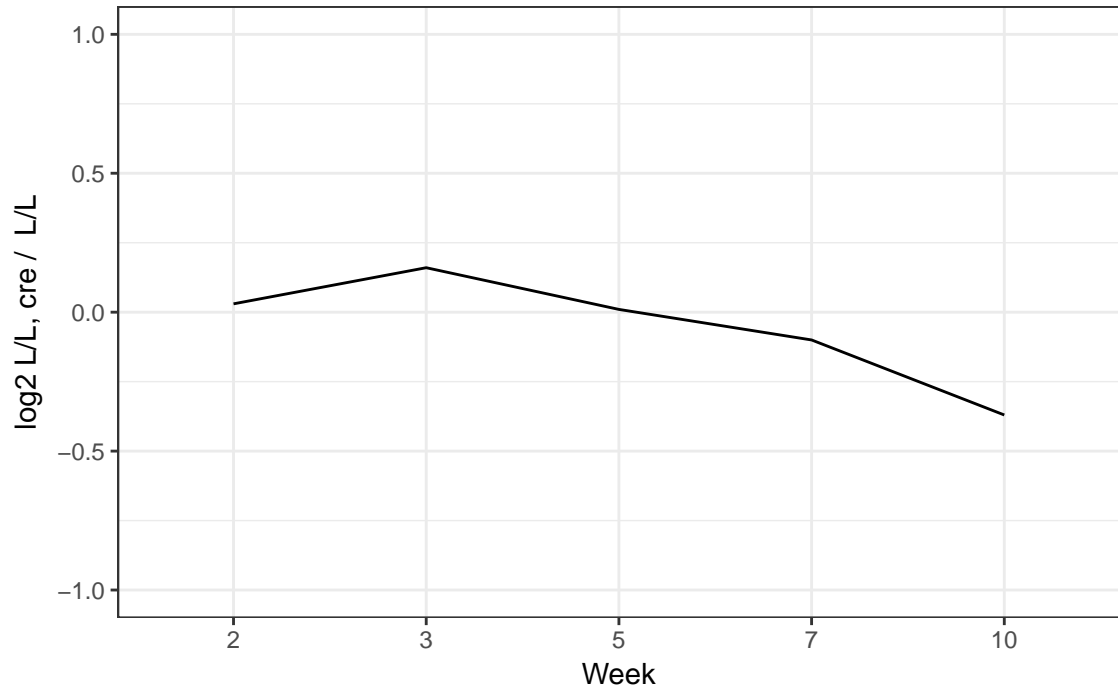

NFU1 / D3Z285; adj.p value: 0.00016

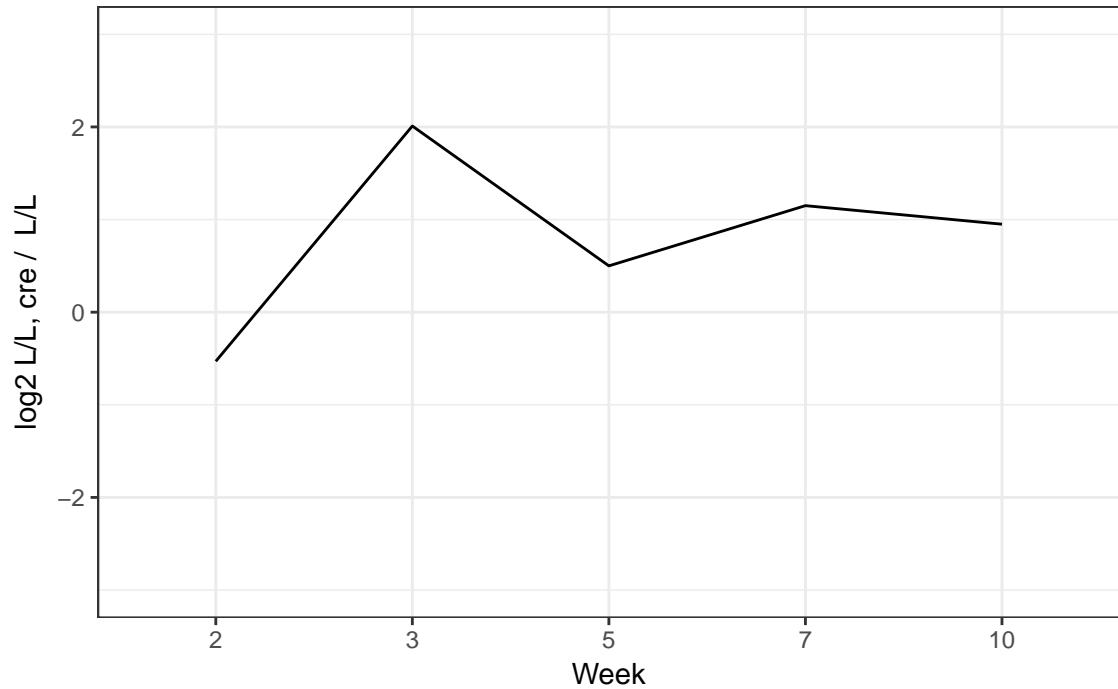

NFU1 / Q9QZ23; adj.p value: 0

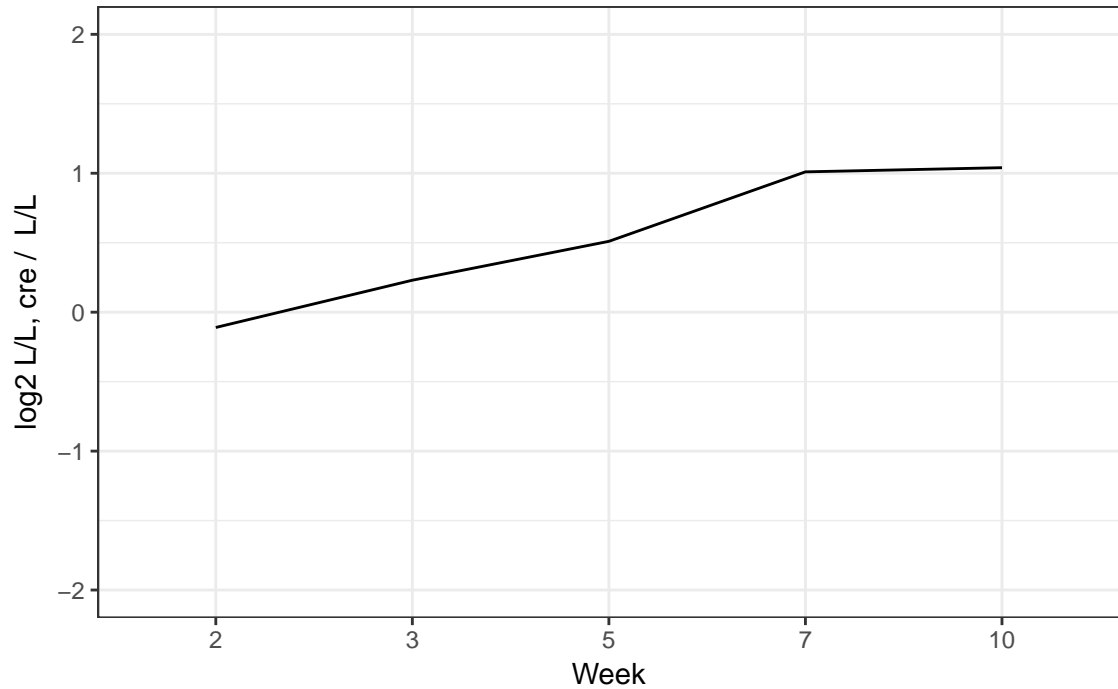

NIF3L1 / Q9EQ80; adj.p value: 0.00631

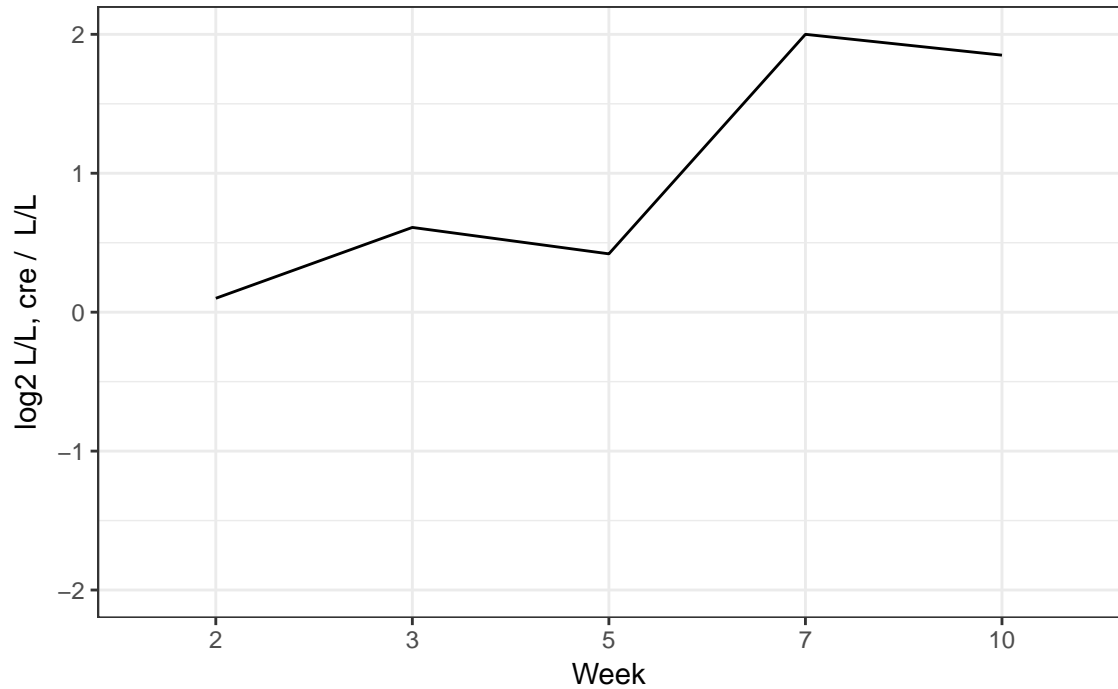

NIPSNAP3B / Q9CQE1; adj.p value: 3e-05

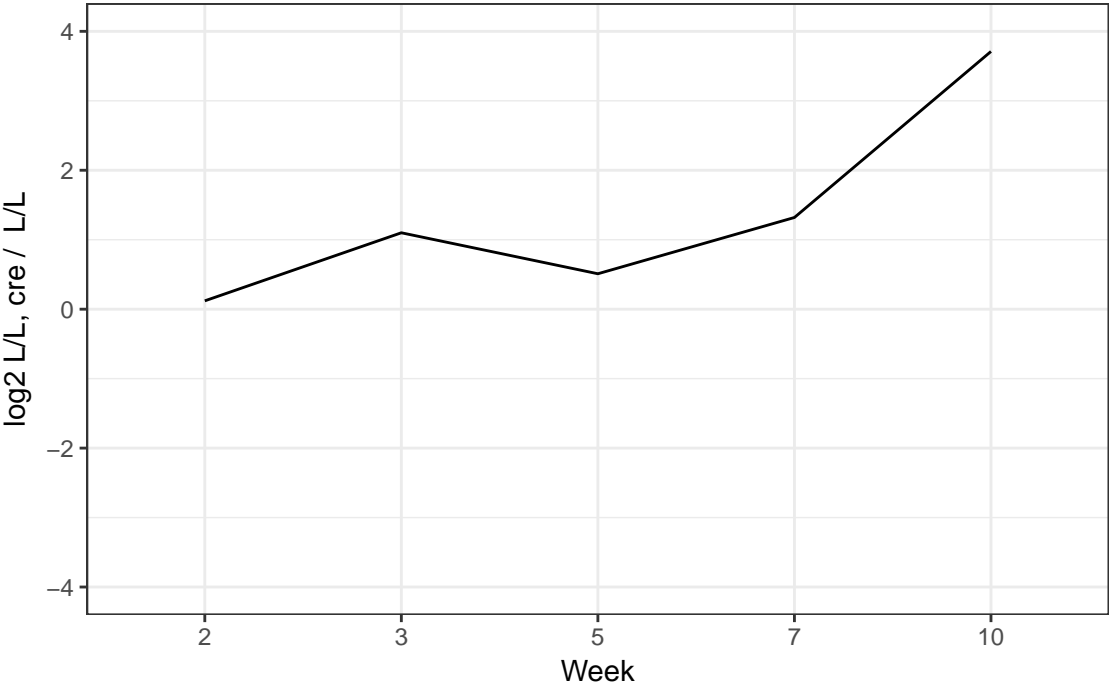

NIT1 / Q8VDK1-2; adj.p value: 0.40526

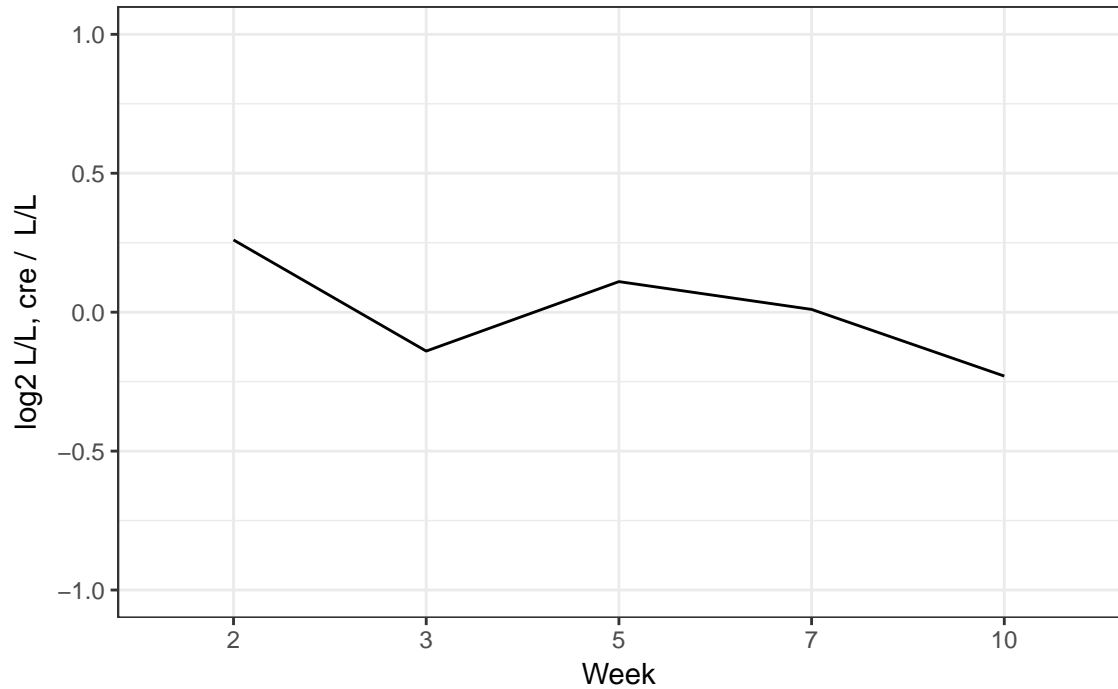

NIT2 / Q9JHW2; adj.p value: 0.32226

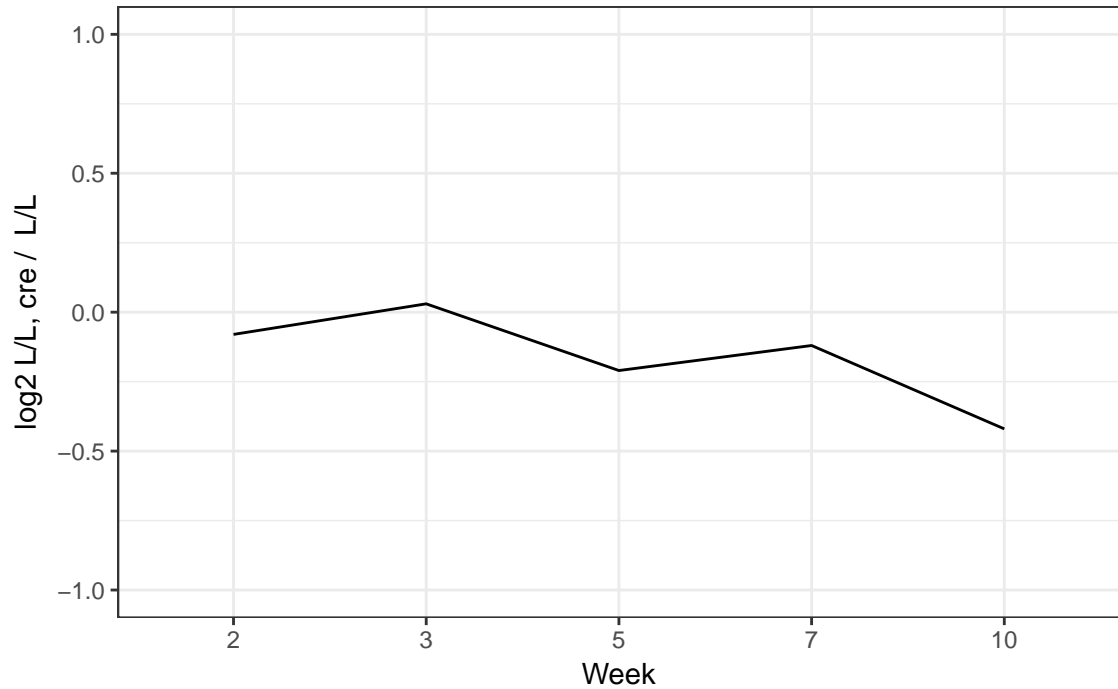



NLN / Q91YP2; adj.p value: 0.00066

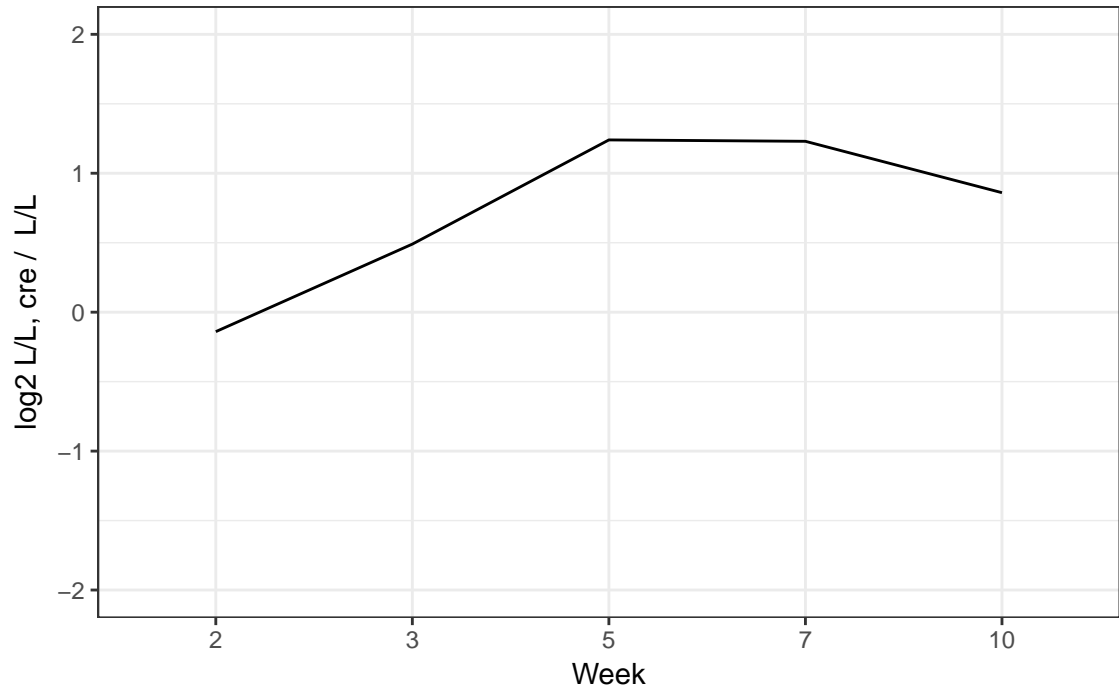

NLRX1 / Q3TL44; adj.p value: 0.57481

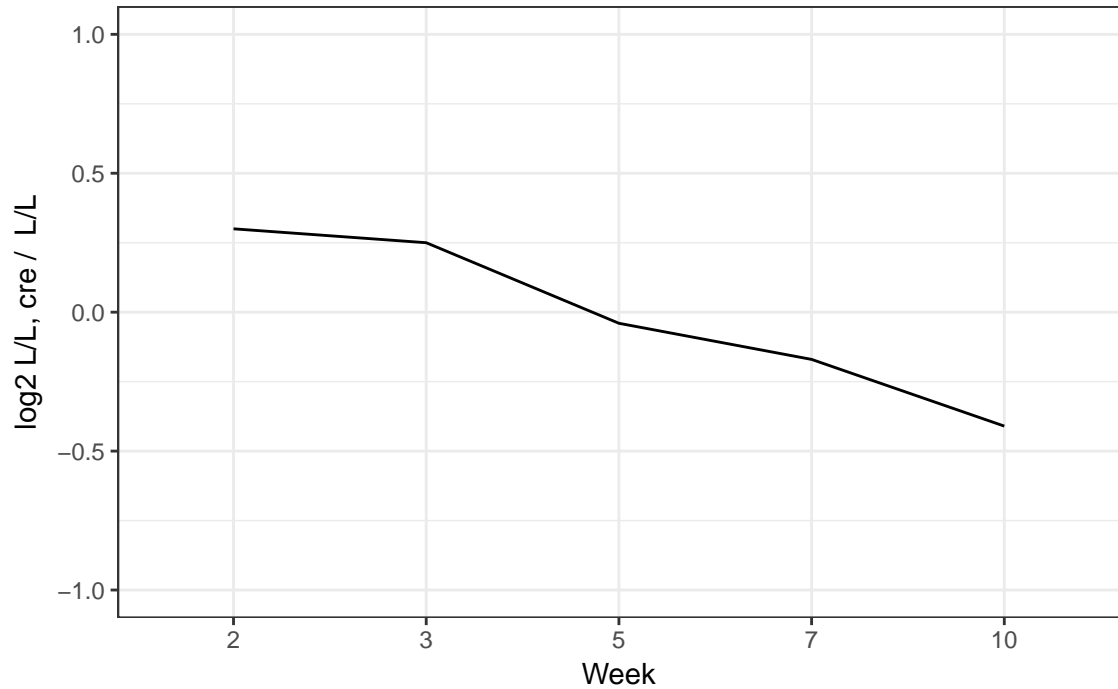

NME3 / Q9WV85; adj.p value: 0.18457

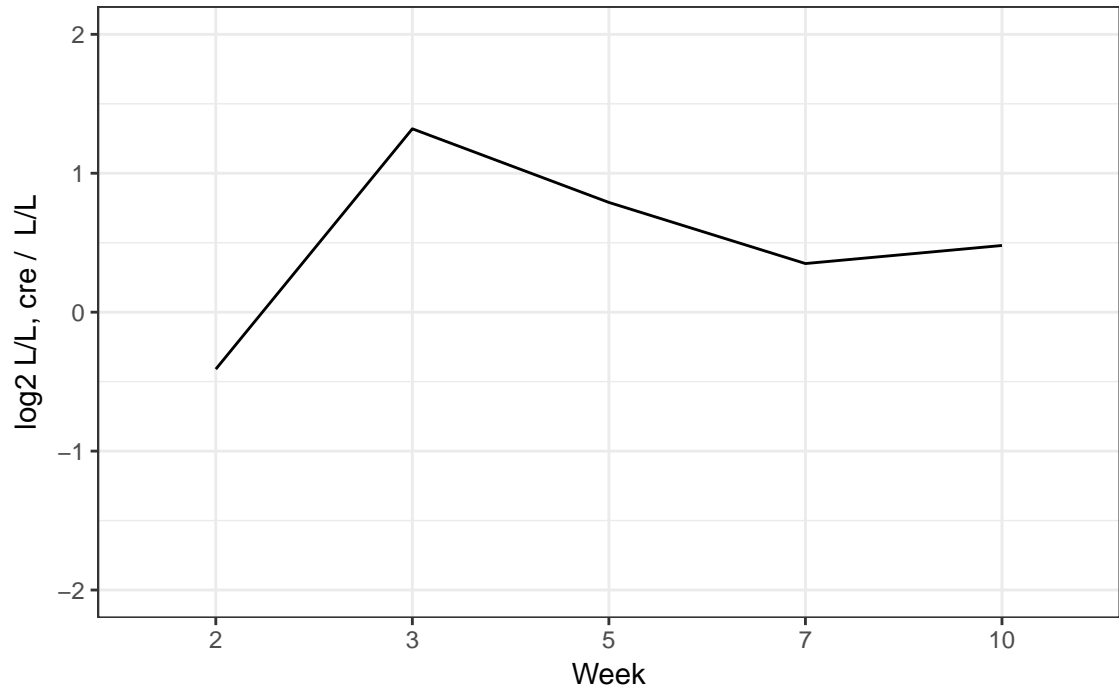

NMNAT3 / Q99JR6; adj.p value: 0.8376

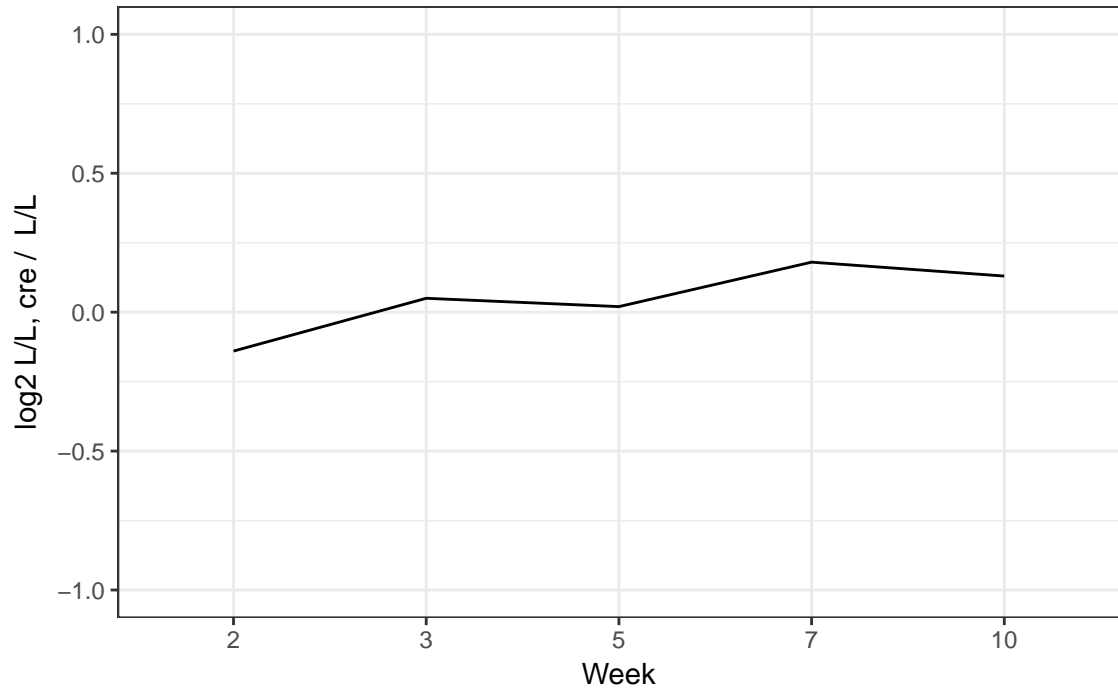

NNT / Q61941; adj.p value: 0.01109

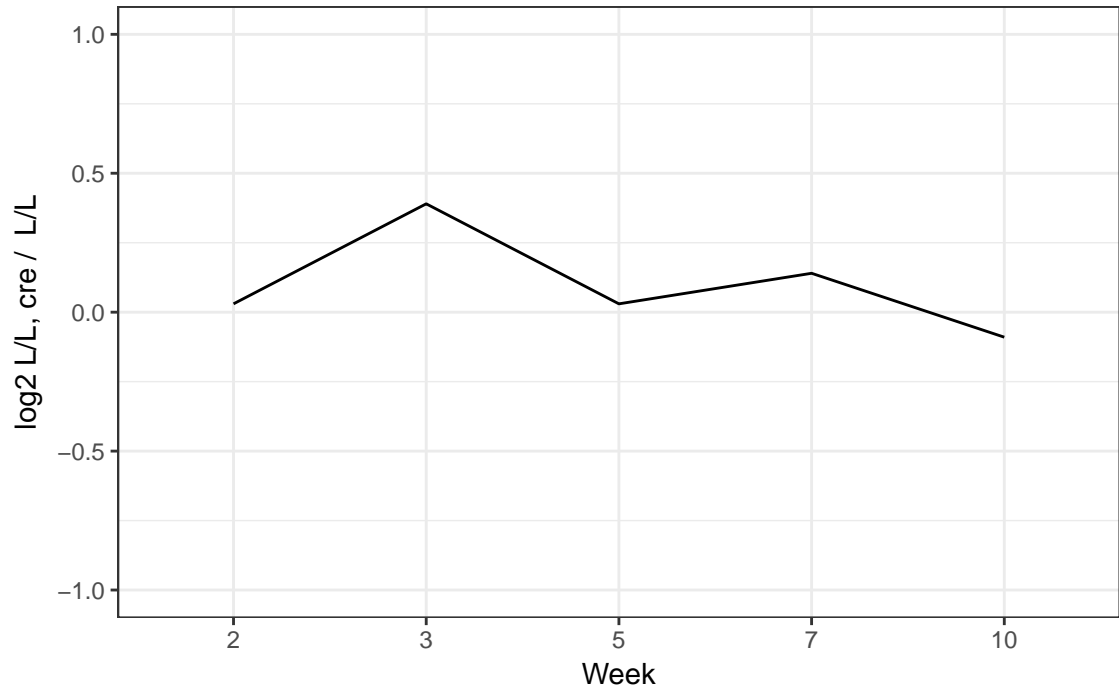

NSUN4 / Q9CZ57; adj.p value: 0.01429

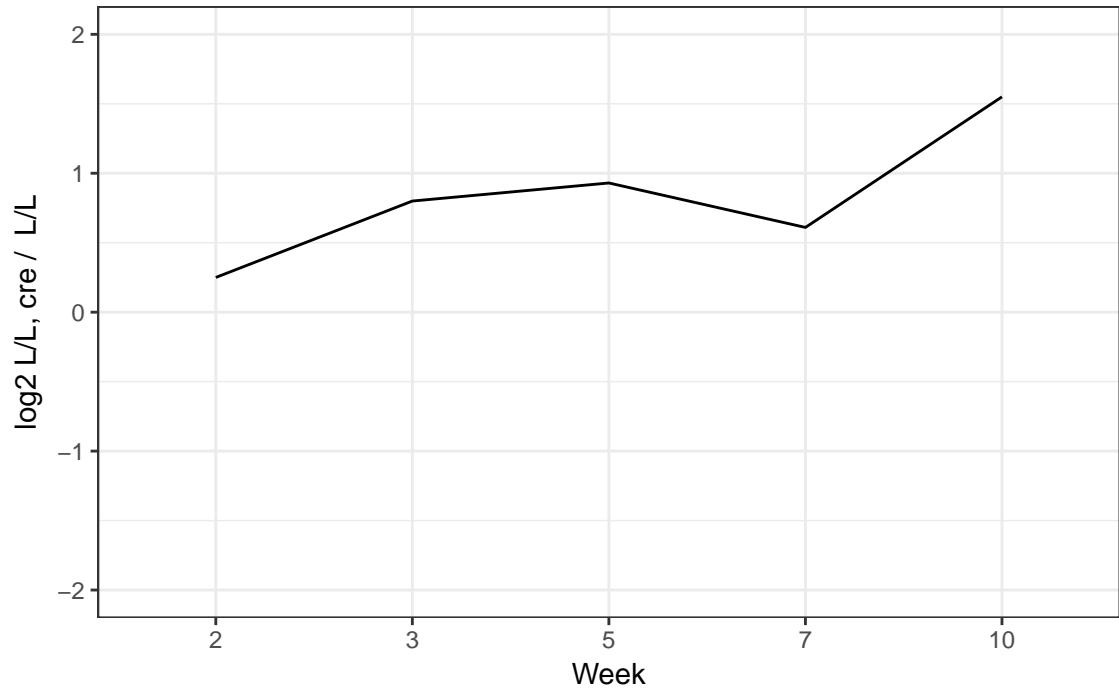

NT5DC2 / Q91X76; adj.p value: 0.1015

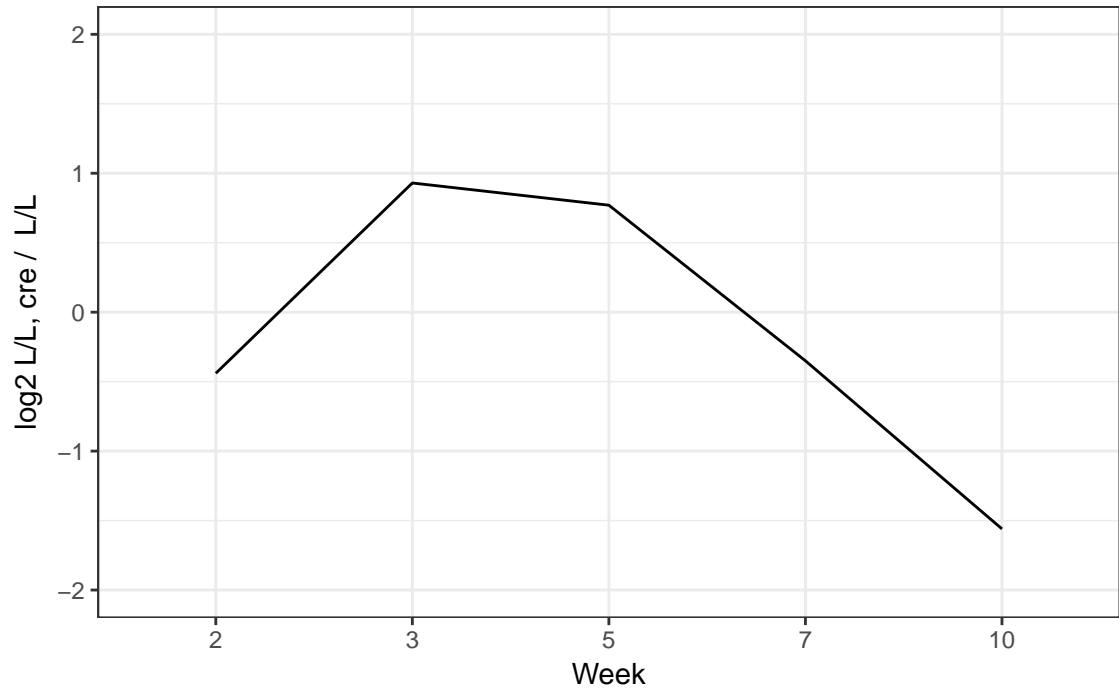

NT5DC3 / Q3UHB1; adj.p value: 0.38695

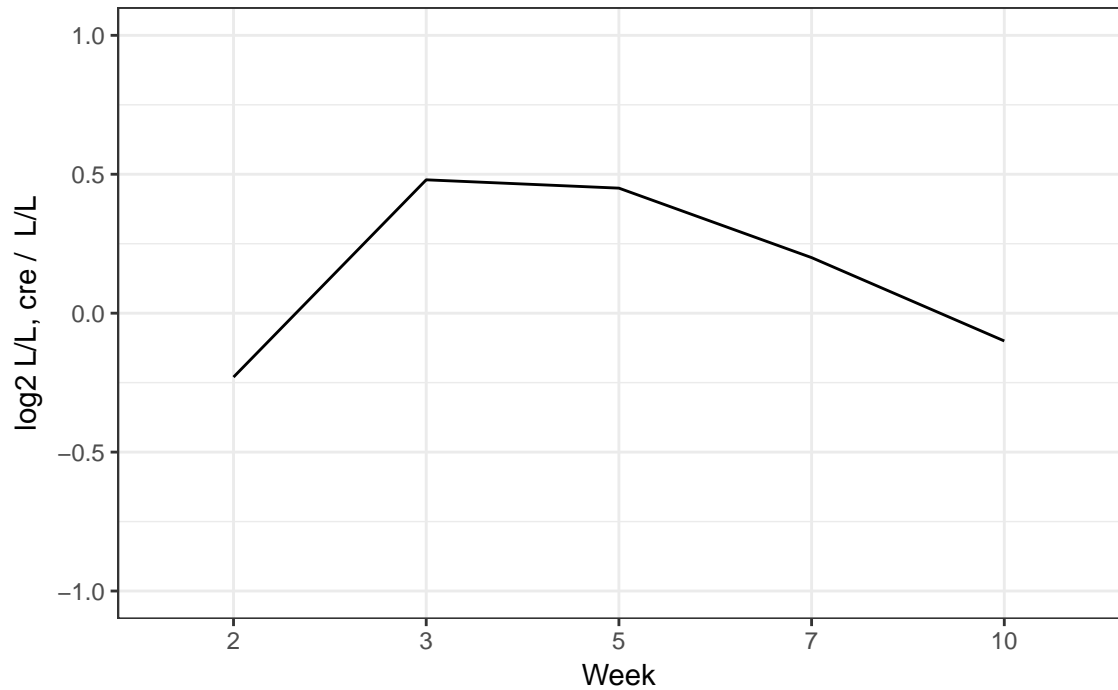



NT5M / Q8VCE6; adj.p value: 0.31801

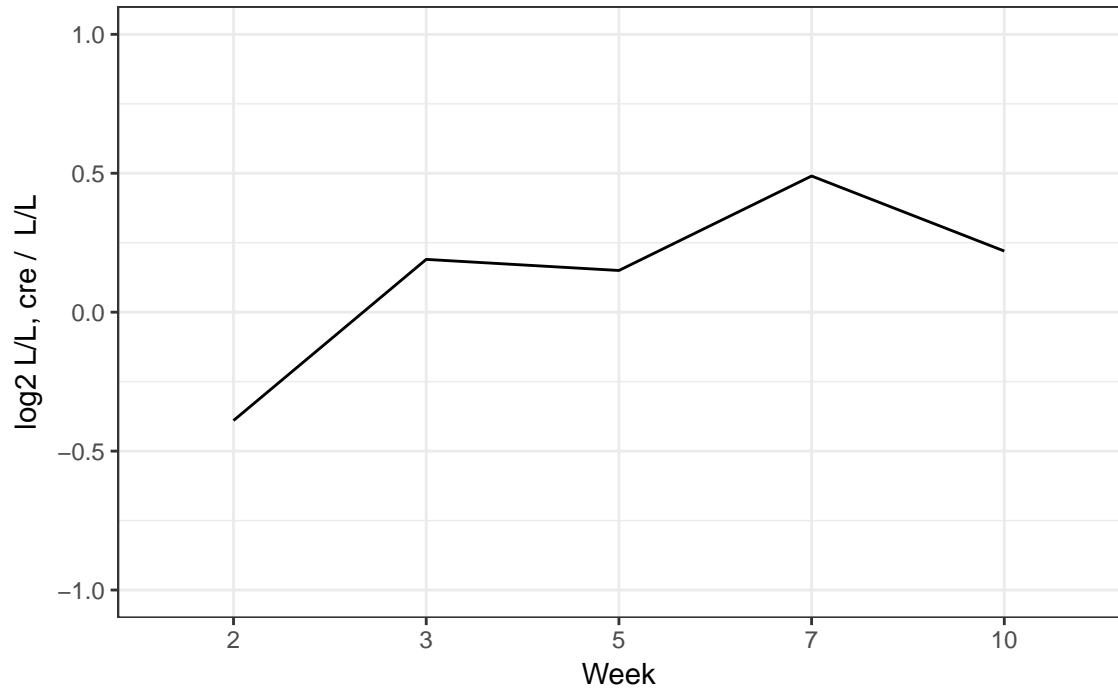

NUBPL / Q9CWD8; adj.p value: 0.05041

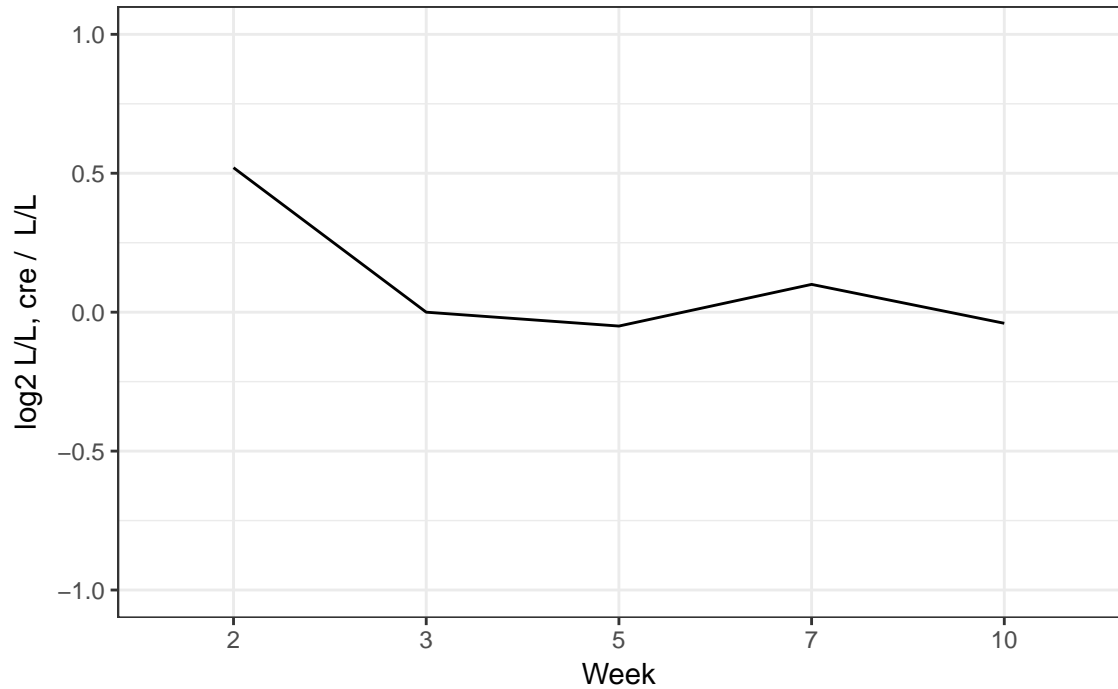

NUDT13 / Q8JZU0; adj.p value: 0.00853

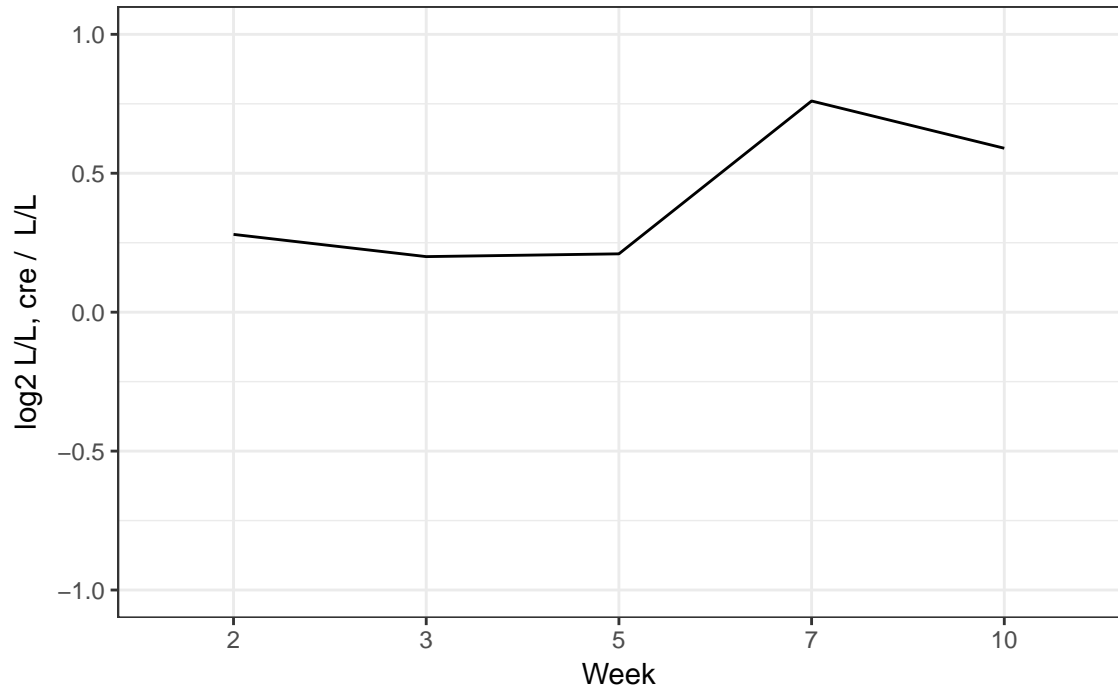

NUDT19 / P11930; adj.p value: 0.07353

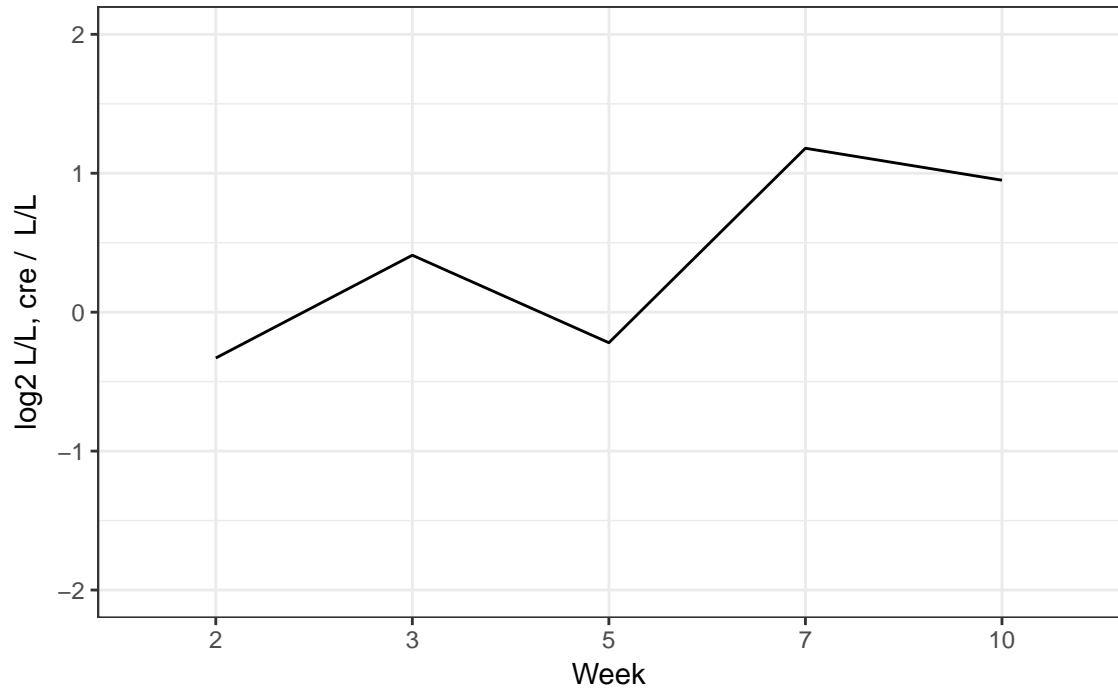

NUDT2 / P56380; adj.p value: 0.18319

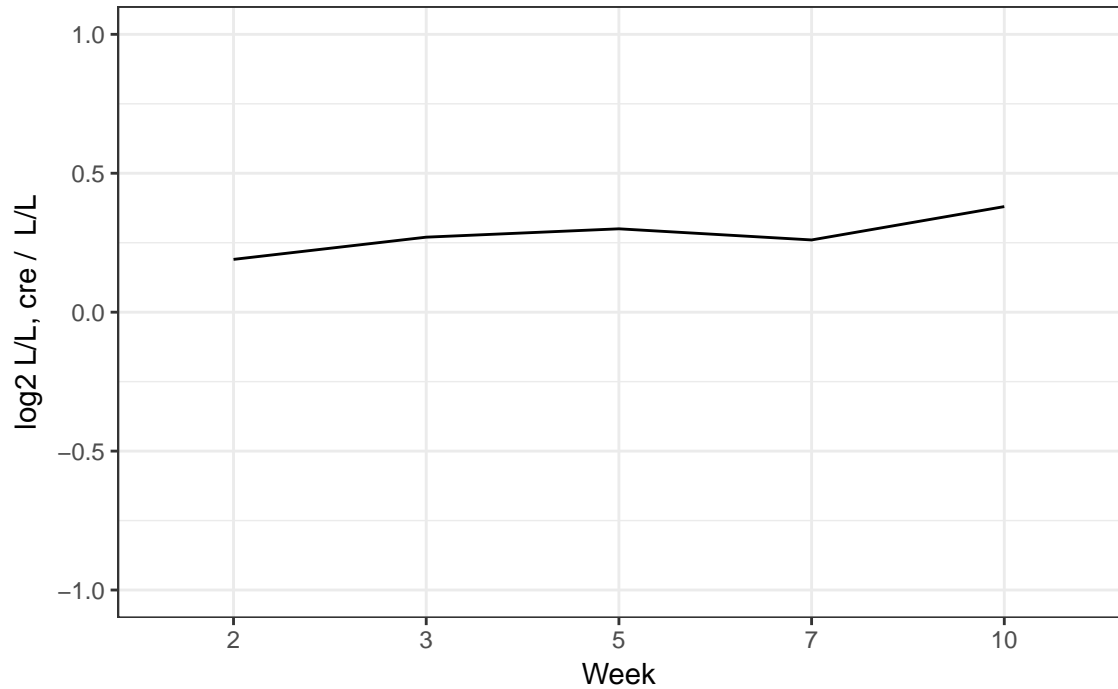

NUDT6 / Q3ULU4; adj.p value: 0.70199

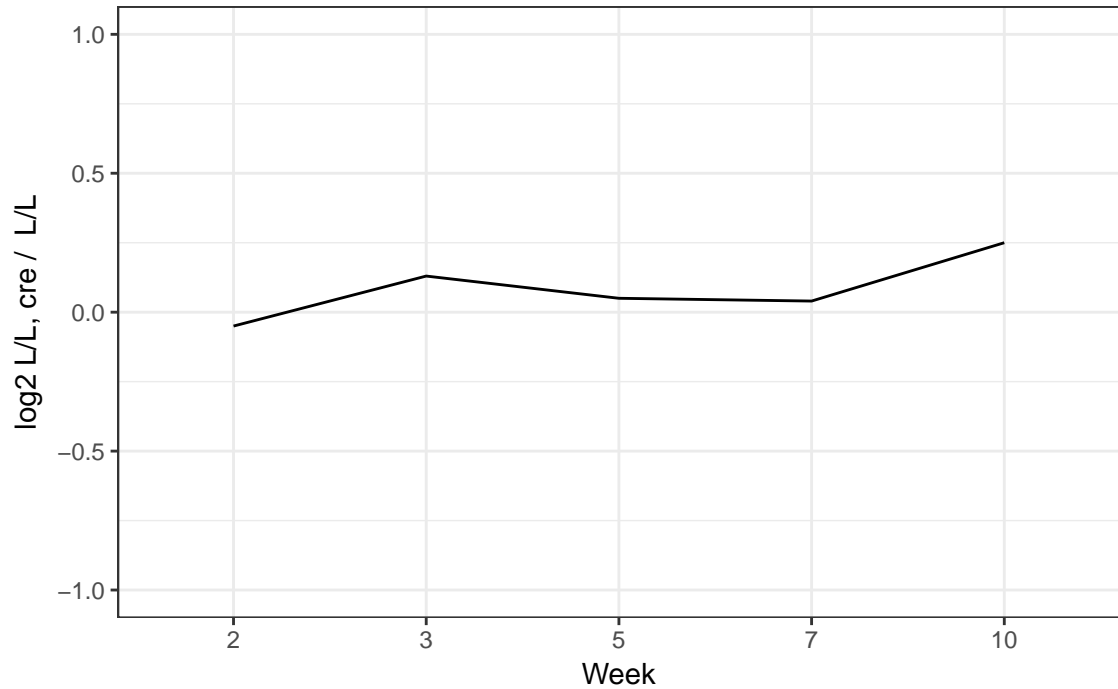

NUDT8 / Q9CR24; adj.p value: 0.00042

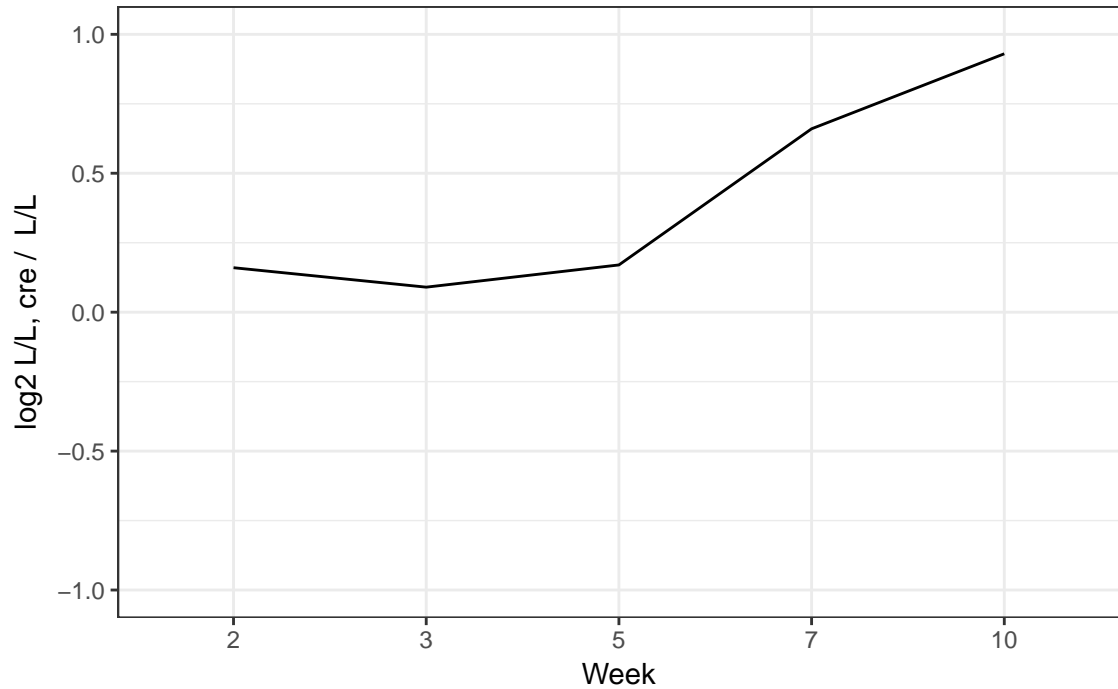

NUDT9 / Q8BVU5; adj.p value: 0.03871

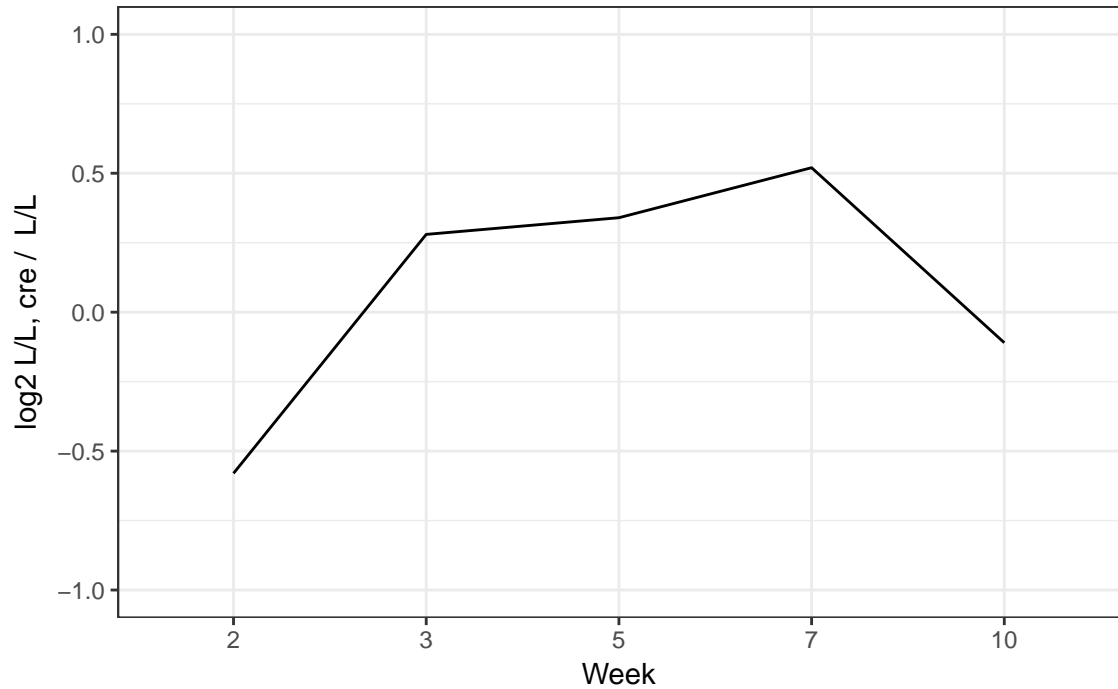



OAT / P29758; adj.p value: 0.57892

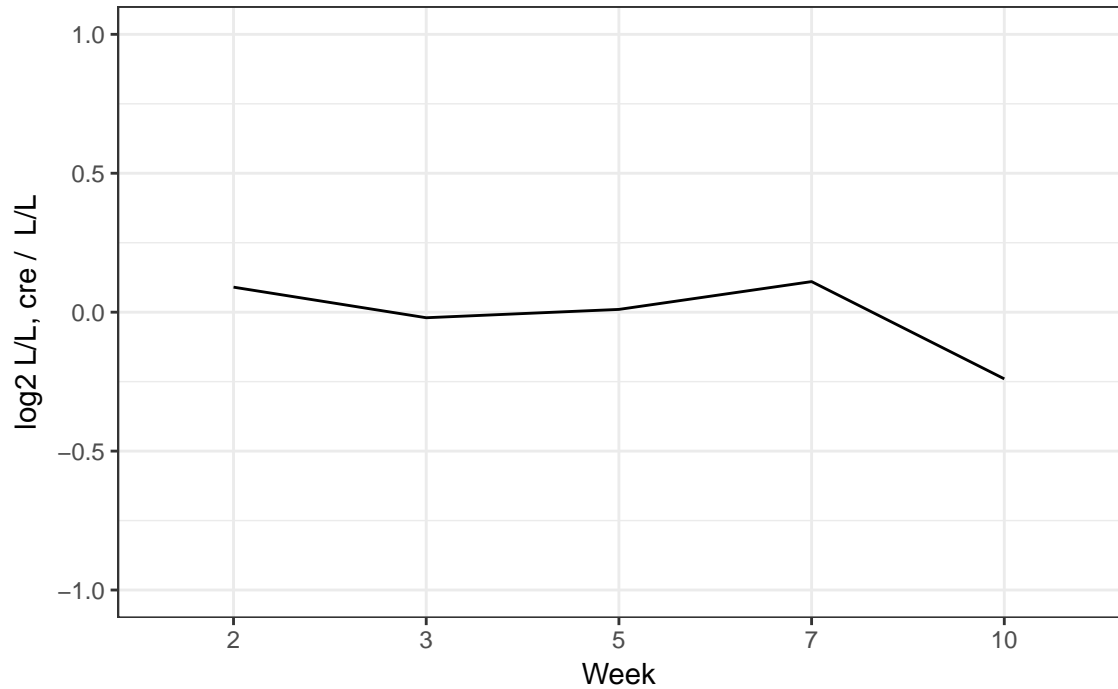

OBSCN / E9QQ96; adj.p value: 0.21262

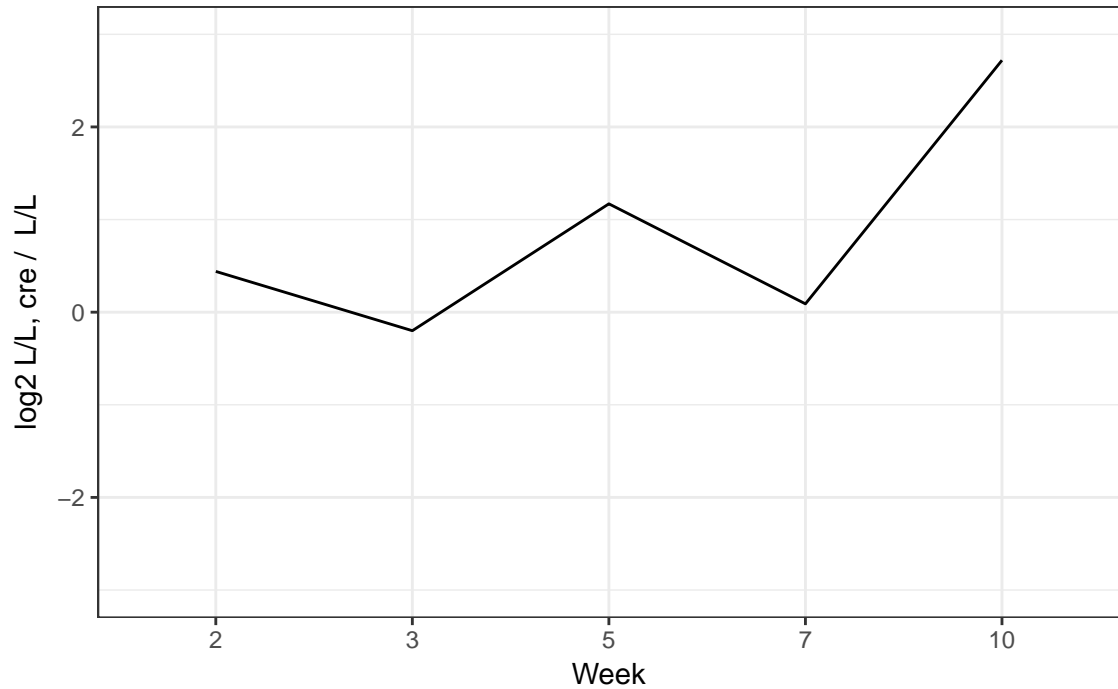

OCIAD1 / Q9CRD0; adj.p value: 0.01242

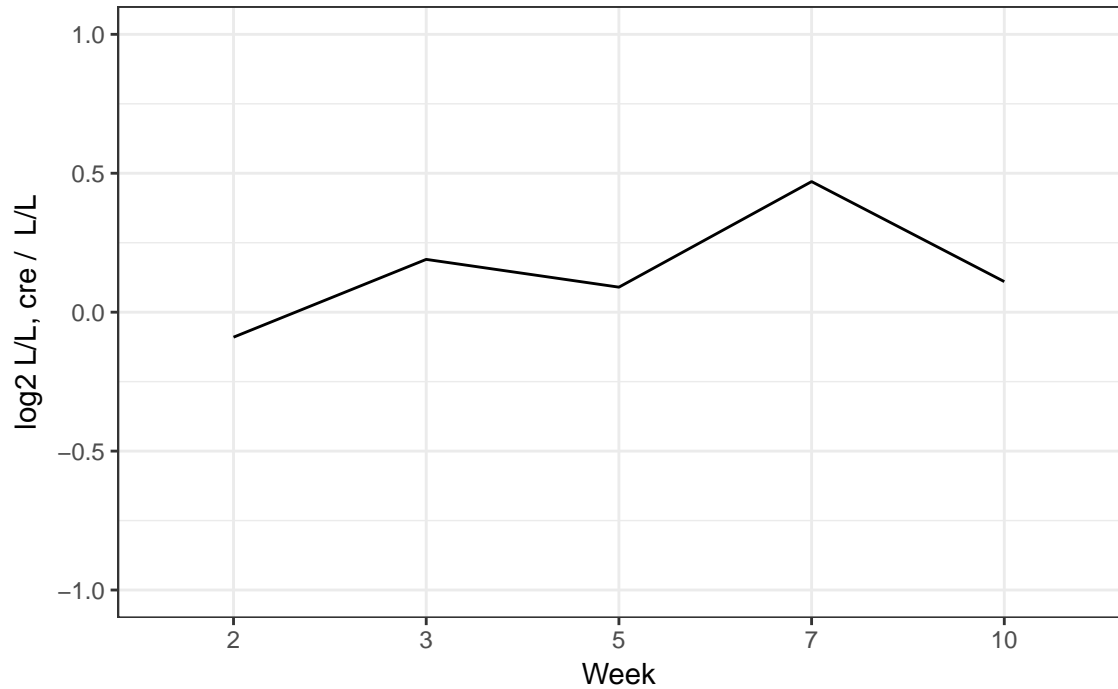

OGDH / Q60597; adj.p value: 0.43386

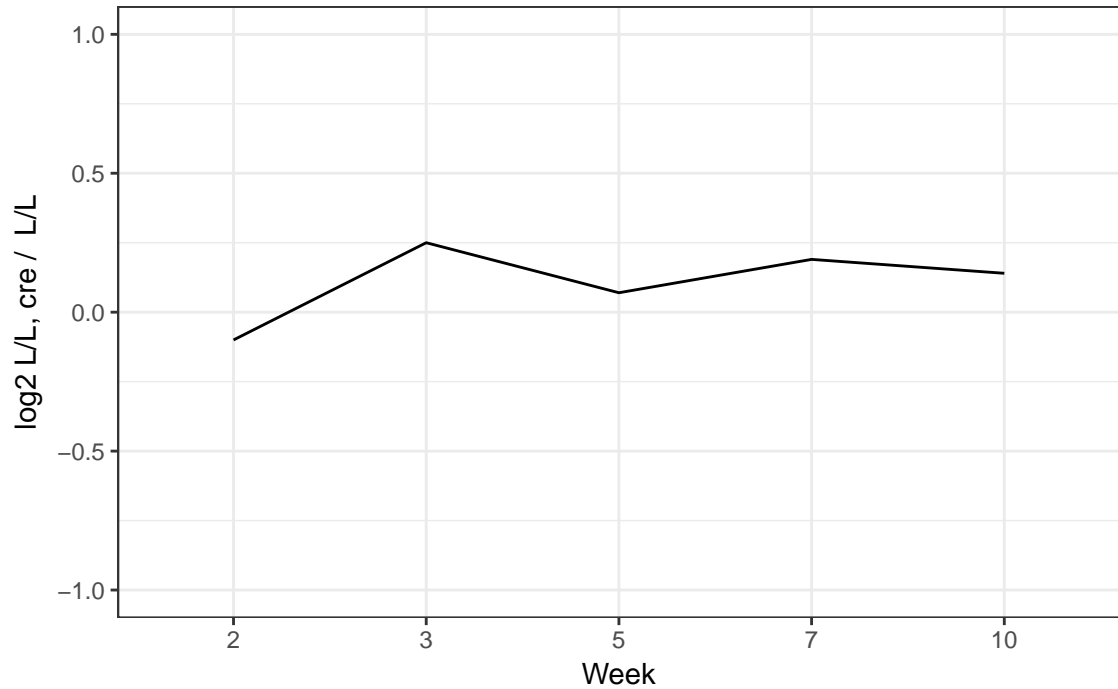

OGDHL / E9Q7L0; adj.p value: 0.02527

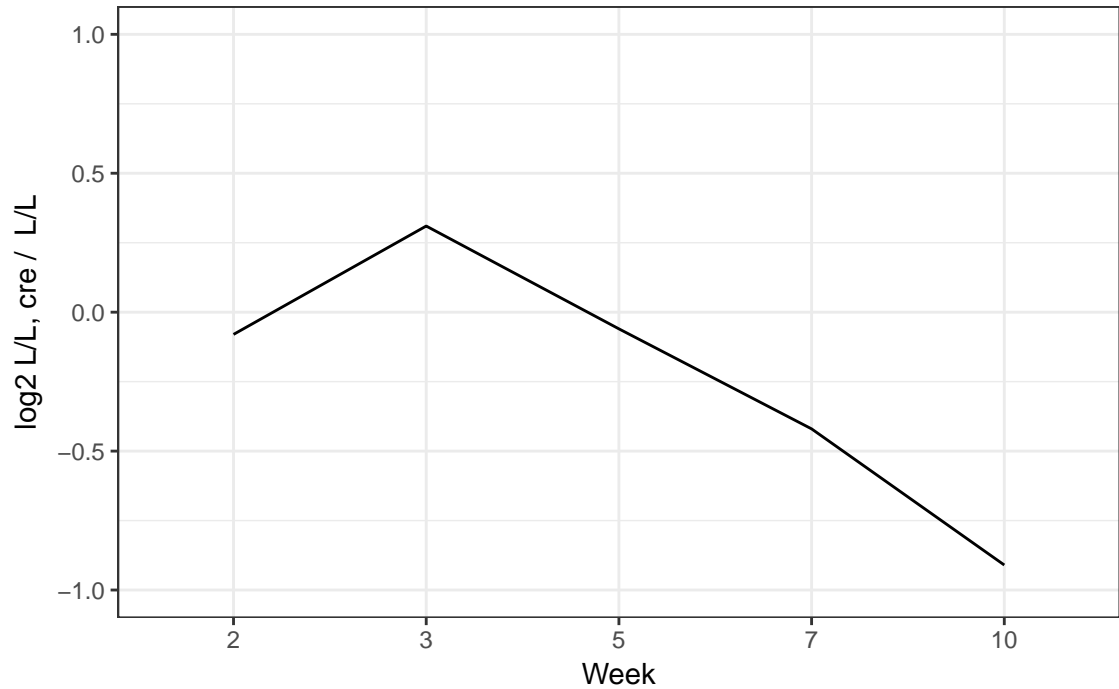

OMA1 / Q9D8H7; adj.p value: 0.63457

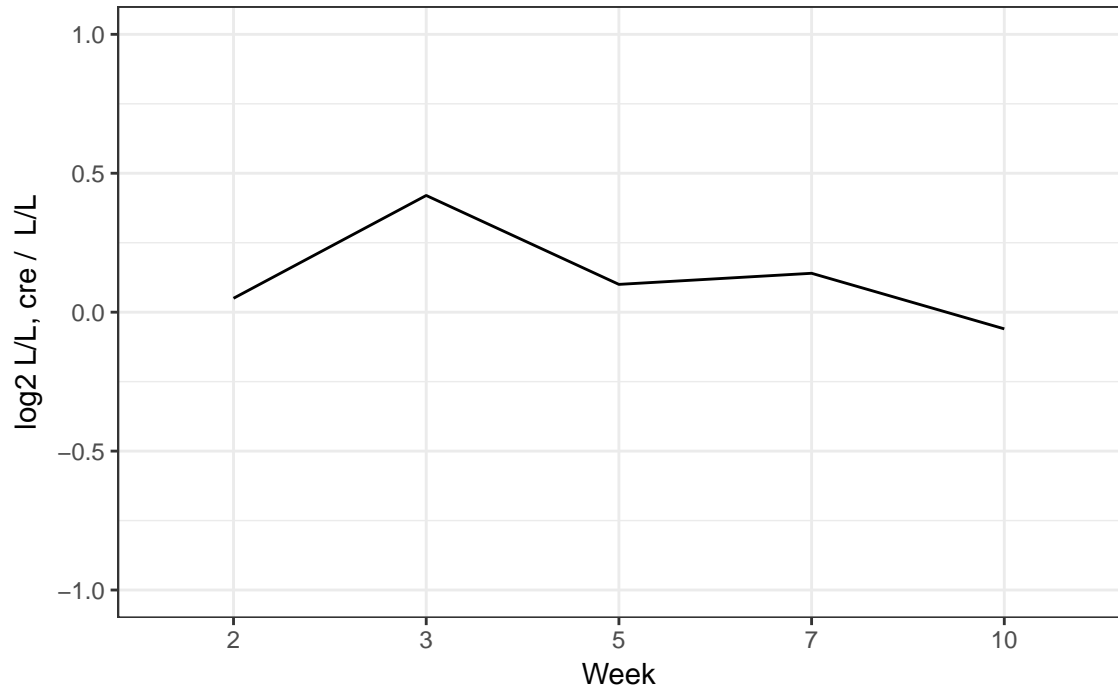

OPA1 / P58281-2; adj.p value: 2e-05

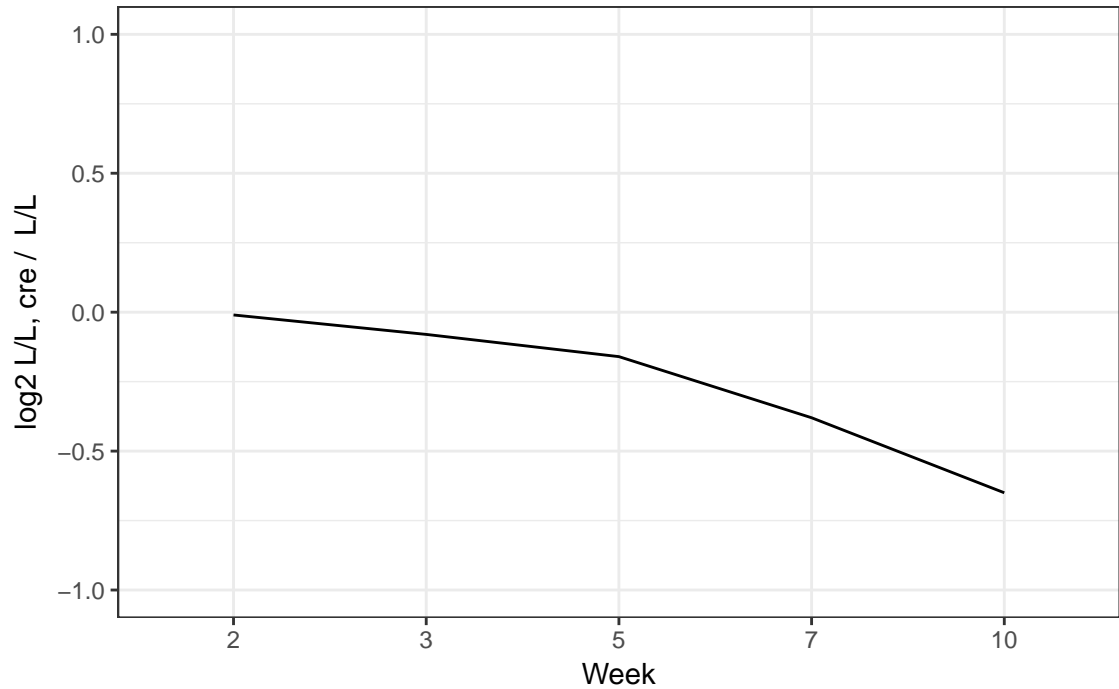

OPA3 / Q505D7; adj.p value: 0.52388

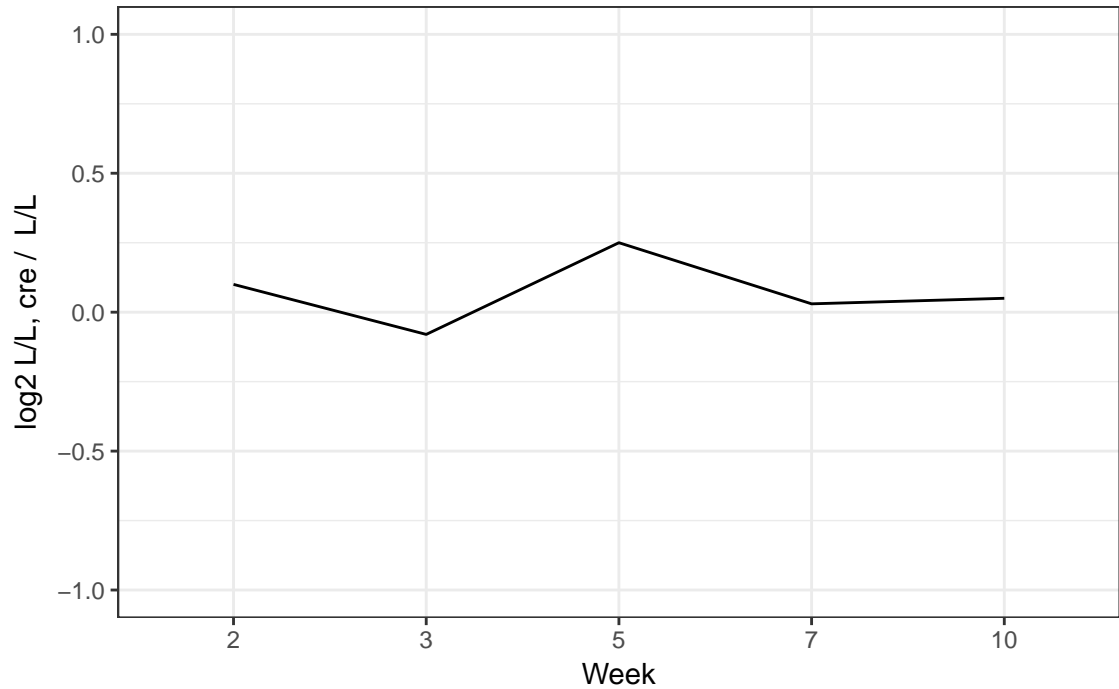



OXA1L / Q8BGA9; adj.p value: 0.00035

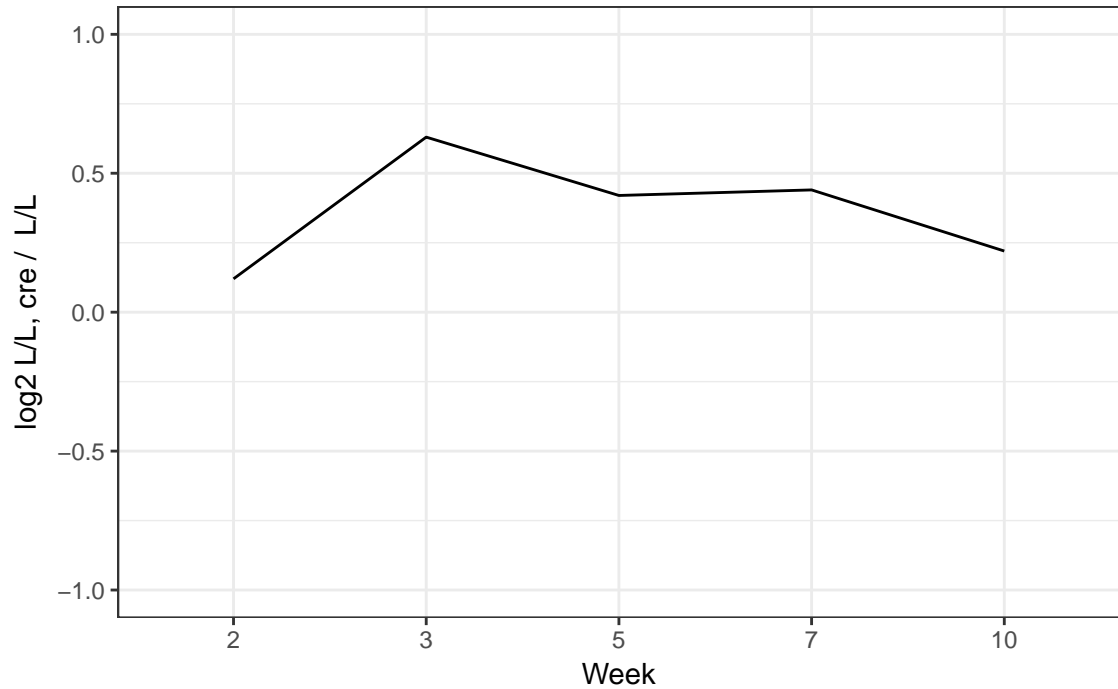

OXCT1 / Q9D0K2; adj.p value: 0.00689

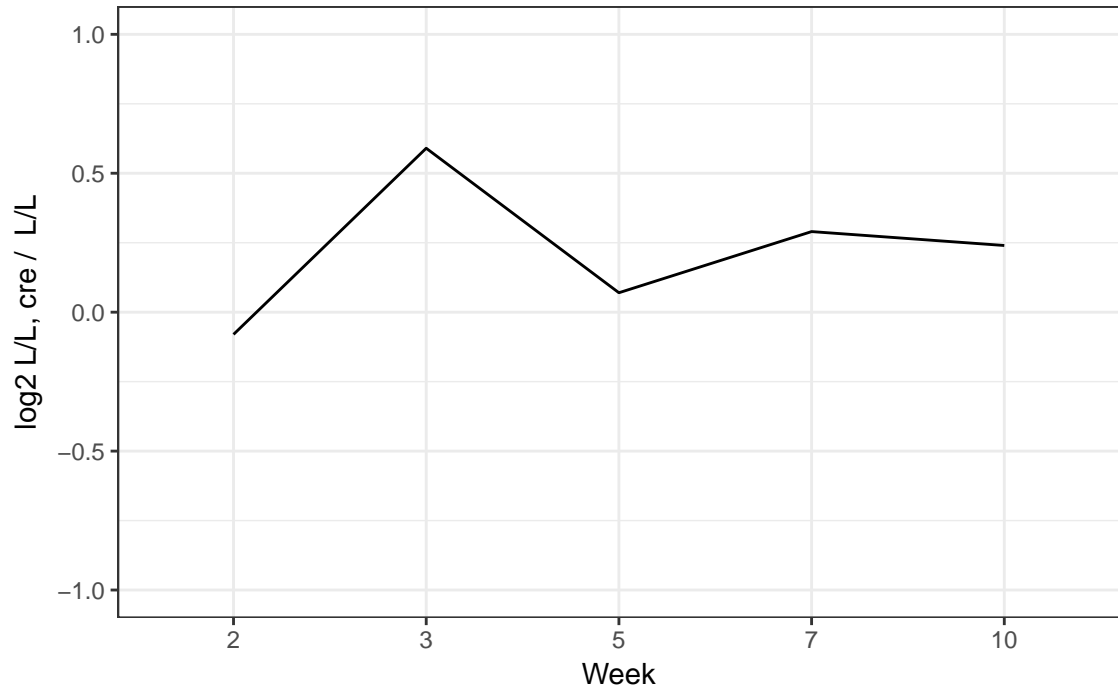

OXLD1 / Q9CR10; adj.p value: 0.56031

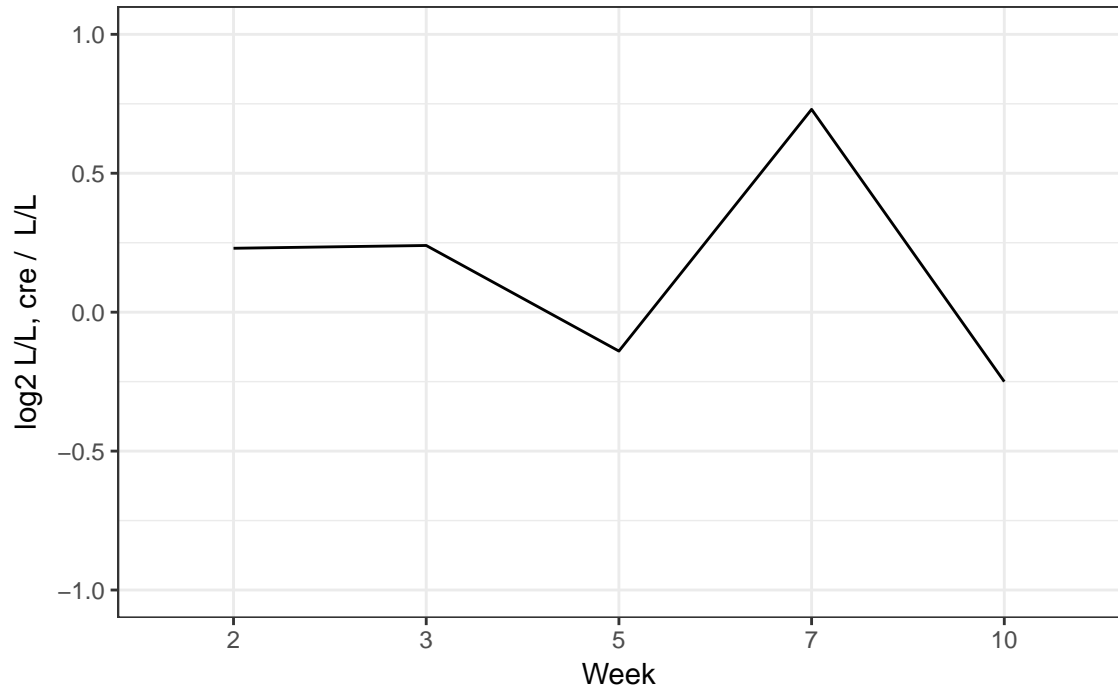

OXNAD1 / Q8VE38-2; adj.p value: 0.77537

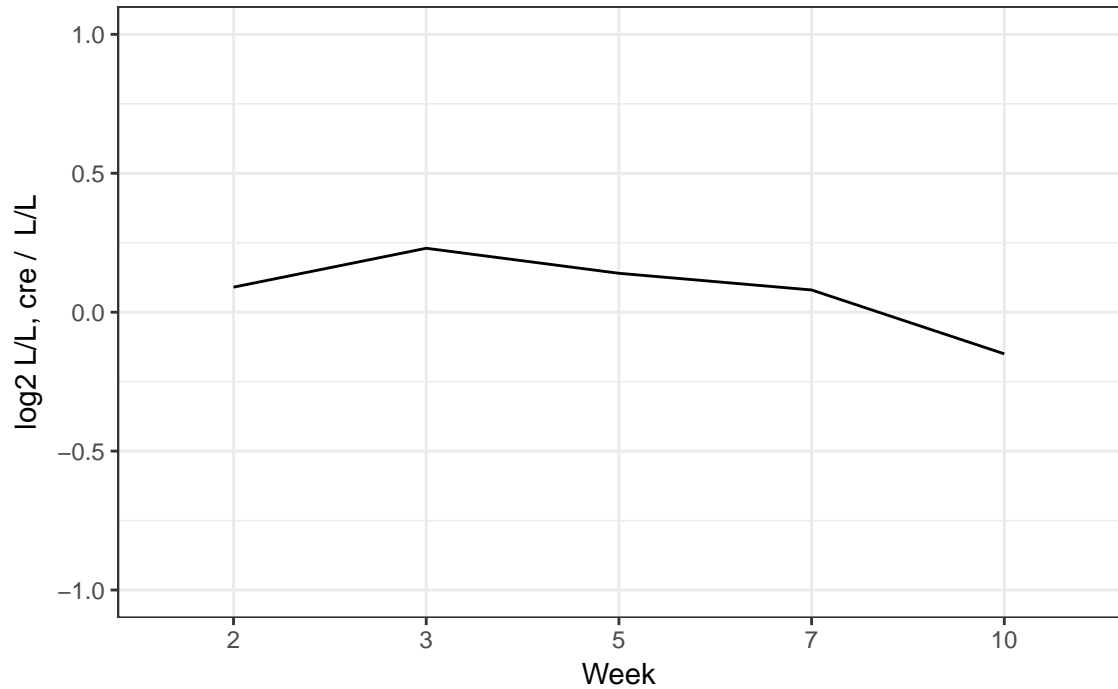

OXSM / Q9D404; adj.p value: 0.41549

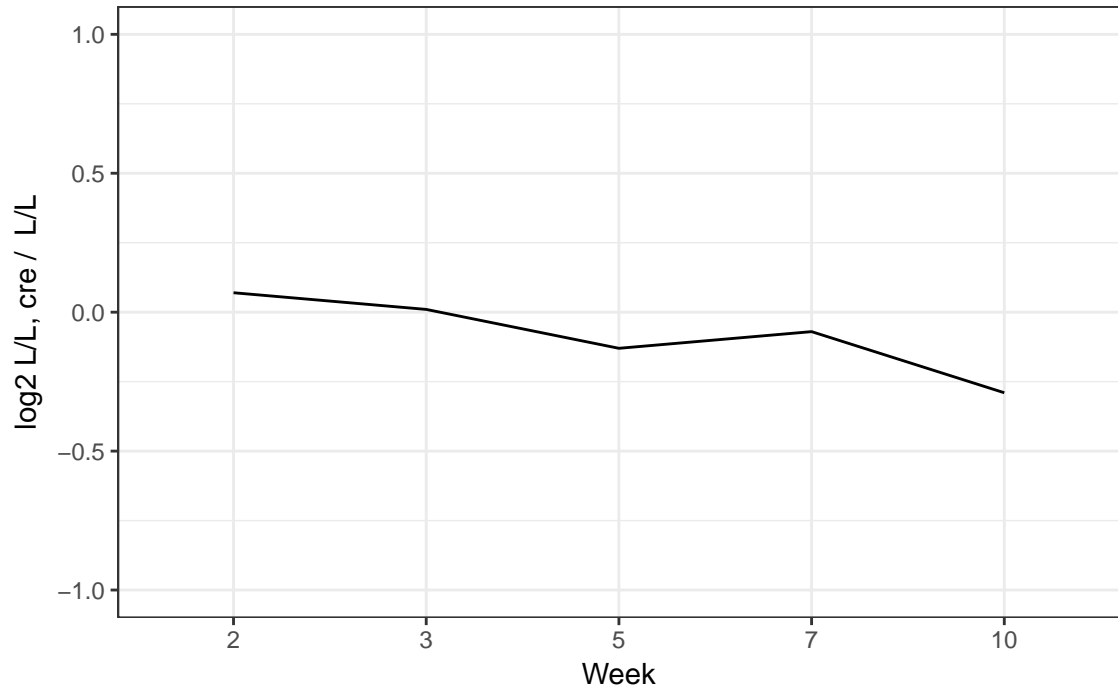

P4HB / P09103; adj.p value: 0.00032

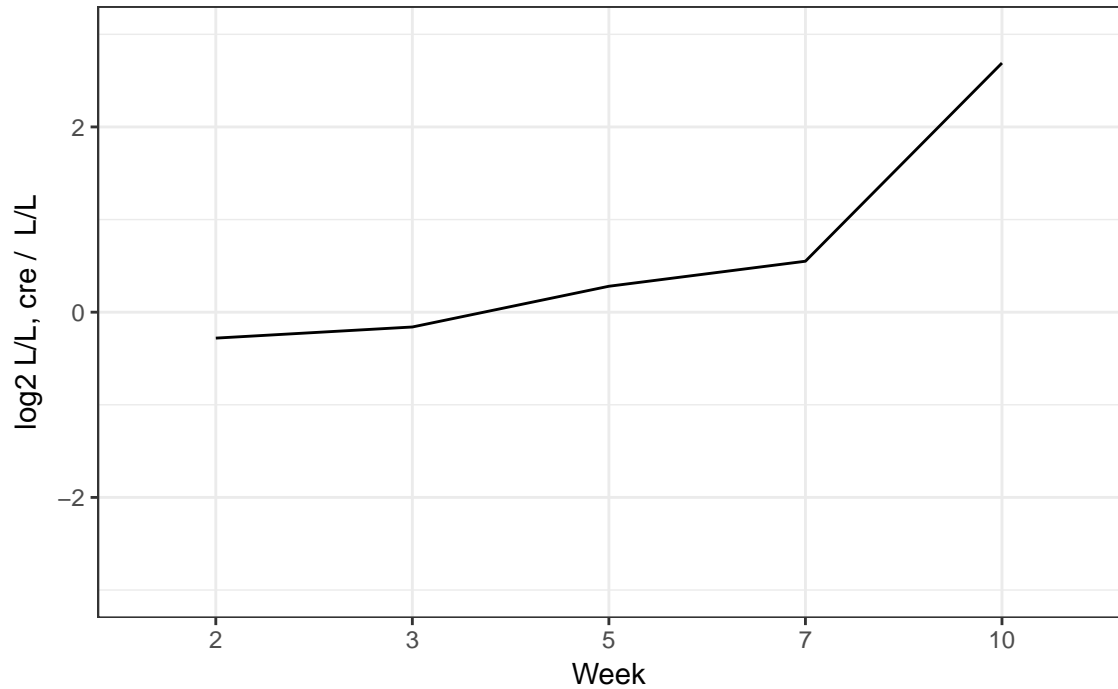

PAM16 / Q9CQV1; adj.p value: 0.42148

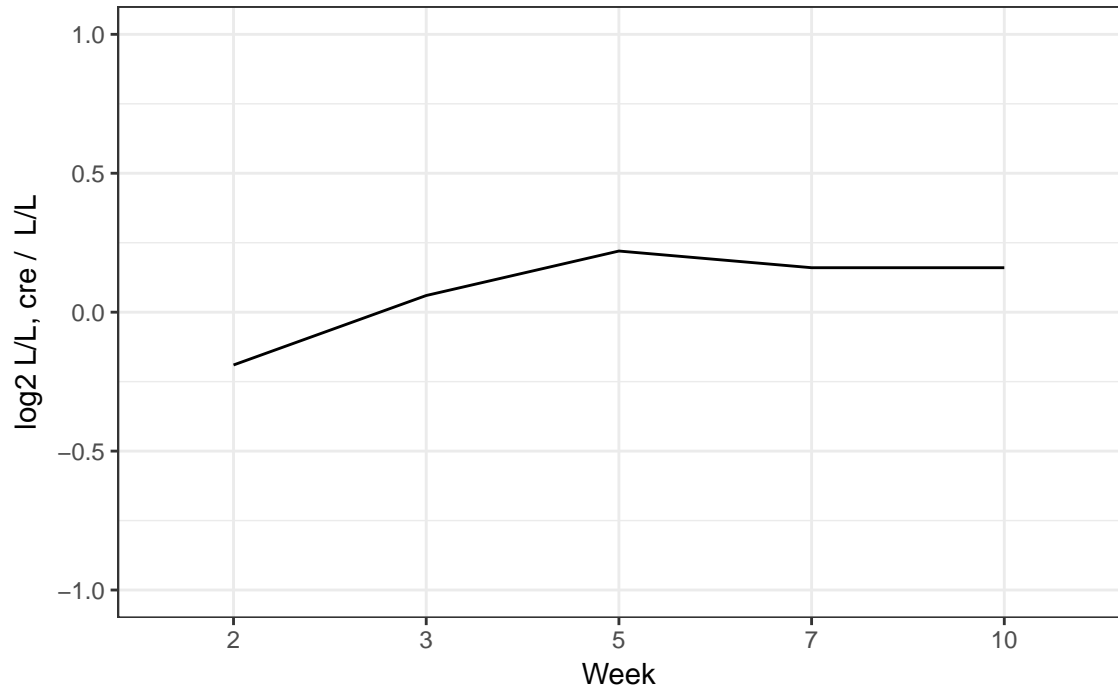

PARK7 / Q99LX0; adj.p value: 0.81686

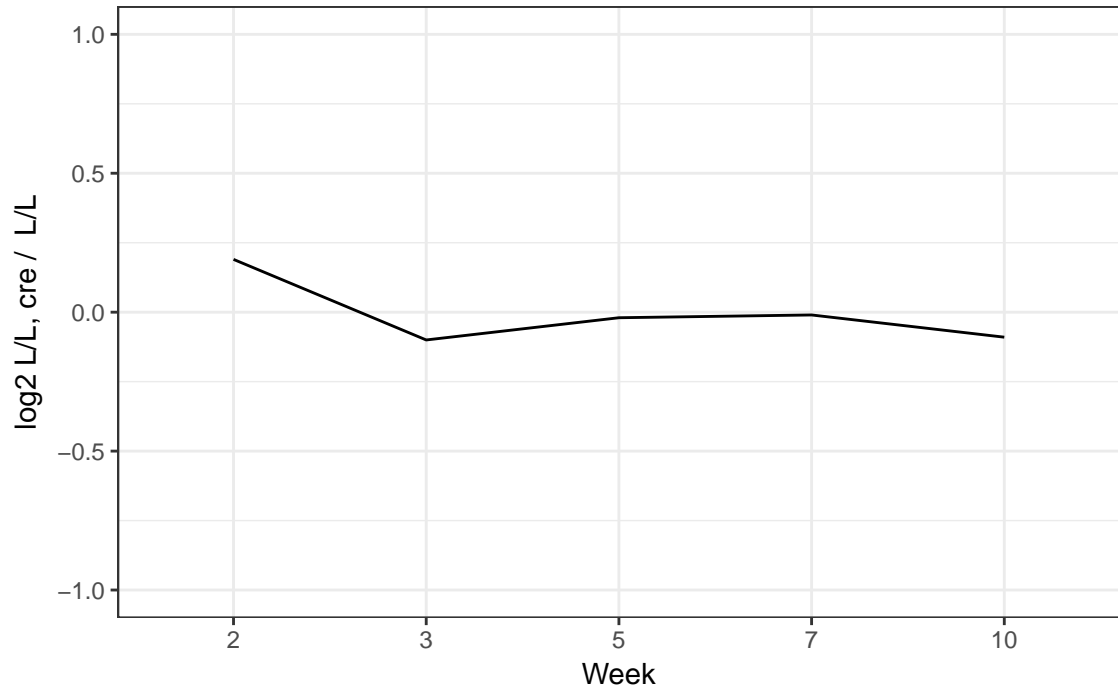



PARL / Q5XJY4; adj.p value: 0.00642

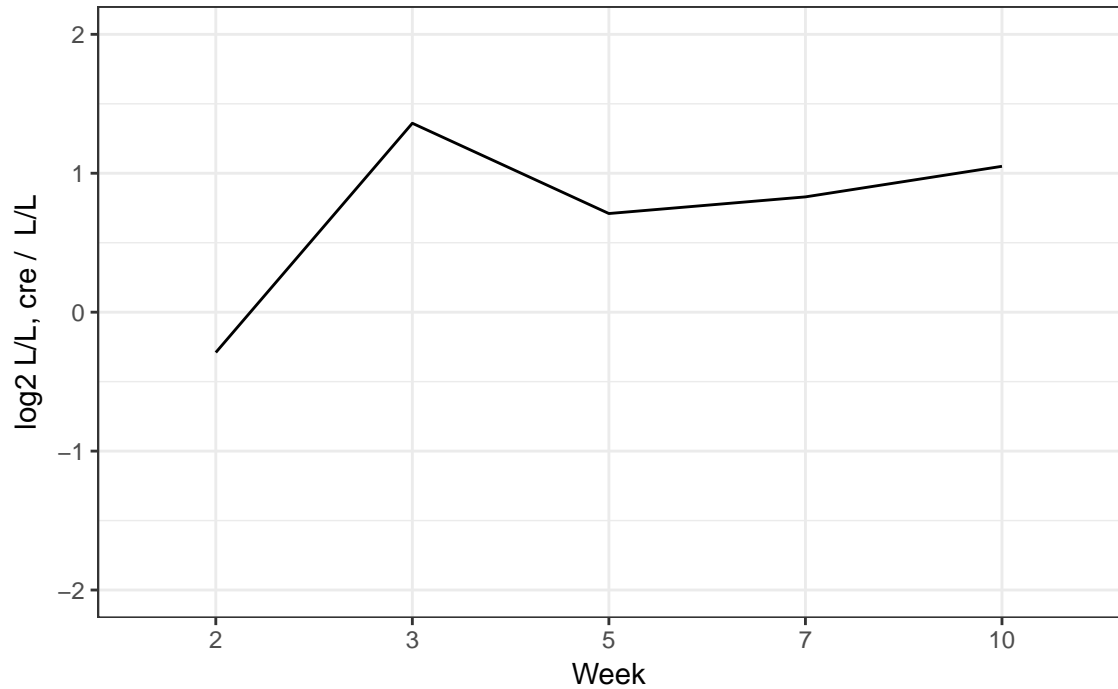

PARS2 / A8Y5T6; adj.p value: 0.06293

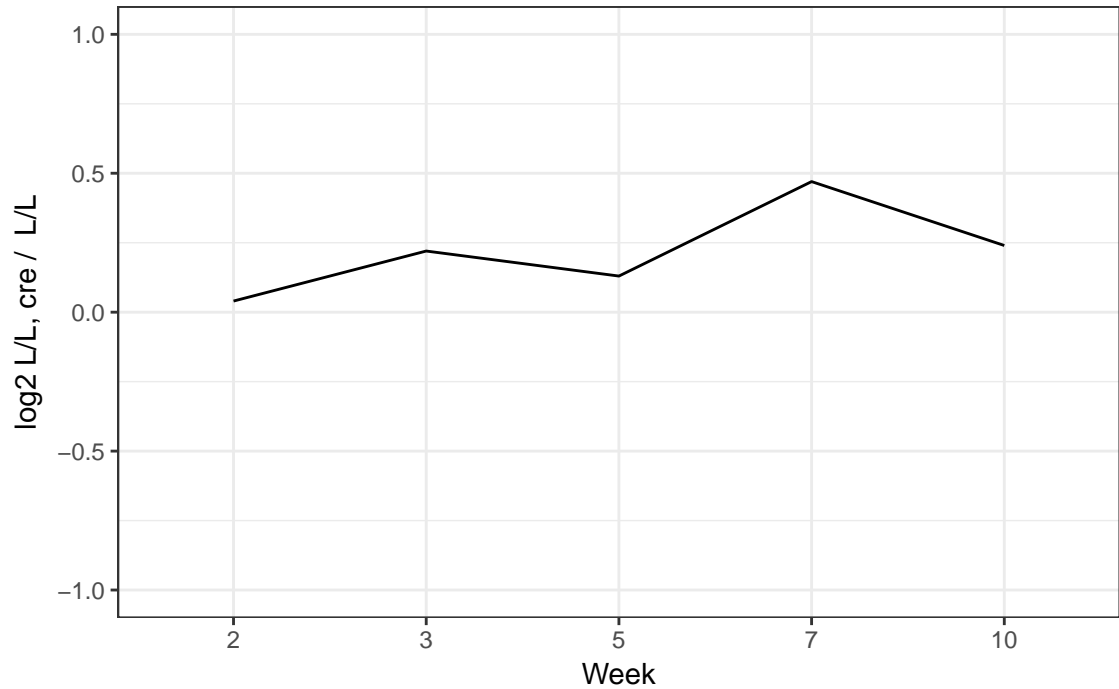

PCBD2 / Q9CZL5; adj.p value: 0.07058

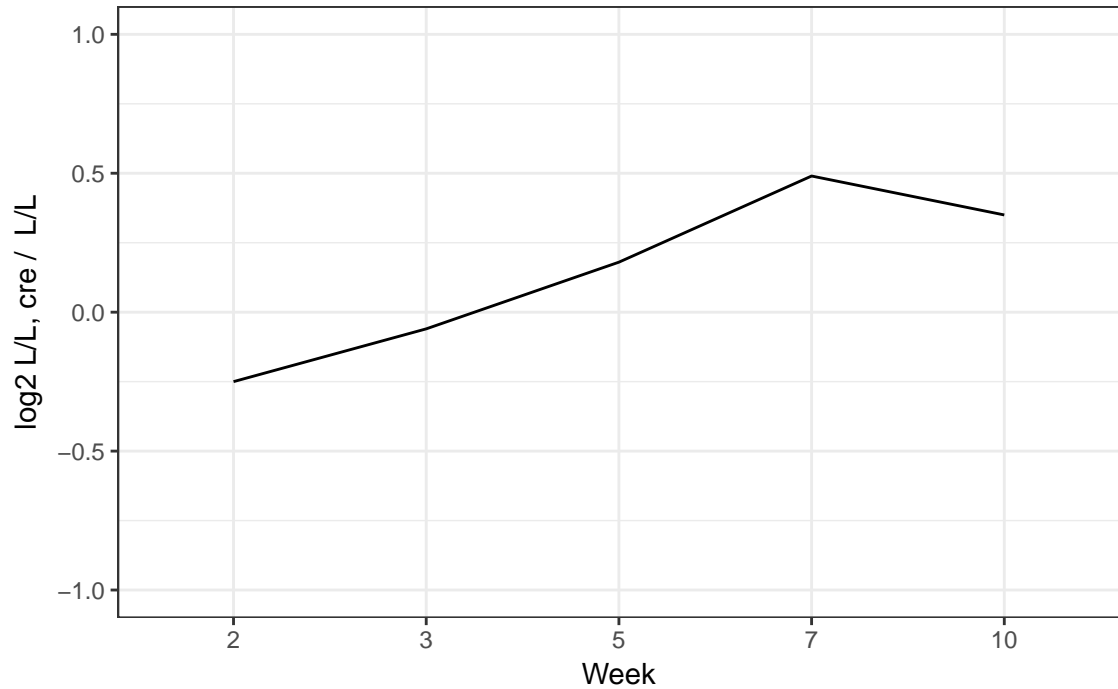

PCCA / Q91ZA3; adj.p value: 0.46794

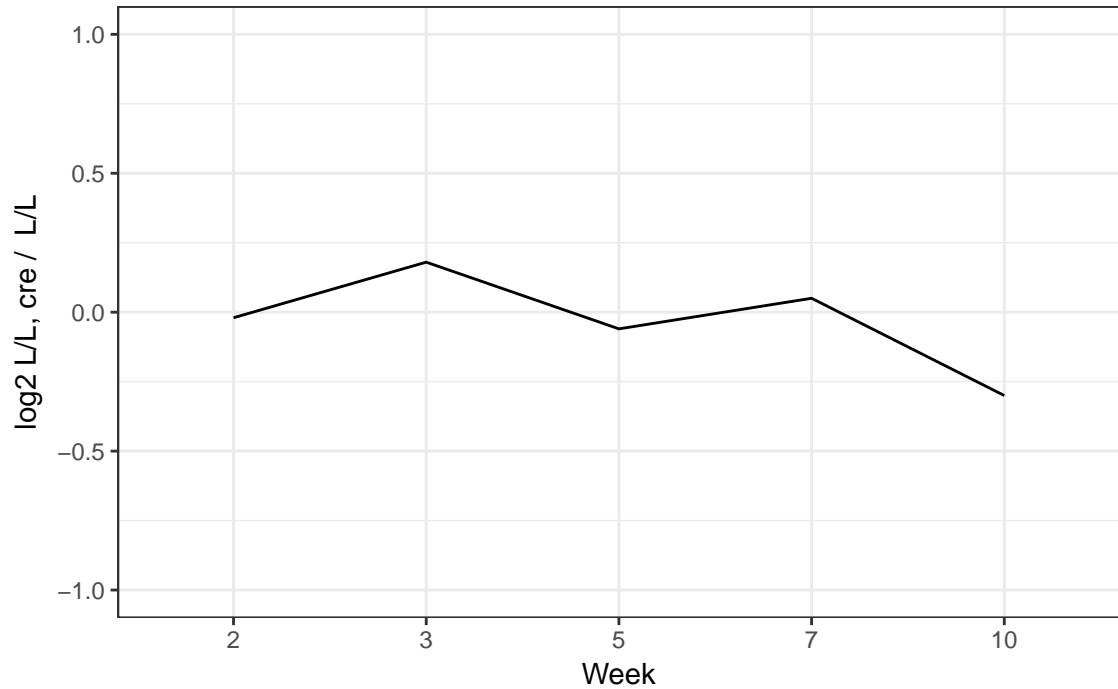

PCCB / Q99MN9; adj.p value: 0.60156

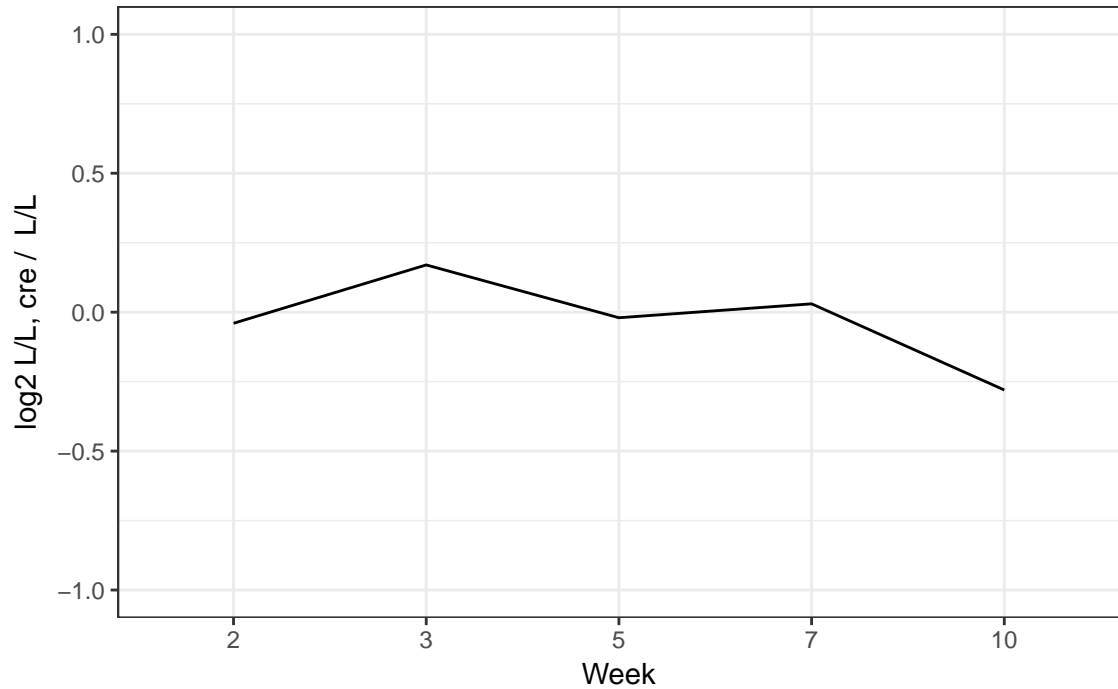

PCK2 / Q8BH04; adj.p value: 0

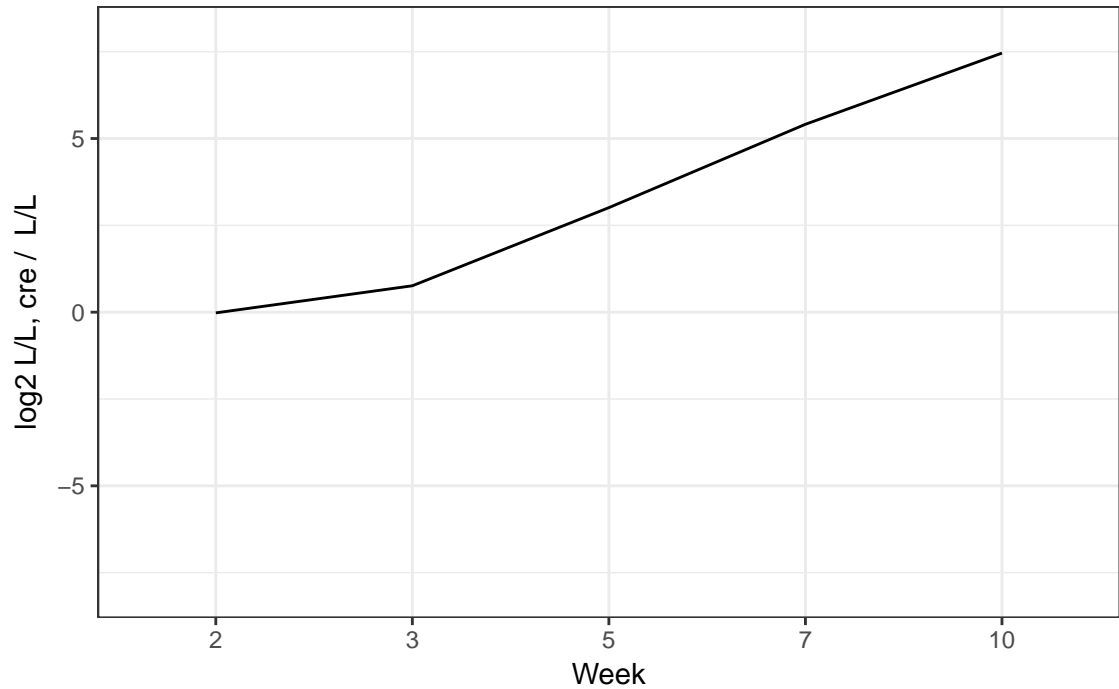

PCX / G5E8R3; adj.p value: 0.36917

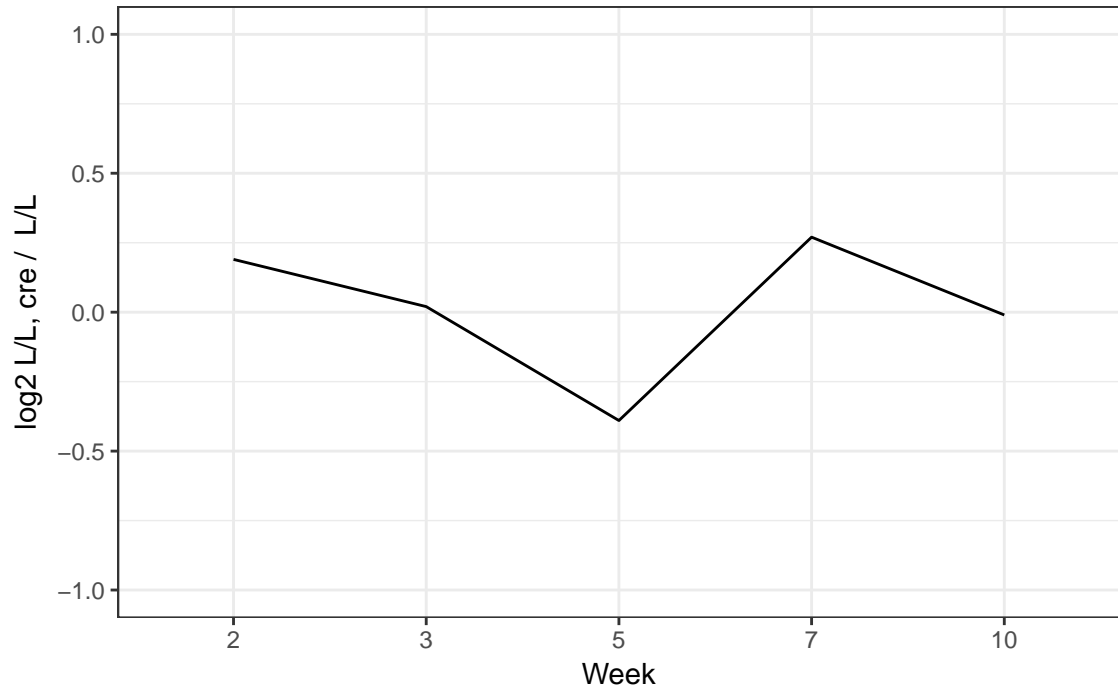

PDF / S4R2K0; adj.p value: 0.27111

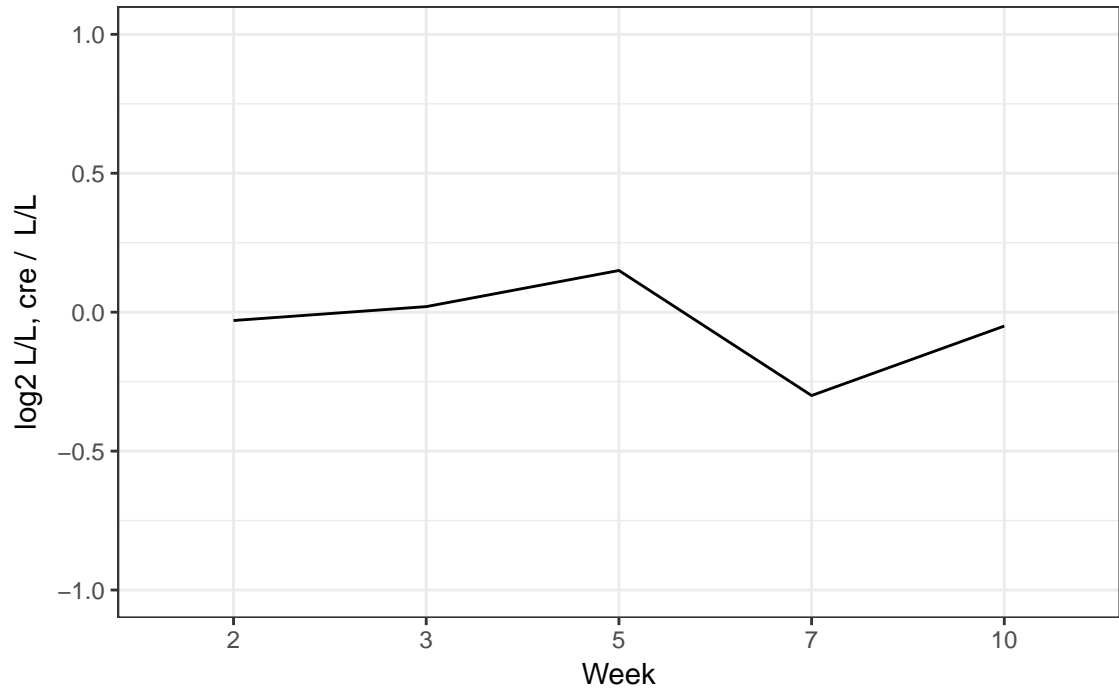



PDHA1 / P35486; adj.p value: 0.06219

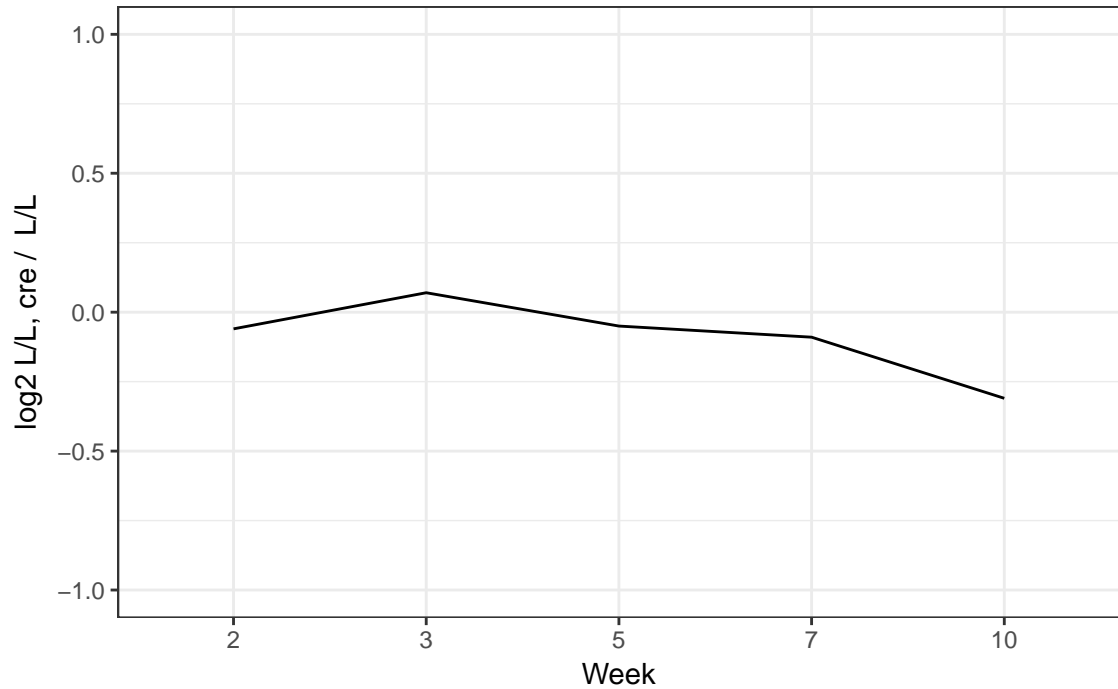

PDHB / Q9D051; adj.p value: 0.56318

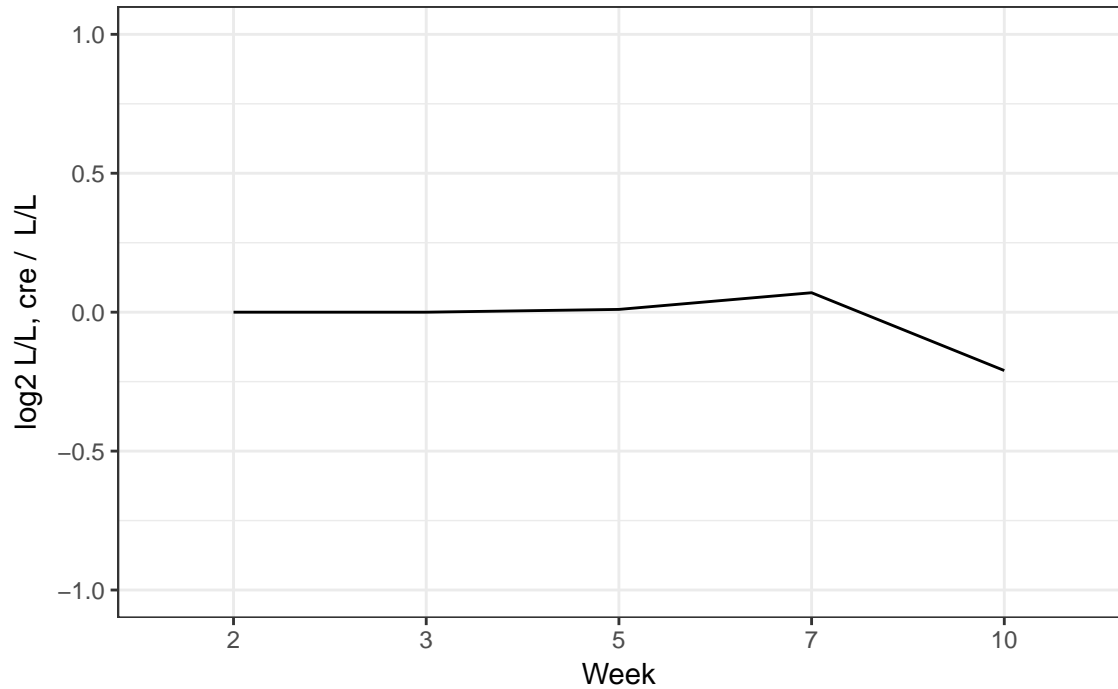

PDHX / Q8BKZ9; adj.p value: 0.68402

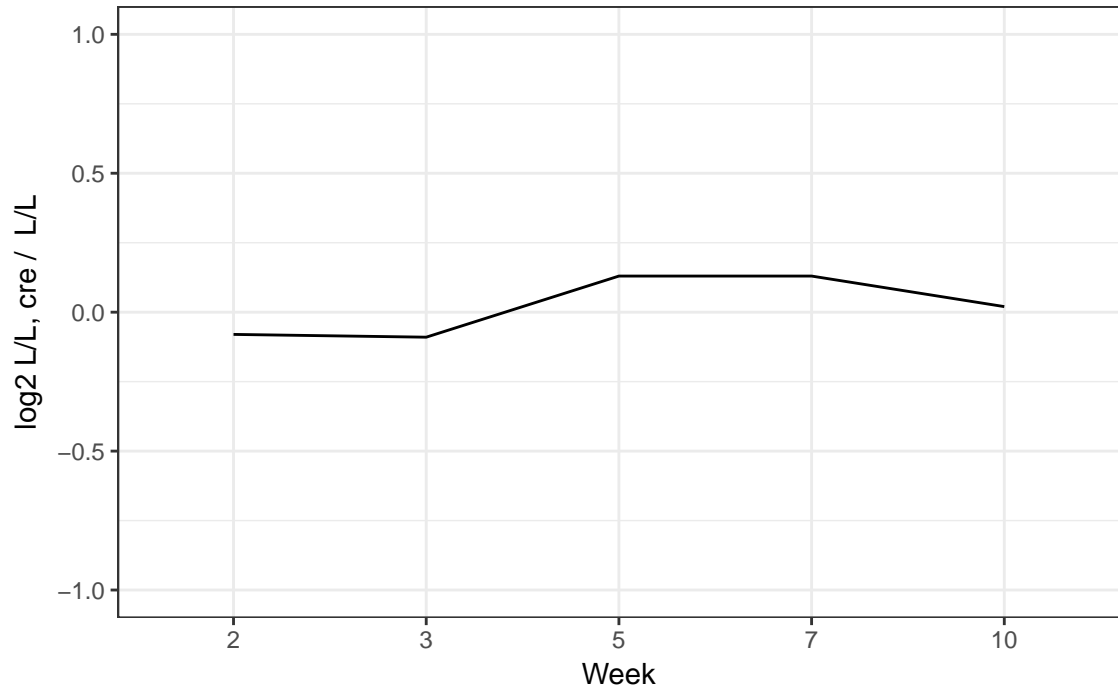

PDK1 / Q8BFP9; adj.p value: 0.87375

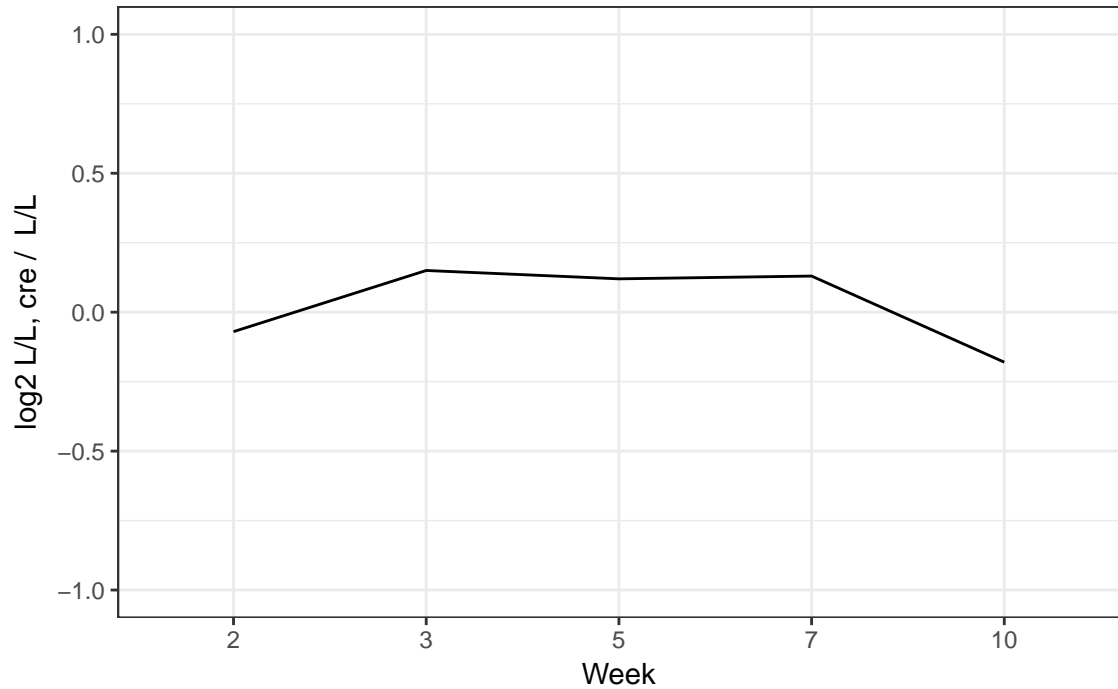

PDK2 / Q9JK42; adj.p value: 0.0961

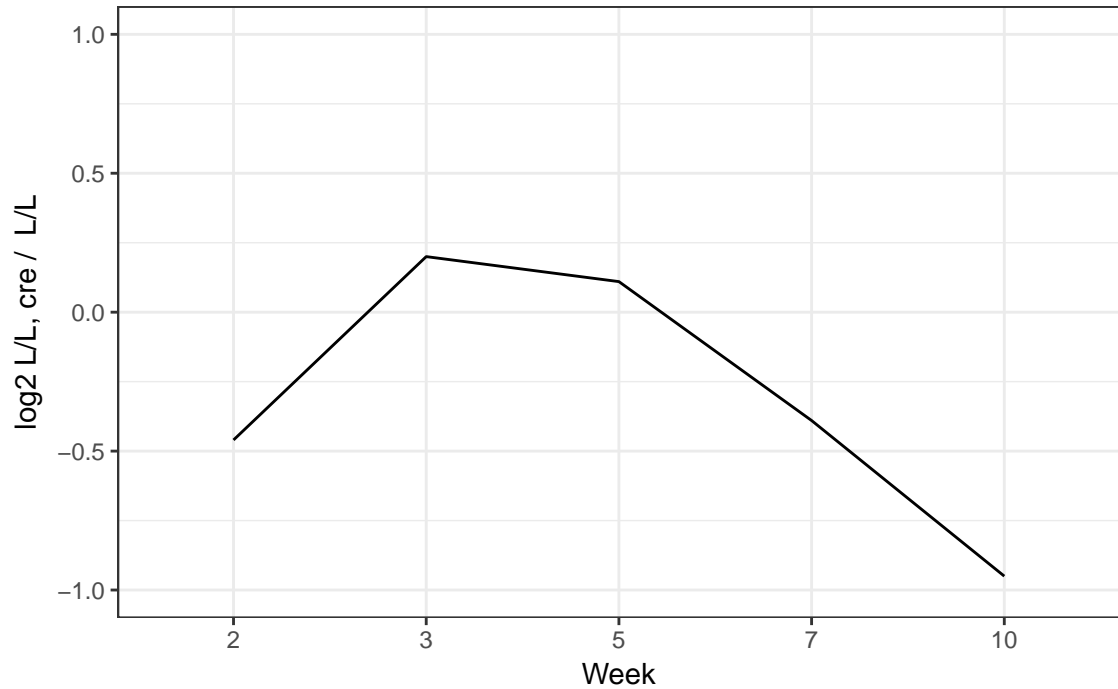

PDK3 / Q922H2; adj.p value: 0.4659

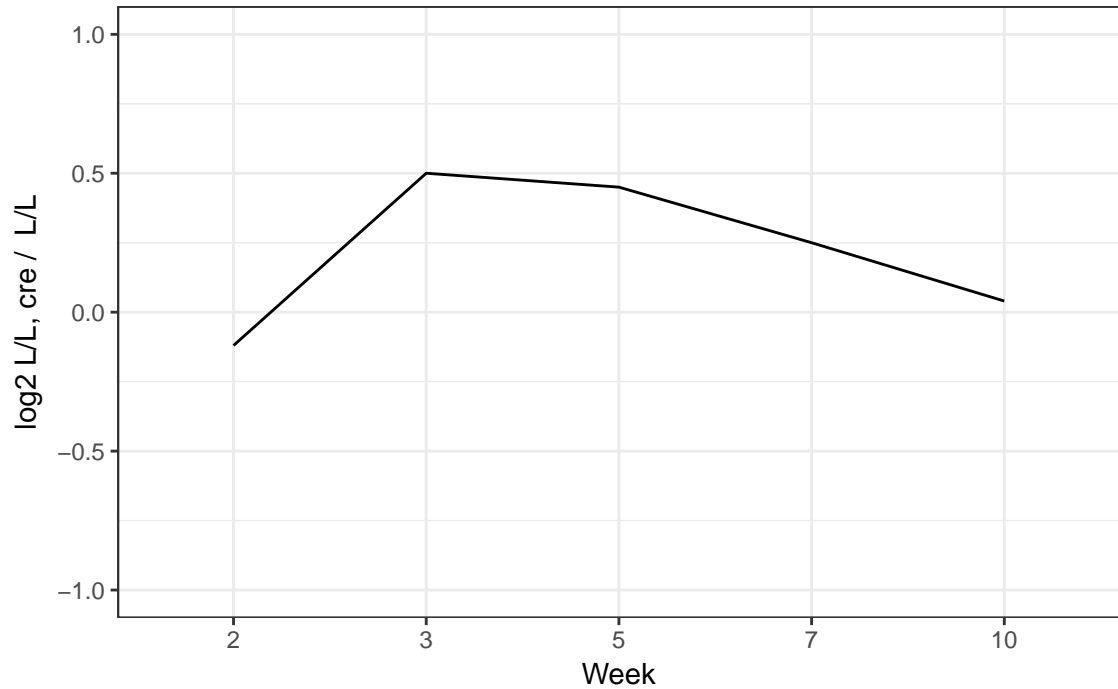

PDK4 / O70571; adj.p value: 0.46392

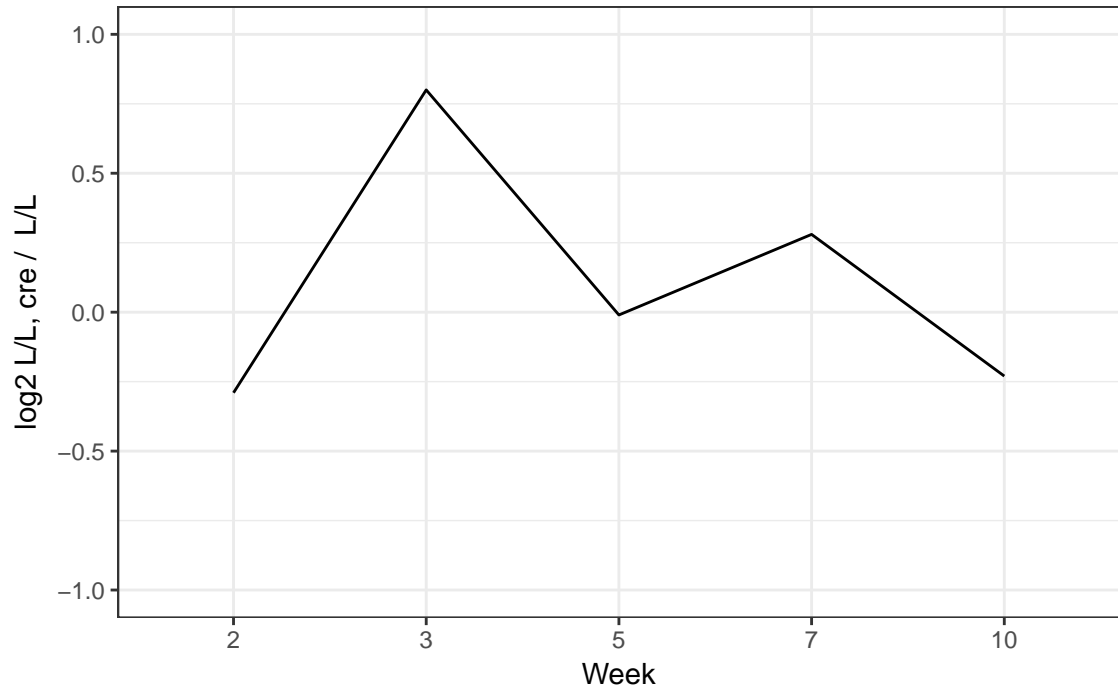

PDP1 / A2AJP9; adj.p value: 0.27773

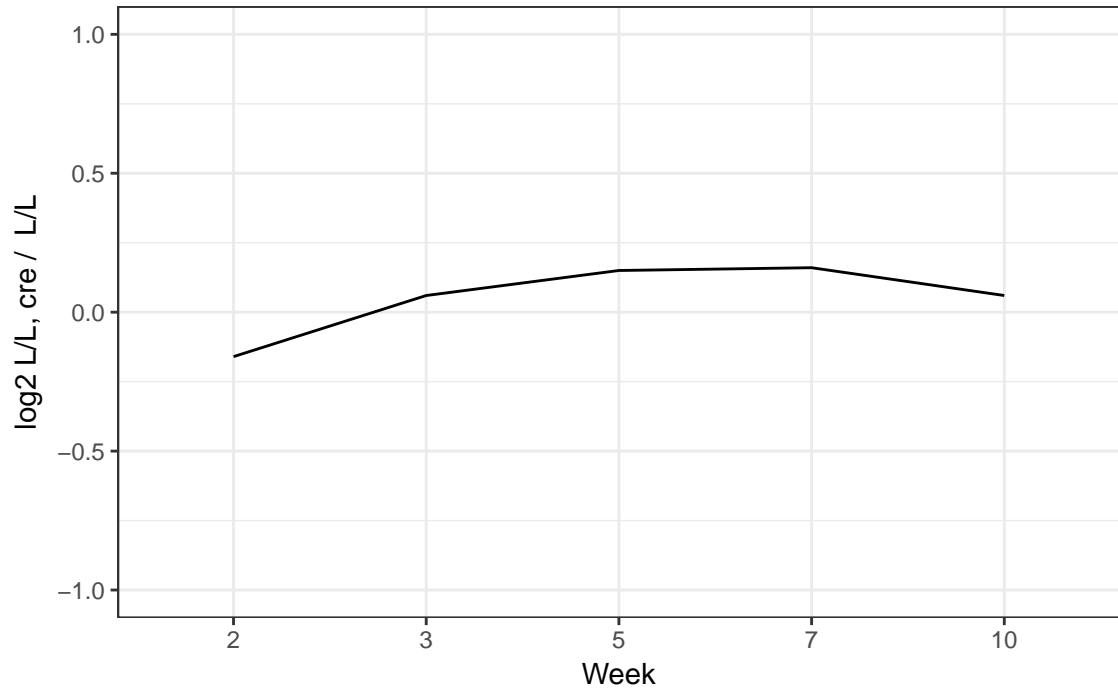



PDP2 / Q504M2; adj.p value: 0.00033

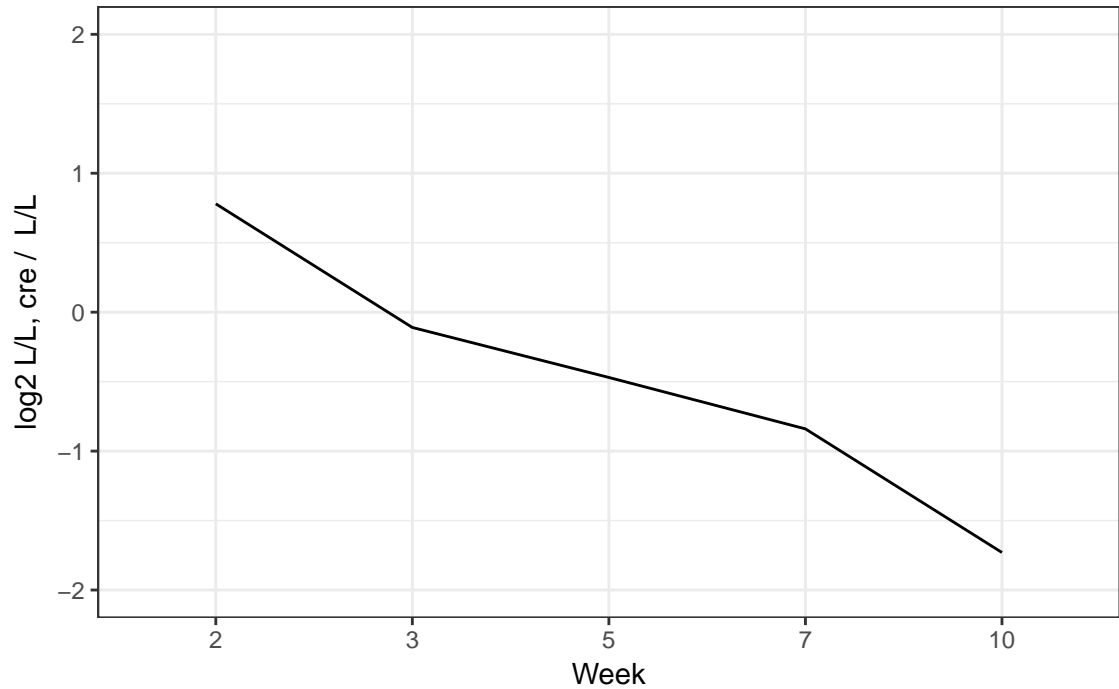

PDPR / Q7TSQ8; adj.p value: 0.64967

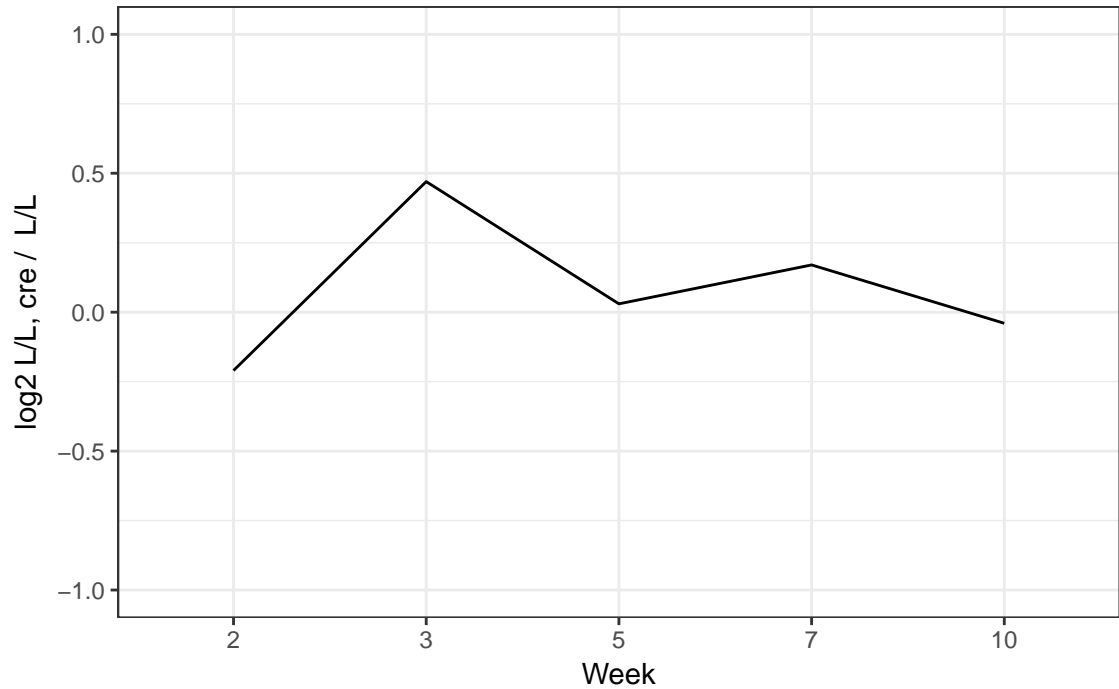

PDSS2 / Q33DR3; adj.p value: 0.00438

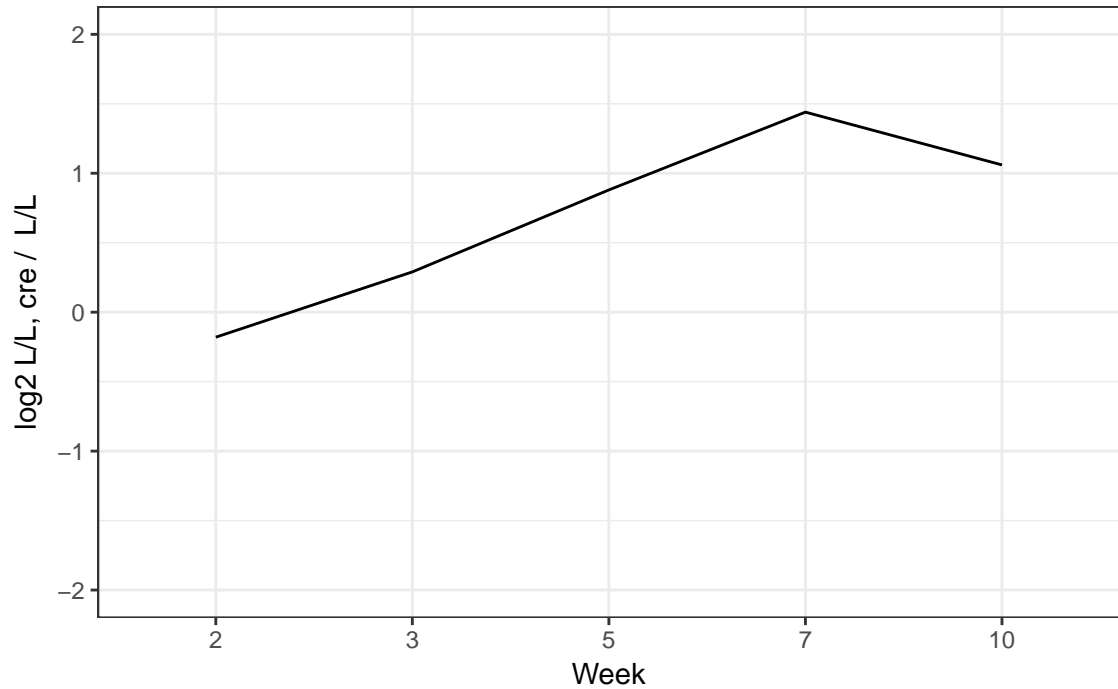

PET100 / P0DJE0; adj.p value: 0.00012

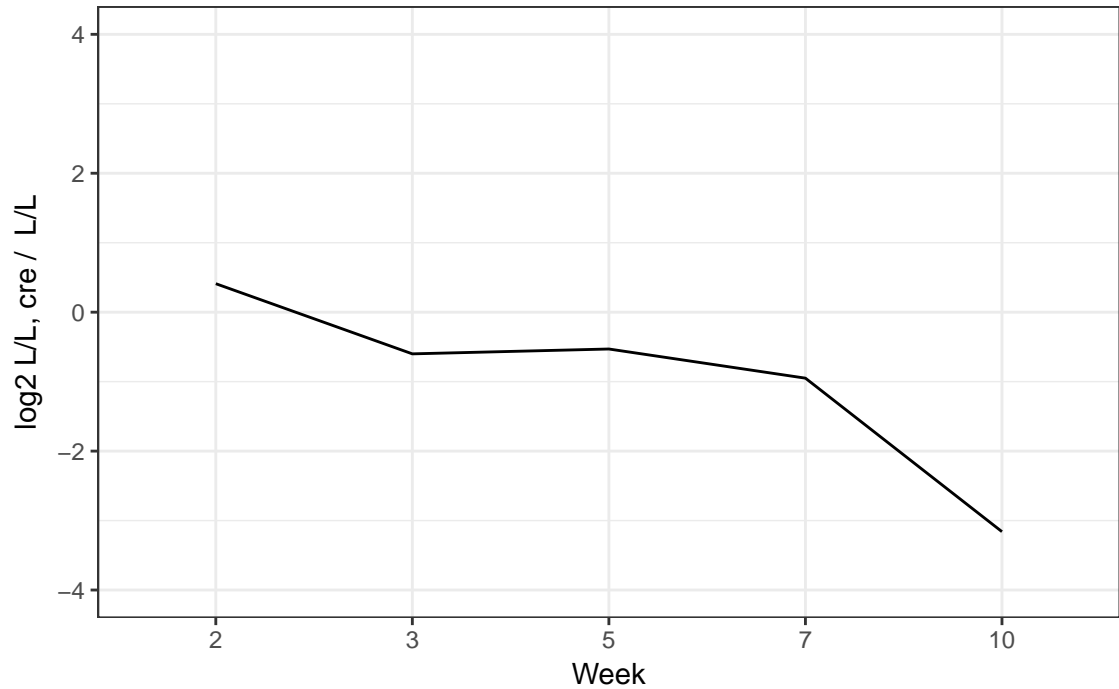

PET112 / Q99JT1; adj.p value: 0.00853

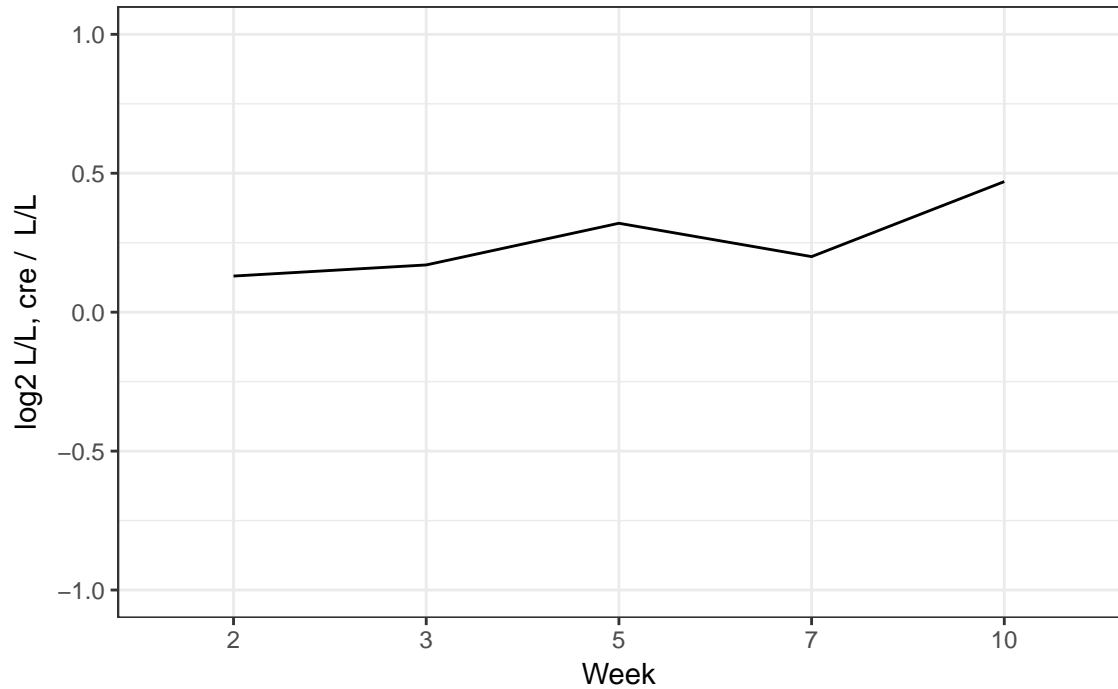

PGAM5 / Q8BX10; adj.p value: 0.00048

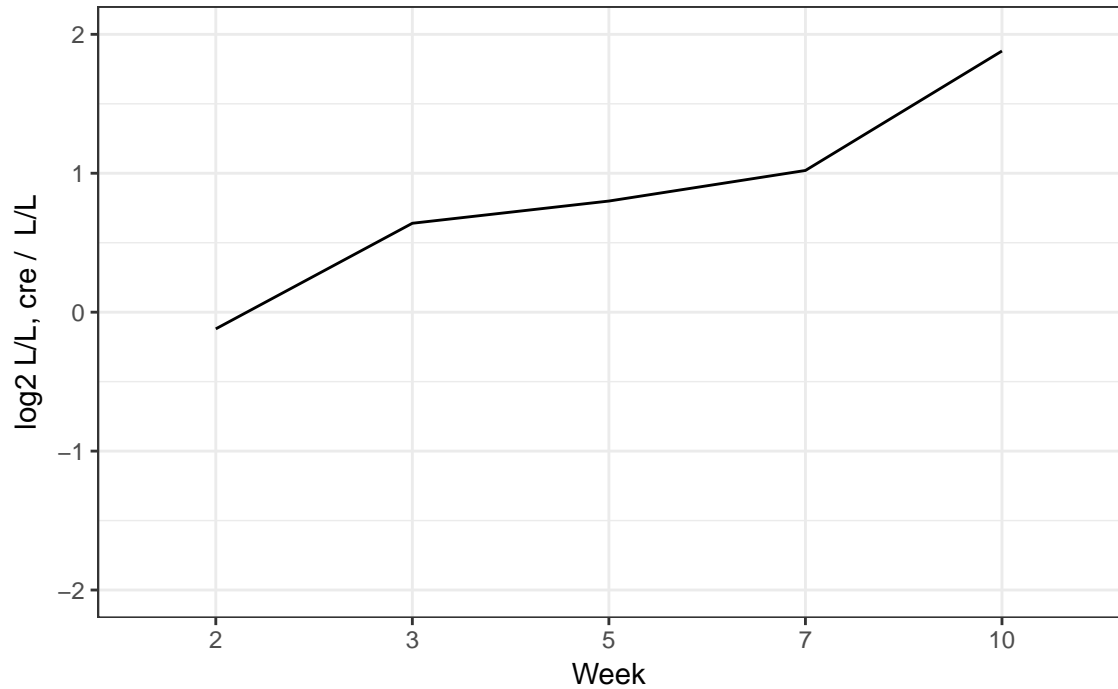

PGS1 / Q8BHF7; adj.p value: 0.32269

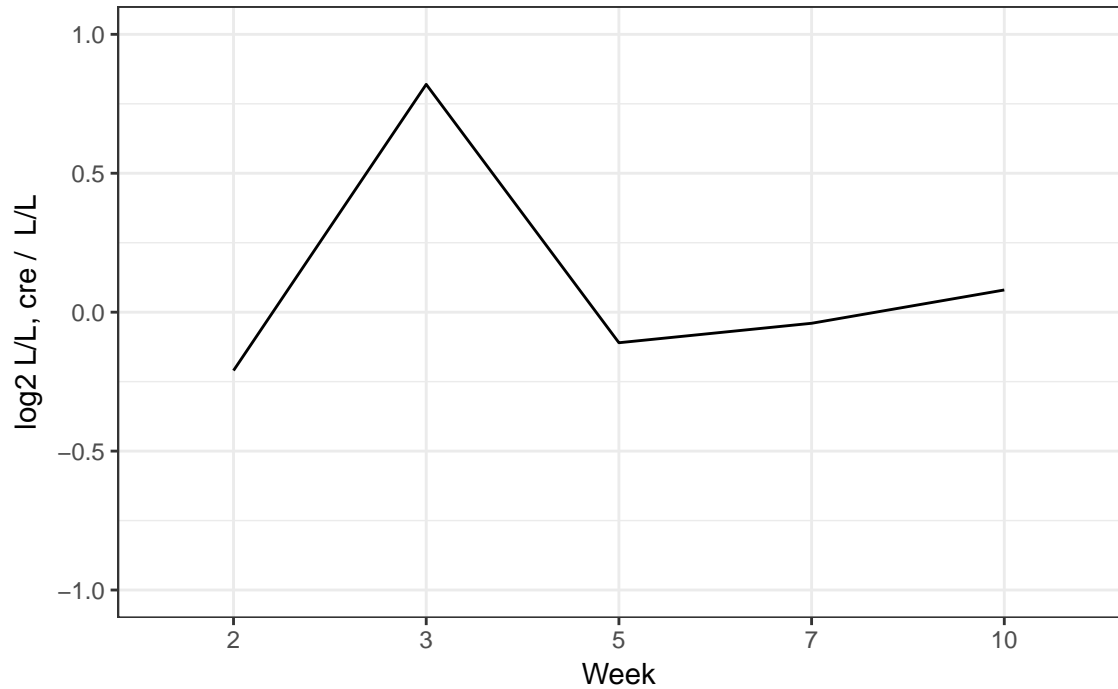

PHB / P67778; adj.p value: 0.01128

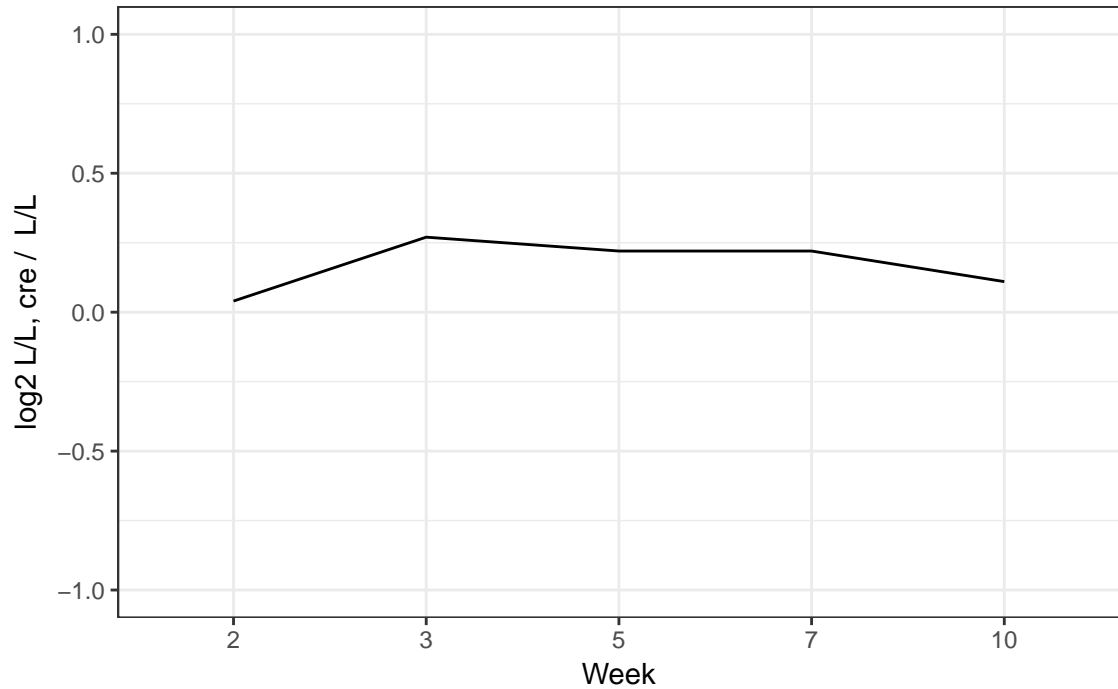



PHB2 / O35129; adj.p value: 0.04549

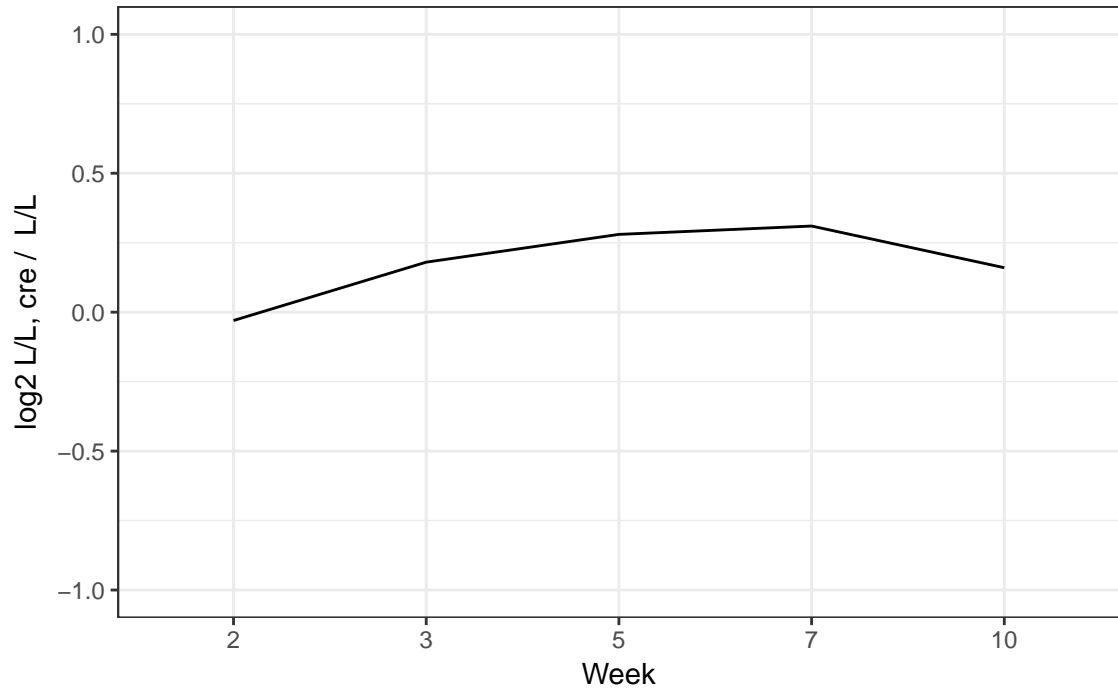

PHYH / O35386; adj.p value: 0.33356

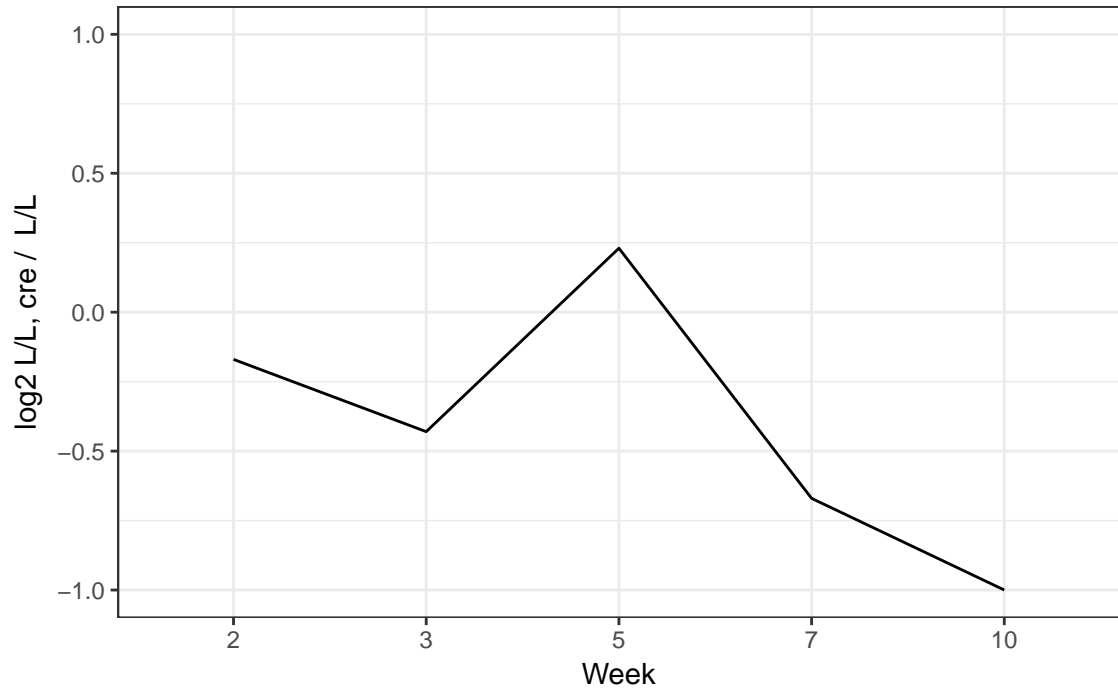

PITRM1 / Q8K411-2; adj.p value: 0.08965

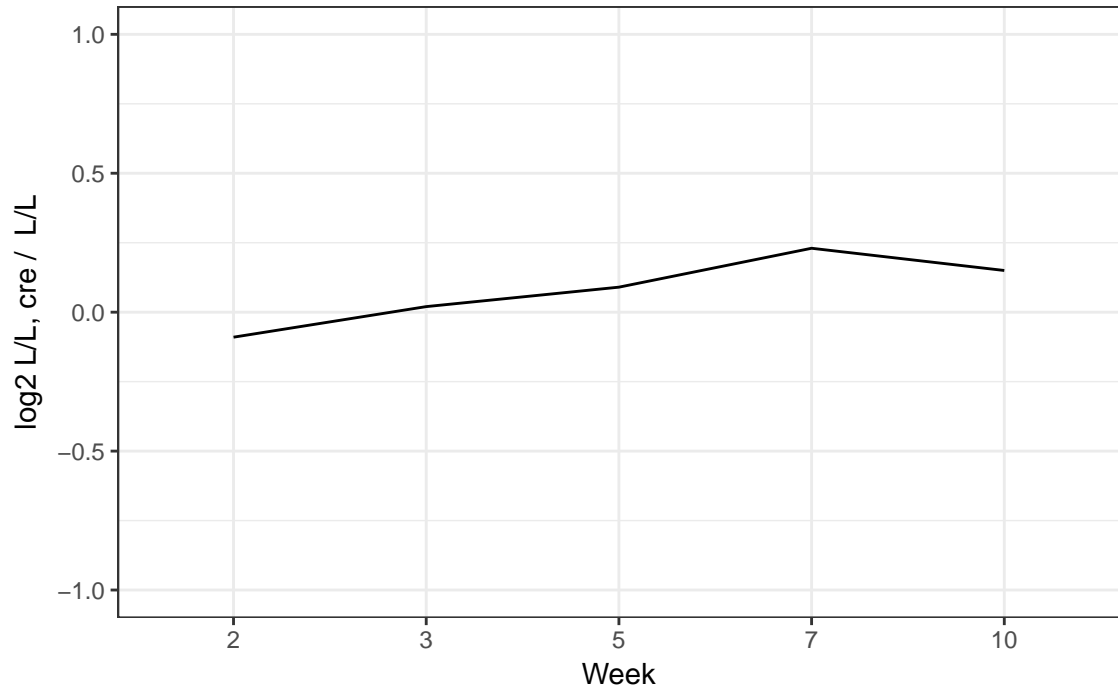

PLGRKT / Q9D3P8; adj.p value: 0.54239

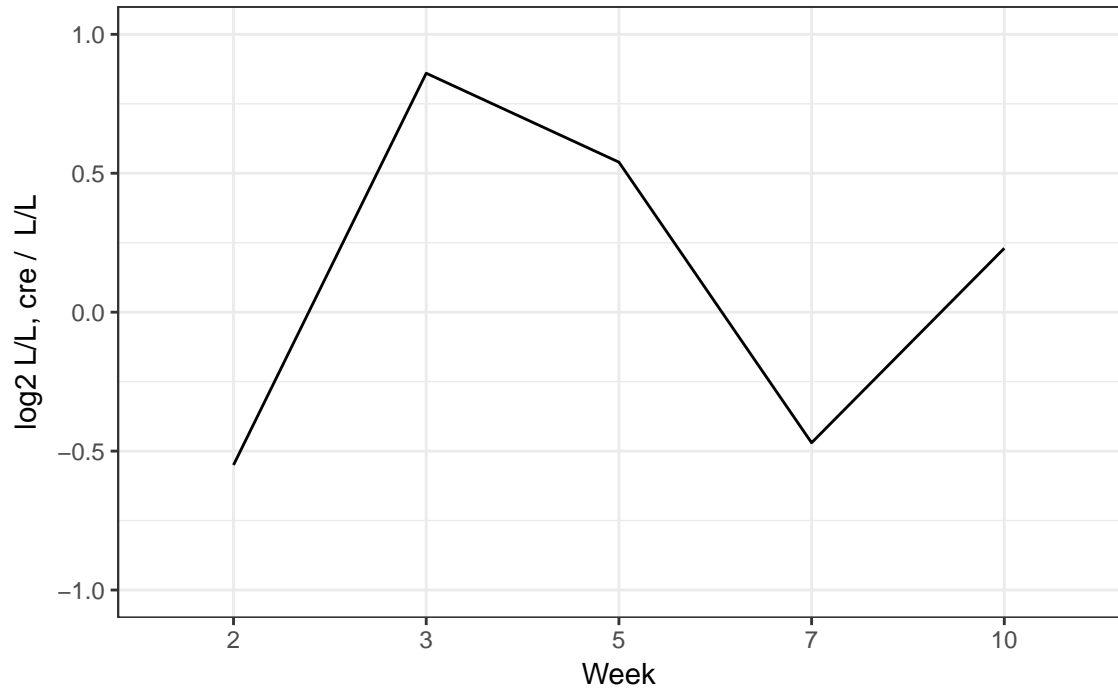

PMPCA / Q9DC61; adj.p value: 1e-05

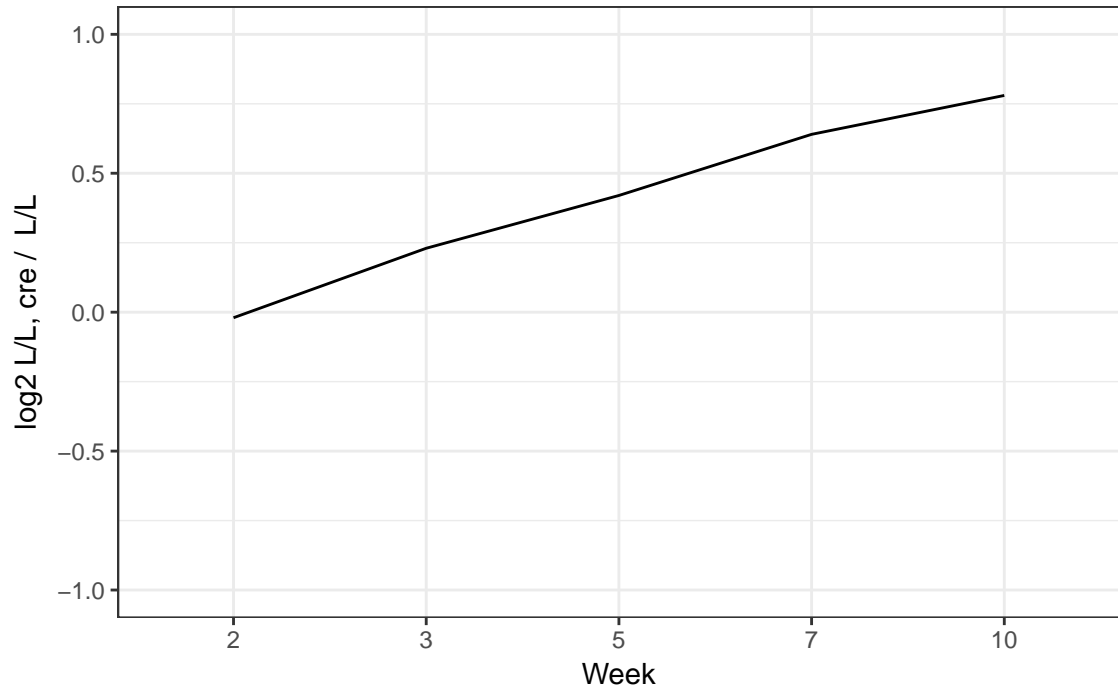

PMPCB / Q9CXT8; adj.p value: 0

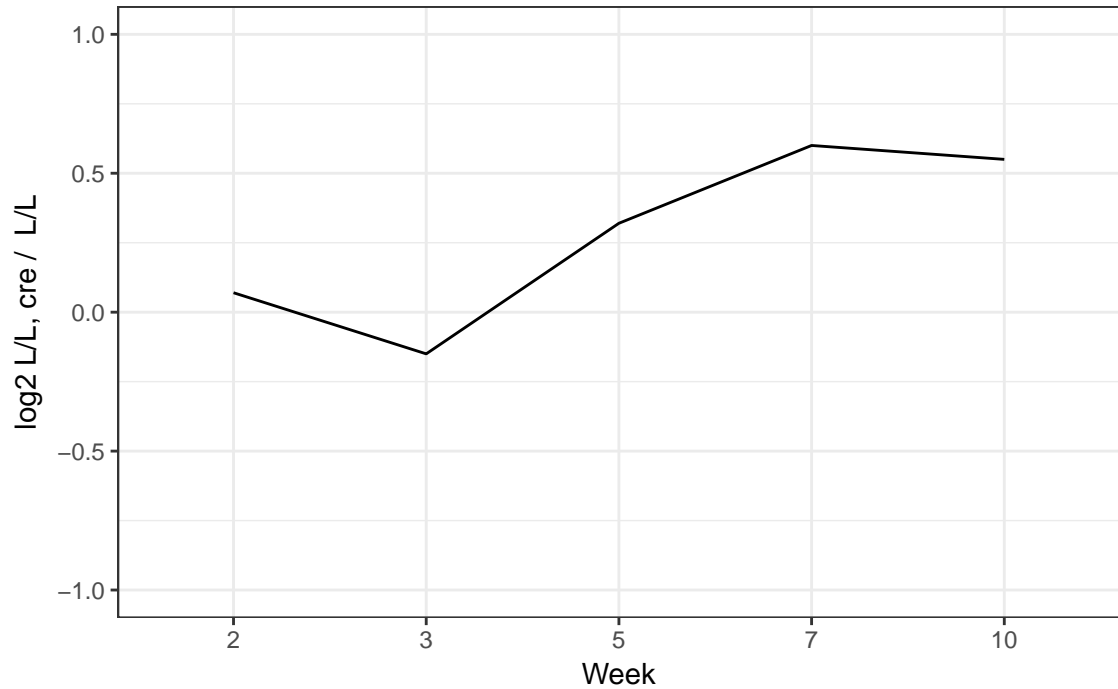

PNPLA8 / Q8K1N1; adj.p value: 0

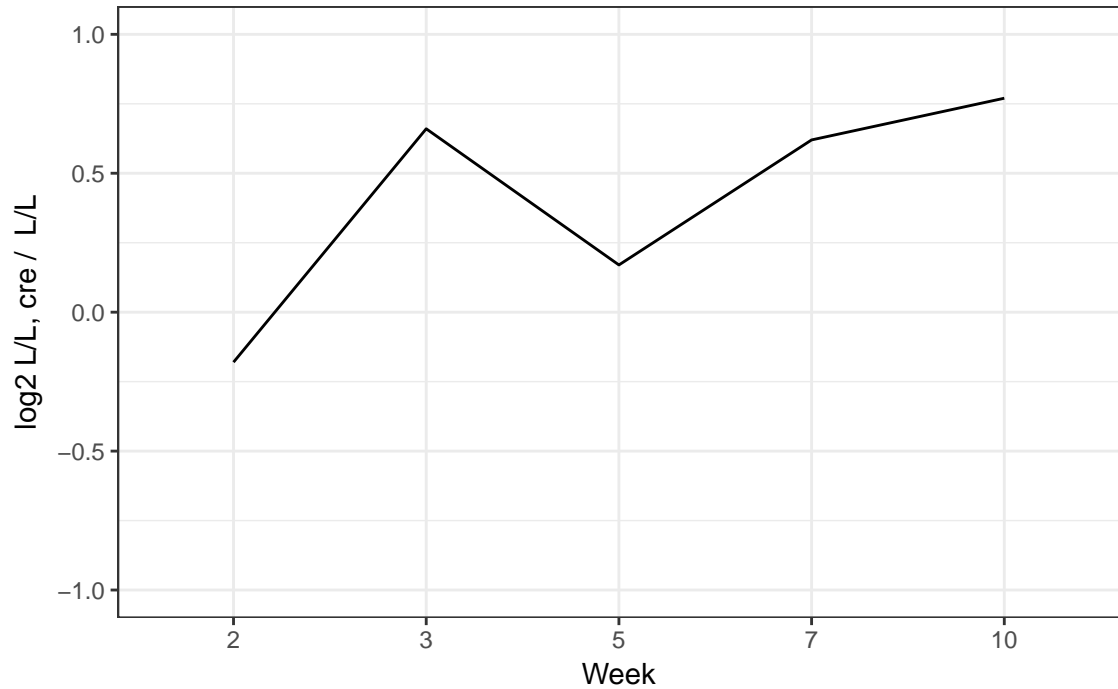

PNPT1 / Q8K1R3; adj.p value: 0.00031

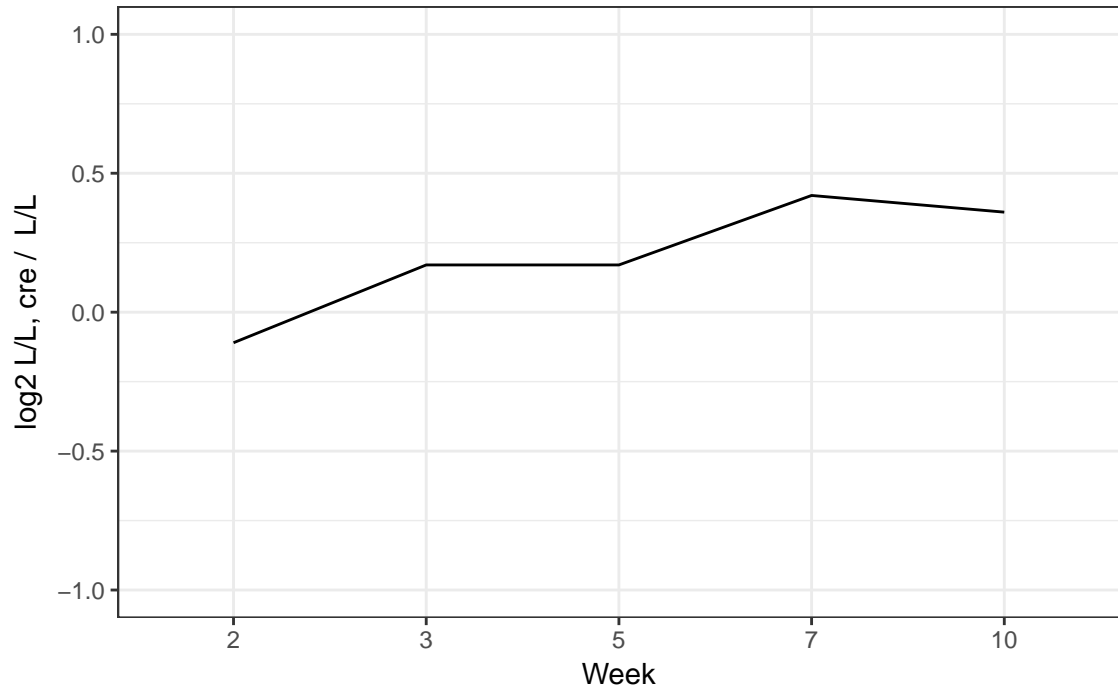



POLDIP2 / Q91VA6; adj.p value: 0.08517

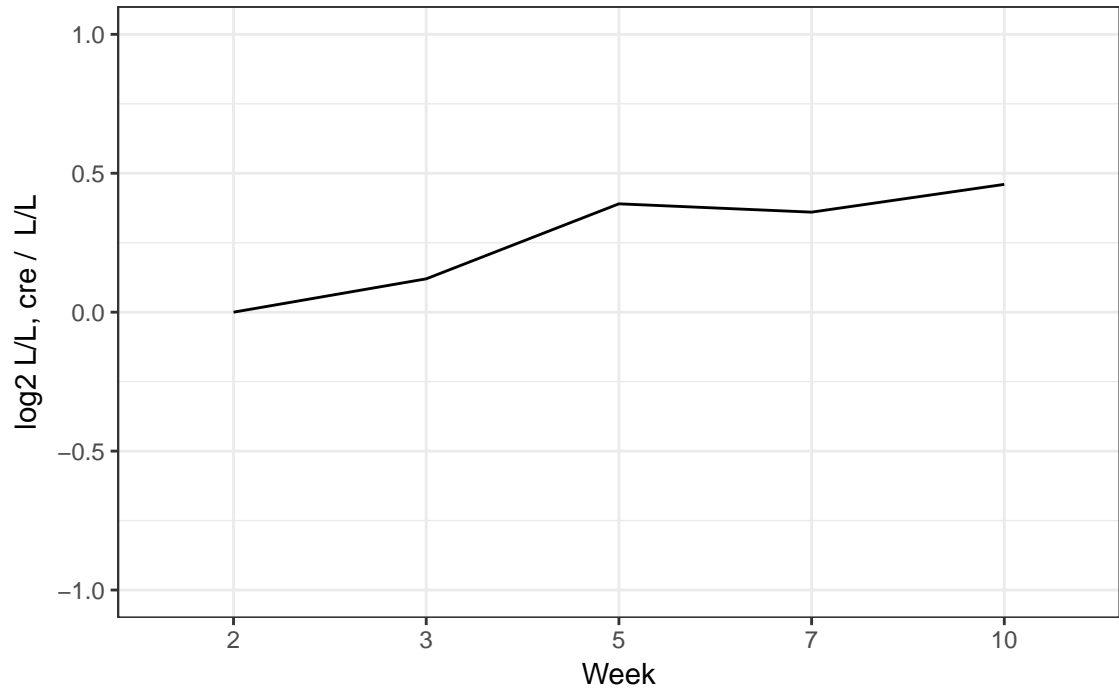

POLRMT / E9PWD9; adj.p value: 0.00041

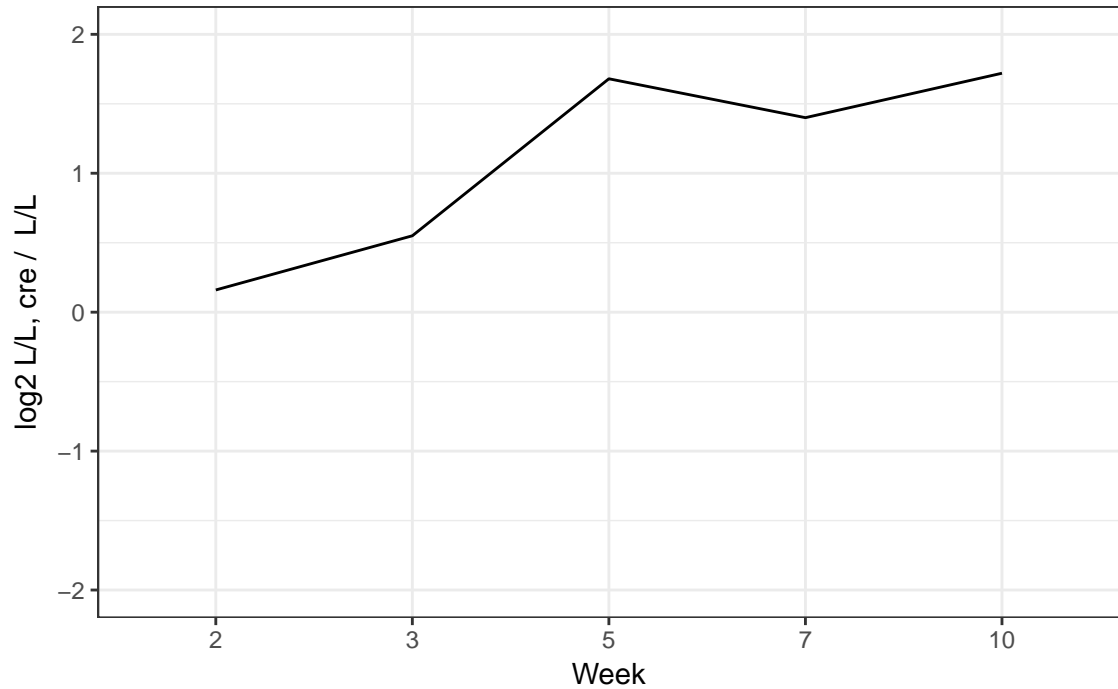

PPA2 / Q91VM9; adj.p value: 0.80034

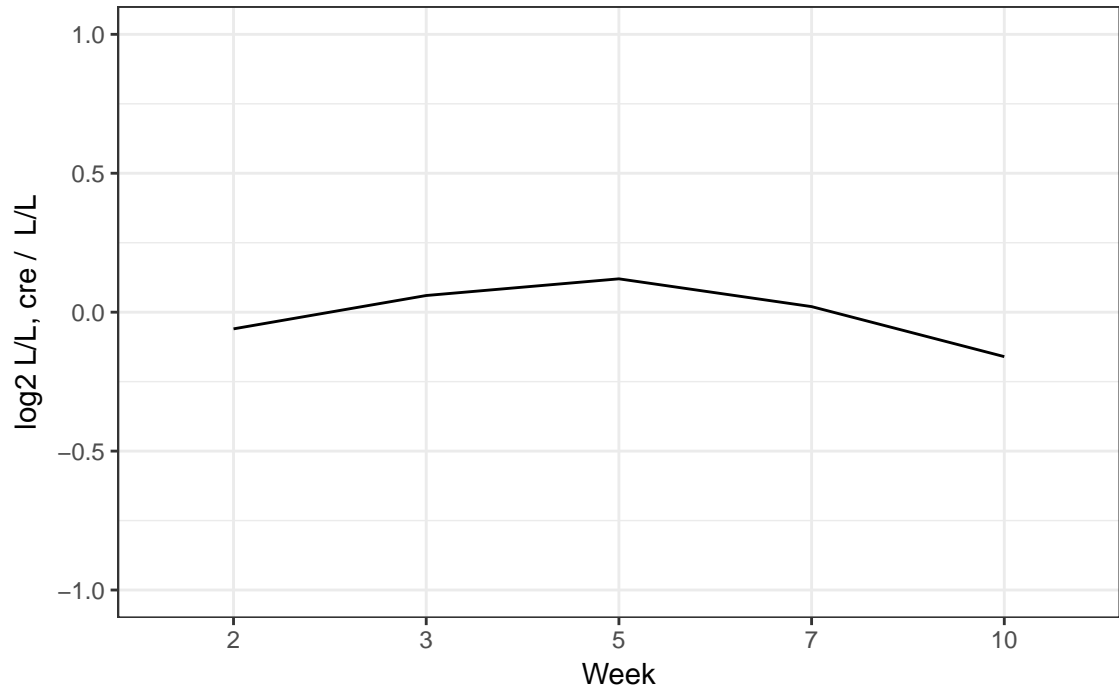

PPIF / Q99KR7; adj.p value: 0.28957

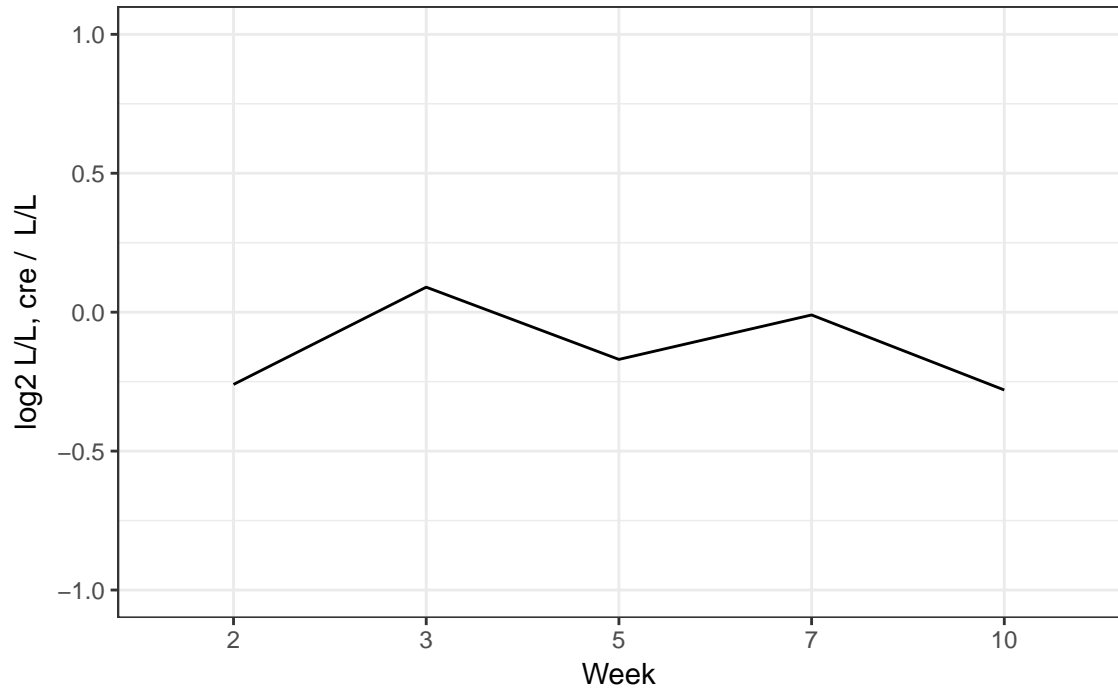

PPM1K / Q8BXN7; adj.p value: 0

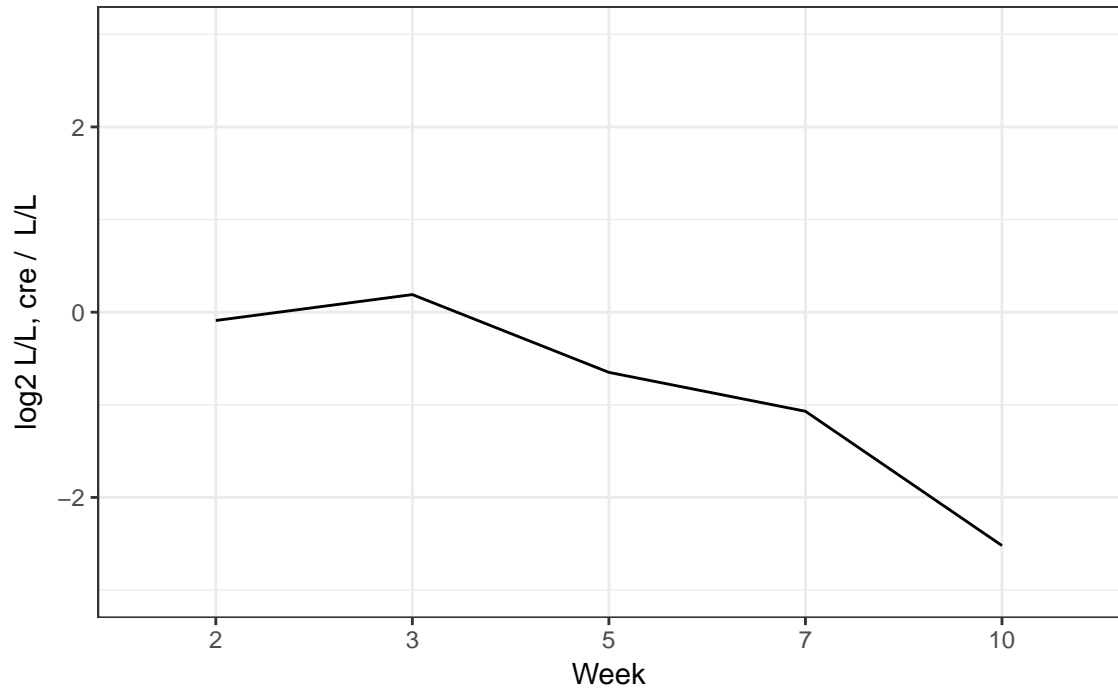

PPOX / P51175; adj.p value: 0.25847

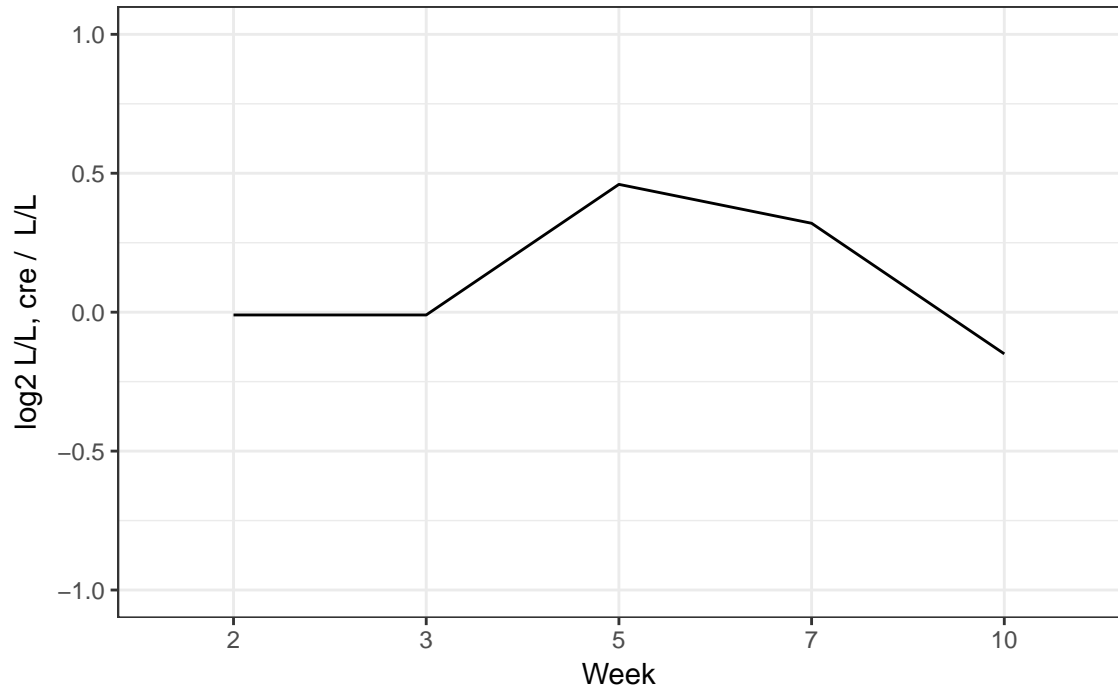

PPTC7 / Q6NVE9; adj.p value: 0.04549

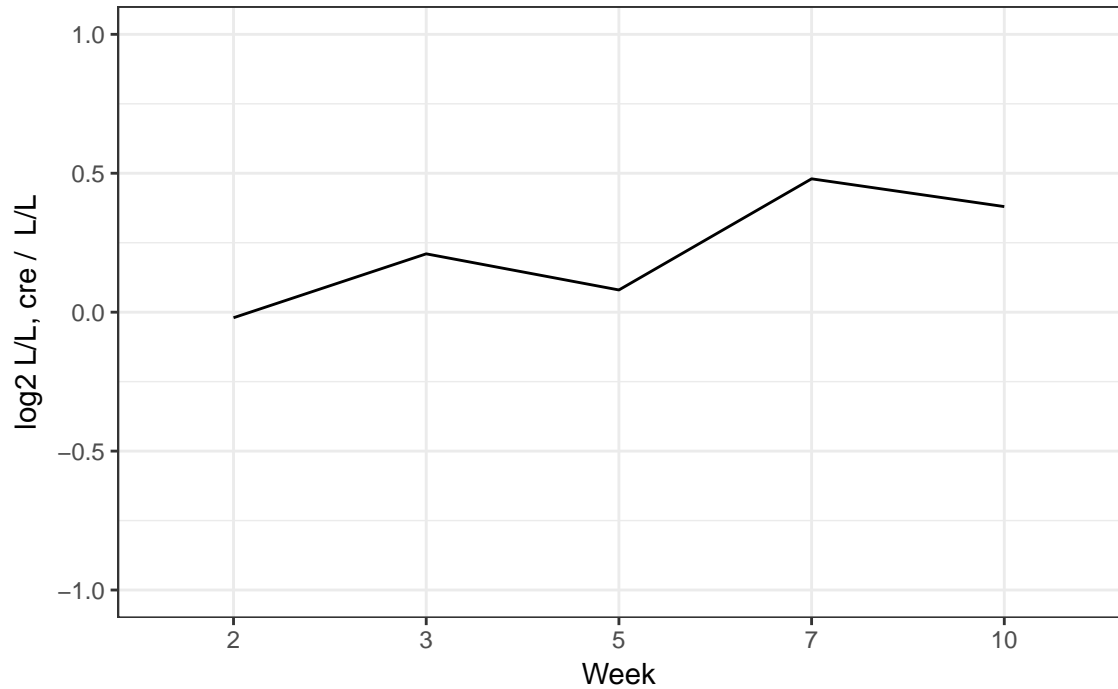

PRDX2 / Q61171; adj.p value: 0.07274

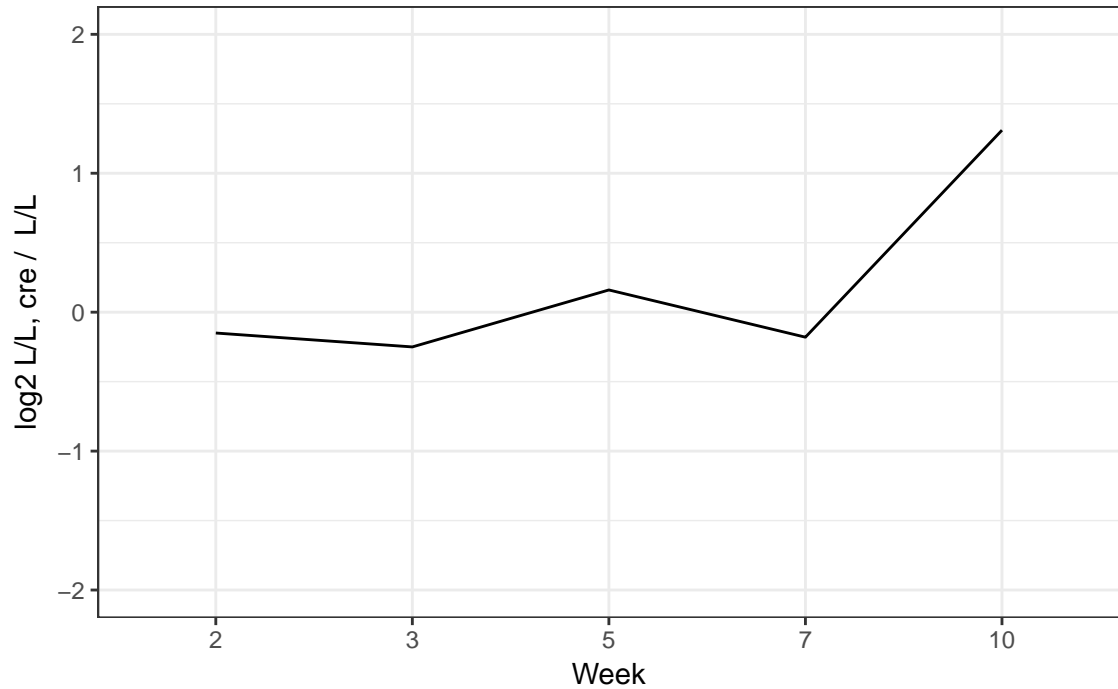



PRDX3 / P20108; adj.p value: 0.15358

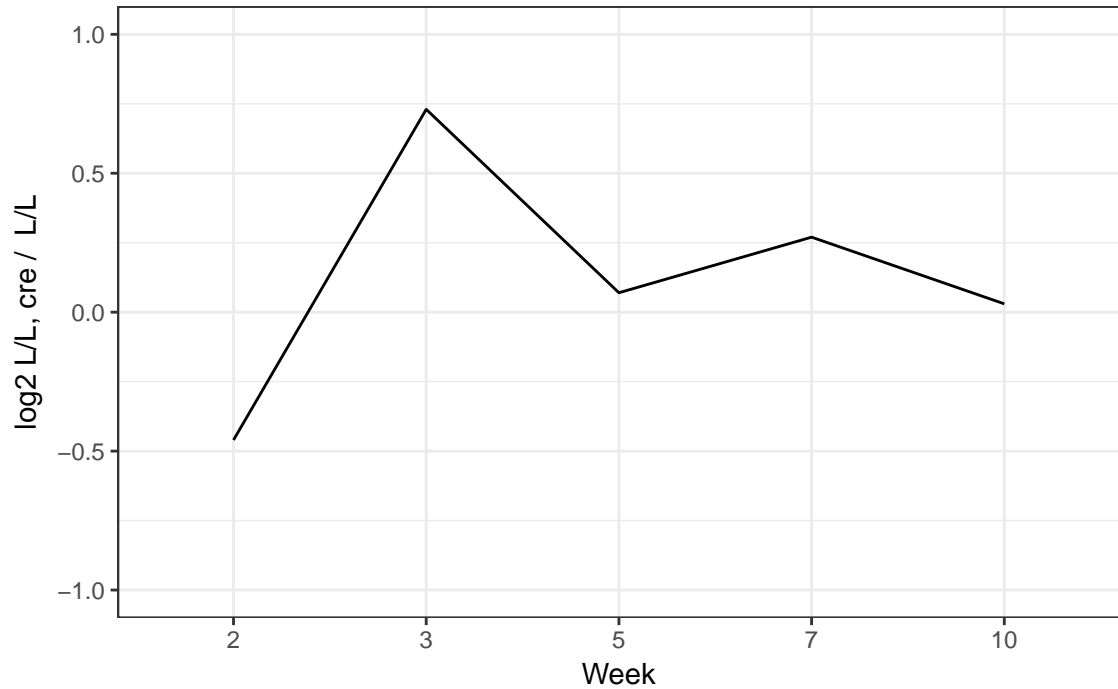

PRDX5 / P99029-2; adj.p value: 0.02115

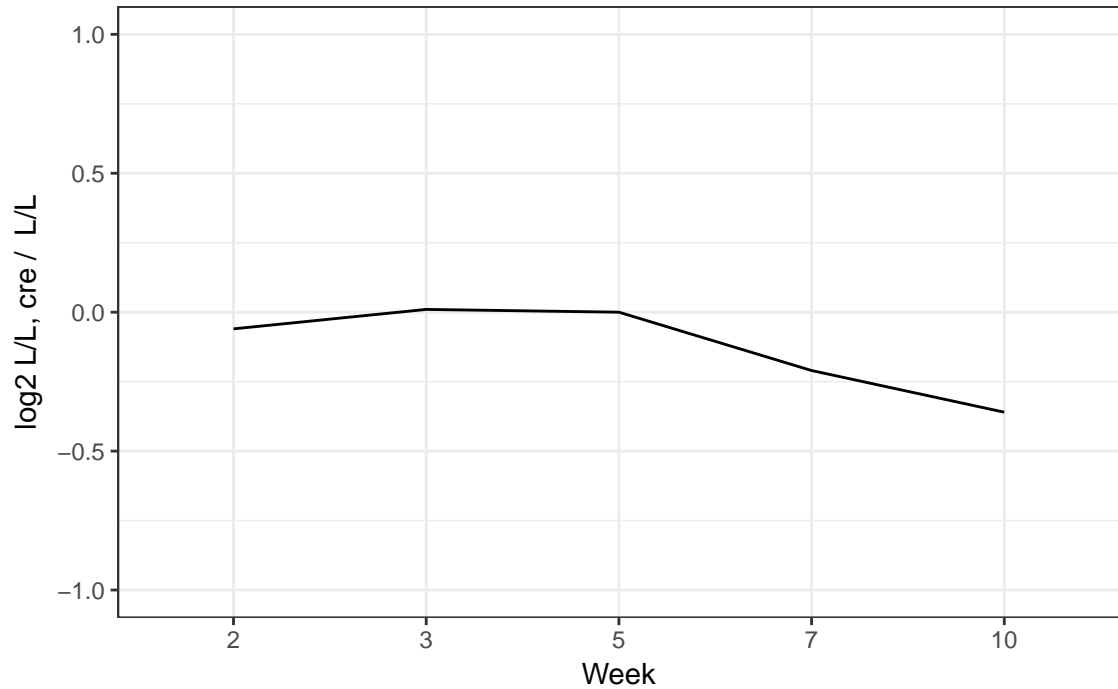

PRODH / Q9WU79; adj.p value: 0.01559

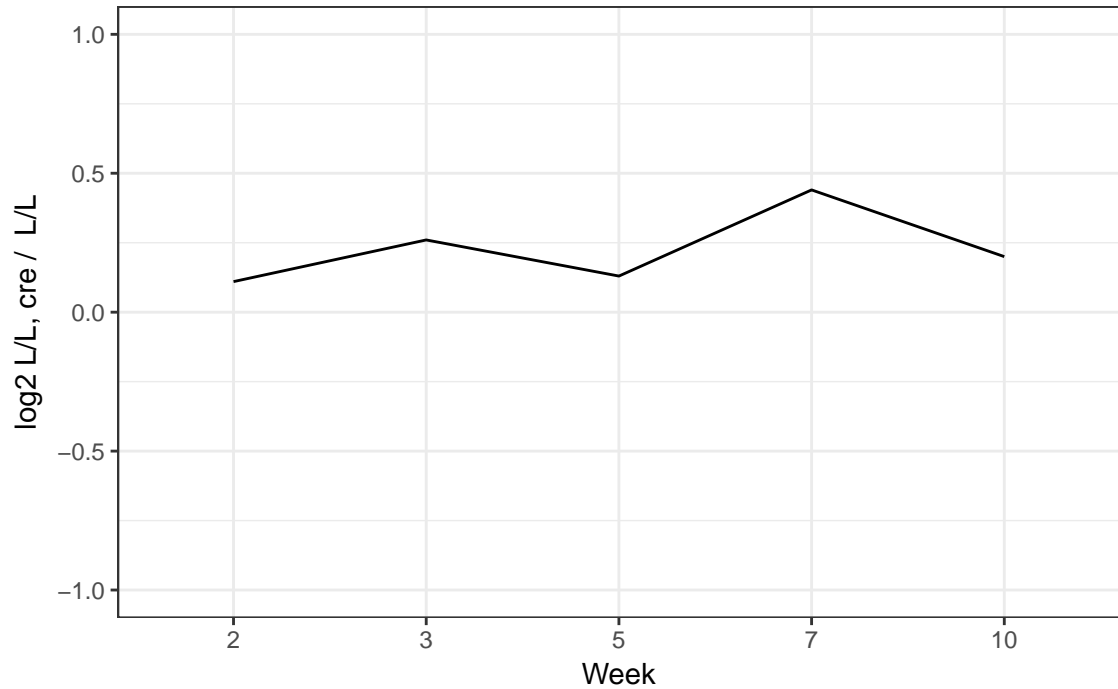

PROSC / Q9Z2Y8; adj.p value: 0.49967

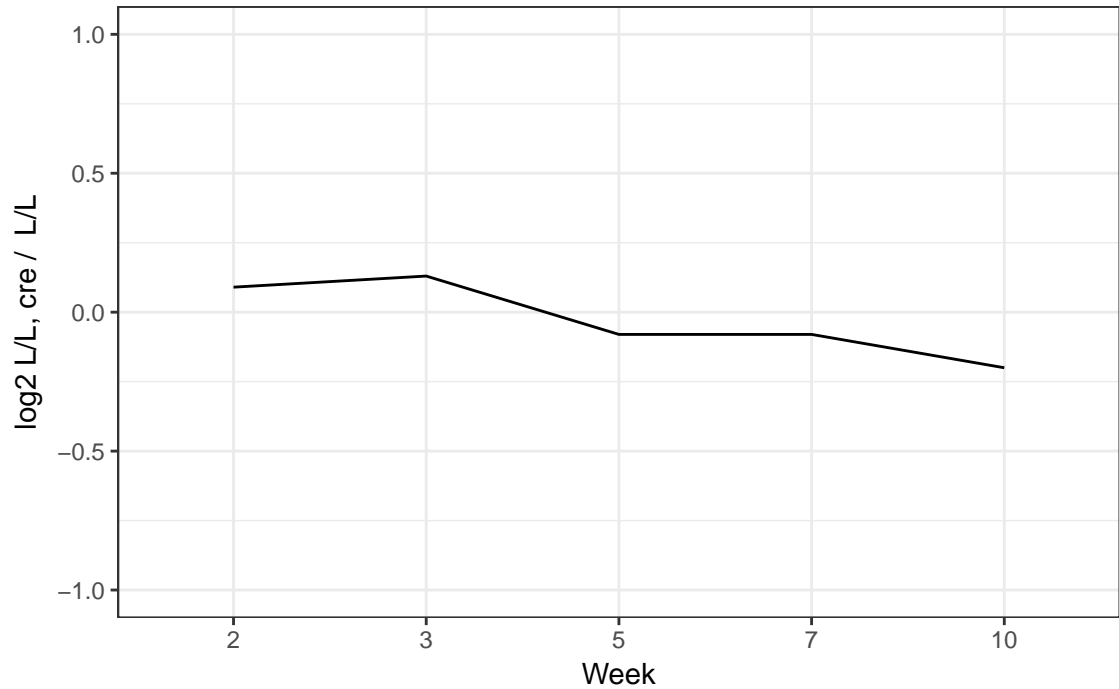

PTCD1 / Q8C2E4; adj.p value: 0.68402

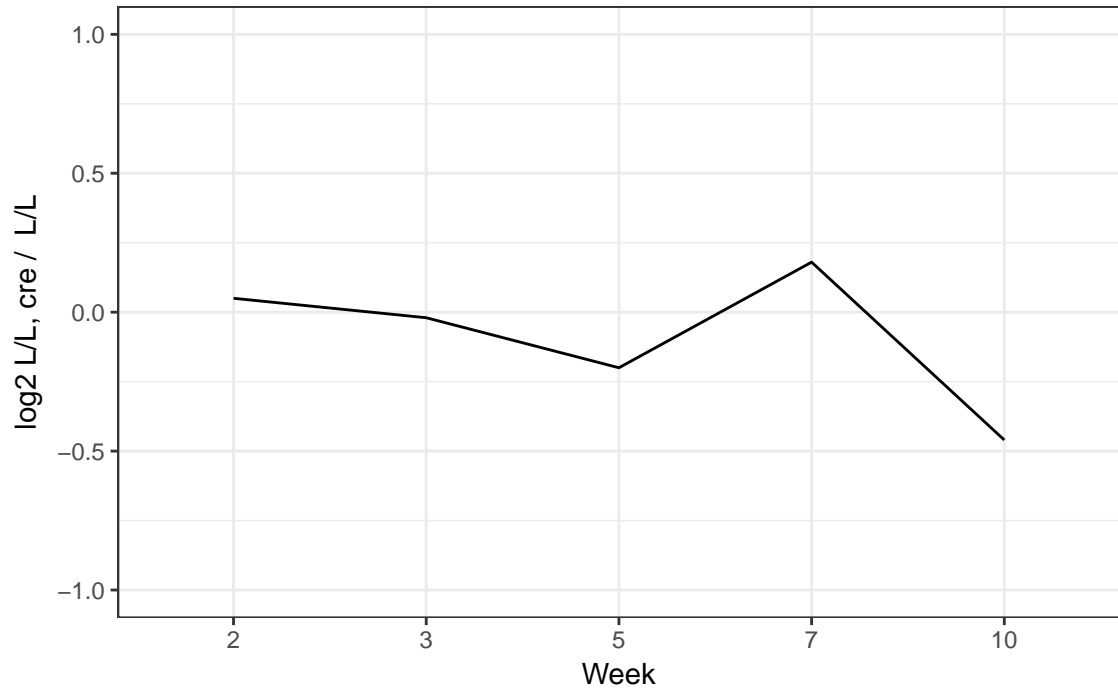

PTCD2 / Q8R3K3; adj.p value: 0.00021

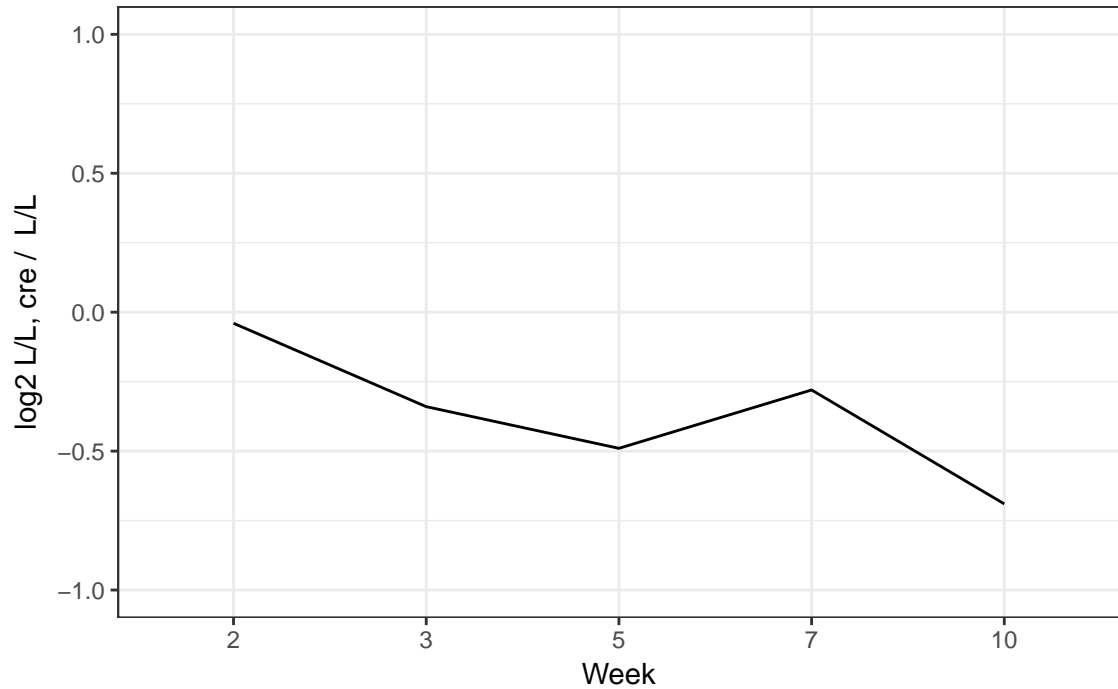

PTGES2 / Q8BWM0; adj.p value: 0.30189

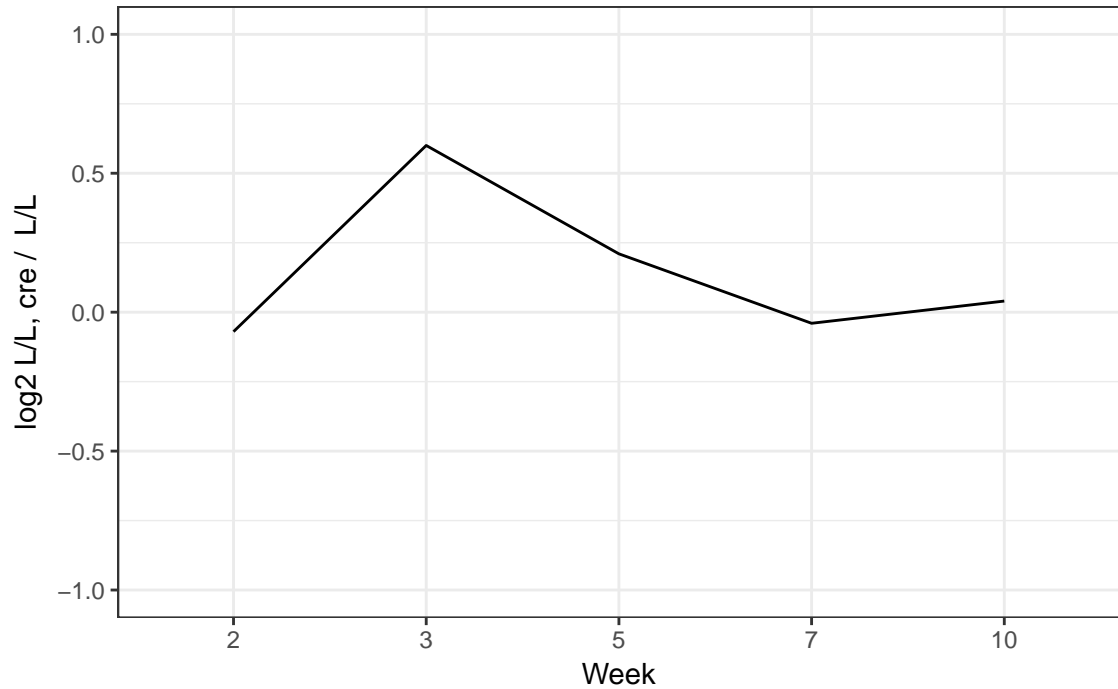

PTPMT1 / Q66GT5; adj.p value: 0.0195

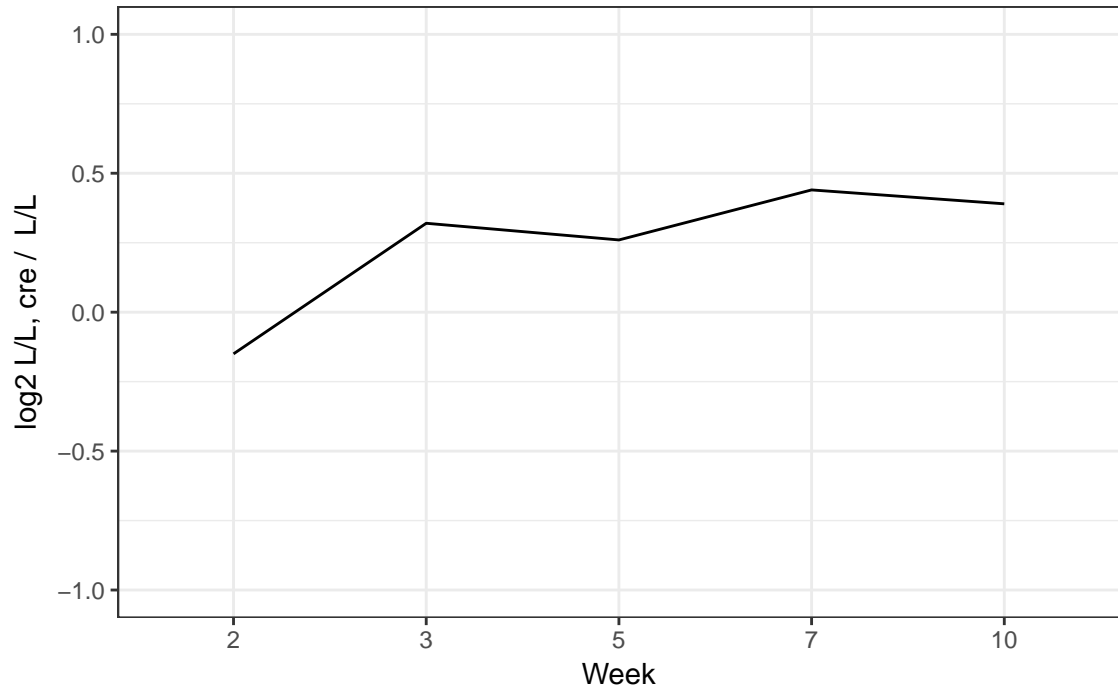



PTRH2 / Q8R2Y8; adj.p value: 0.00087

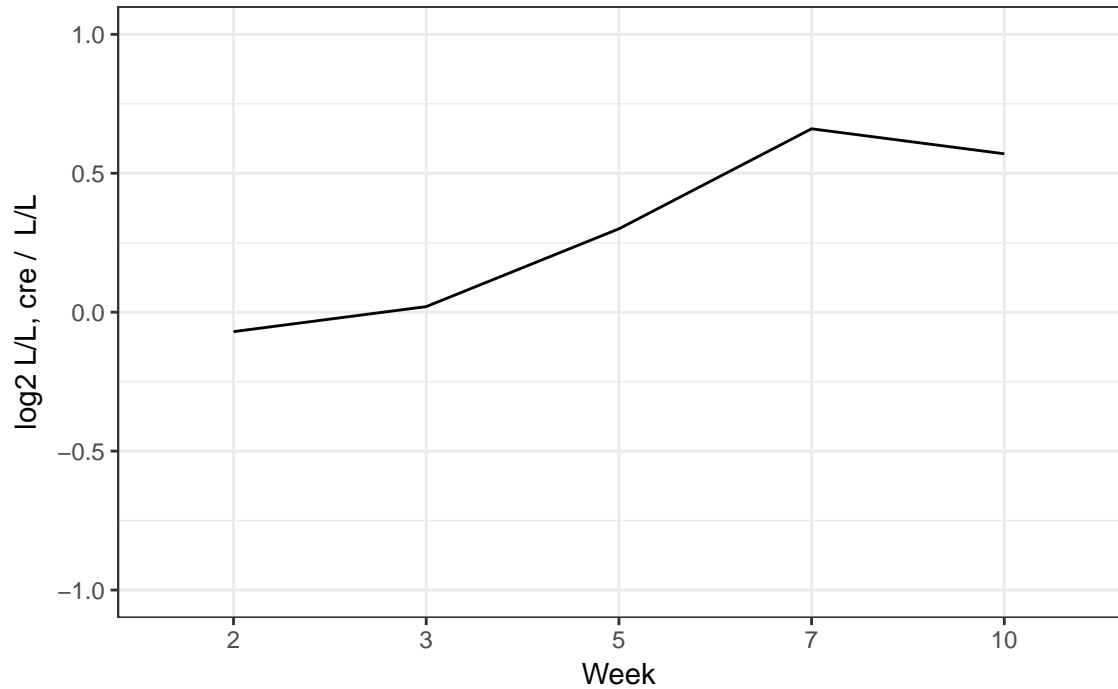

PYCR2 / Q922Q4; adj.p value: 0

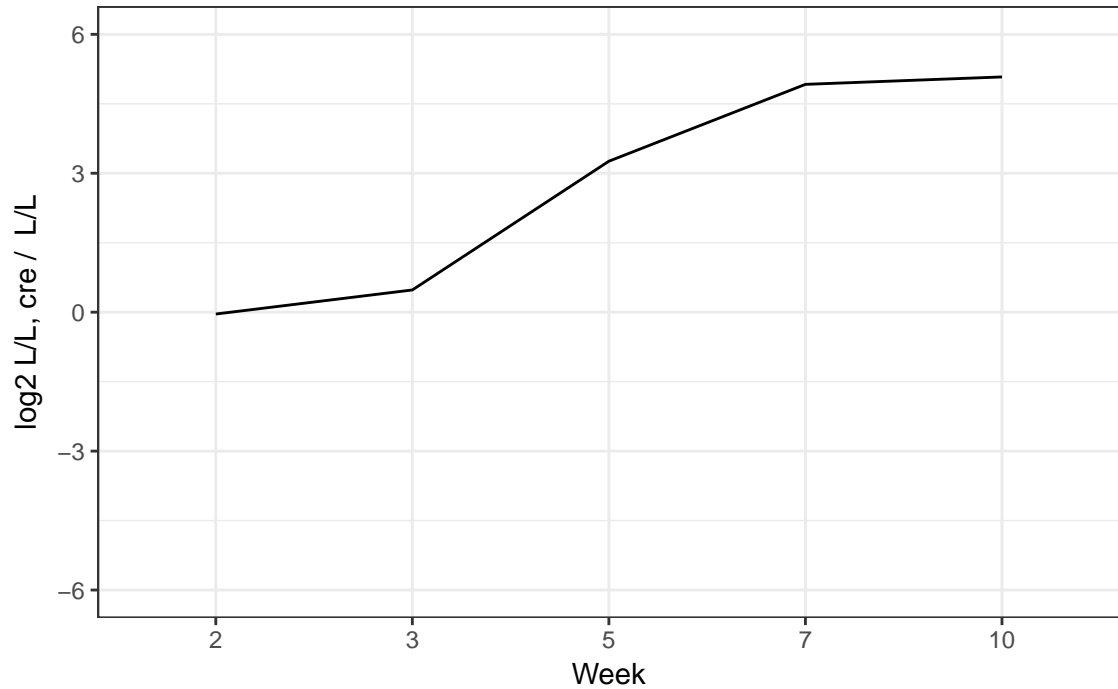

PYURF / Q9D1C3; adj.p value: 0.61795

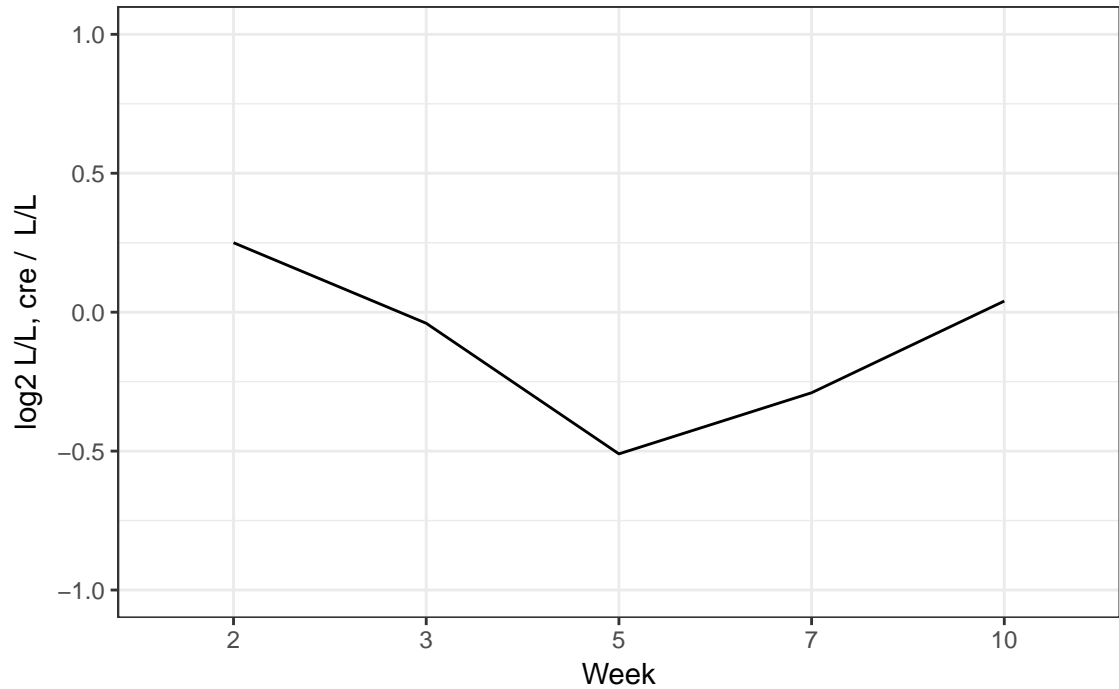

QDPR / Q8BVI4; adj.p value: 0.22254

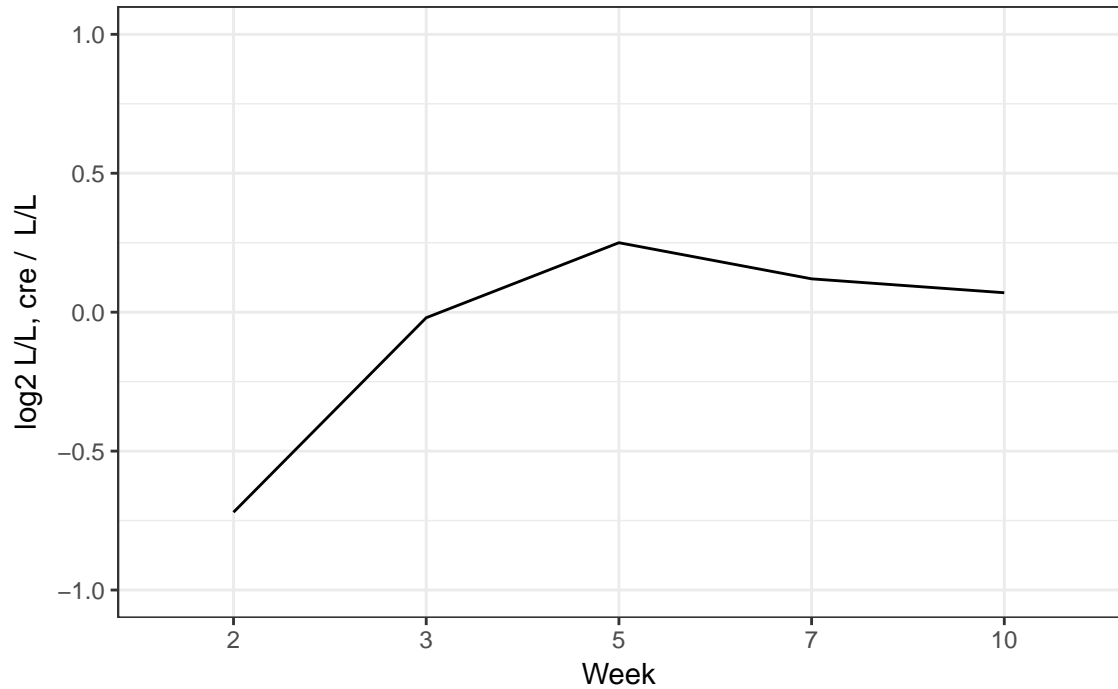

QIL1 / Q8R404; adj.p value: 0.08685

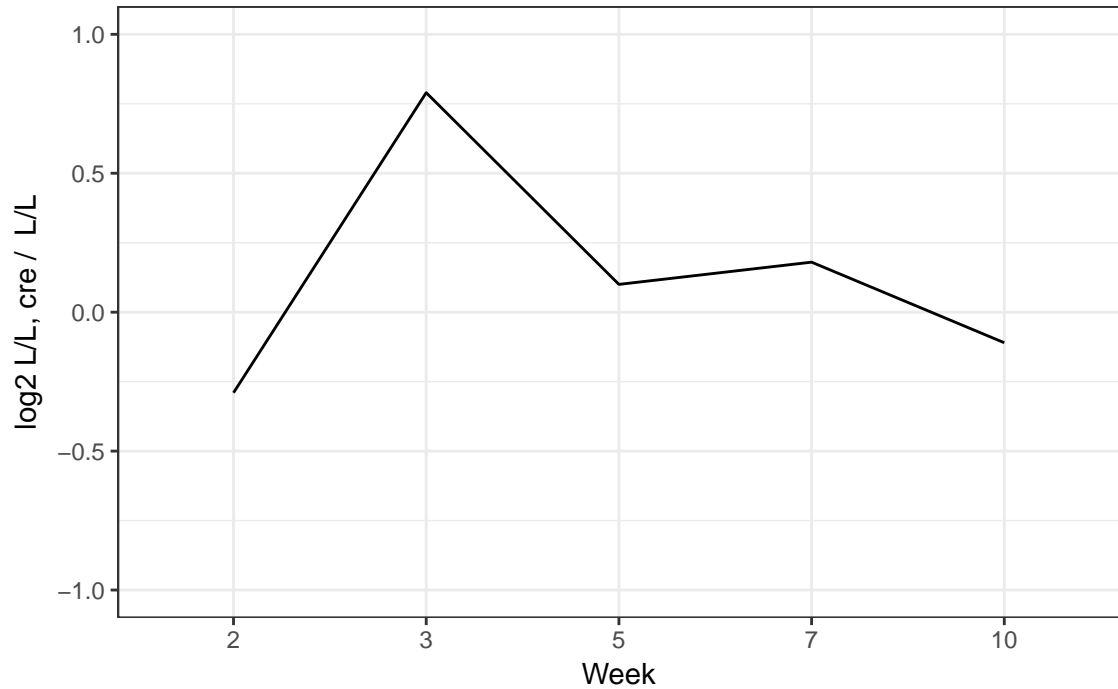

QRSL1 / Q9CZN8; adj.p value: 0.01466

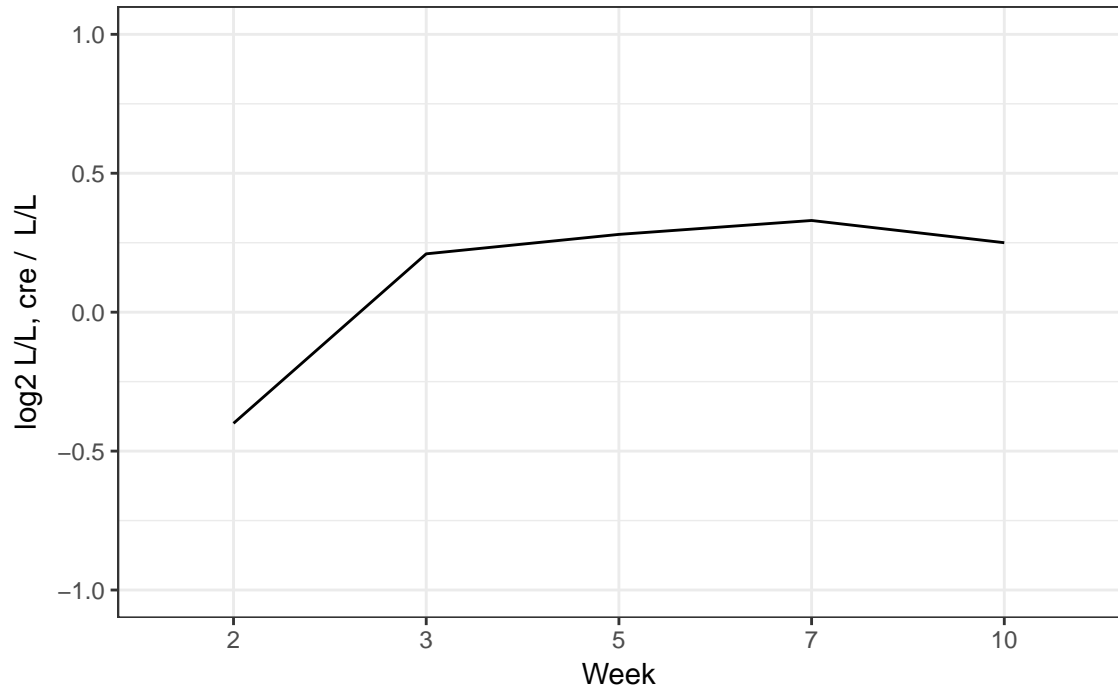

RAB35 / Q6PHN9; adj.p value: 0.1257

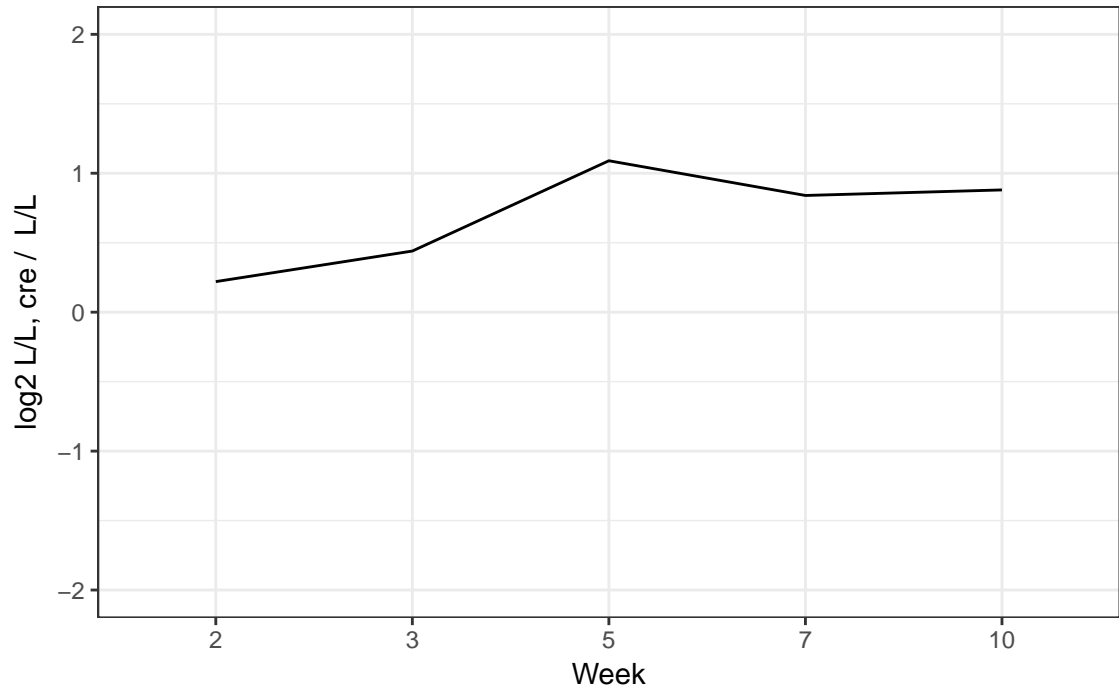

RARS2 / Q3U186; adj.p value: 0.06717

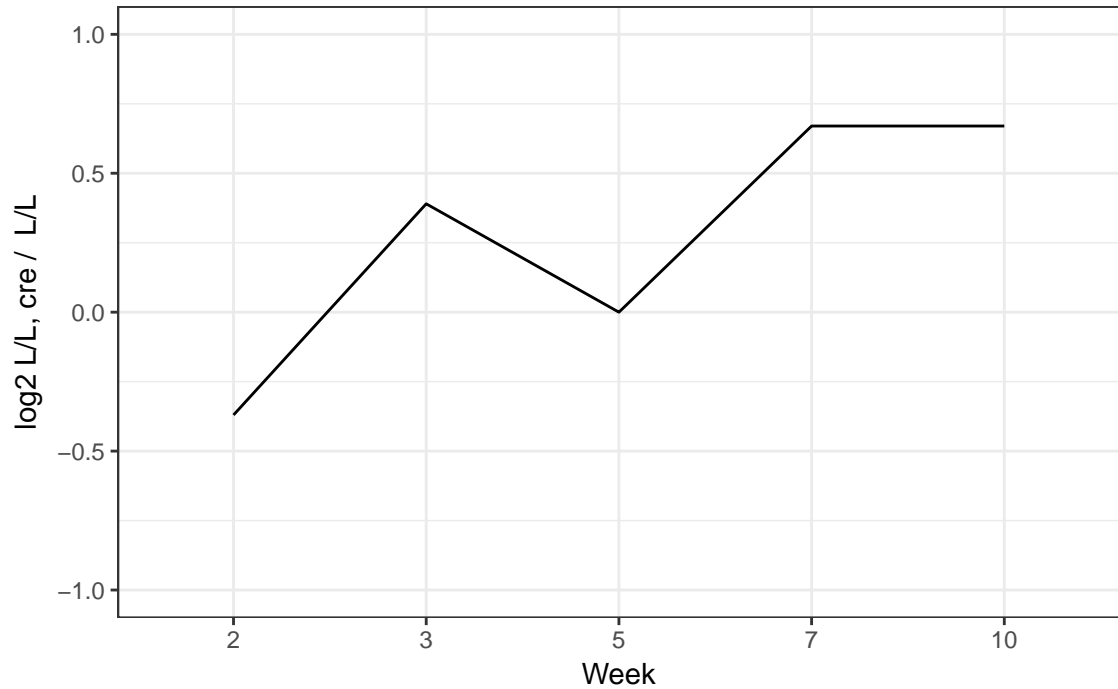



RBFA / Q6P3B9; adj.p value: 0

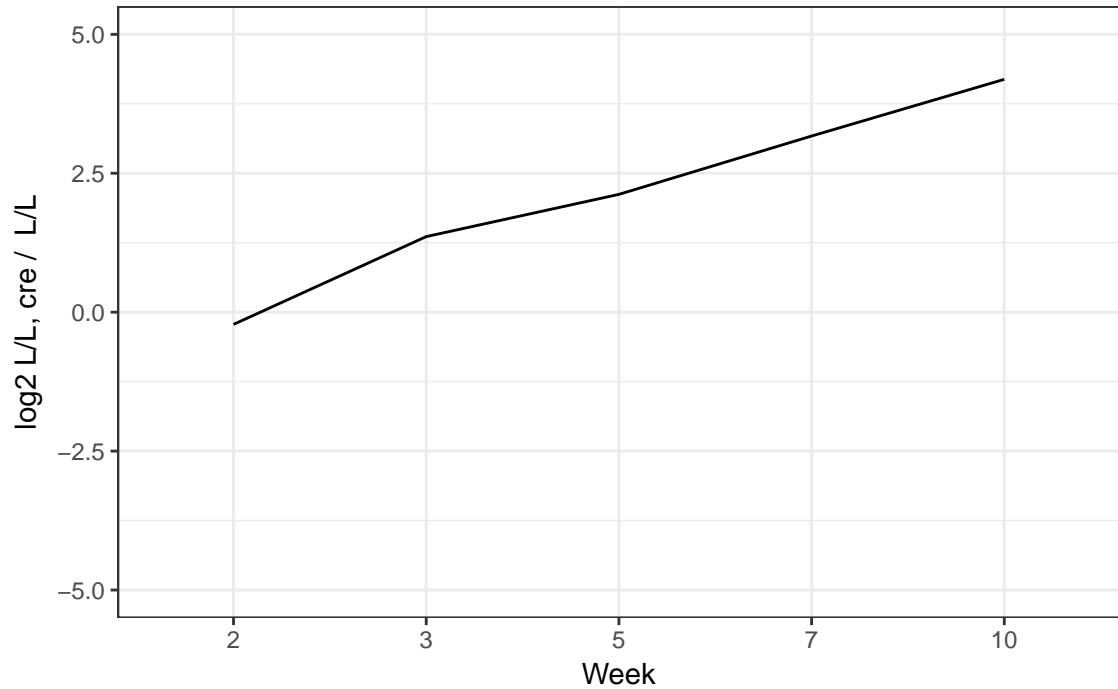

RDH13 / Q8CEE7; adj.p value: 0.00678

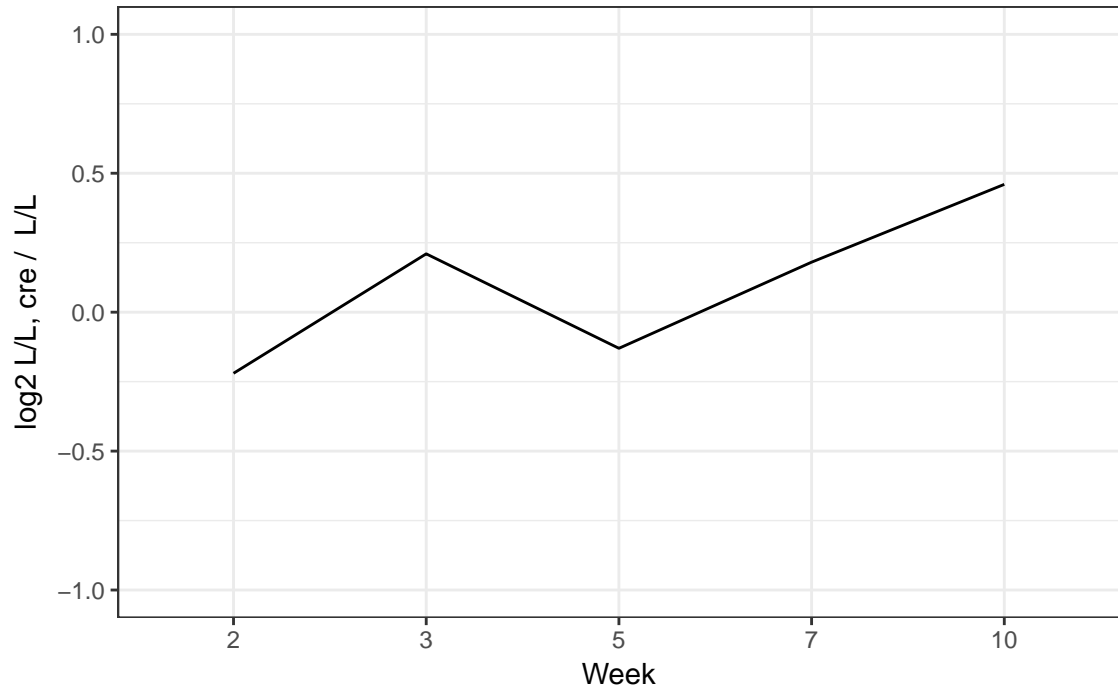

RDH14 / Q9ERI6; adj.p value: 0.11024

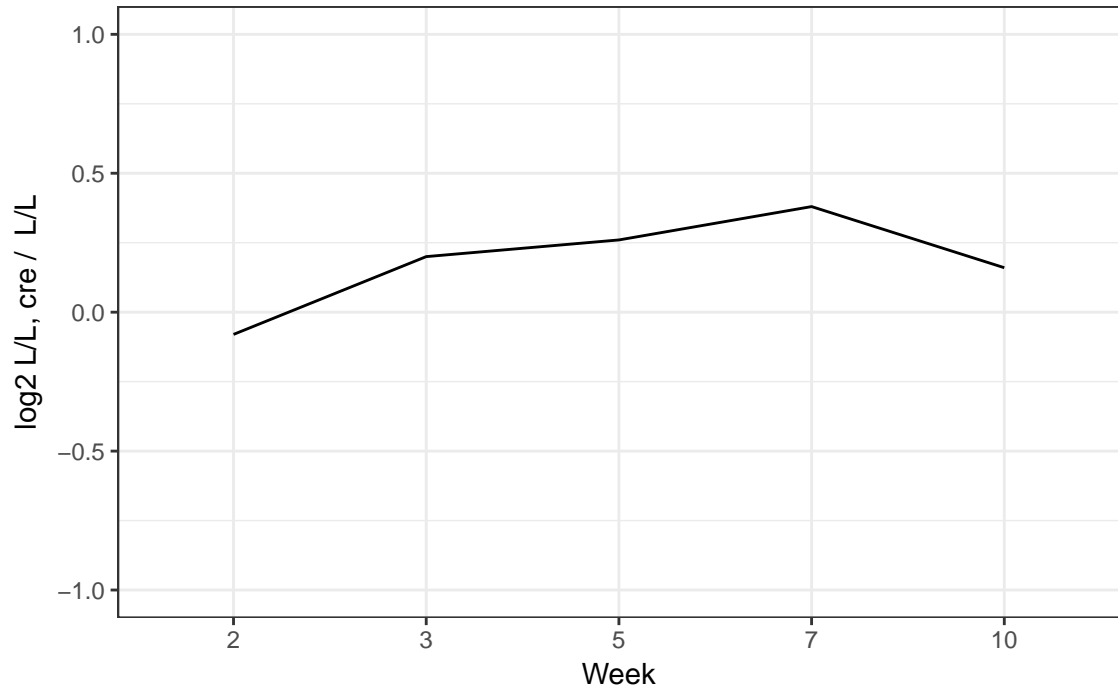

REXO2 / Q9D8S4; adj.p value: 0.18869

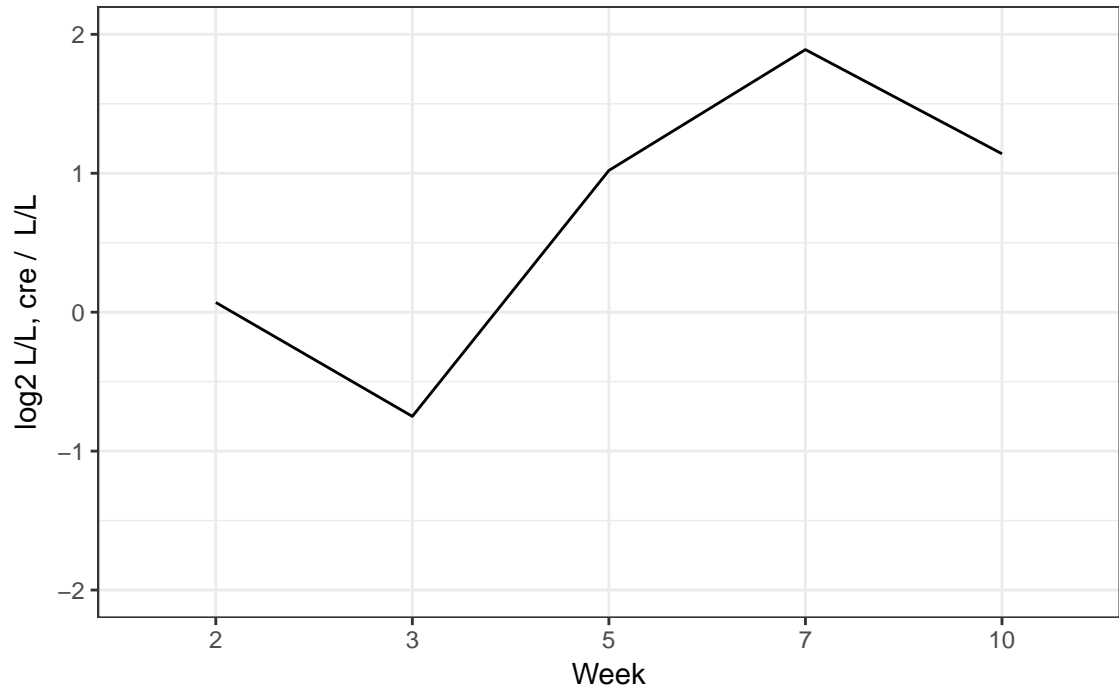

RHOT1 / Q8BG51-3; adj.p value: 0.6095

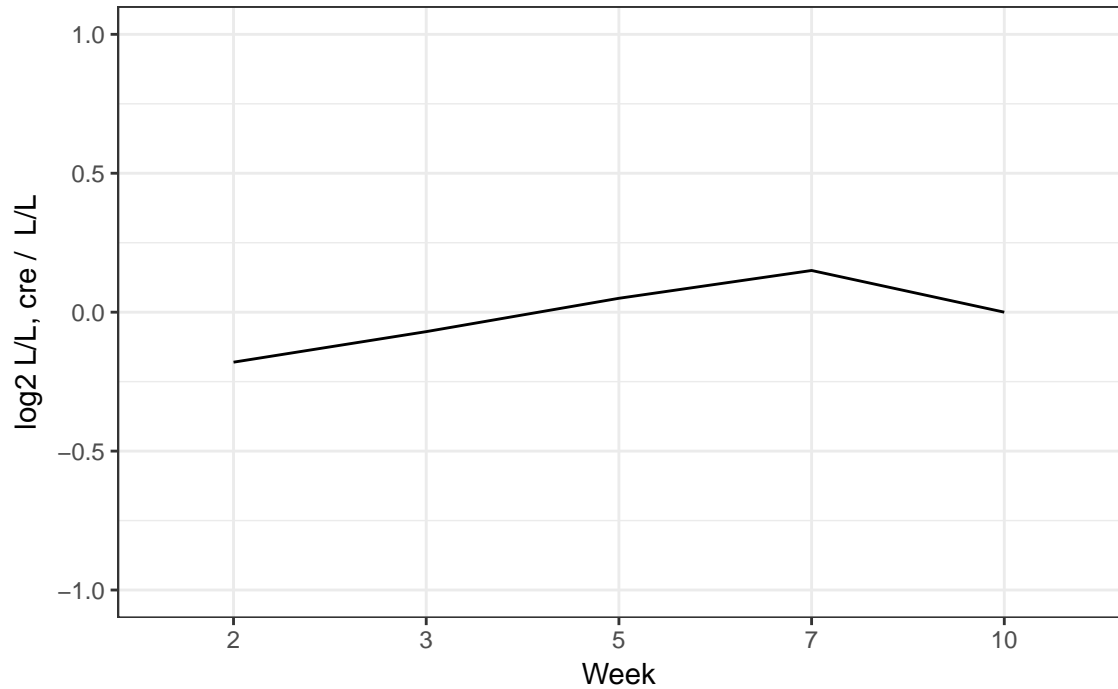

RHOT2 / Q8JZN7; adj.p value: 0.31815

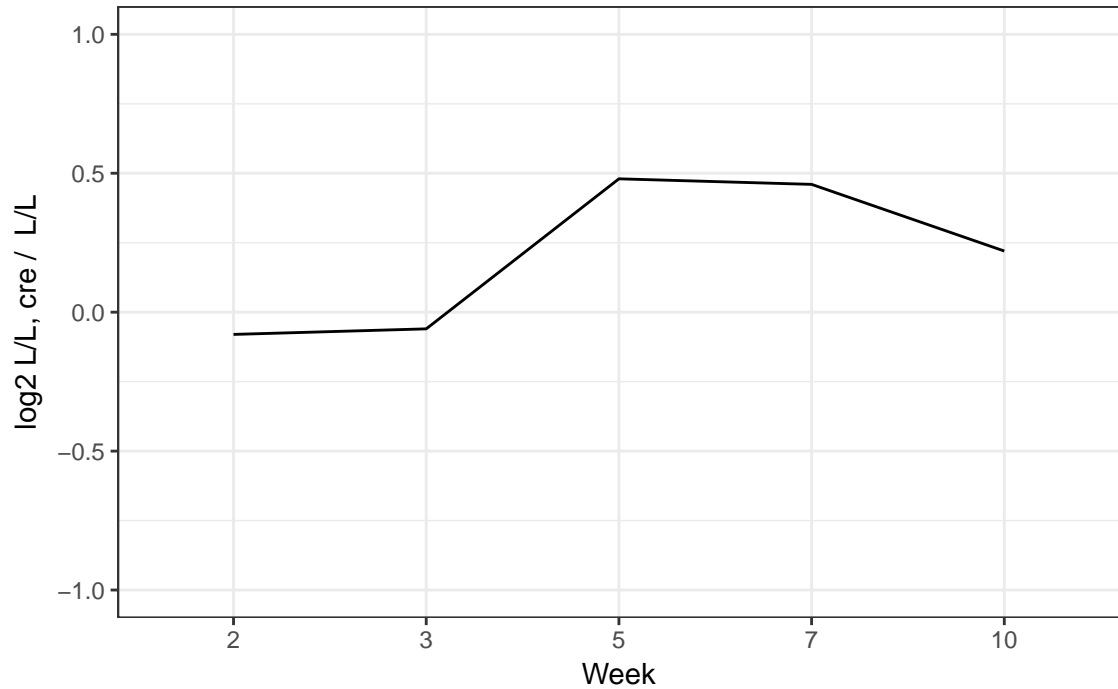

RMDN1 / Q9DCV4; adj.p value: 0.26603

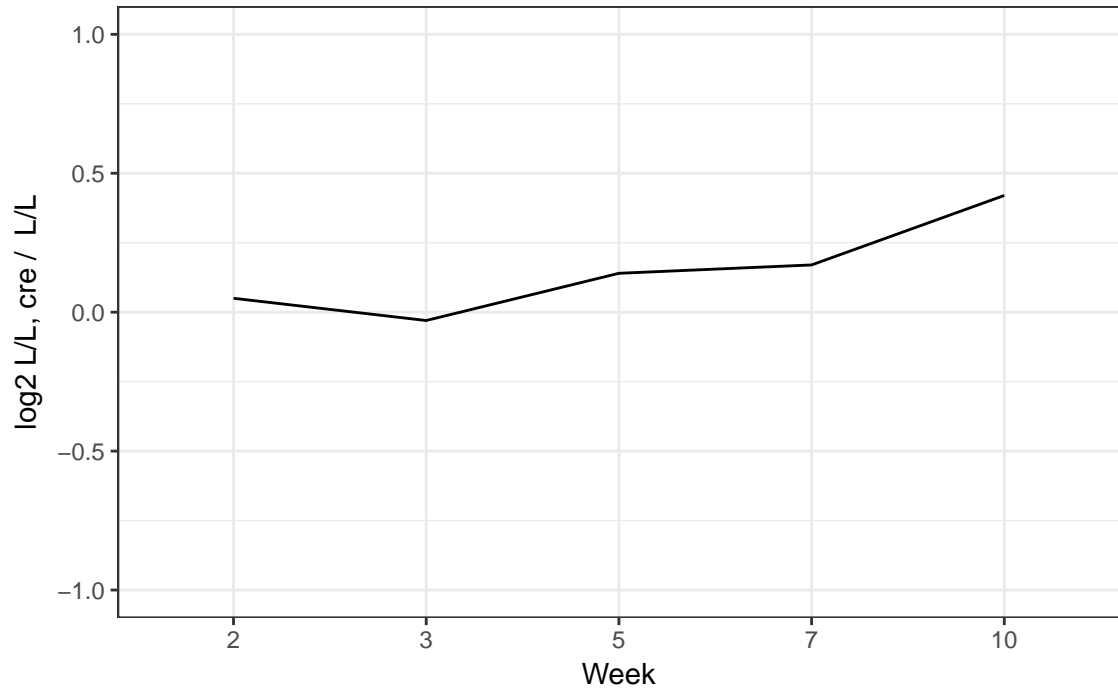

RMND1 / Q8CI78; adj.p value: 0.07776

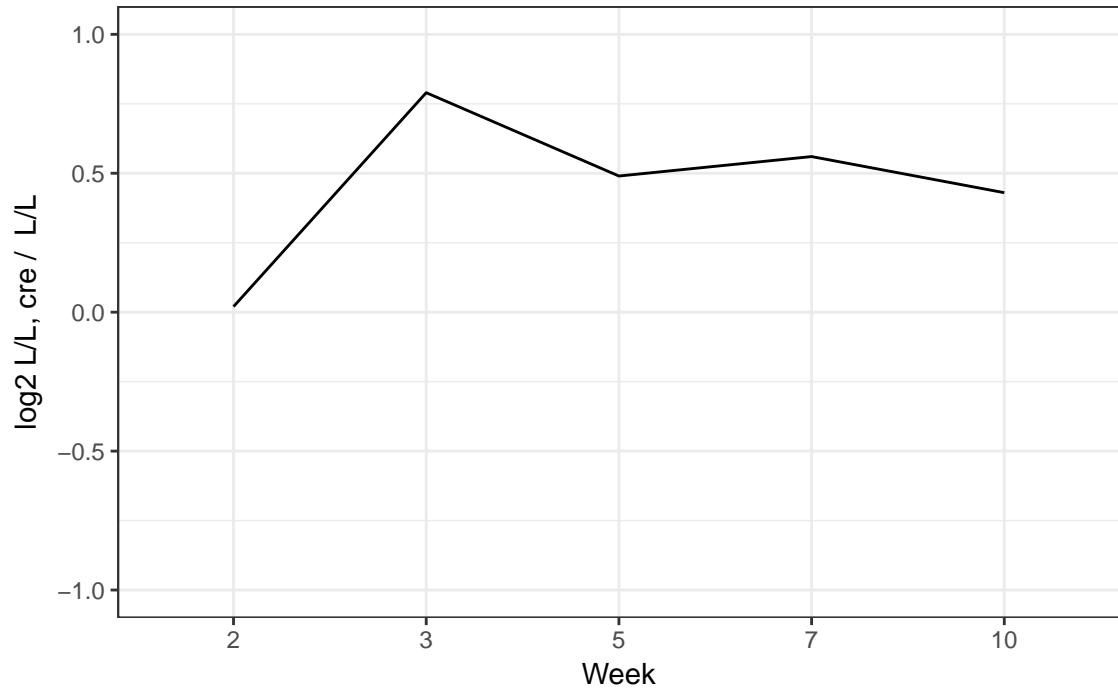



RNMTL1 / Q5ND52; adj.p value: 0.02143

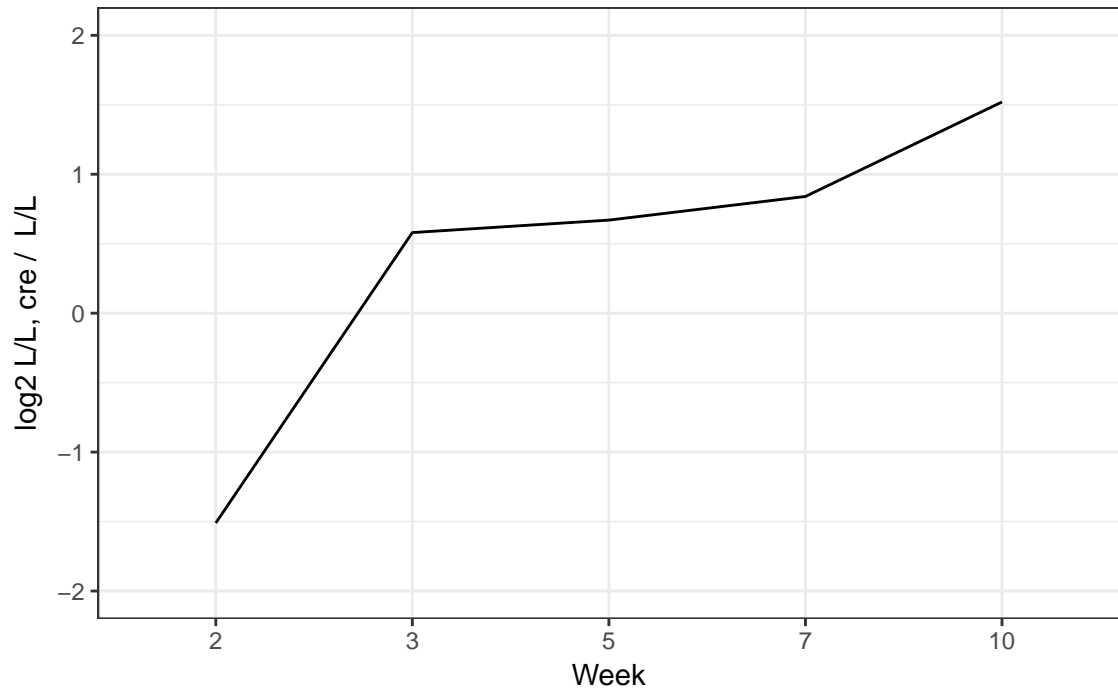

ROMO1 / P60603; adj.p value: 0.41549

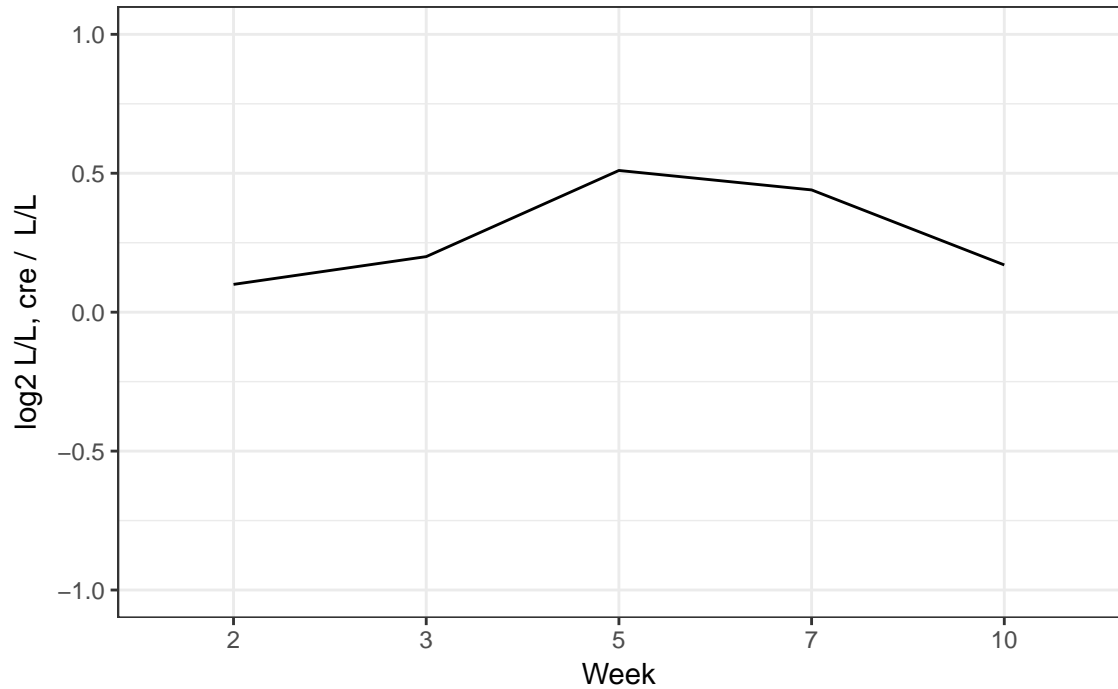

RPL10A / Q5XJF6; adj.p value: 0.03653

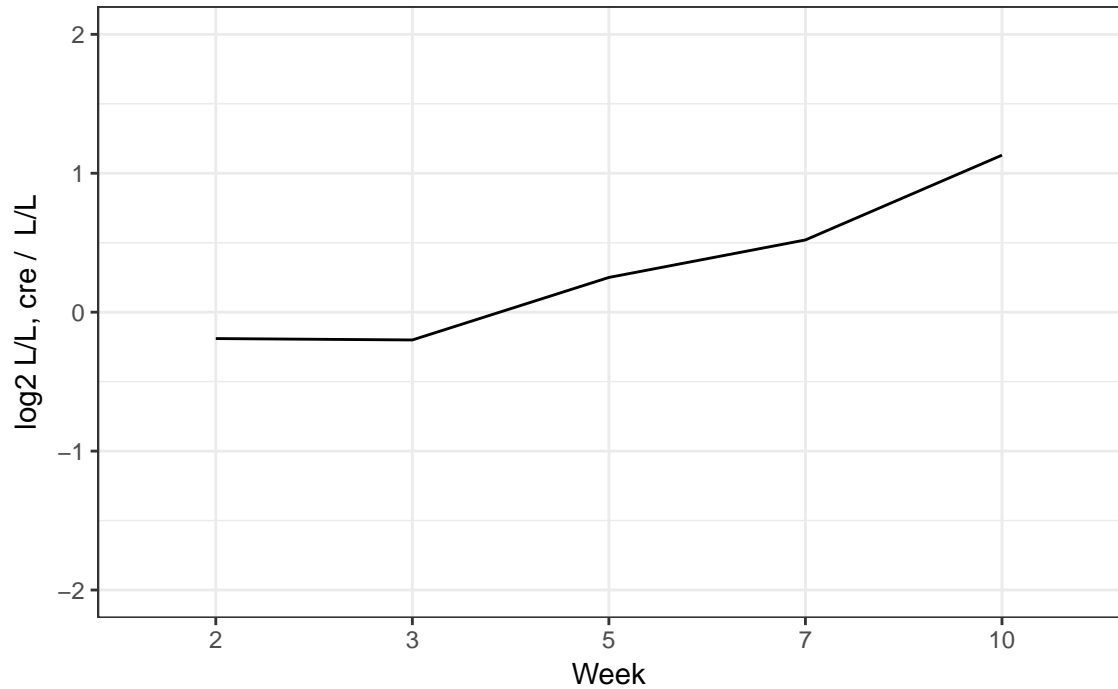

RPL34 / Q9D1R9; adj.p value: 0.10029

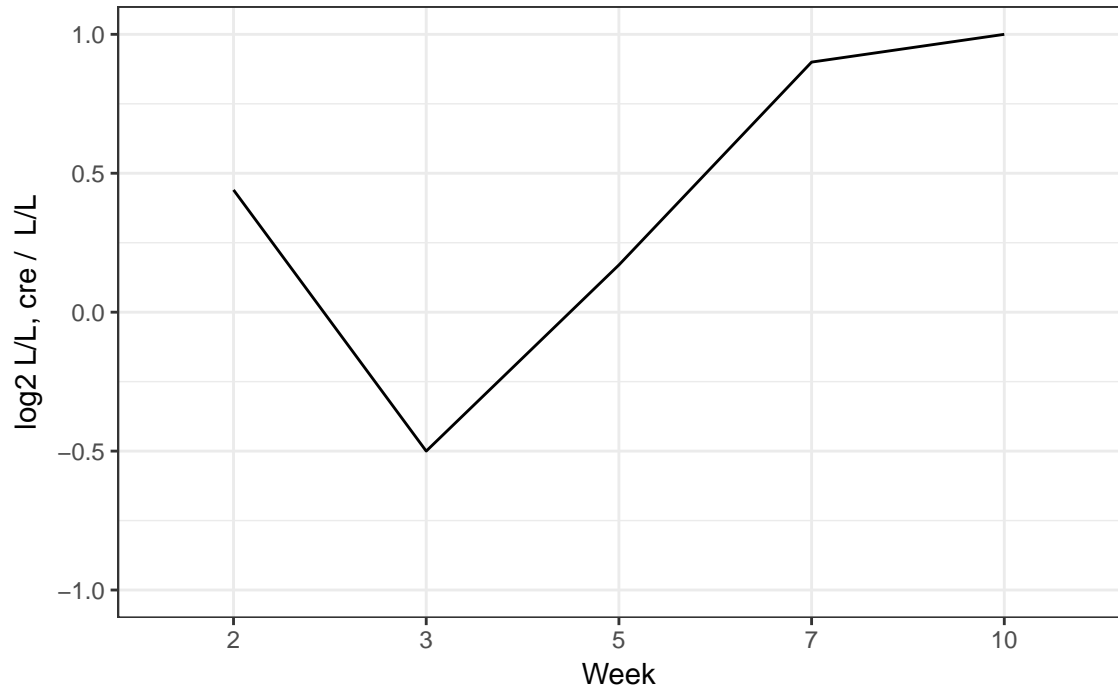

RPL35A / O55142; adj.p value: 0.91025

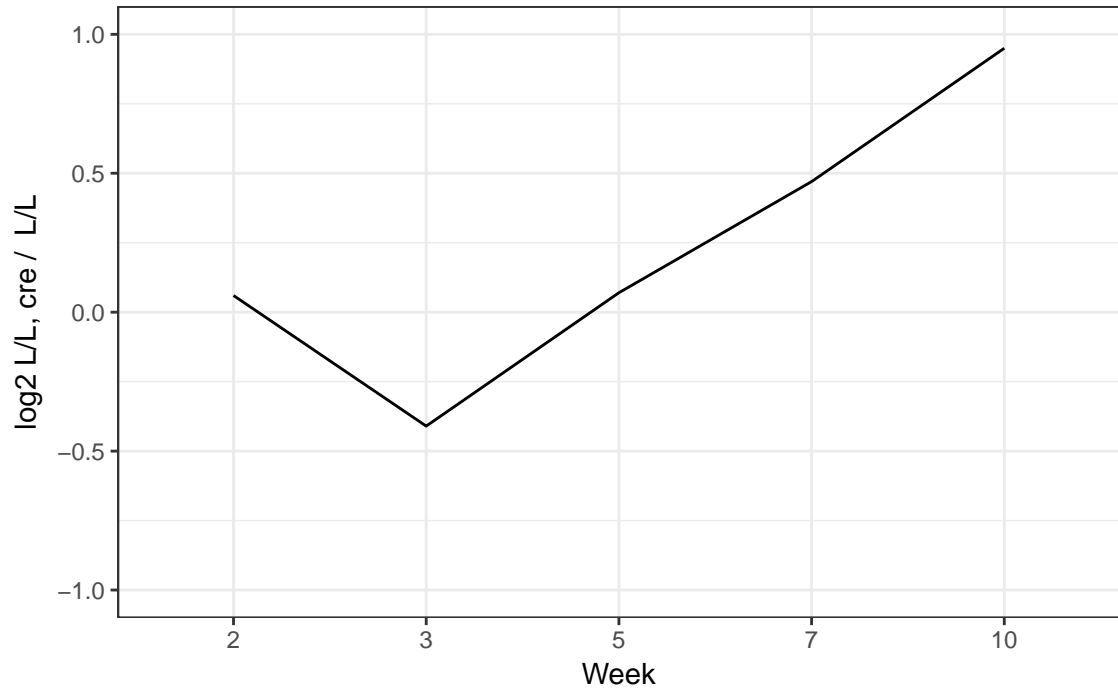

RPUSD4 / Q9CWX4; adj.p value: 0.19167

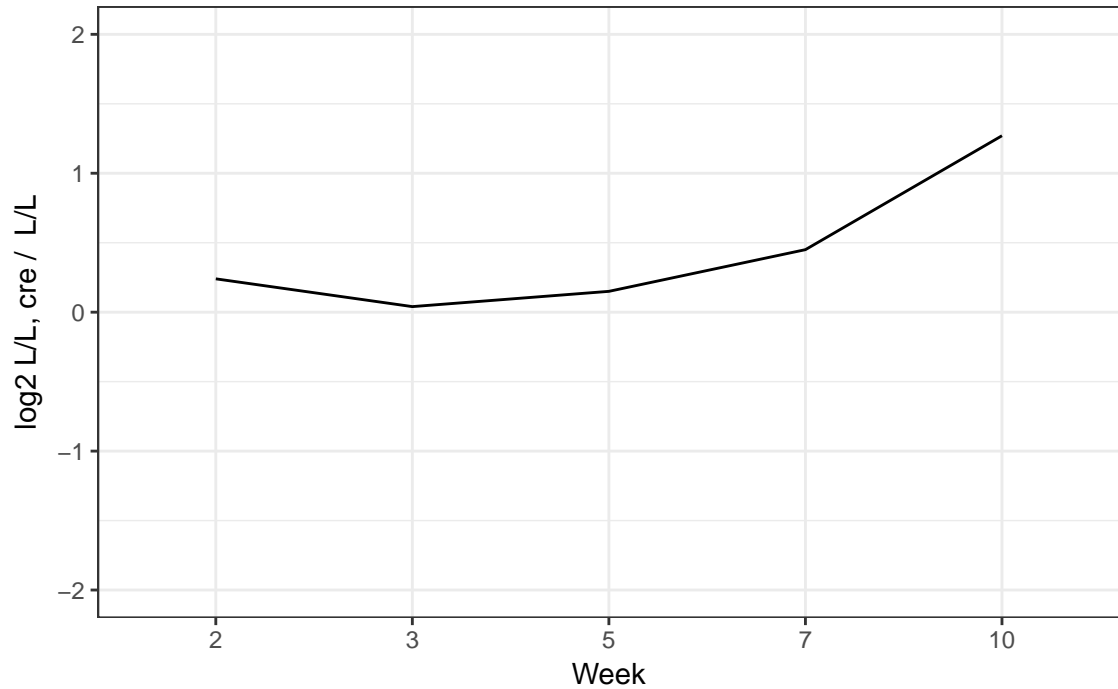

RTN4IP1 / Q924D0; adj.p value: 0

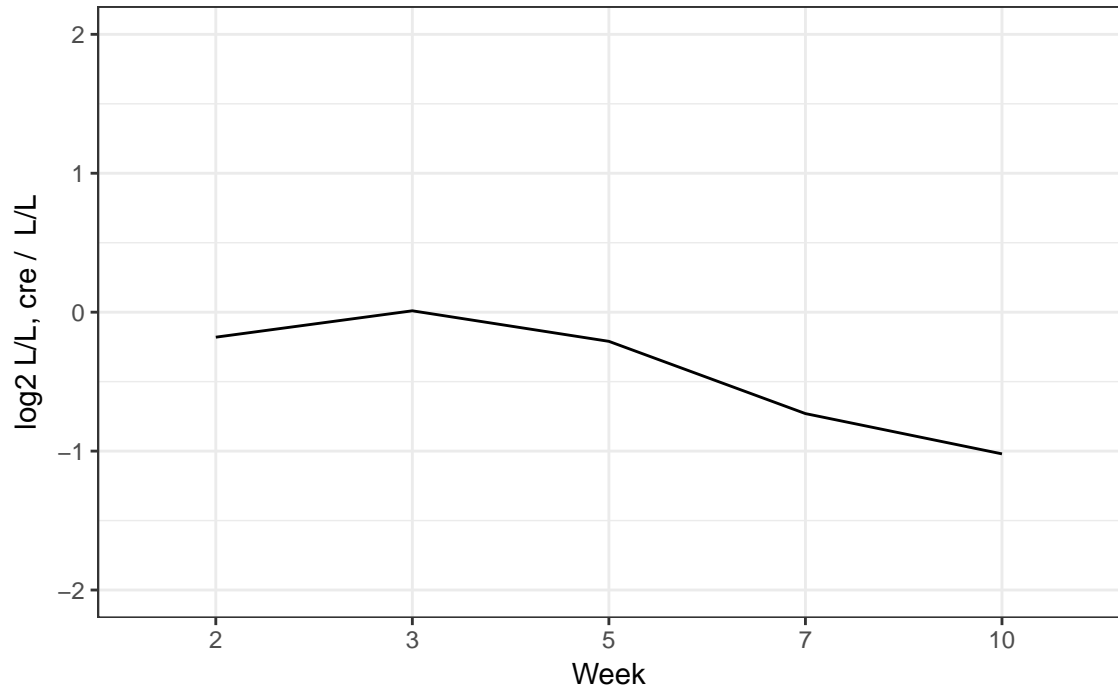

SAMM50 / Q8BGH2; adj.p value: 0.84671

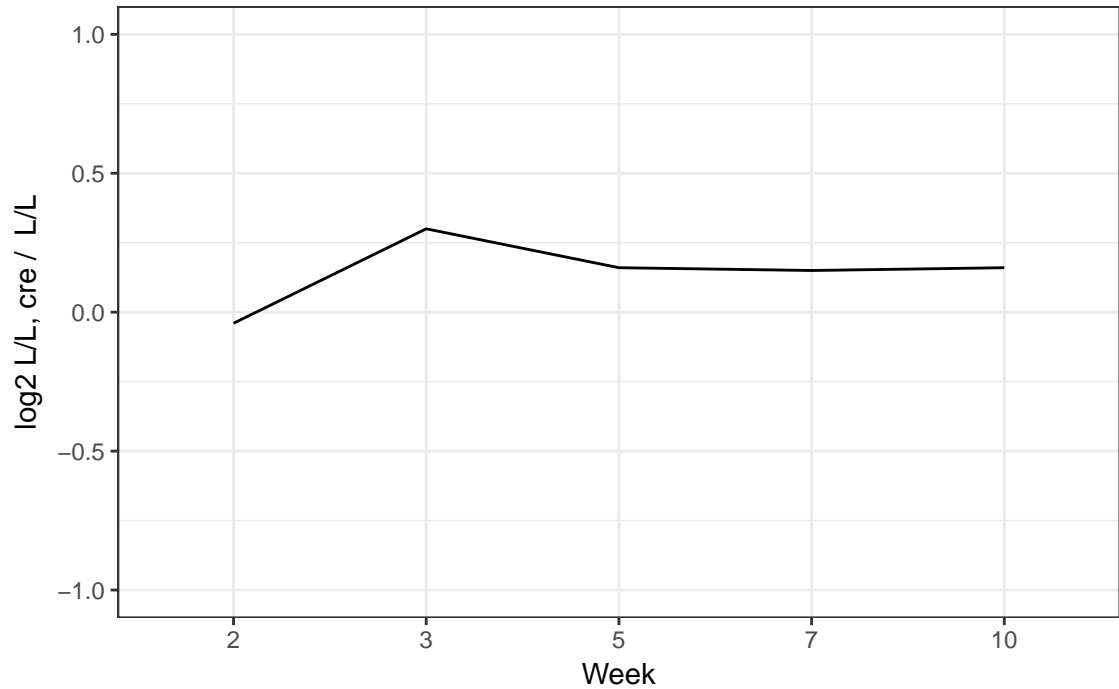



SARDH / Q99LB7; adj.p value: 0.57326

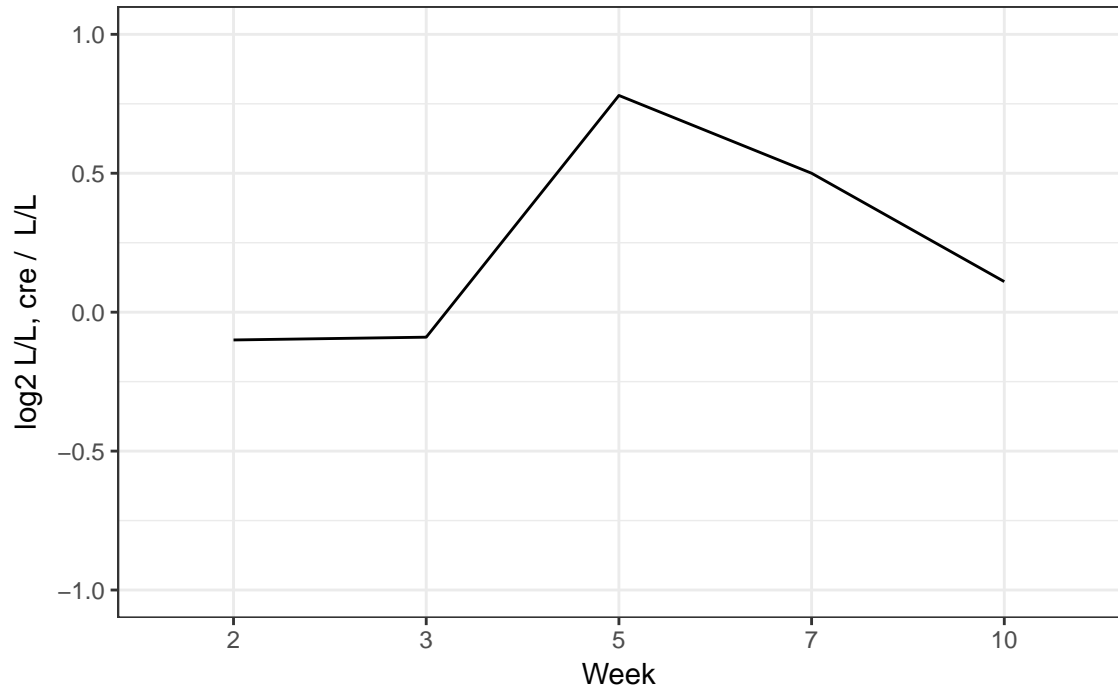

SARS2 / Q9JJL8; adj.p value: 0.05214

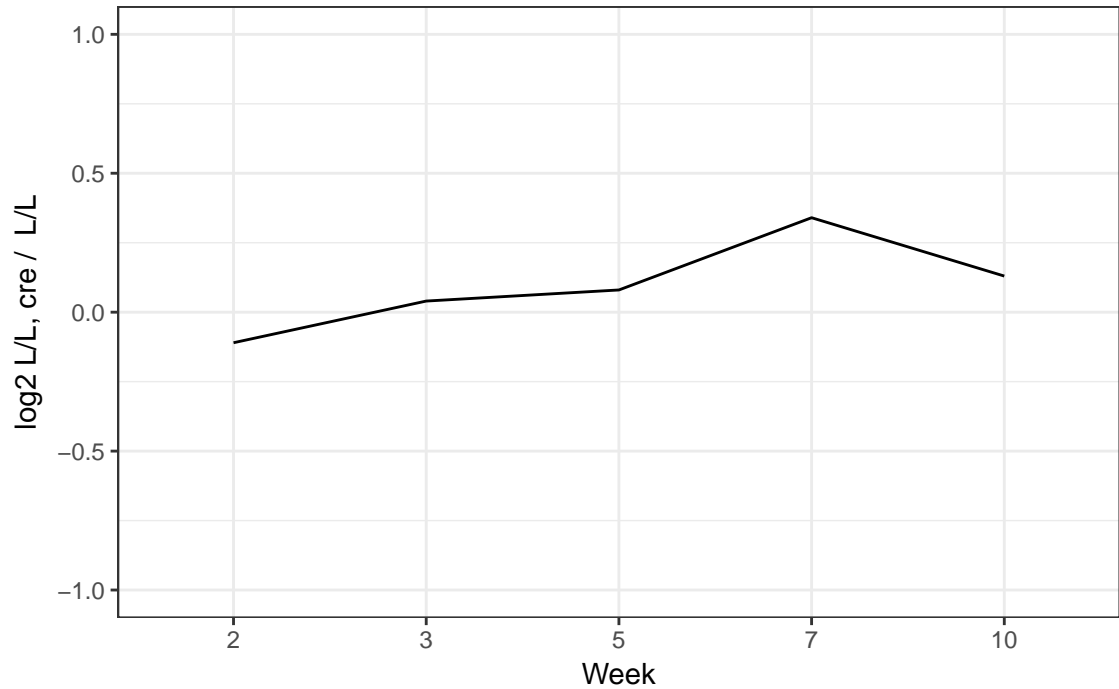

SCCPDH / Q8R127; adj.p value: 0.49967

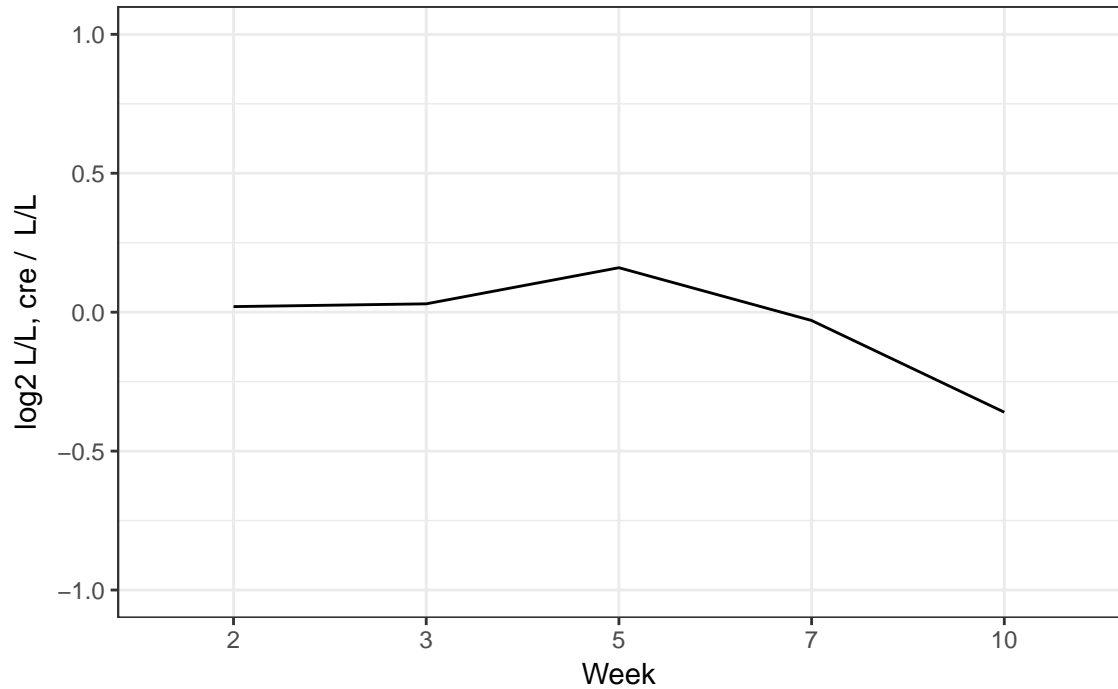

SCO1 / Q5SUD5; adj.p value: 0.10764

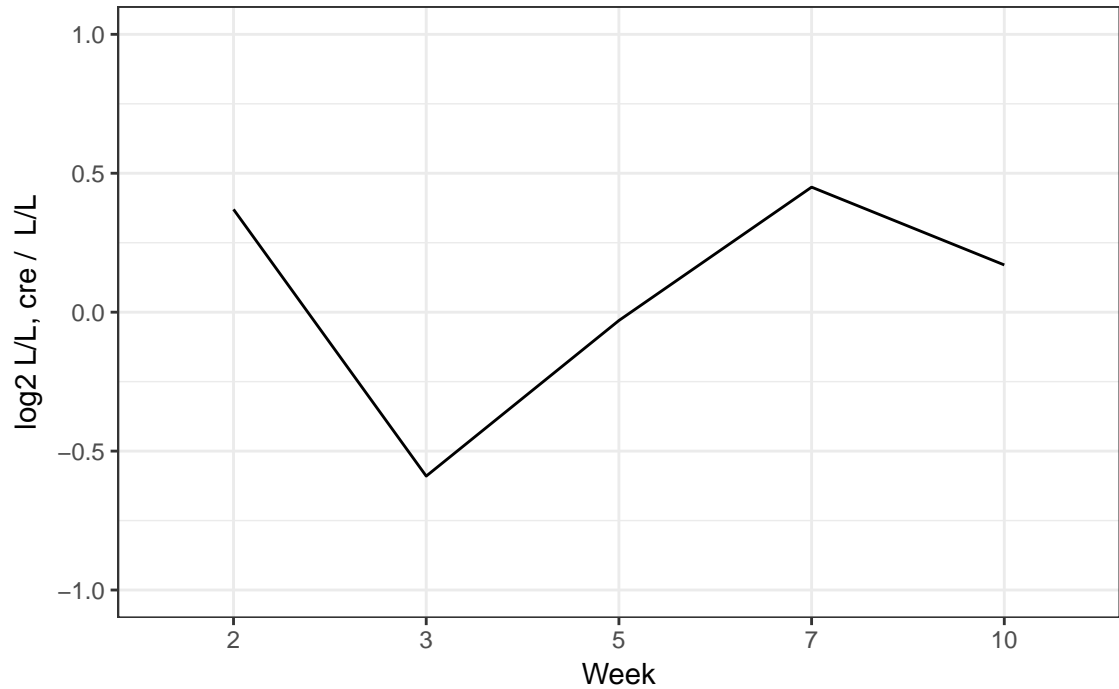

SCO2 / Q8VCL2; adj.p value: 0.19472

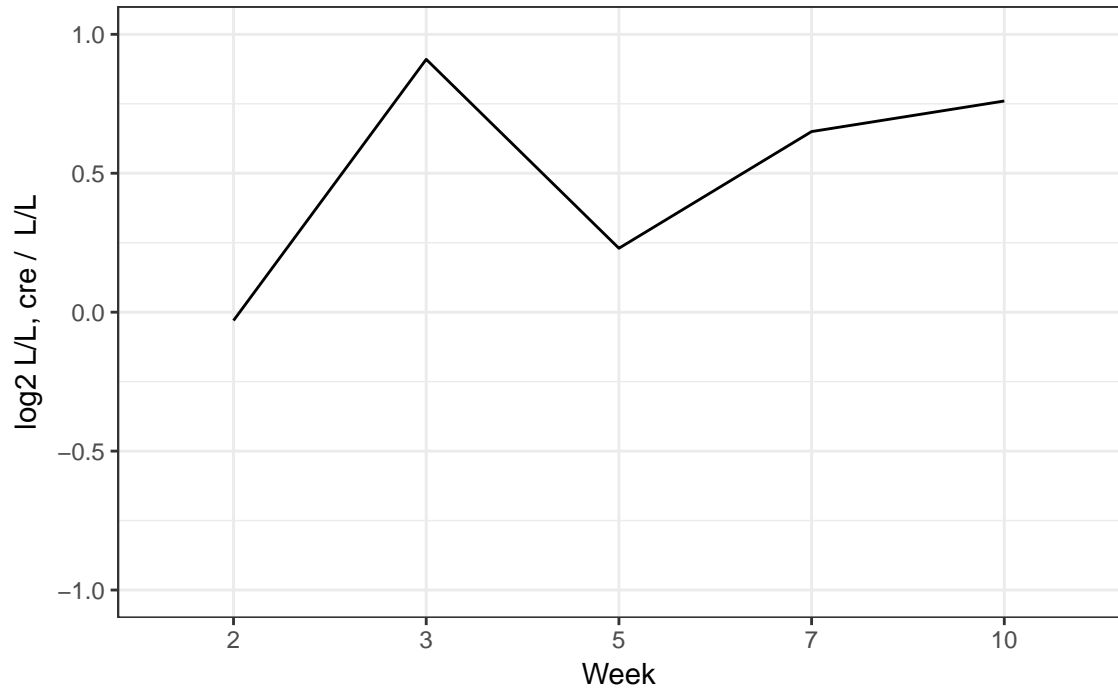

SCP2 / P32020; adj.p value: 0.6387

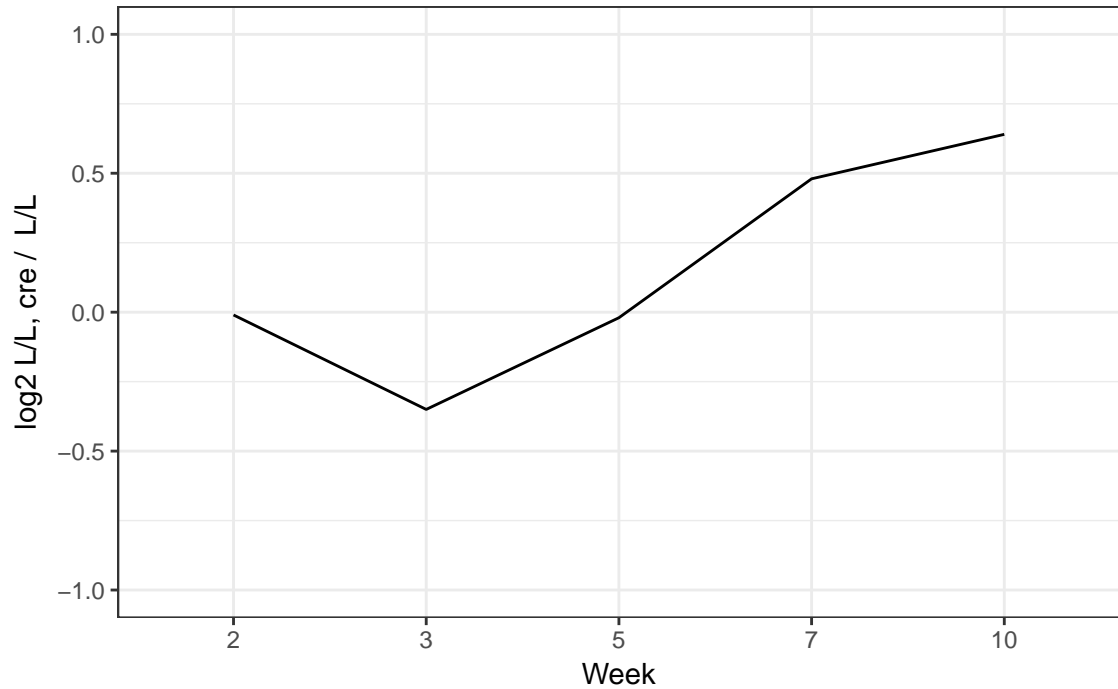

SDHA / Q8K2B3; adj.p value: 0.15835

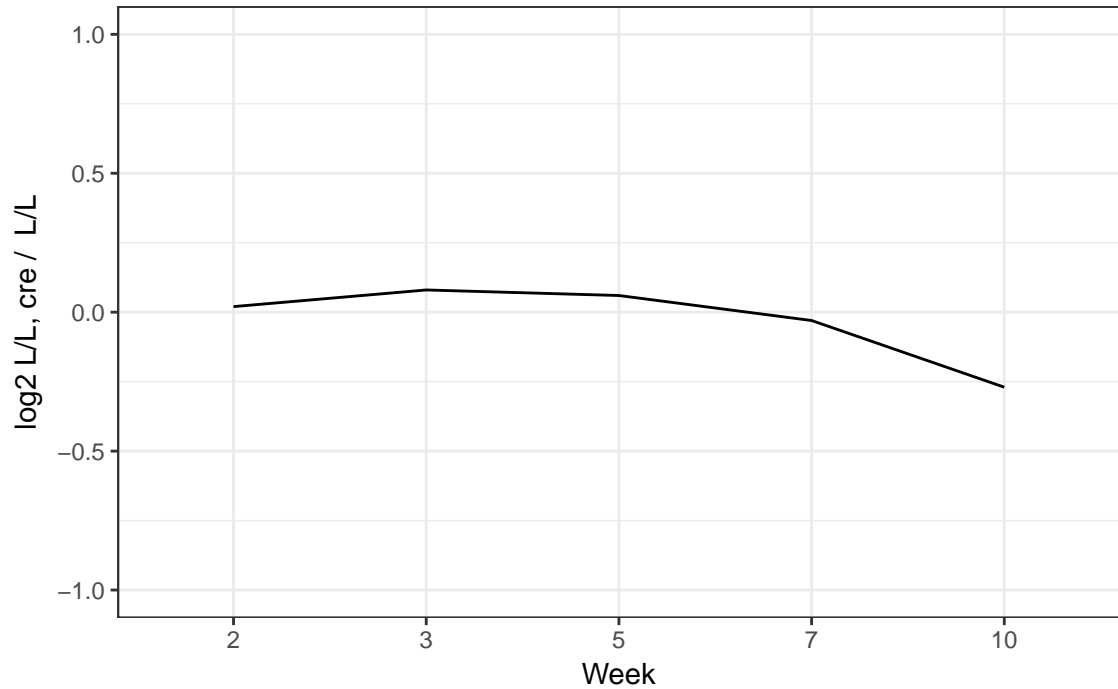

SDHAF2 / Q8C6I2; adj.p value: 0.07058

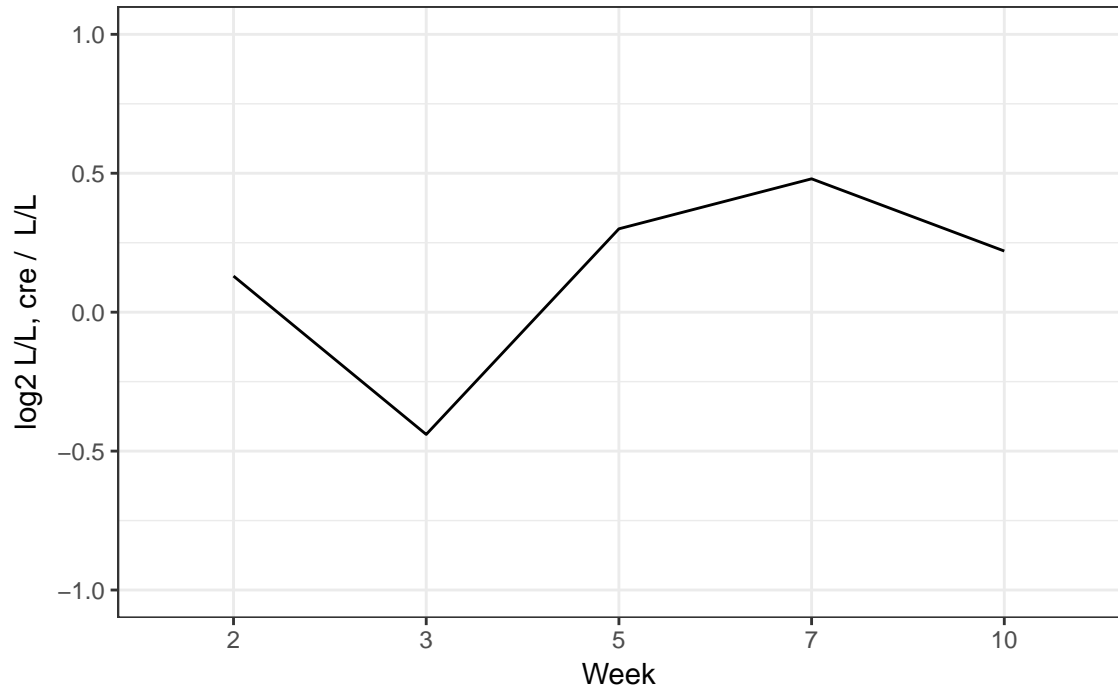



SDHB / Q9CQA3; adj.p value: 0.03287

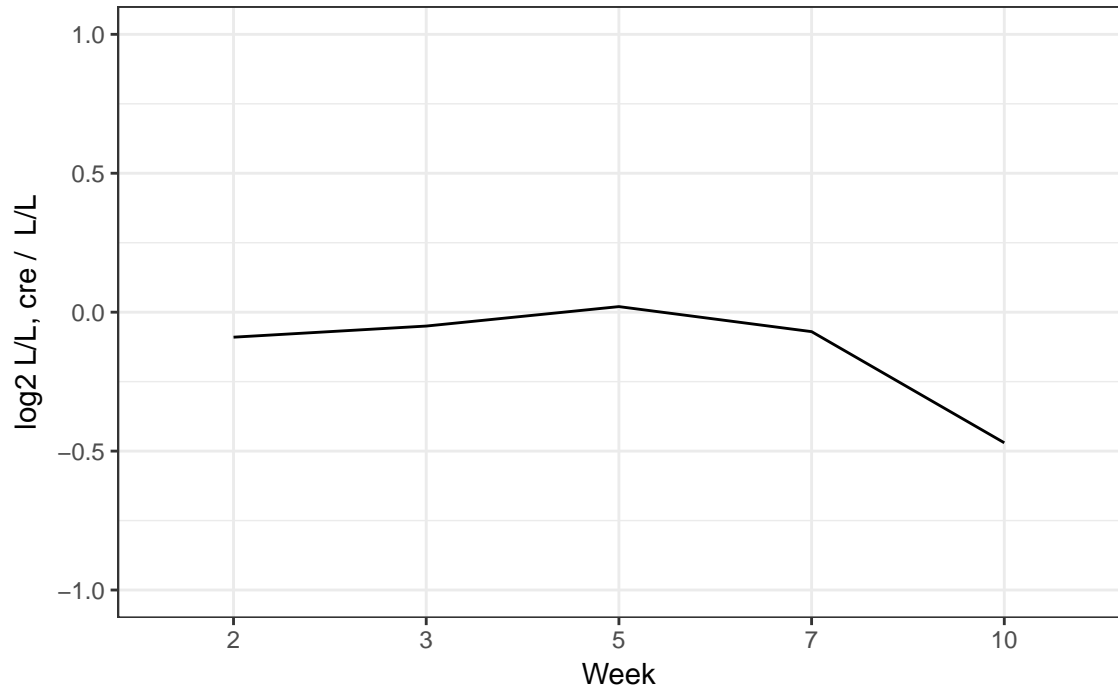

SDHC / Q9CZB0; adj.p value: 0.95451

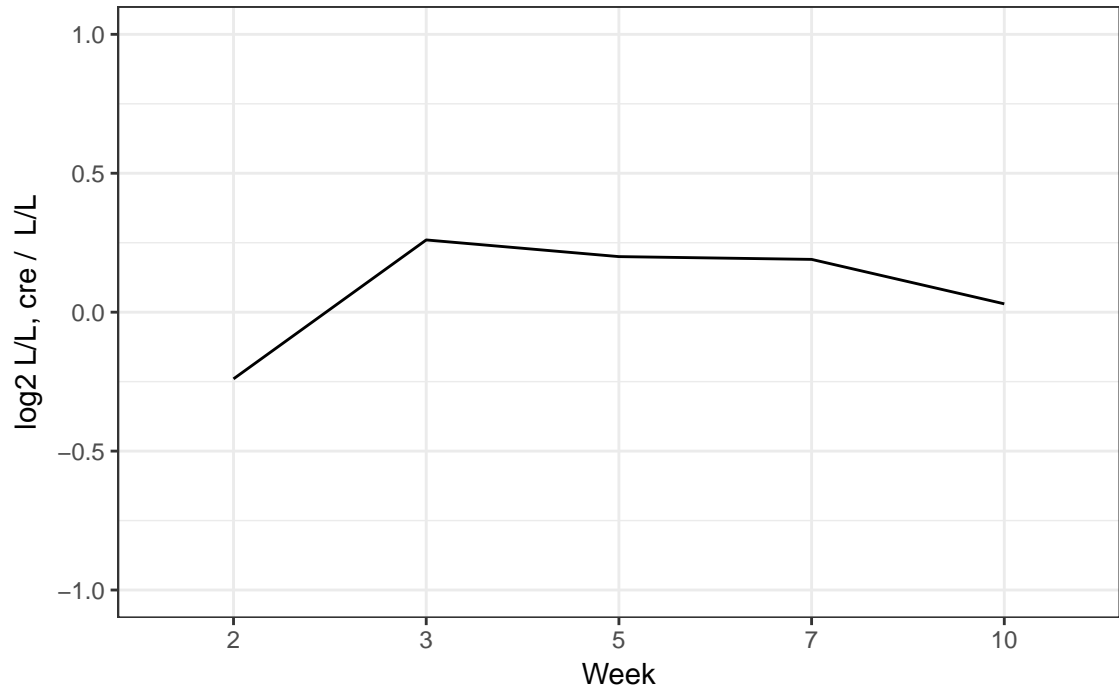

SDHD / Q9CXV1; adj.p value: 0.36379

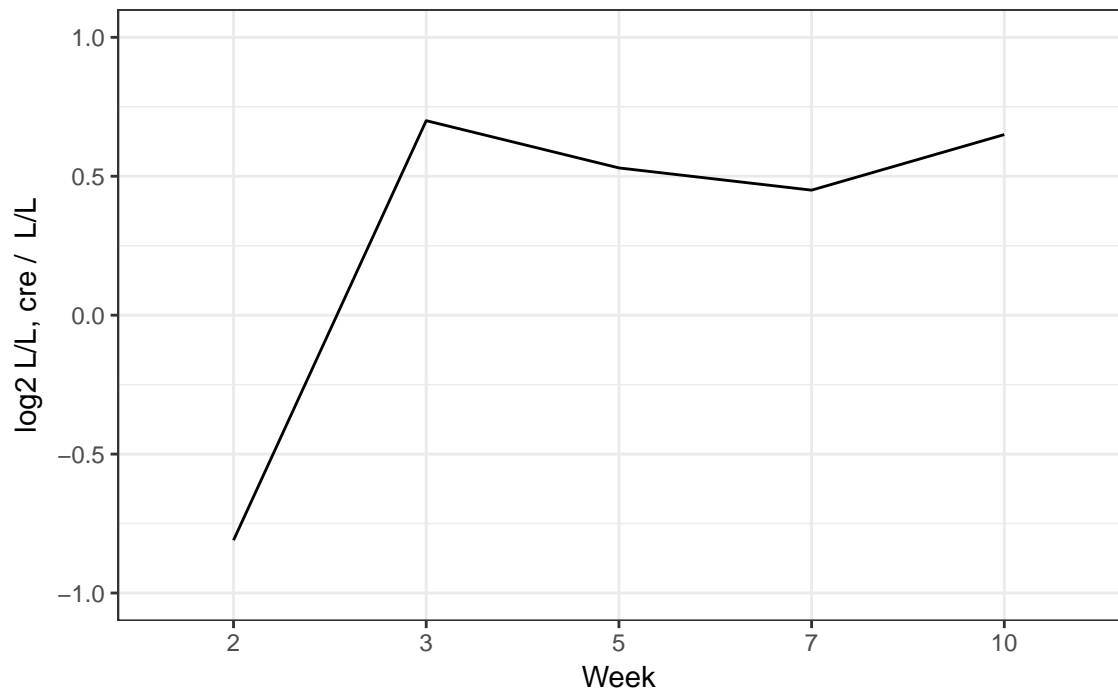

SDR39U1 / Q5M8N4-2; adj.p value: 0.32226

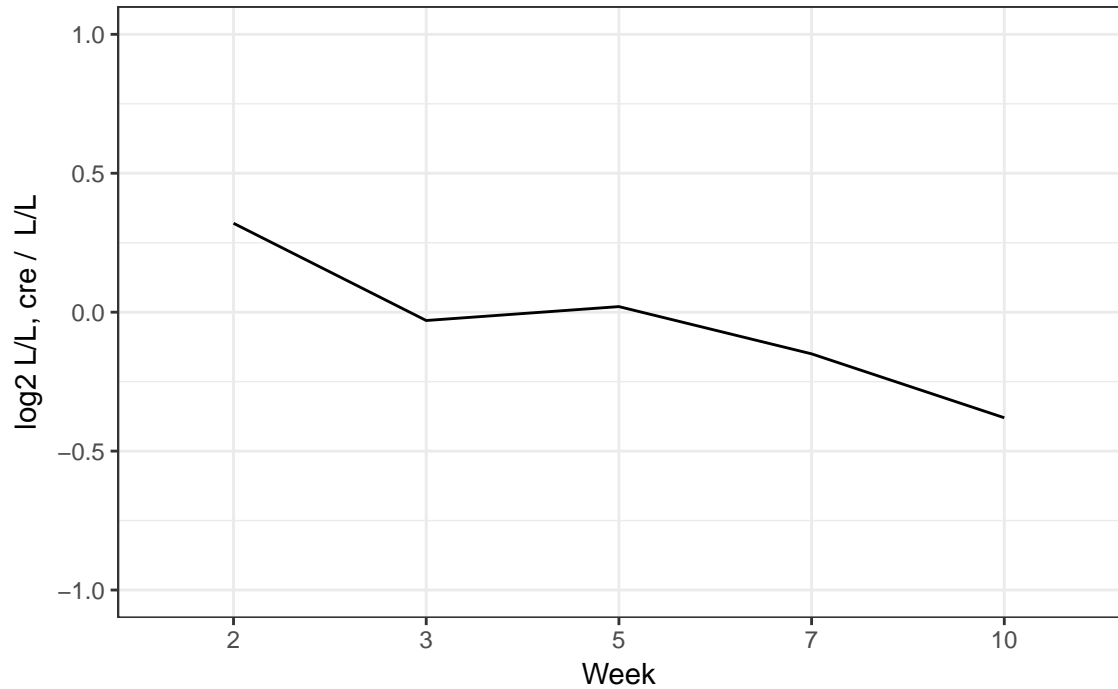

SFXN3 / Q91V61-2; adj.p value: 0.38452

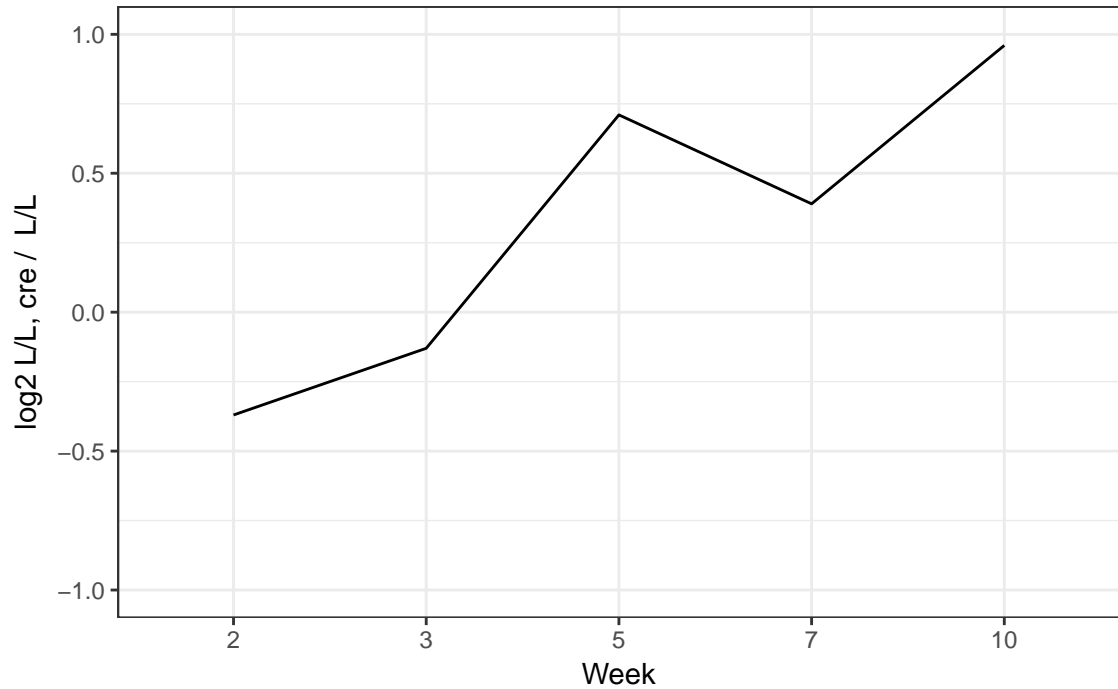

SHMT2 / Q9CZN7; adj.p value: 0

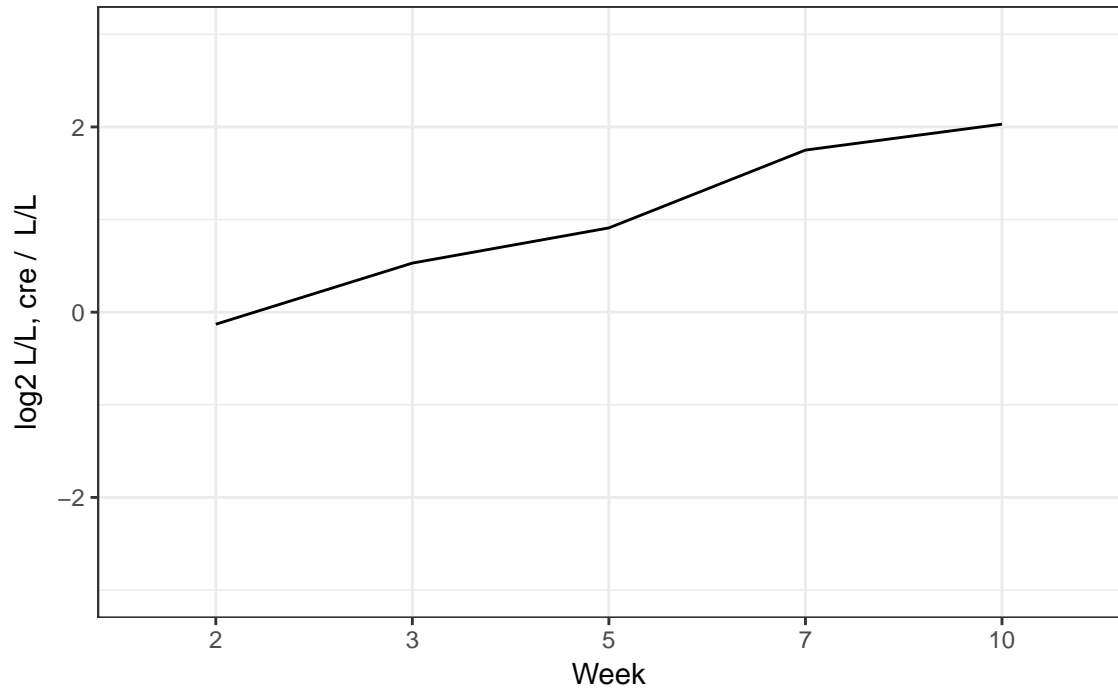

SIRT3 / Q8R104; adj.p value: 0.38853

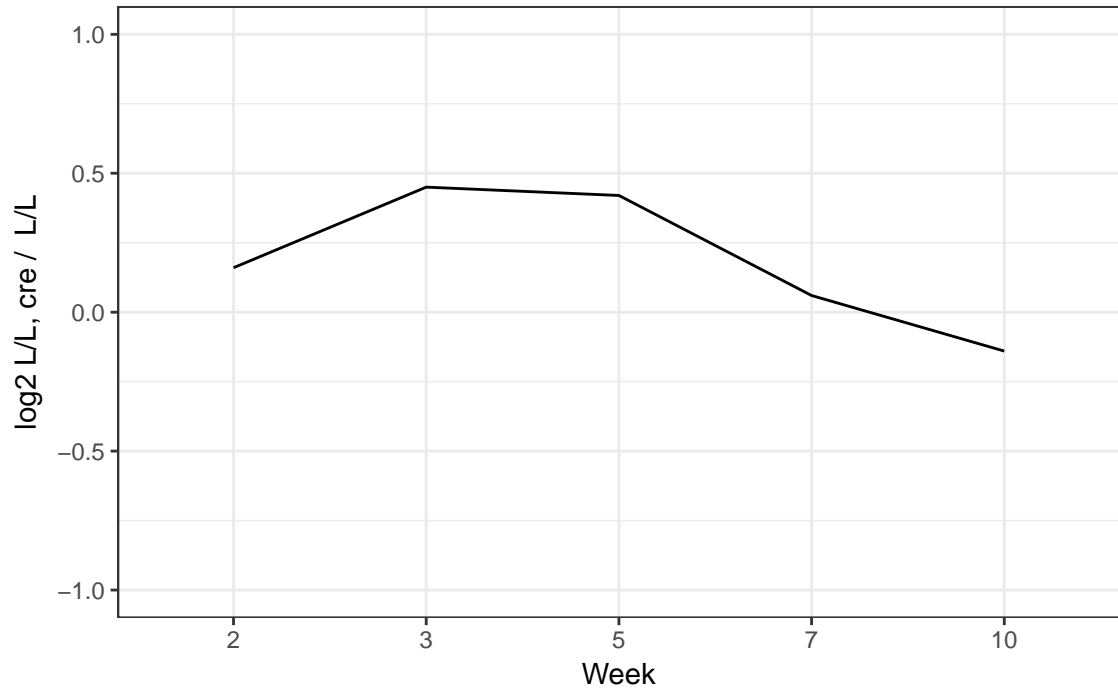

SIRT4 / Q8R216; adj.p value: 0.46224

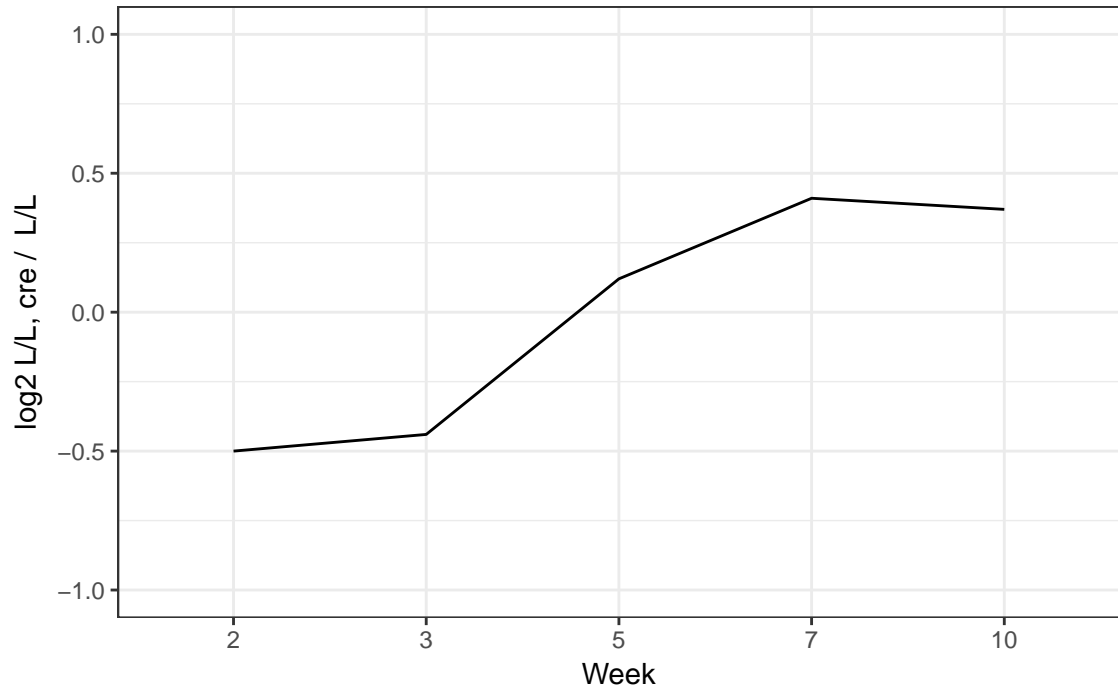



SIRT5 / Q8K2C6; adj.p value: 0.83565

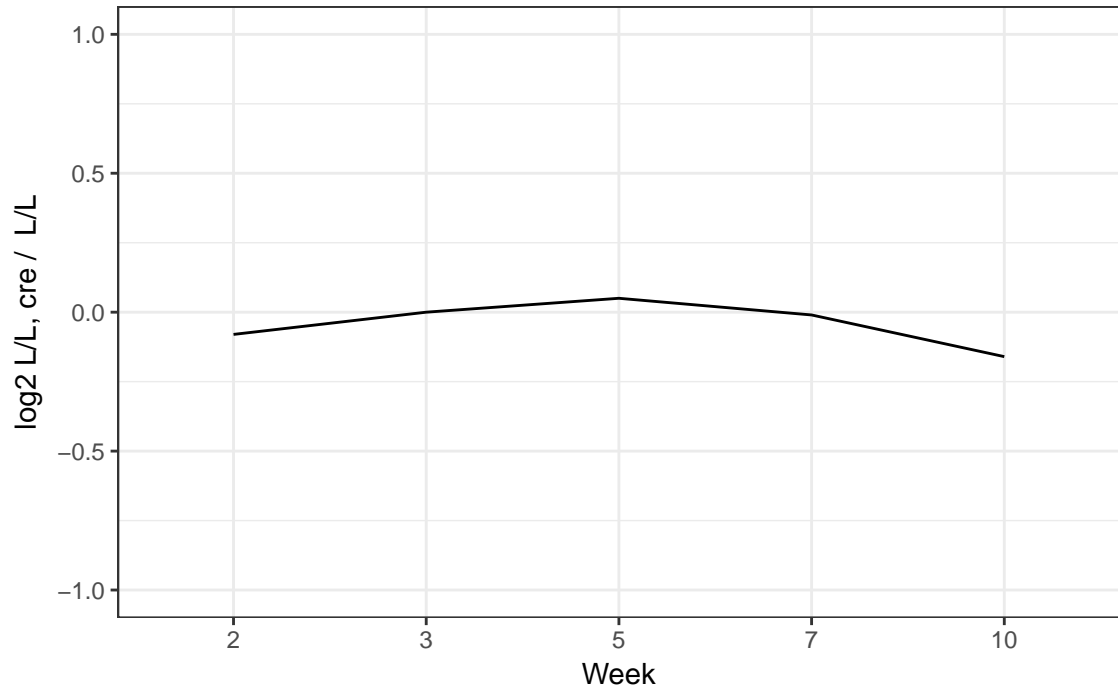

SLC25A1 / Q8JZU2; adj.p value: 0.12704

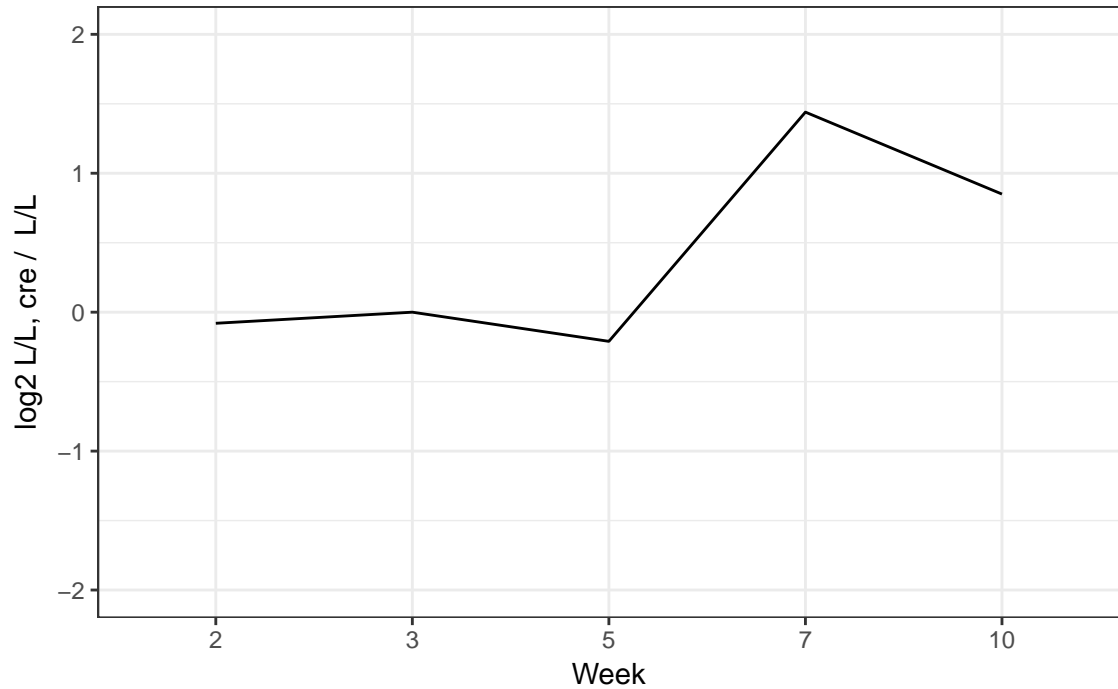

SLC25A10 / Q9QZD8; adj.p value: 0.01252

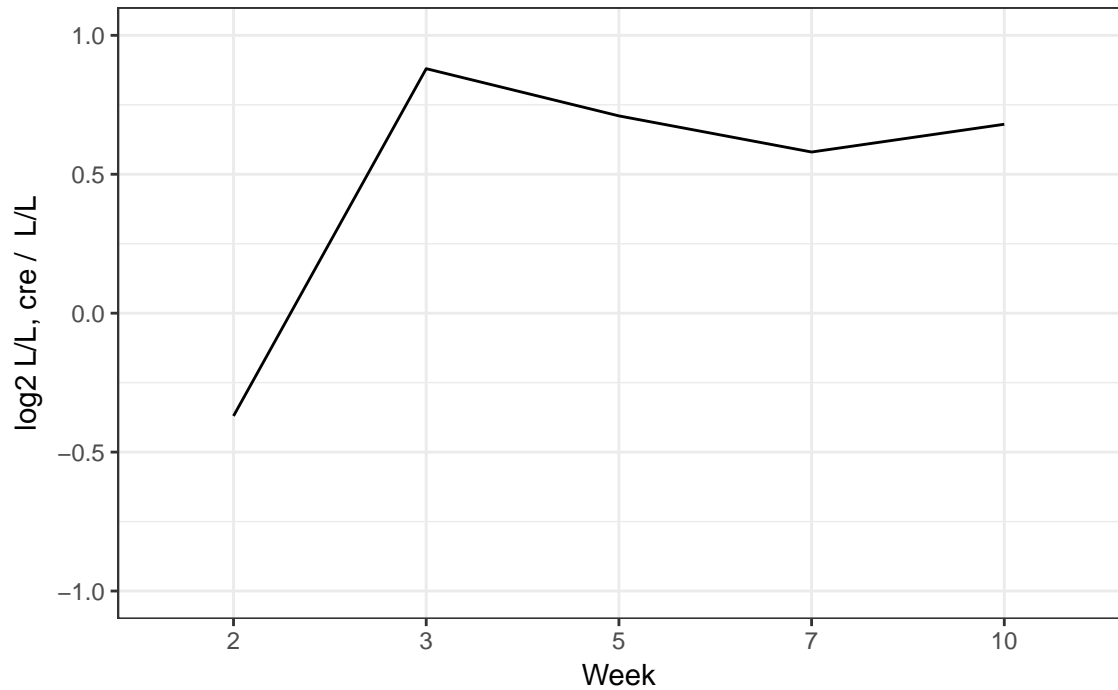

SLC25A11 / Q9CR62; adj.p value: 0.45745

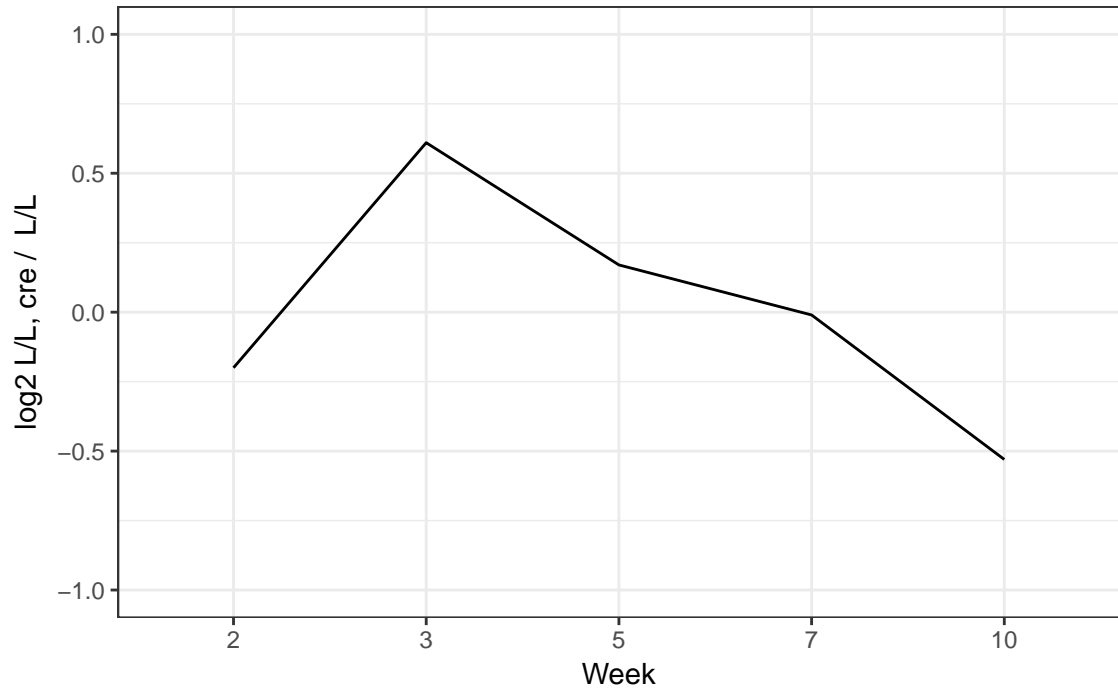

SLC25A12 / Q8BH59; adj.p value: 0.73268

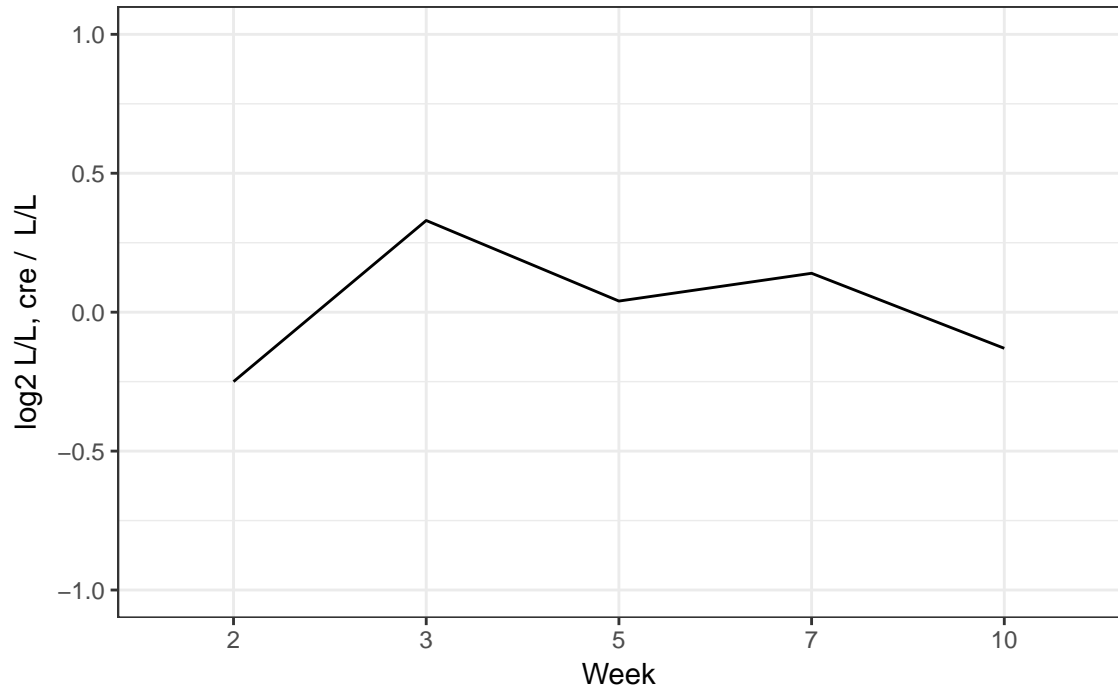

SLC25A13 / Q9QXX4; adj.p value: 0.19731

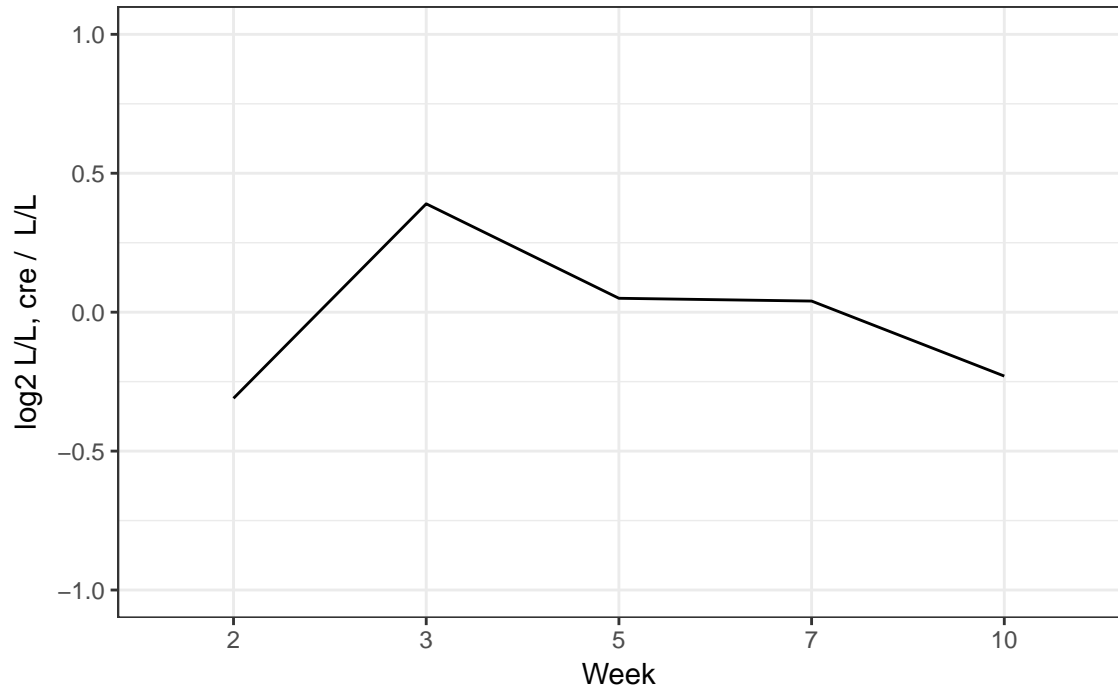

SLC25A15 / Q9WVD5; adj.p value: 0.0436

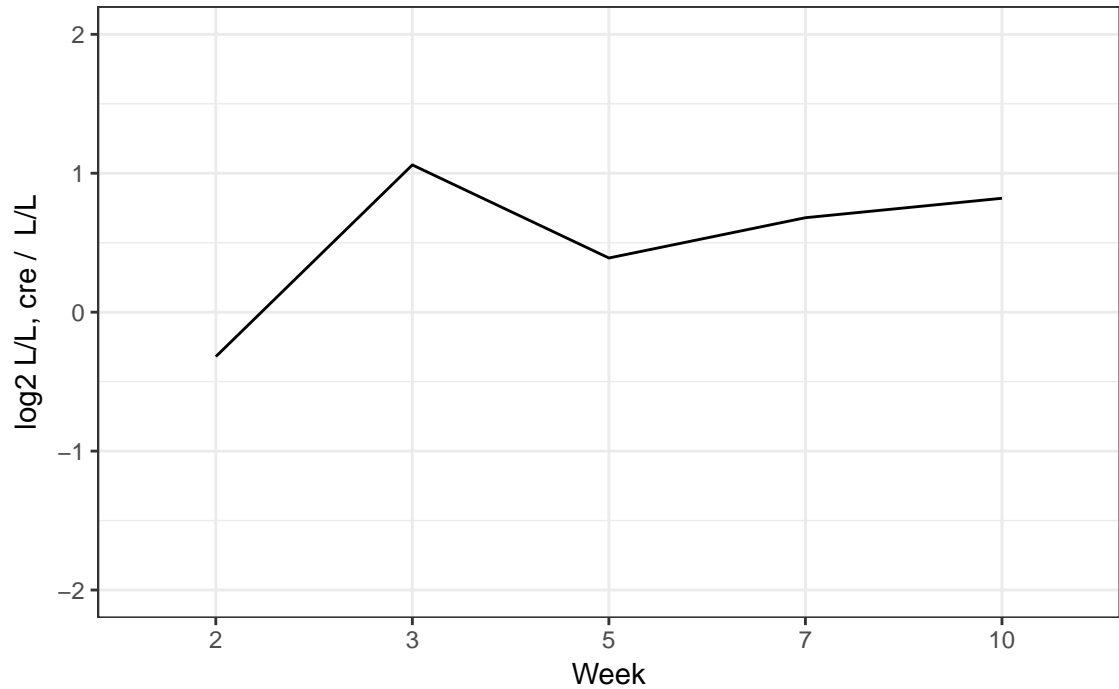

SLC25A16 / D3YVC9; adj.p value: 0.48329

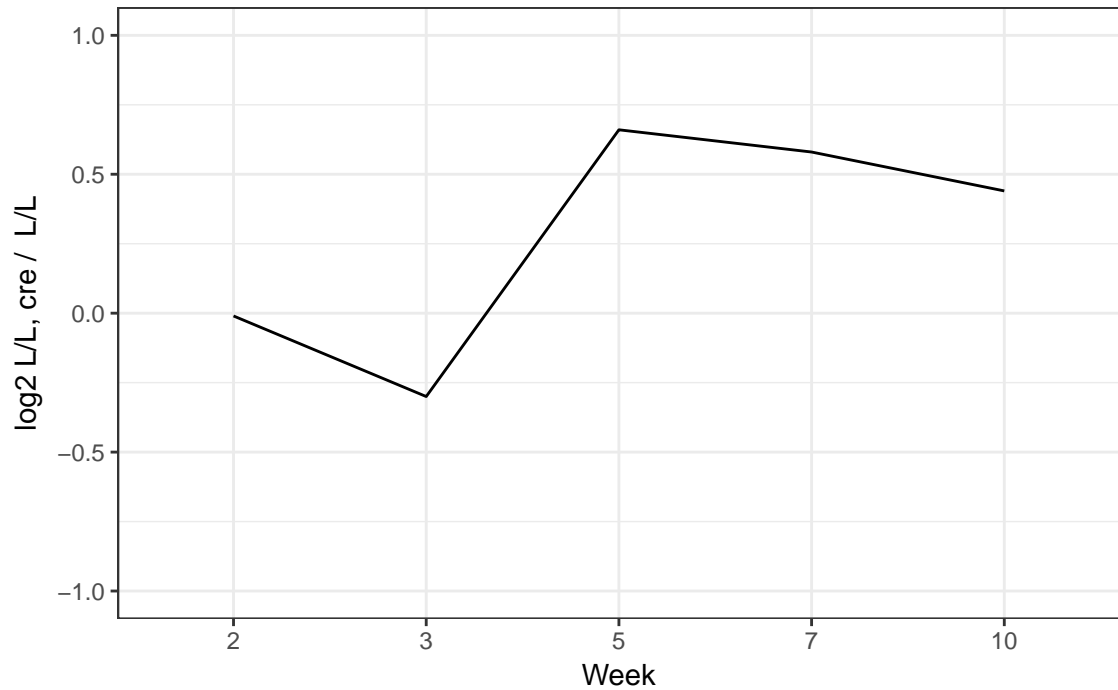



SLC25A19 / Q9DAM5; adj.p value: 0.41405

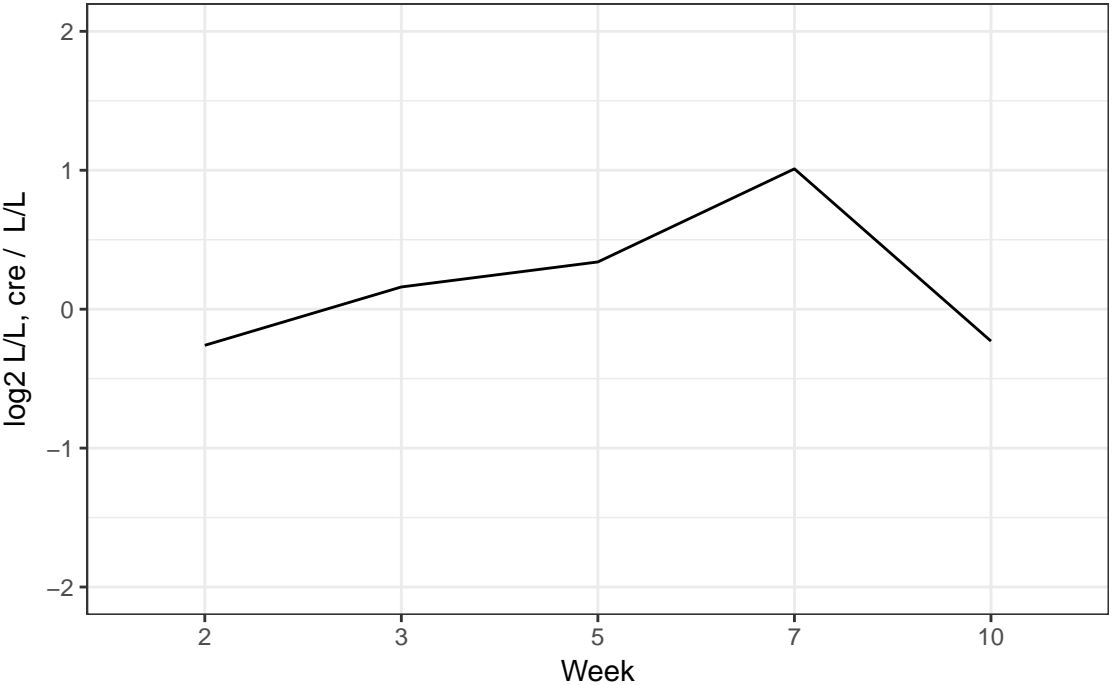

SLC25A20 / Q9Z2Z6; adj.p value: 0.48694

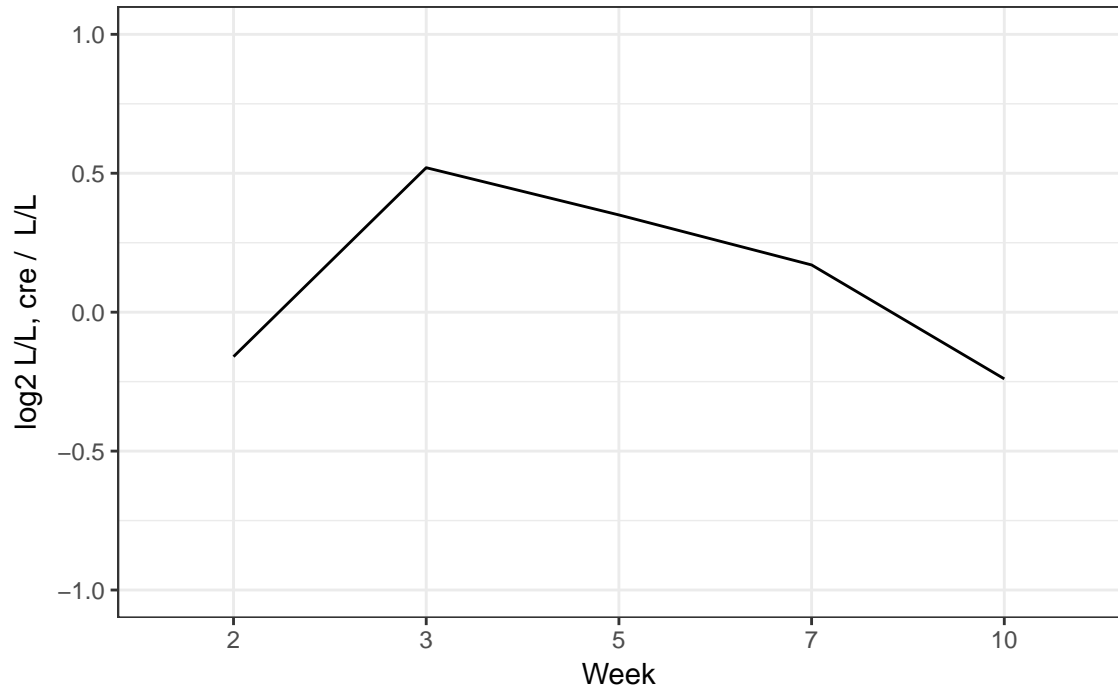

SLC25A22 / Q9D6M3; adj.p value: 1e-05

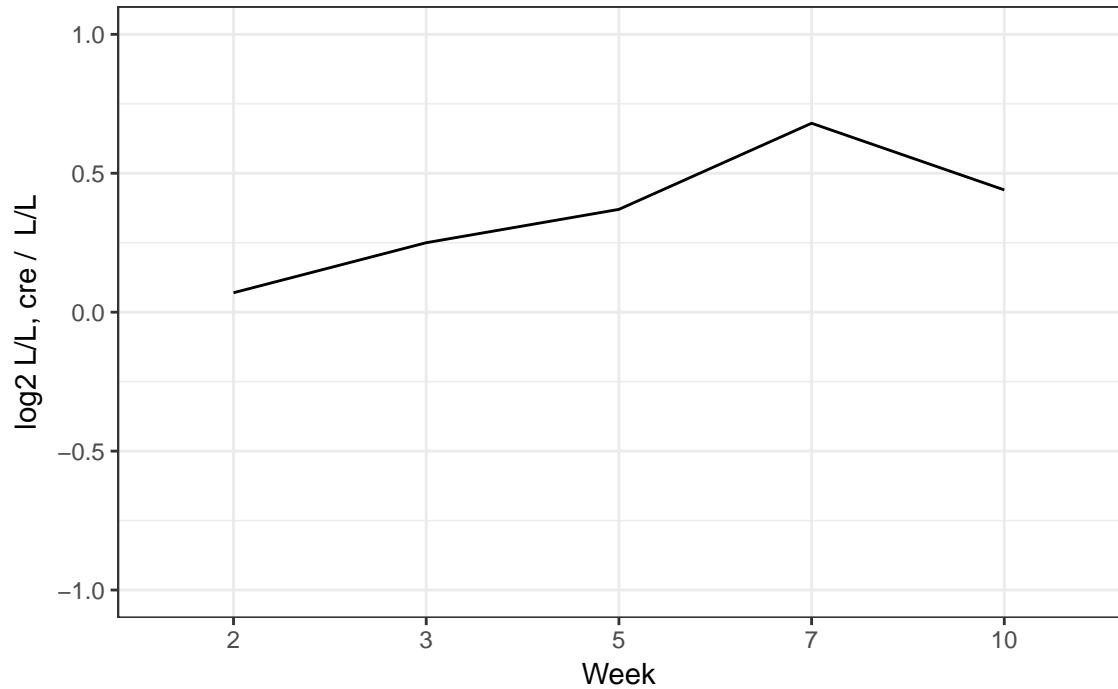

SLC25A24 / Q8BMD8; adj.p value: 0.02497

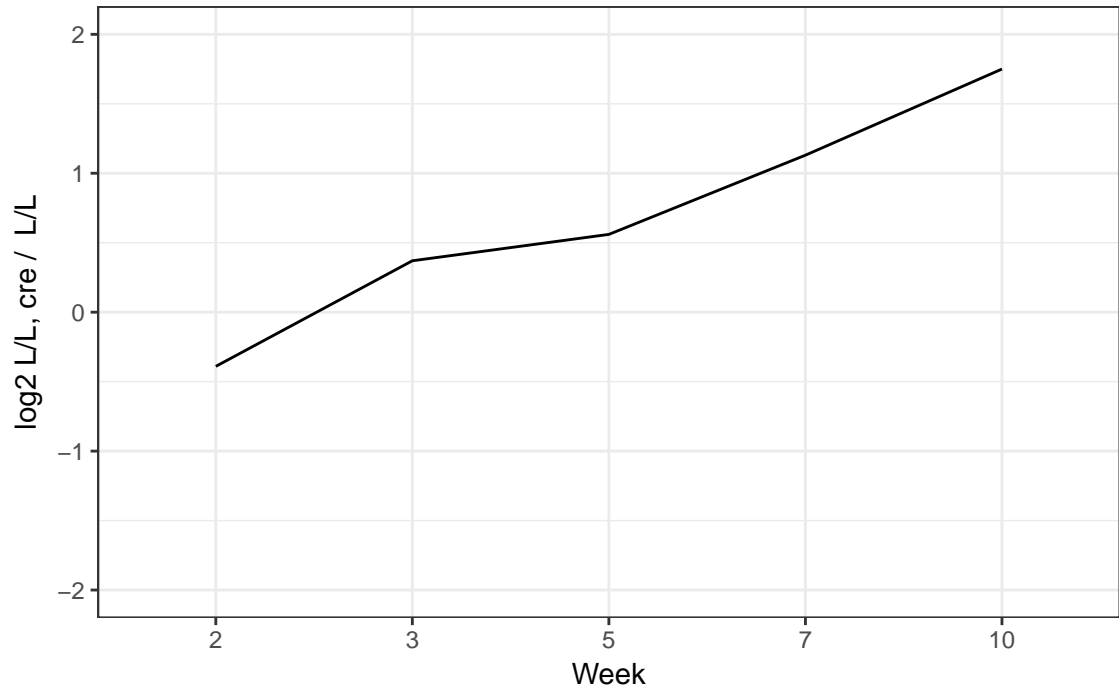

SLC25A29 / Q8BL03; adj.p value: 0.50704

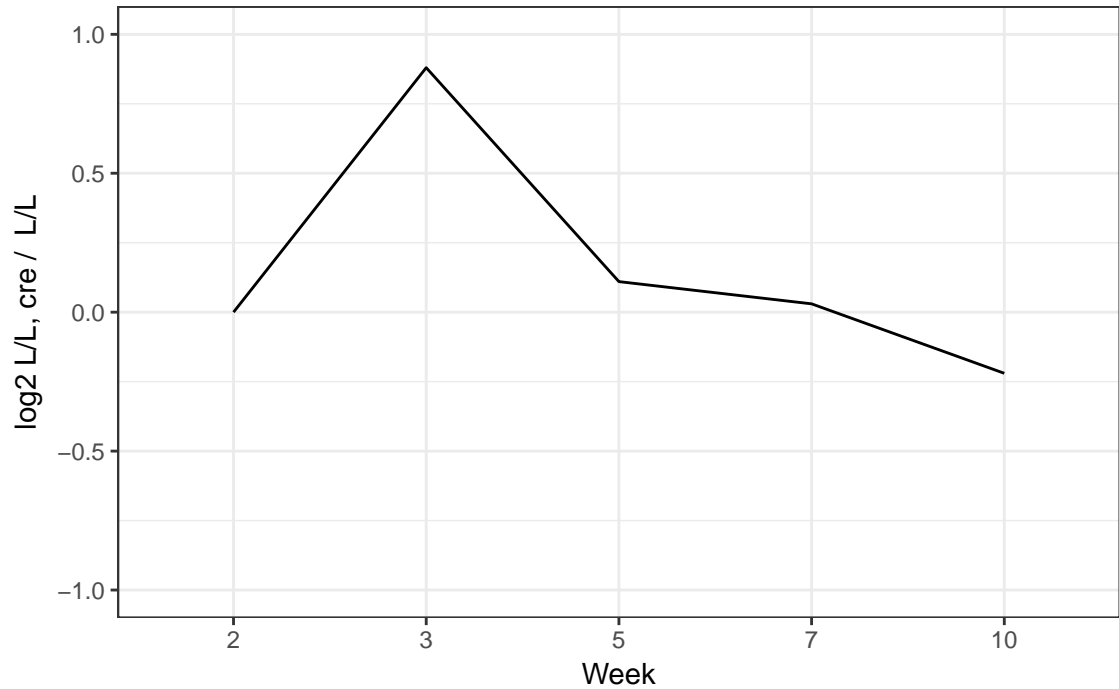

SLC25A3 / G5E902; adj.p value: 0.50279

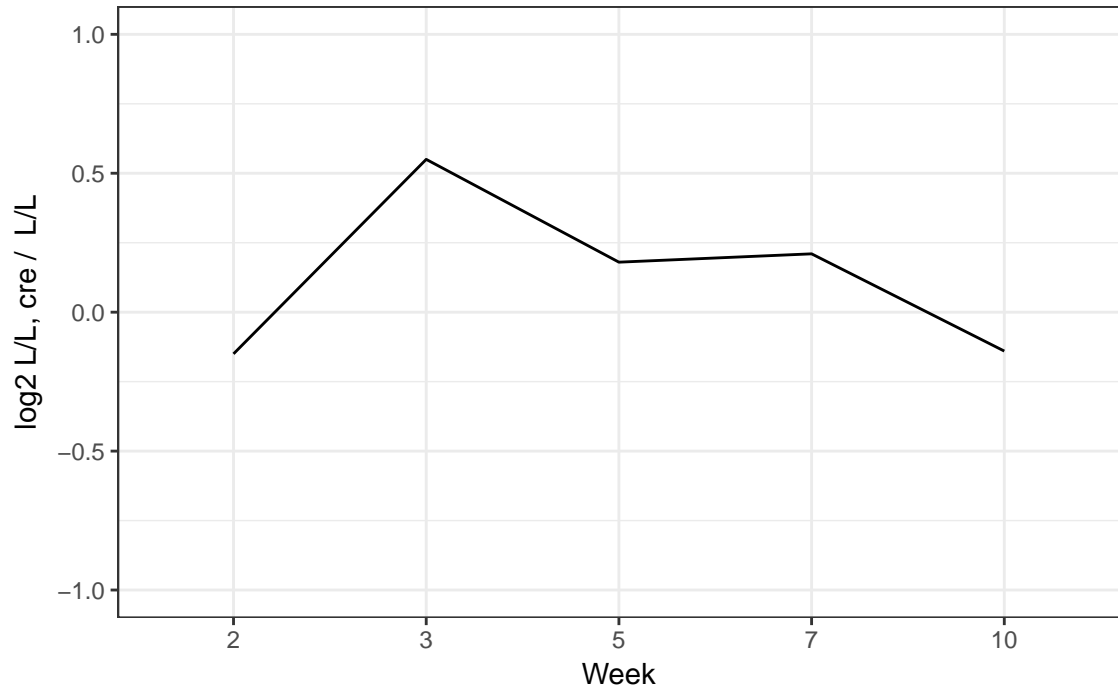

SLC25A31 / Q3V132; adj.p value: 0.57725

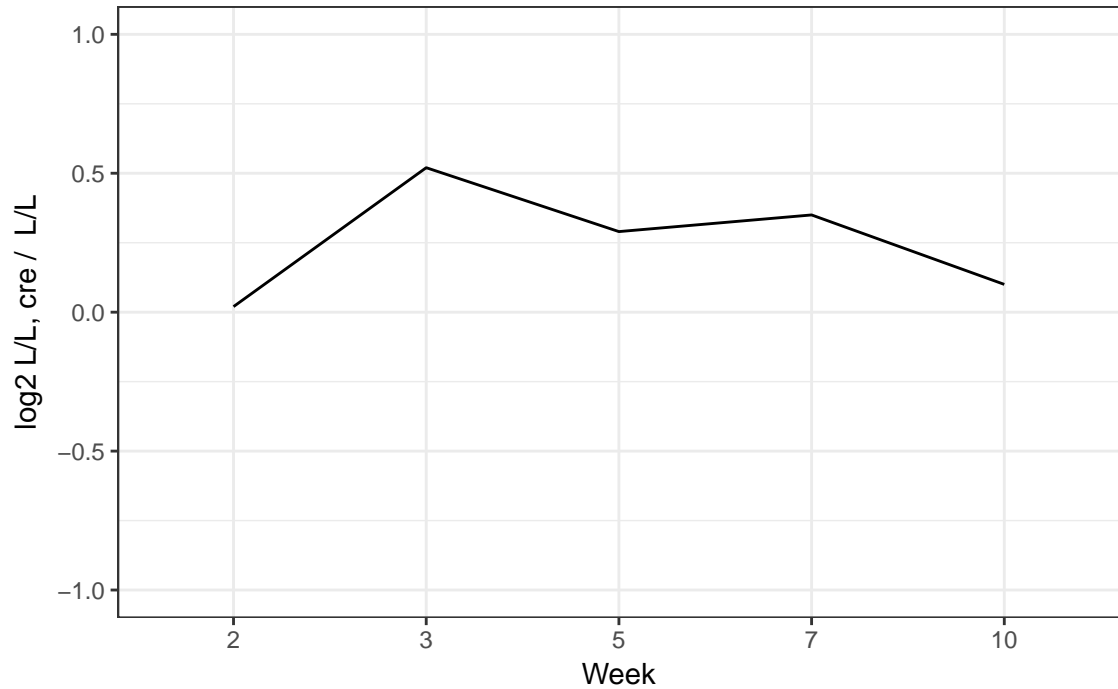

SLC25A32 / Q8BMG8; adj.p value: 0.23891

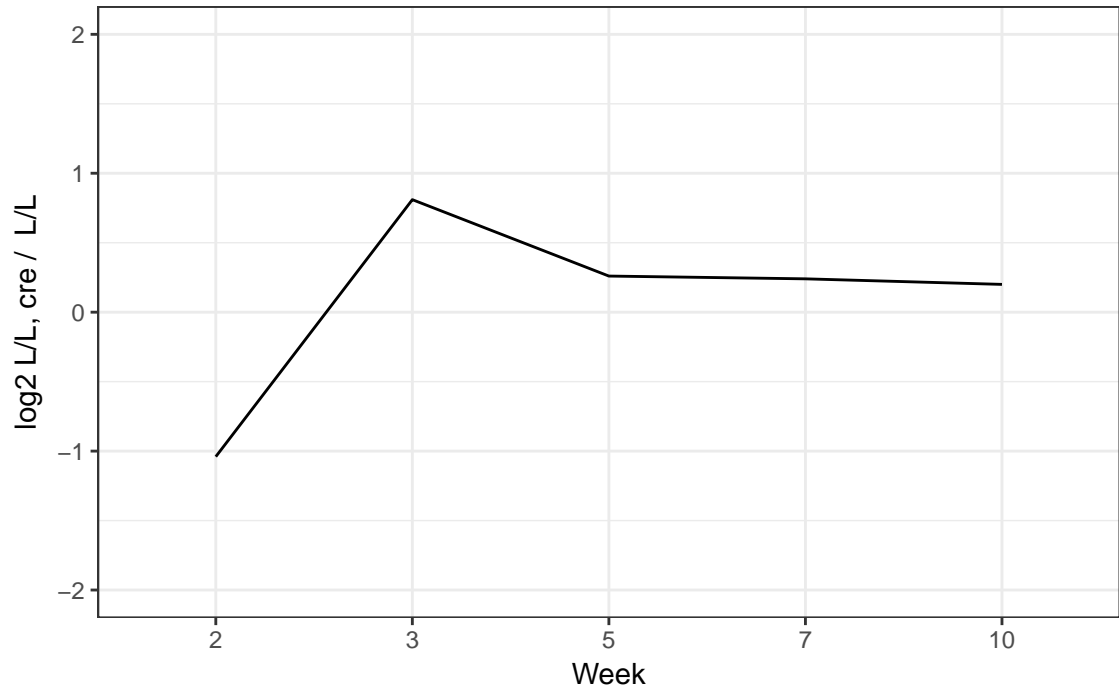



SLC25A34 / A2ADF7; adj.p value: 0.02475

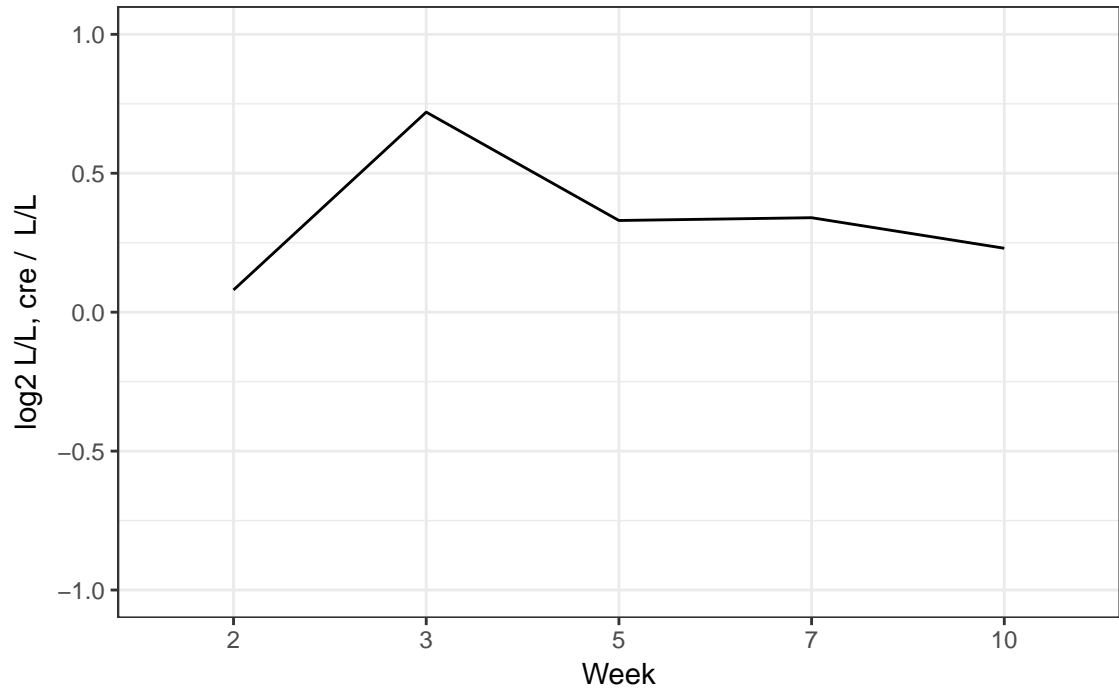

SLC25A35 / Q5SWT3; adj.p value: 0.10556

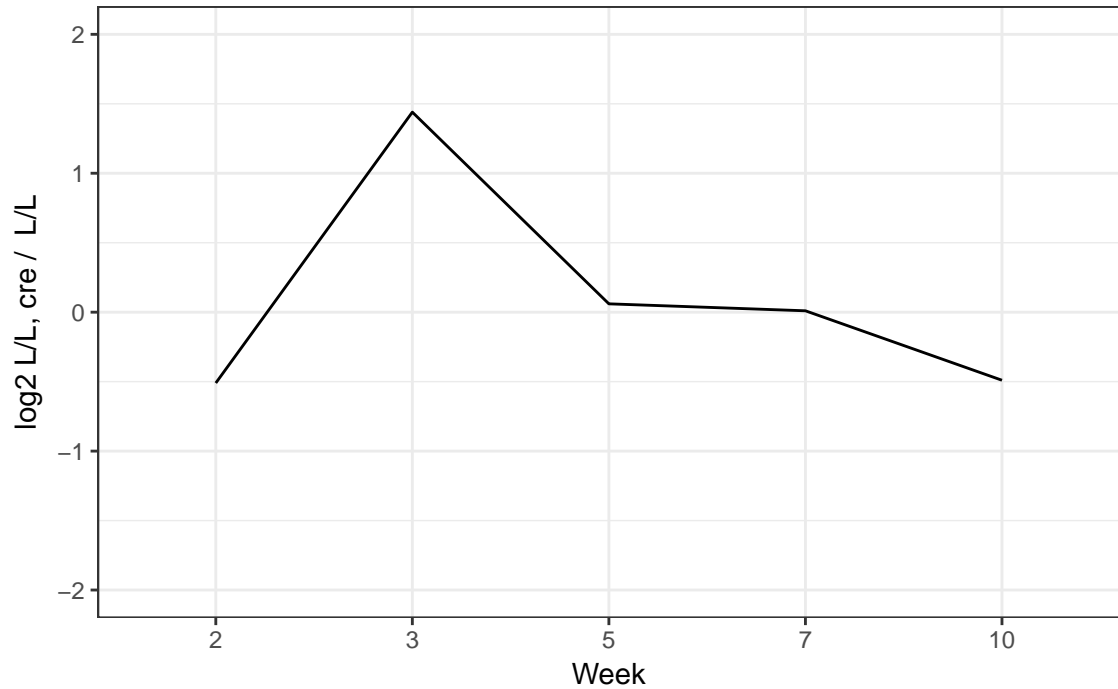

SLC25A4 / P48962; adj.p value: 0.02251

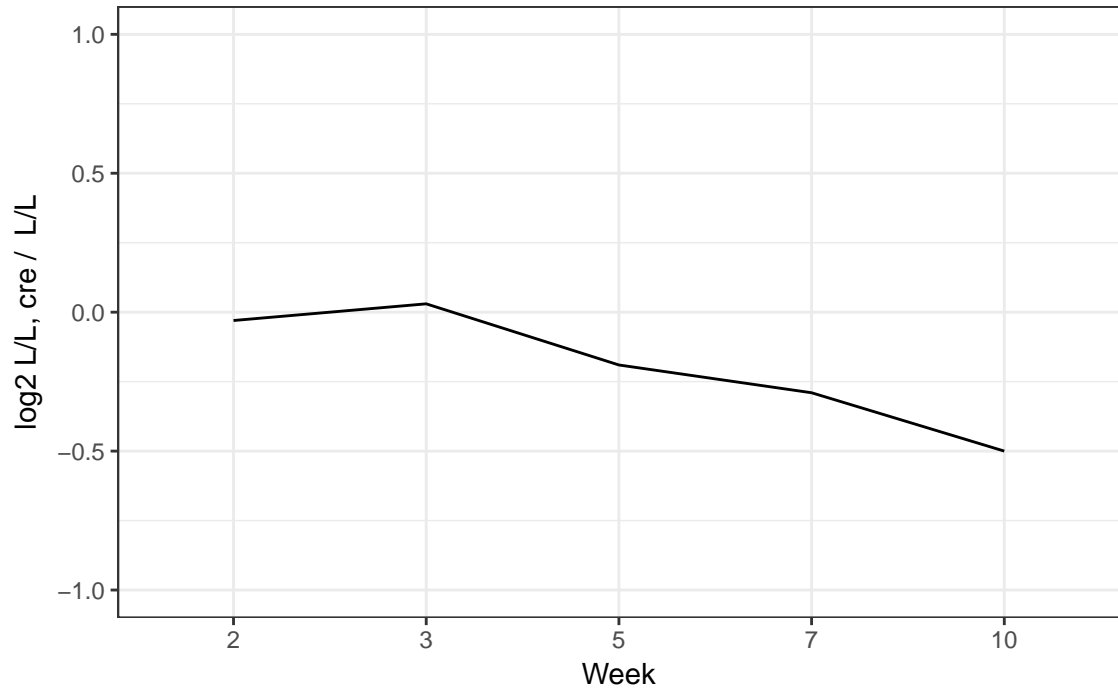

SLC25A40 / Q8BGP6-2; adj.p value: 0.62208

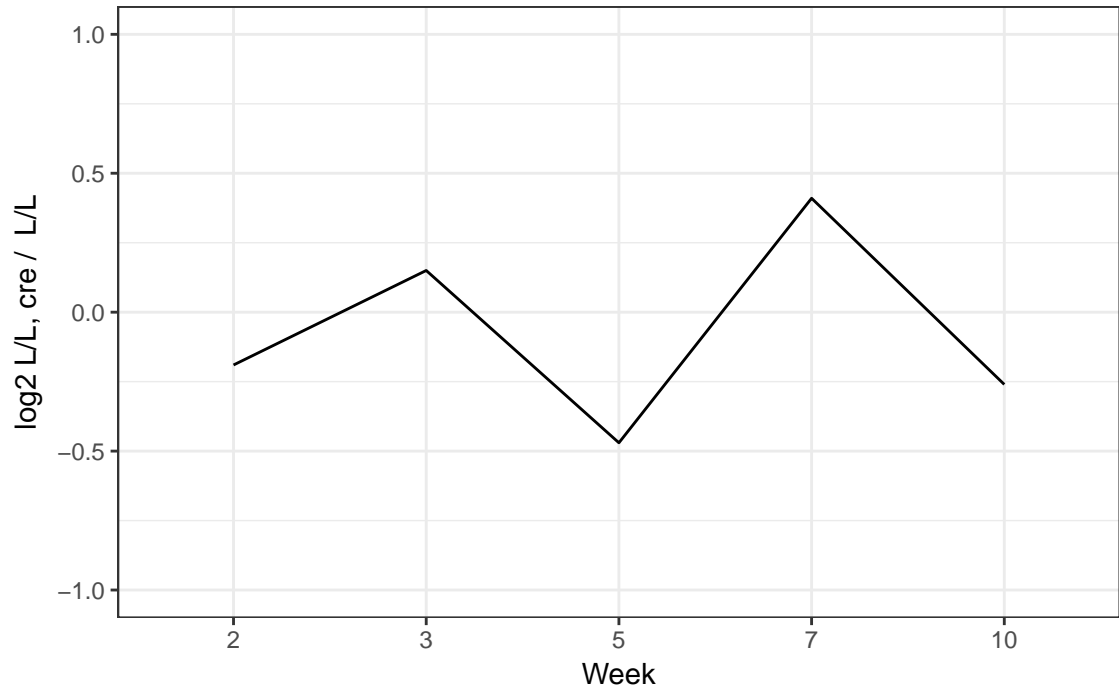

SLC25A42 / Q8R0Y8; adj.p value: 0.00143

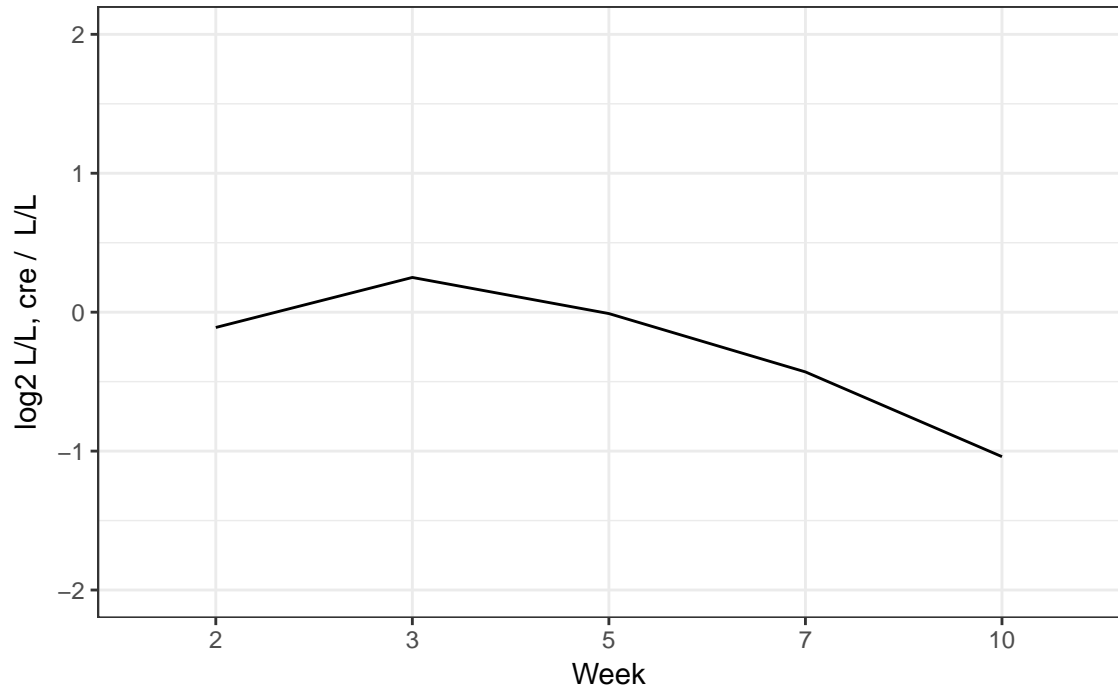

SLC25A46 / Q9CQS4; adj.p value: 0.05948

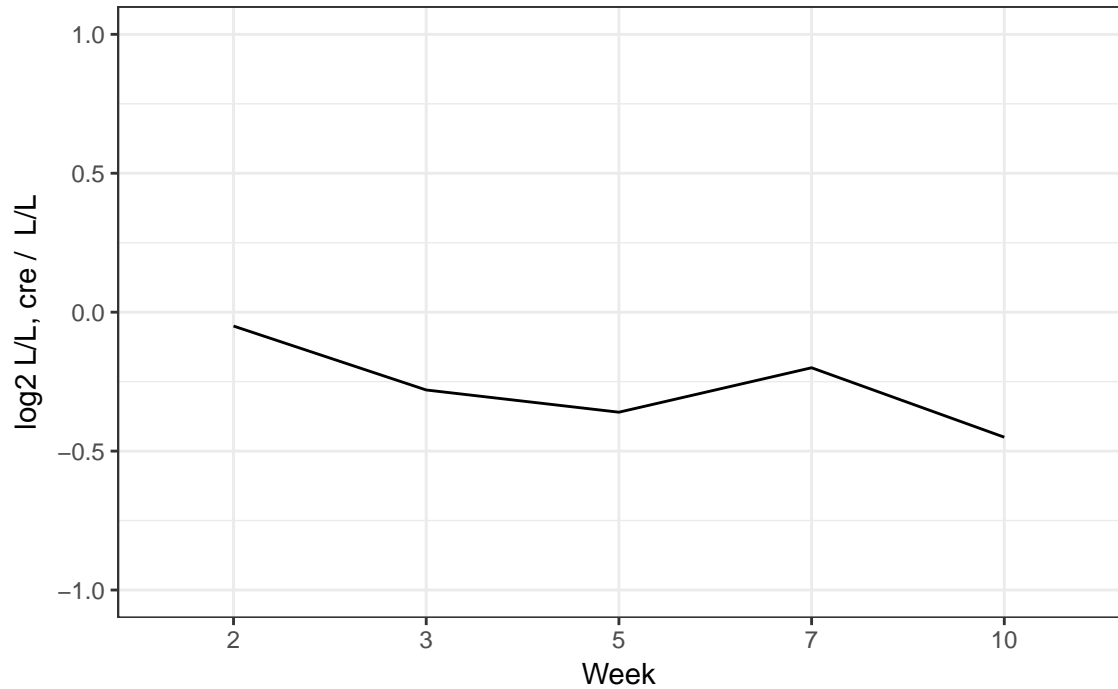

SLC25A5 / P51881; adj.p value: 0.01117

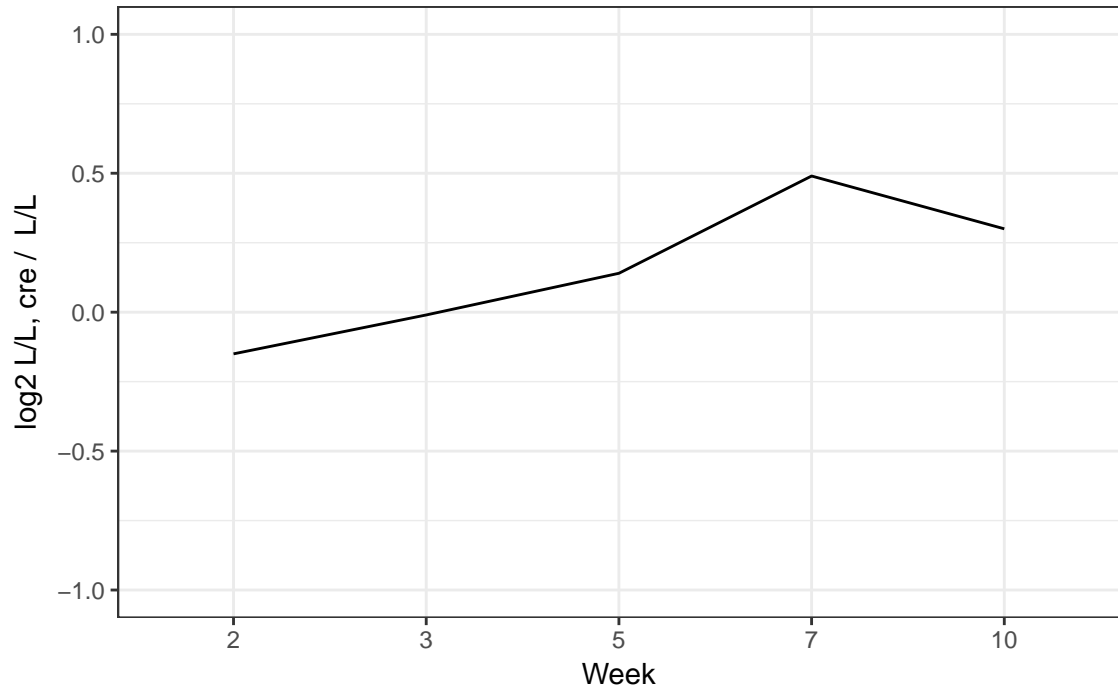

SLC25A51 / Q5HZI9; adj.p value: 0.3708

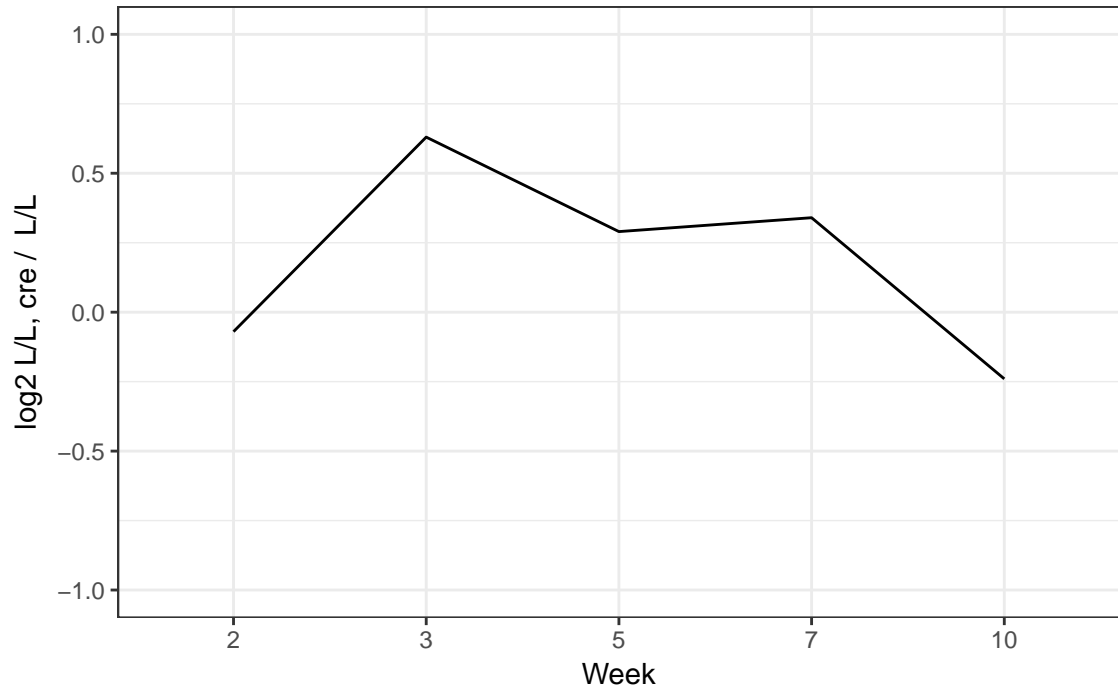



SLC30A9 / Q5IRJ6; adj.p value: 0.00084

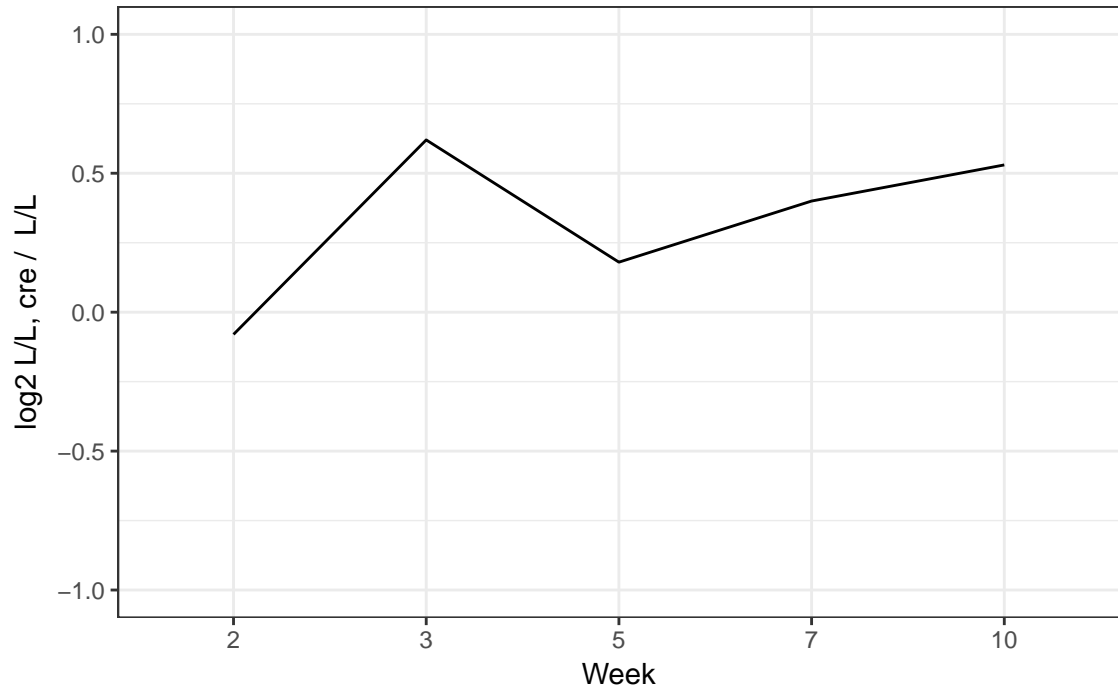

SLIRP / Q9D8T7; adj.p value: 0

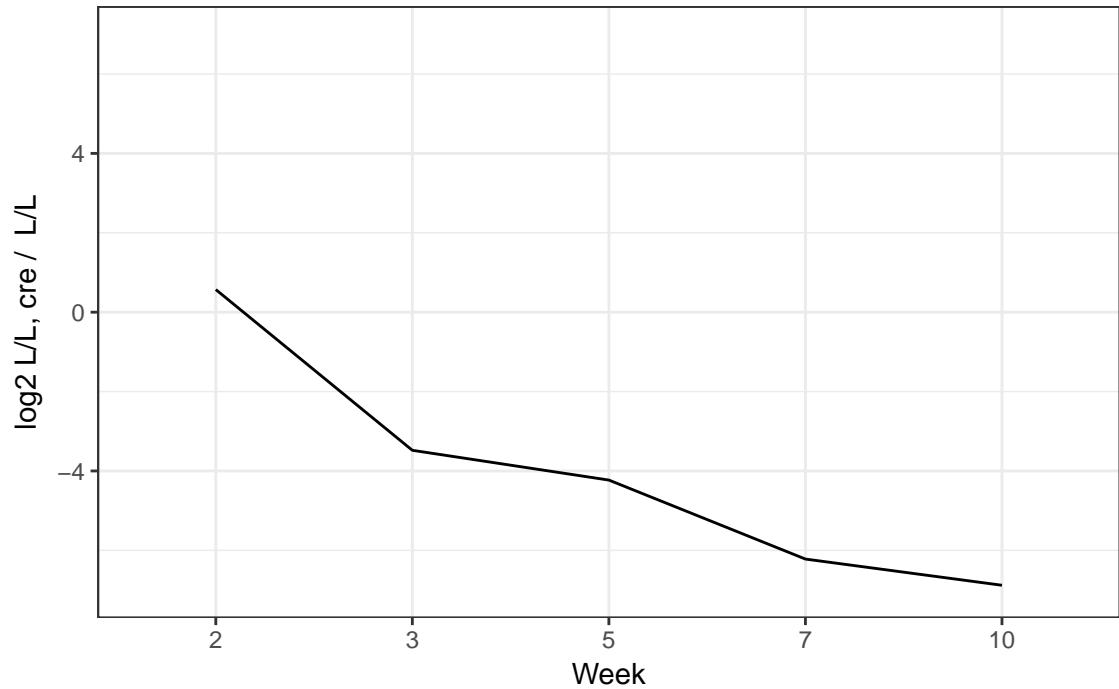

SMIM20 / D3Z7Q2; adj.p value: 0.62623

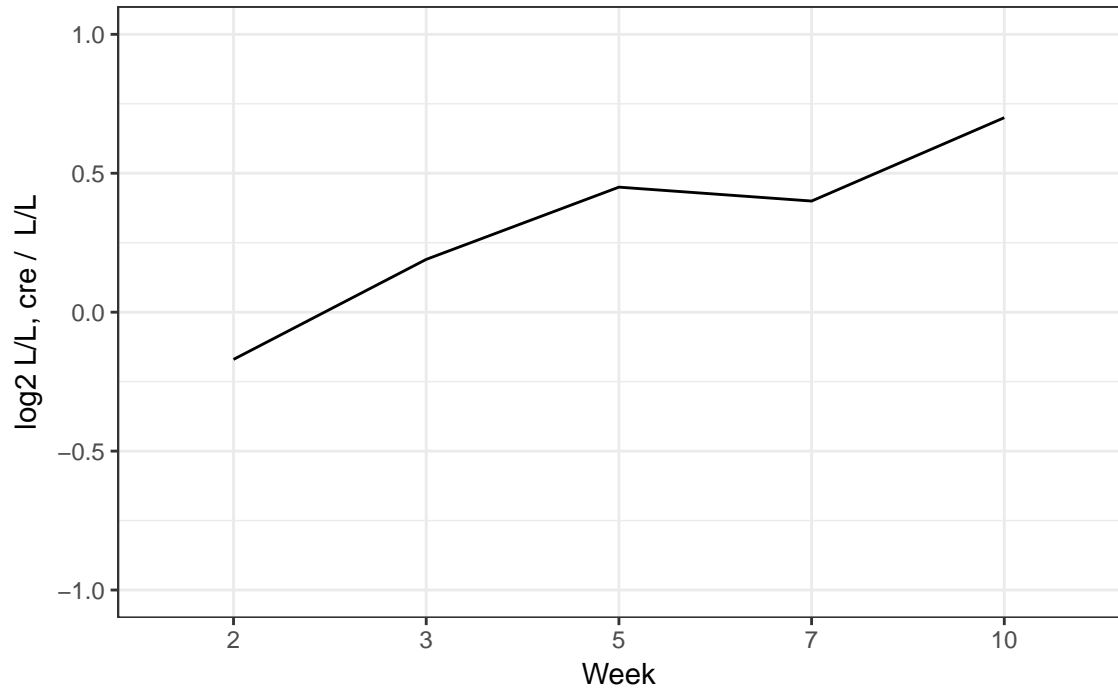

SND1 / Q78PY7; adj.p value: 0.00015

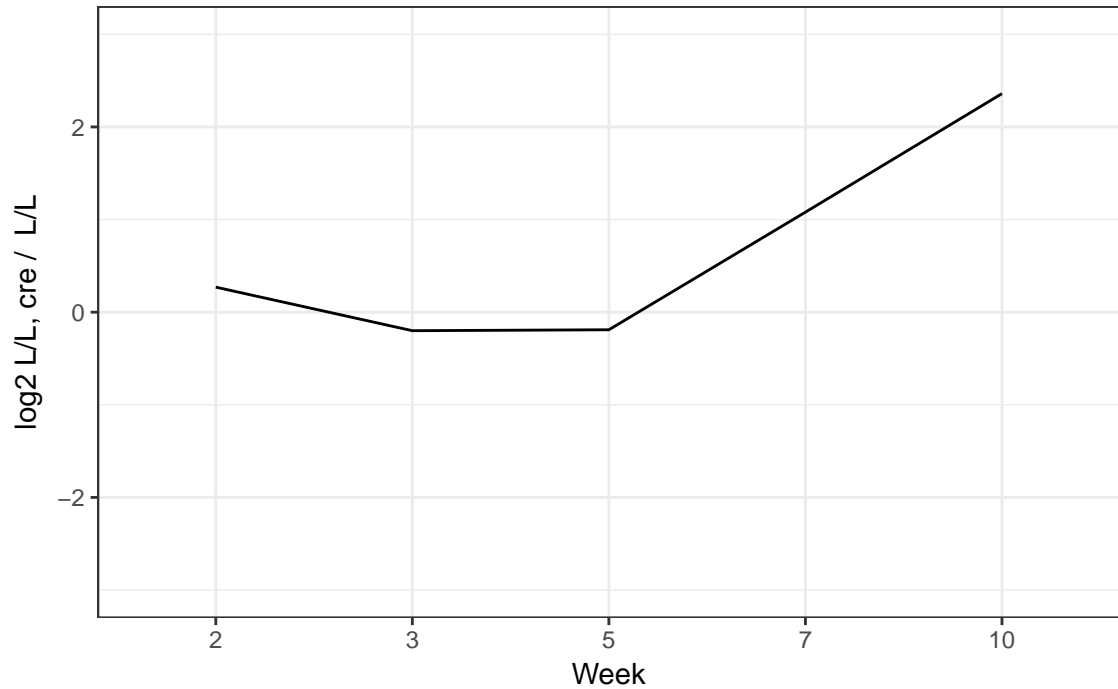

SOD1 / P08228; adj.p value: 0.00195

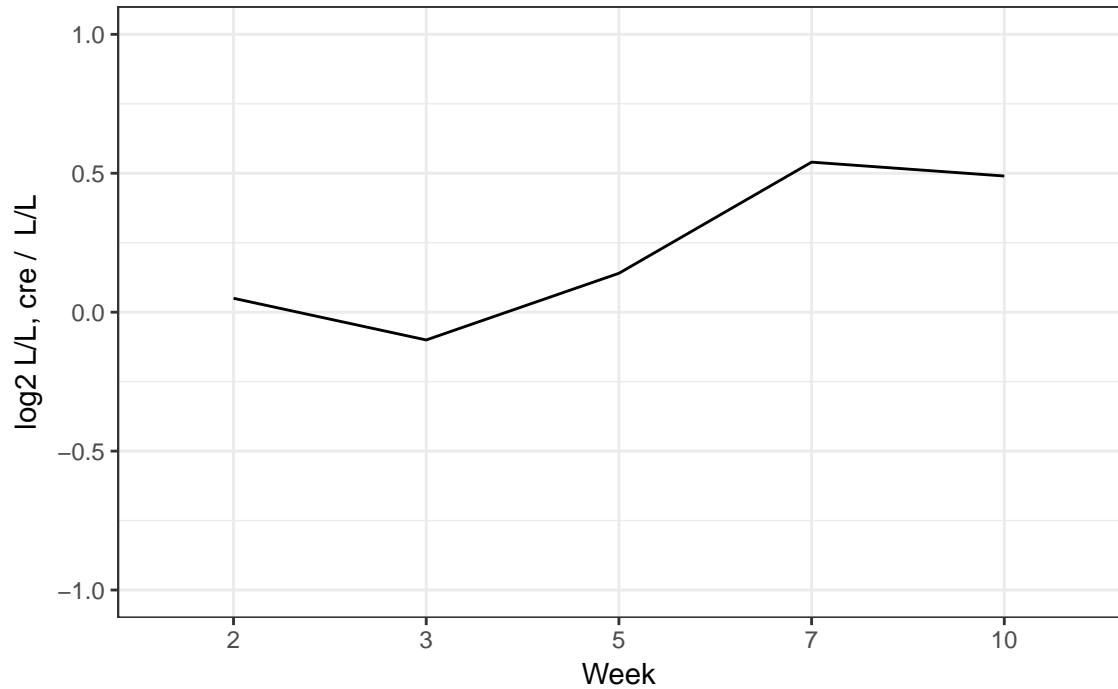

SOD2 / P09671; adj.p value: 0.2699

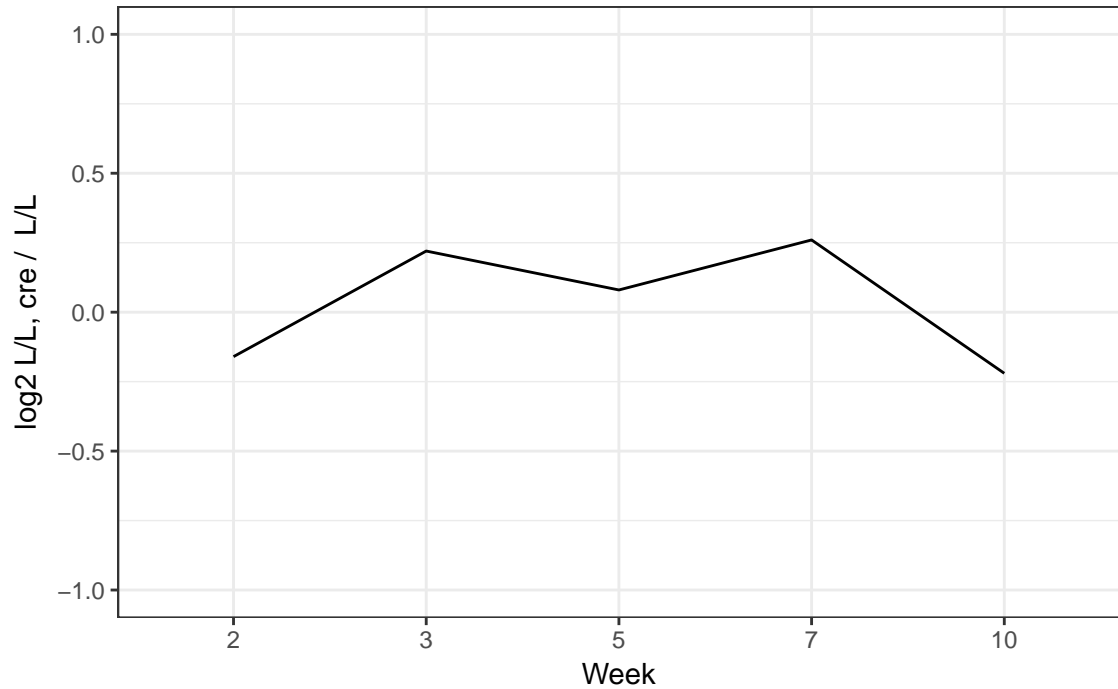

SPG7 / D3YZN4; adj.p value: 0.00392

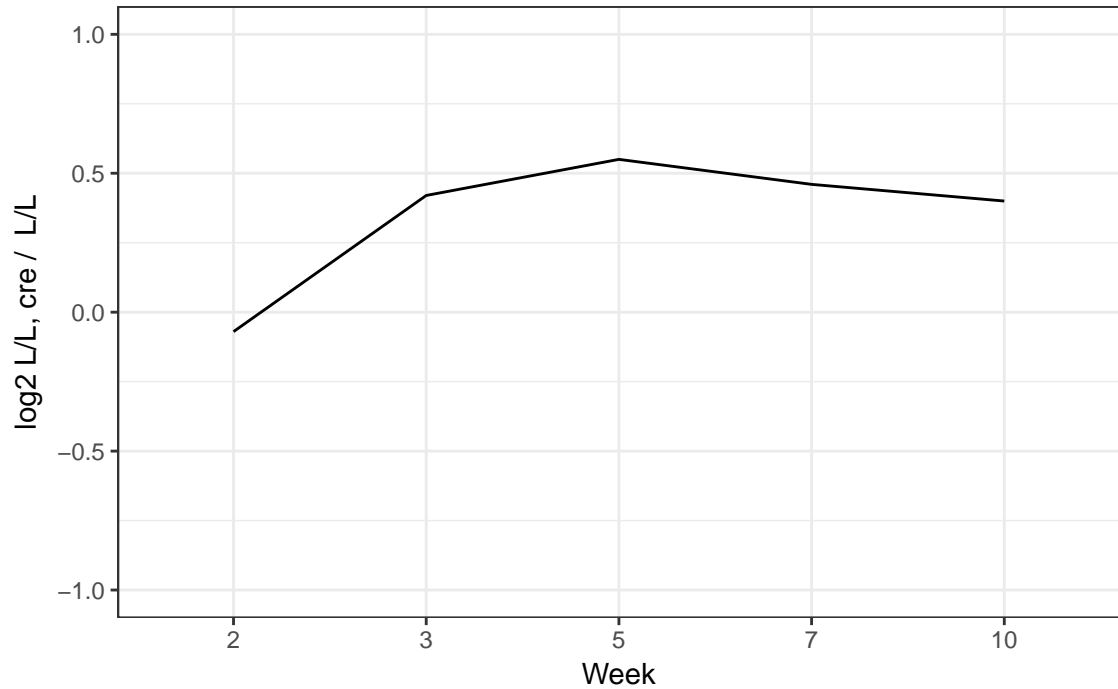

SPR / Q91XH5; adj.p value: 0

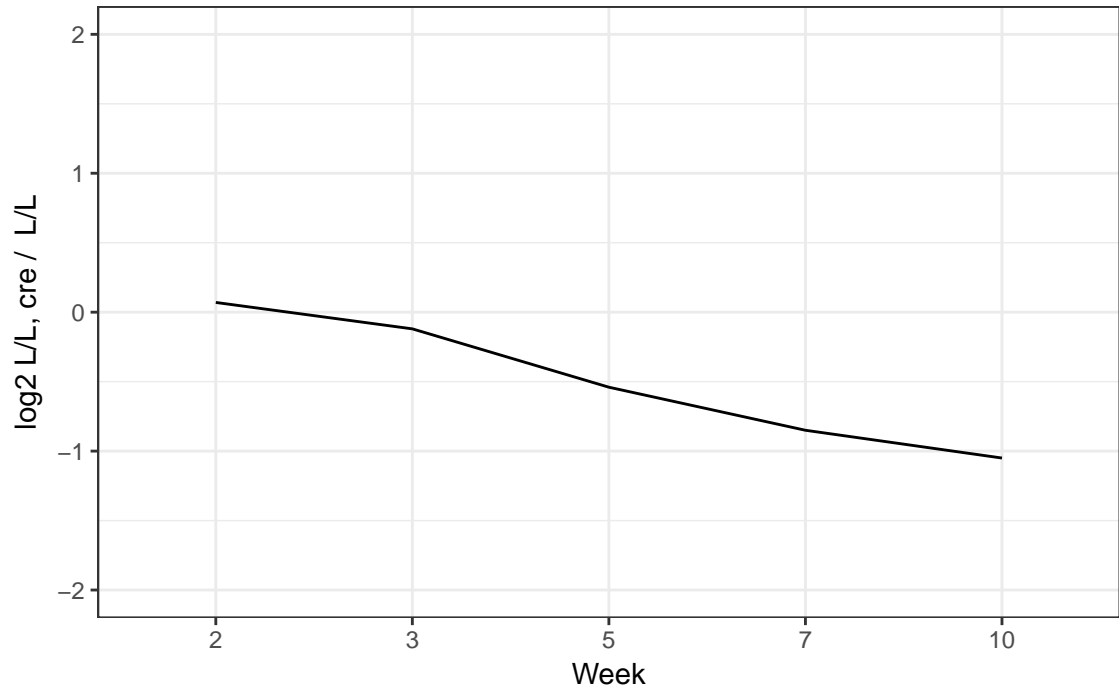



SPRYD4 / Q91WK1; adj.p value: 0

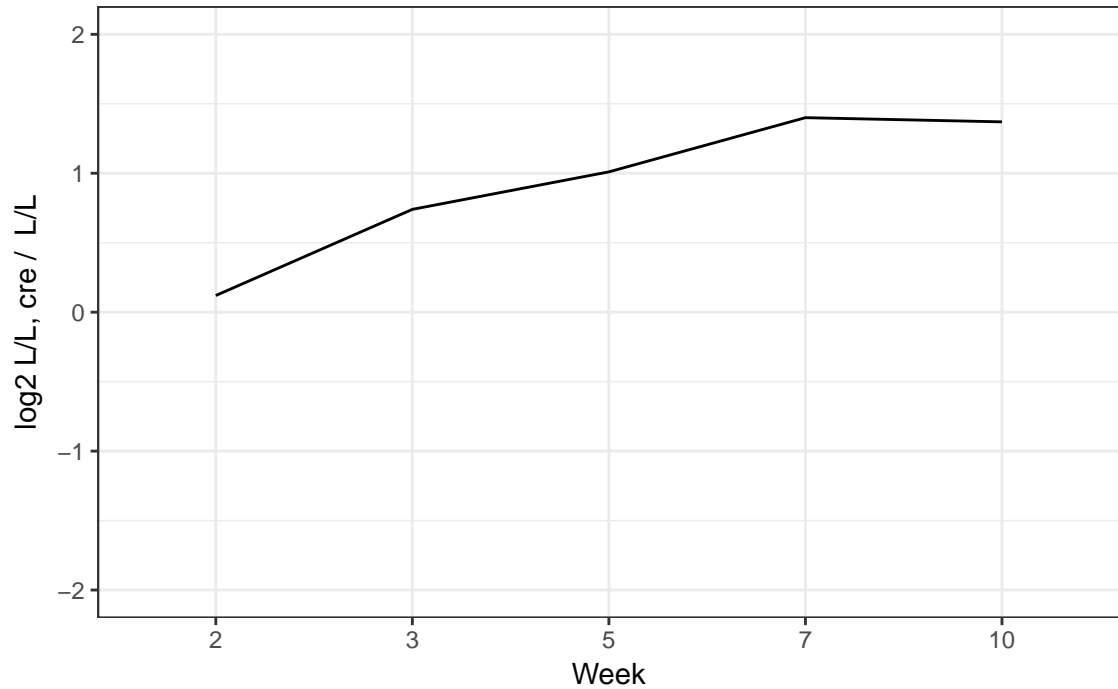

SQRDL / Q9R112; adj.p value: 0.00066

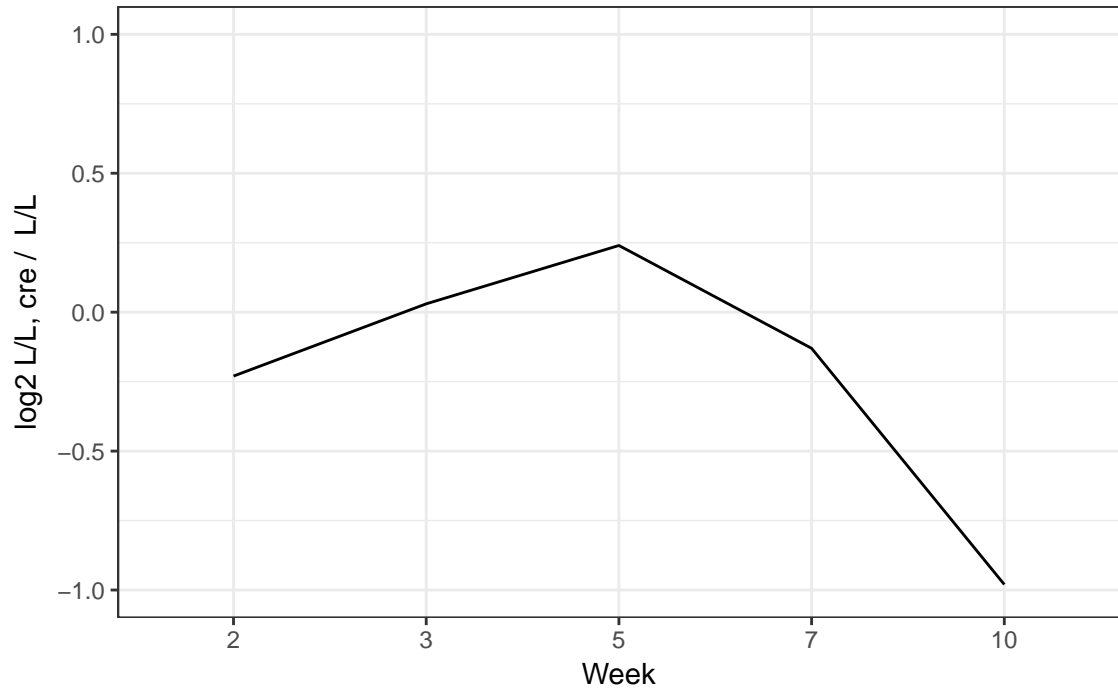

SSBP1 / Q8R2K3; adj.p value: 0.13048

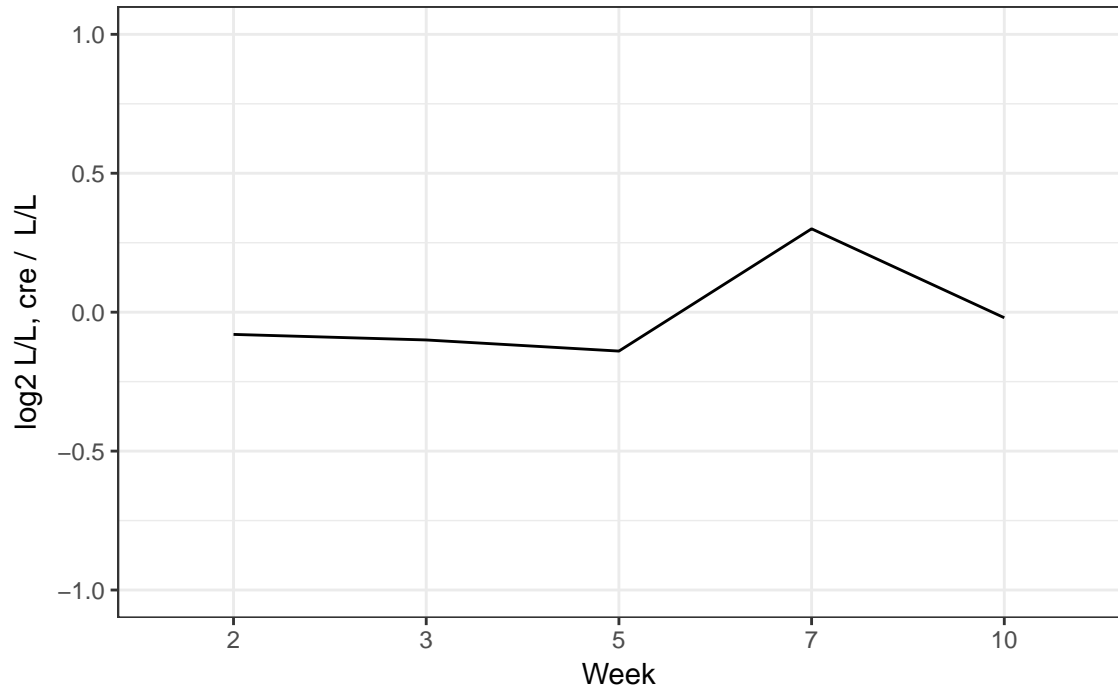

STARD7 / Q8R1R3; adj.p value: 0.03176

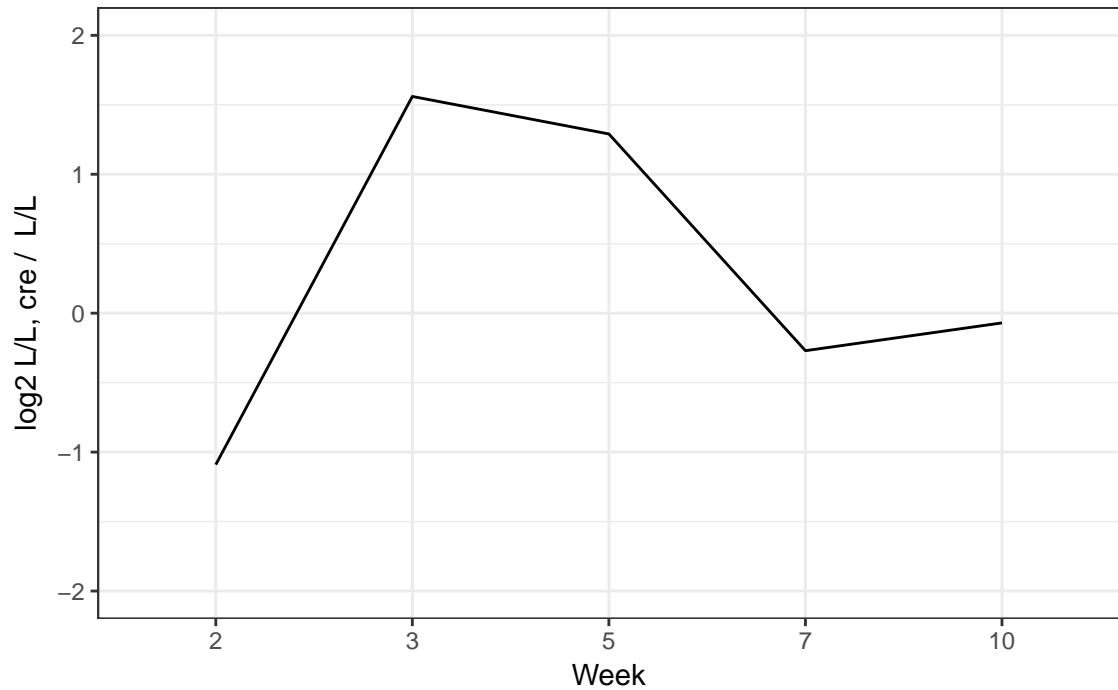

STOML2 / Q99JB2; adj.p value: 0

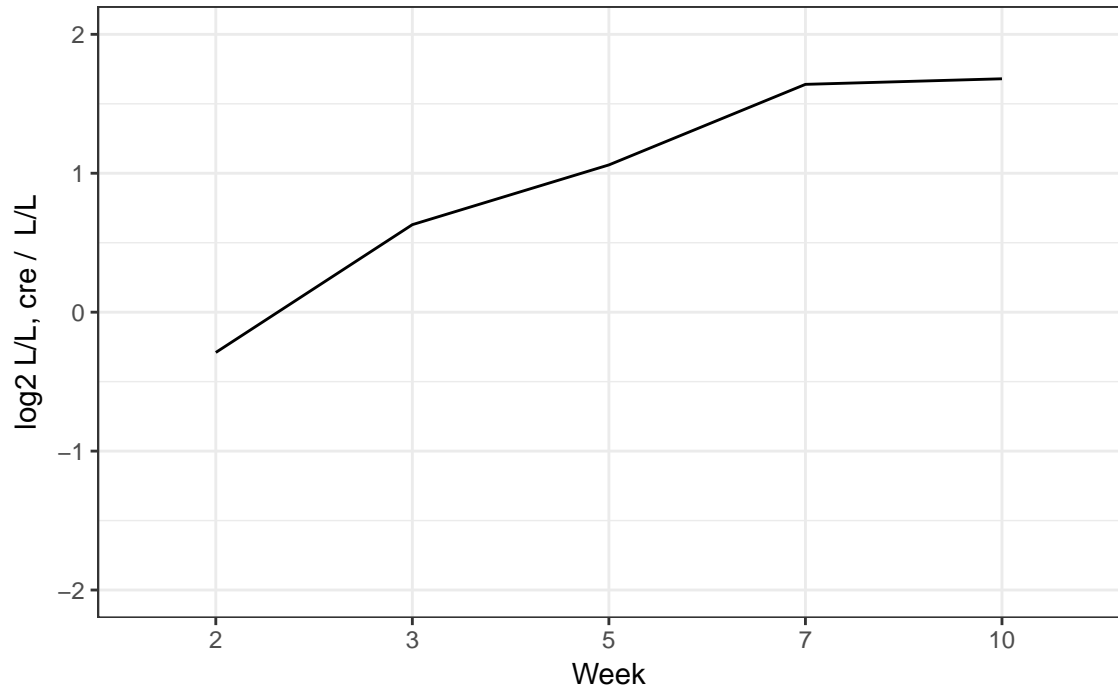

SUCLA2 / Q9Z2I9; adj.p value: 0.33584

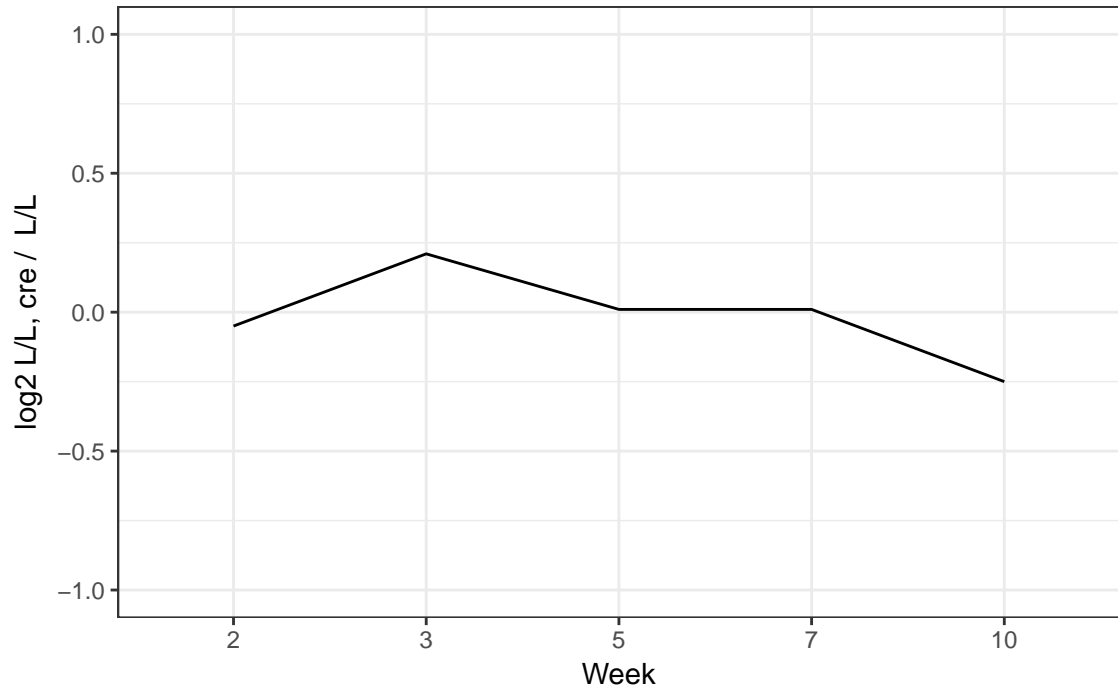

SUCLG1 / Q9WUM5; adj.p value: 0.13351

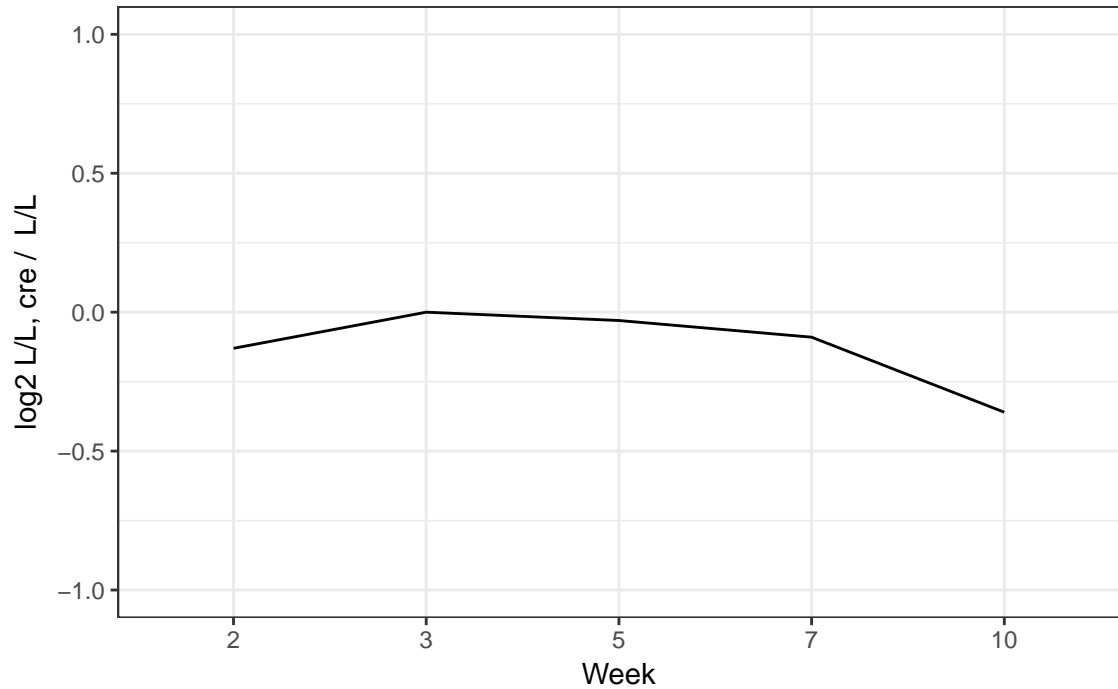

SUCLG2 / Q9Z2I8; adj.p value: 0

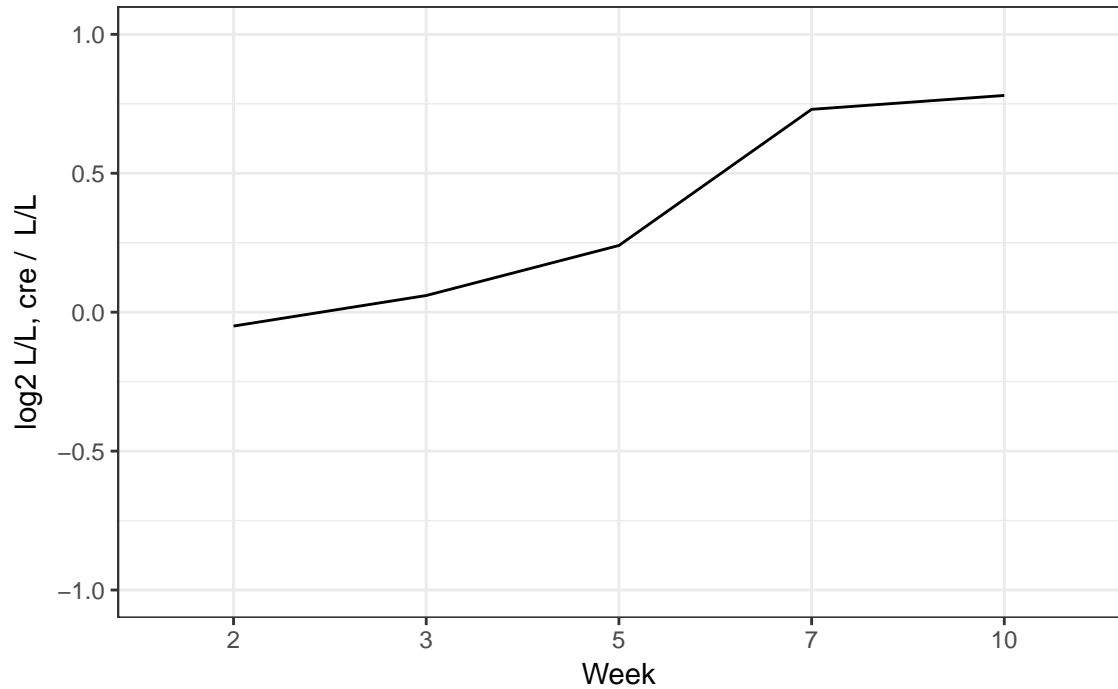



SUOX / Q8R086; adj.p value: 0.02733

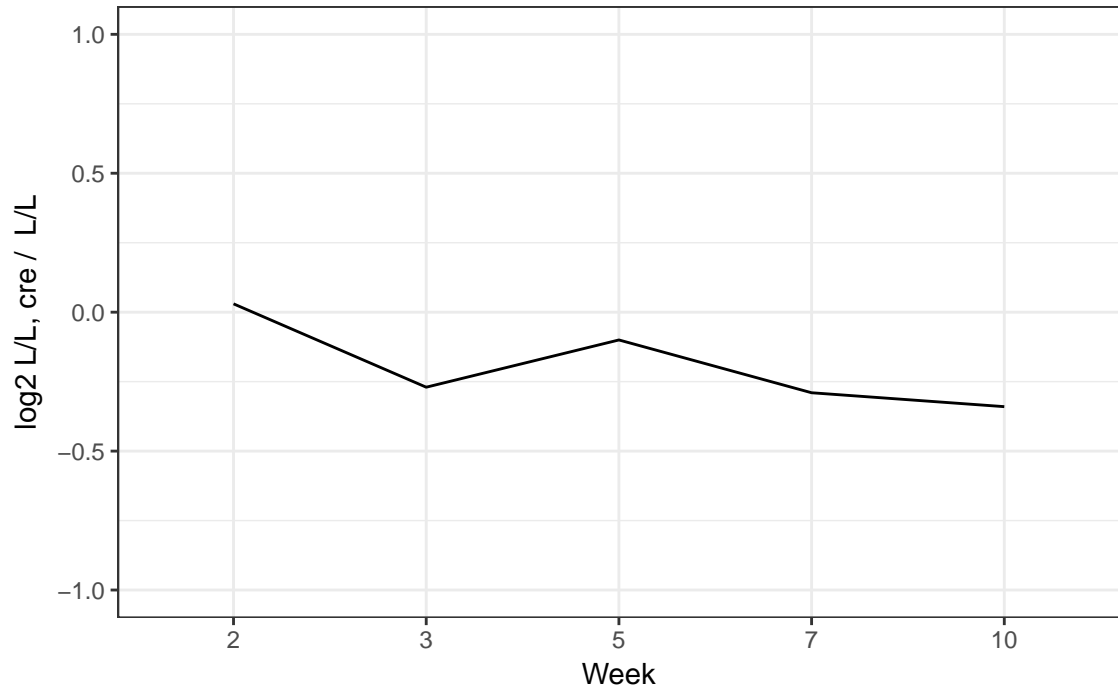

SUPV3L1 / Q80YD1; adj.p value: 0.75909

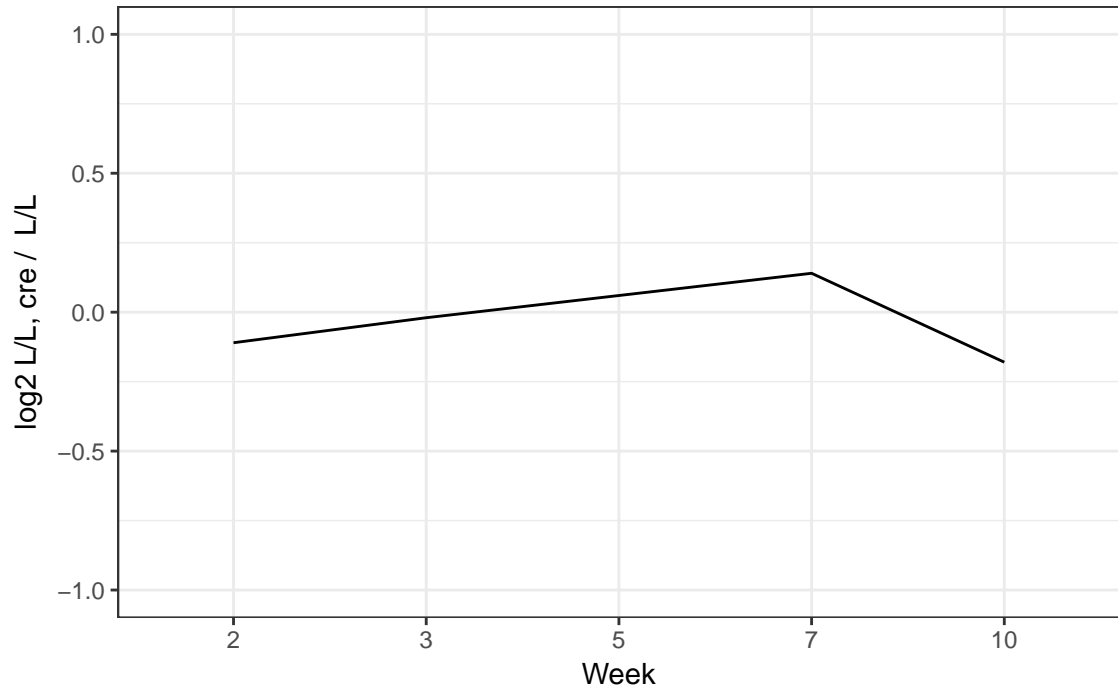

SURF1 / A0A0A6YVR9; adj.p value: 0

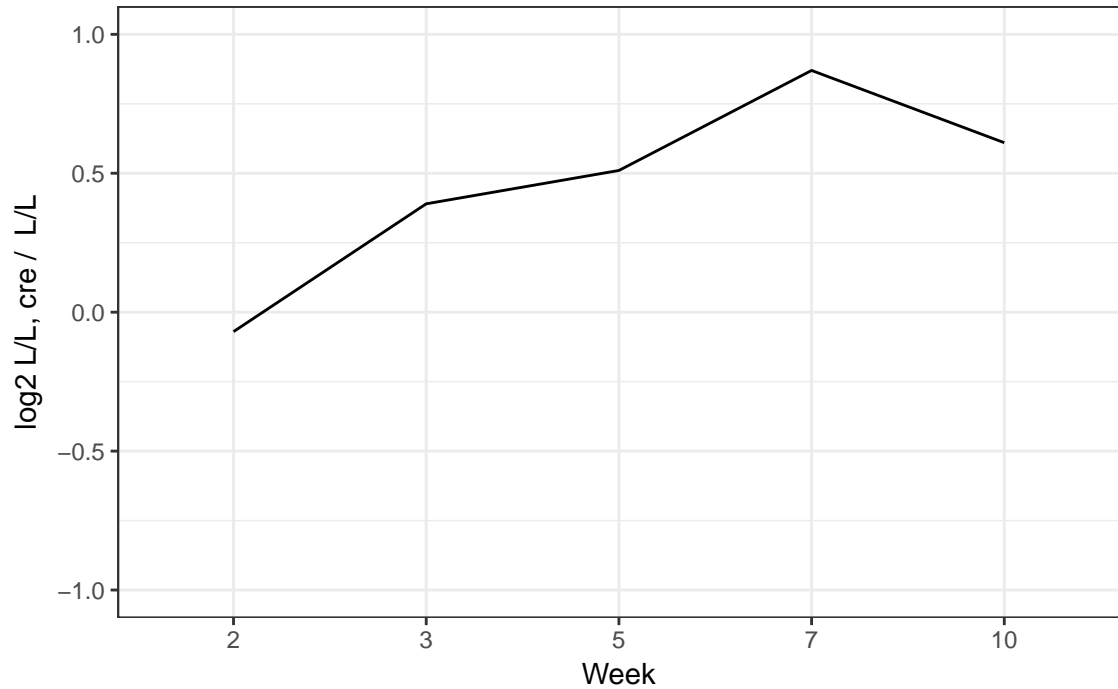

TACO1 / Q8K0Z7; adj.p value: 0.42162

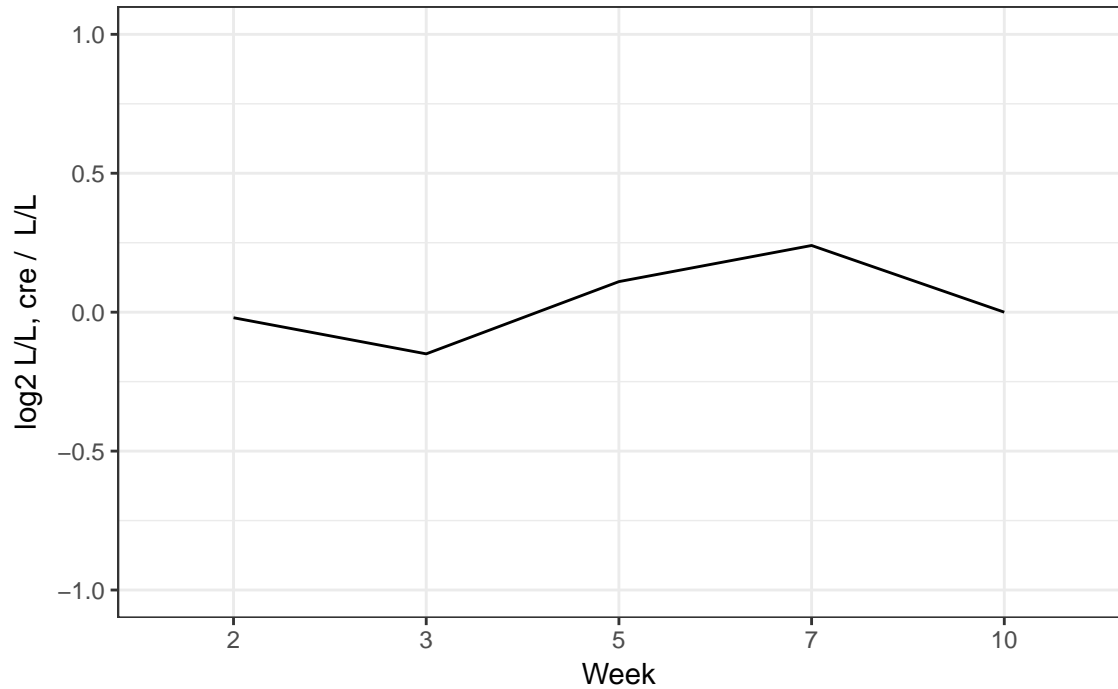

TAMM41 / G5E881; adj.p value: 0.00182

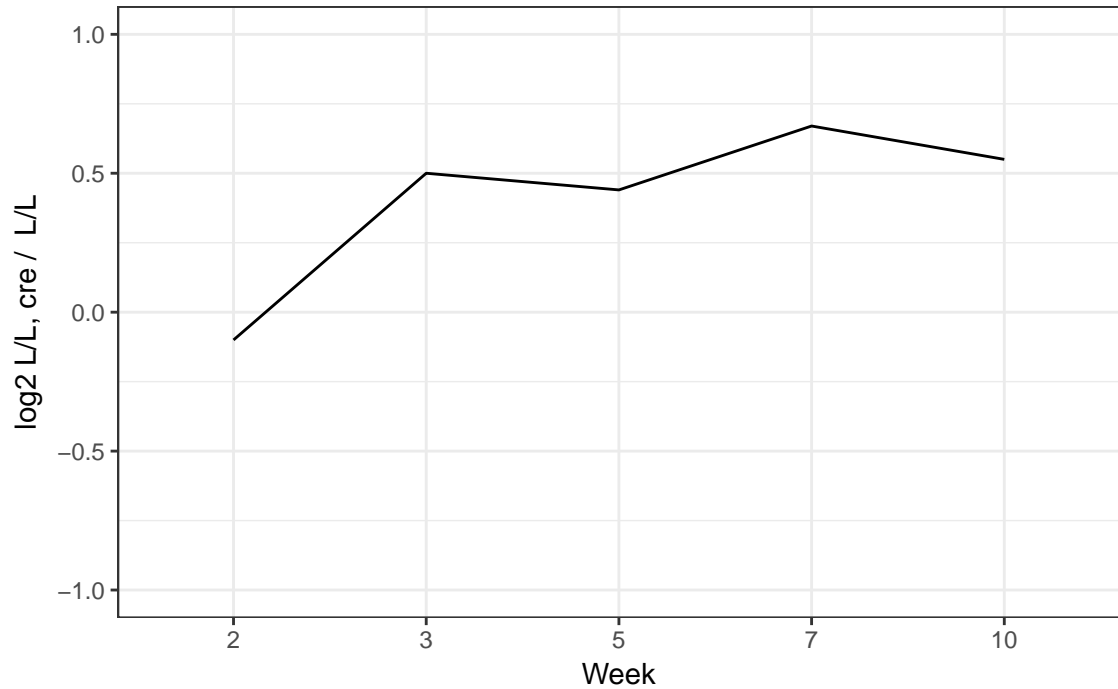

TARS2 / Q3UQ84; adj.p value: 0.00059

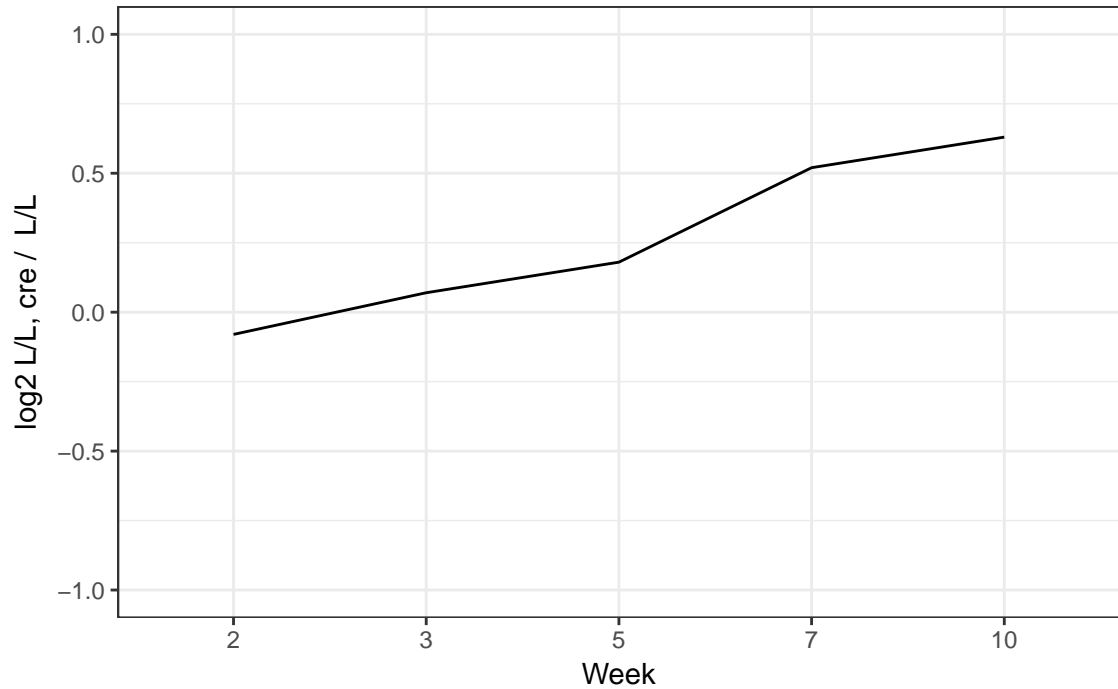

TBRG4 / Q91YM4; adj.p value: 0.13646

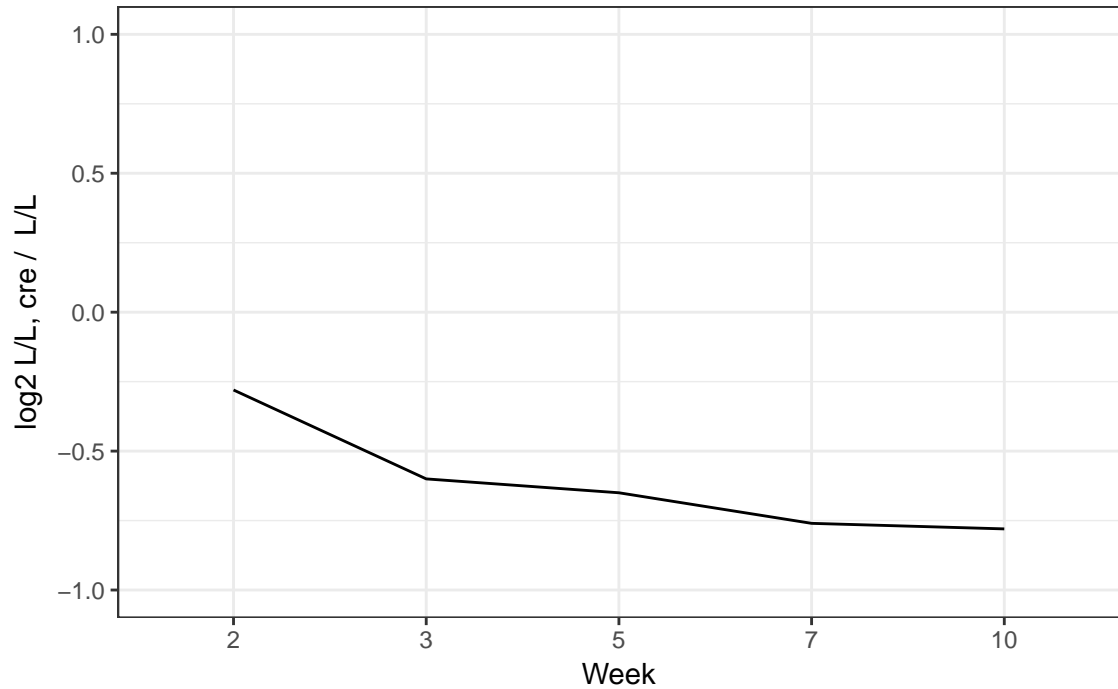

TCAIM / G3X983; adj.p value: 0.18759

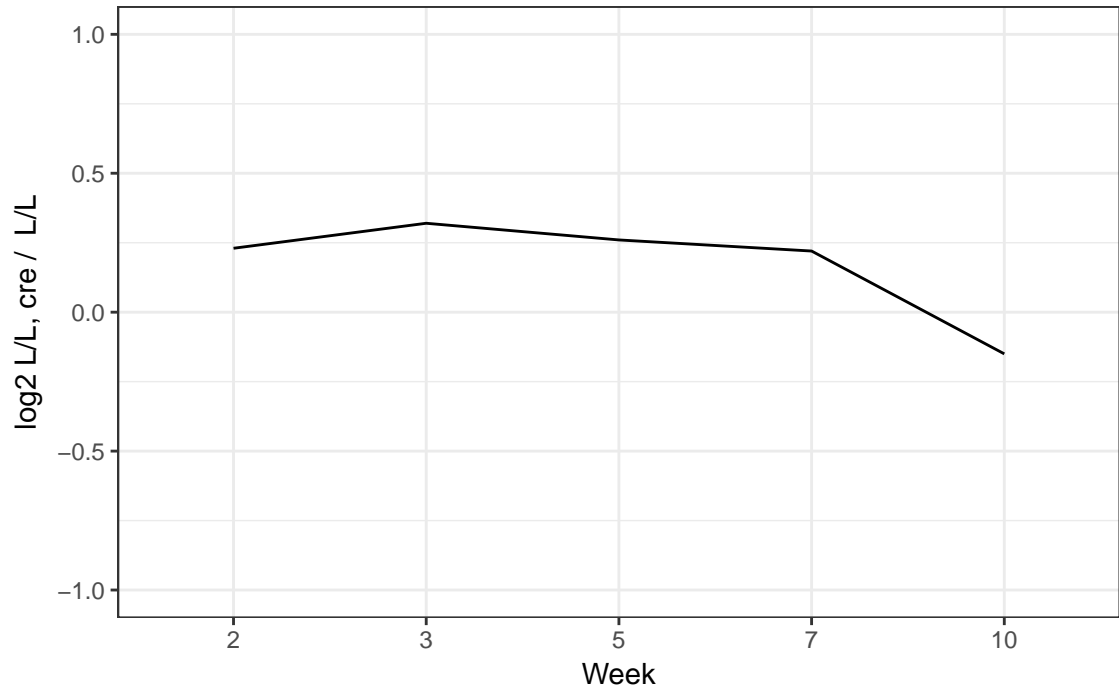



TEFM / Q5SSK3; adj.p value: 0.08657

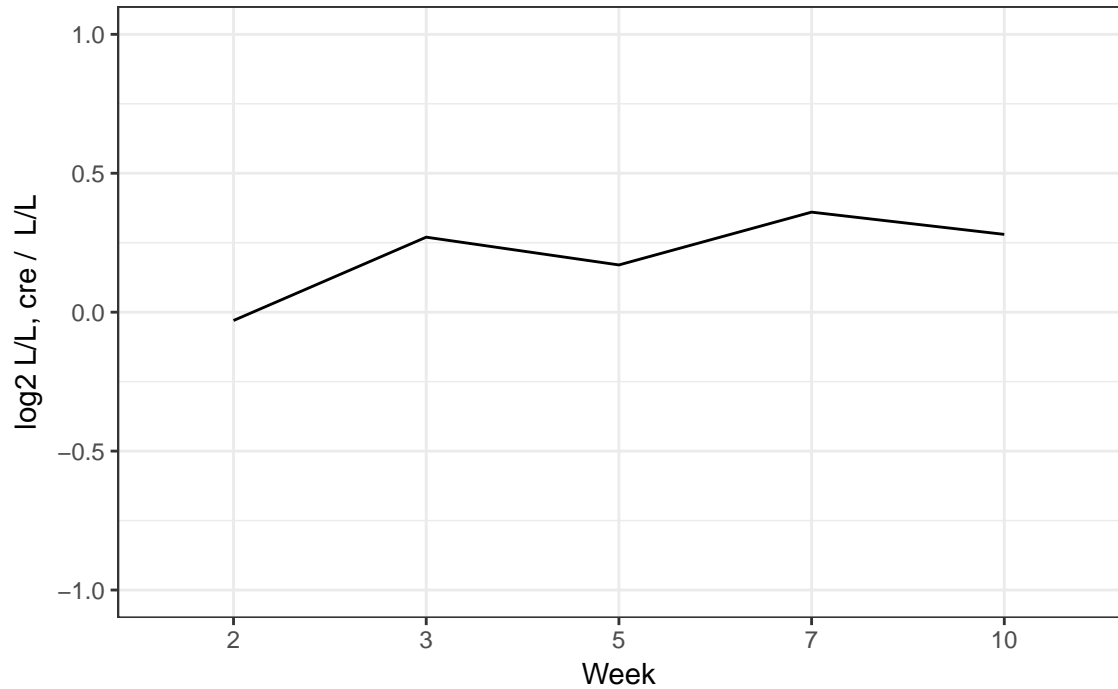

TFAM / P40630-2; adj.p value: 0.15715

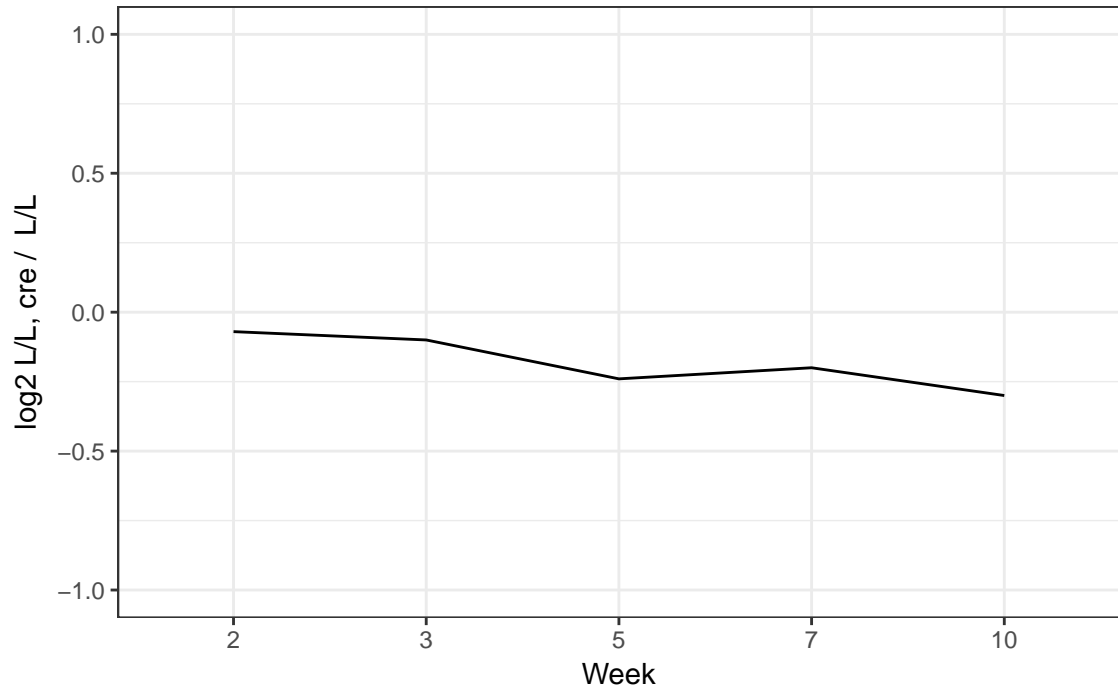

TFB1M / Q8JZM0; adj.p value: 0

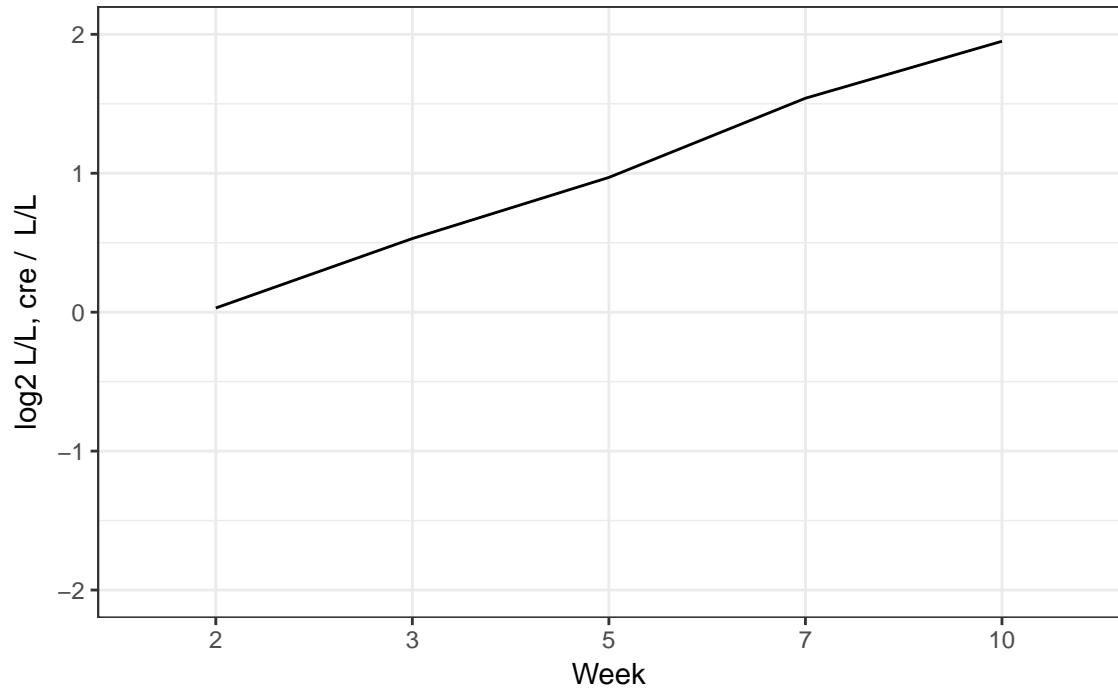

THA1 / Q6XPS7; adj.p value: 0.12908

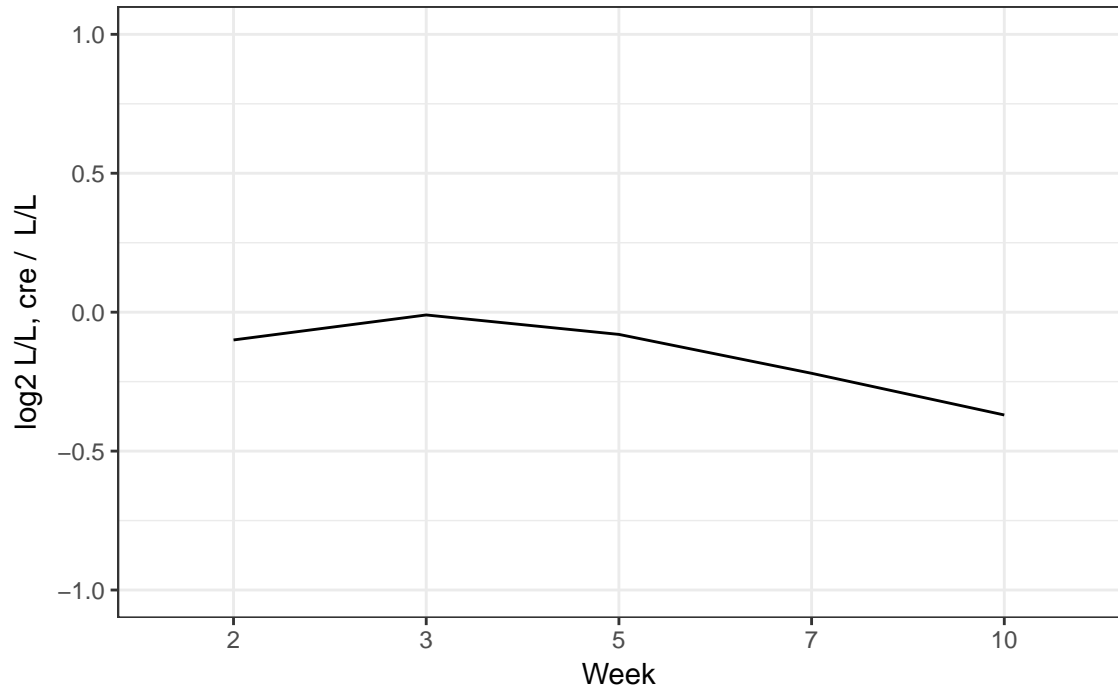

THEM4 / Q3UUI3; adj.p value: 0.08196

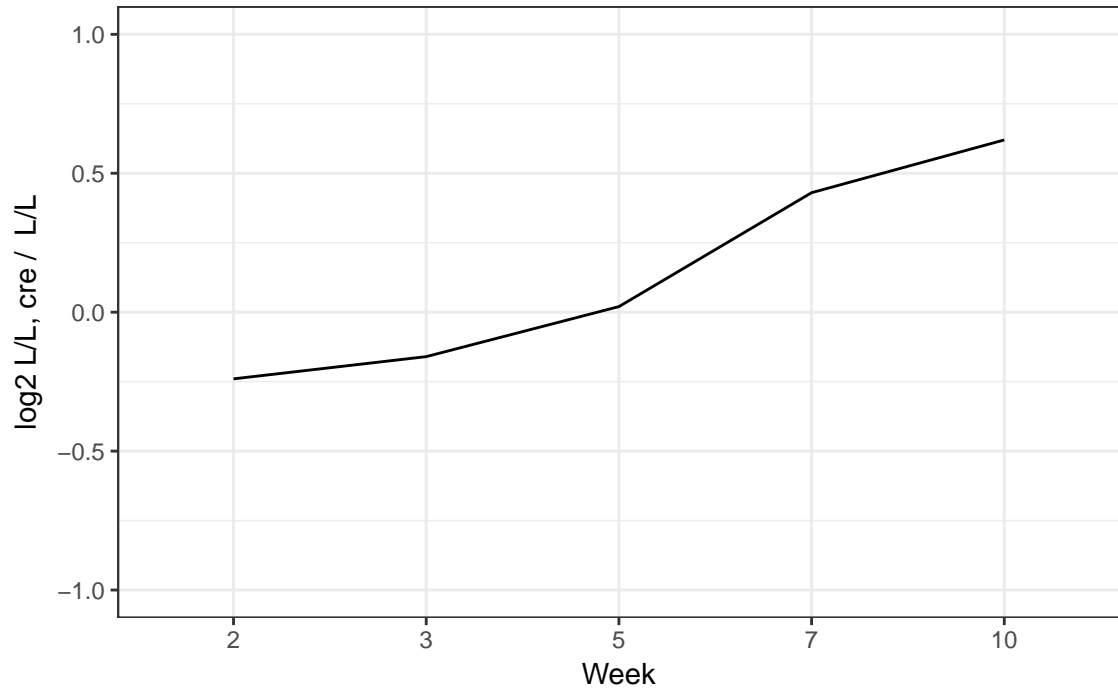

THNSL1 / Q8BH55; adj.p value: 0.0756

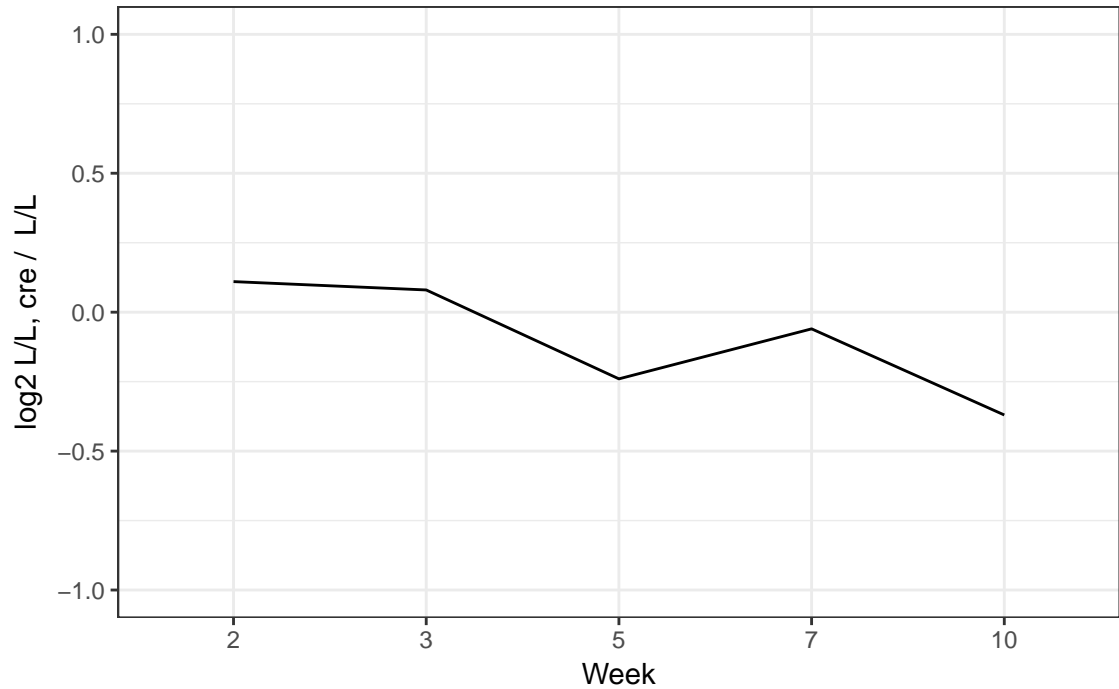

TIMM10 / P62073; adj.p value: 0.05372

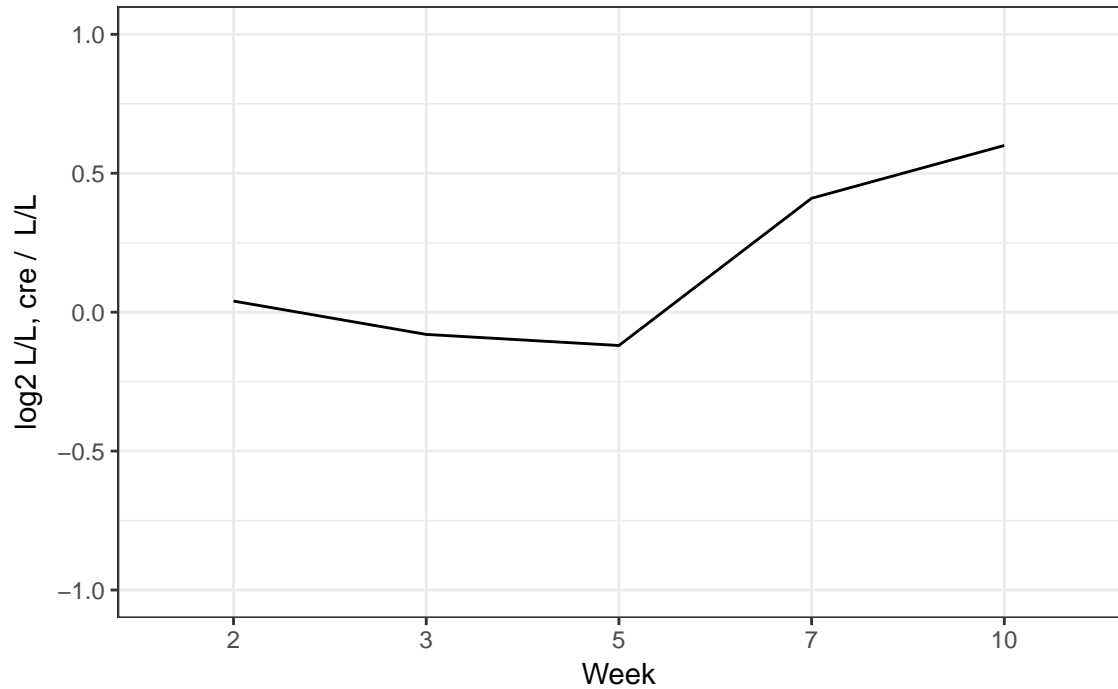

TIMM10B / Q9WV96; adj.p value: 0.06406

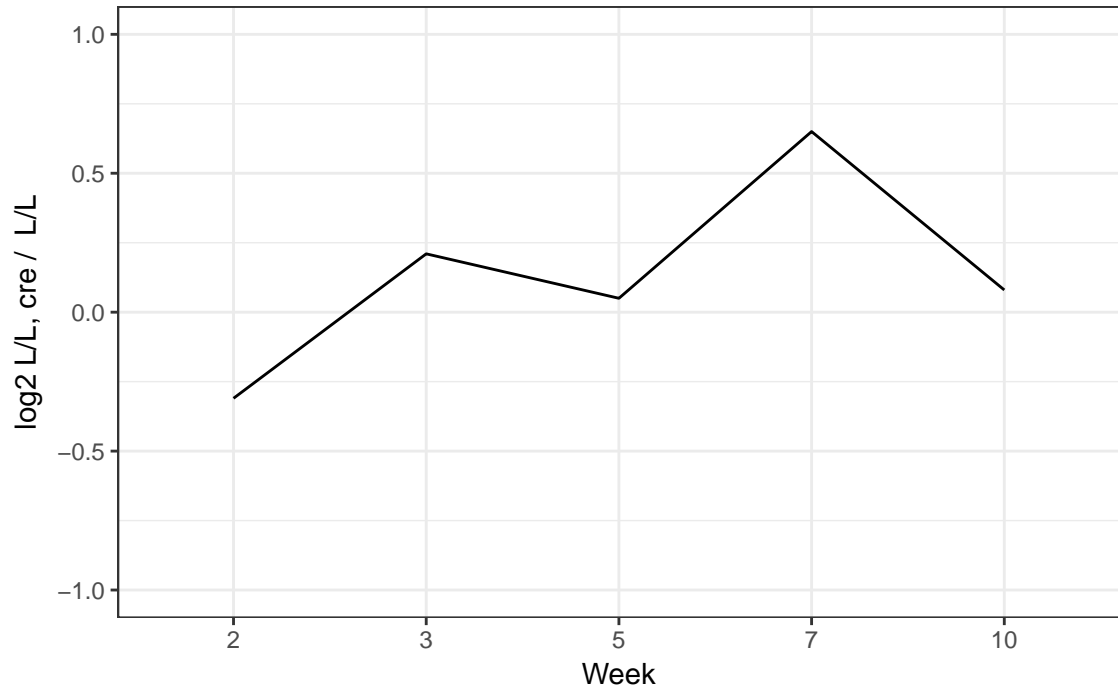



TIMM13 / P62075; adj.p value: 0.18271

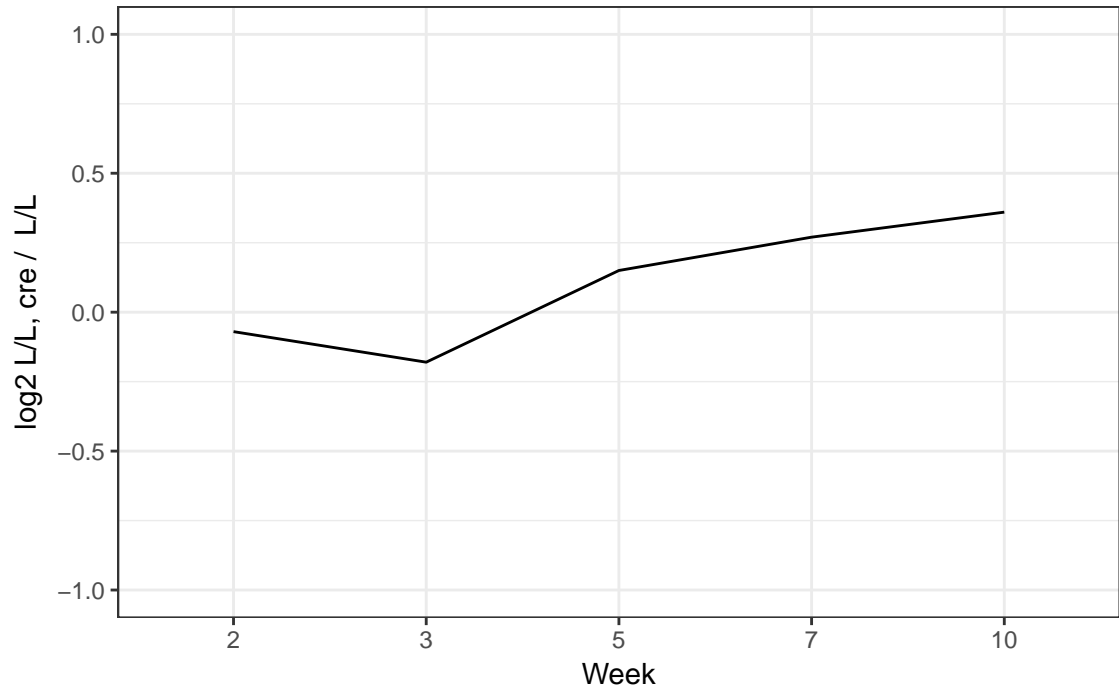

TIMM17A / Q9Z0V8; adj.p value: 0.02742

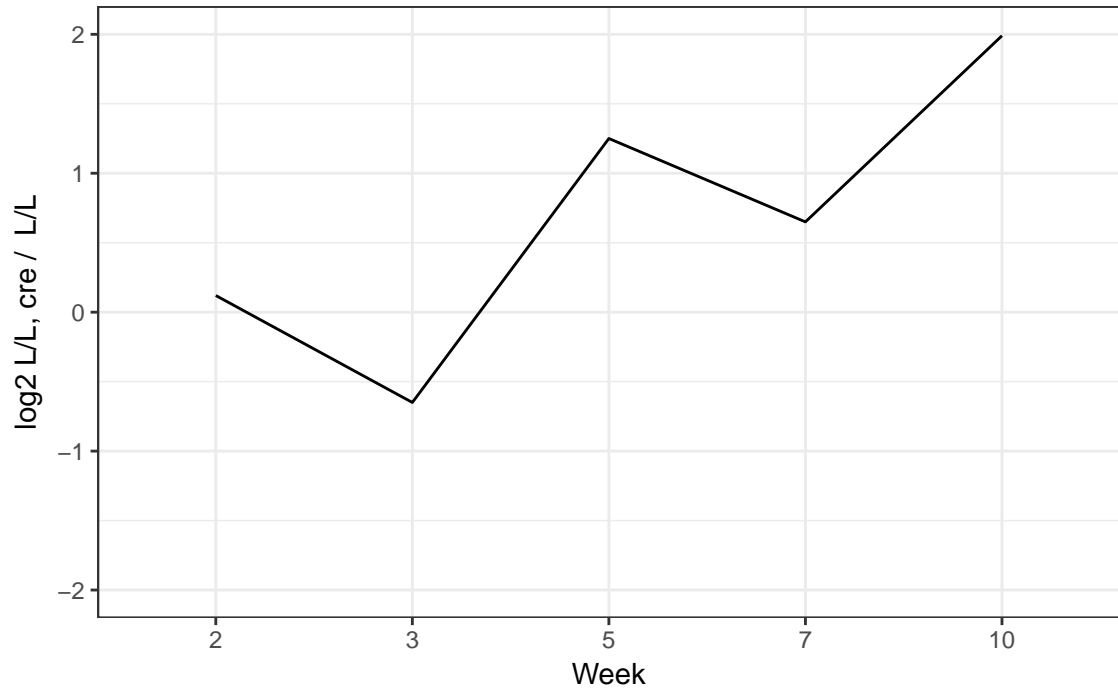

TIMM17B / Q9Z0V7; adj.p value: 0.36456

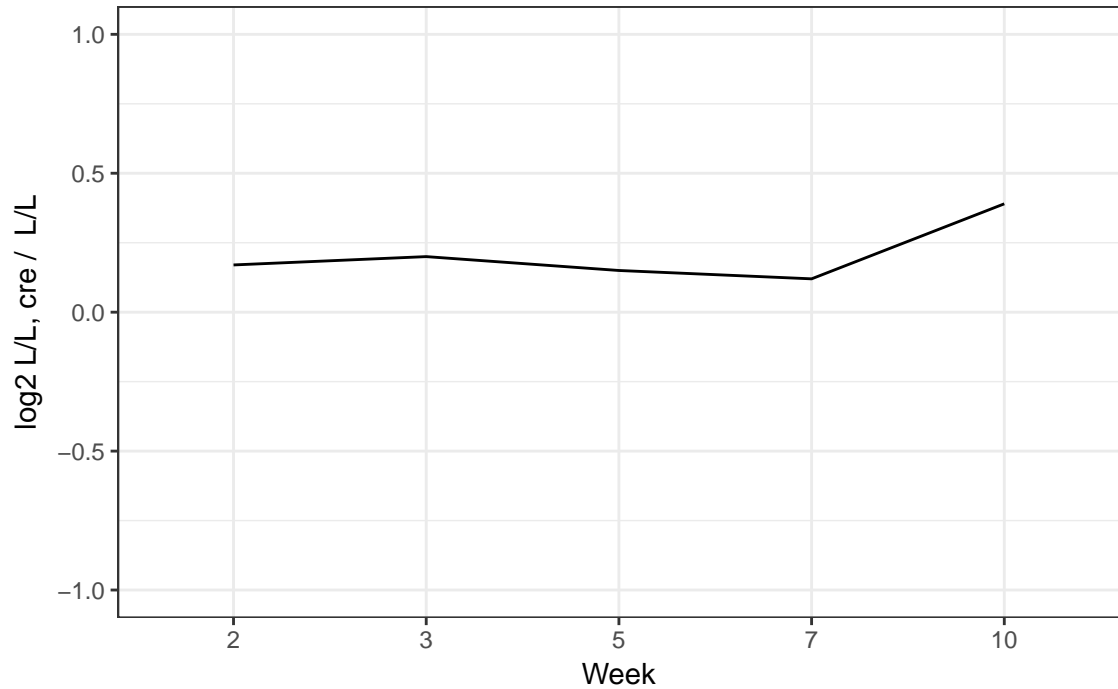

TIMM21 / Q8CCM6-2; adj.p value: 0.83156

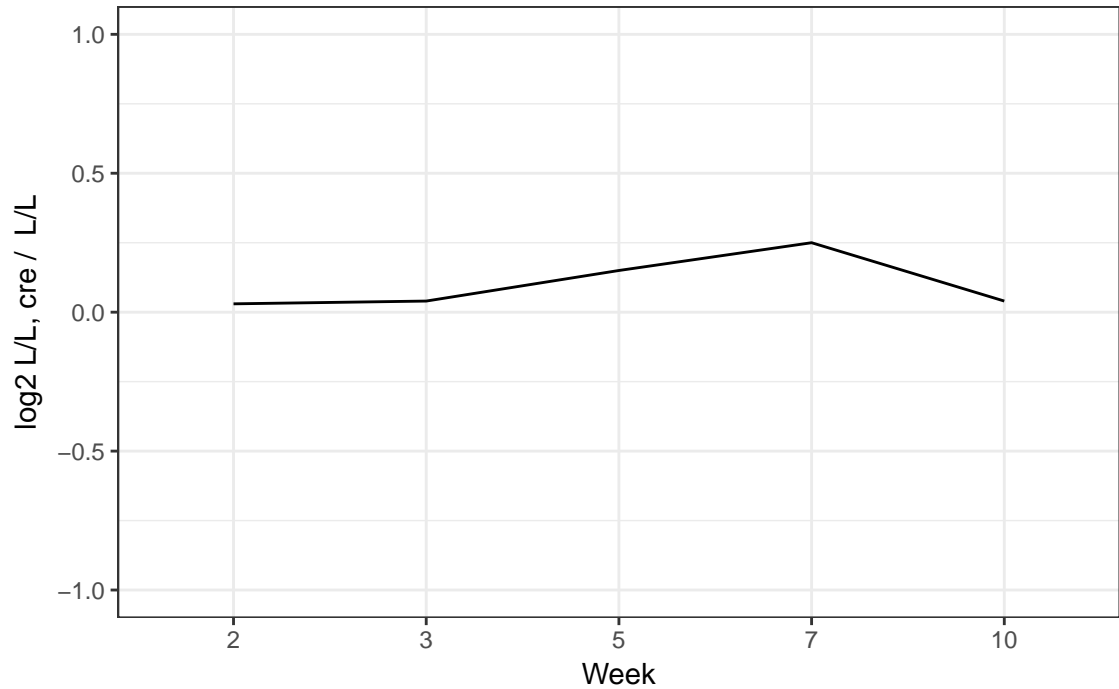

TIMM23 / Q9CXU4; adj.p value: 0.4909

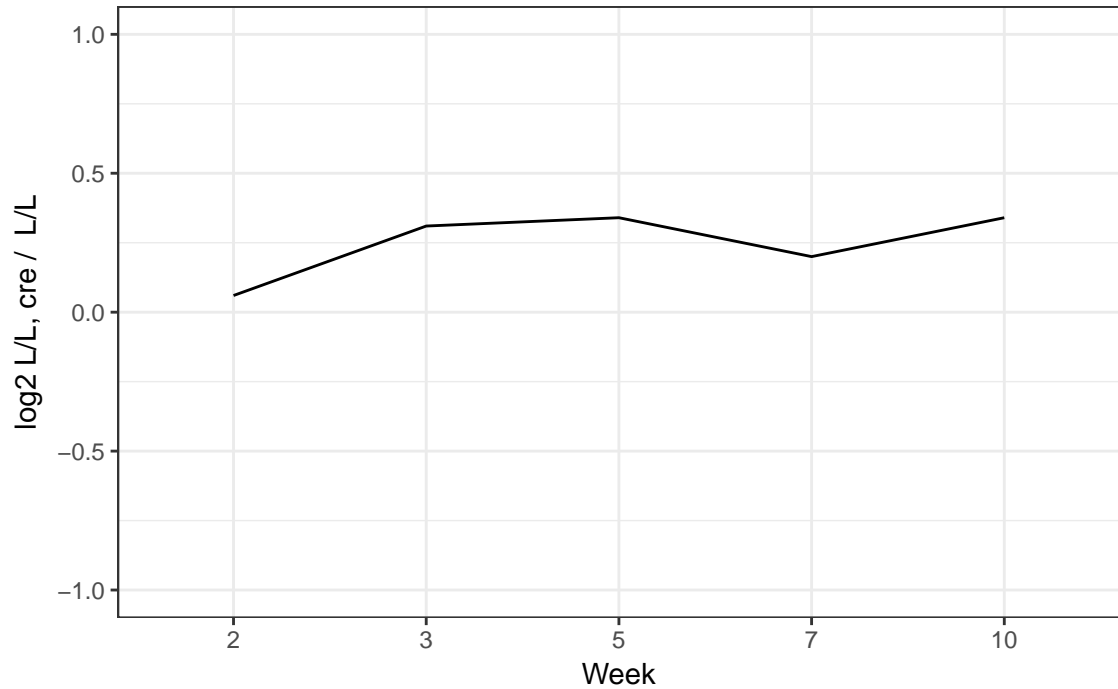

TIMM44 / O35857; adj.p value: 1e-05

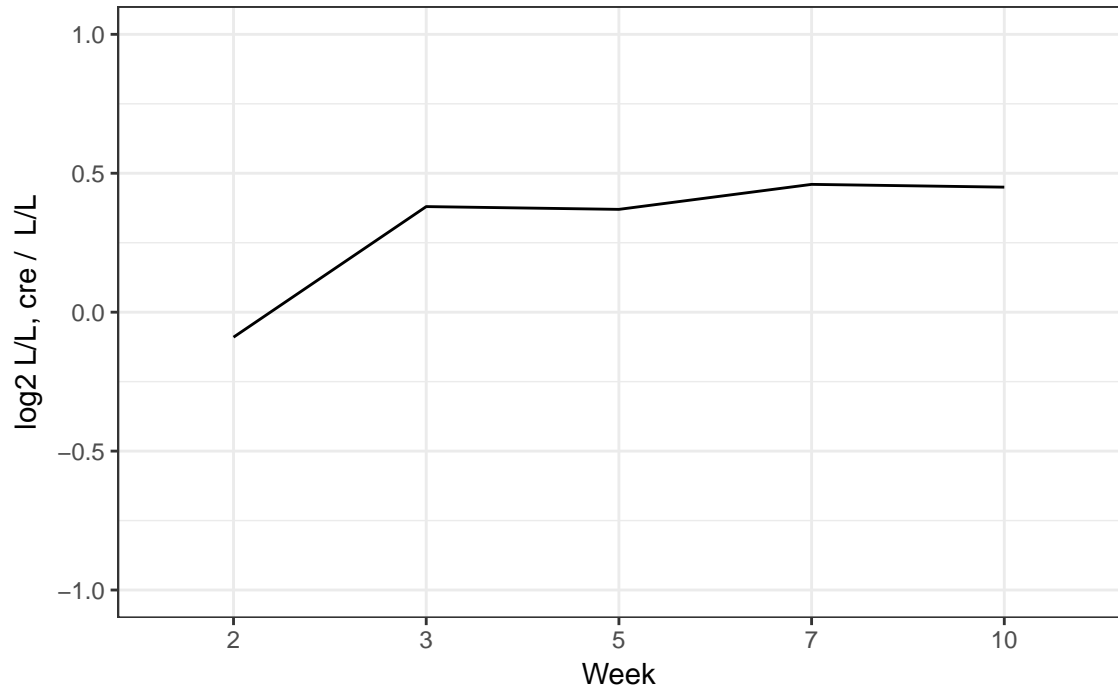

TIMM50 / Q9D880; adj.p value: 0.02065

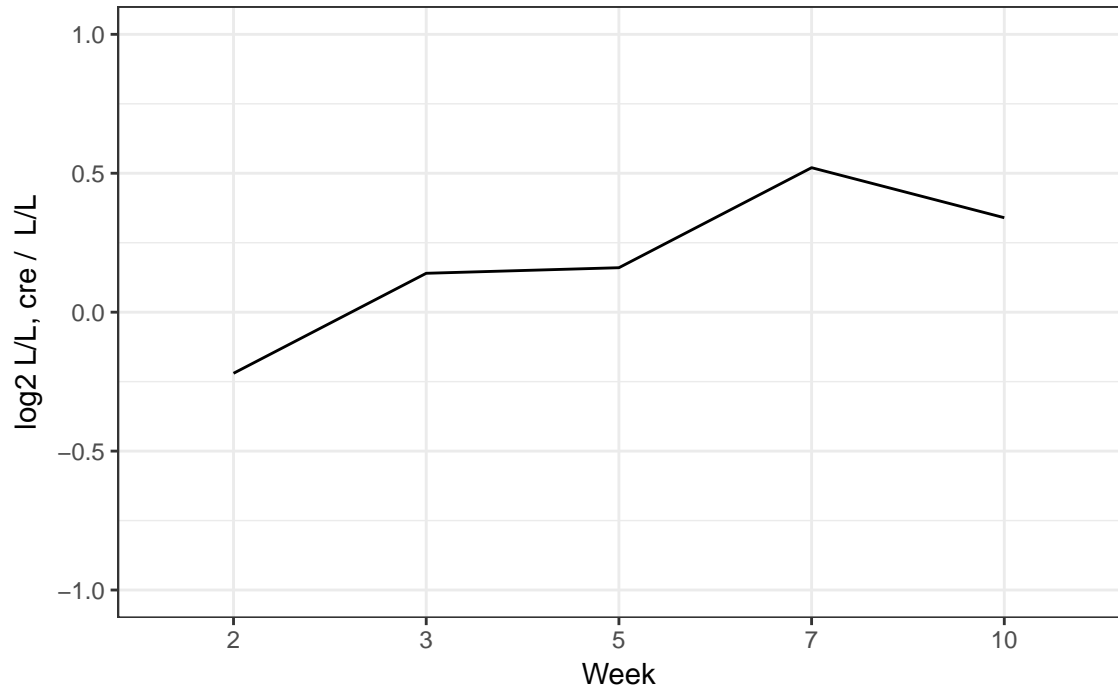

TIMM8A1 / Q9WVA2; adj.p value: 0.46396

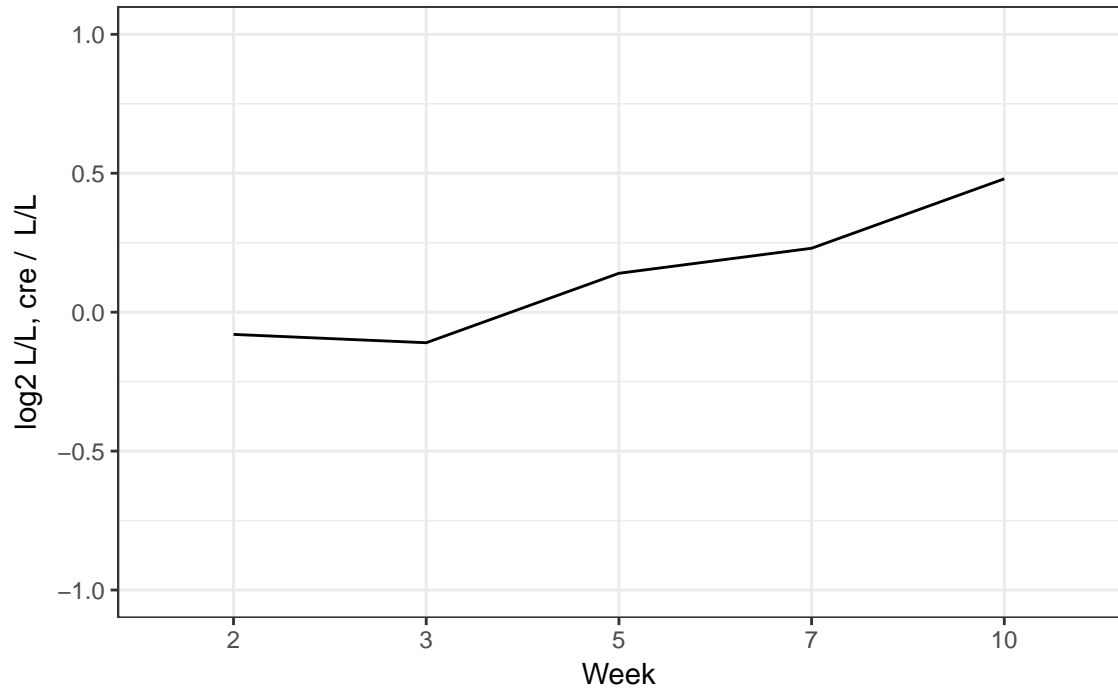



TIMM8B / P62077; adj.p value: 0.83156

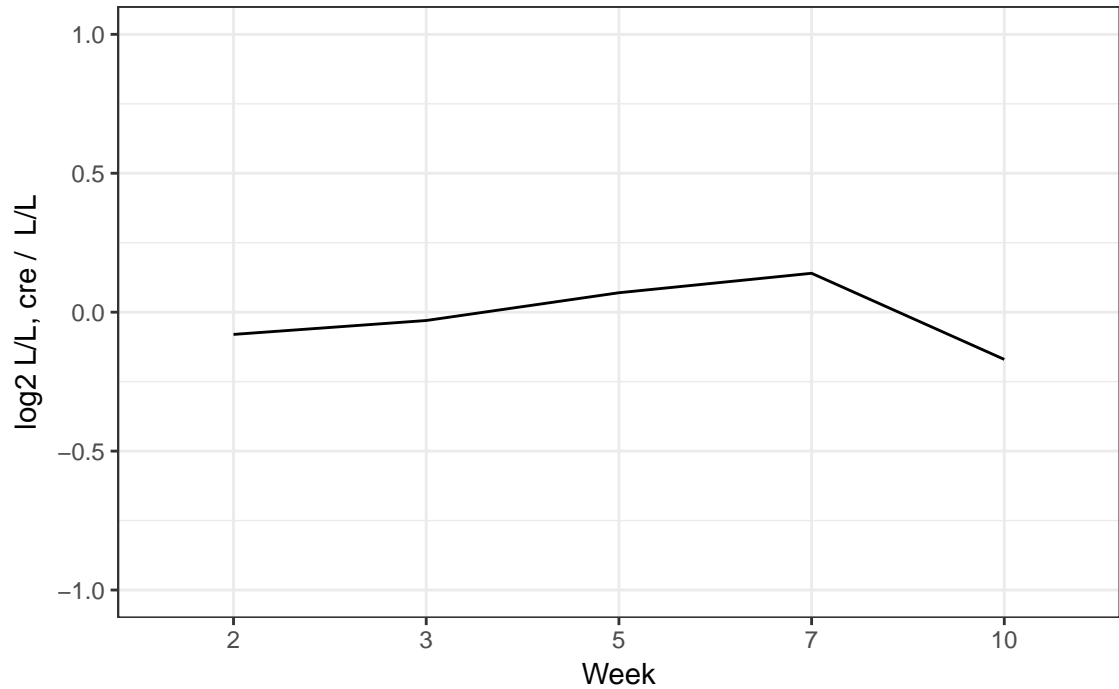

TIMM9 / Q9WV98; adj.p value: 0.13233

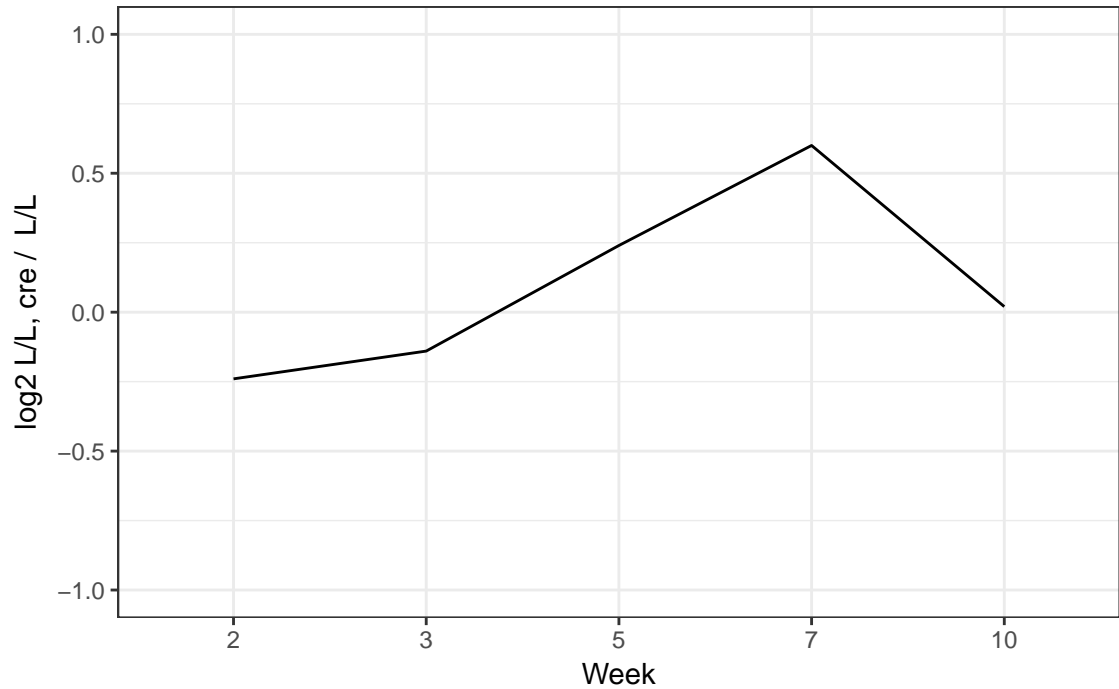

TIMMDC1 / Q8BUY5; adj.p value: 0.0091

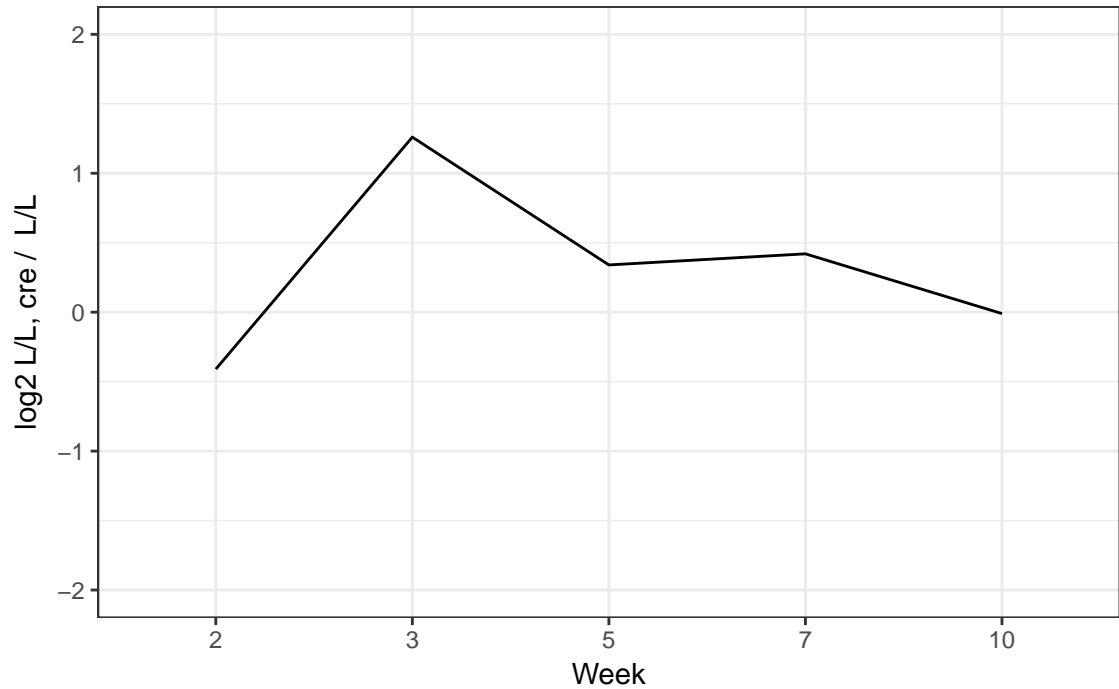

TMEM11 / E9Q933; adj.p value: 0.23189

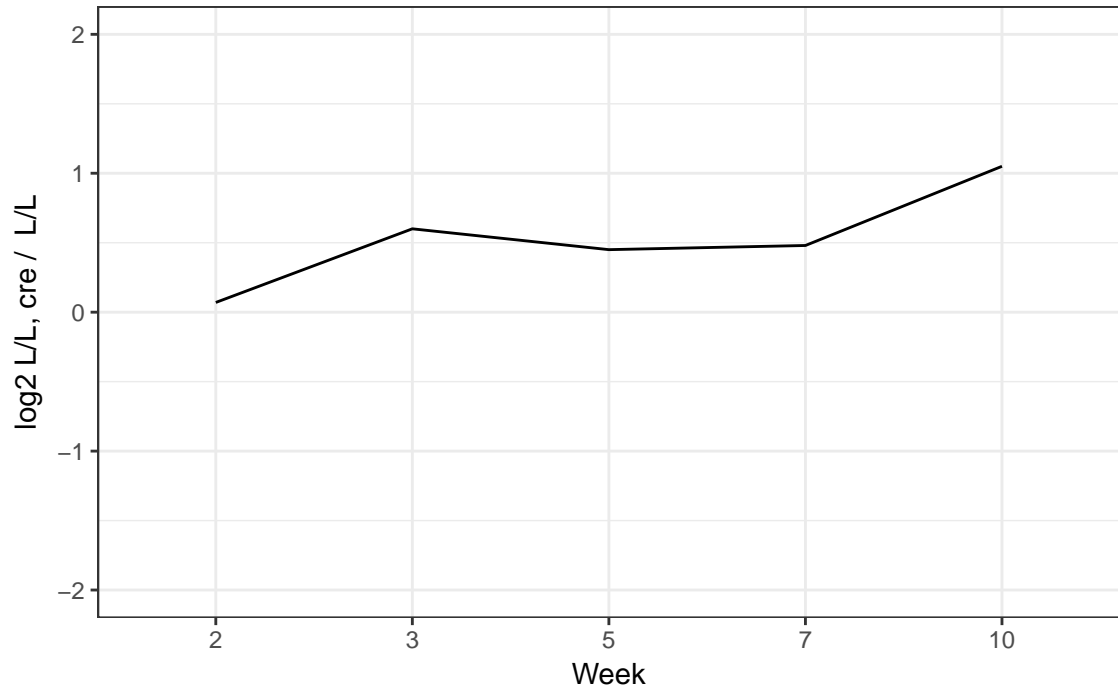

TMEM126A / Q9D8Y1; adj.p value: 0.00208

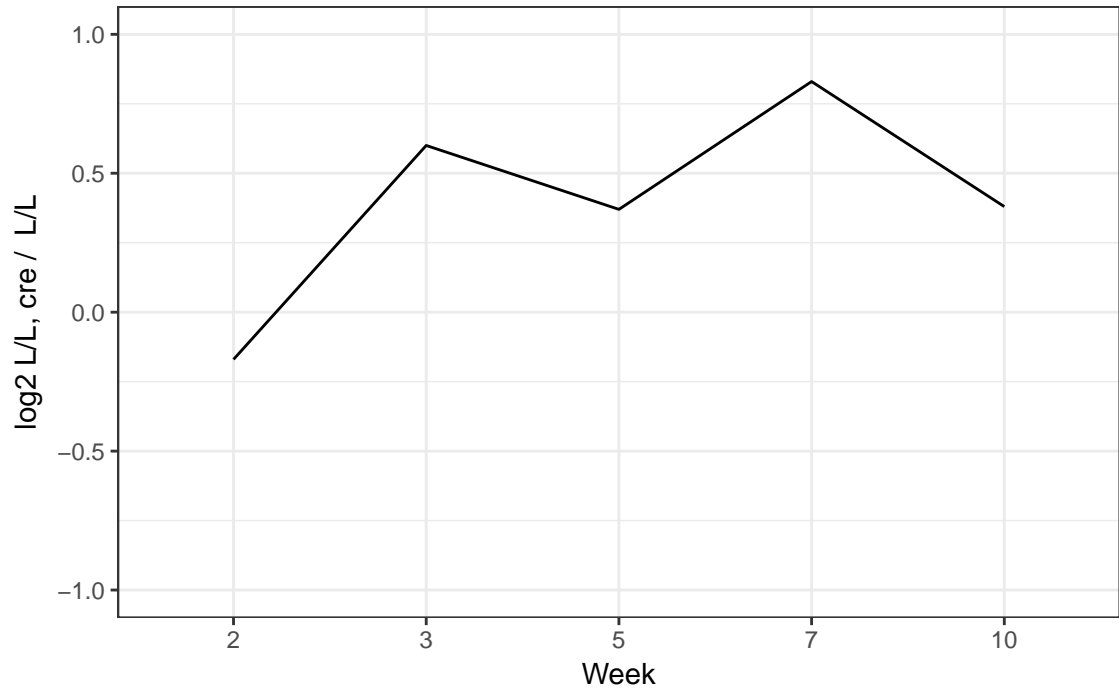

TMEM143 / G3X9F4; adj.p value: 0.15708

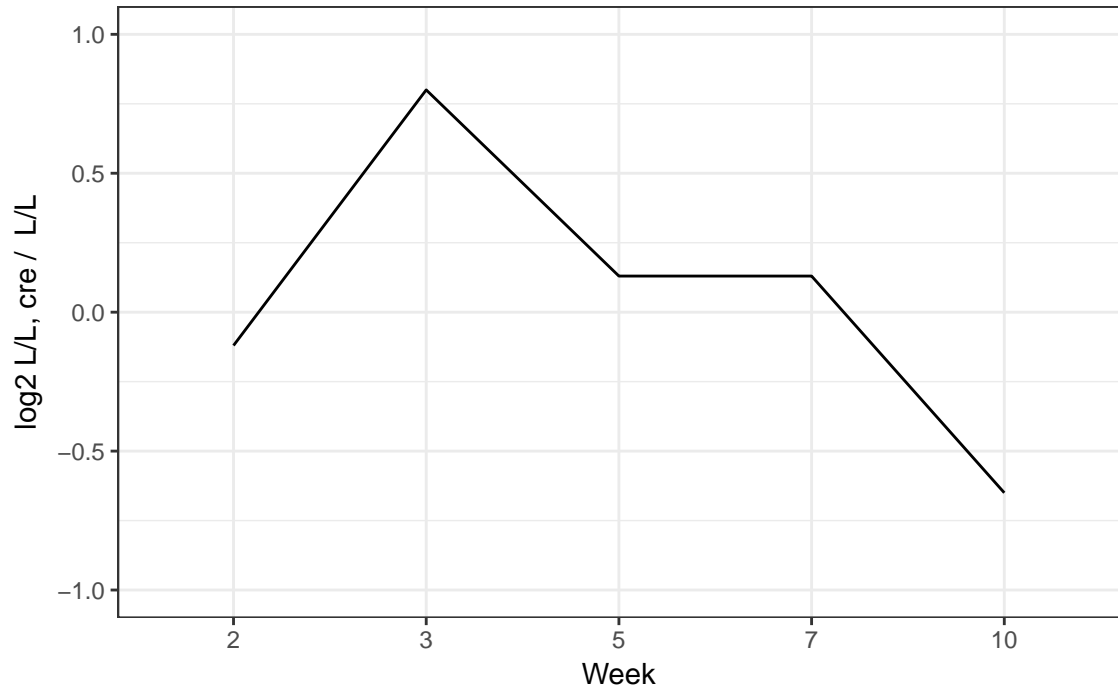

TMEM14C / Q9CQN6; adj.p value: 0.03091

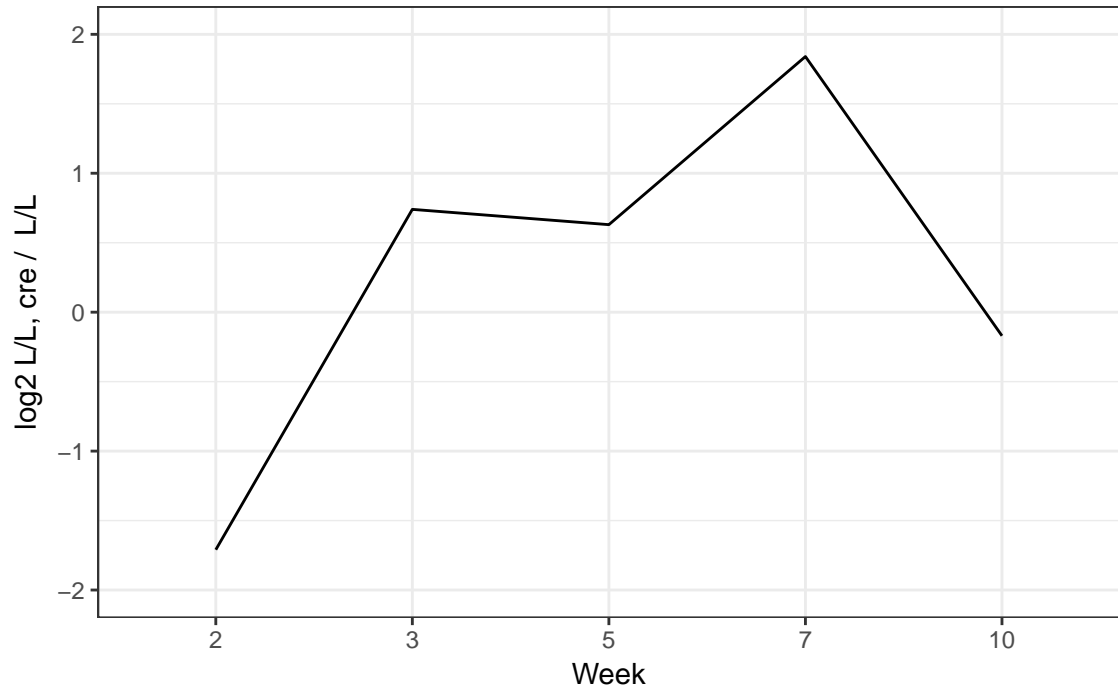

TMEM177 / Q8BPE4; adj.p value: 0.05229

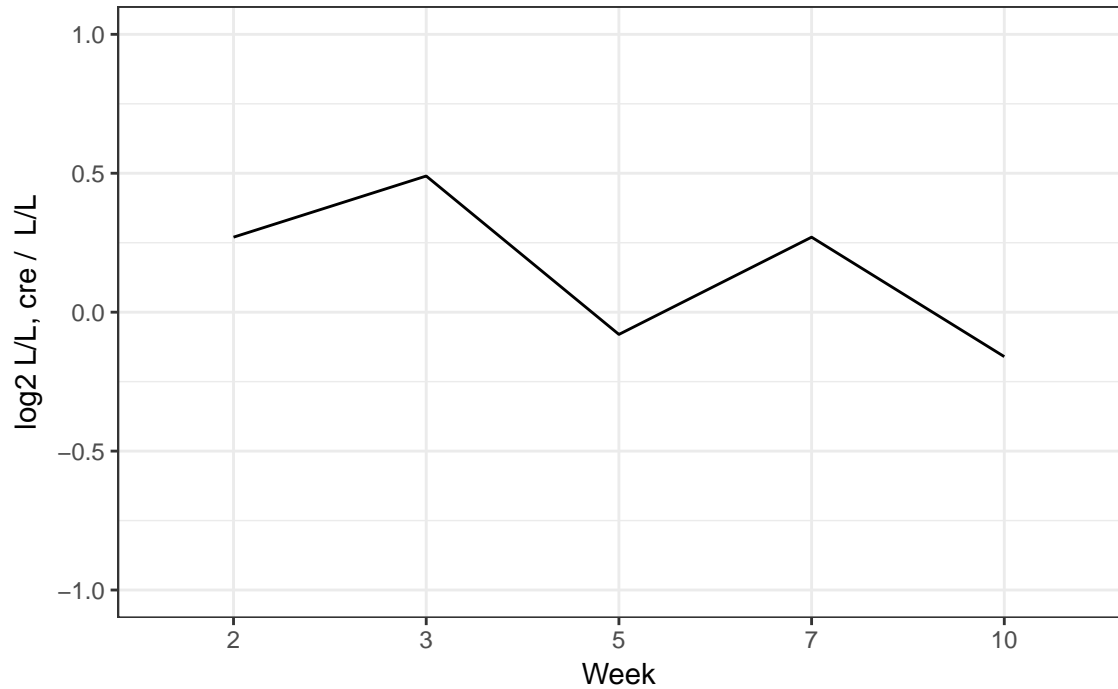



TMEM186 / Q9CR76; adj.p value: 0.50898

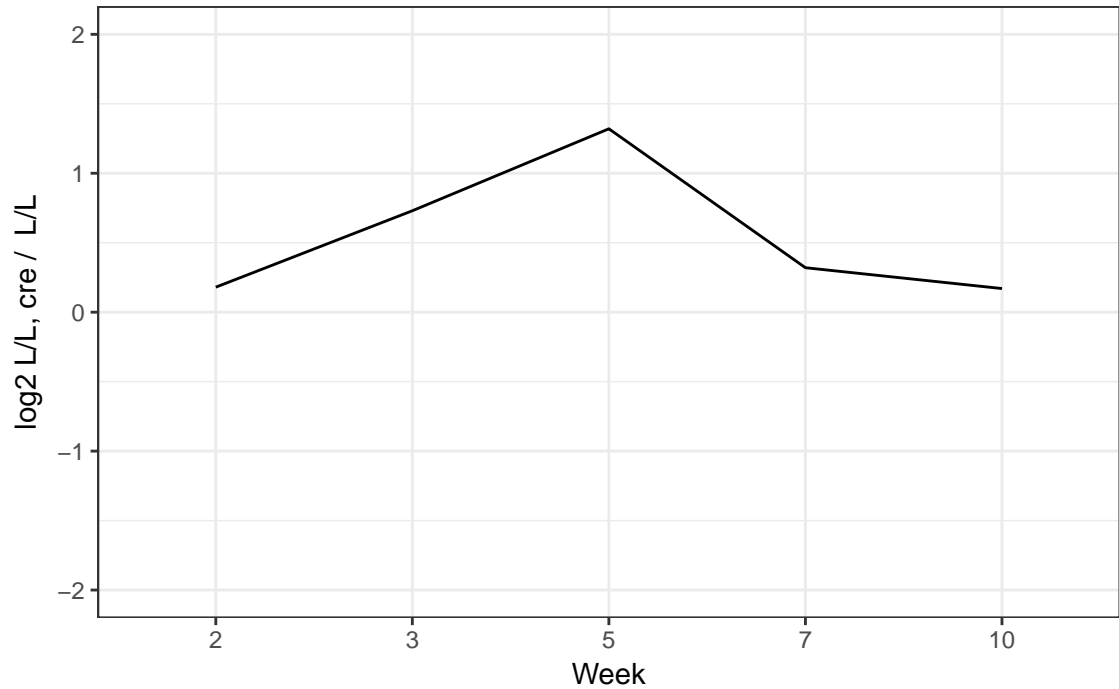

TMEM65 / Q4VAE3; adj.p value: 0.01545

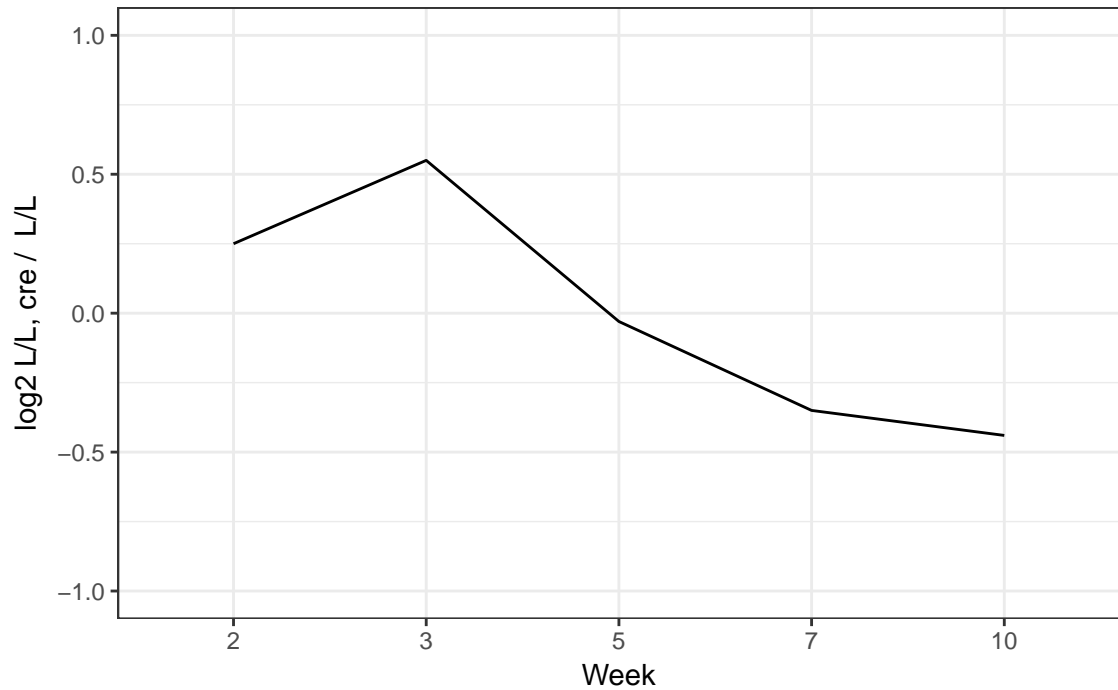

TMEM70 / Q921N7; adj.p value: 0.38265

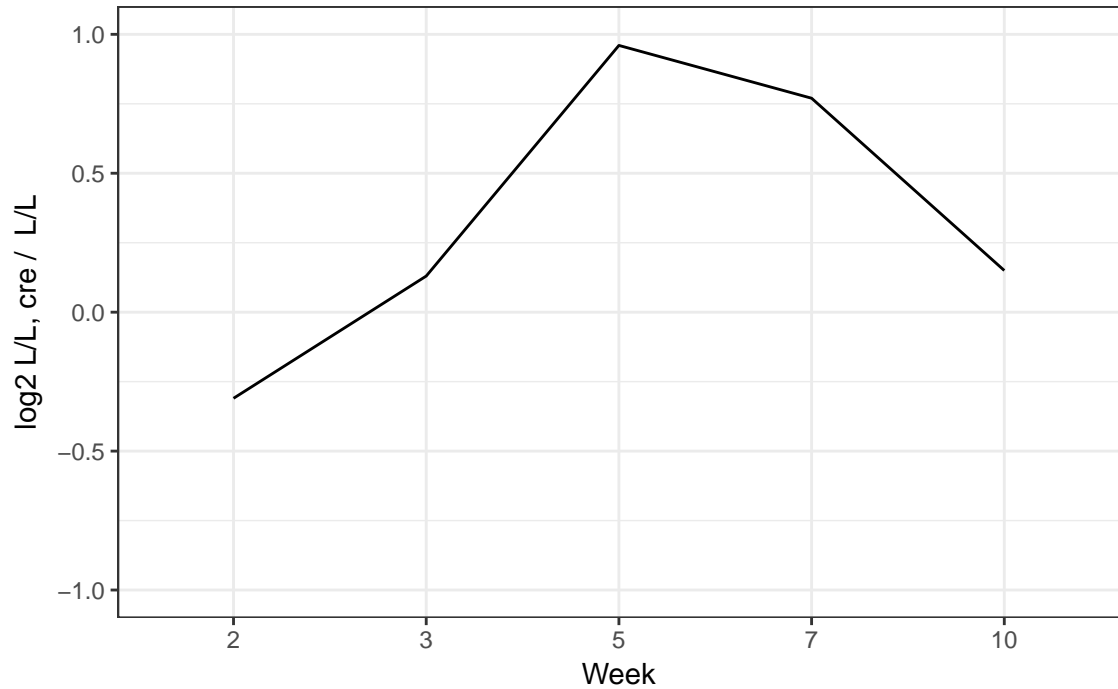

TMLHE / Q91ZE0; adj.p value: 0.45745

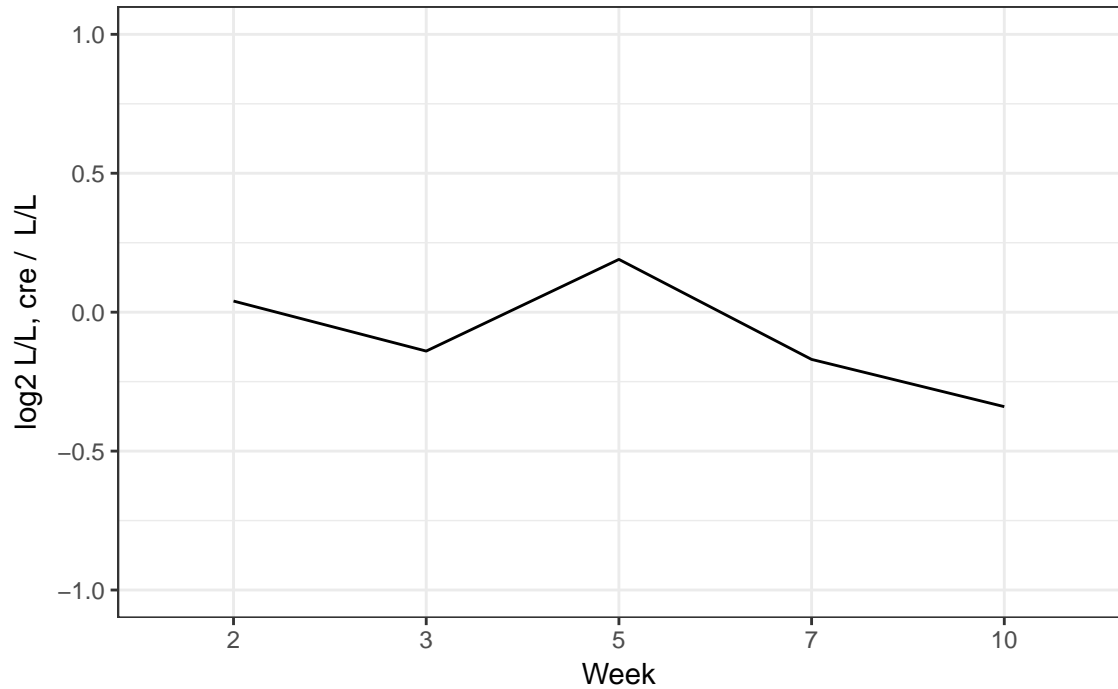

TOMM20 / Q9DCC8; adj.p value: 0.00725

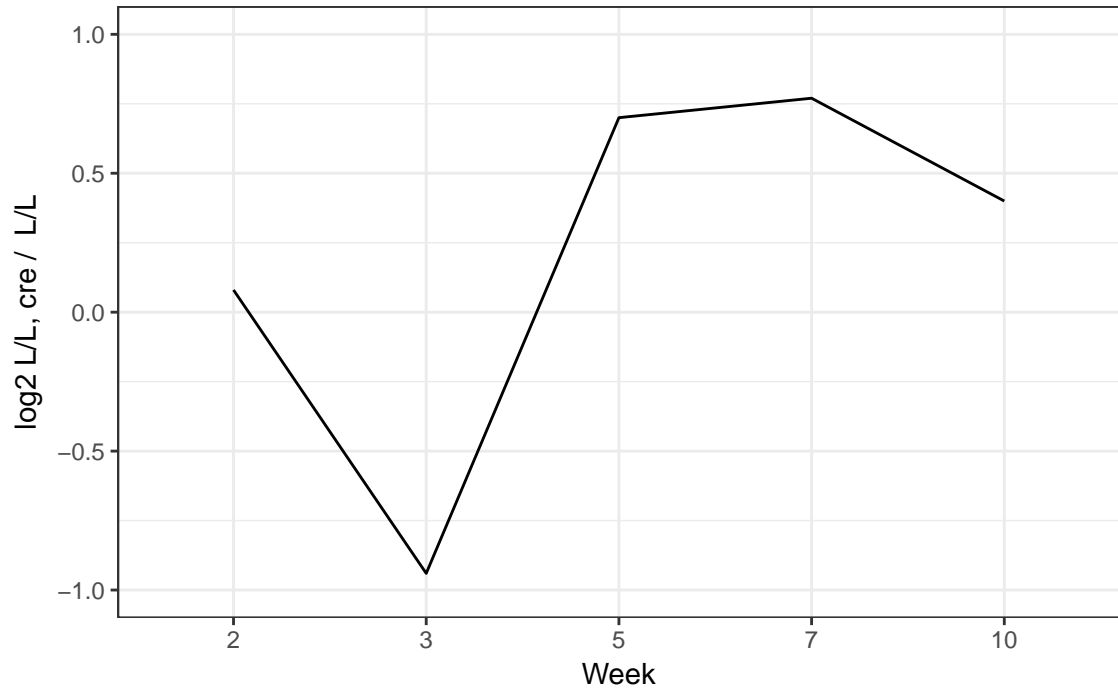

TOMM22 / Q9CPQ3; adj.p value: 0.1095

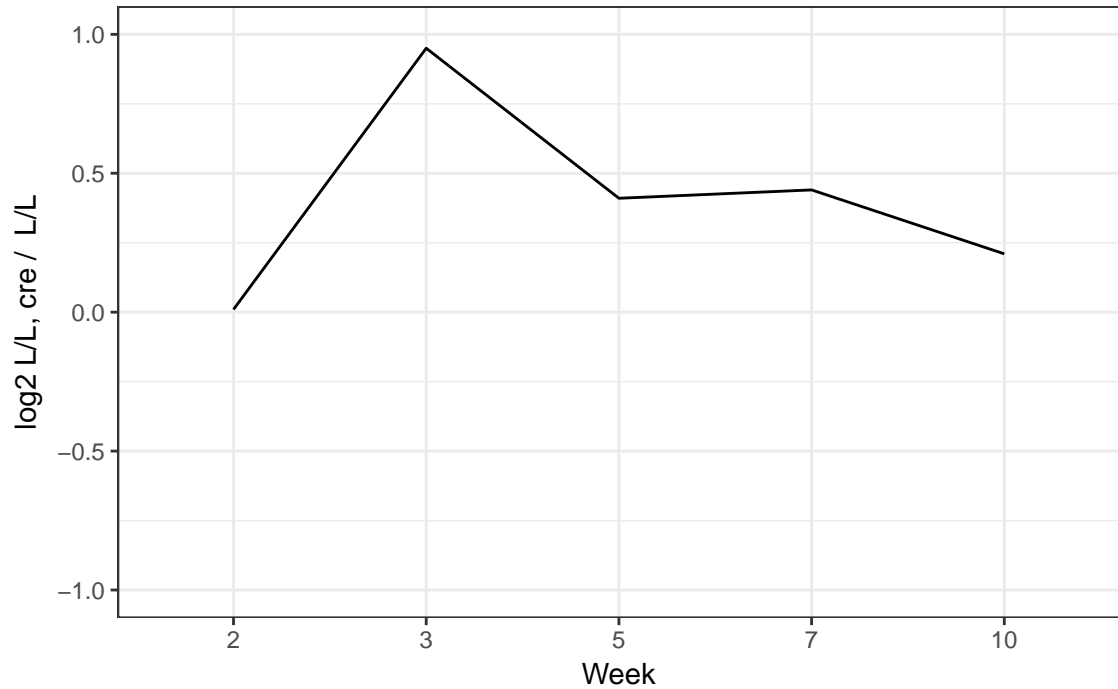

TOMM40 / Q9QYA2; adj.p value: 0.07353

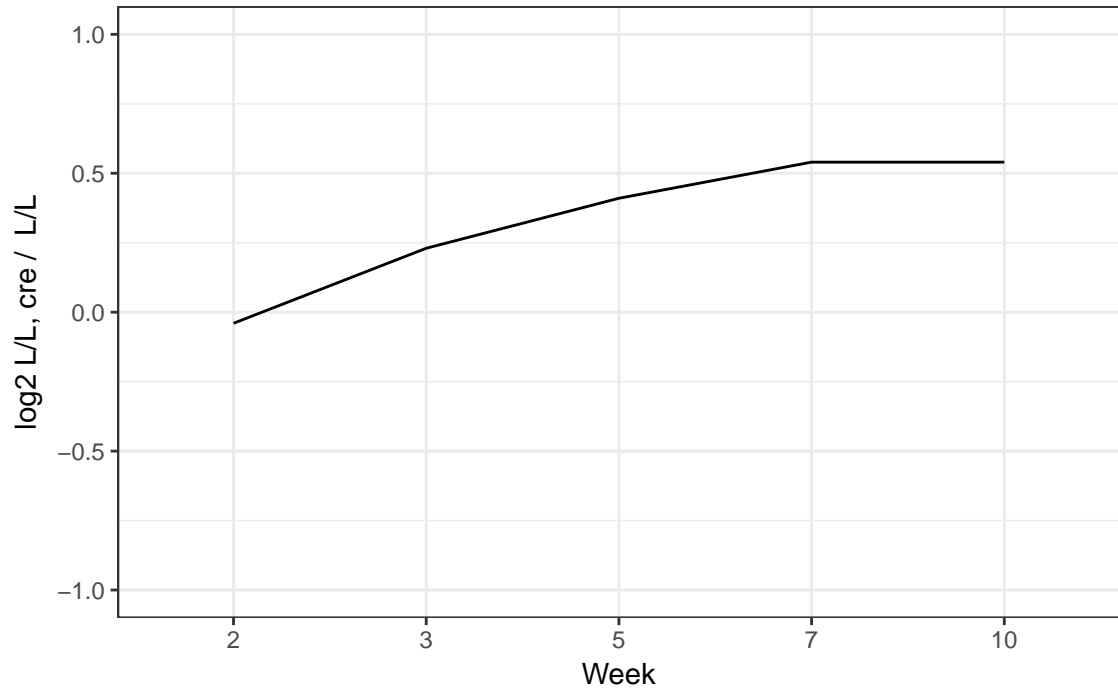

TOMM40L / Q9CZR3; adj.p value: 0.63457

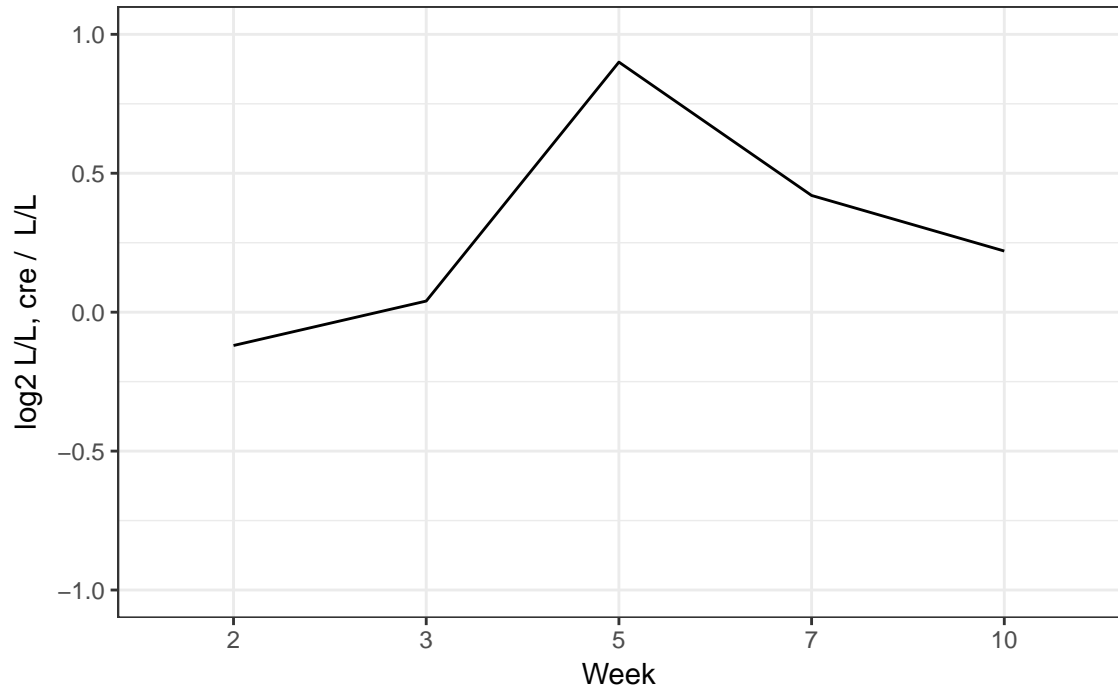



TOMM5 / B1AXP6; adj.p value: 0.5473

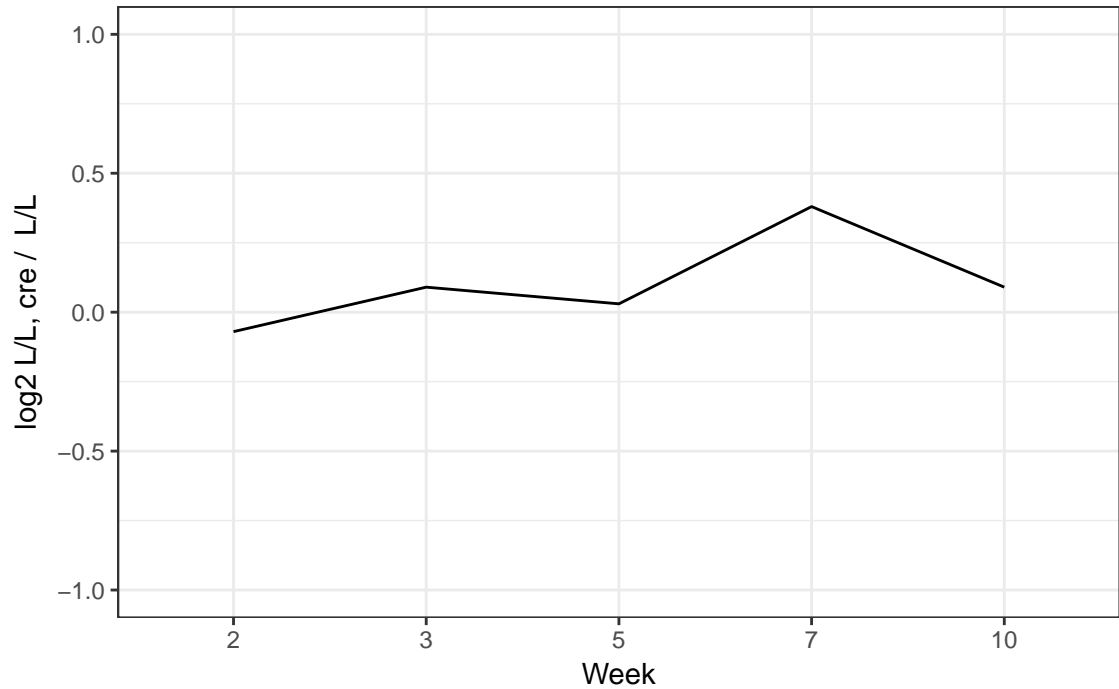

TOMM6 / Q9CQN3; adj.p value: 0.07353

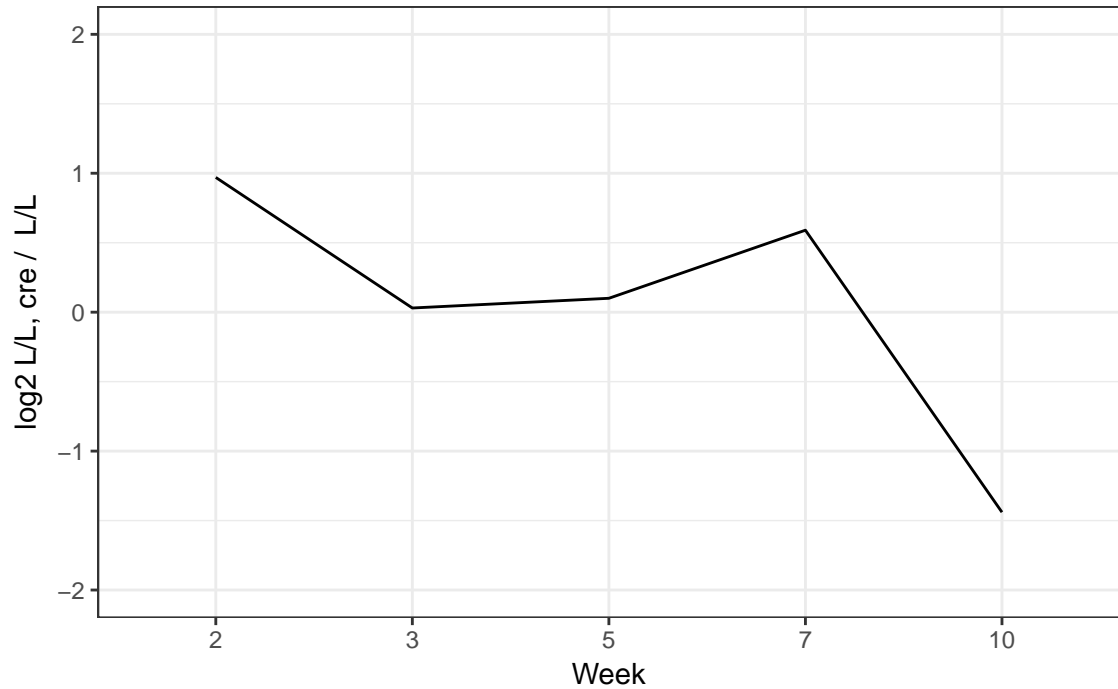

TOMM7 / Q9D173; adj.p value: 0.09027

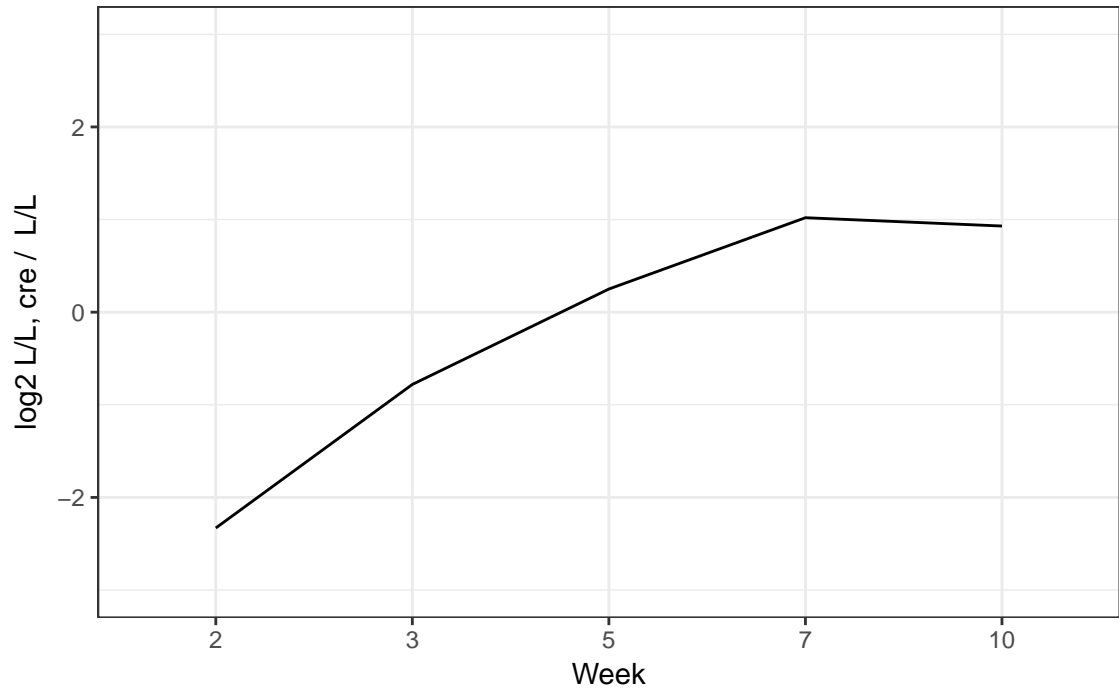

TOMM70A / Q9CZW5; adj.p value: 0

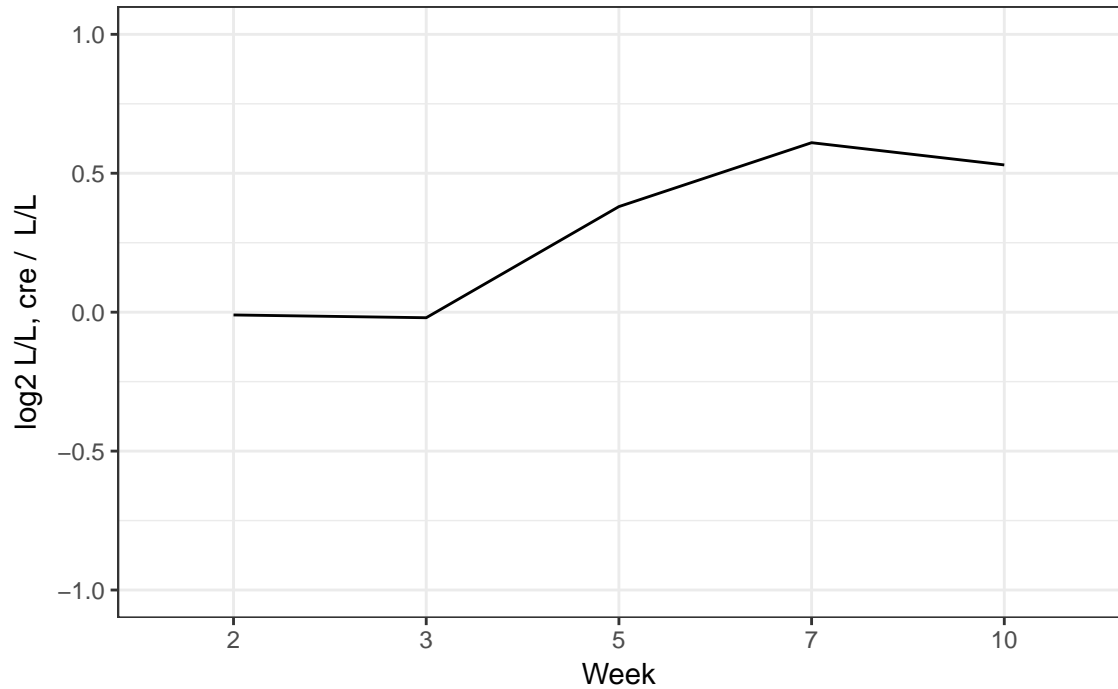

TPI1 / P17751; adj.p value: 0.59316

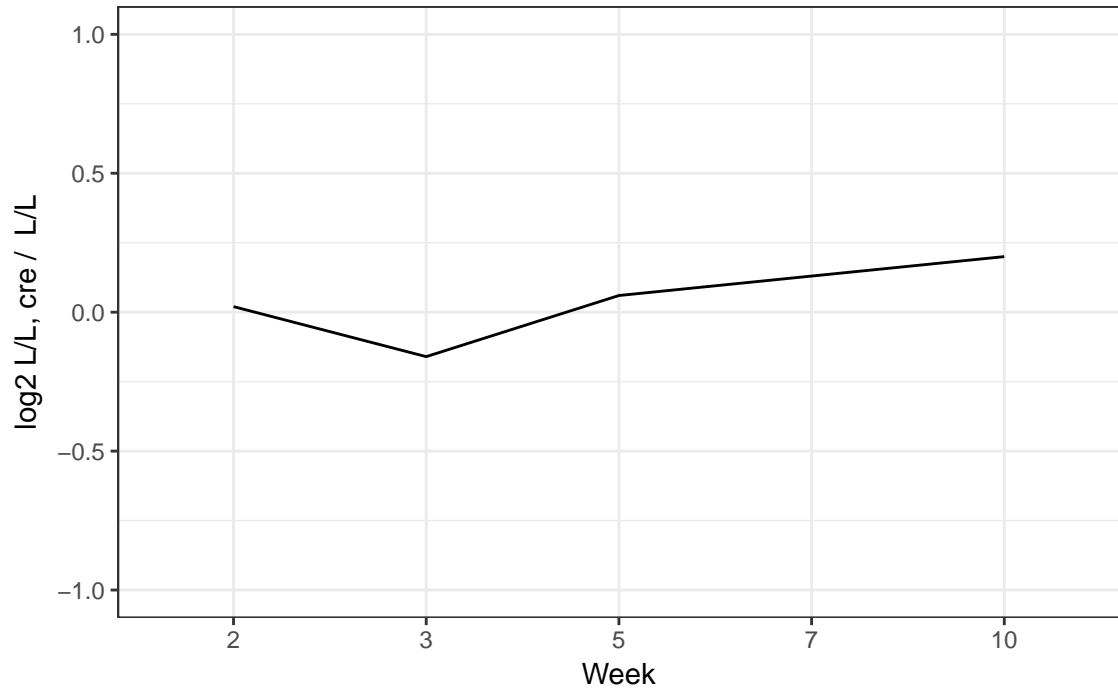

TRAP1 / Q9CQN1; adj.p value: 0

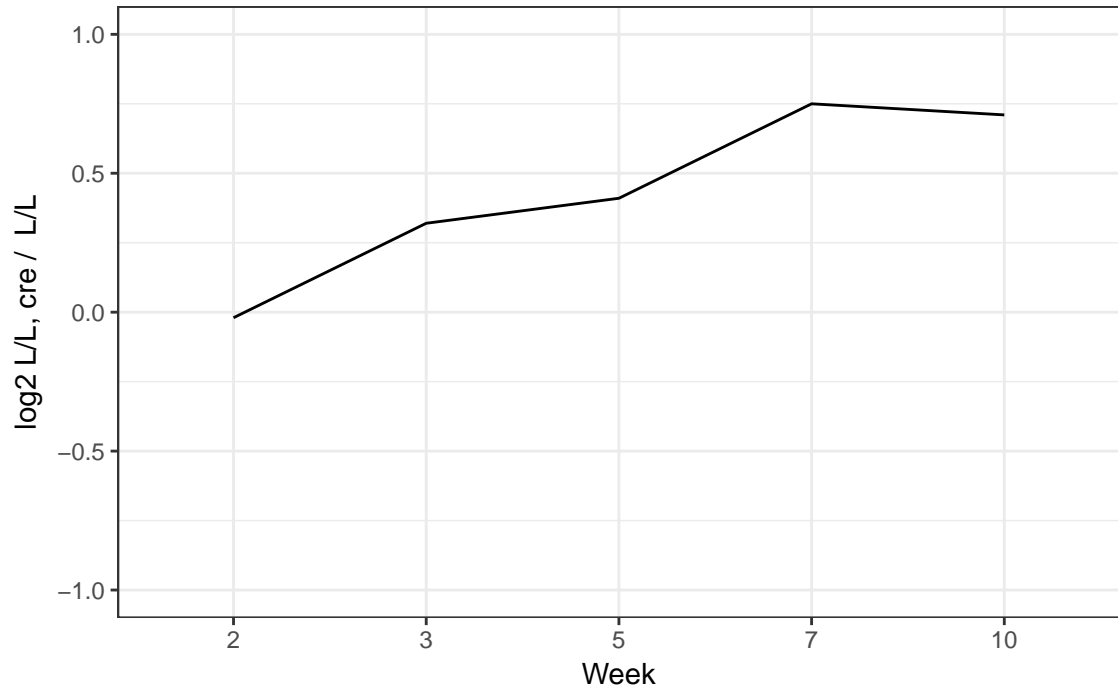

TRIAP1 / Q9D8Z2; adj.p value: 0.54424

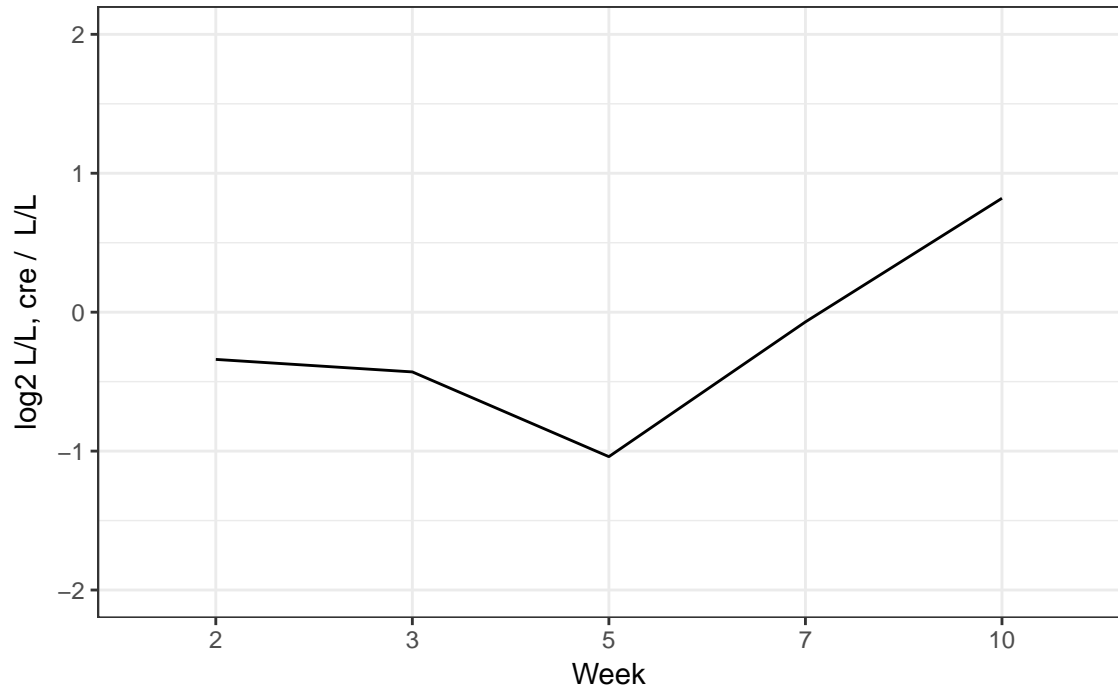

TRMT10C / Q3UFY8; adj.p value: 0.00583

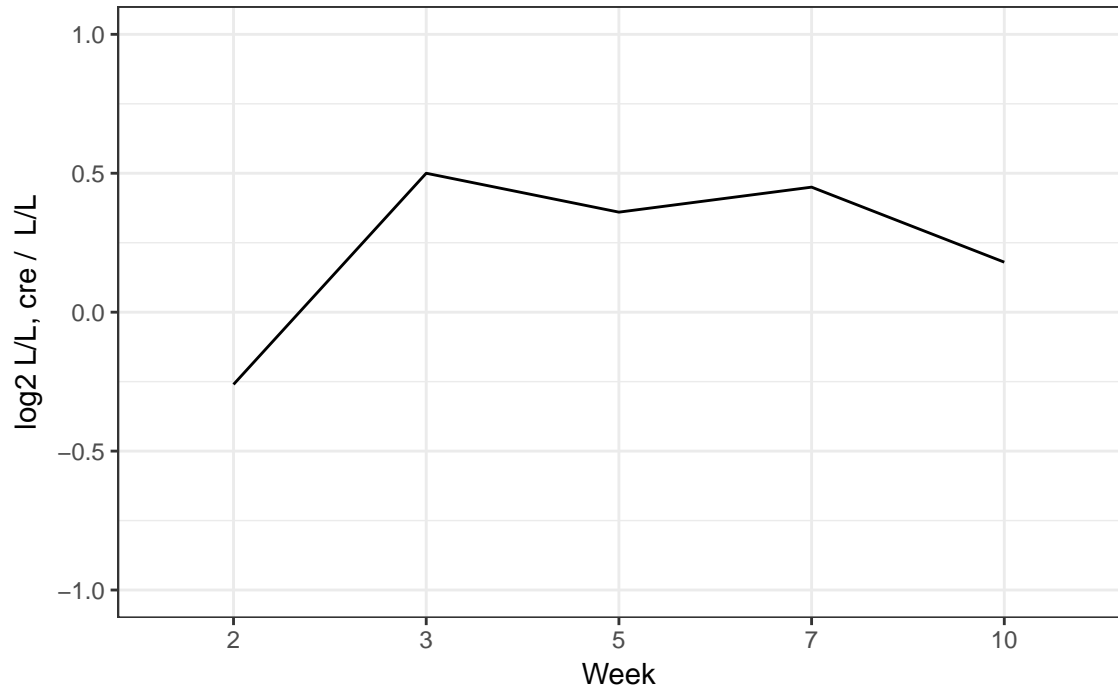



TRMU / Q9DAT5; adj.p value: 0.01689

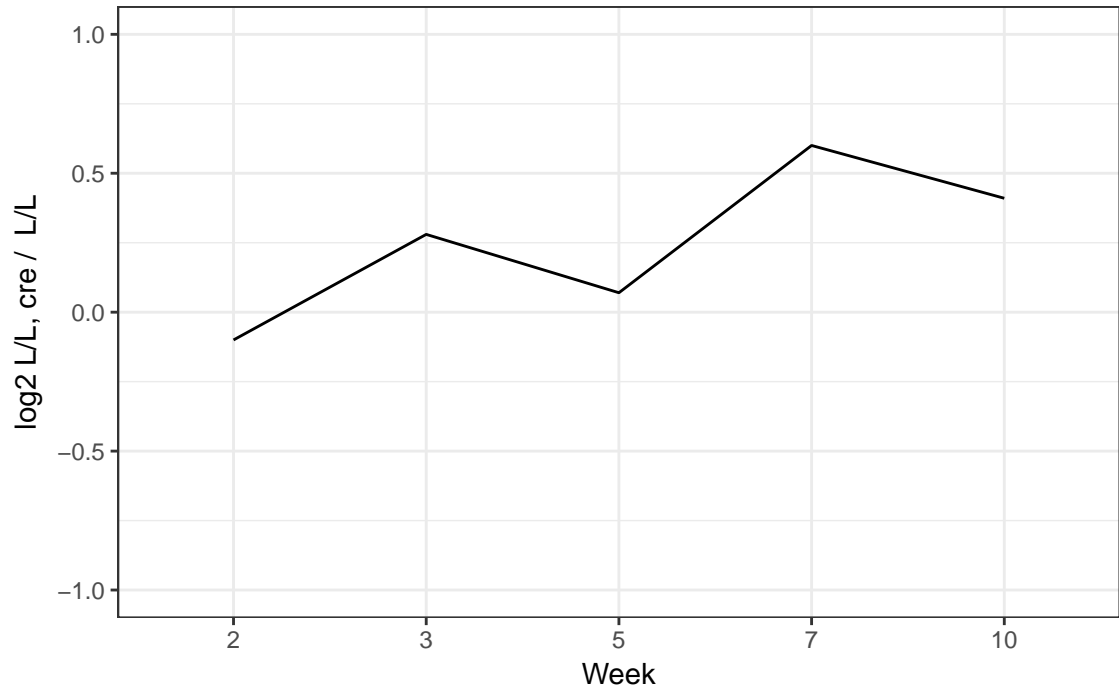

TRNT1 / Q8K1J6; adj.p value: 0

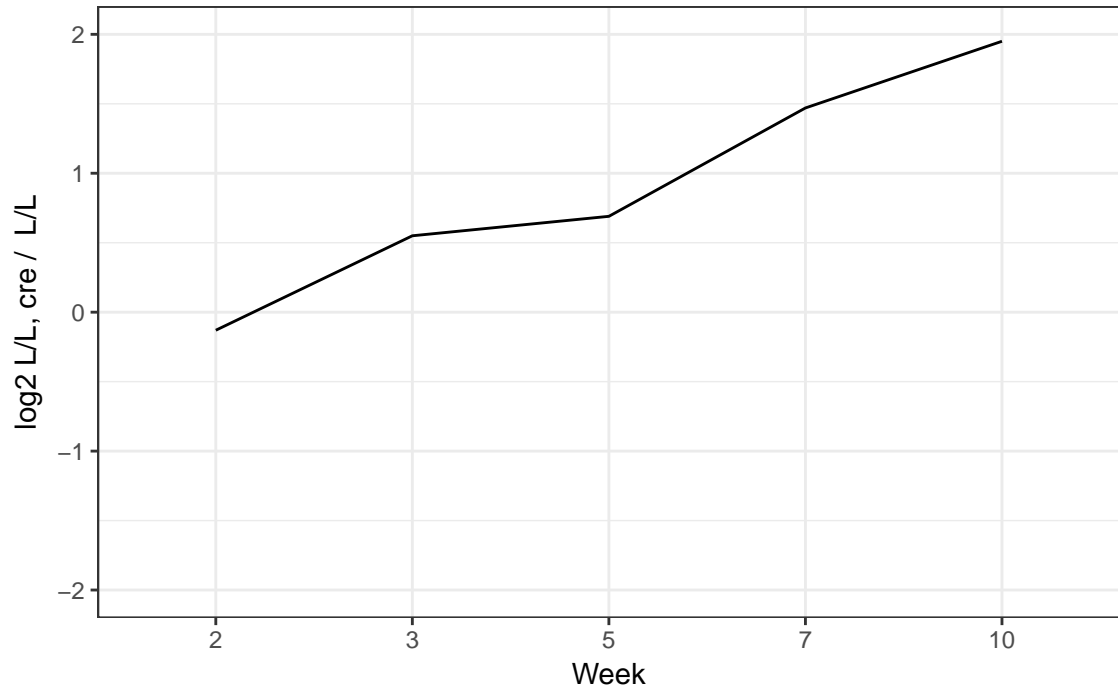

TRUB2 / Q91WG3; adj.p value: 0.04762

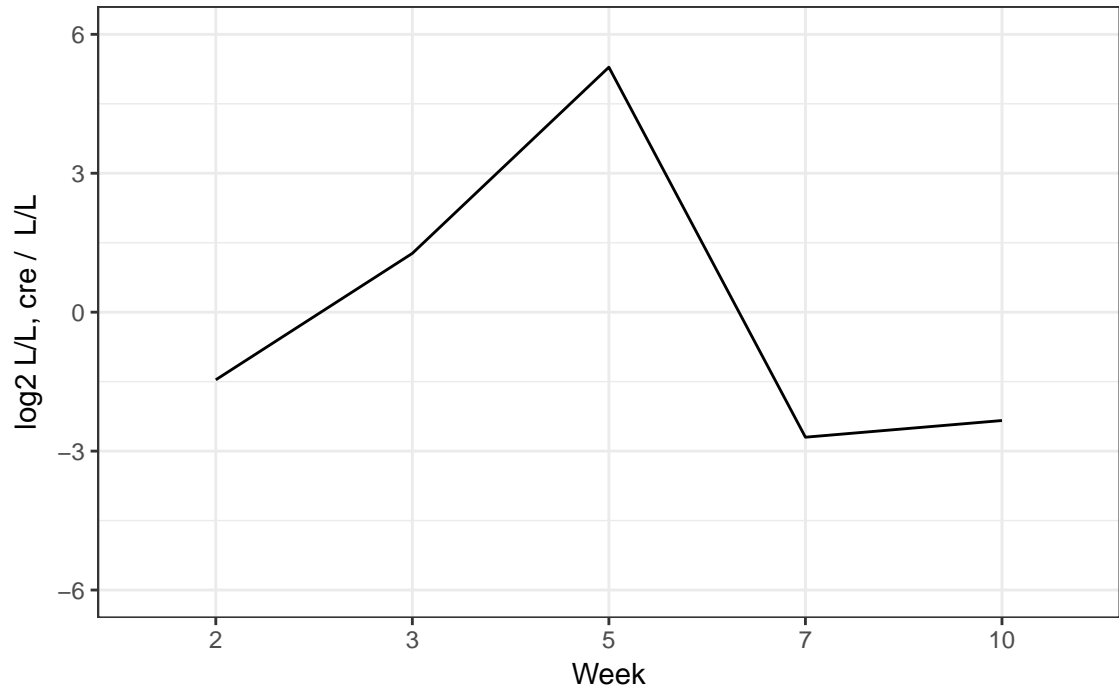

TSMF / Q9CZR8; adj.p value: 0.12908

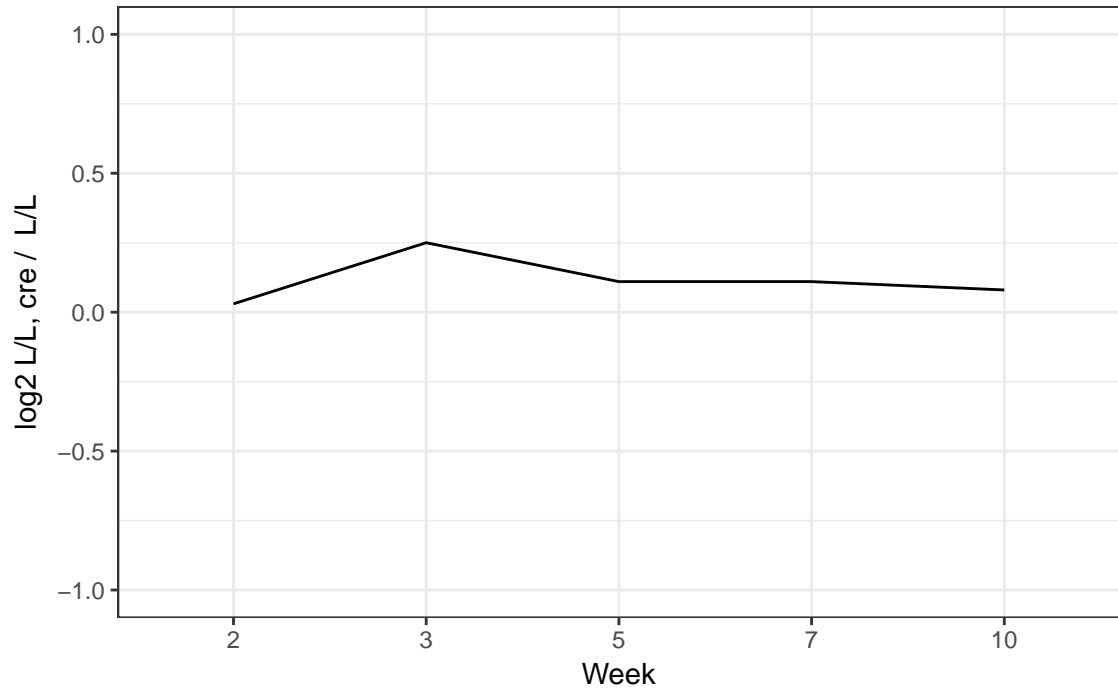

TSPO / P50637; adj.p value: 0.13286

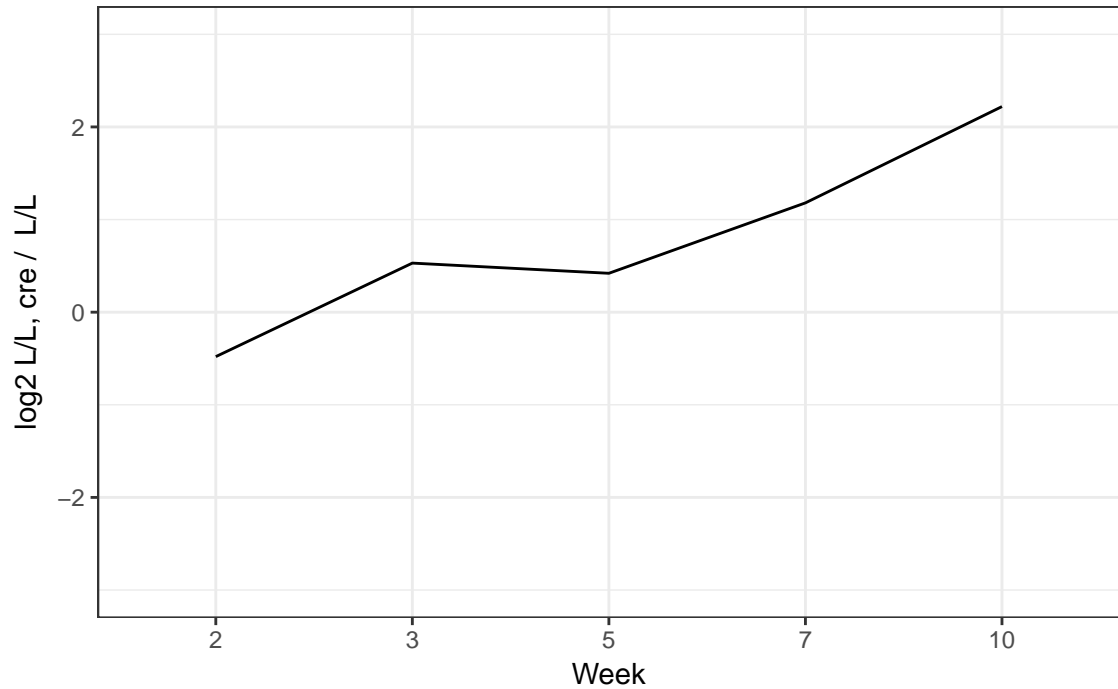

TST / P52196; adj.p value: 0.01465

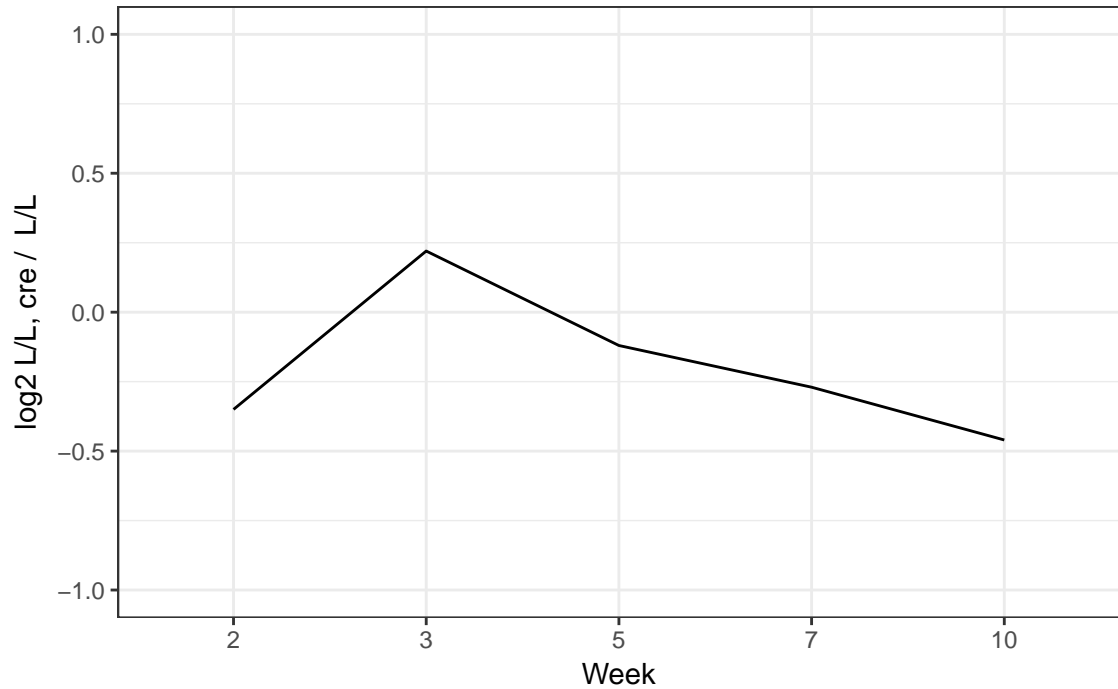

TSTD3 / Q9D0B5; adj.p value: 0.01128

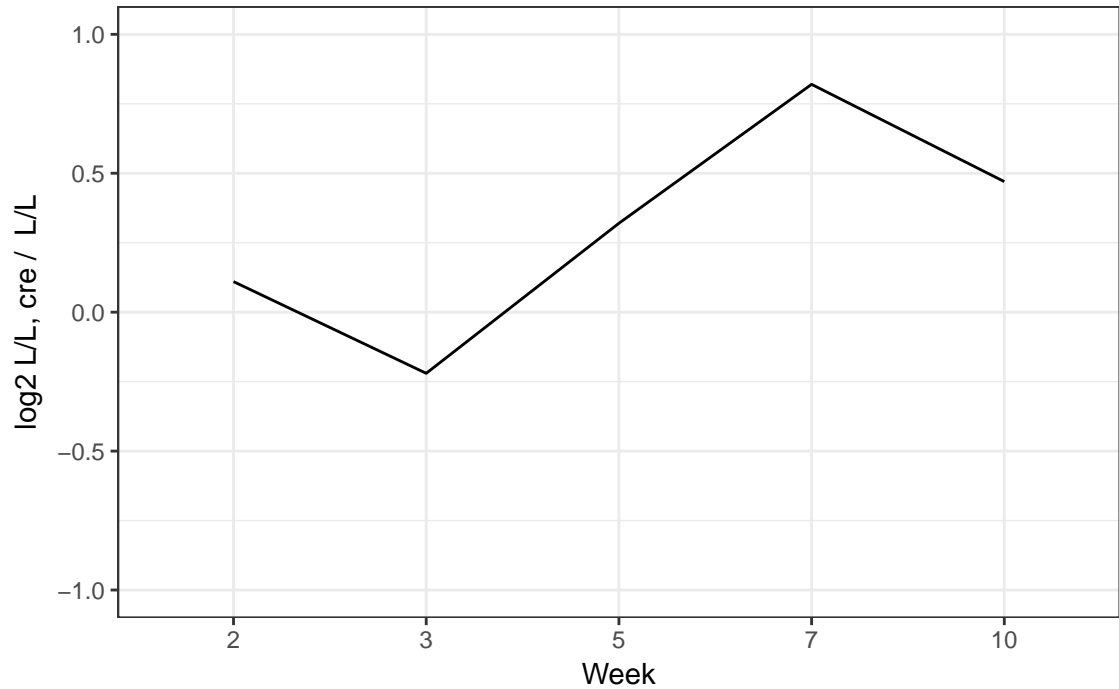

TTC19 / Q8CC21; adj.p value: 0.70304

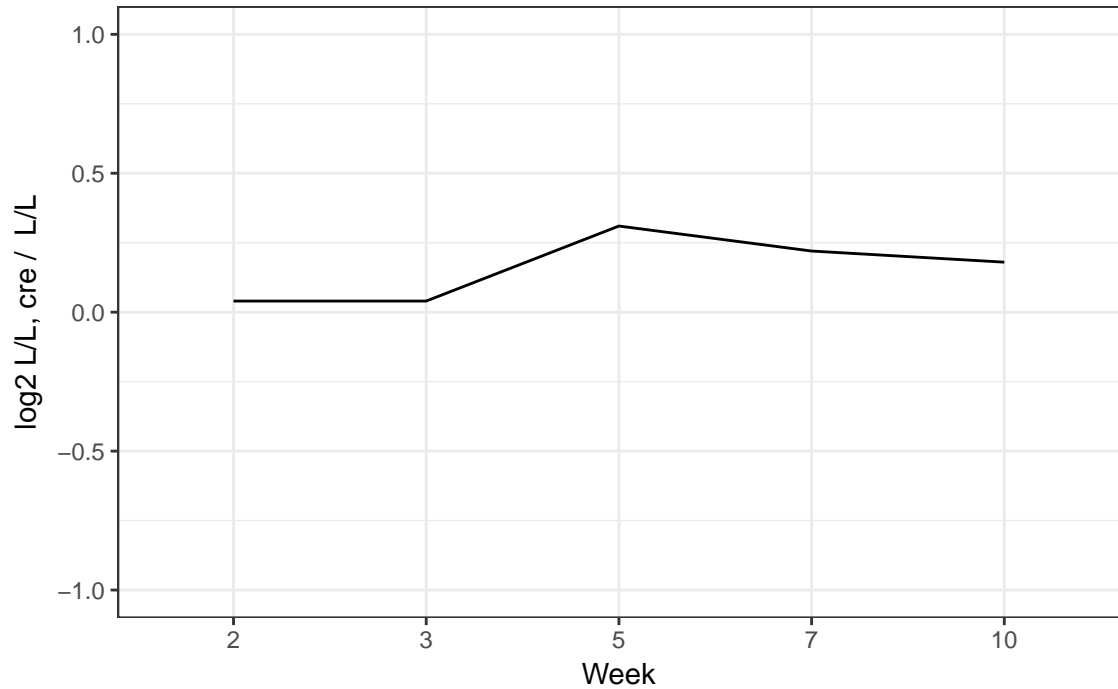



TUFM / Q8BFR5; adj.p value: 0.31754

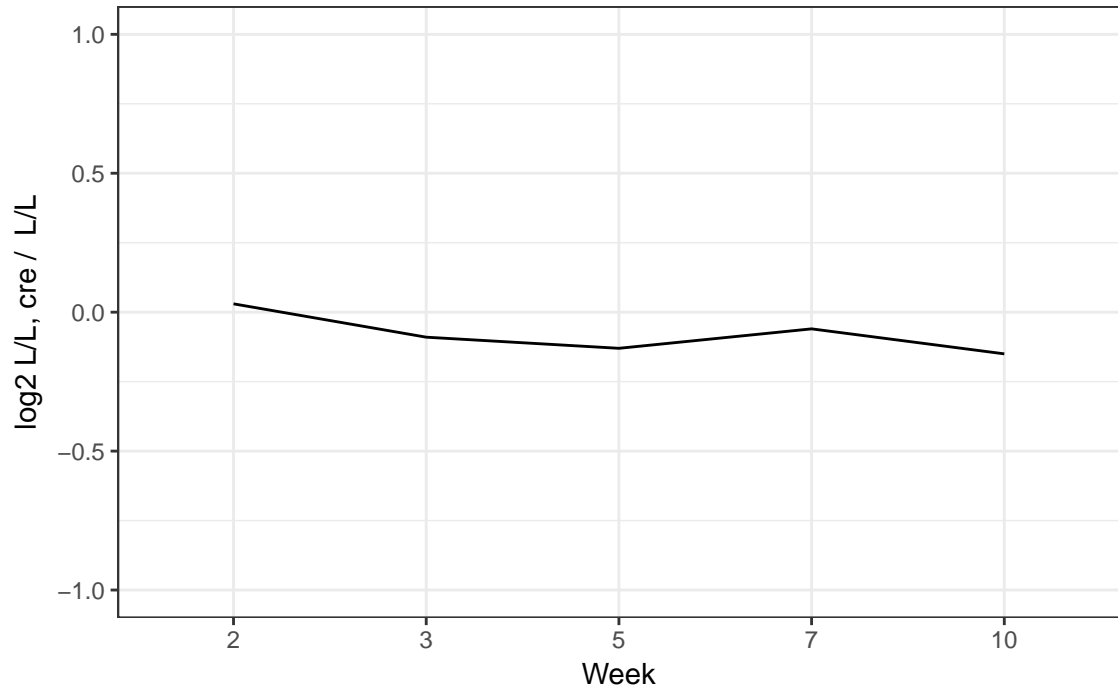

TXN2 / G3UZY2; adj.p value: 0.62274

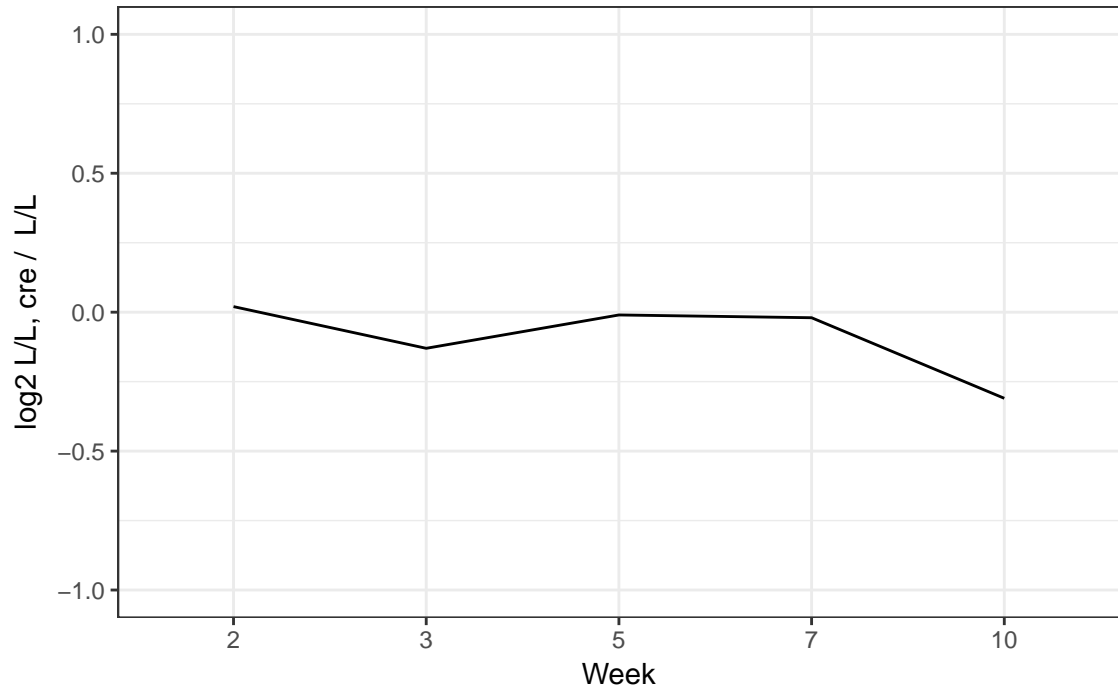

TXNRD2 / J3QMN4; adj.p value: 0.00059

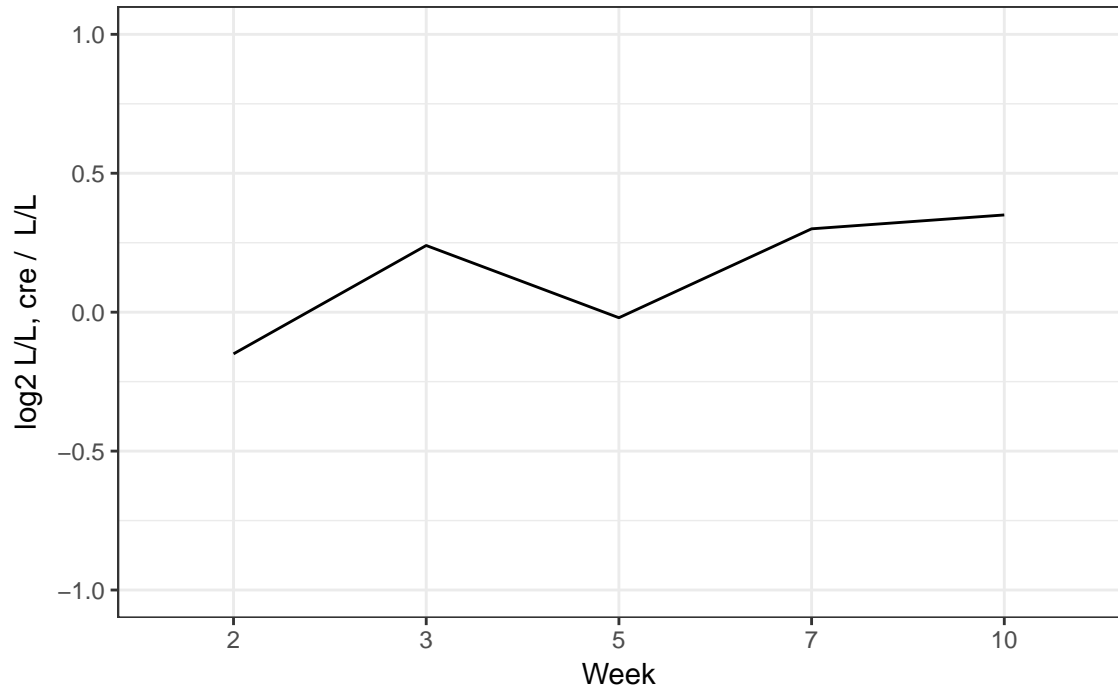

UCP1 / P12242; adj.p value: 0.62513

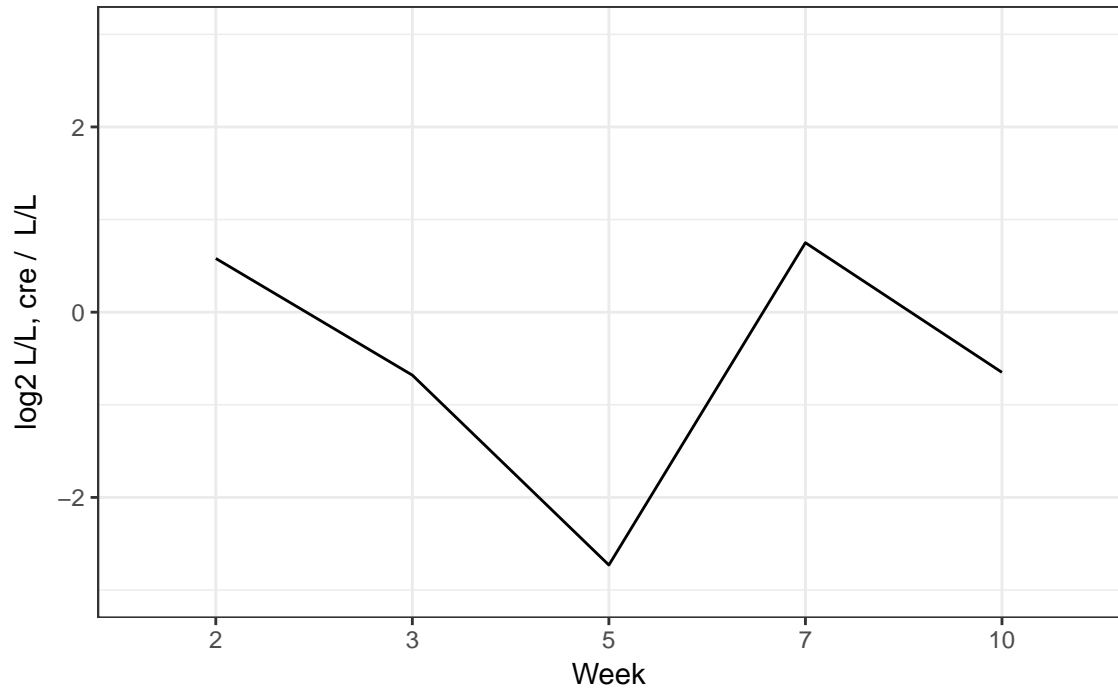

UCP3 / P56501; adj.p value: 0.37638

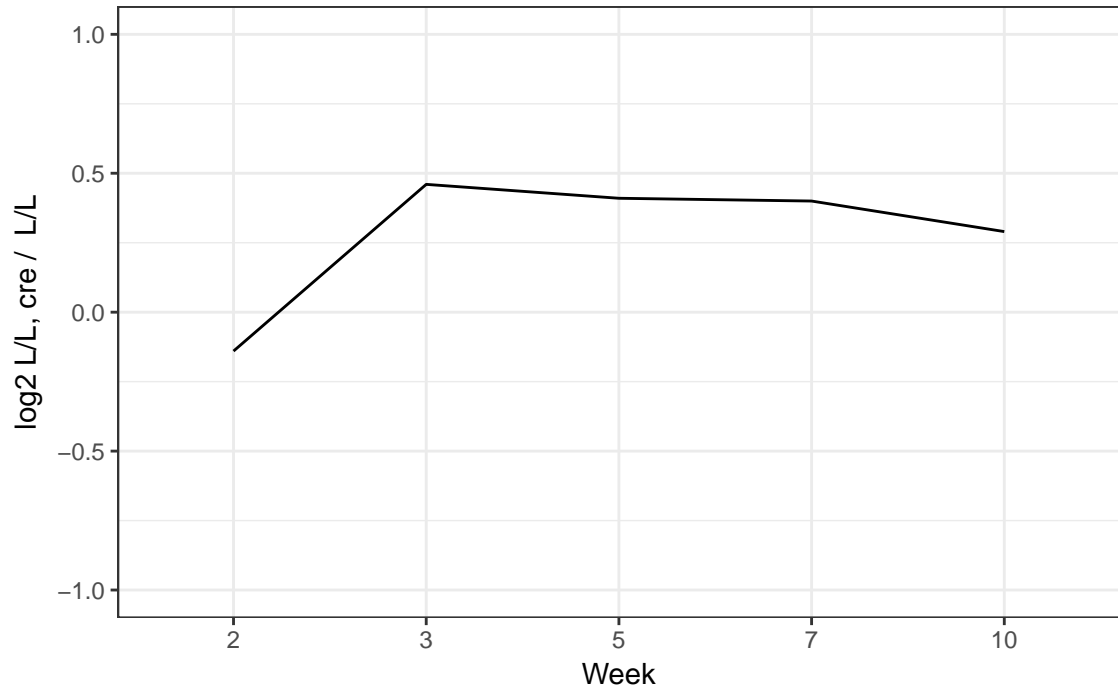

UQCC1 / Q9CWU6; adj.p value: 0.01993

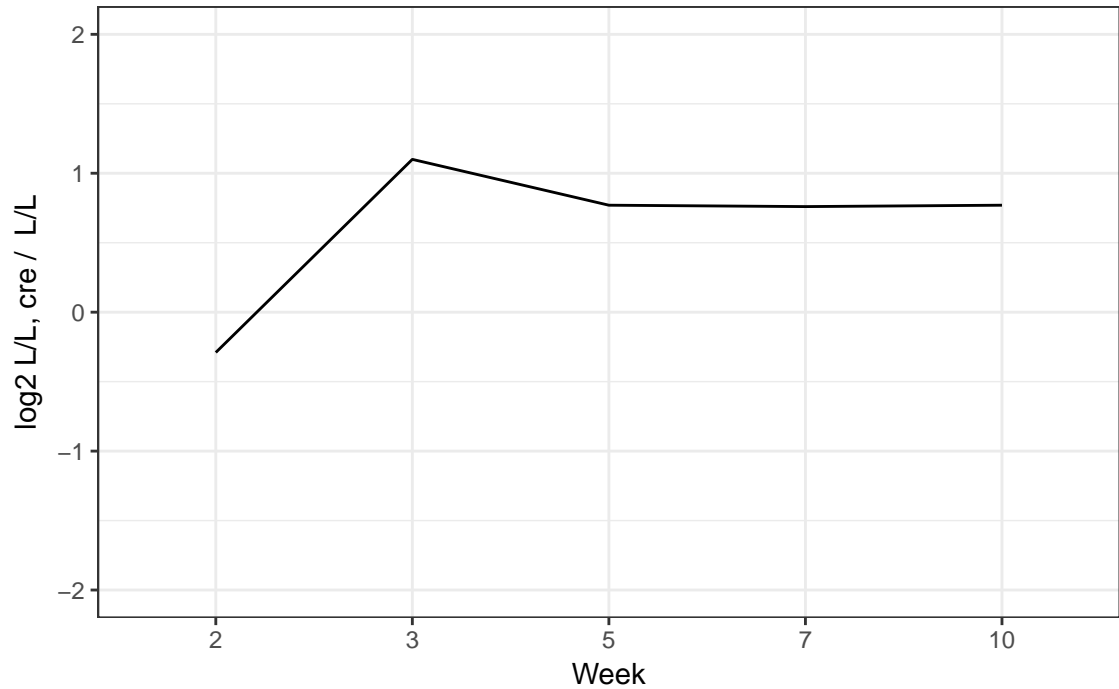

UQCC2 / Q9CQY6; adj.p value: 0.00043

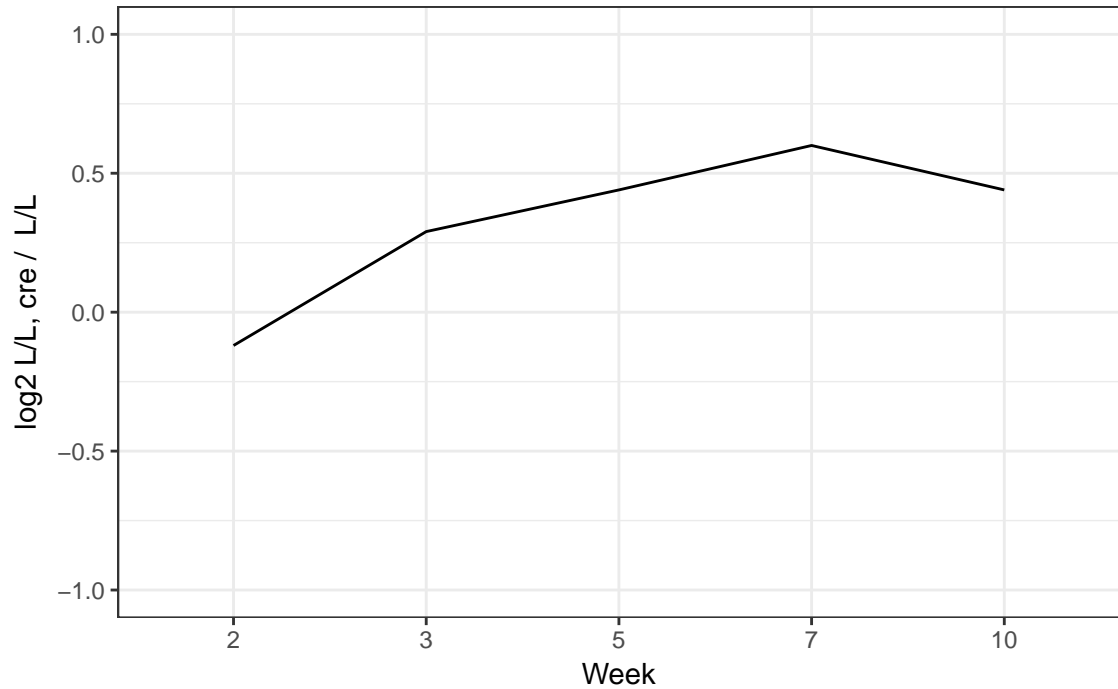

UQCR10 / Q8R111; adj.p value: 0.94963

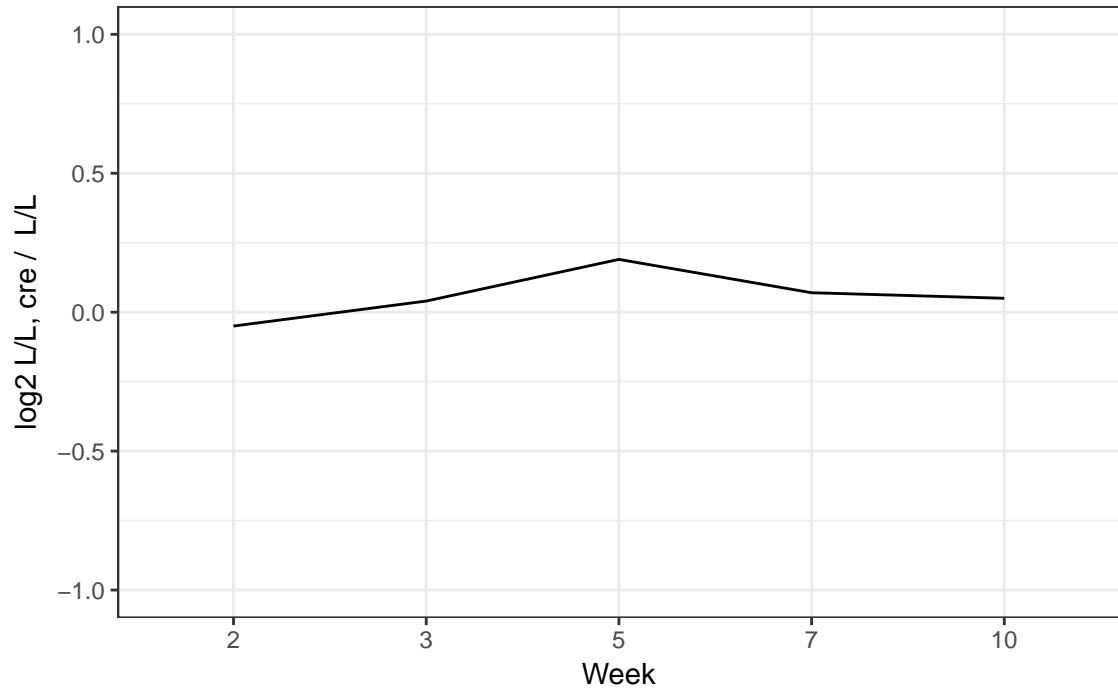



UQCR11 / Q9CPX8; adj.p value: 0.61146

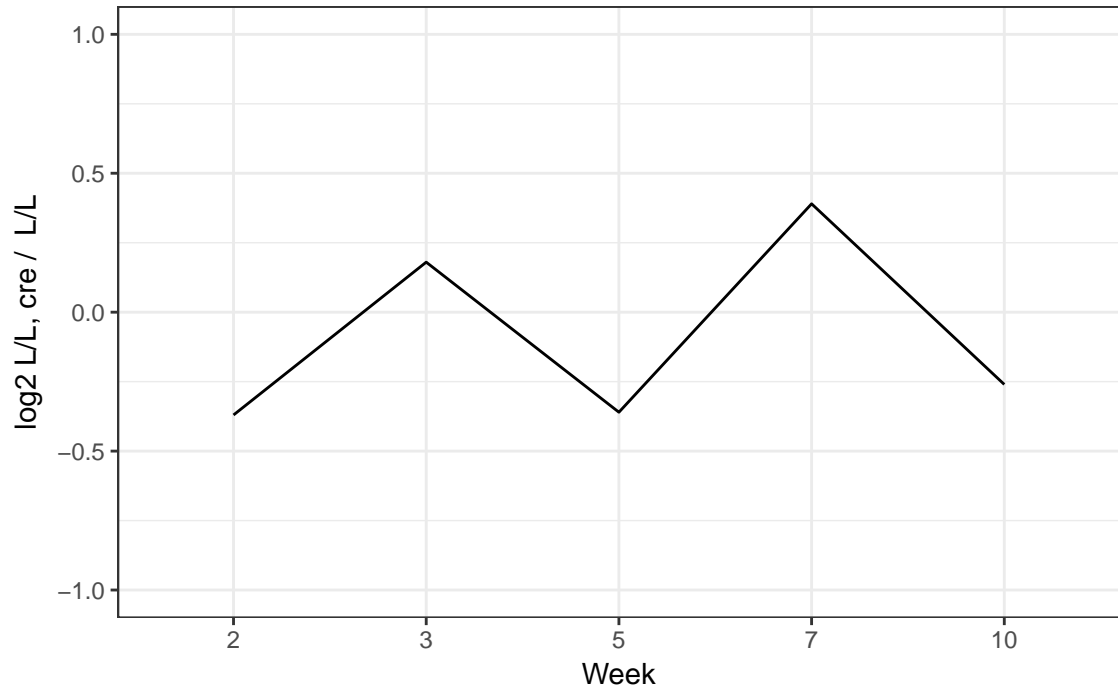

UQCRB / Q9CQB4; adj.p value: 0.06872

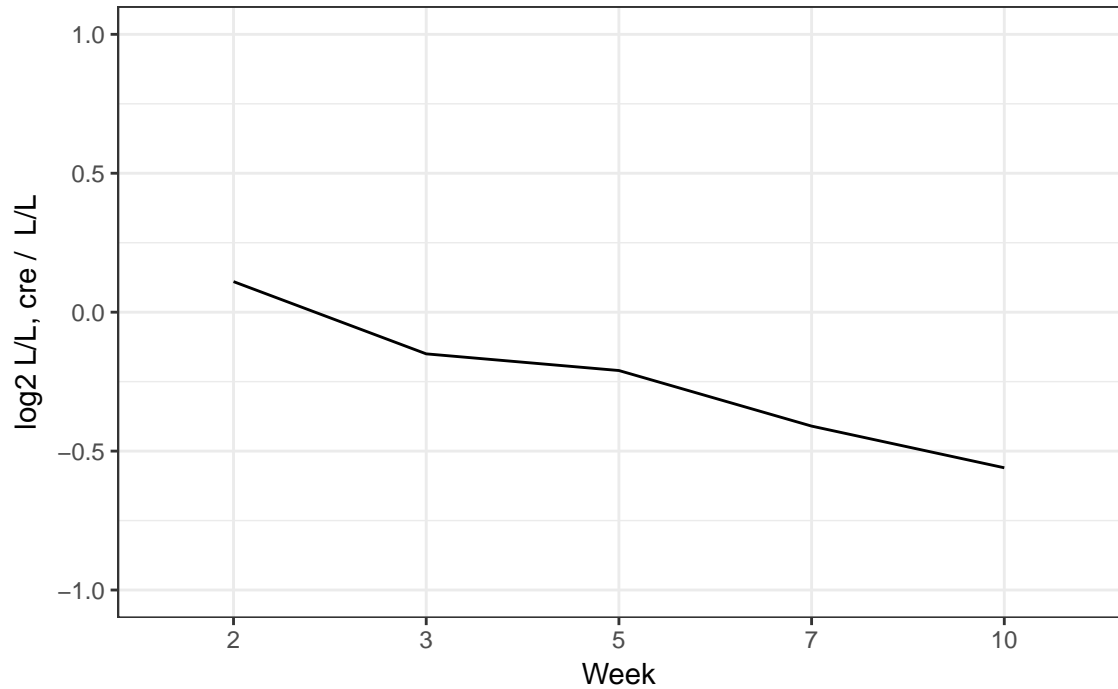

UQCRC1 / Q9CZ13; adj.p value: 0.42162

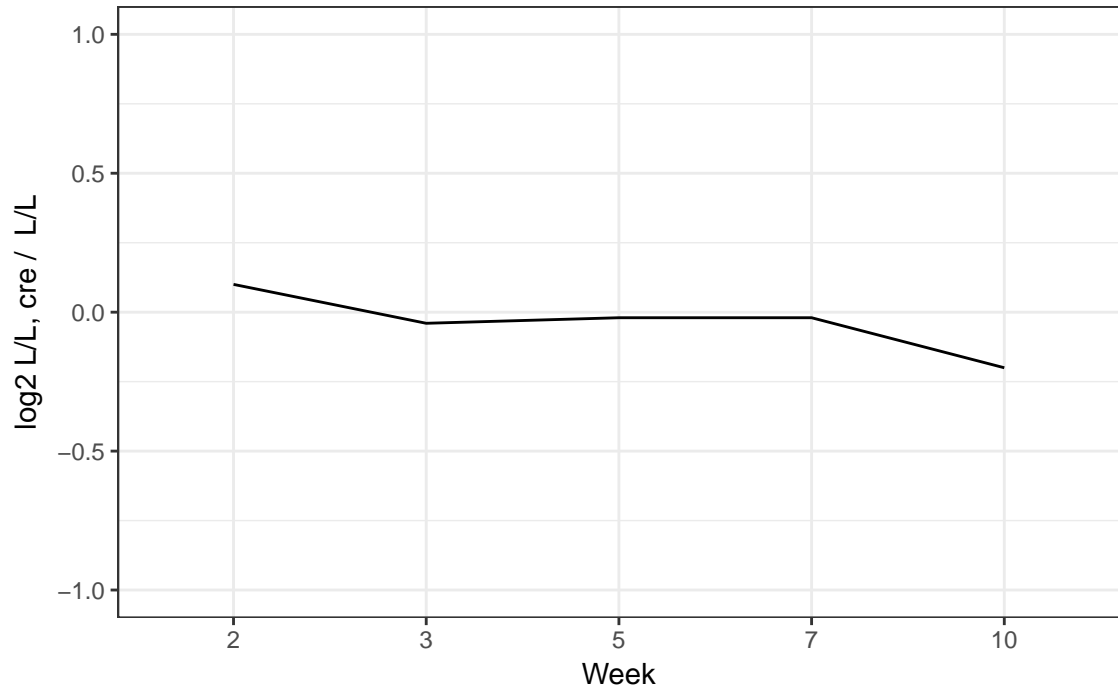

UQCRC2 / Q9DB77; adj.p value: 0.33584

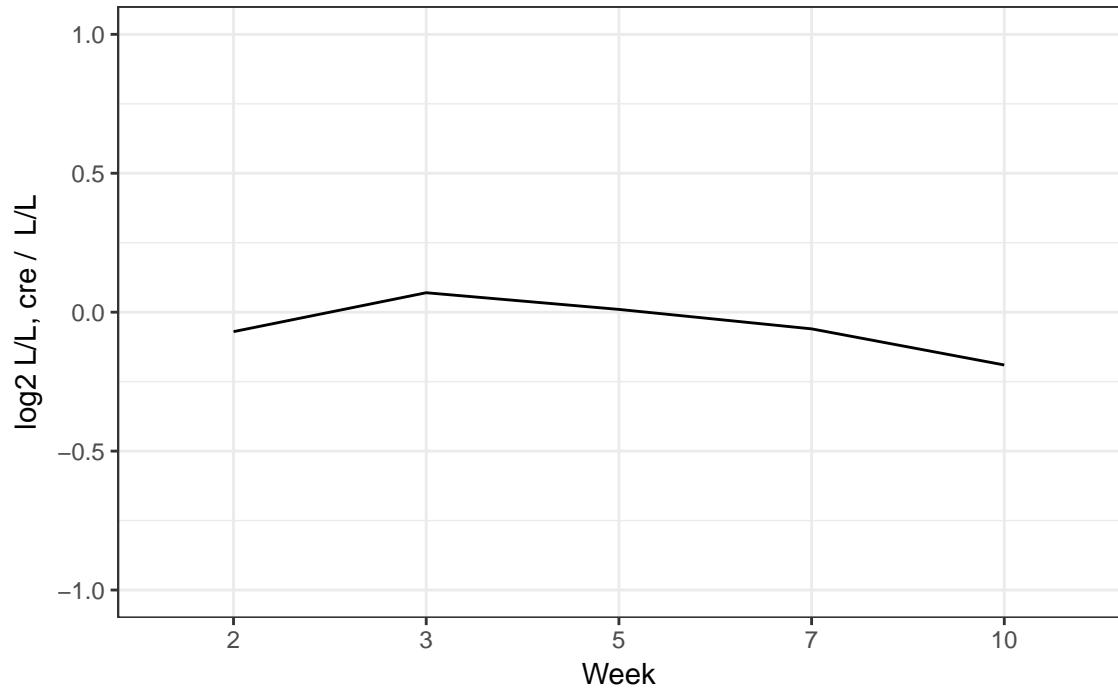

UQCRFS1 / Q9CR68; adj.p value: 0.18734

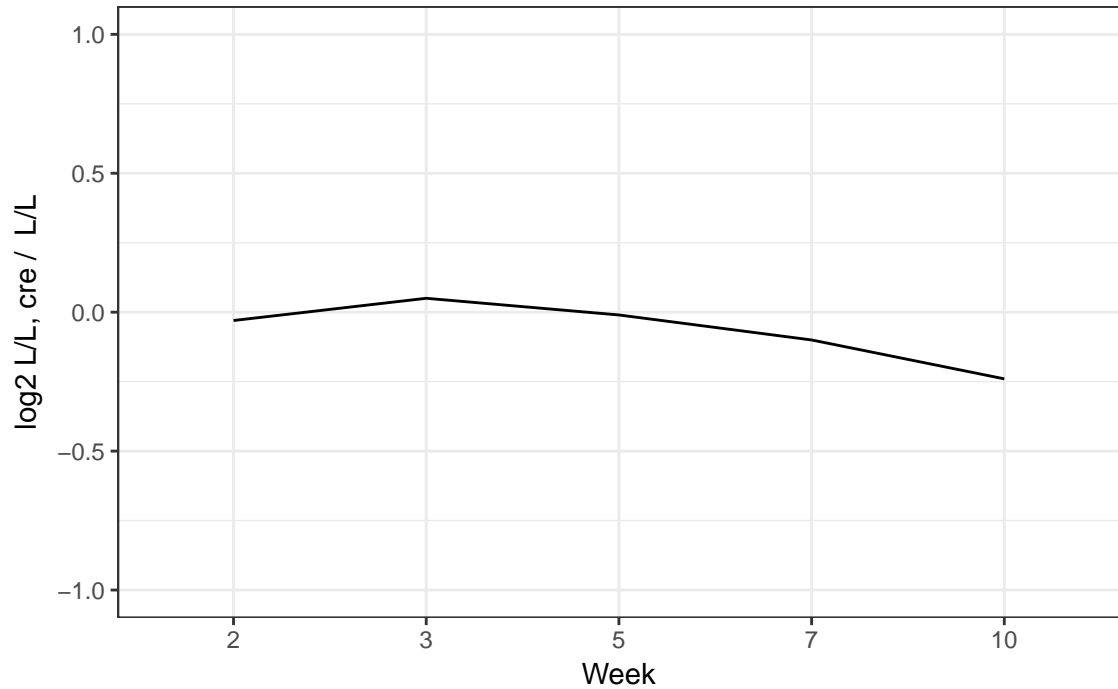

UQCRH / P99028; adj.p value: 0.05467

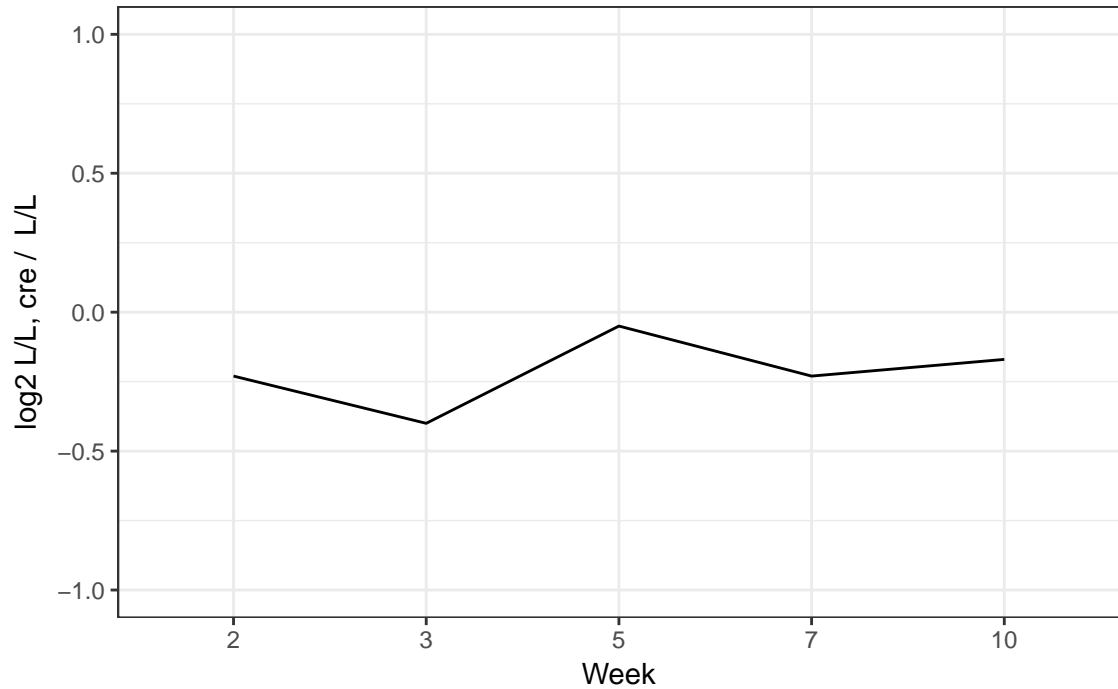

UQCRQ / Q9CQ69; adj.p value: 0.00064

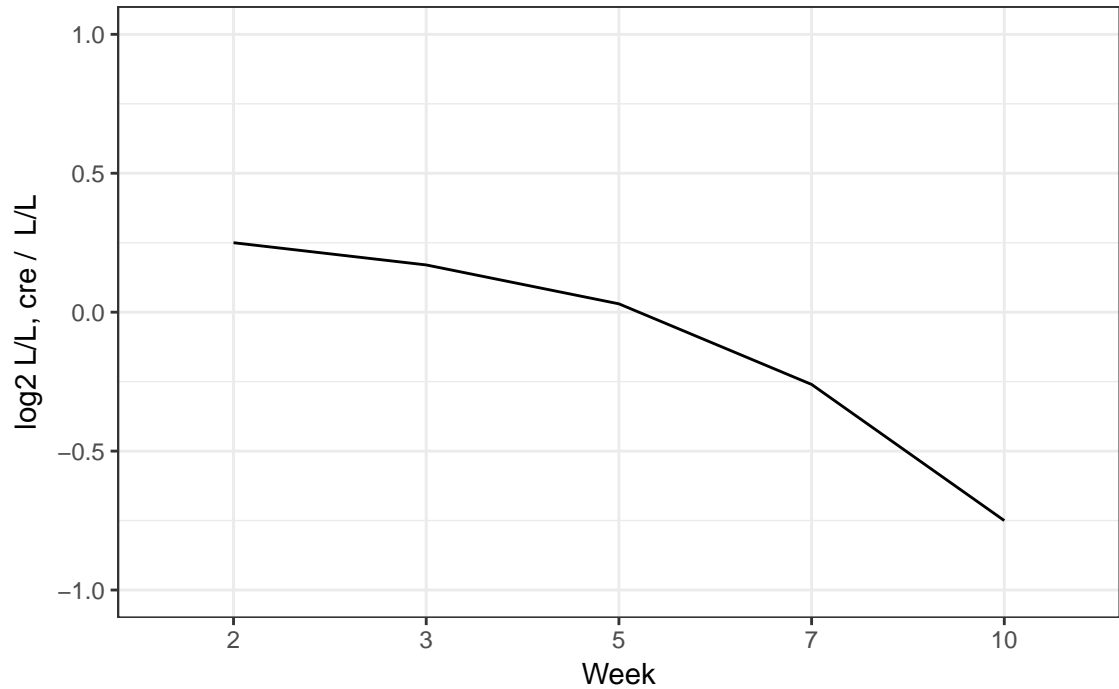

USMG5 / Q78IK2; adj.p value: 0.00016

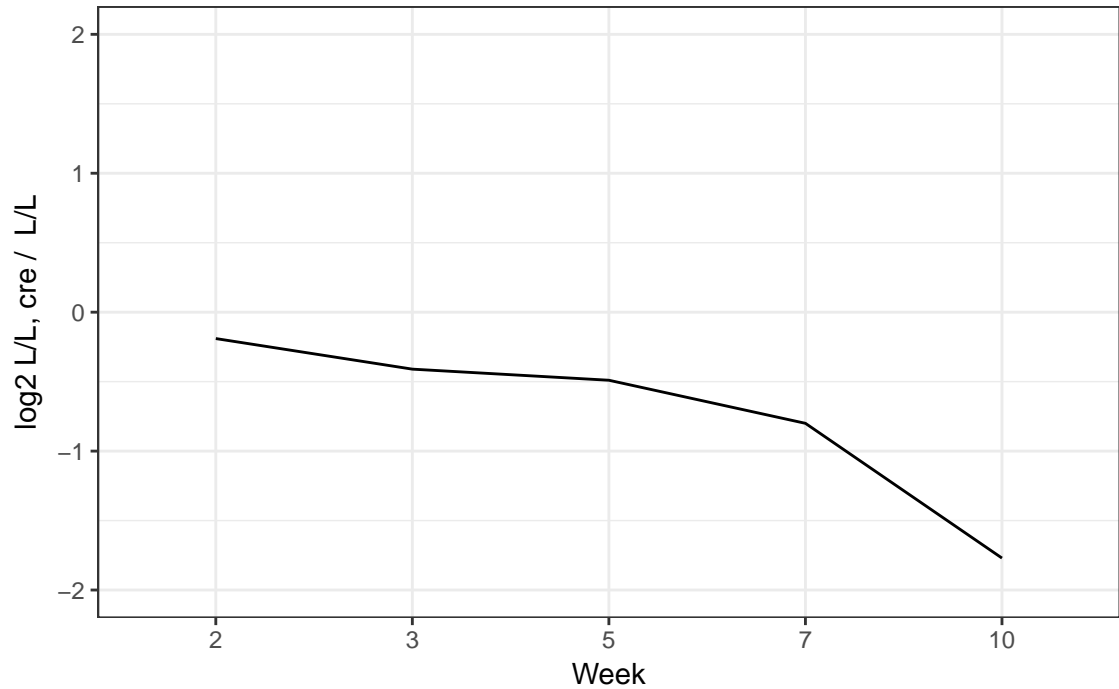



VAR2 / Q3U2A8; adj.p value: 0.18345

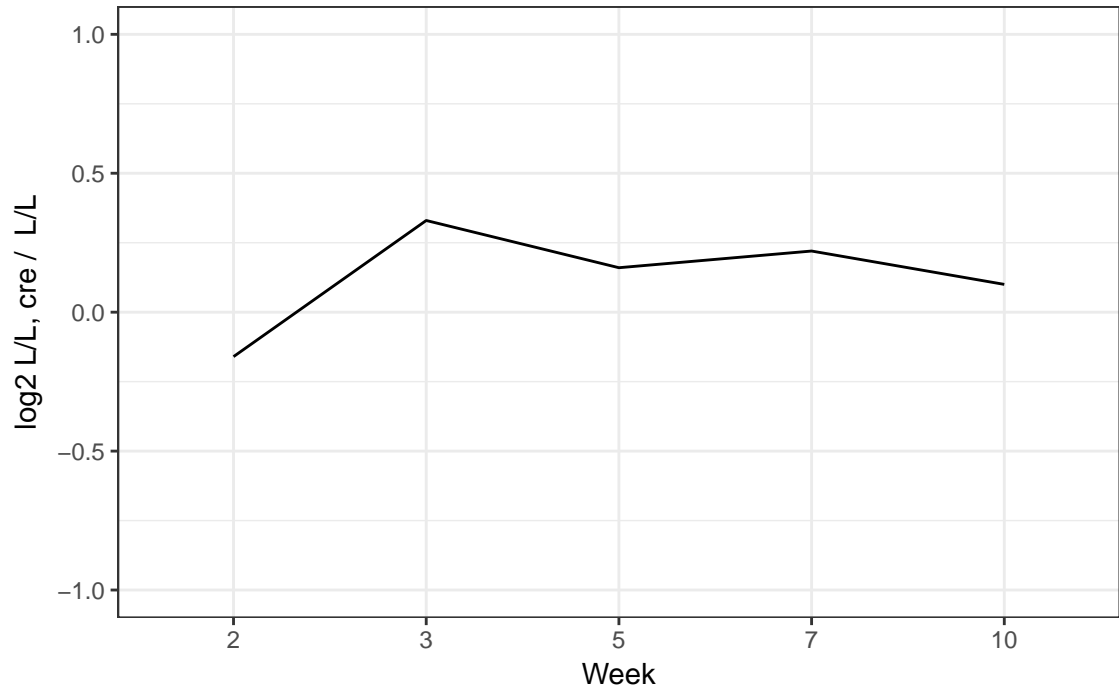

VDAC1 / Q60932-2; adj.p value: 0.61747

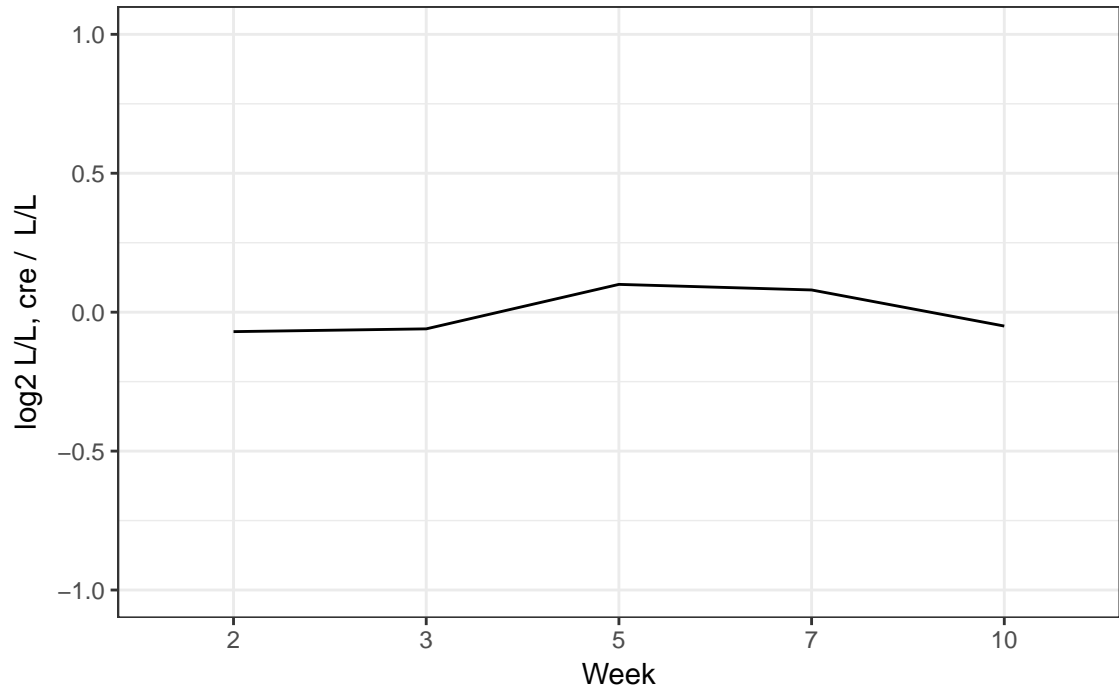

VDAC2 / Q60930; adj.p value: 0.26166

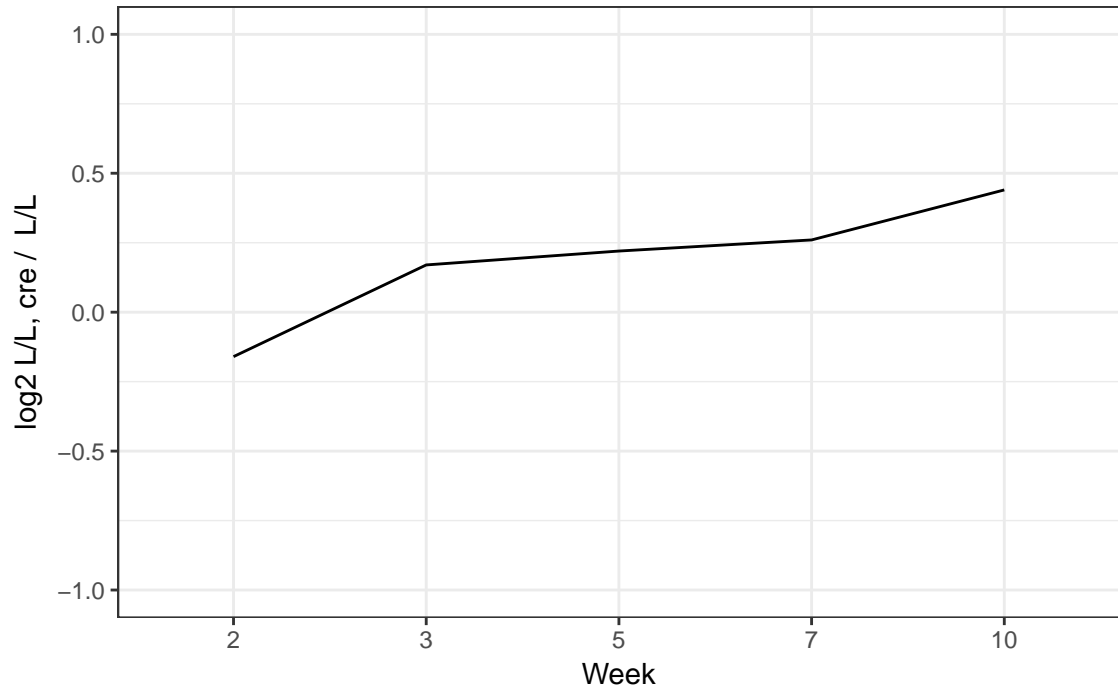

VDAC3 / Q60931; adj.p value: 0.07776

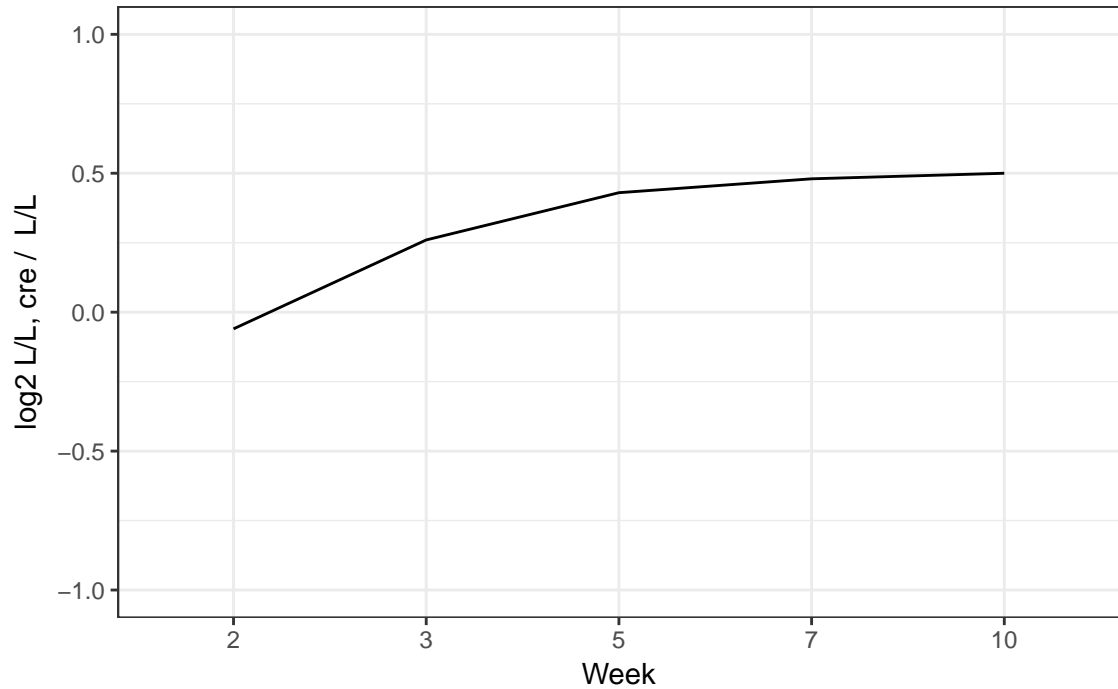

VWA8 / Q8CC88; adj.p value: 0.25904

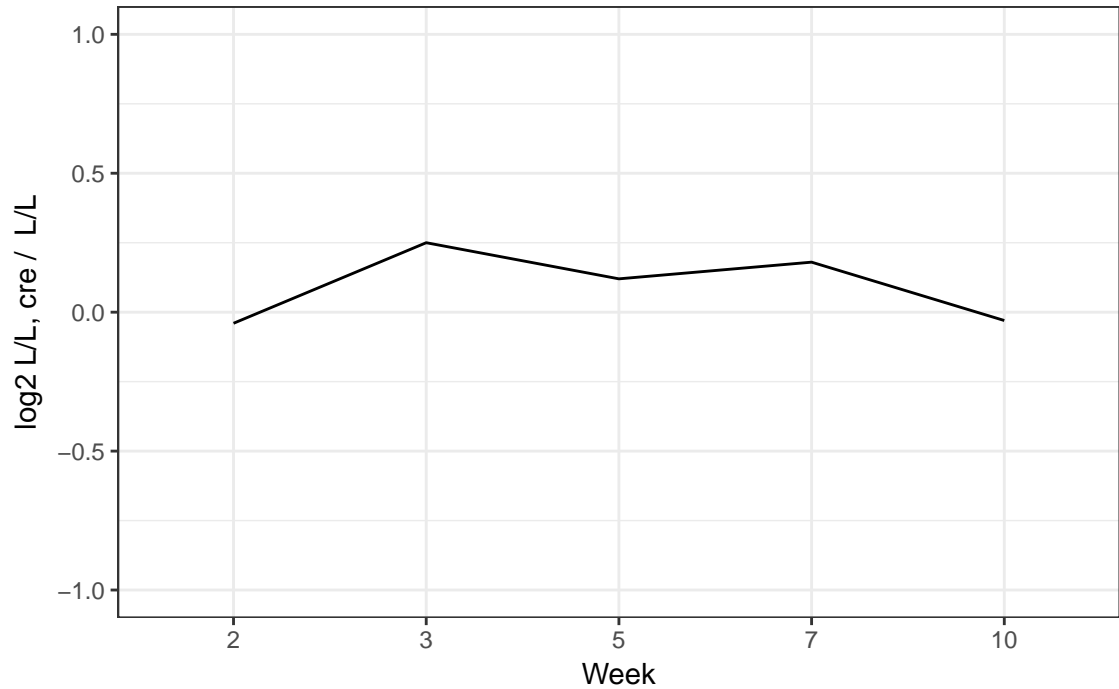

WARS2 / Q9CYK1; adj.p value: 0.13183

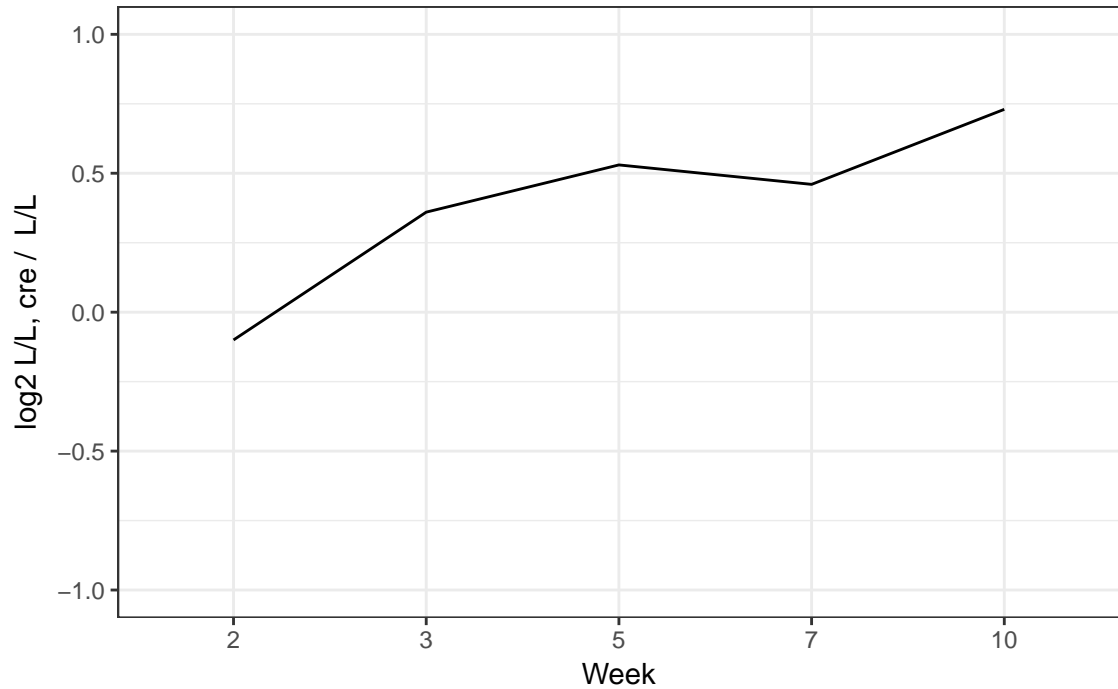

XPNPEP3 / B7ZMP1; adj.p value: 0.01199

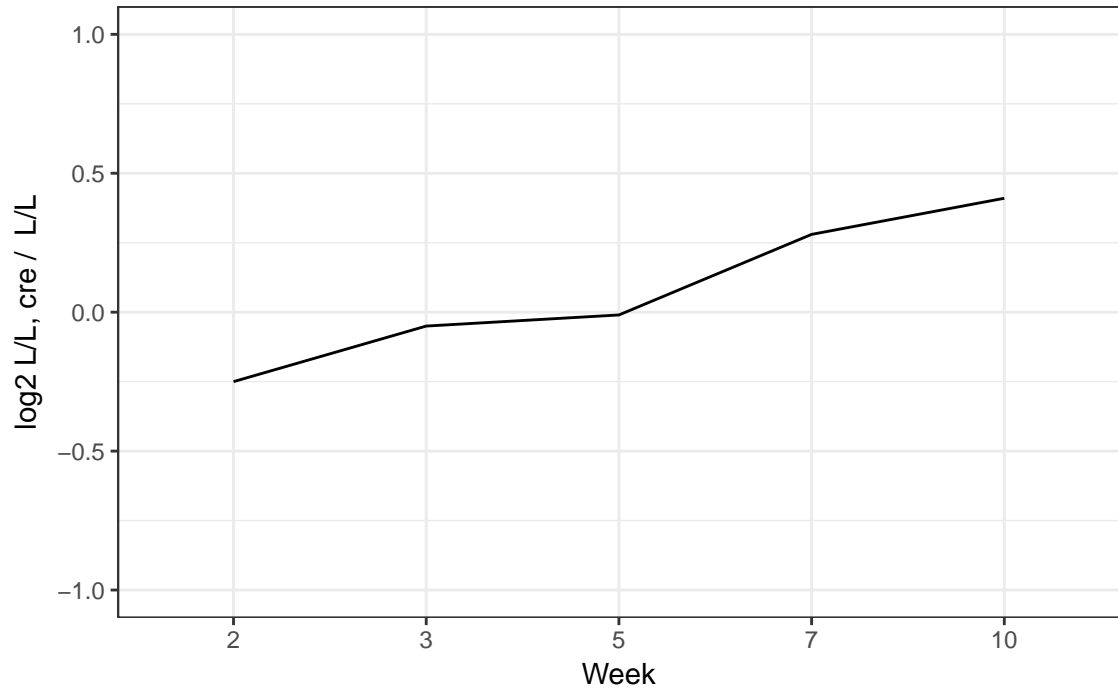

YARS2 / Q8BYL4; adj.p value: 0

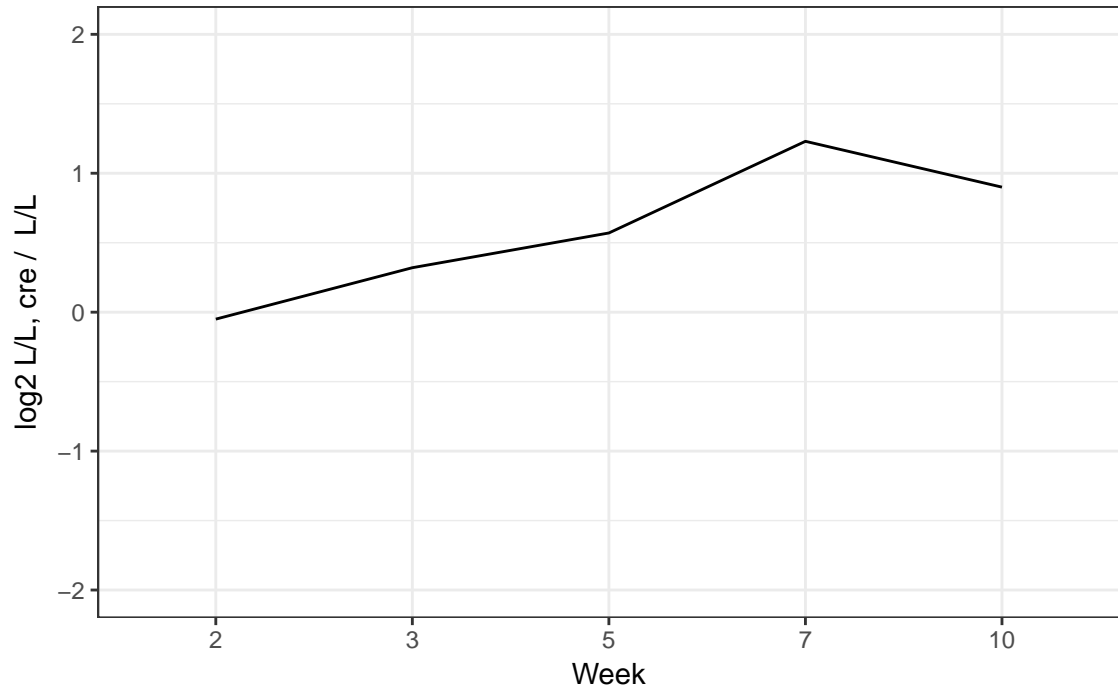



YME1L1 / O88967; adj.p value: 0

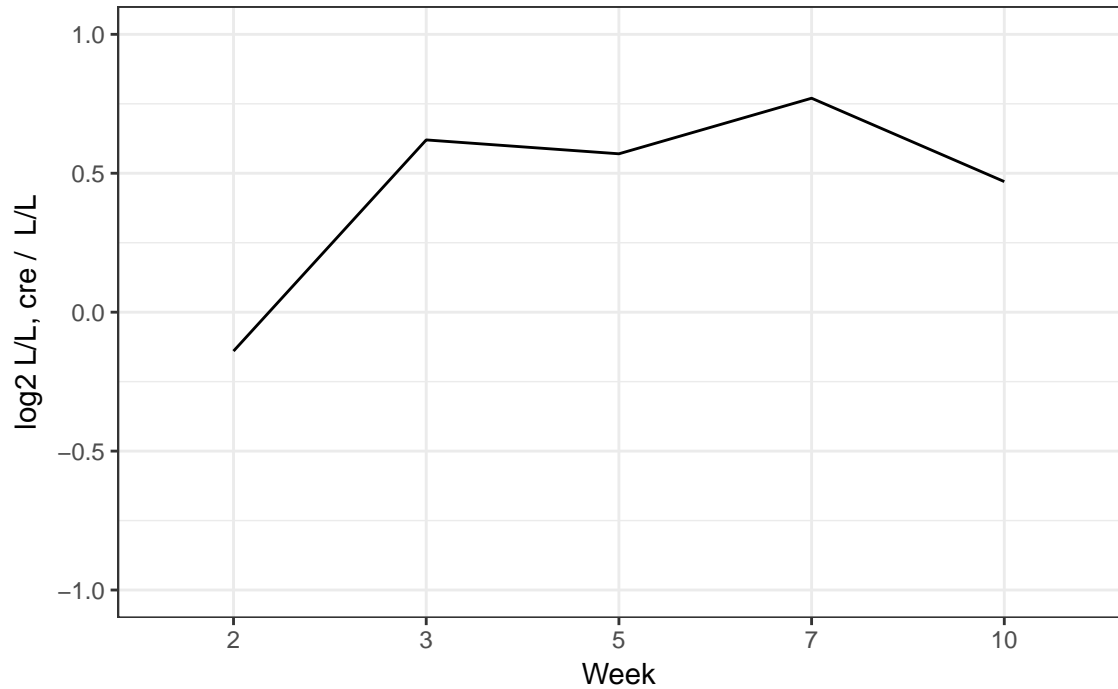

ZADH2 / Q8BGC4; adj.p value: 0.84224

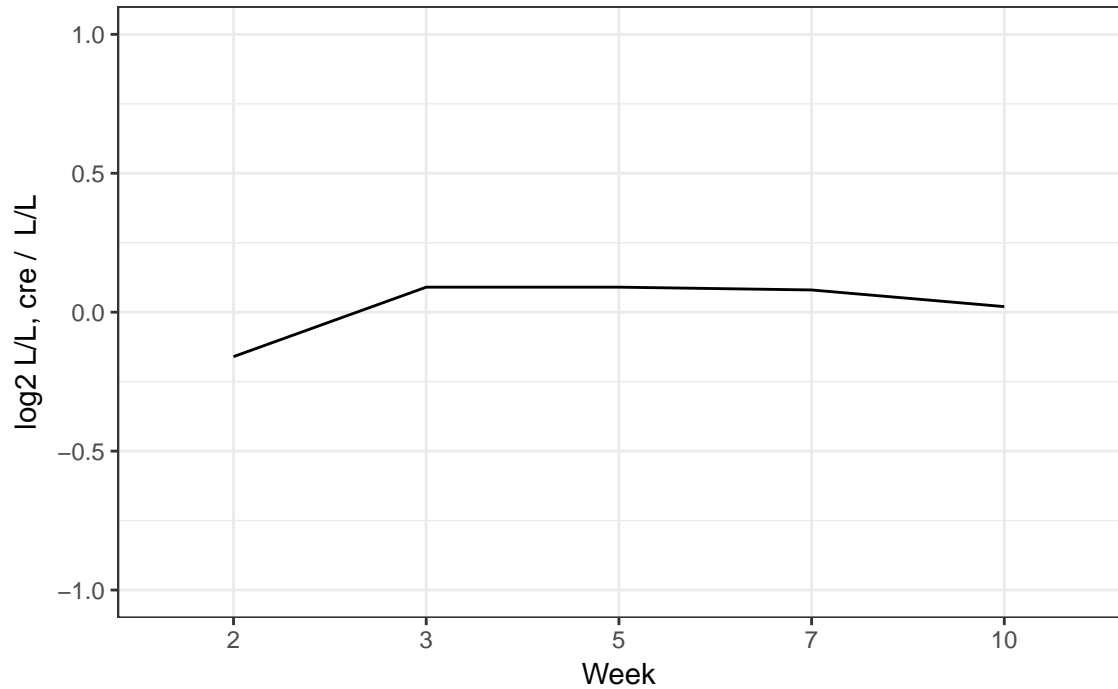

Supplement: supp [file elife-30952-supp-v1.zip]
