# Supplementary material for: Transcriptomic and proteomic landscape of mitochondrial dysfunction reveals secondary coenzyme Q deficiency in mammals
Source: eLife journal article supplement (doi:10.7554/elife.30952), 2017-11-13

## Supplementary File 8: Differential expression proteomic analysis all knockouts Kühl *et al.*

Boxplots of the intensity detected by mass spectrometry per protein.

Boxplots represent median  $\pm$  25% quantile. The whiskers extend from the hinge to the highest and lowest value within 1.5x IQR, respectively. Red dot: mean.

Each mouse strain is labeled in the boxplots with the protein name of the gene they are knockout for:

*Twink*: TWINKLE

*Tfam*: TFAM

*Polrmt*: POLRMT

*Lrpprc*: LRPPRC

*Mterf4*: MTERF4

# / A2AMZ4

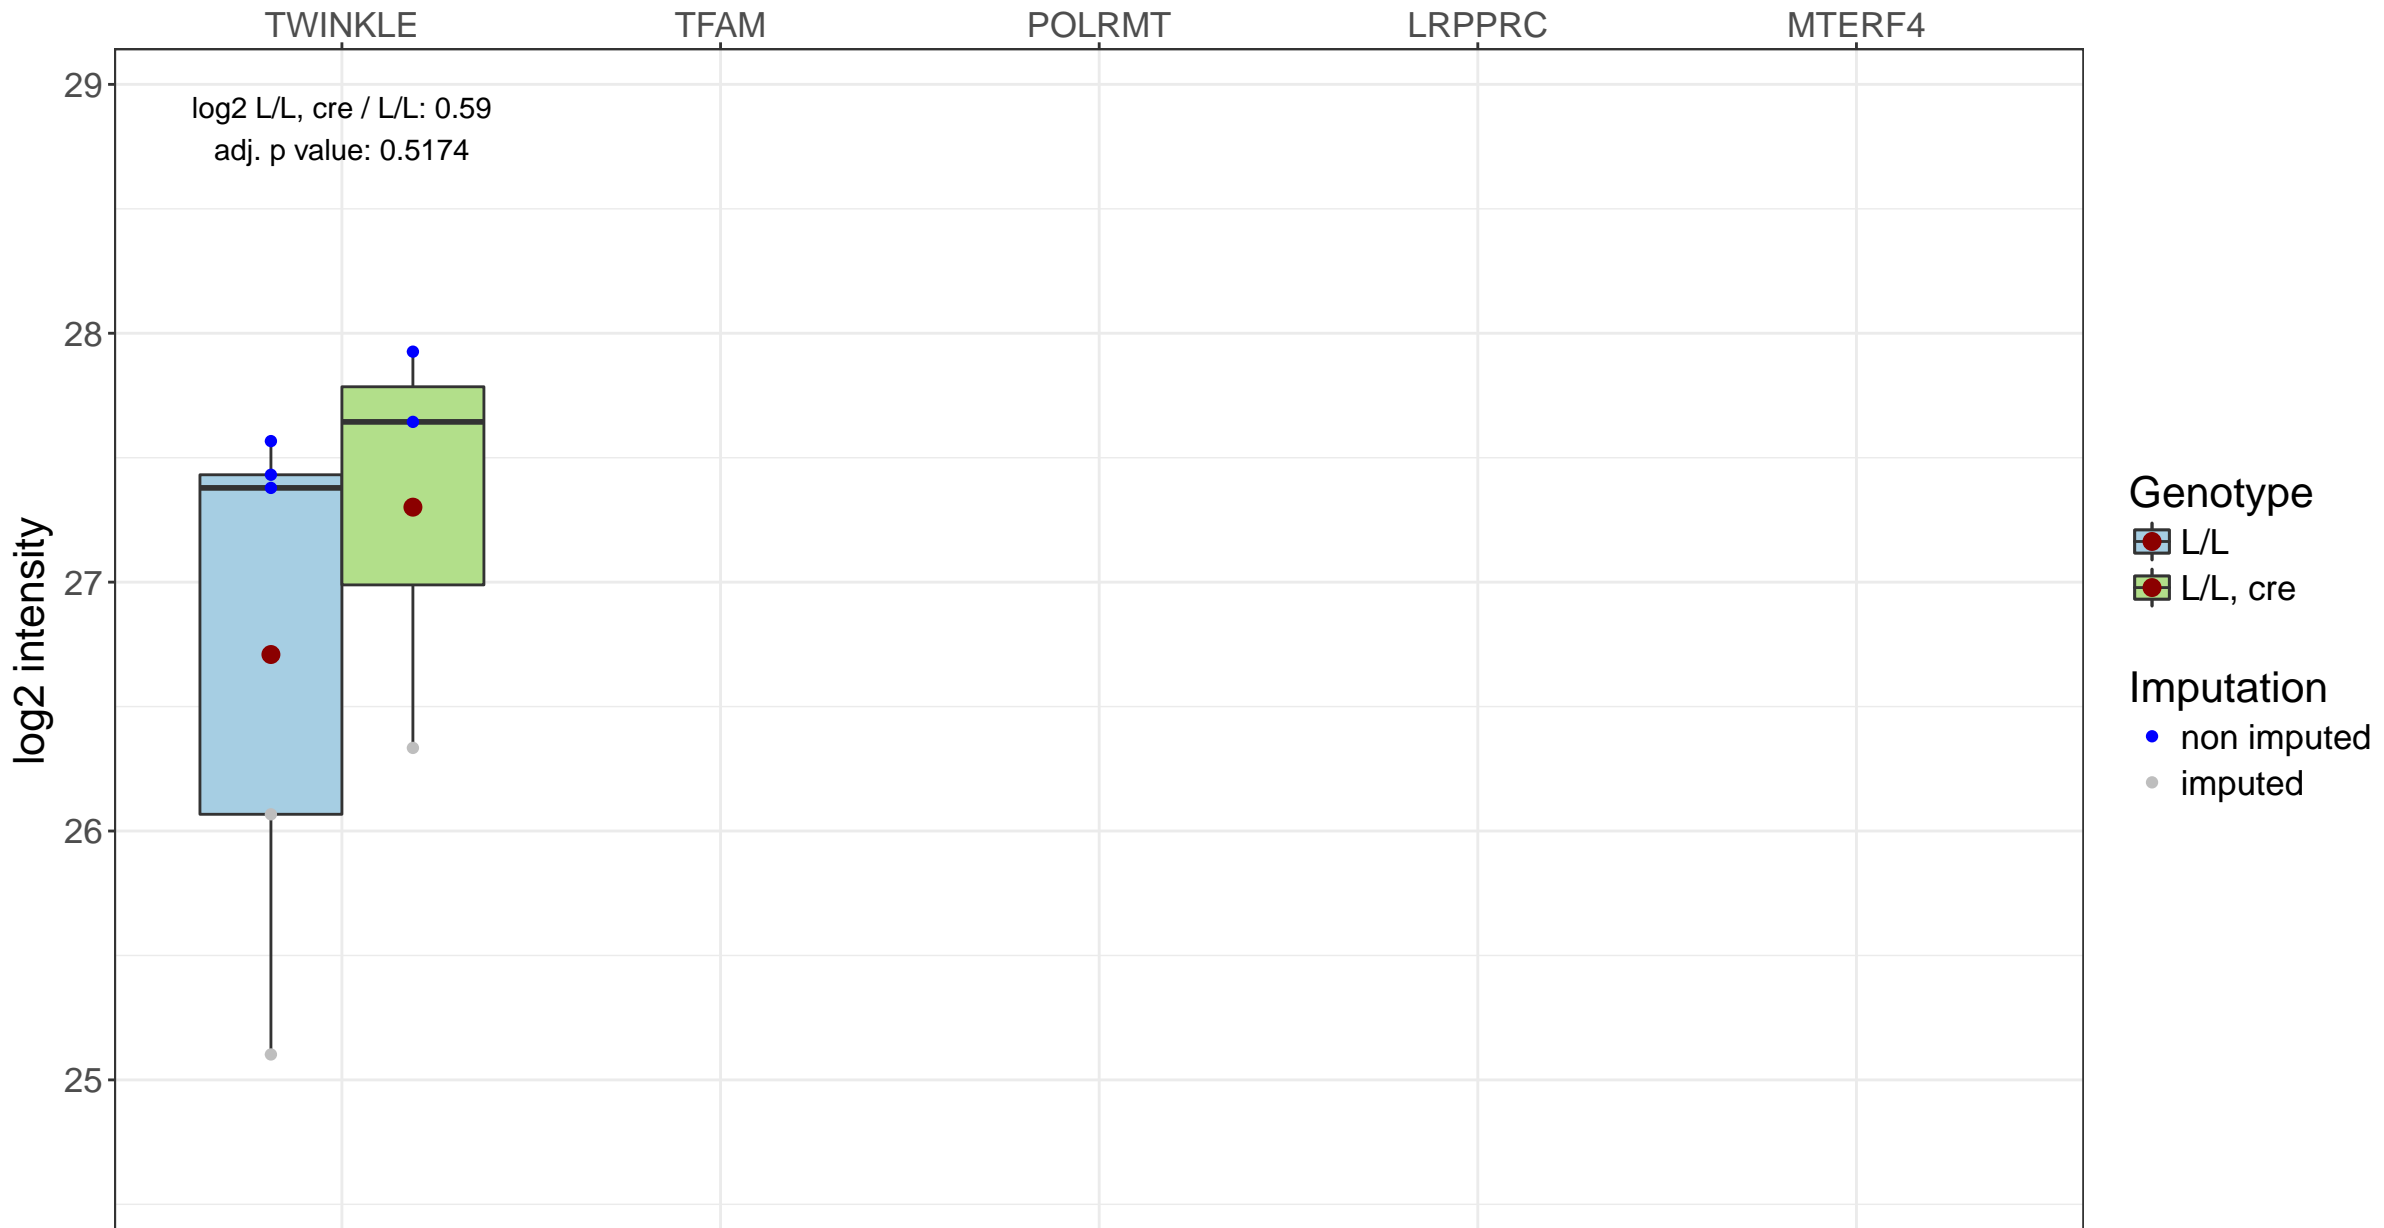

# / Q3UNZ8

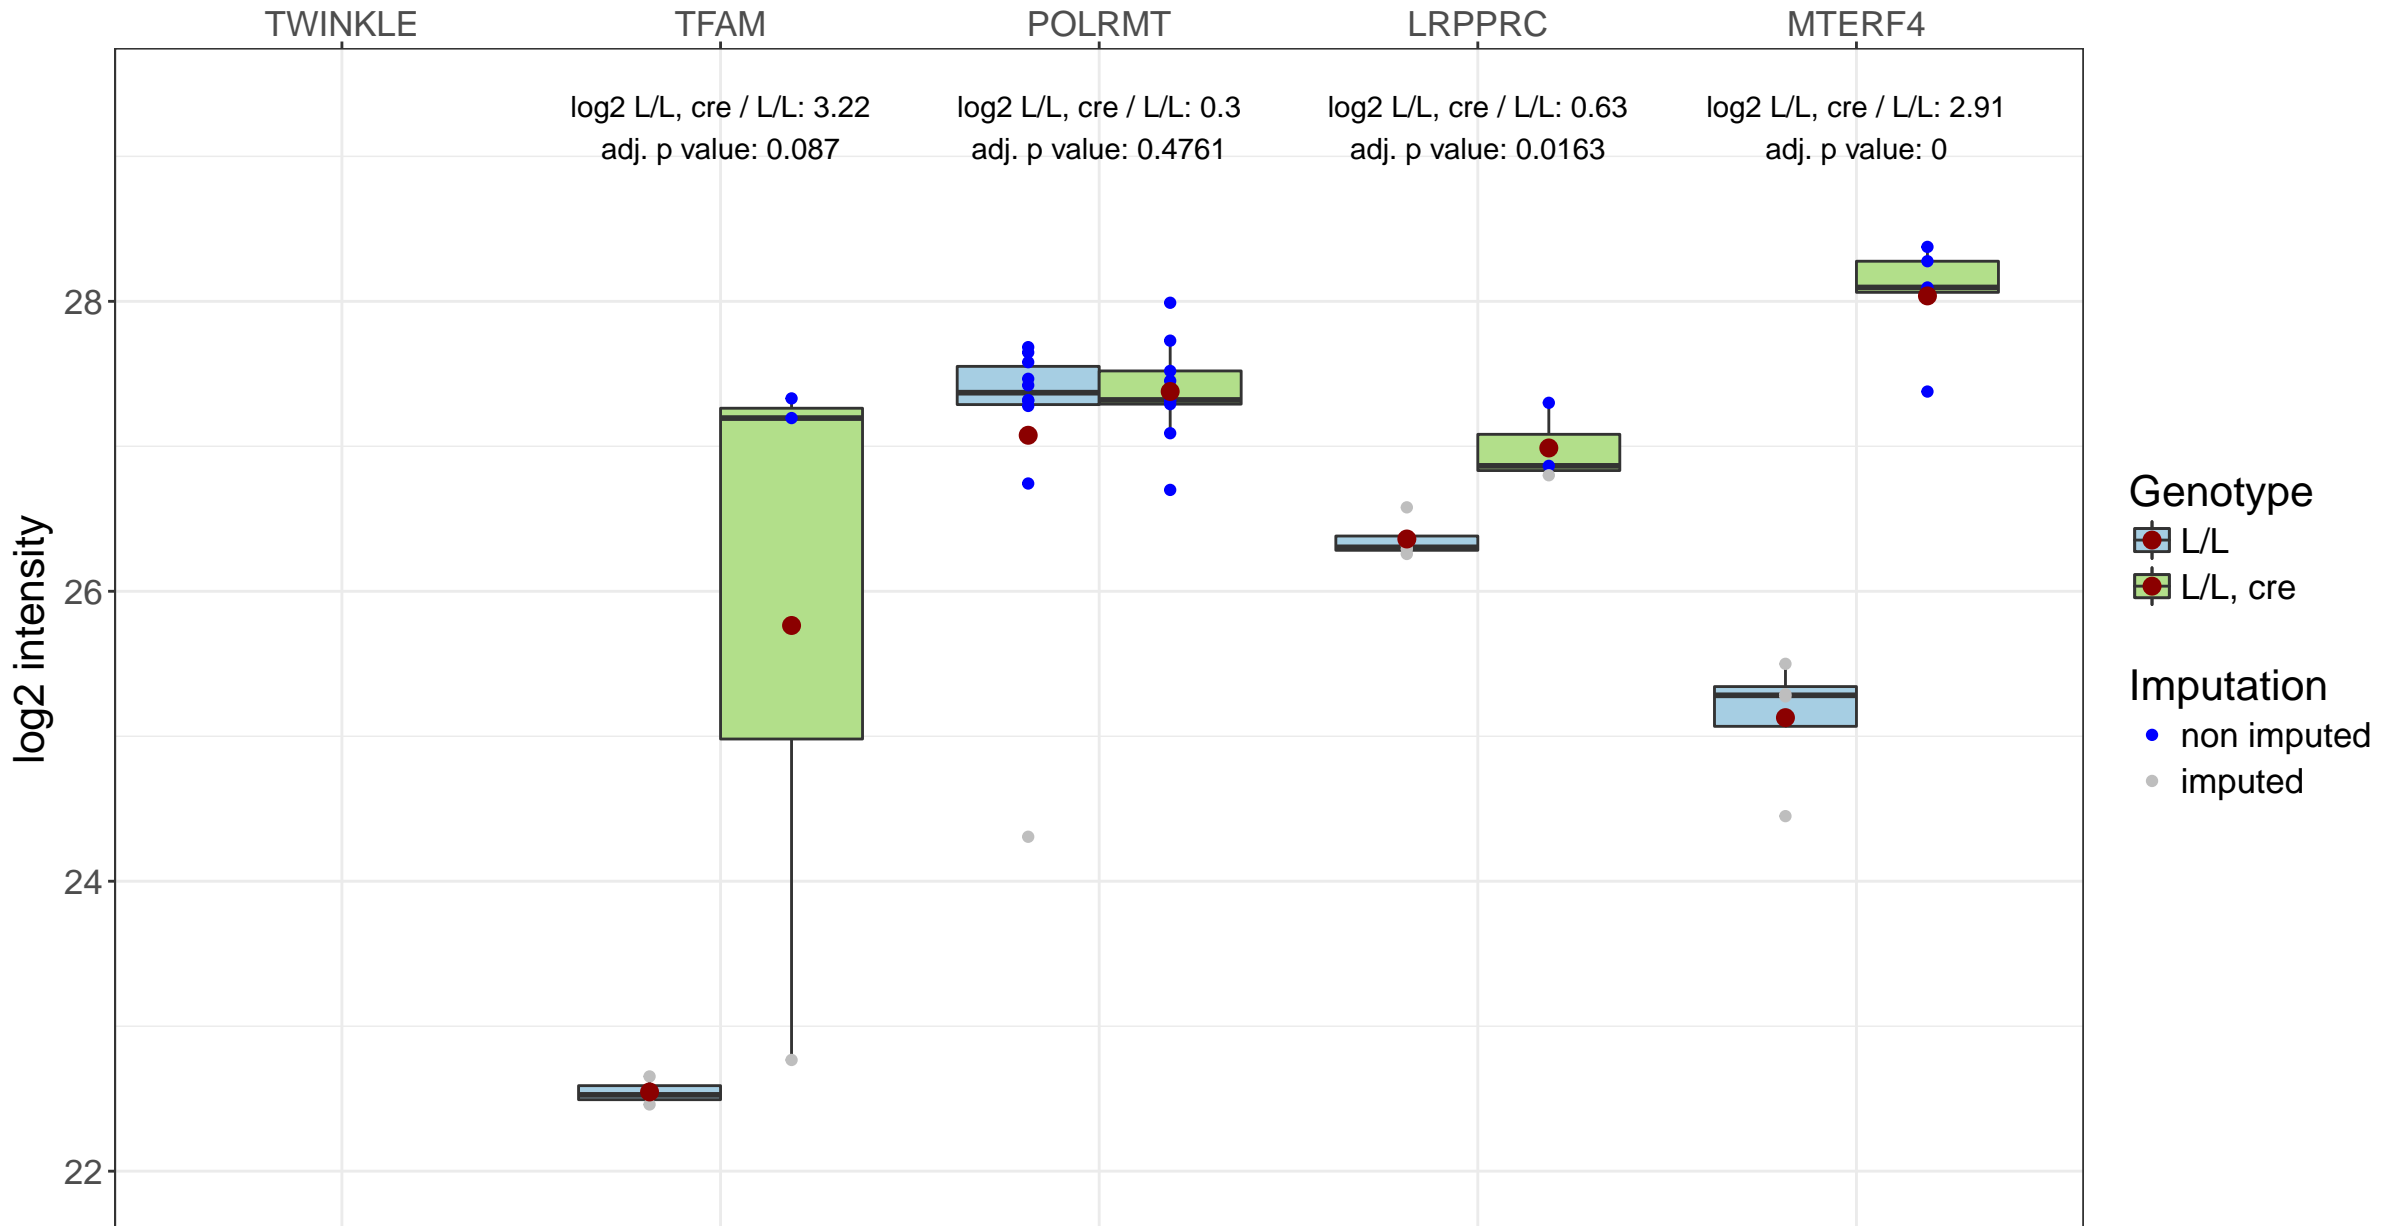

# / Q80VP5

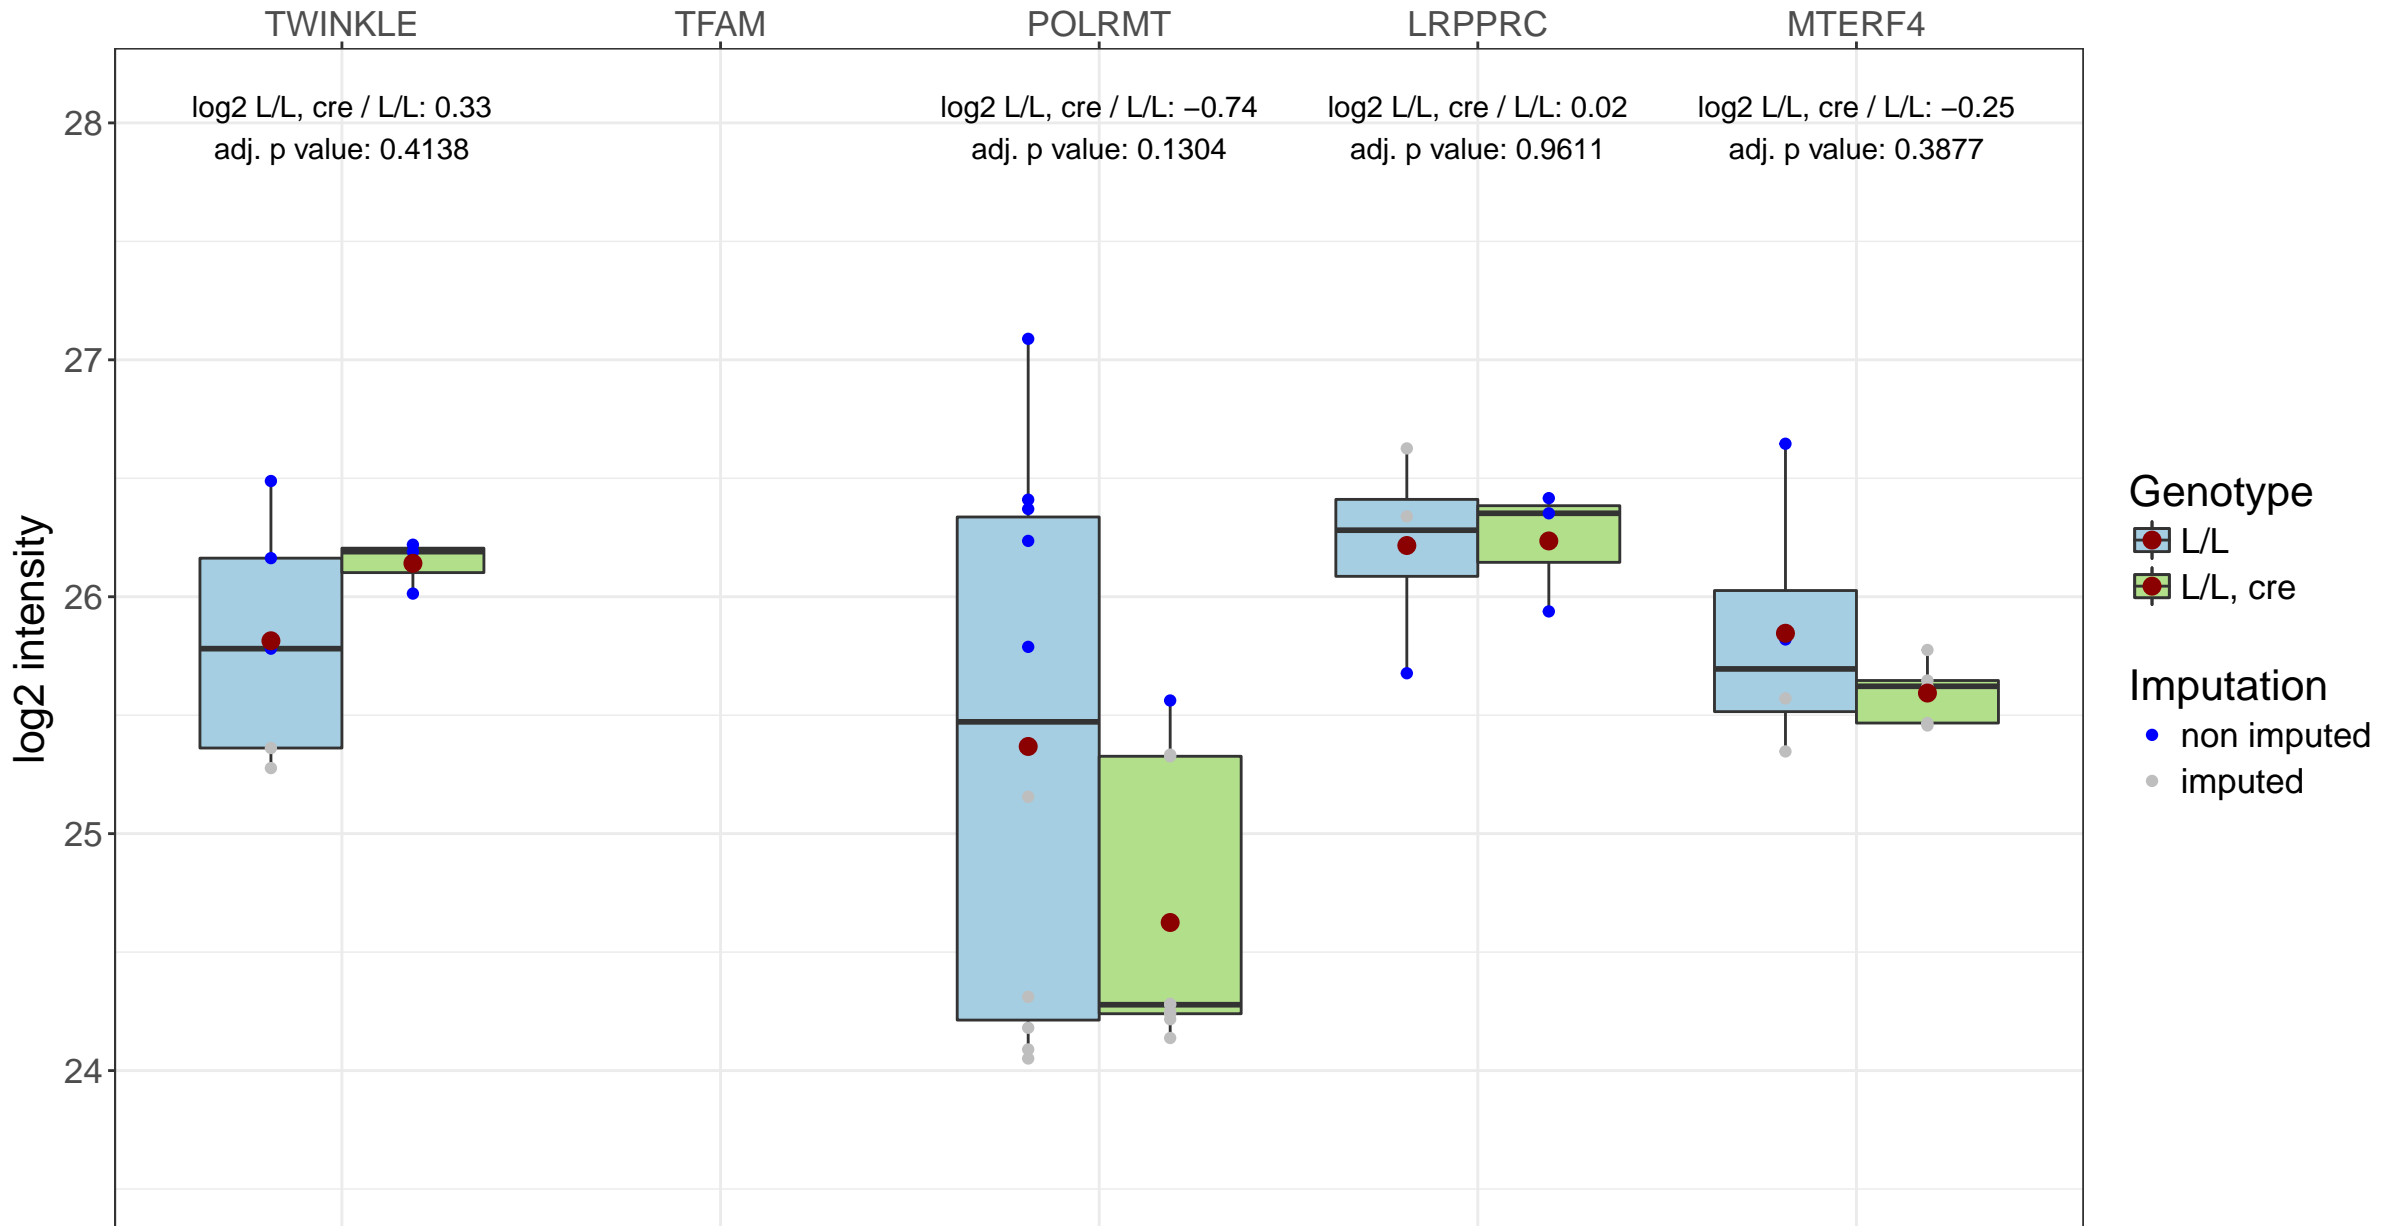

# / Q8BGX2

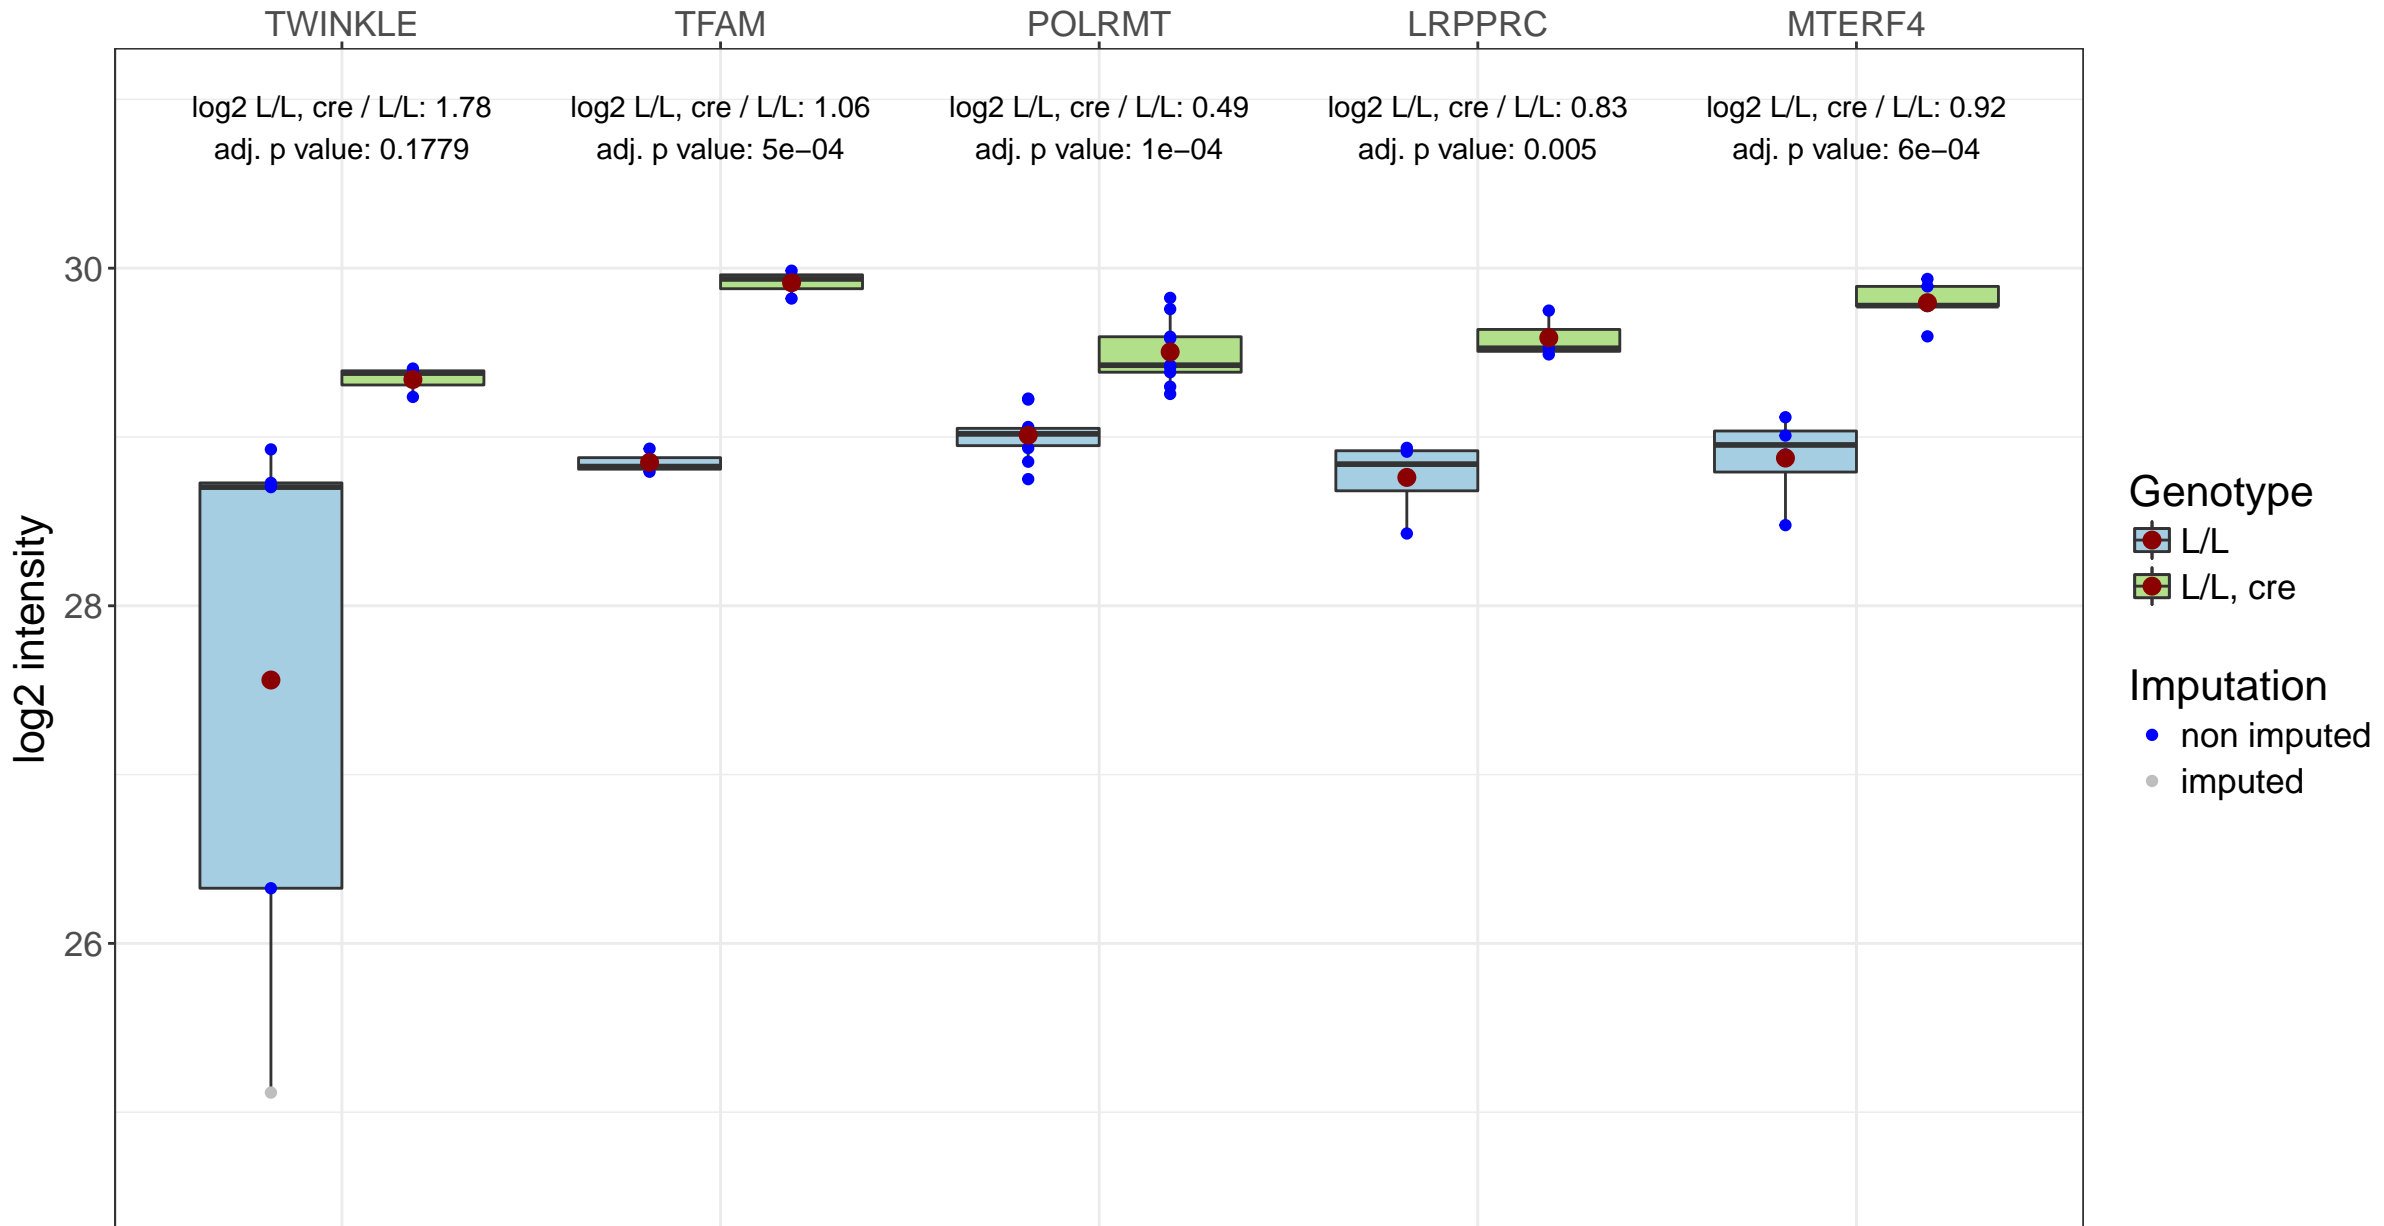

# / Q8BHE8

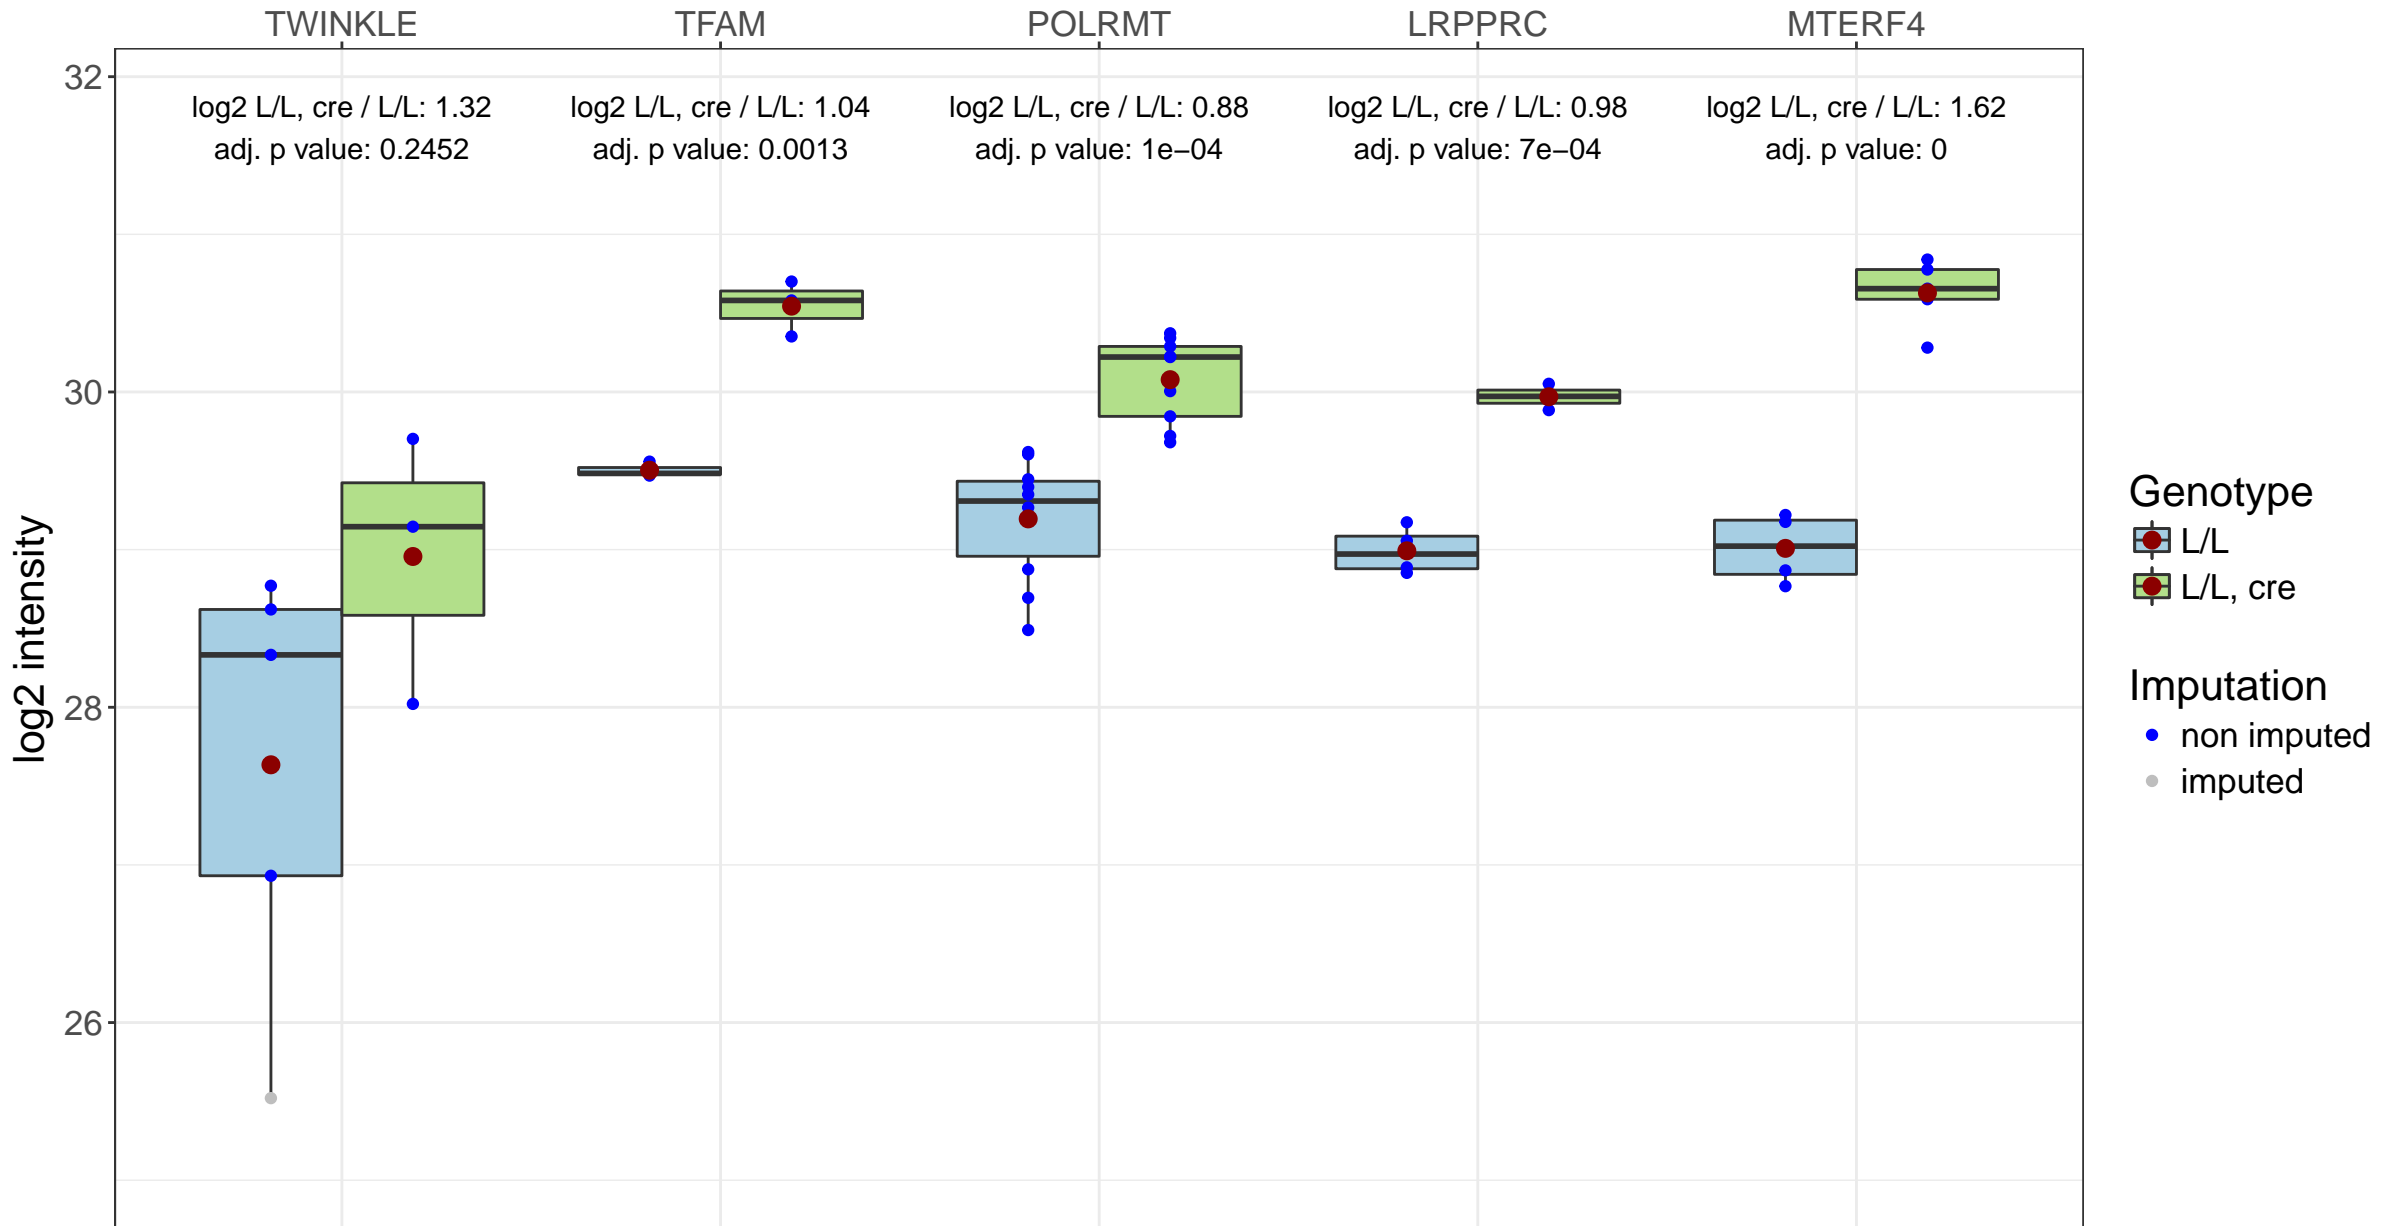

# / Q8BTC1

TWINKLE

TFAM

POLRMT

LRPPRC

MTERF4

$\log_2 L/L, cre / L/L: -0.09$   
adj. p value: 0.8824

$\log_2 L/L, cre / L/L: -0.07$   
adj. p value: 0.8887

log2 intensity

28

27

26

25

Genotype

L/L

L/L, cre

Imputation

non imputed

imputed

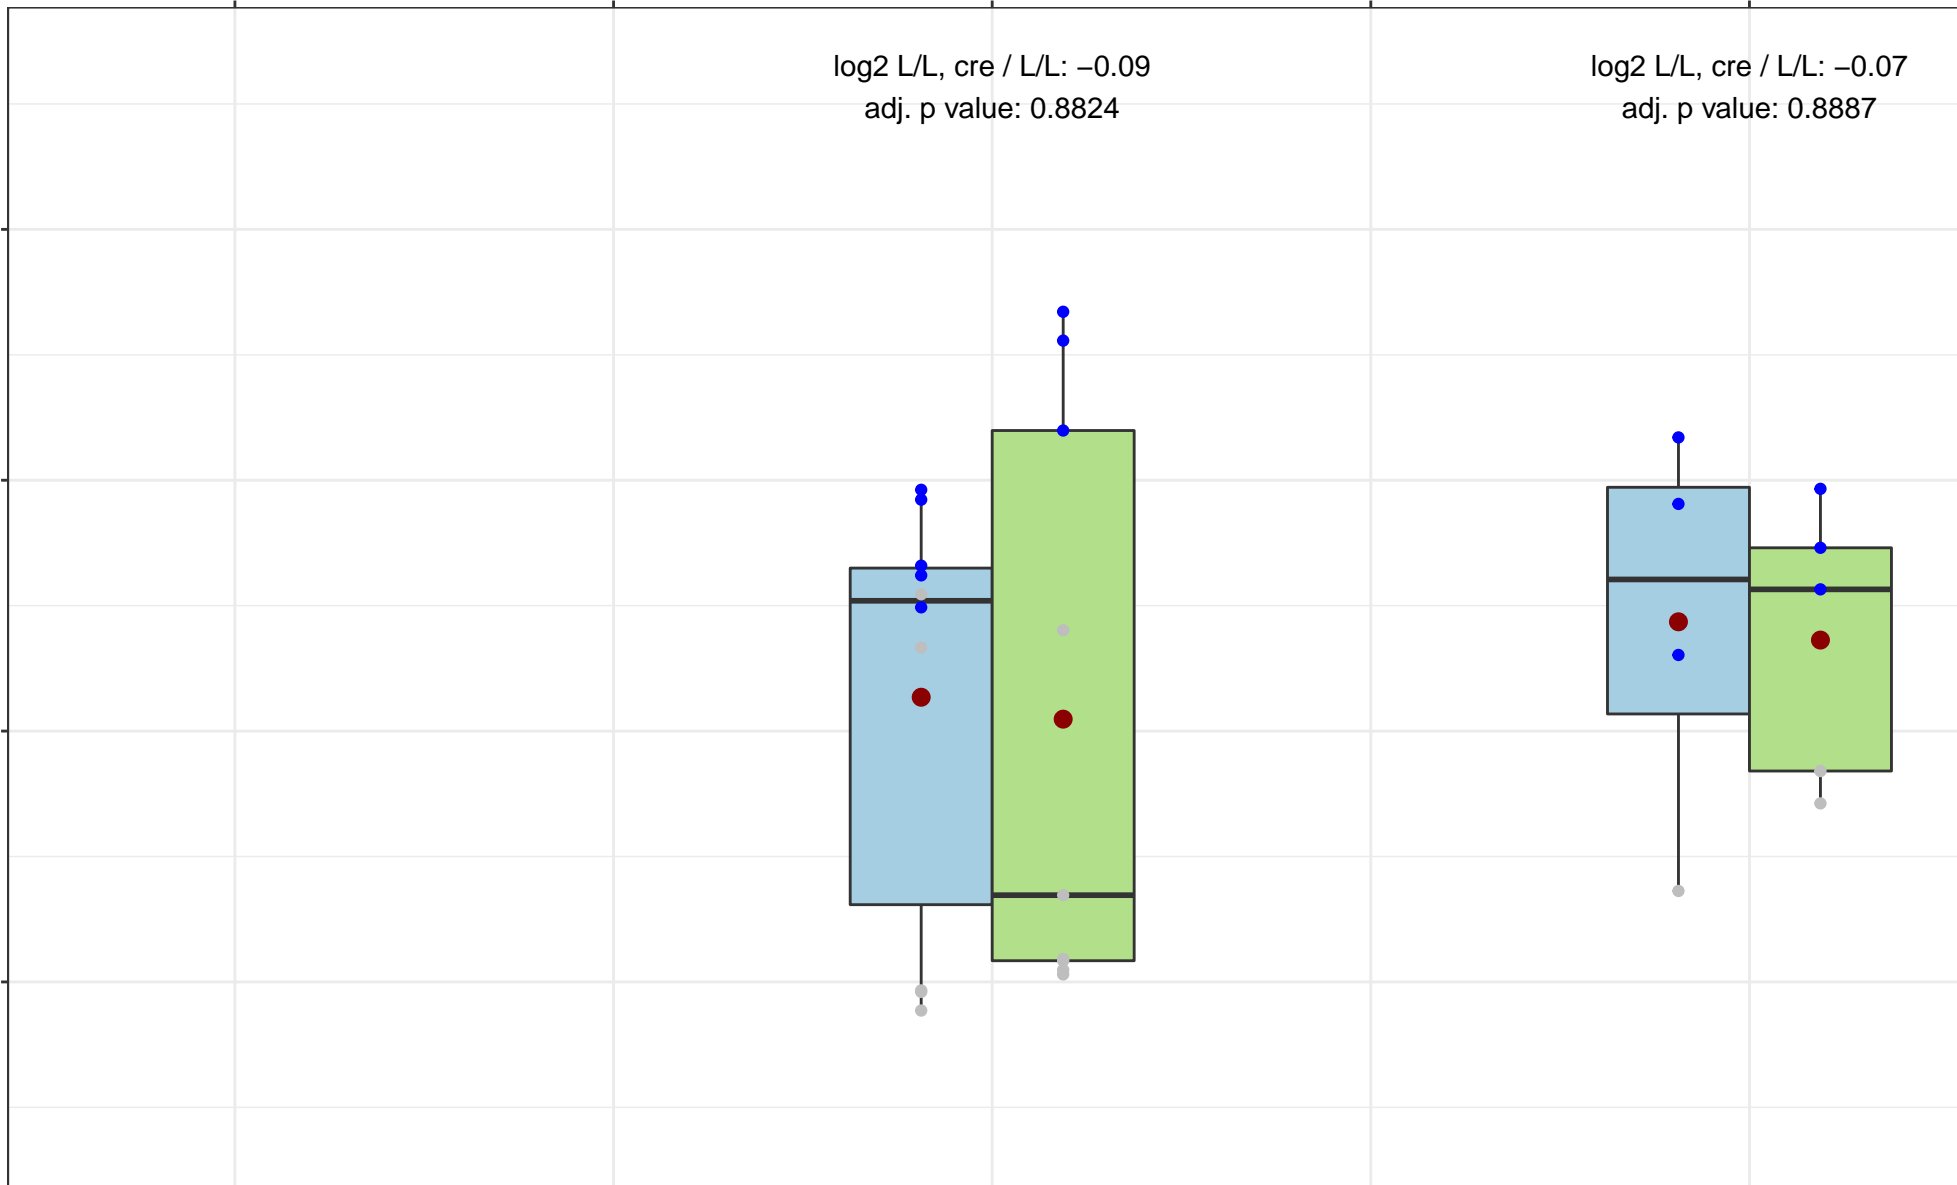

# / Q8BTE0

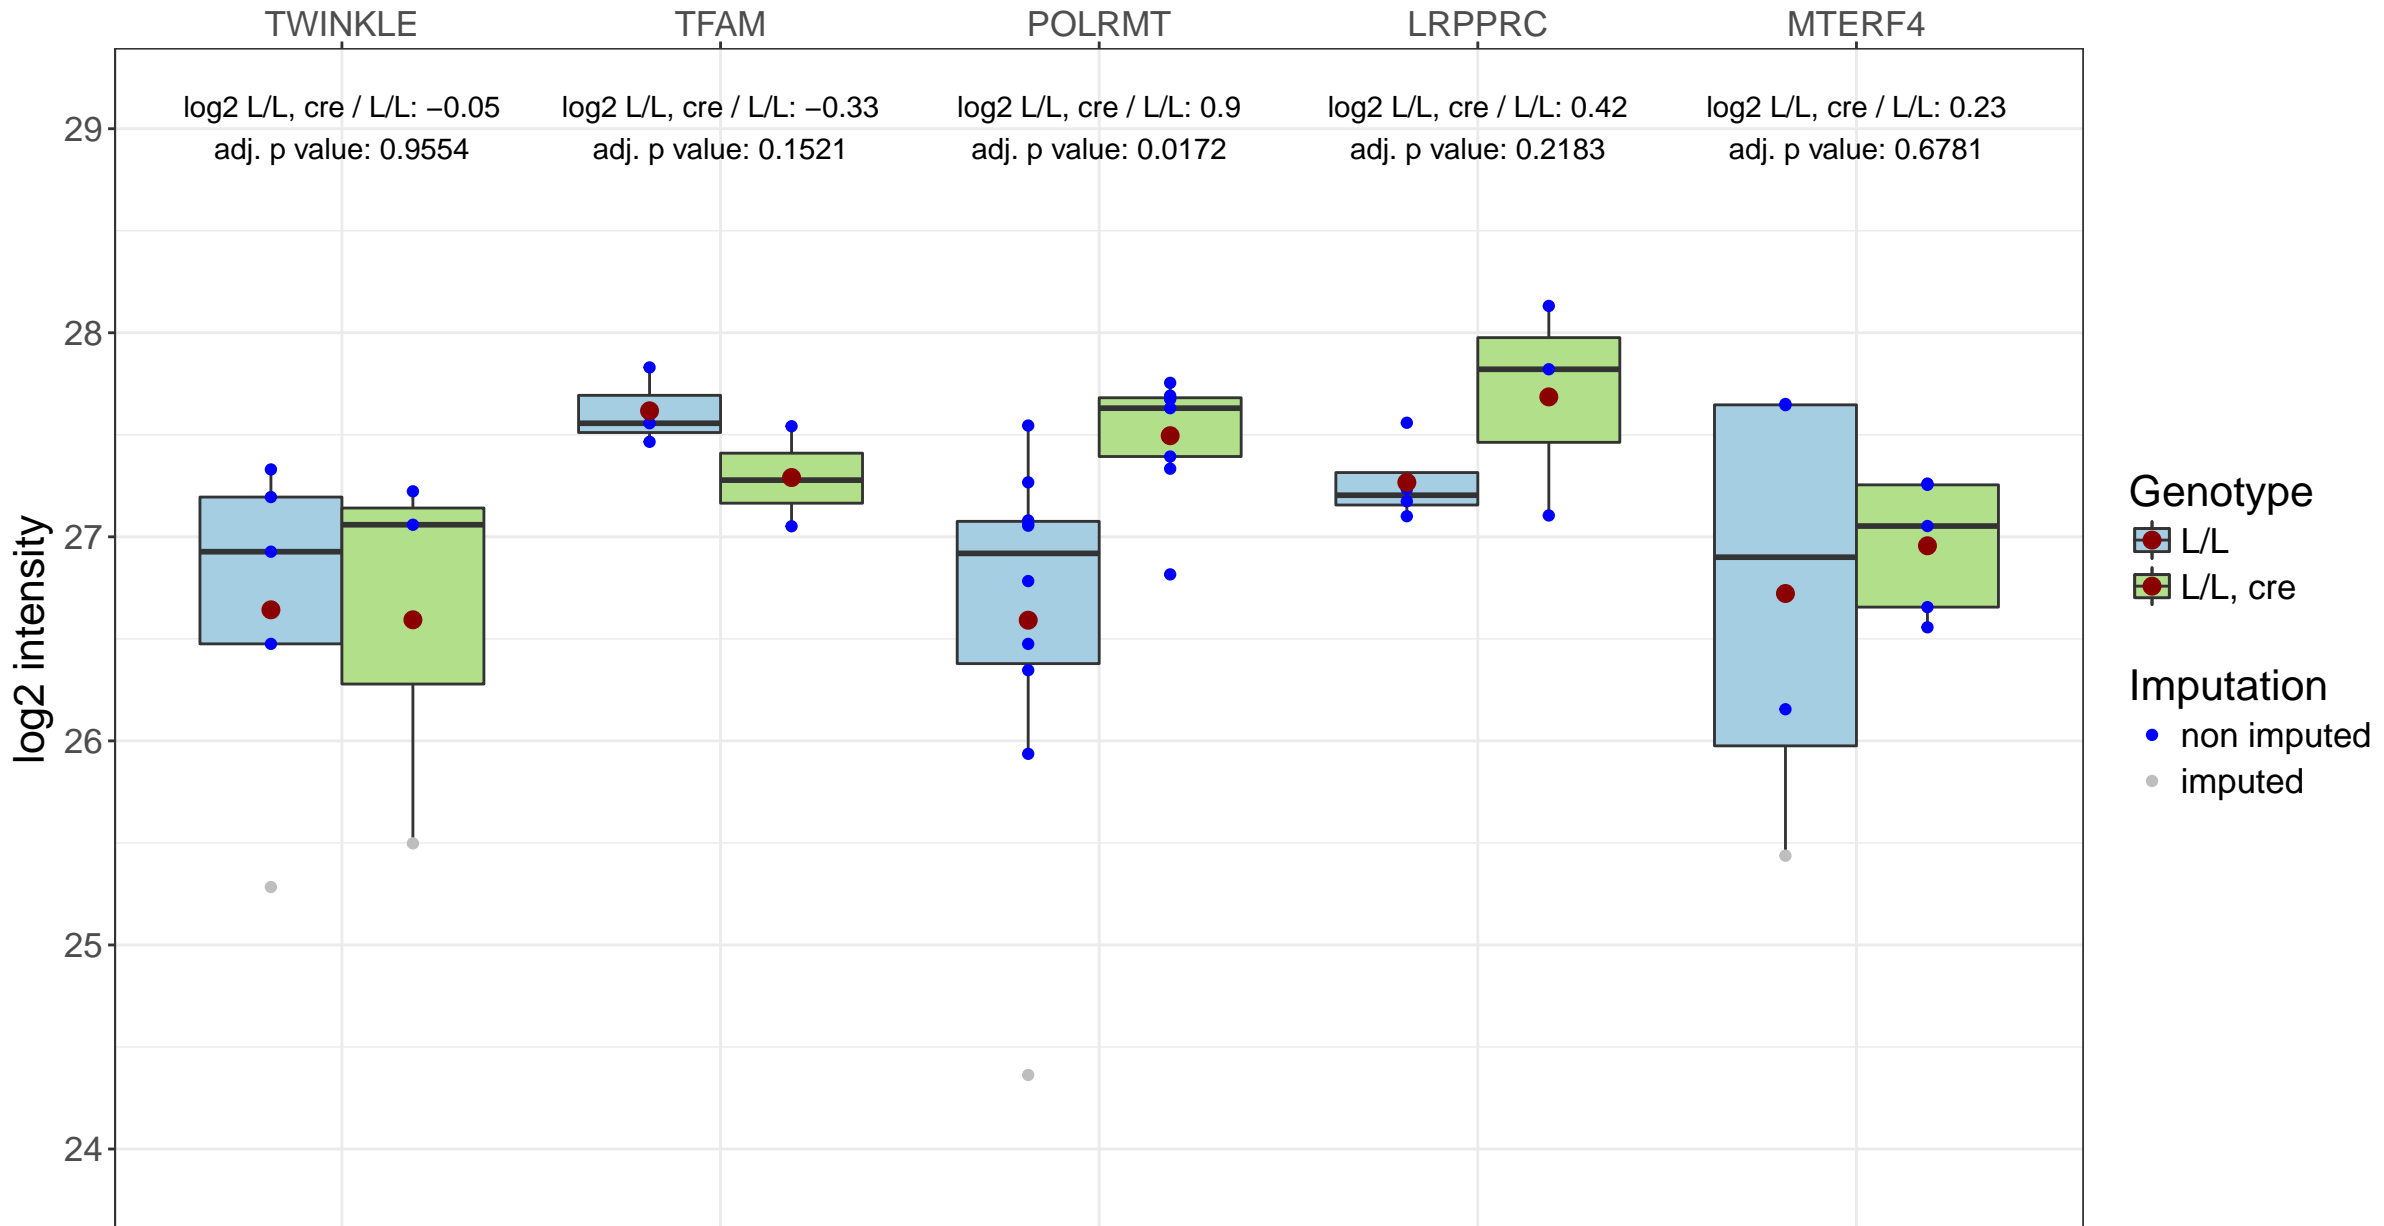



# / Q8K2T4

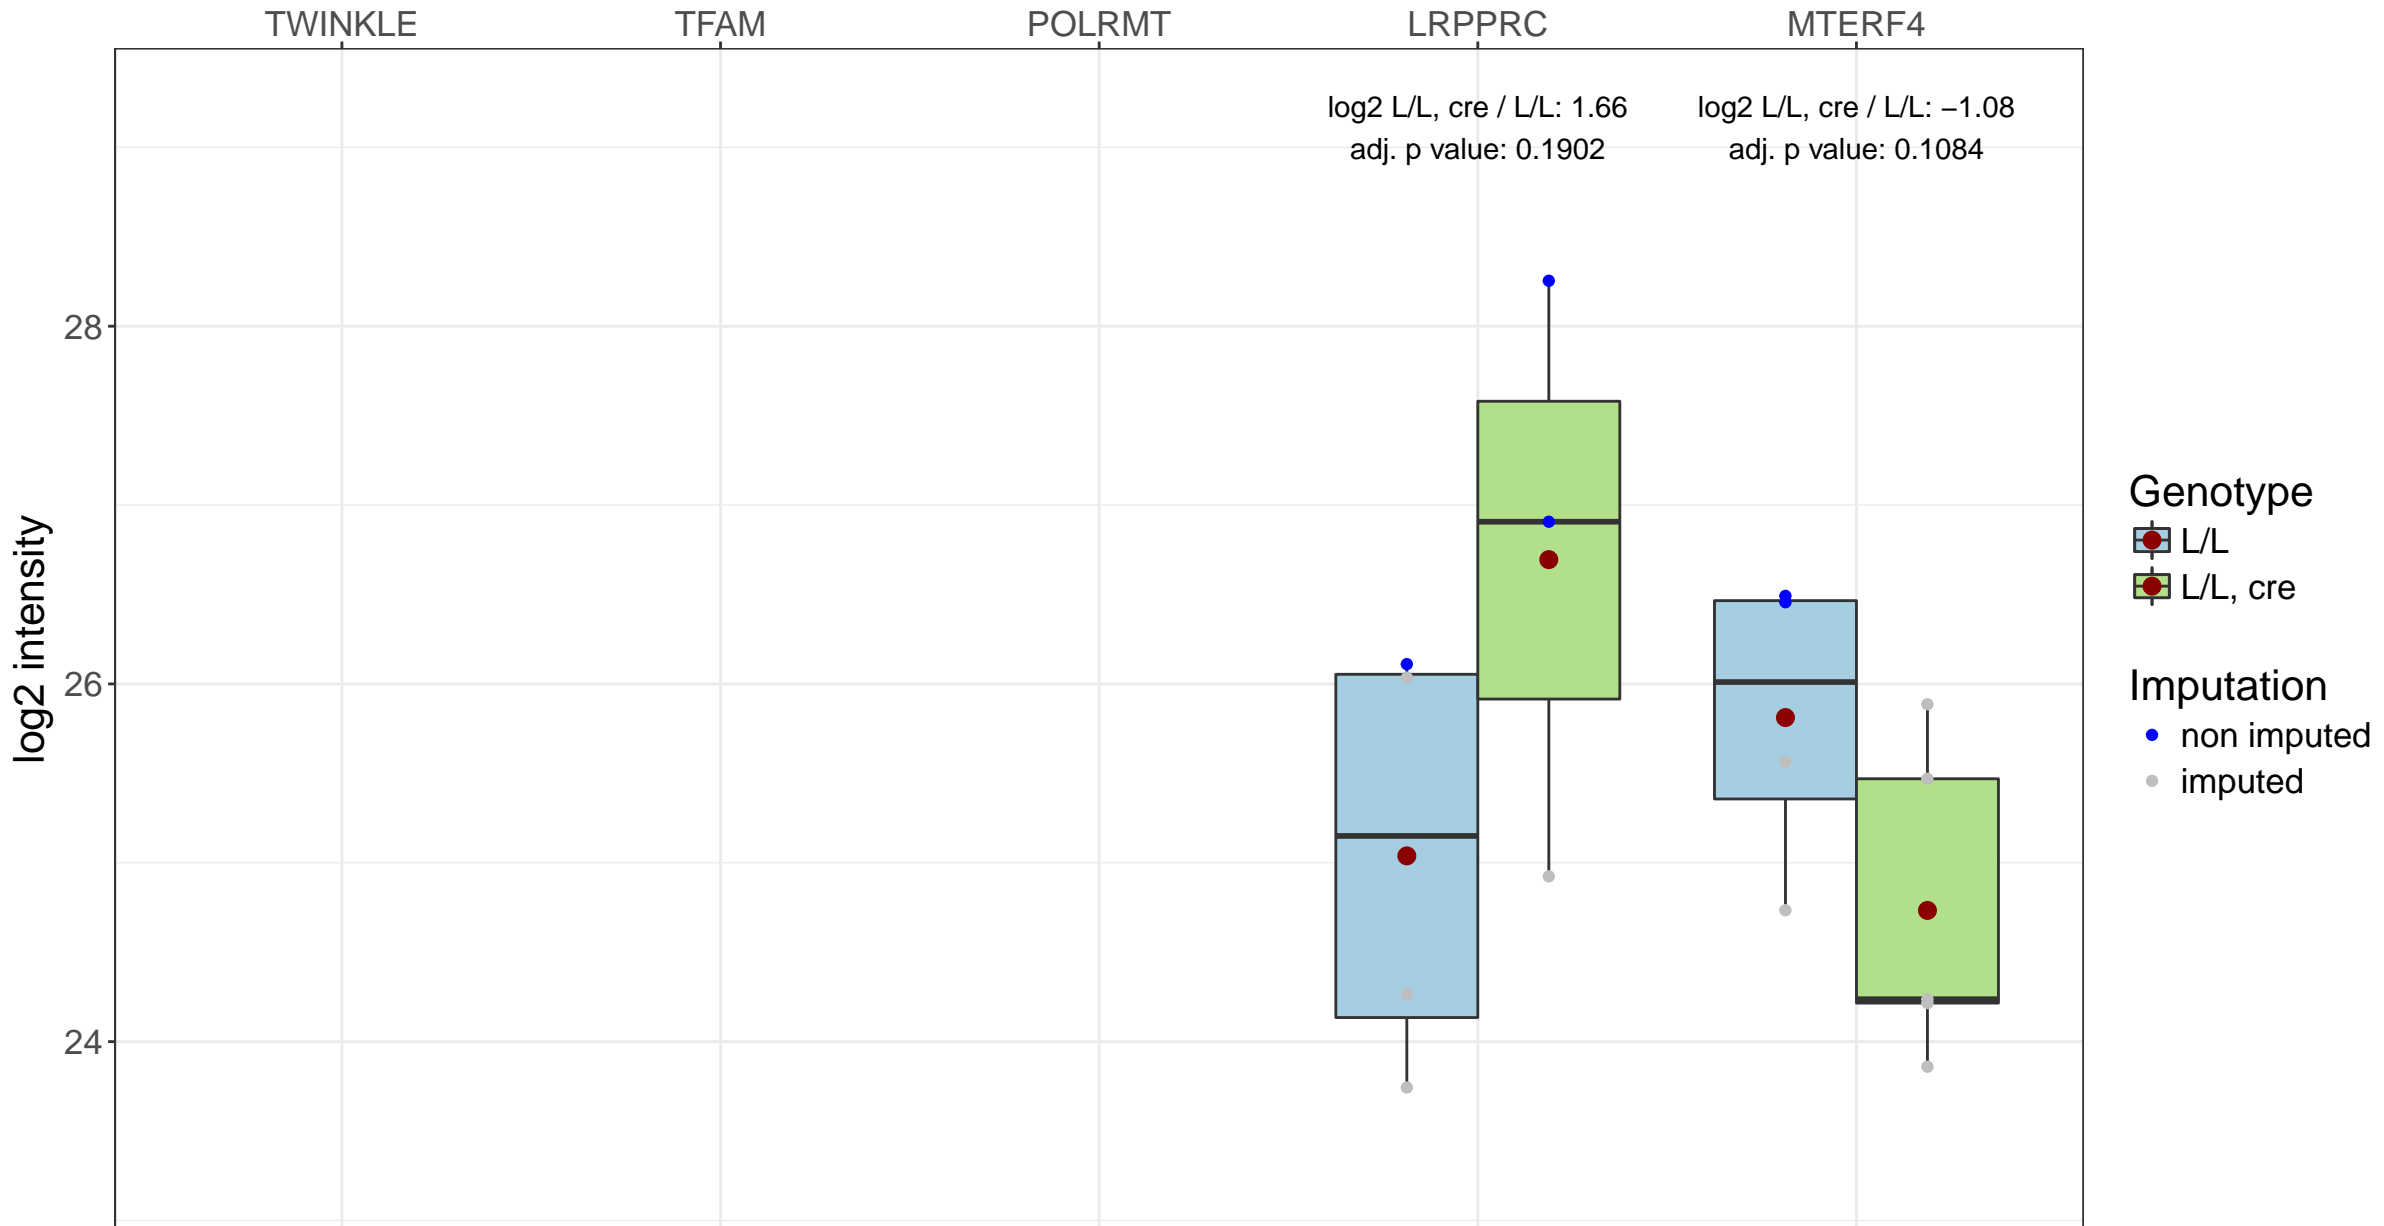

# / Q8VE95

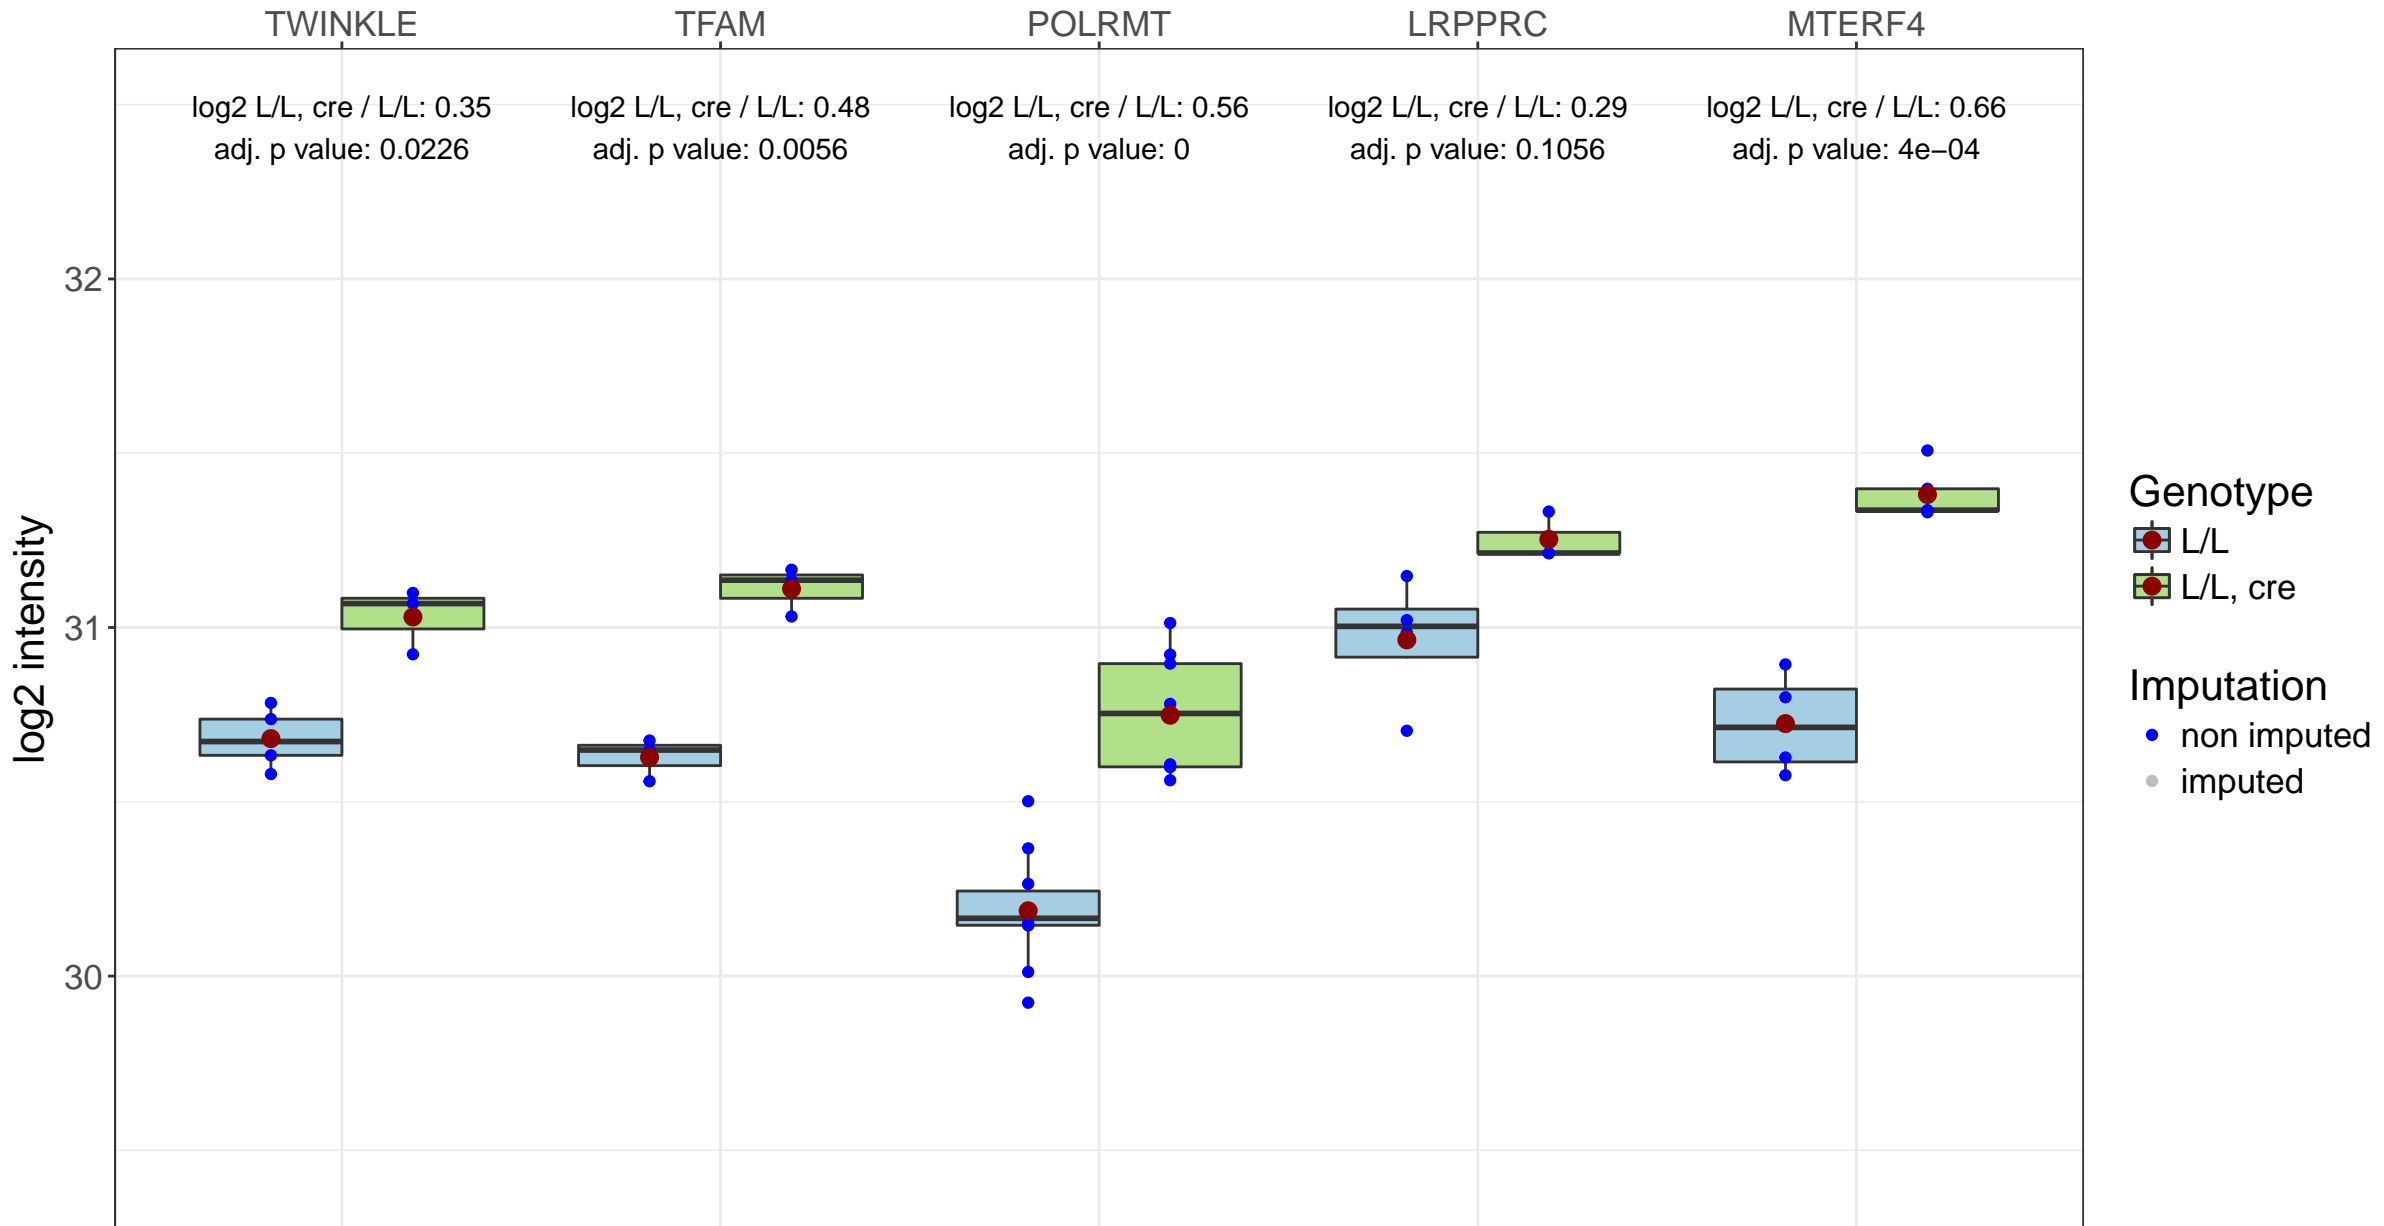

# / Q9CR13

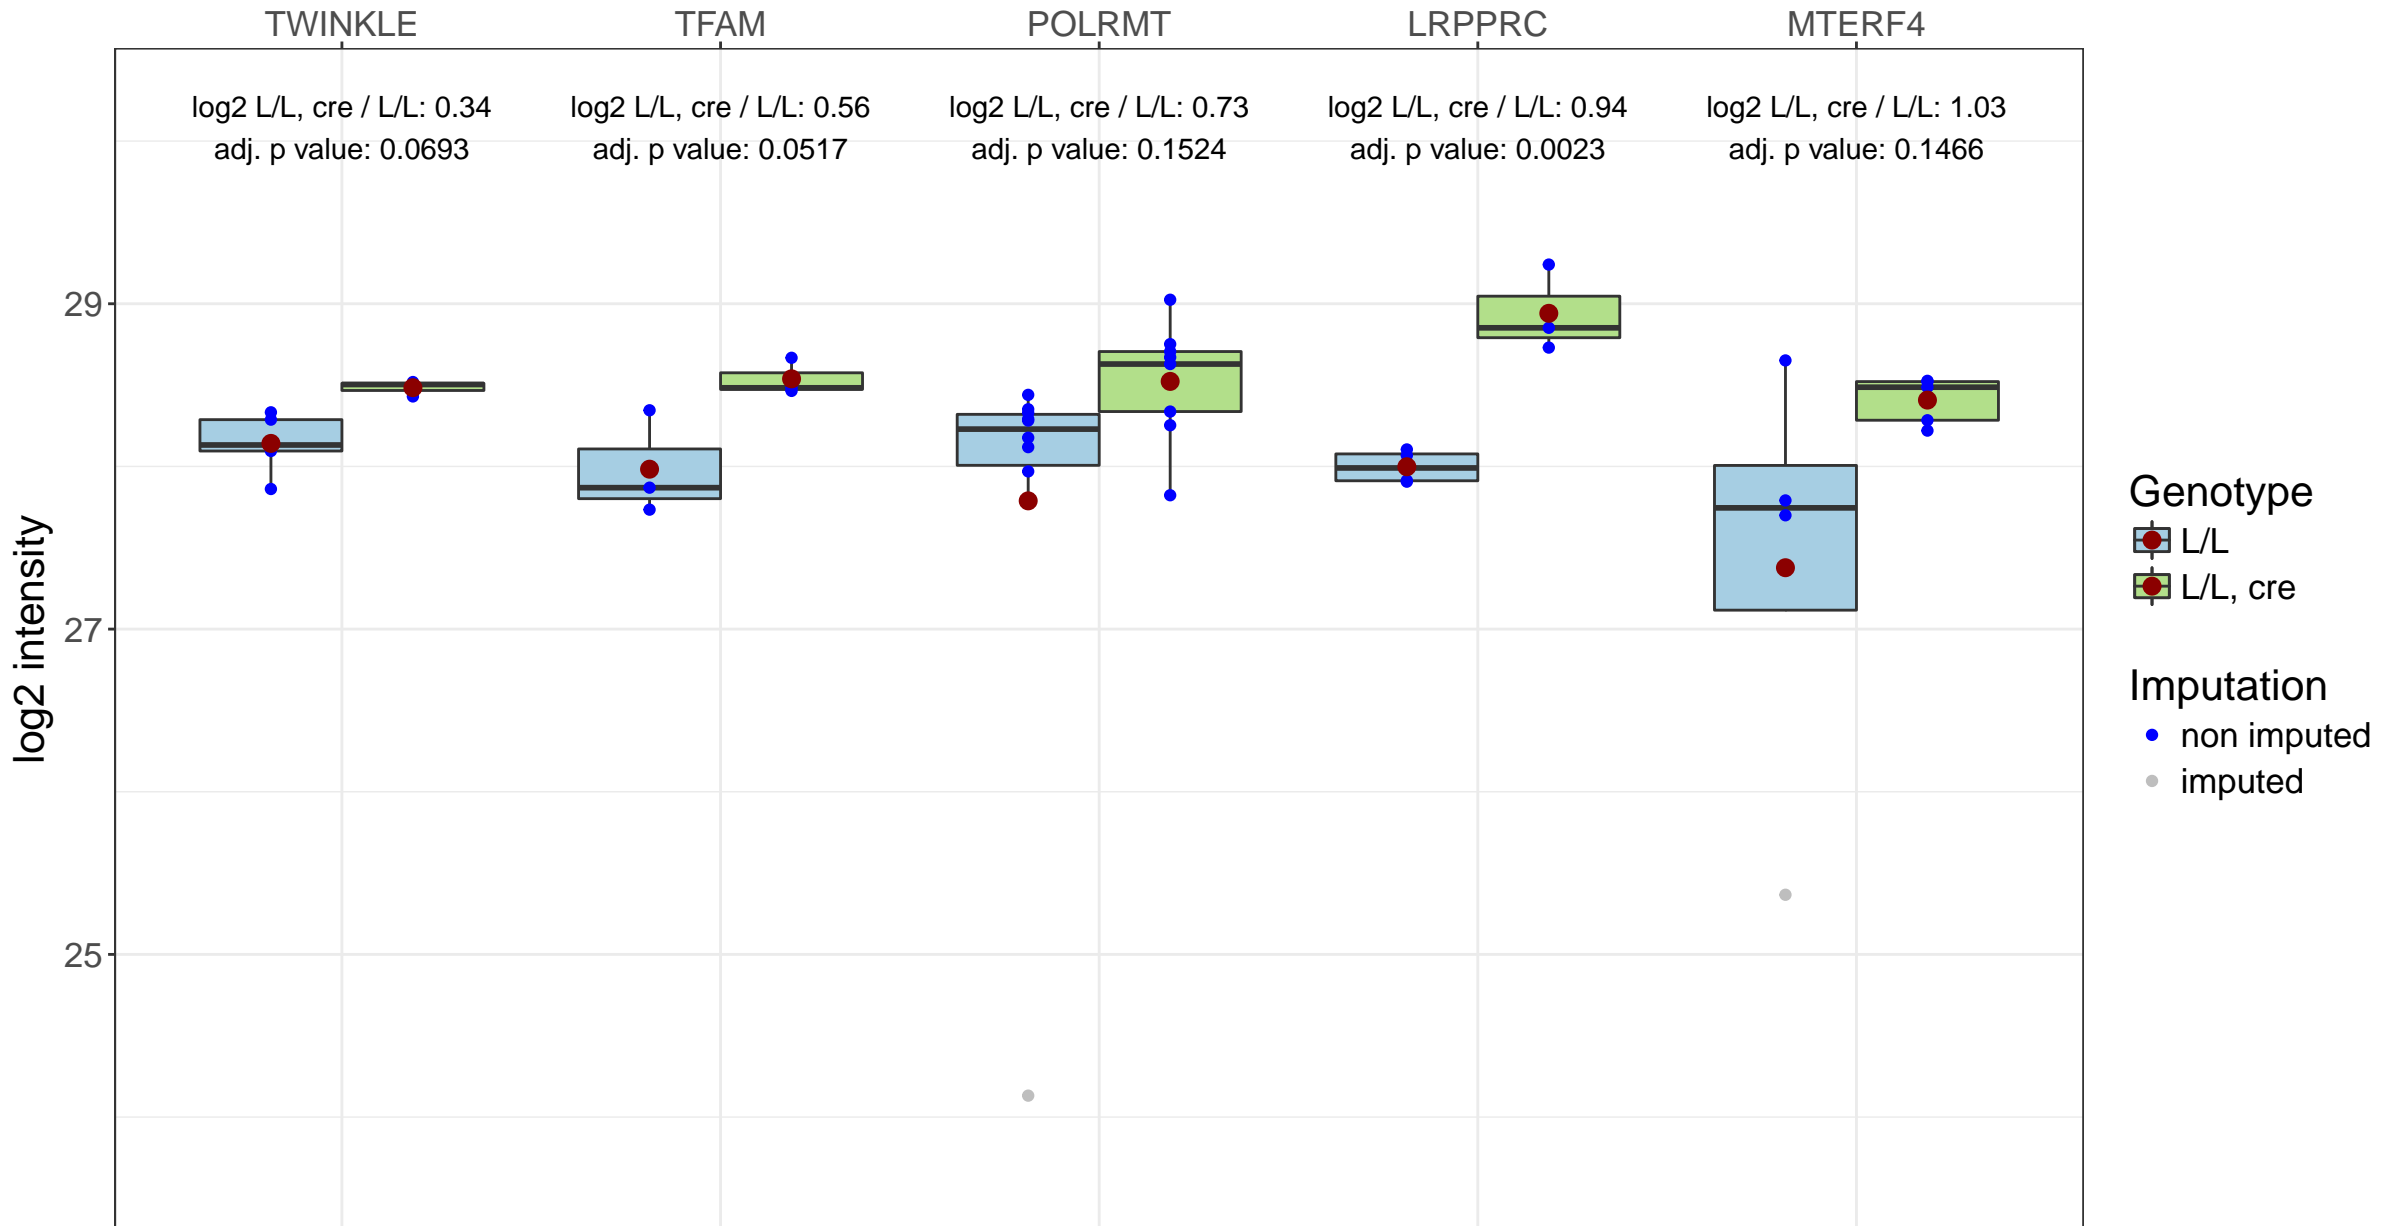

# / Q9CWB7

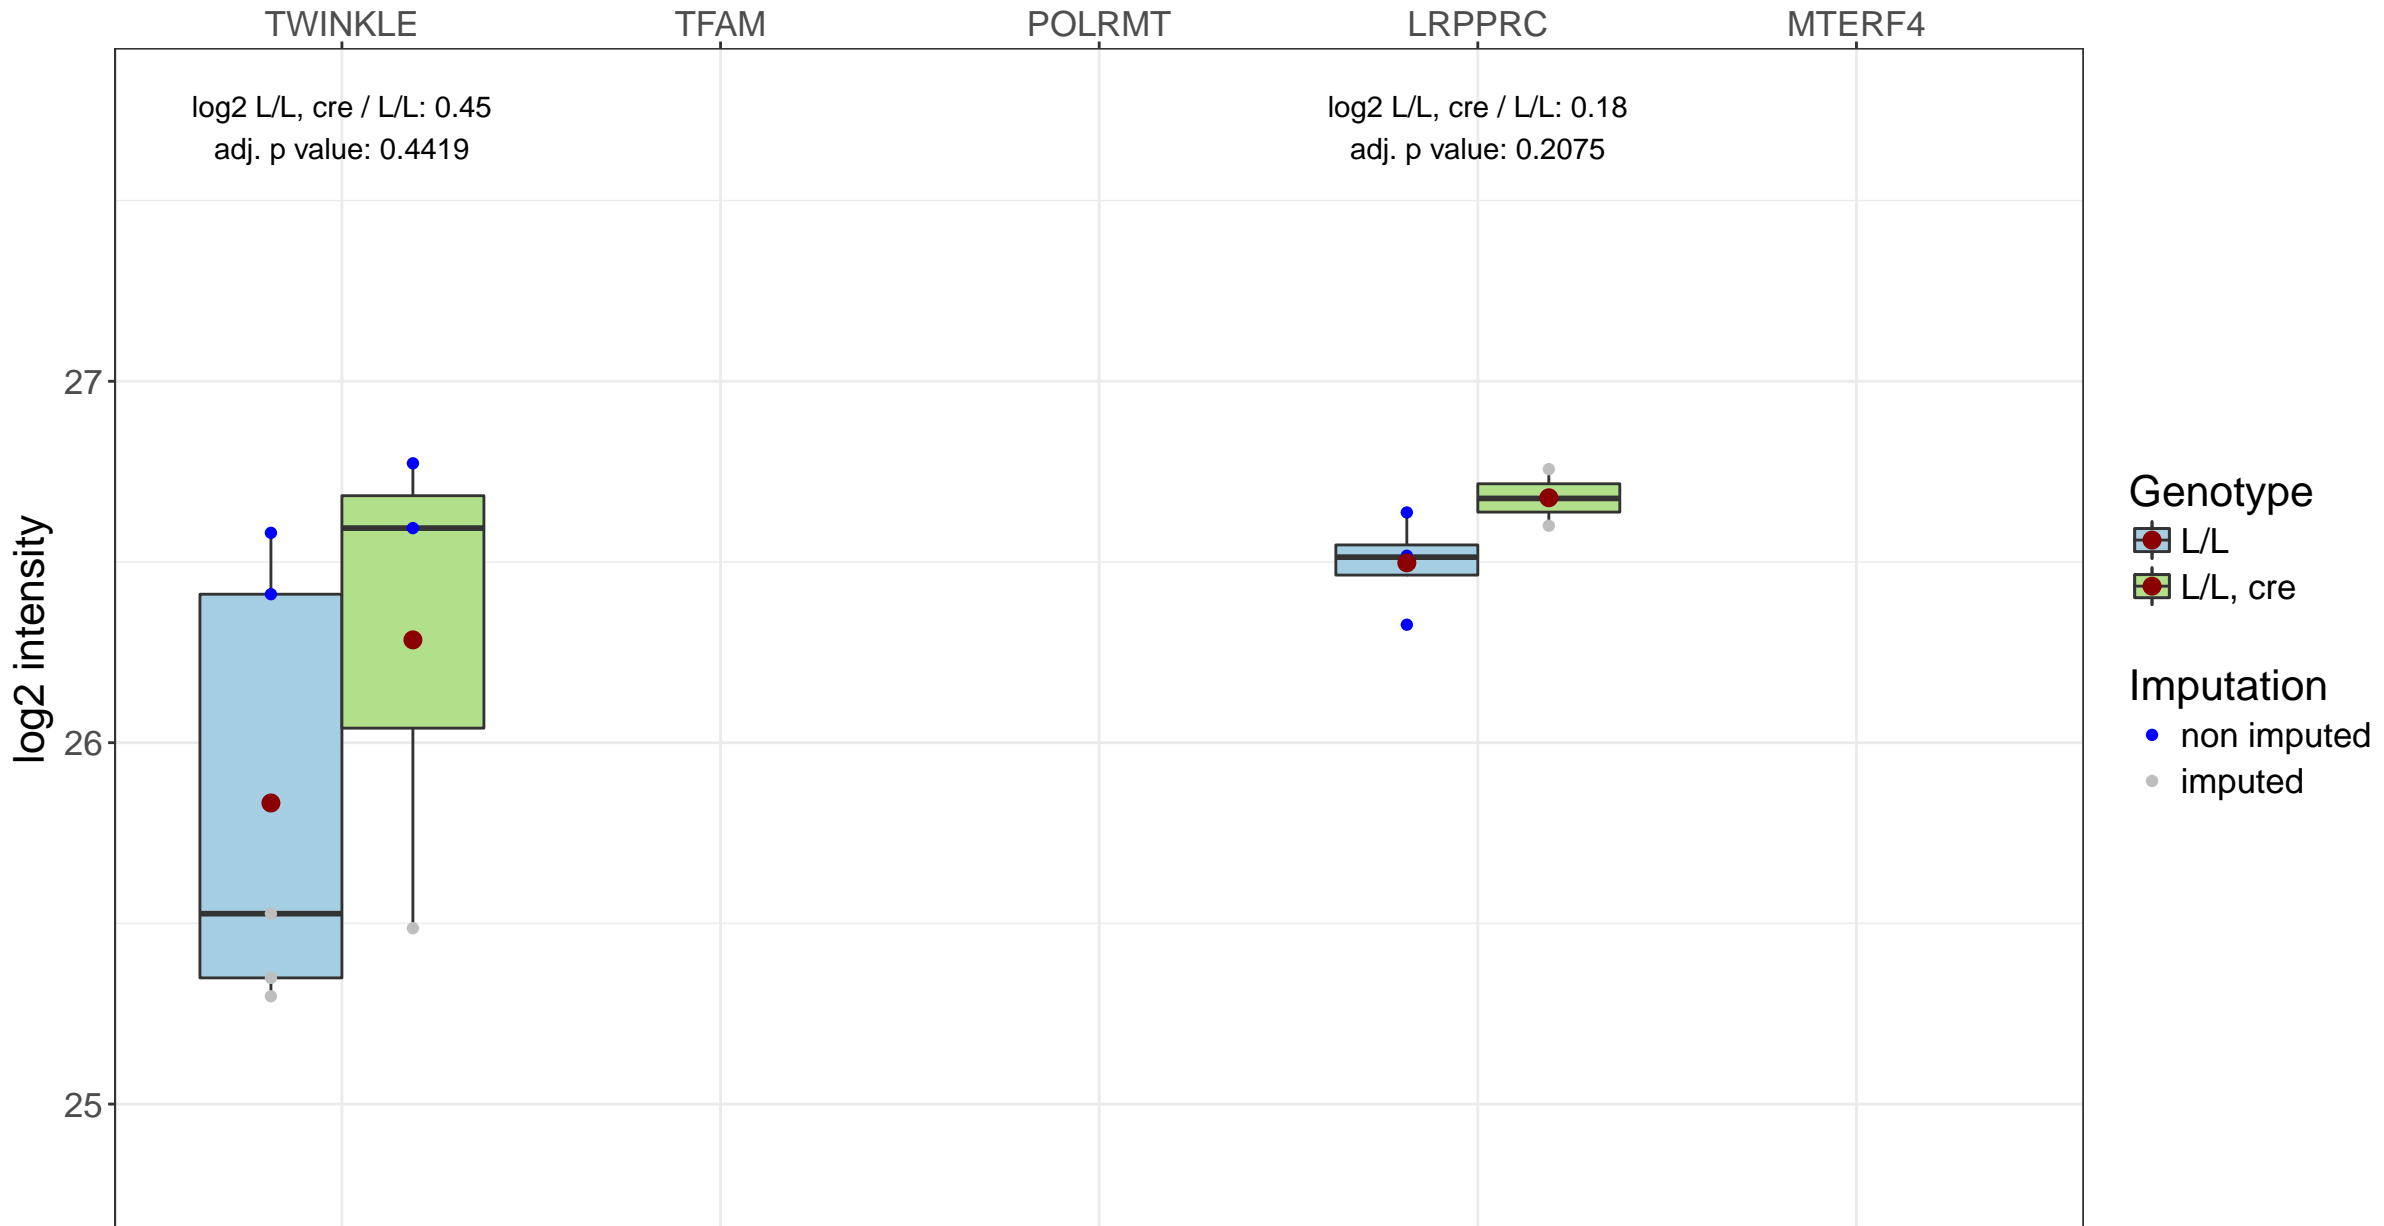

# / Q9D1I2

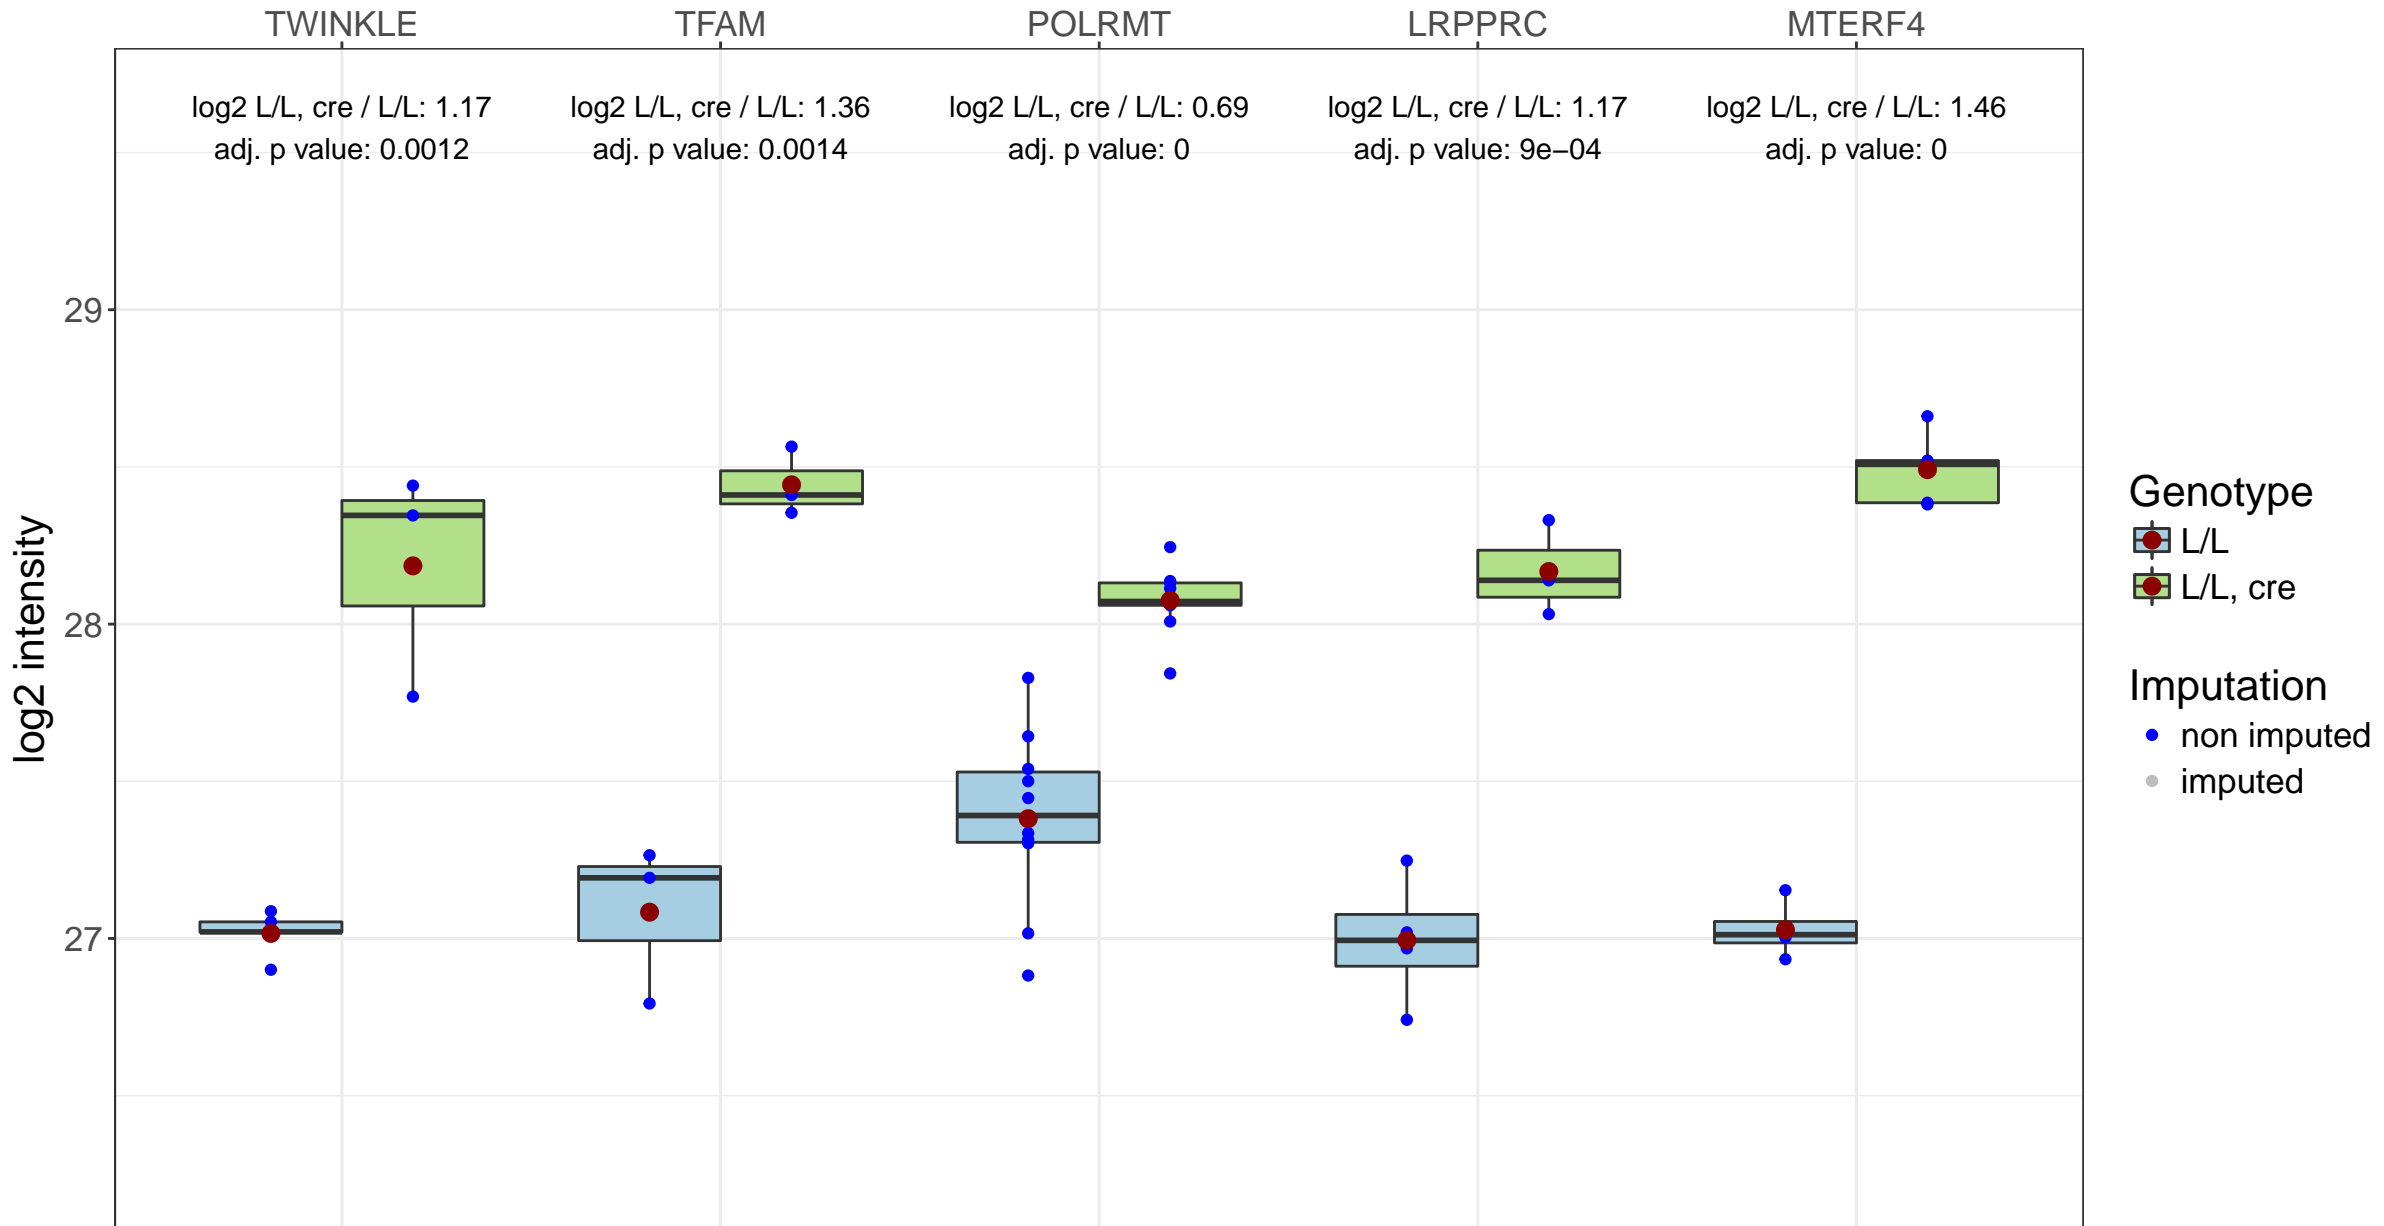

# 1700021F05RIK / Q9CQF4

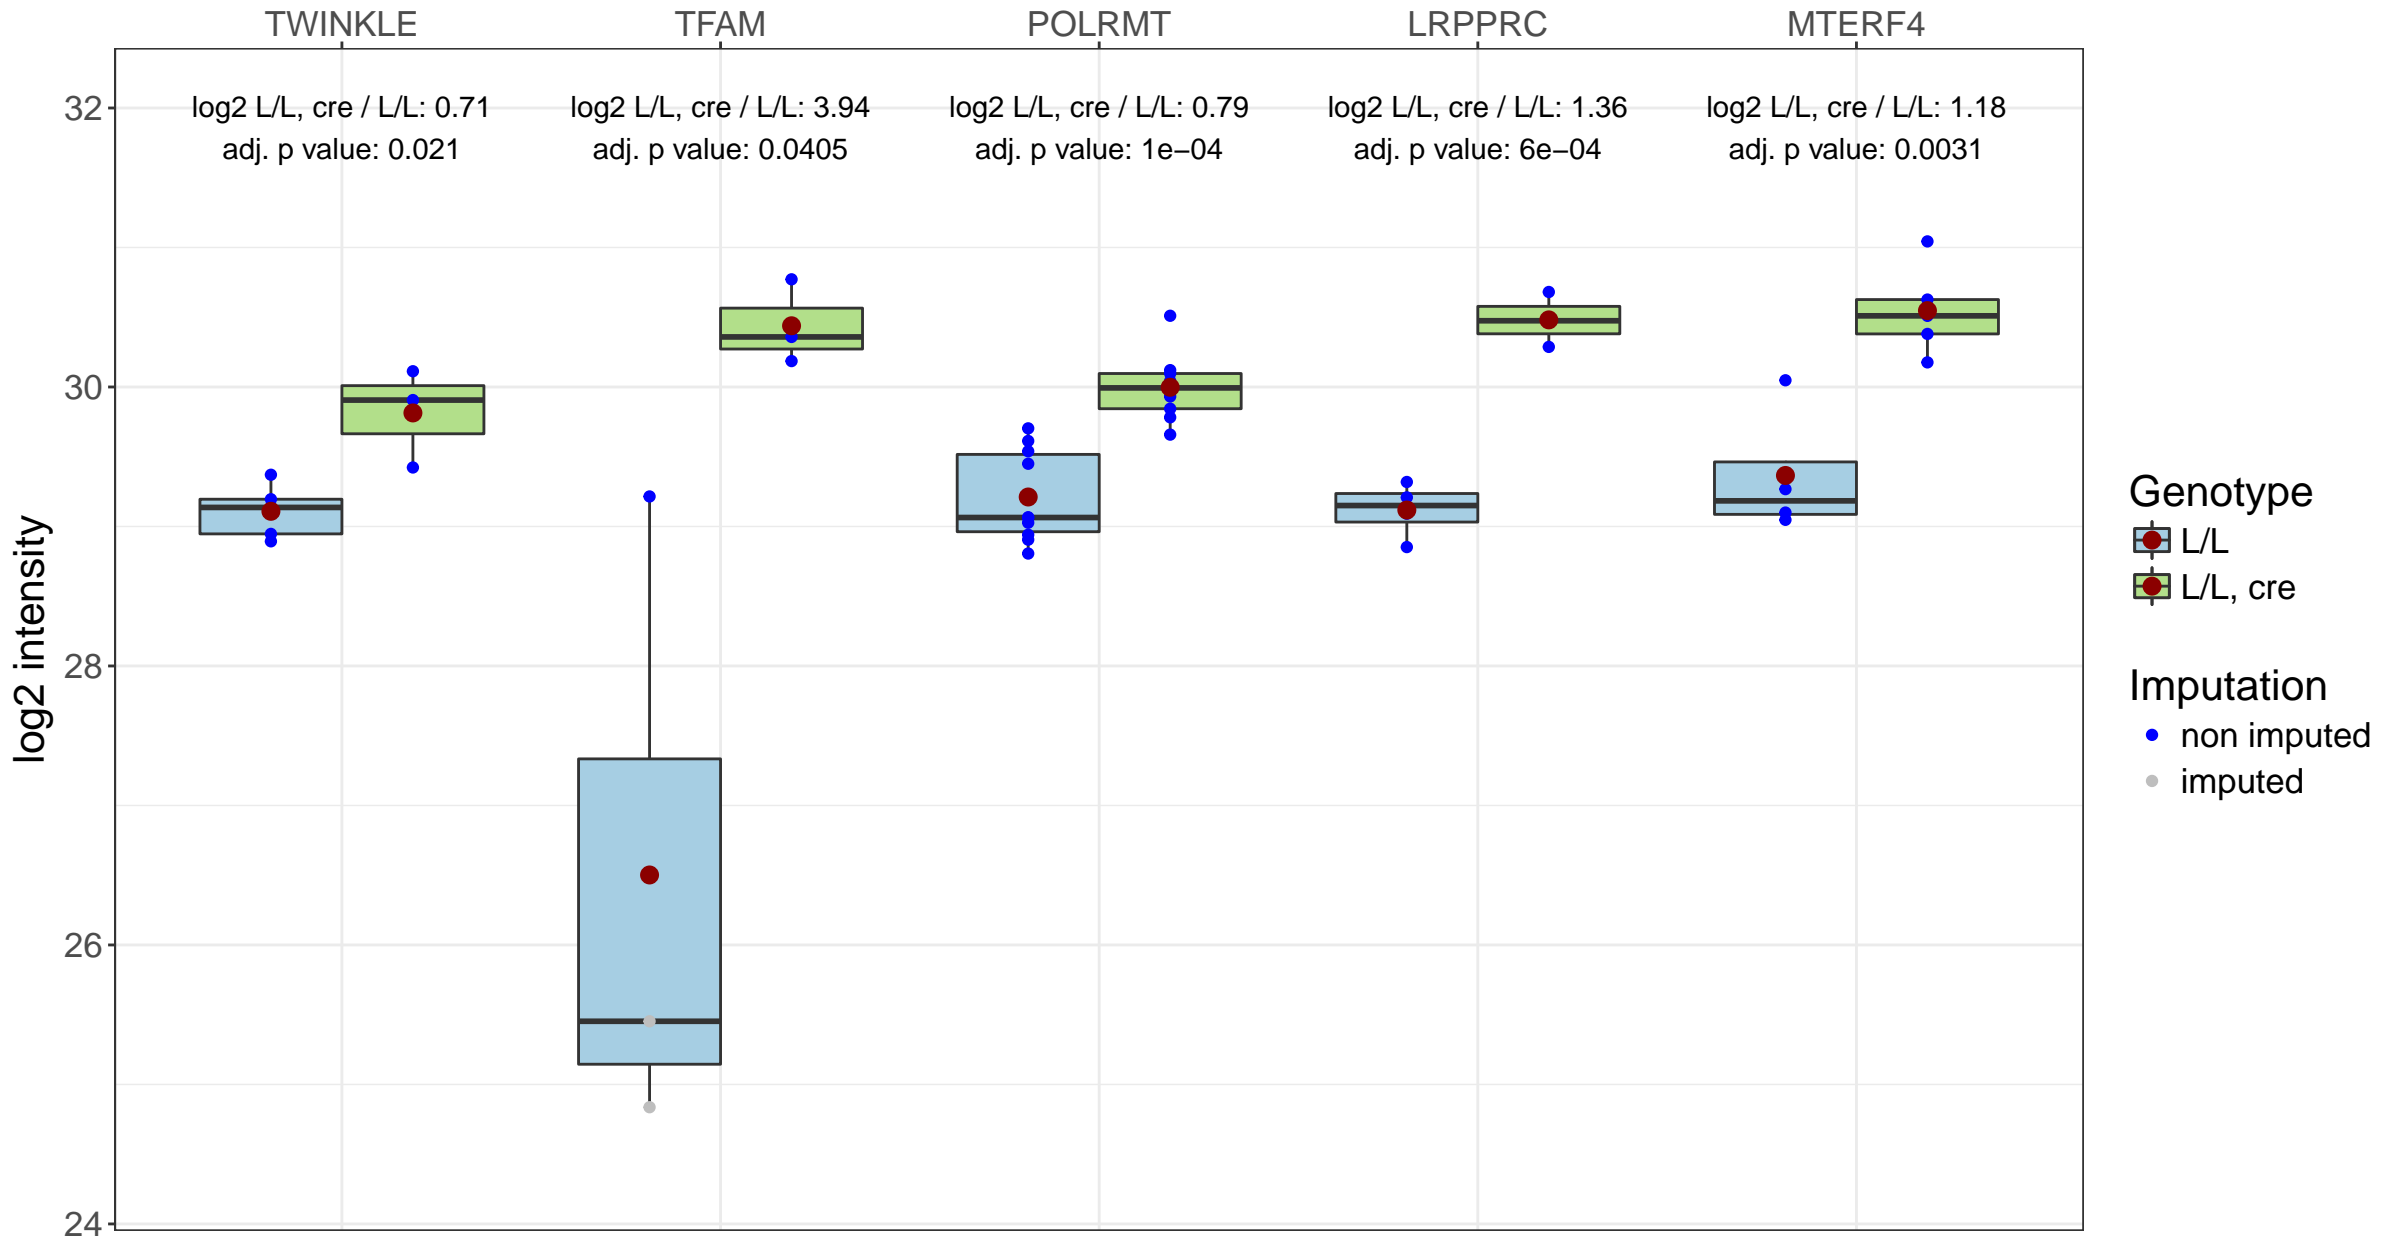

# 2310061I04RIK / B8JJ66

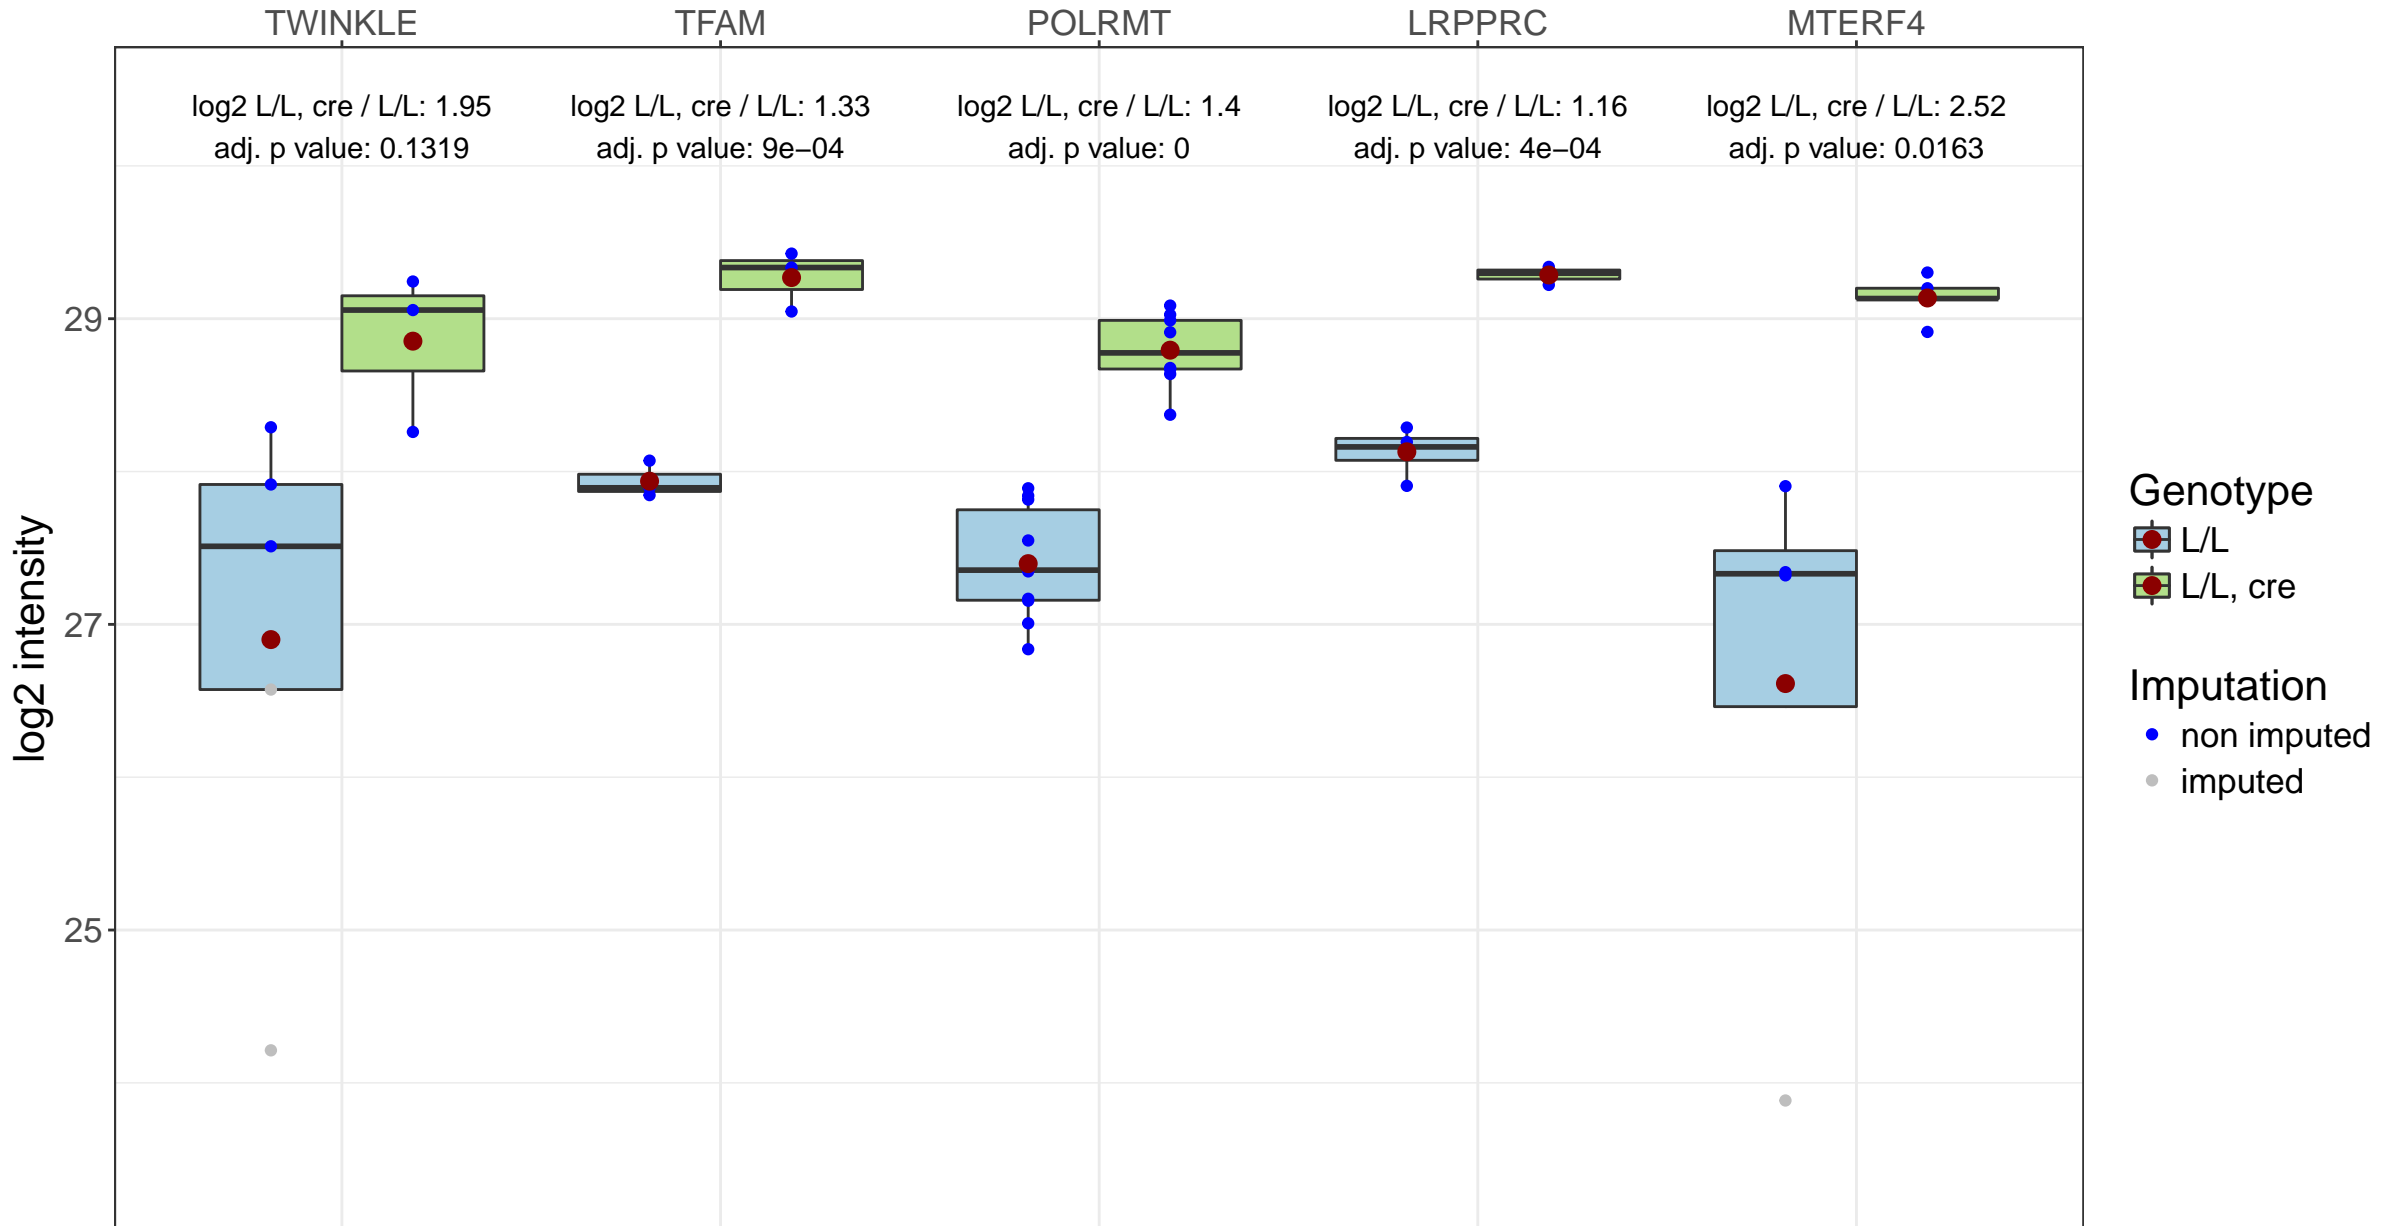

# 9030617O03RIK / E9QMK9

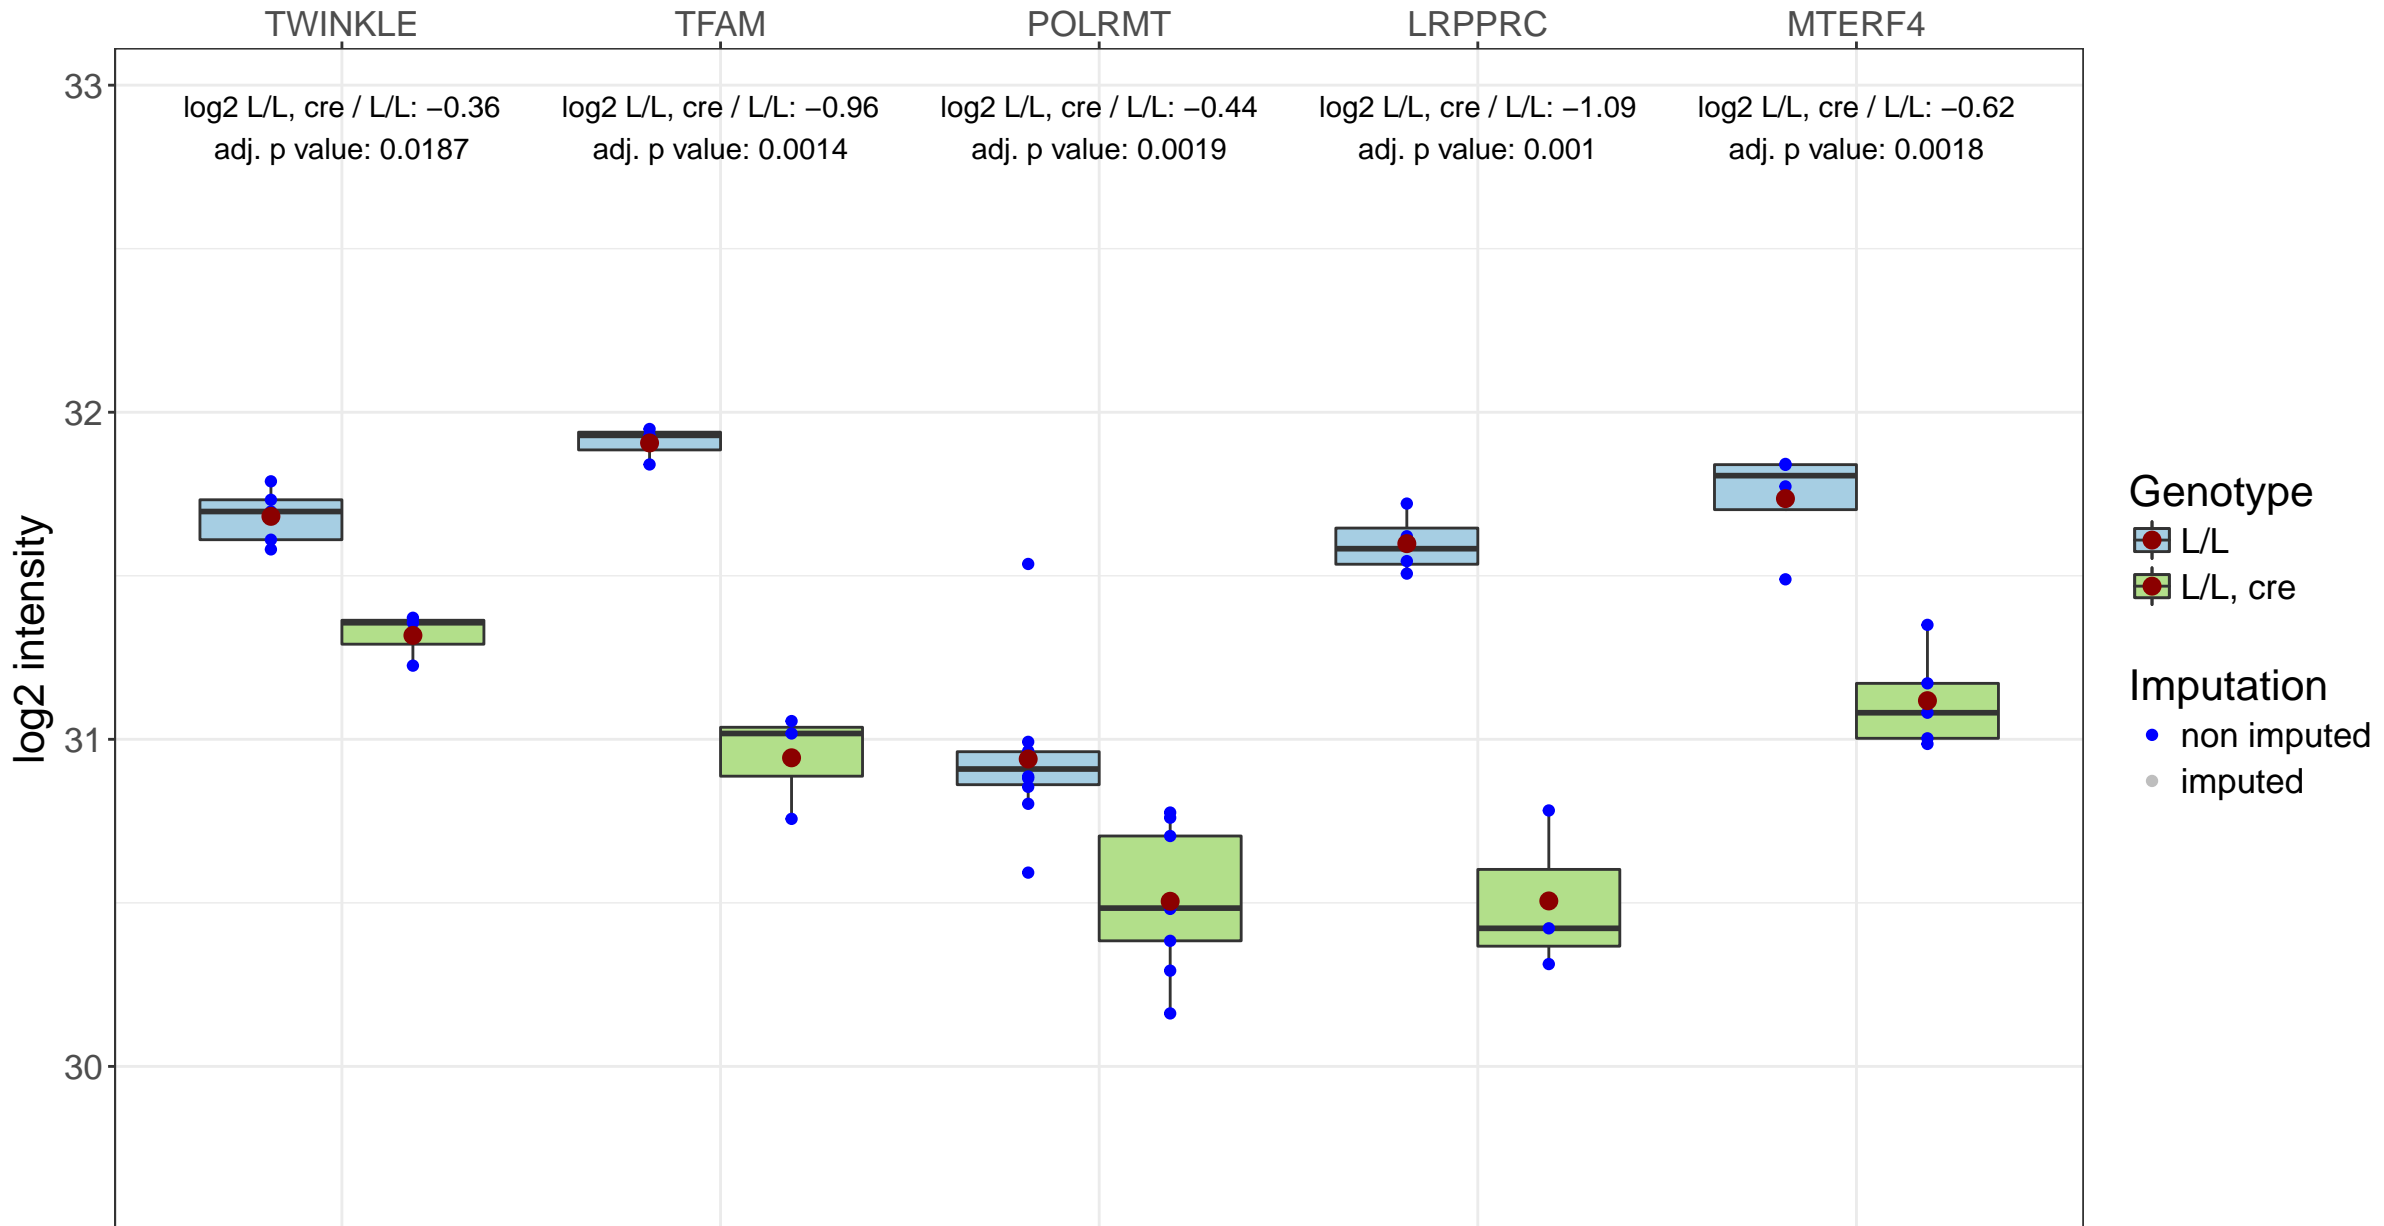



# AARS2 / Q14CH7

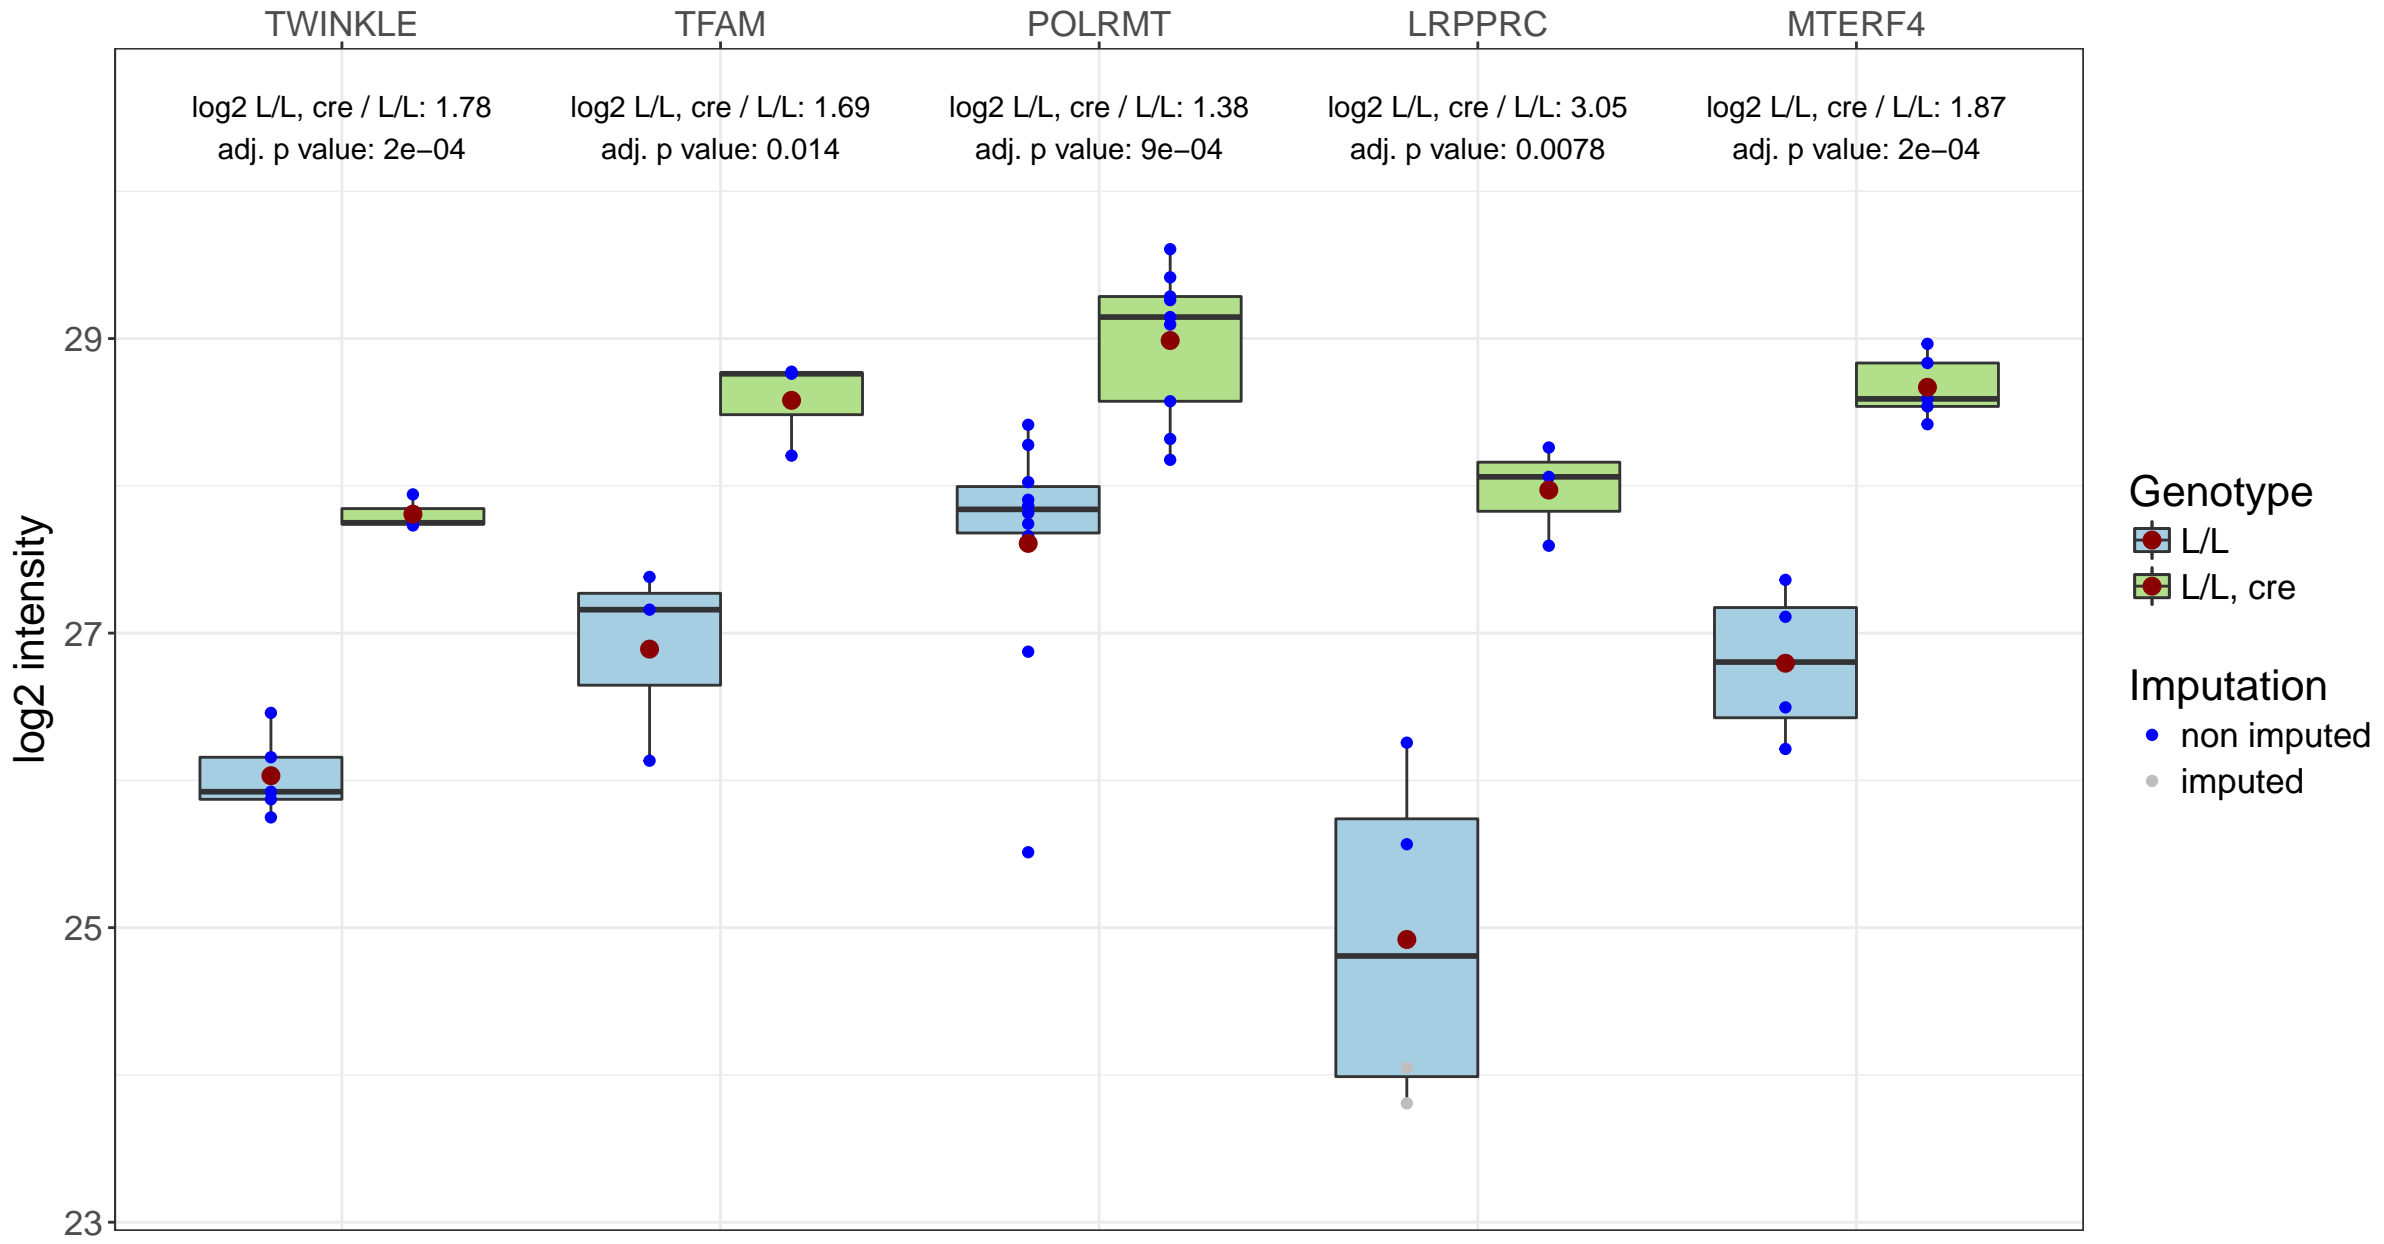

# ABAT / P61922

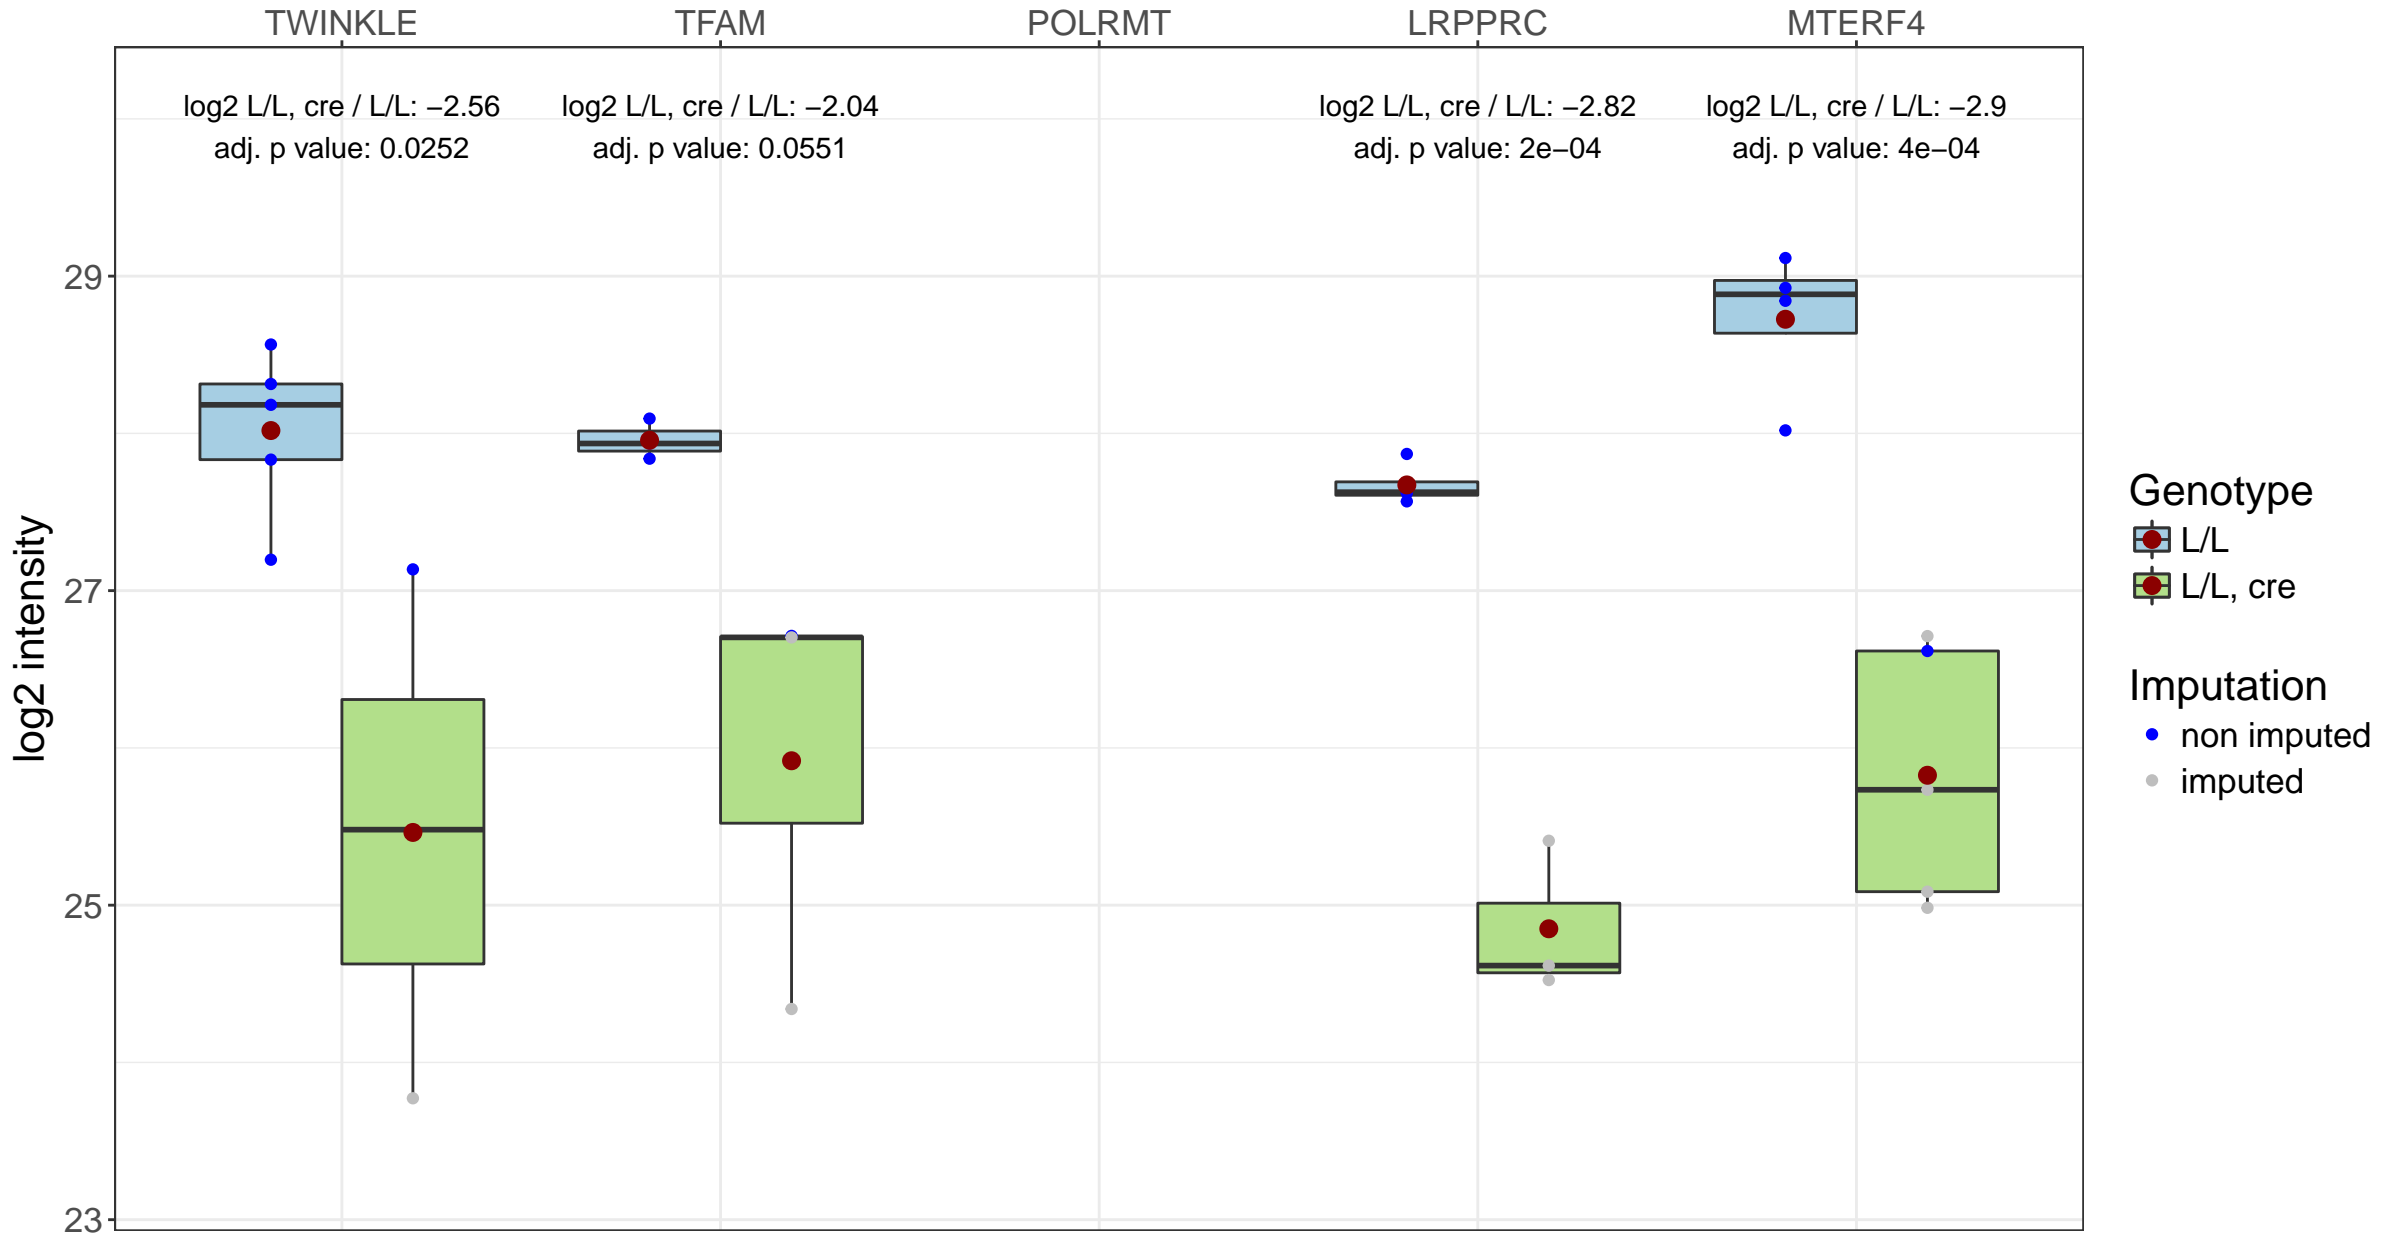

# ABCB10 / Q9JI39

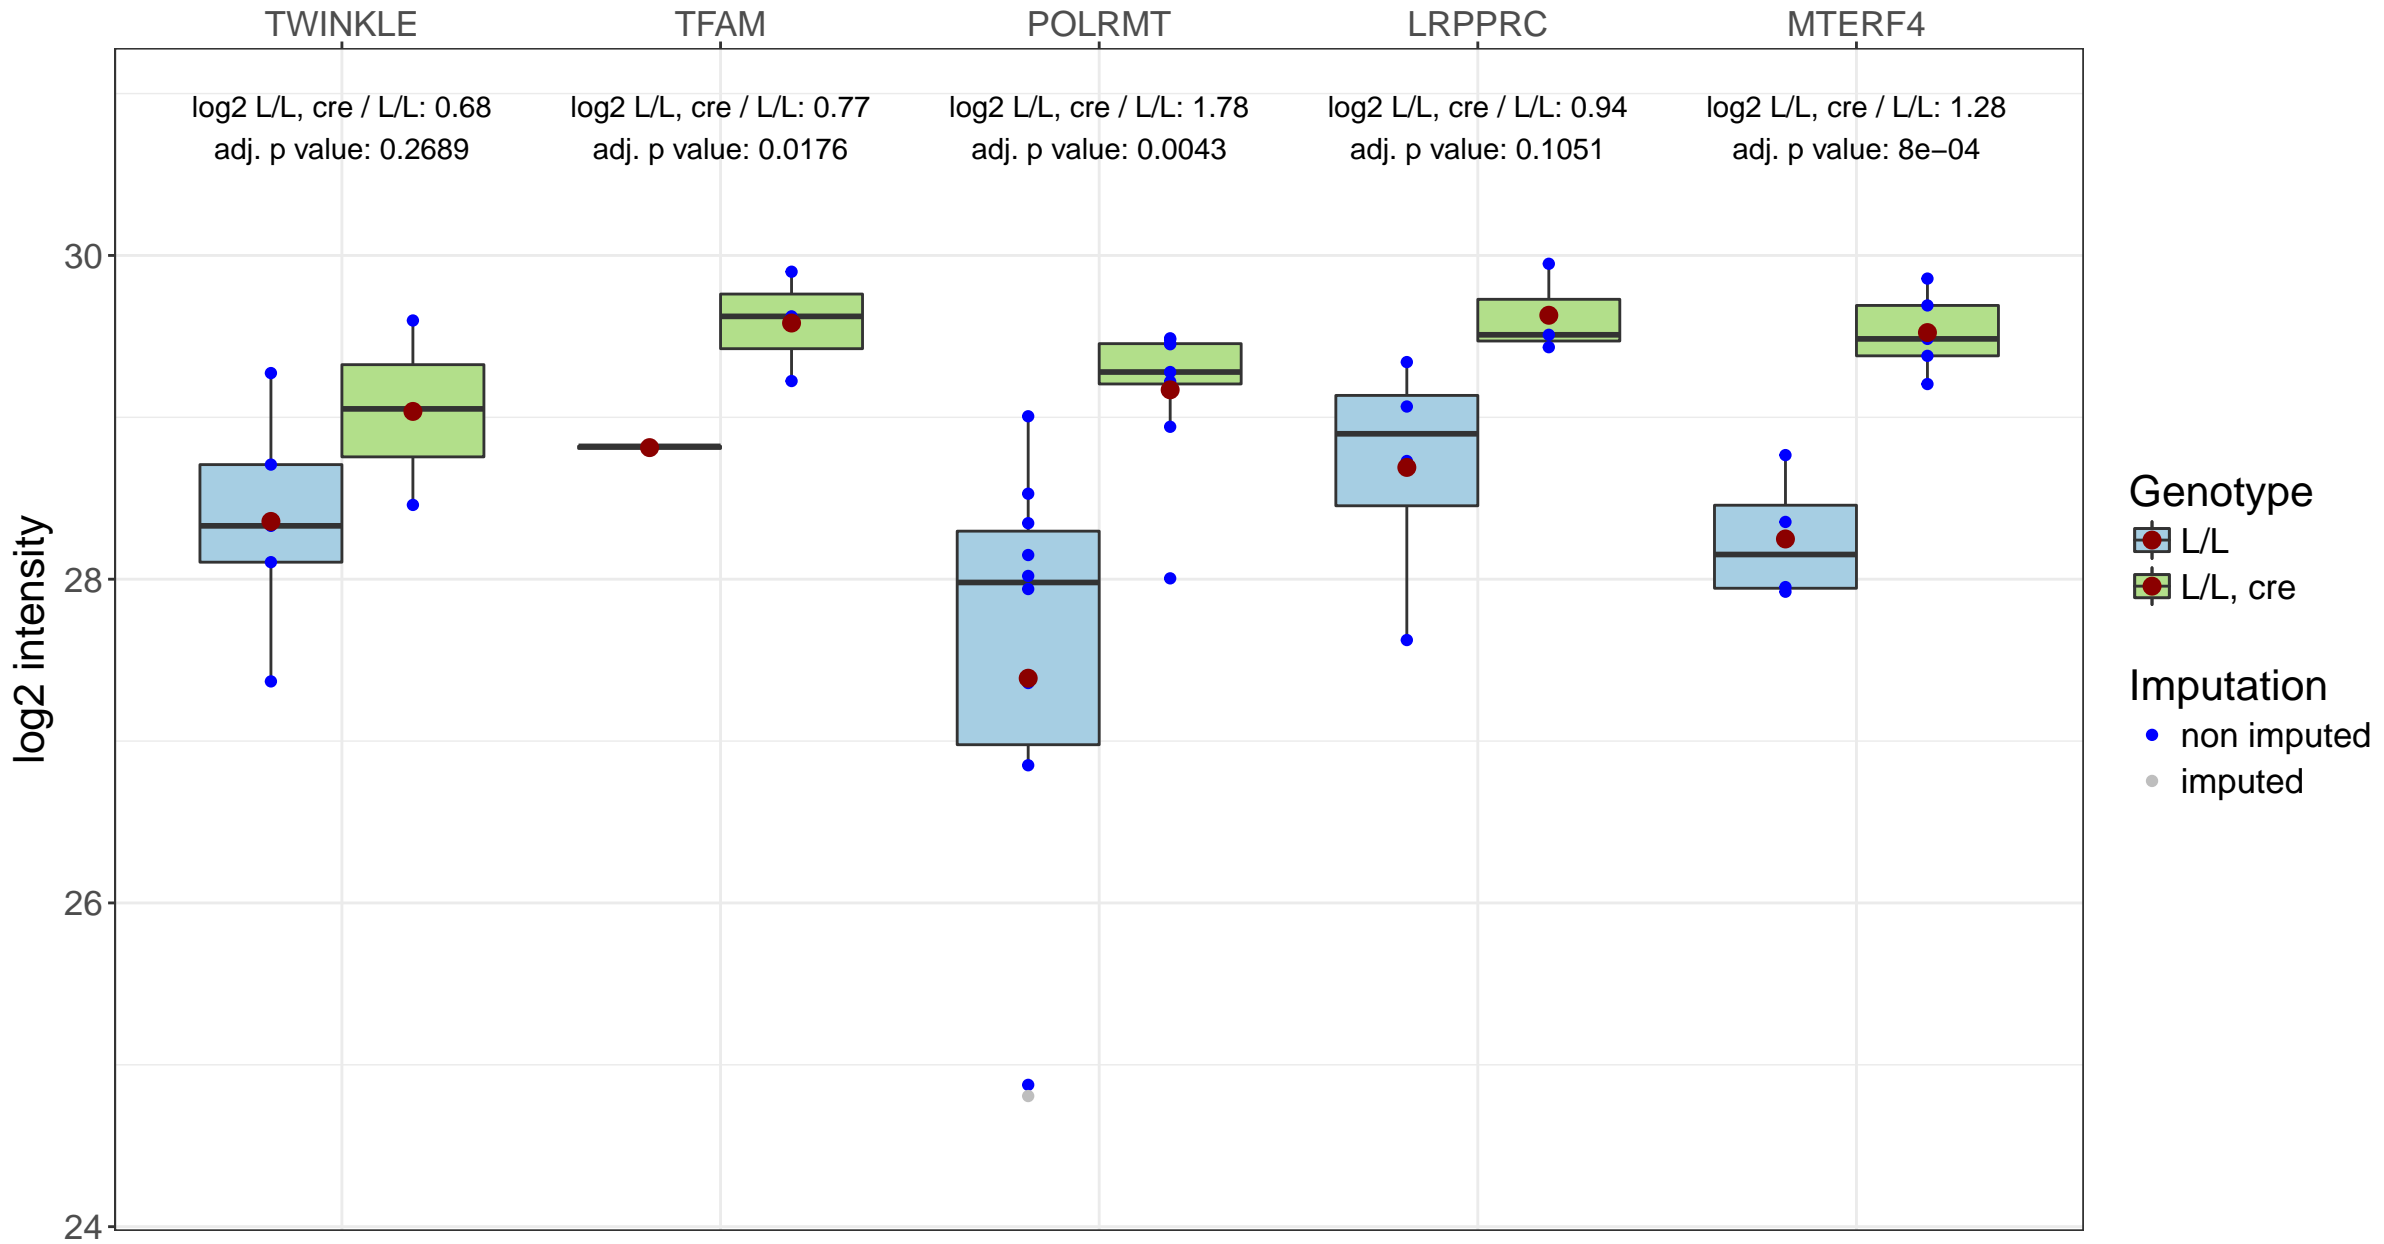

# ABCB7 / Q61102

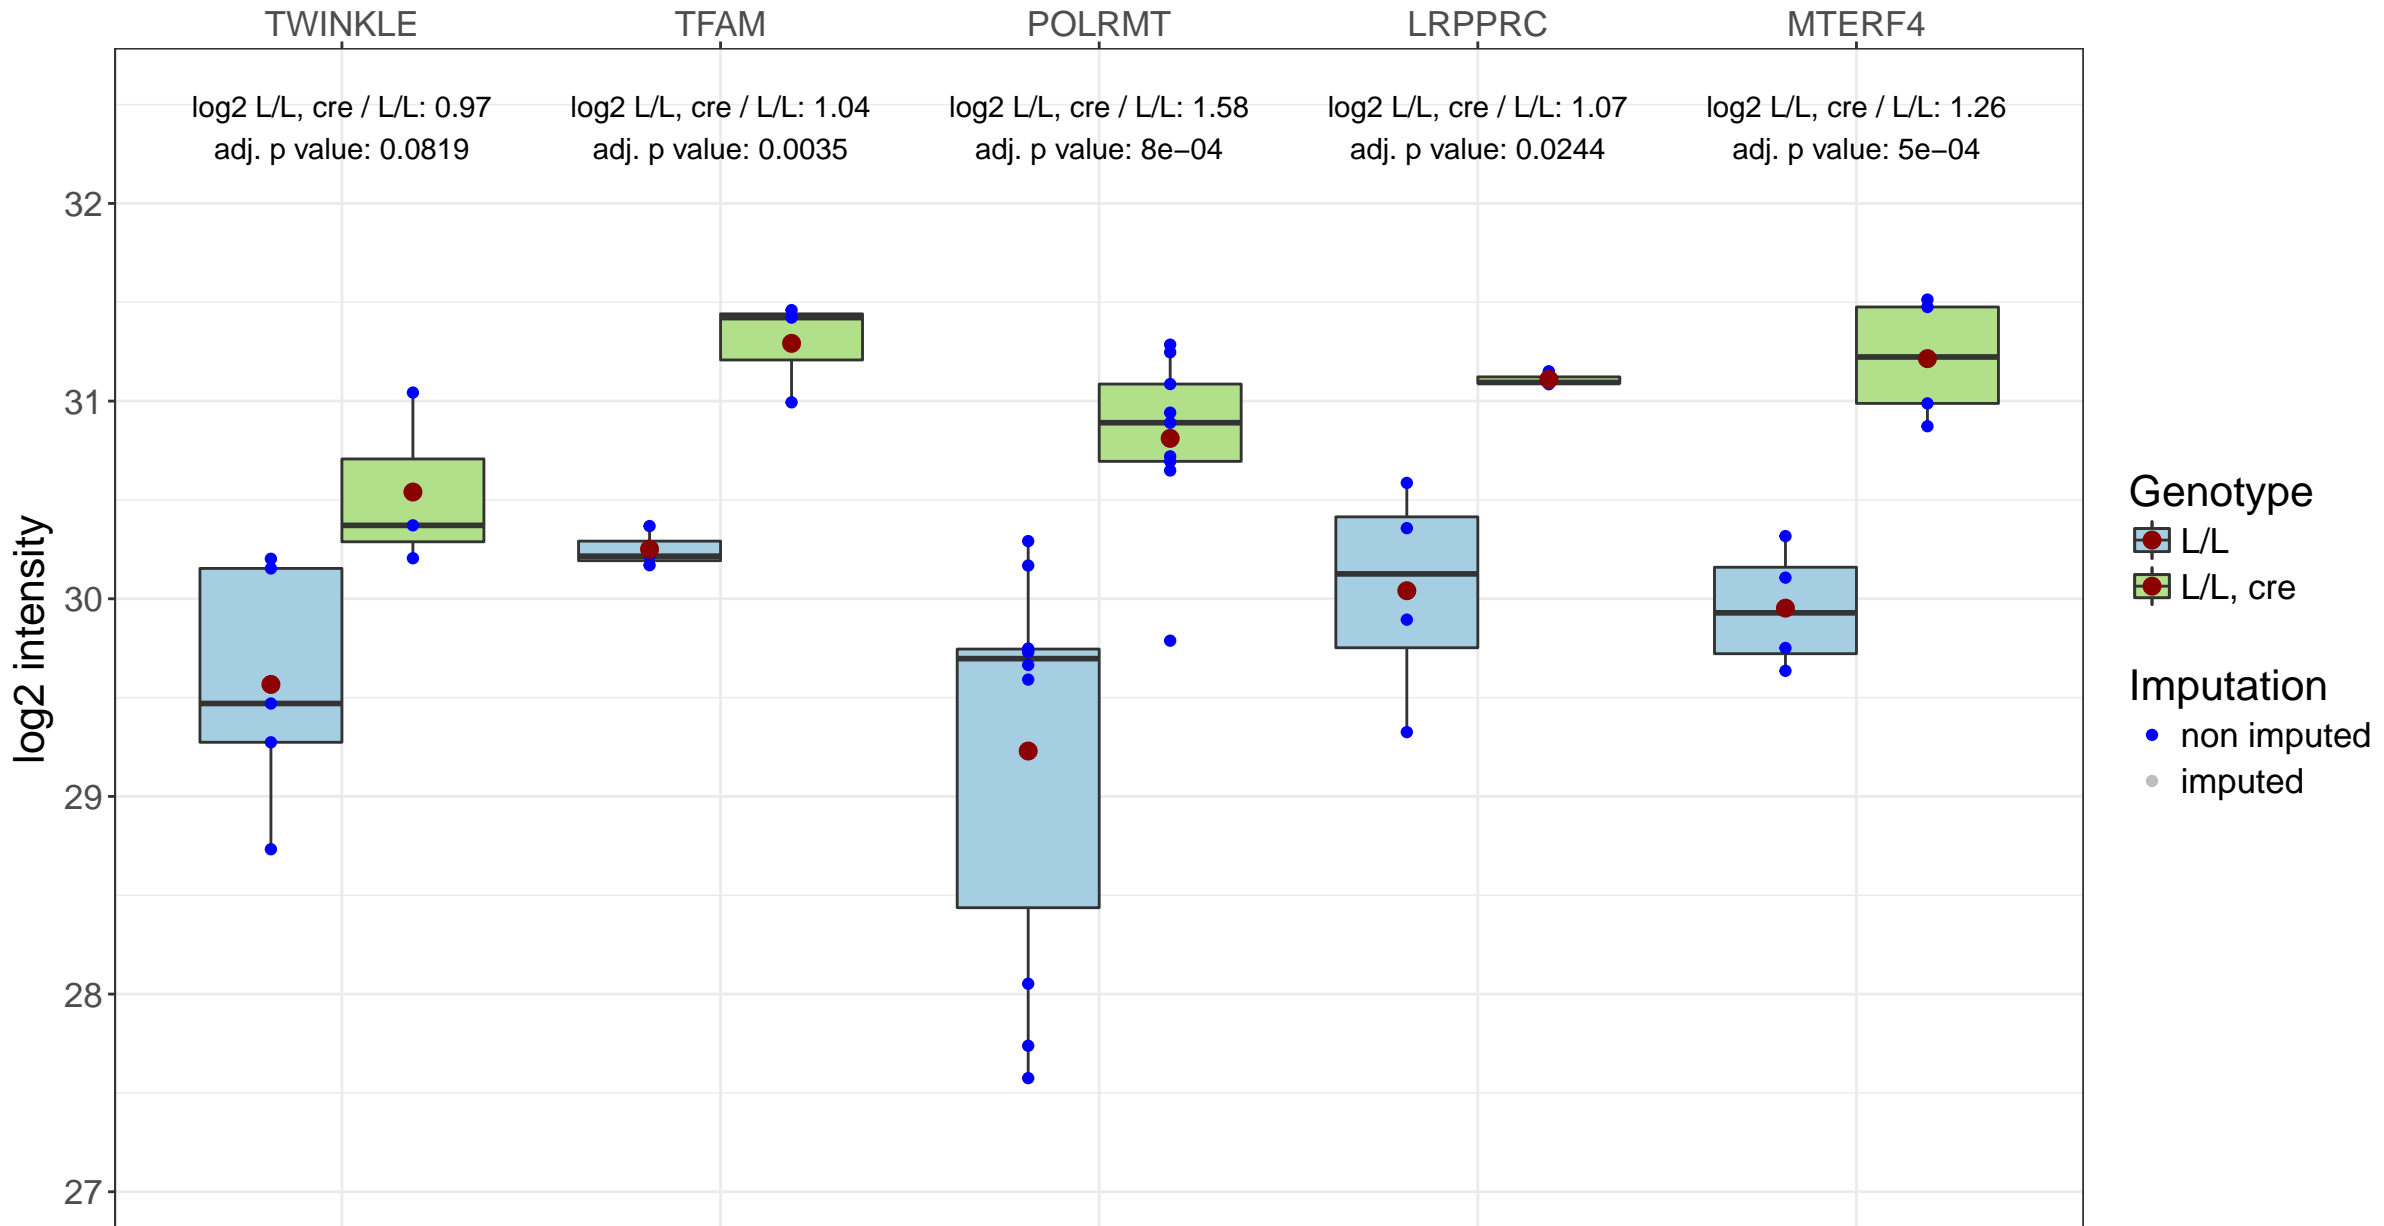

# ABCB8 / Q9CXJ4

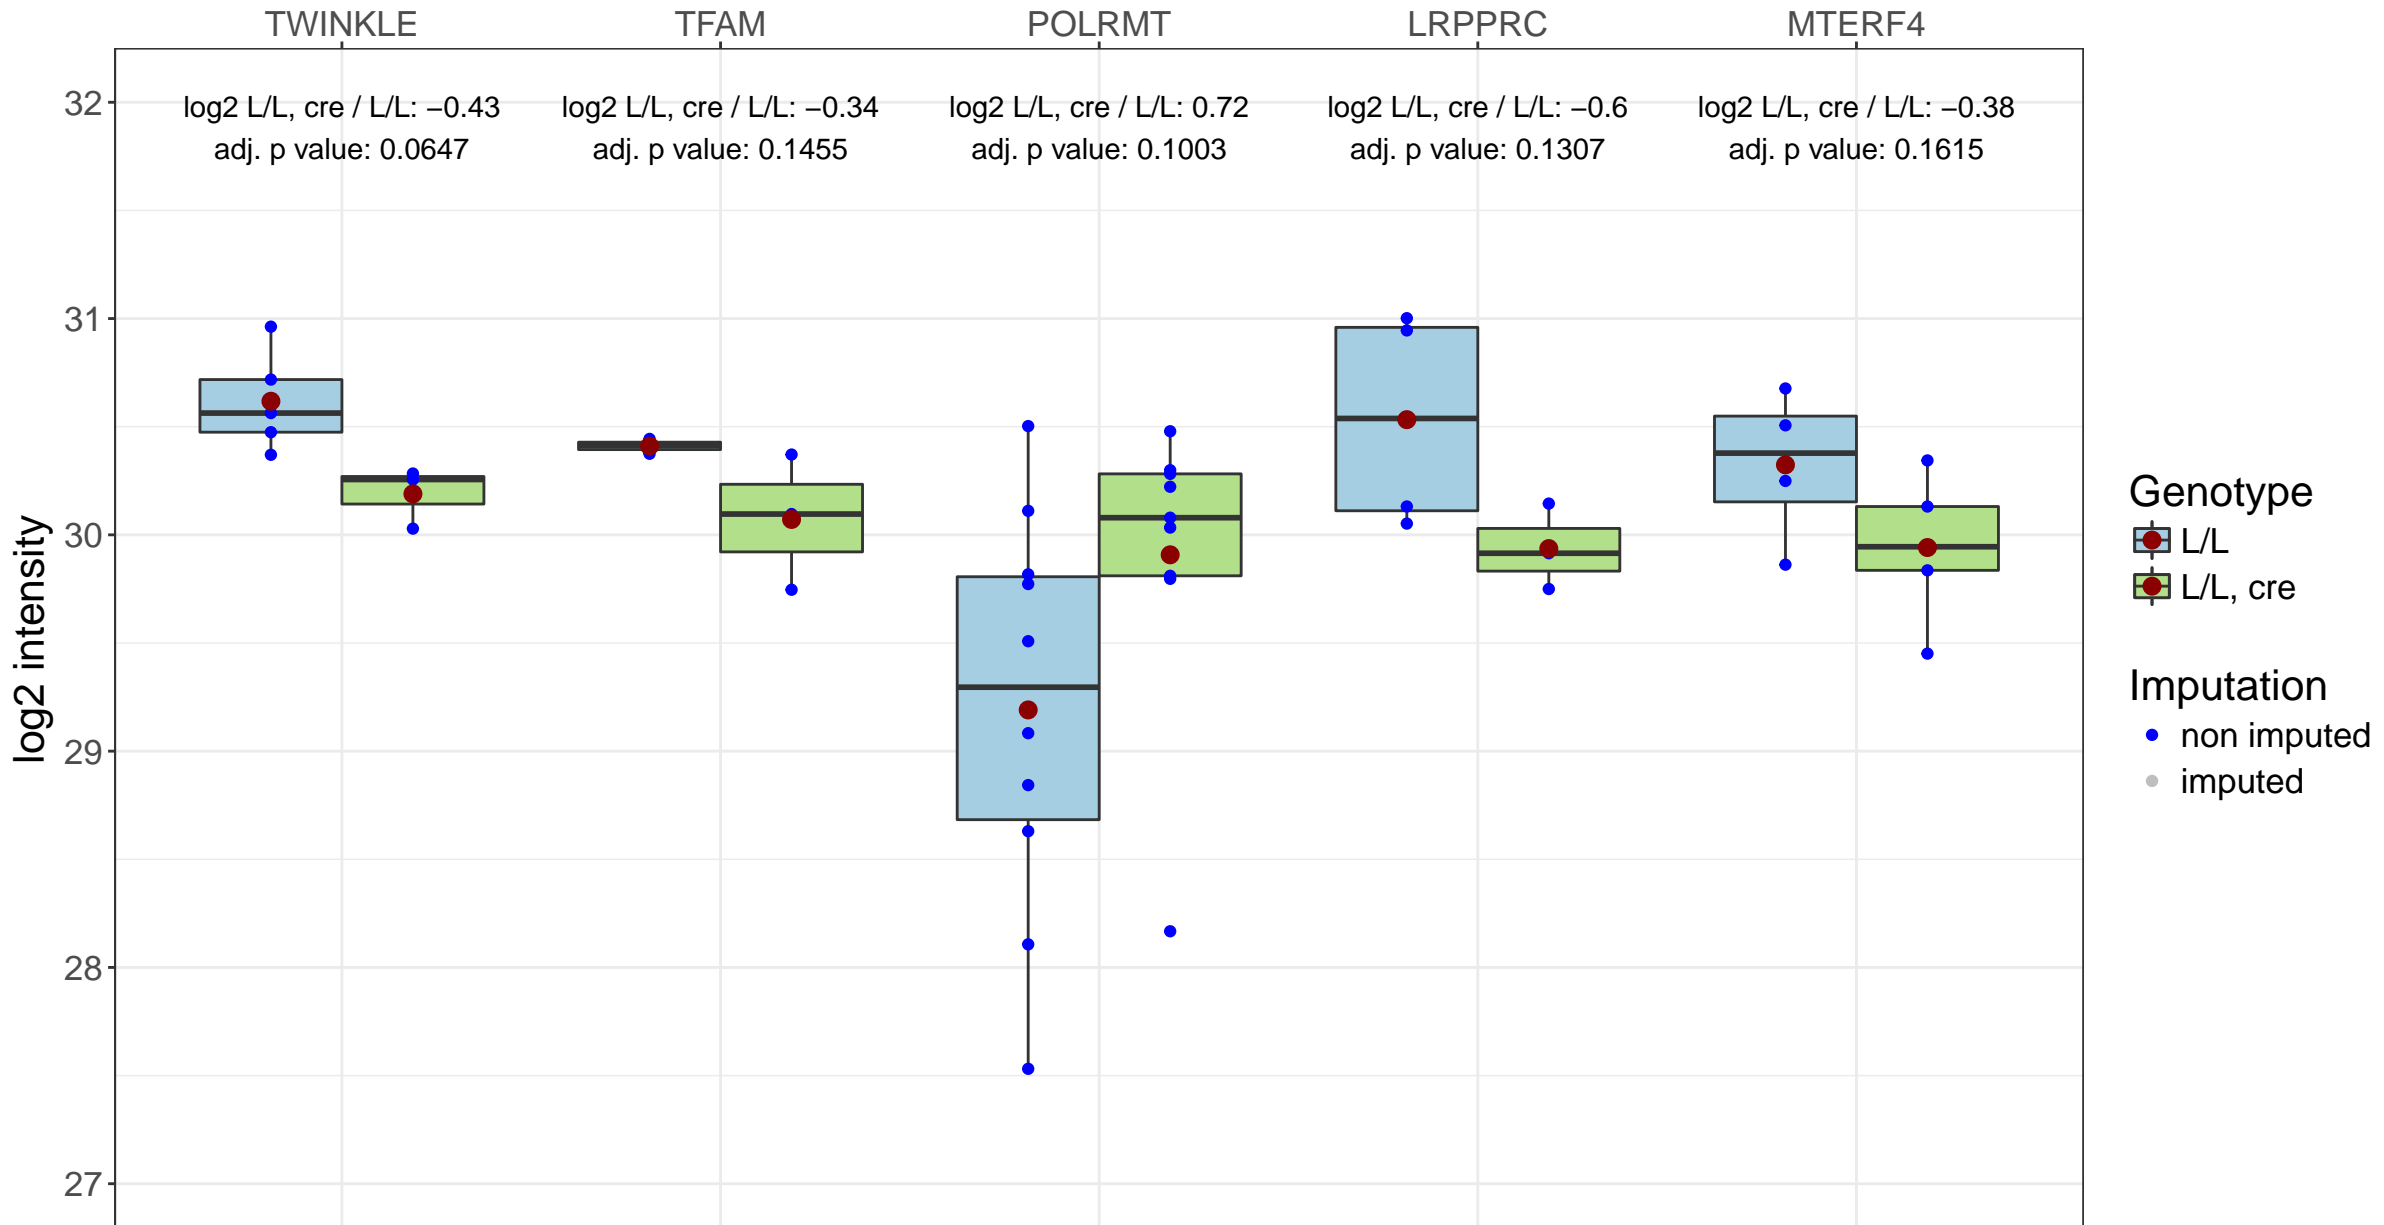

# ABHD10 / Q6PE15

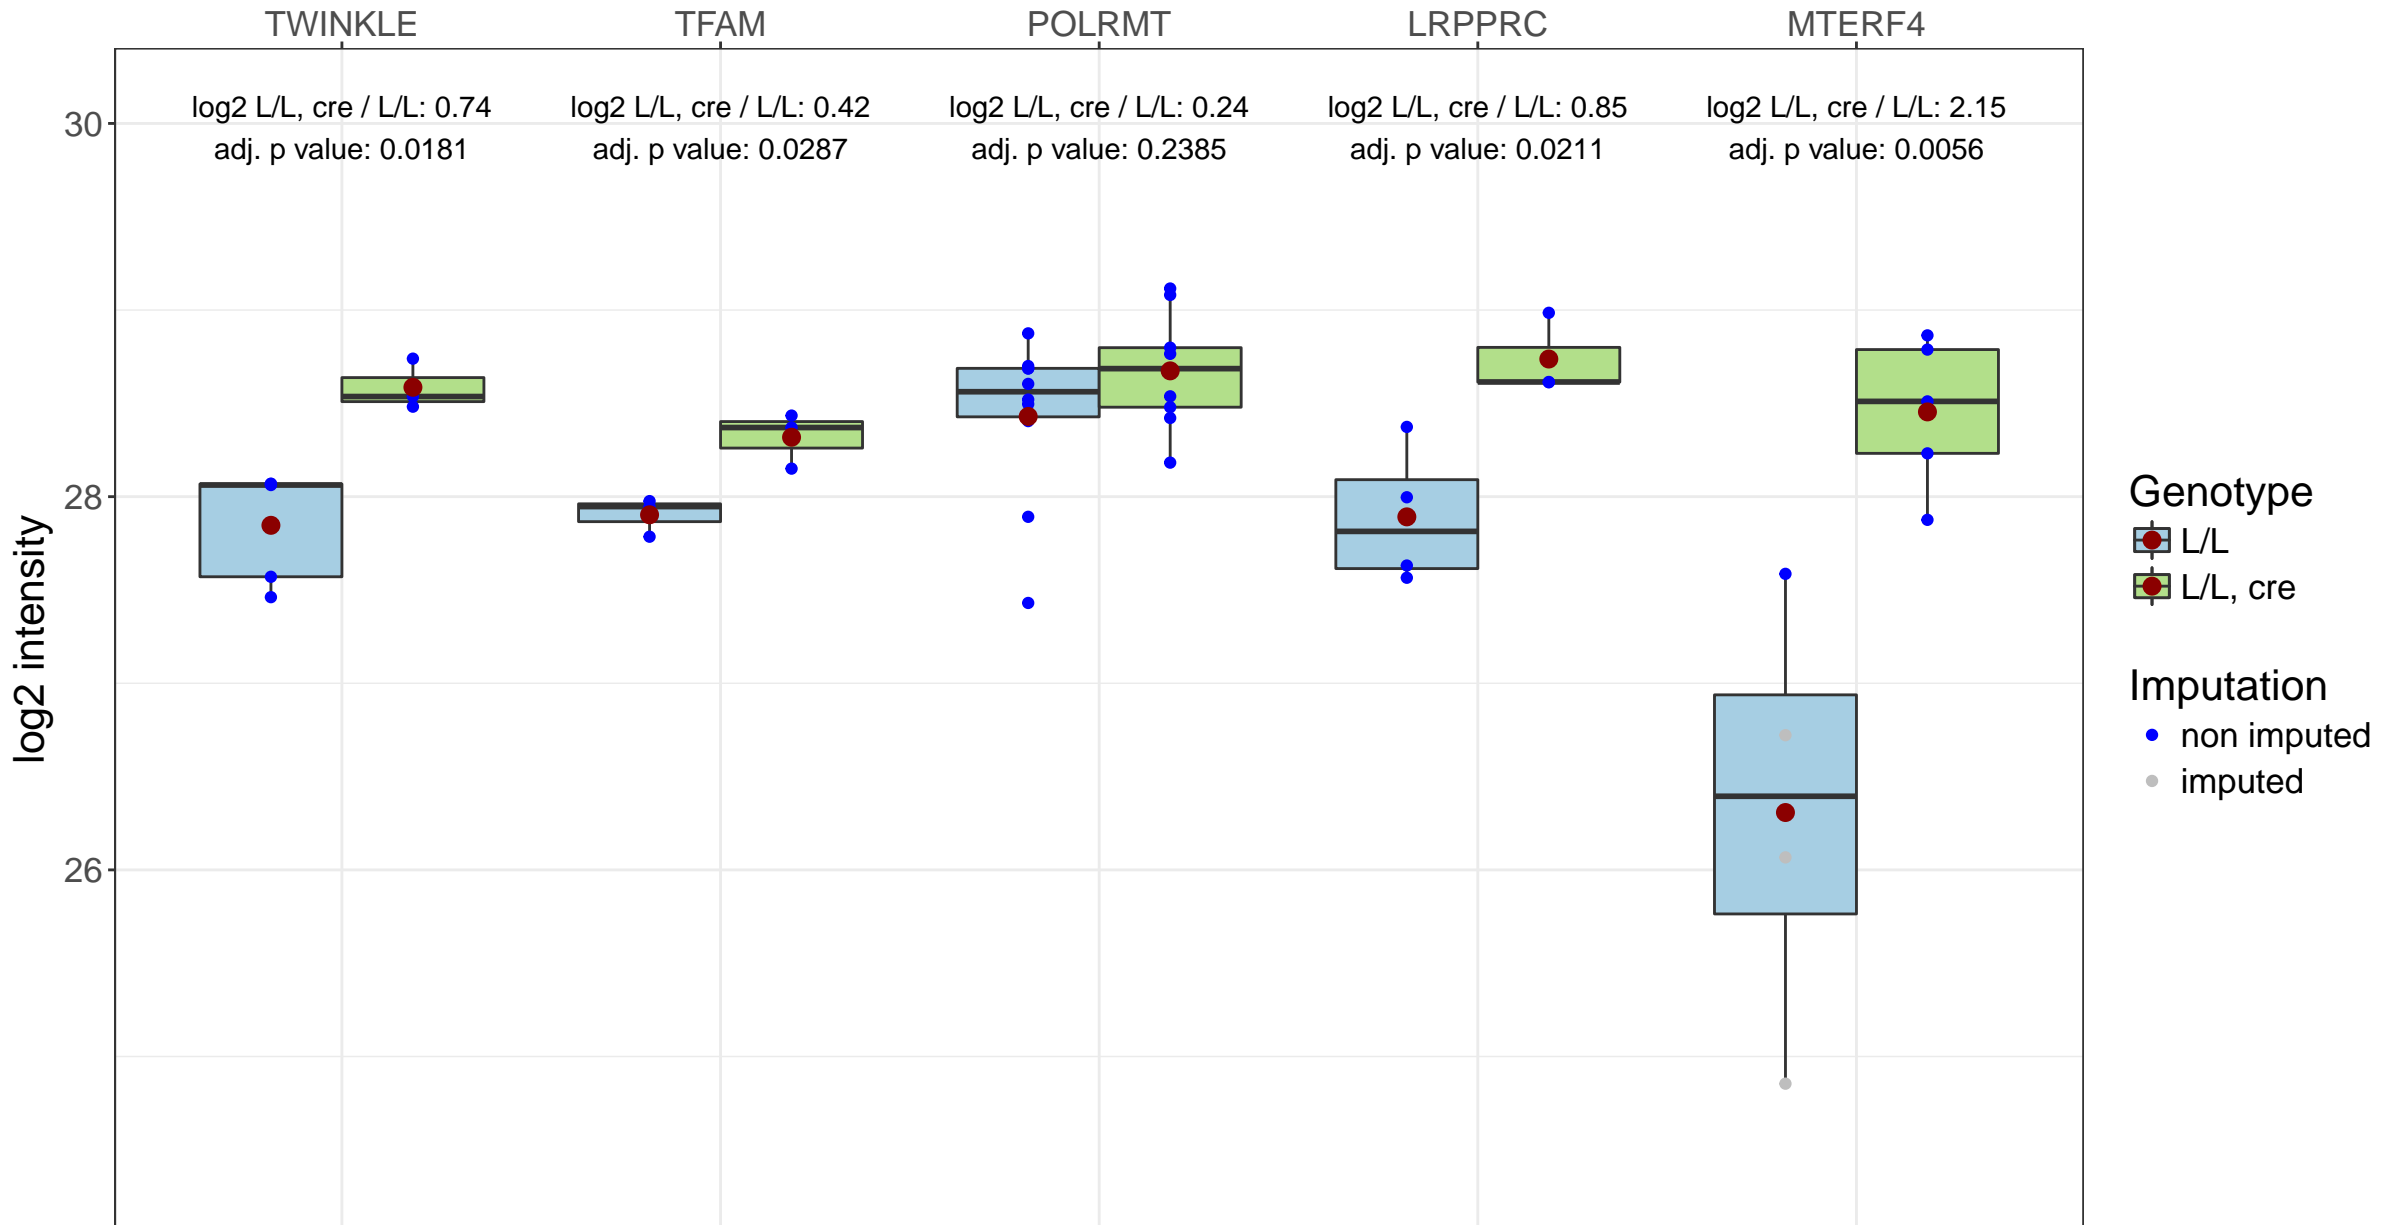

# ABHD11 / Q8K4F5

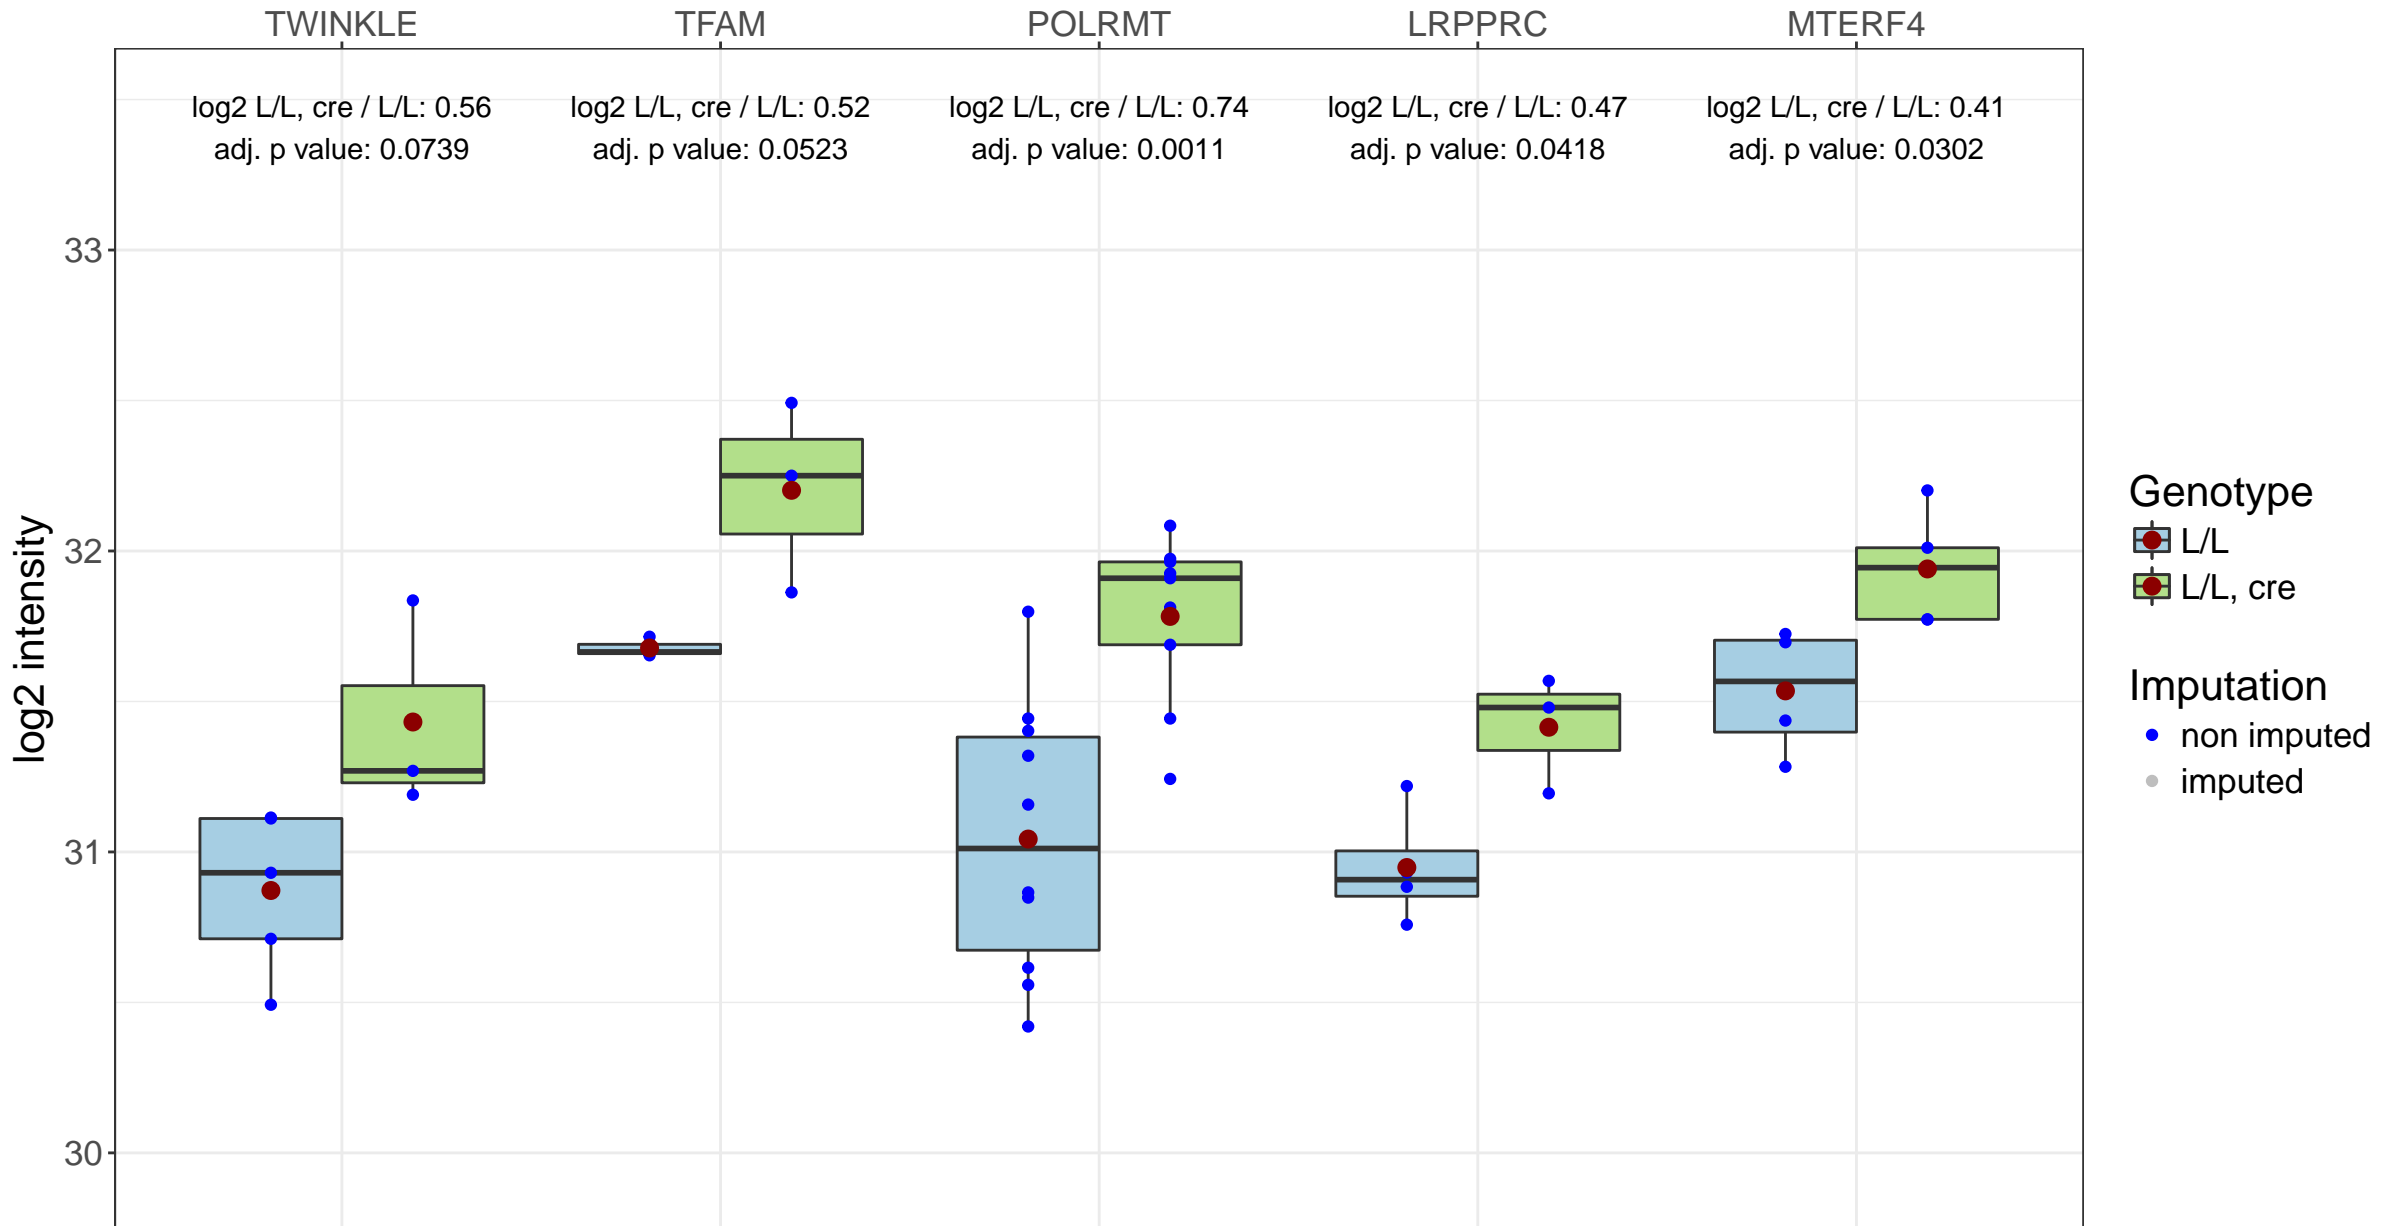

# ABHD16A / Q9Z1Q2

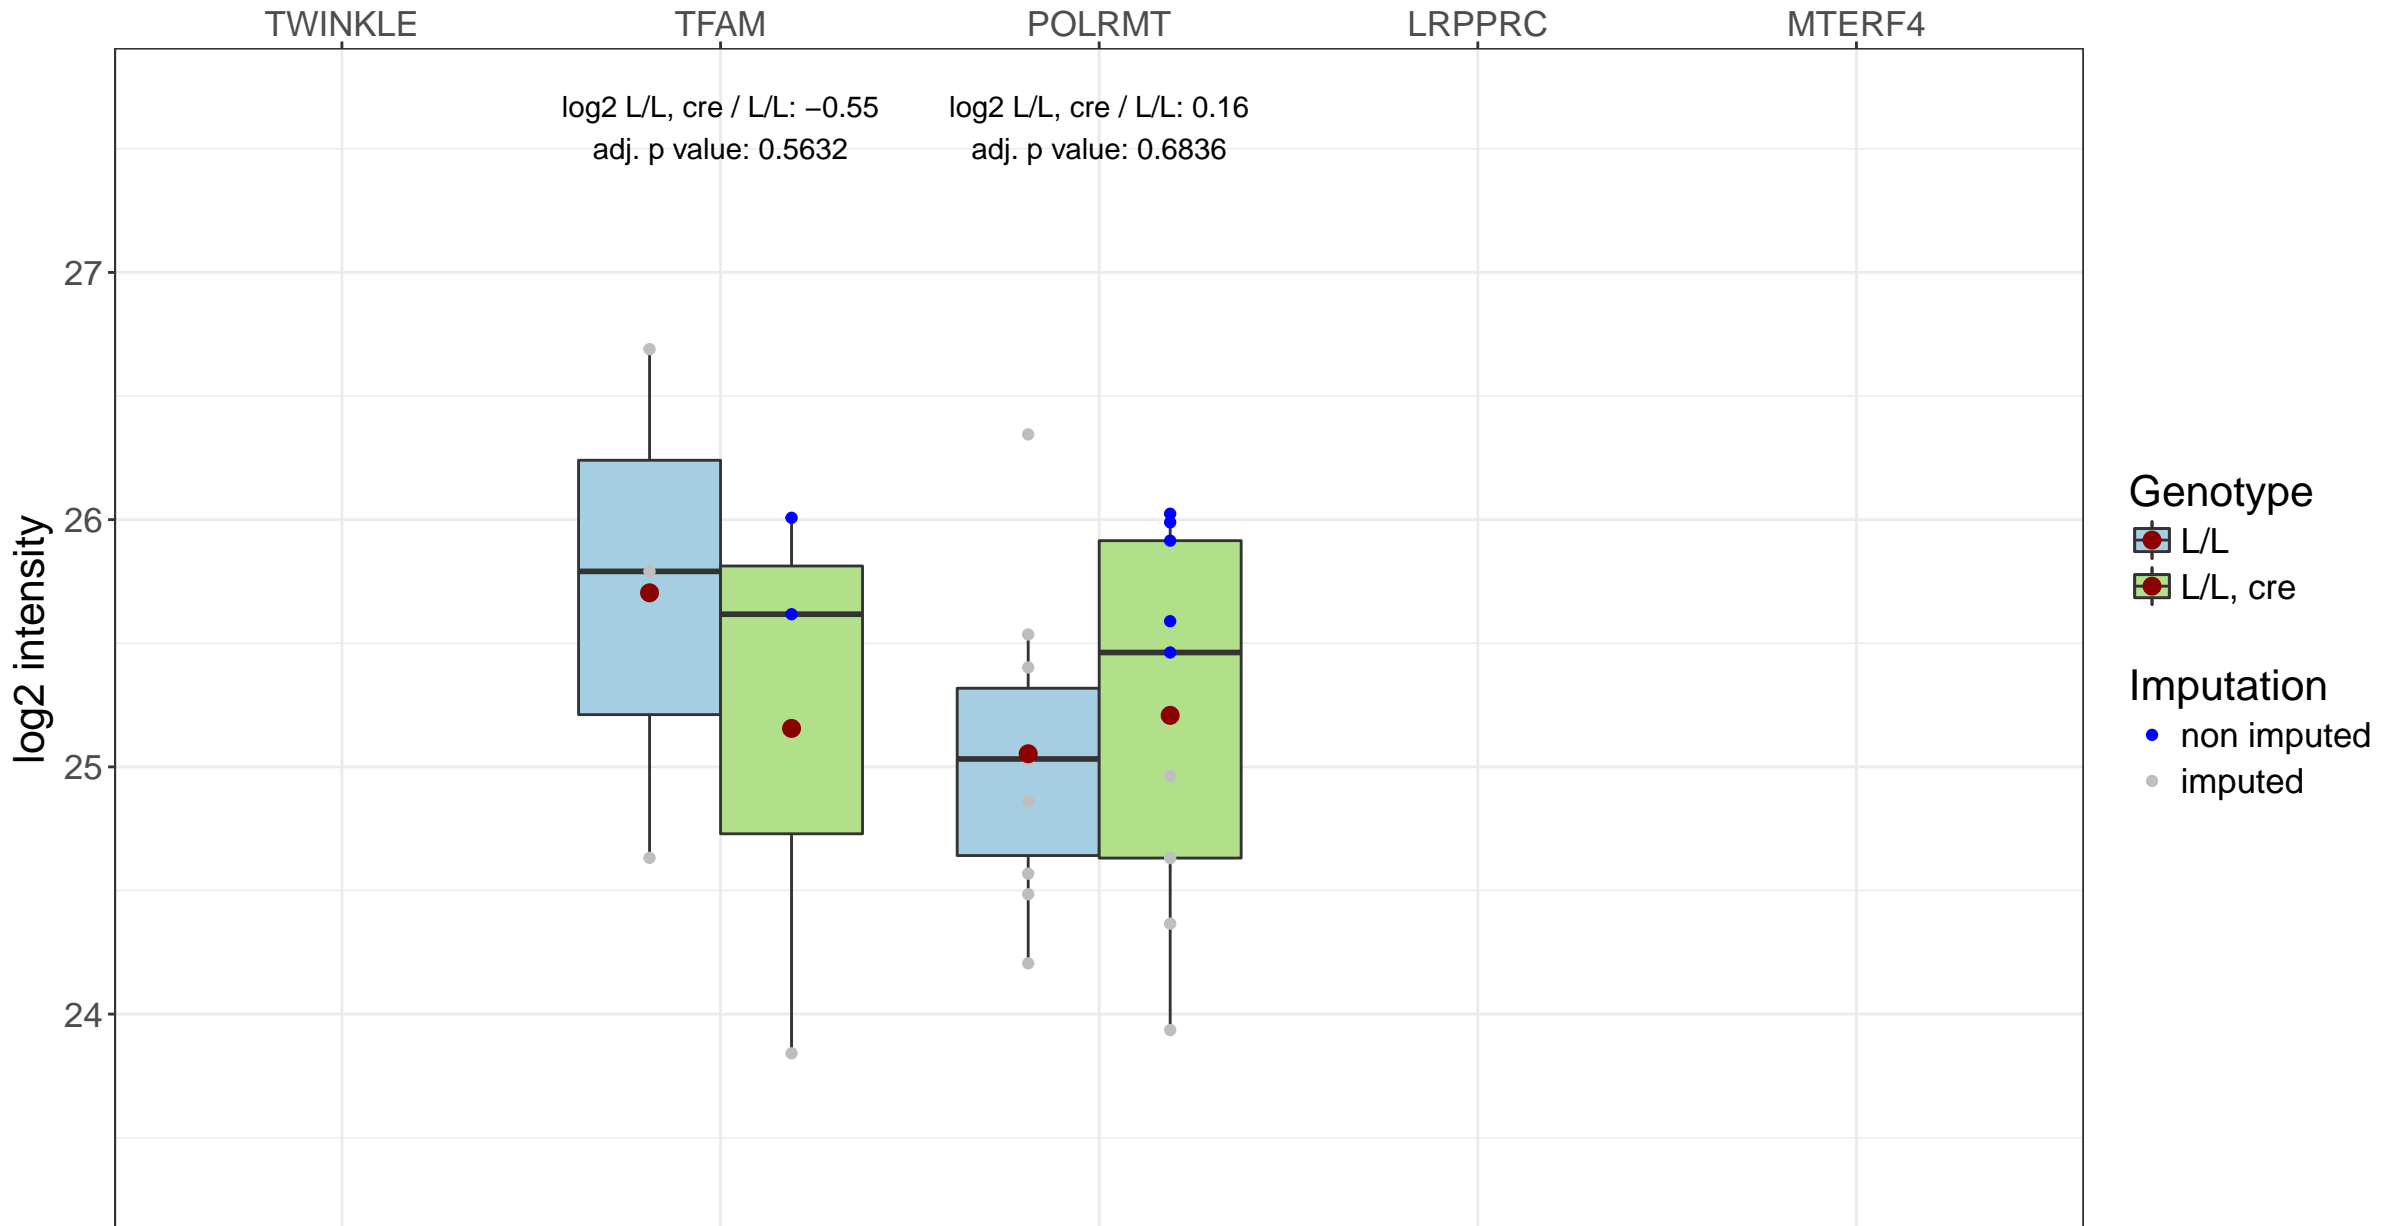



# ACAA1A / Q921H8

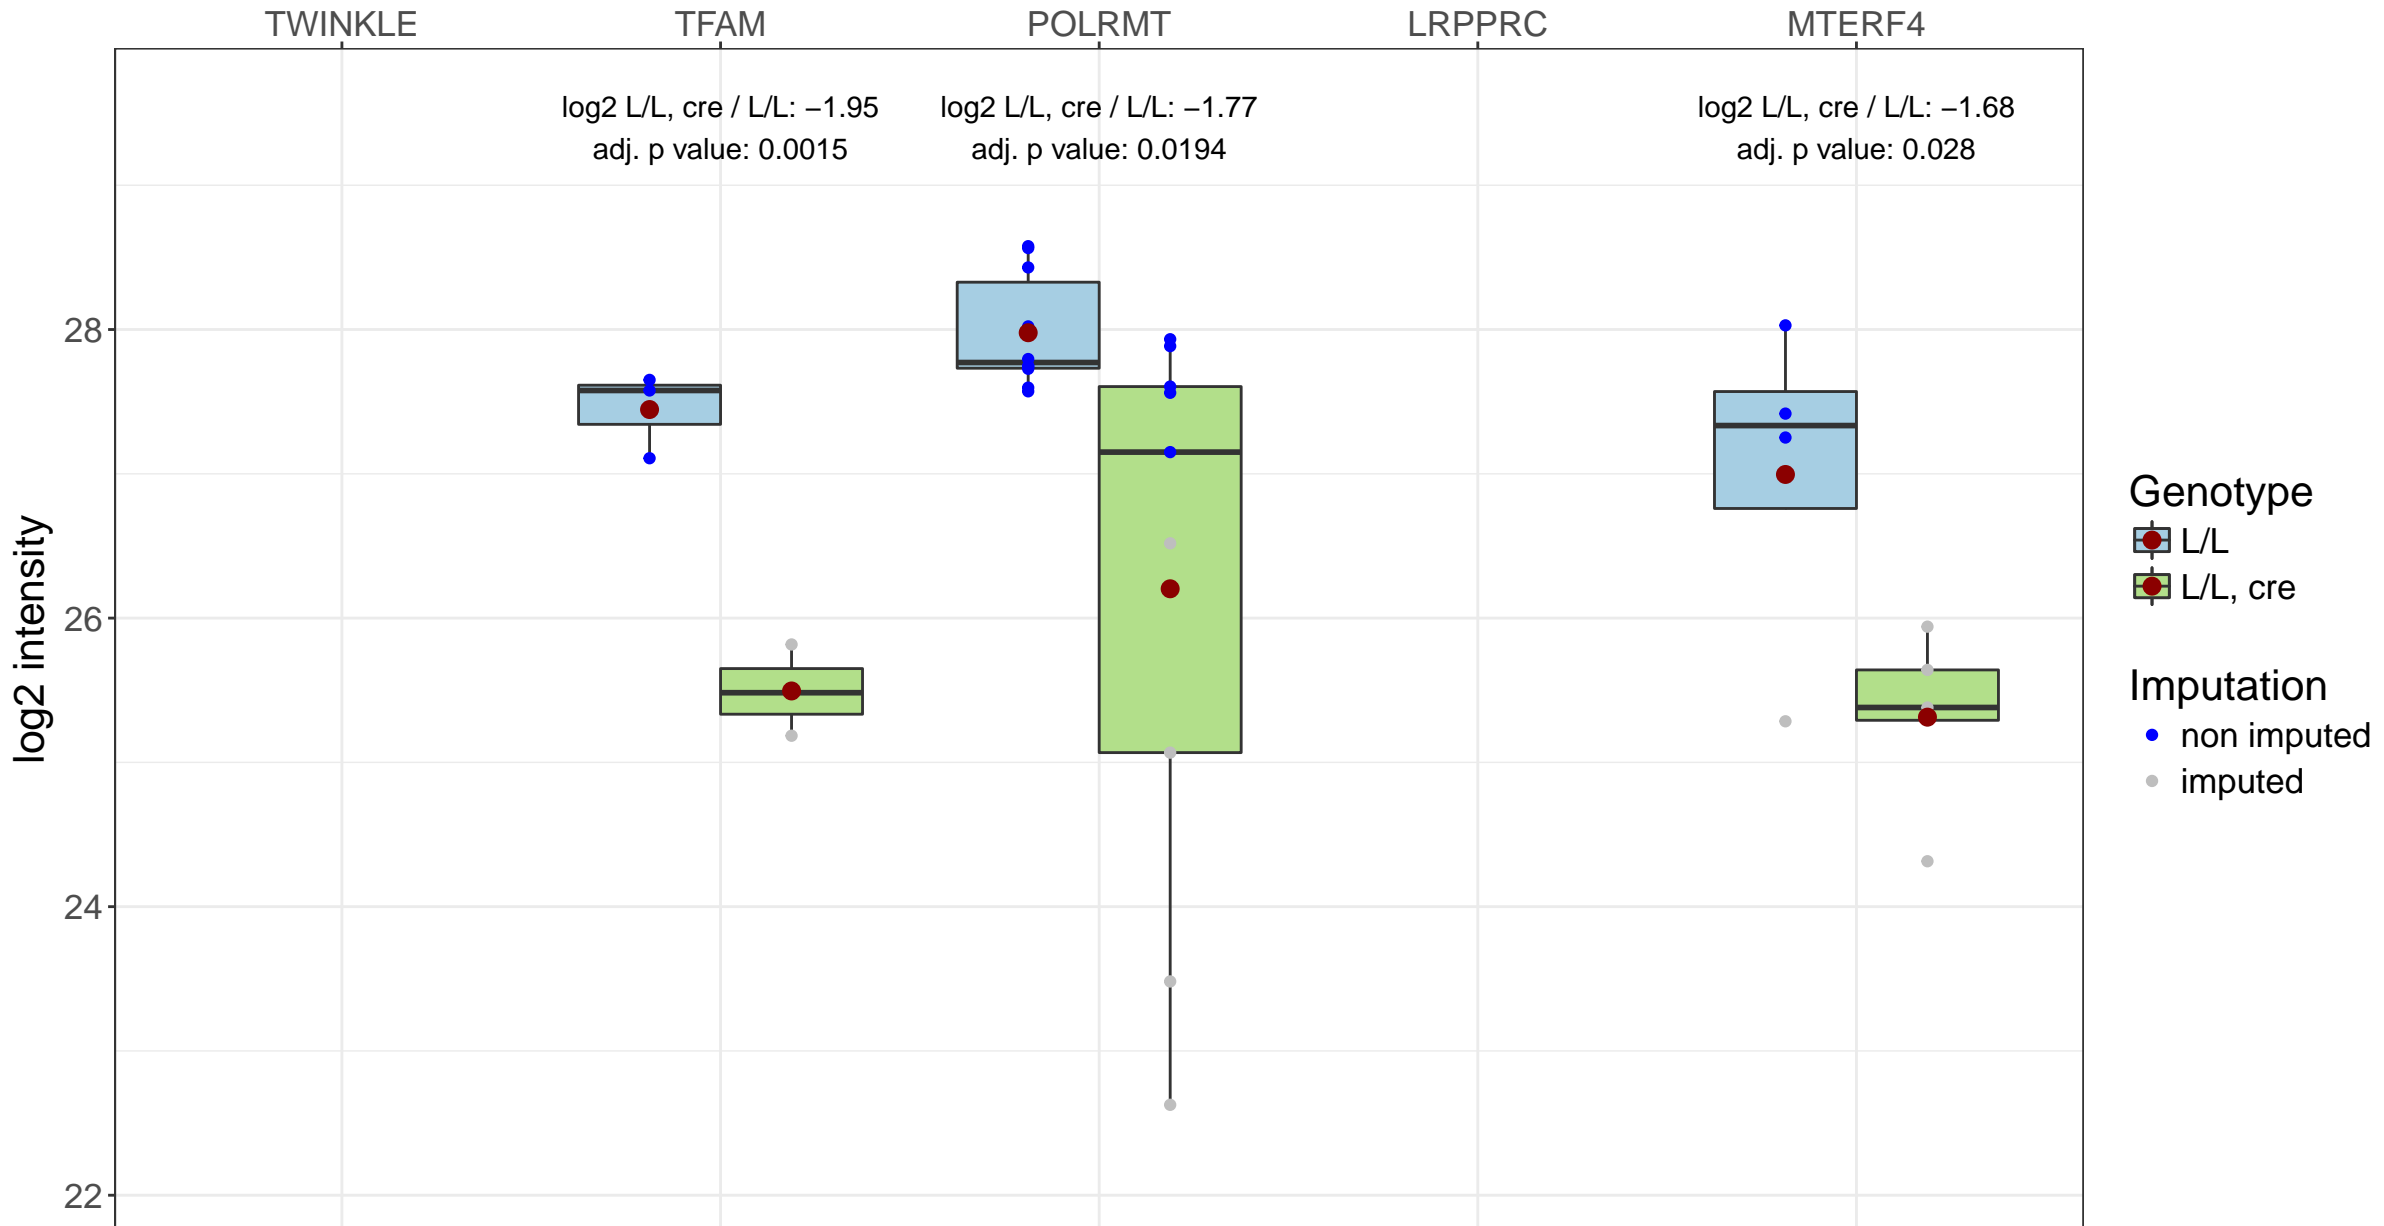

# ACAA2 / Q8BWT1

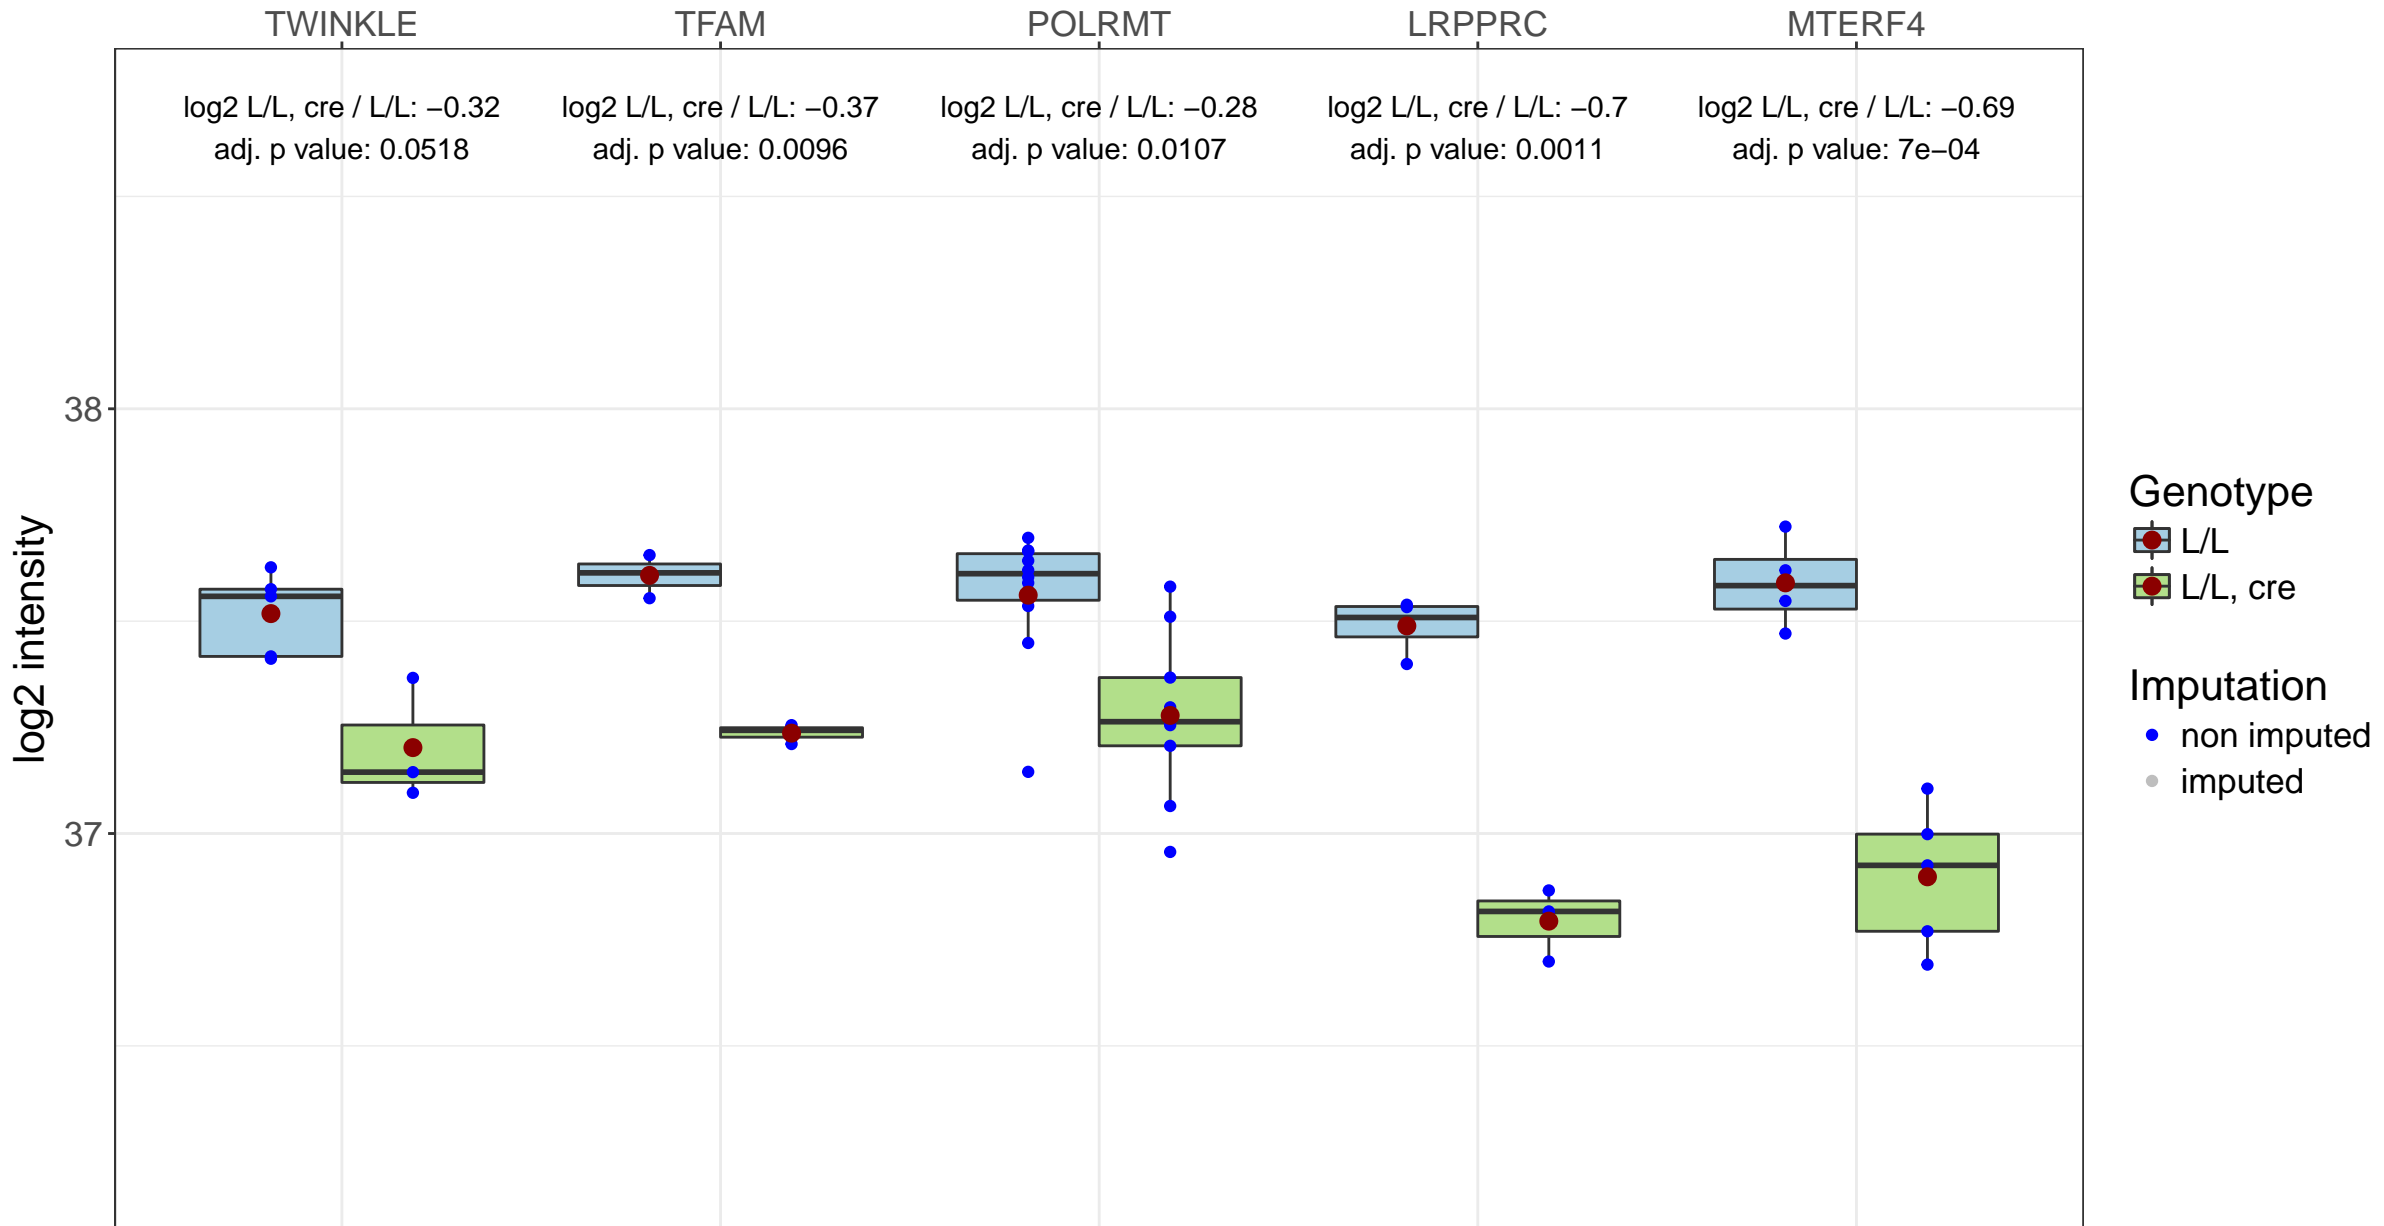

# ACAD10 / Q8K370

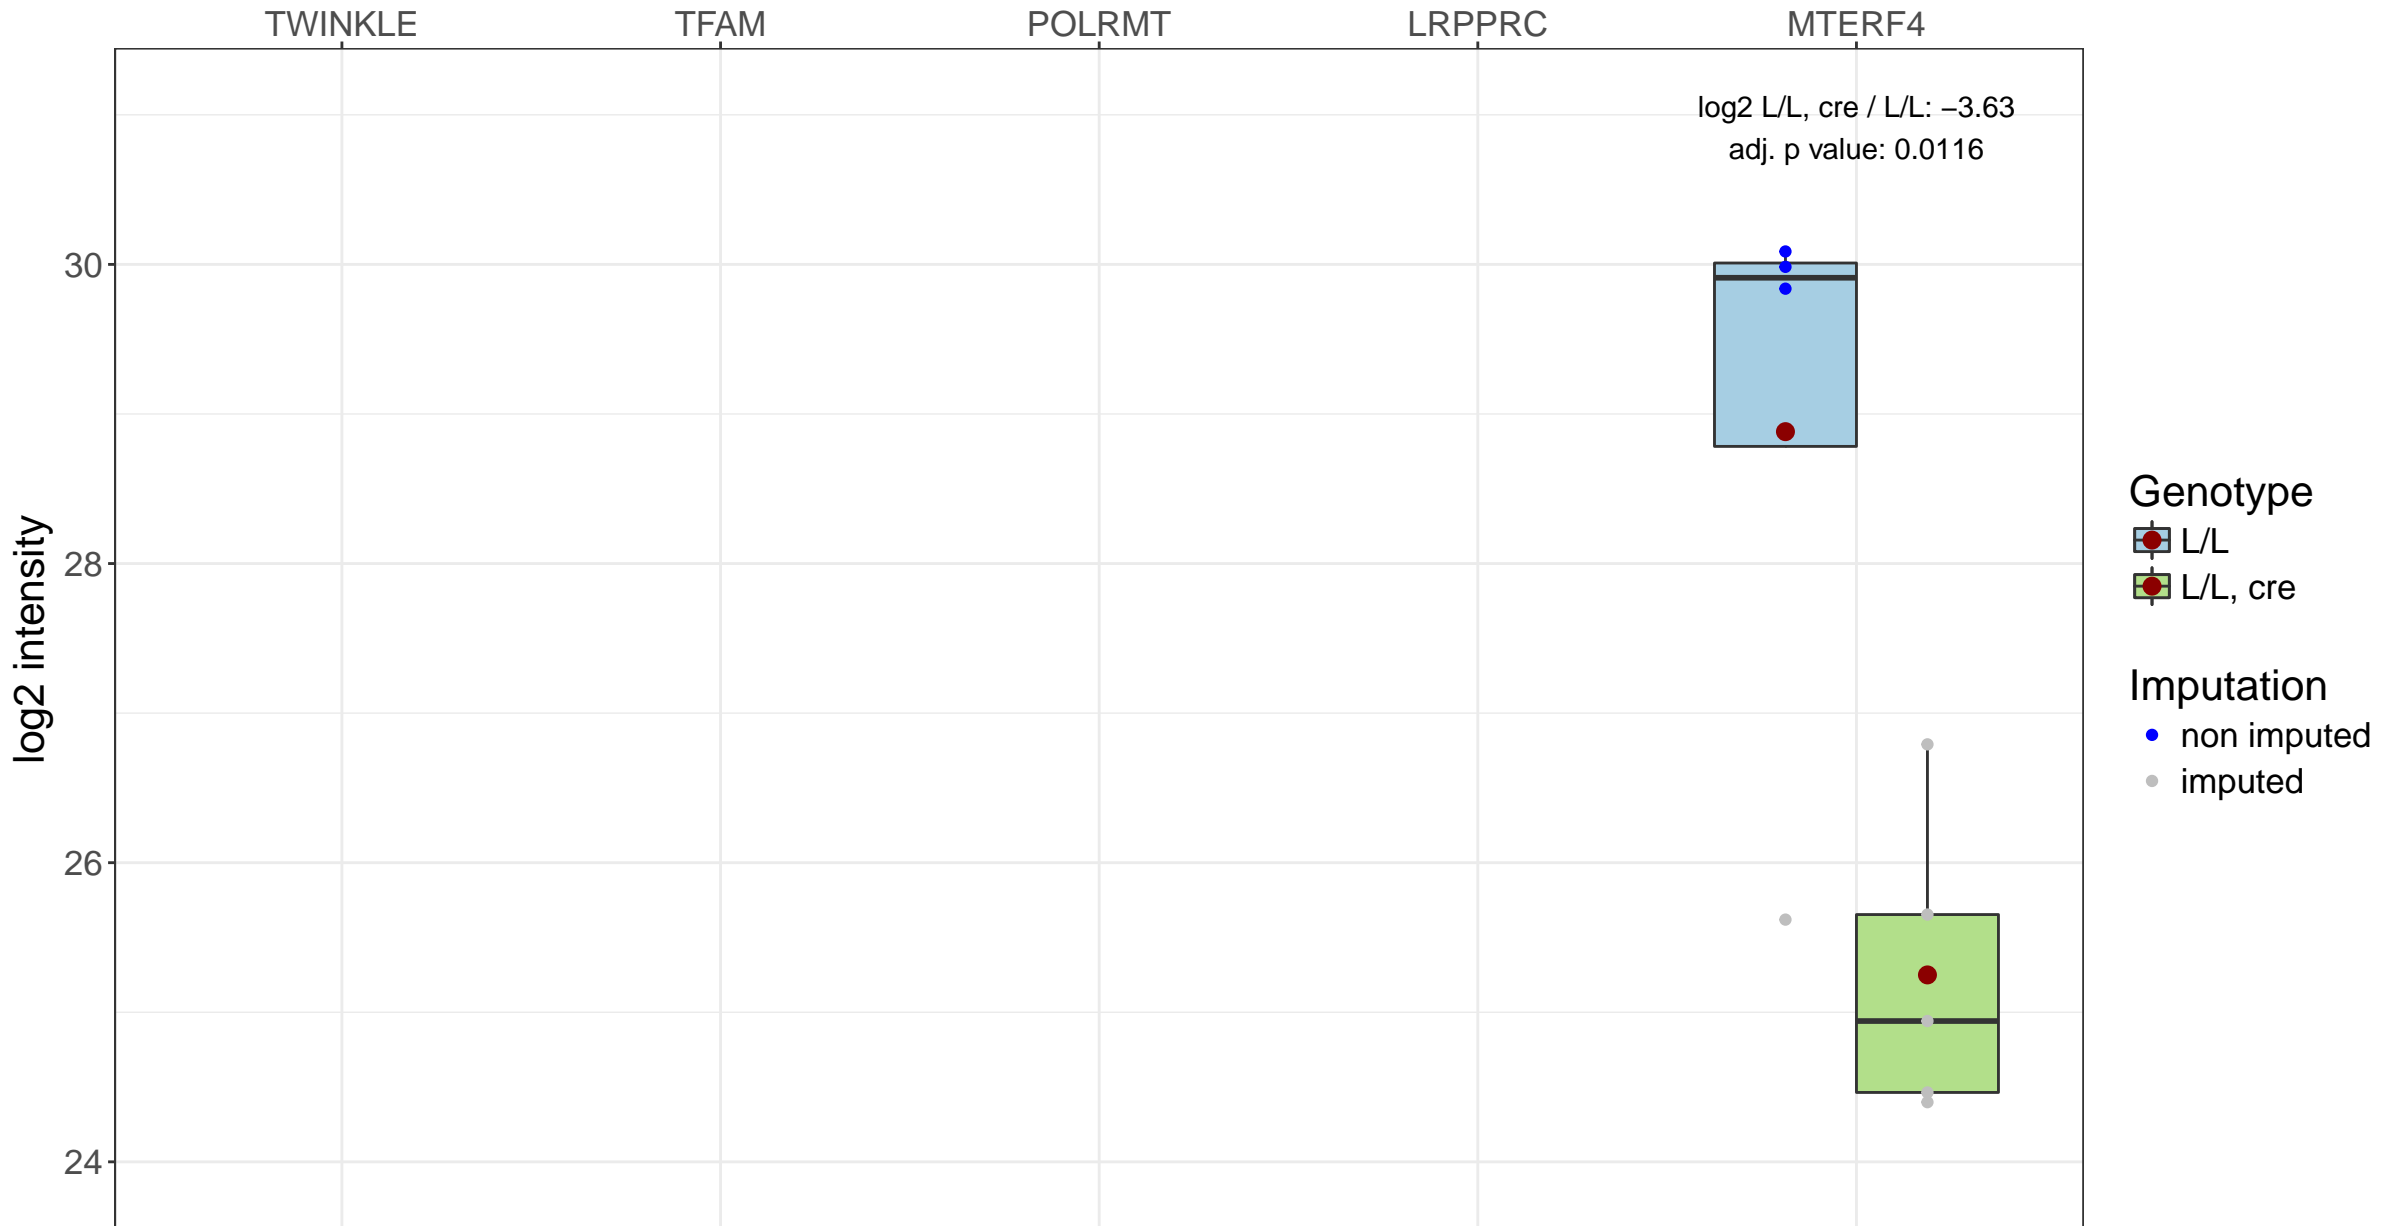

# ACAD12 / D3Z7X0

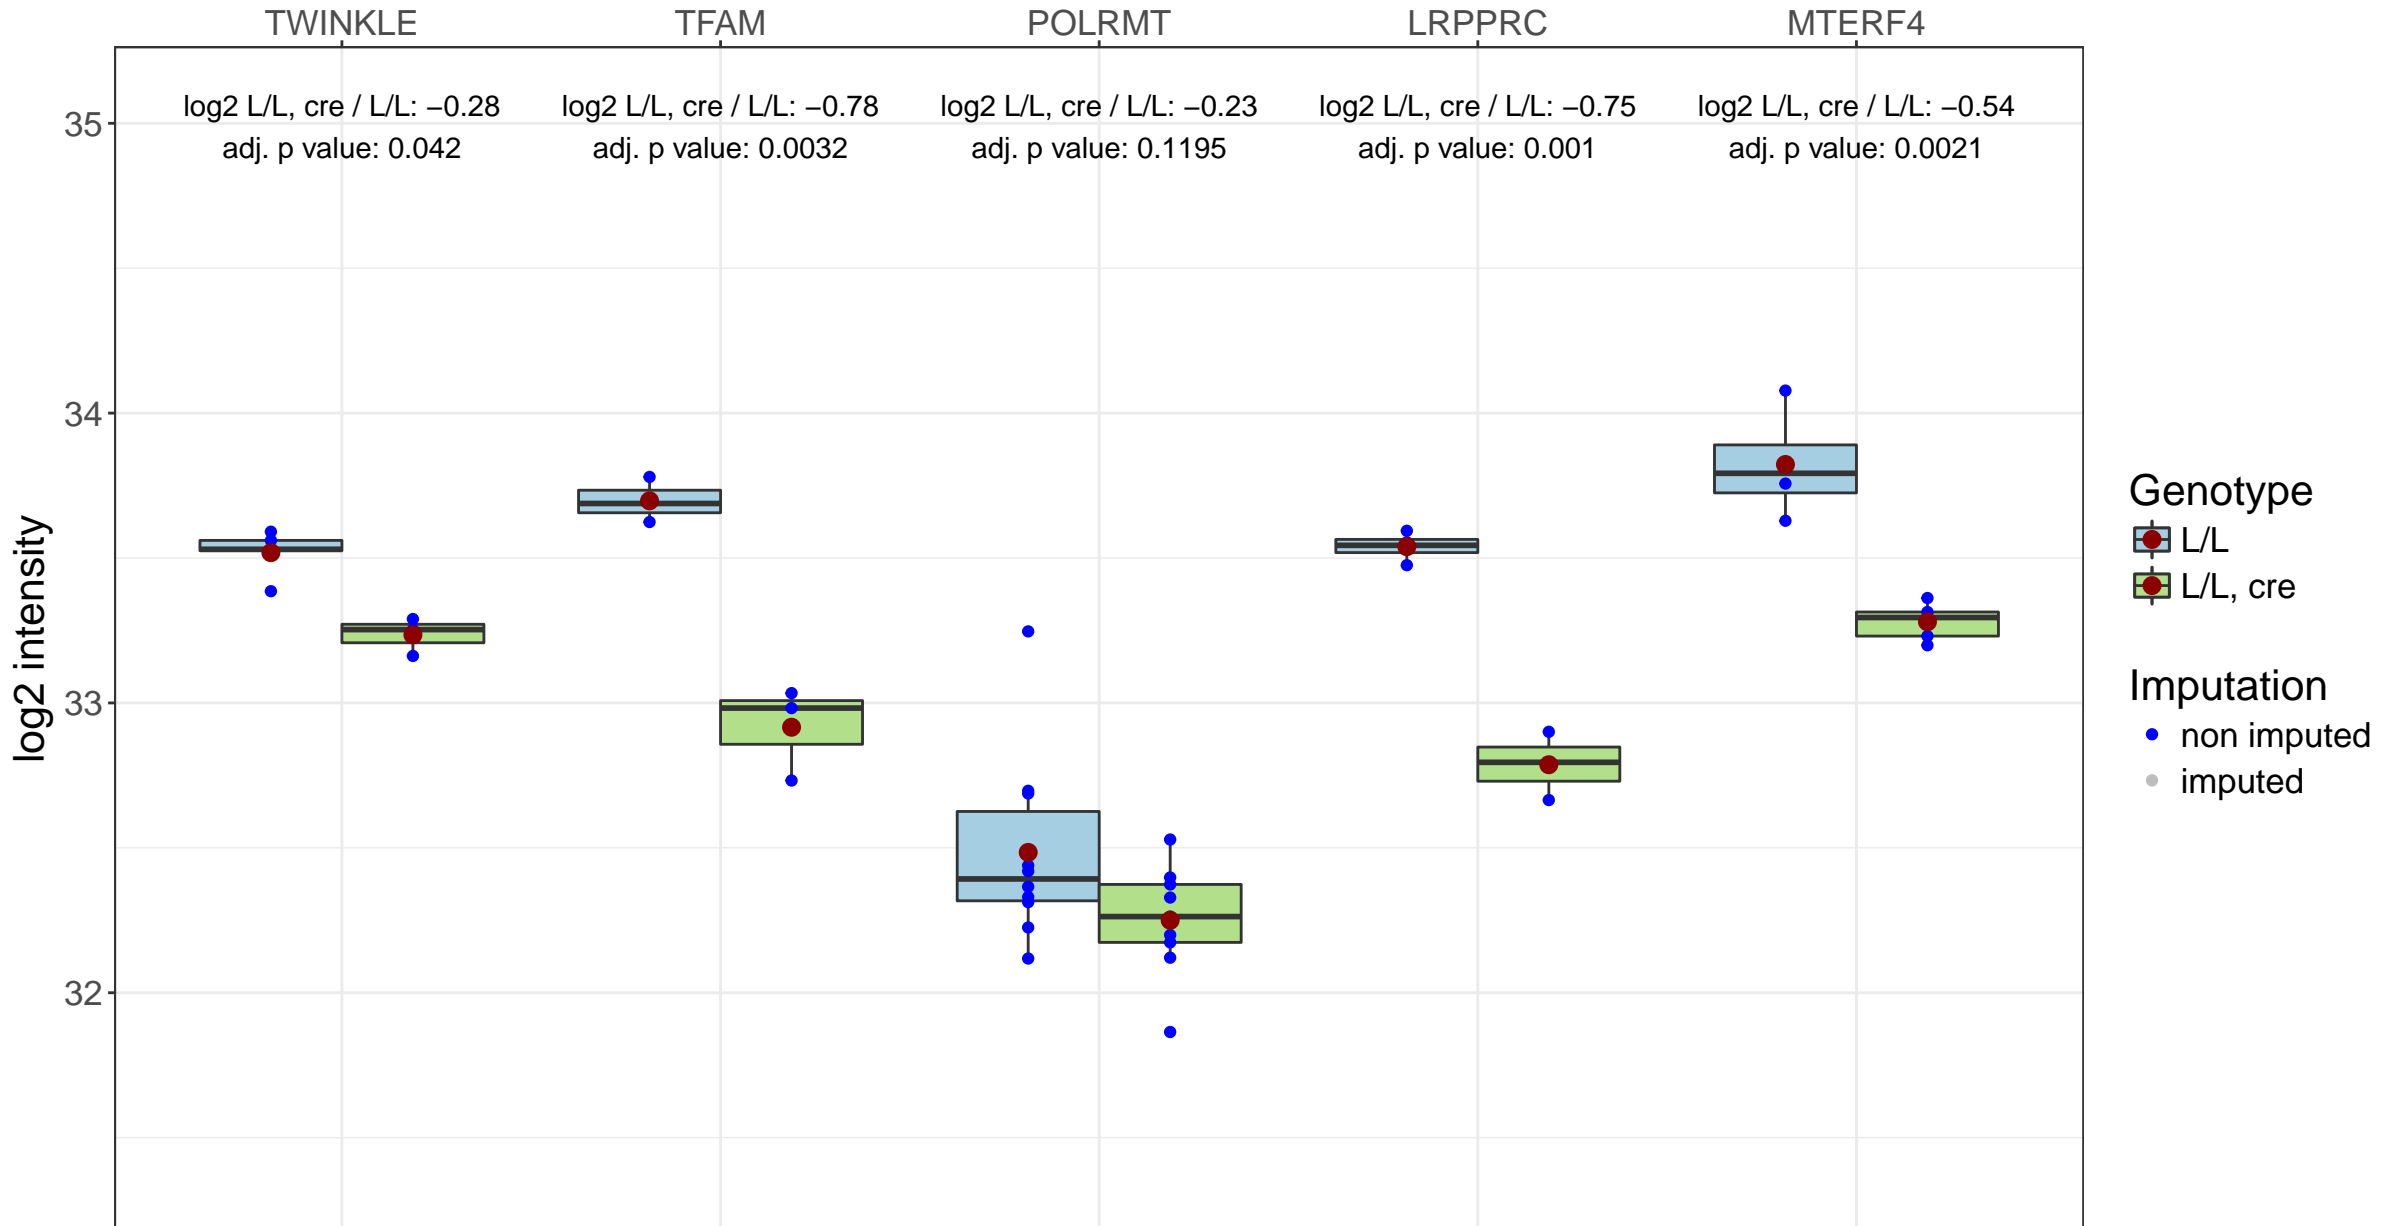

# ACAD8 / Q9D7B6

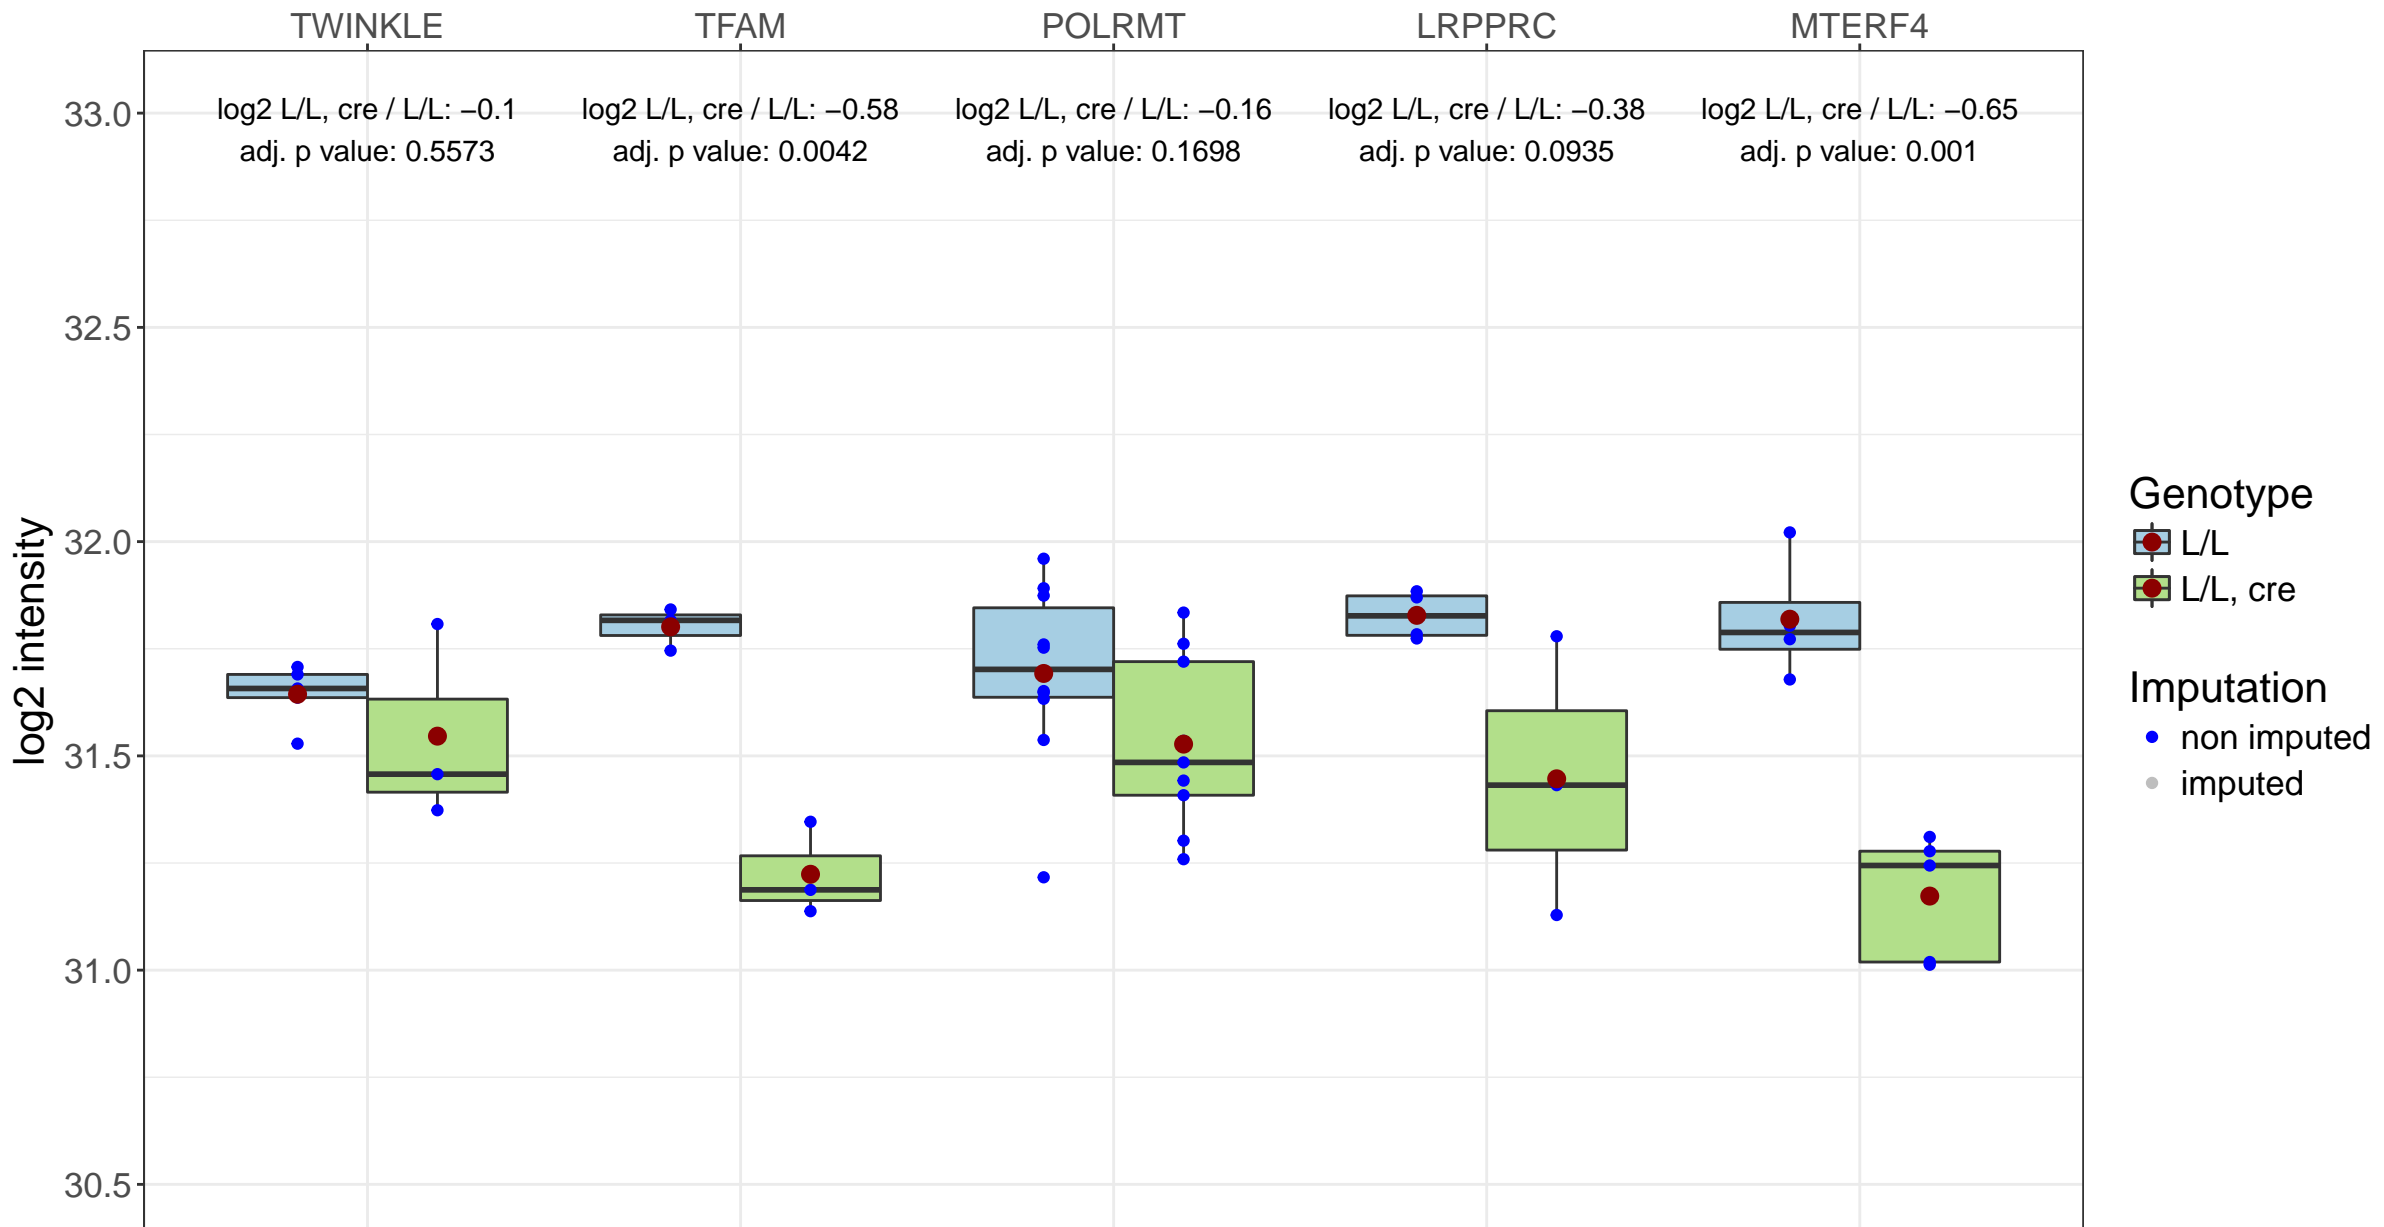

# ACAD9 / Q8JZN5

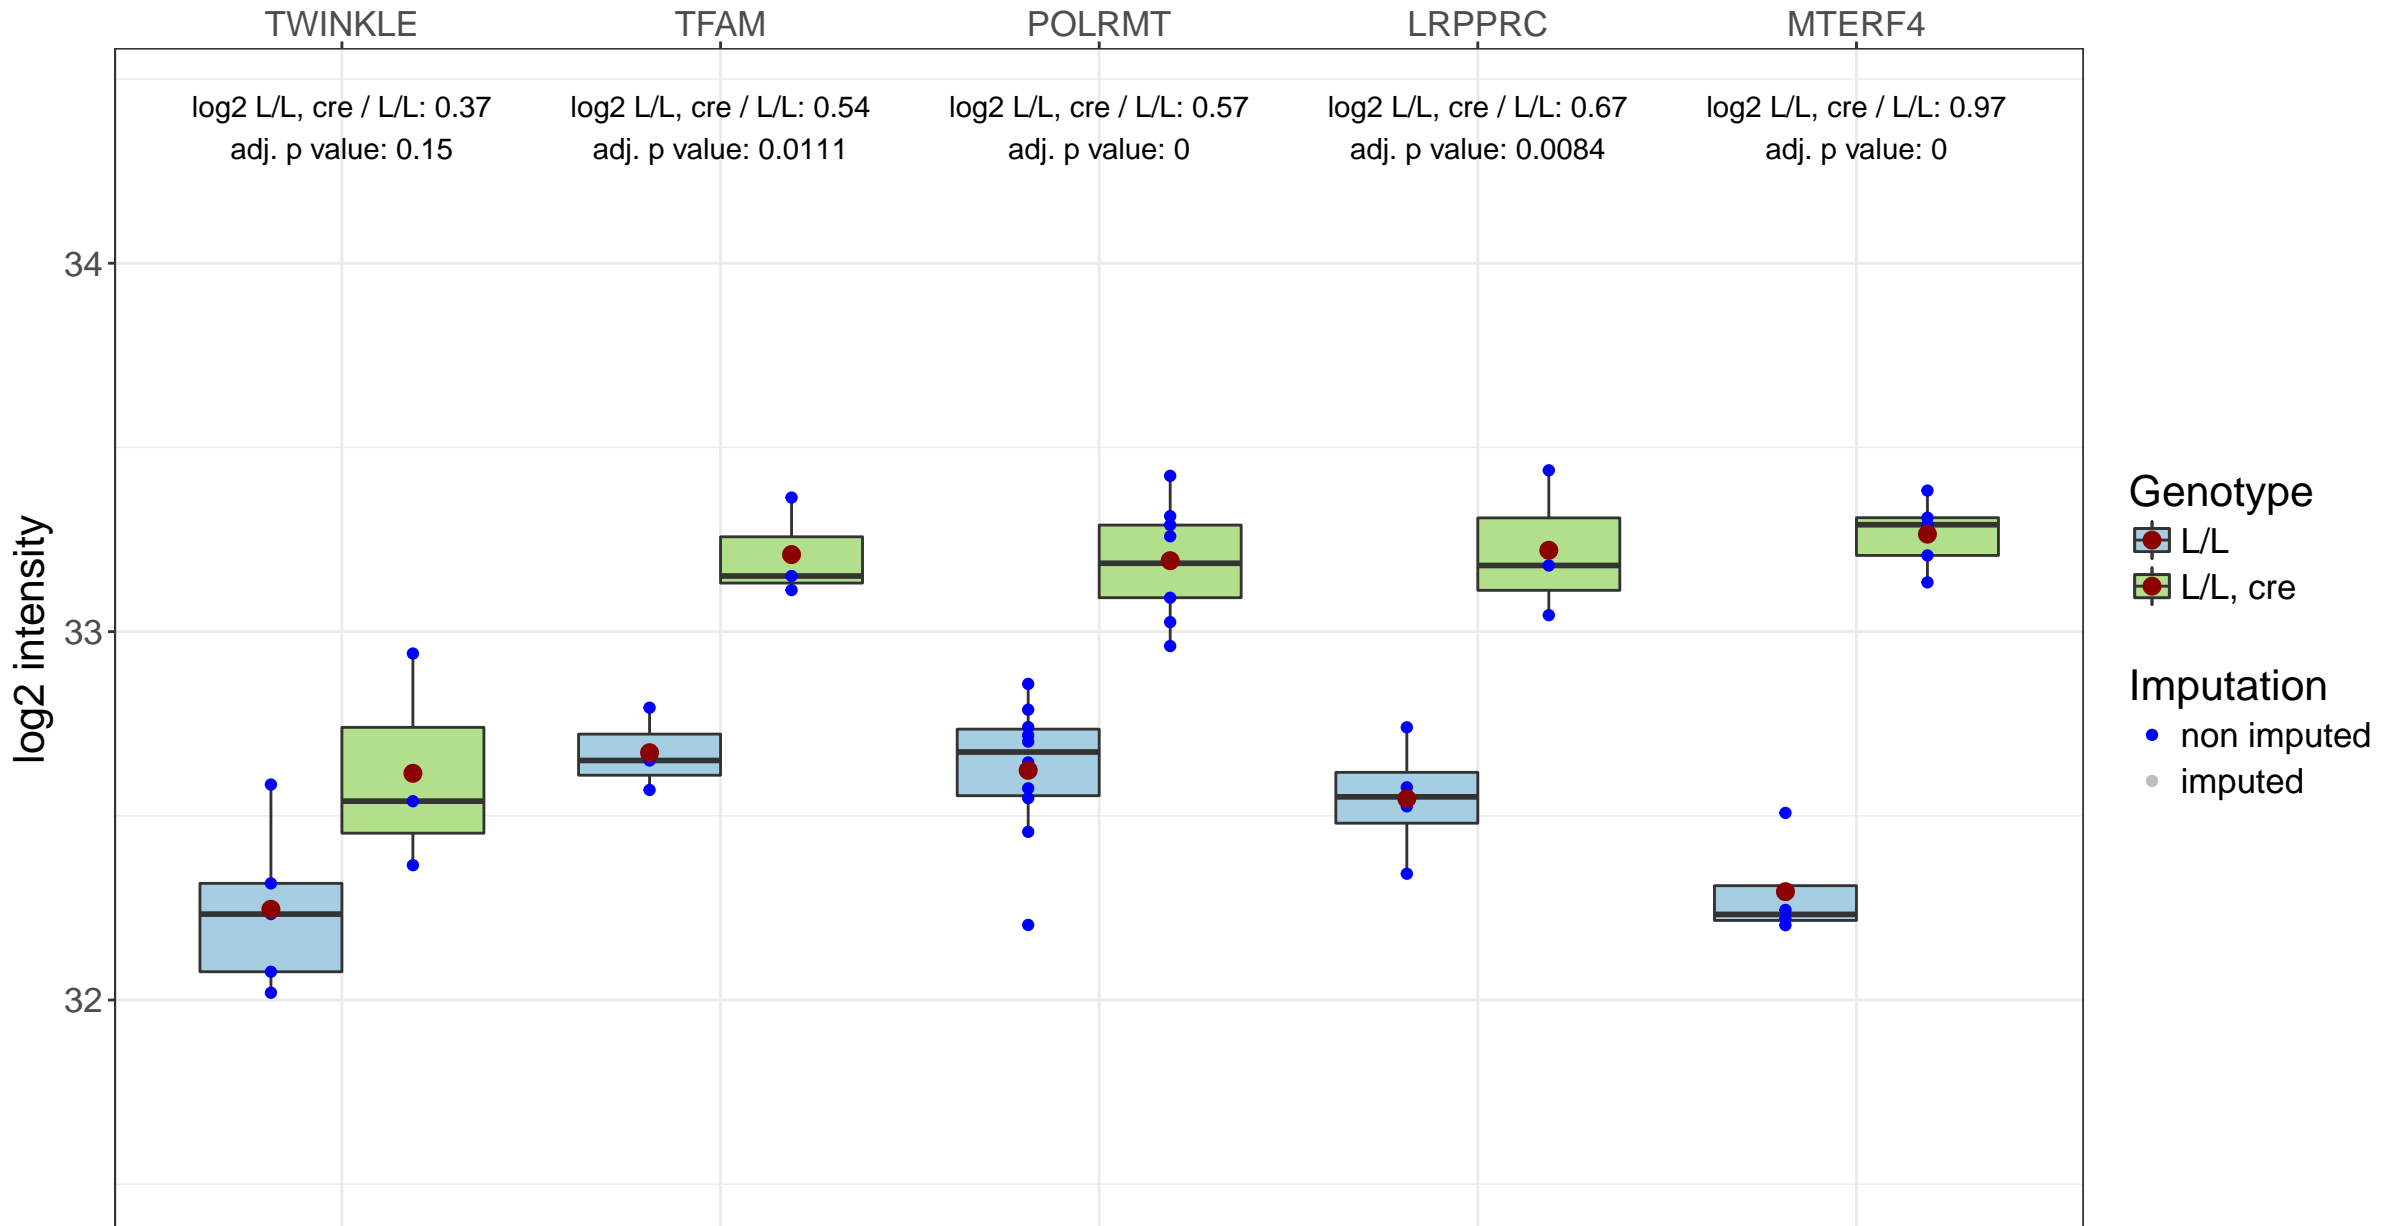

# ACADL / P51174

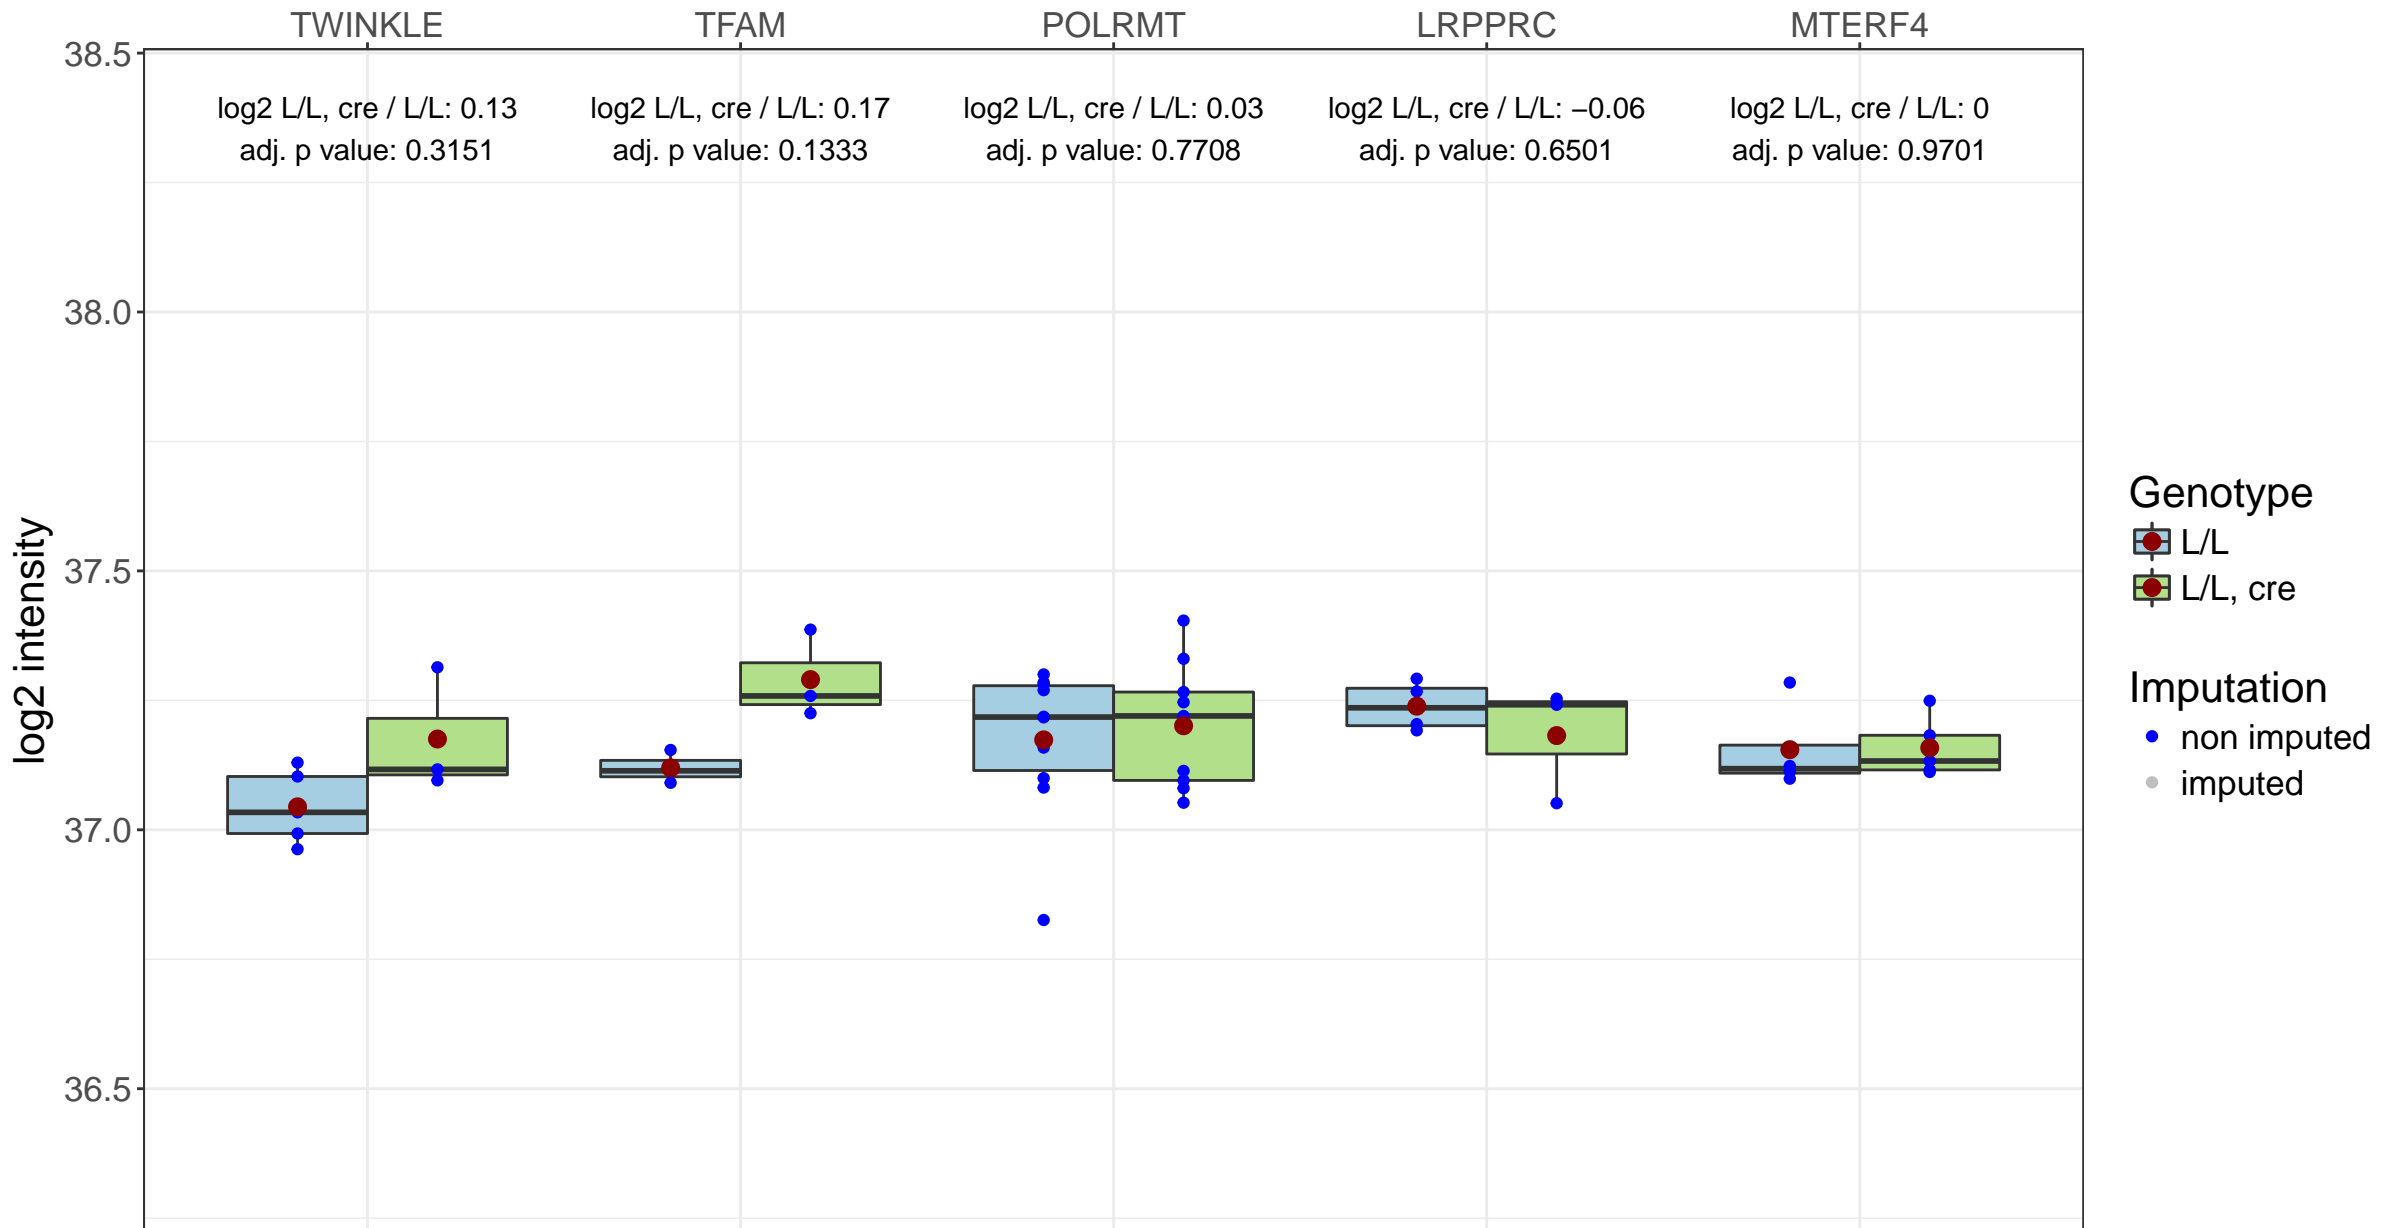

# ACADM / P45952

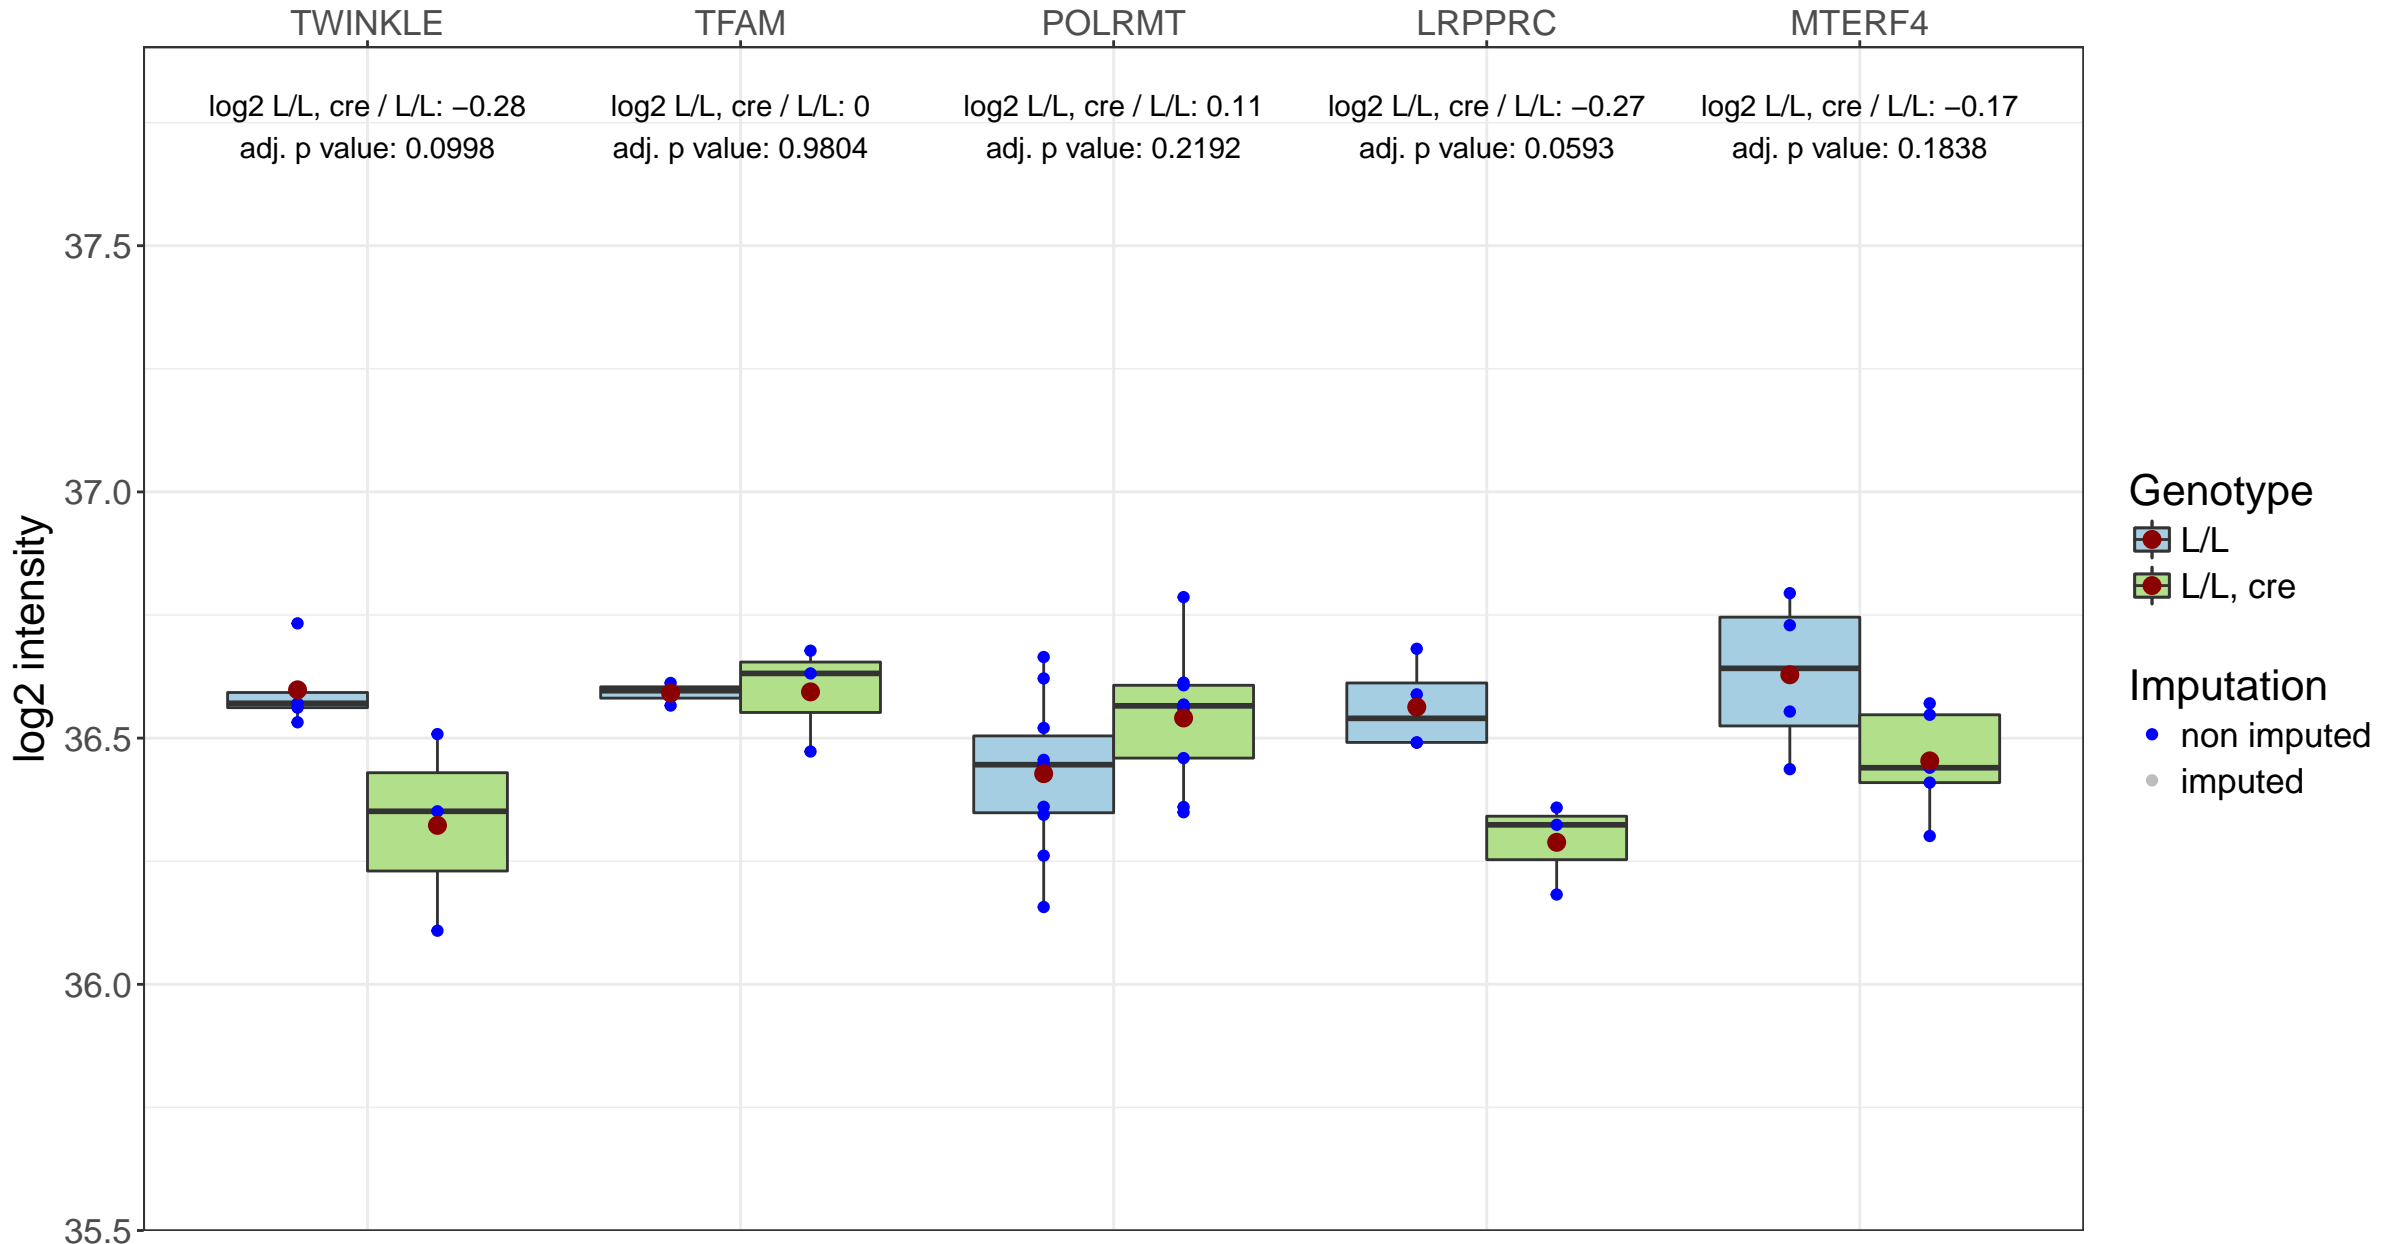



# ACADS / Q07417

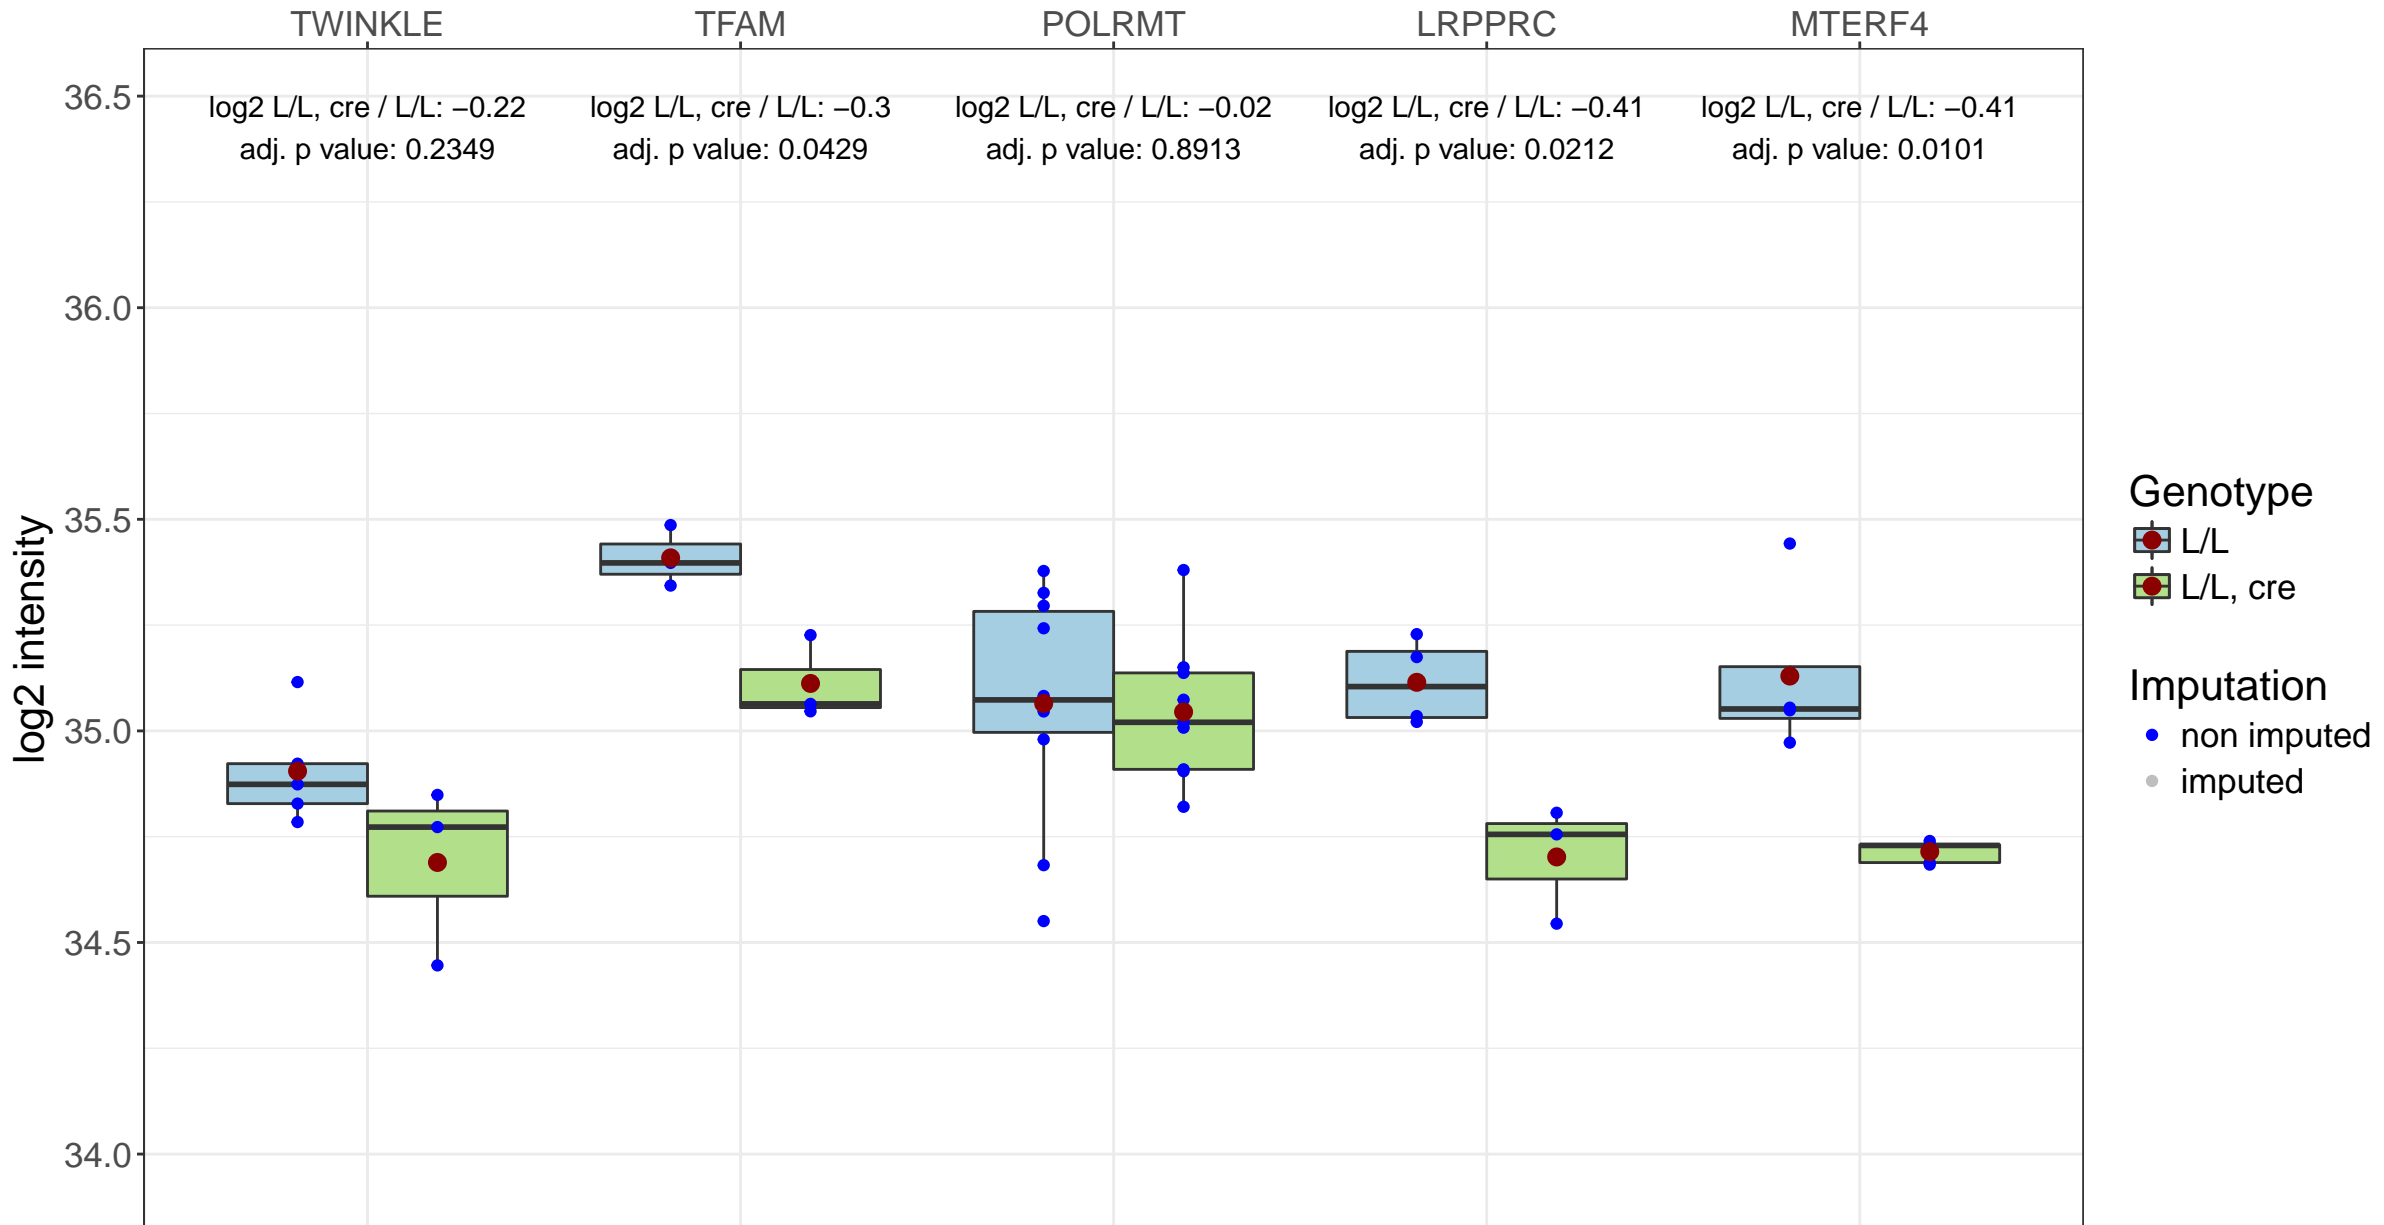

# ACADSB / Q9DBL1

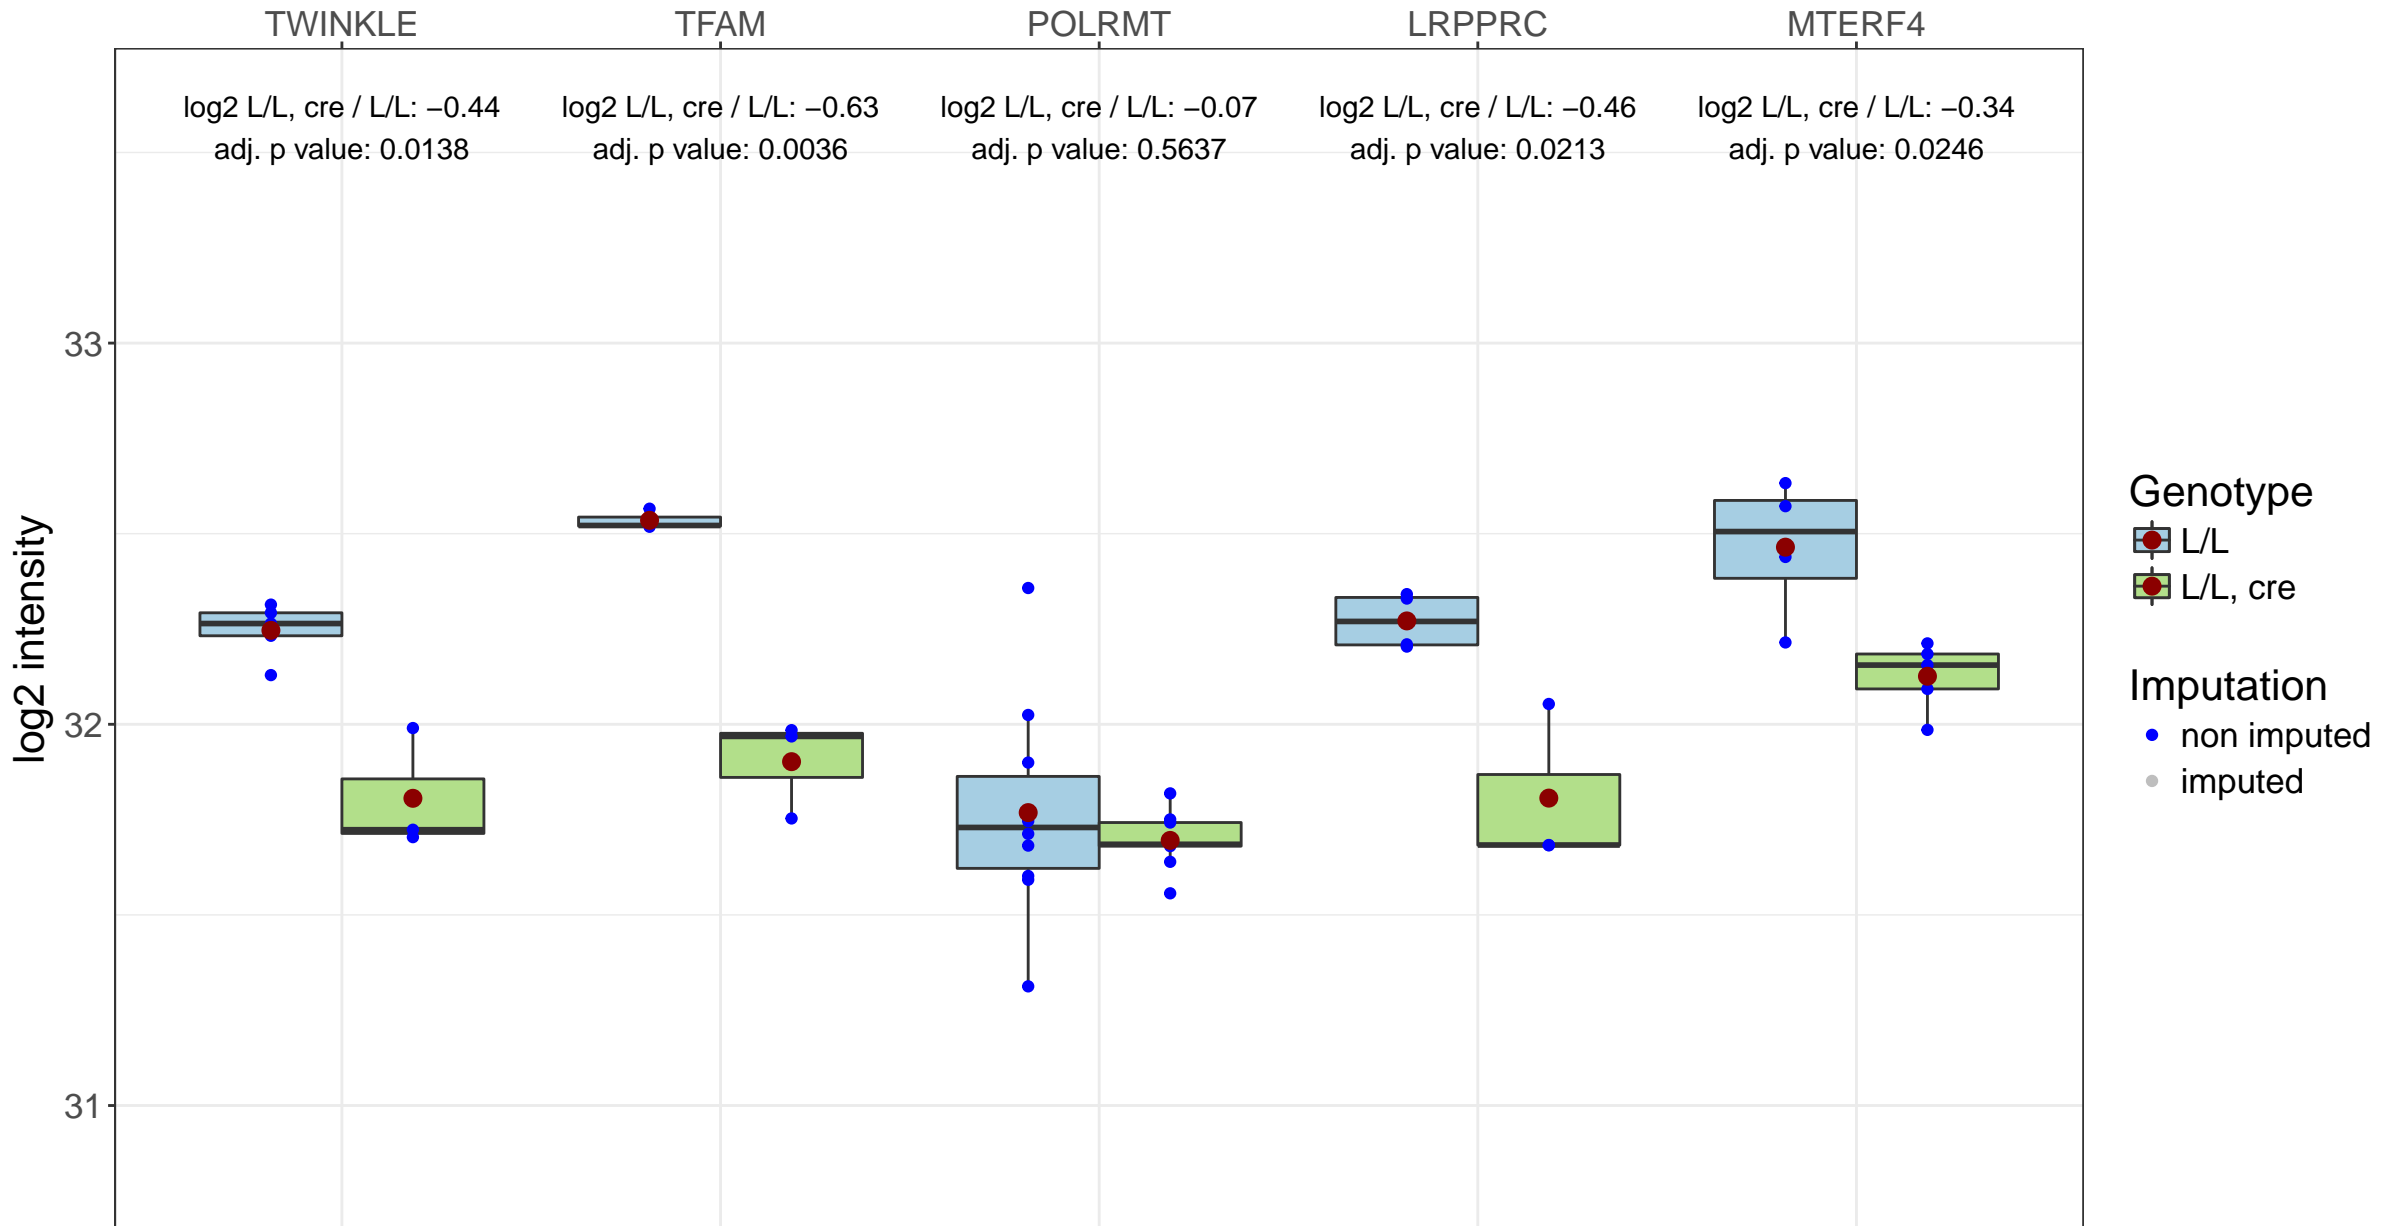

# ACADV1 / P50544

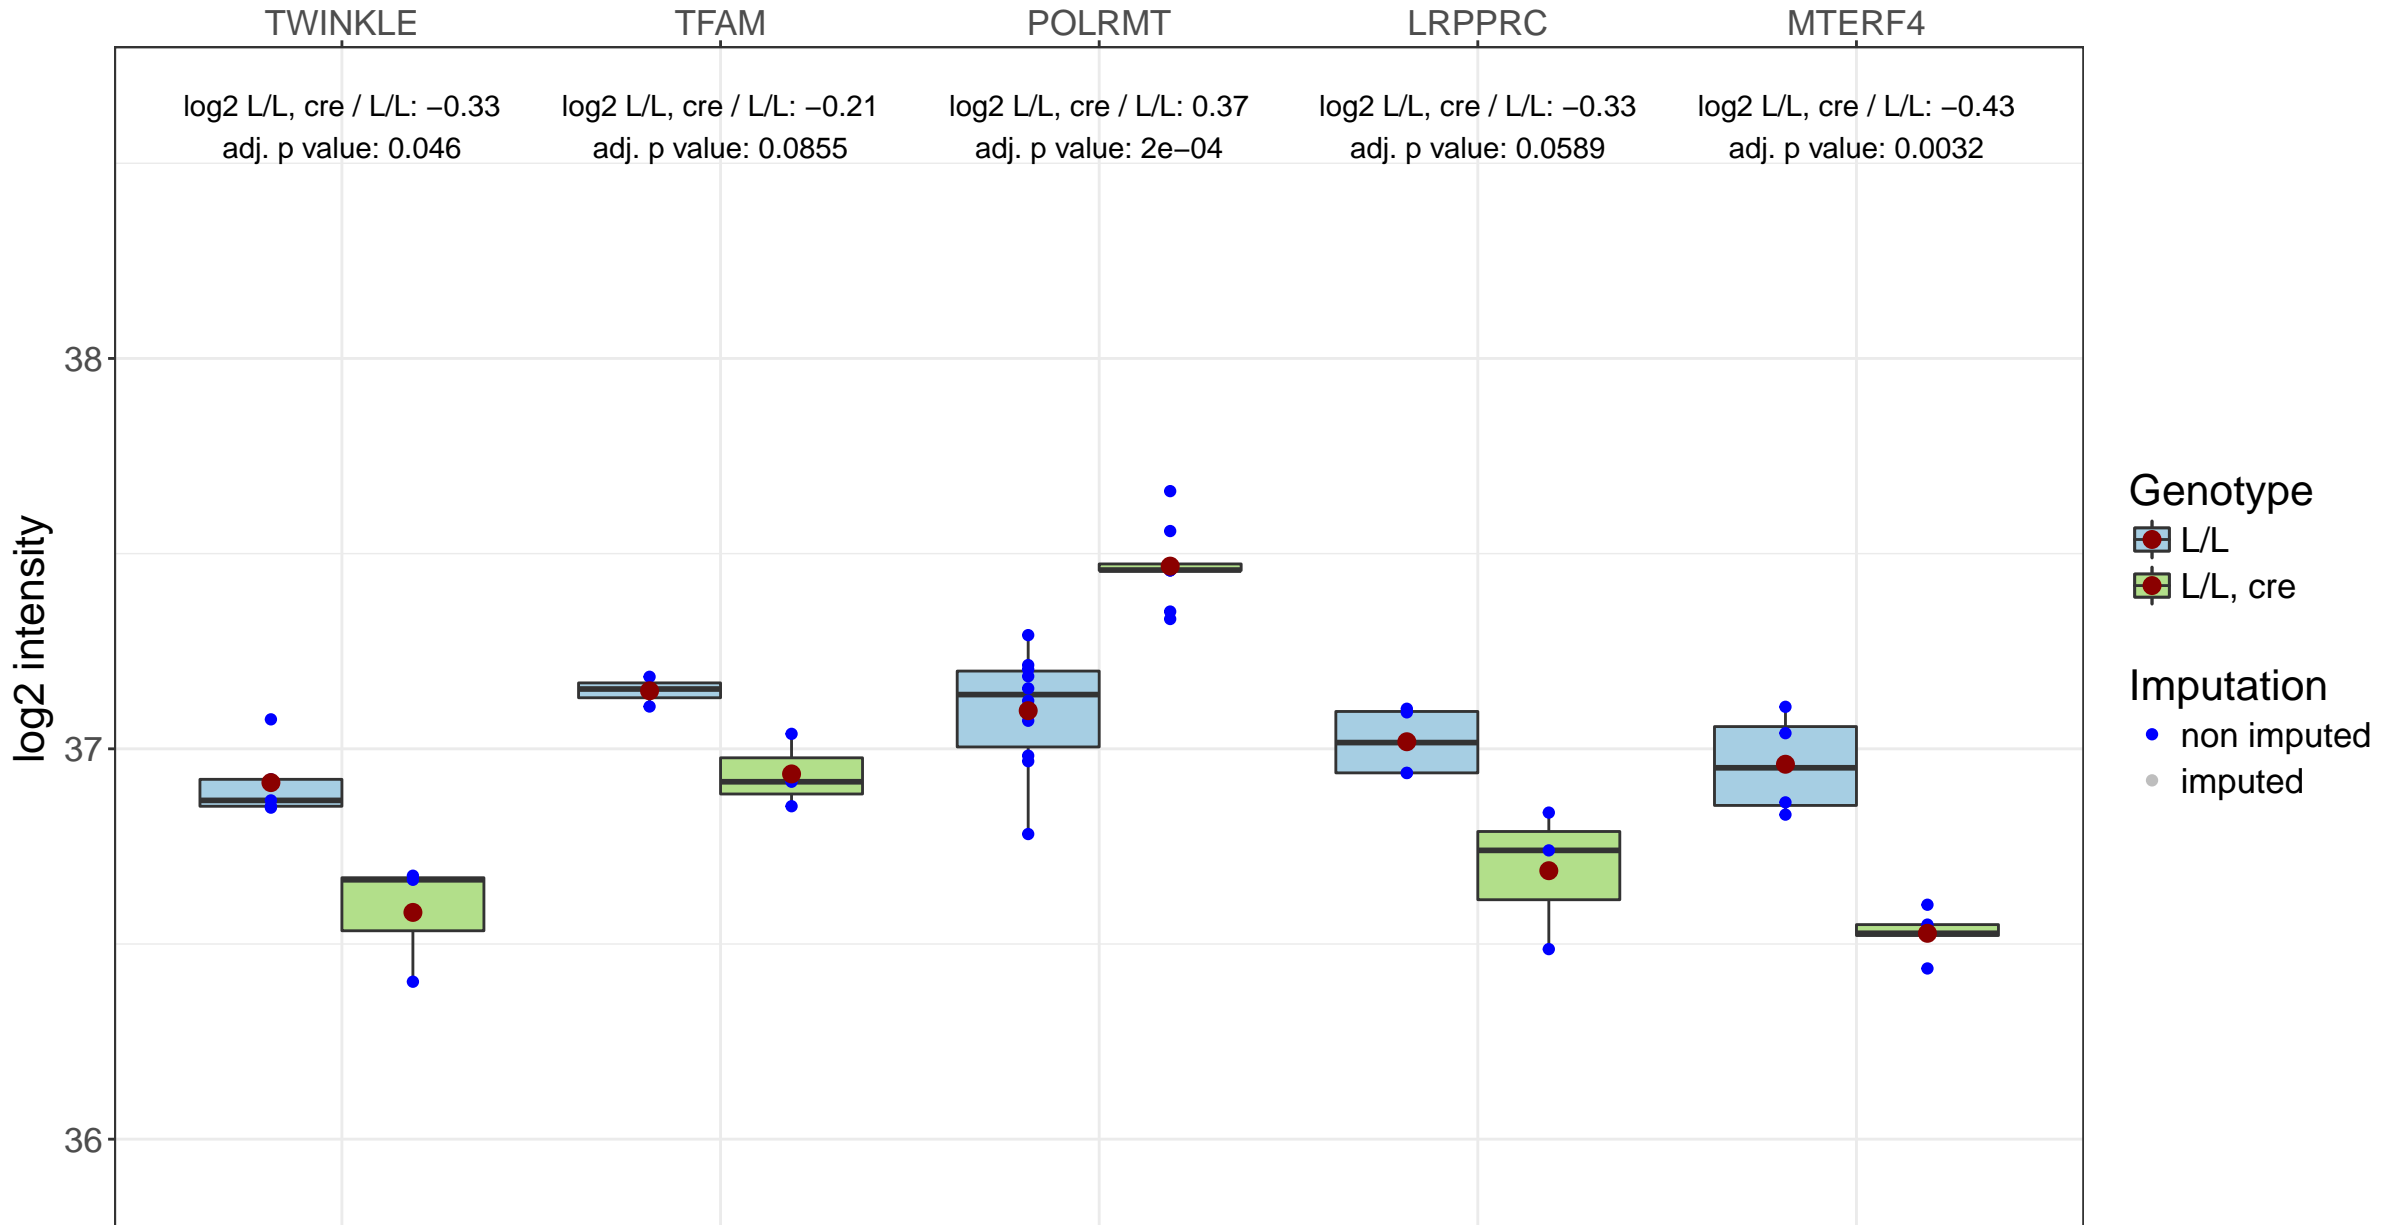

# ACAT1 / Q8QZT1

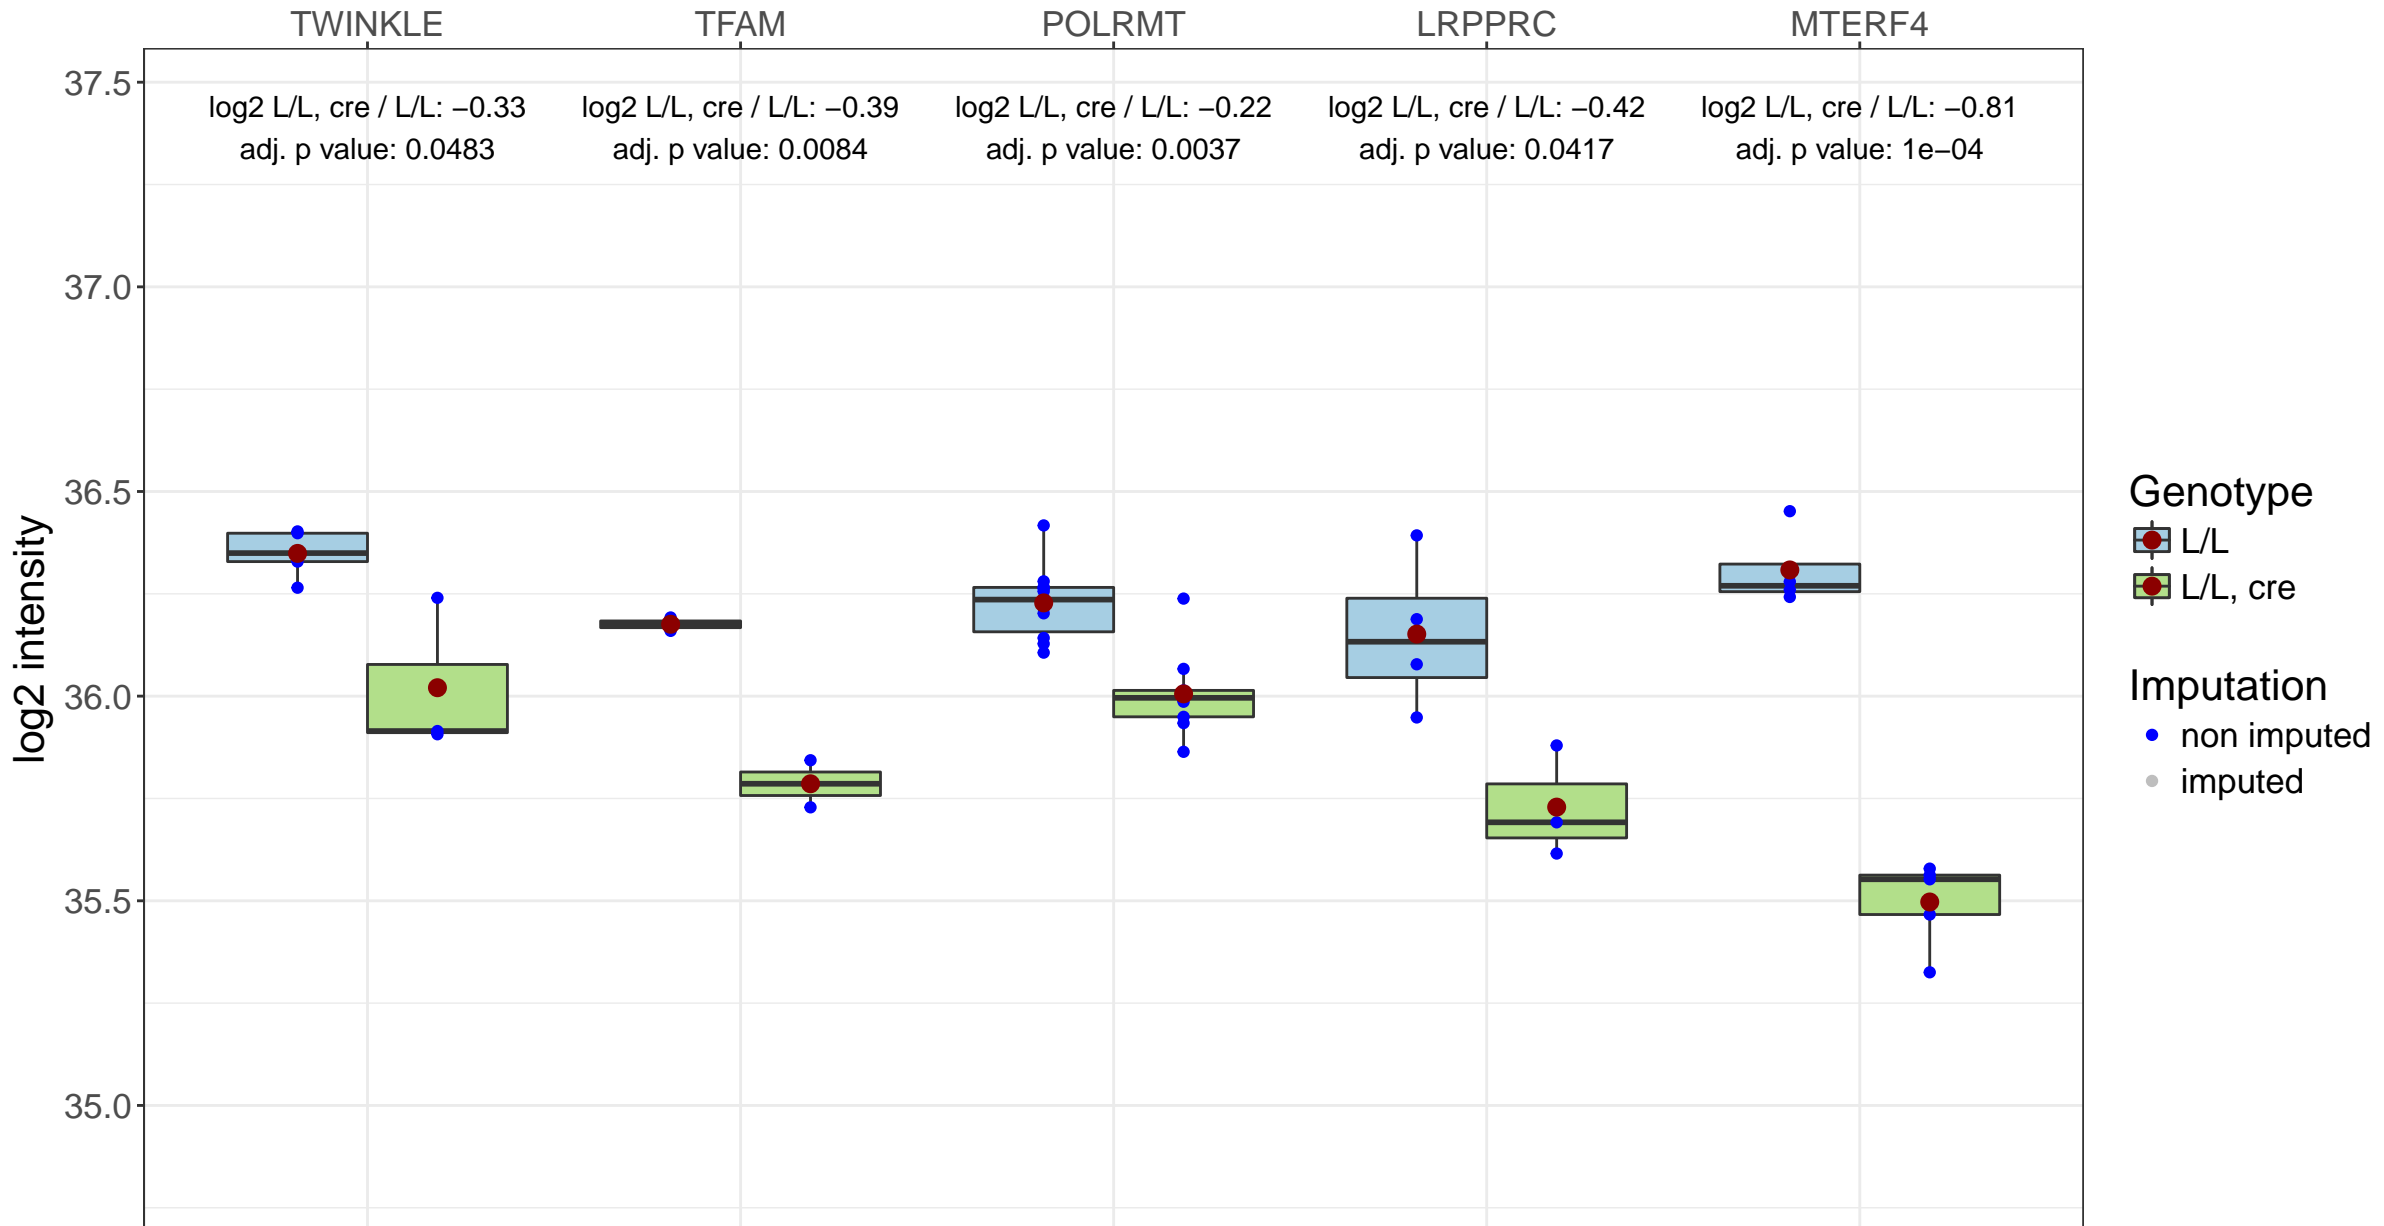

# ACN9 / Q8BQU3

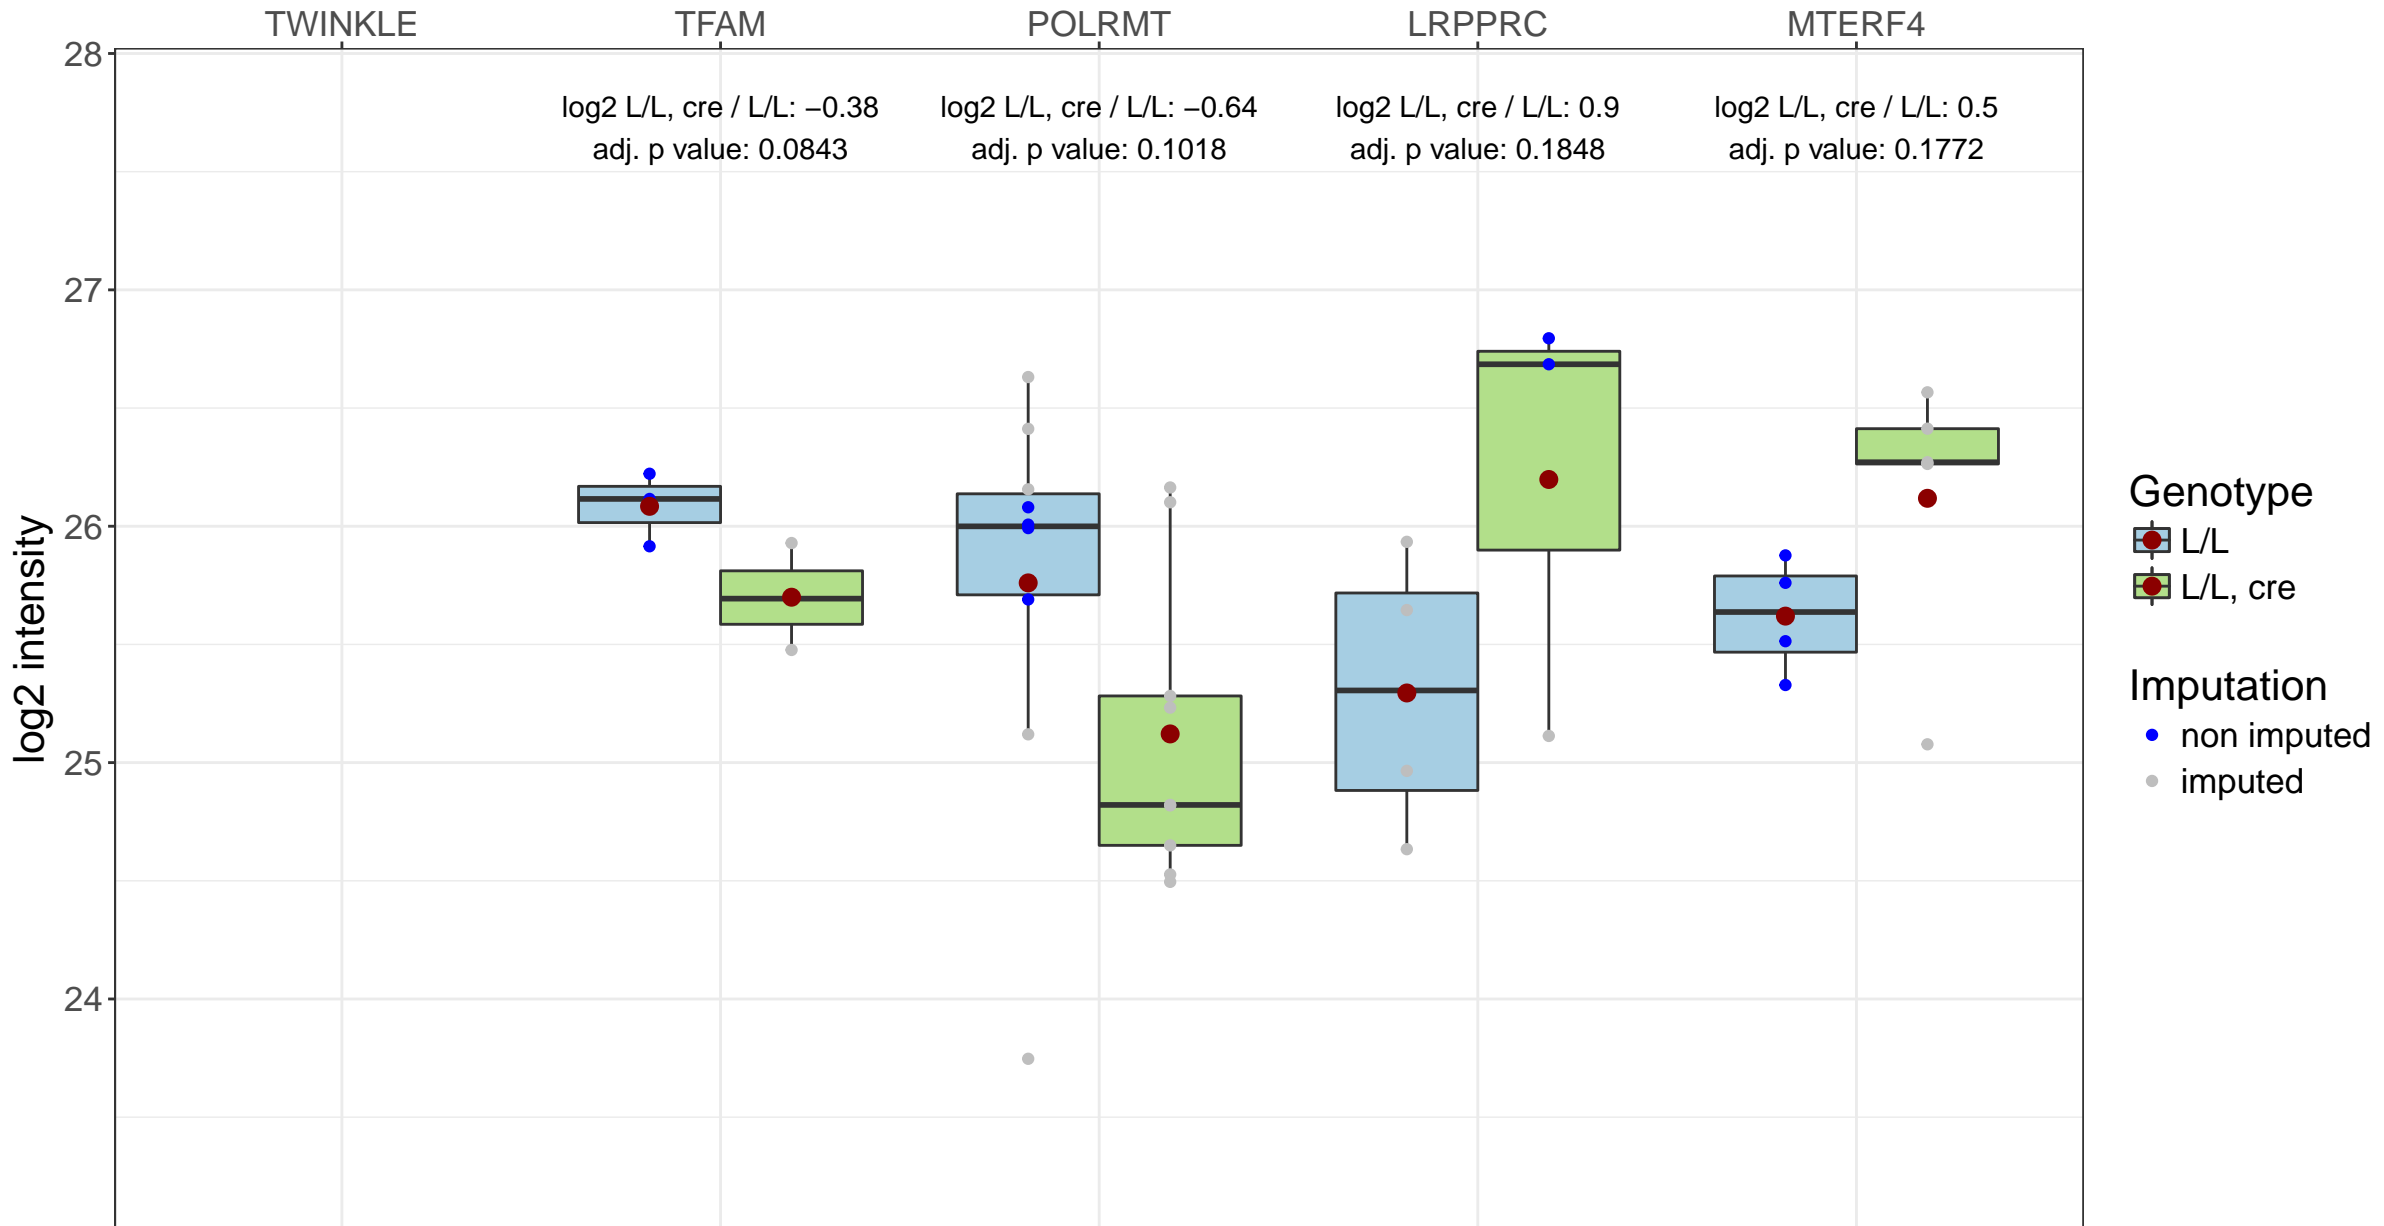

# ACO2 / Q99KI0

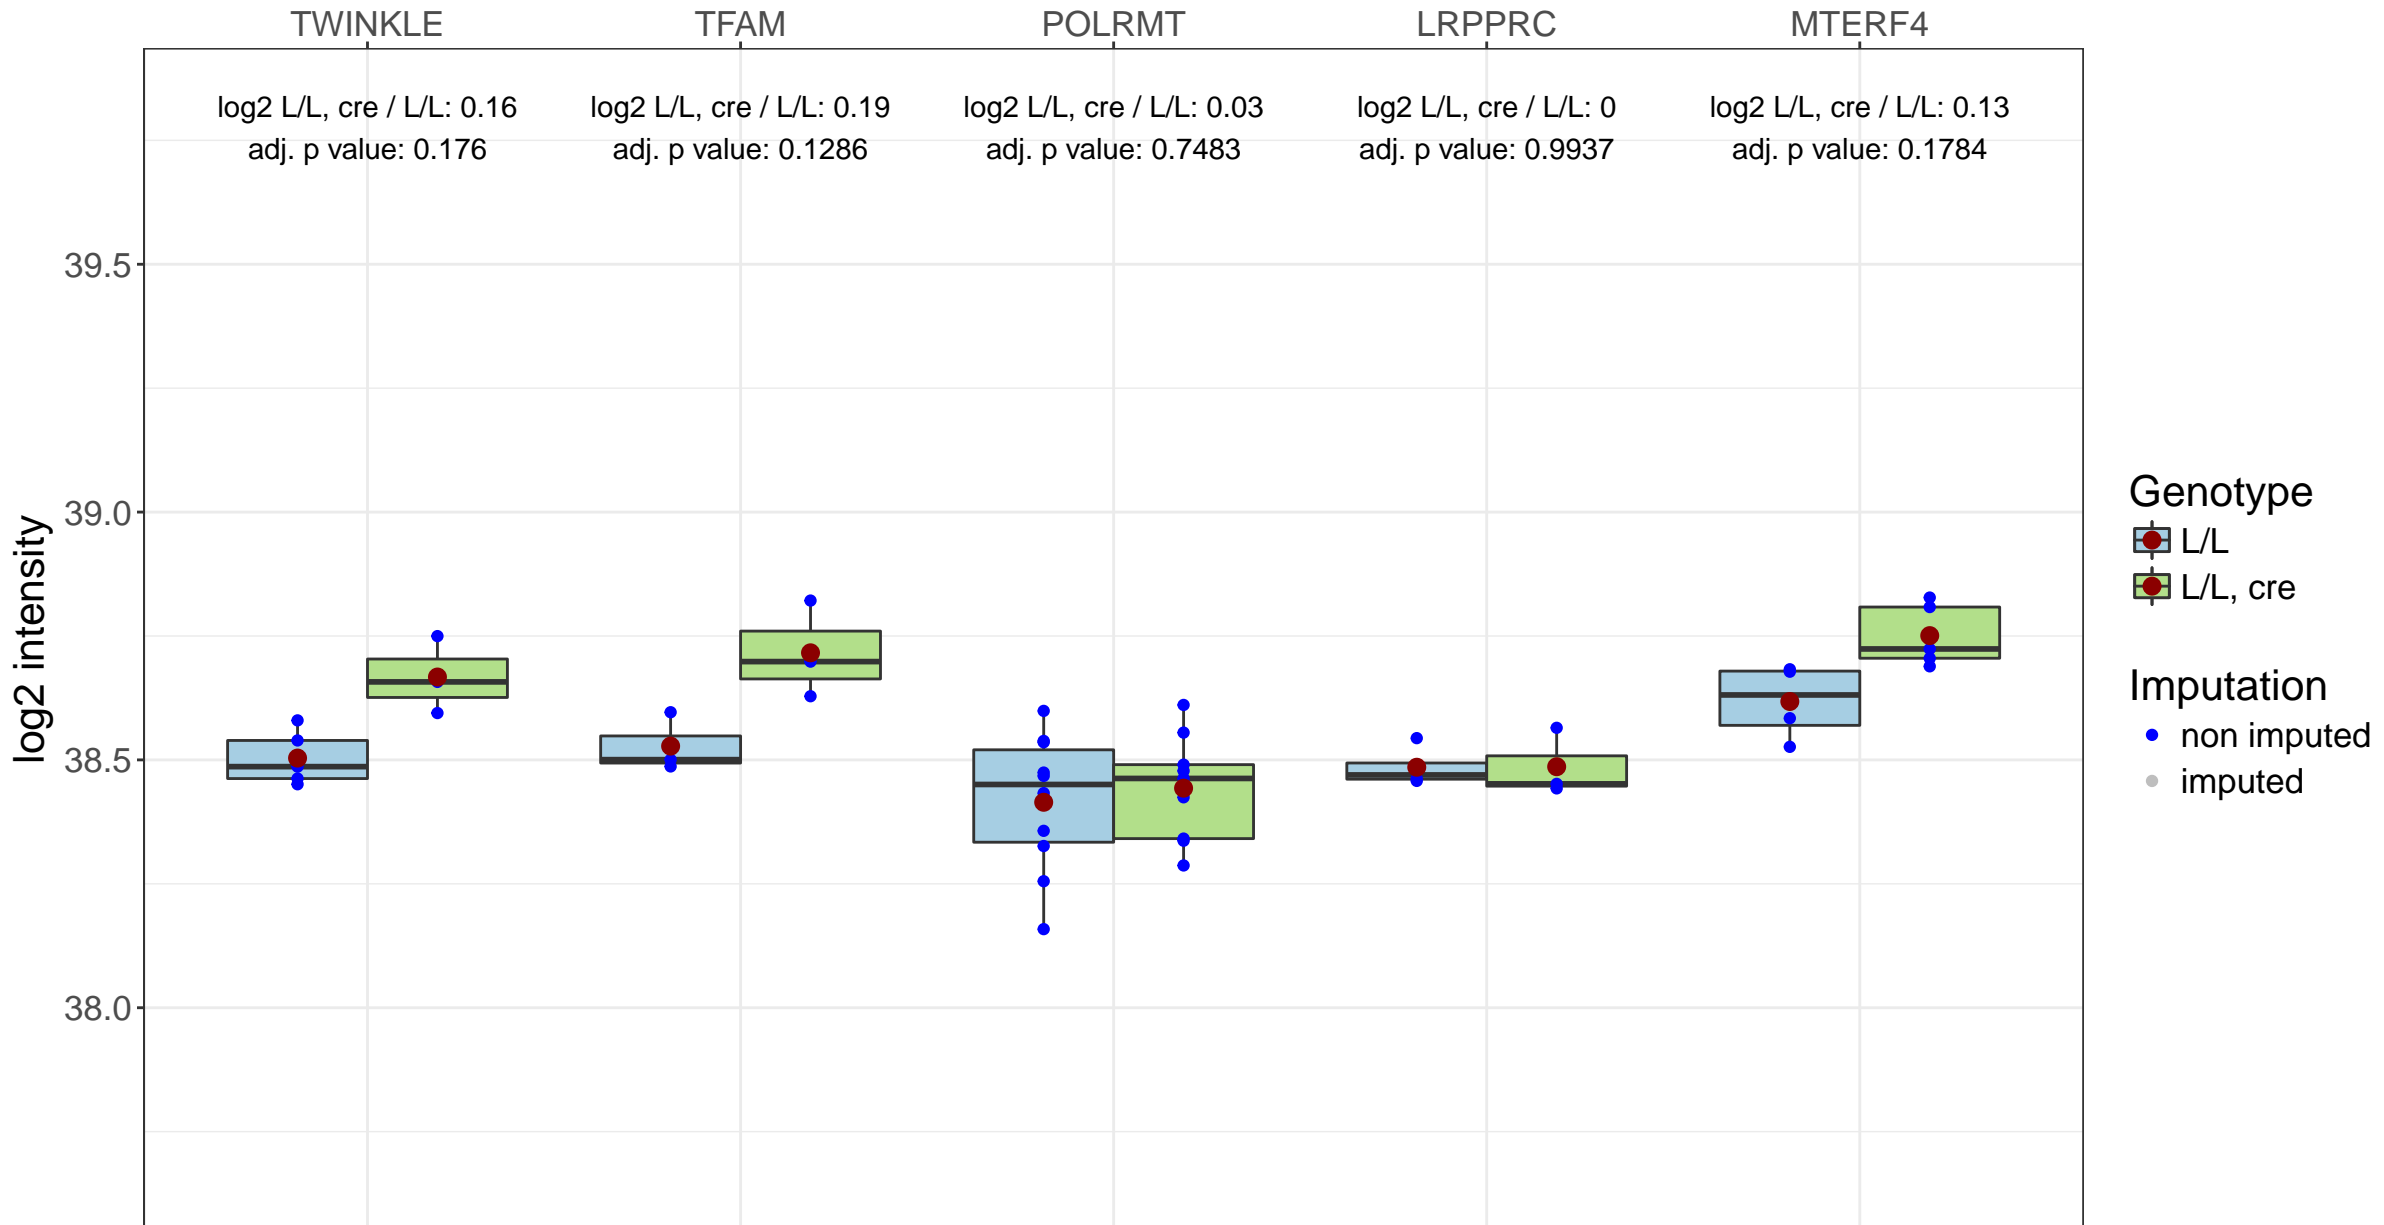

# ACOT13 / Q9CQR4

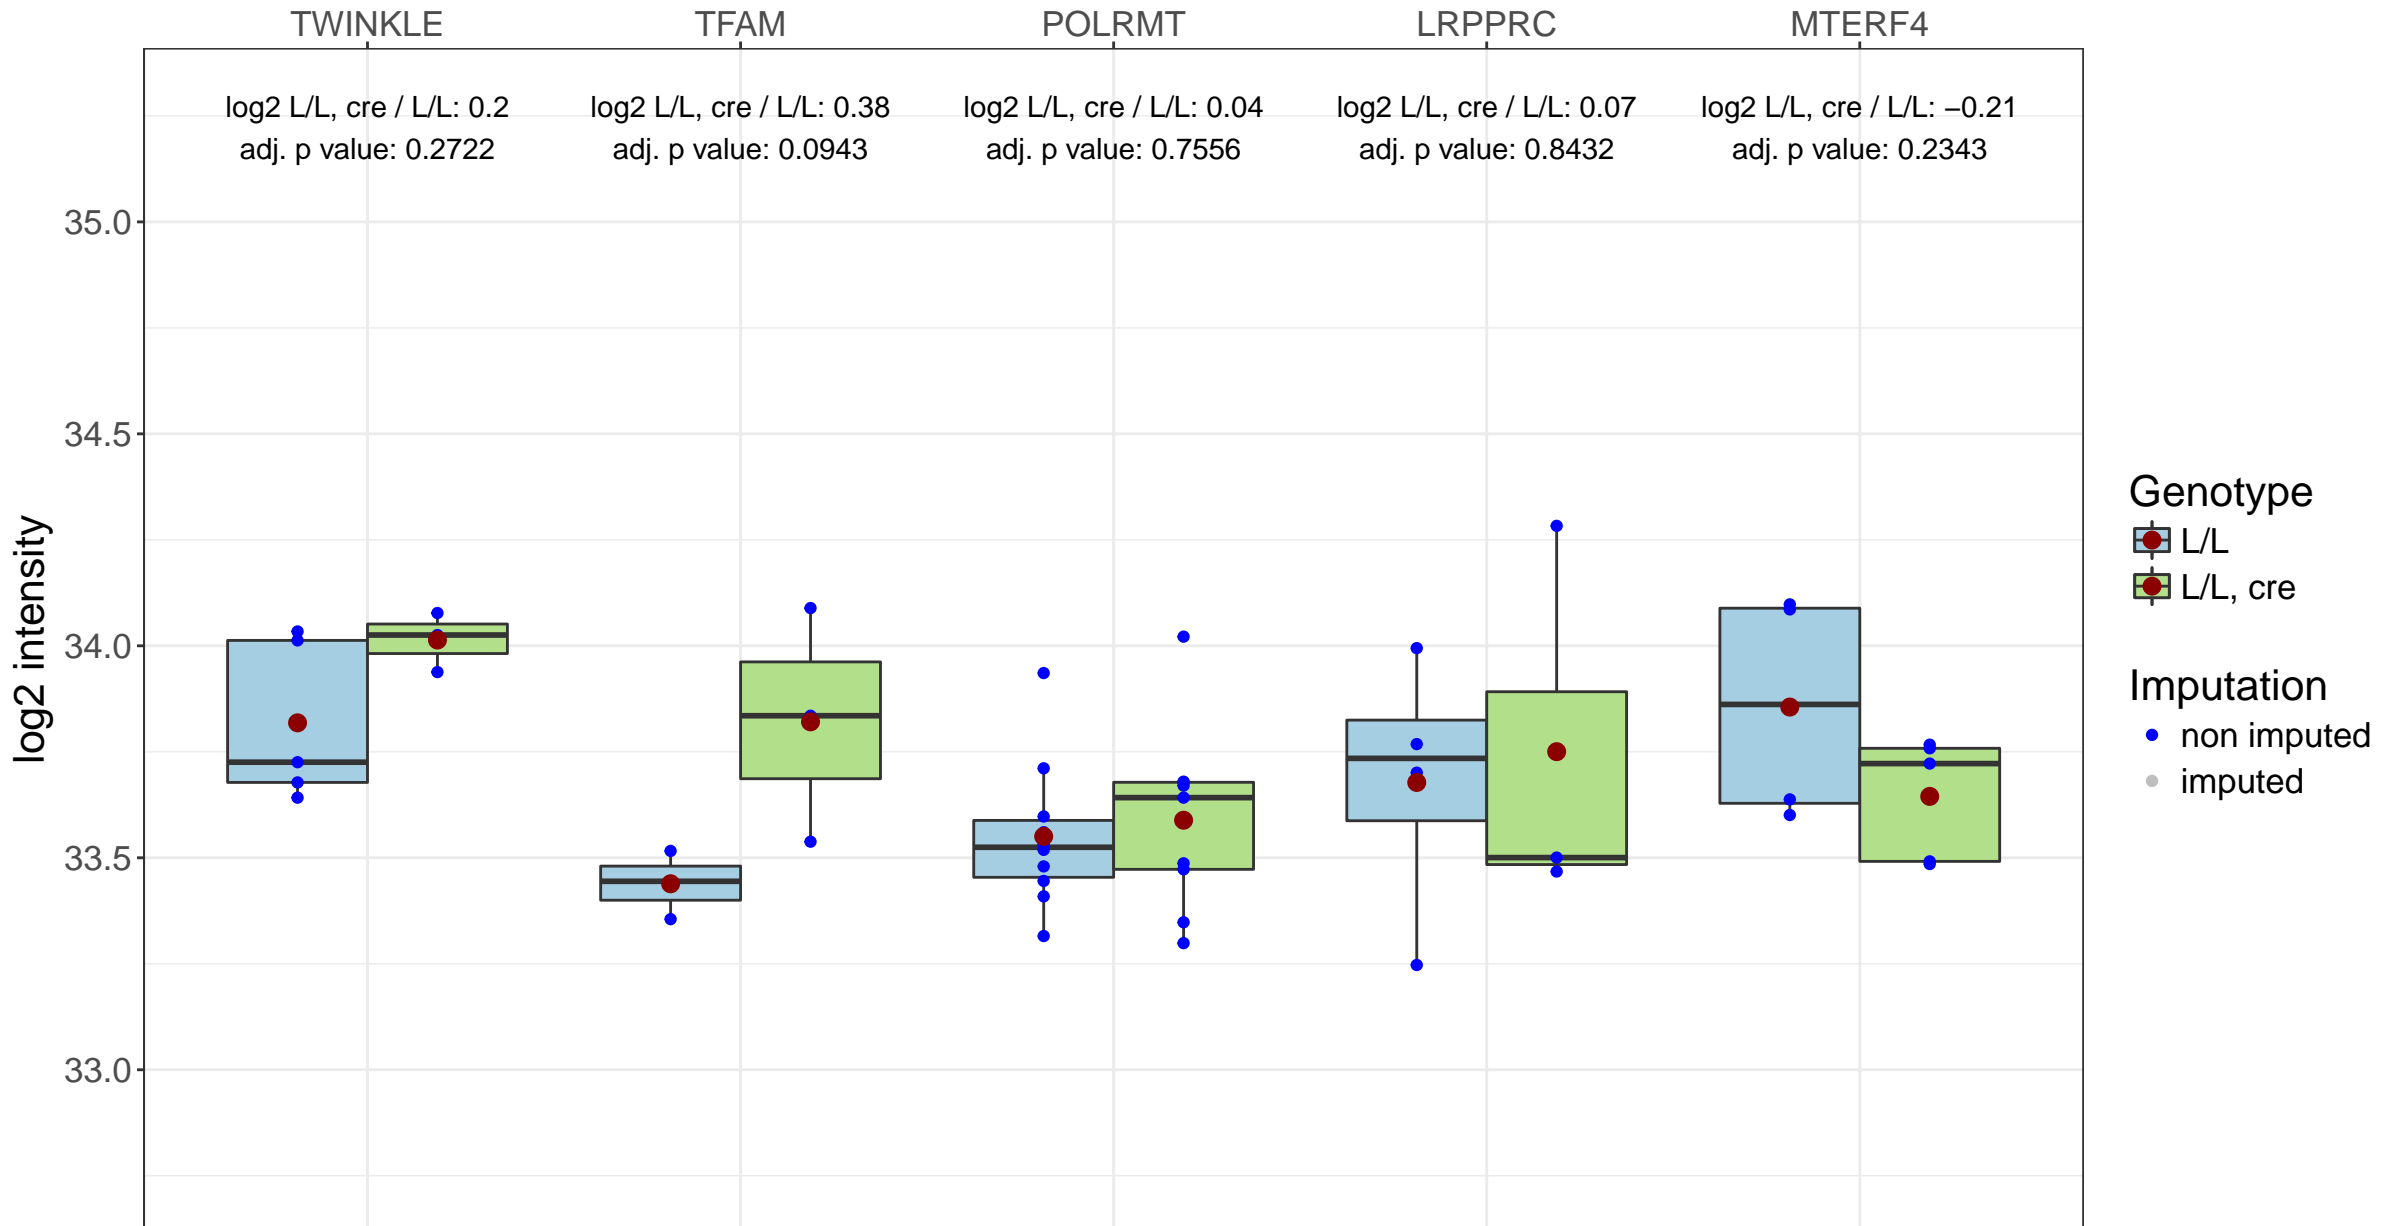

# ACOT2 / Q9QYR9

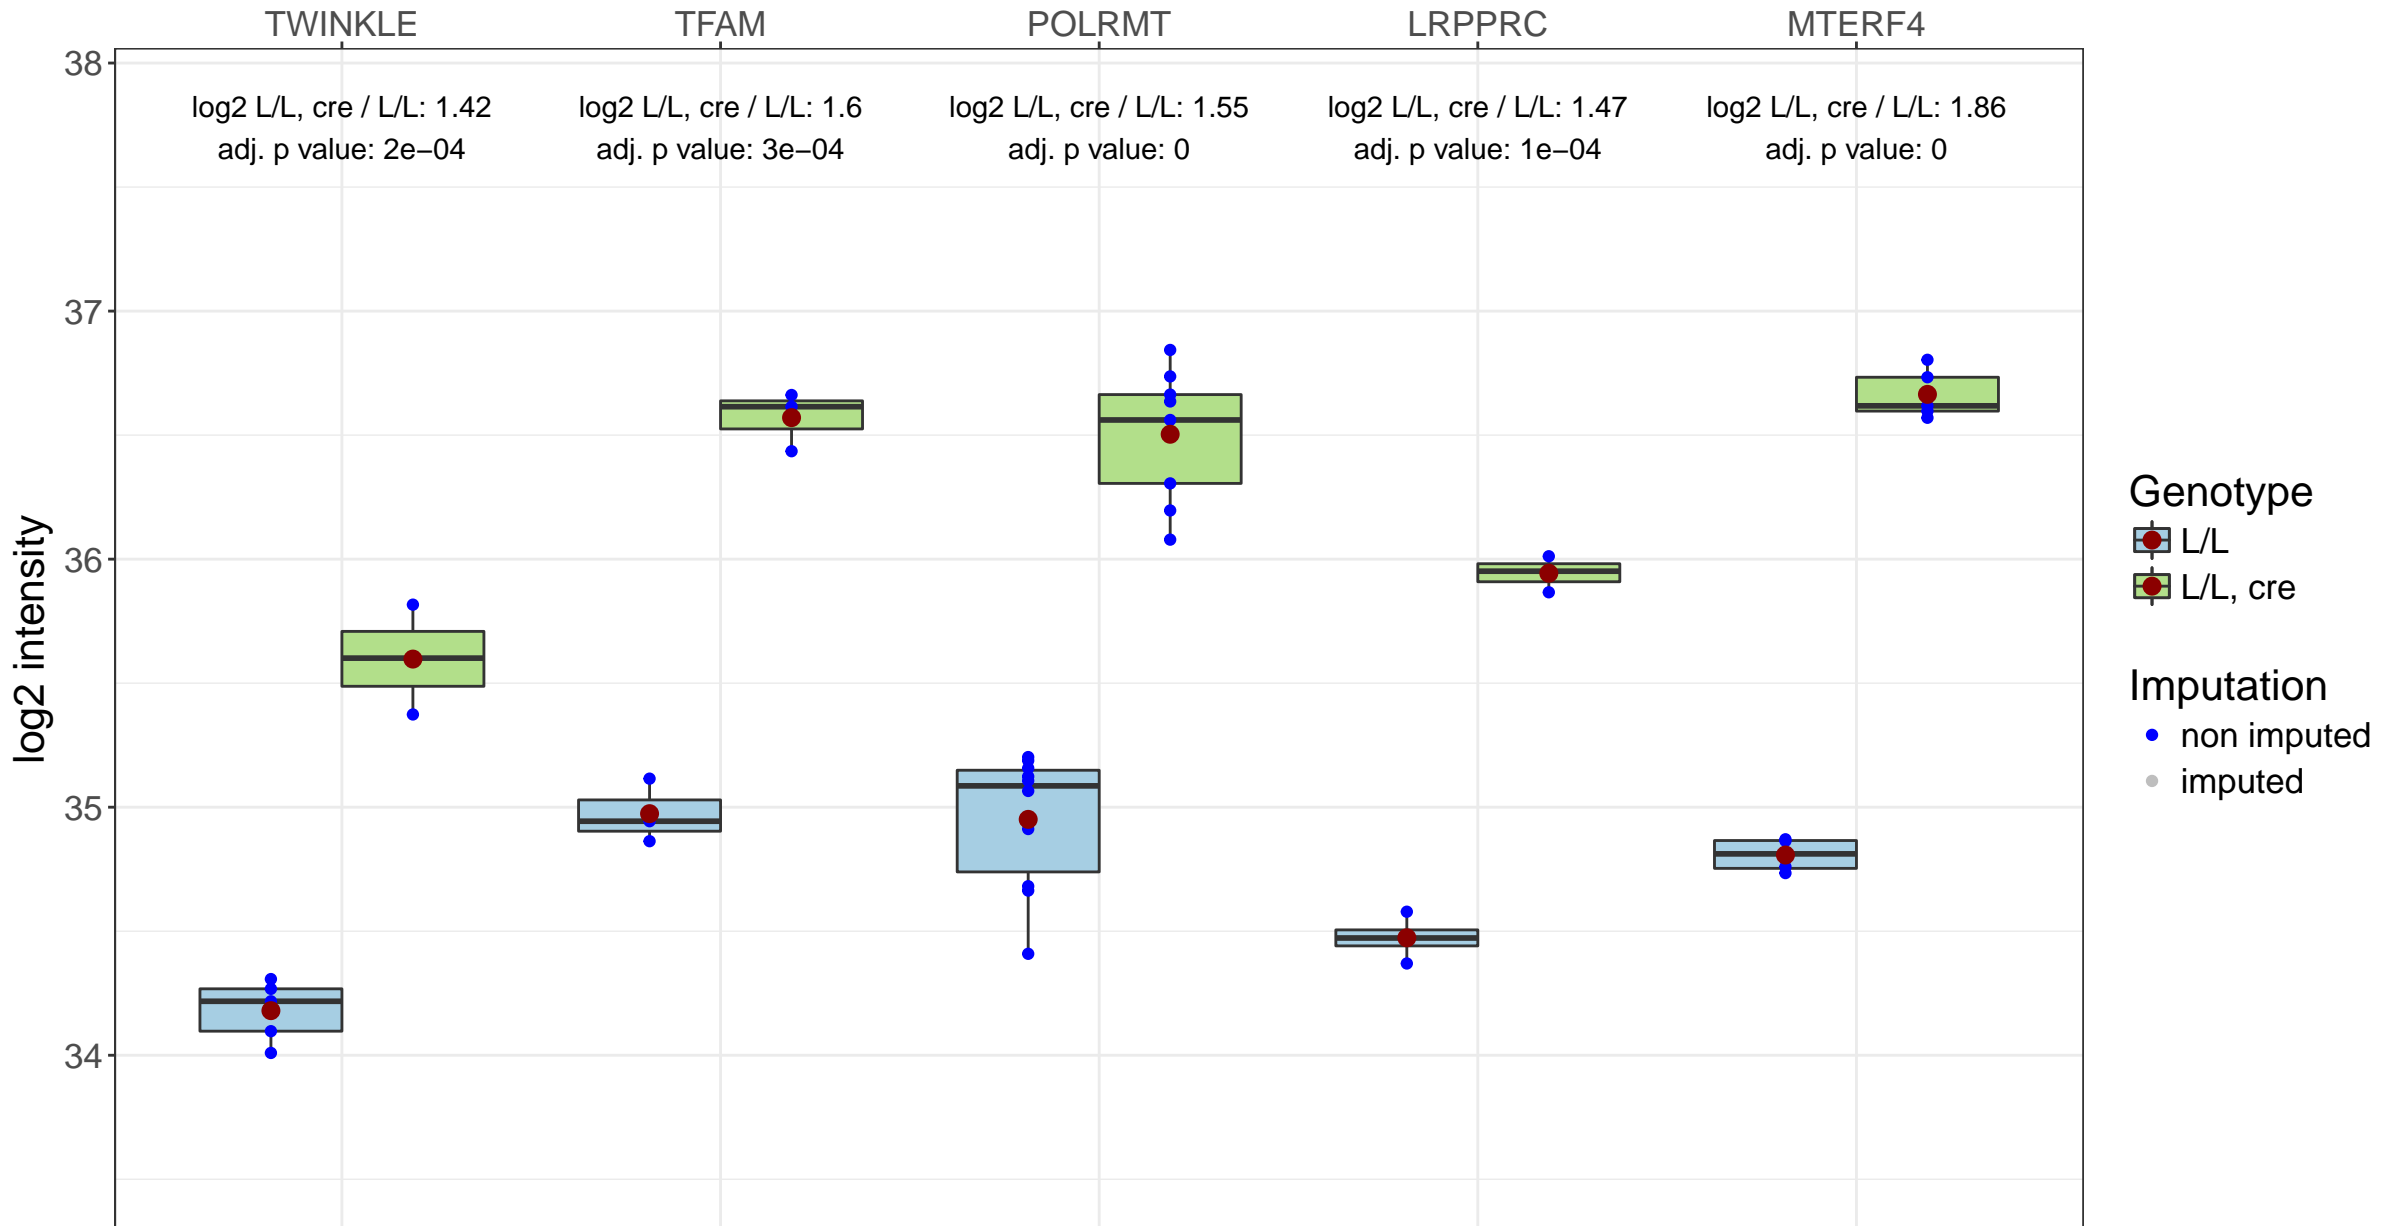



# ACOT7 / E9PYH2

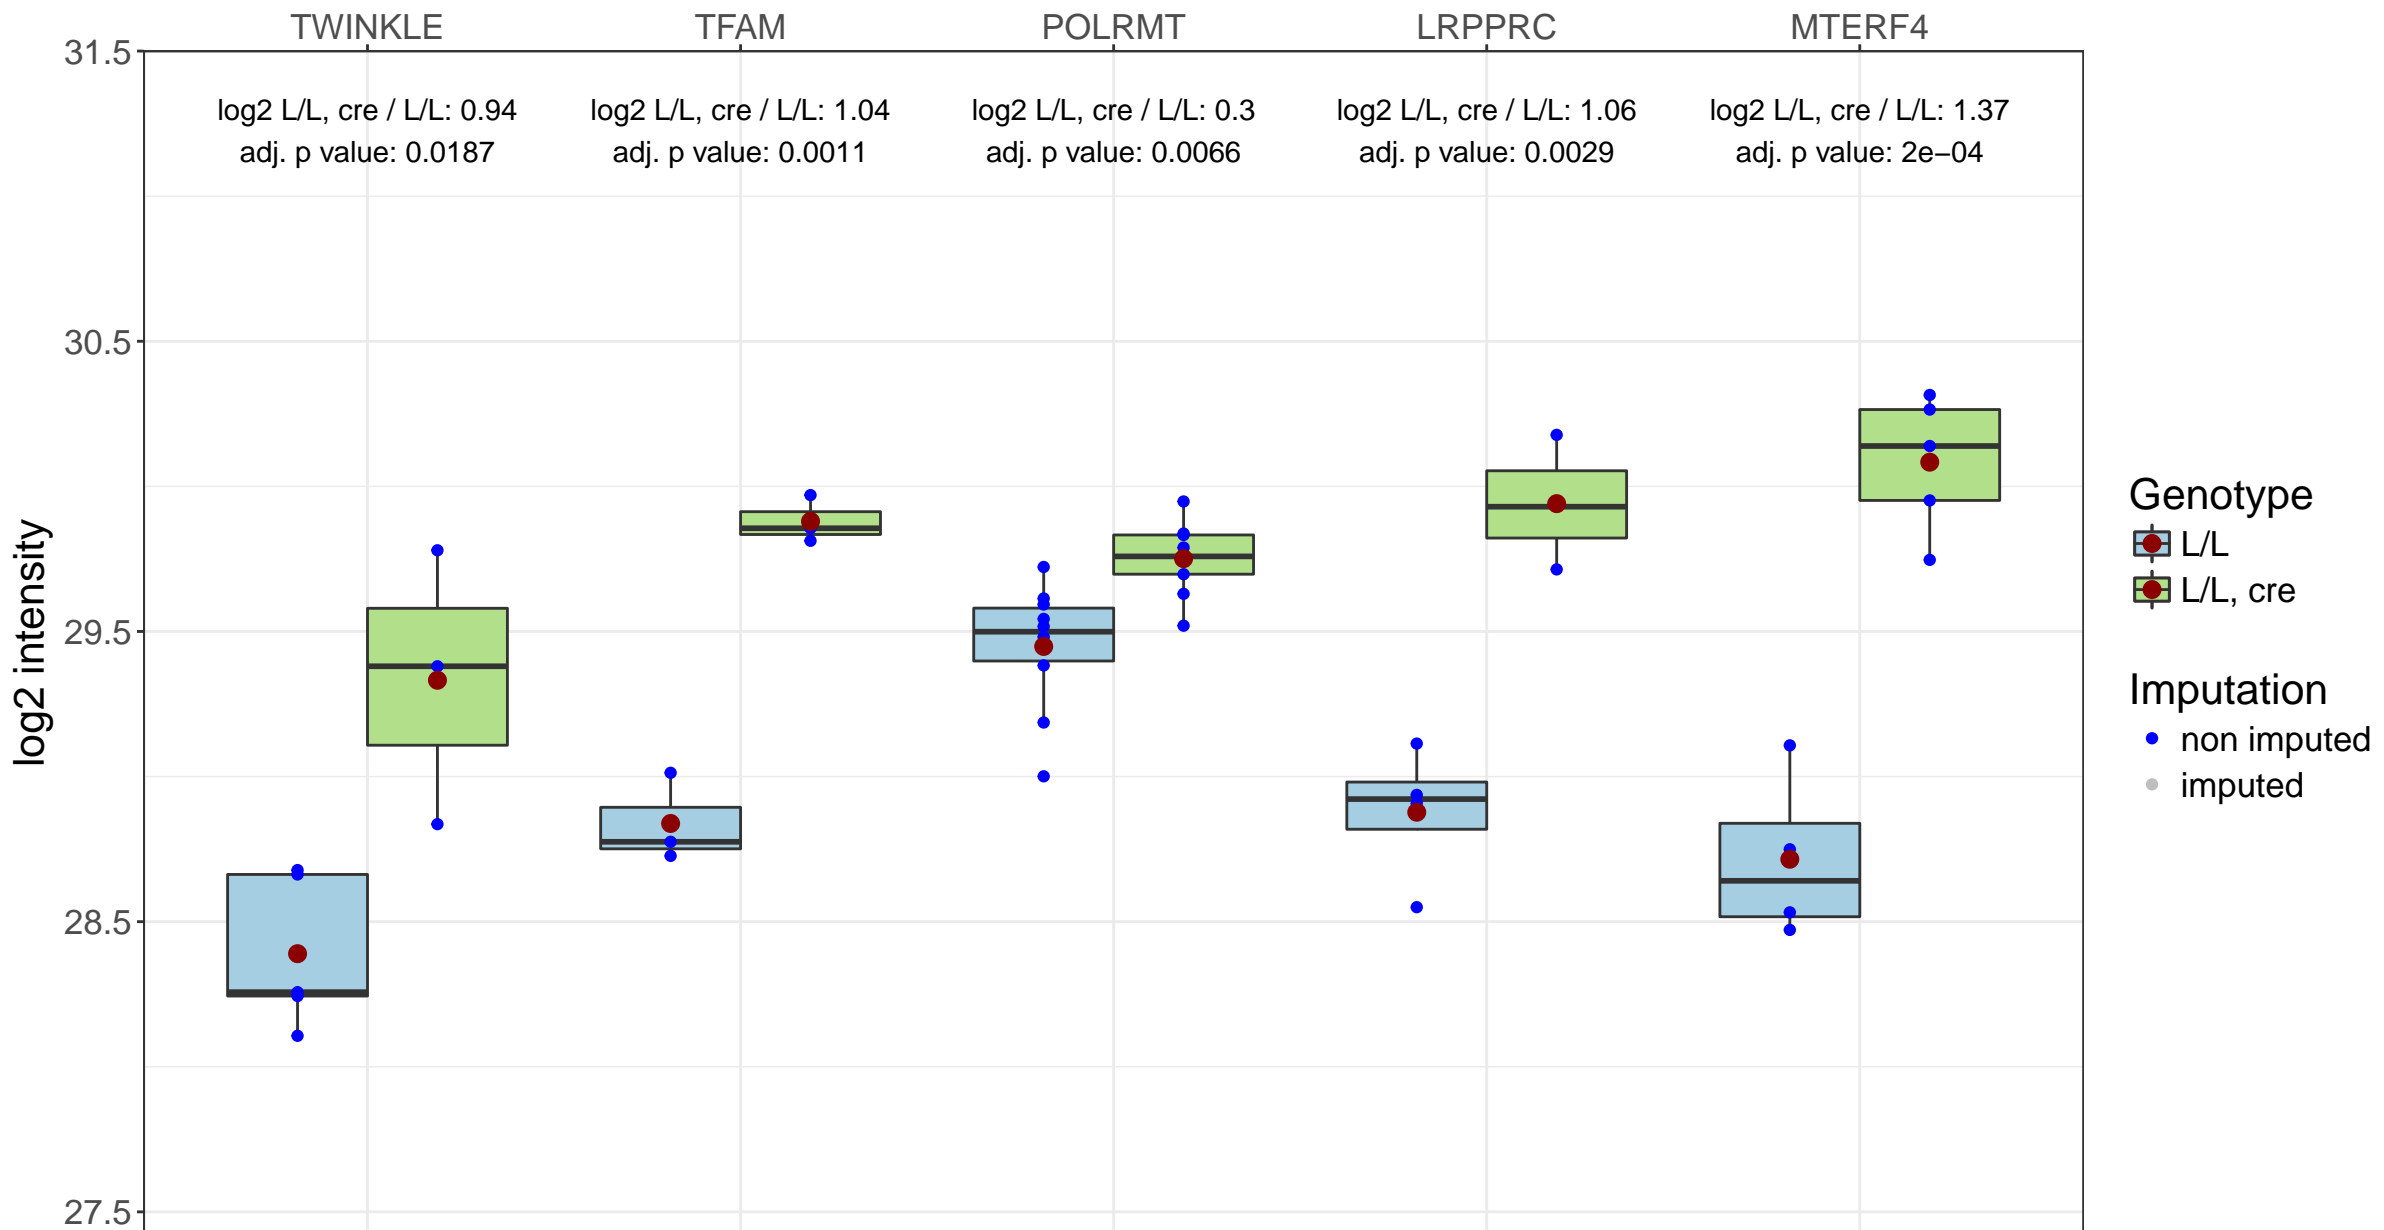

# ACOT9 / Q9R0X4

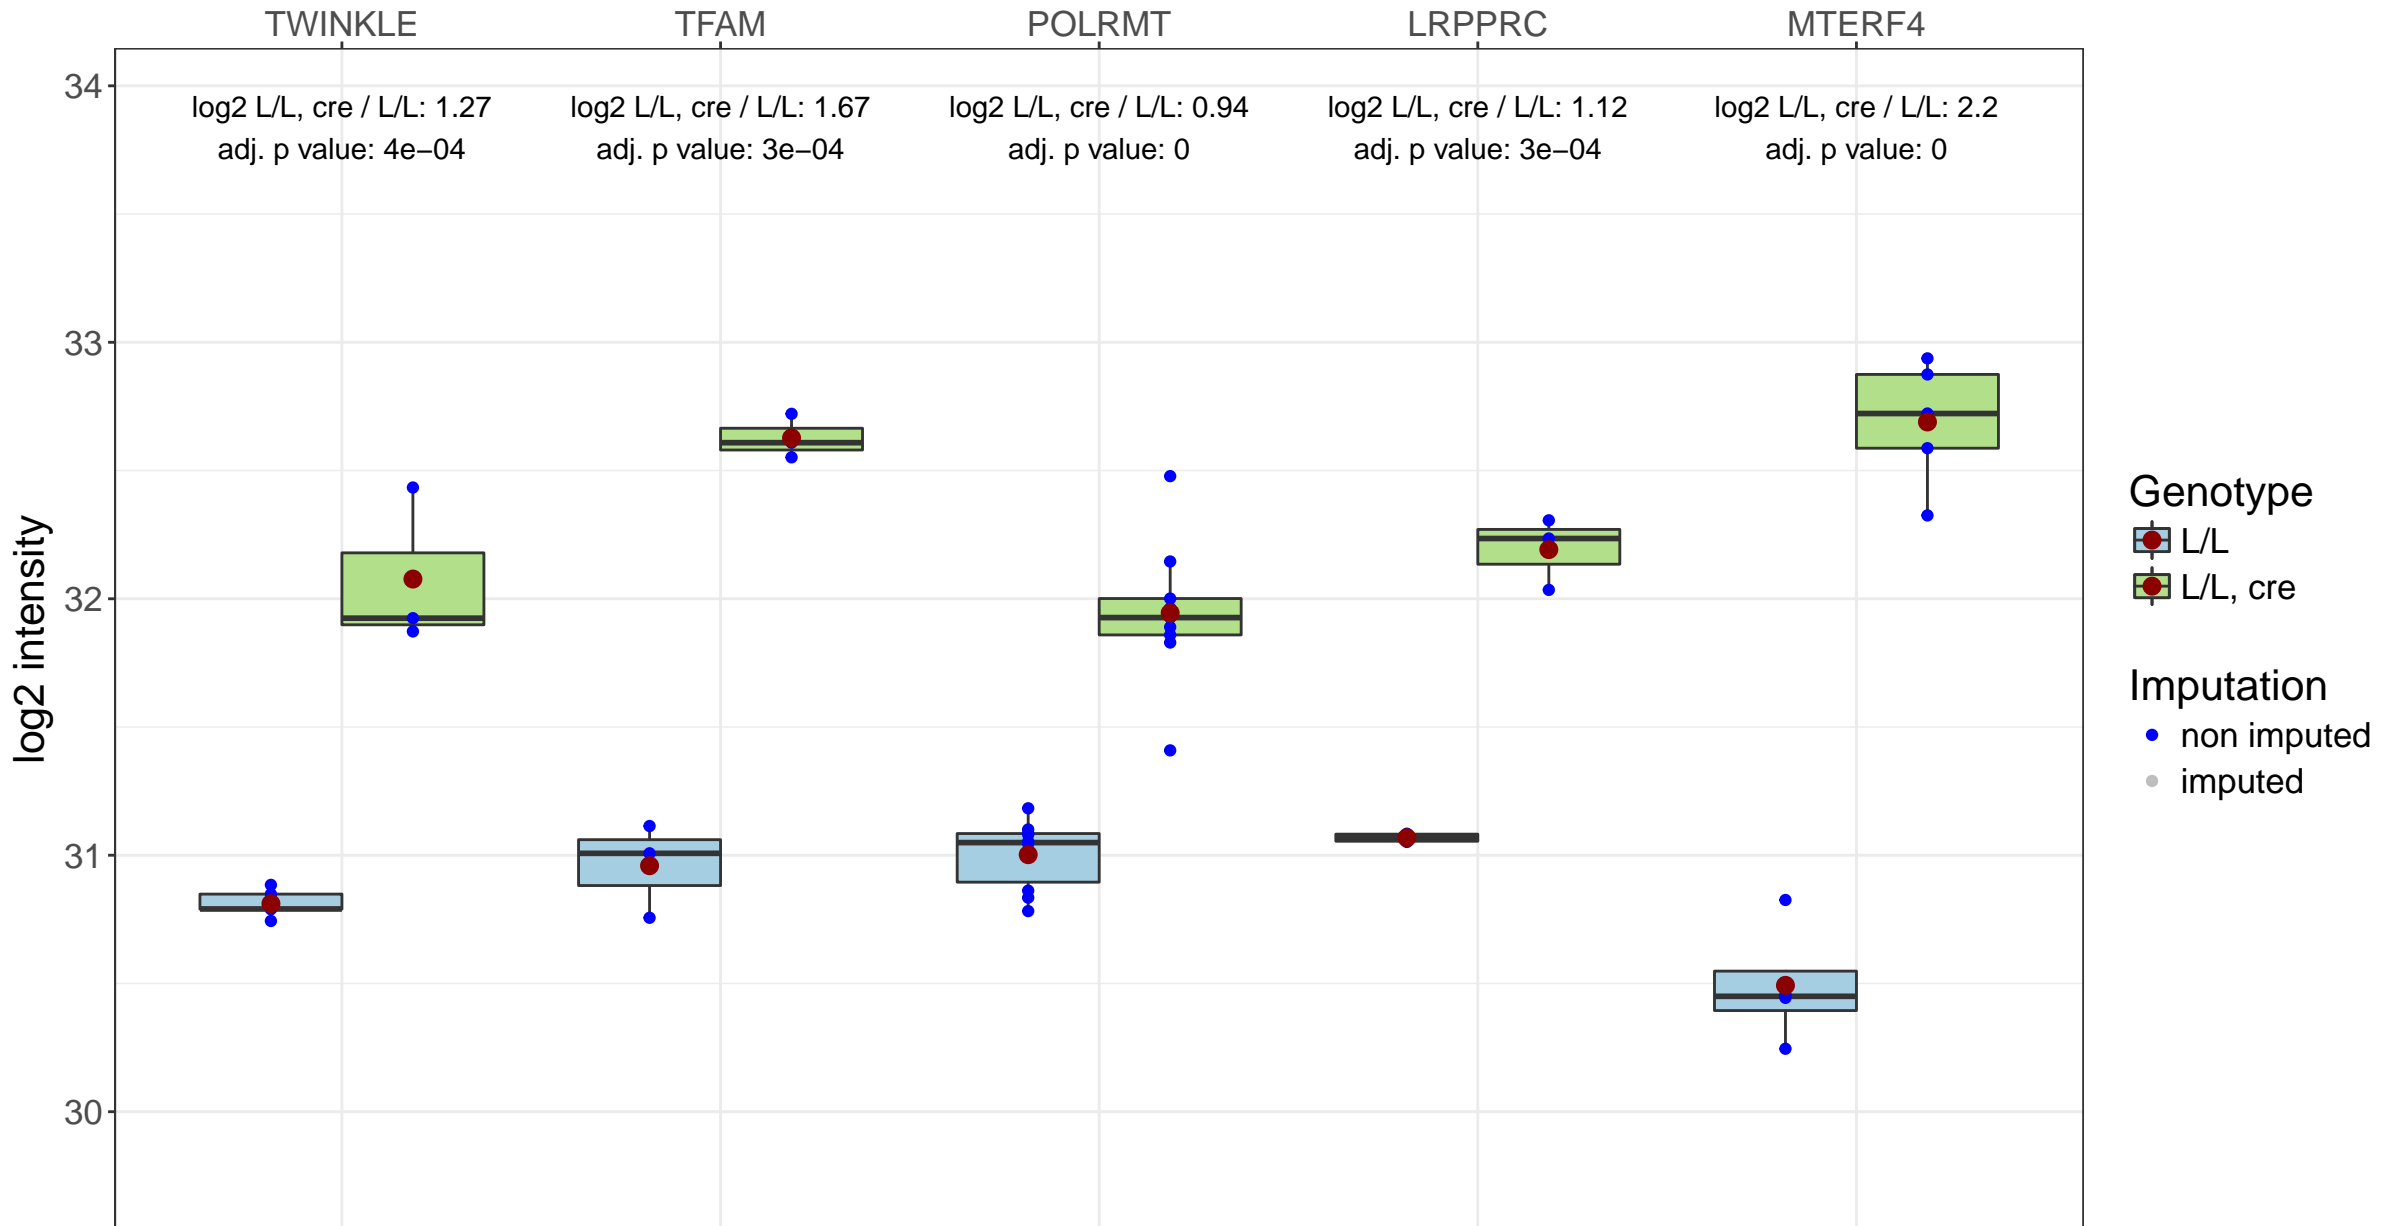

# ACP6 / Q8BP40

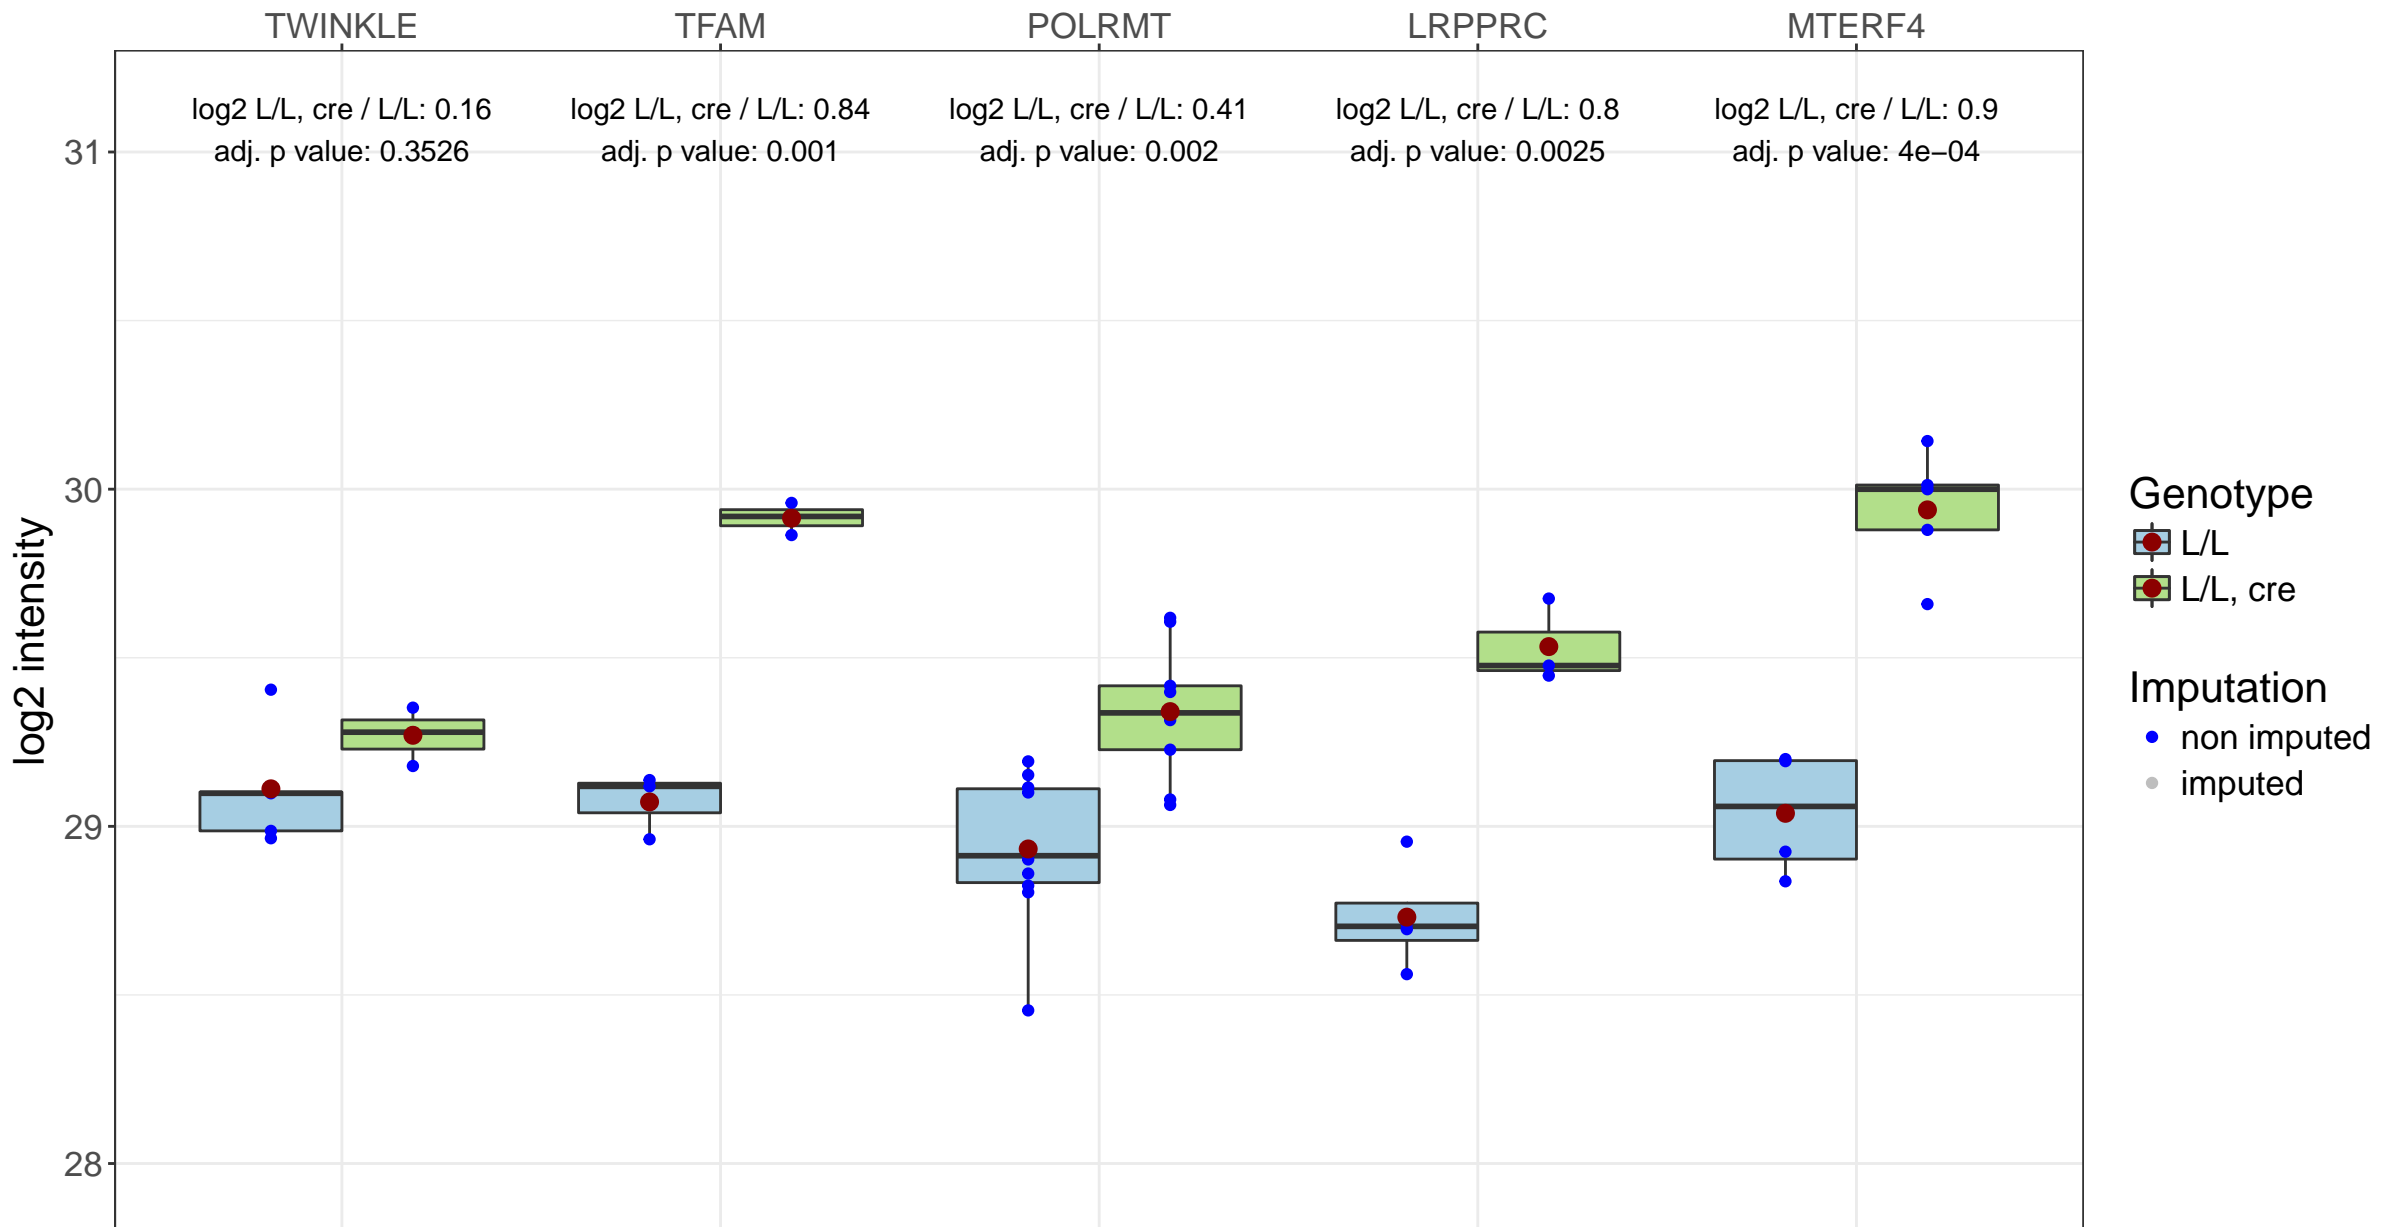

# ACSF2 / Q8VCW8

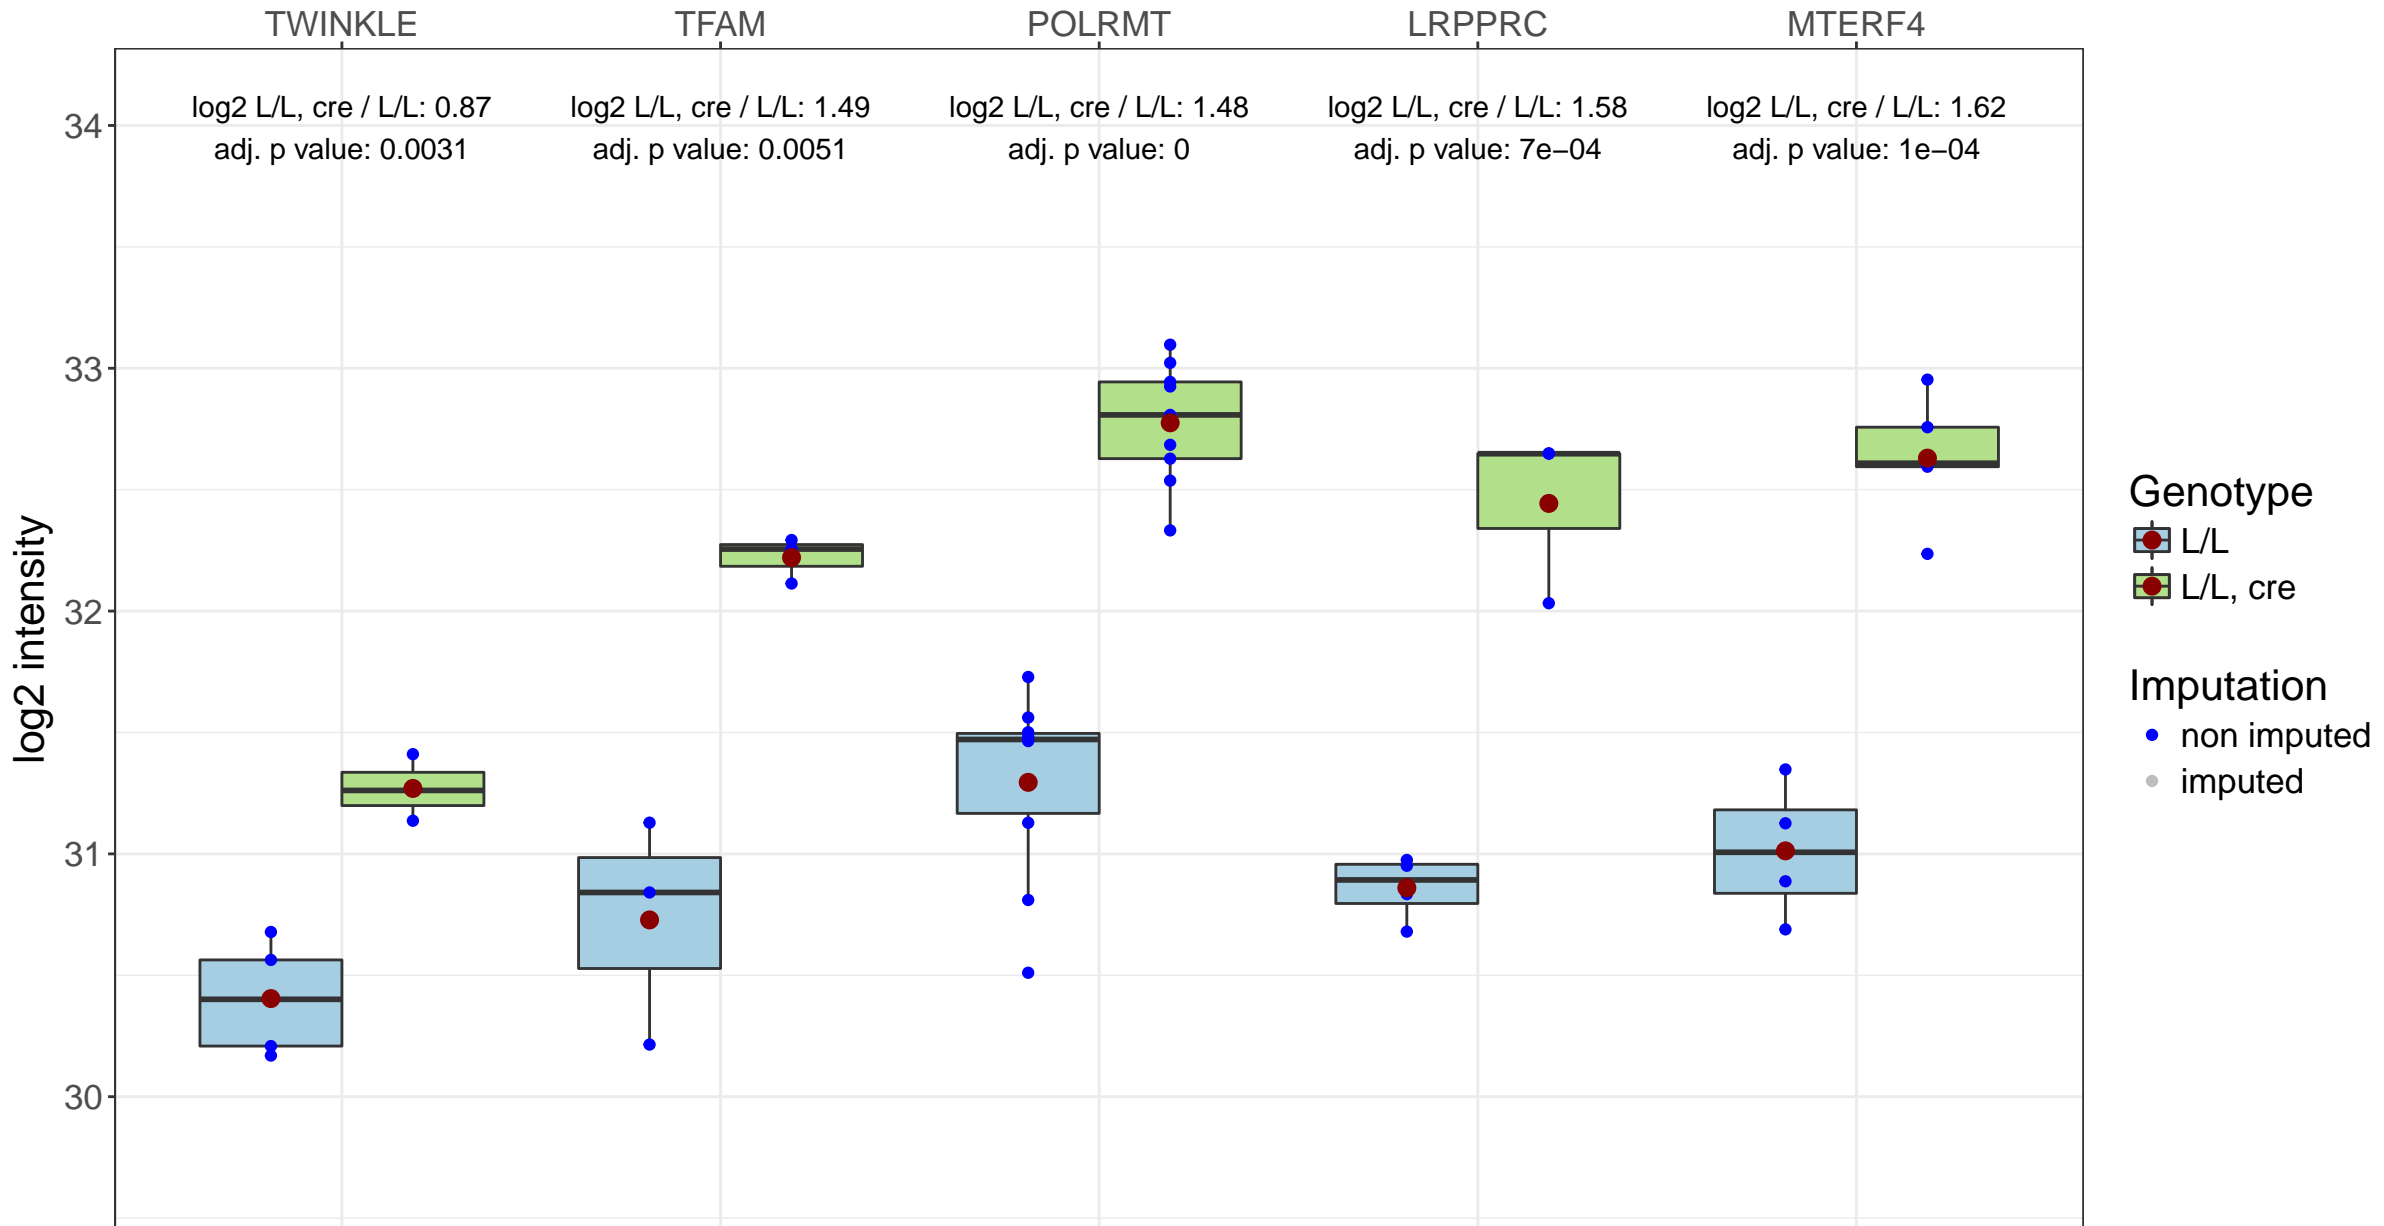

# ACSF3 / Q3URE1

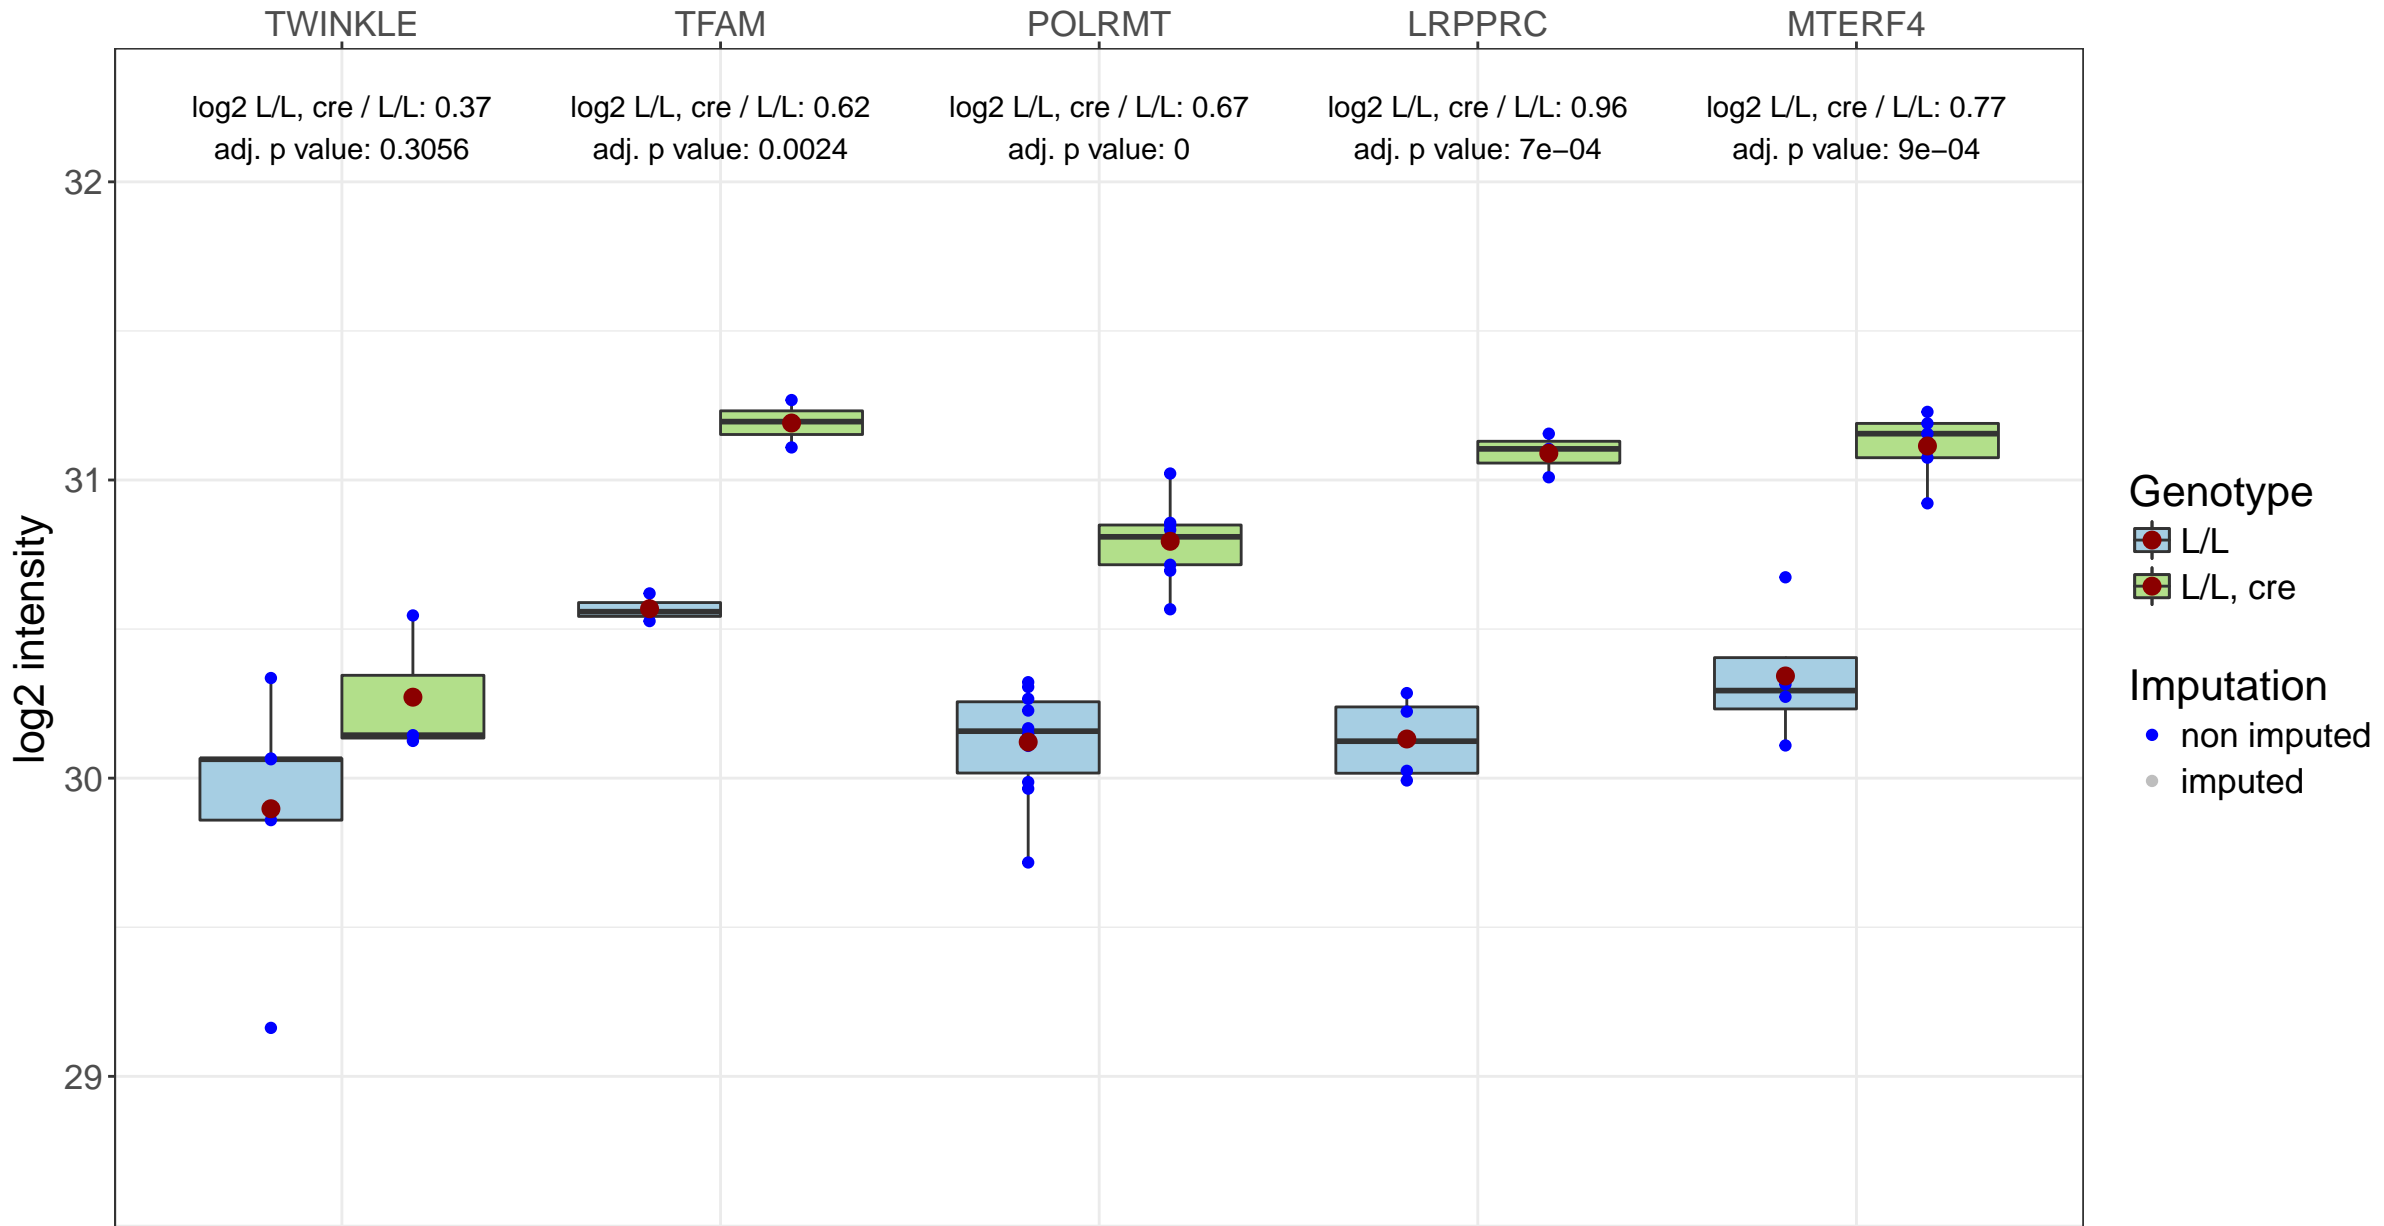

# ACSL1 / P41216

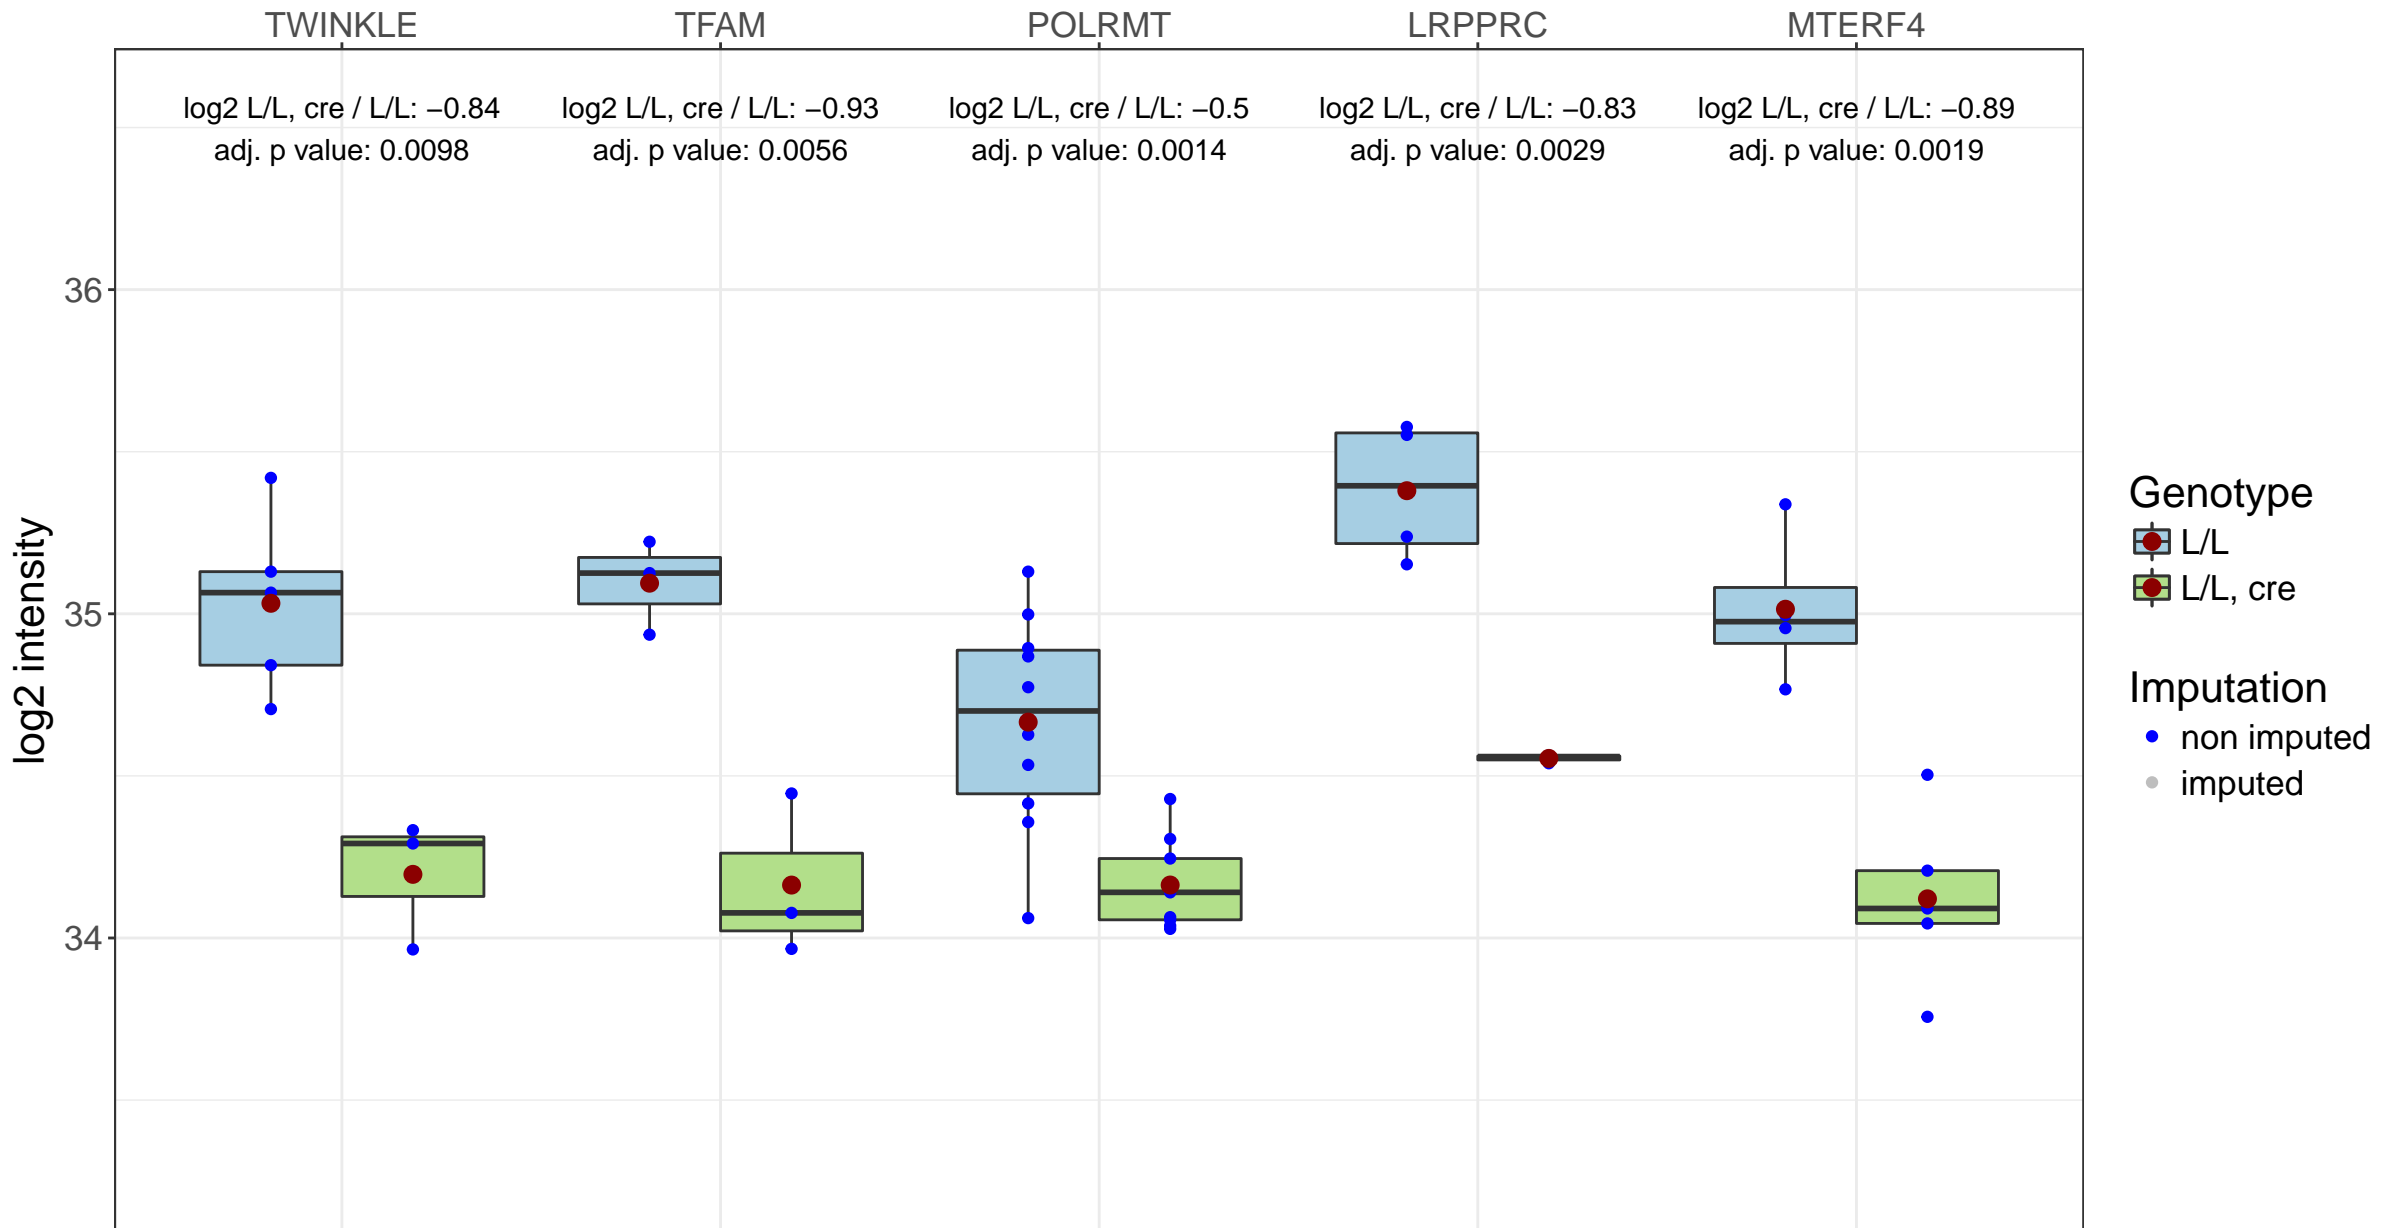

# ACSS1 / Q99NB1

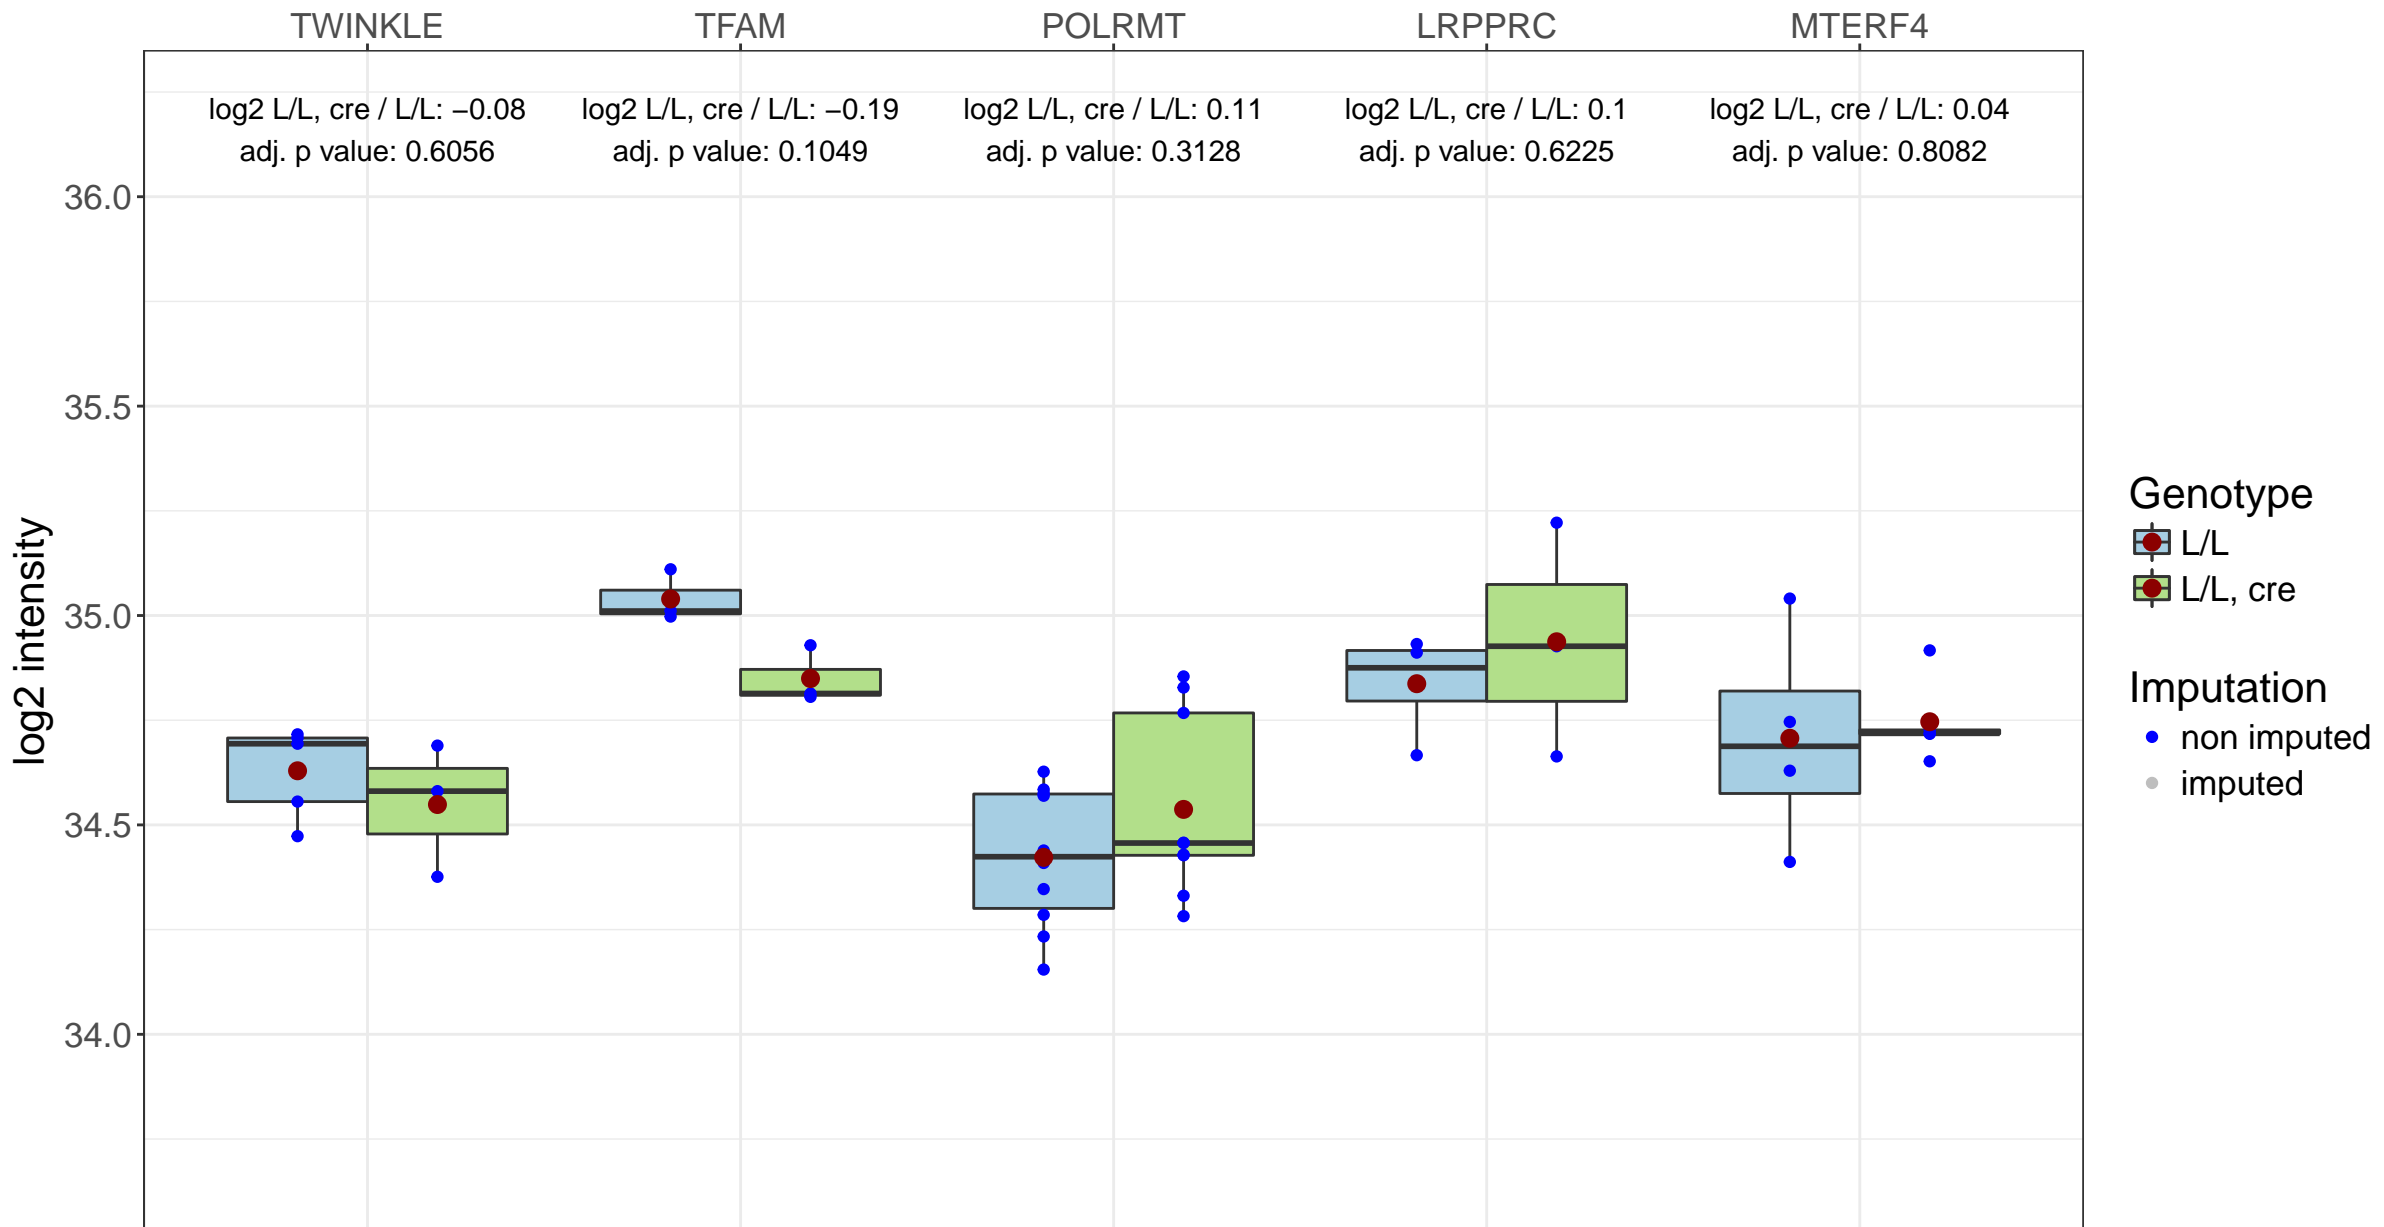

# ACTC1 / P68033

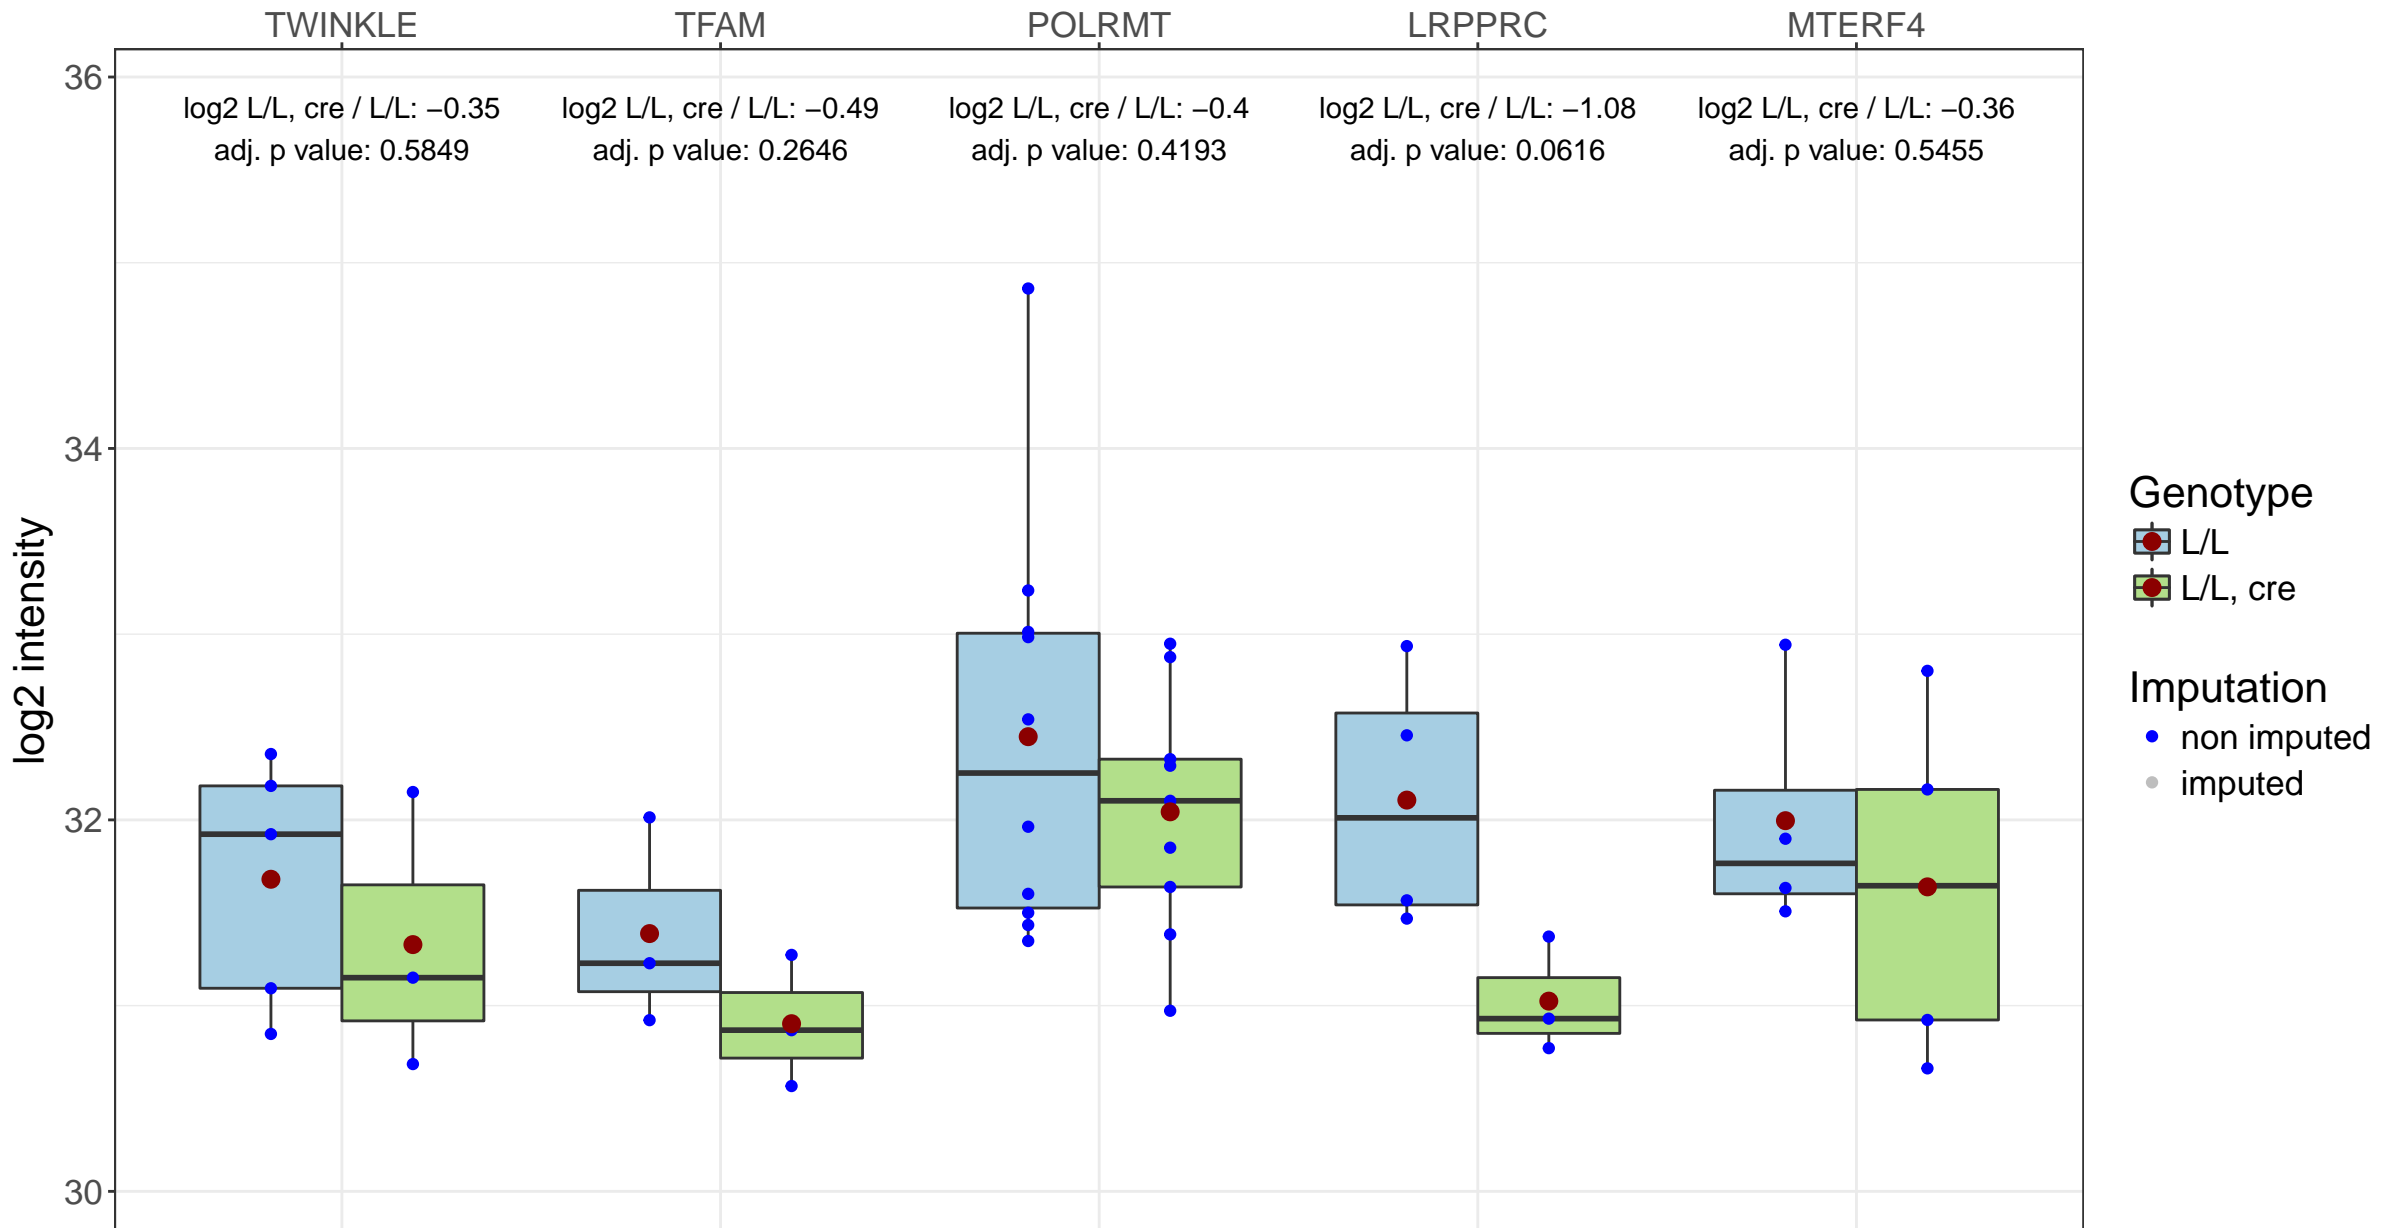



# ACTG1 / P63260

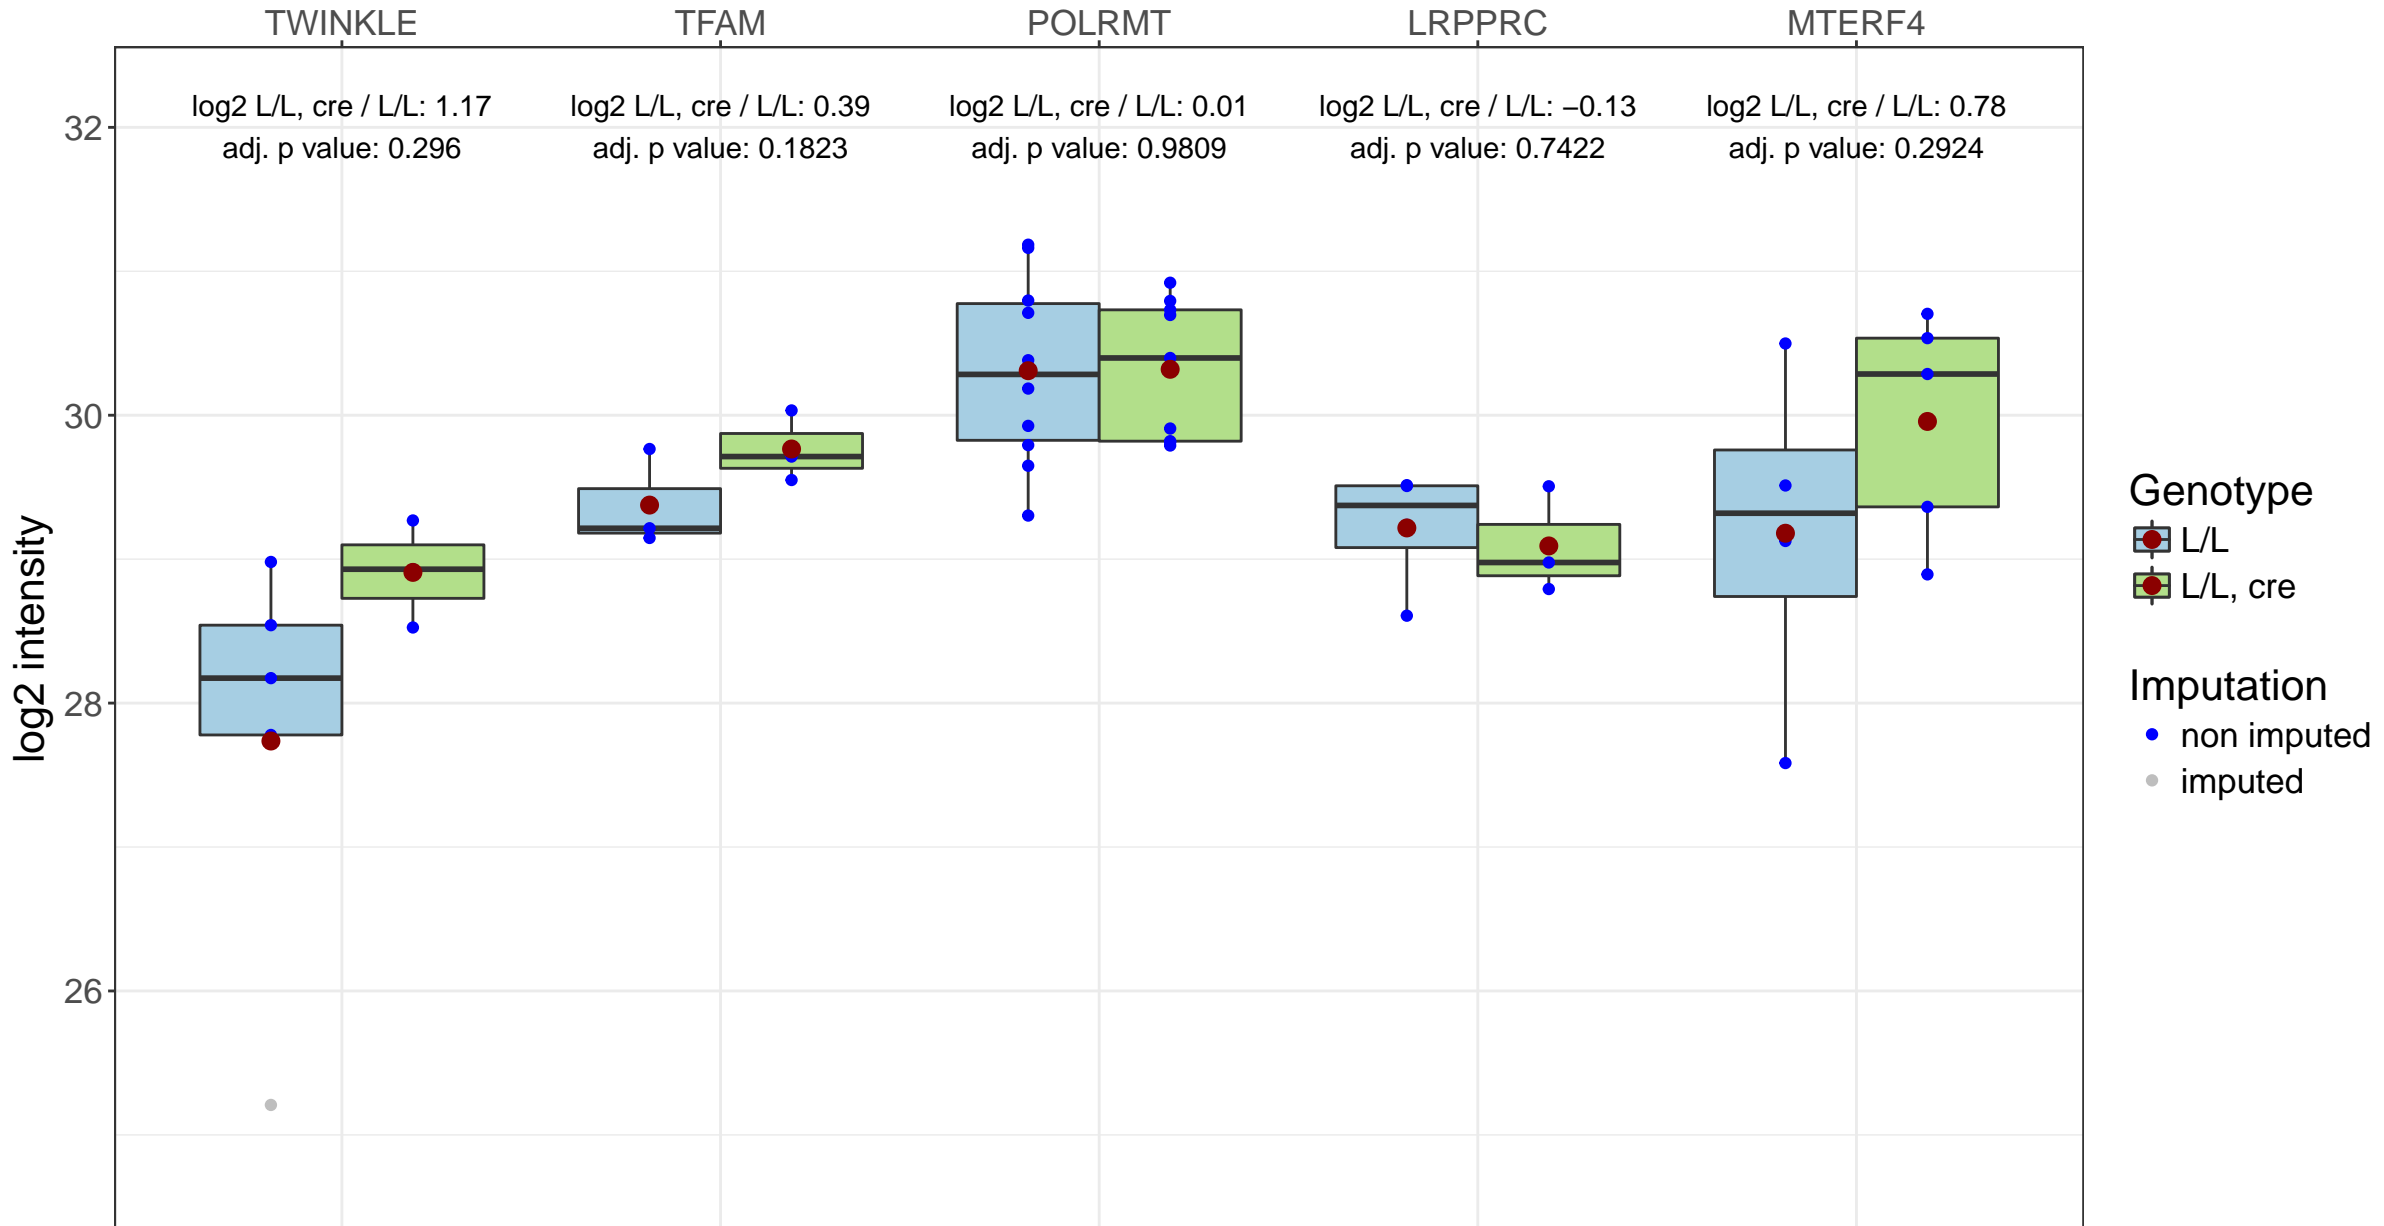

# ACTN2 / Q9JI91

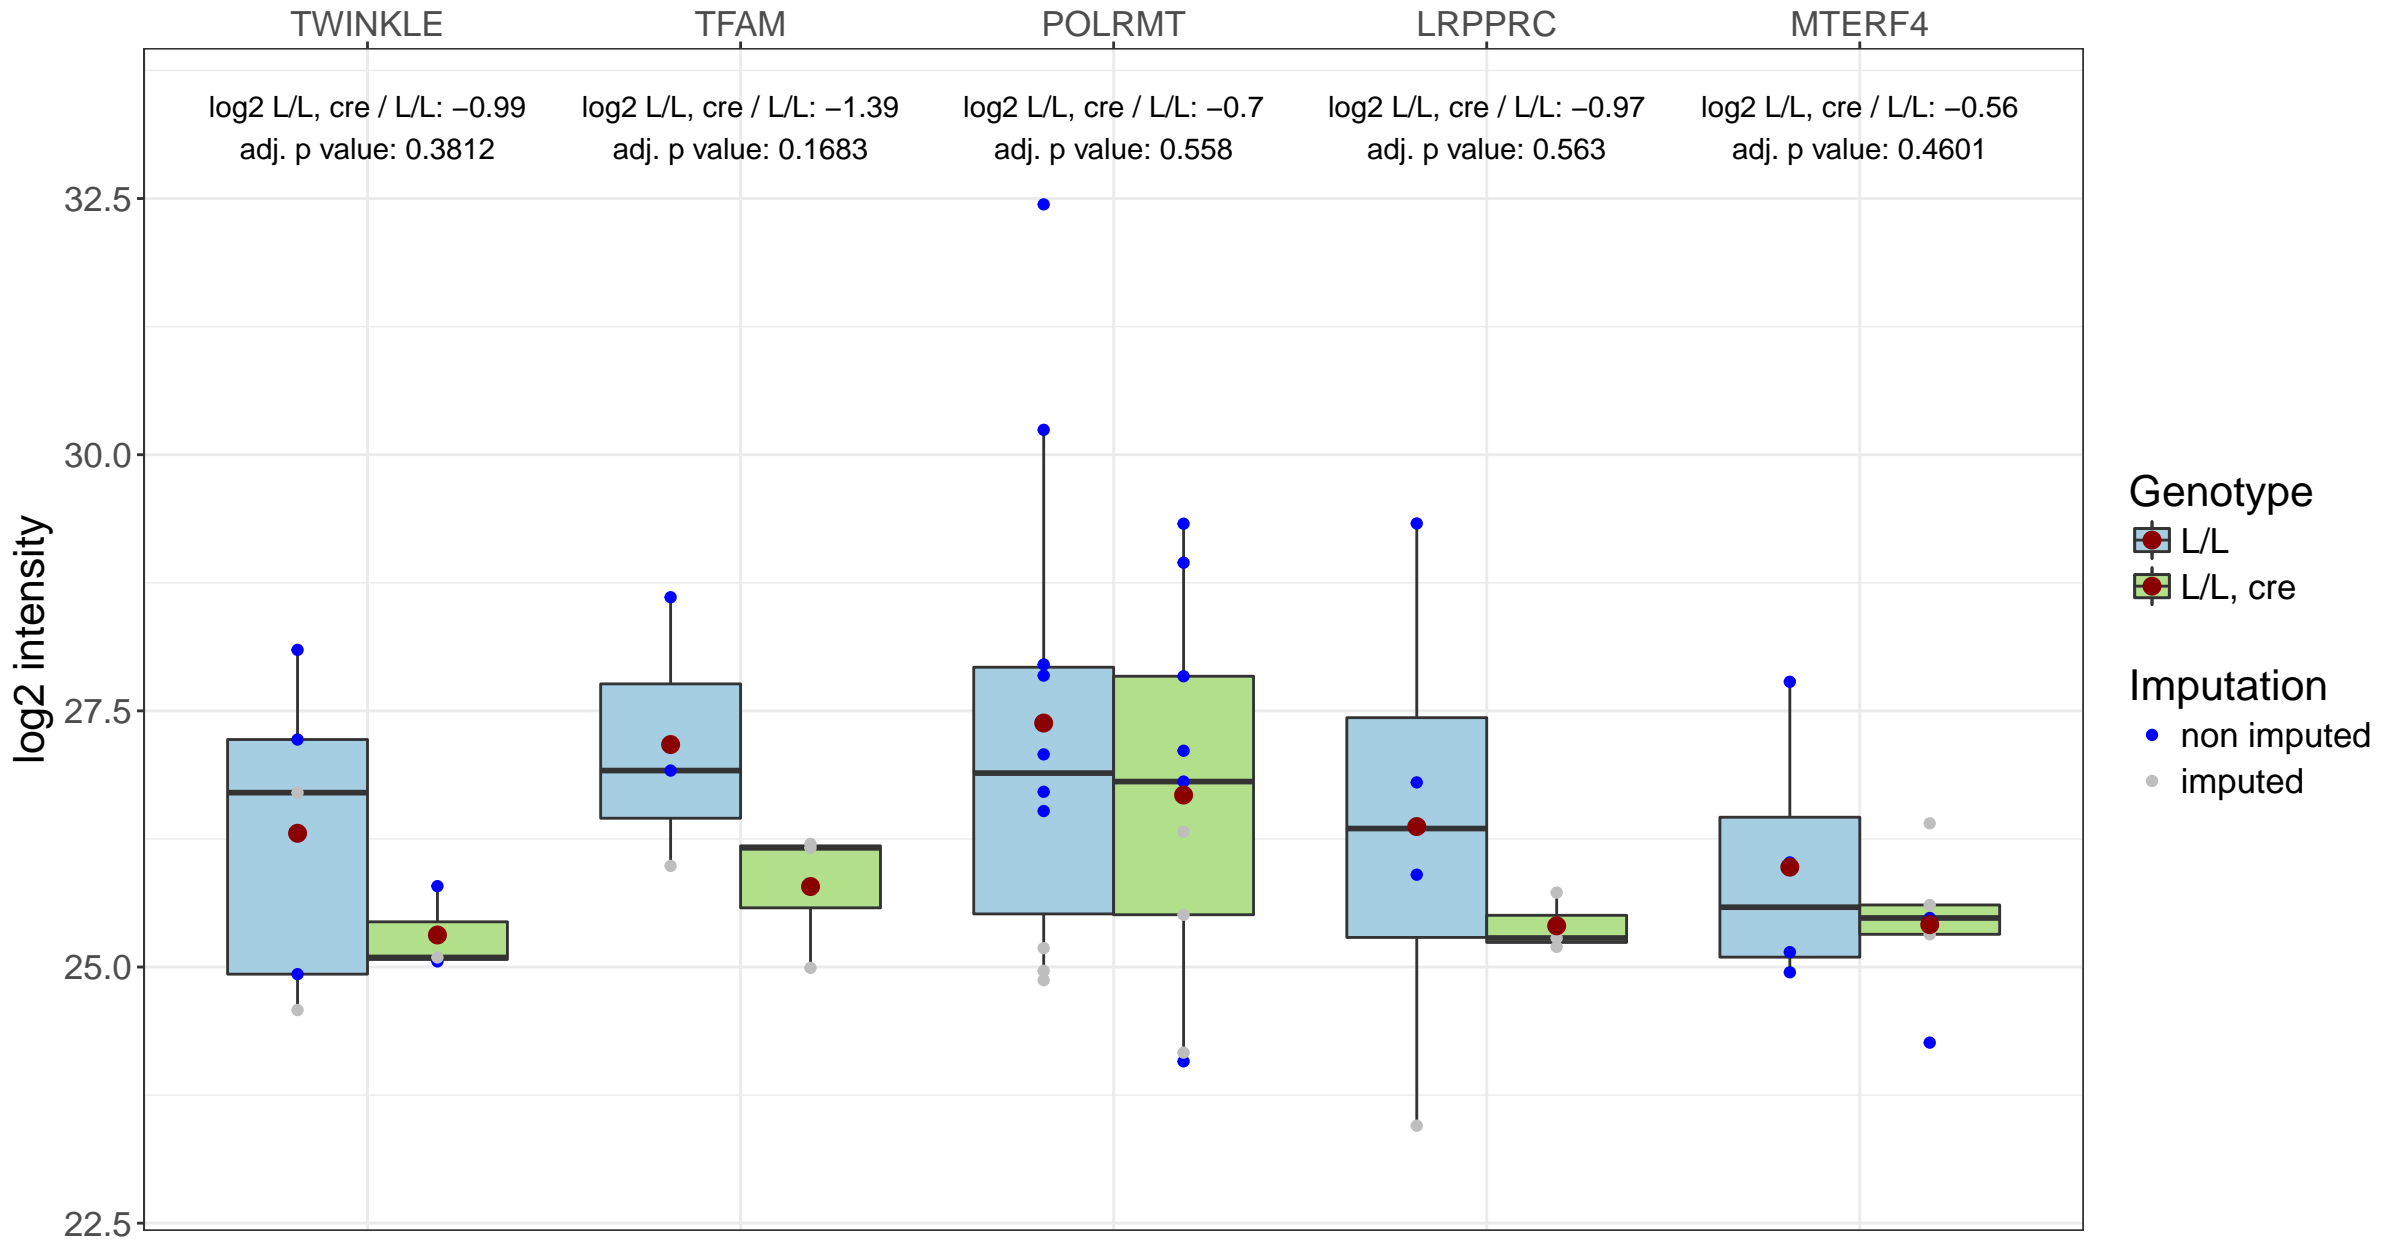

# ACYP1 / E9QJT5

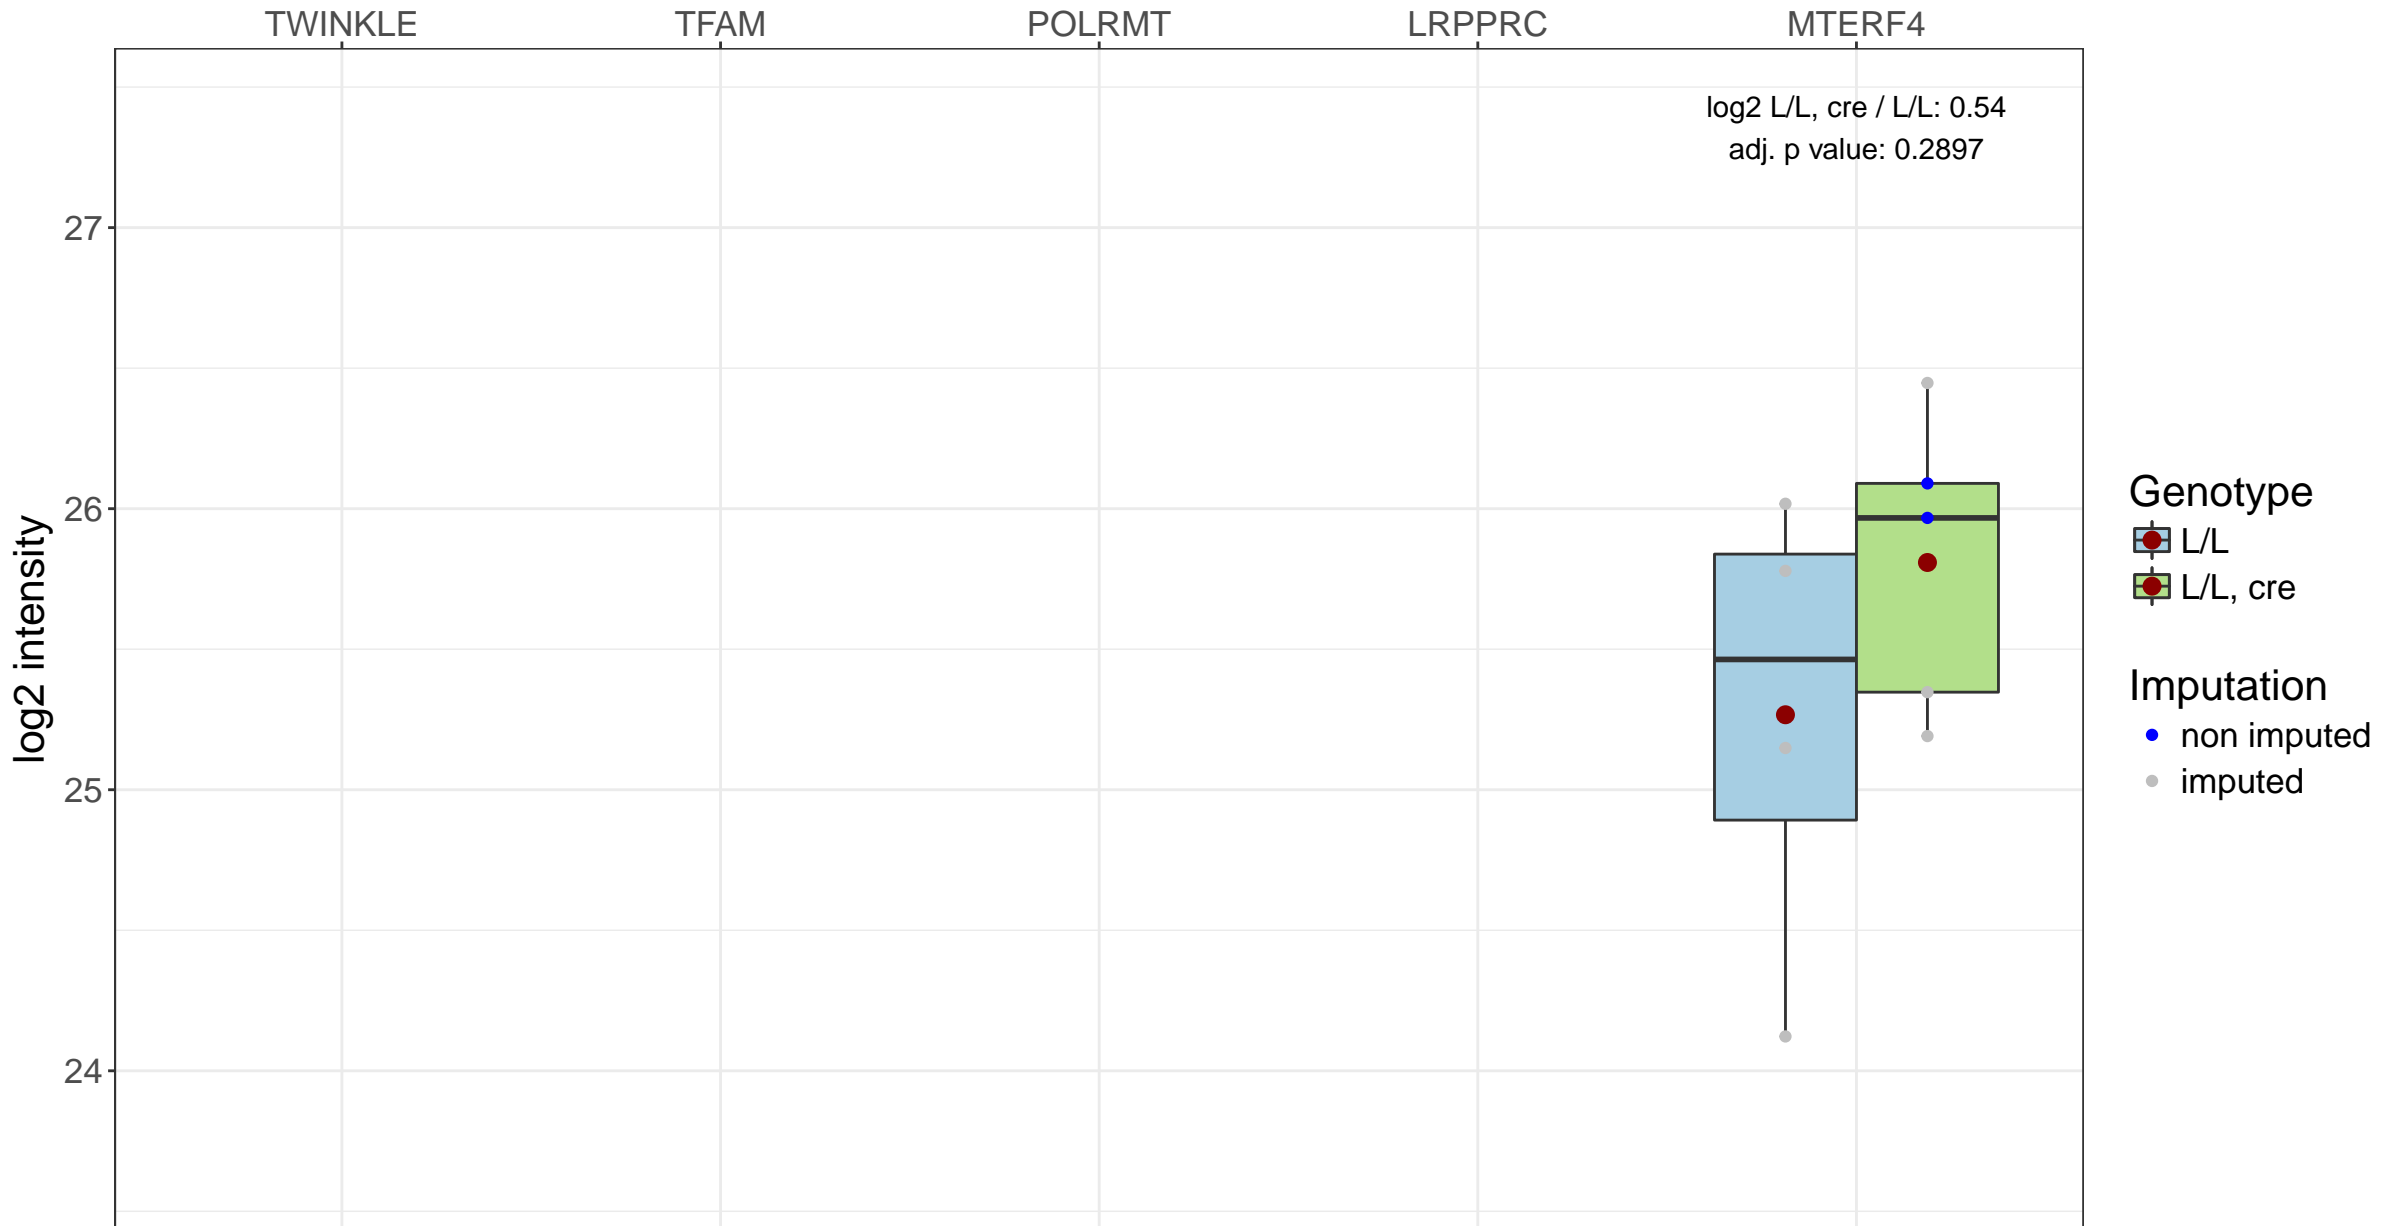

# ACYP2 / P56375

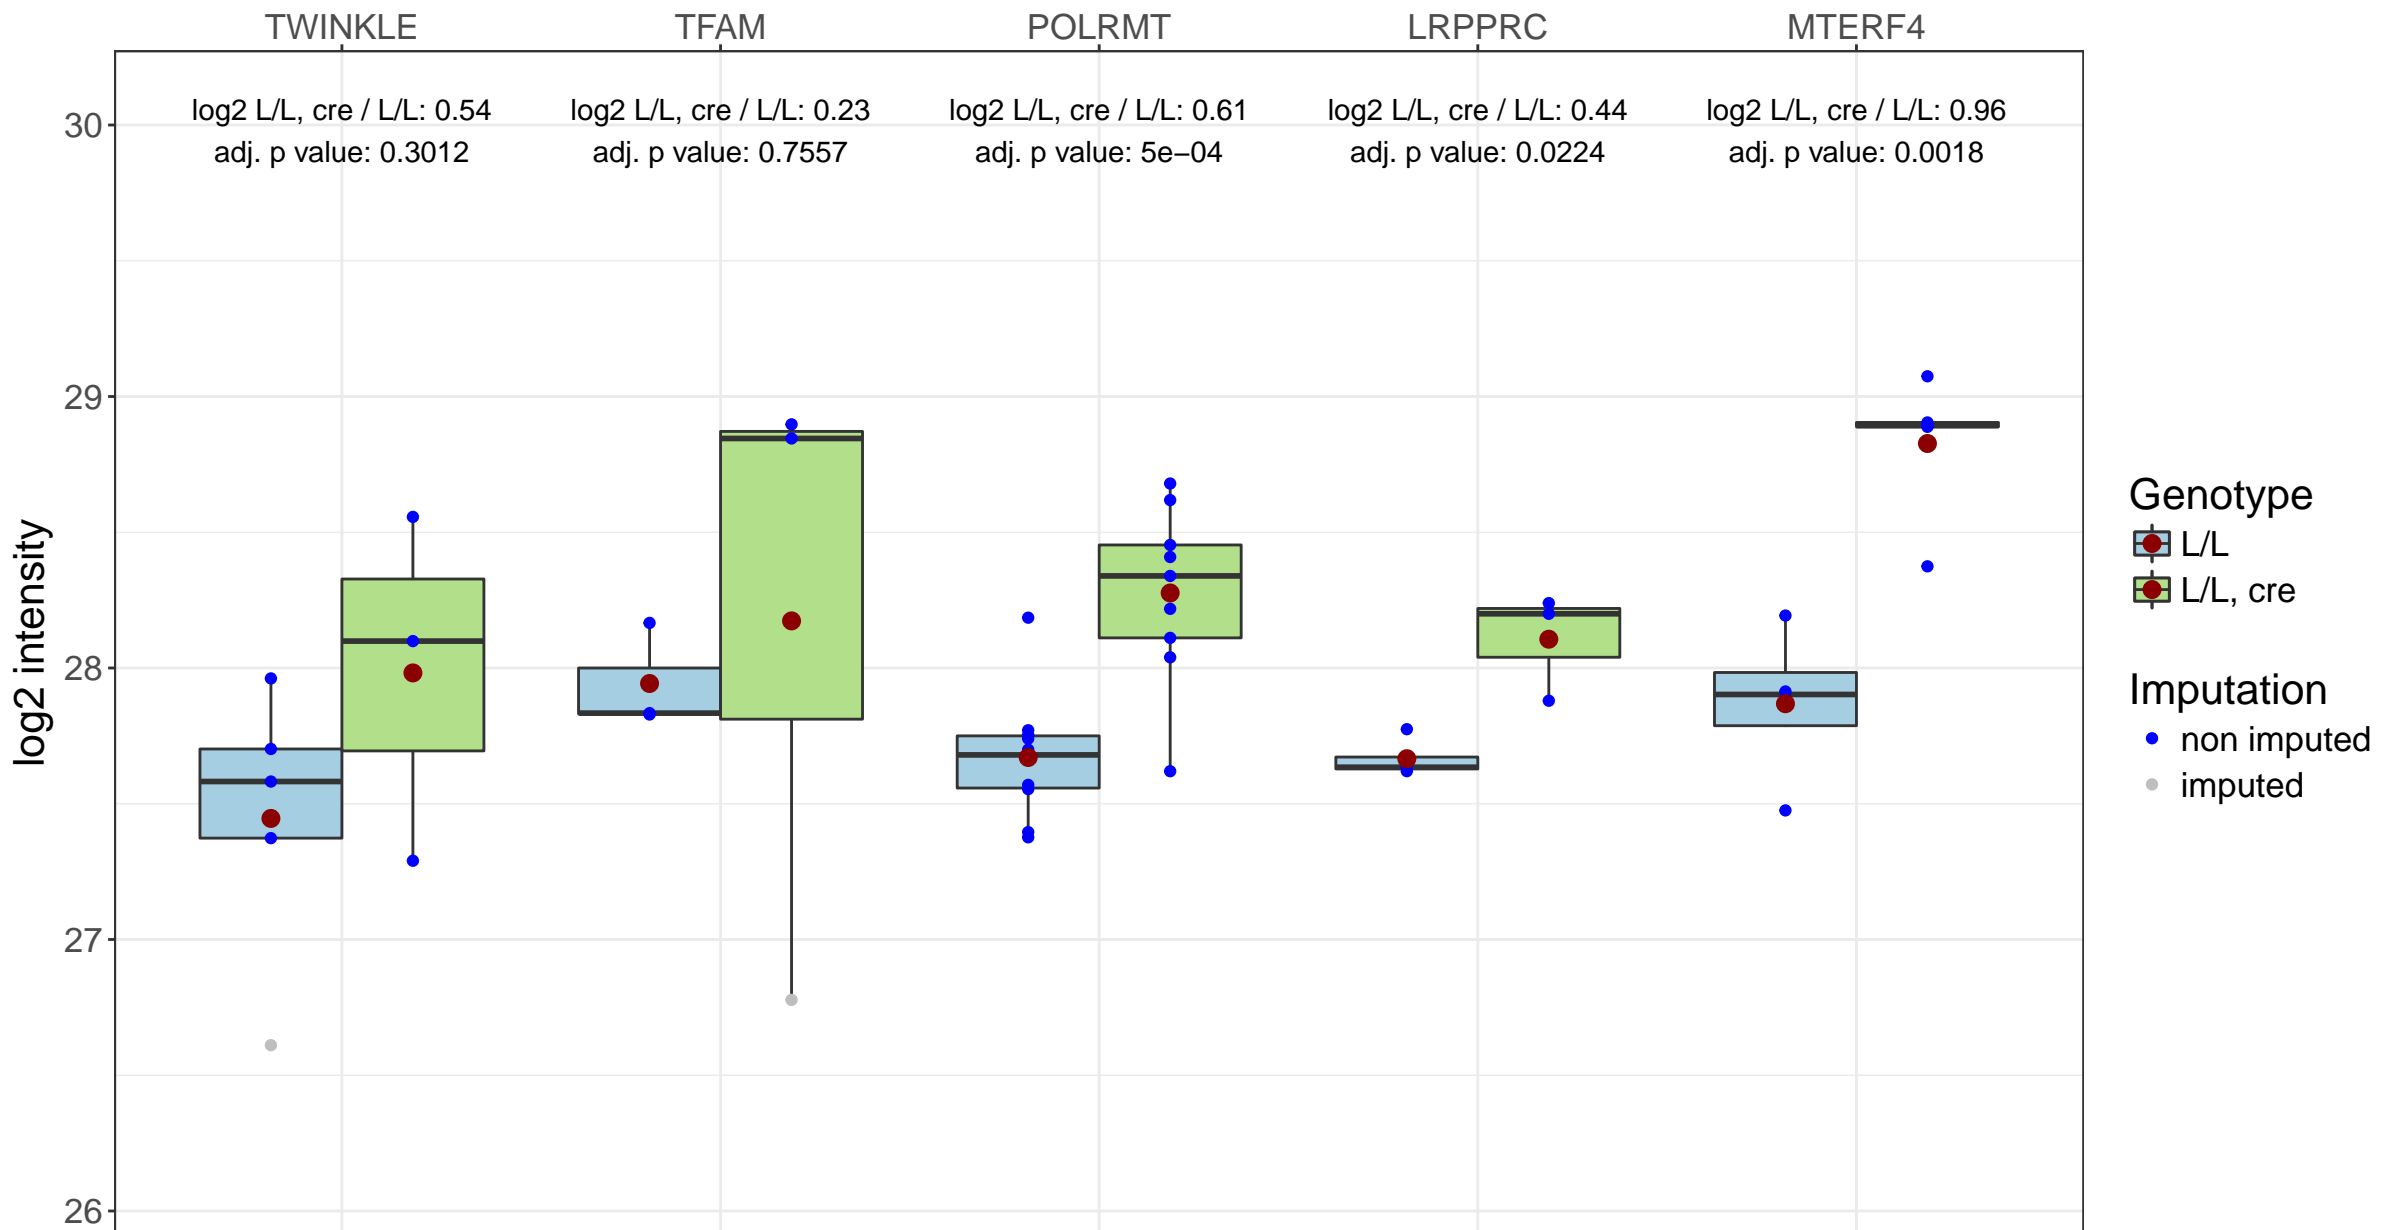

# ADCK1 / Q9D0L4

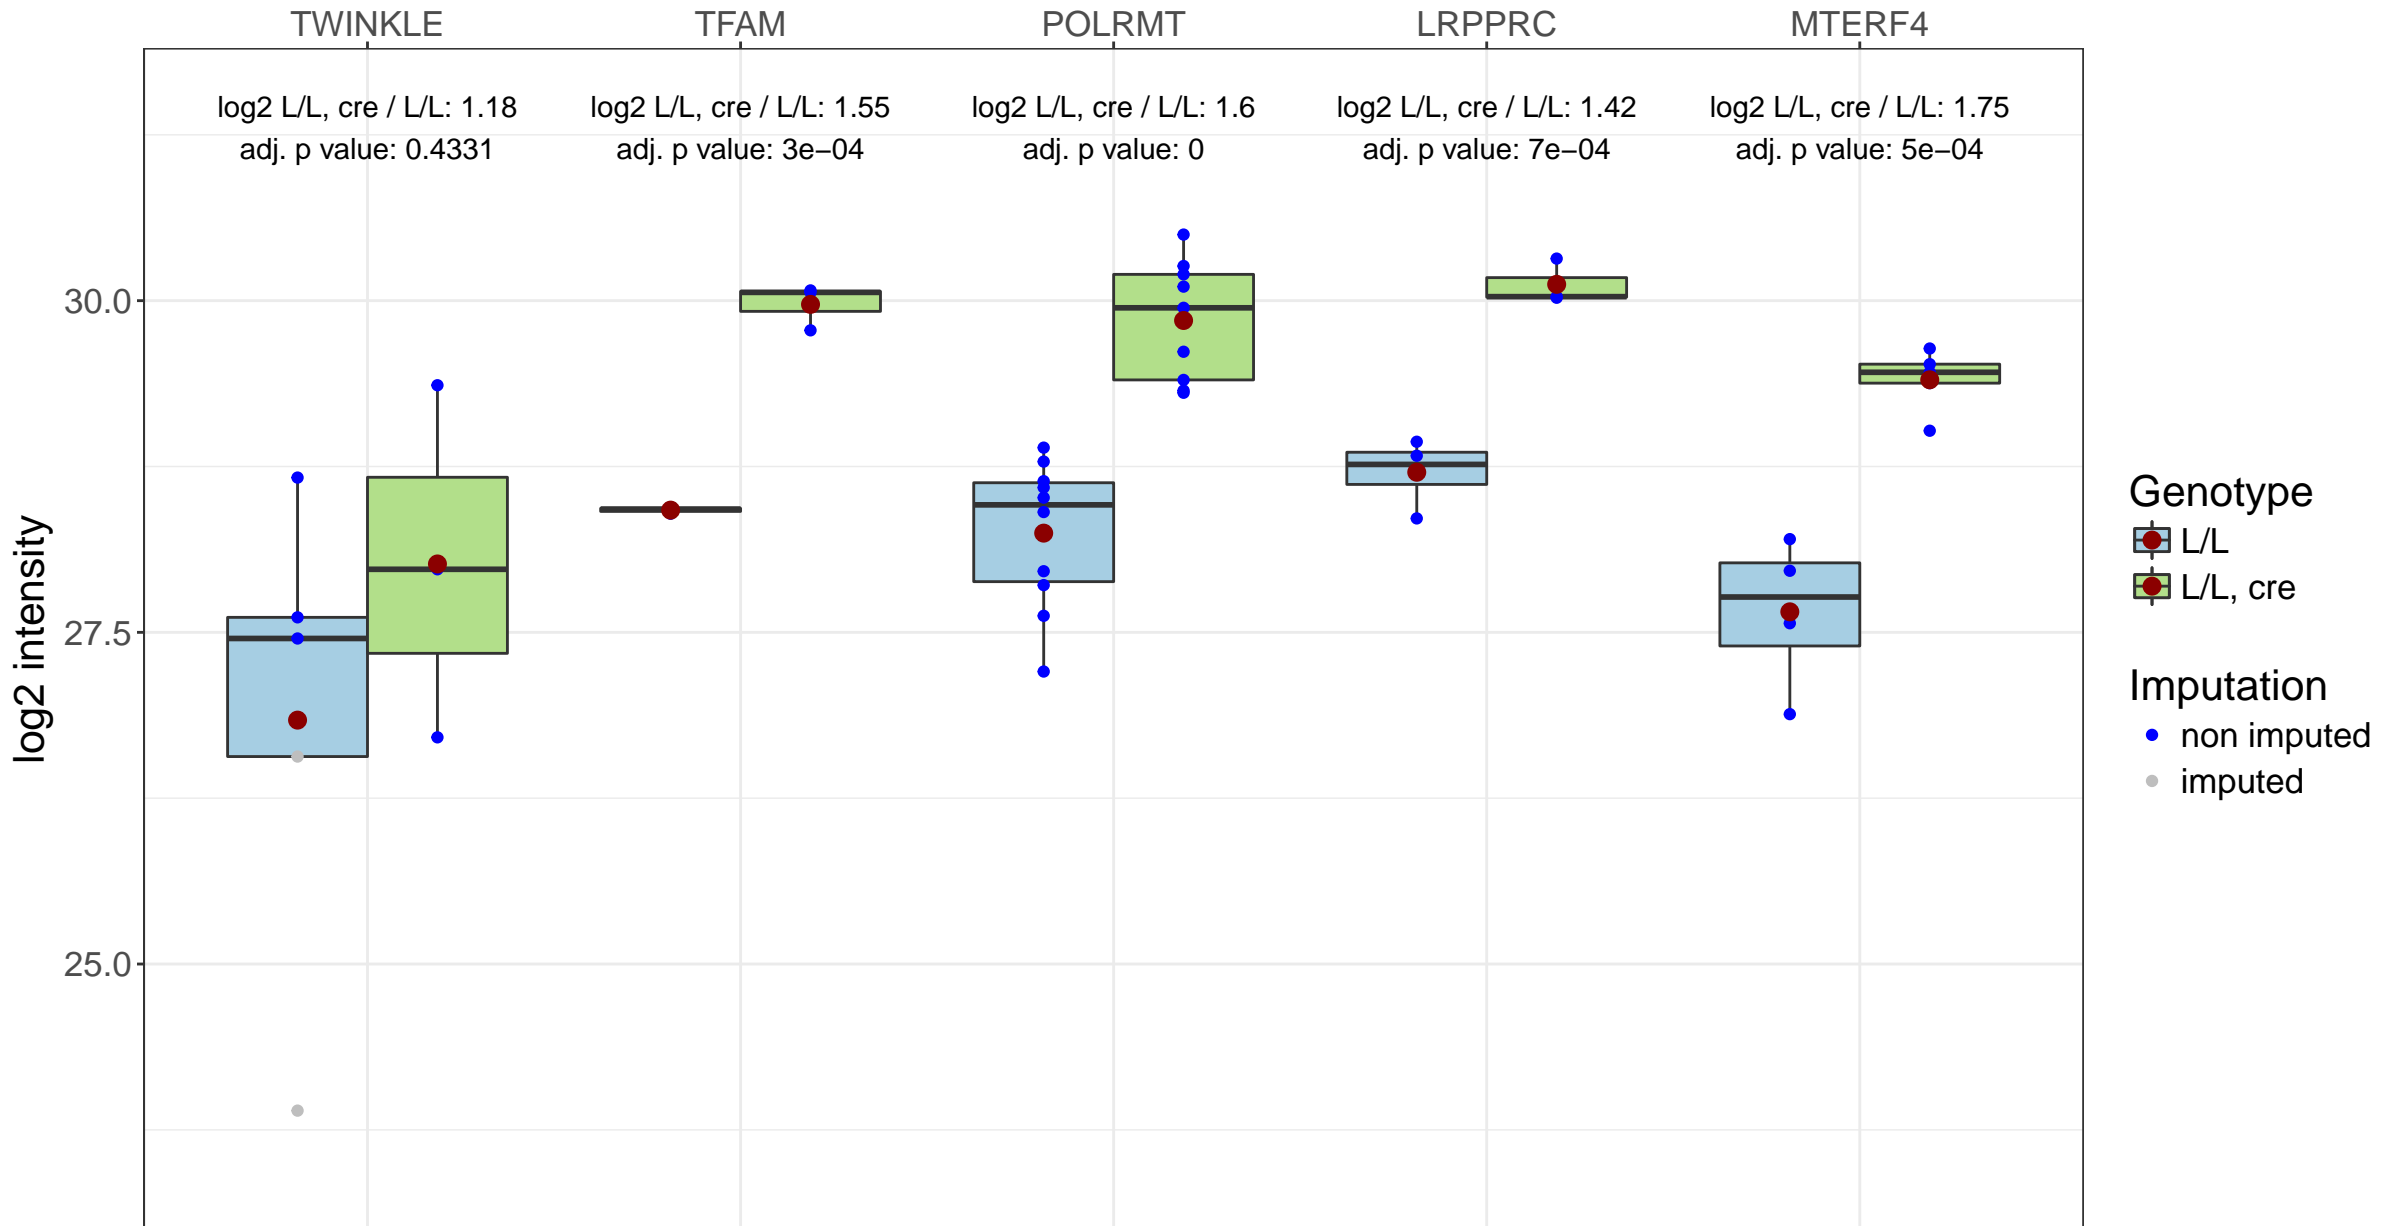

# ADCK3 / Q60936

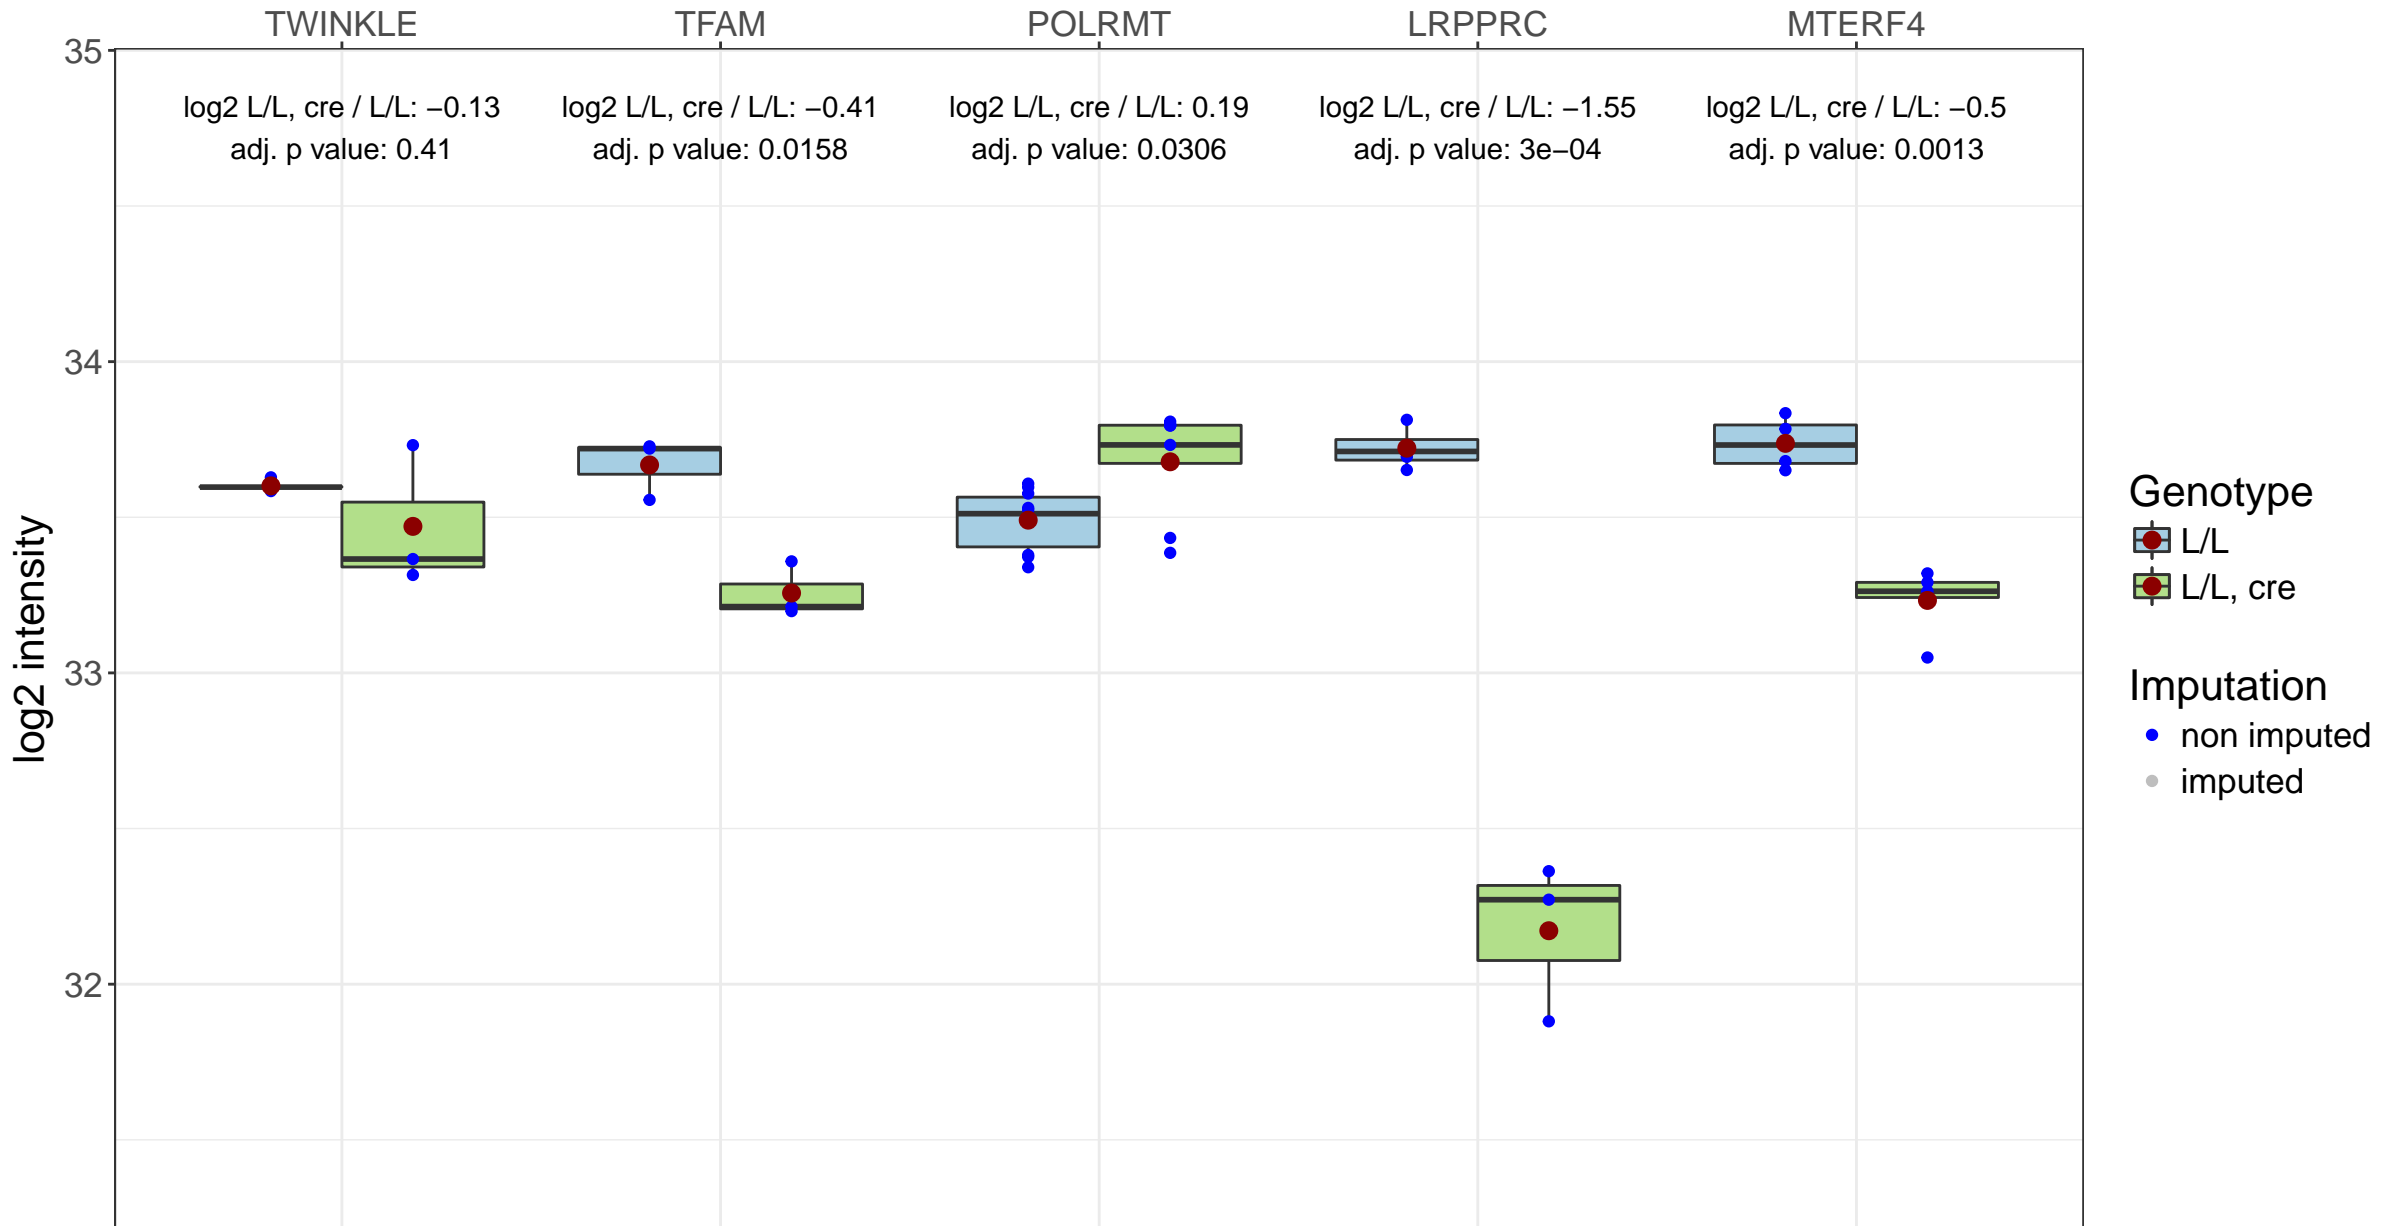

# ADCK4 / E9QLB8

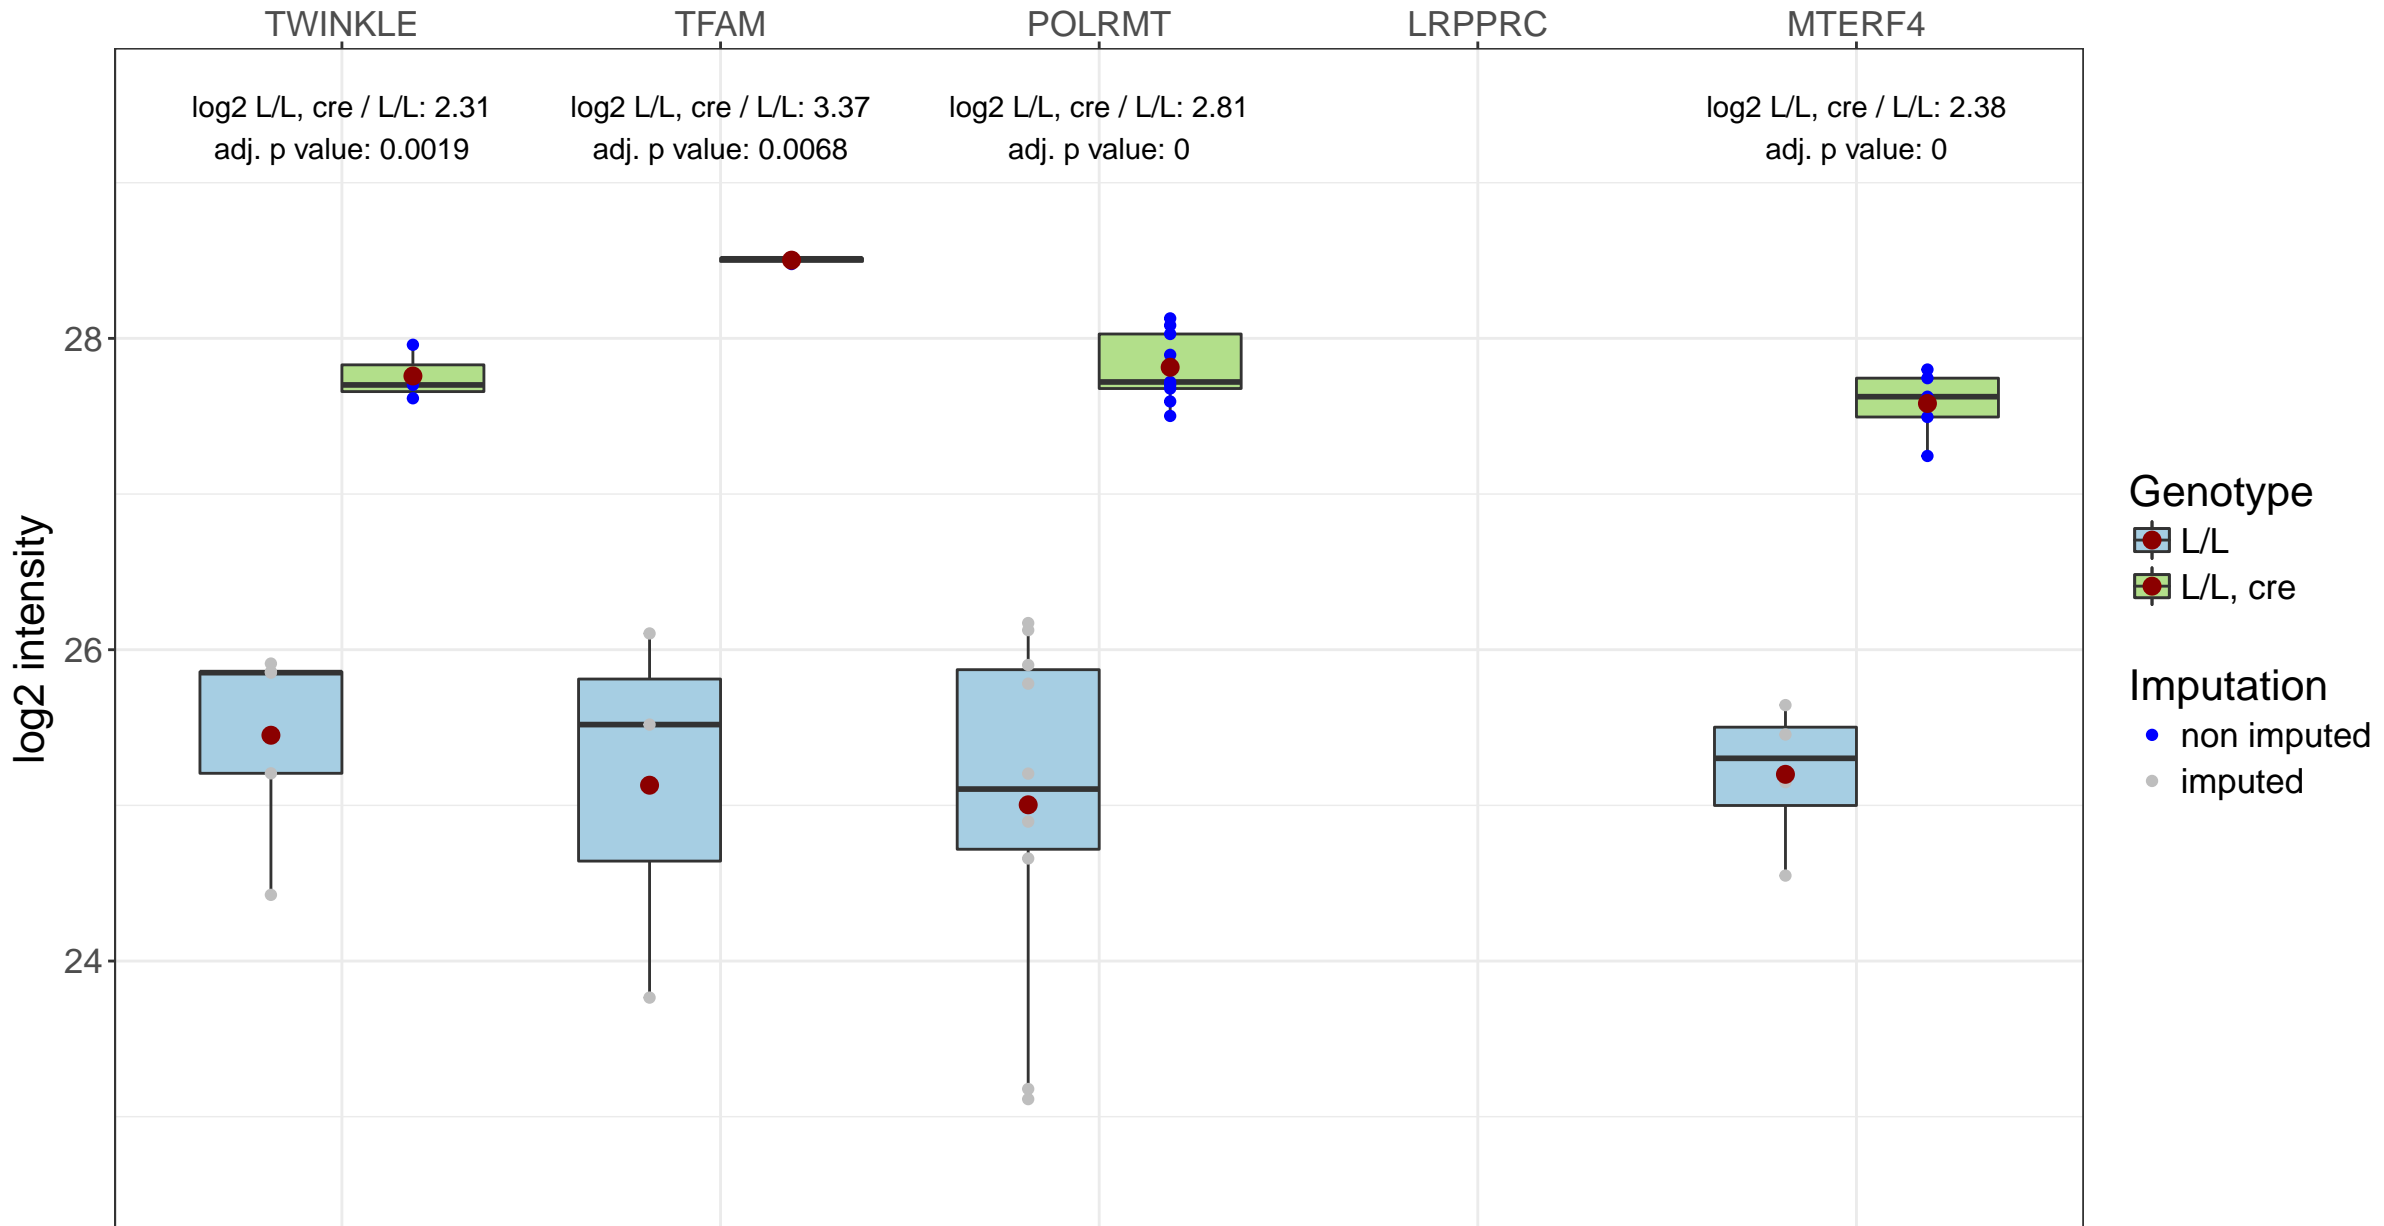

# ADCK5 / E0CXW2

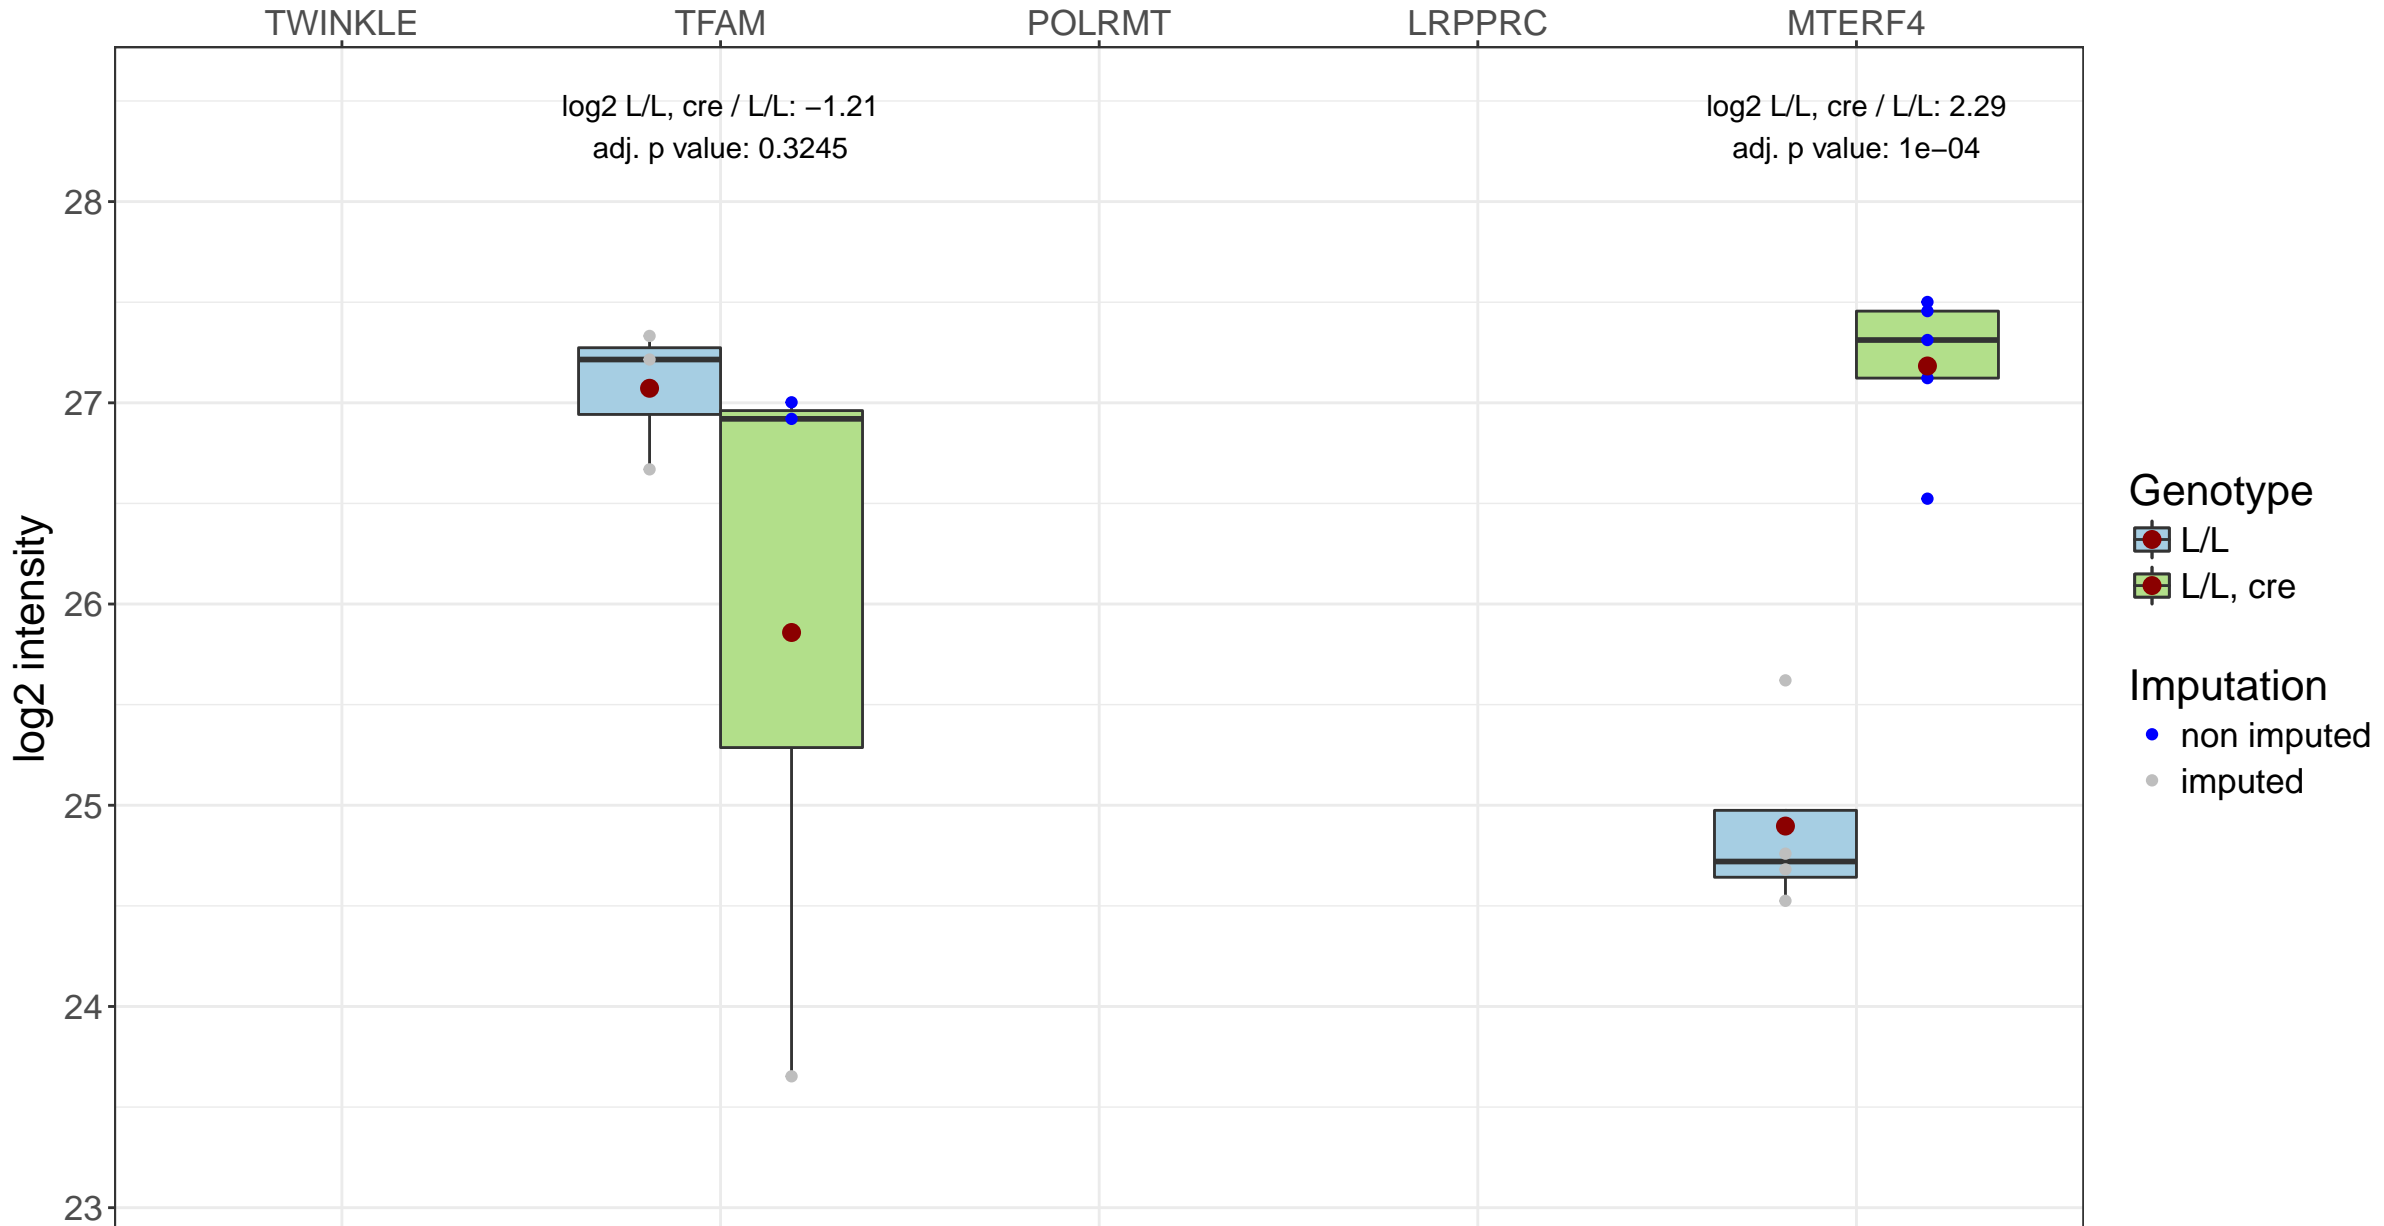



# ADHFE1 / Q8R0N6

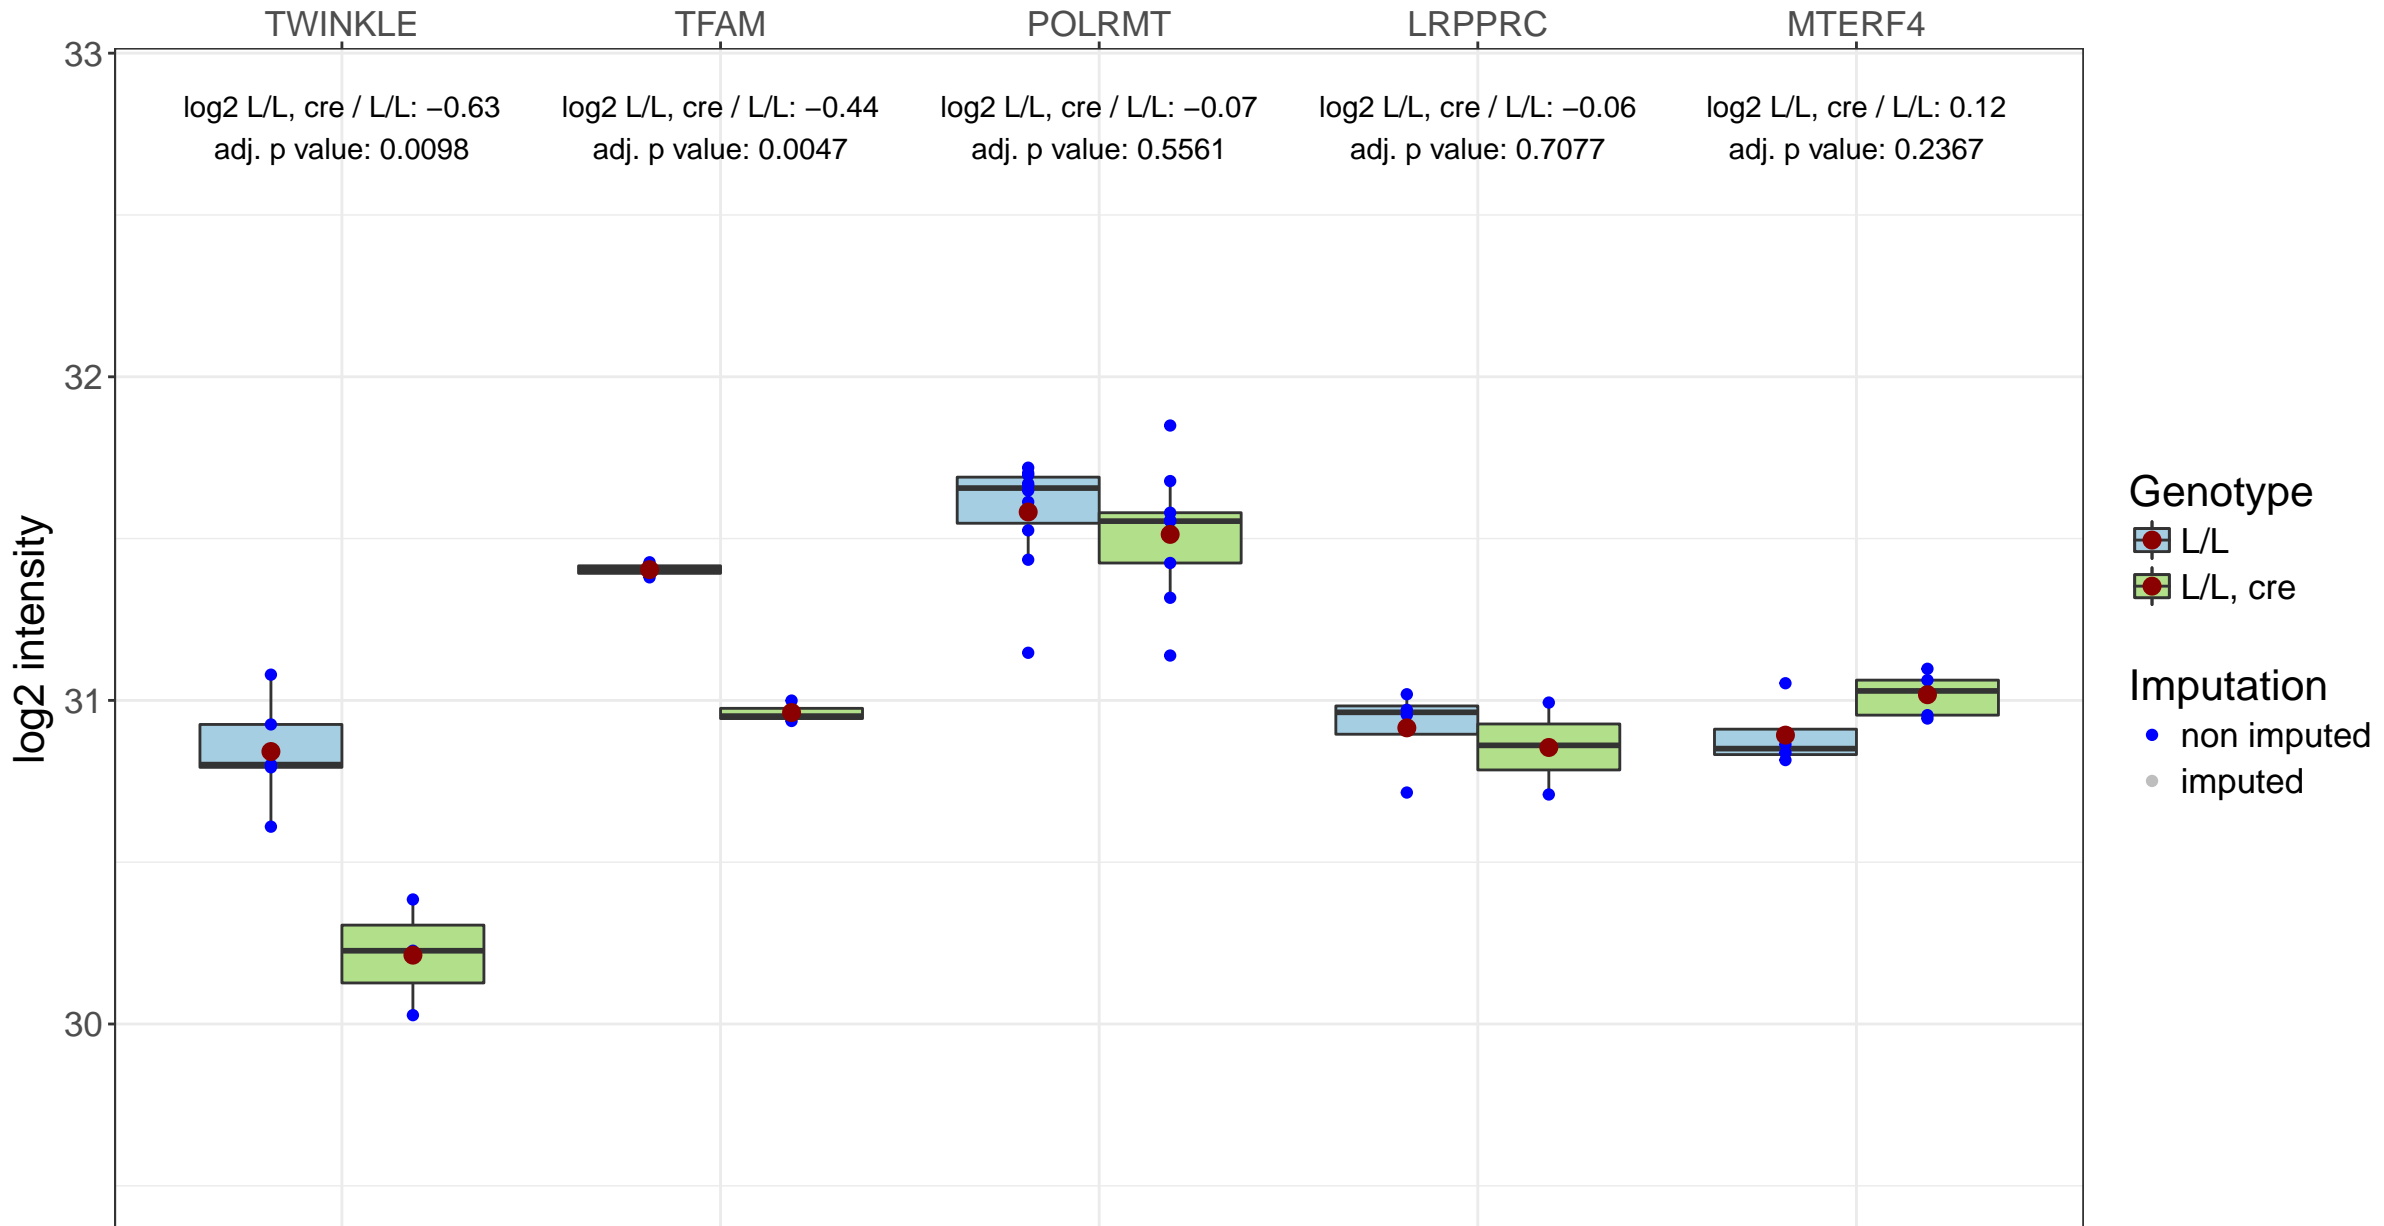

# ADSSL1 / P28650

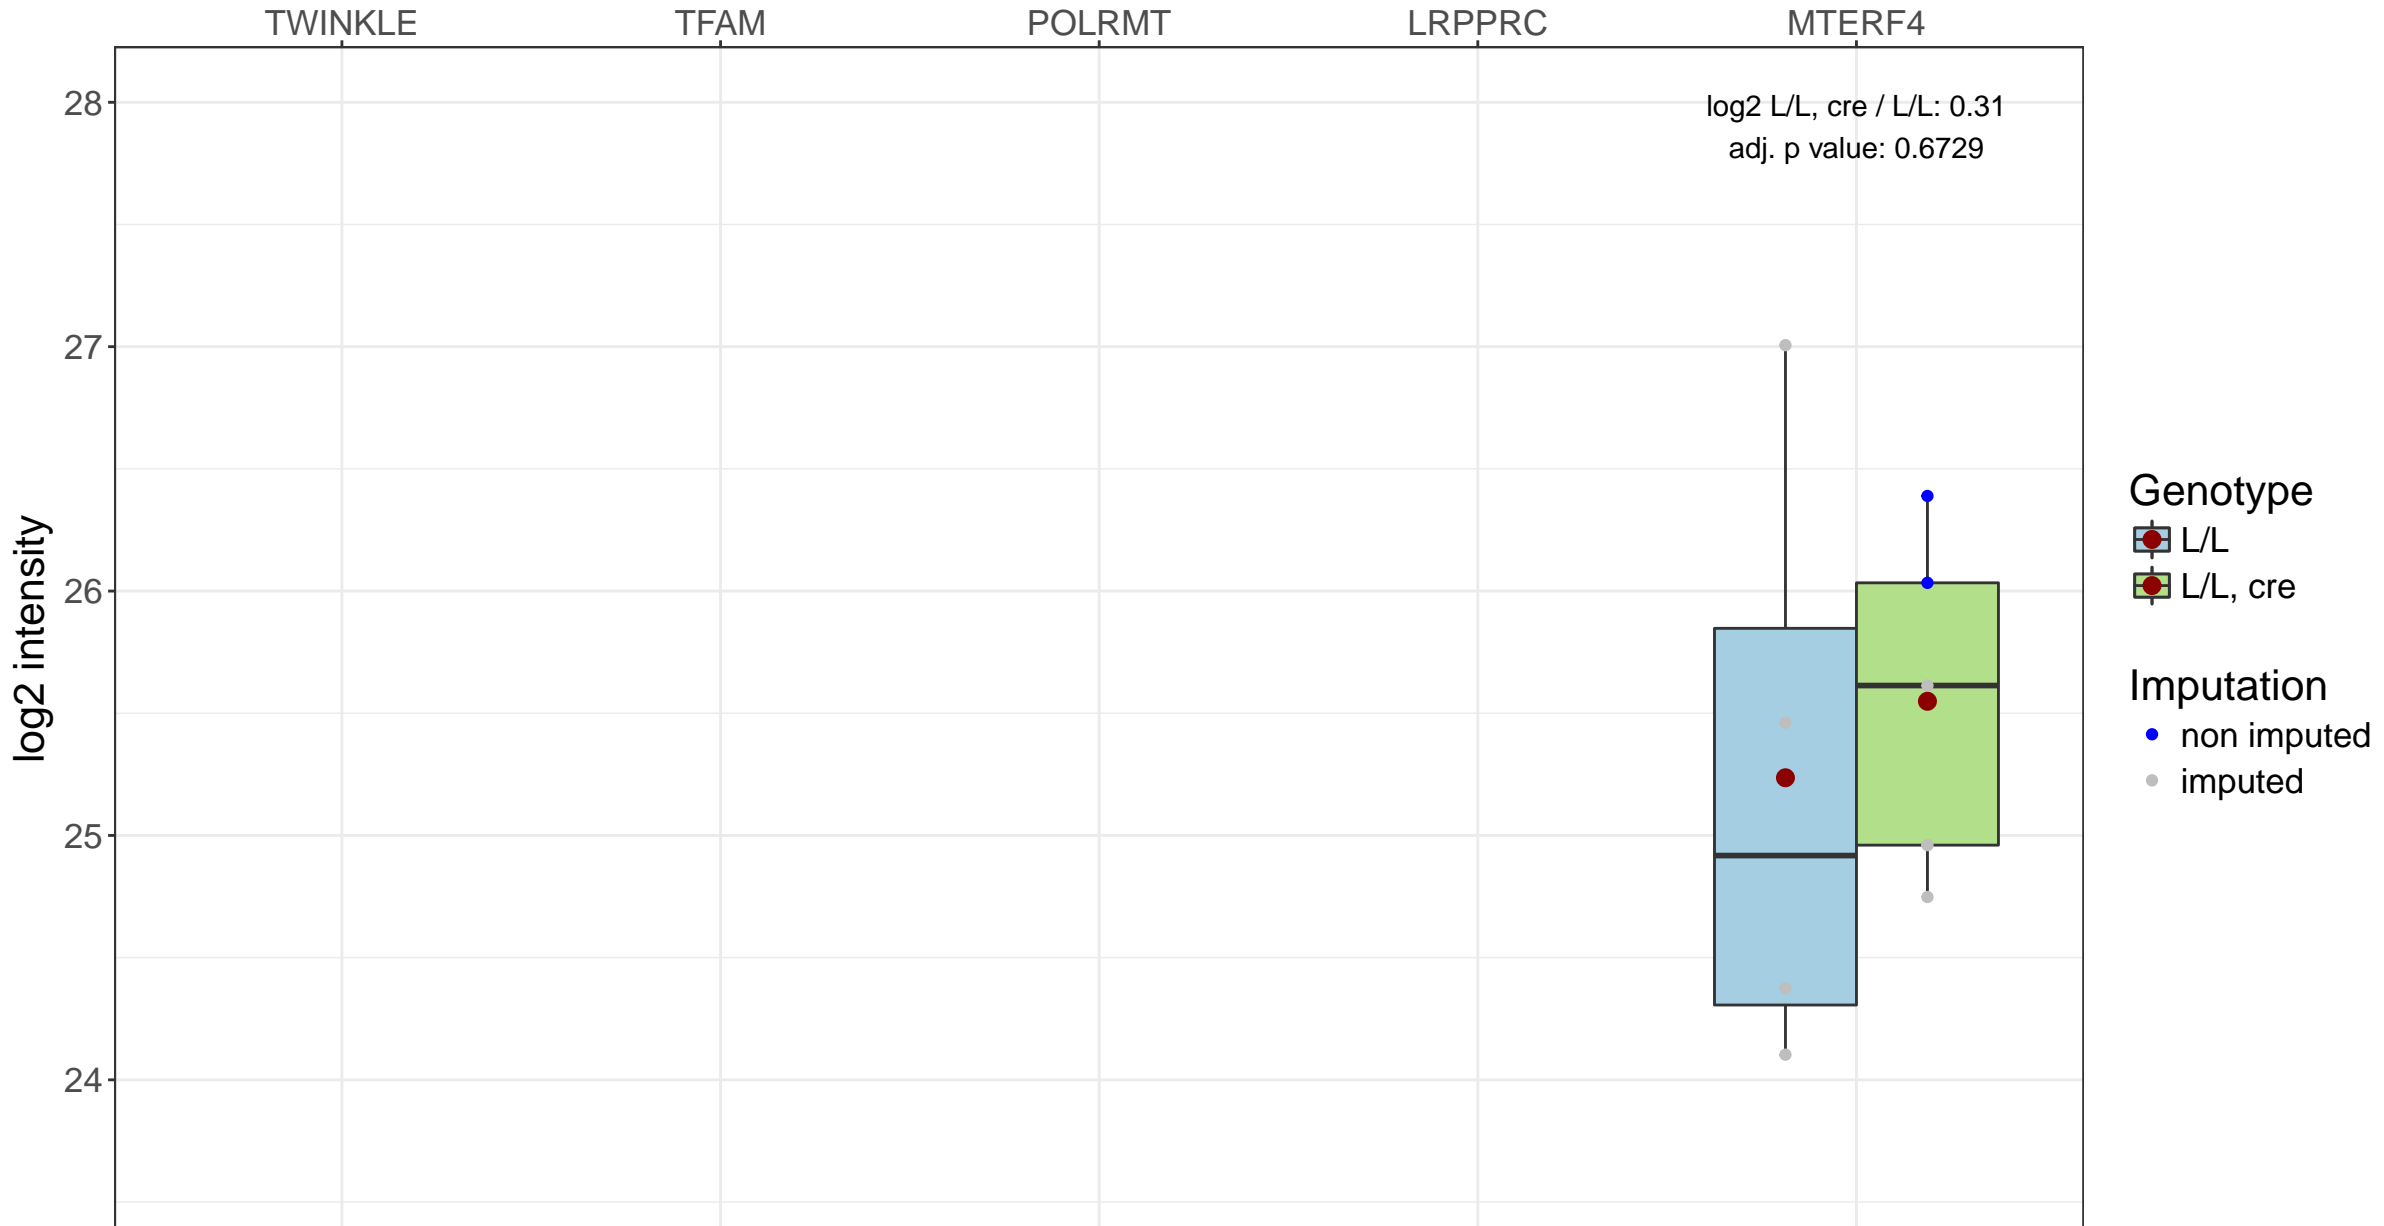

# AFG3L1 / Q920A7

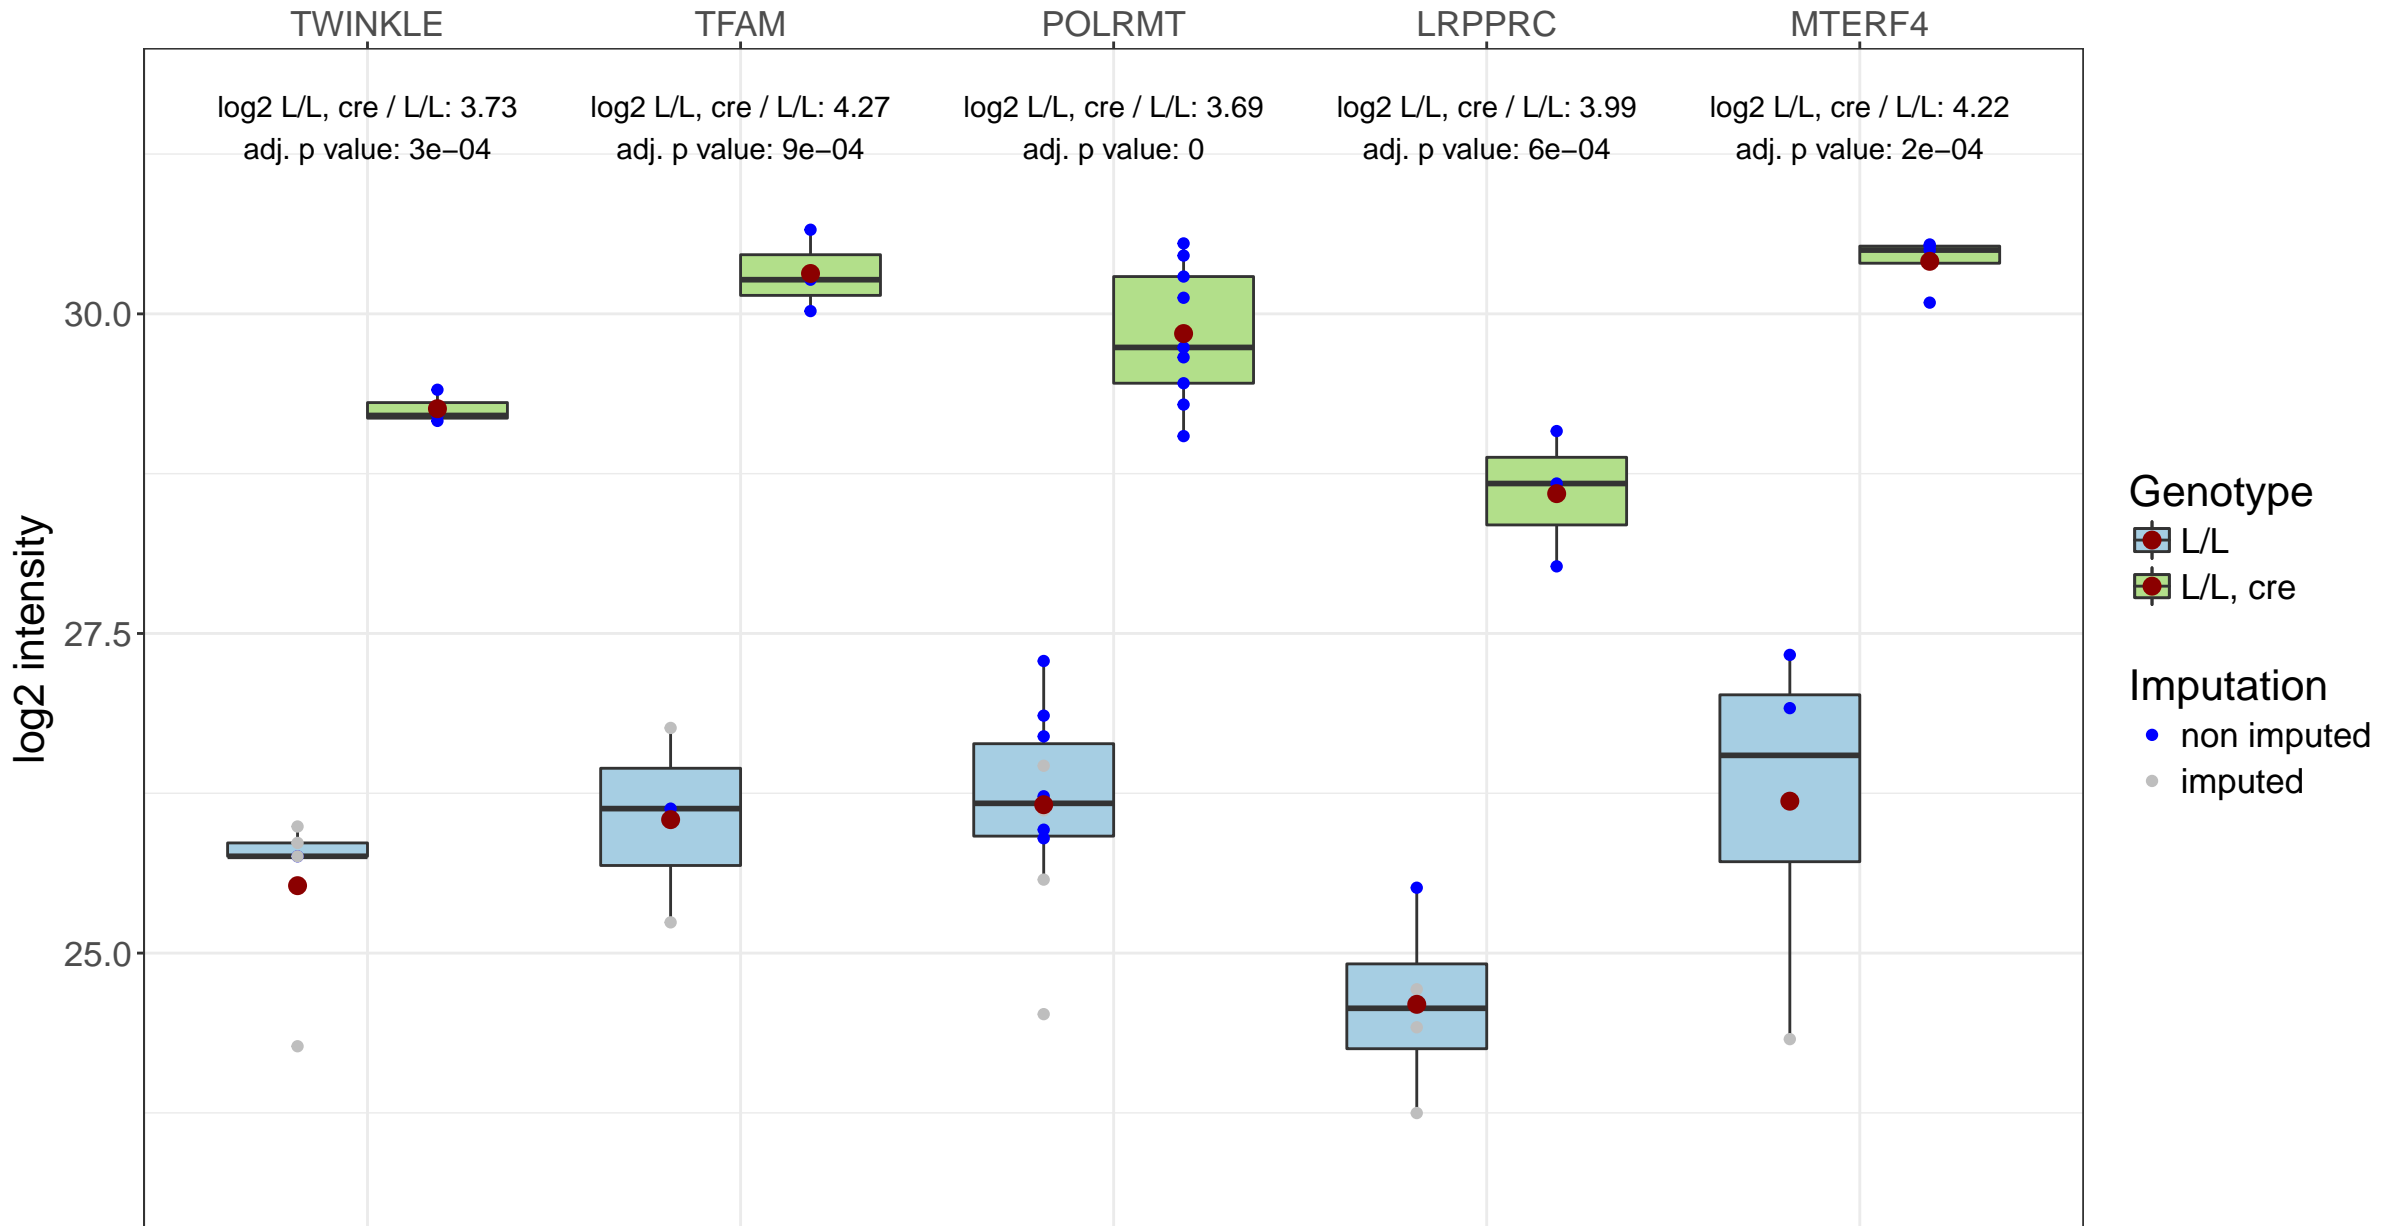

# AFG3L2 / Q8JZQ2

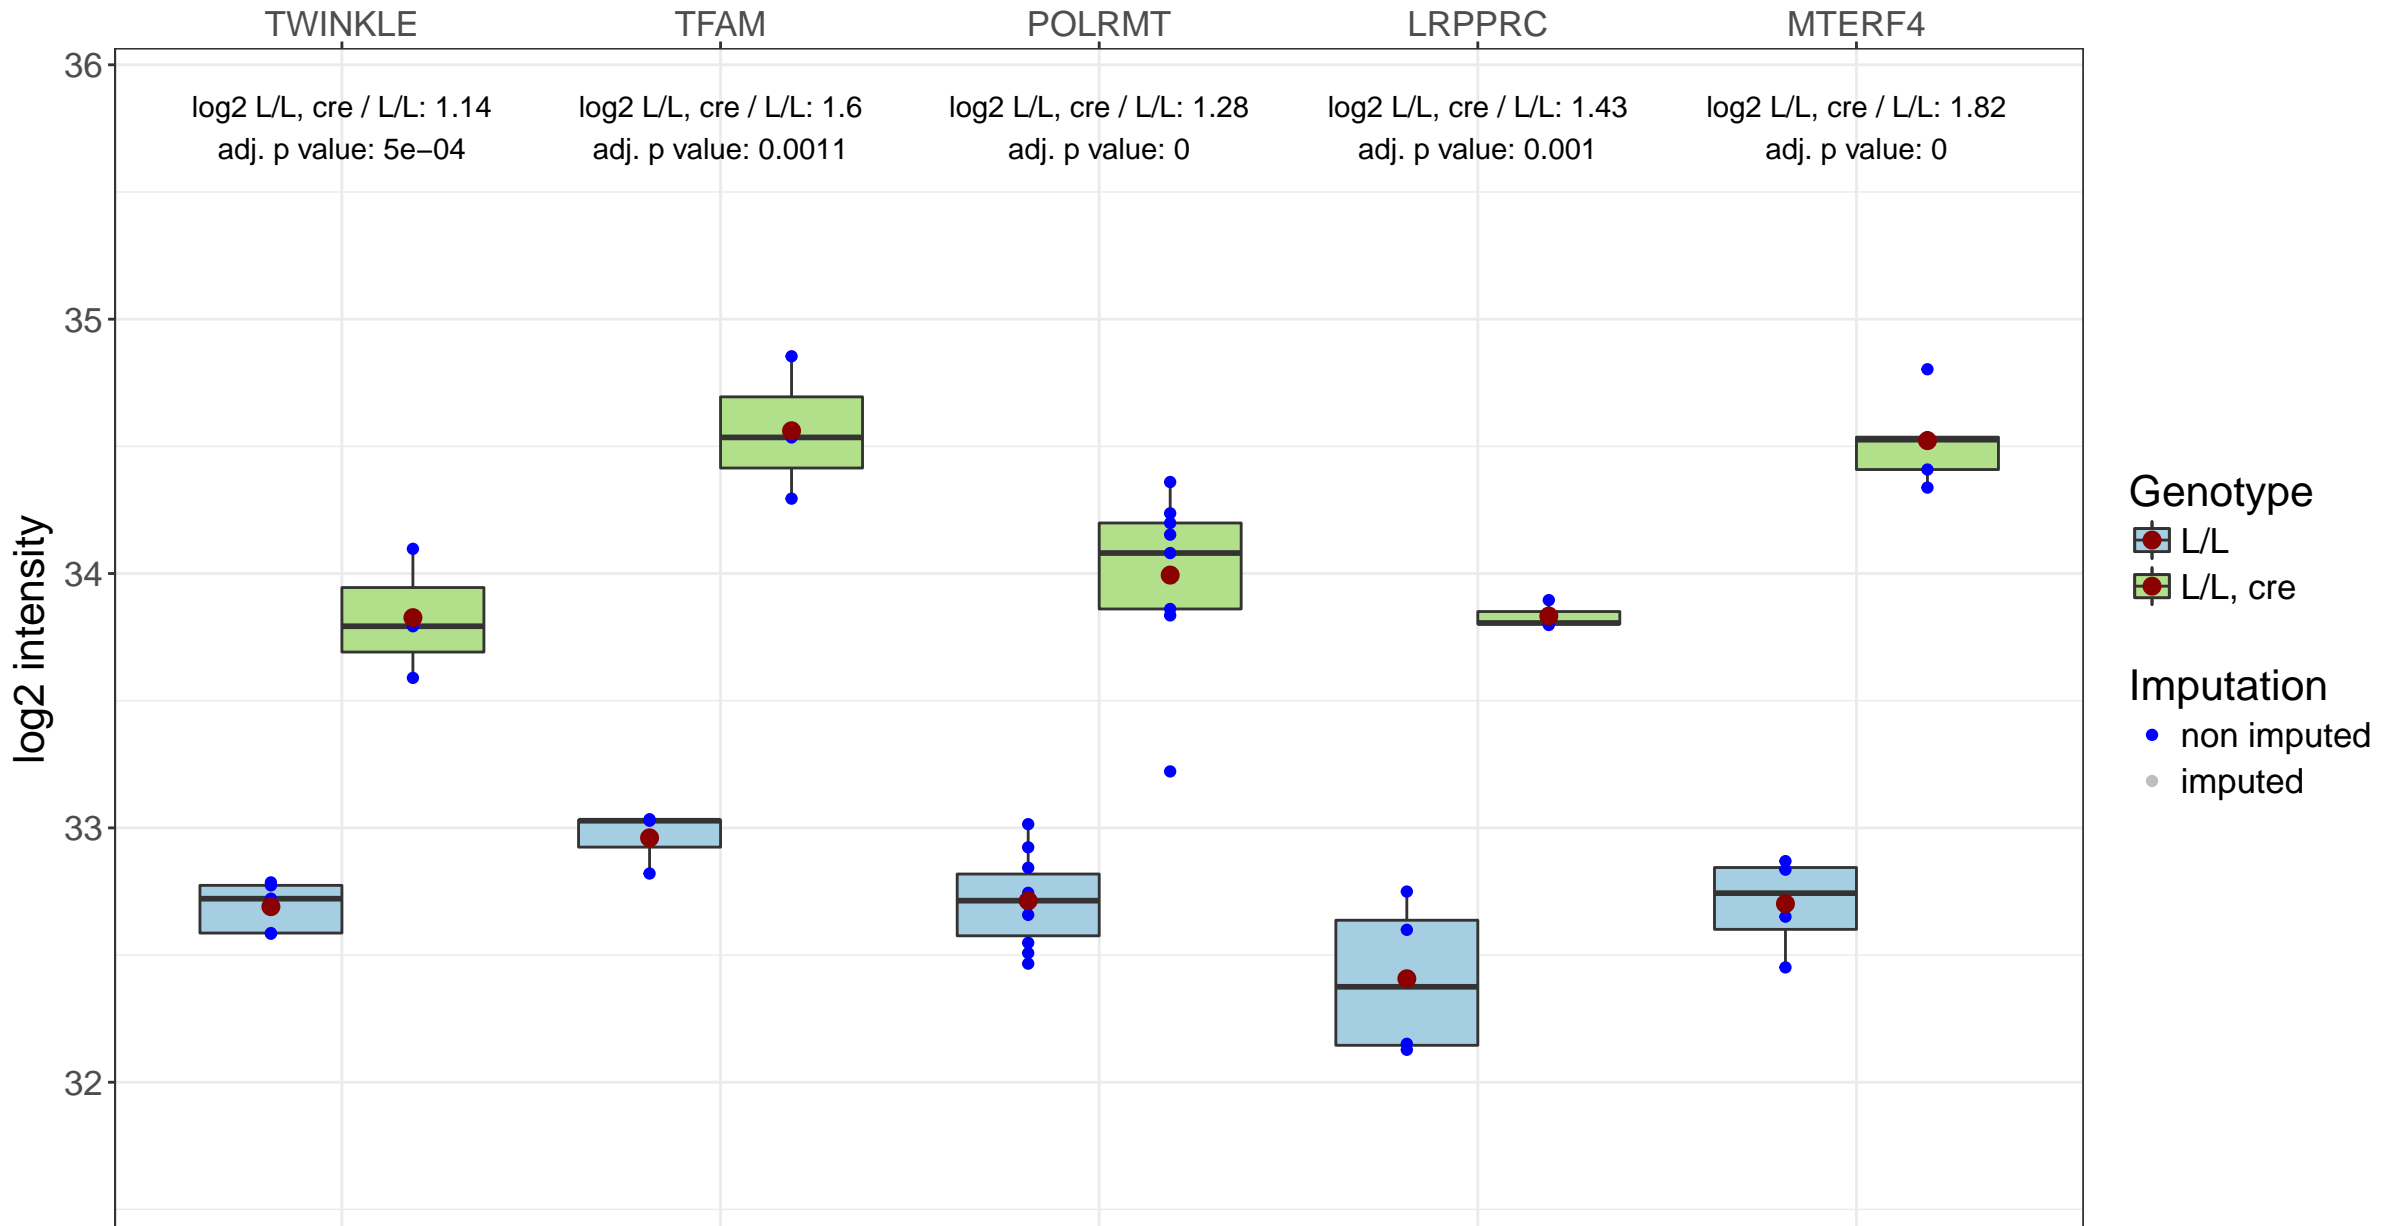

# AGK / Q9ESW4

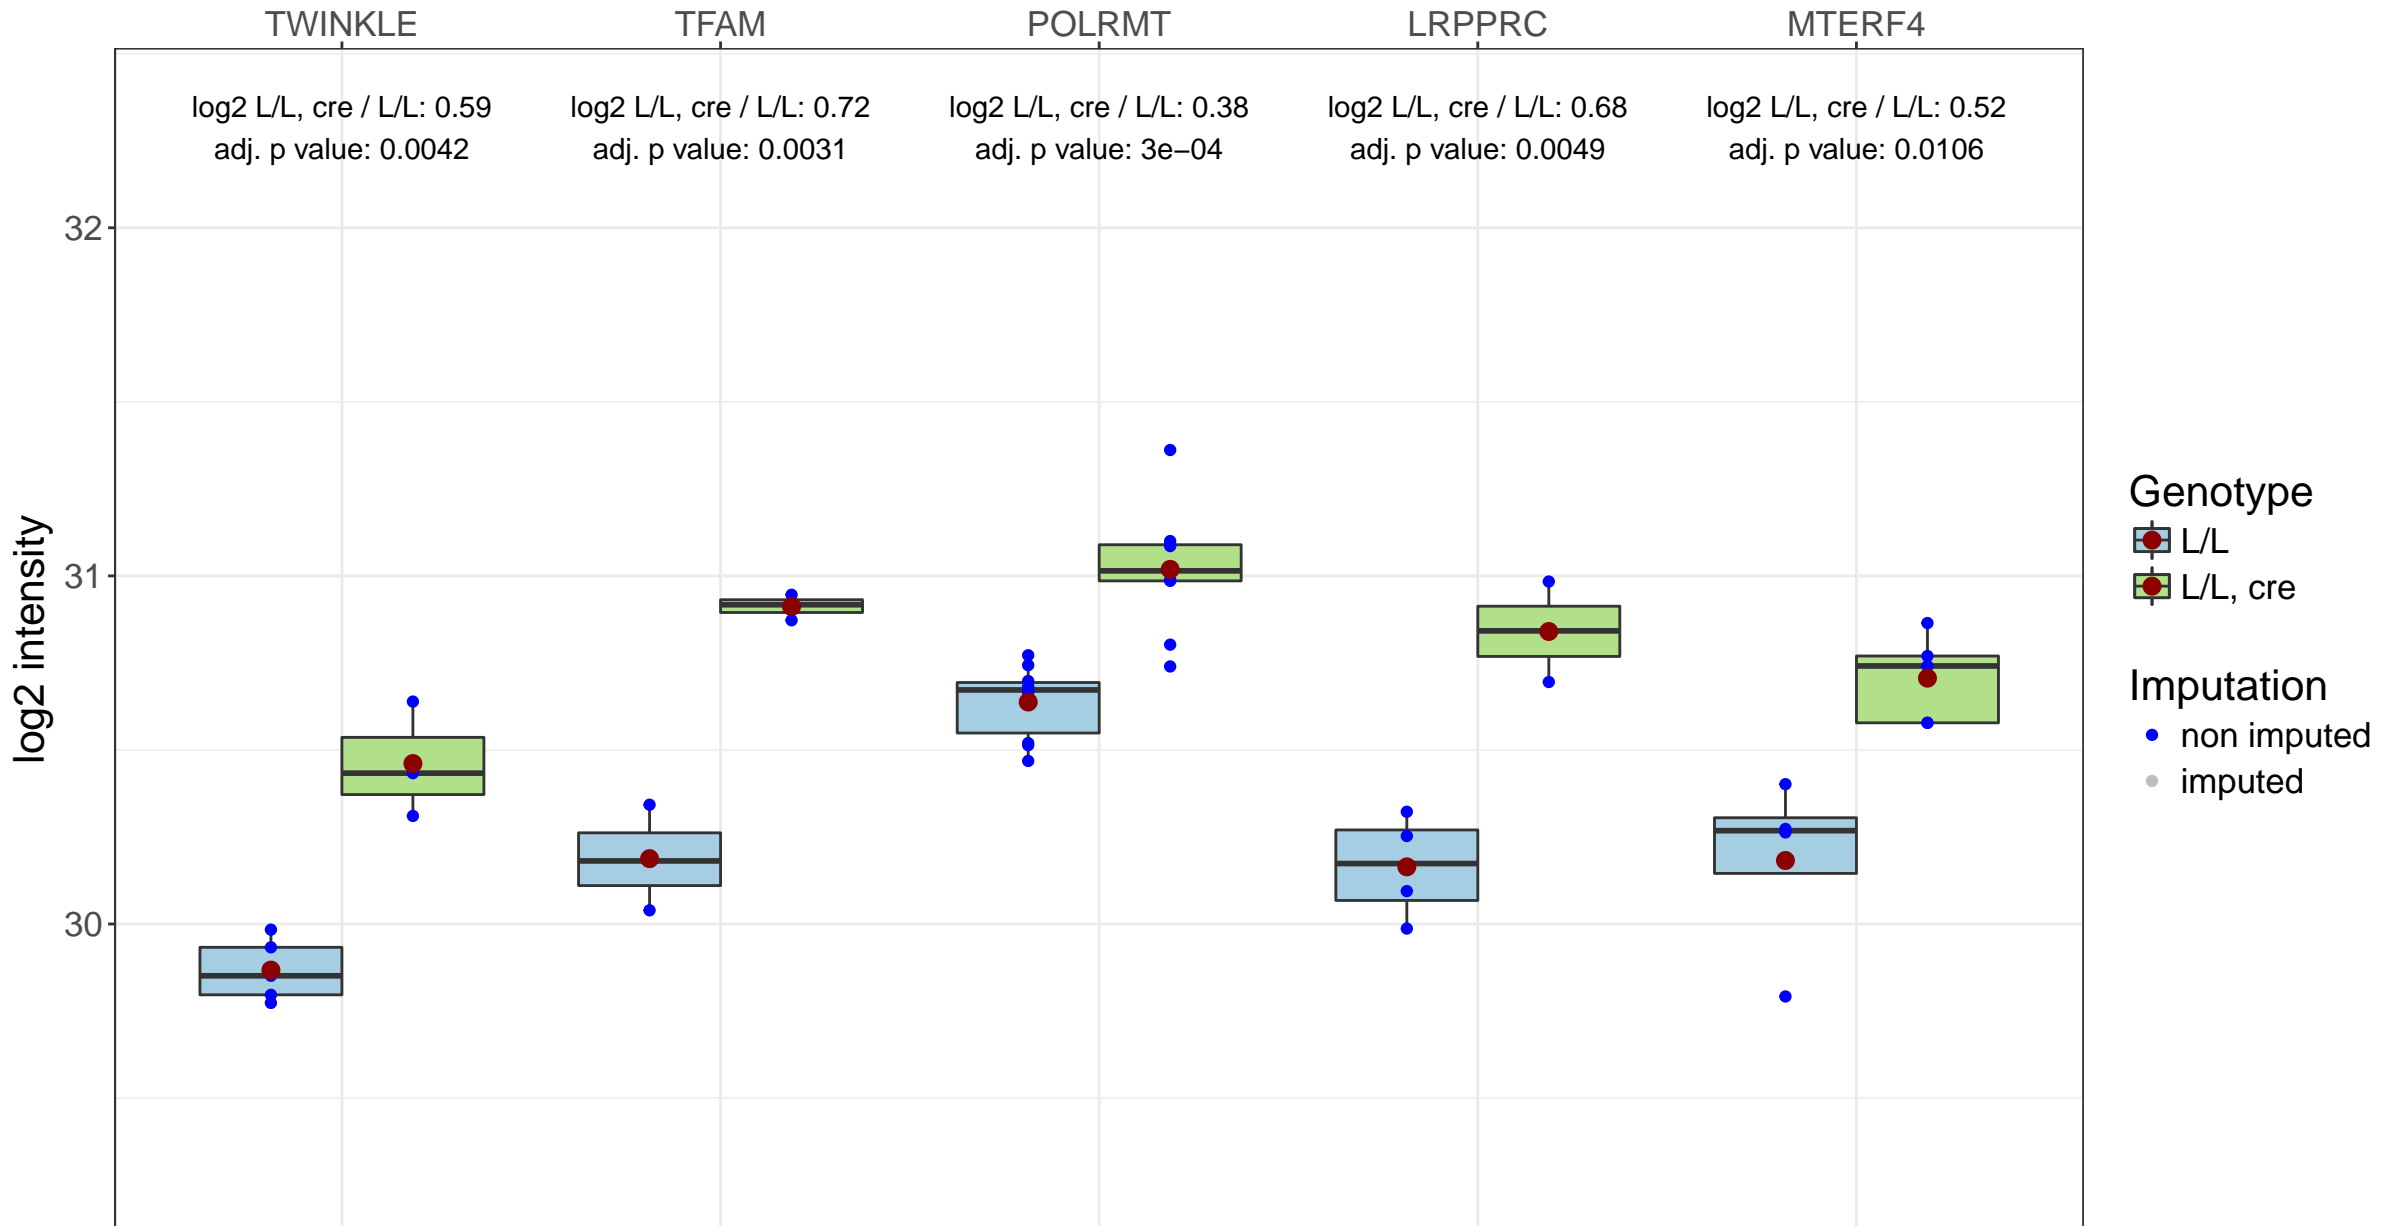

# AHNAK / E9Q616

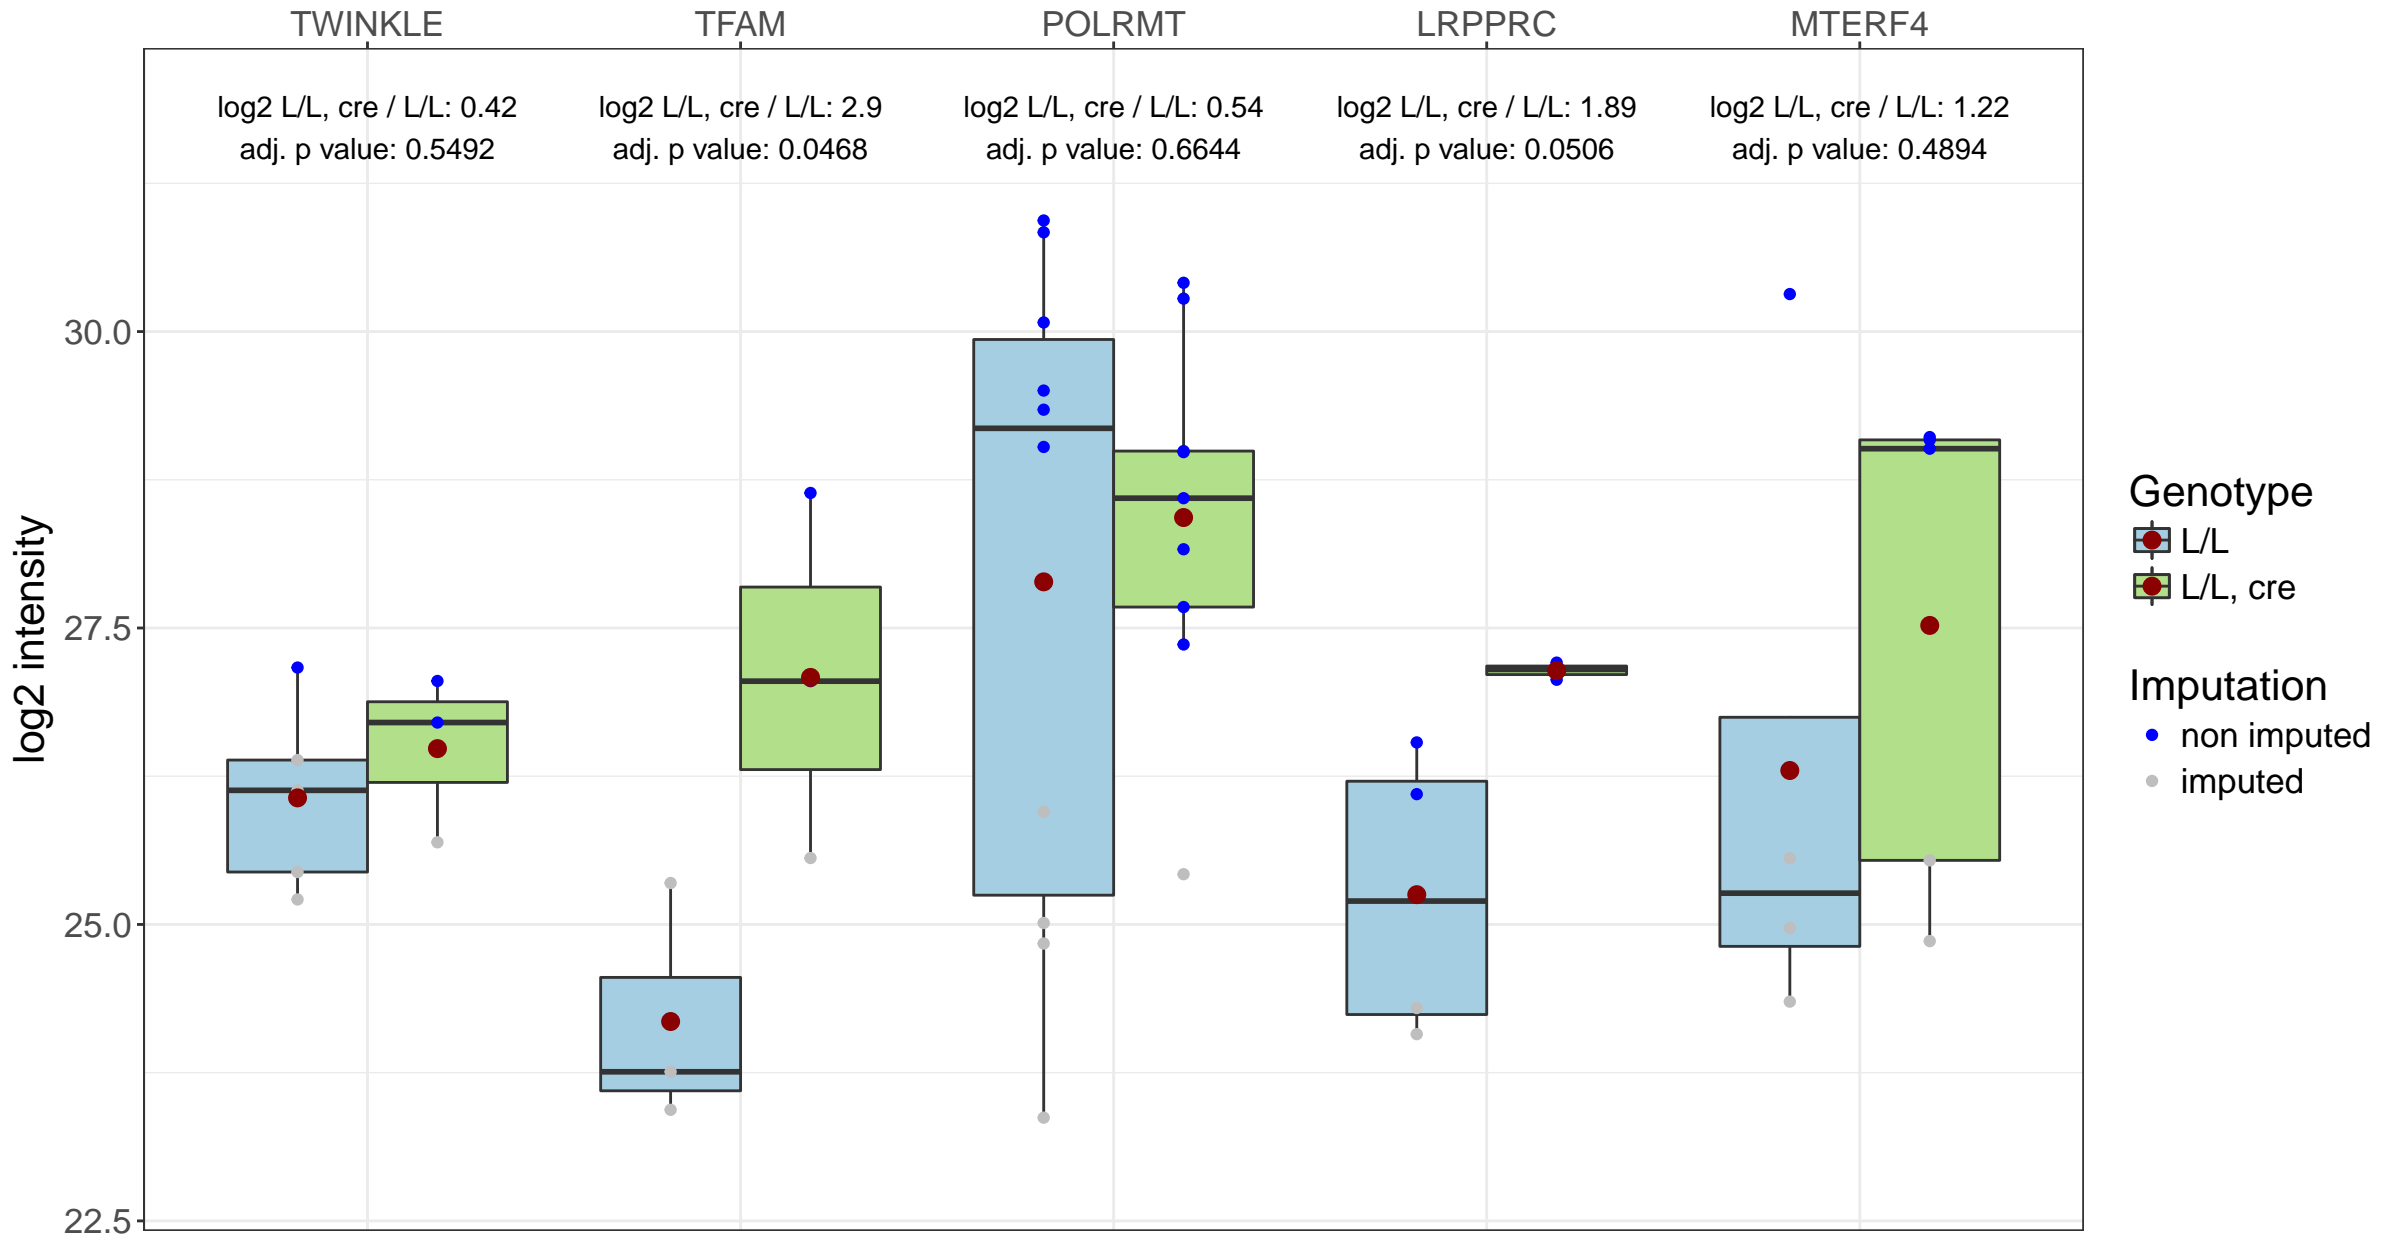

# AIFM1 / Q9Z0X1

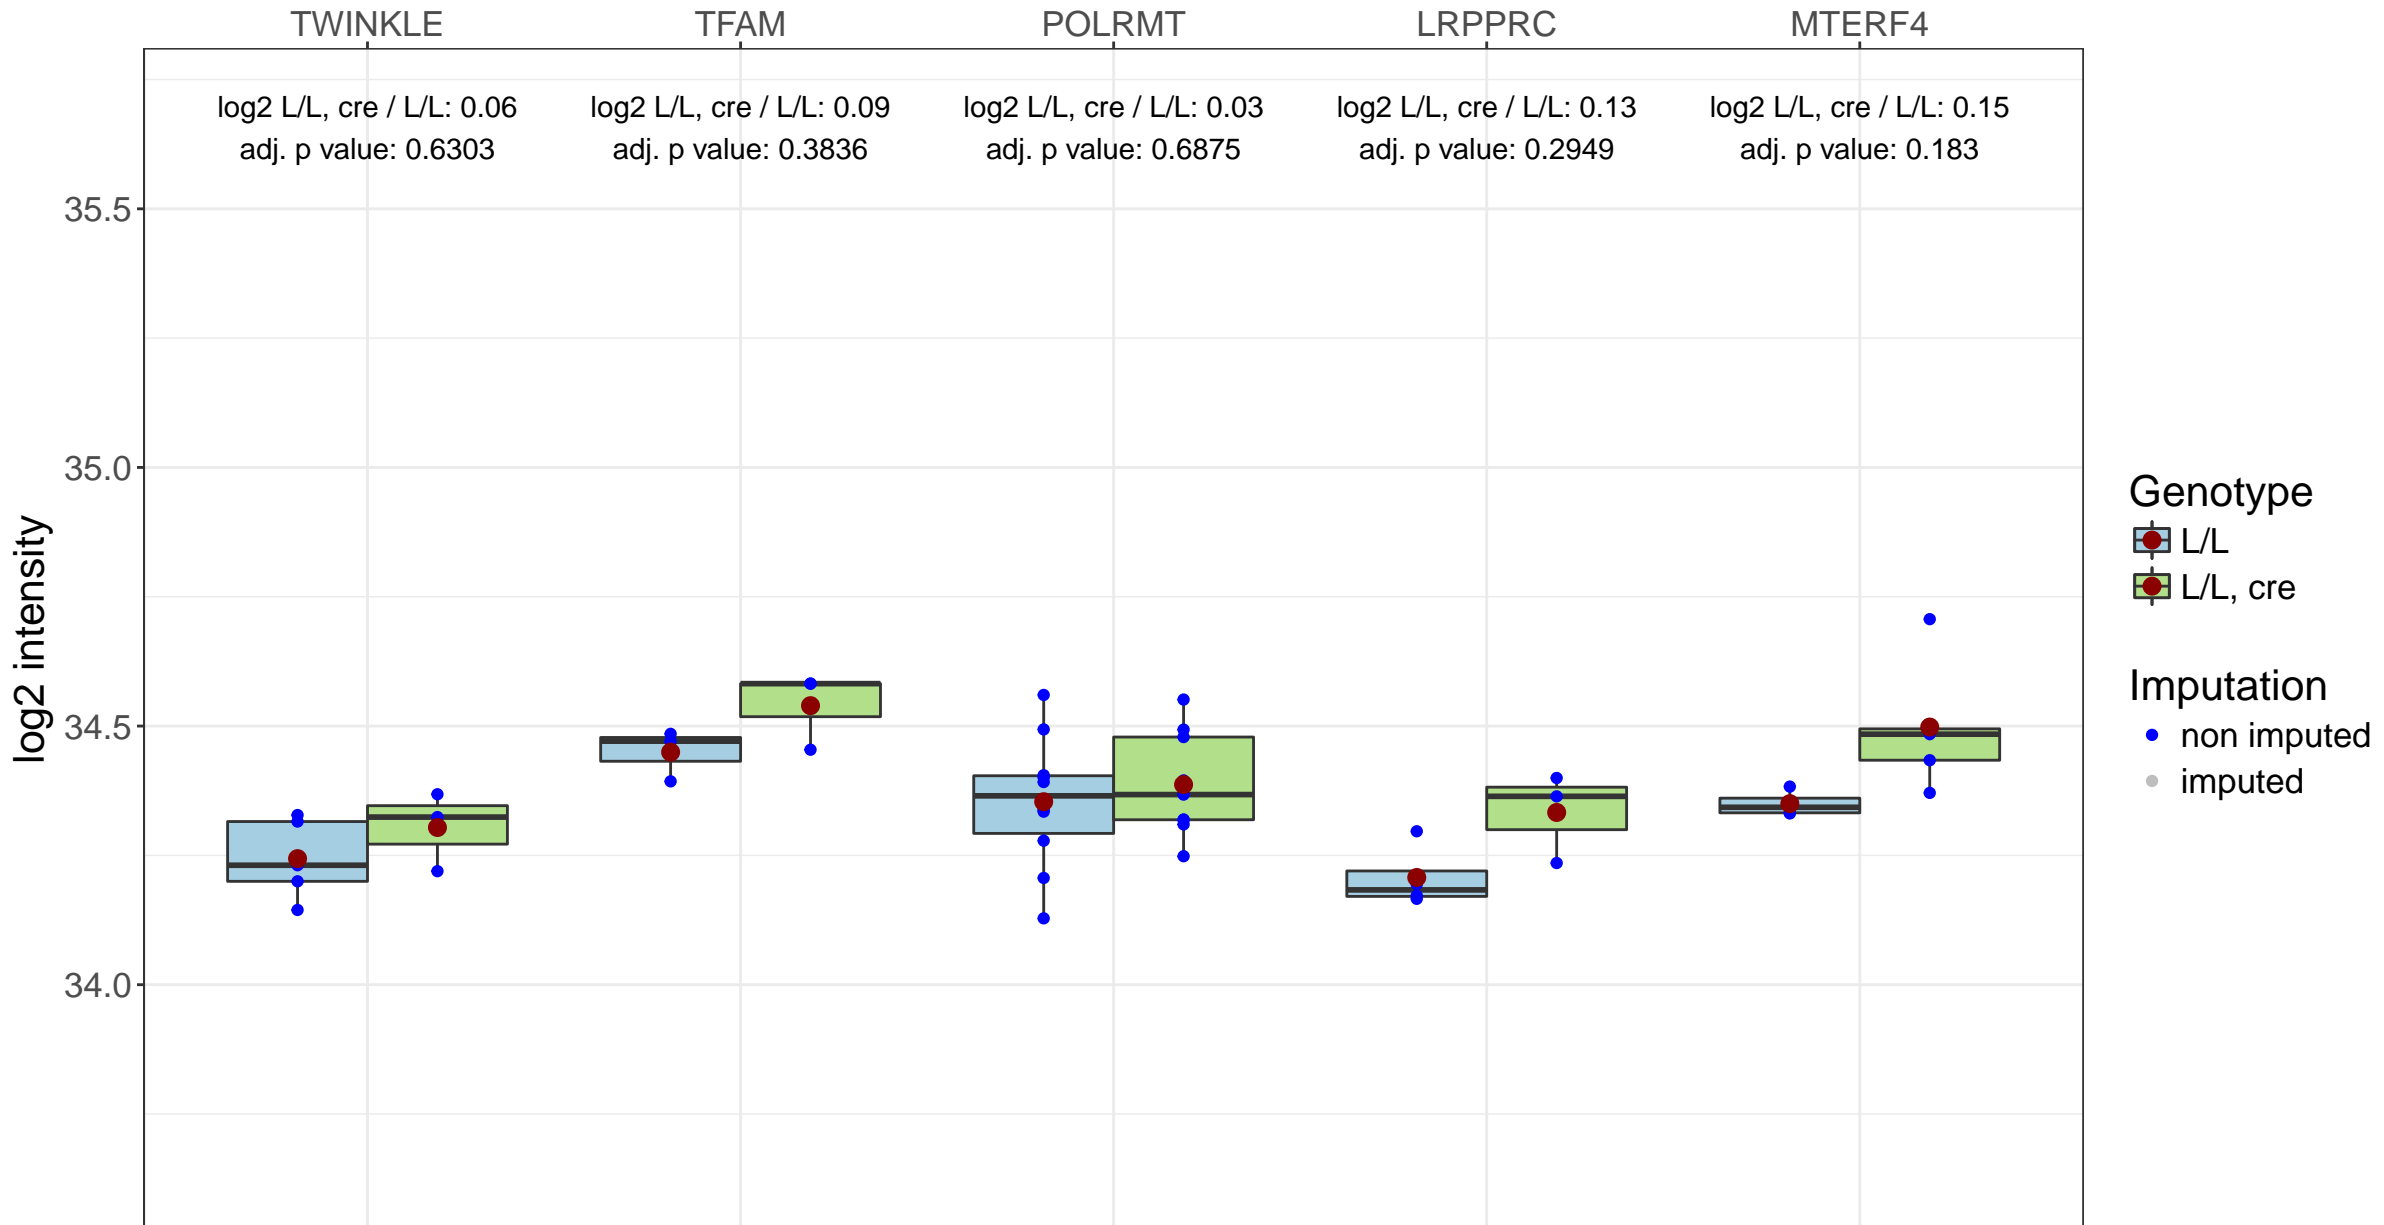

# AIMP1 / P31230

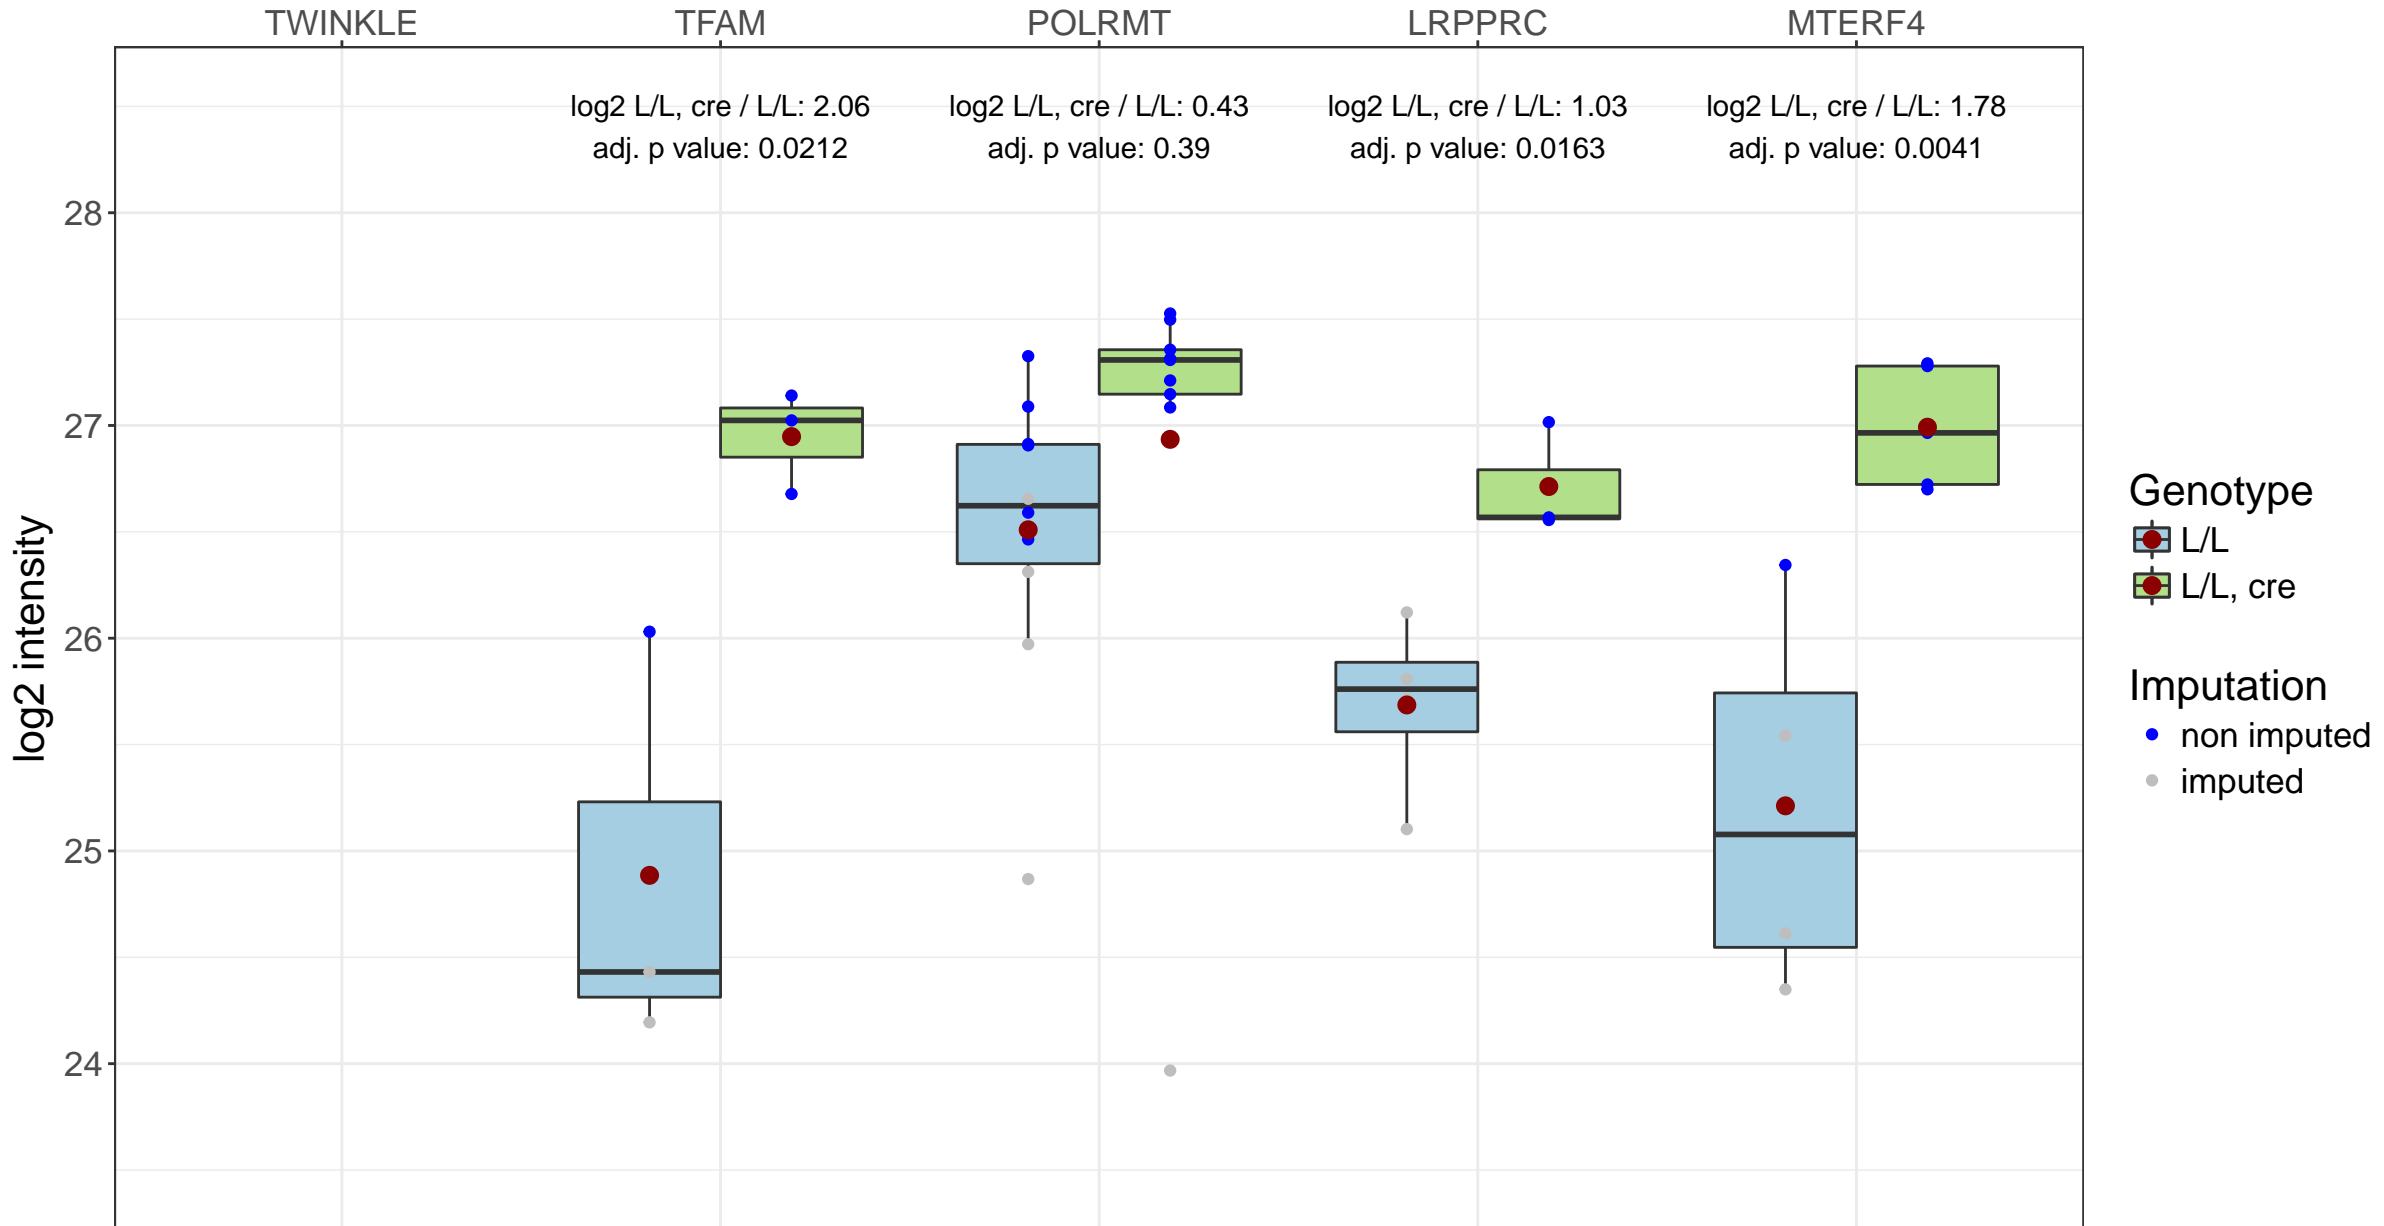



# AK157302 / I3ITR1

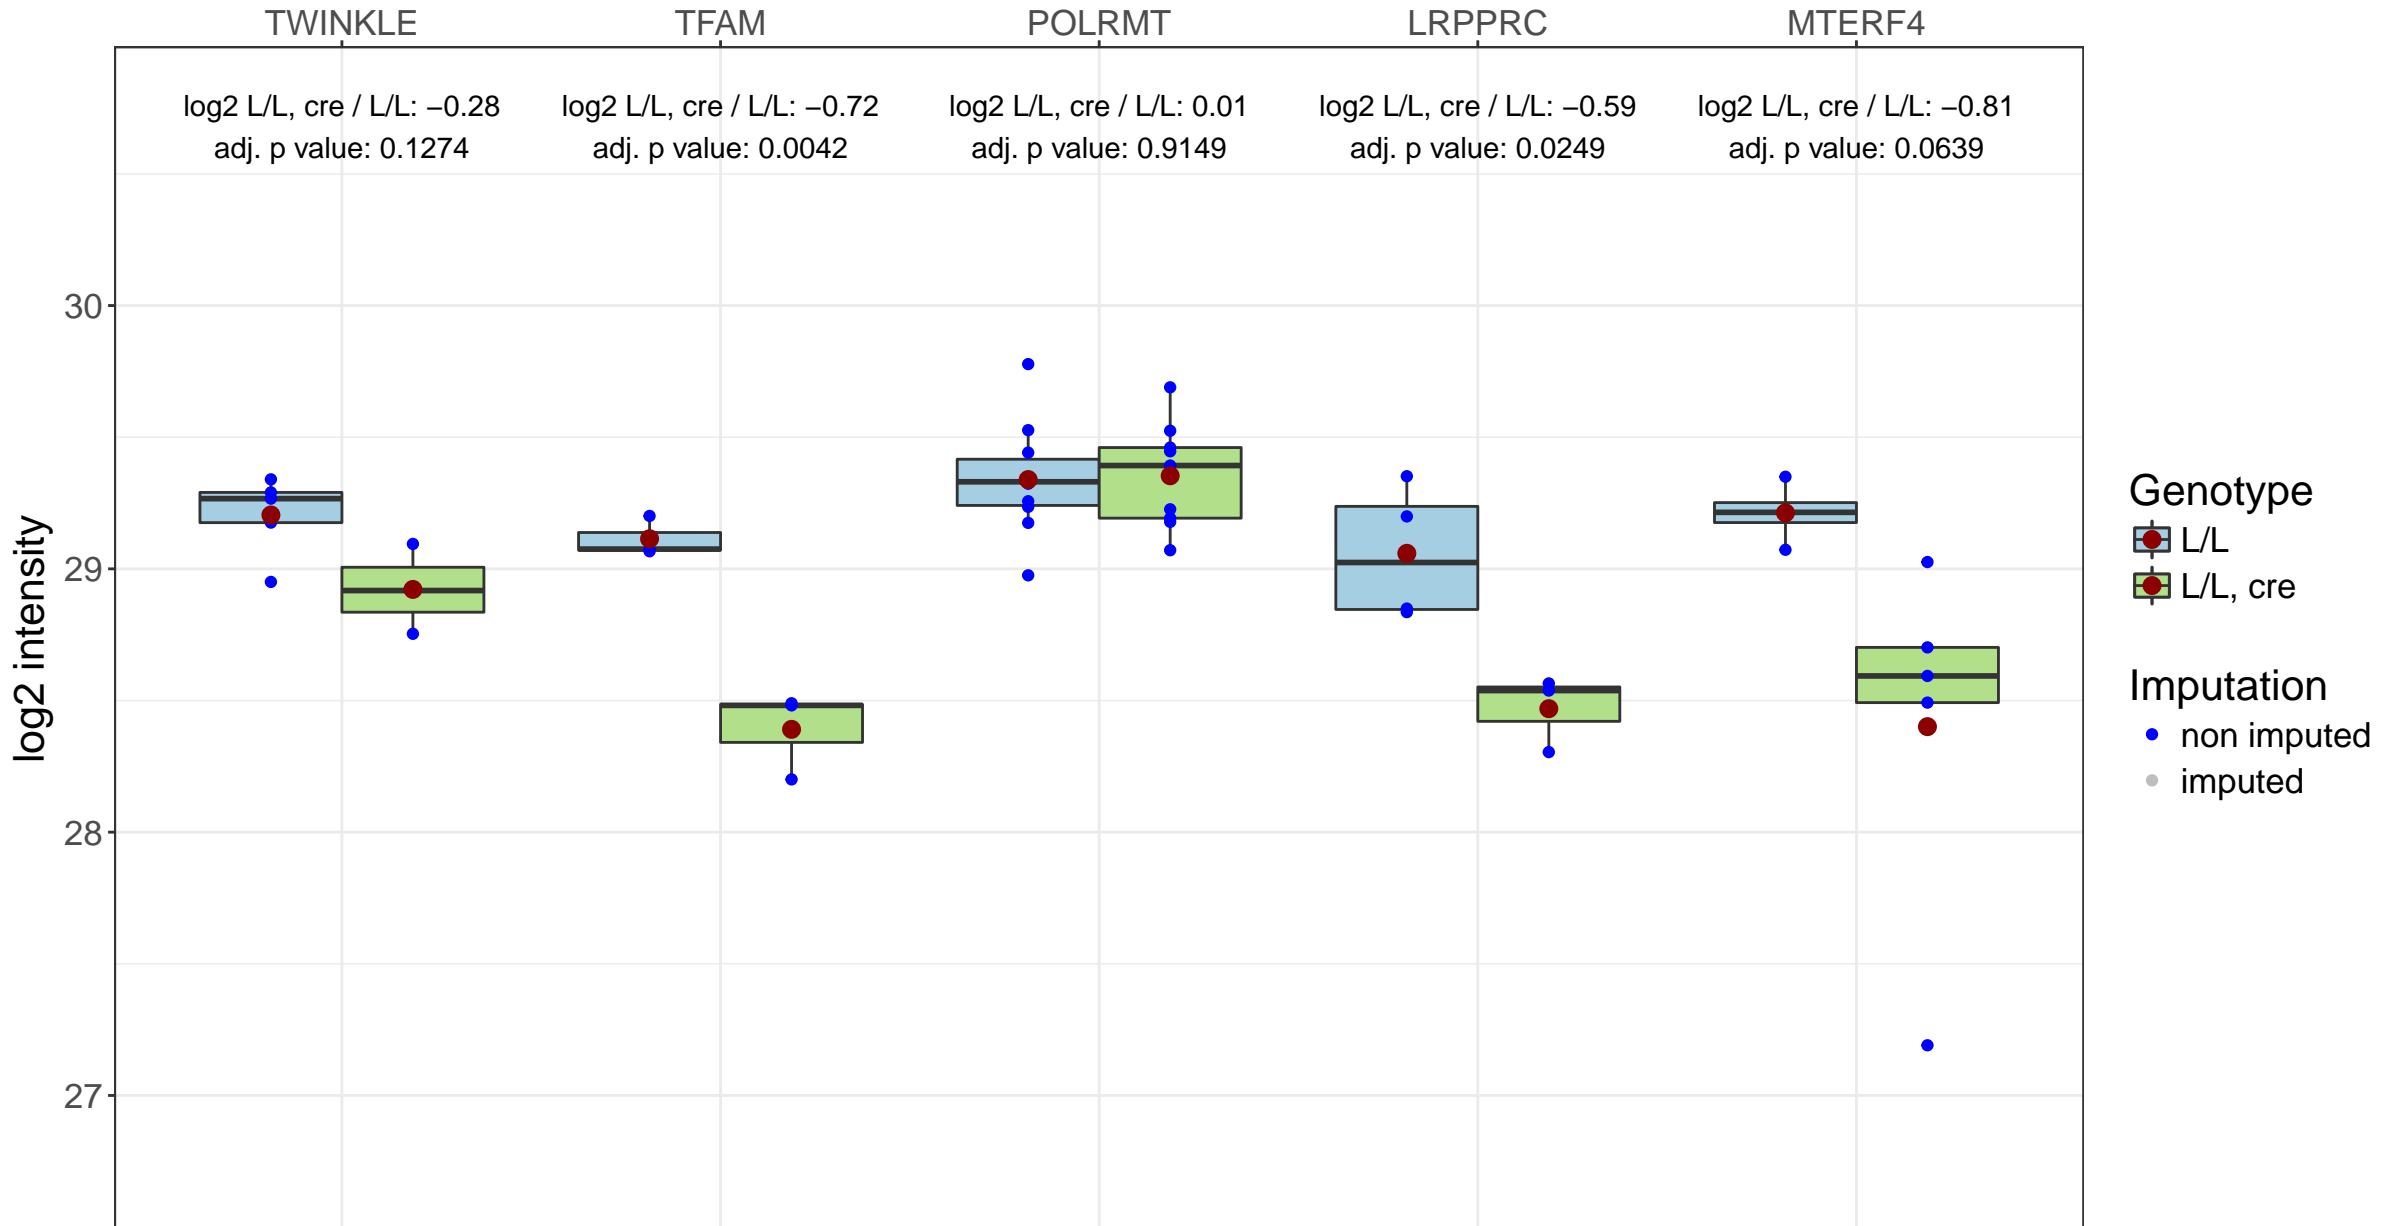

# AK2 / Q9WTP6-2

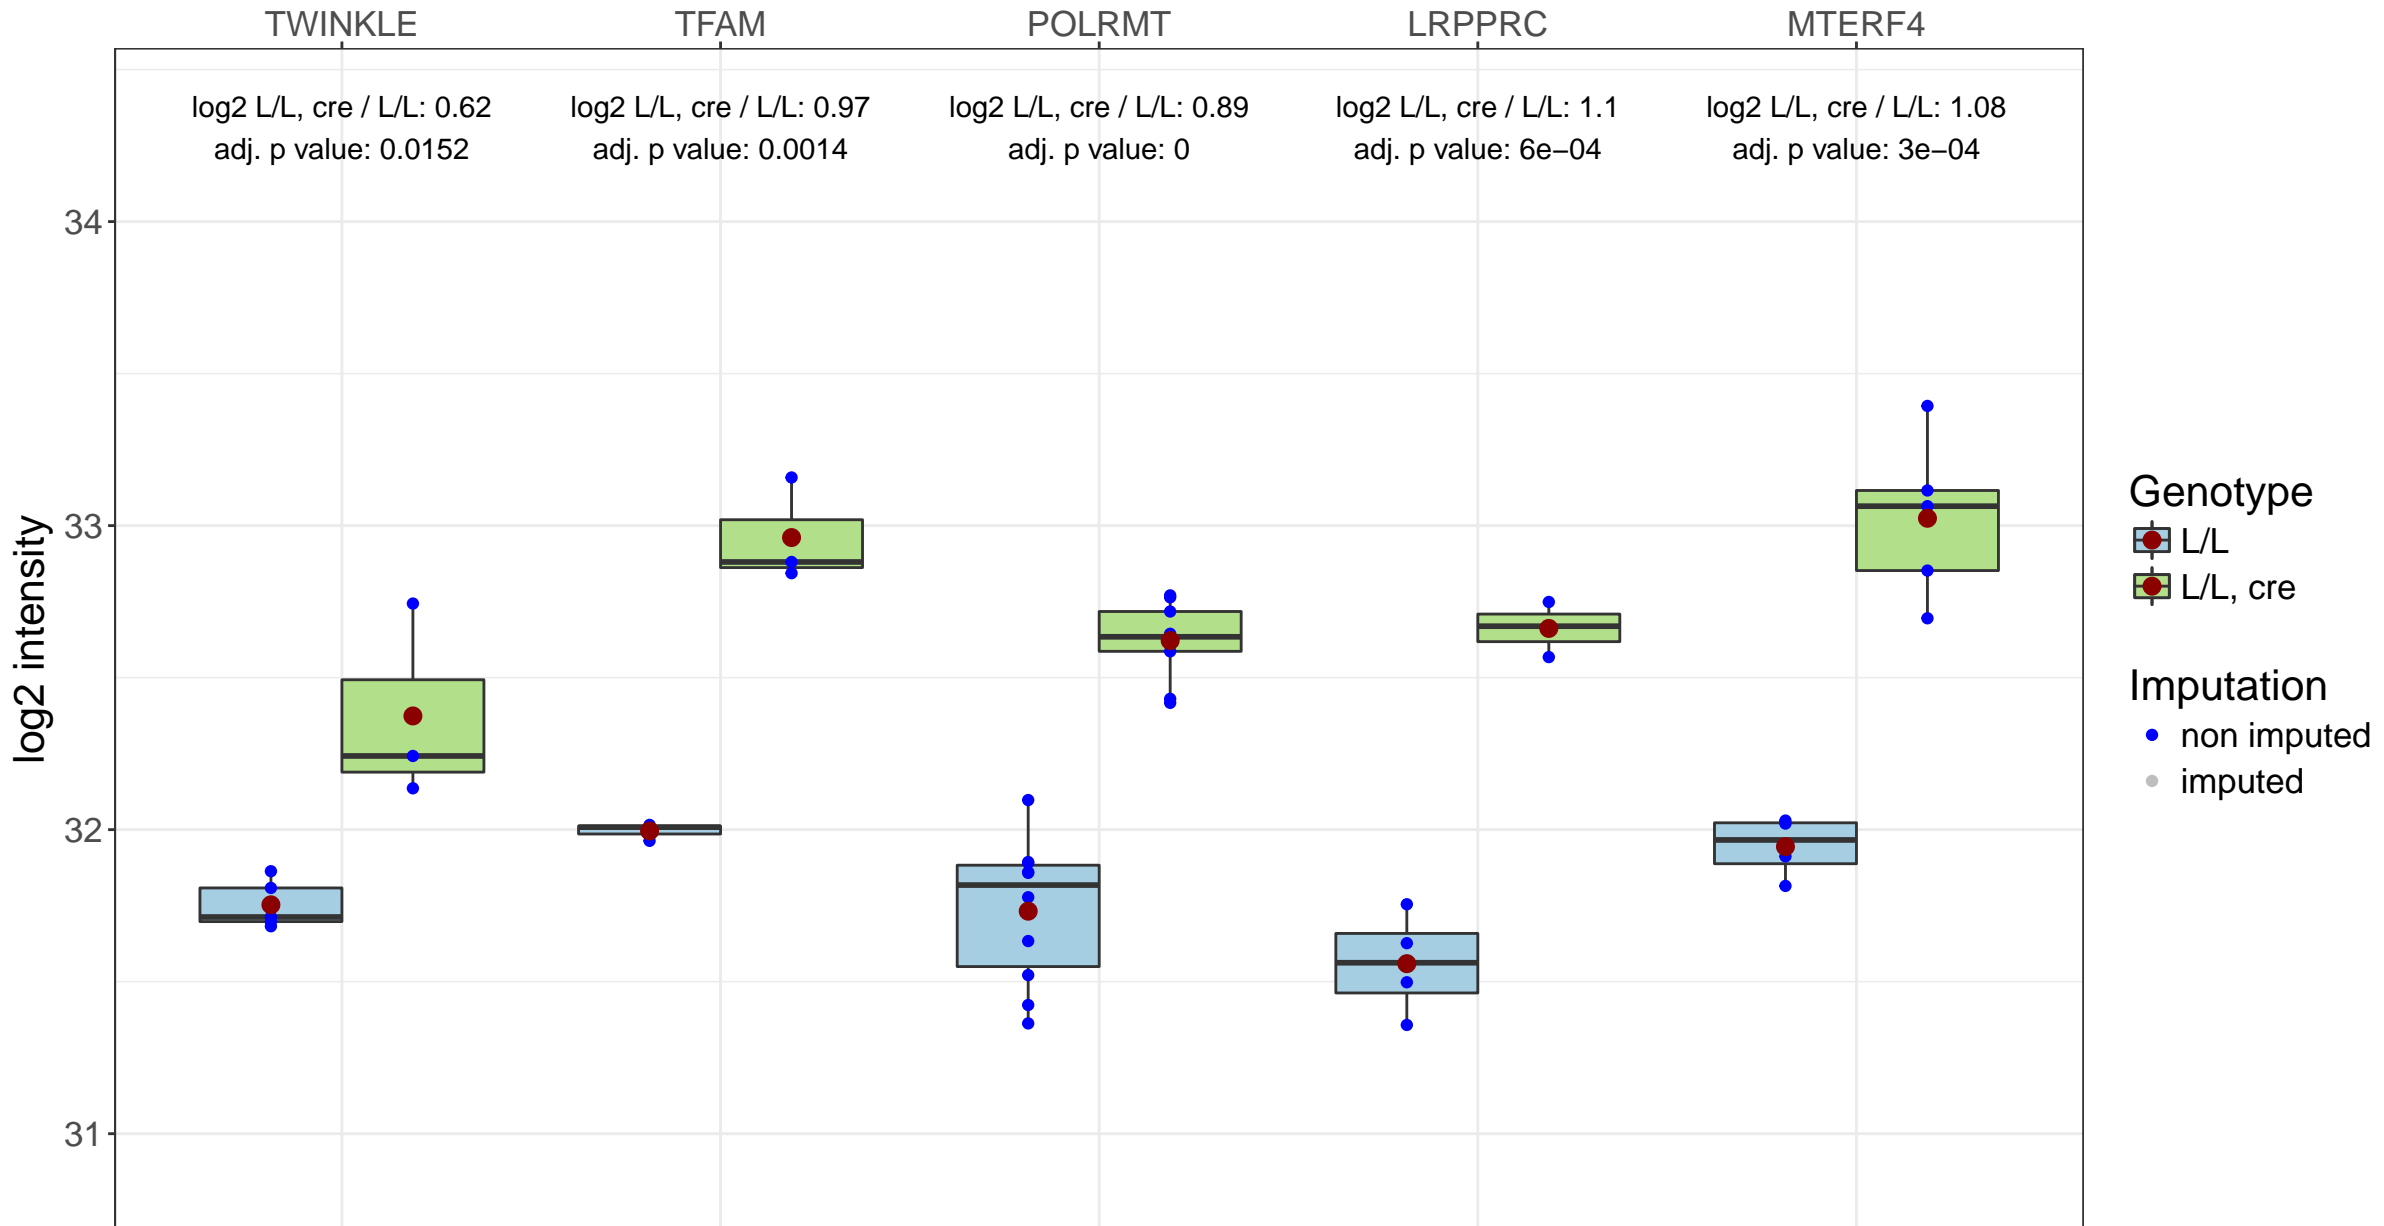

# AK3 / Q9WTP7

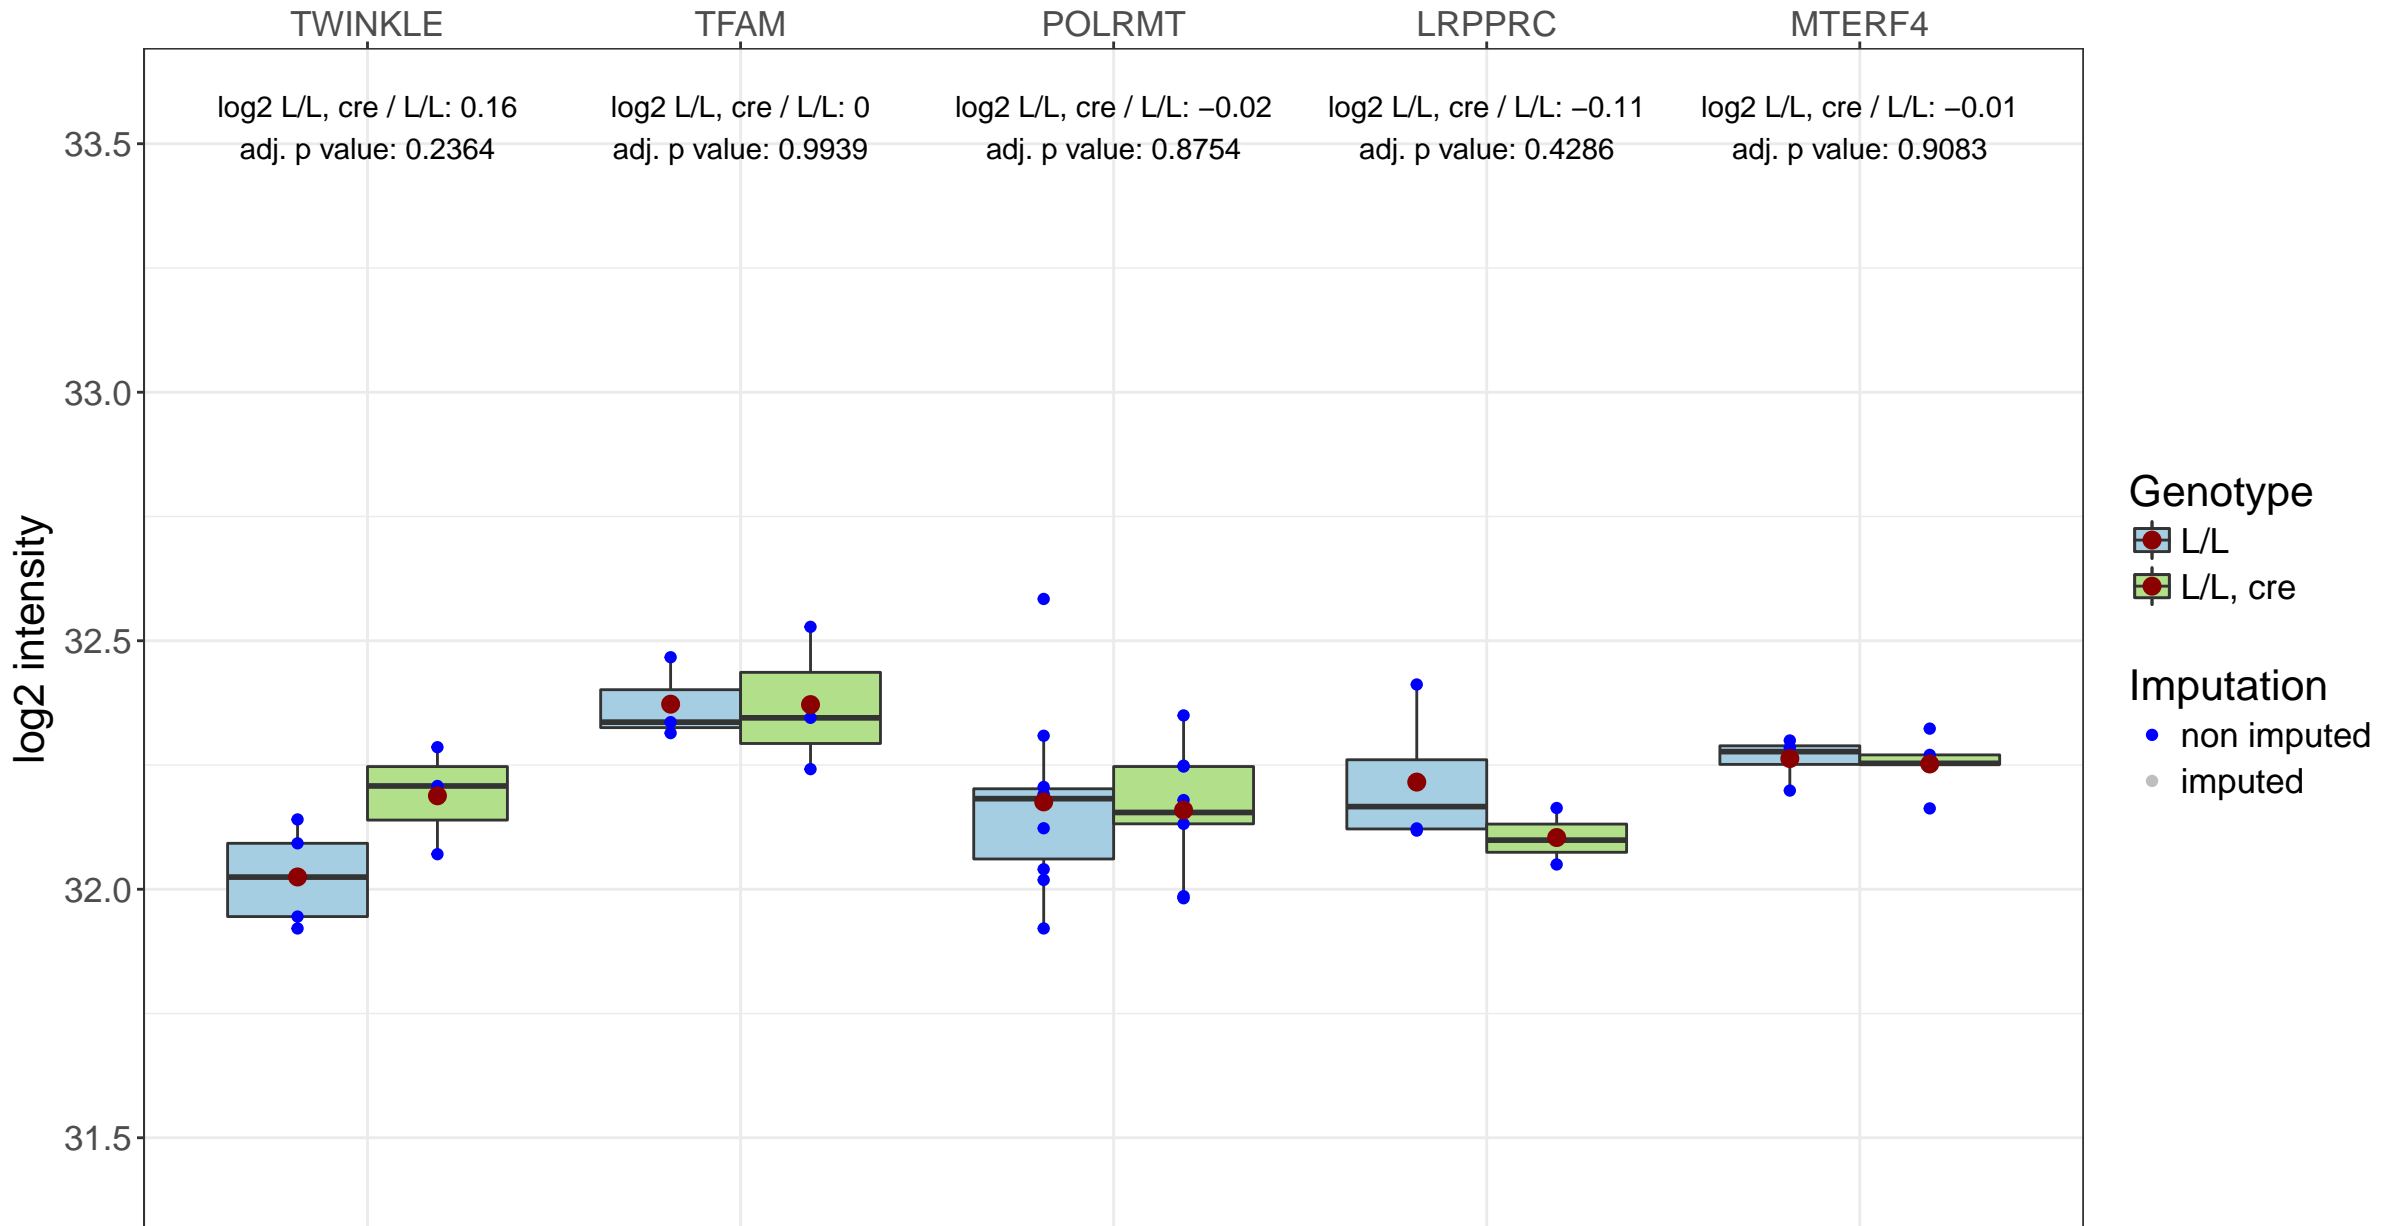

# AK4 / Q9WUR9

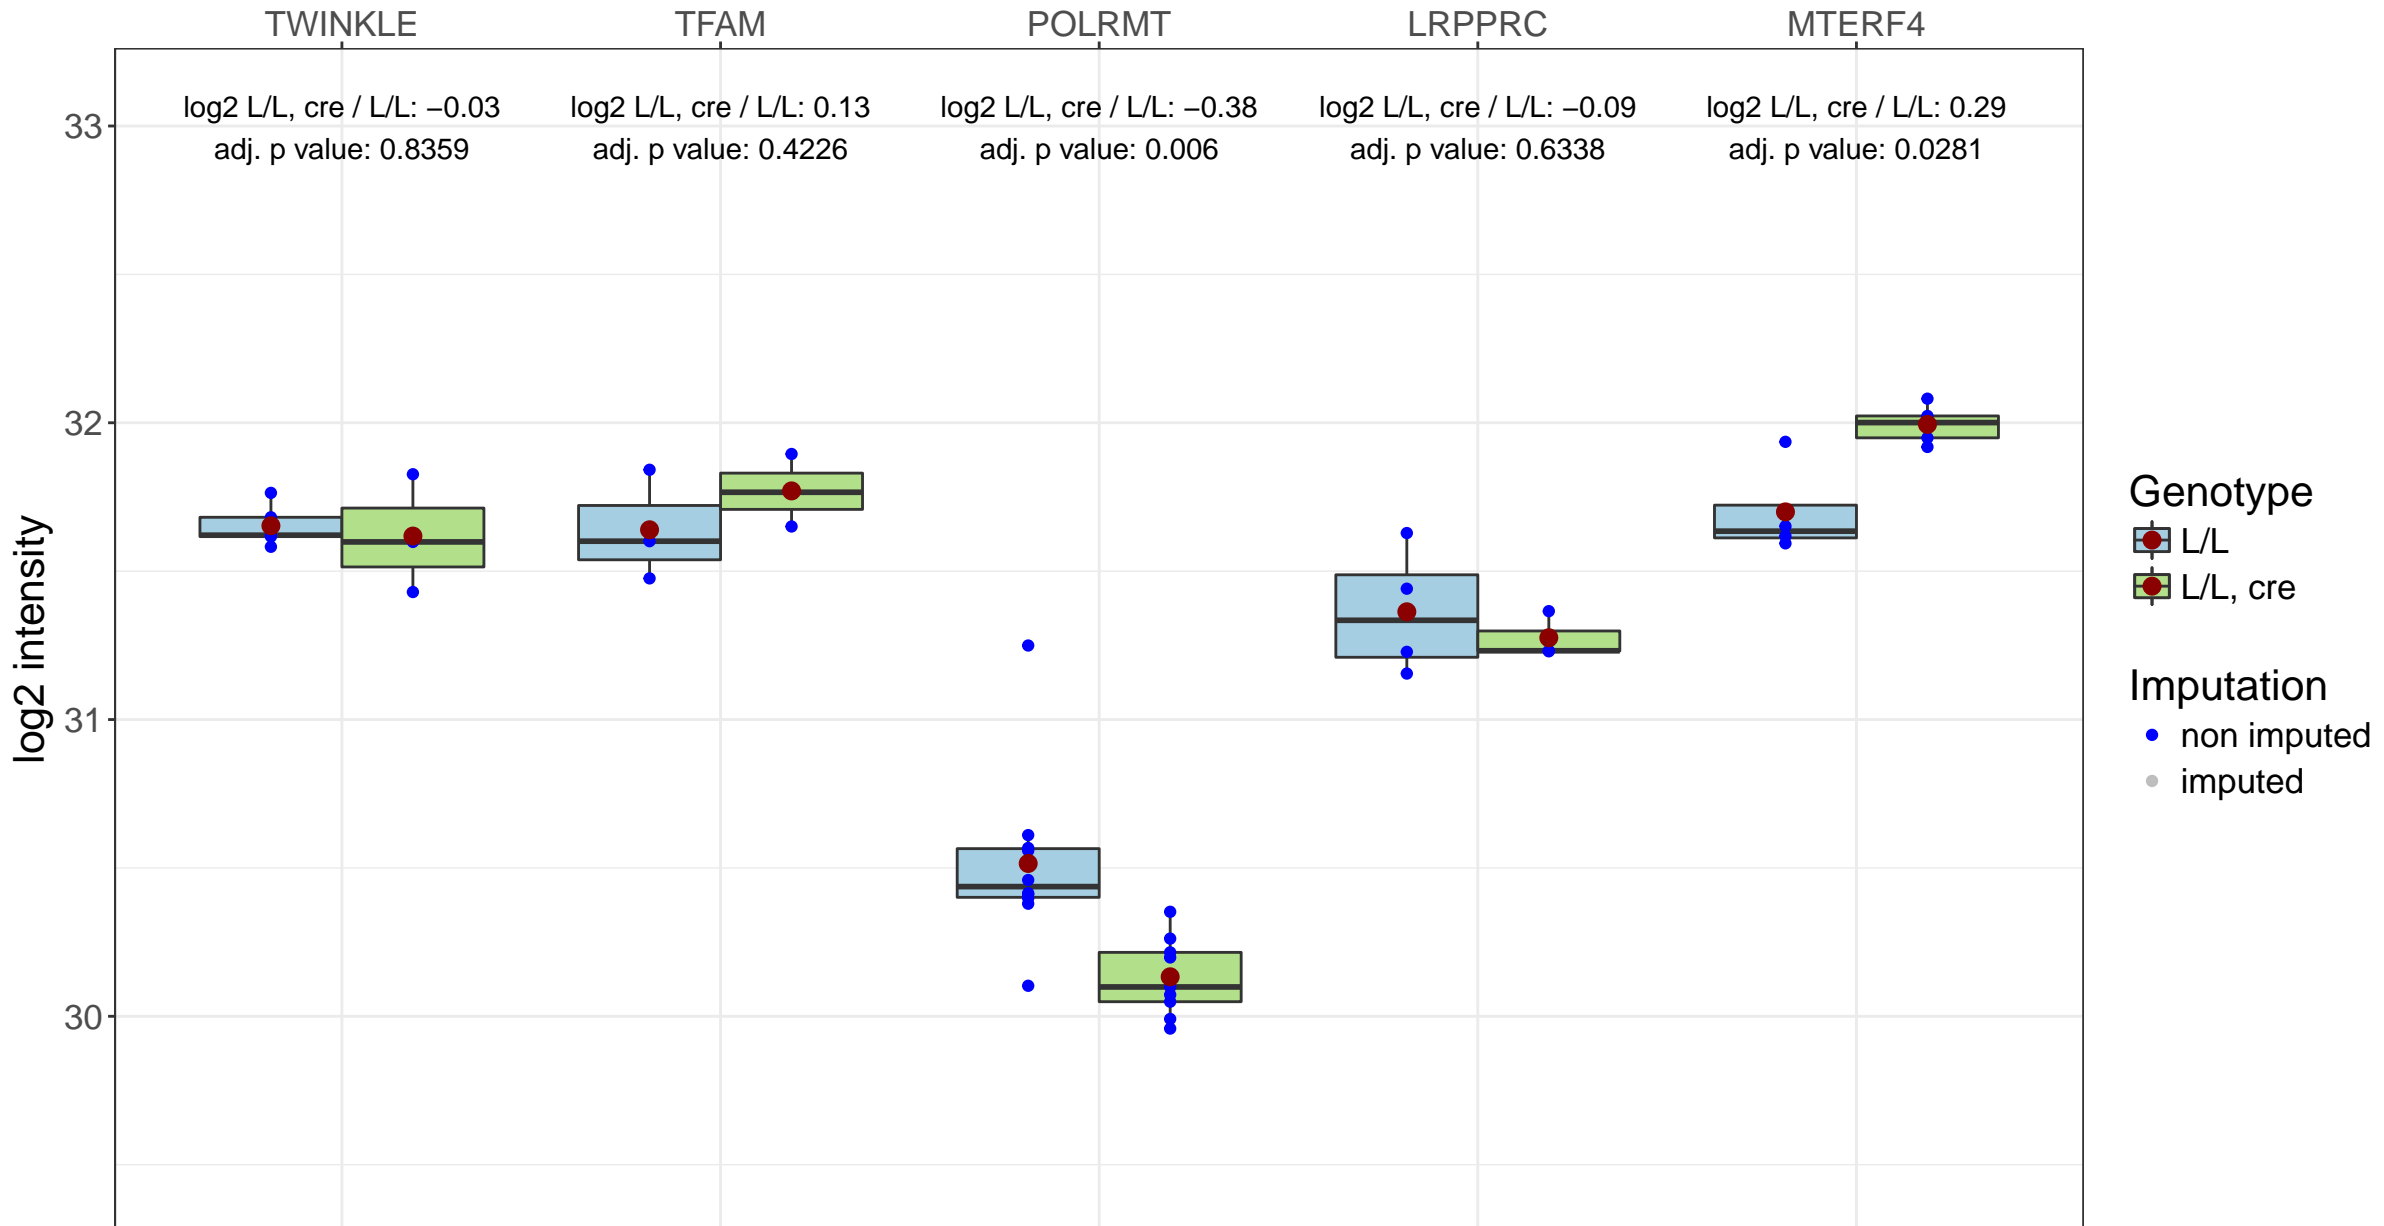

# AKAP1 / O08715

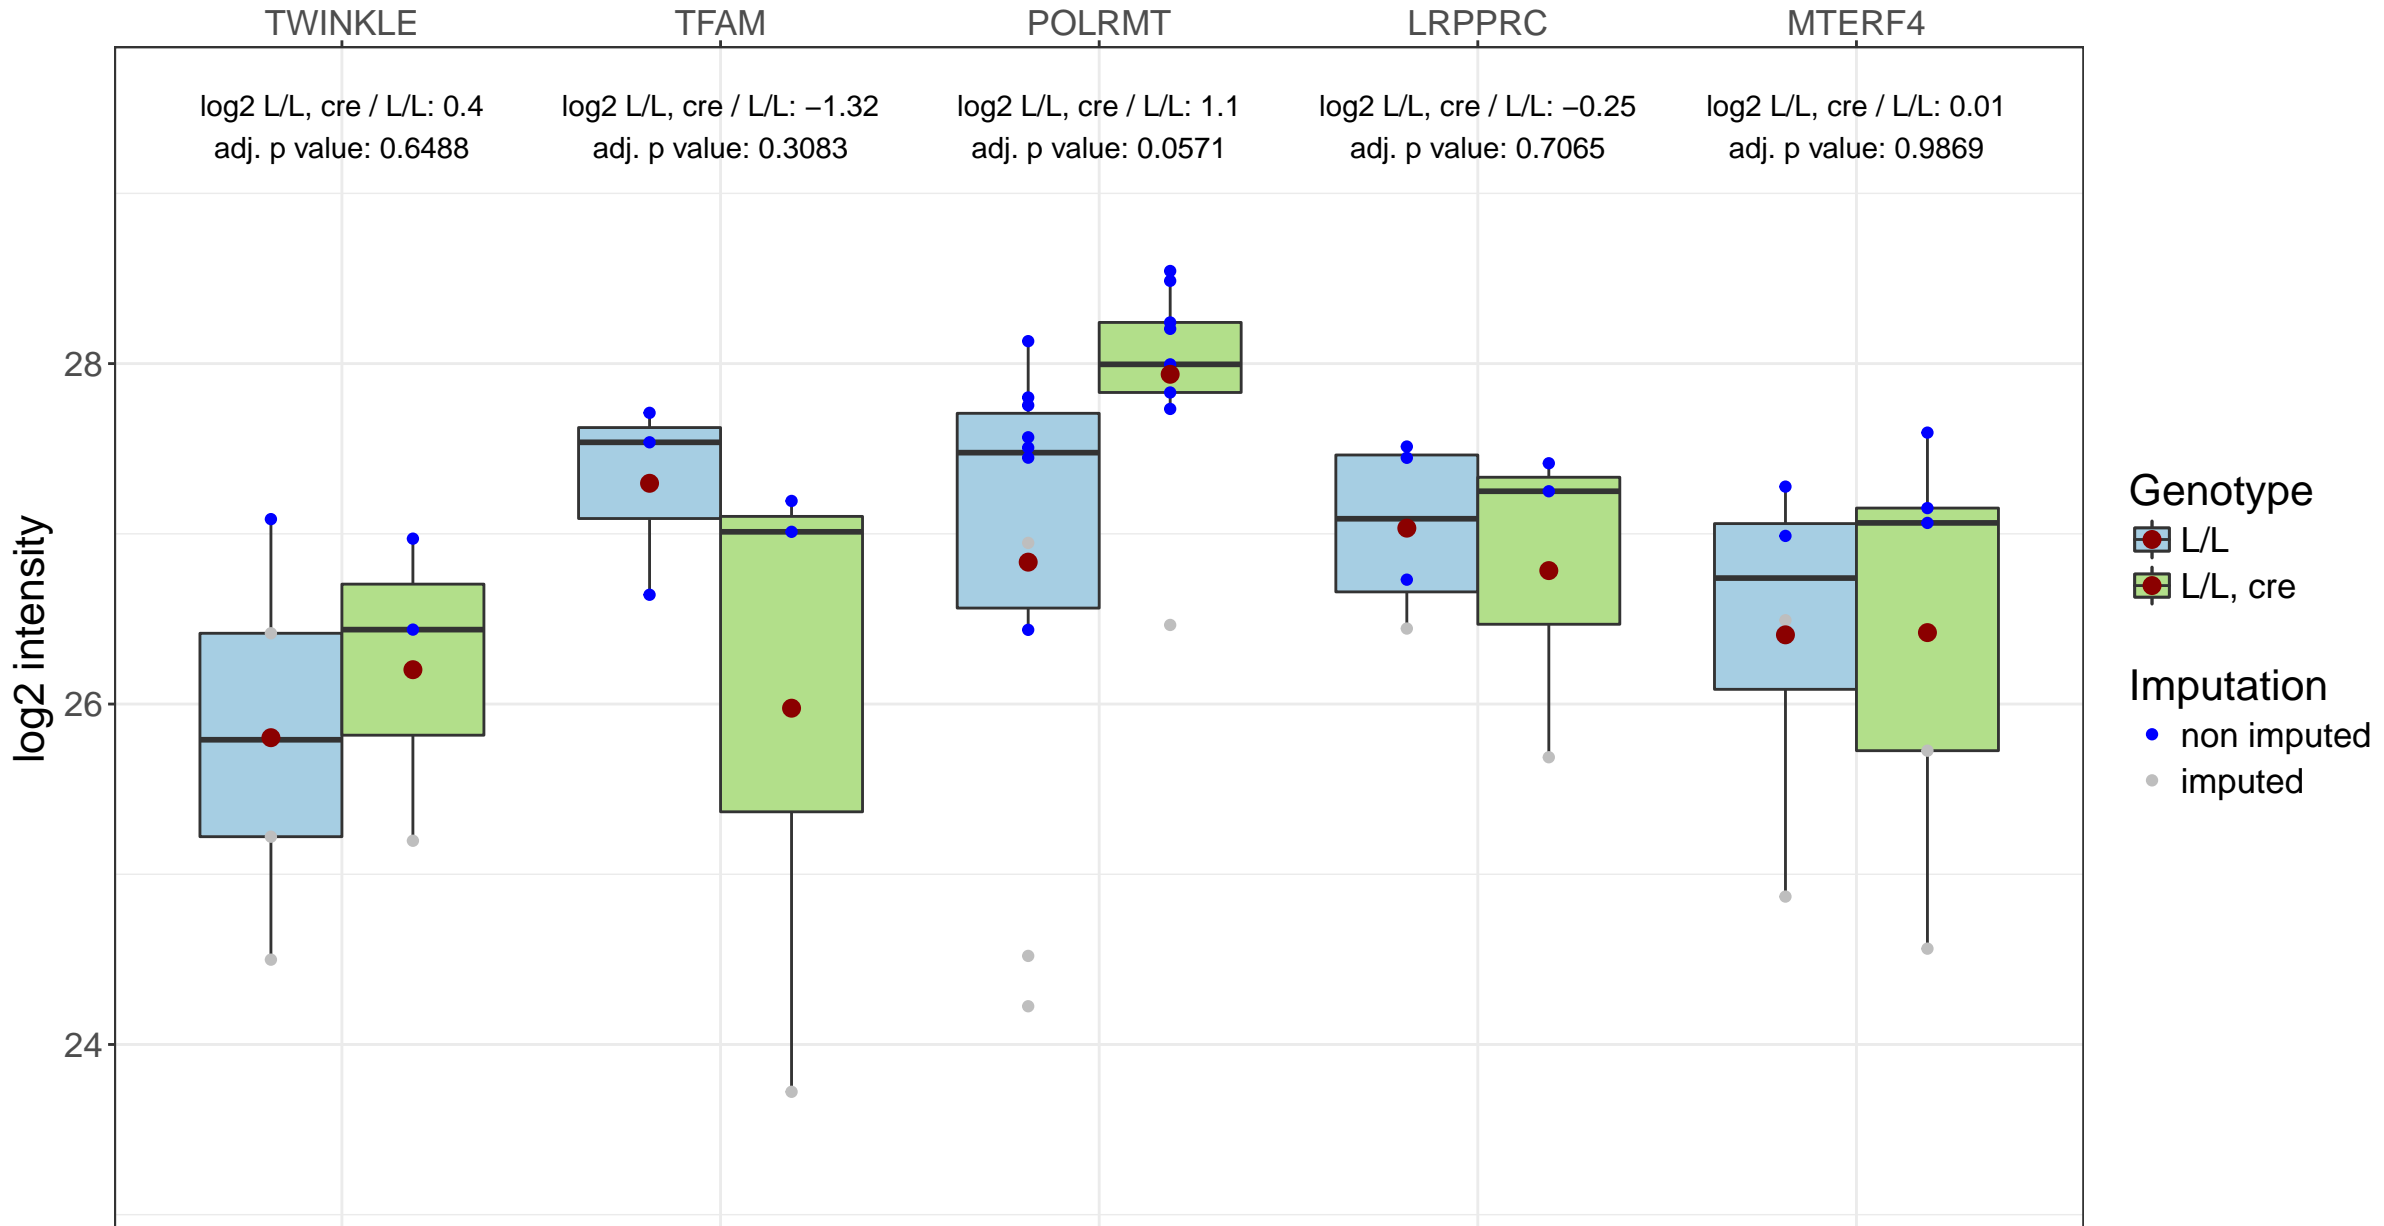

# AKR1B10 / G5E895

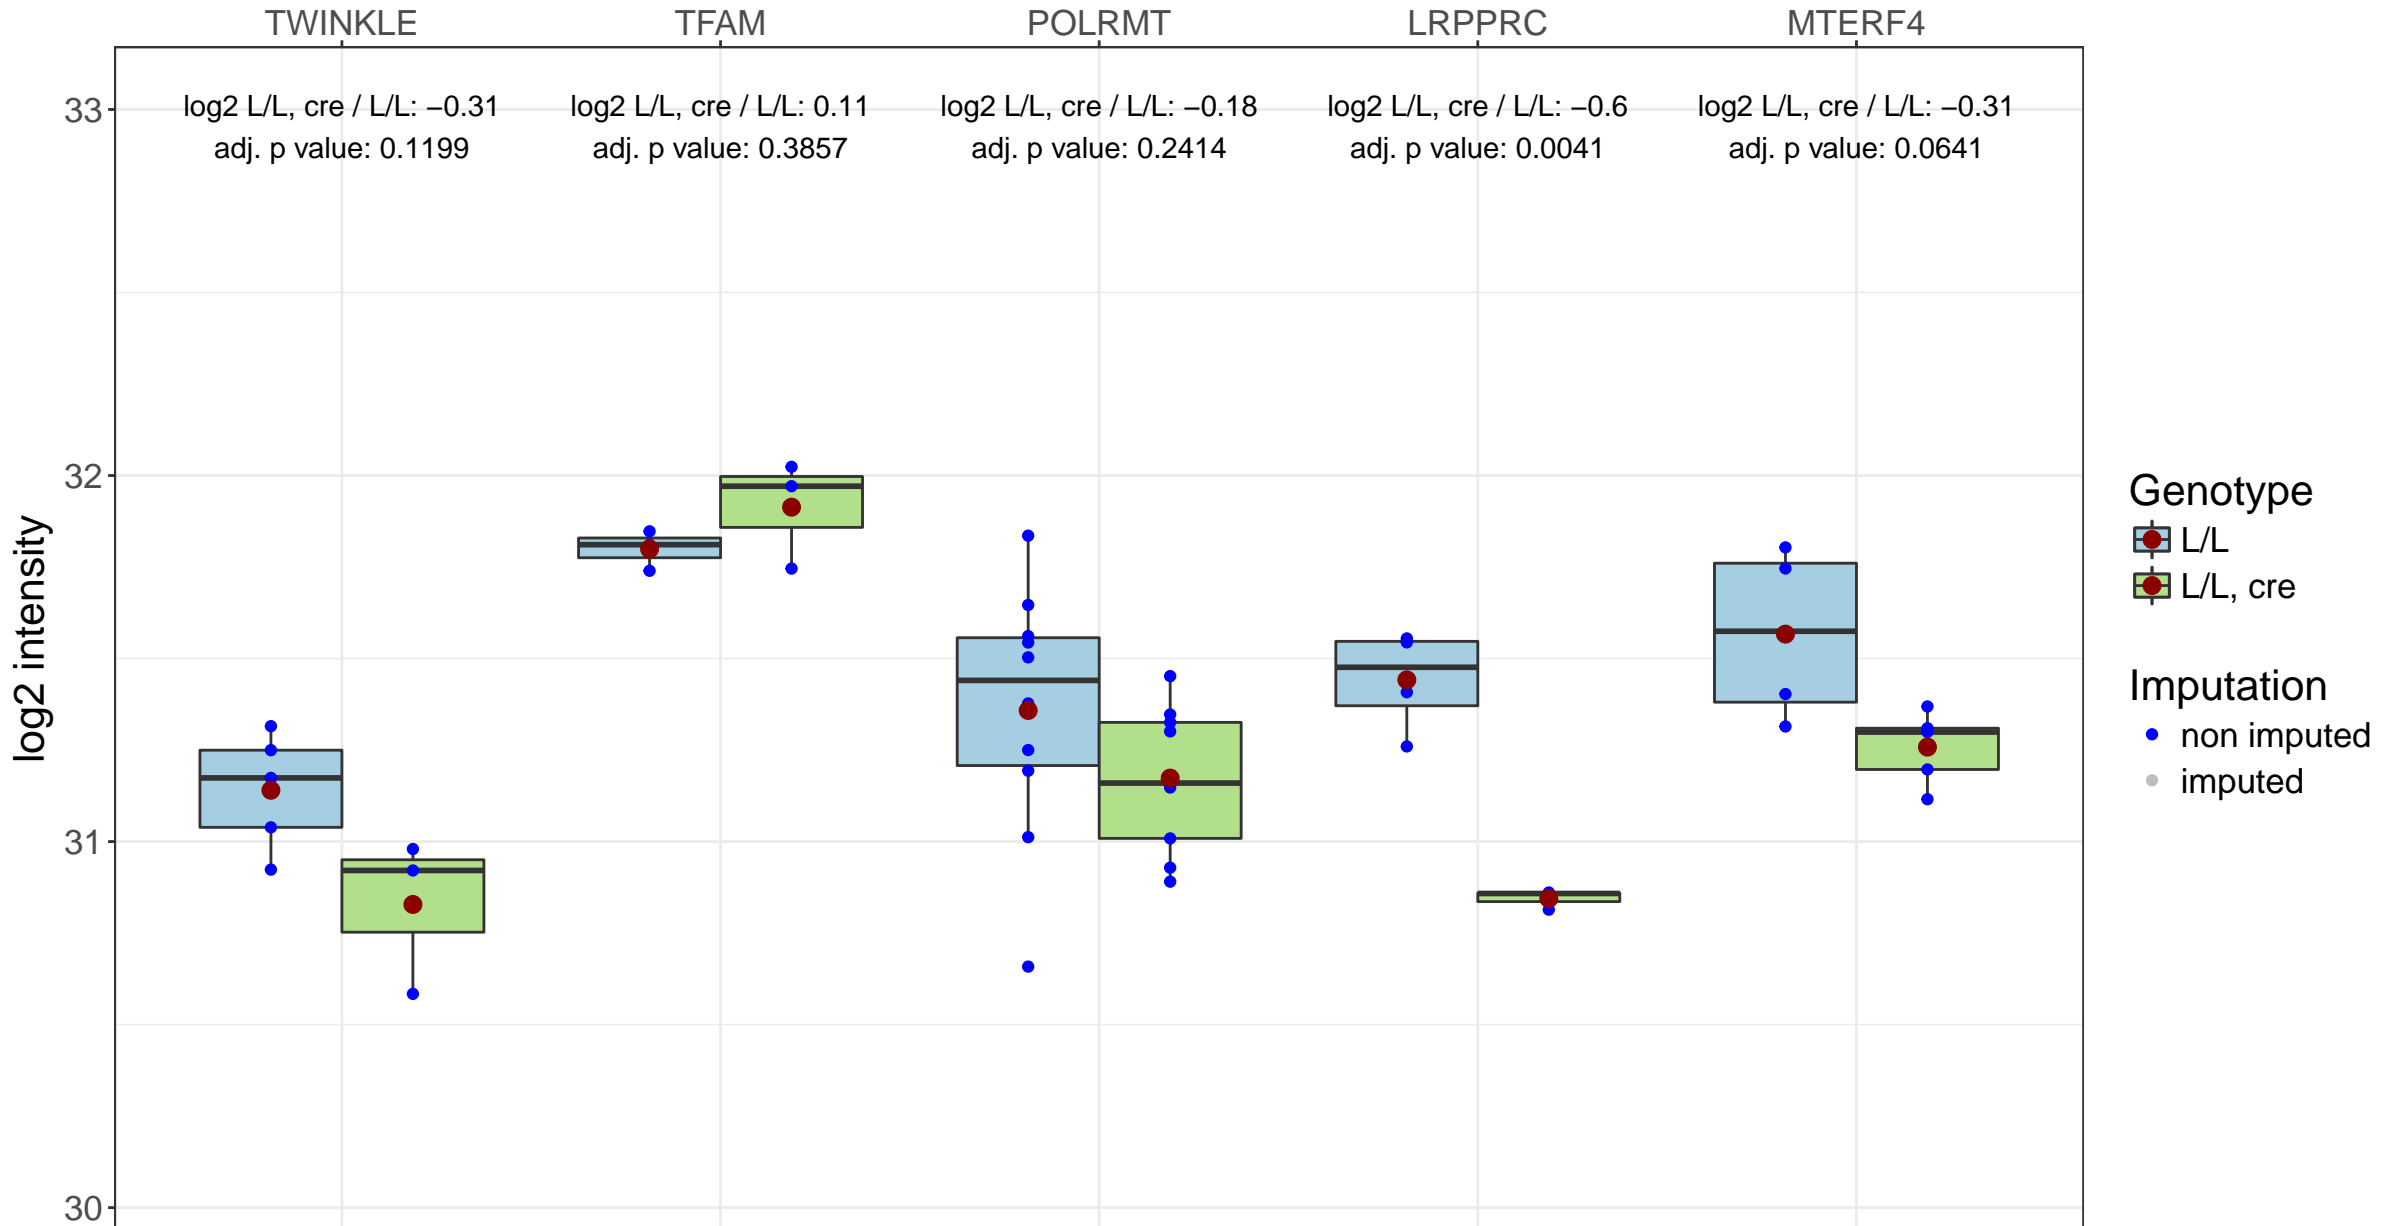

# AKR1B7 / P21300

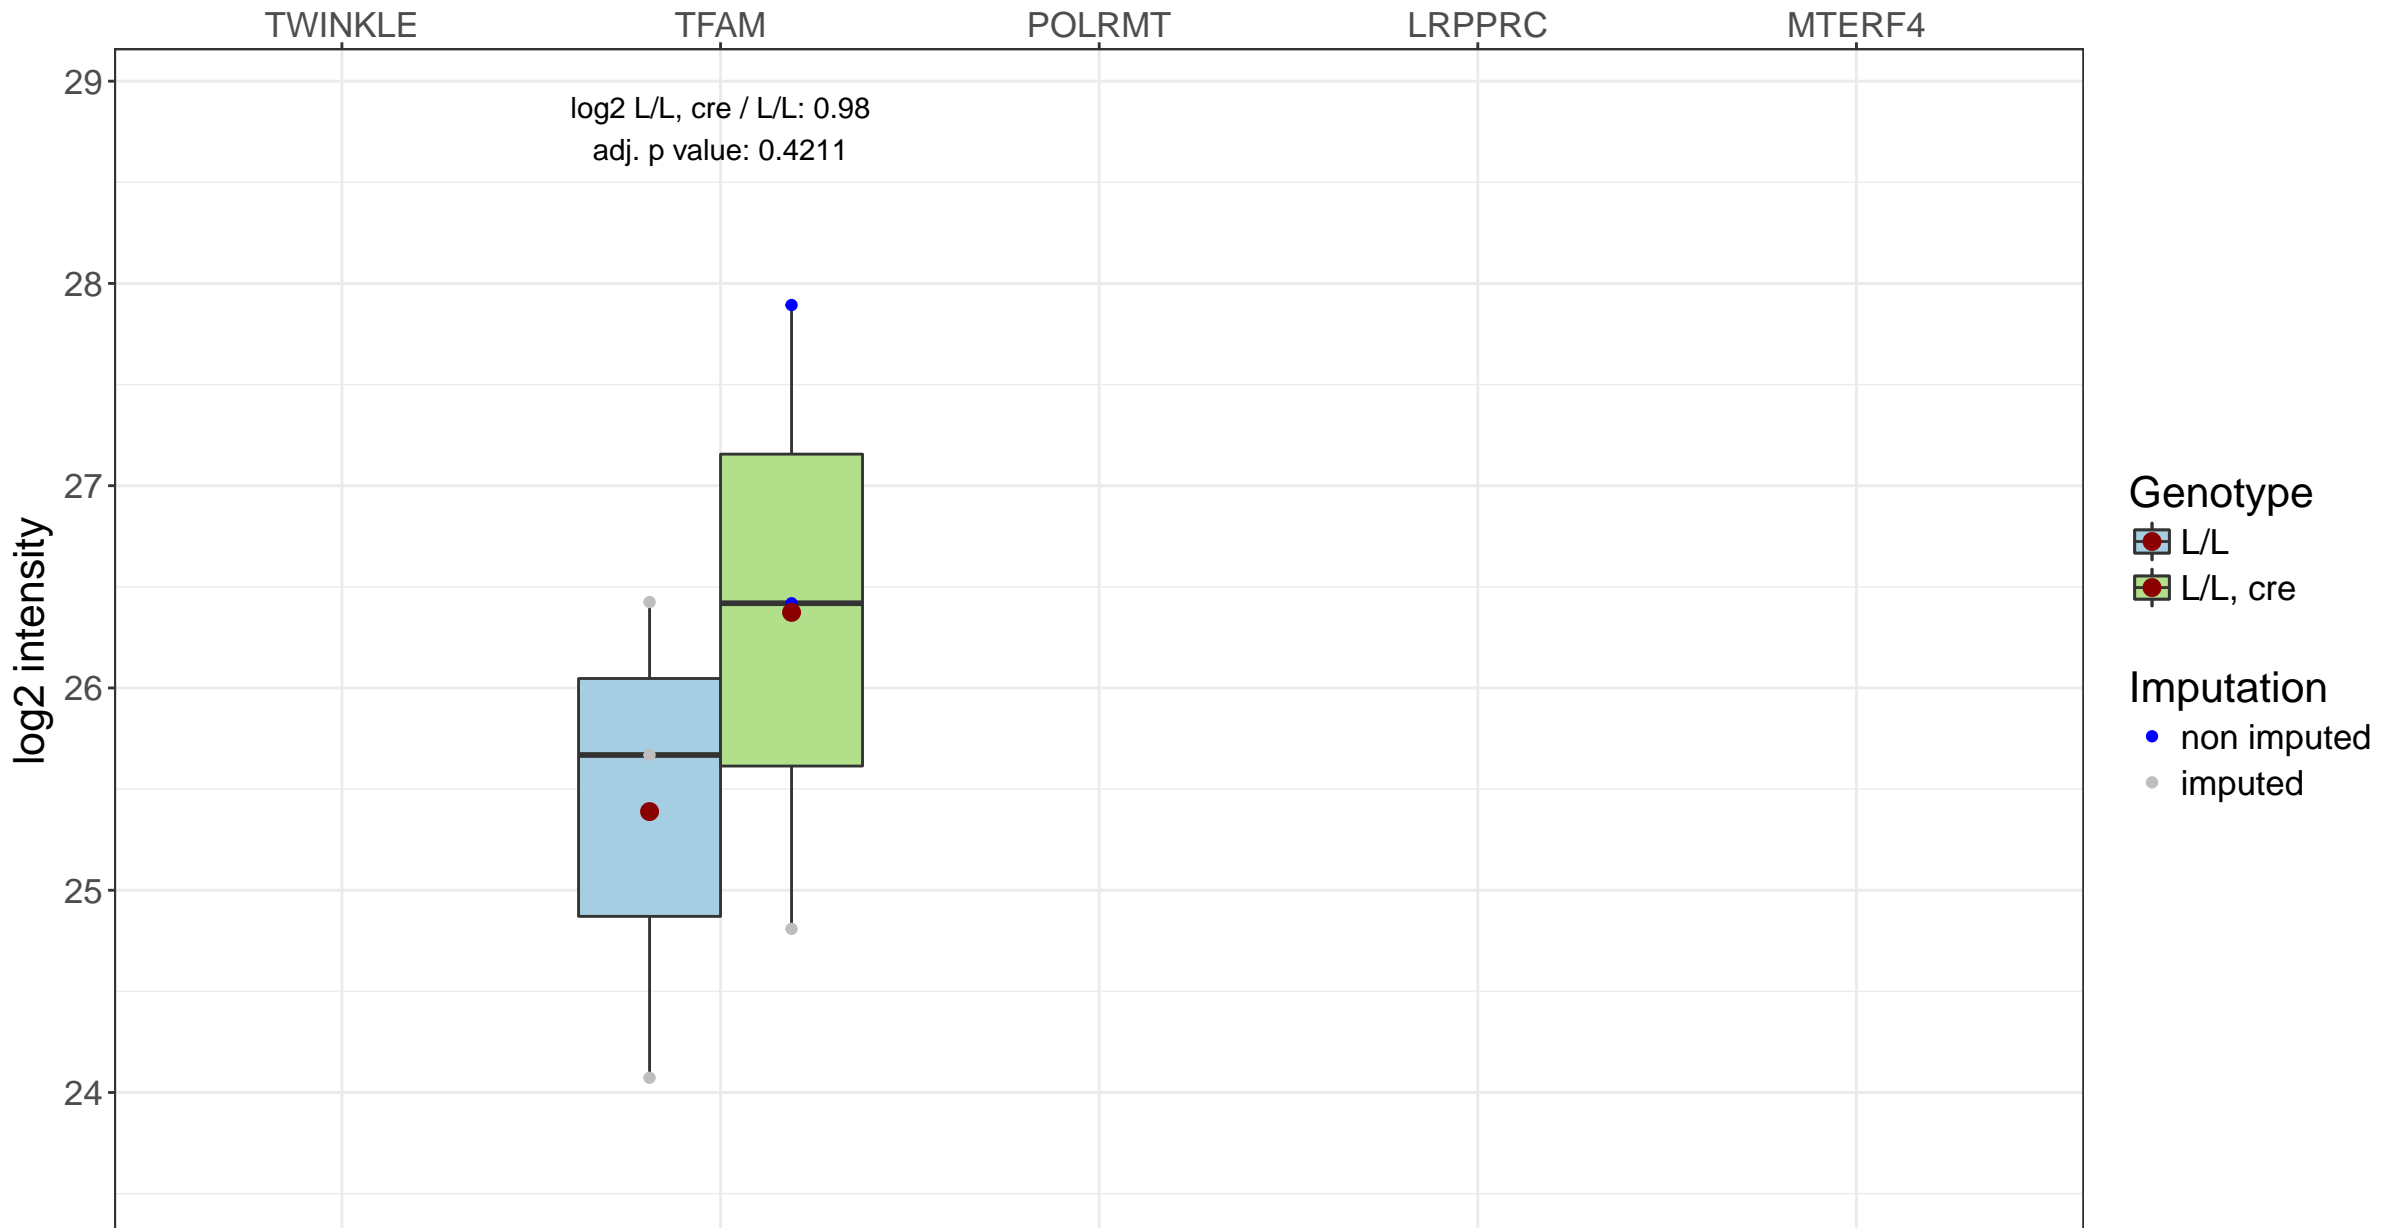

# AKR7A2 / Q8CG76

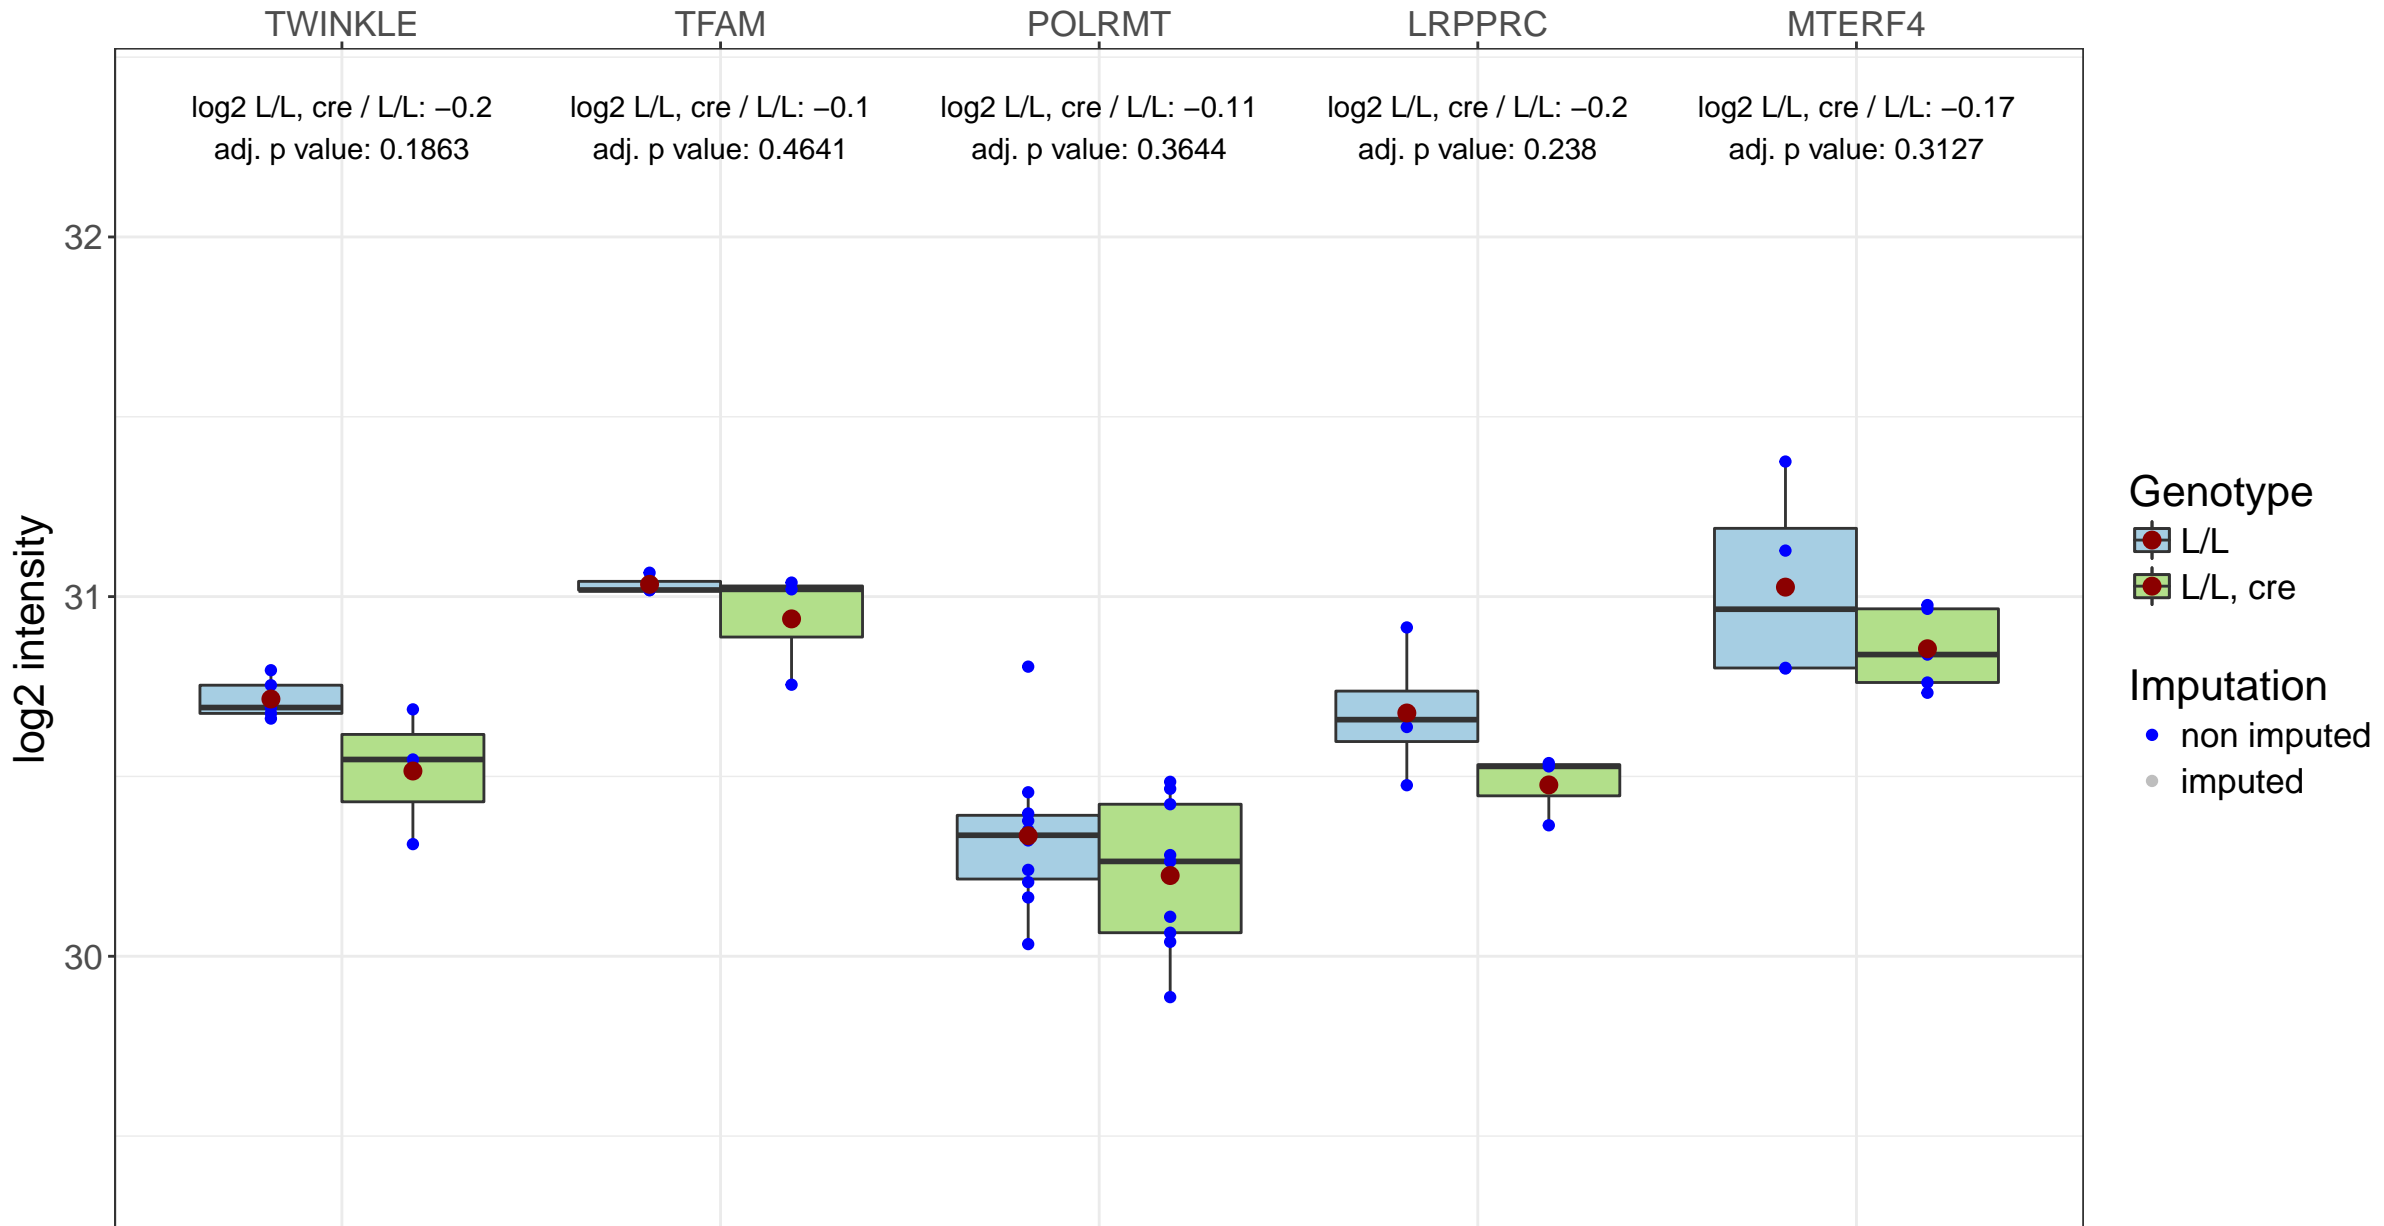



# ALAS1 / Q8VC19

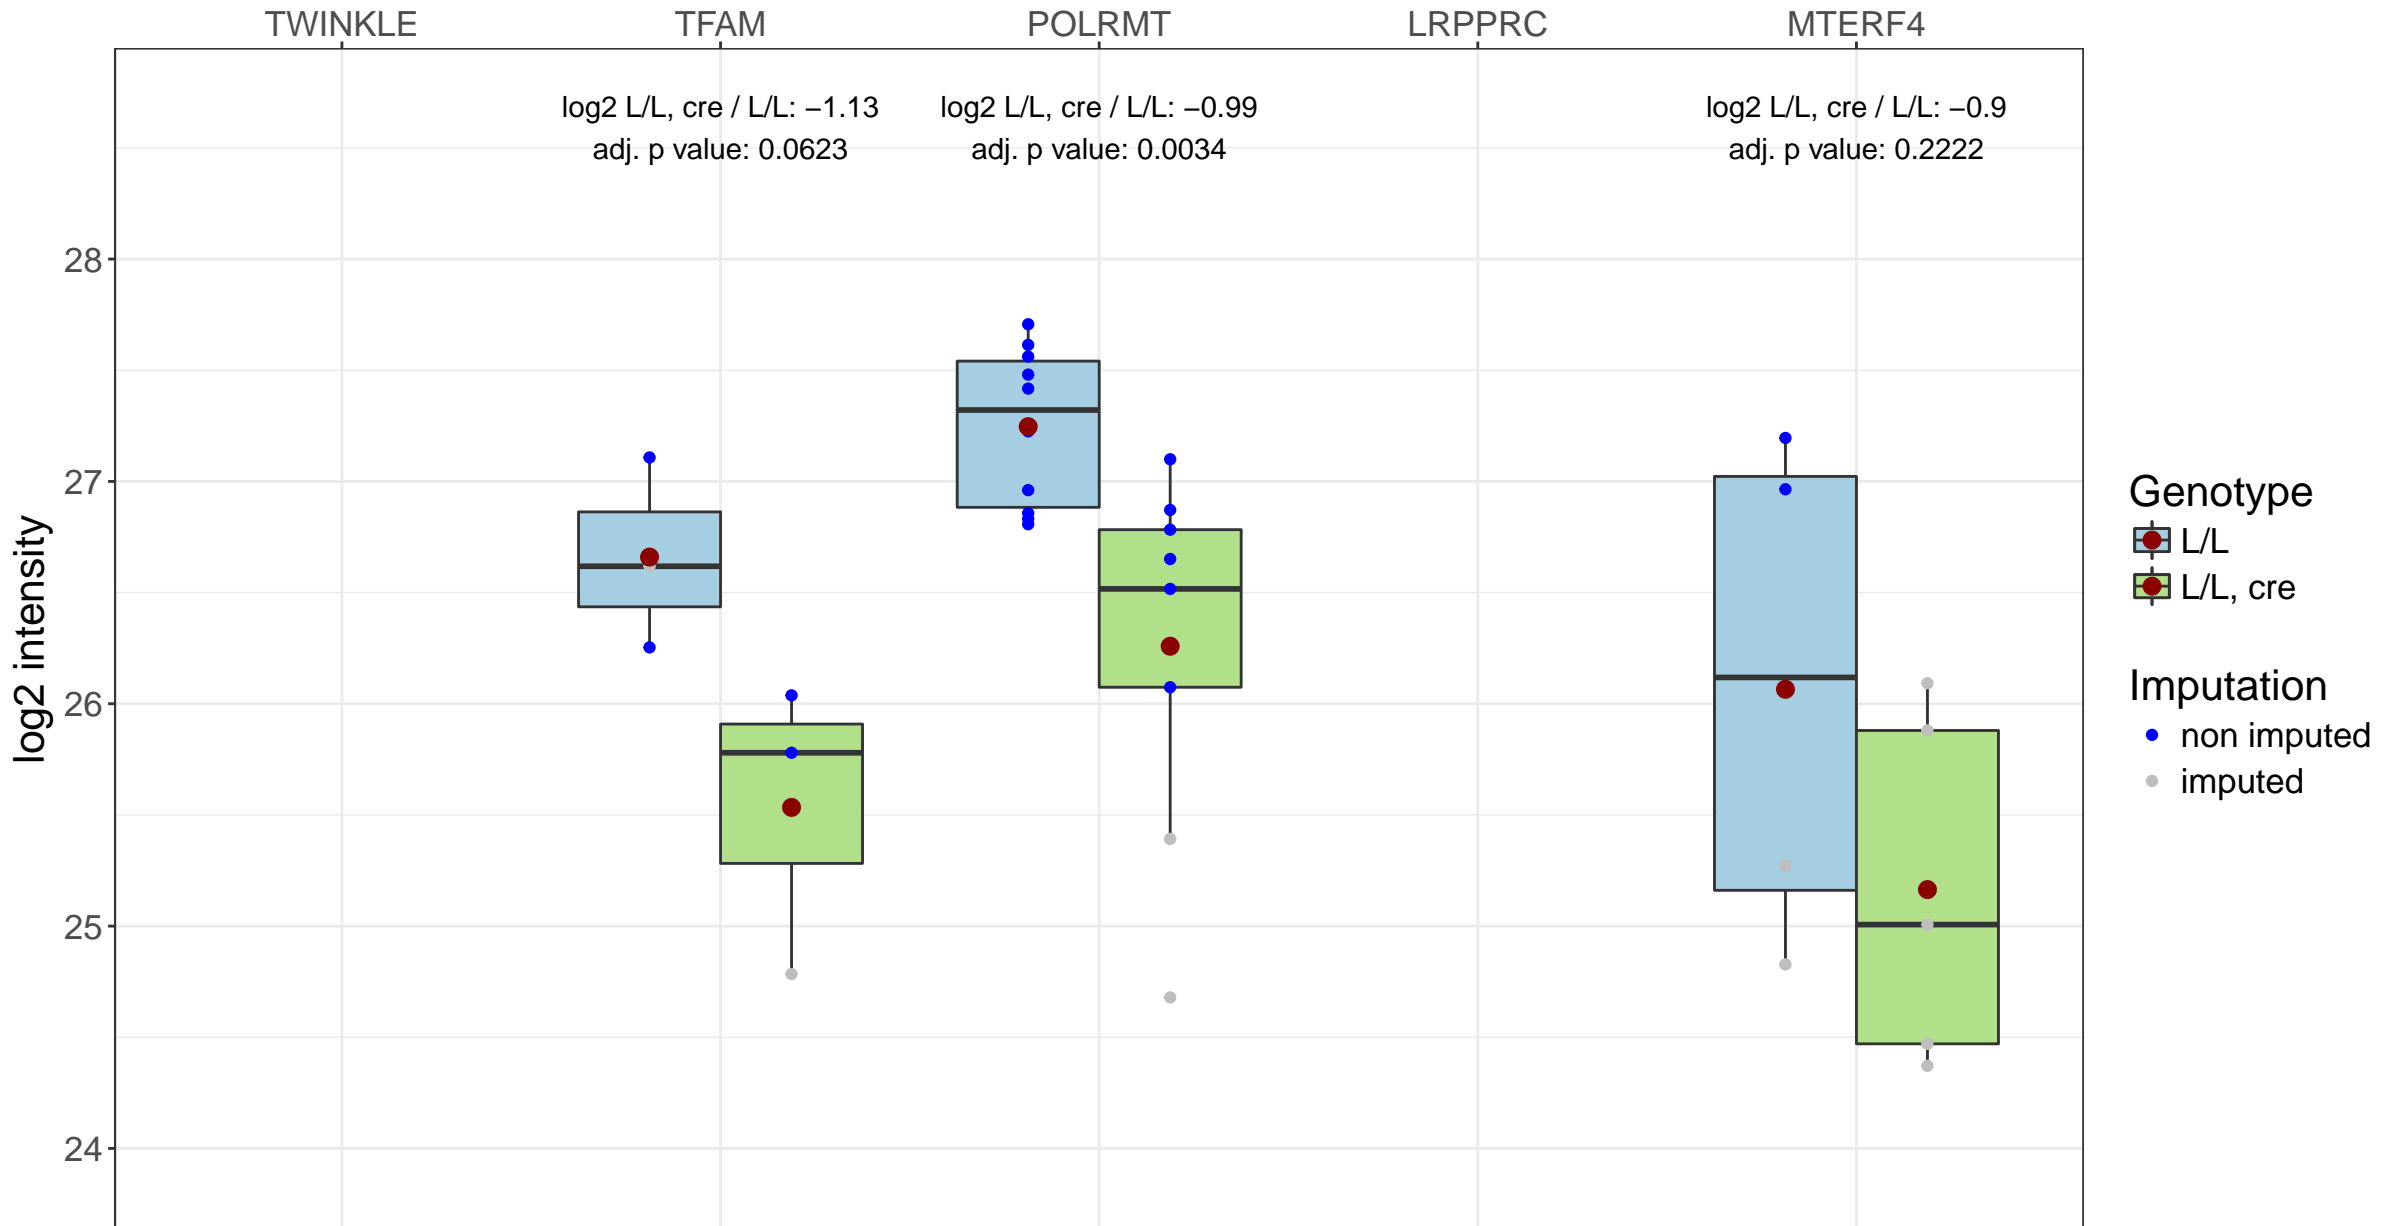

# ALB / P07724

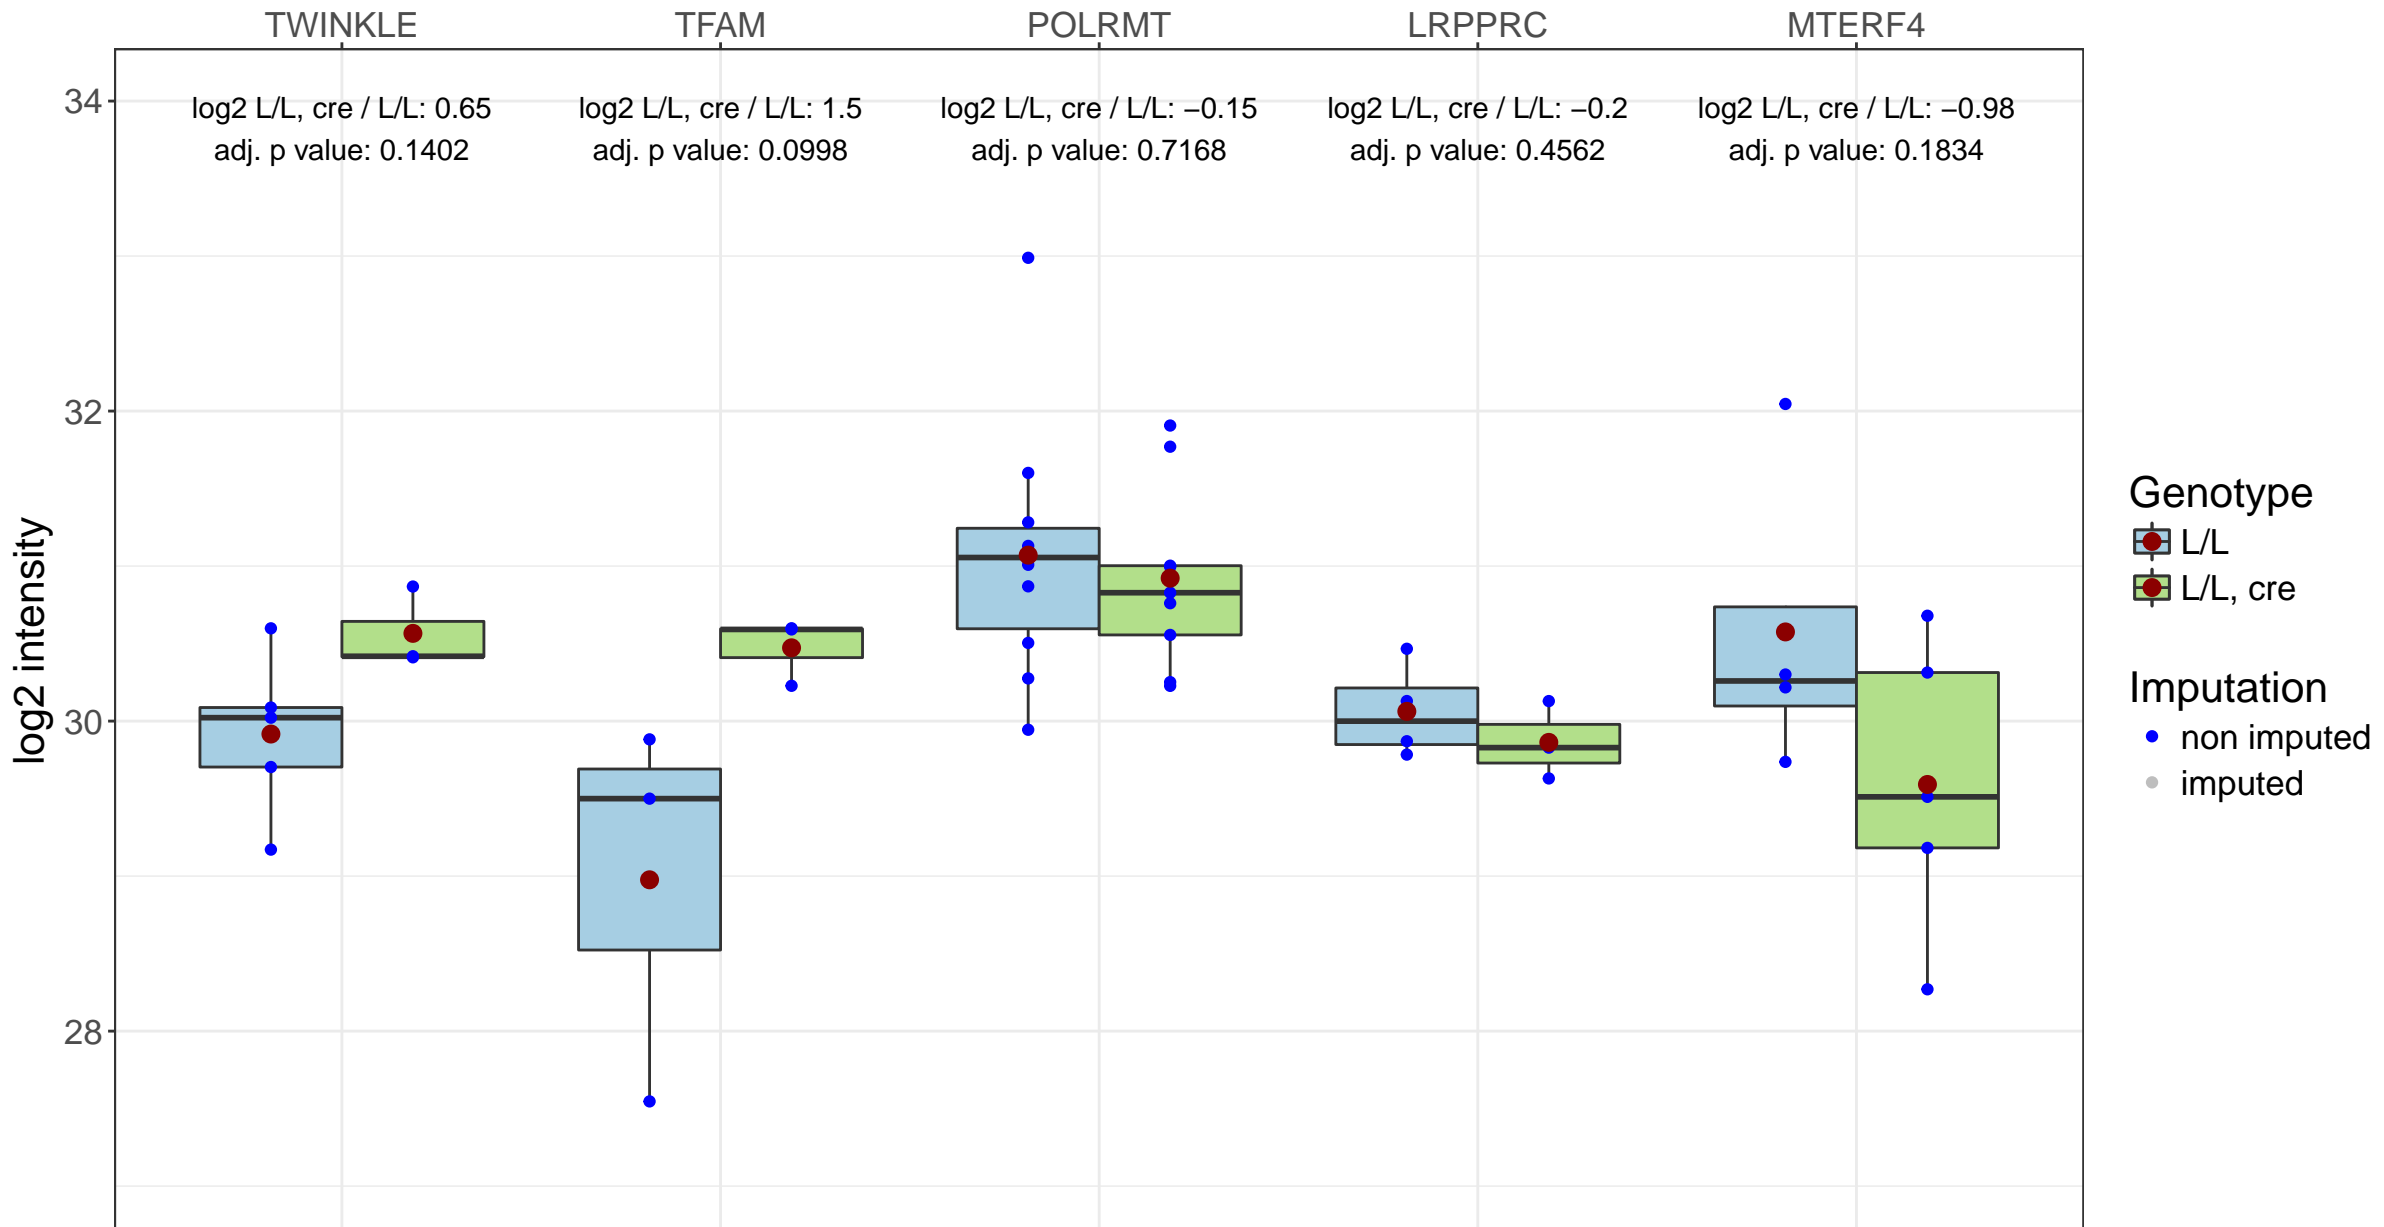

# ALDH18A1 / Q9Z110-2

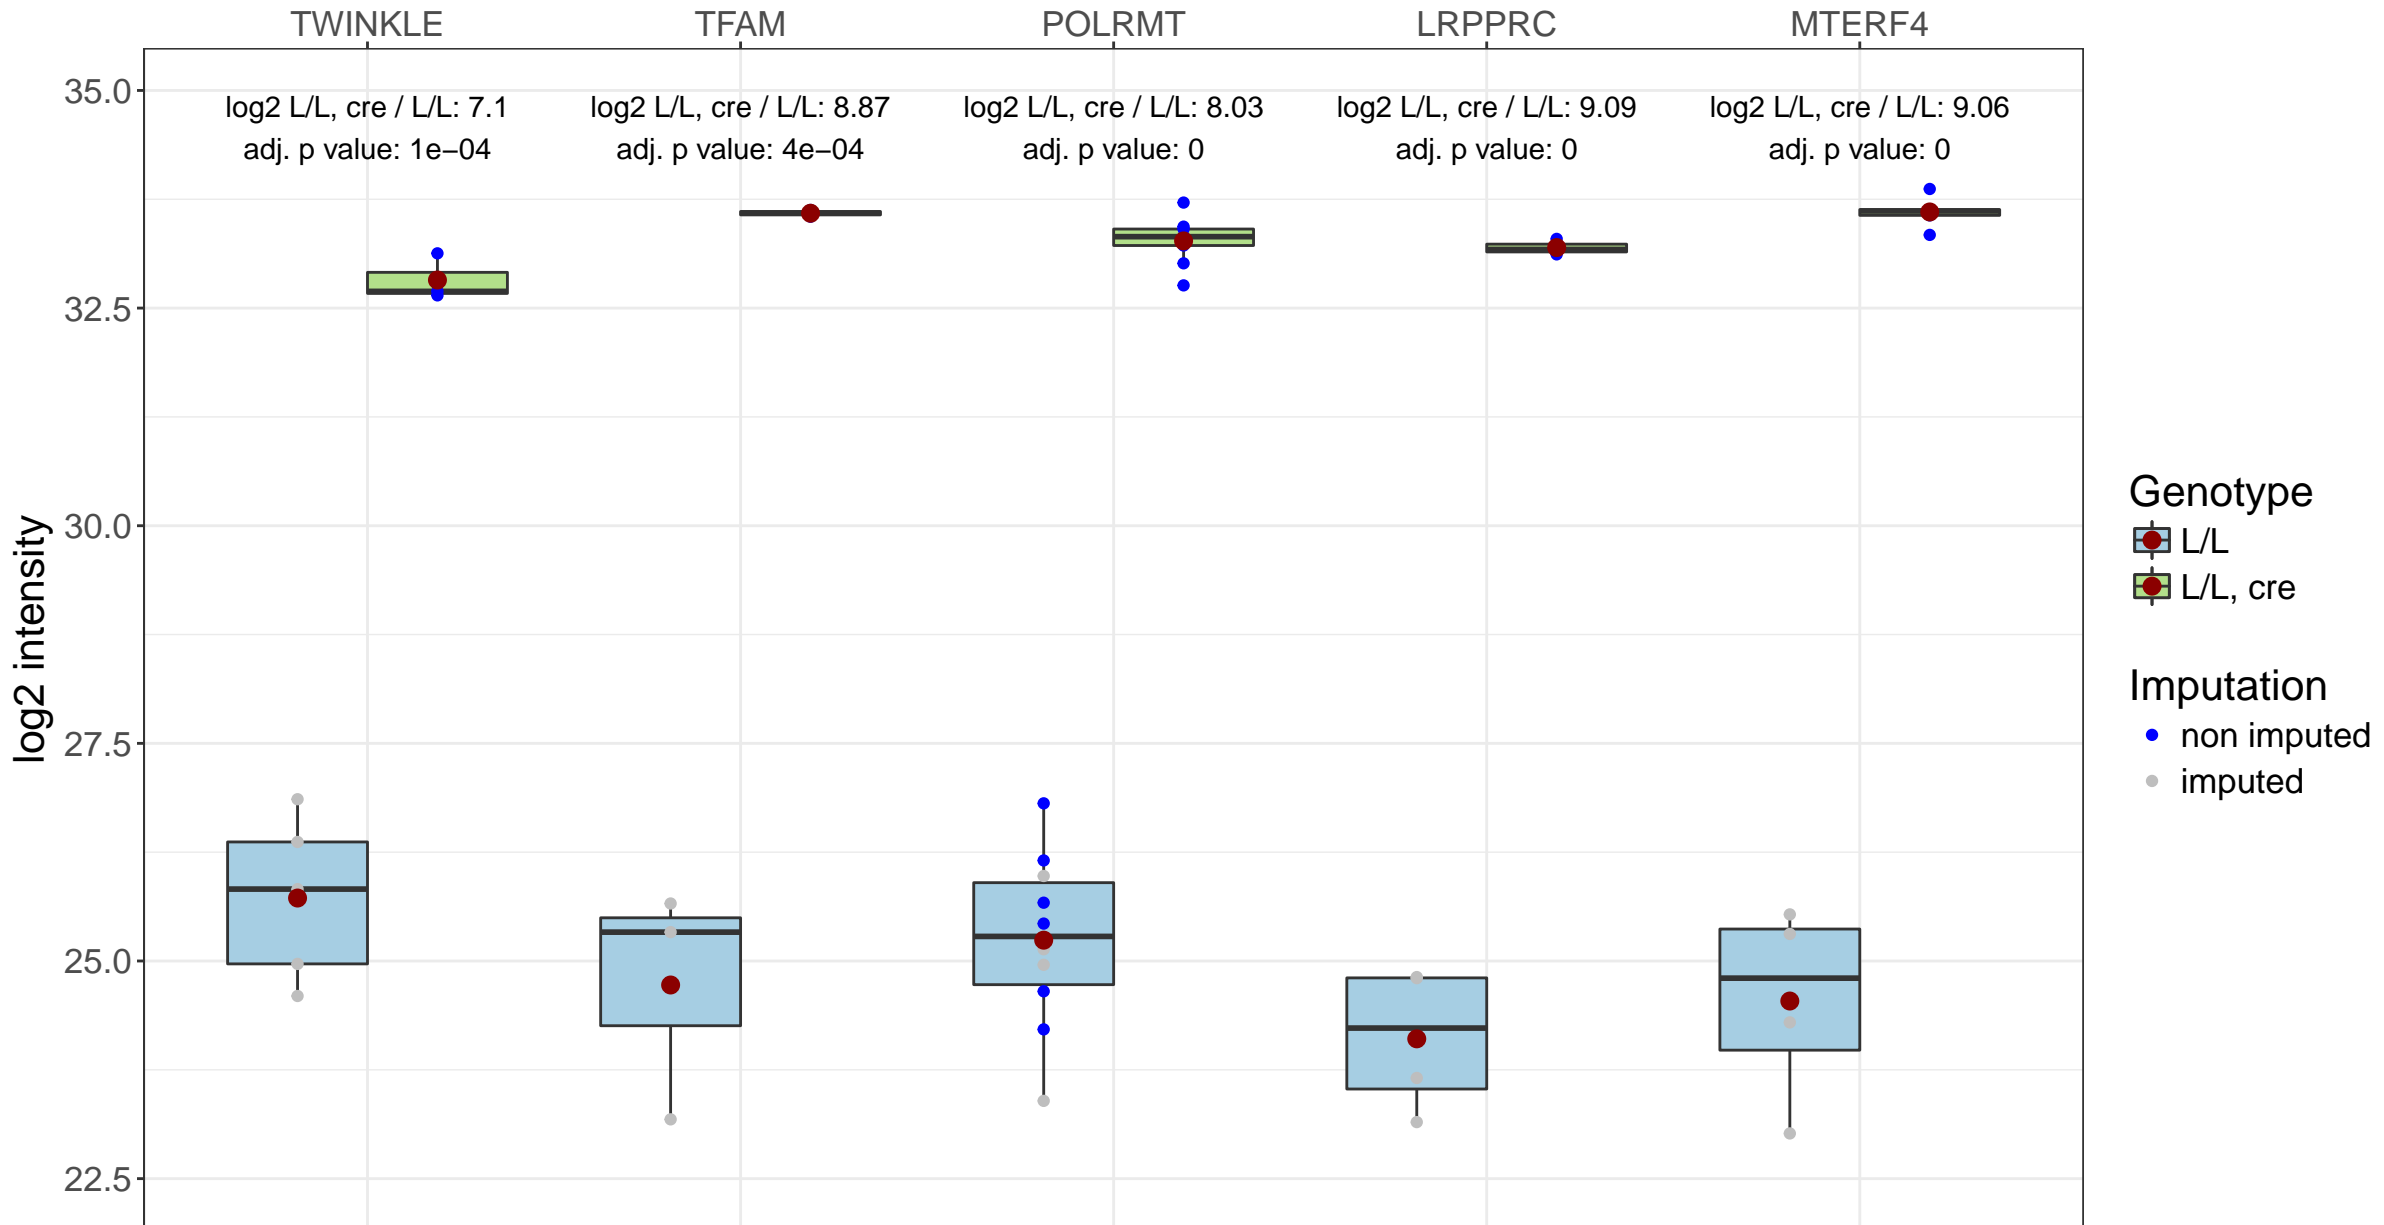

# ALDH1B1 / Q9CZS1

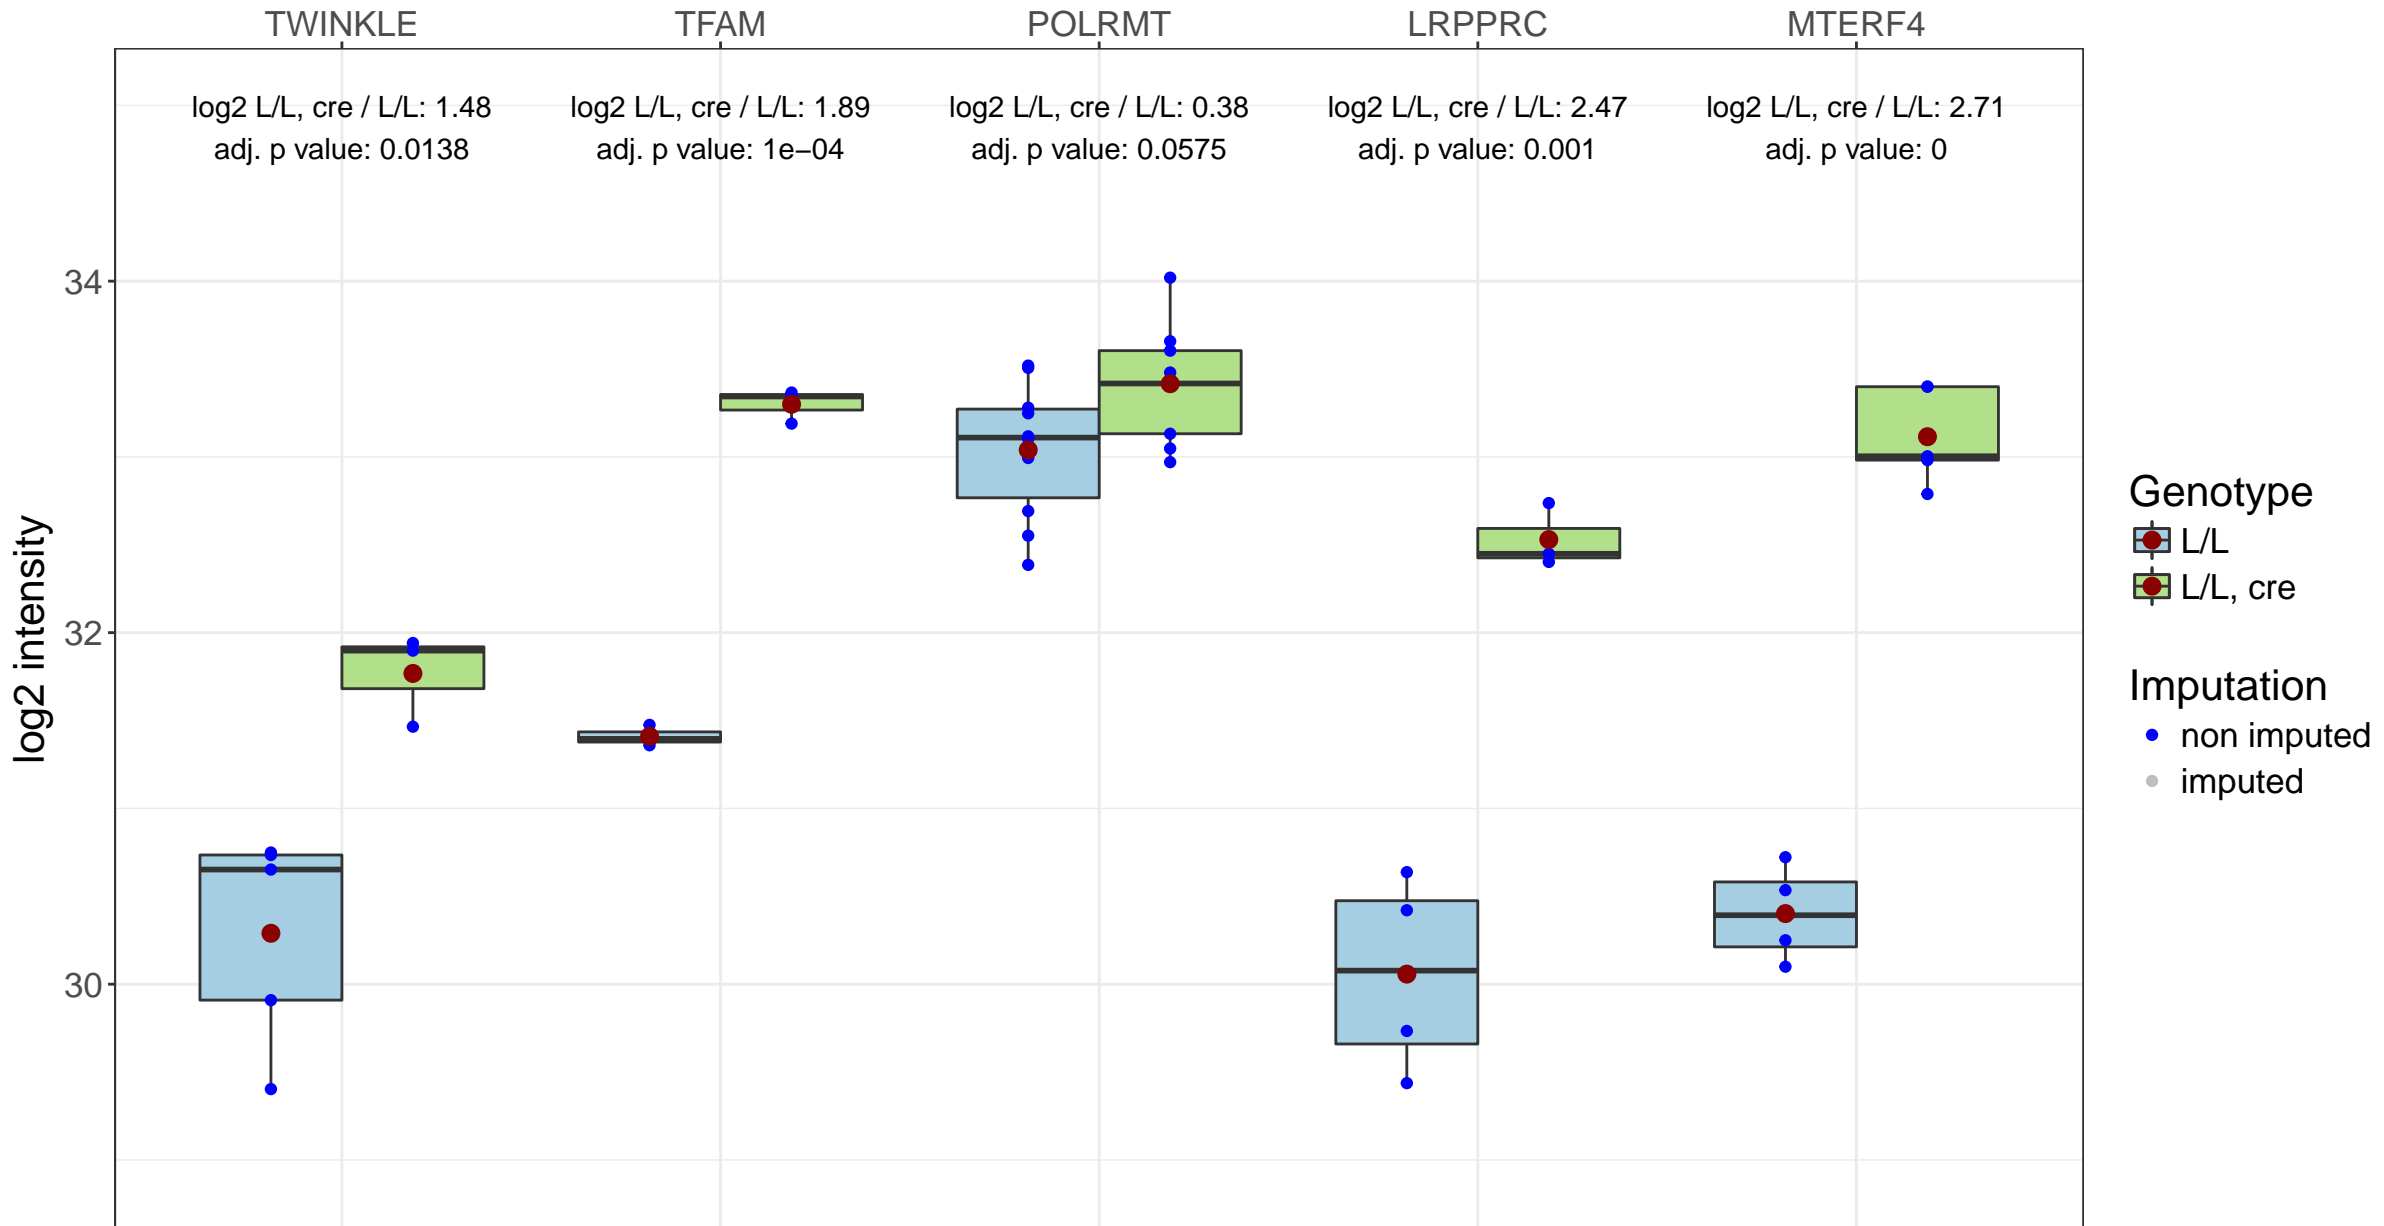

# ALDH1L2 / Q8K009

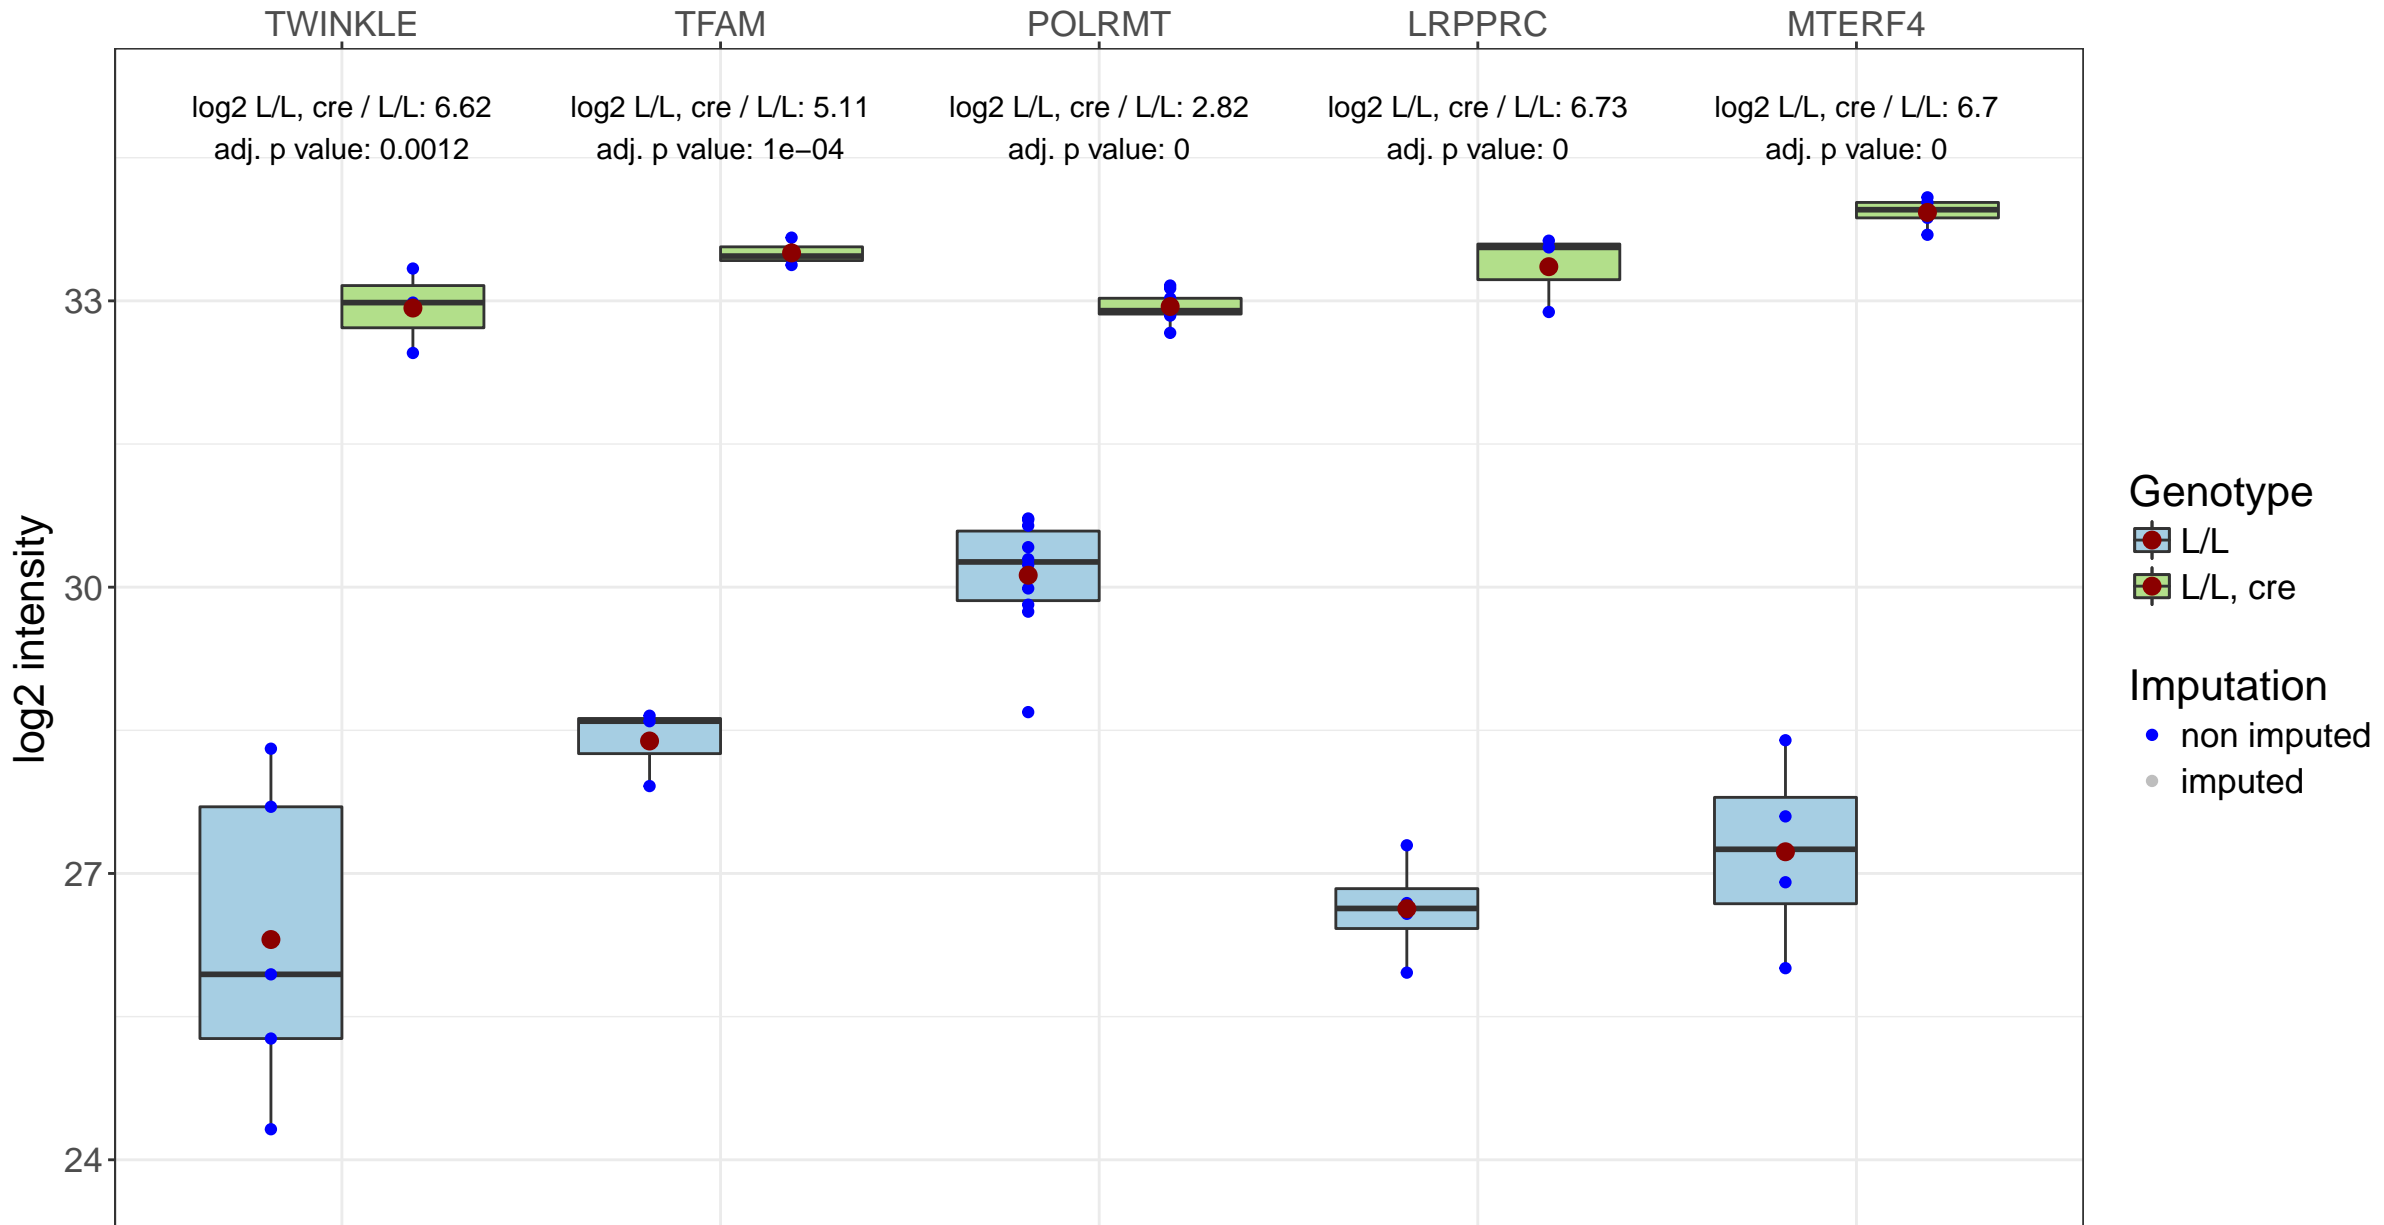

# ALDH2 / P47738

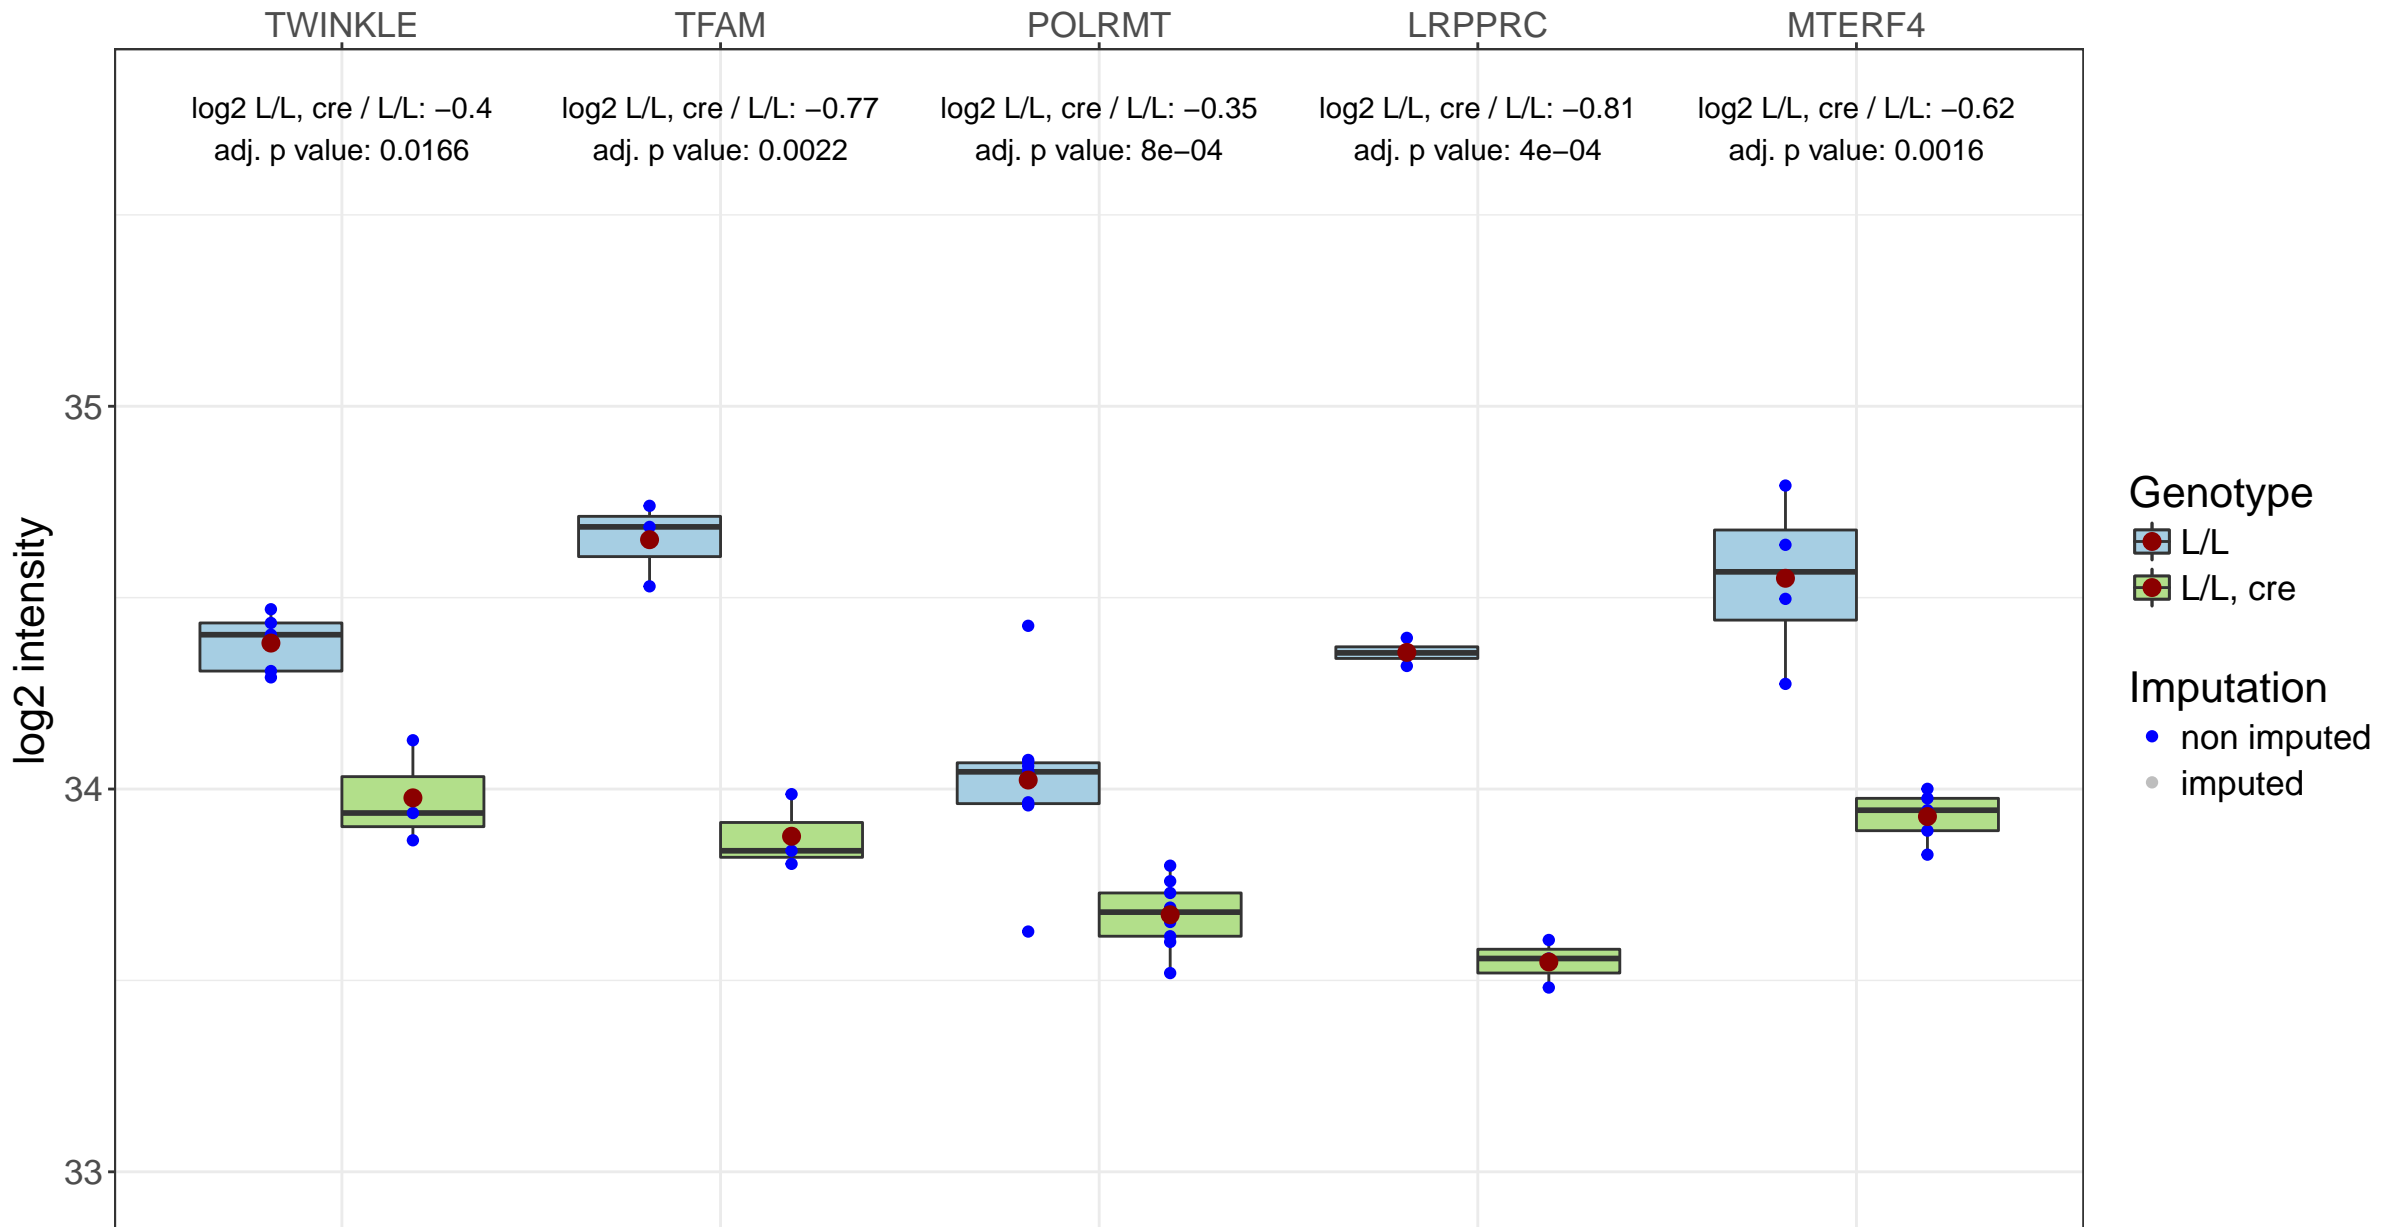

# ALDH3A2 / B1AV77

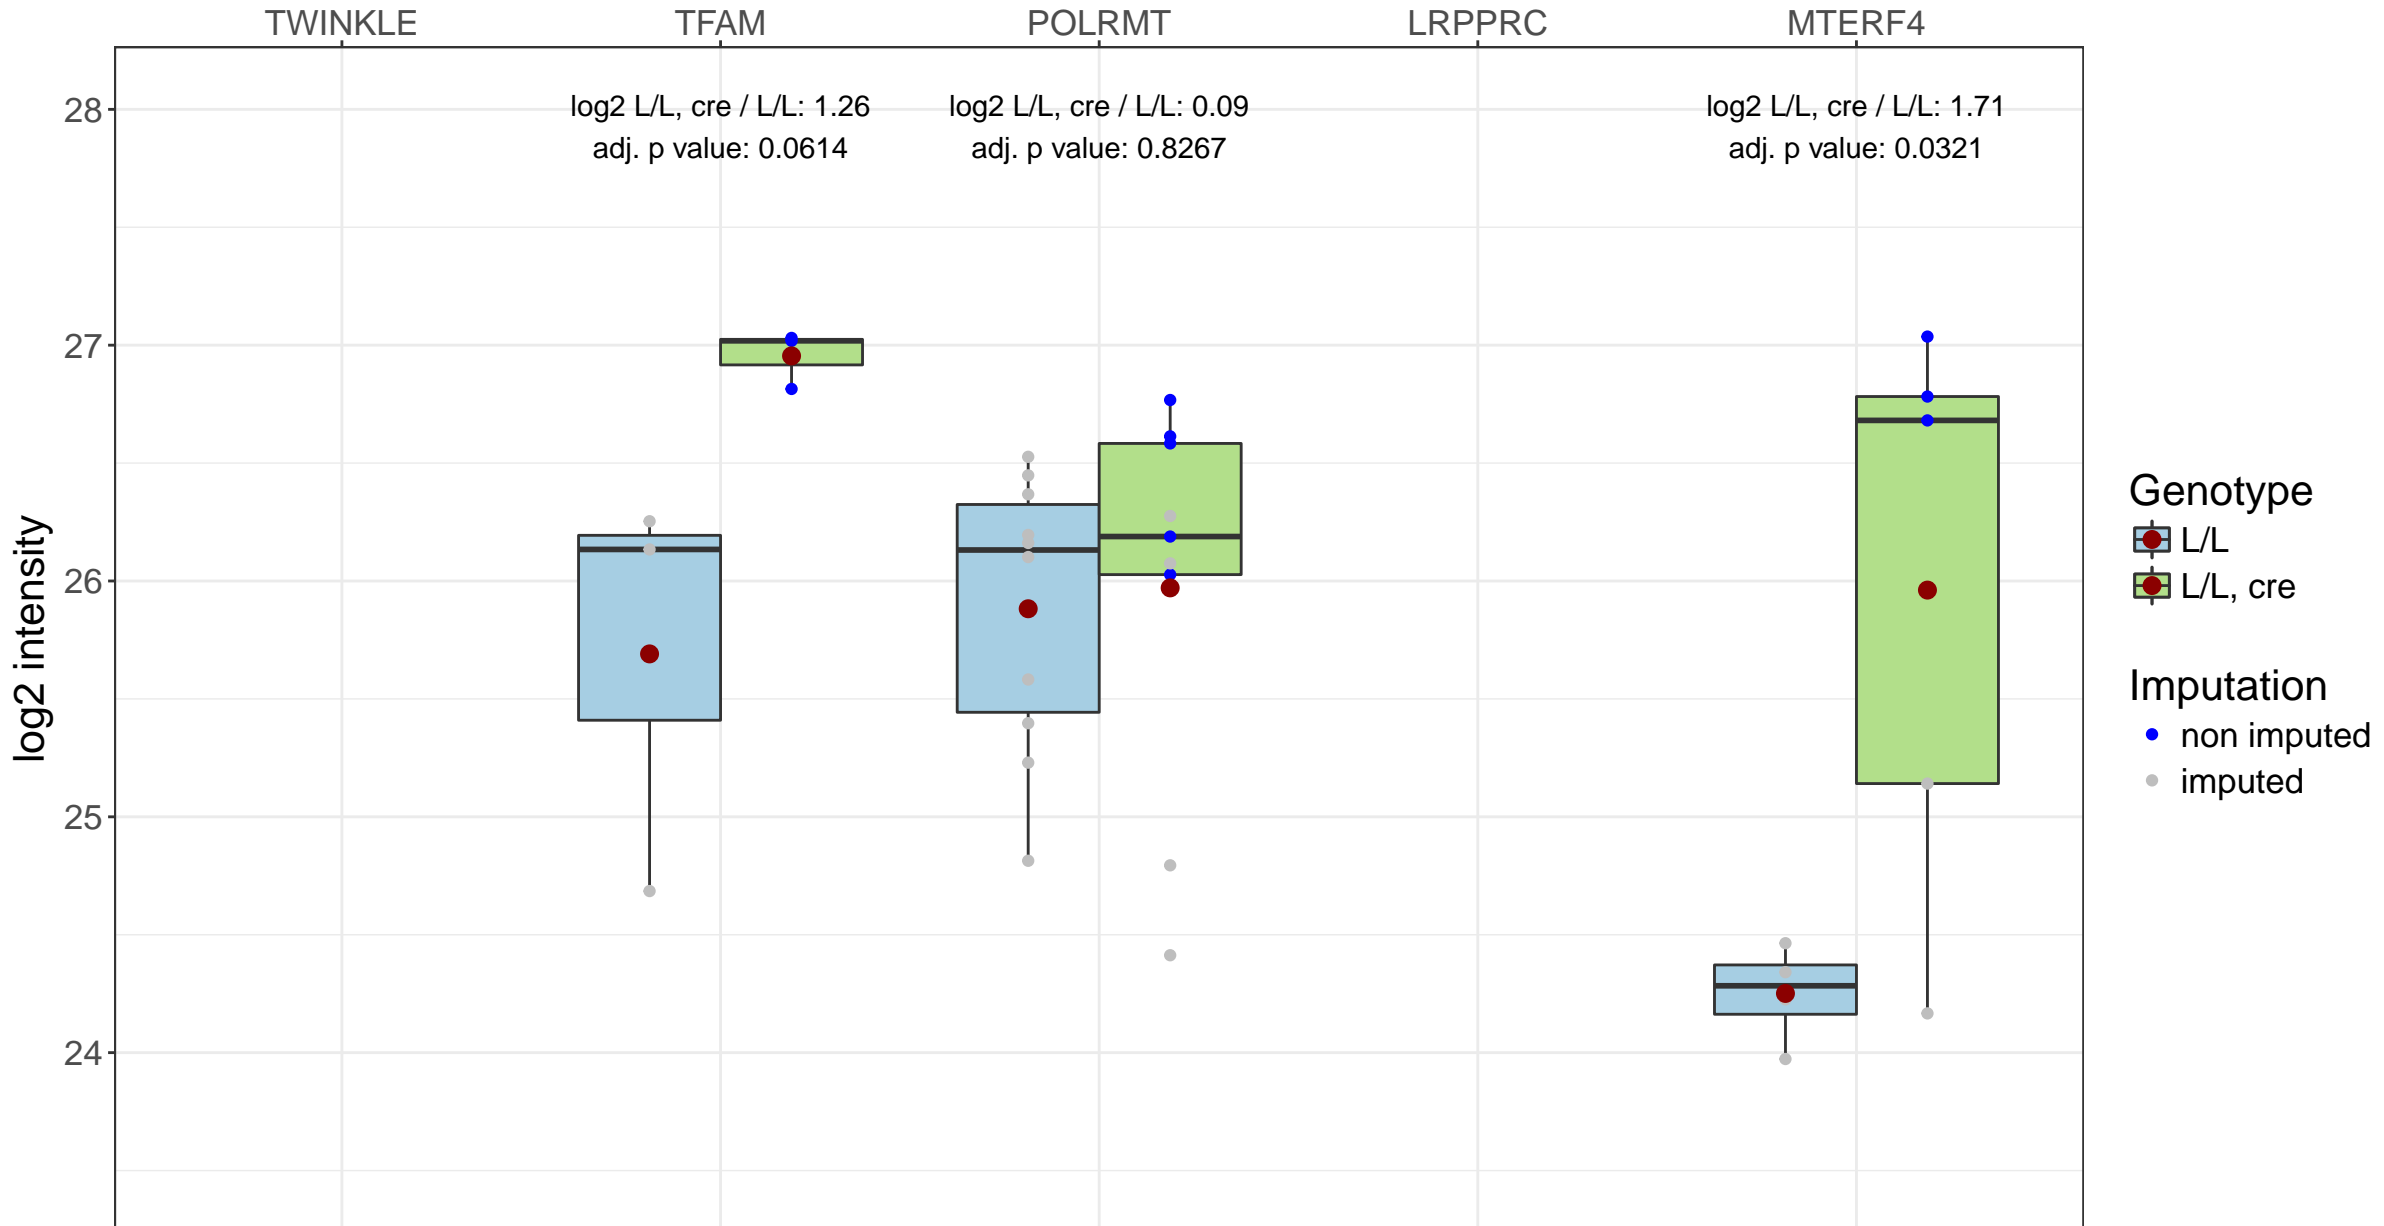

# ALDH4A1 / Q8CHT0

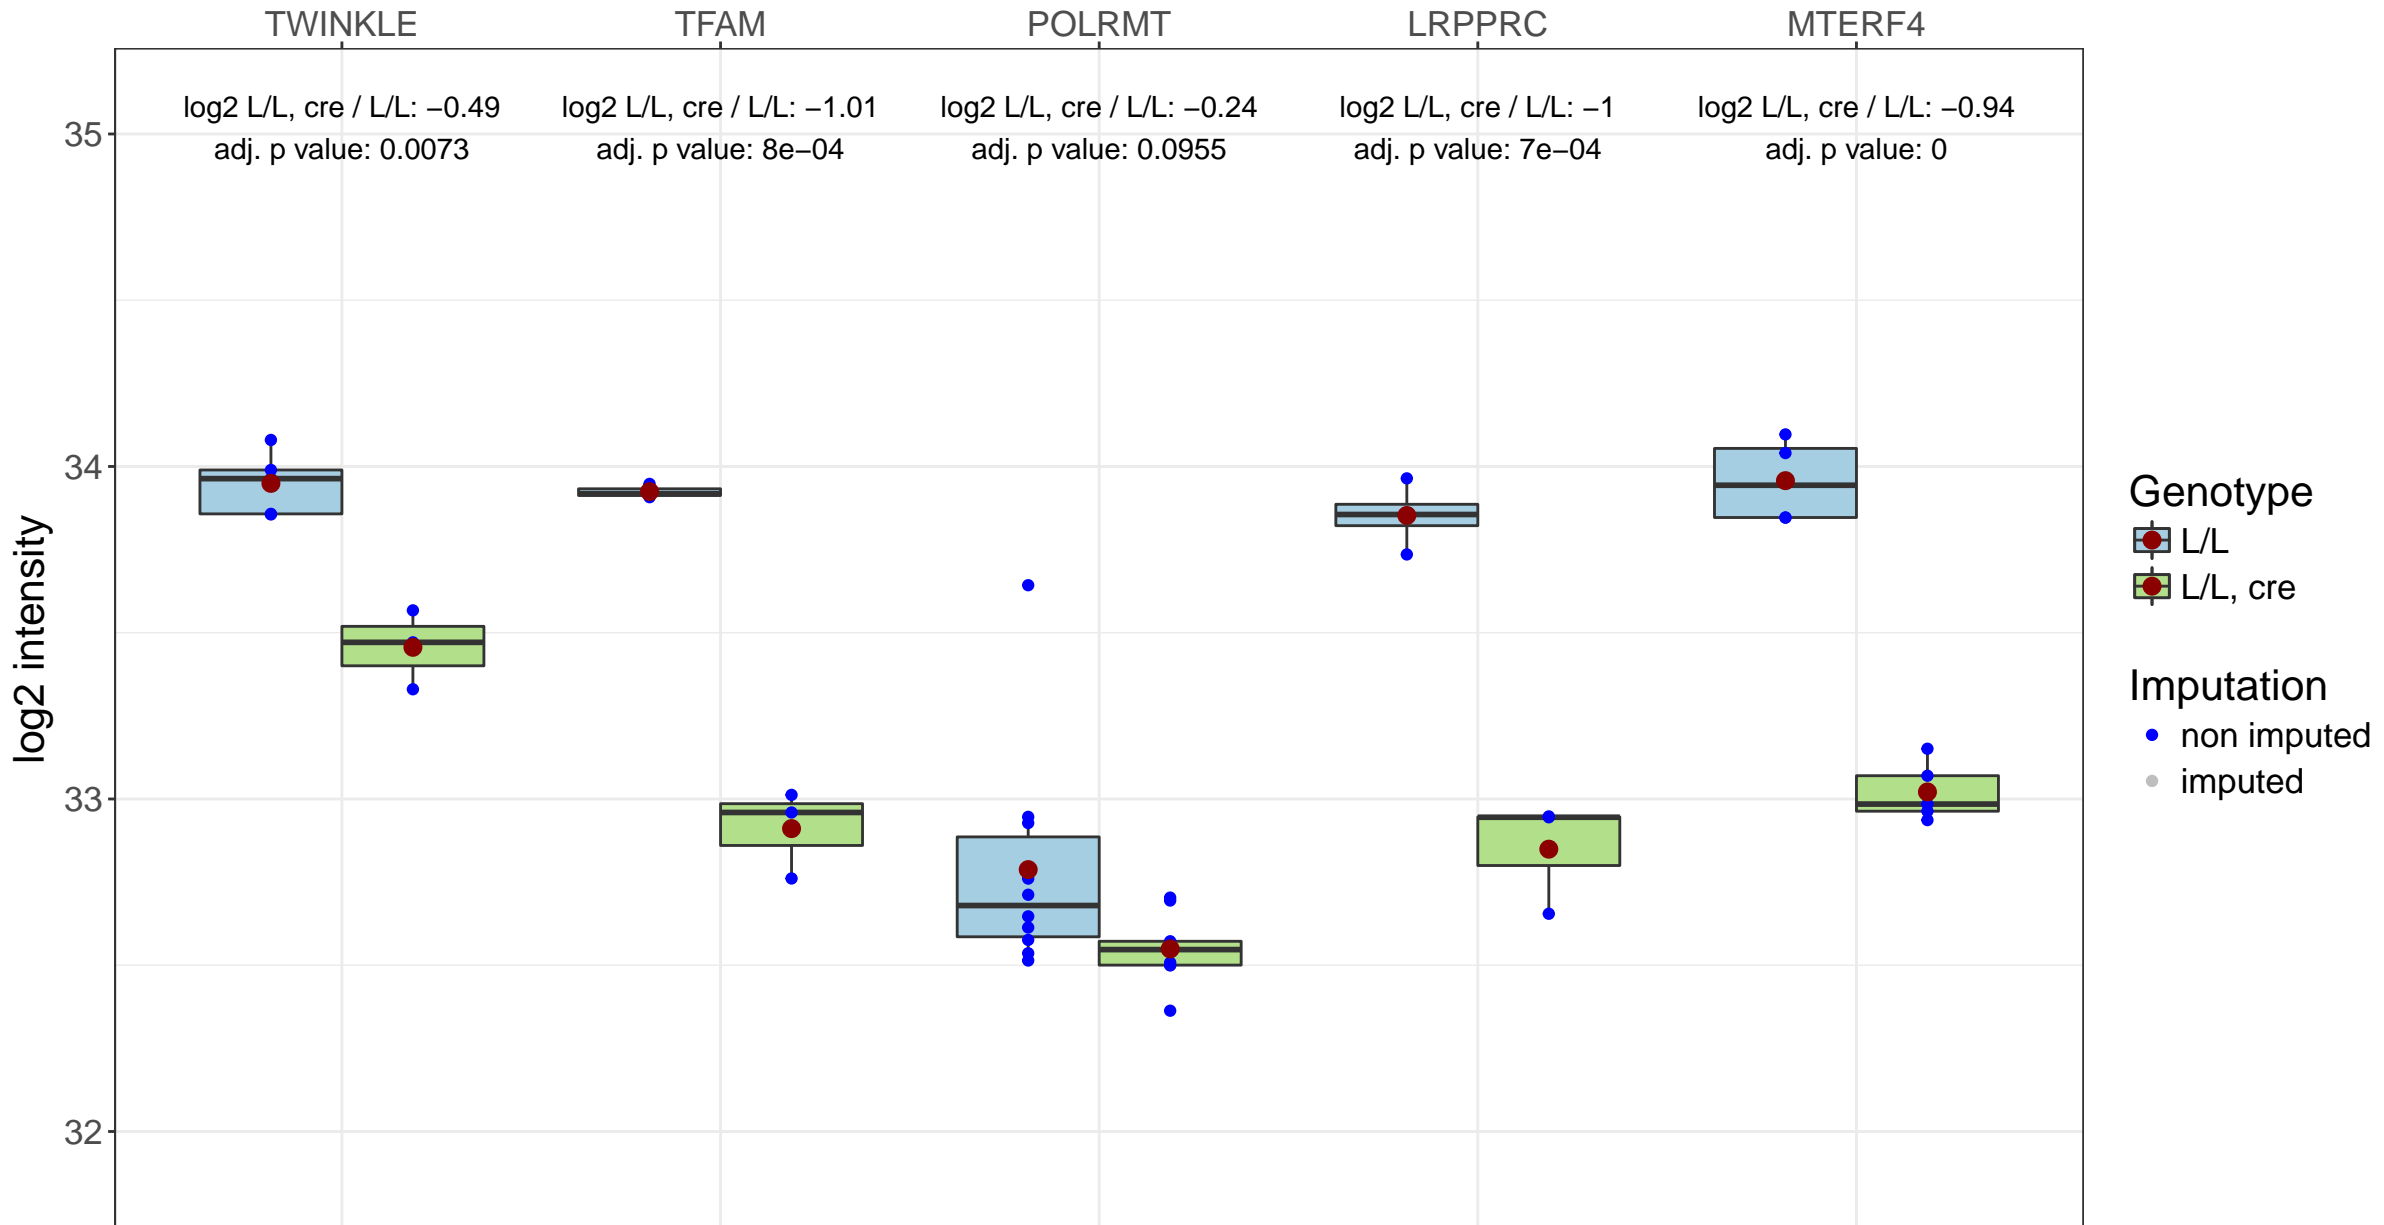



# ALDH5A1 / Q8BWF0

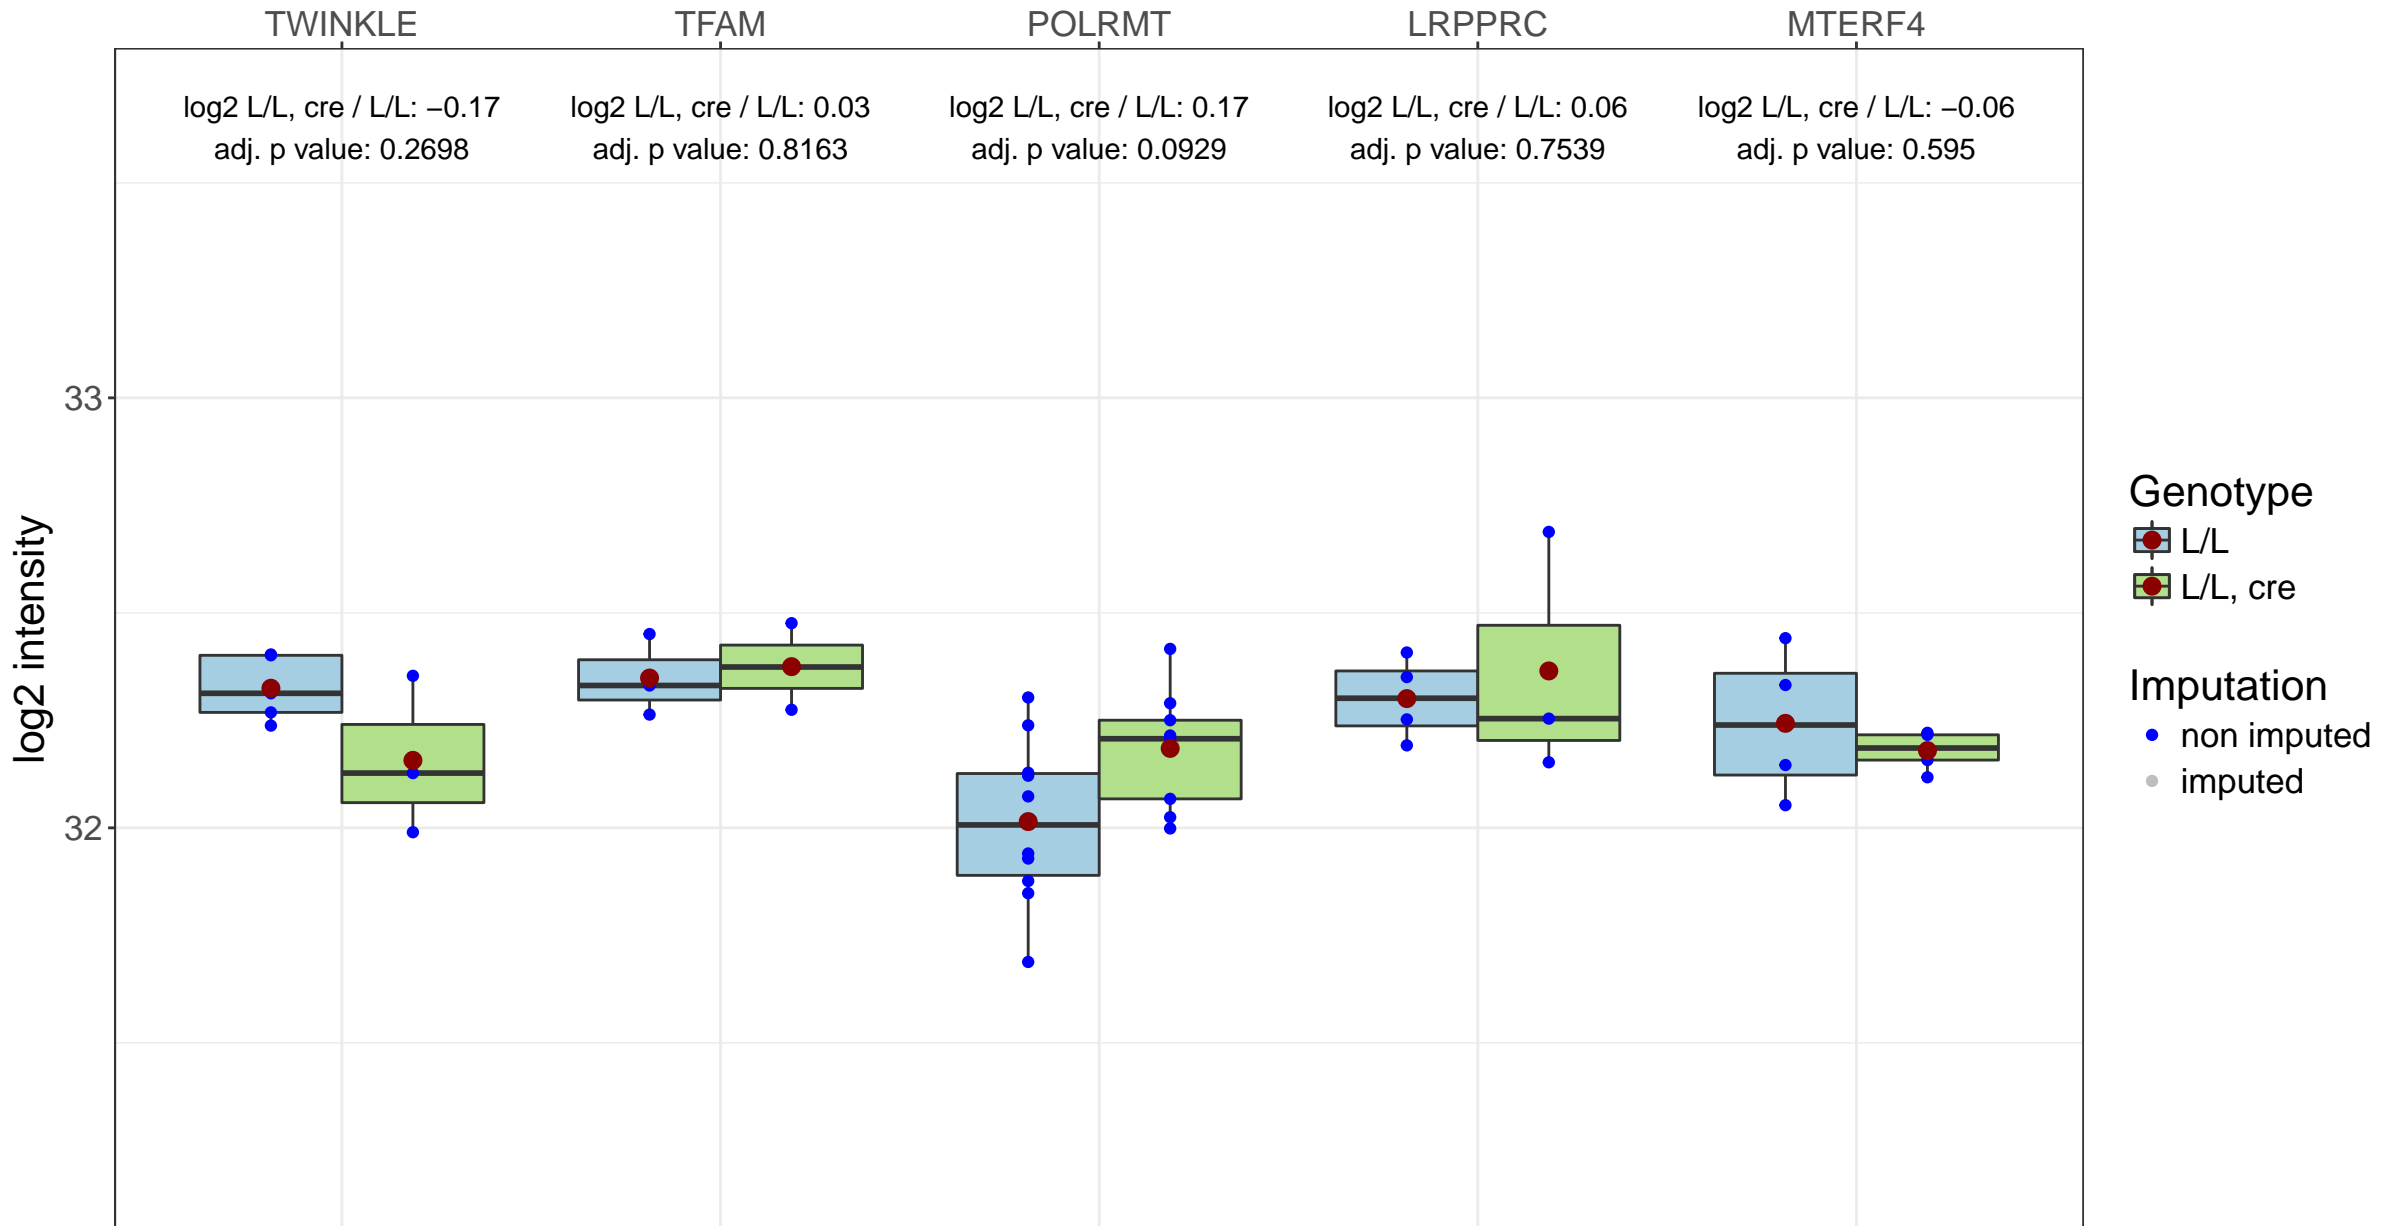

# ALDH6A1 / Q9EQ20

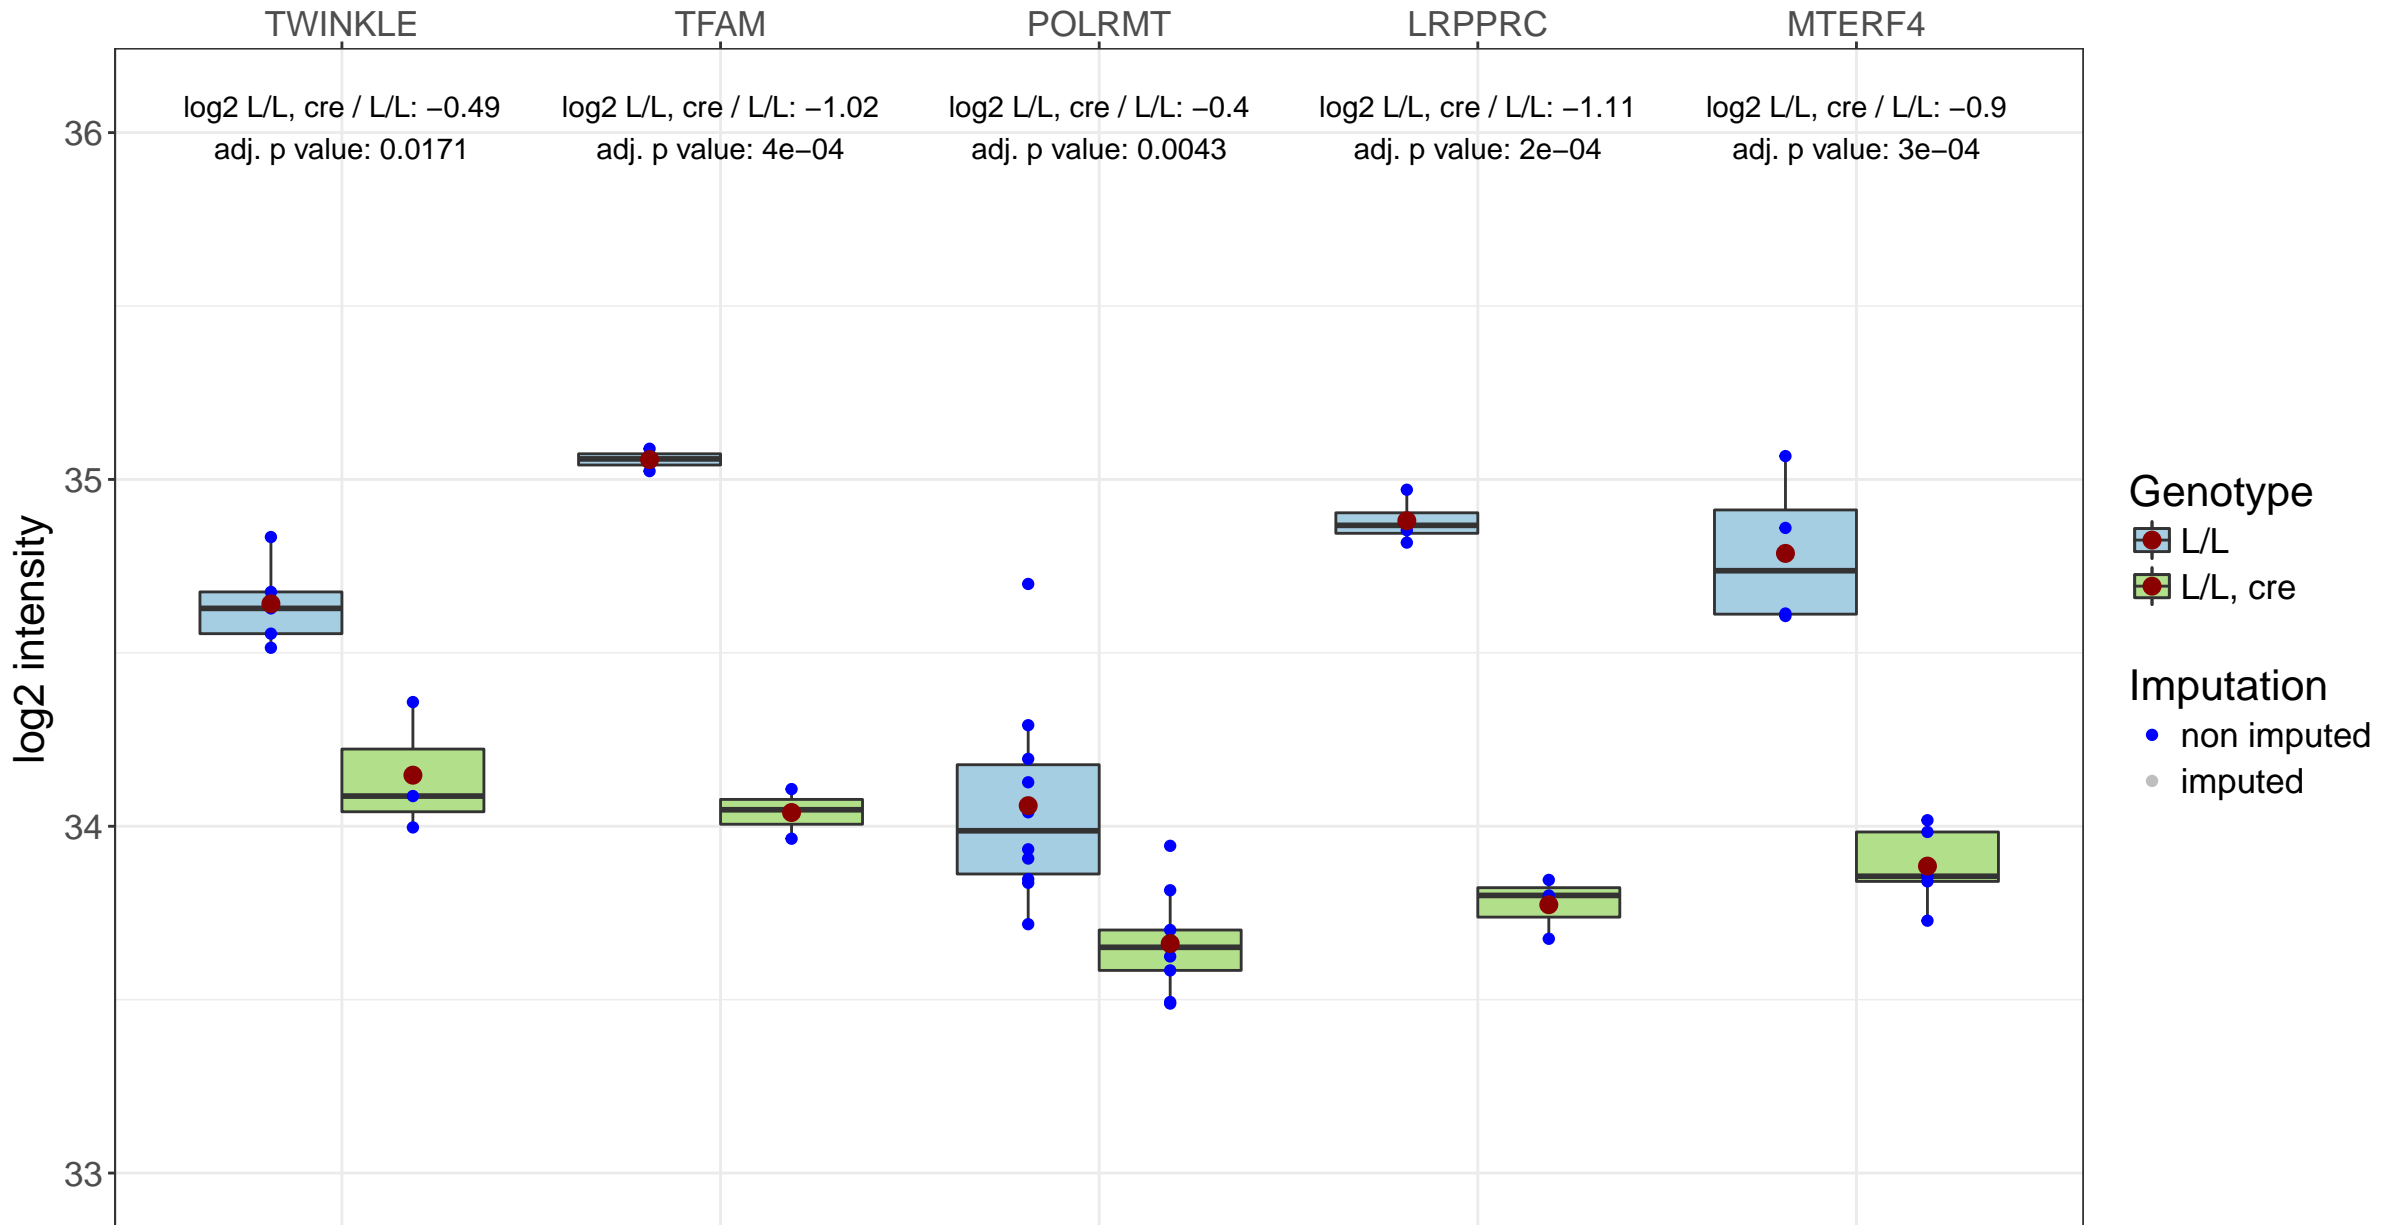

# ALDH7A1 / Q9DBF1-2

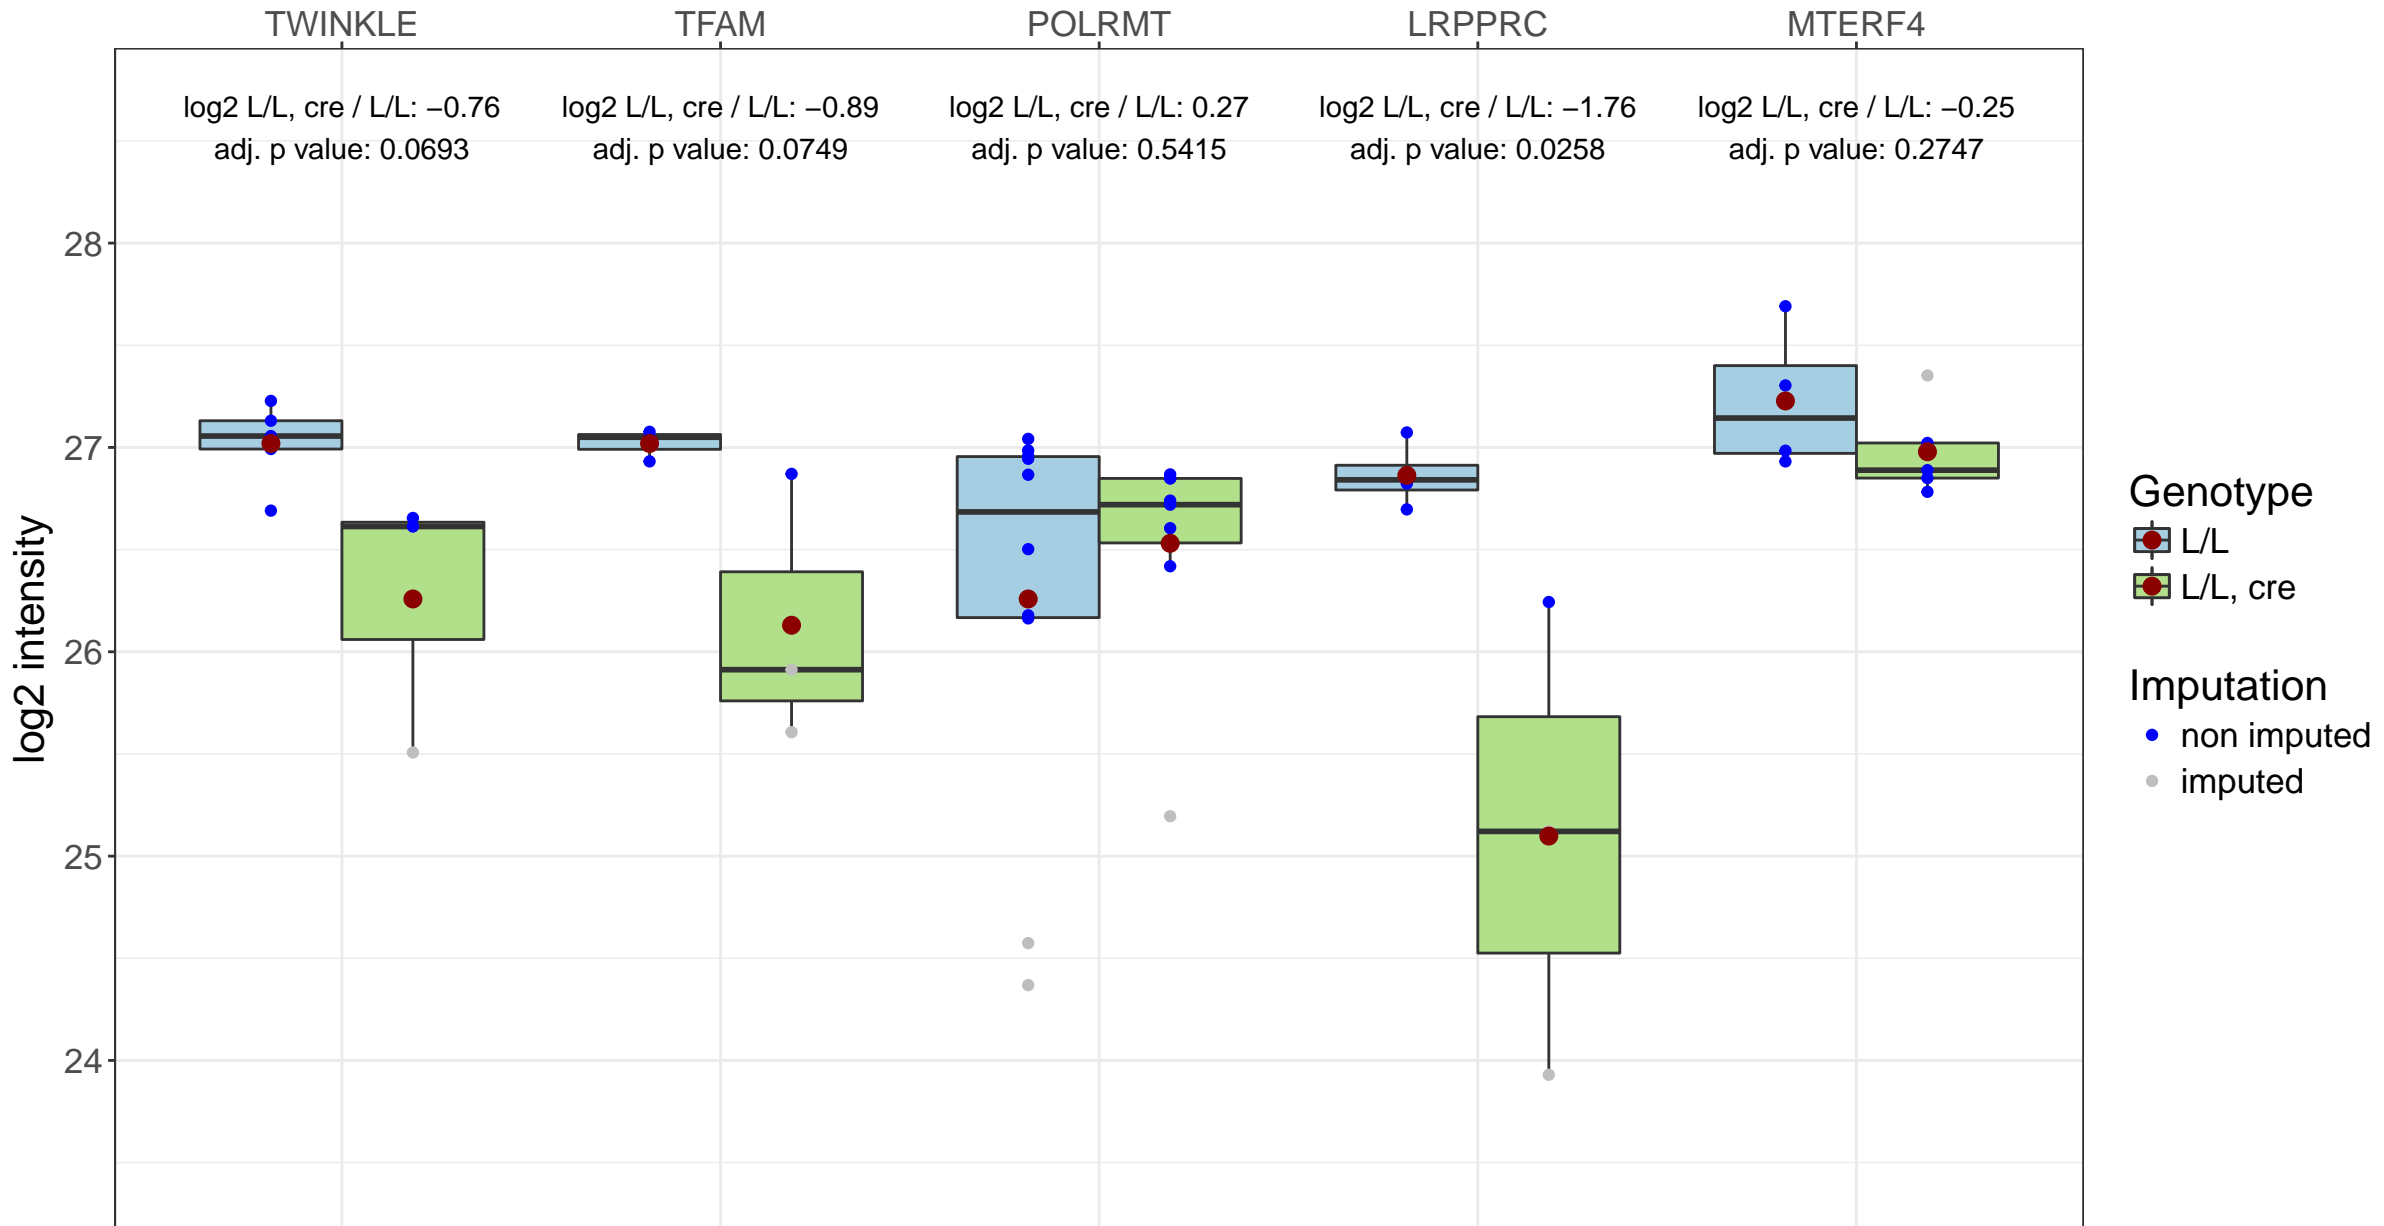

# ALDH9A1 / Q9JLJ2

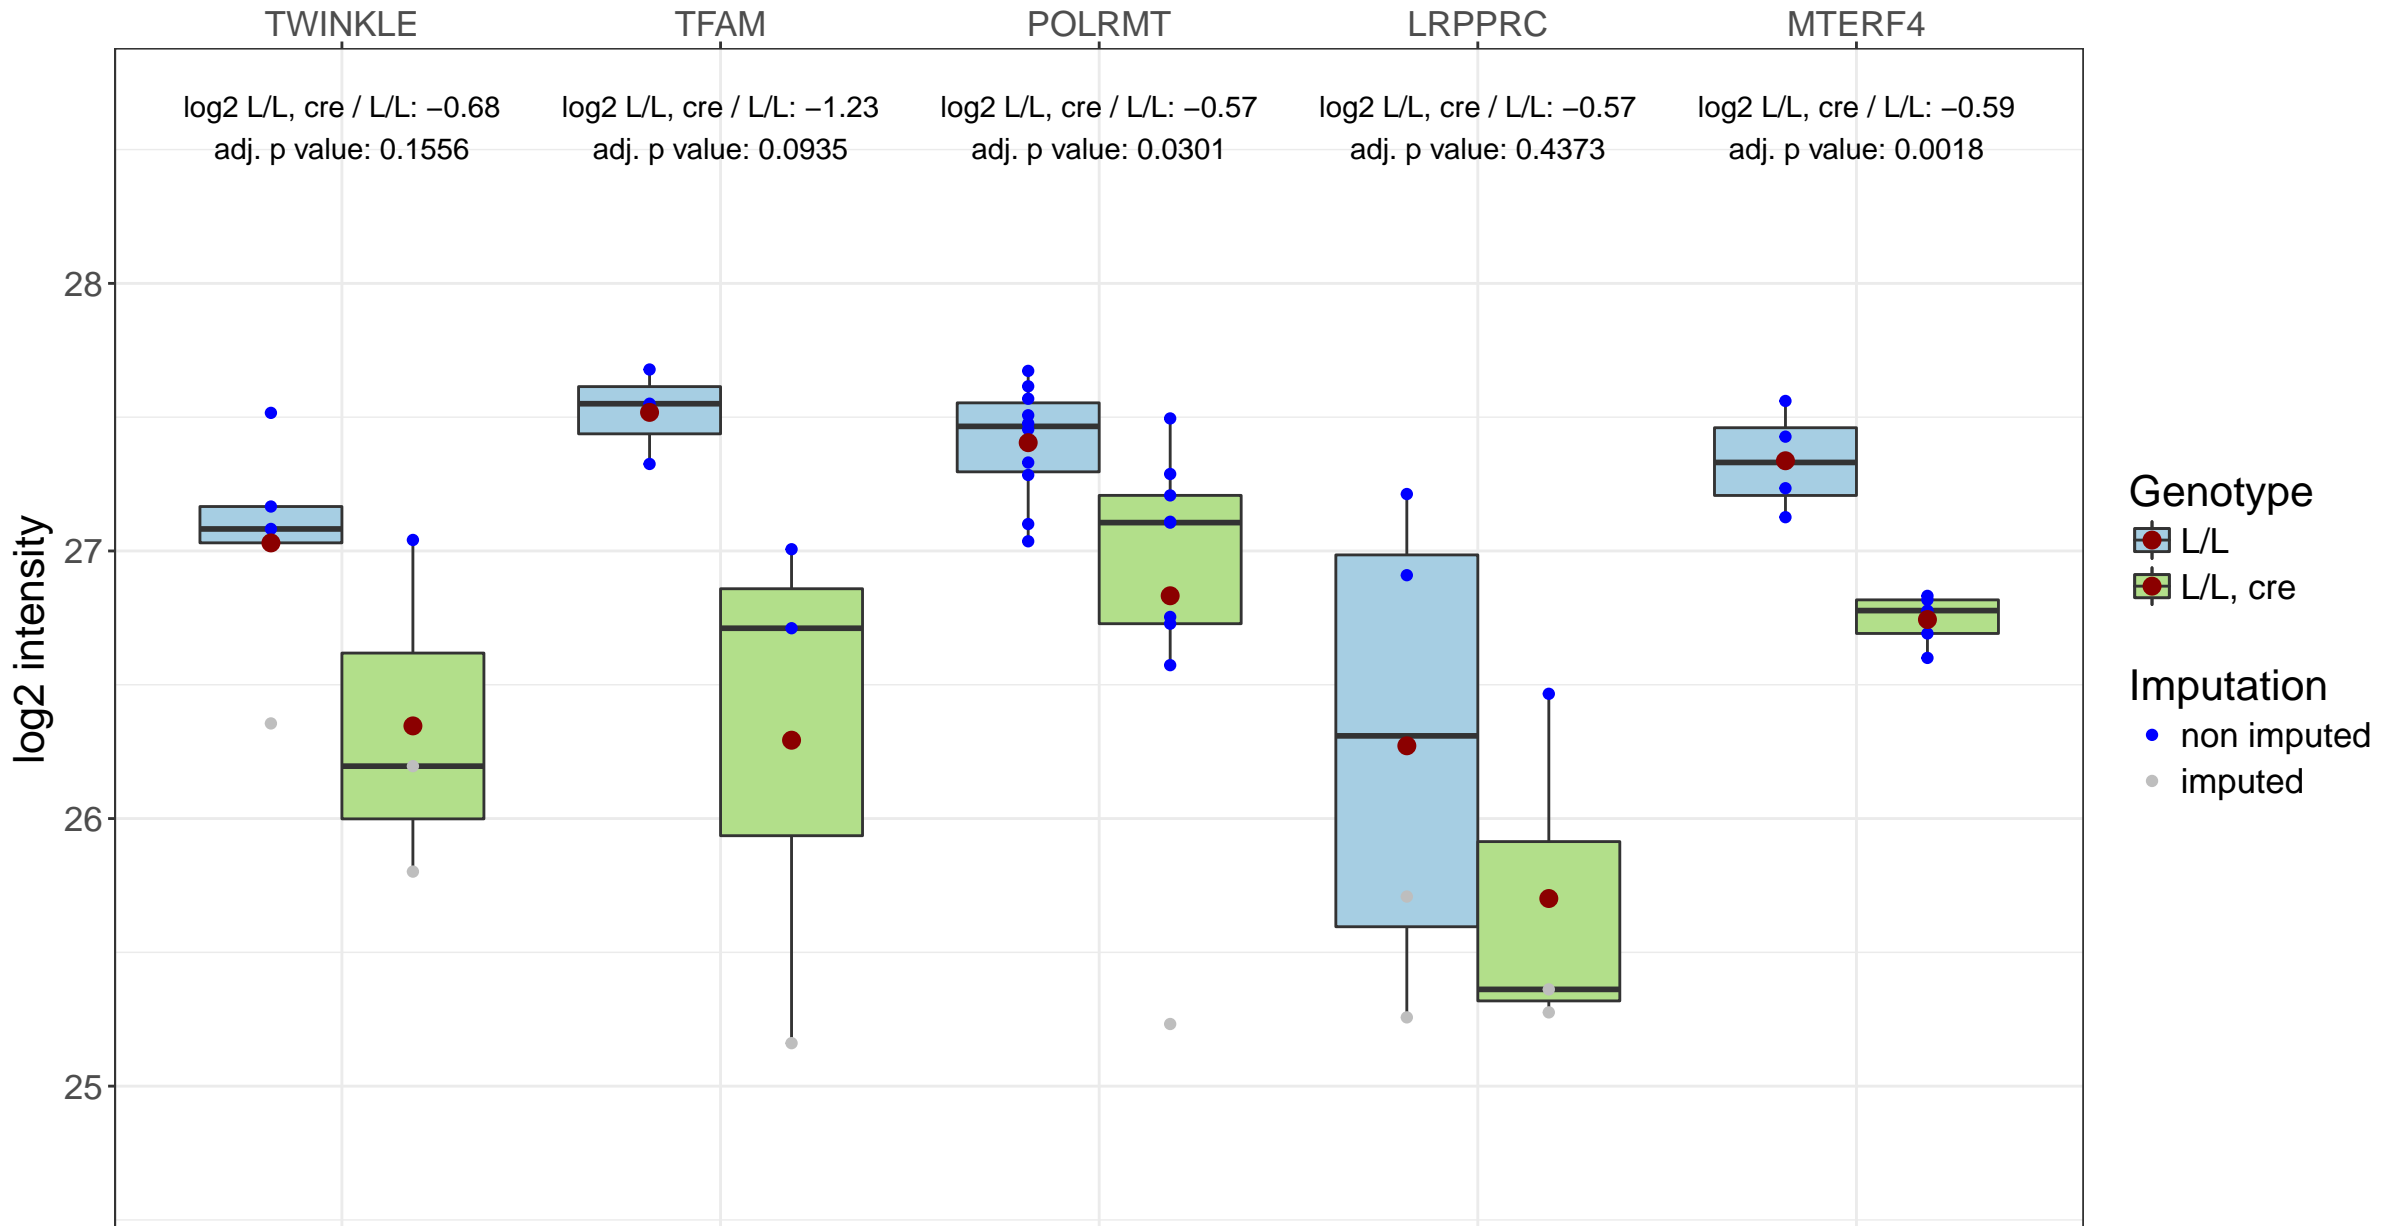

# ALDOA / P05064

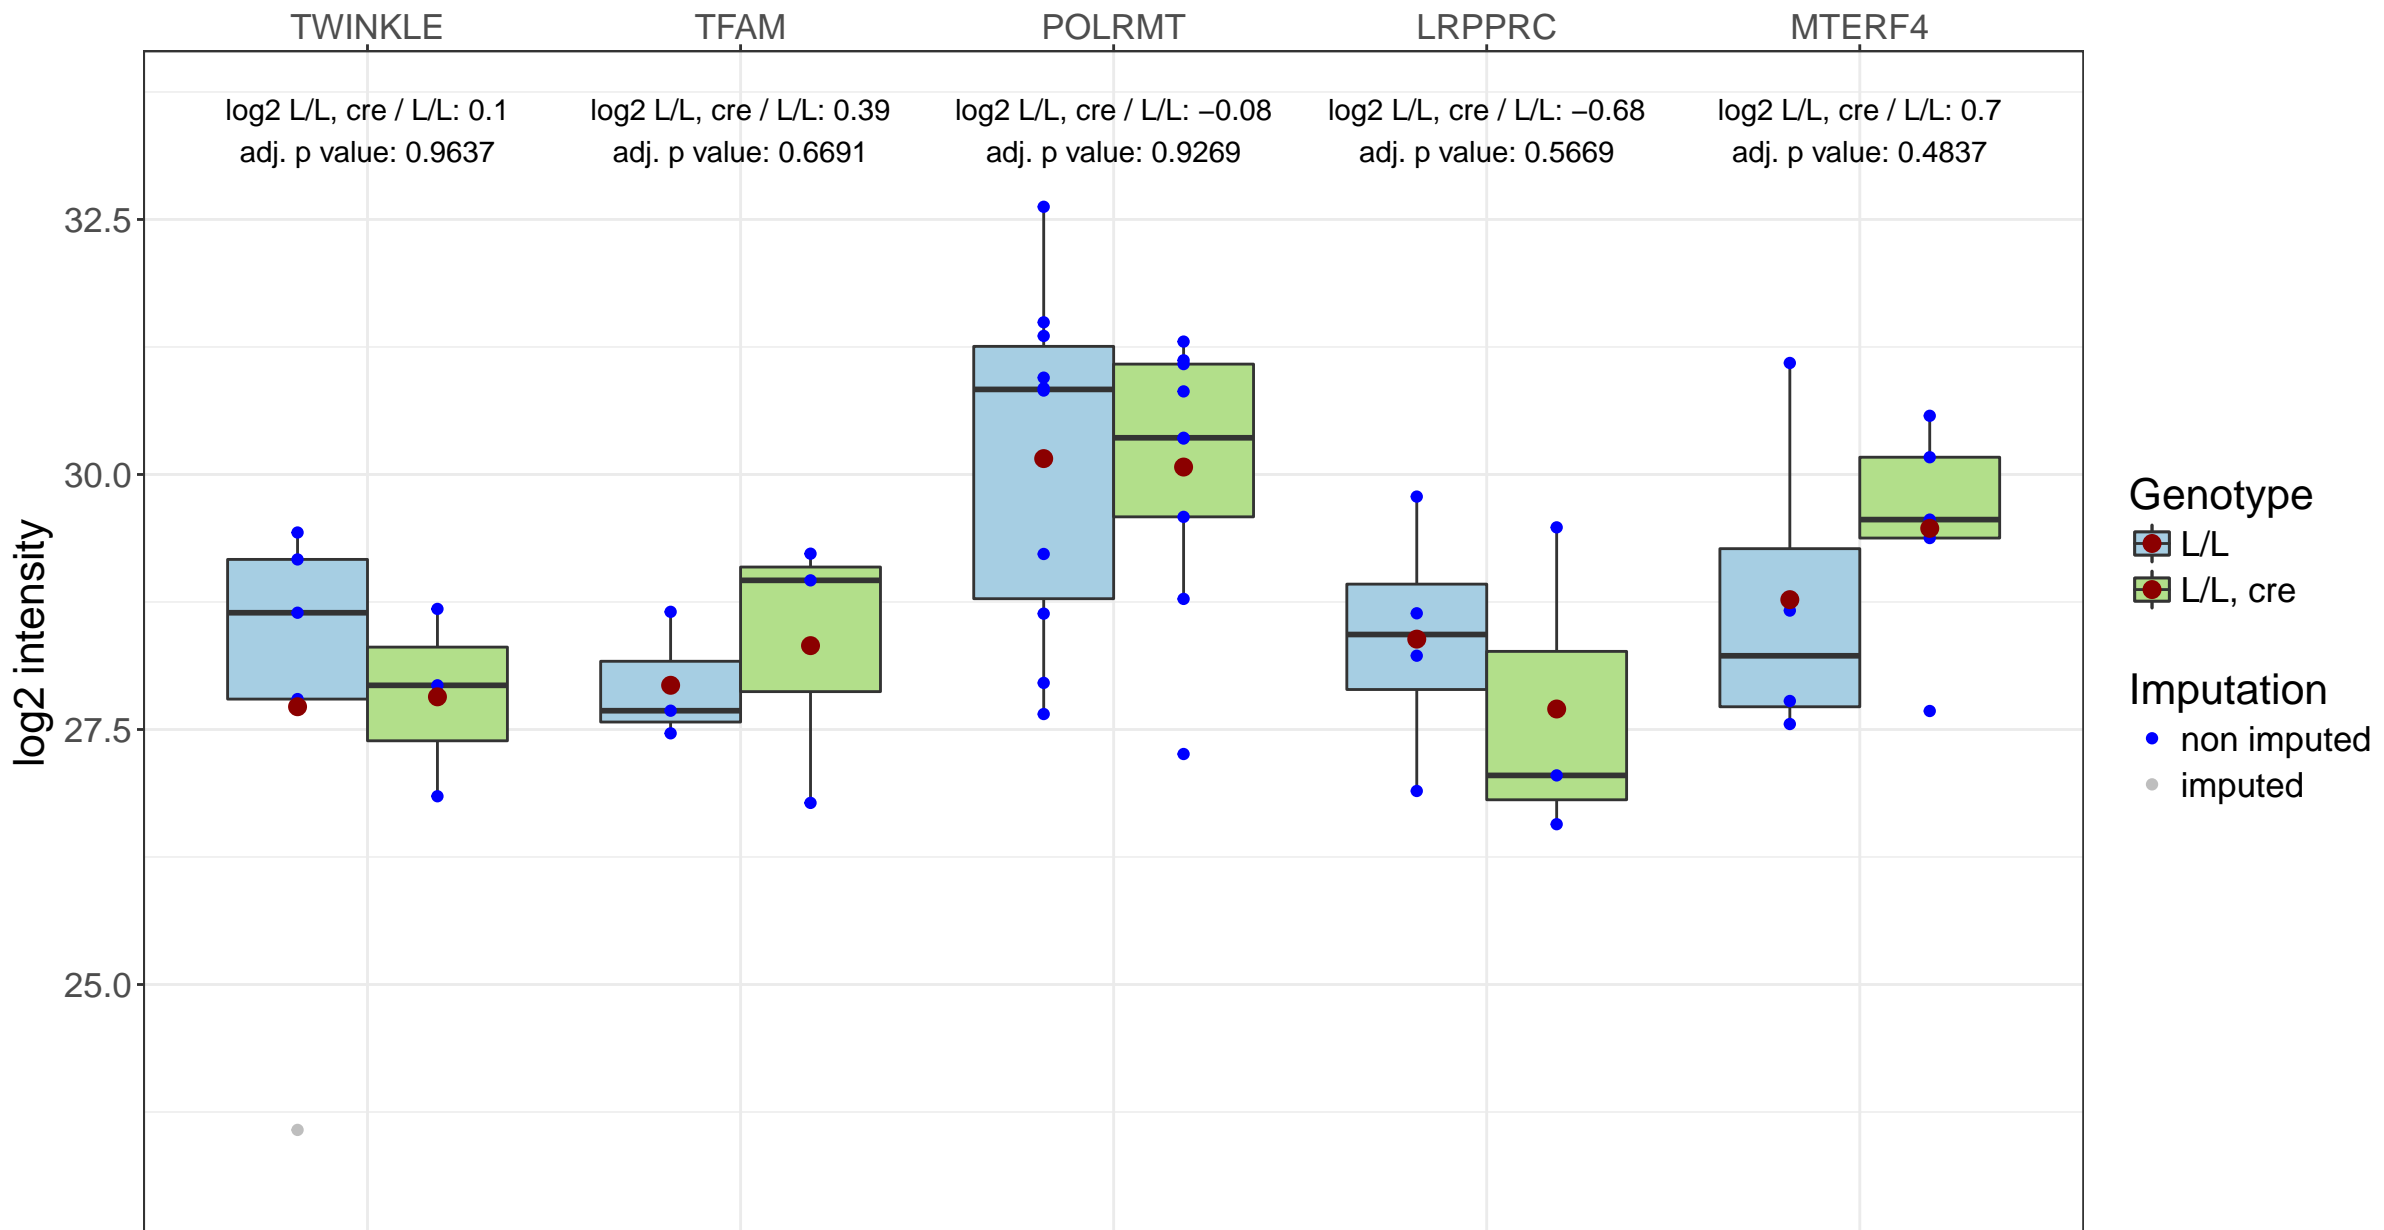

# AMACR / O09174

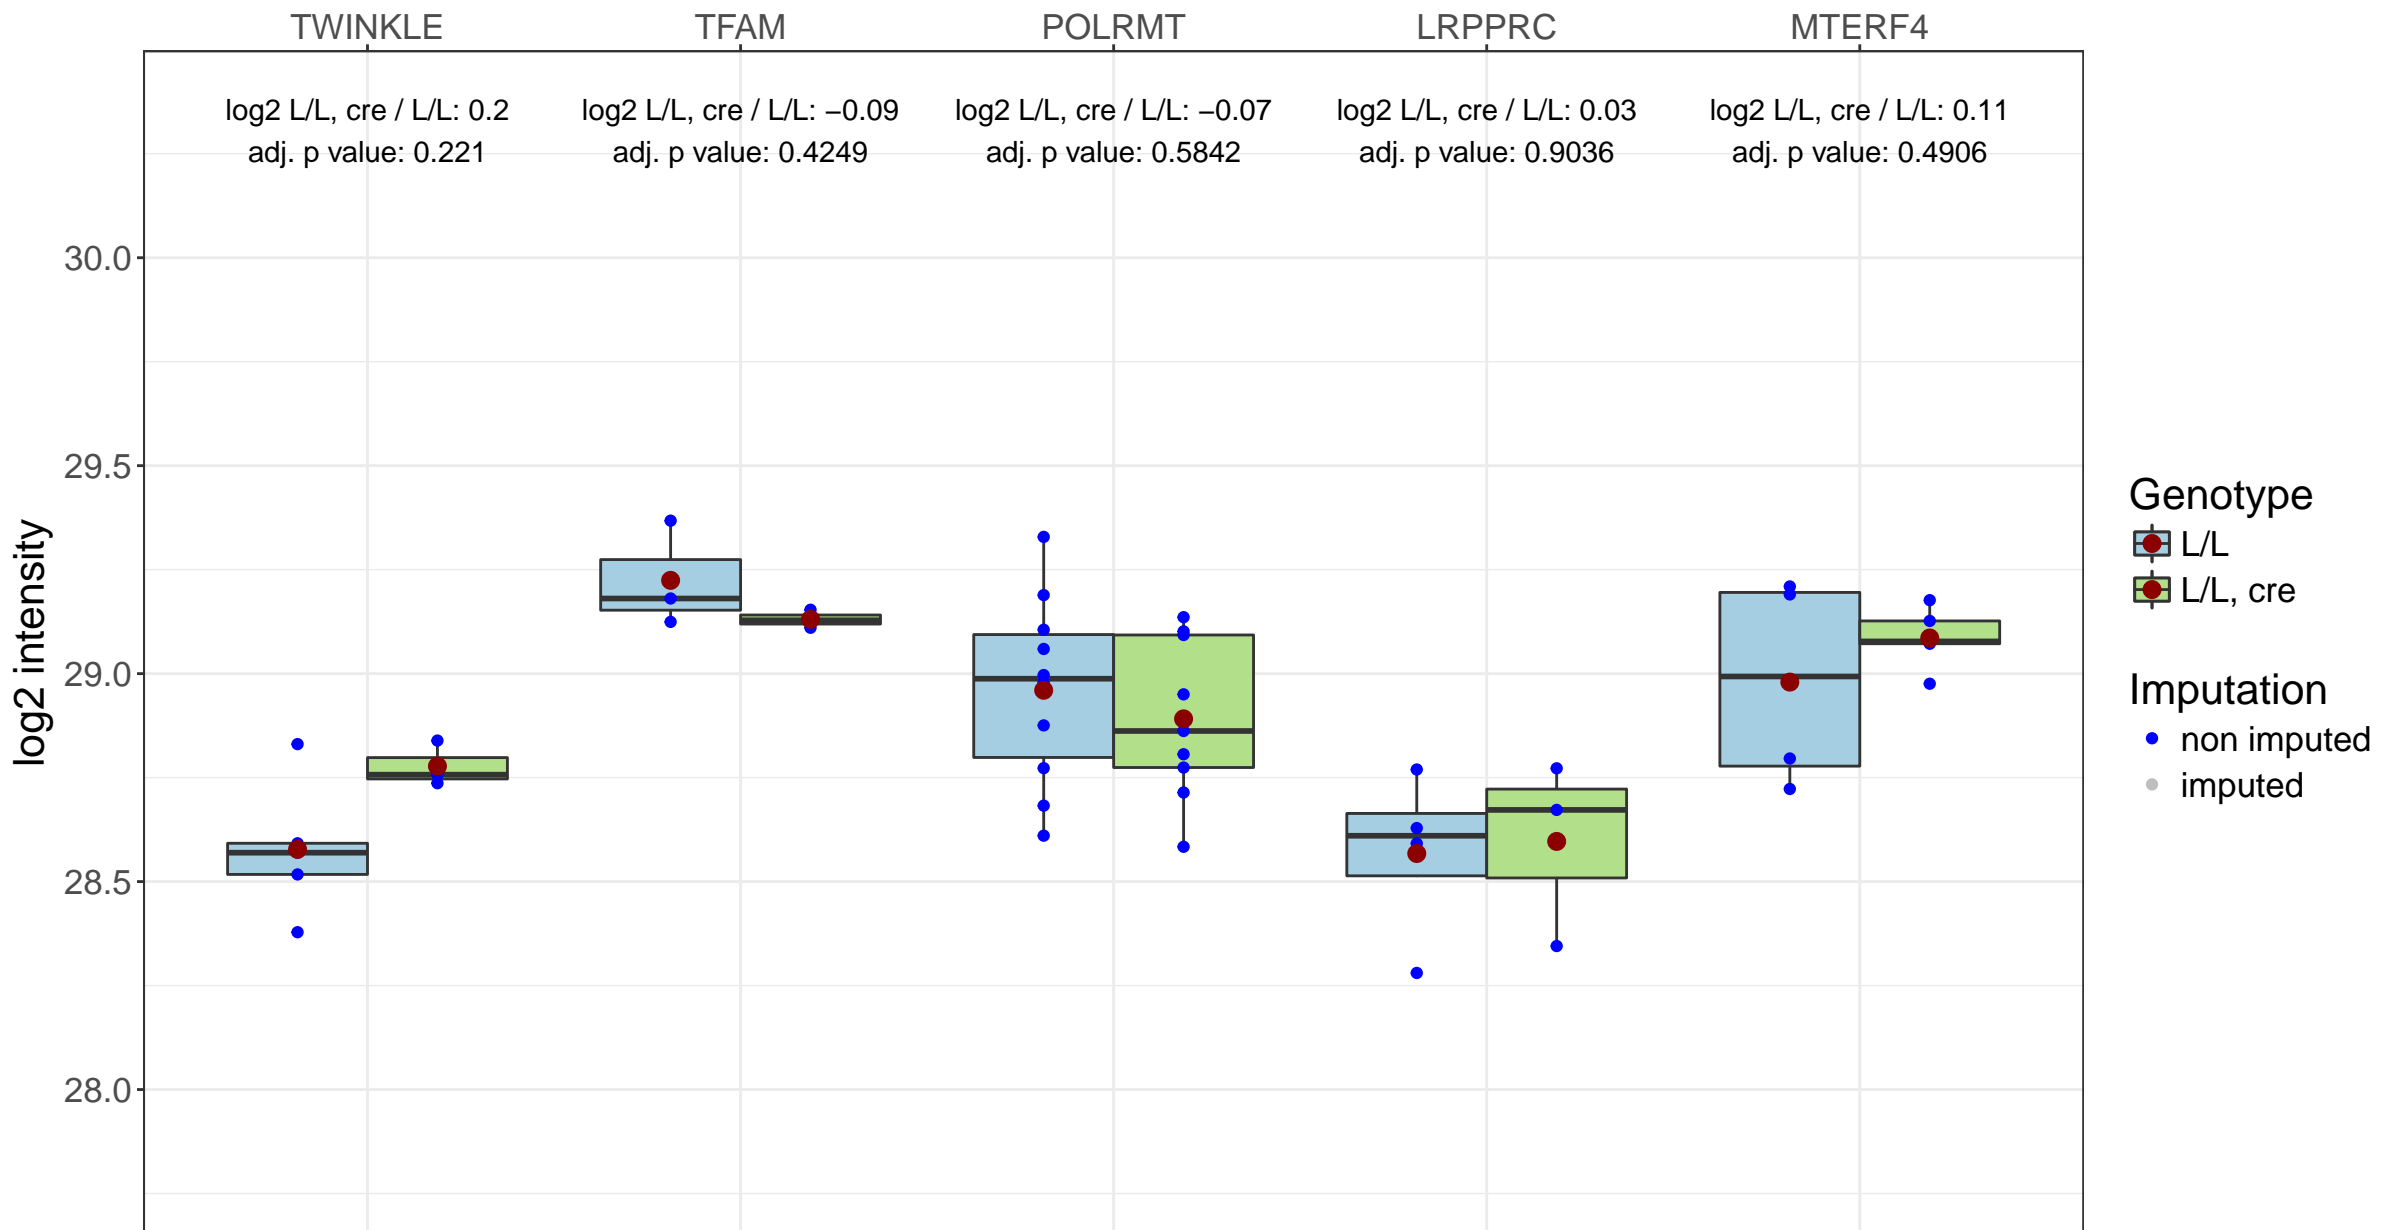

# ANGEL2 / Q8K1C0-2

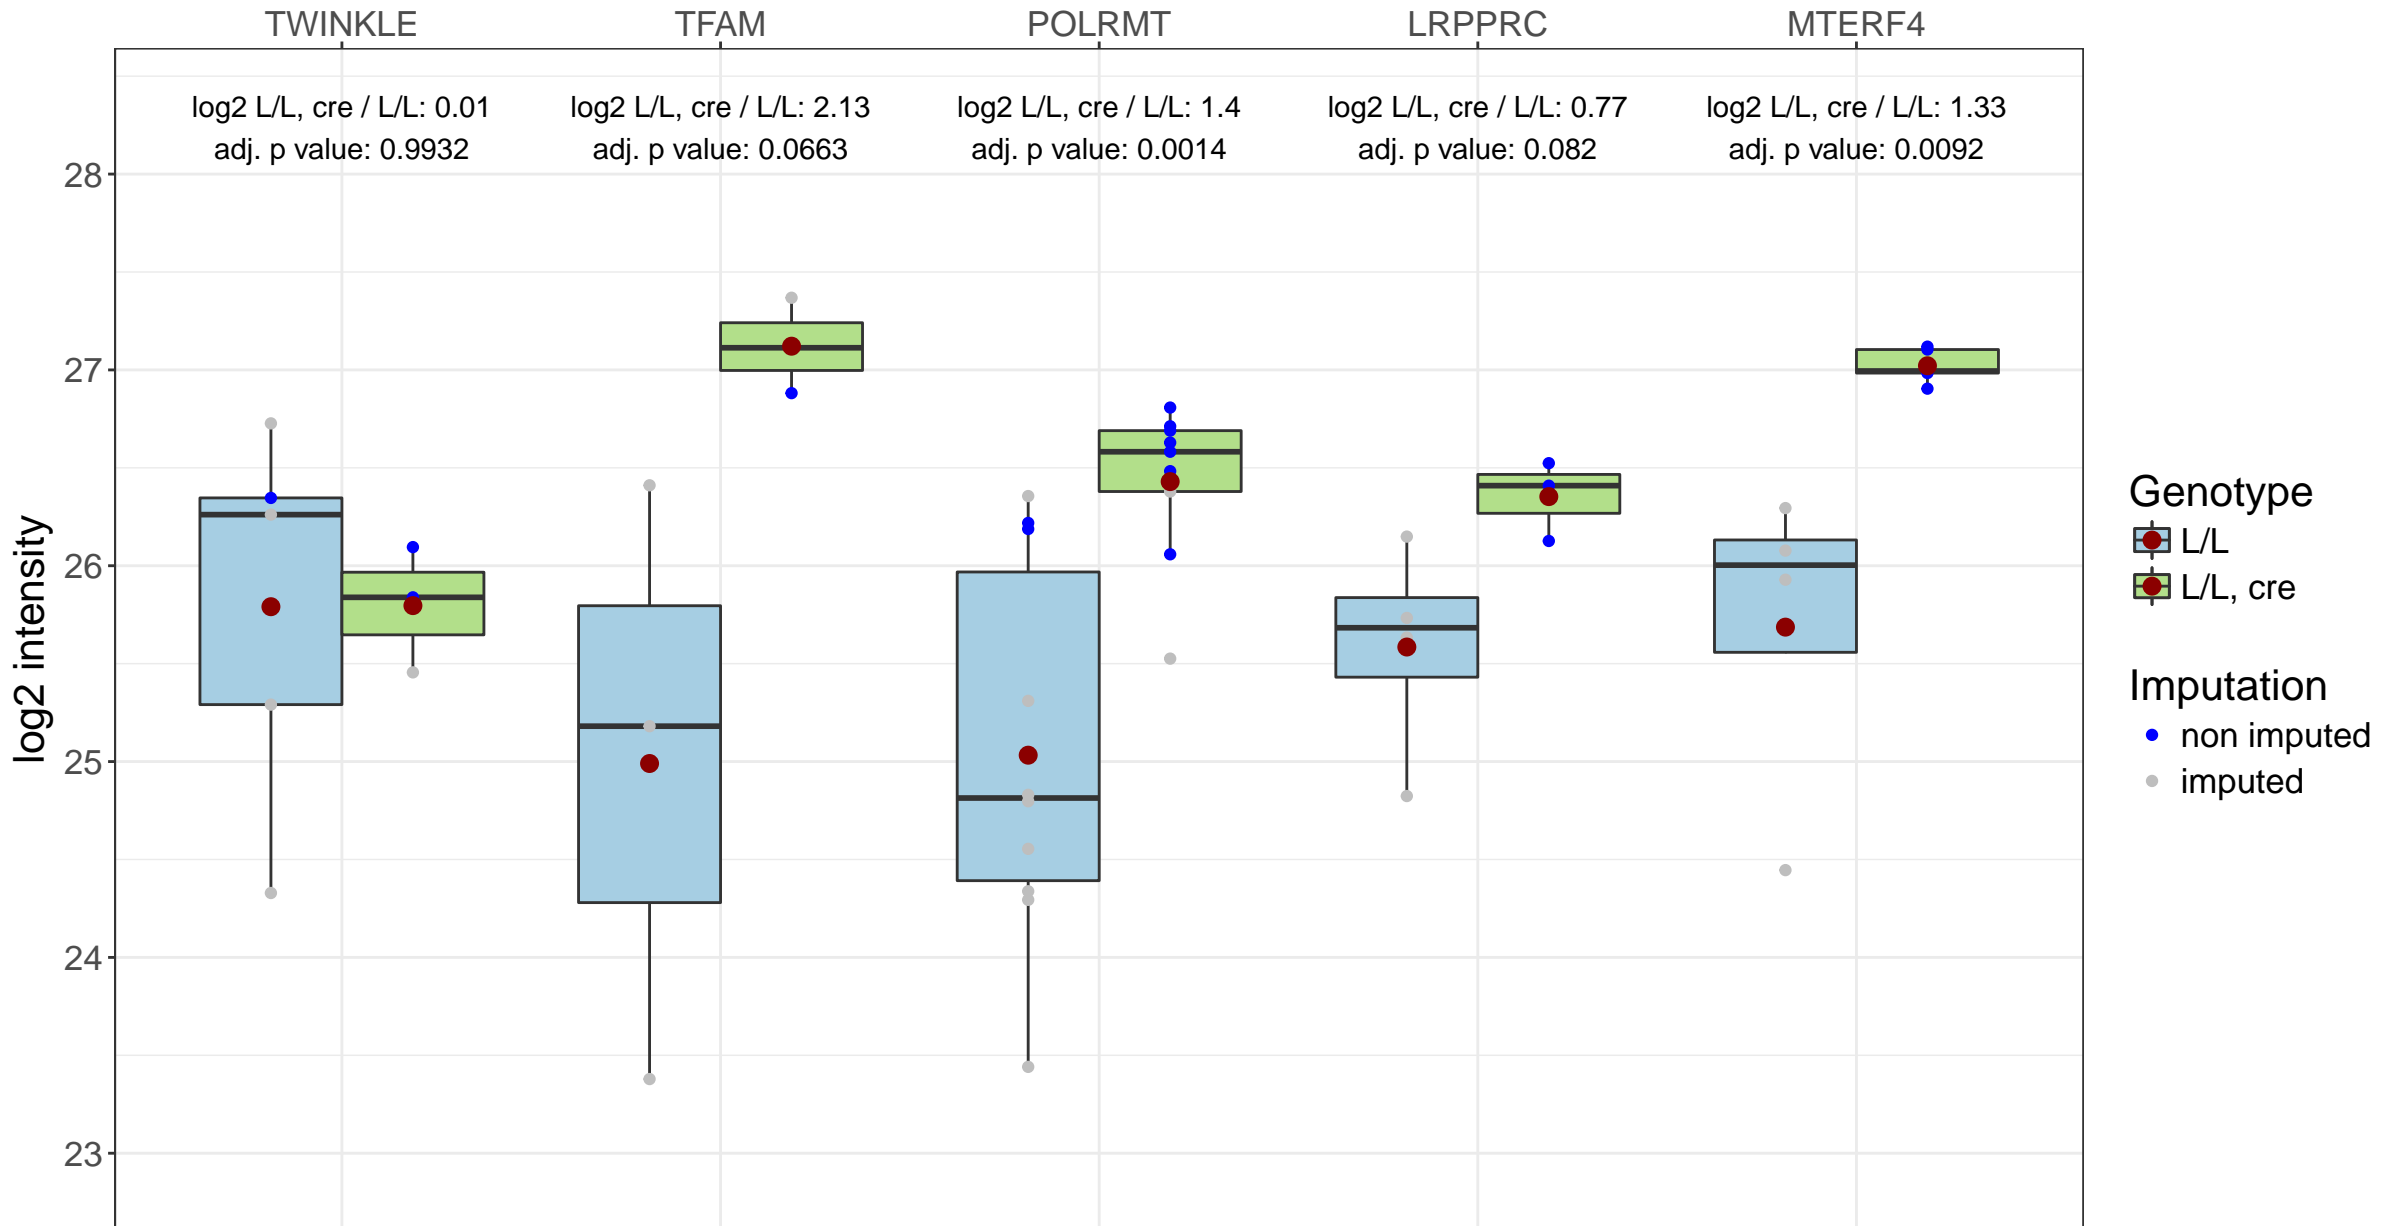

# ANKEF1 / Q9D2J7

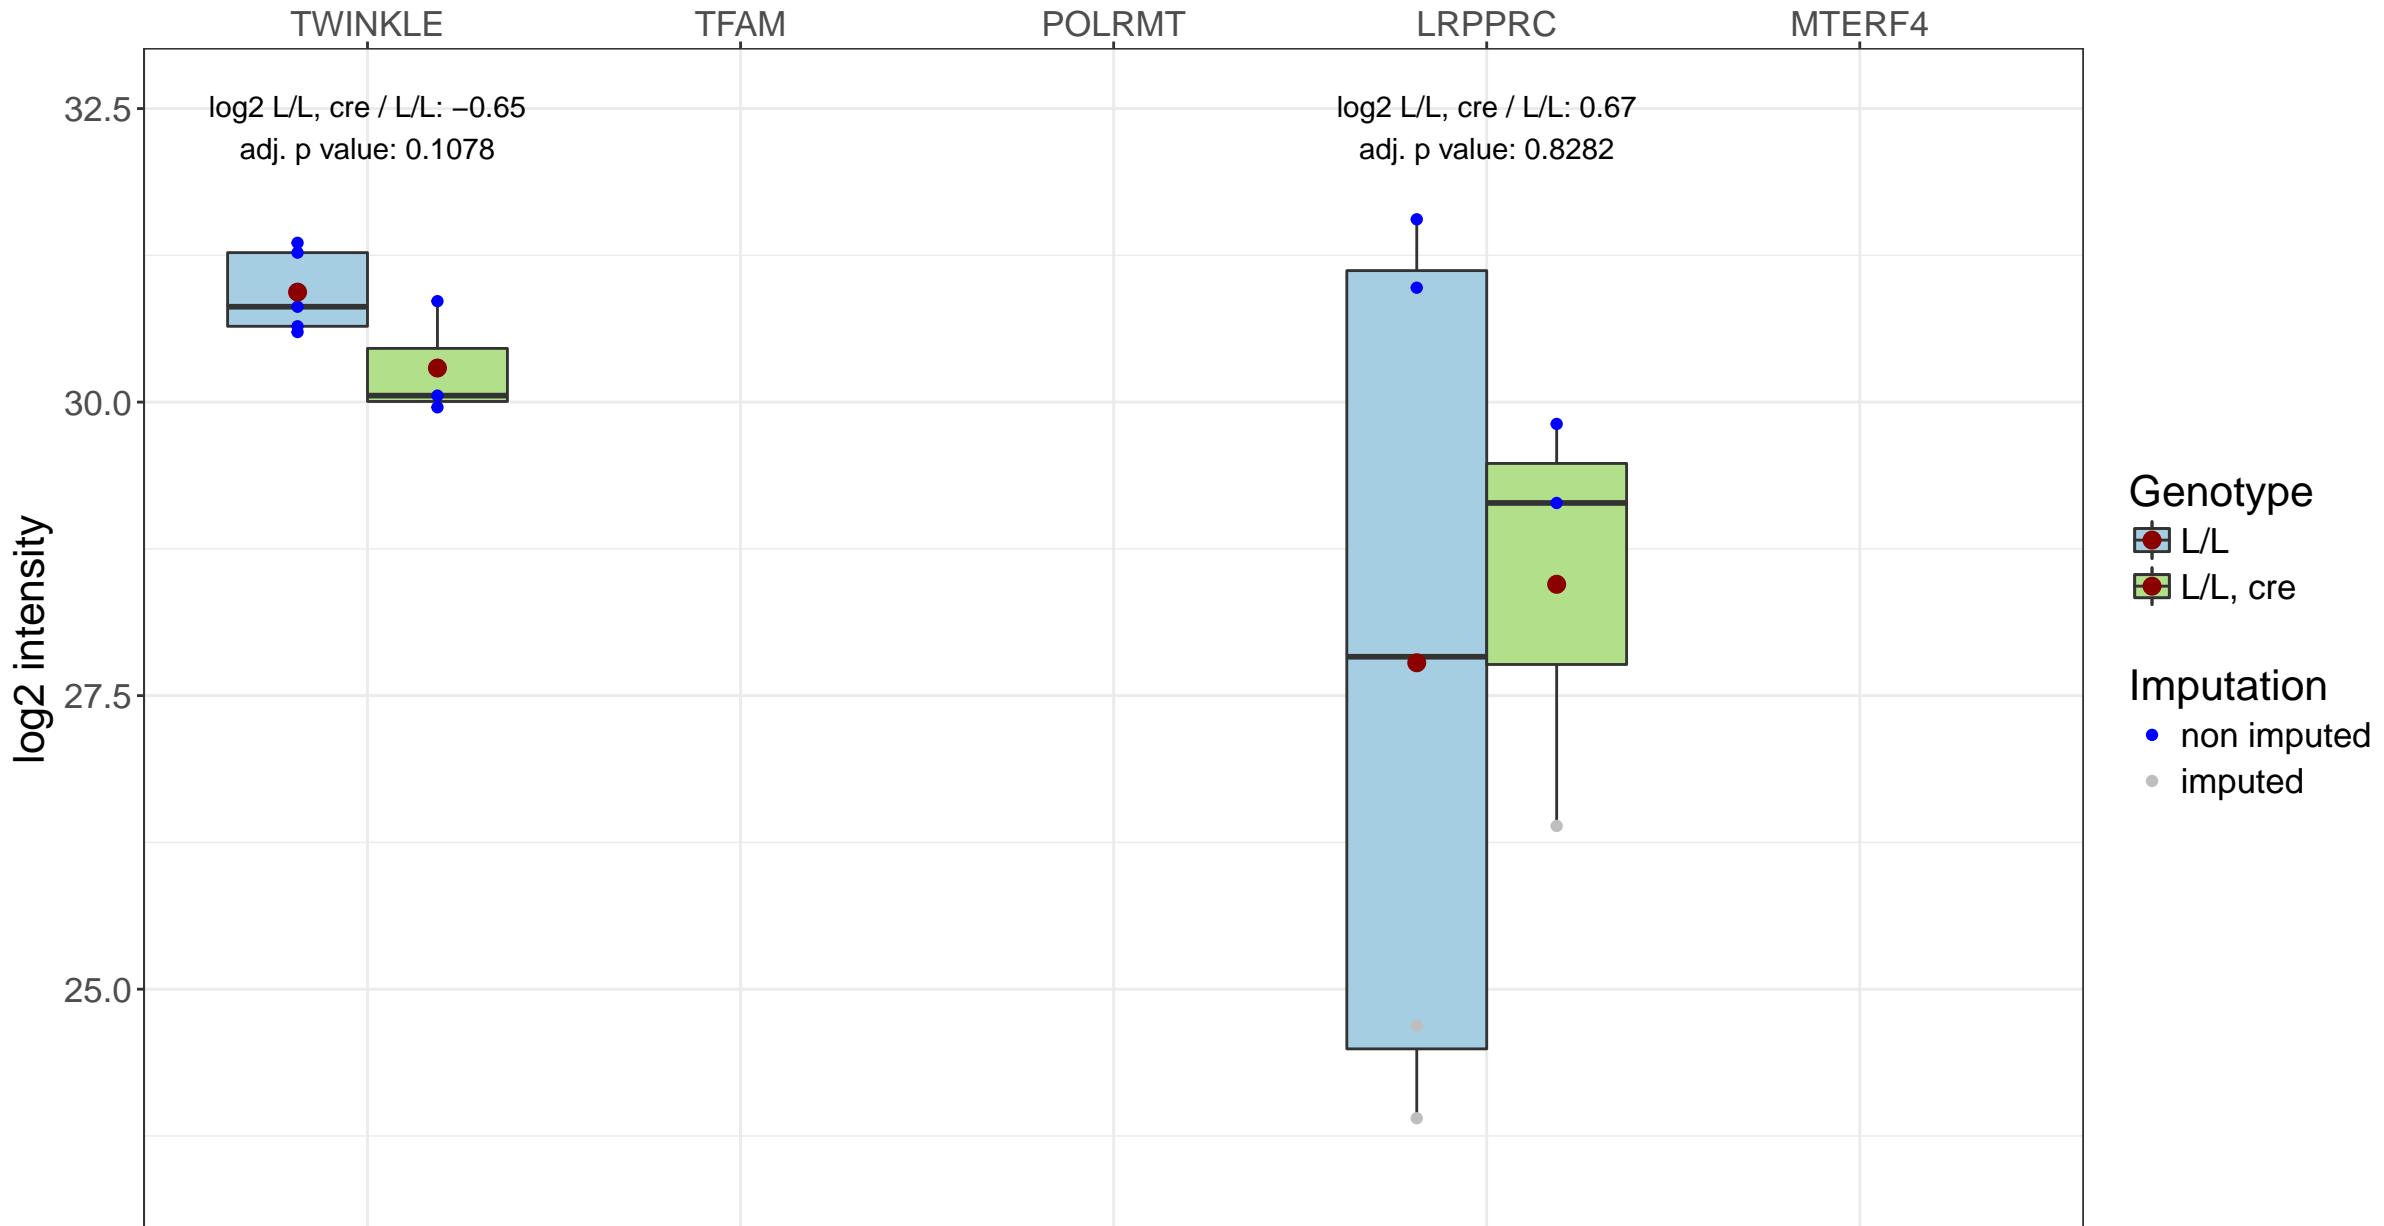



# ANXA2 / P07356

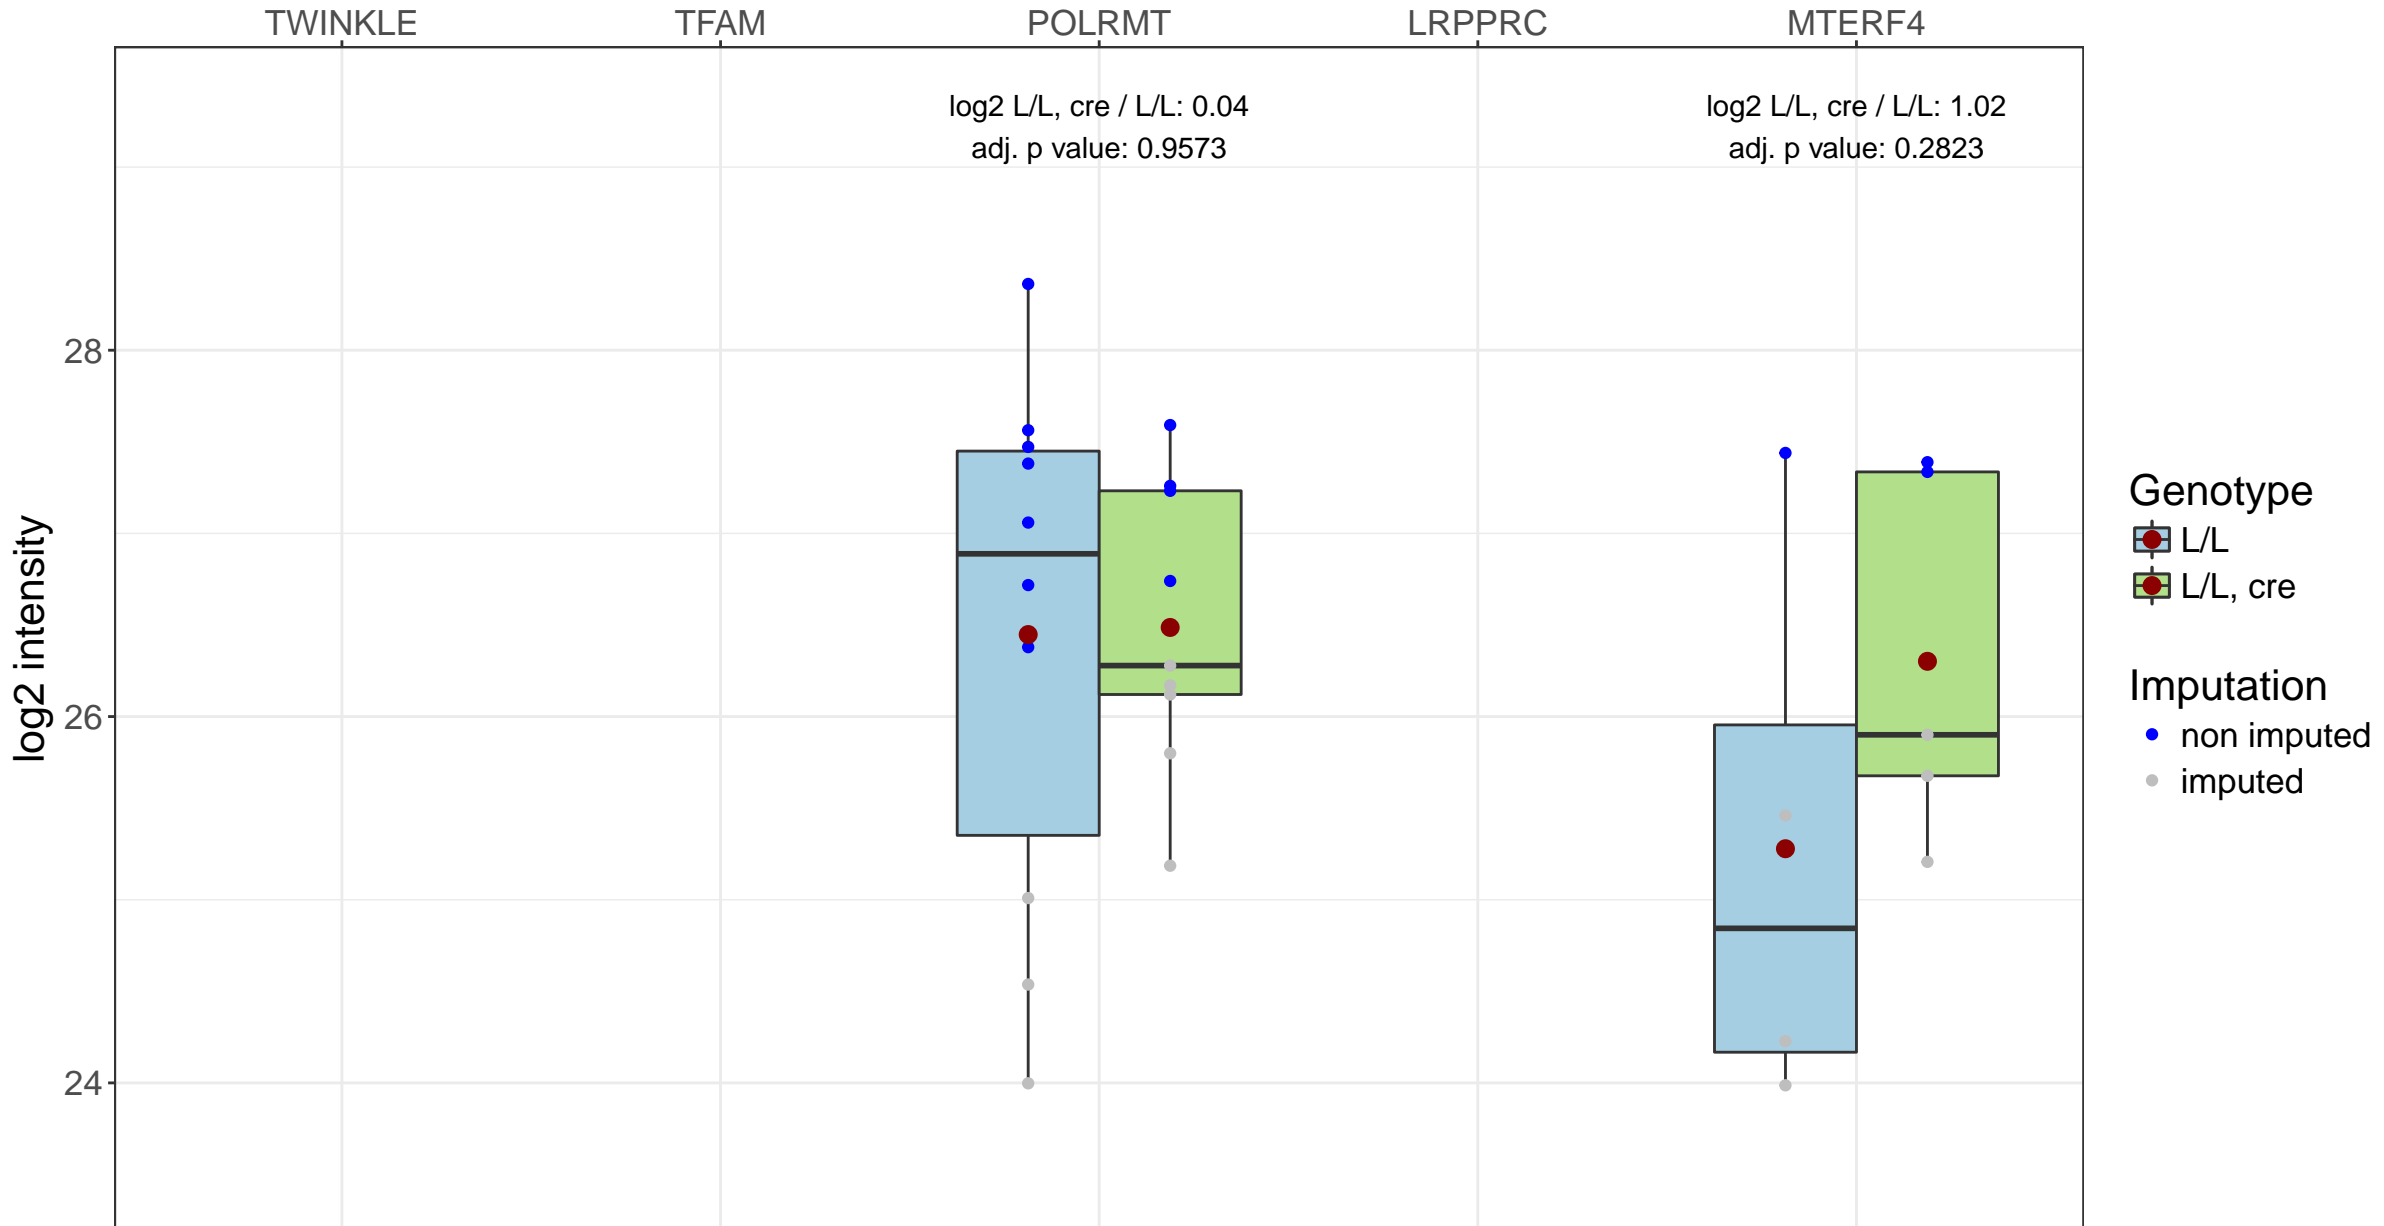

# ANXA7 / Q07076

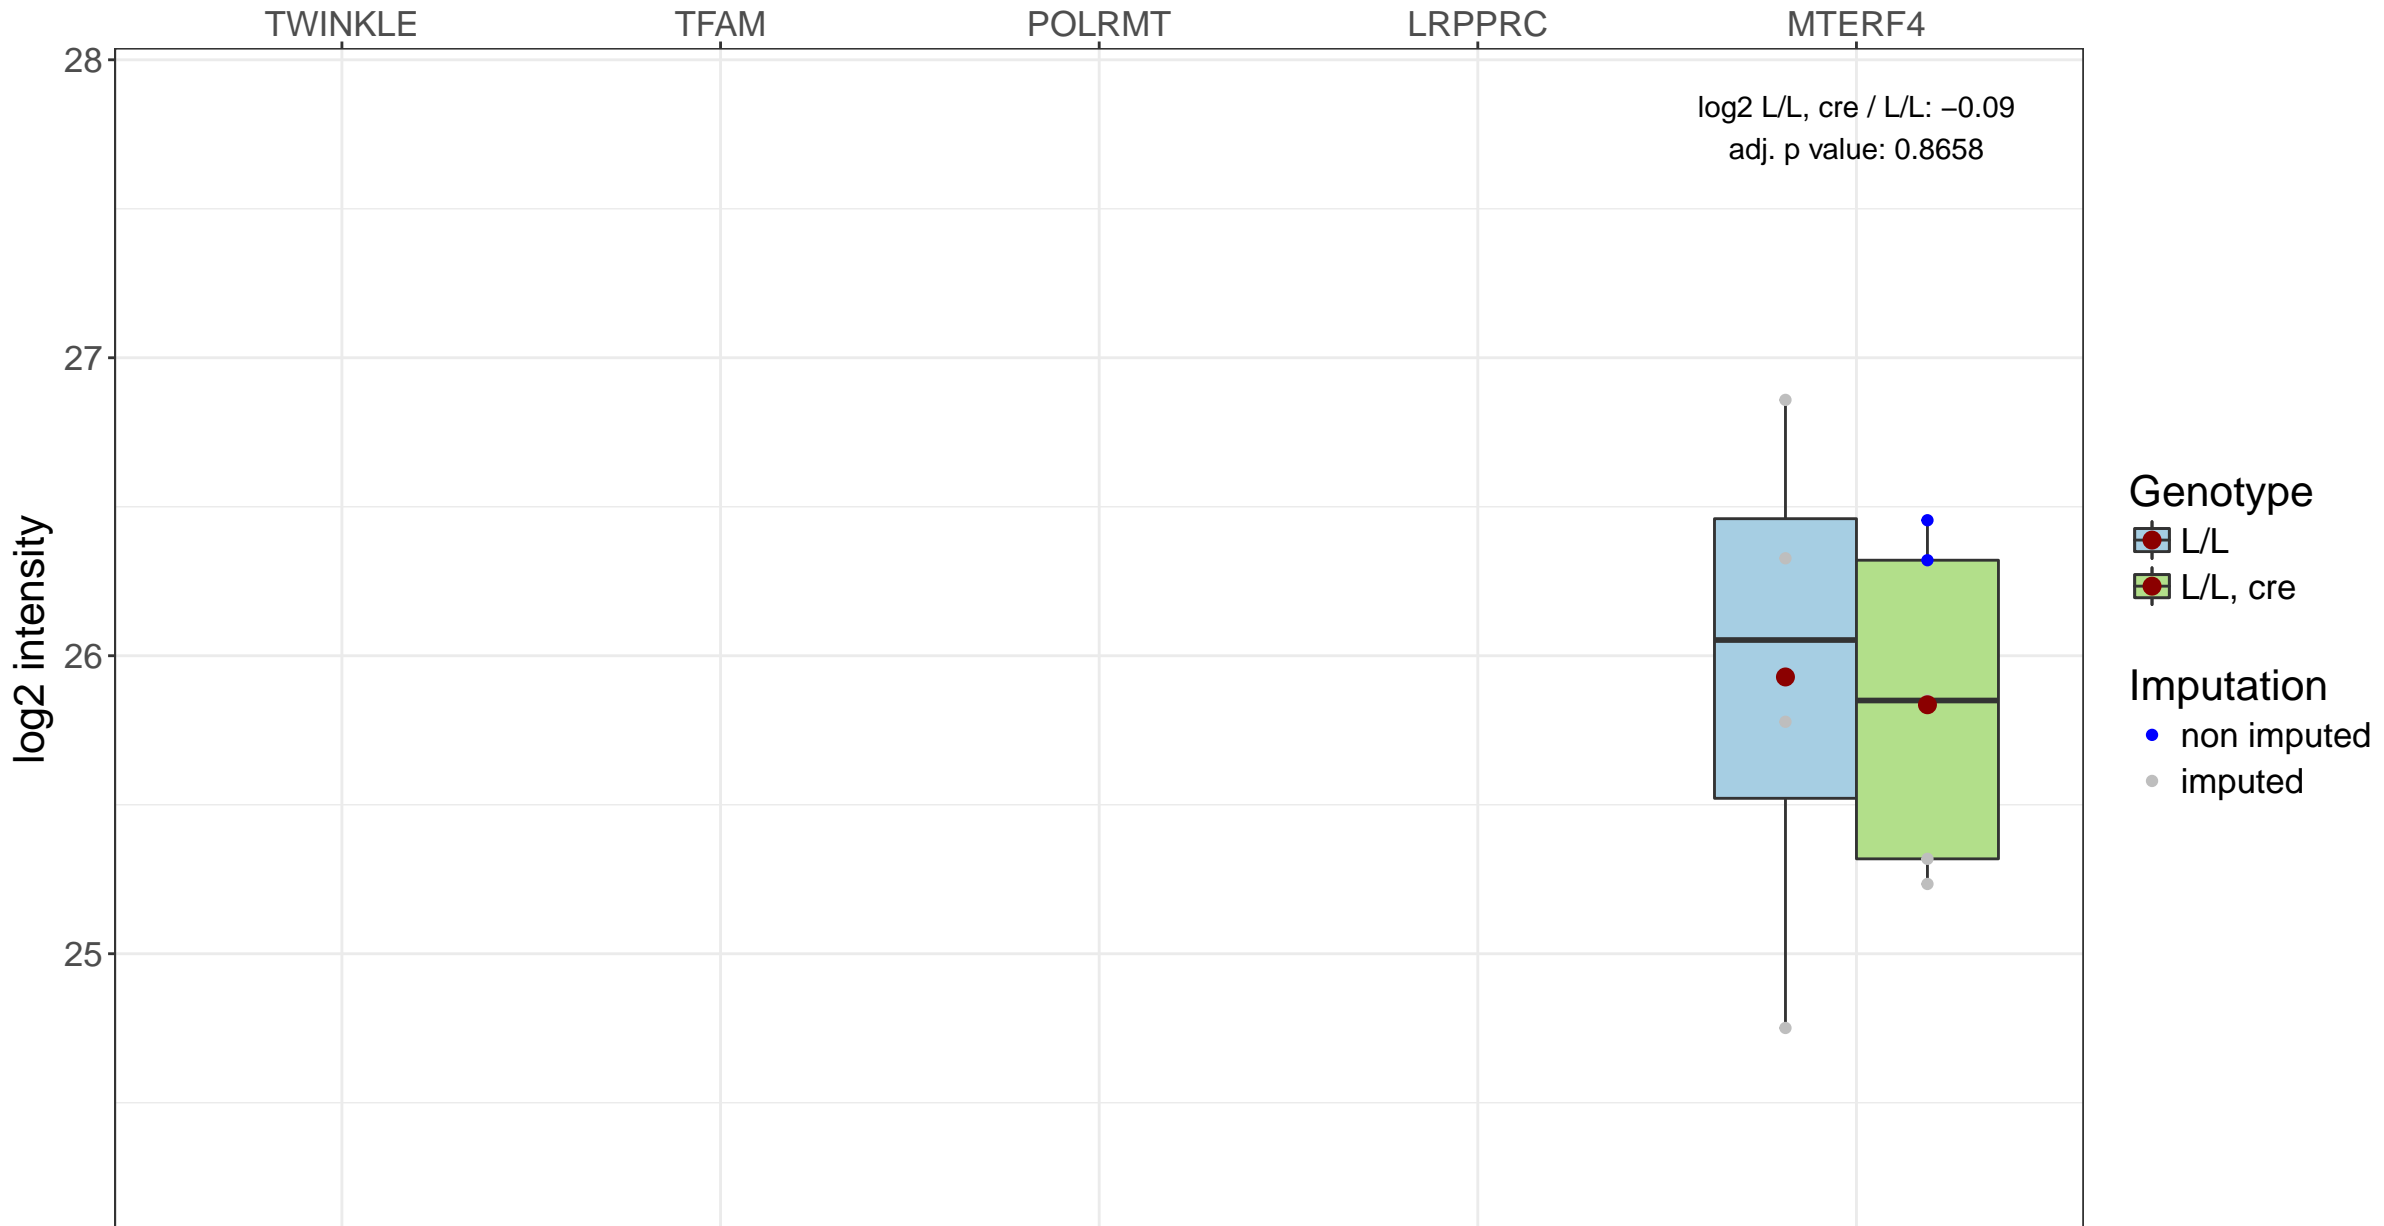

# APOA1BP / Q8K4Z3

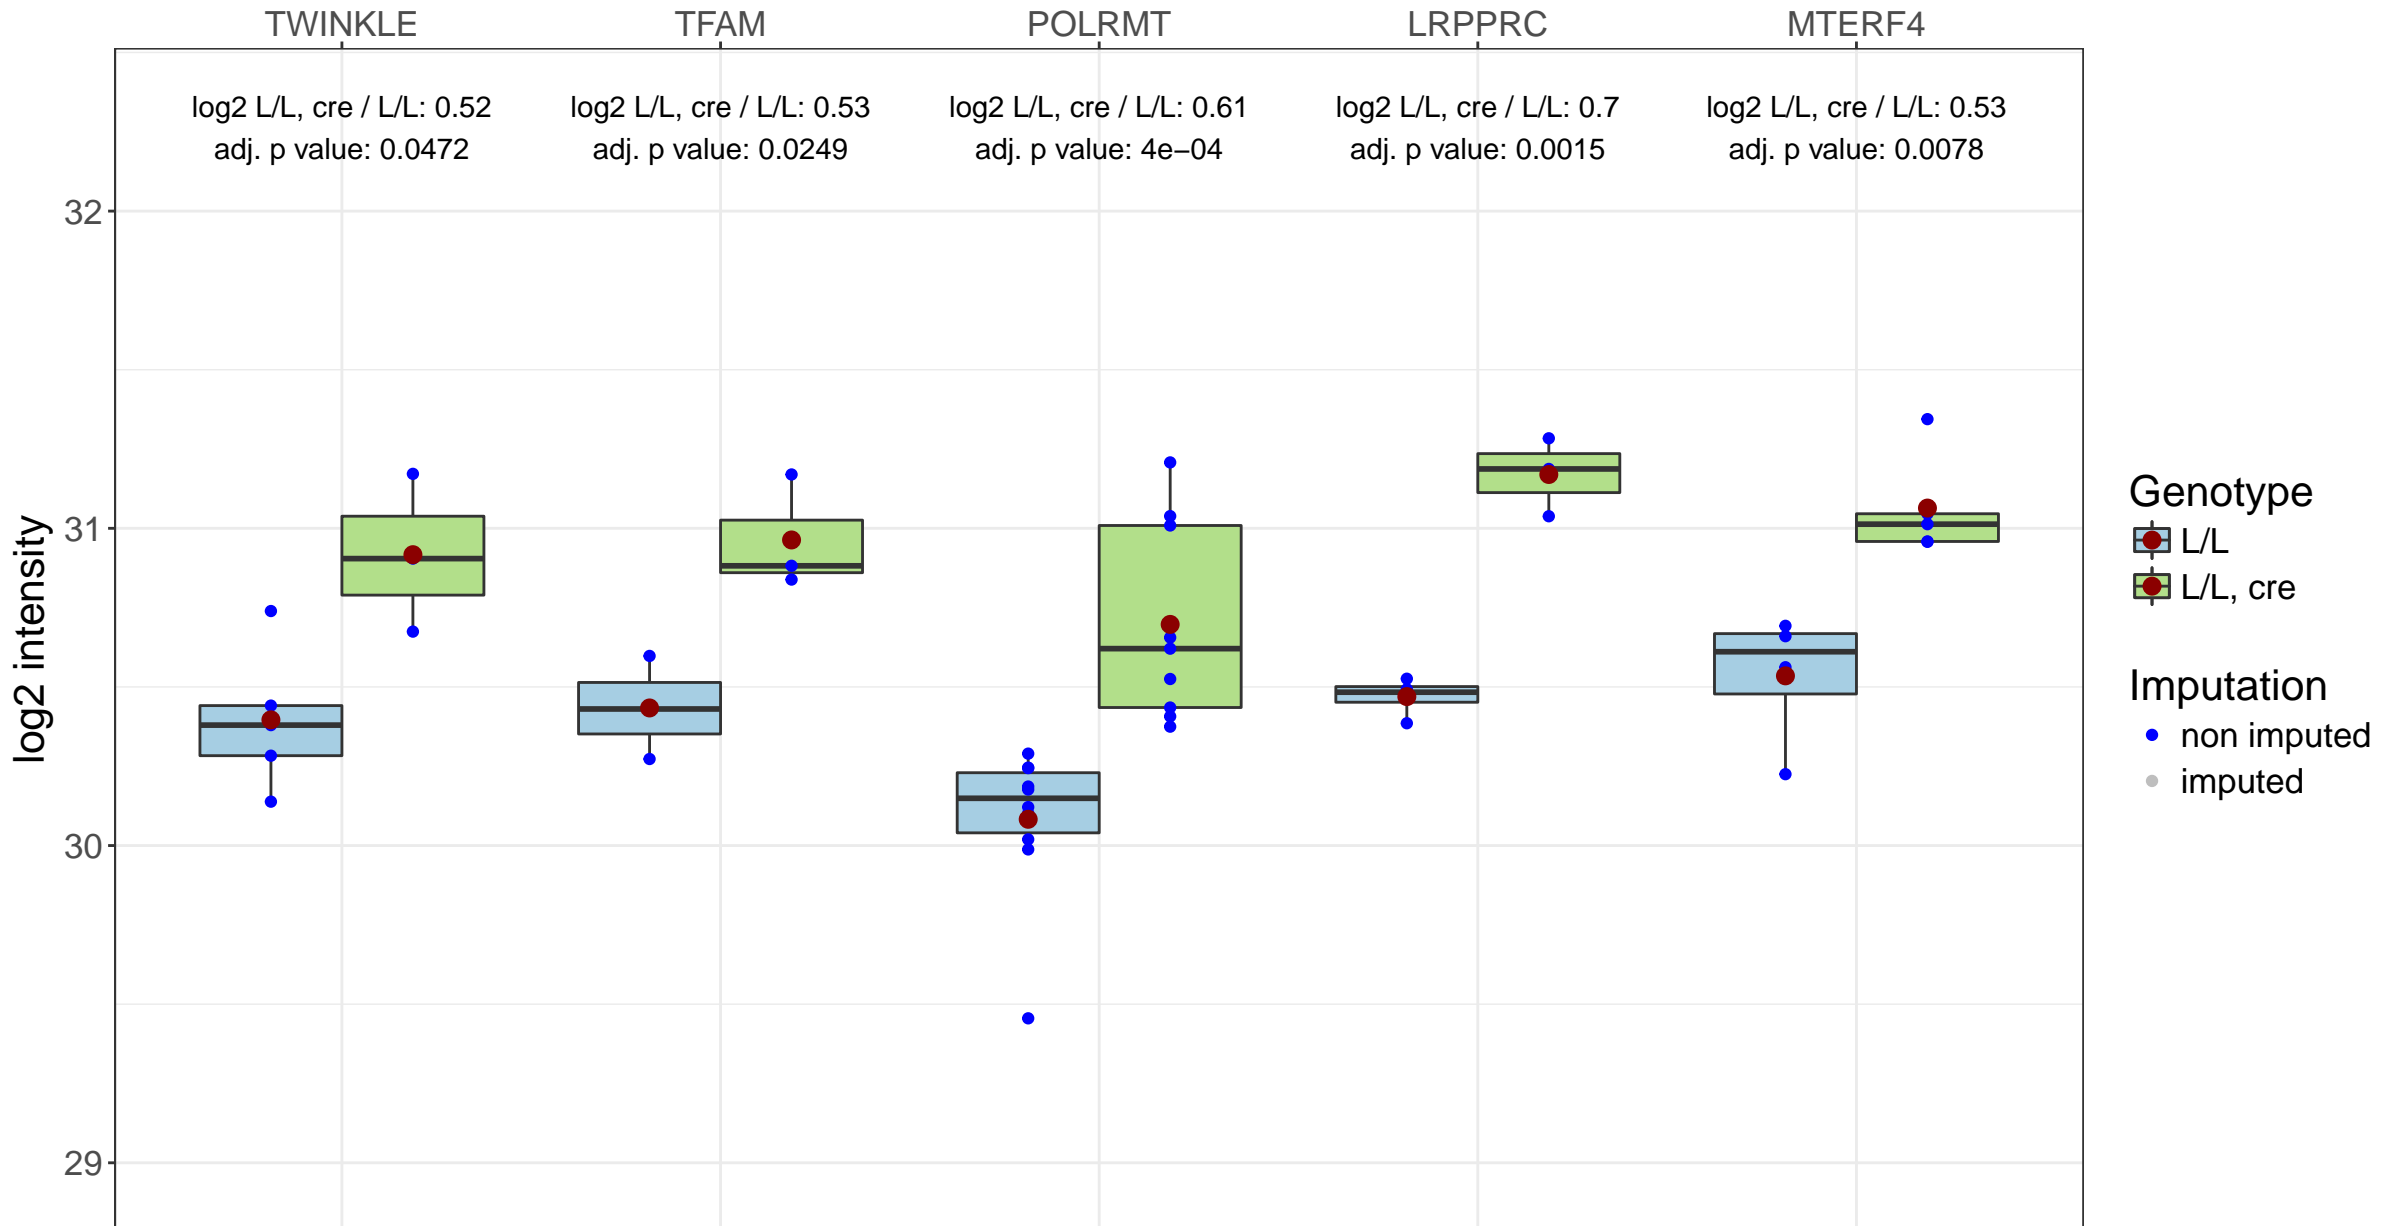

# APOH / Q01339

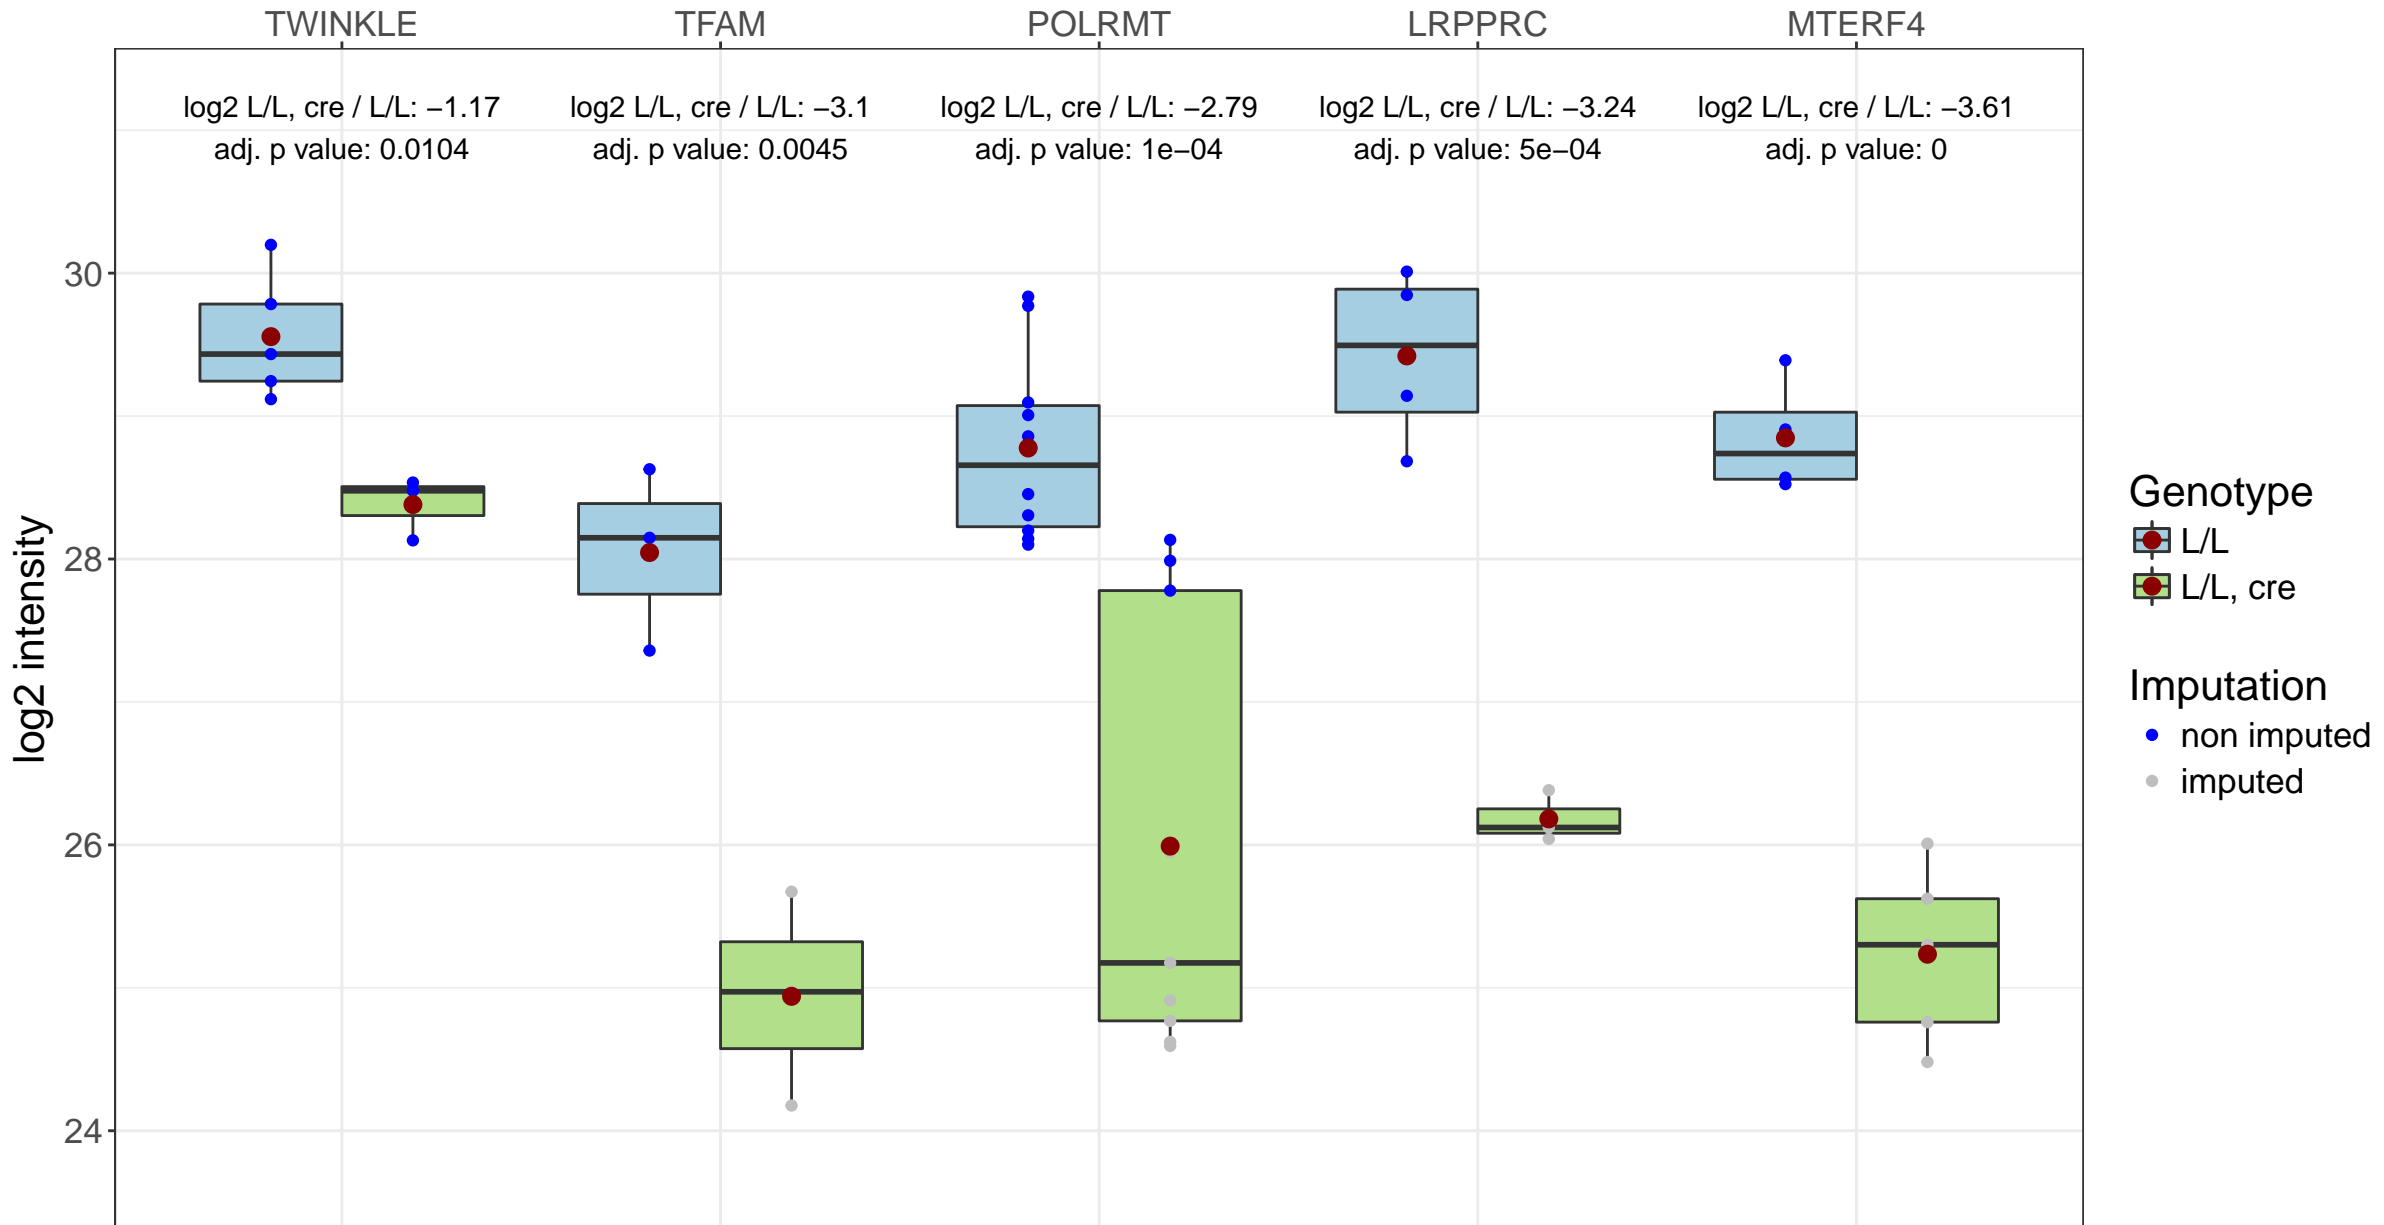

# APOO / Q9D186

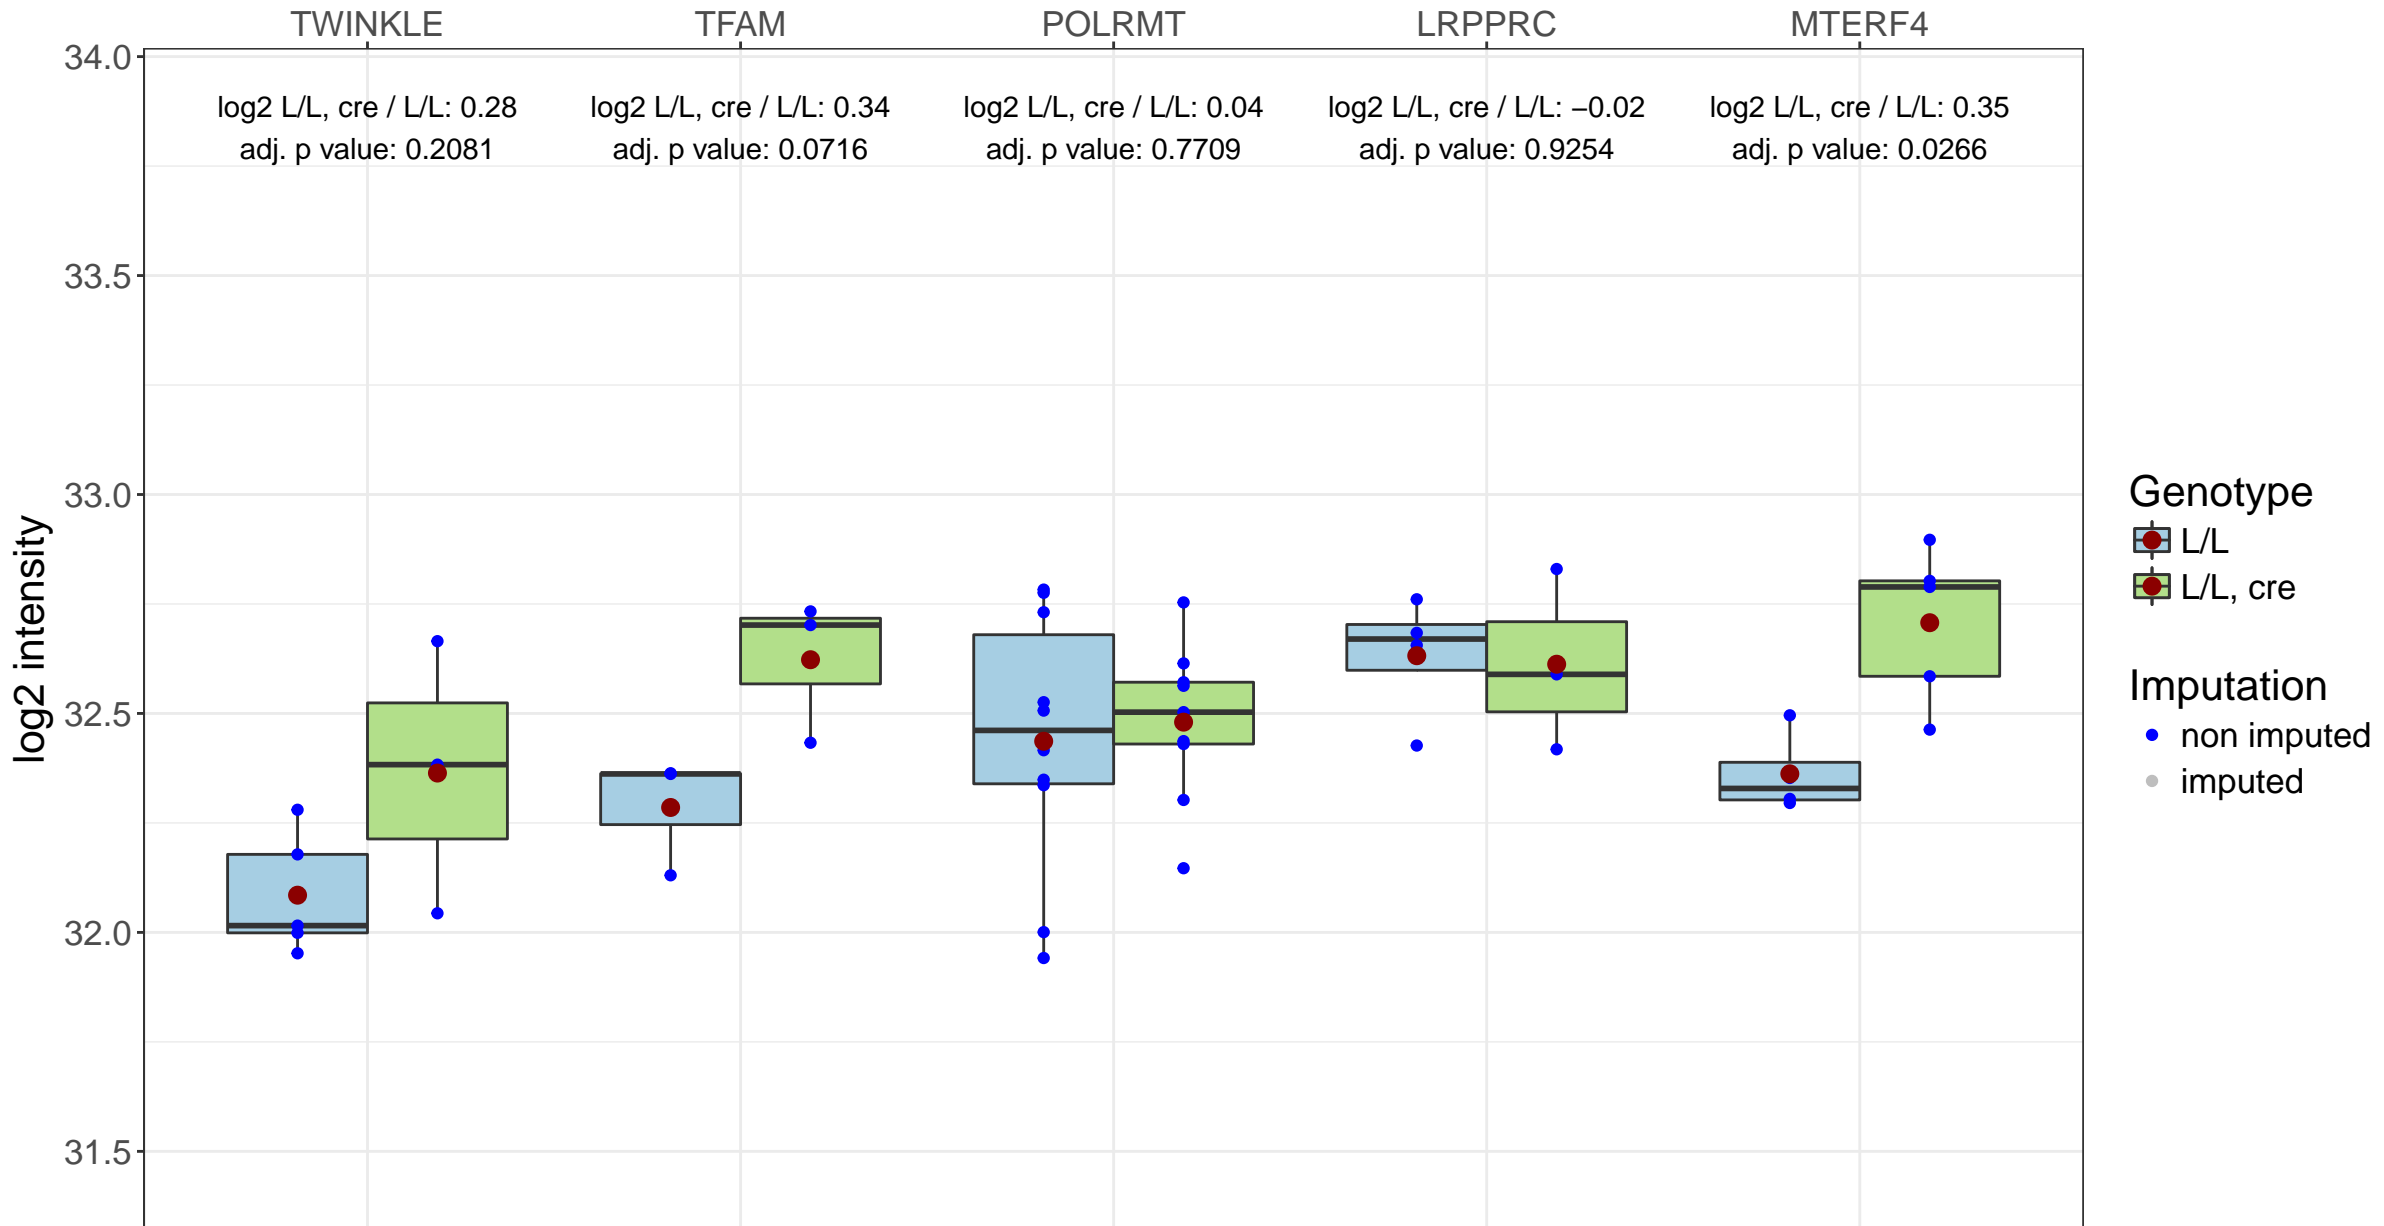

# APOOL / Q78IK4

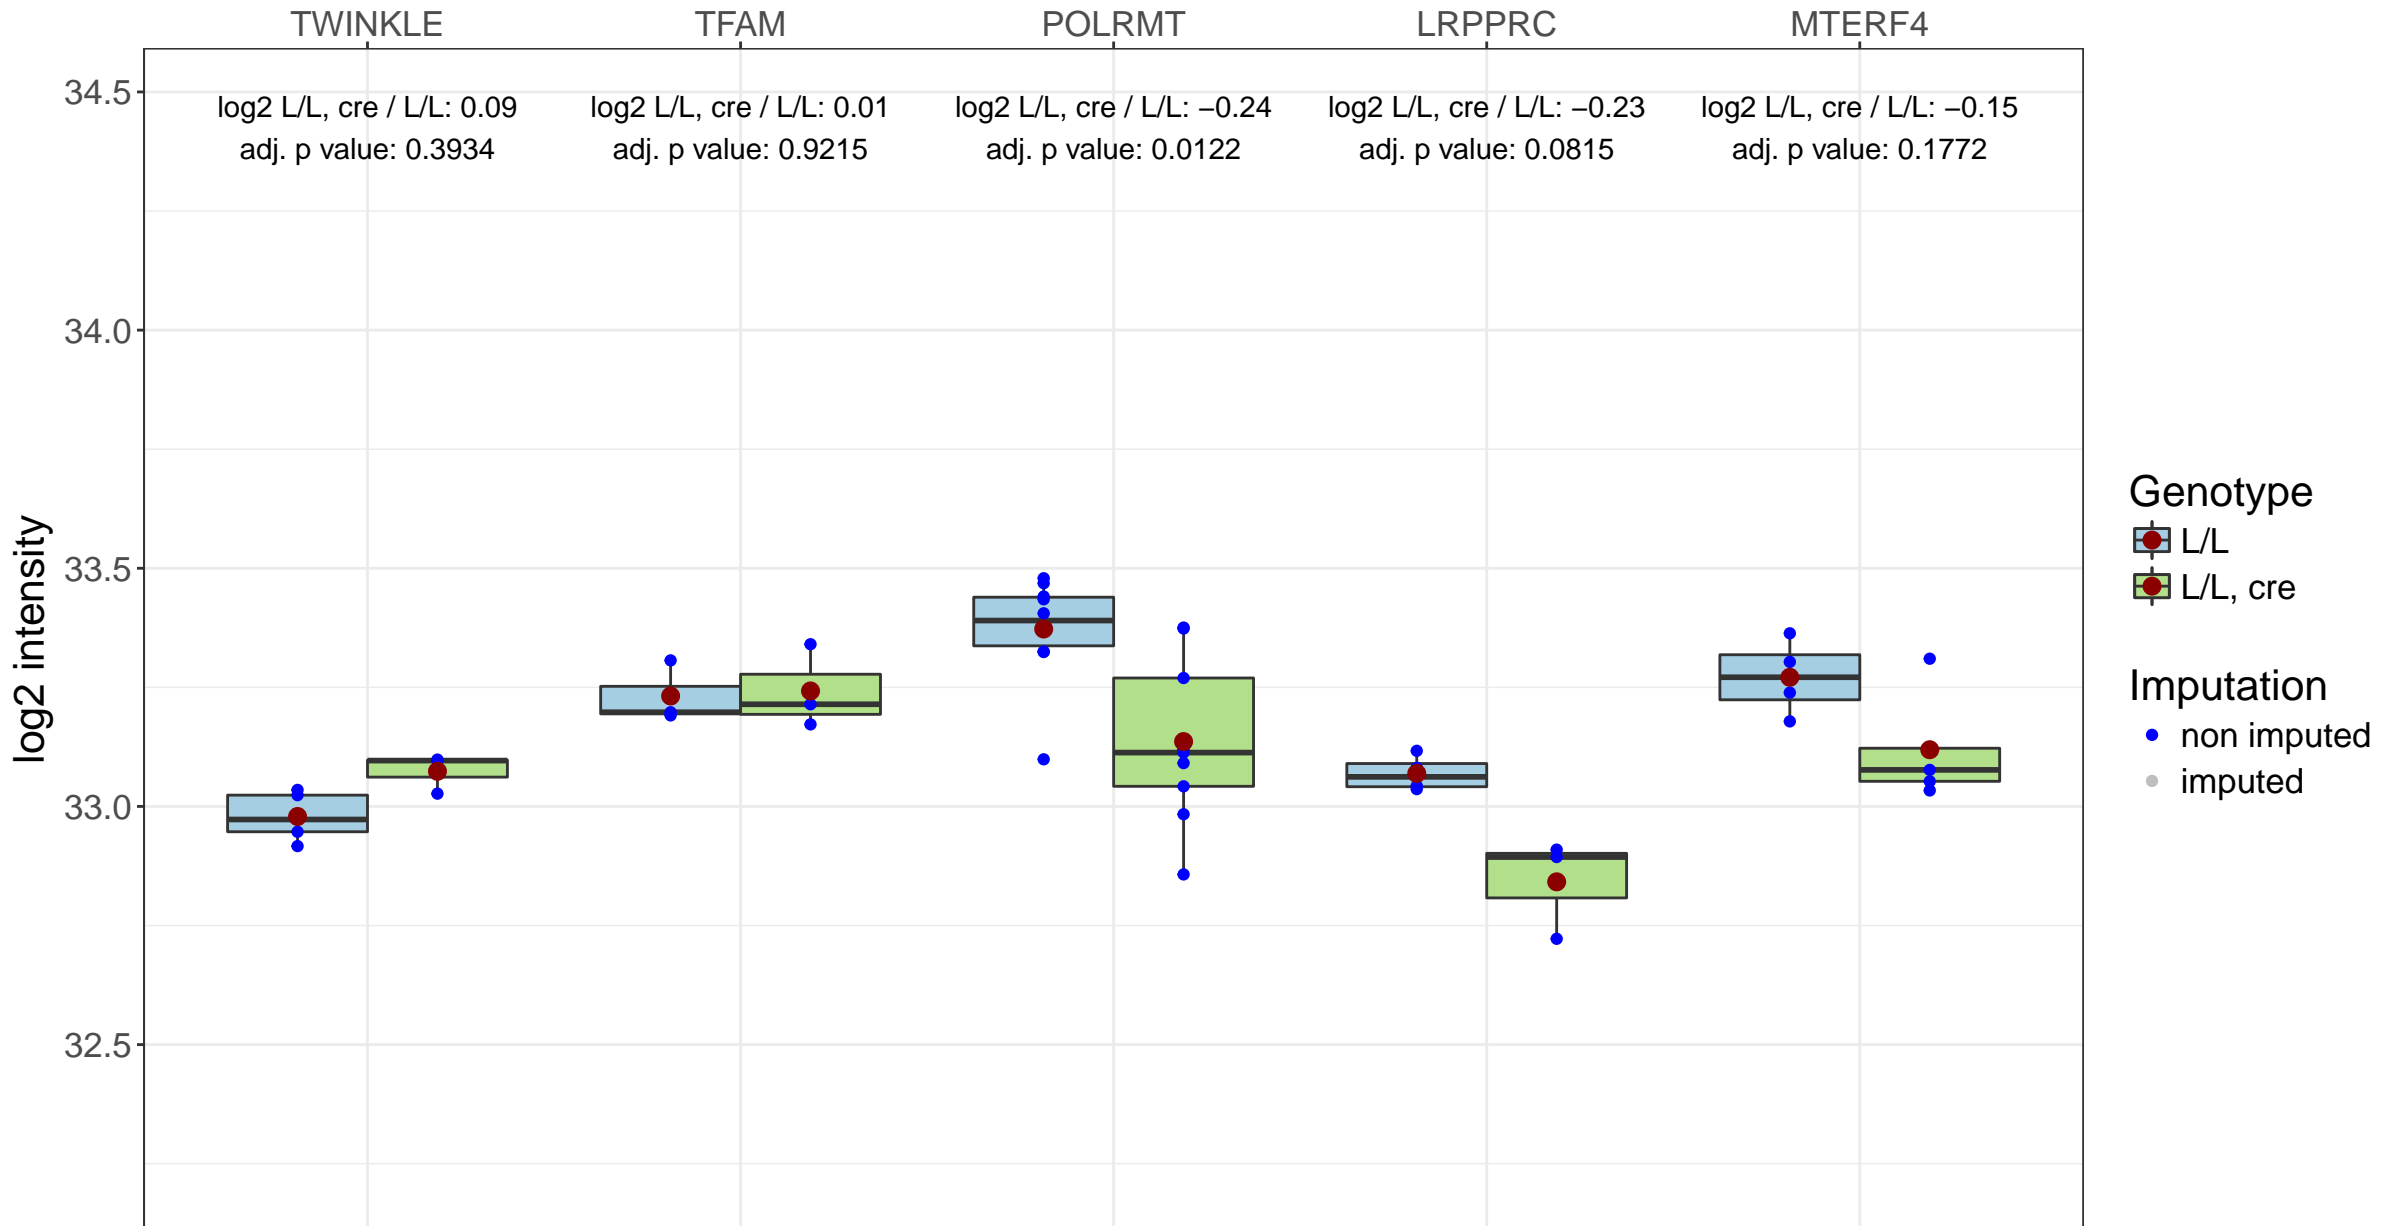

# ARMC1 / Q9D7A8

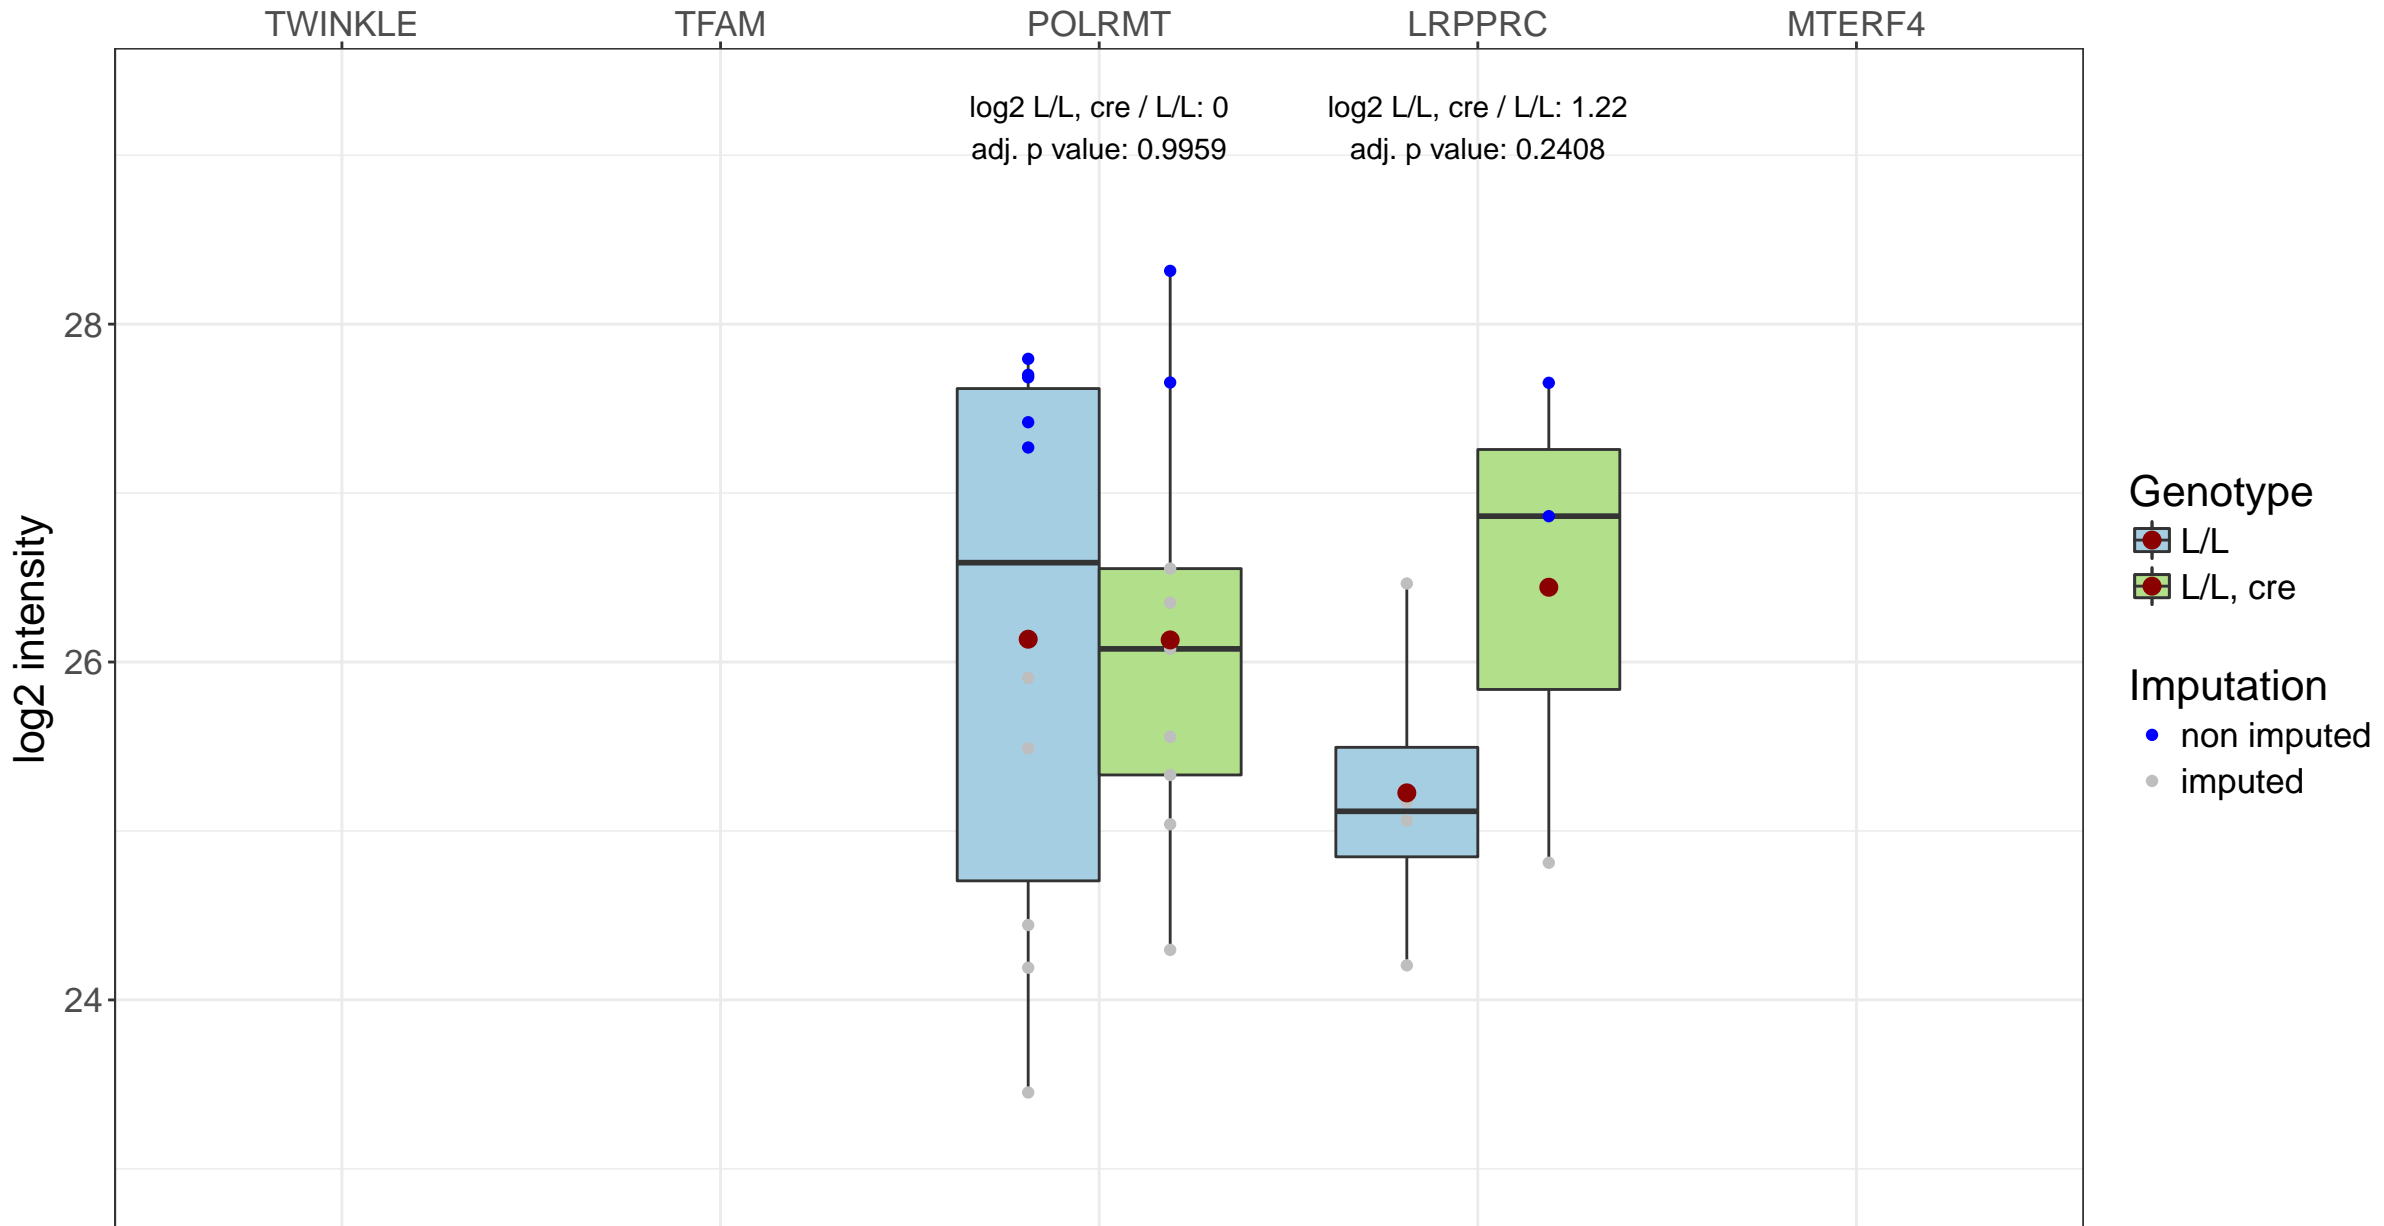

# ARMC10 / Q9D0L7-2

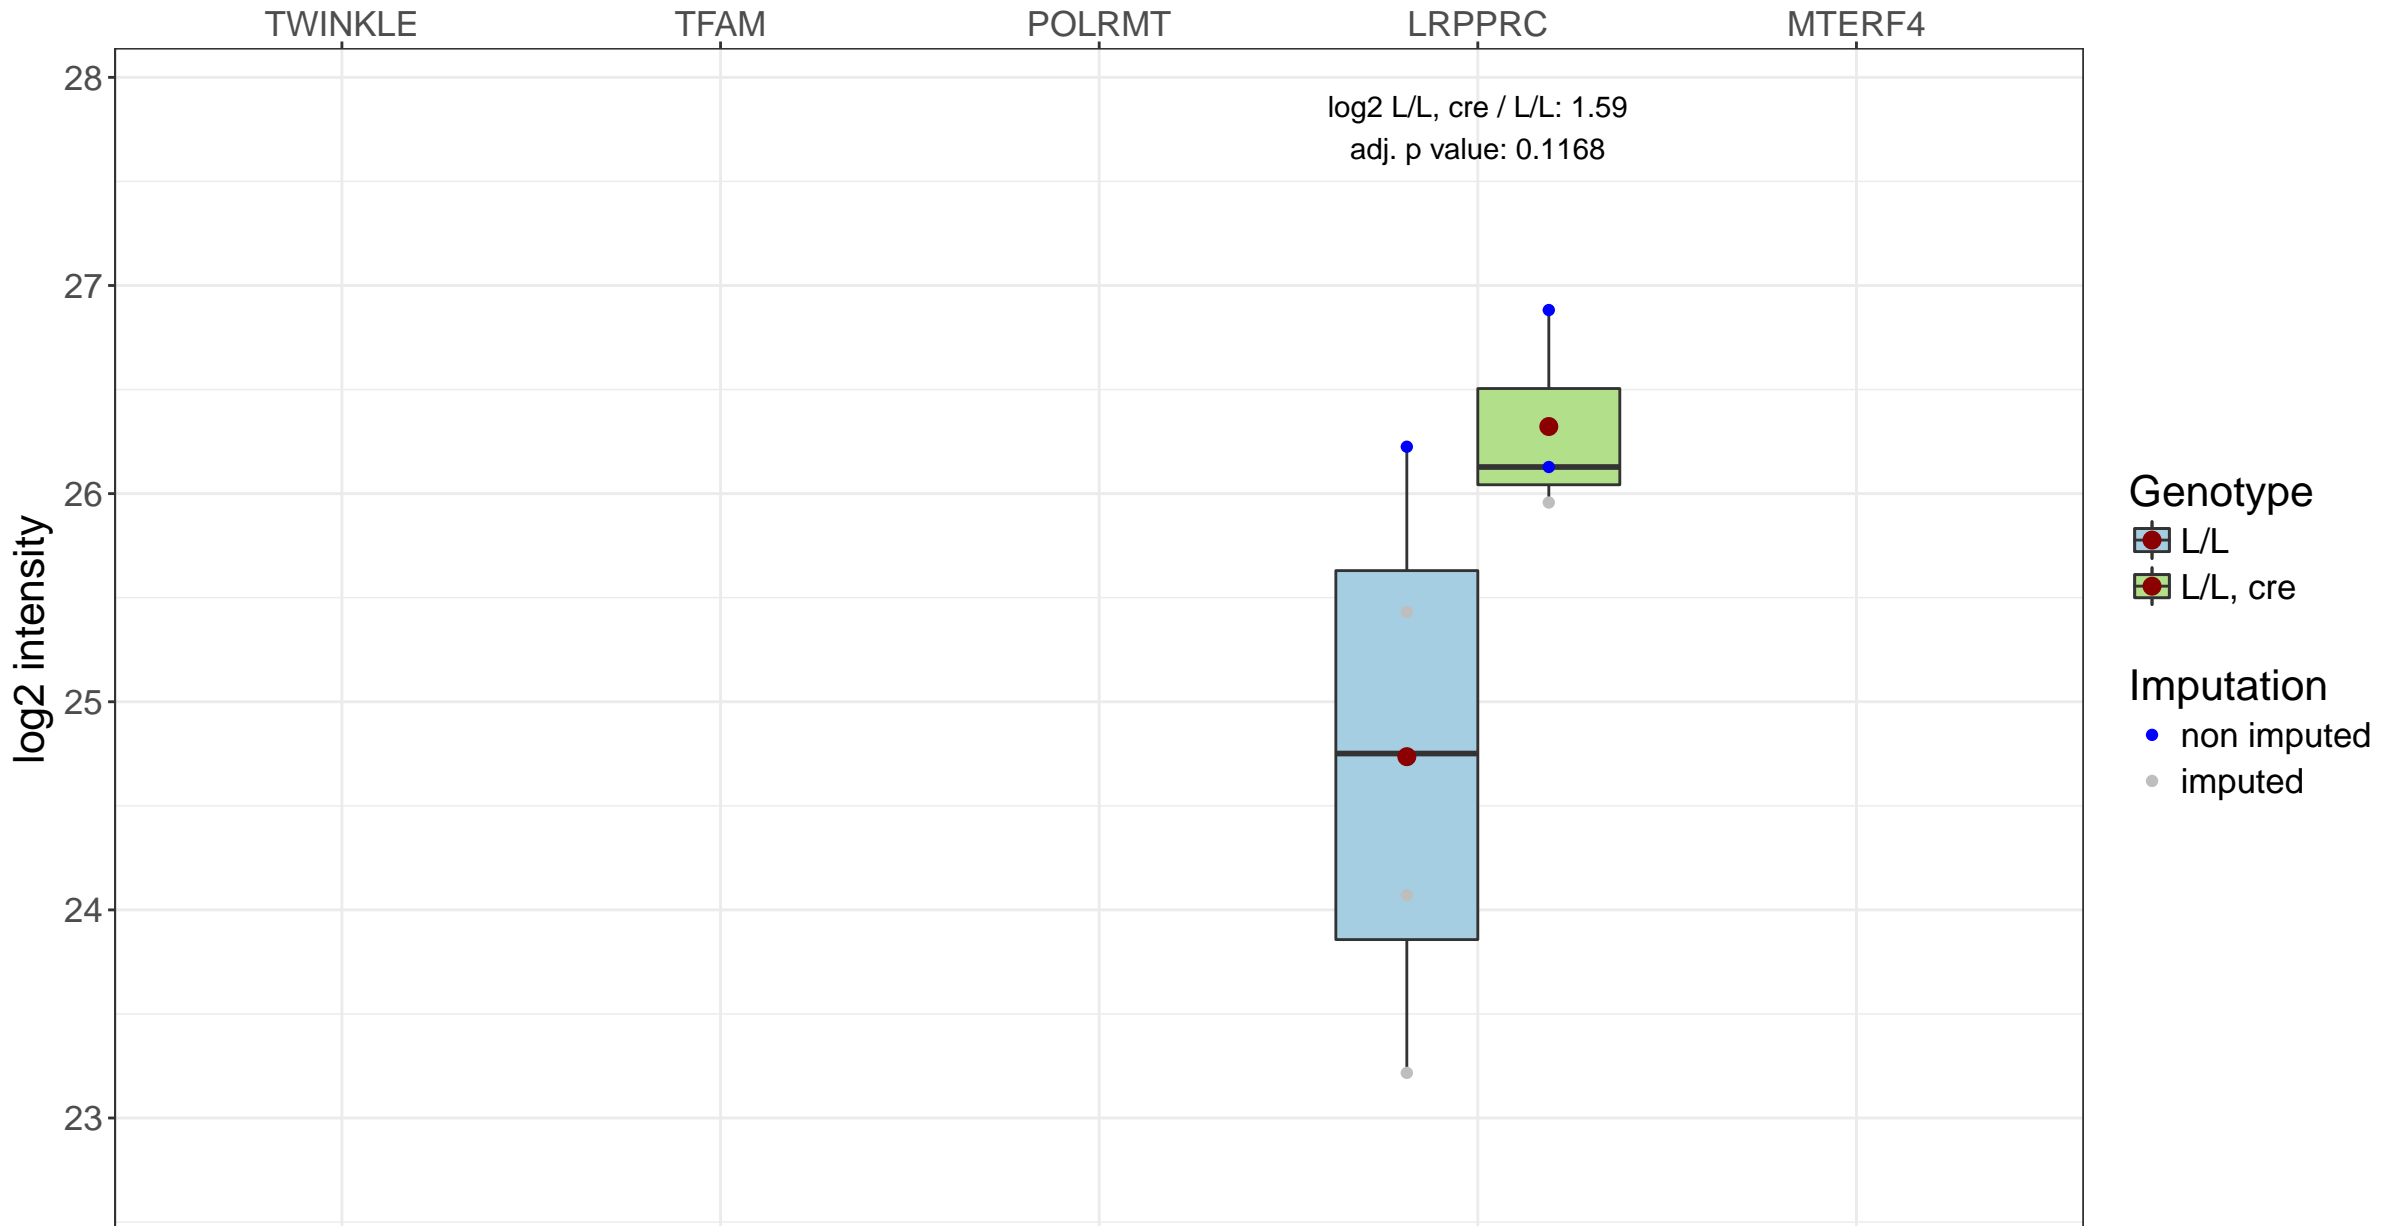



# ASPH / A2AL85

TWINKLE

TFAM

POLRMT

LRPPRC

MTERF4

log2 intensity

27  
26  
25  
24

log2 L/L, cre / L/L: -0.19  
adj. p value: 0.4791

Genotype

L/L

L/L, cre

Imputation

non imputed

imputed

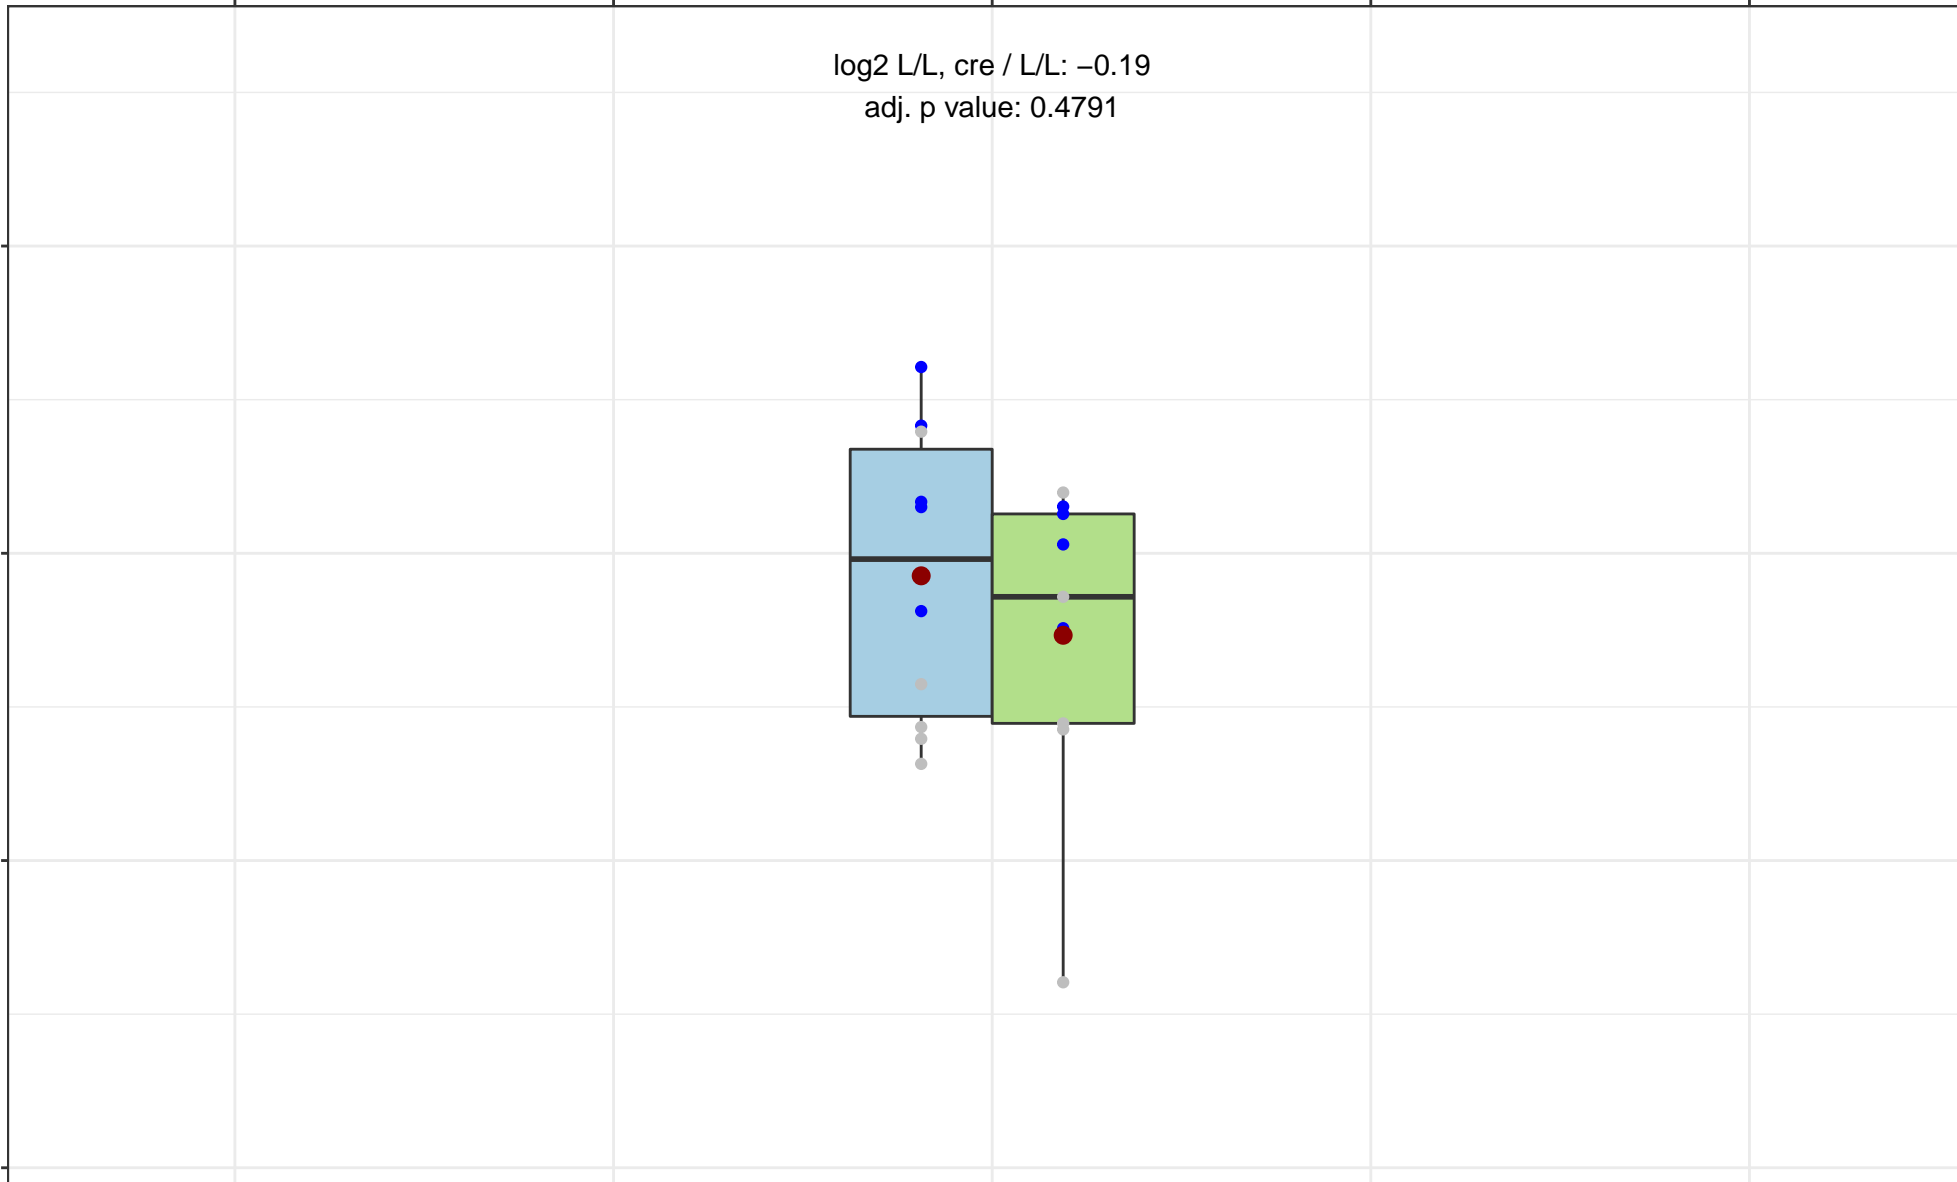

# ATAD1 / Q9D5T0

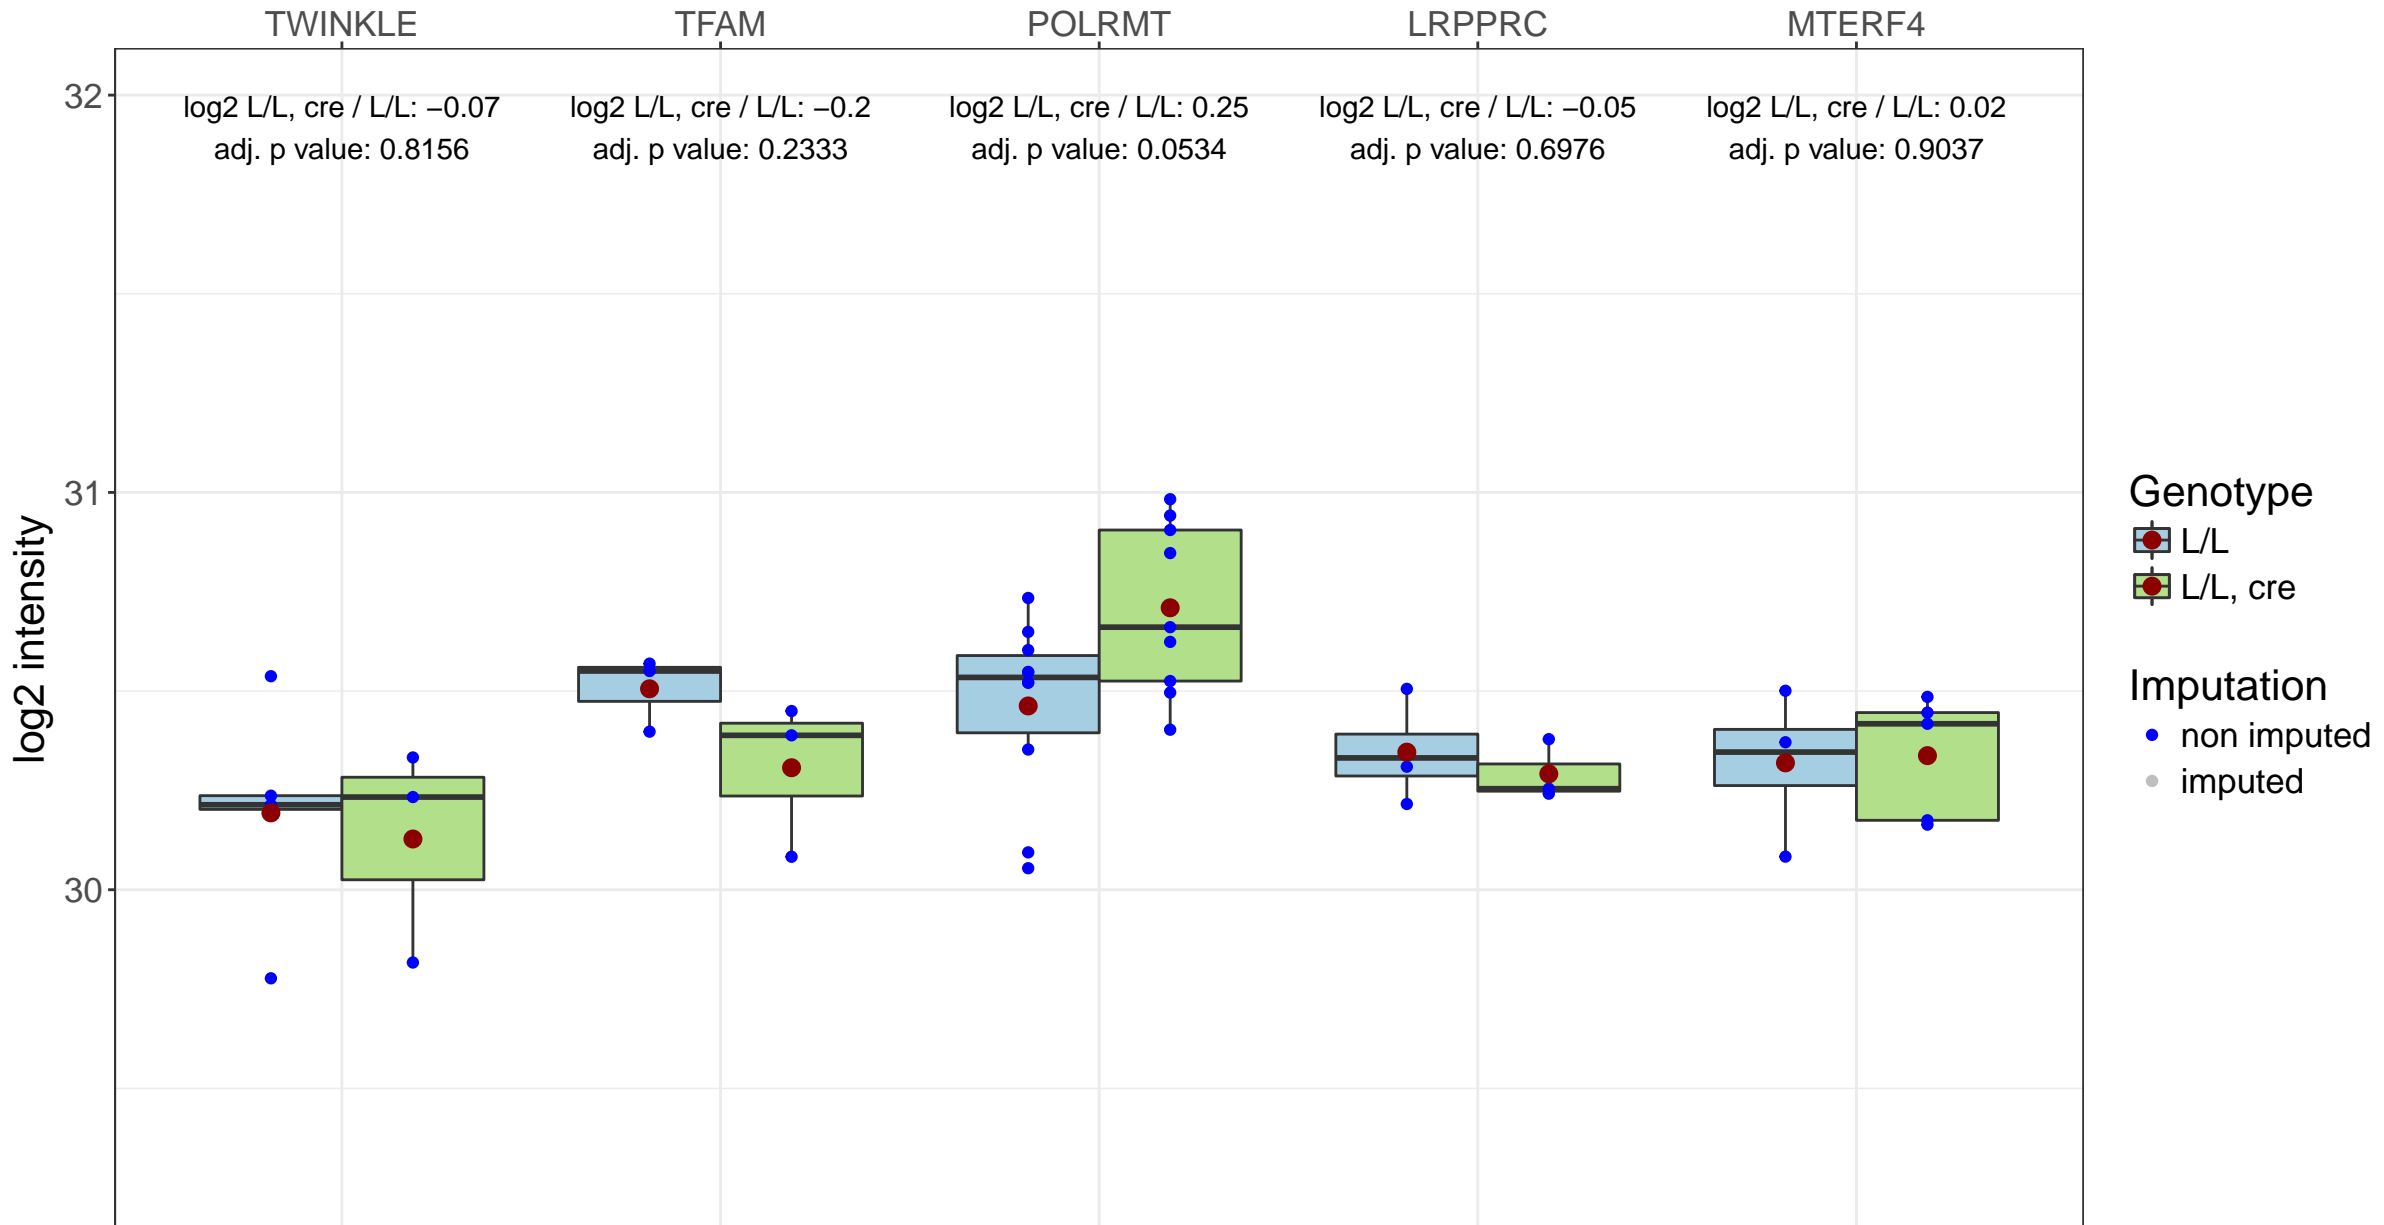

# ATAD3 / Q925I1

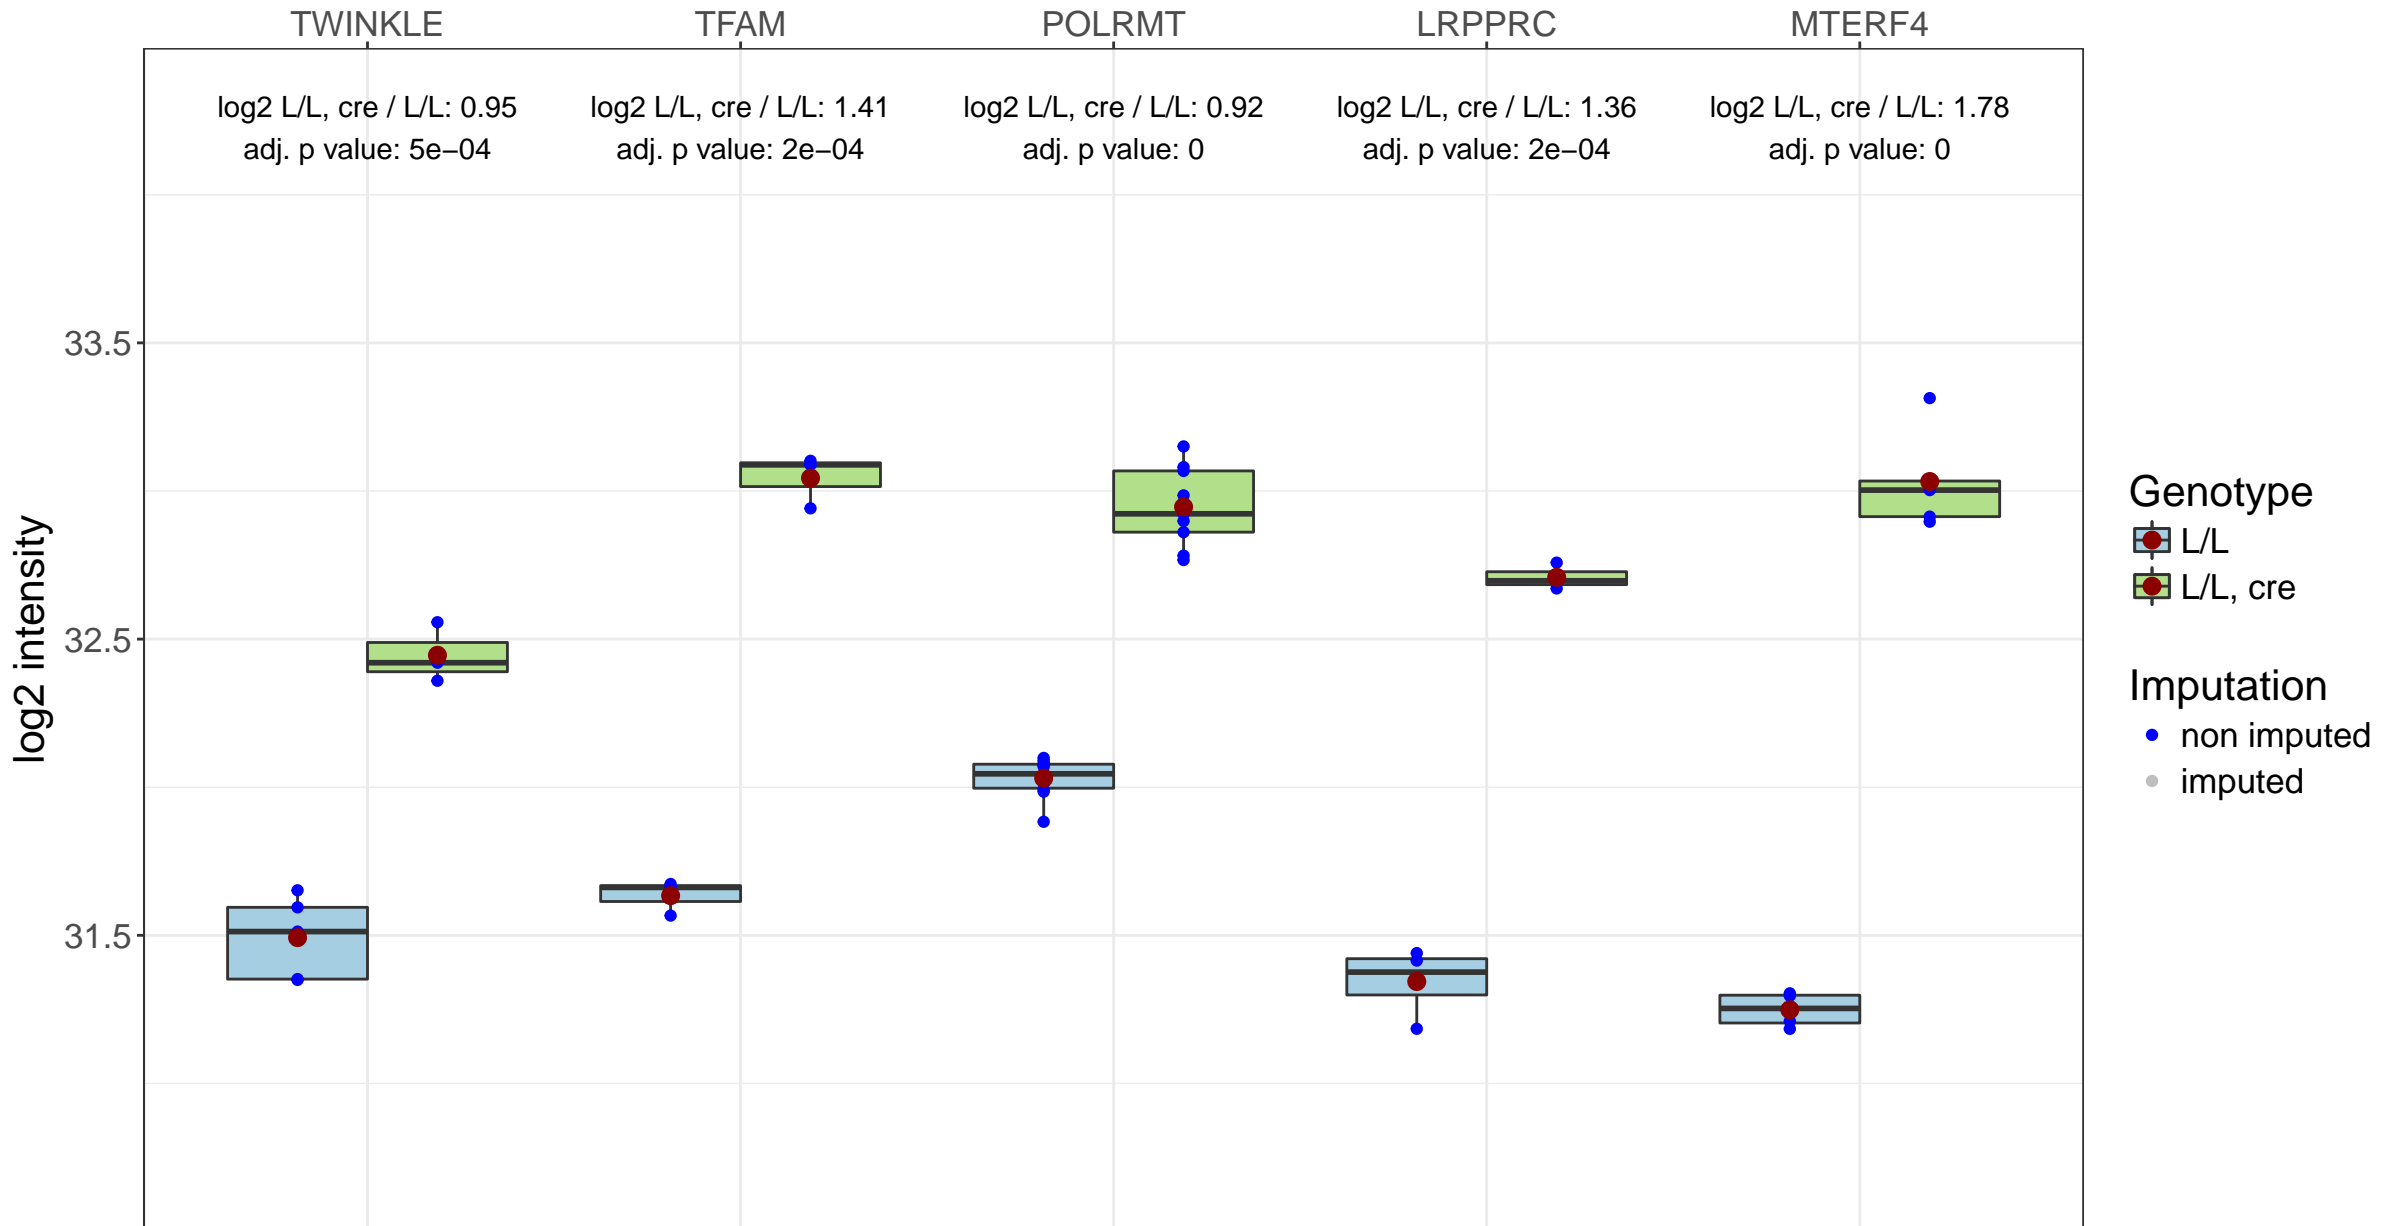

# ATP1A1 / Q8VDN2

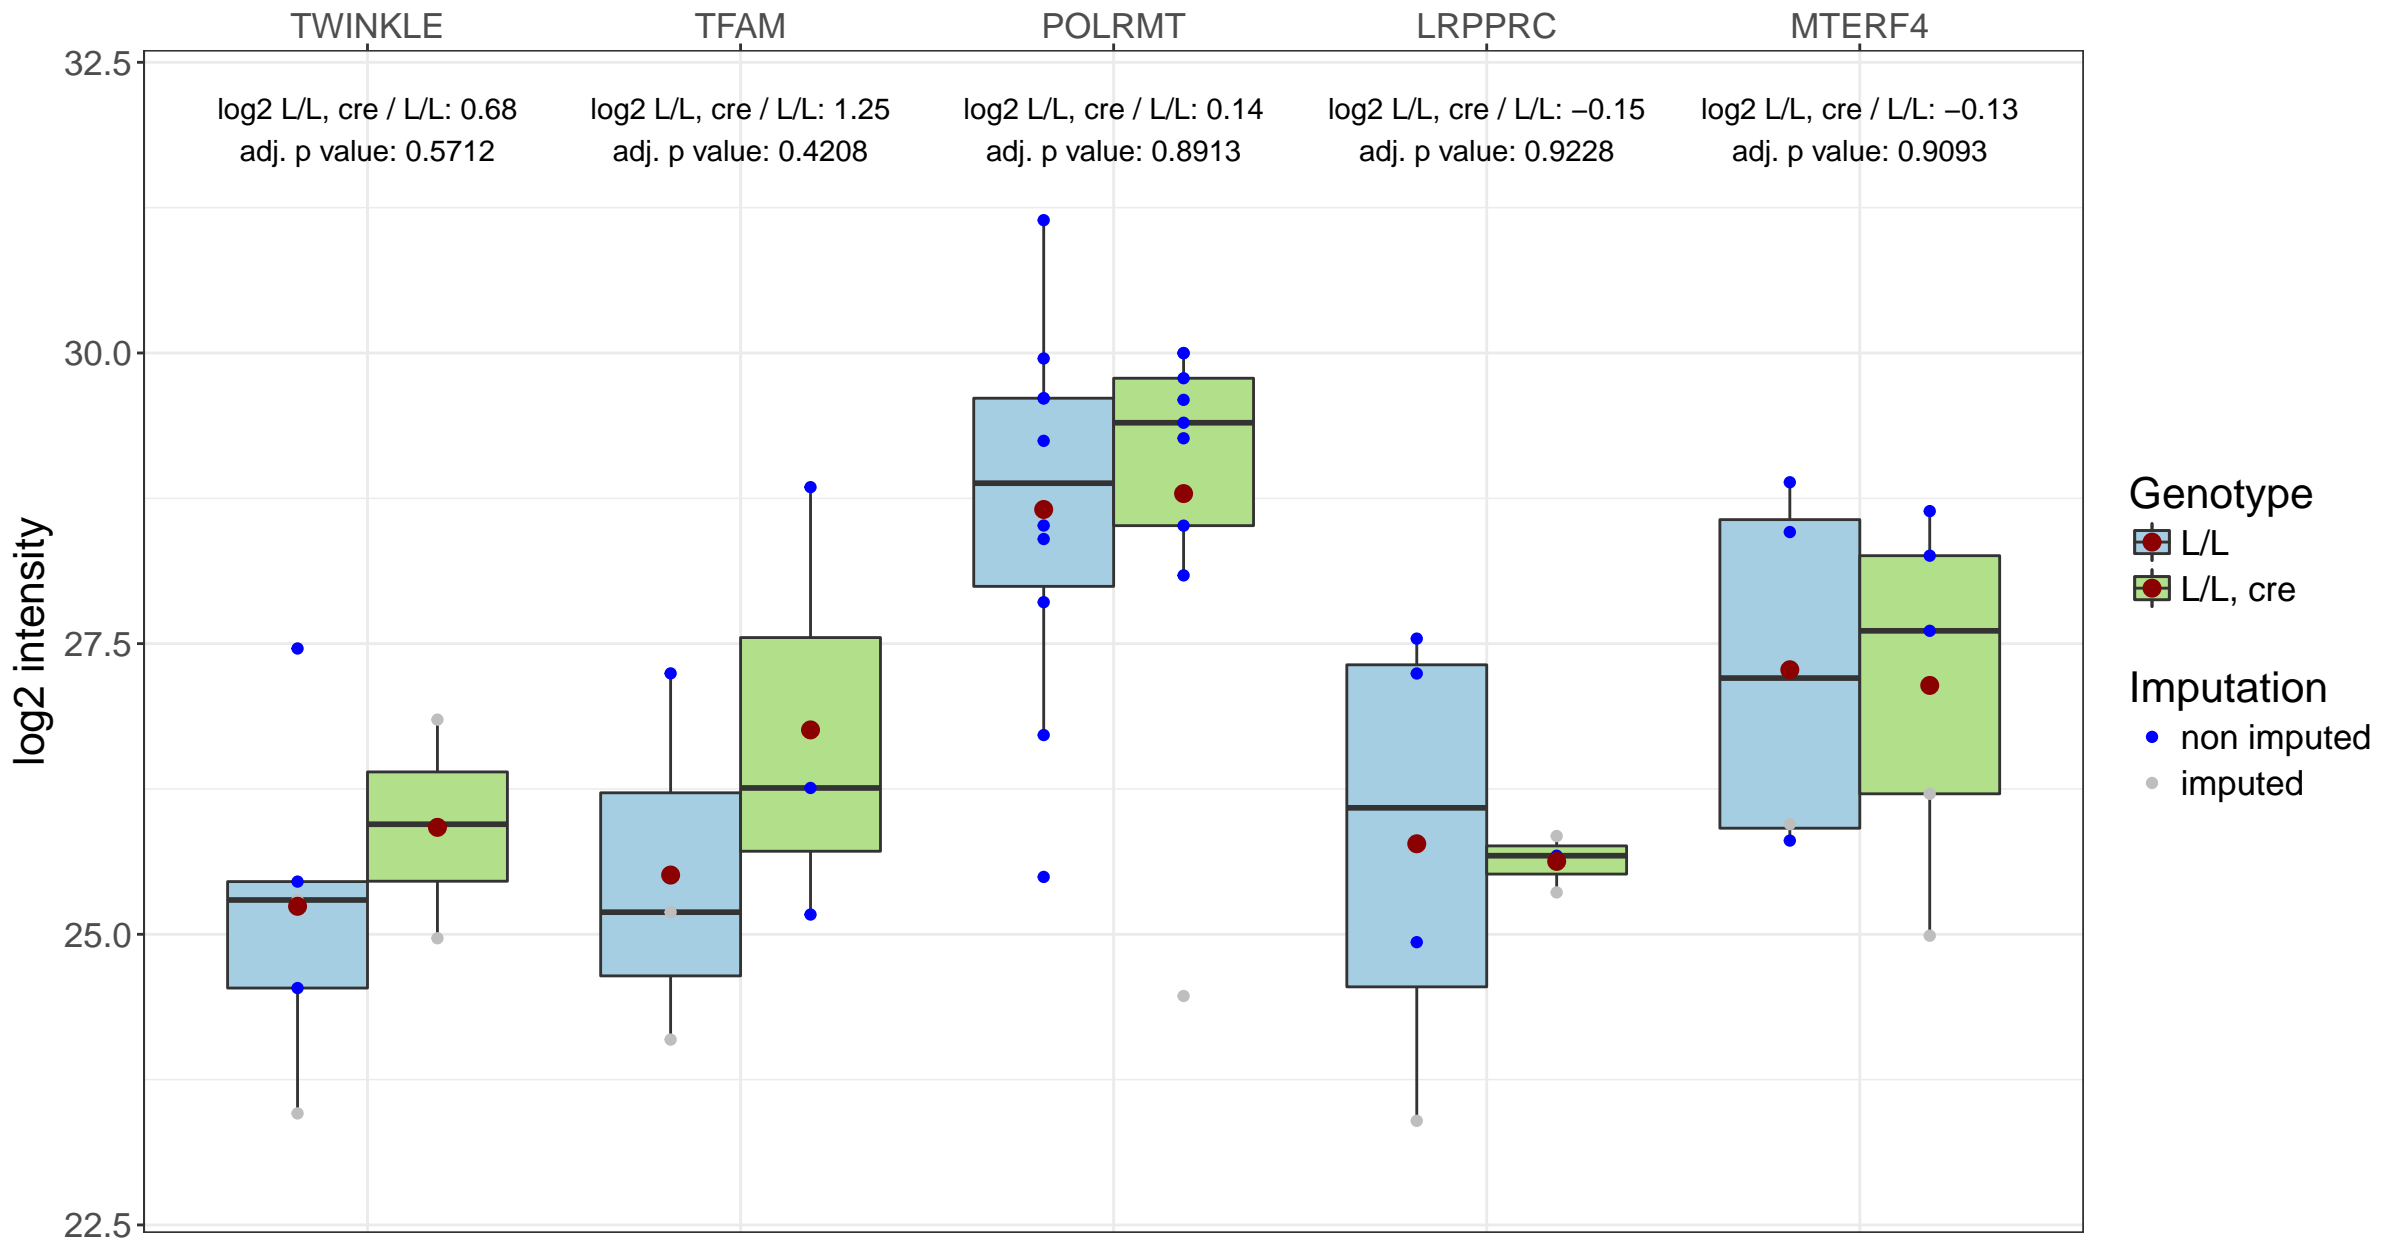

# ATP1B1 / P14094

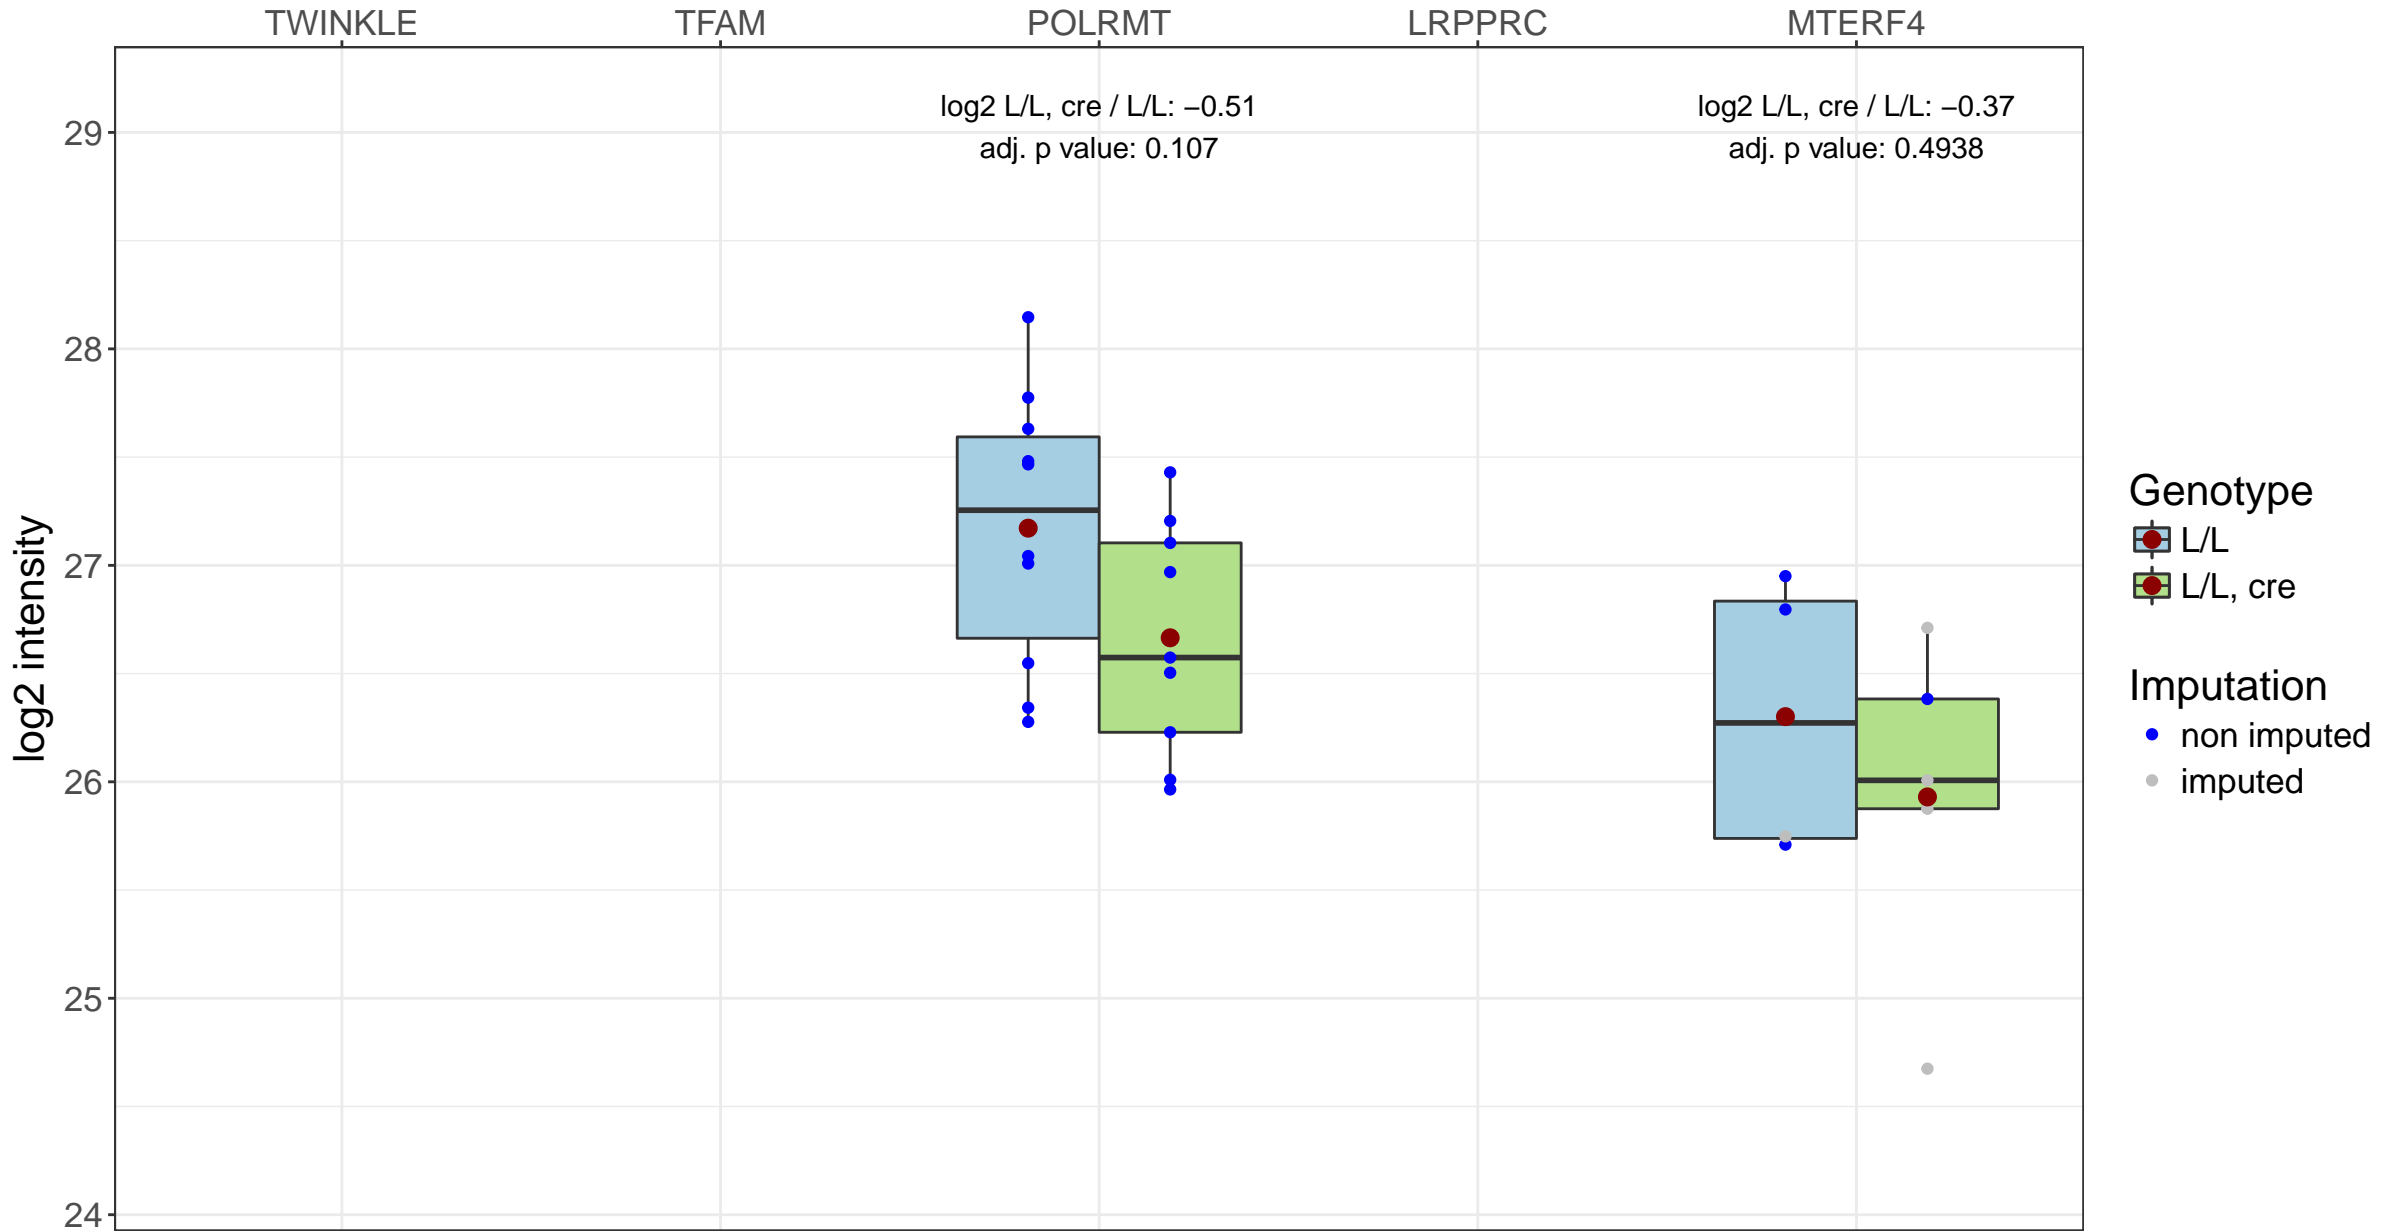

# ATP2A2 / O55143

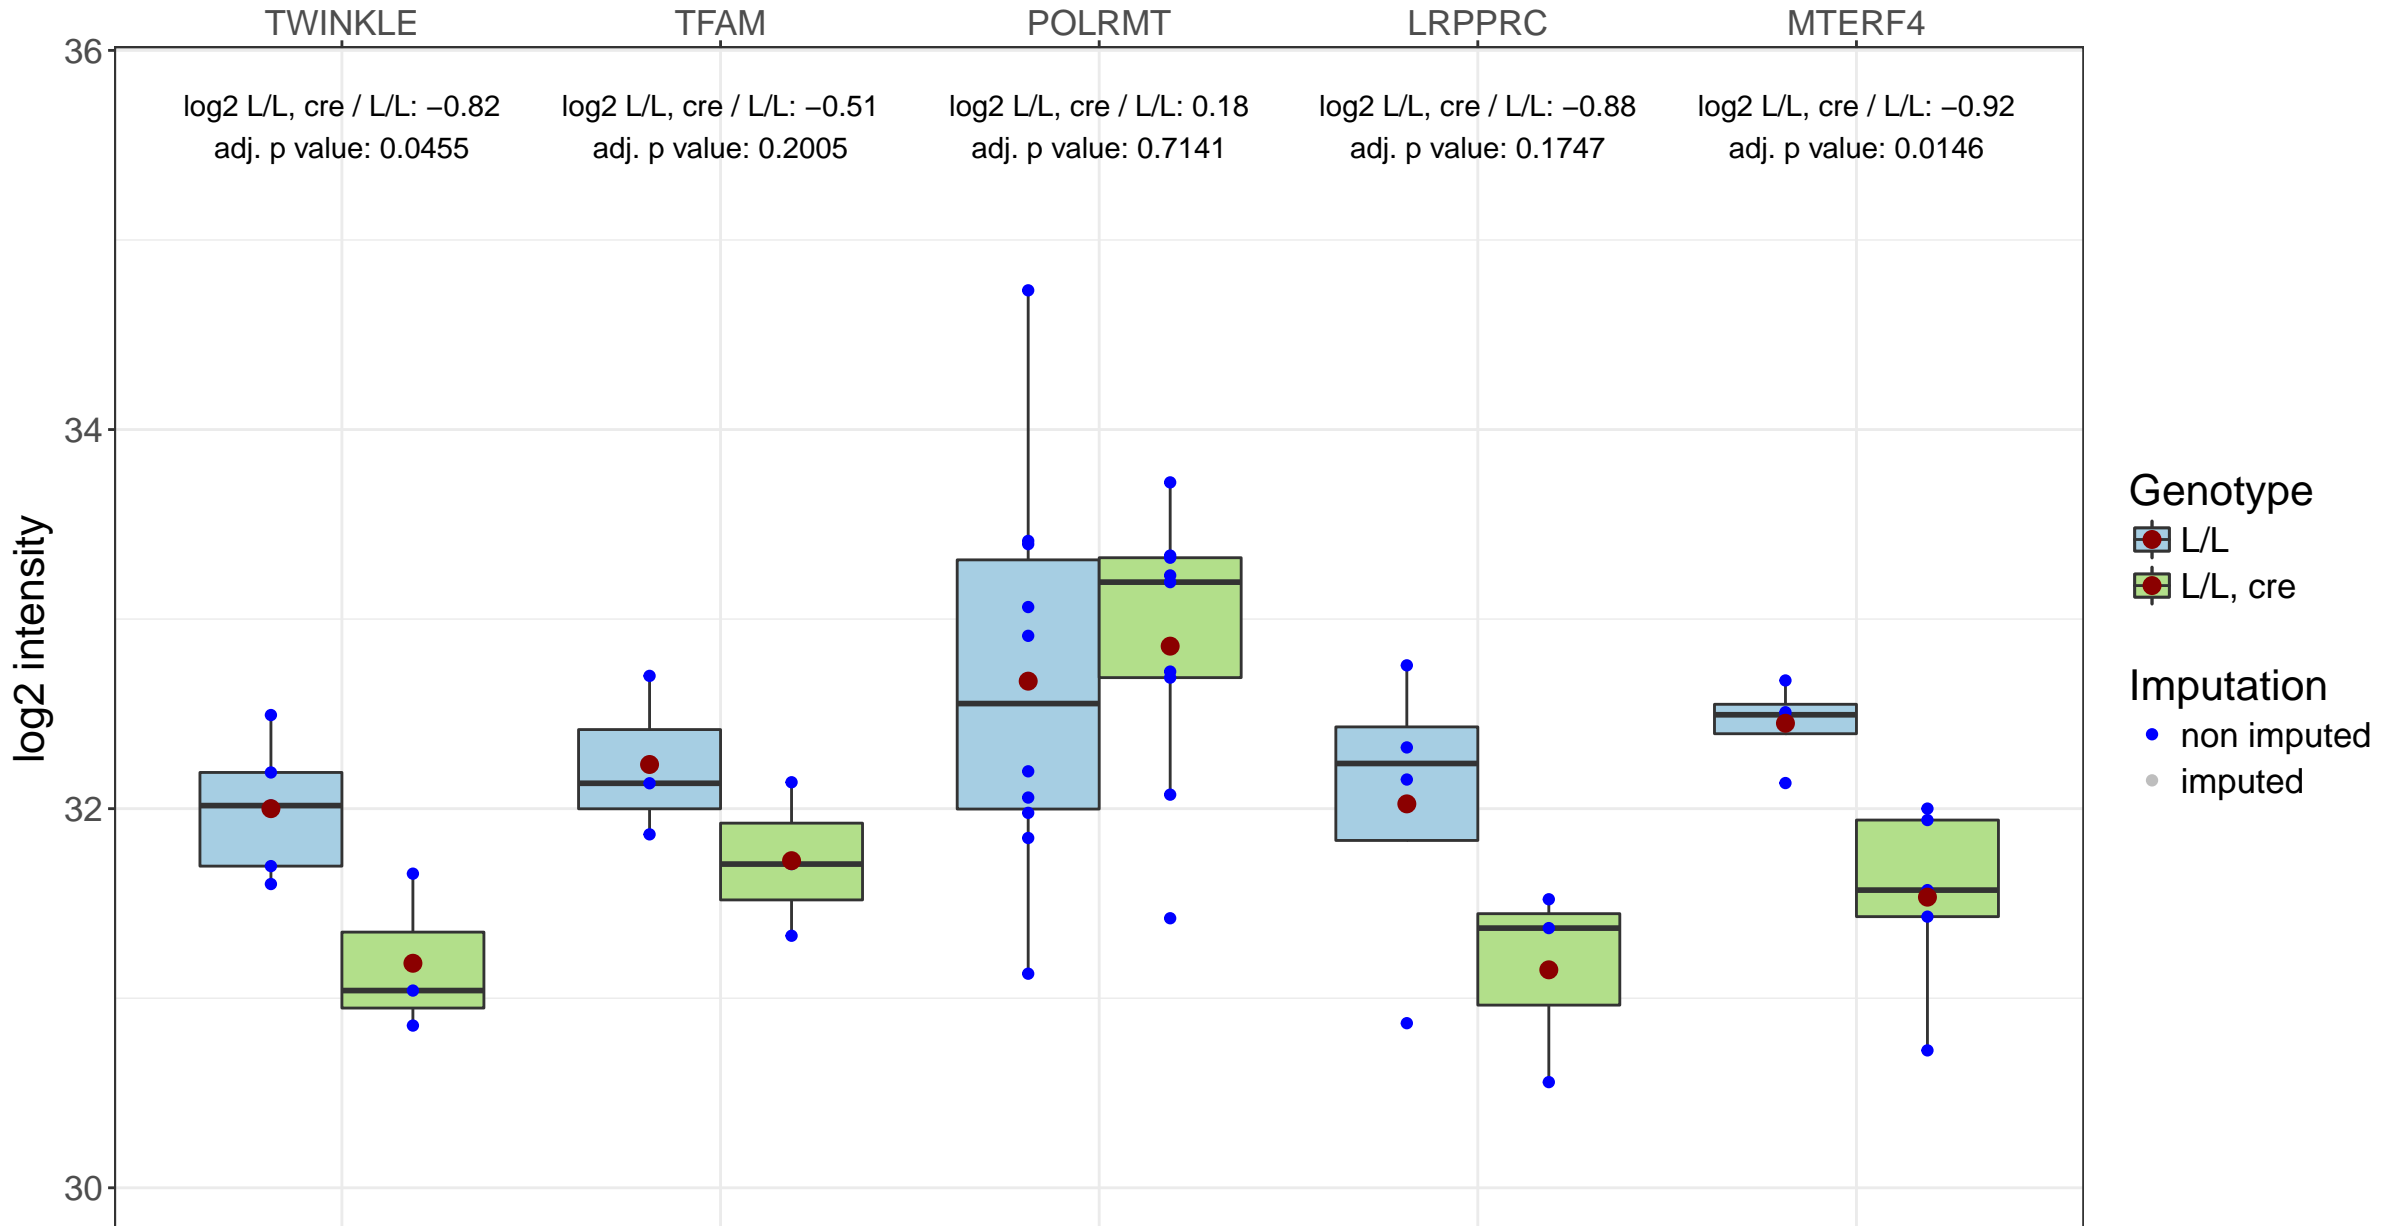

# ATP5A1 / Q03265

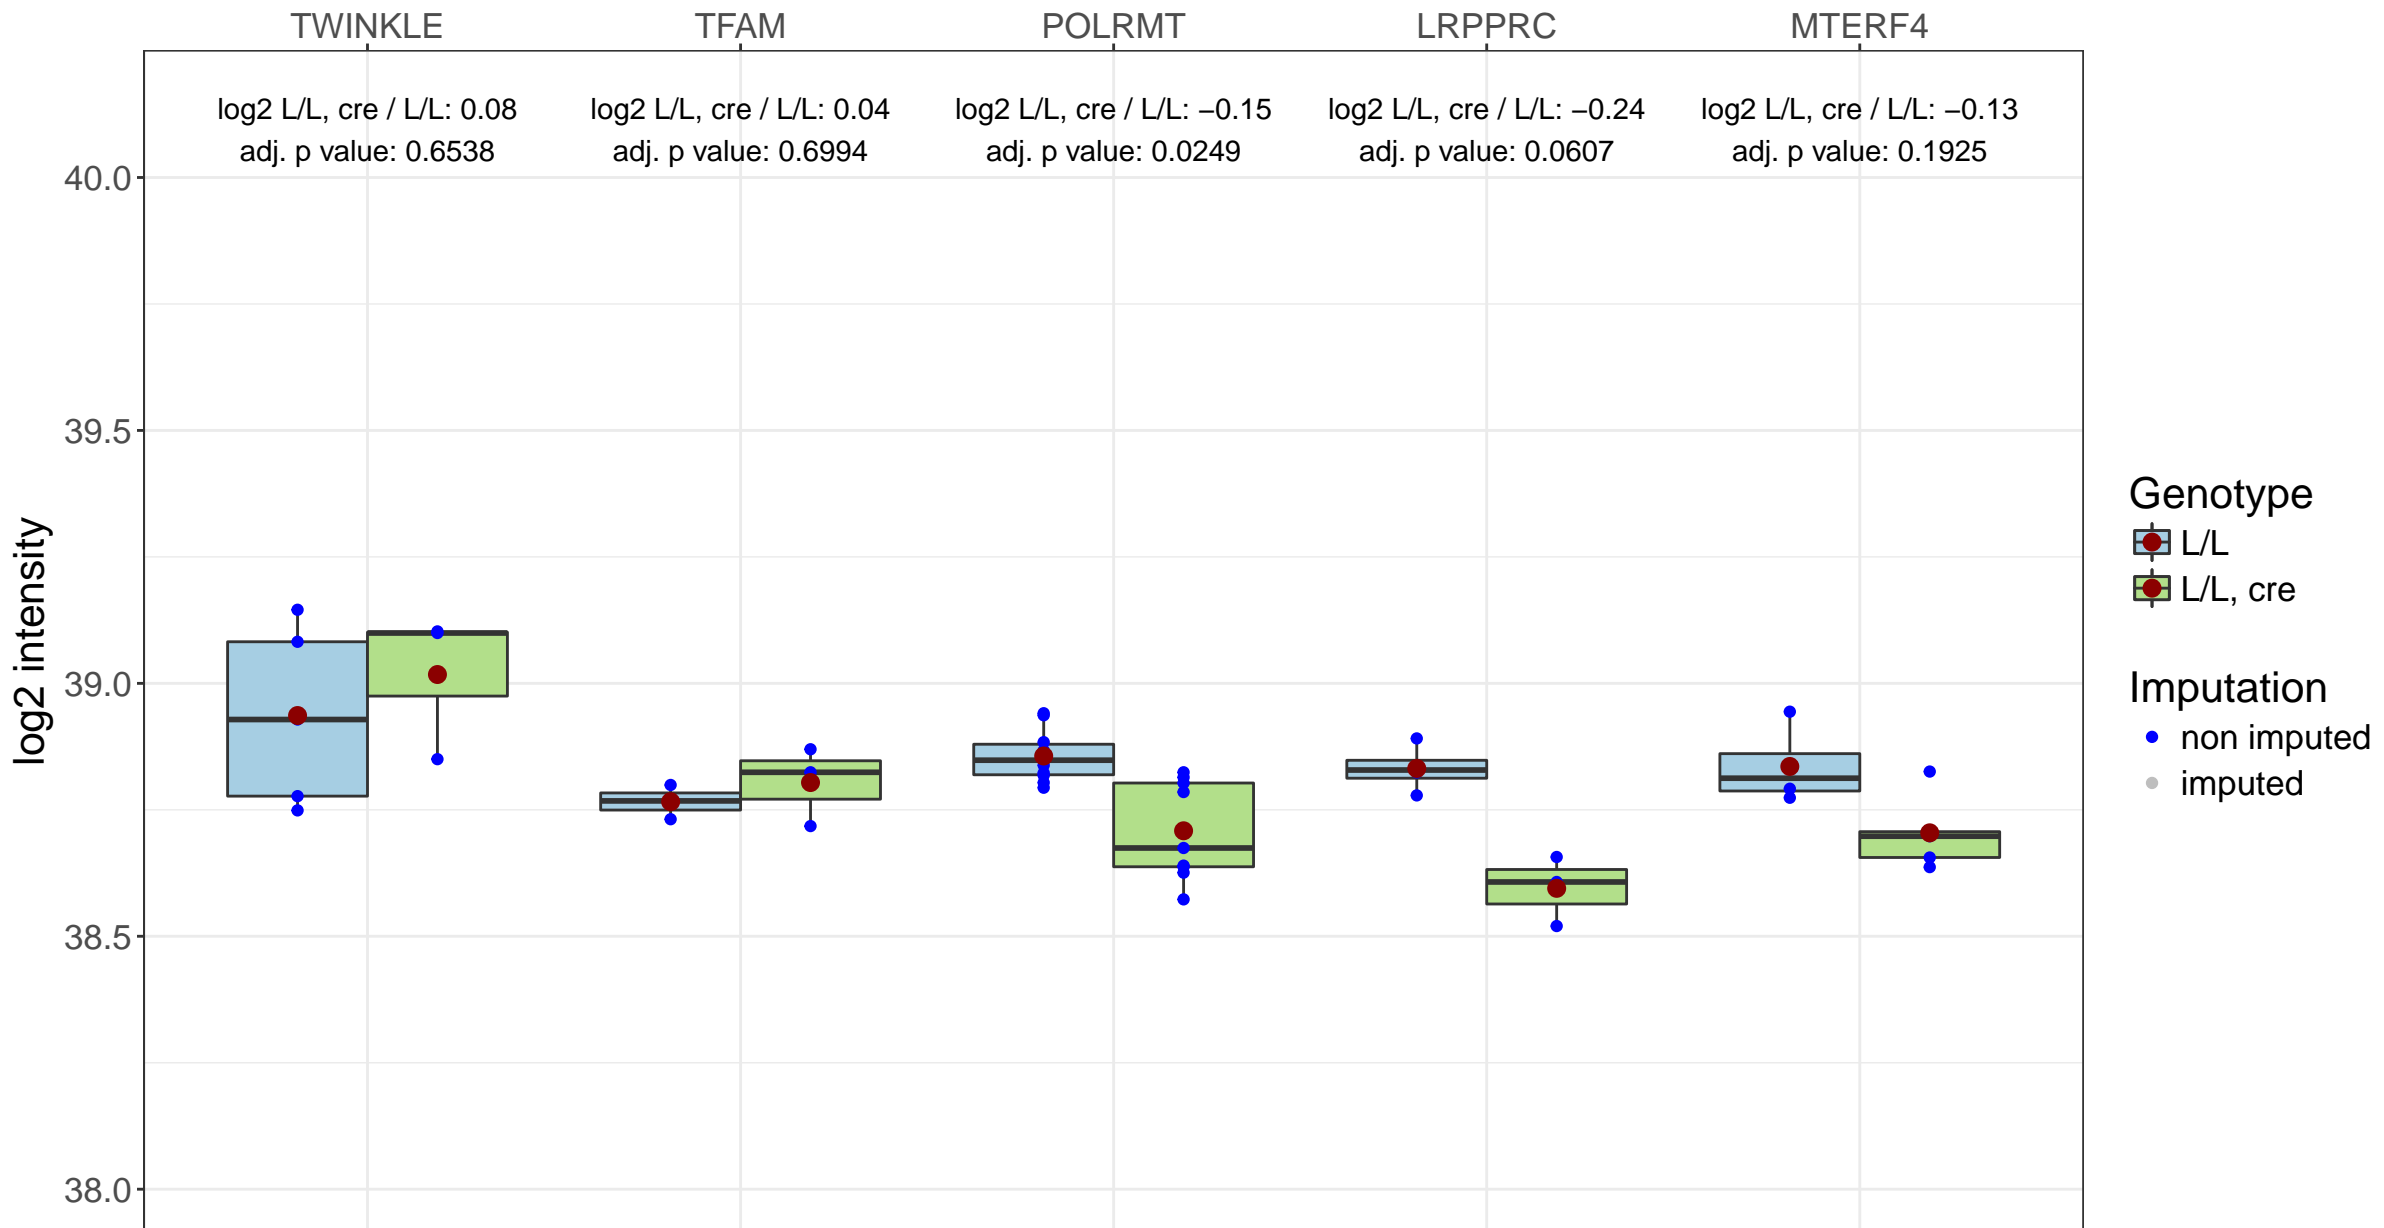

# ATP5B / P56480

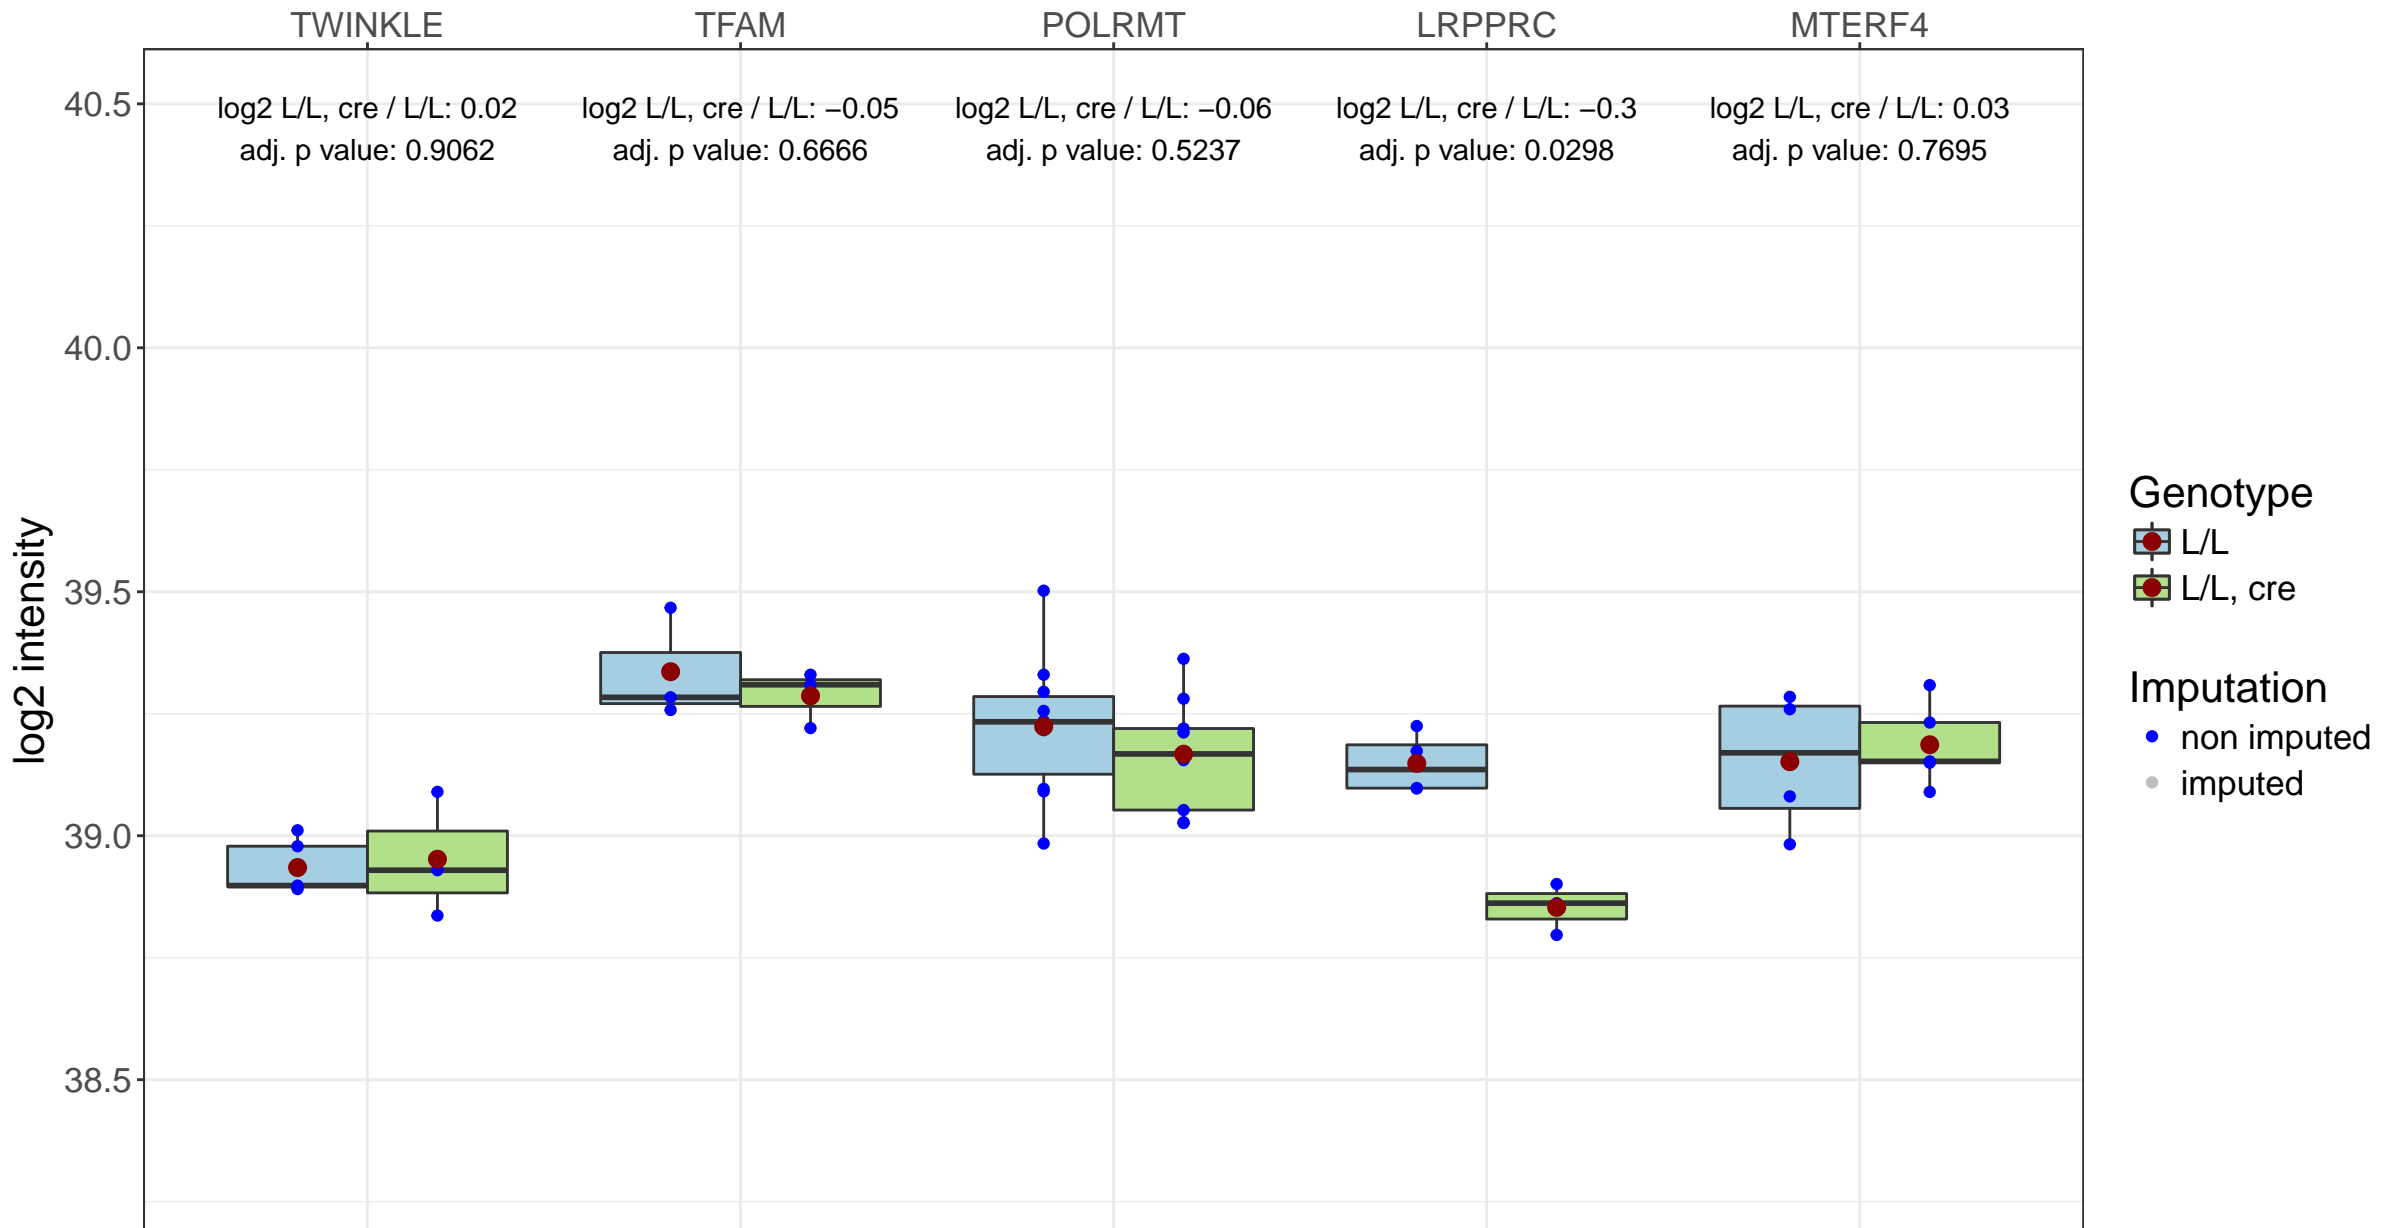



# ATP5C1 / A2AKU9

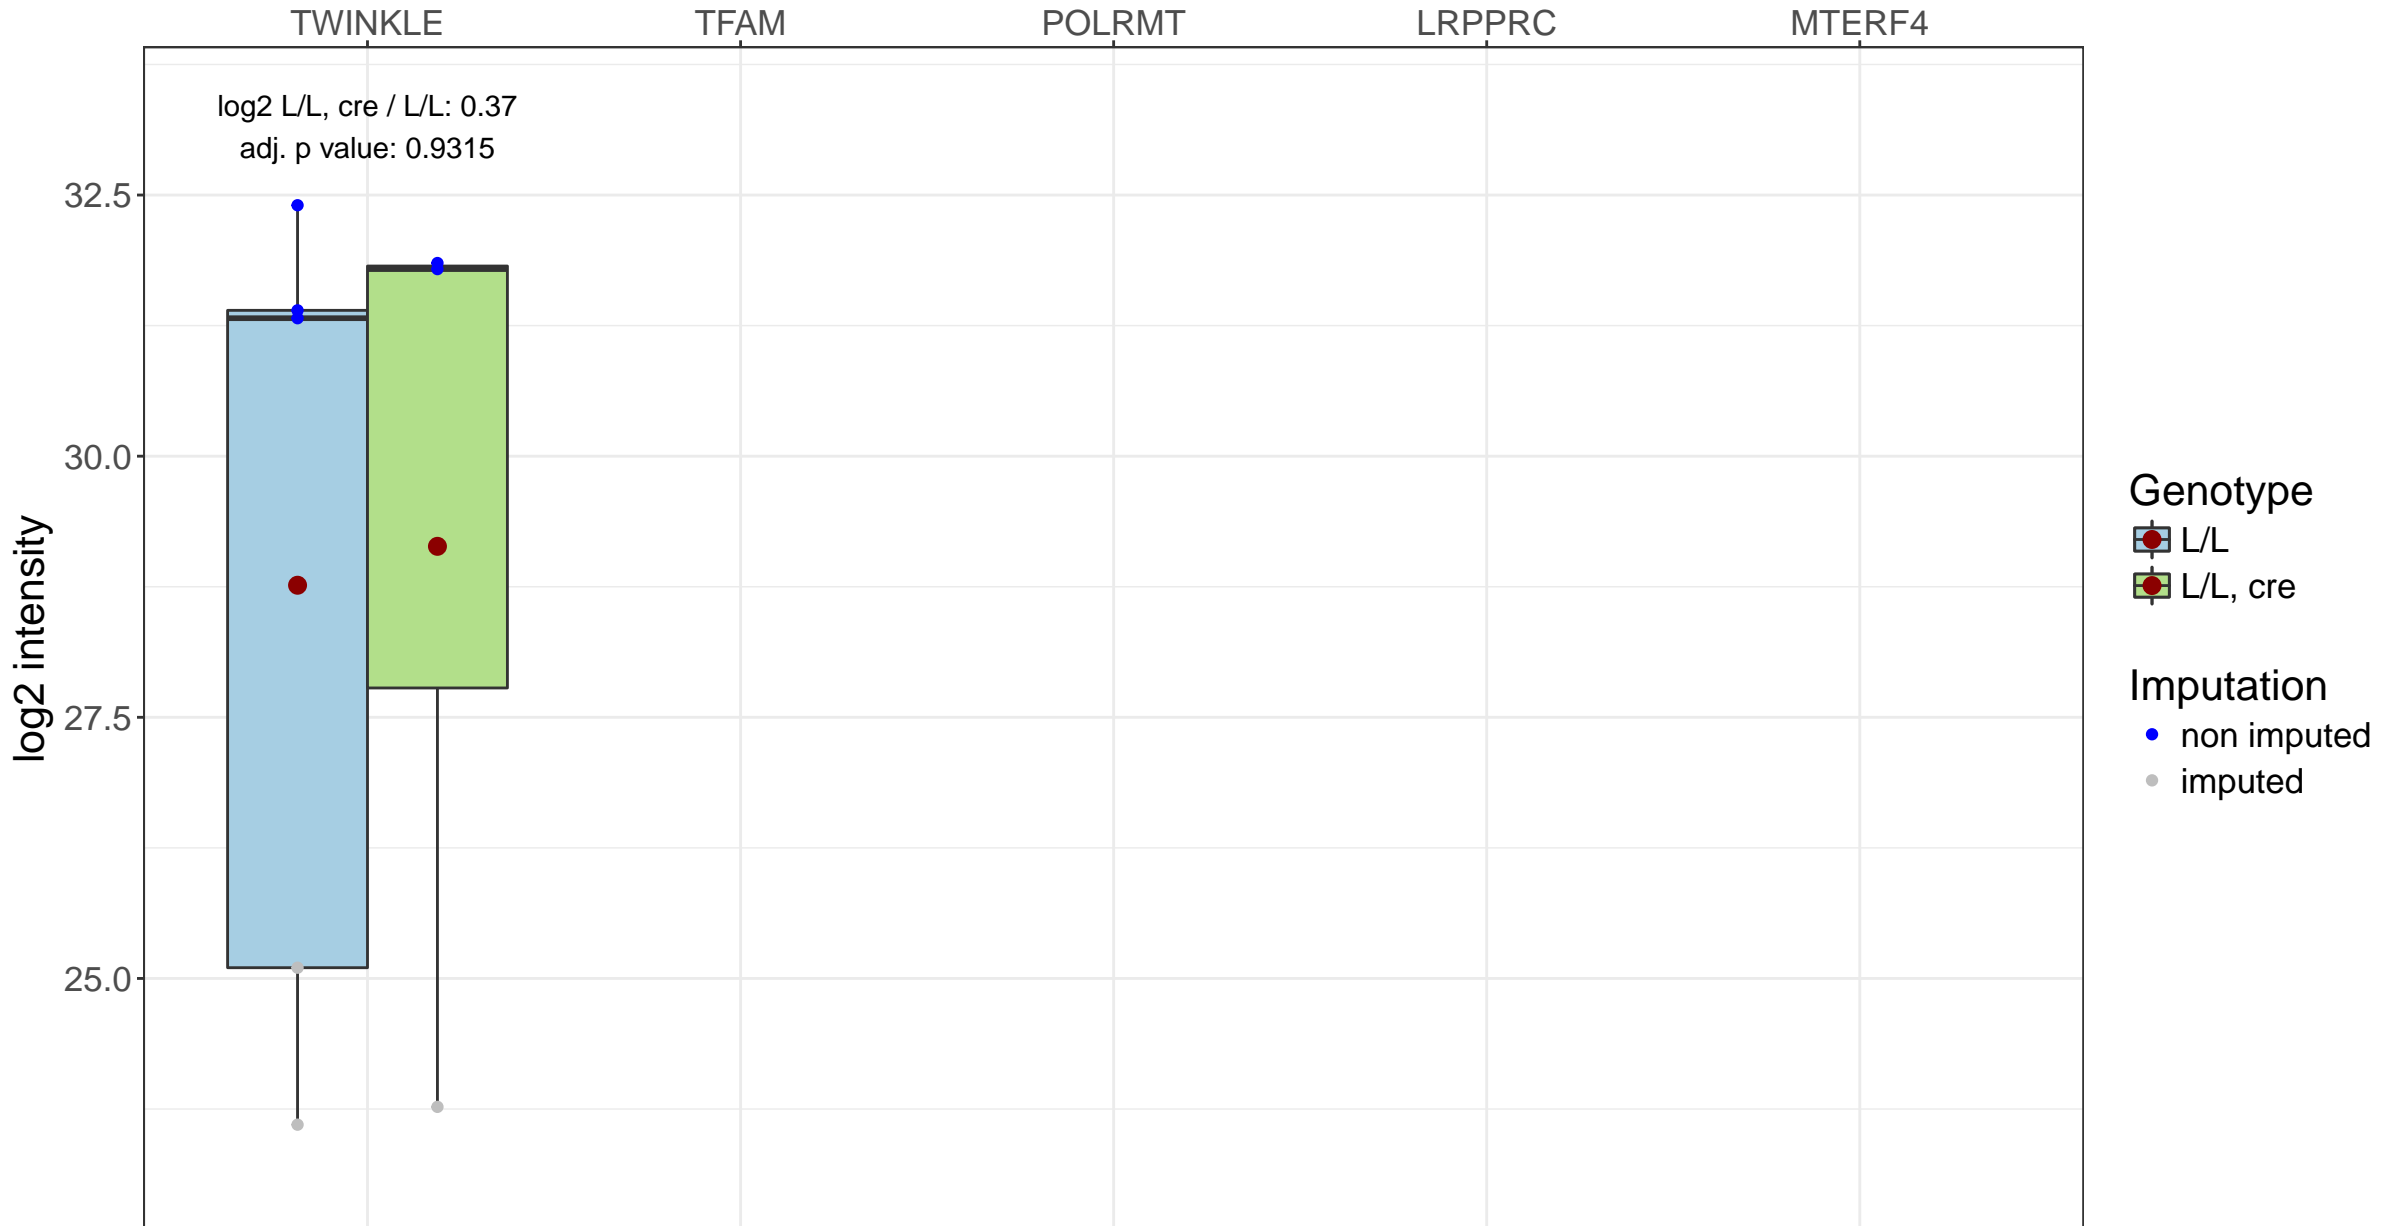

# ATP5C1 / Q8C2Q8

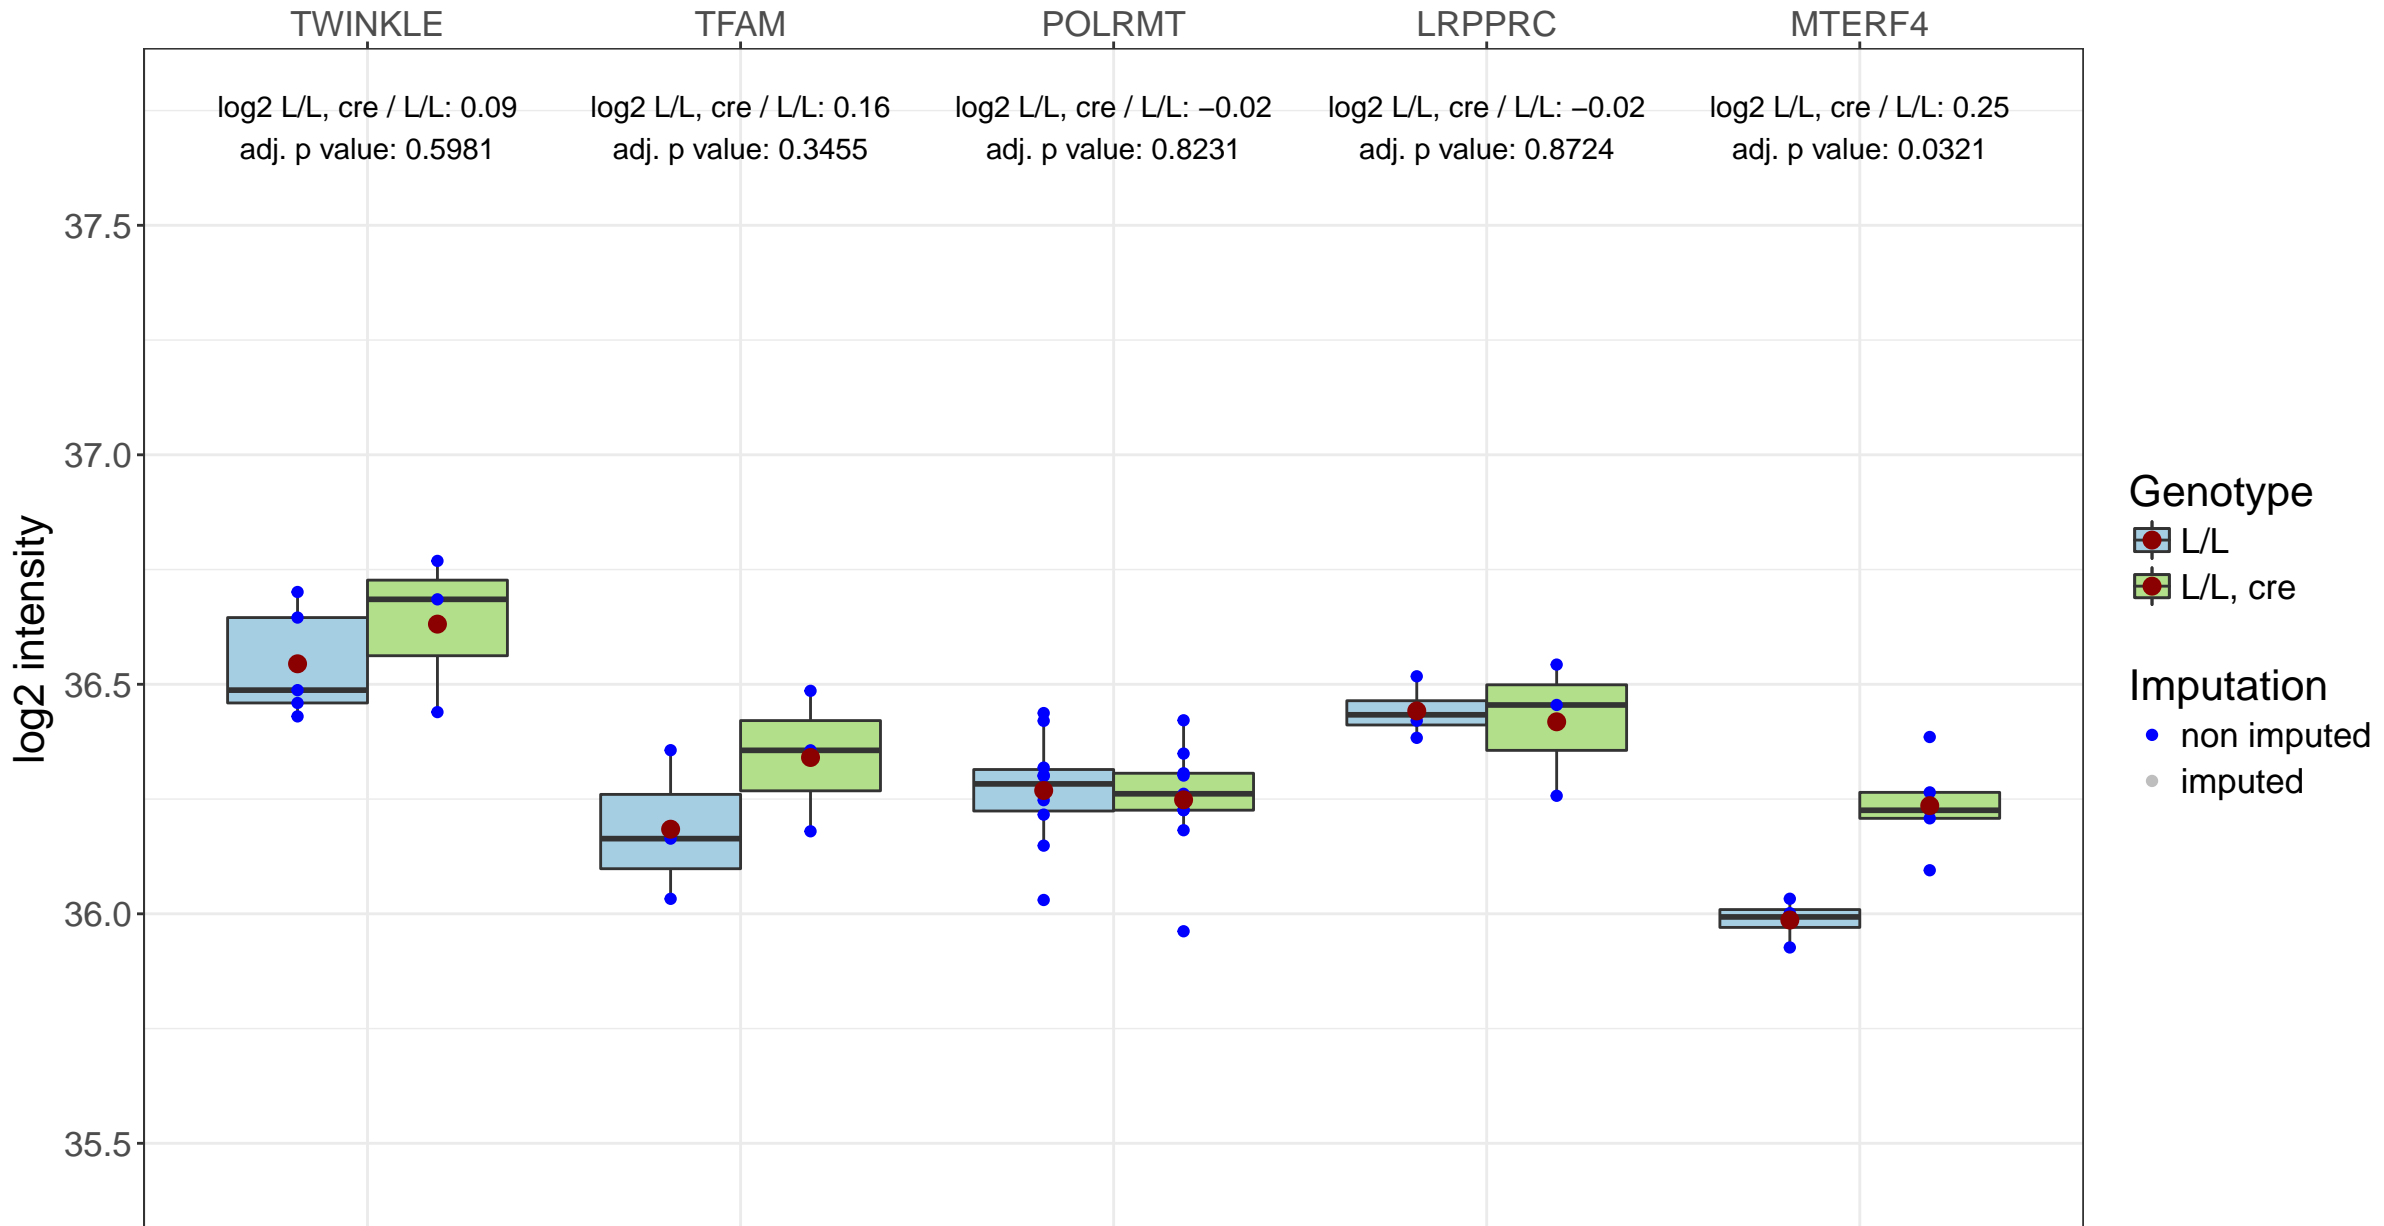

# ATP5D / Q9D3D9

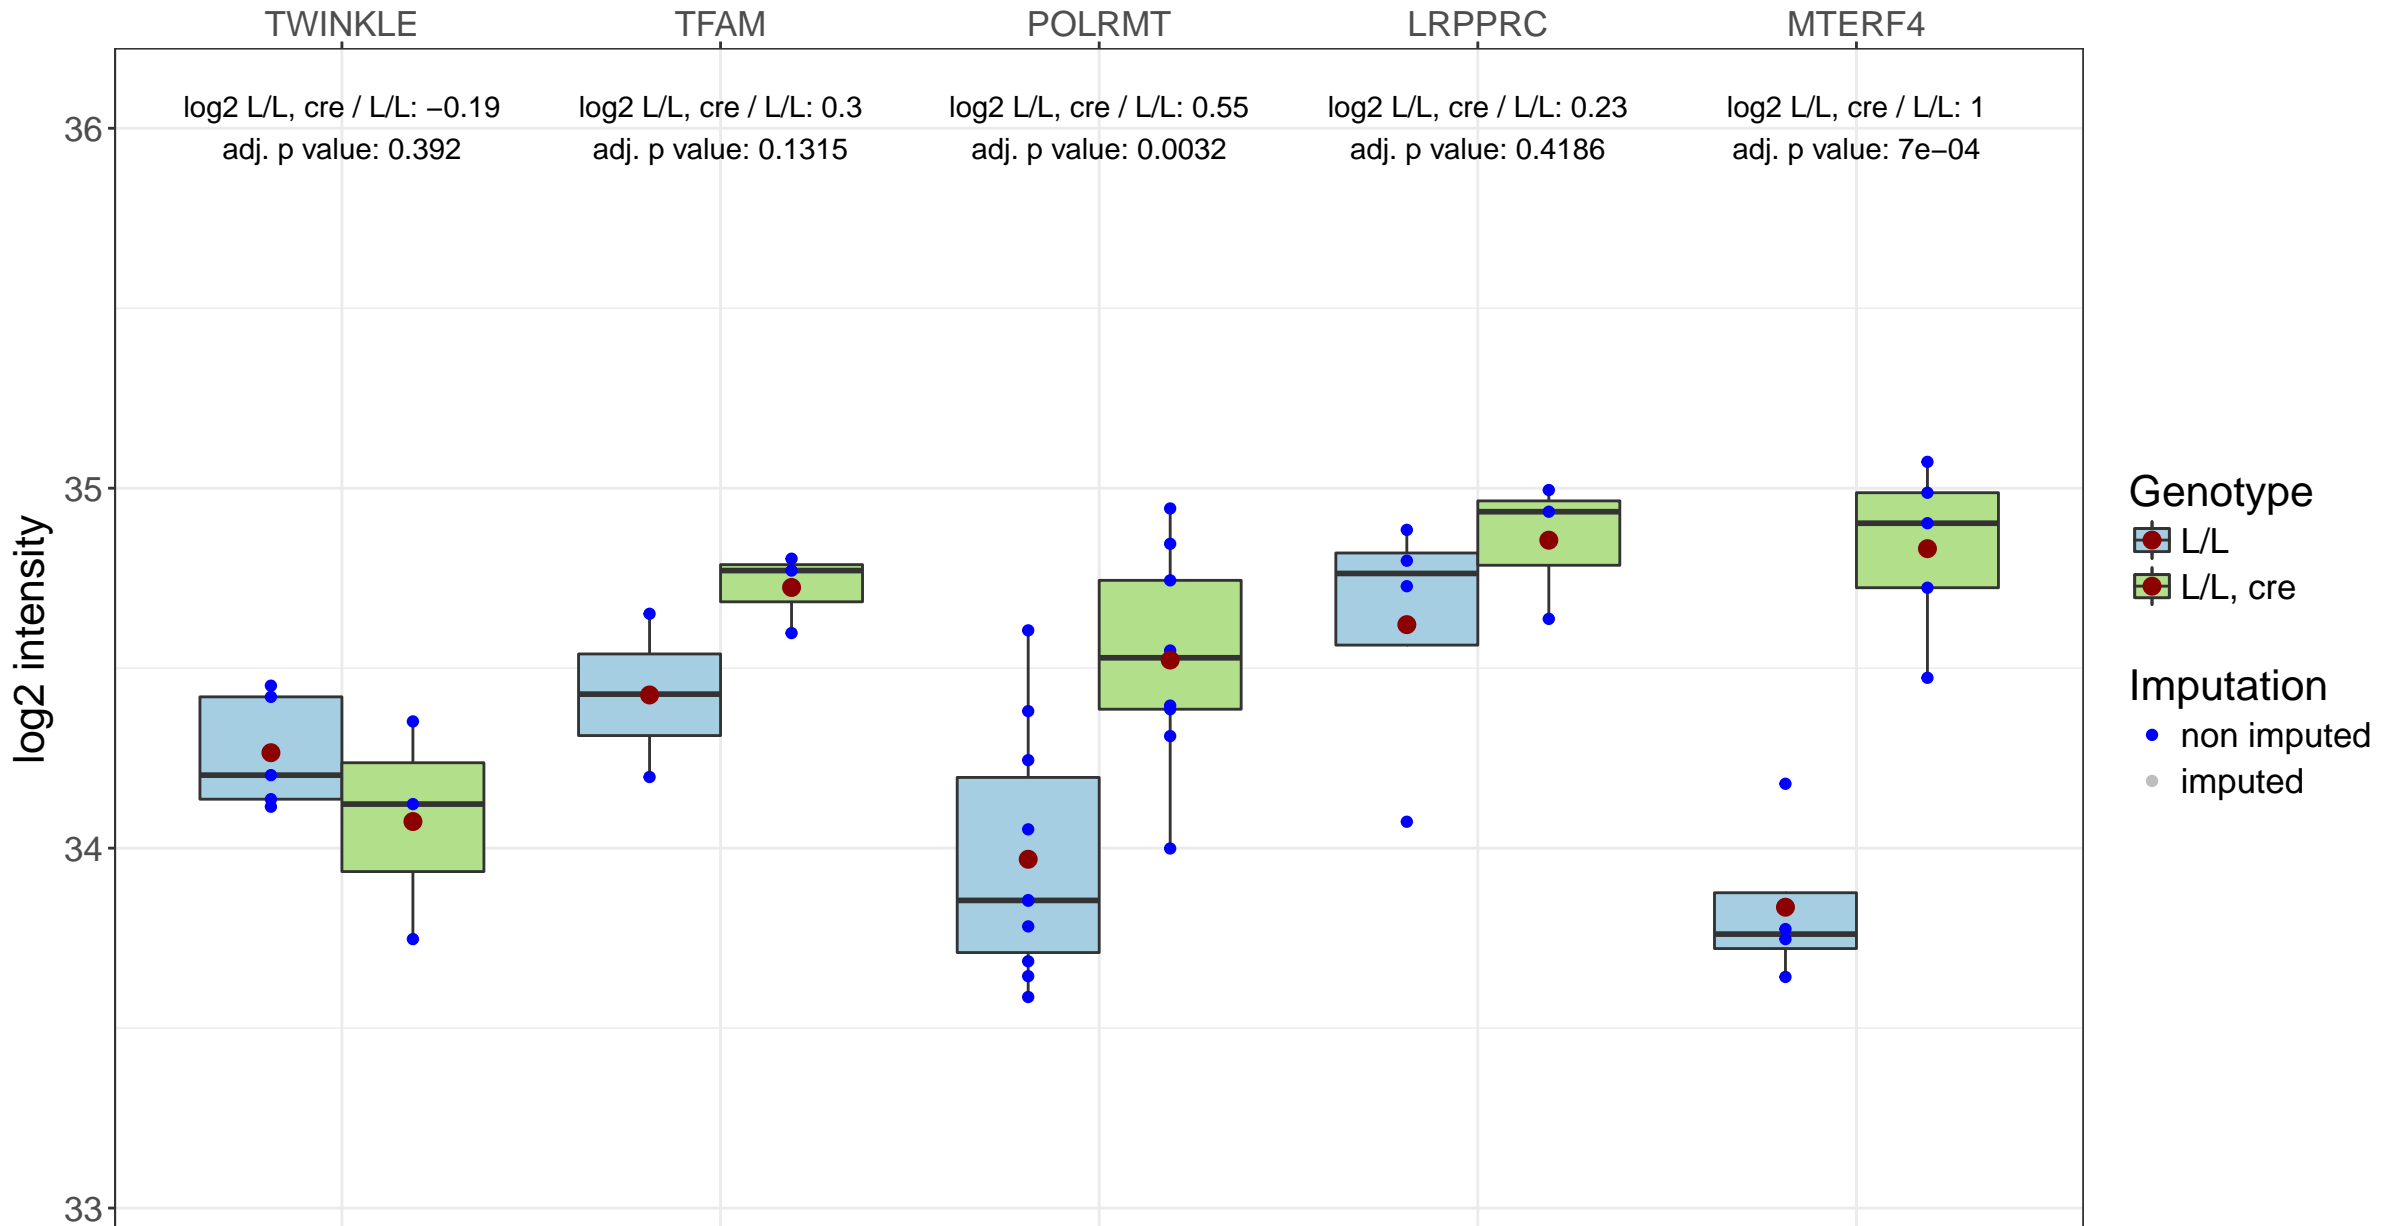

# ATP5E / P56382

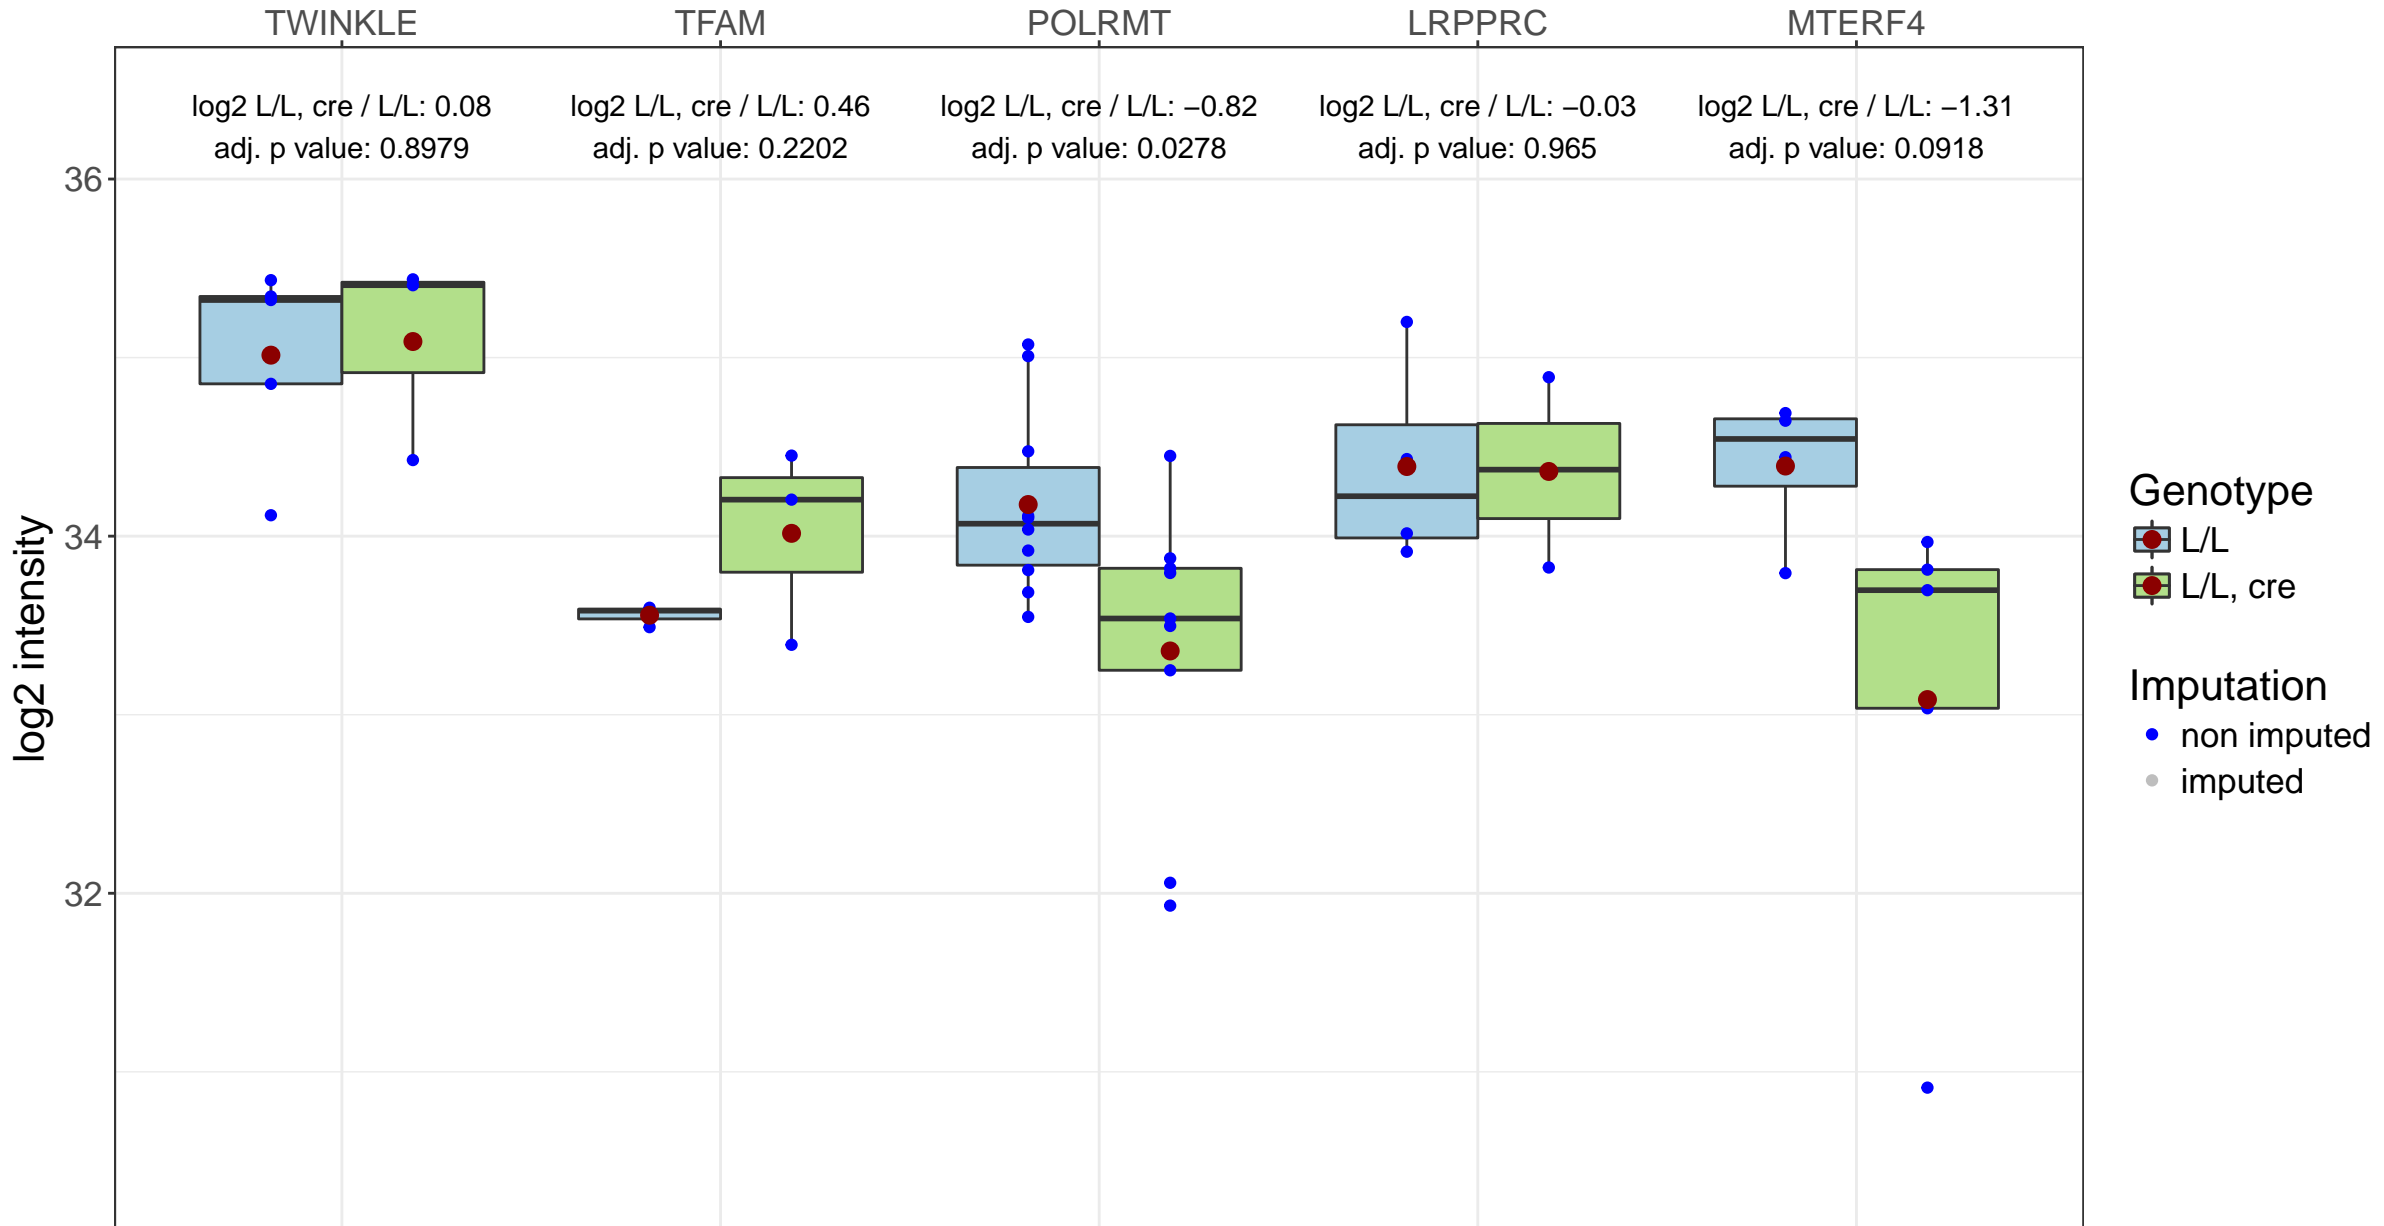

# ATP5F1 / Q9CQQ7

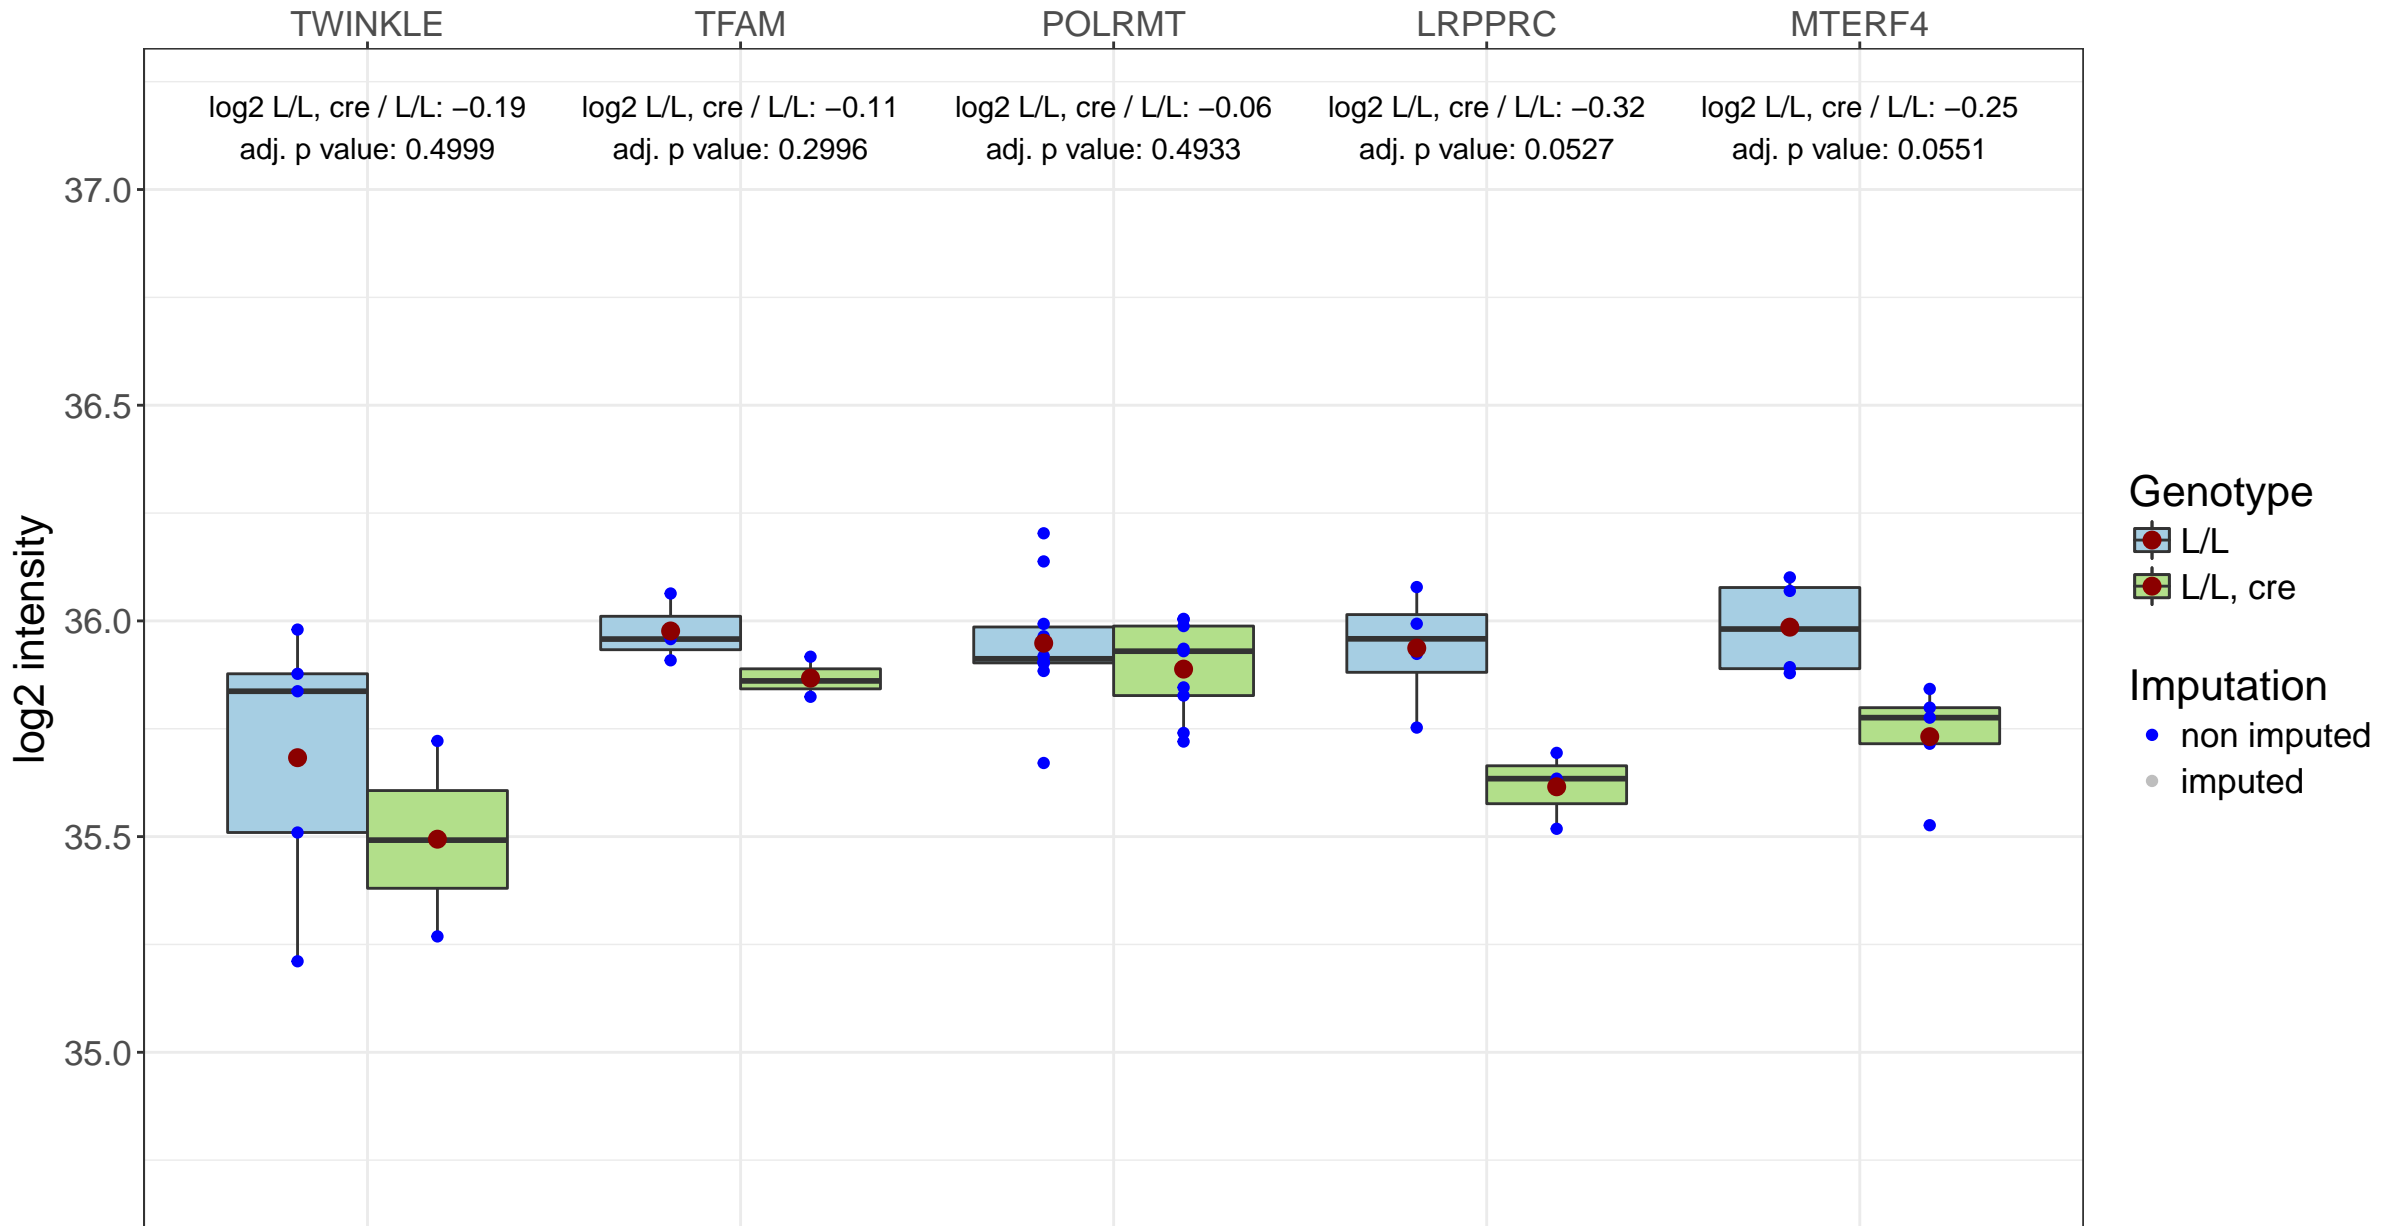

# ATP5H / Q9DCX2

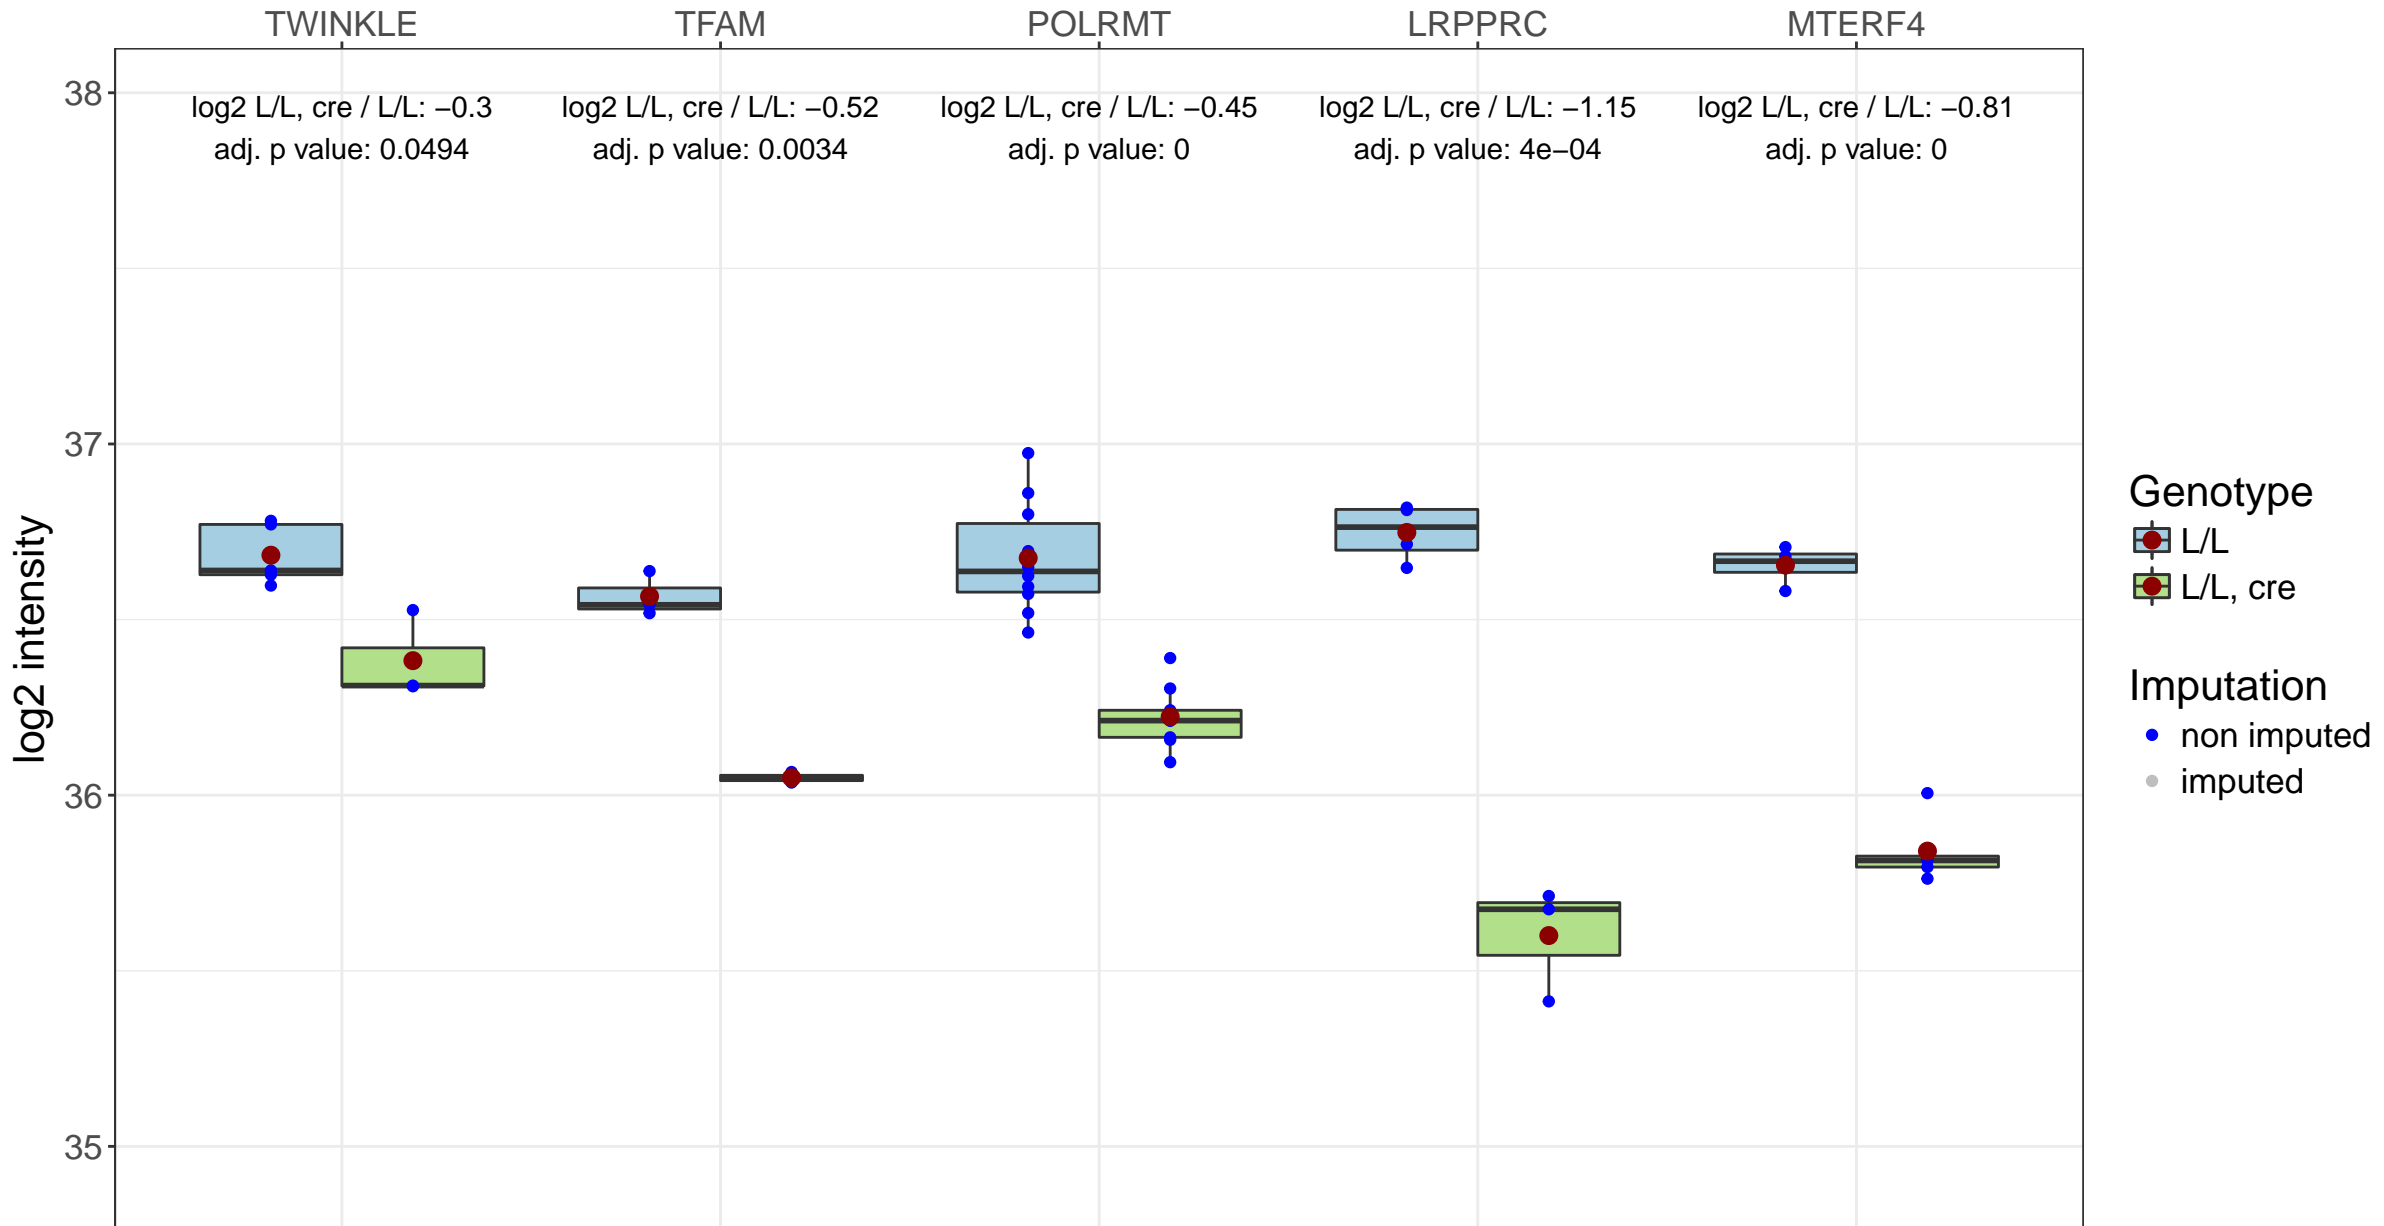

# ATP5I / Q06185

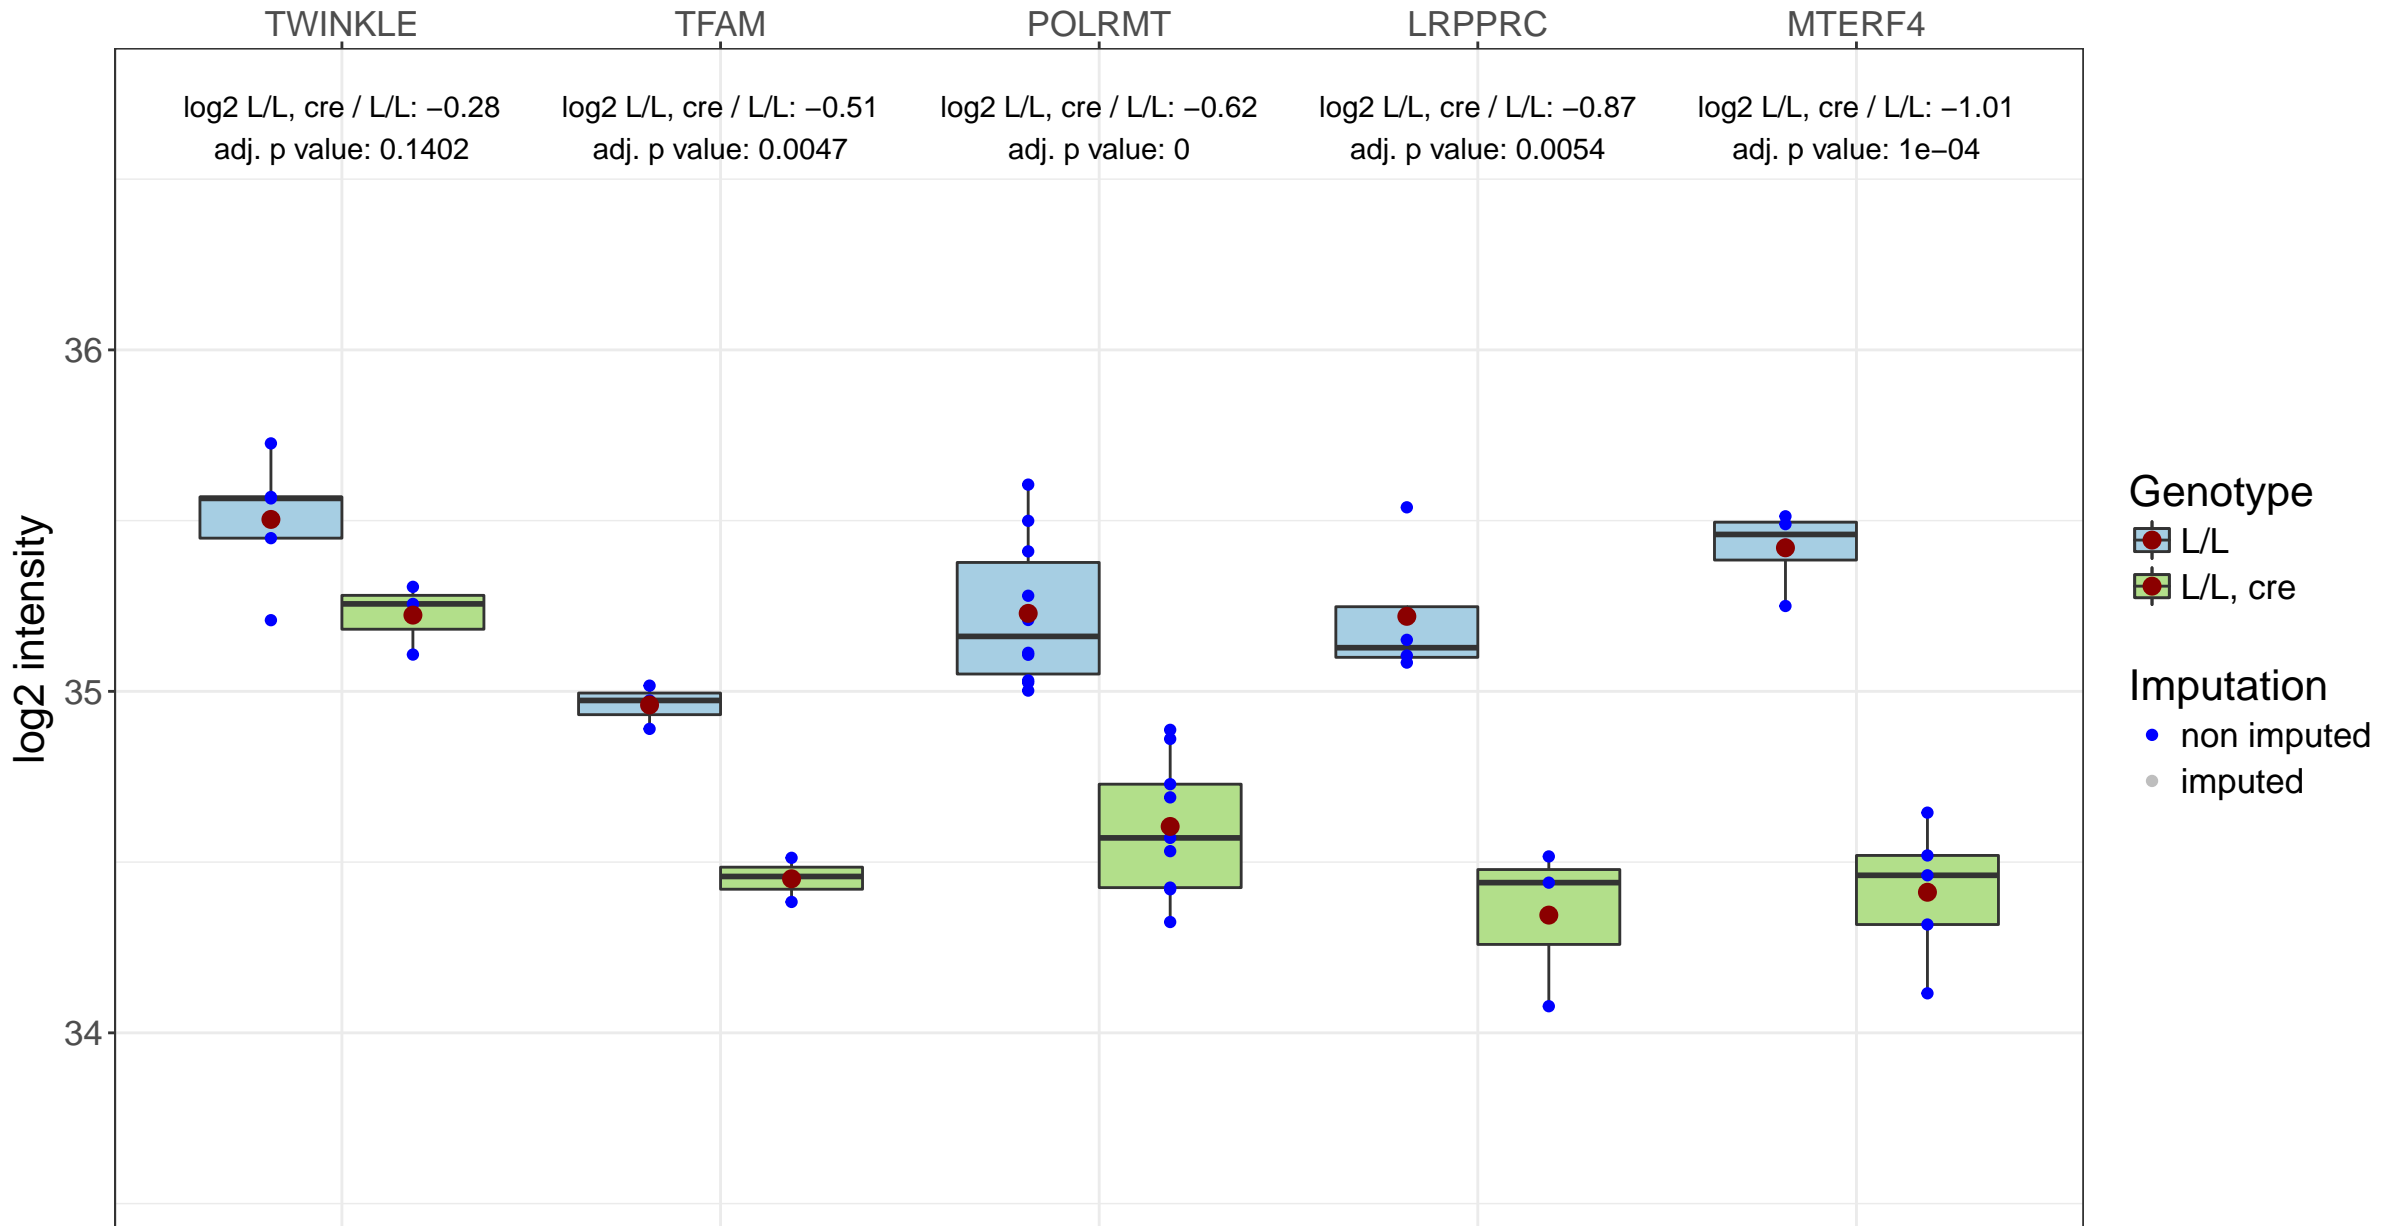

# ATP5J / P97450

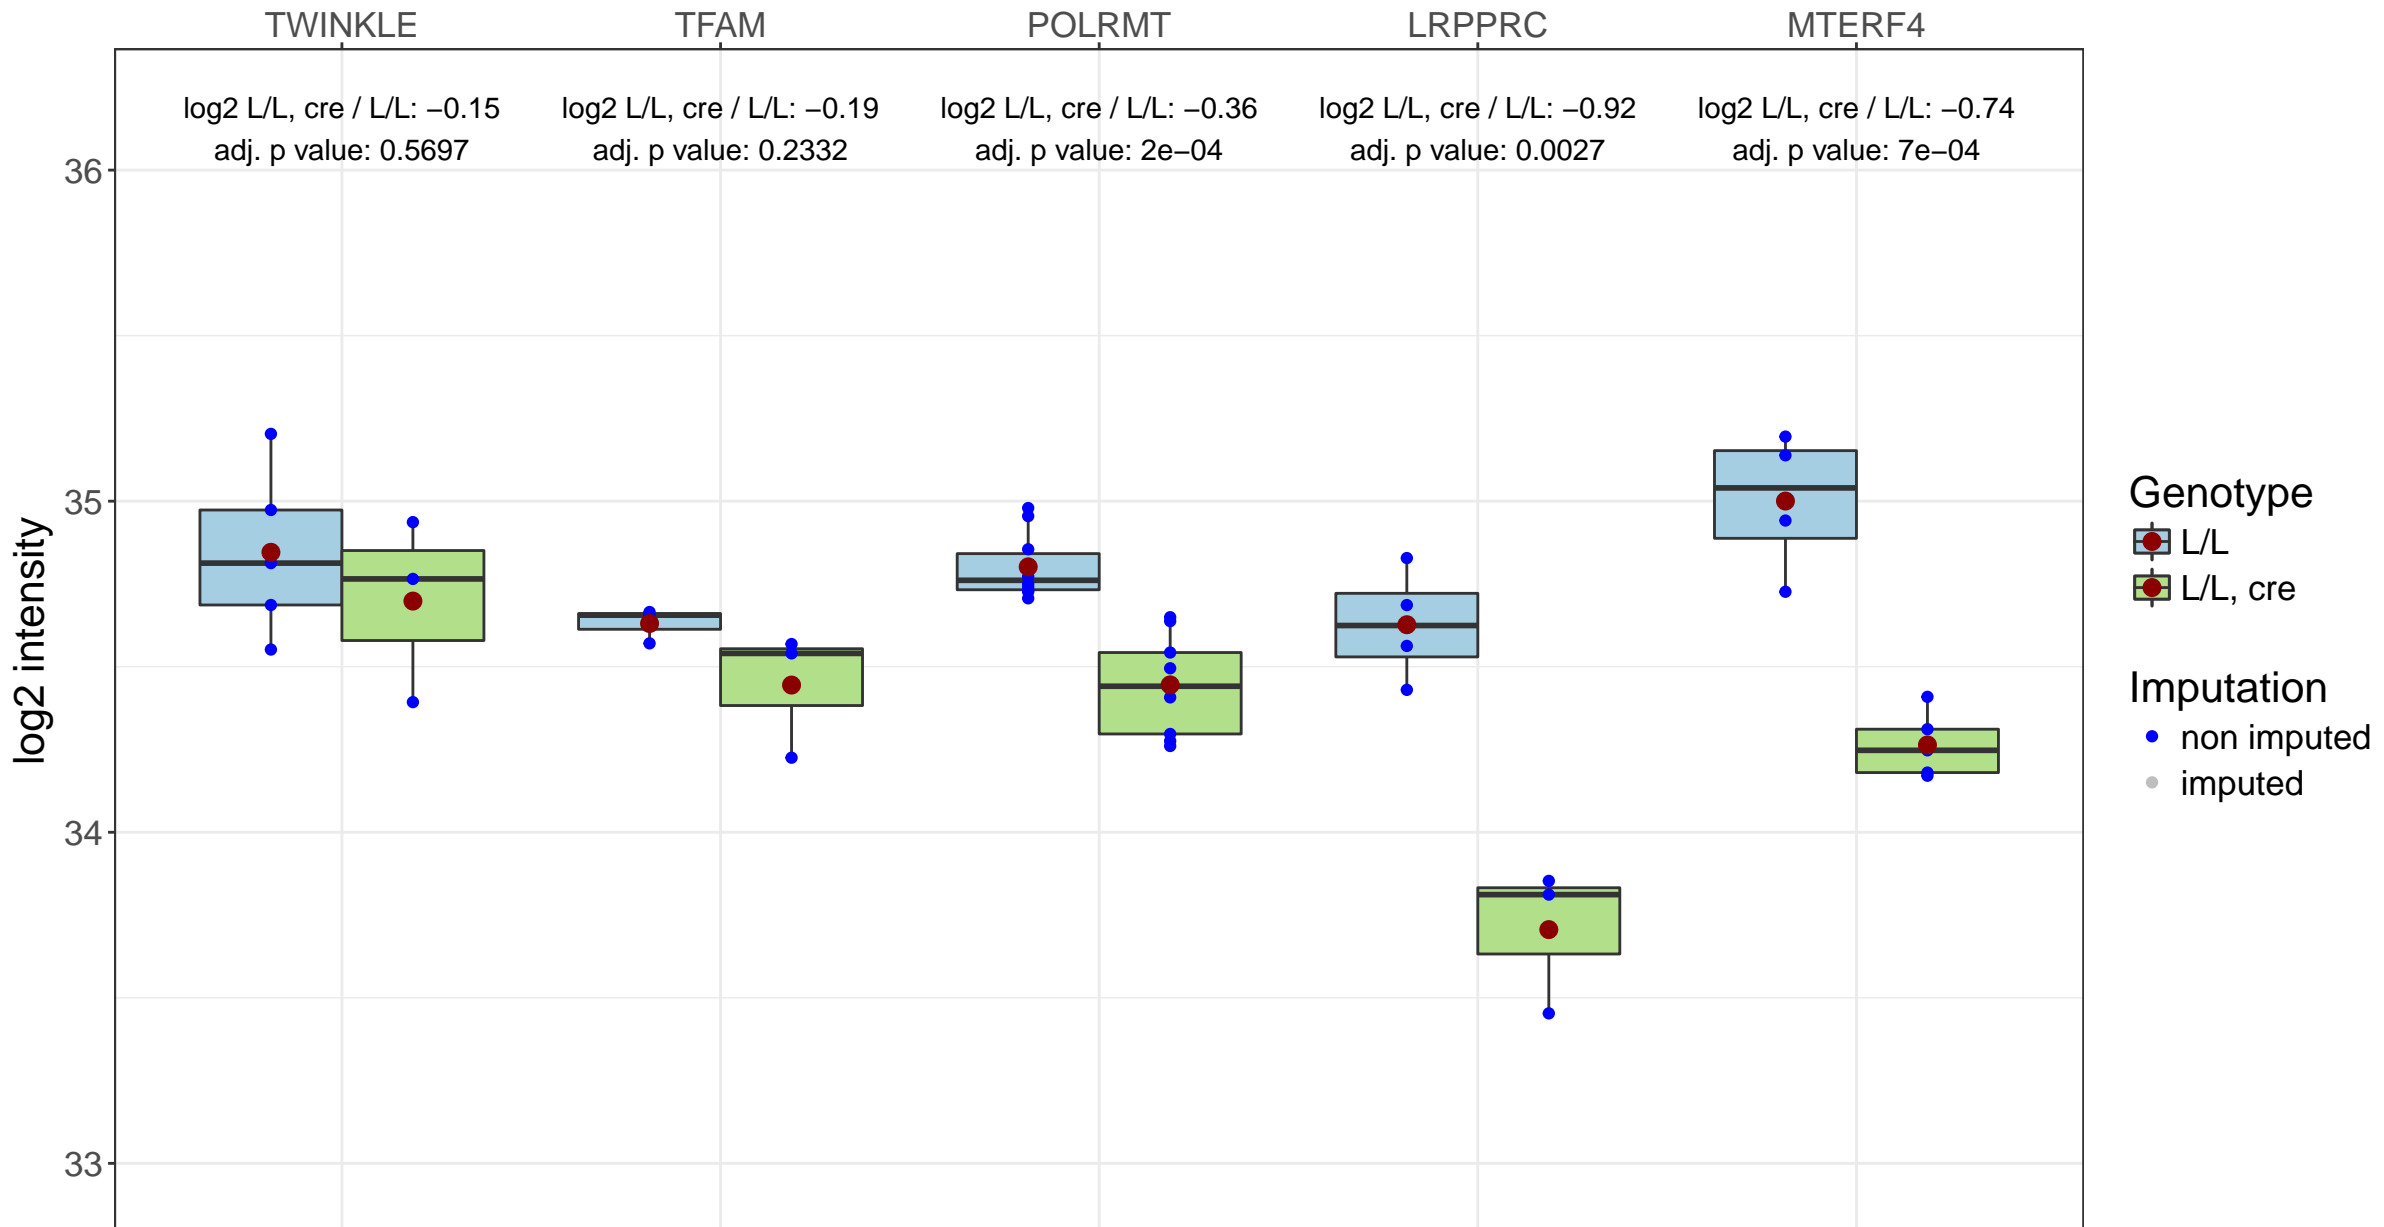



# ATP5J2 / P56135

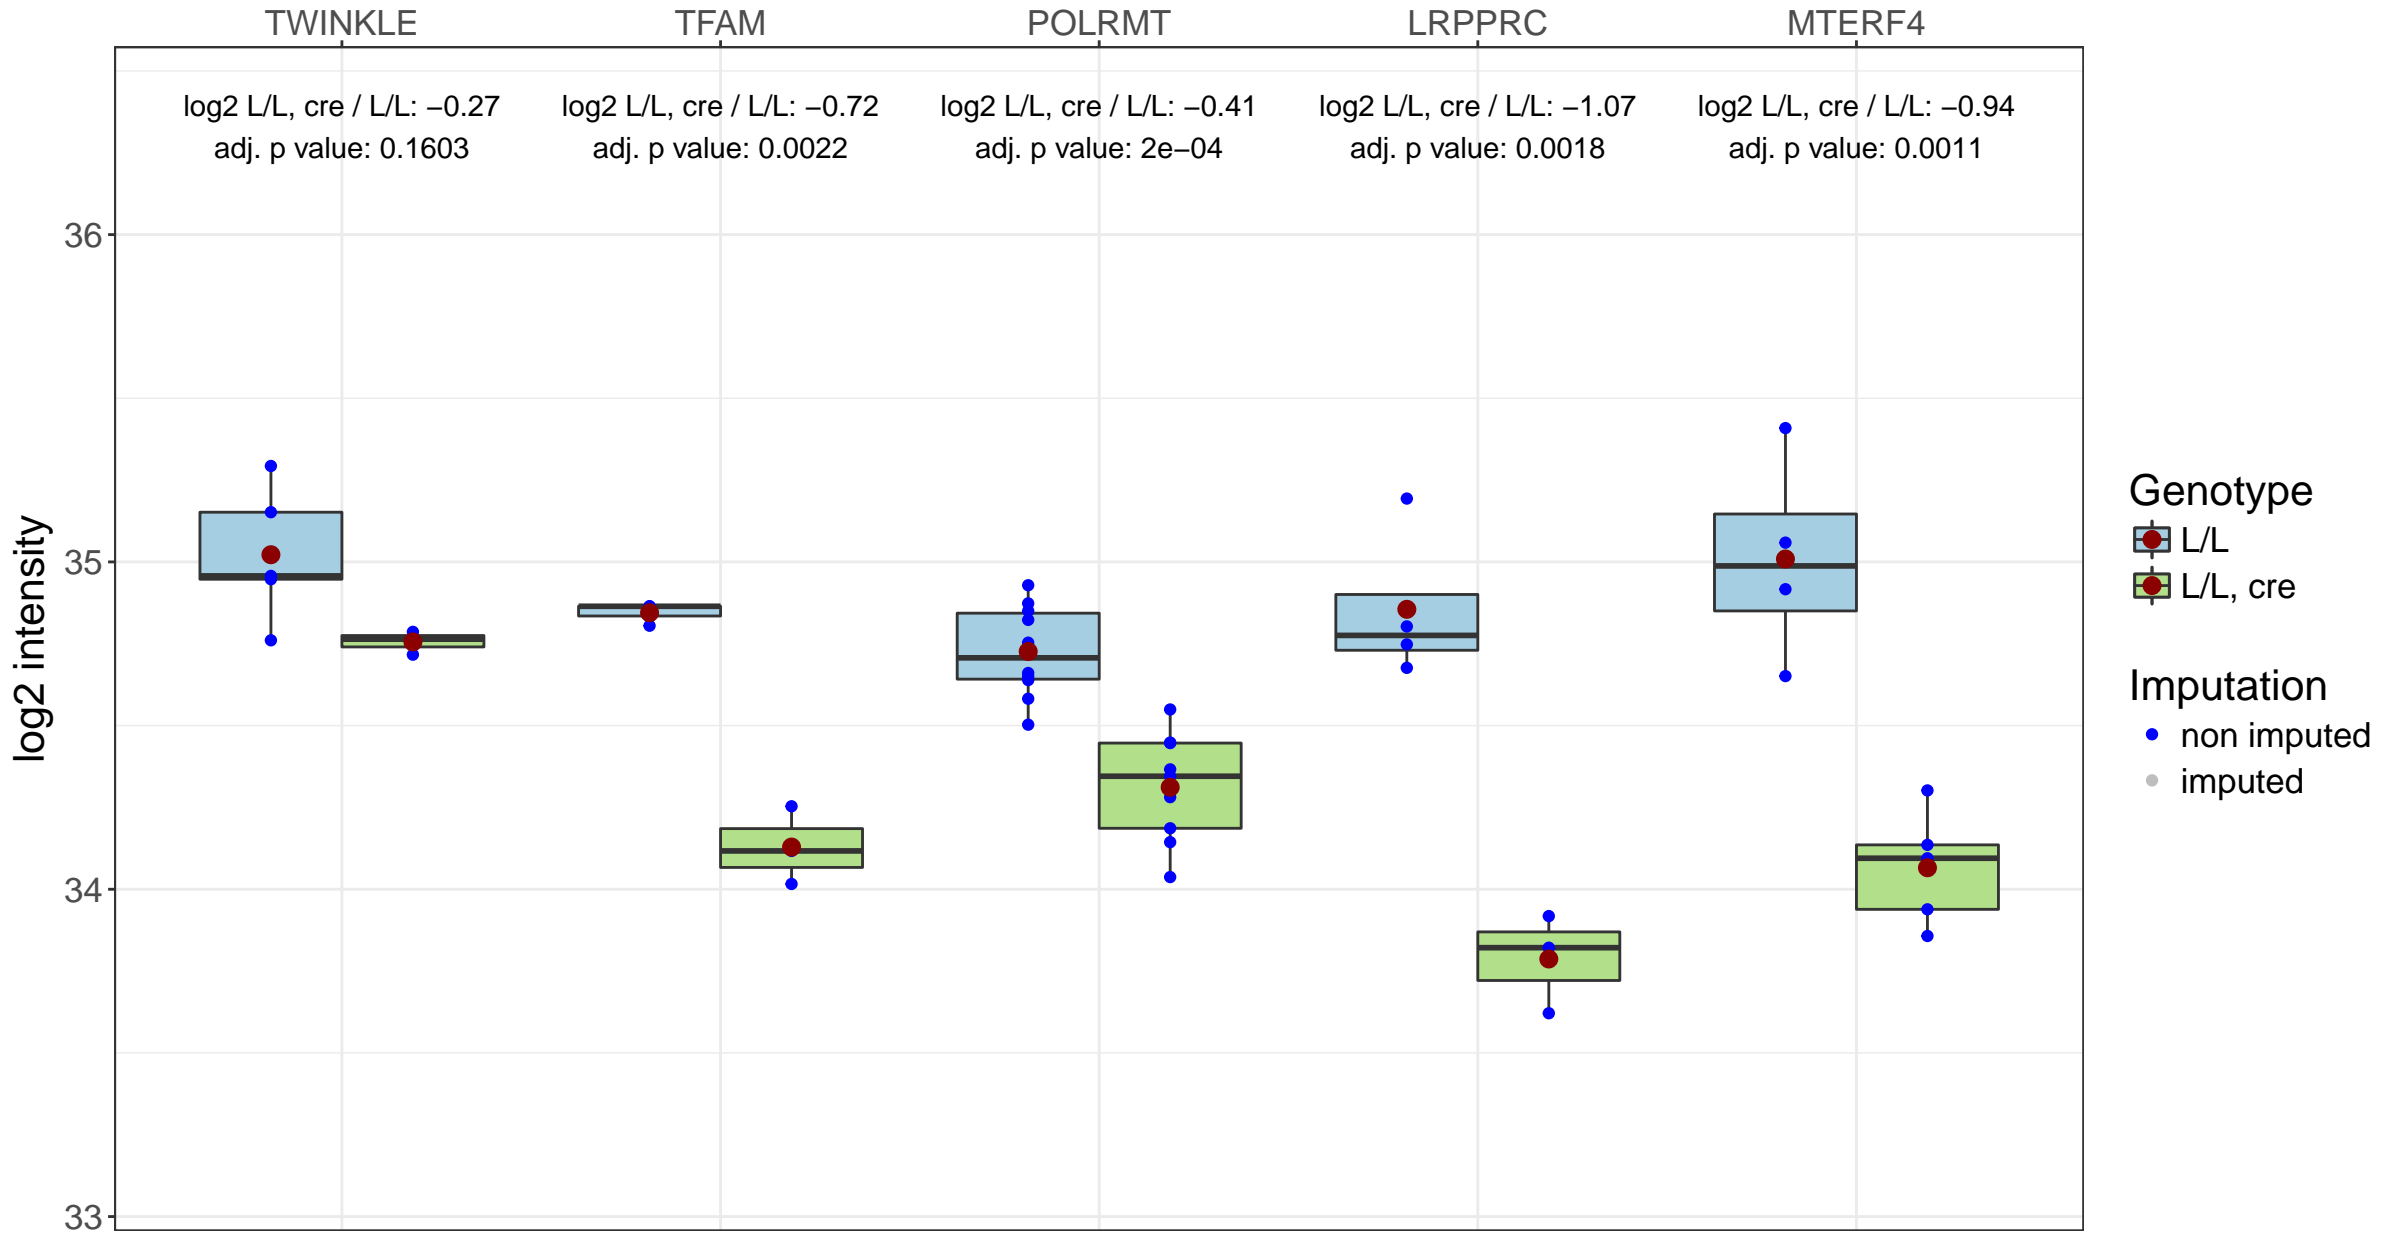

# ATP5L / Q9CPQ8

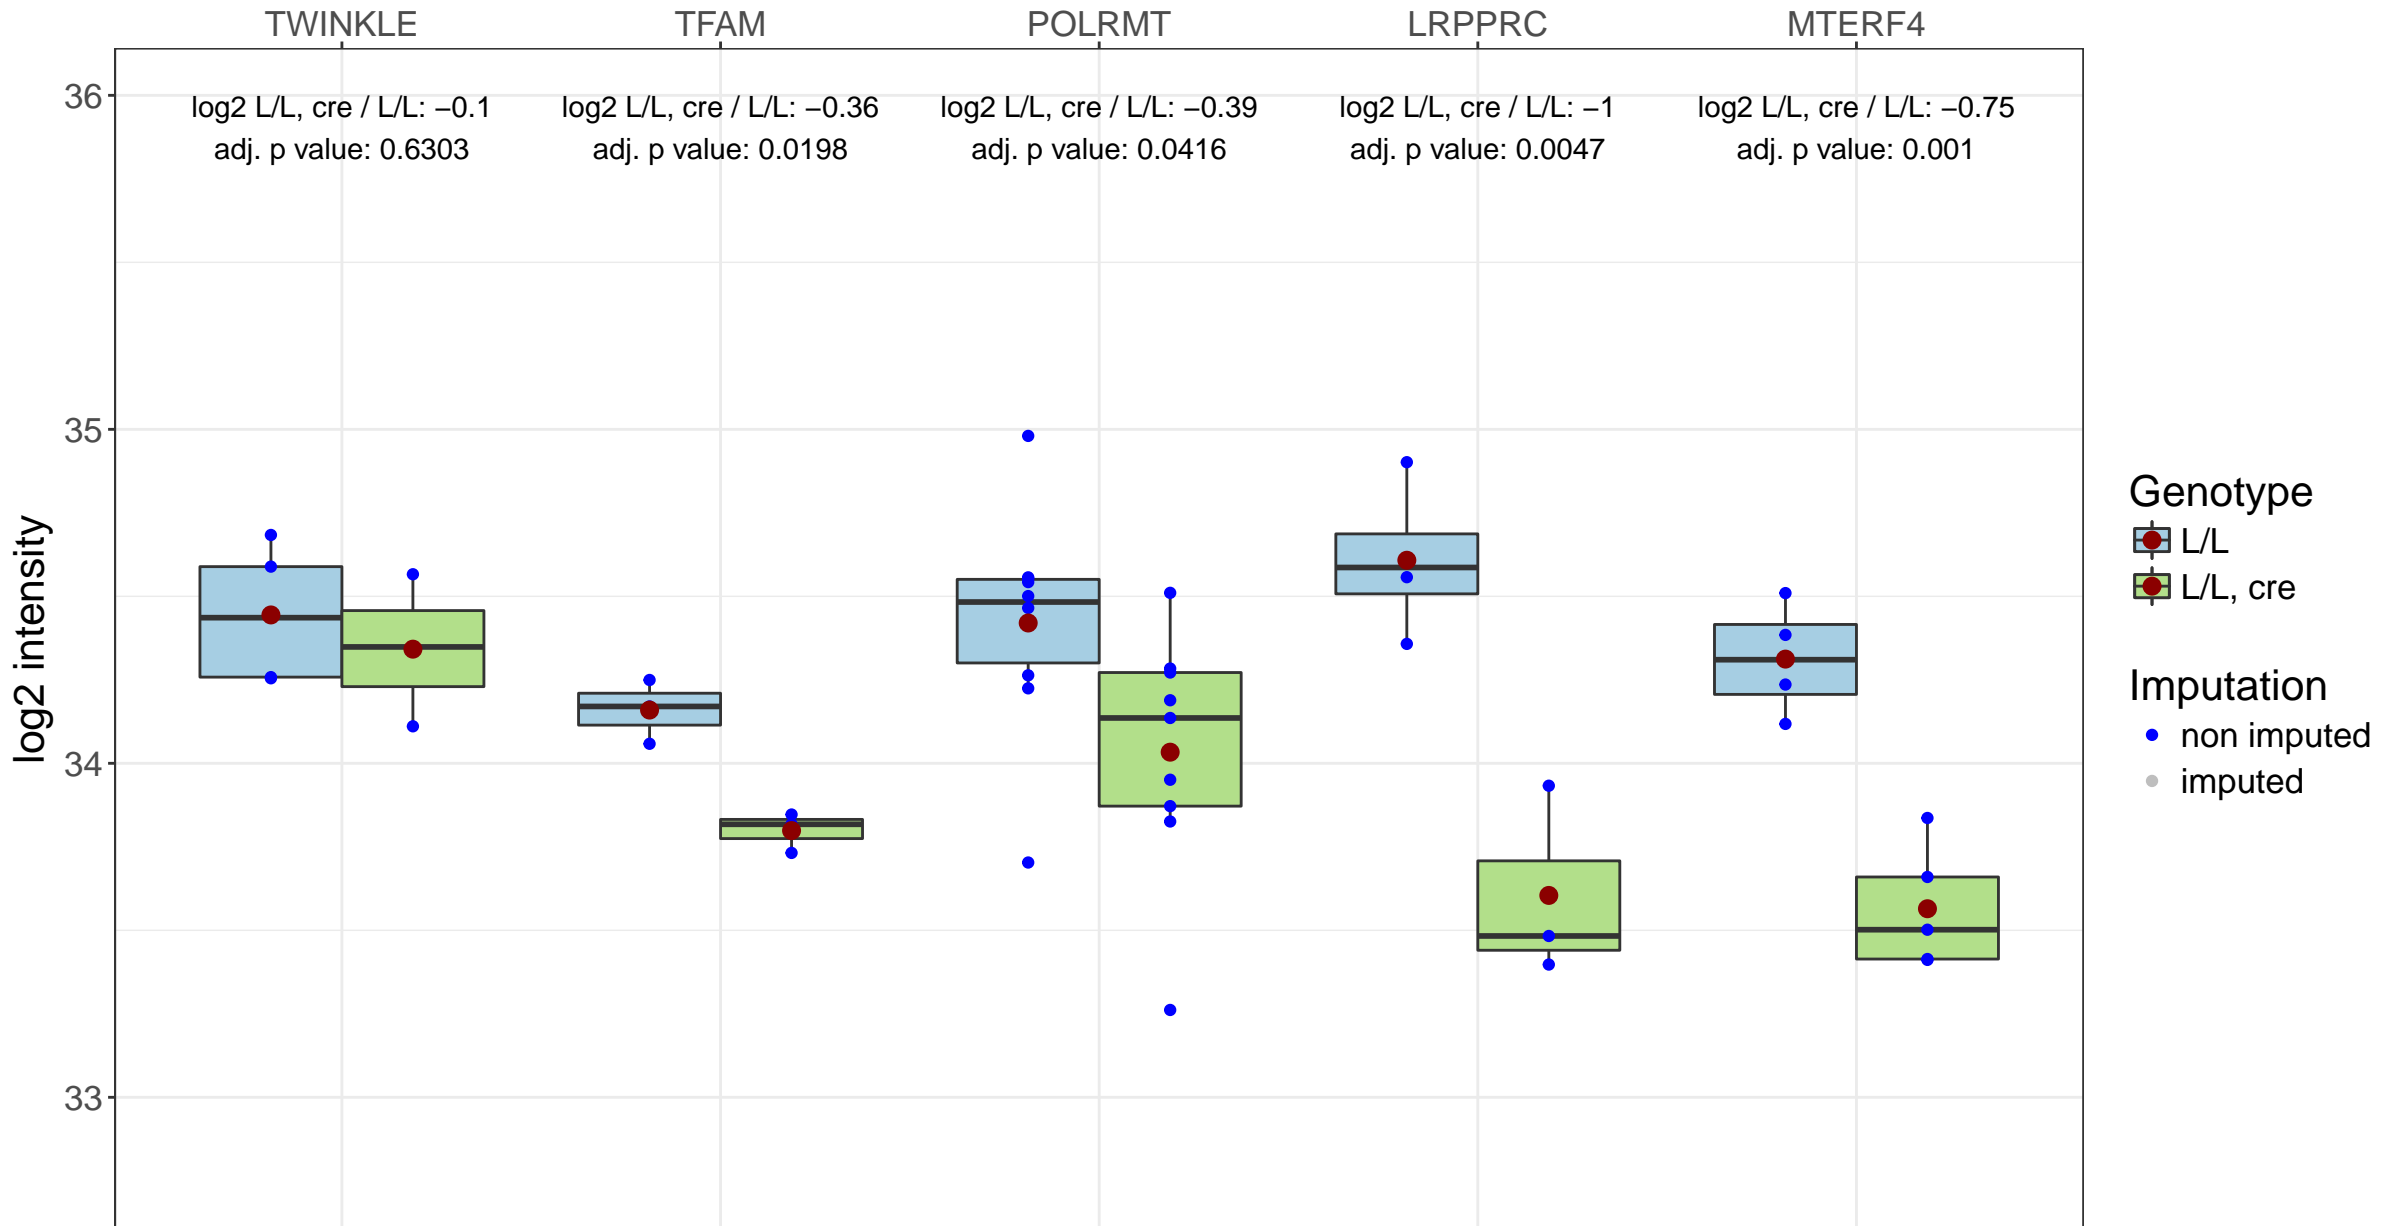

# ATP50 / Q9DB20

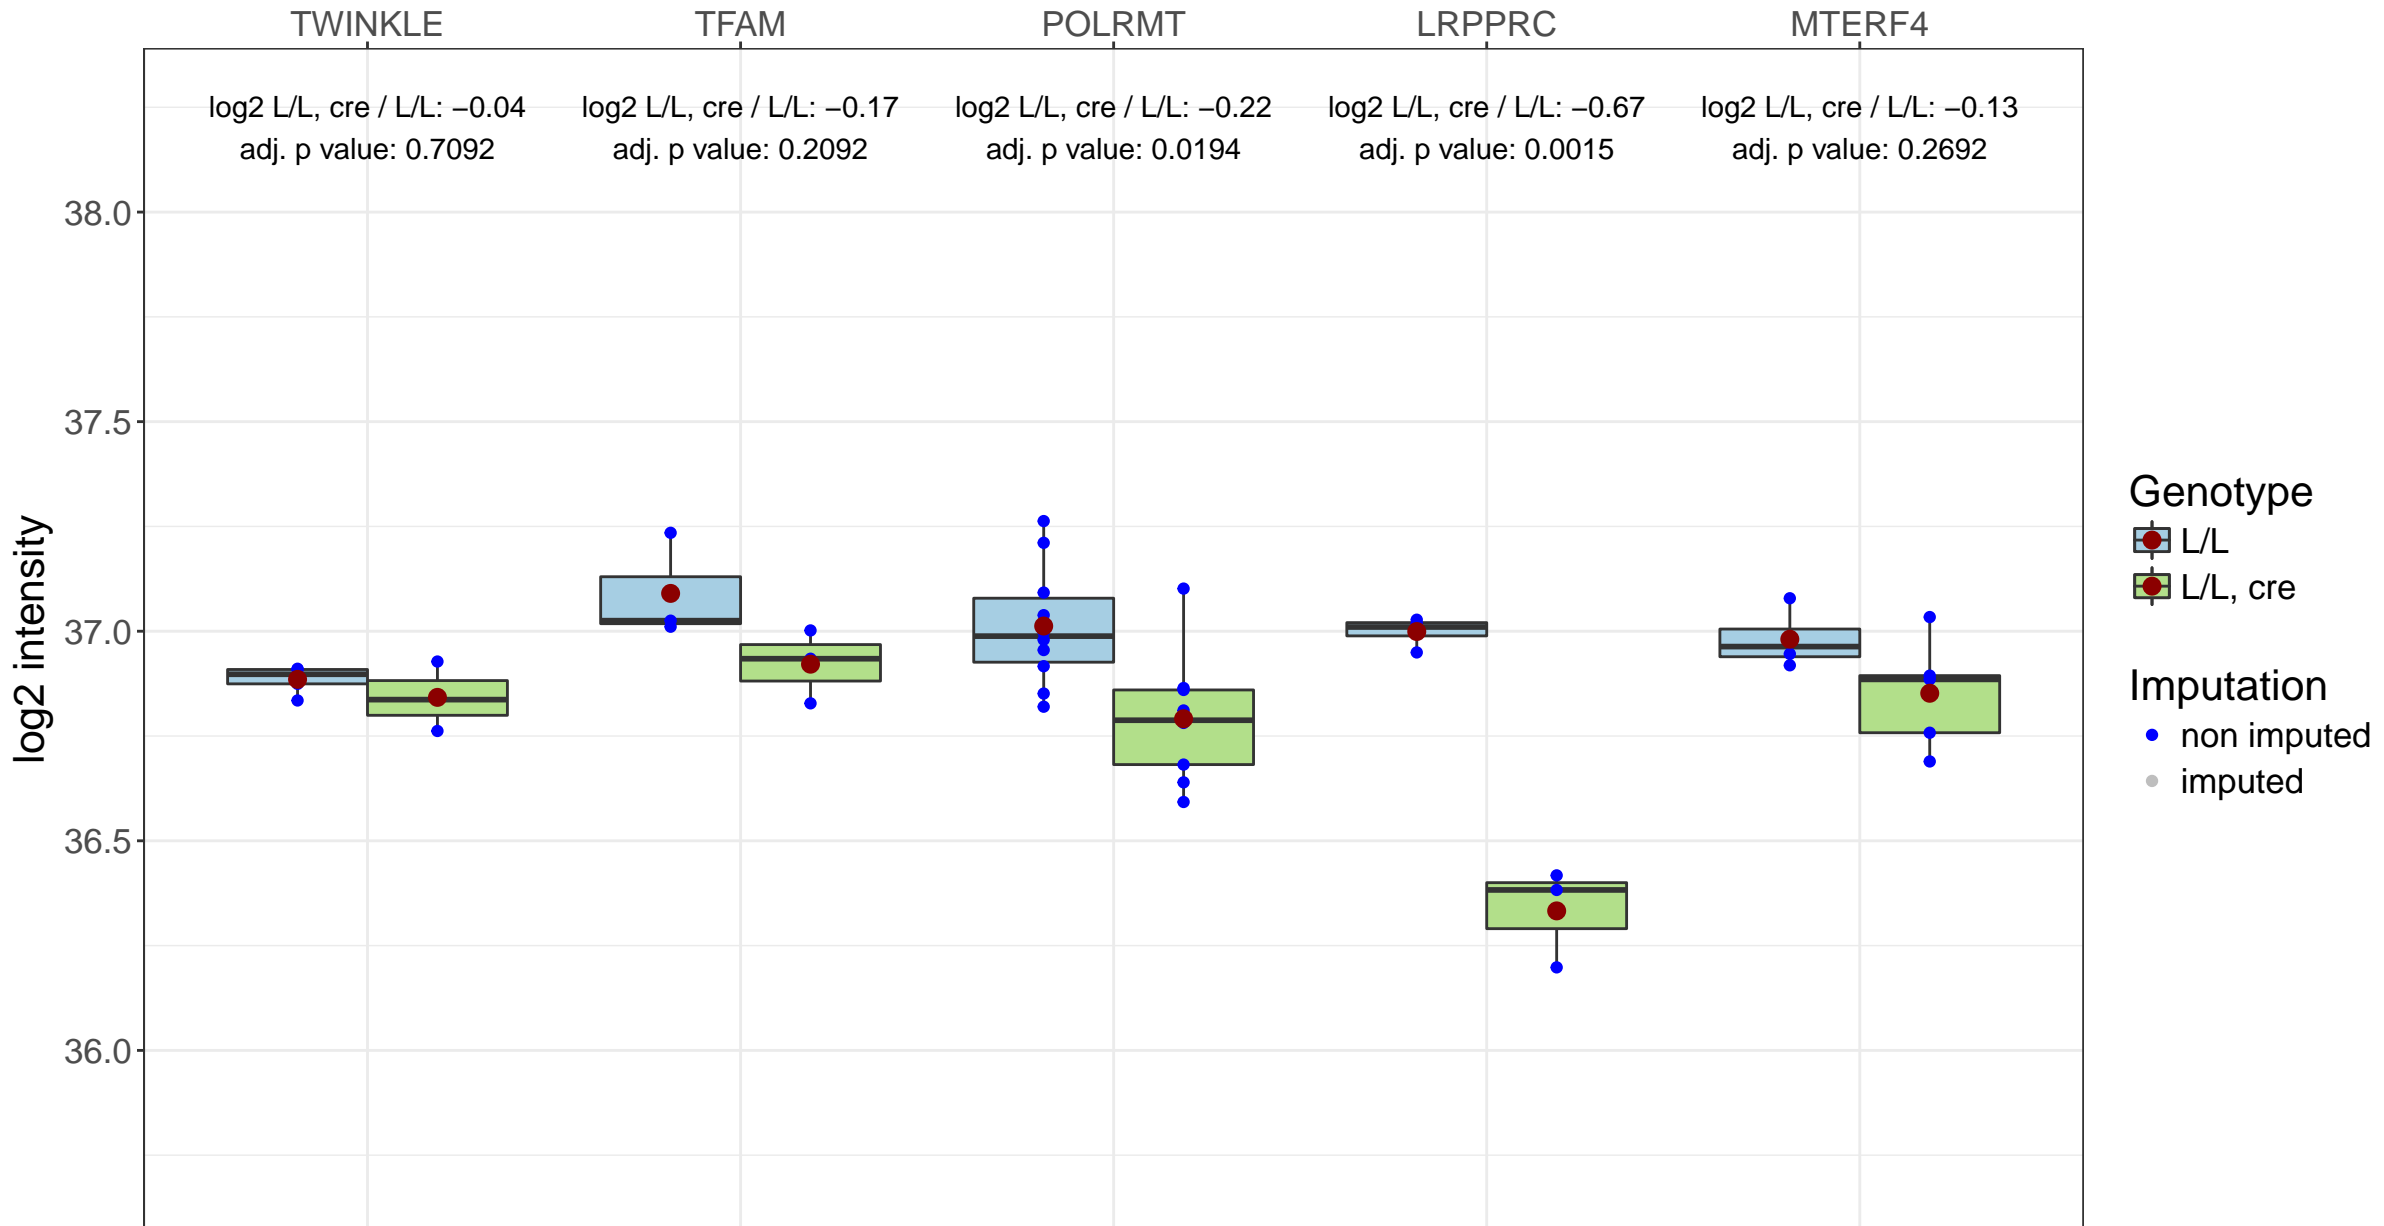

# ATP5S / Q9CRA7

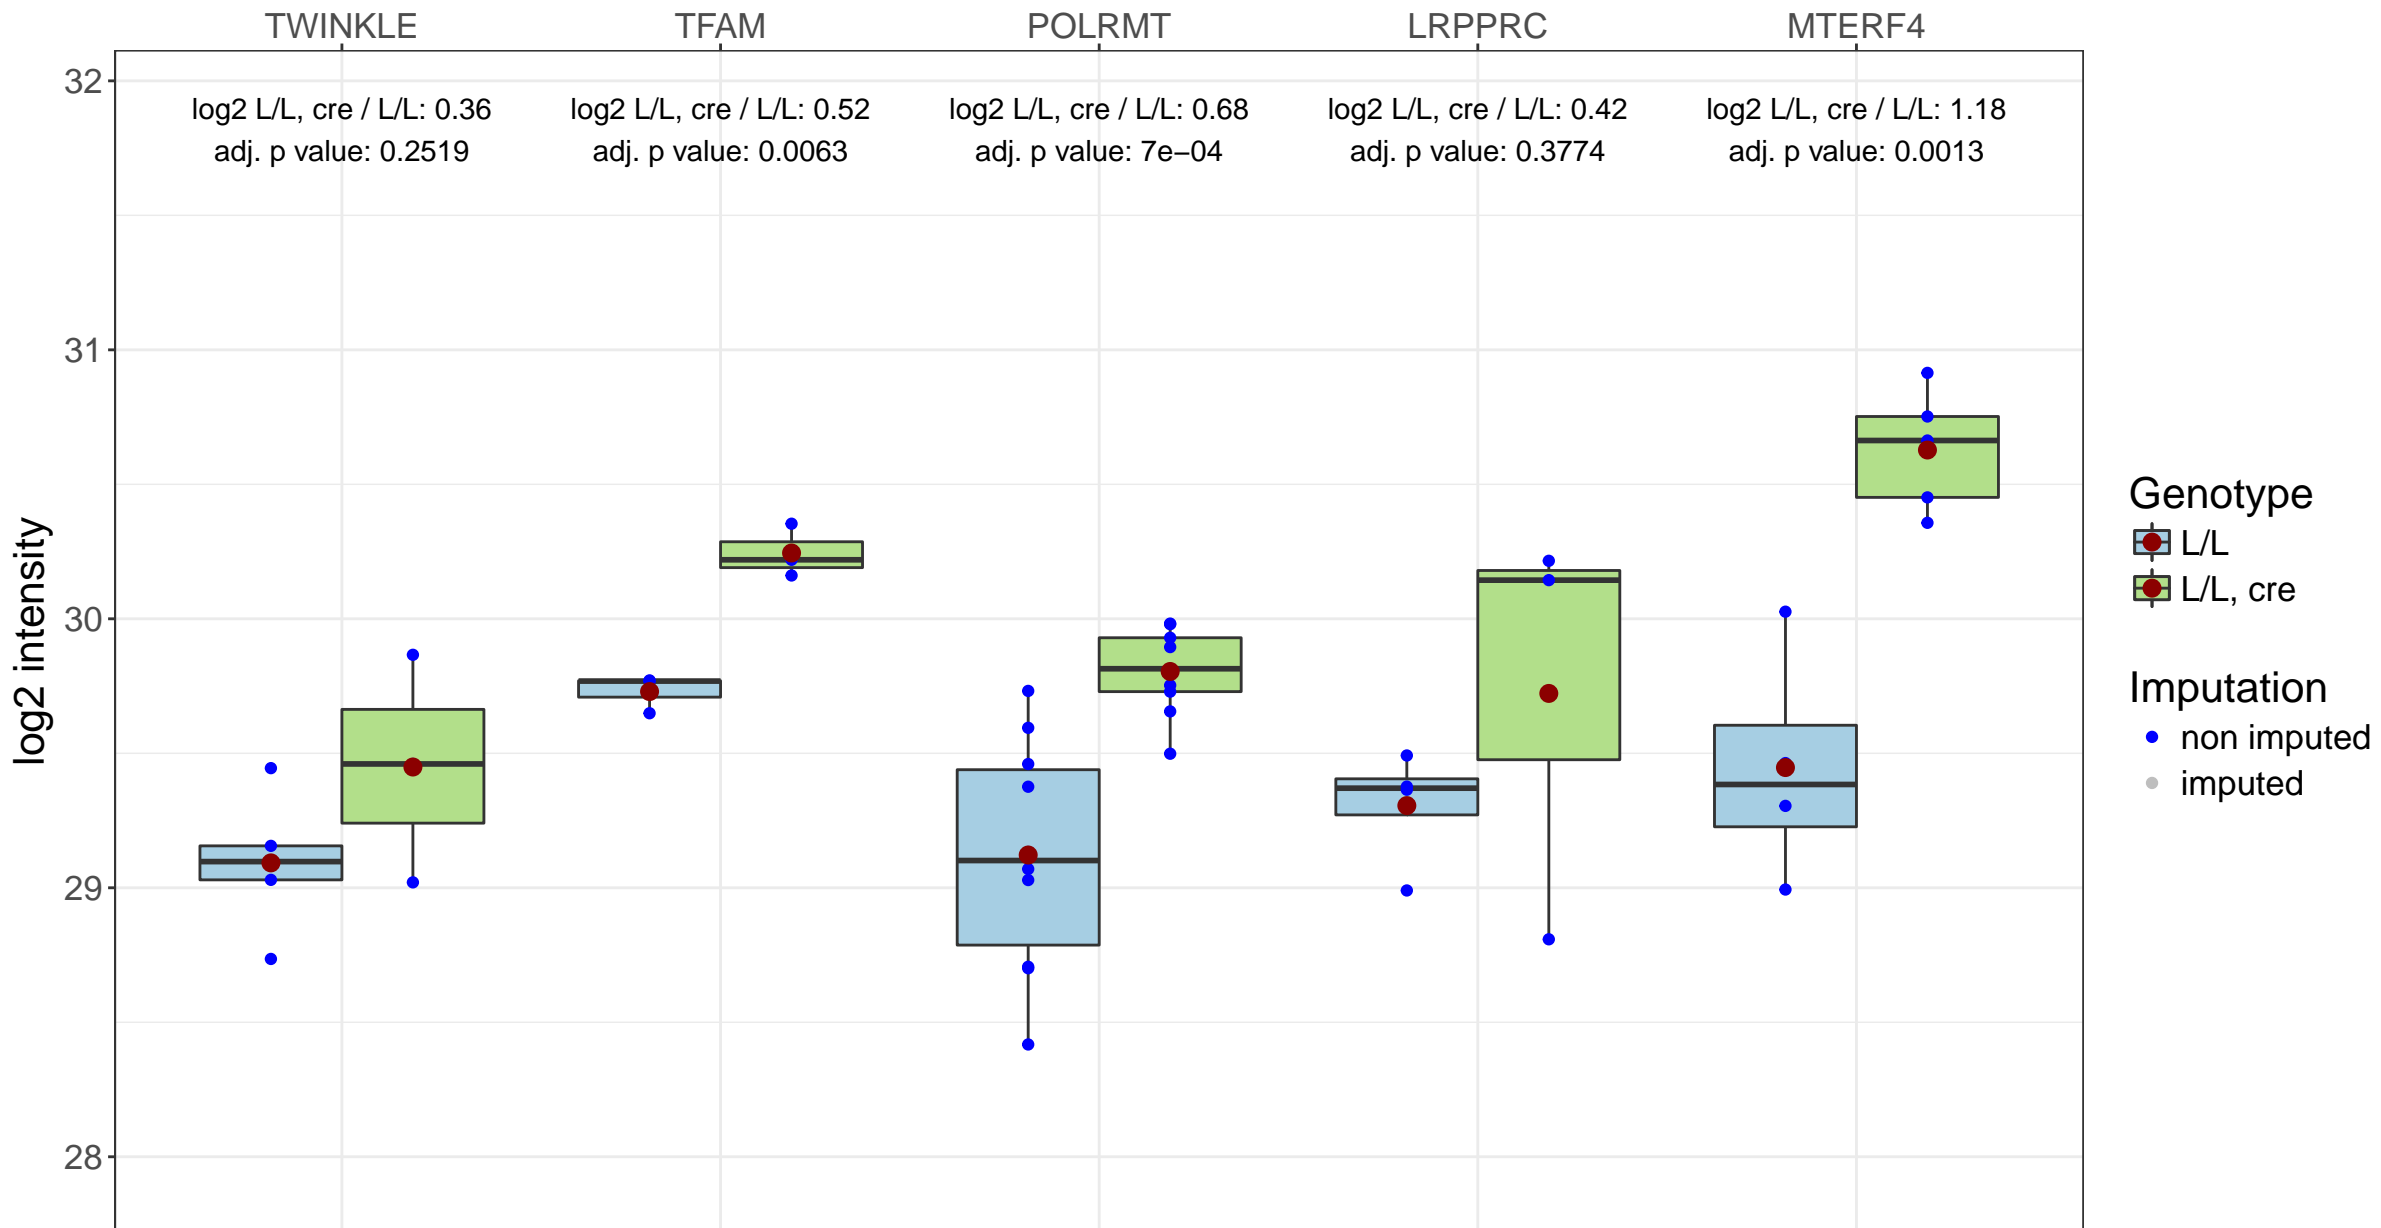

# ATP8B4 / A2ANX3

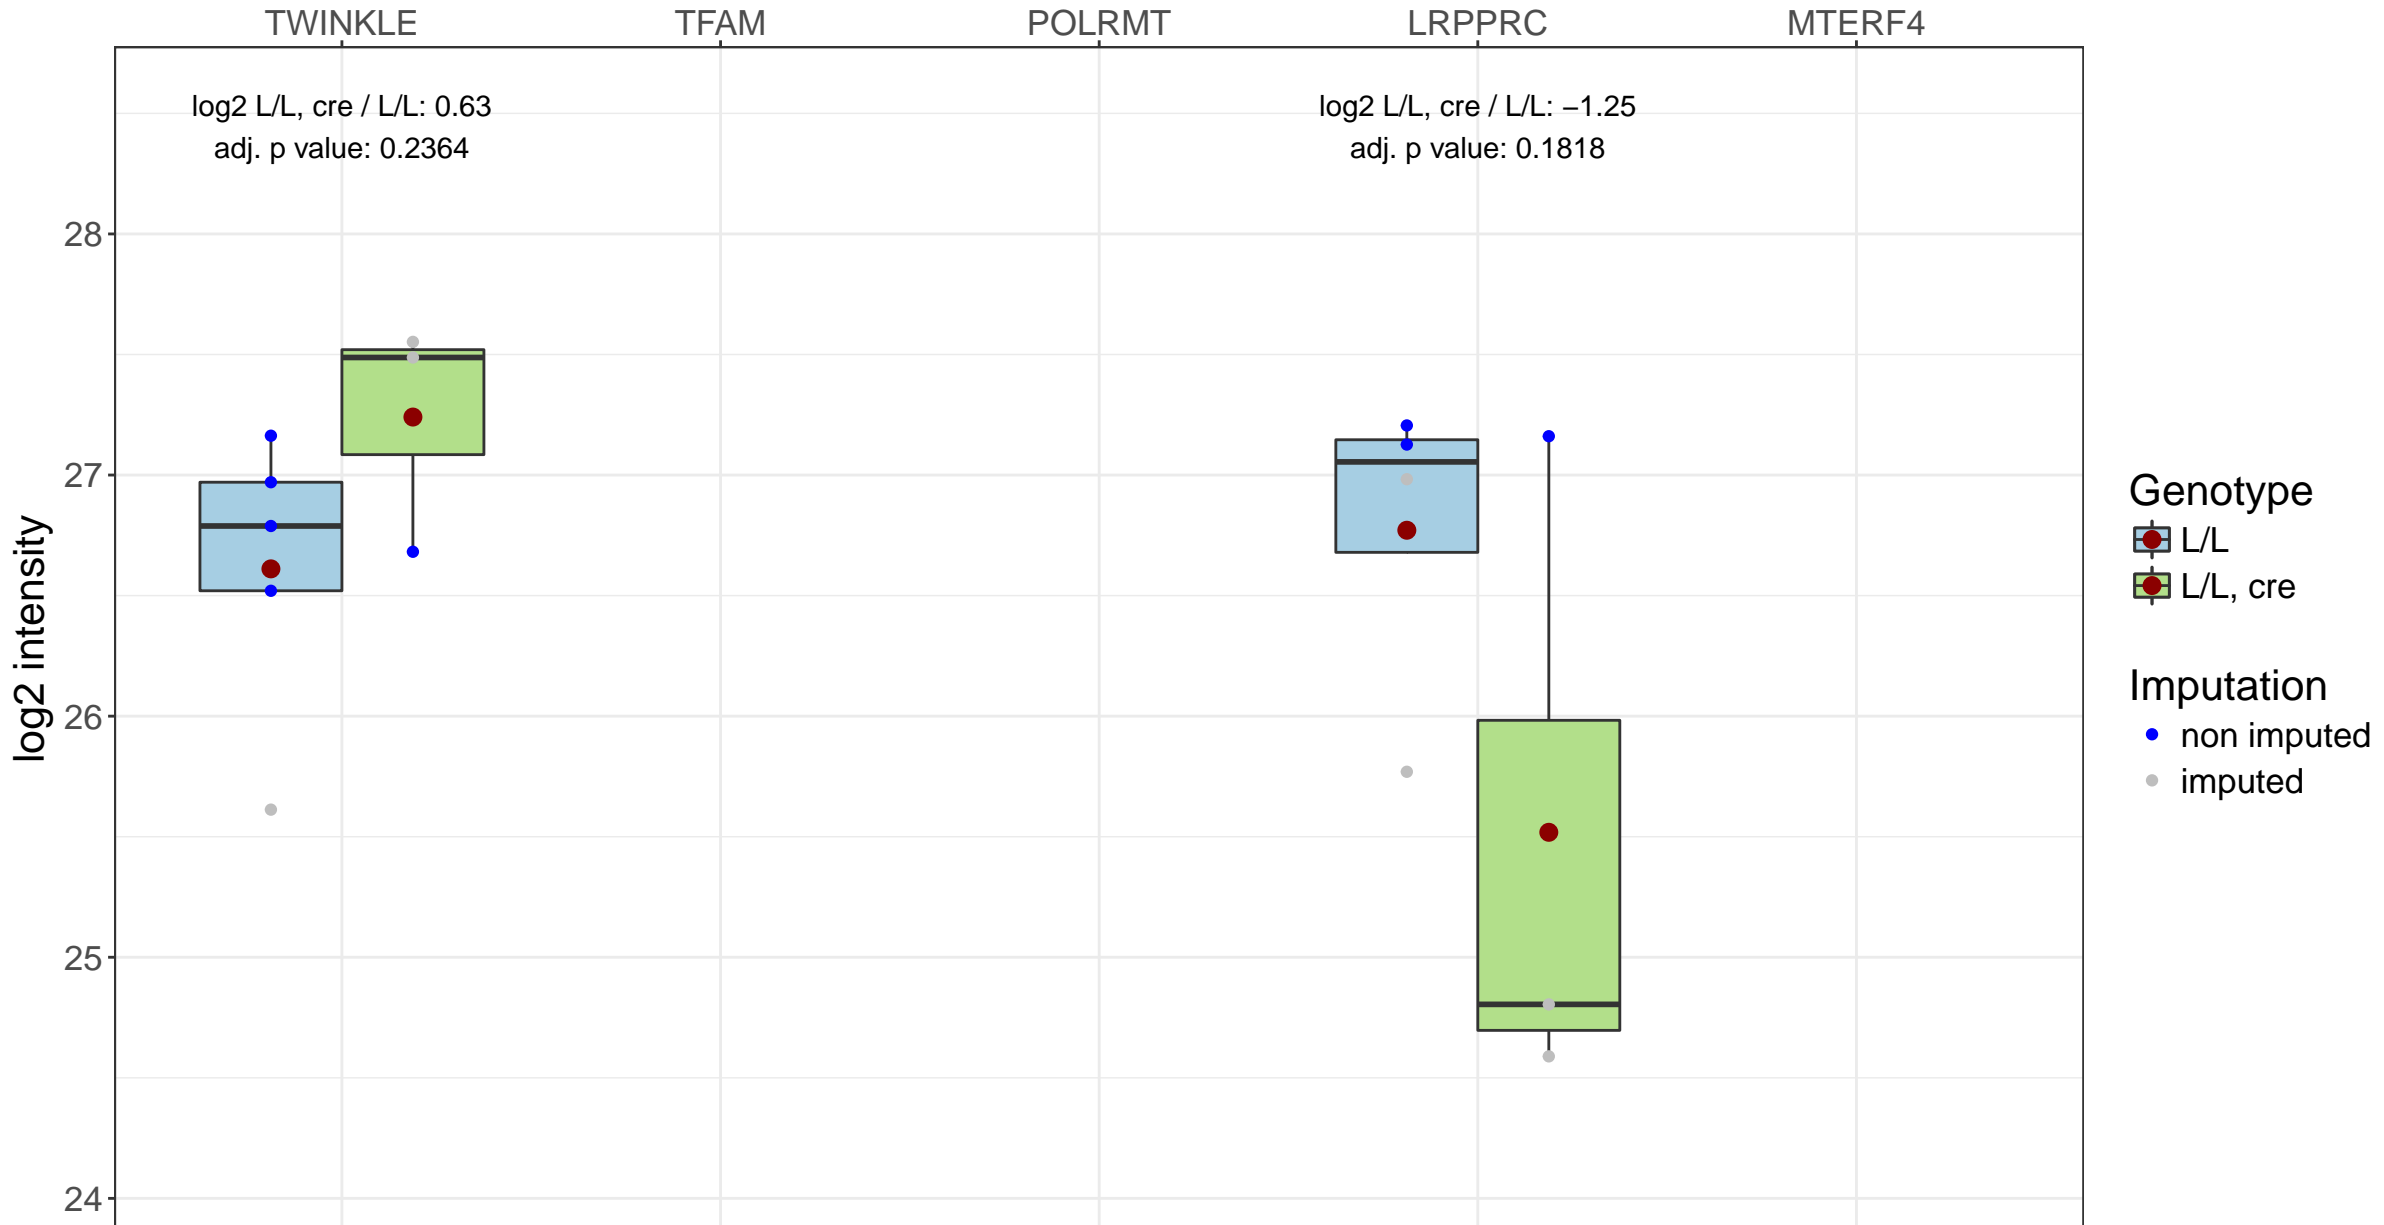

# ATPAF1 / V9GX21

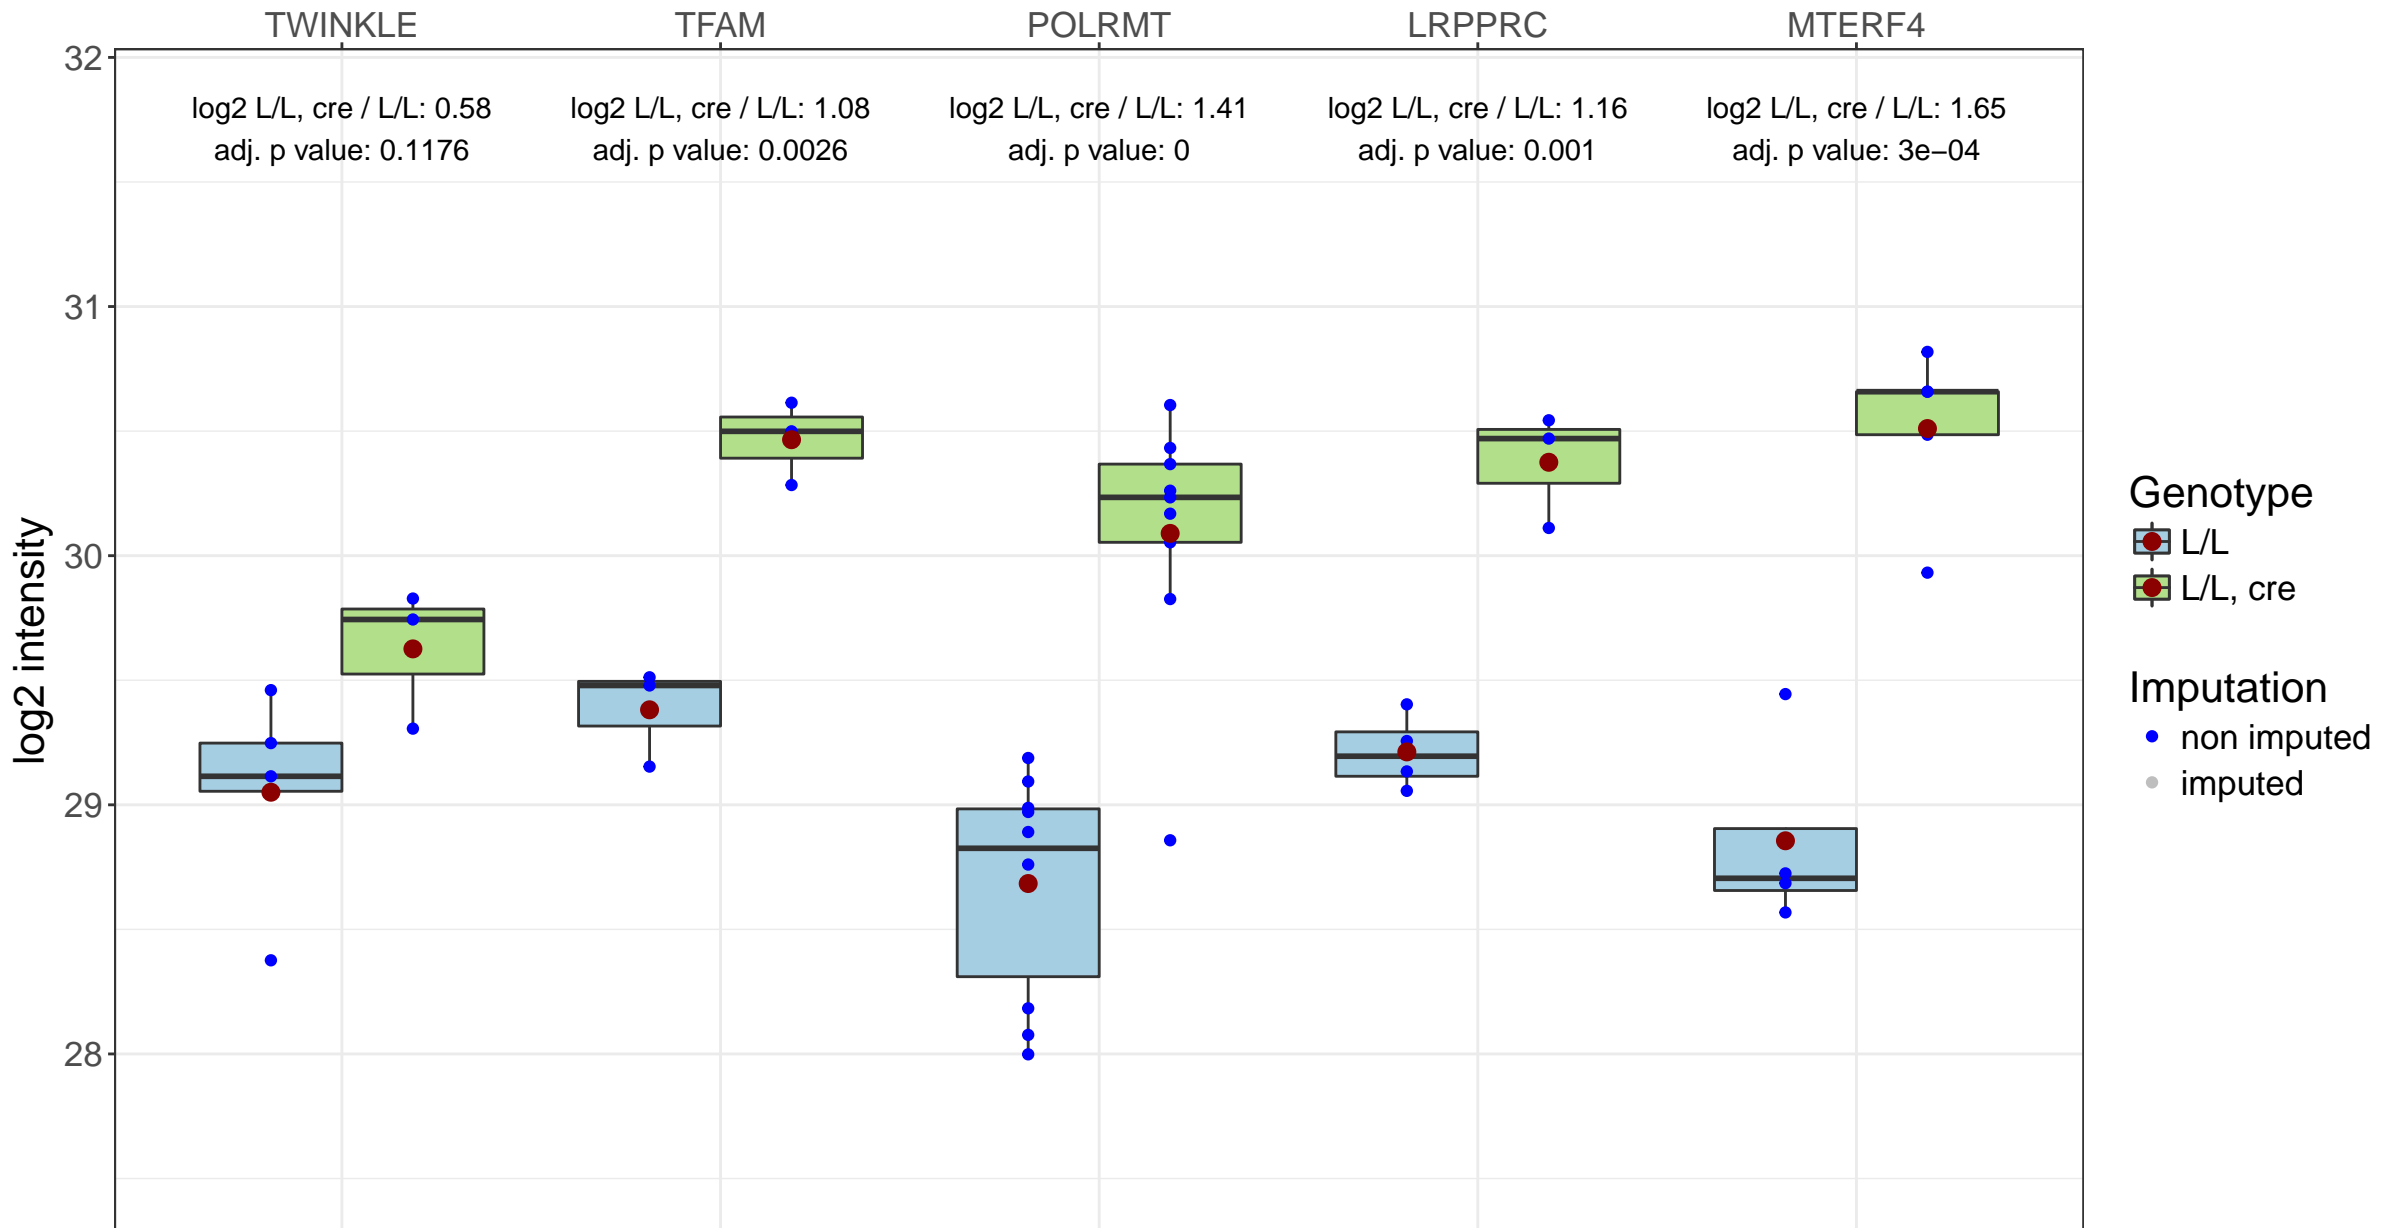

# ATPAF2 / Q91YY4

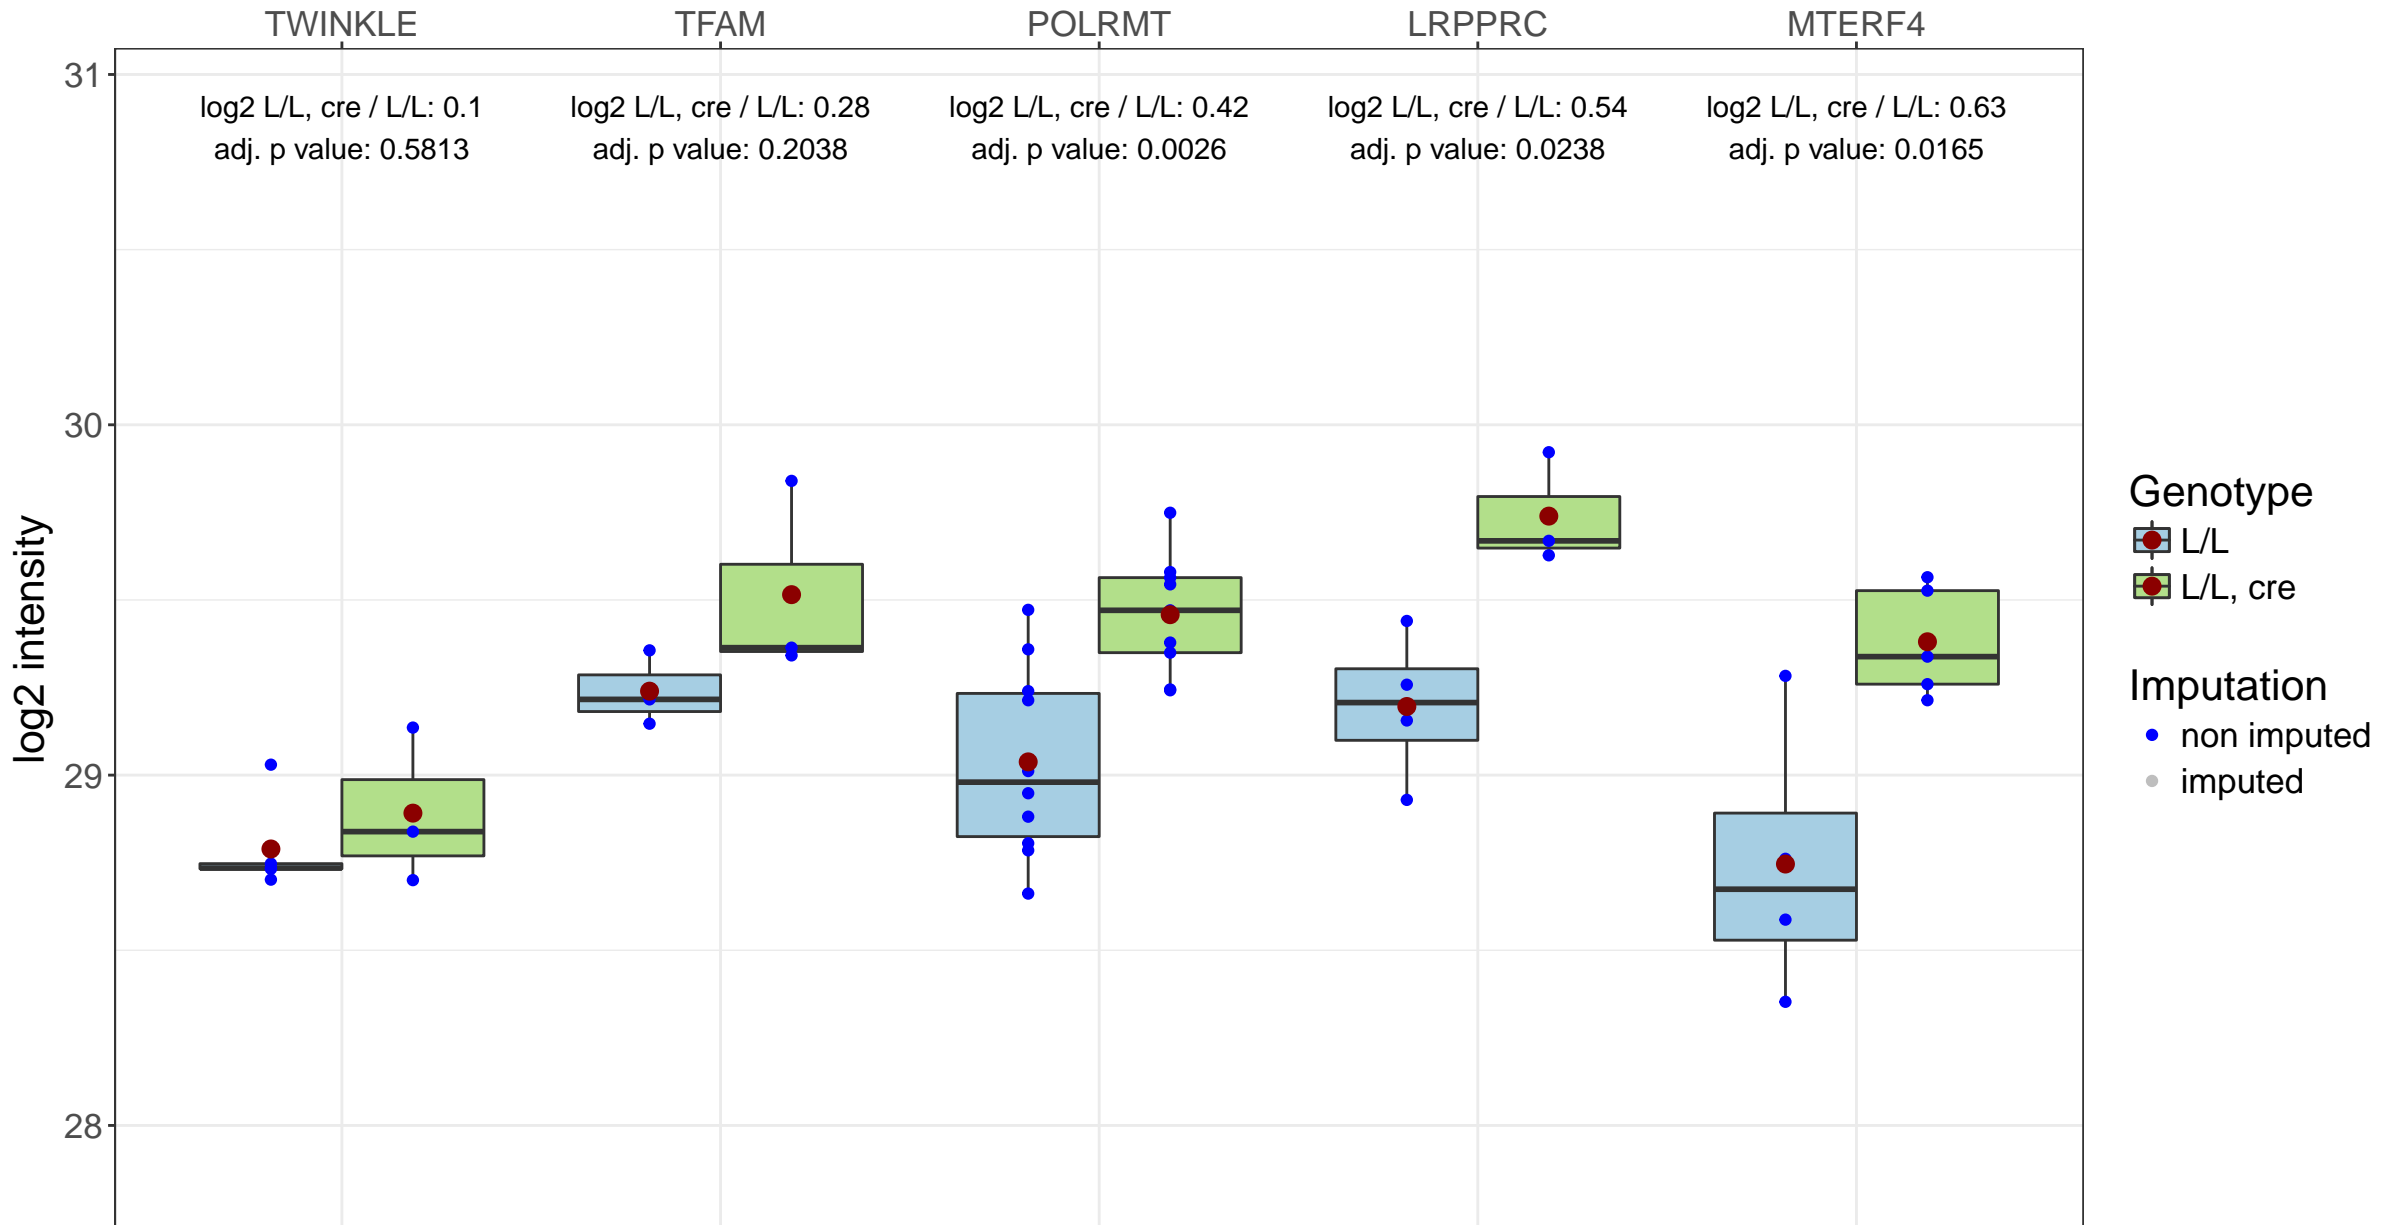

# ATPIF1 / E9PV44

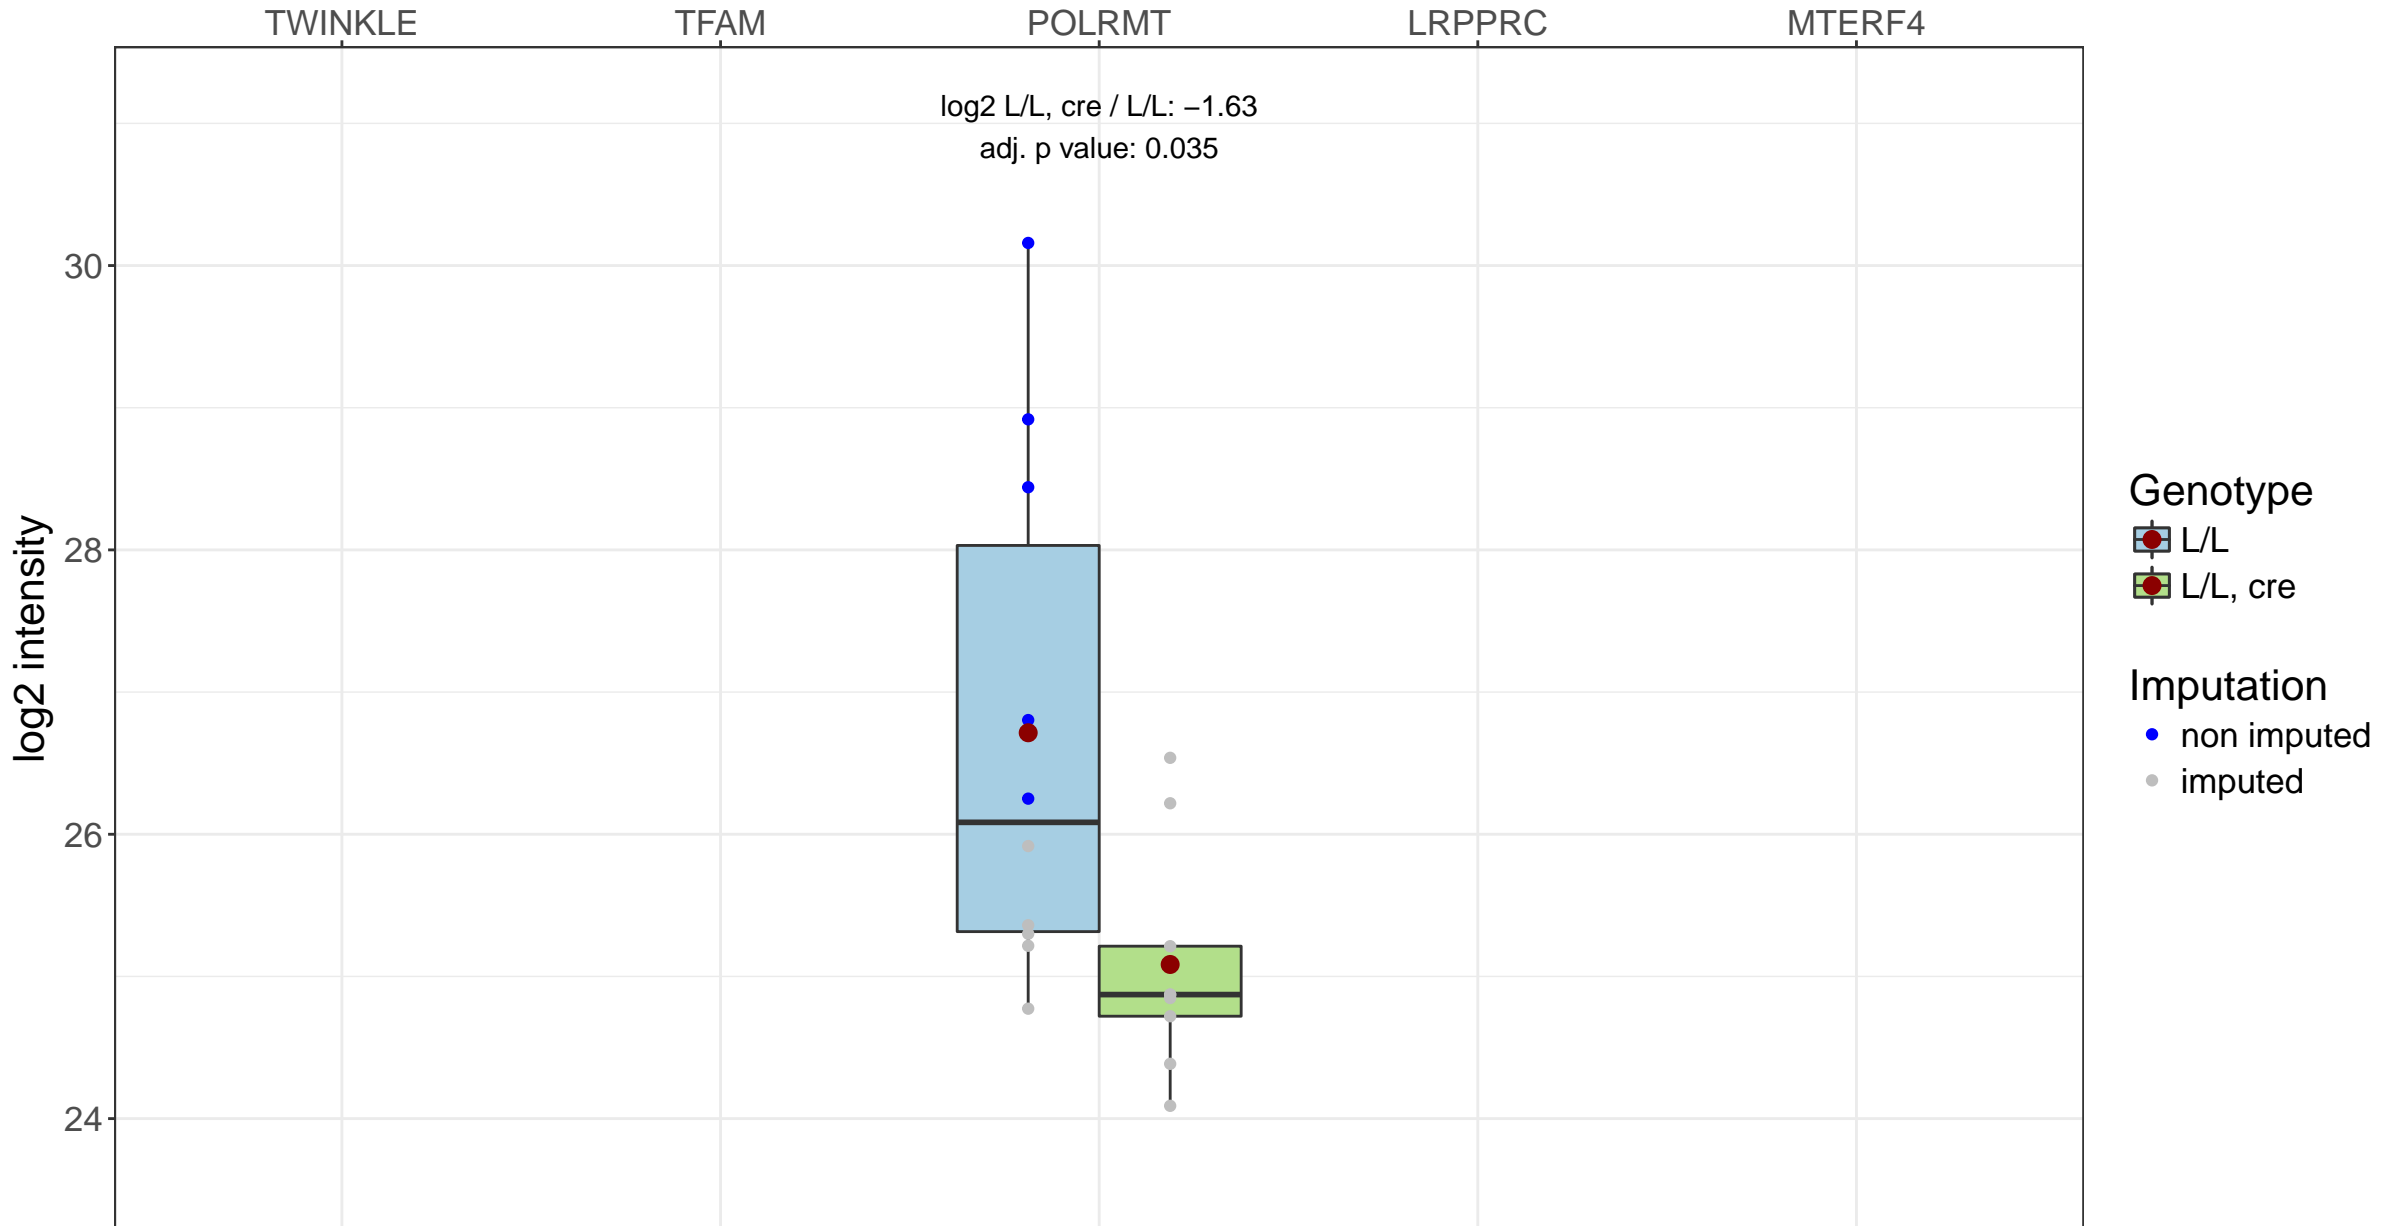



# ATPIF1 / O35143

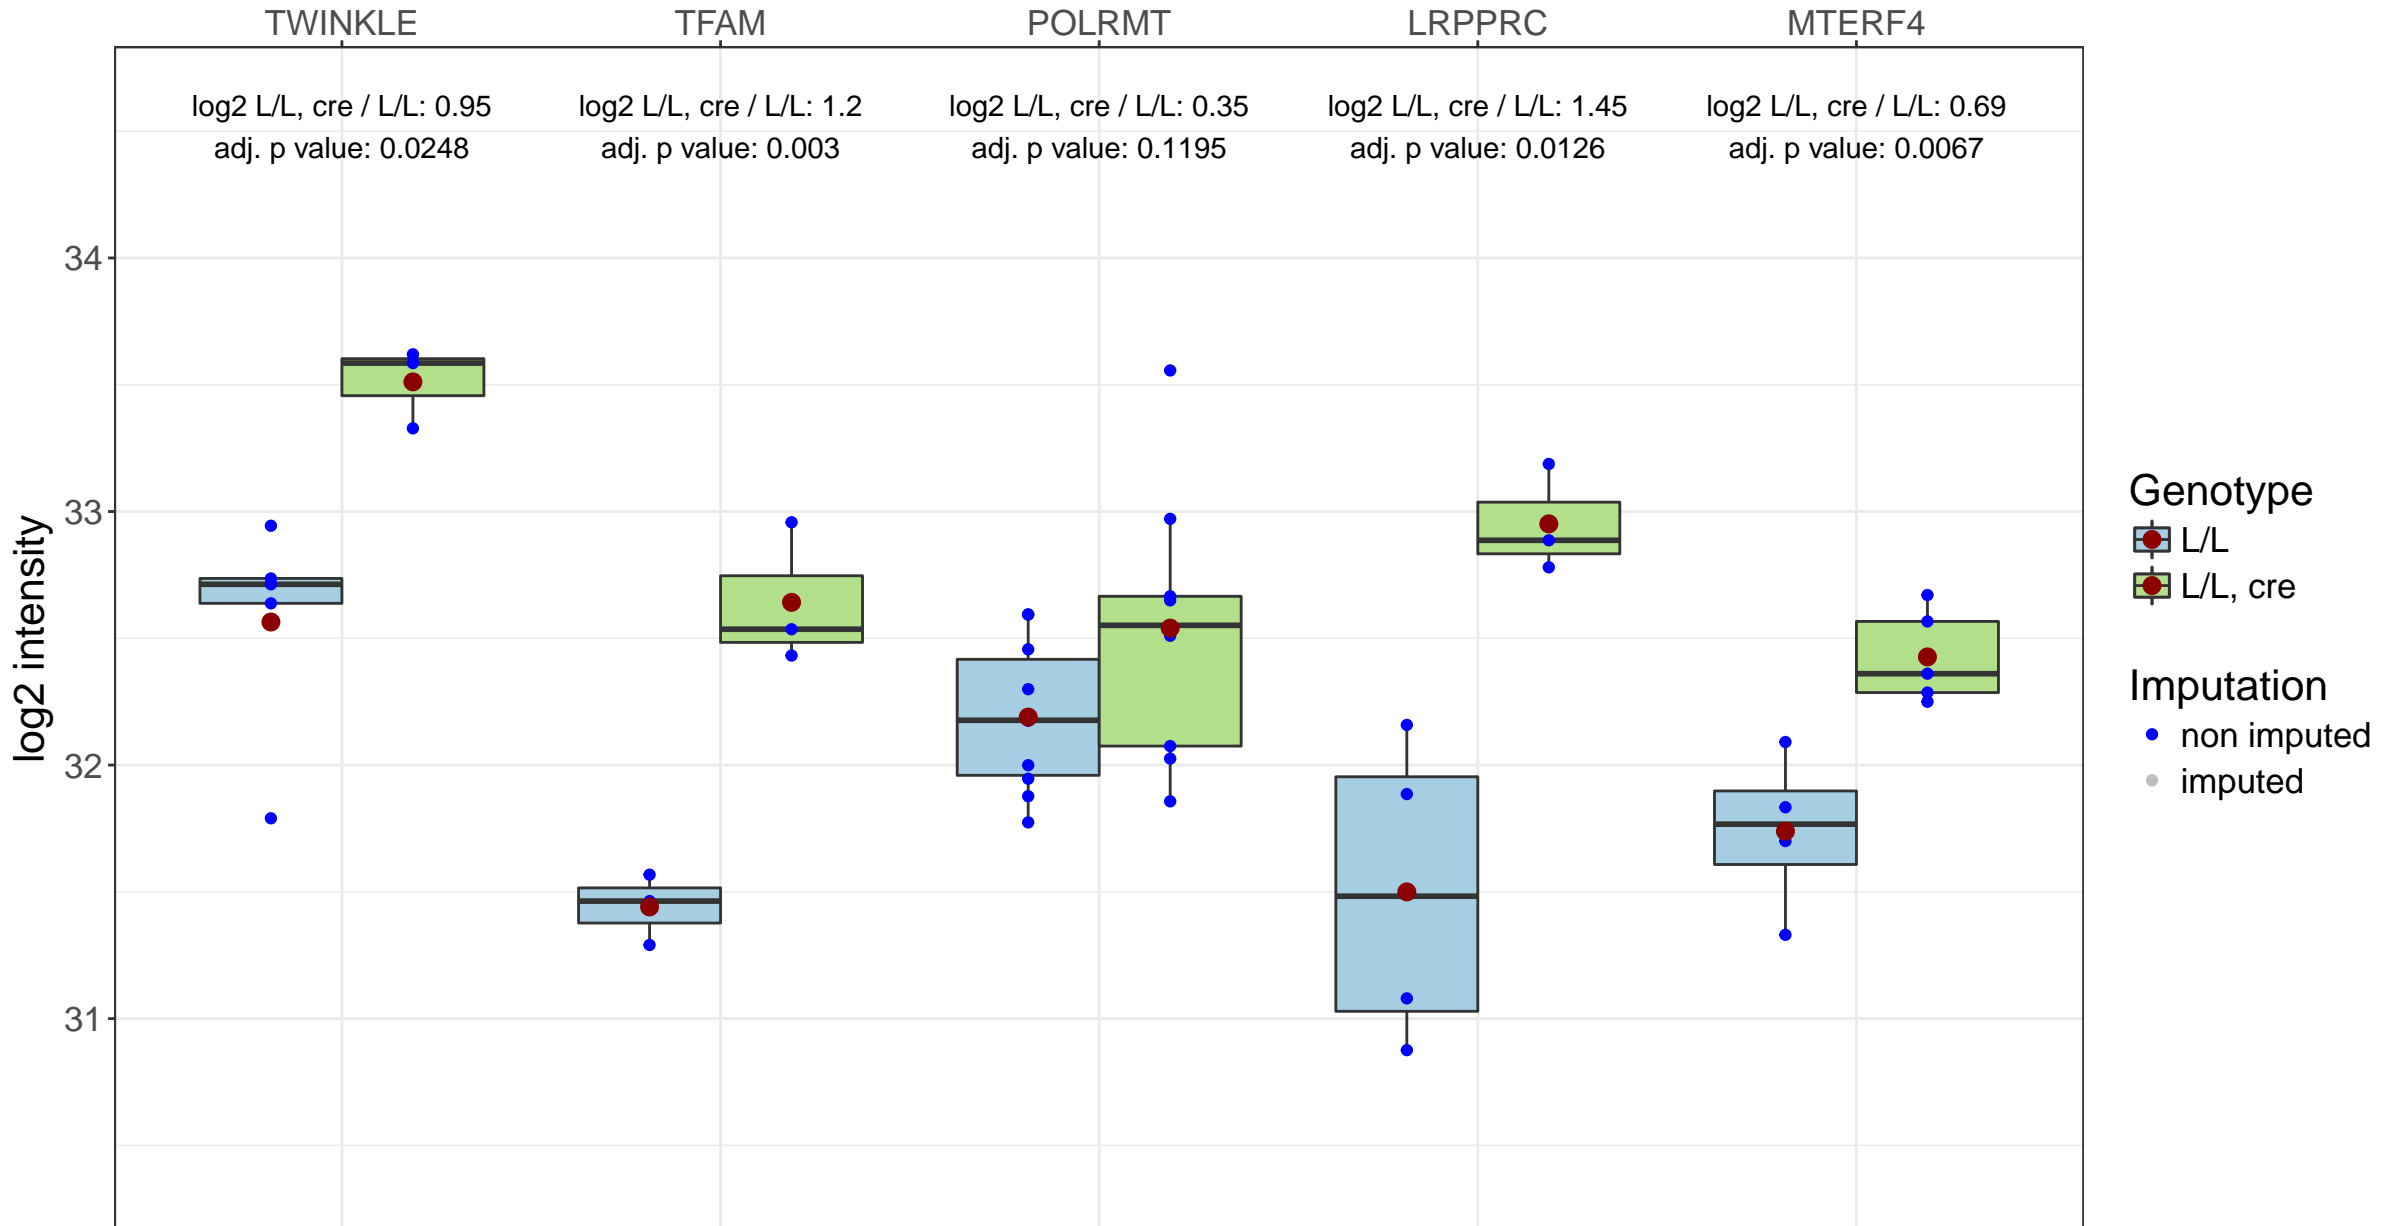

# AUH / Q9JLZ3

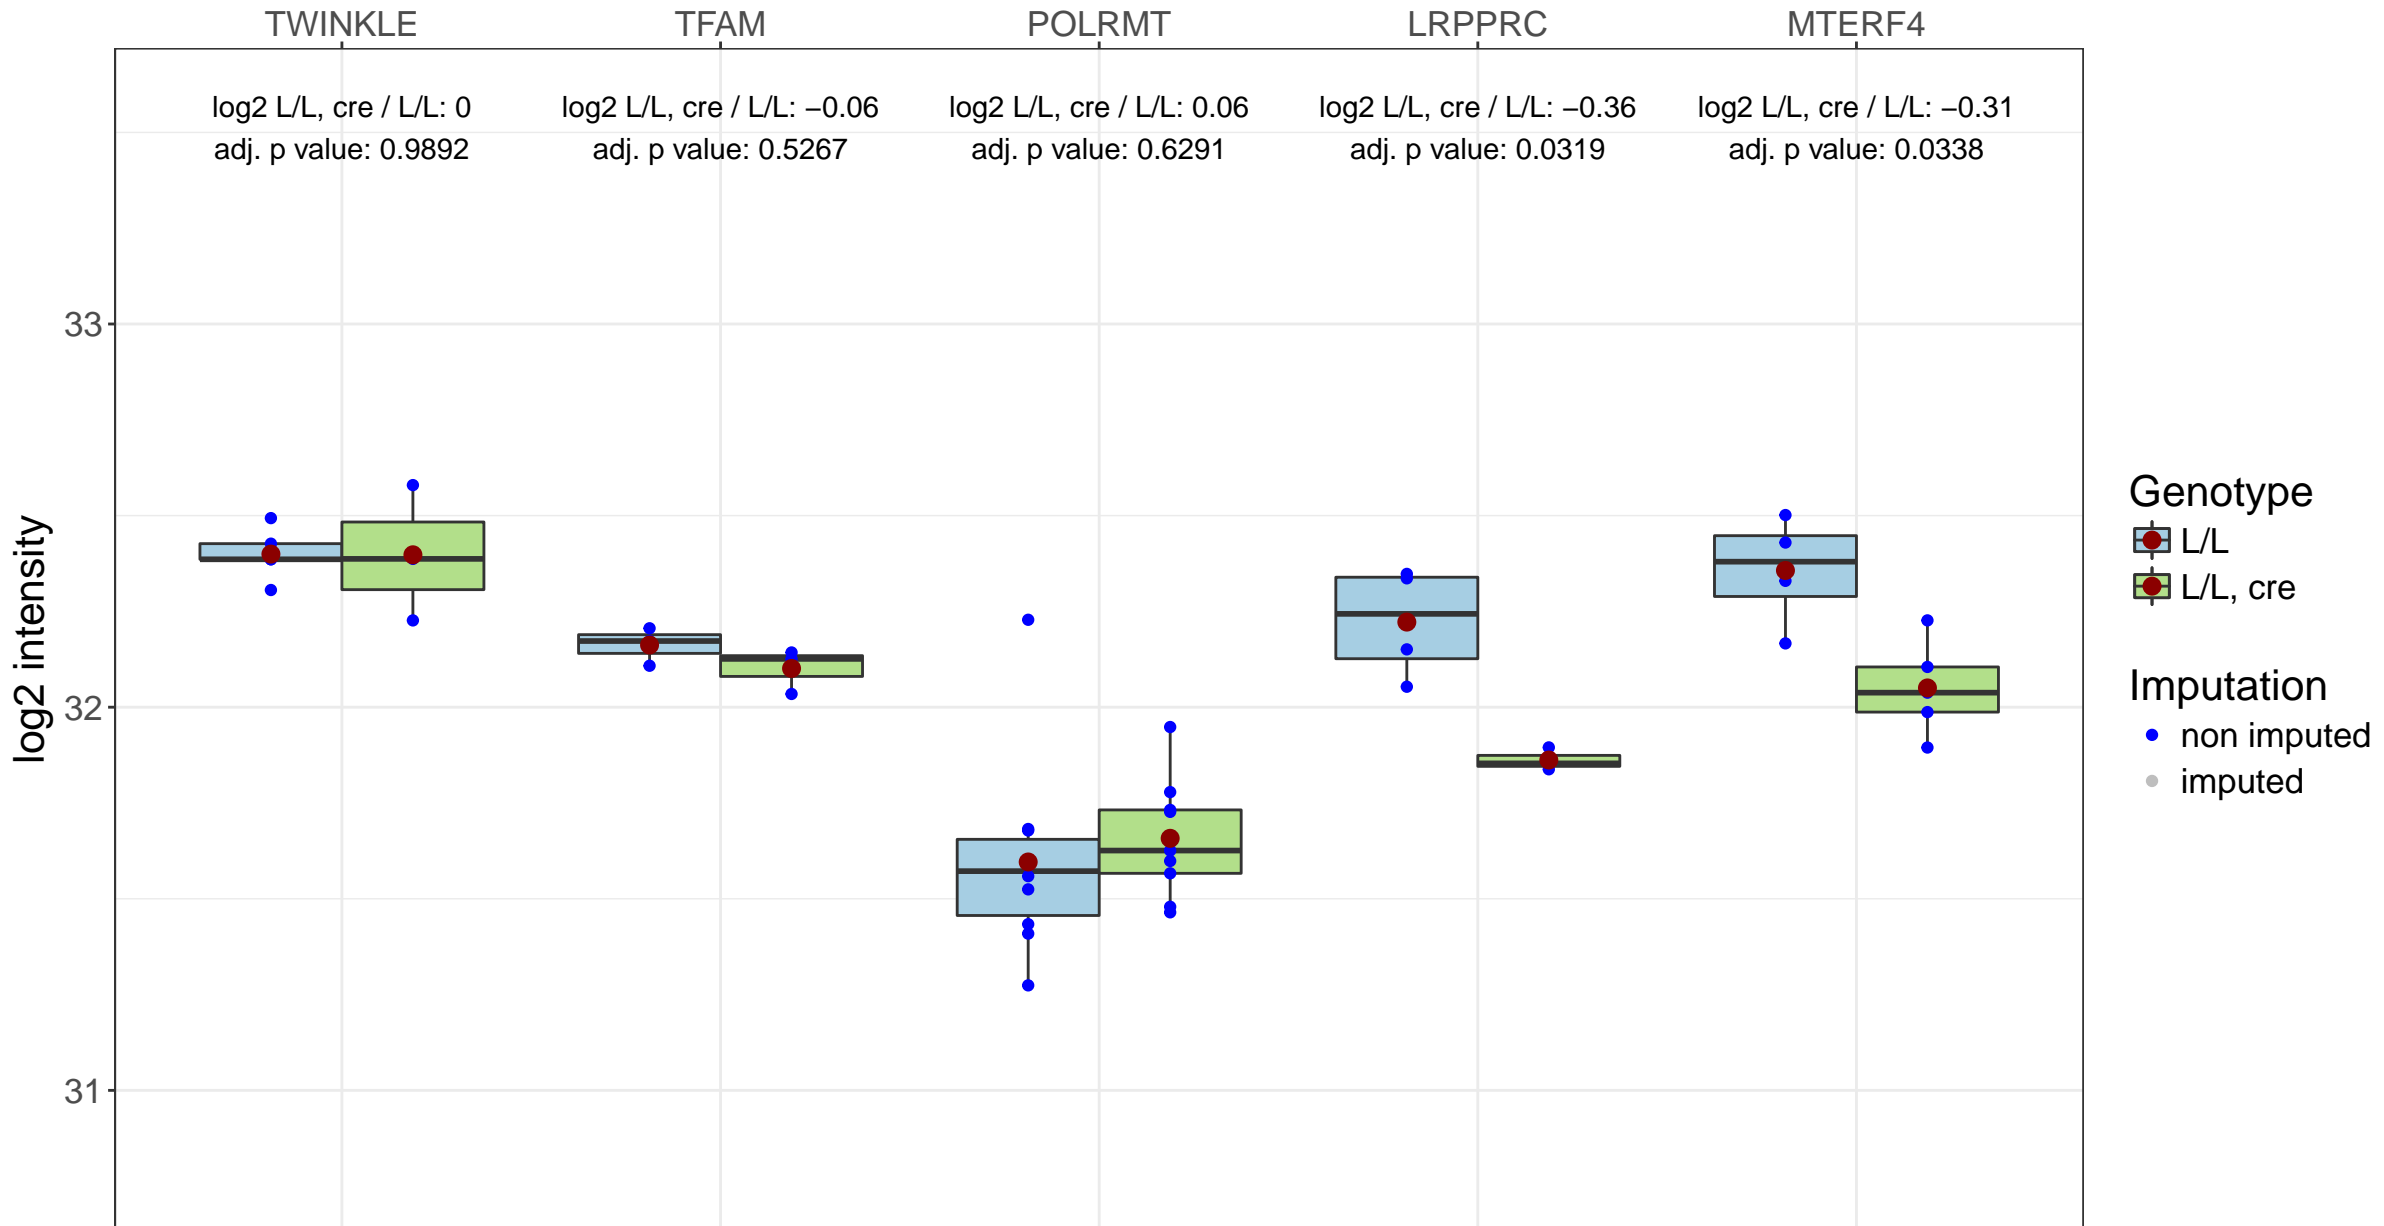

# BAK1 / E9QM21

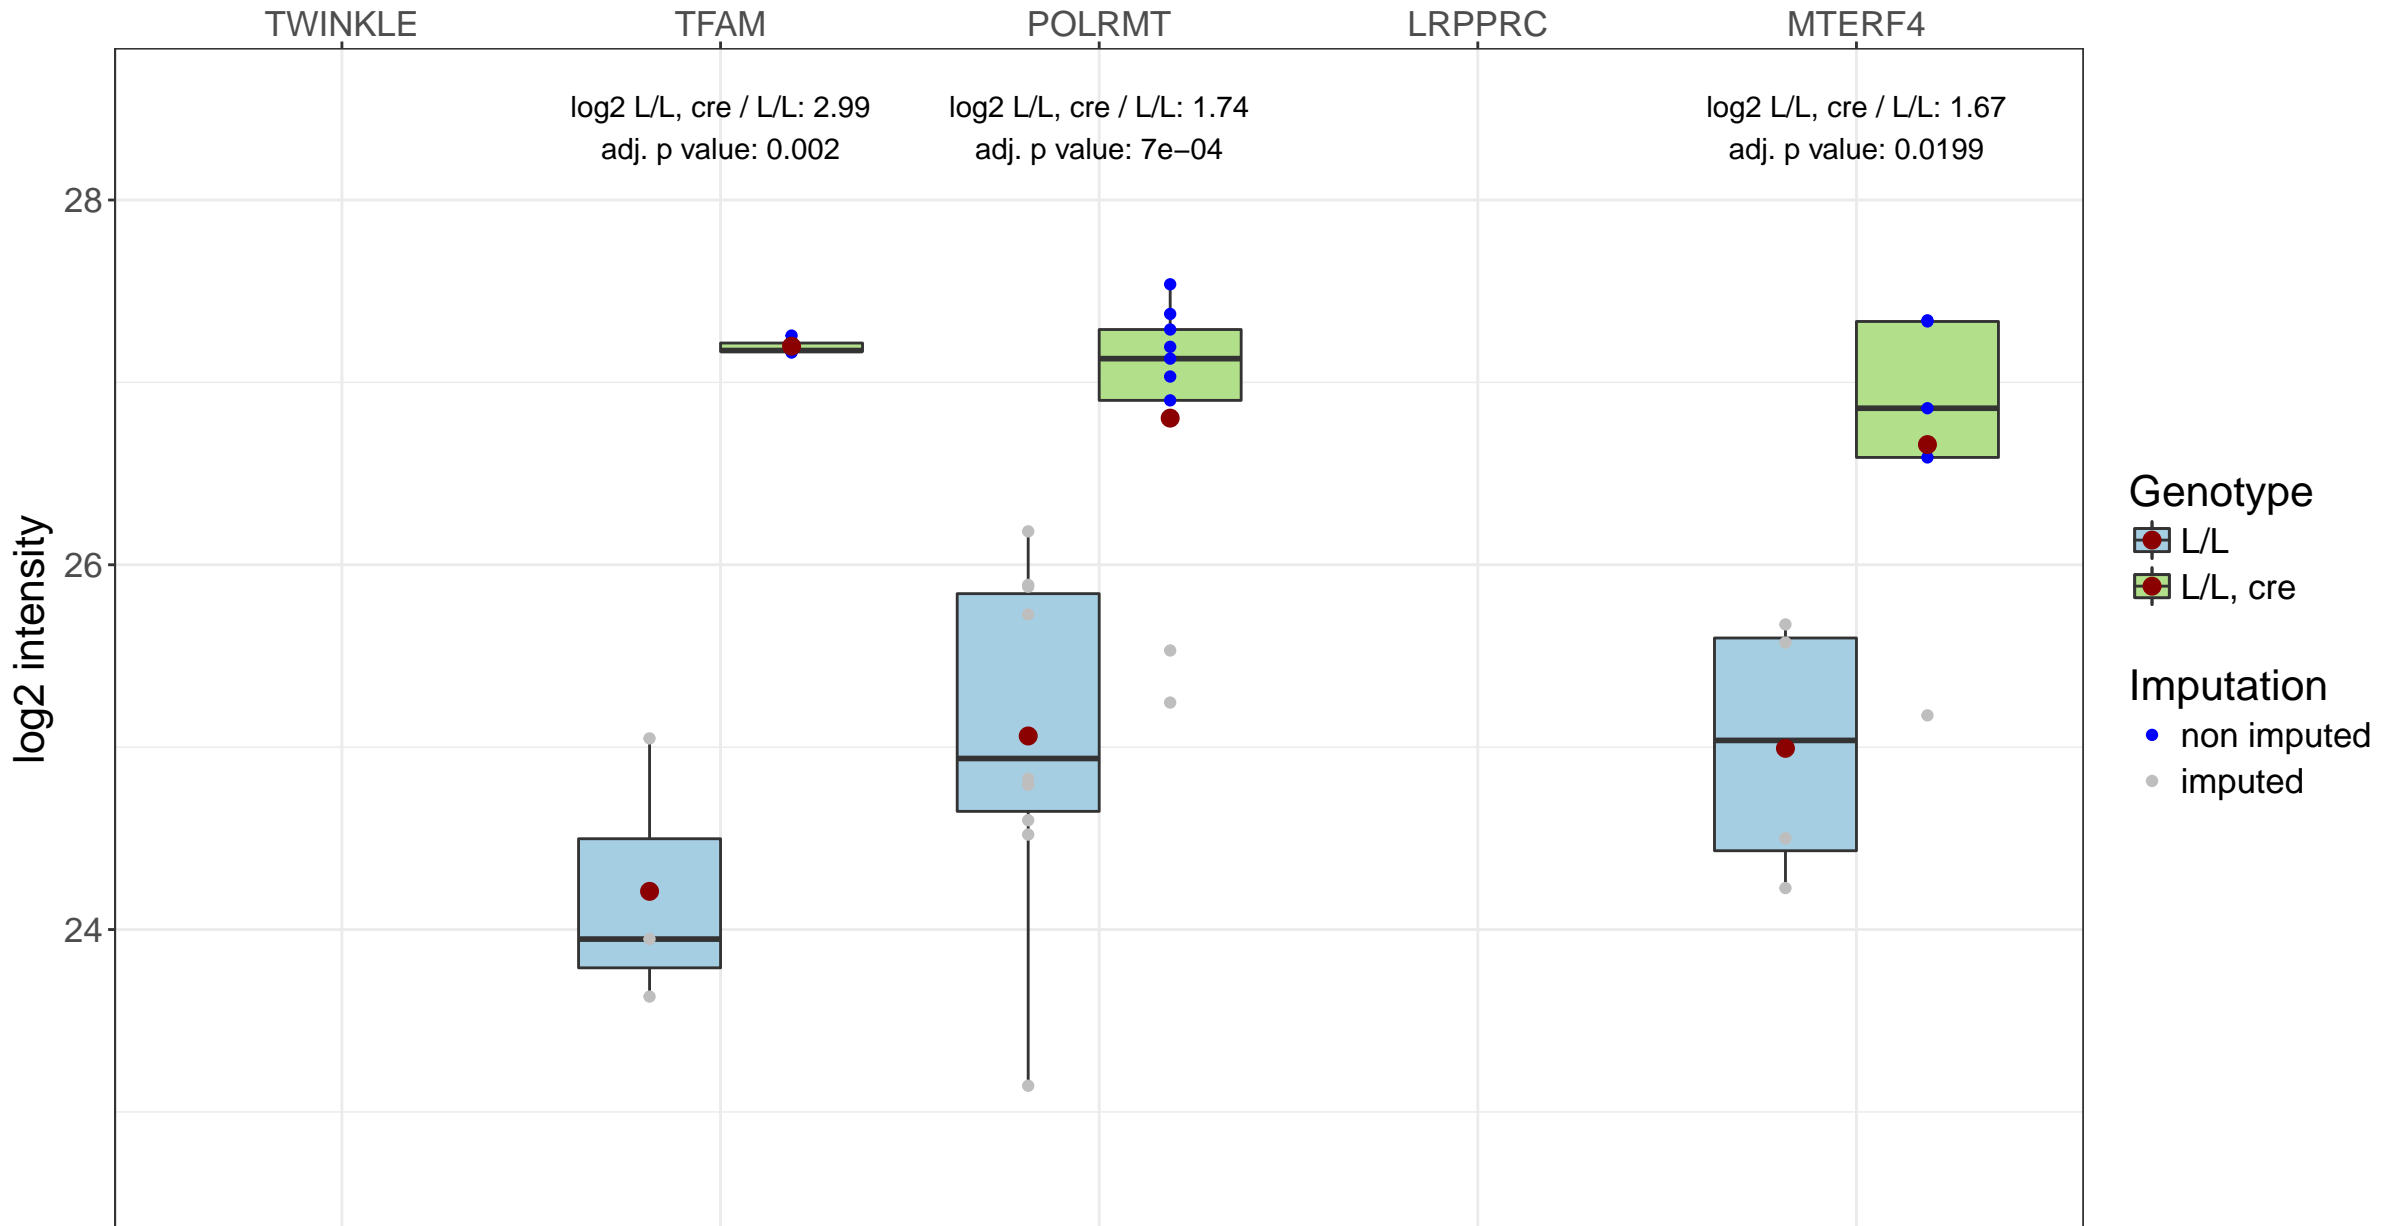

# BAX / Q07813

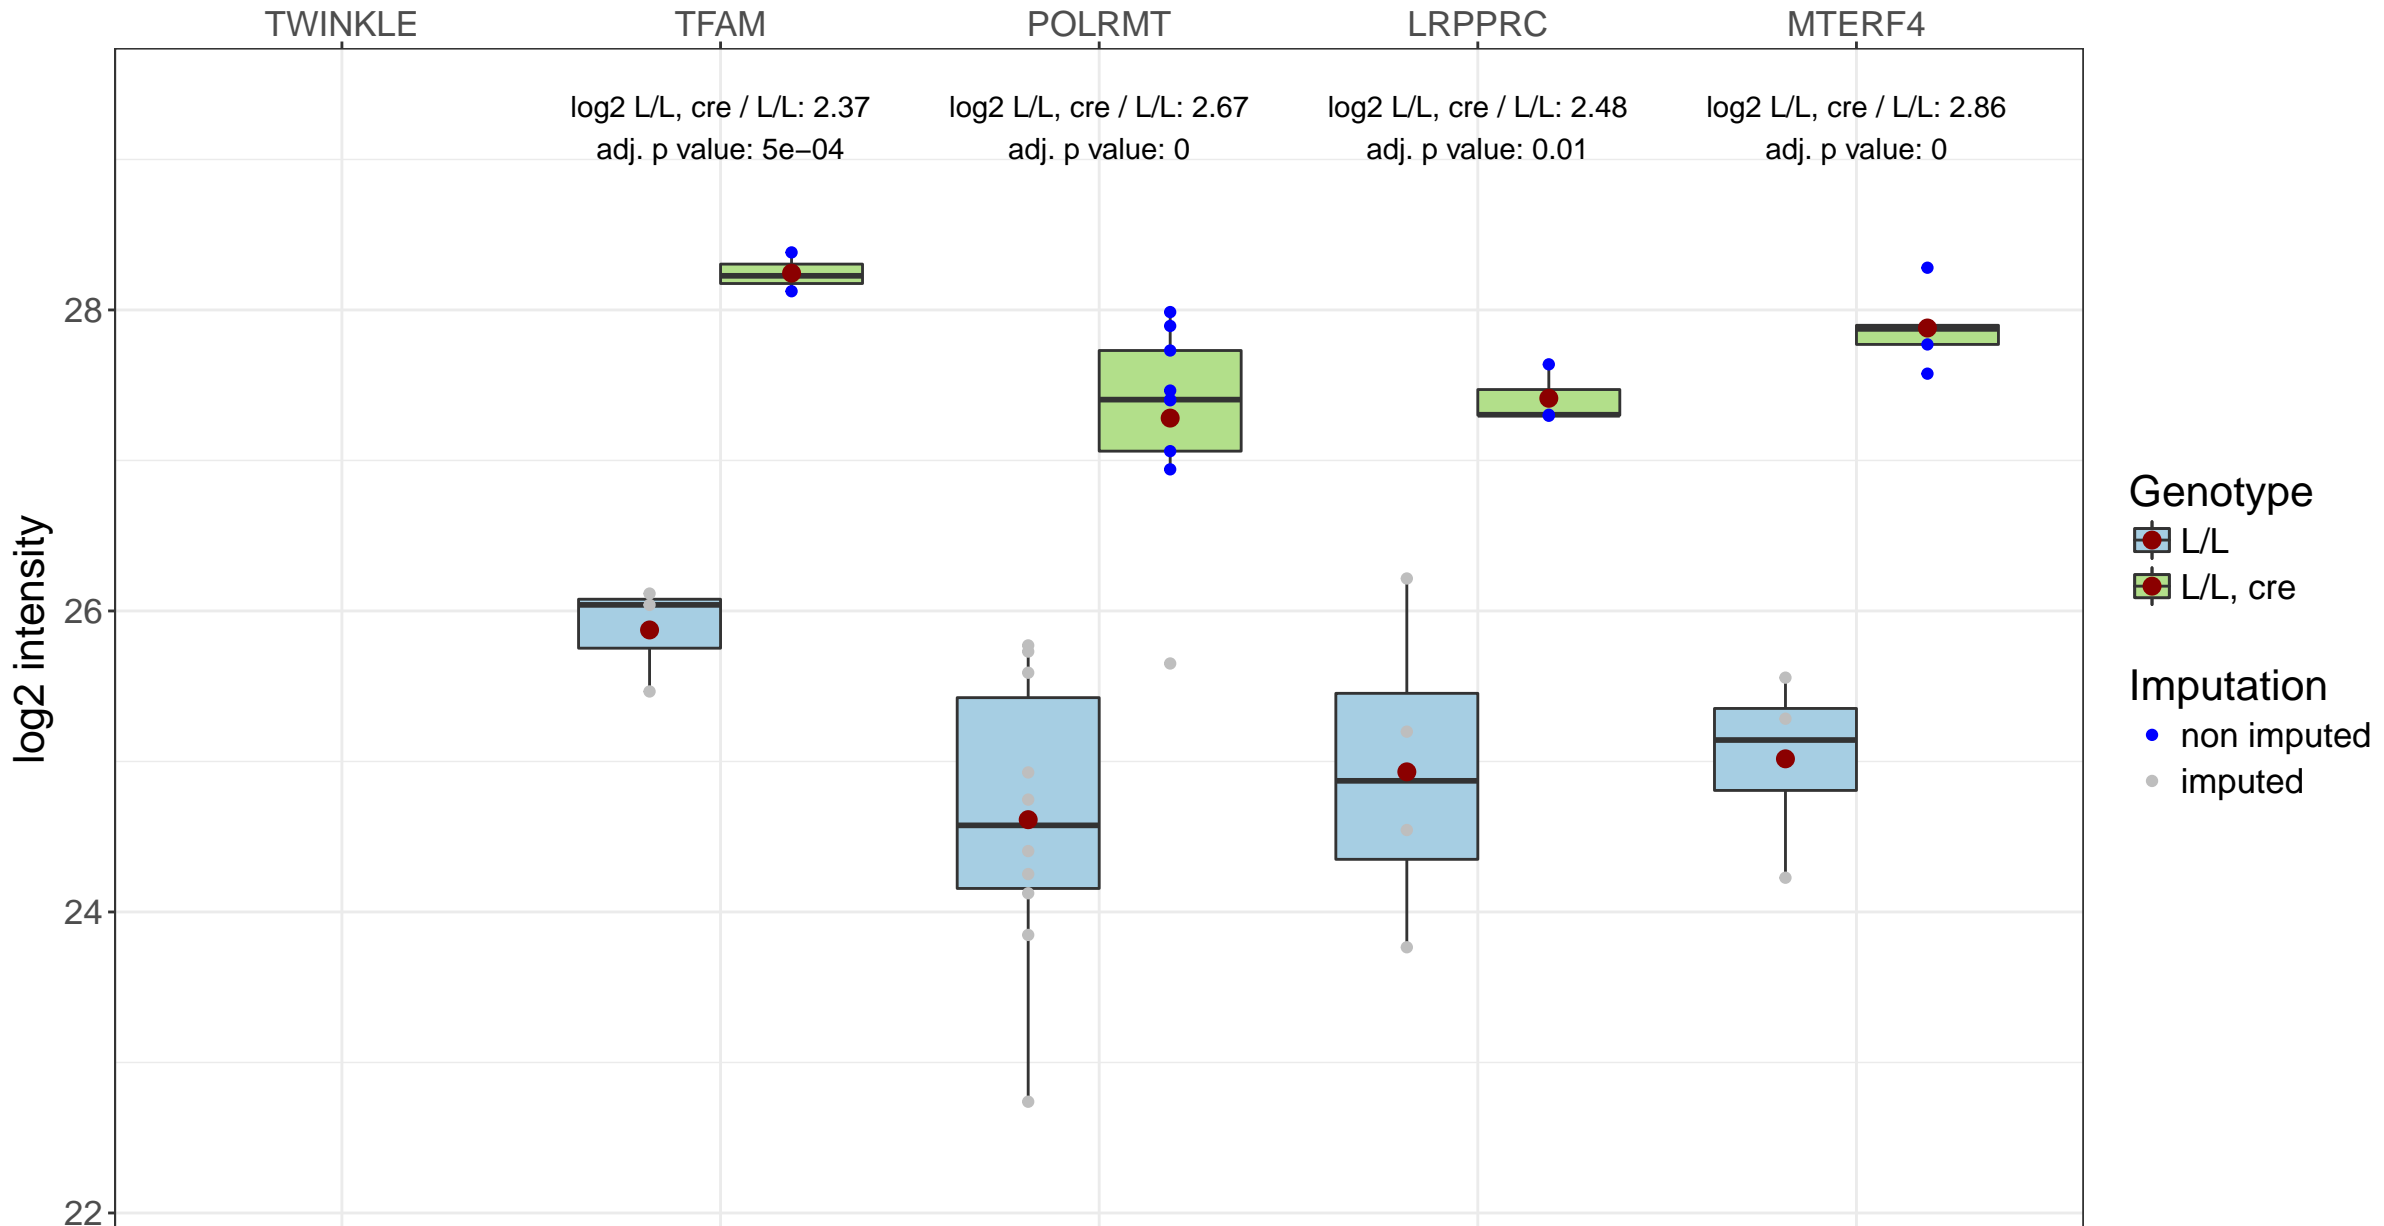

# BCAT2 / O35855

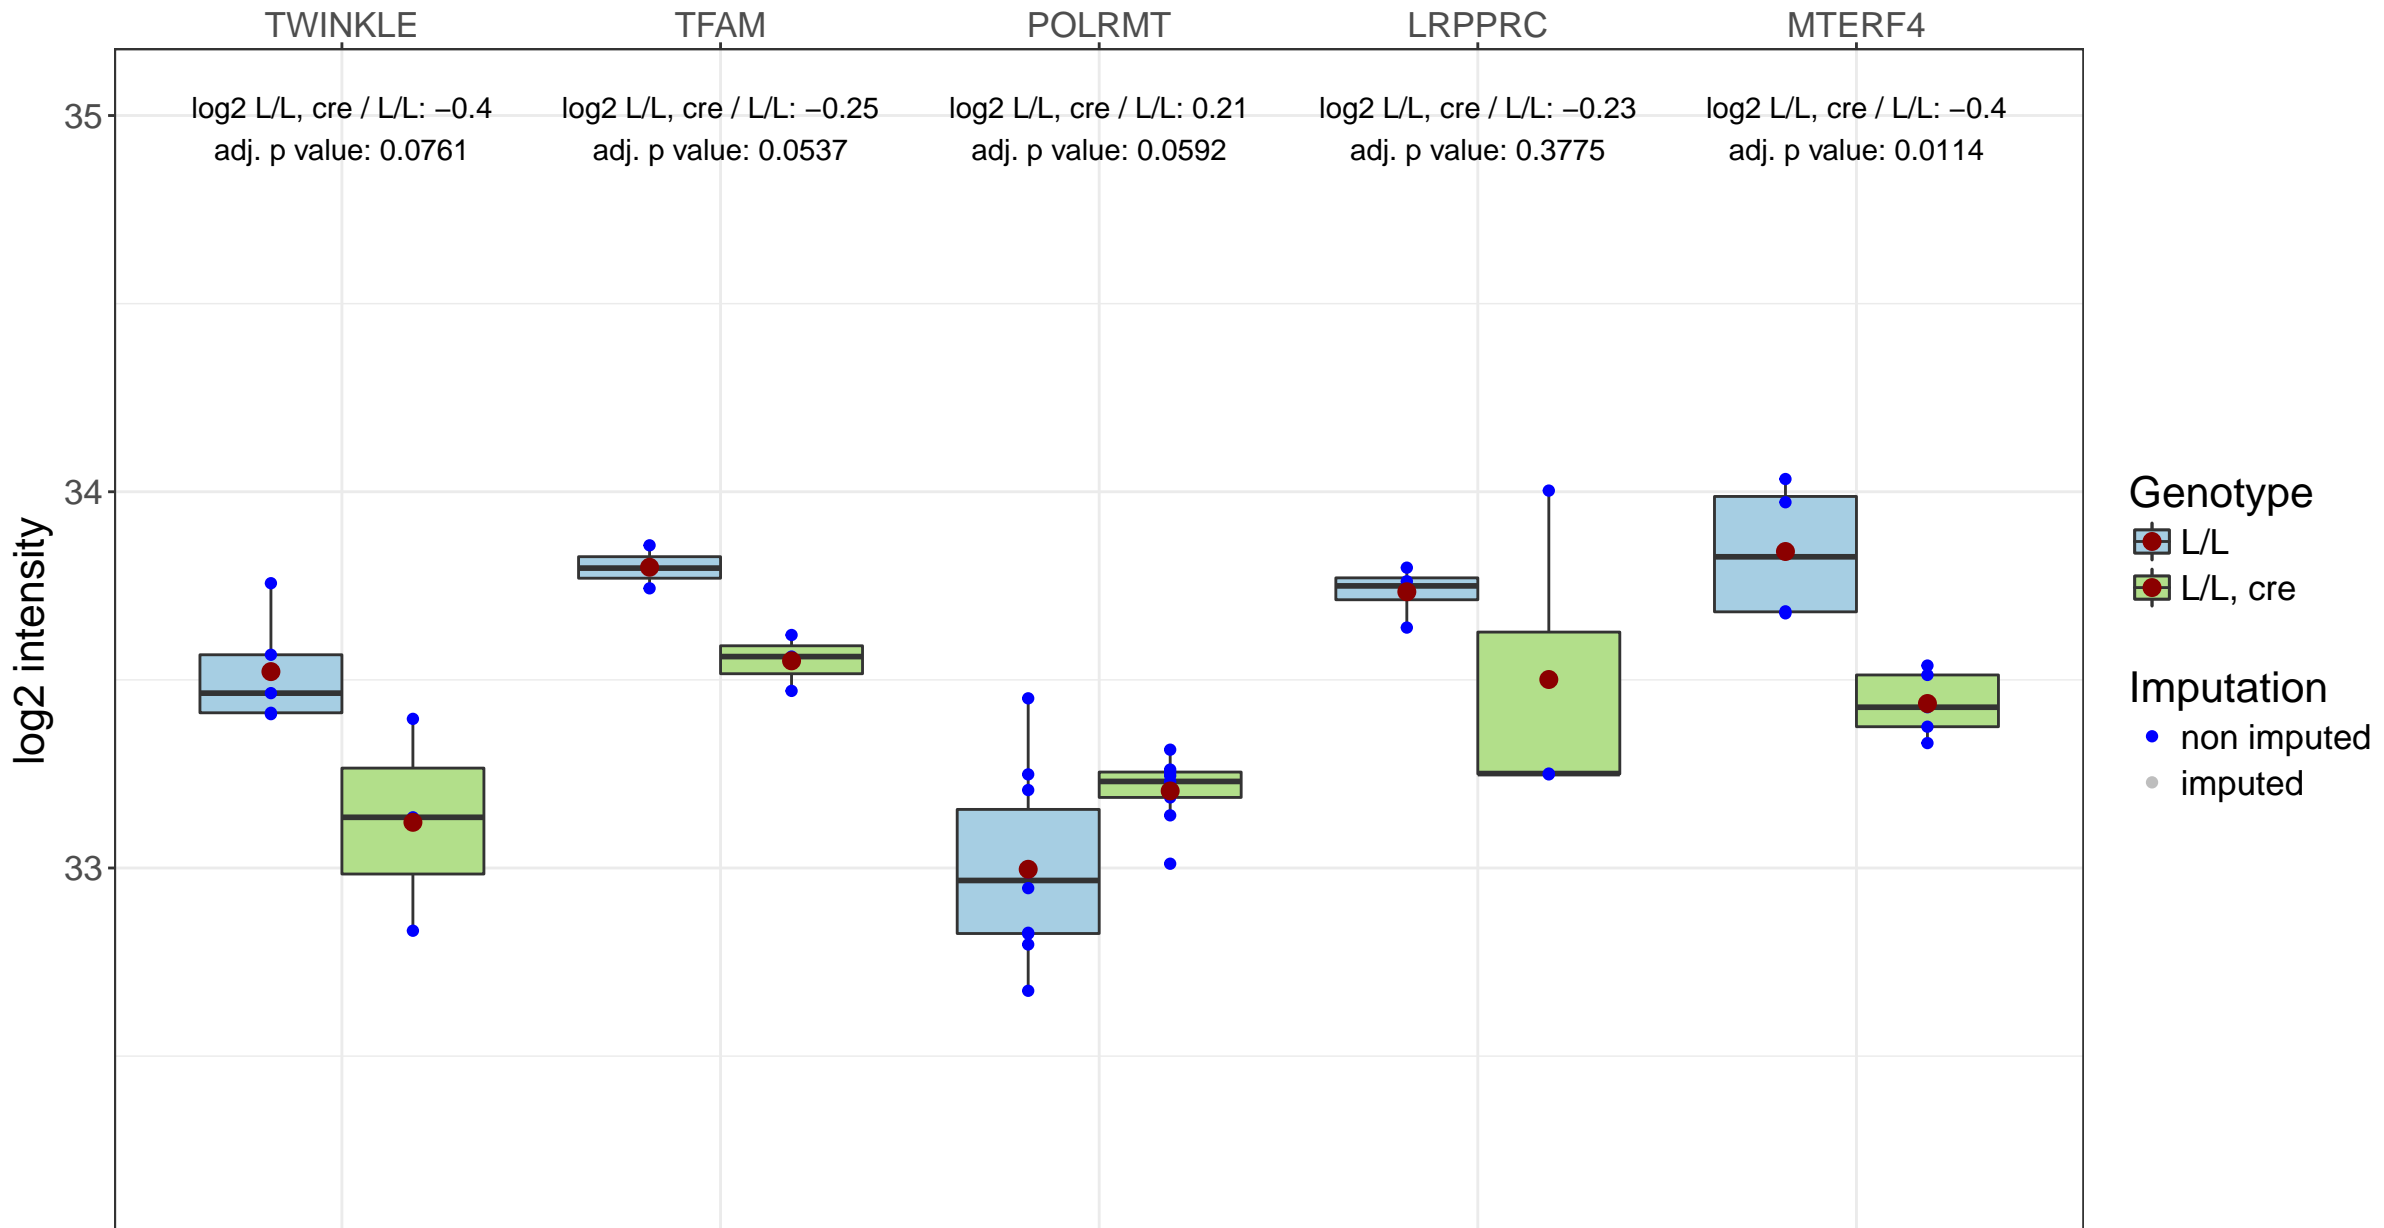

# BCKDHA / Q3U3J1

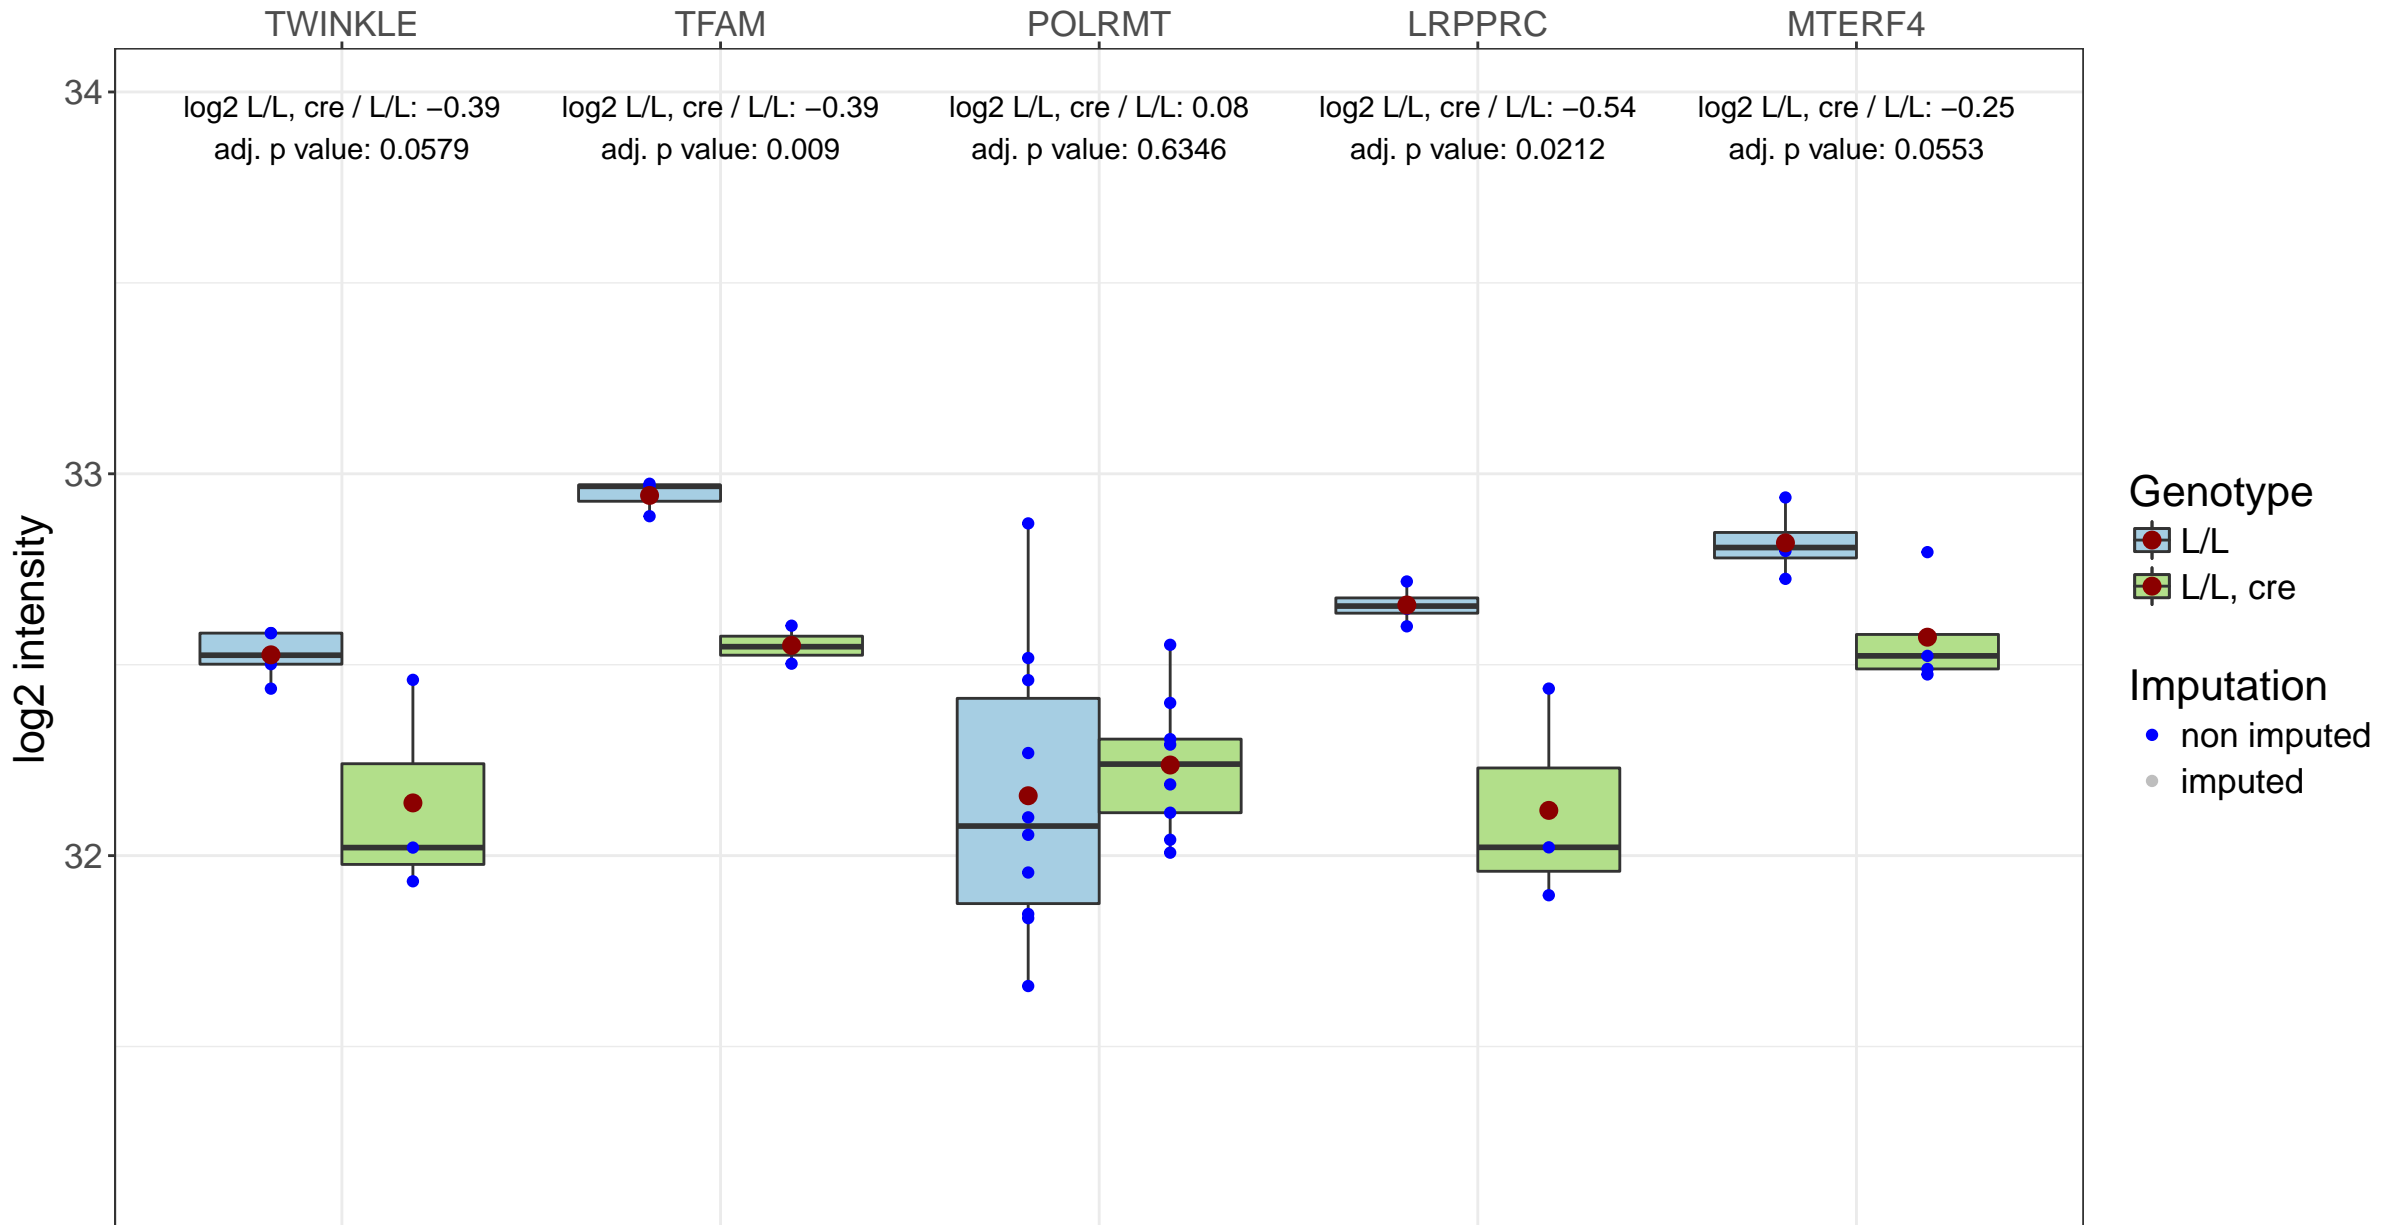

# BCKDHB / Q6P3A8

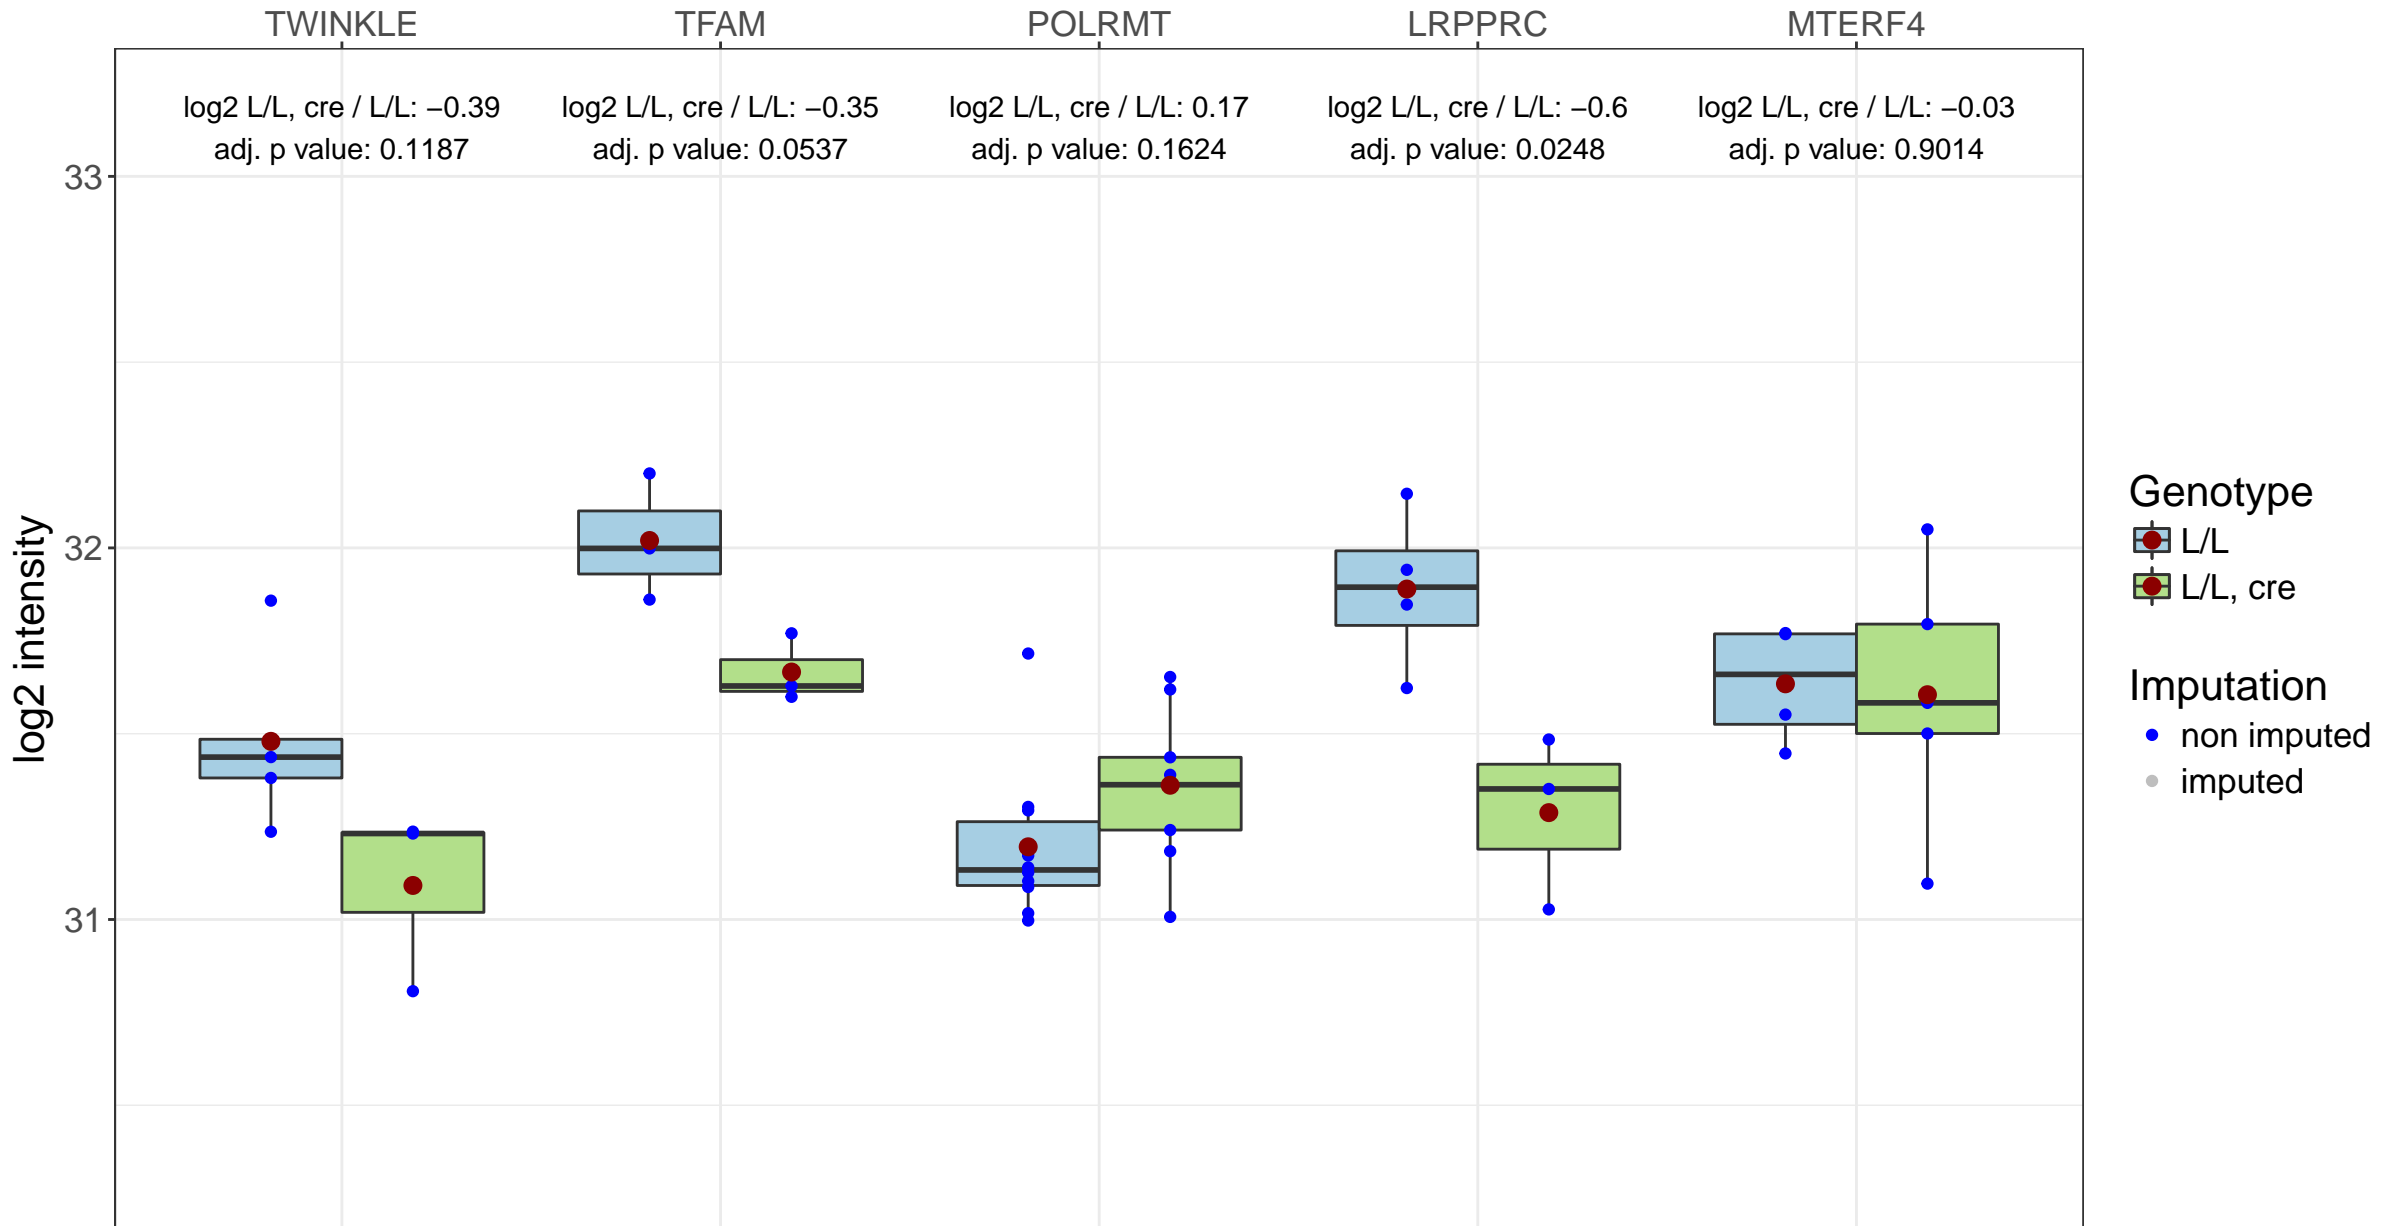

# BCKDK / O55028

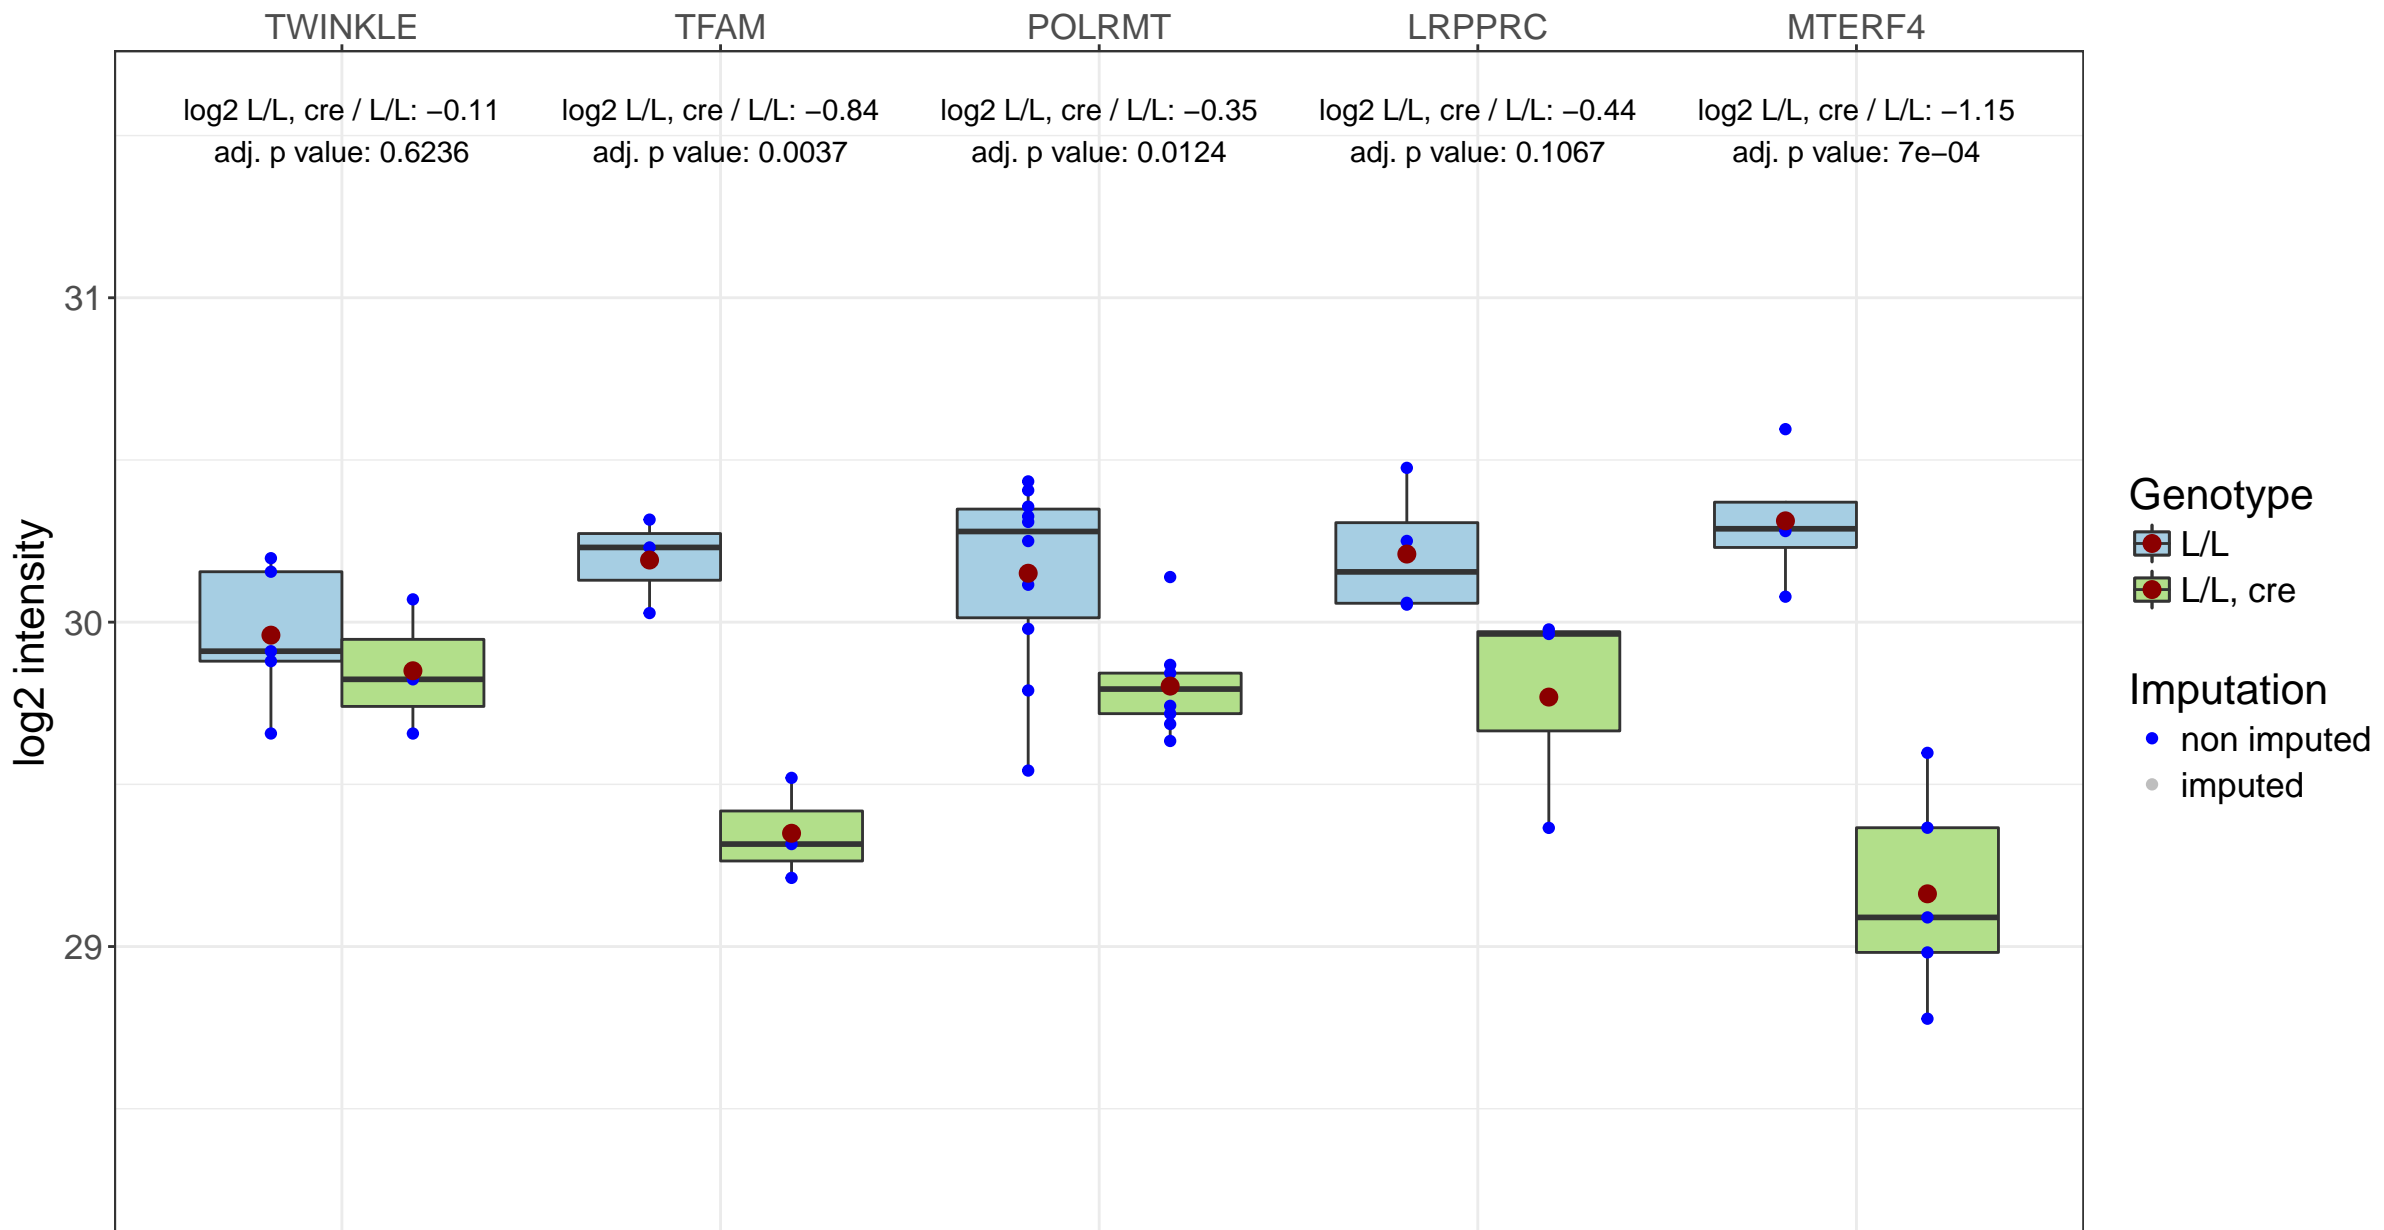



# BCL2L13 / P59017

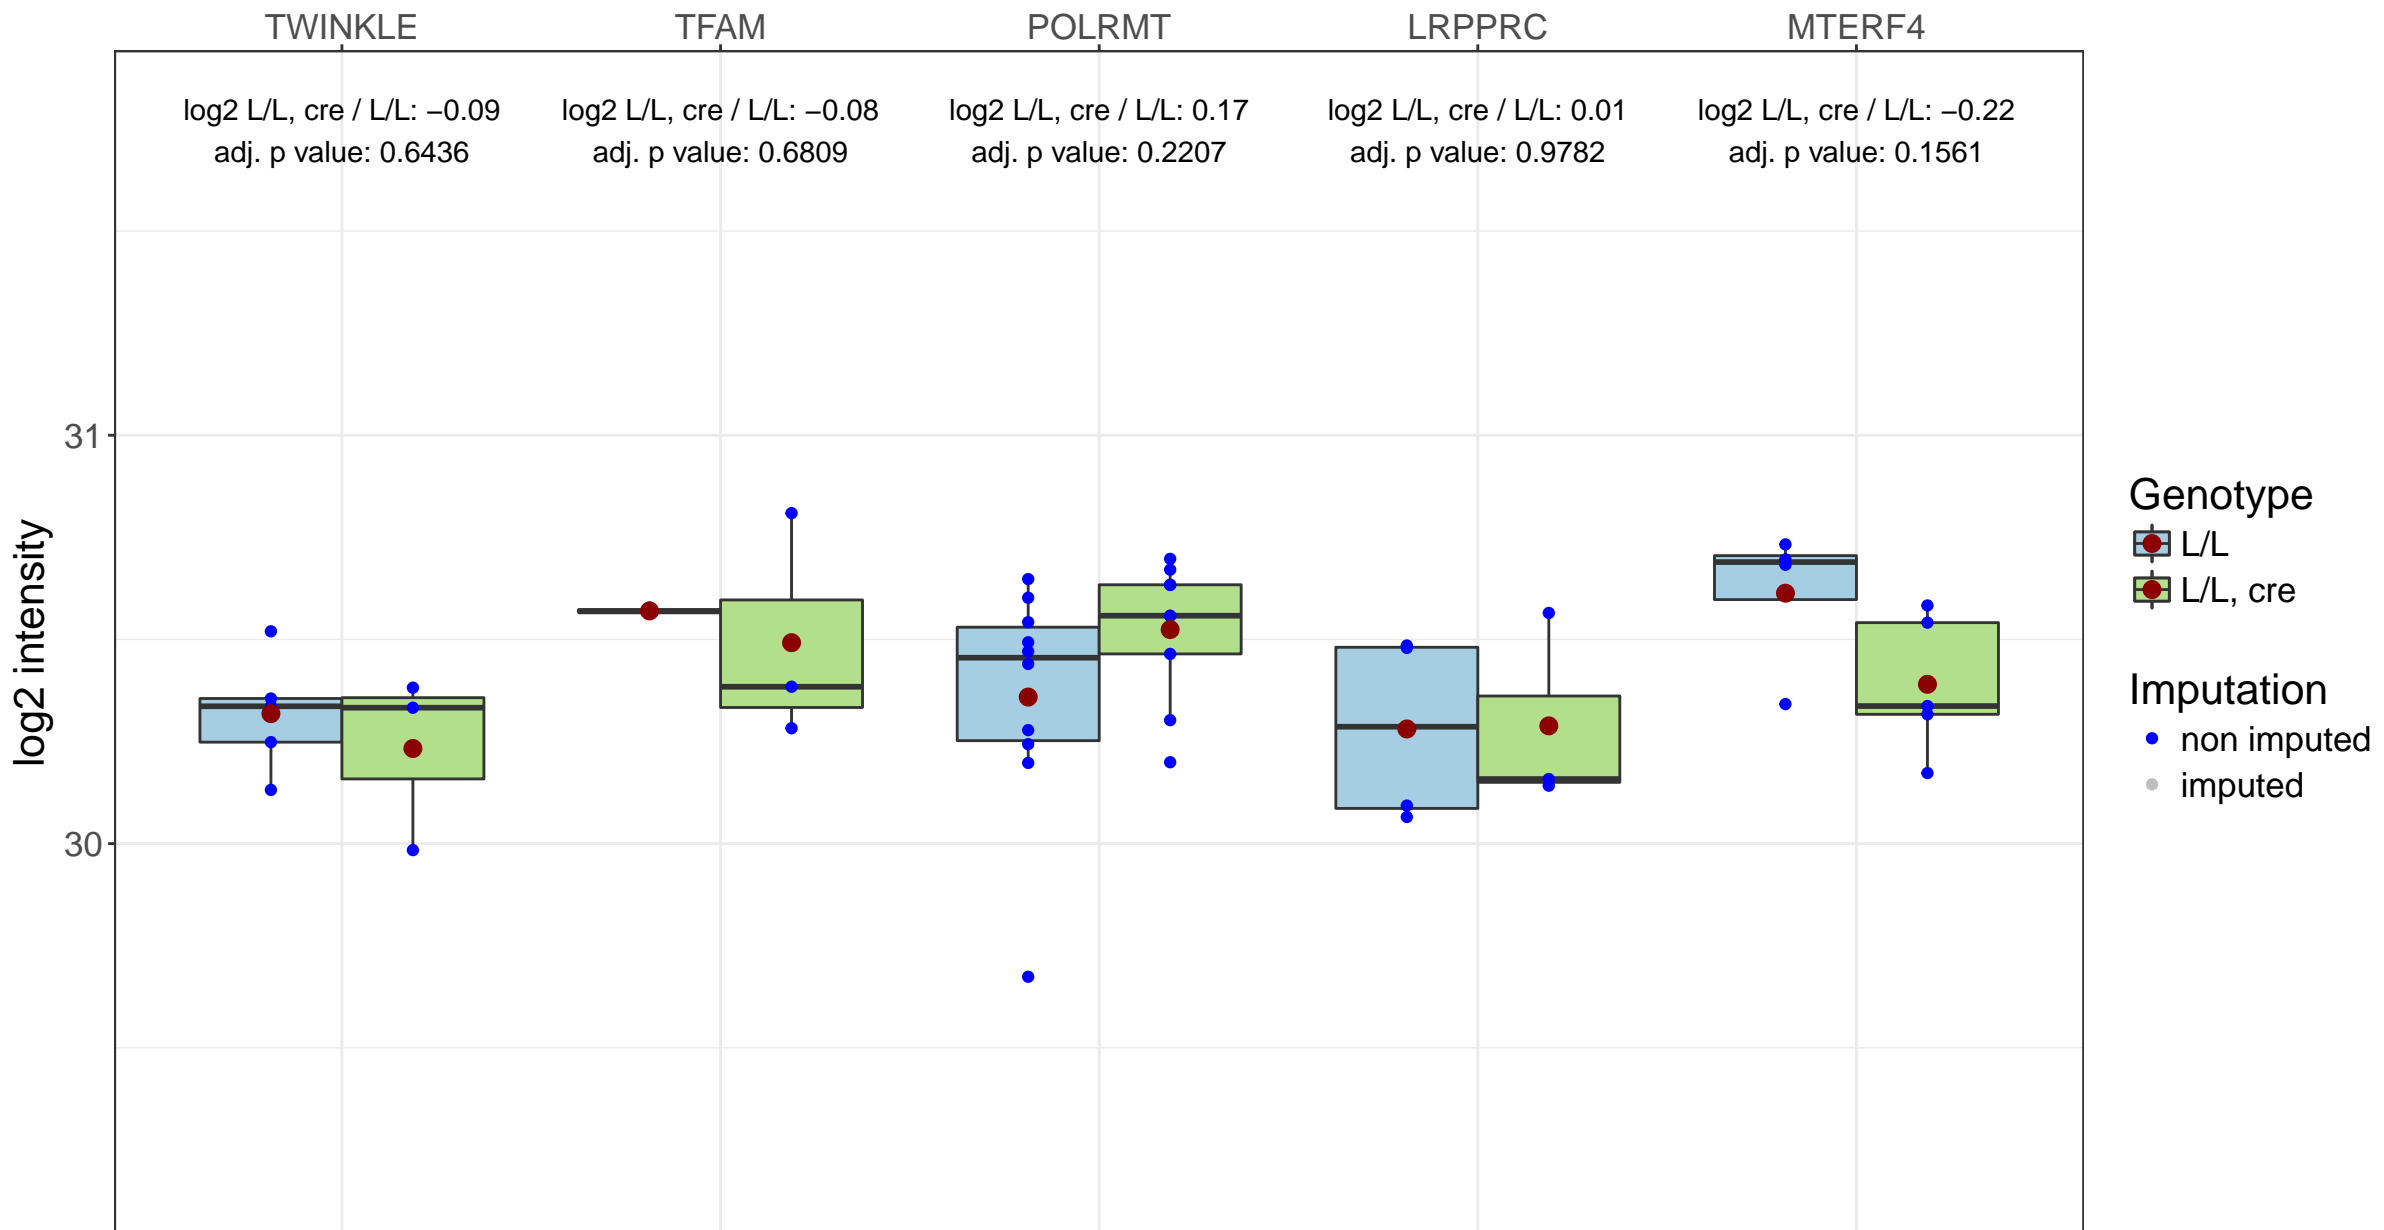

# BCS1L / Q9CZP5

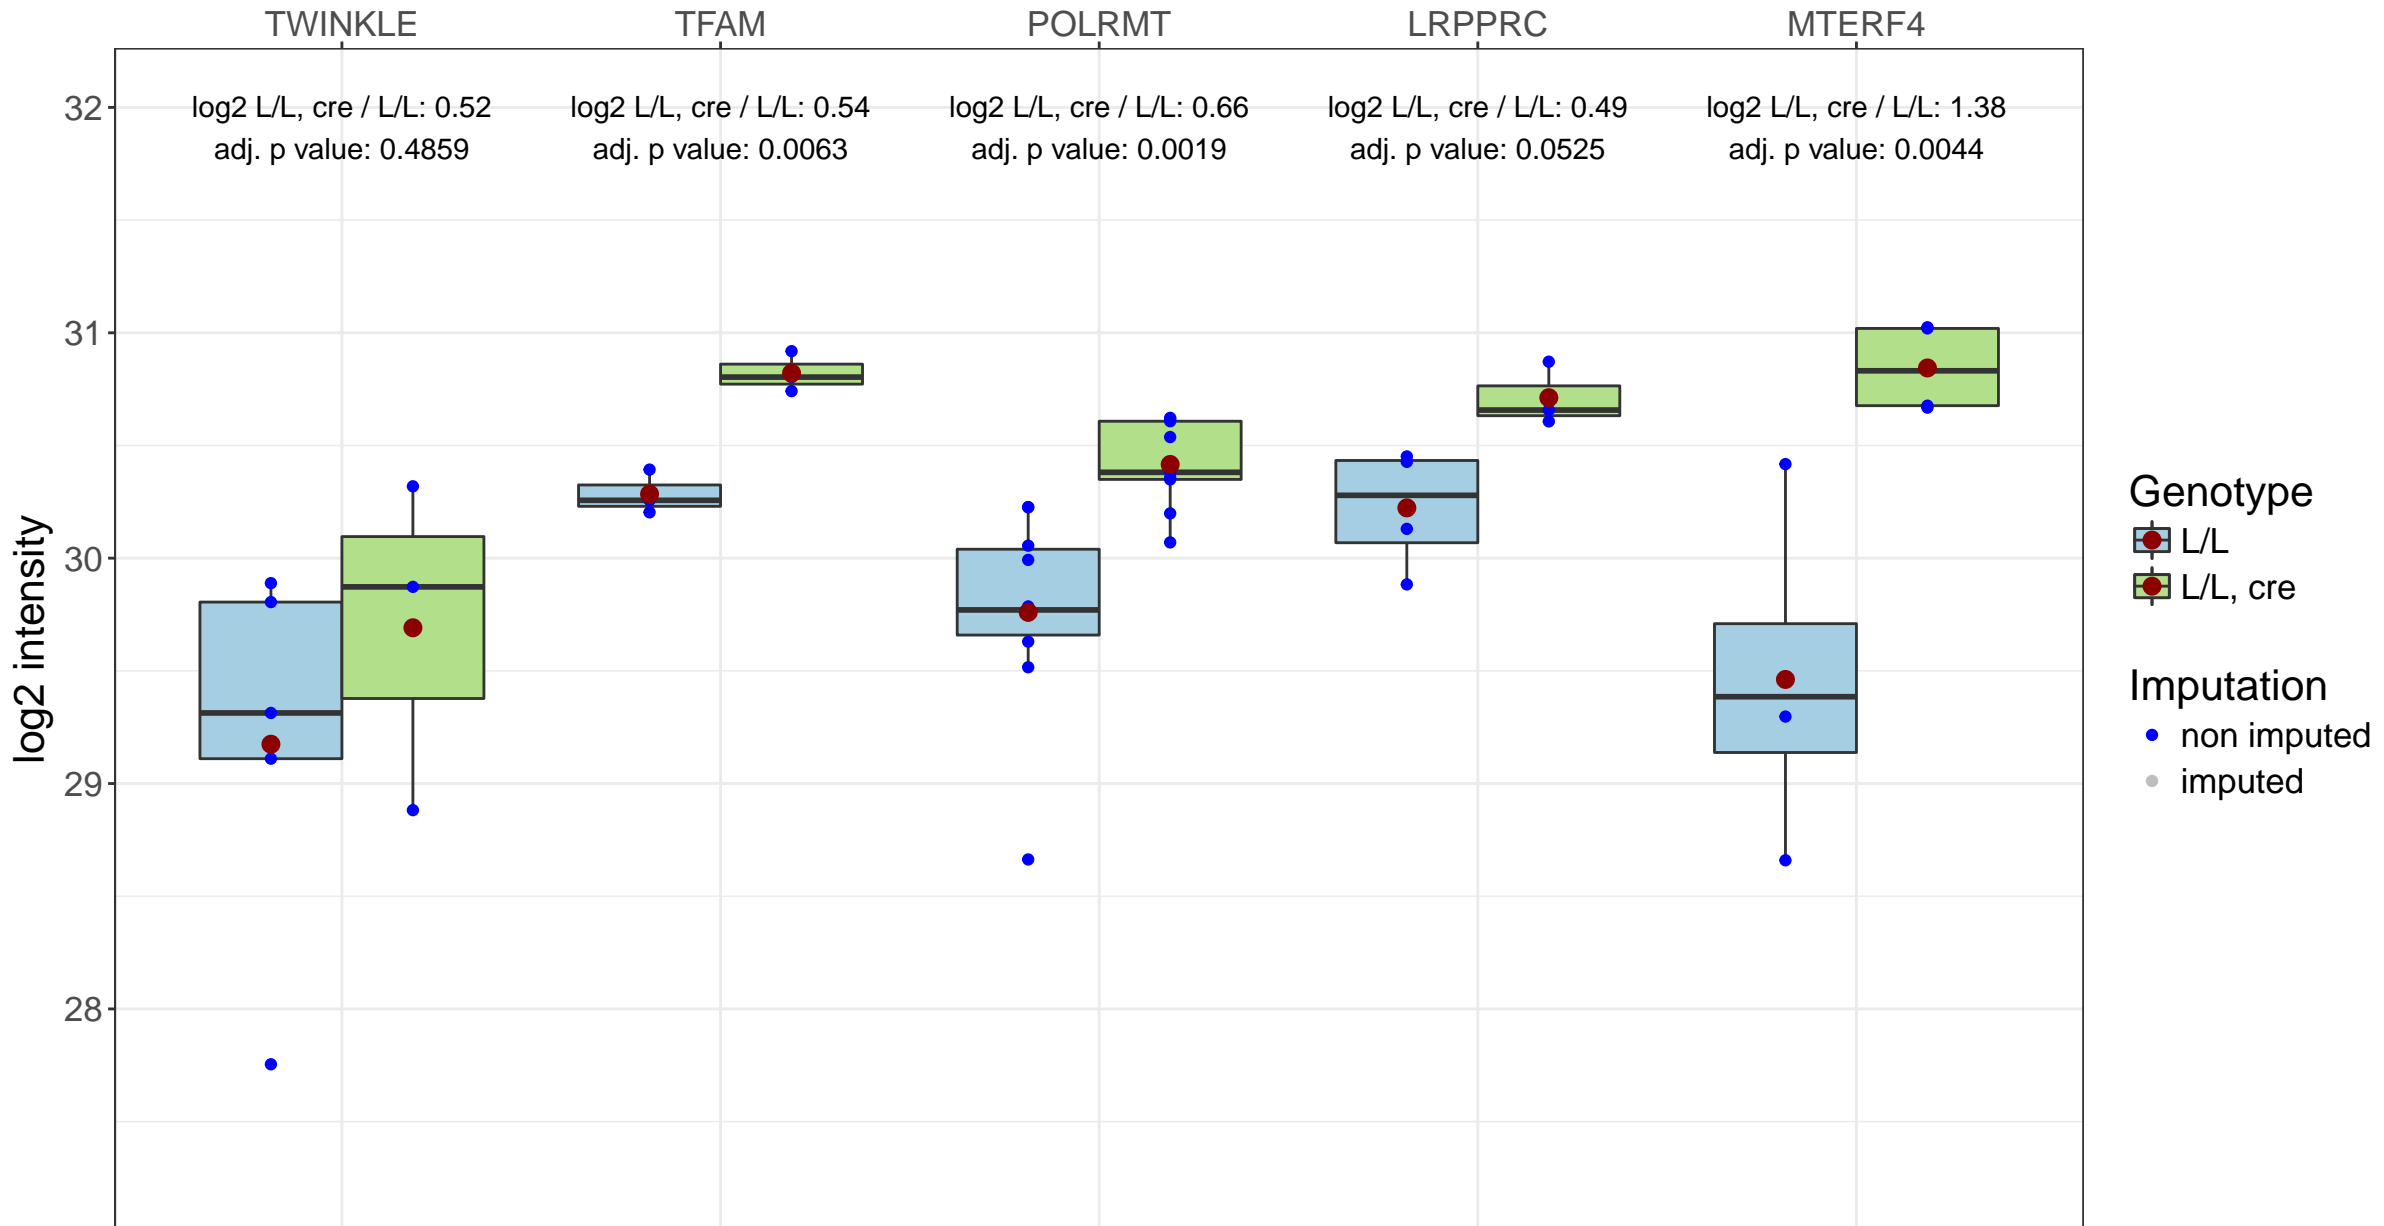

# BDH1 / Q80XN0

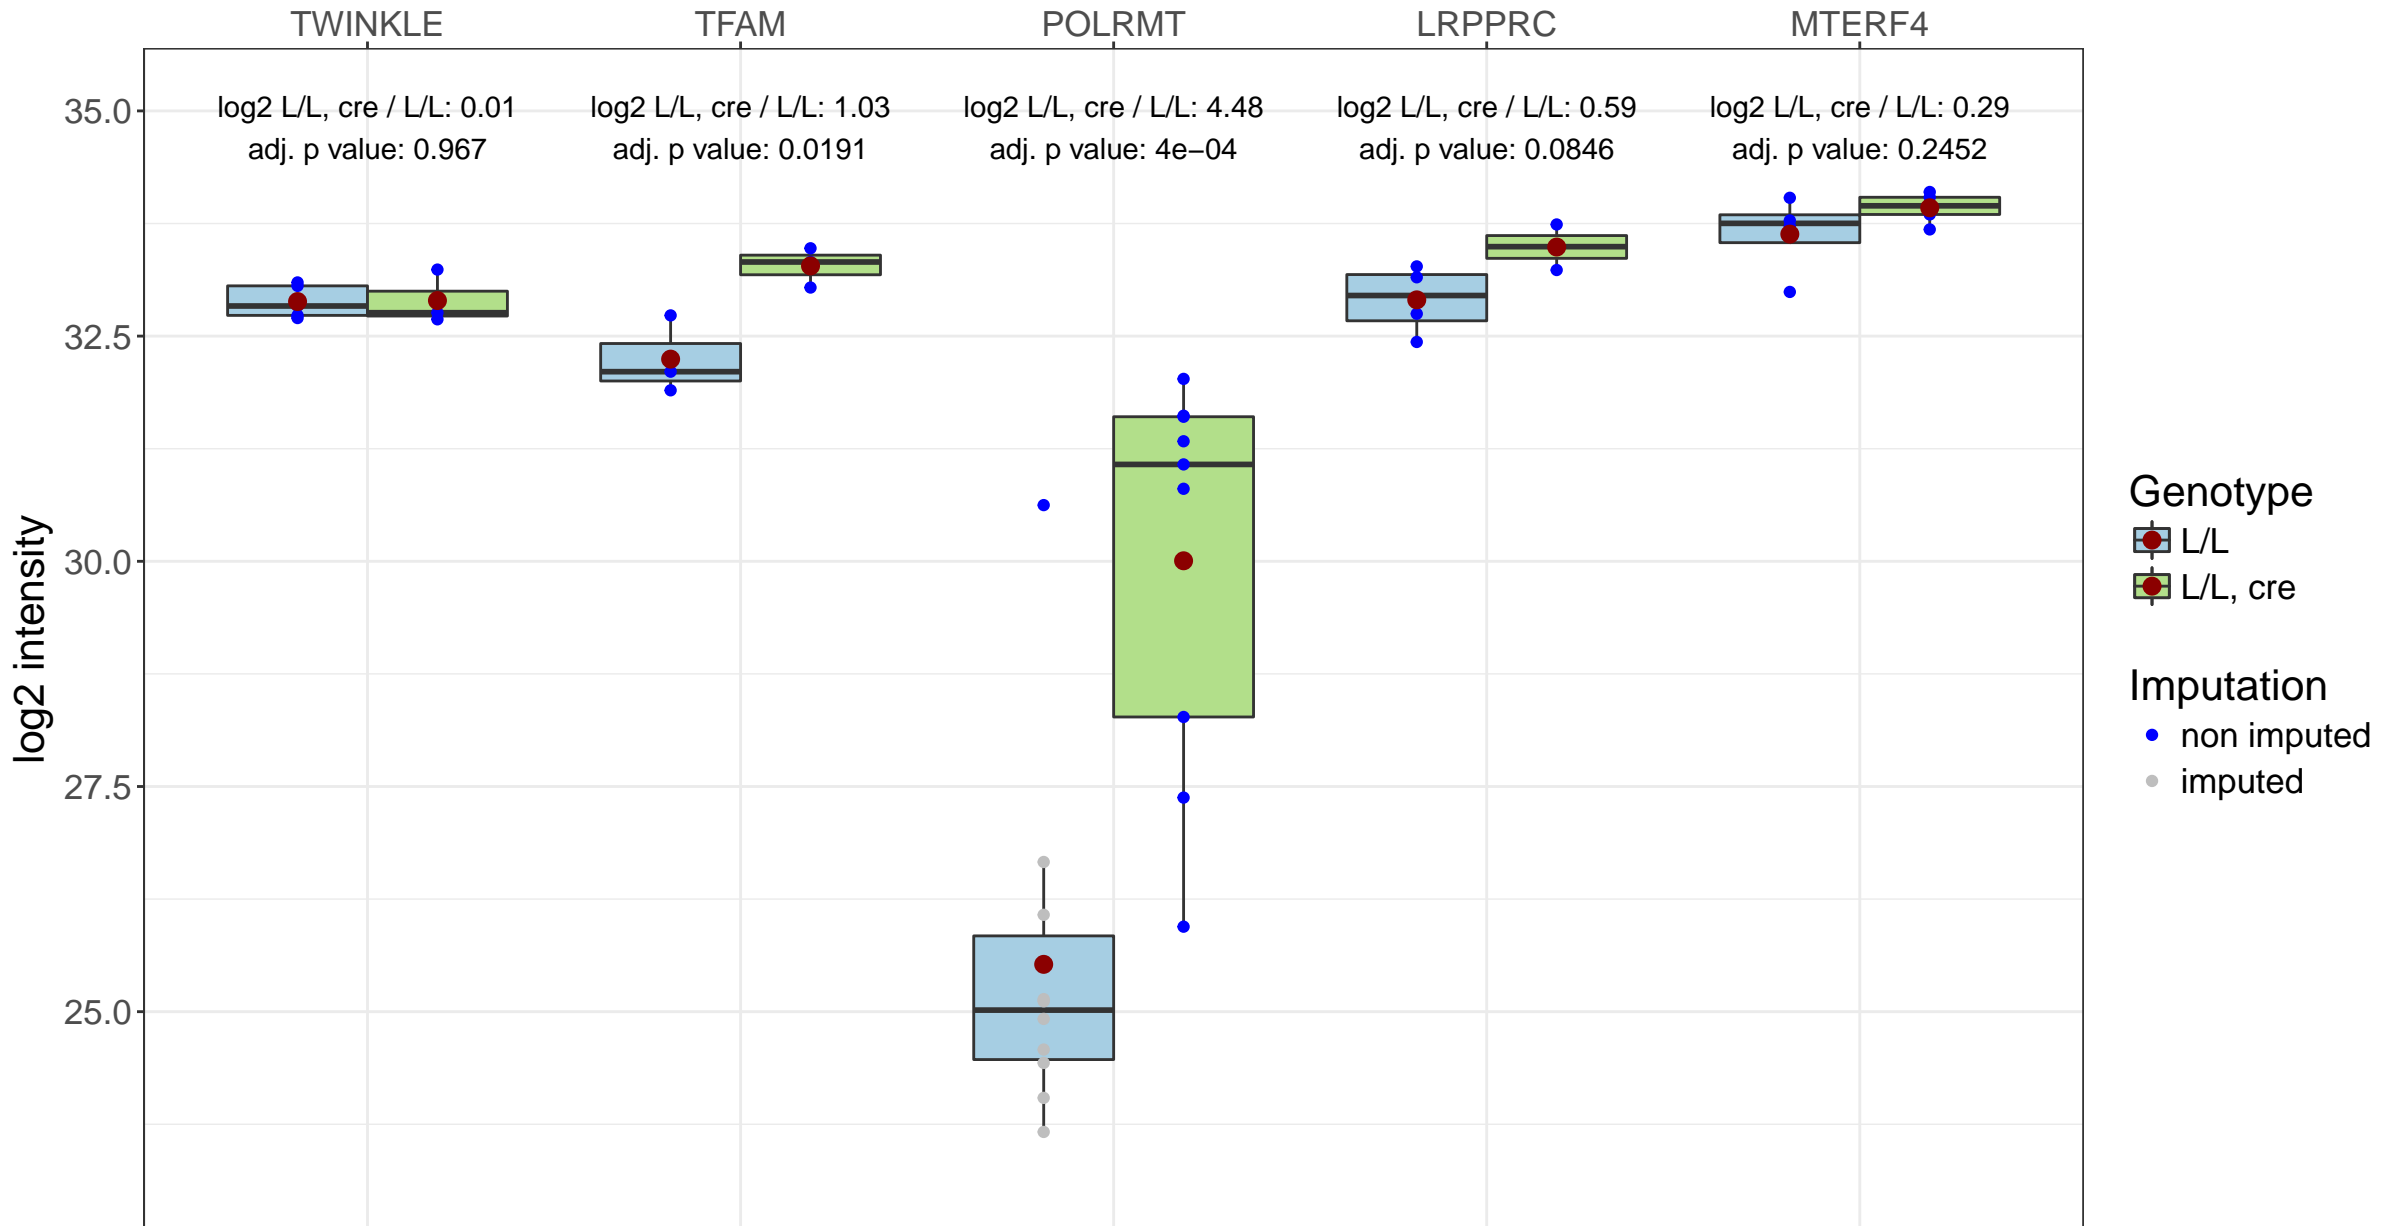

# BNIP3 / O55003

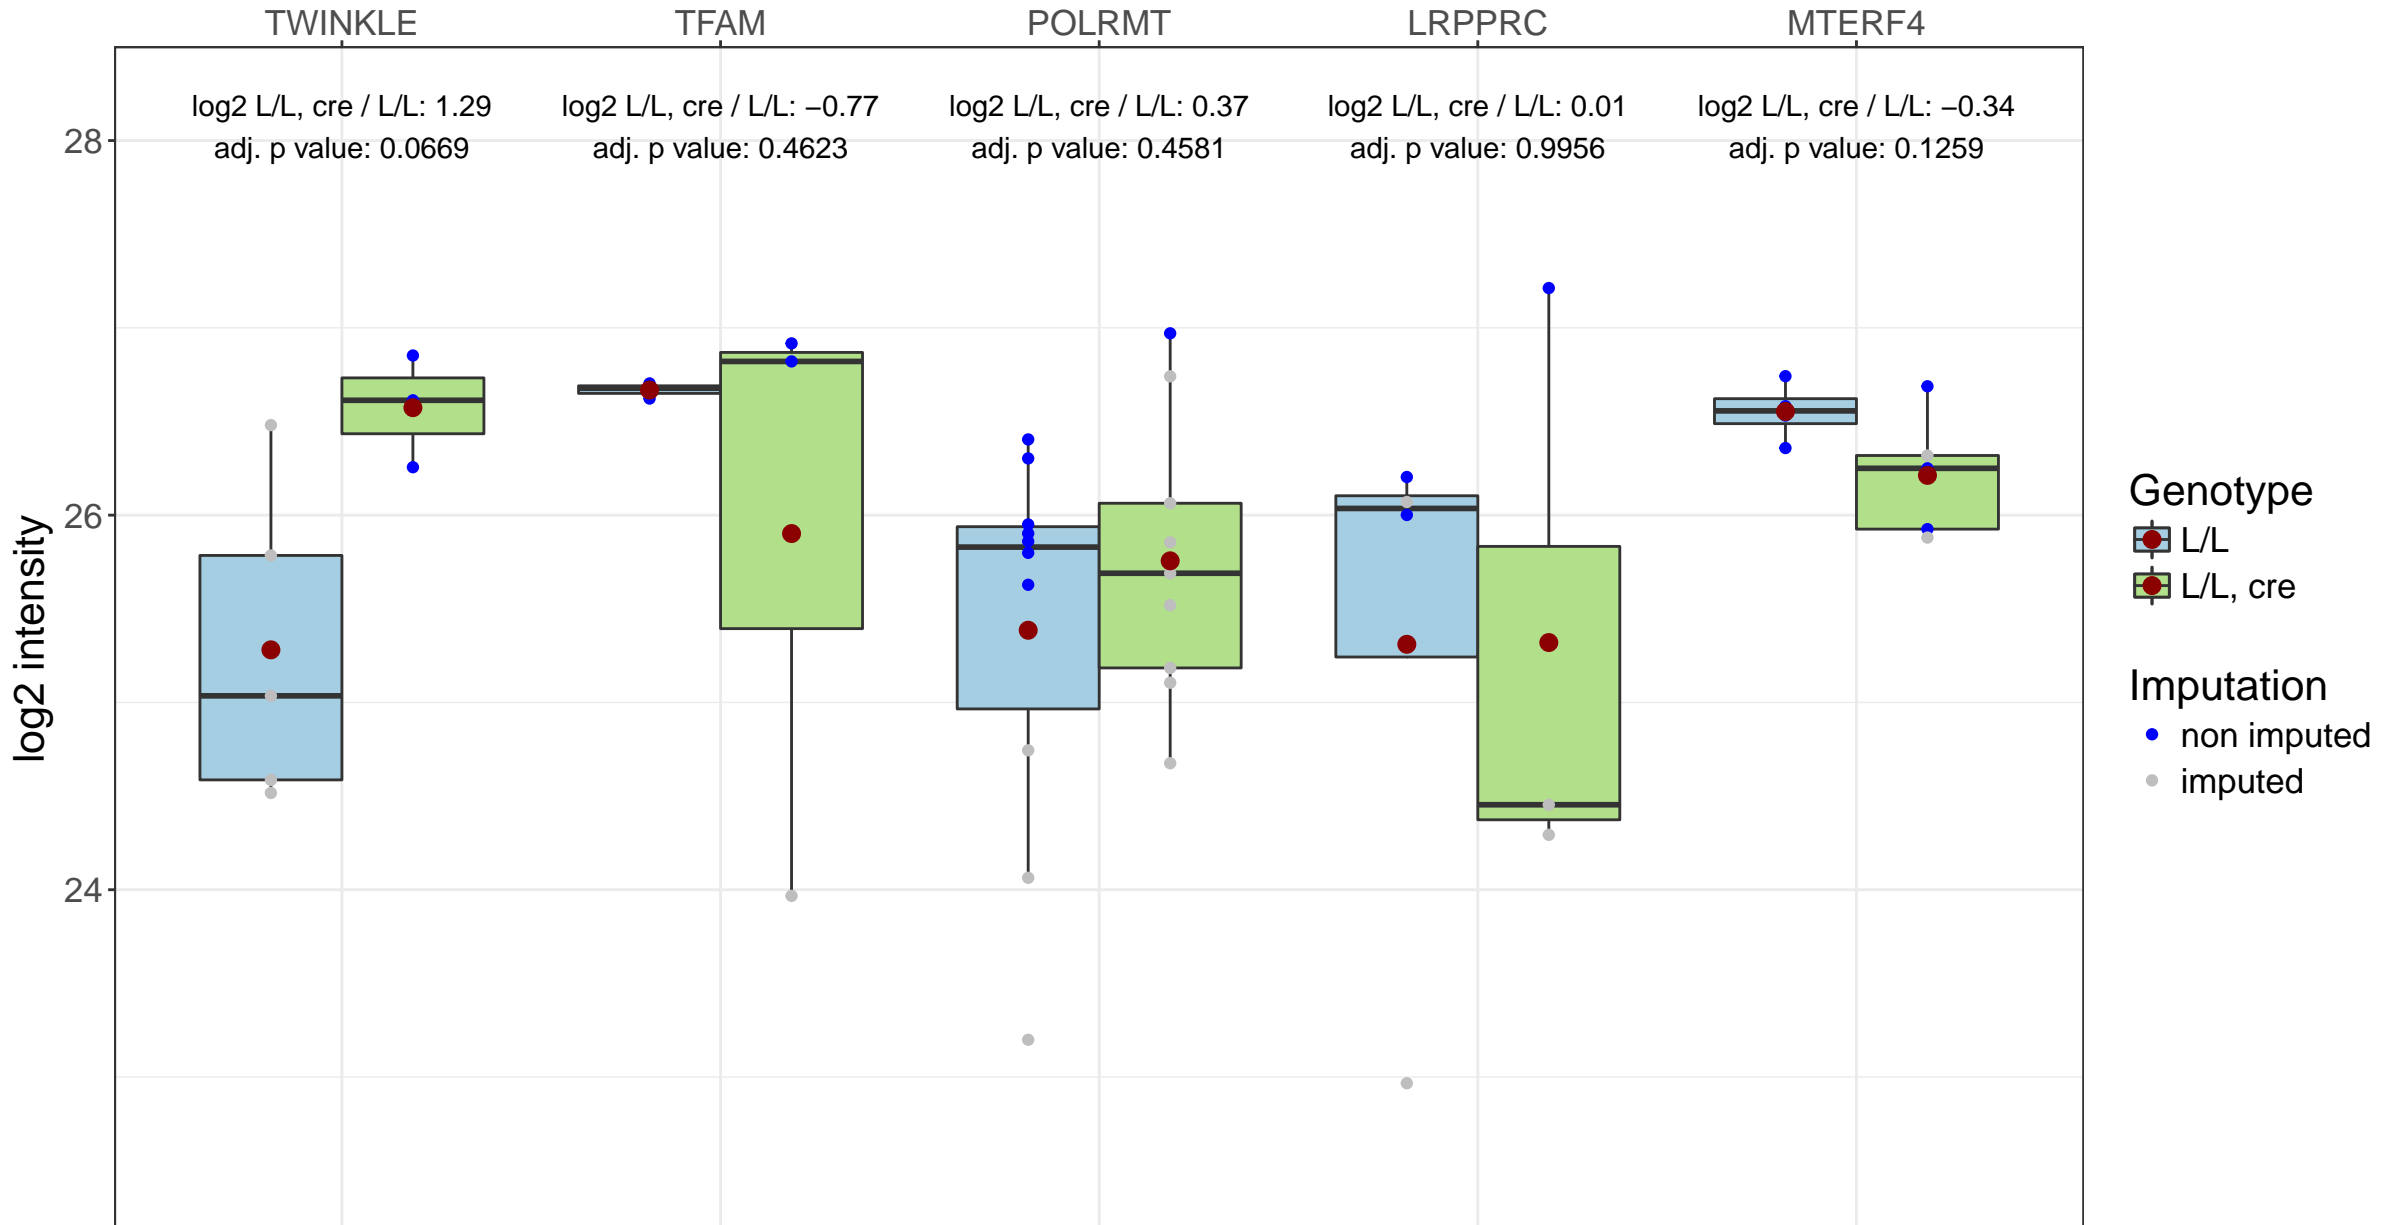

# BOLA1 / Q9D8S9

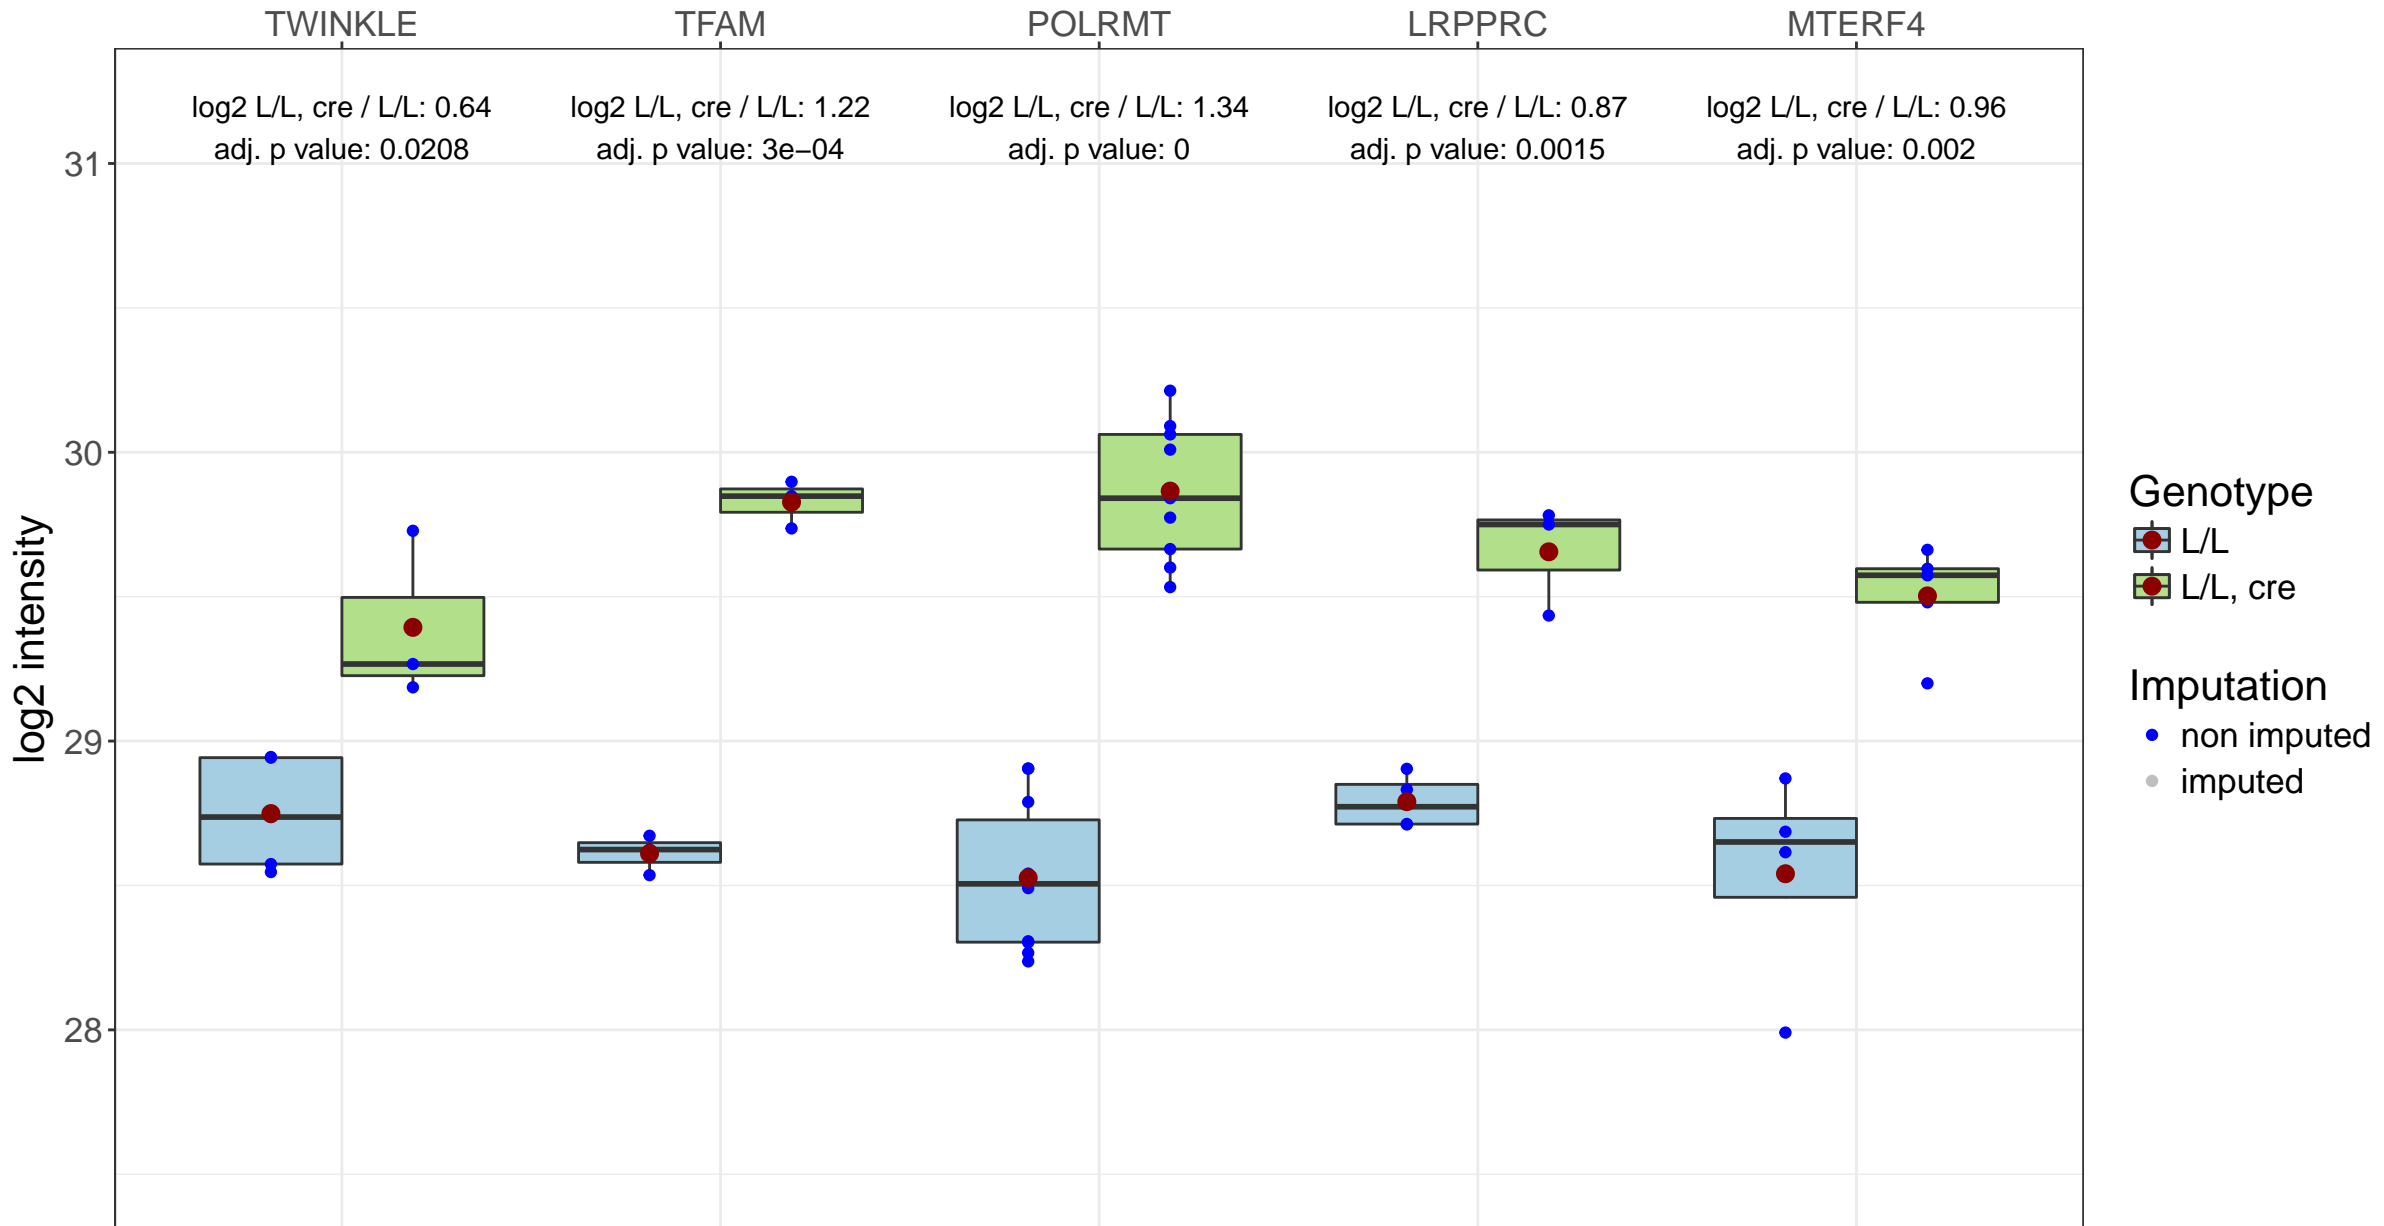

# BOLA3 / E9Q705

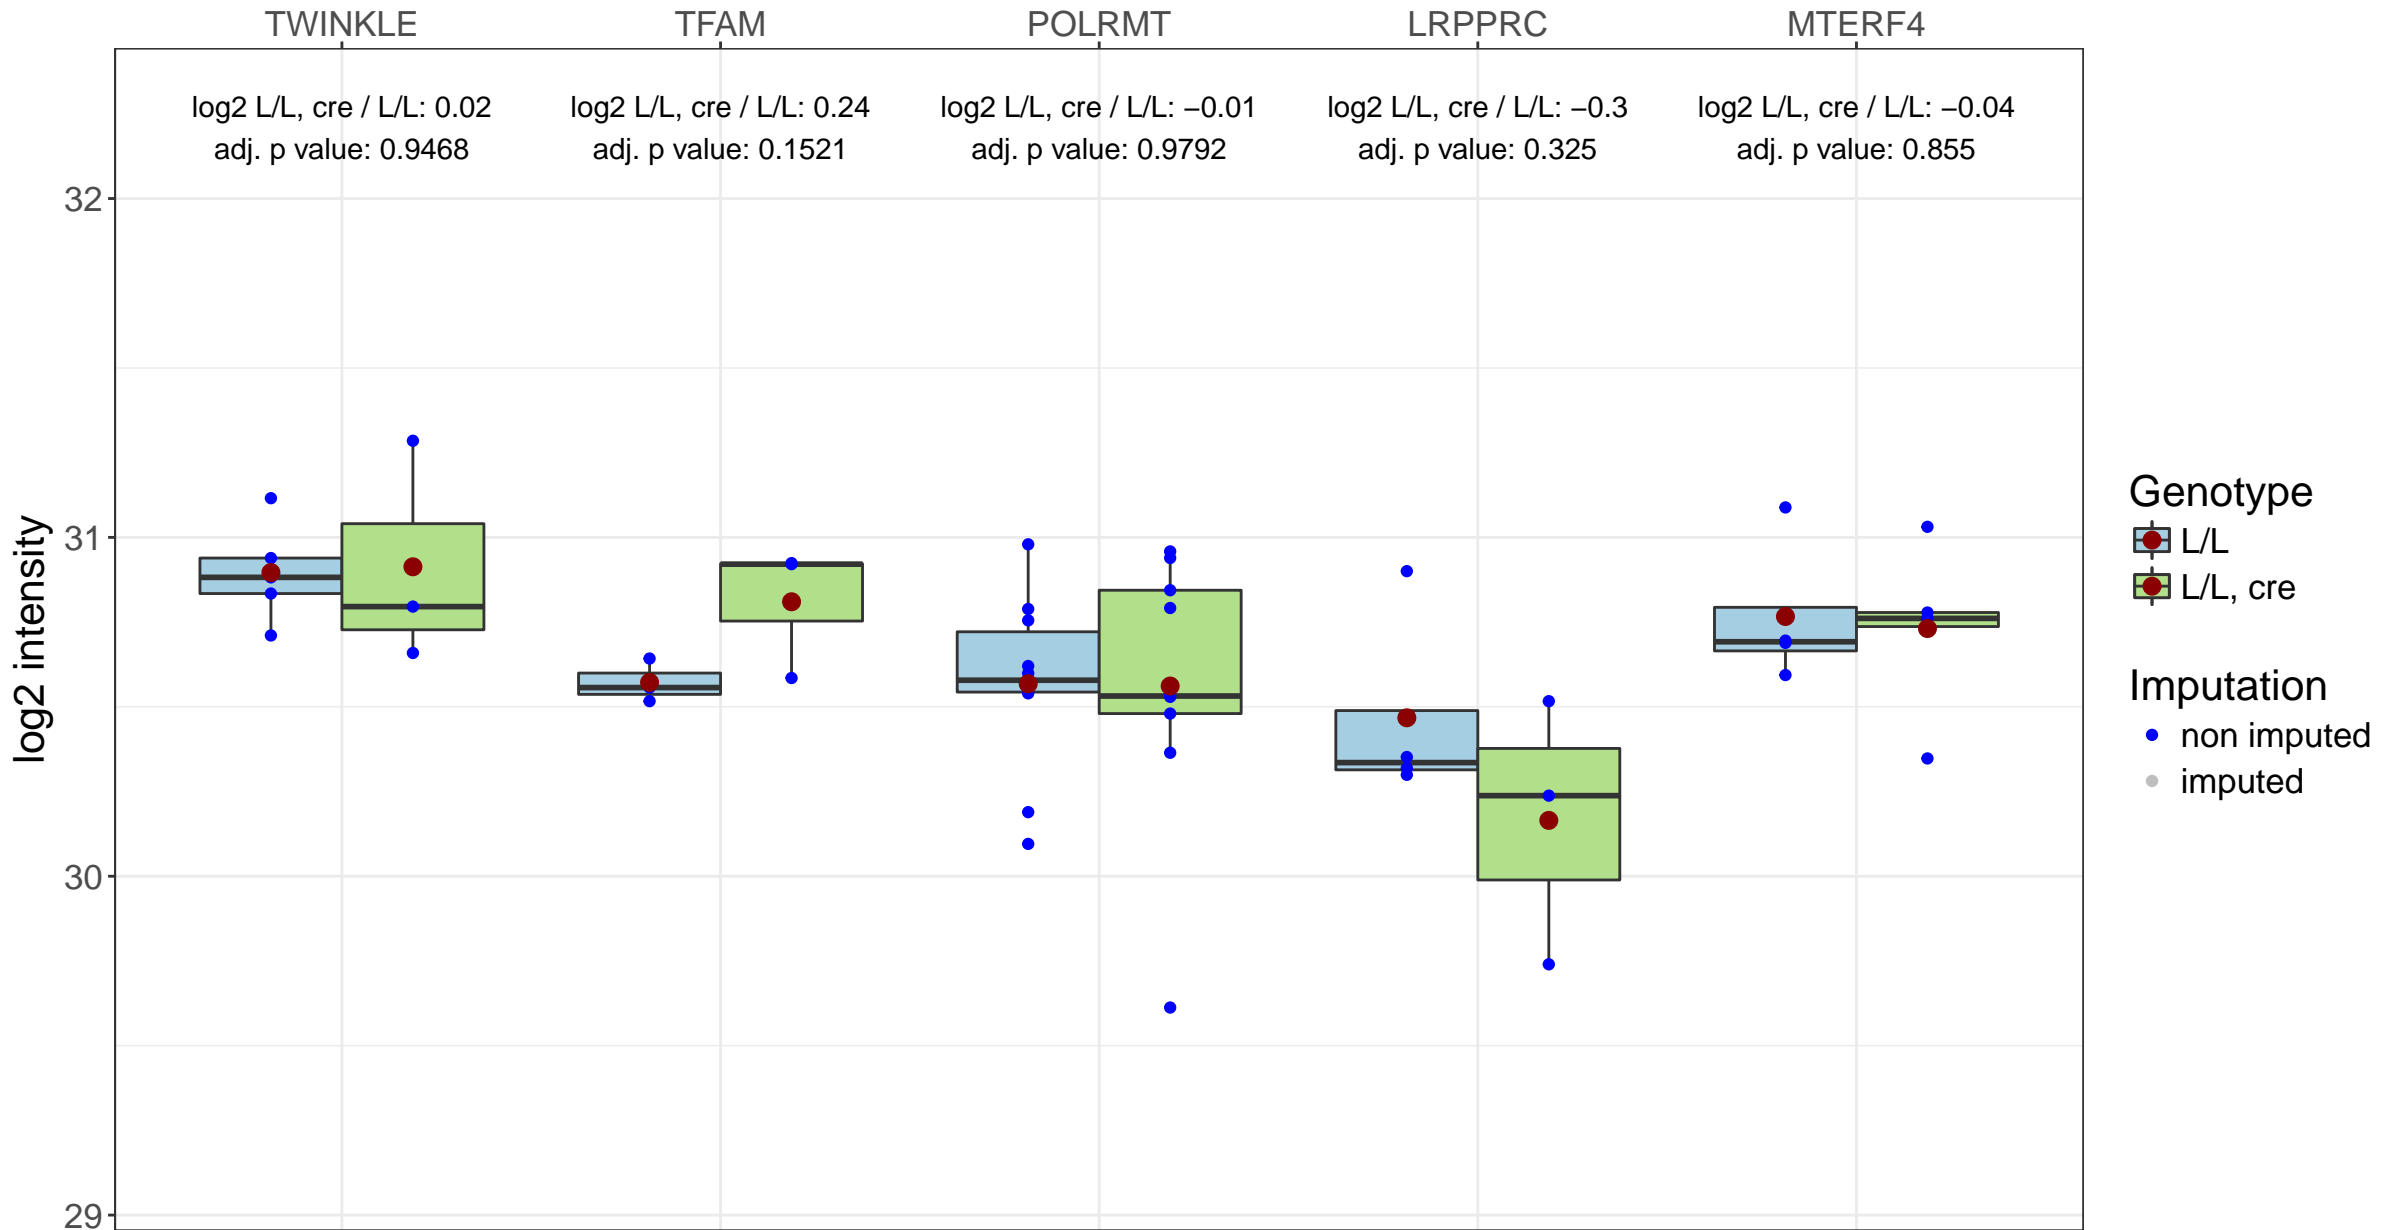

# BPHL / Q8R164

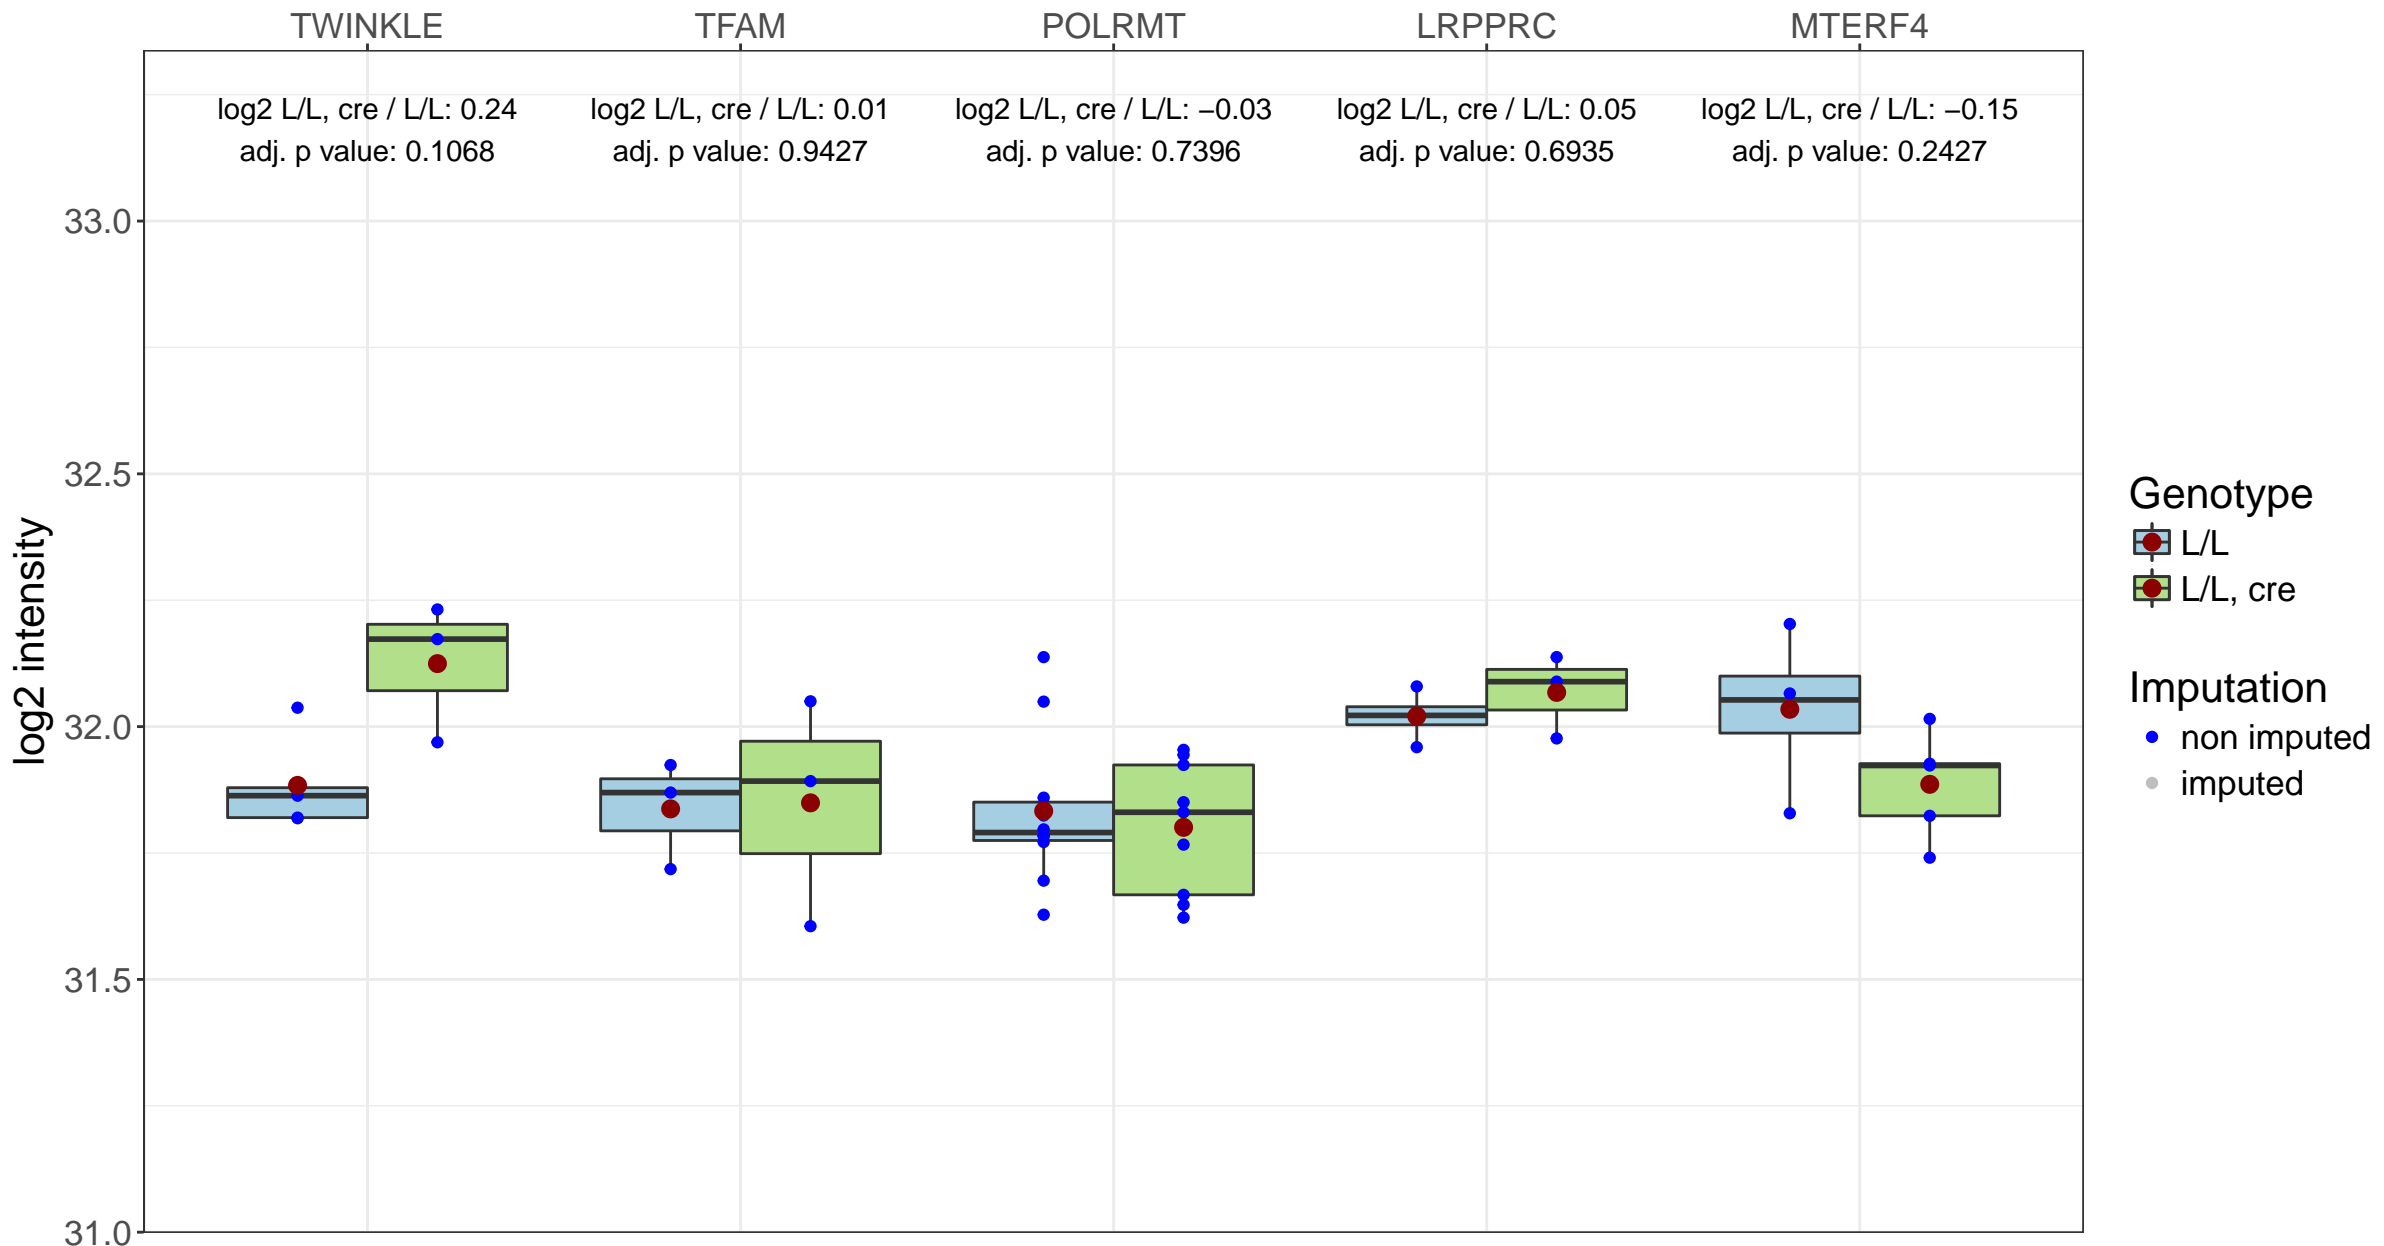

# BPNT1 / Q9Z0S1

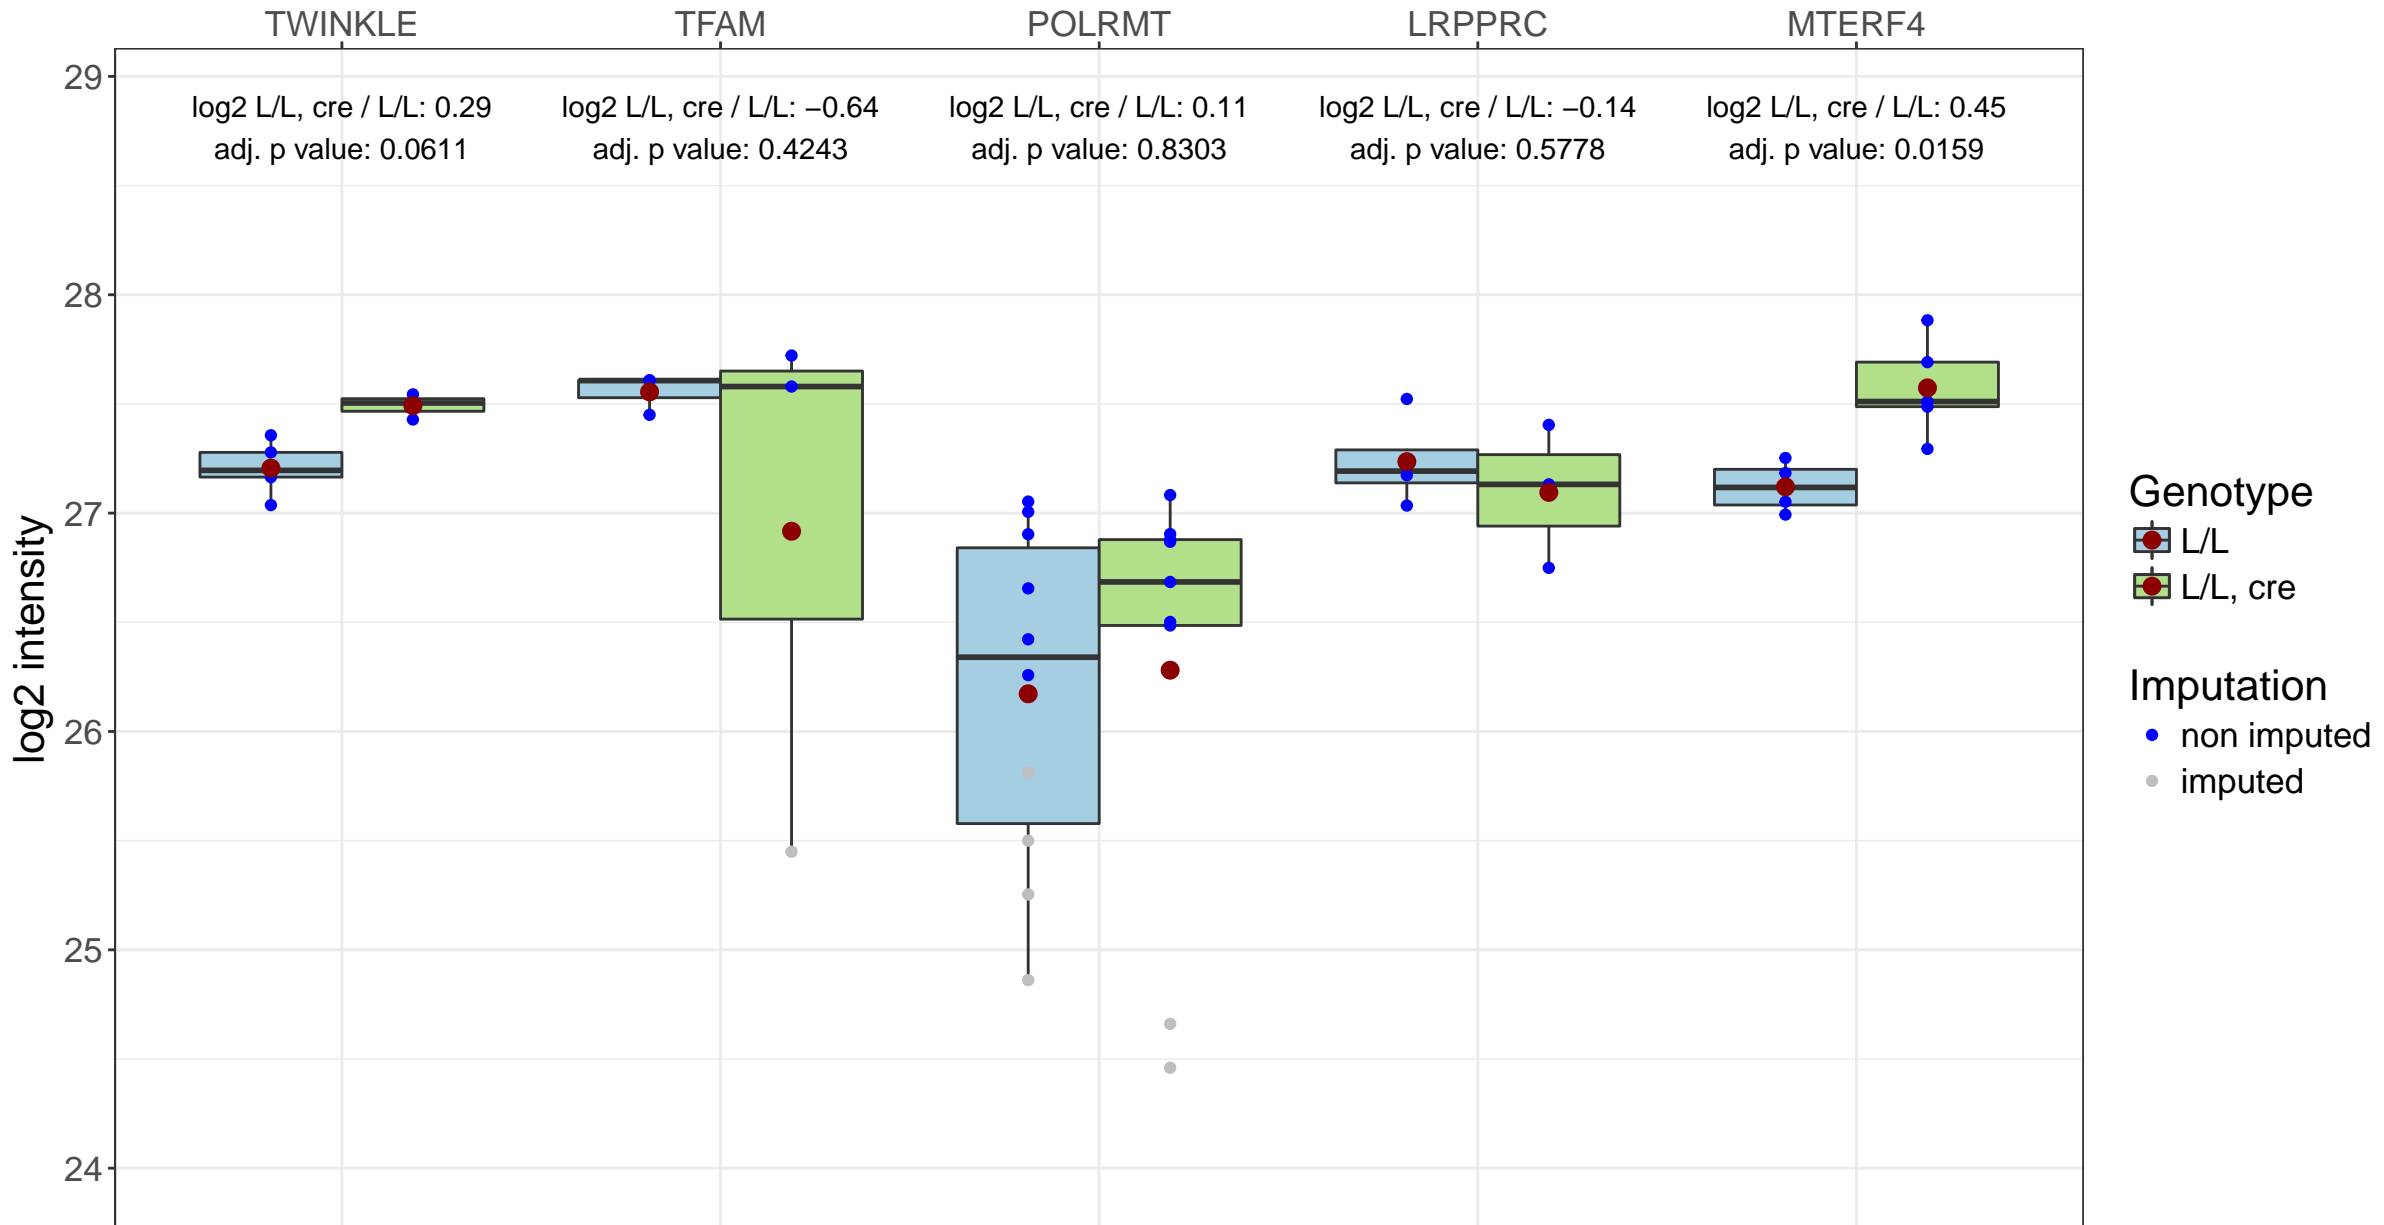



# BSG / K3W4Q8

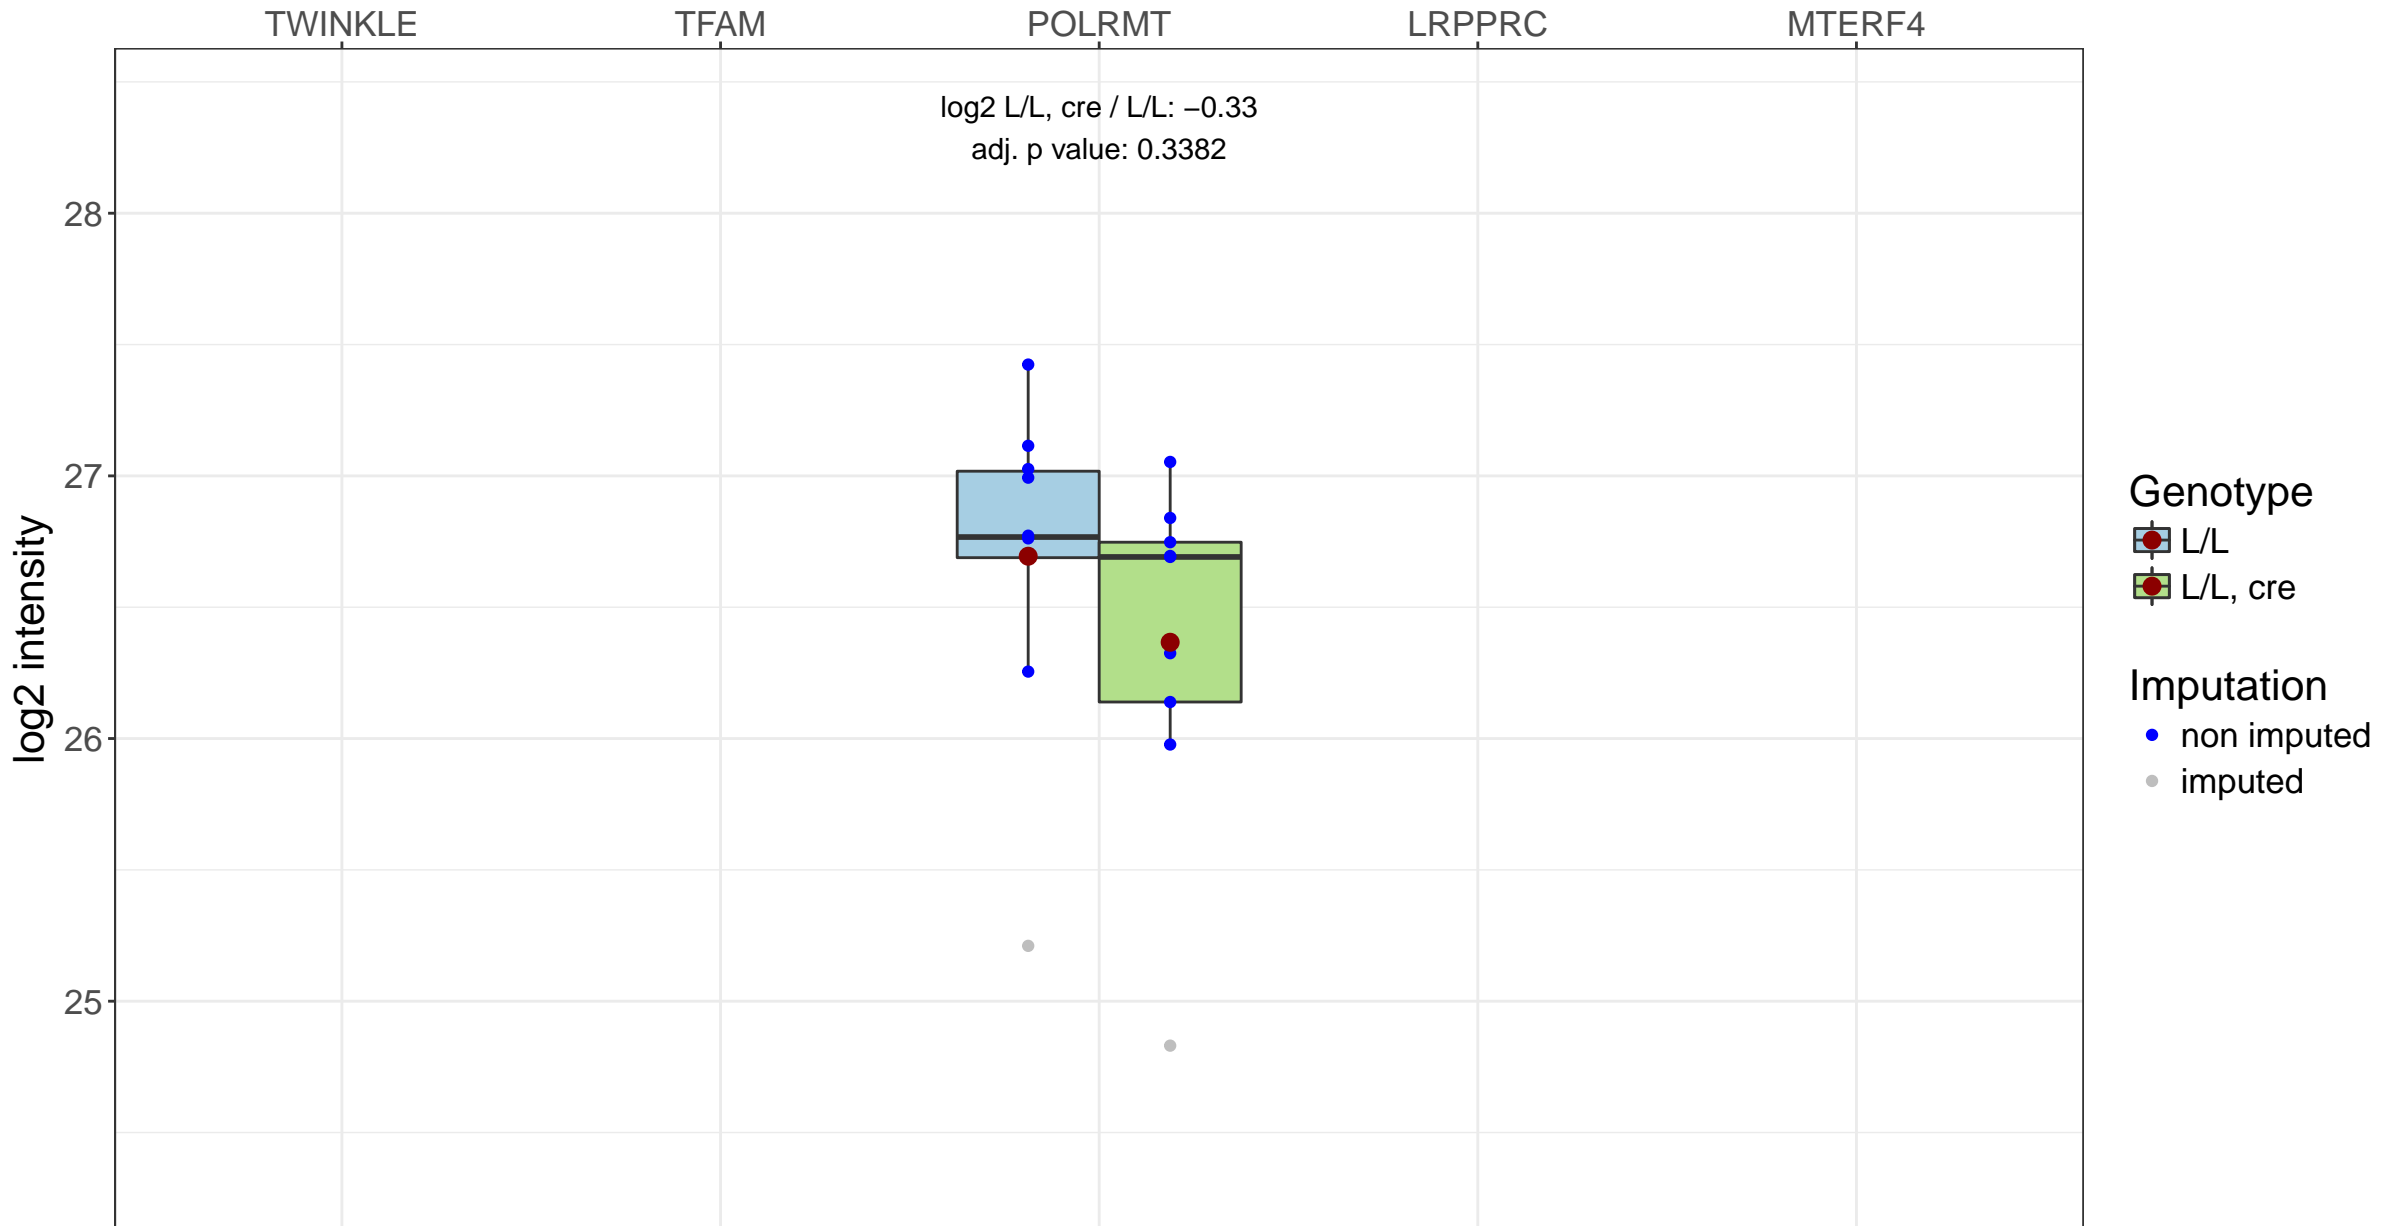

# C1QBP / Q8R5L1

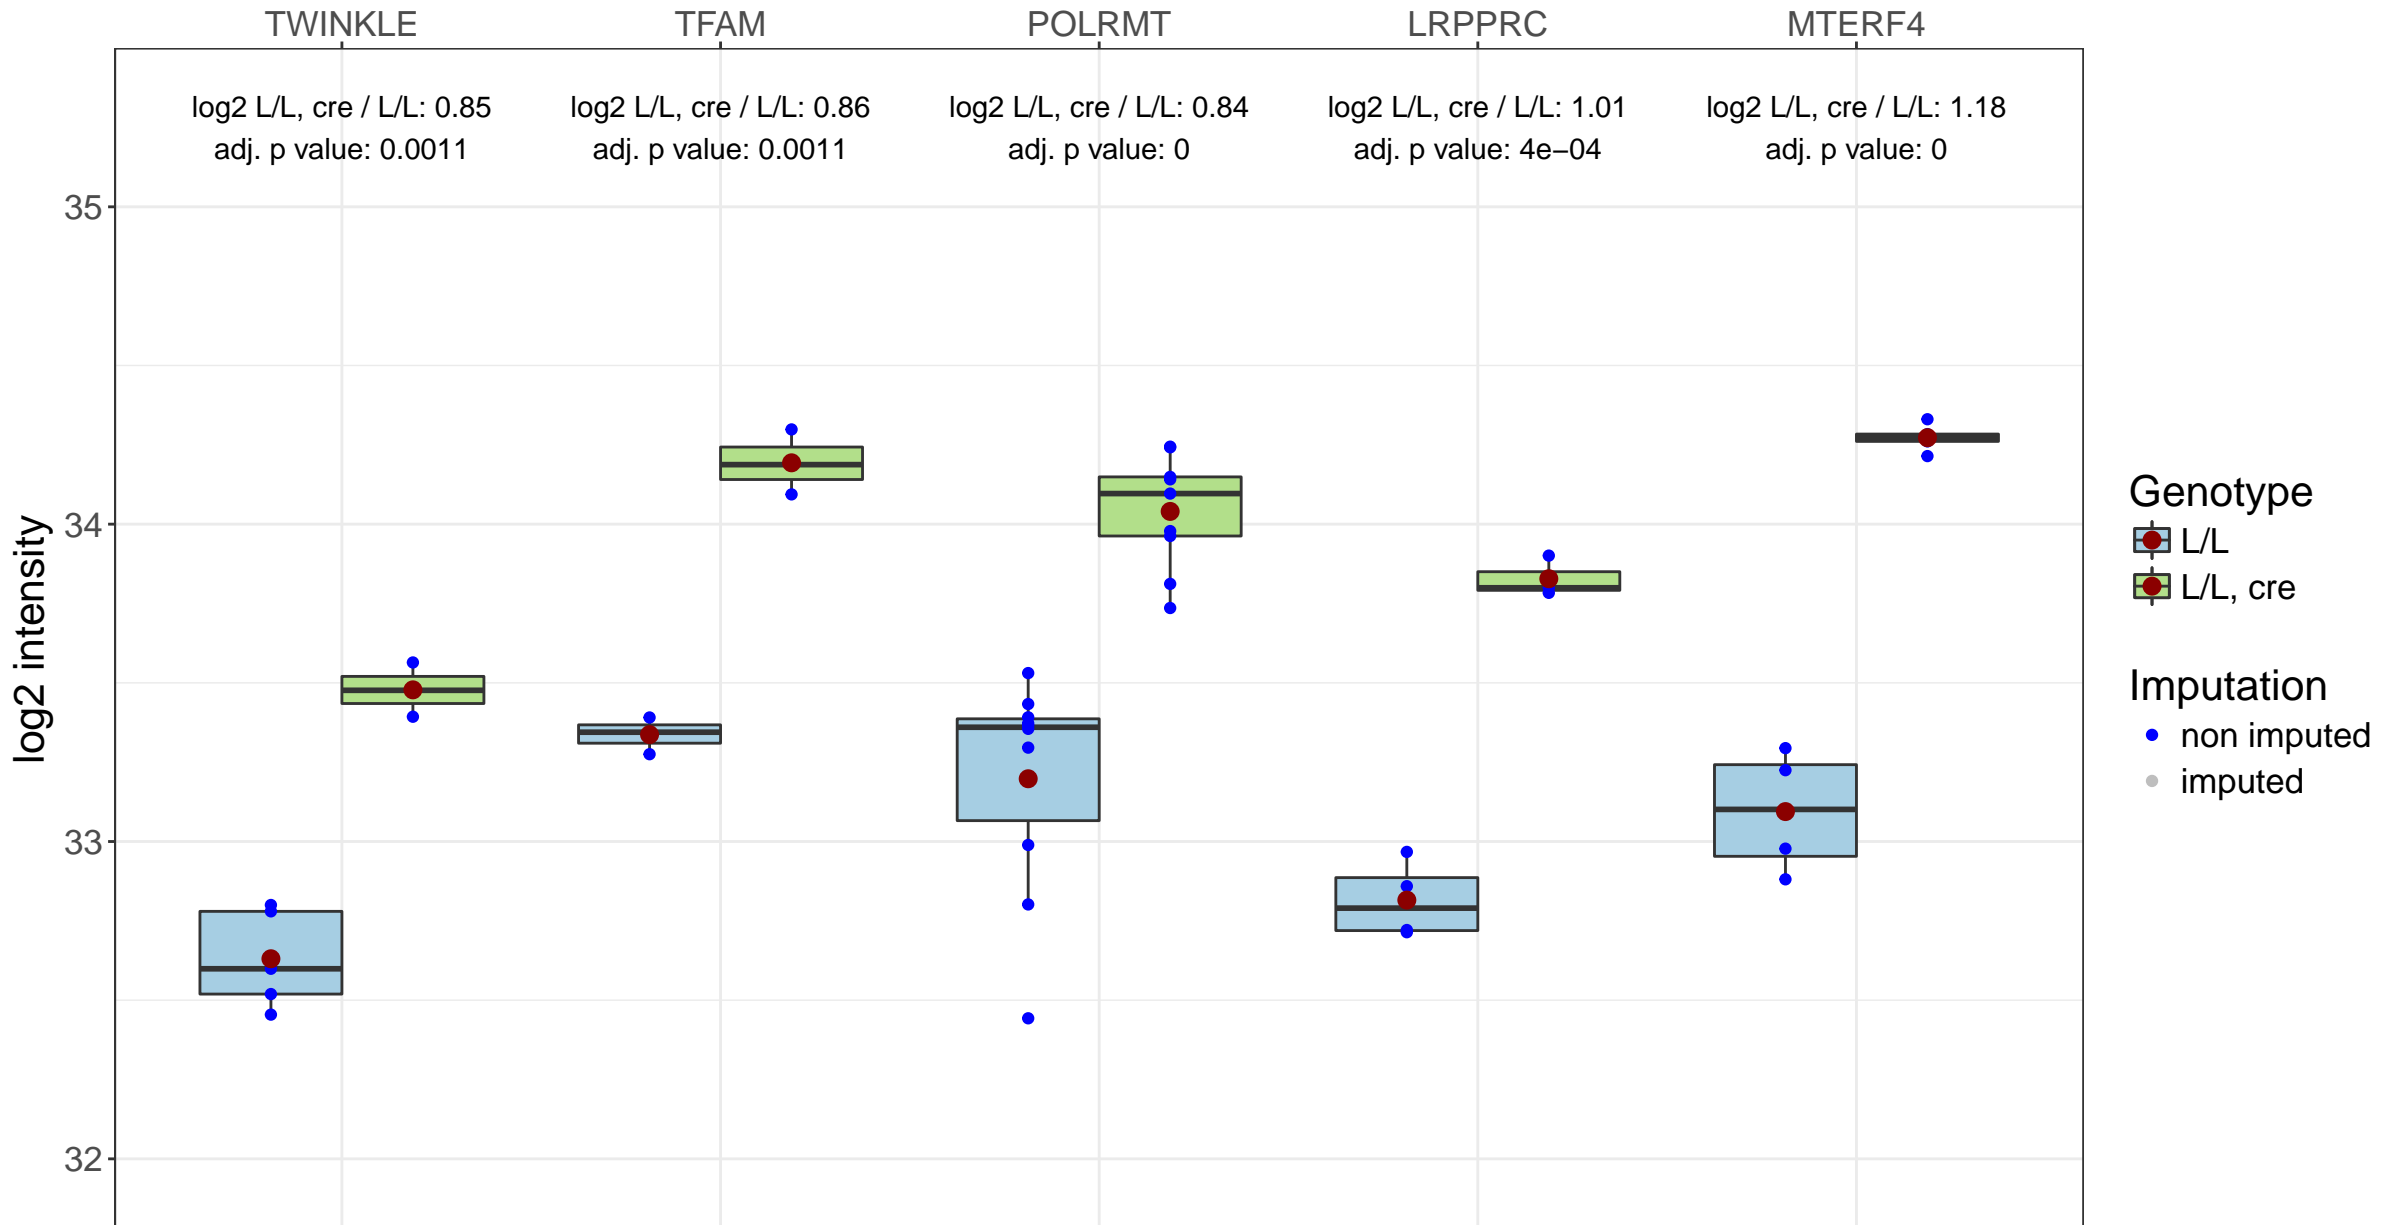

# CALM1 / P62204

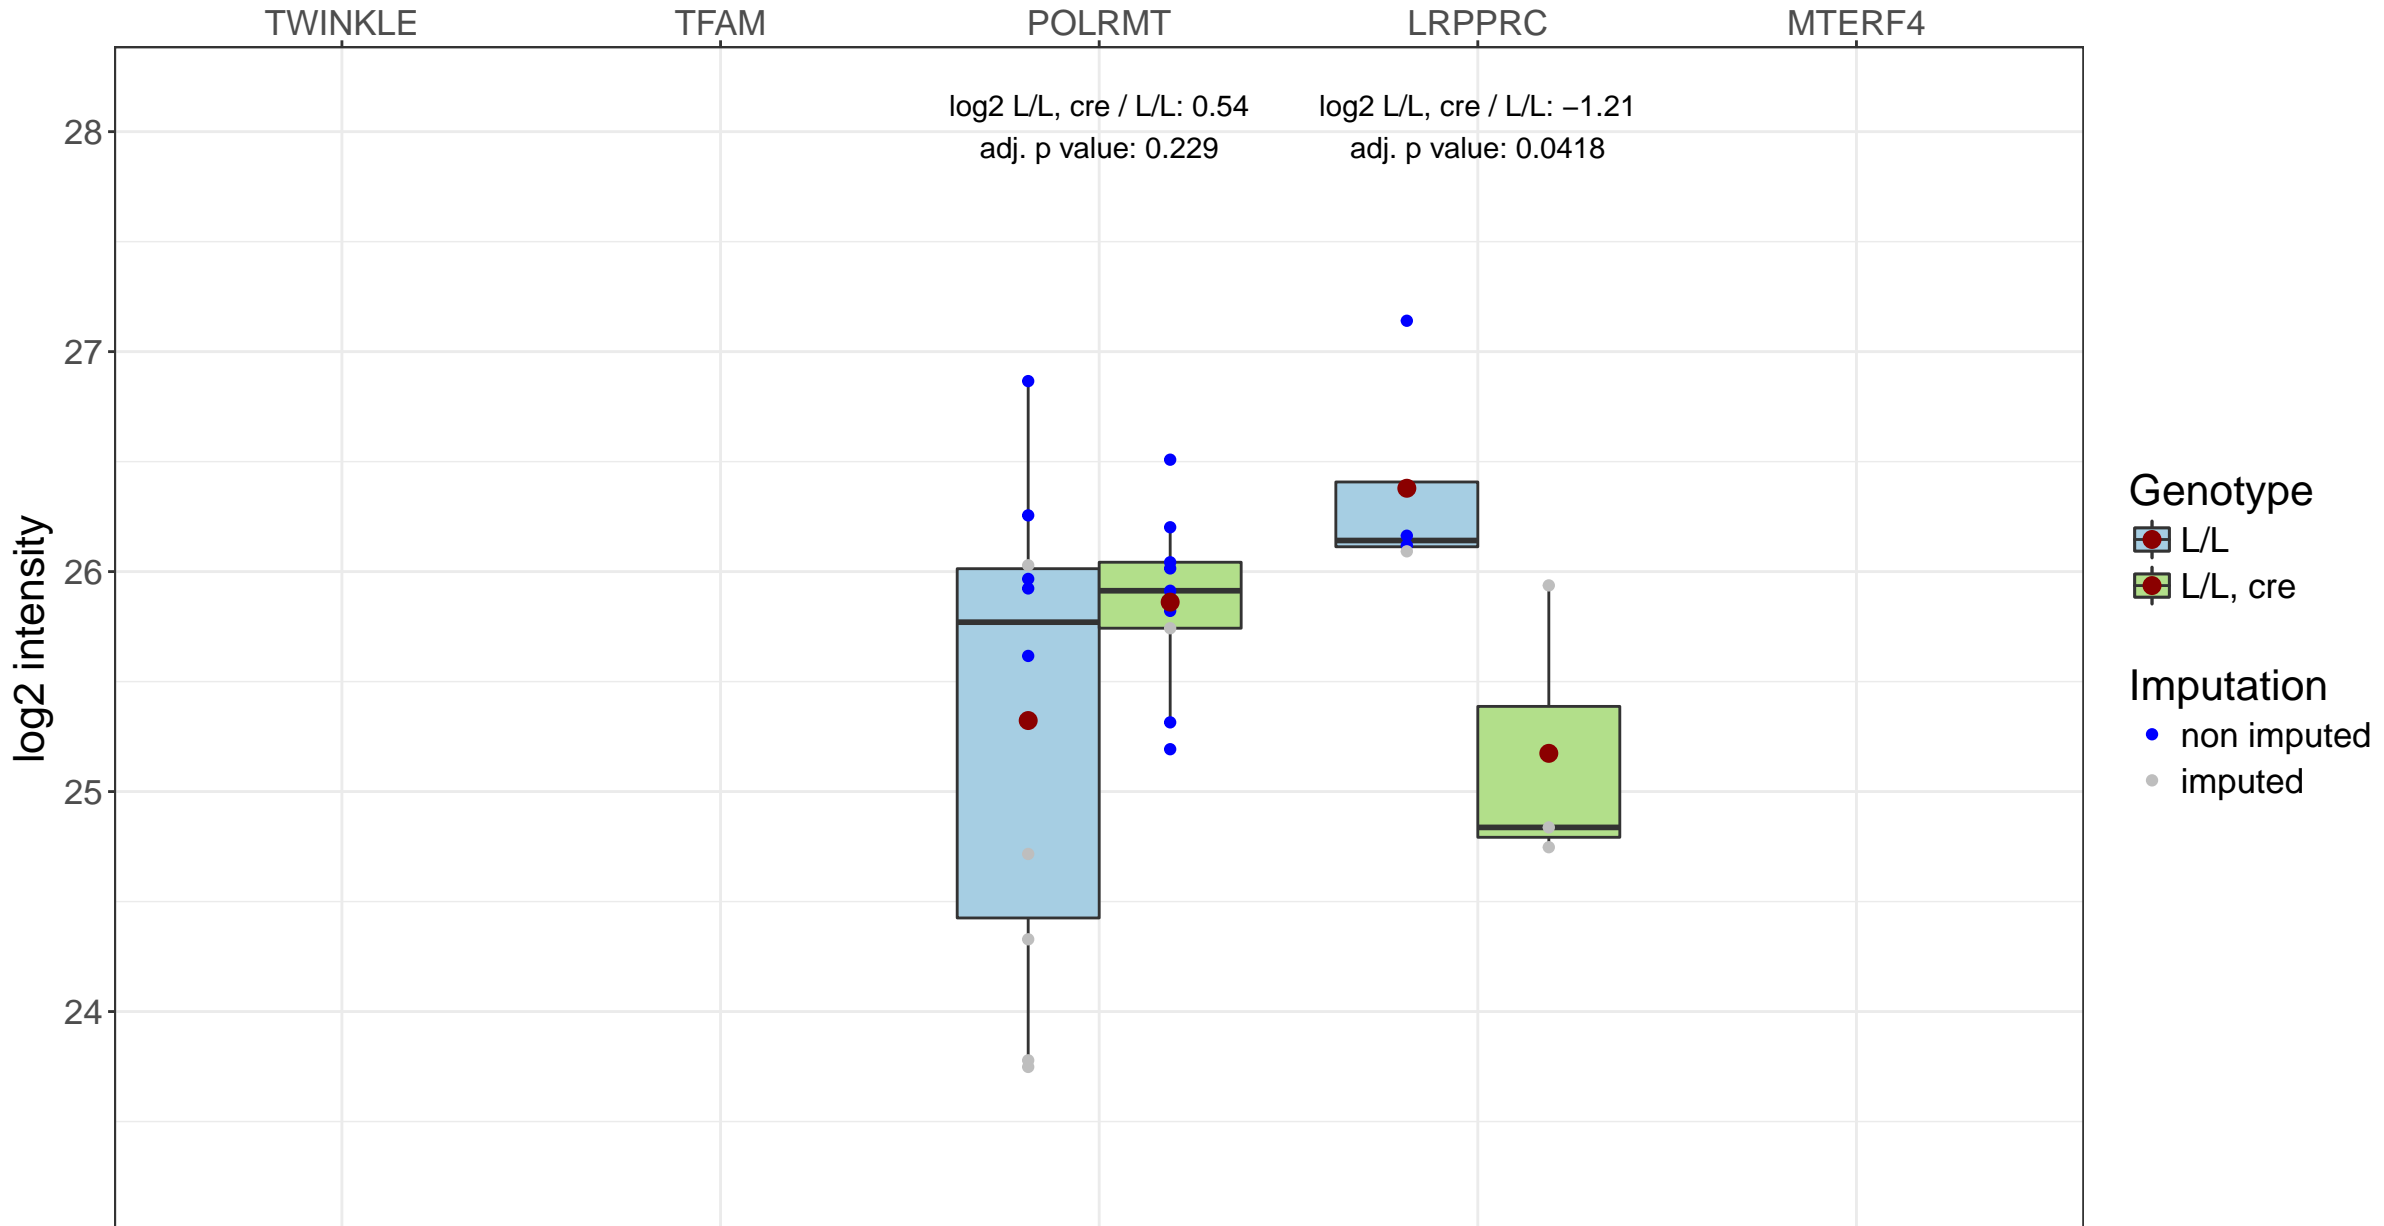

# CALR / P14211

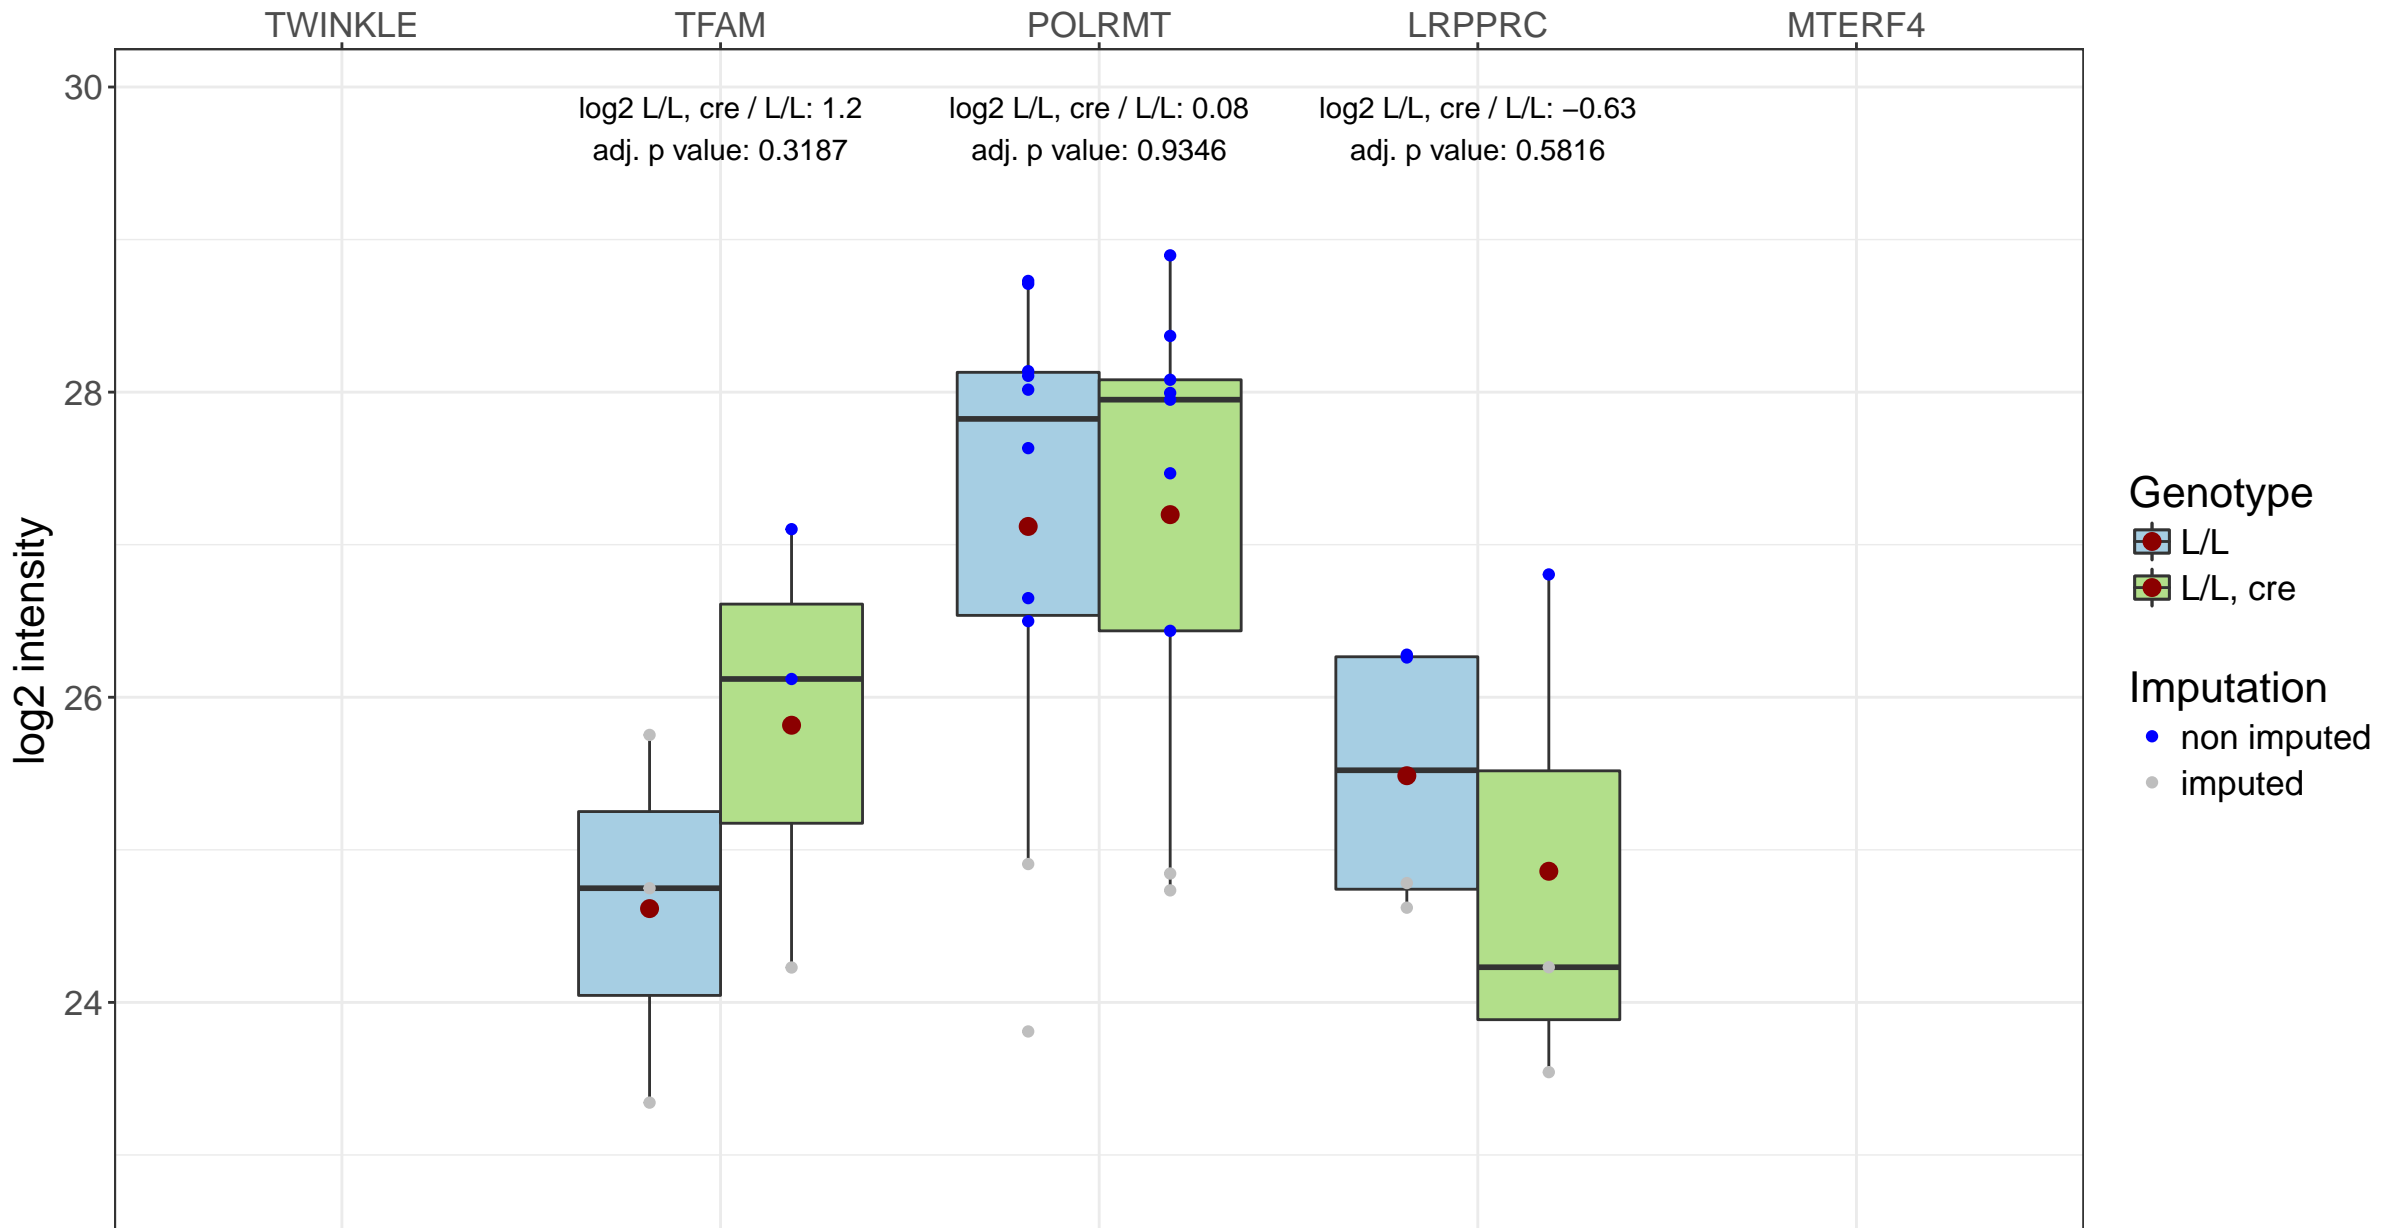

# CALU / O35887

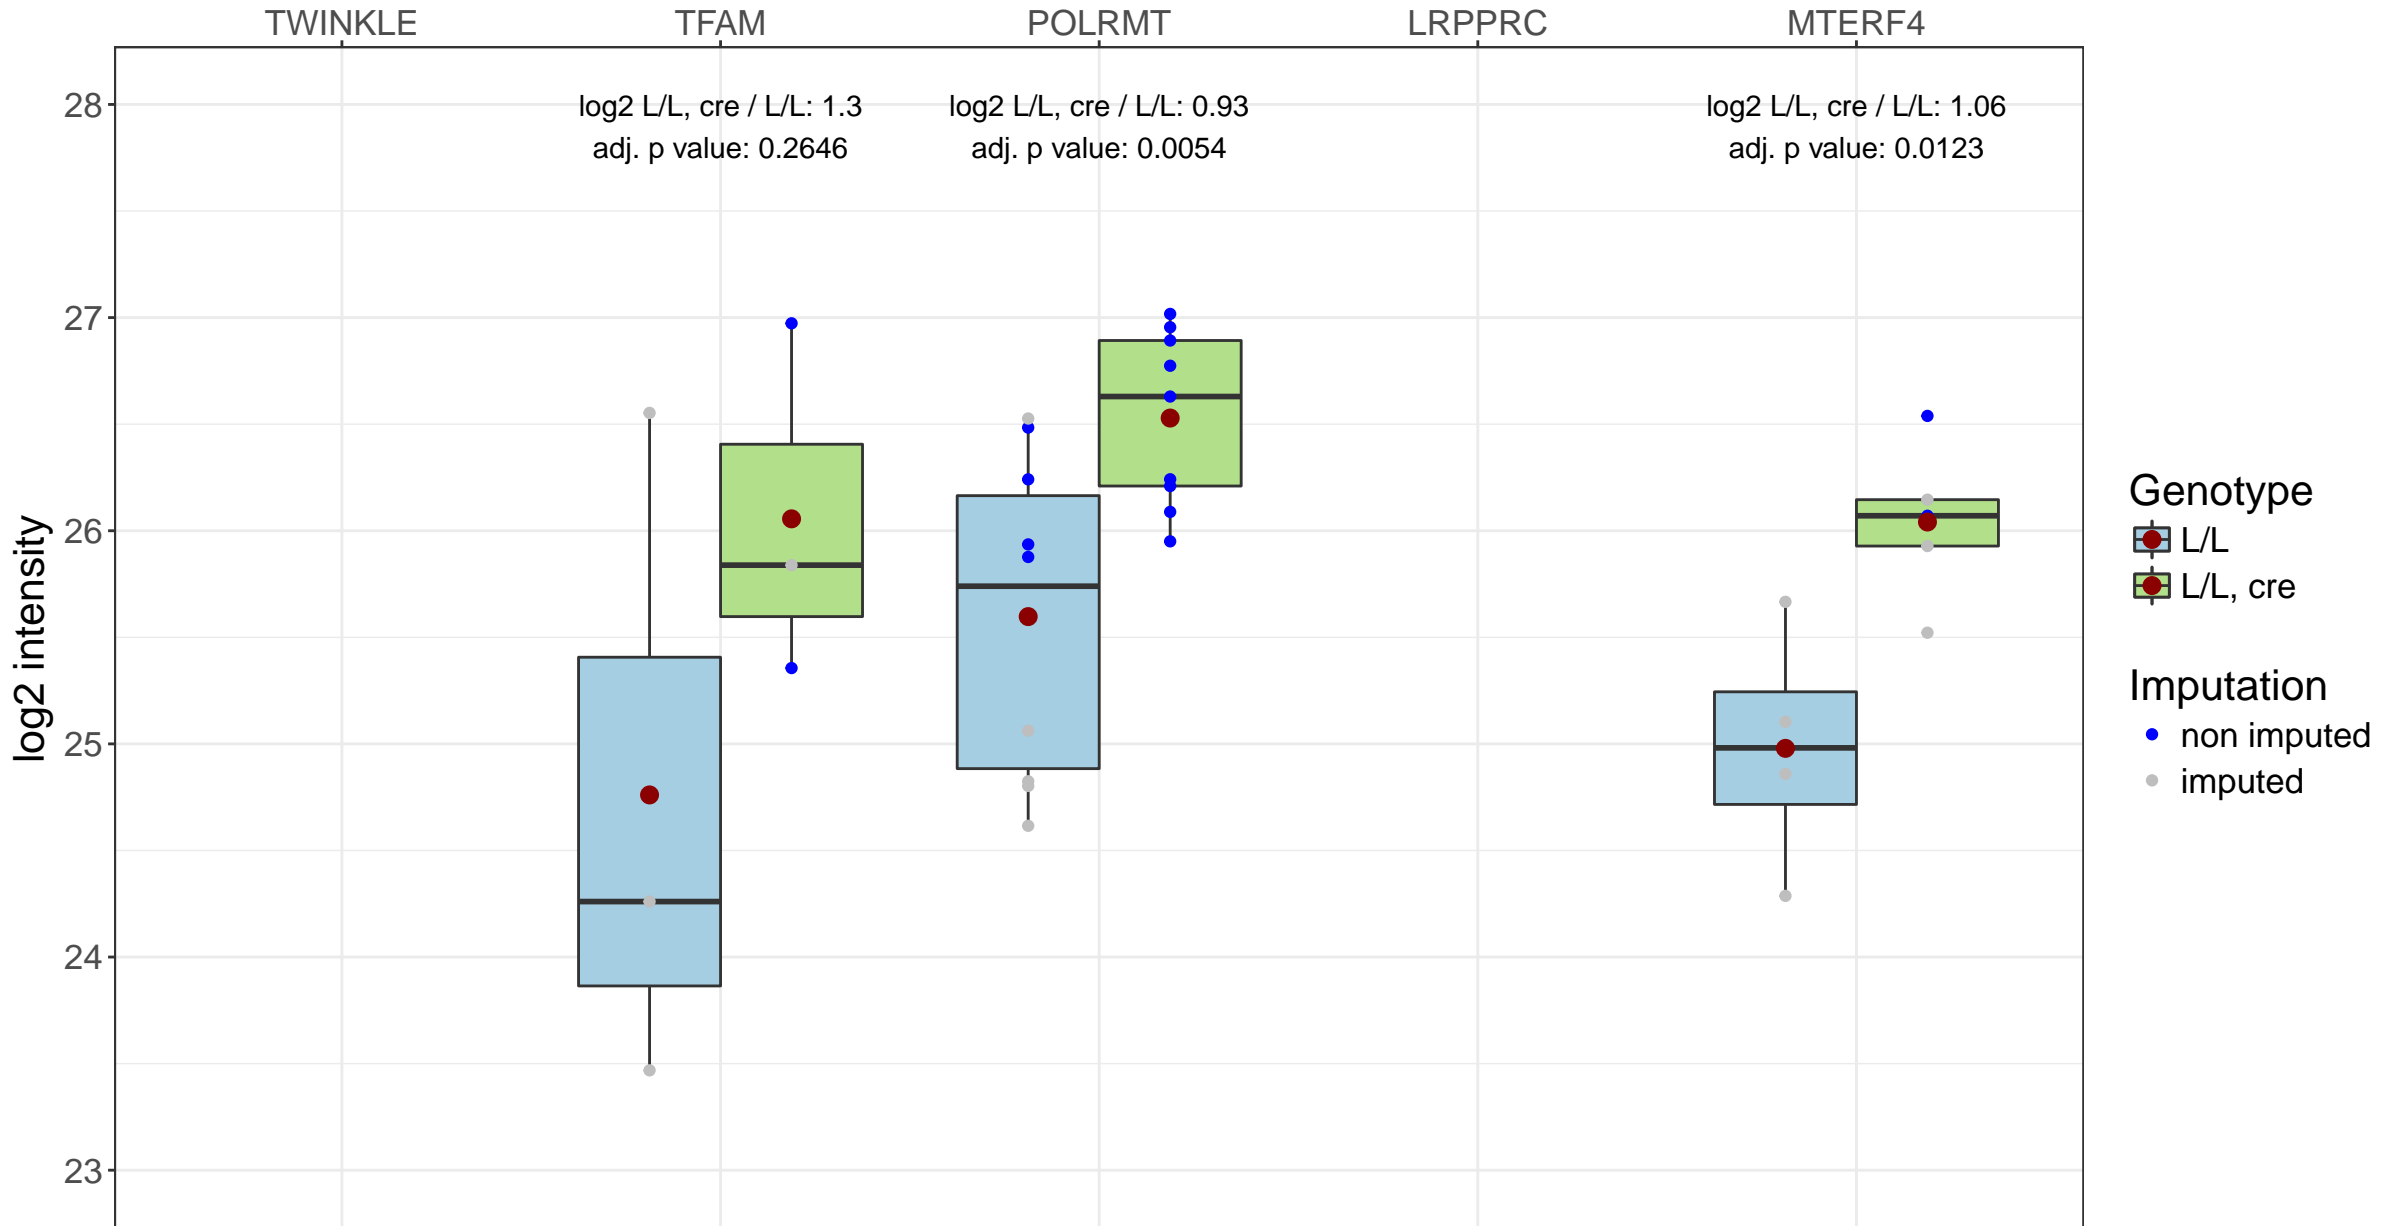

# CANX / P35564

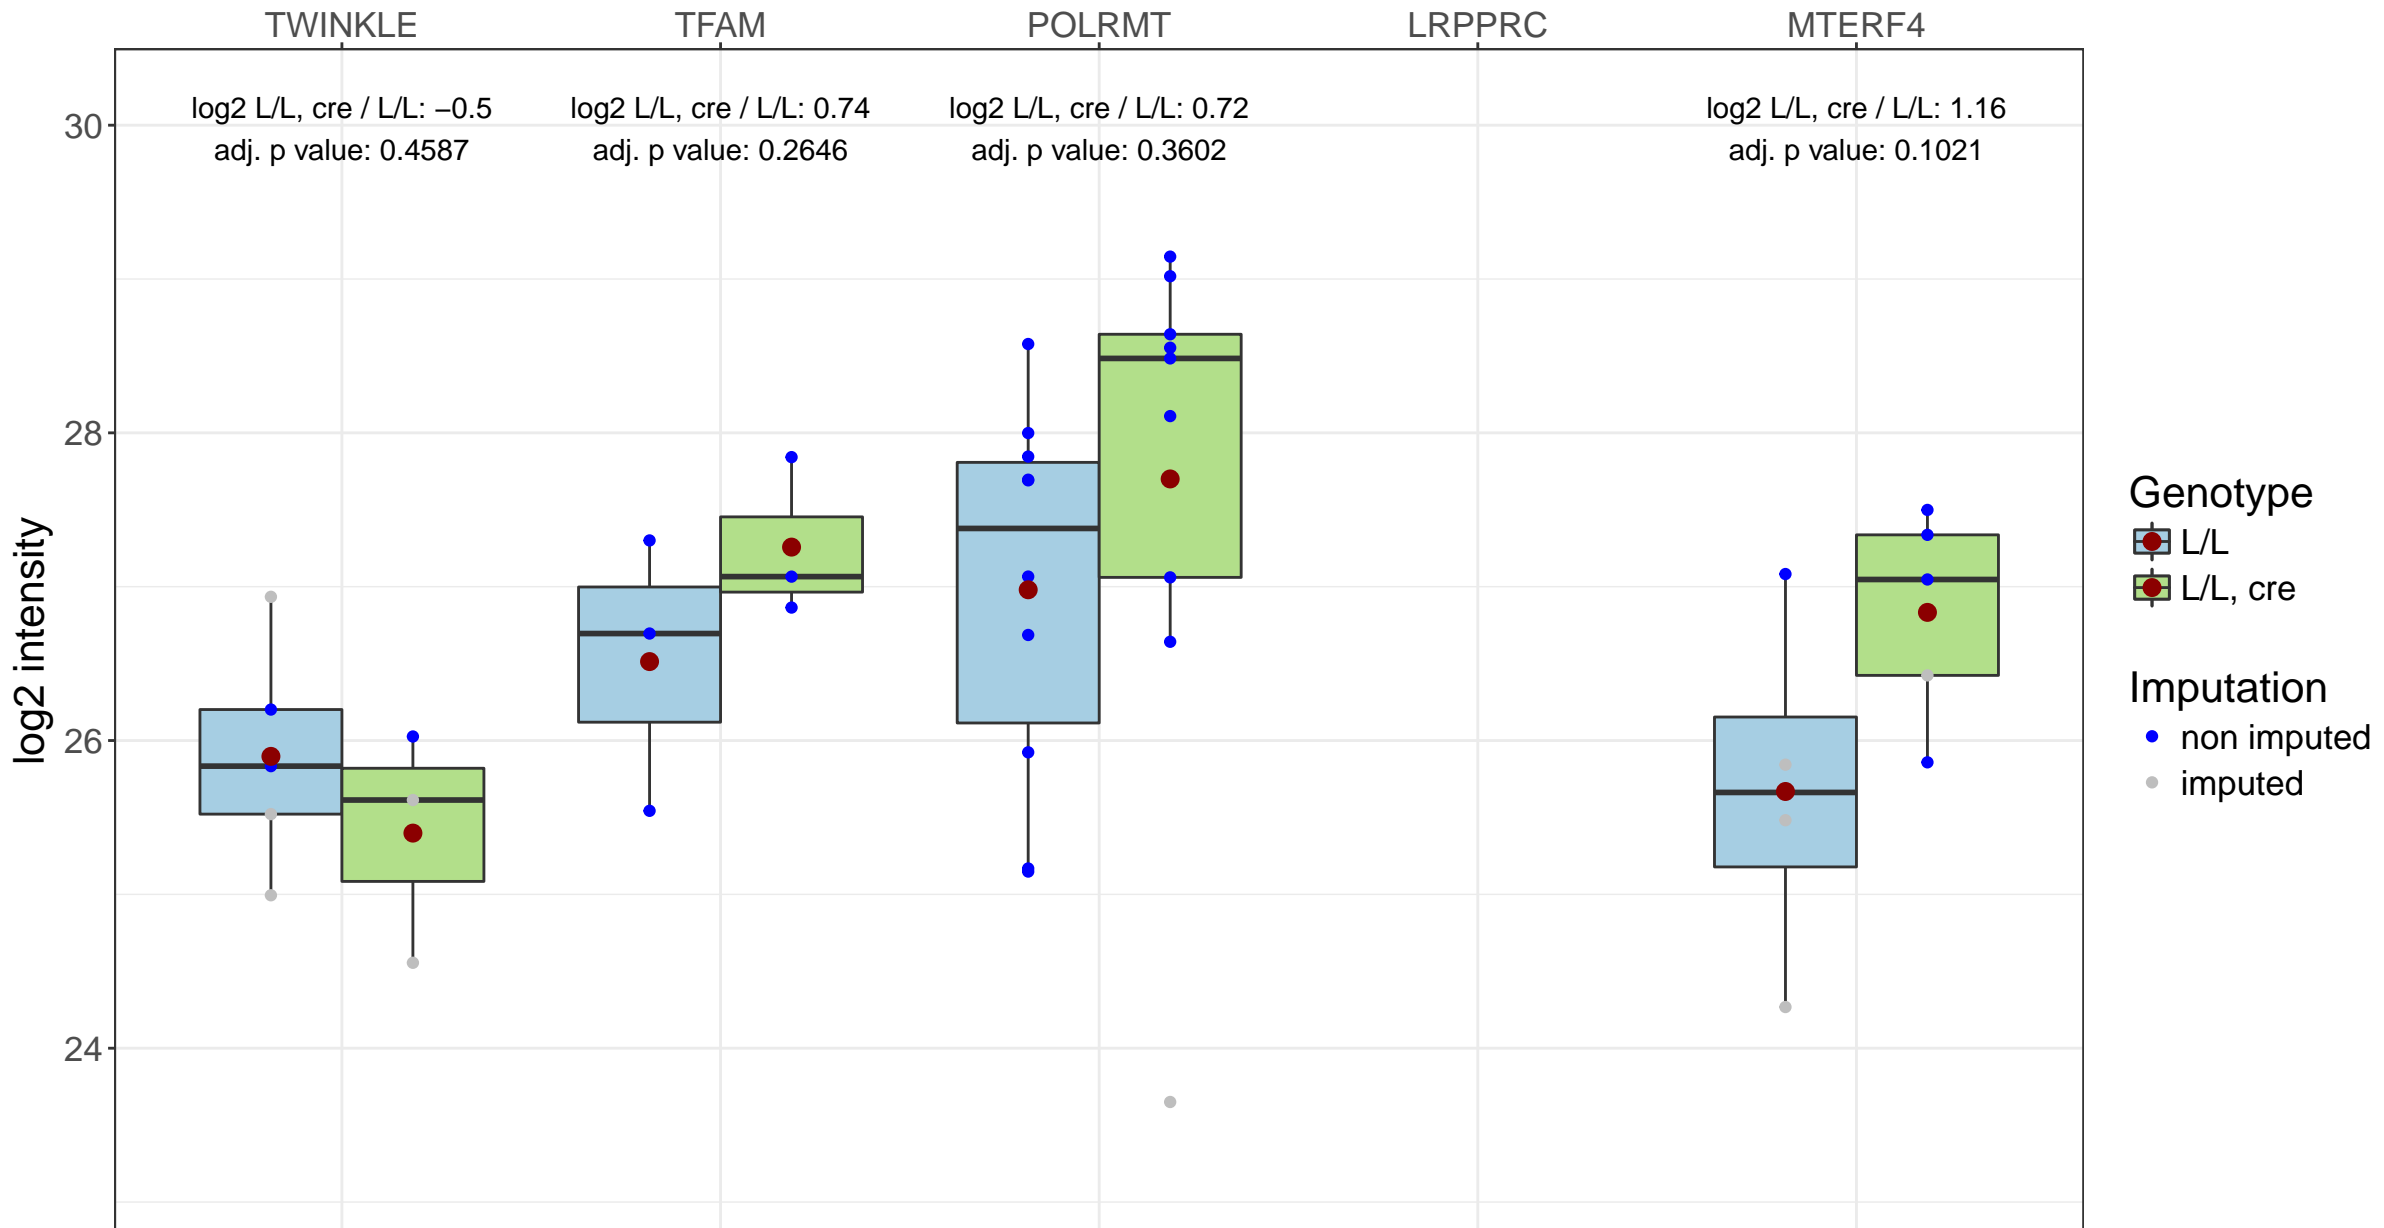

# CARKD / J3QMM7

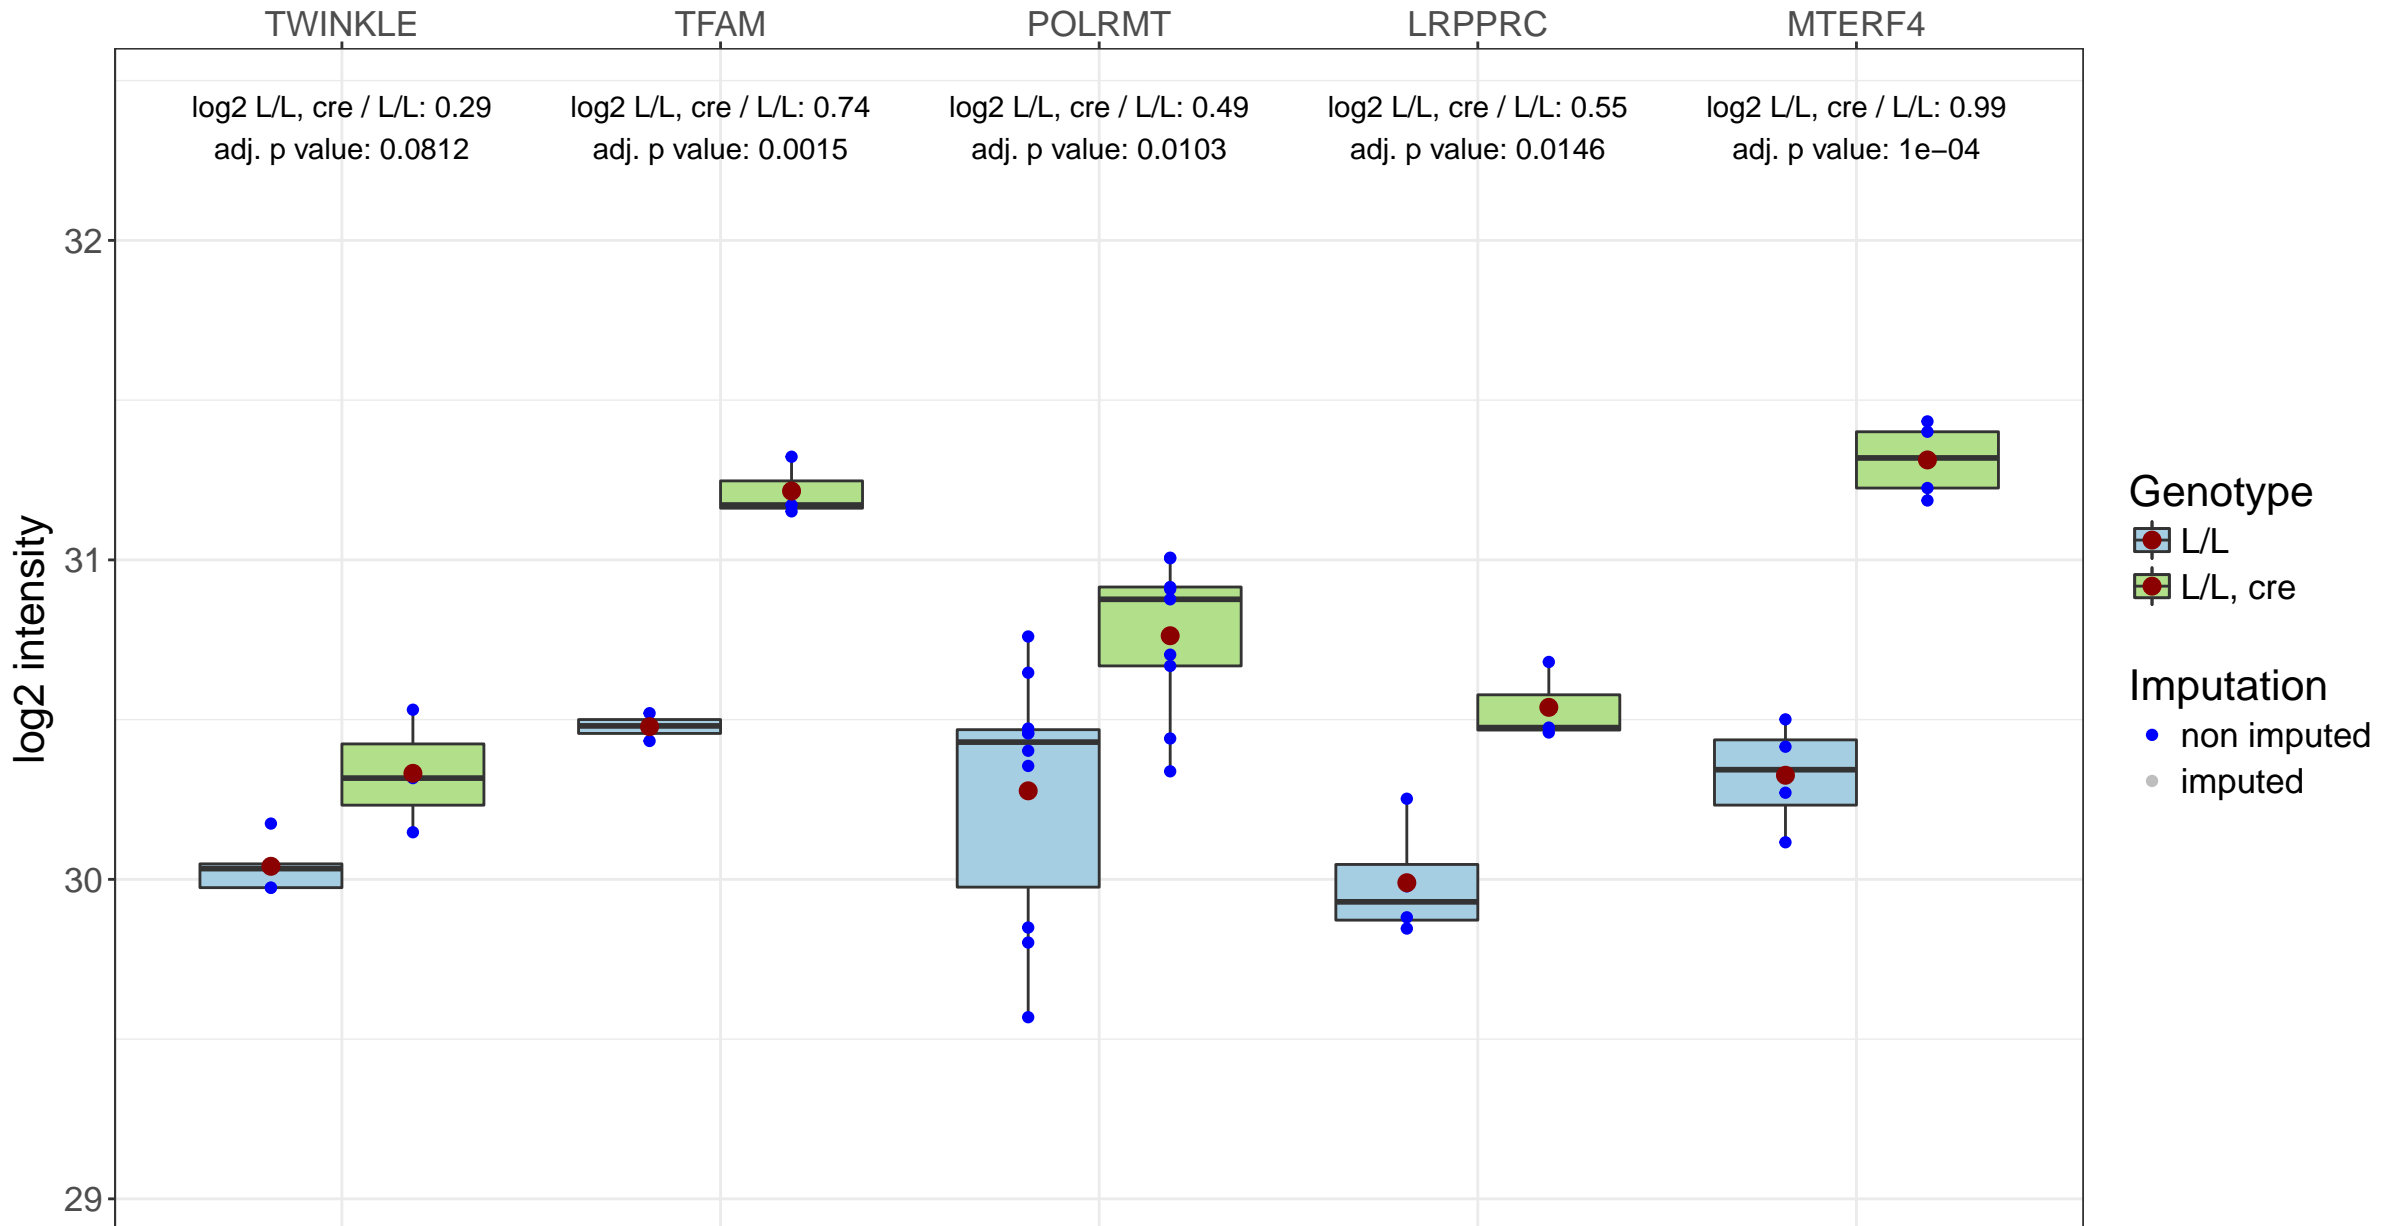

# CARS2 / G3X975

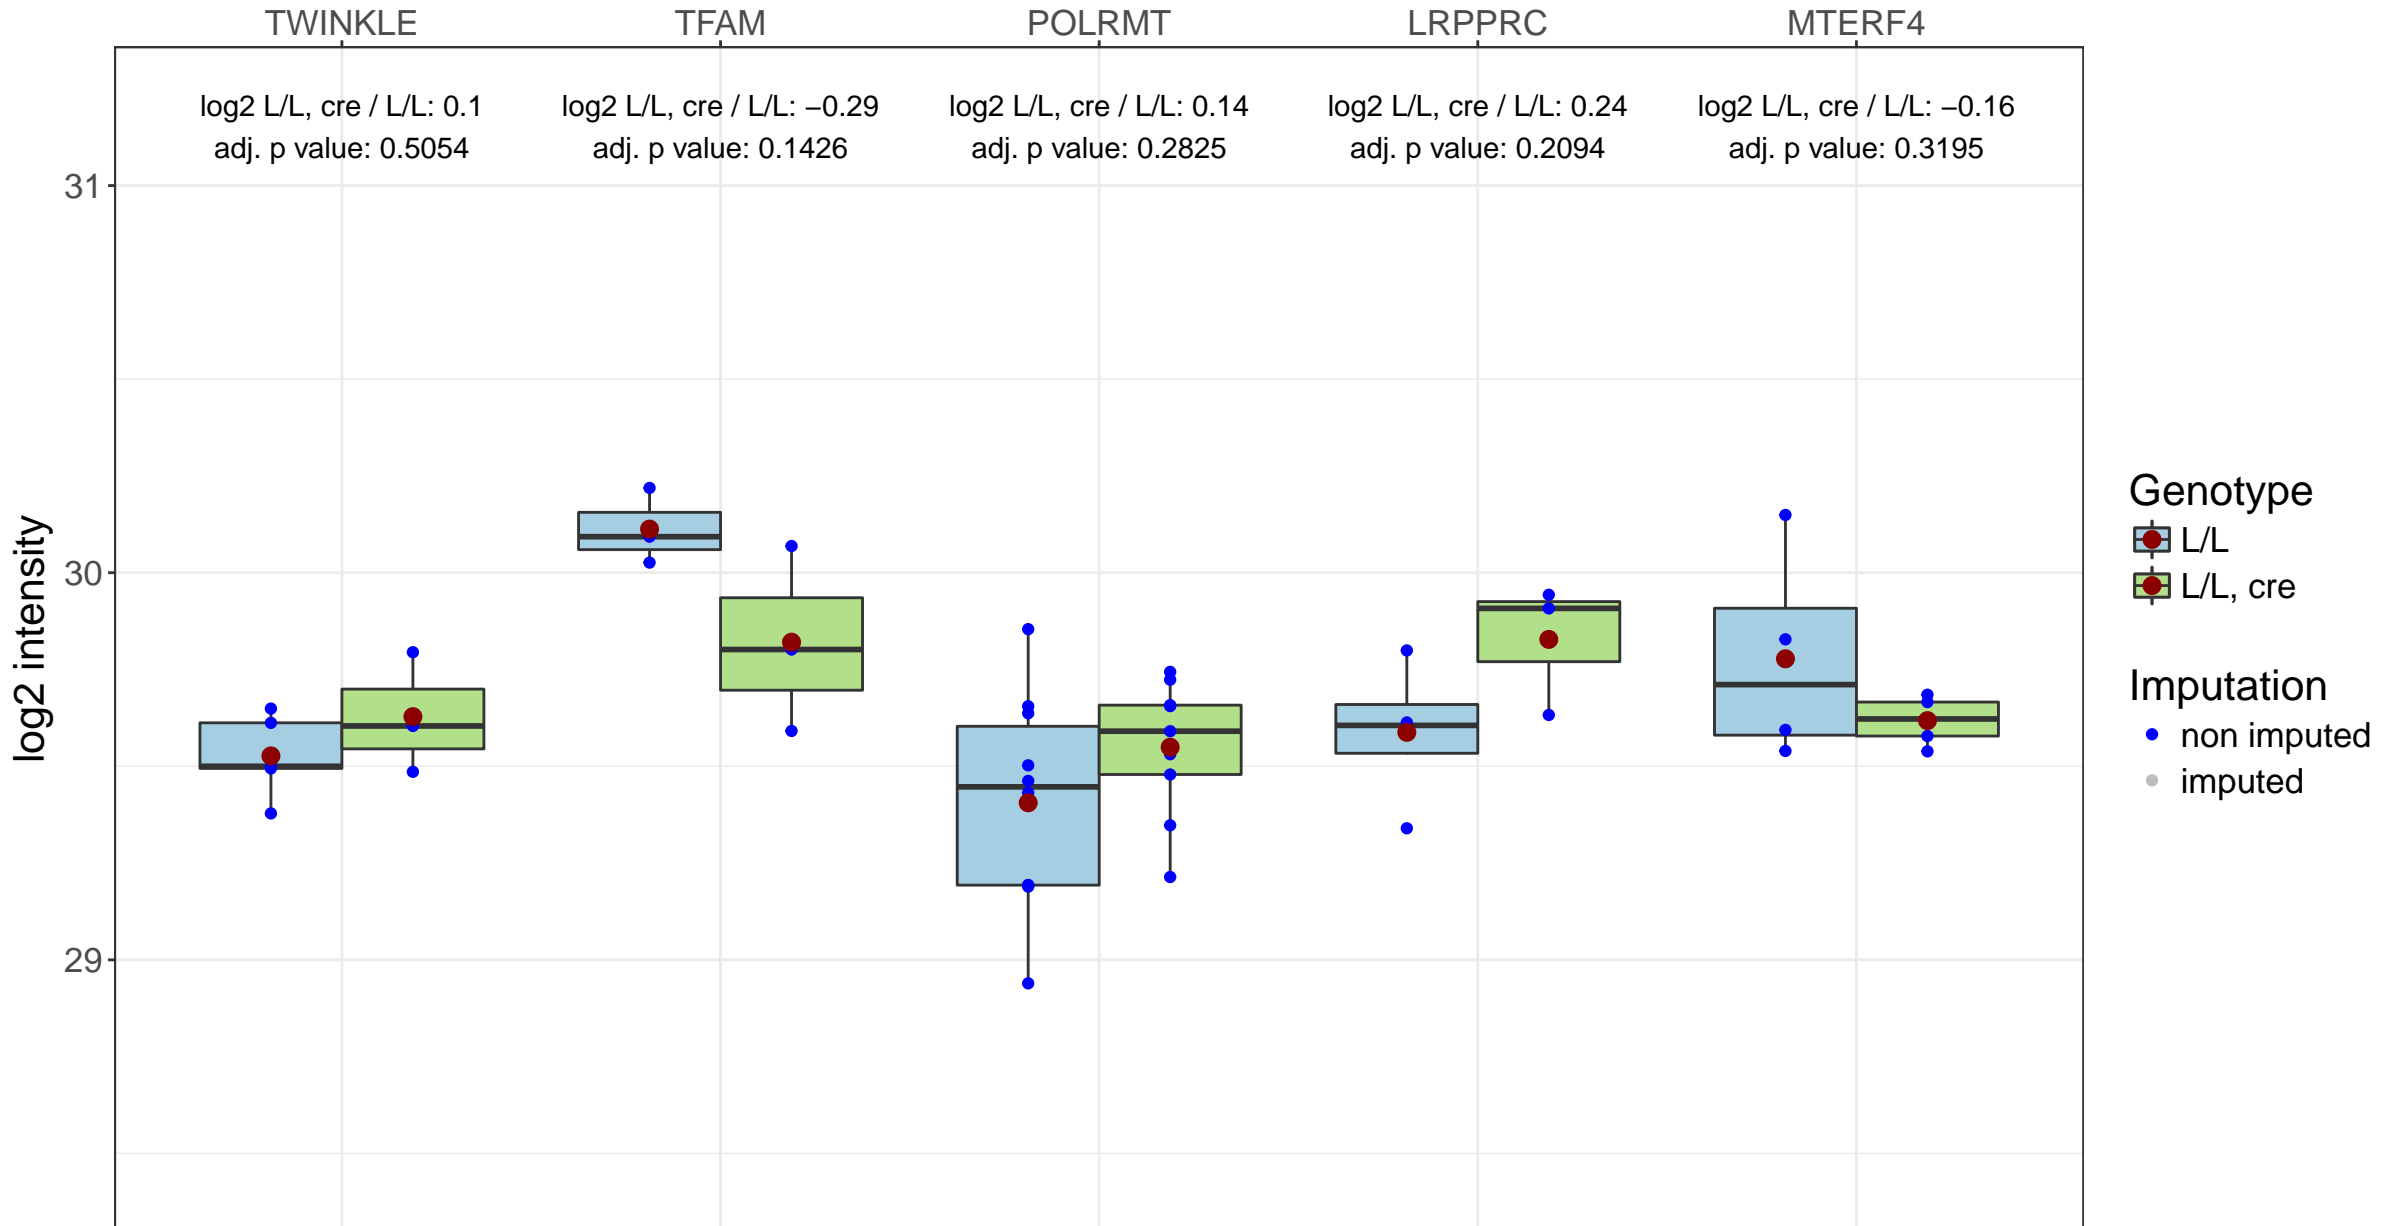



# CASQ2 / O09161

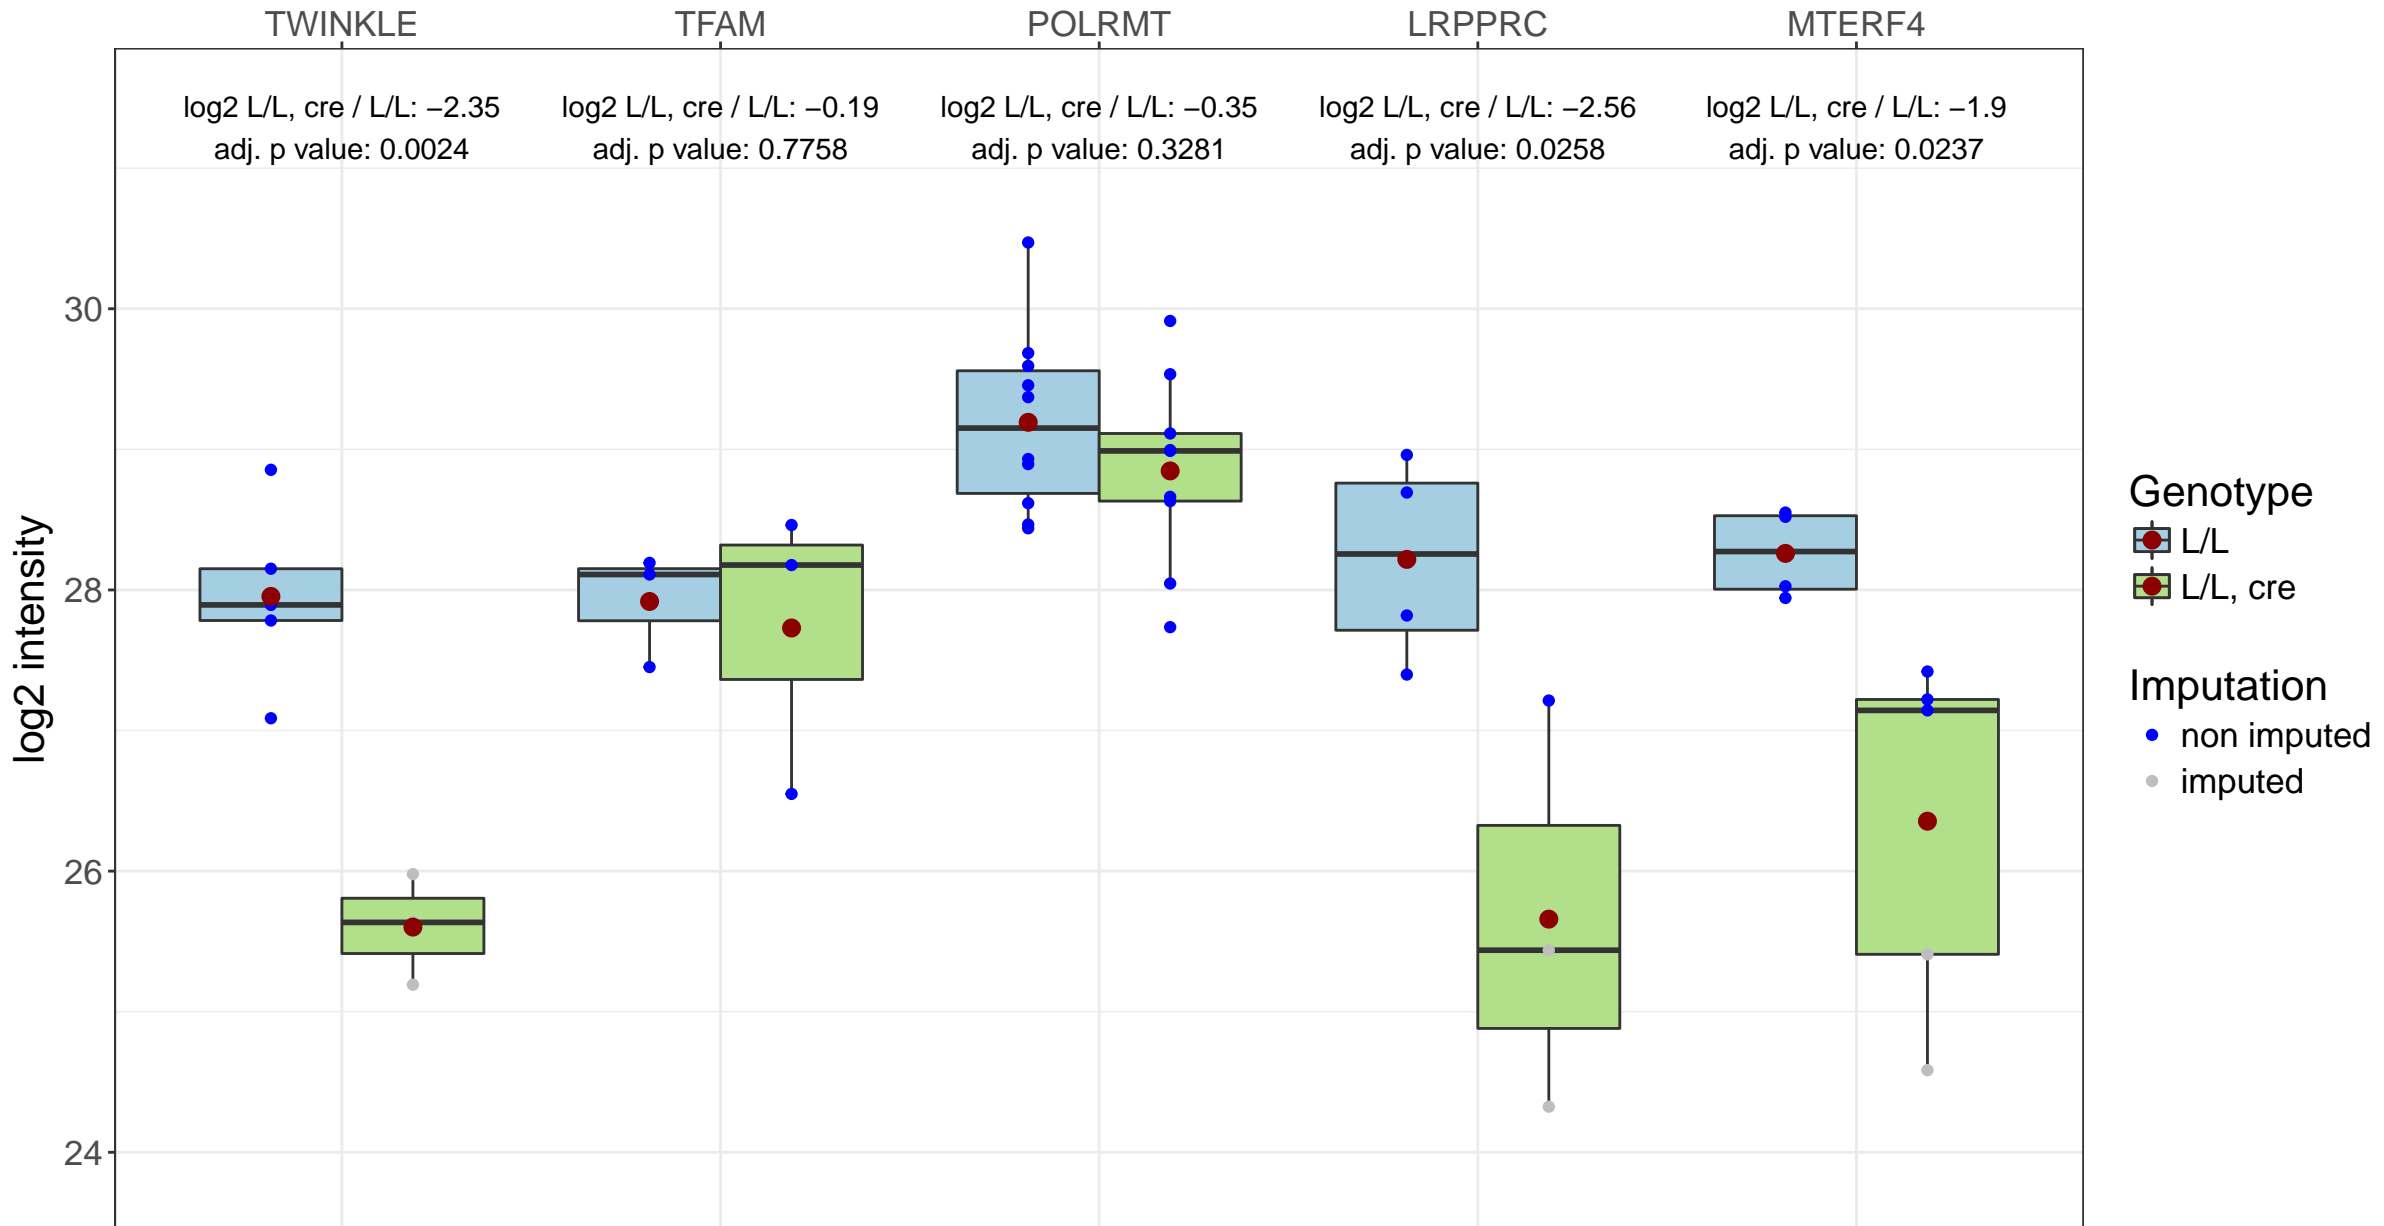

# CAT / P24270

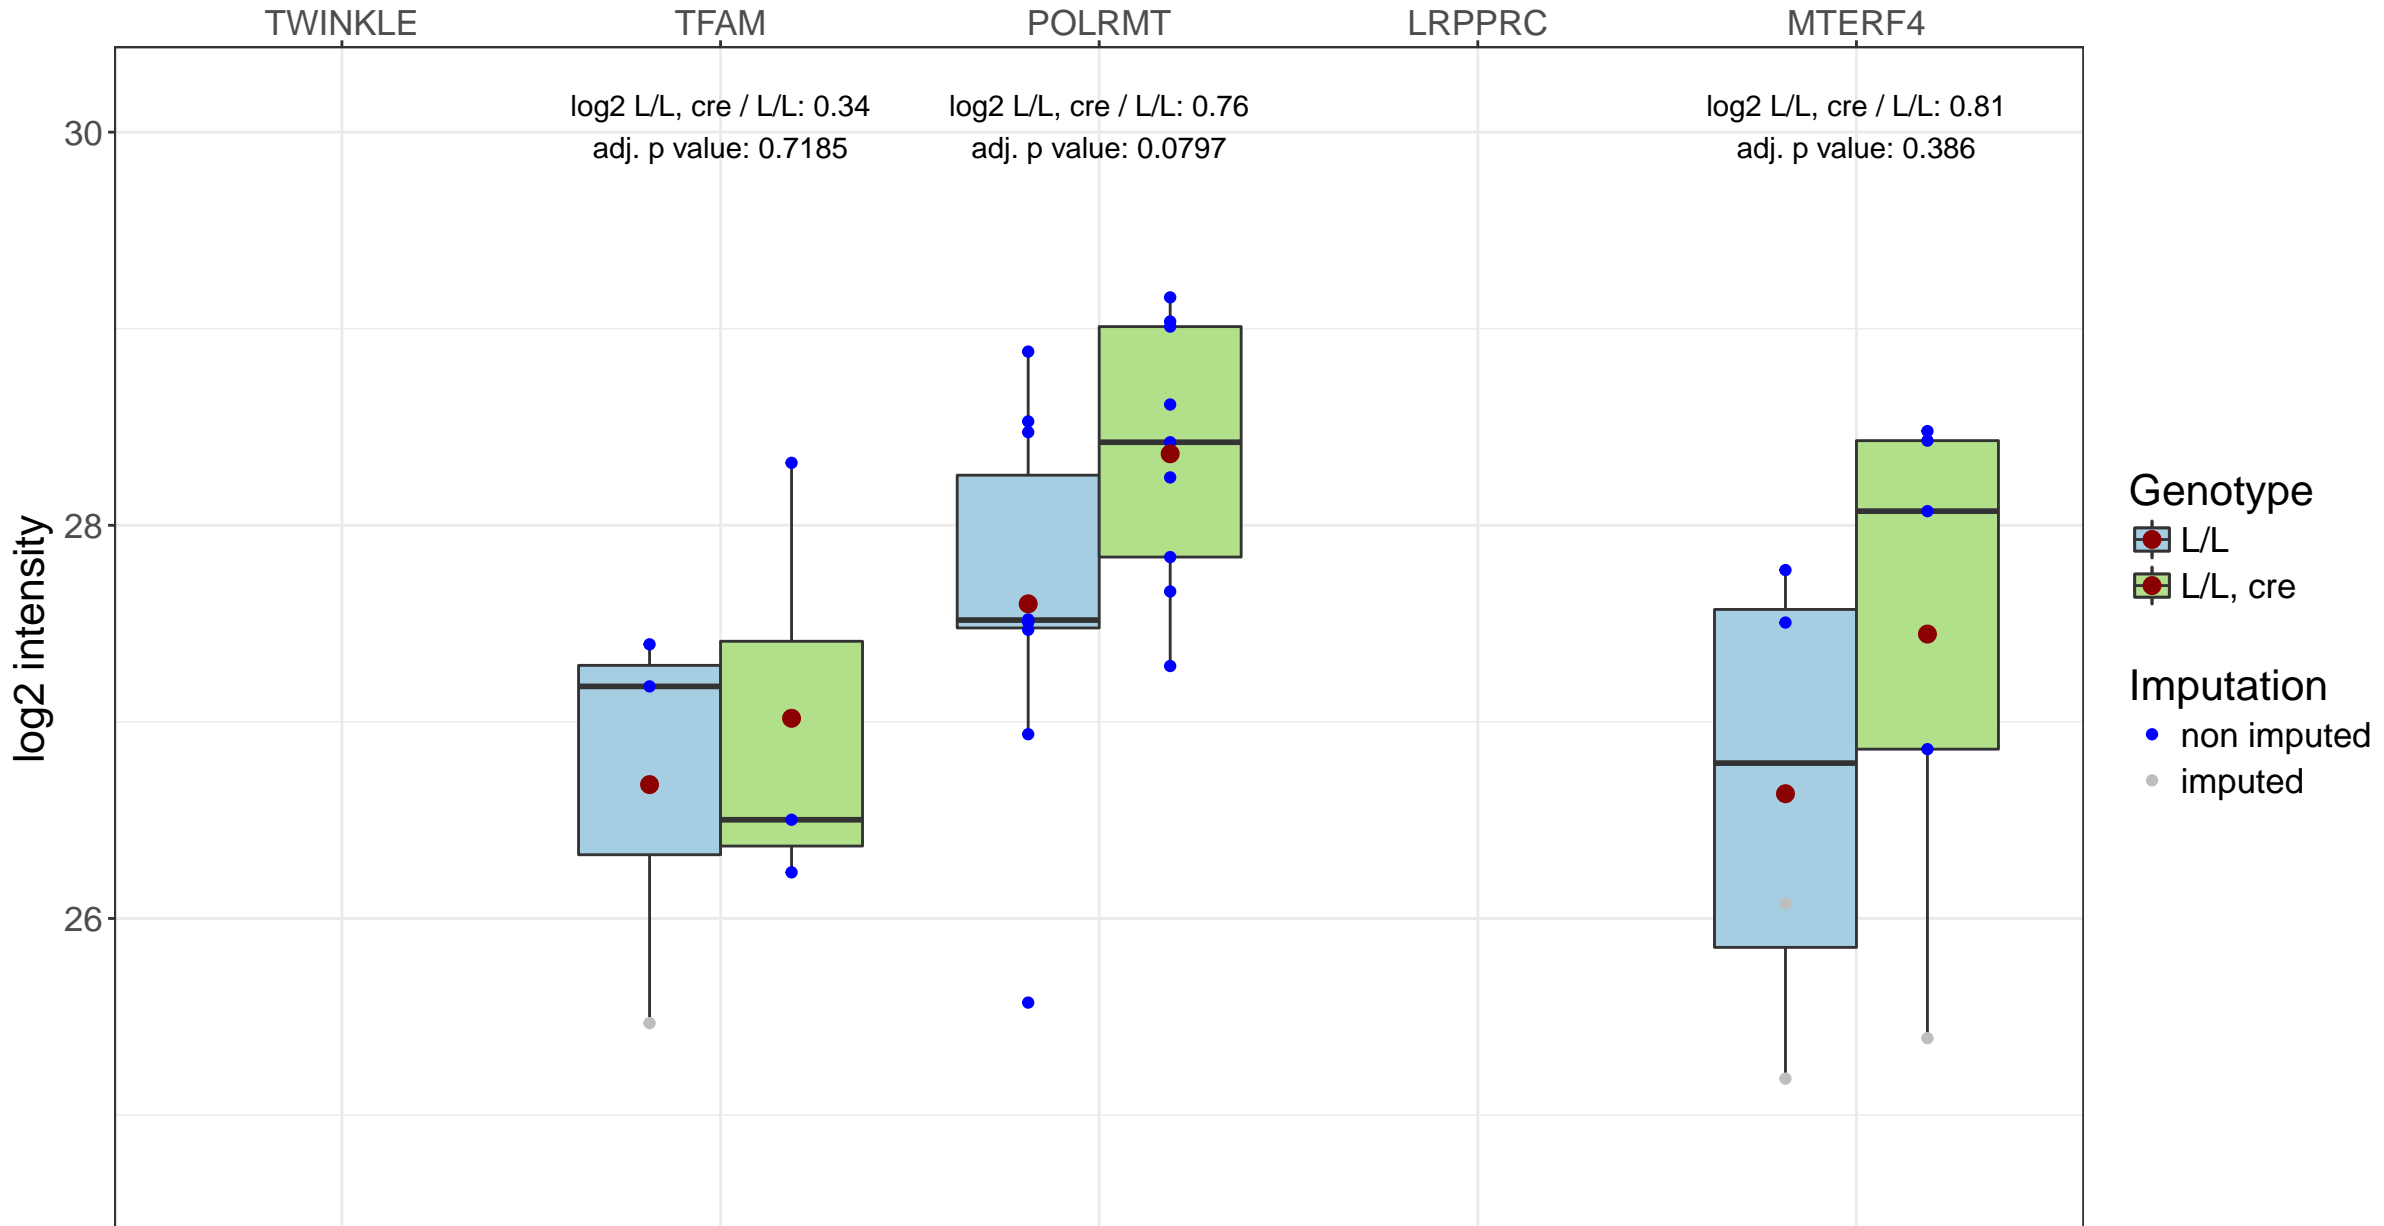

# CBR1 / P48758

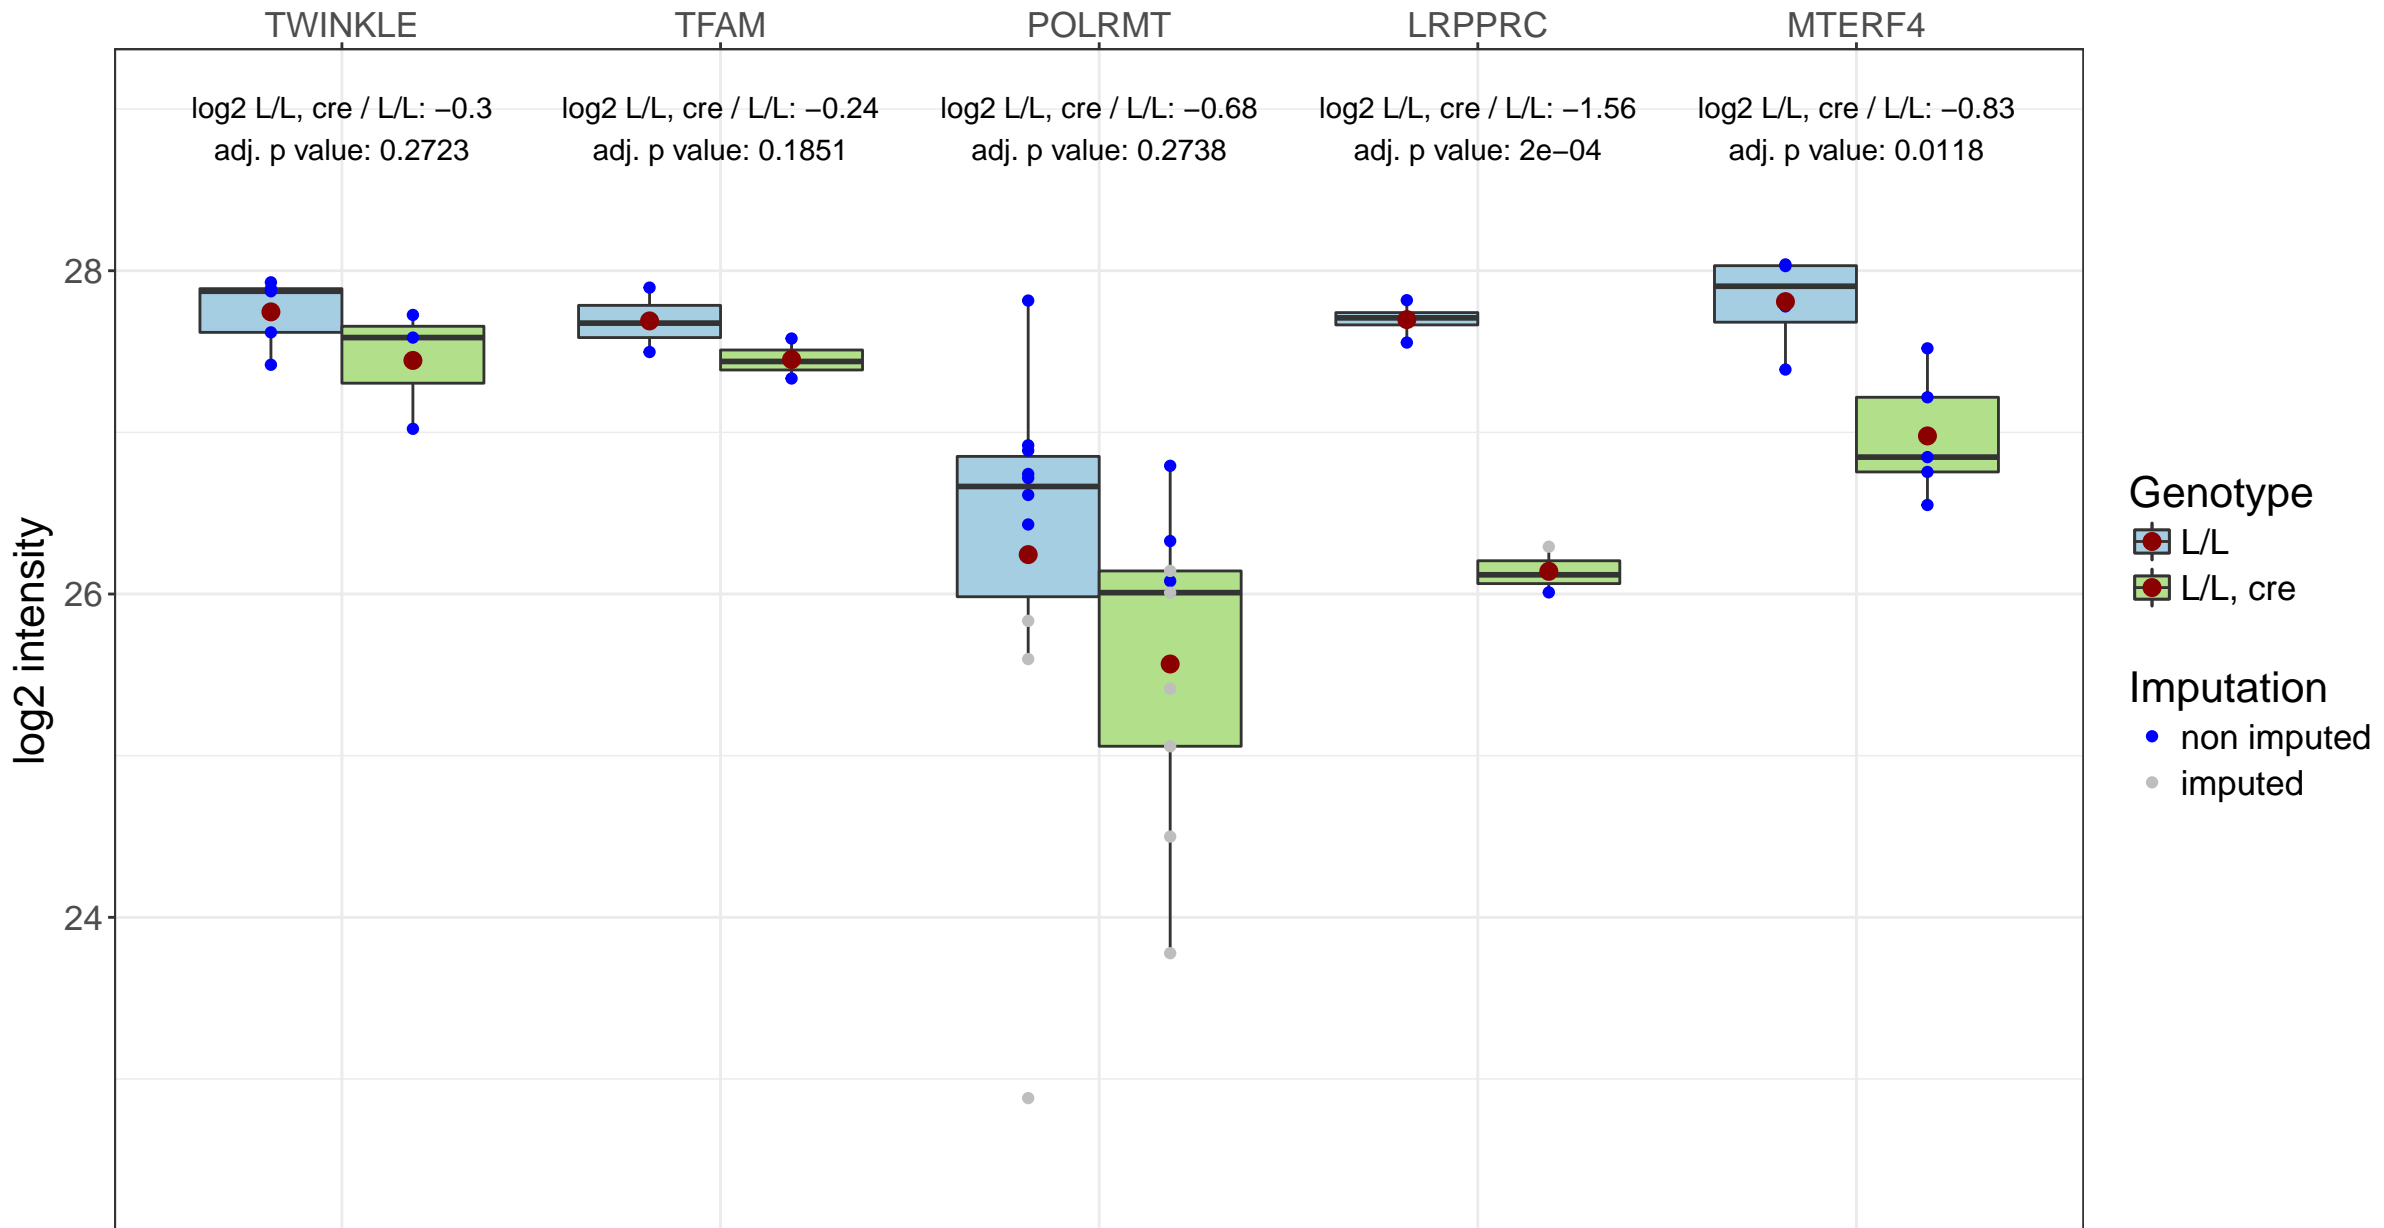

# CBR2 / P08074

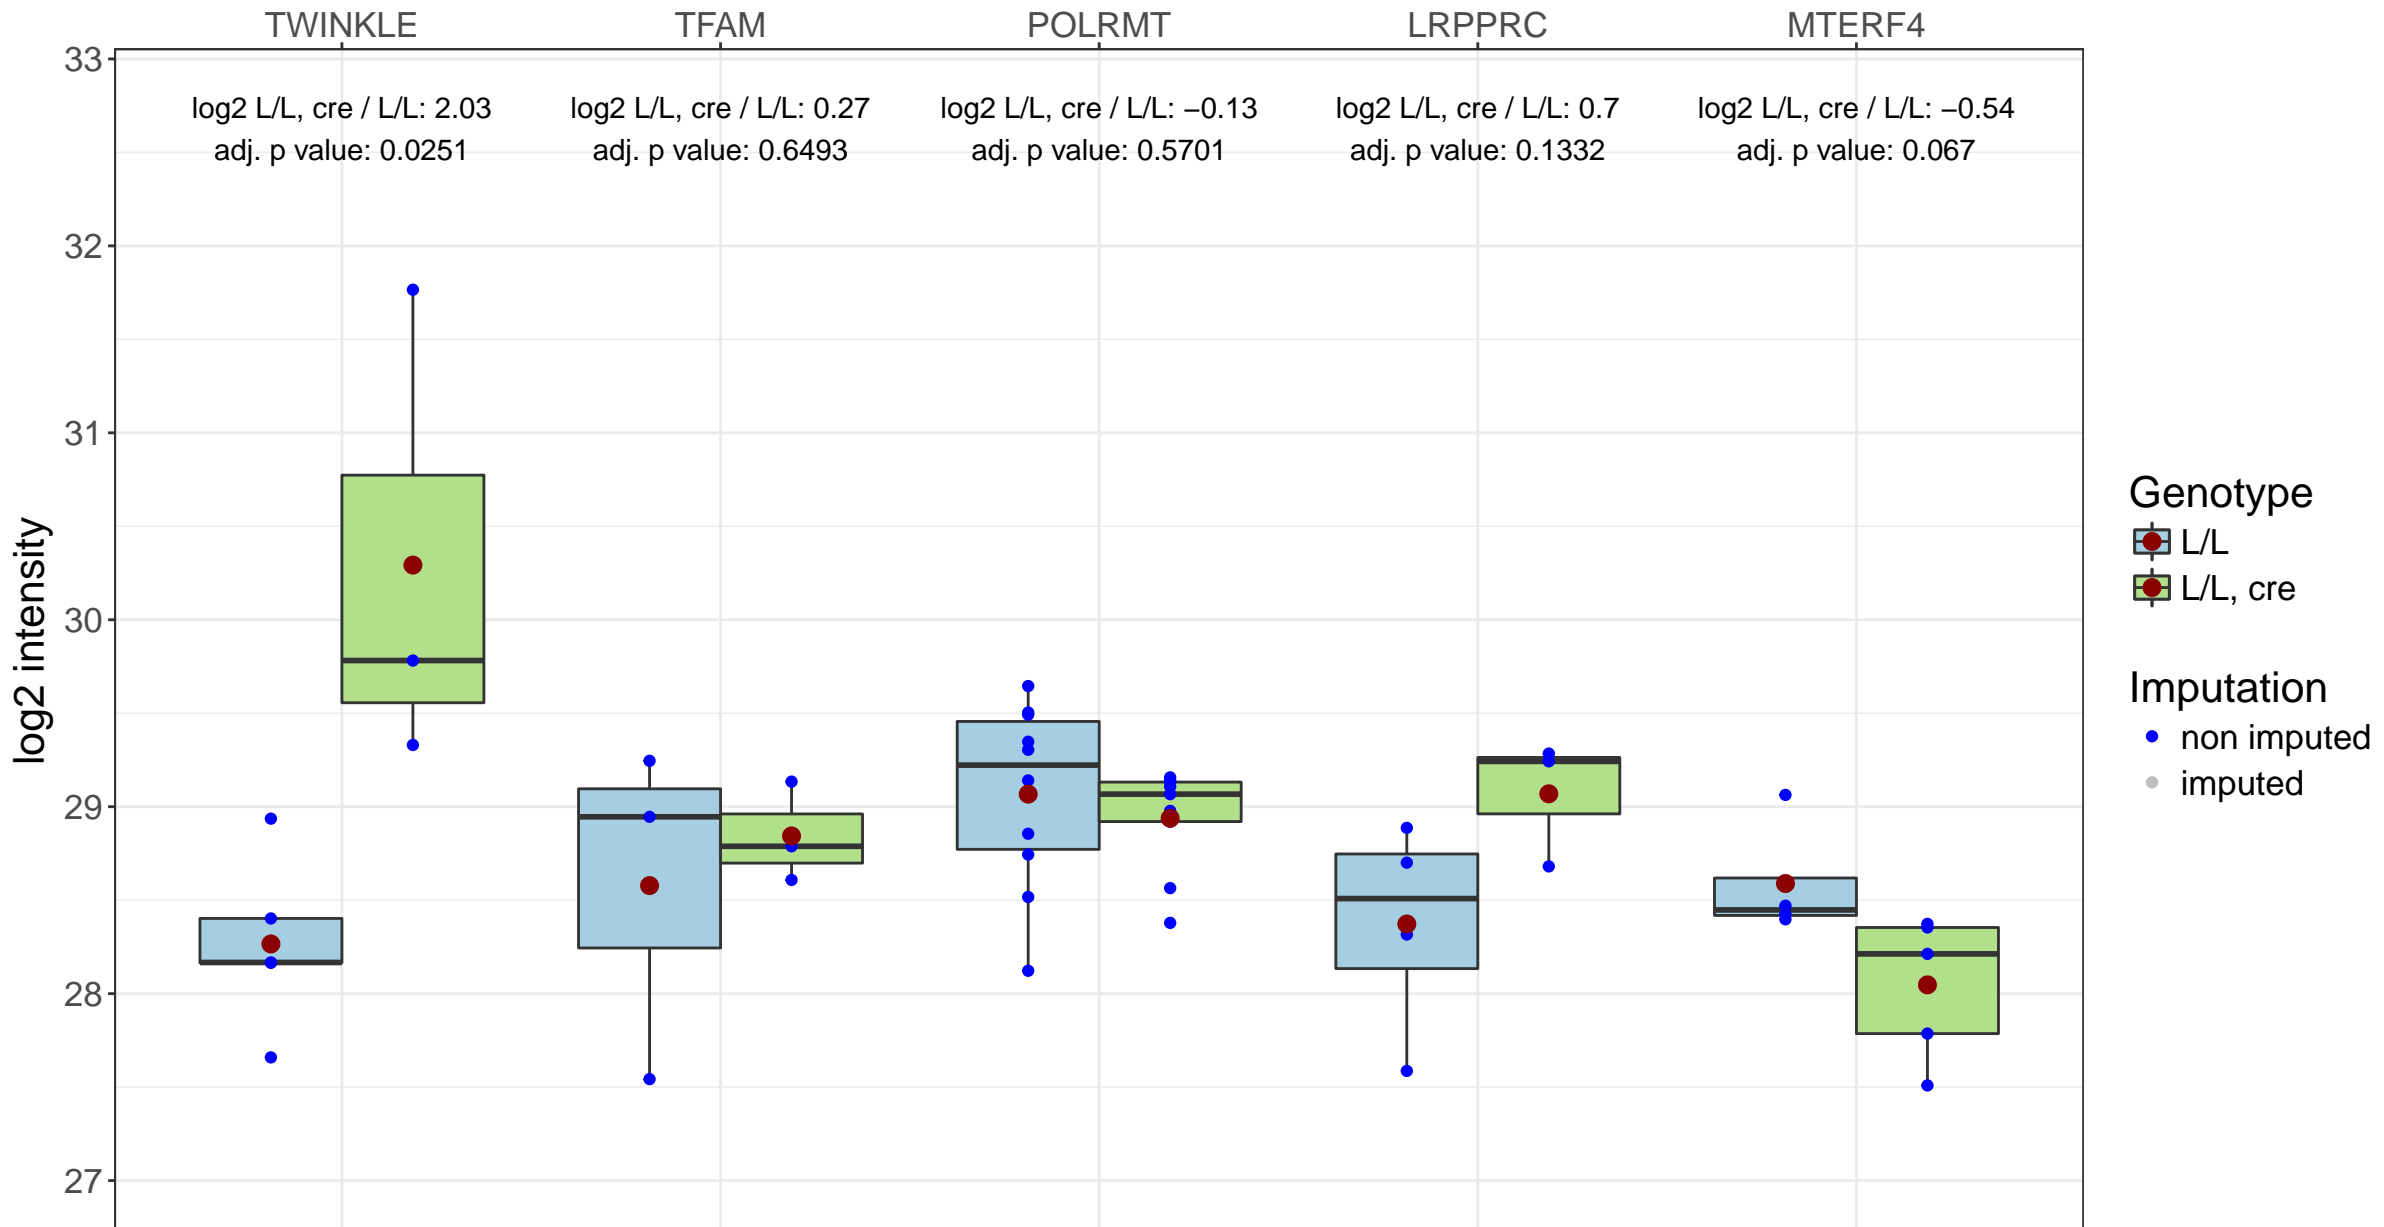

# CBR4 / Q91VT4

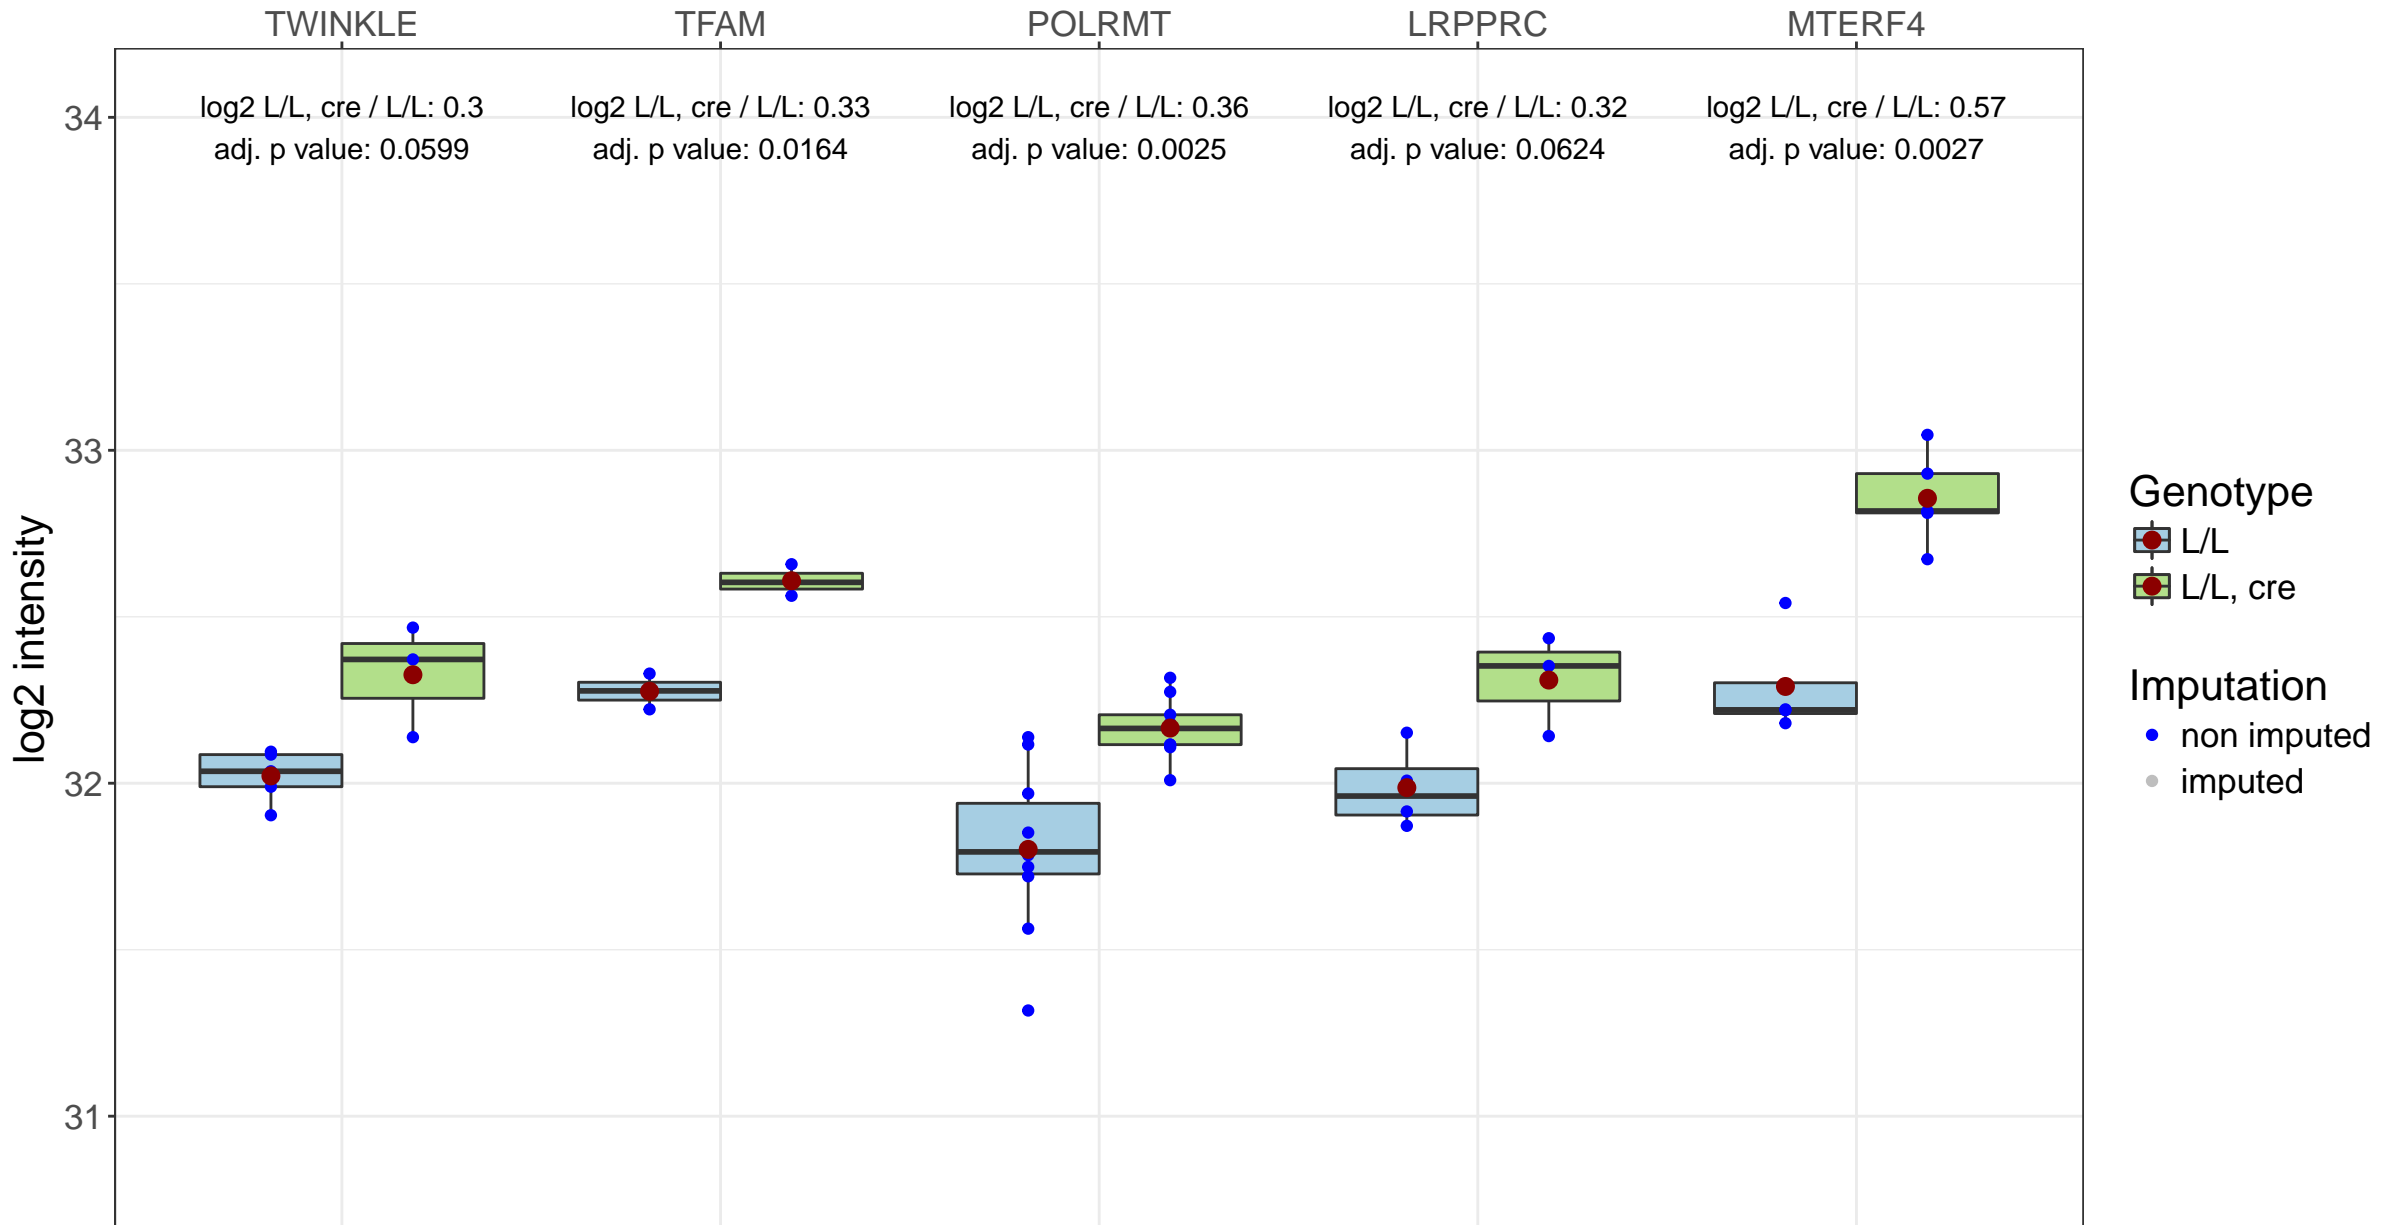

# CCBL2 / Q71RI9-2

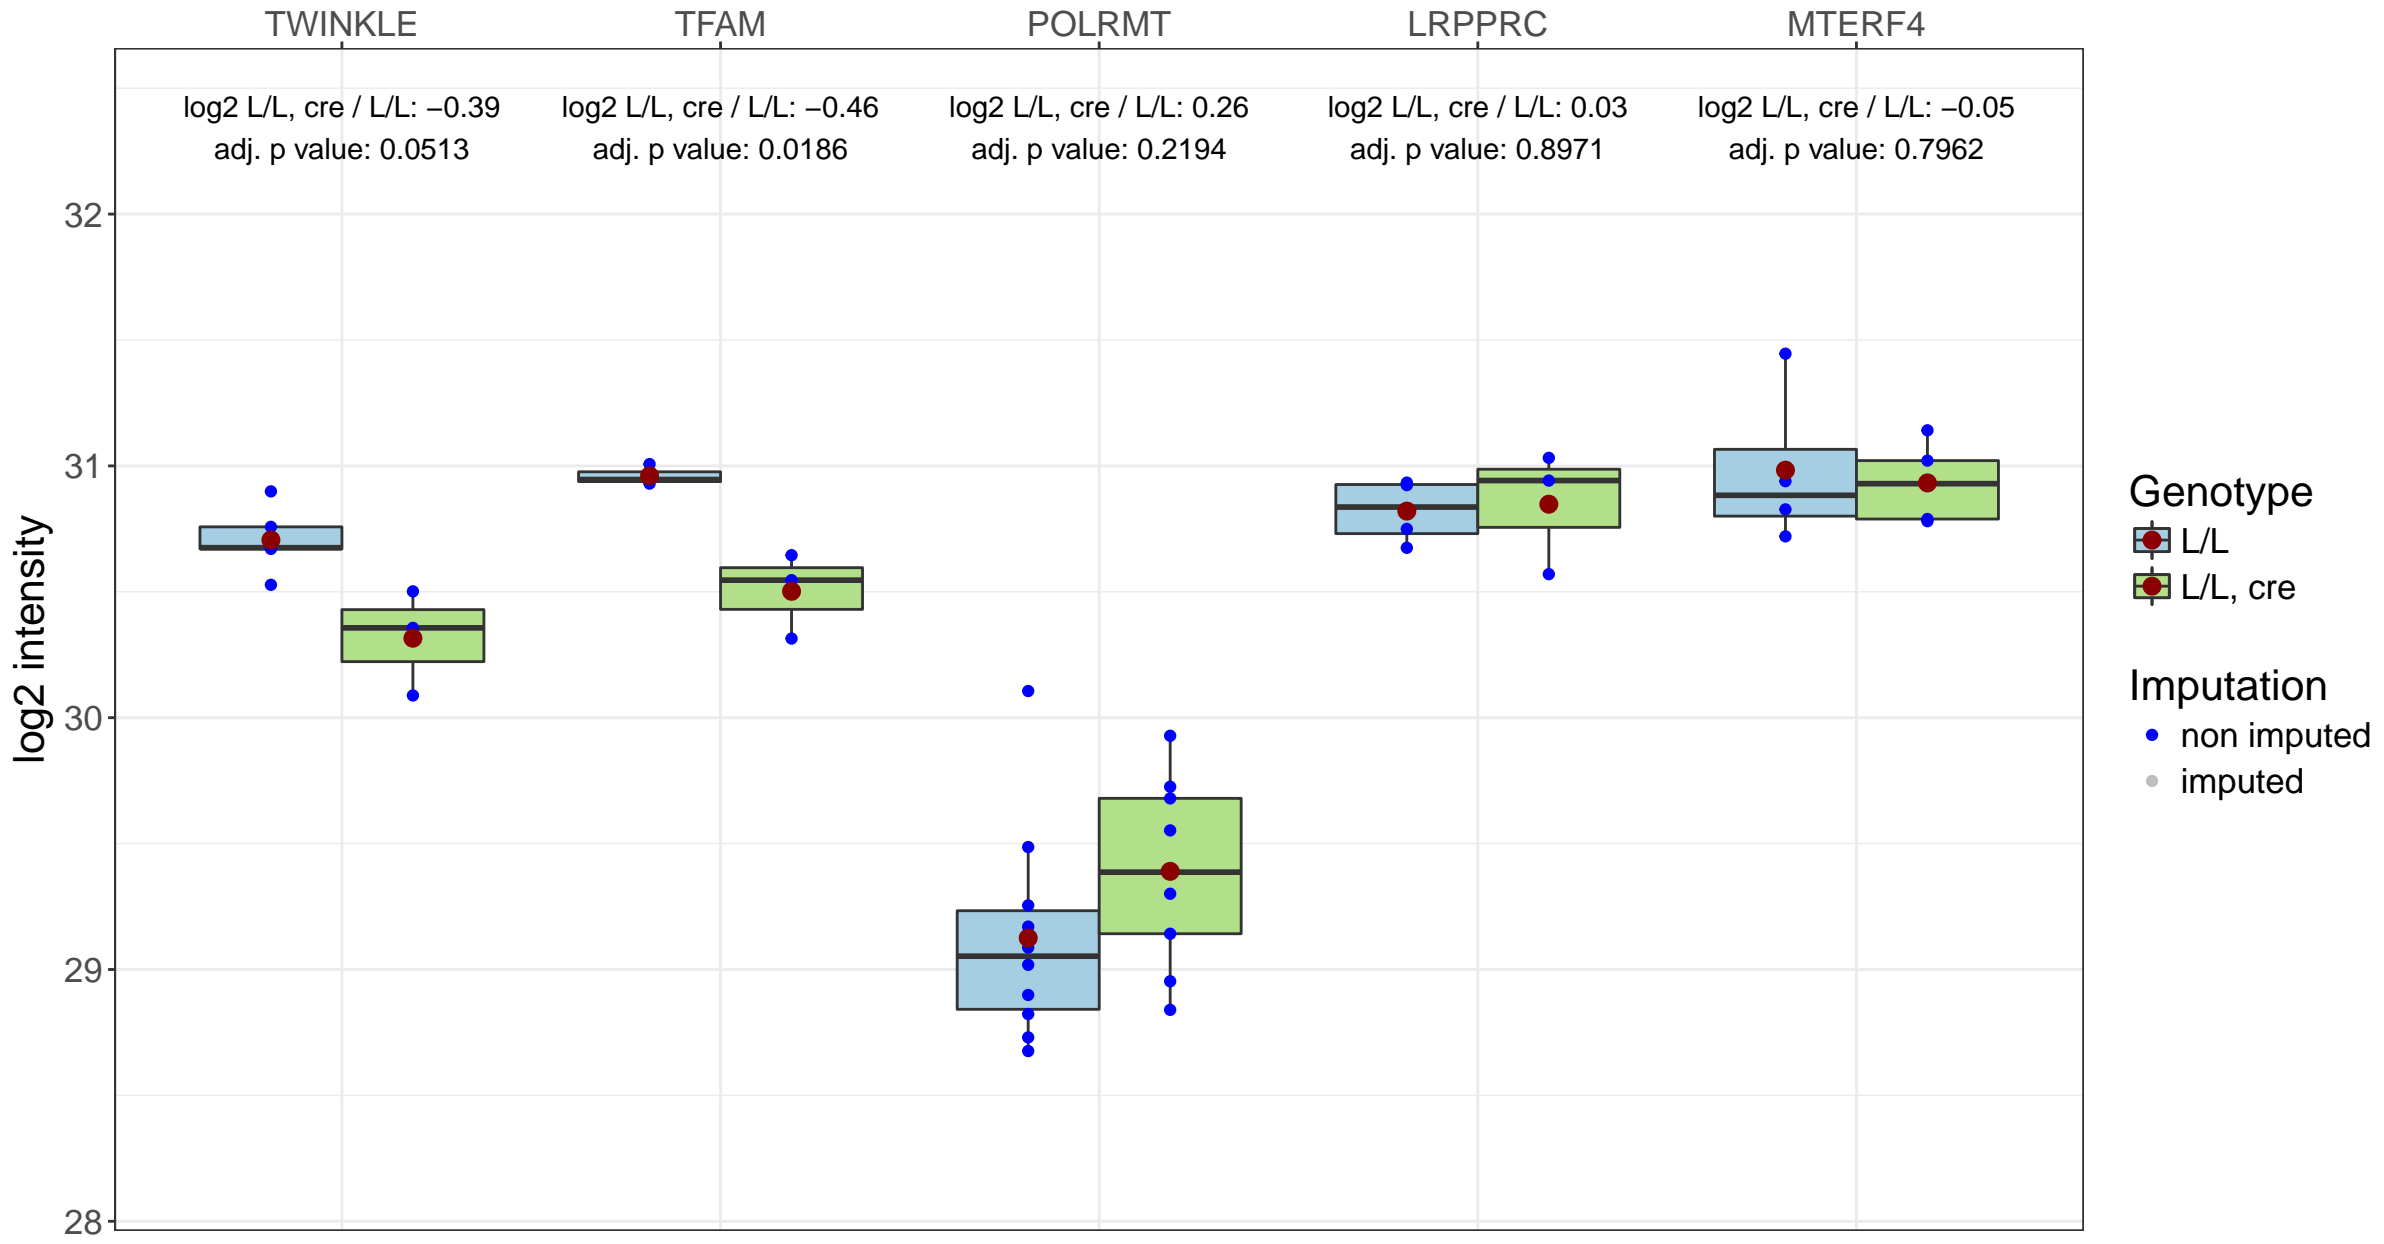

# CCDC127 / E0CYX9

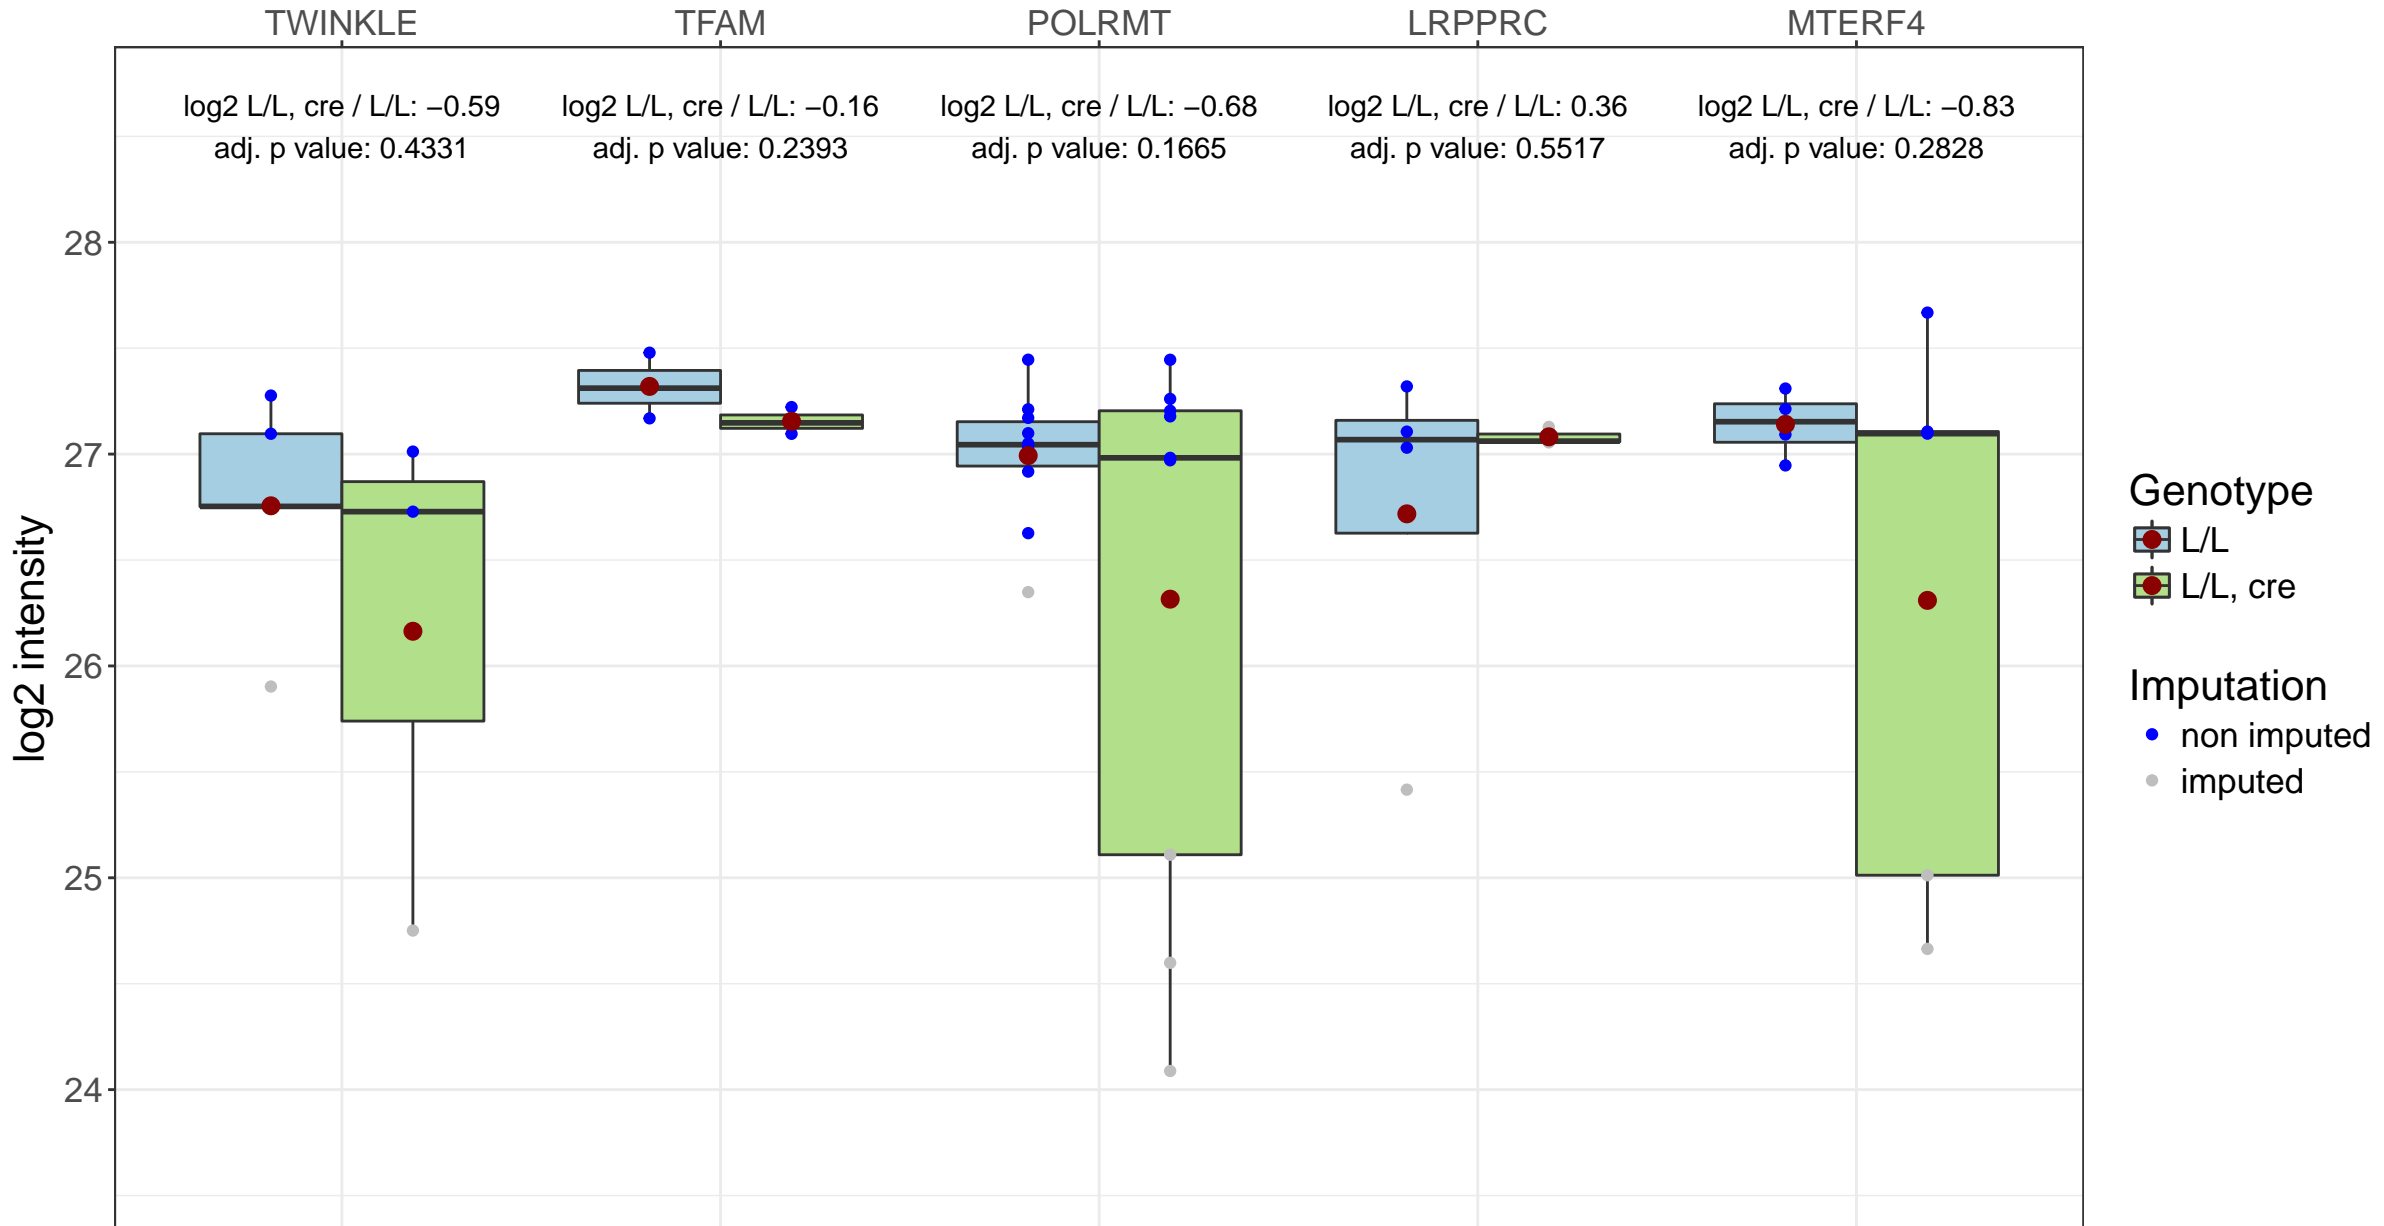

# CCDC51 / Q3URS9-2

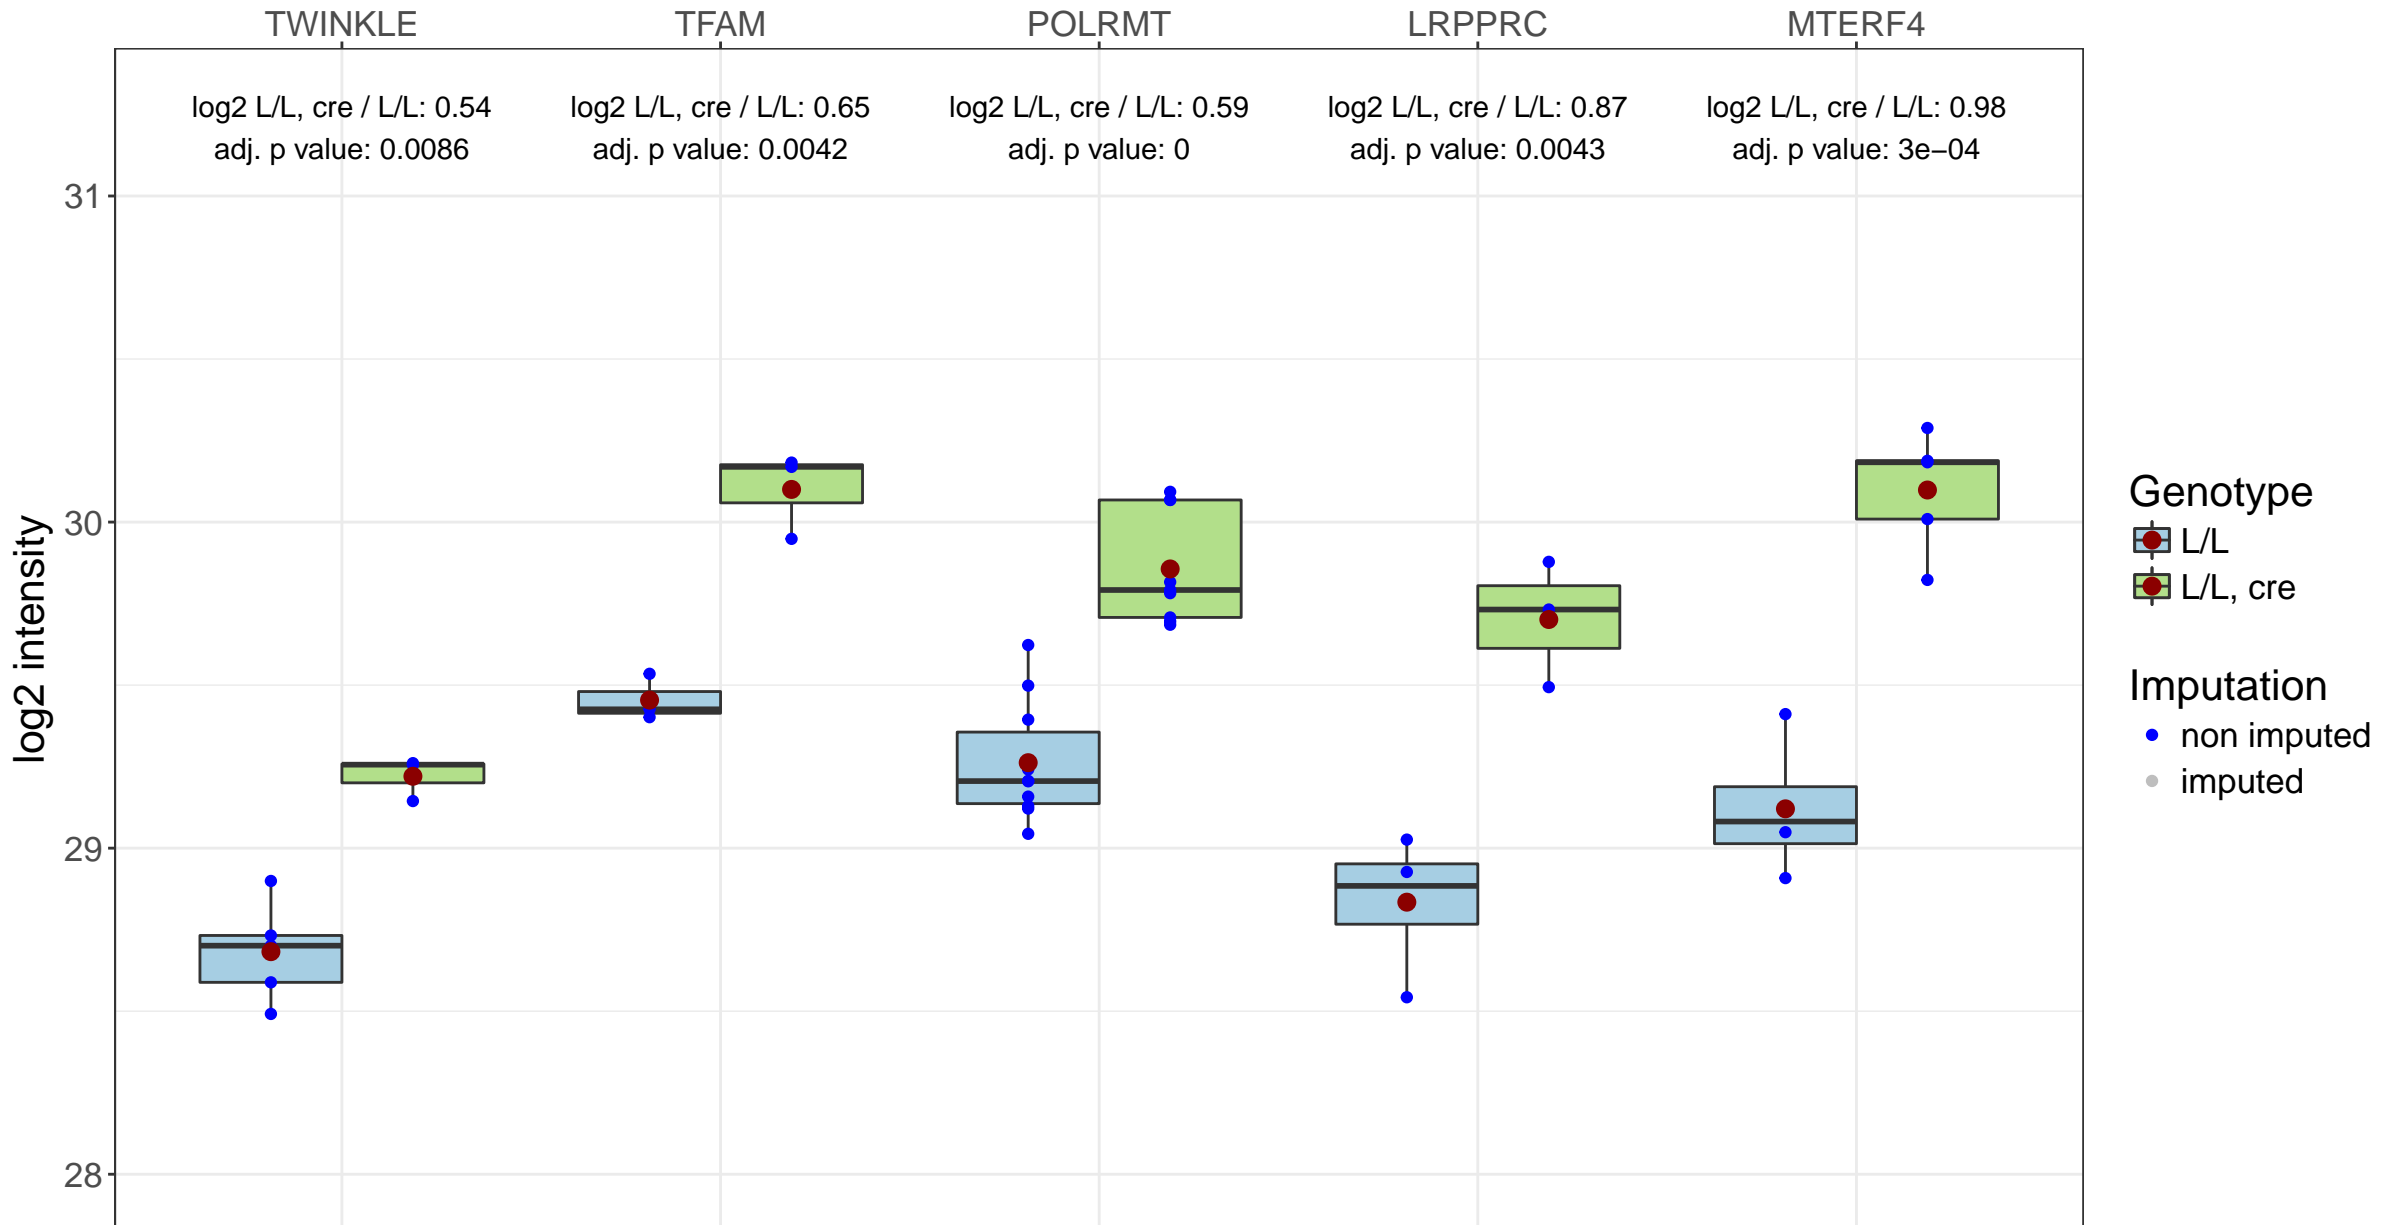



# CCDC58 / F8WJI3

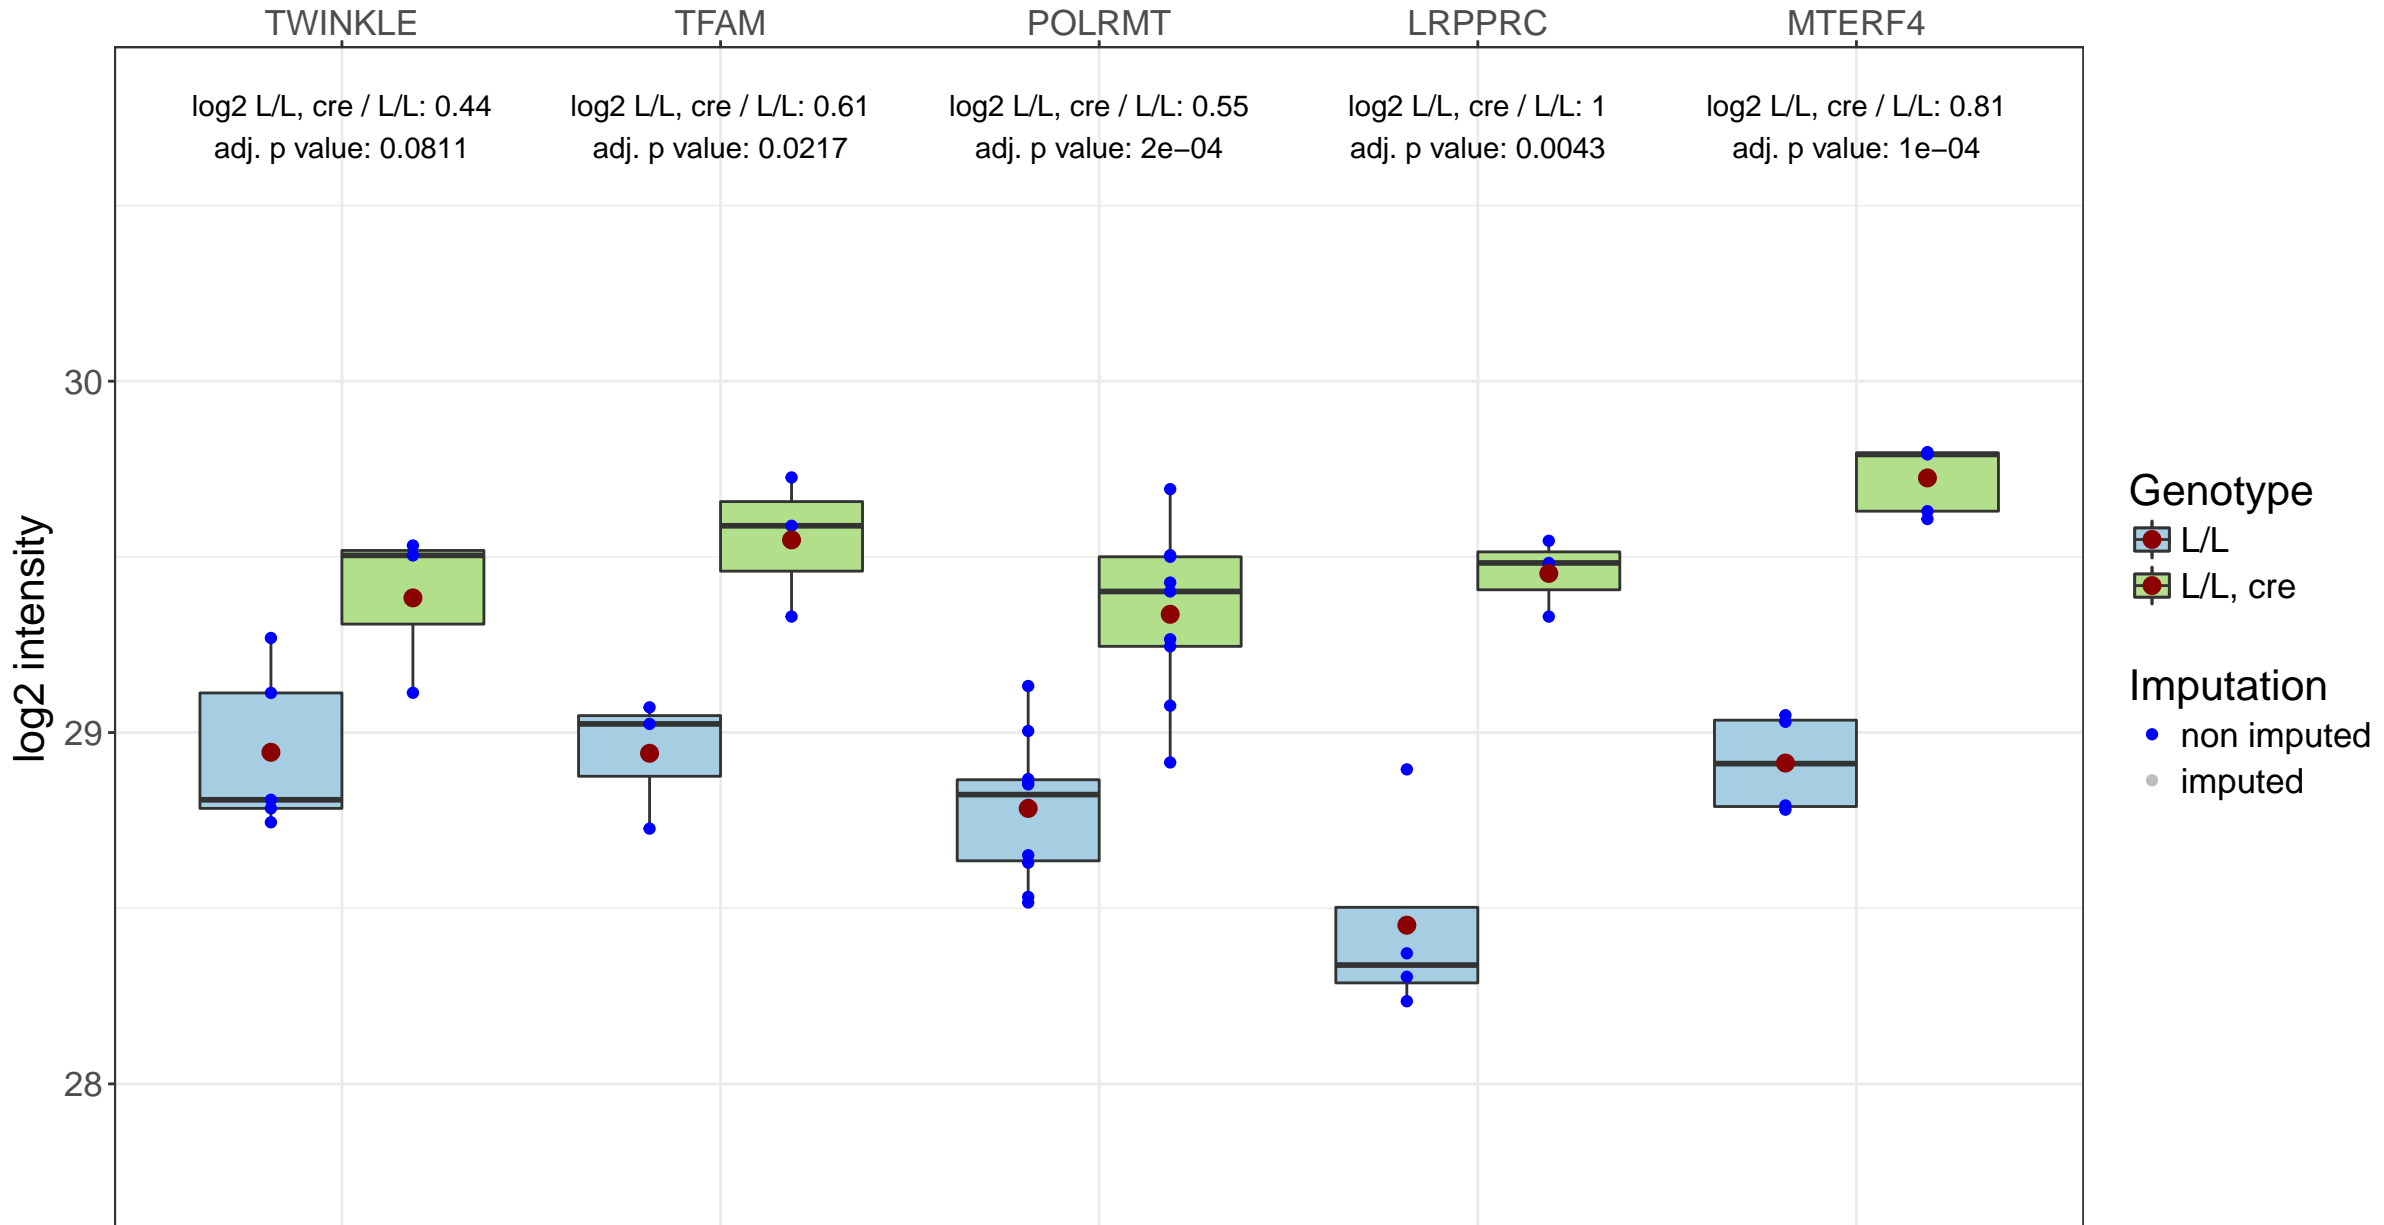

# CCDC90B / Q8C3X2

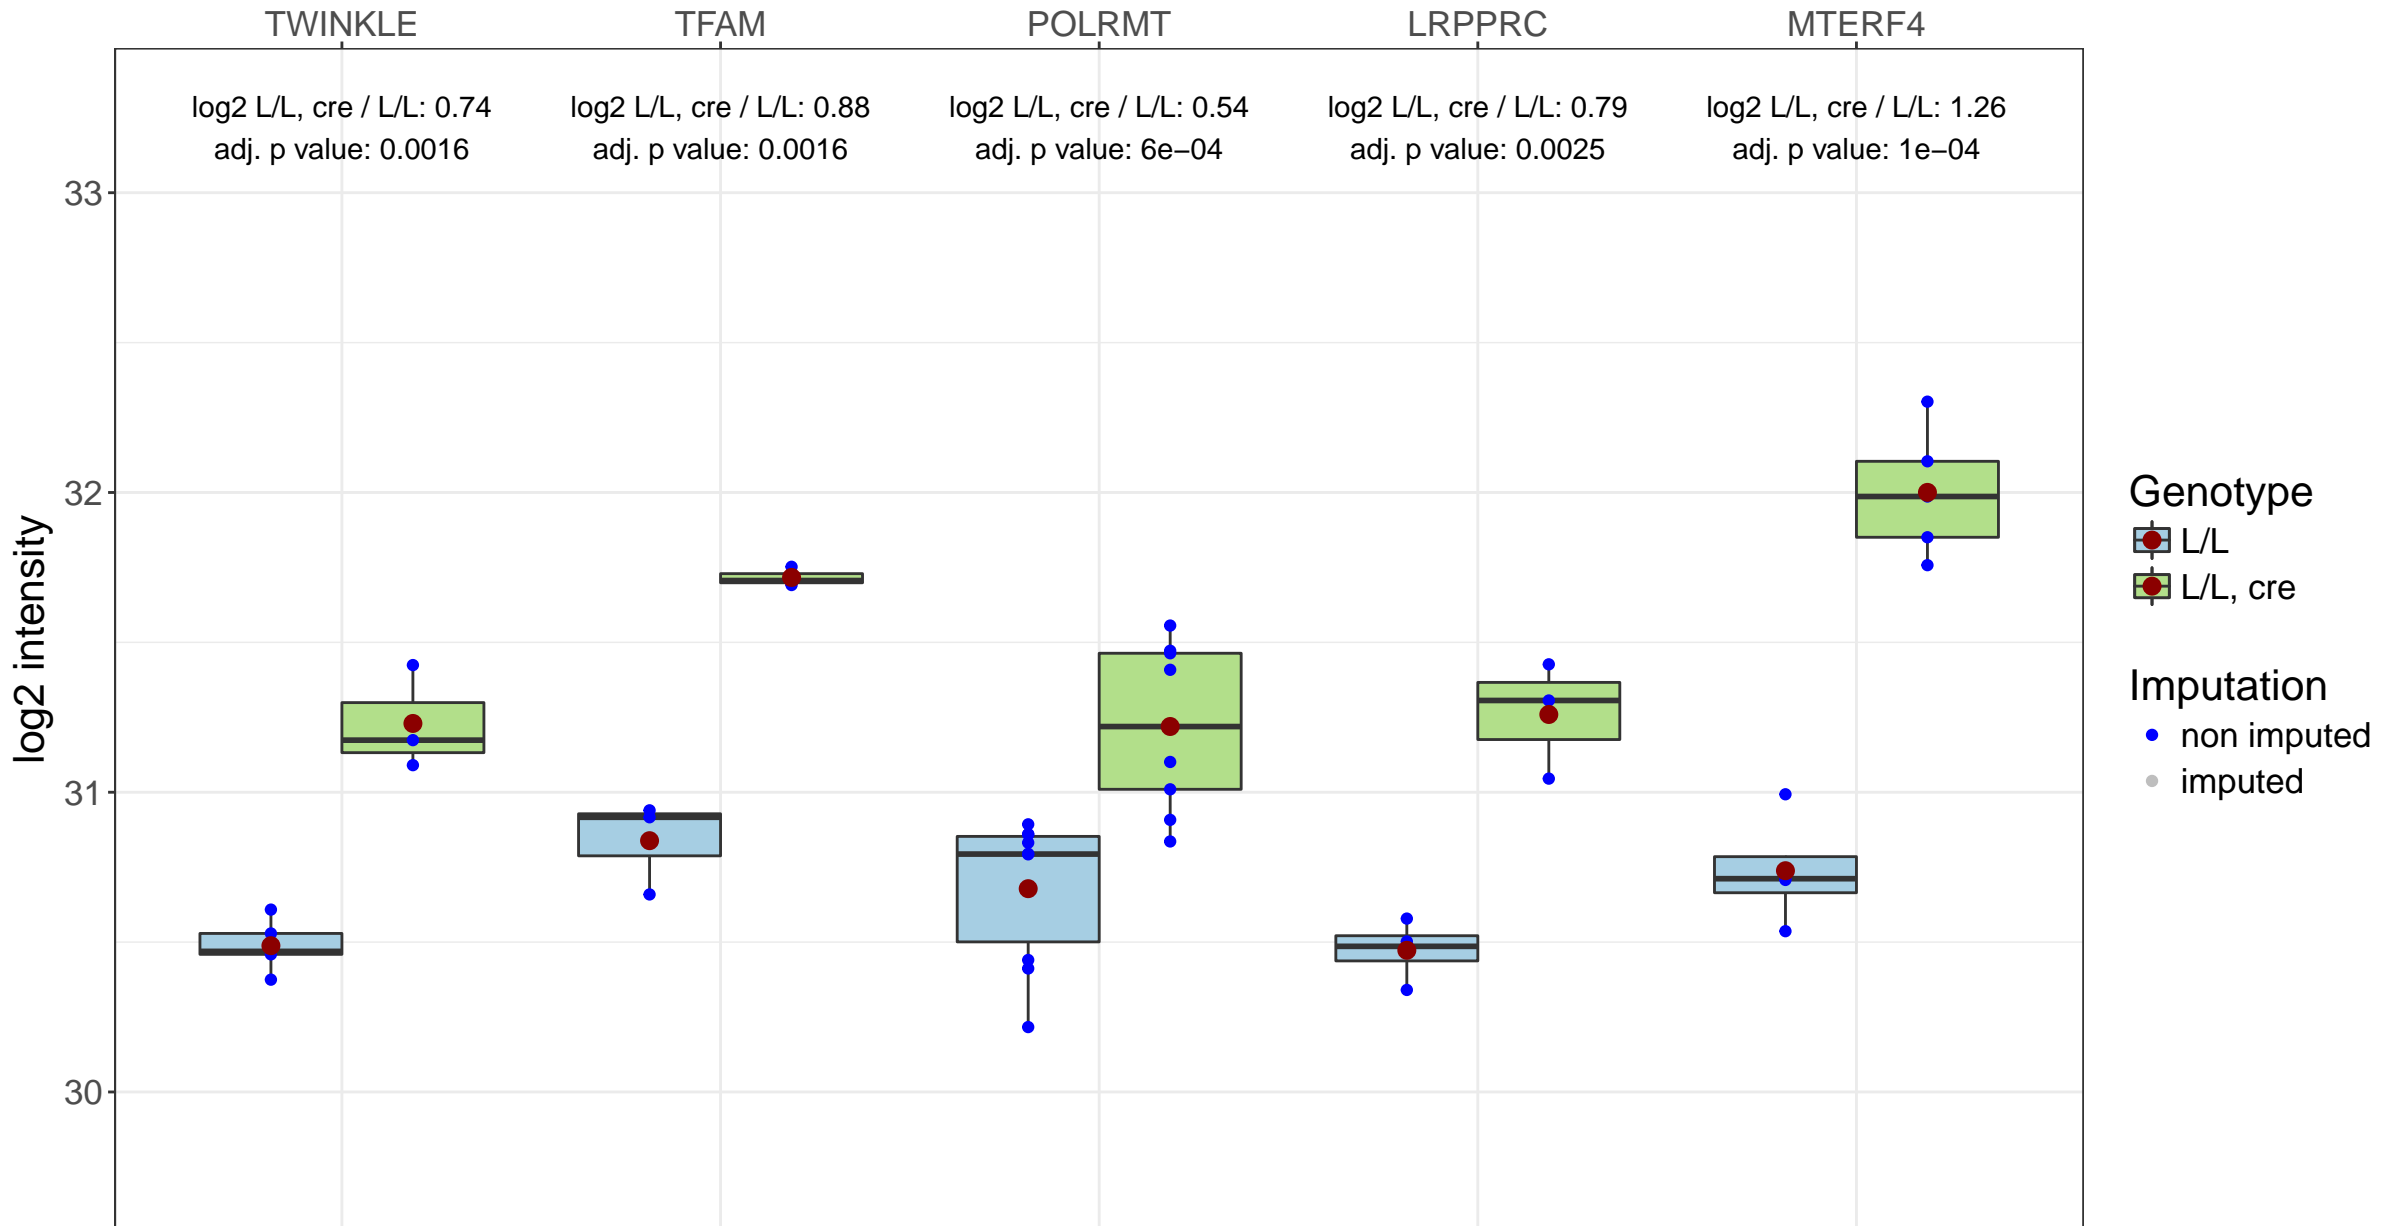

# CCSMST1 / Q6RUT7

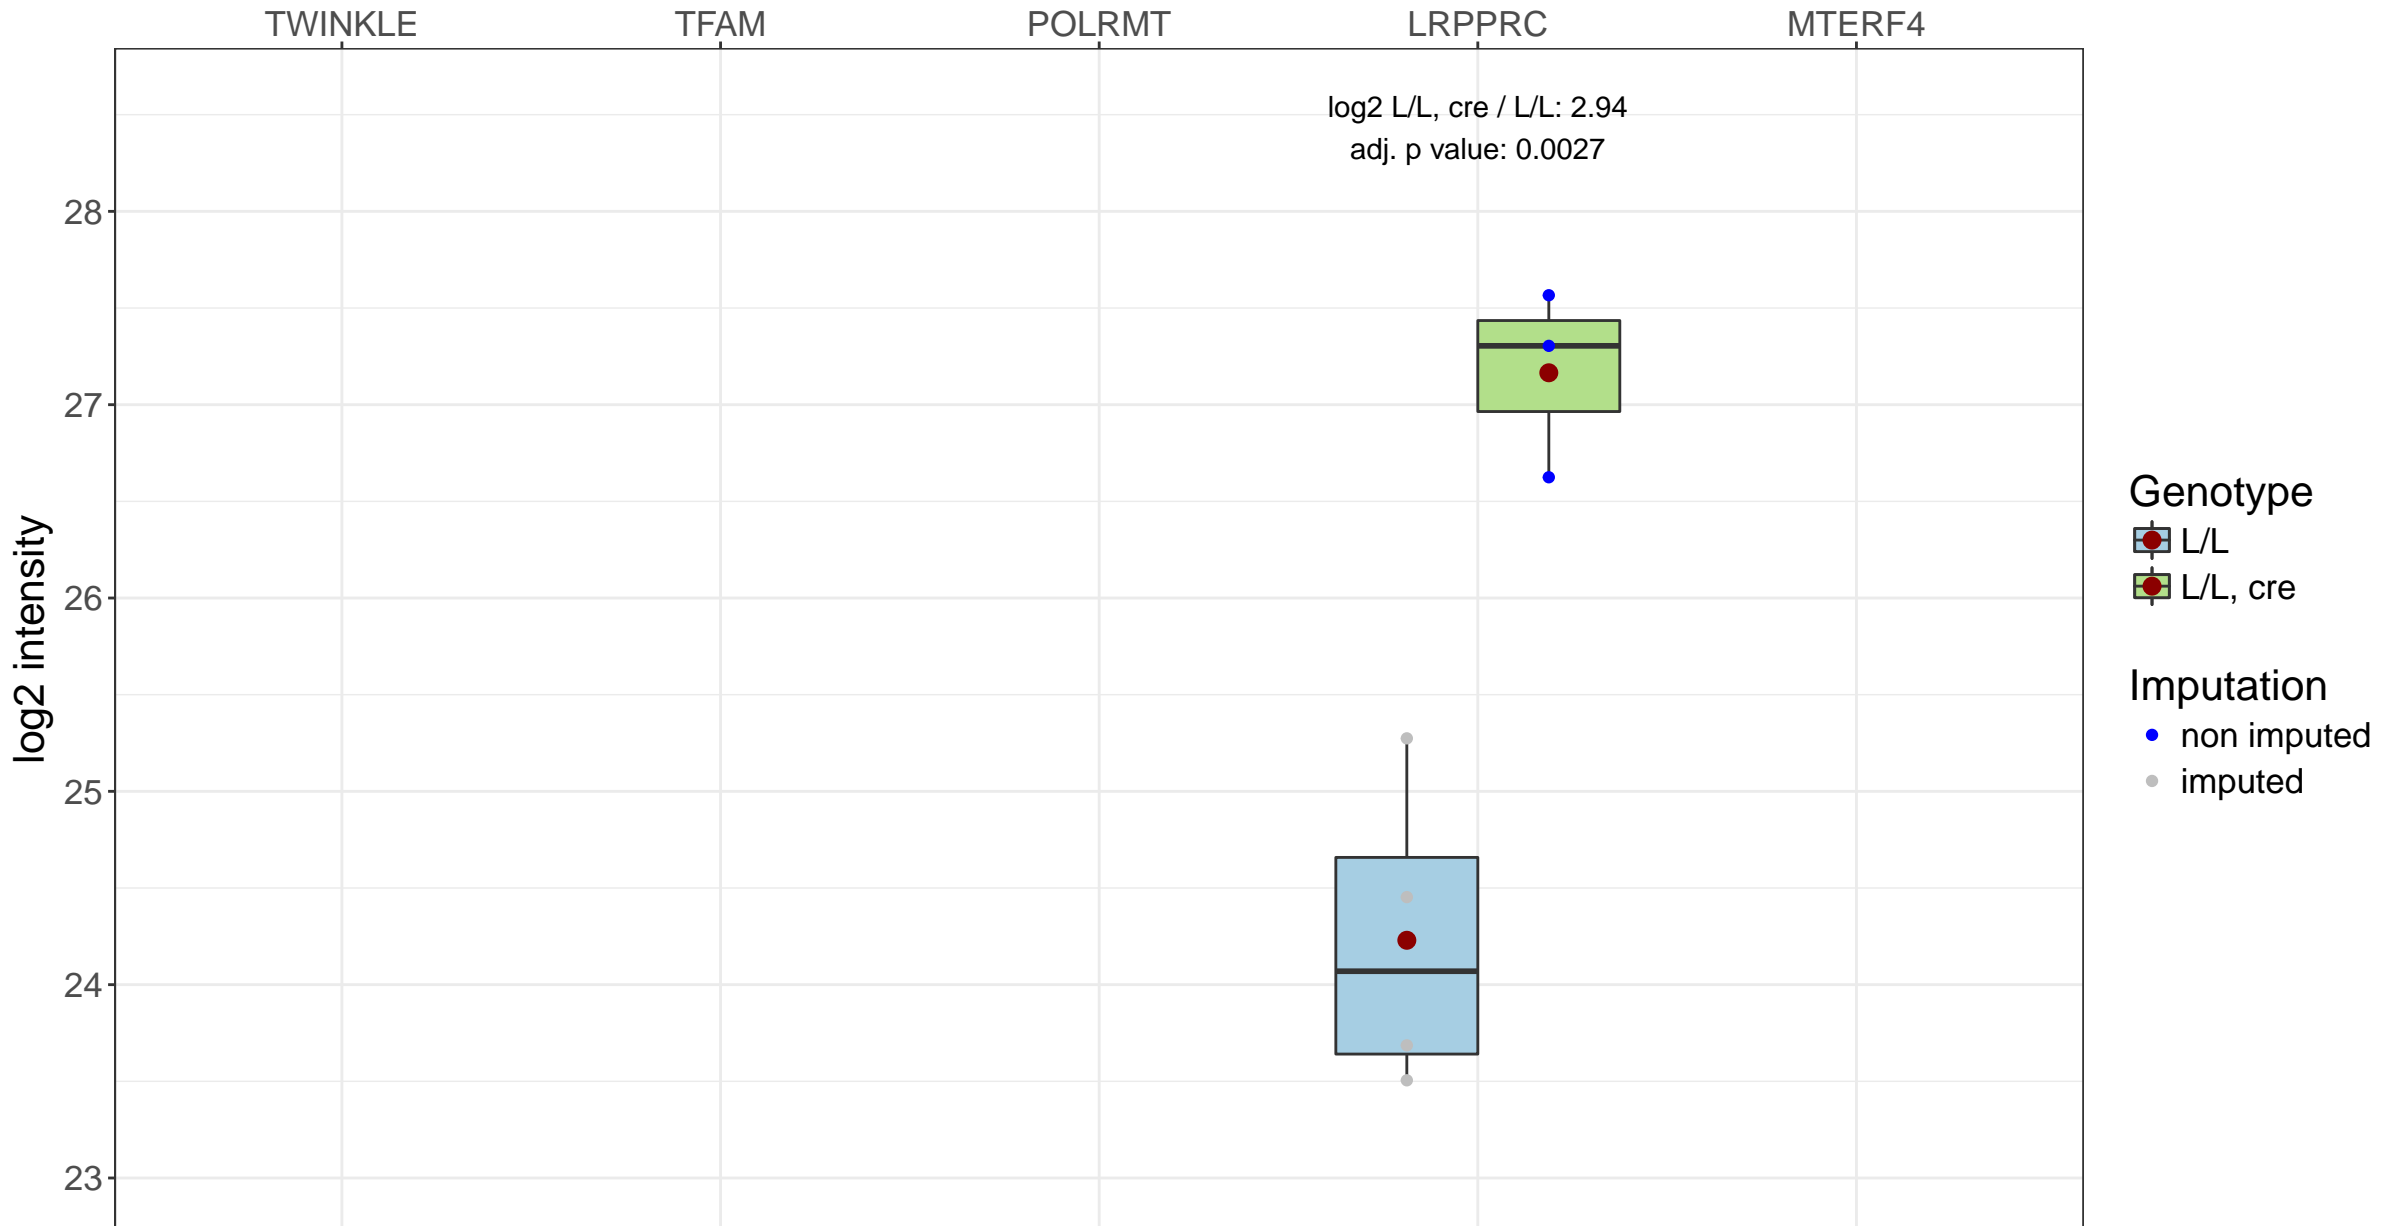

# CD36 / Q08857

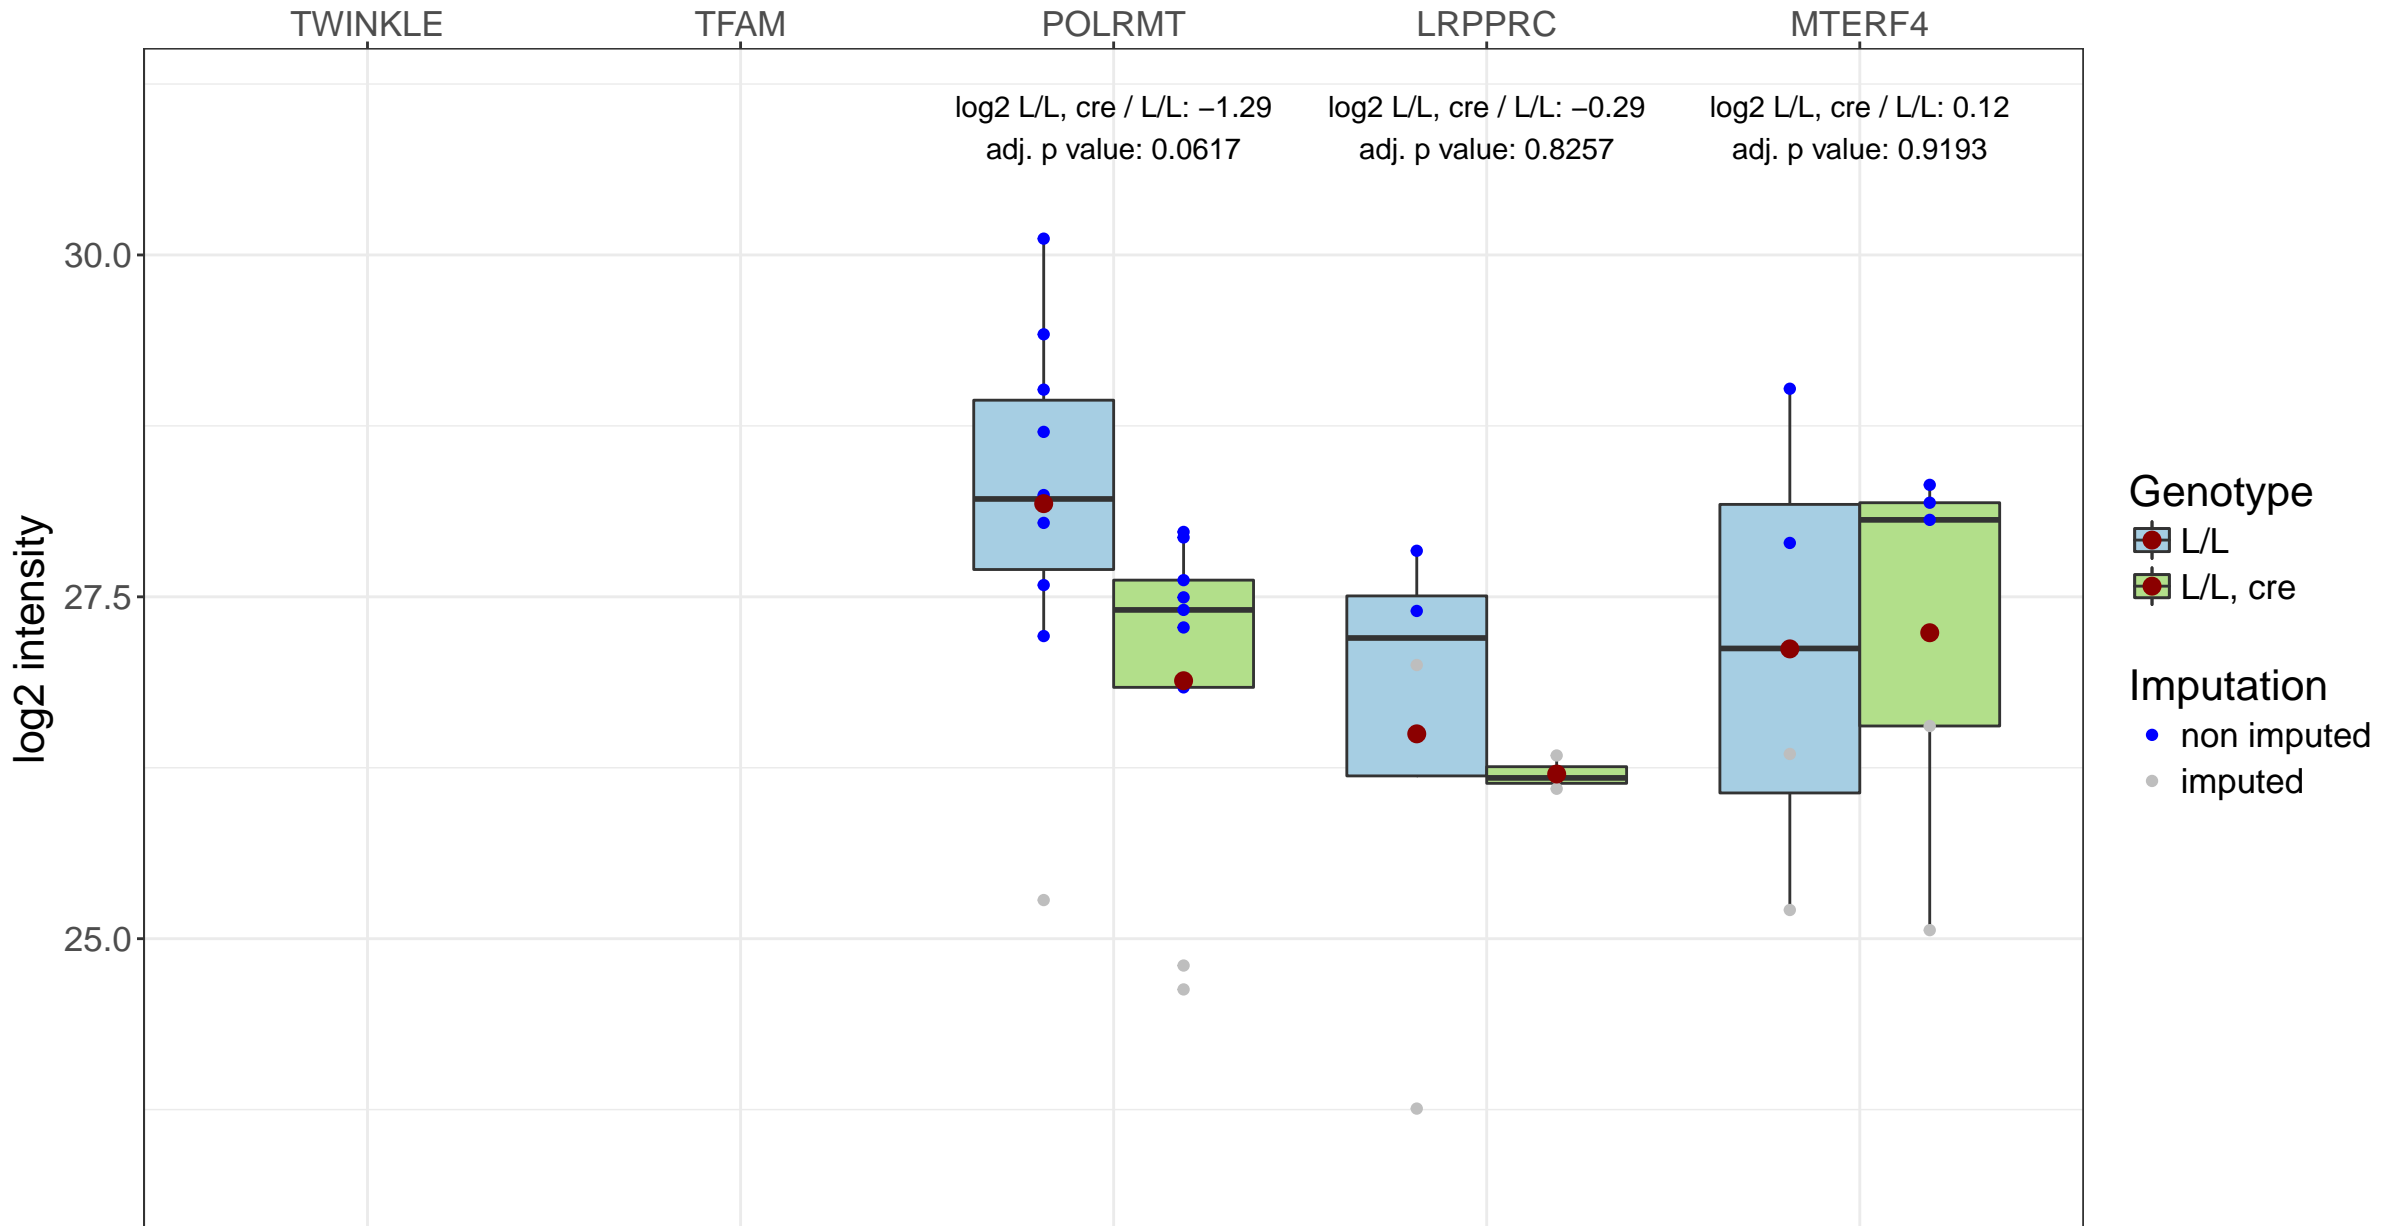

# CDC42 / P60766

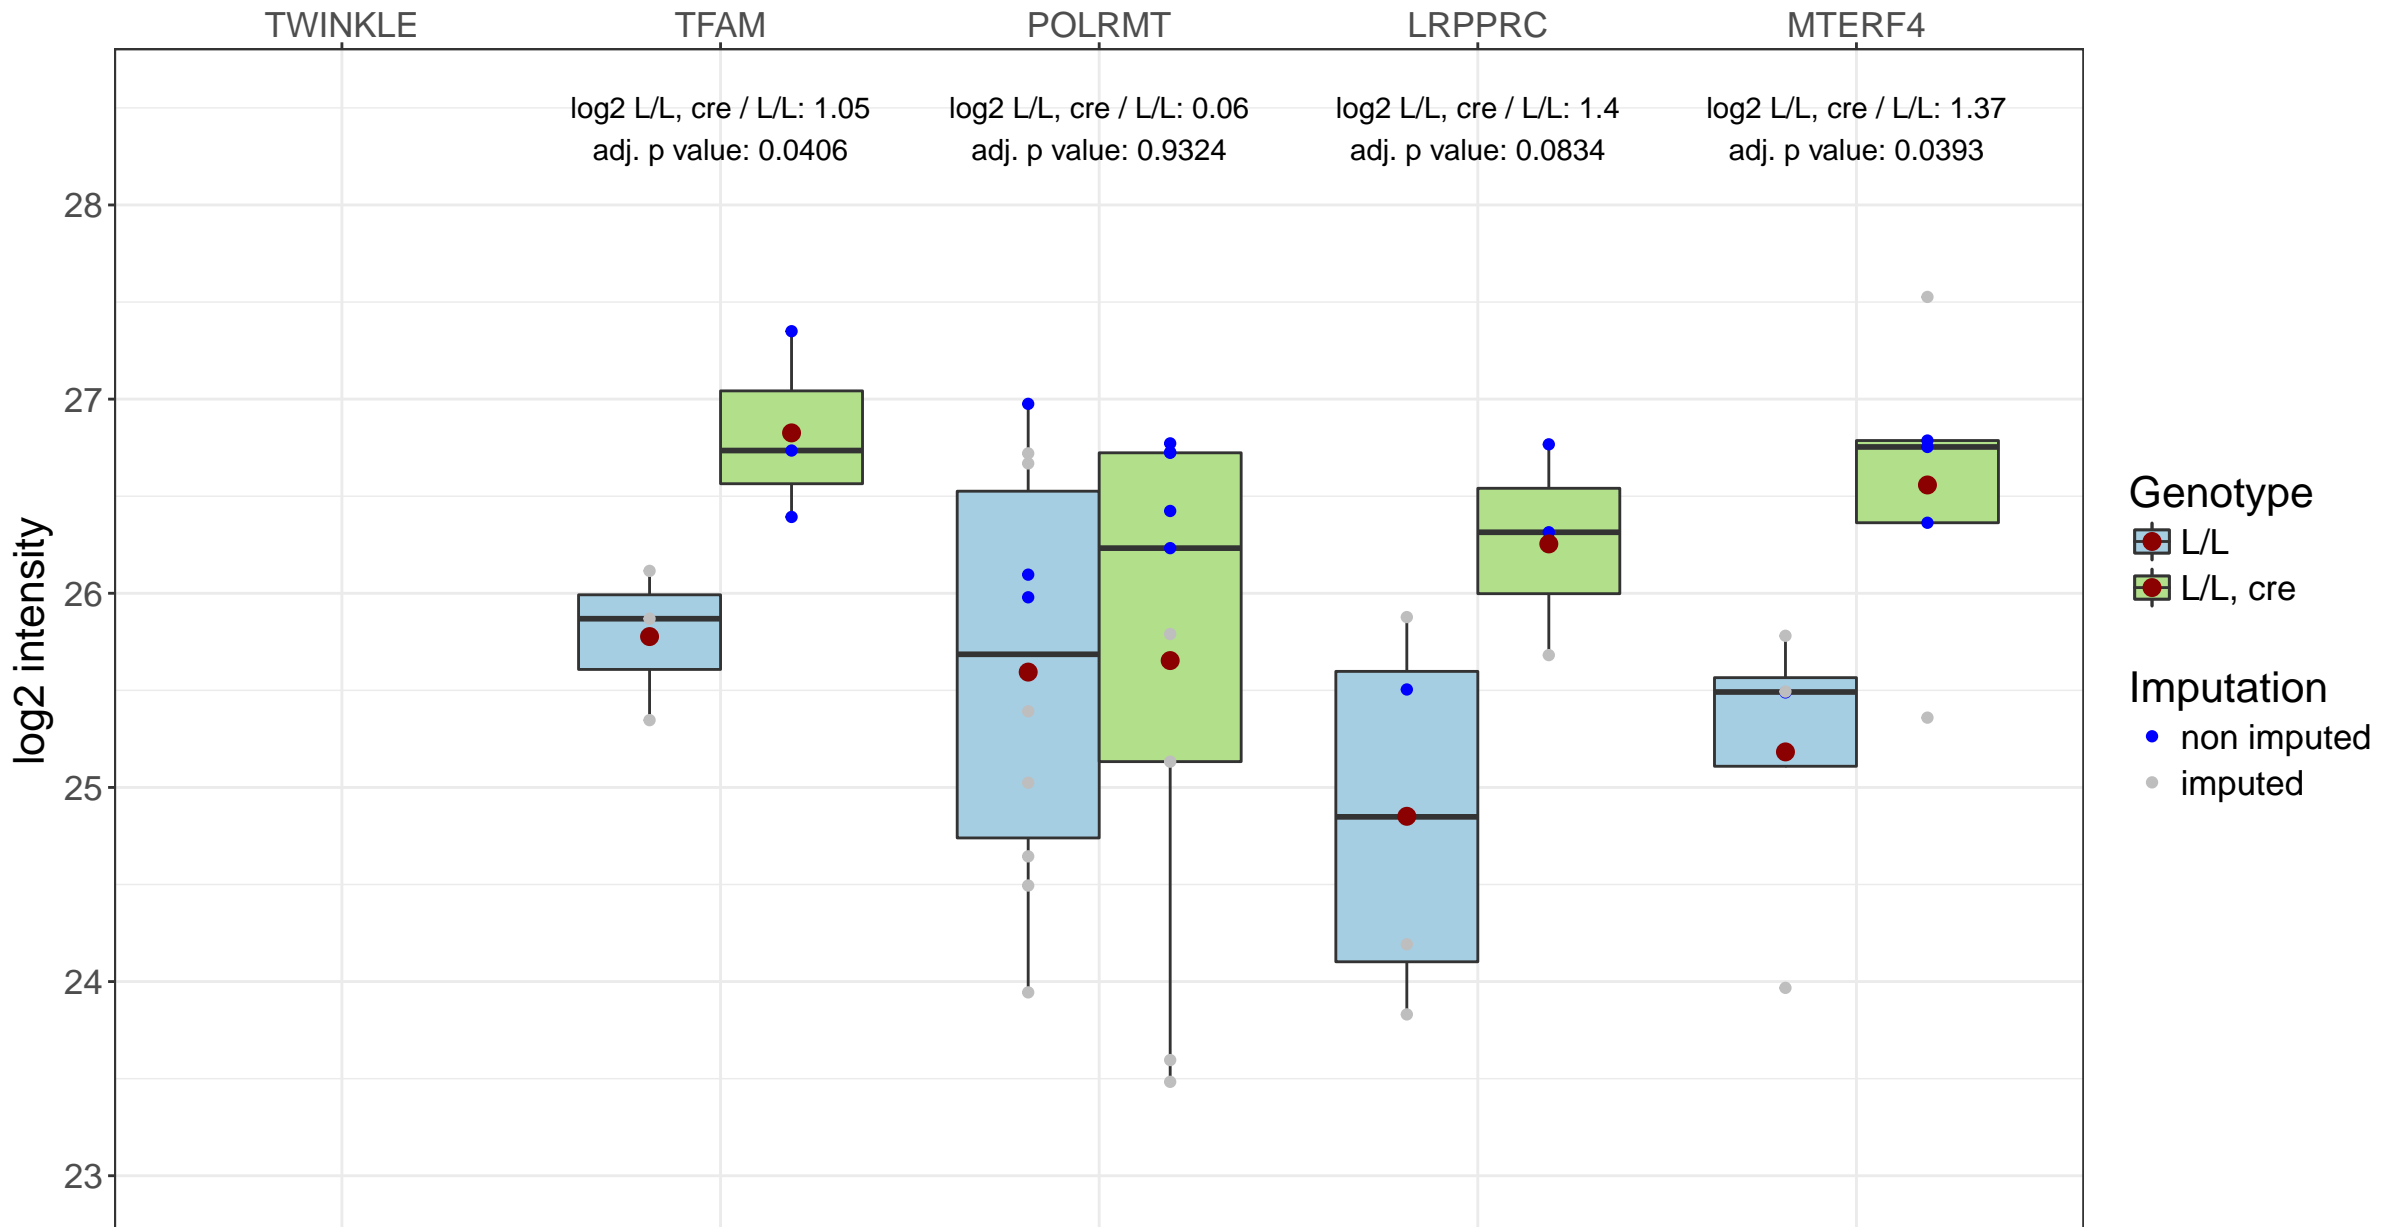

# CDV3 / Q4VAA2-2

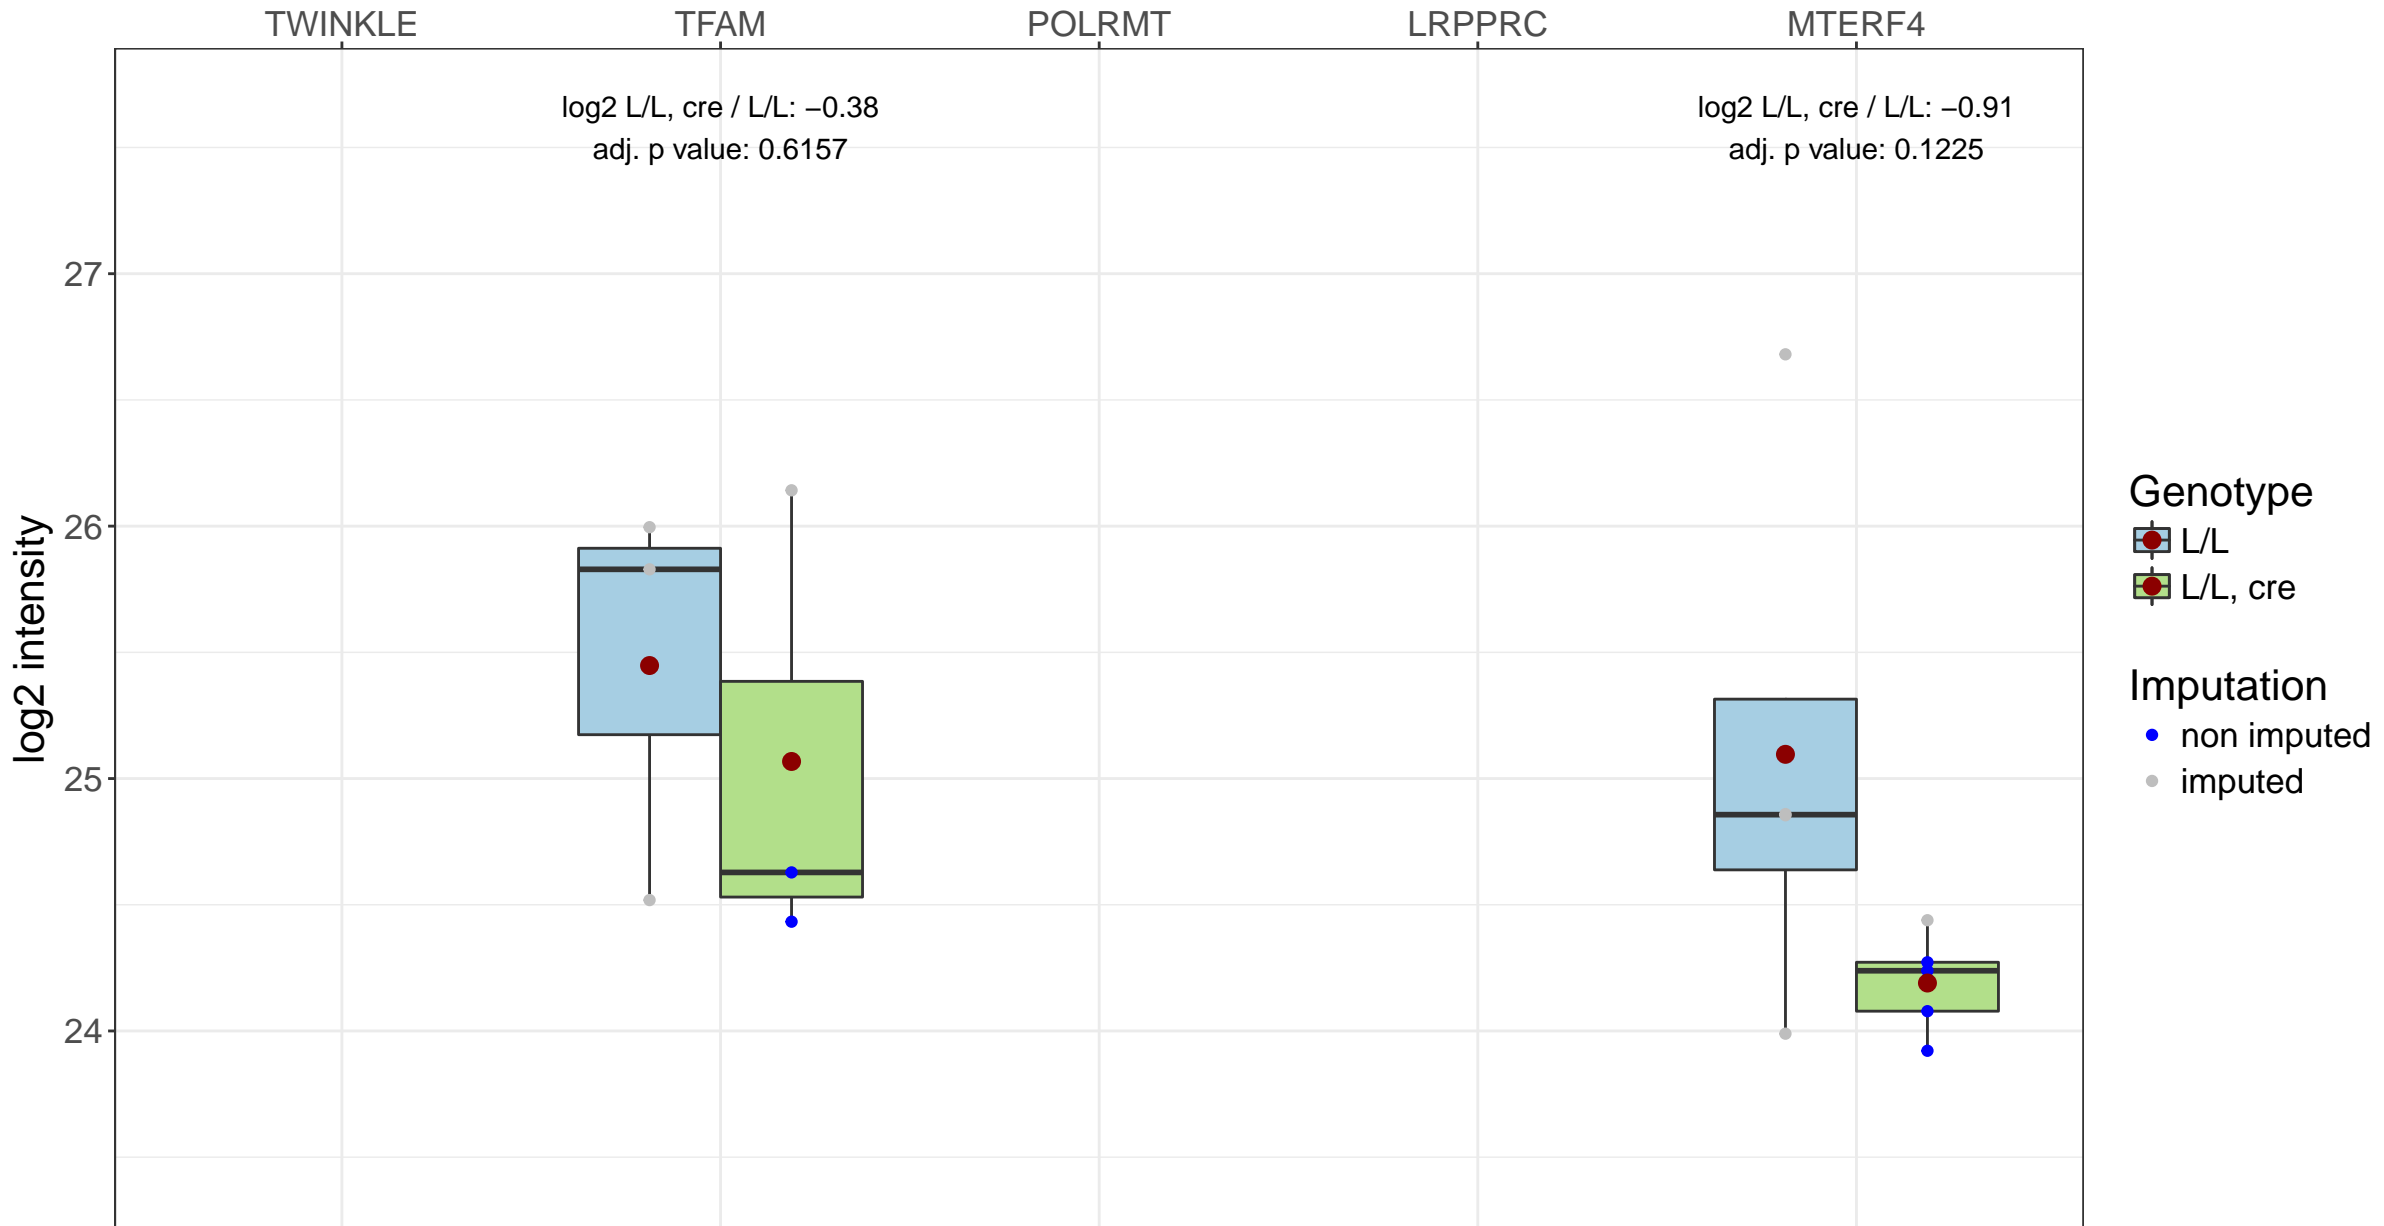

# CEBPZOS / Q8BTE5

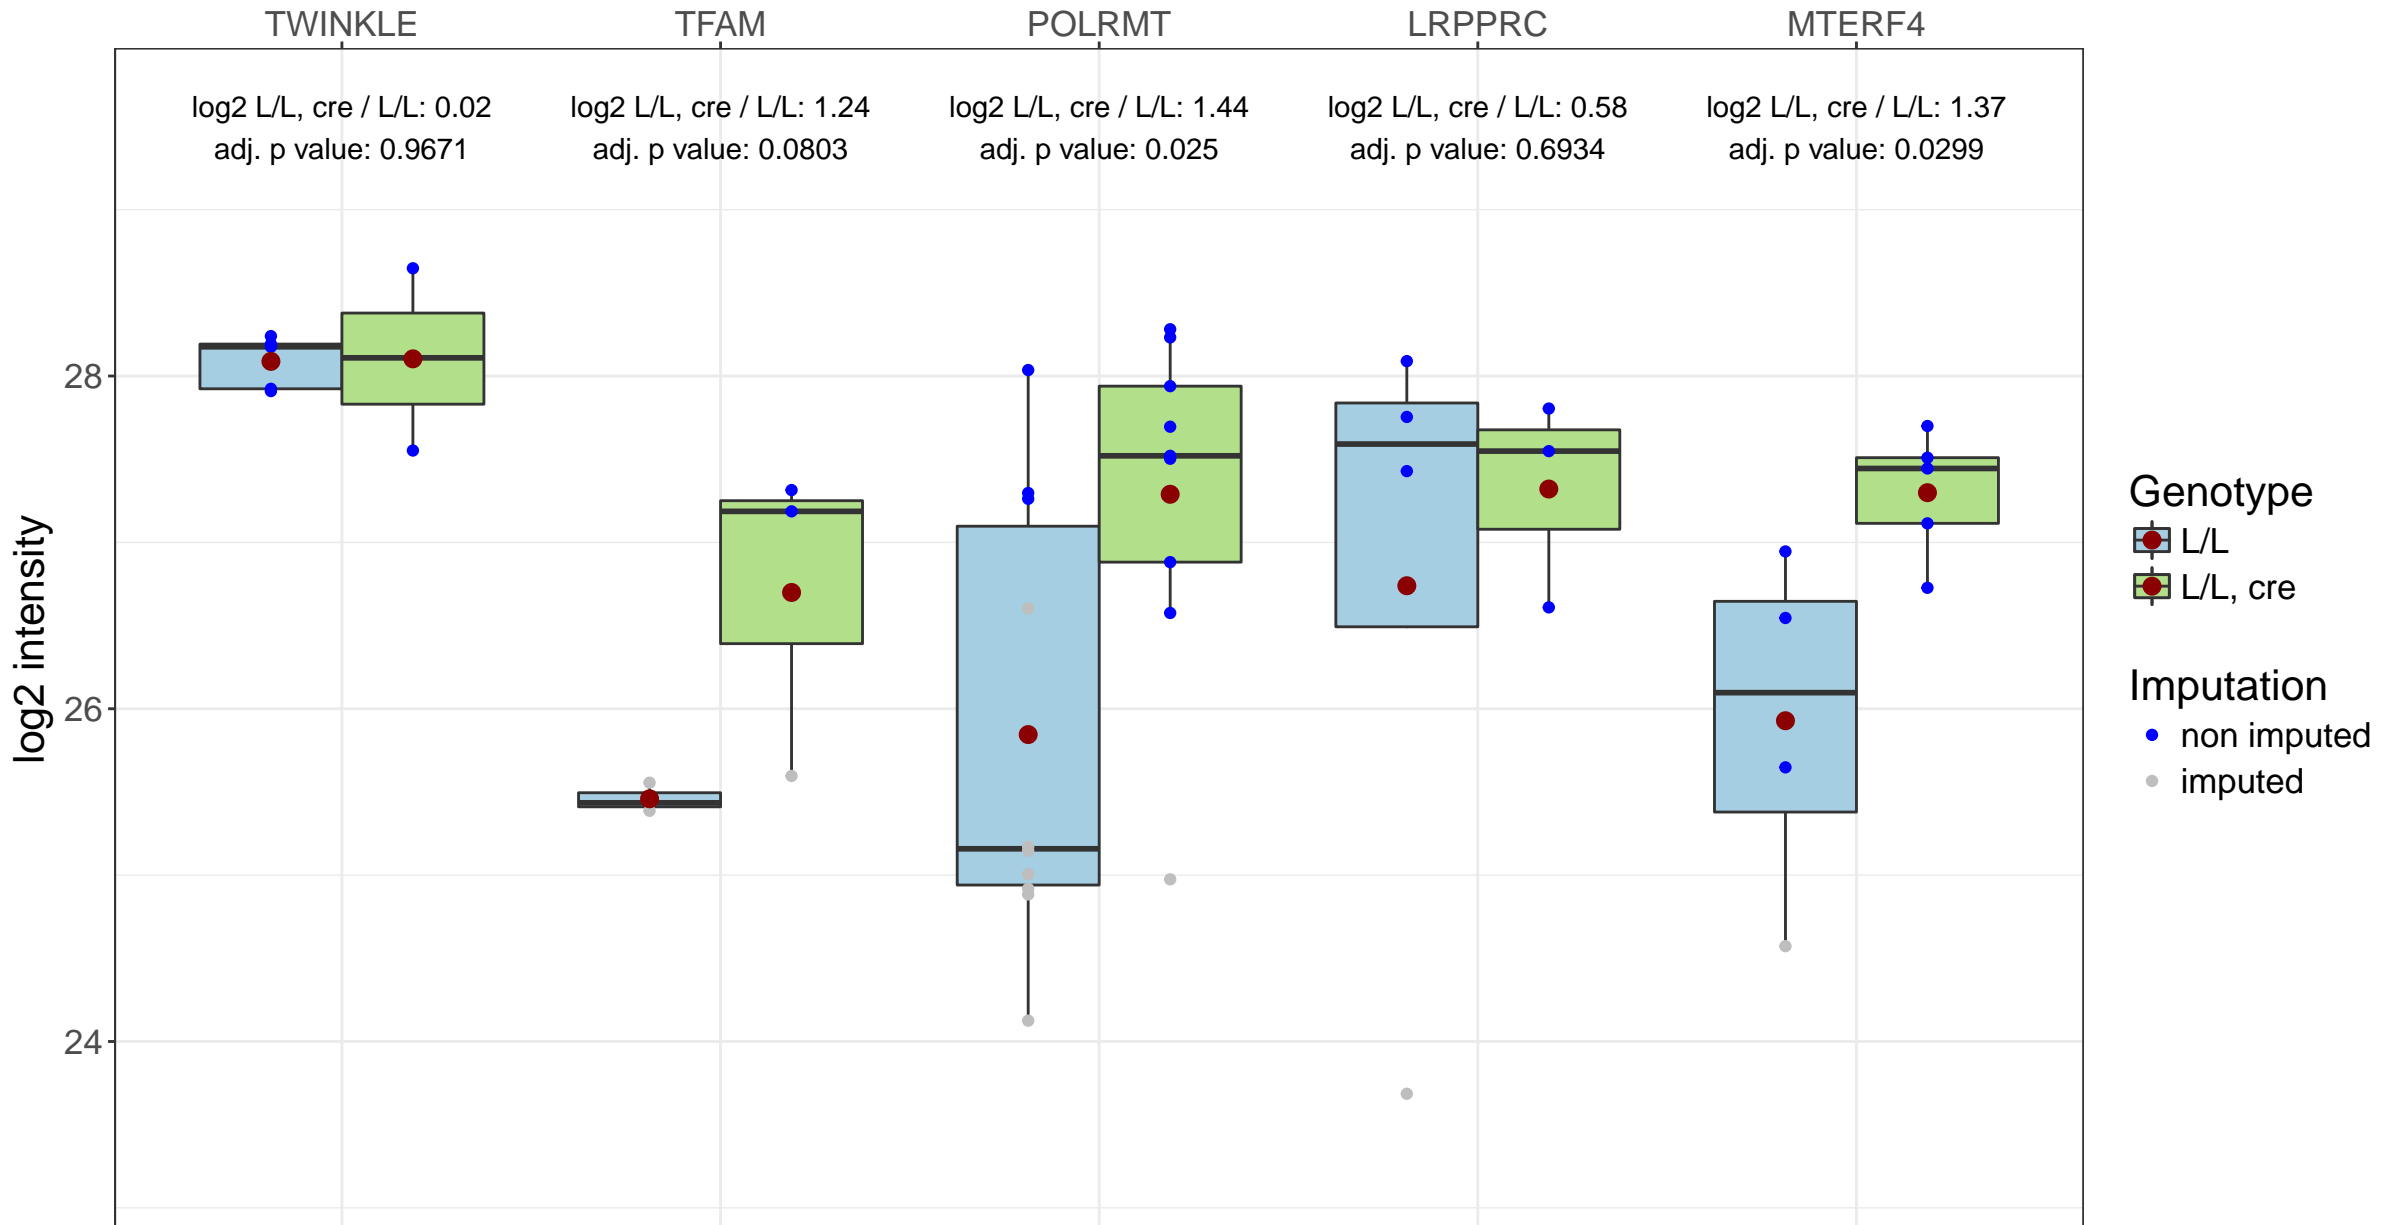

# CECR5 / Q91WM2

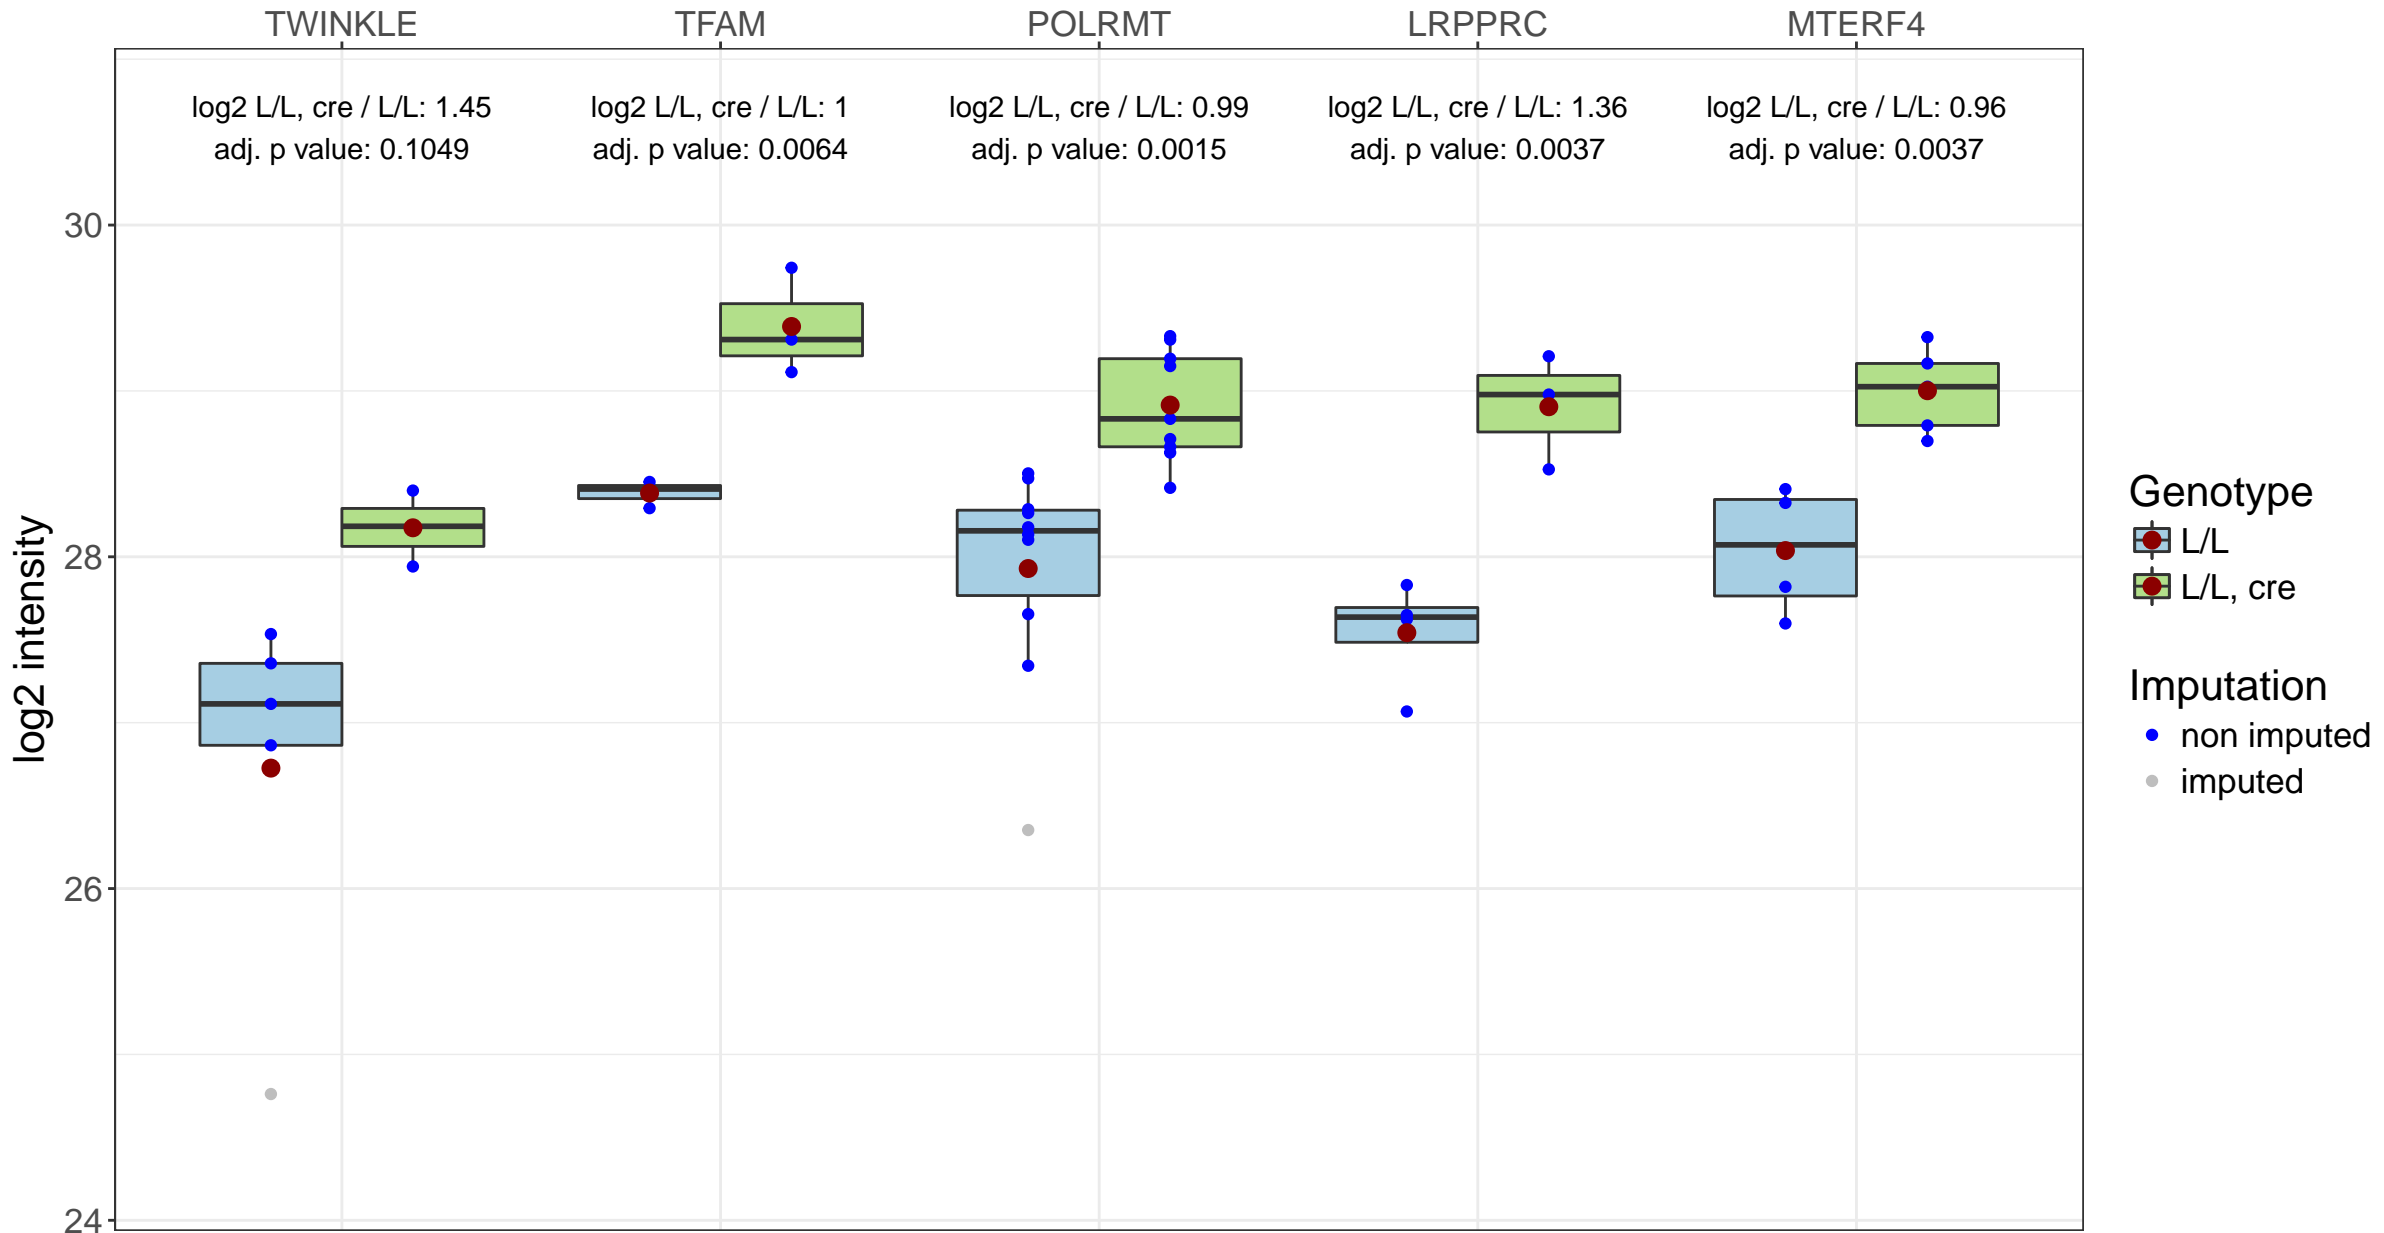



# CHCHD10 / Q7TNL9

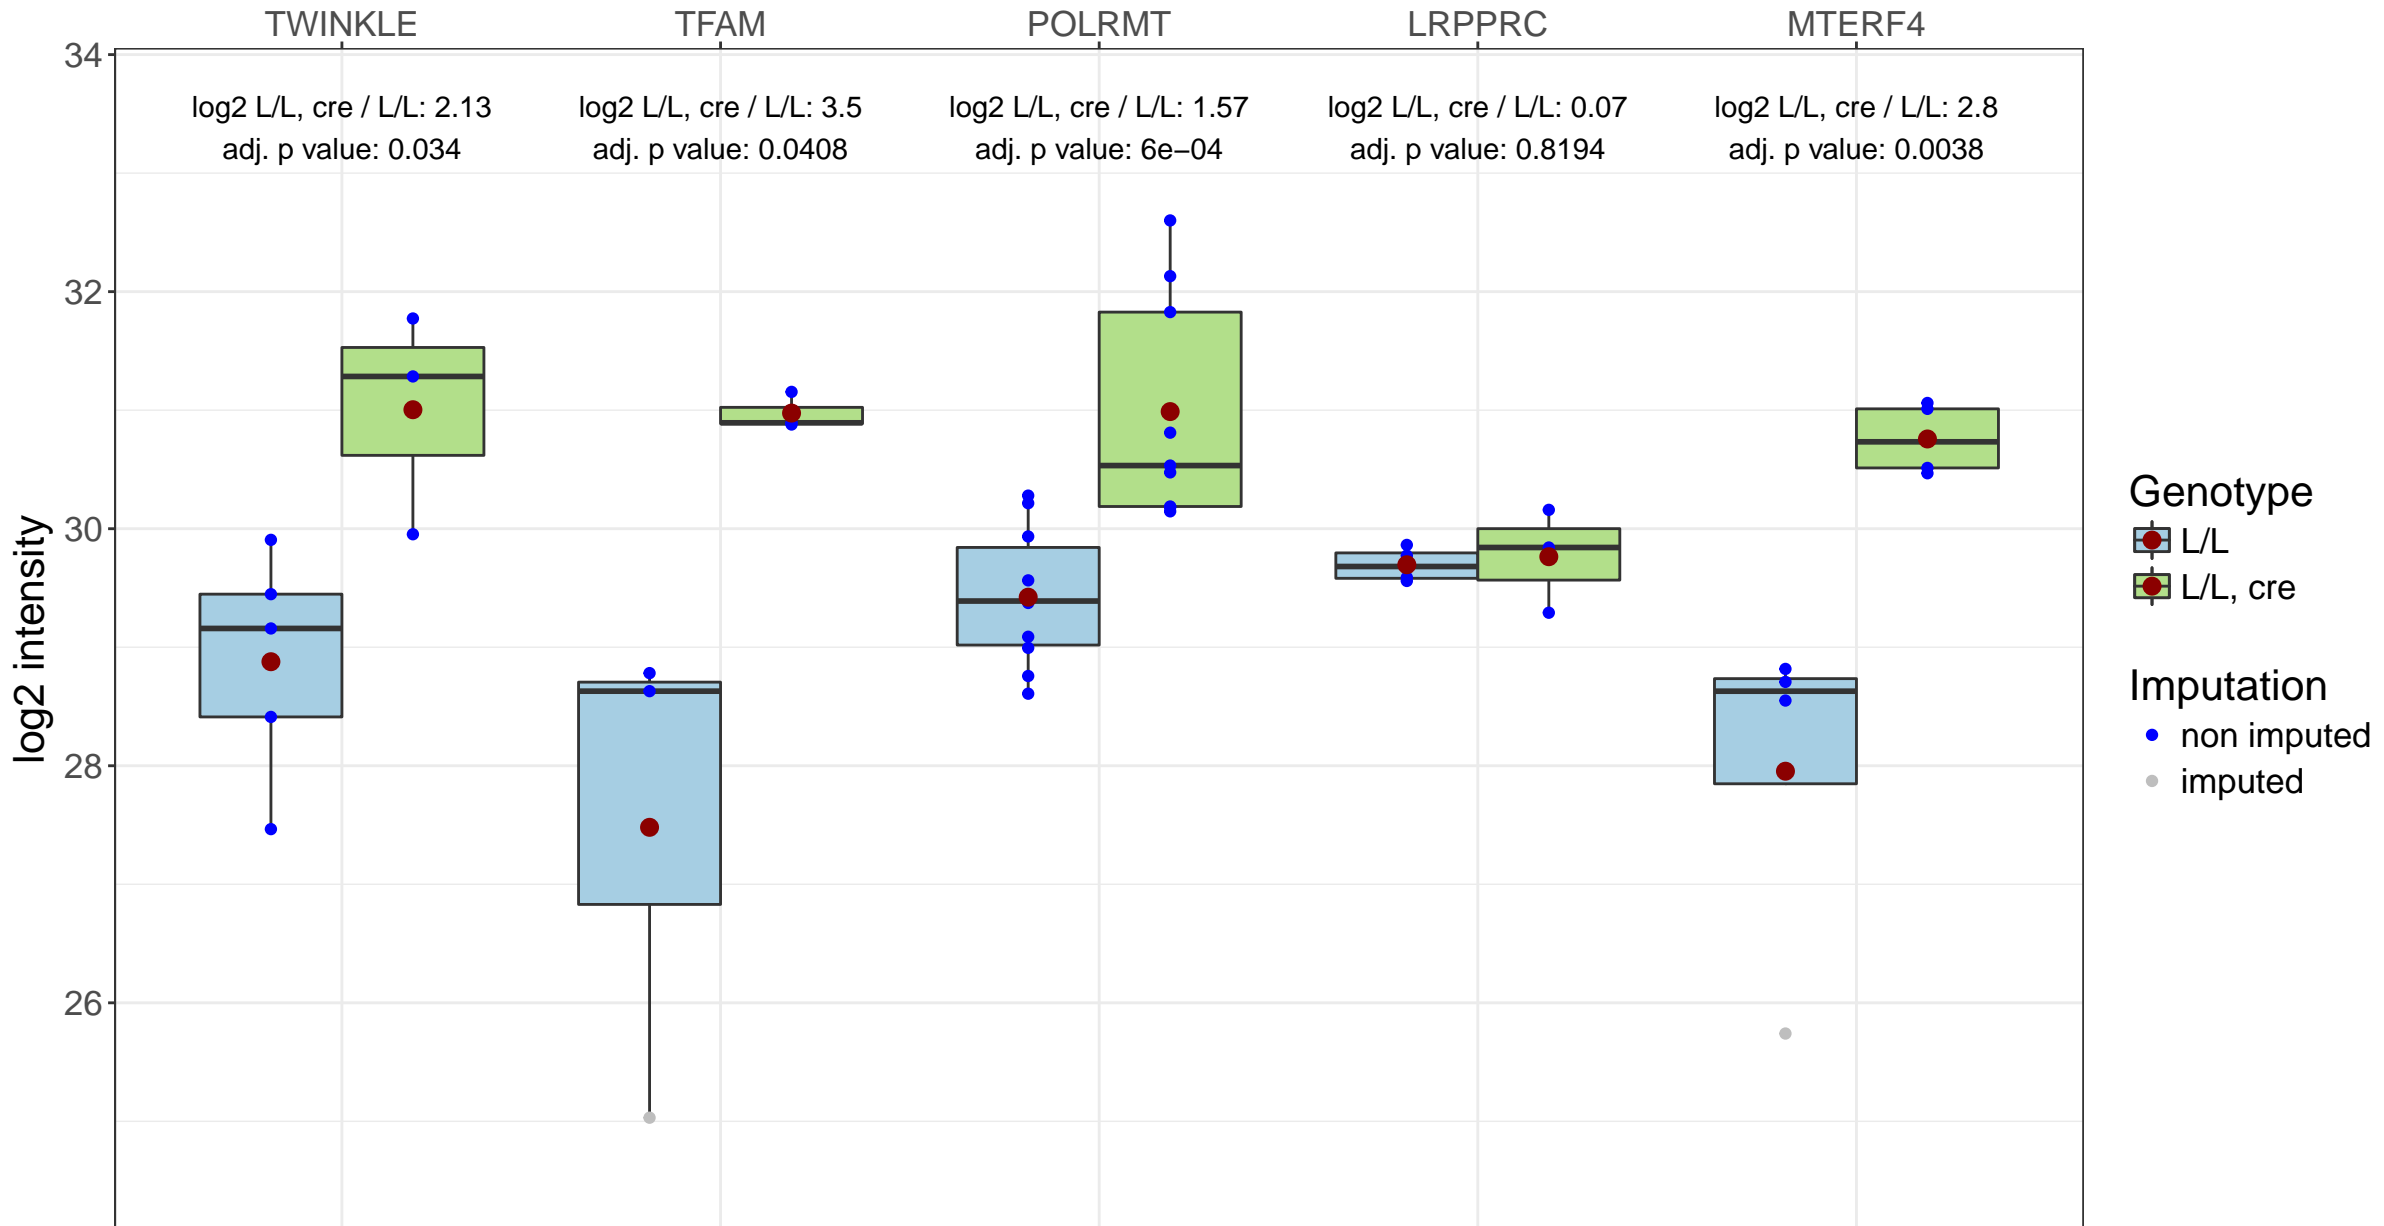

# CHCHD2 / Q9D1L0

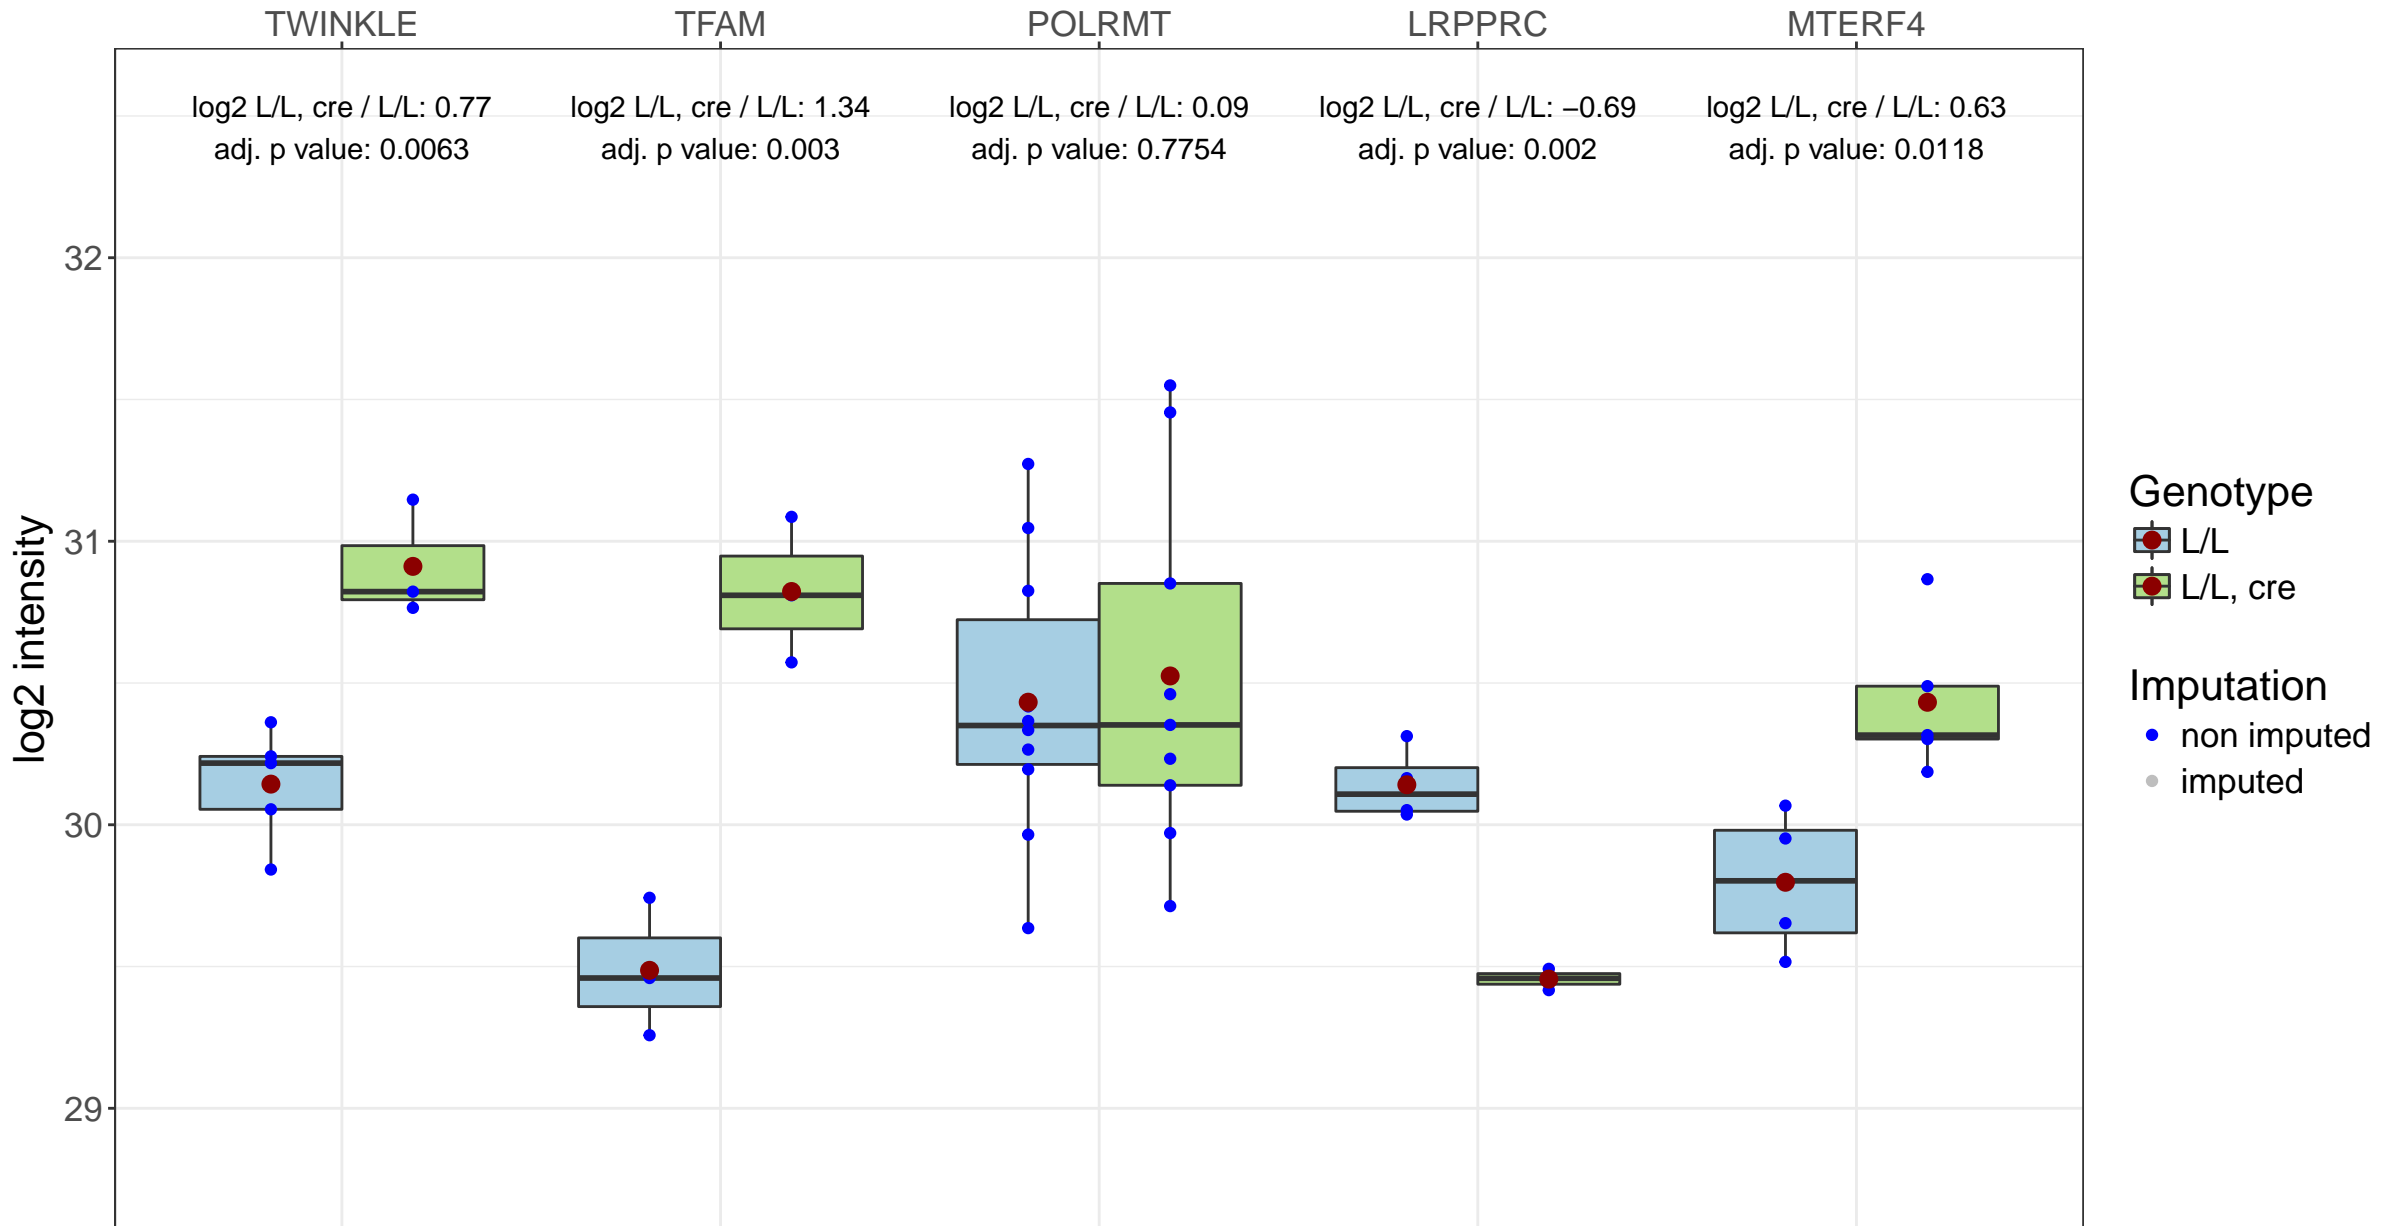

# CHCHD3 / Q9CRB9

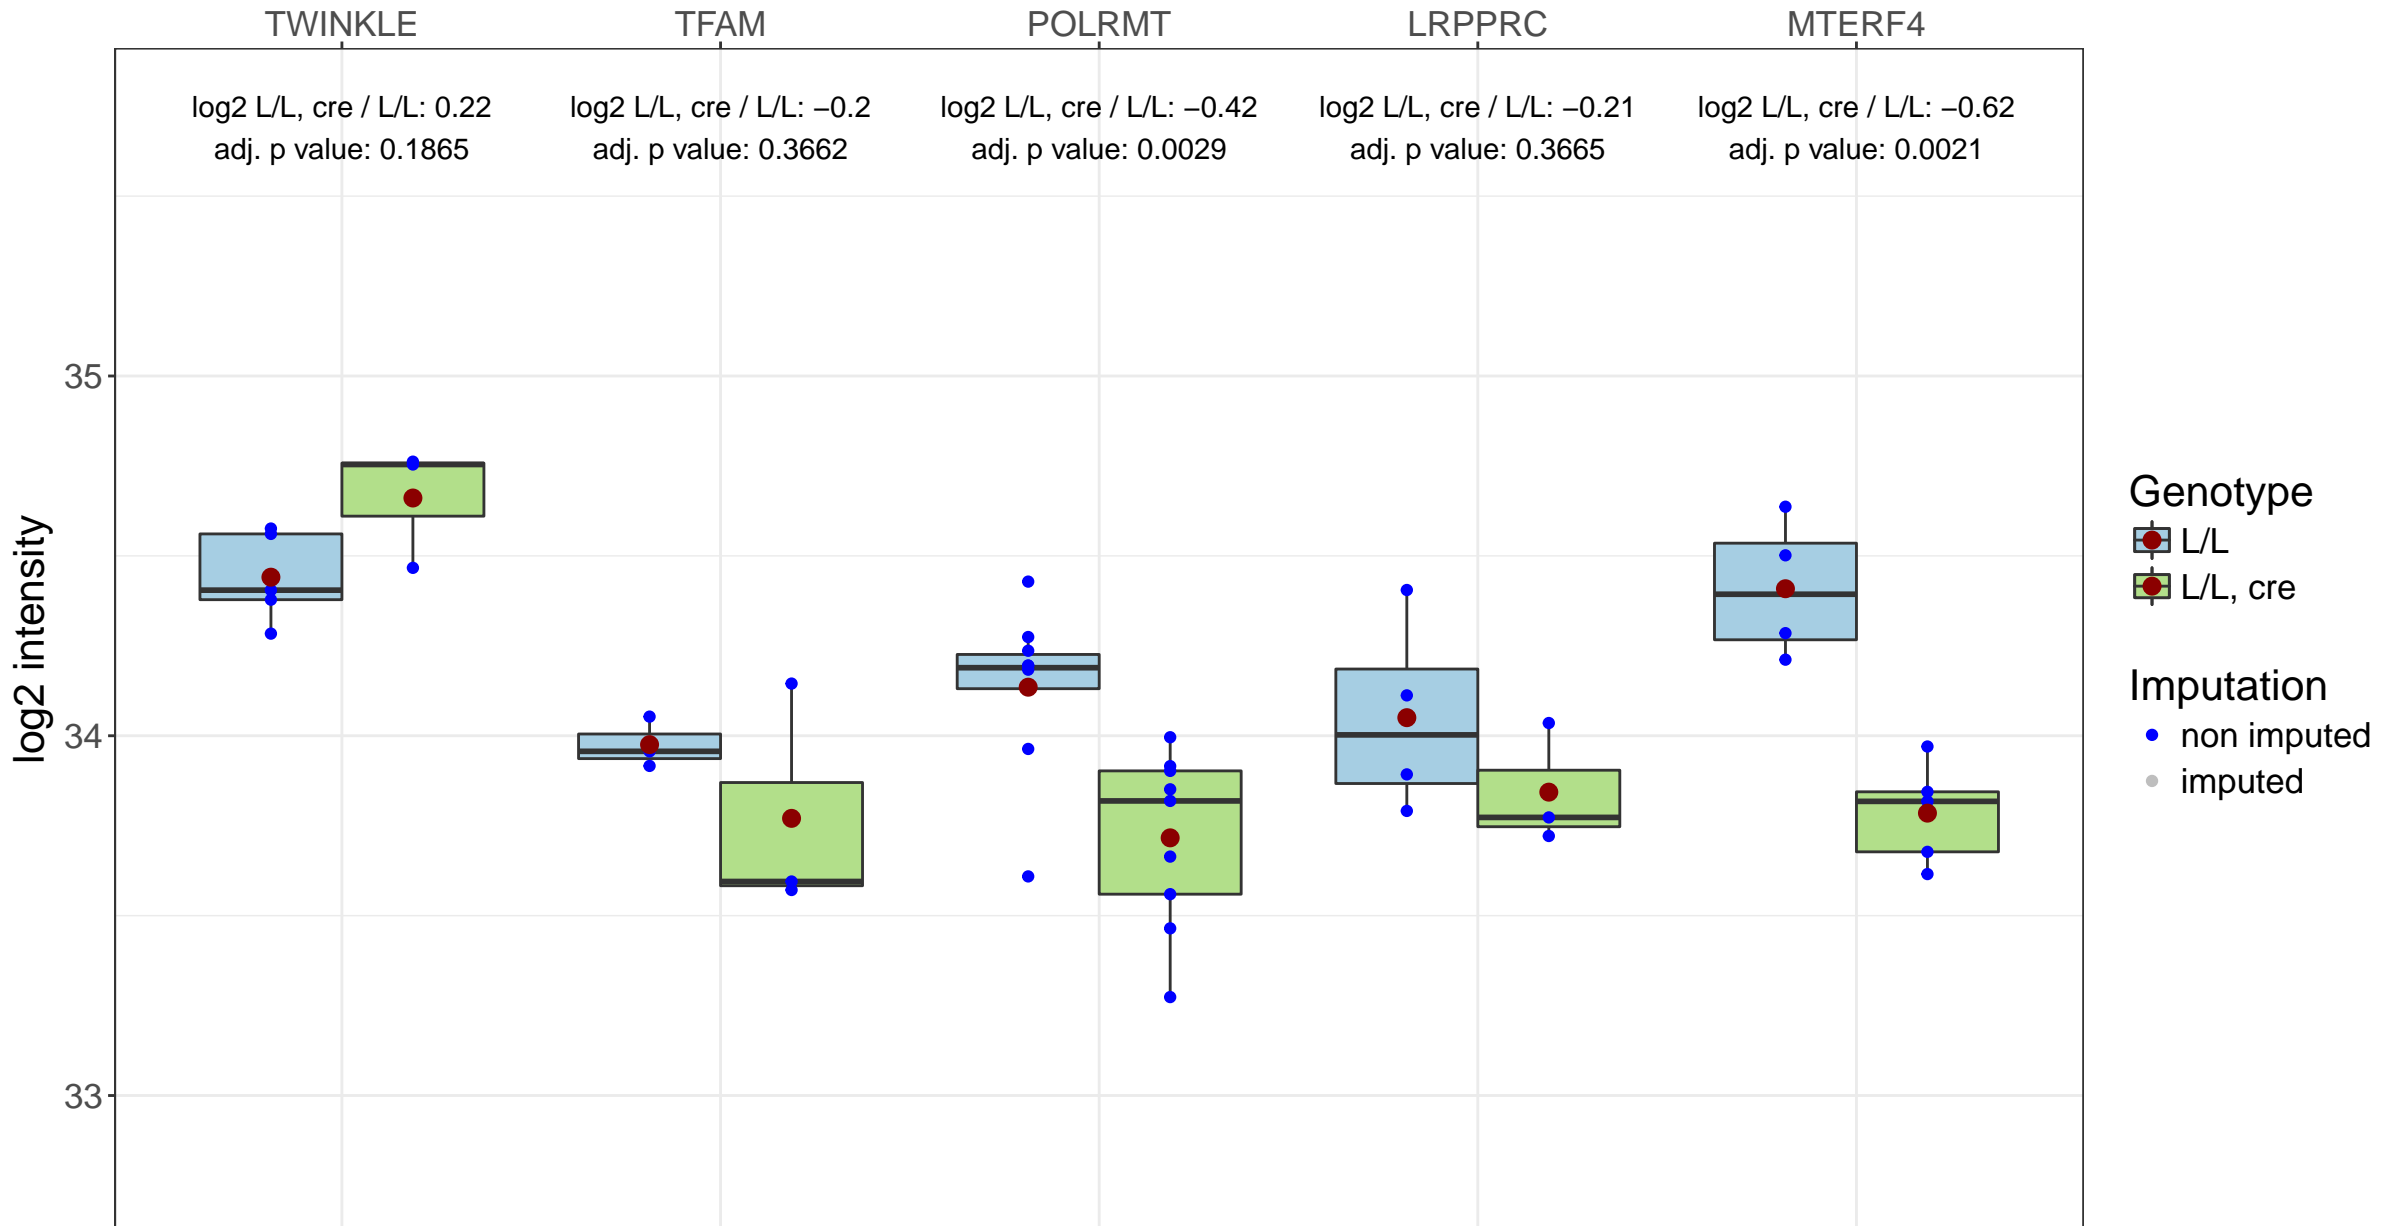

# CHCHD4 / Q8VEA4

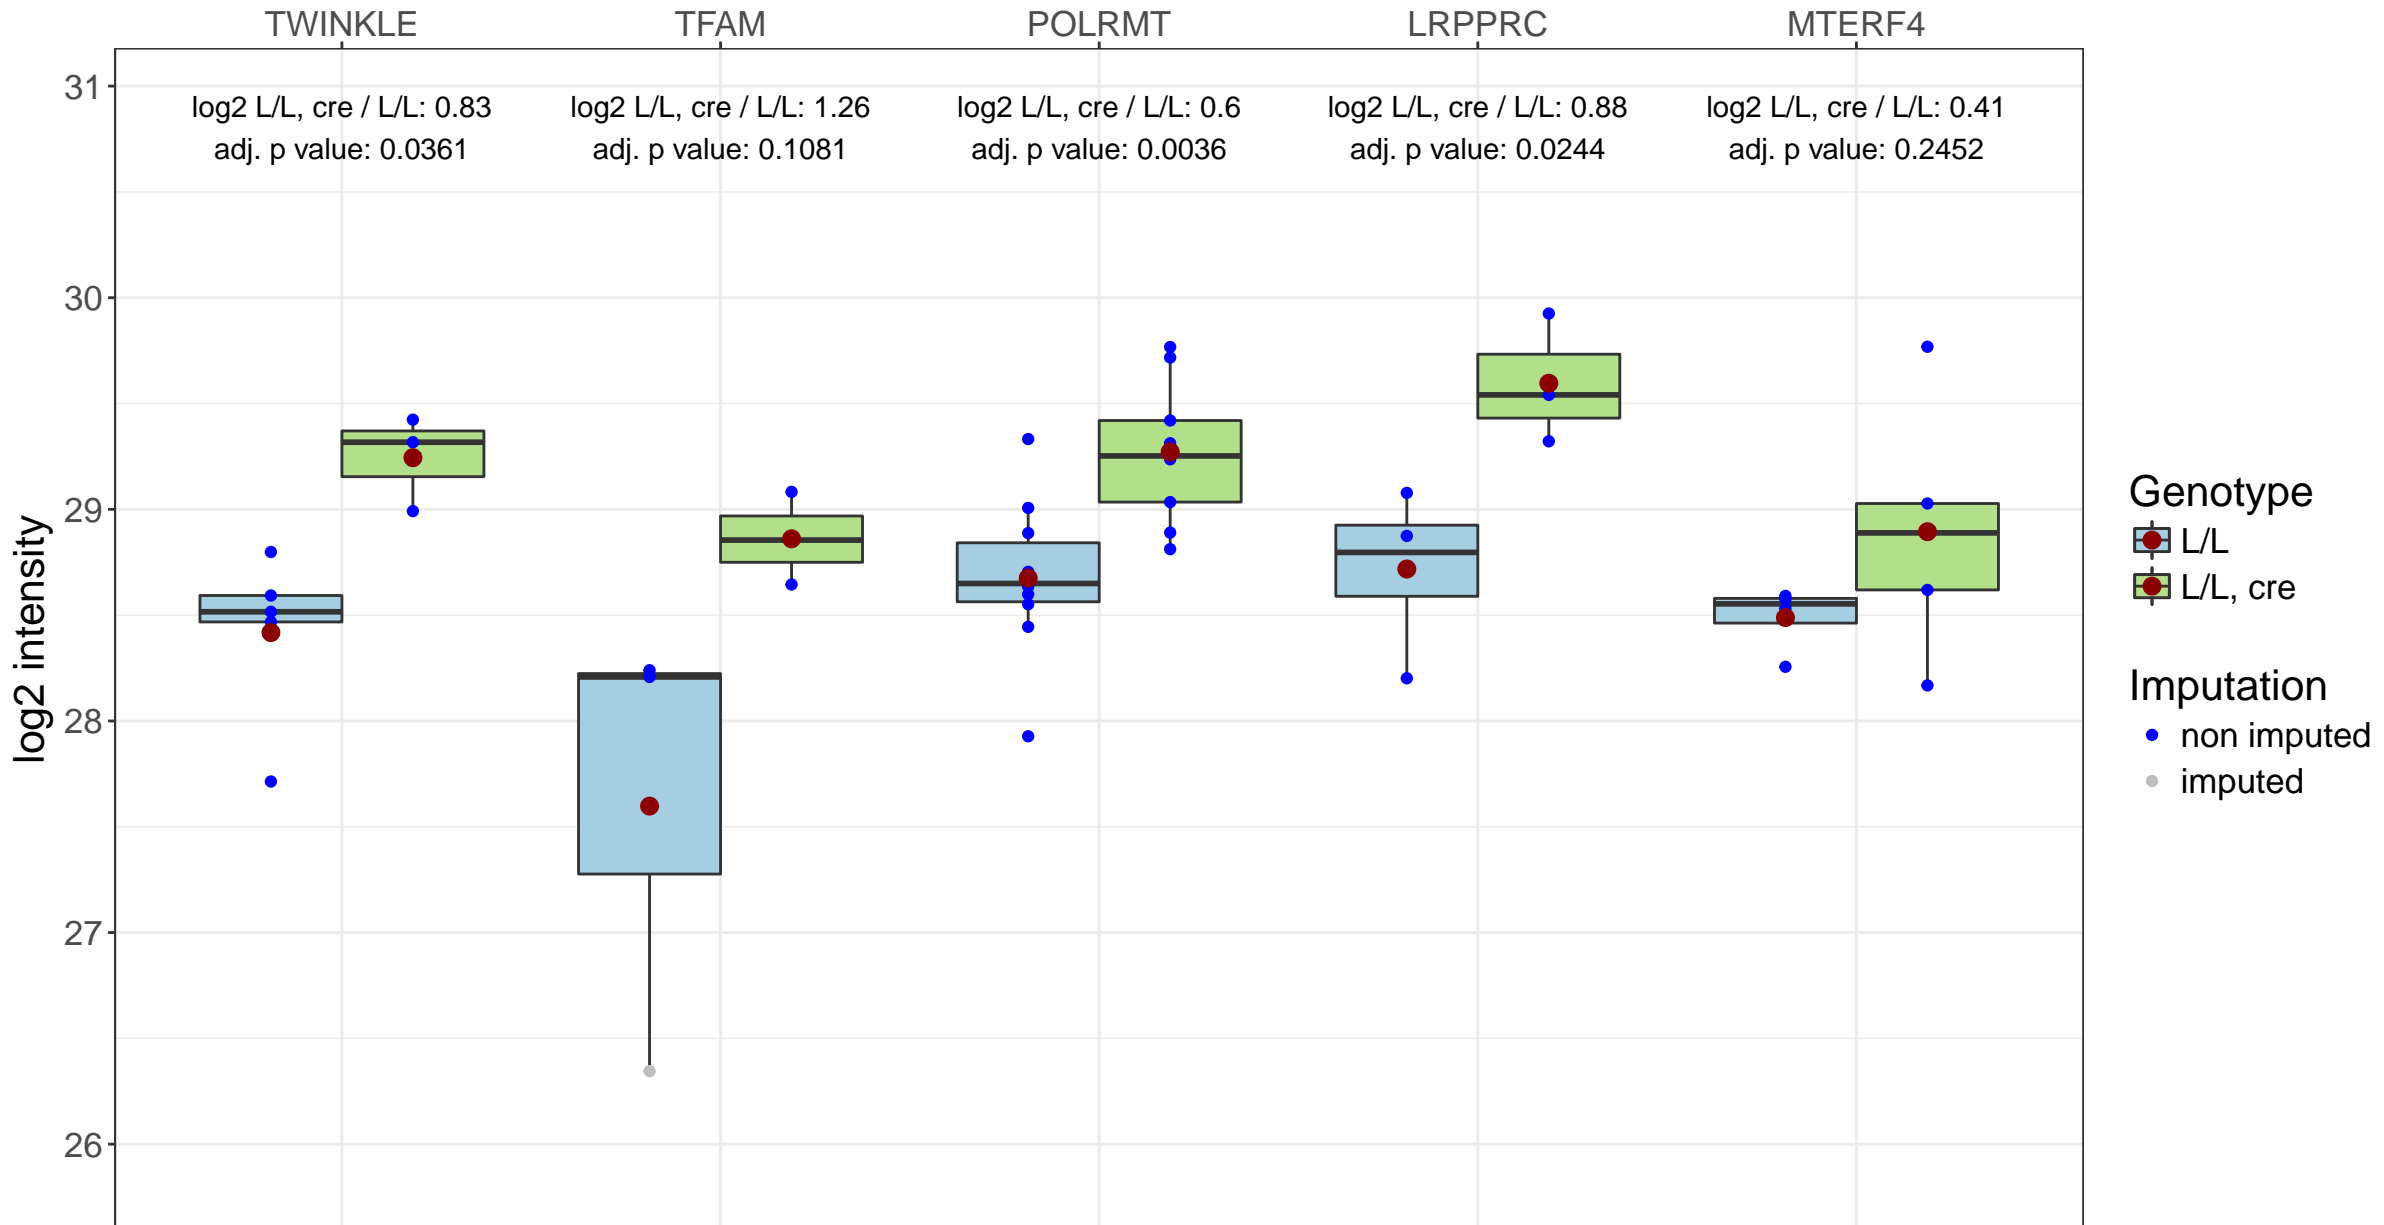

# CHCHD5 / Q9CQP3

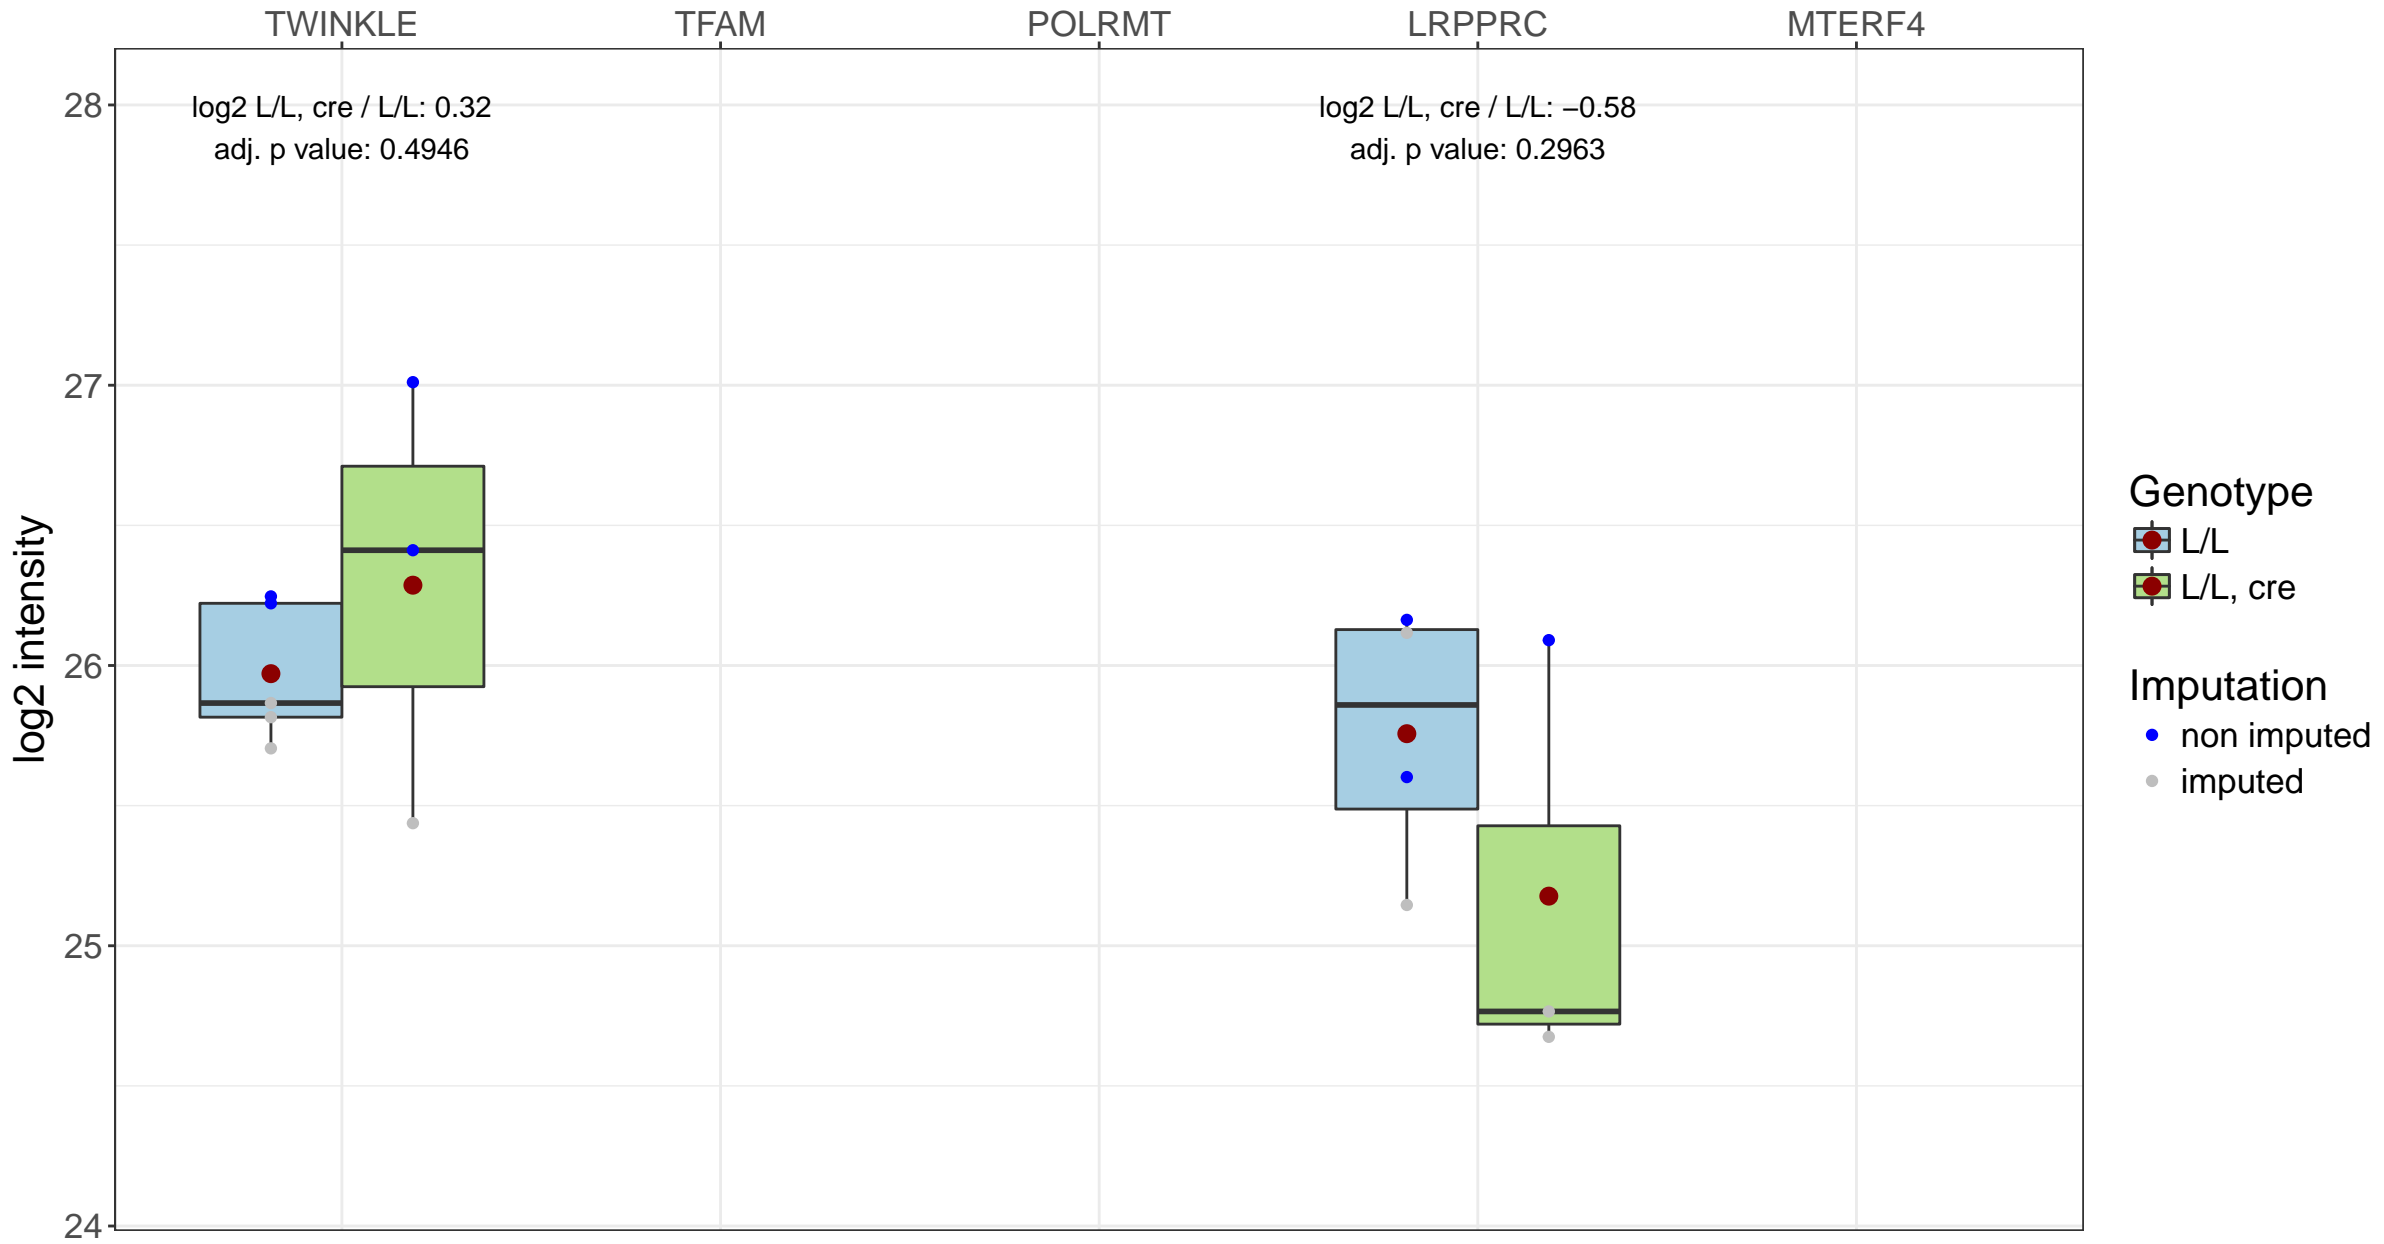

# CHCHD6 / Q91VN4

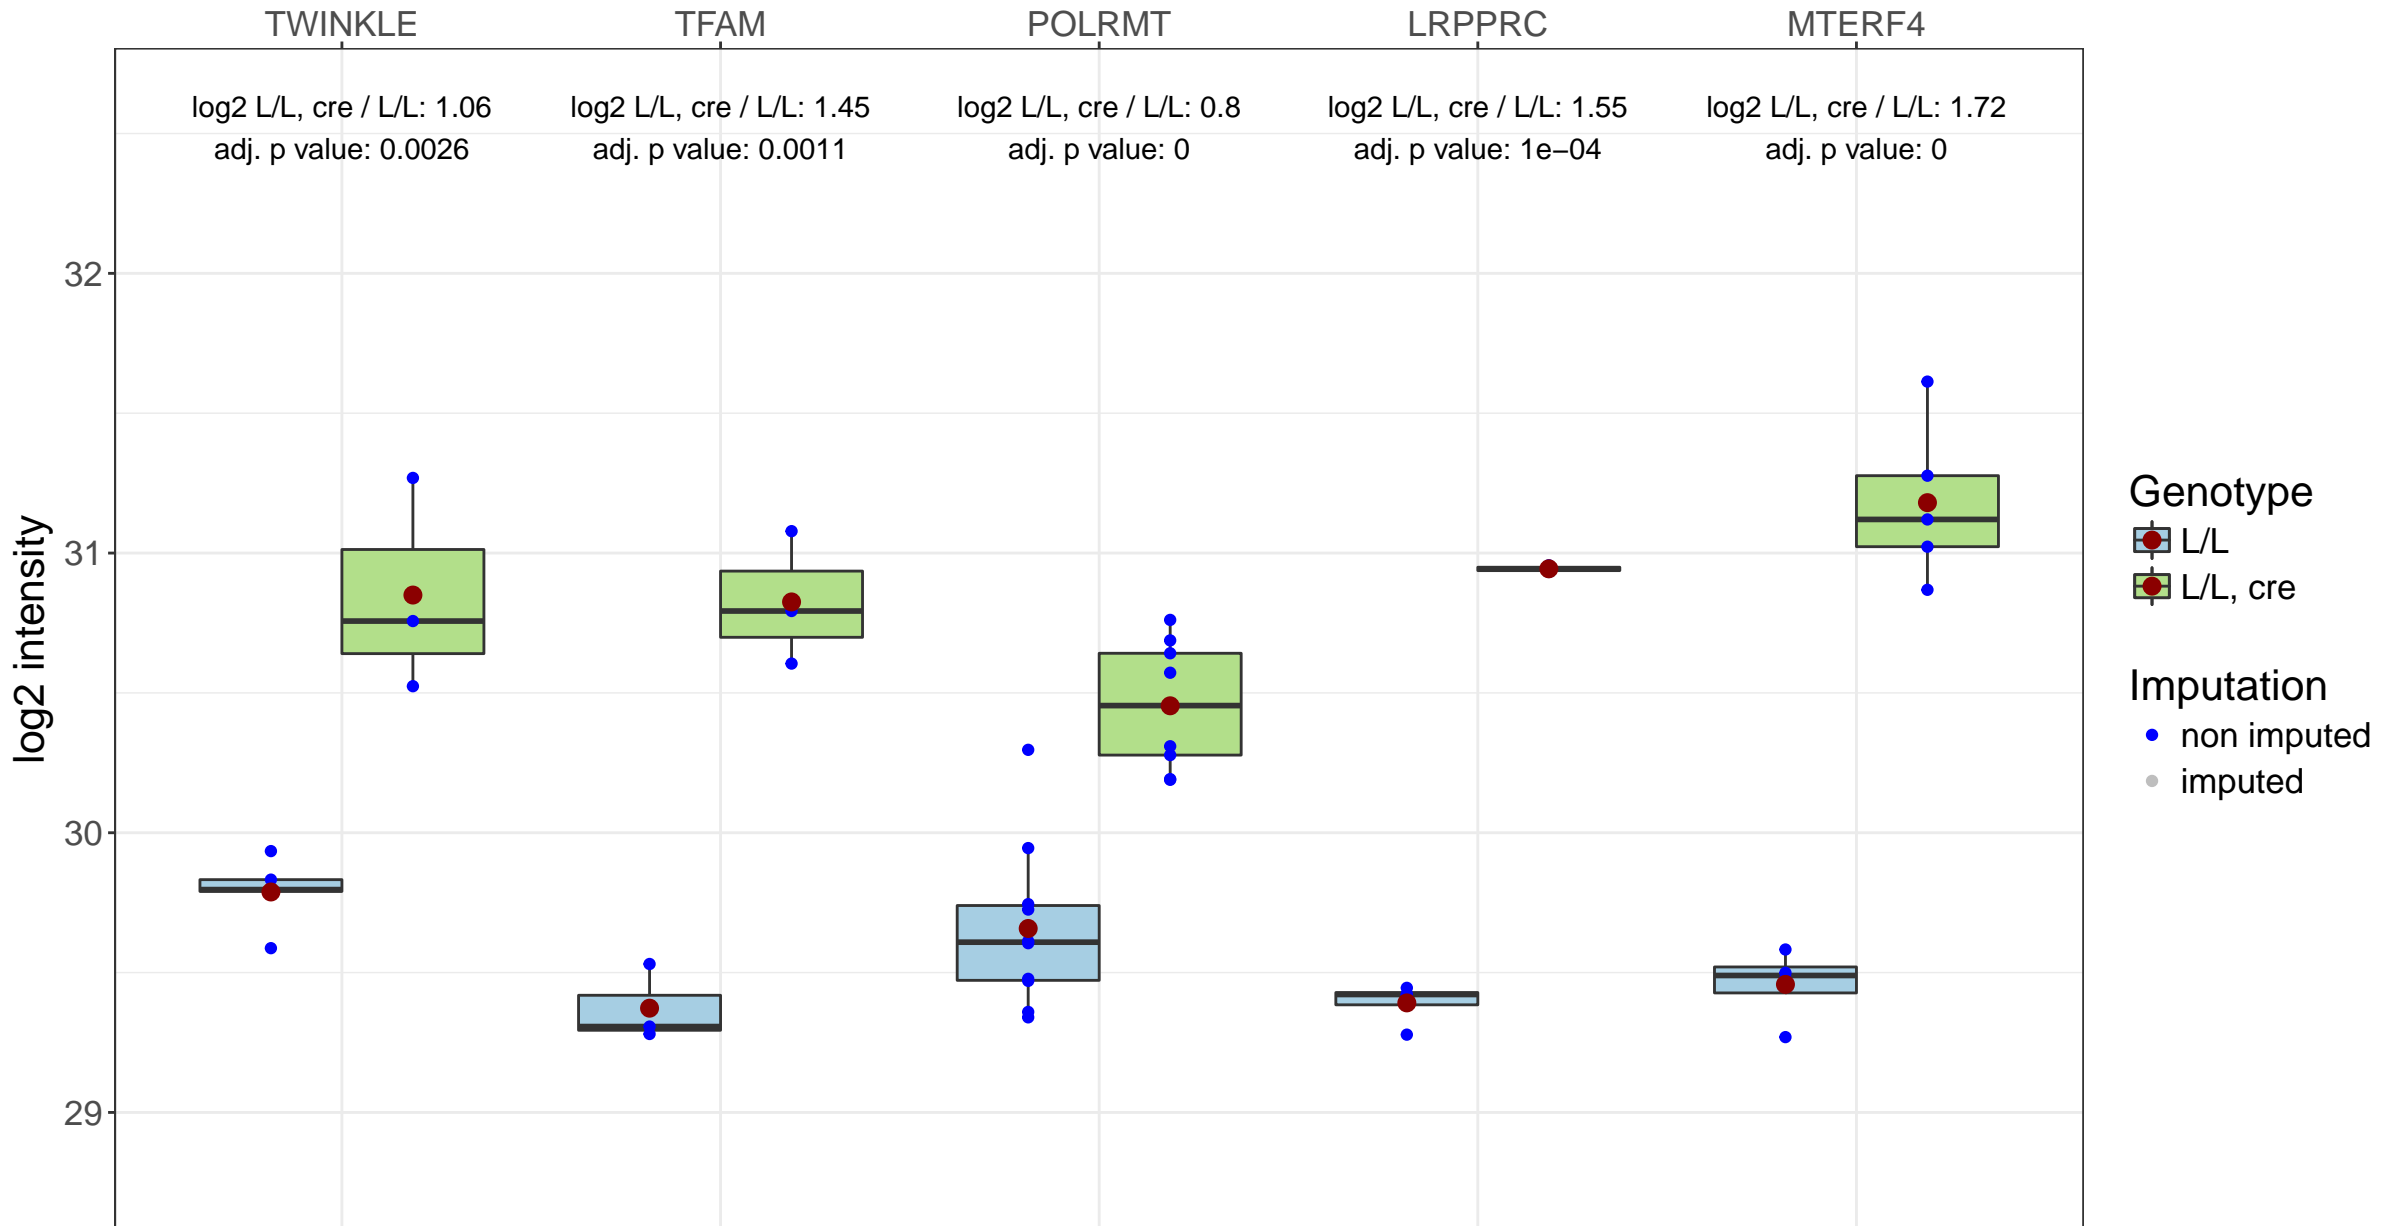

# CHCHD7 / Q8K2Q5

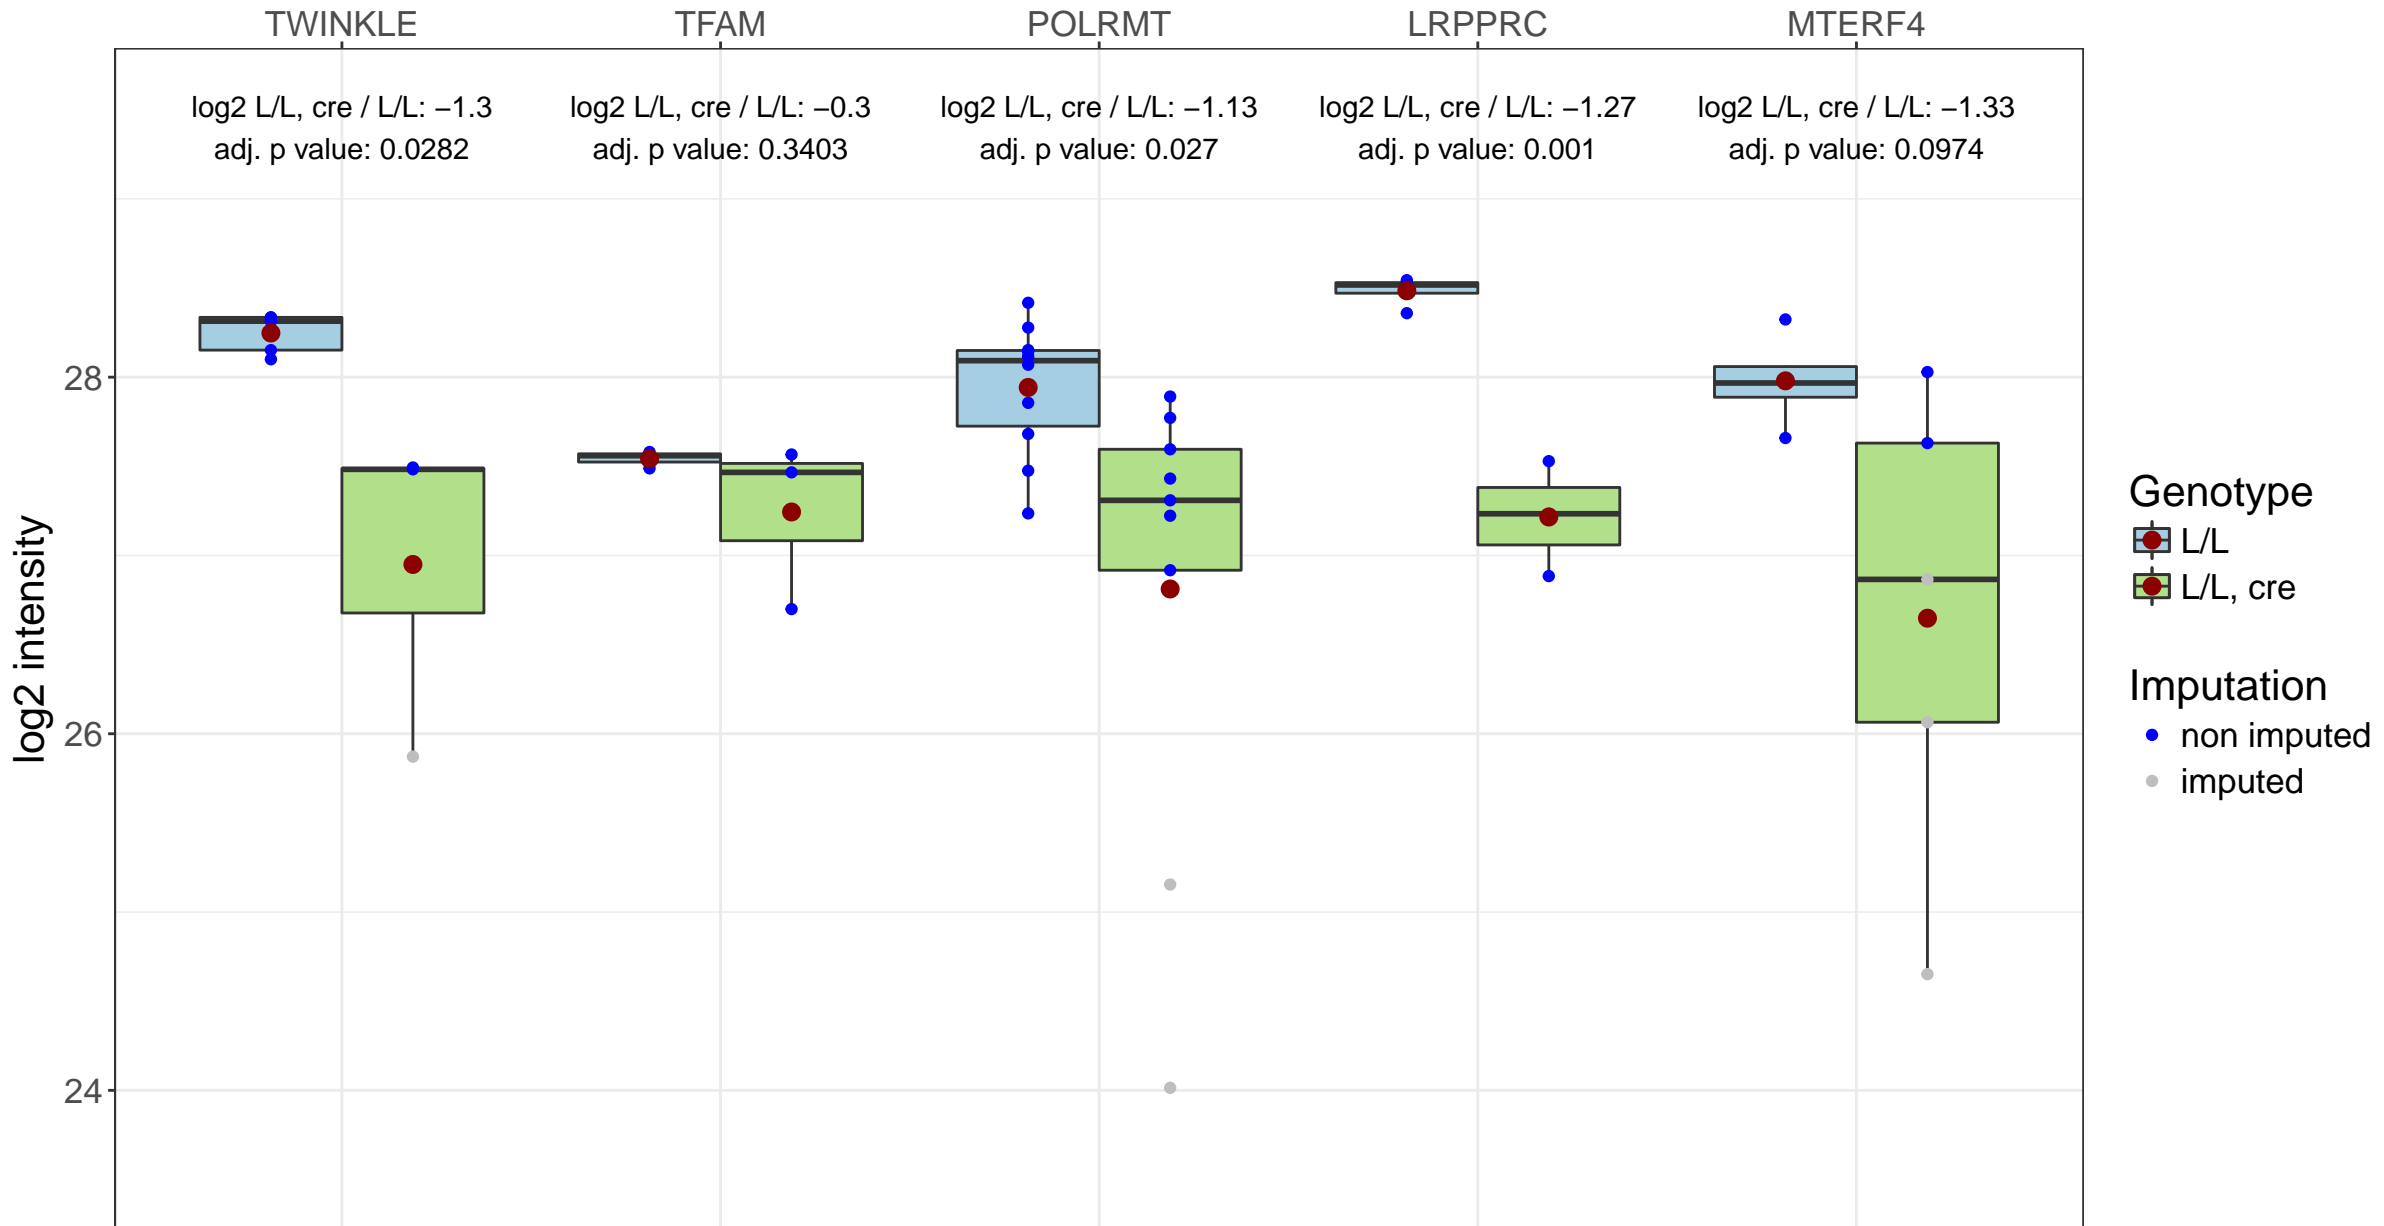

# CISD1 / Q91WS0

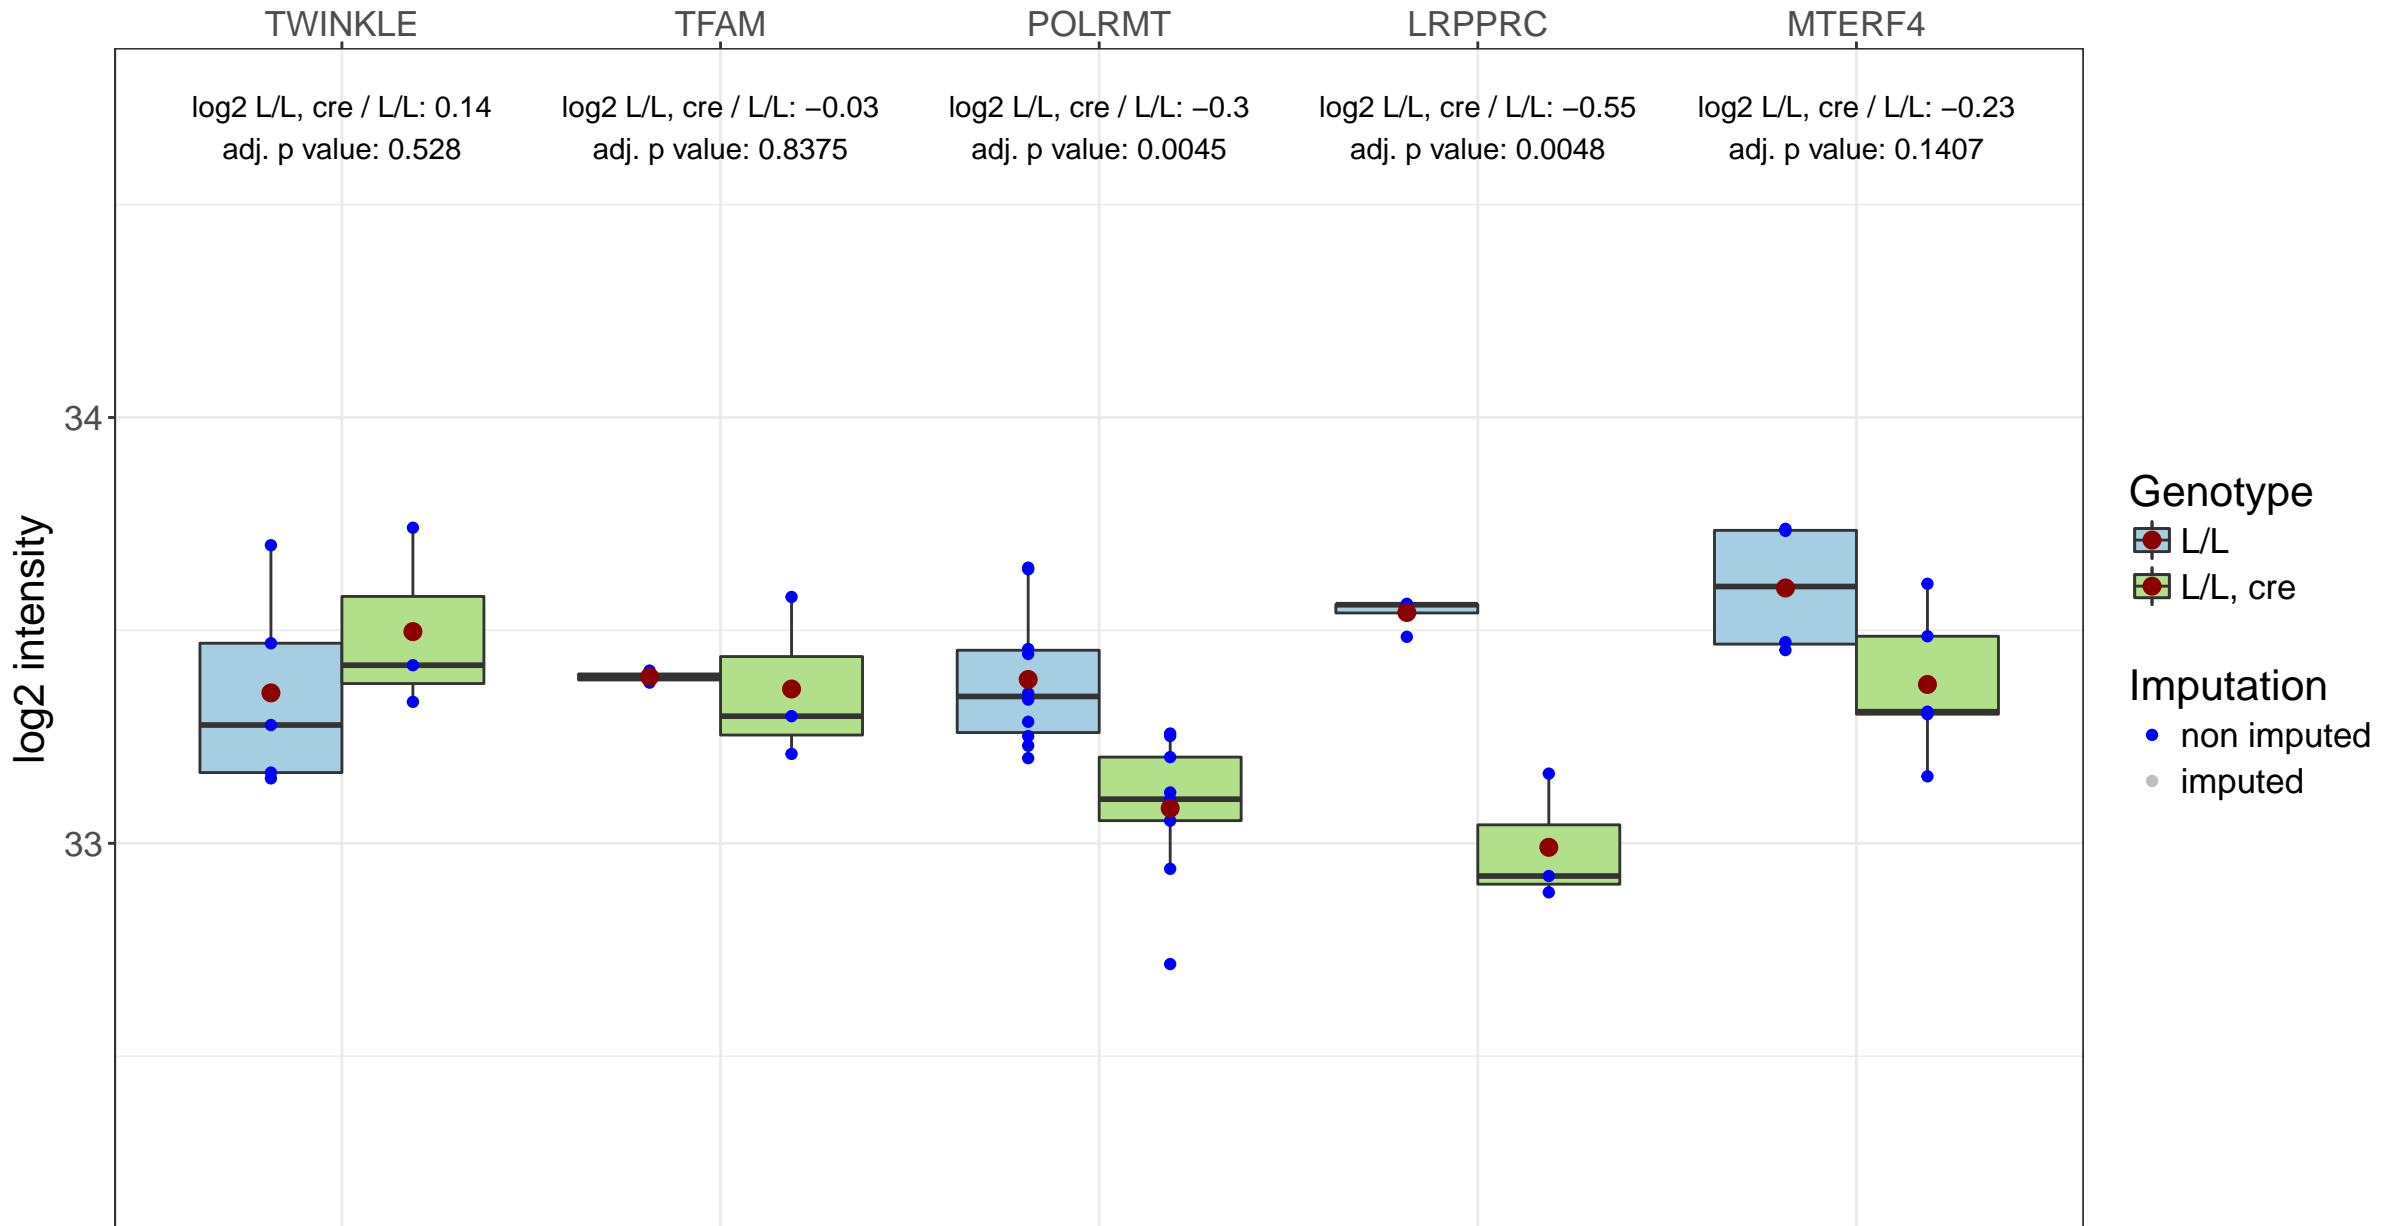



# CISD3 / Z4YKM2

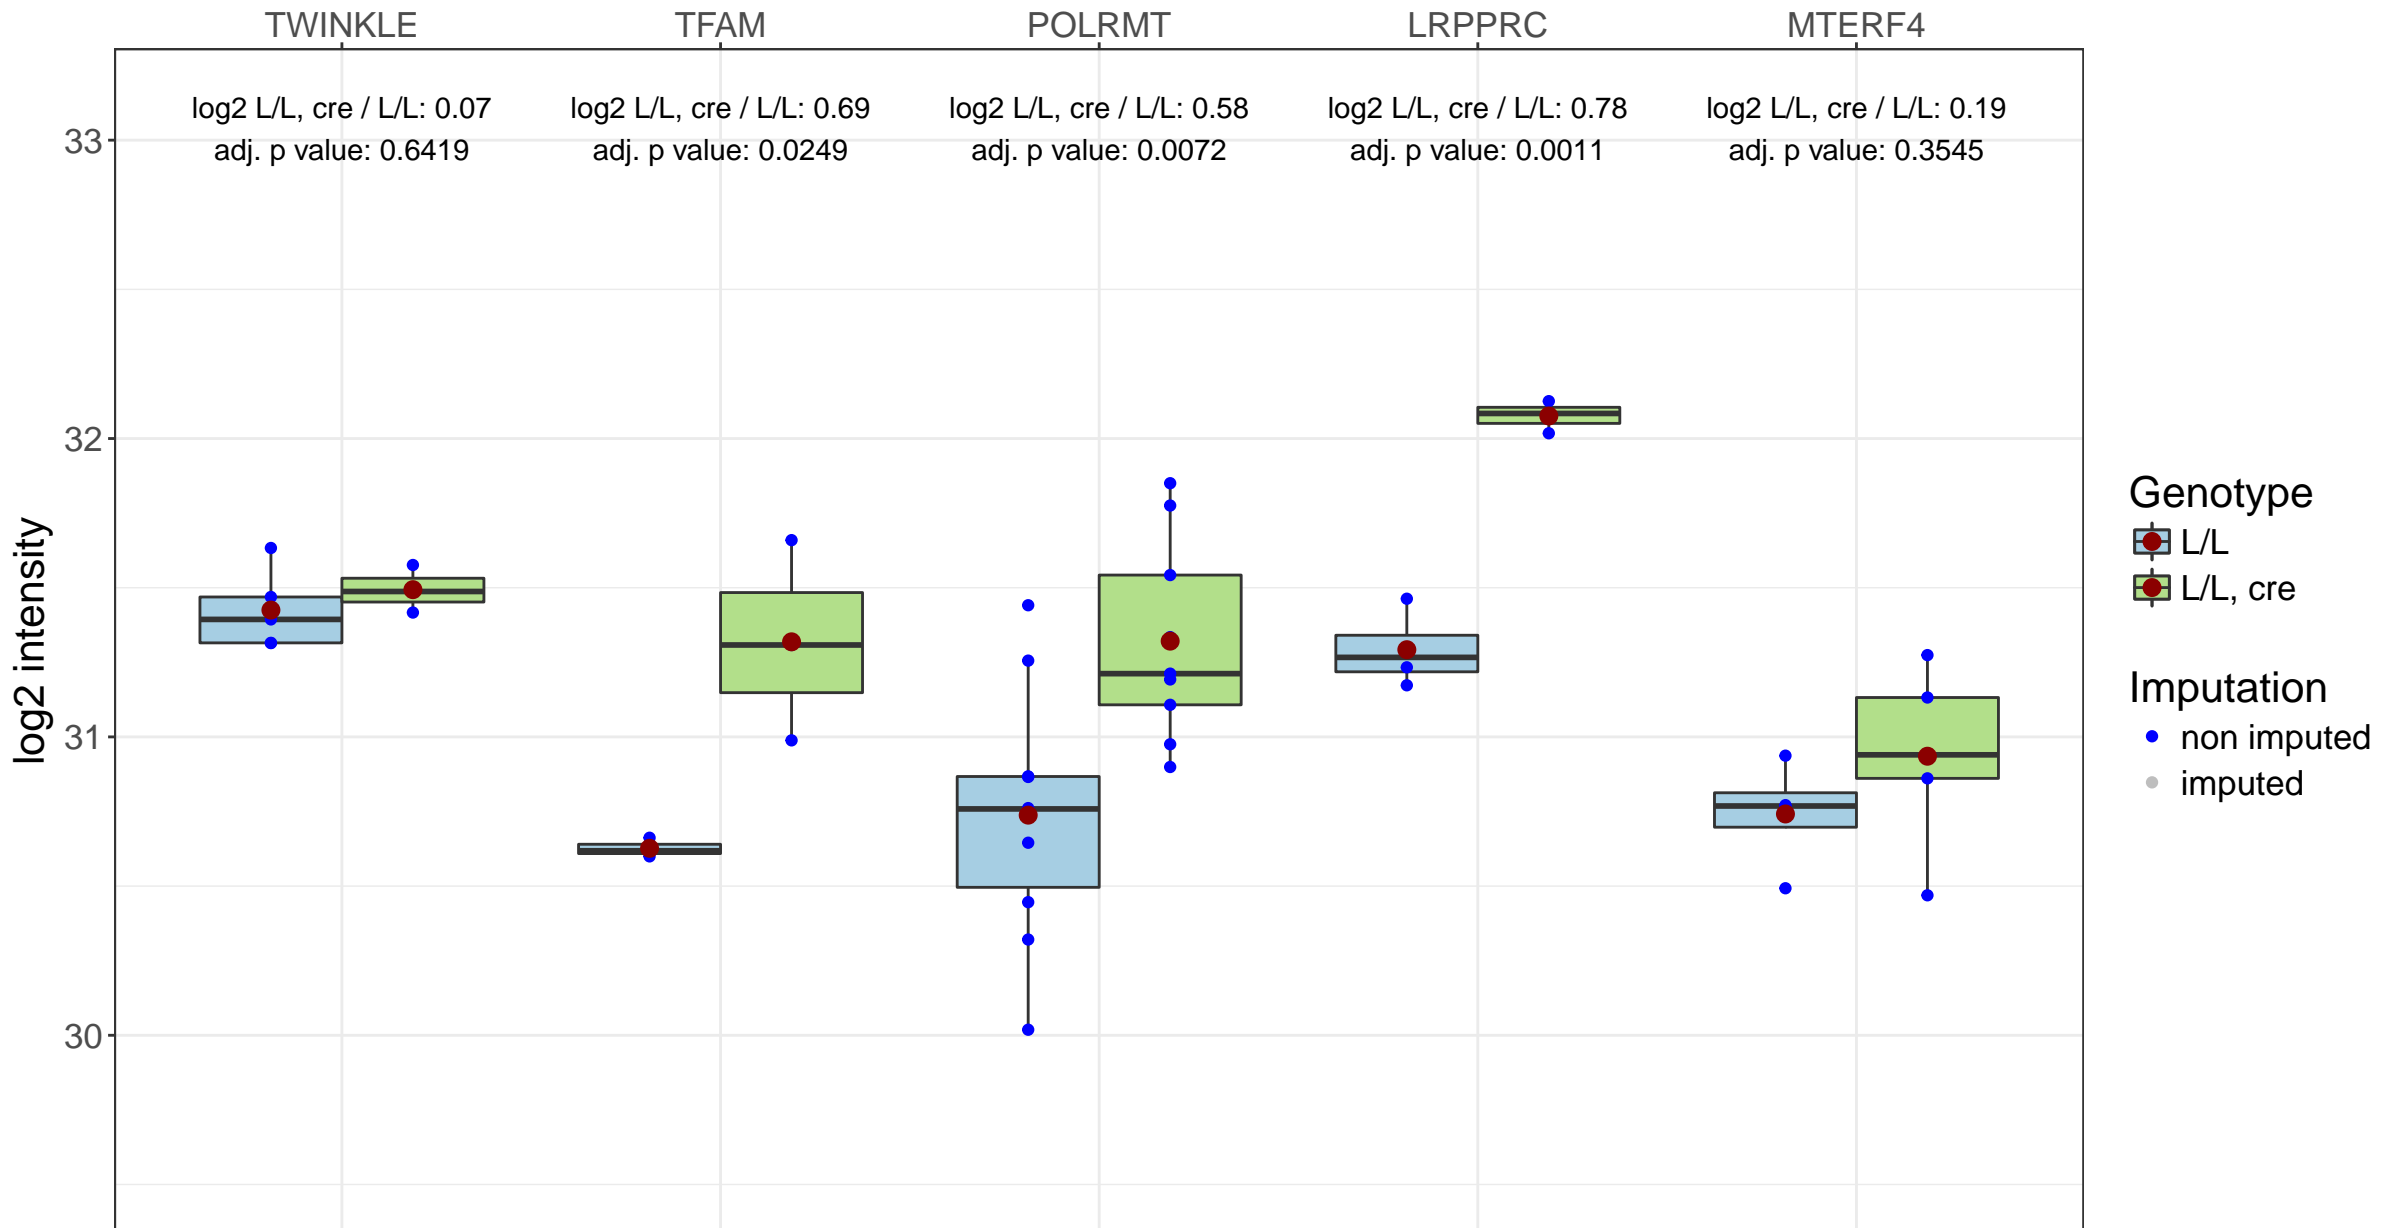

# CKAP4 / Q8BMK4

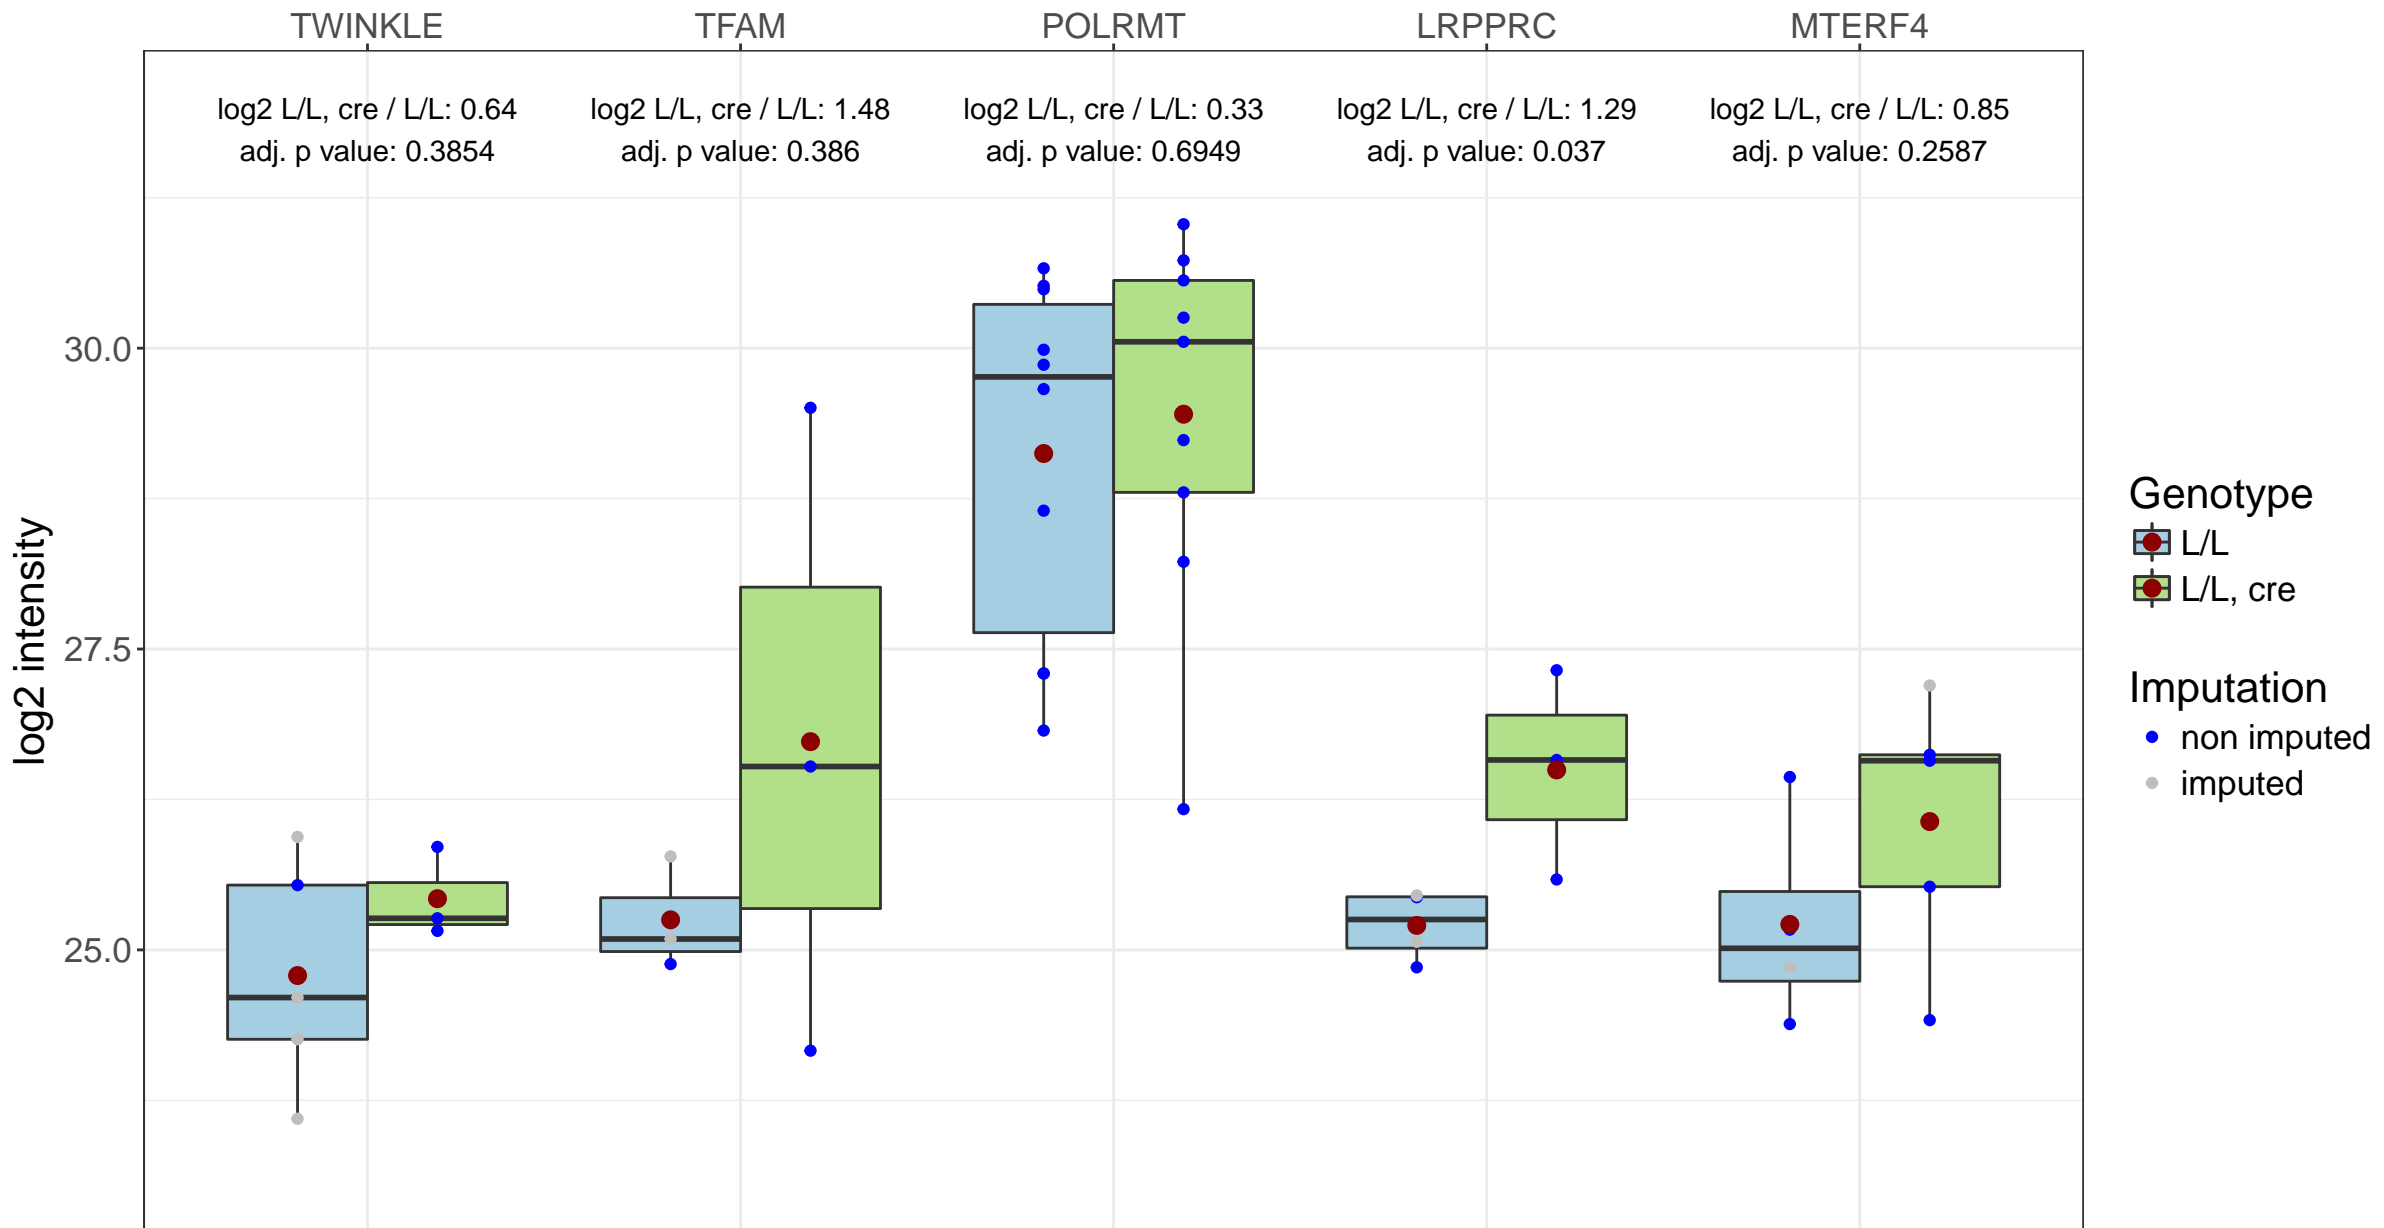

# CKM / P07310

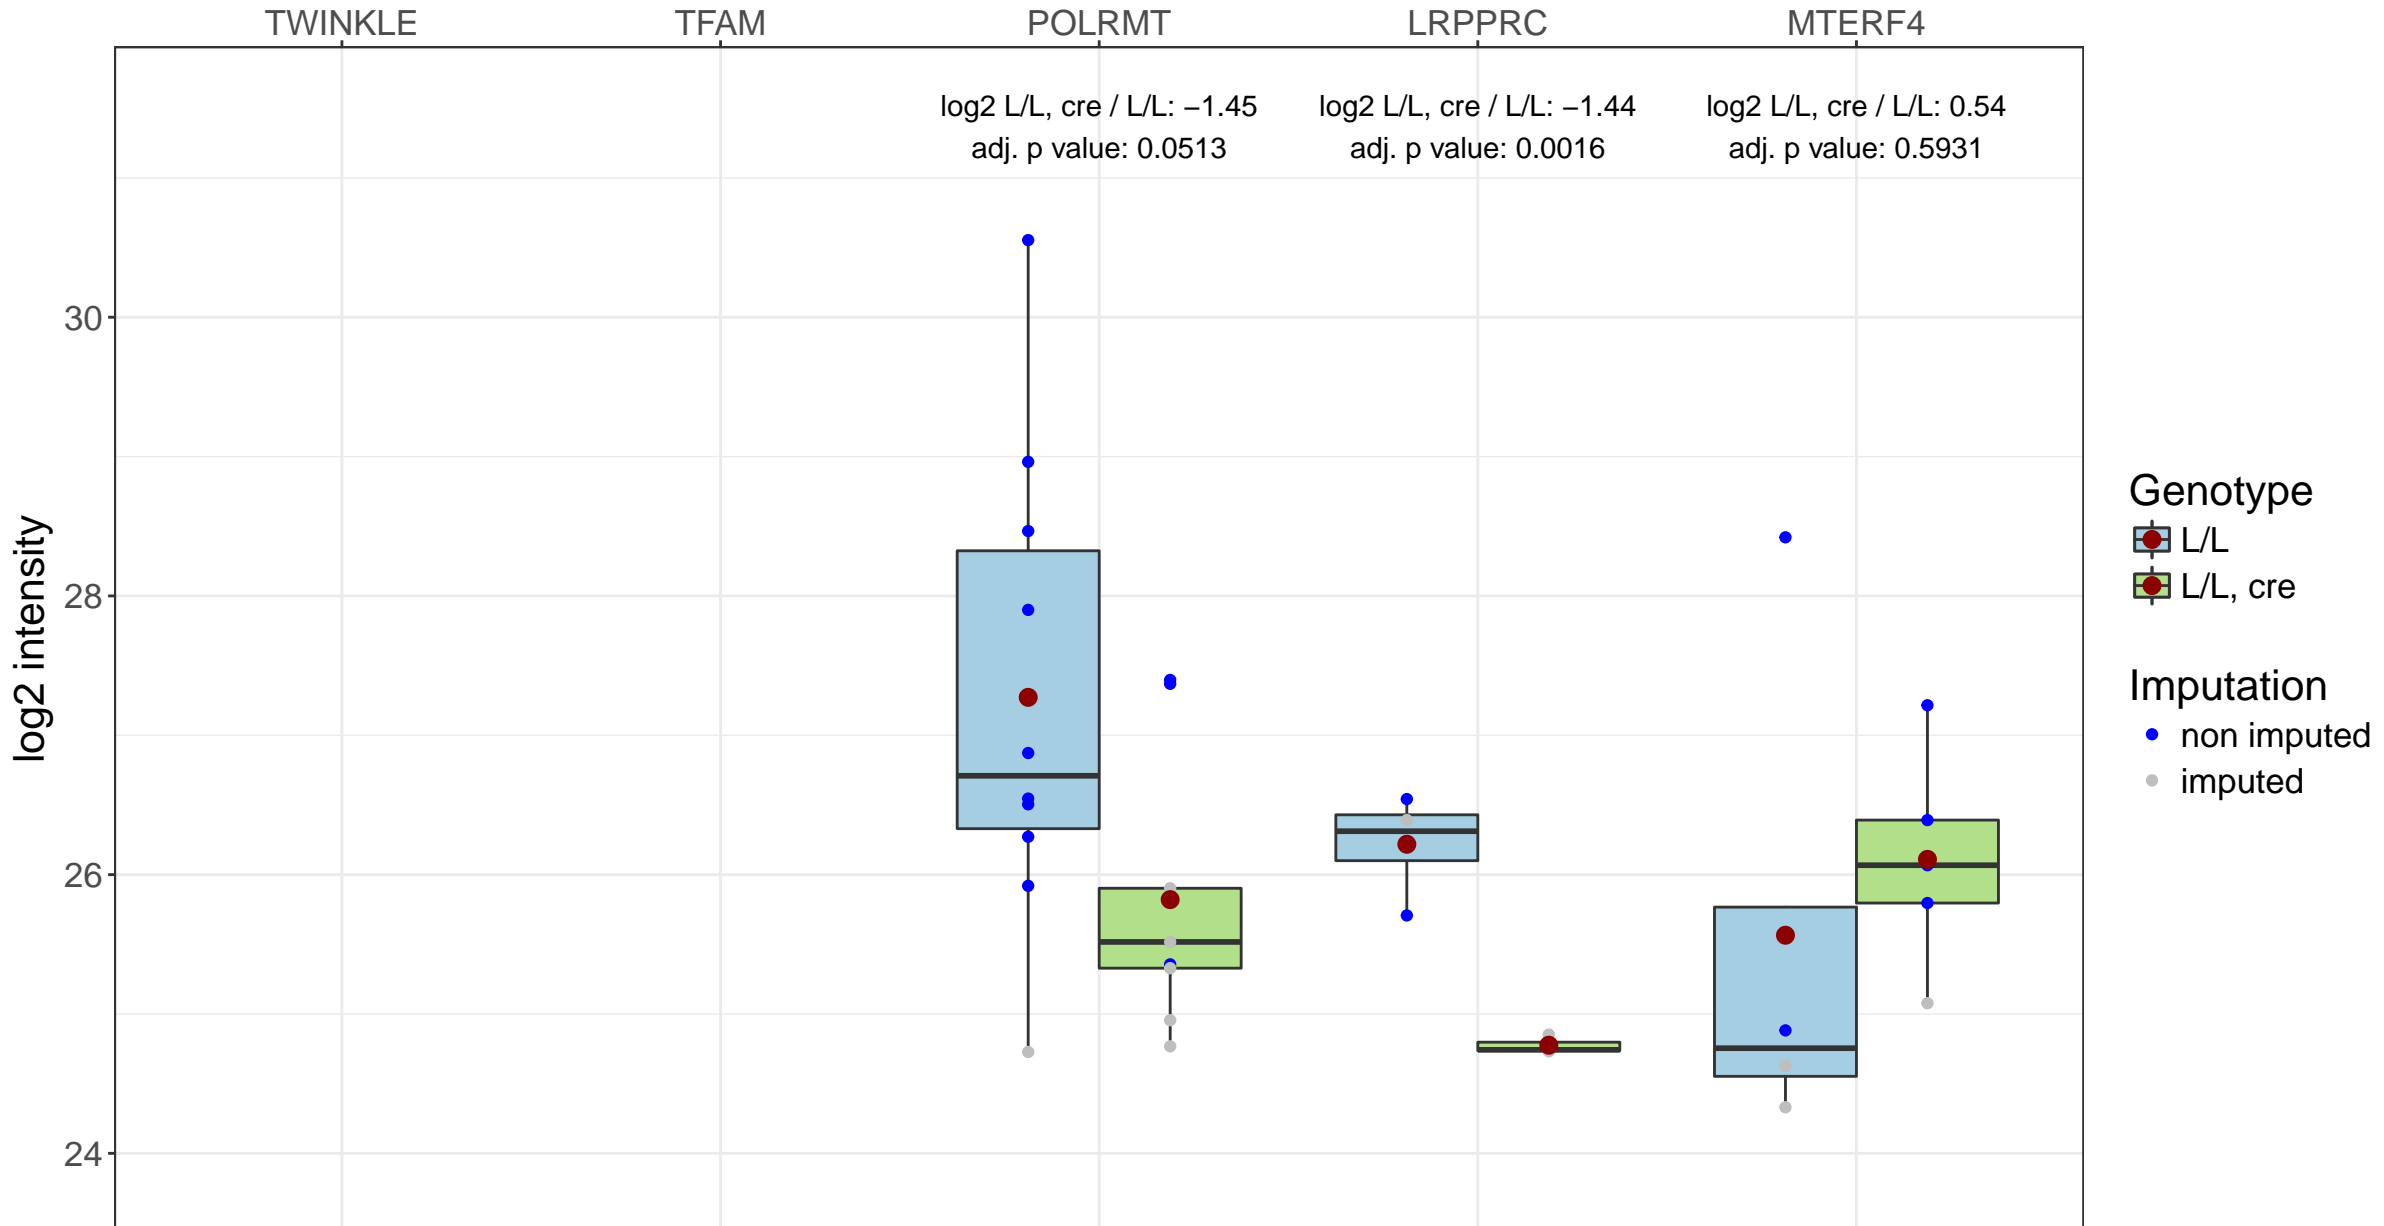

# CKMT2 / Q6P8J7

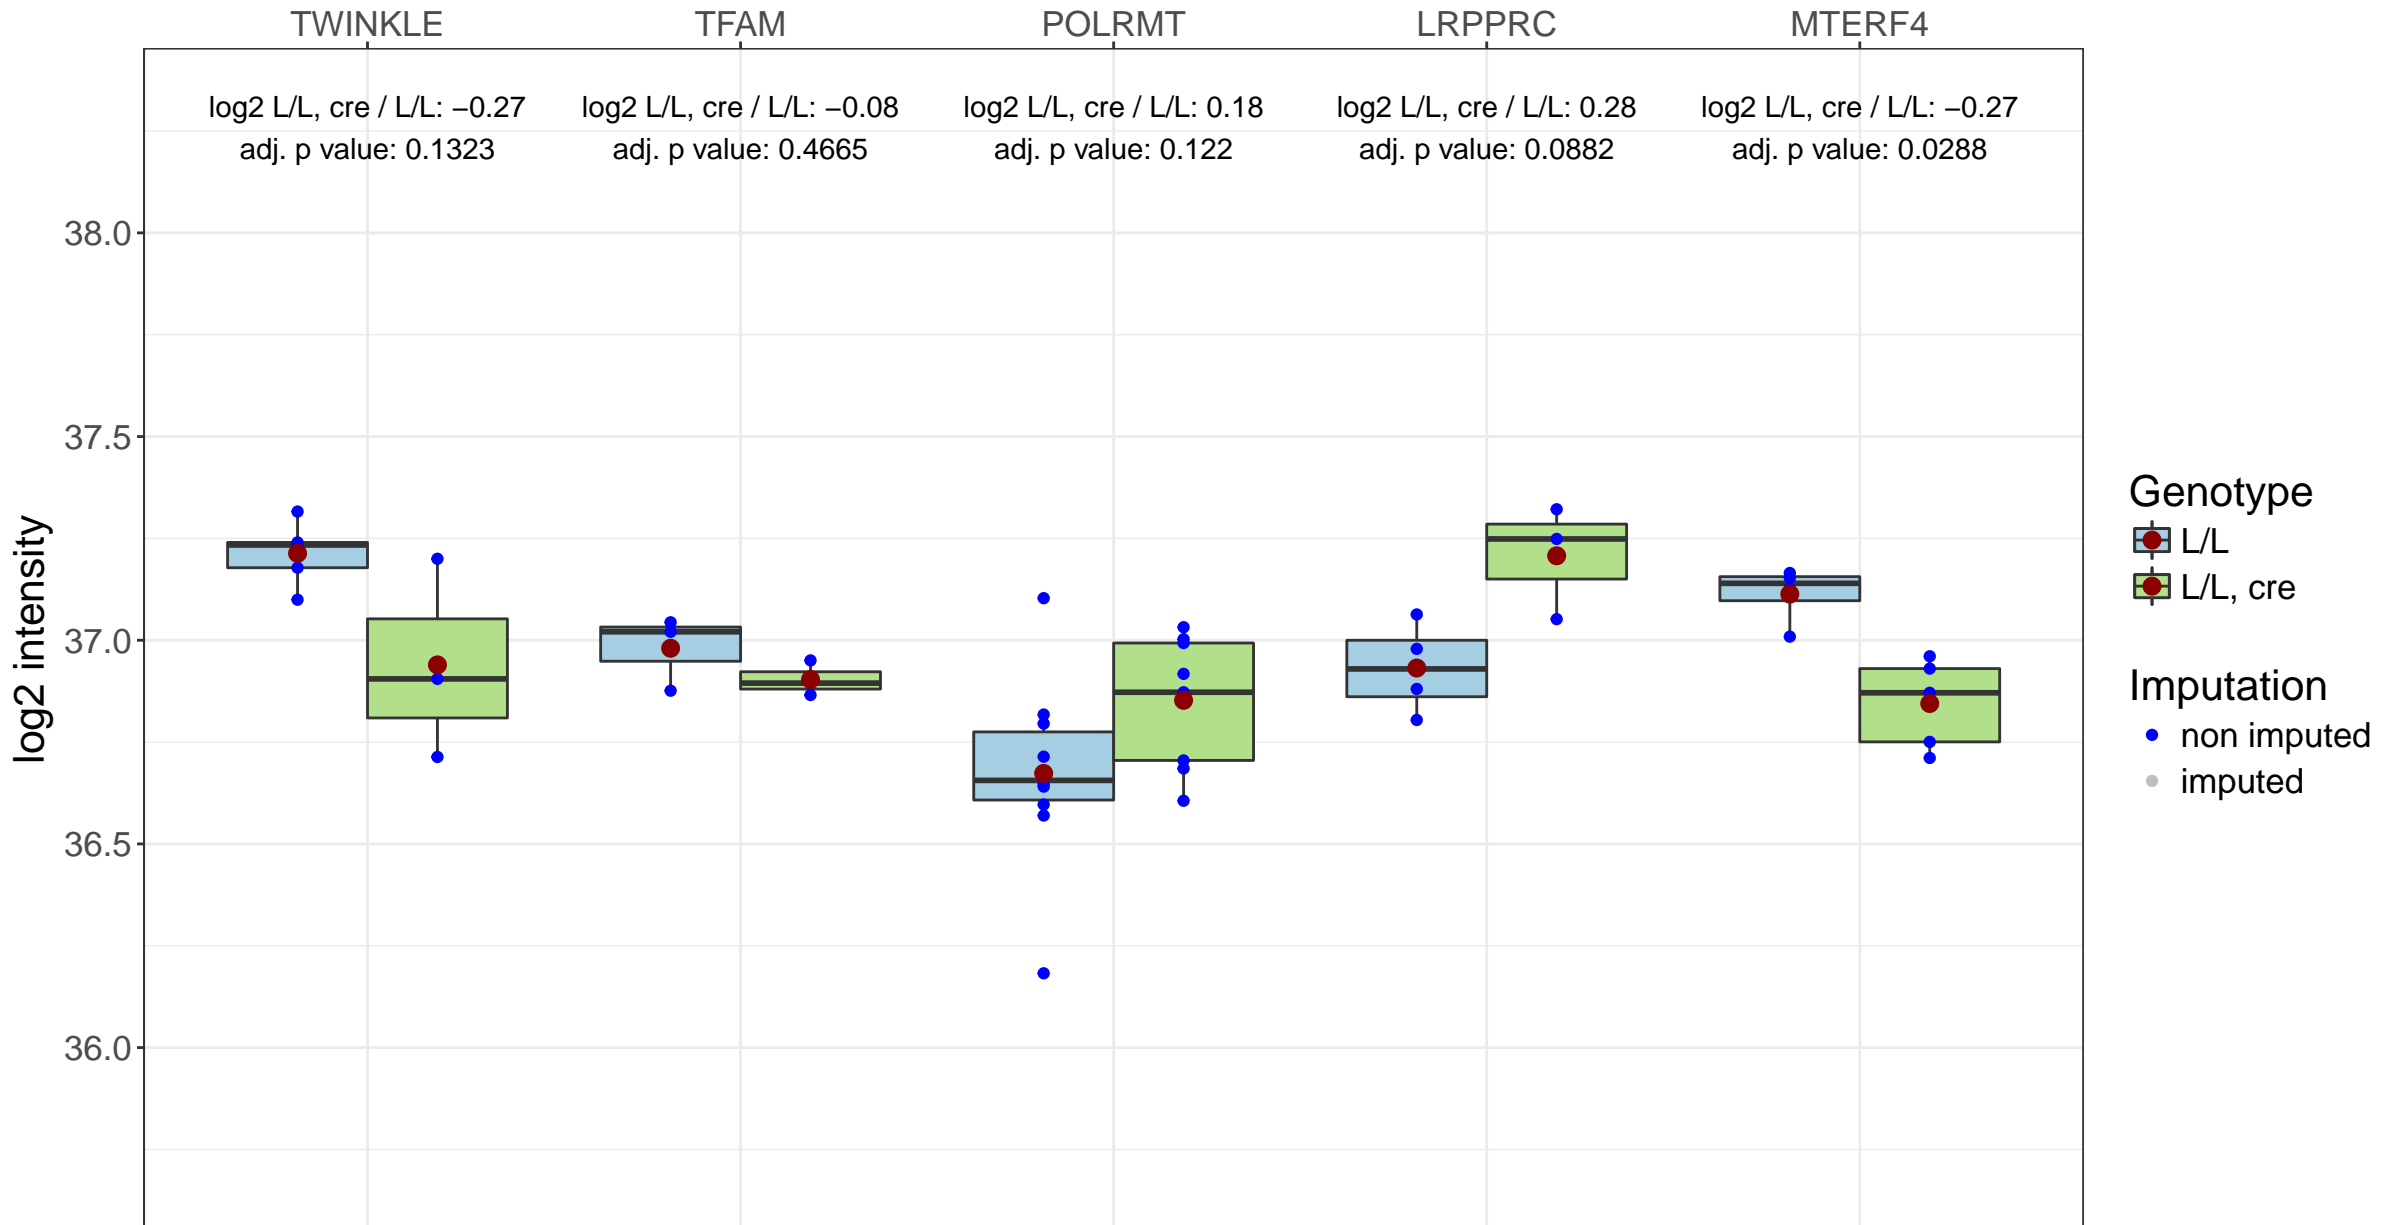

# CLPB / Q60649

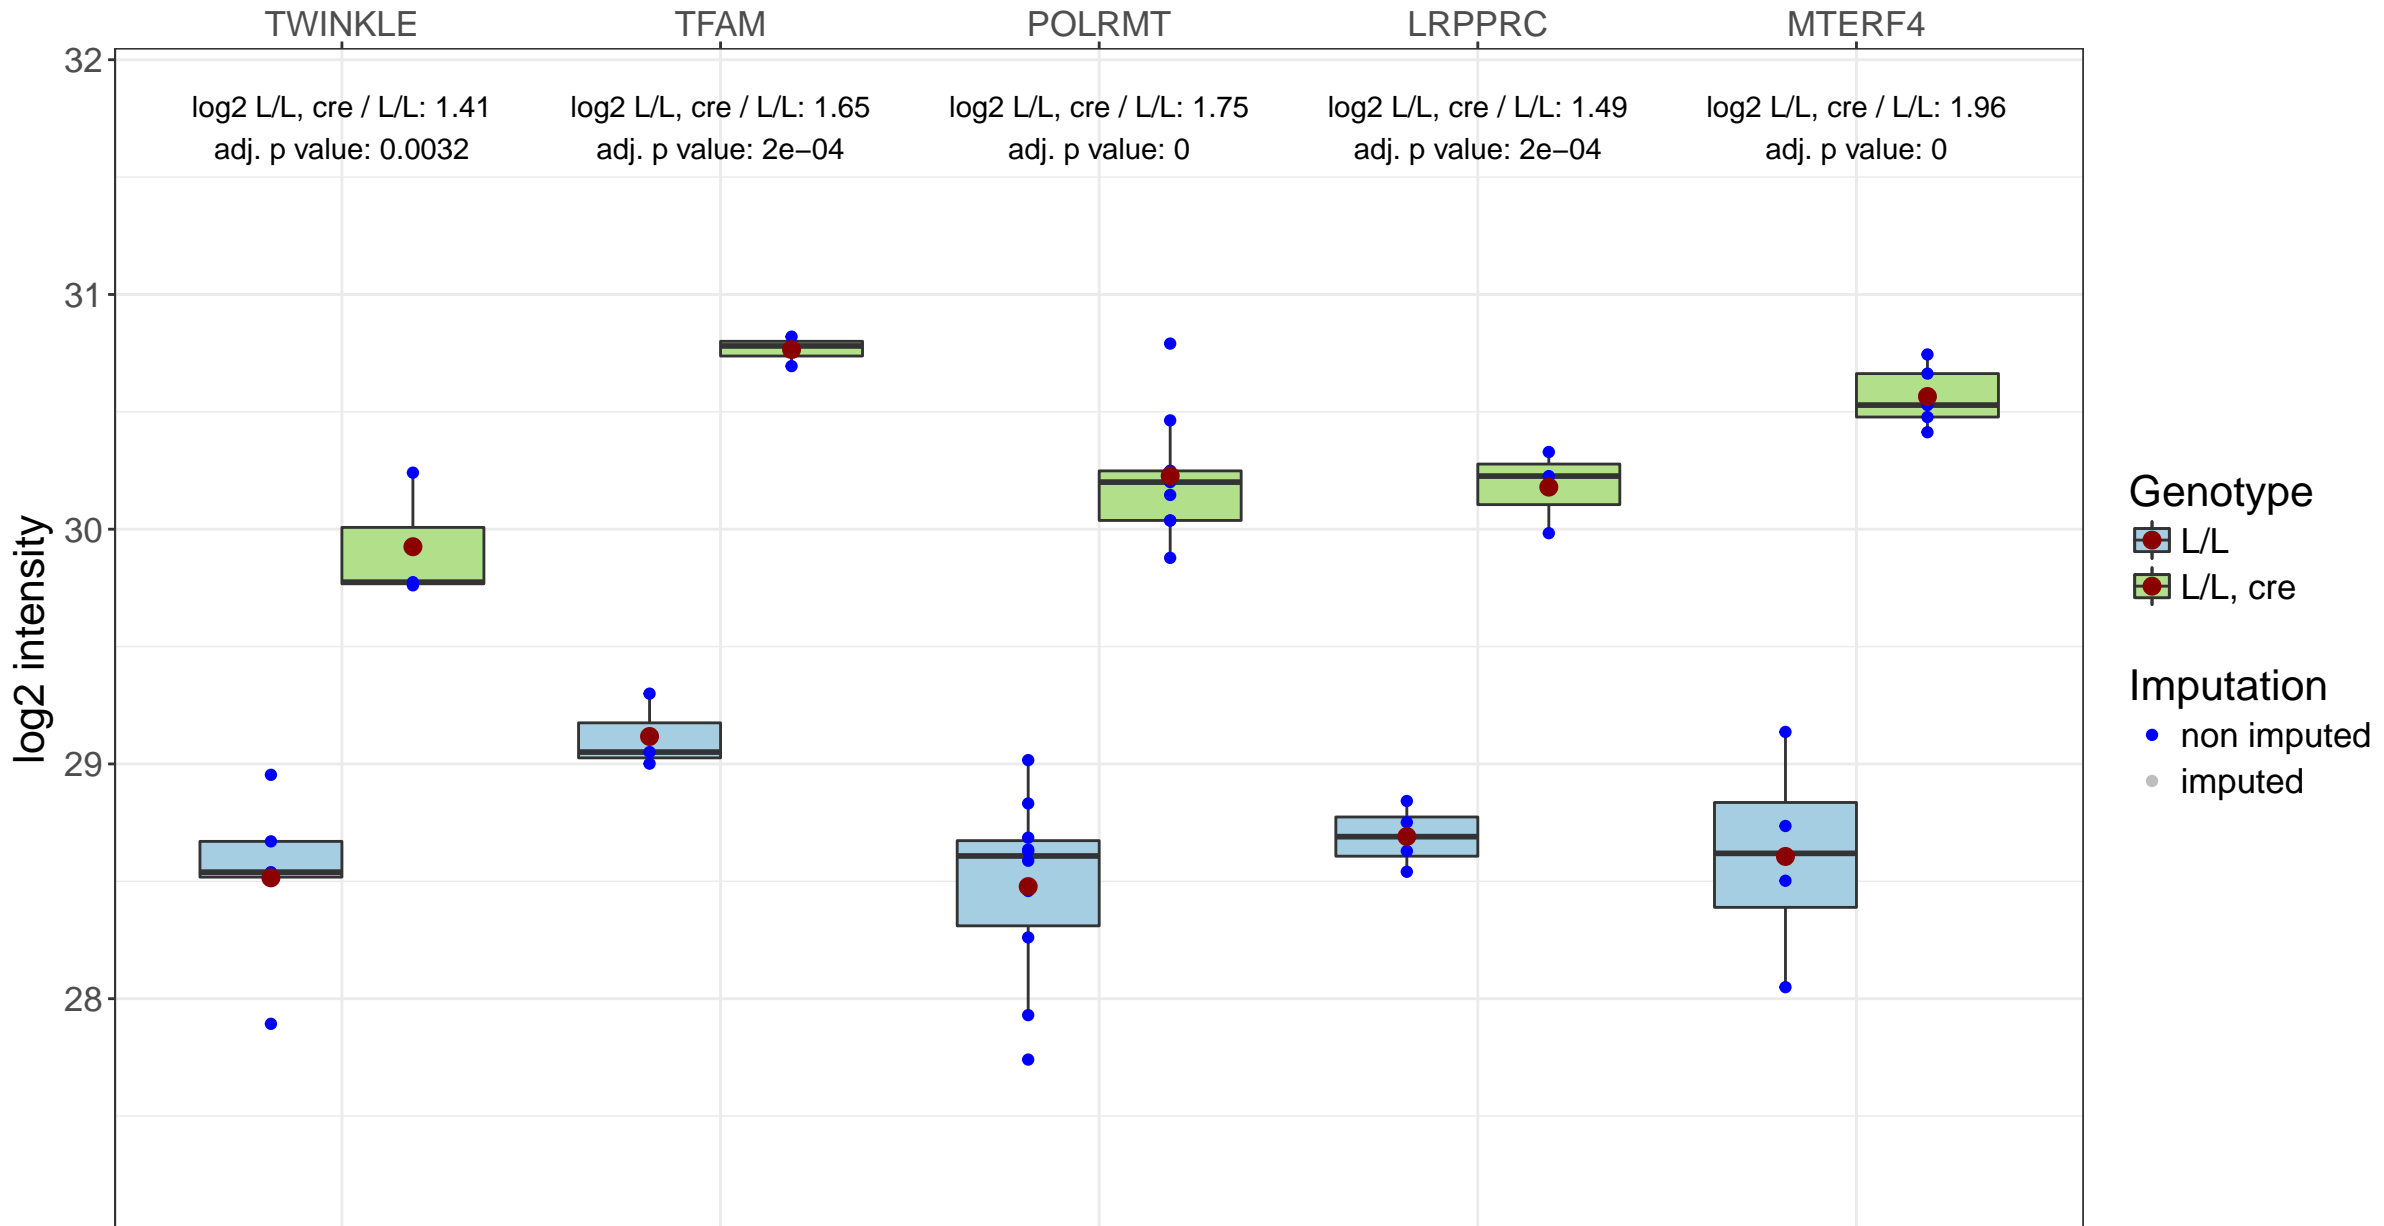

# CLPP / O88696

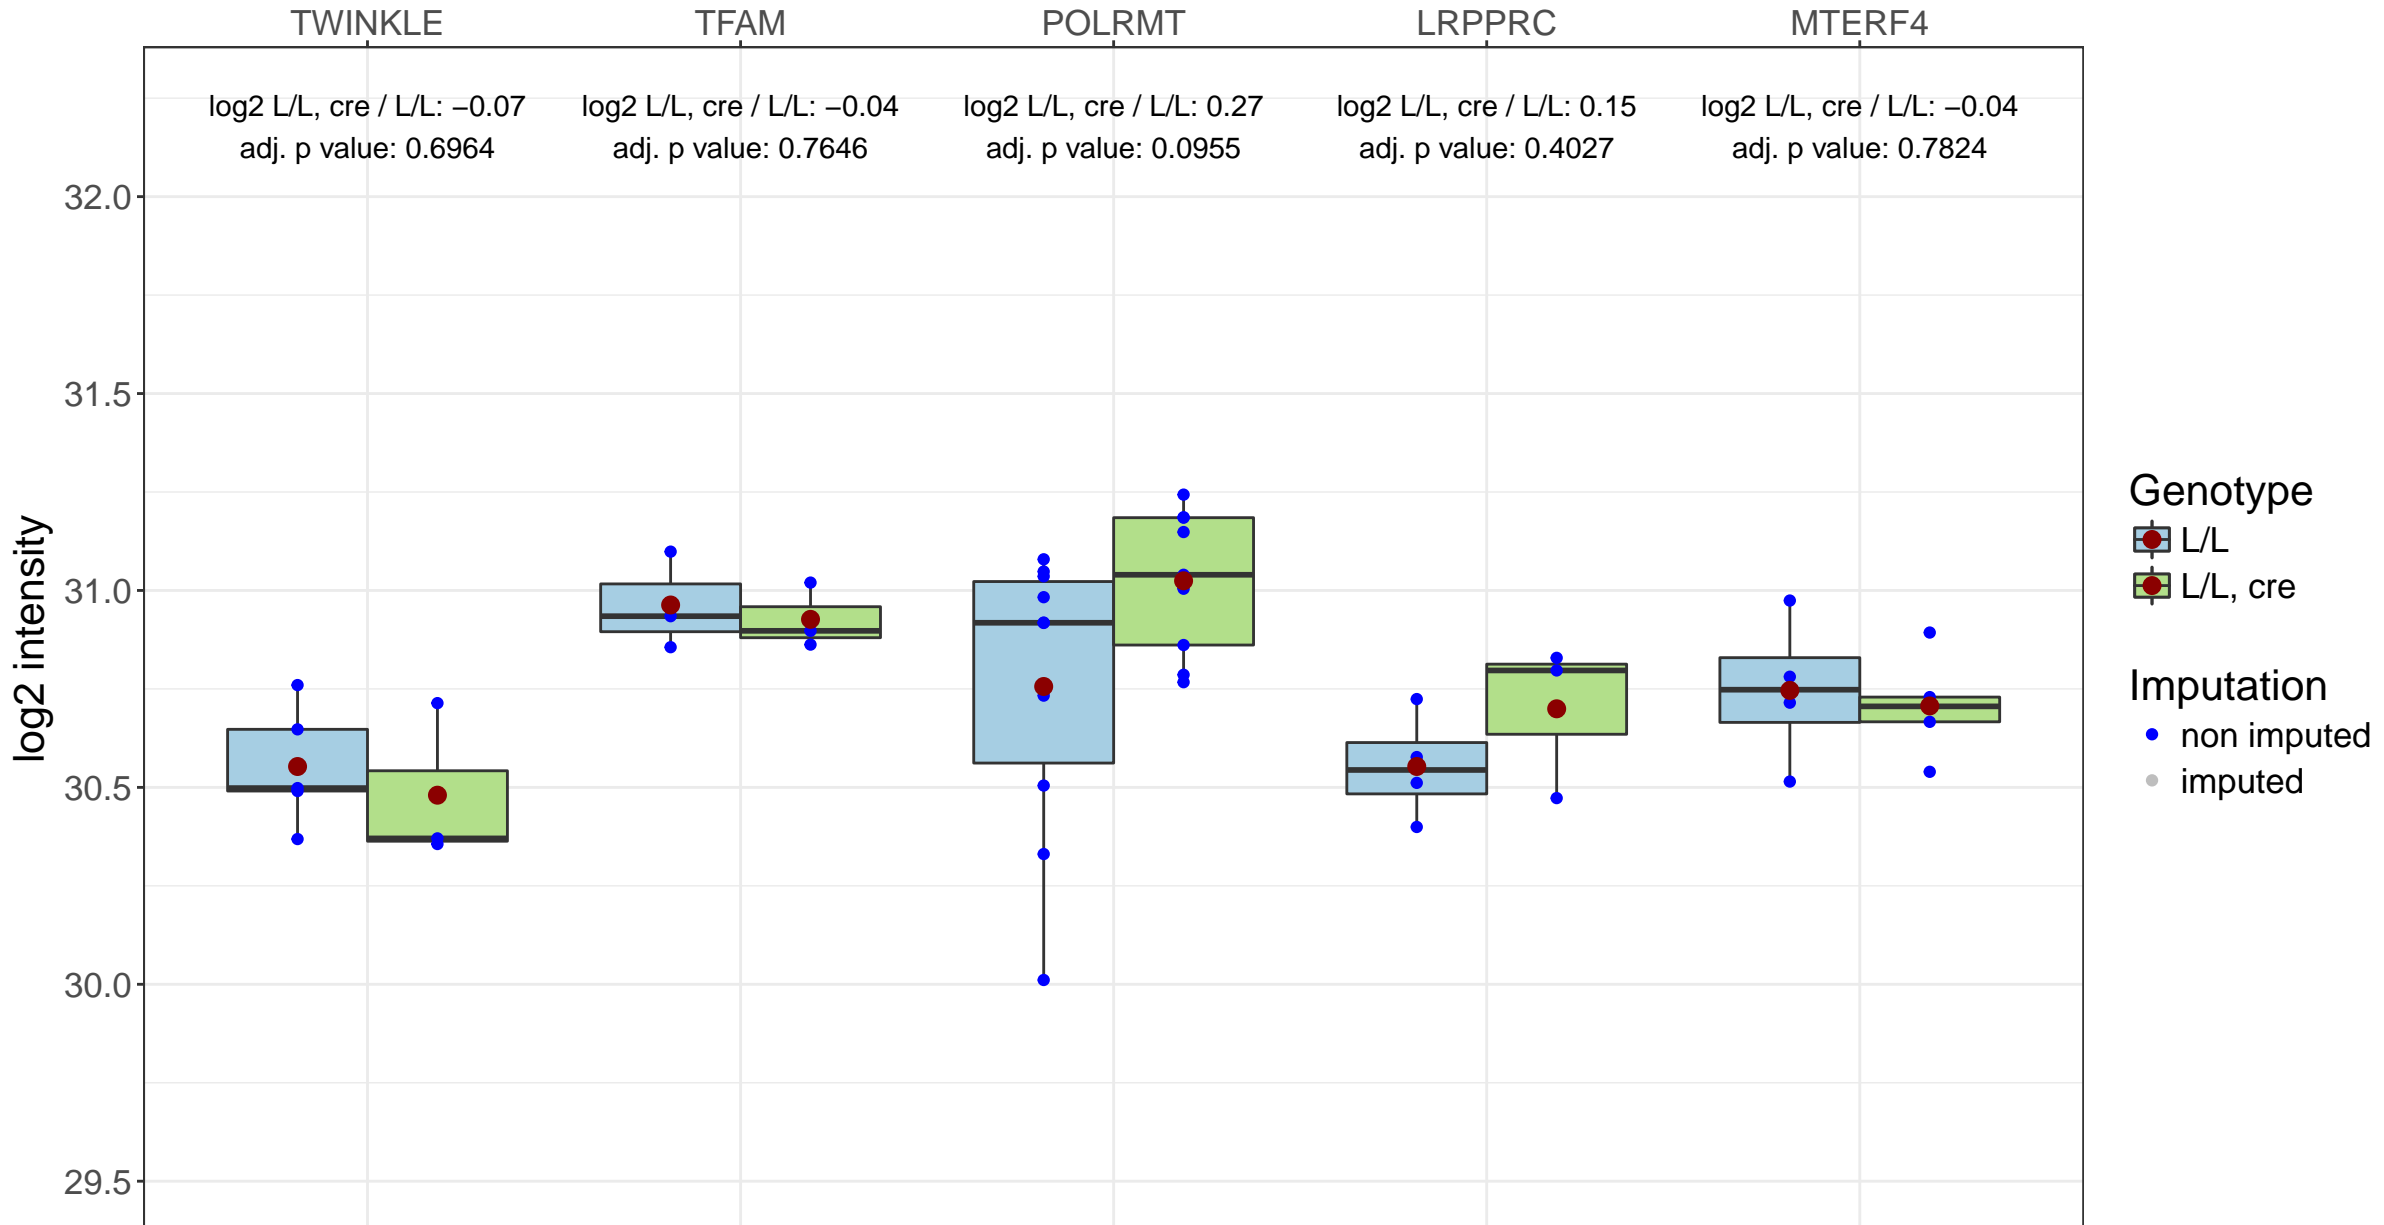

# CLPX / Q9JHS4

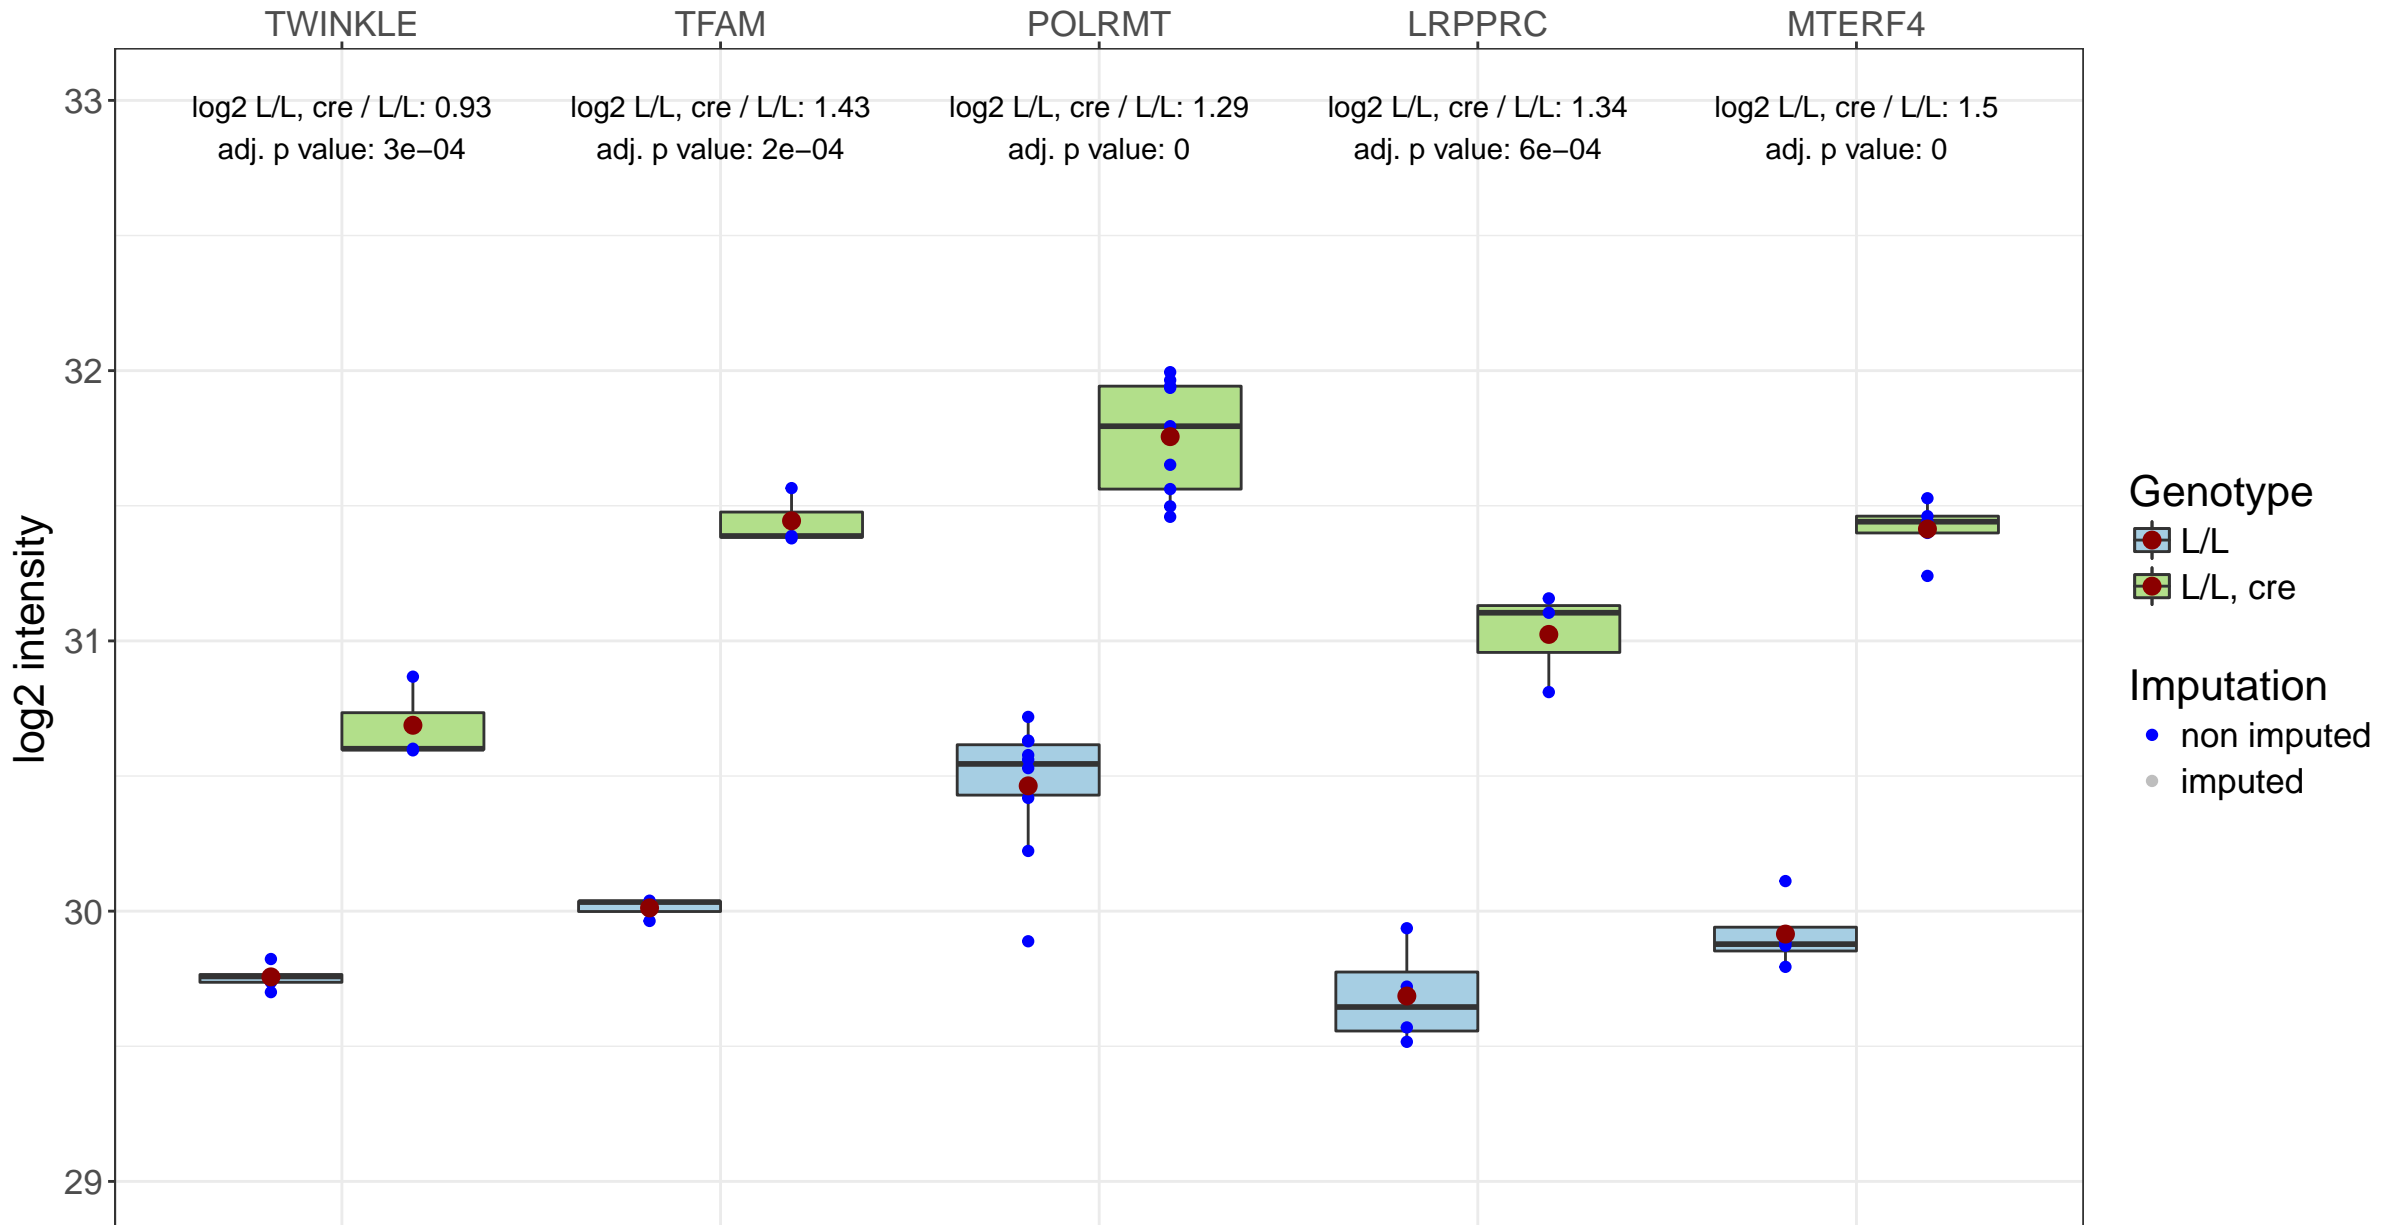

# CLYBL / Q8R4N0

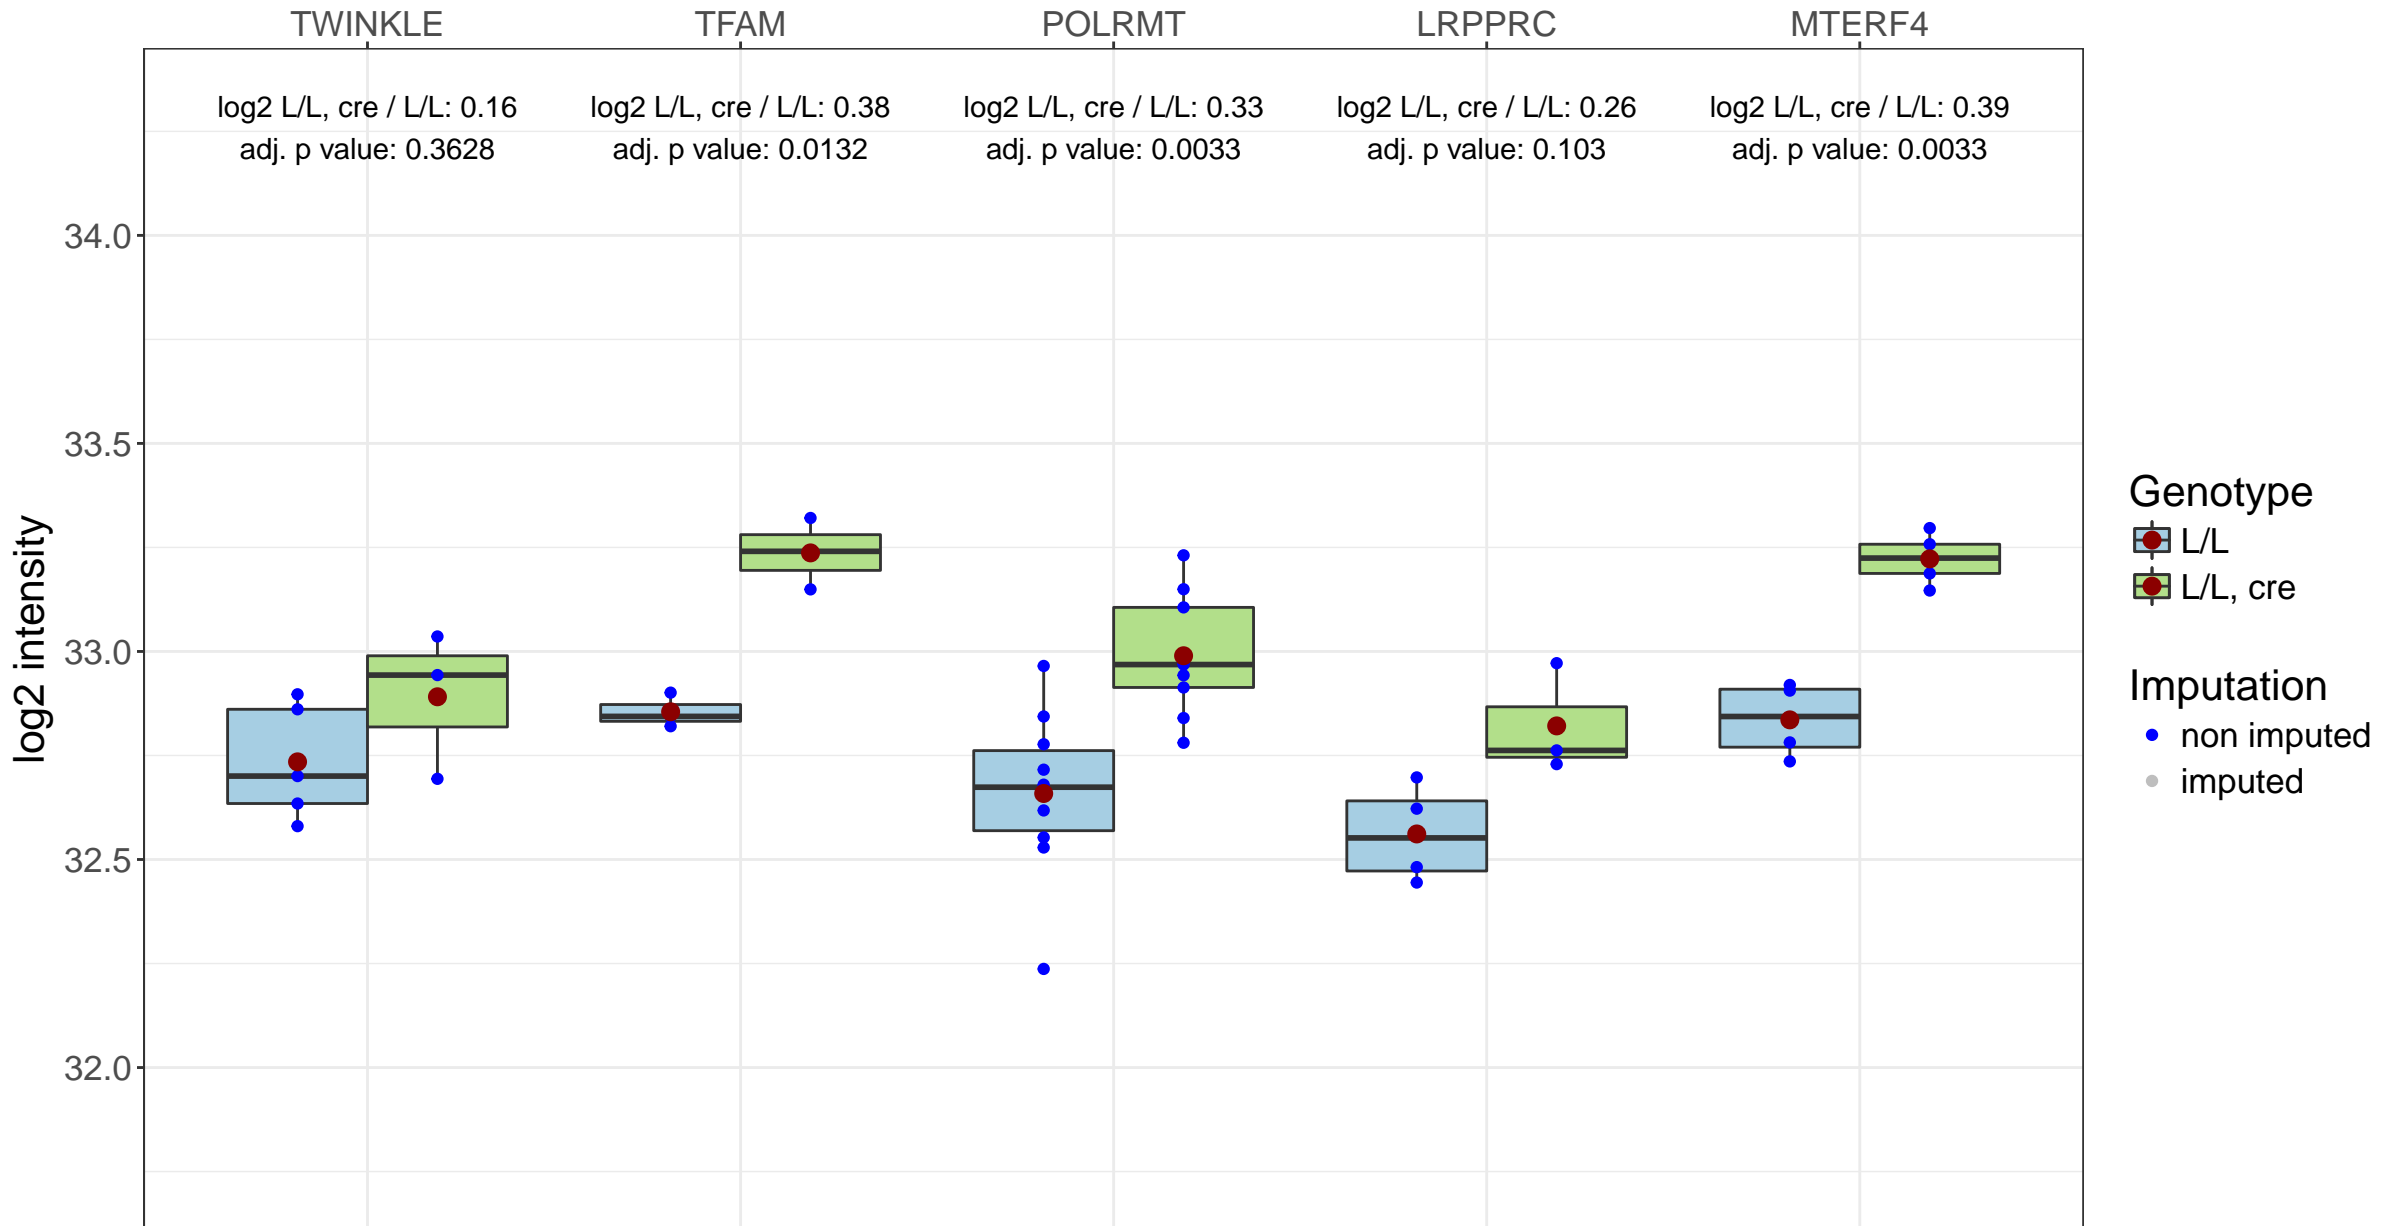



# CMA1 / A4QPC5

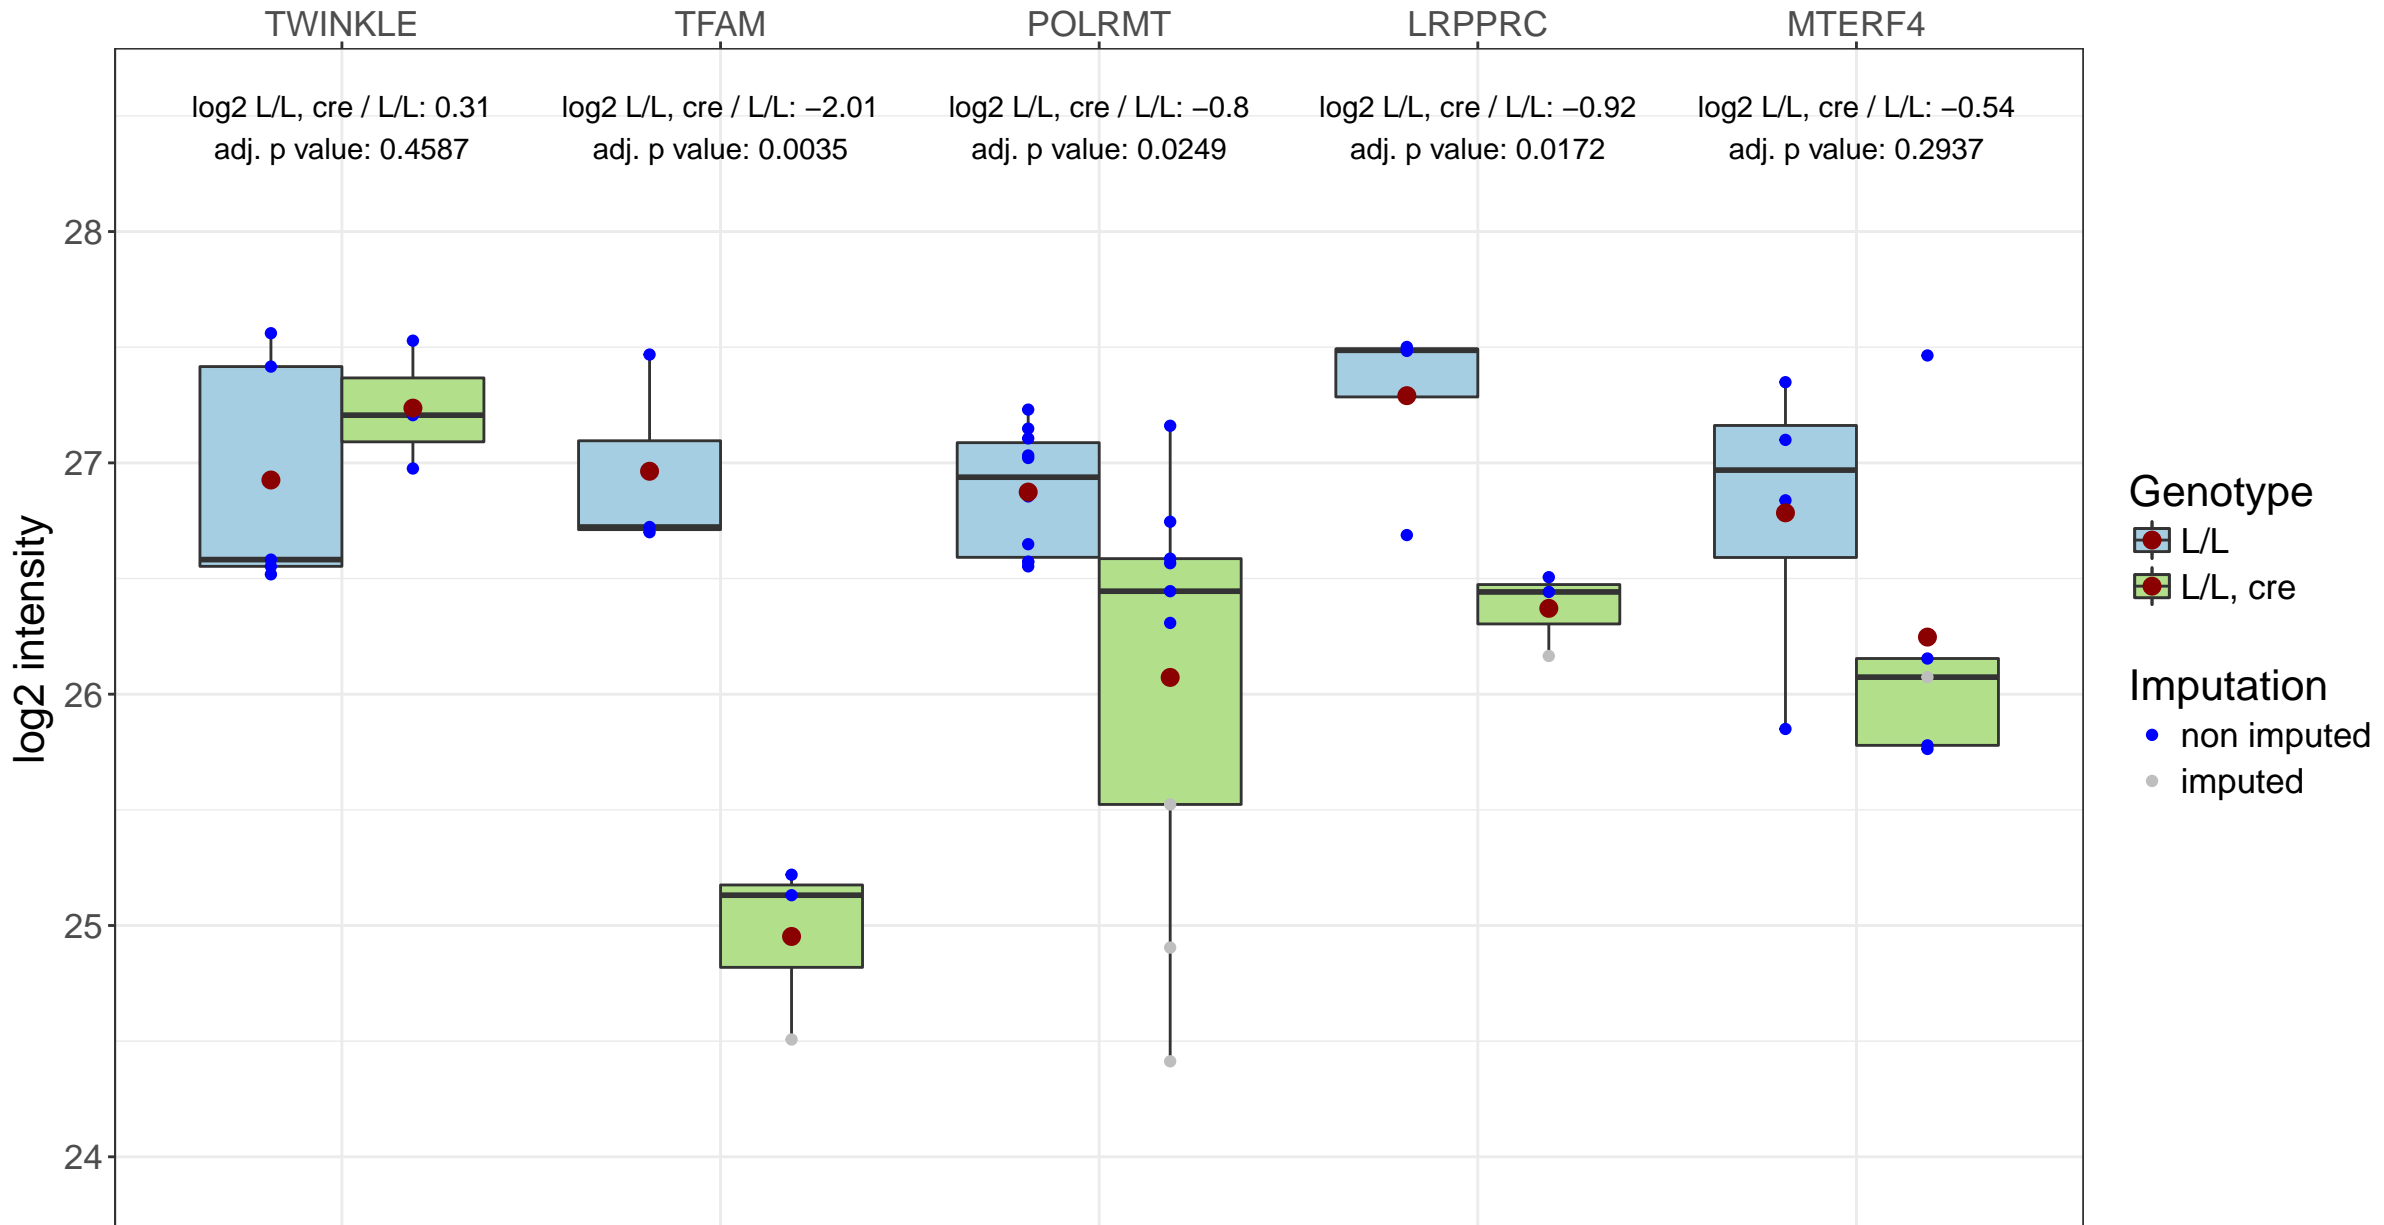

# CMC1 / Q9CPZ8

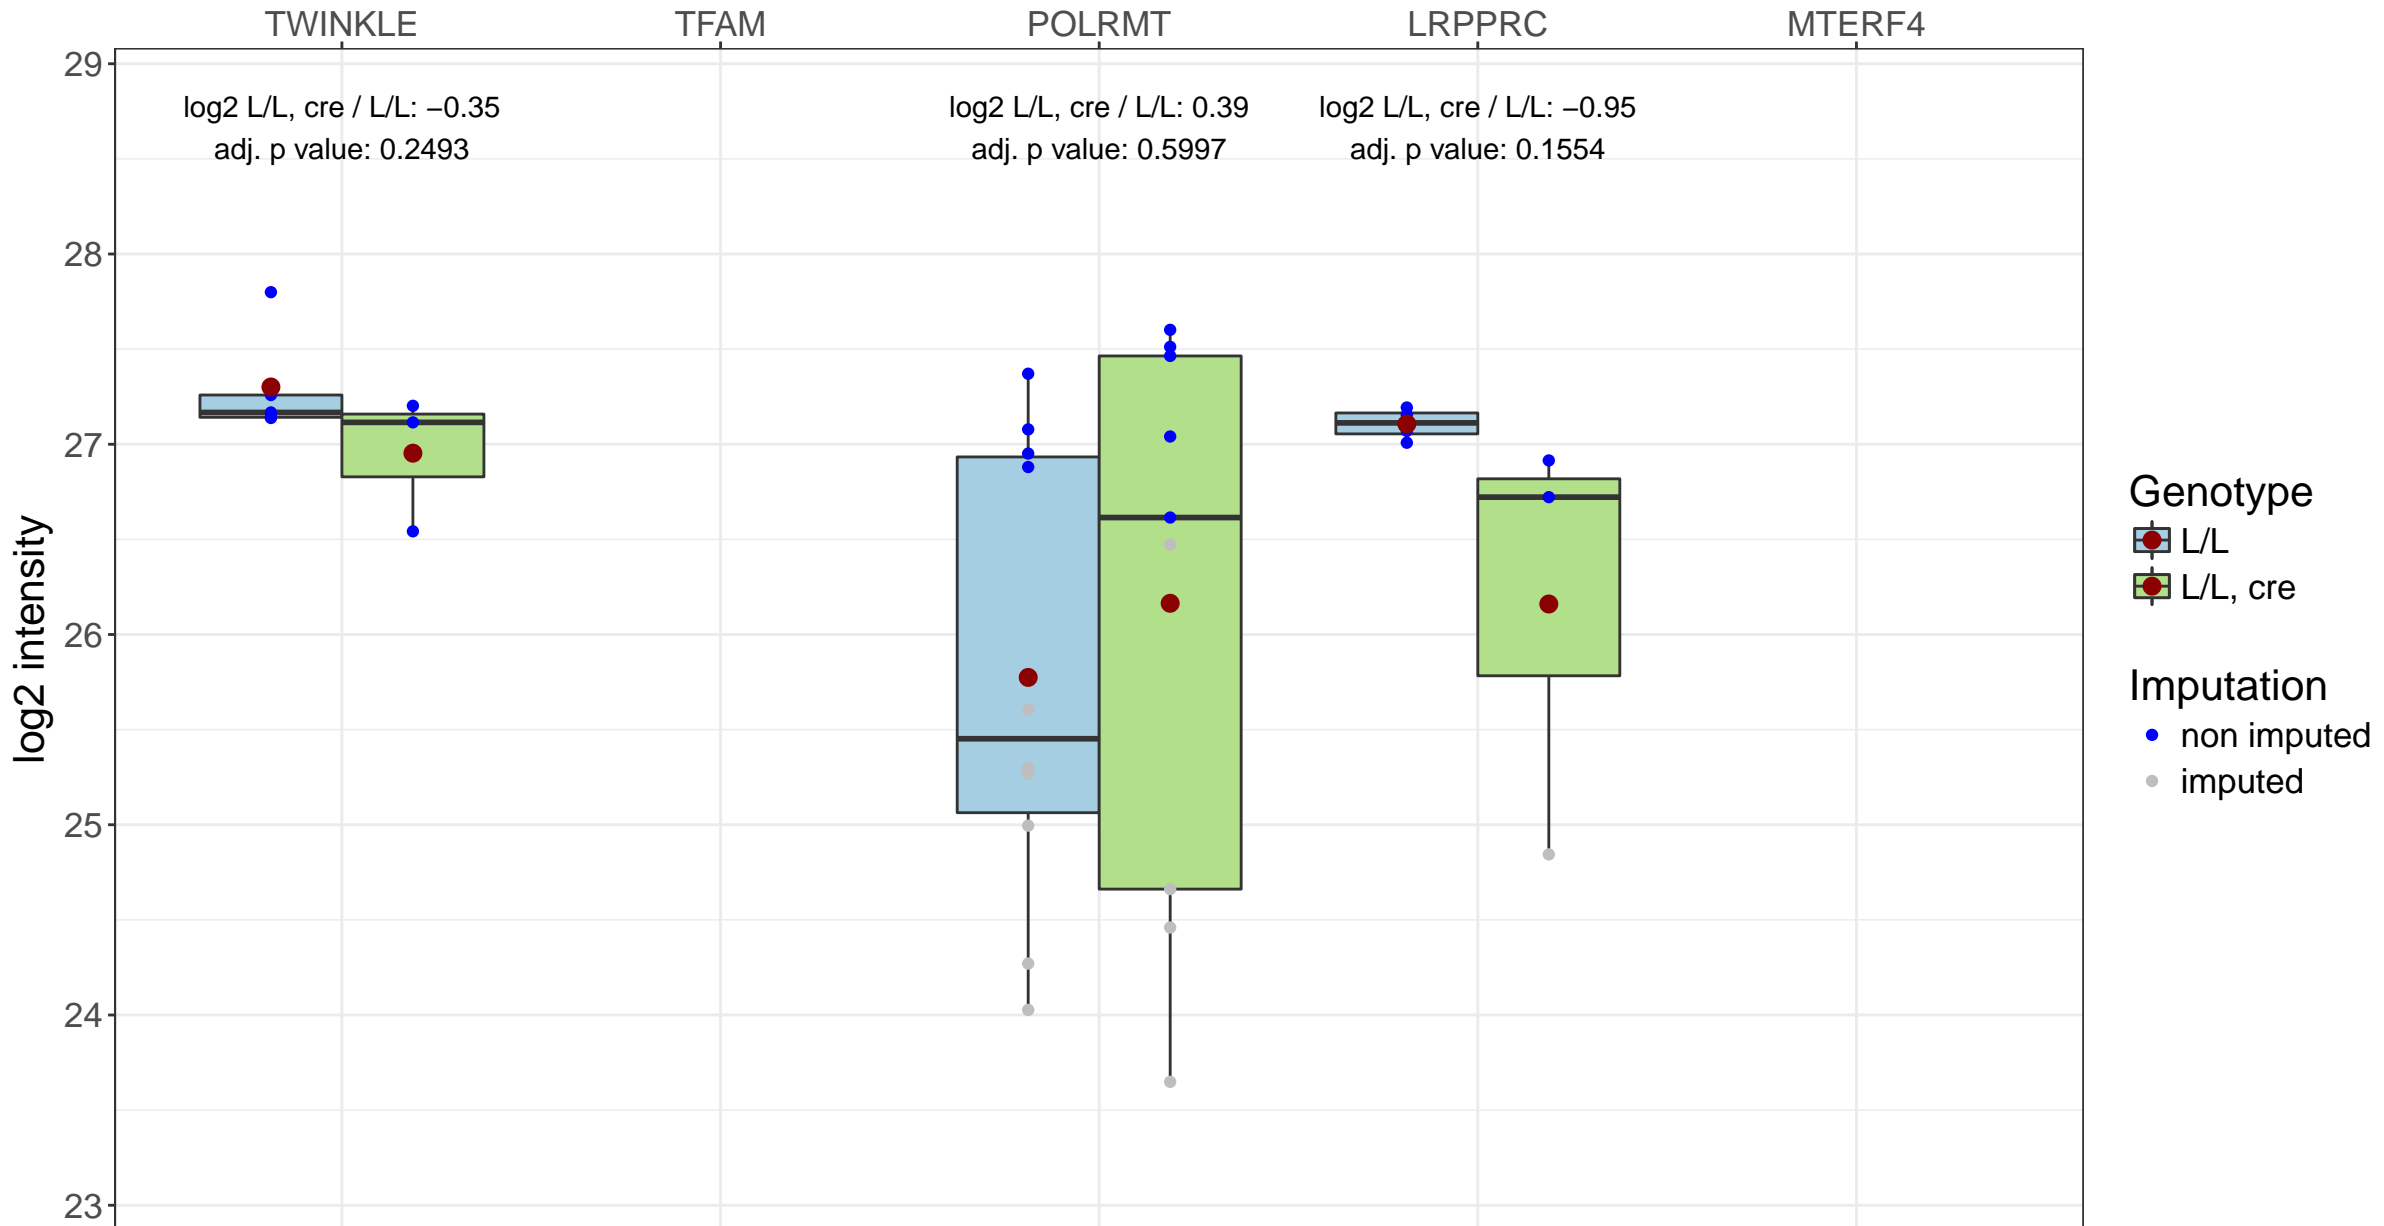

# CMC2 / Q8K199

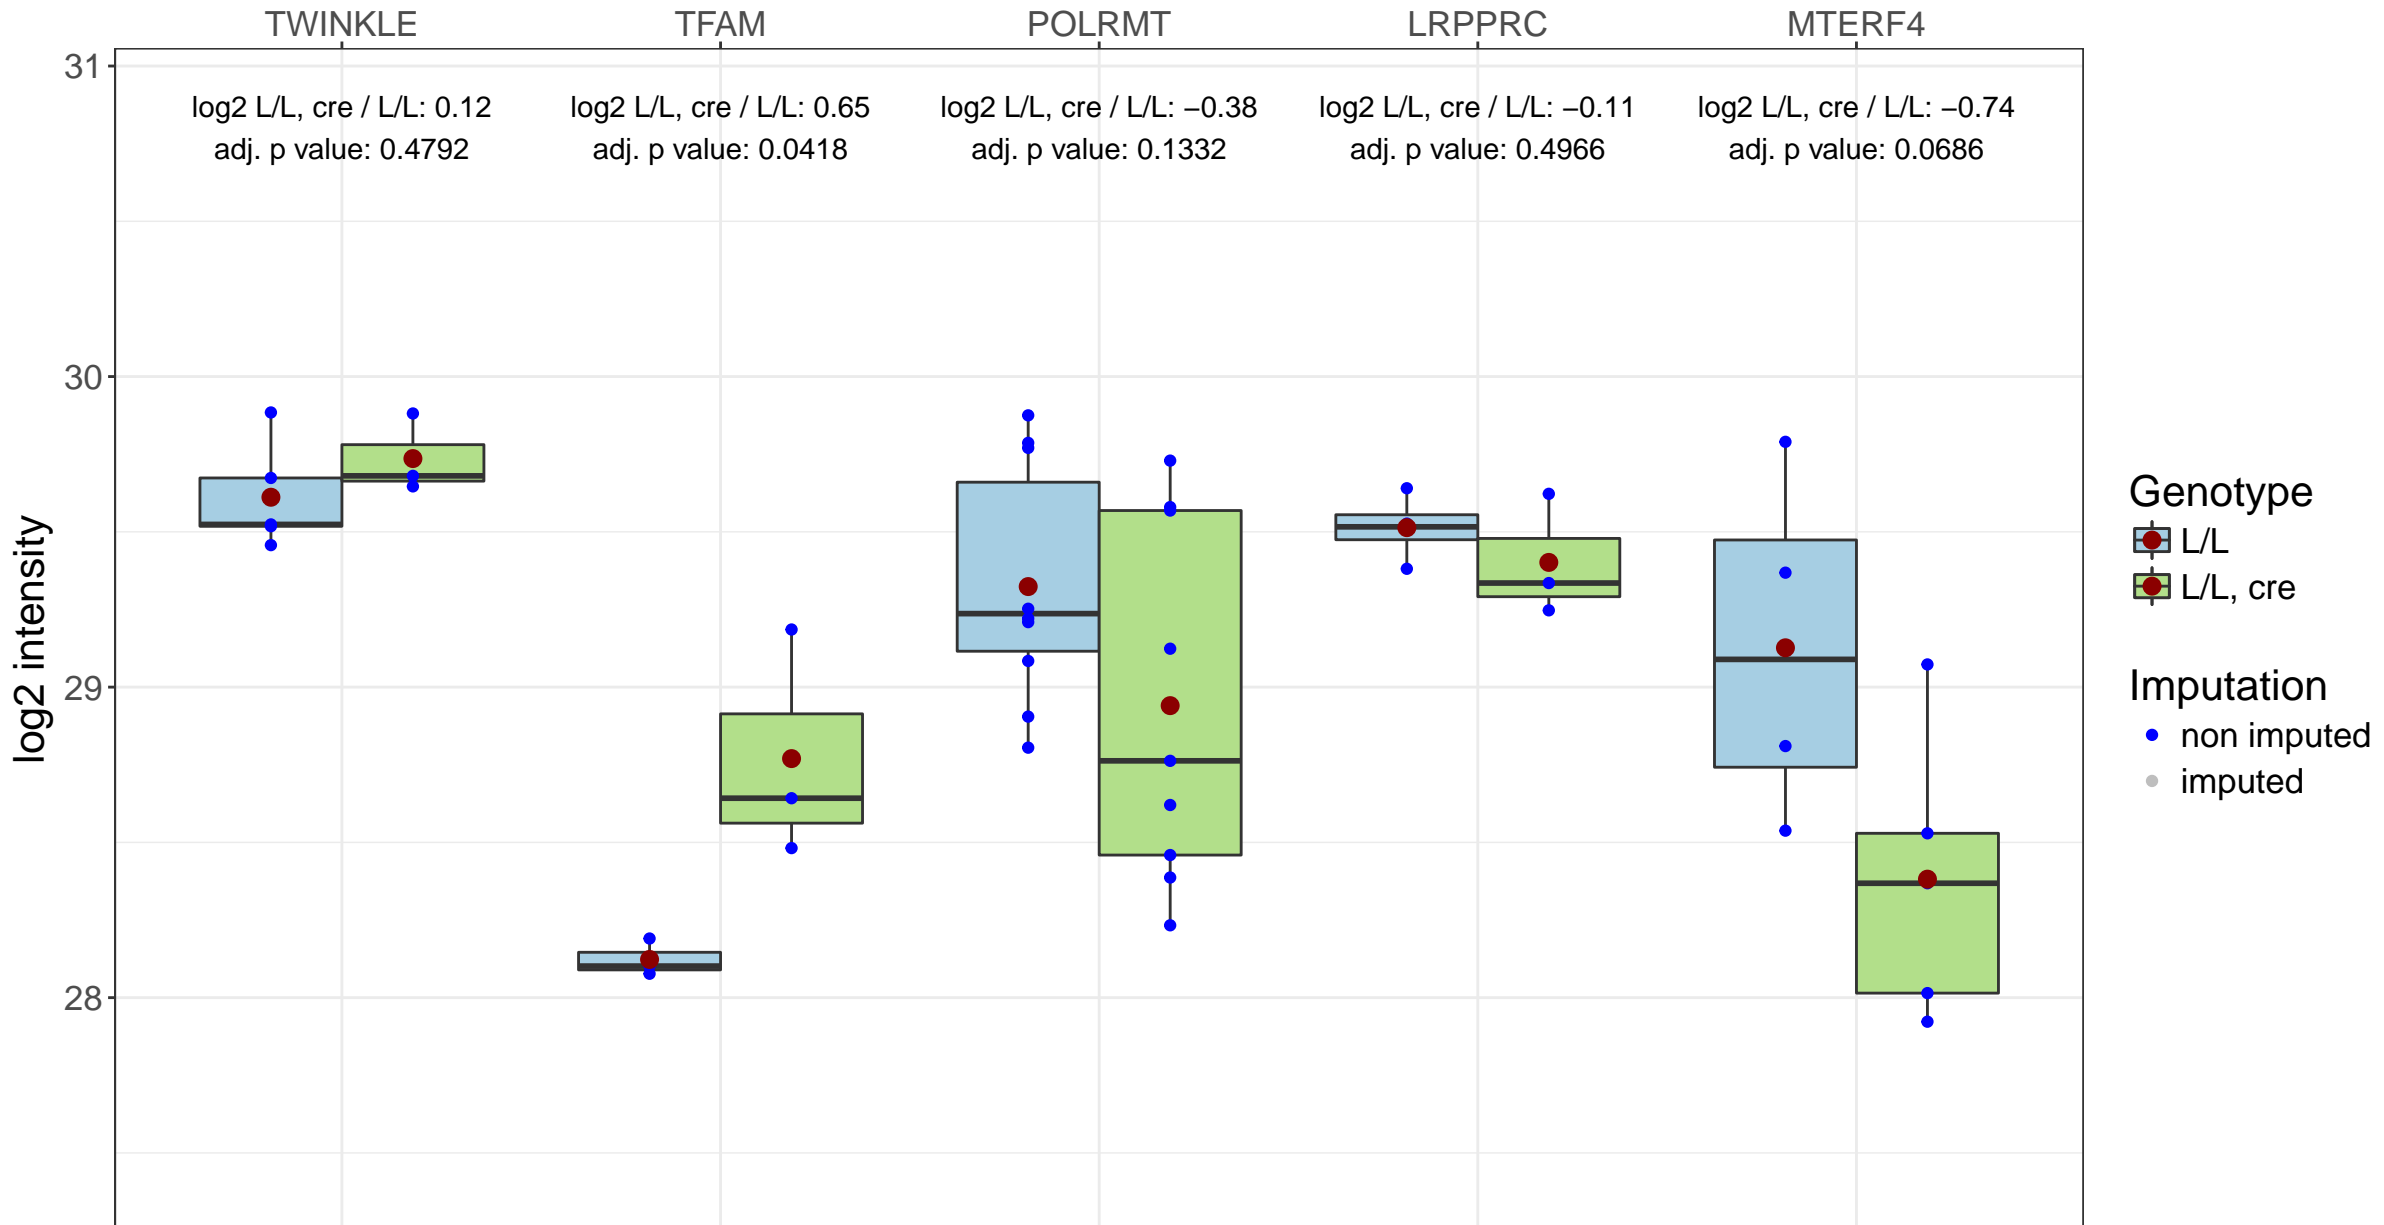

# COA3 / Q9D2R6

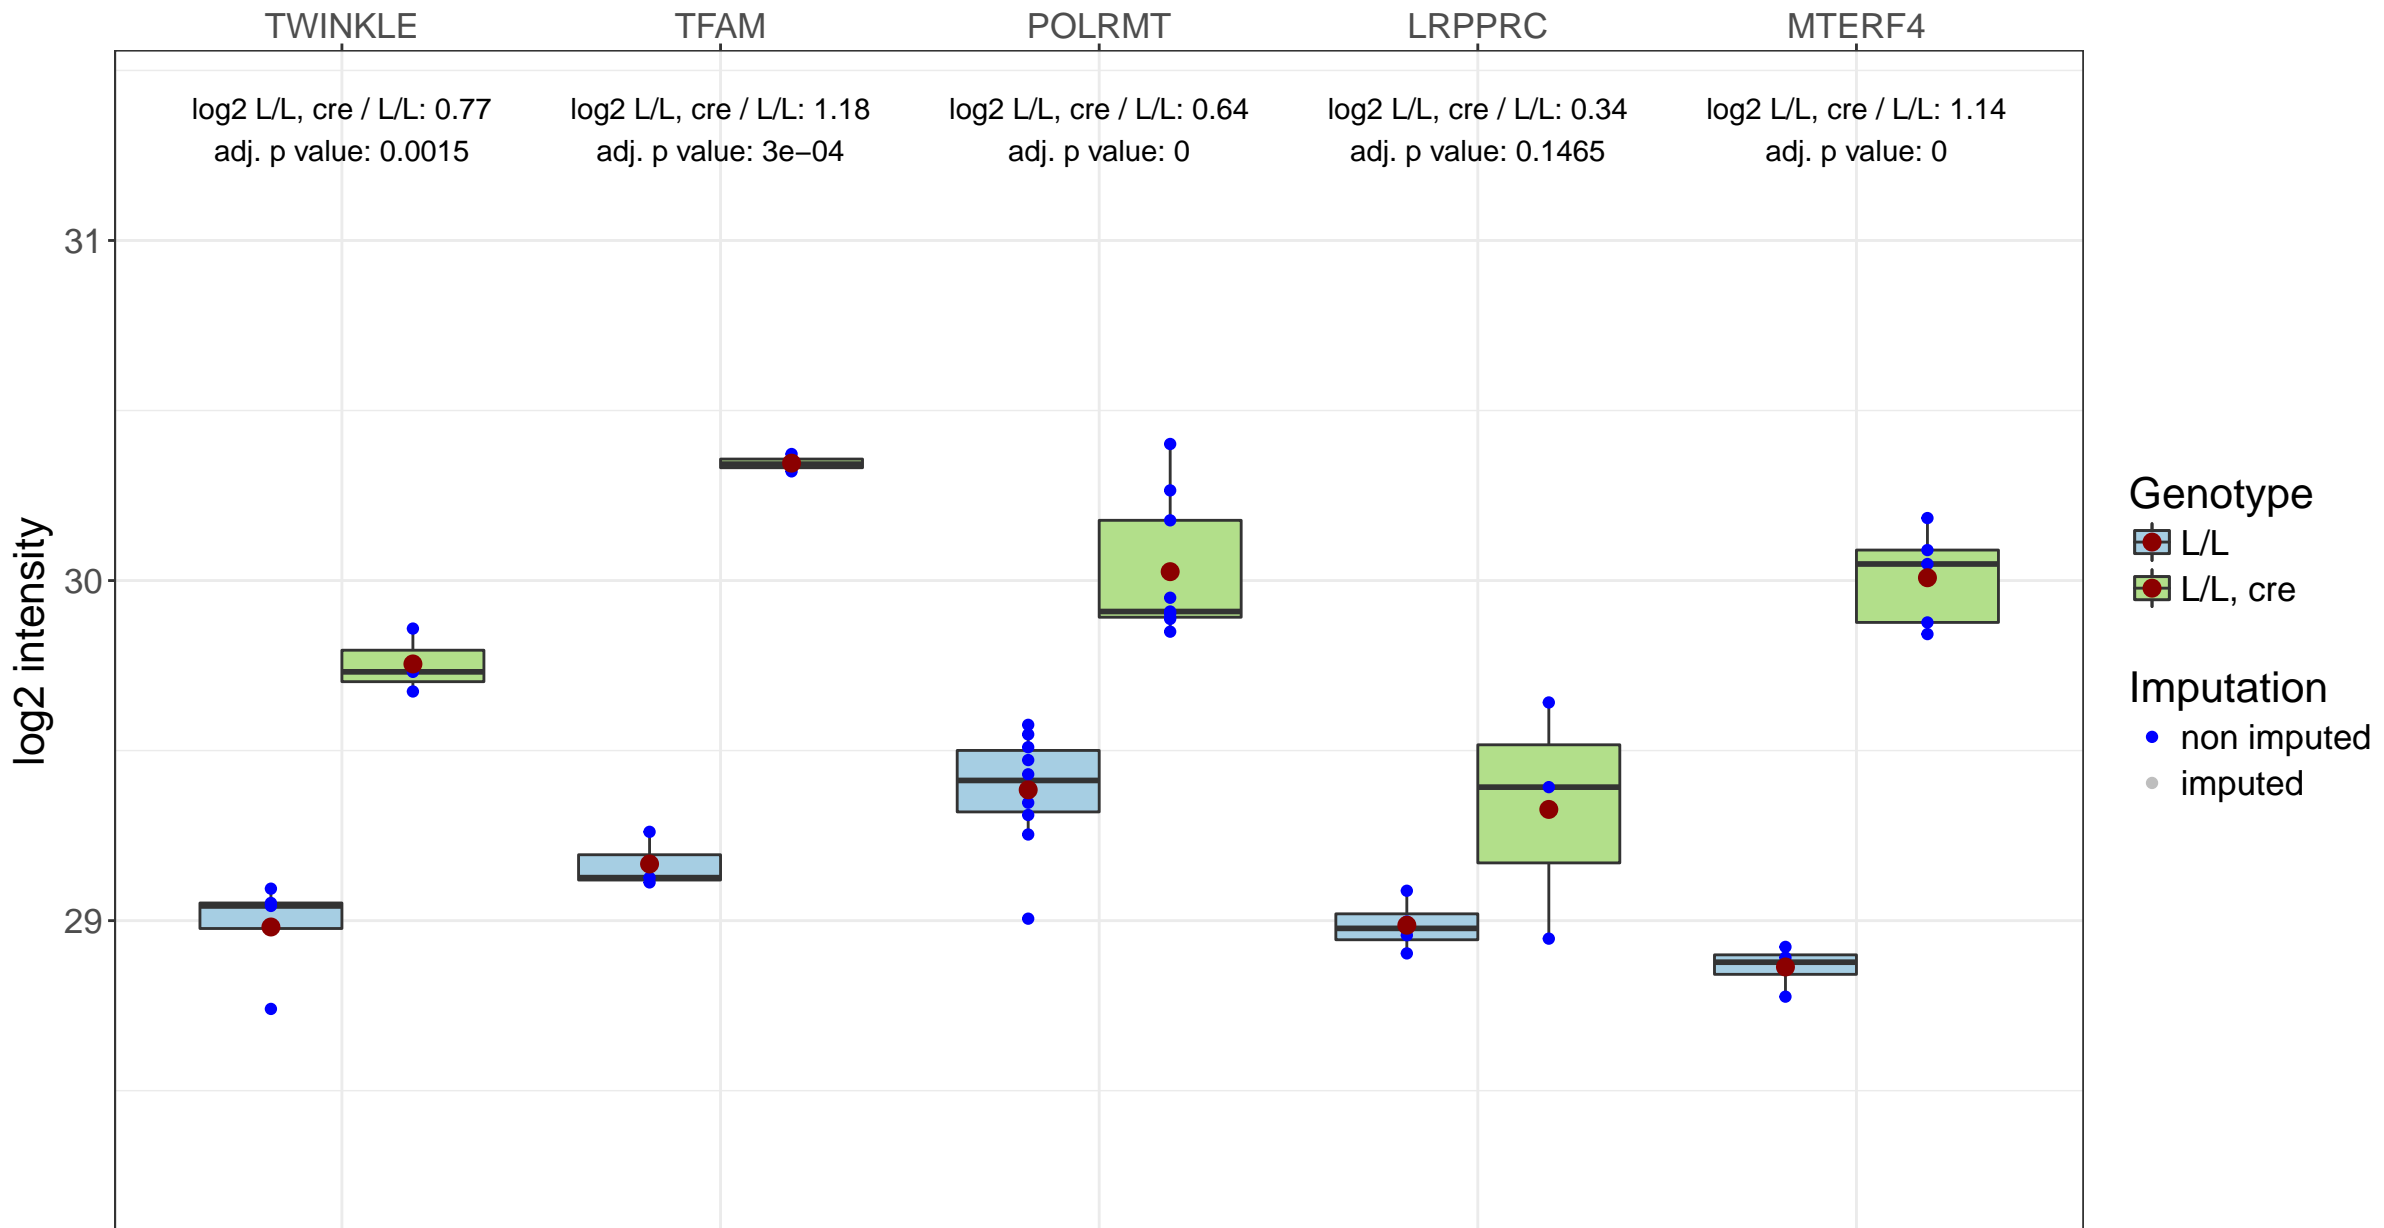

# COA4 / Q8BT51

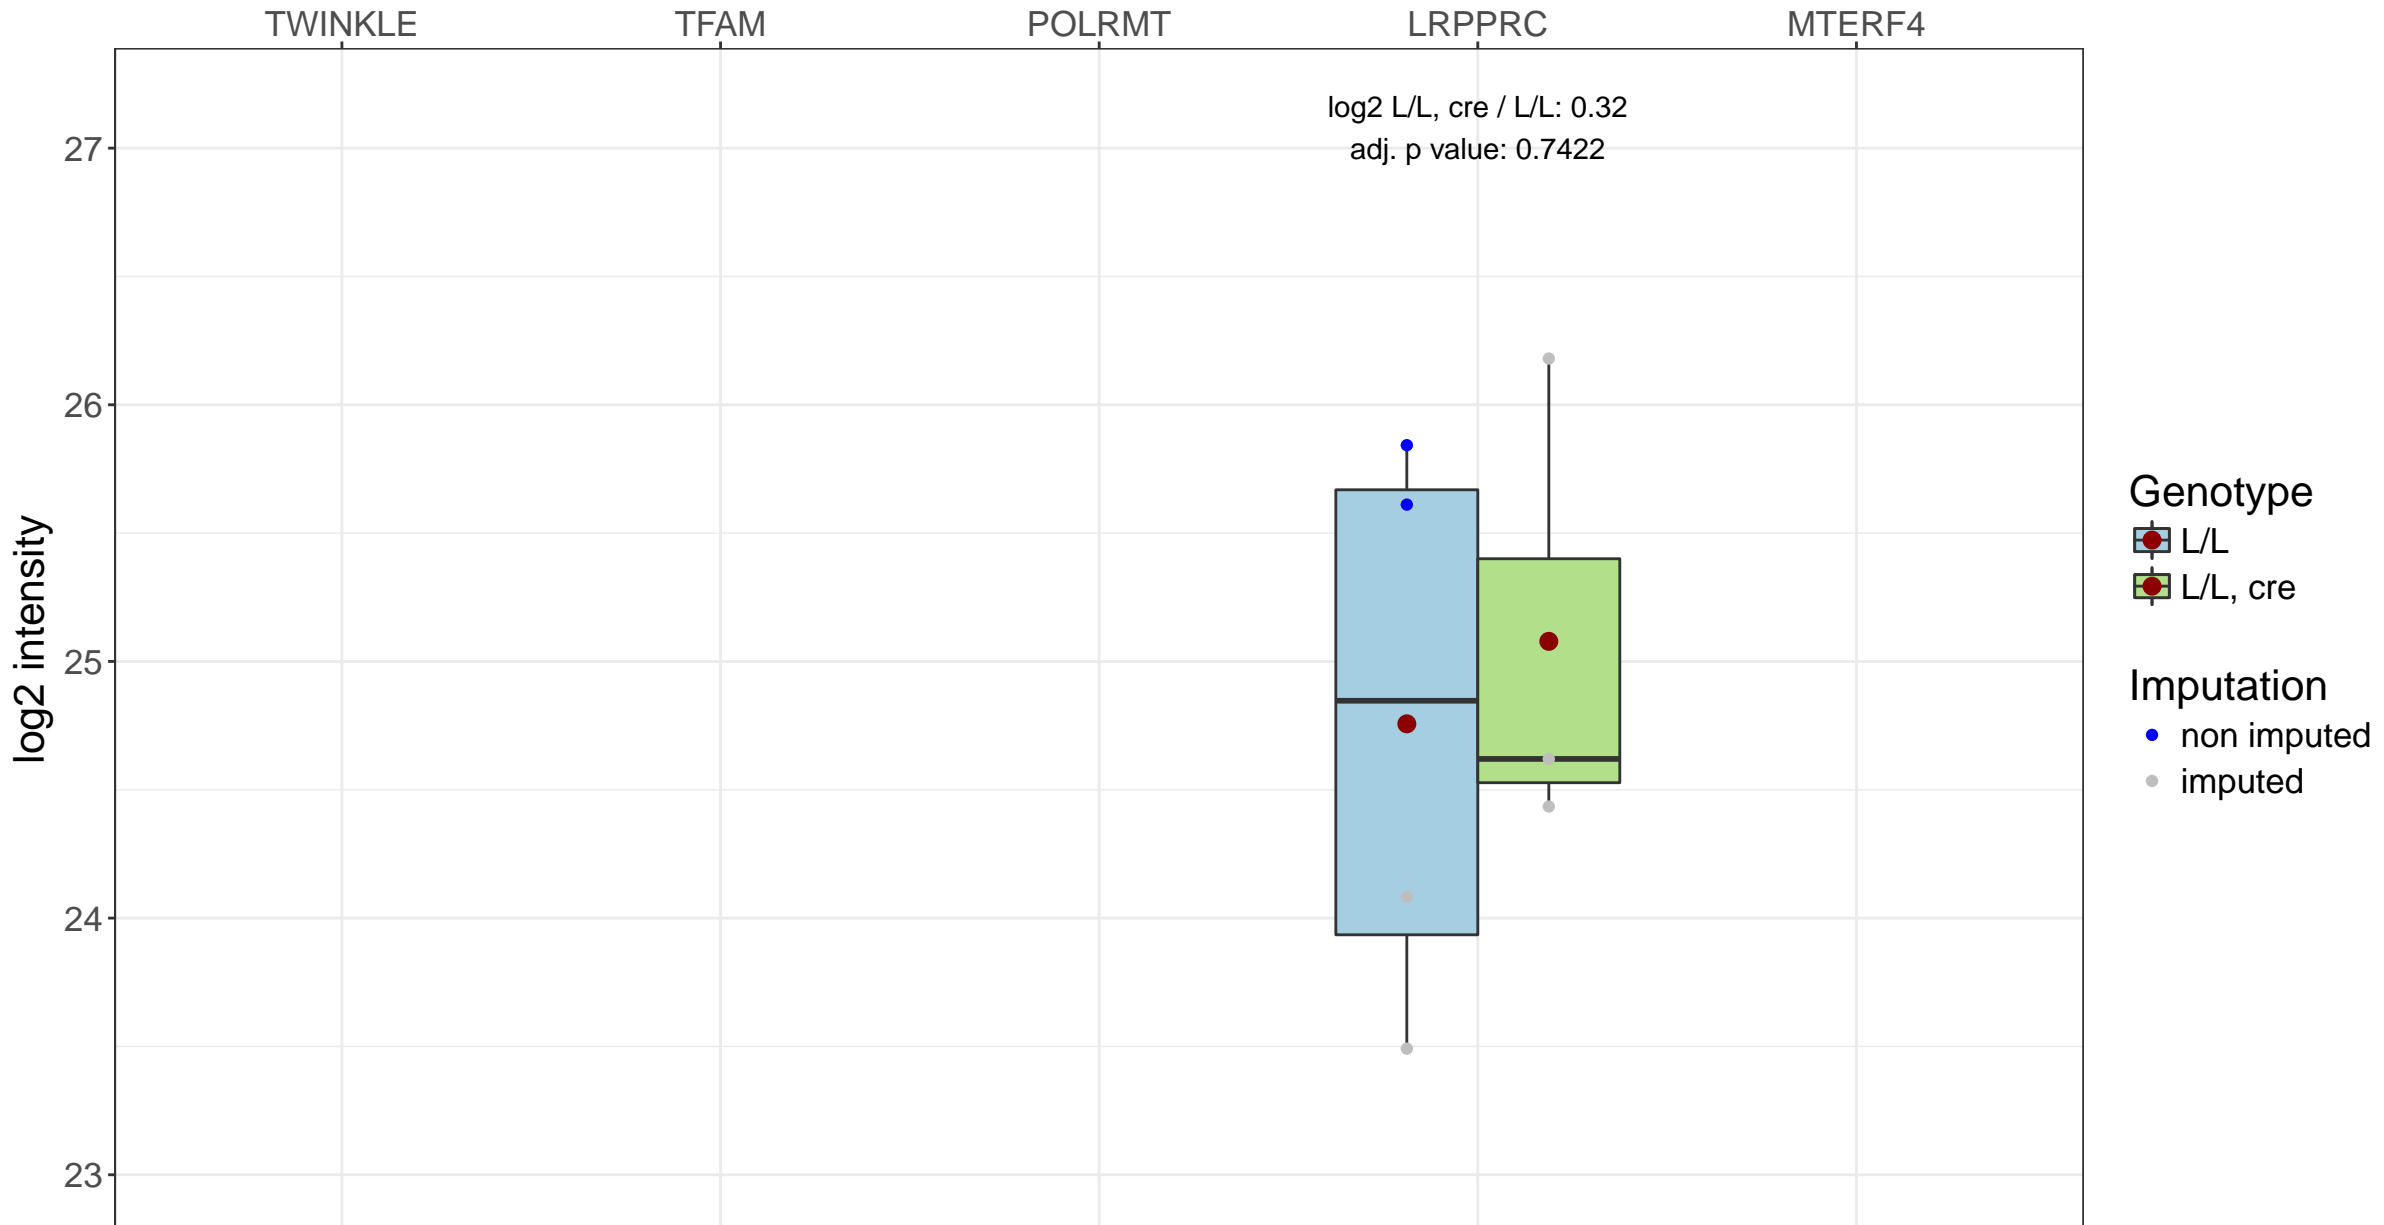

# COA5 / Q99M07

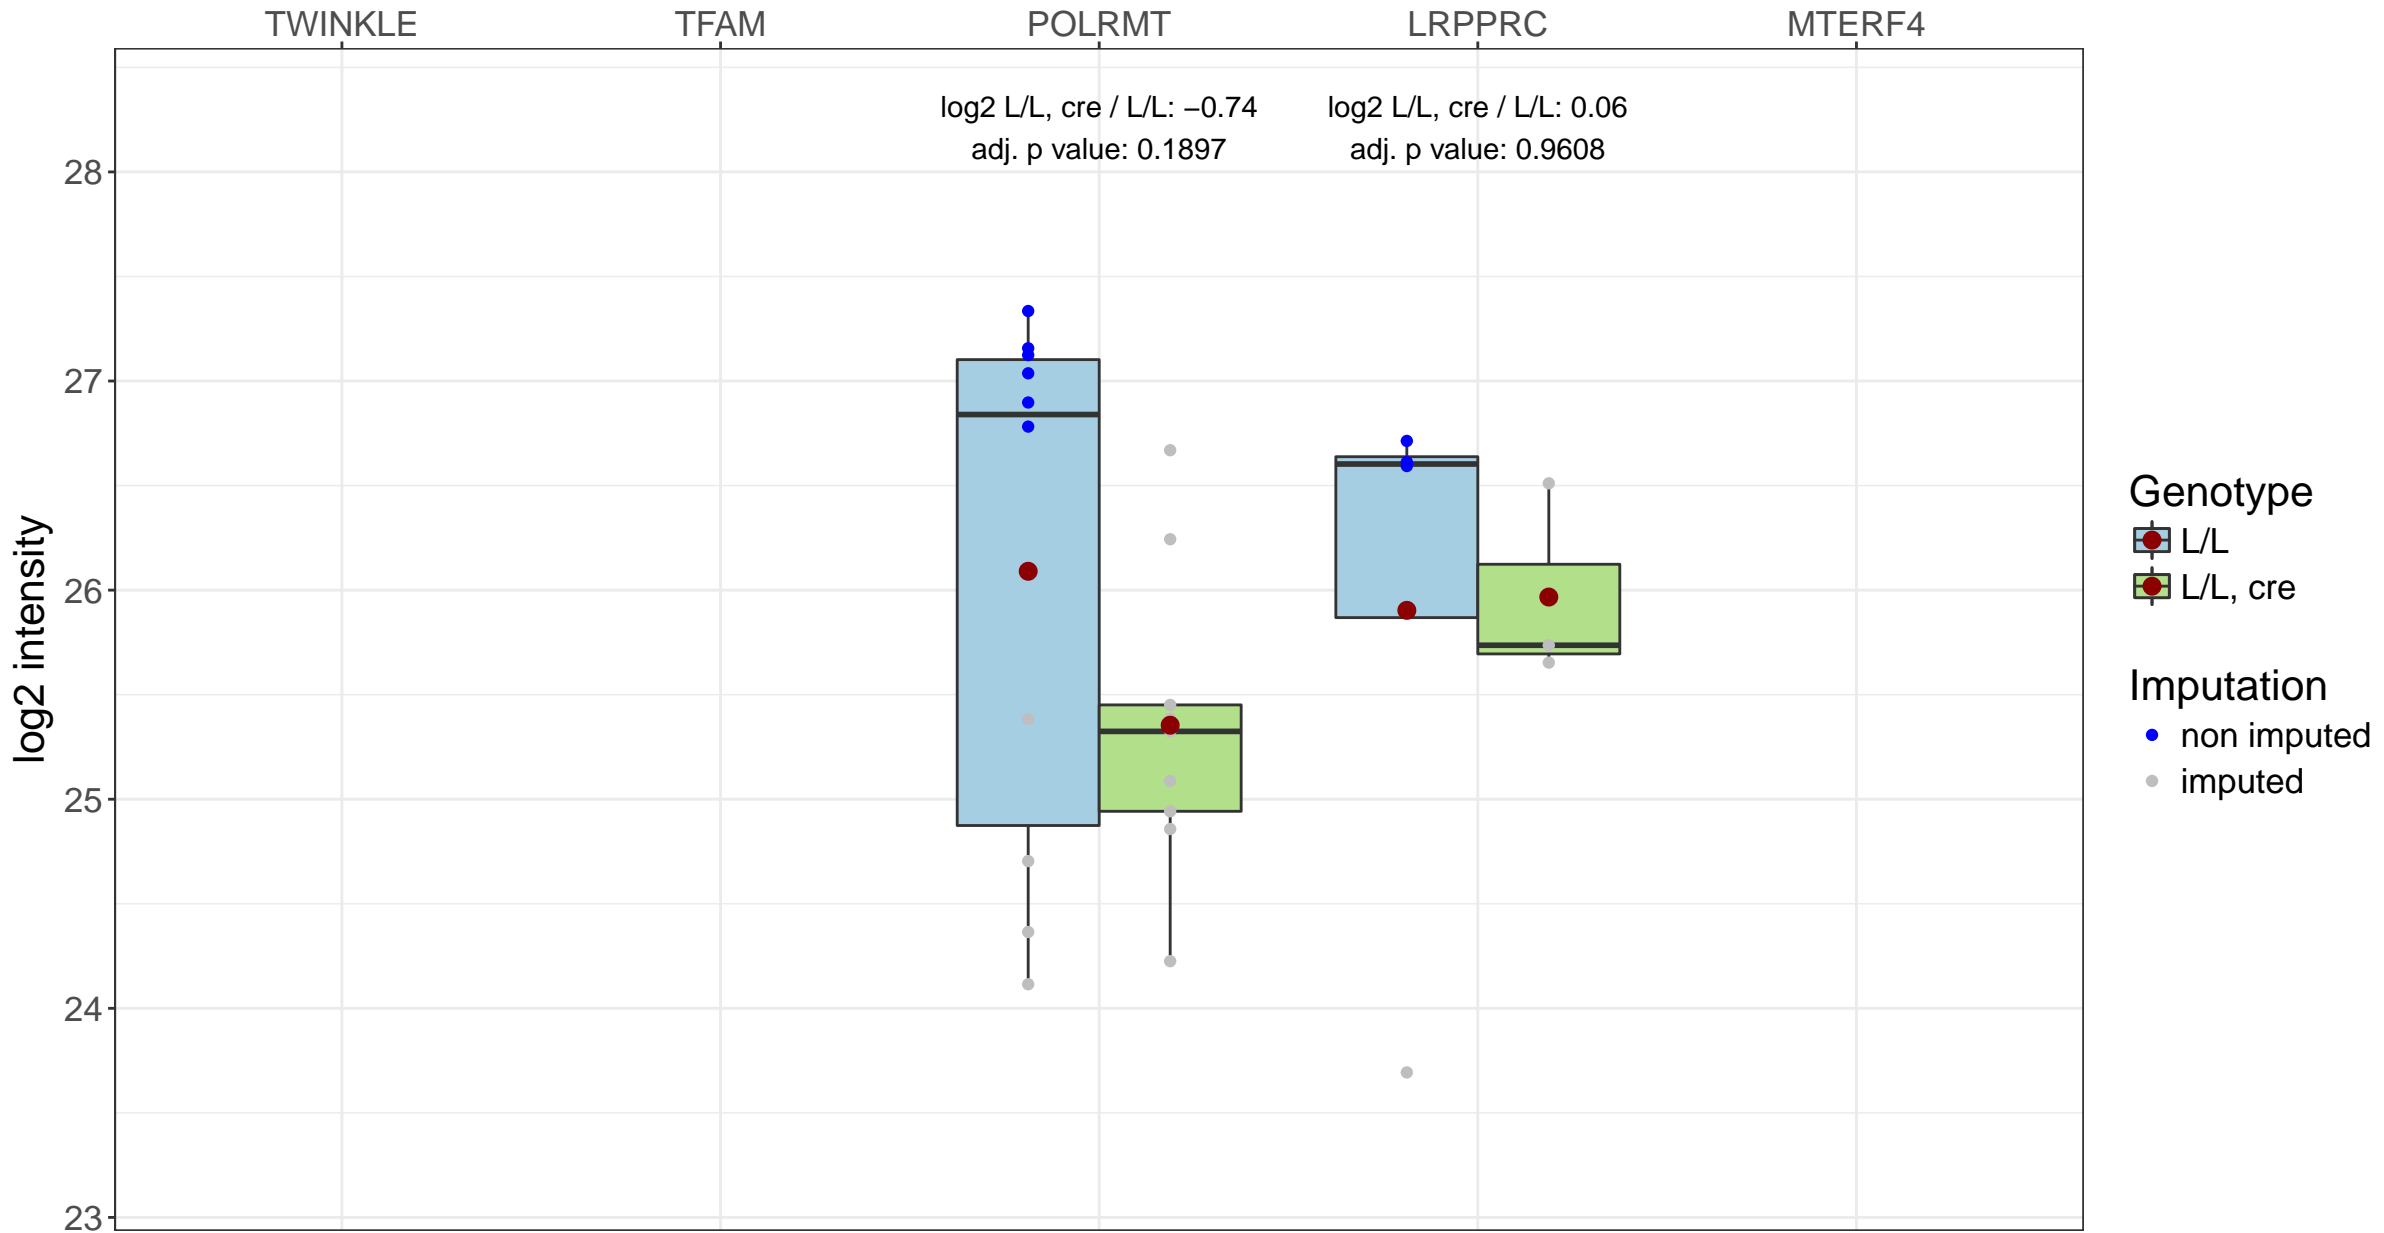

# COA6 / Q8BGD8

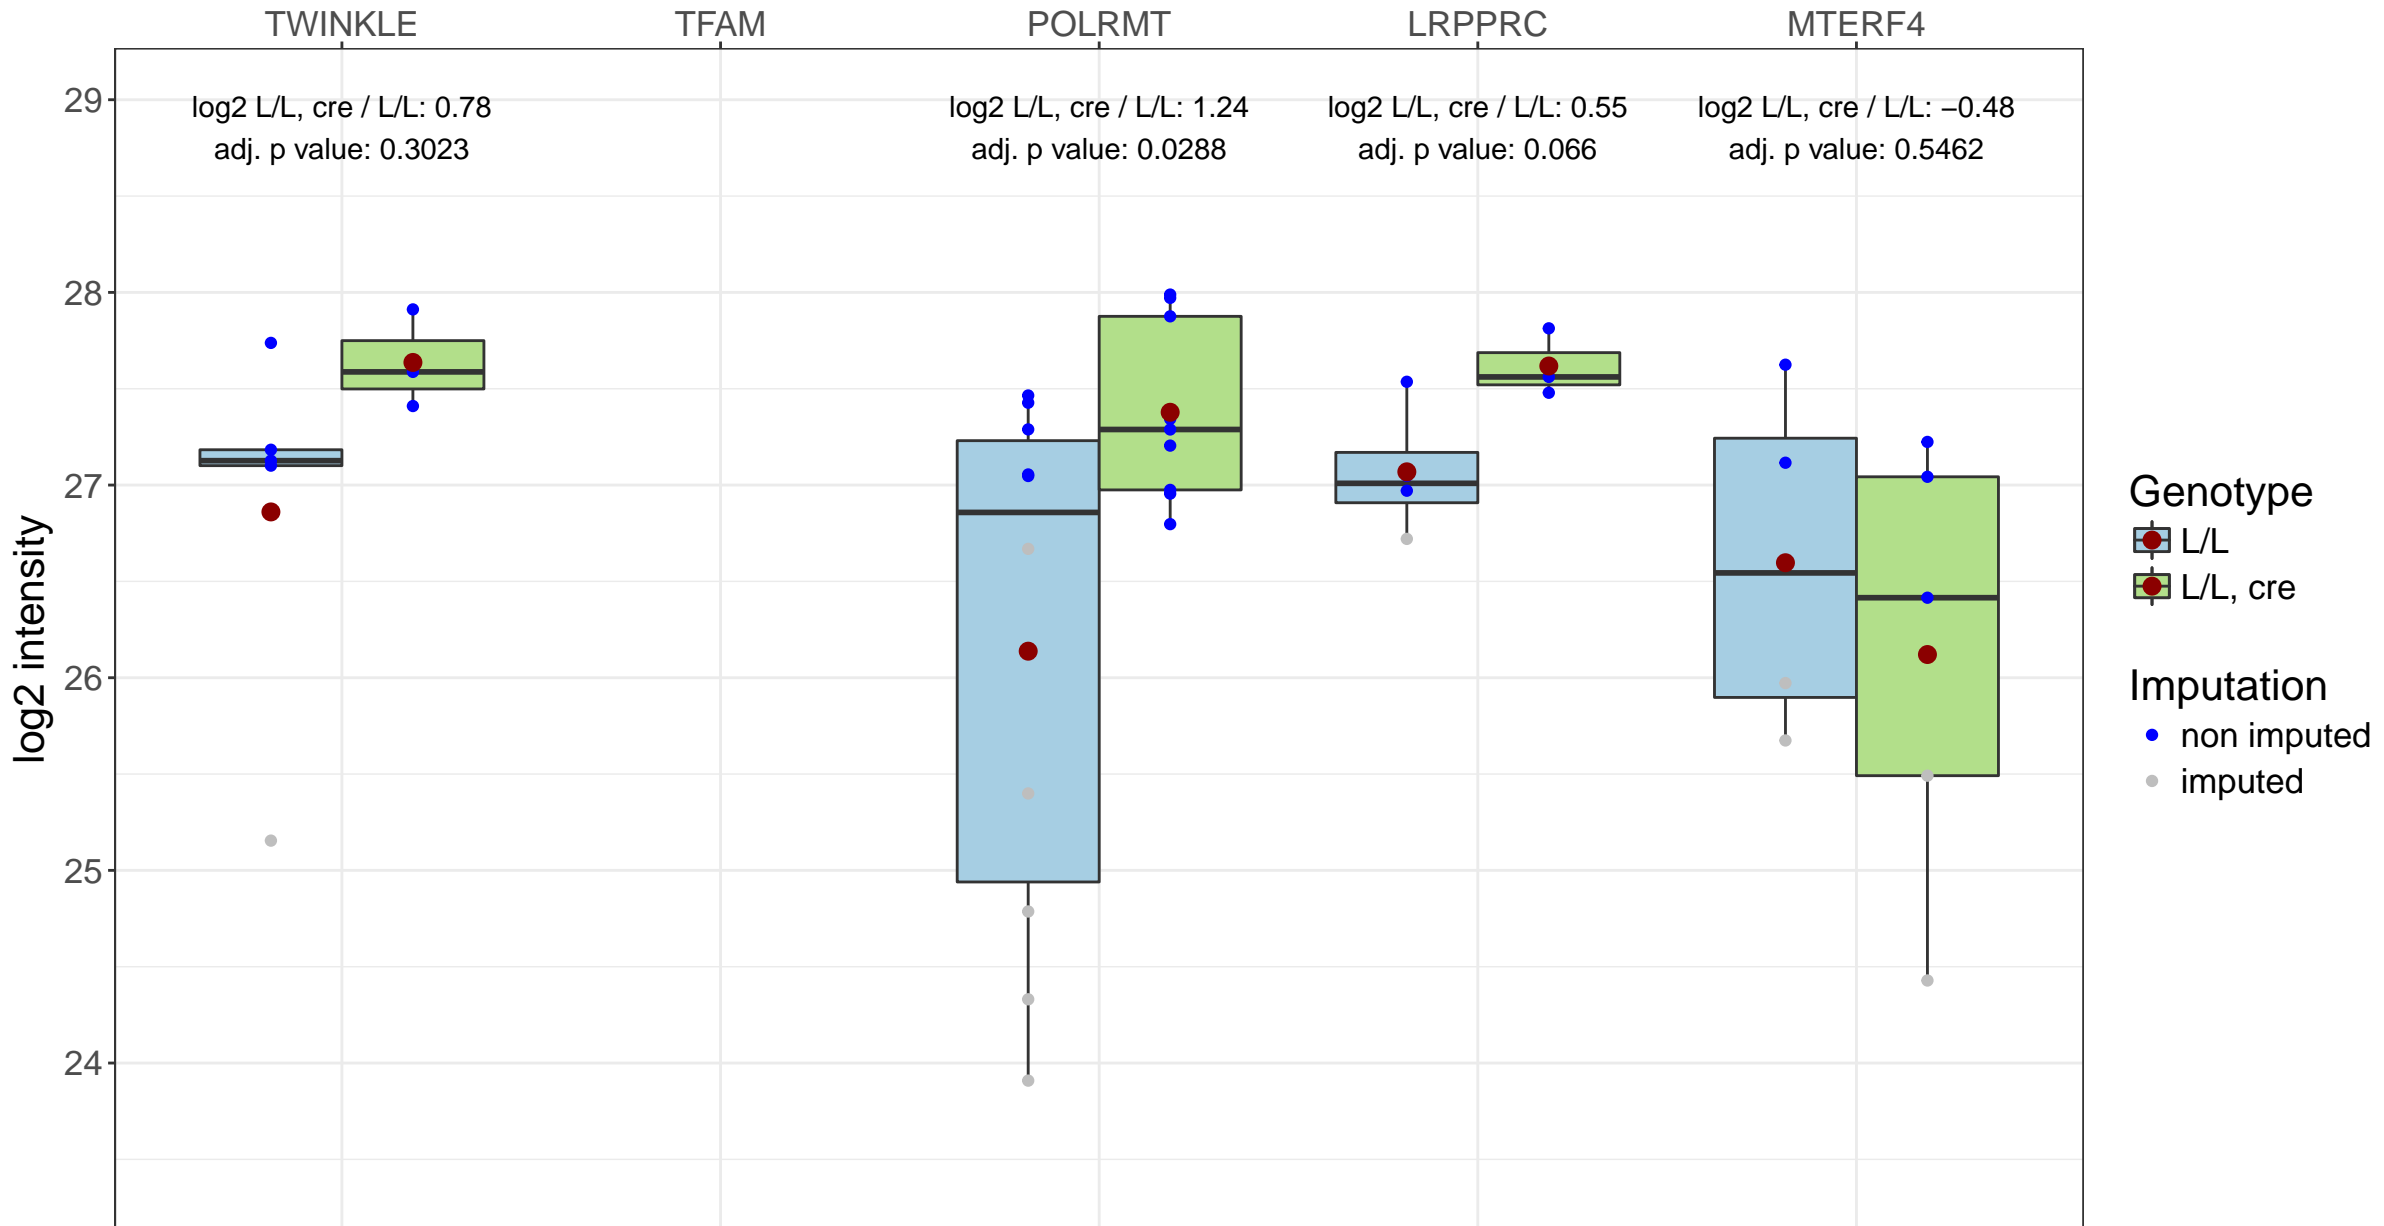

# COA7 / Q921H9

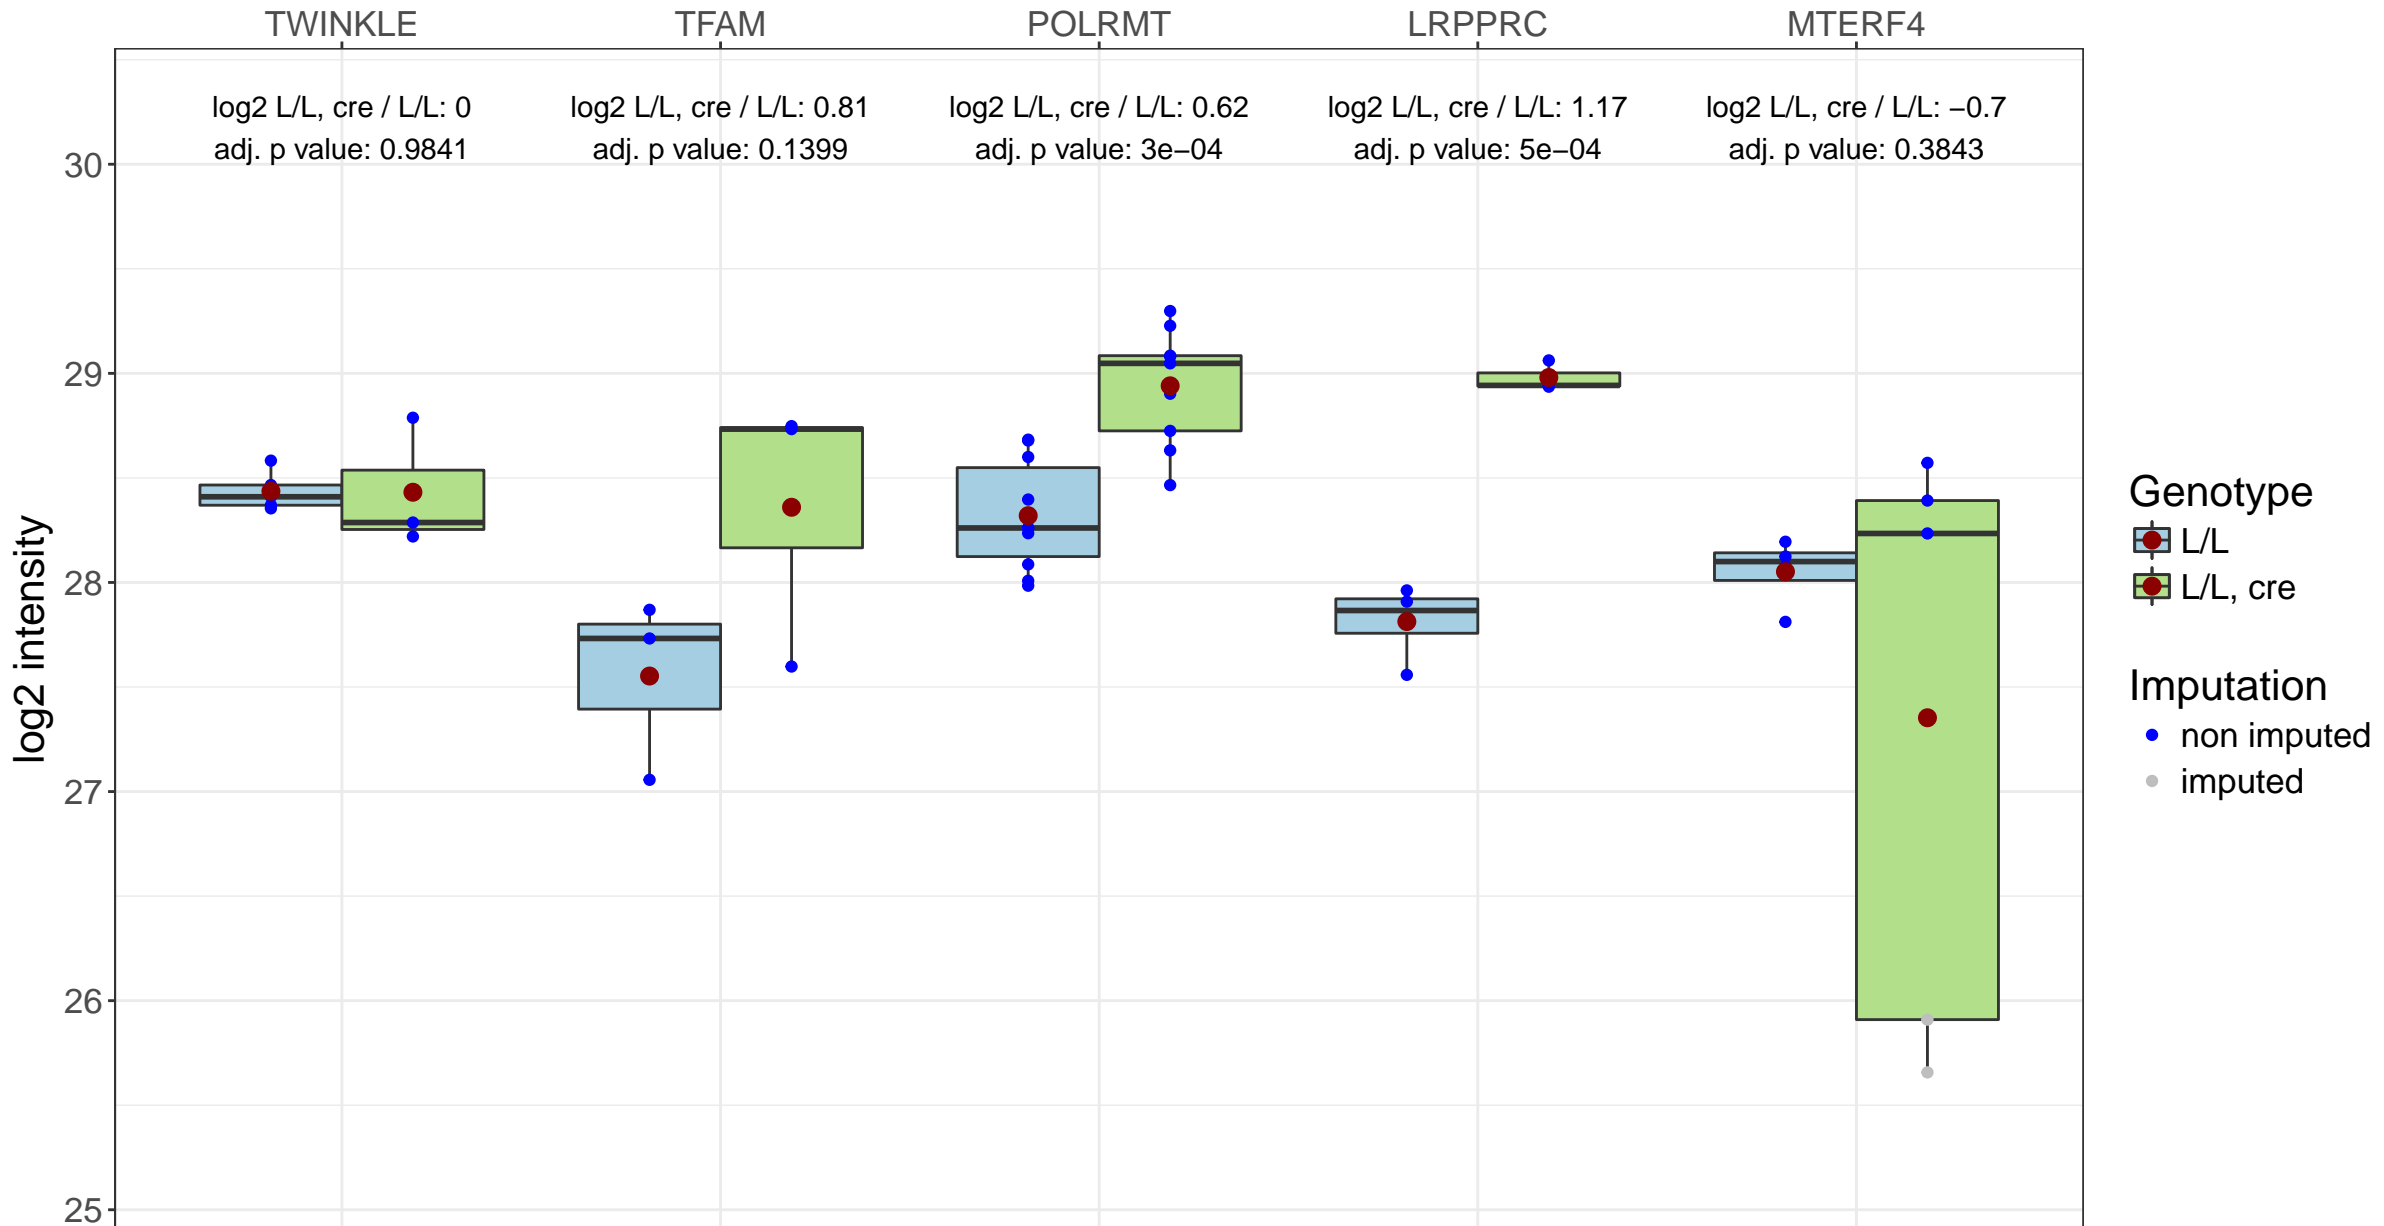



# COASY / Q9DBL7

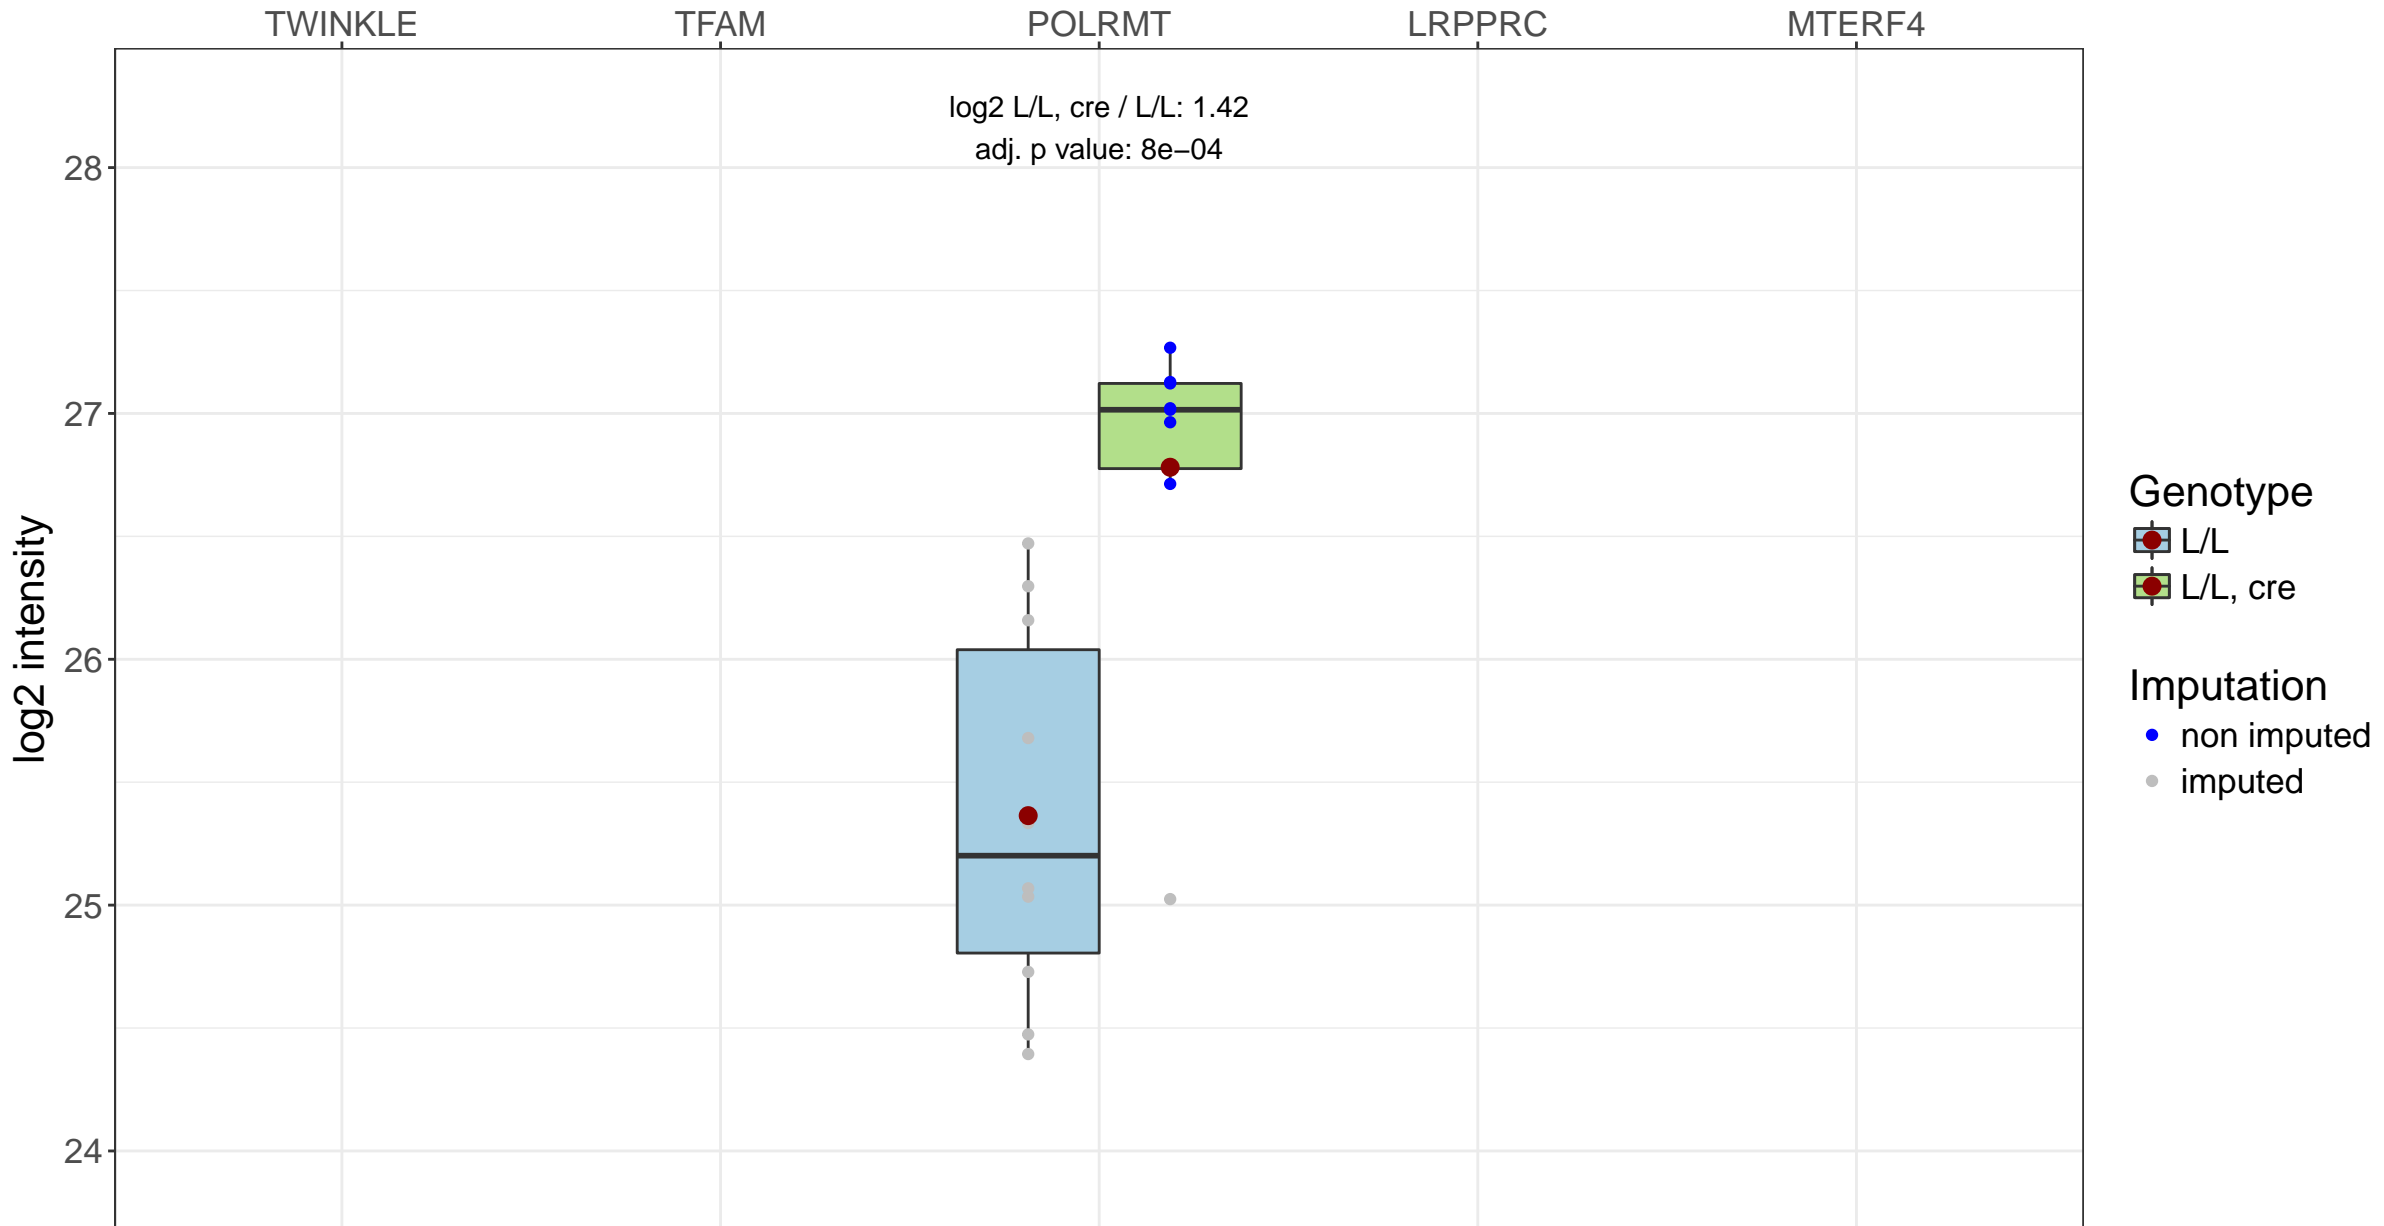

# COL1A2 / Q01149

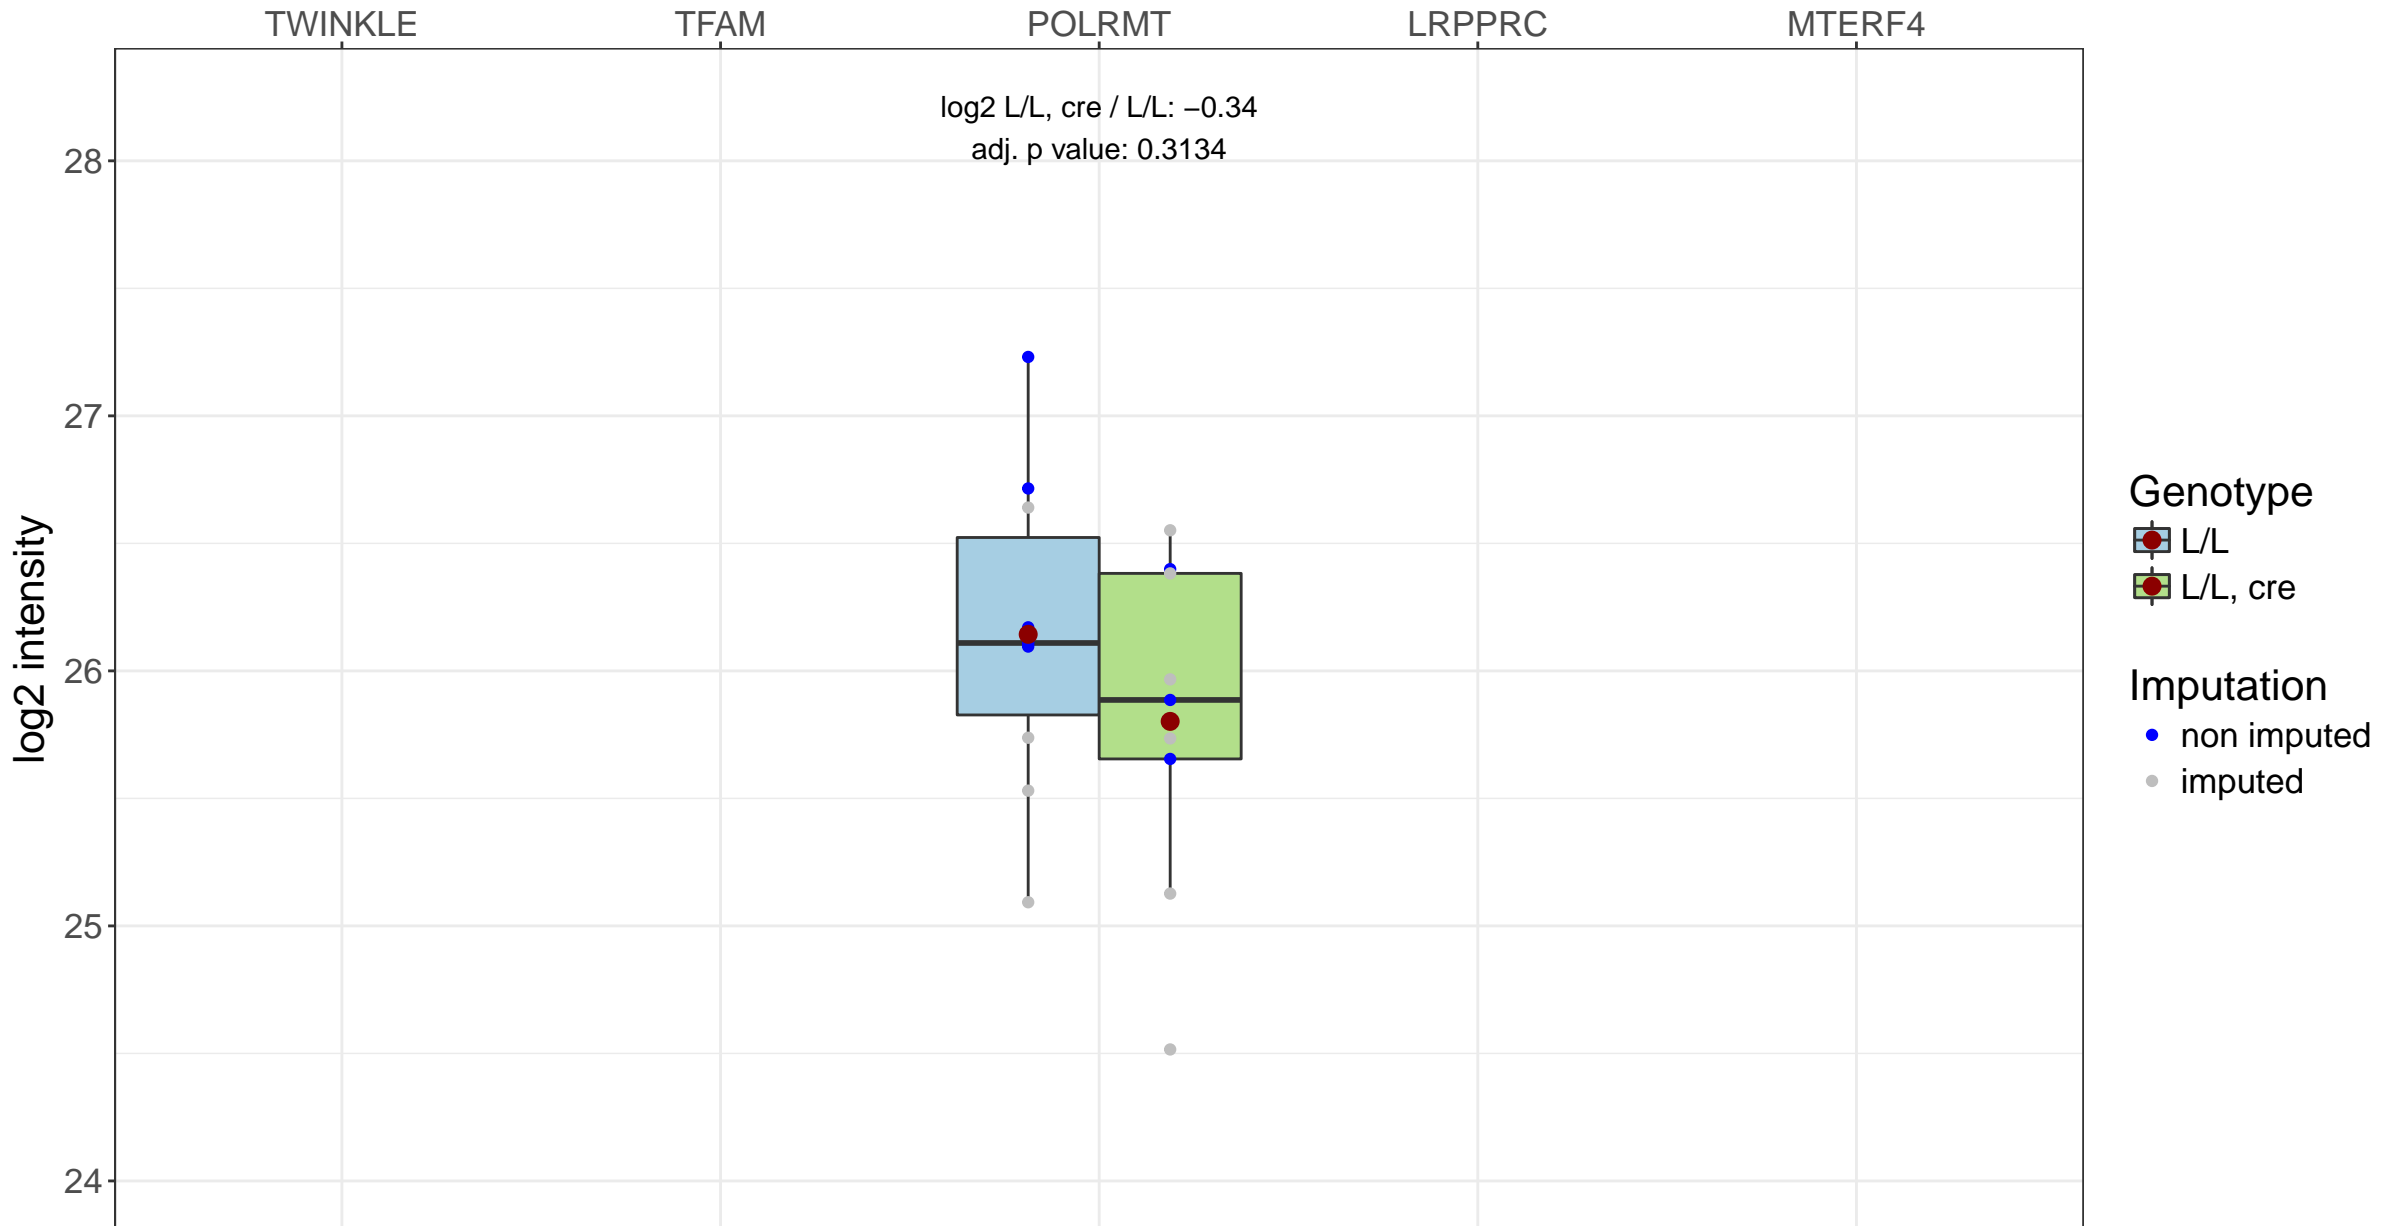

# COL6A1 / Q04857

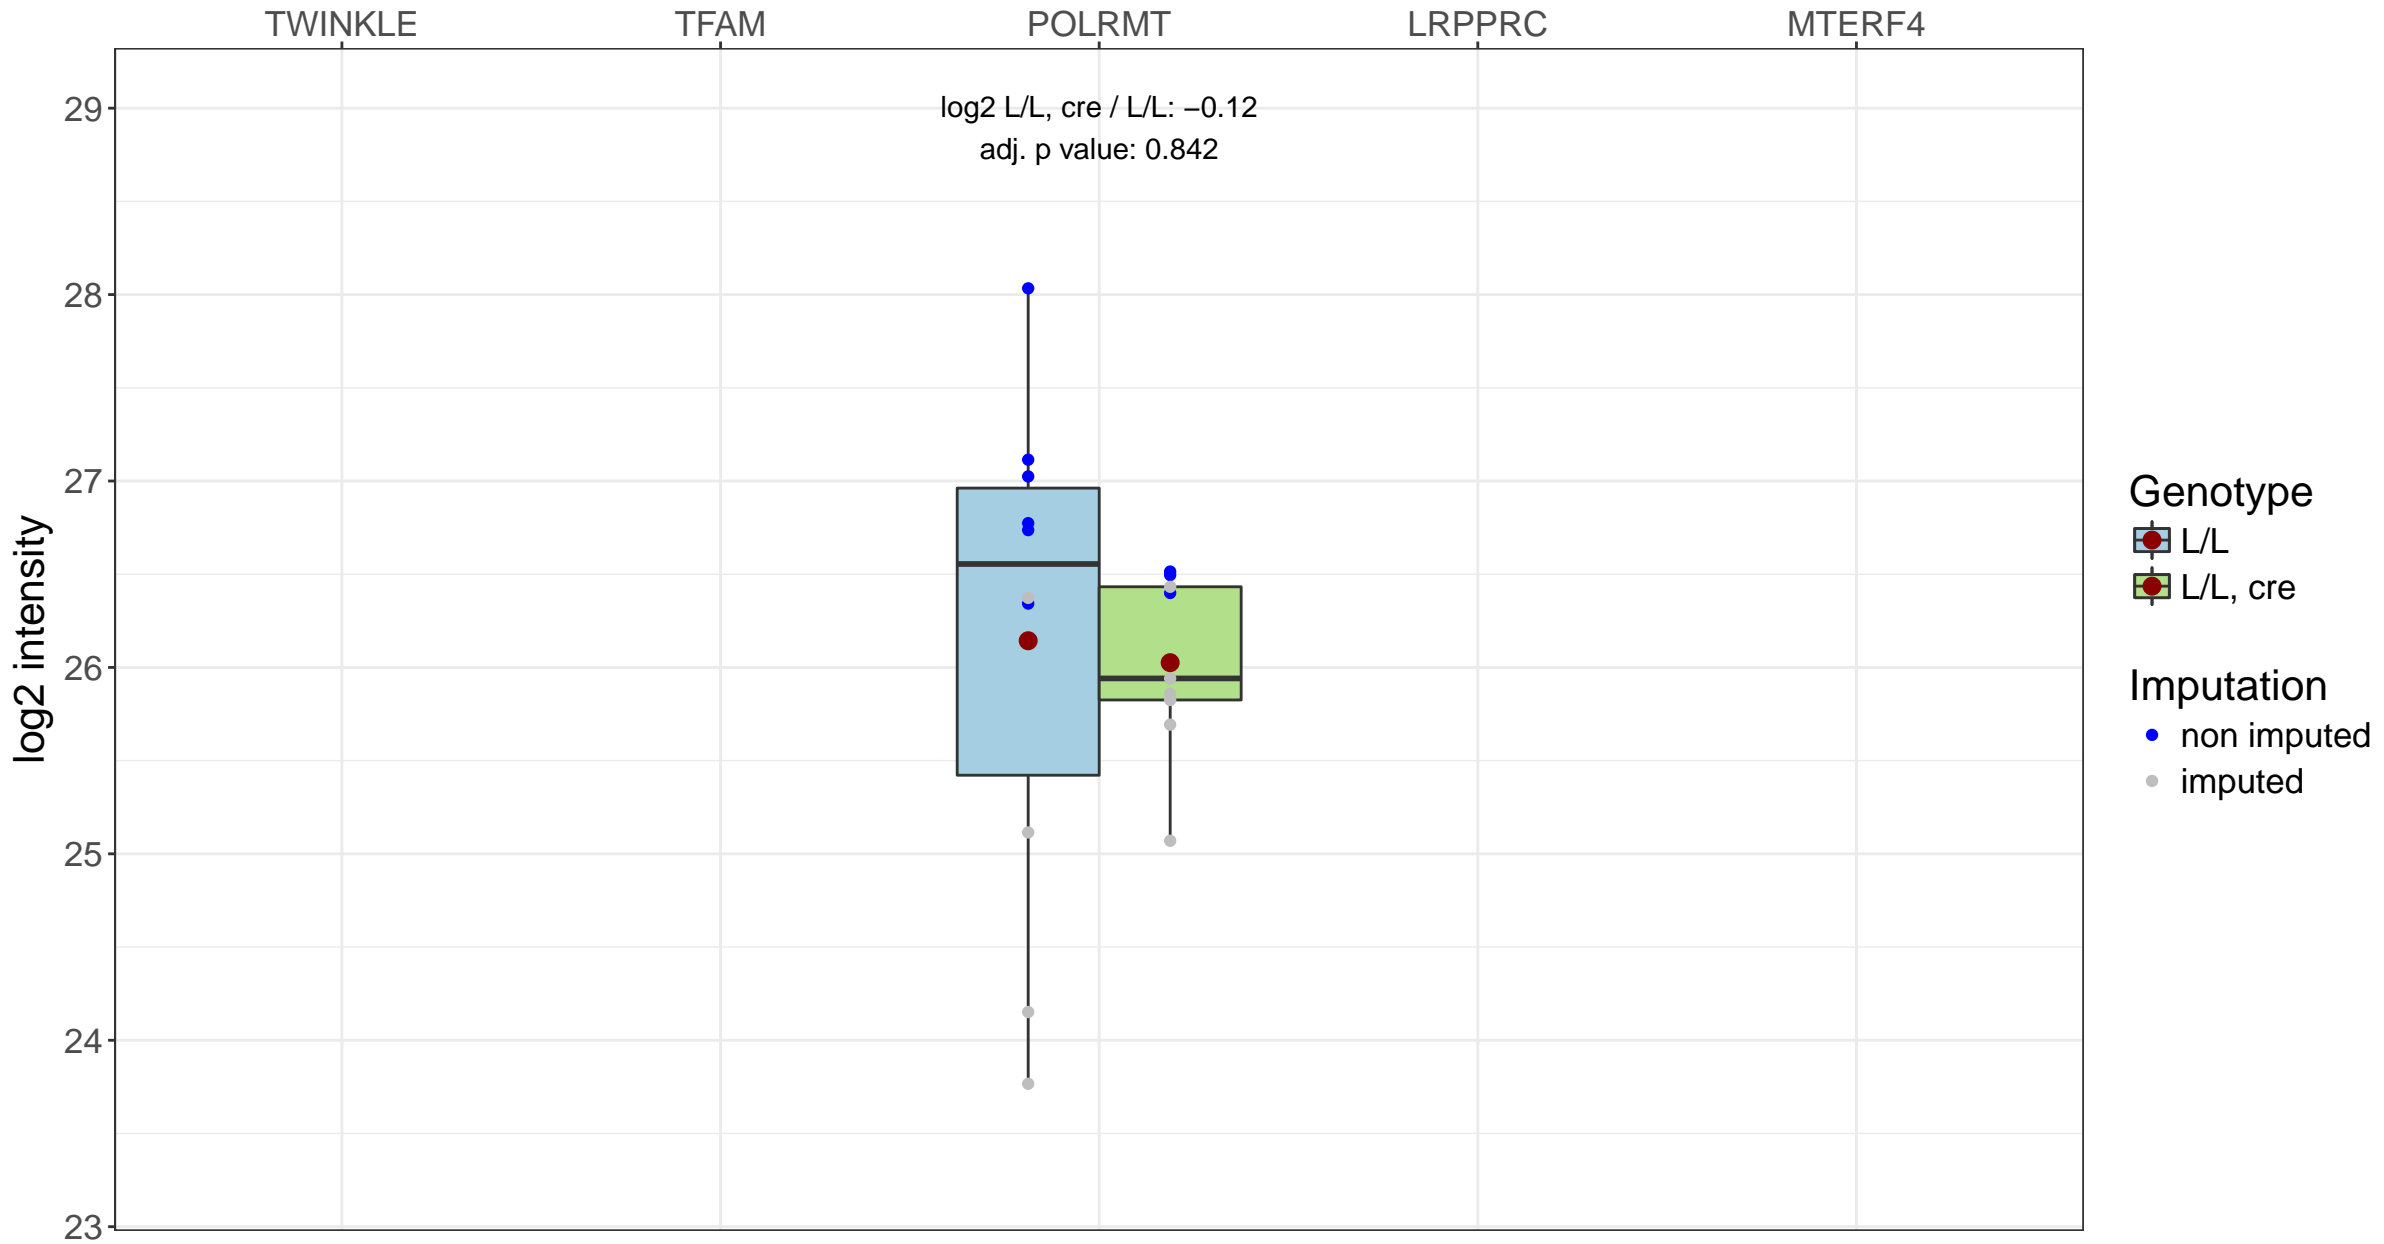

# COL6A2 / Q02788

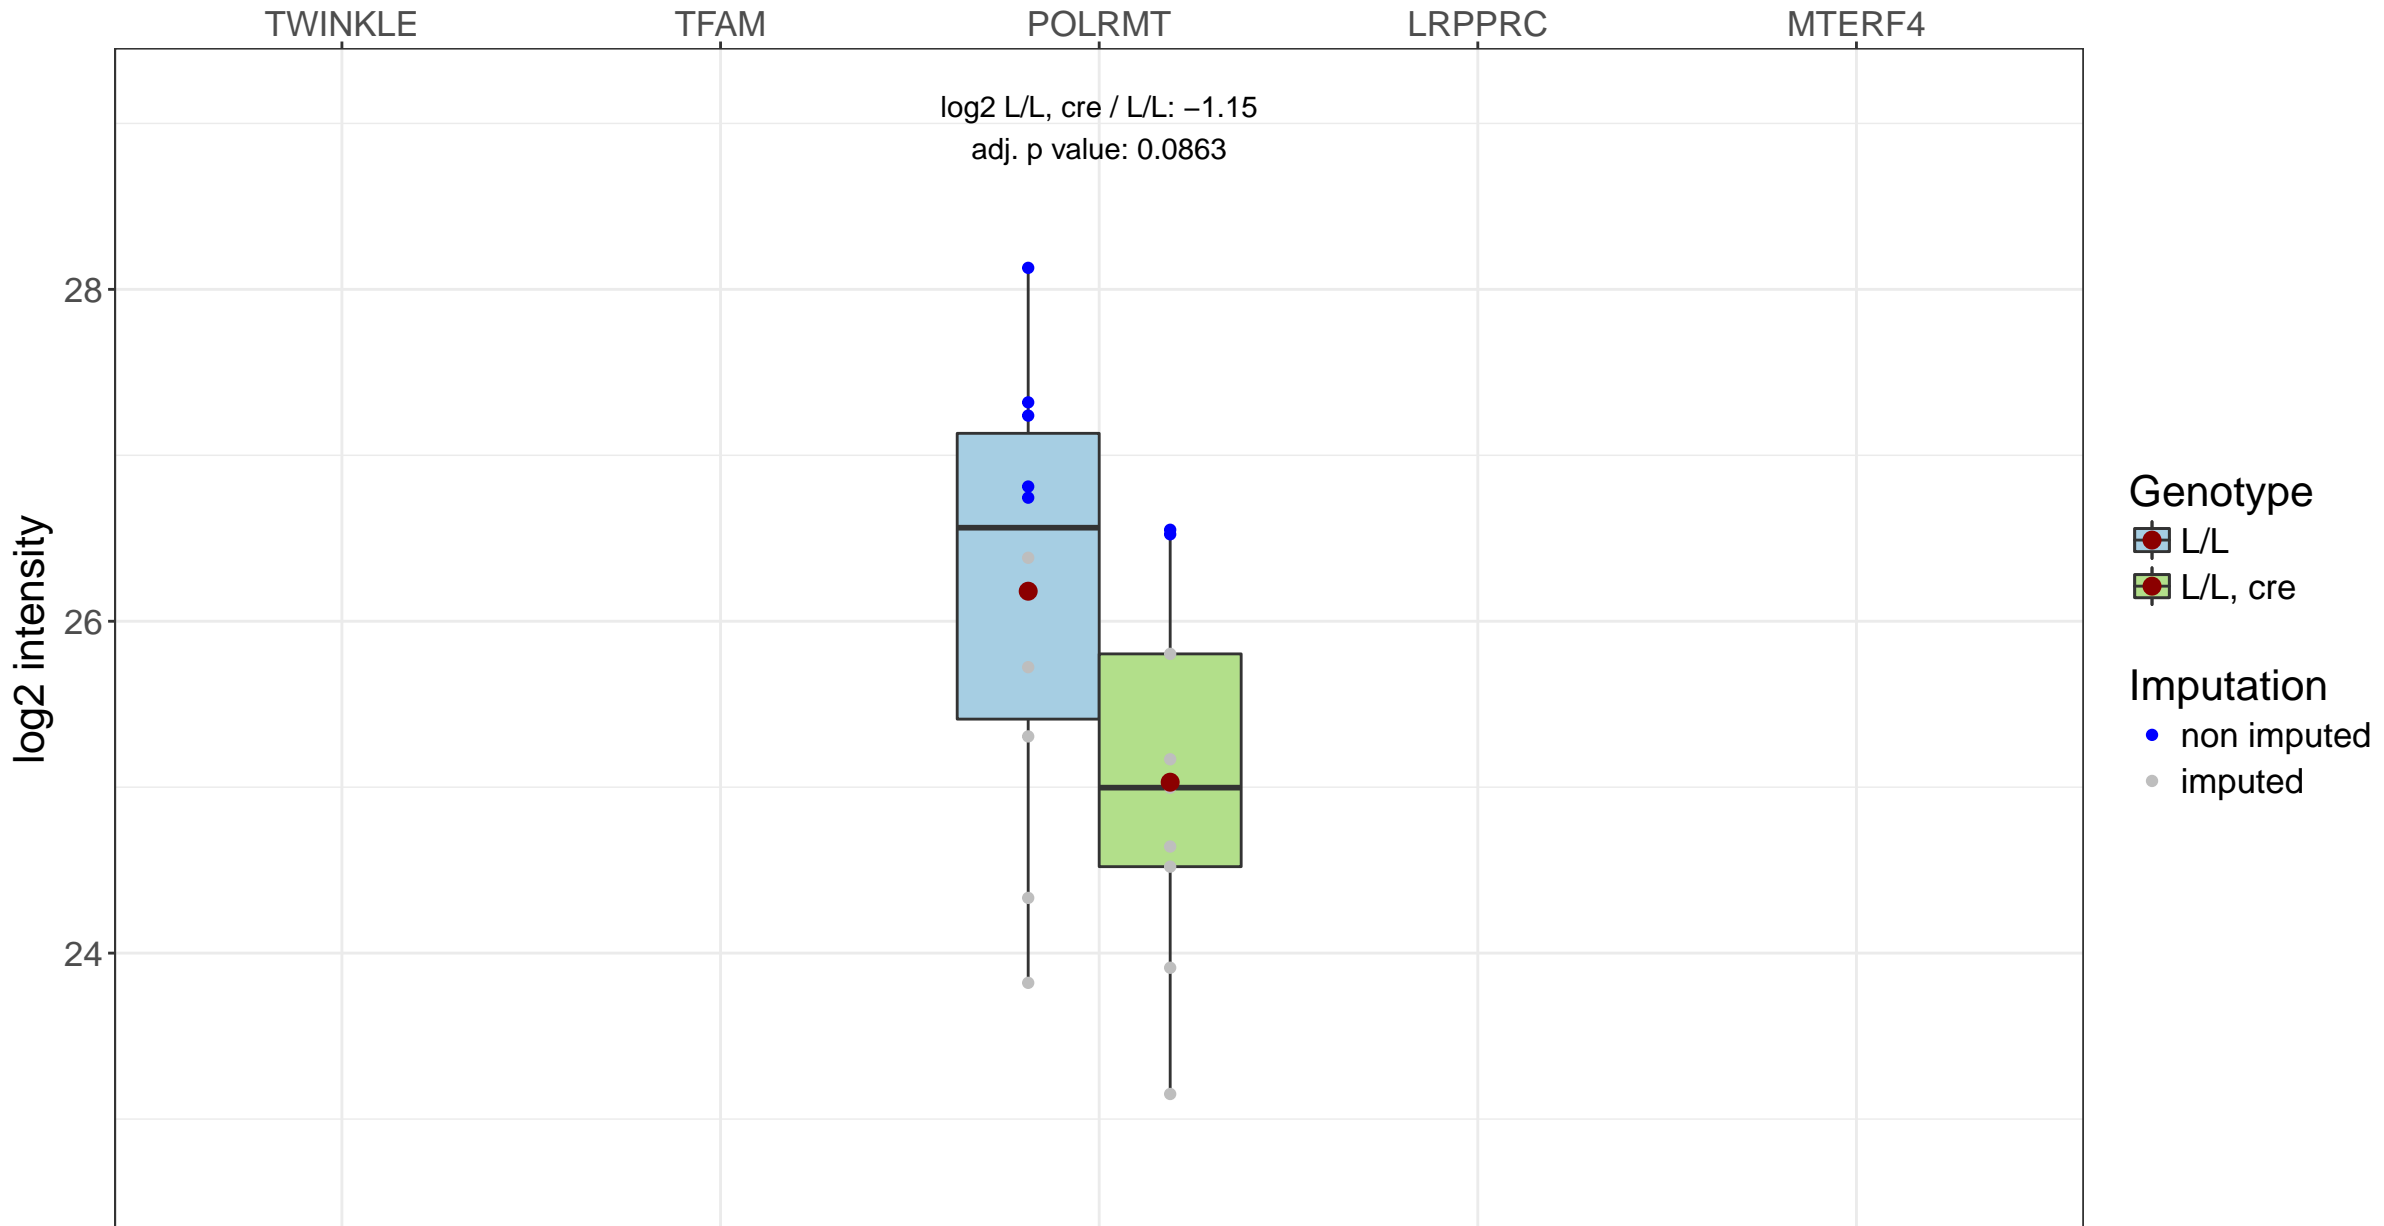

# COL6A3 / J3QQ16

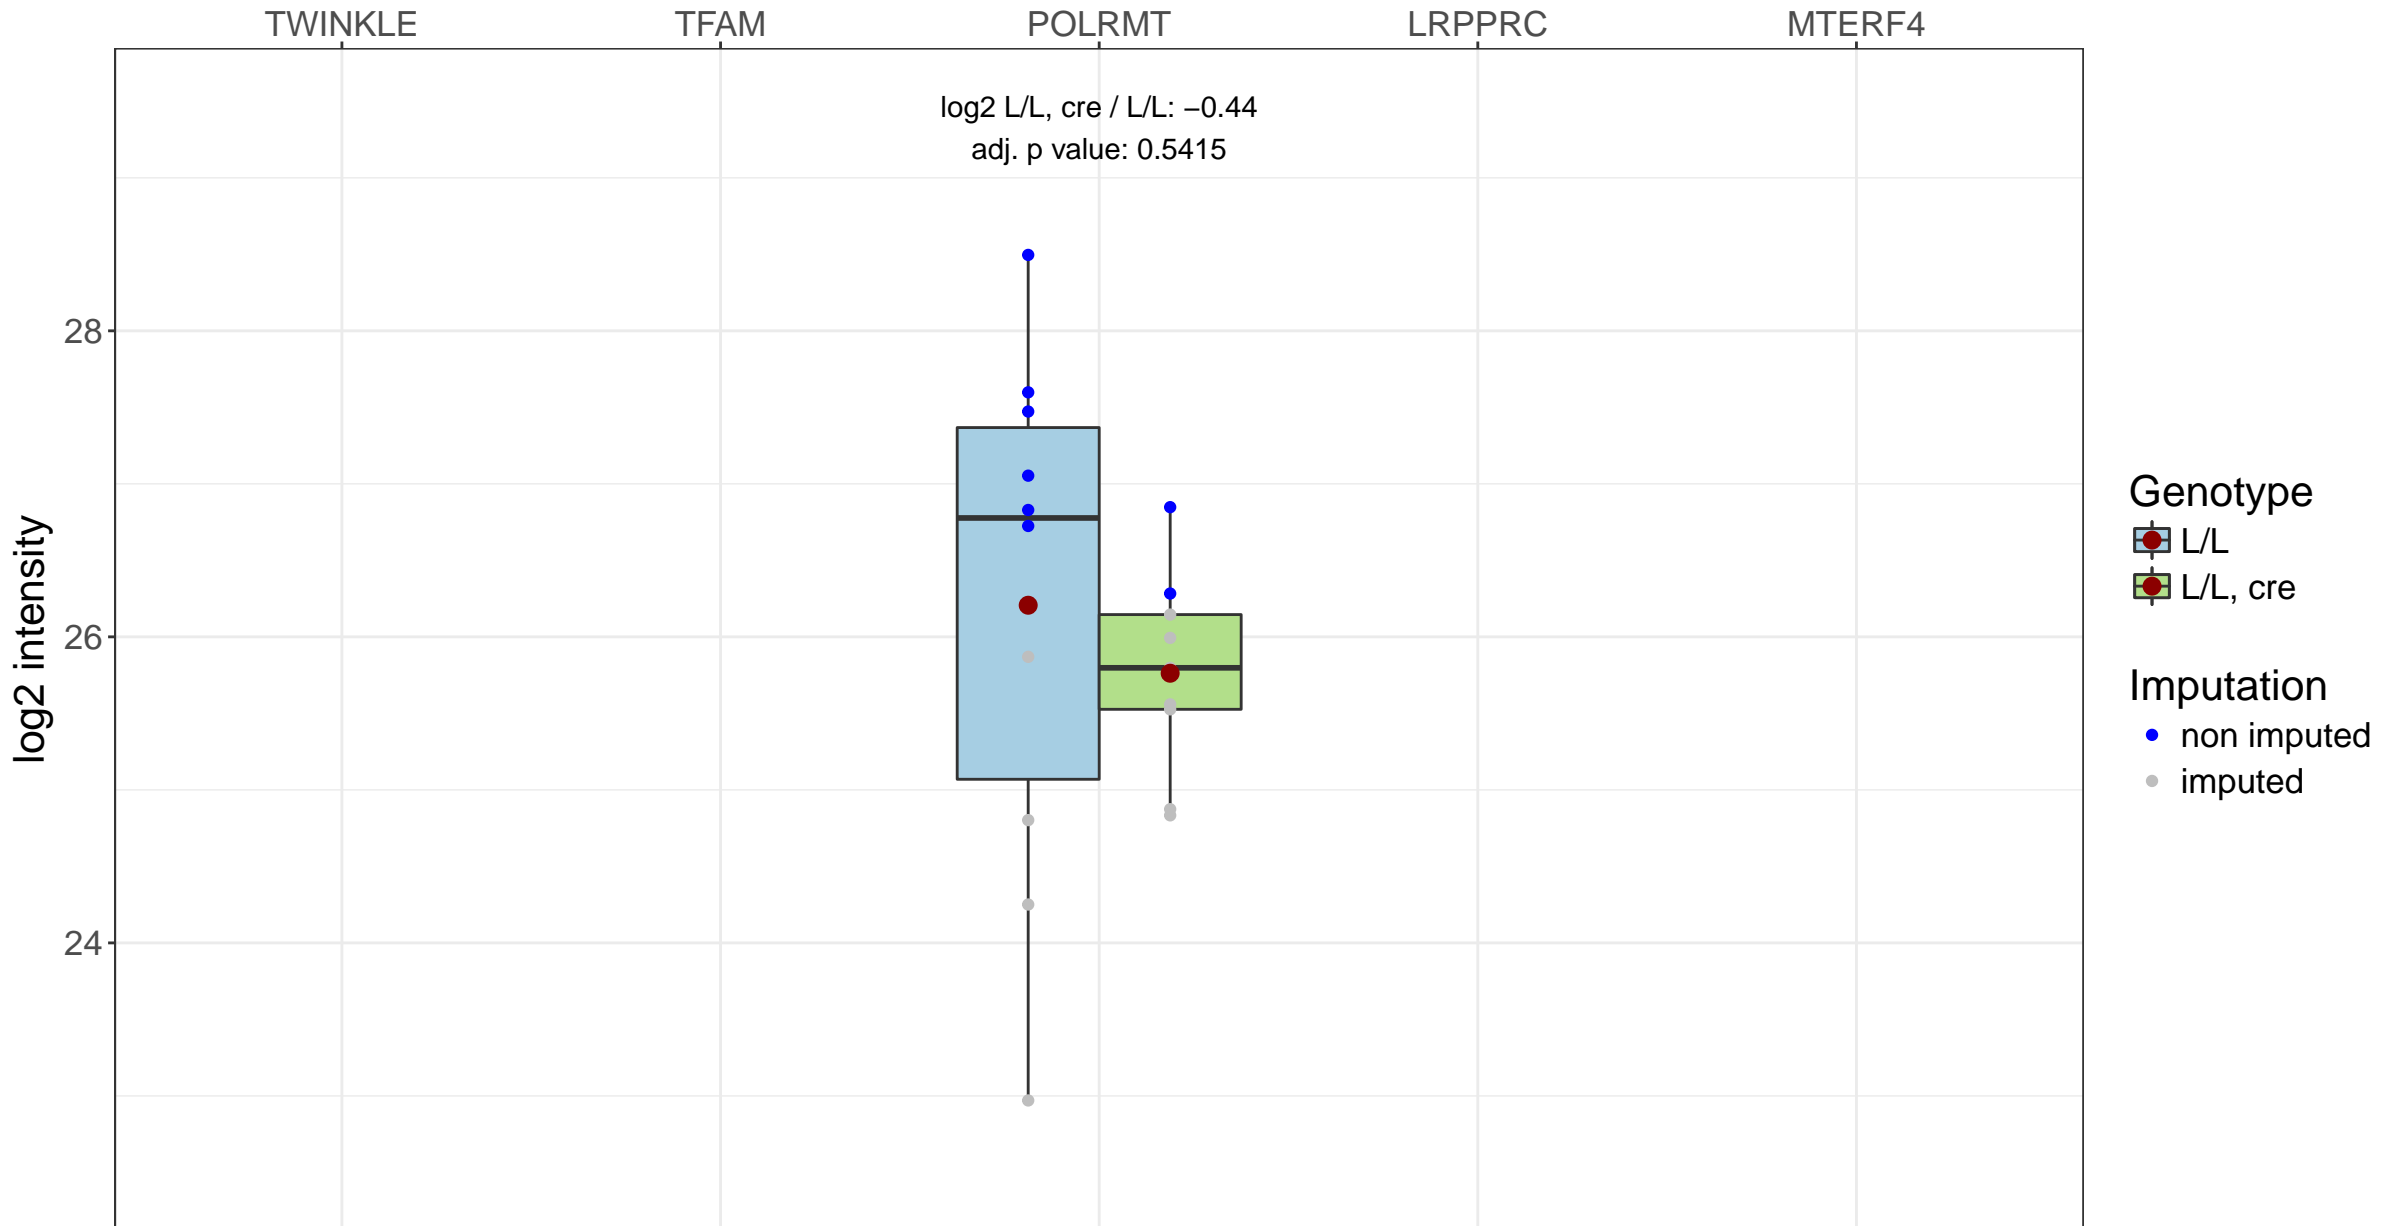

# COMTD1 / Q8BIG7

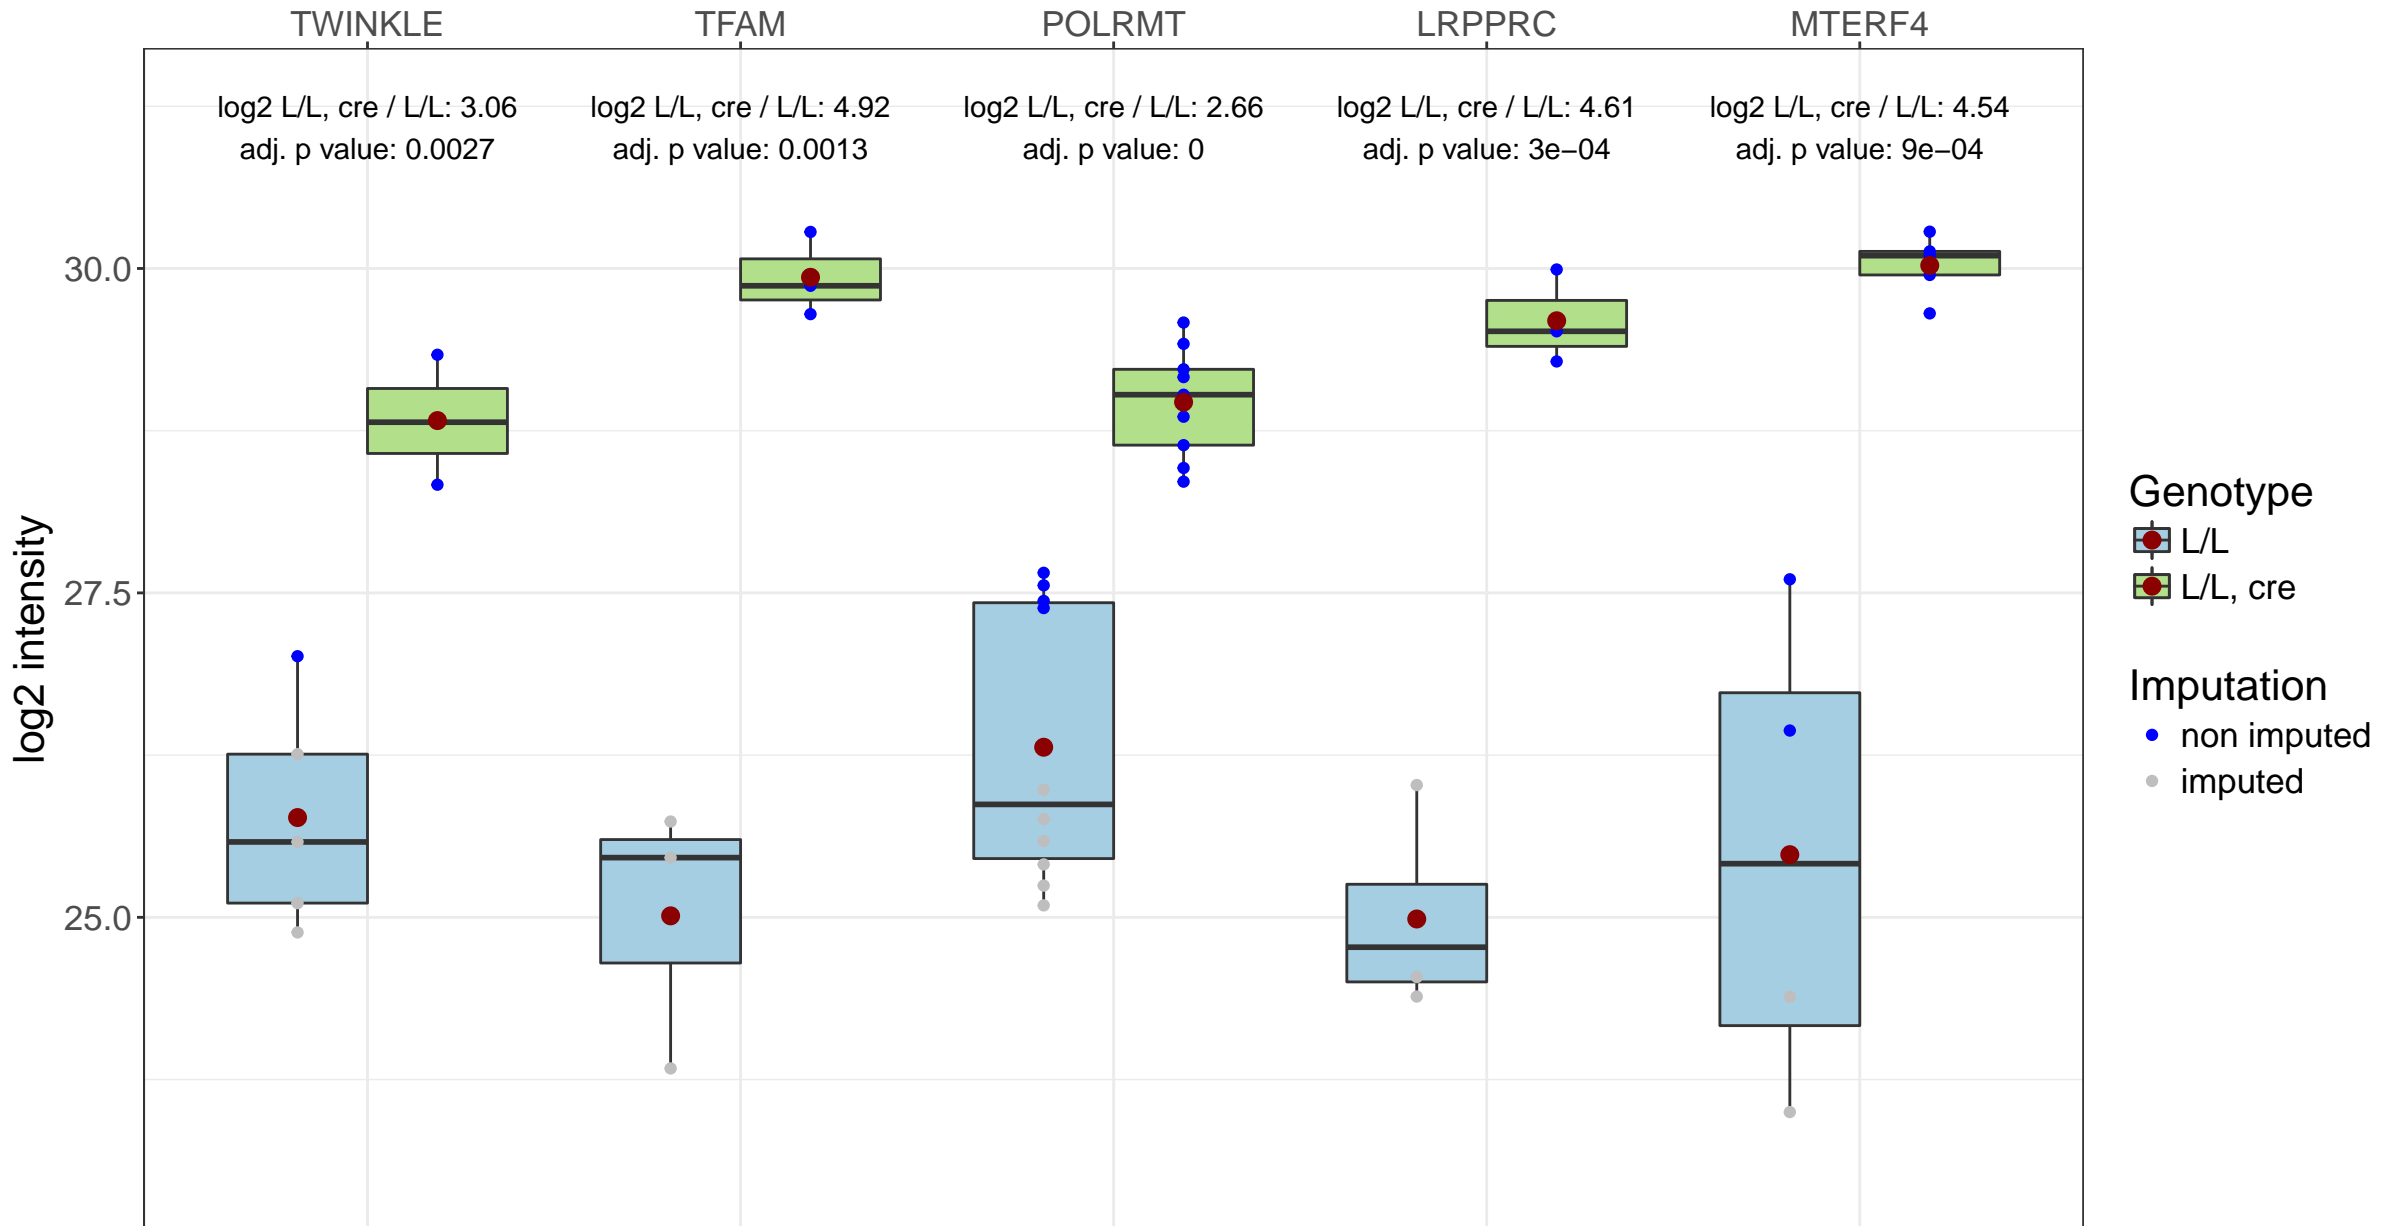

# COQ10A / E9Q3H6

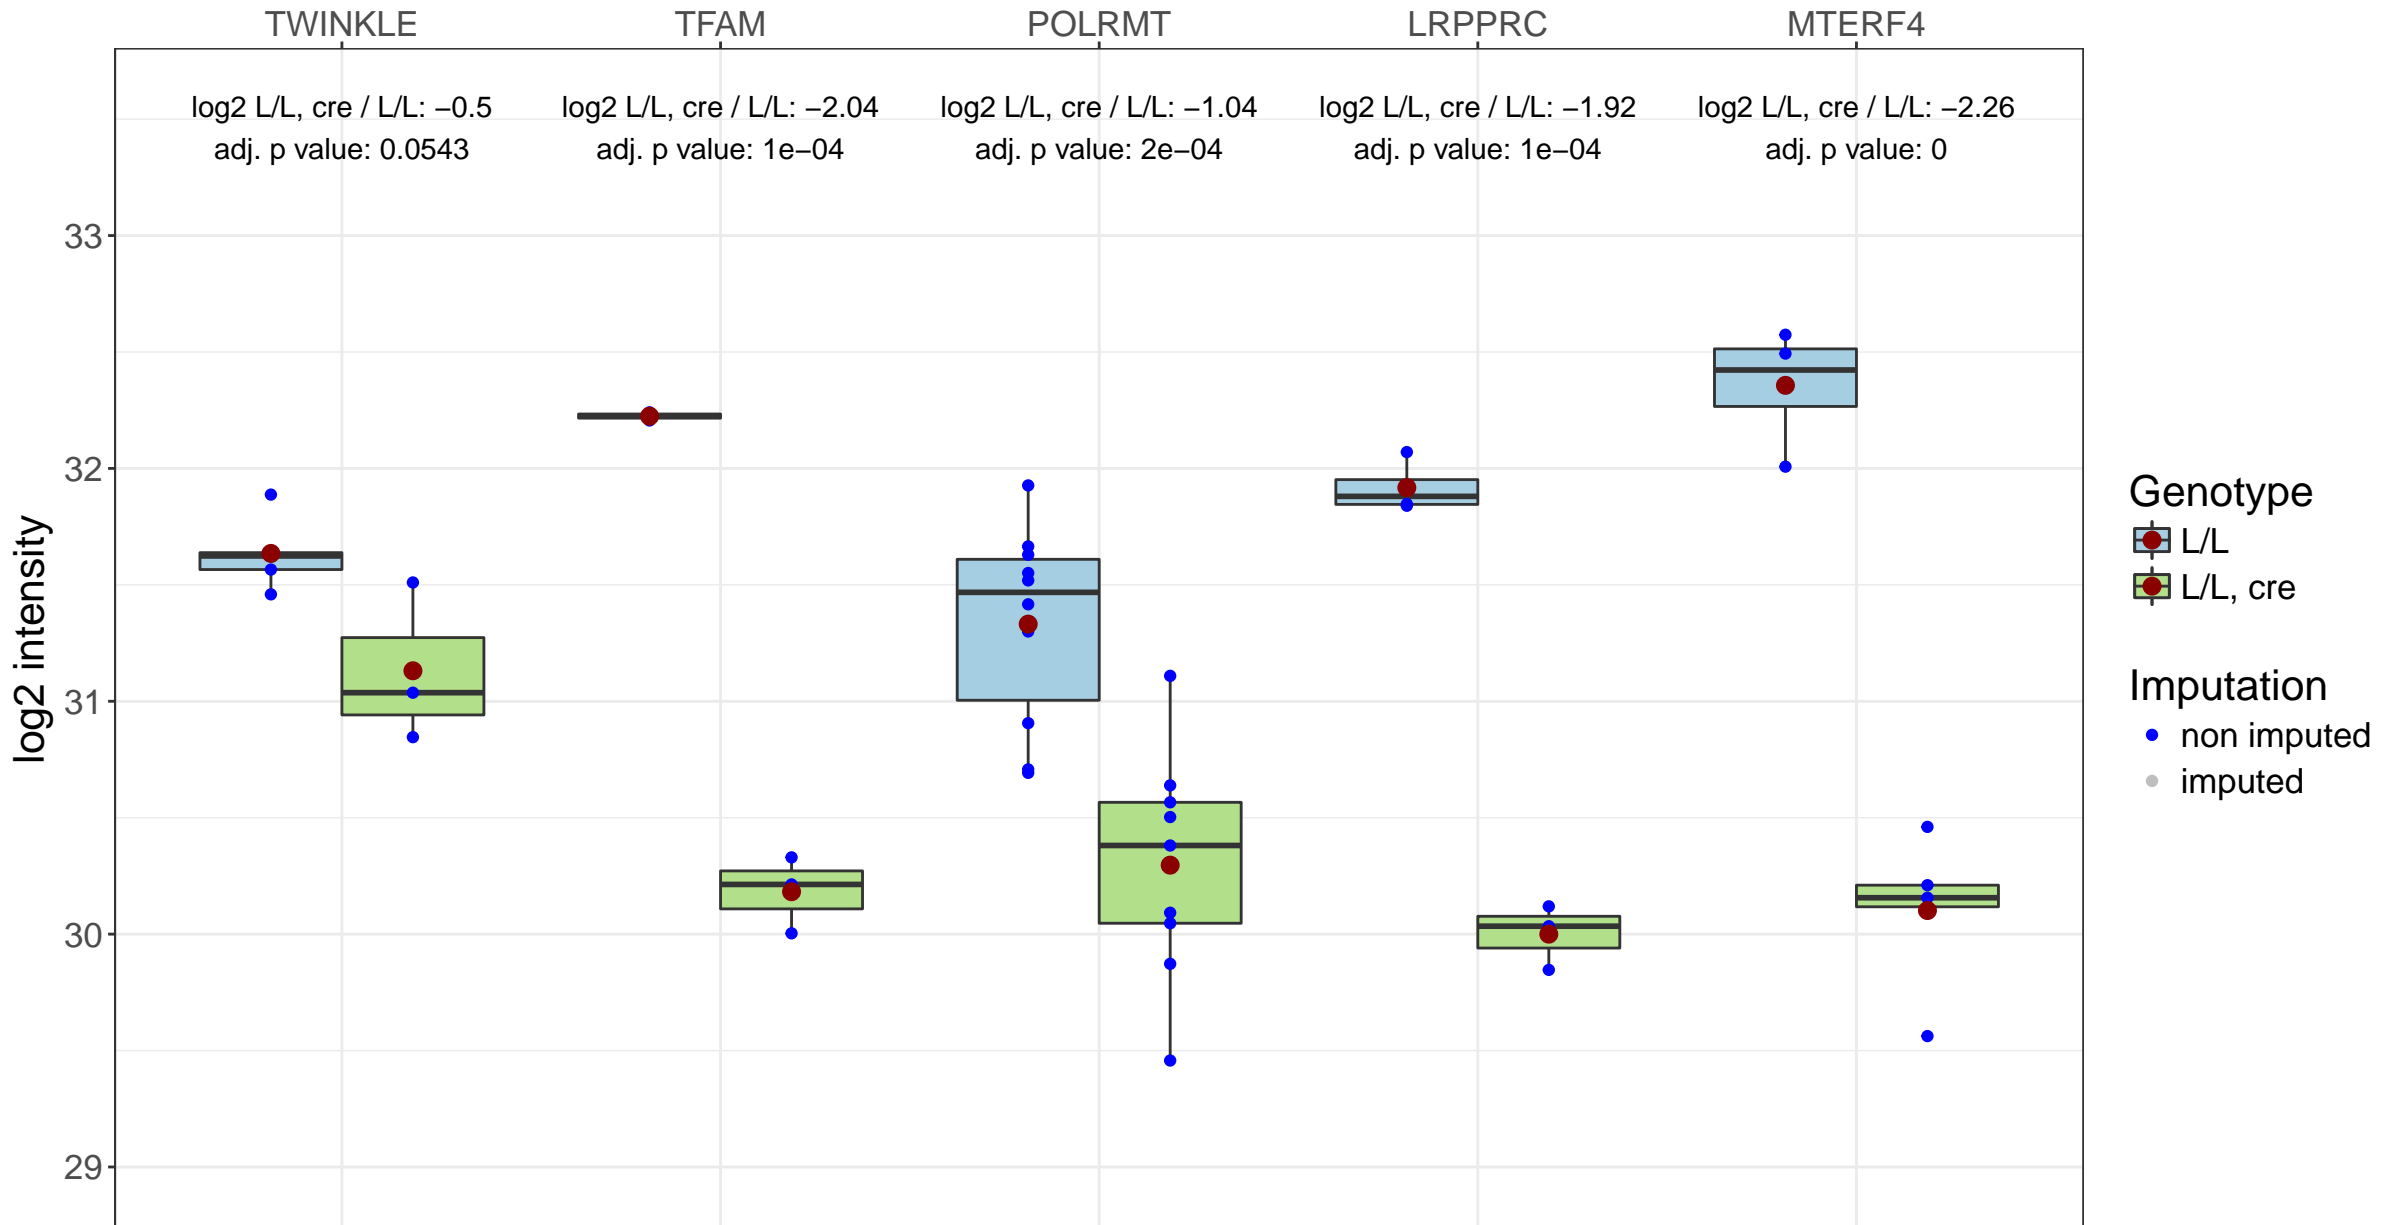

# COQ3 / Q8BMS4

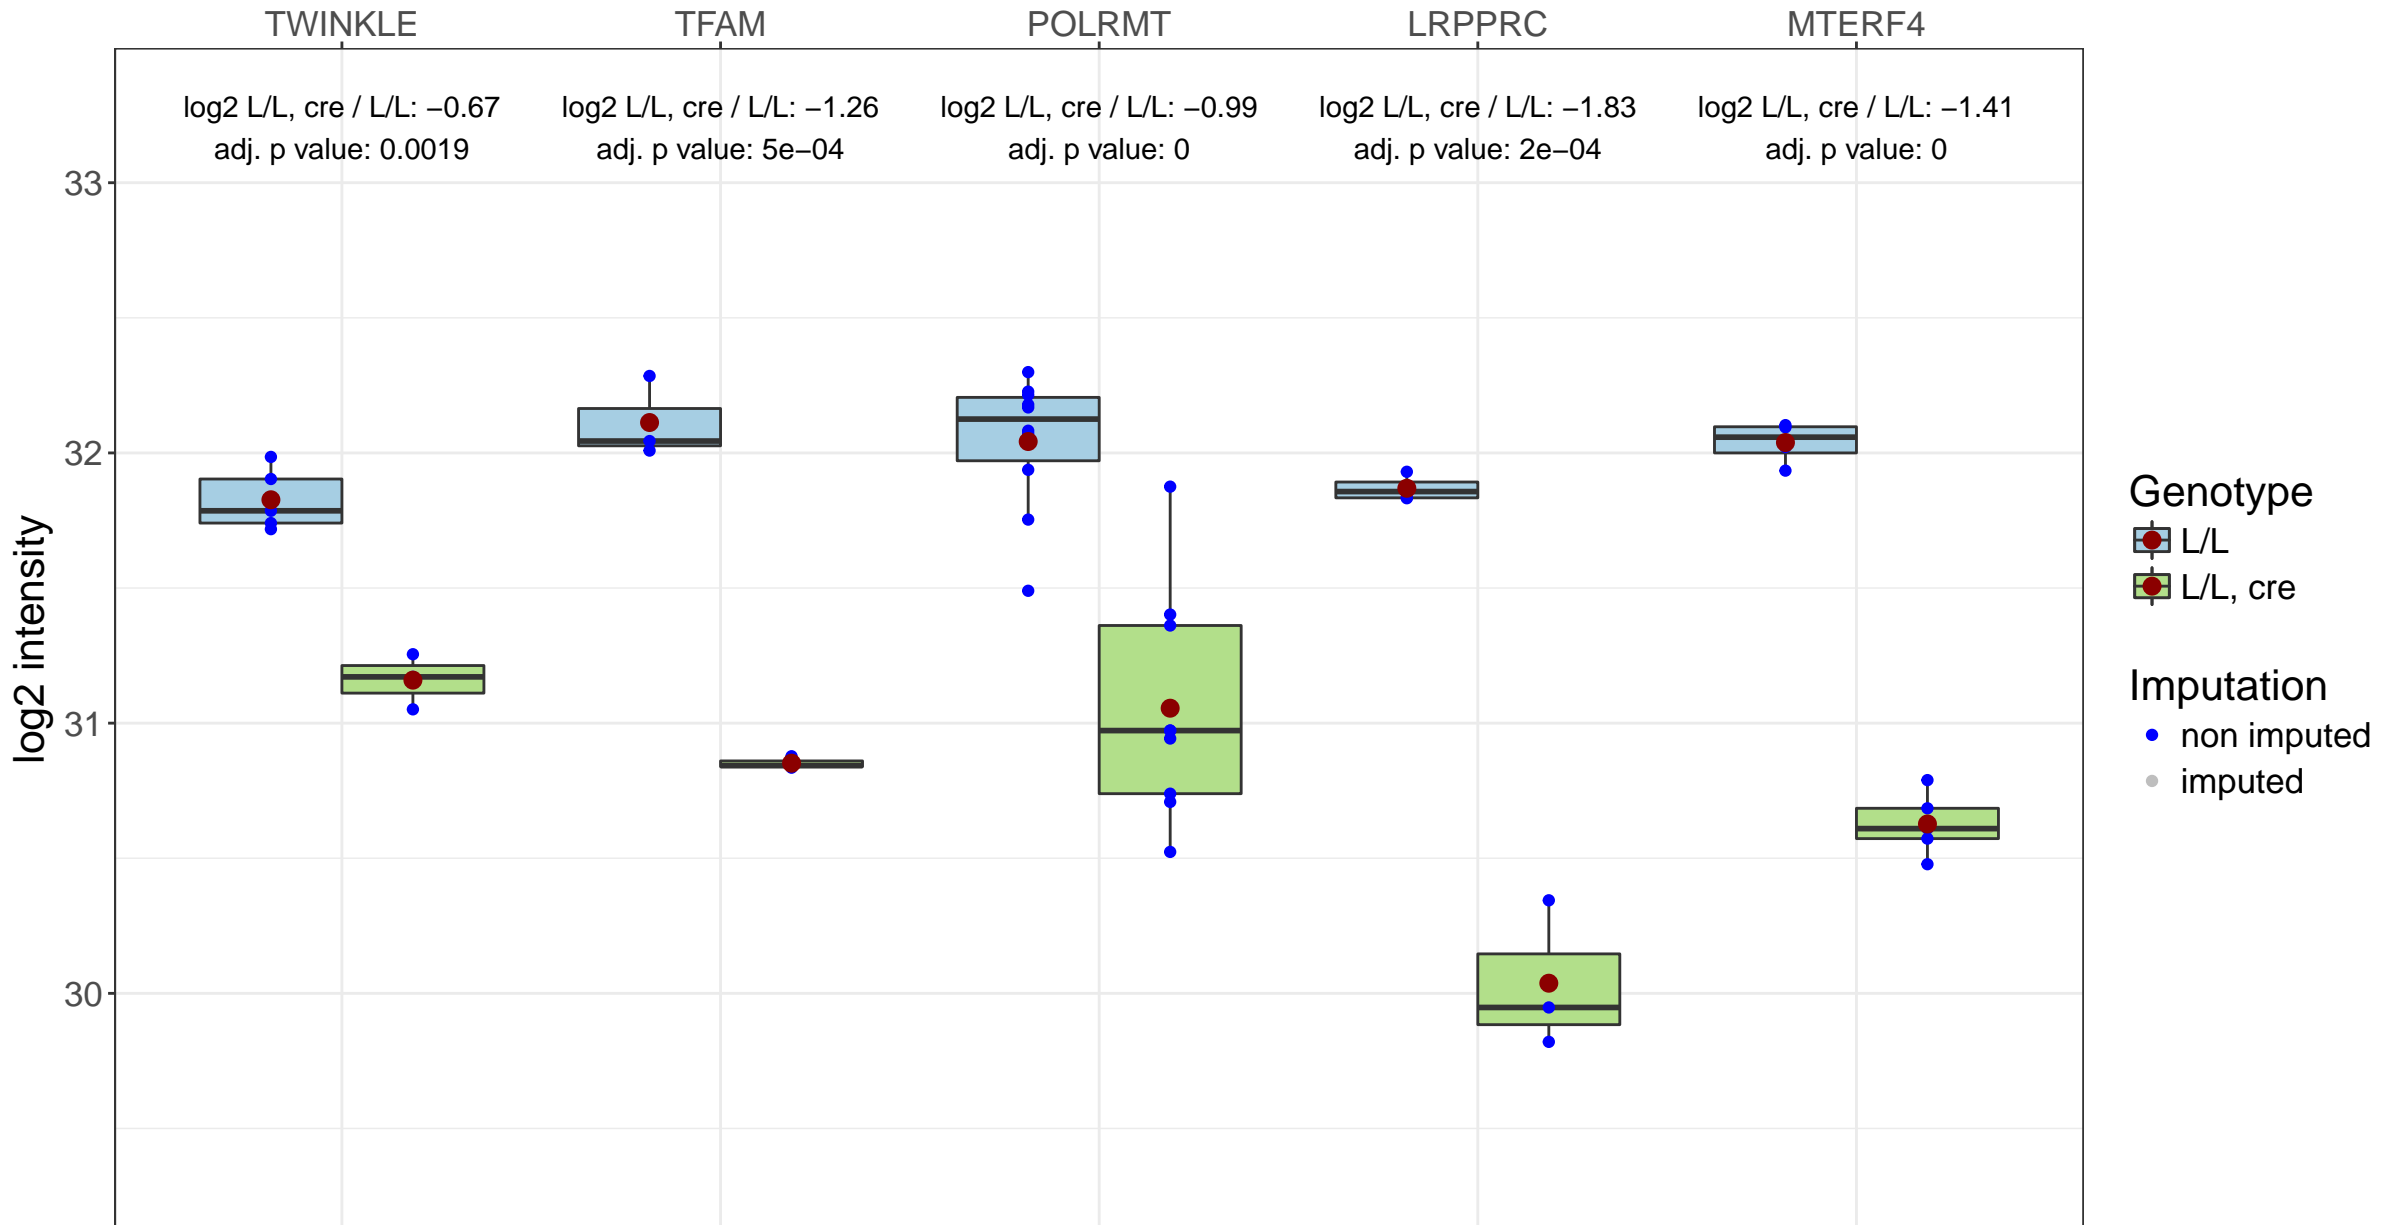



# COQ4 / Q8BGB8

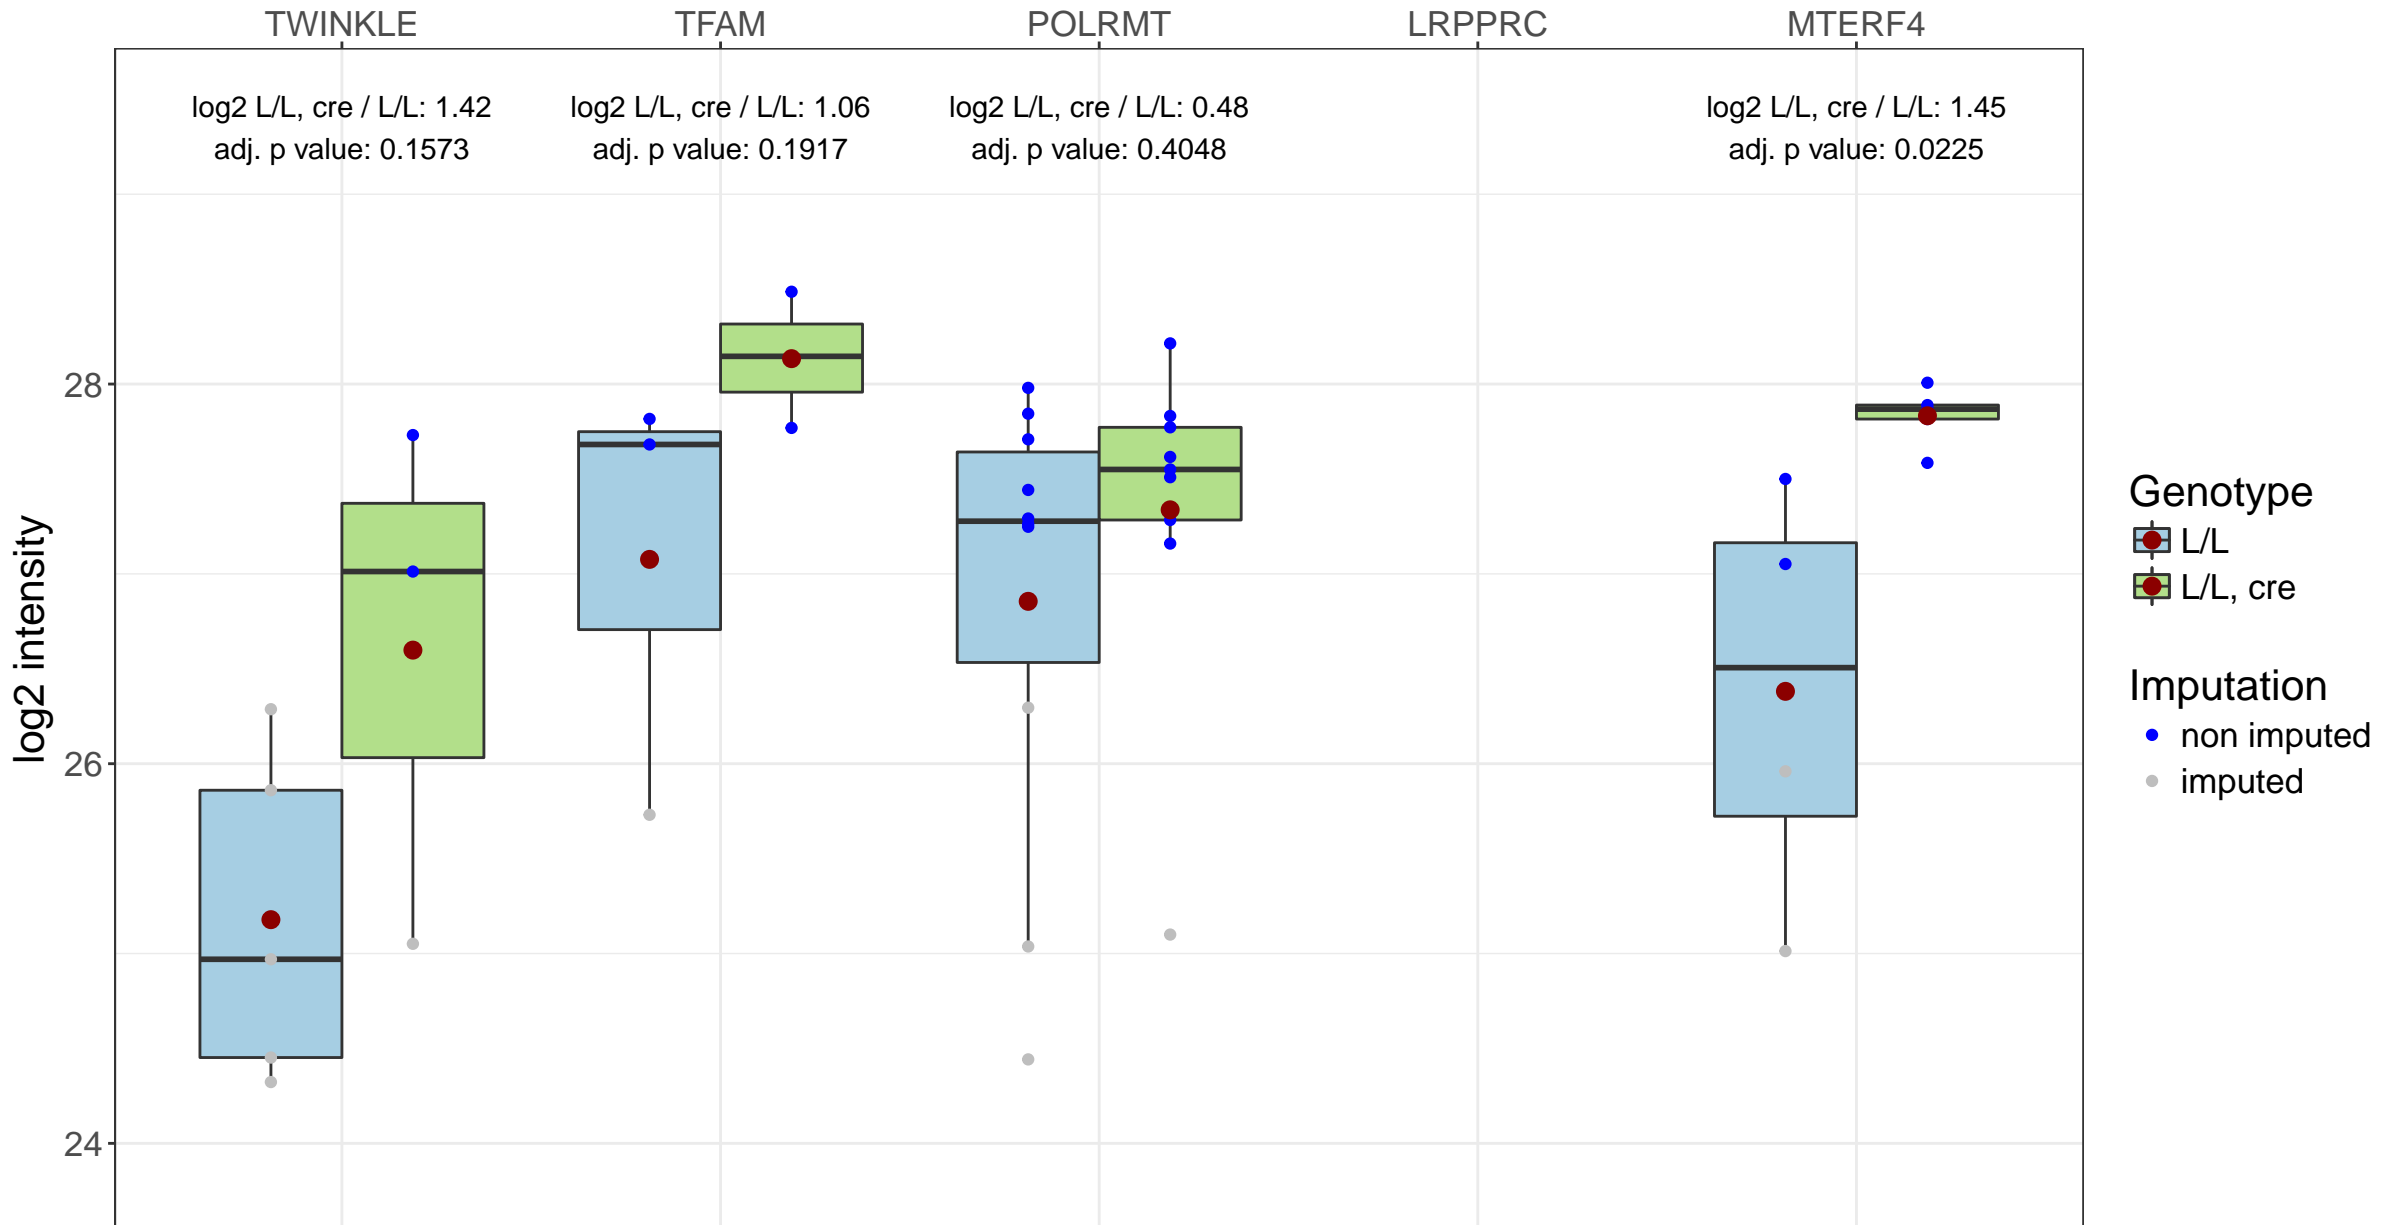

# COQ5 / Q9CX10

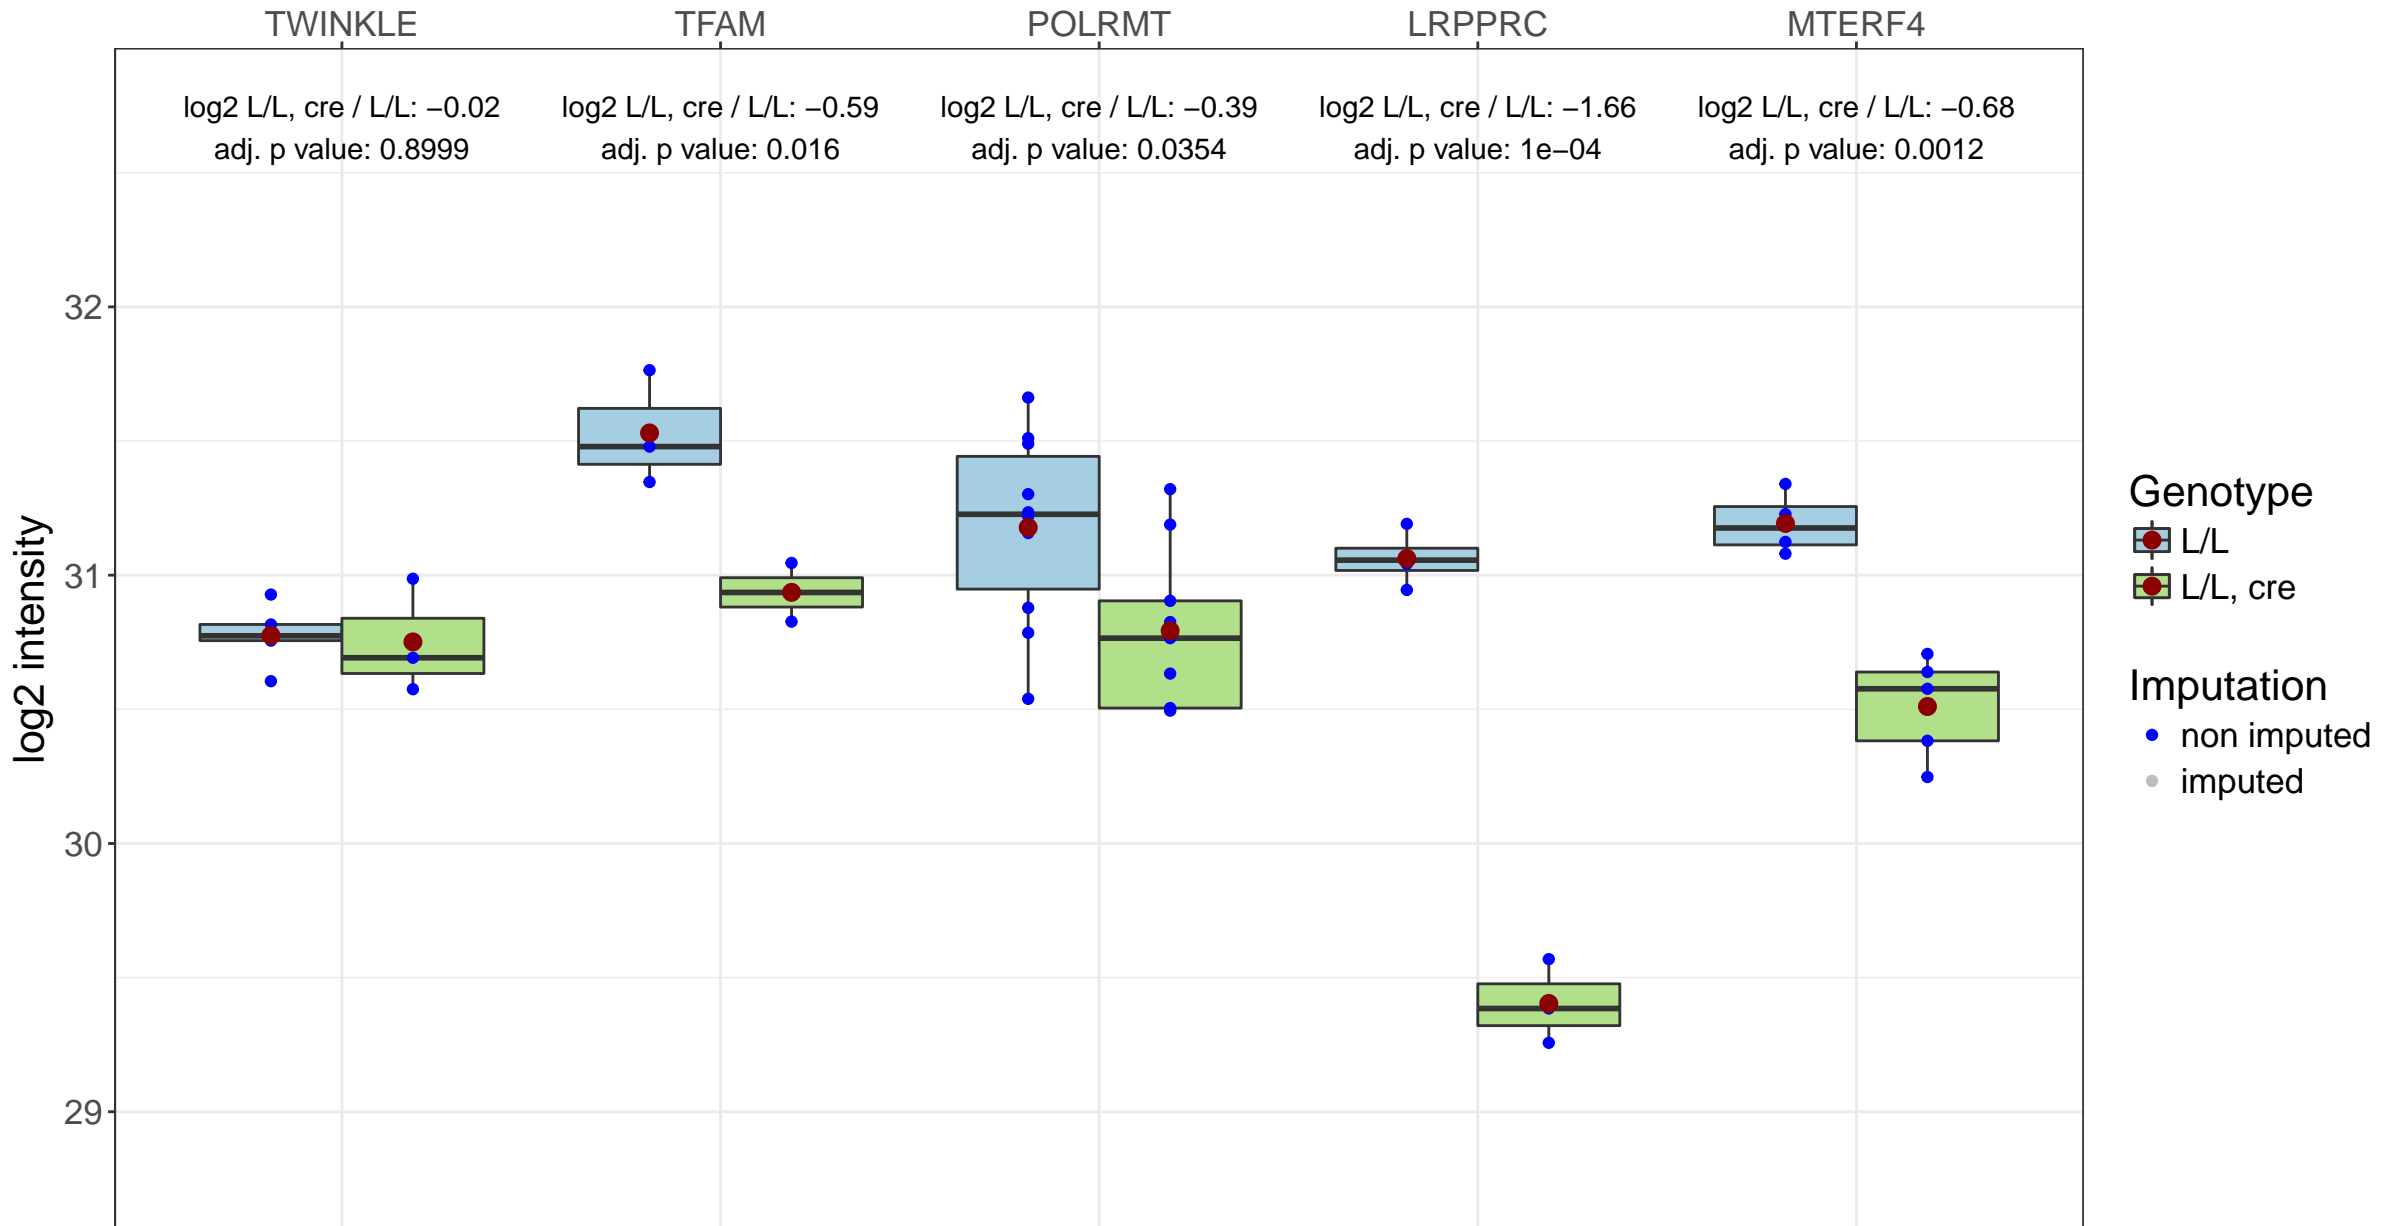

# COQ6 / Q8R1S0

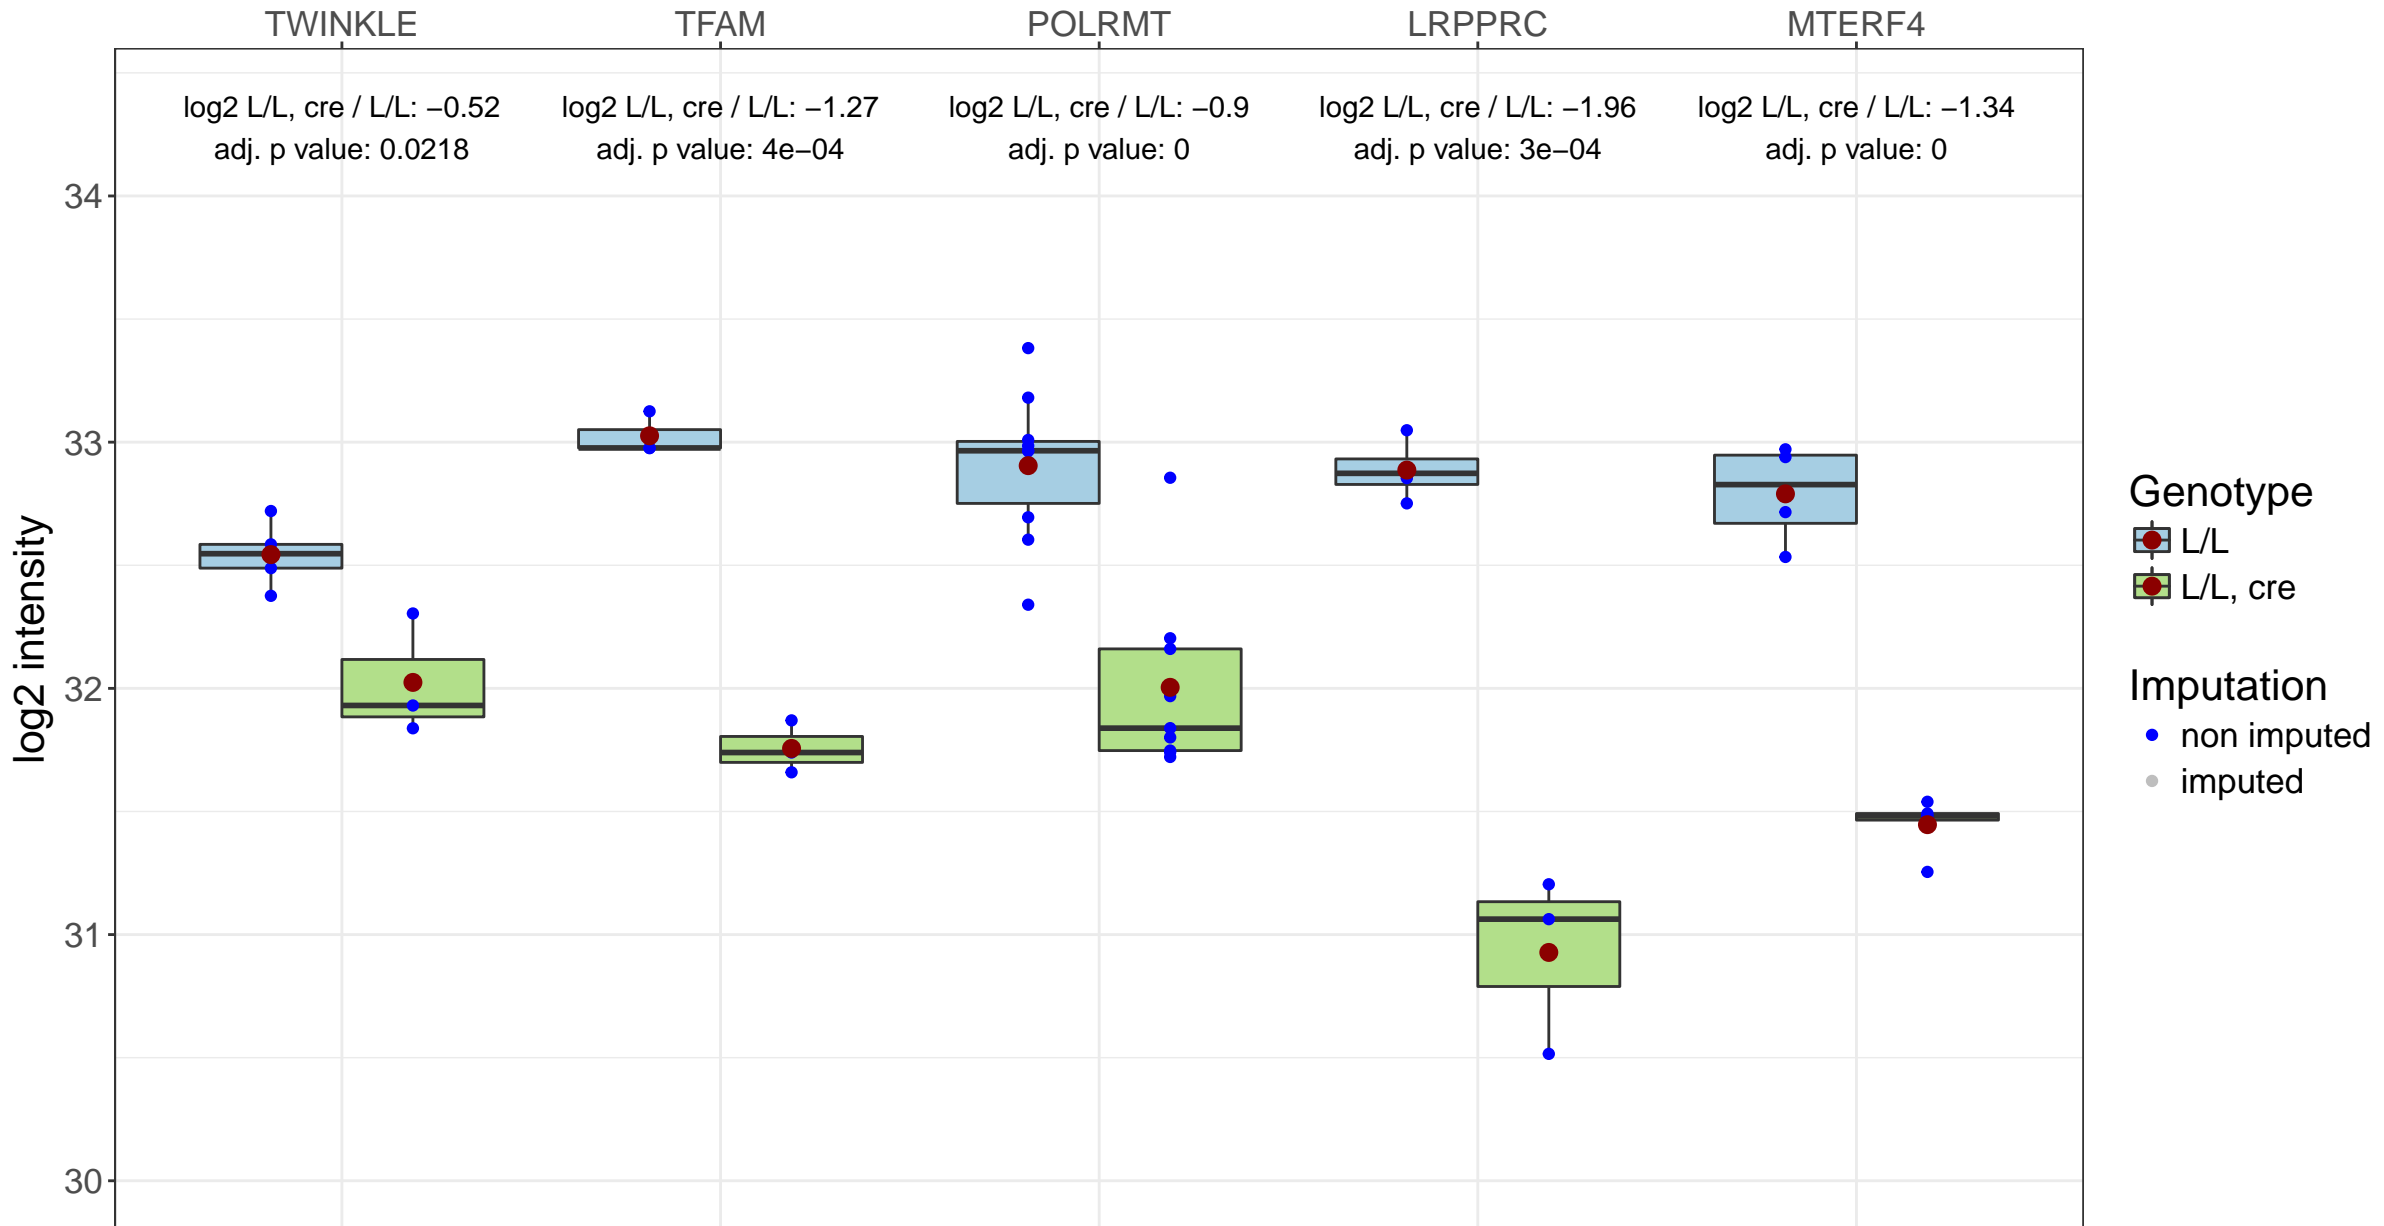

# COQ7 / P97478

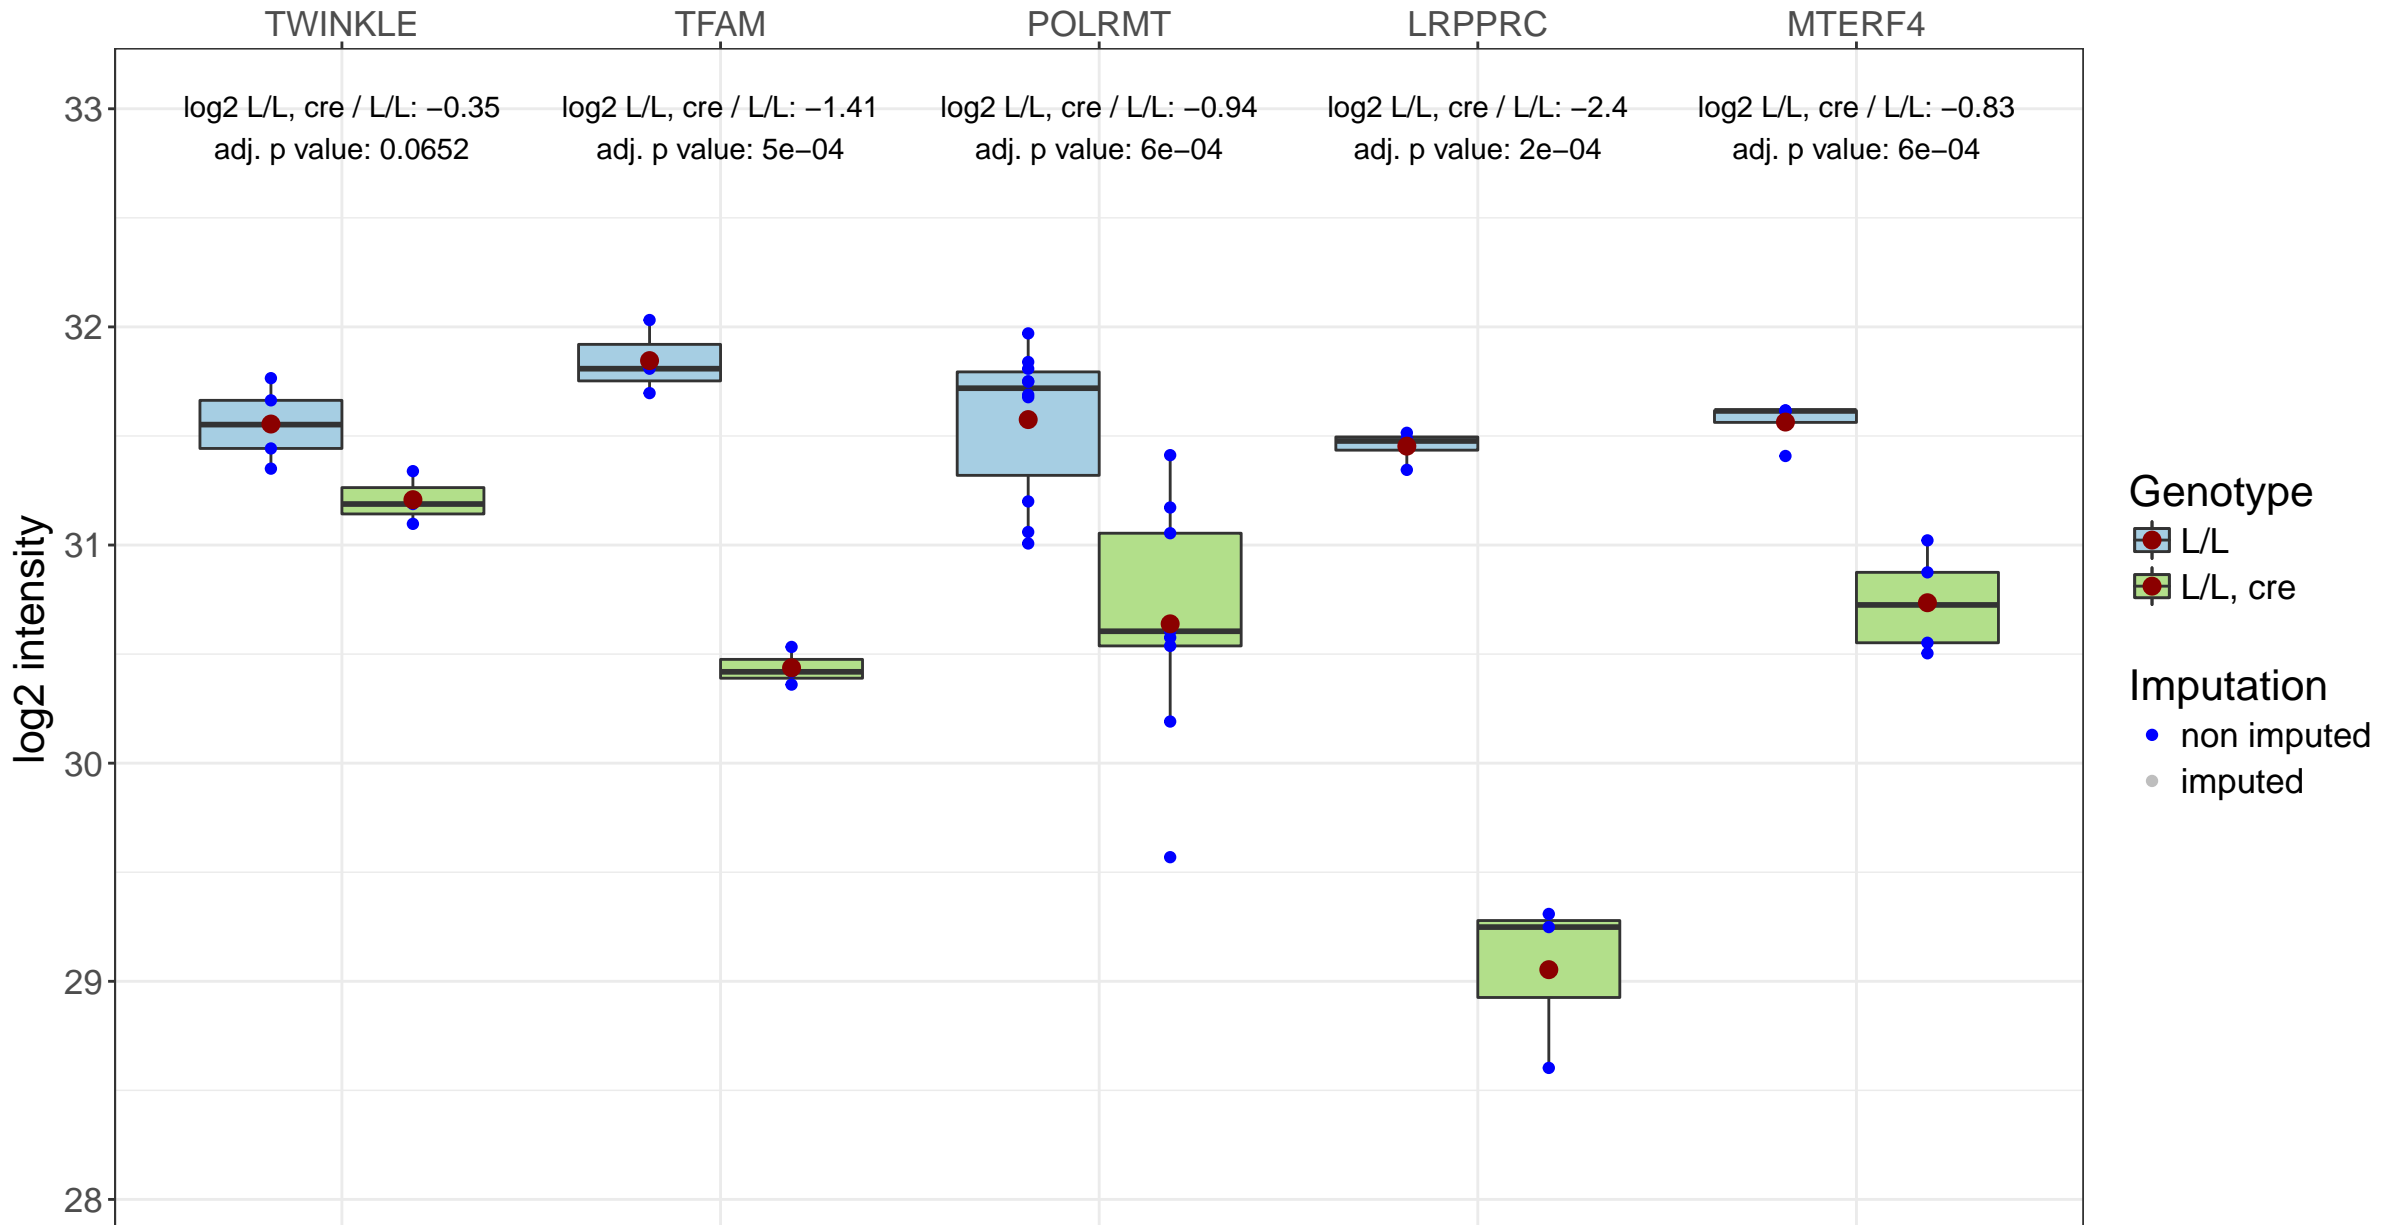

# COQ9 / Q8K1Z0

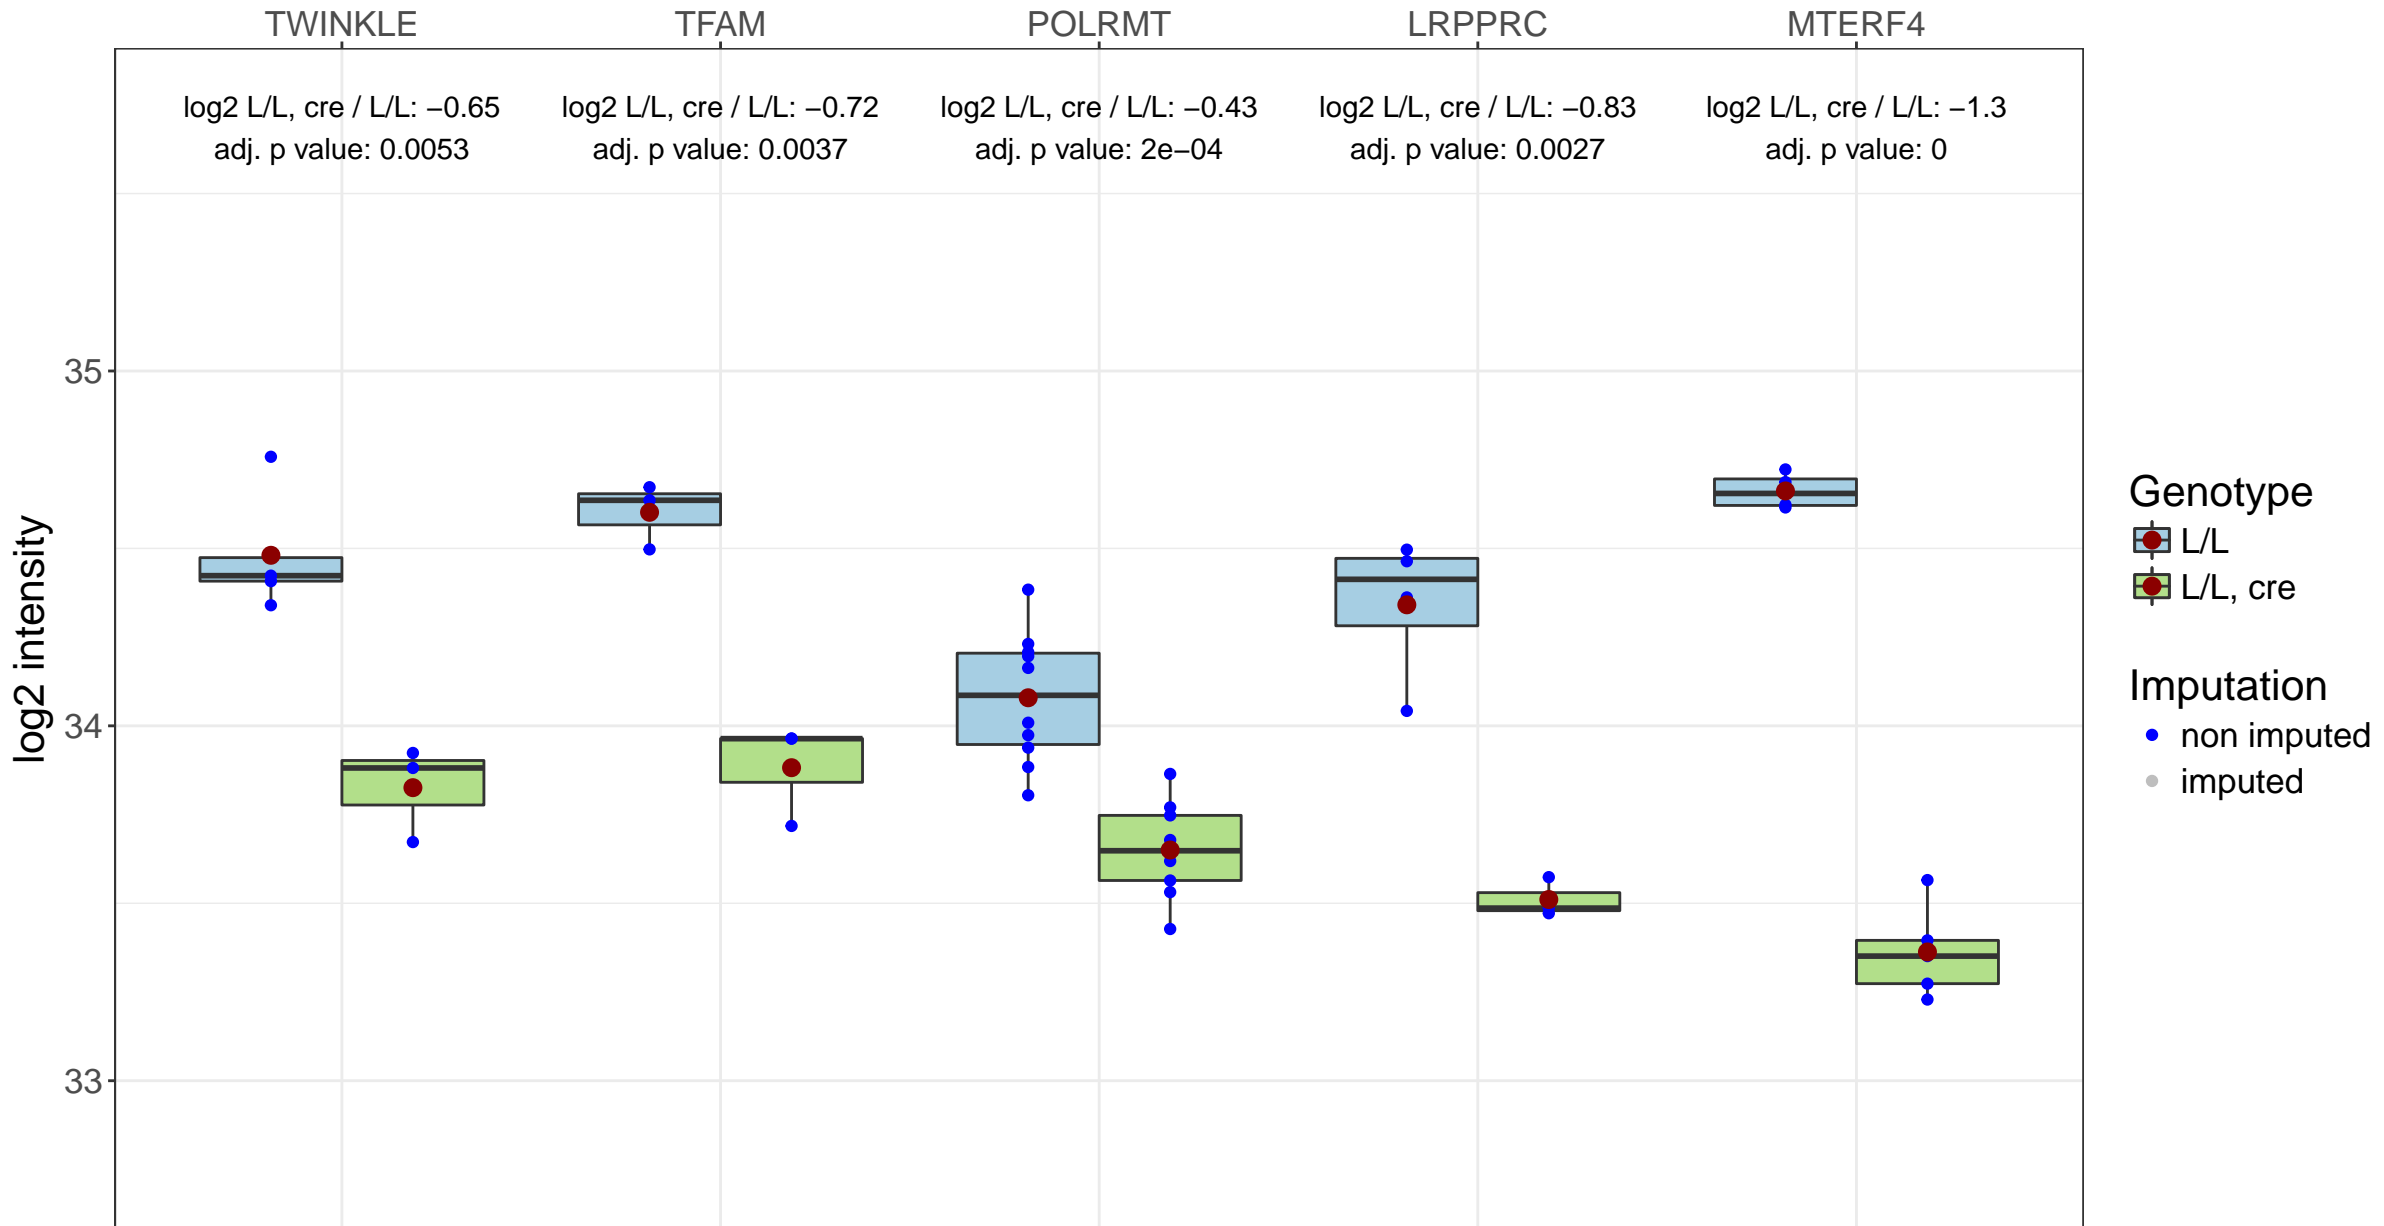

# COX10 / Q8CFY5

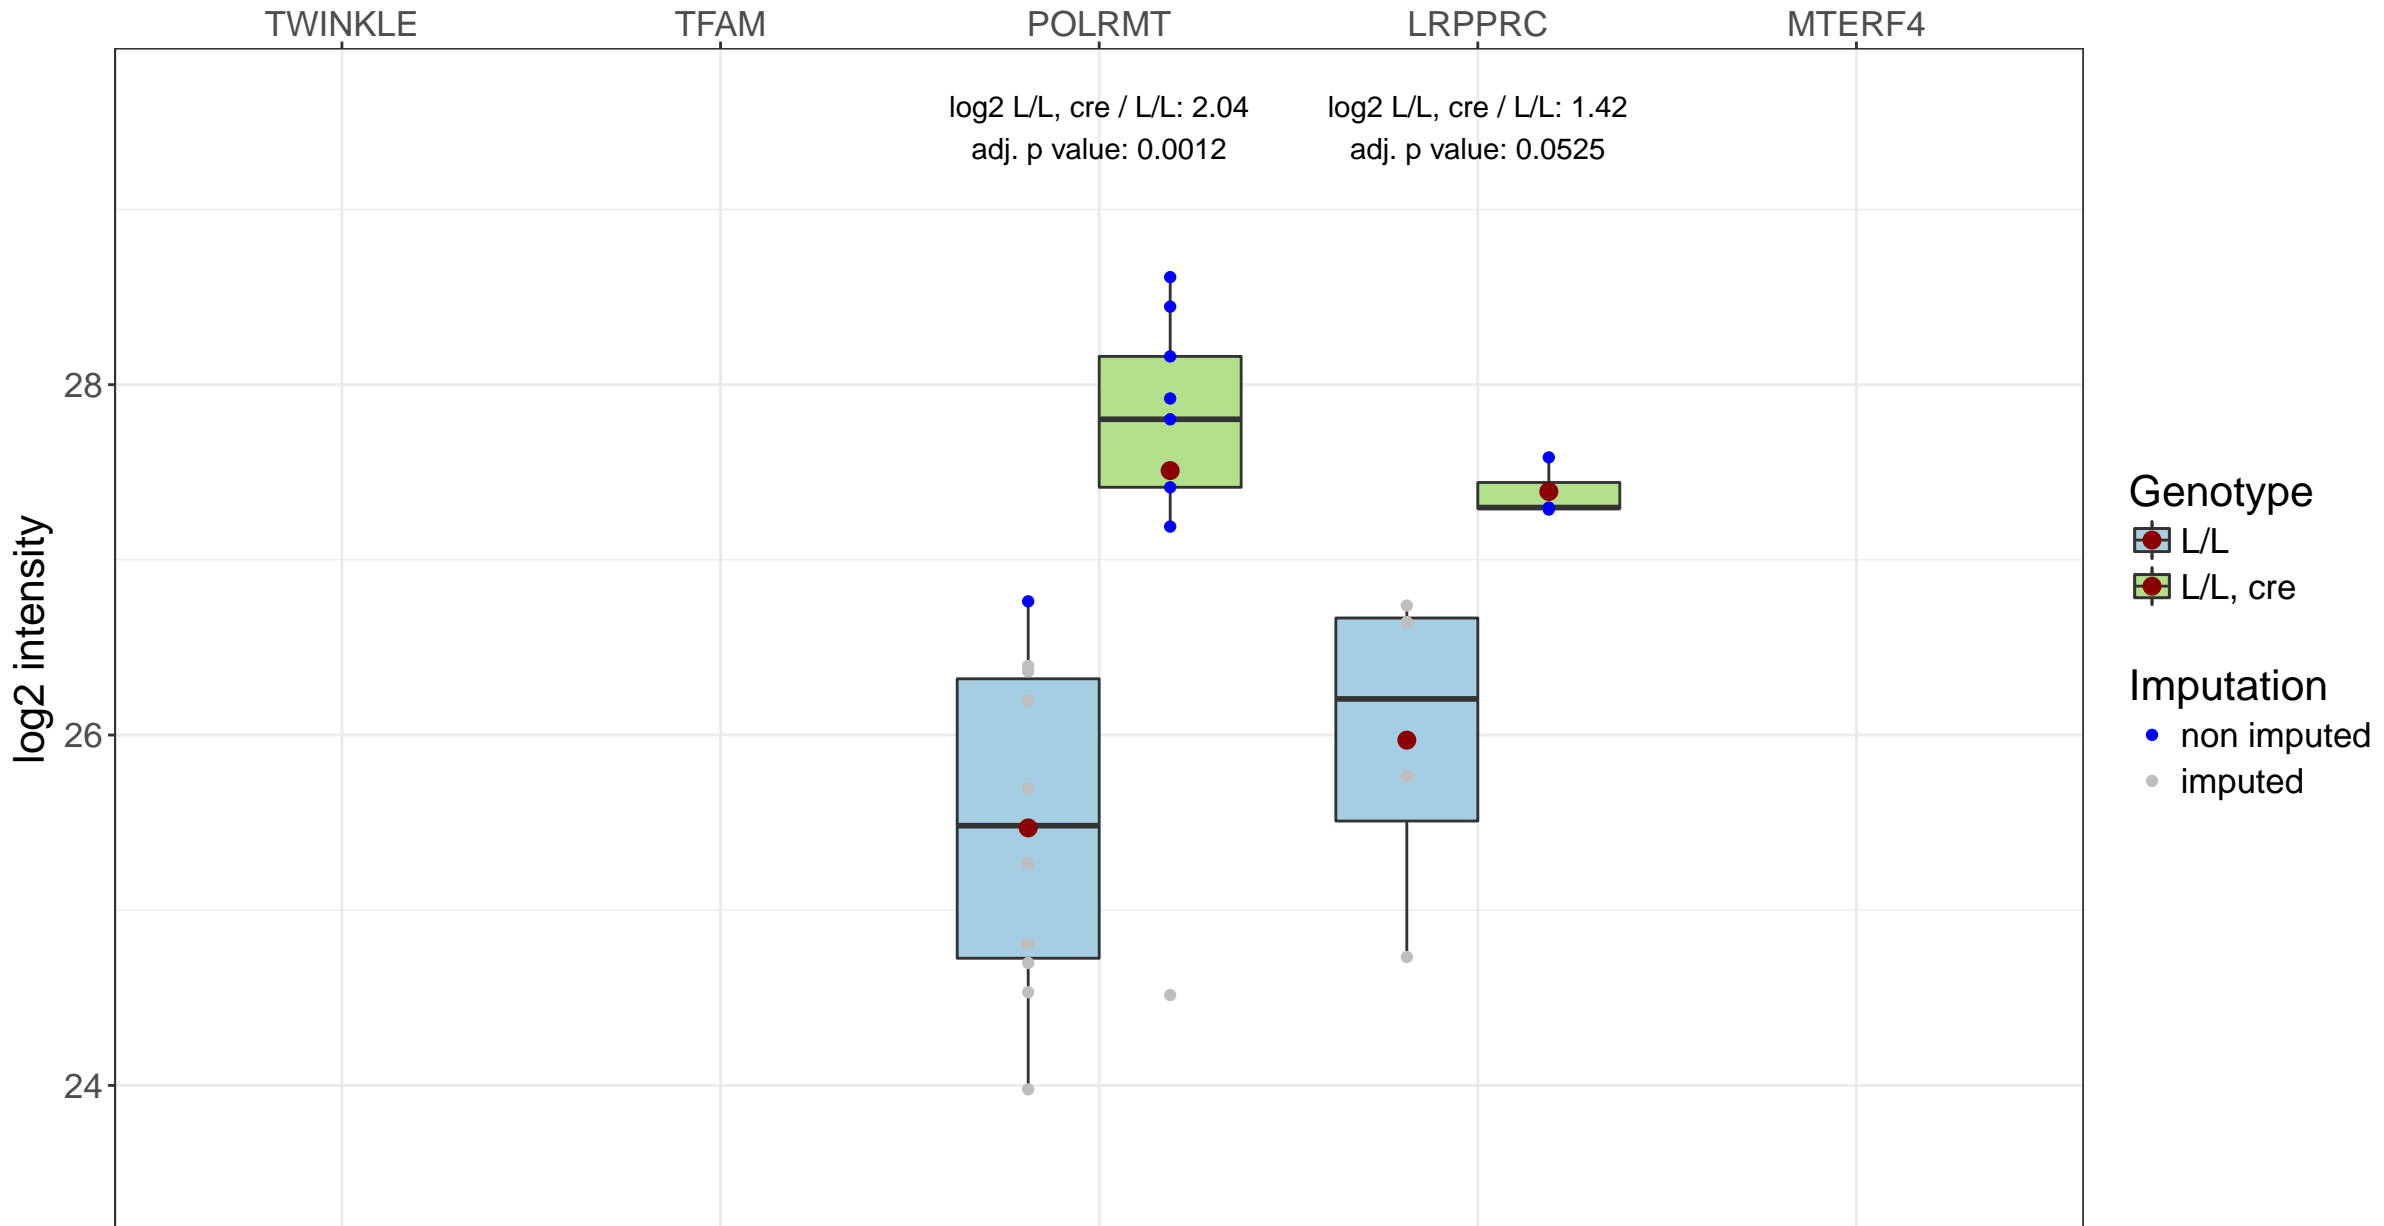

# COX11 / Q6P8I6

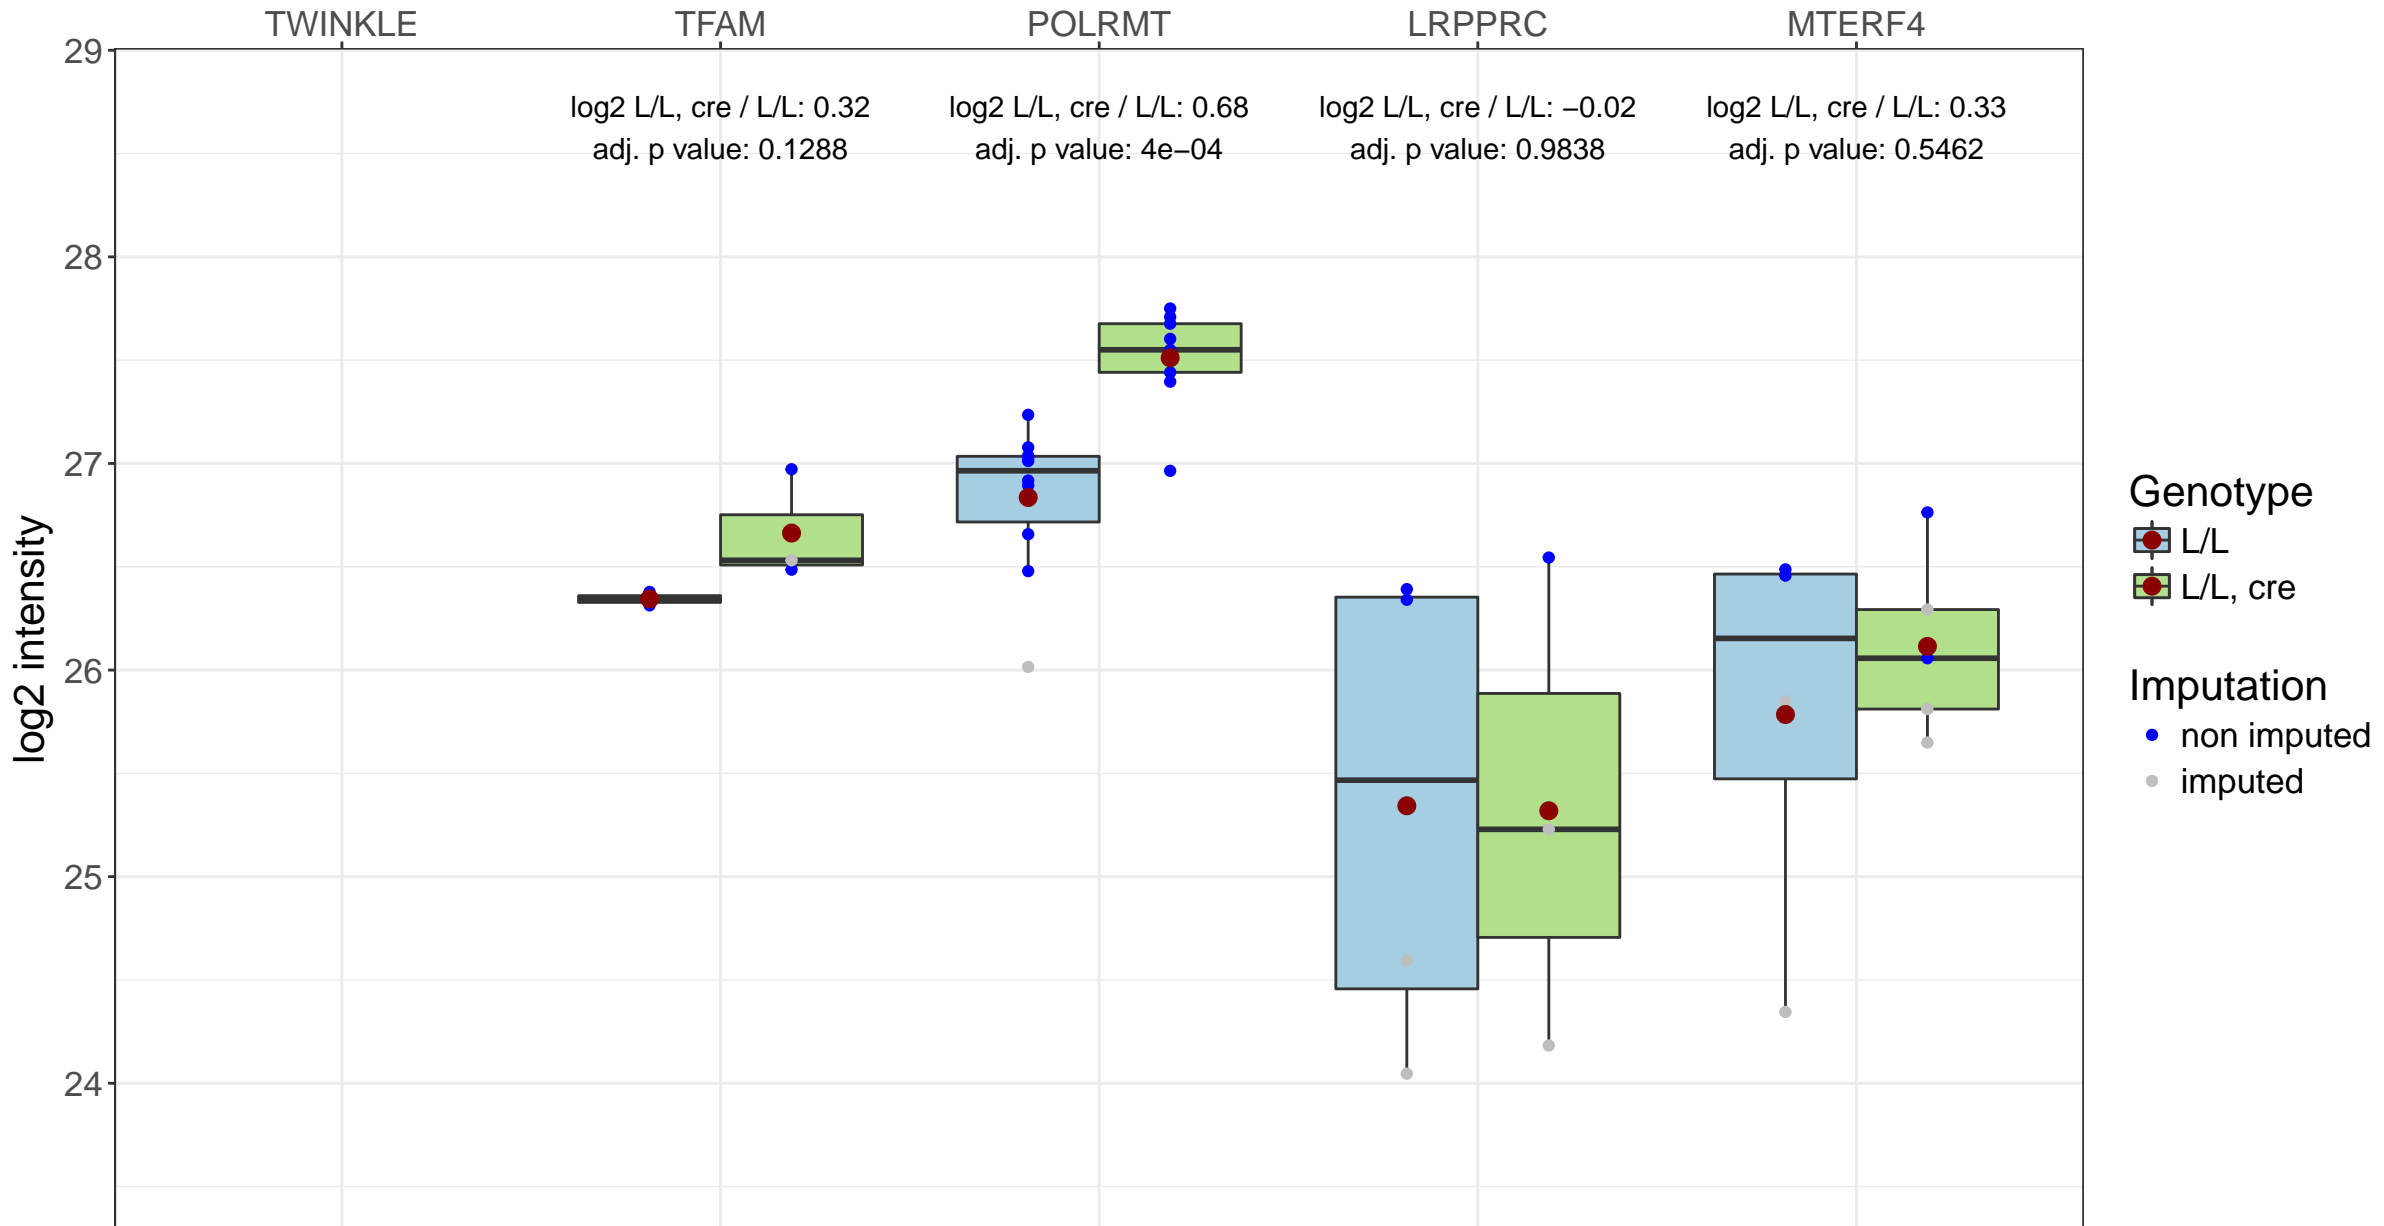

# COX15 / Q8BJ03-2

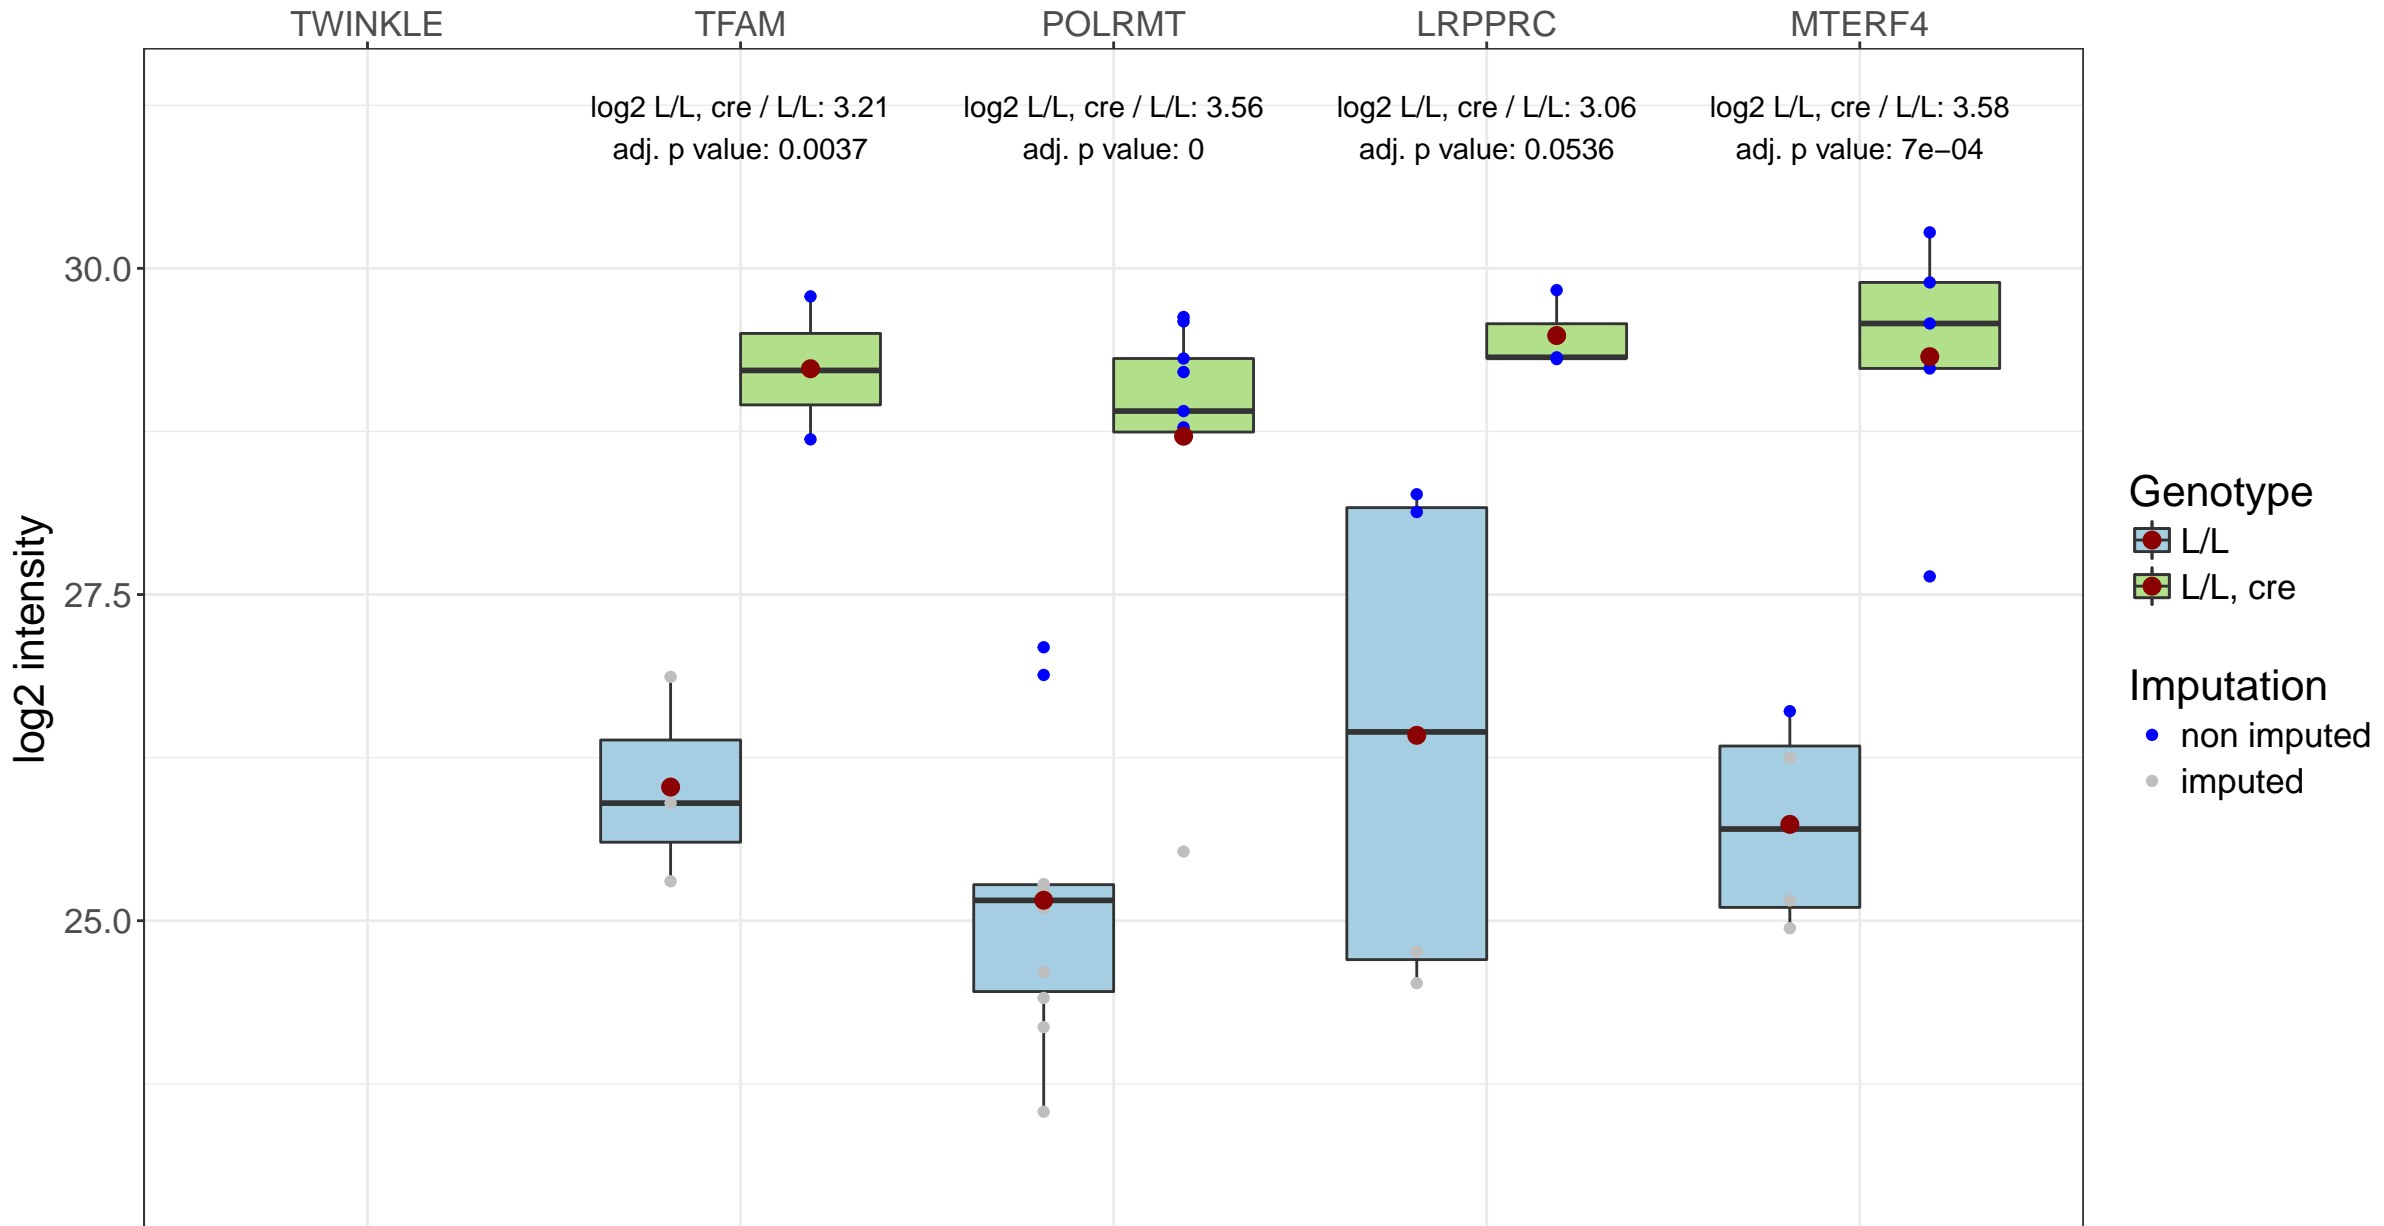



# COX17 / P56394

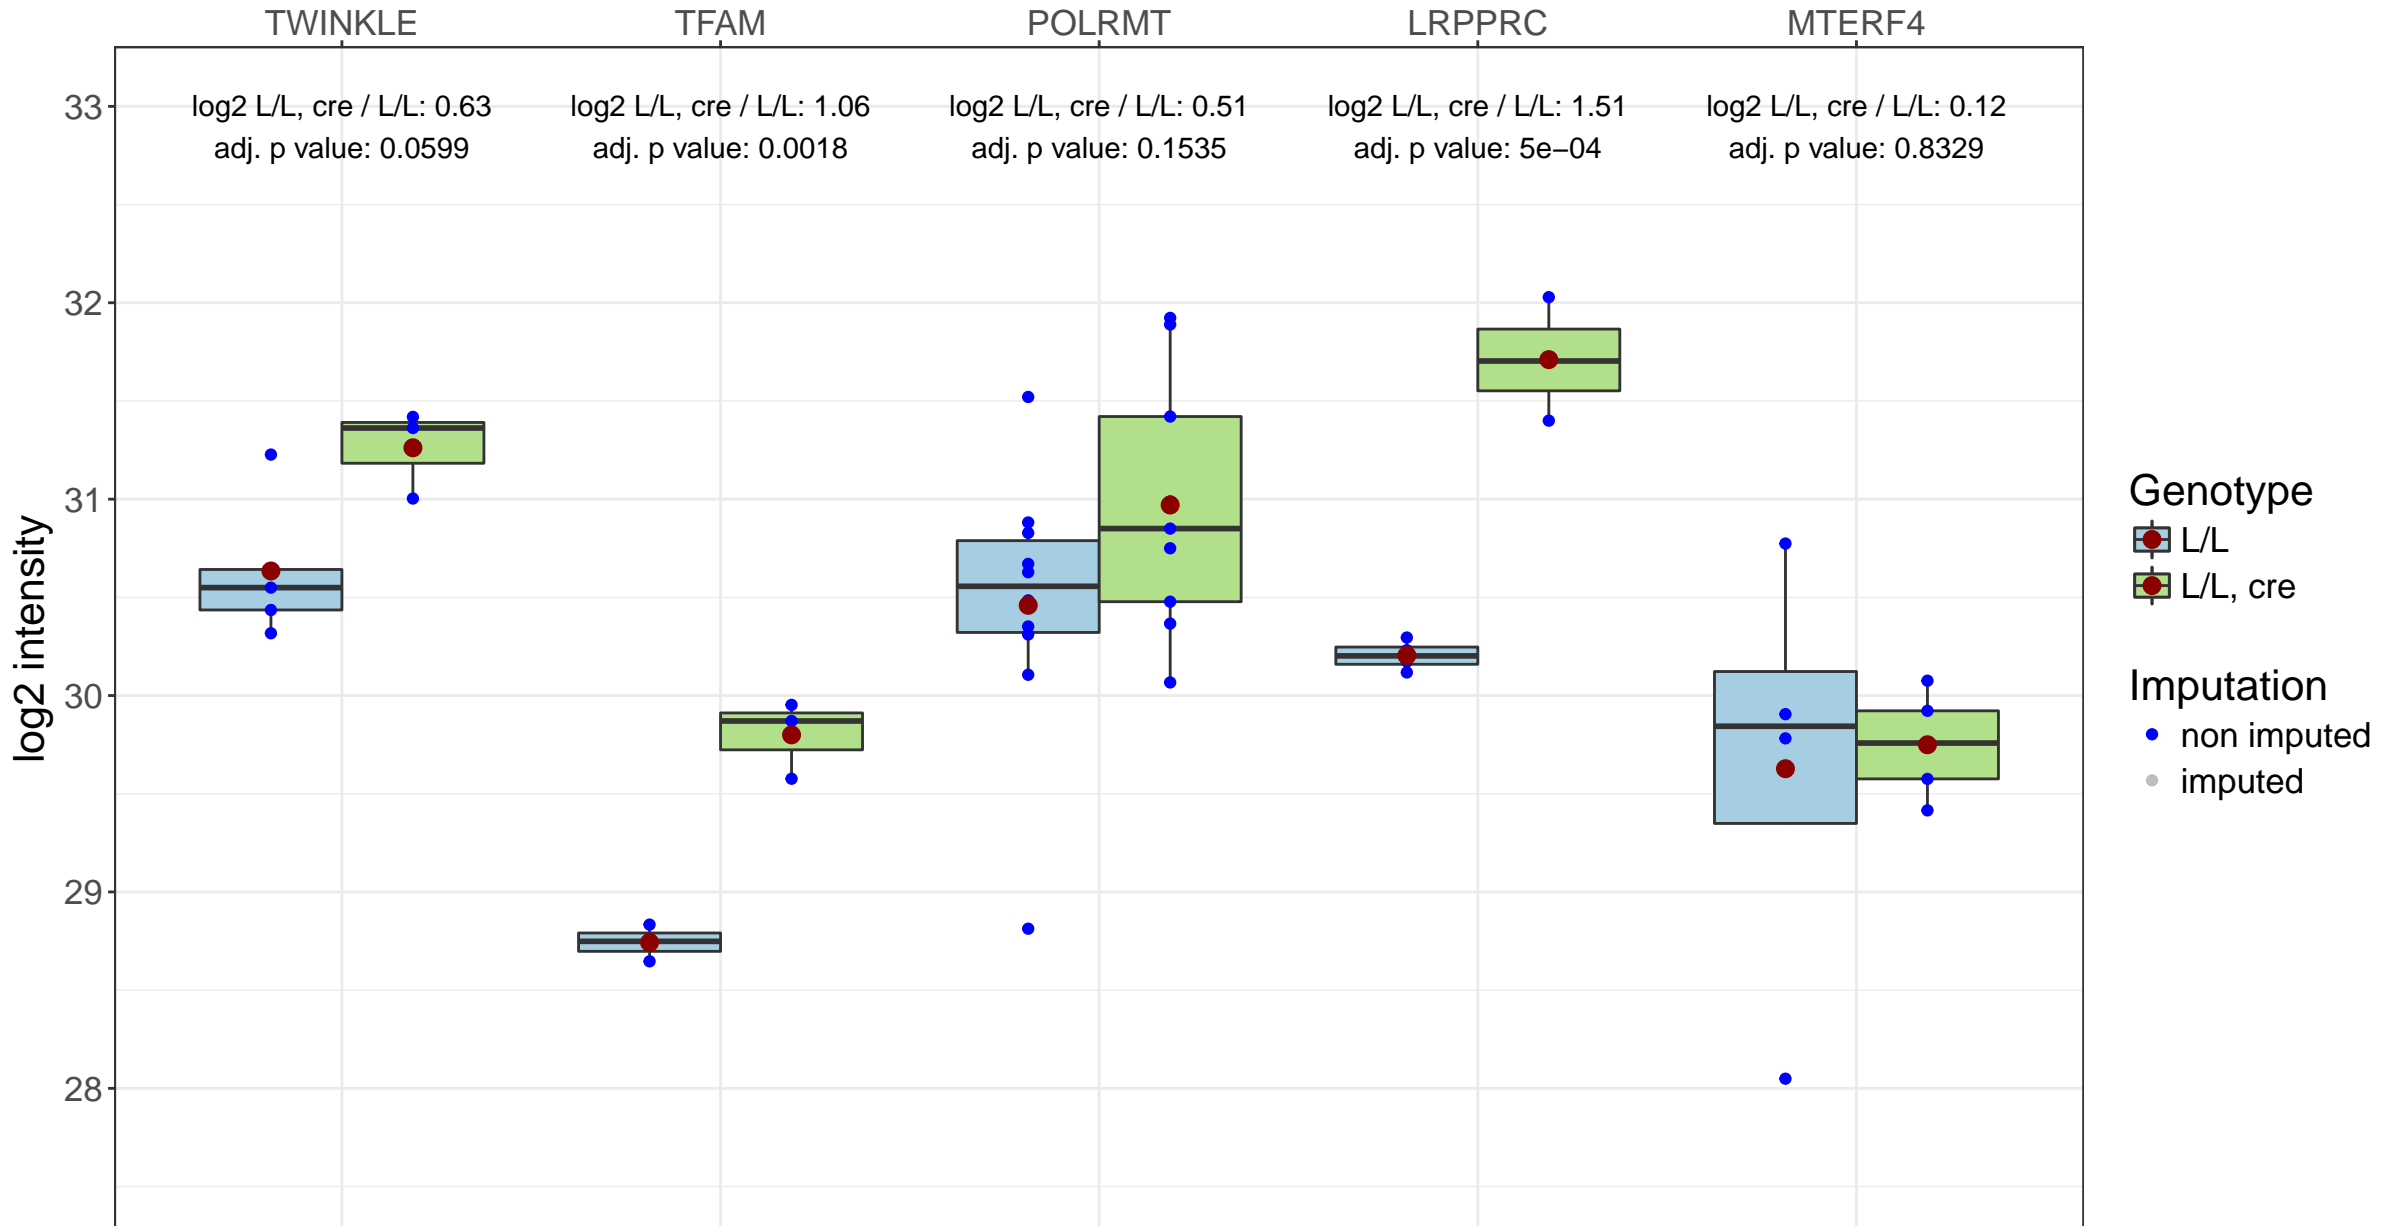

# COX19 / Q8K0C8

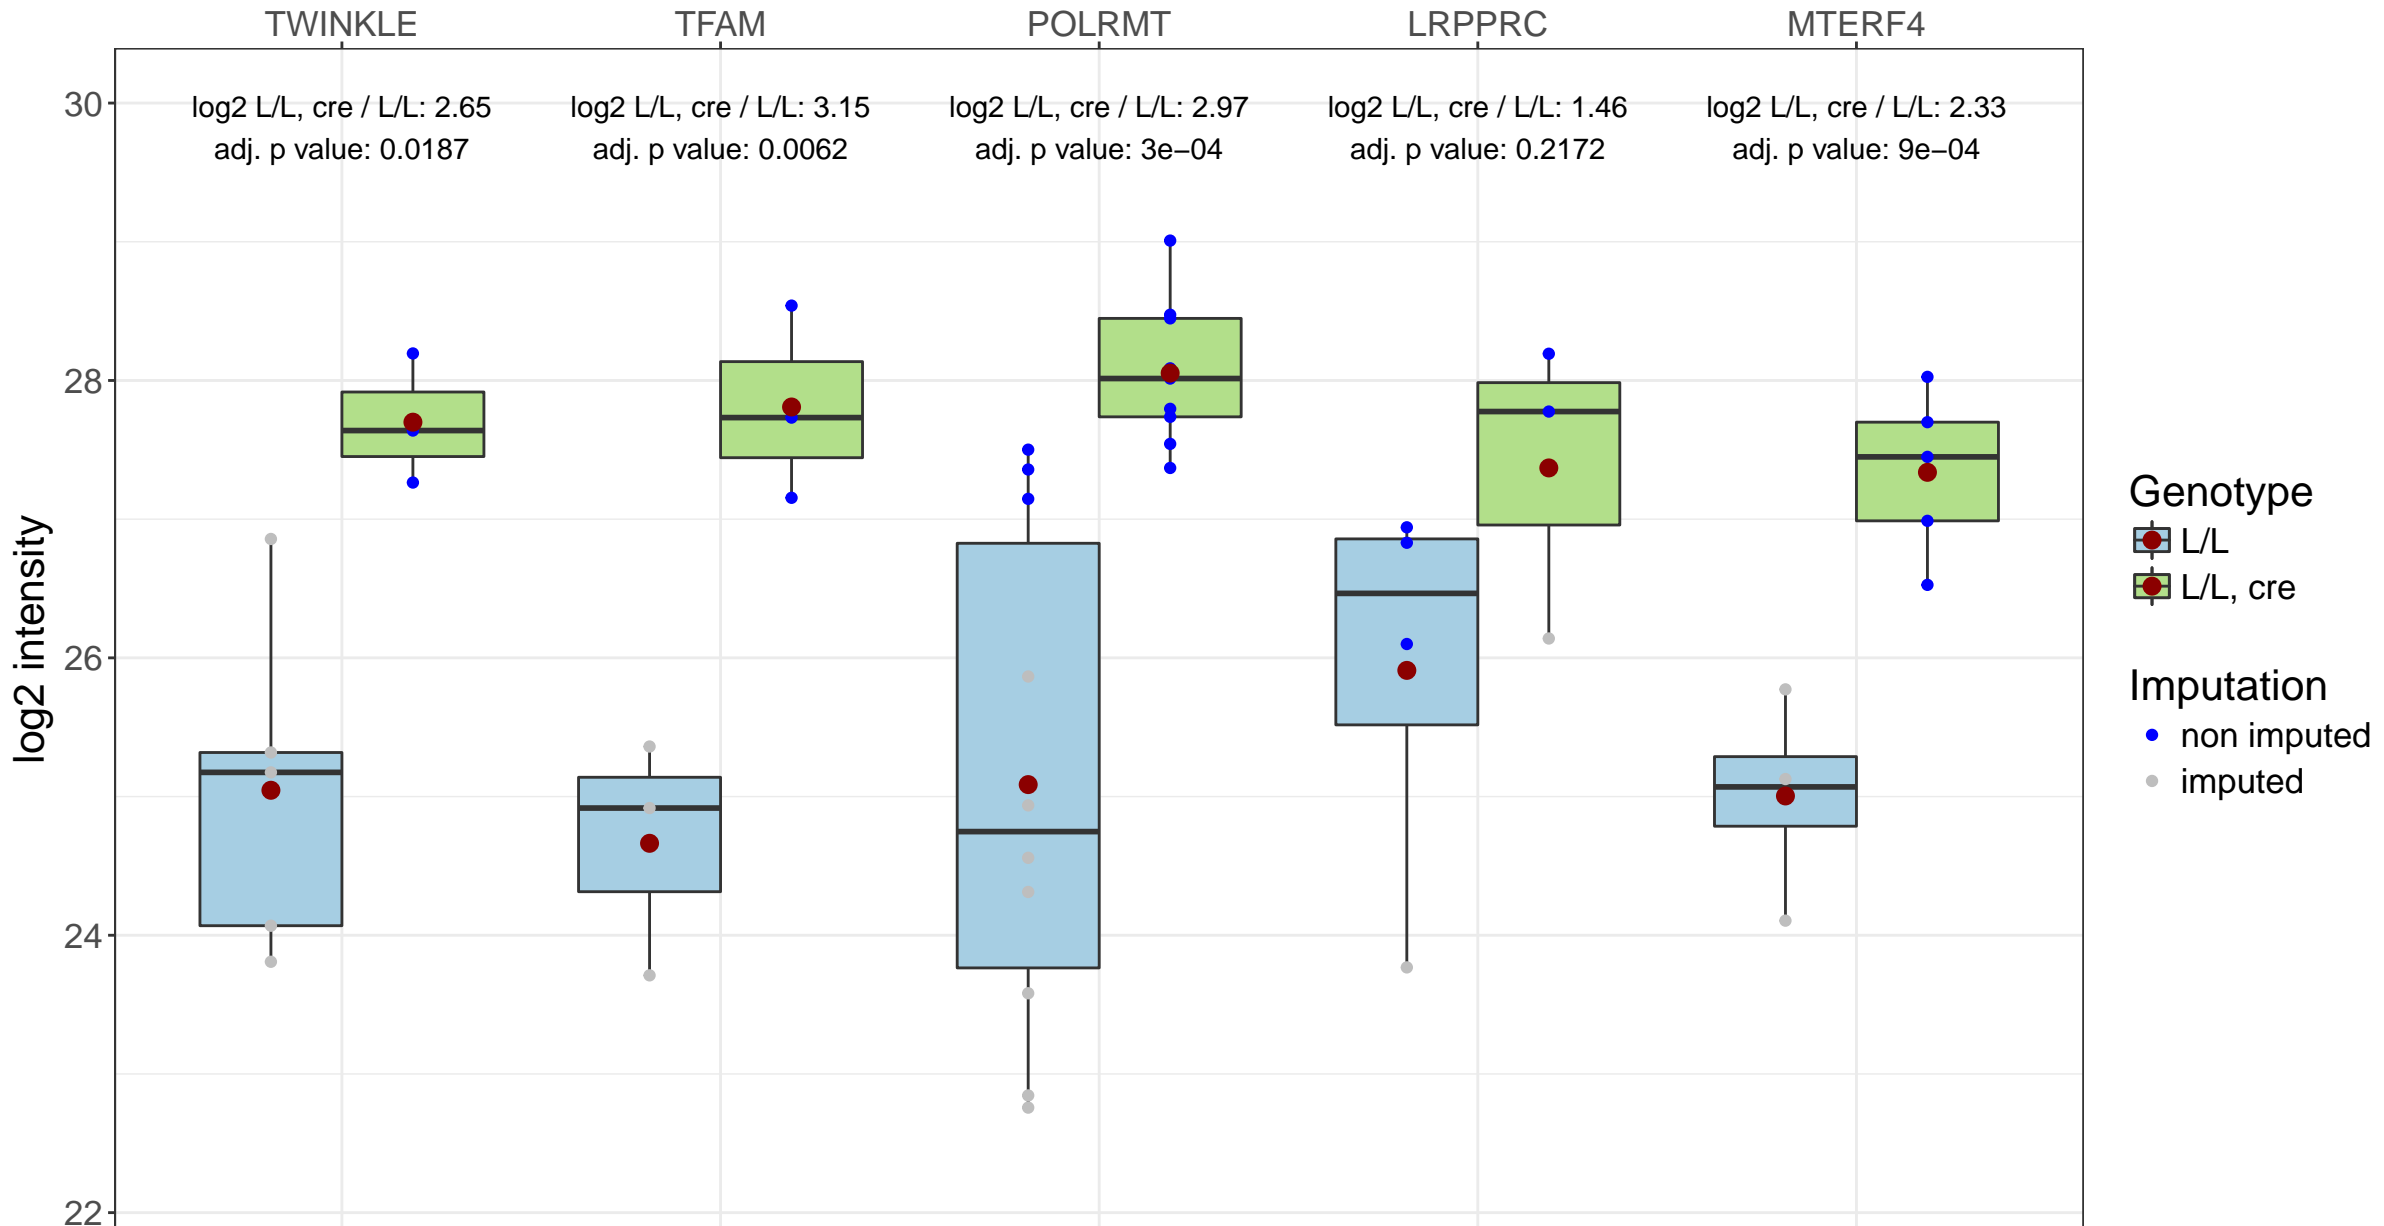

# COX20 / Q9D7J4

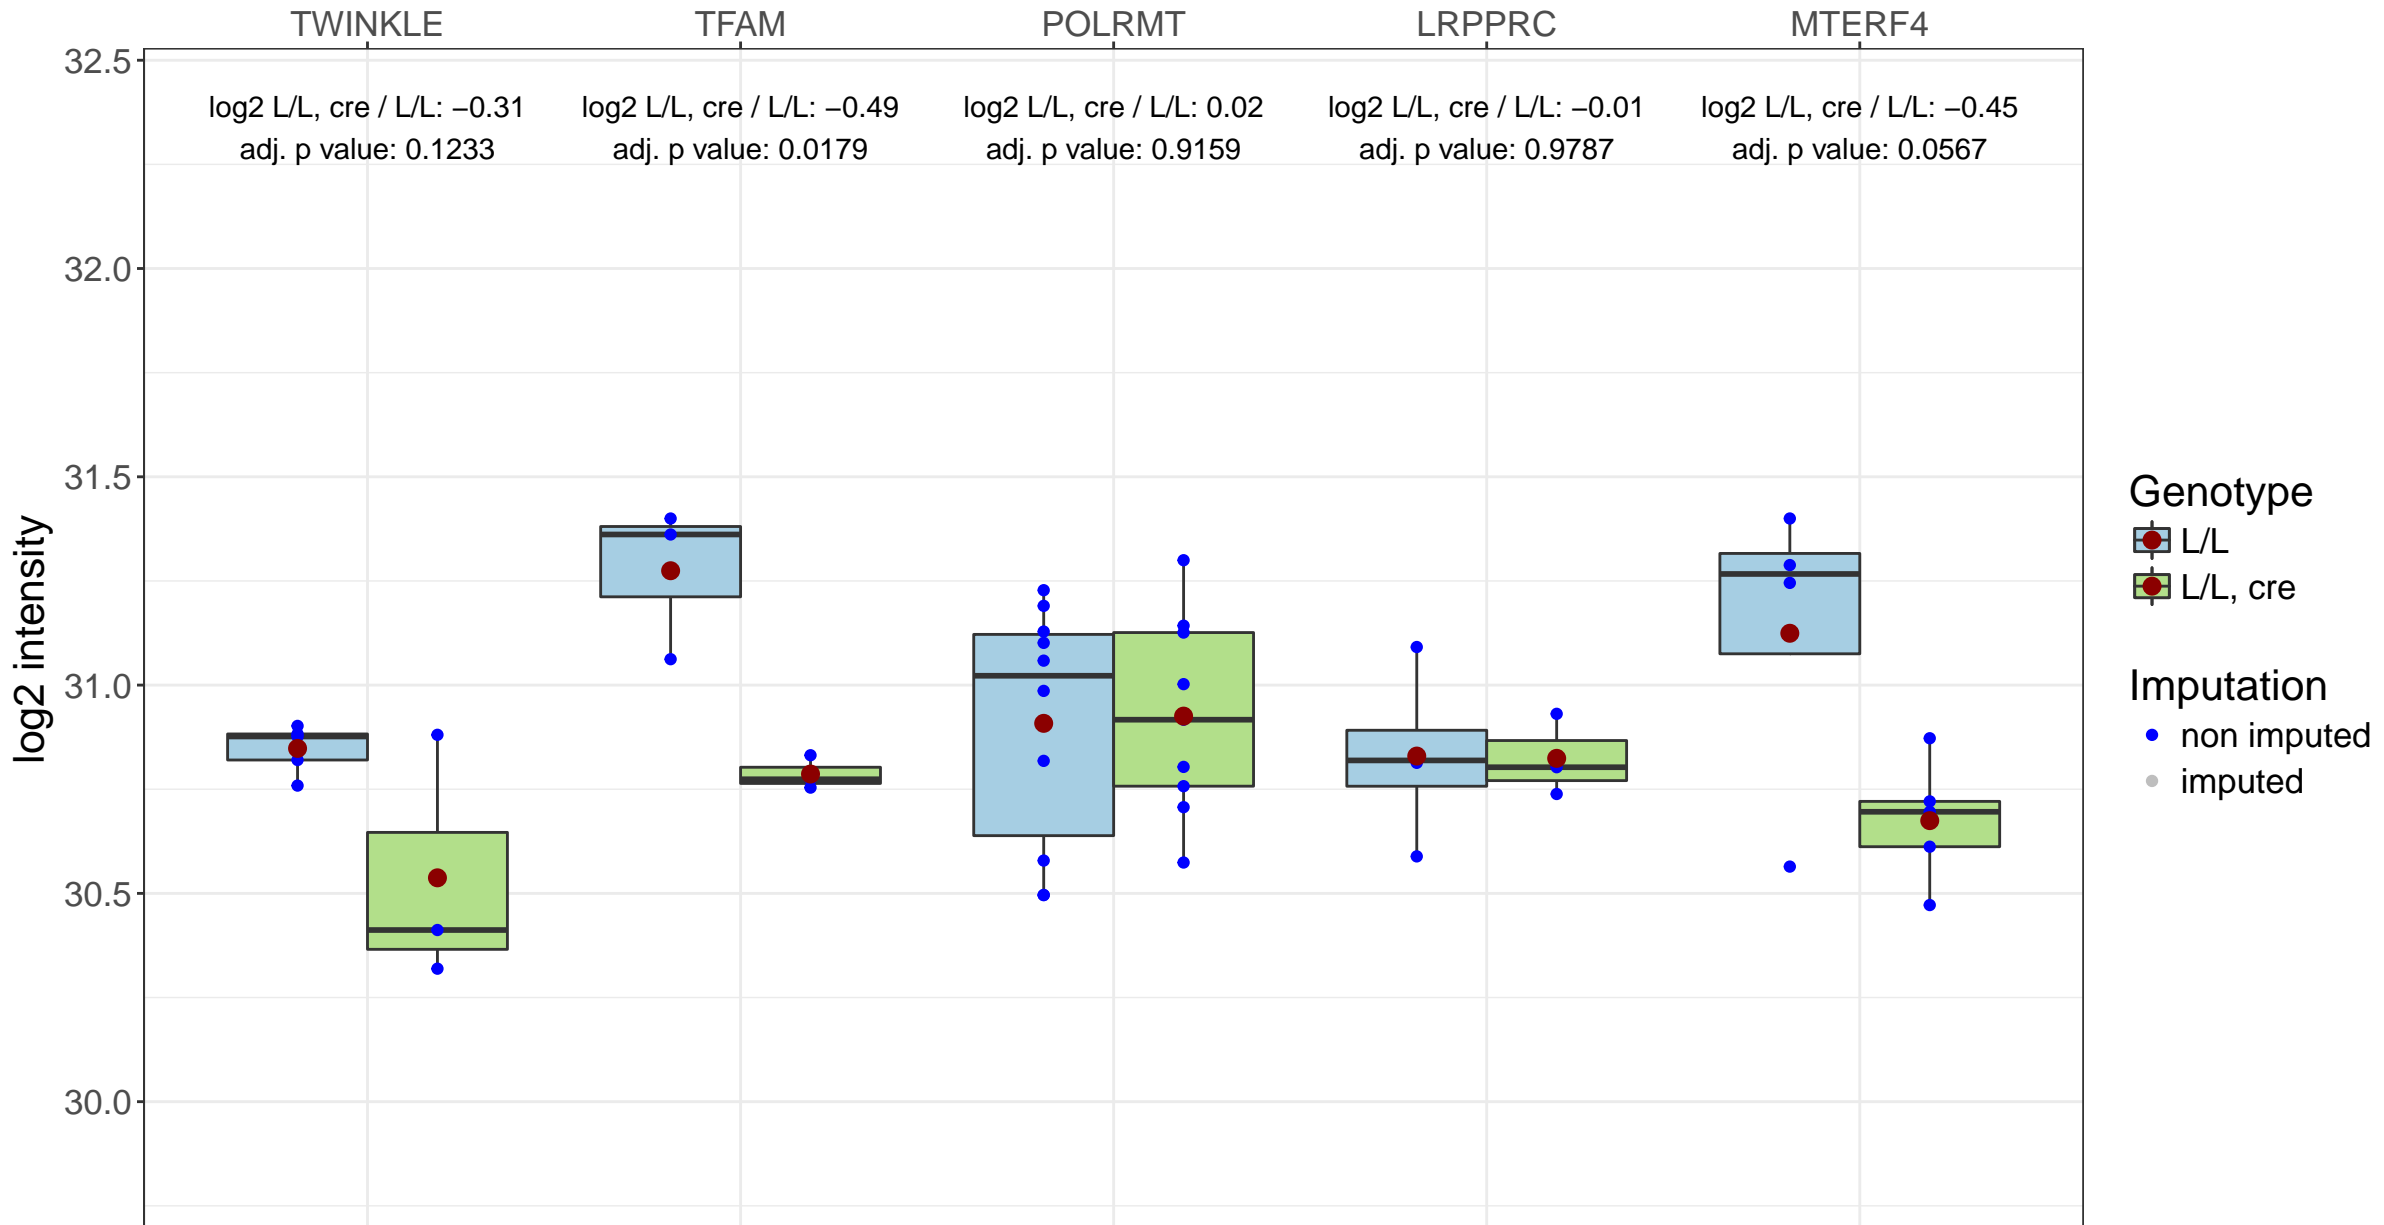

# COX4I1 / P19783

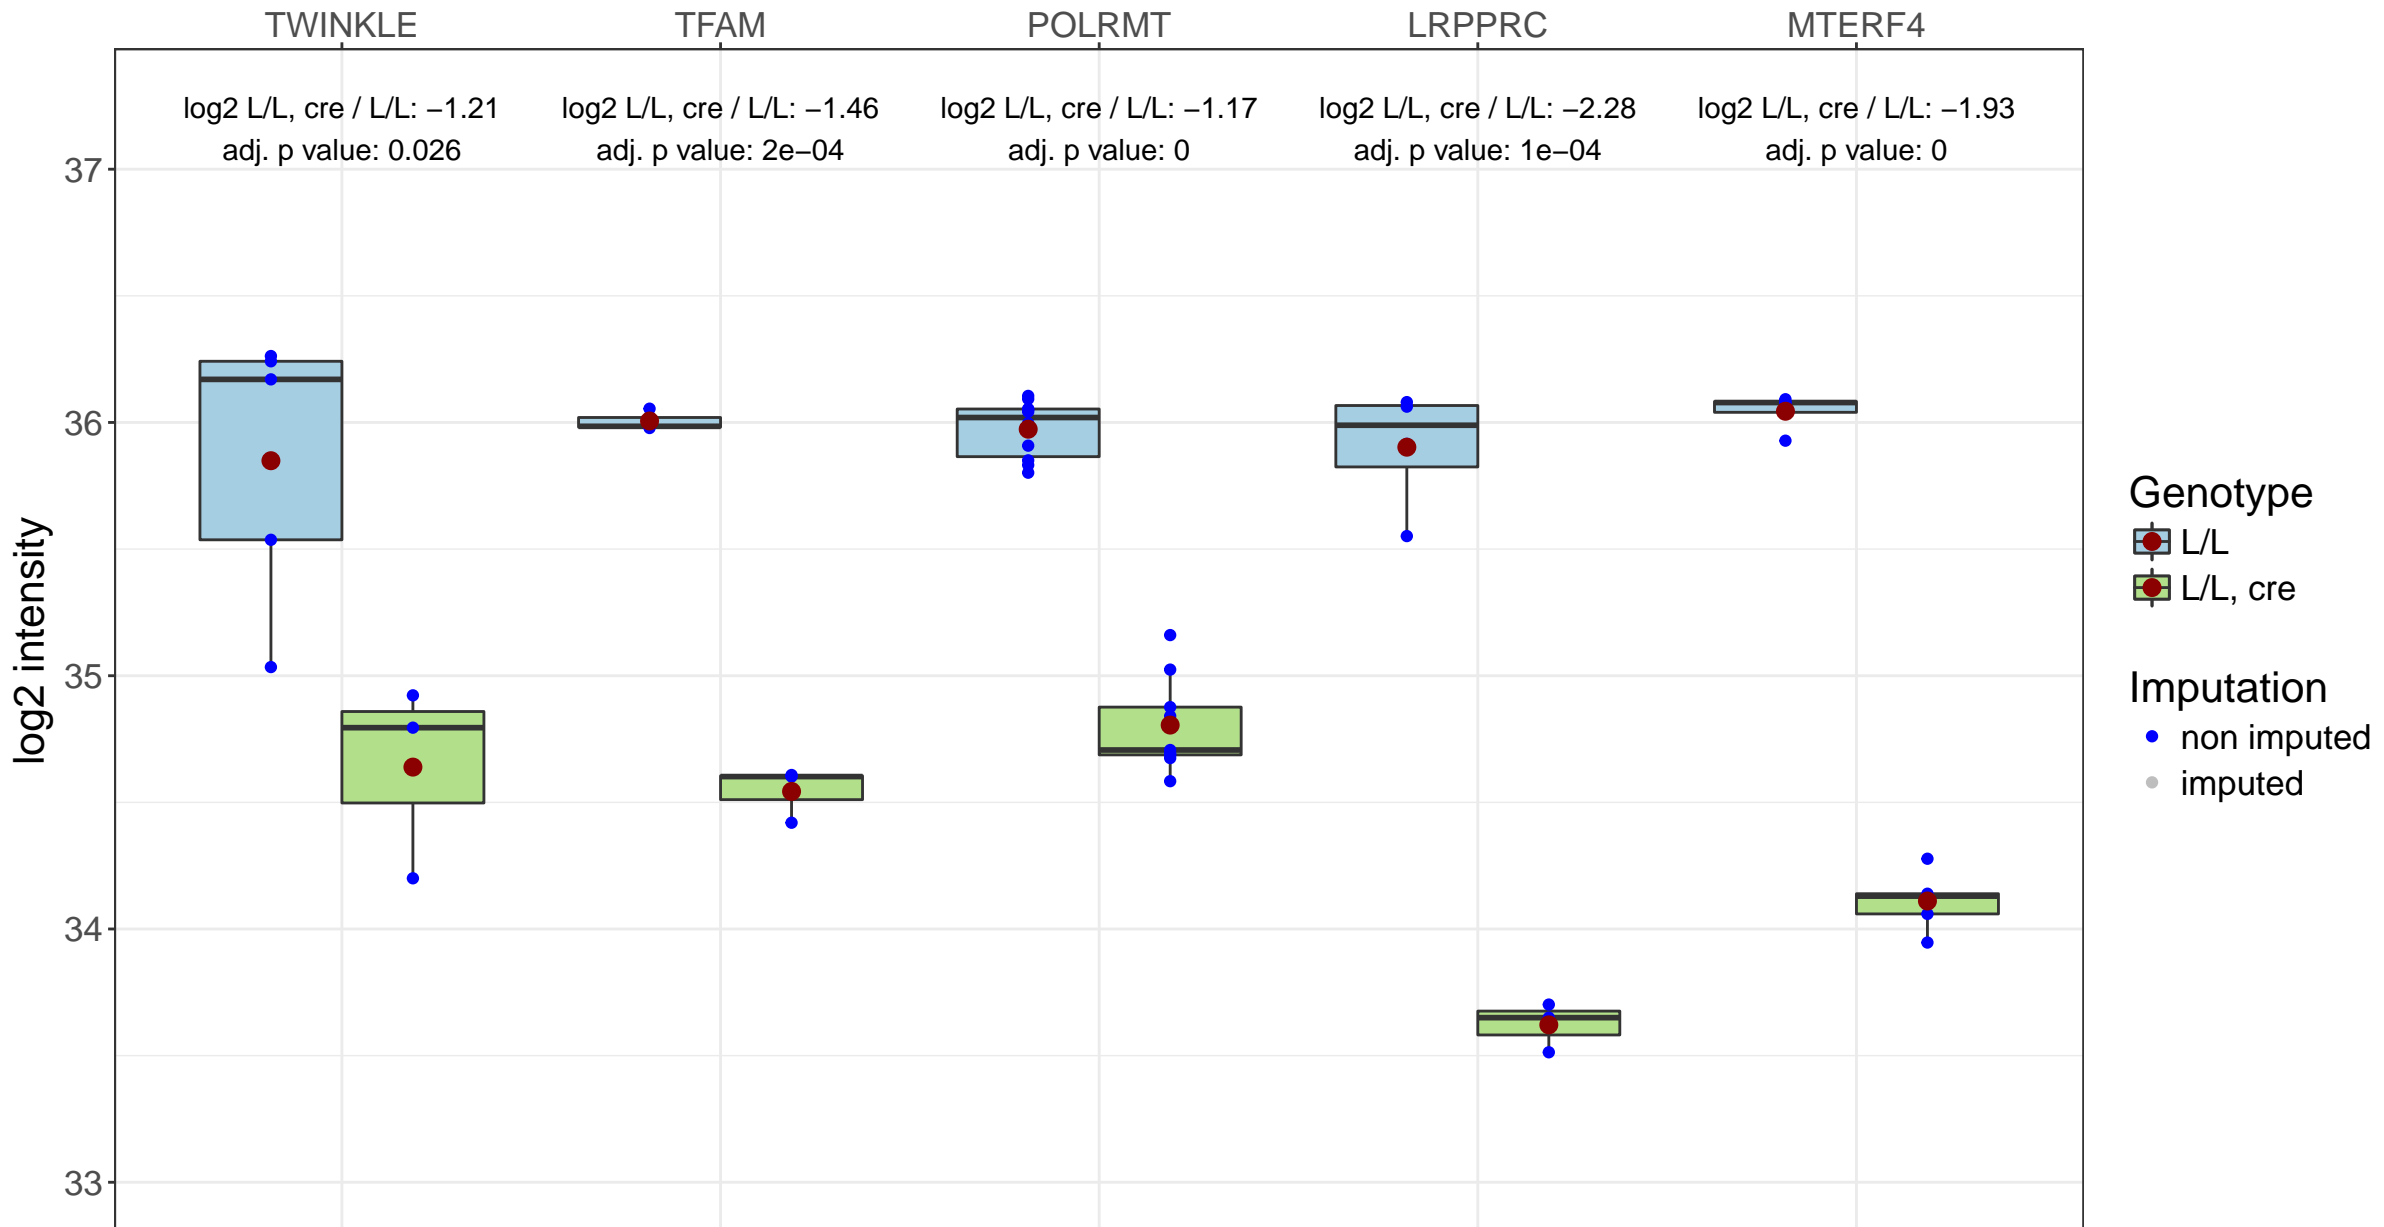

# COX5A / P12787

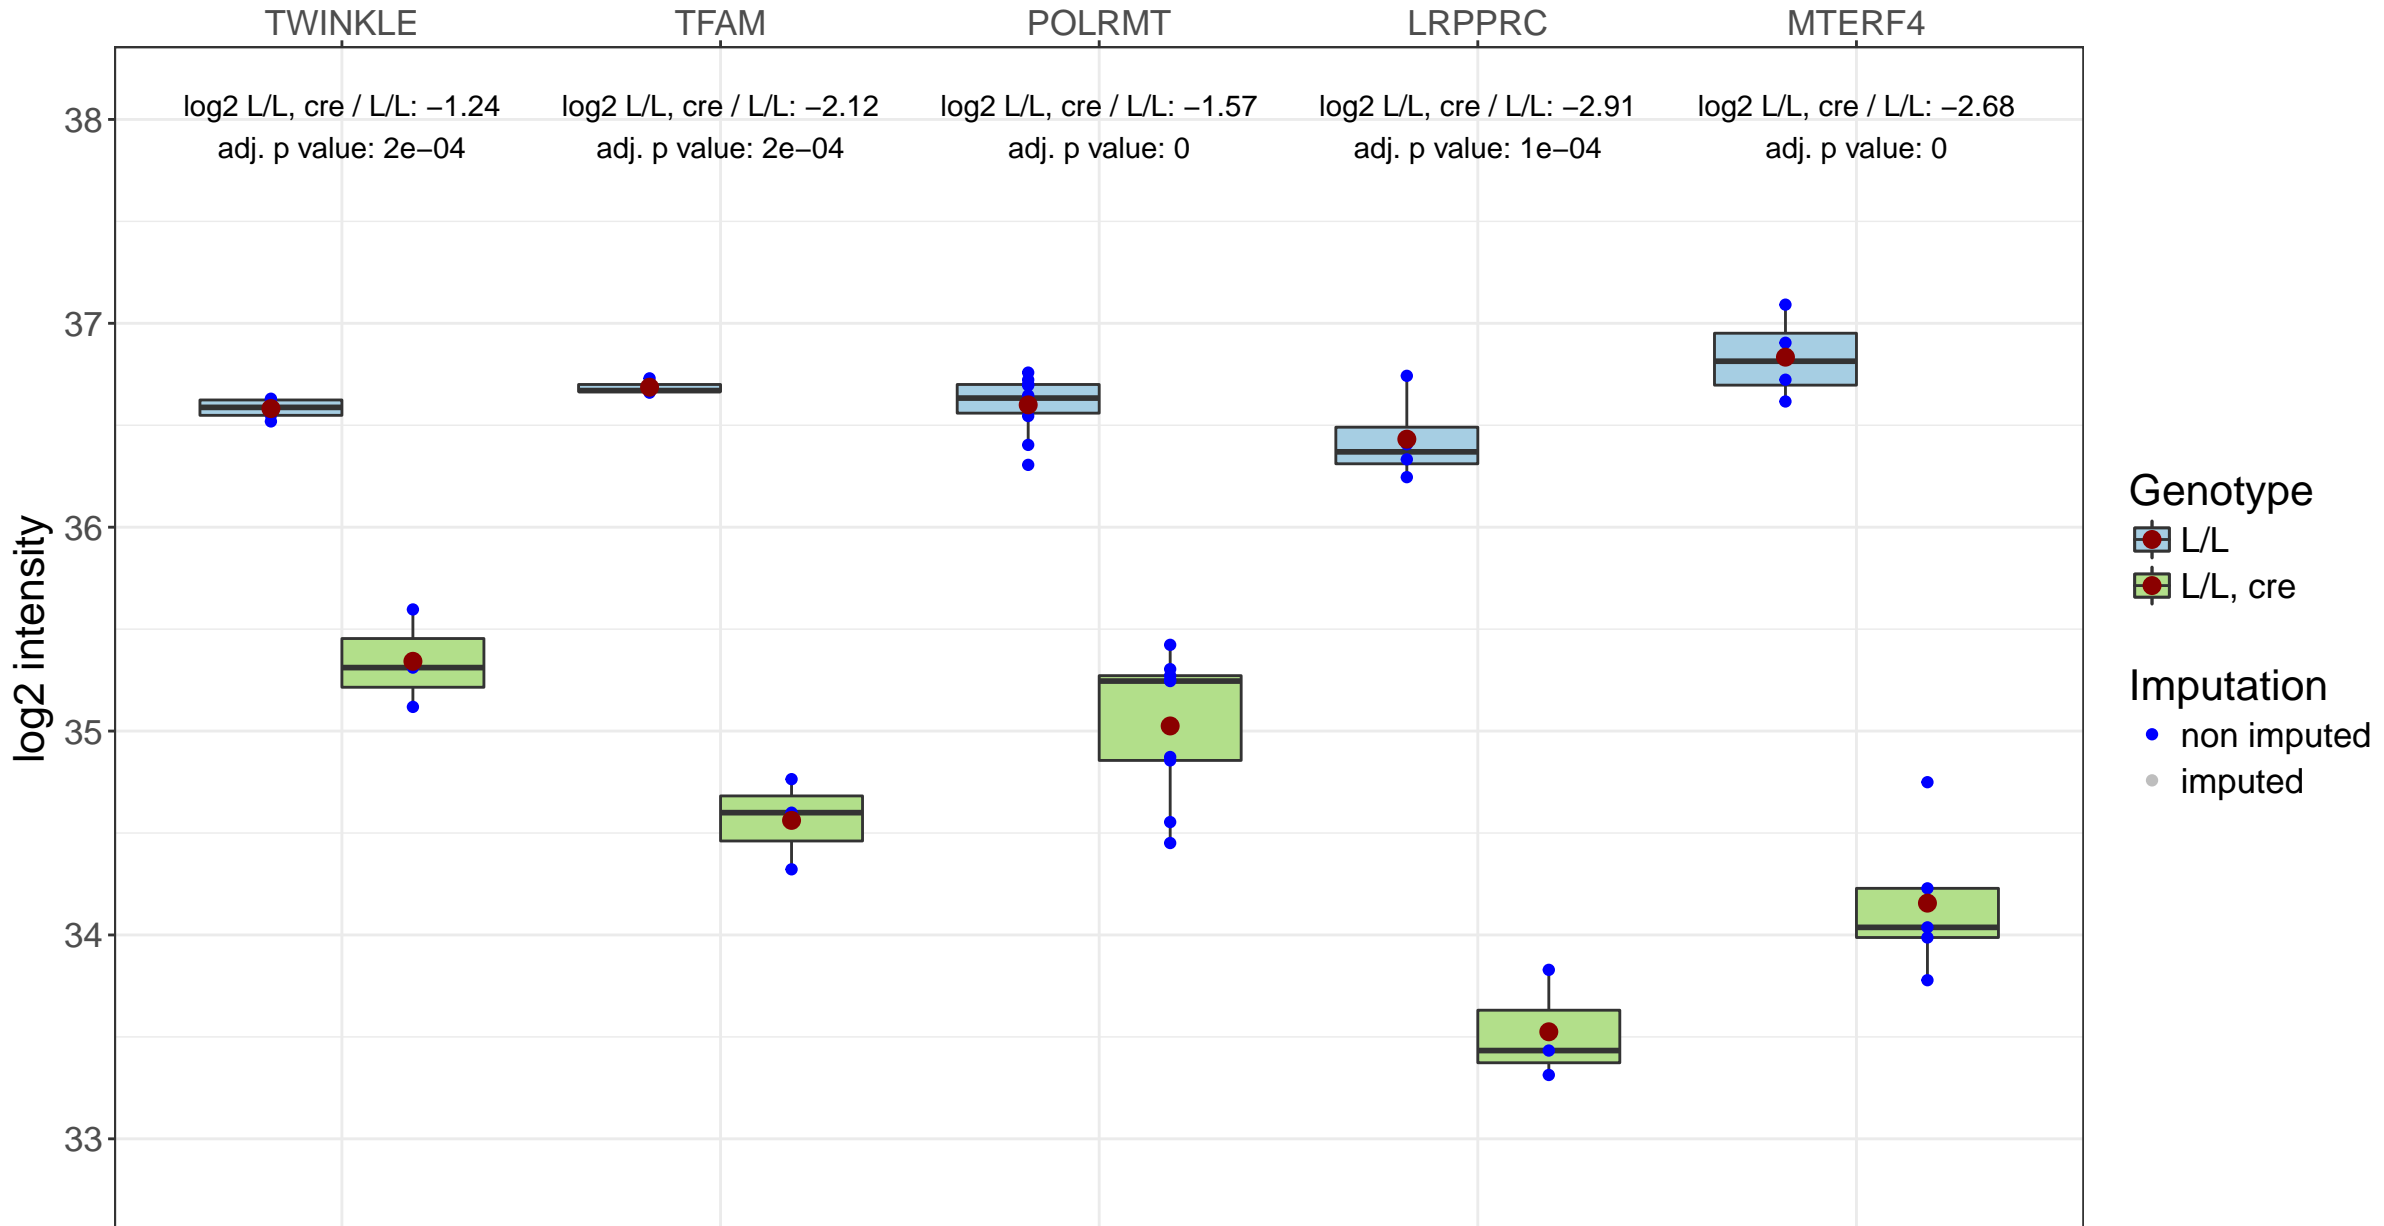

# COX5B / Q9D881

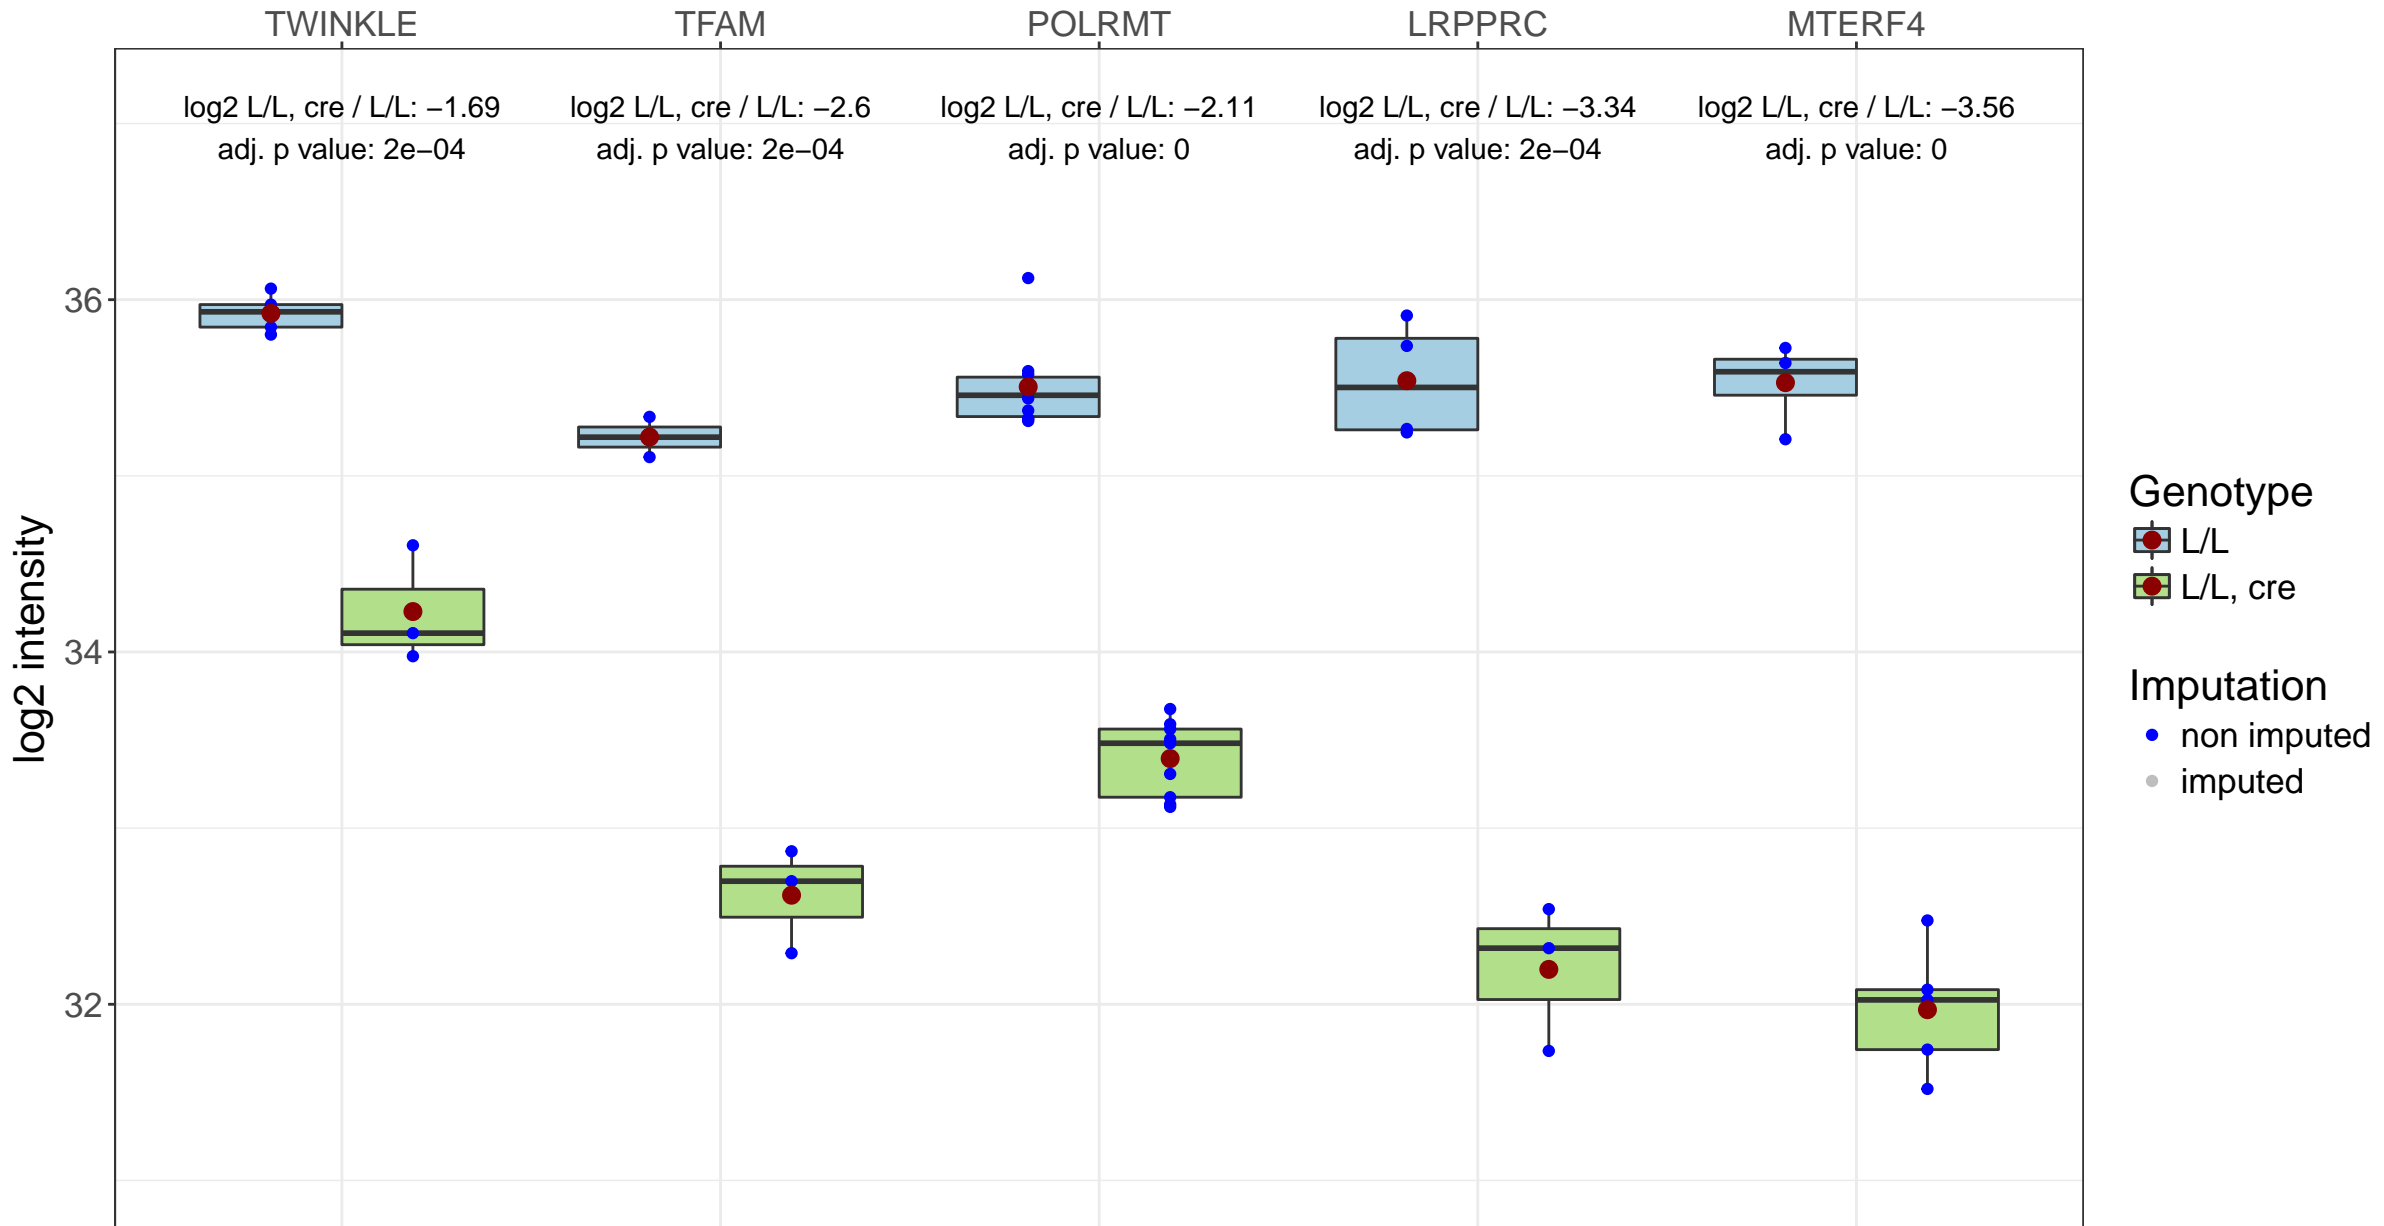

# COX6A1 / Q9DCW5

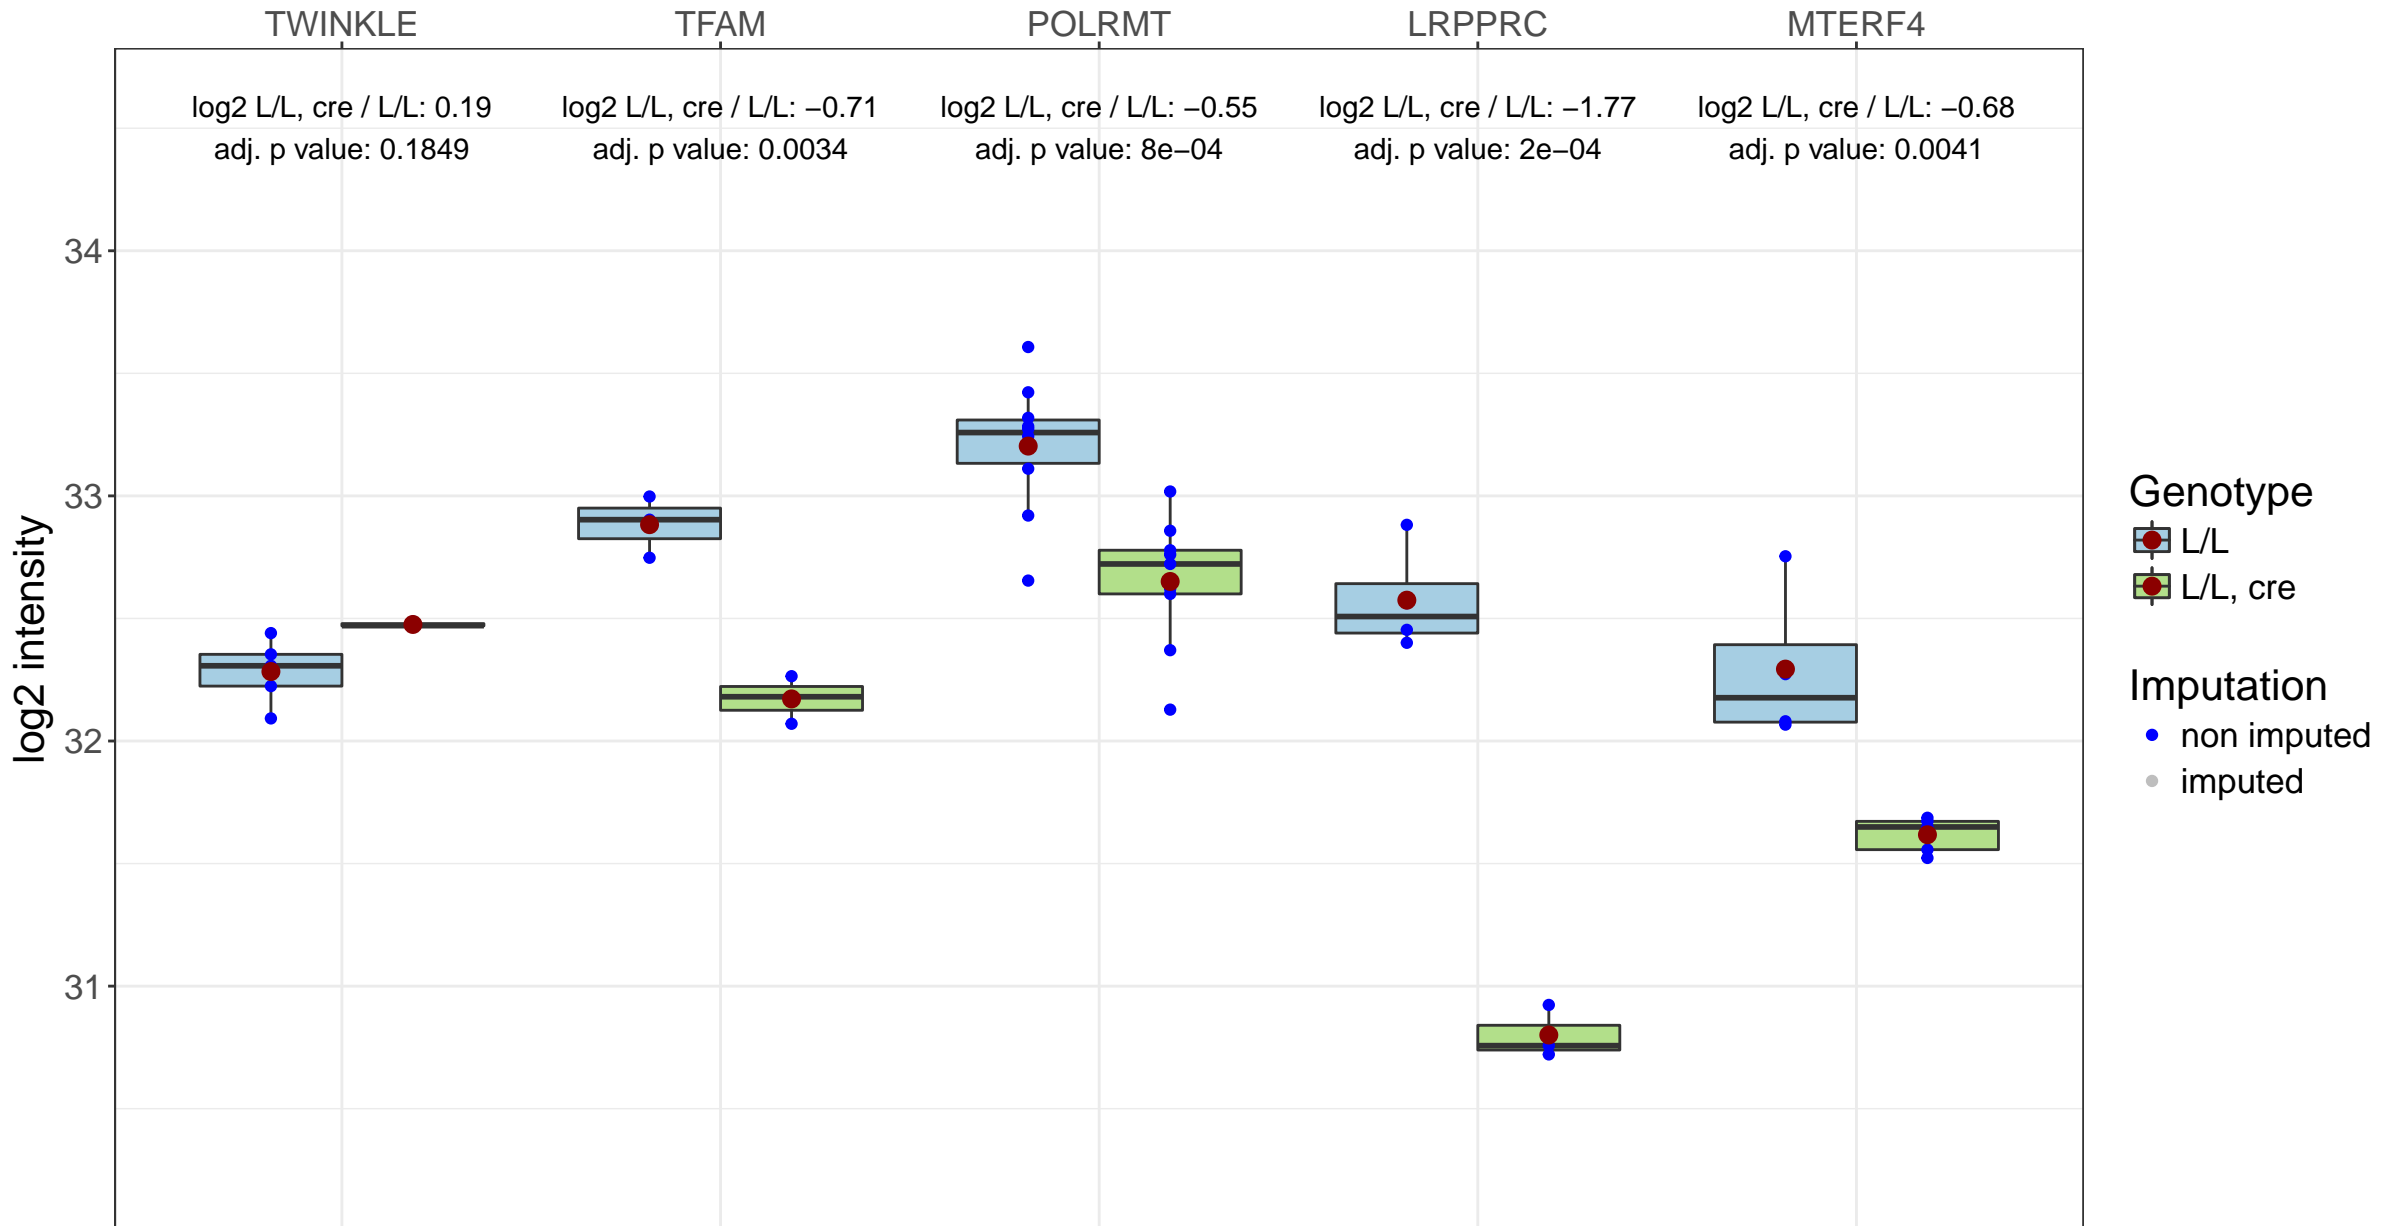

# COX6A2 / P43023

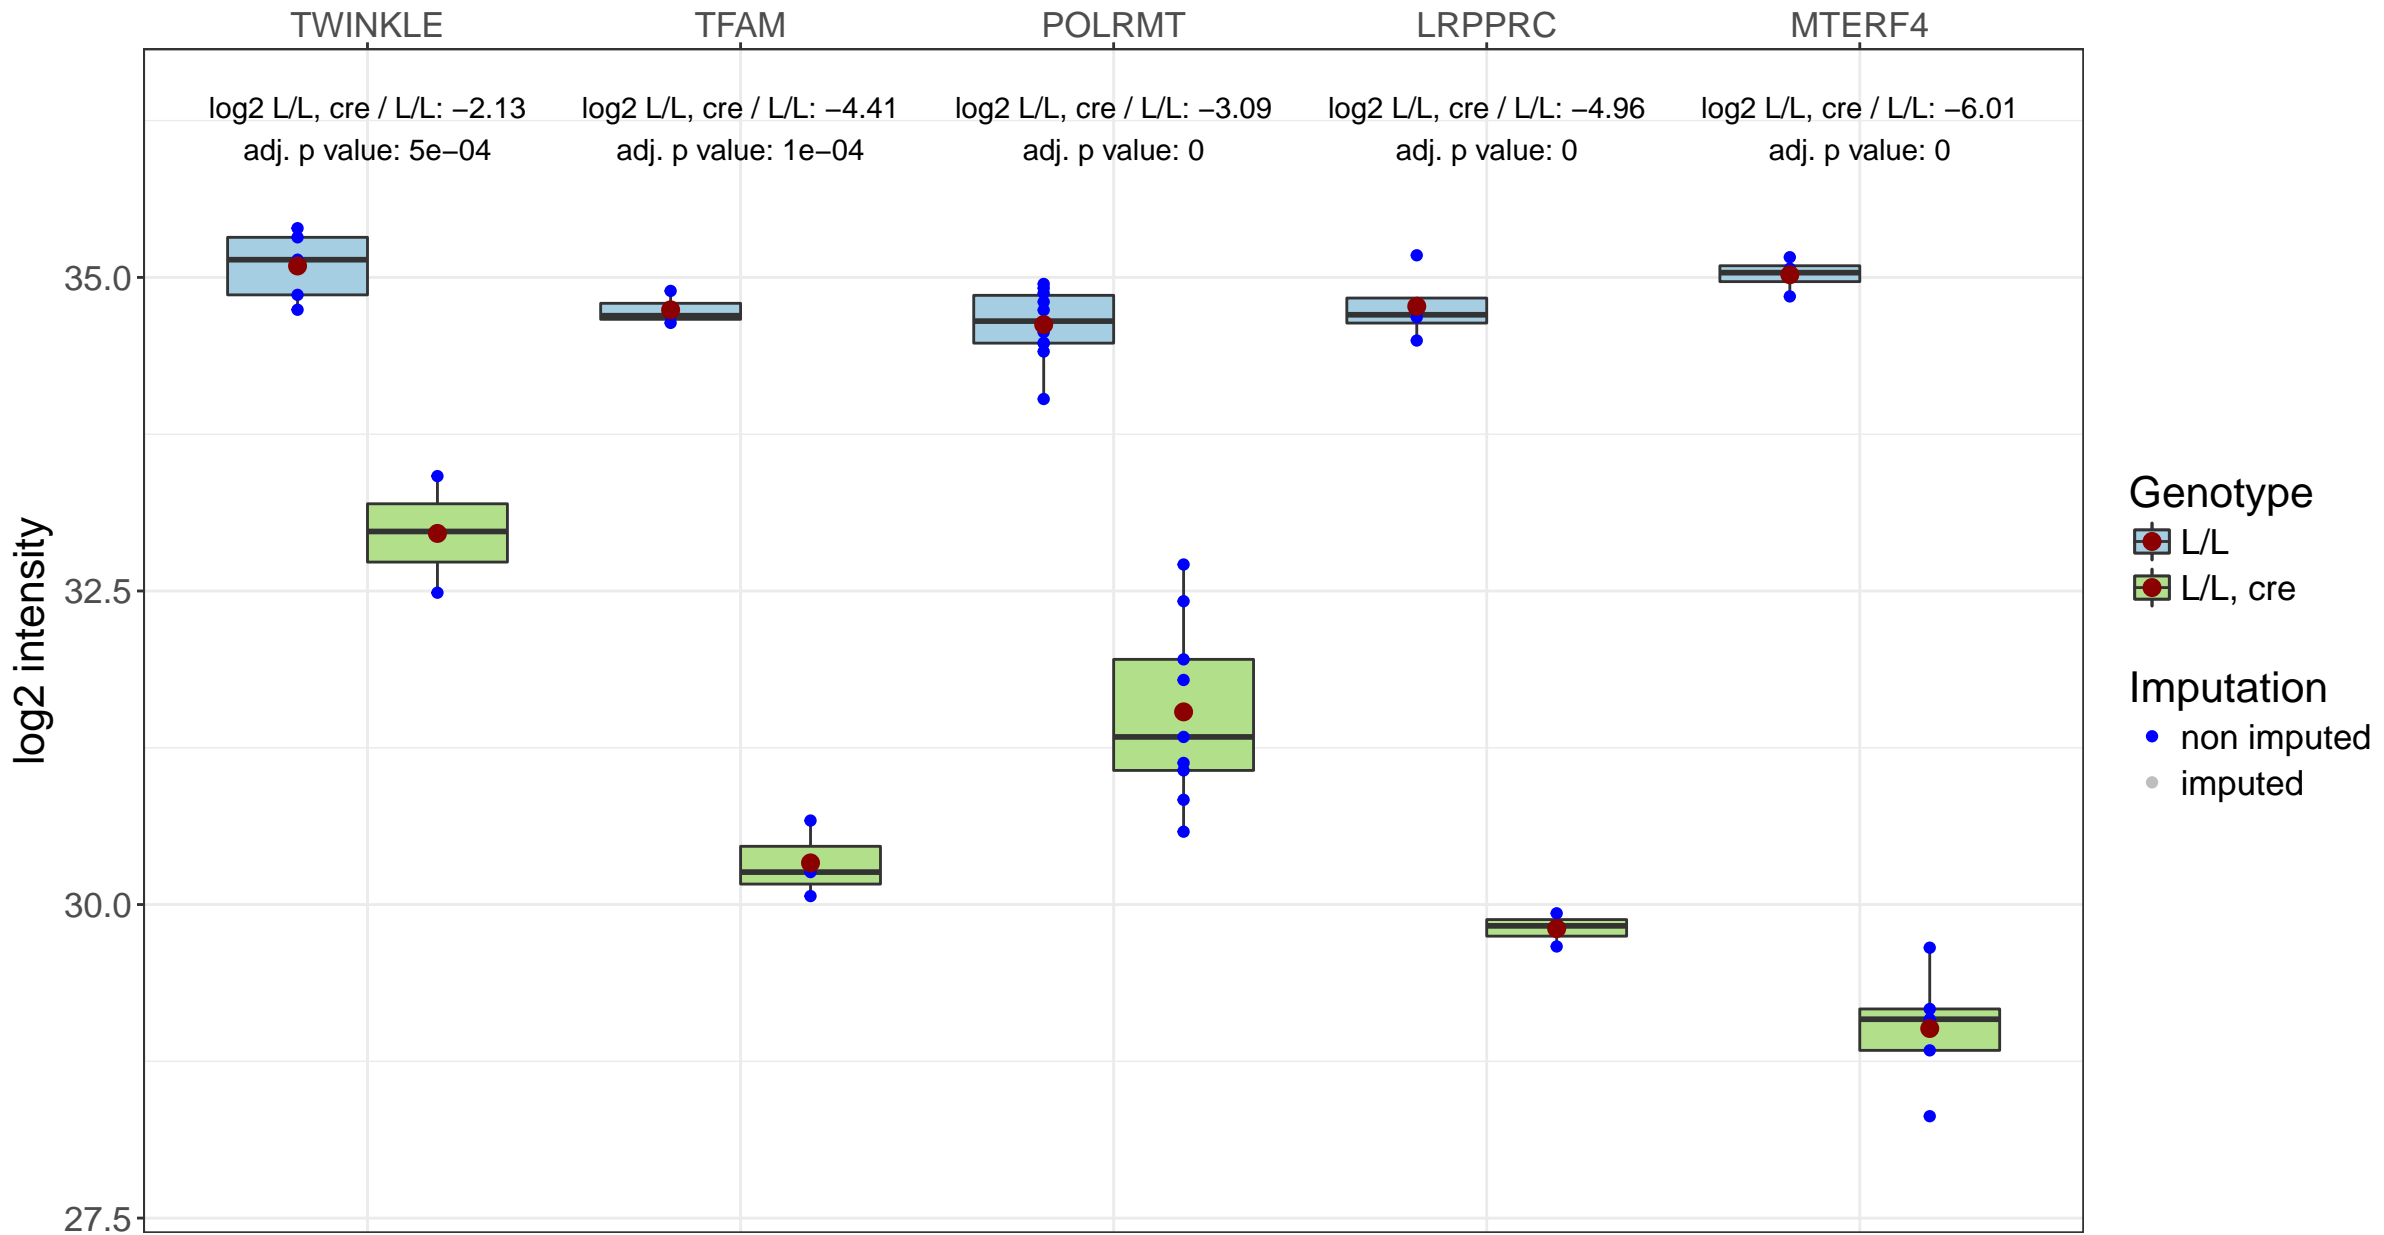



# COX6B1 / P56391

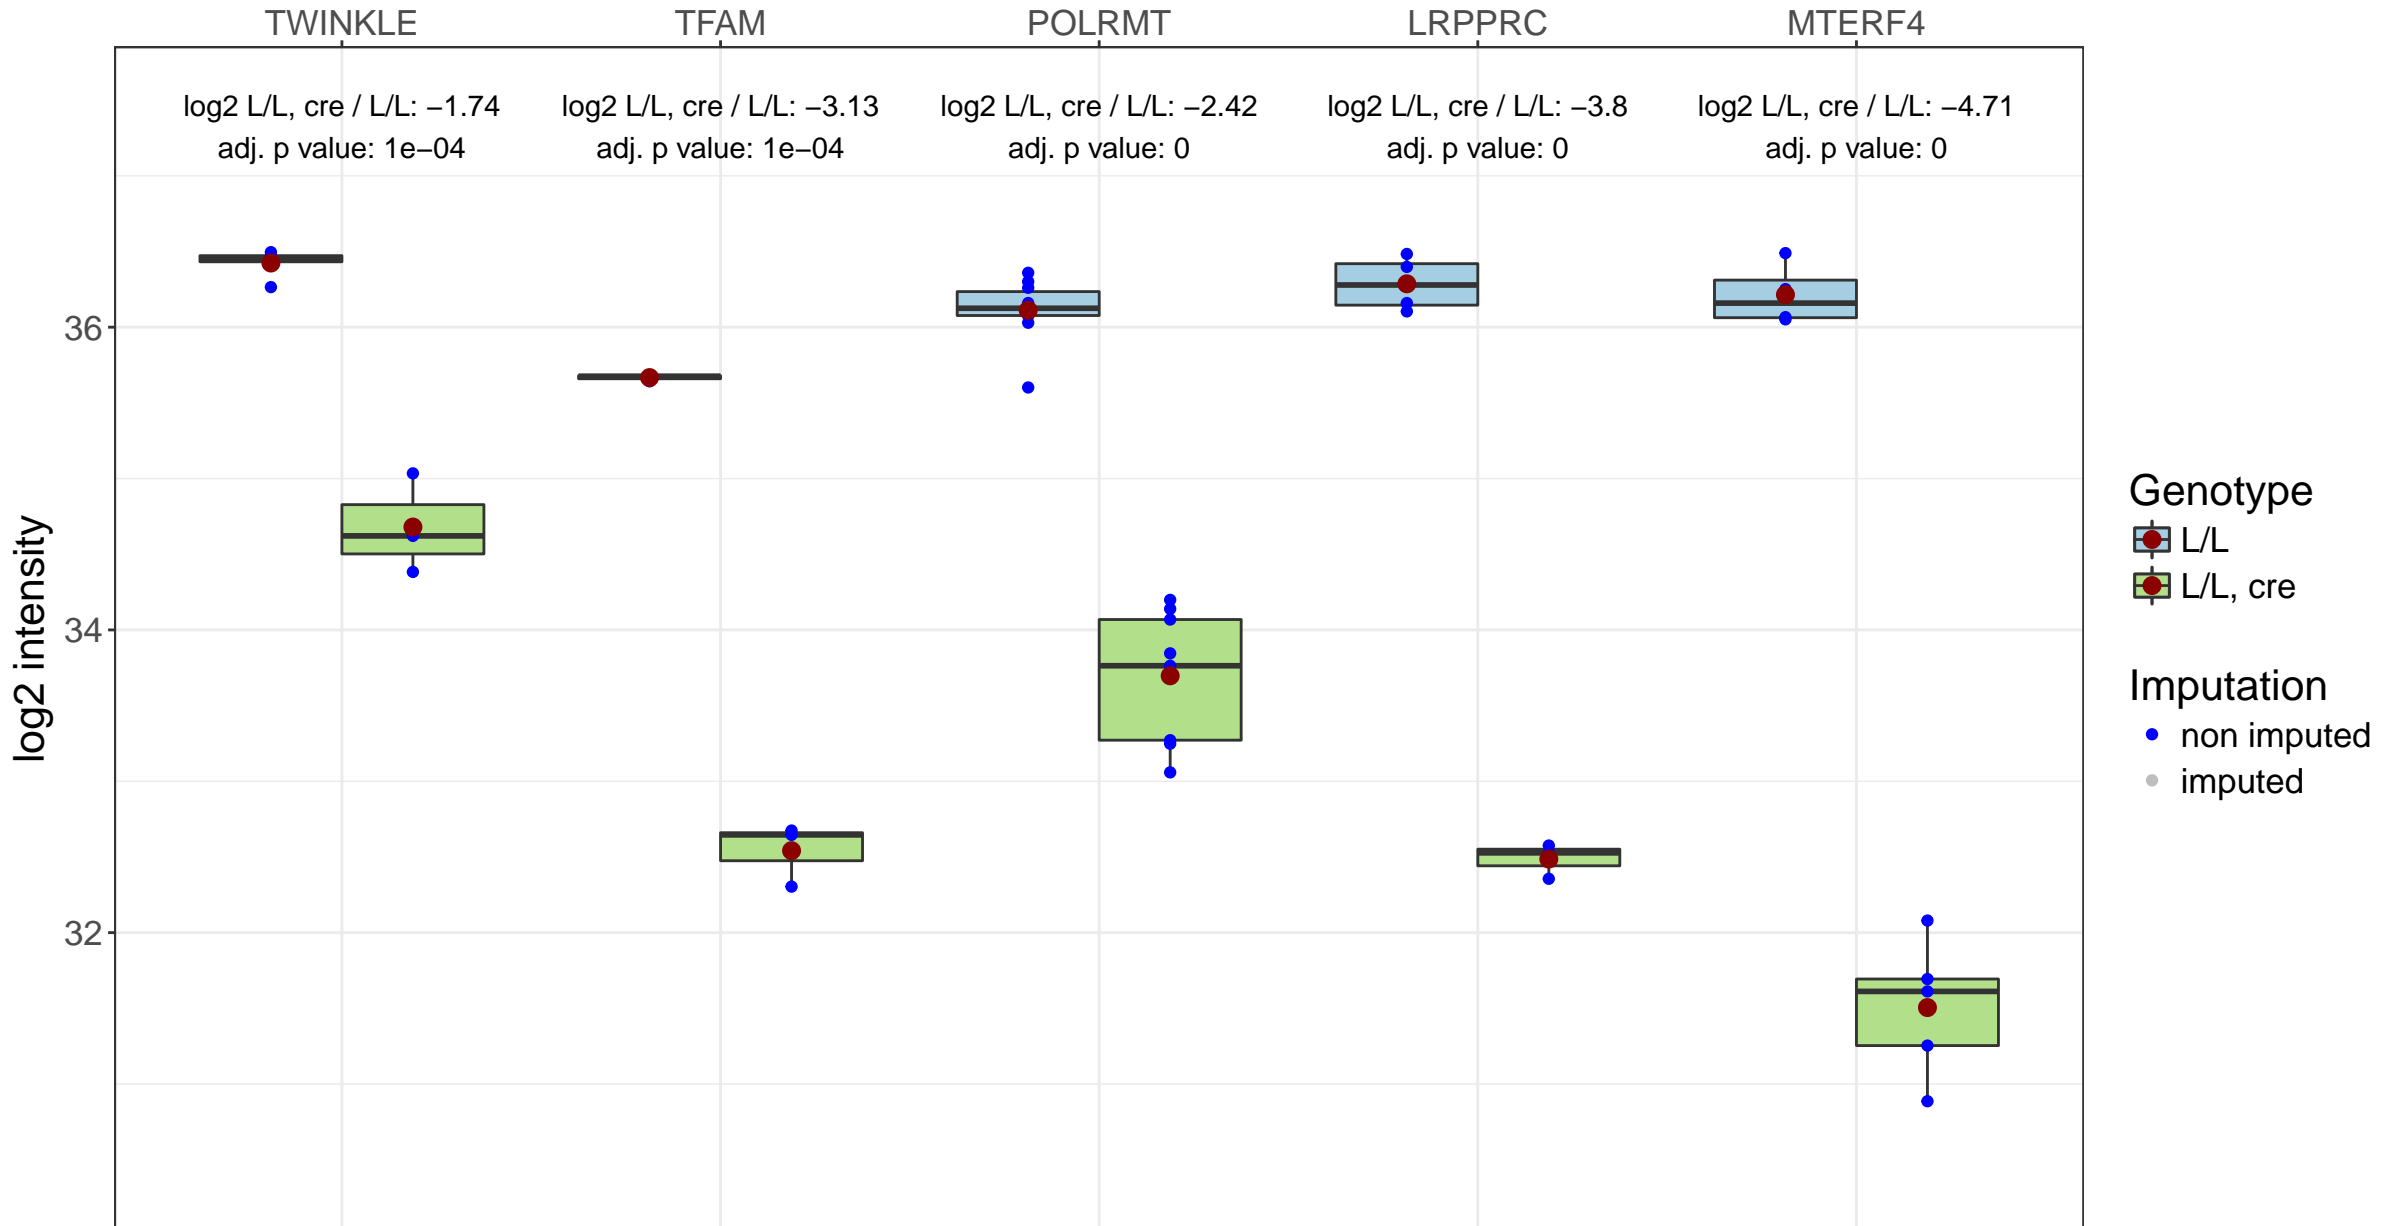

# COX6C / Q9CPQ1

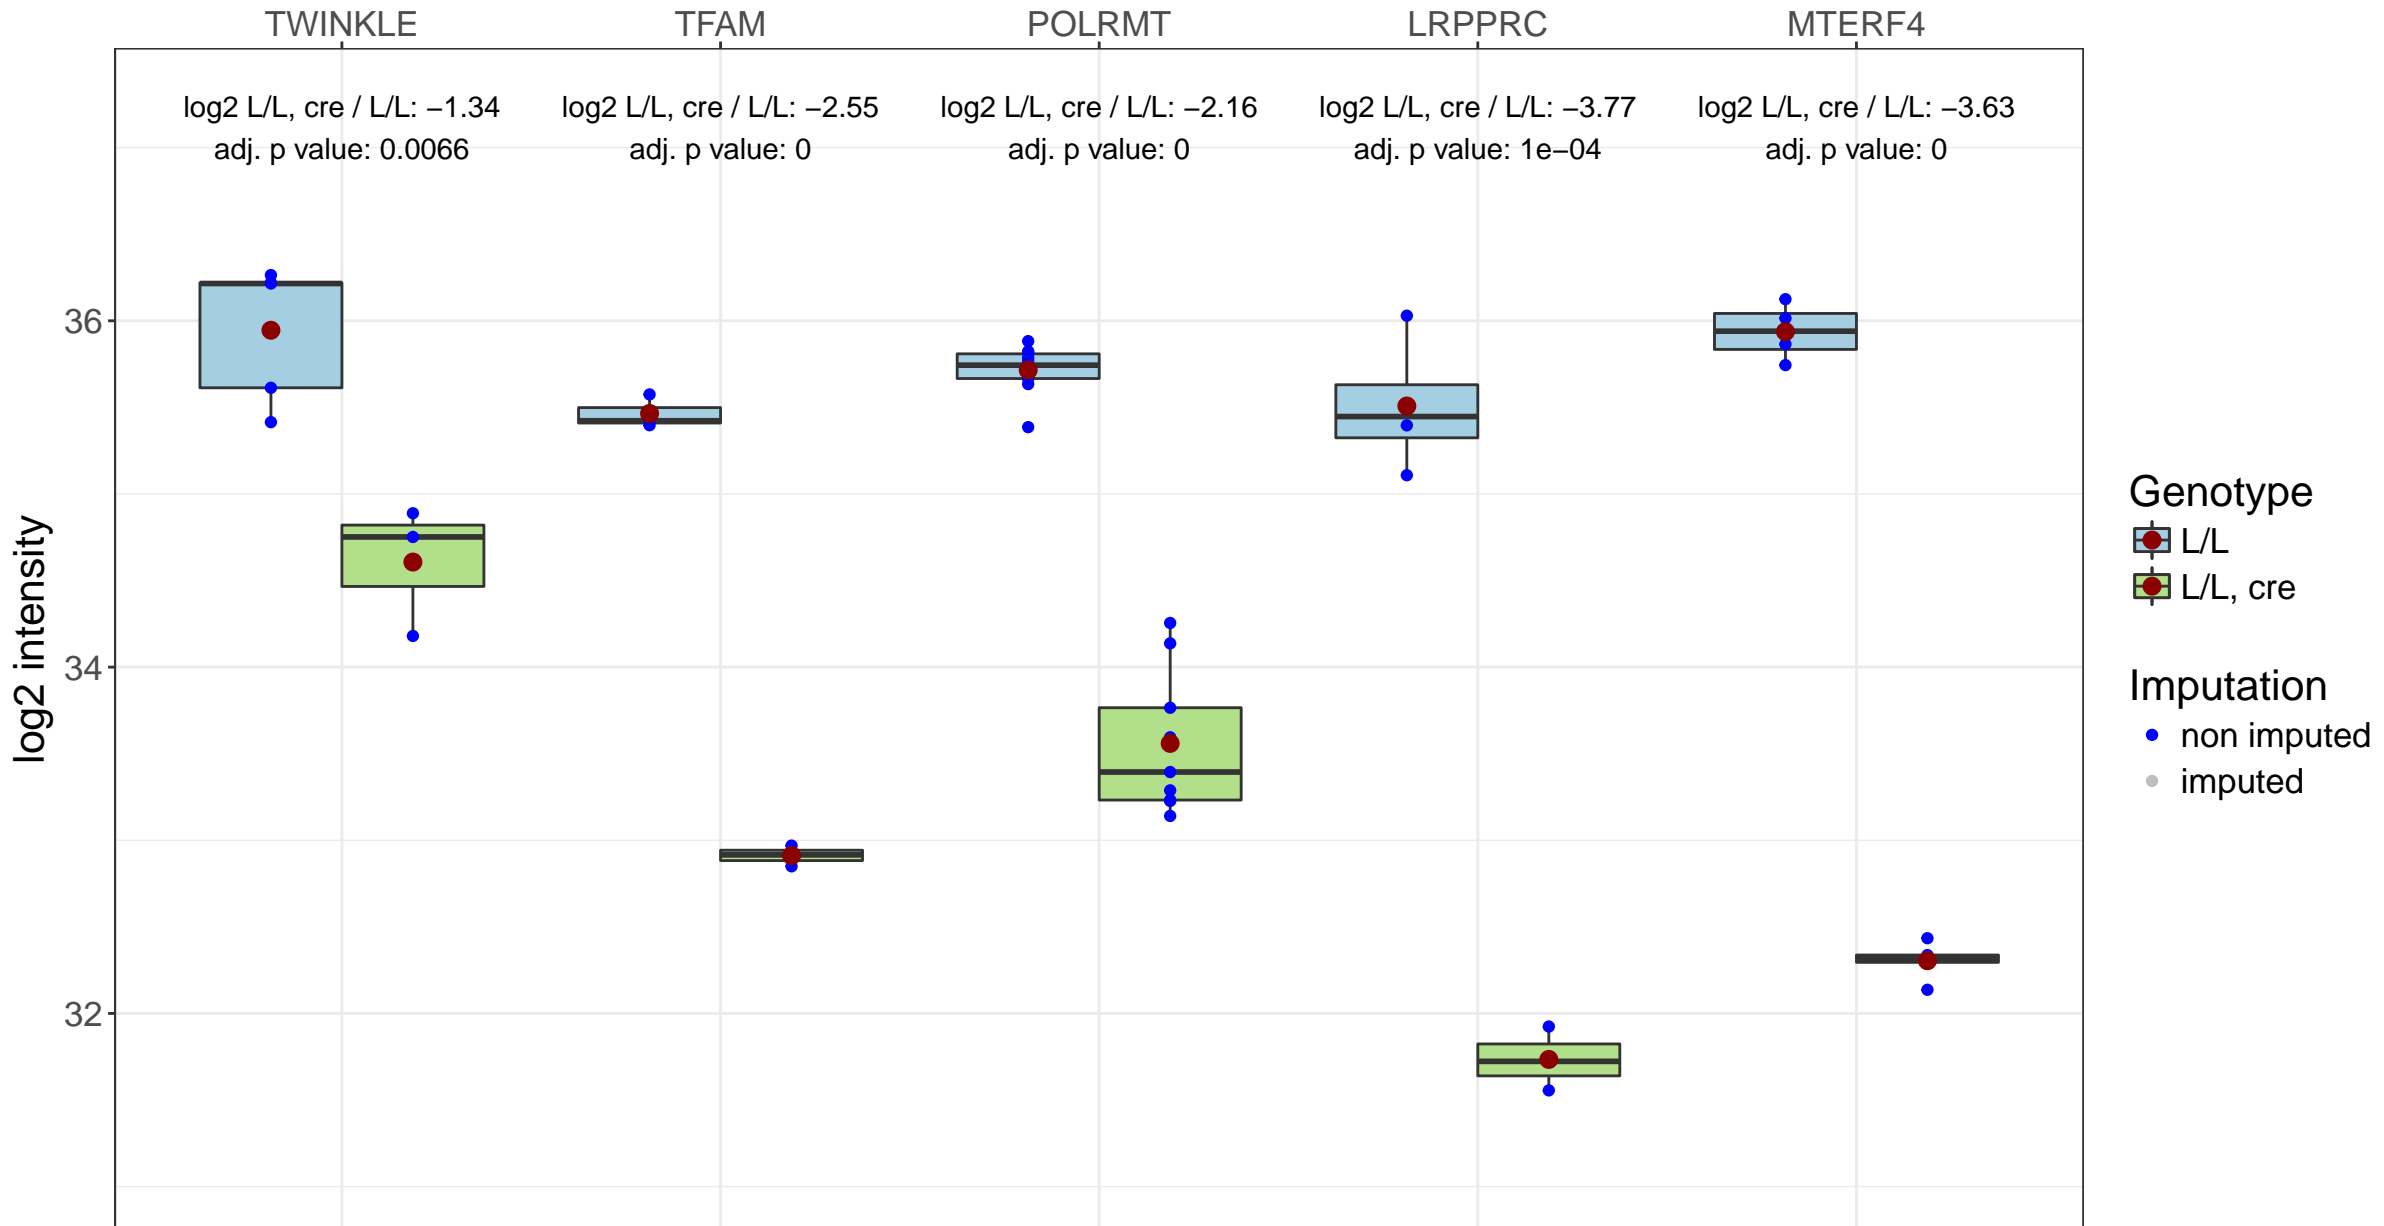

# COX7A1 / P56392

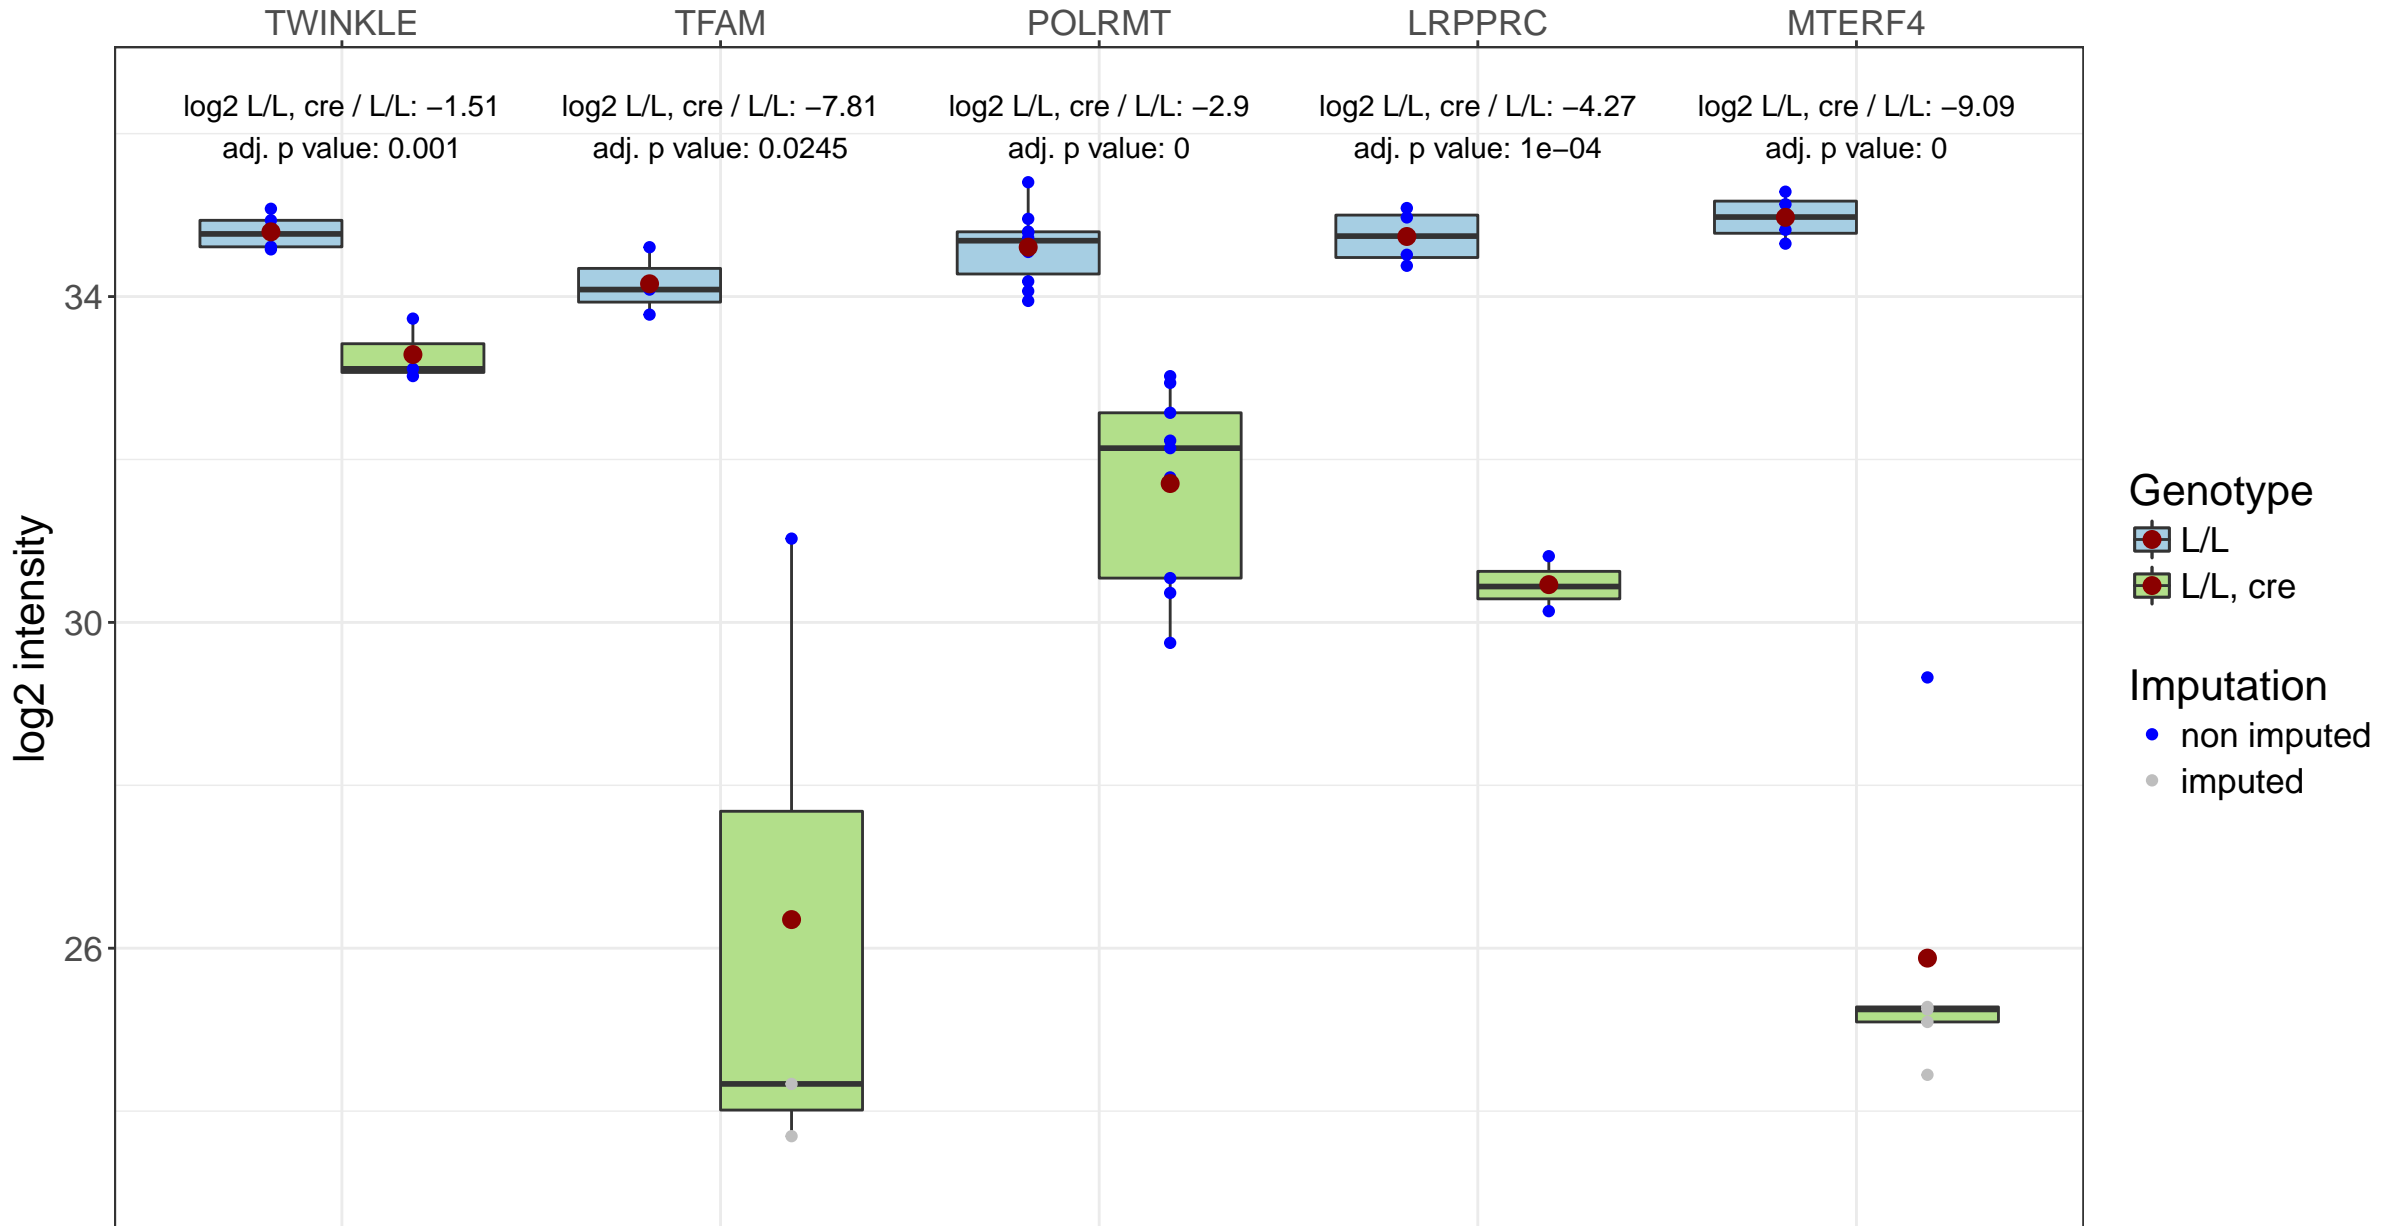

# COX7A2 / P48771

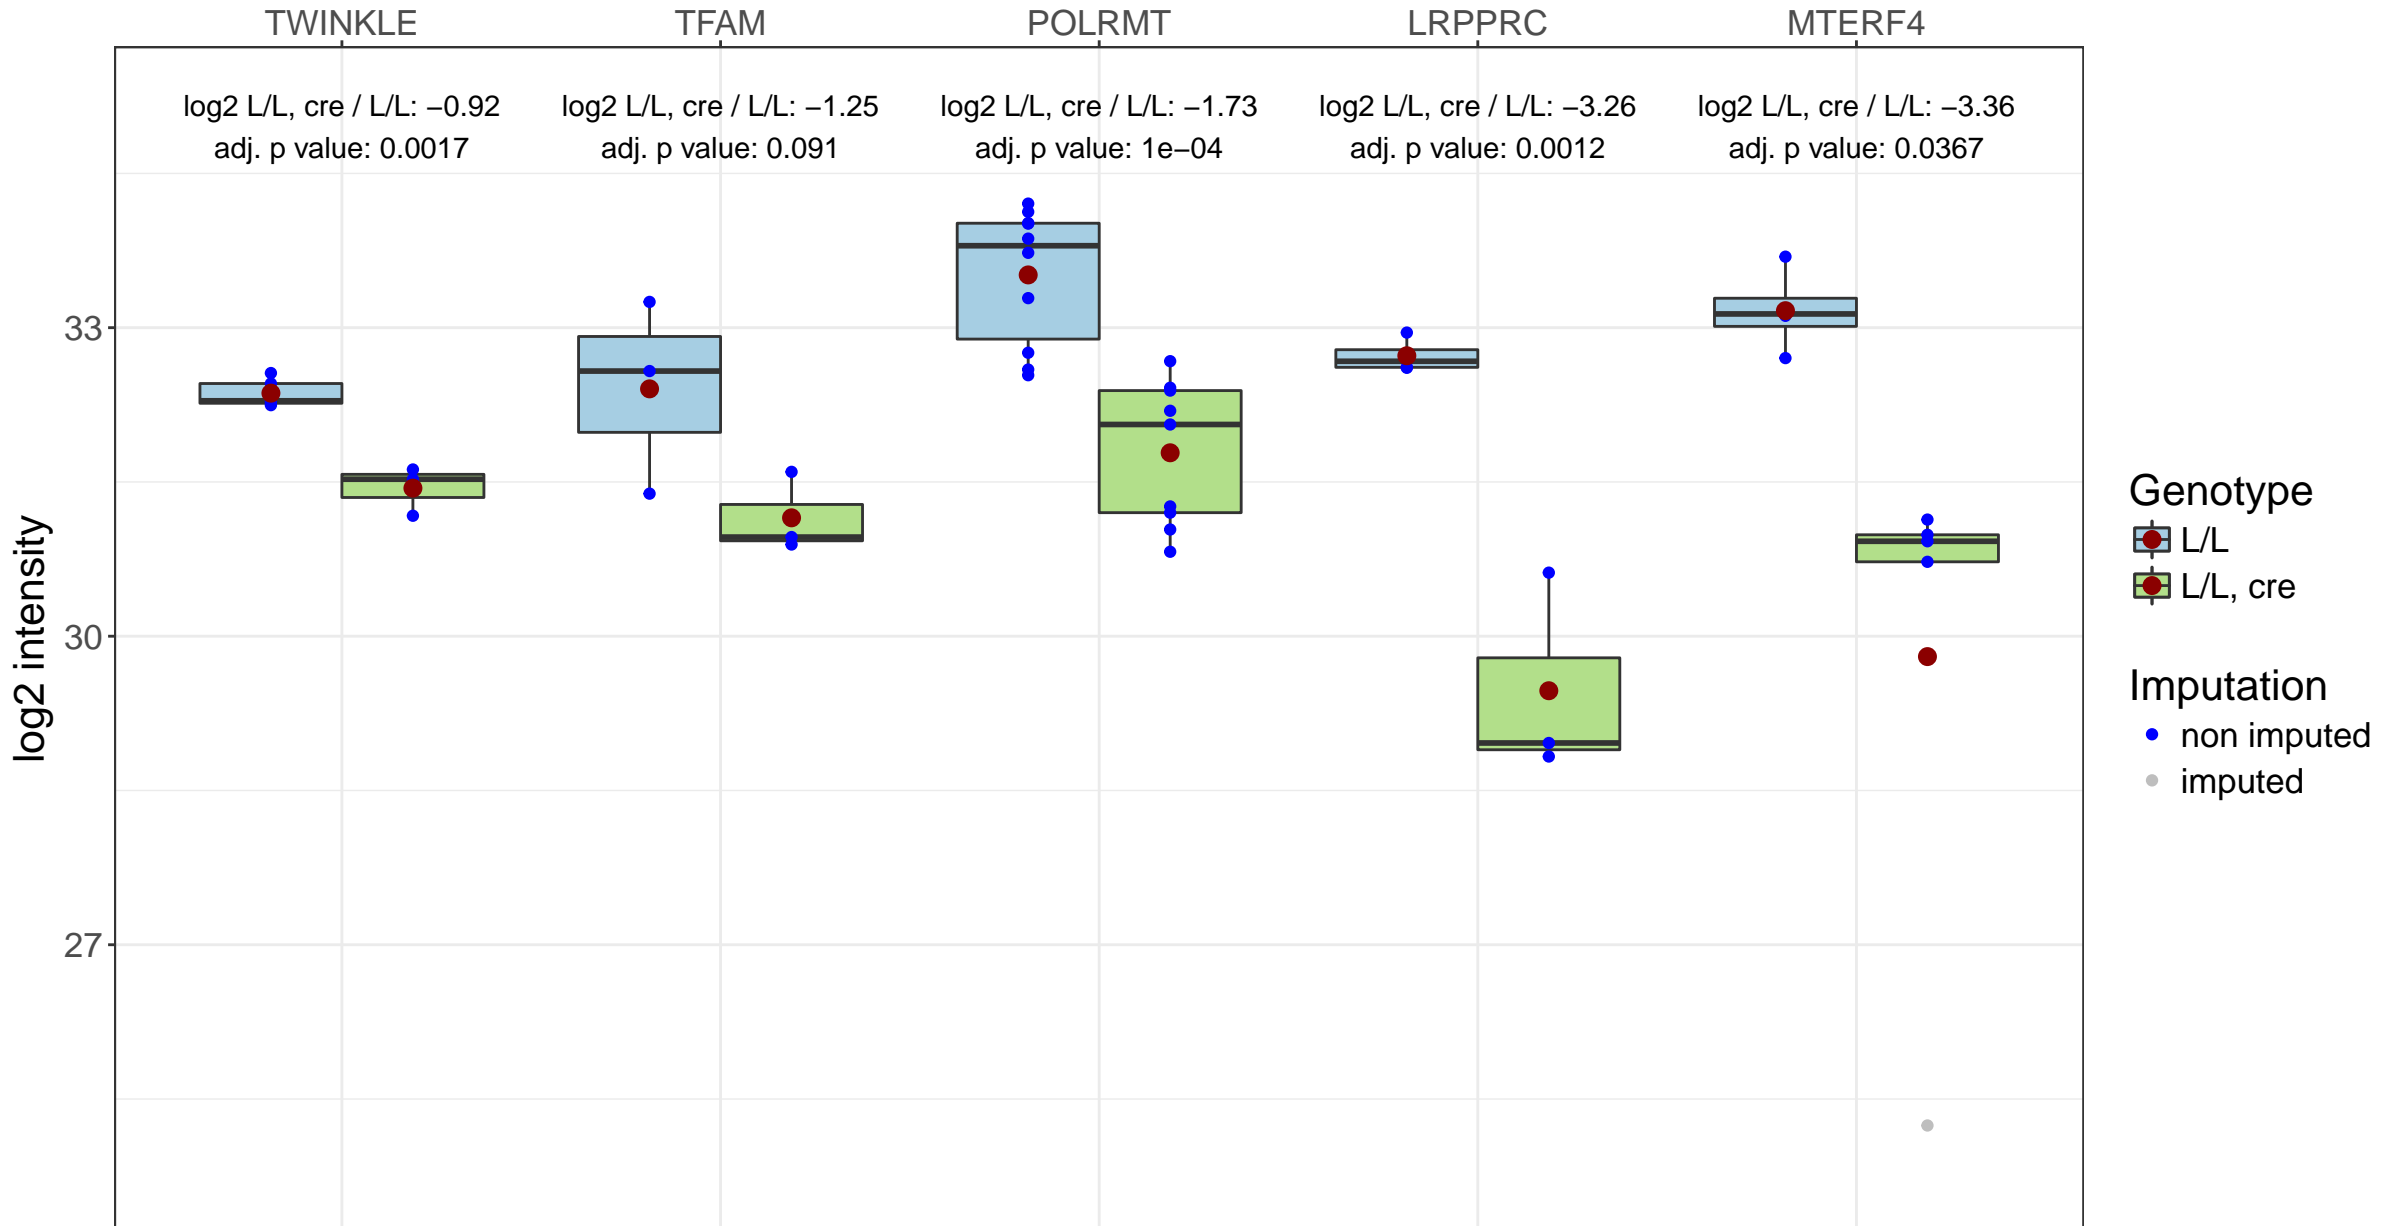

# COX7A2L / E9PZS8

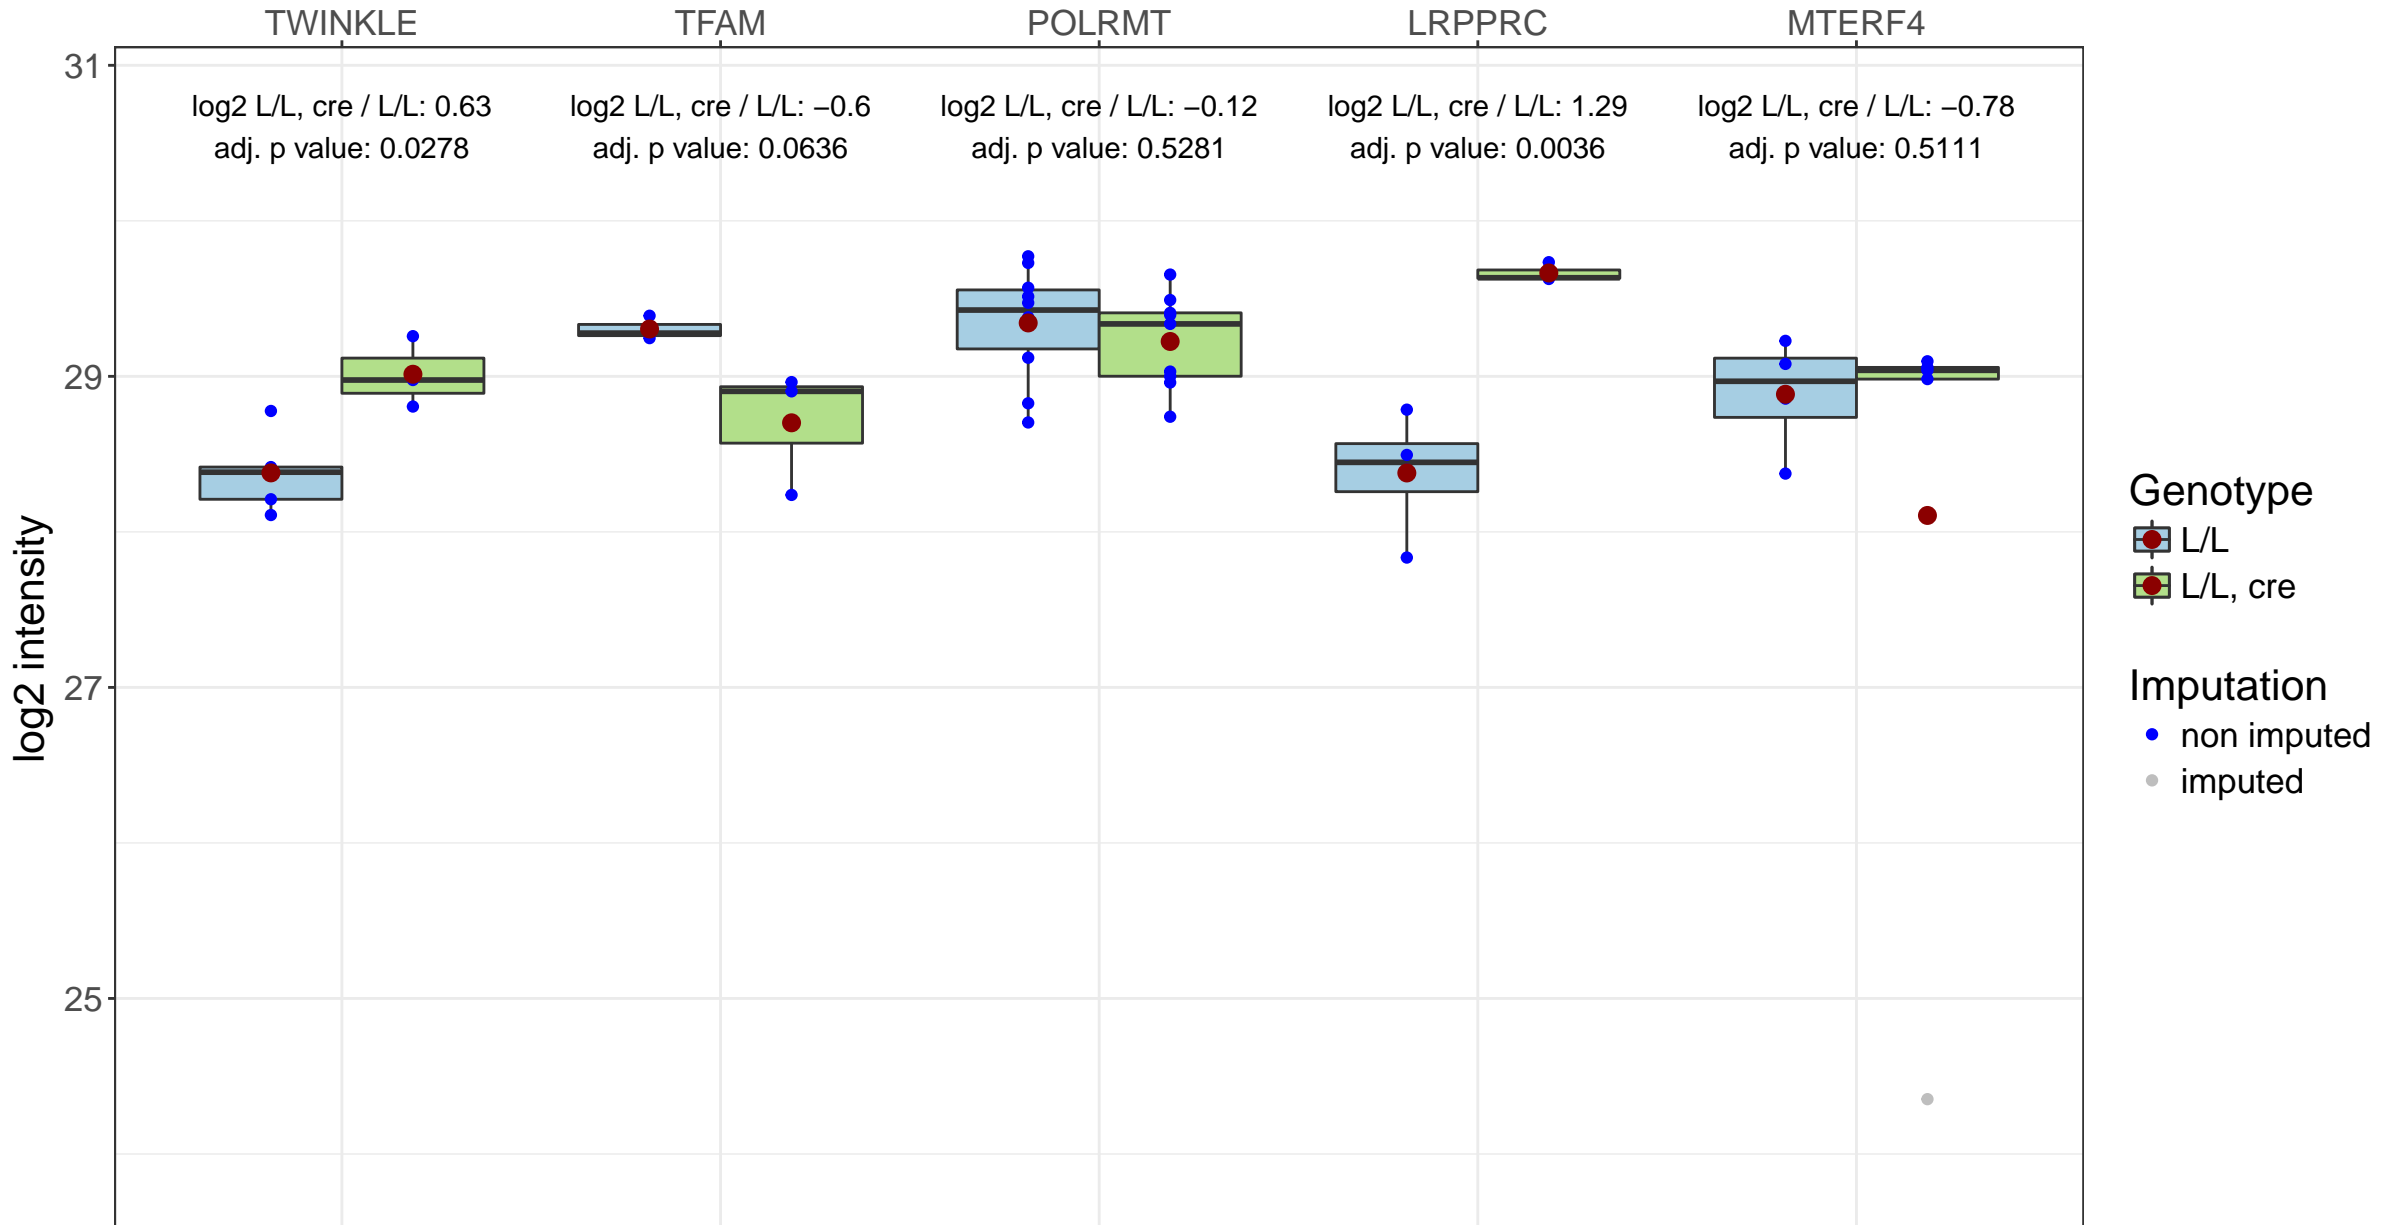

# COX7B / P56393

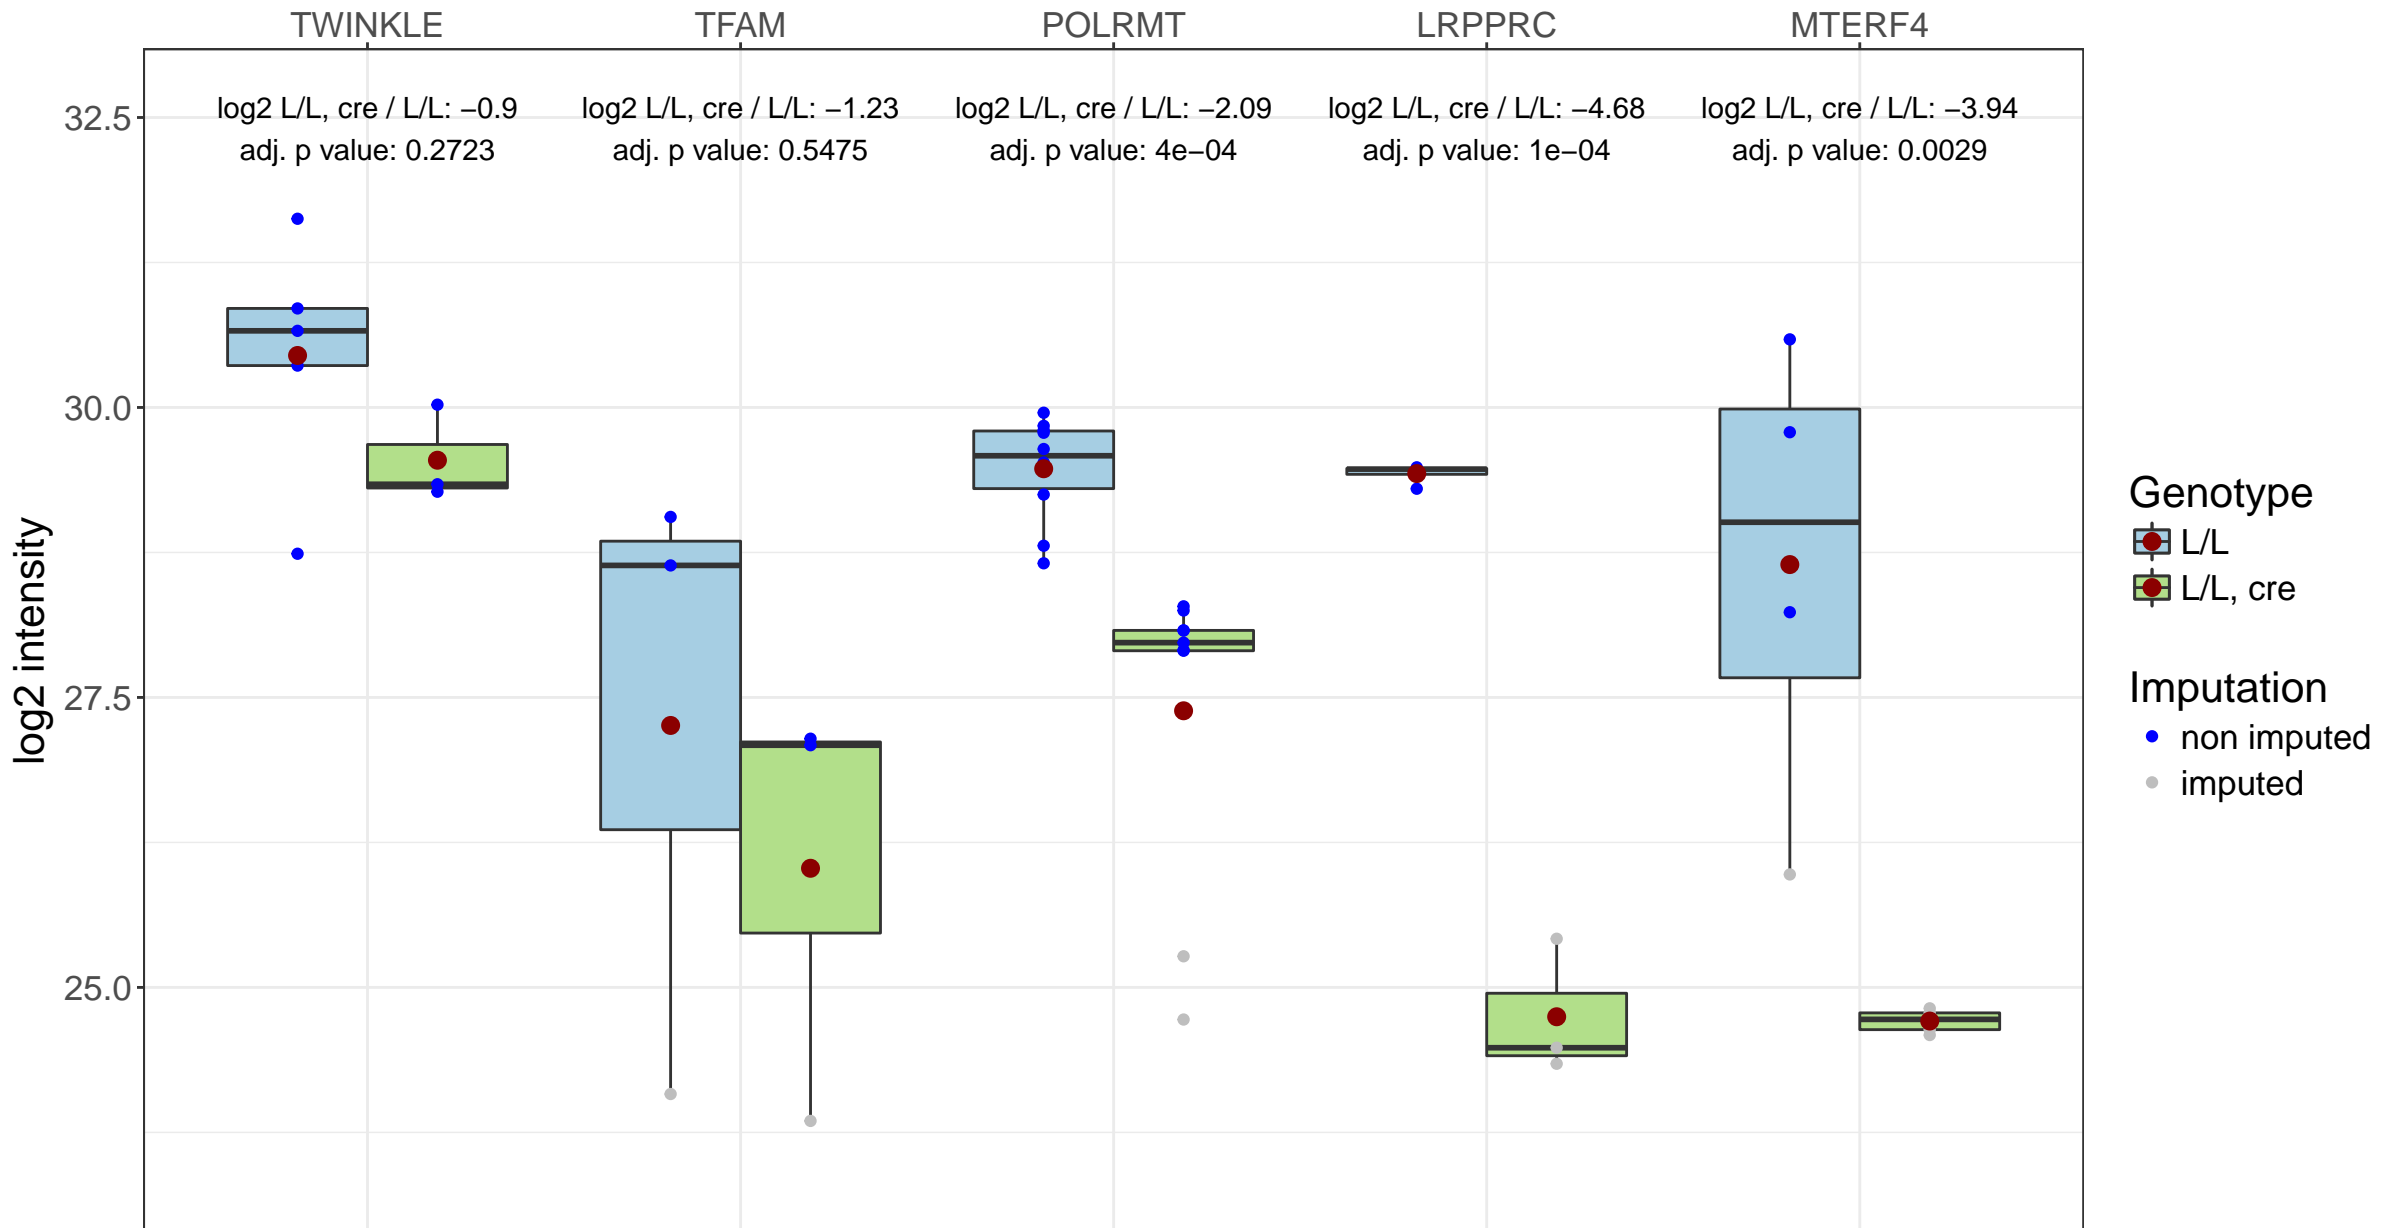

# COX7C / P17665

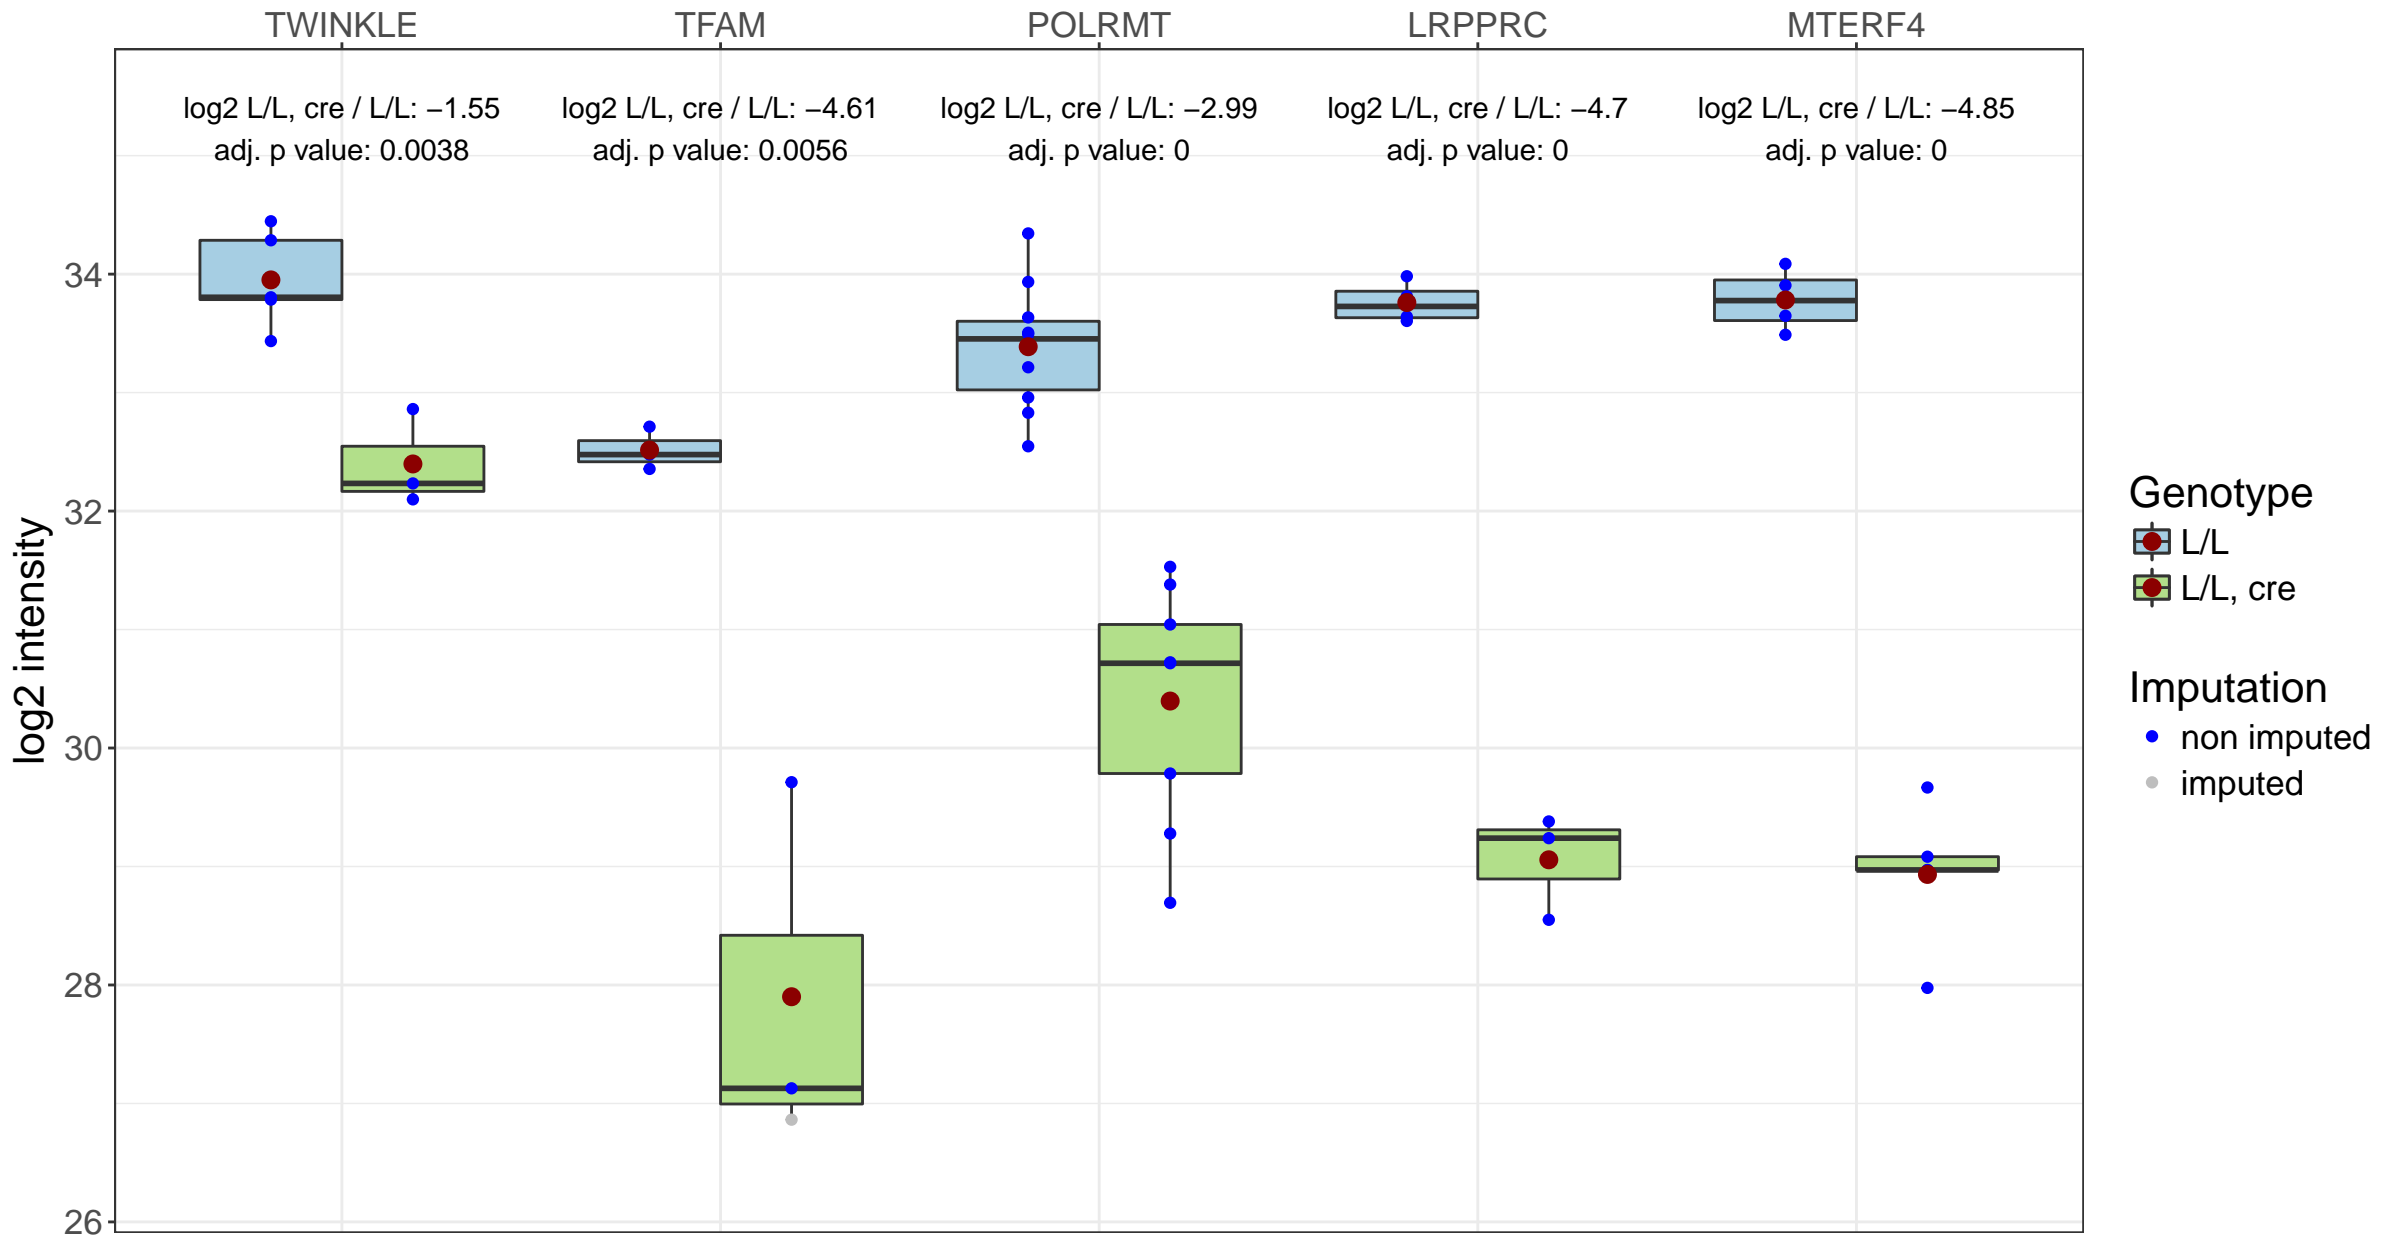

# COX8A / Q64445

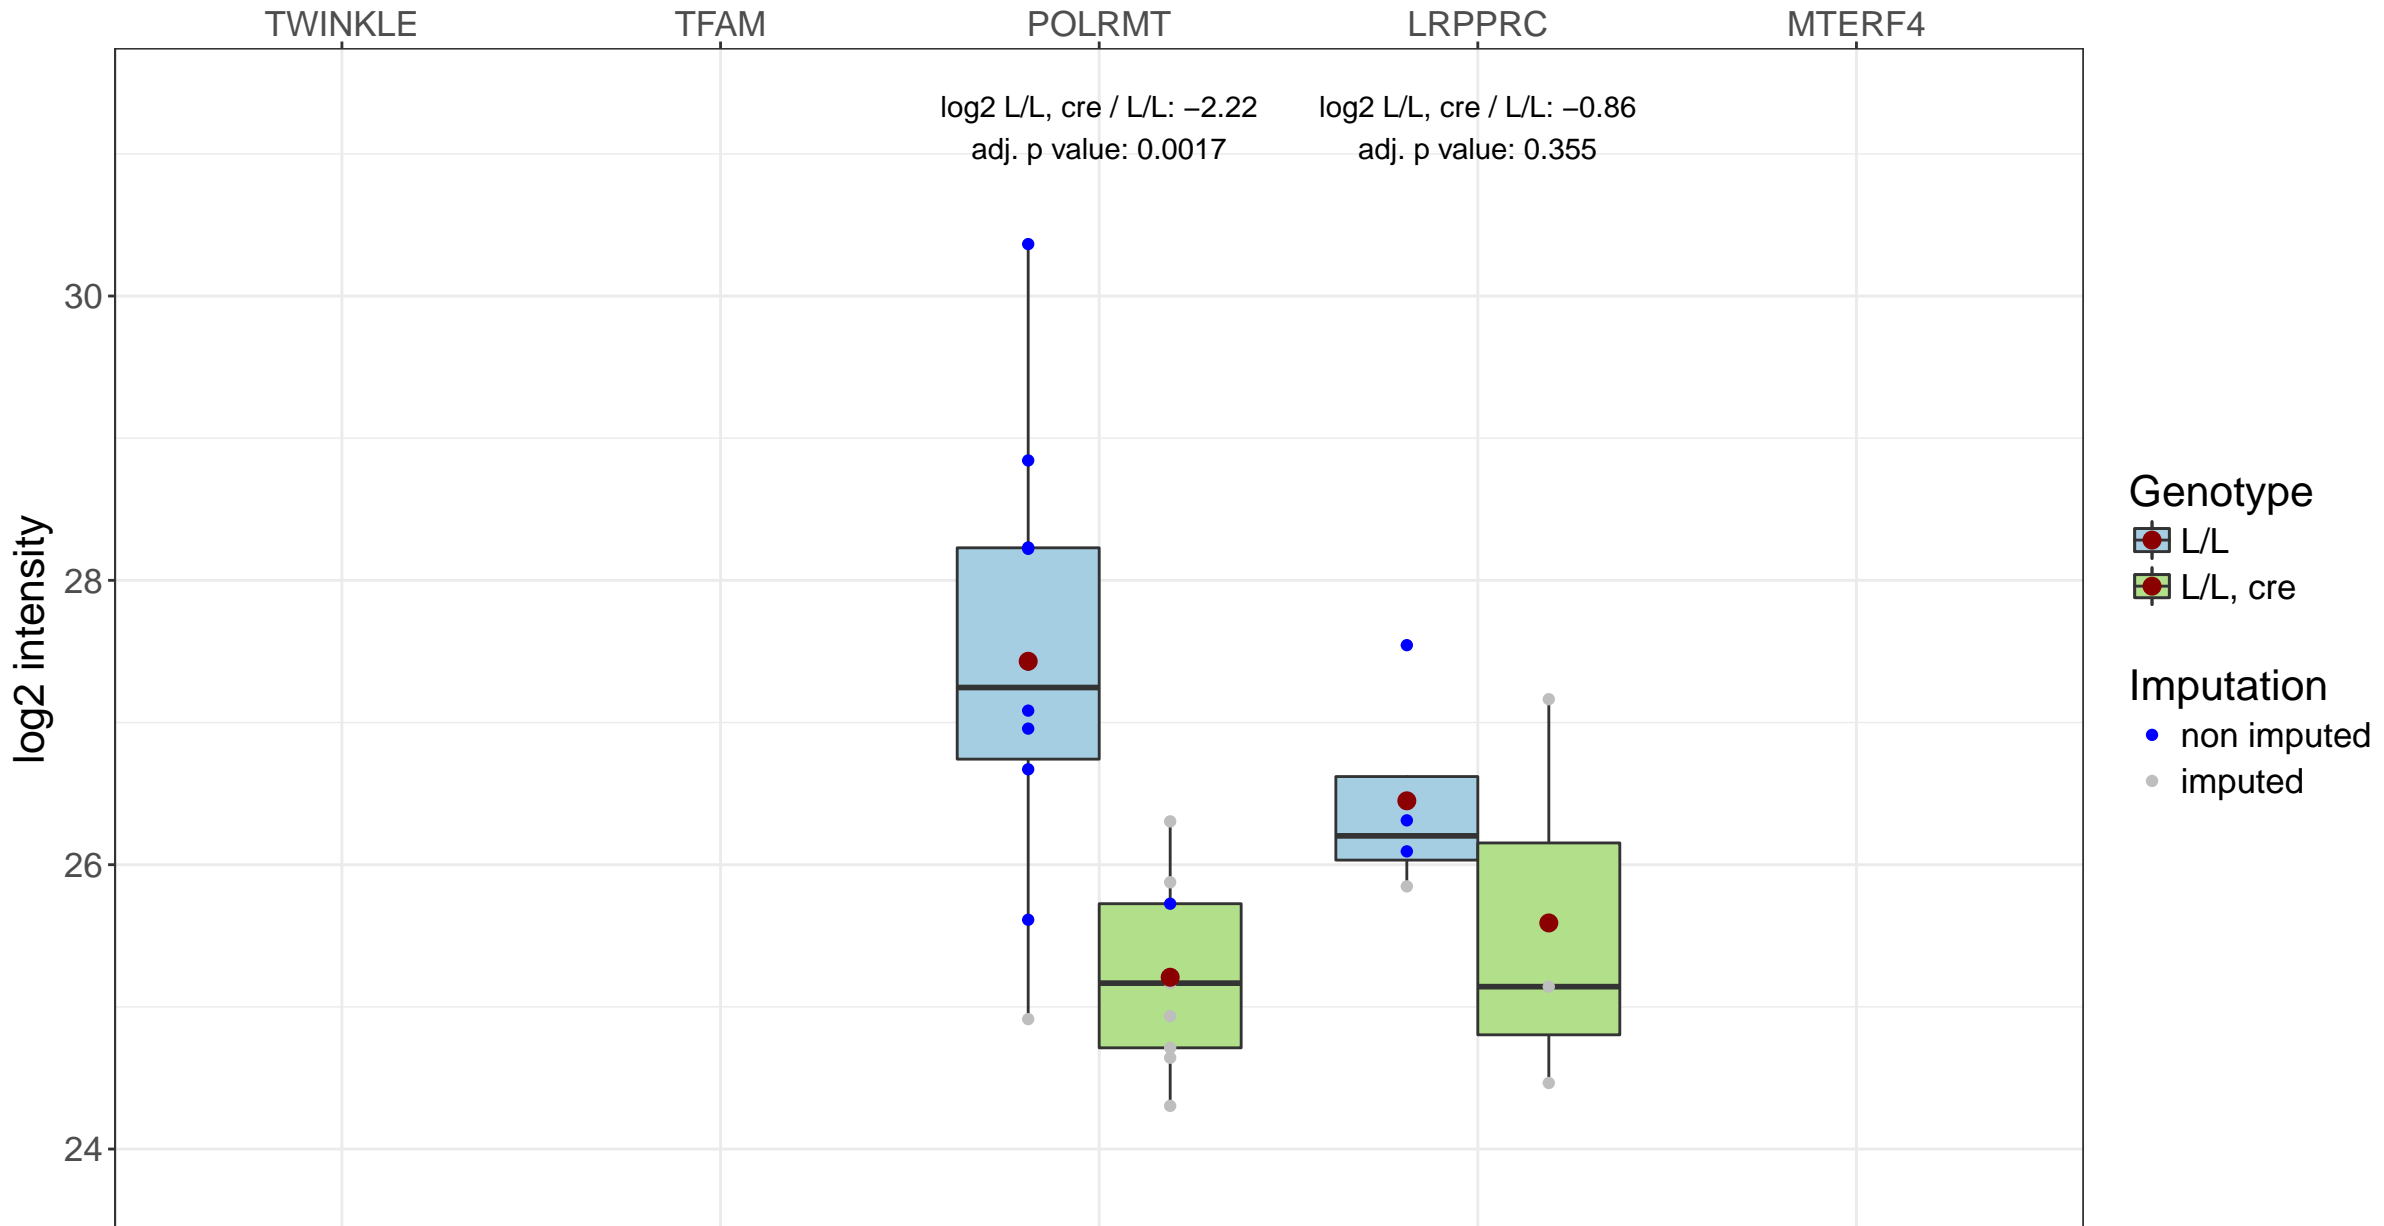



# COX8B / P48772

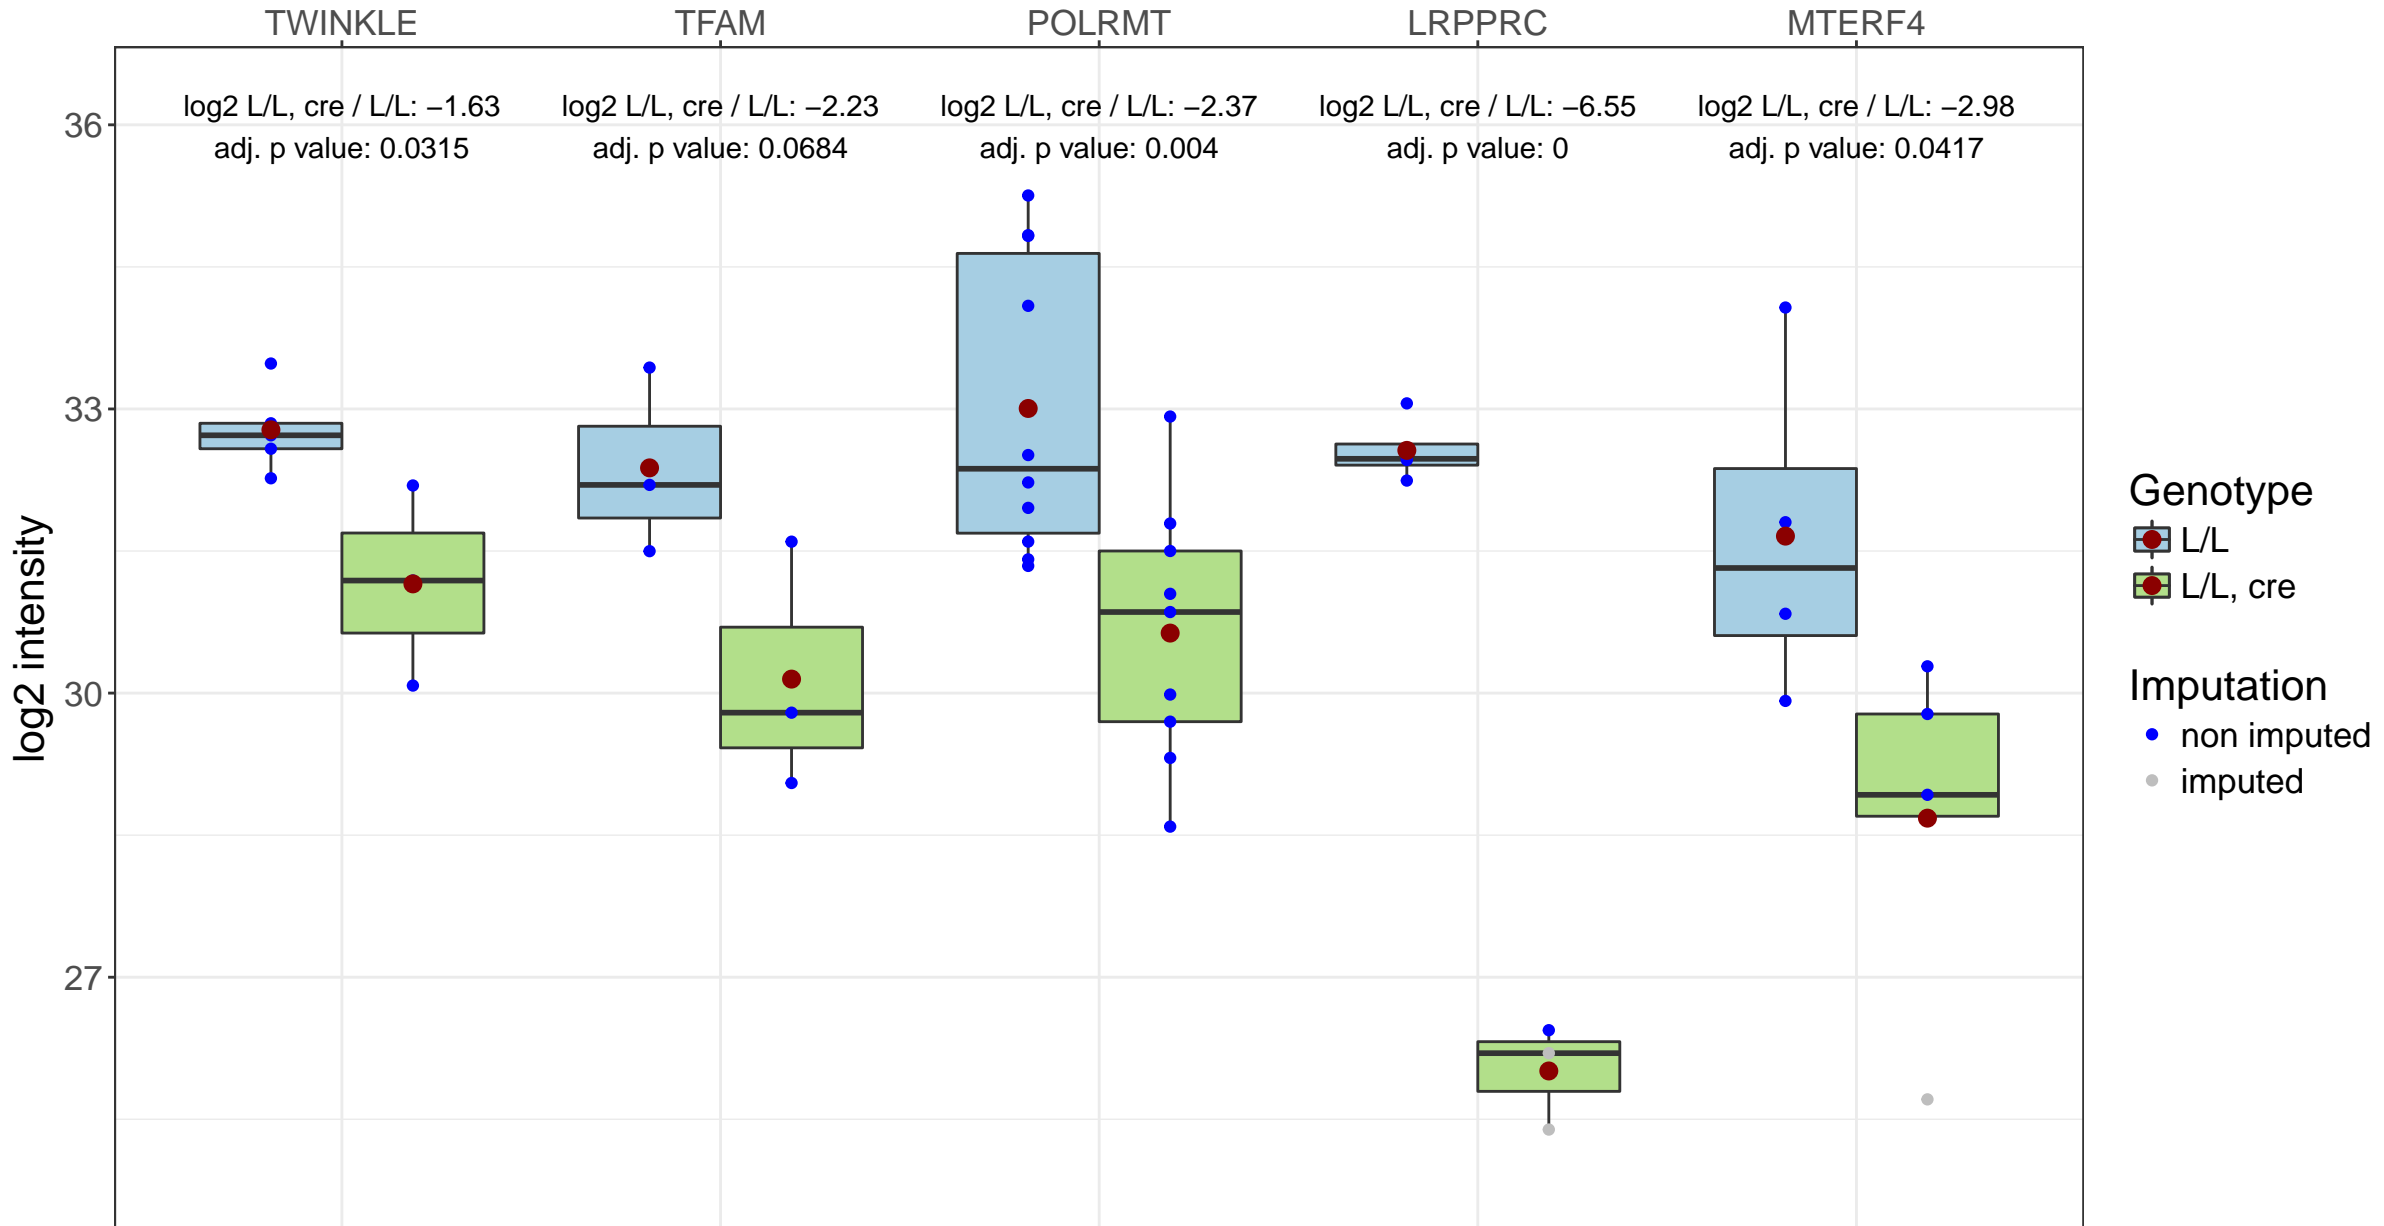

# CPA3 / P15089

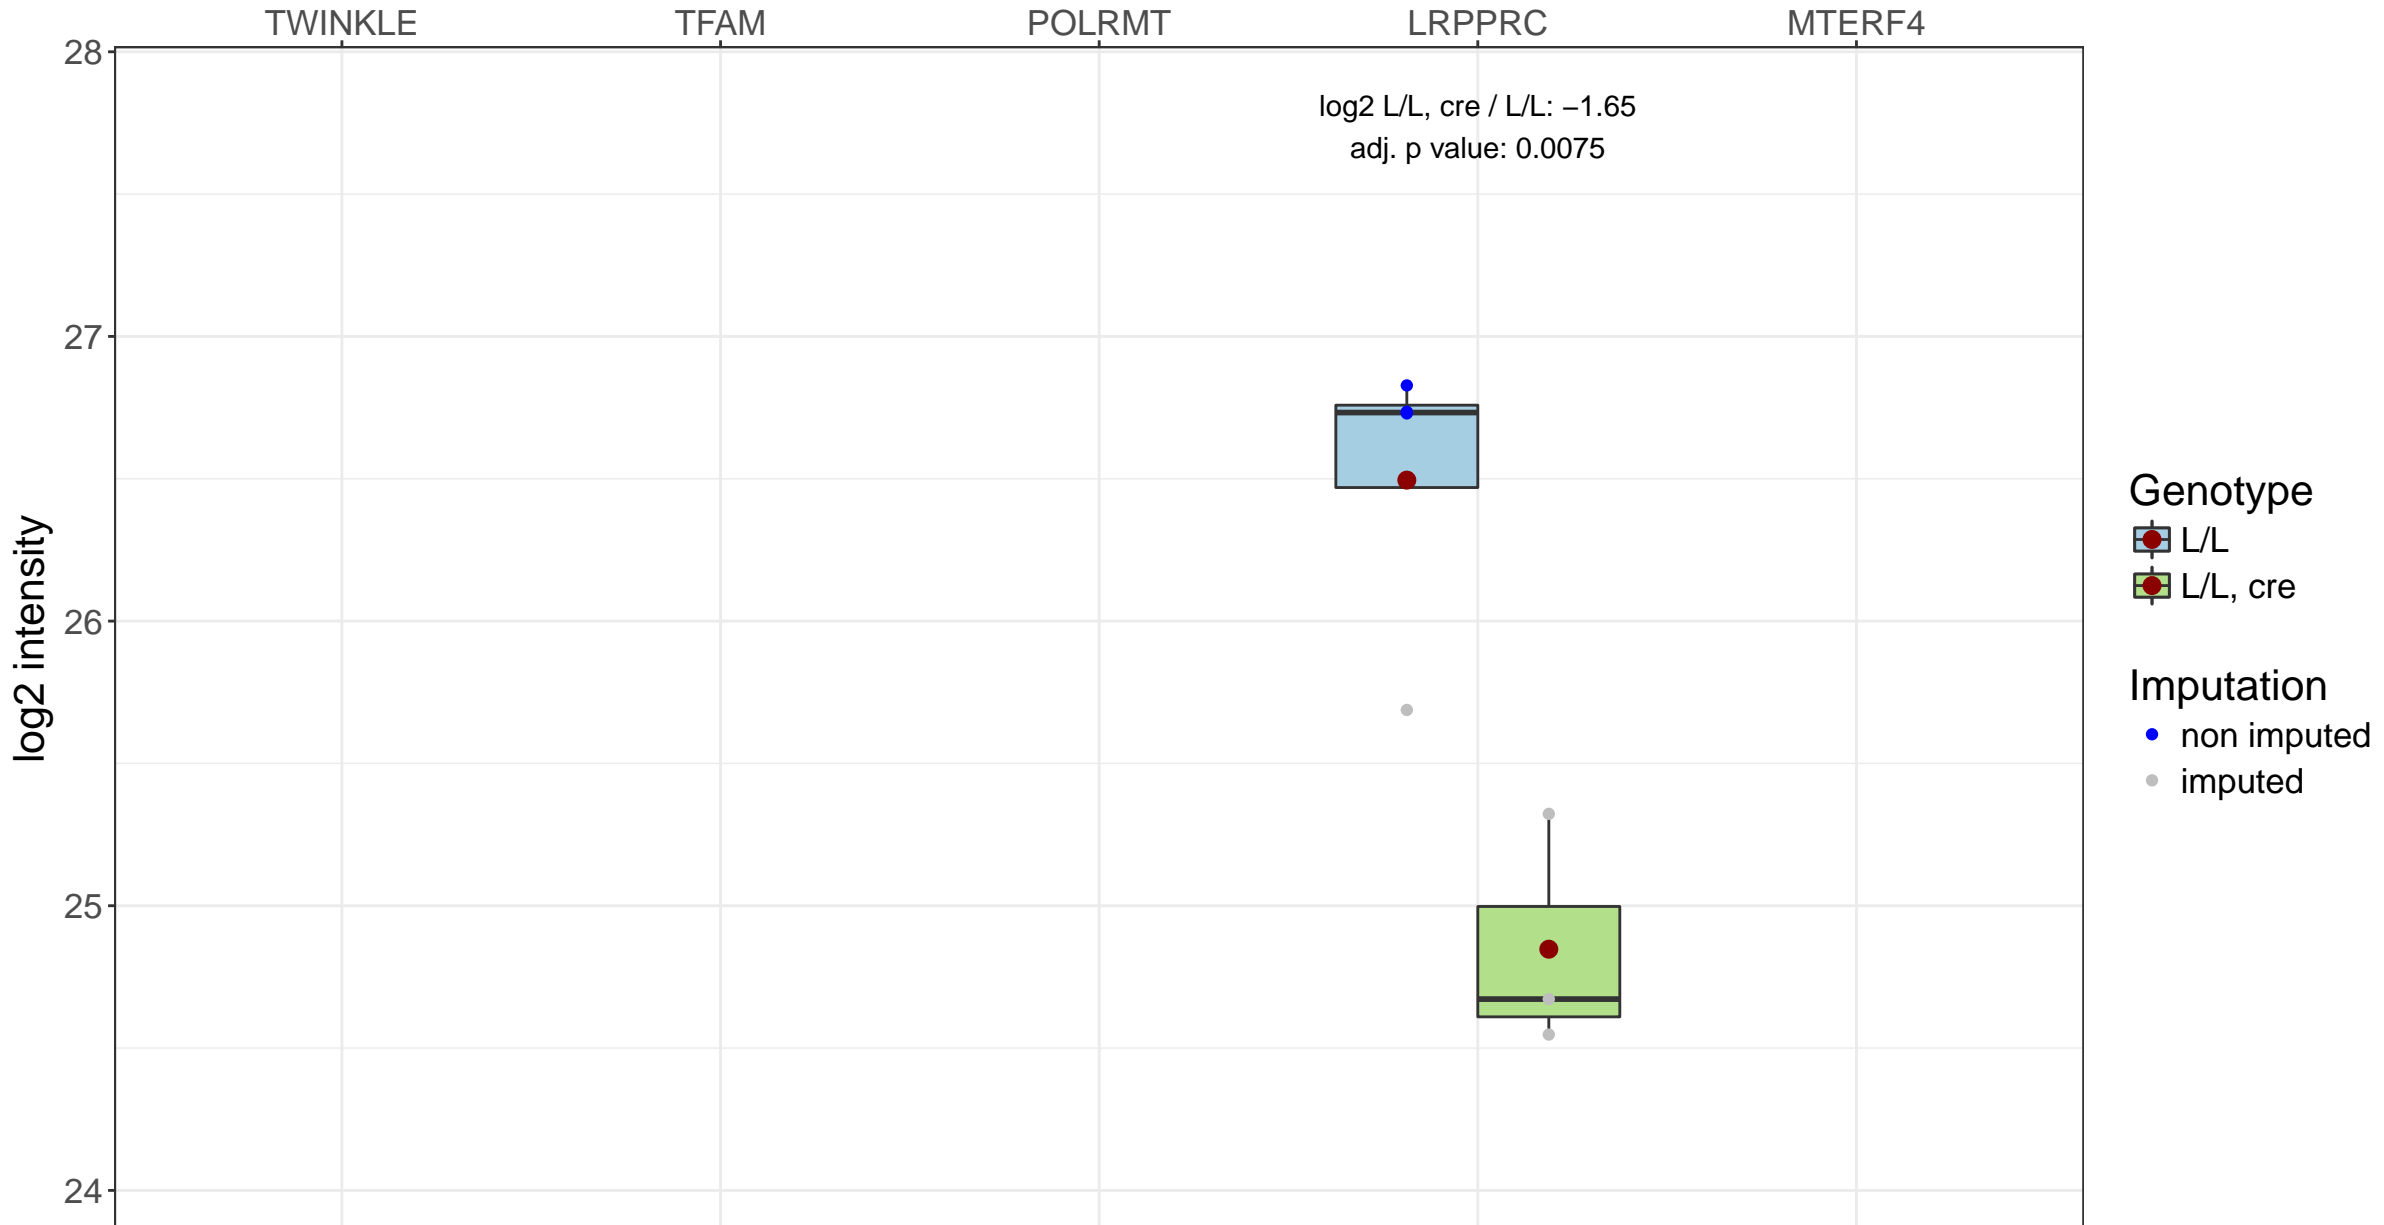

# CPB2 / Q9JHH6

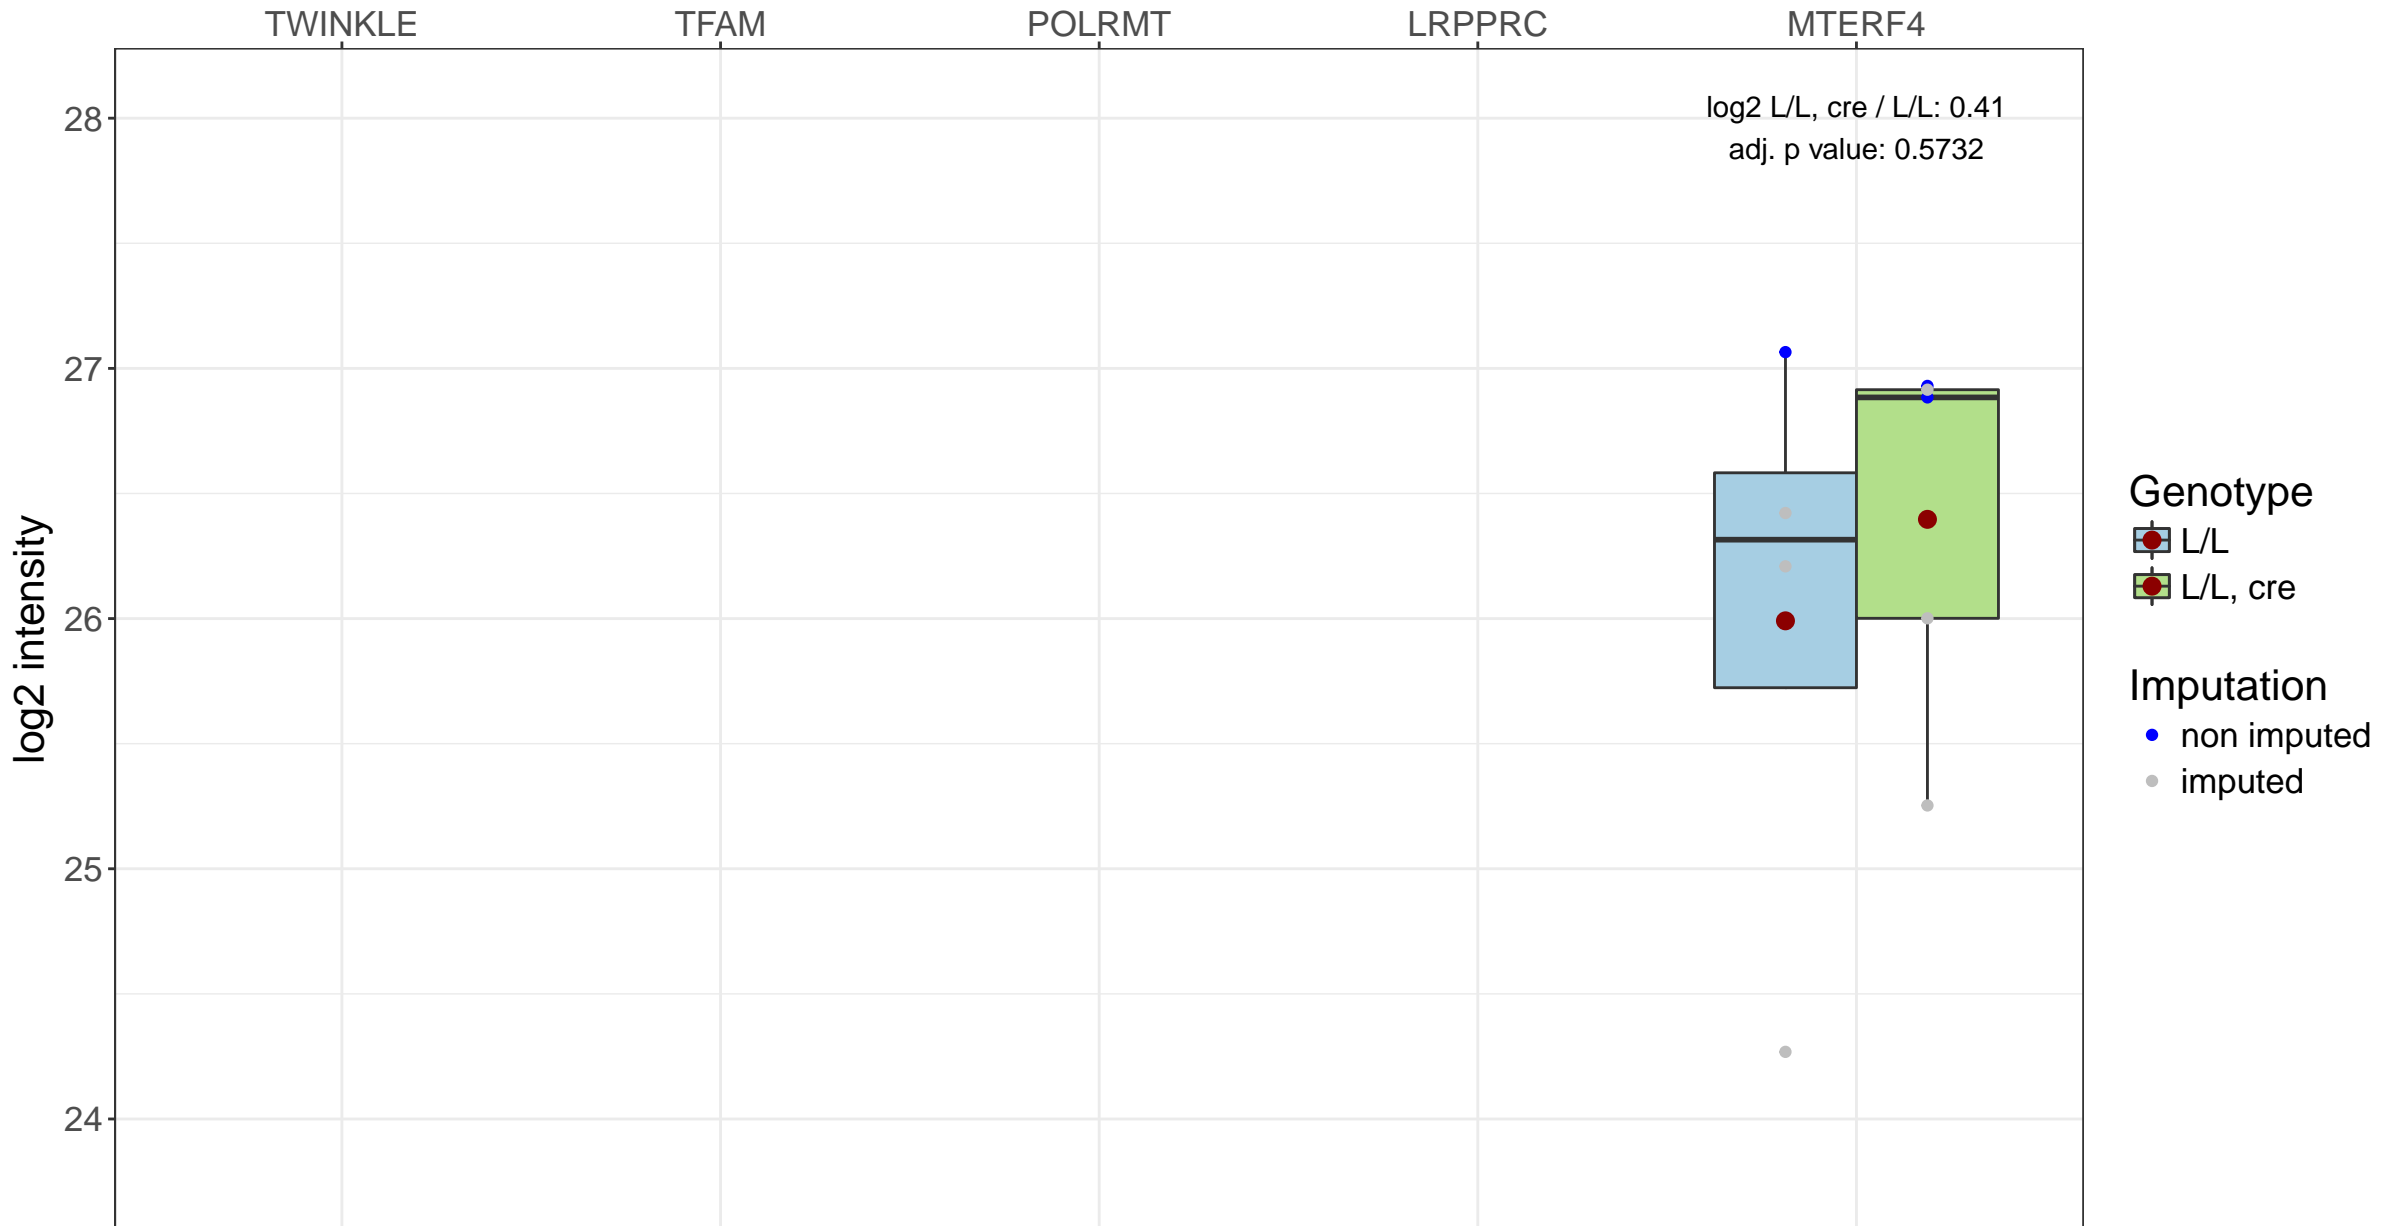

# CPOX / P36552

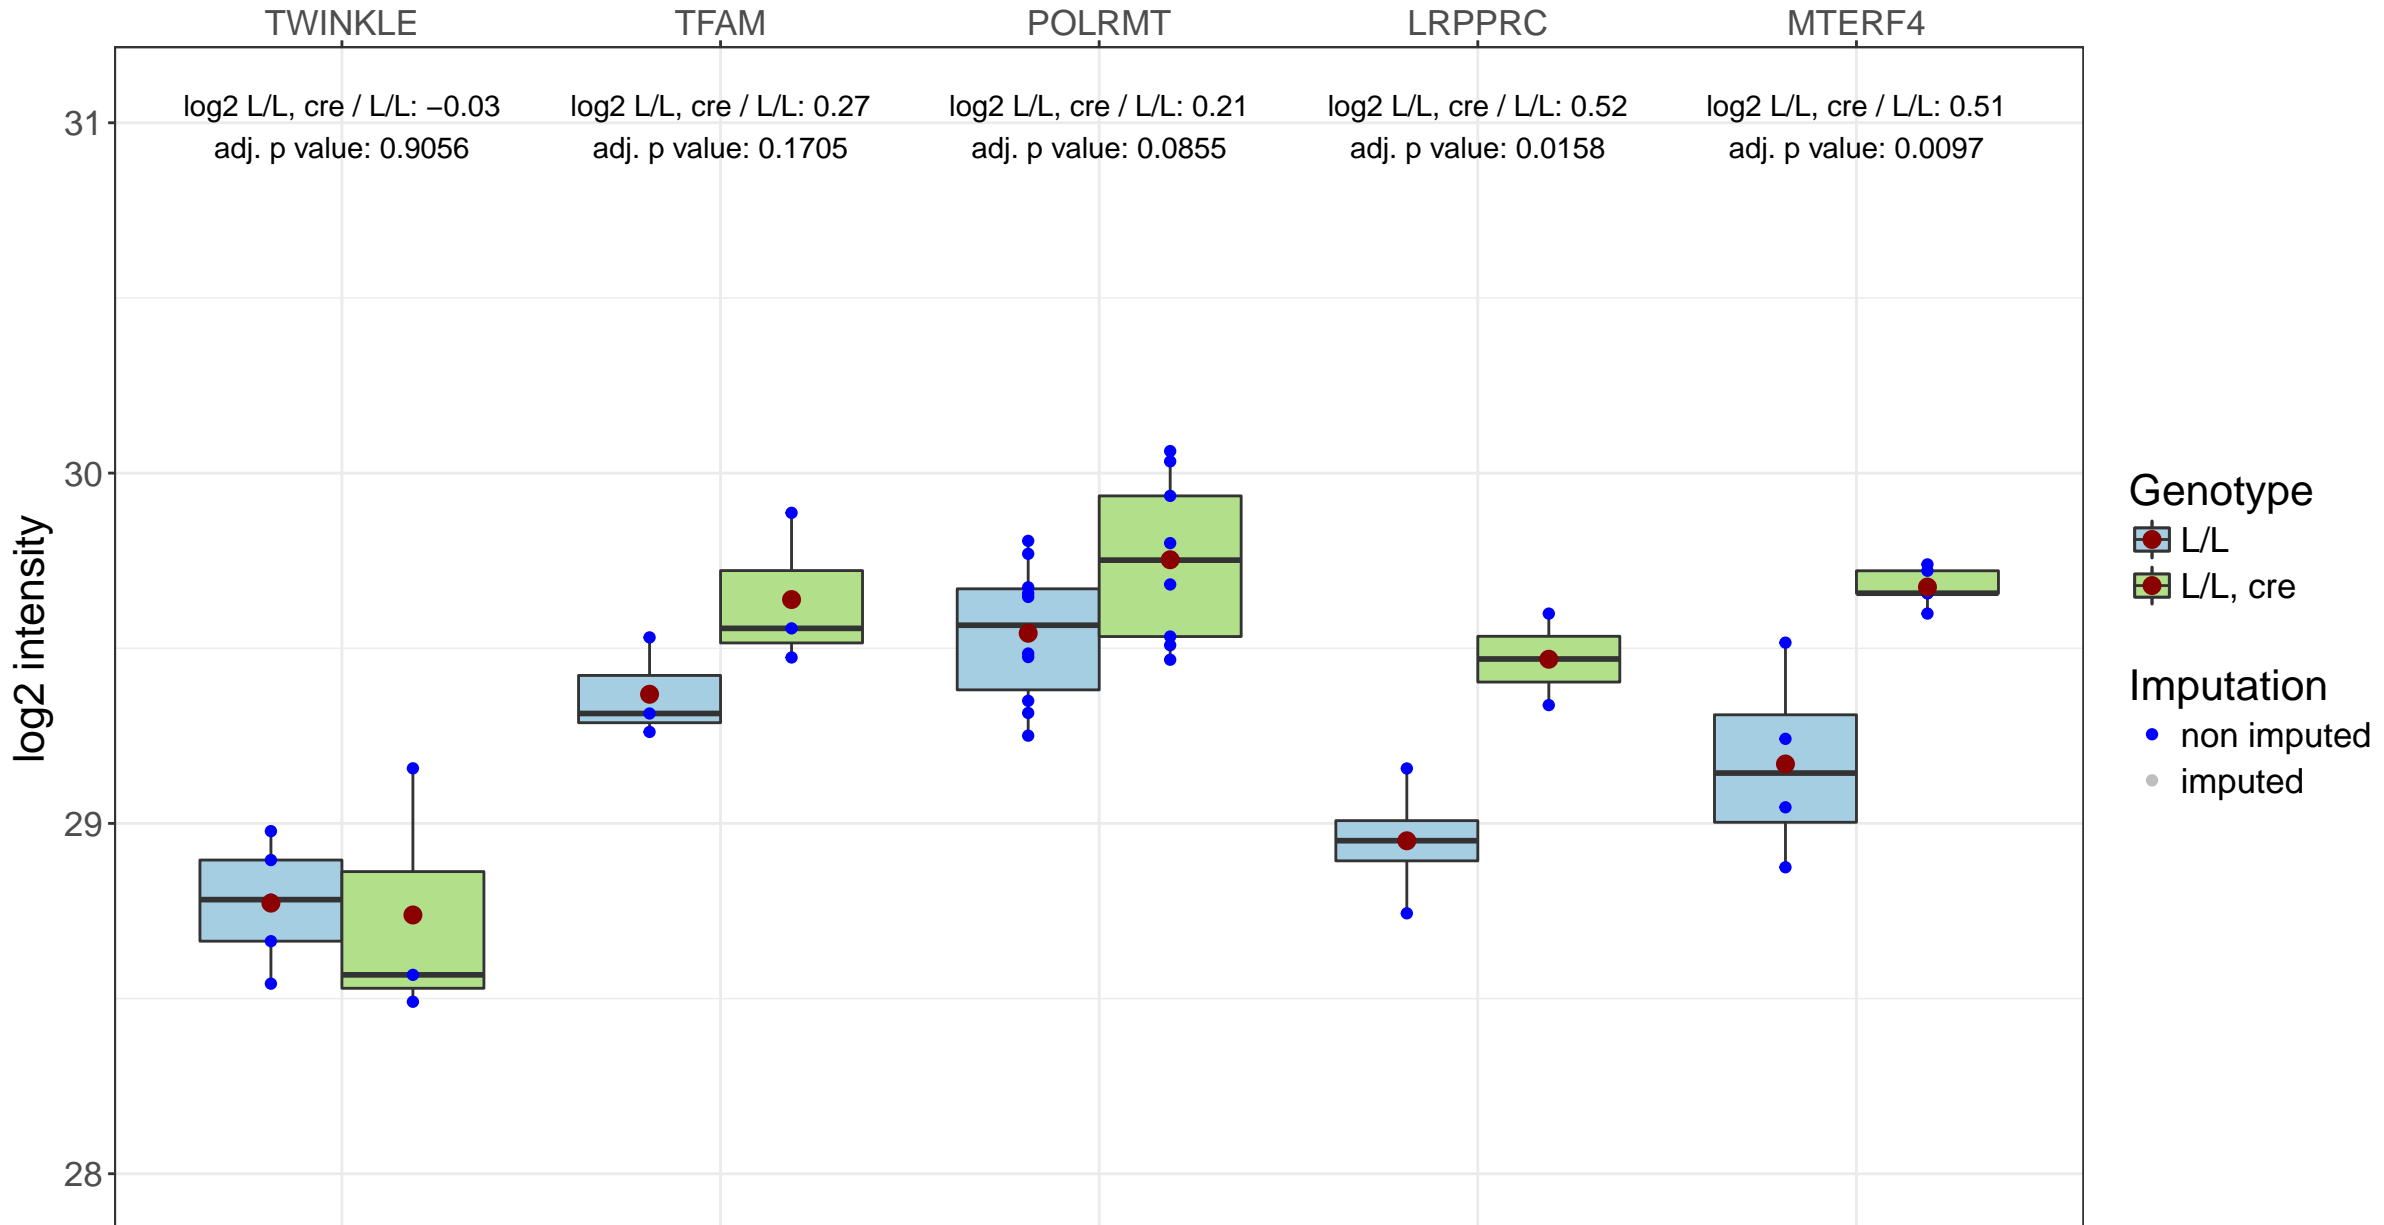

# CPT1A / P97742

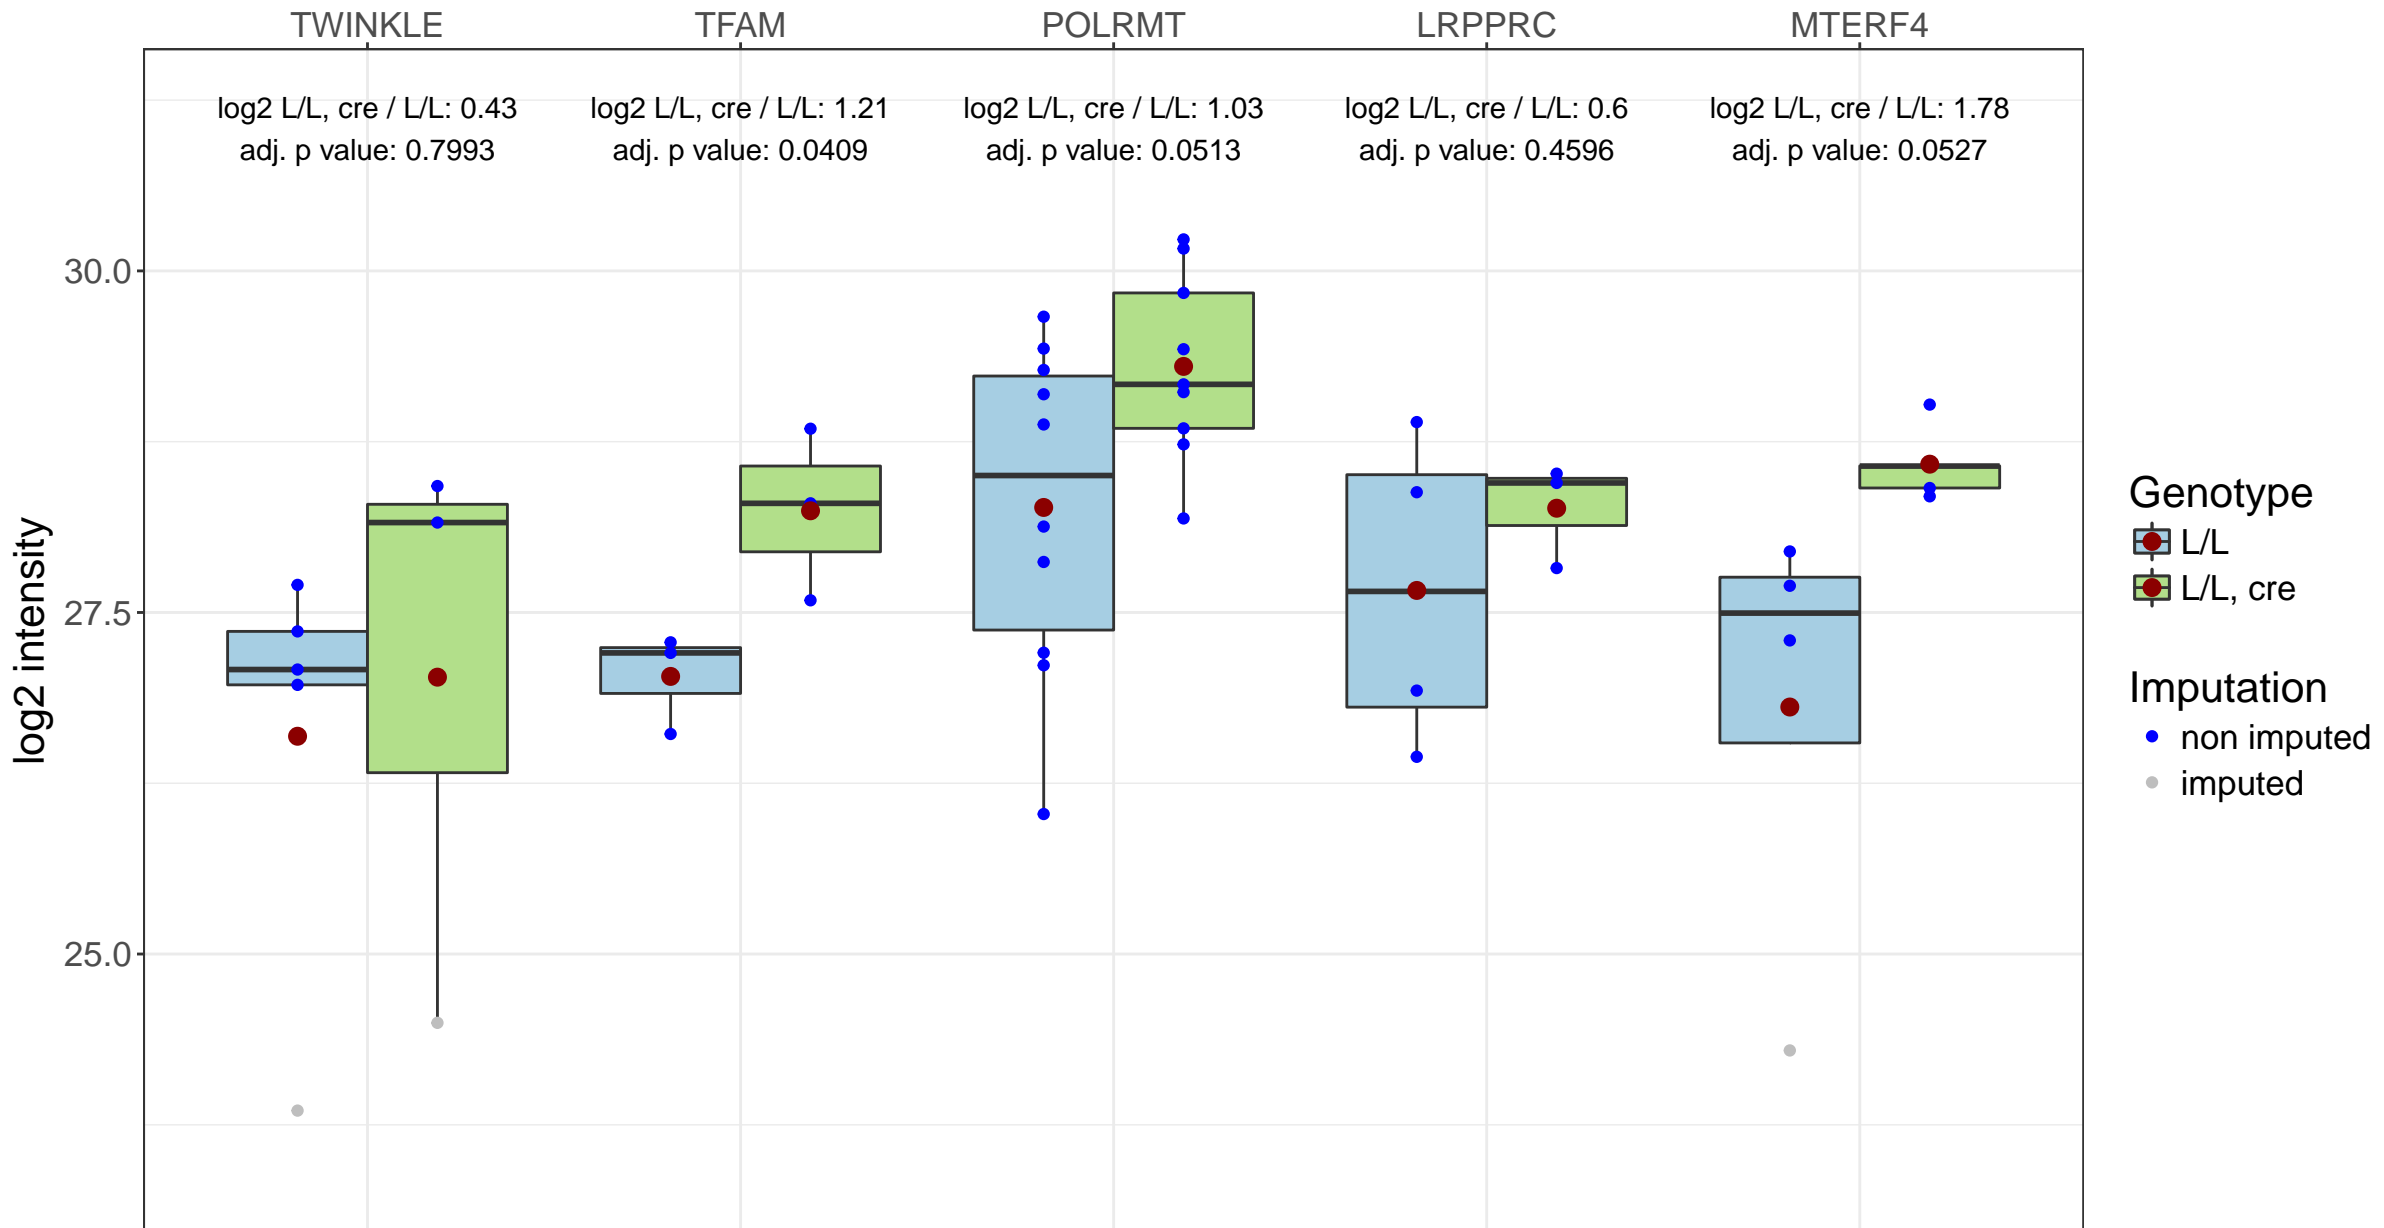

# CPT1B / Q924X2

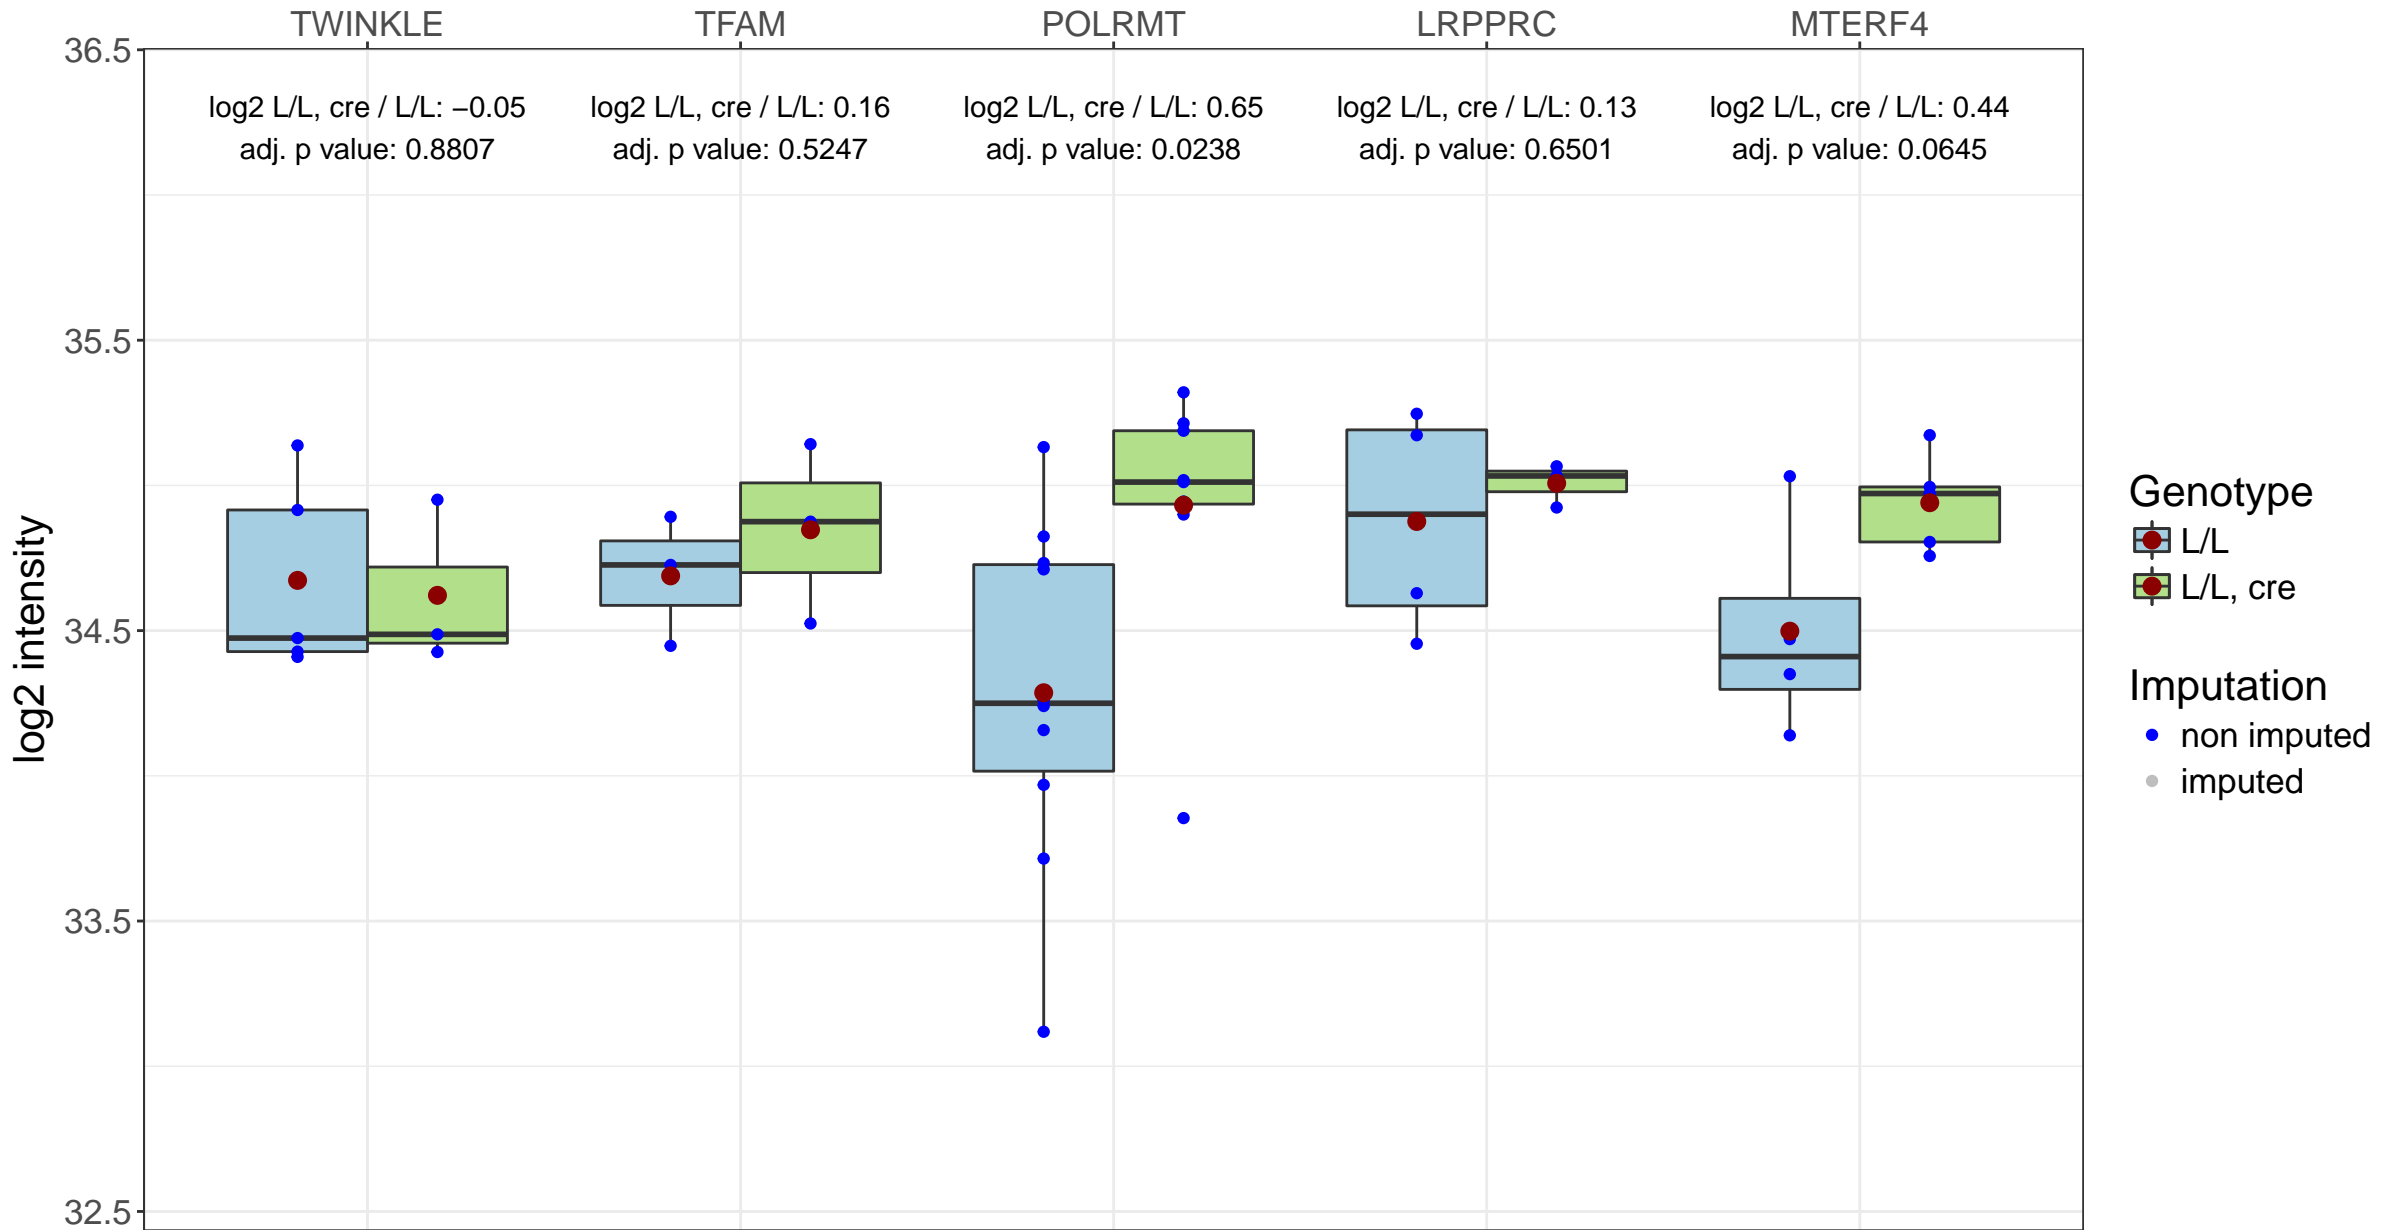

# CPT2 / P52825

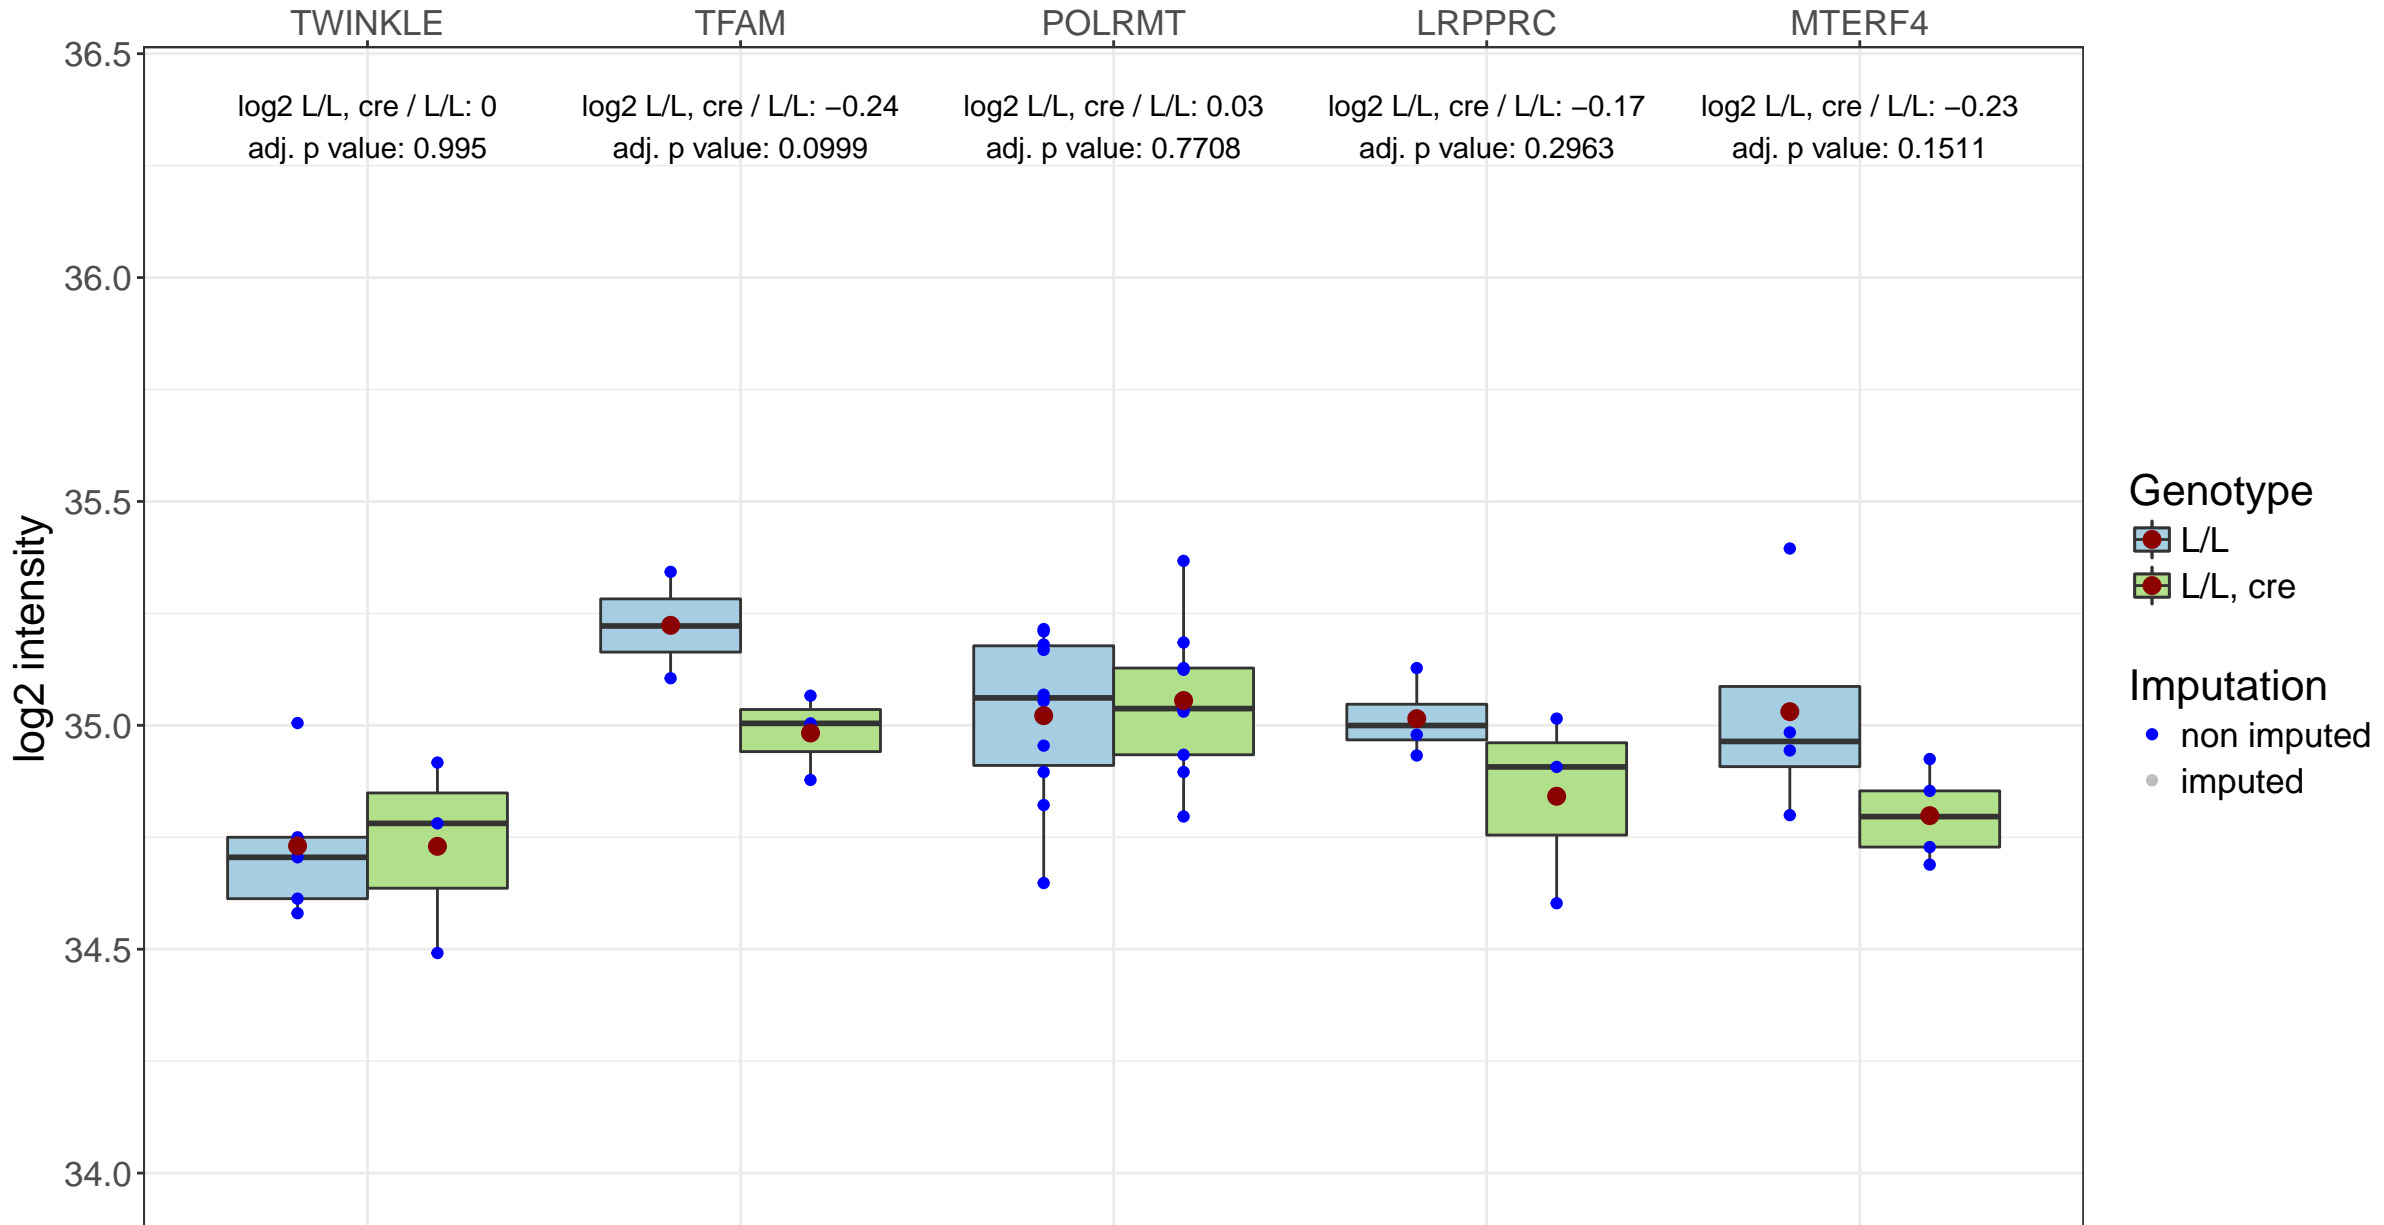

# CRAT / P47934

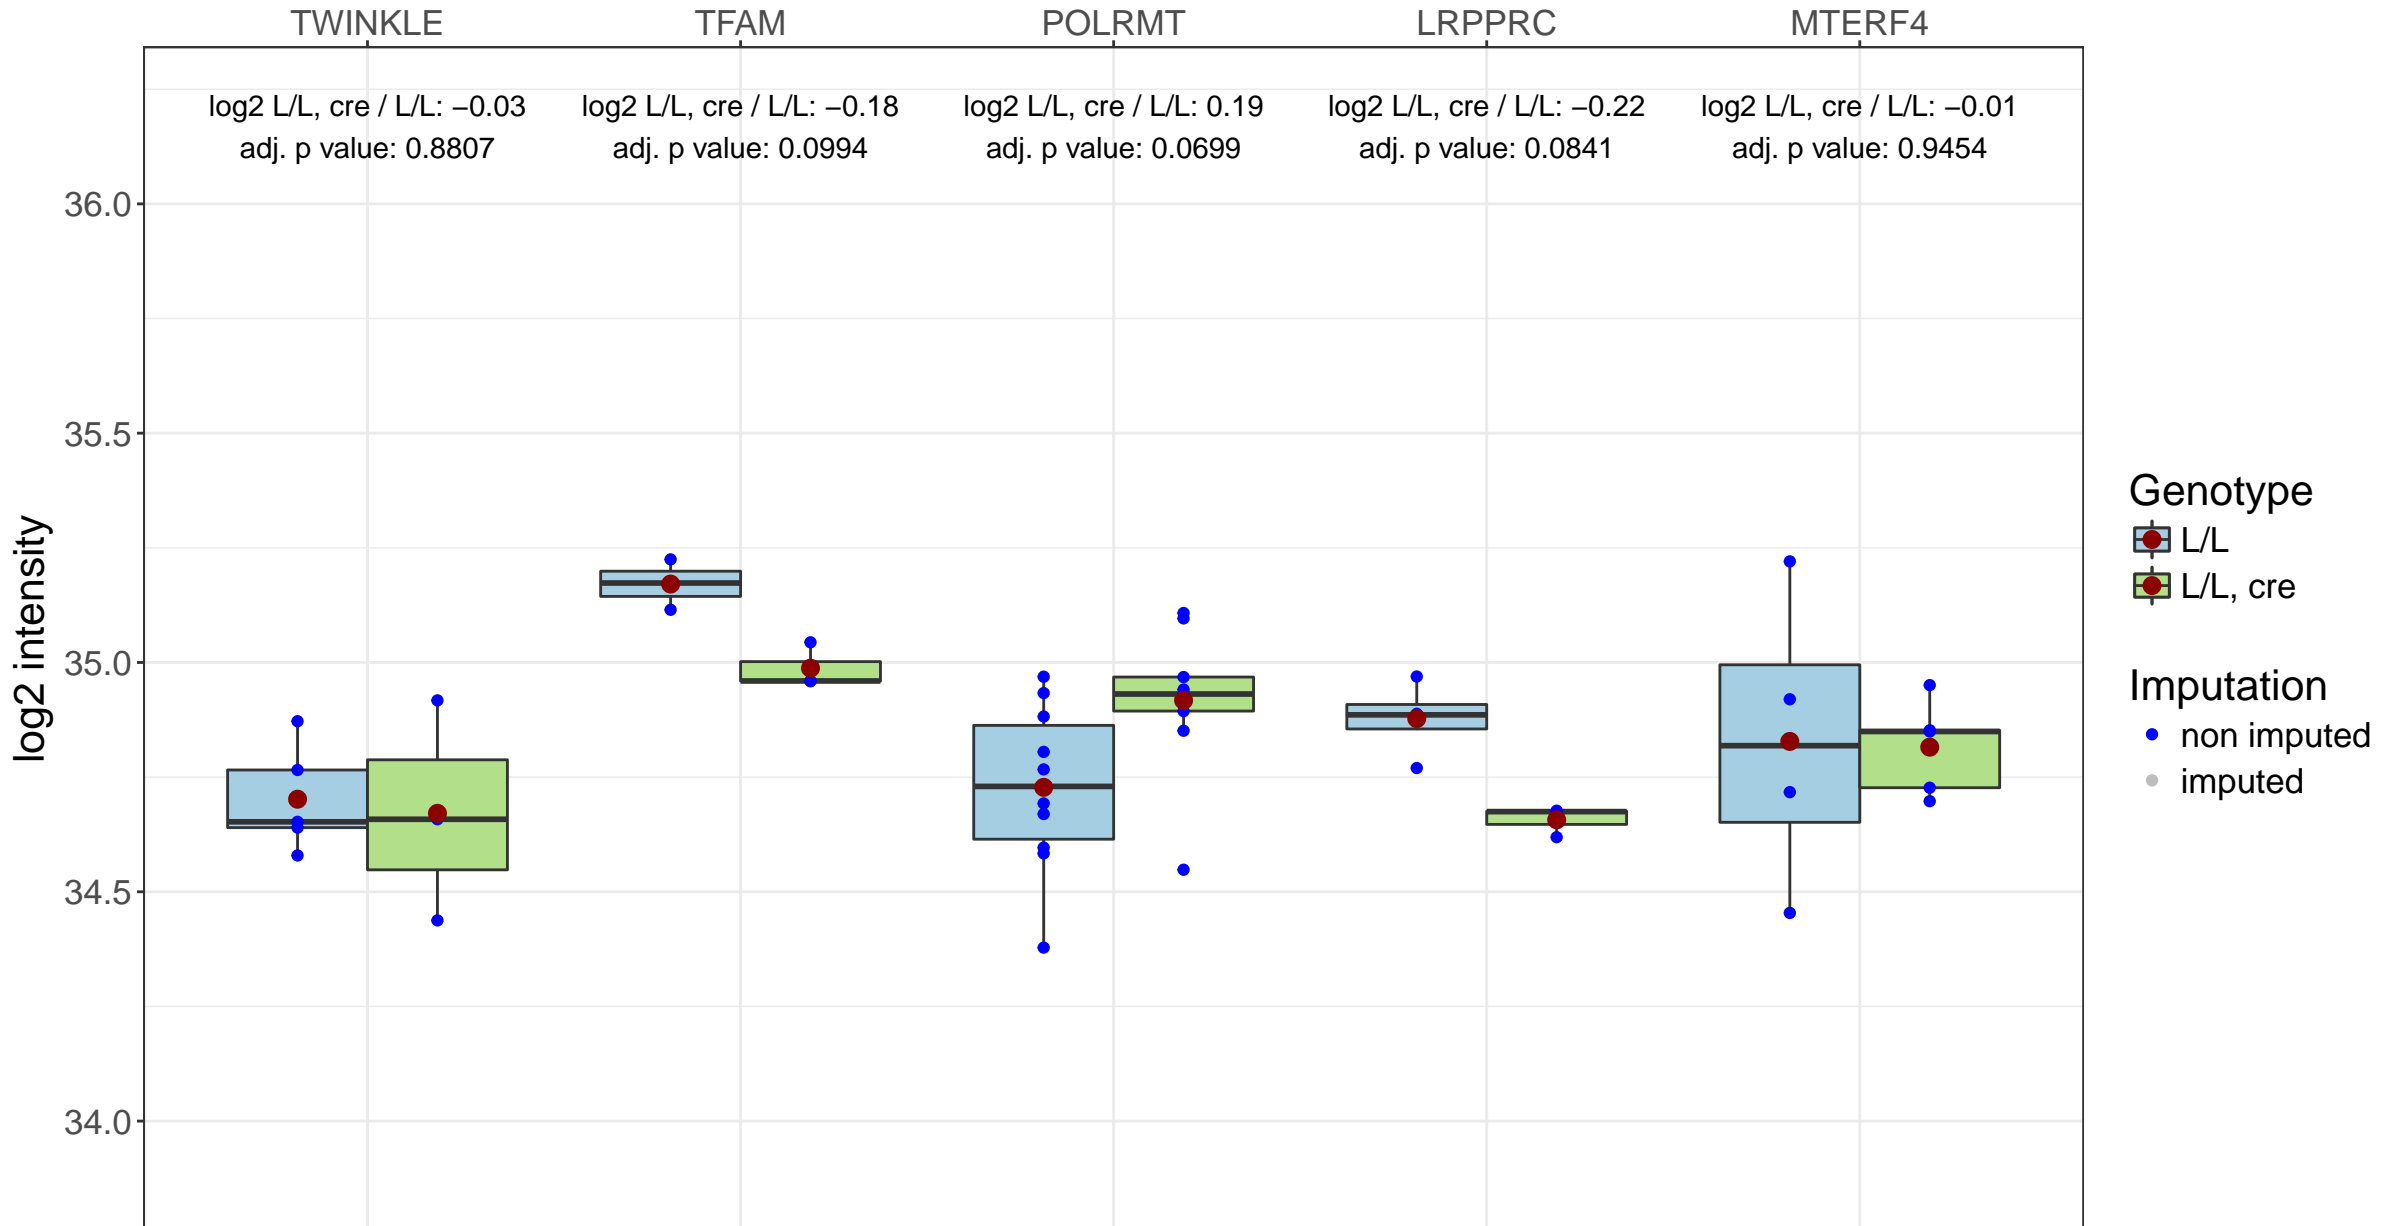



# CRYAB / P23927

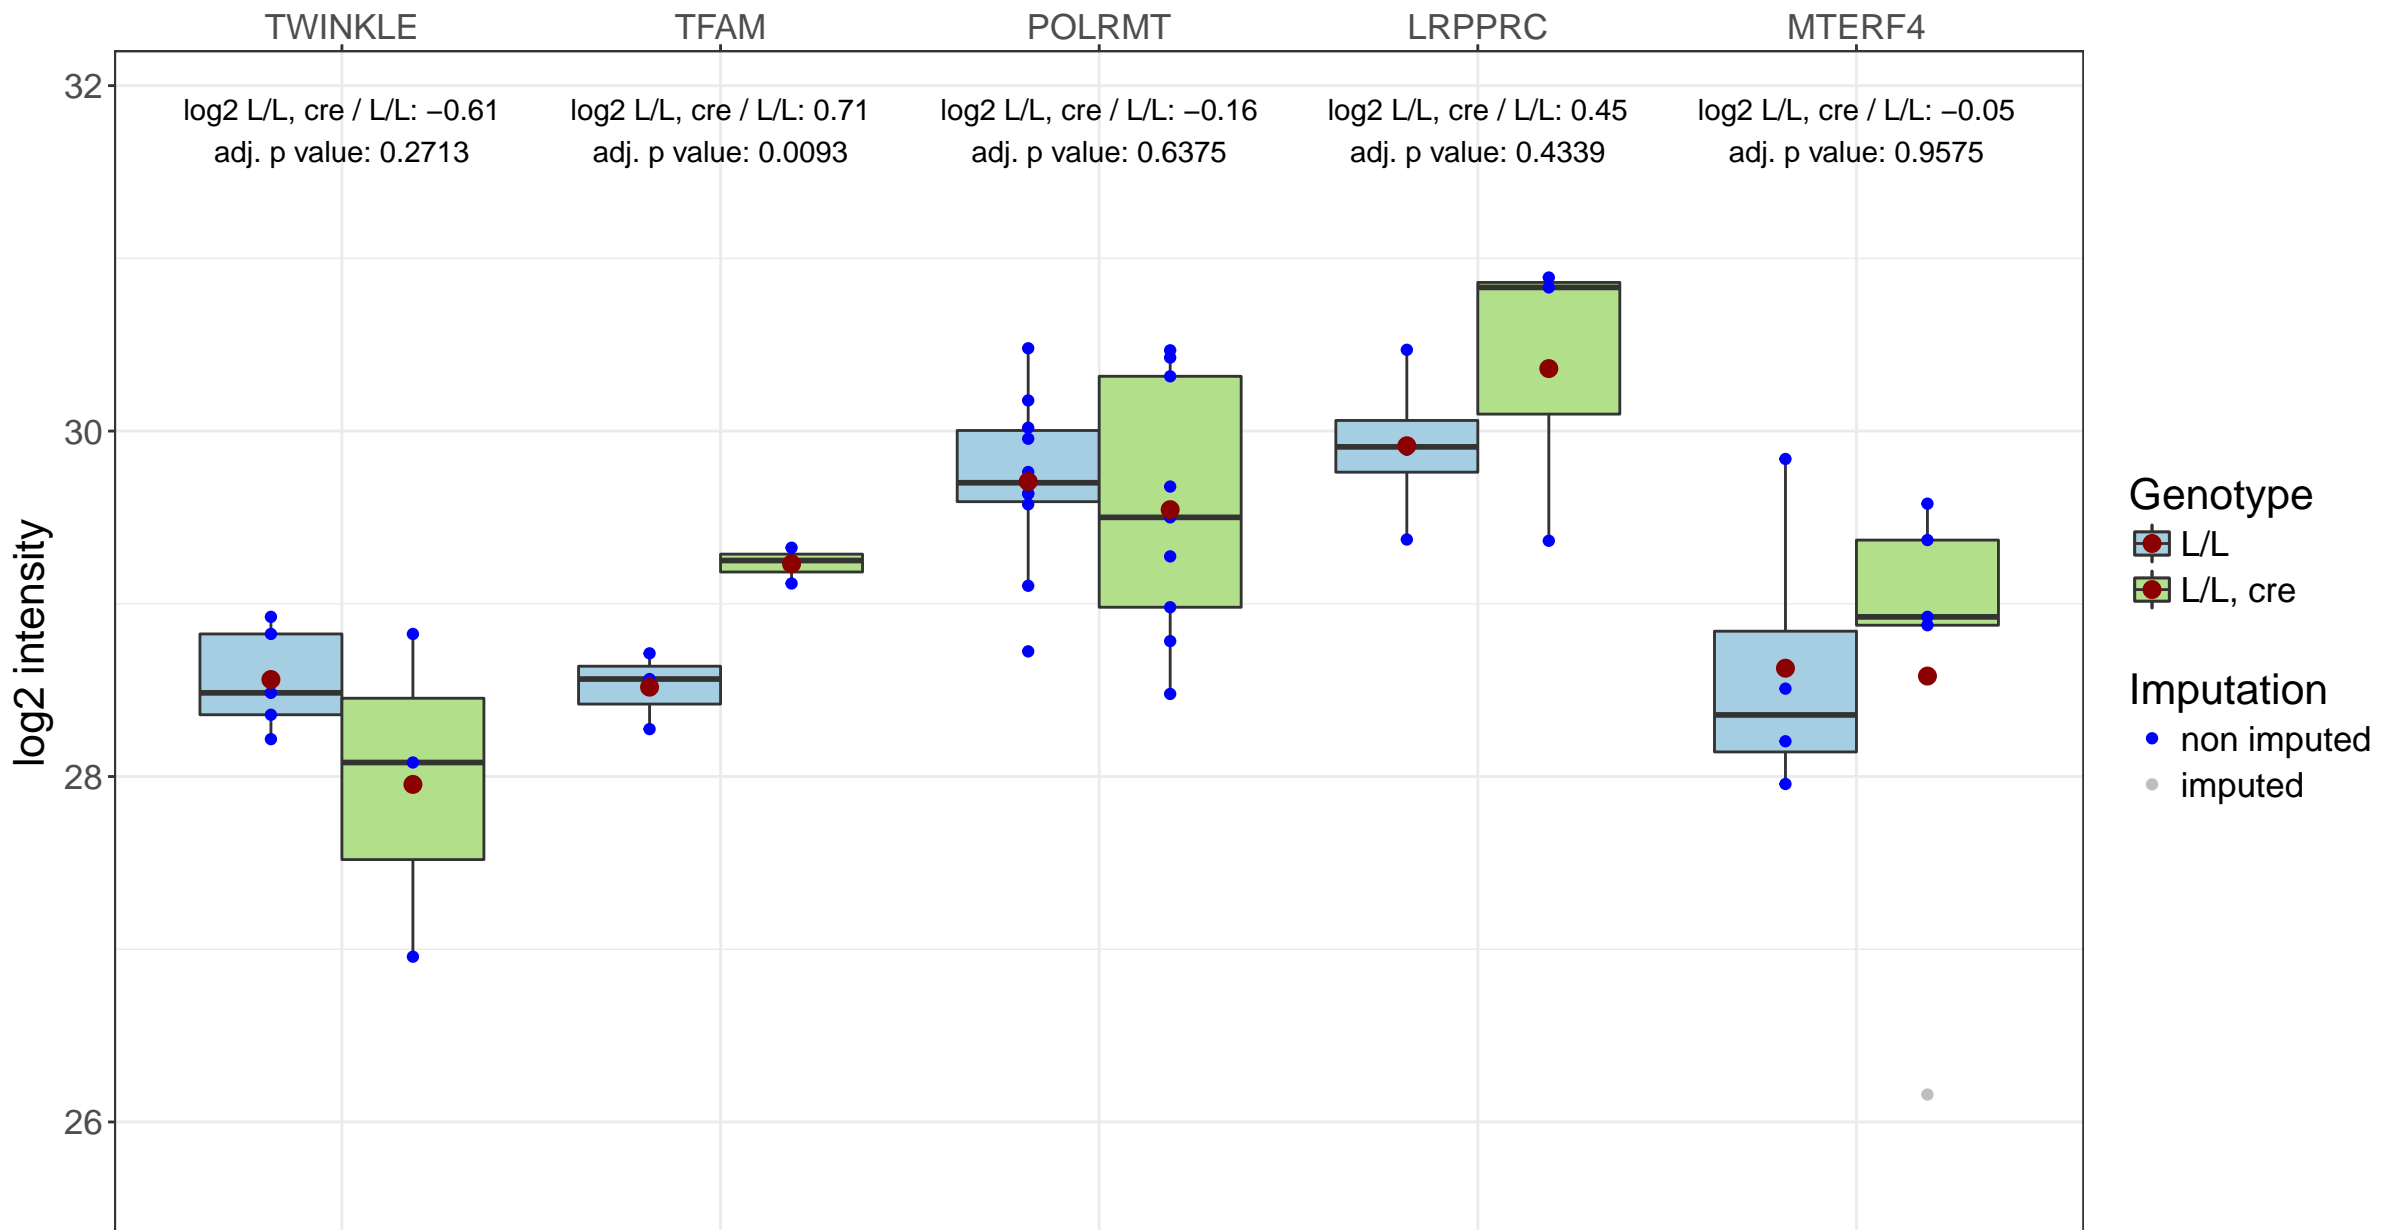

# CS / Q9CZU6

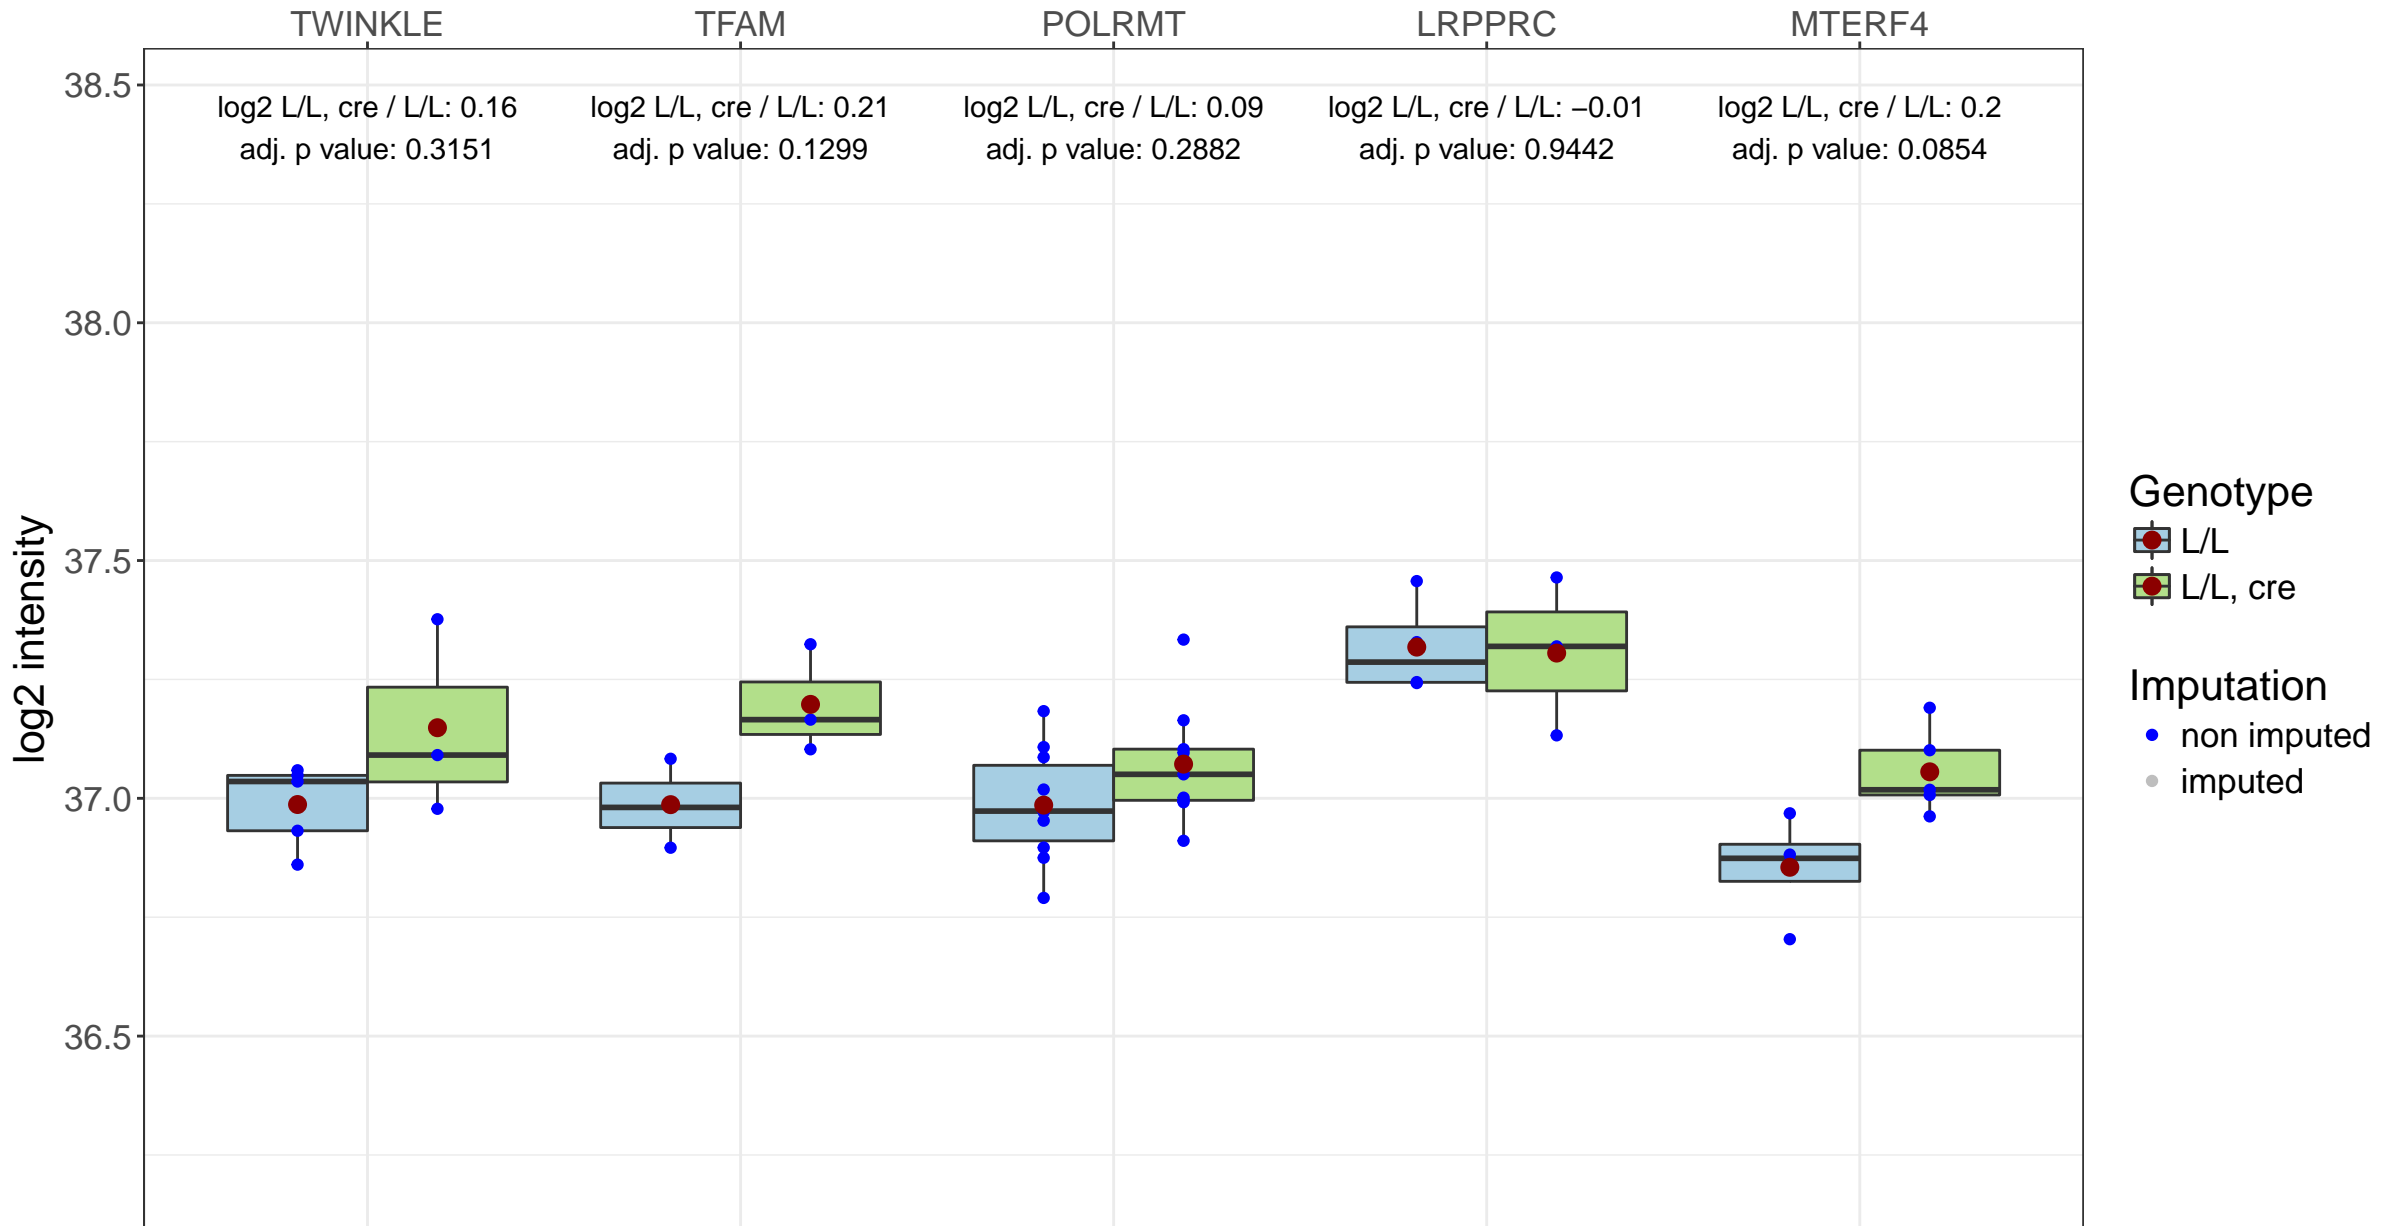

# CSL / Q80X68

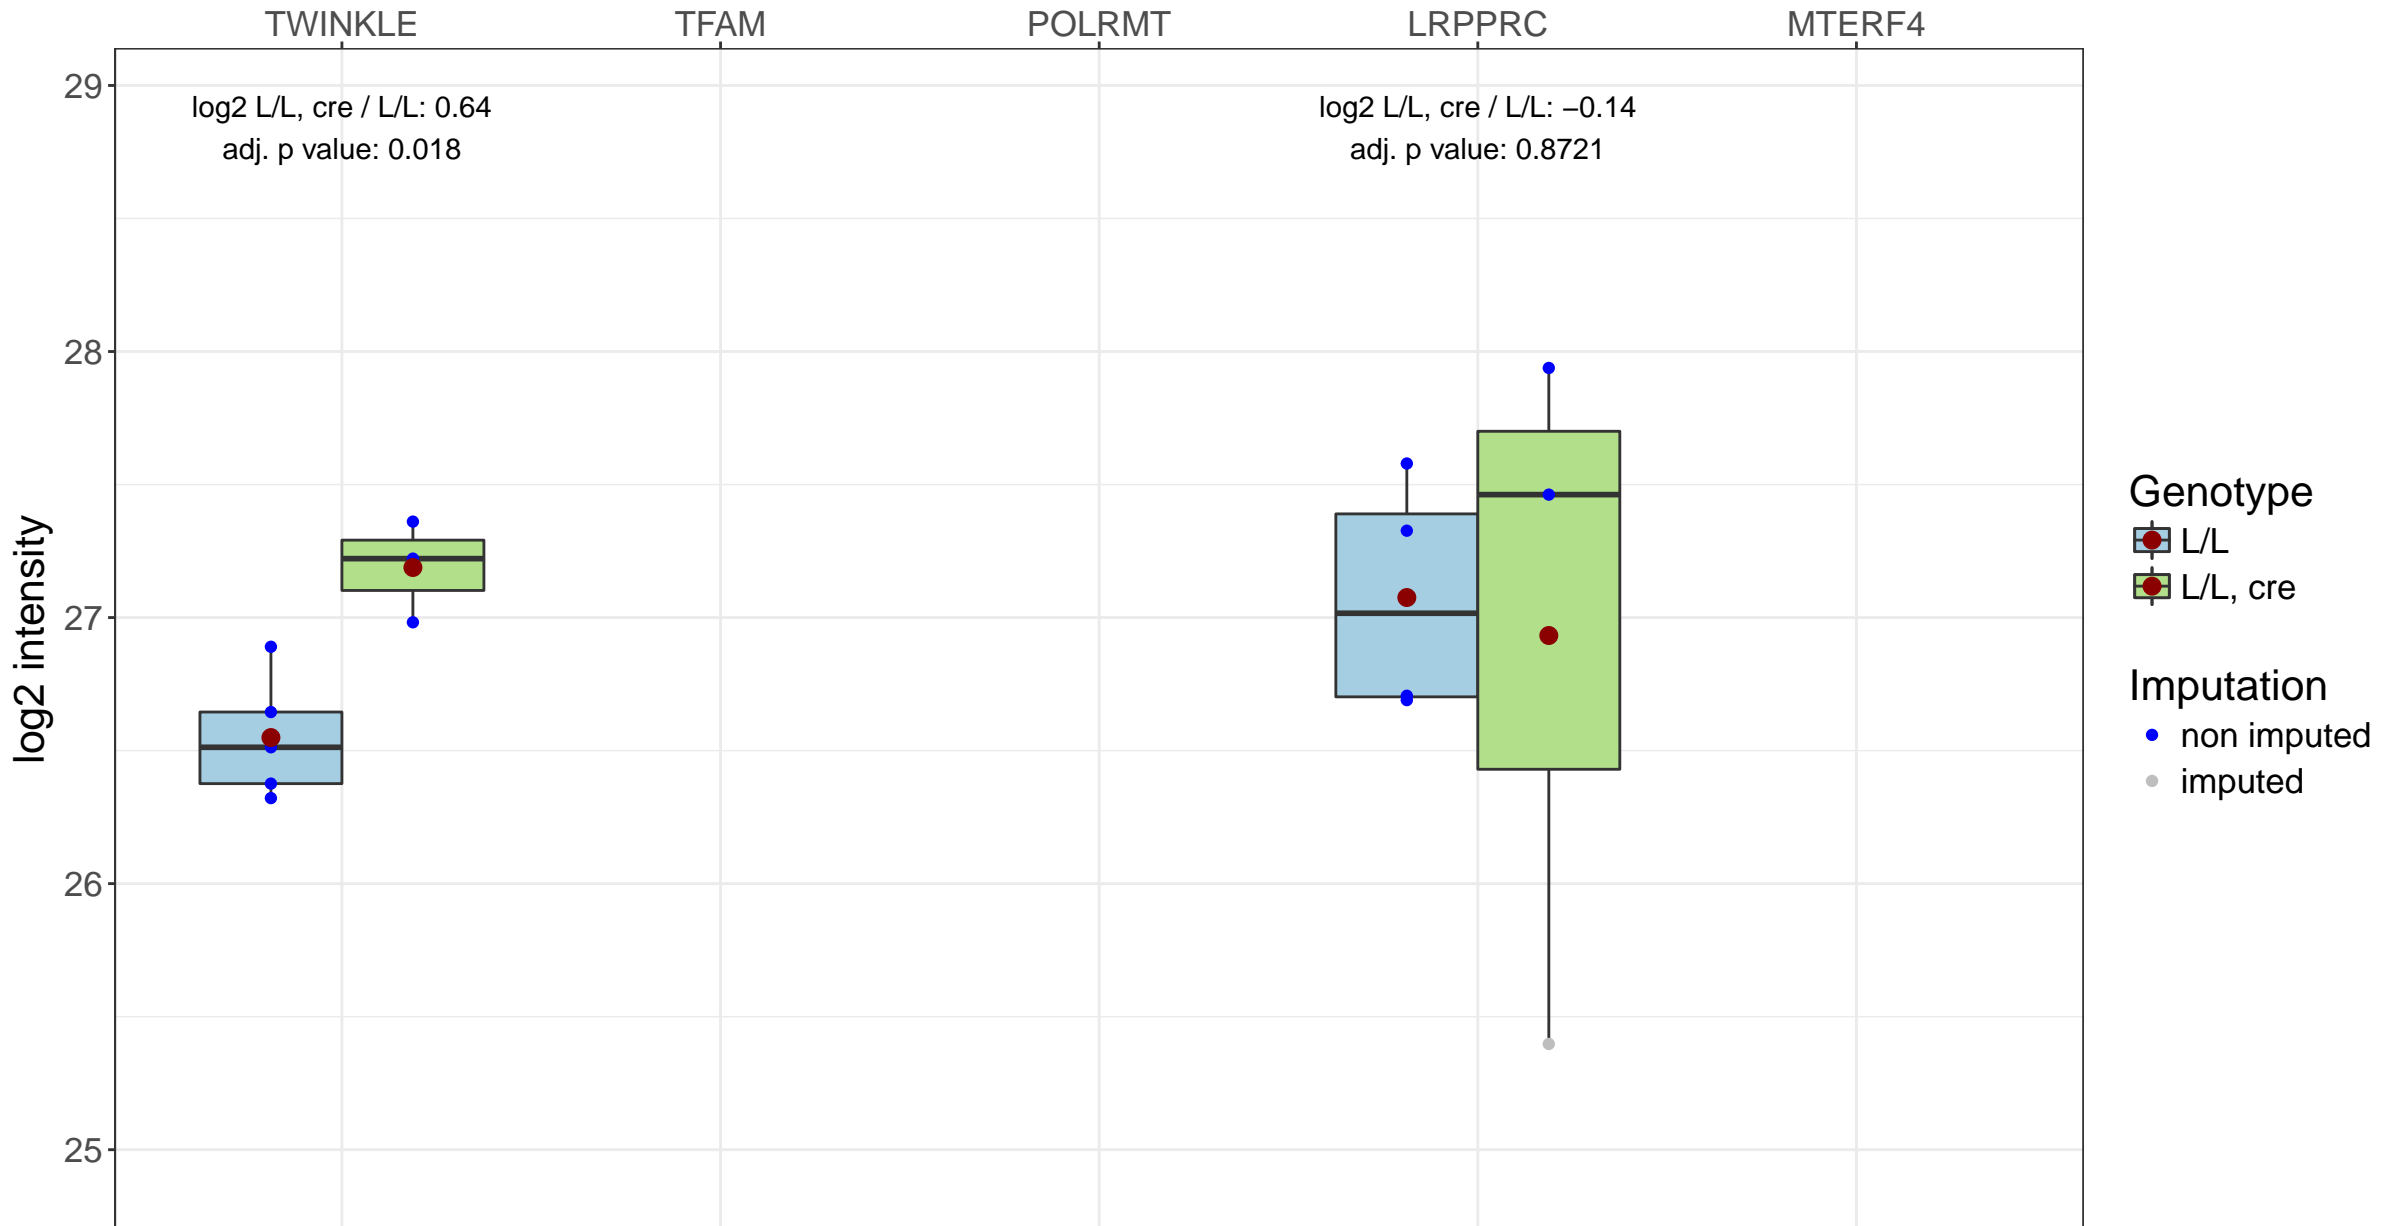

# CSRP3 / P50462

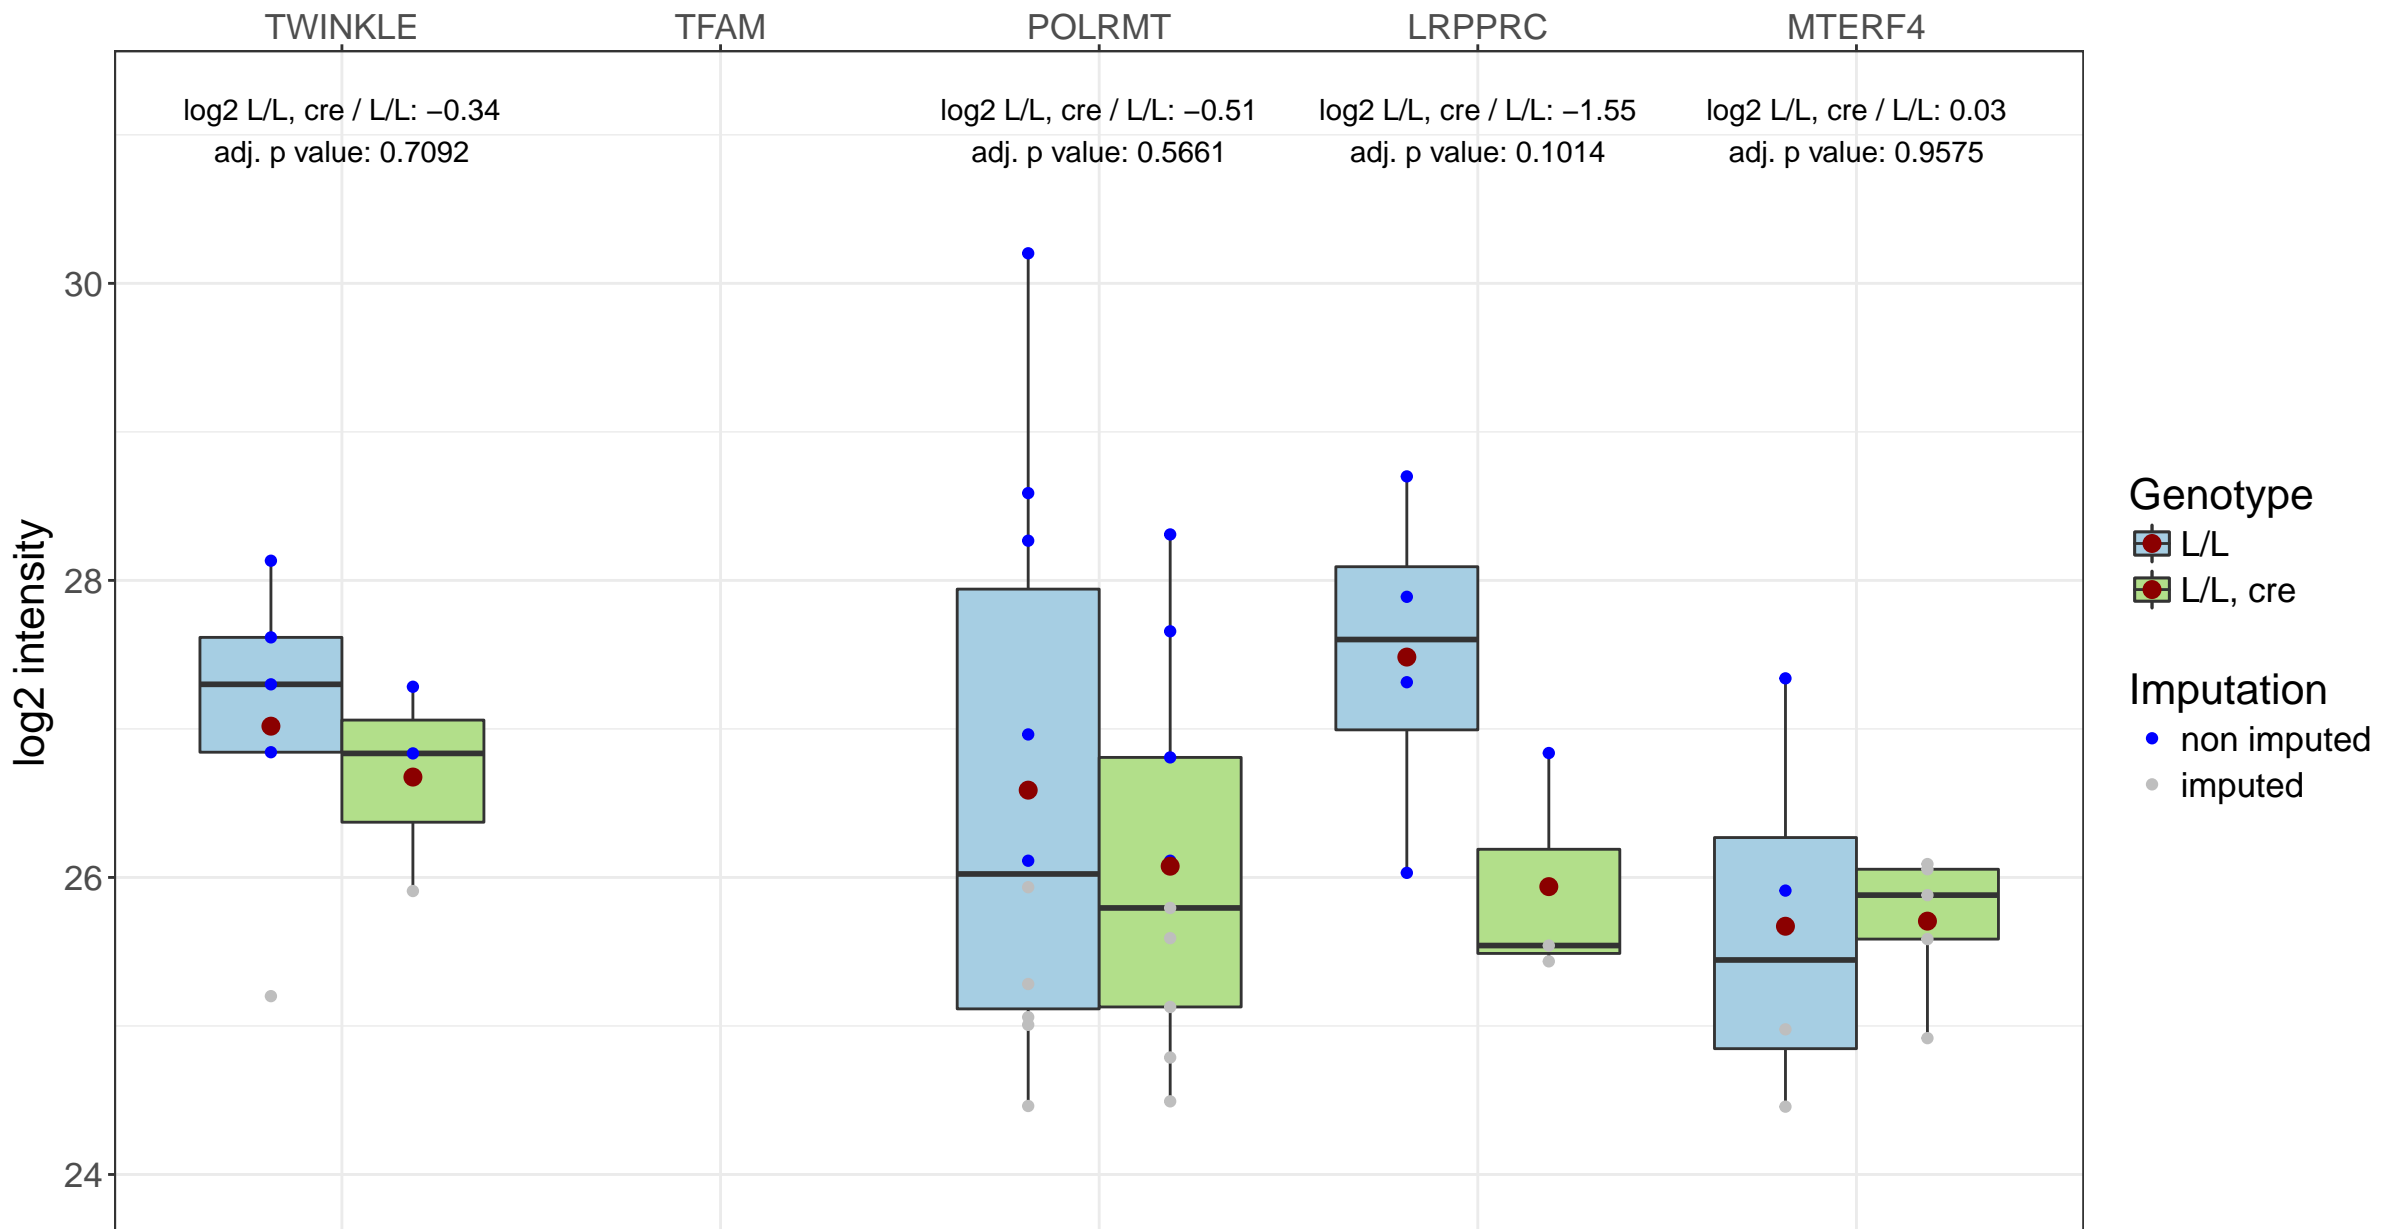

# CTSB / P10605

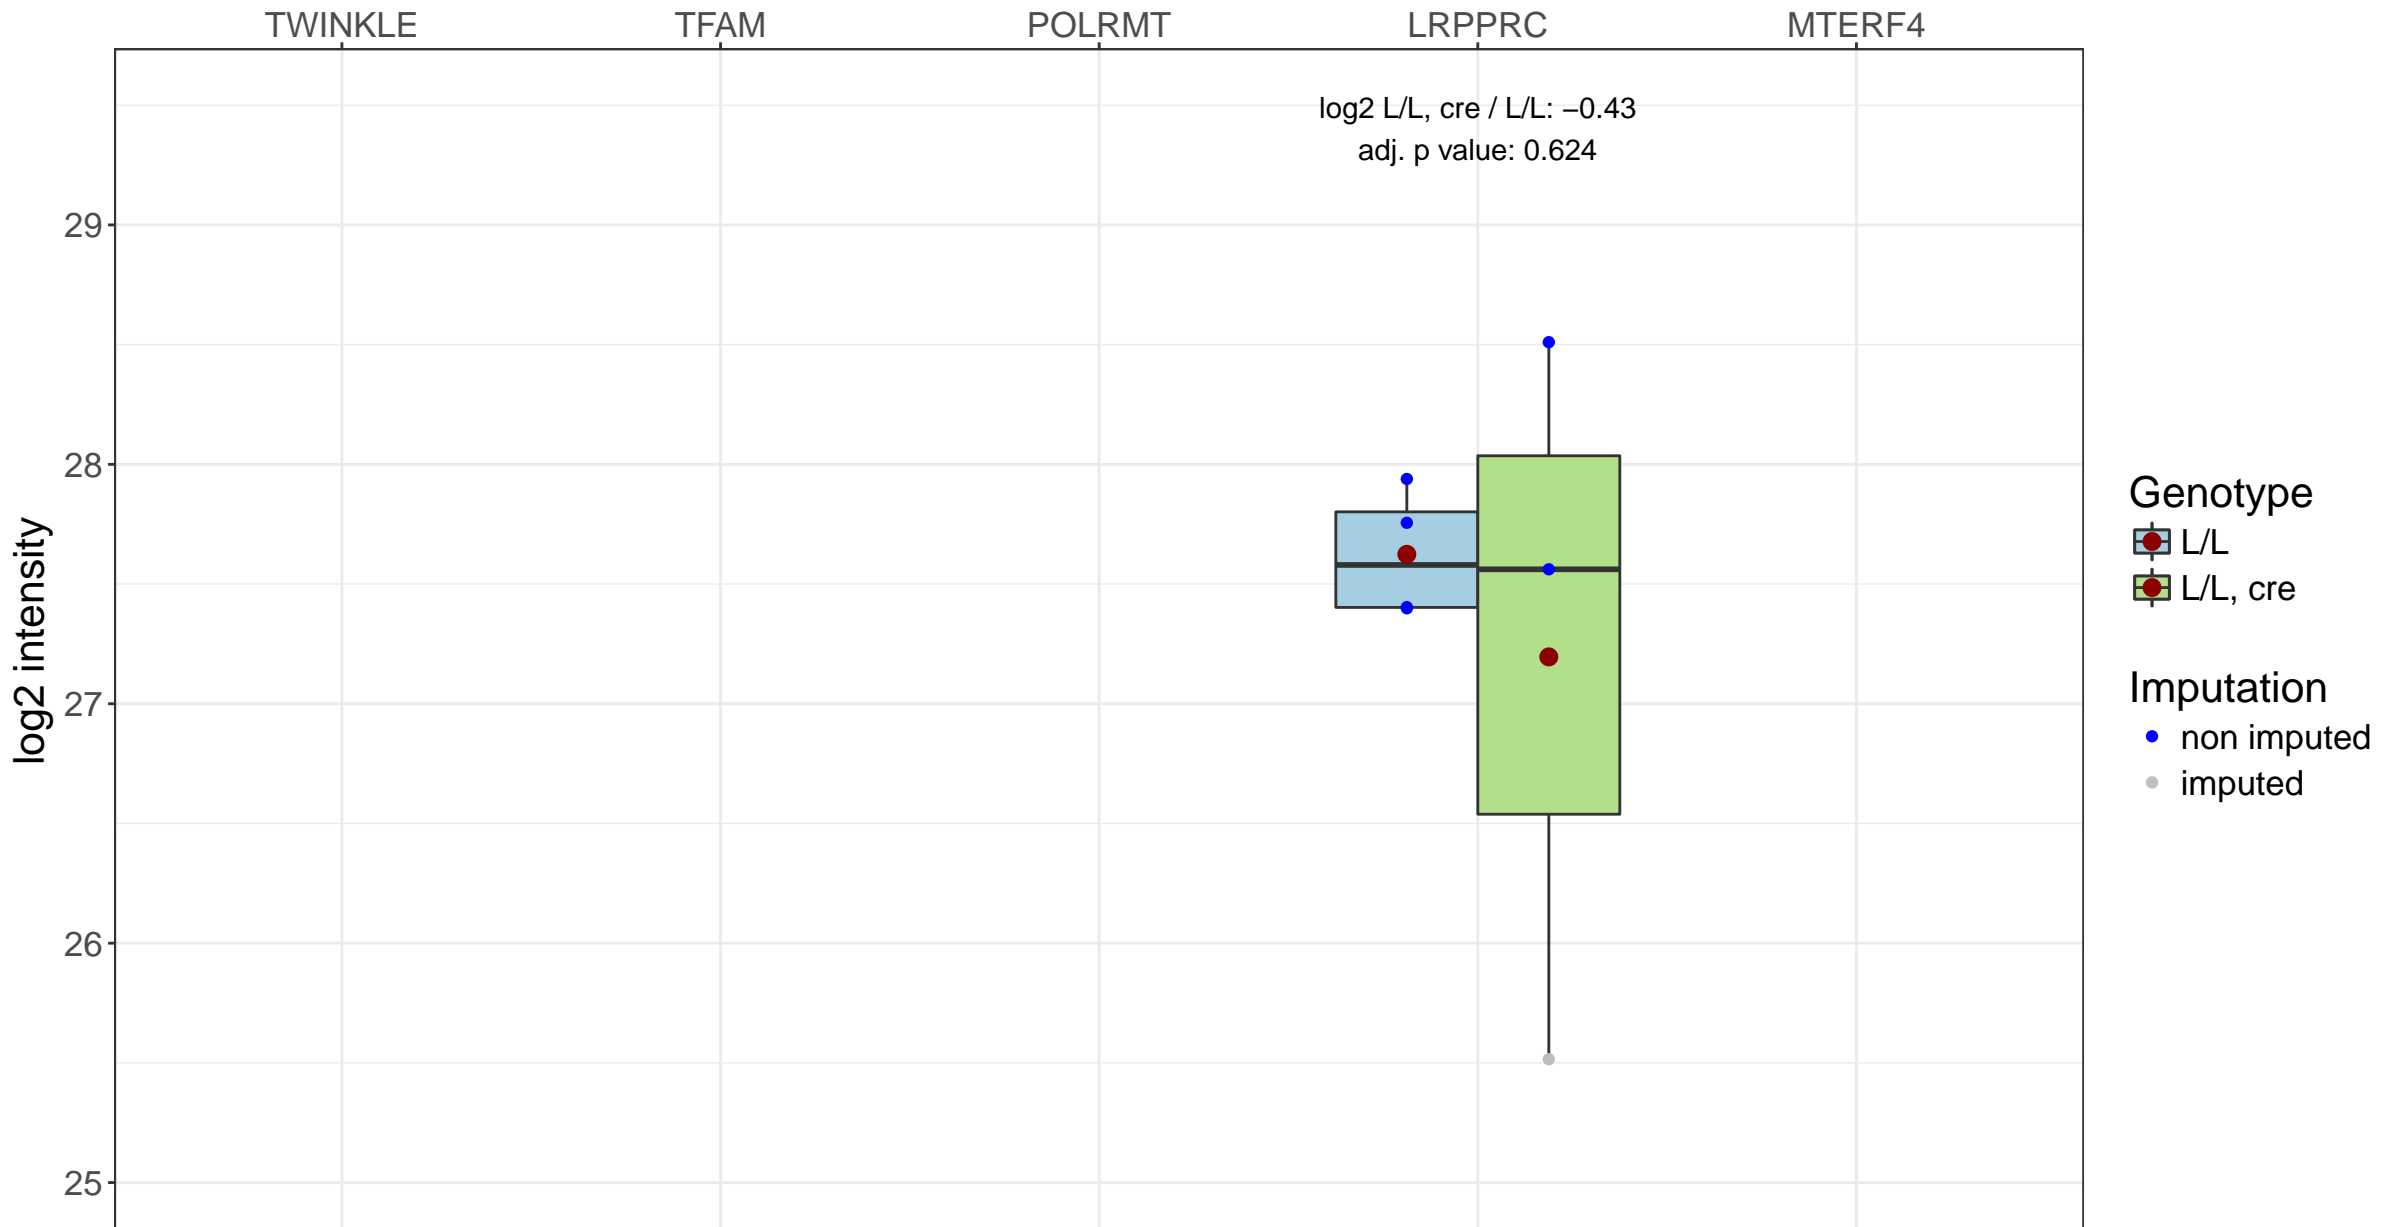

# CTSD / P18242

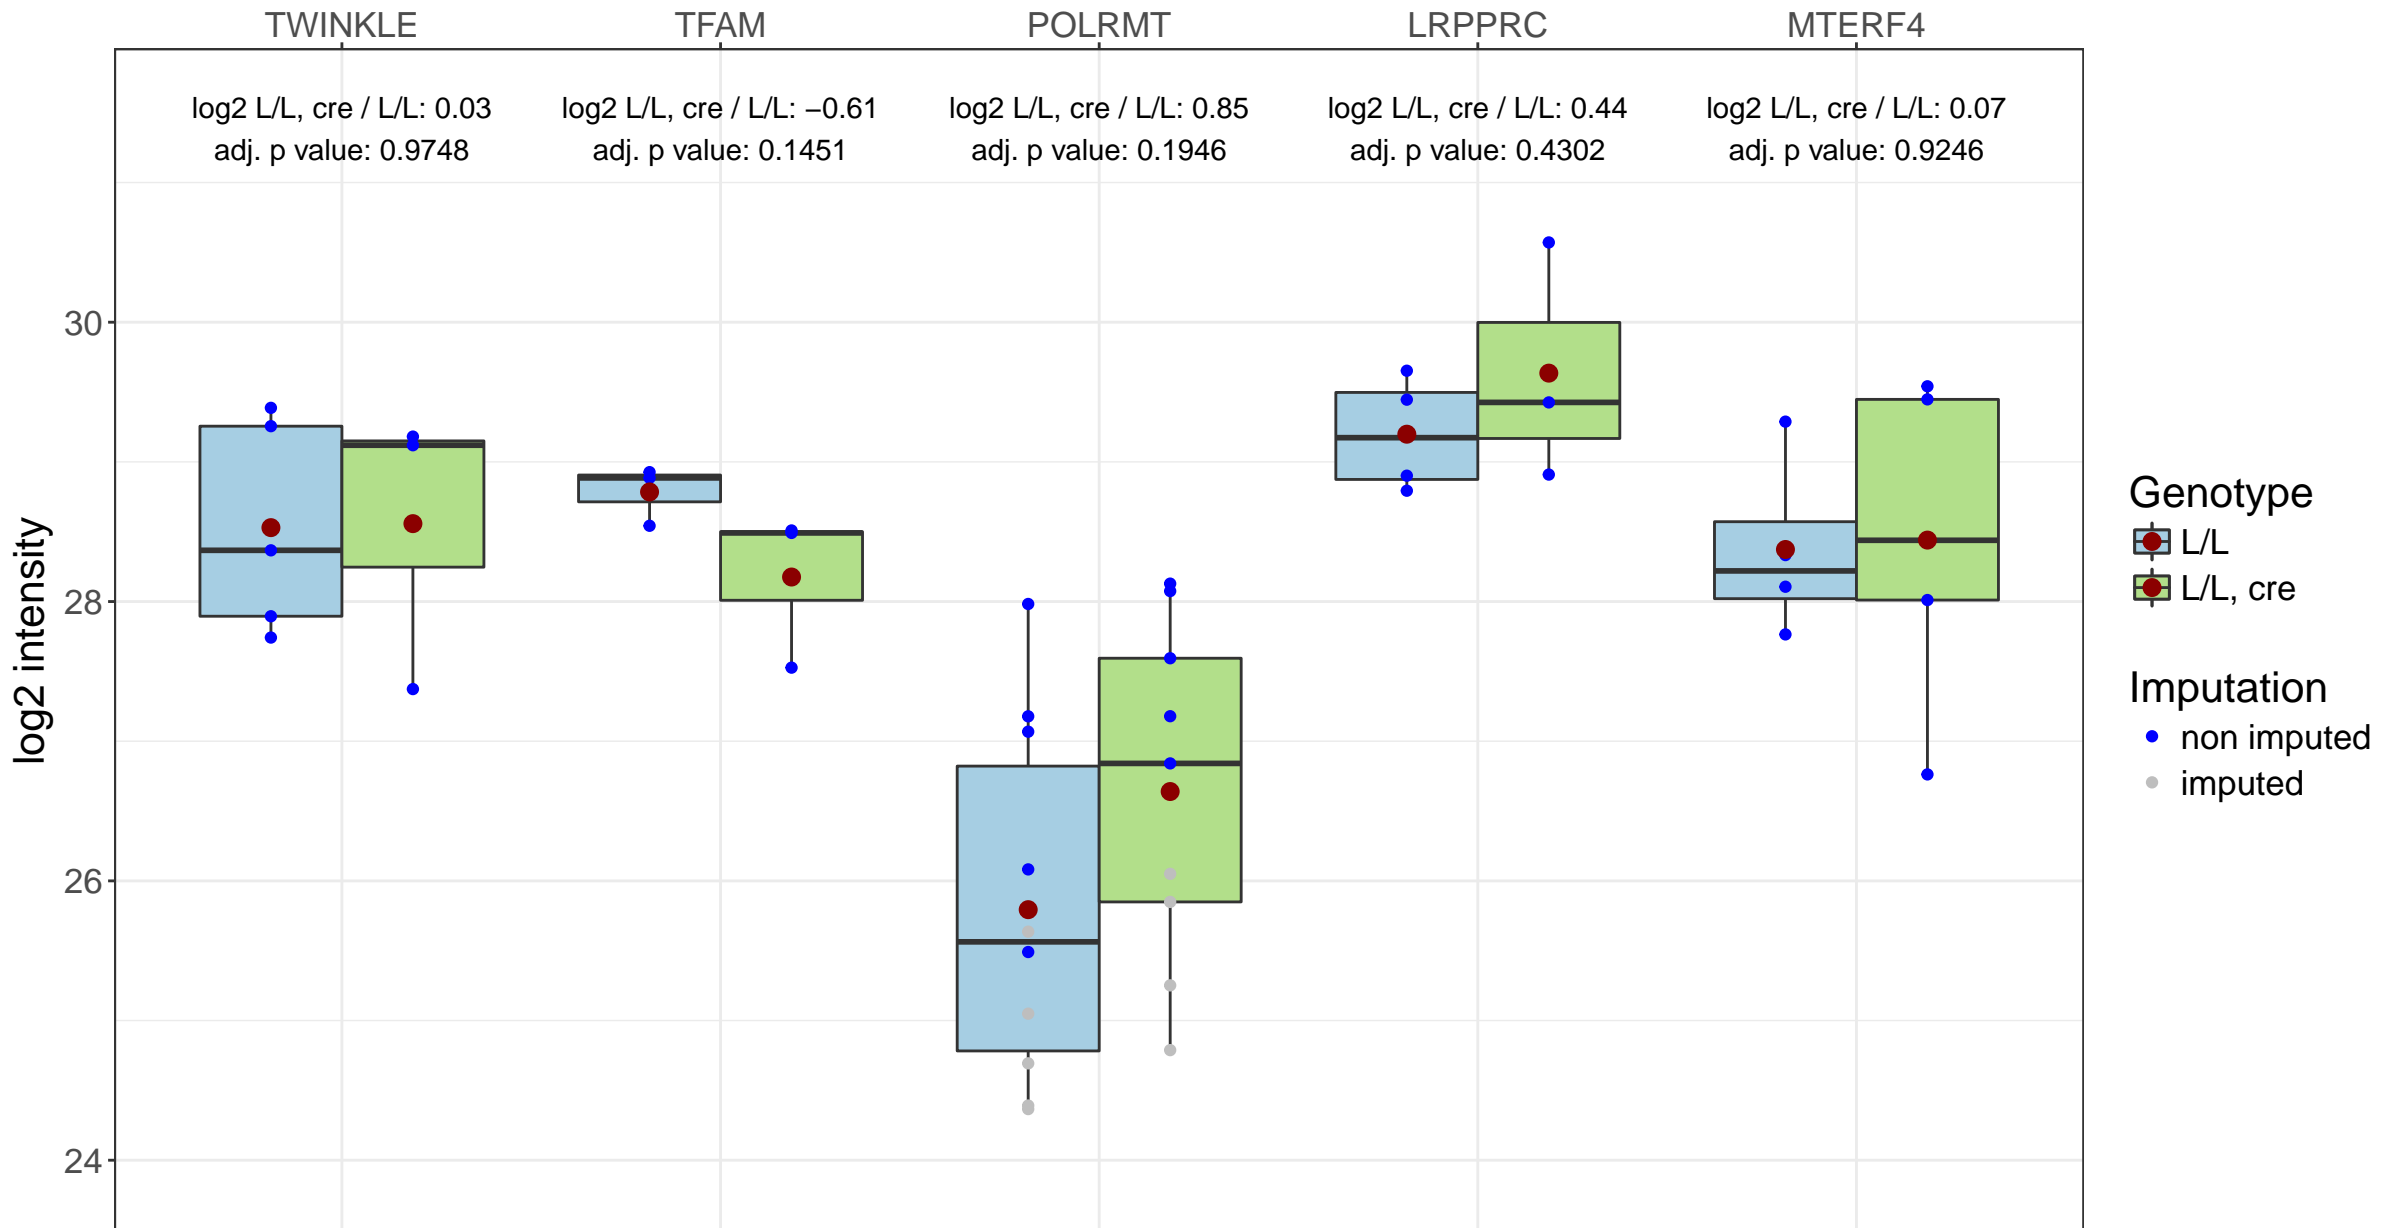

# CYB5A / G5E850

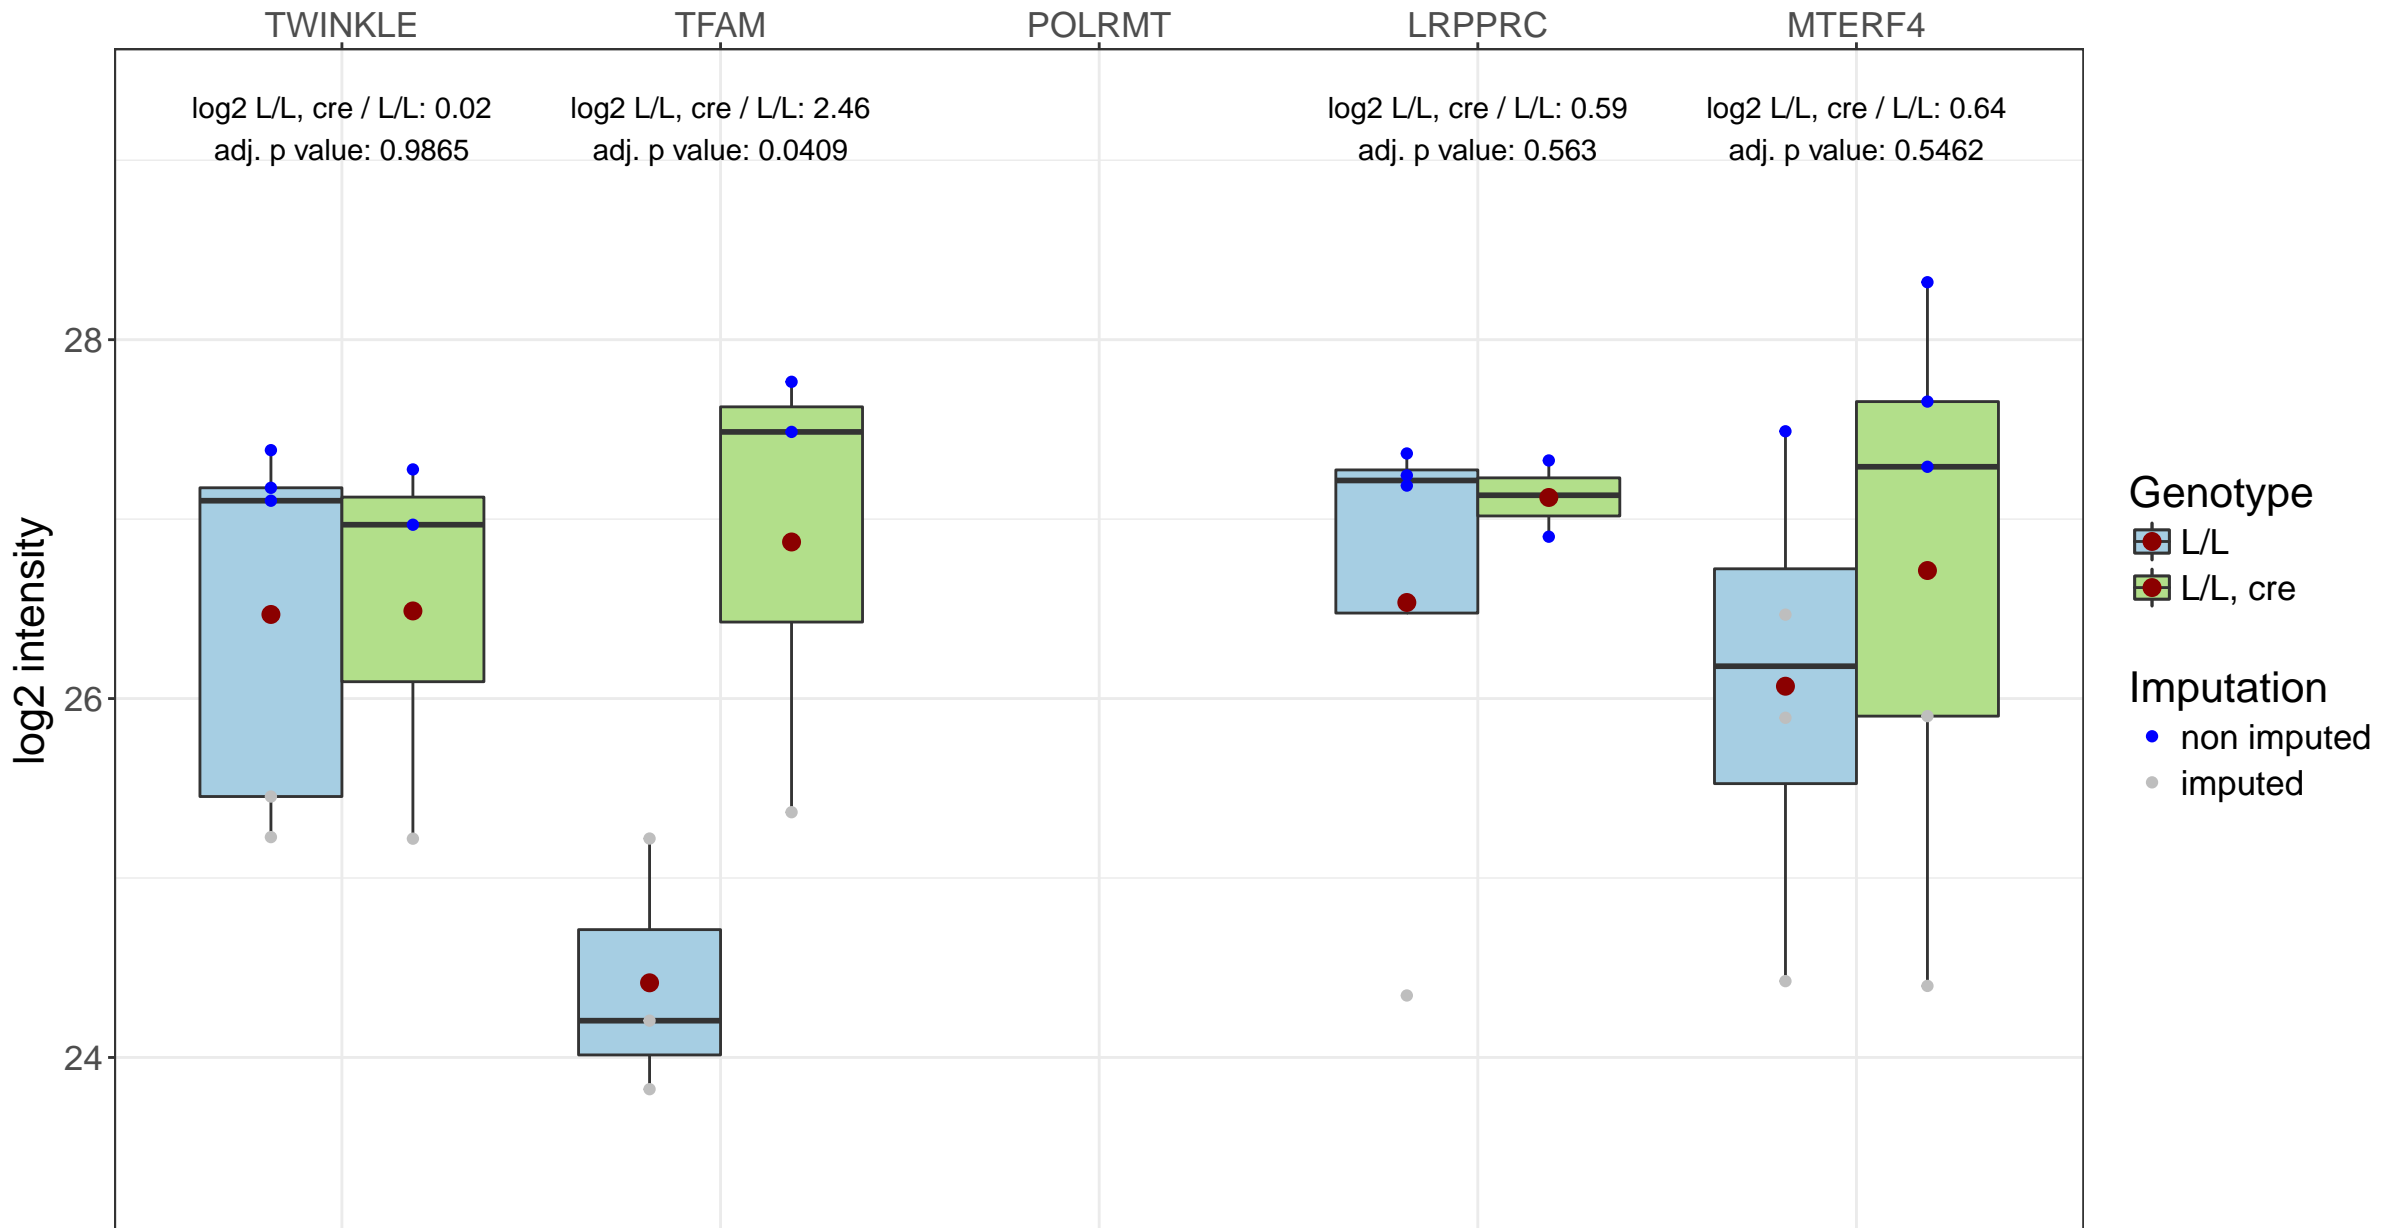

# CYB5B / Q9CQX2

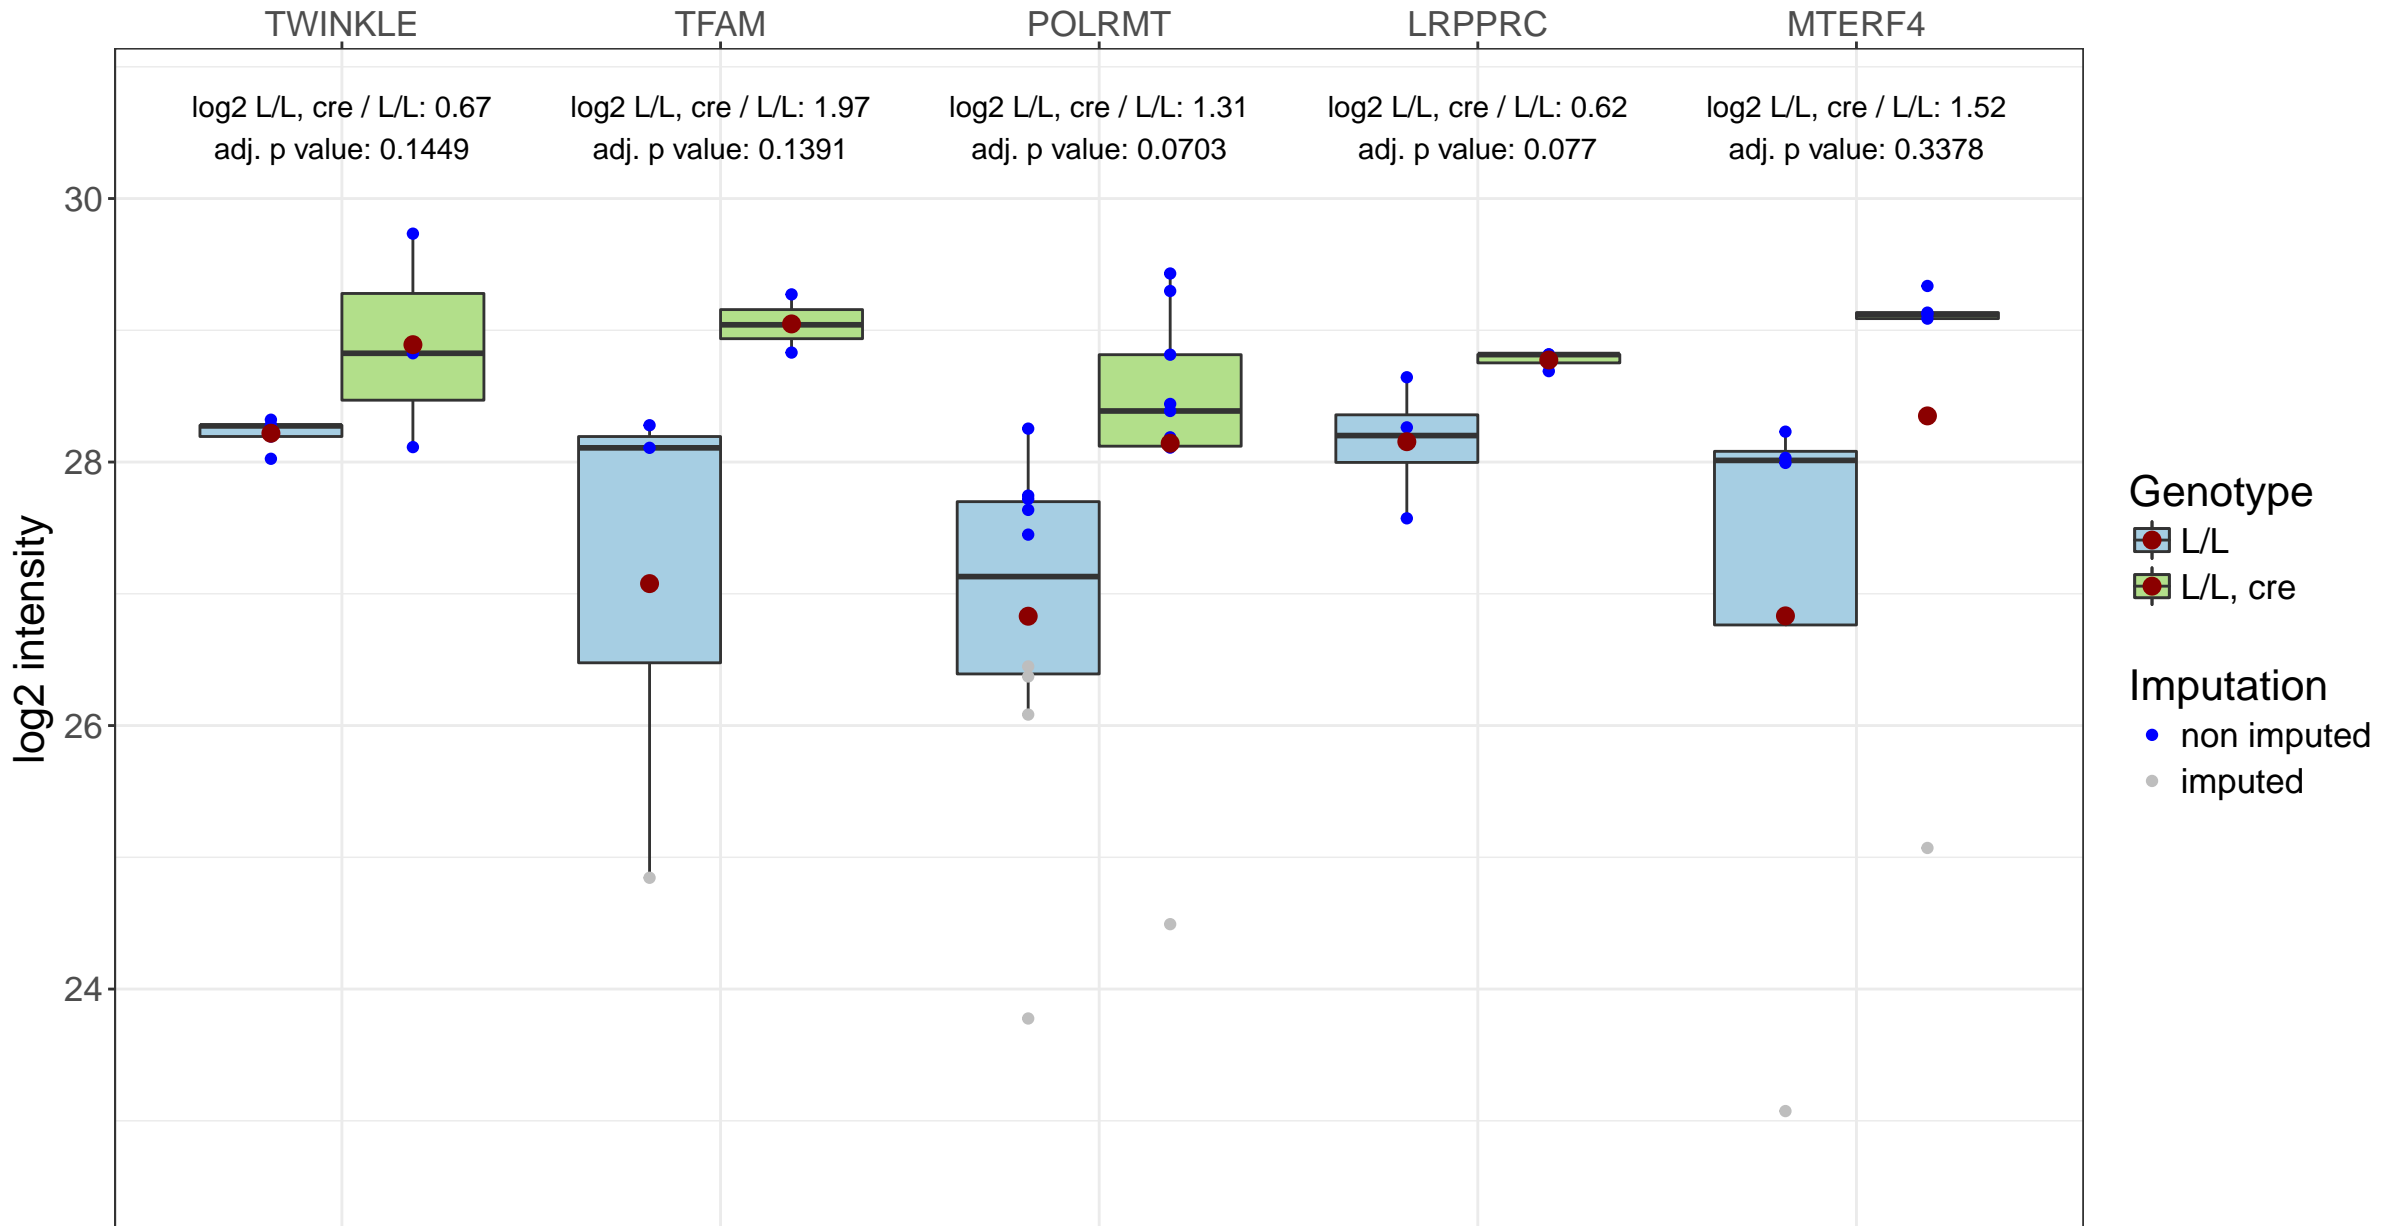



# CYB5R1 / Q9DB73

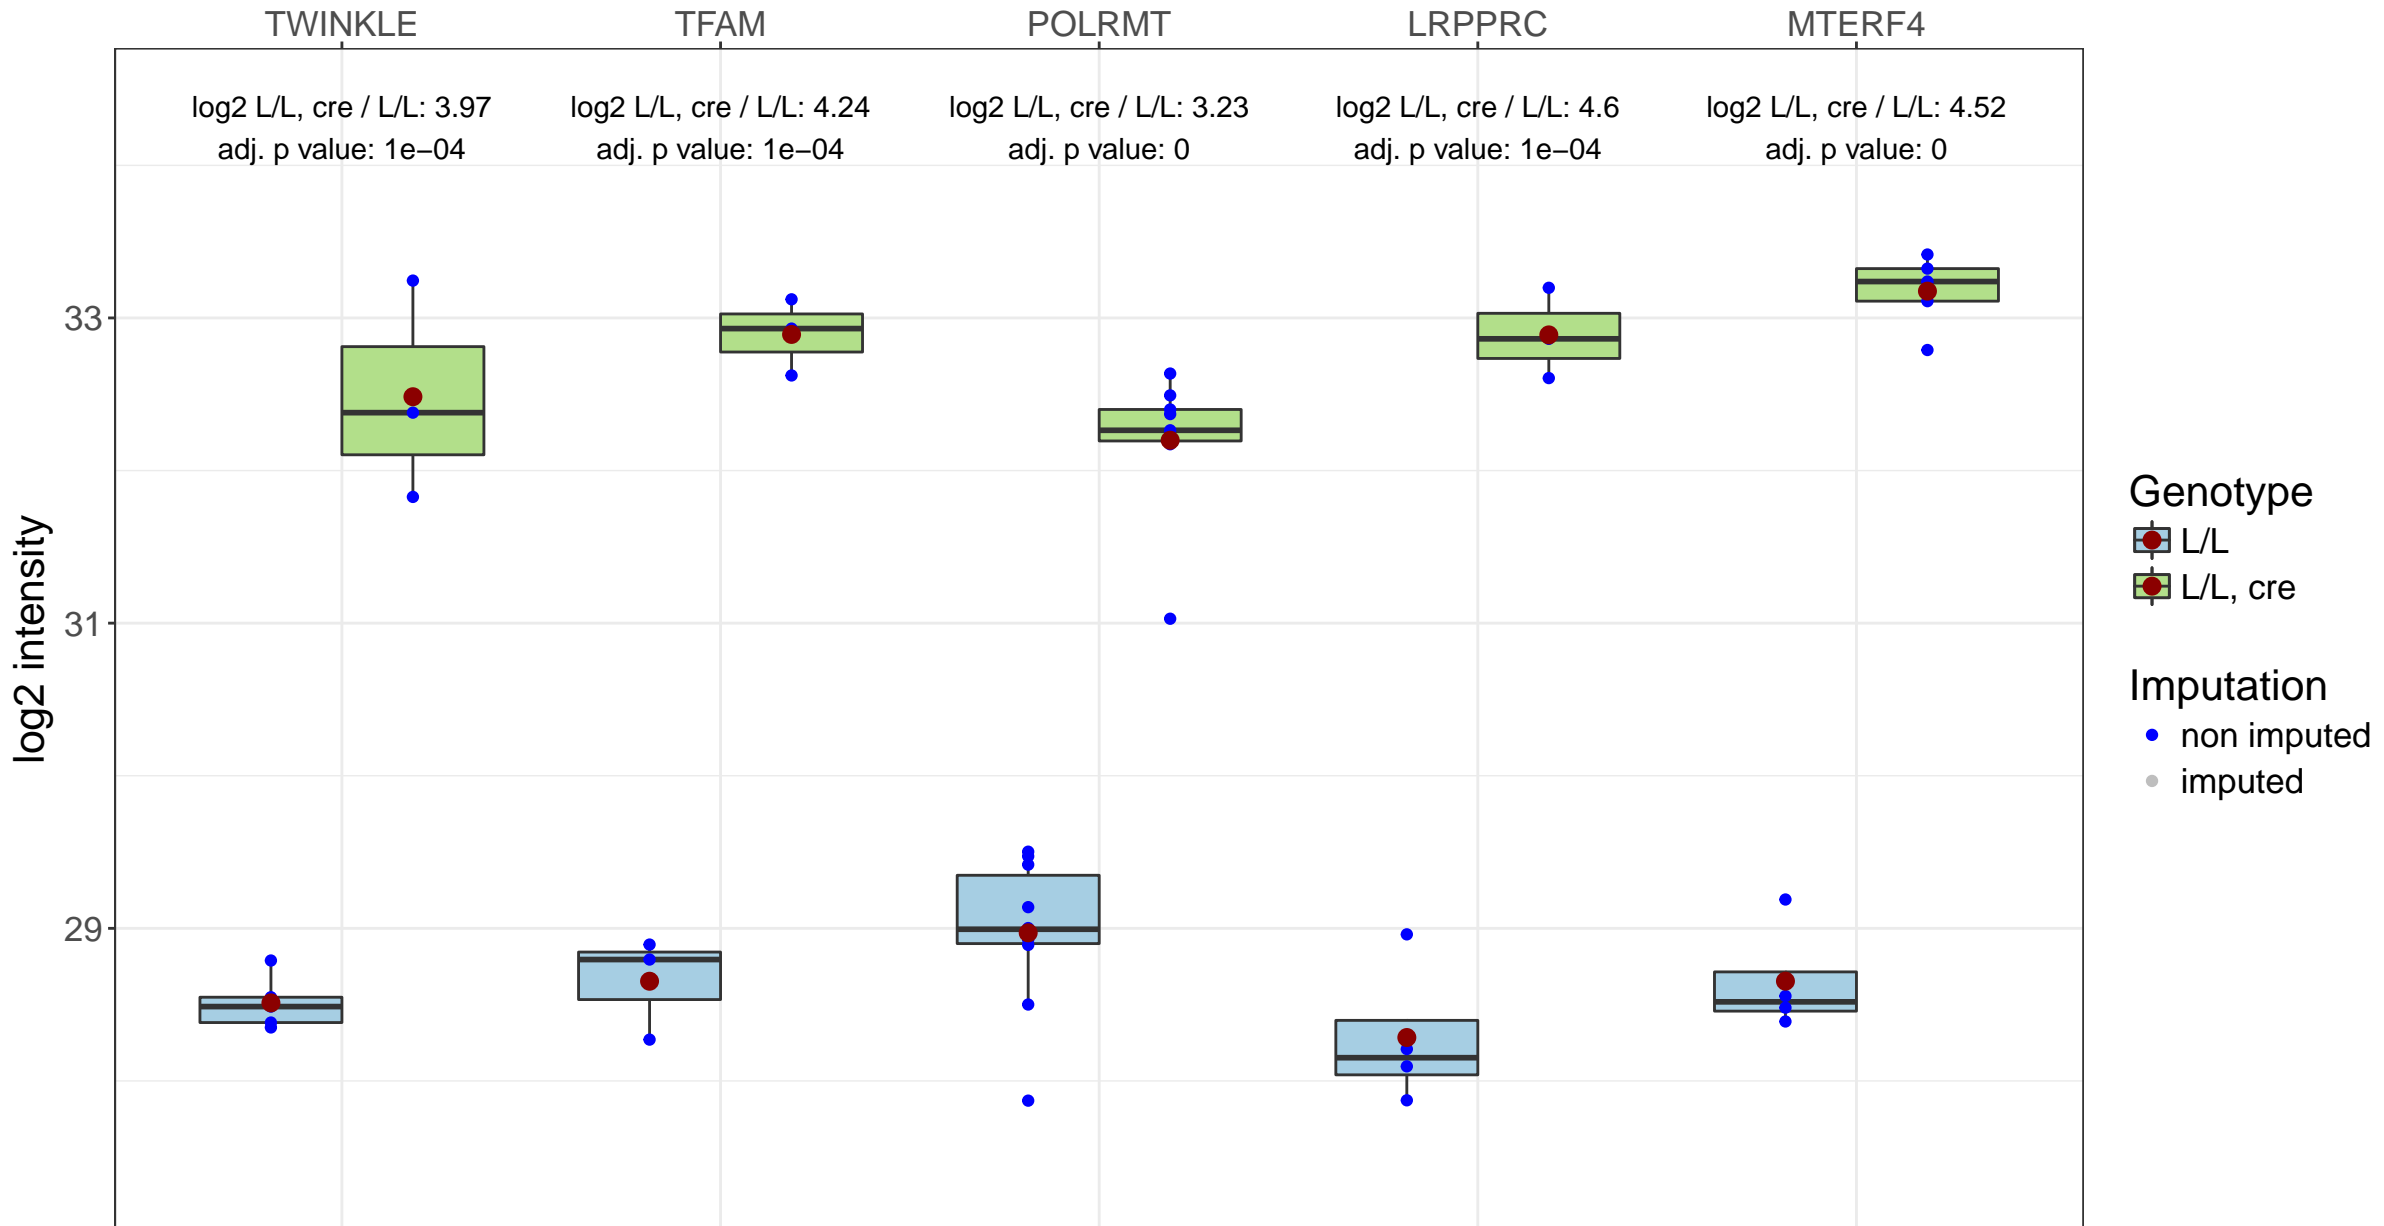

# CYB5R3 / Q9DCN2-2

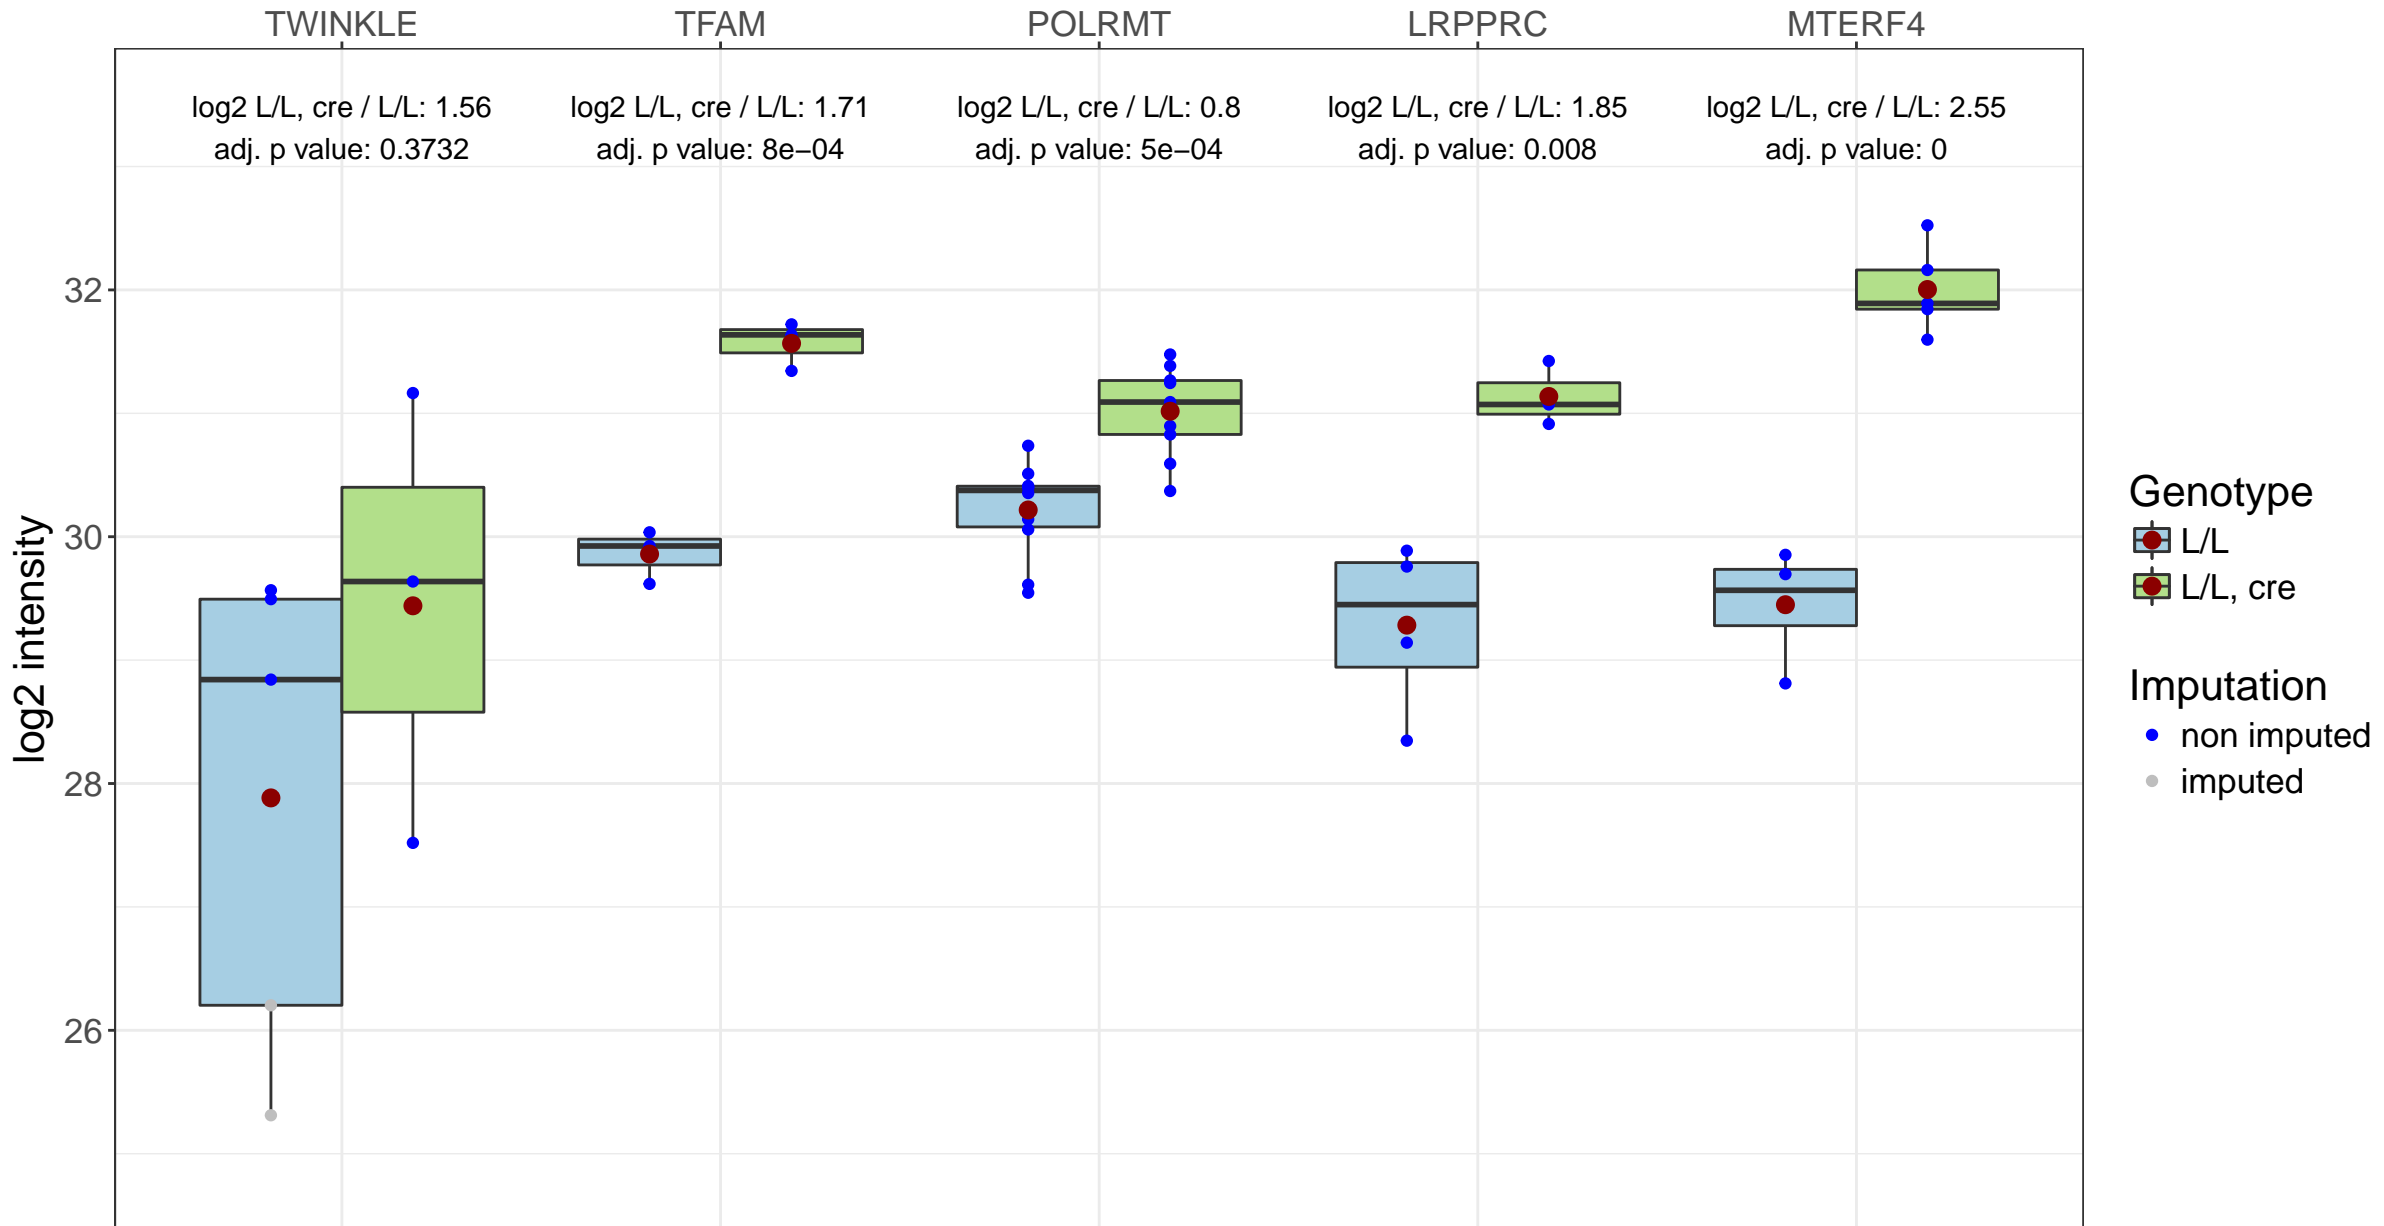

# CYC1 / Q9D0M3-2

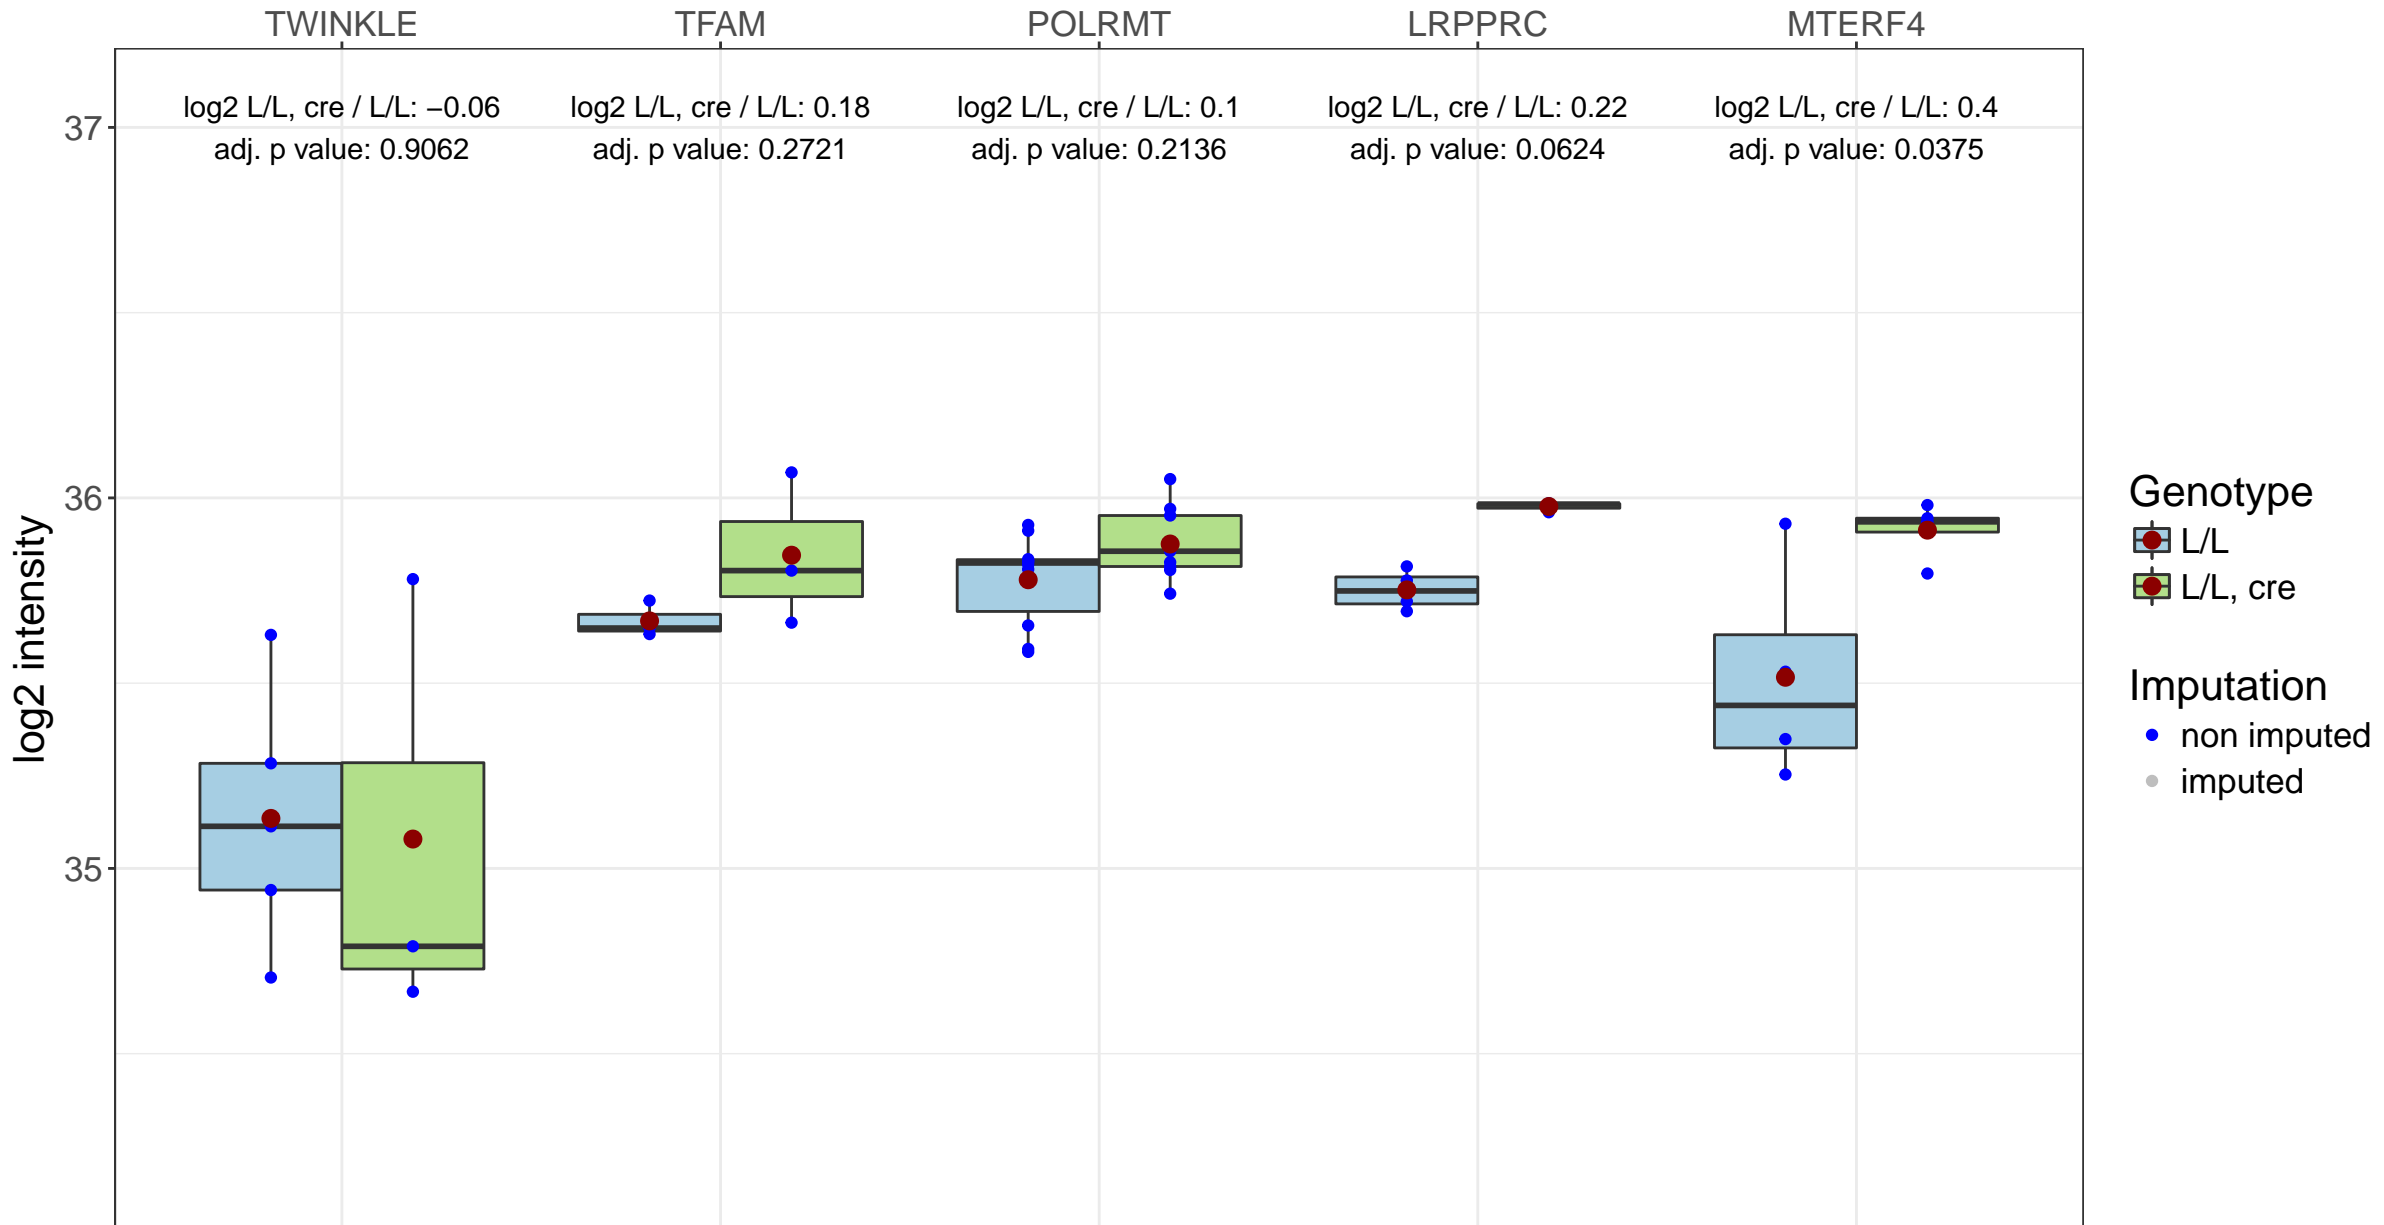

# CYP27A1 / Q9DBG1

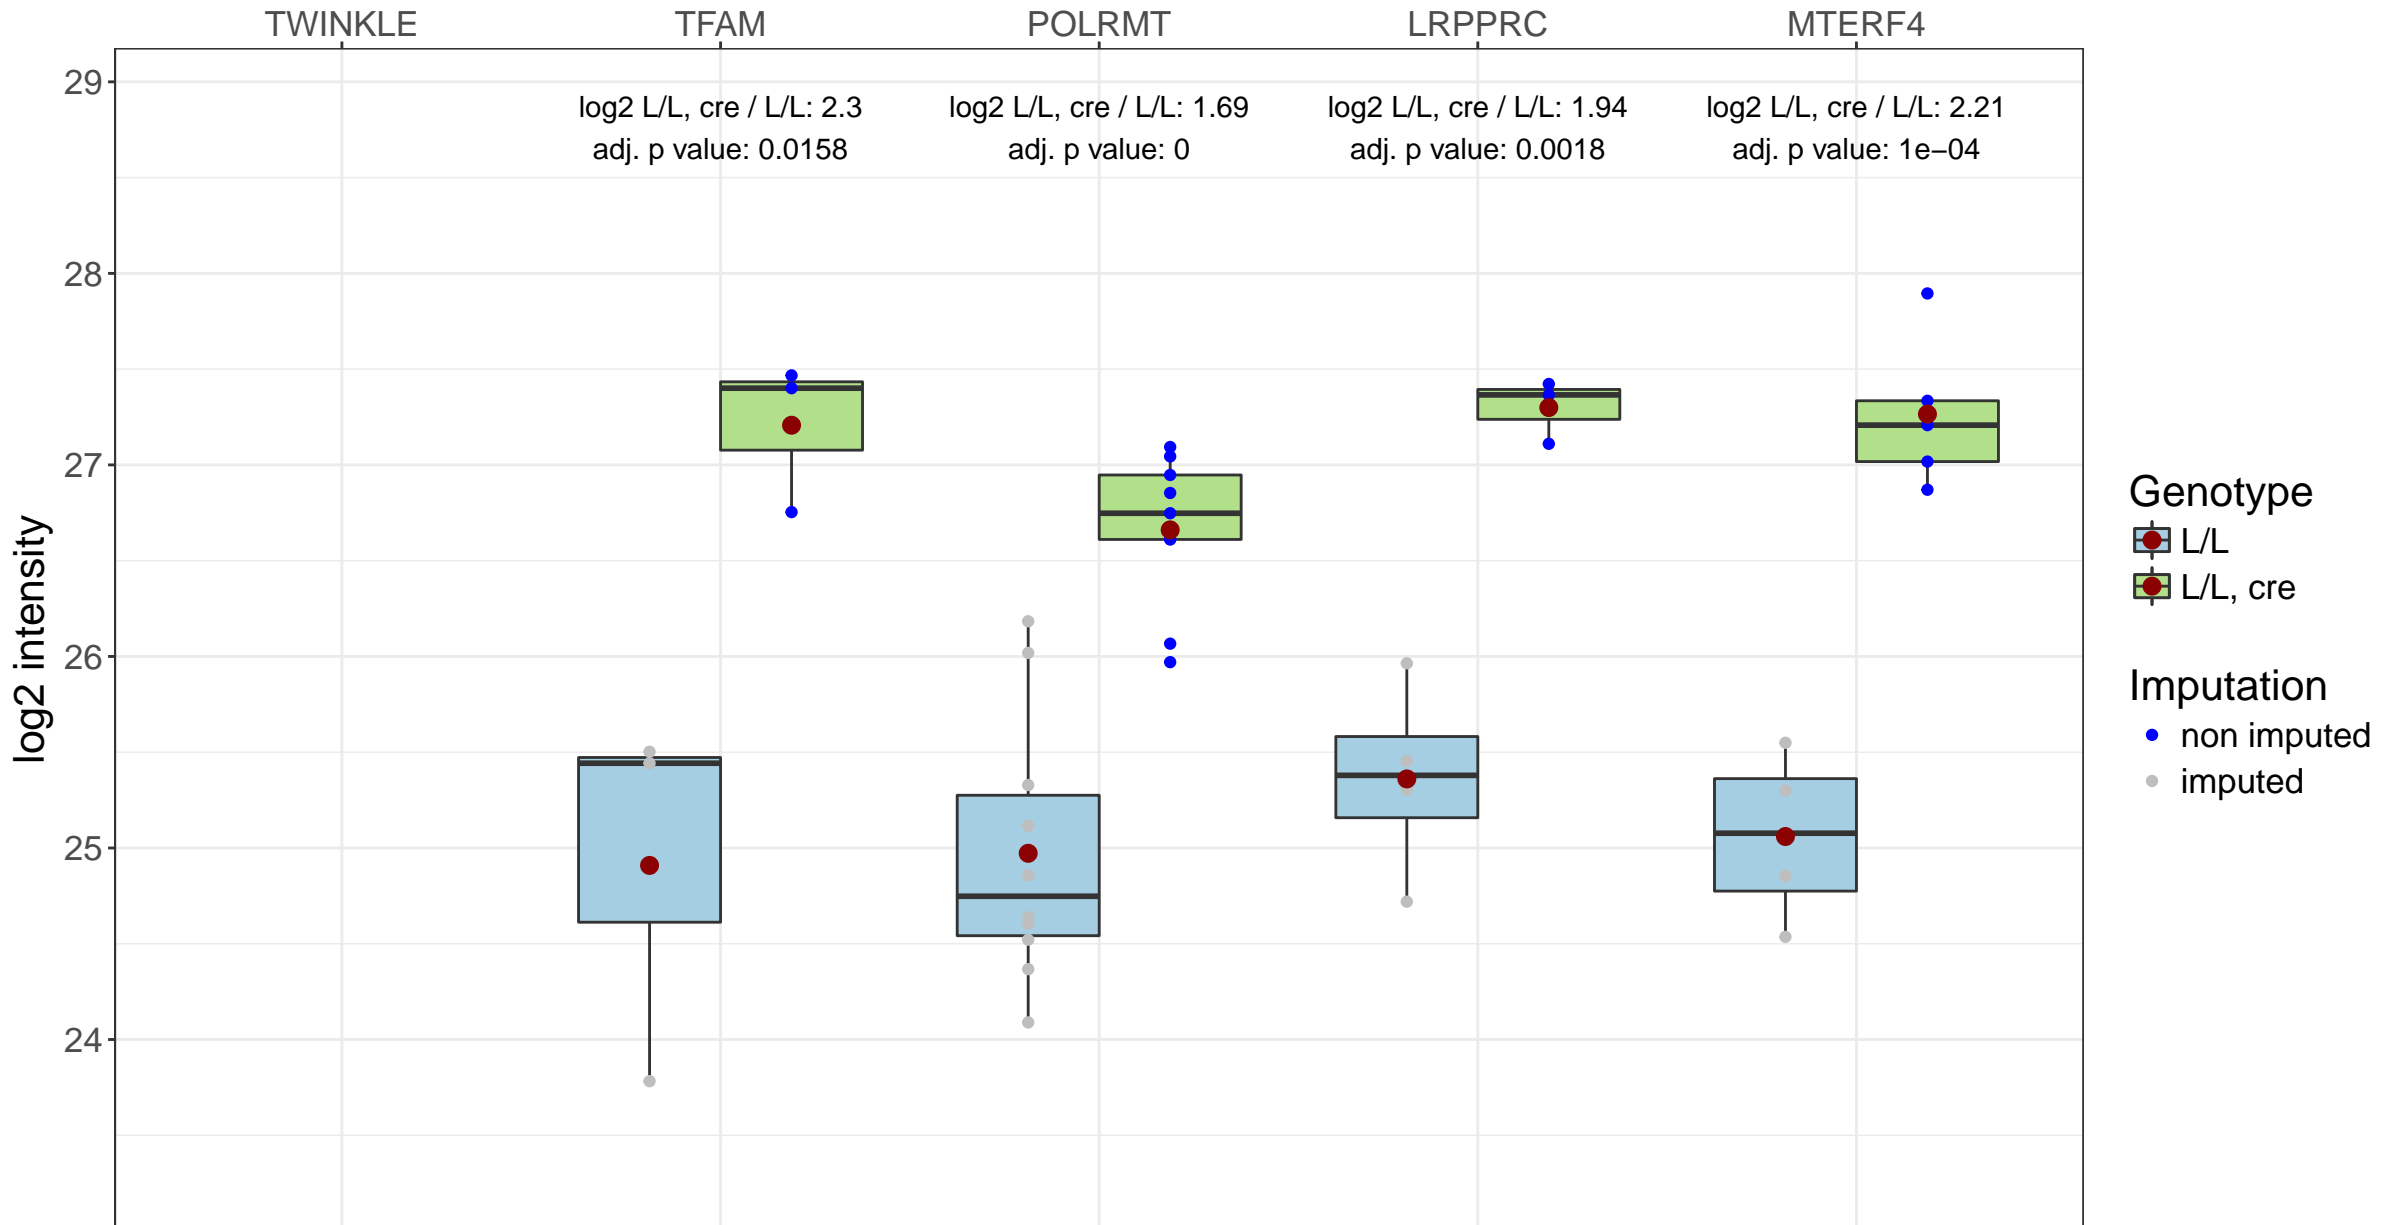

# D10JHU81E / Q9D172

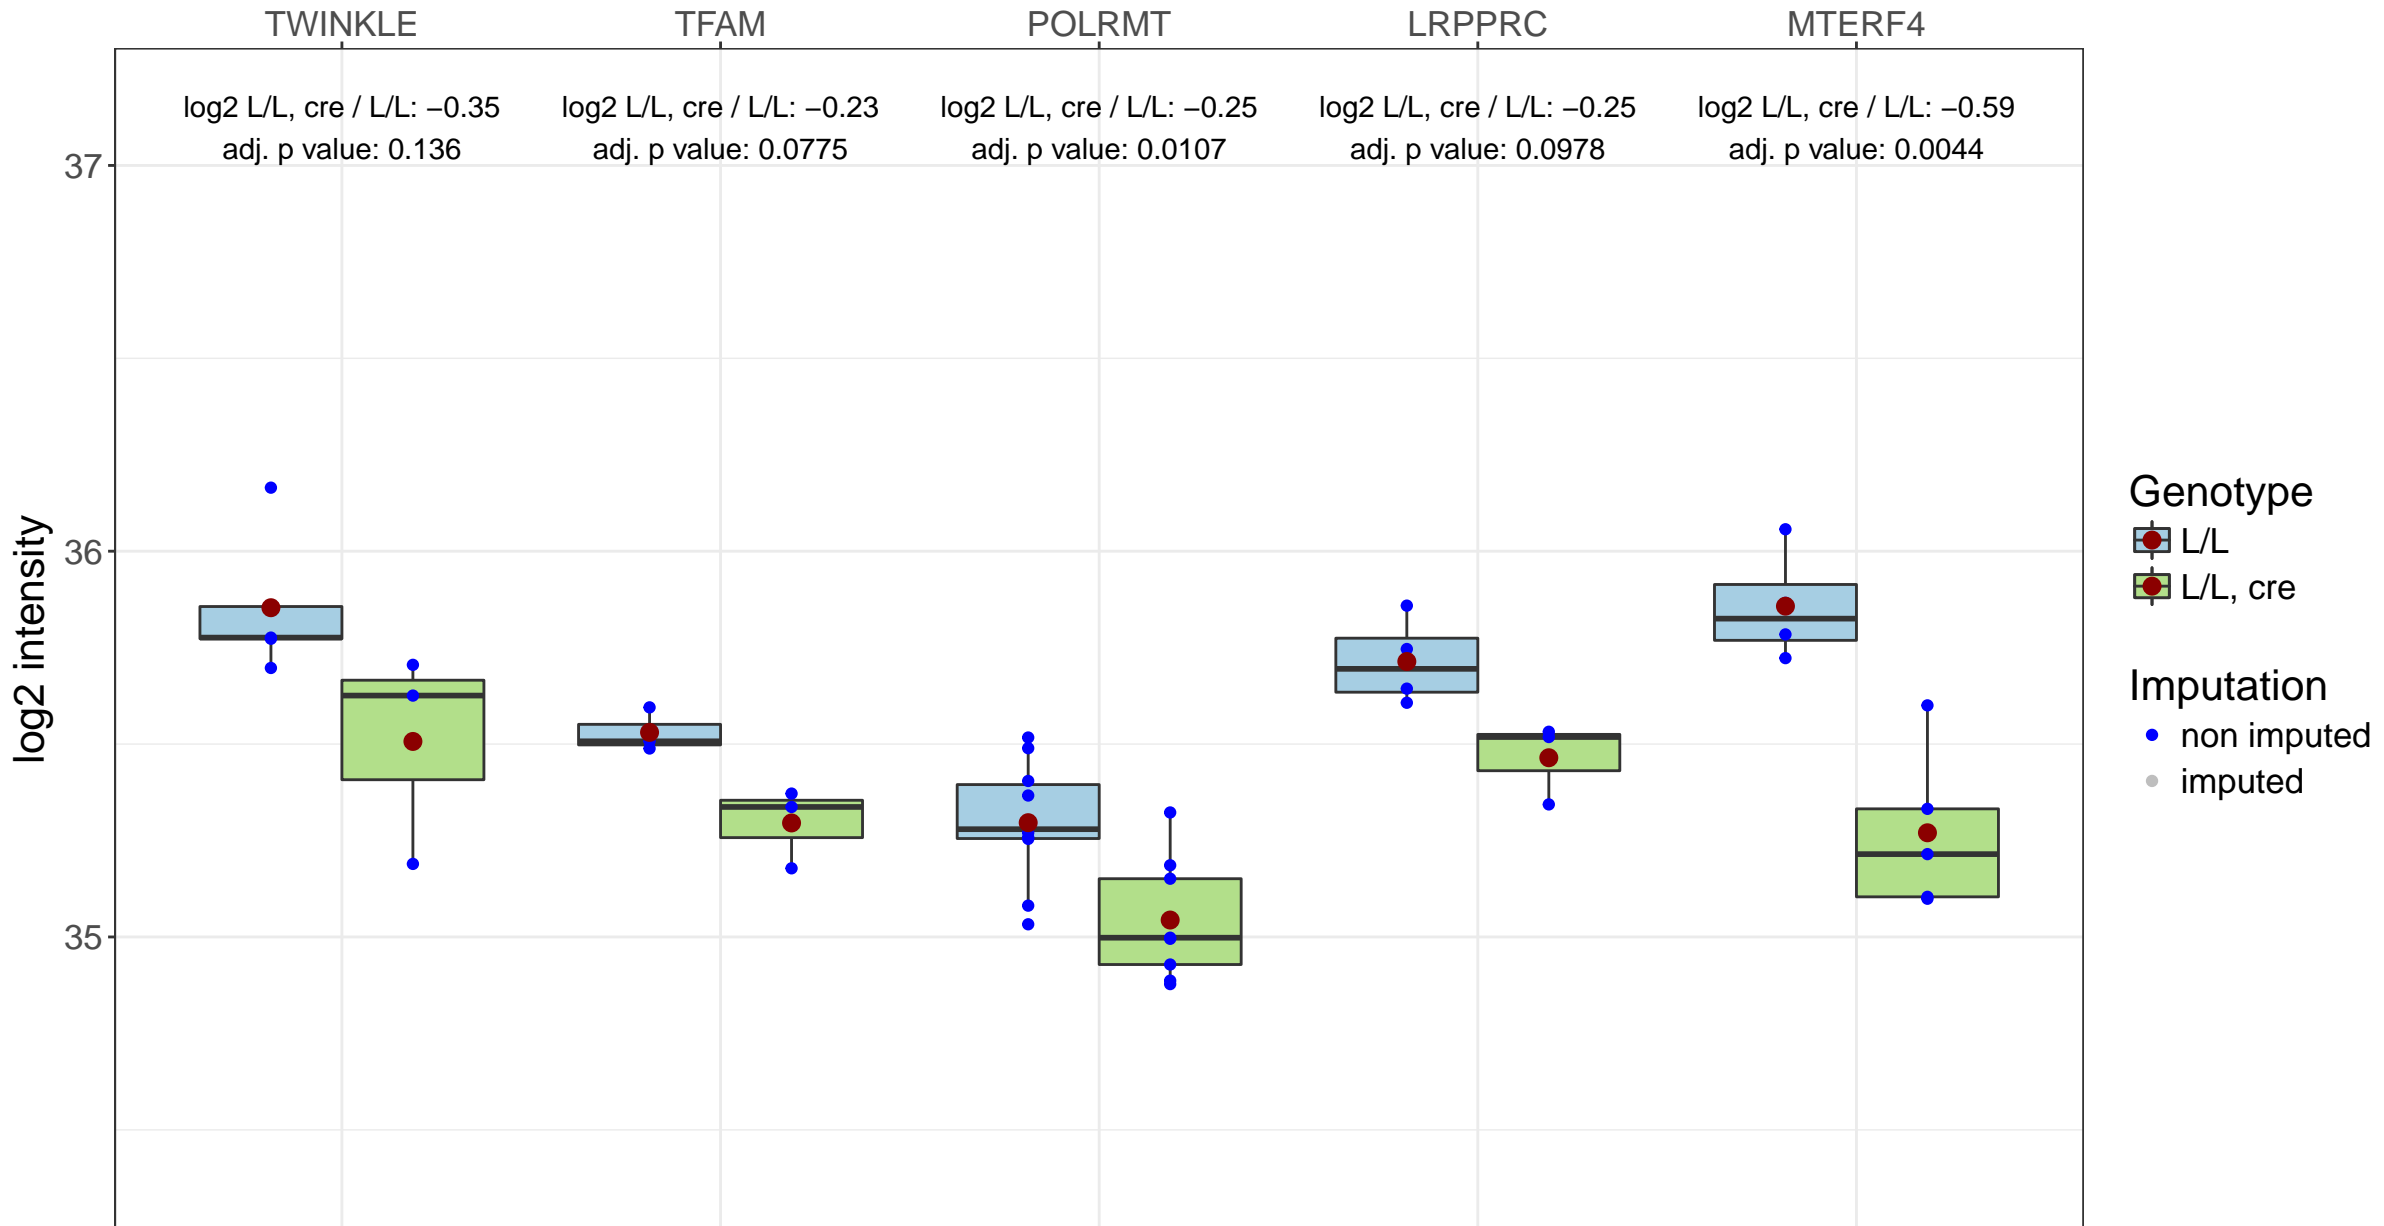

# D2HGDH / E9QN44

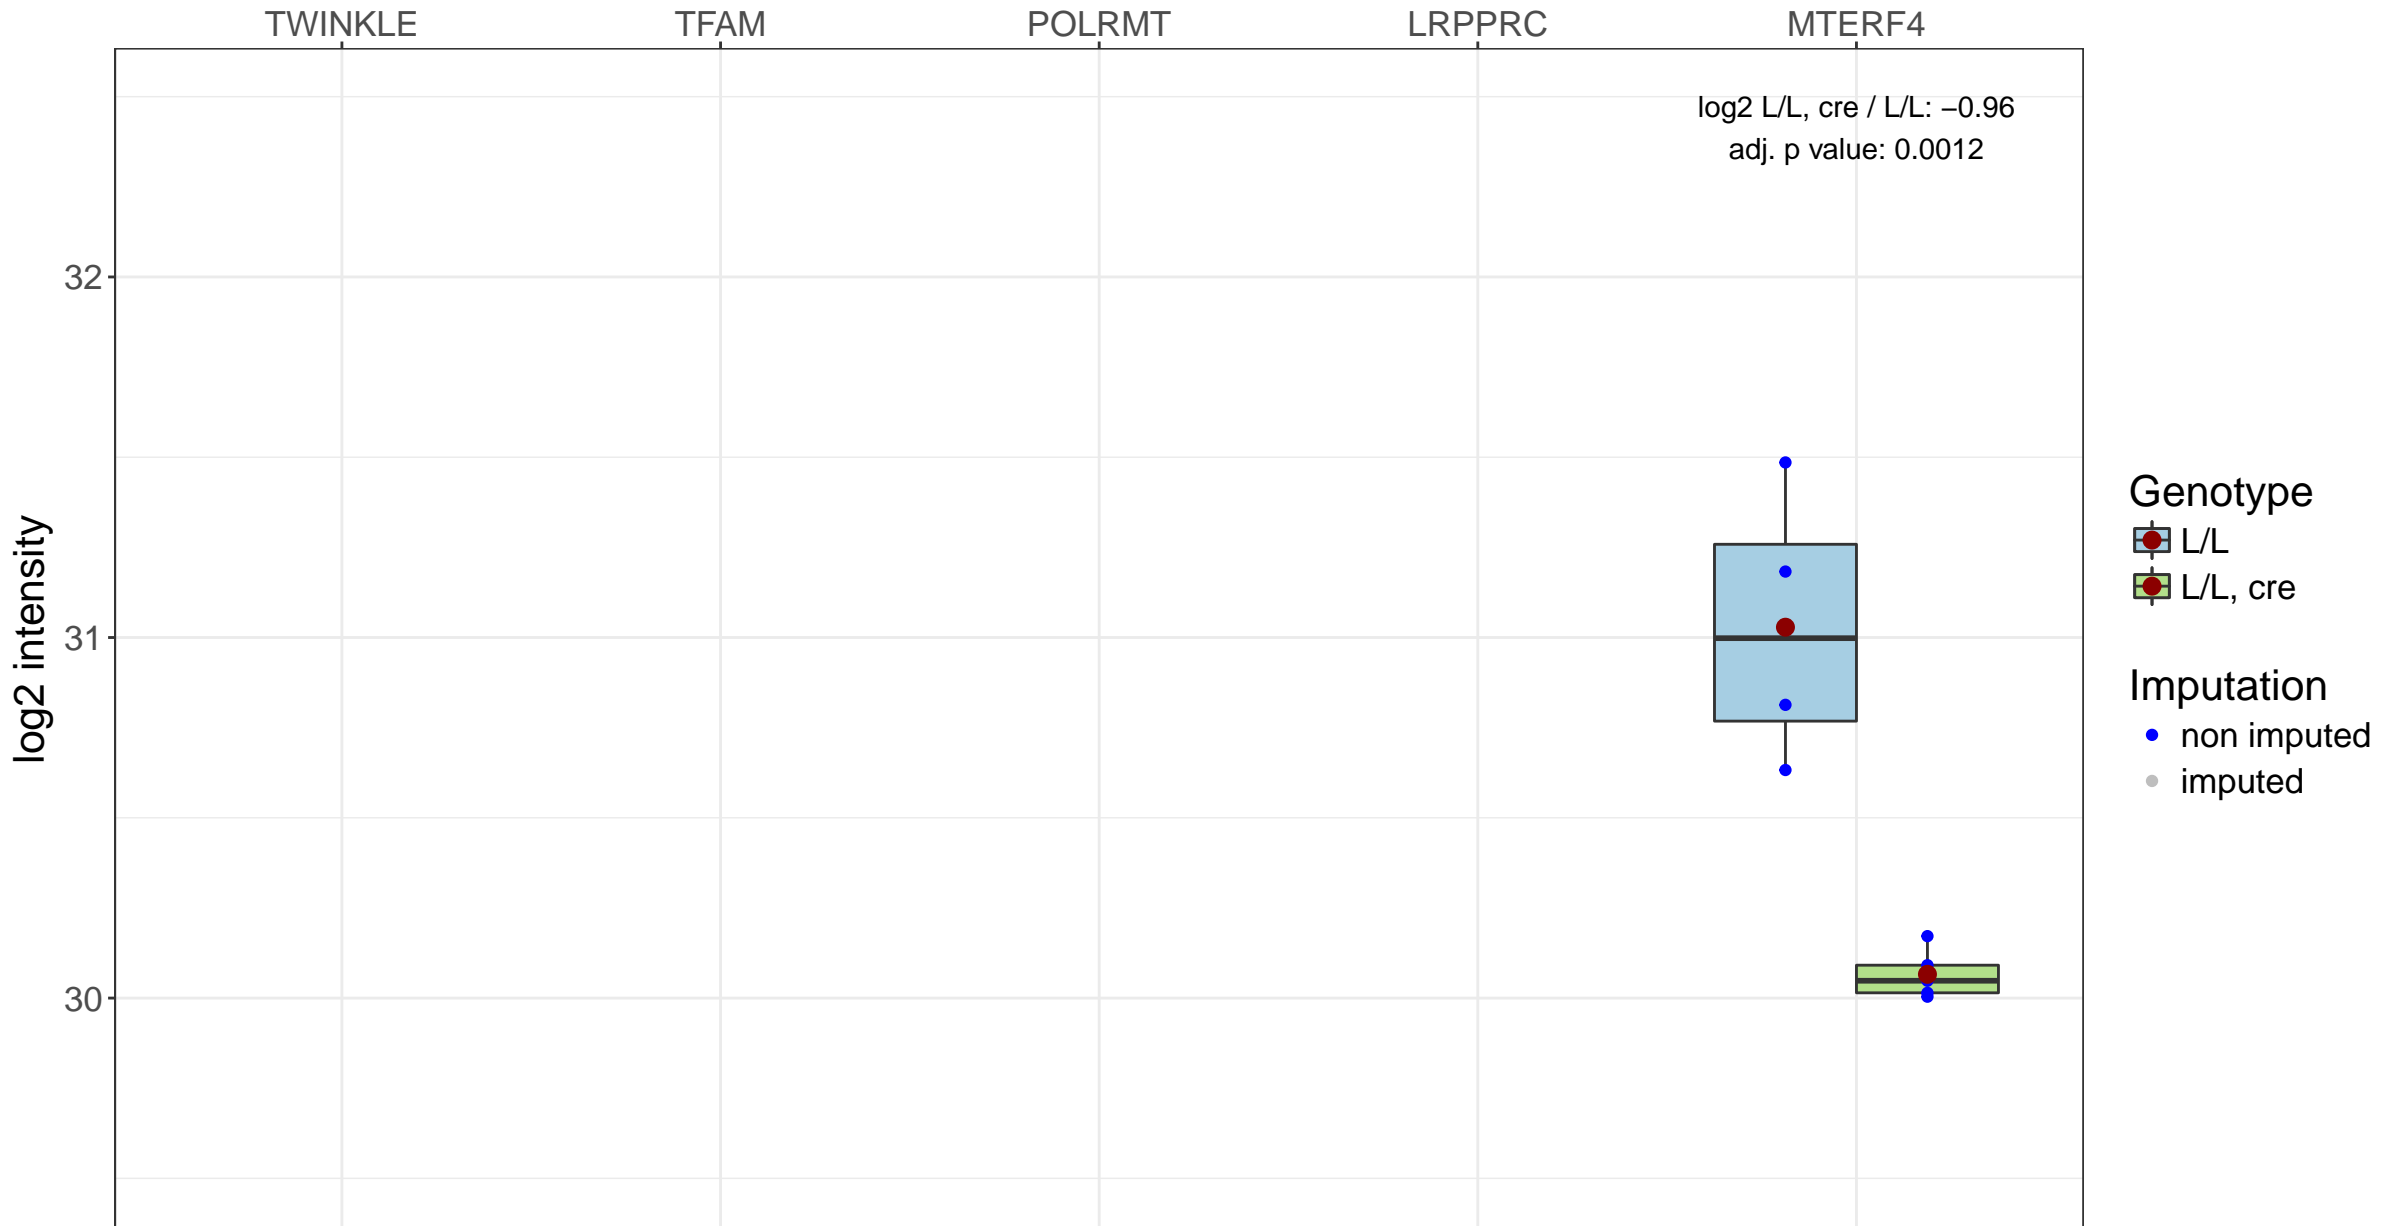

# DARS2 / Q8BIP0

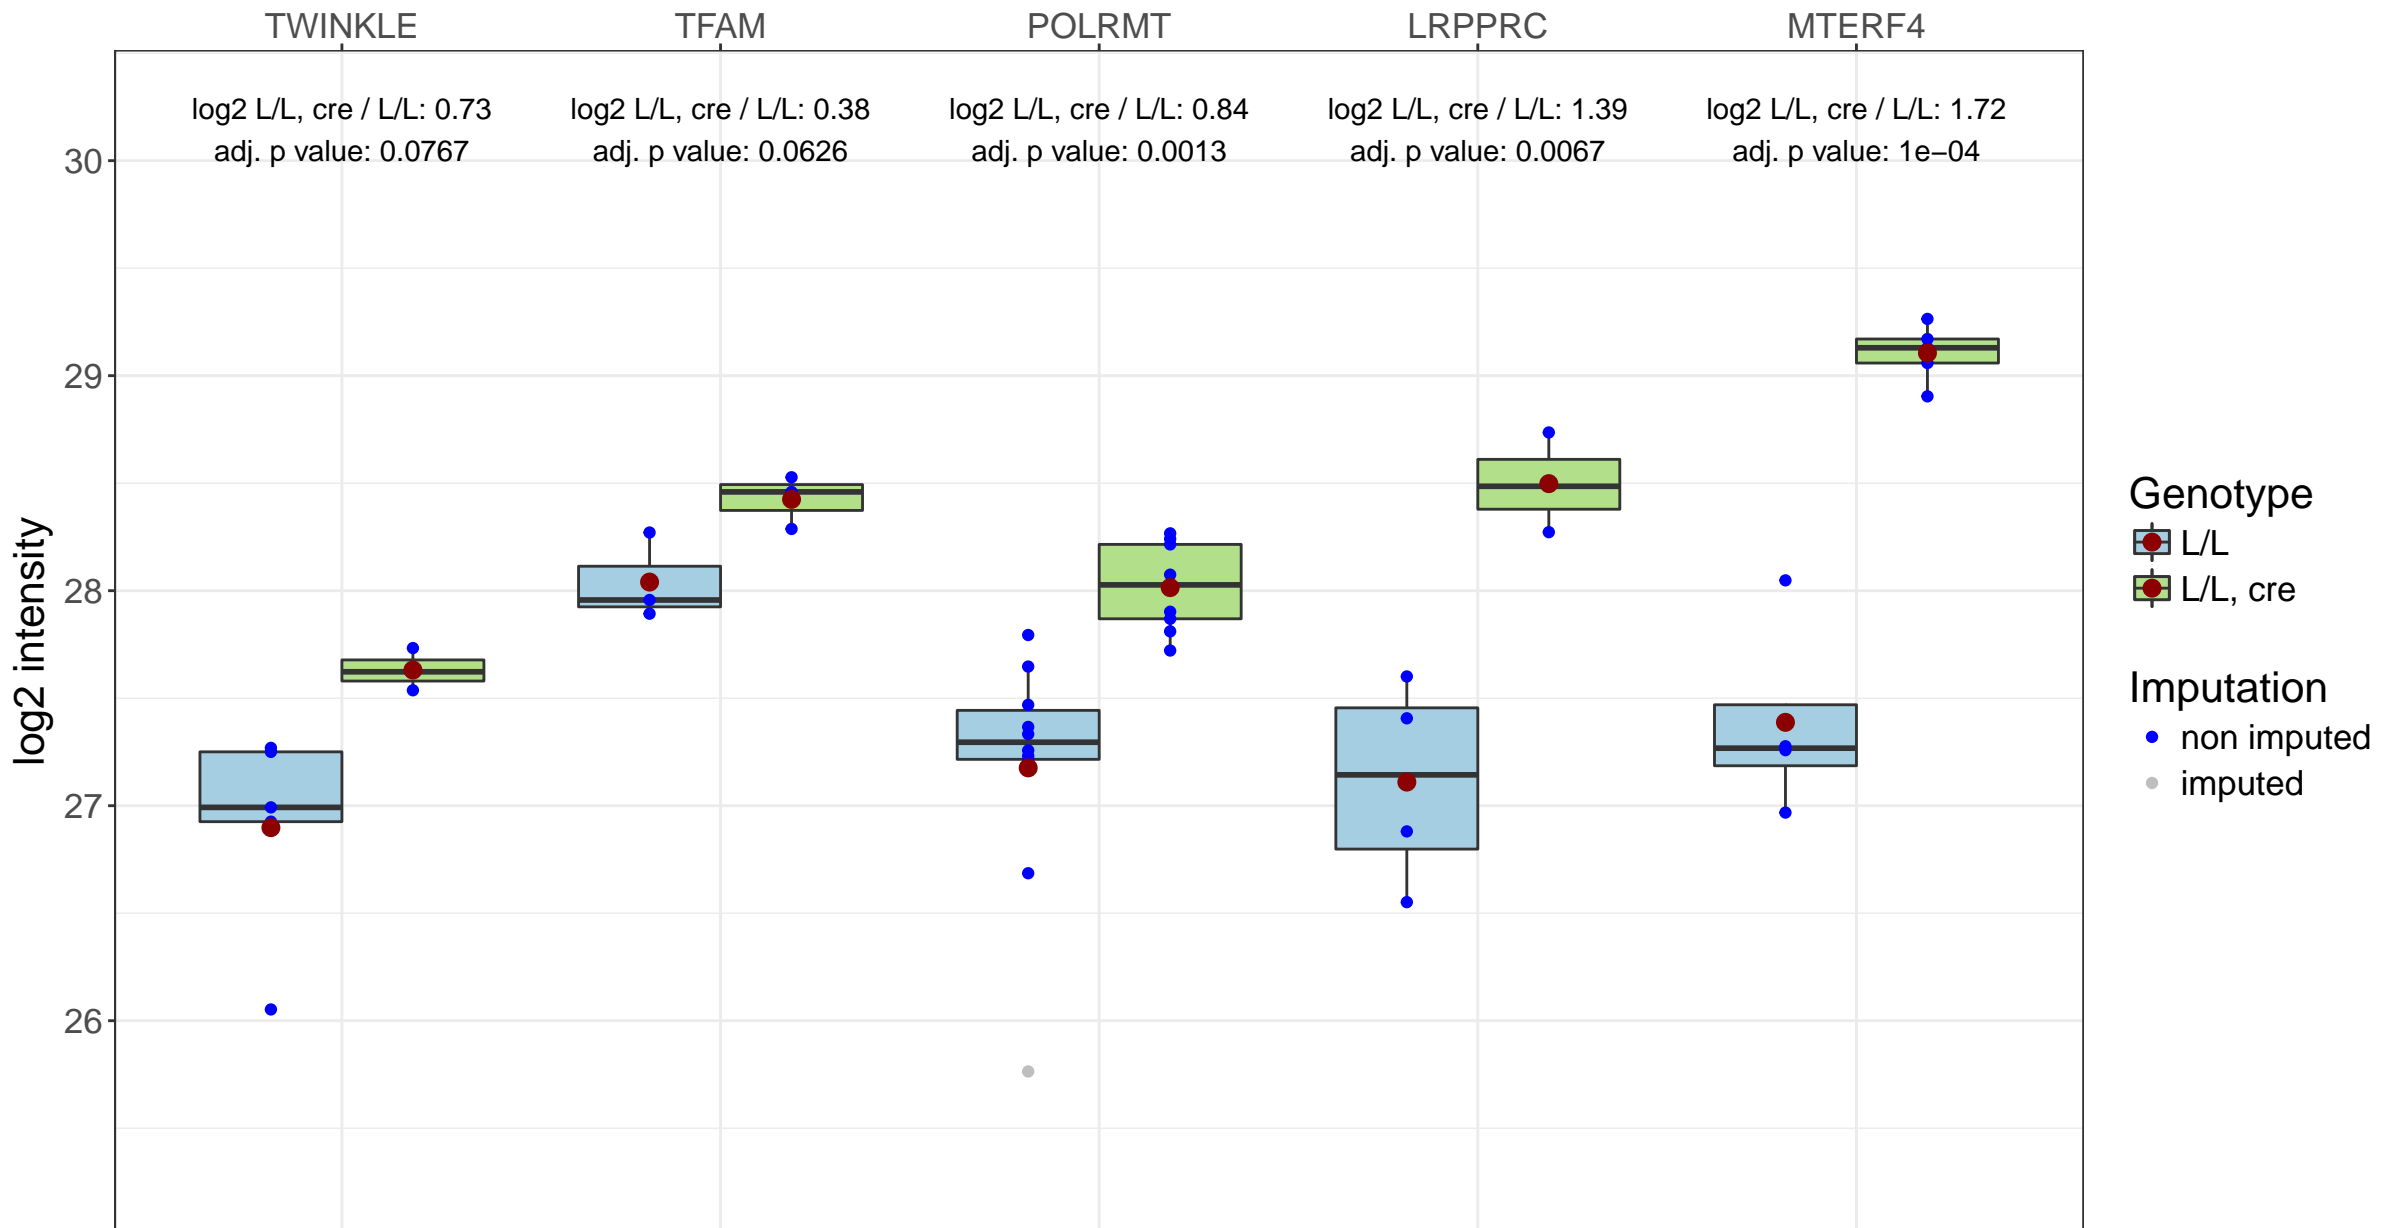

# DBI / P31786

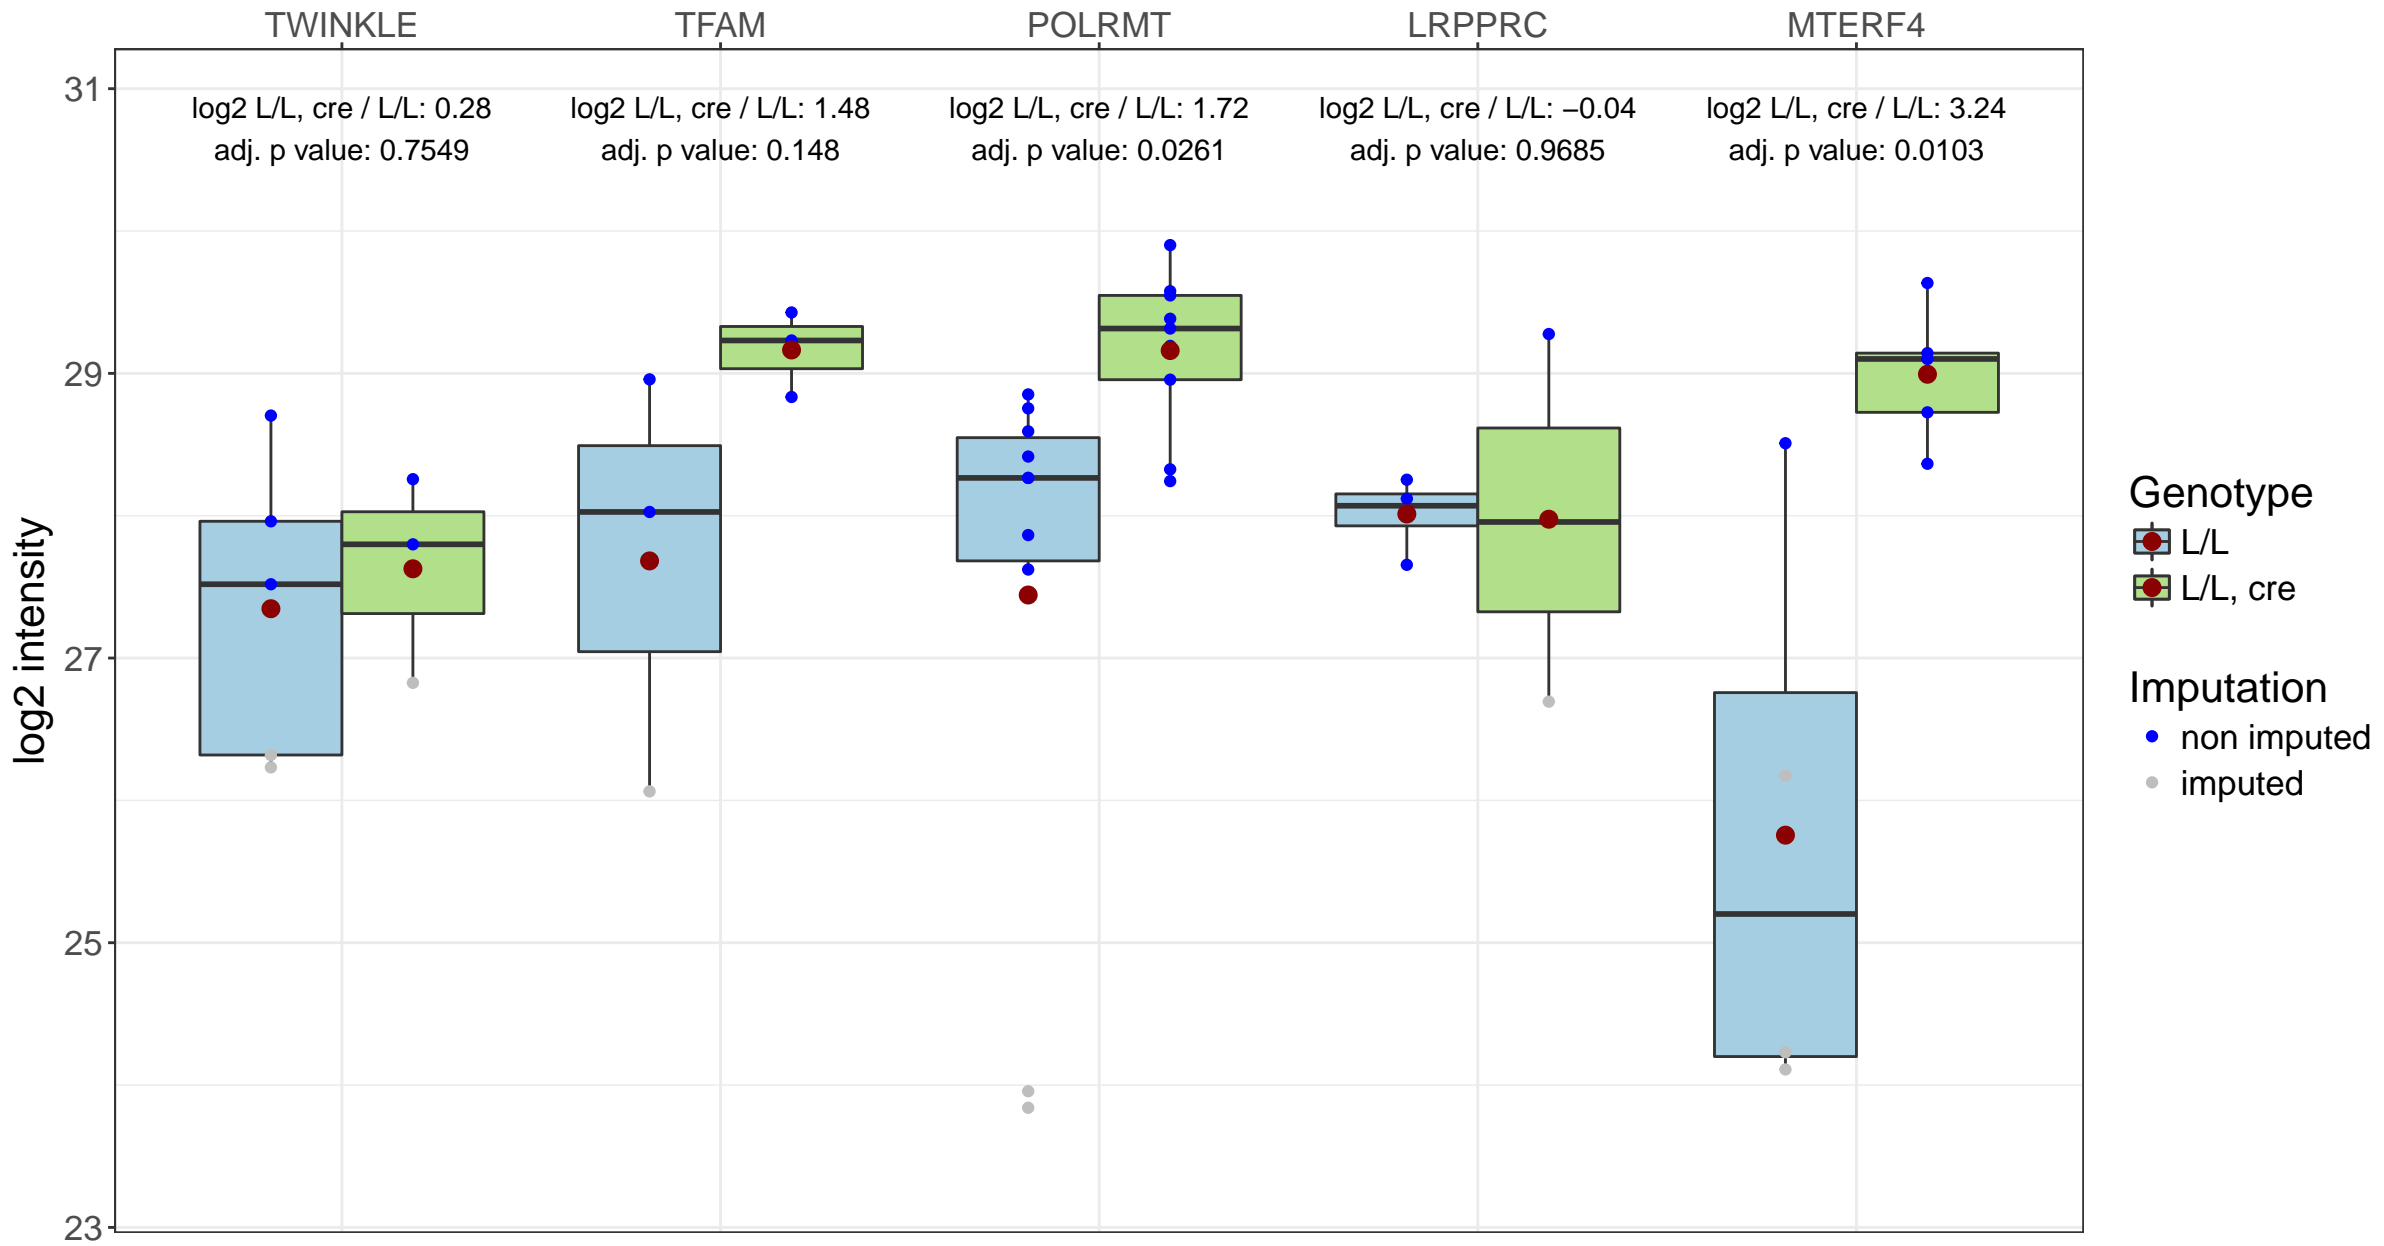



# DBT / P53395

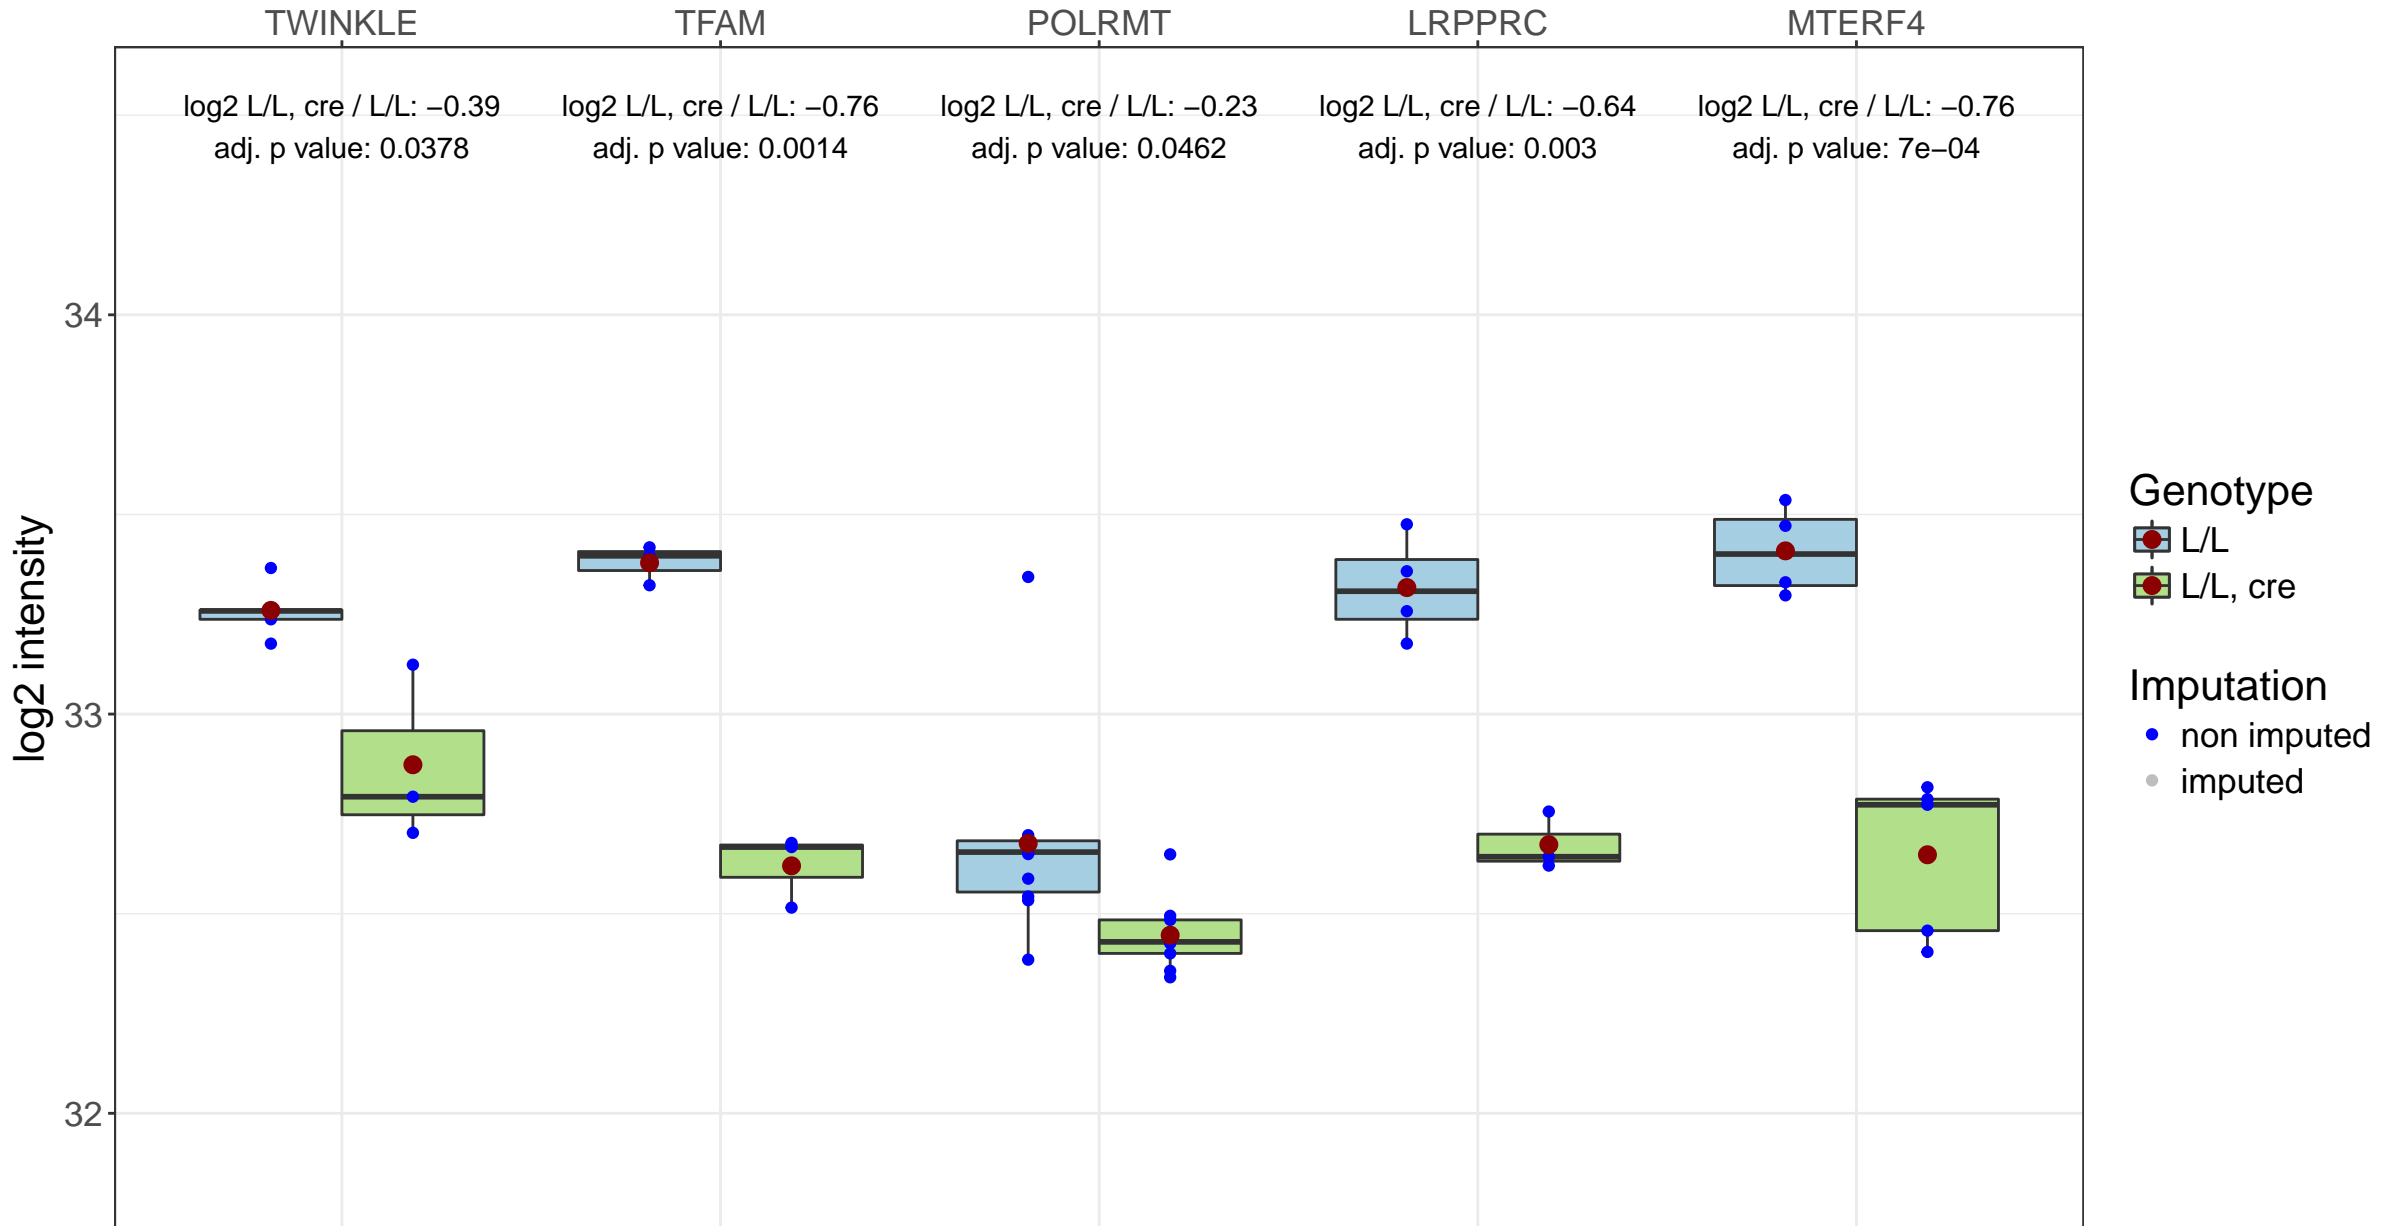

# DCAKD / Q8BHC4

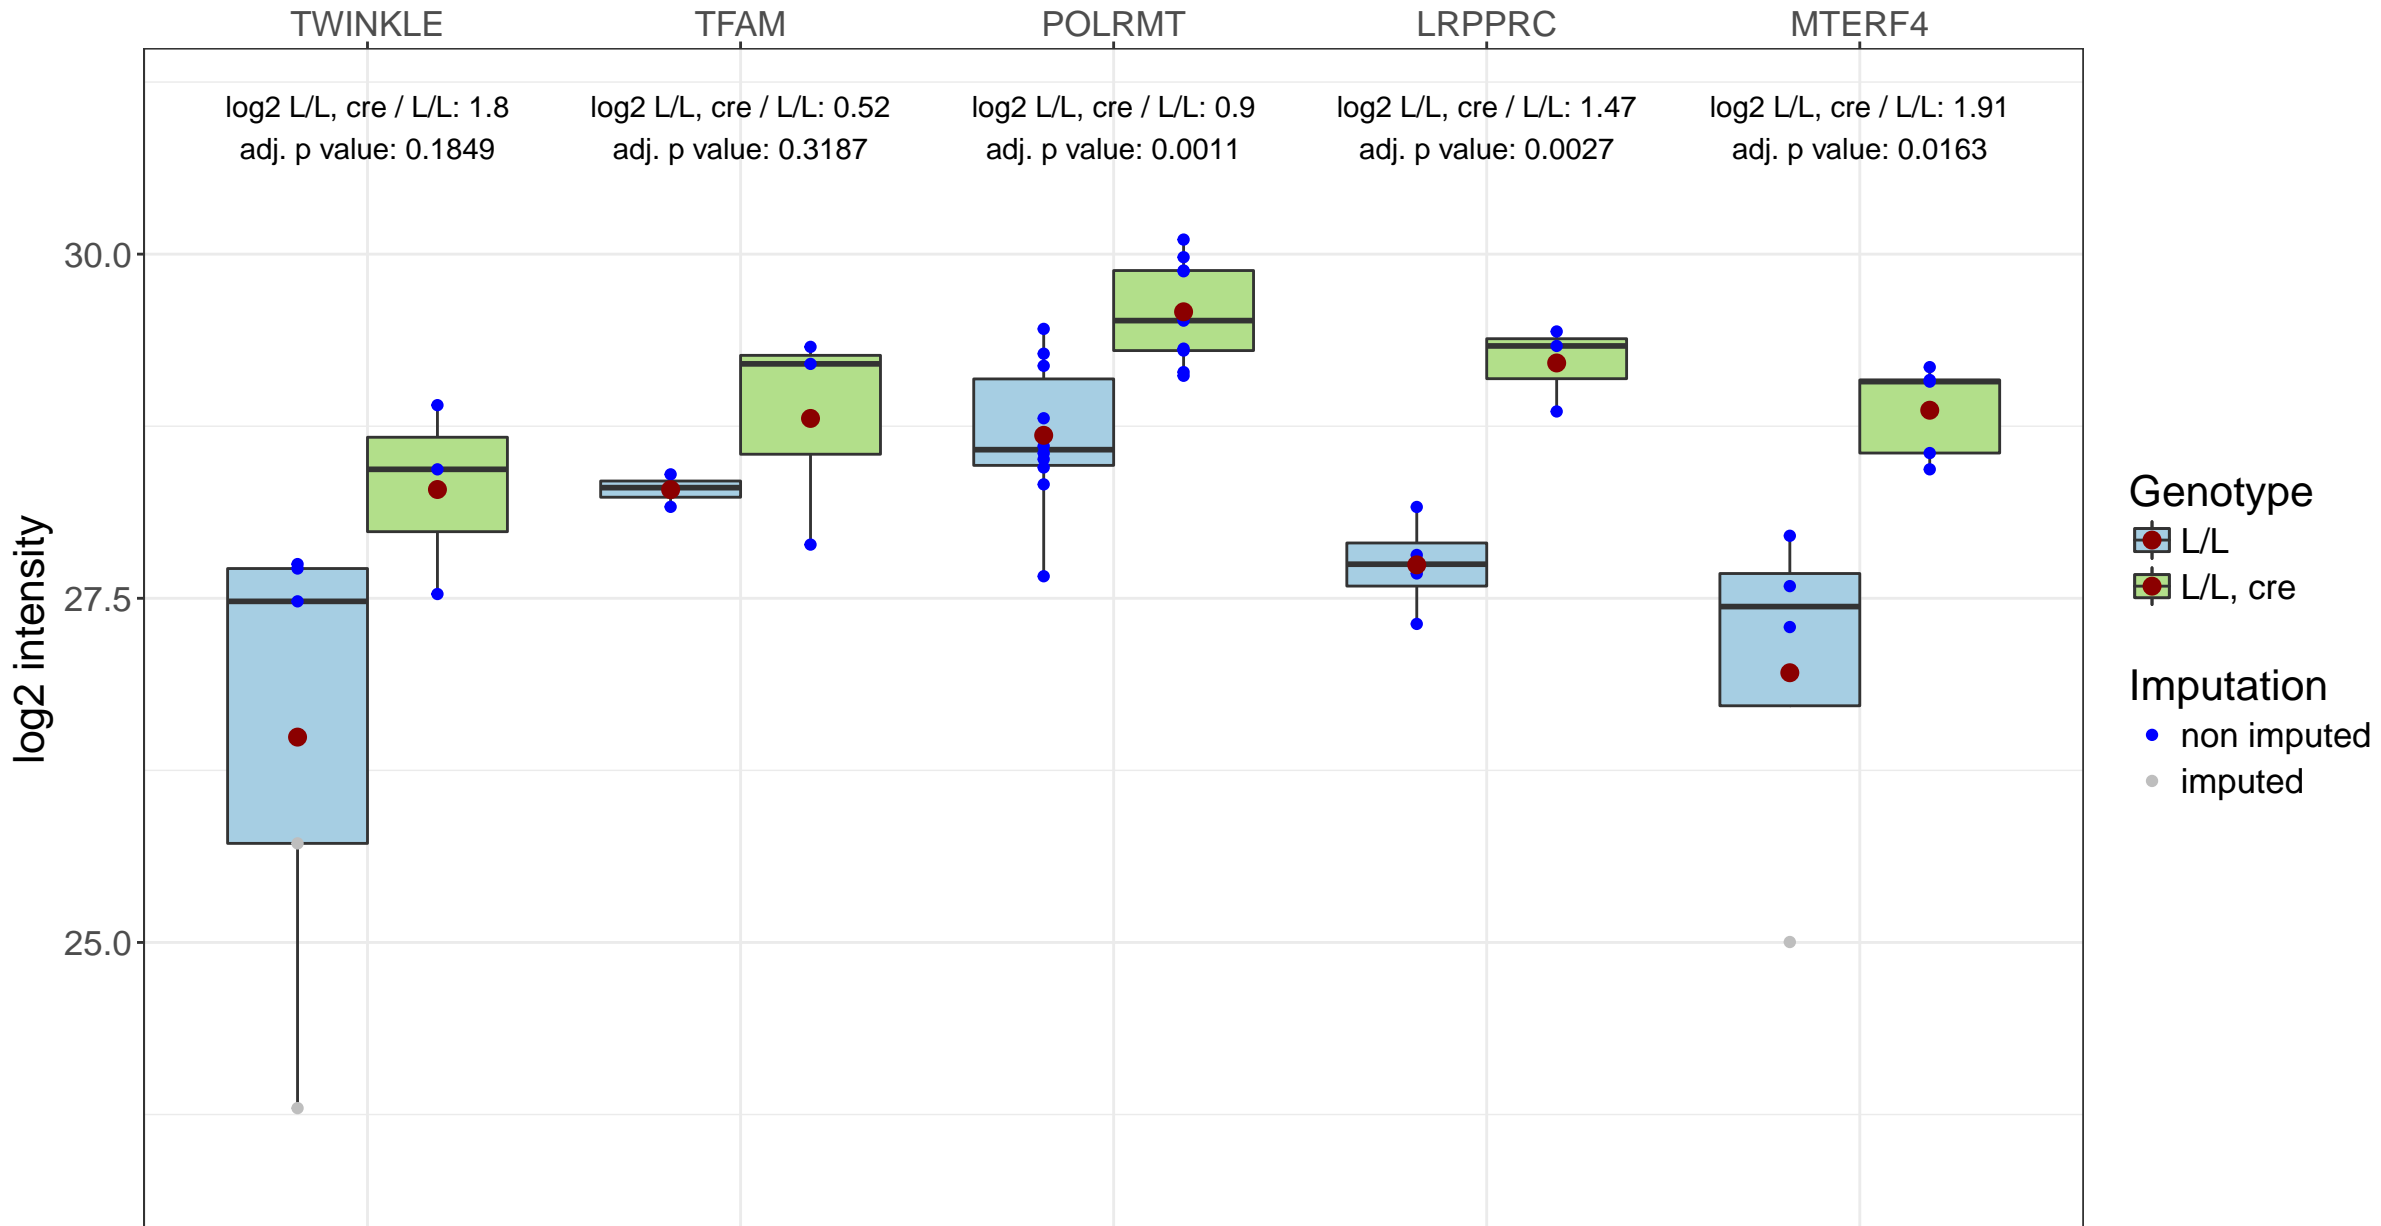

# DCN / P28654

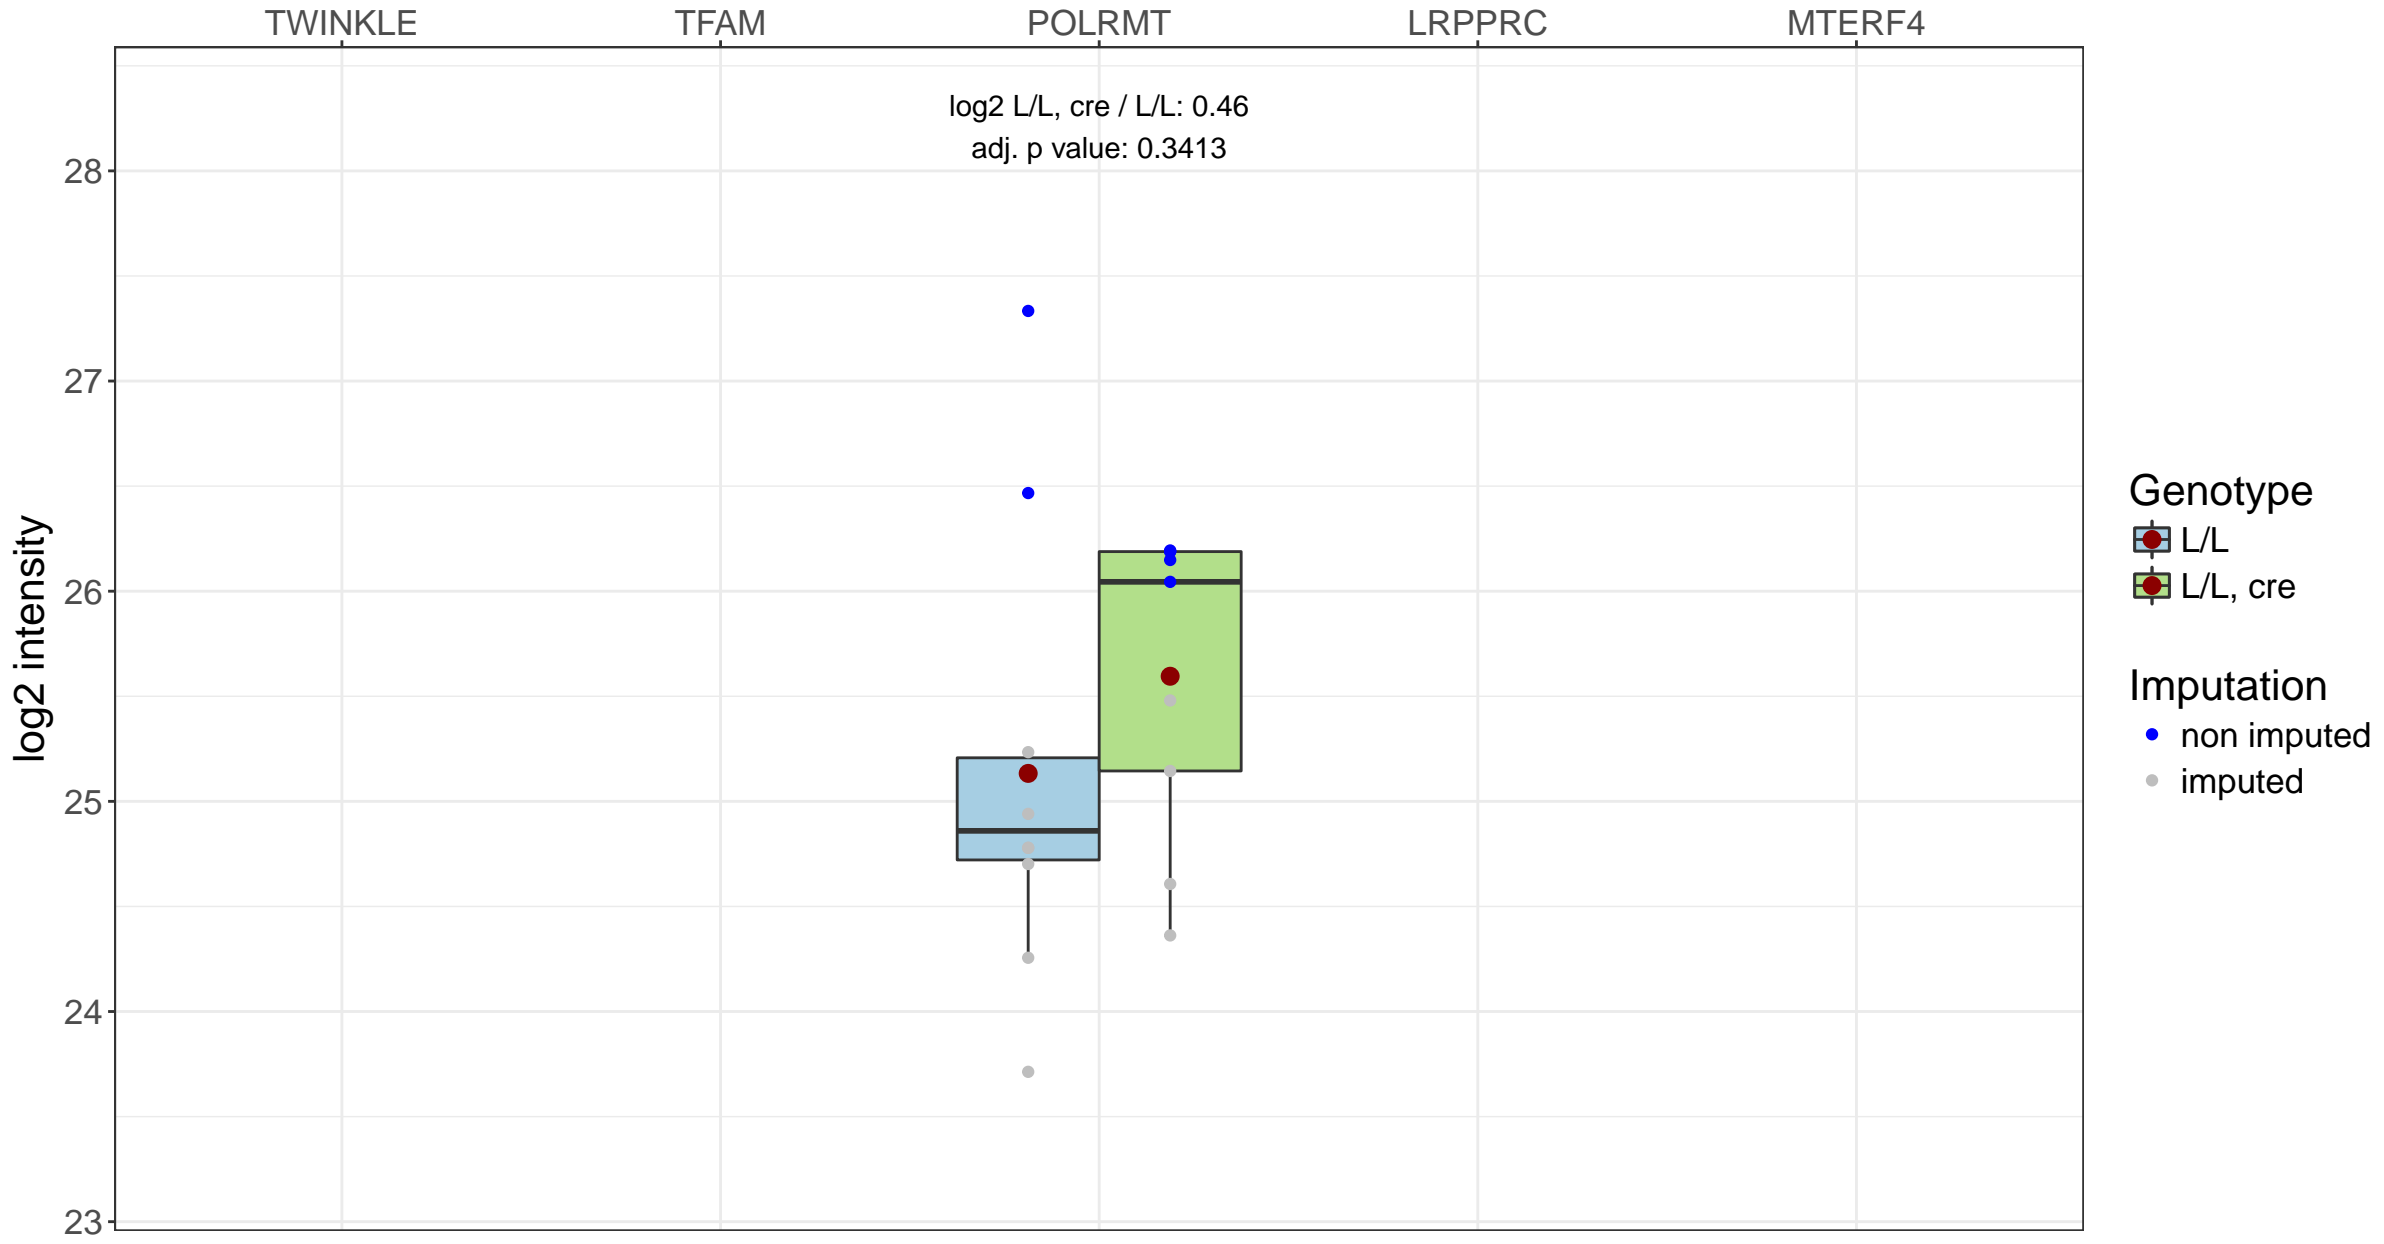

# DDOST / O54734

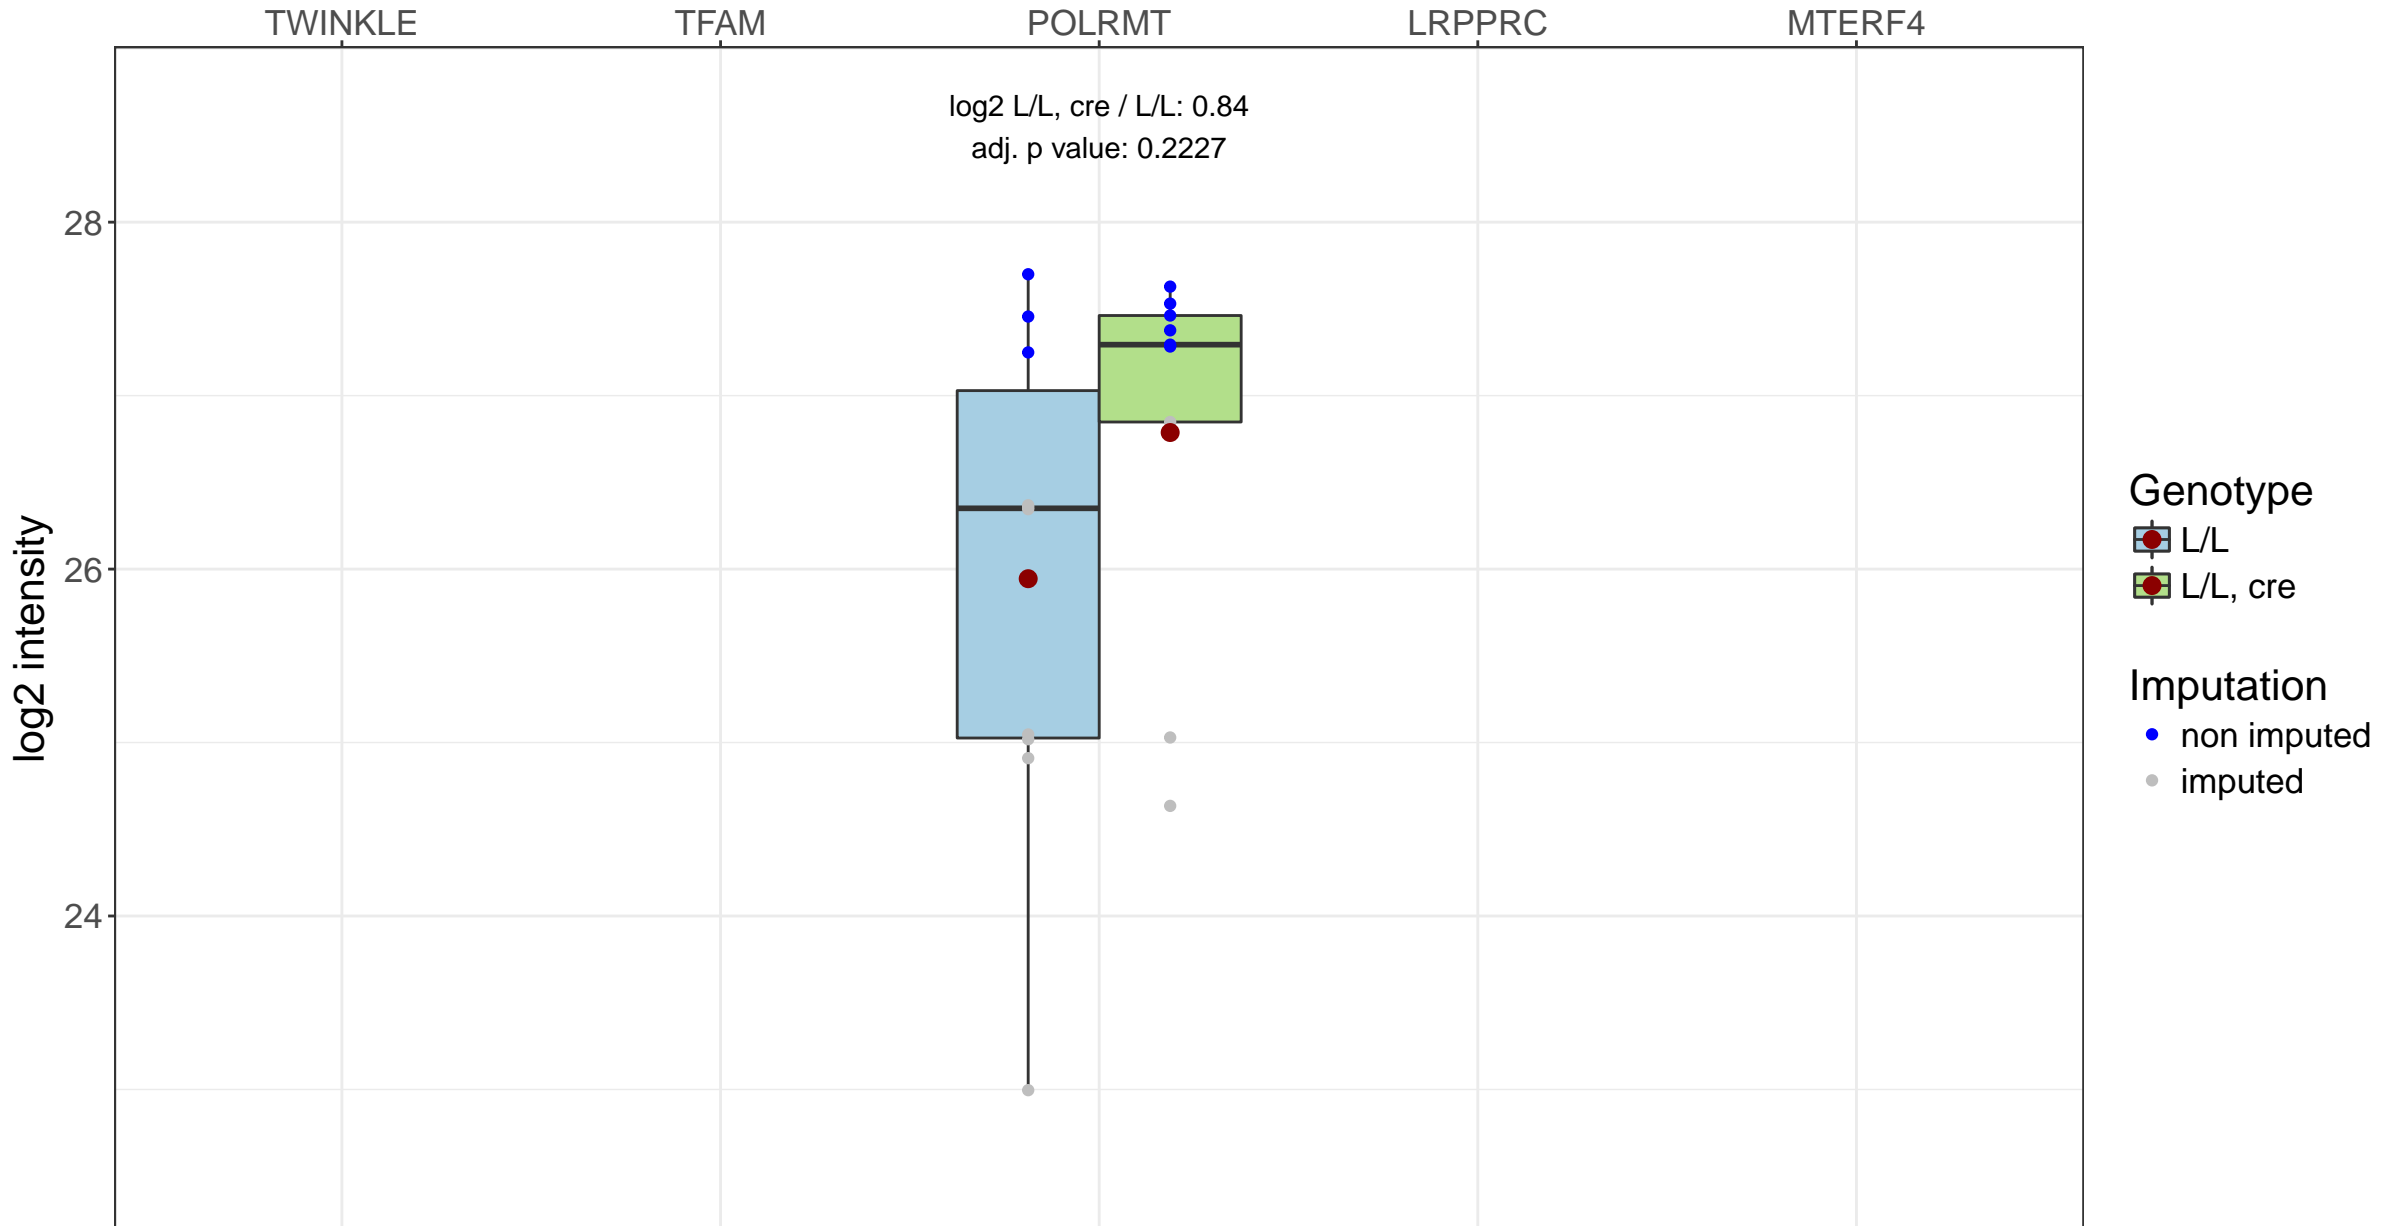

# DDX28 / Q9CWT6

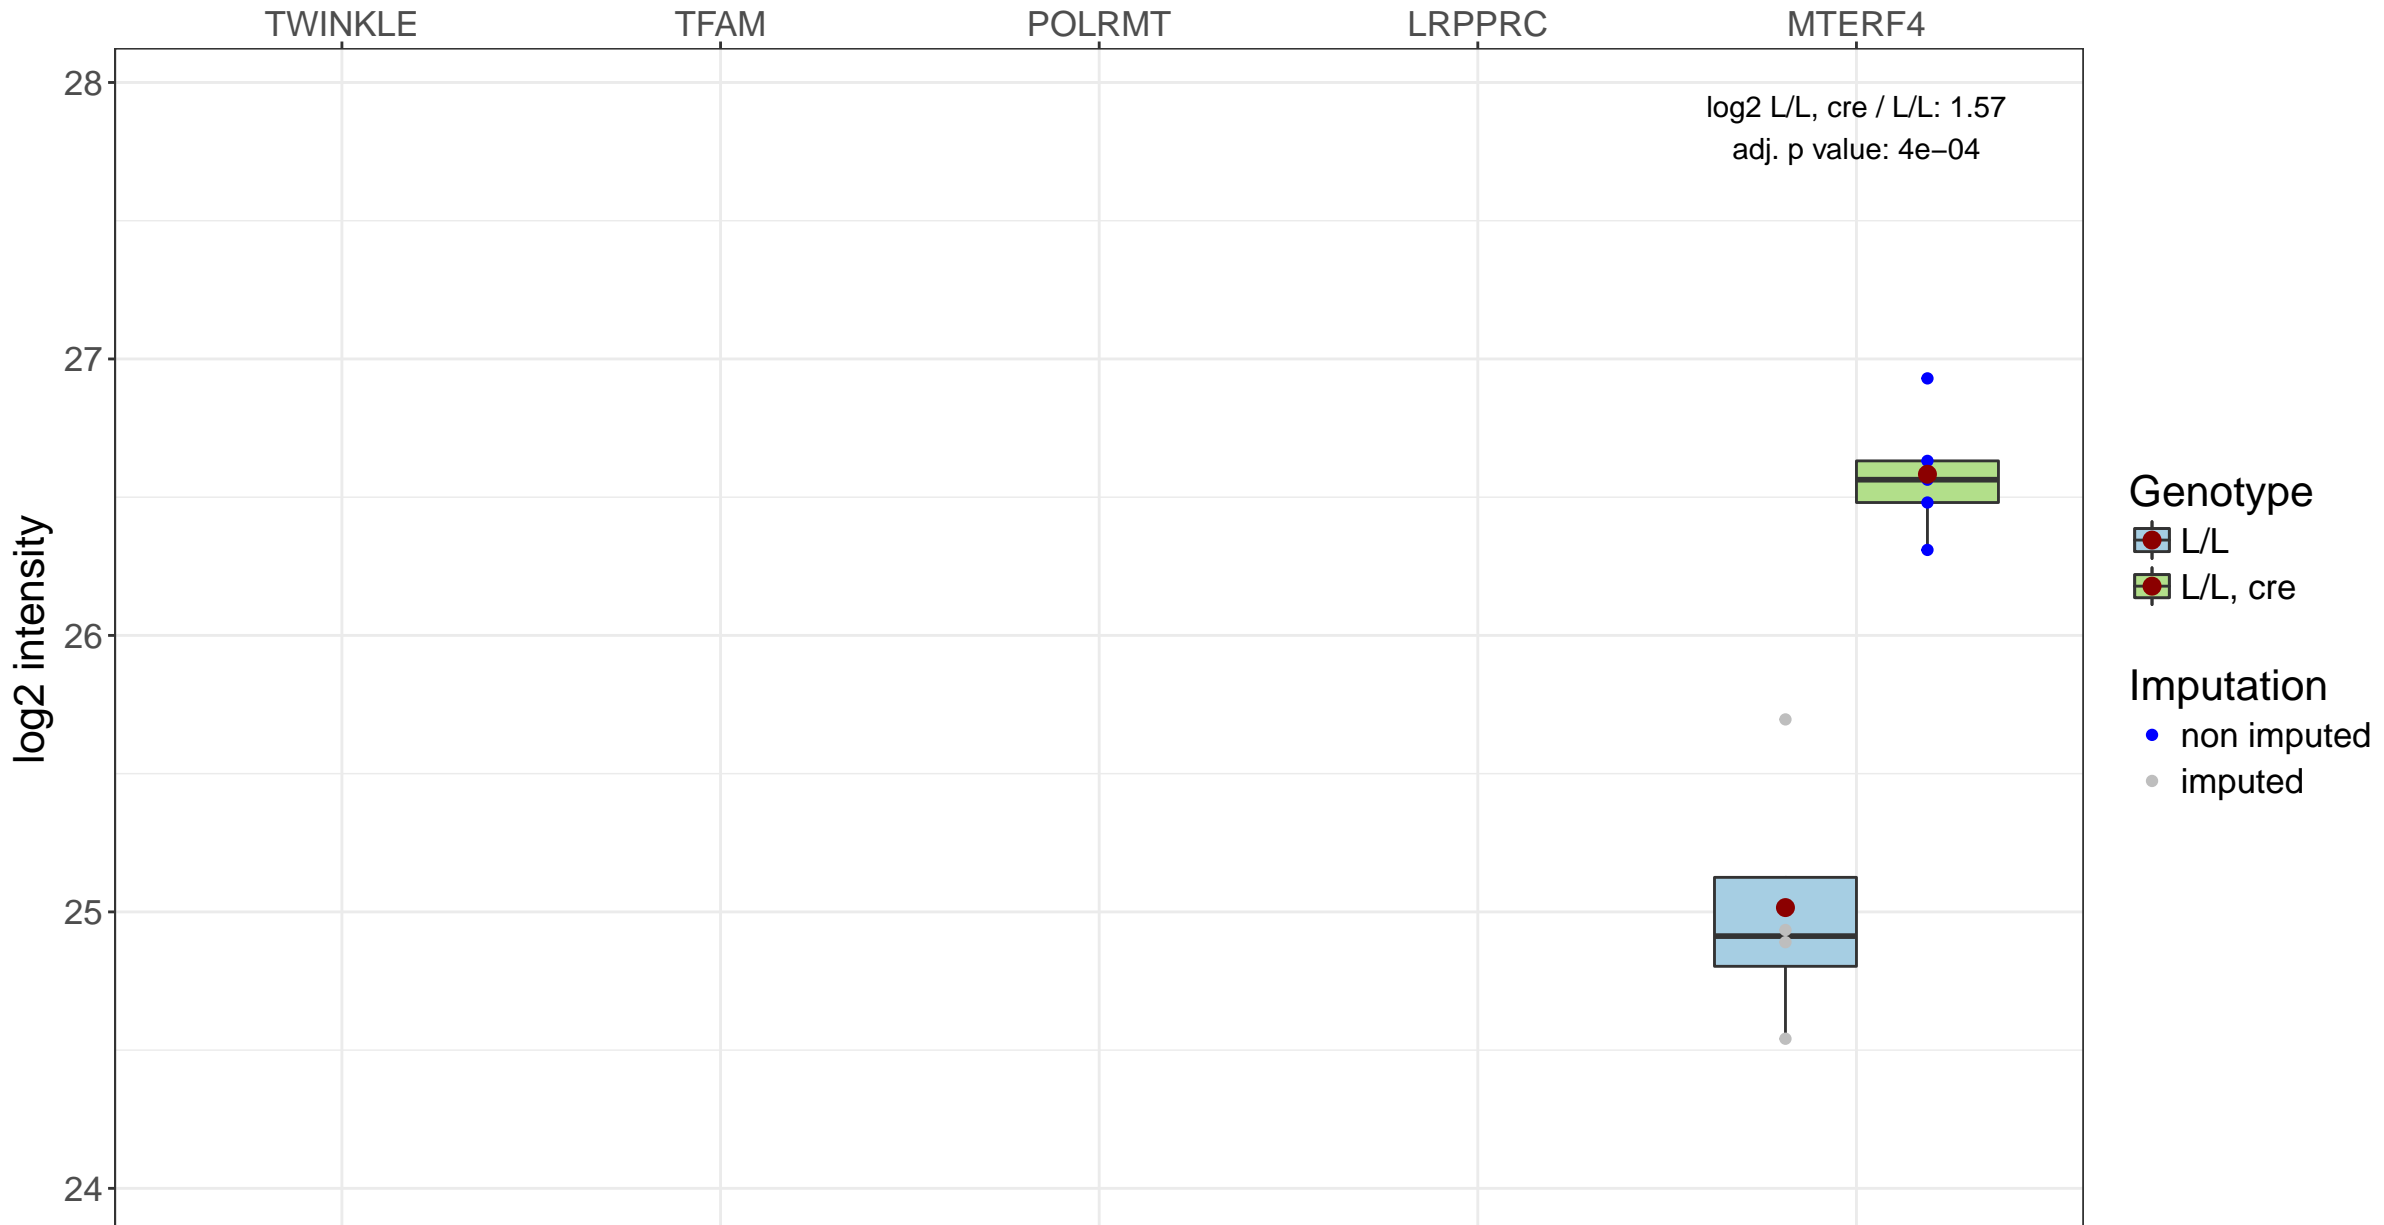

# DECR1 / Q9CQ62

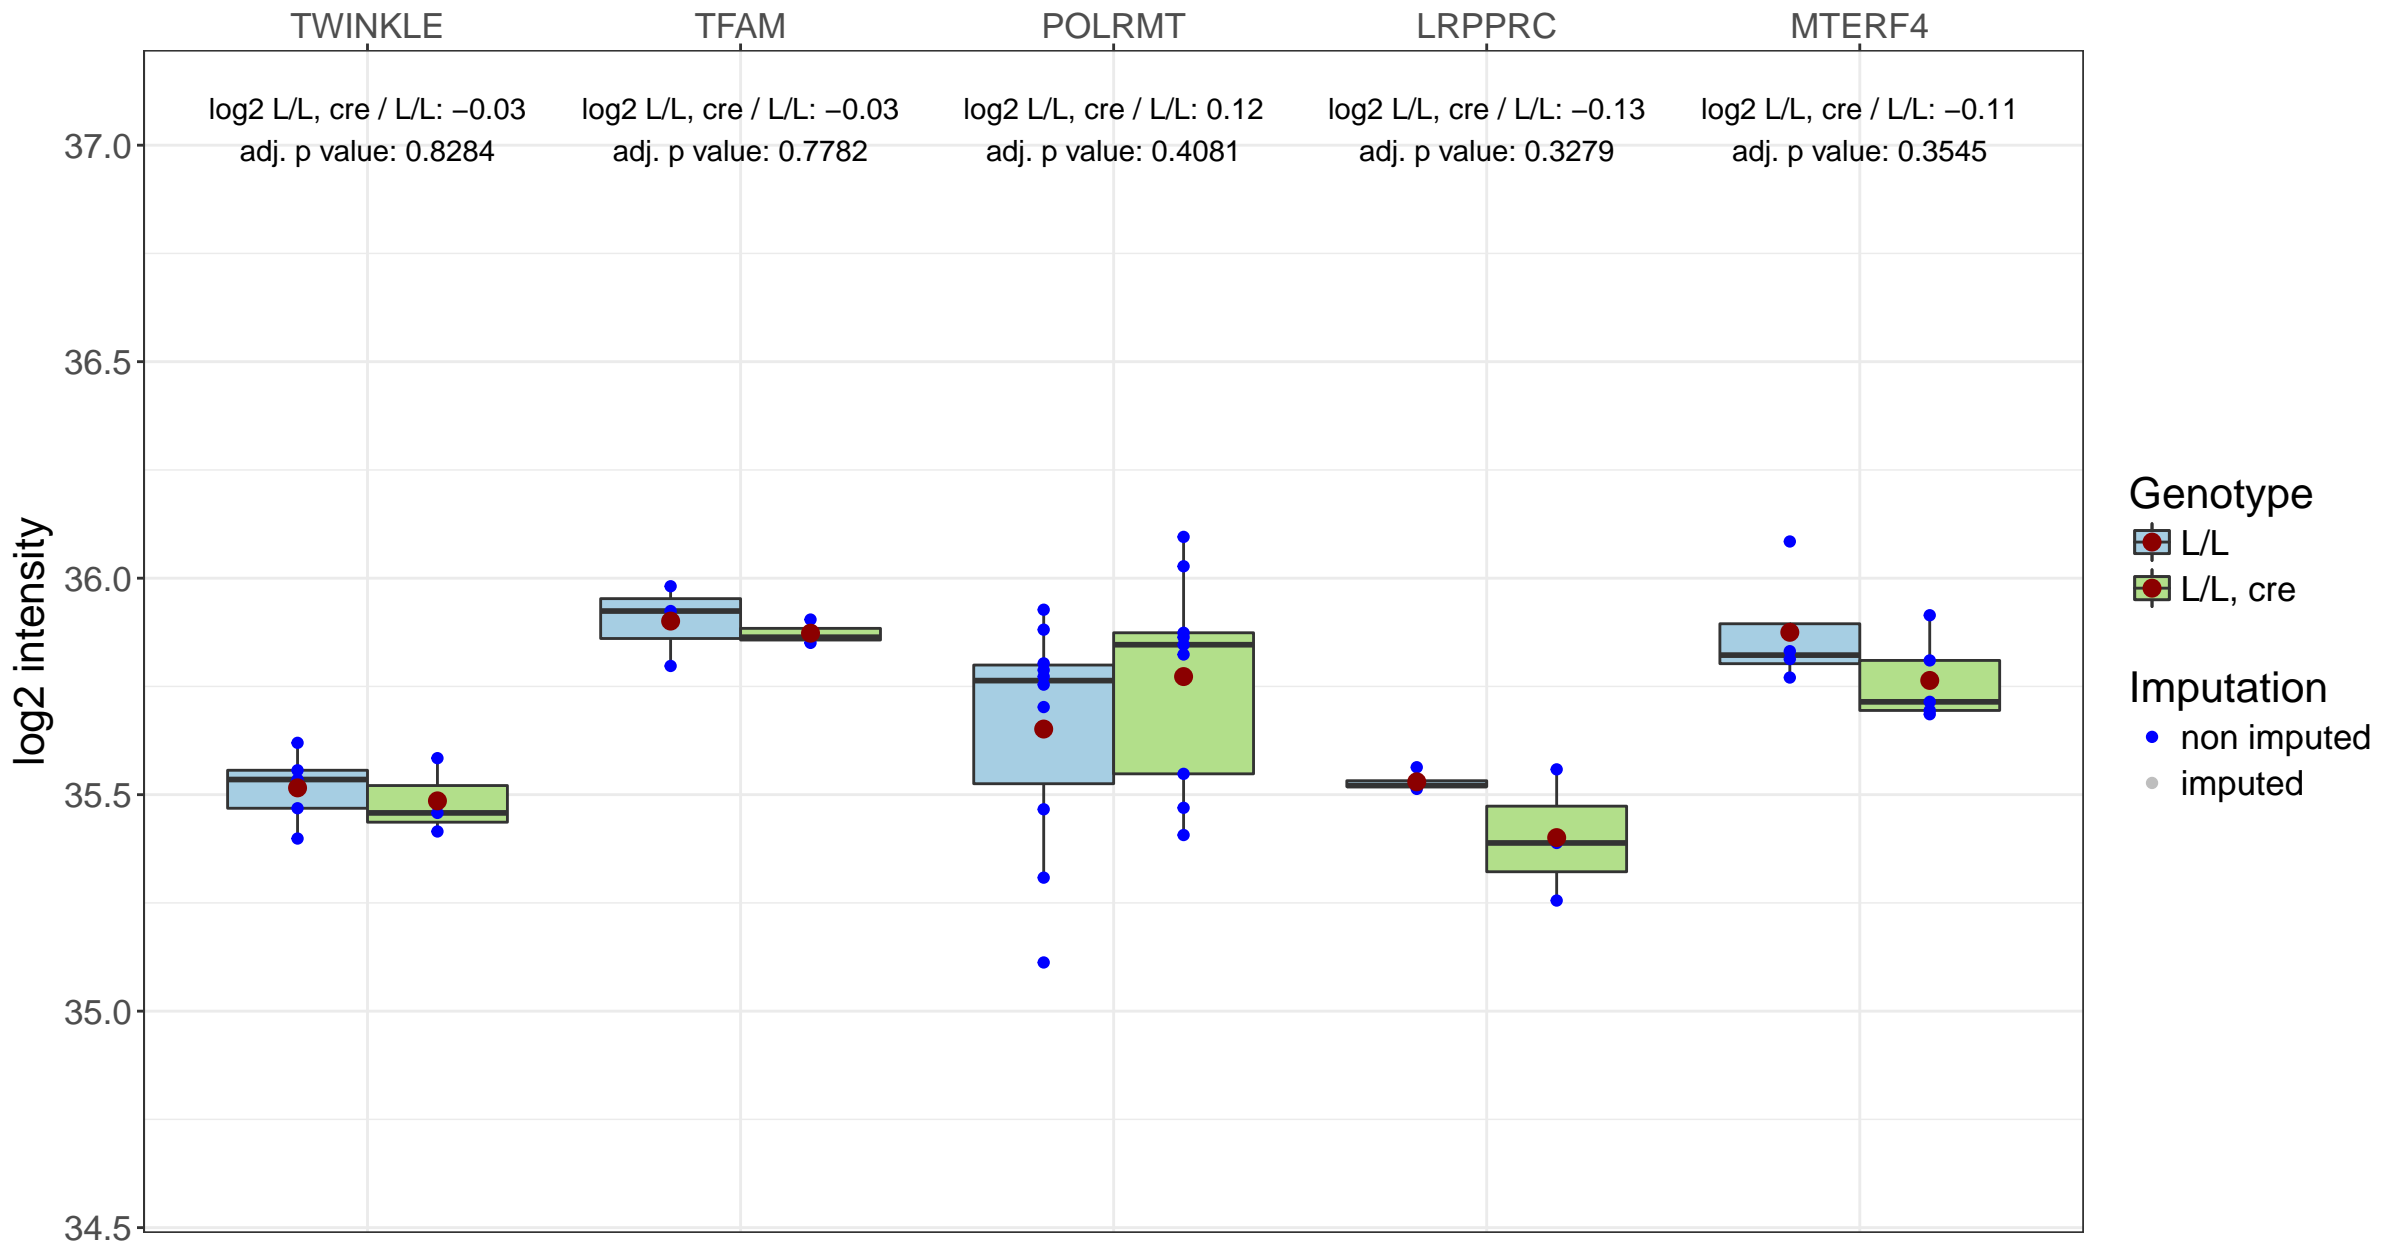

# DES / P31001

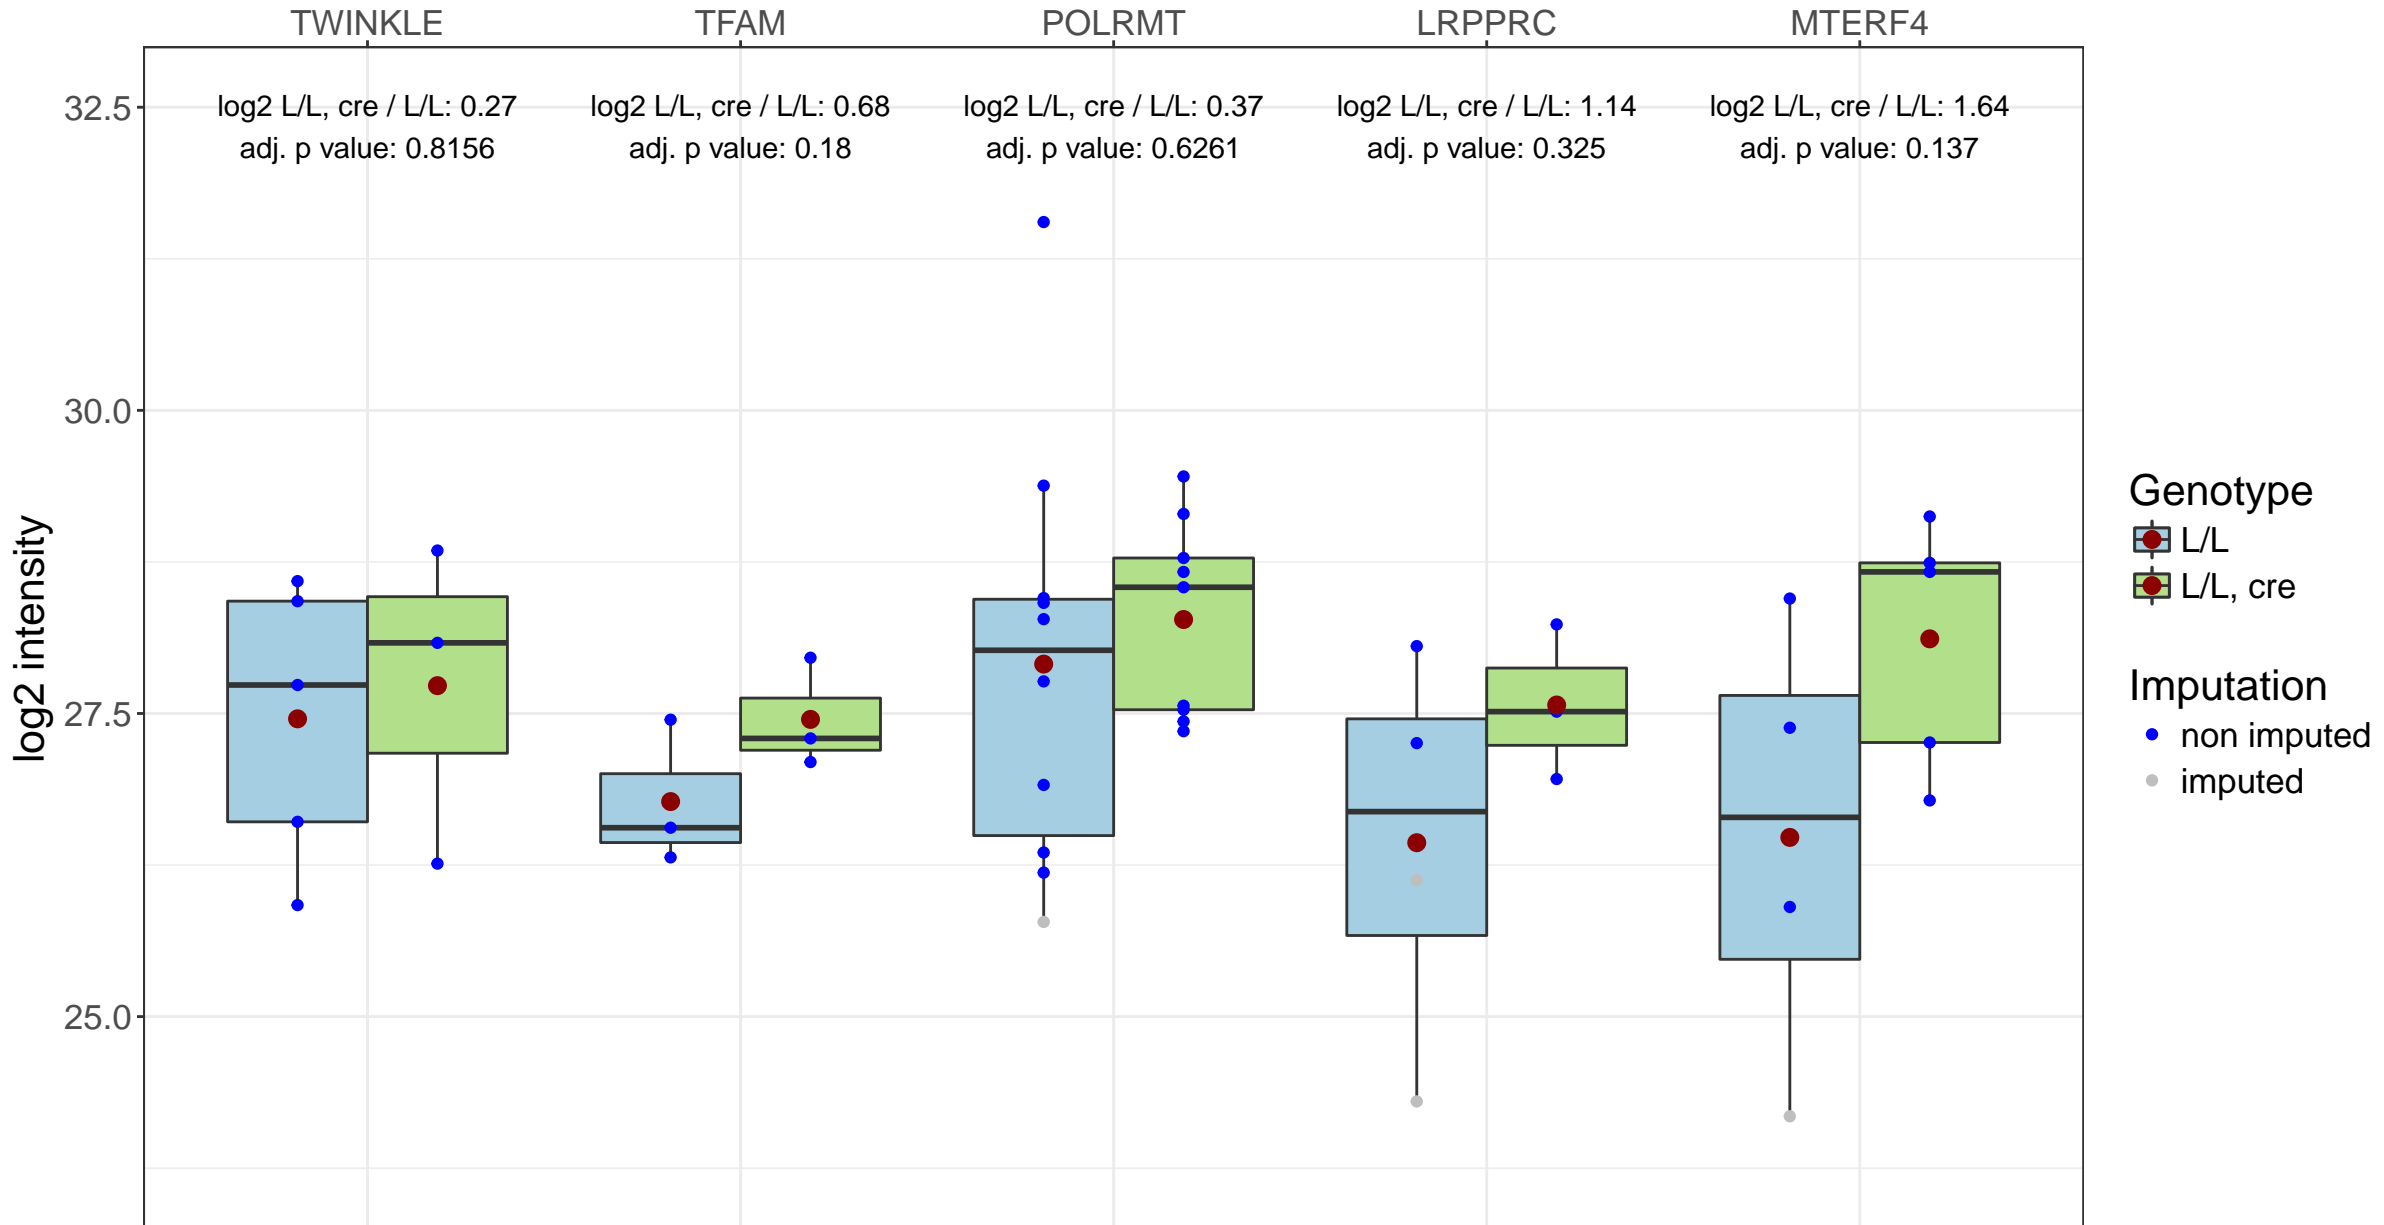

# DGUOK / Q9QX60-2

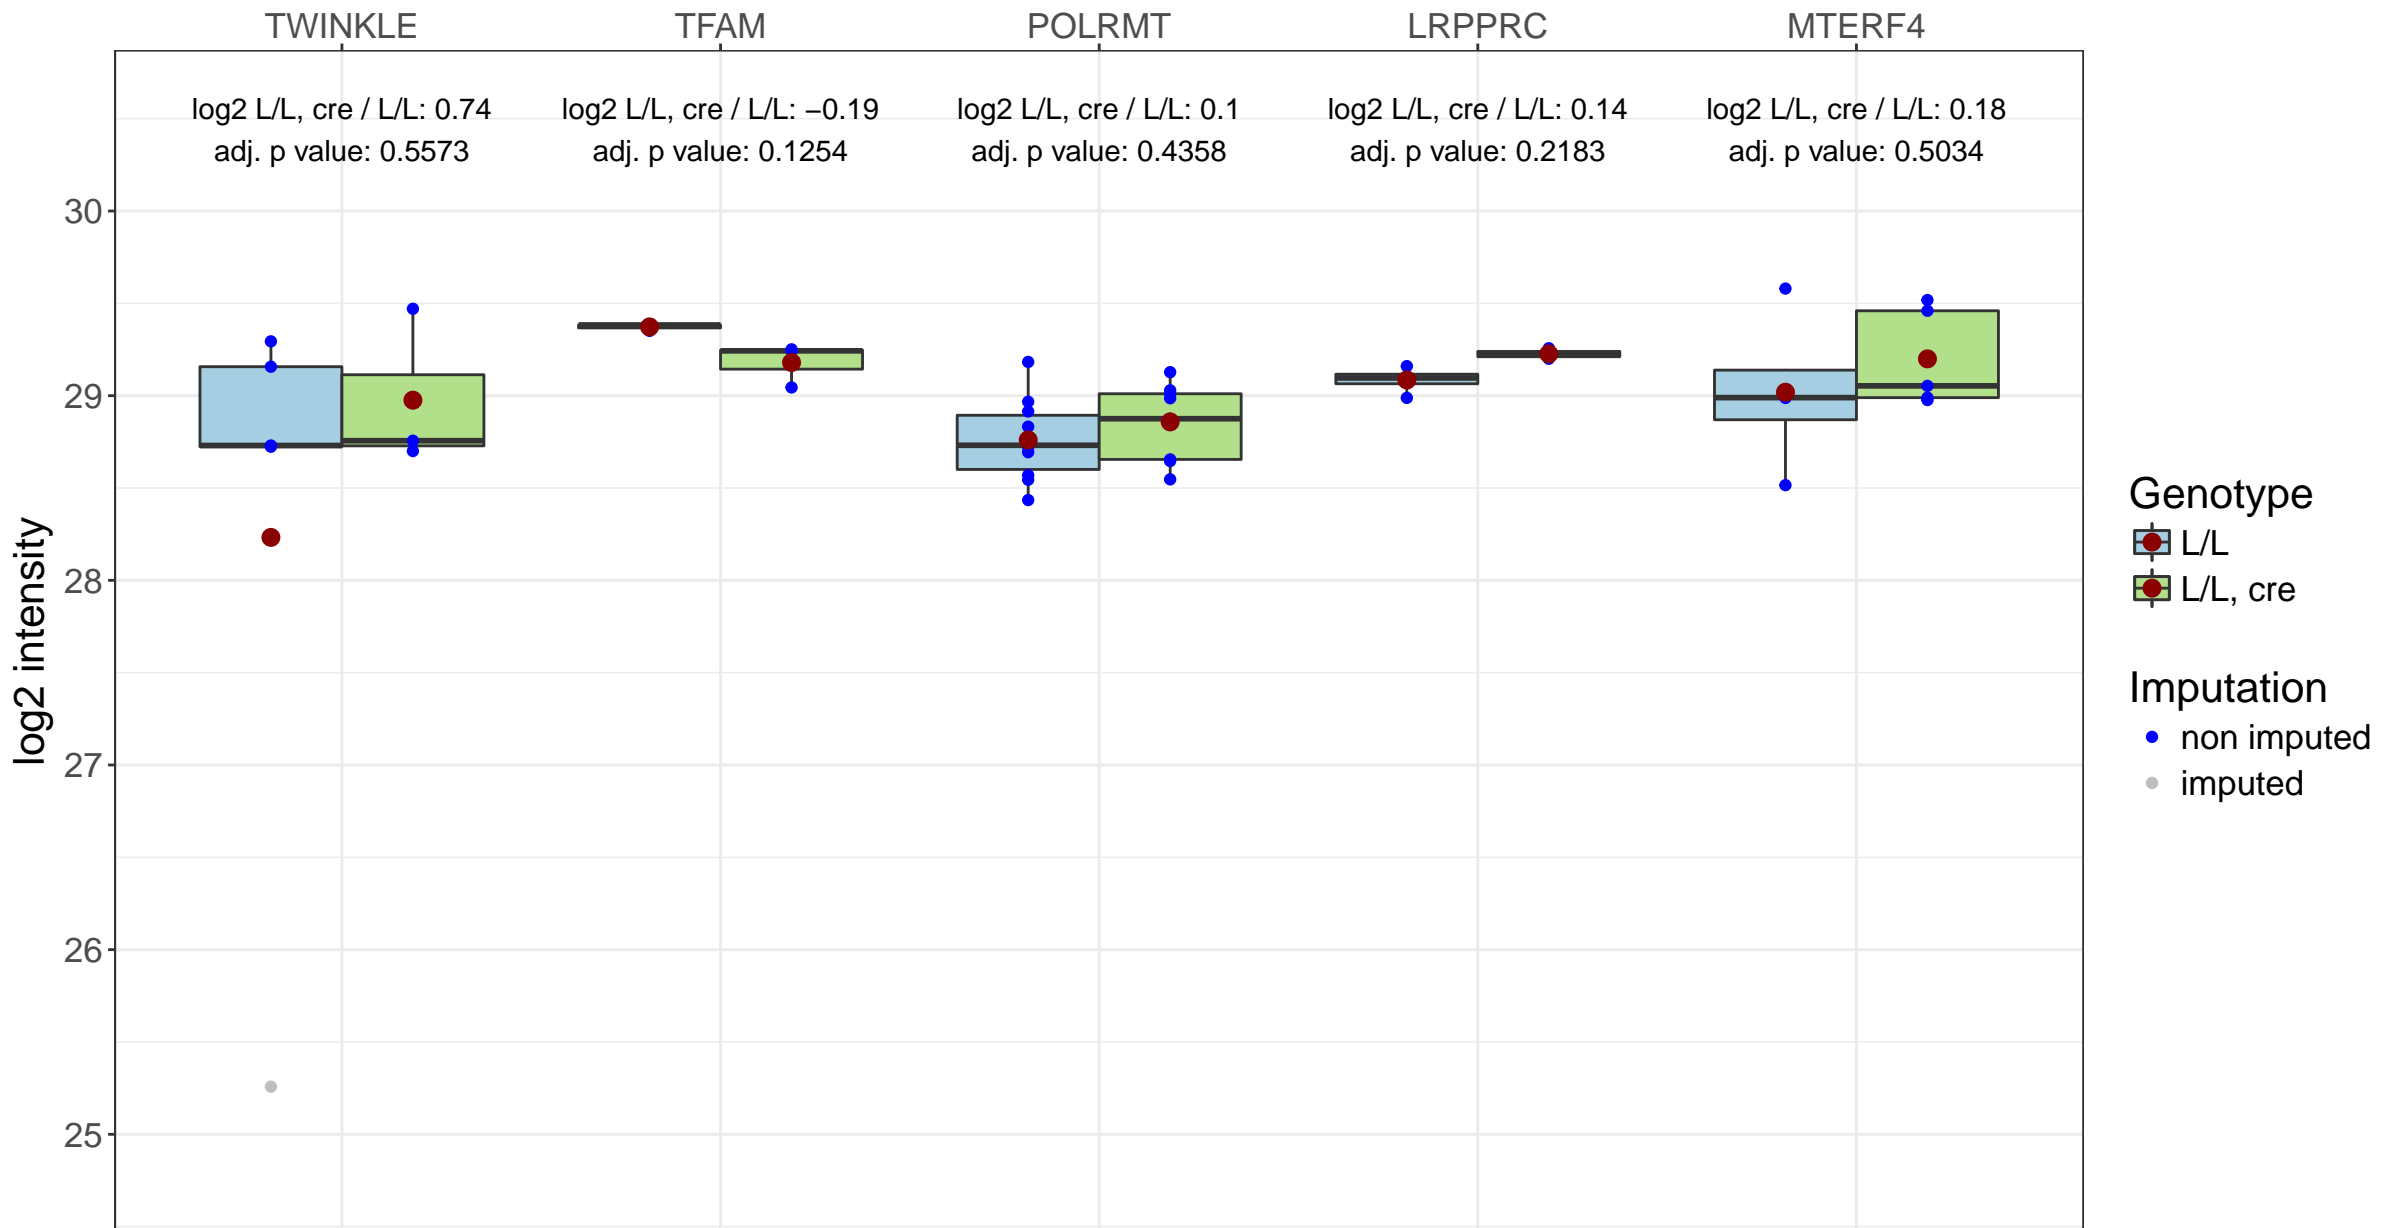



# DHODH / O35435

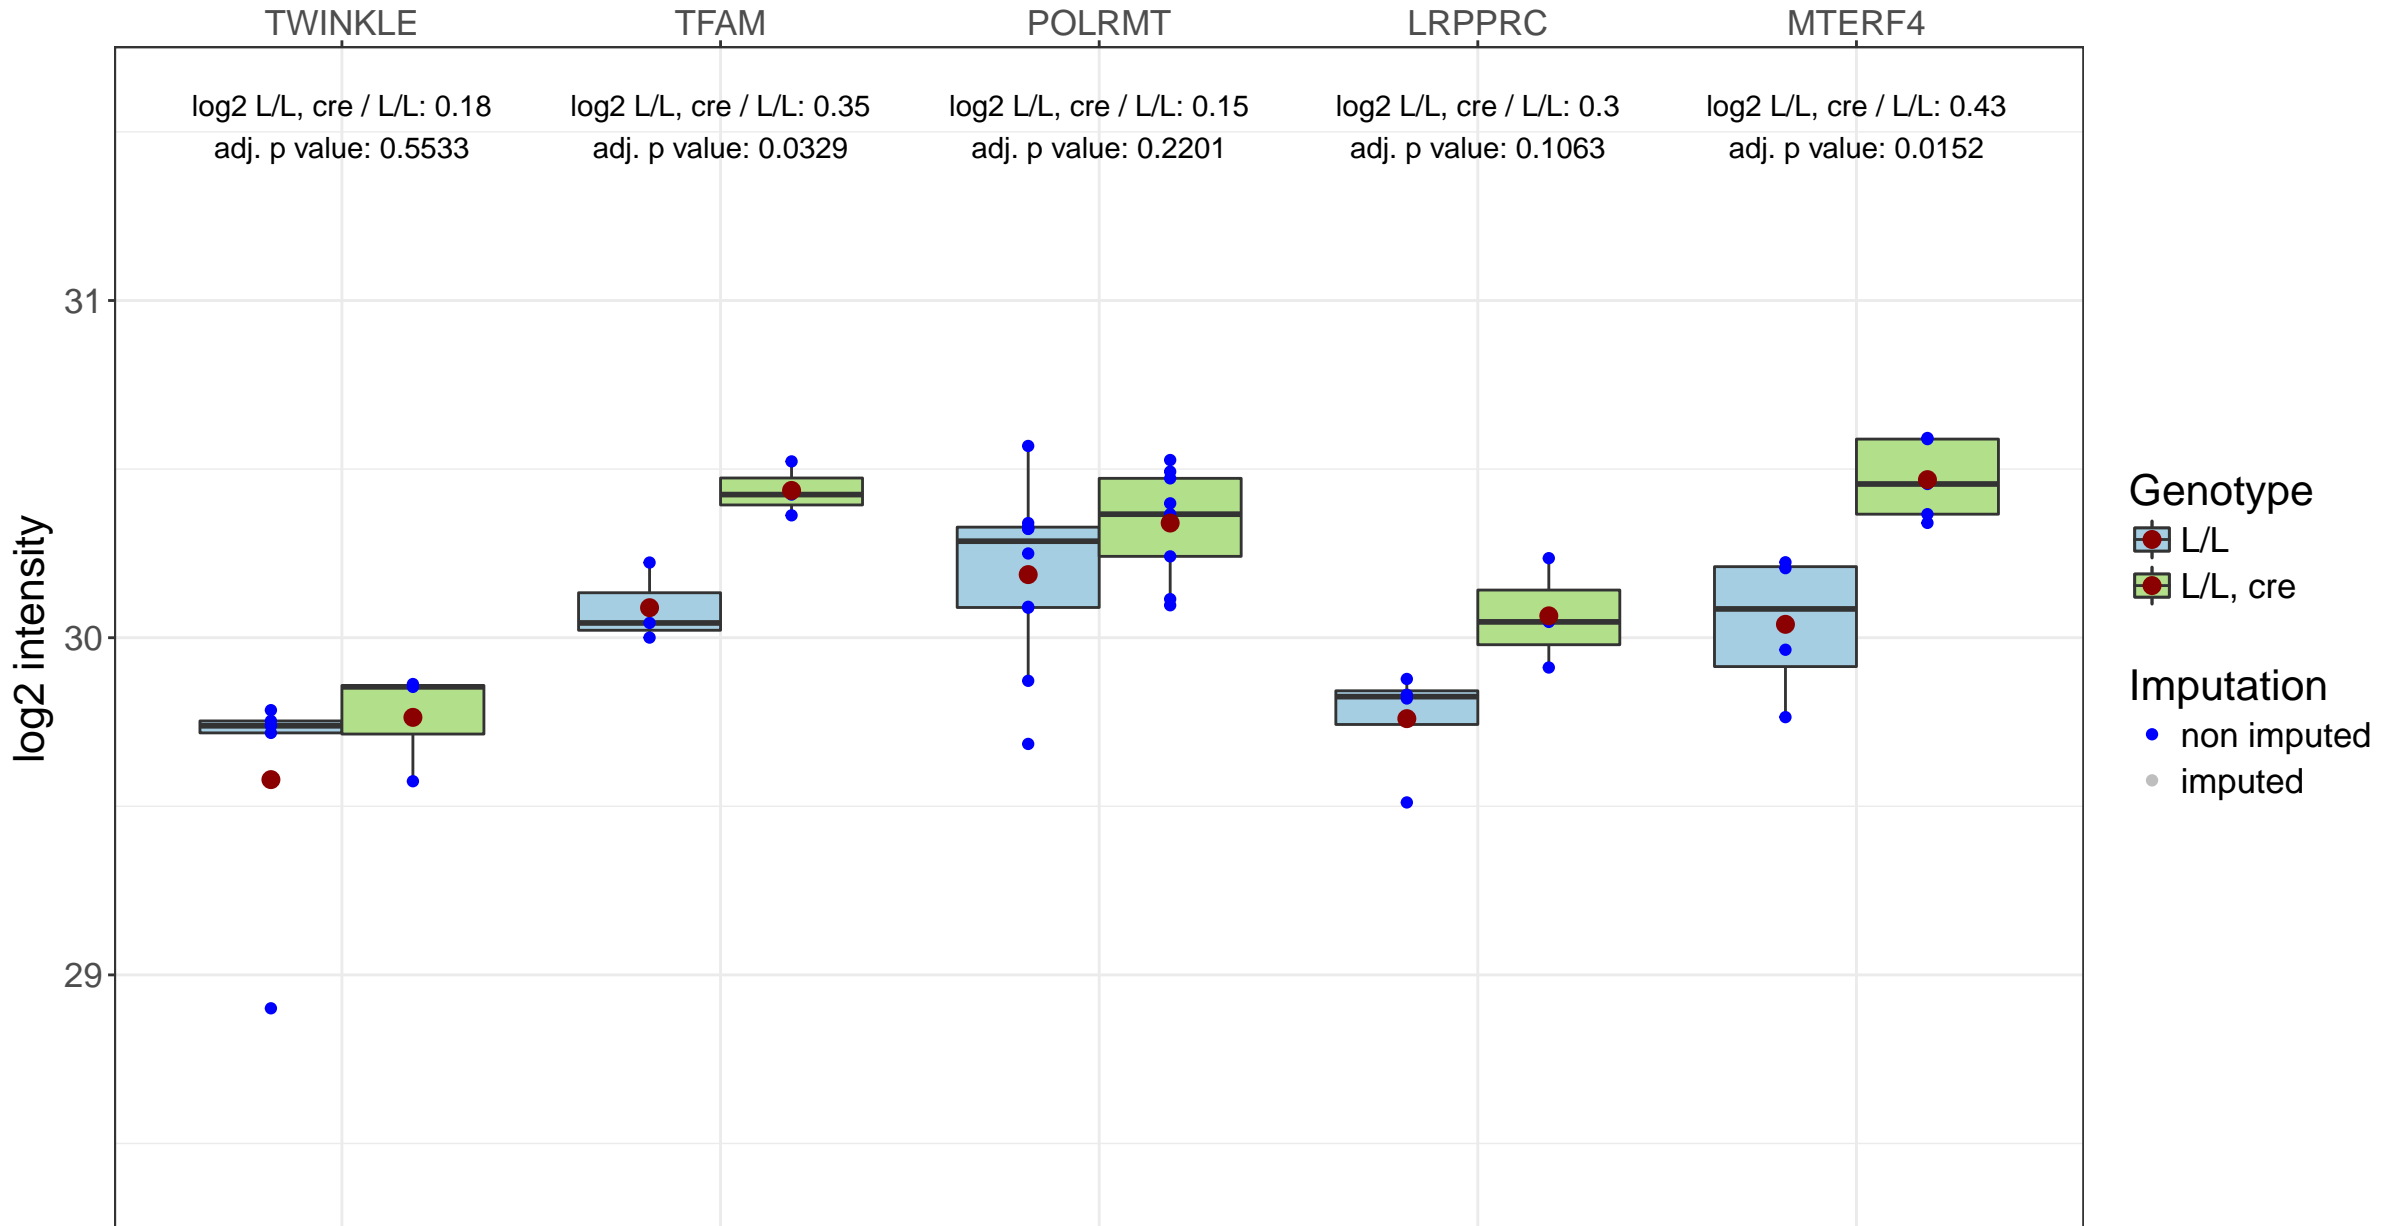

# DHRS1 / Q99L04

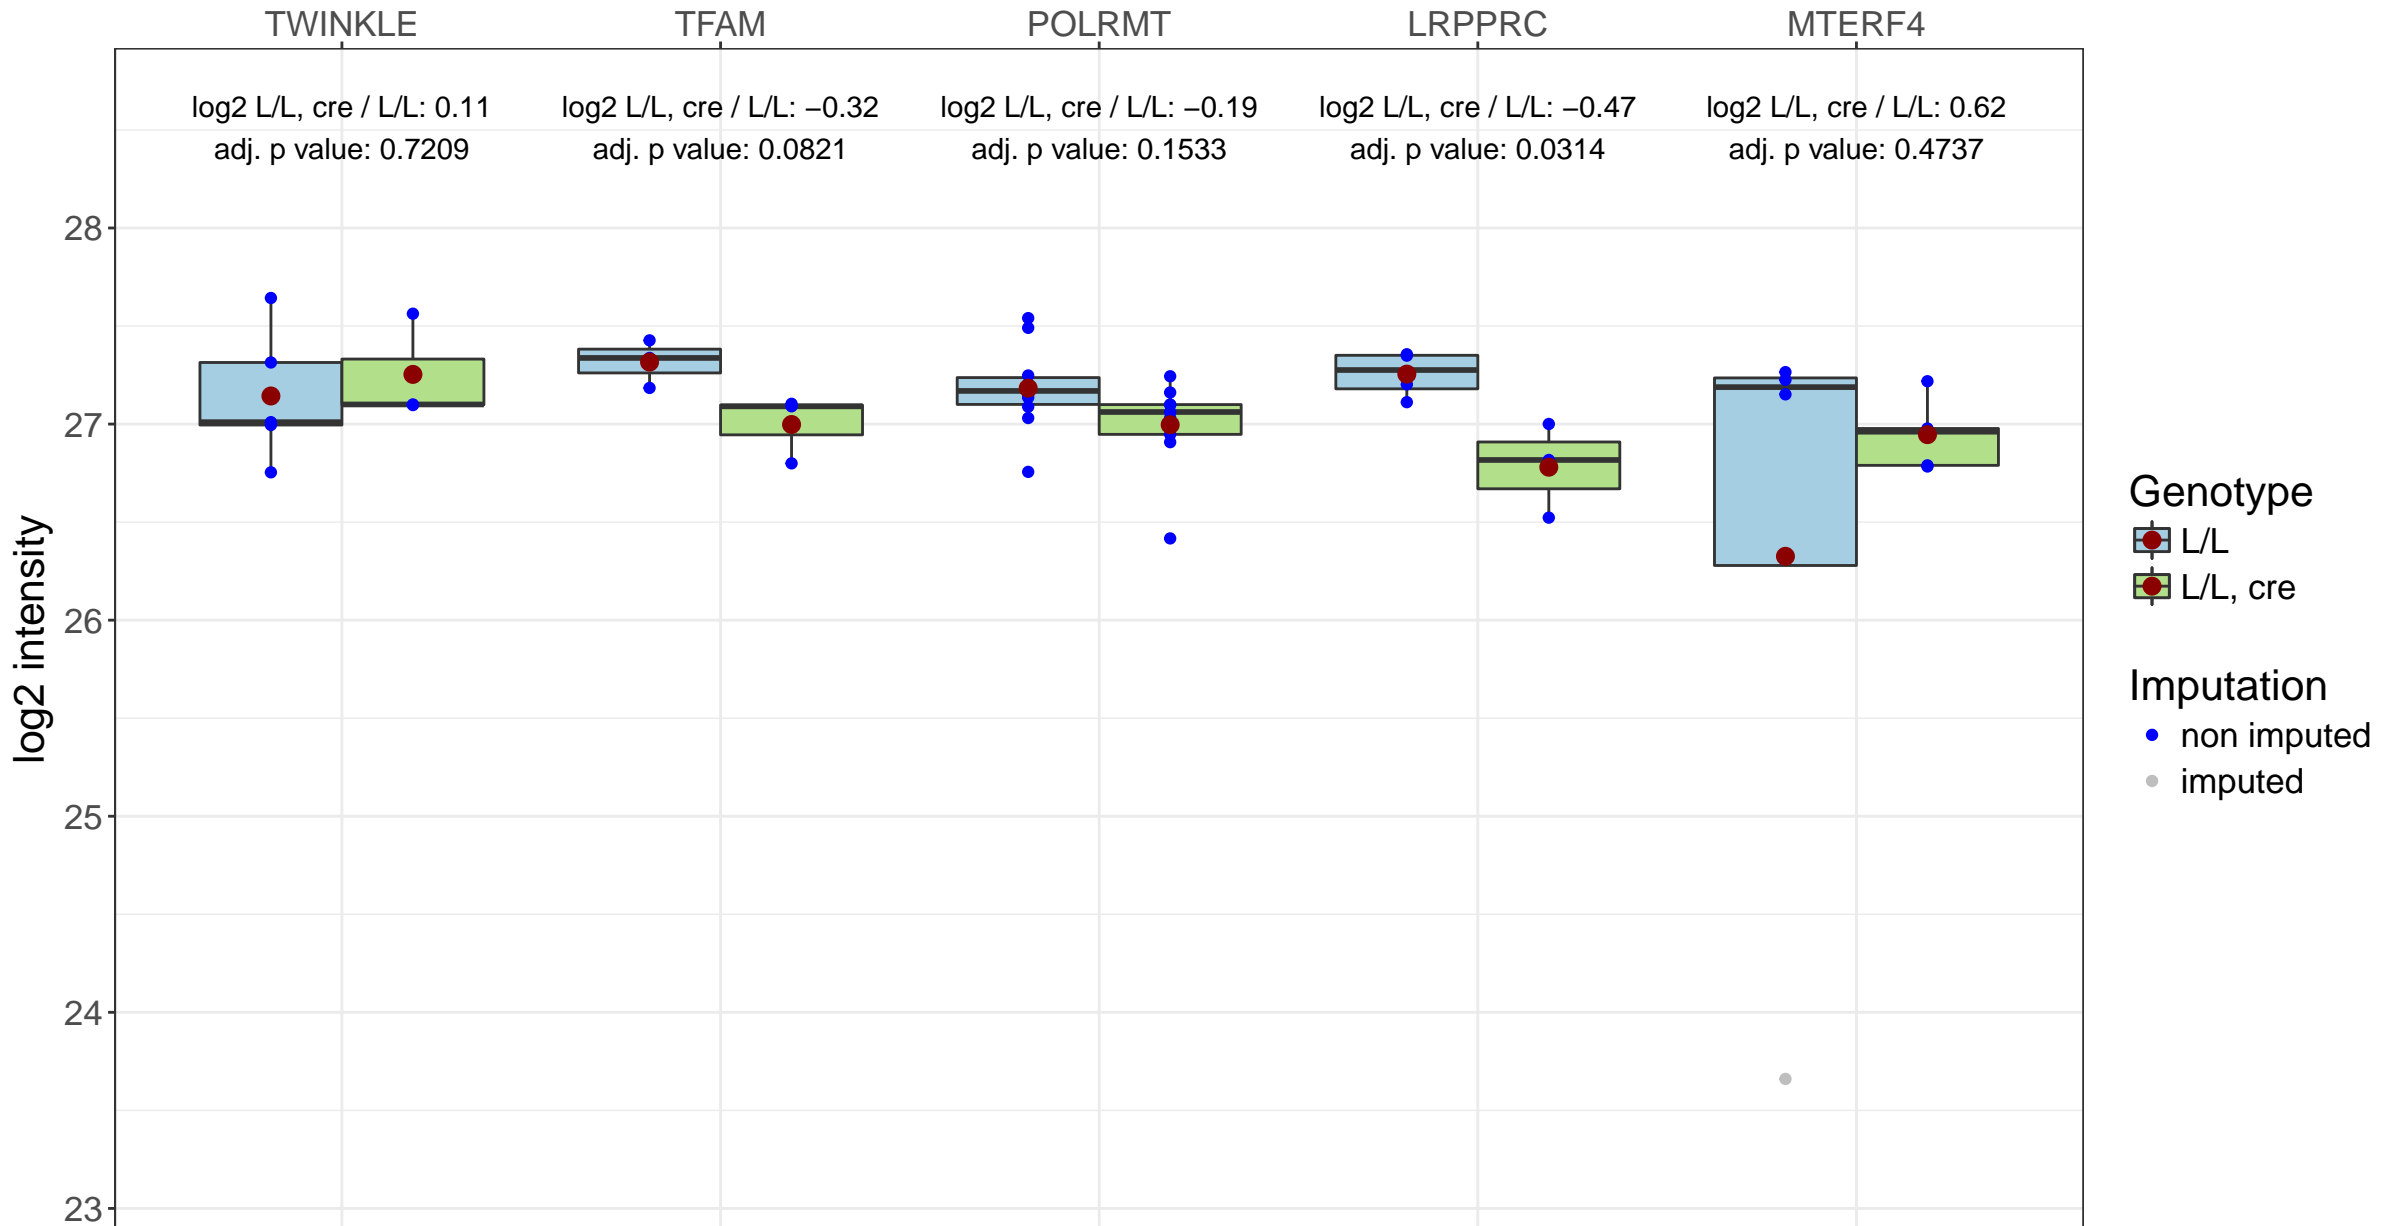

# DHRS4 / Q99LB2

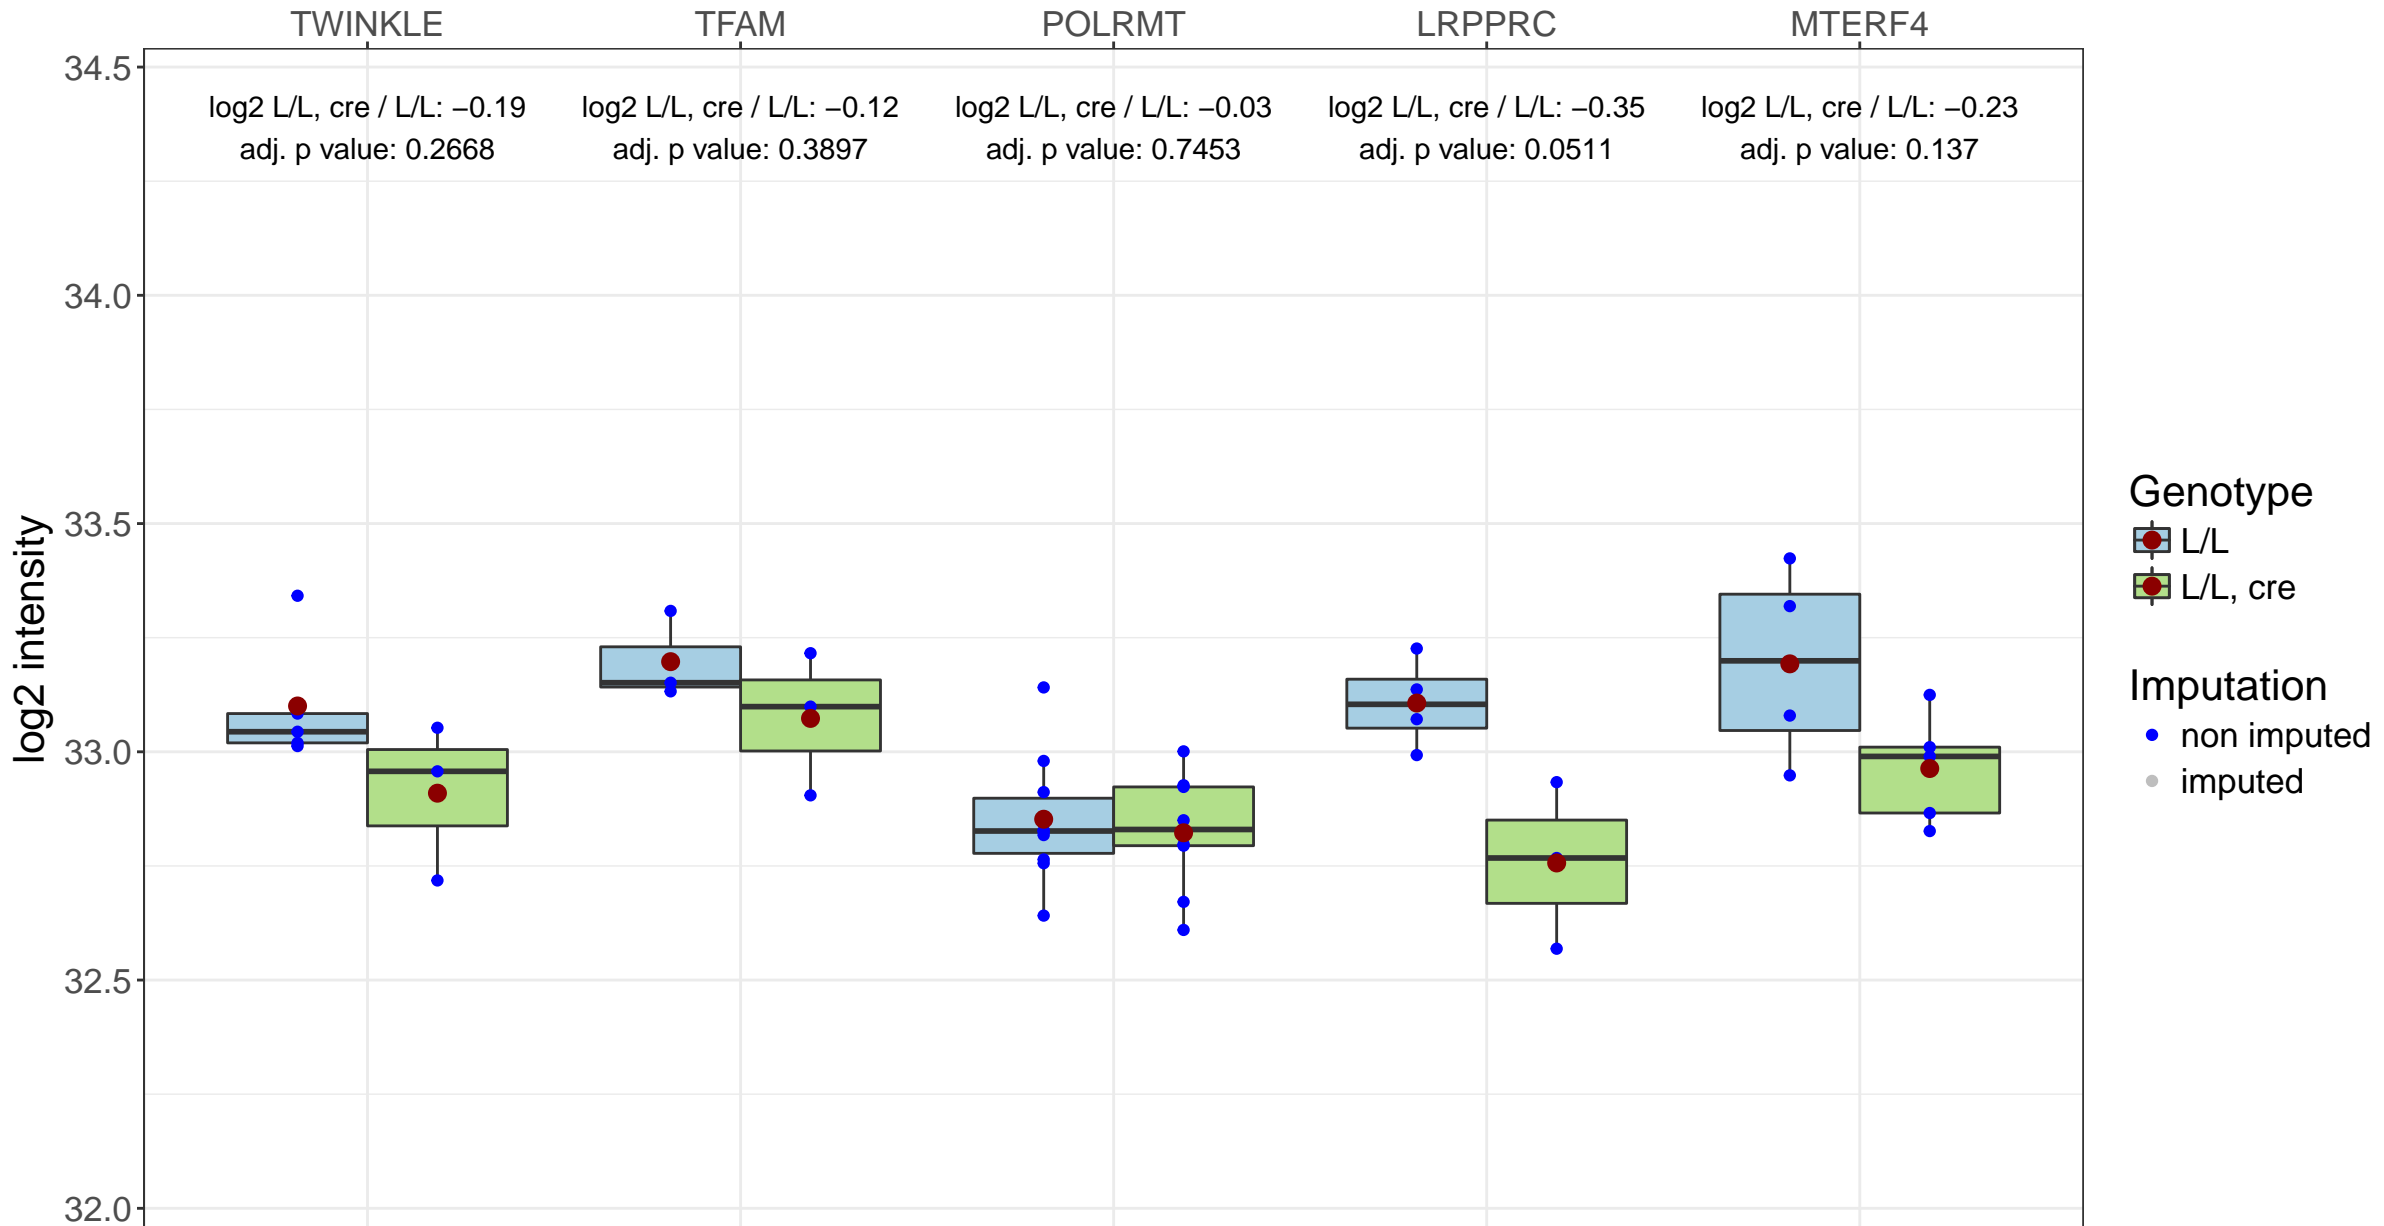

# DHRS7B / Z4YKT6

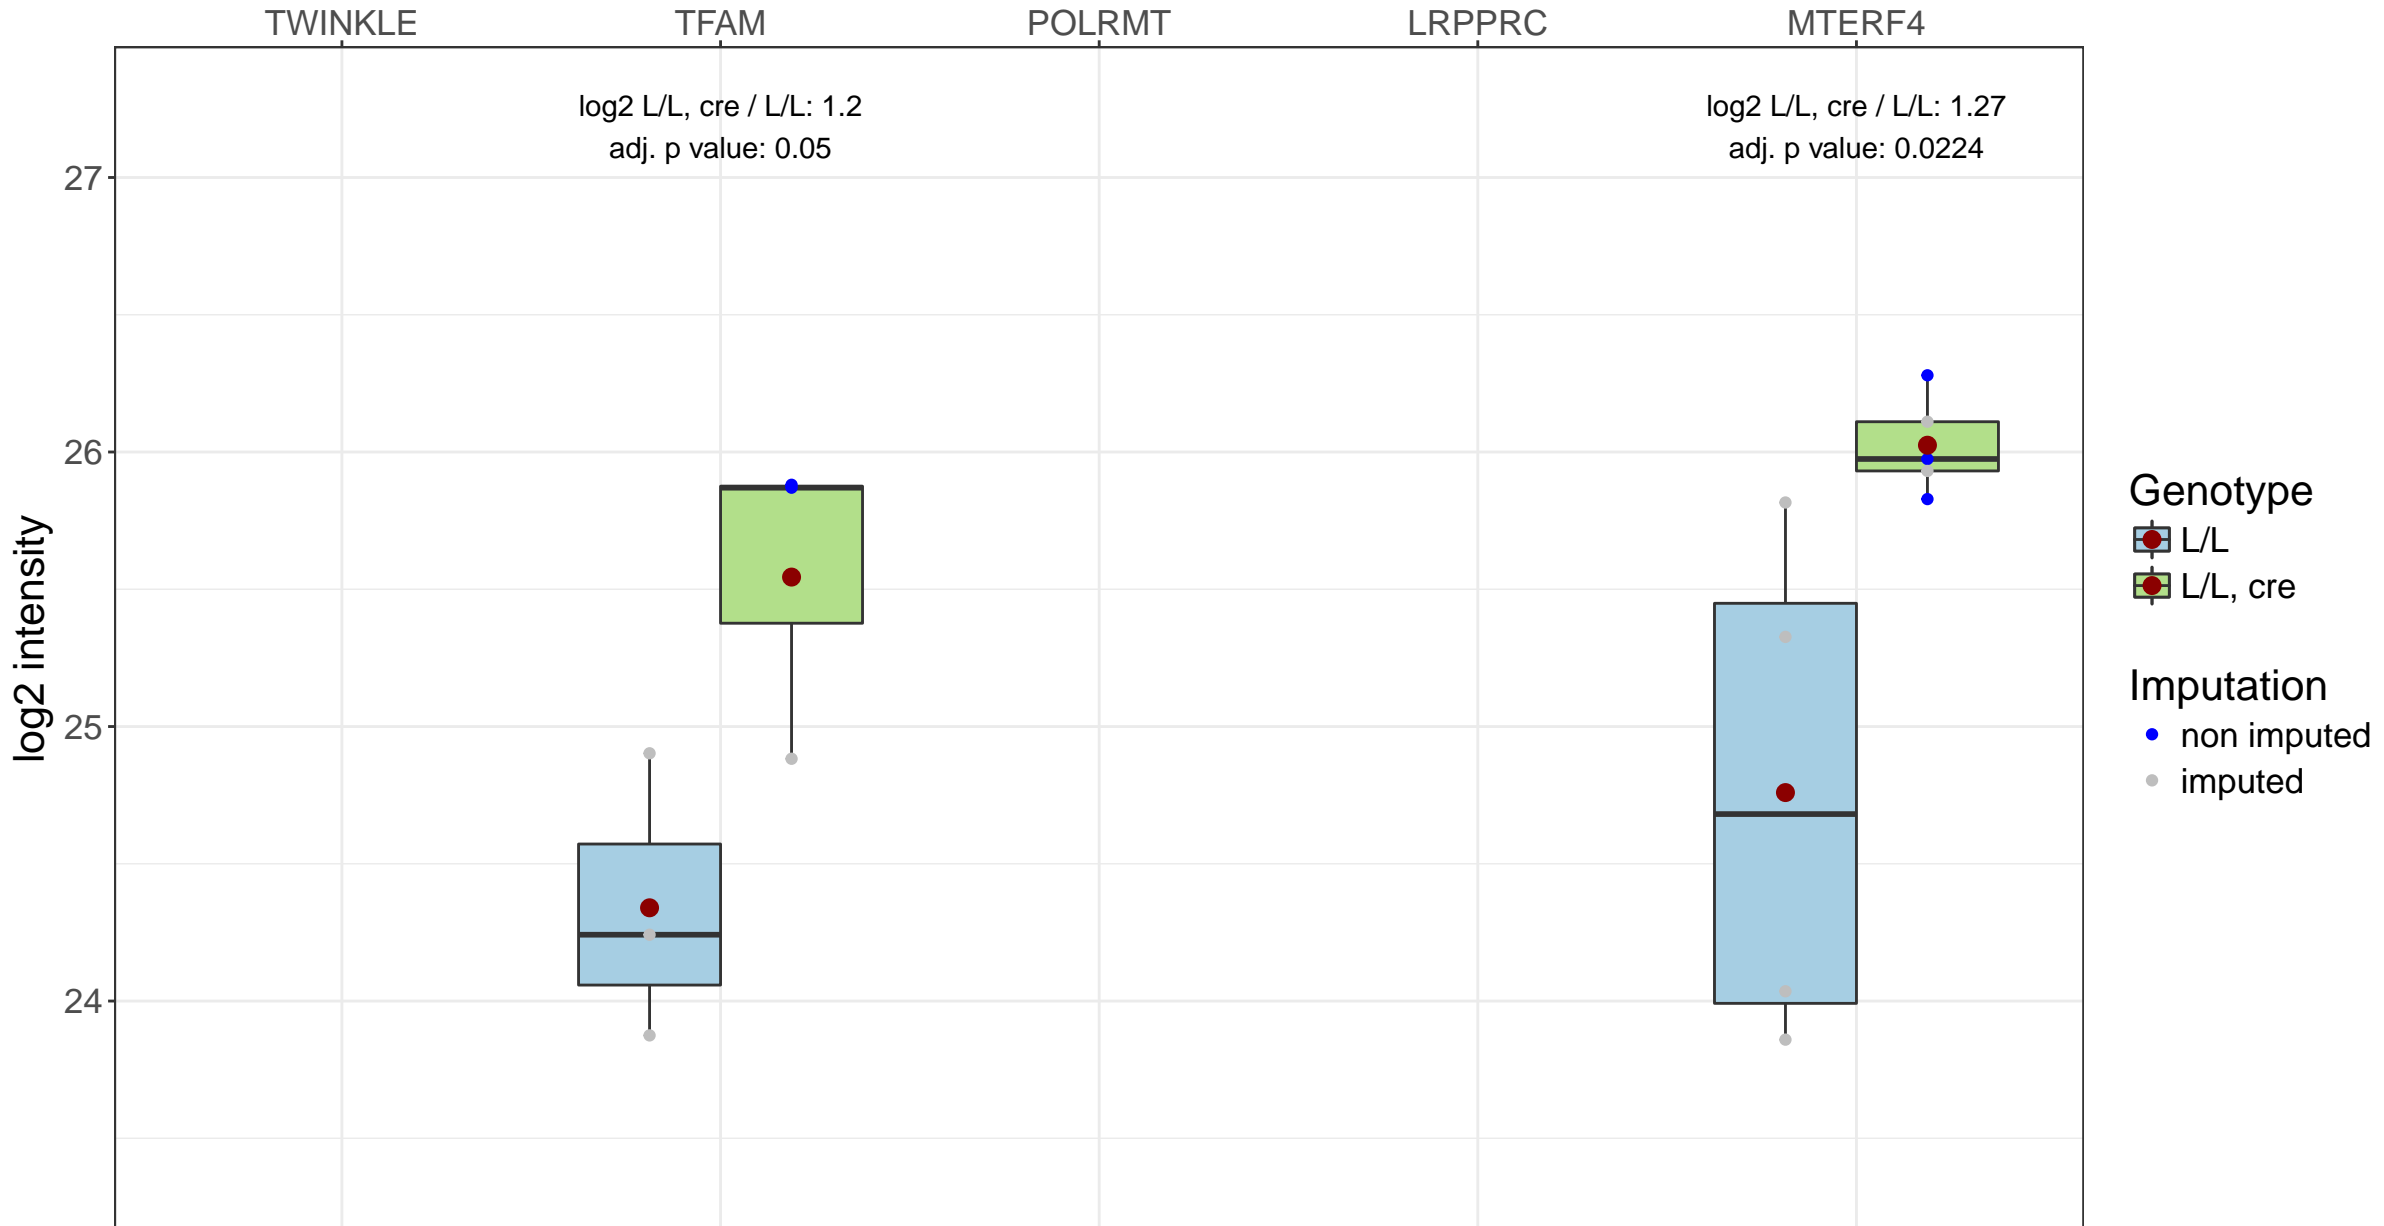

# DHX30 / D3Z2J3

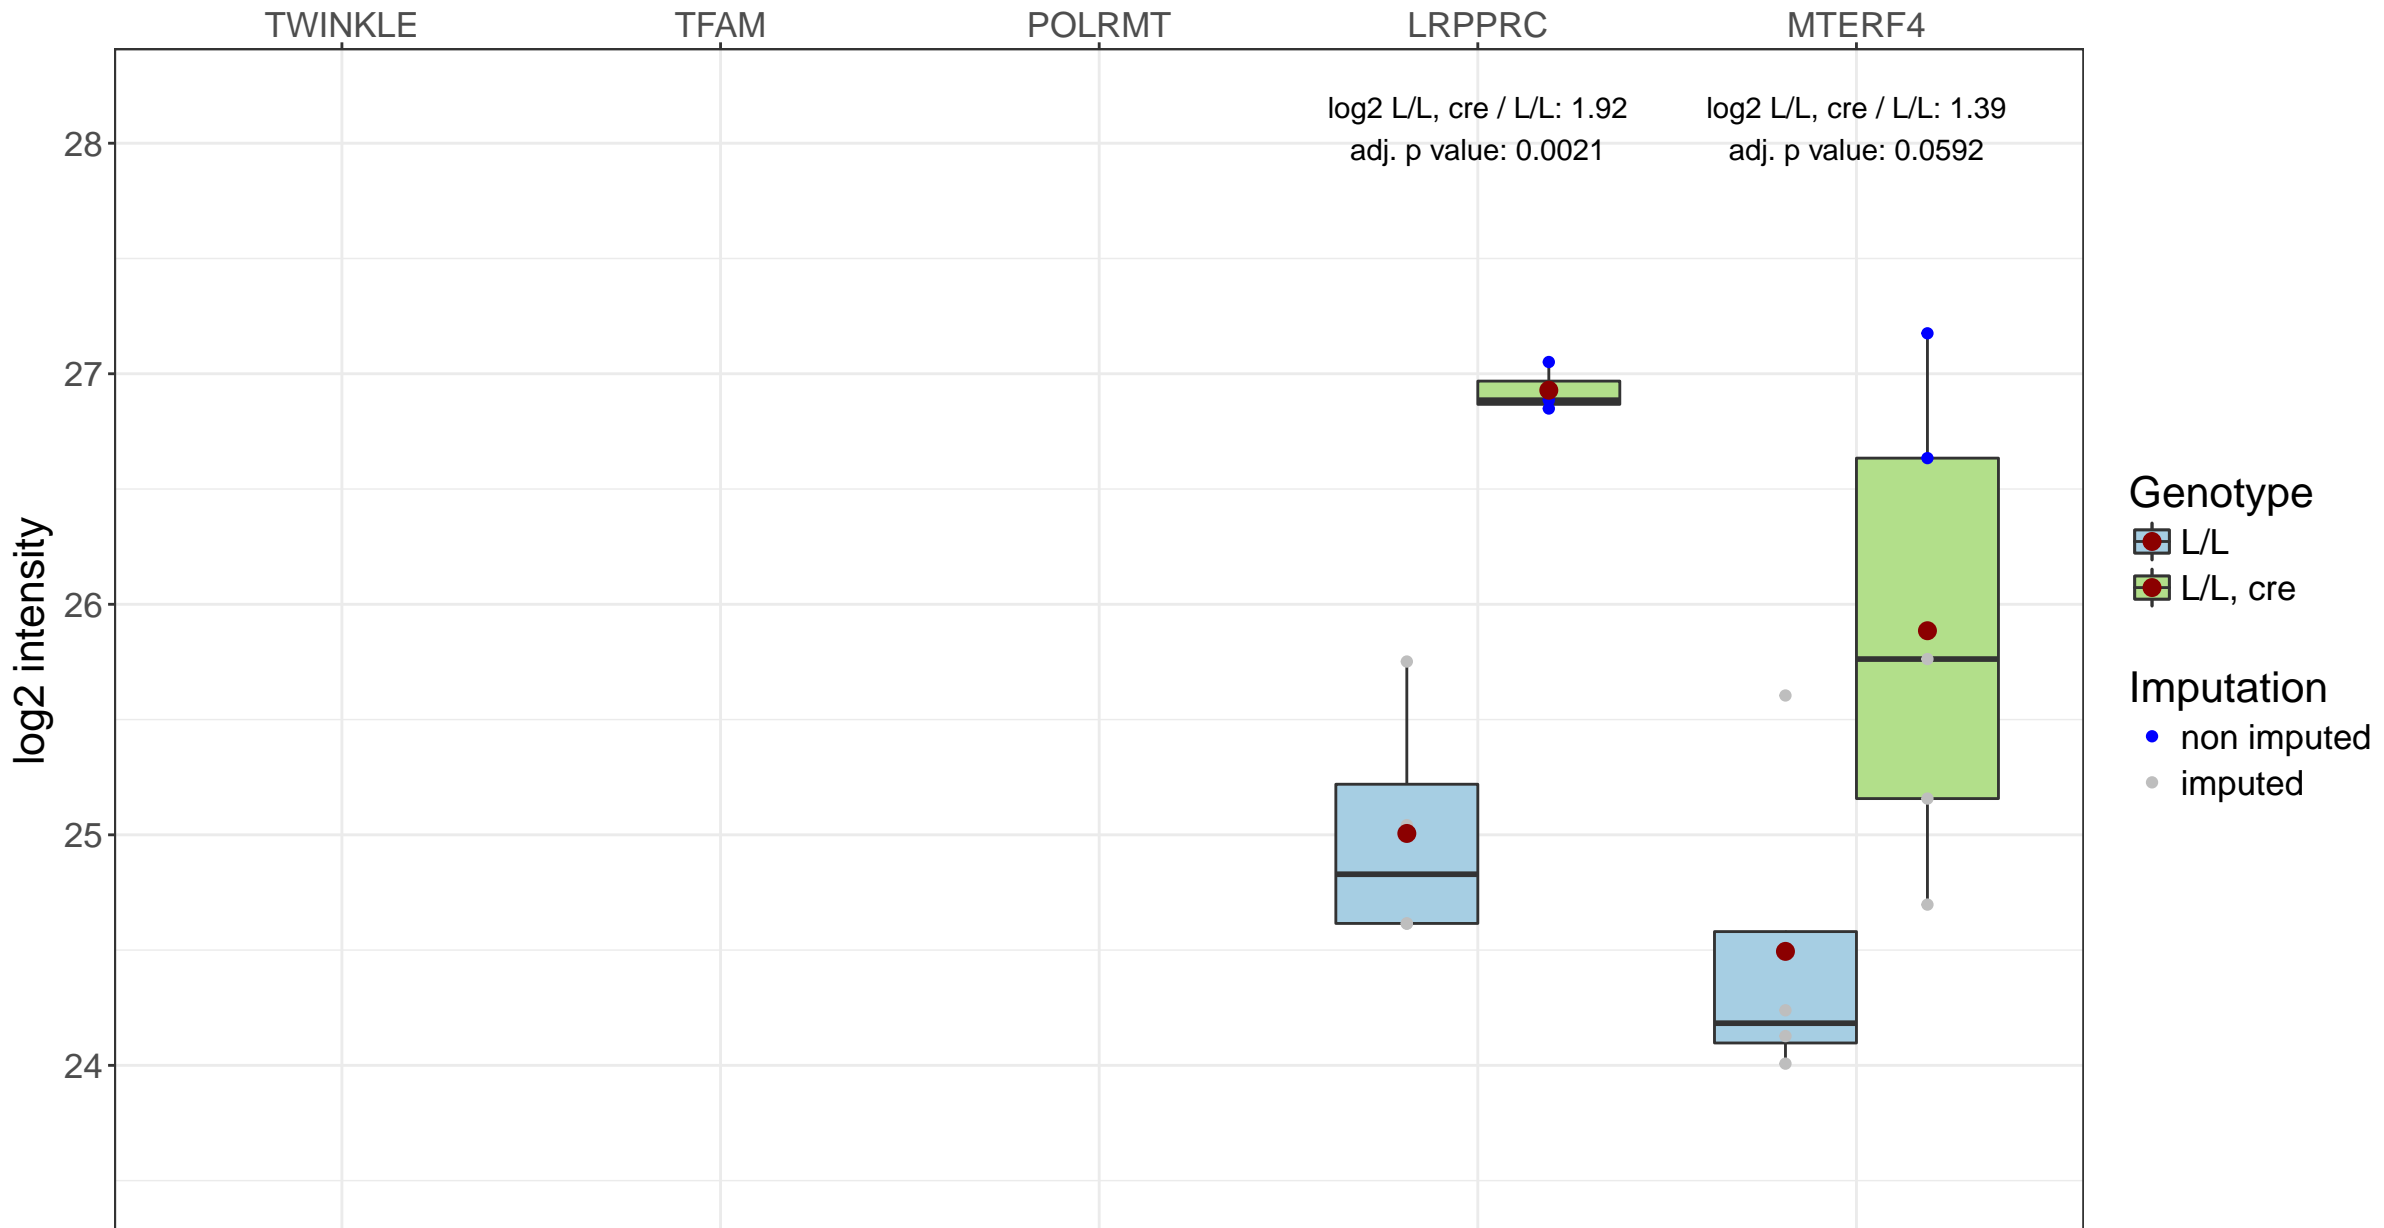

# DIABLO / Q9JIQ3

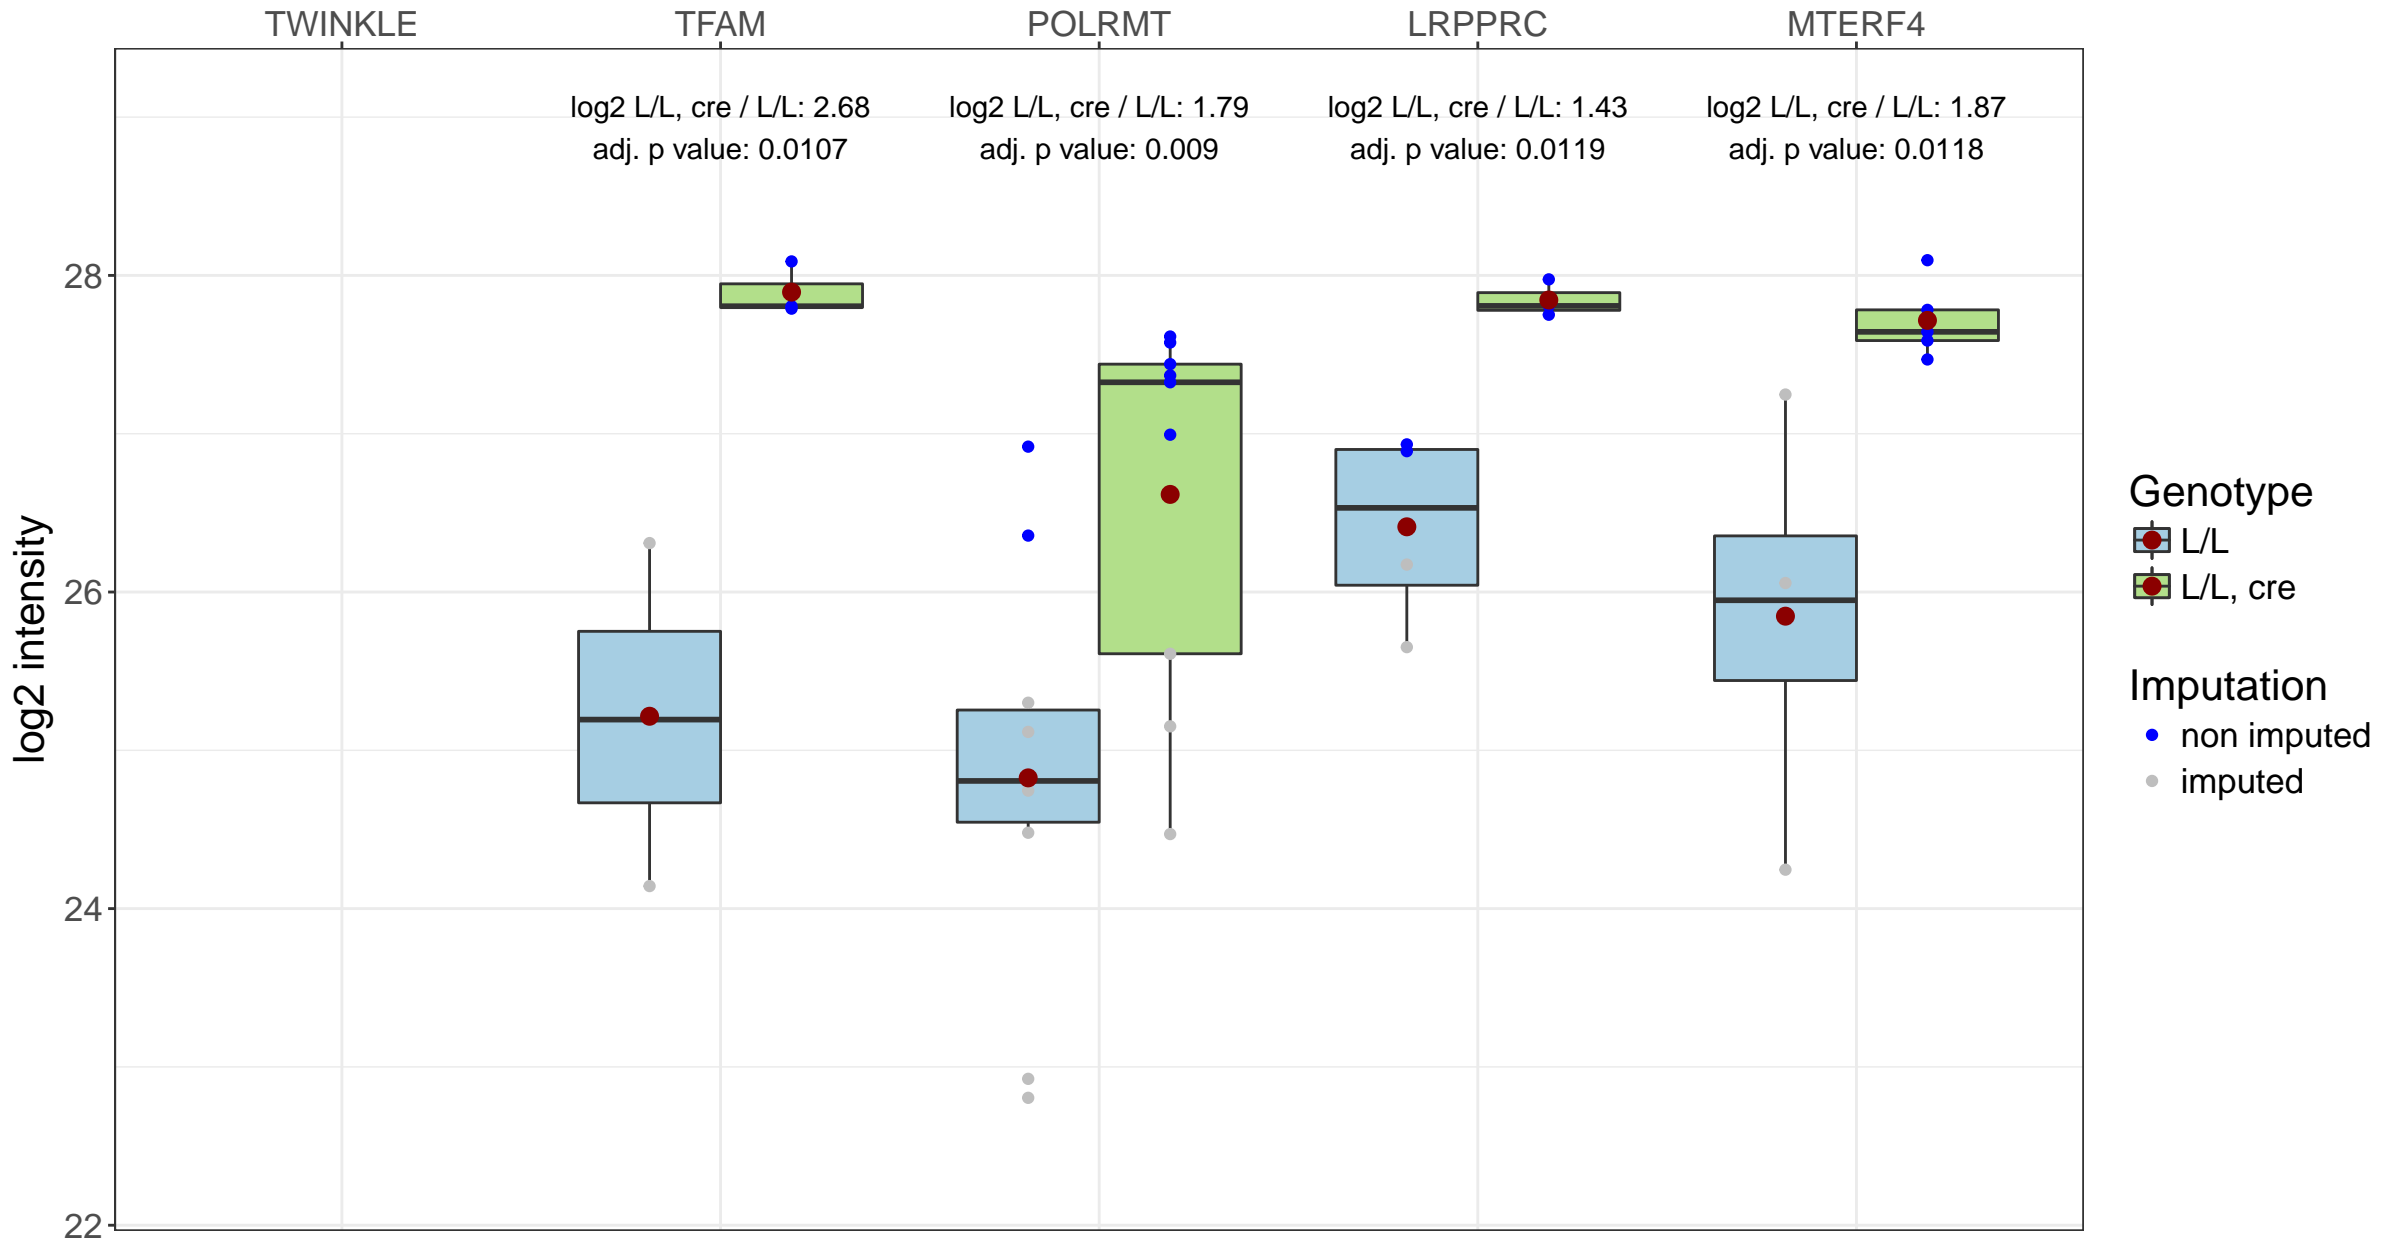

# DLAT / Q8BMF4

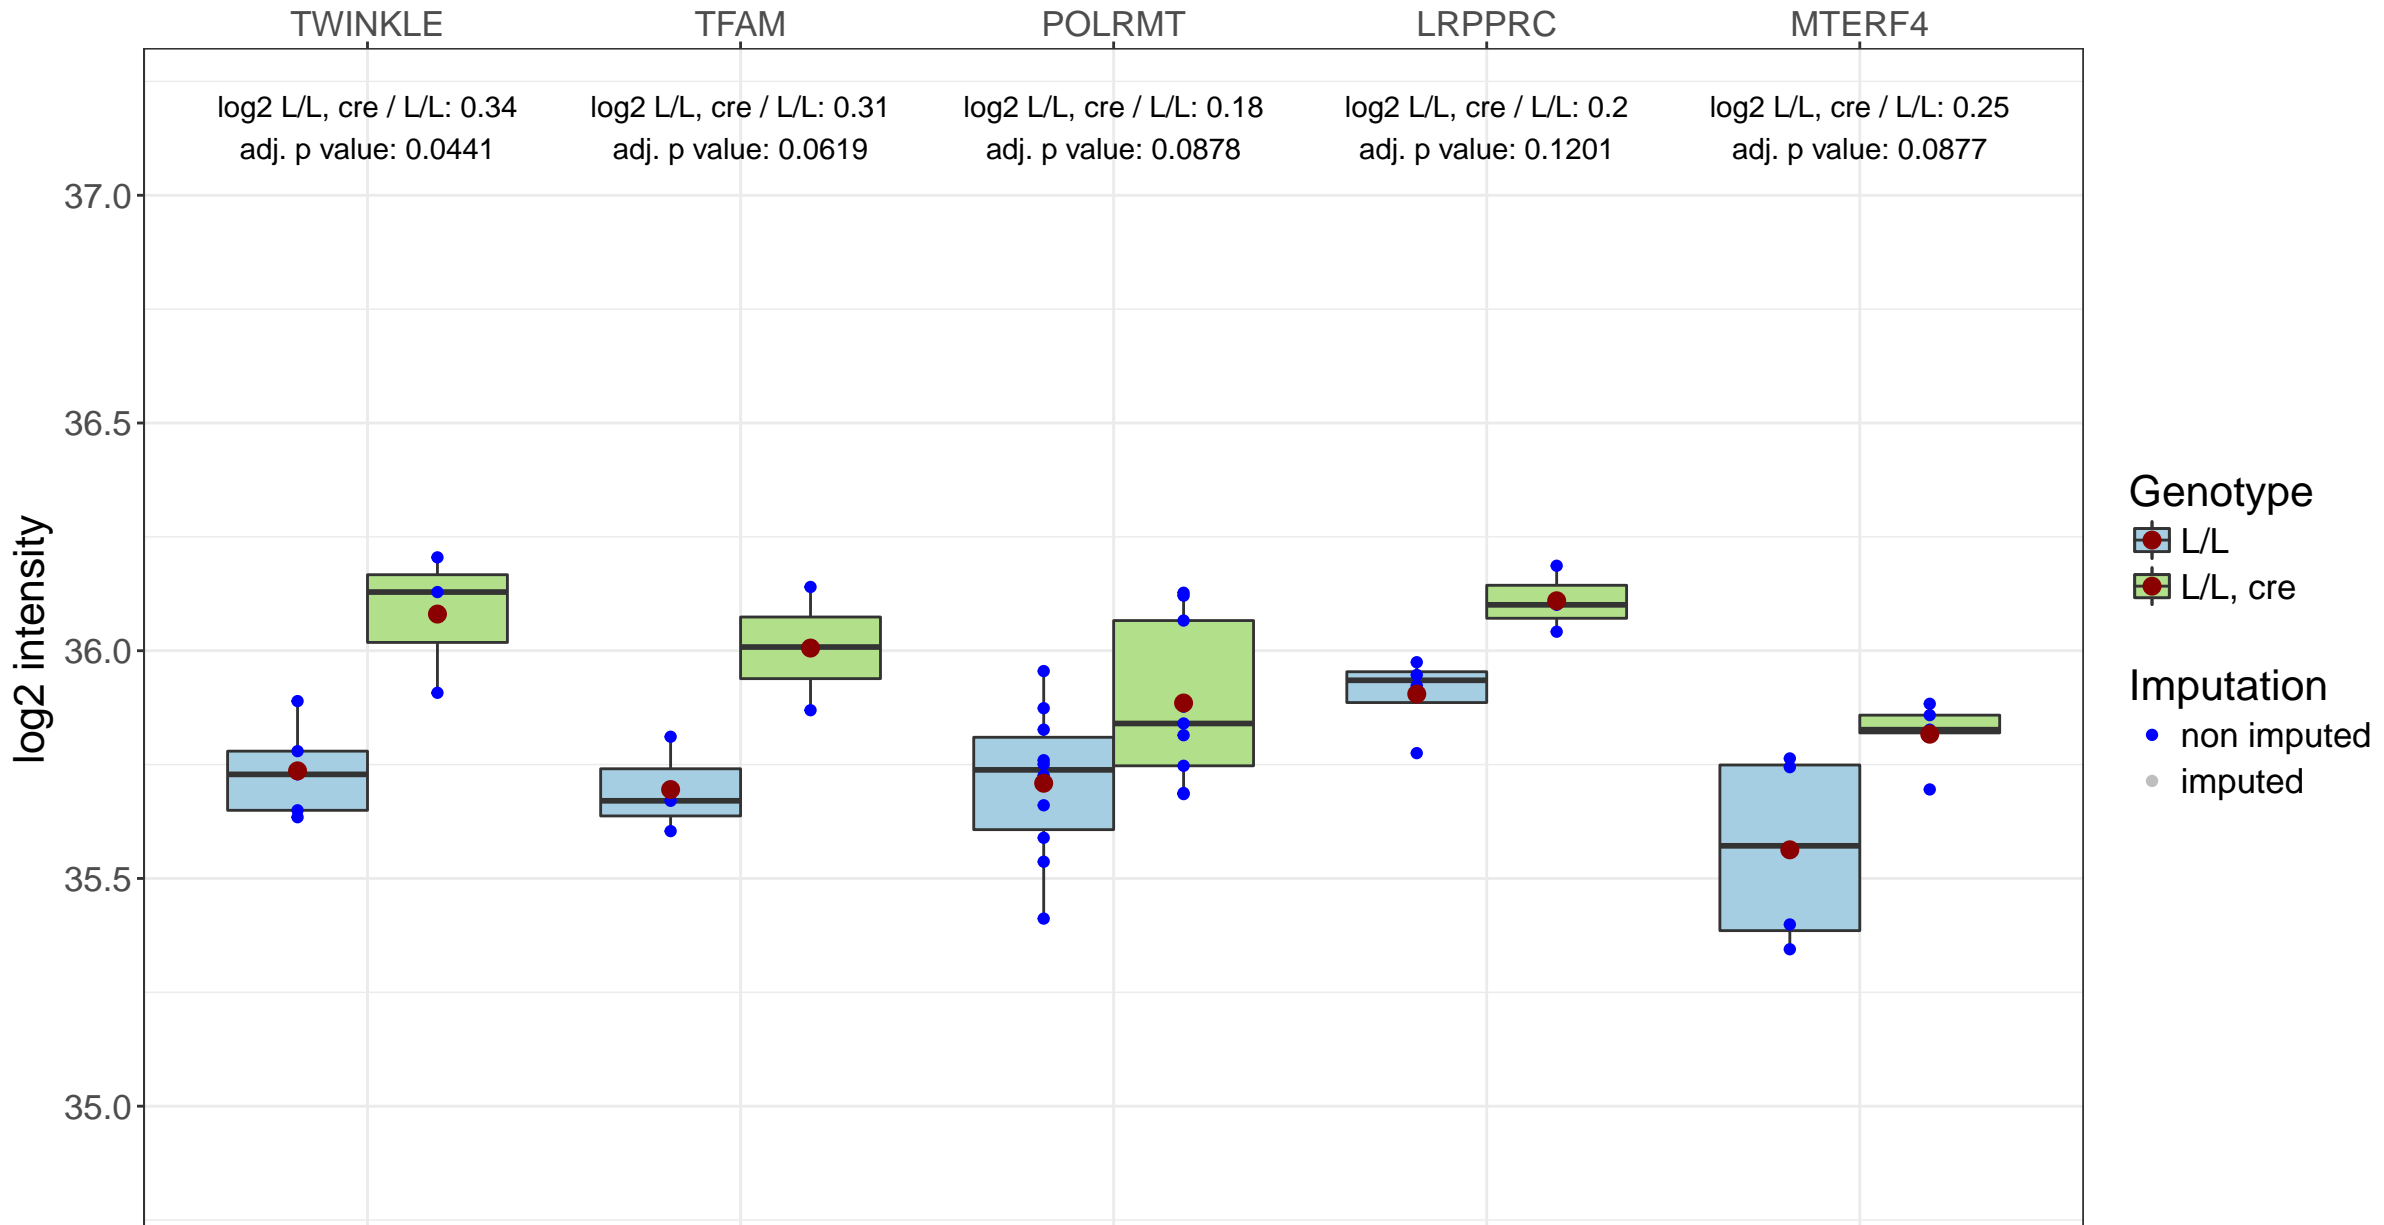

# DLD / O08749

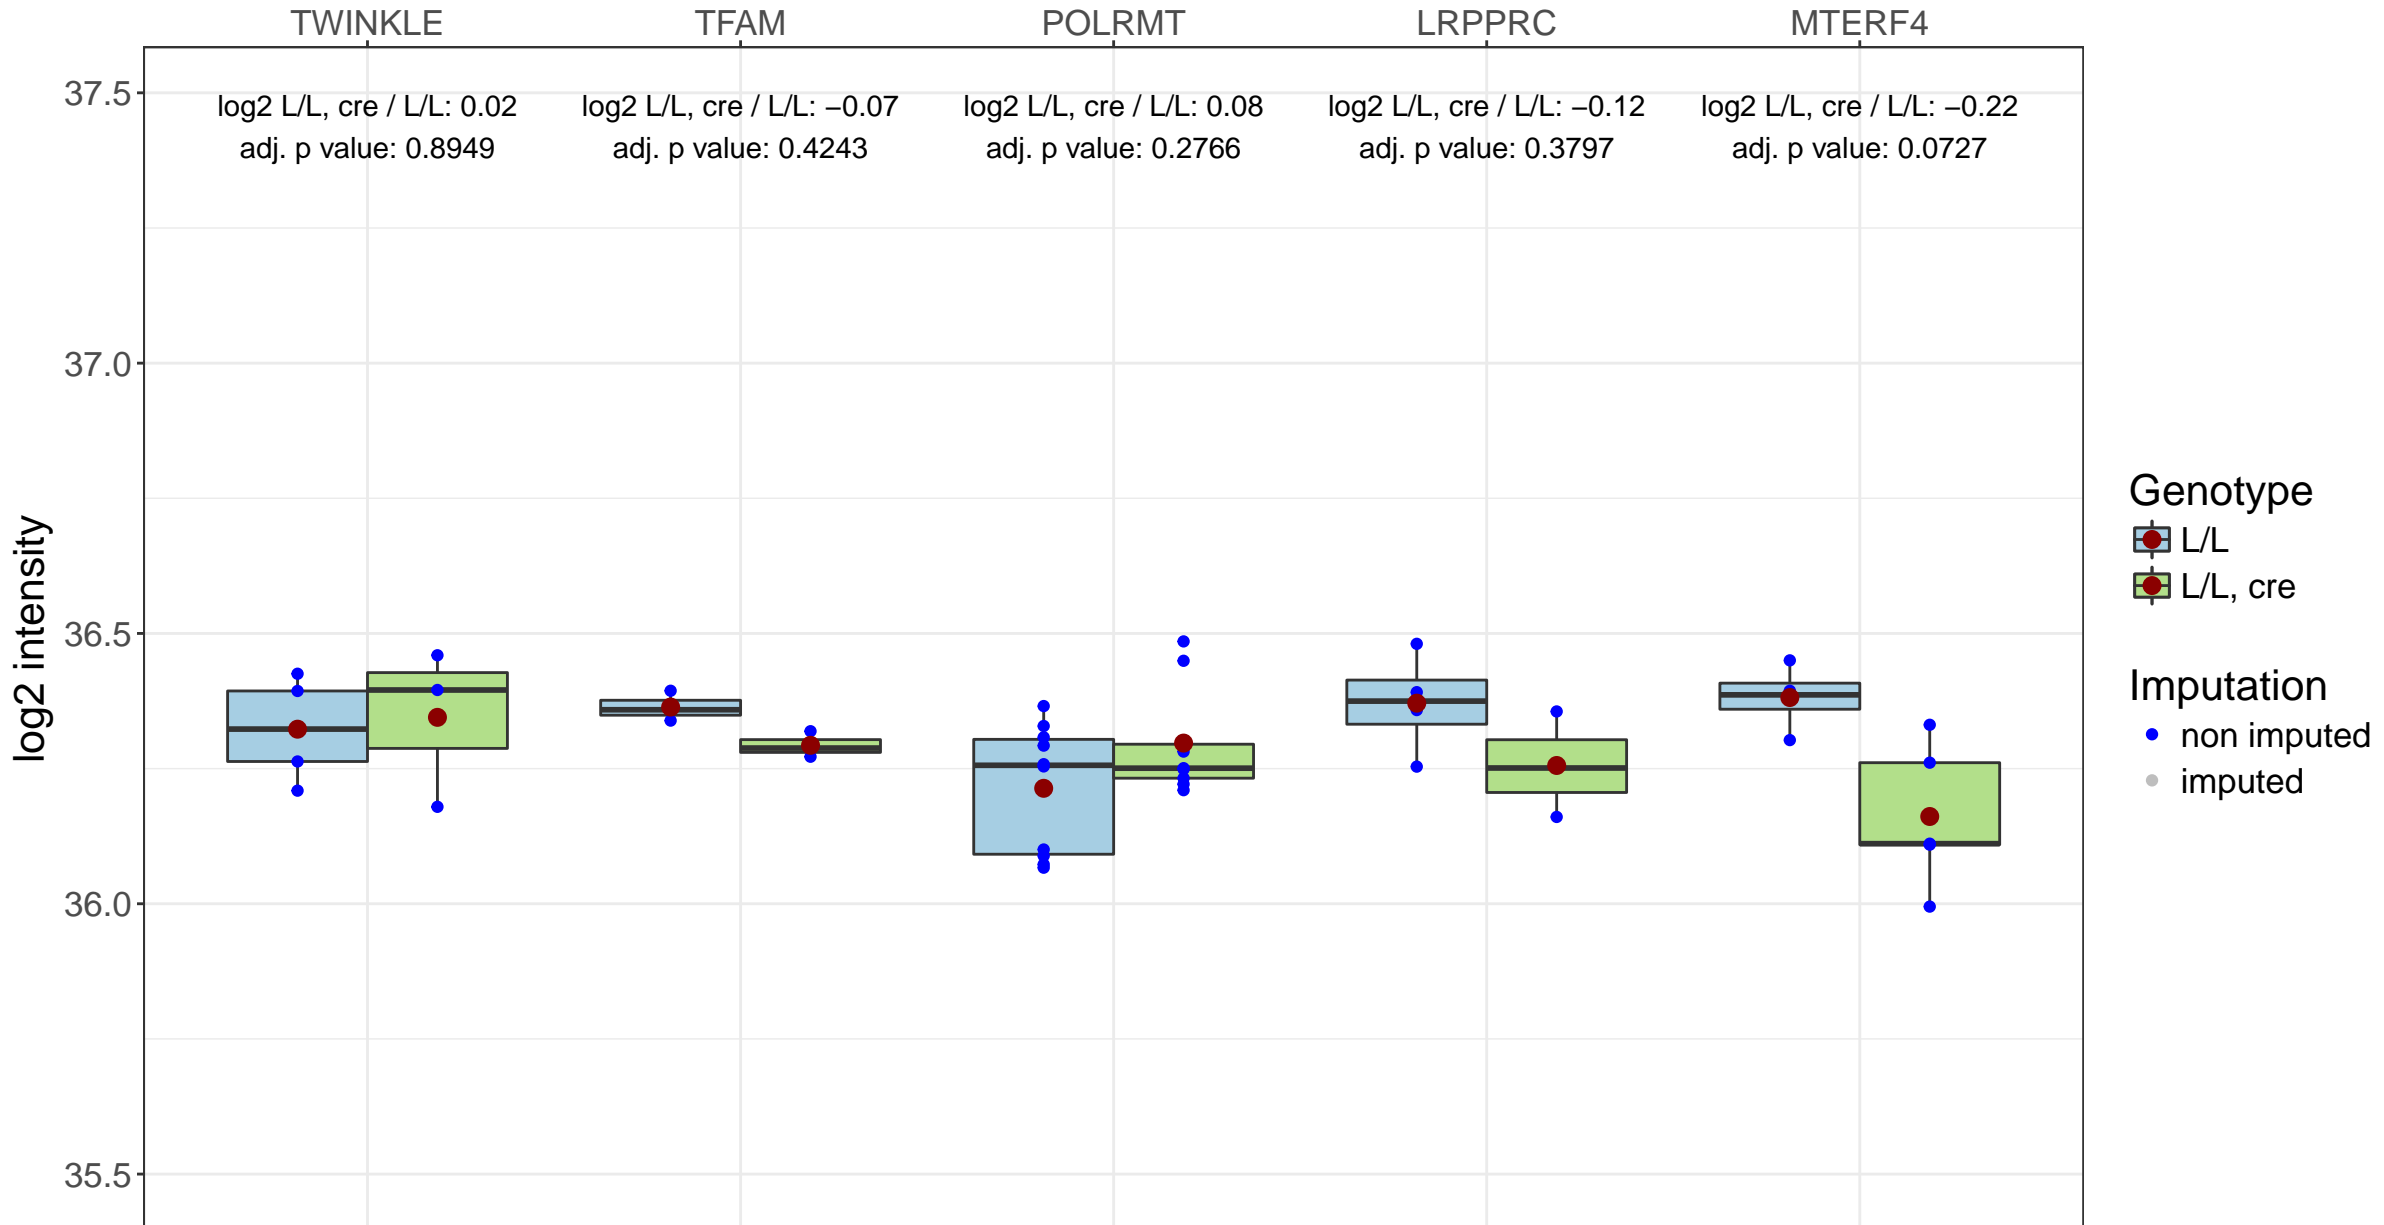



# DLST / Q9D2G2

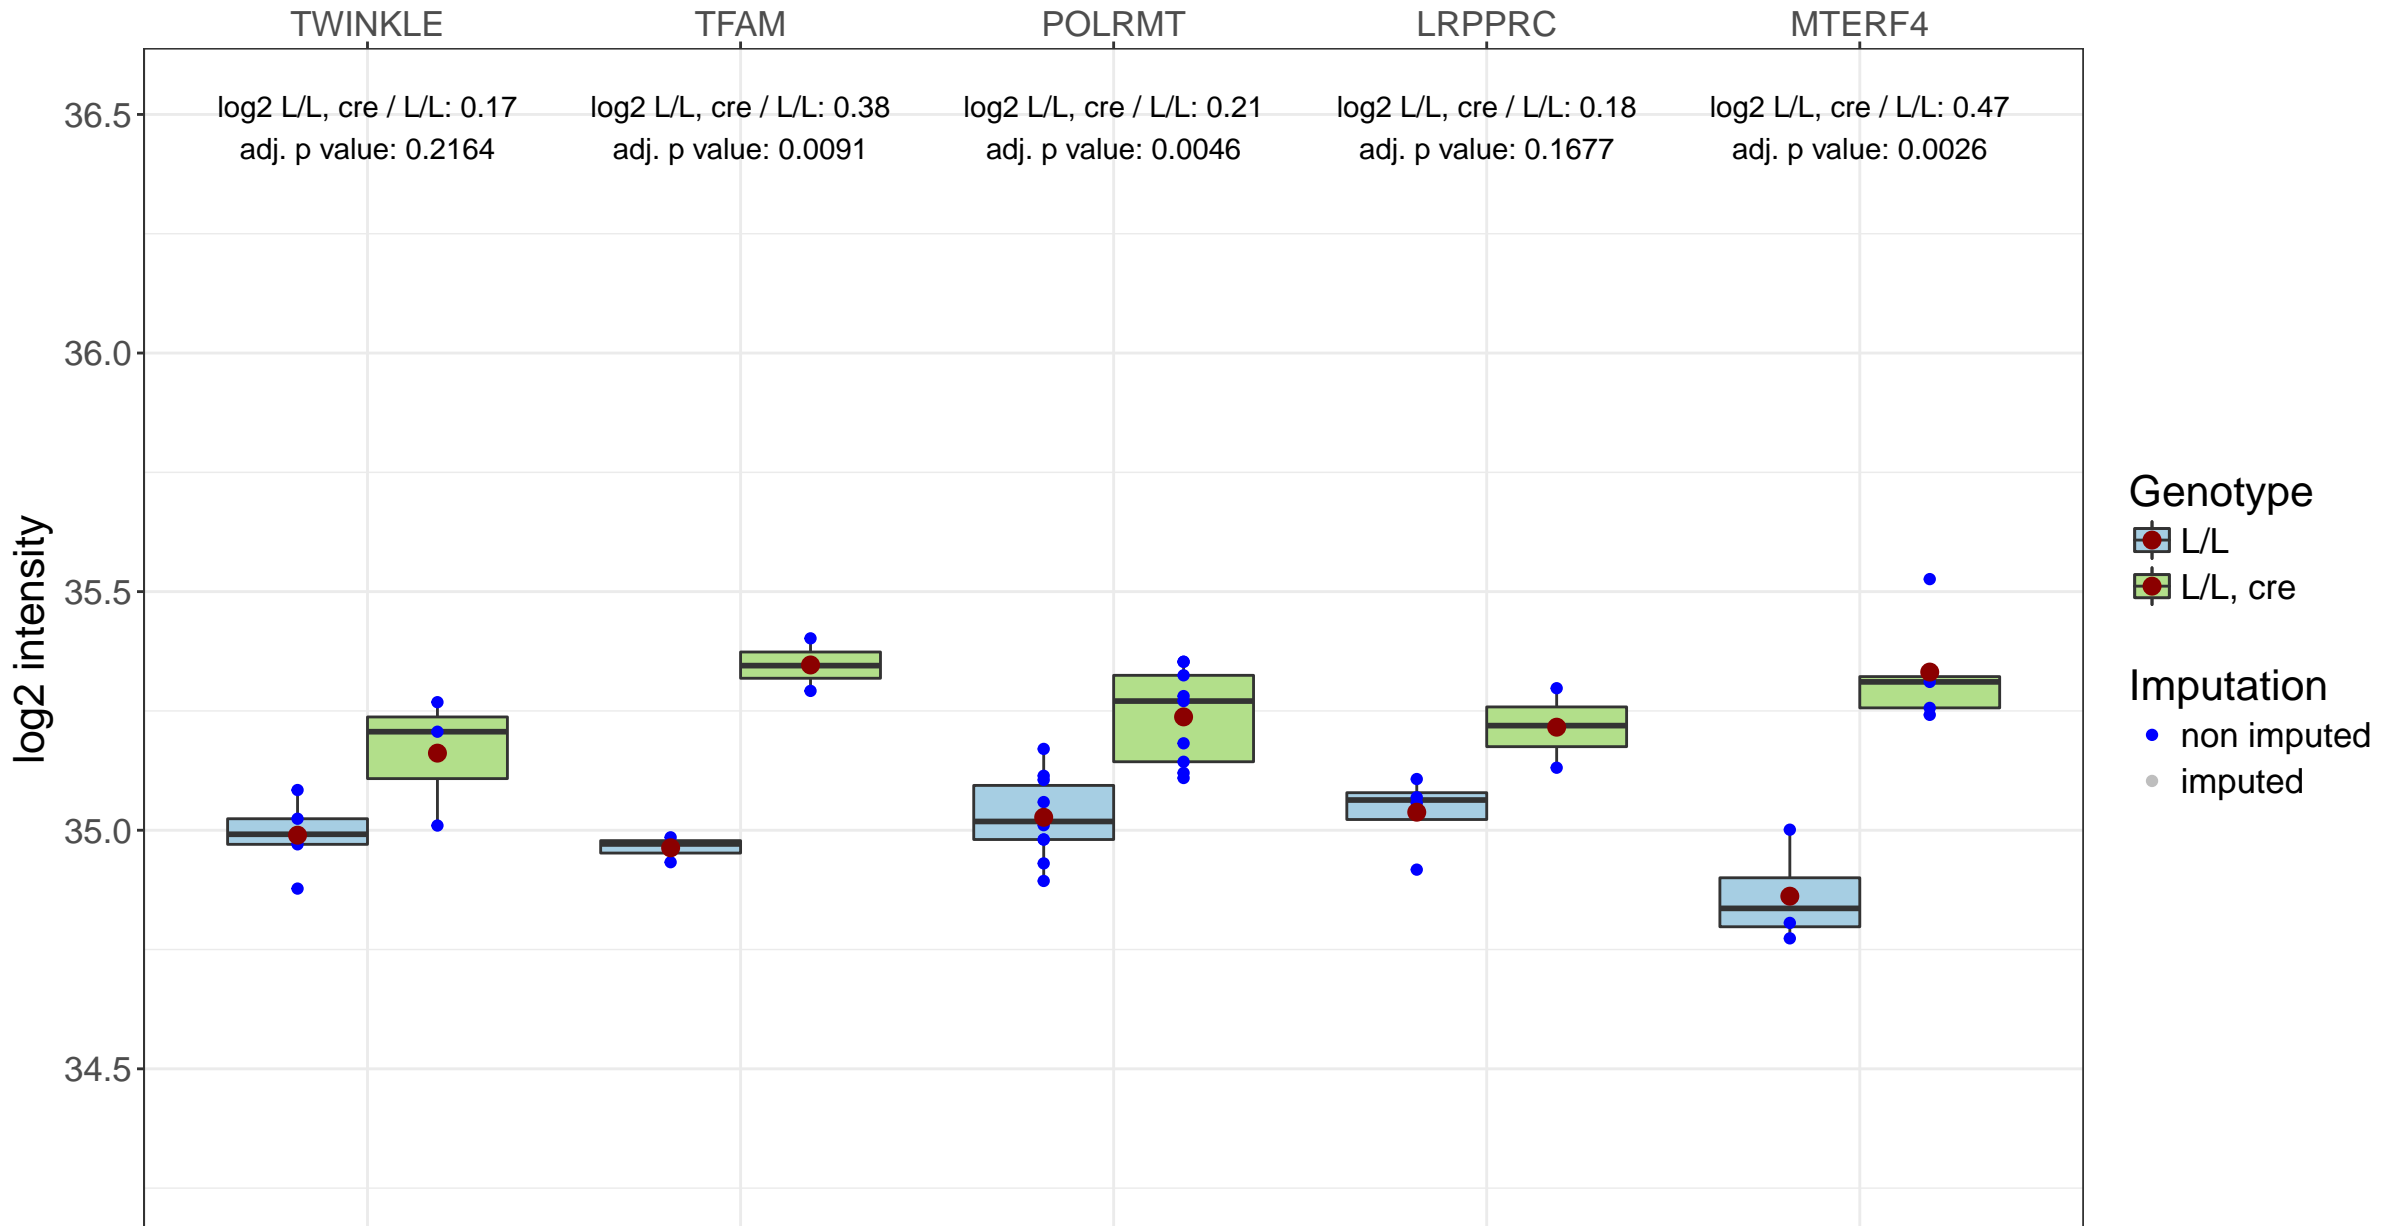

# DNAJA3 / Q99M87

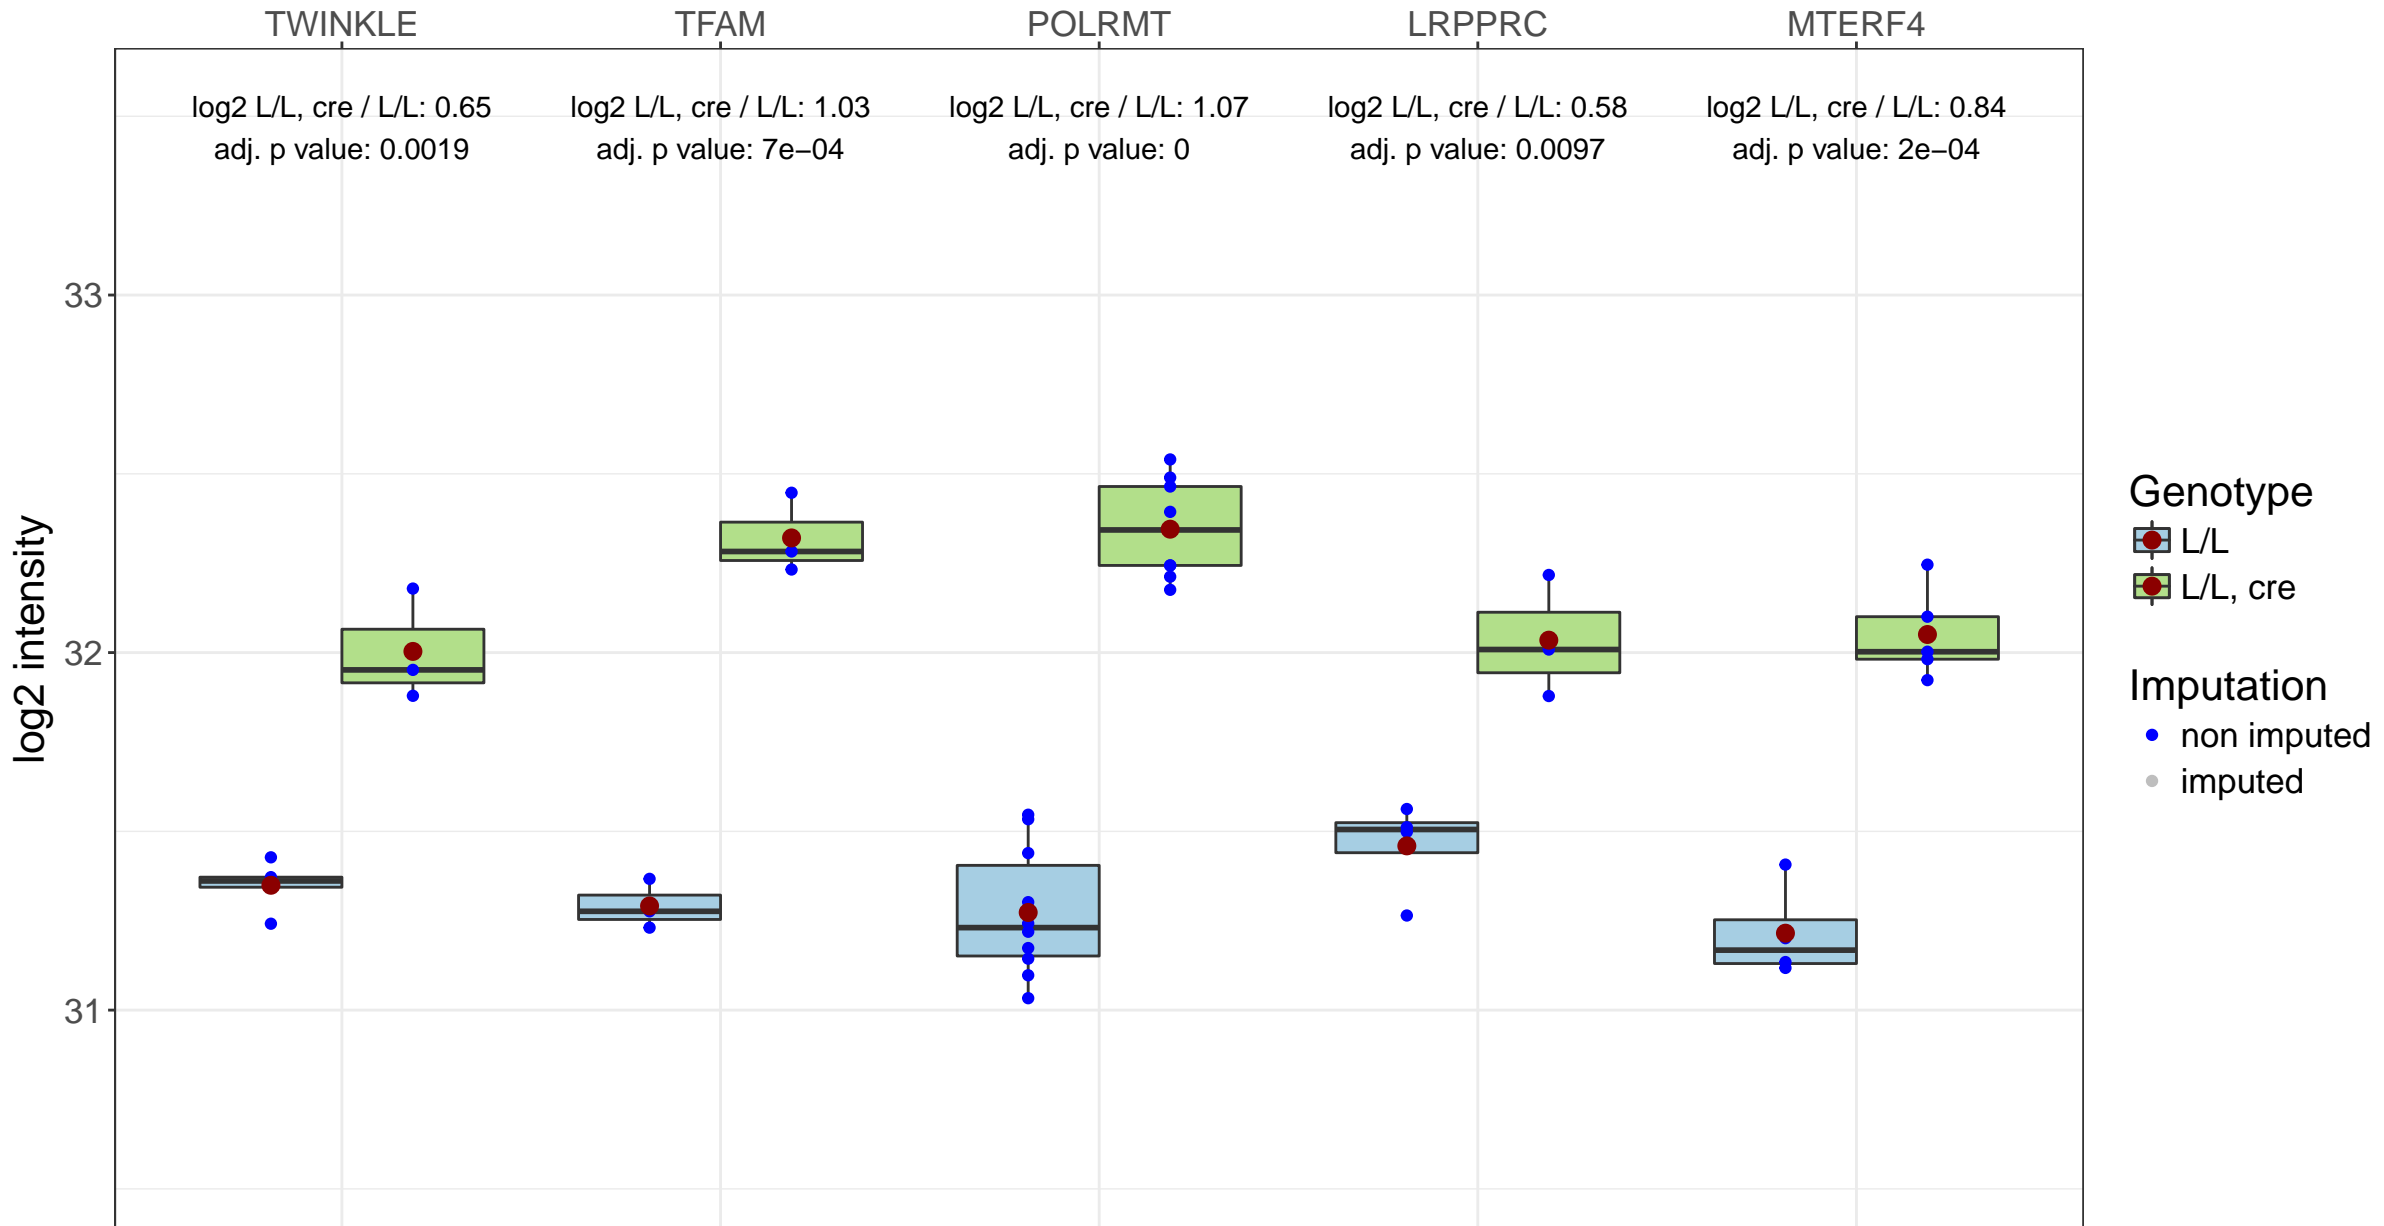

# DNAJC11 / Q5U458

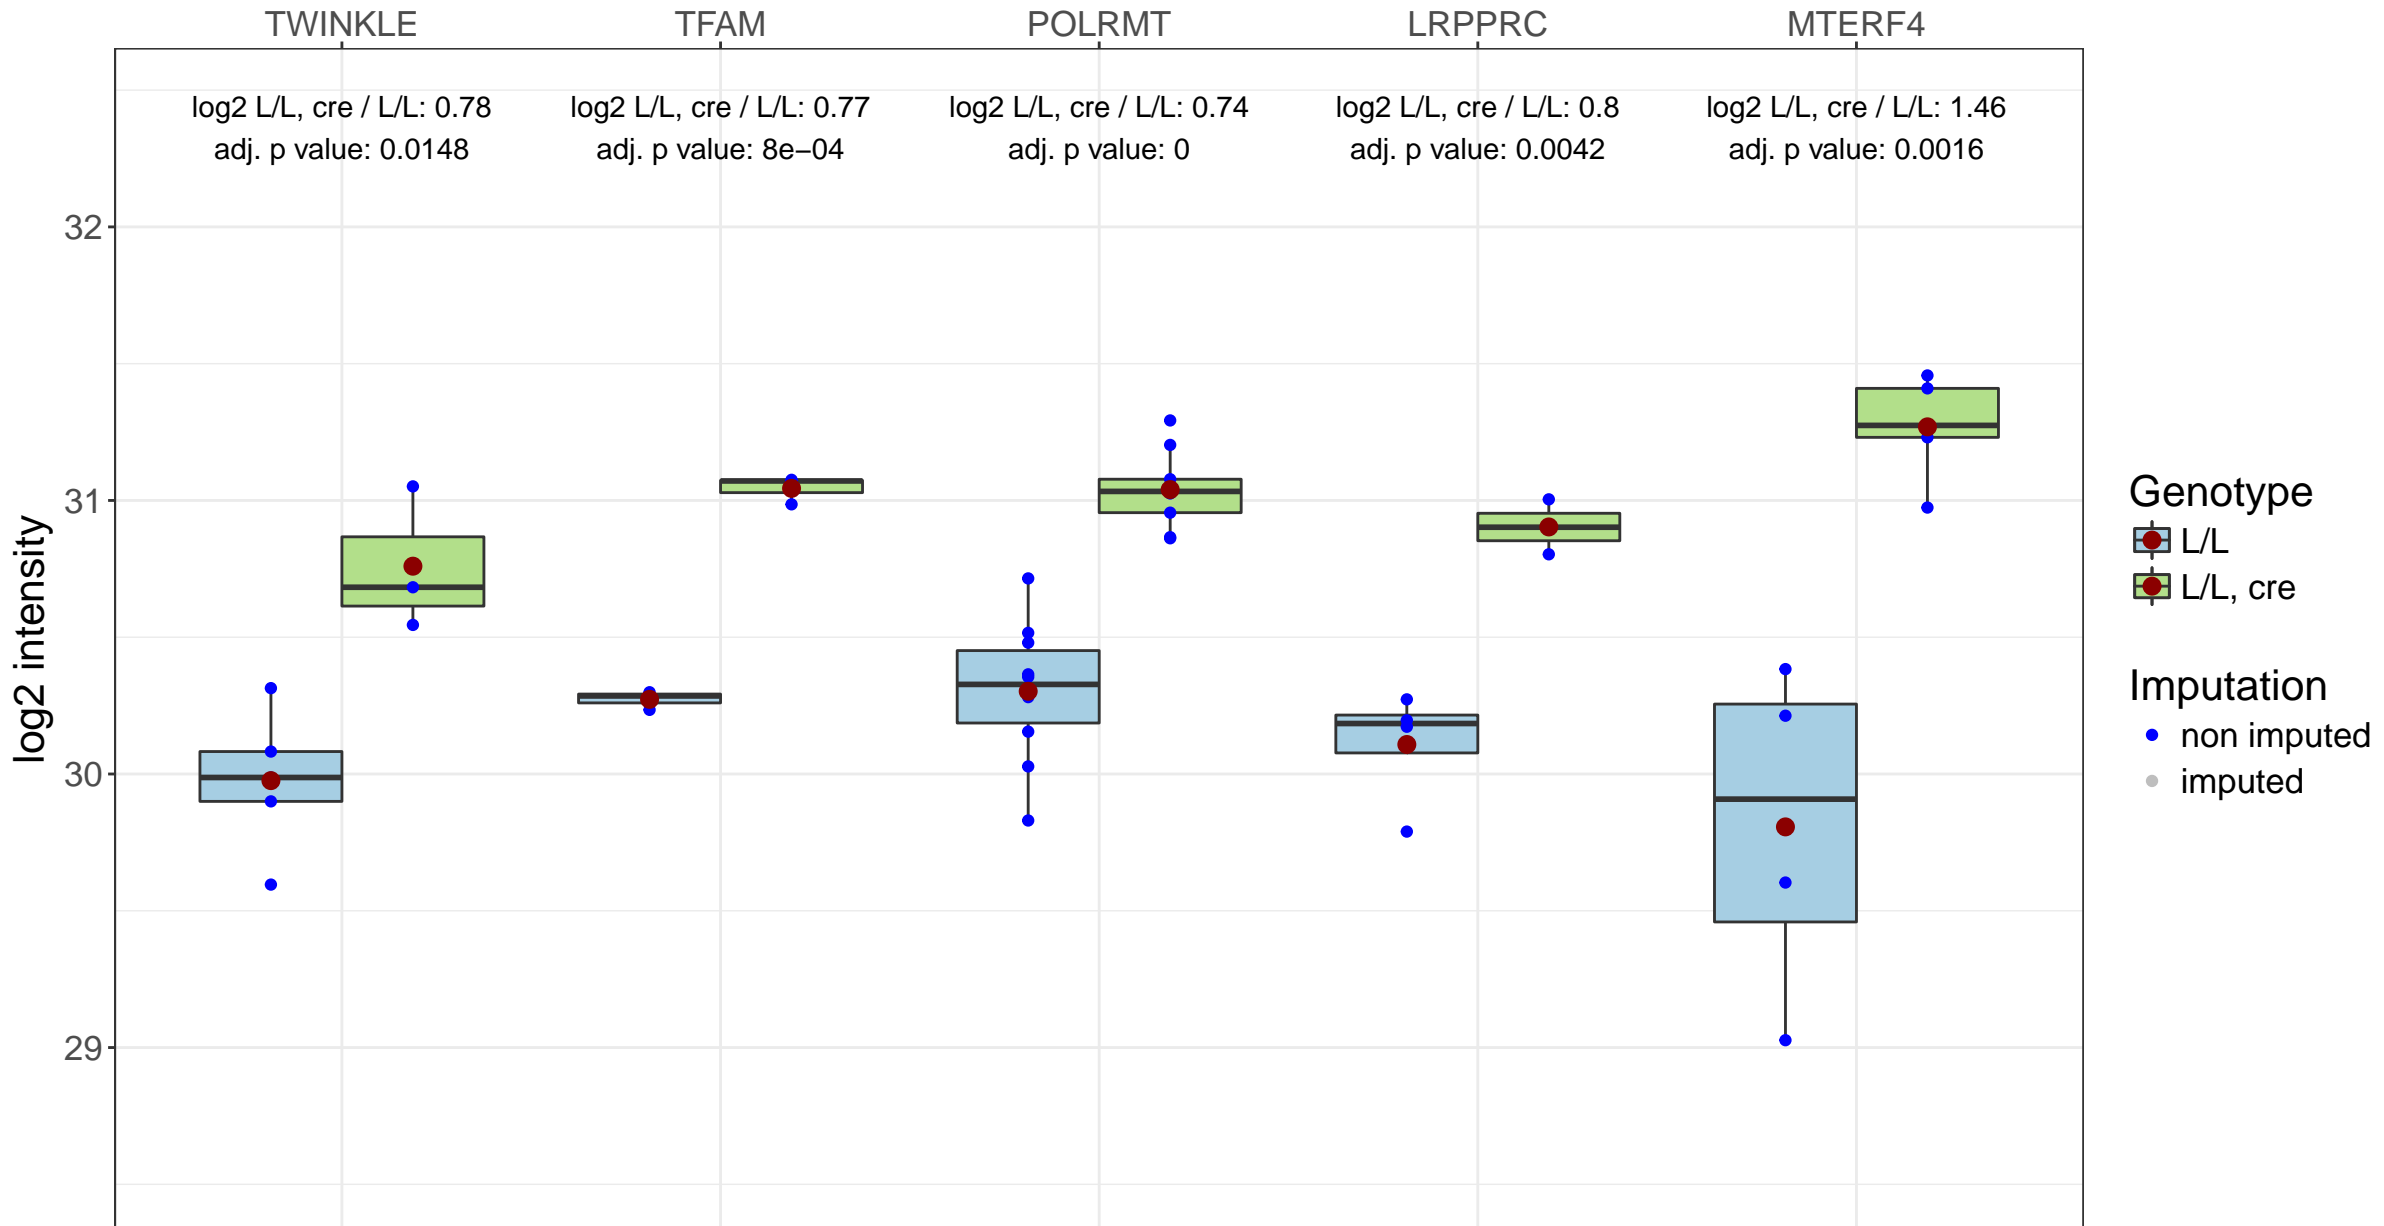

# DNAJC15 / Q78YY6

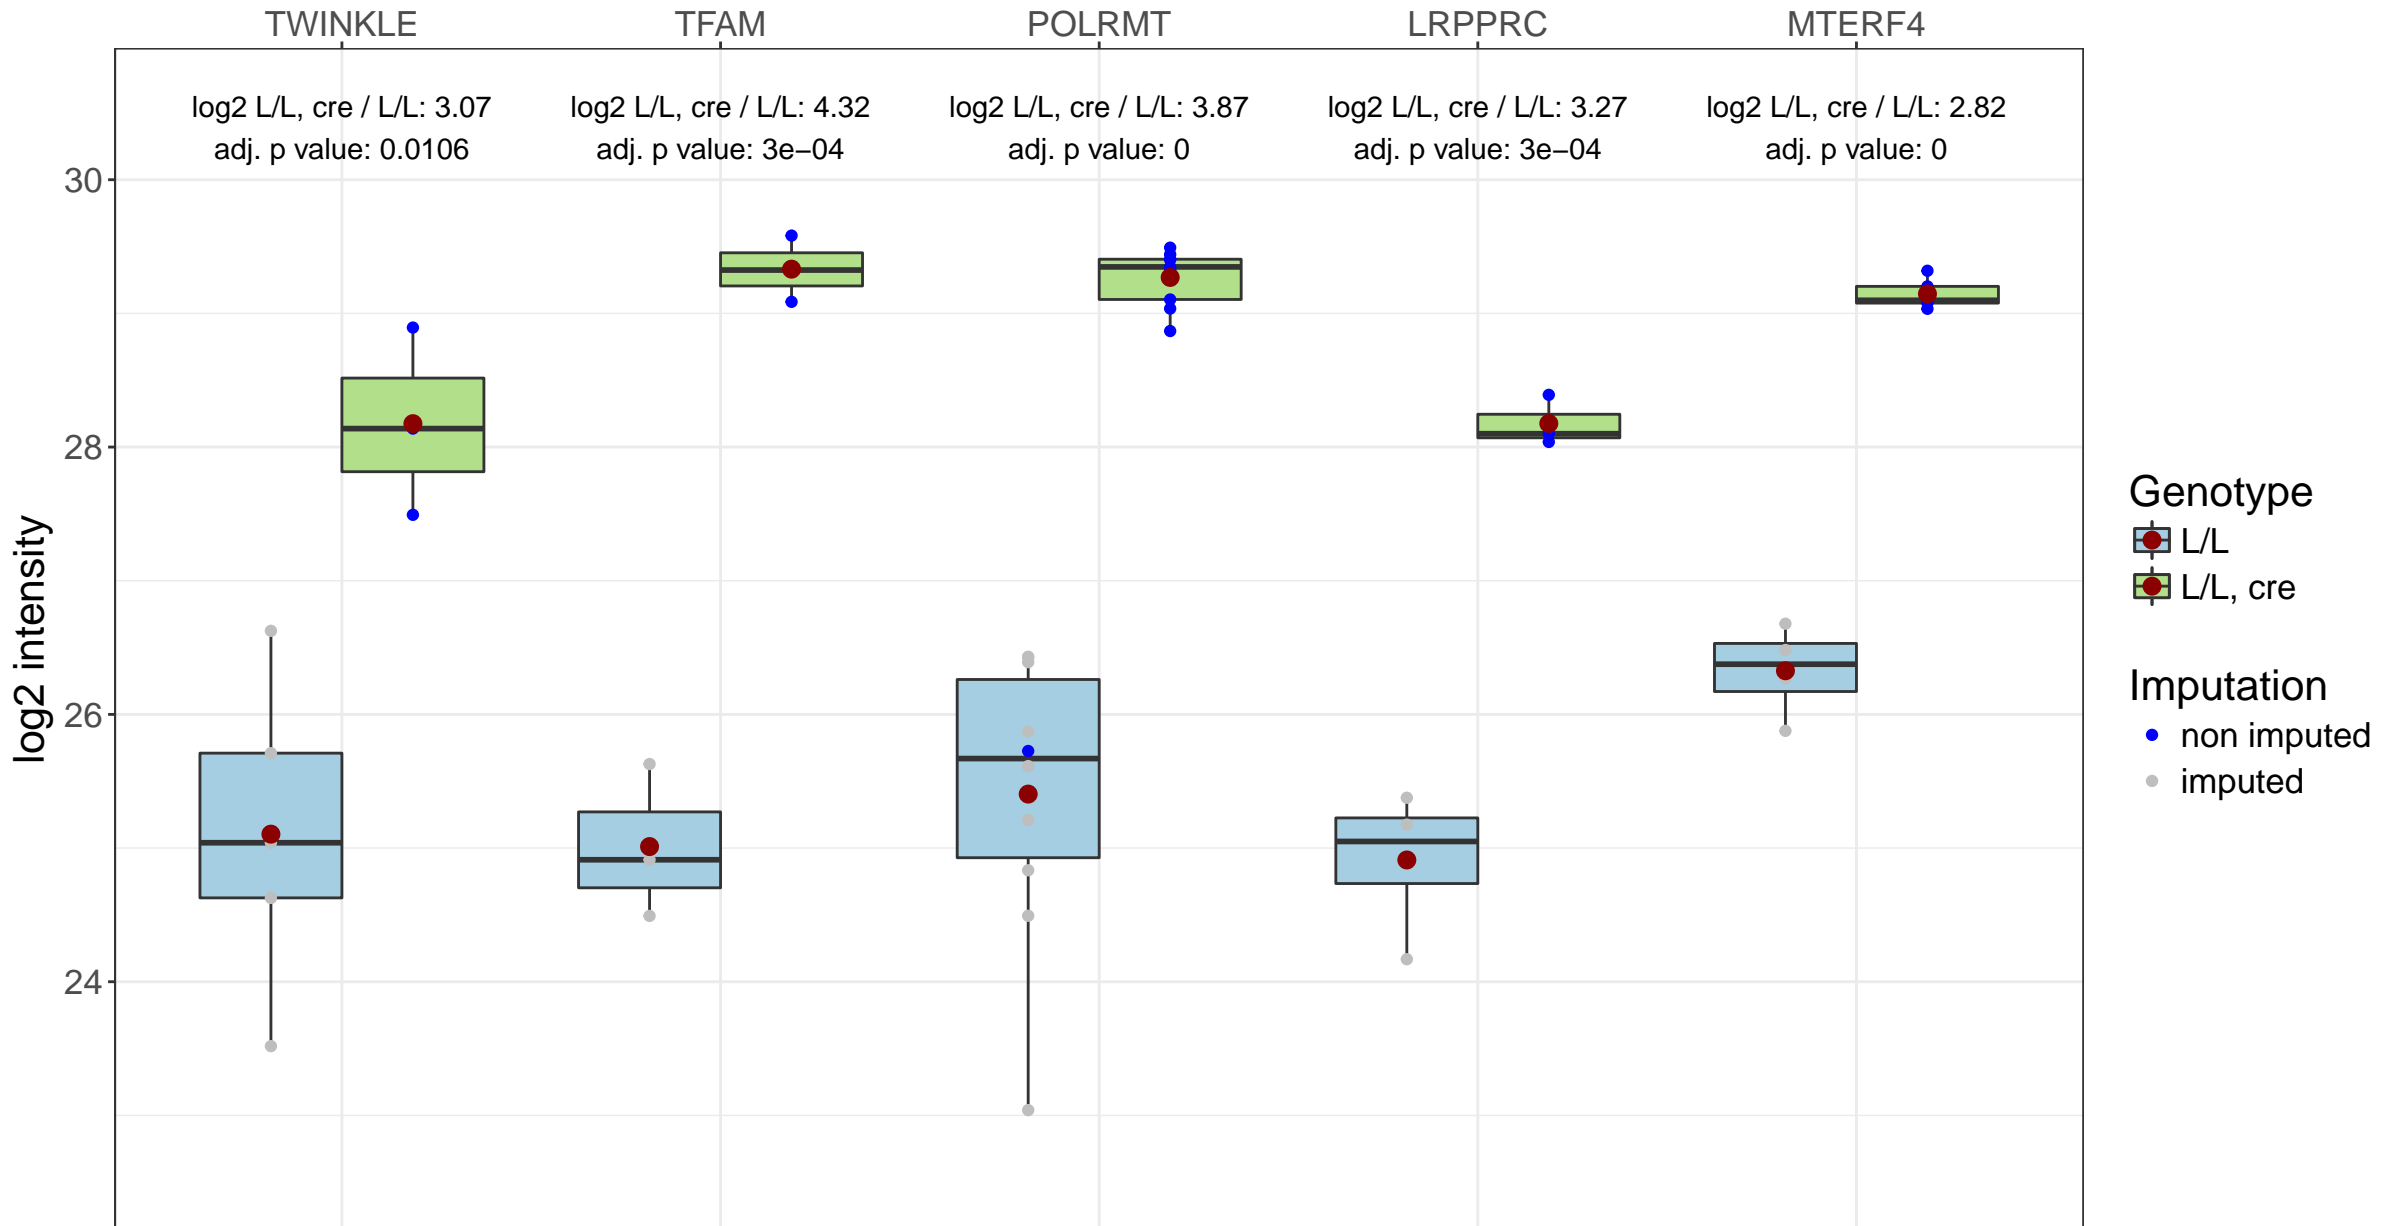

# DNAJC19 / Q9CQV7

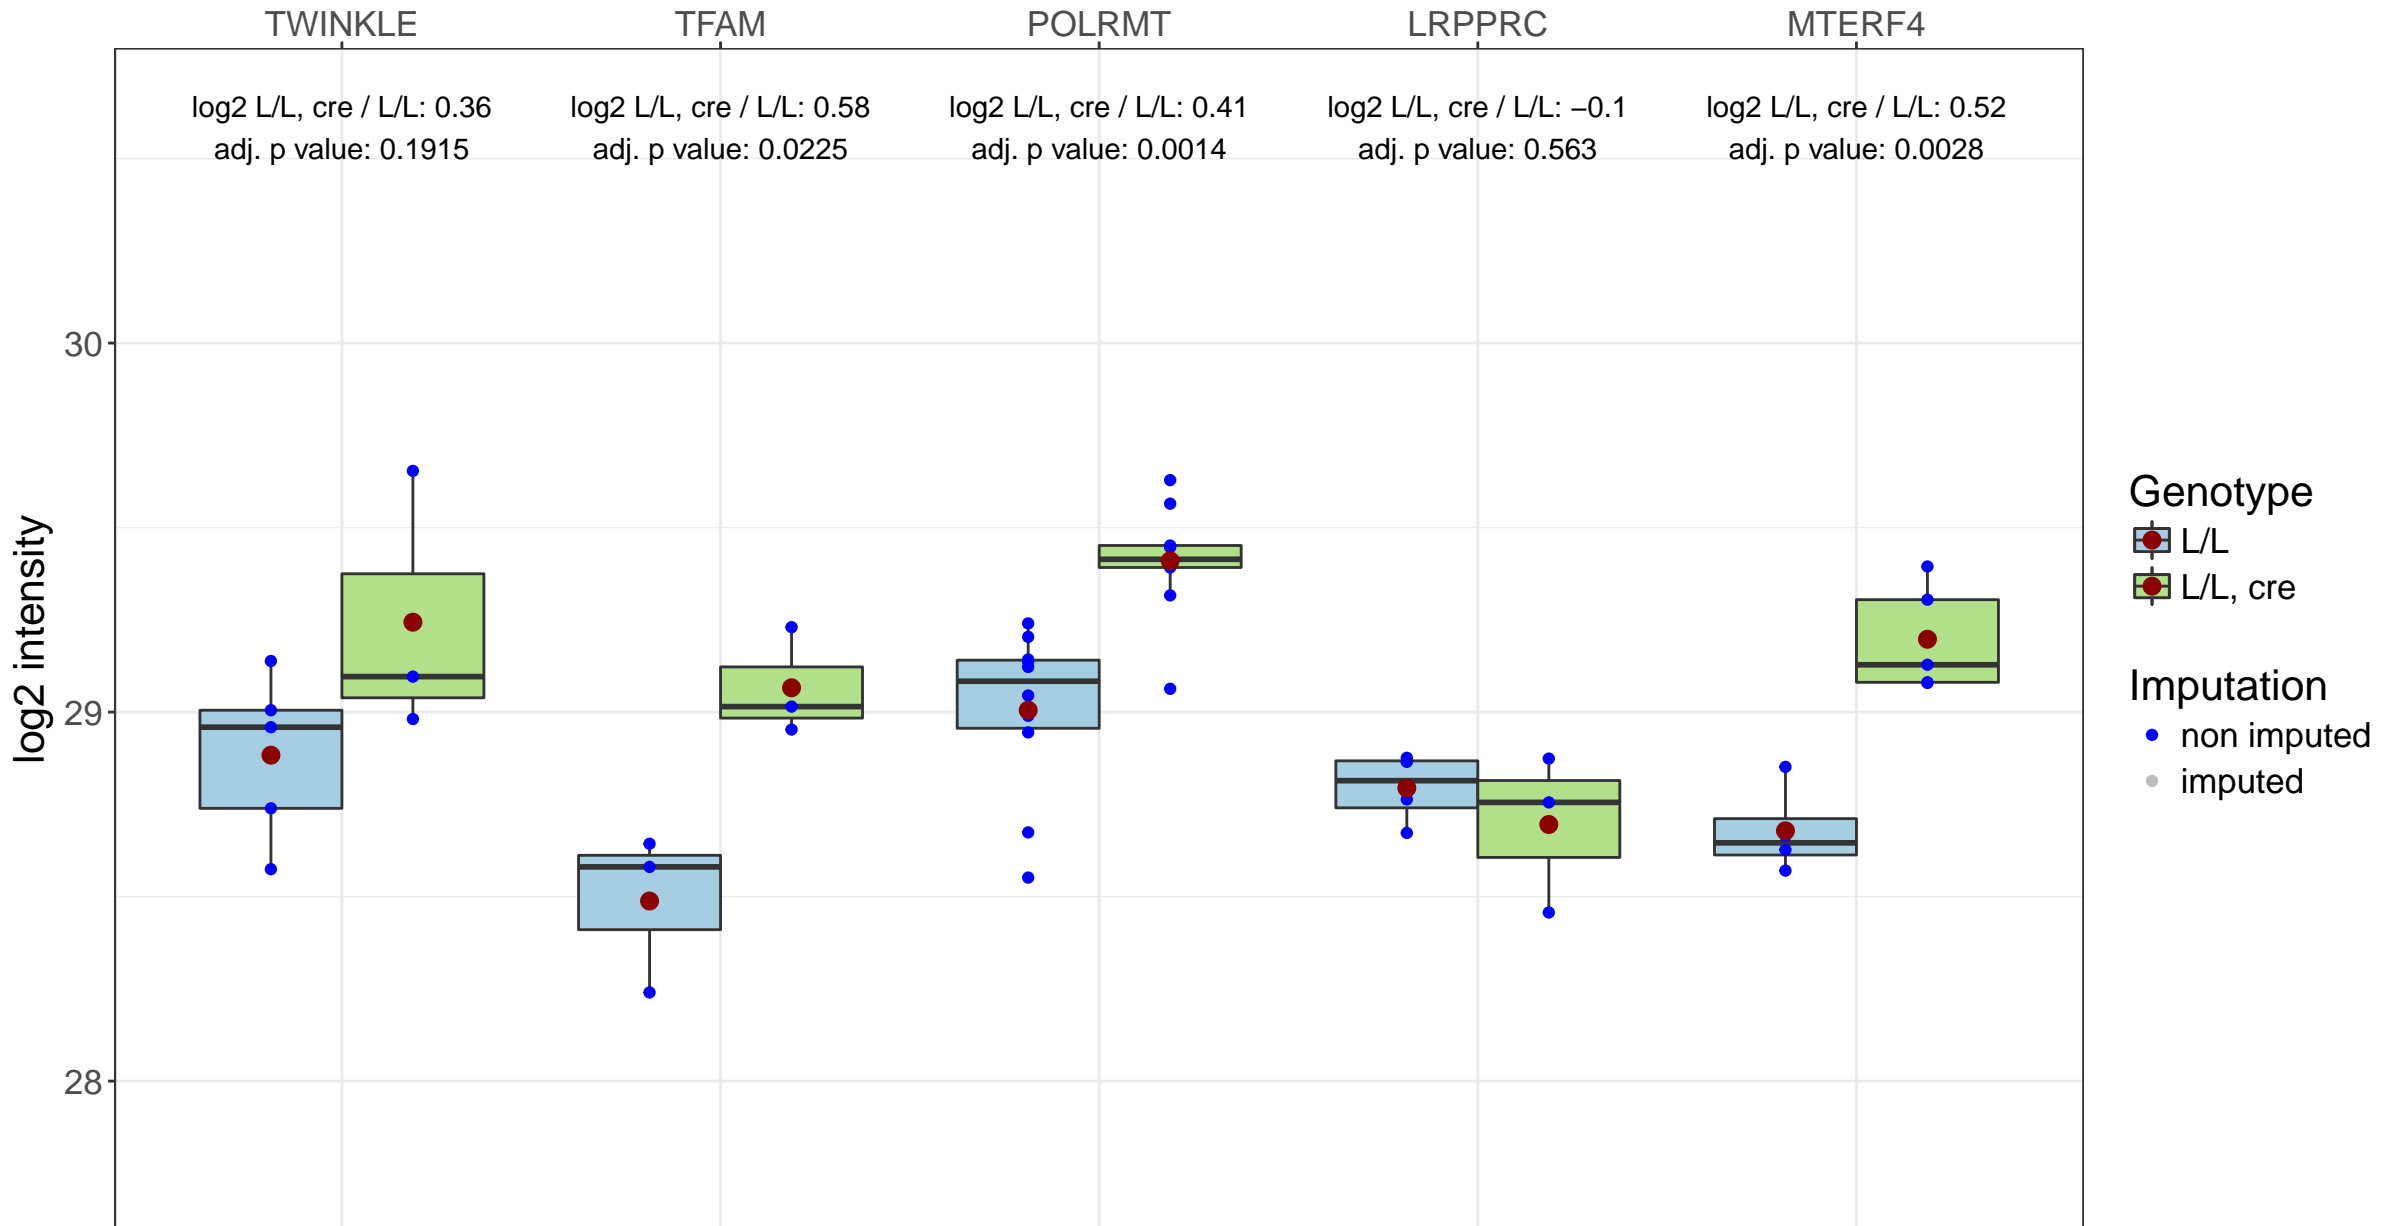

# DNAJC28 / E9Q1L7

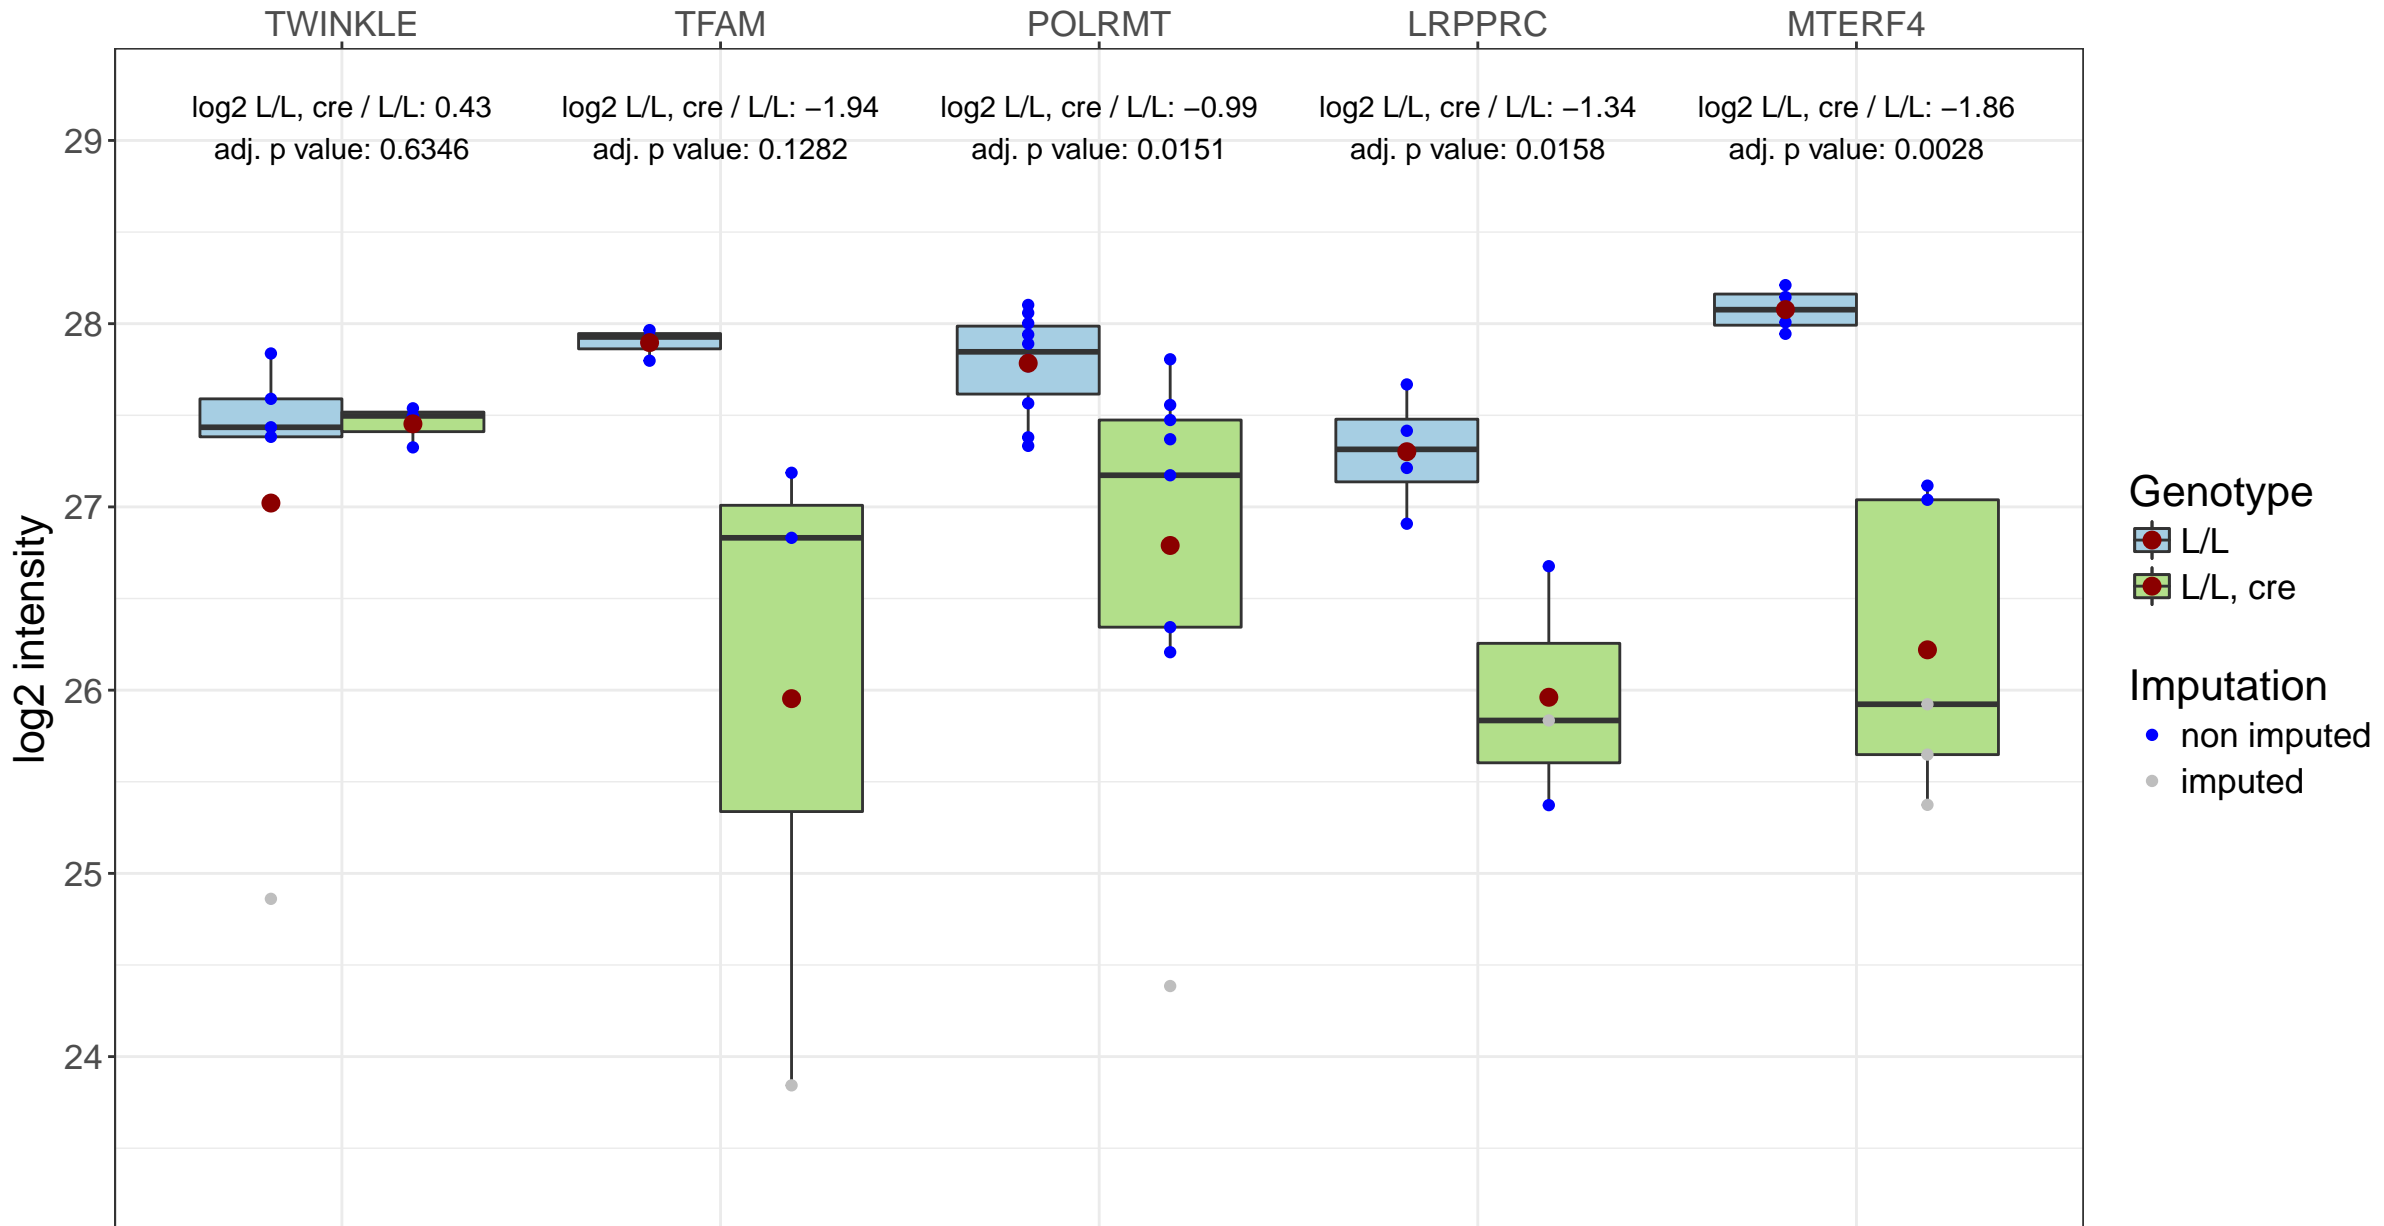

# DNAJC30 / P59041

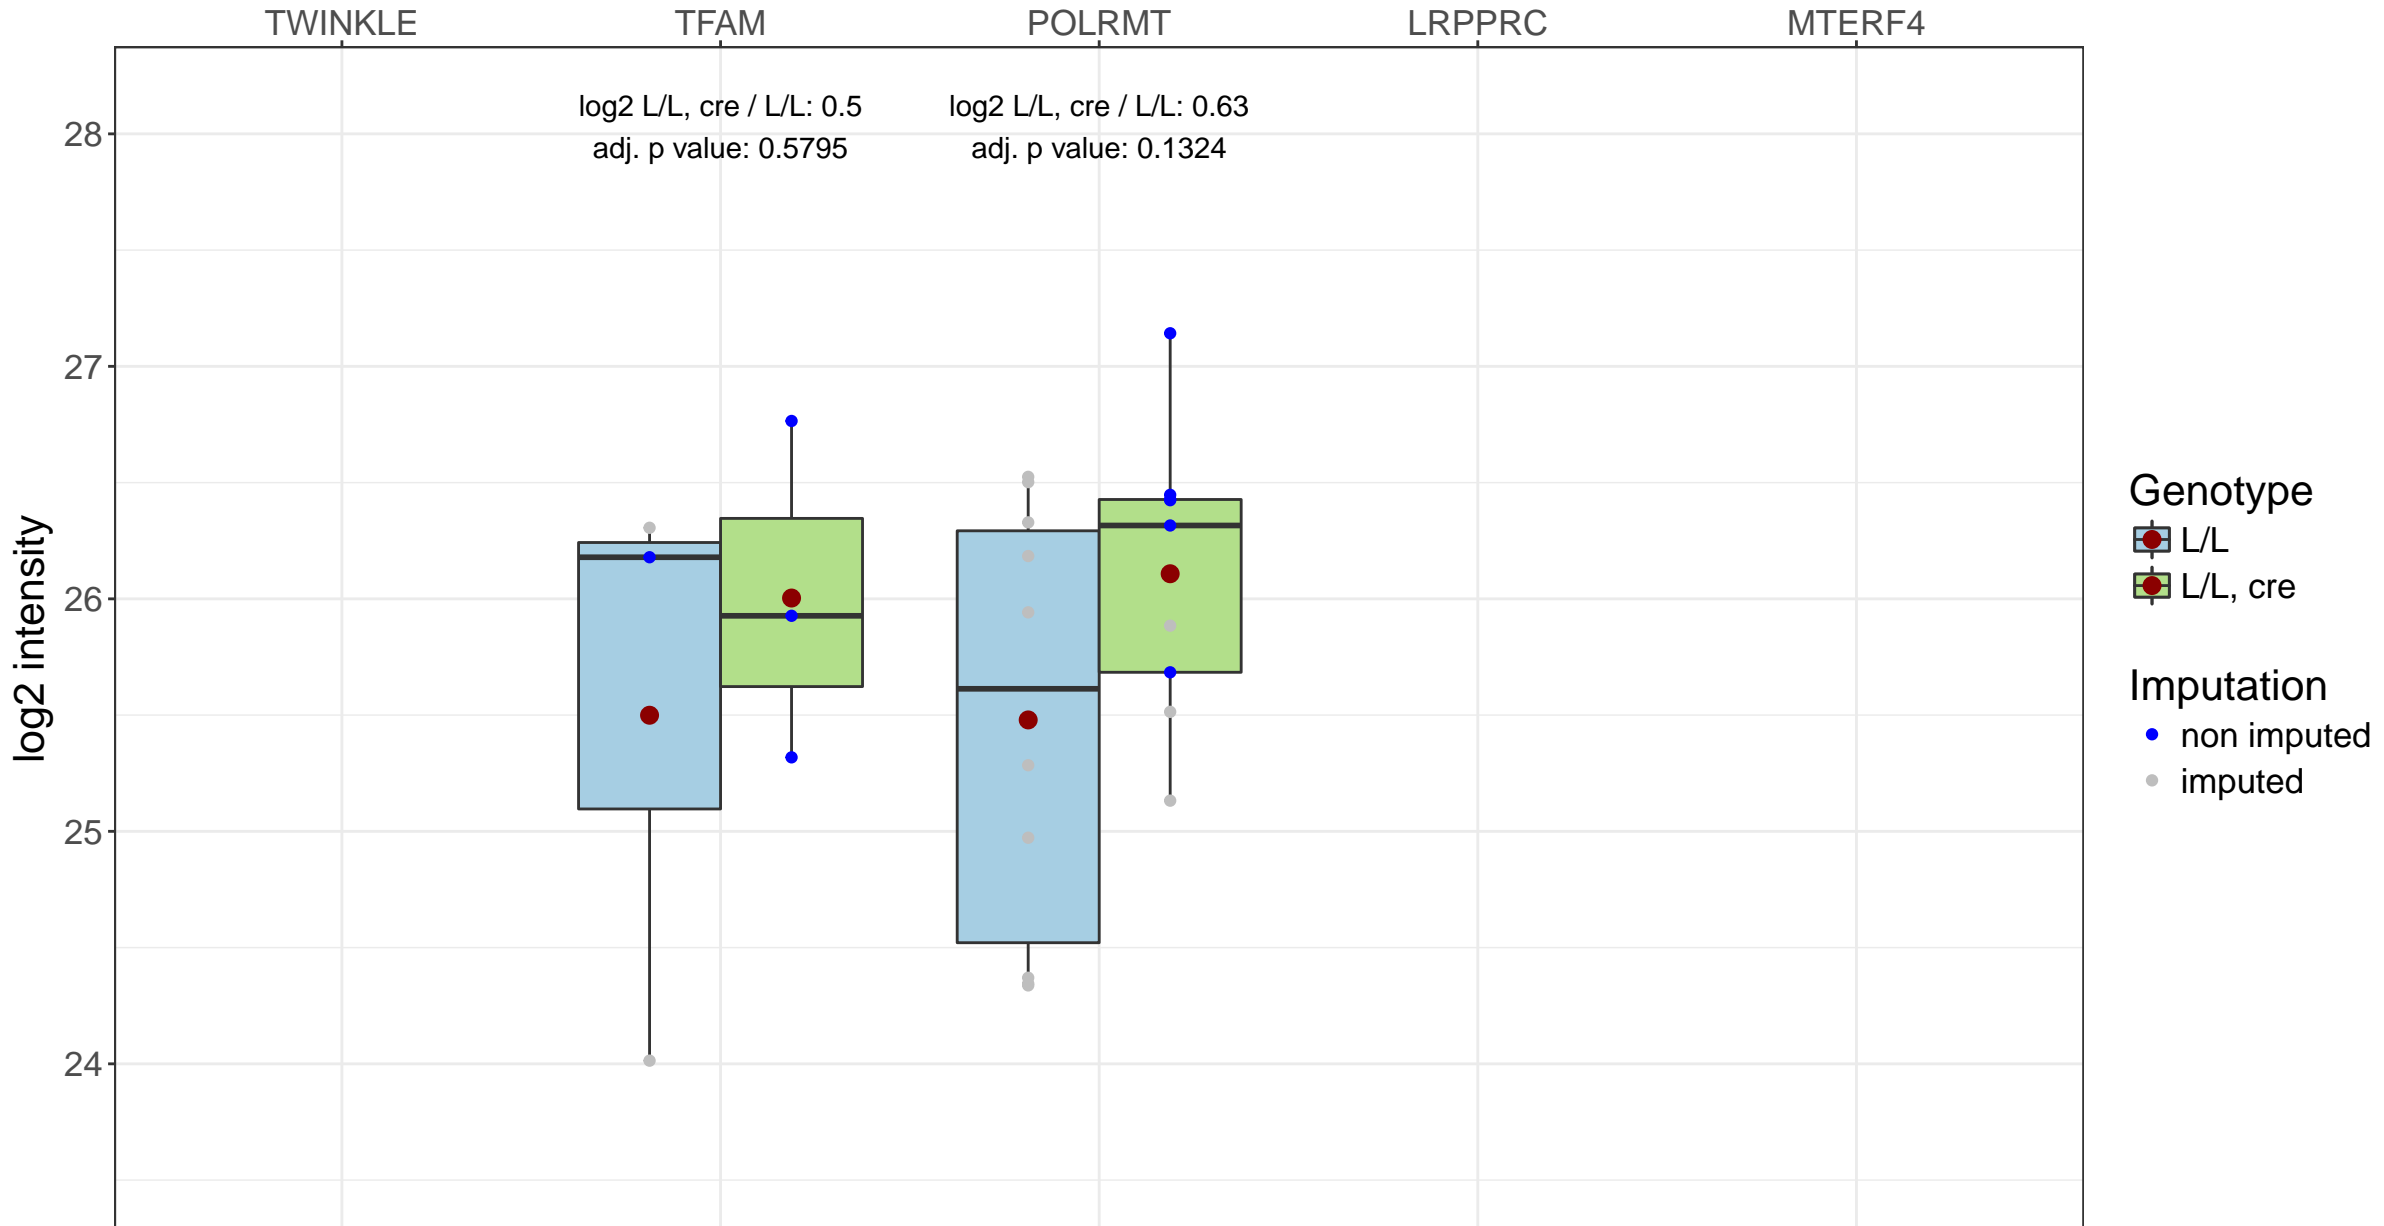

# DNLZ / Q9D113

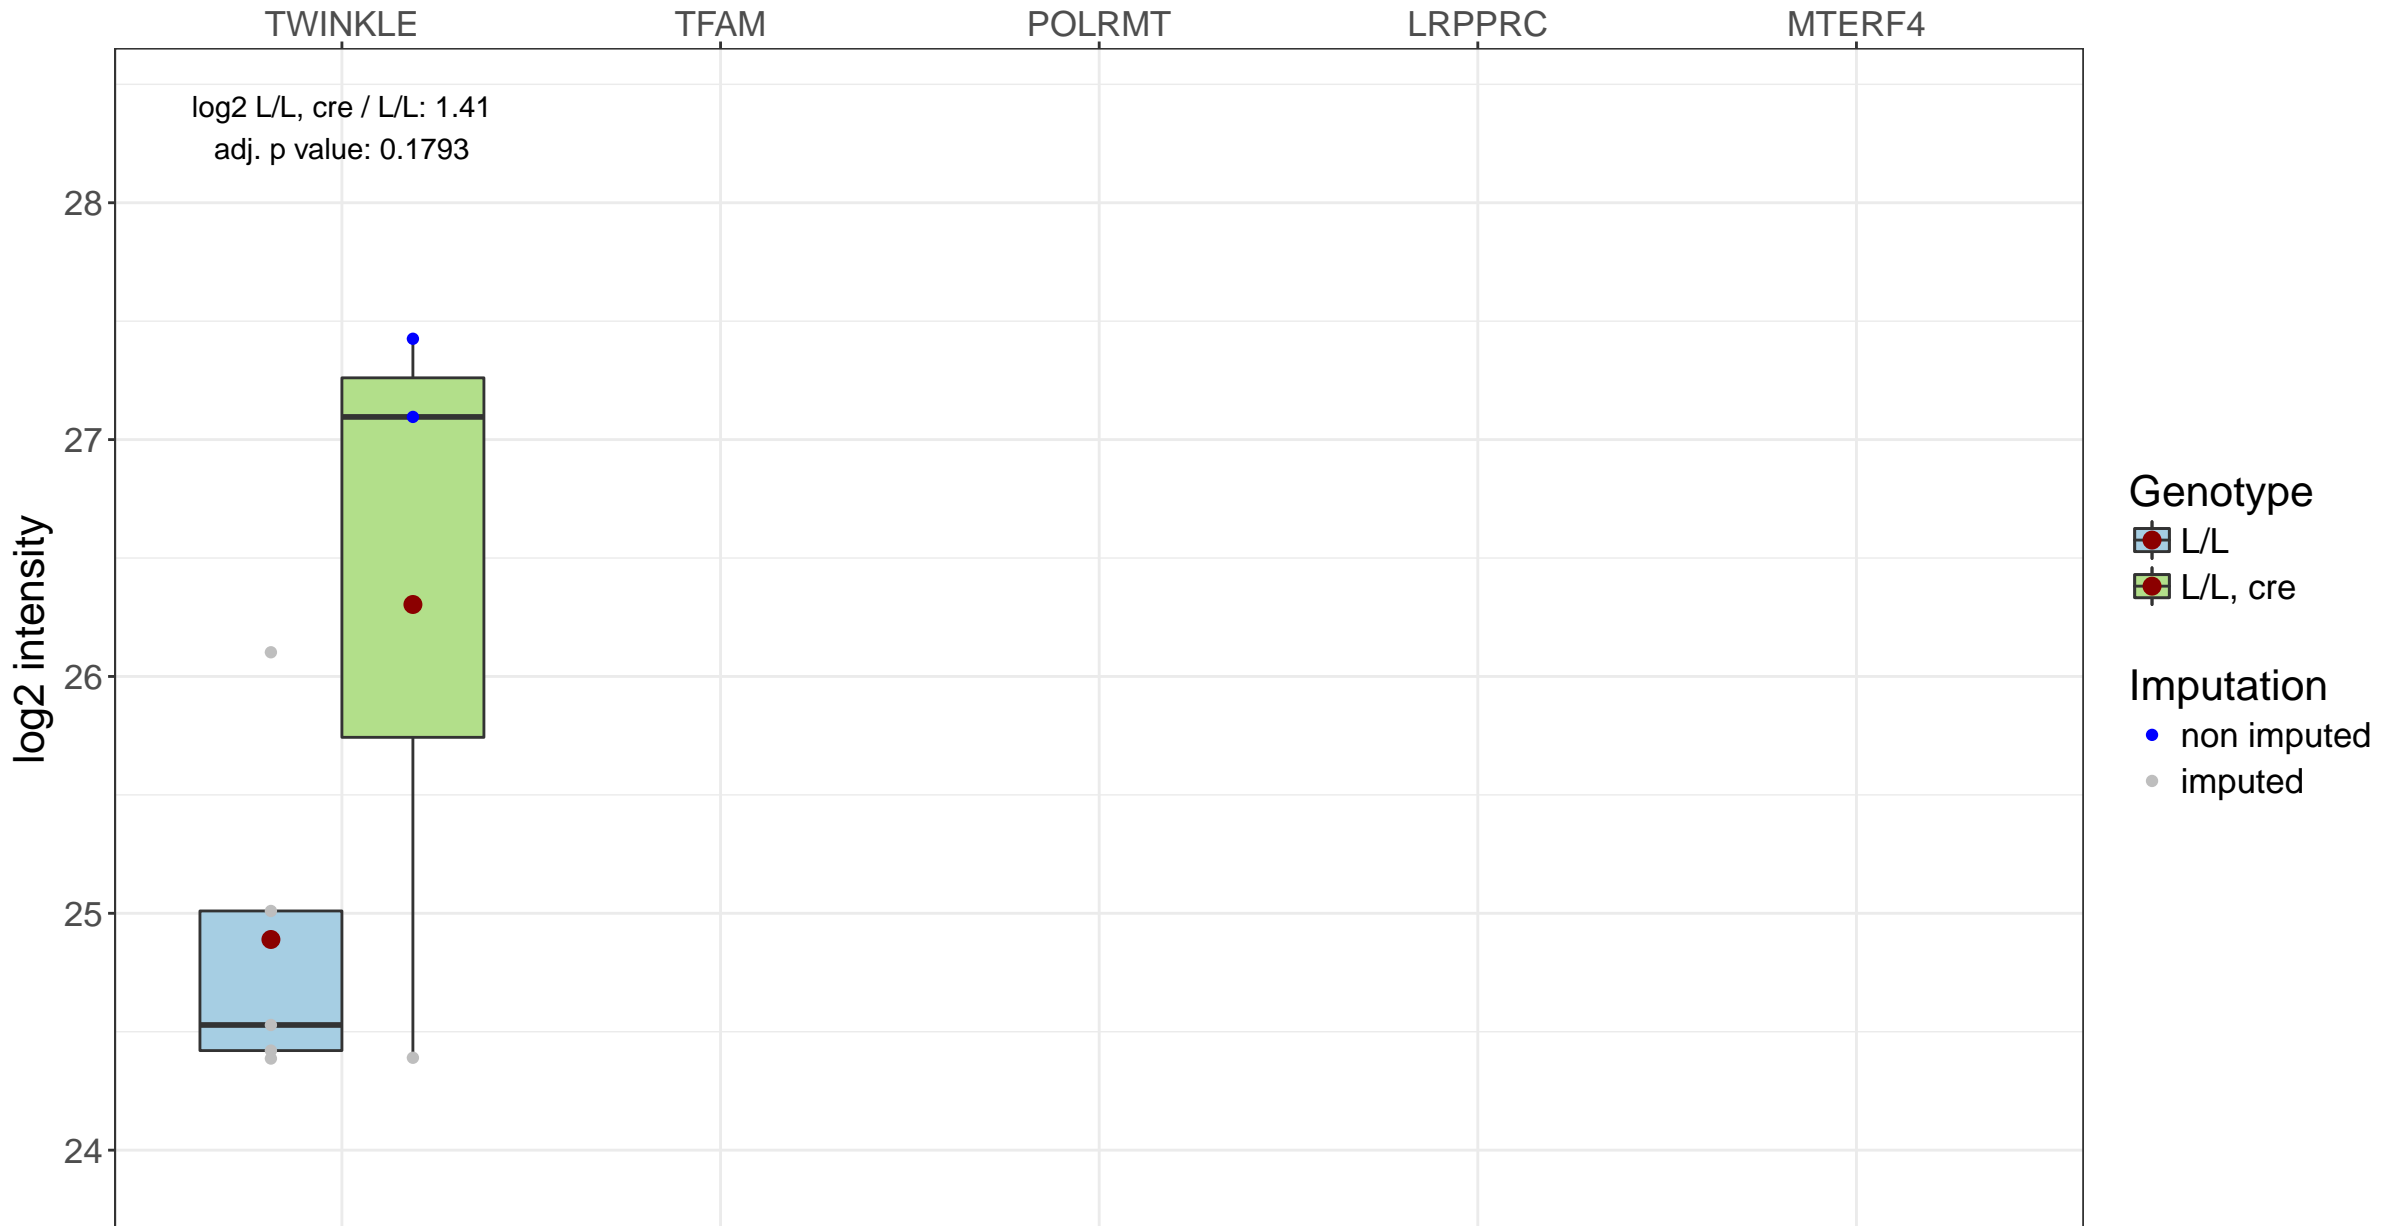



# DNPEP / Q9Z2W0

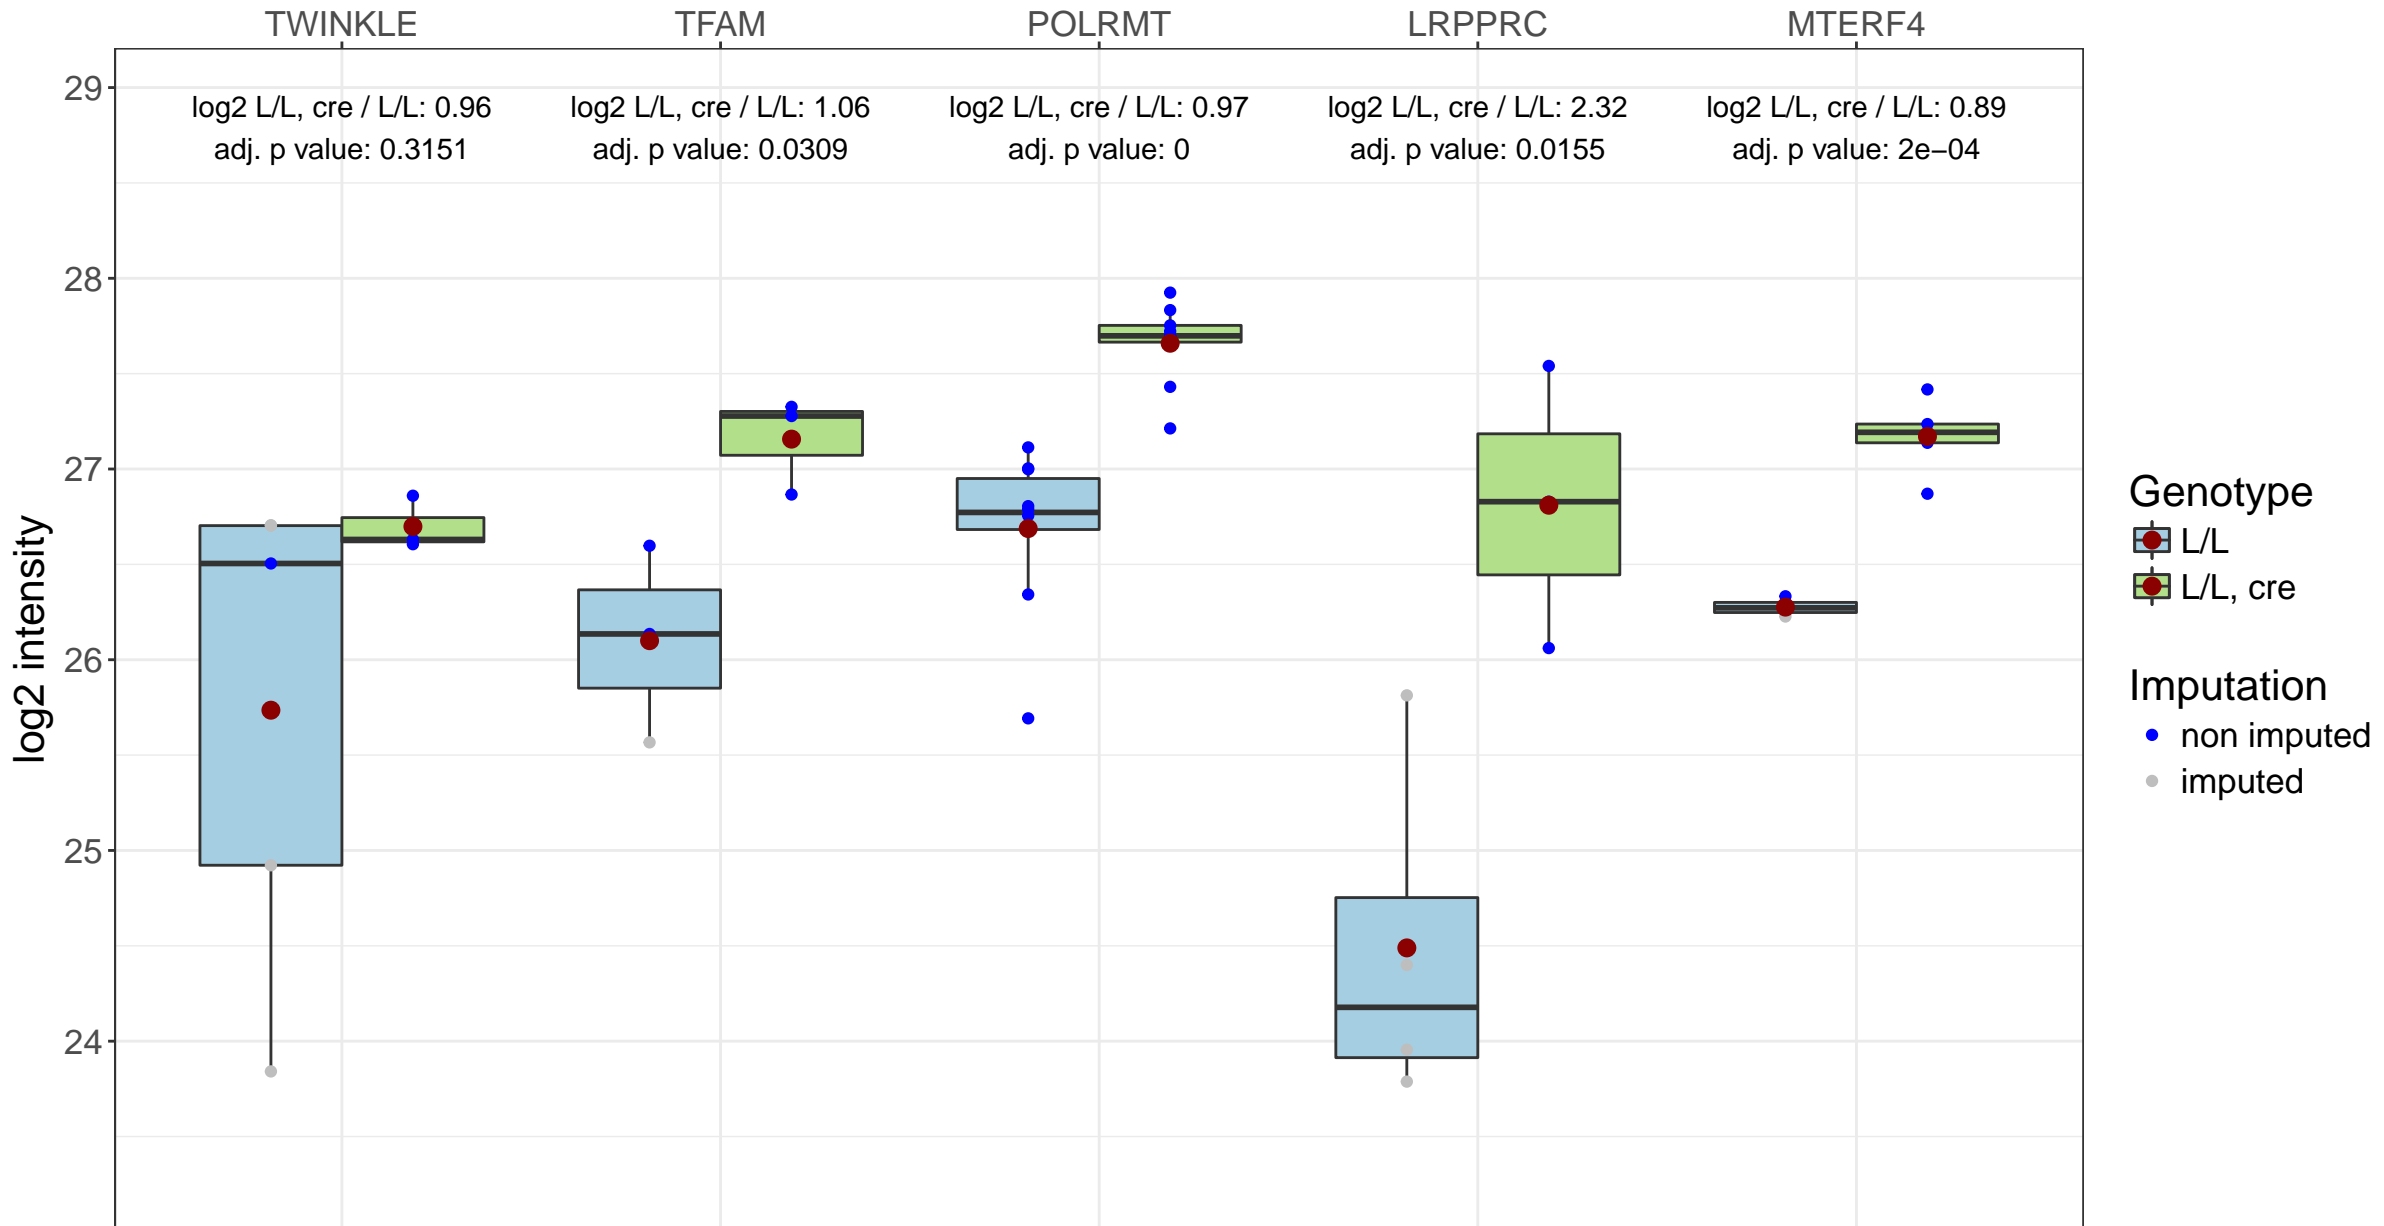

# DPEP1 / P31428

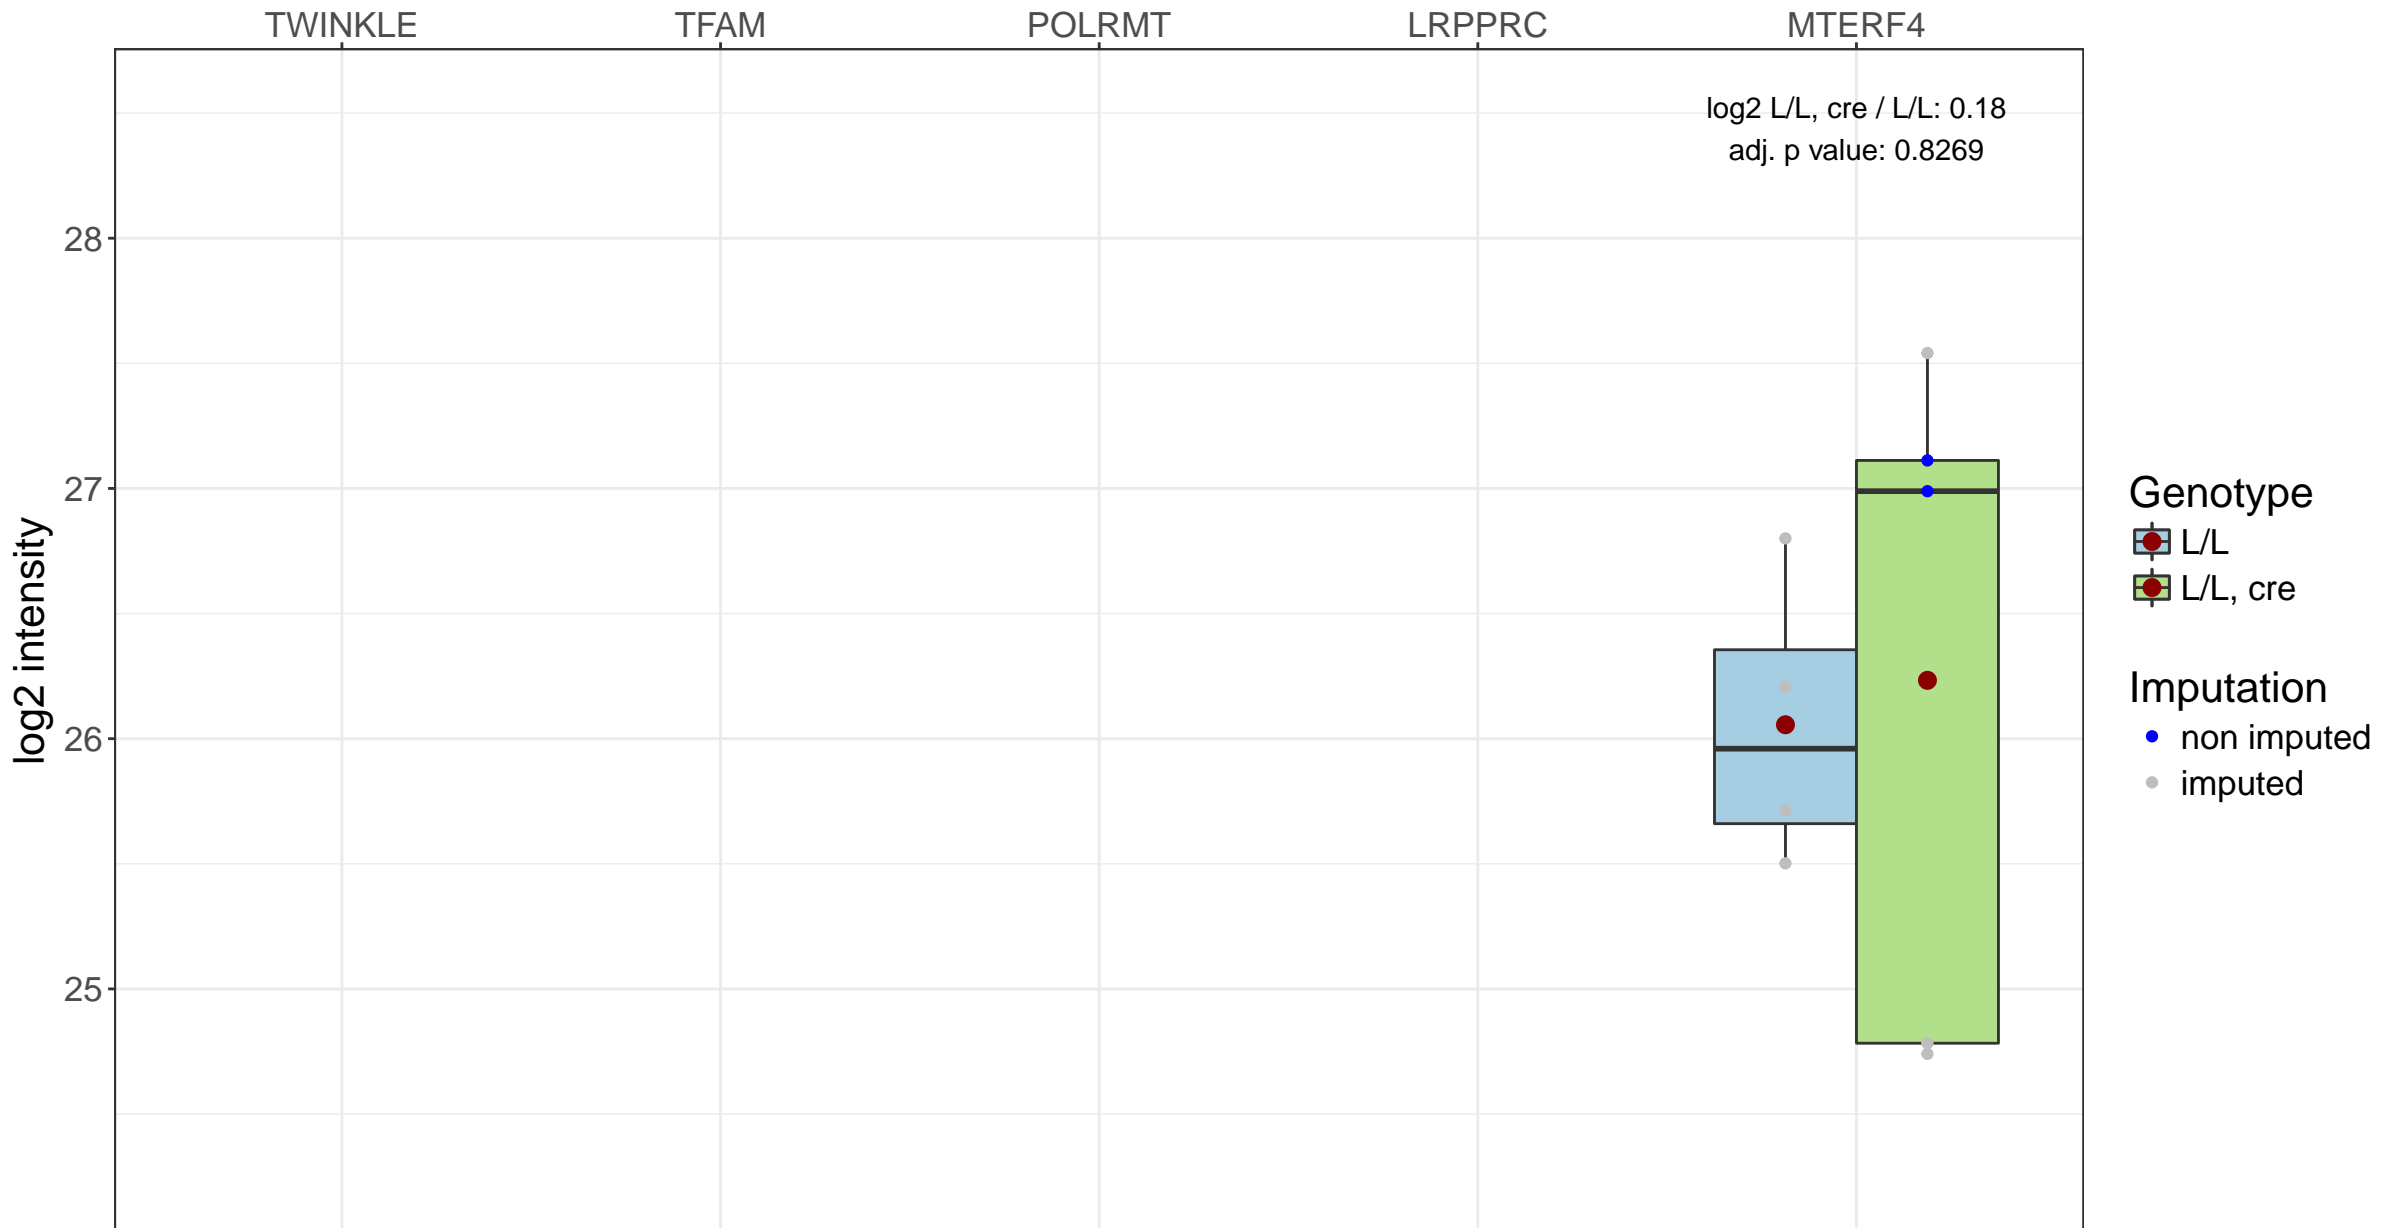

# DPYSL2 / O08553

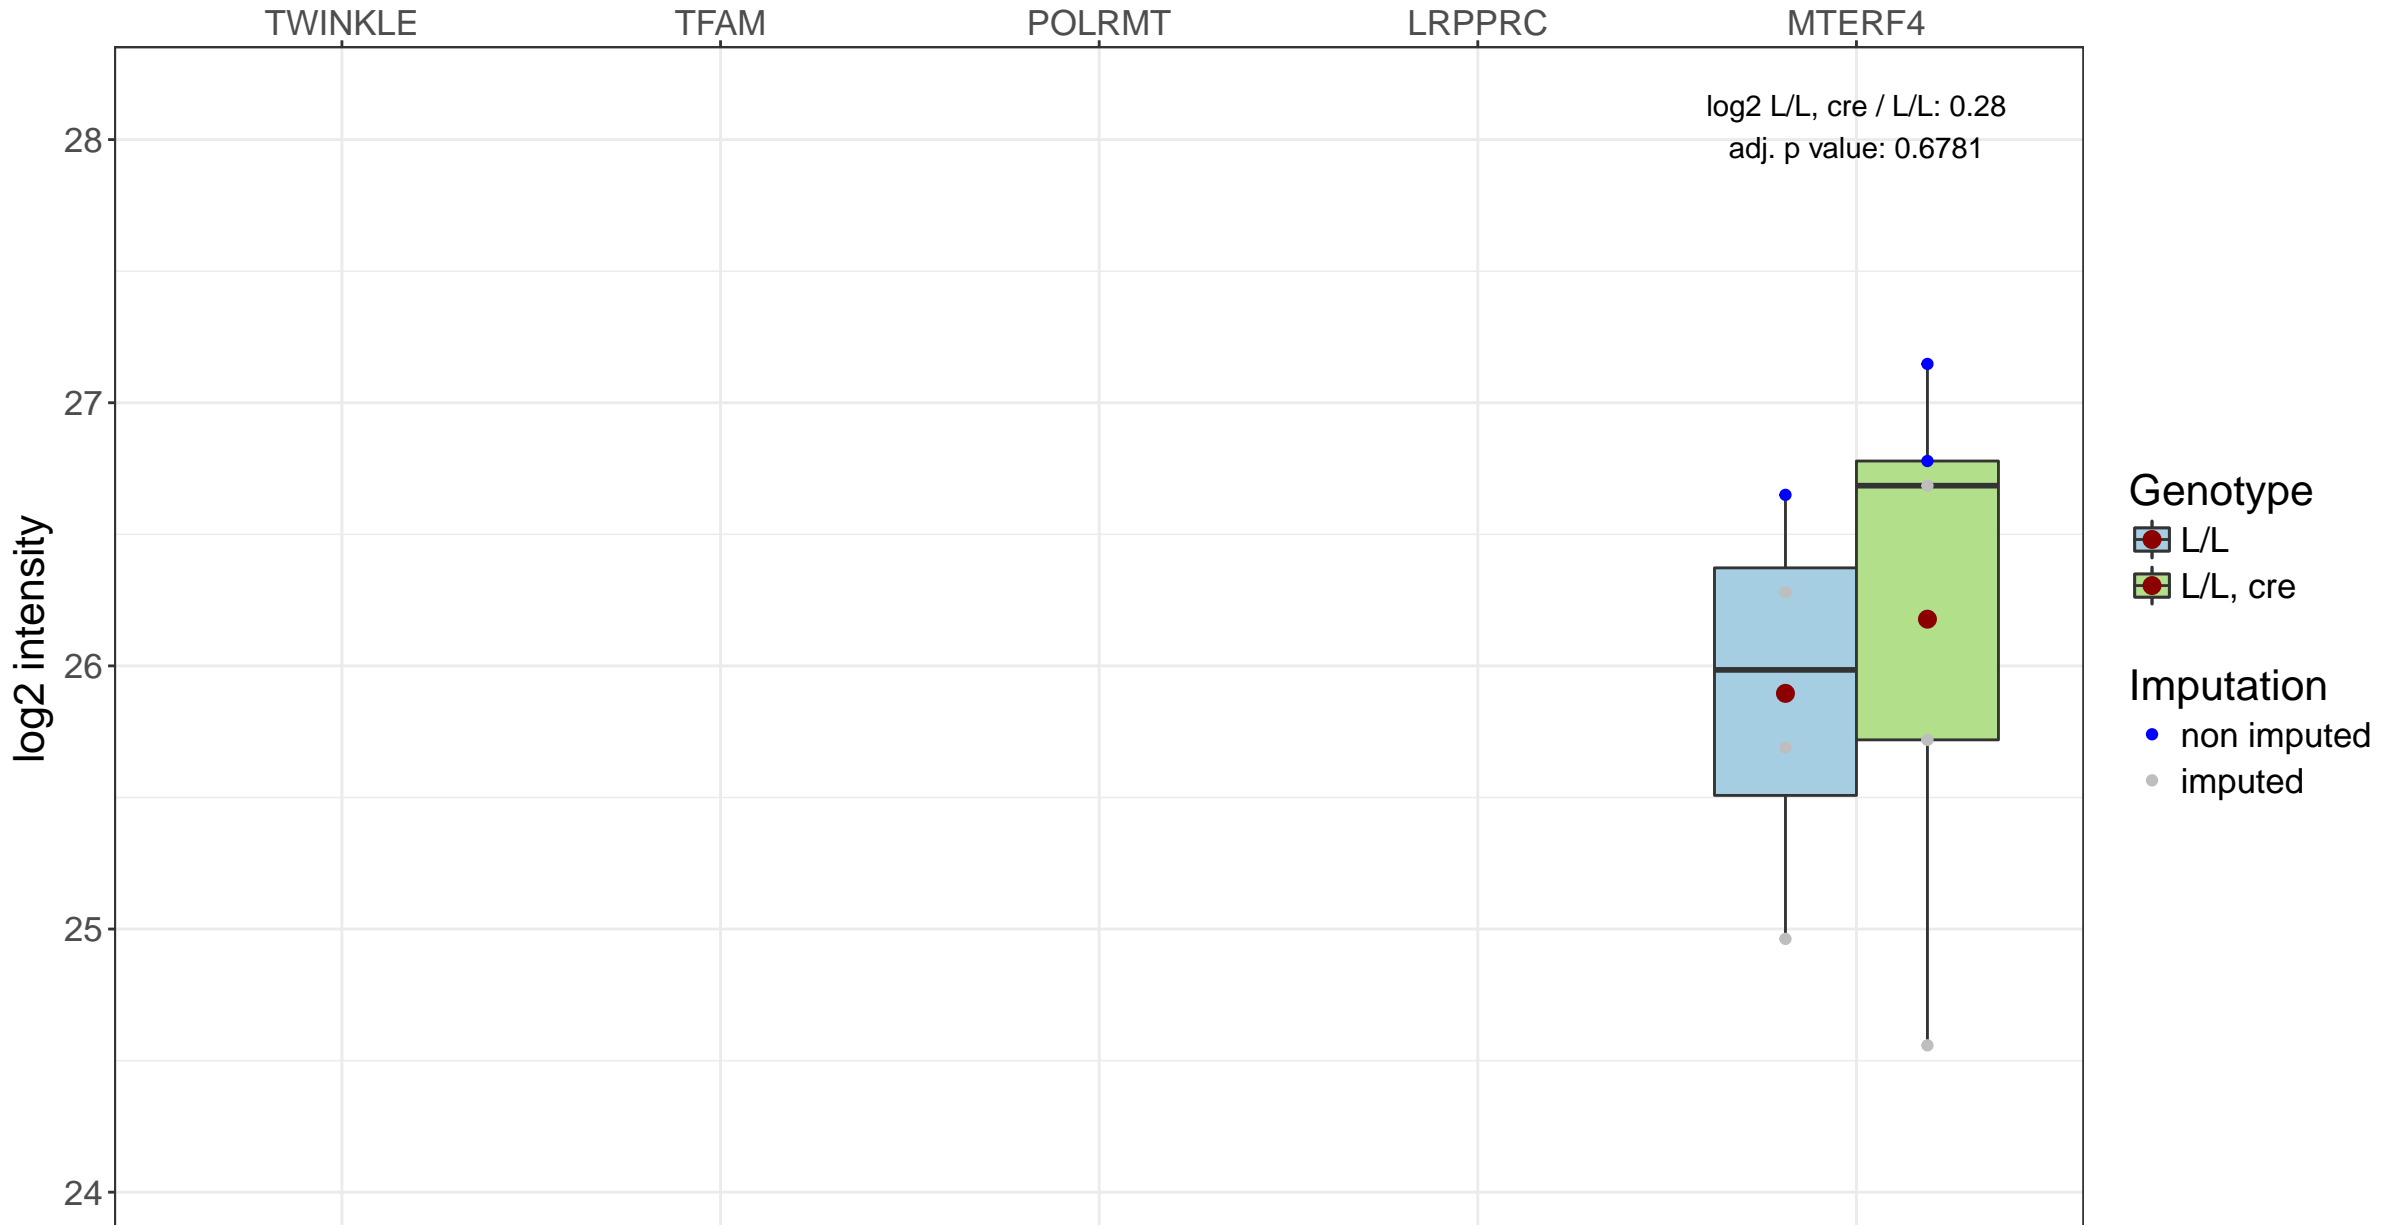

# DTD1 / Q9DD18

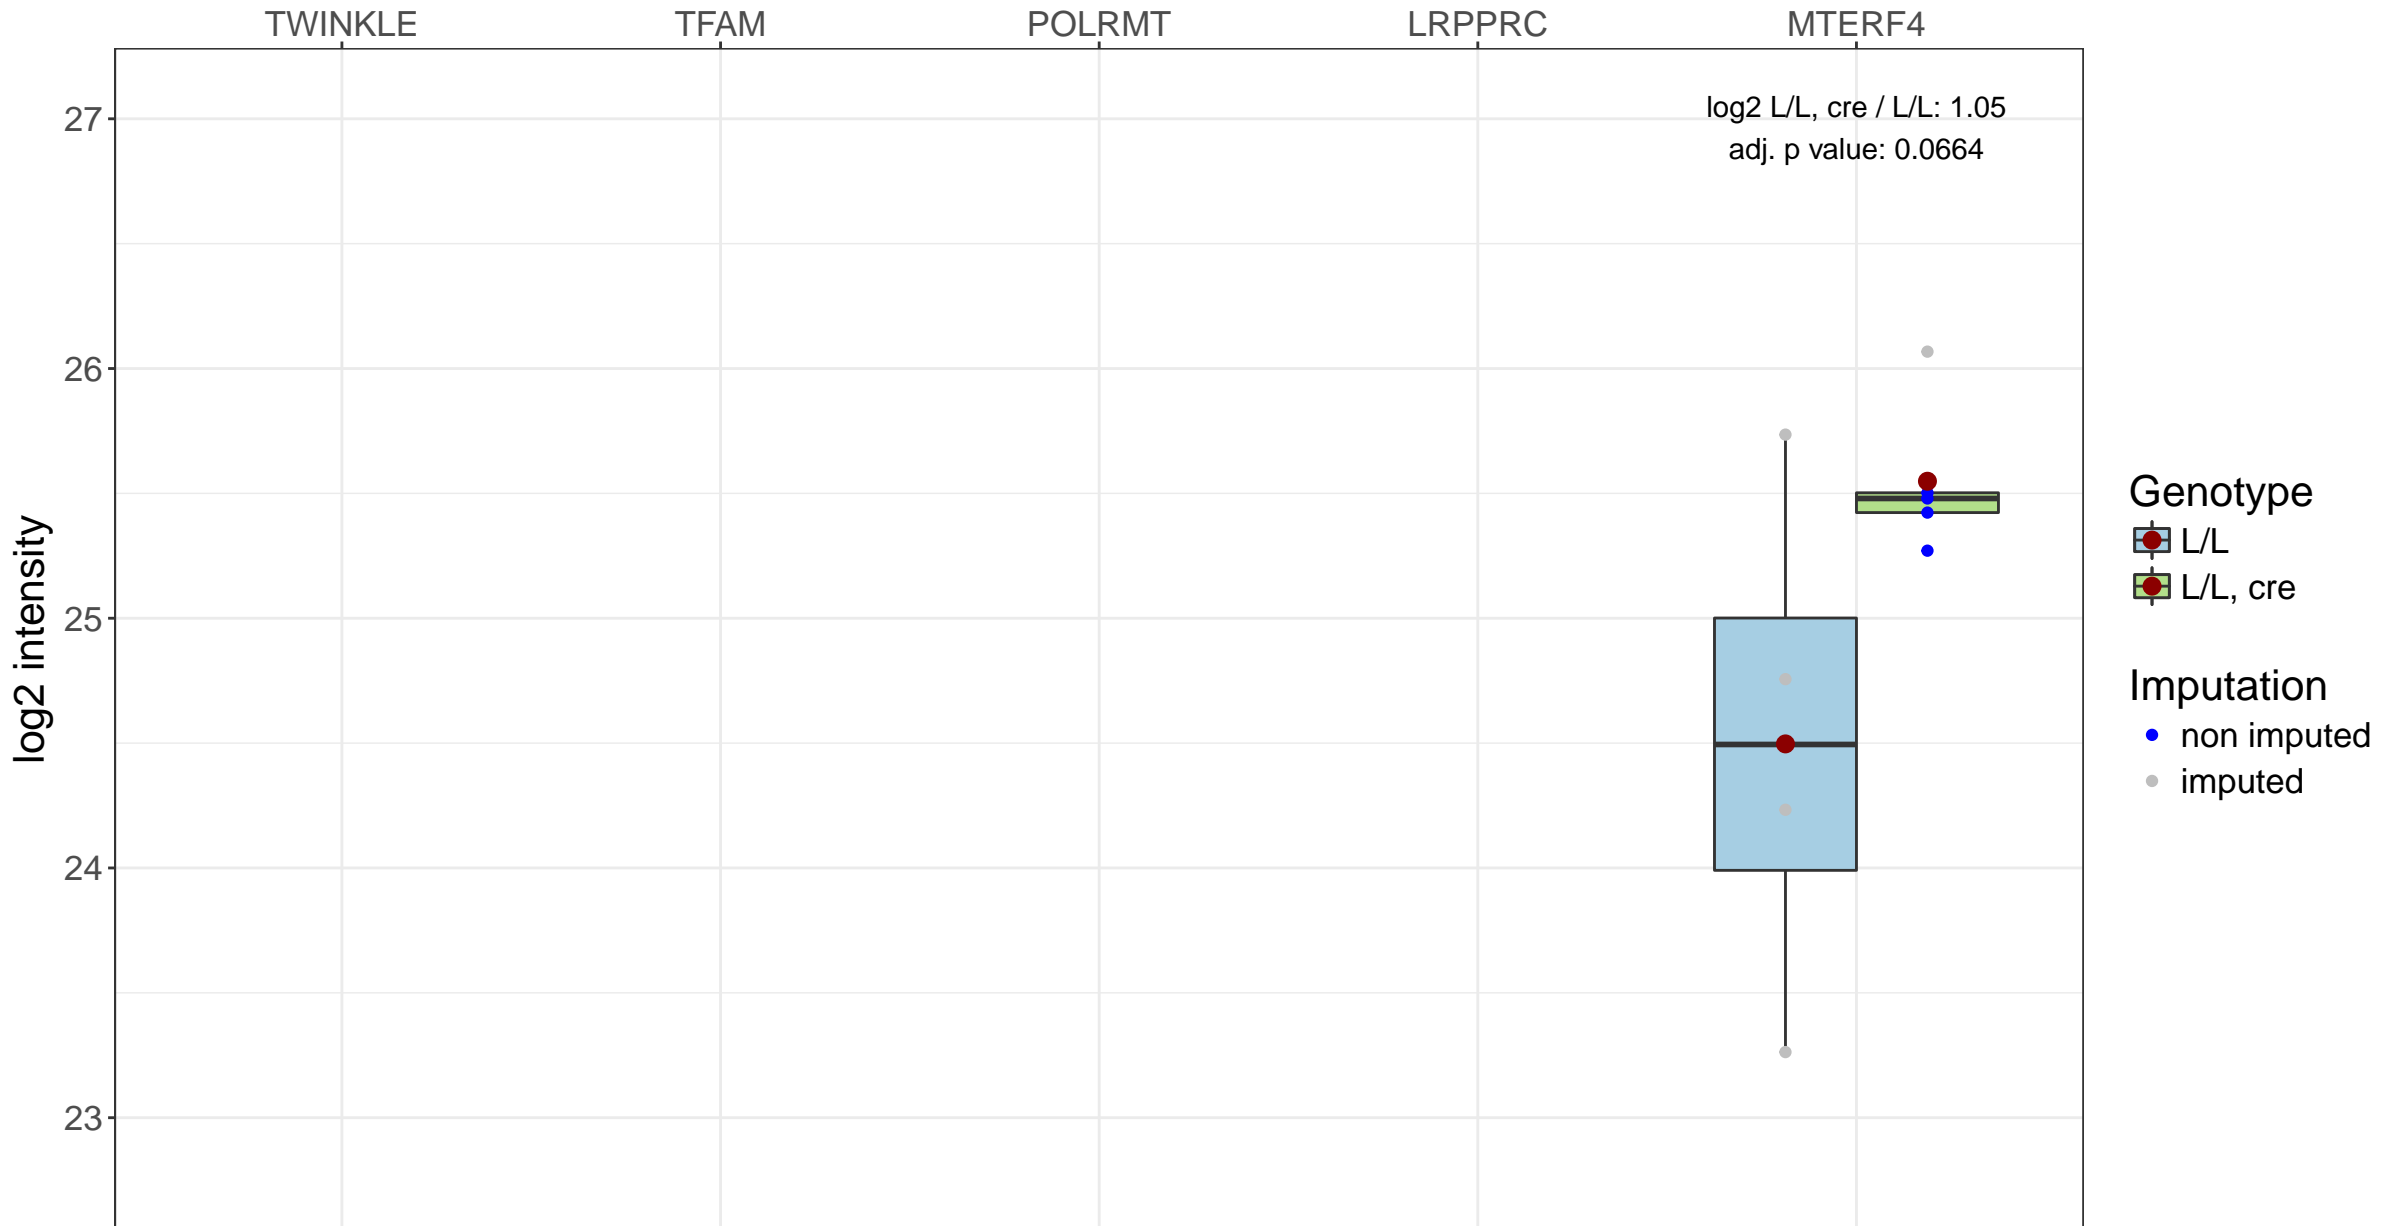

# DTYMK / P97930

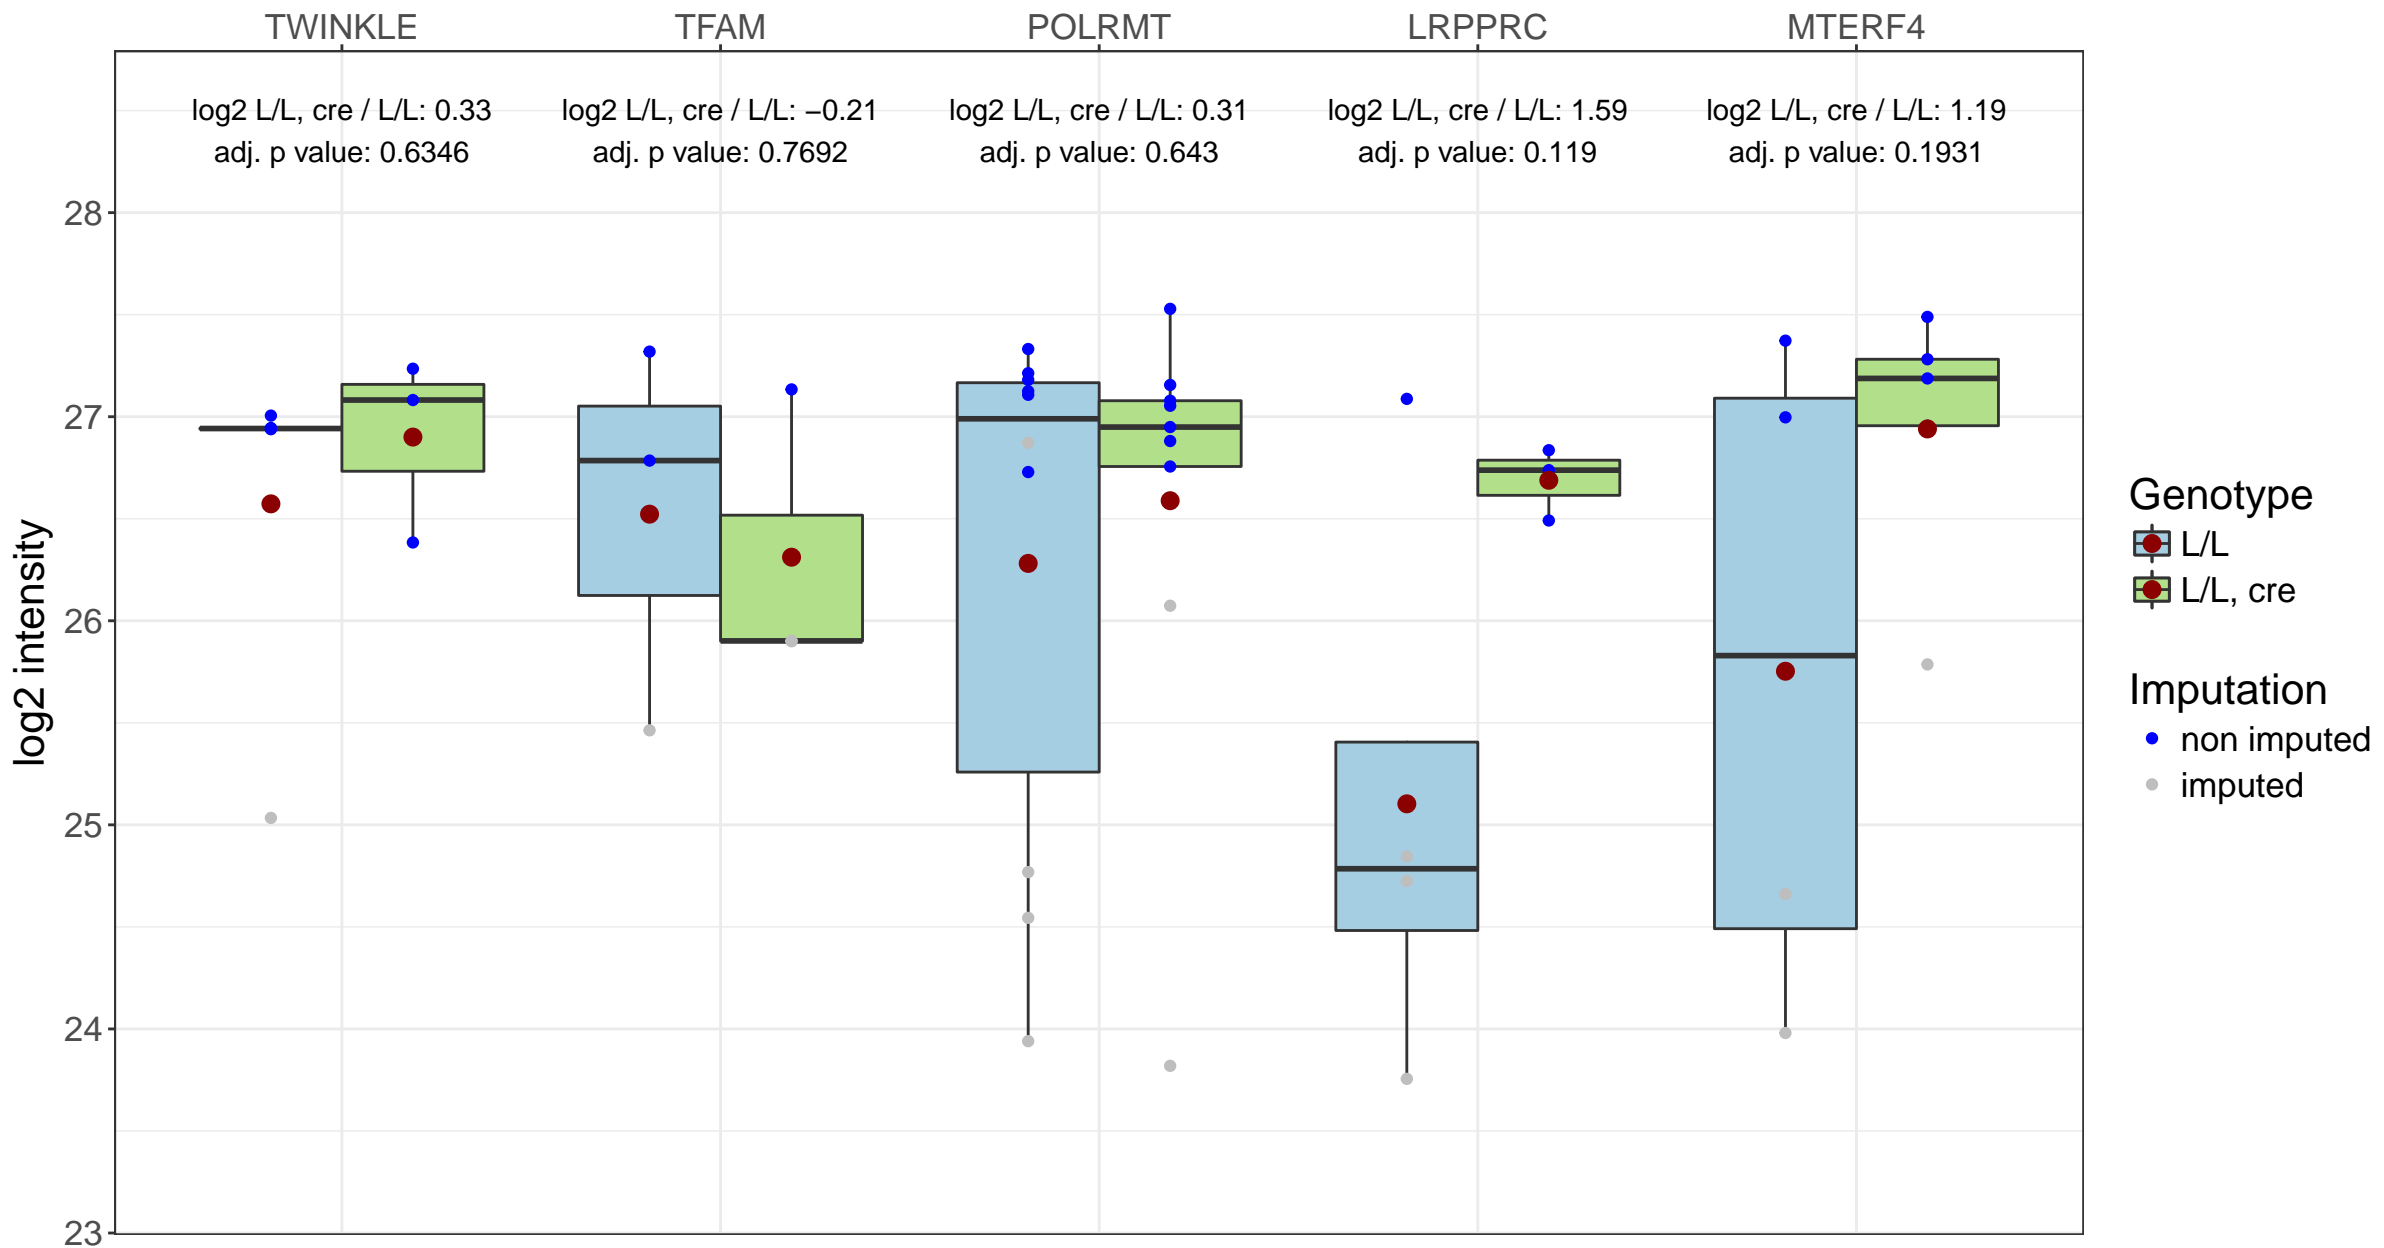

# DUT / Q8VCG1

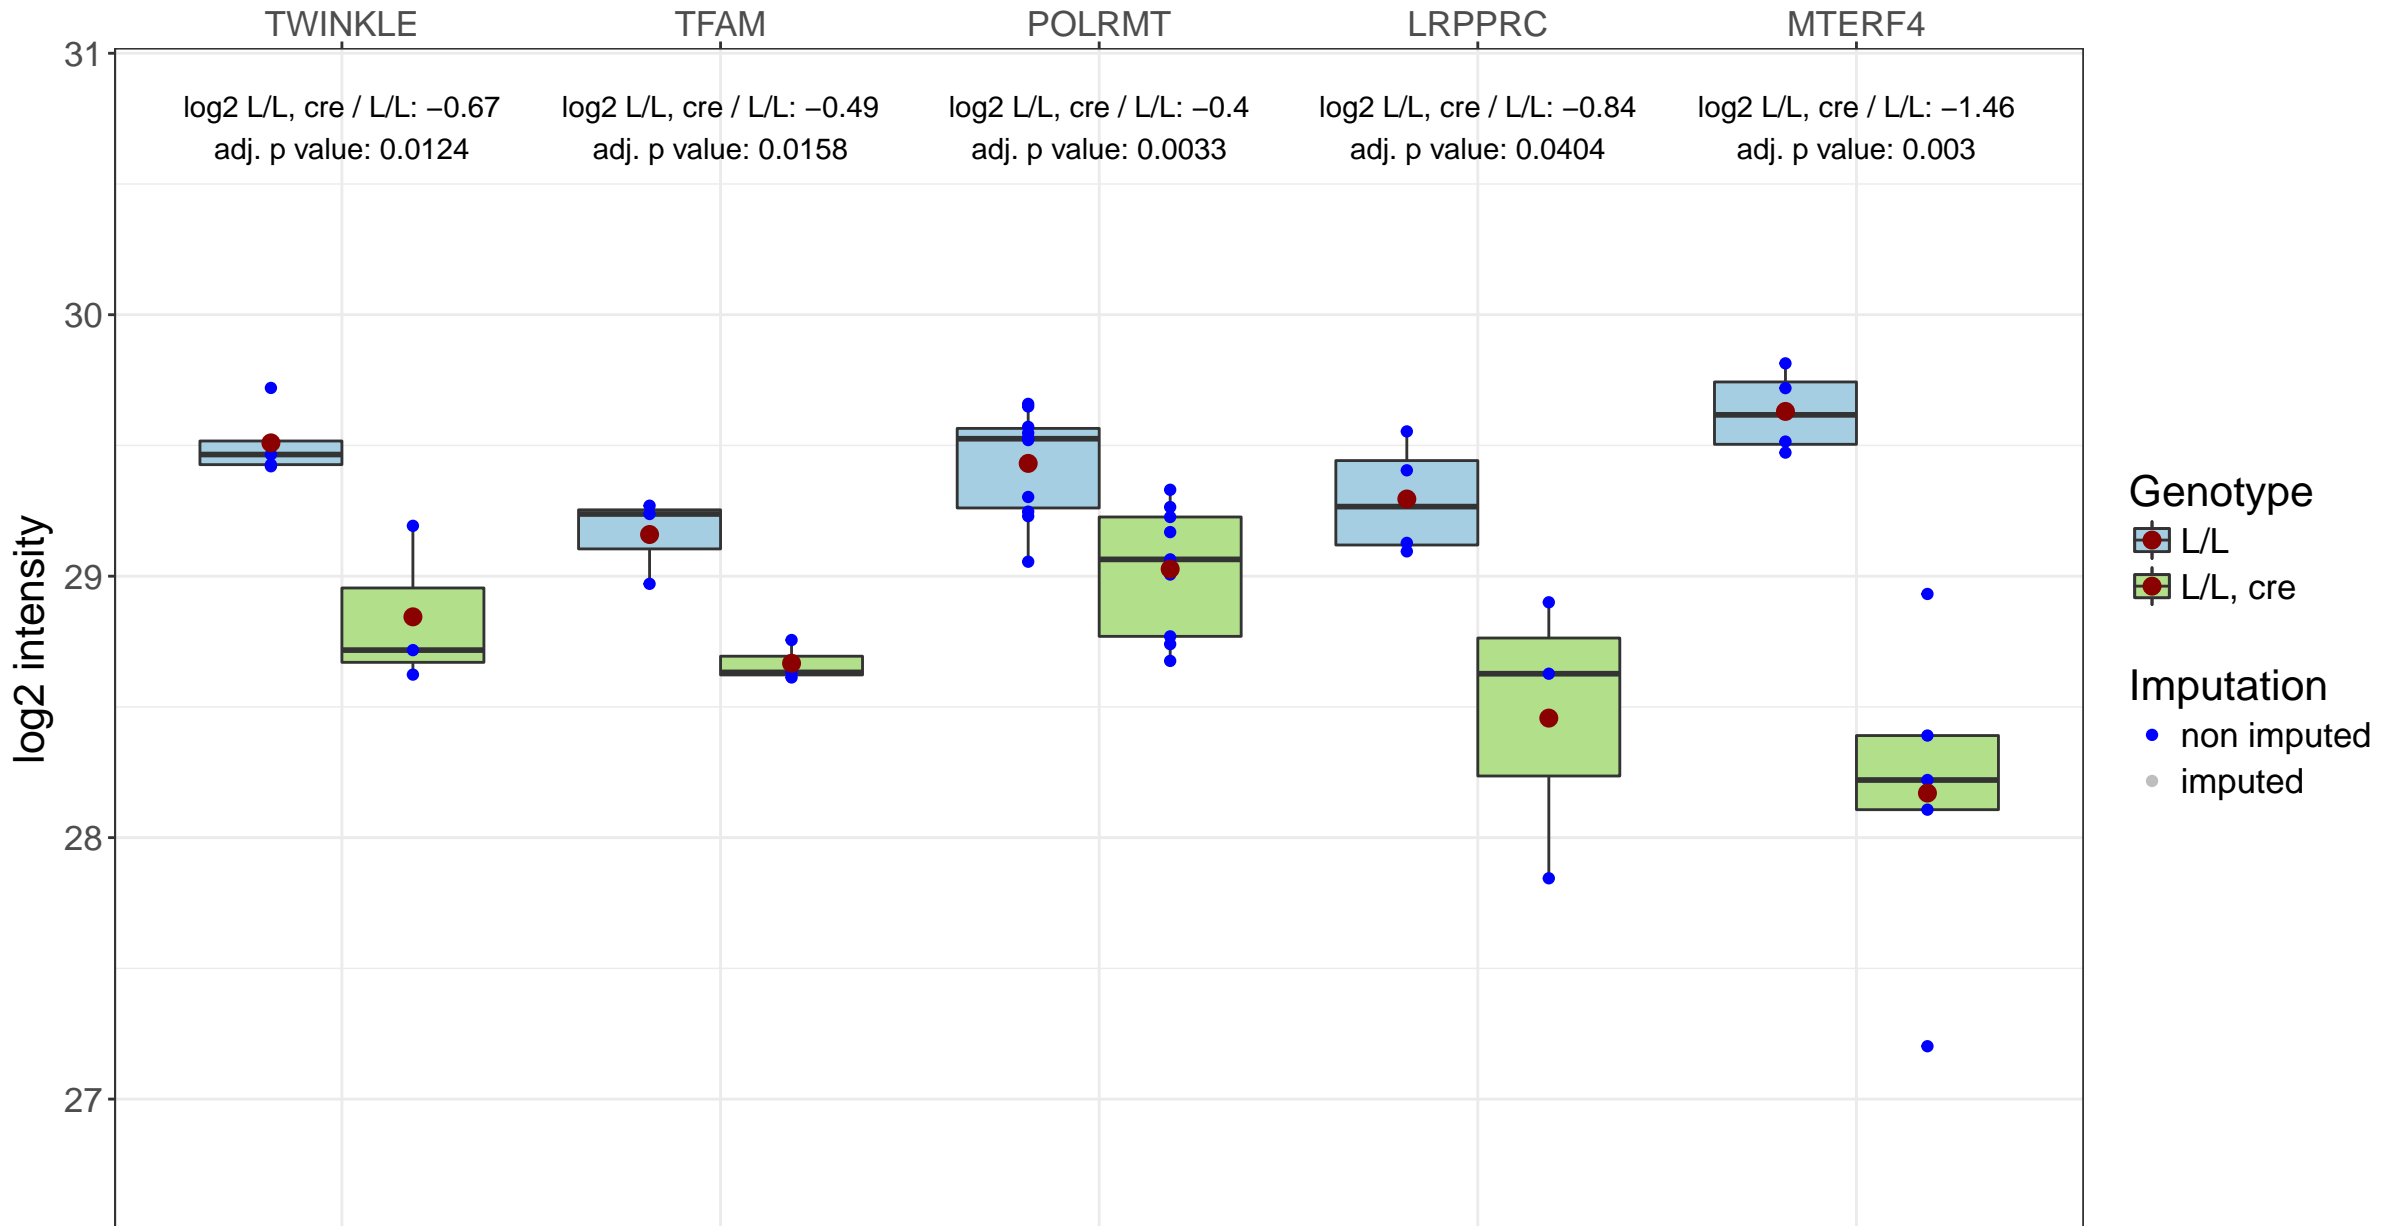

# DYNC1H1 / Q9JHU4

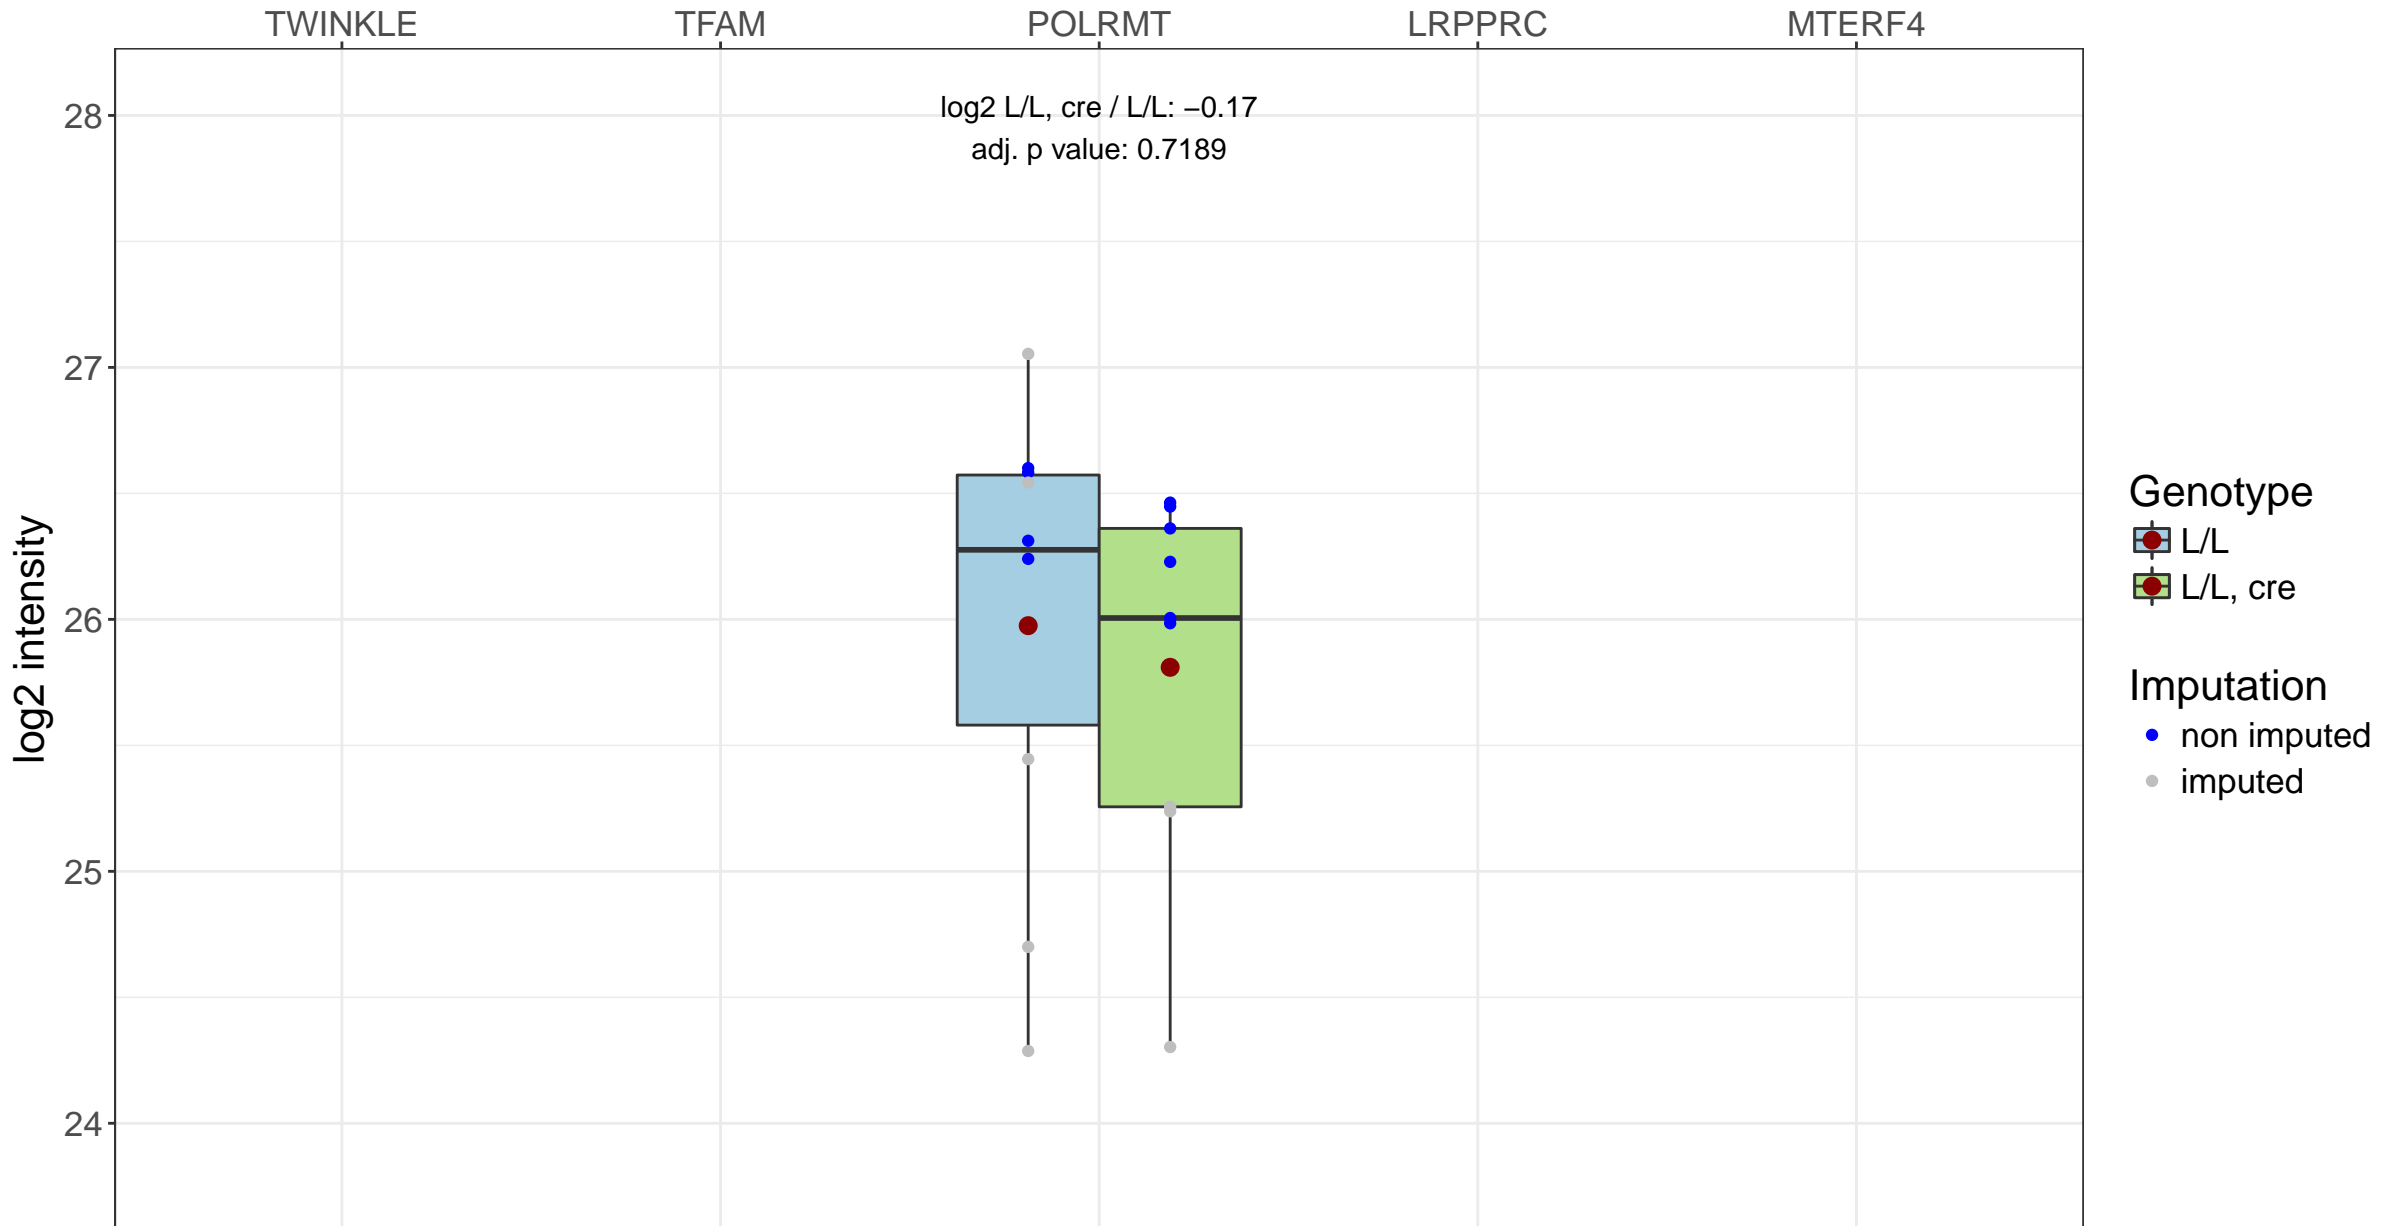

# EARS2 / Q9CXJ1

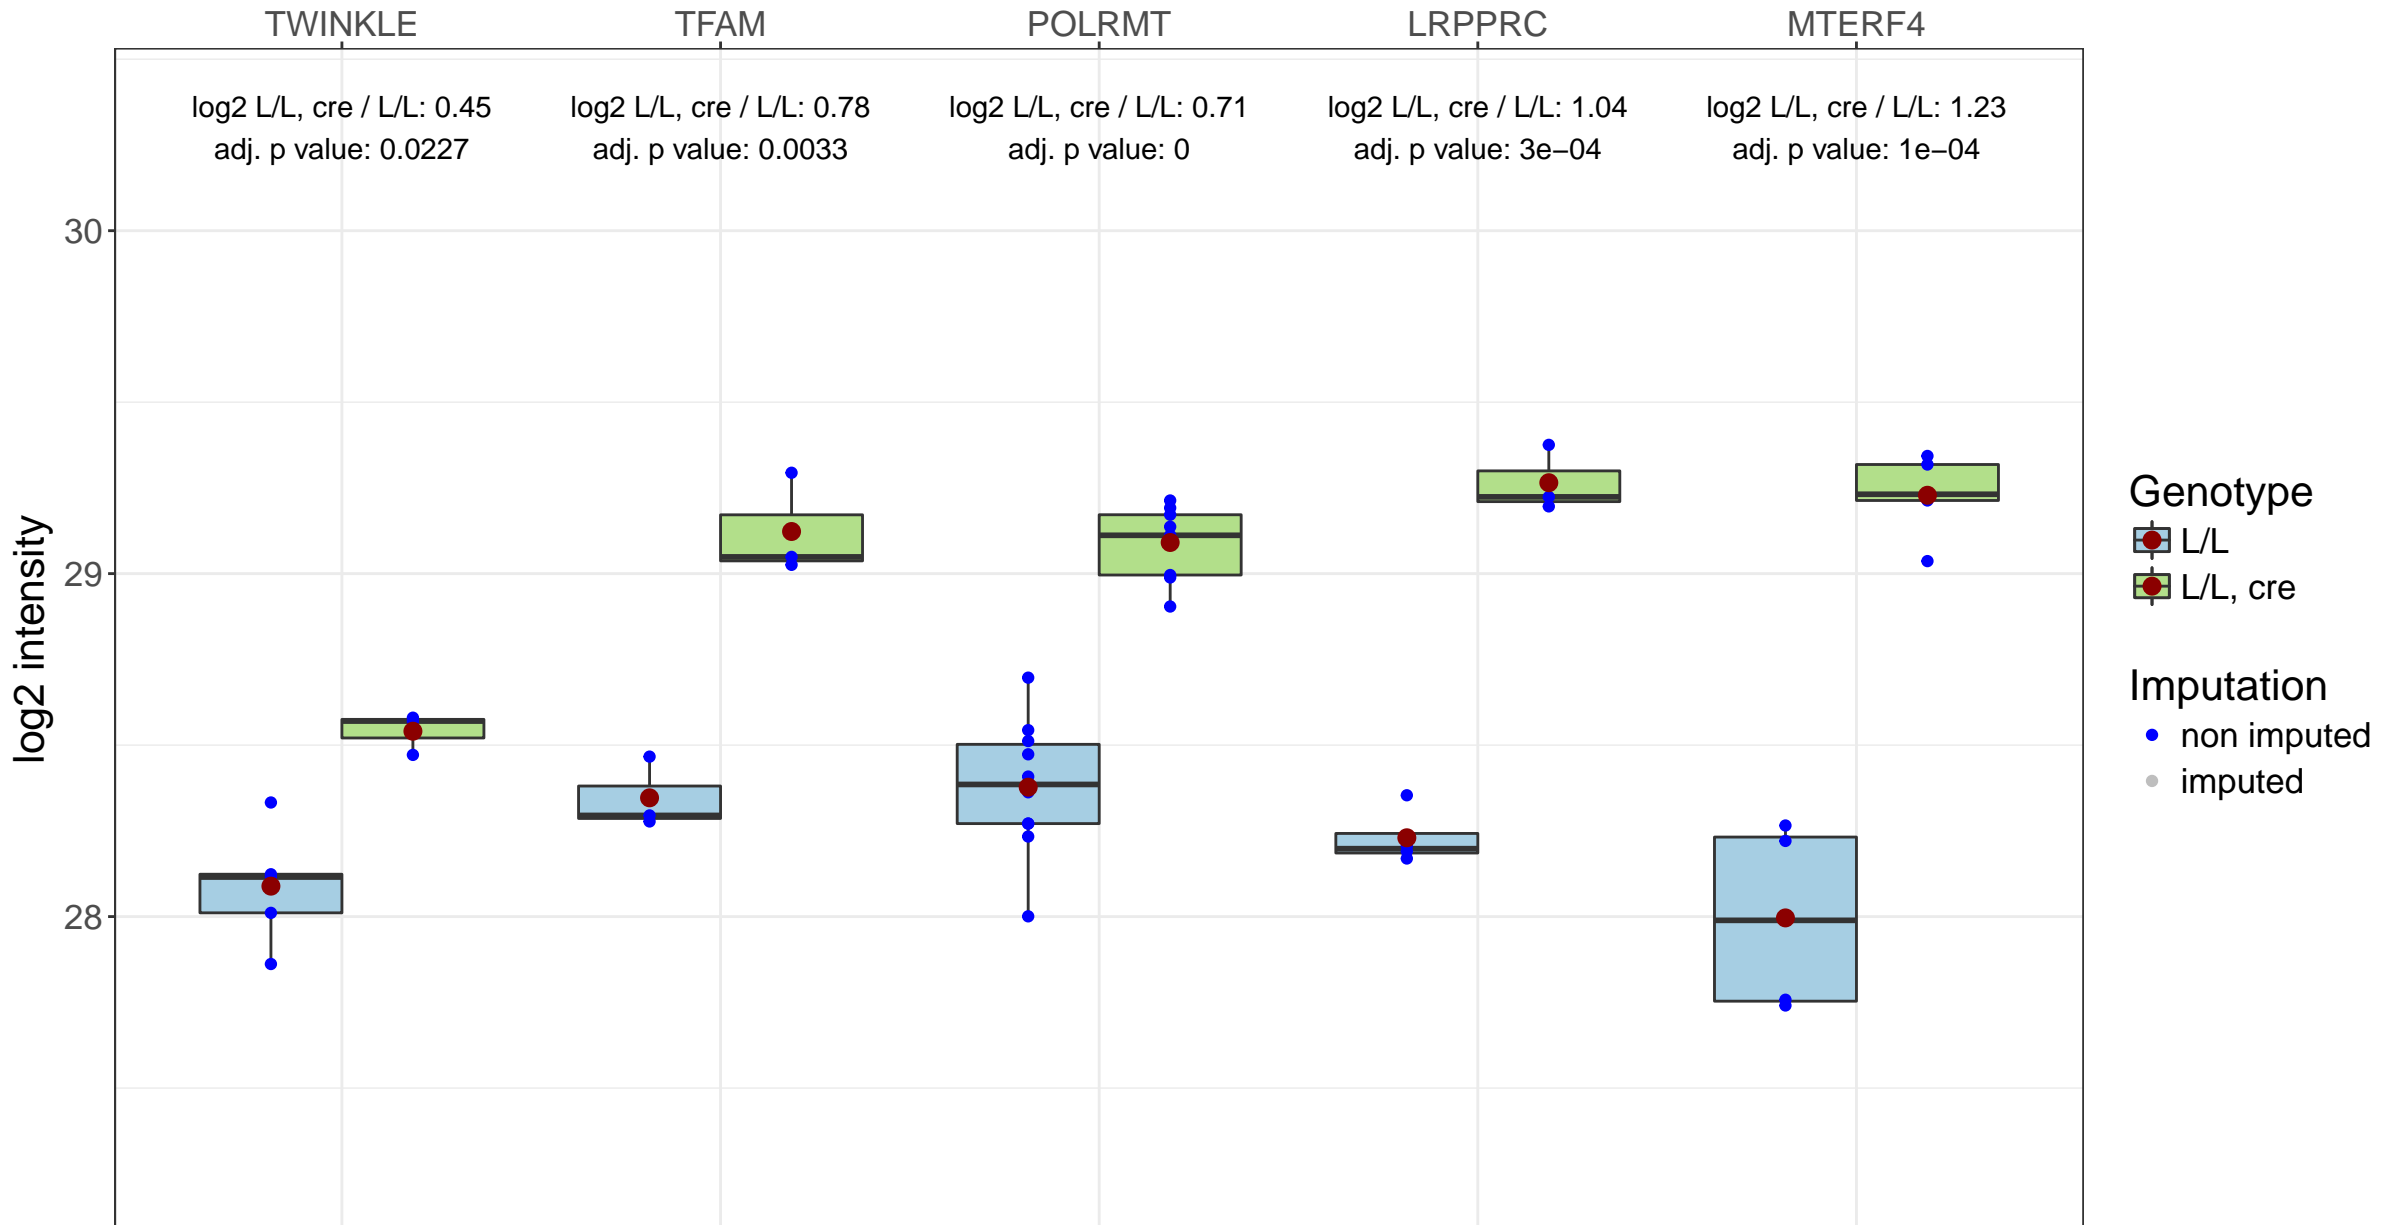



# ECH1 / O35459

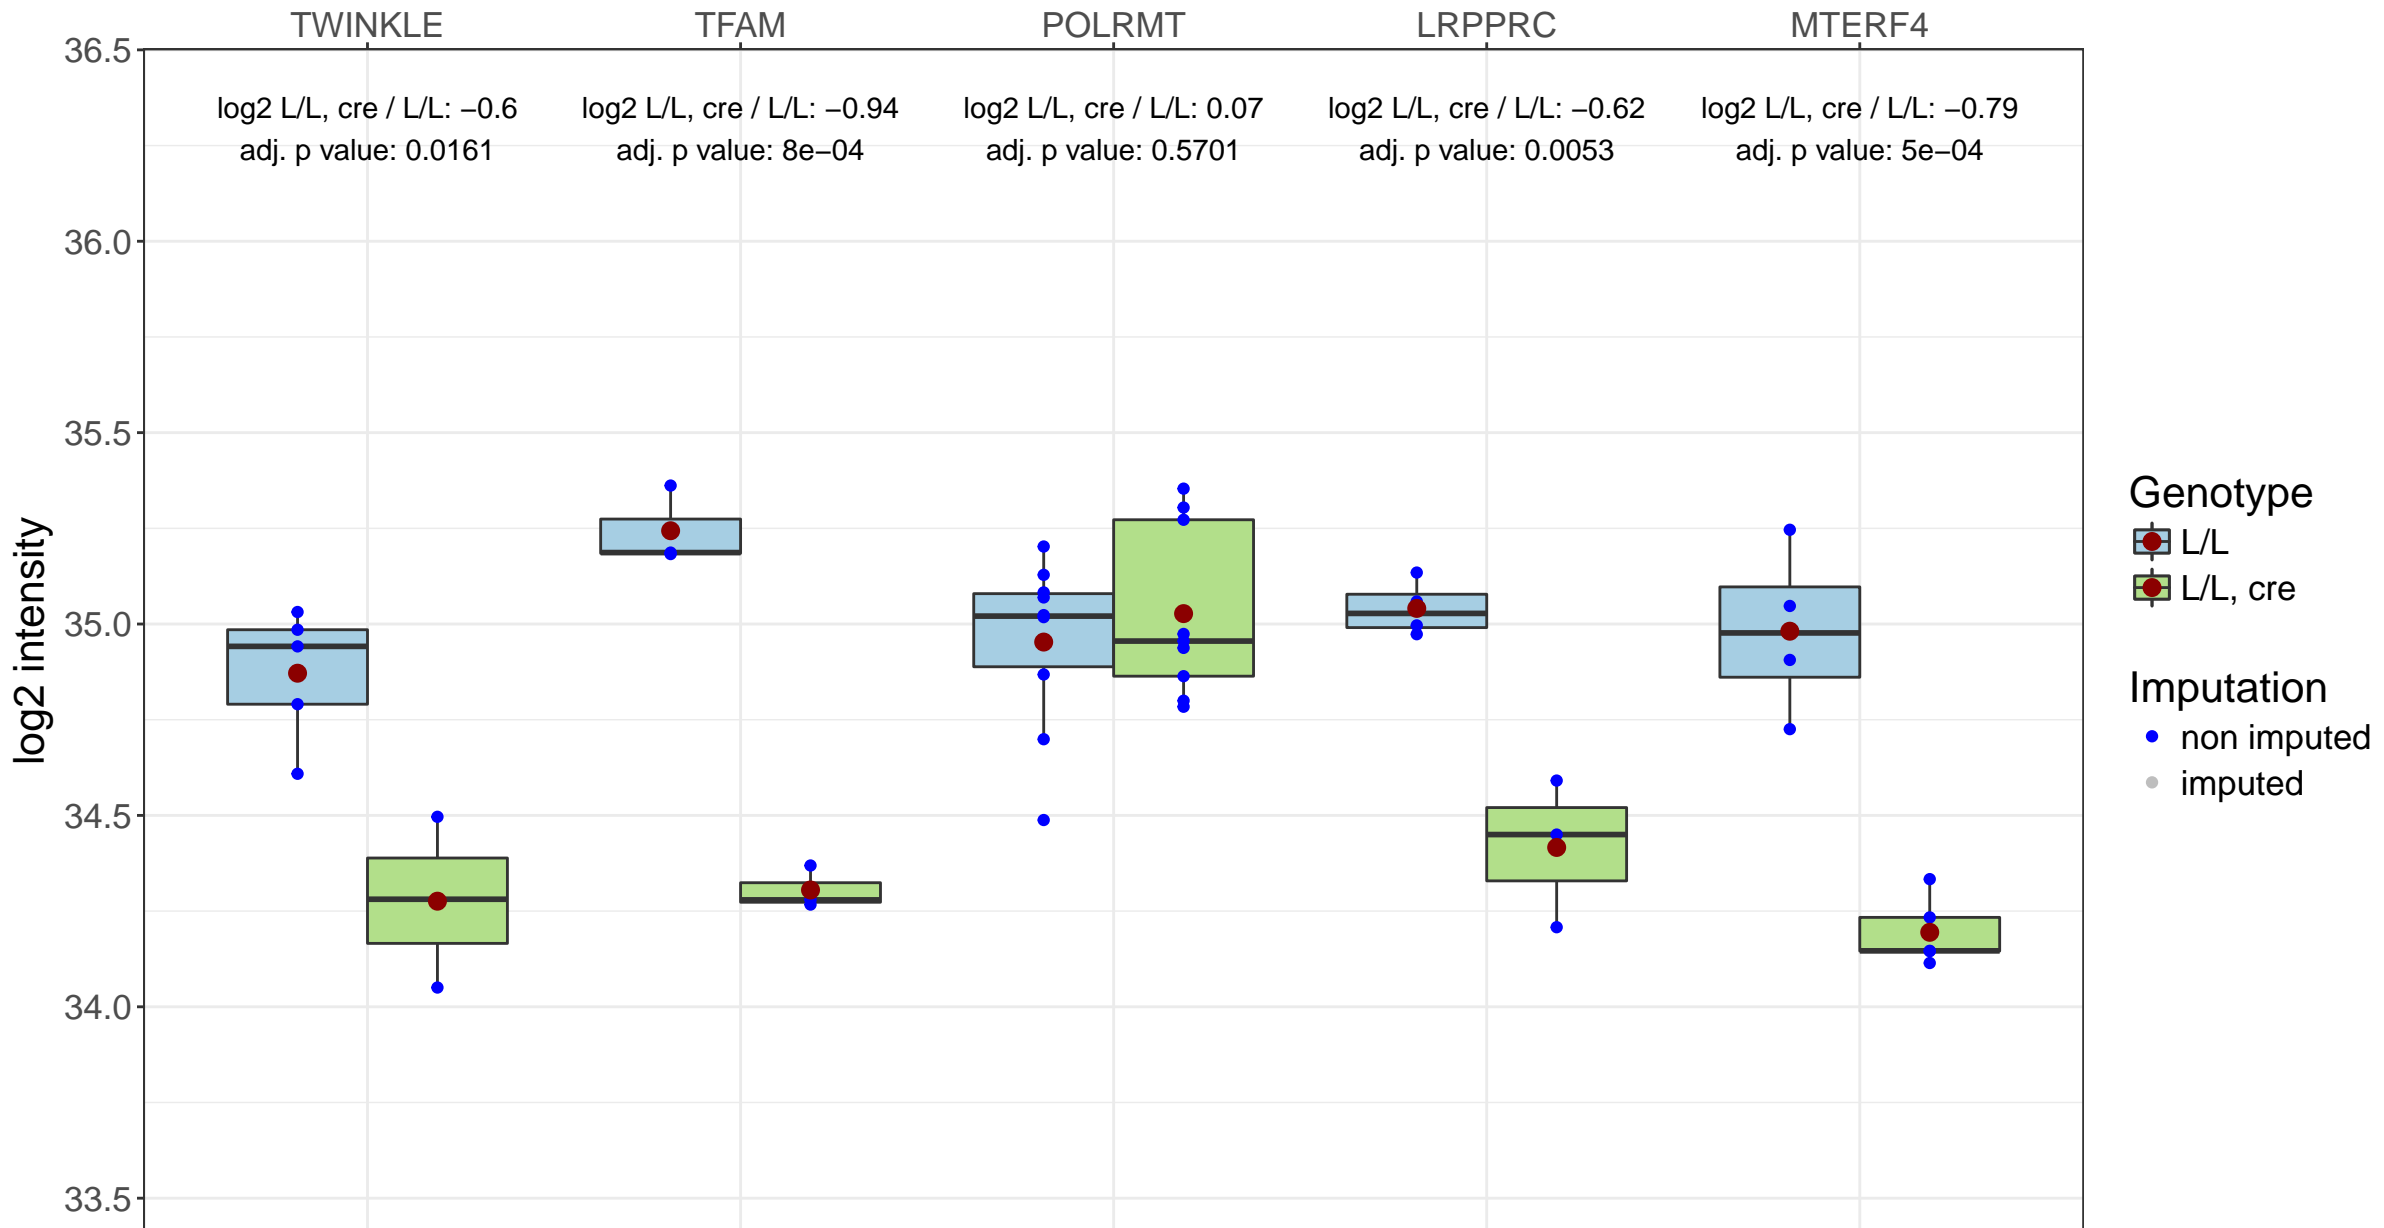

# ECHDC2 / Q3TLP5

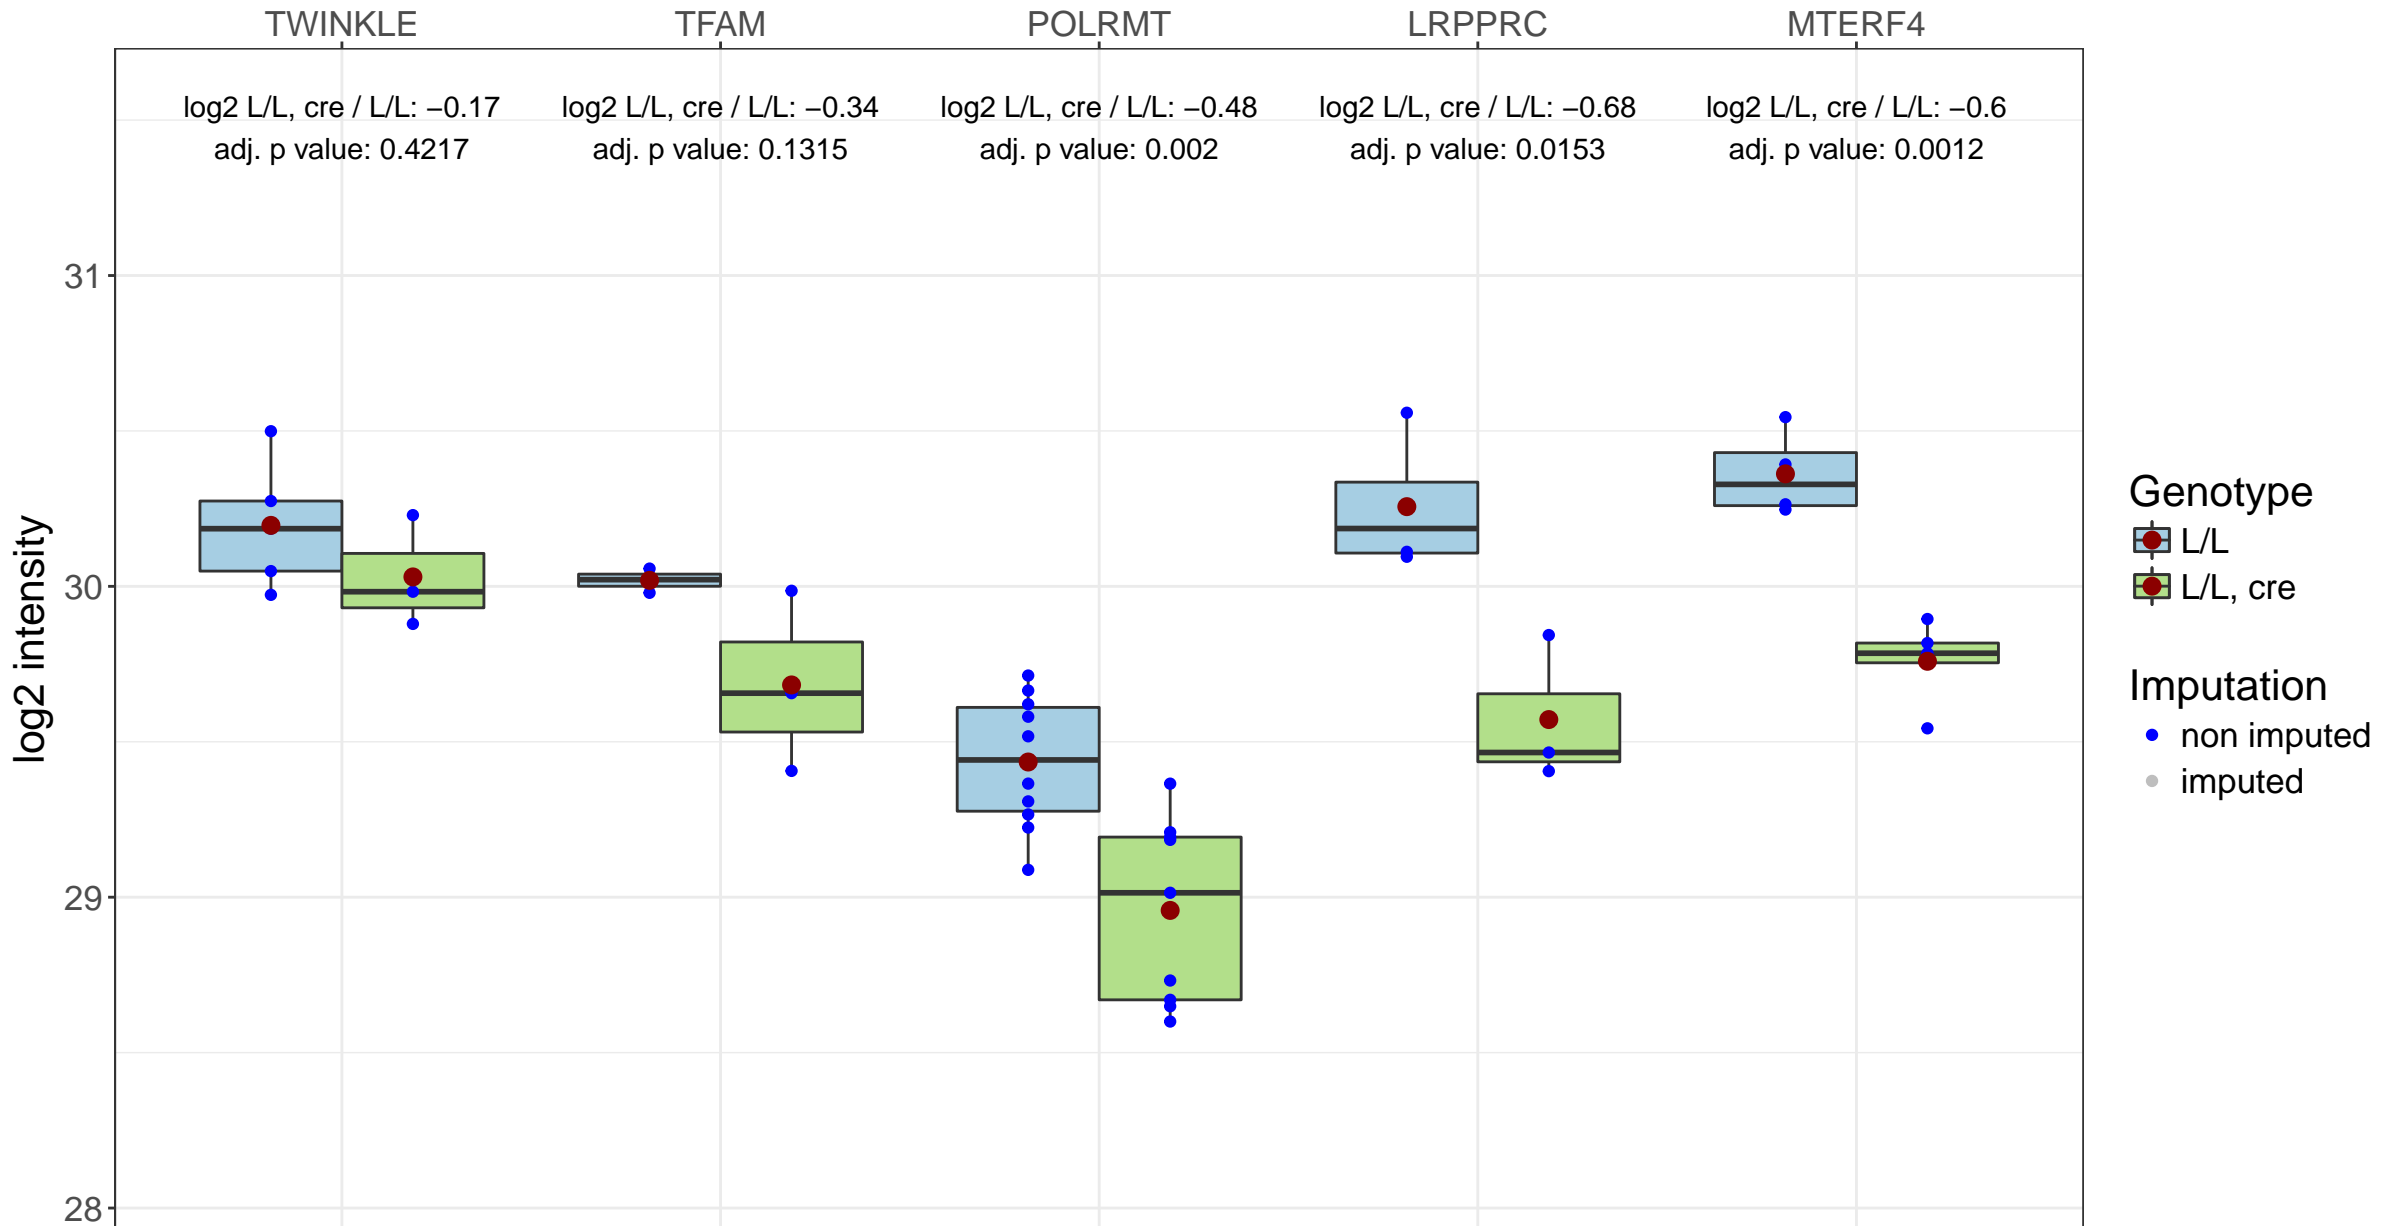

# ECHDC3 / Q9D7J9

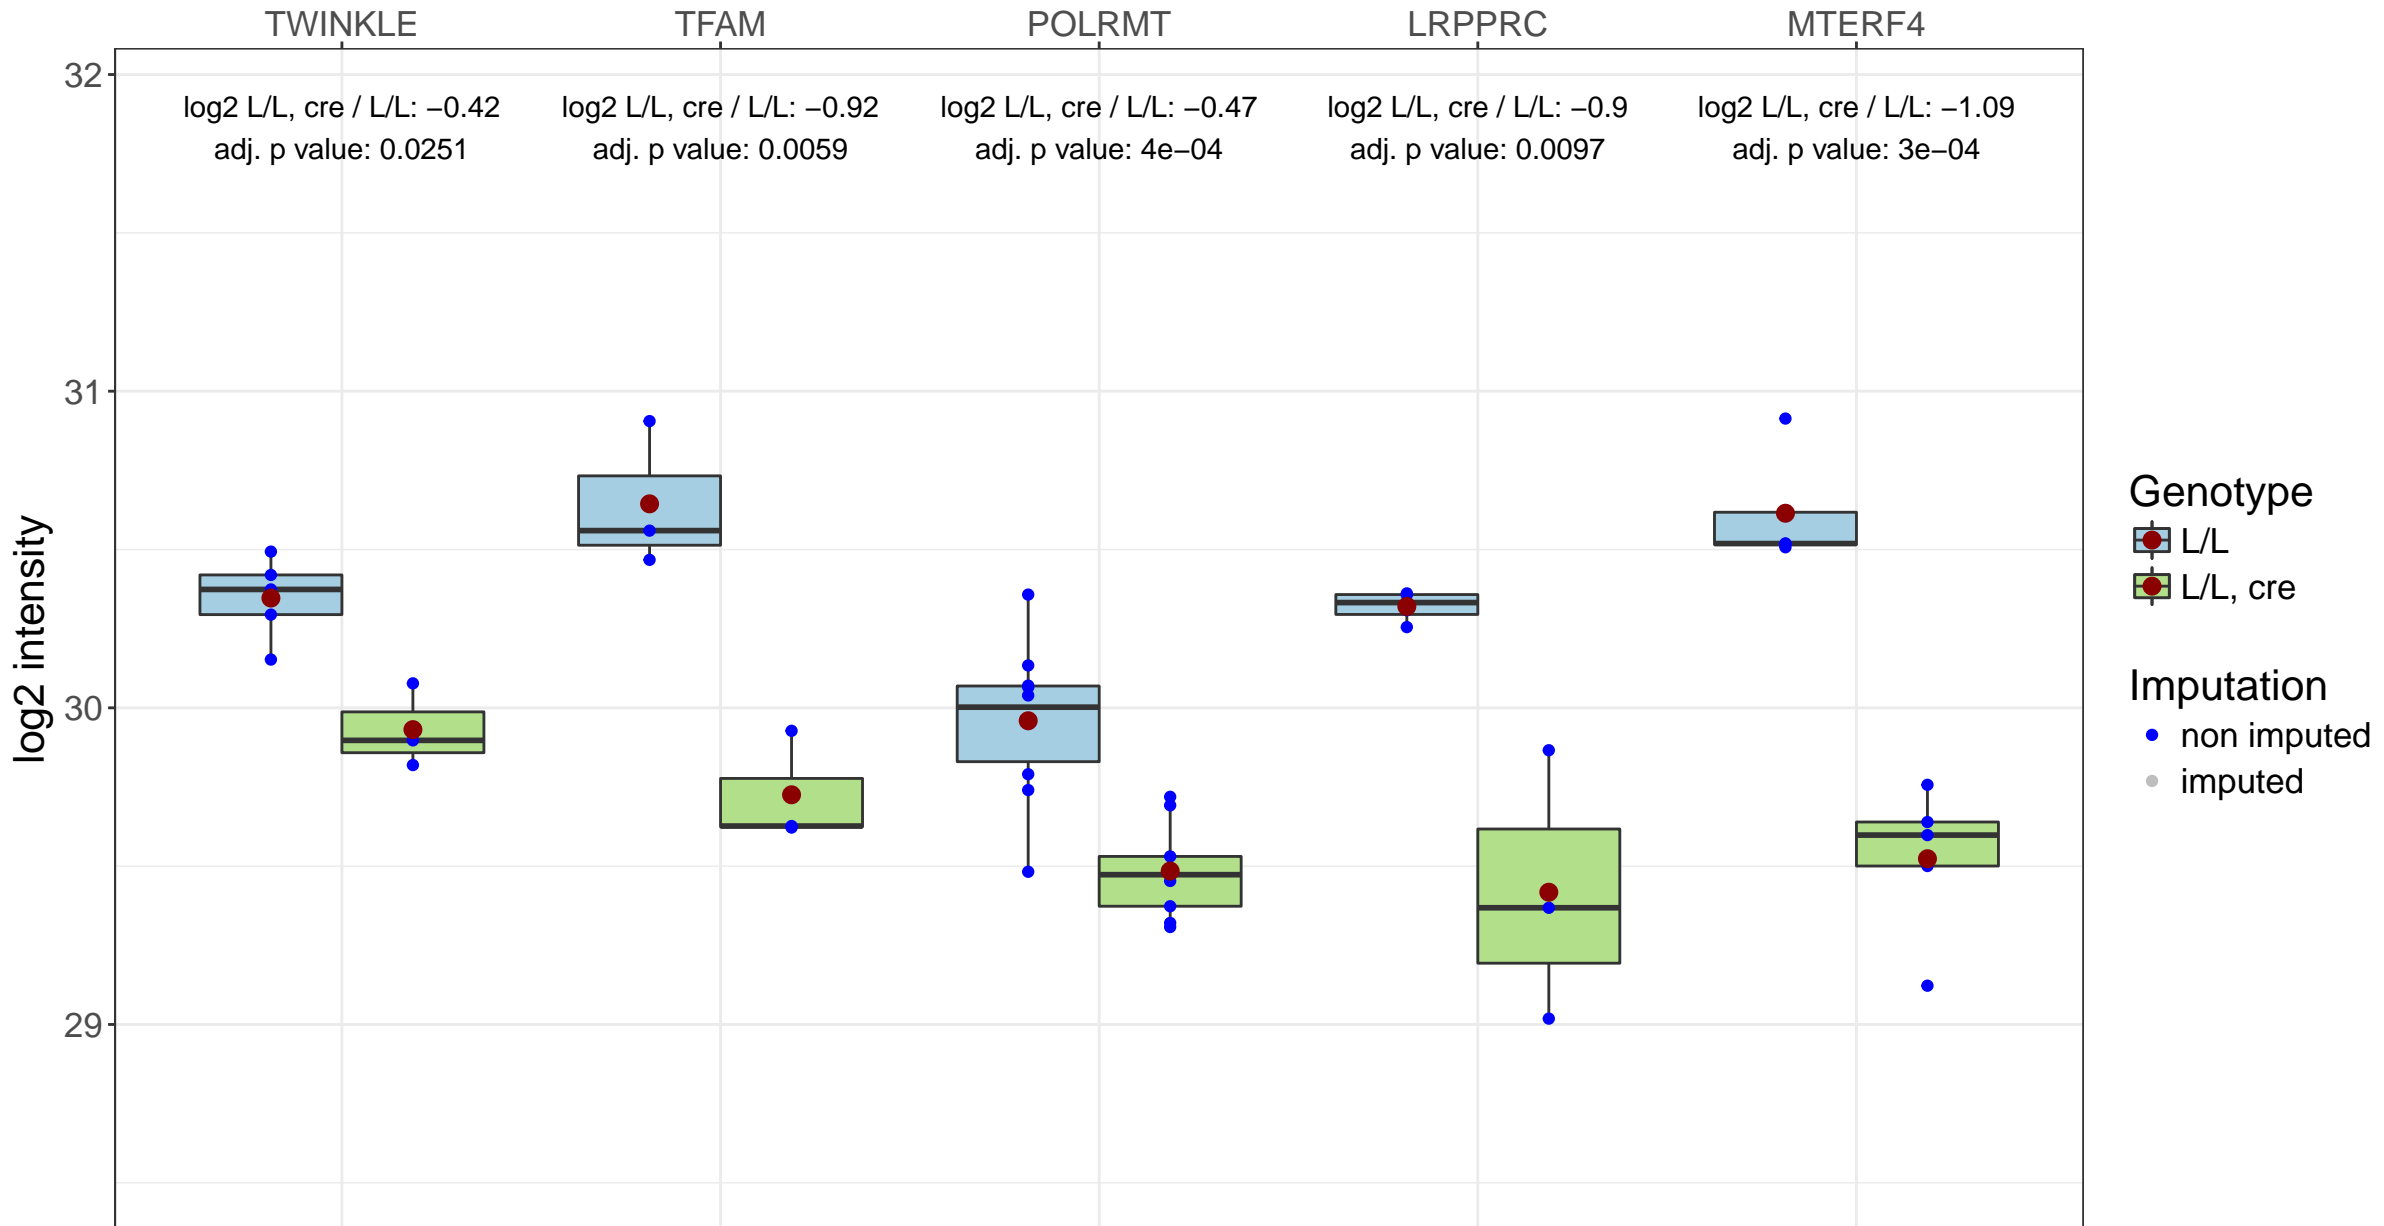

# ECHS1 / Q8BH95

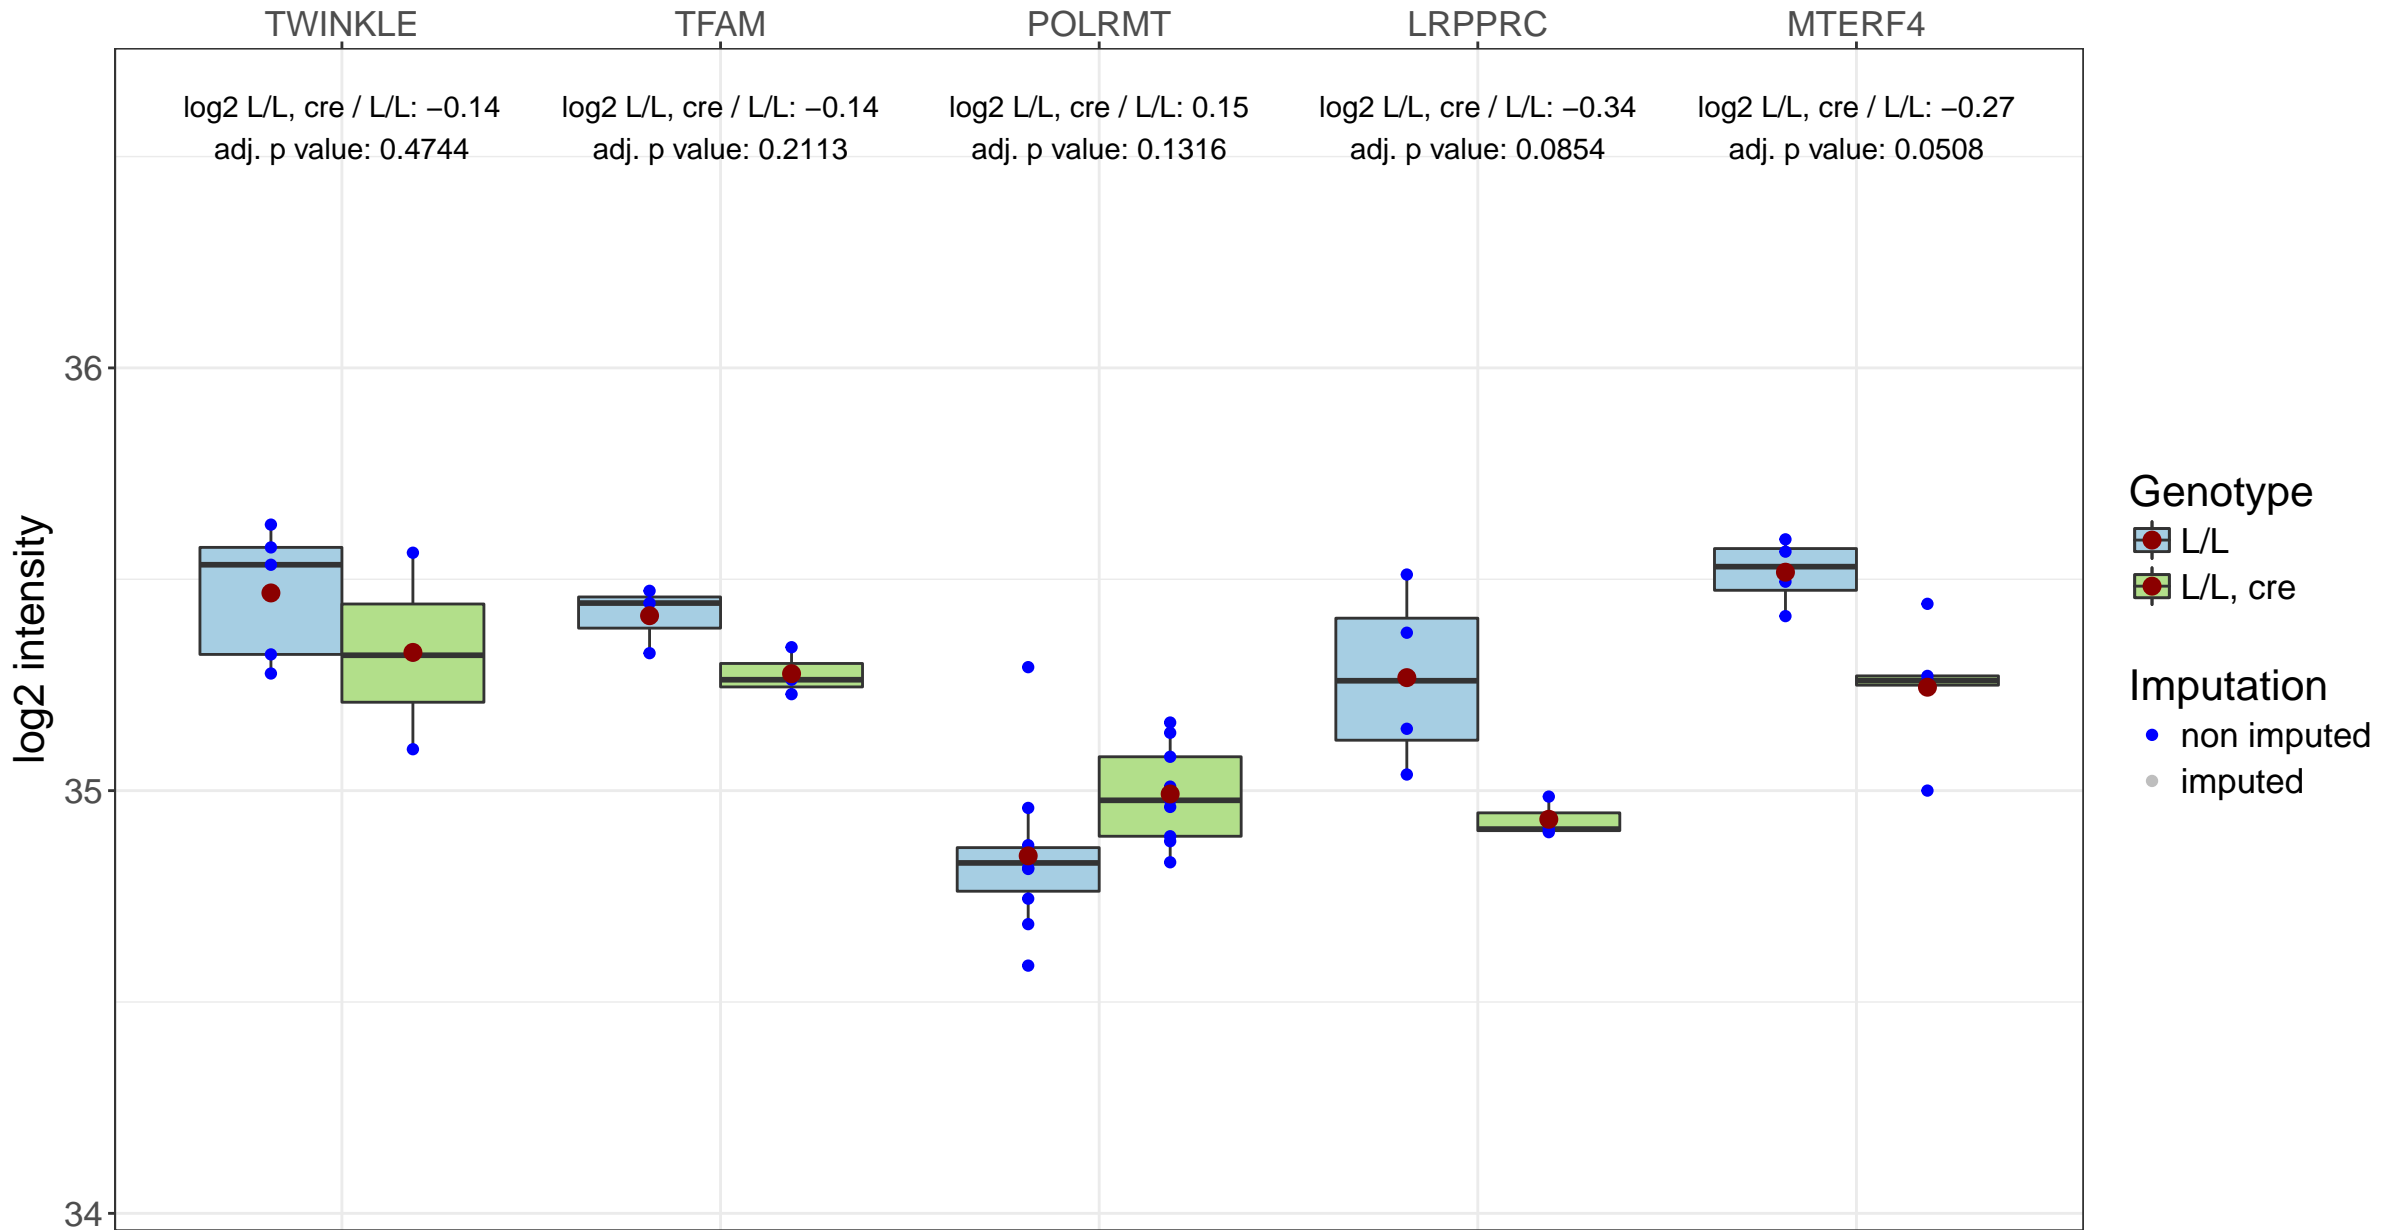

# ECI1 / P42125

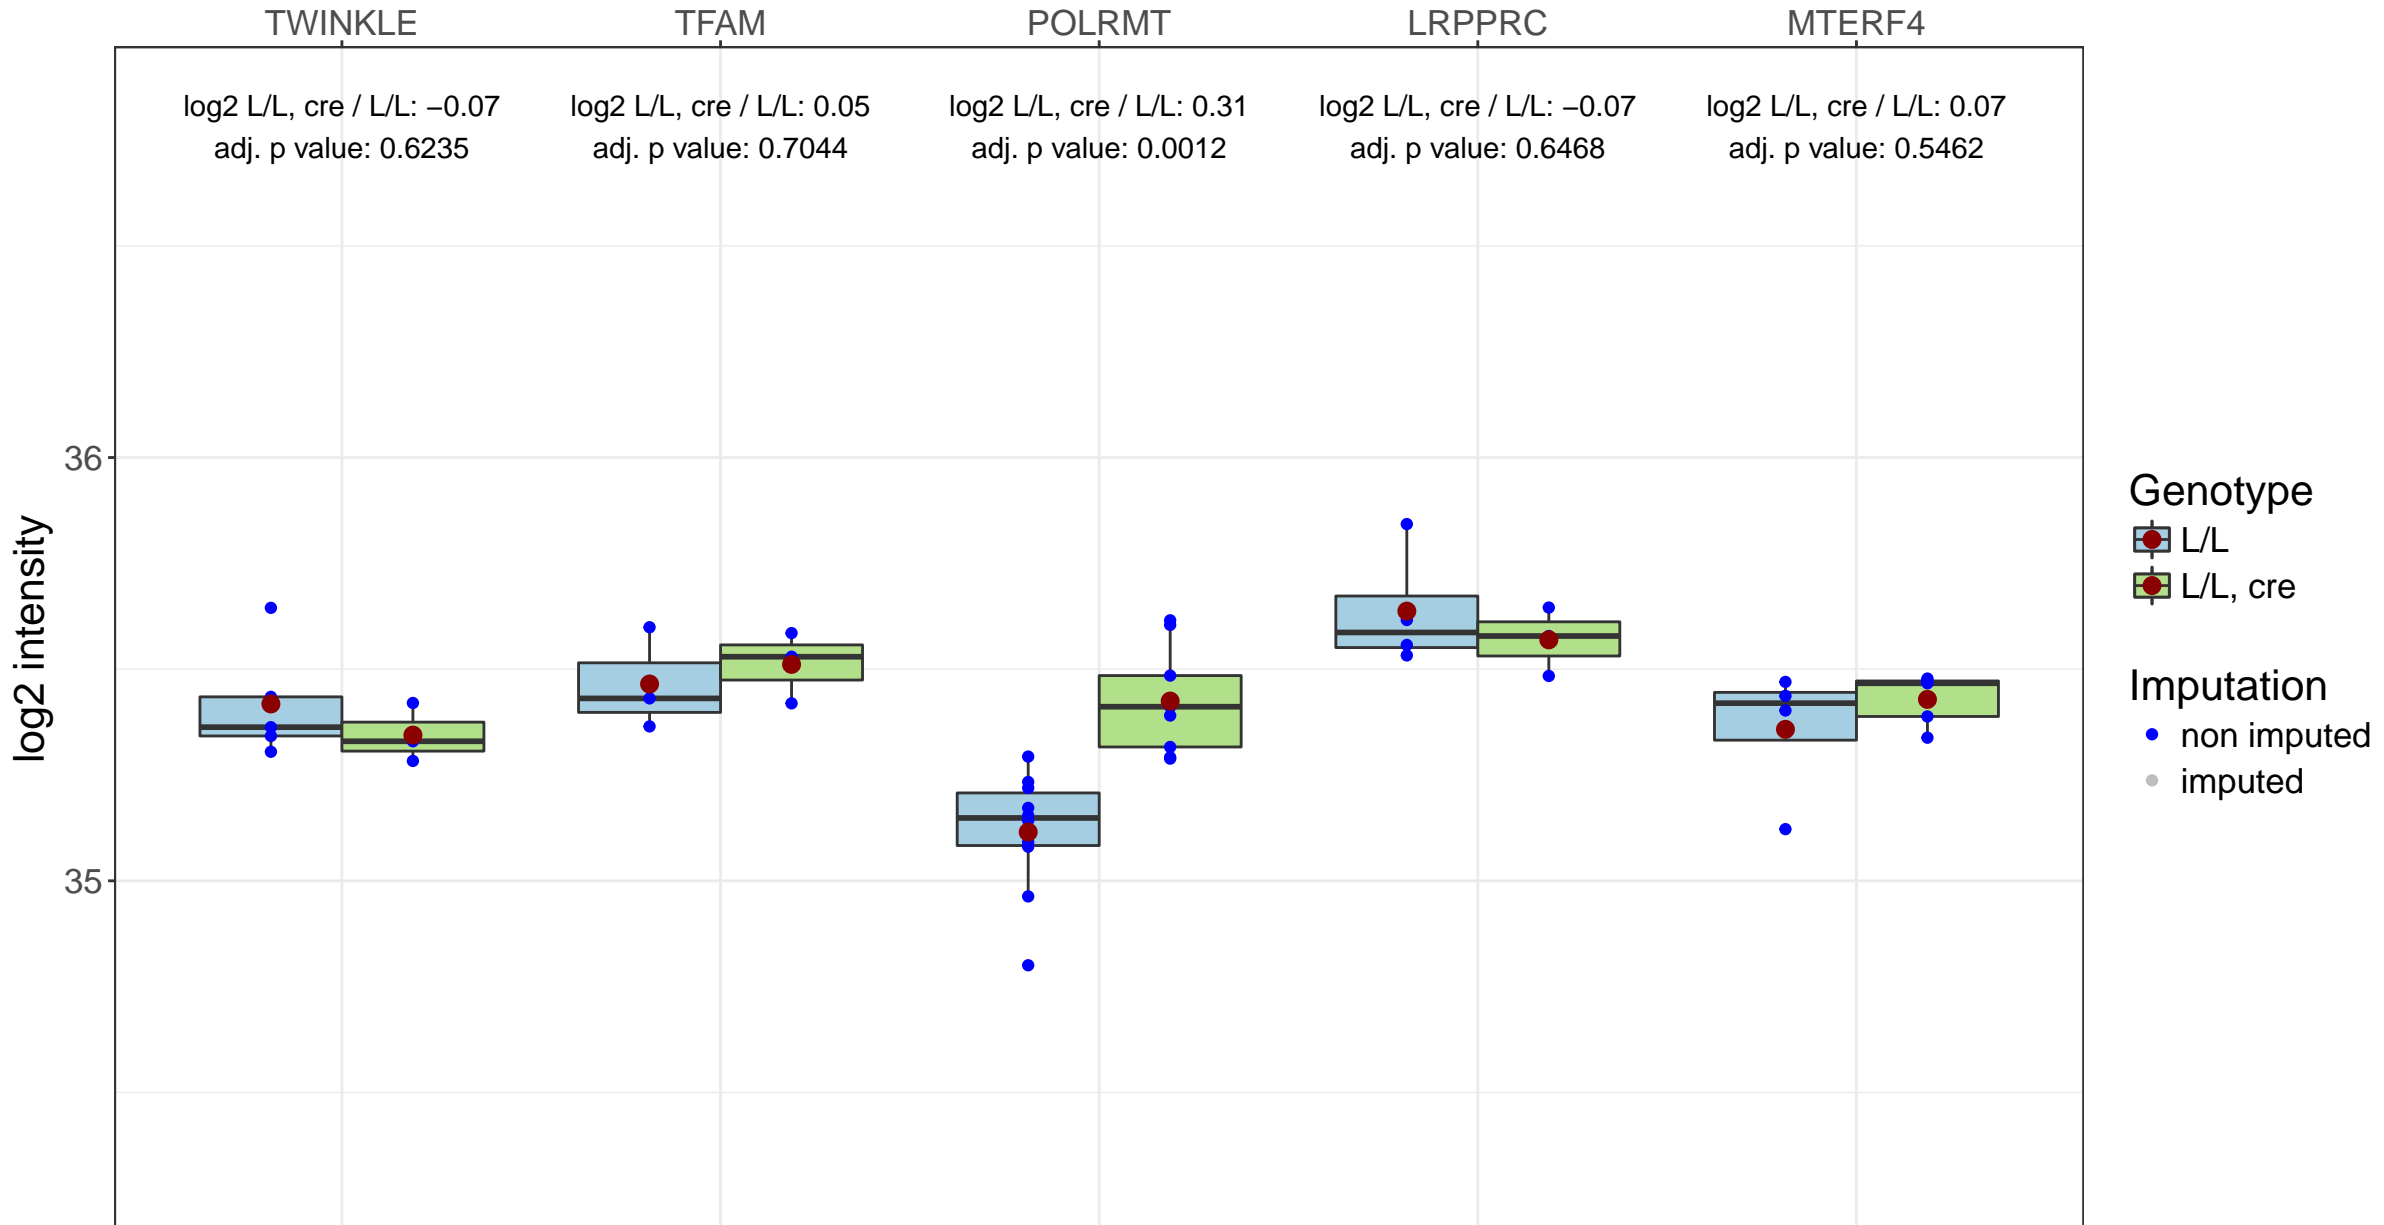

# ECI2 / Q9WUR2-2

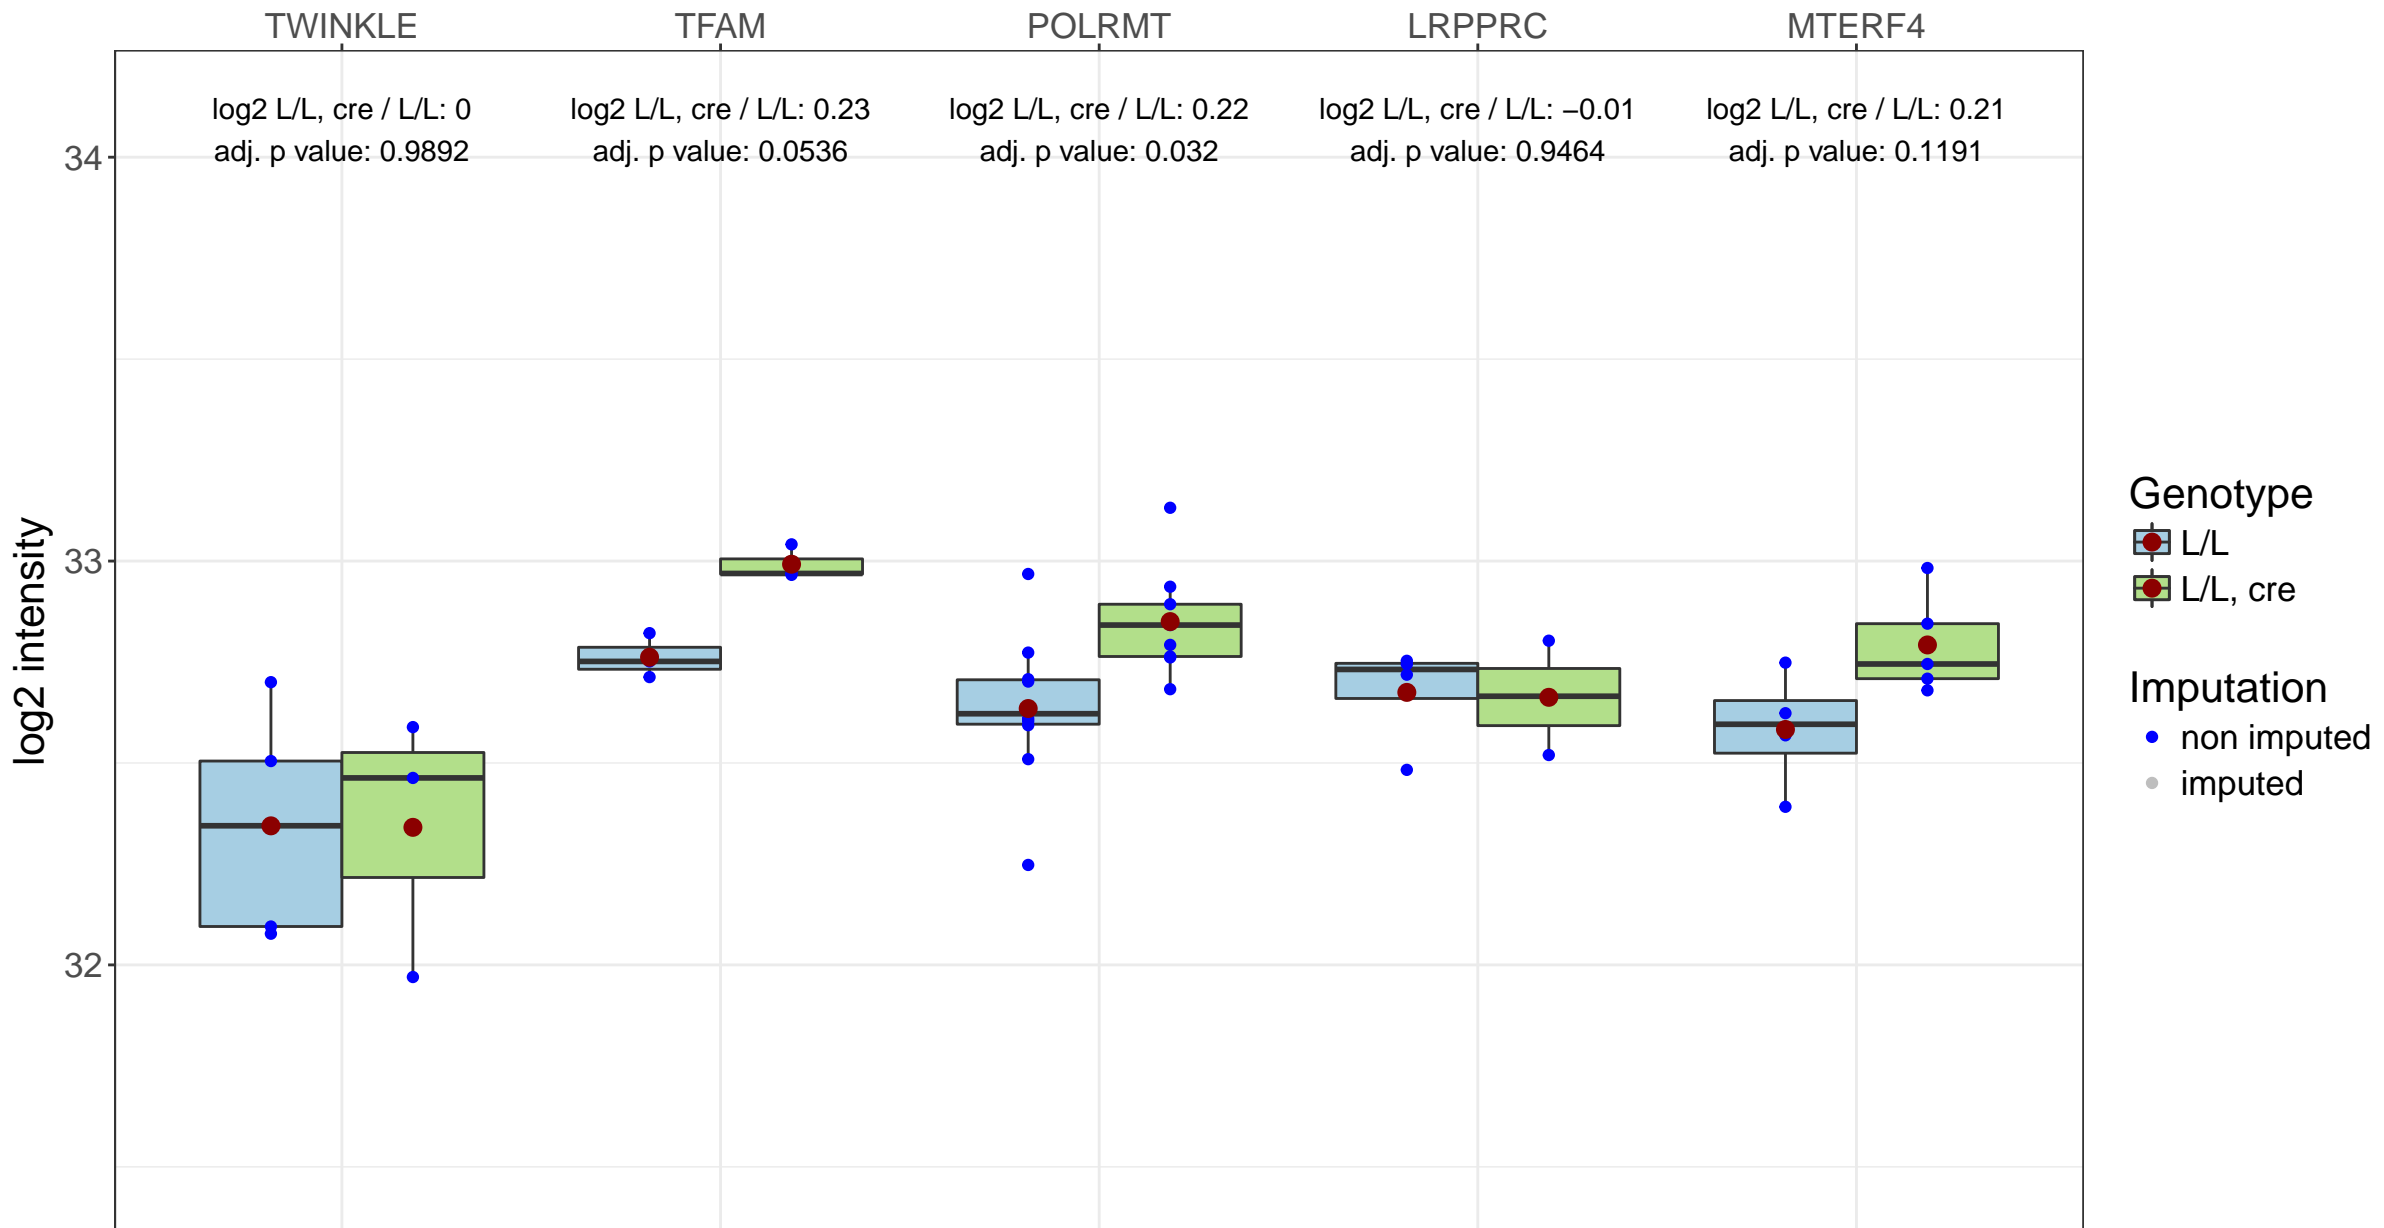

# ECSIT / Q9QZH6

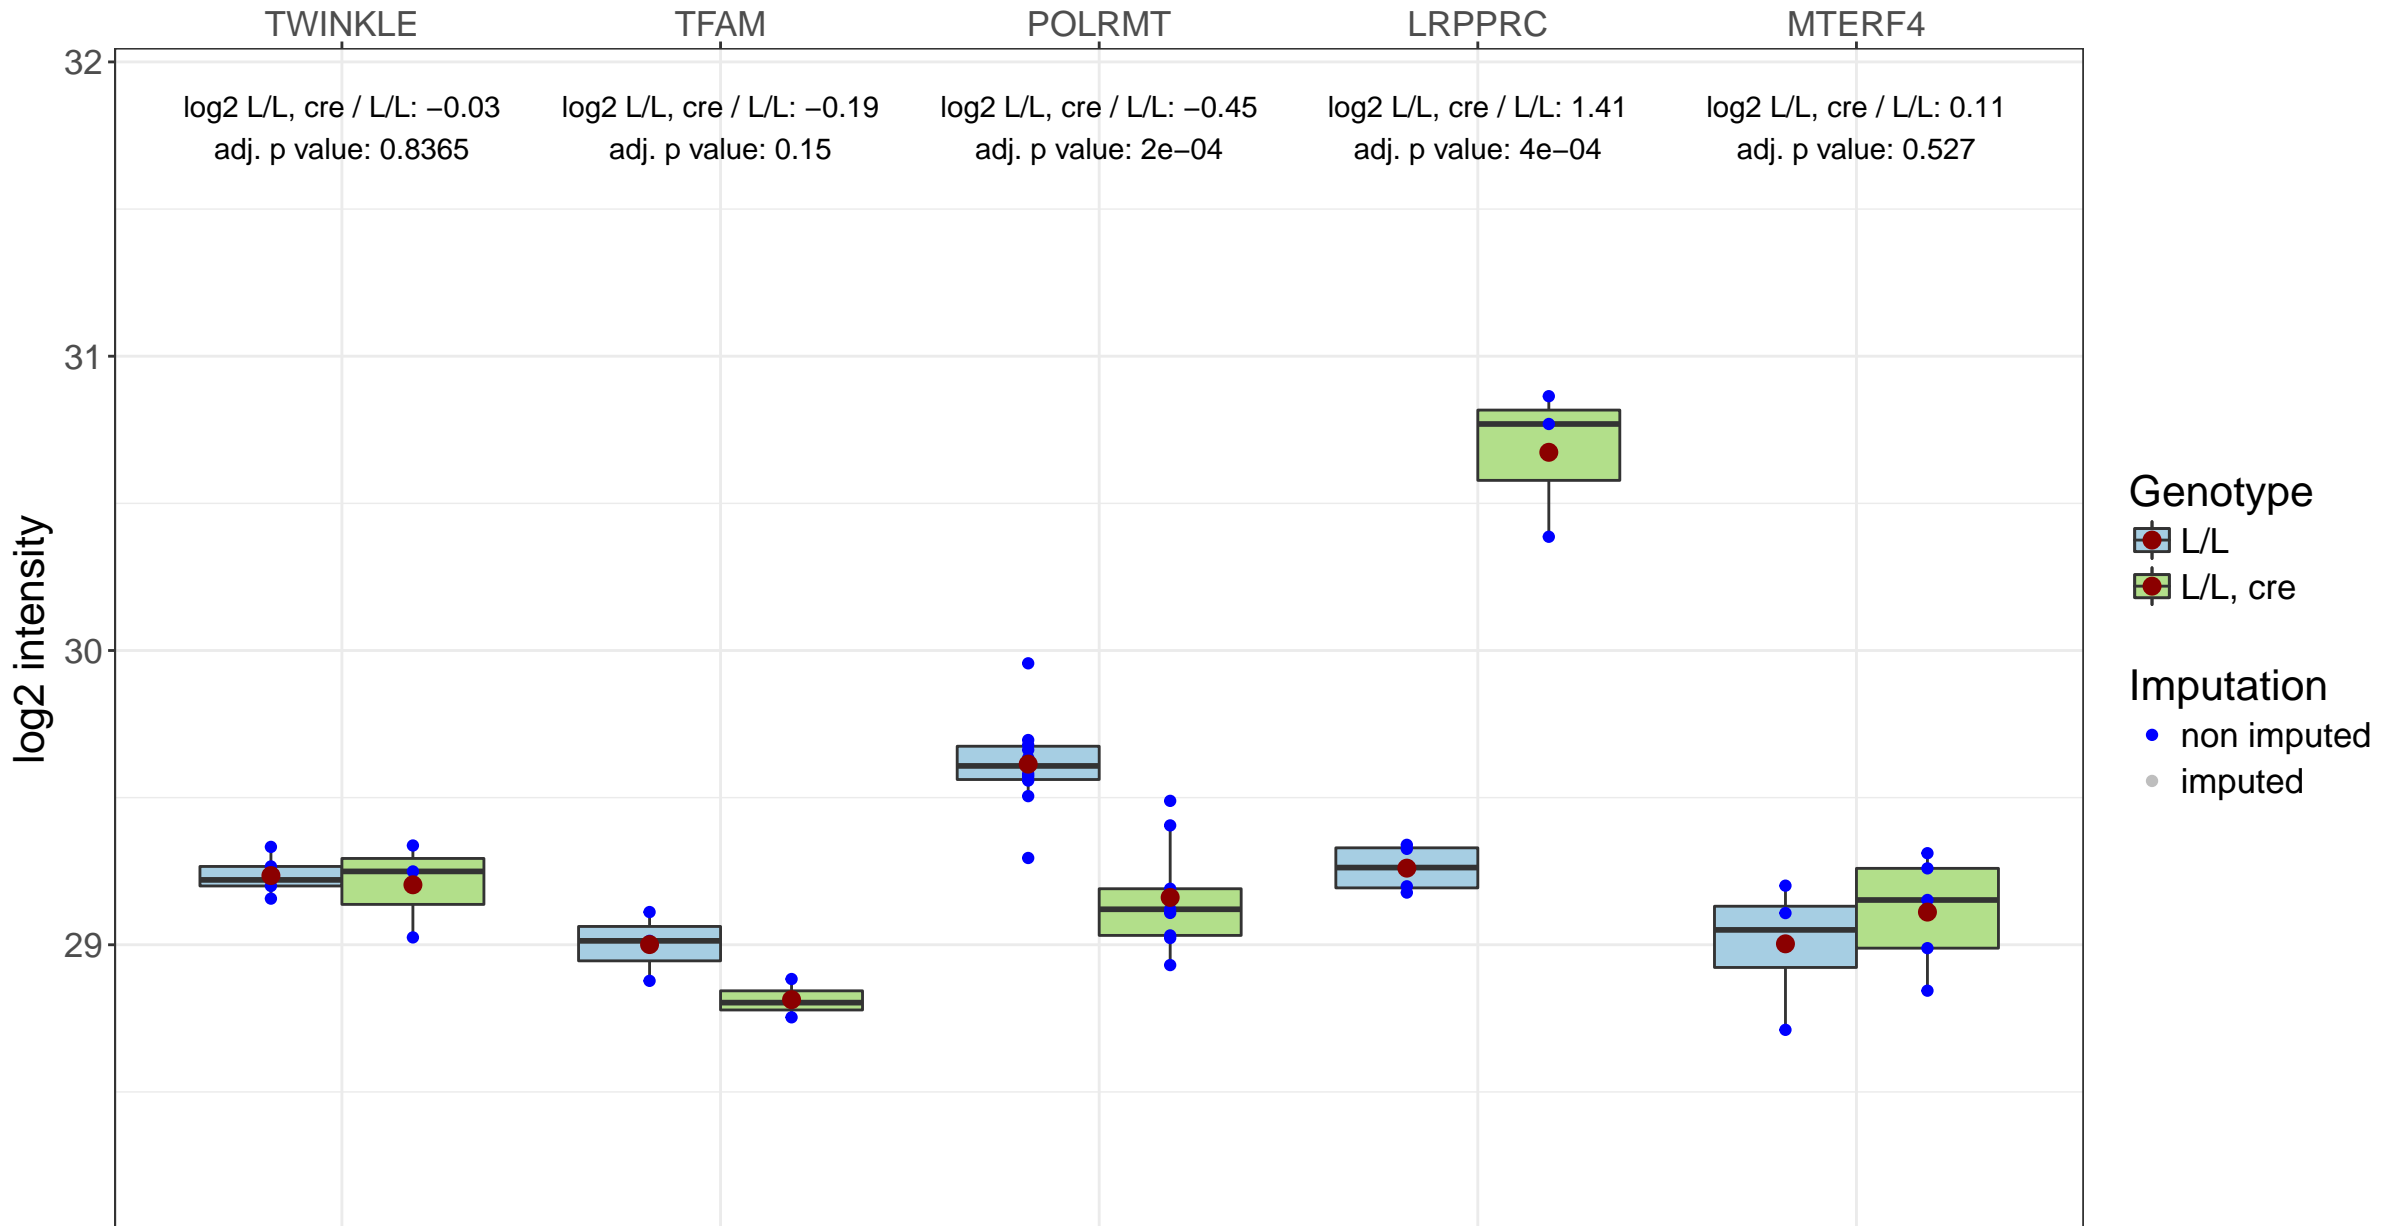

# EEF1A1 / P10126

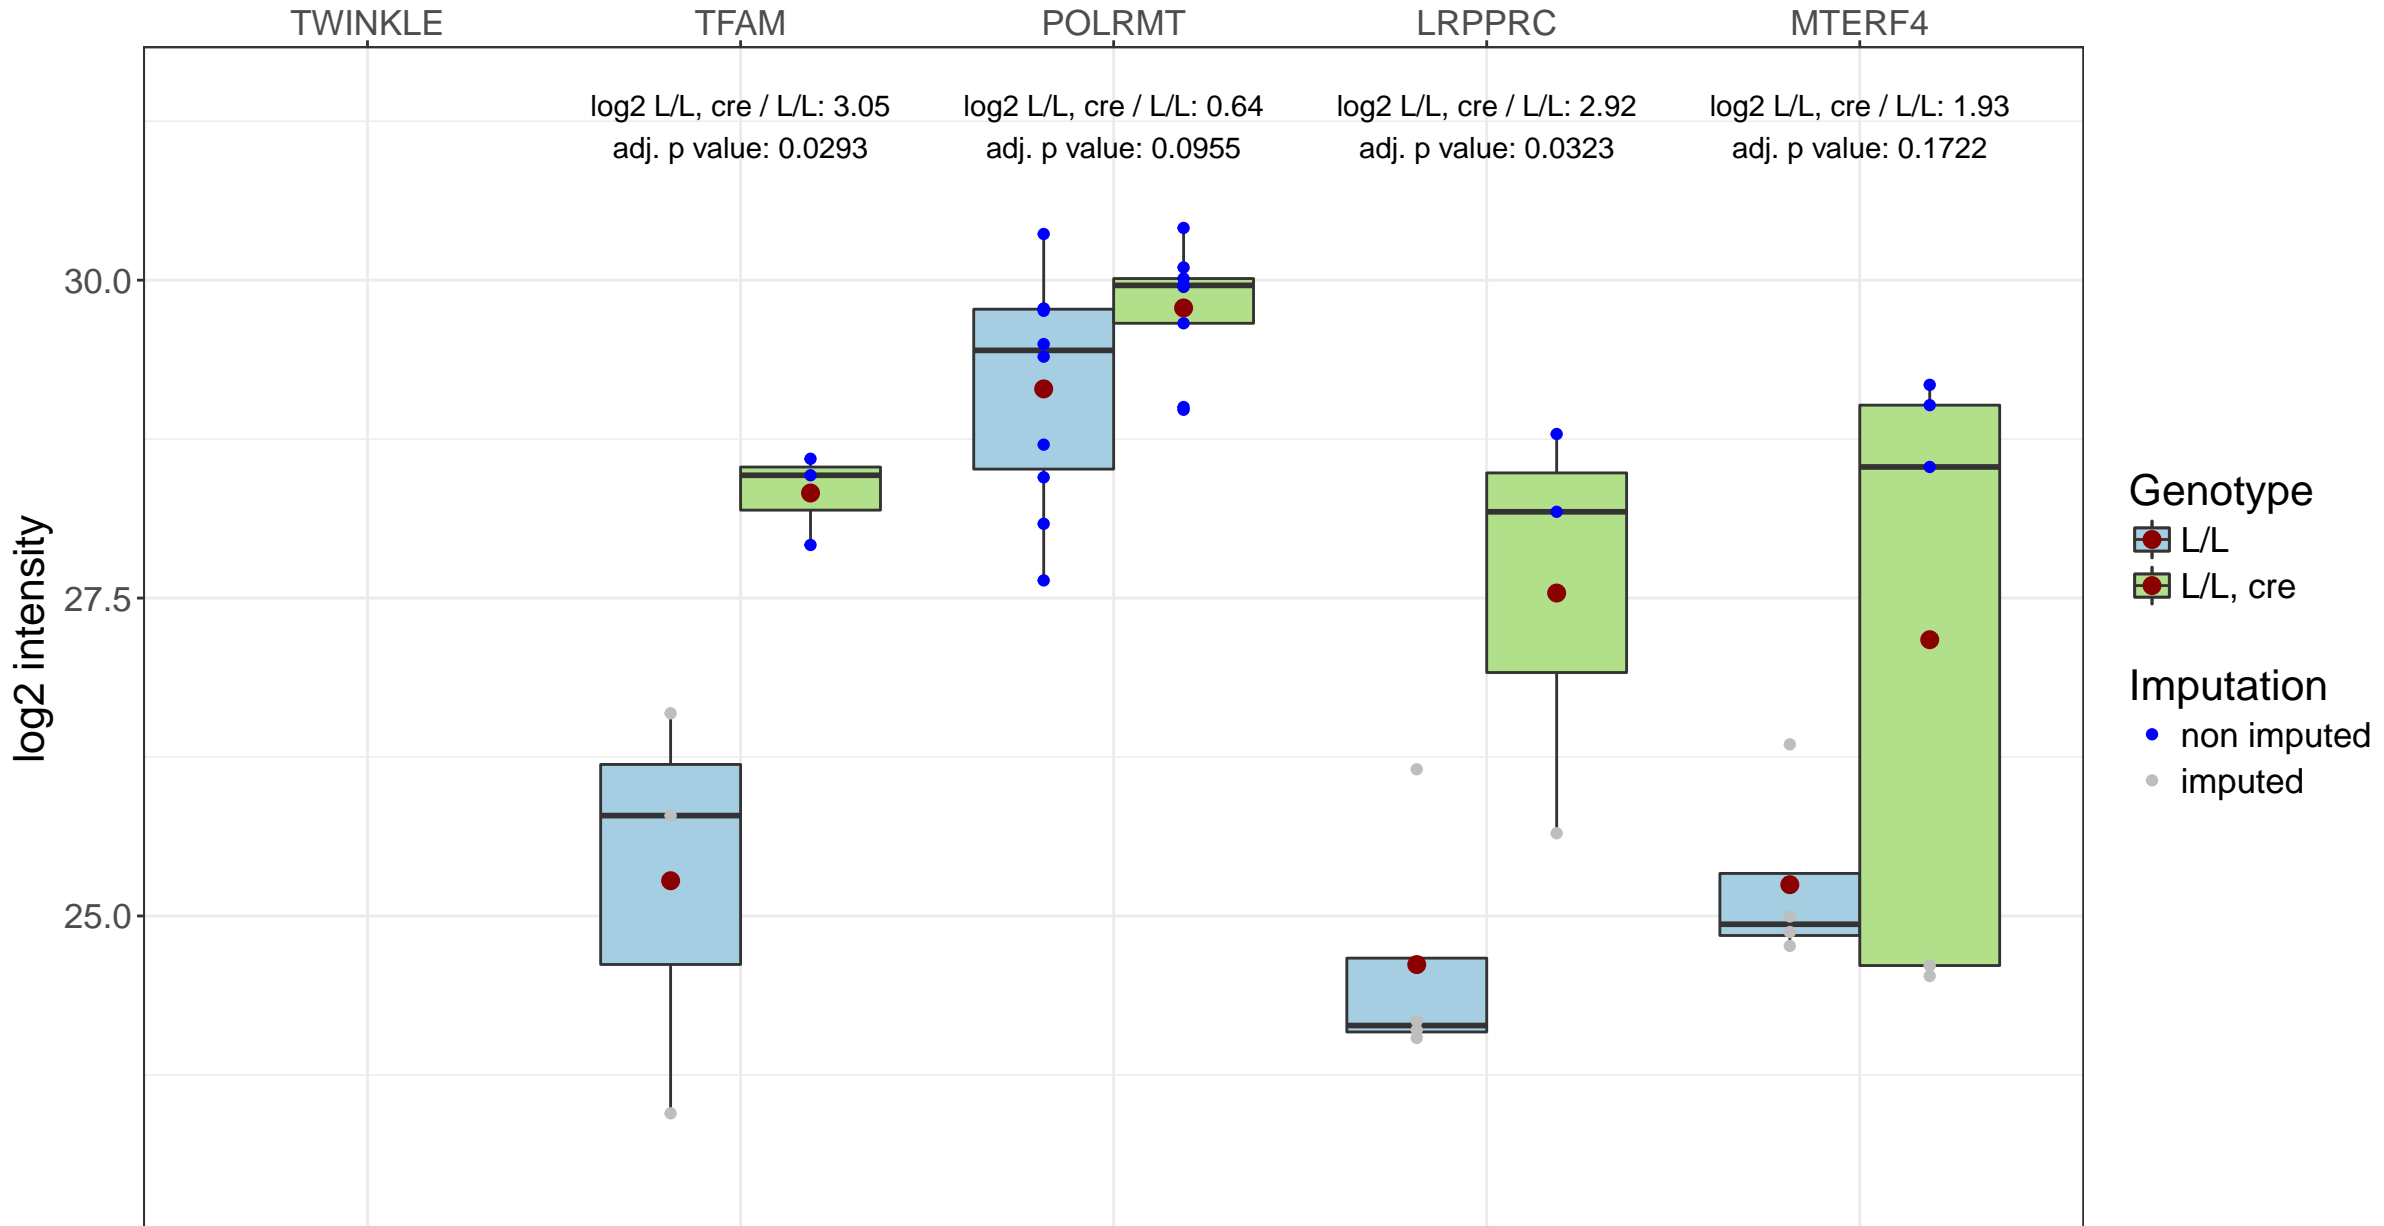



# EEF1A2 / P62631

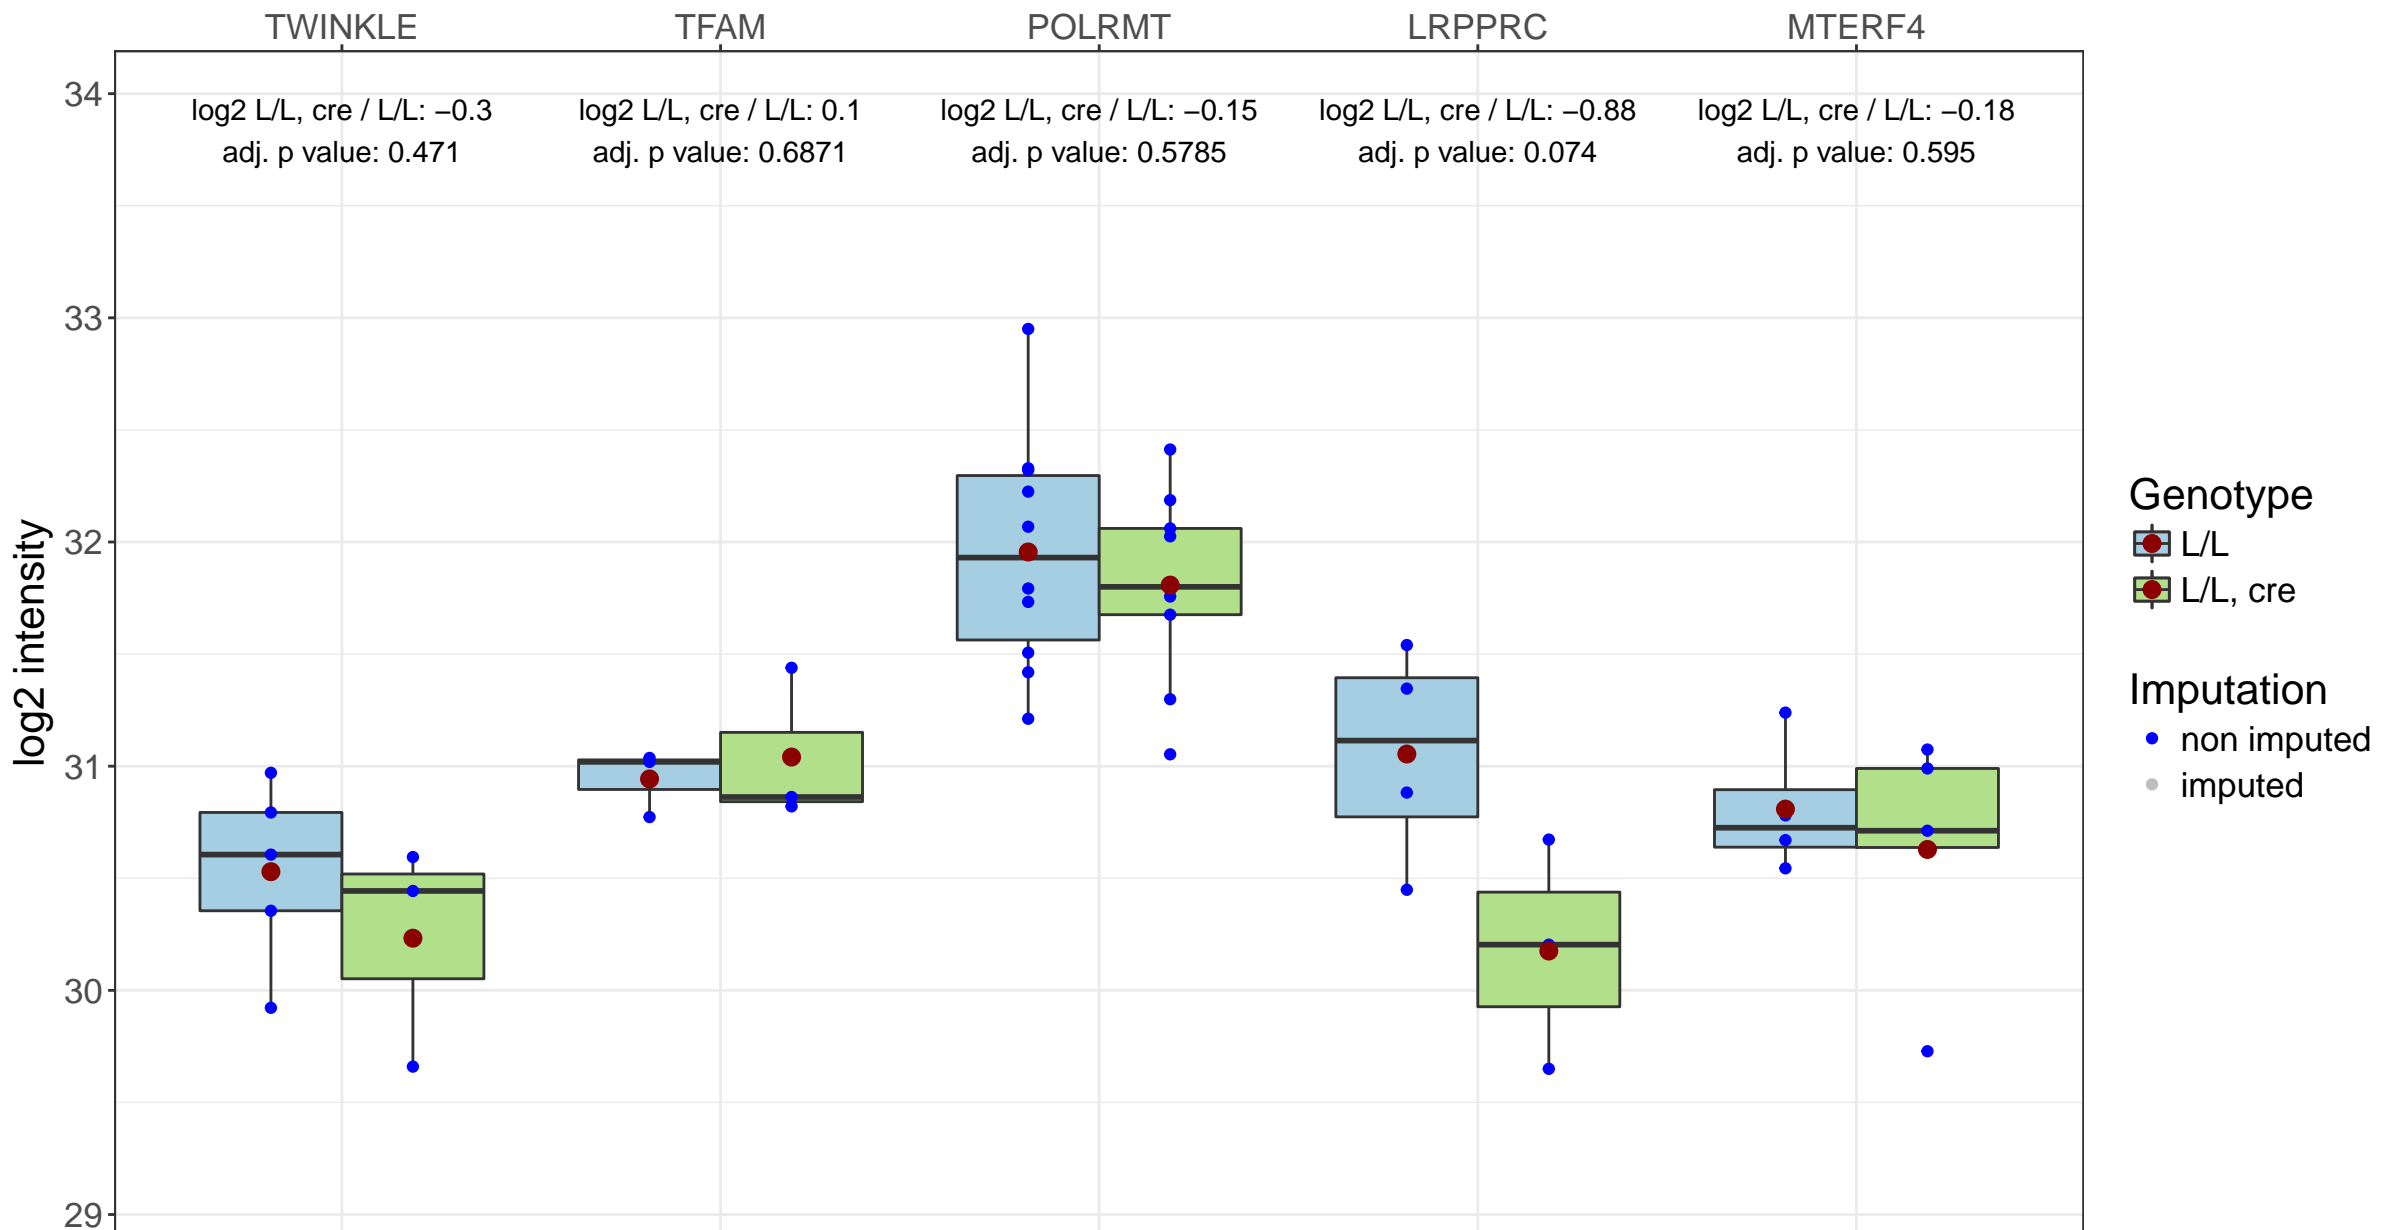

# EEF1G / Q9D8N0

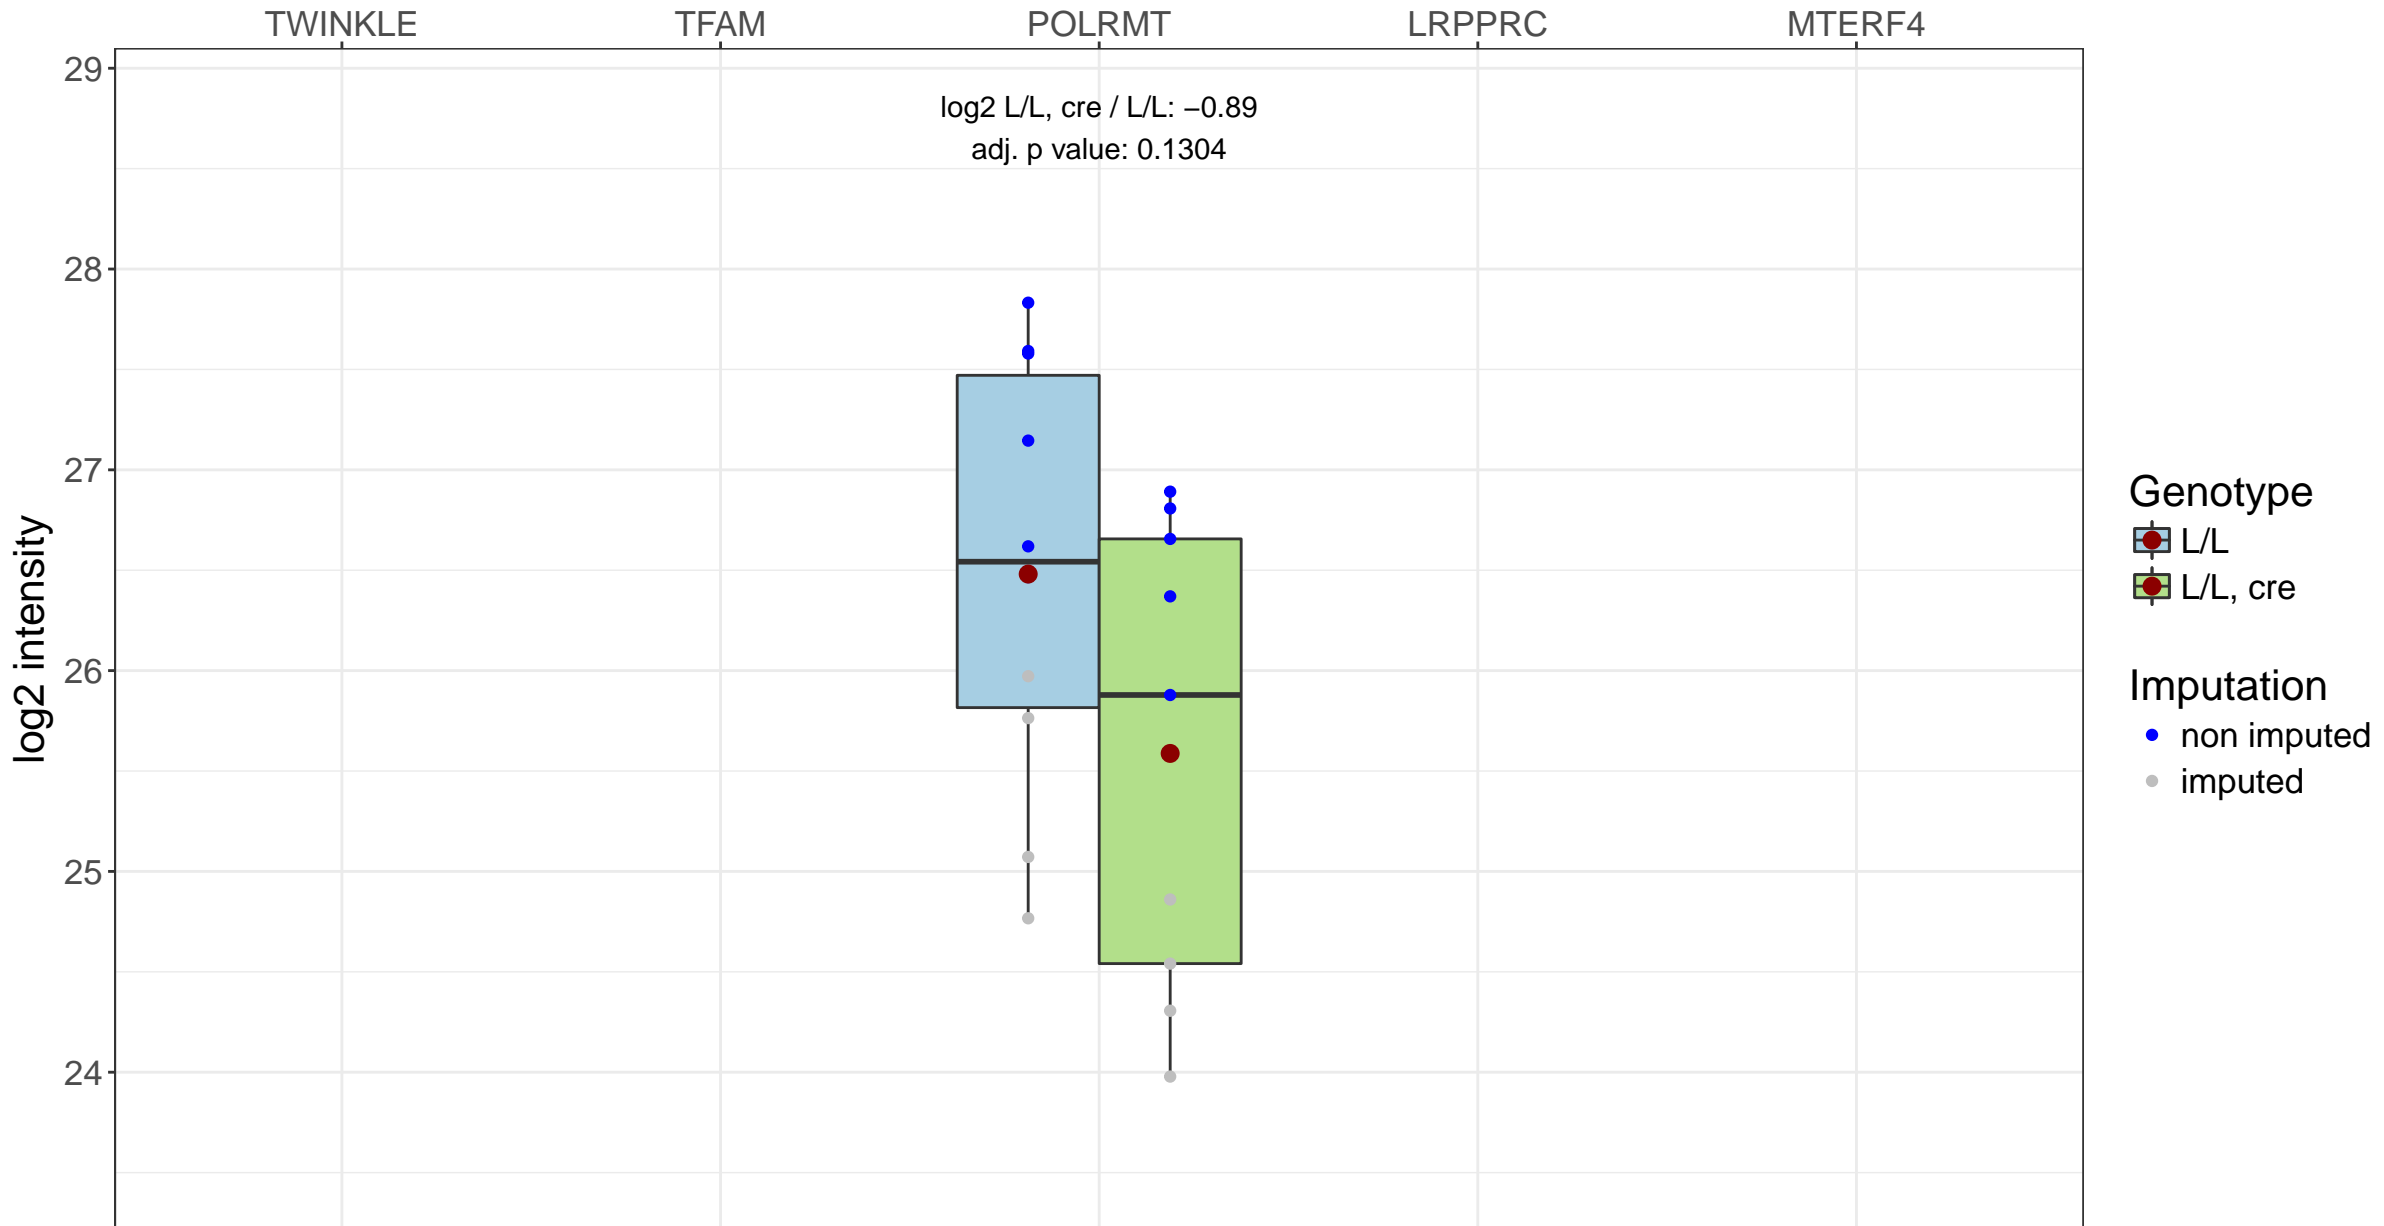

# EEF2 / P58252

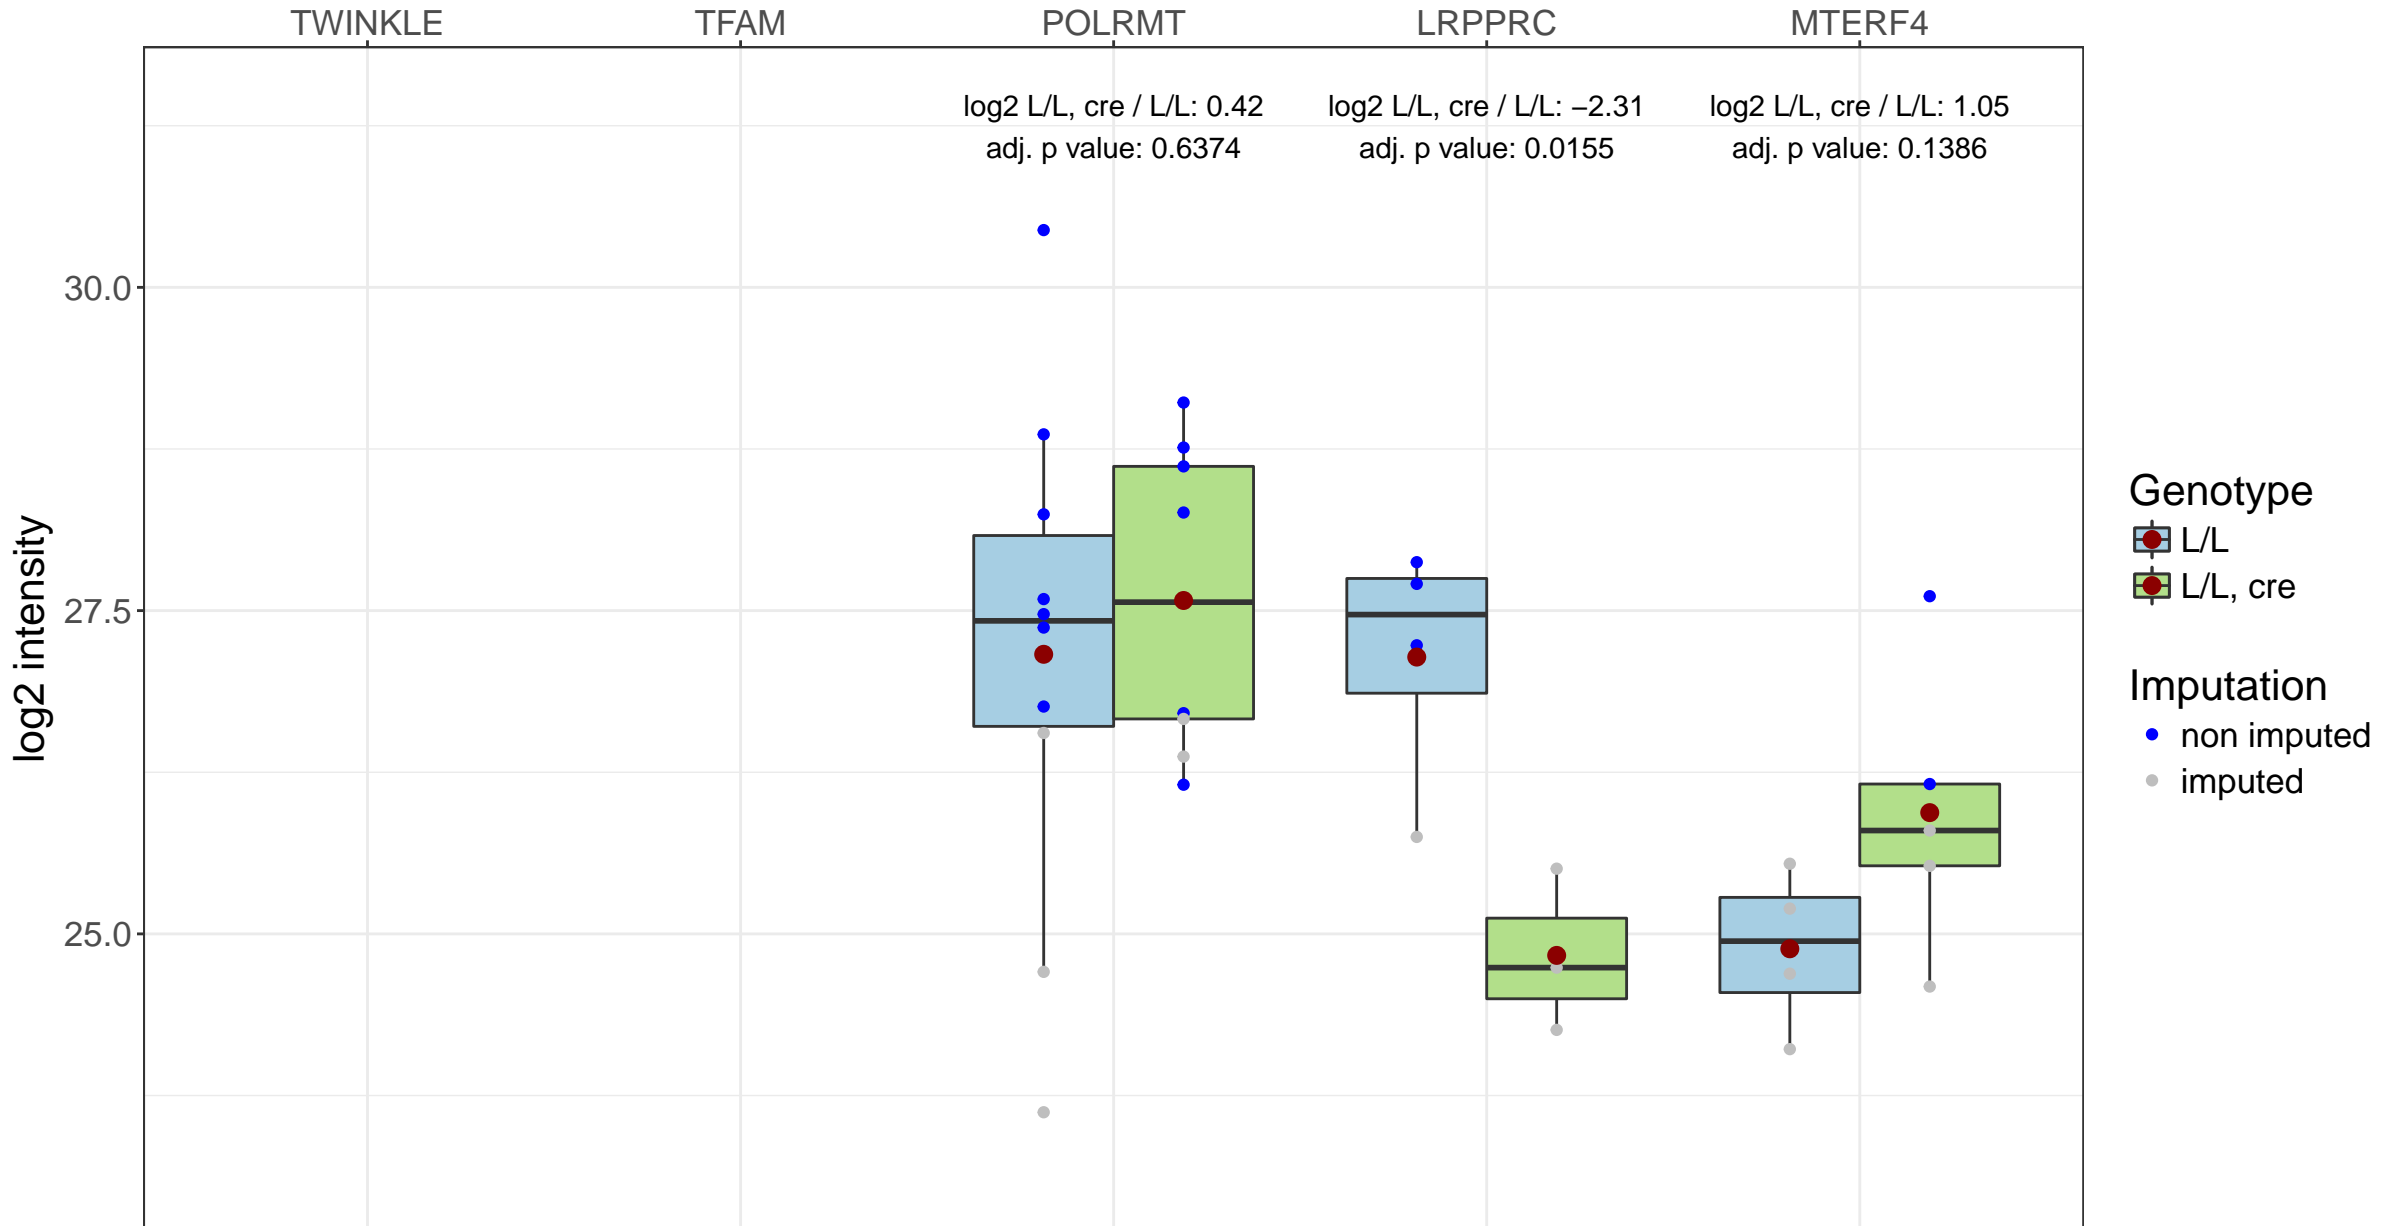

# EHD1 / Q9WVK4

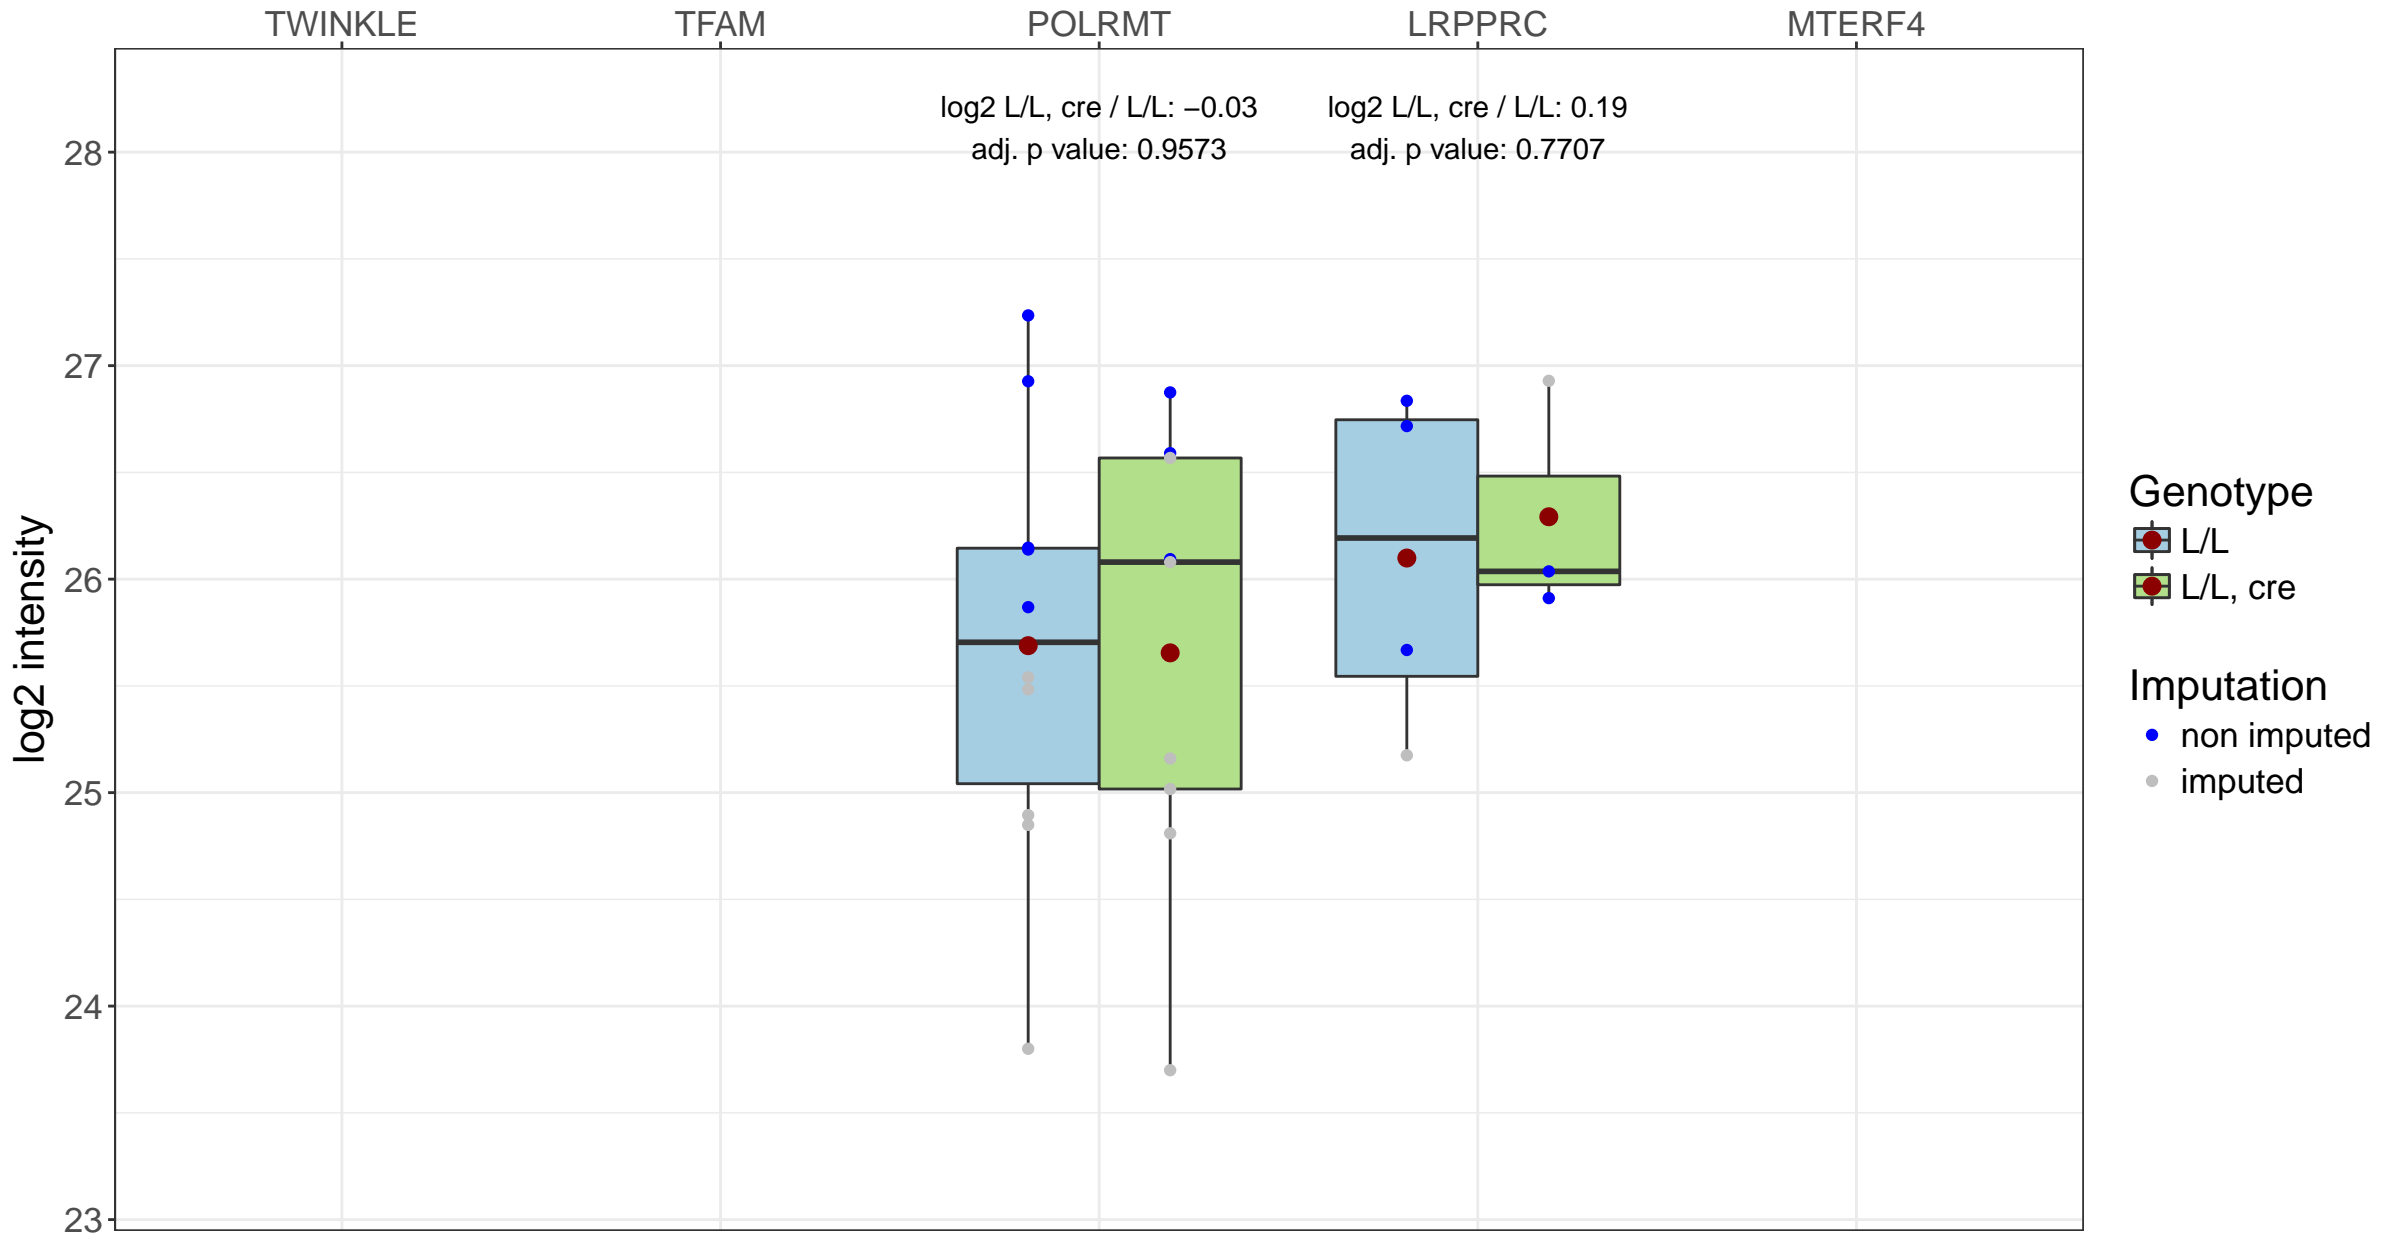

# EHD4 / Q9EQP2

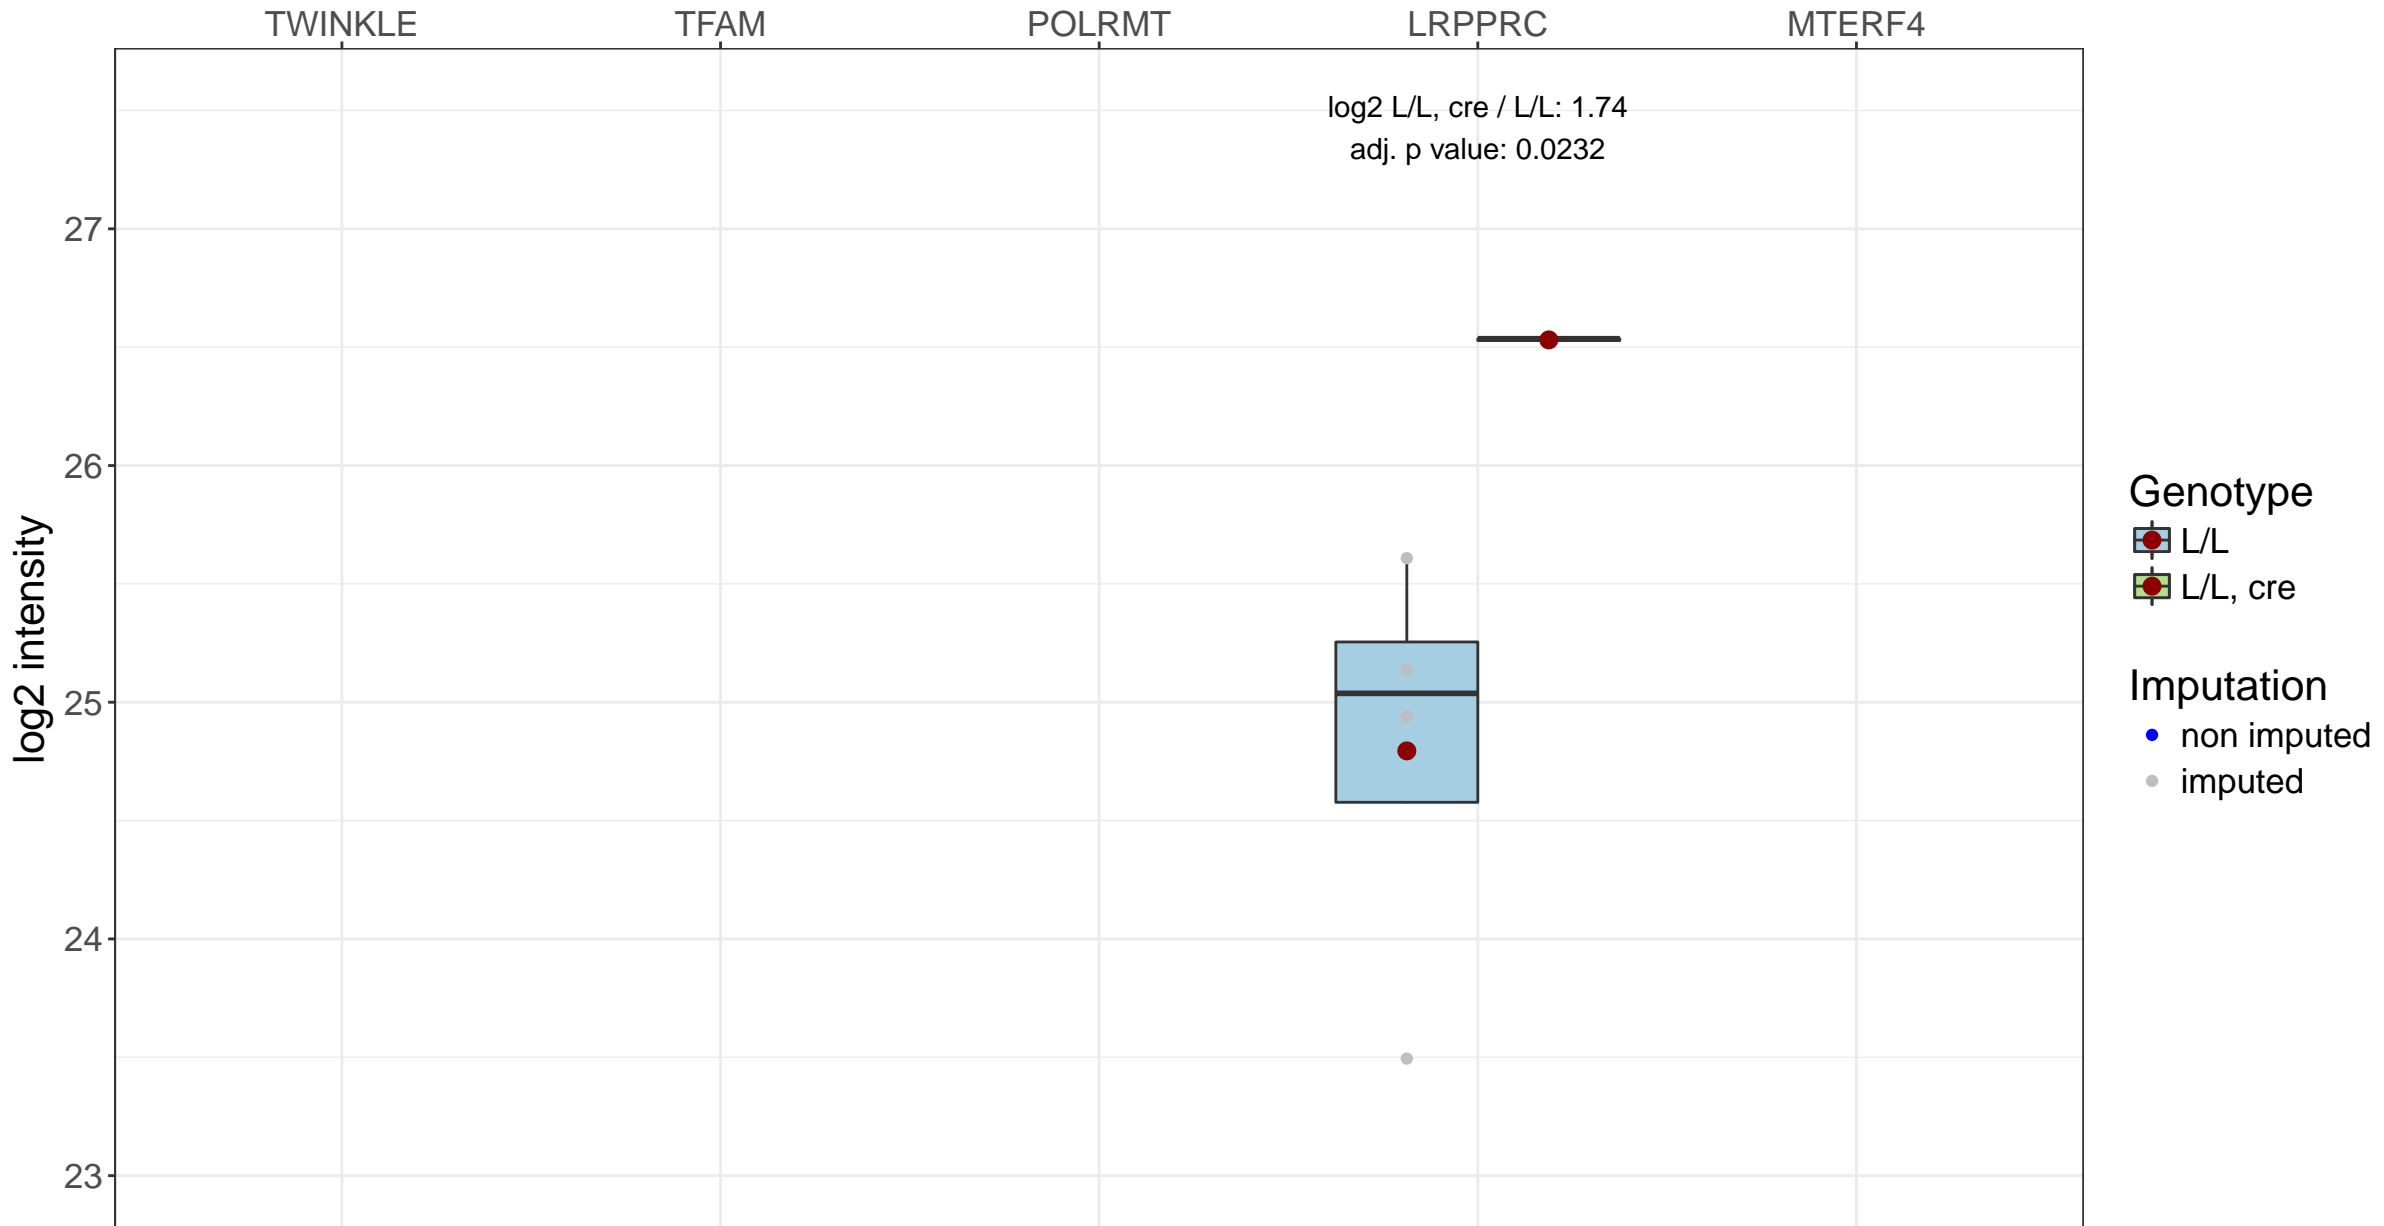

# EIF4B / Q8BGD9

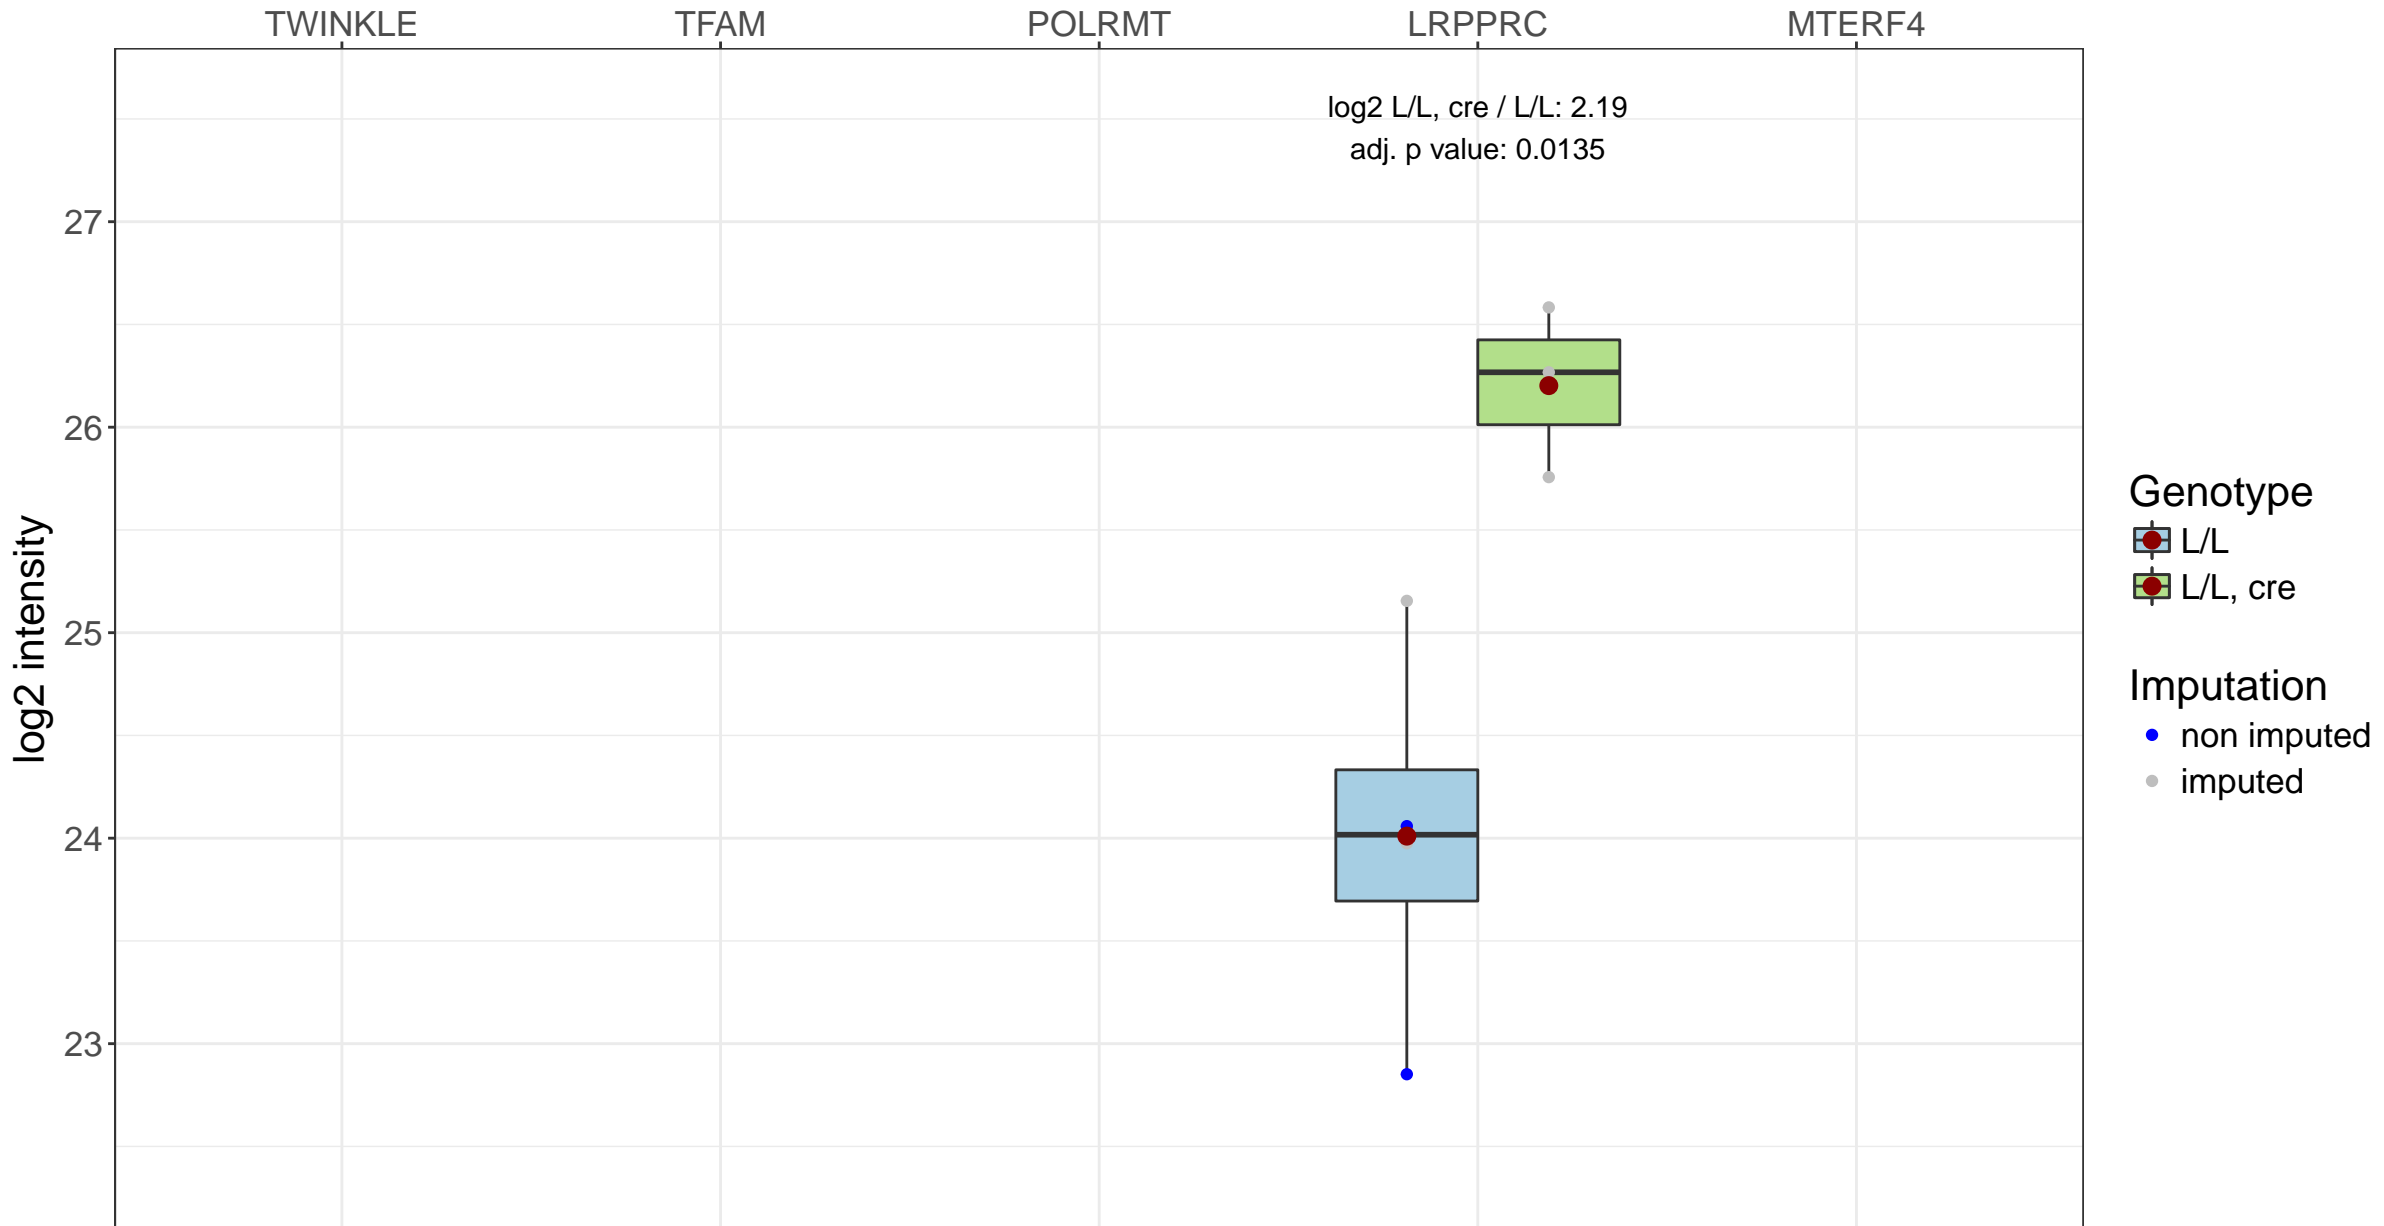

# EIF5A / P63242

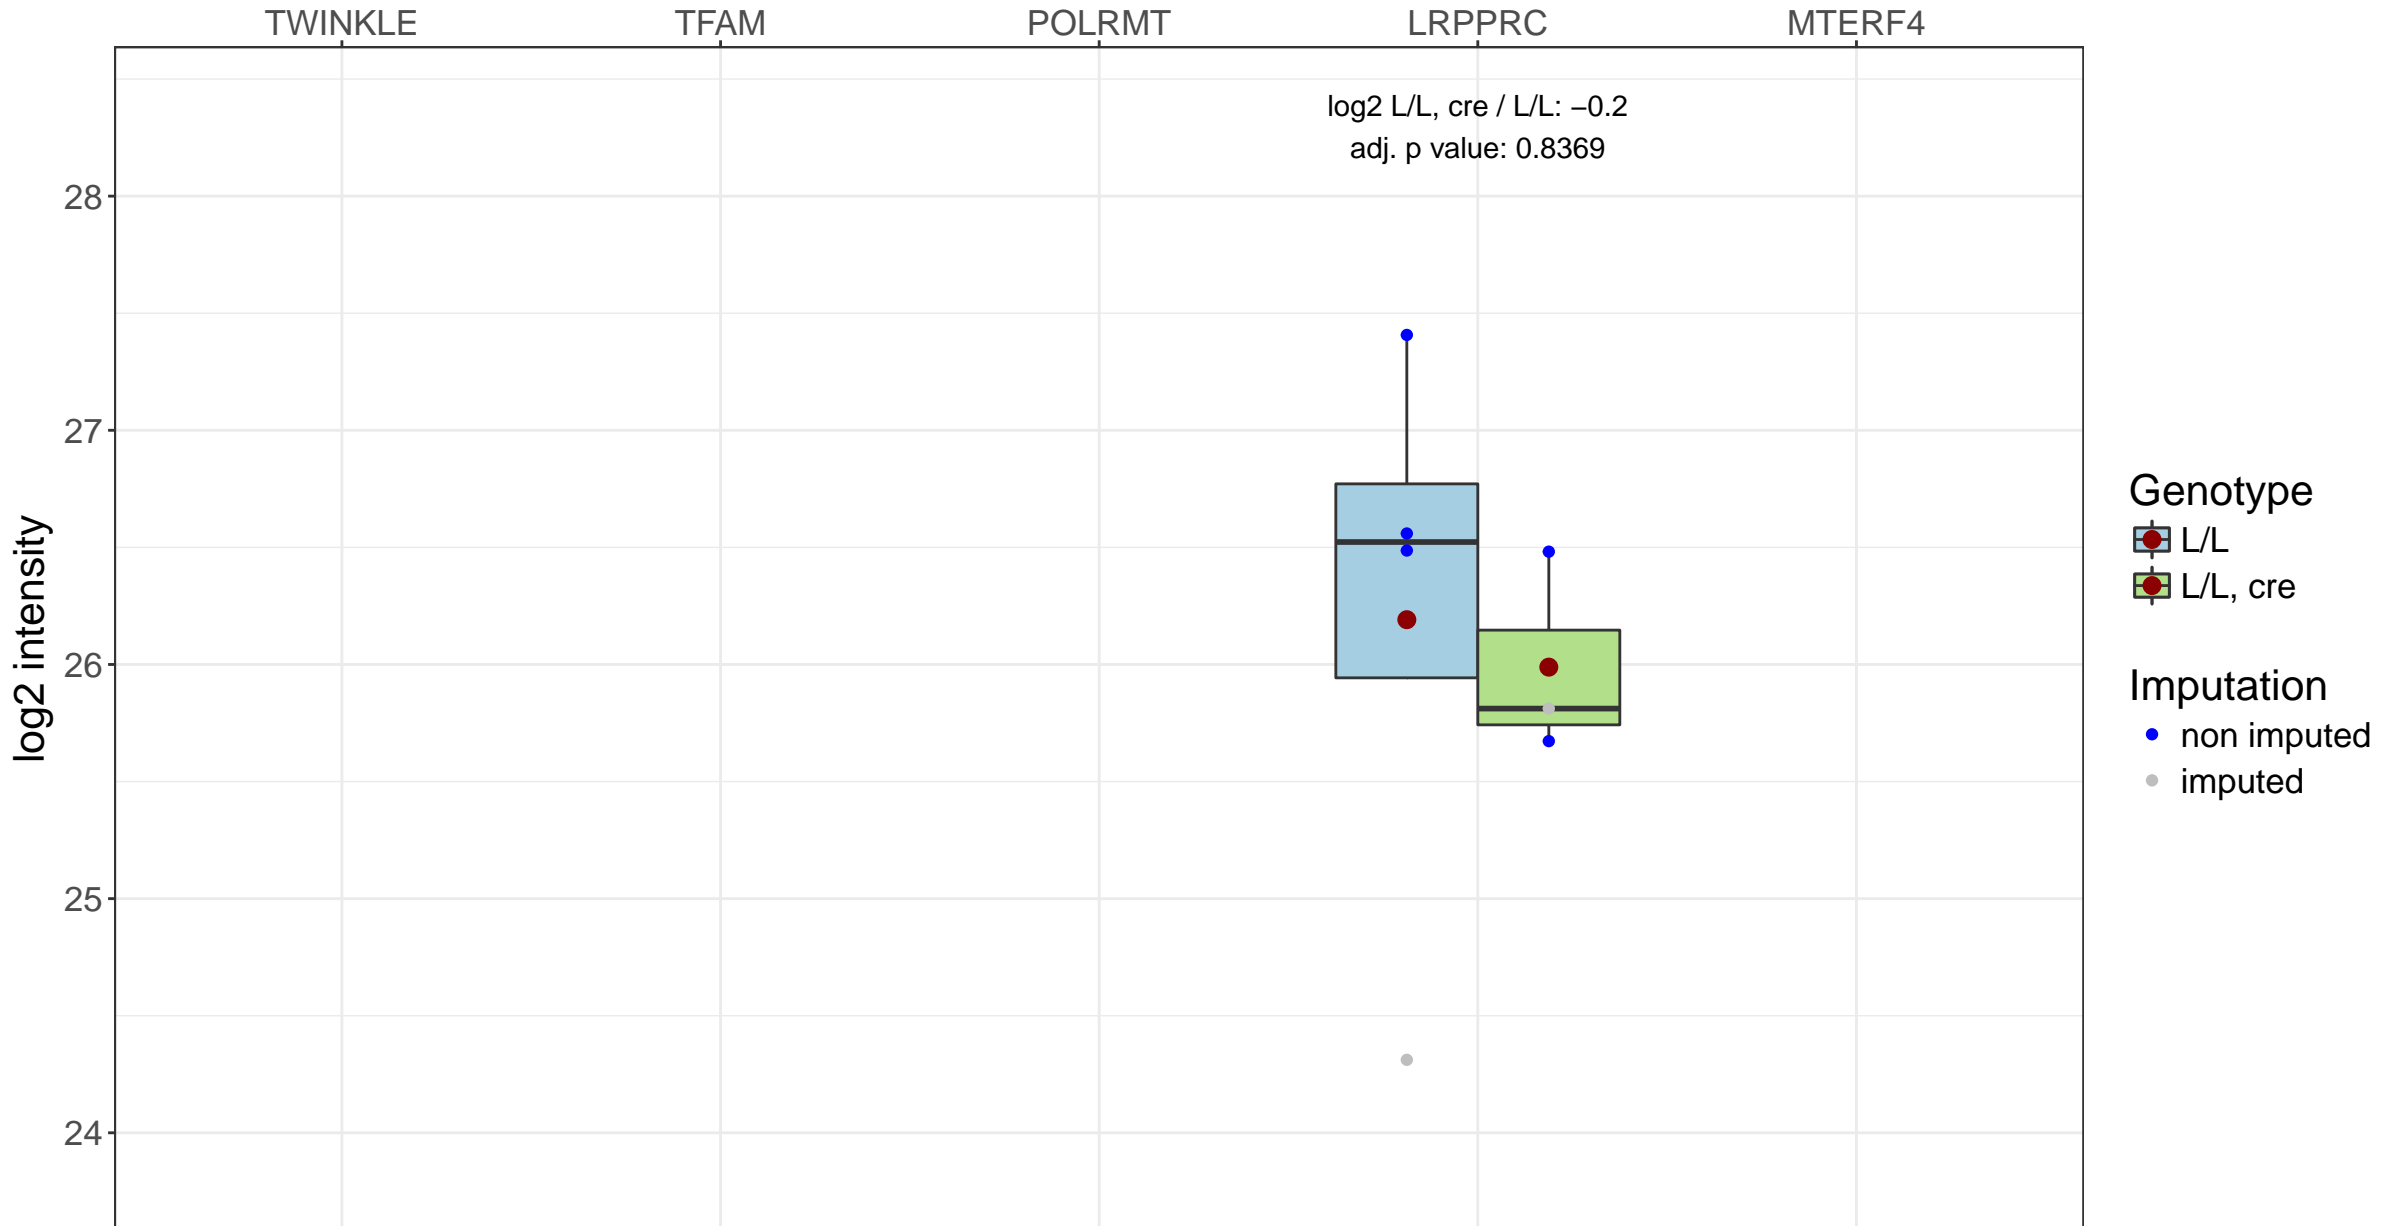

# ELAC2 / B1ATP7

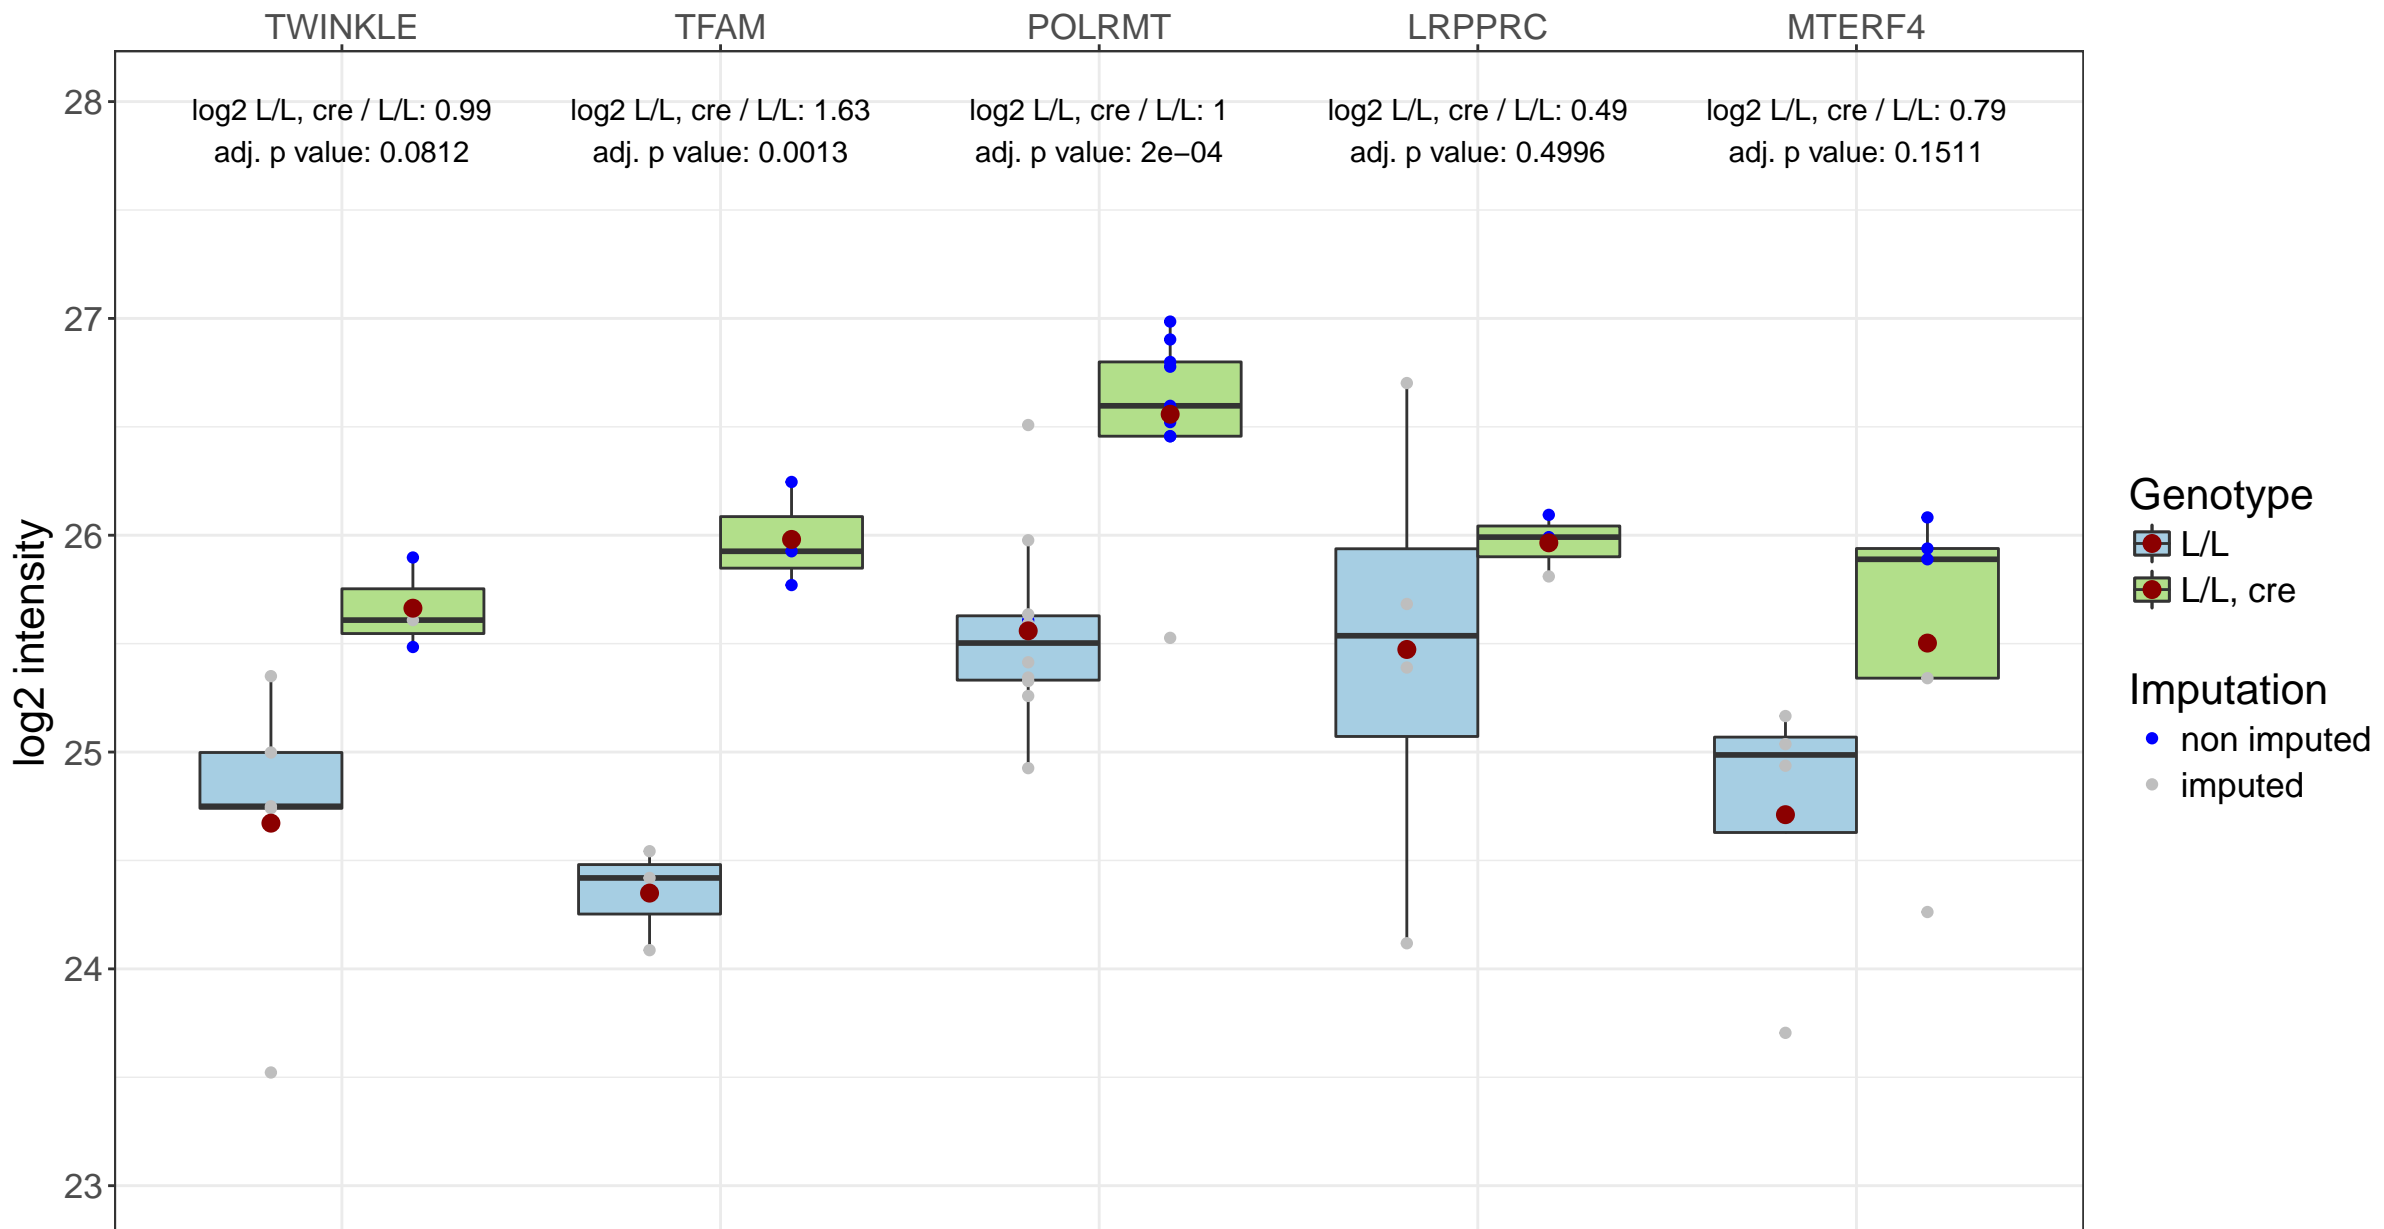



# ENDOG / O08600

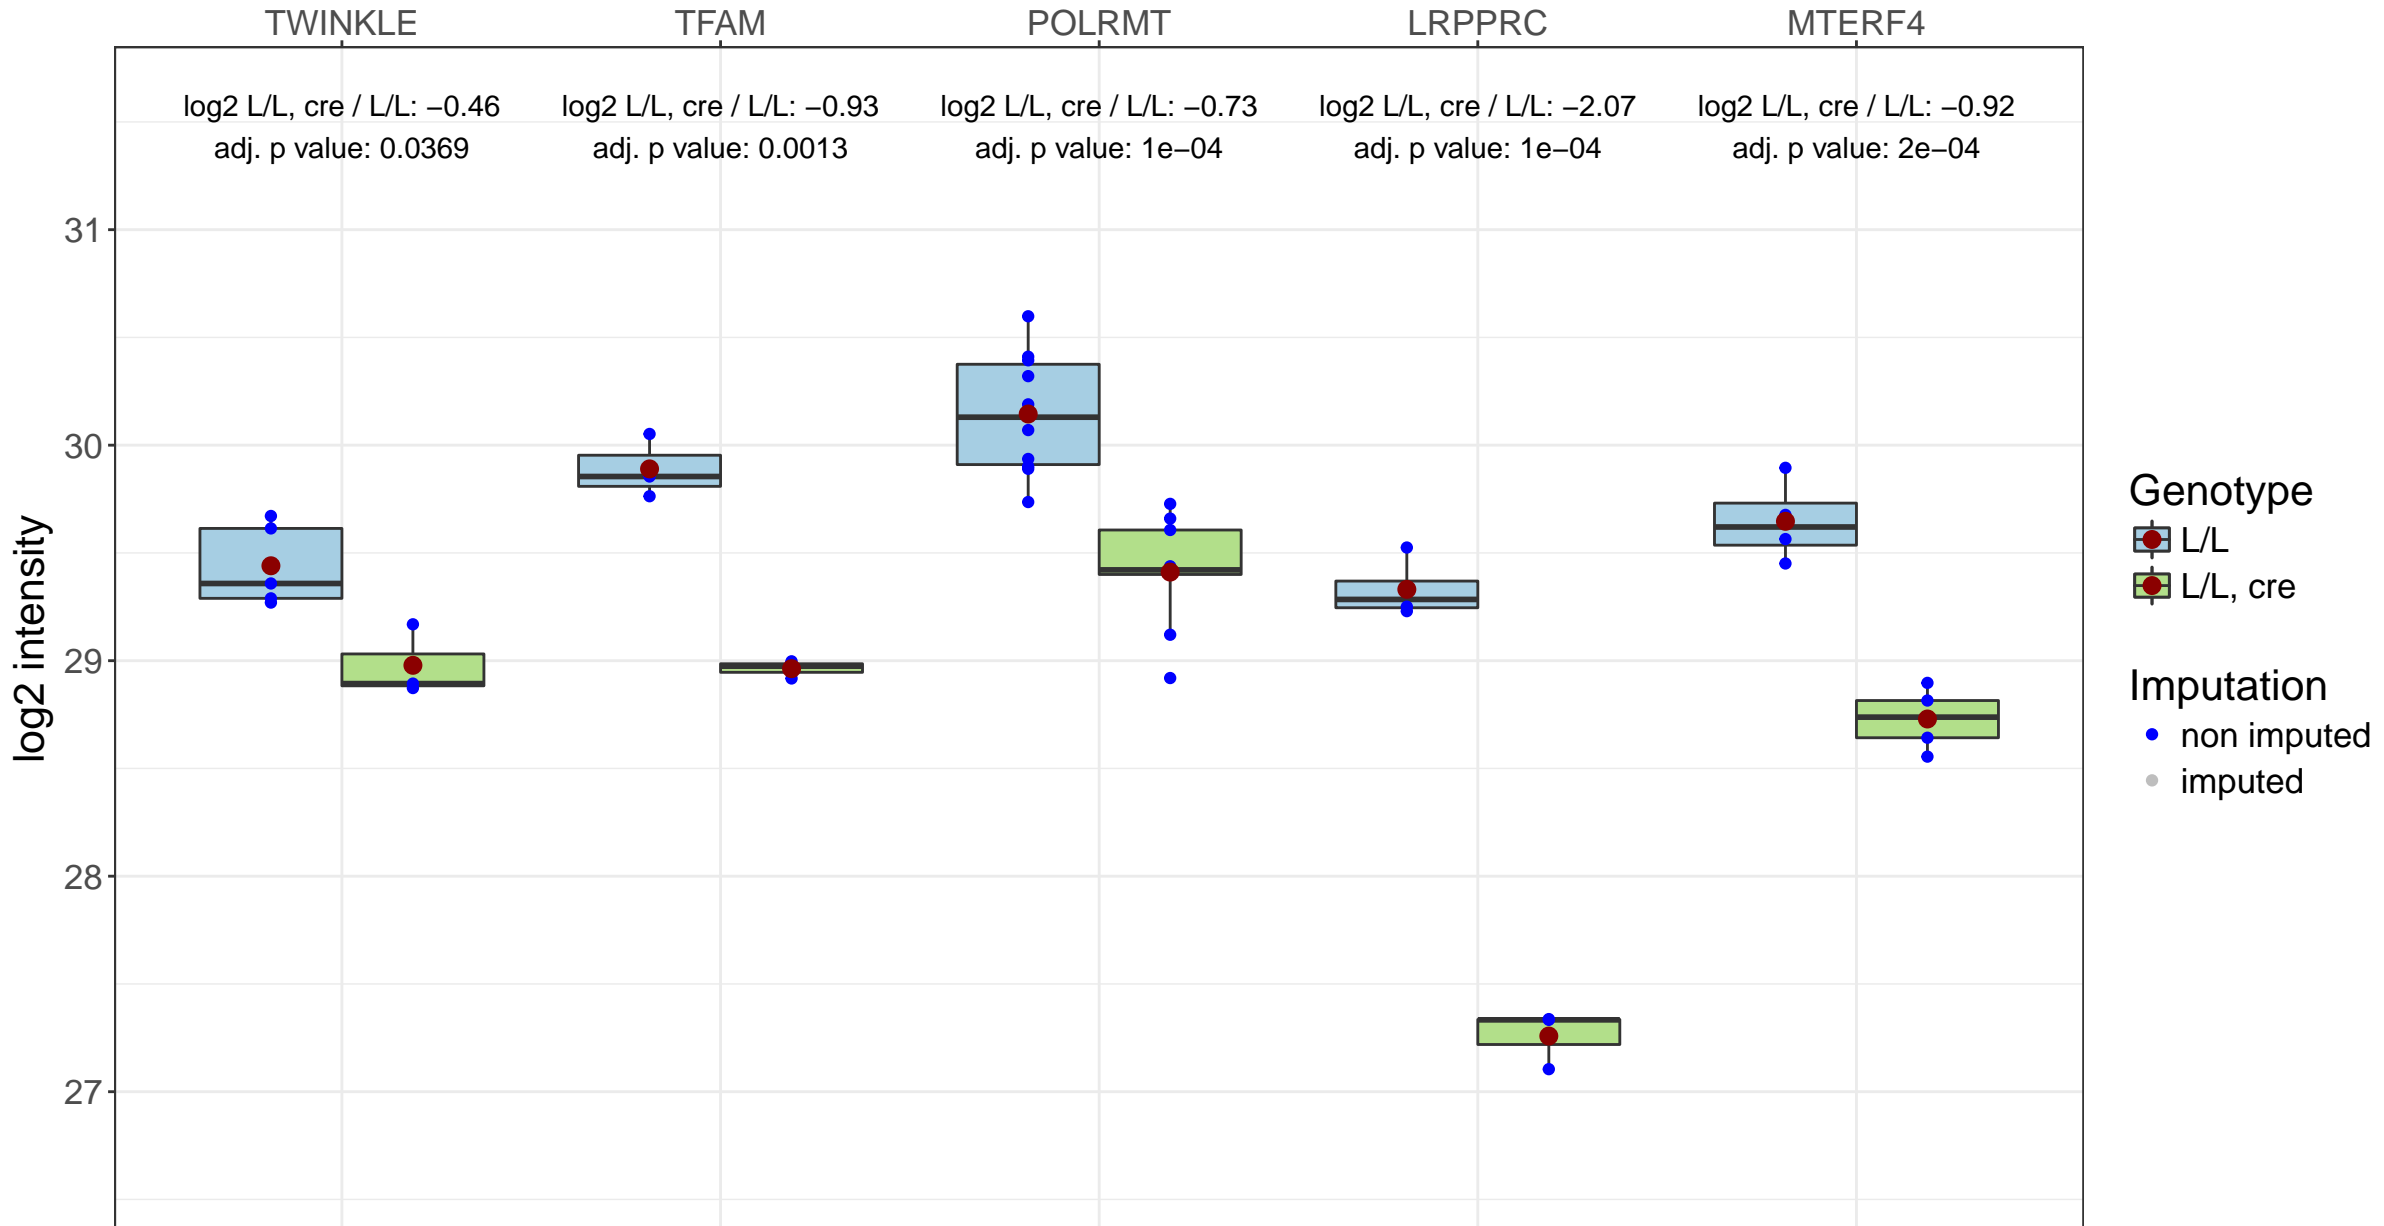

# ENO3 / P21550

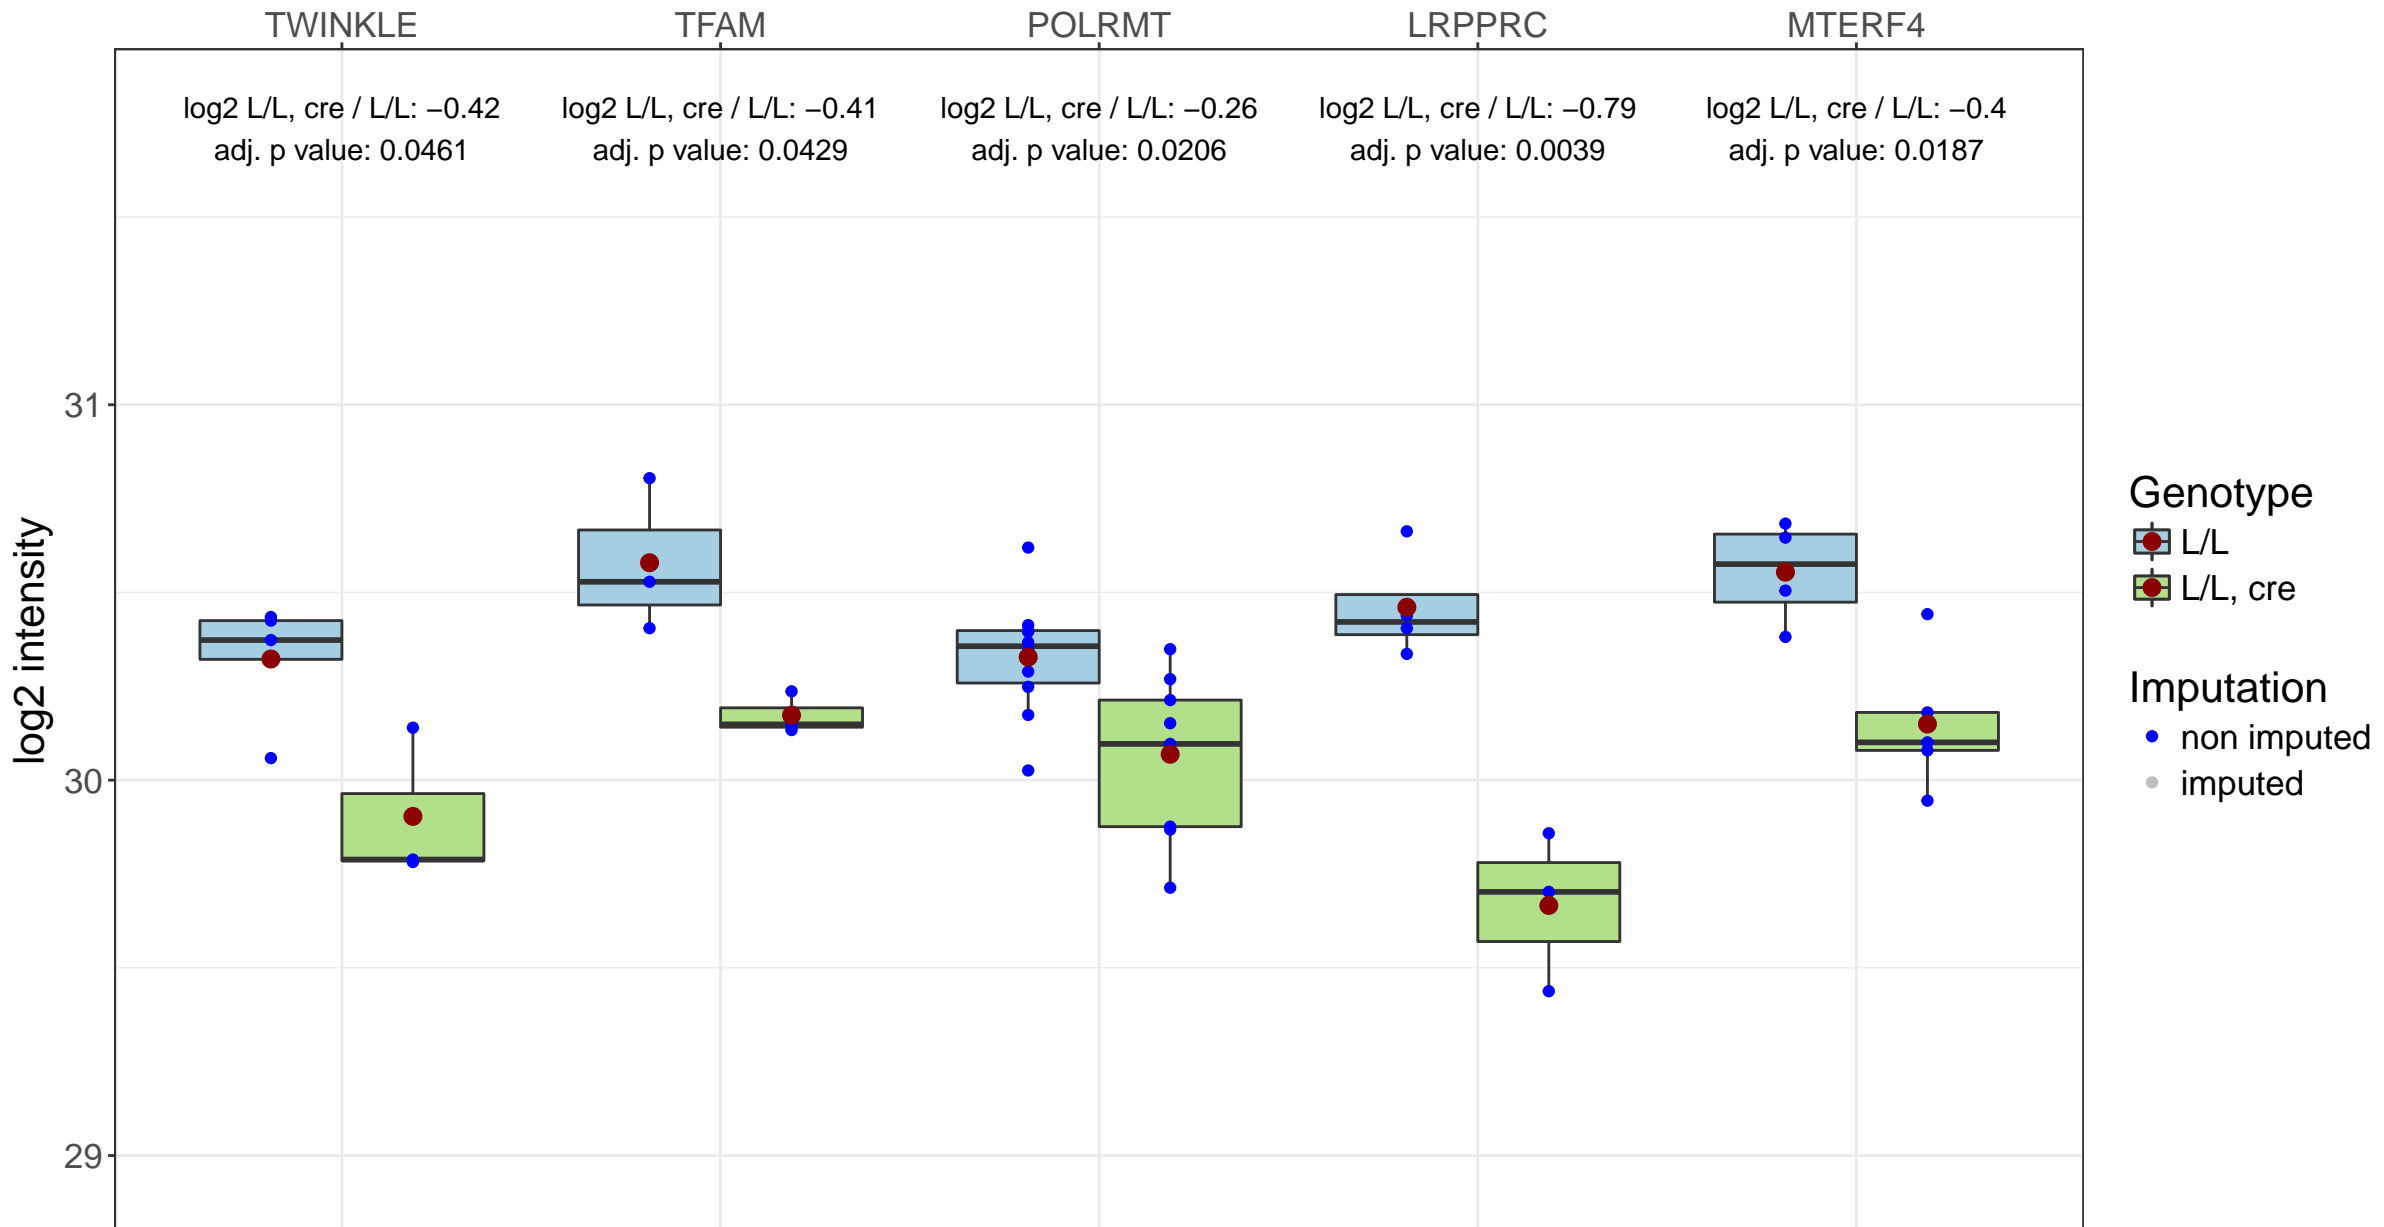

# EPHX2 / P34914

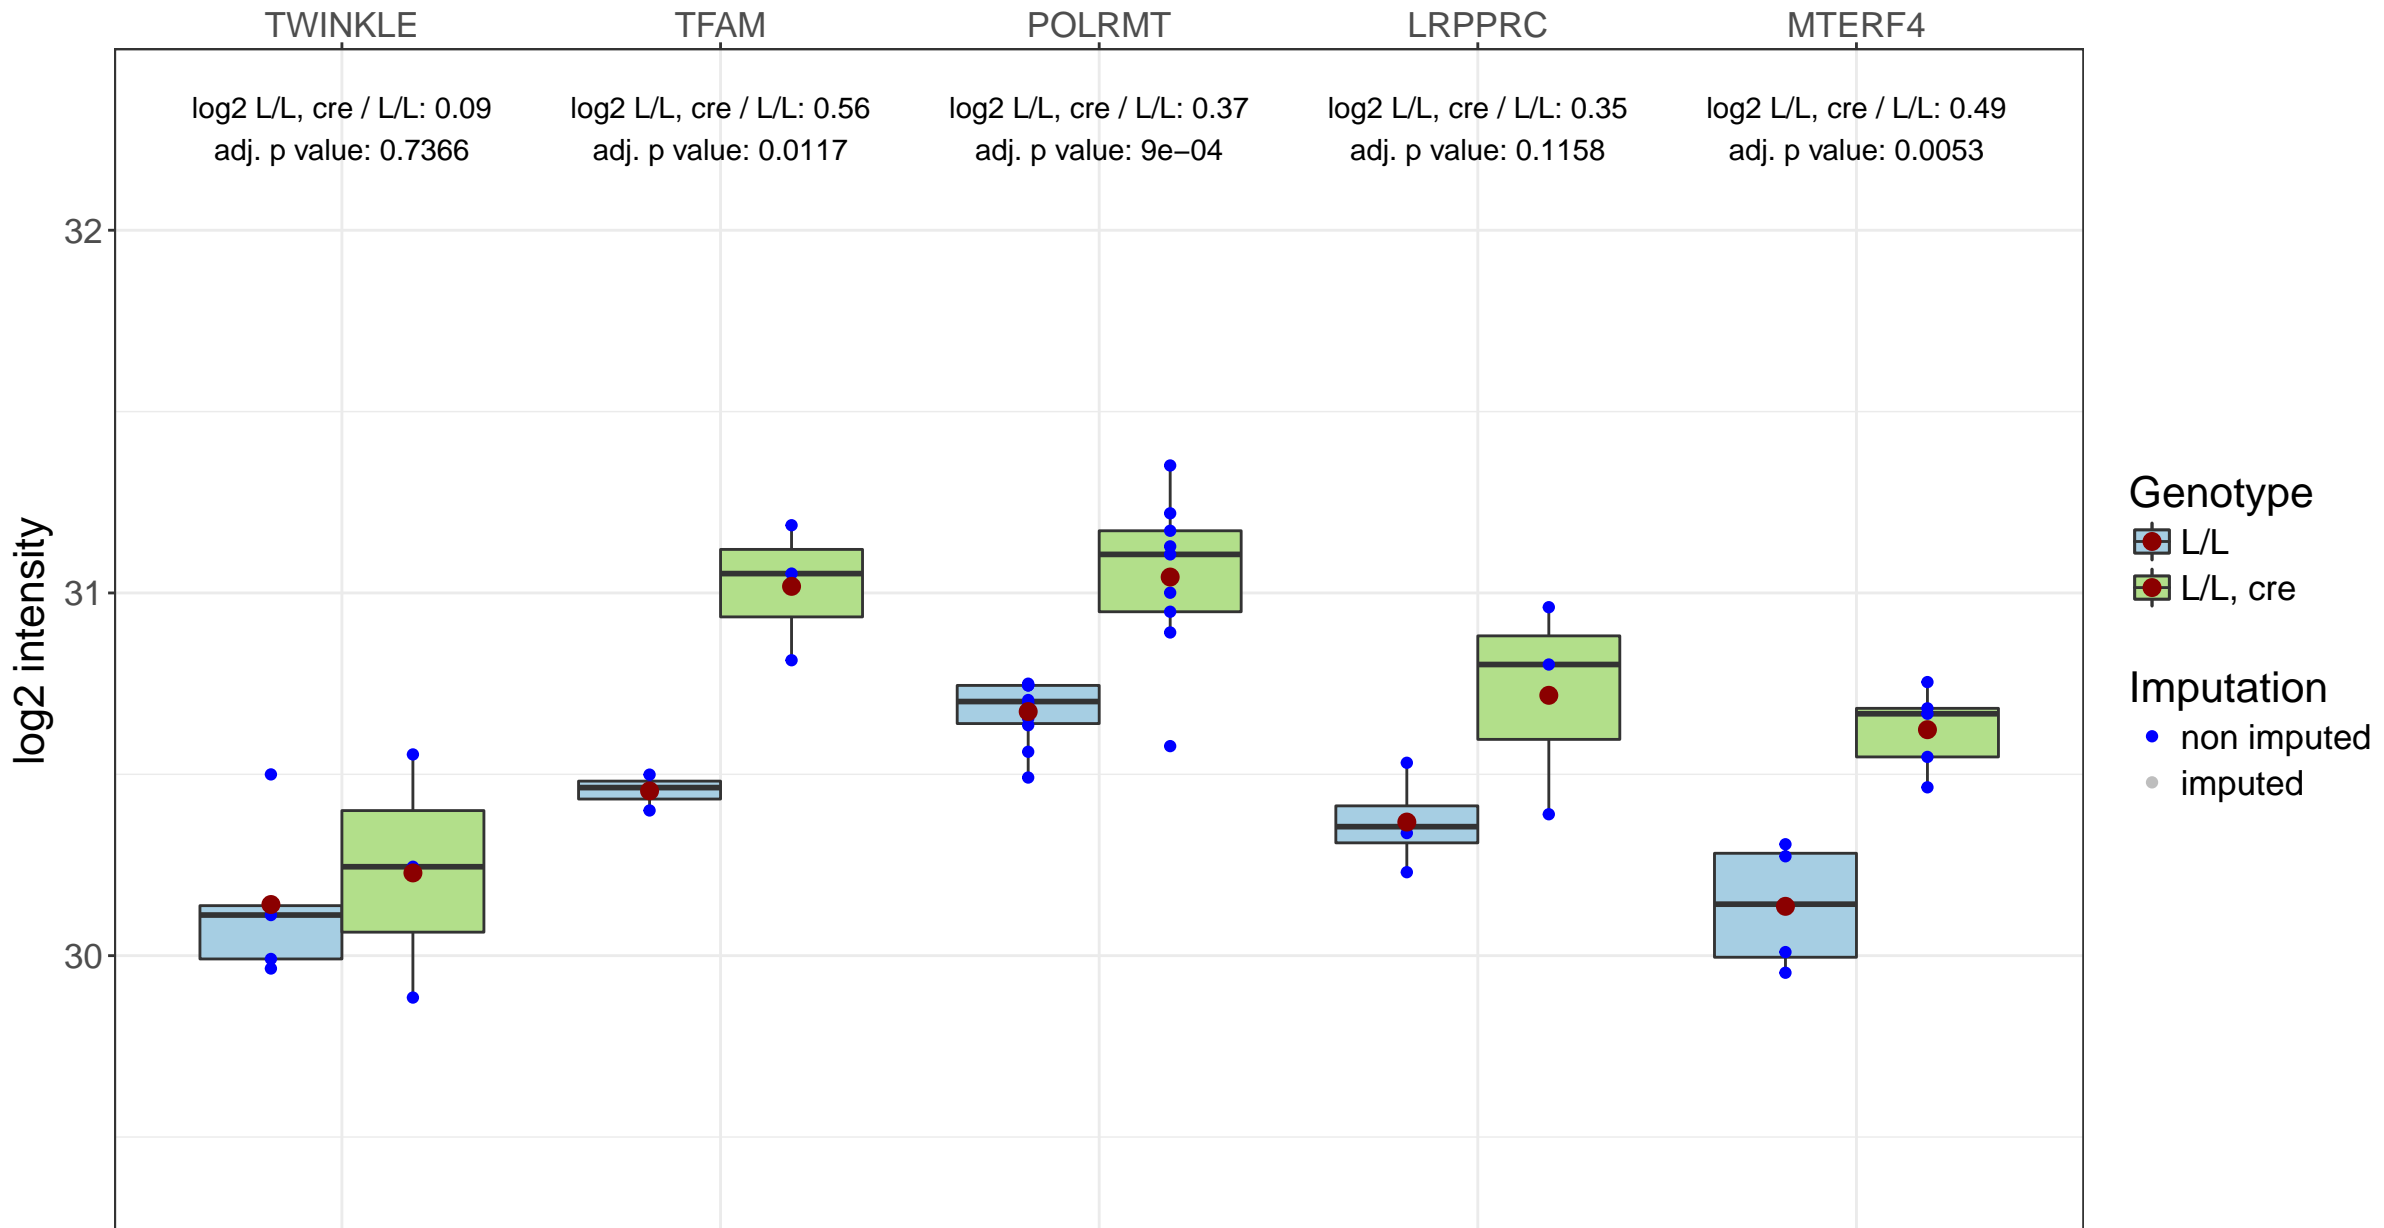

# ERAL1 / Q9CZU4

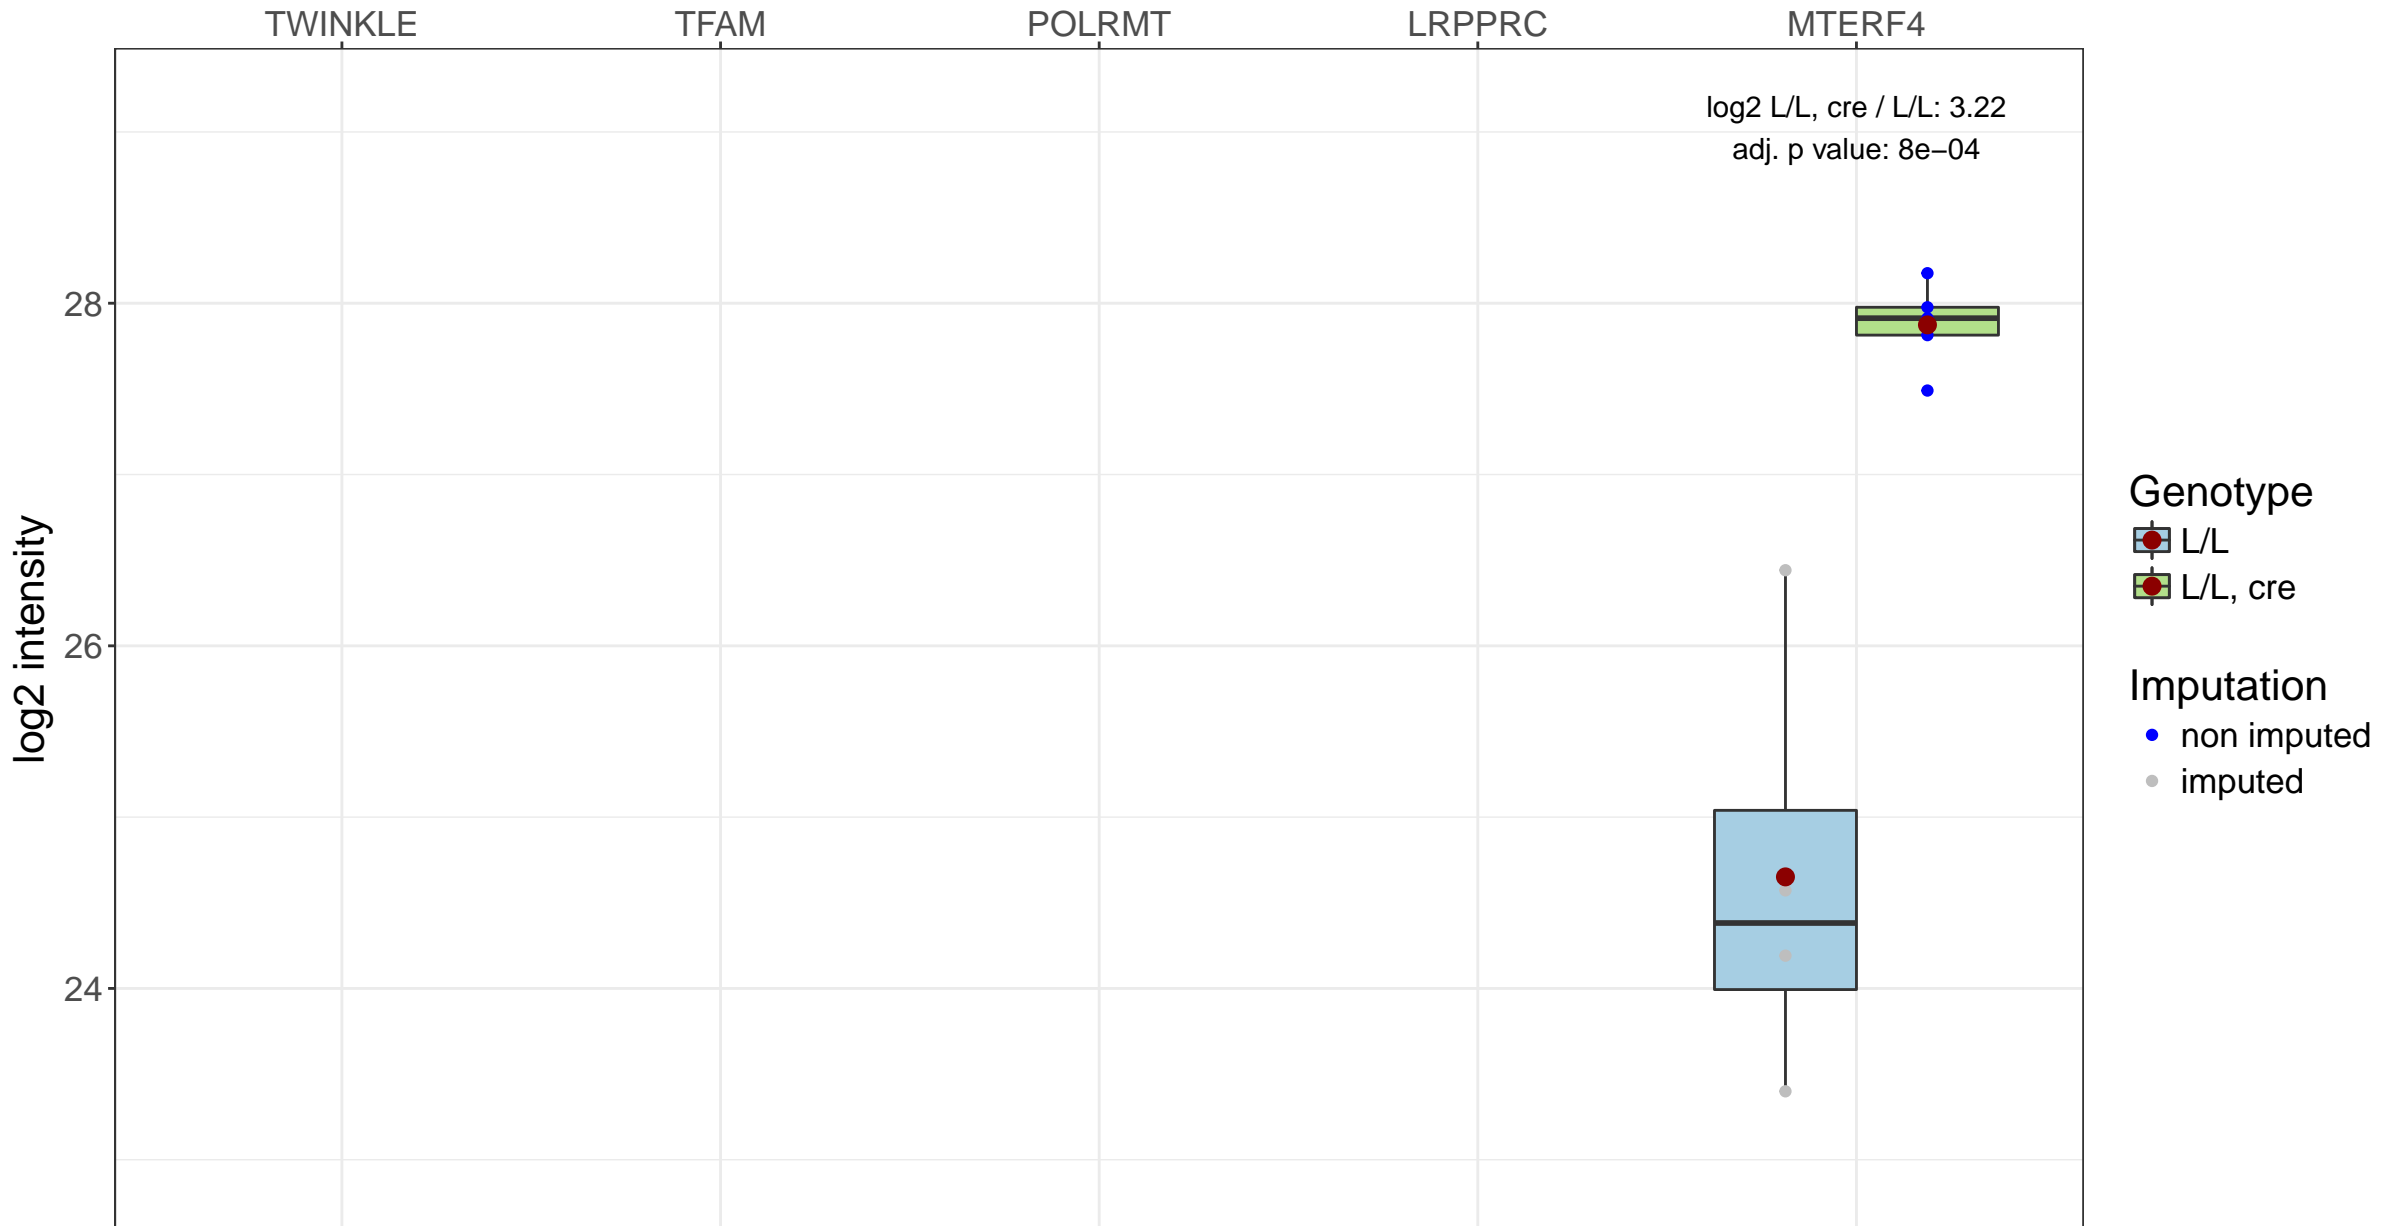

# ETFA / Q99LC5

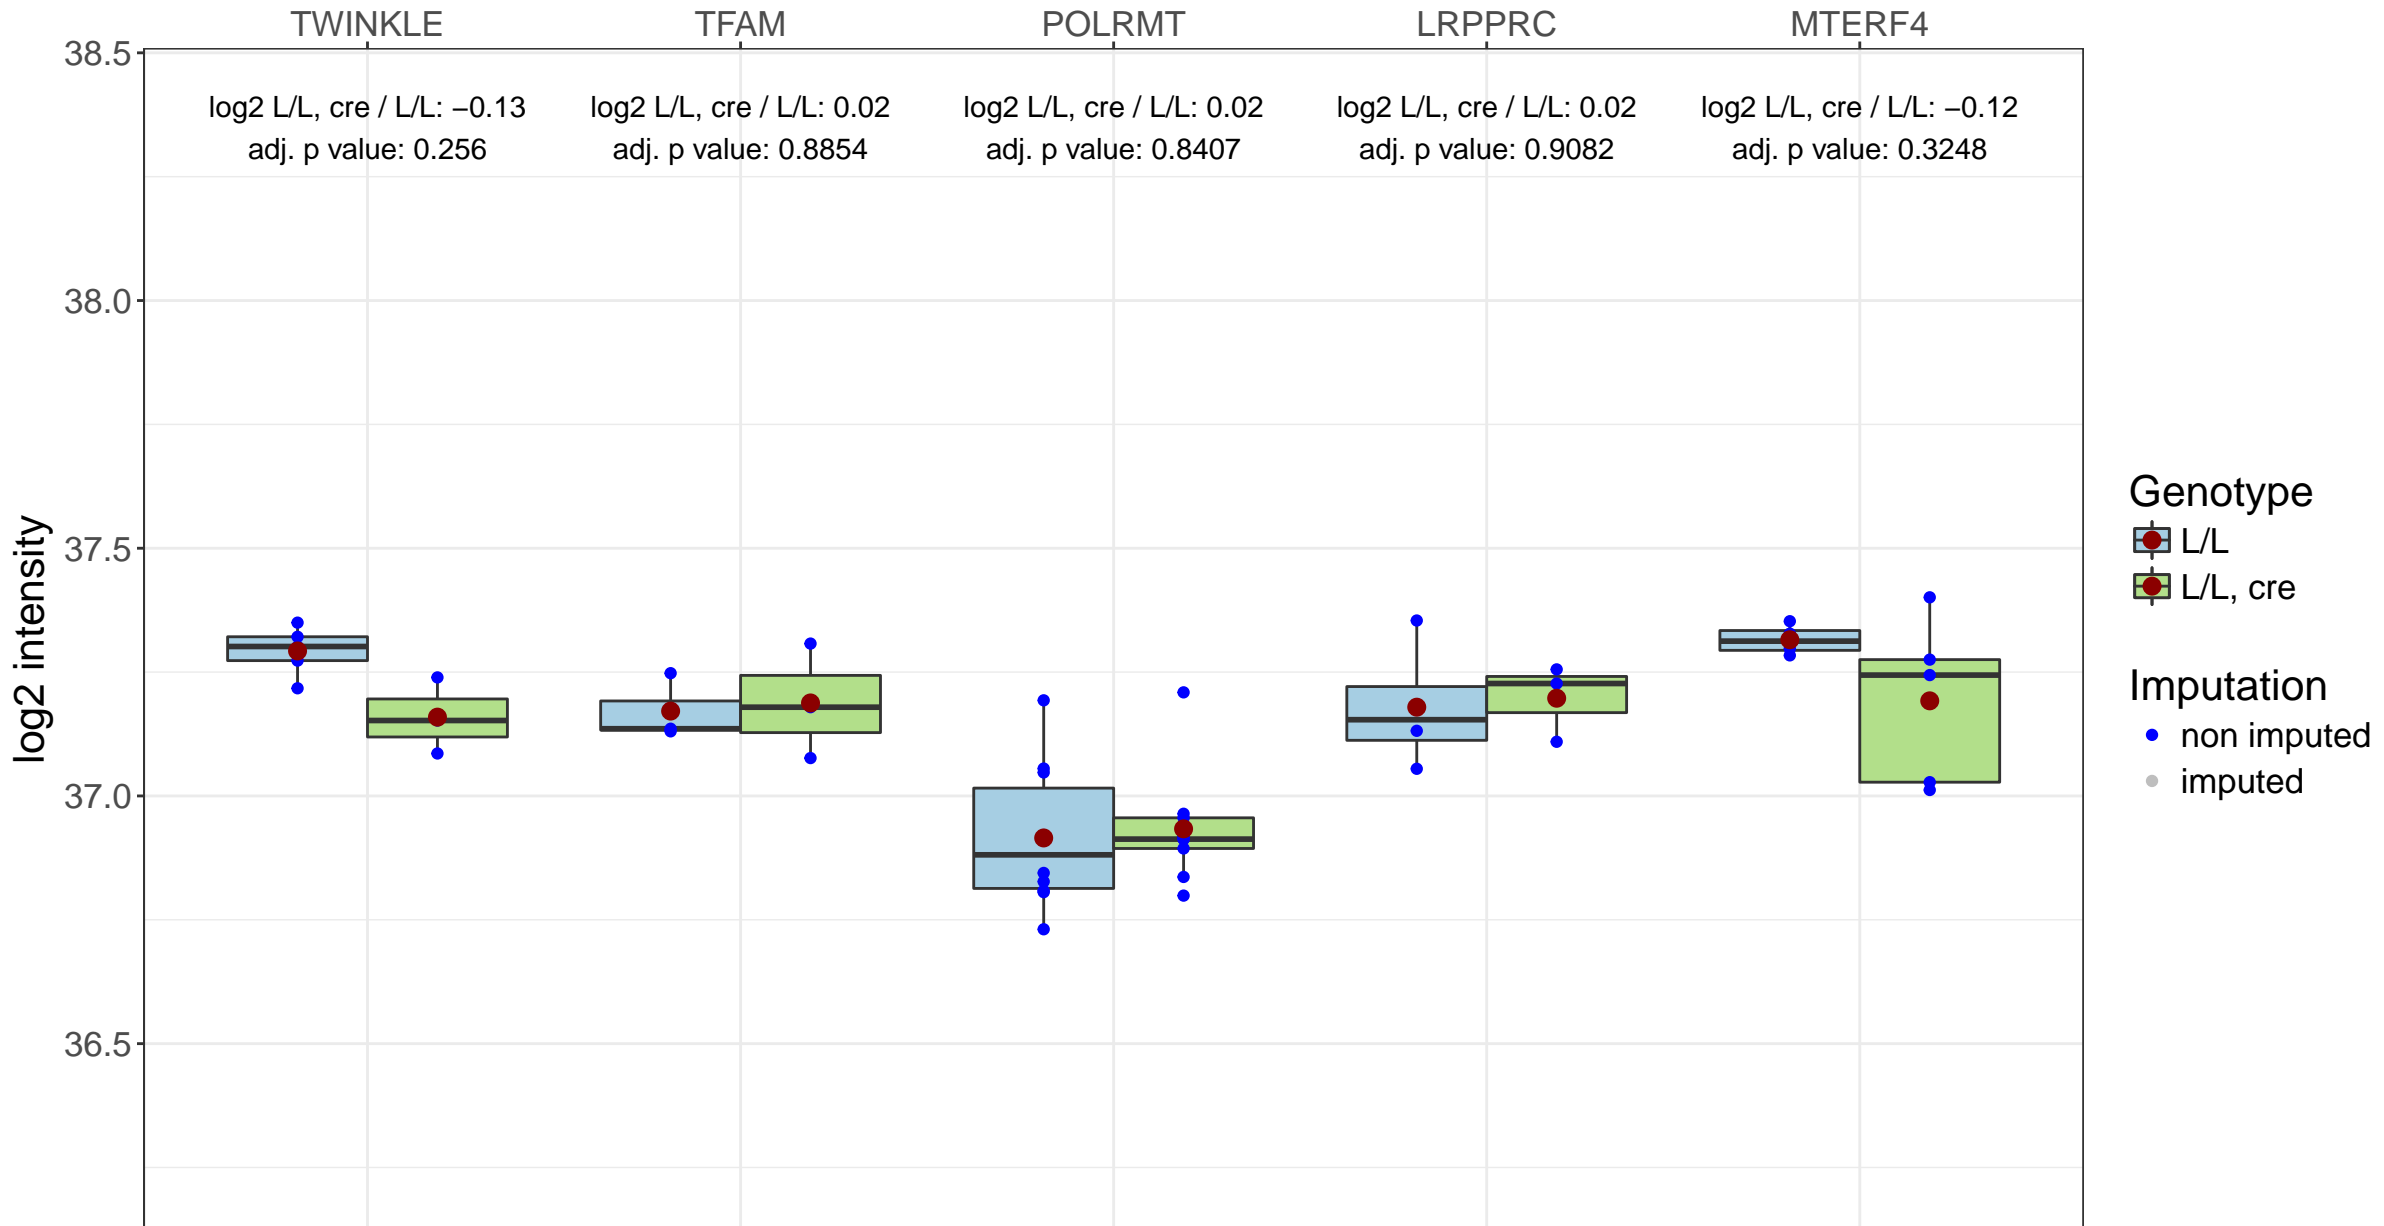

# ETFB / Q9DCW4

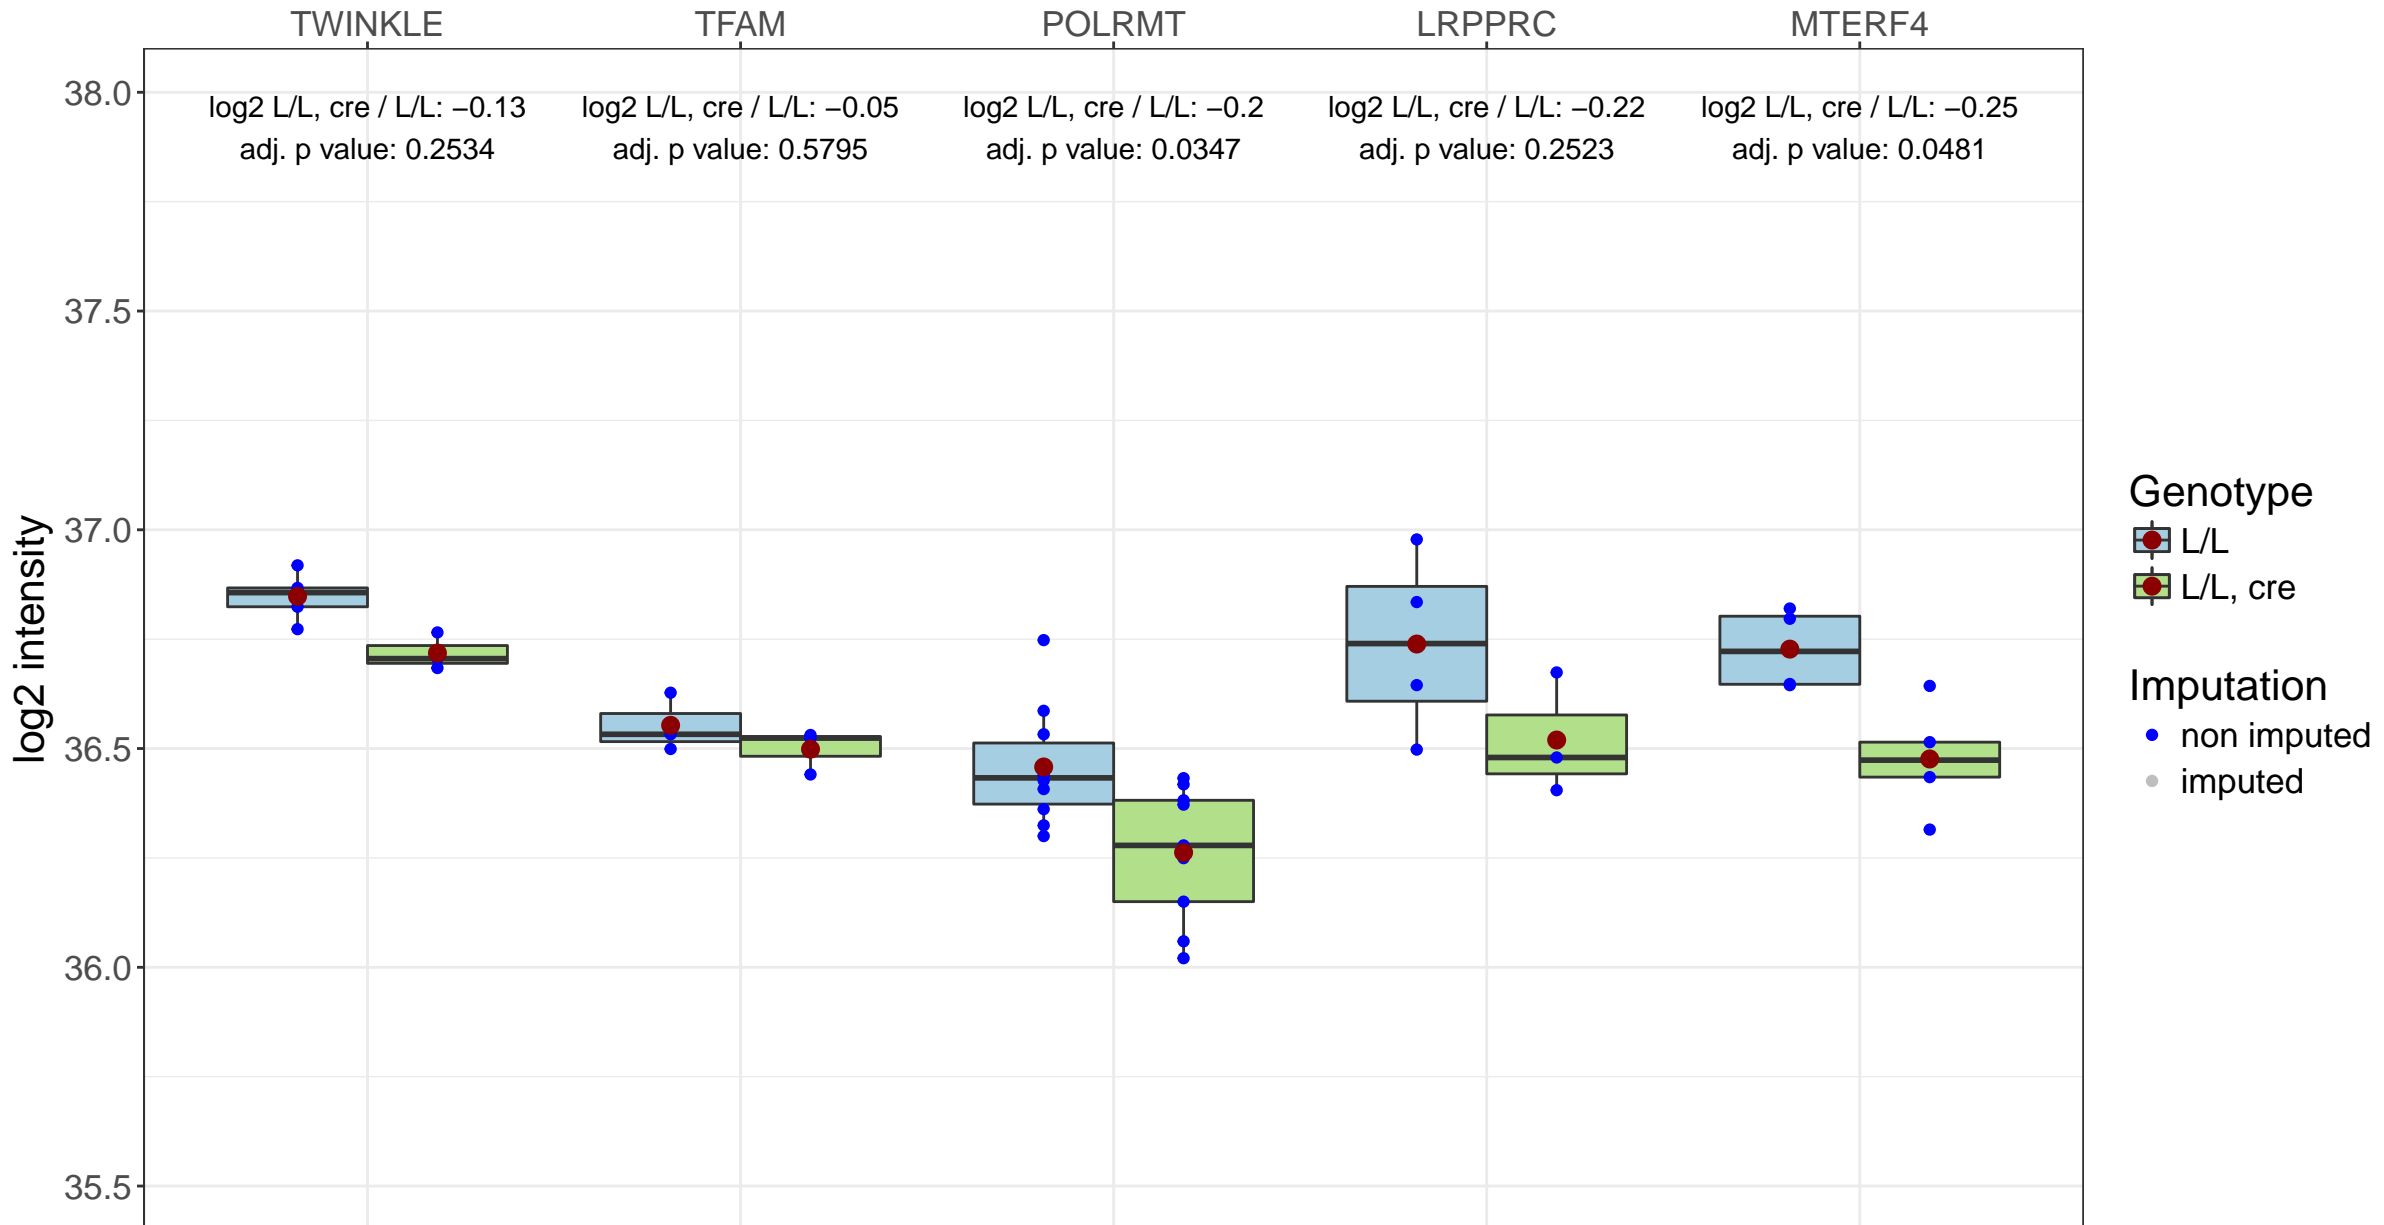

# ETFDH / Q921G7

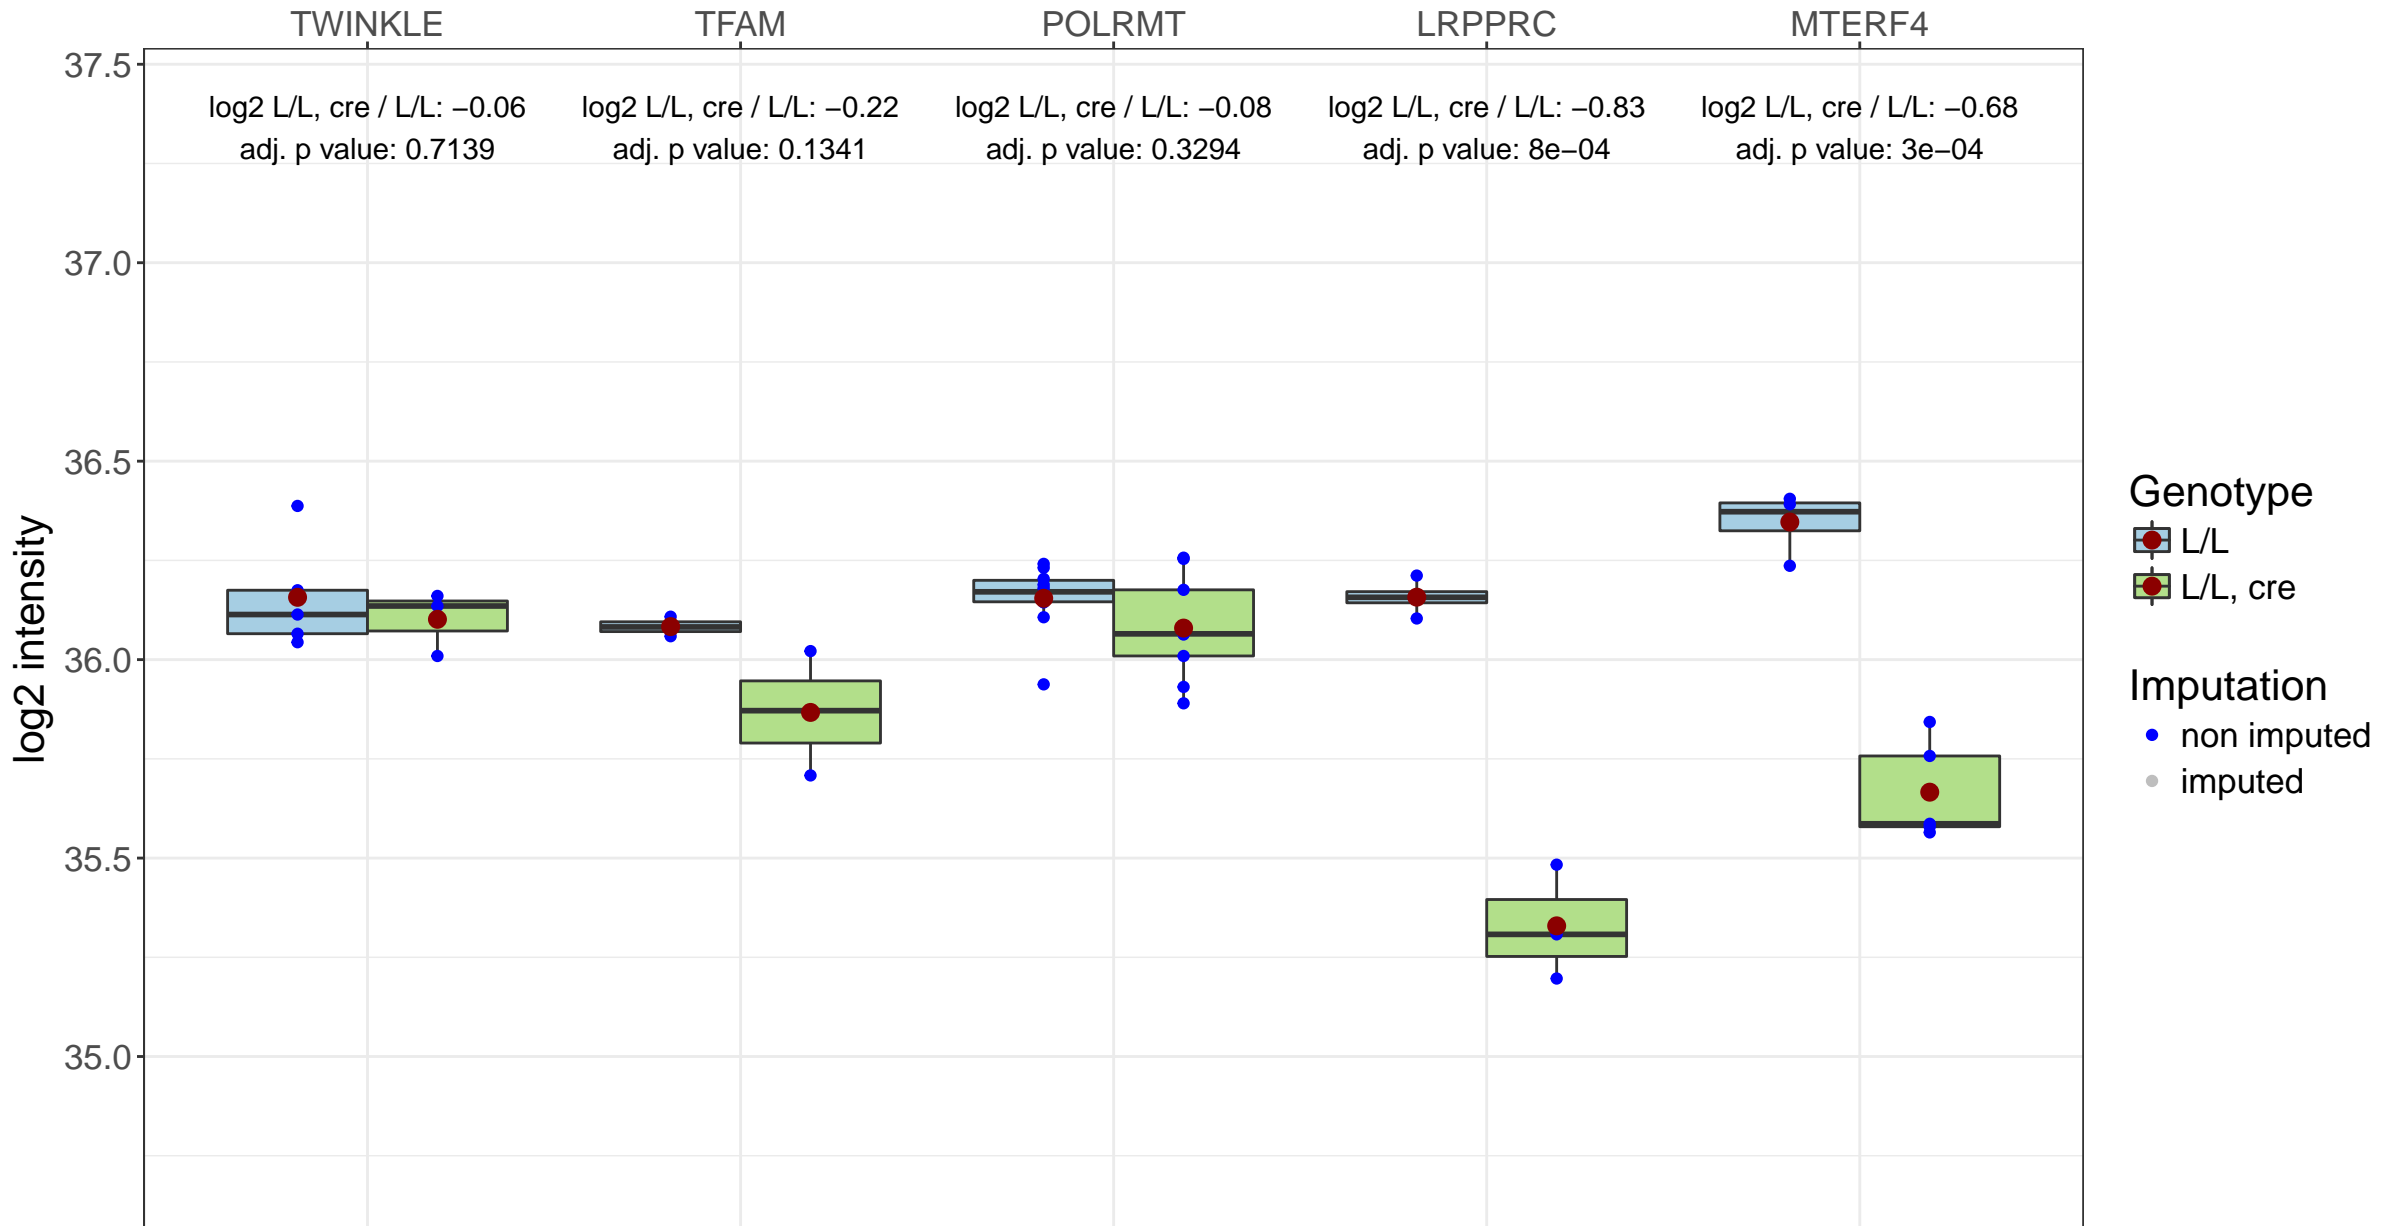

# ETHE1 / Q9DCM0

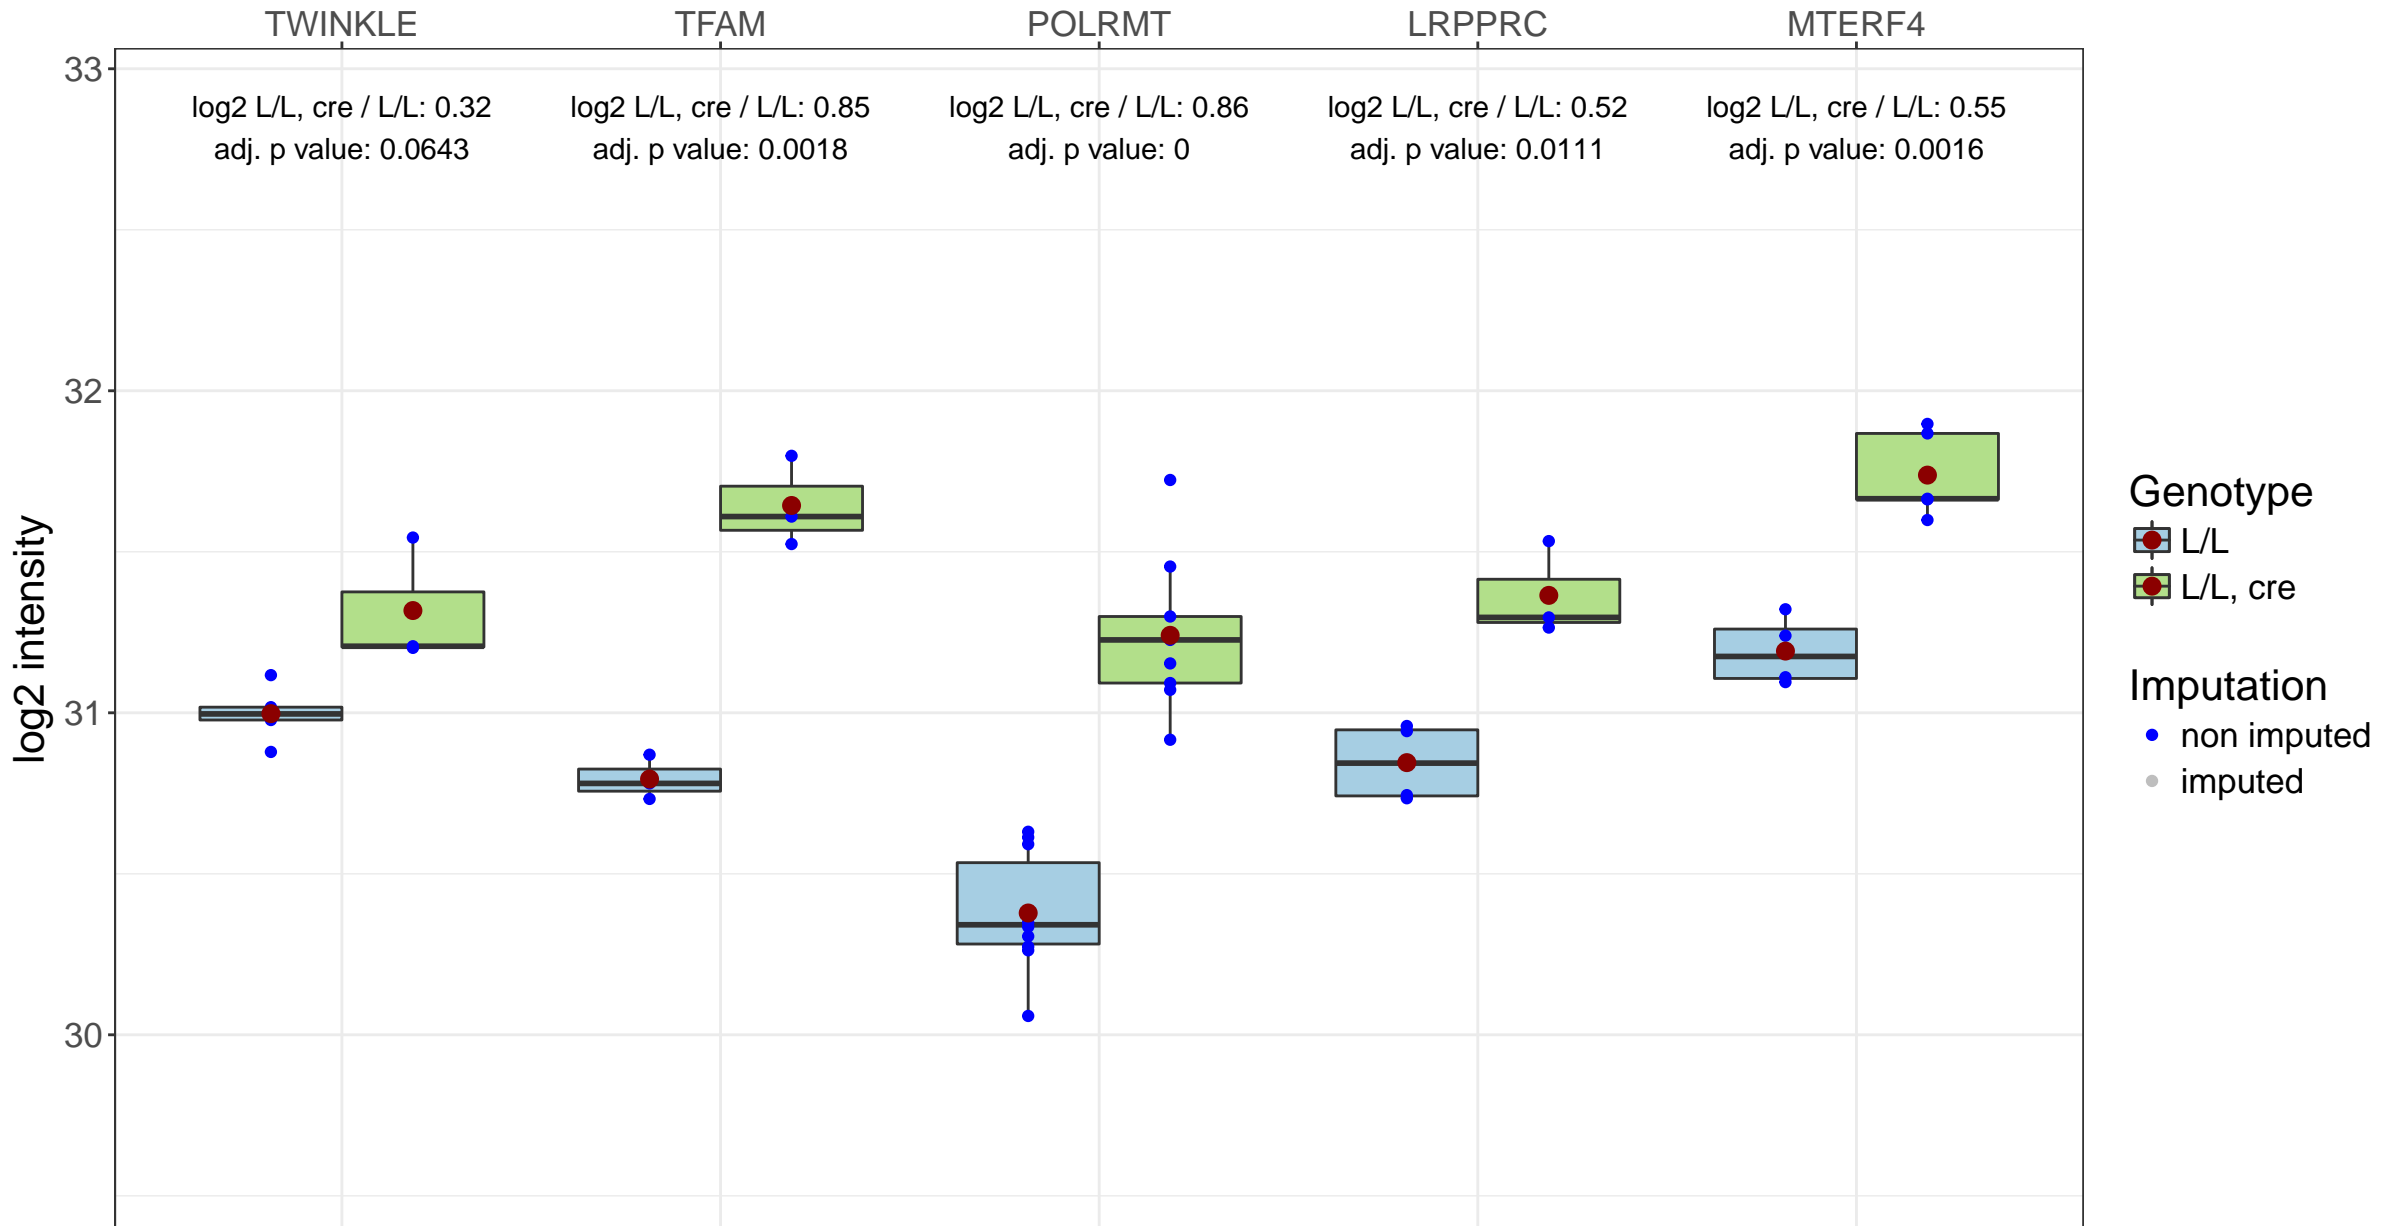



# FABP3 / P11404

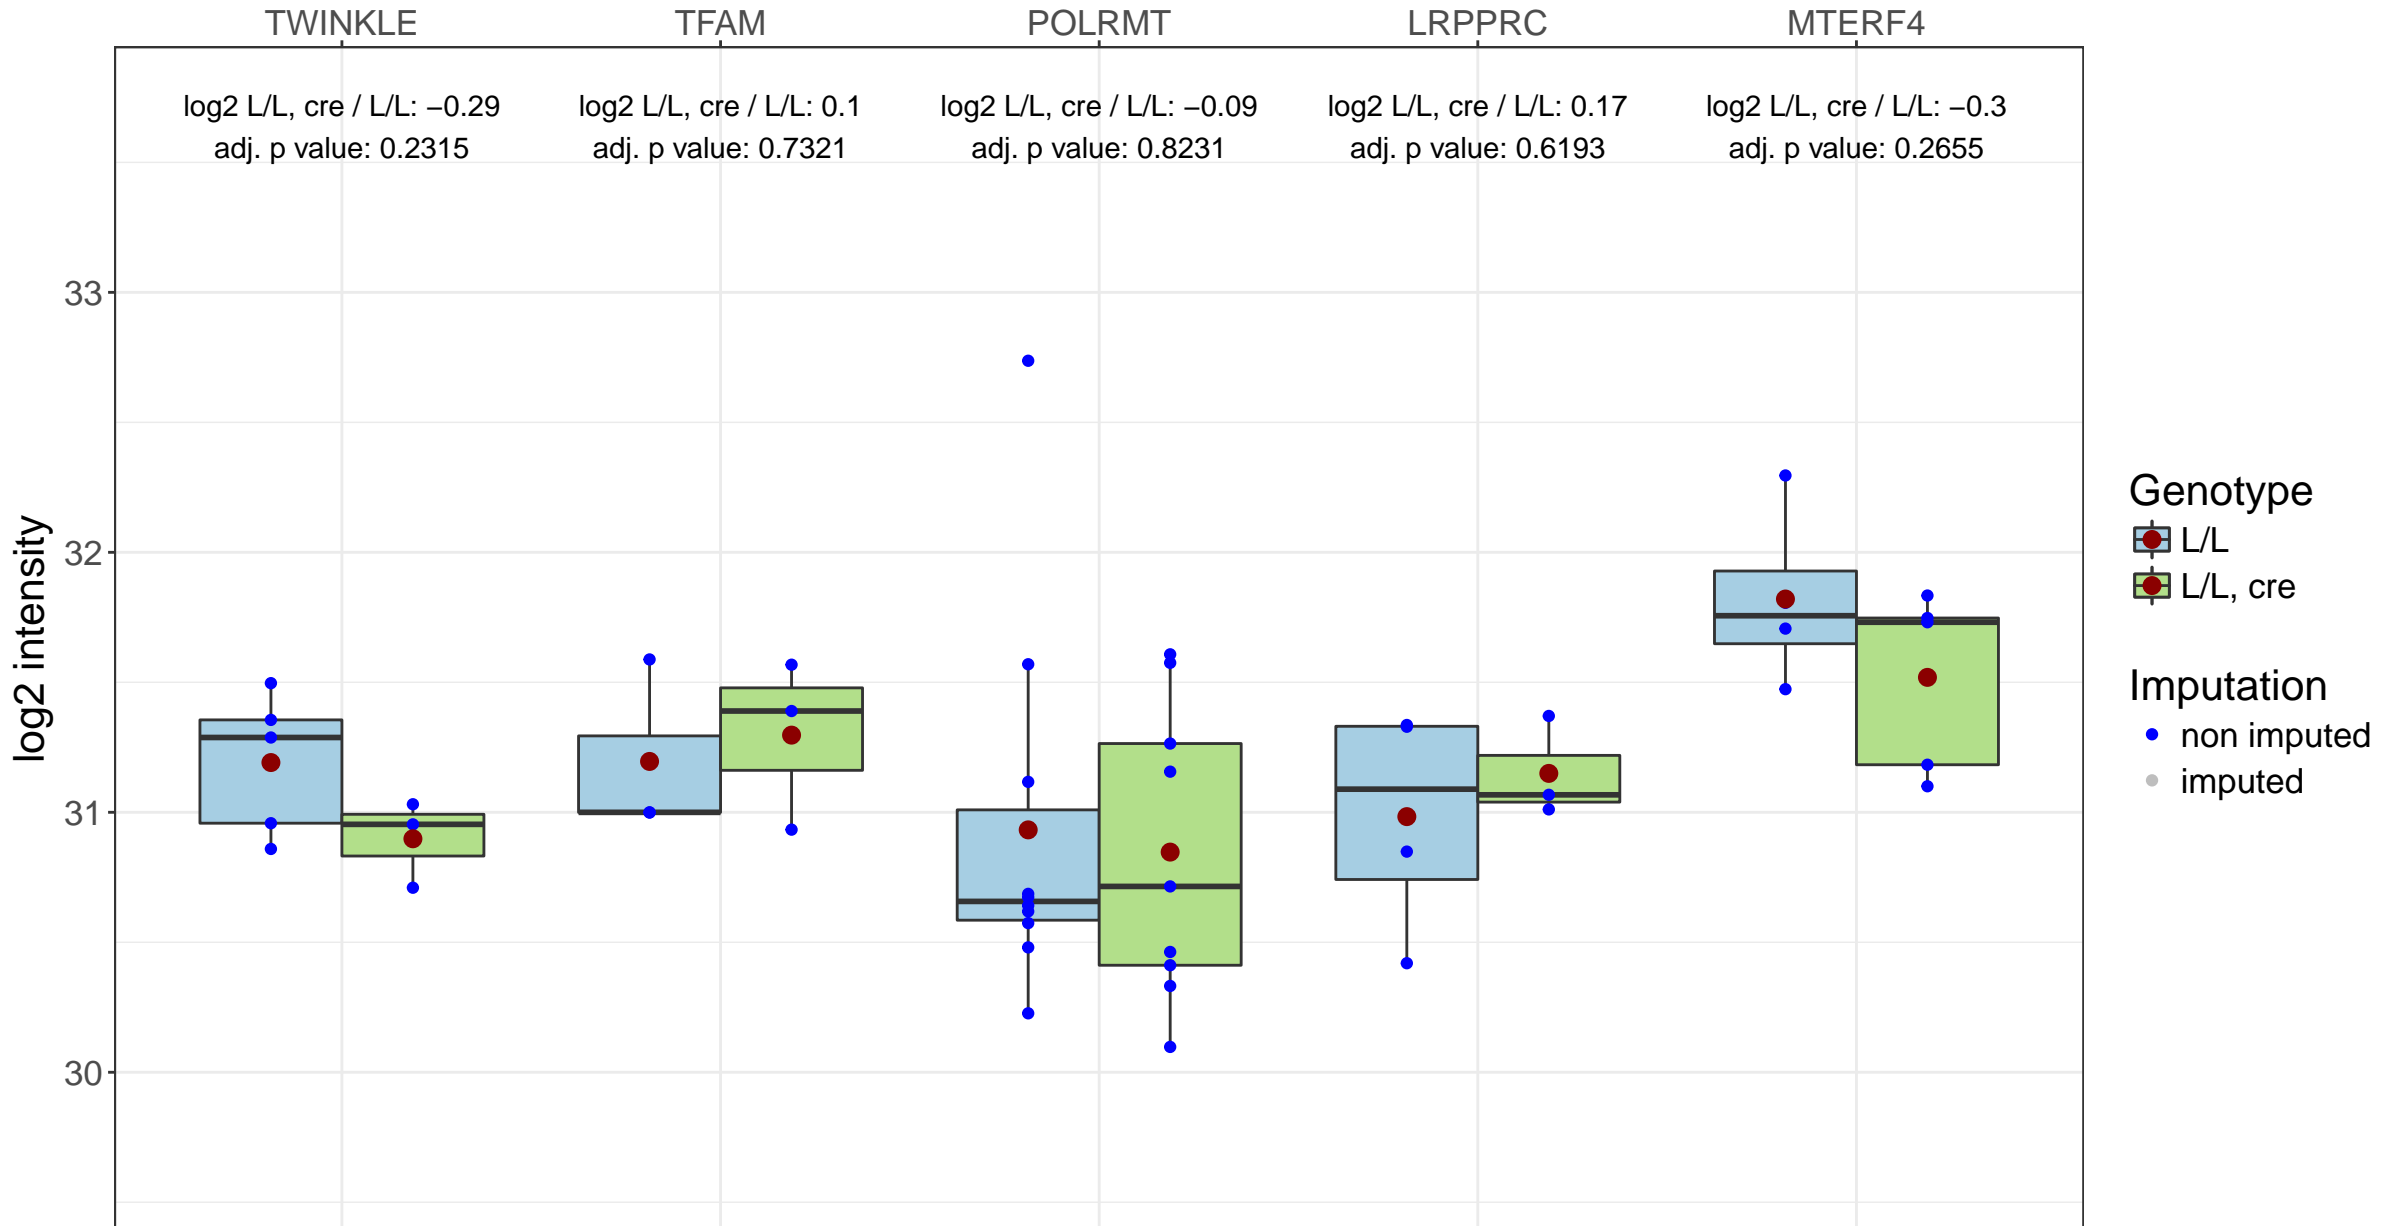

# FABP4 / P04117

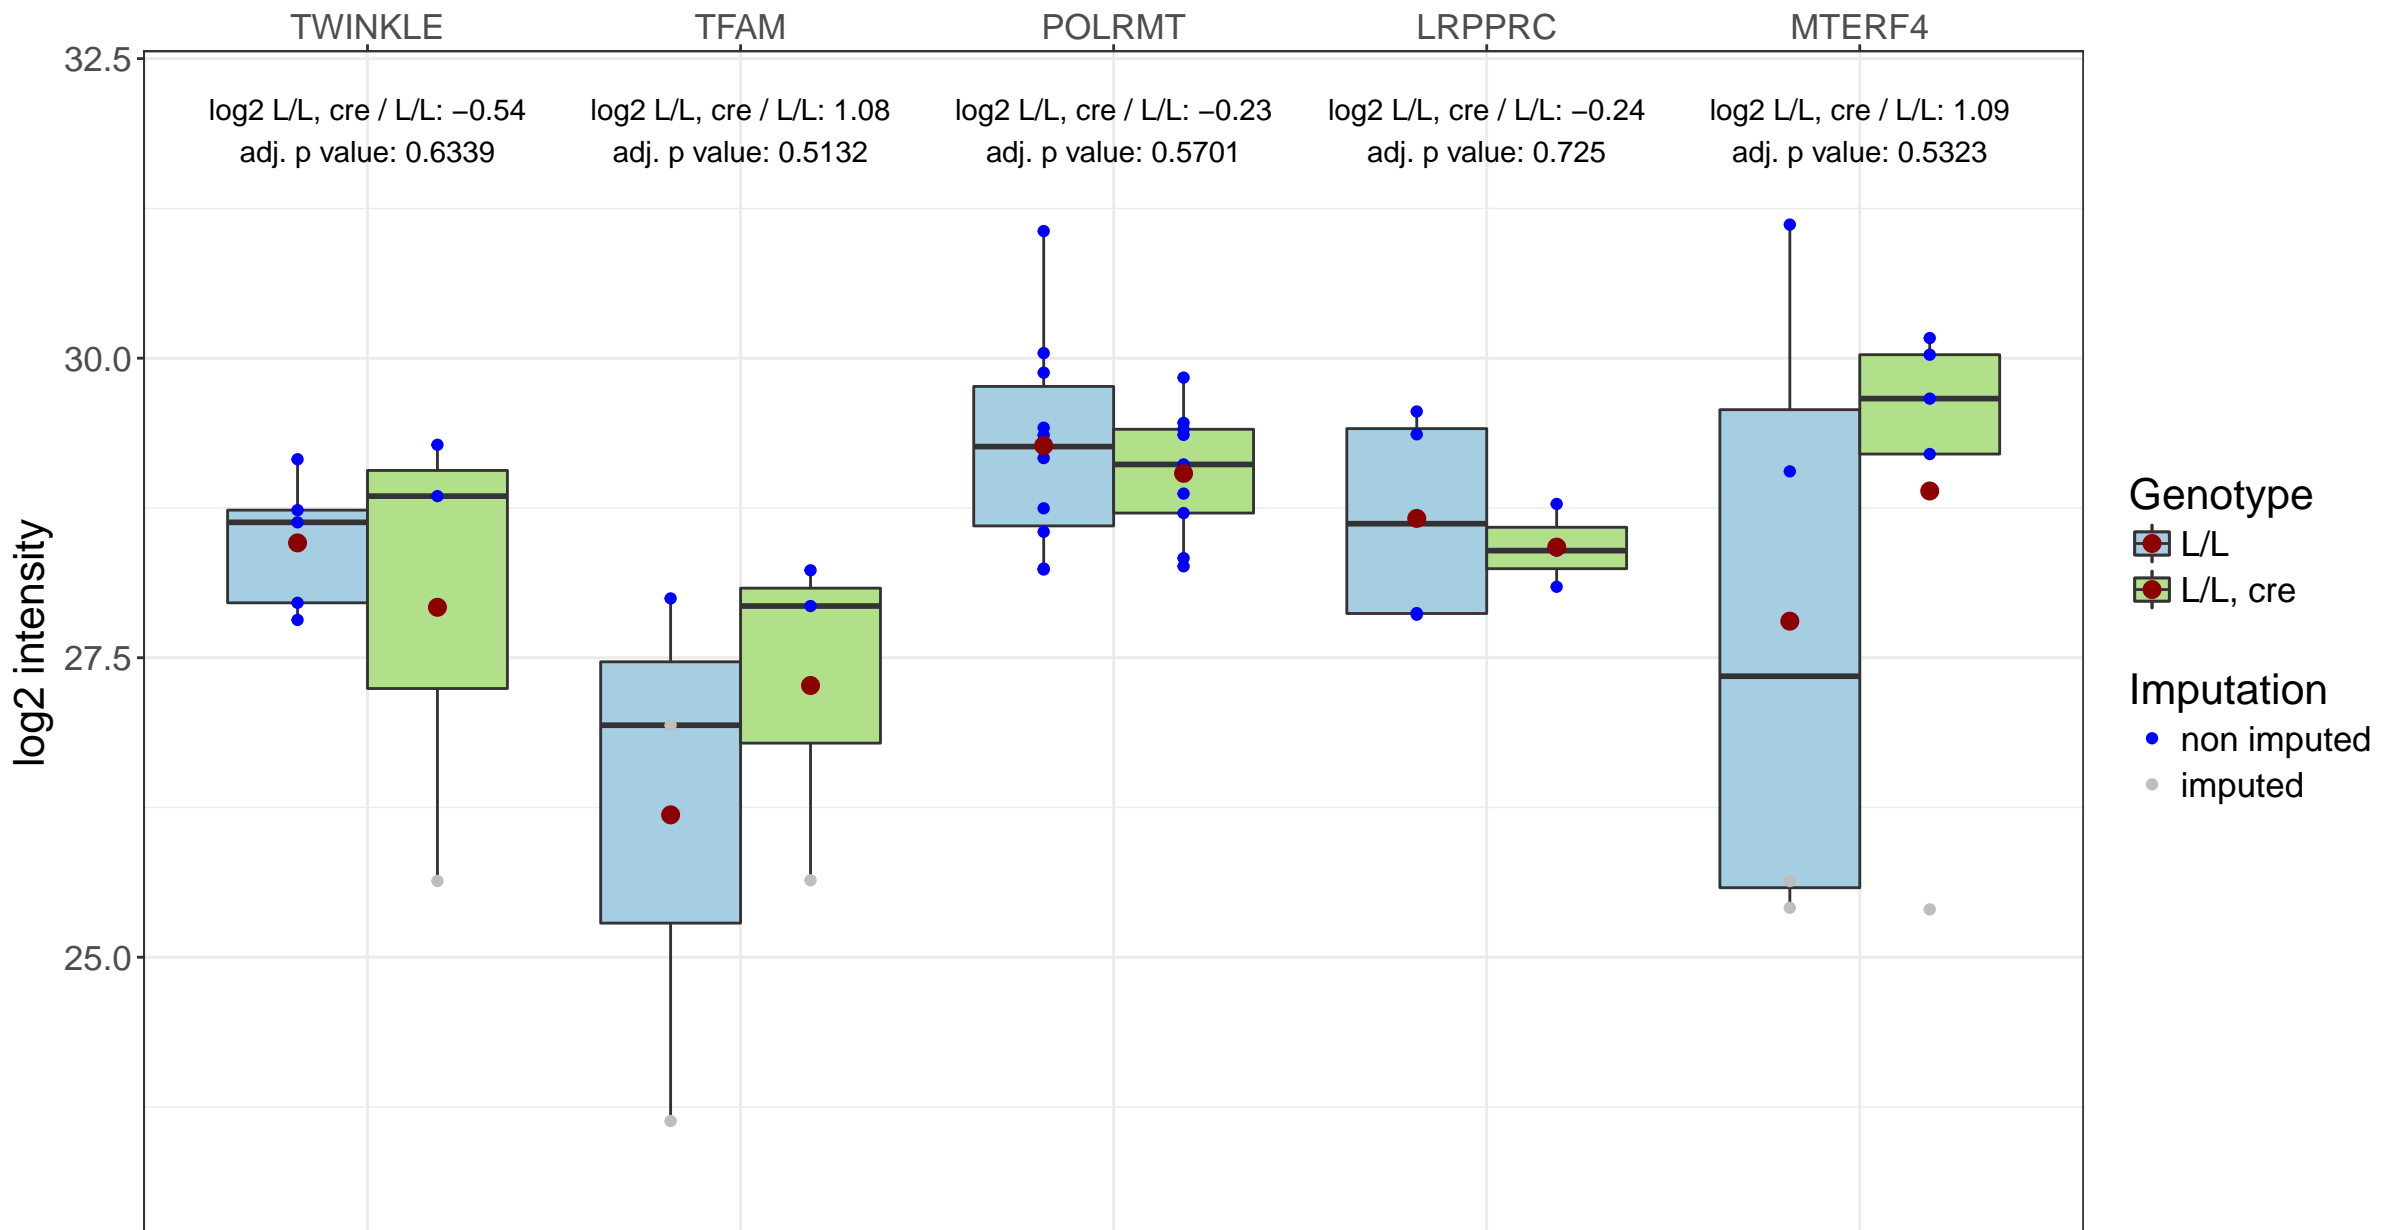

# FAHD1 / Q8R0F8

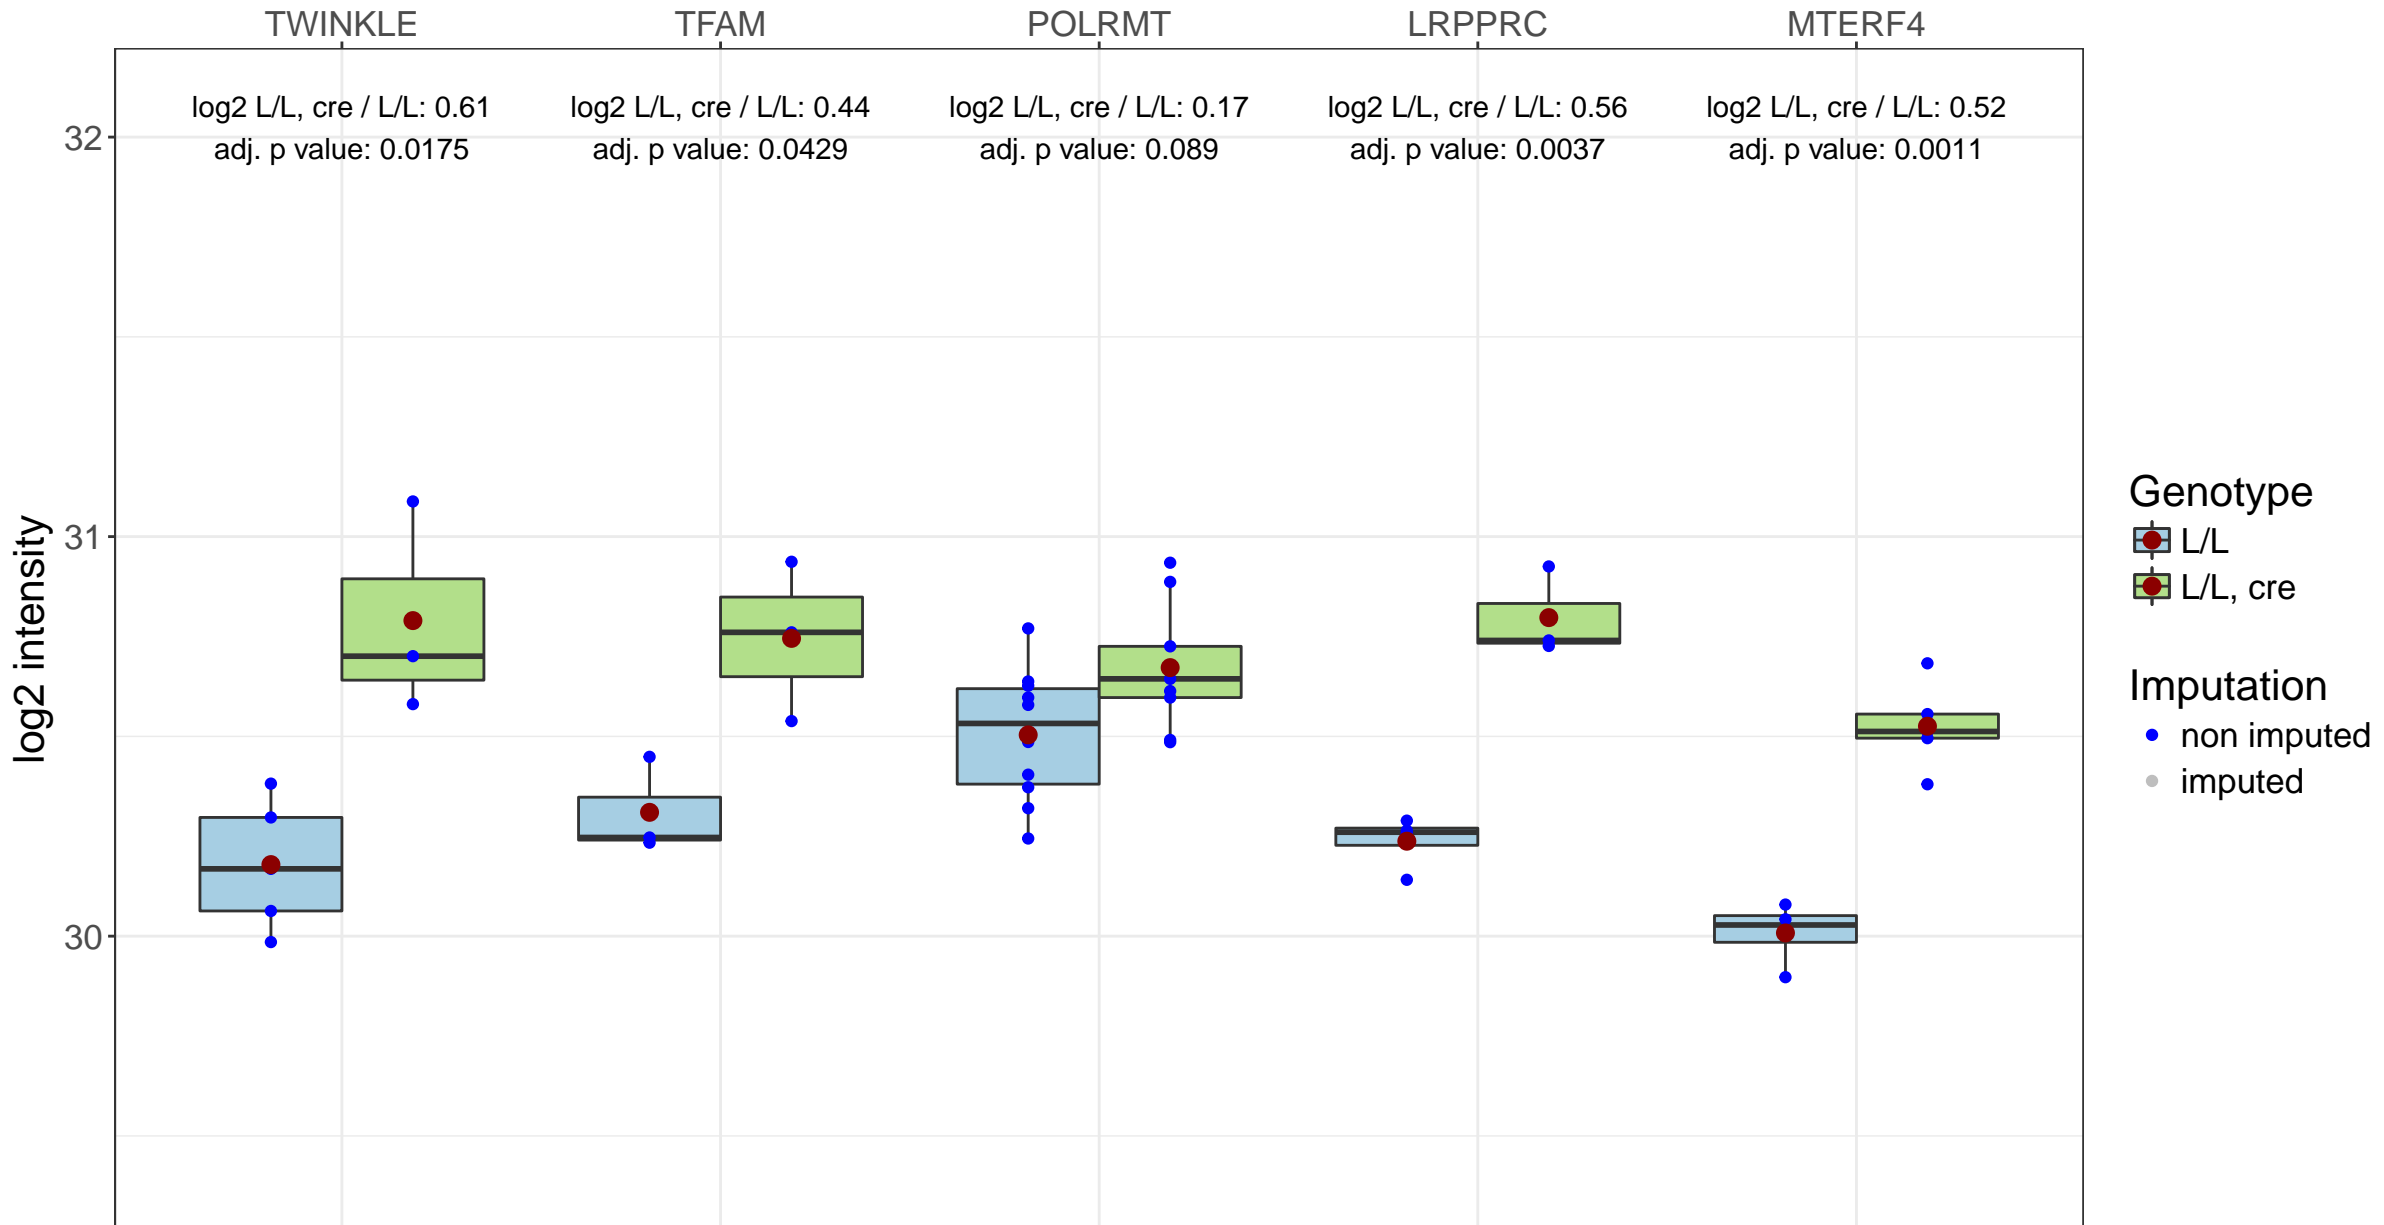

# FAHD2 / Q3TC72

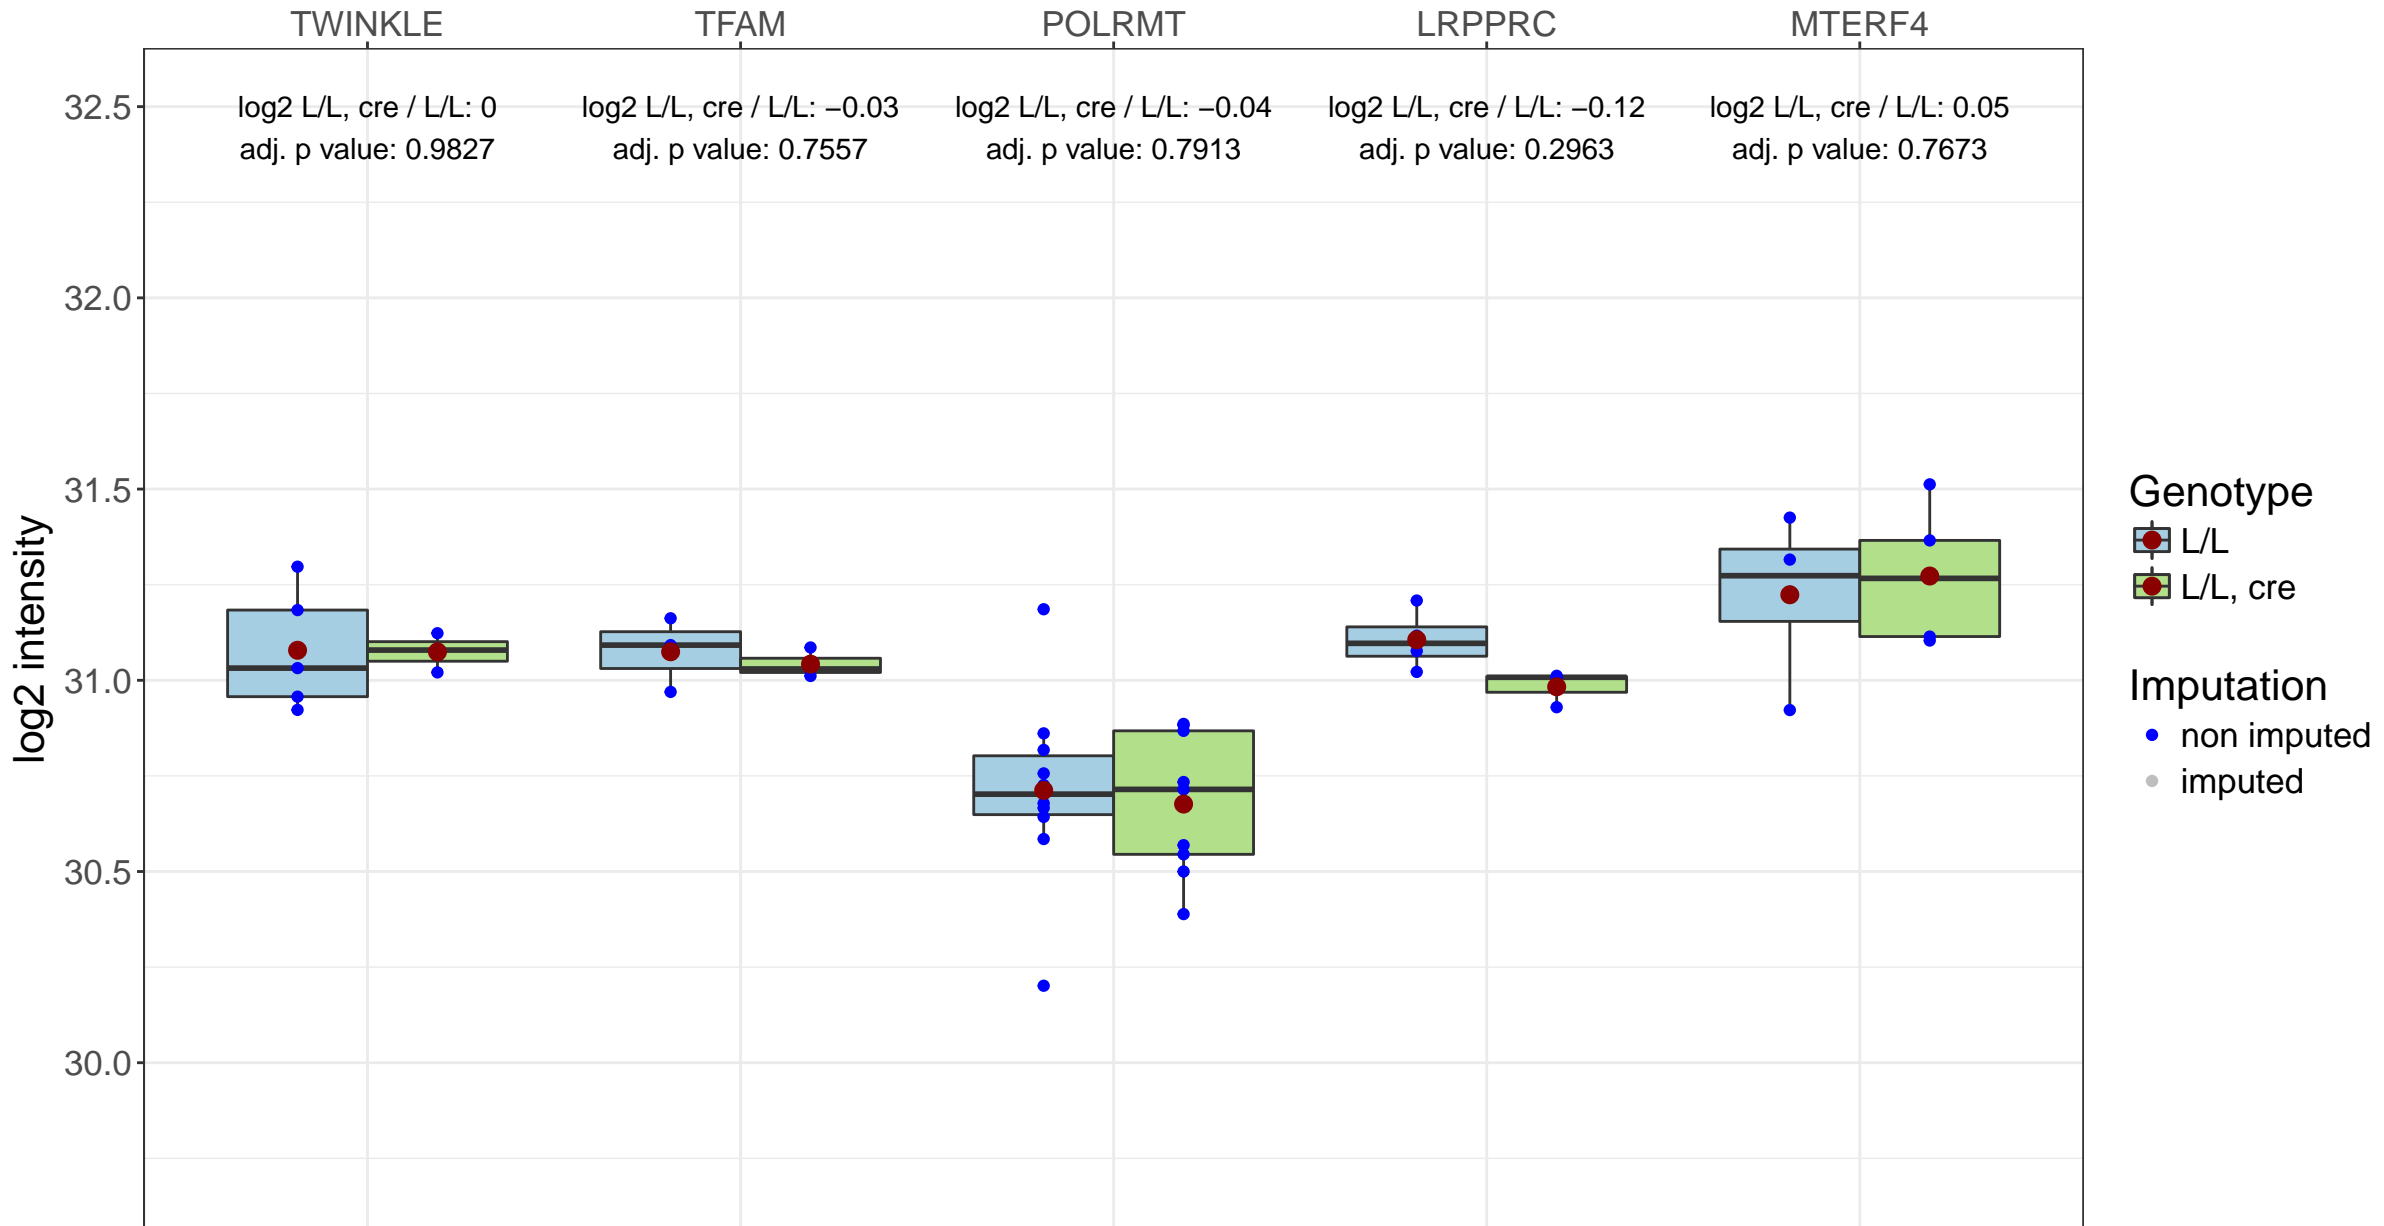

# FAM136A / Q9CR98

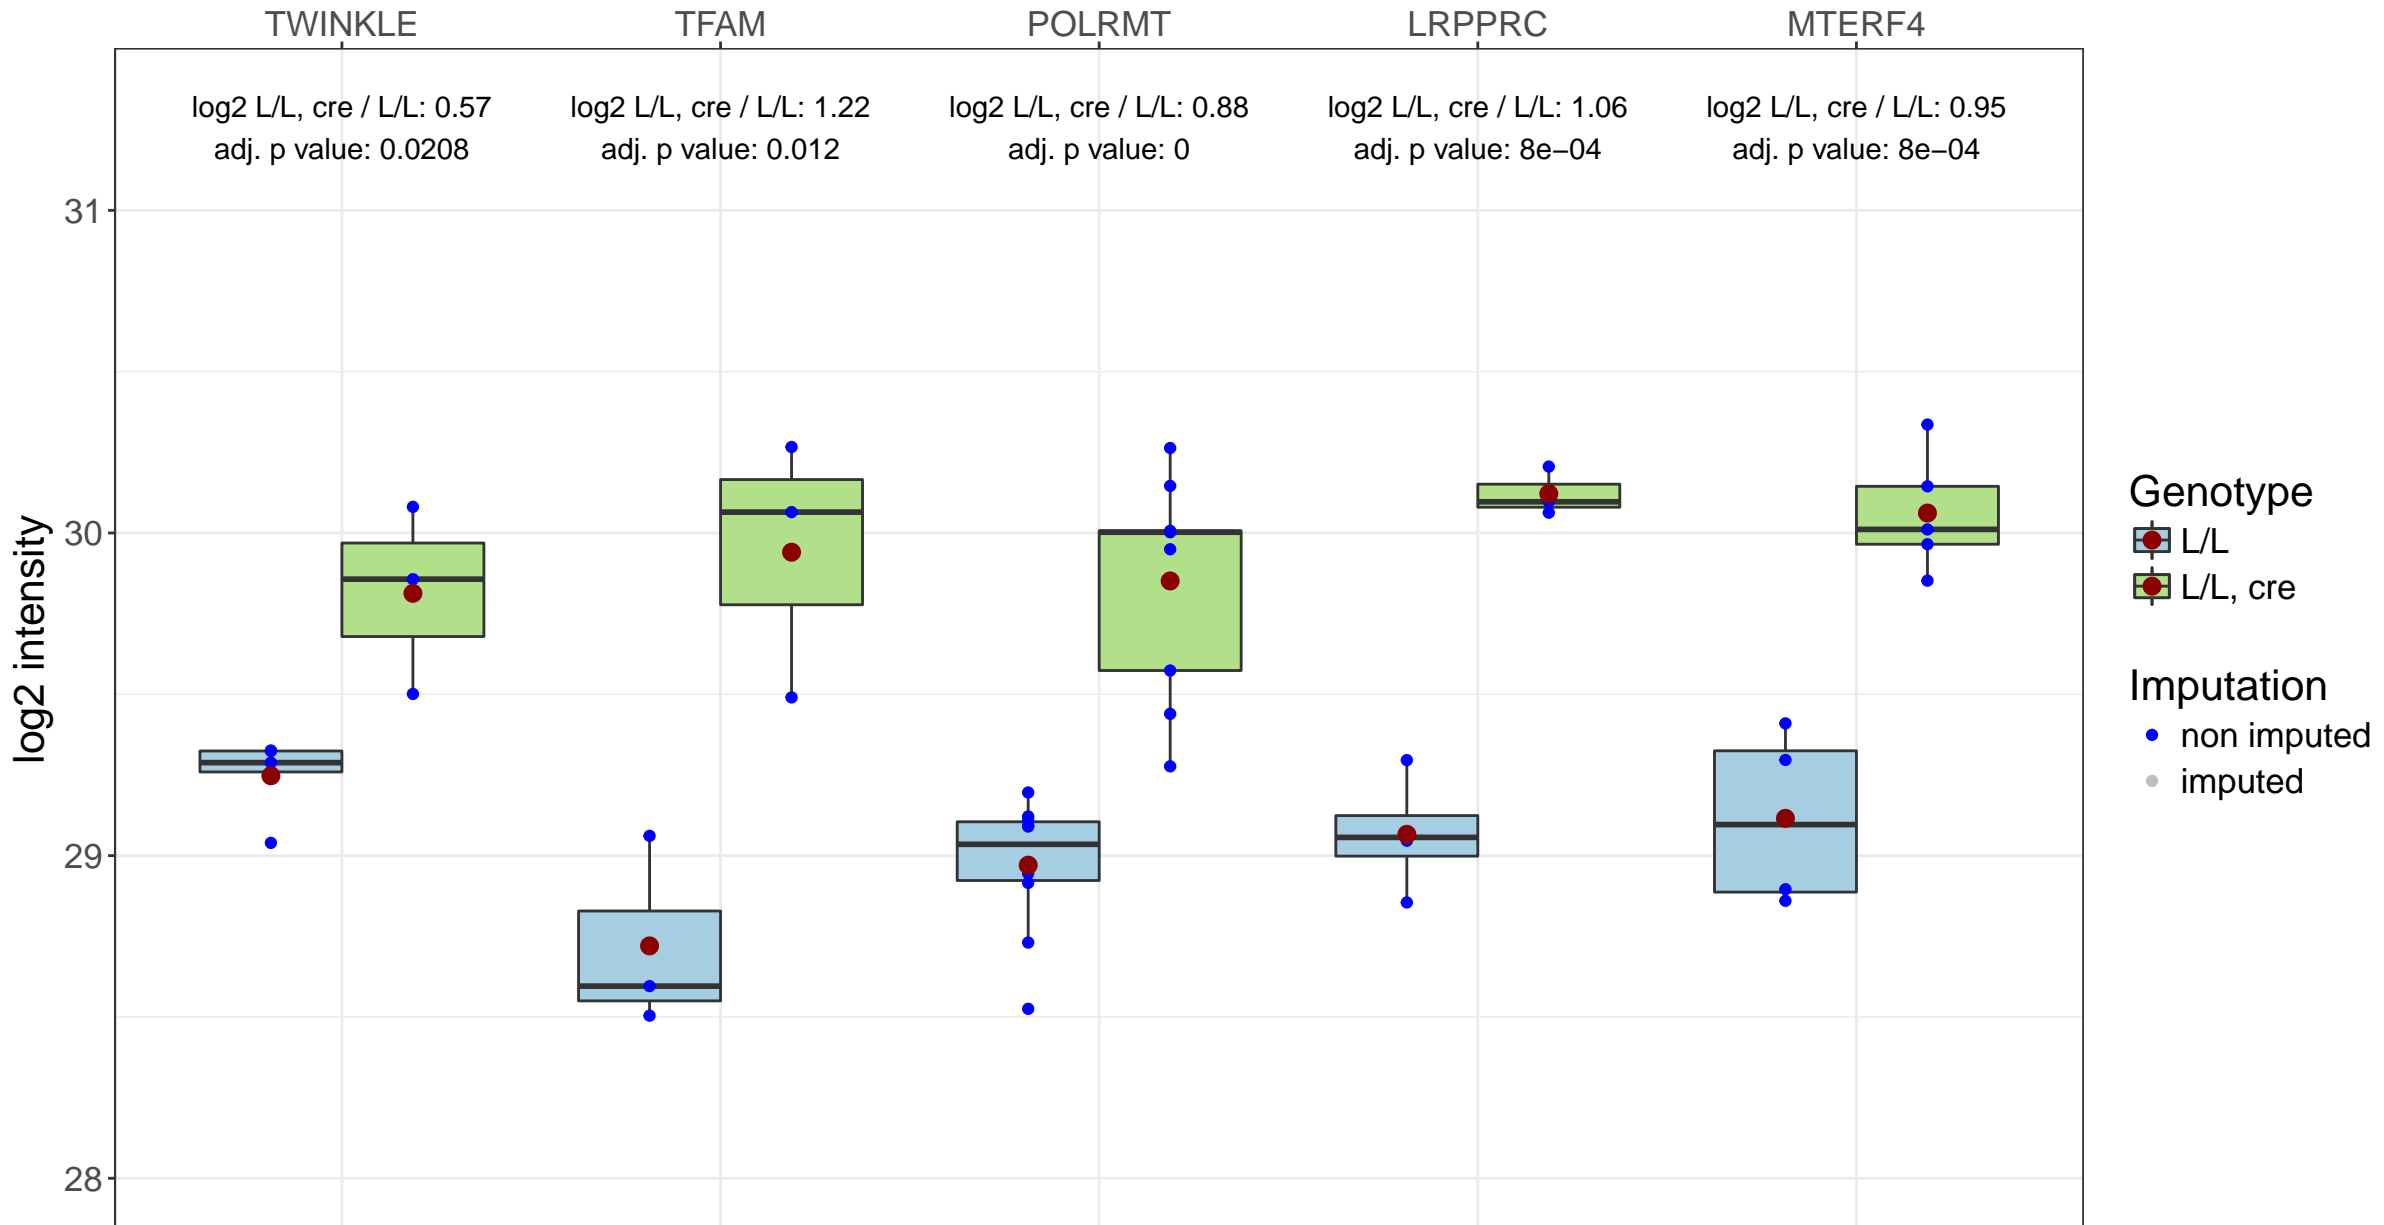

# FAM162A / Q9D6U8

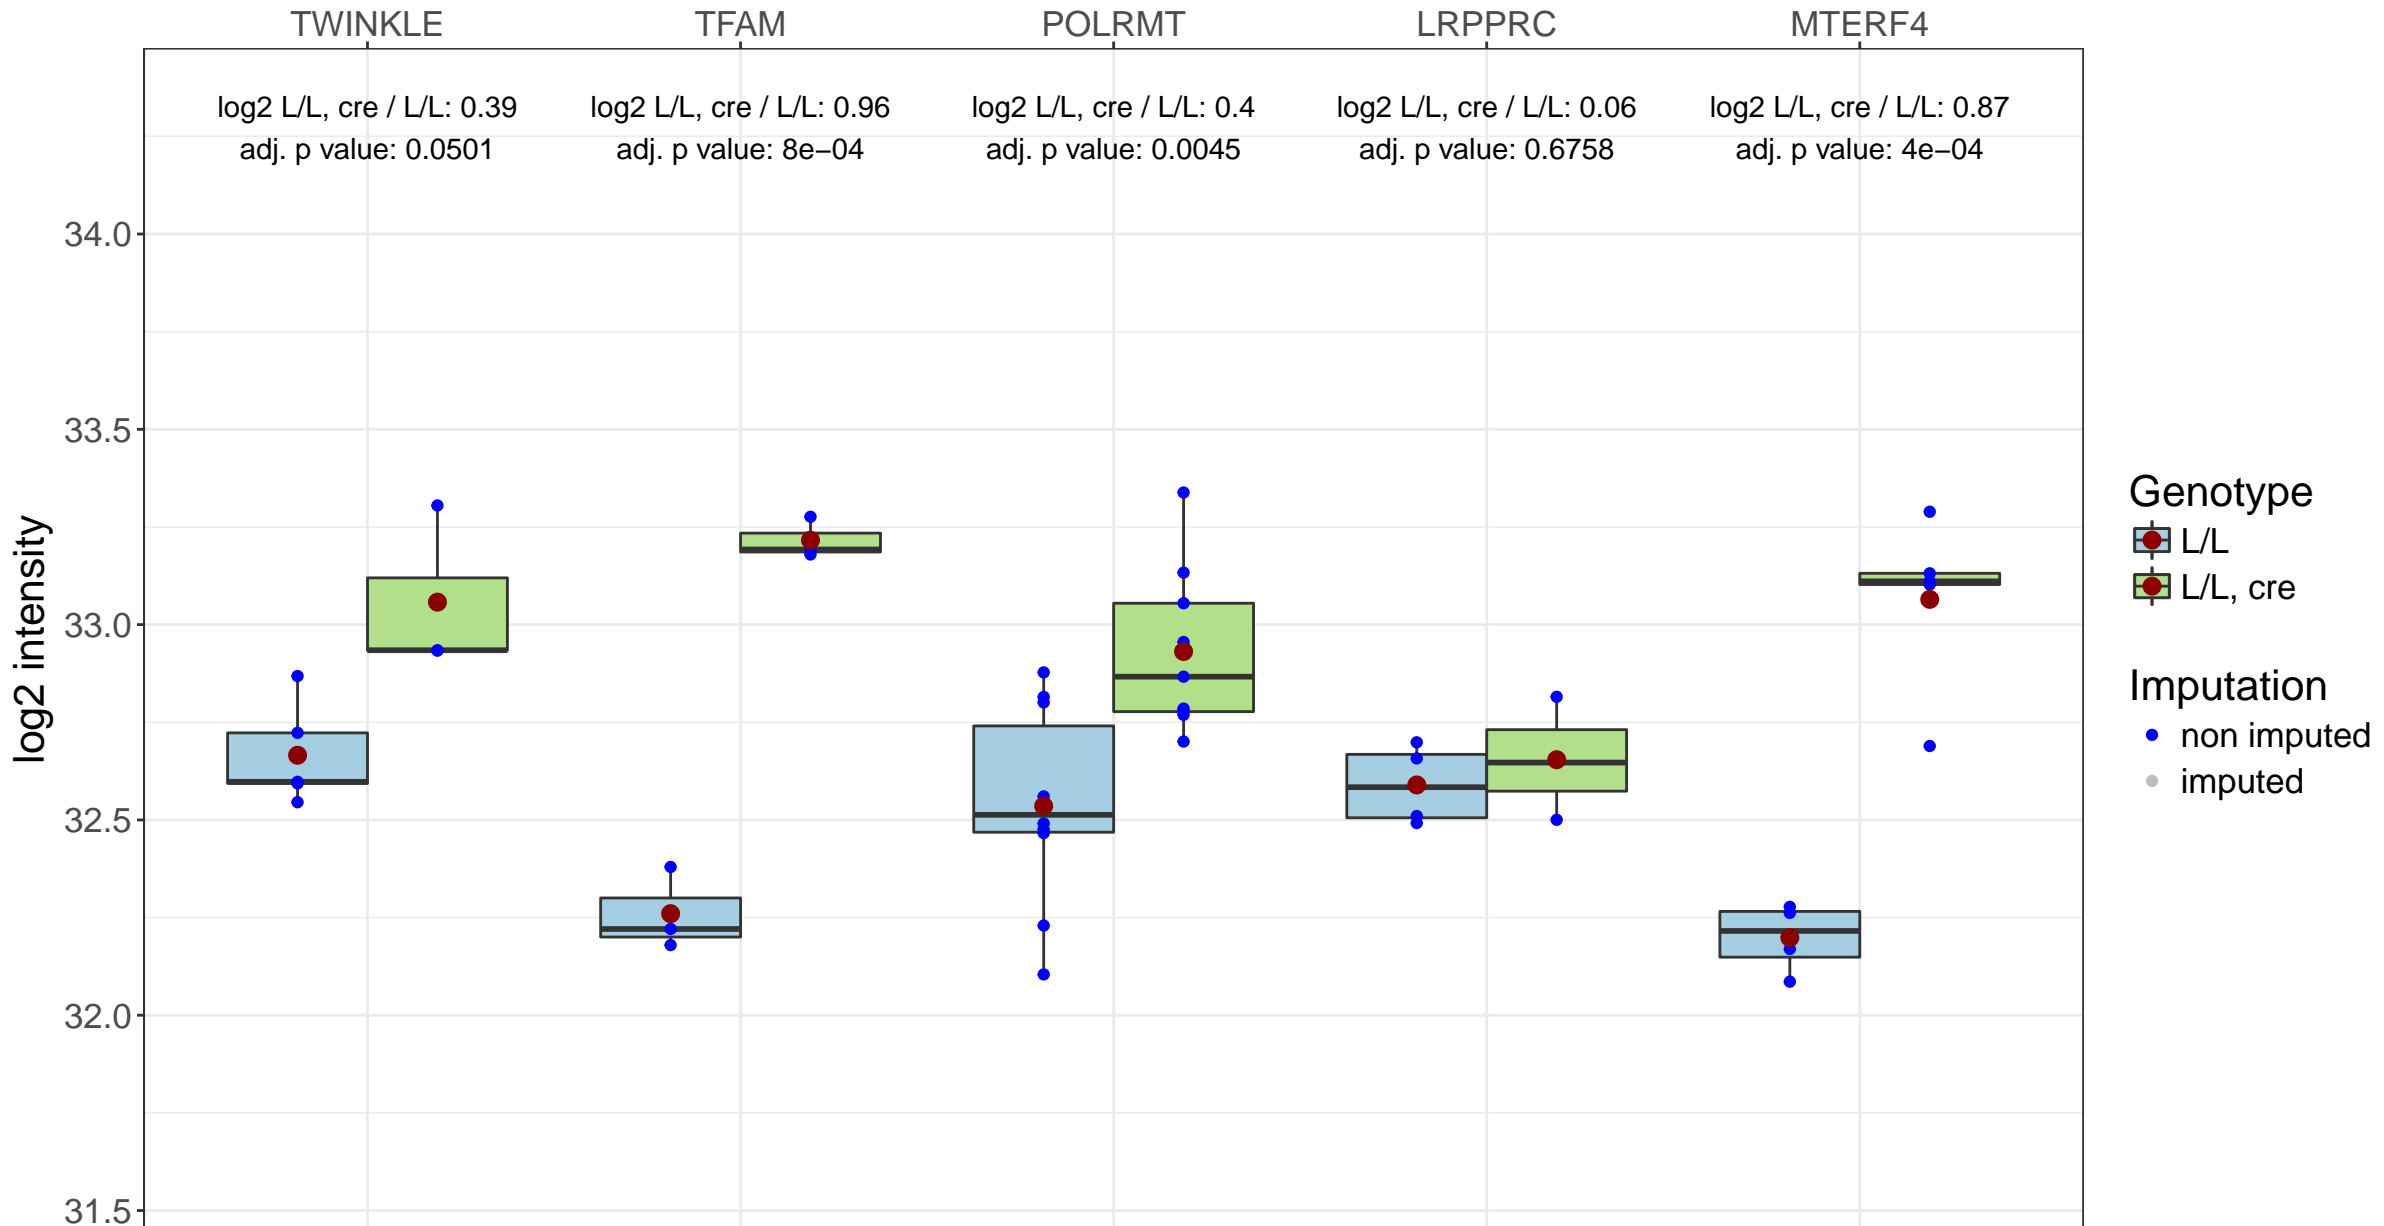

# FAM173A / Q501J2

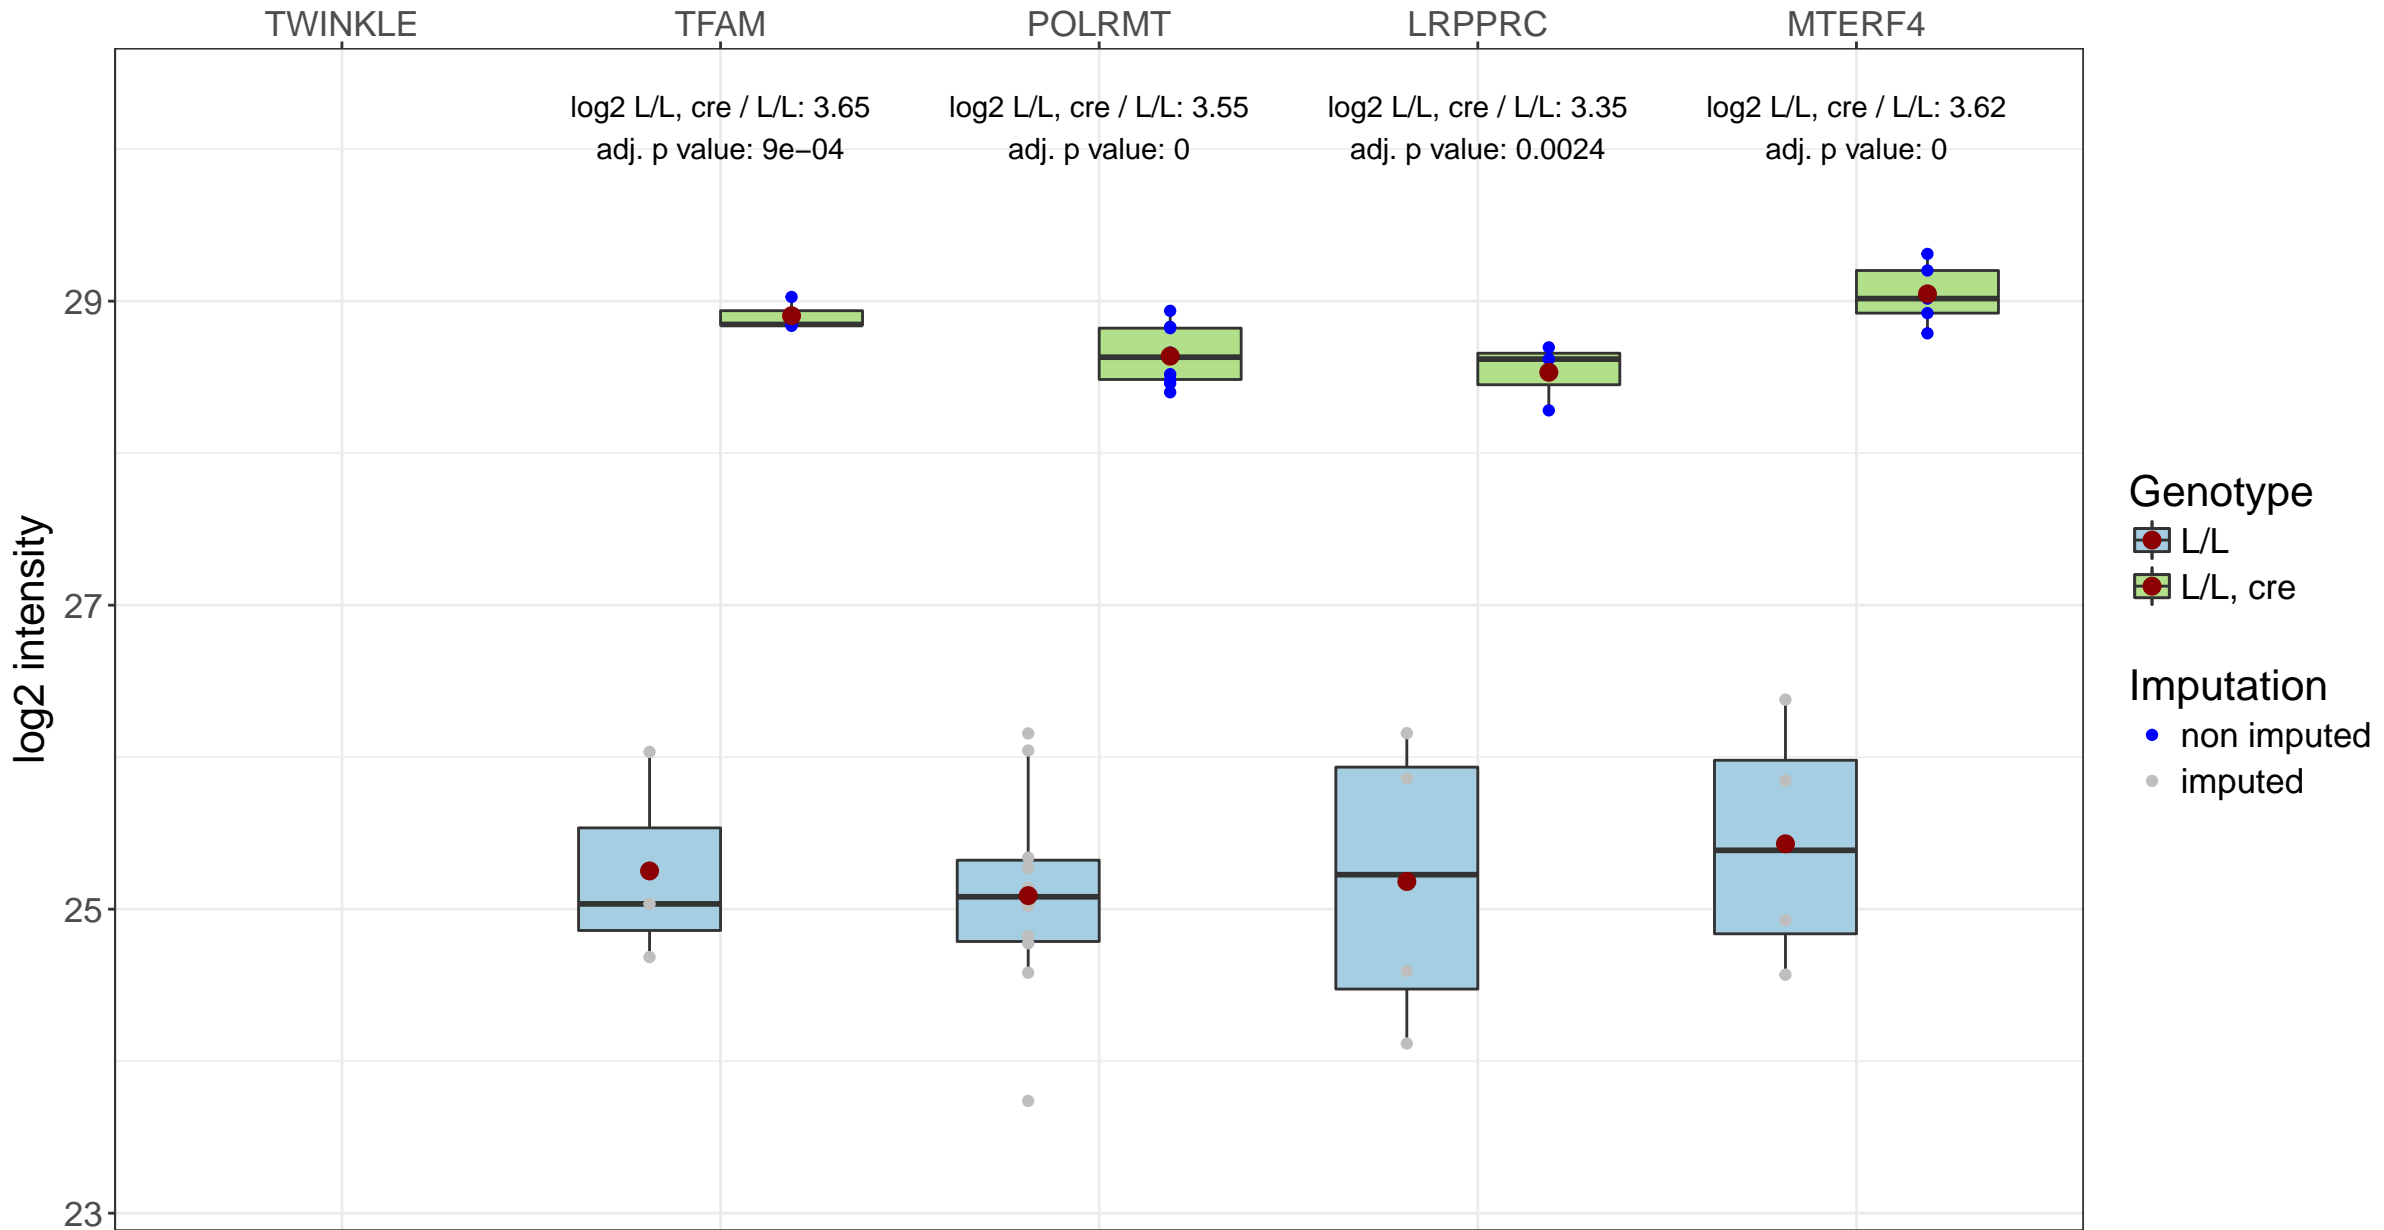

# FAM173B / Q9D1Z3

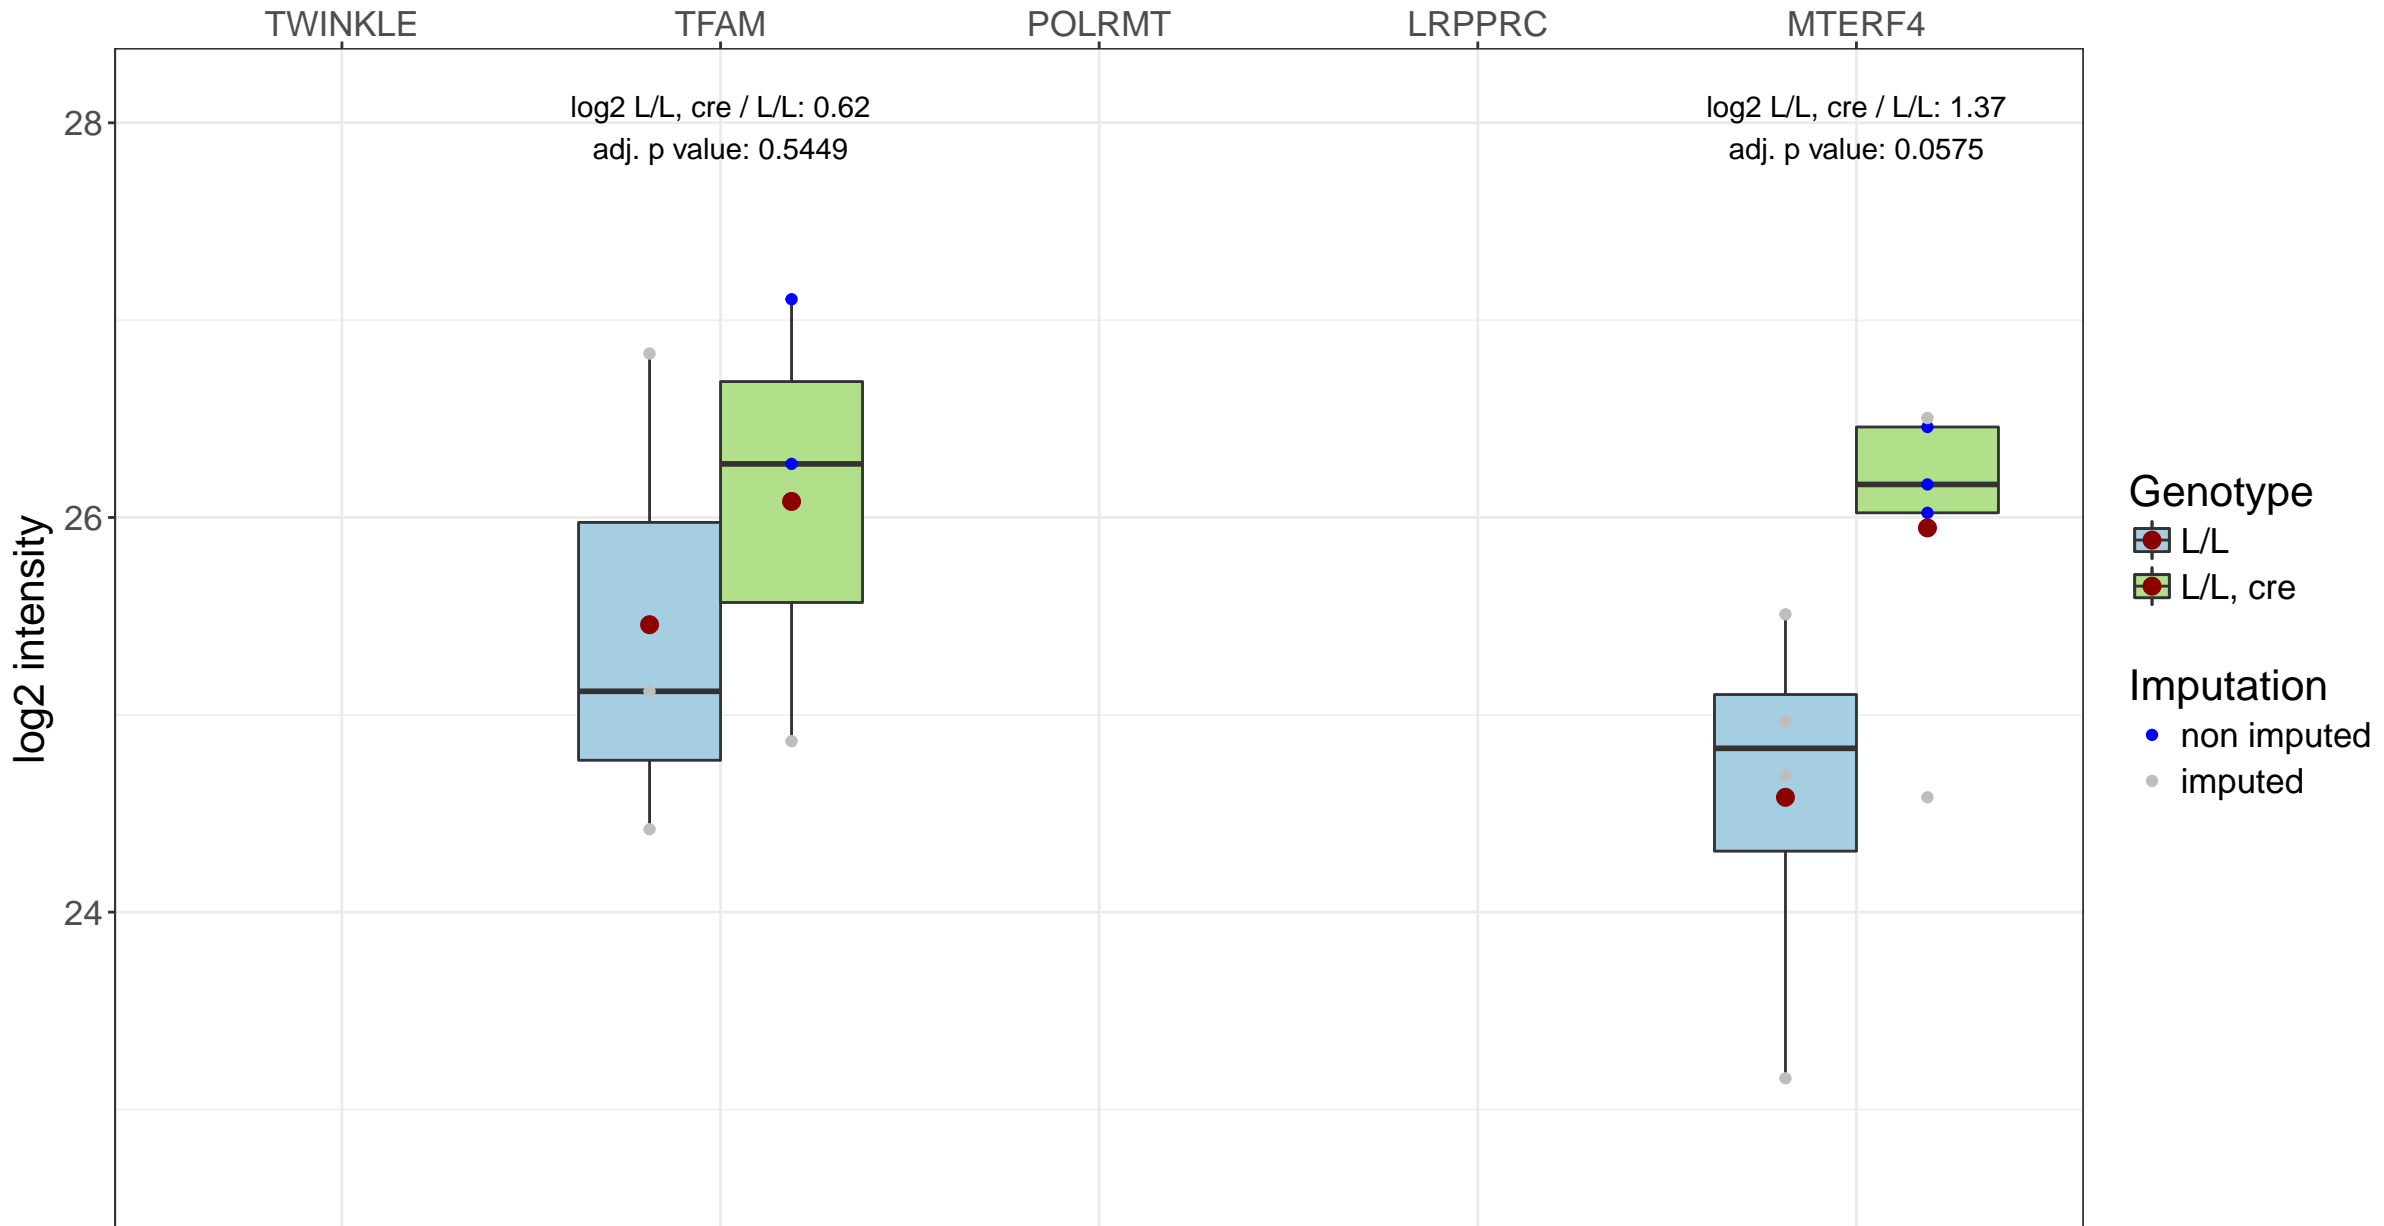



# FAM185A / Q7TPD2

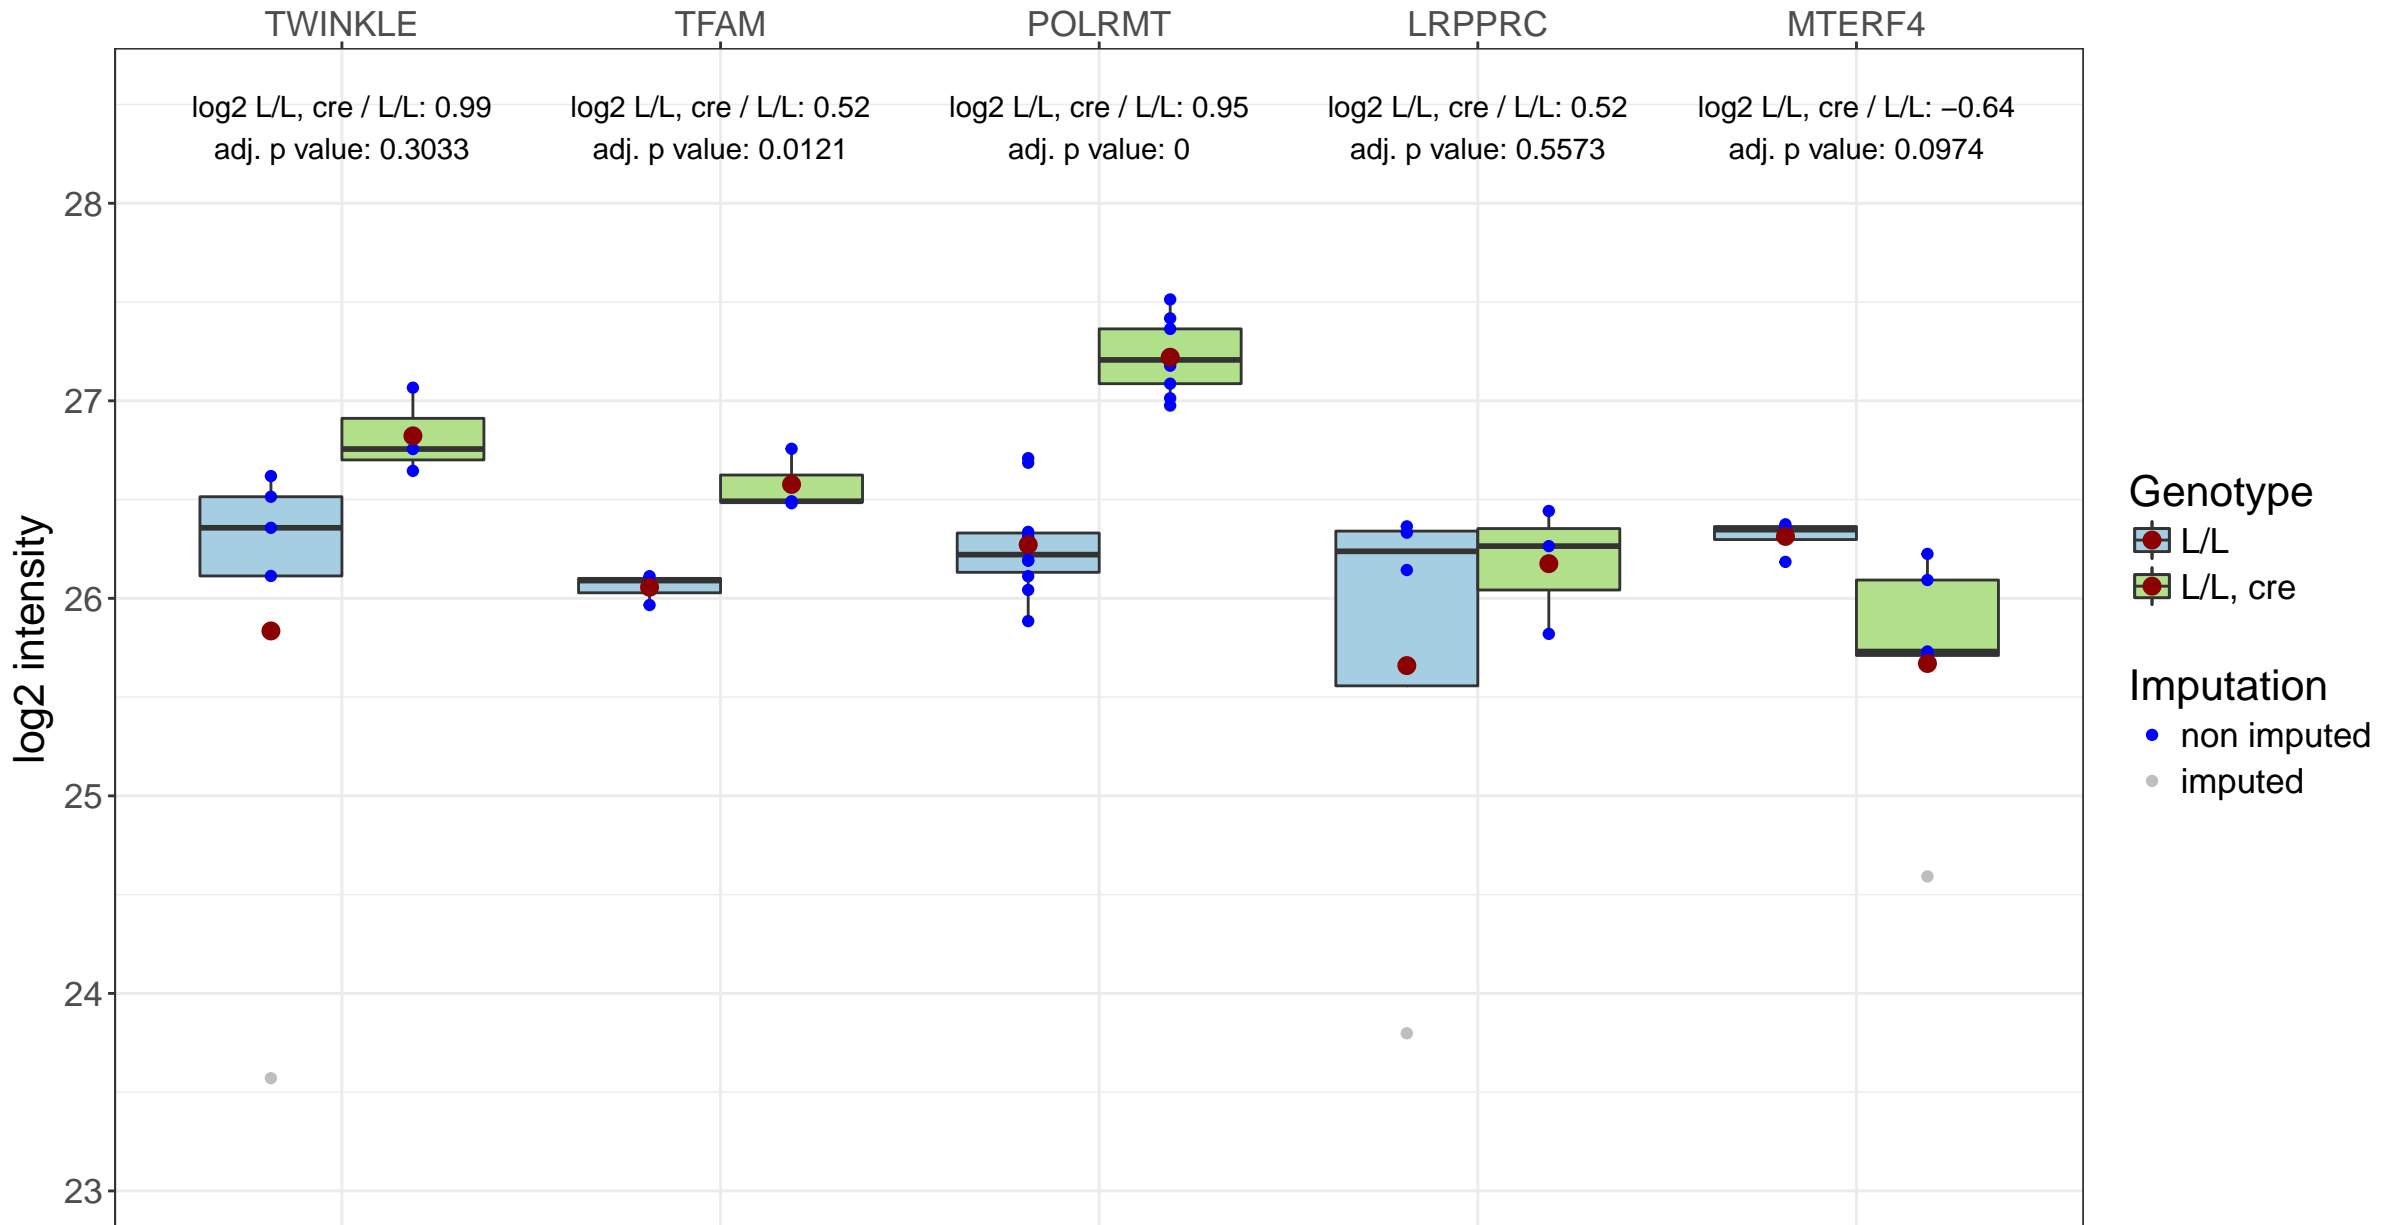

# FAM210A / Q8BGY7

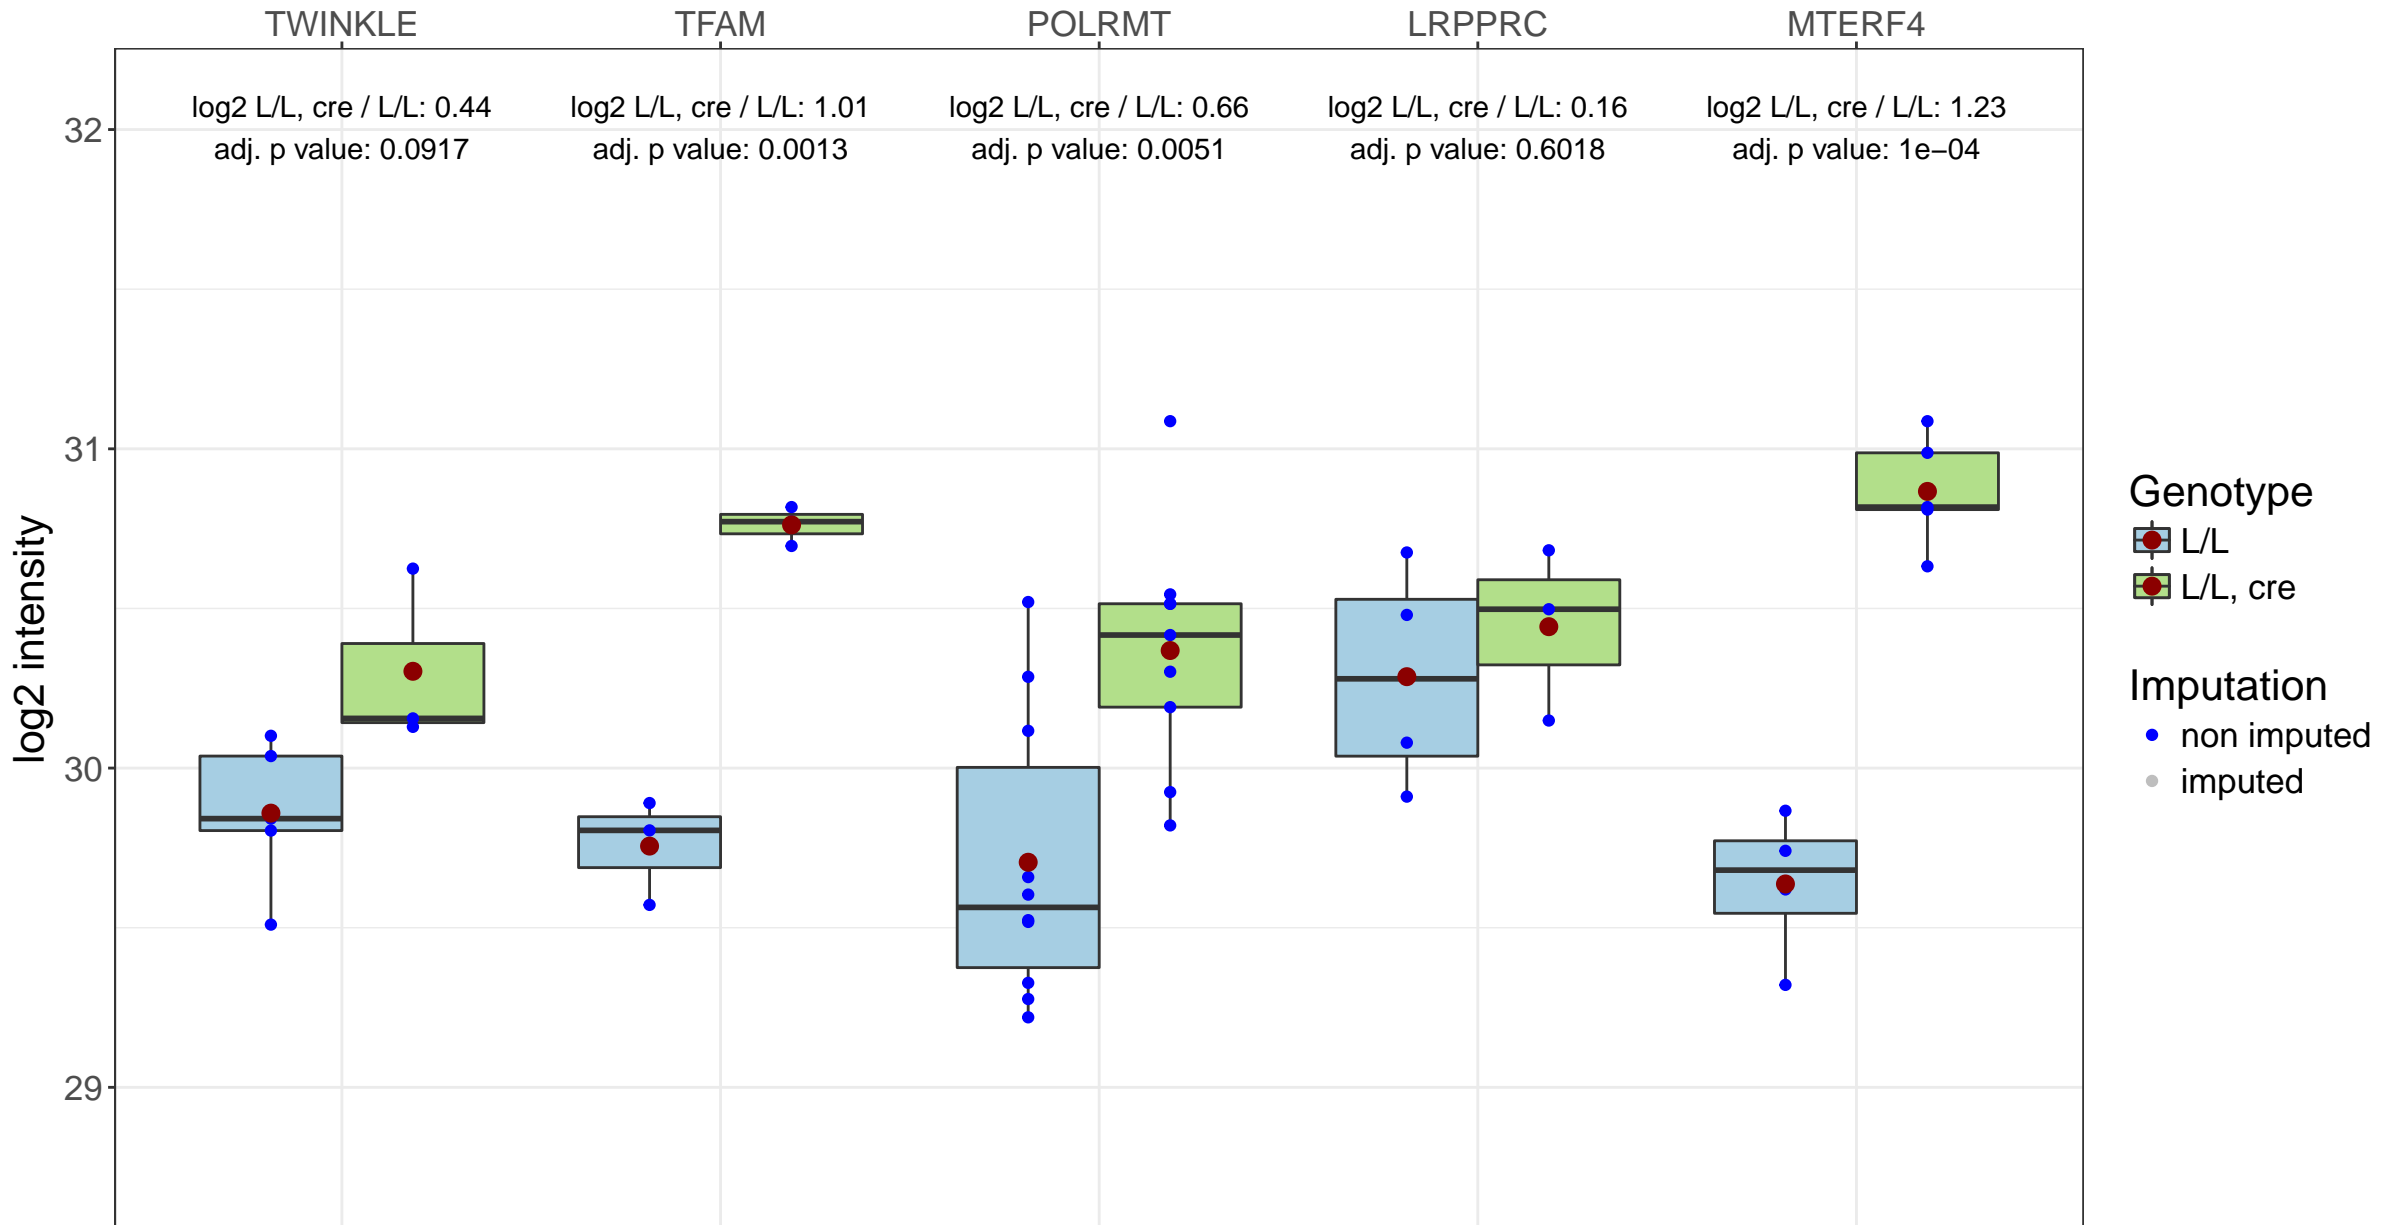

# FAM213B / Q9DB60

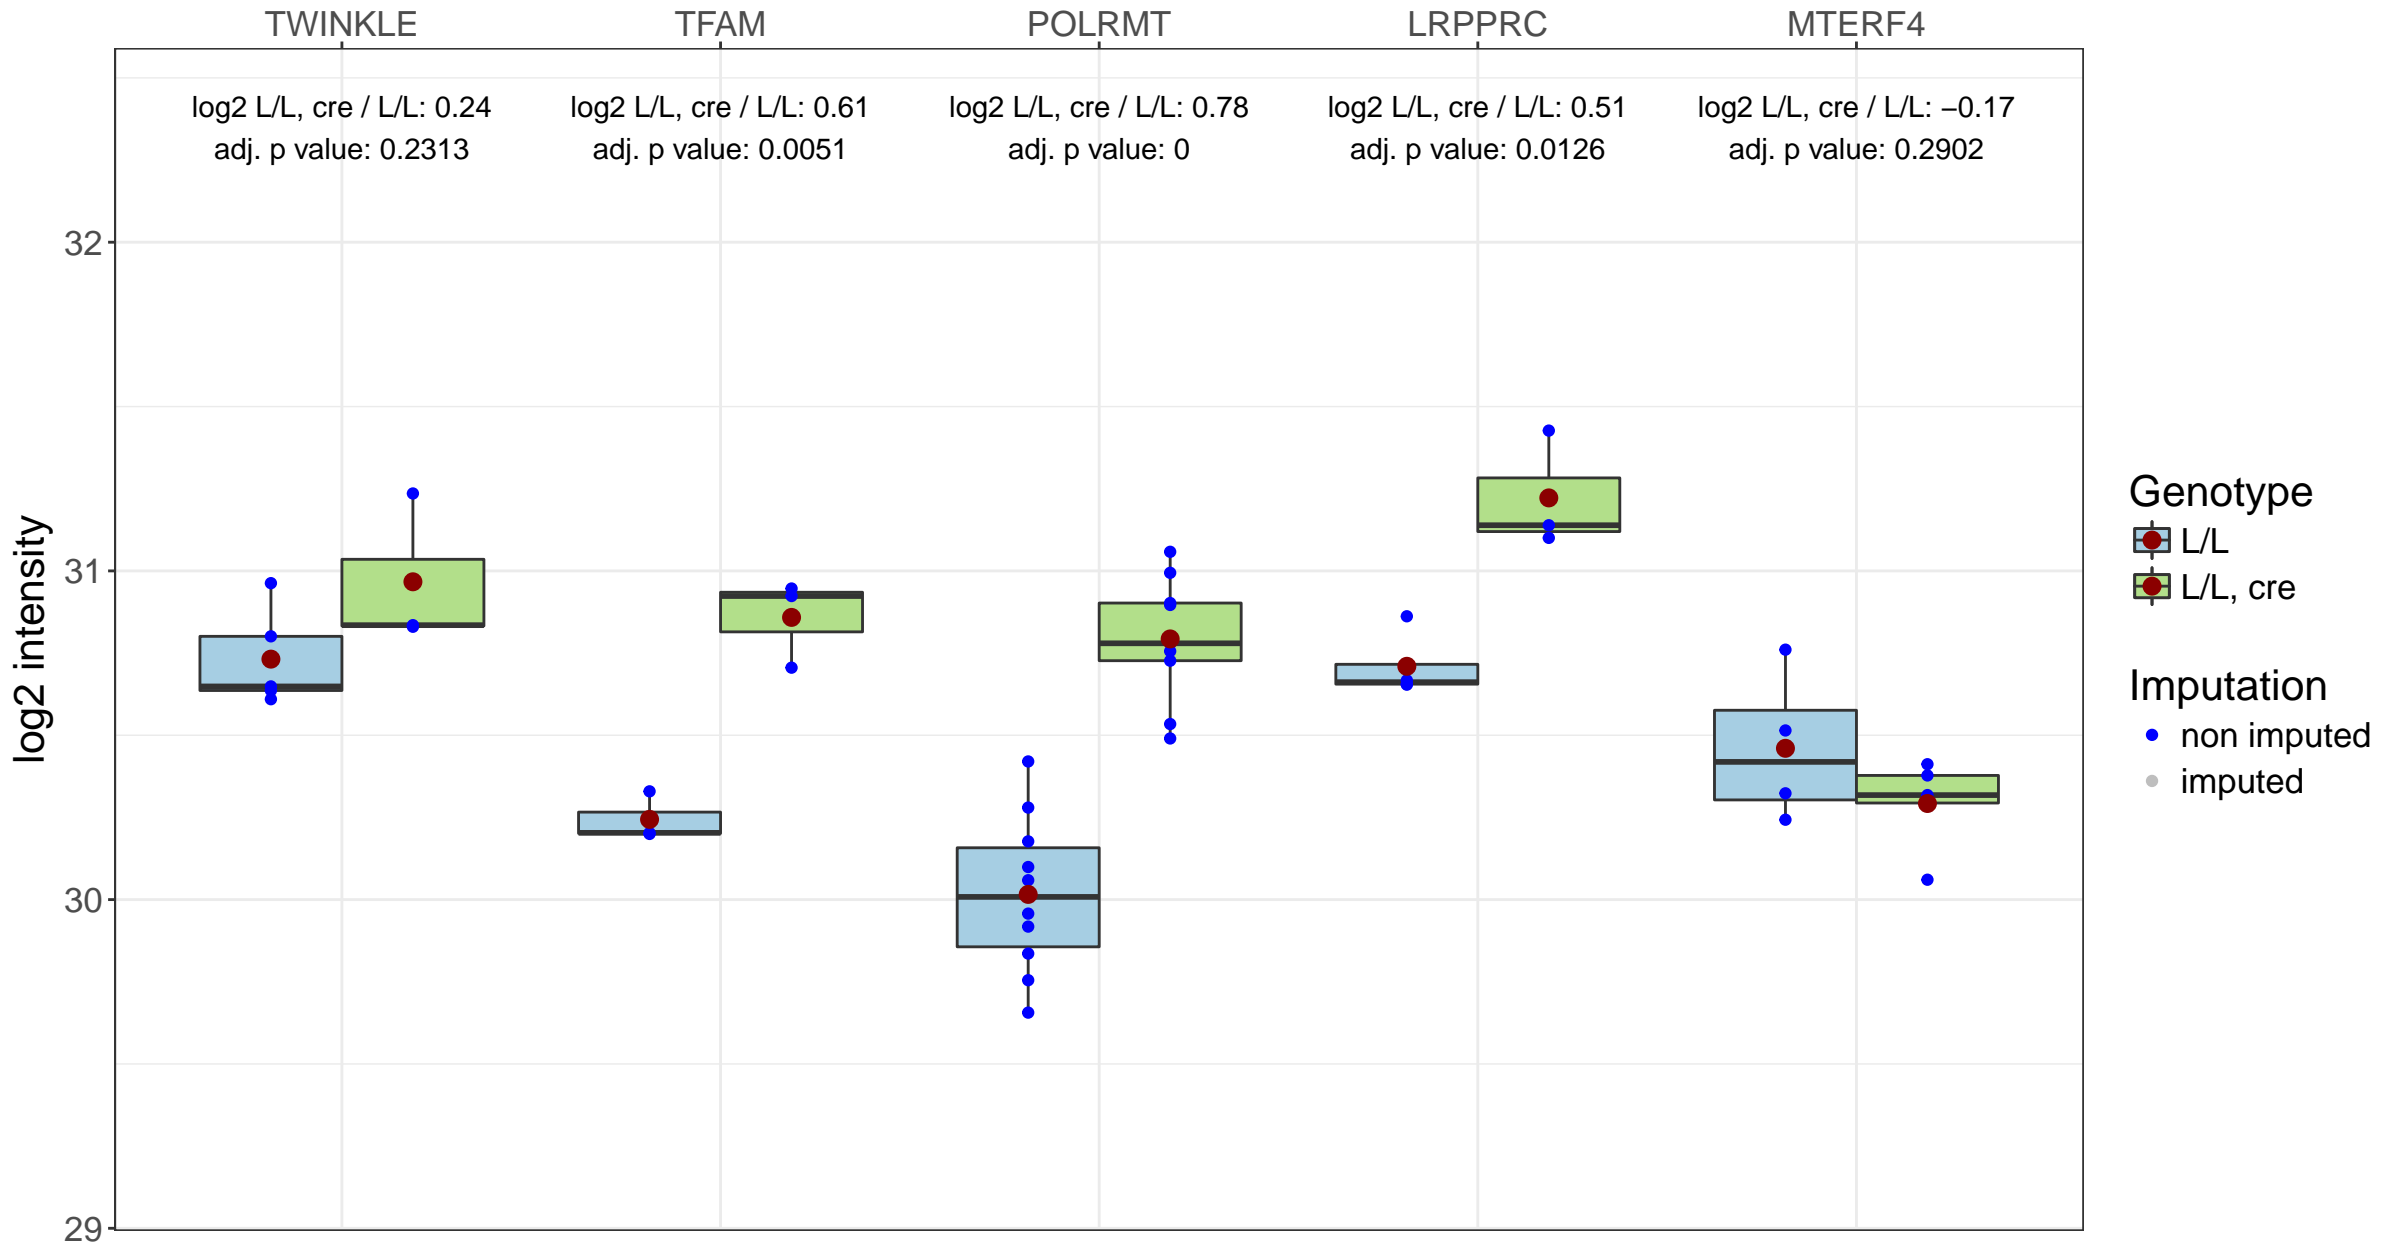

# FARS2 / Q99M01

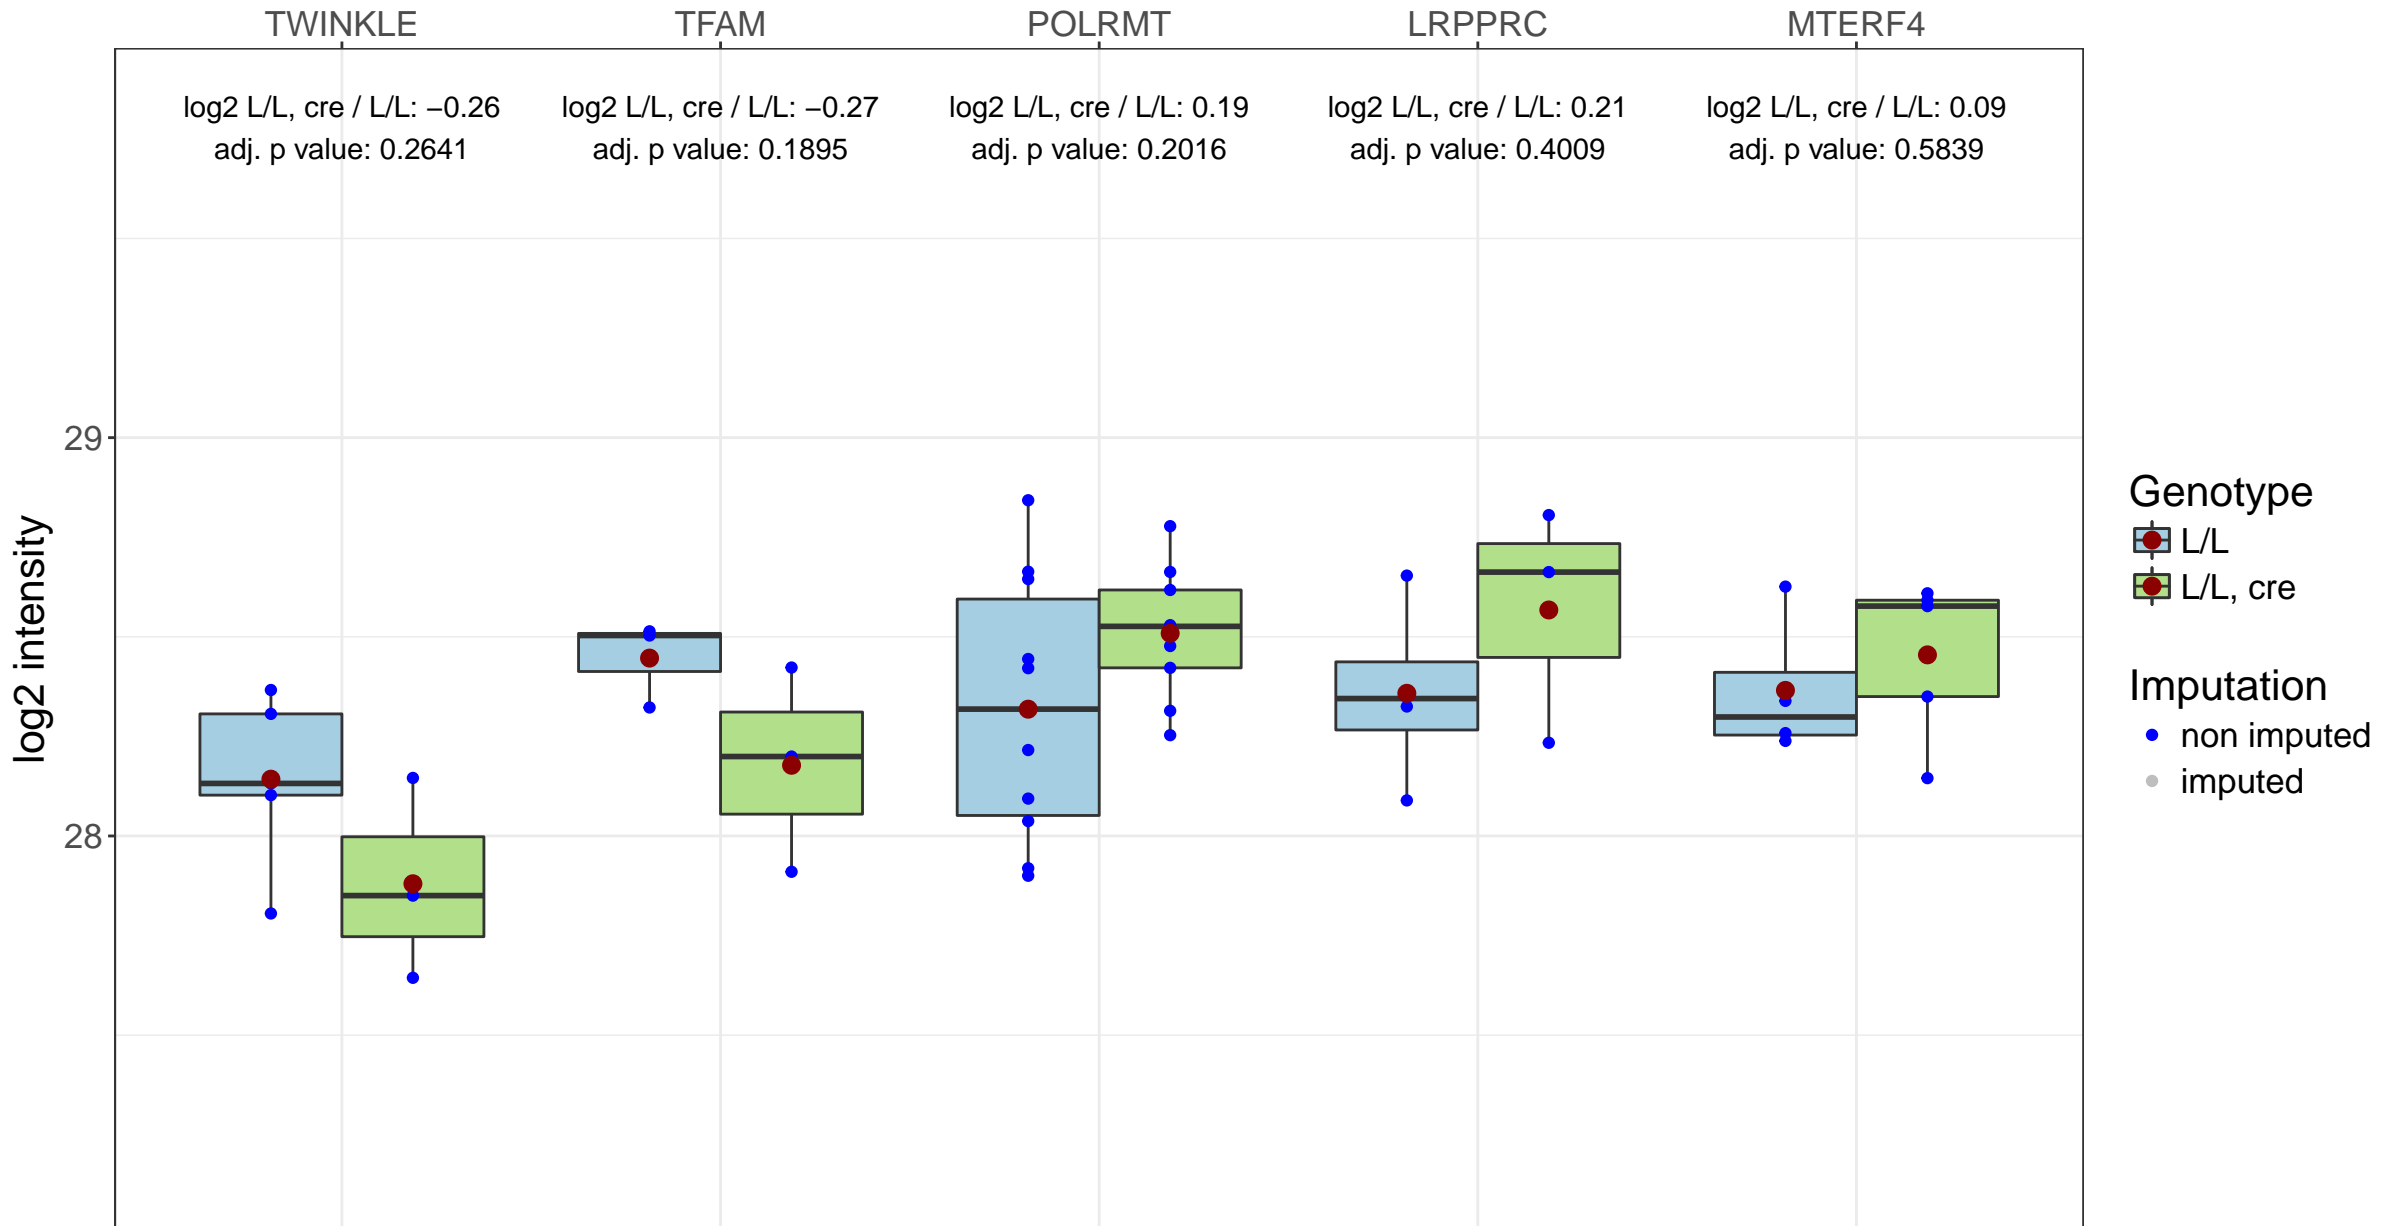

# FASTKD2 / Q922E6

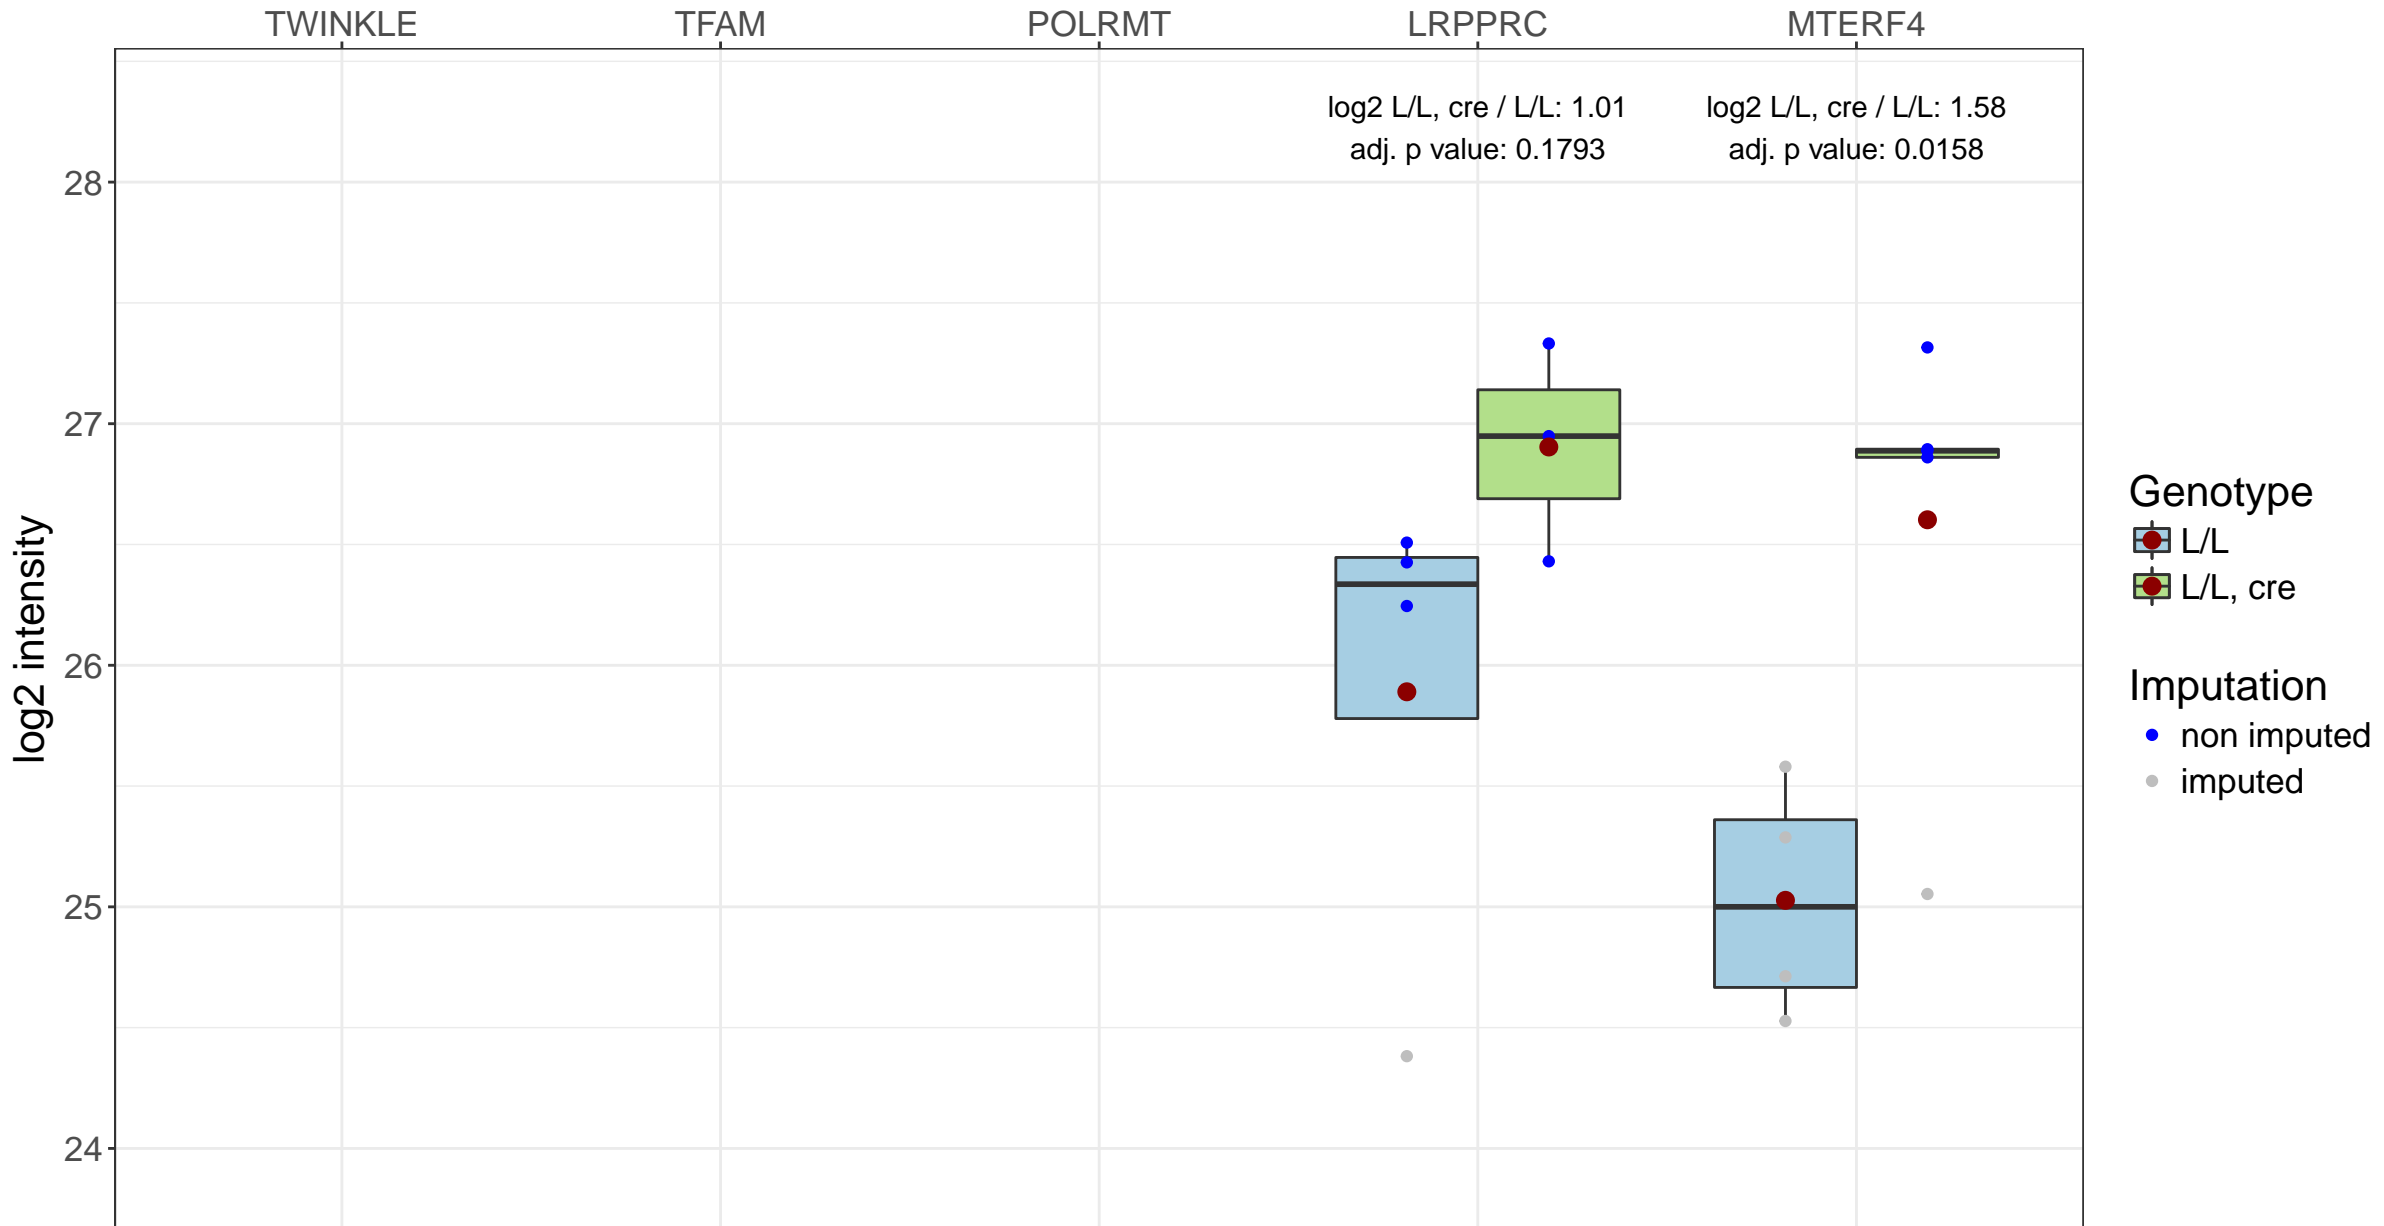

# FBN1 / A2AQ53

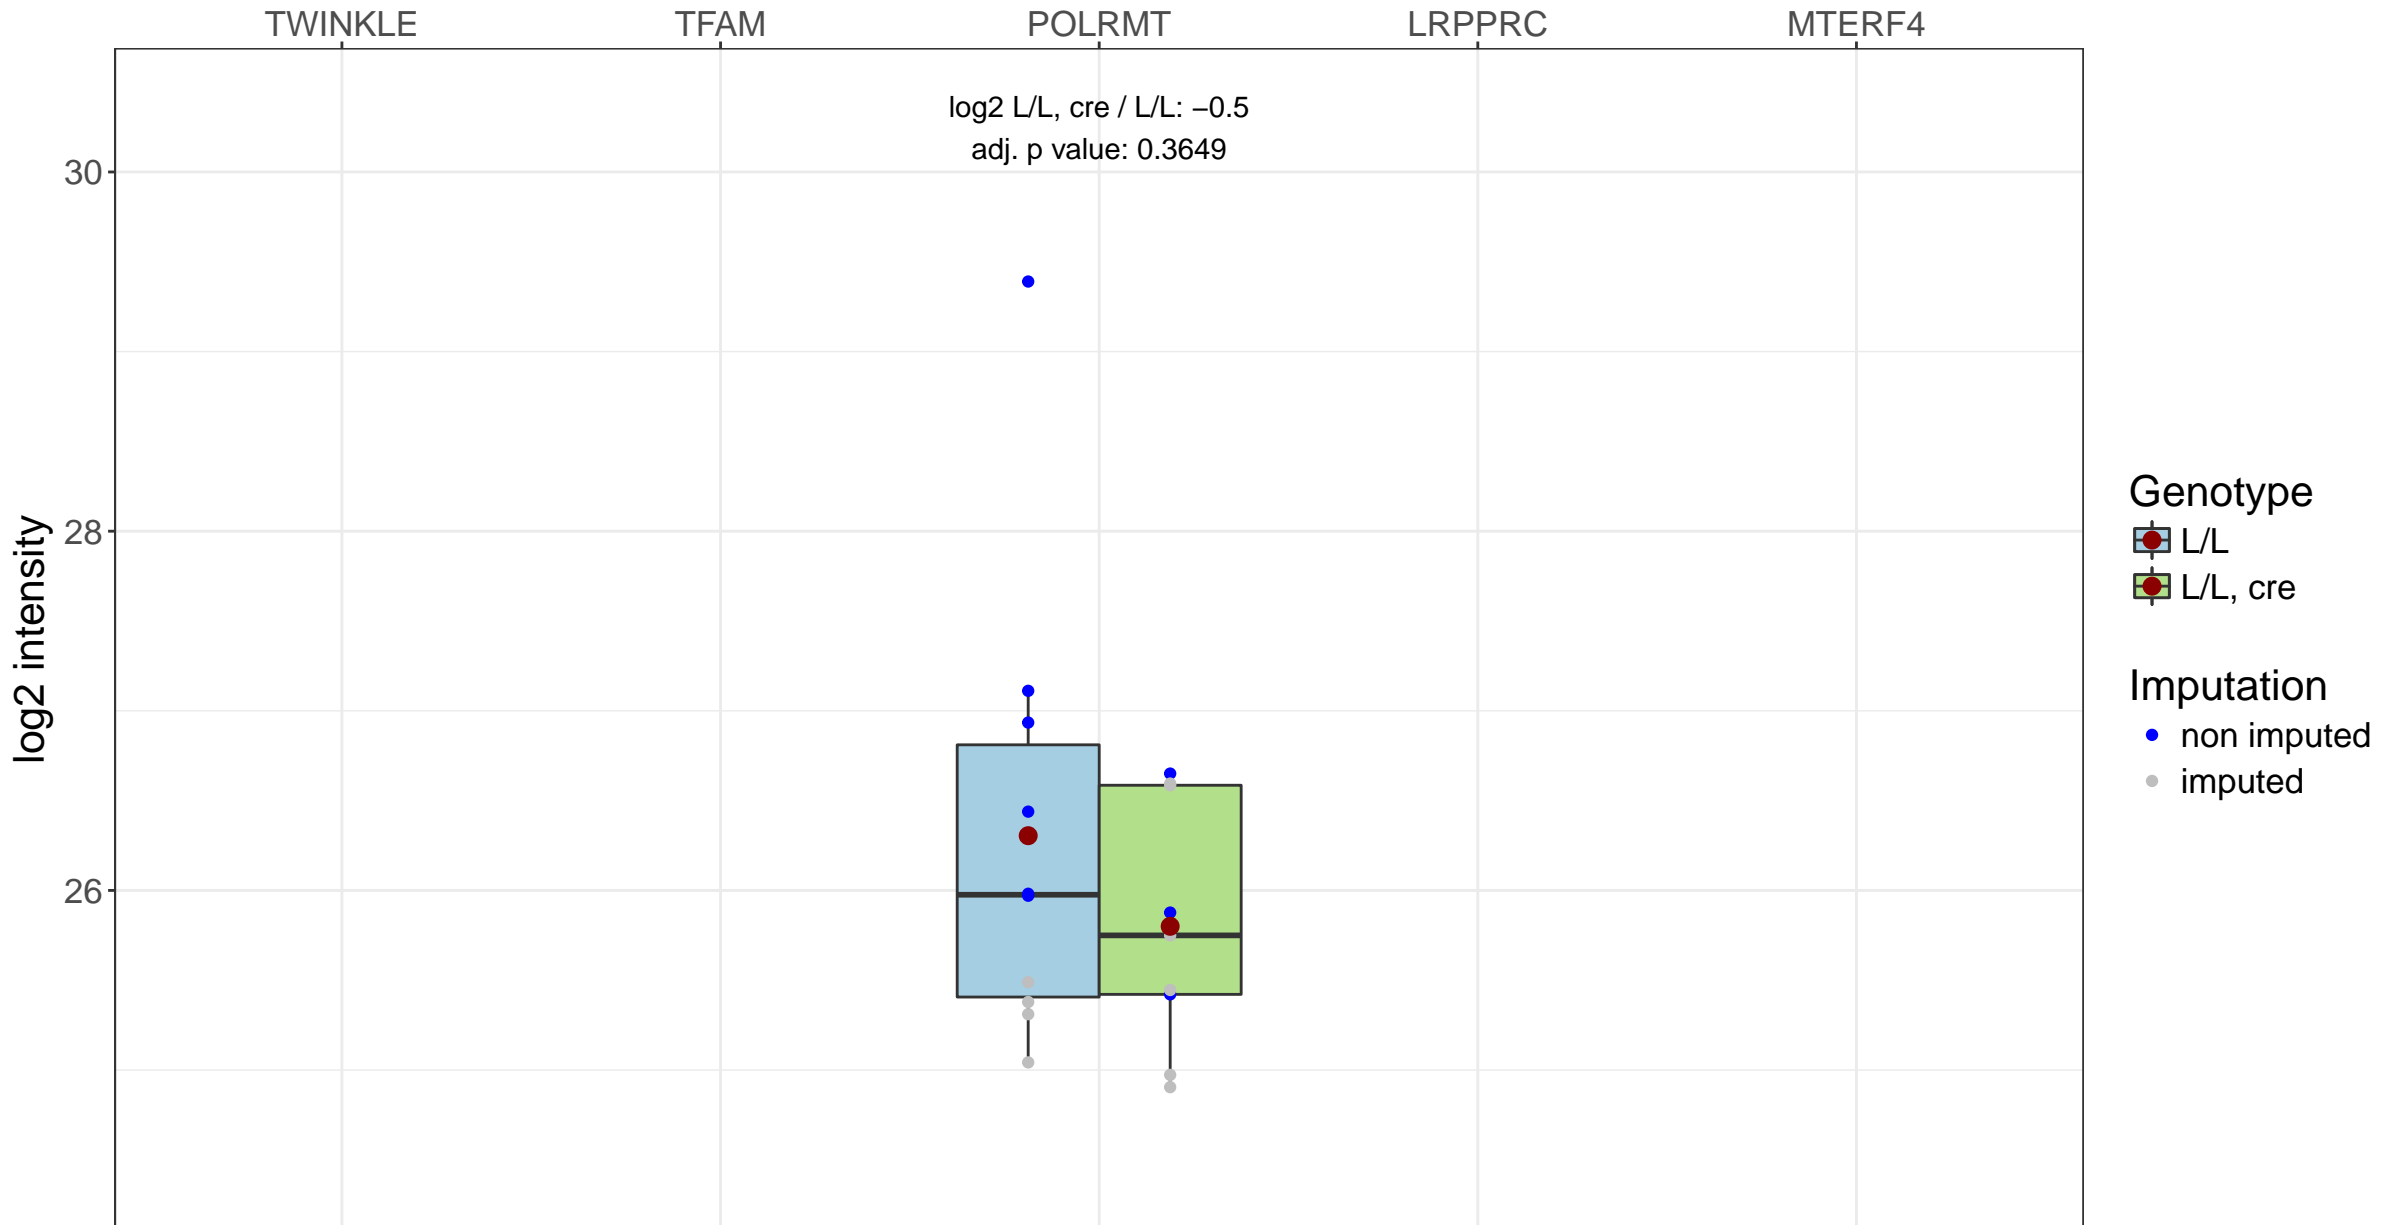

# FDX1 / P46656

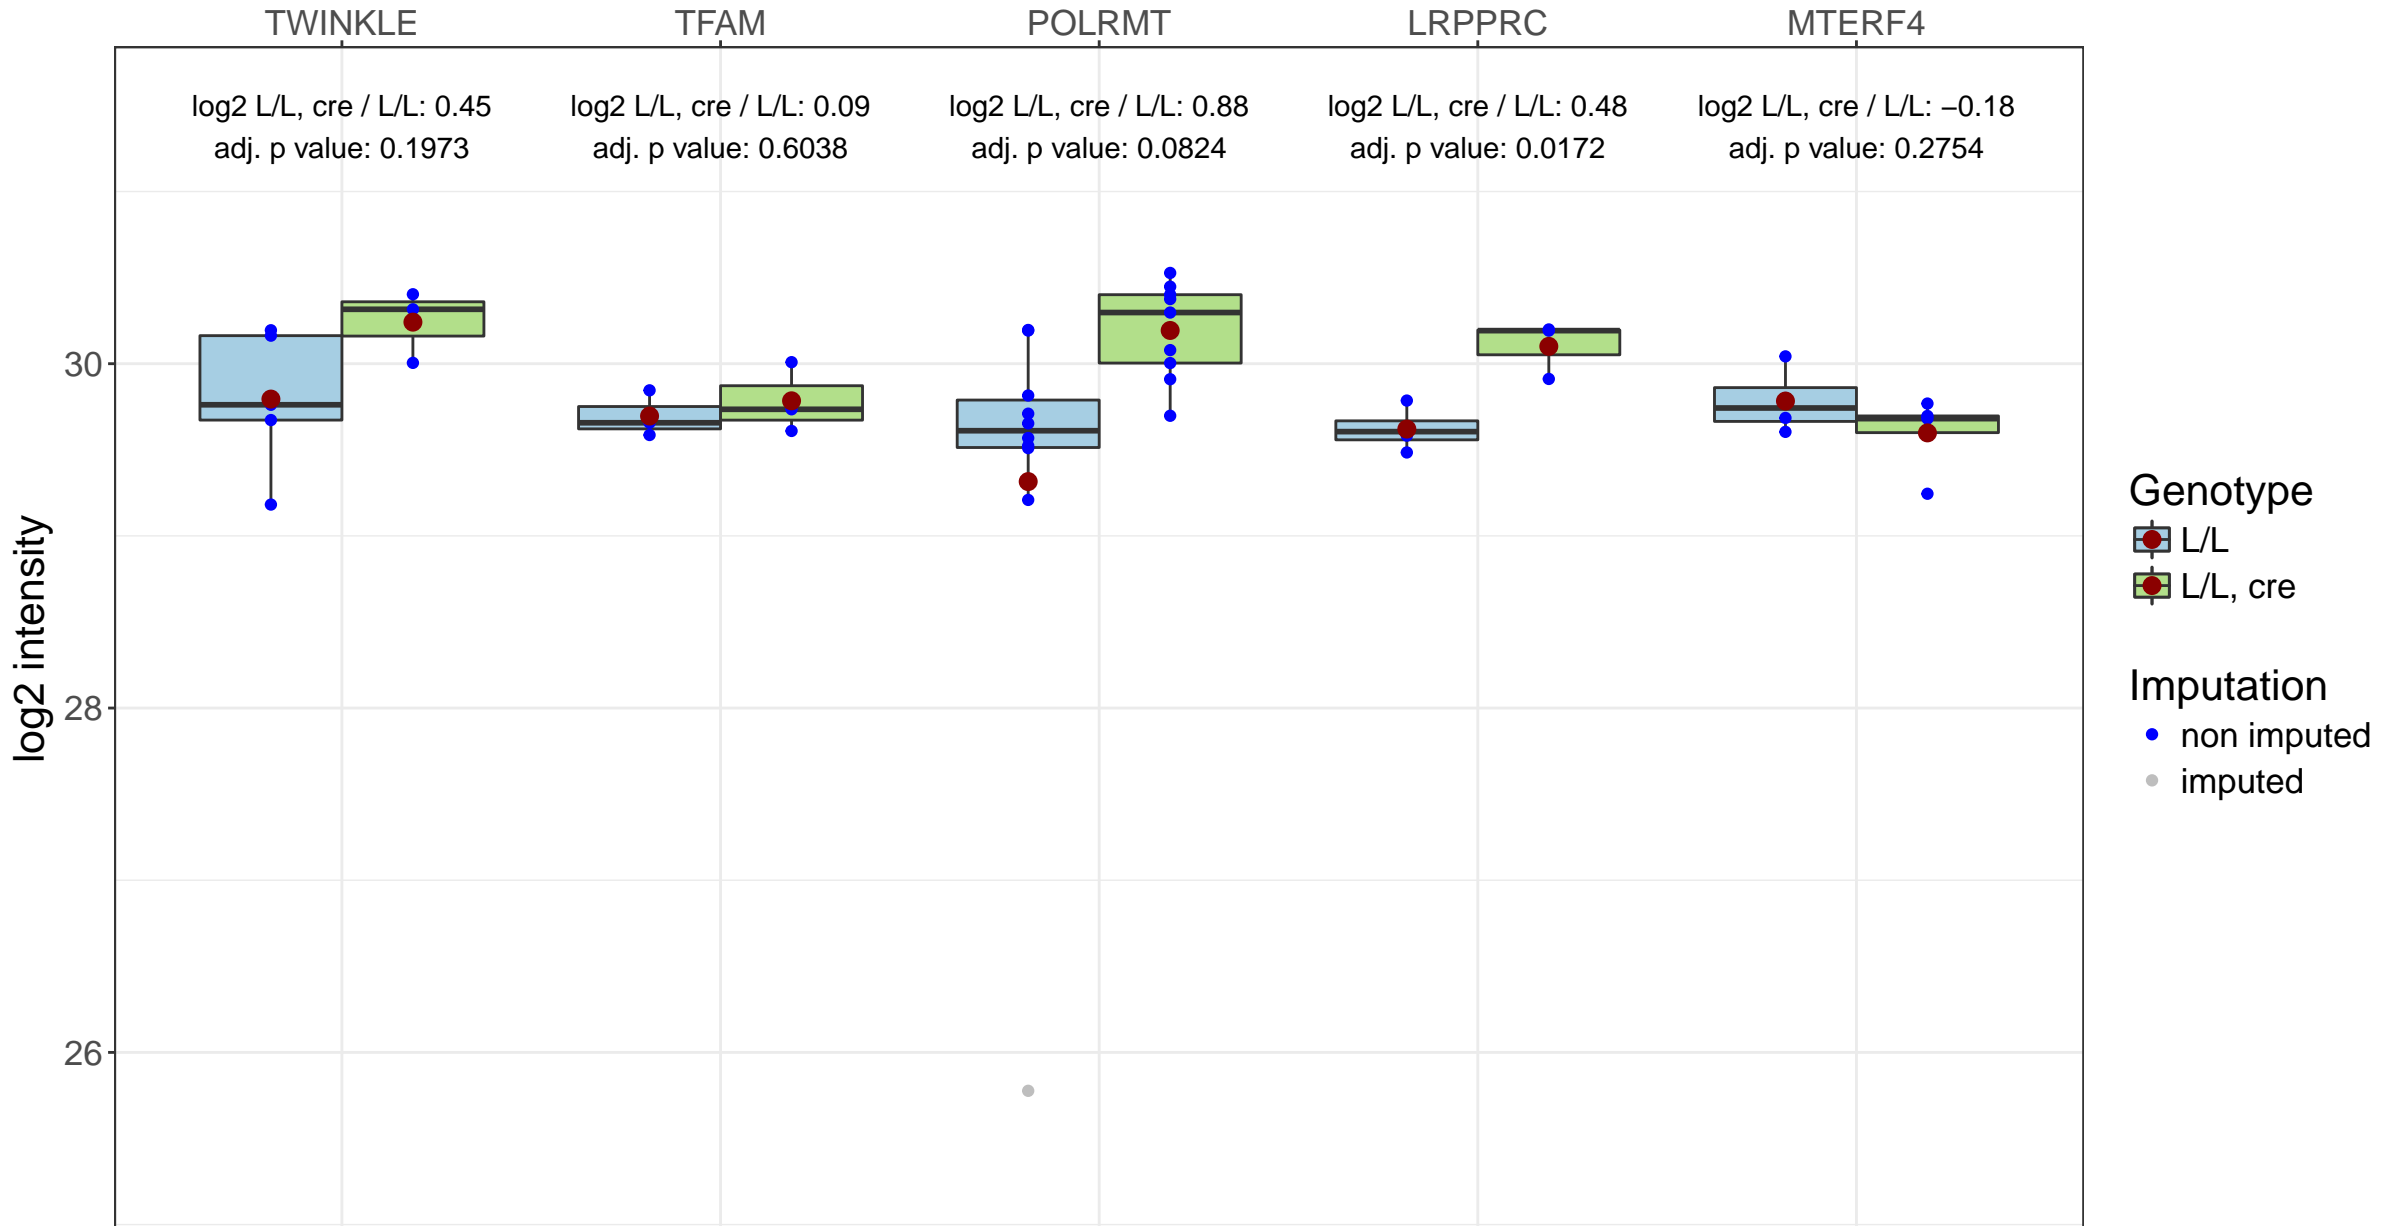

# FDX1L / Q9CPW2

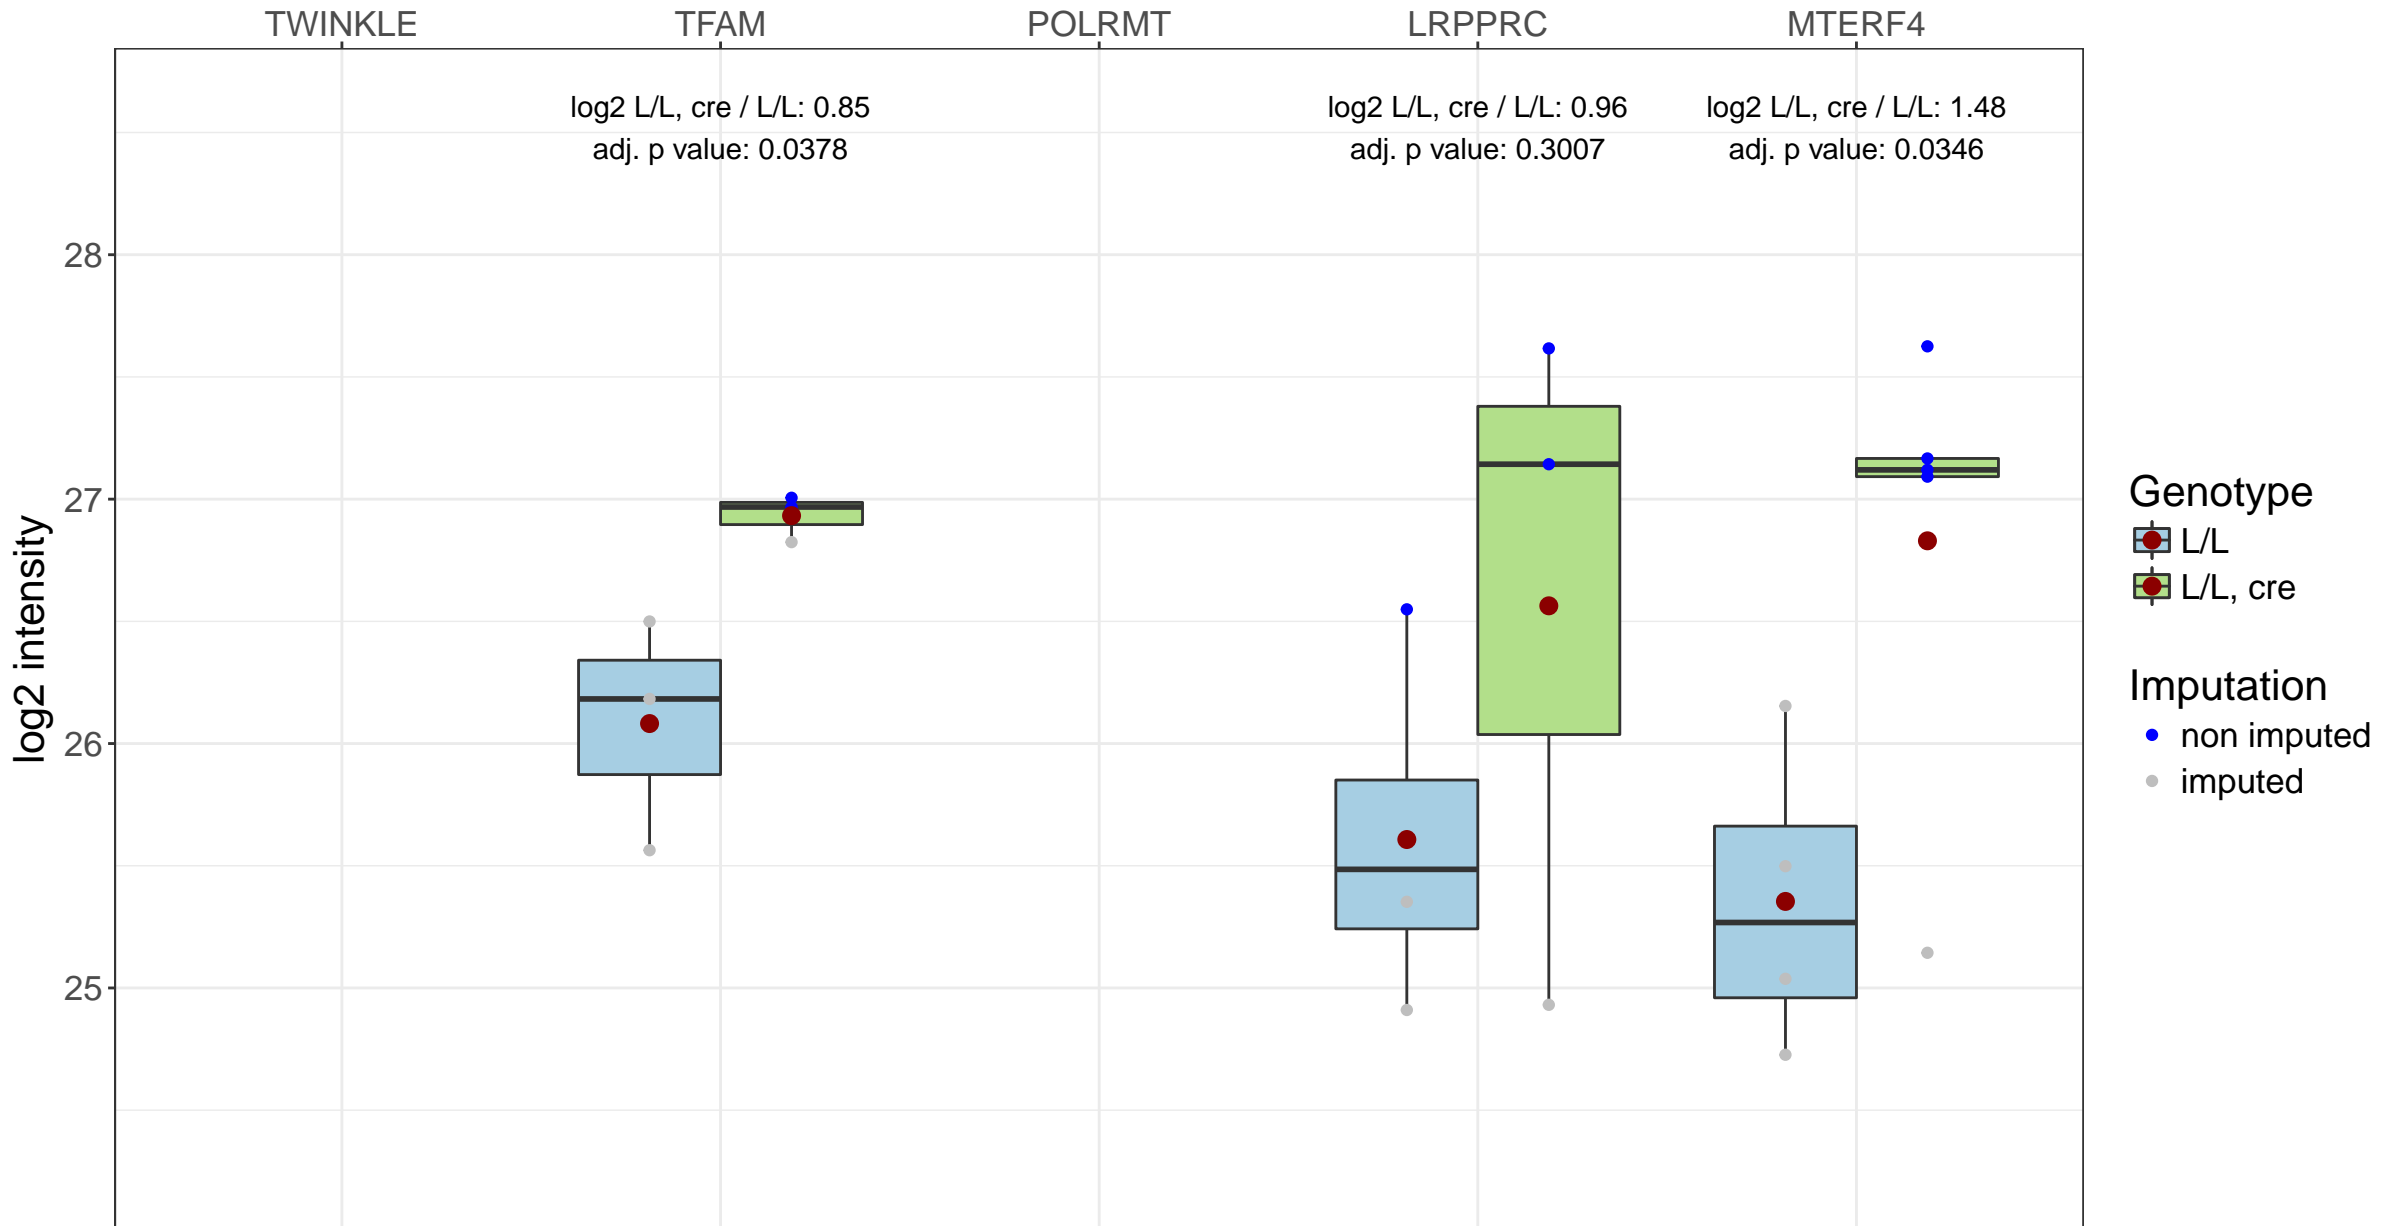



# FDXR / Q61578

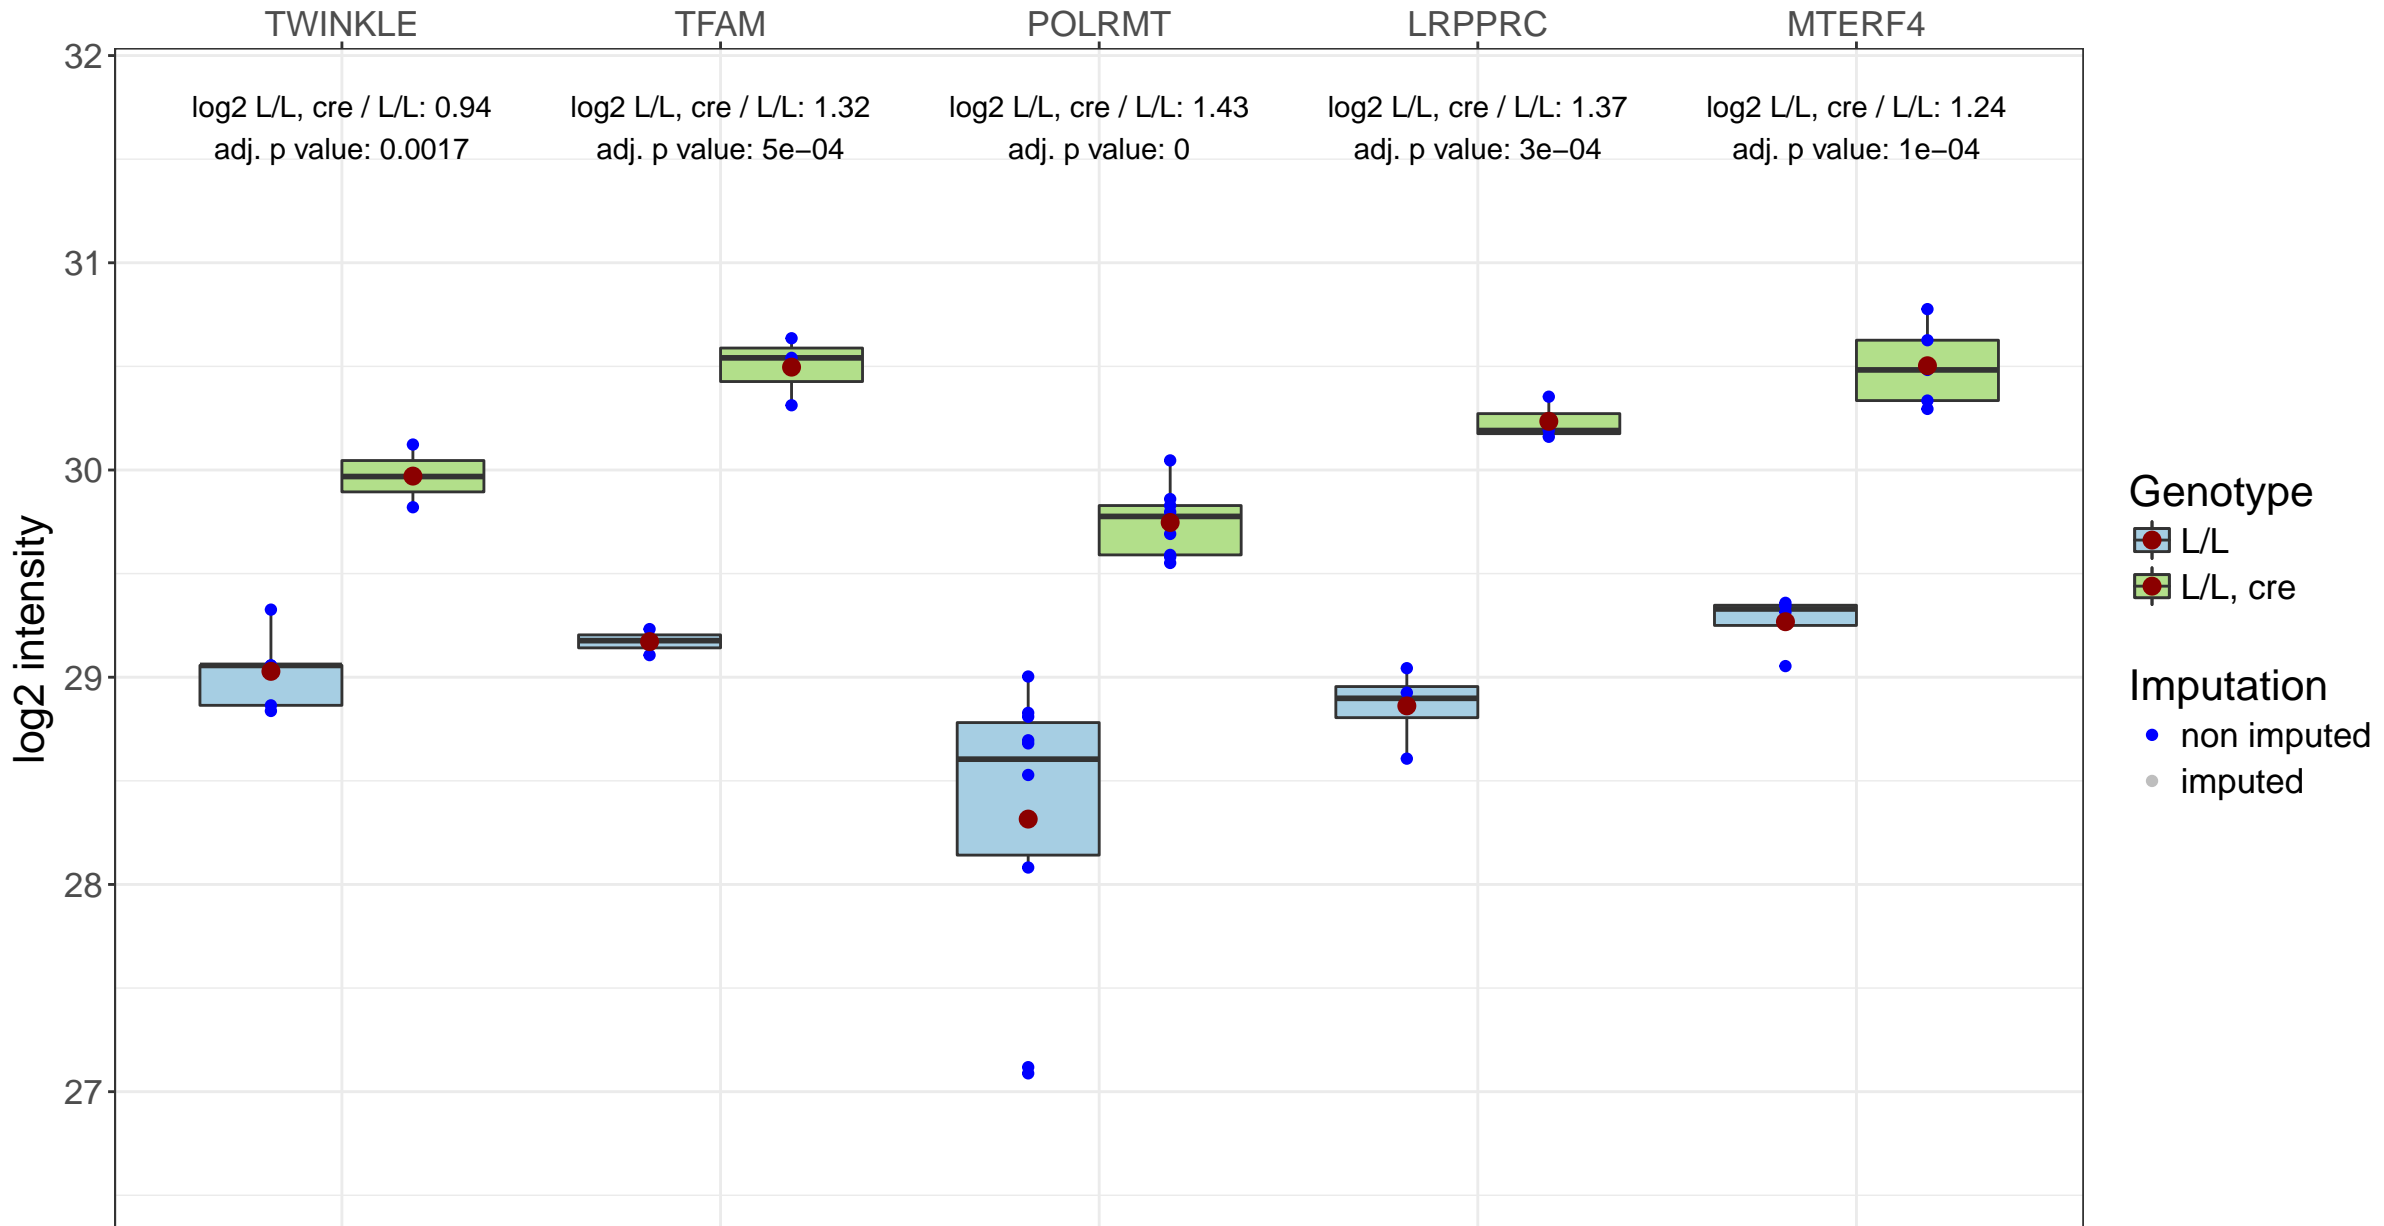

# FECH / Q544X6

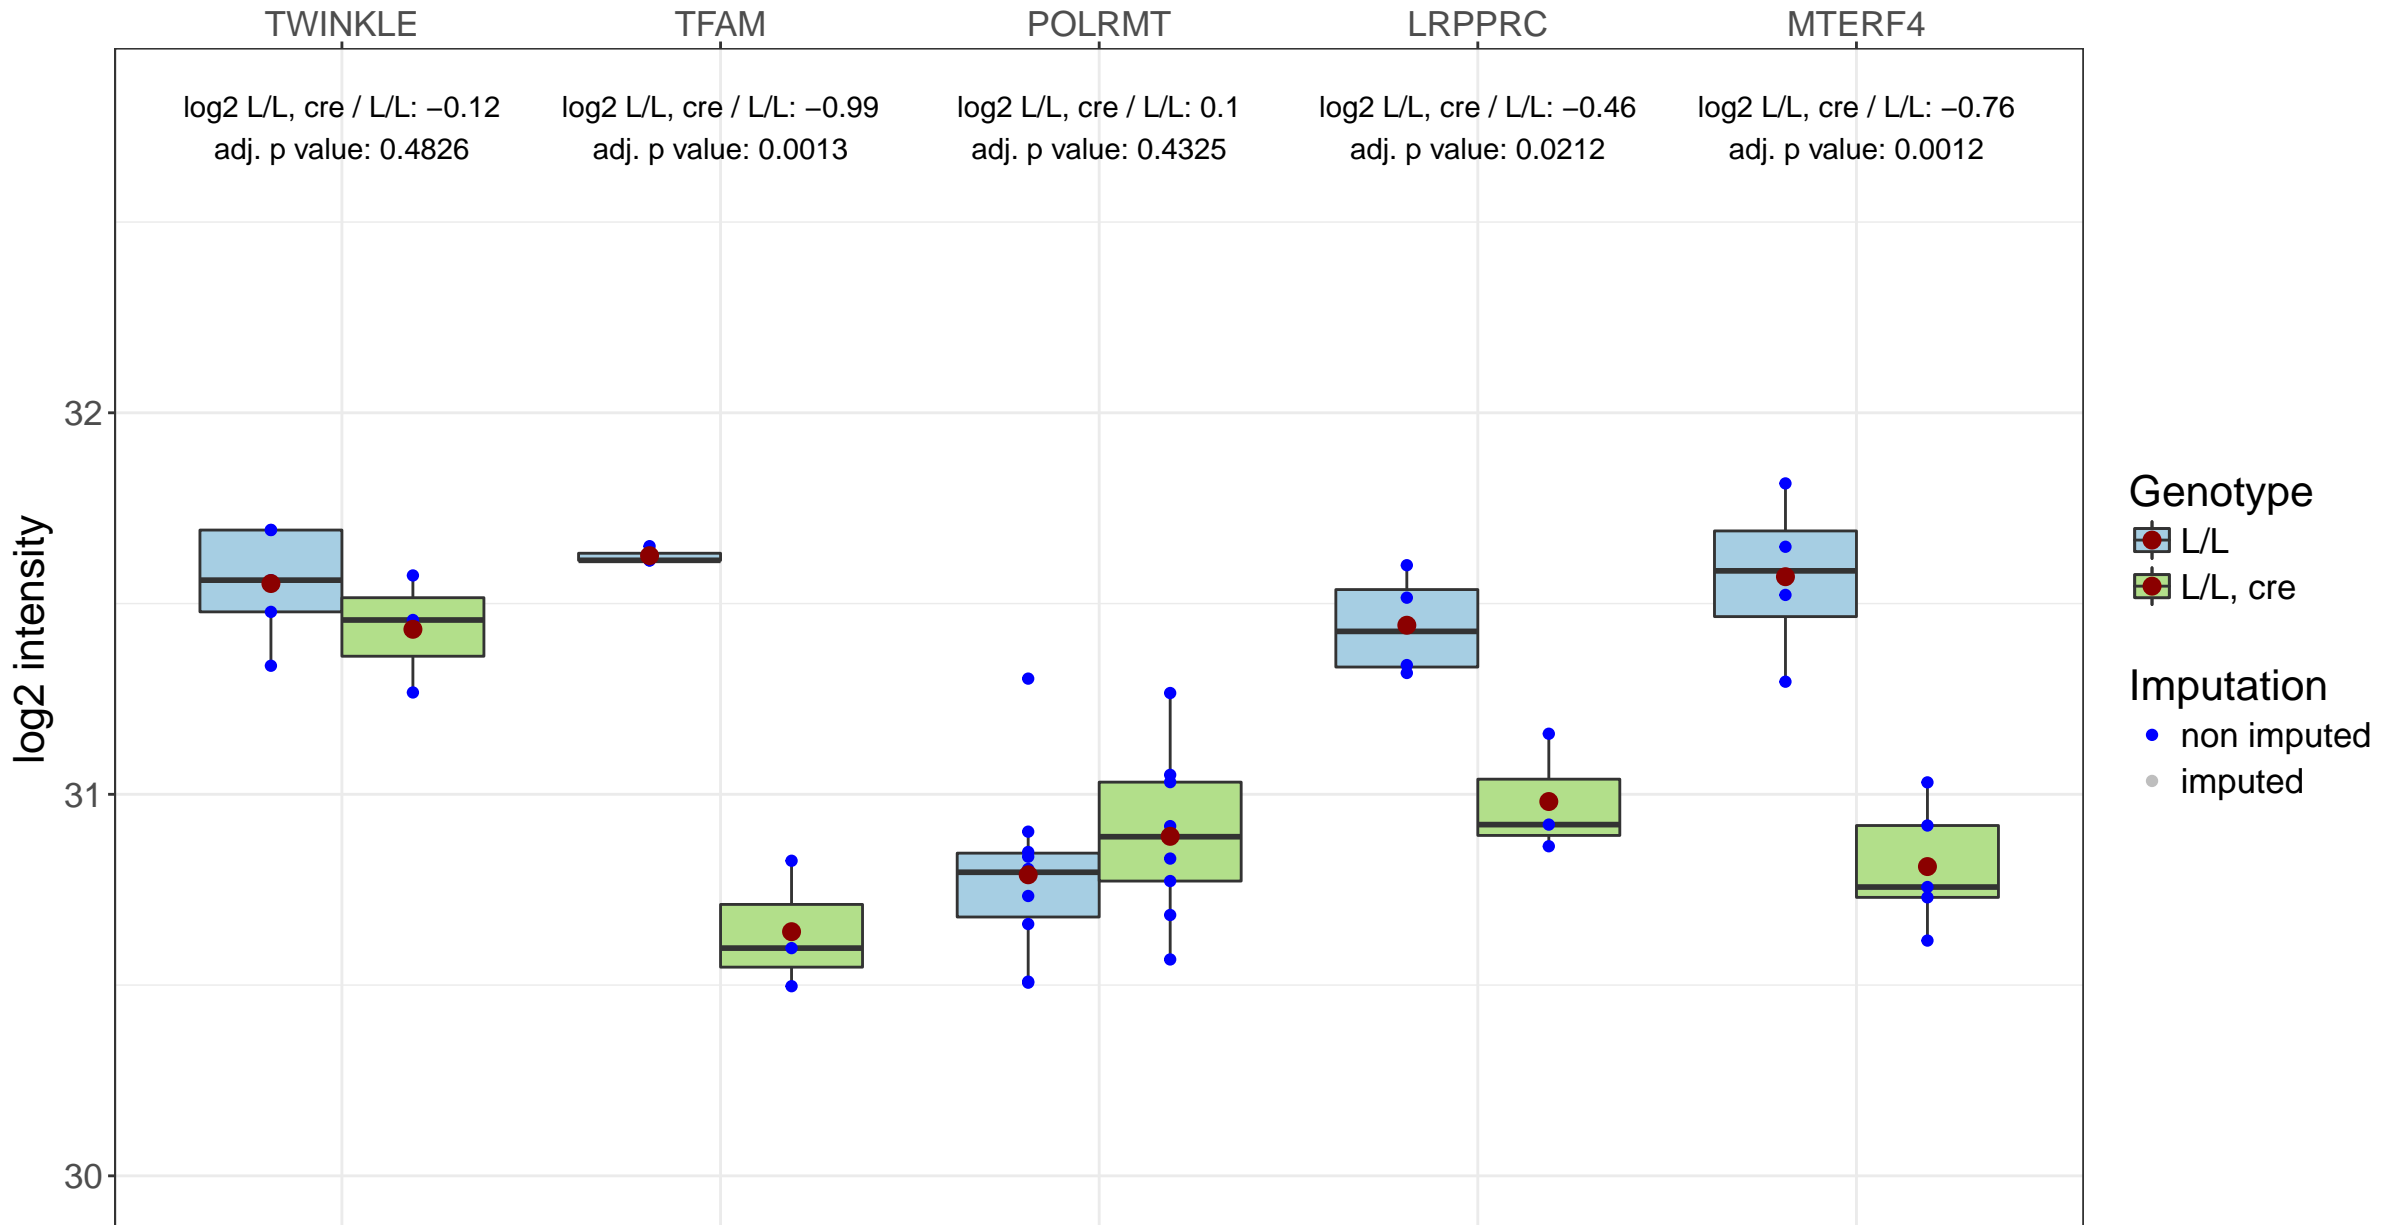

# FGA / E9PV24

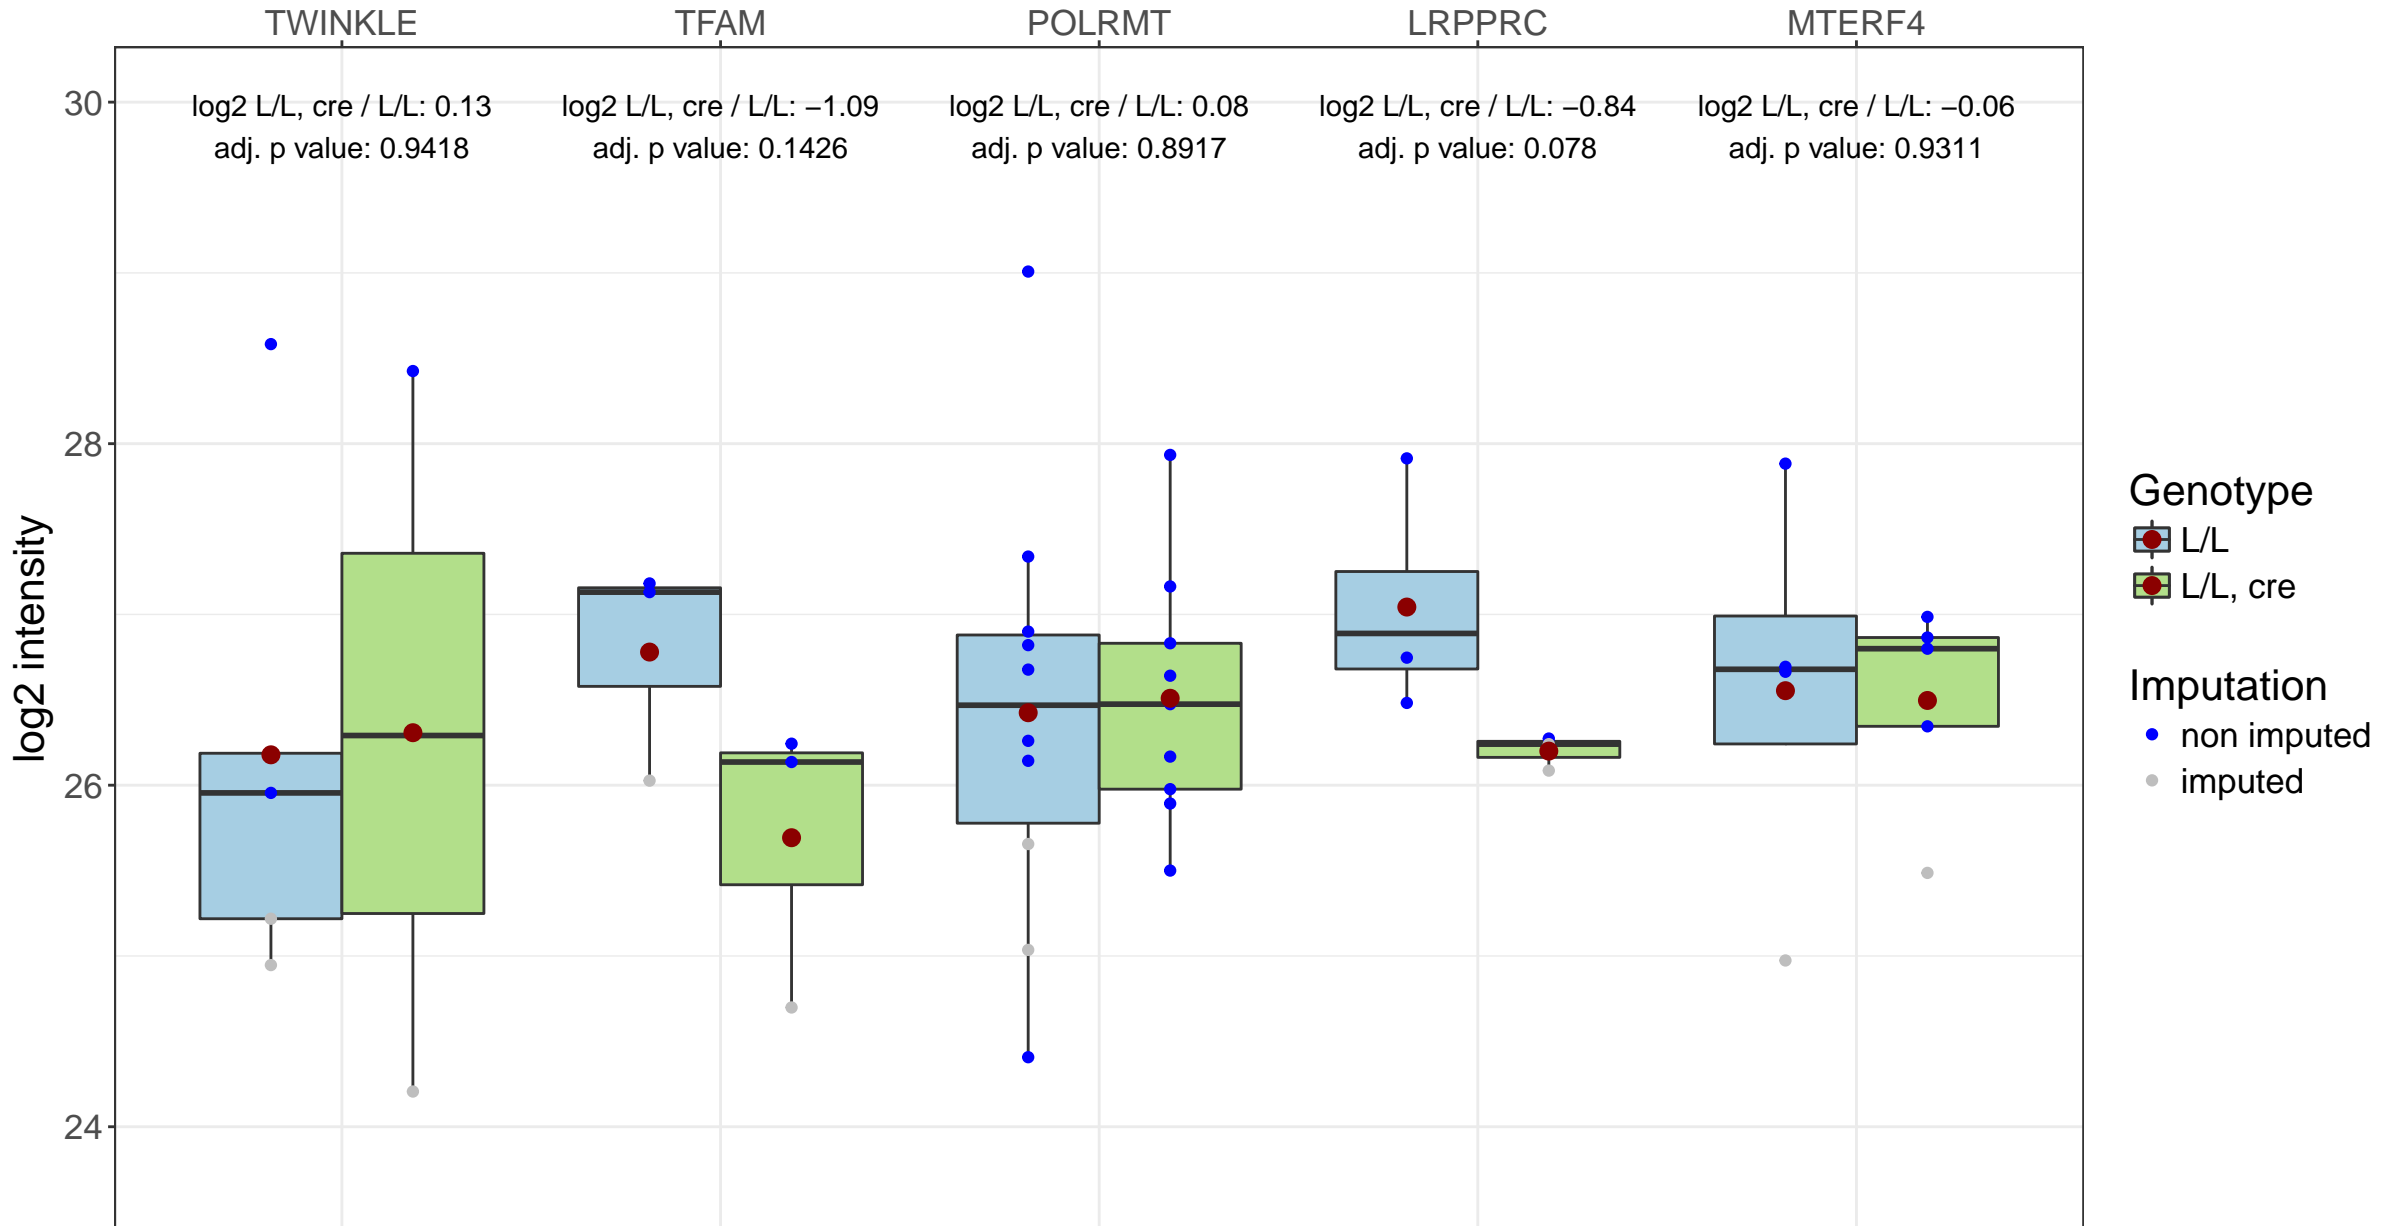

# FGB / Q8K0E8

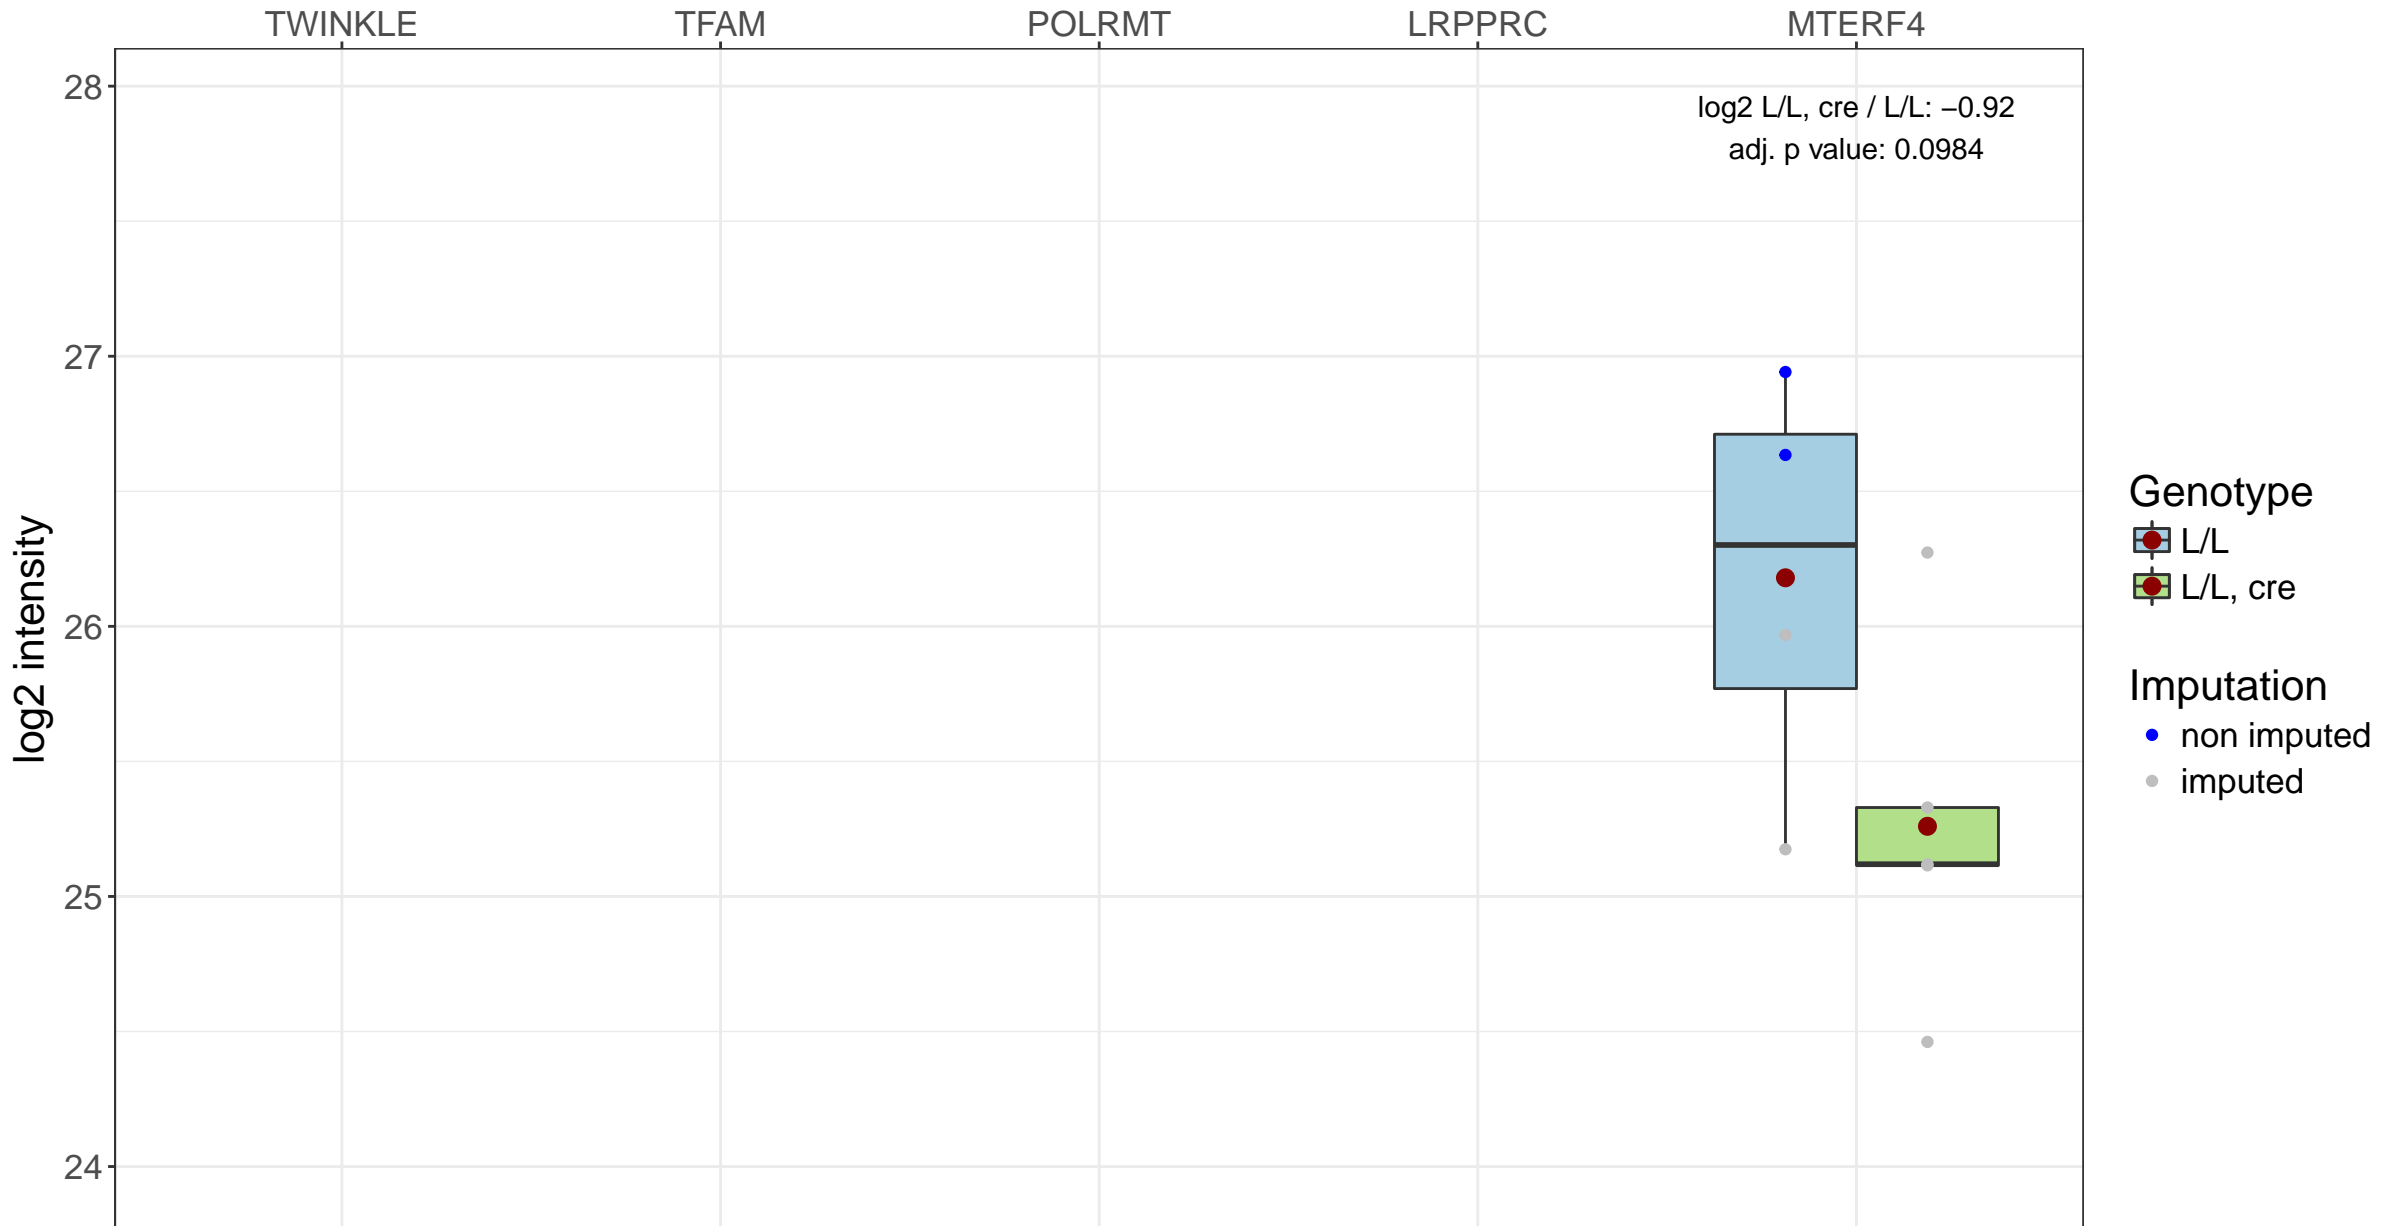

# FGG / Q8VCM7

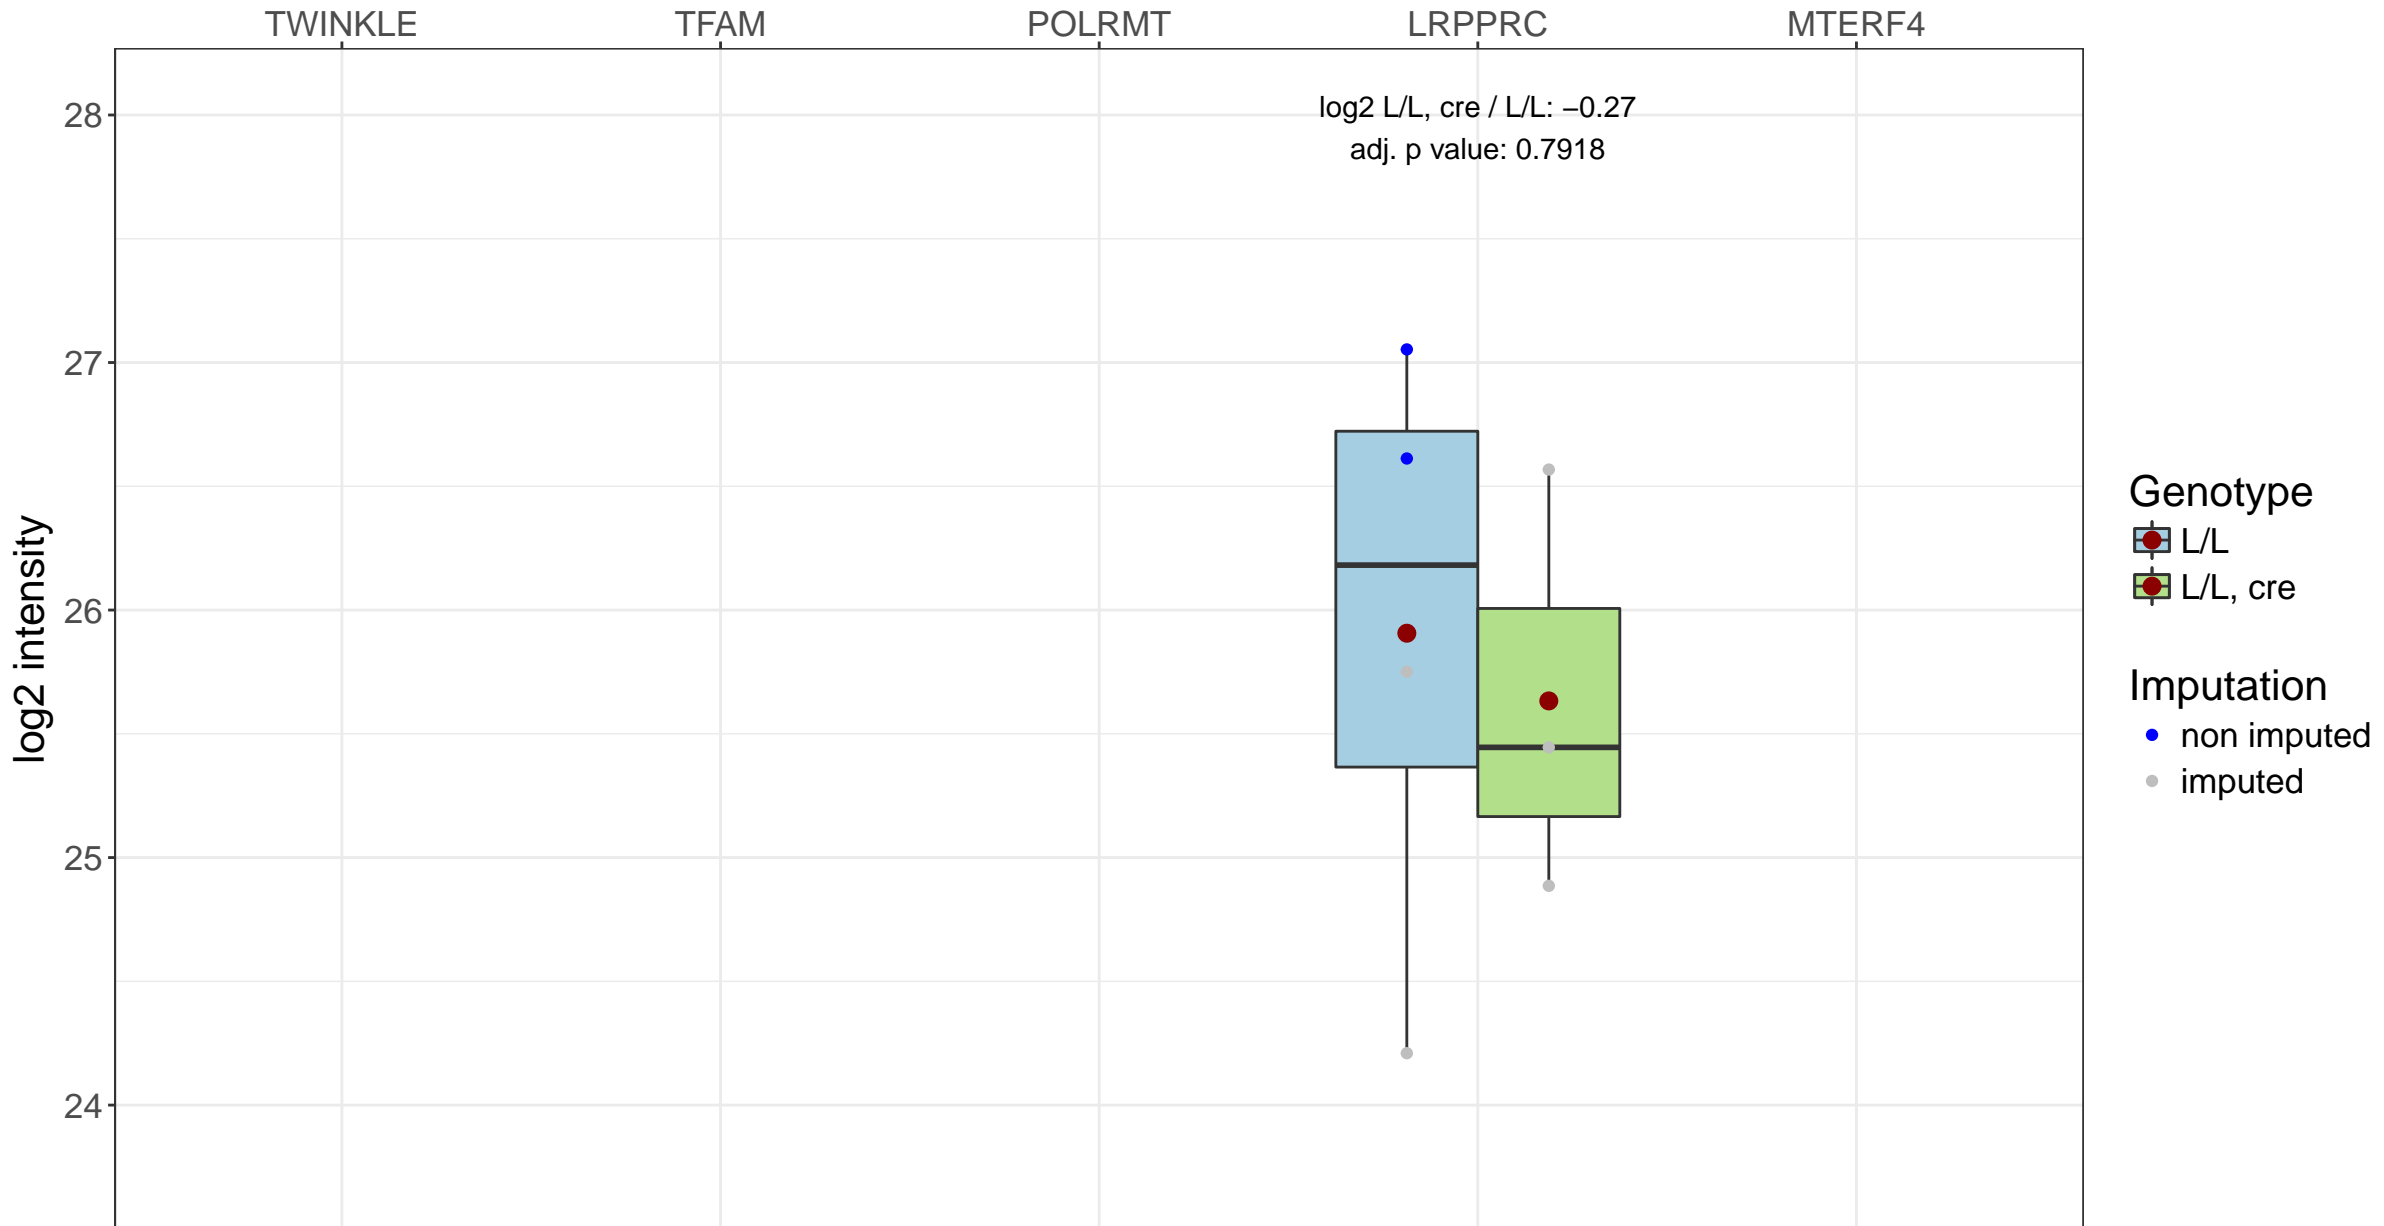

# FH / P97807-2

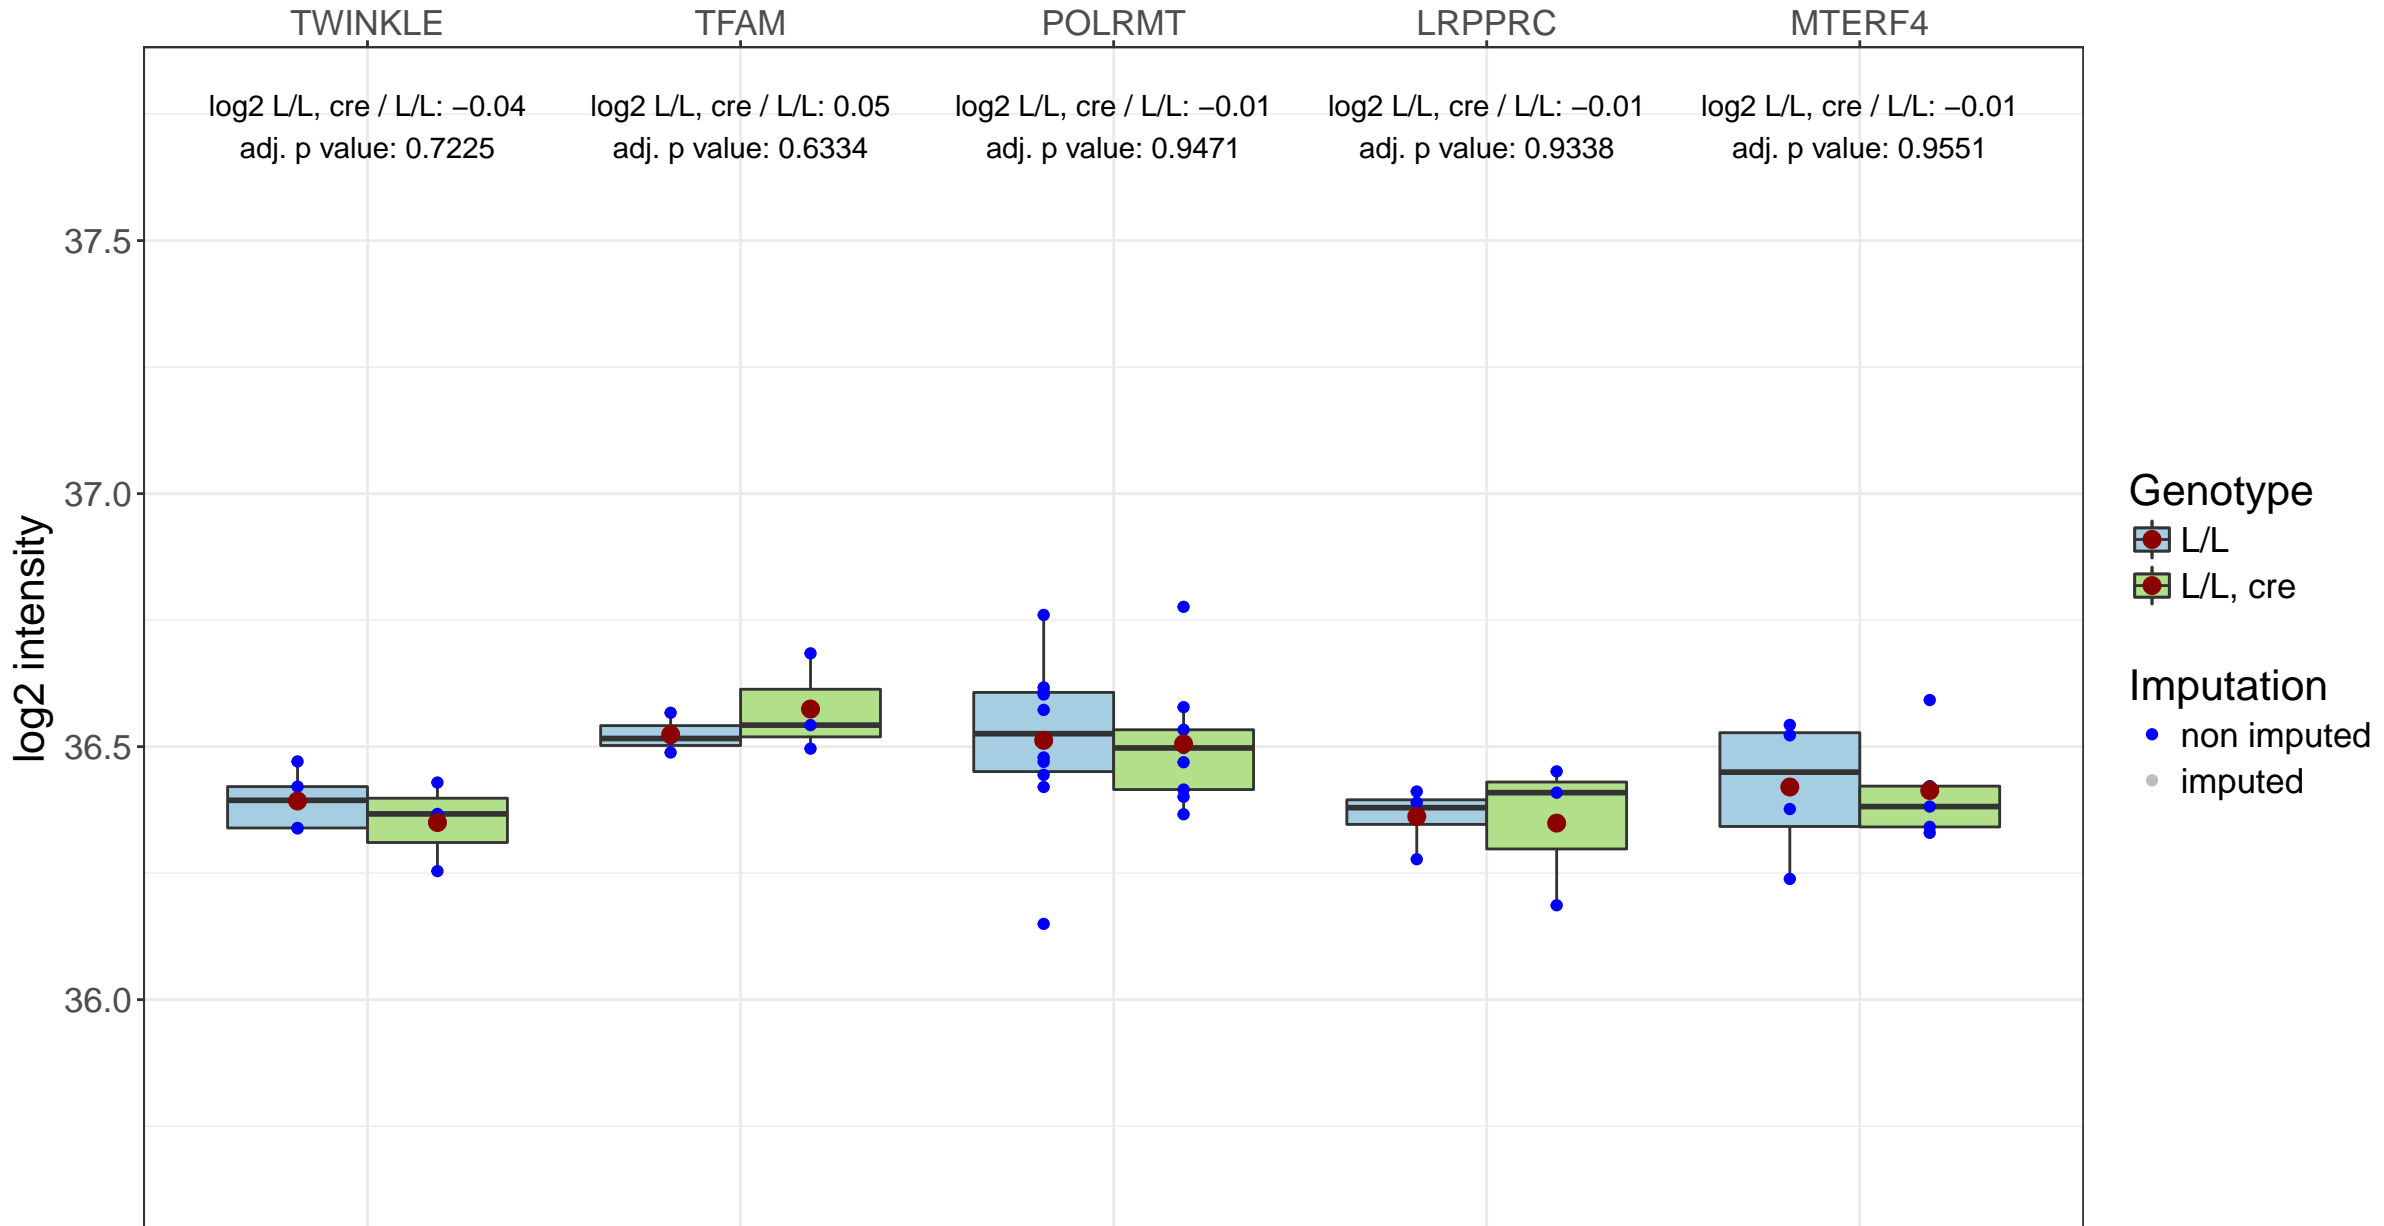

# FHIT / E9PZ91

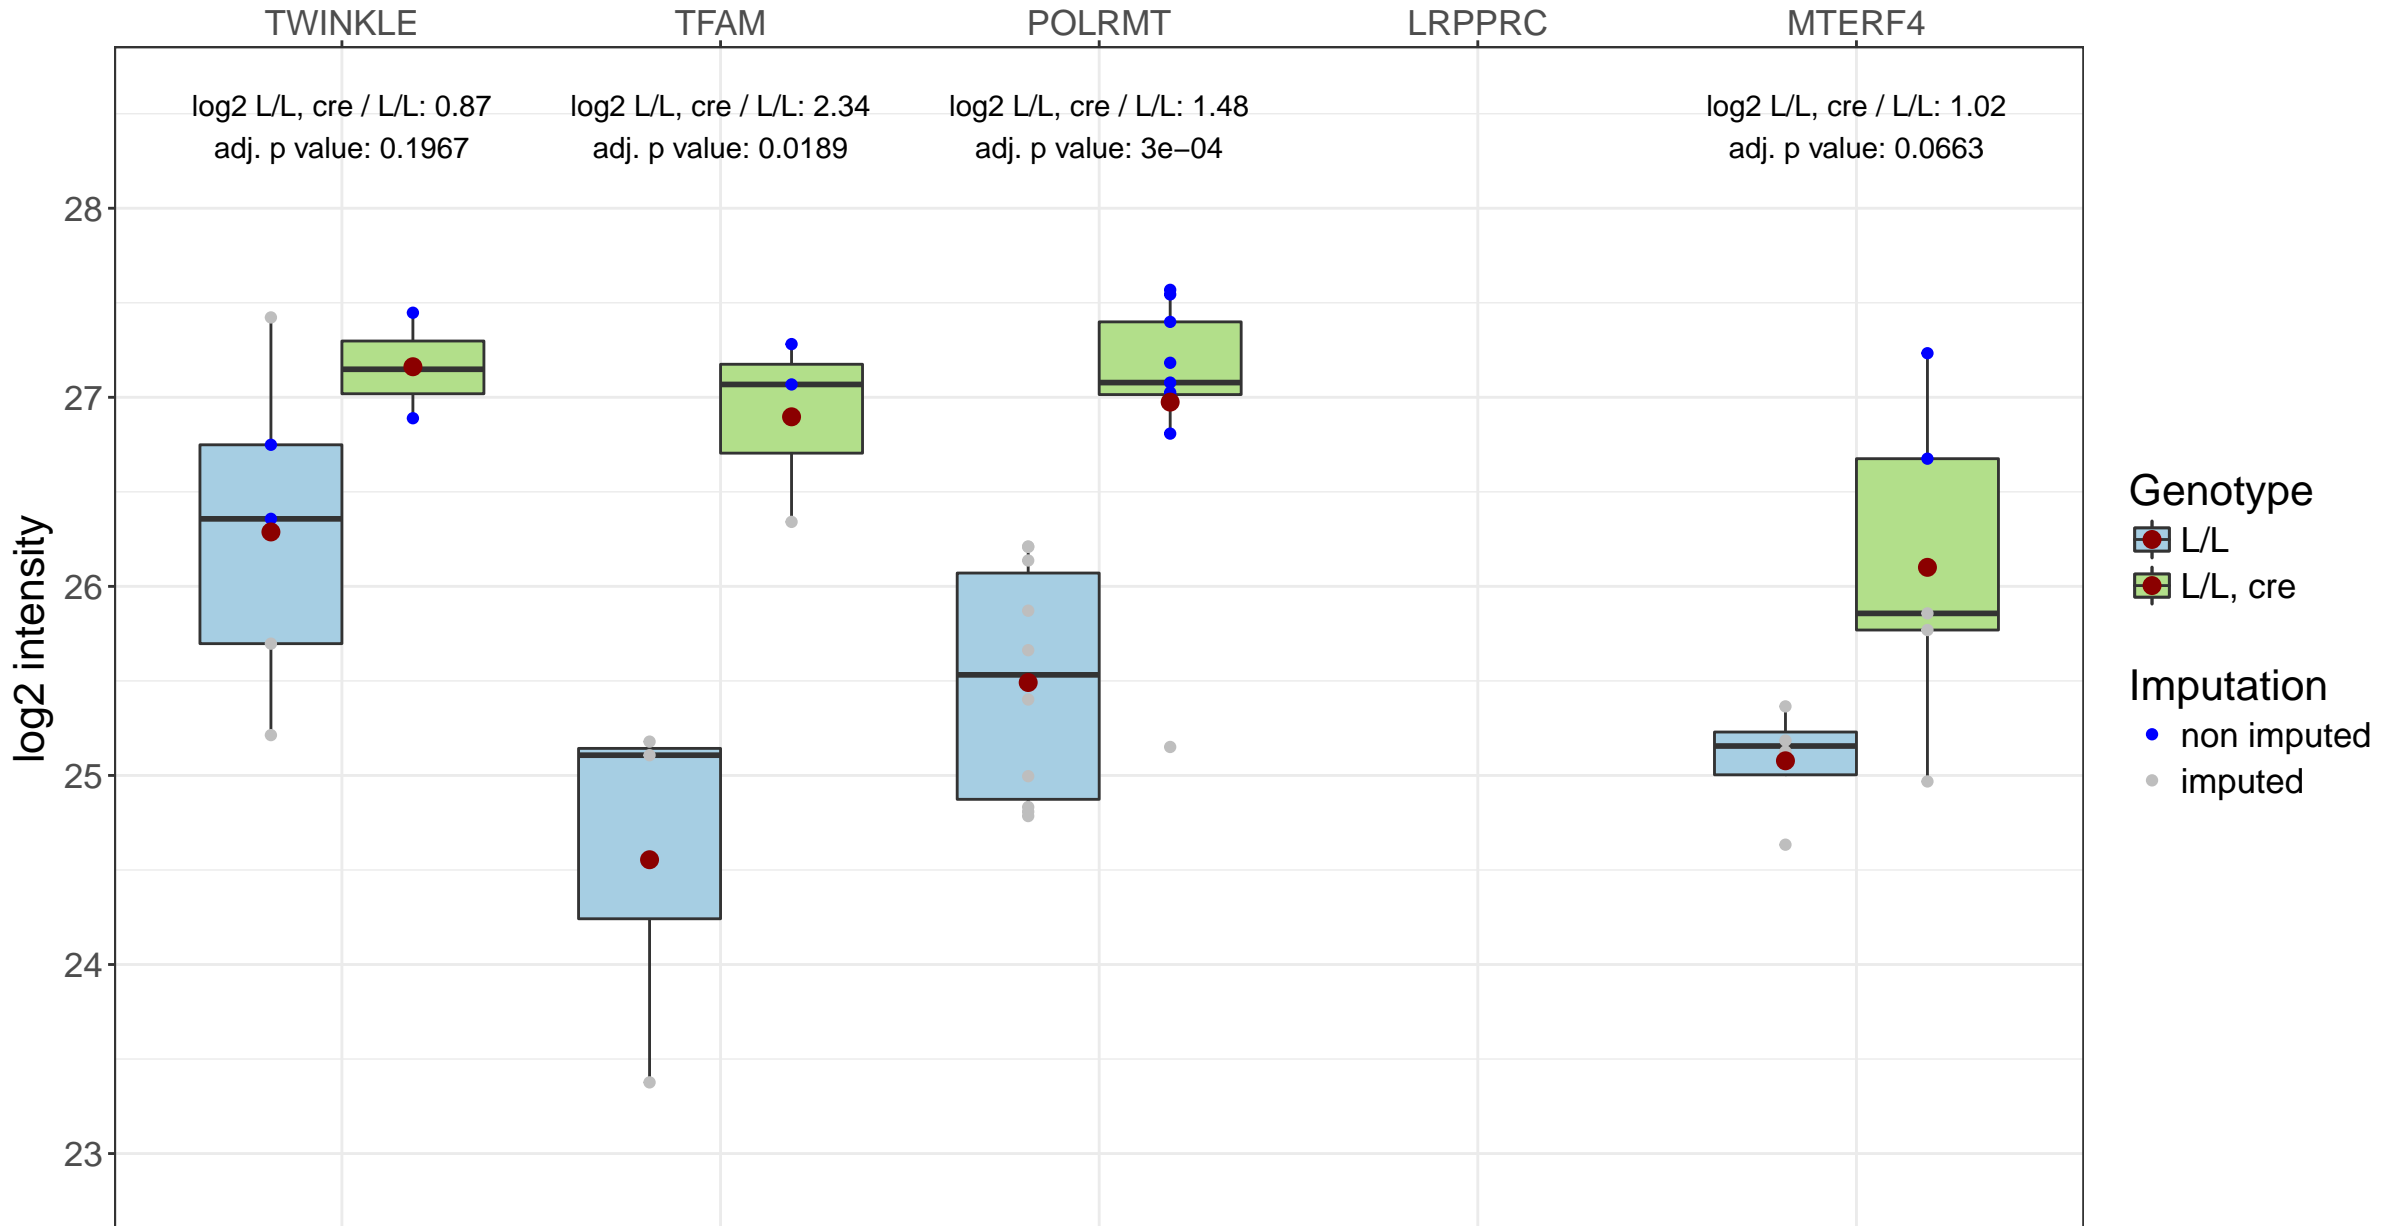

# FIS1 / Q9CQ92

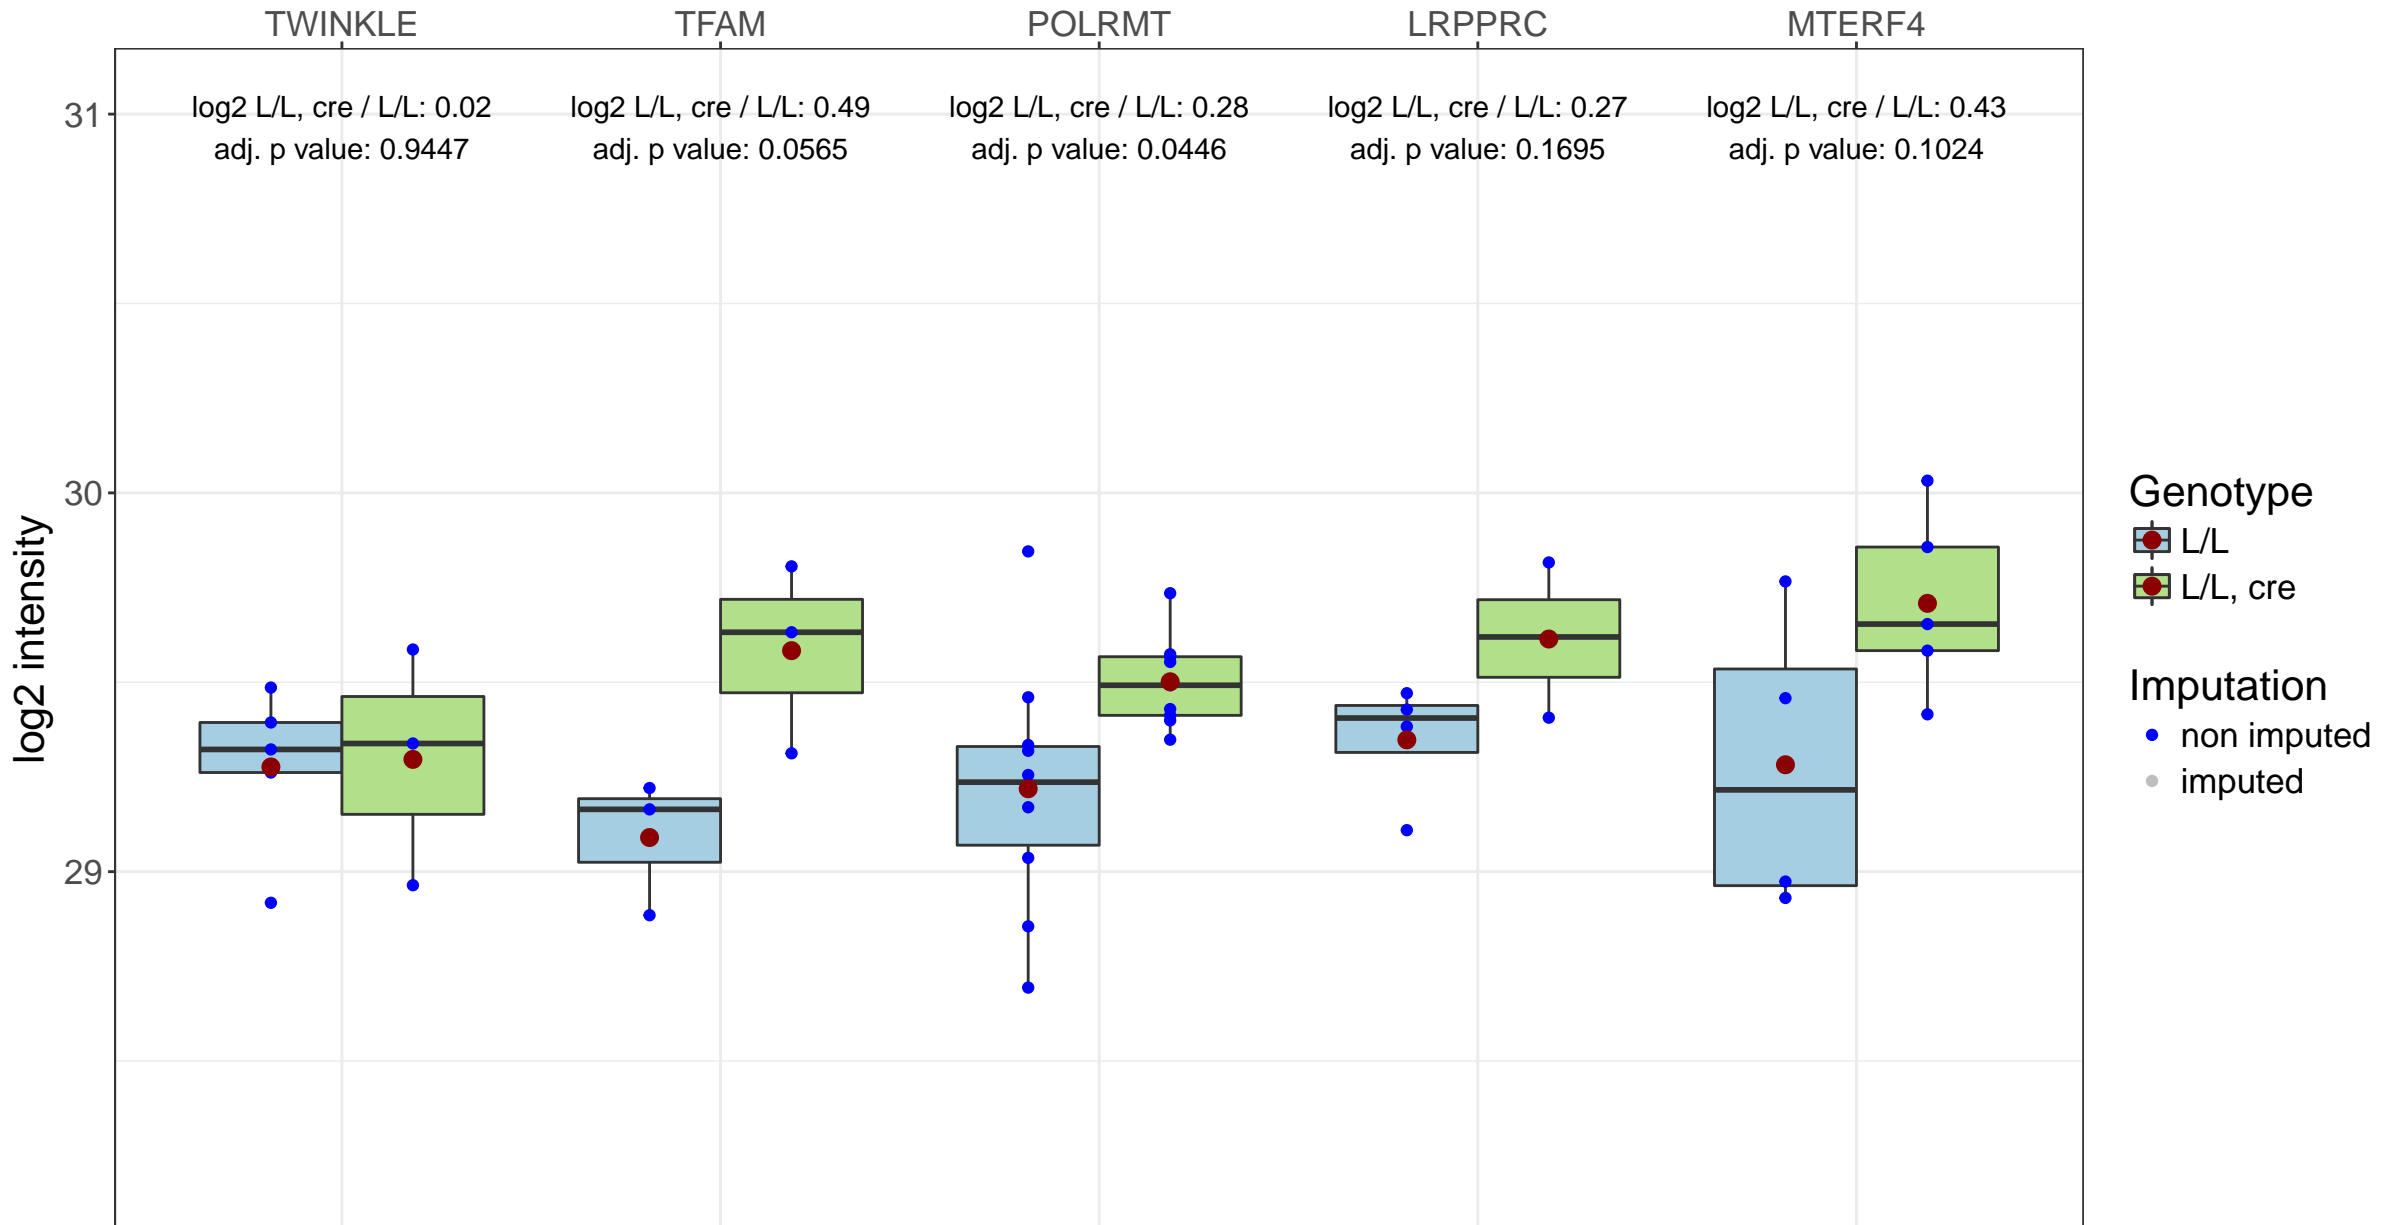



# FKBP3 / Q62446

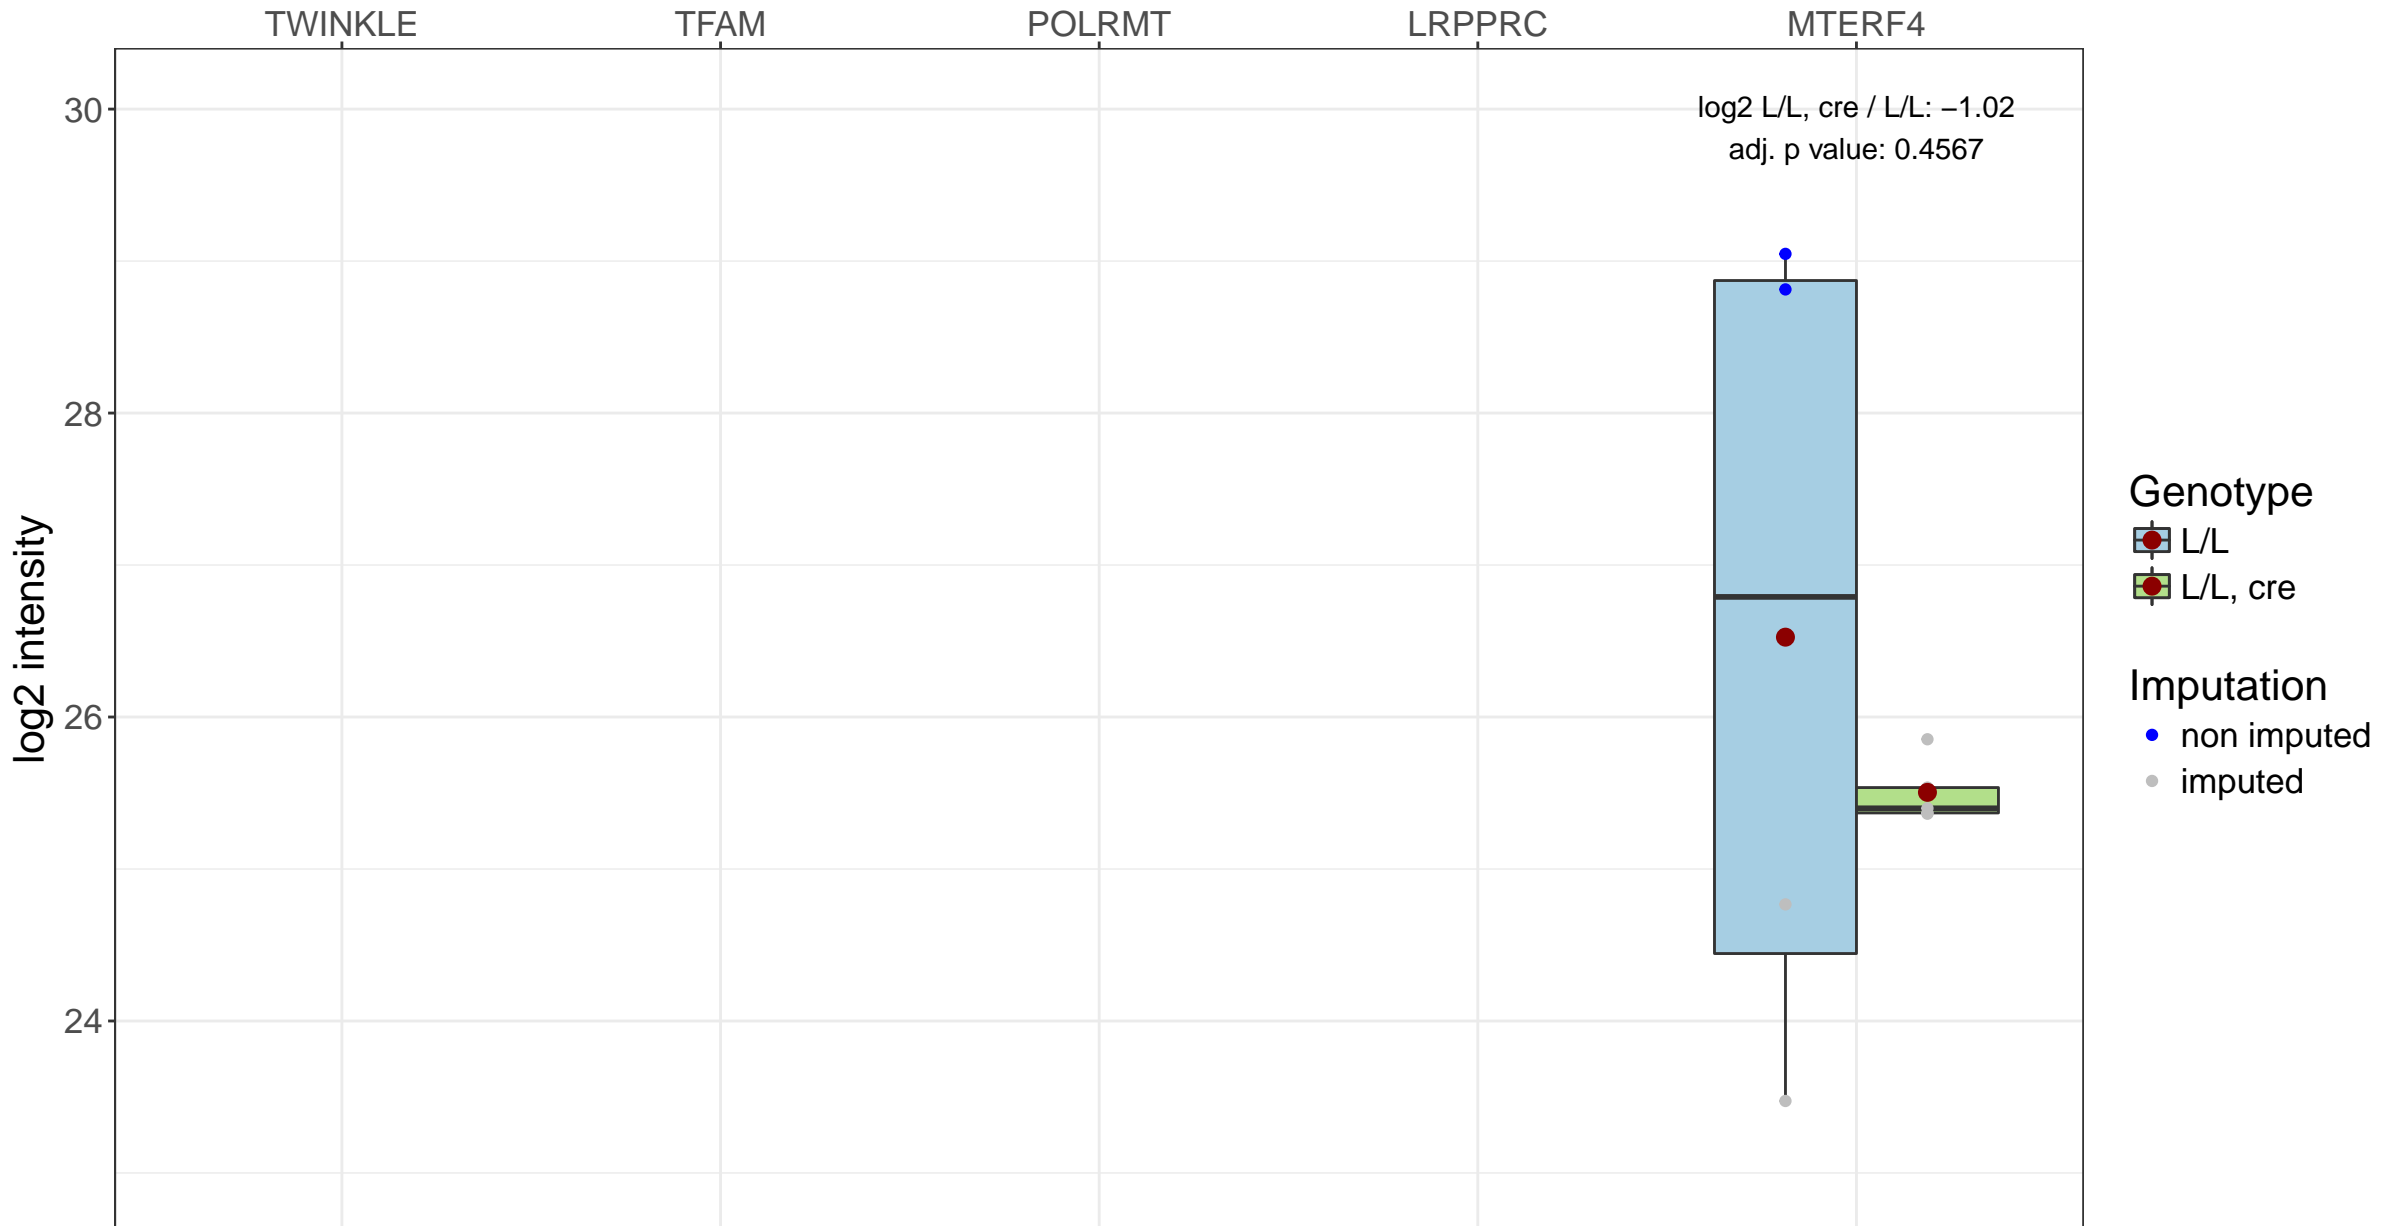

# FKBP8 / O35465-2

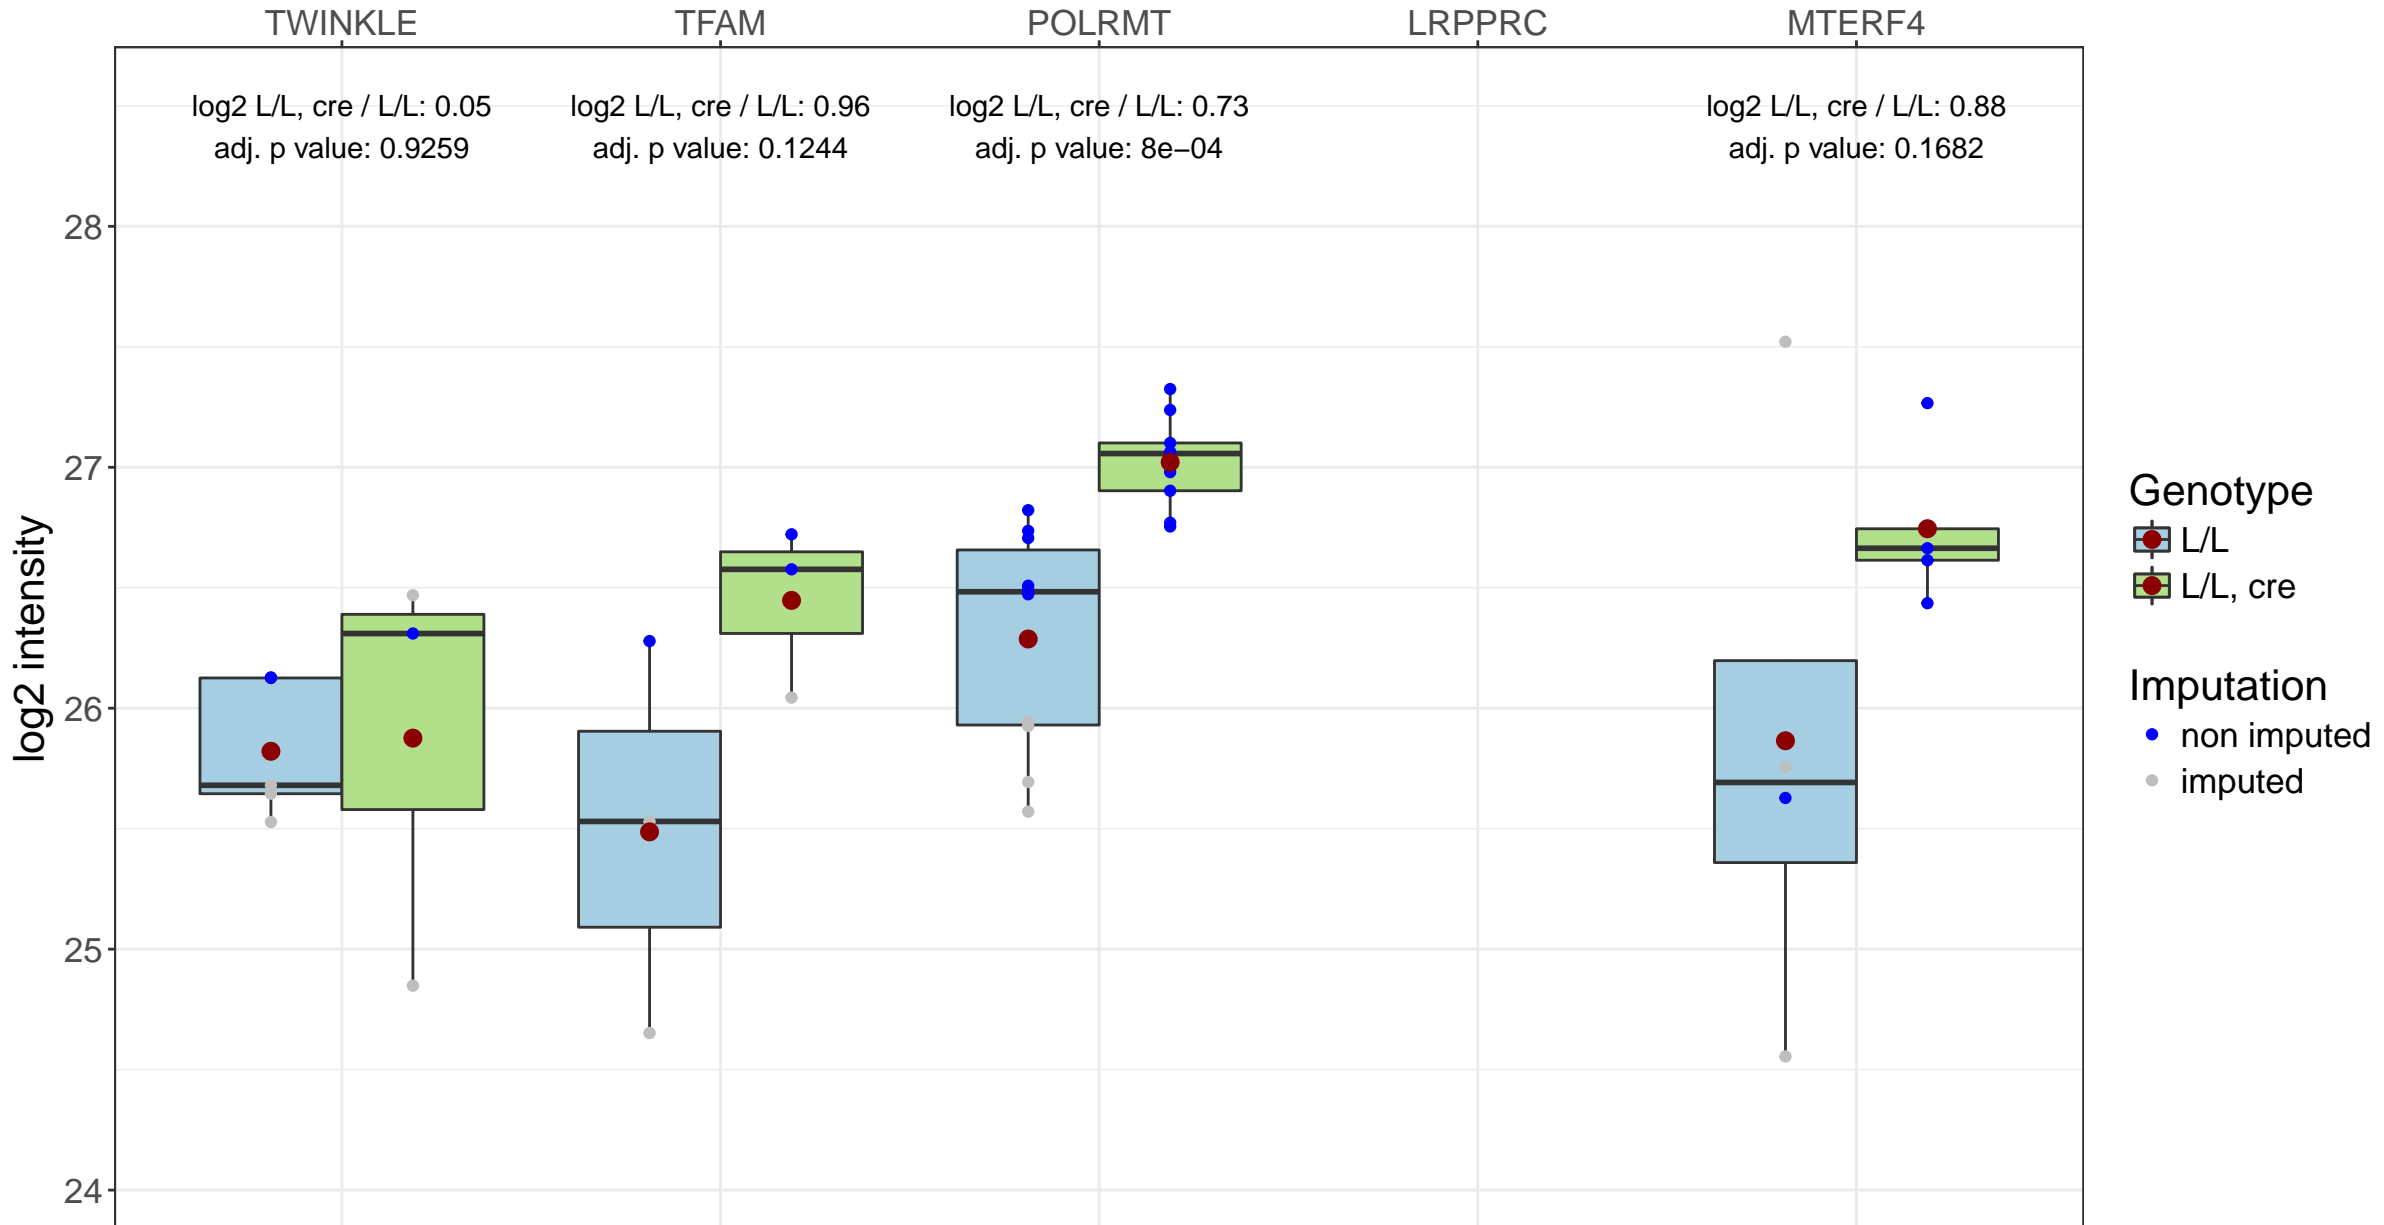

# FLAD1 / Q8R123

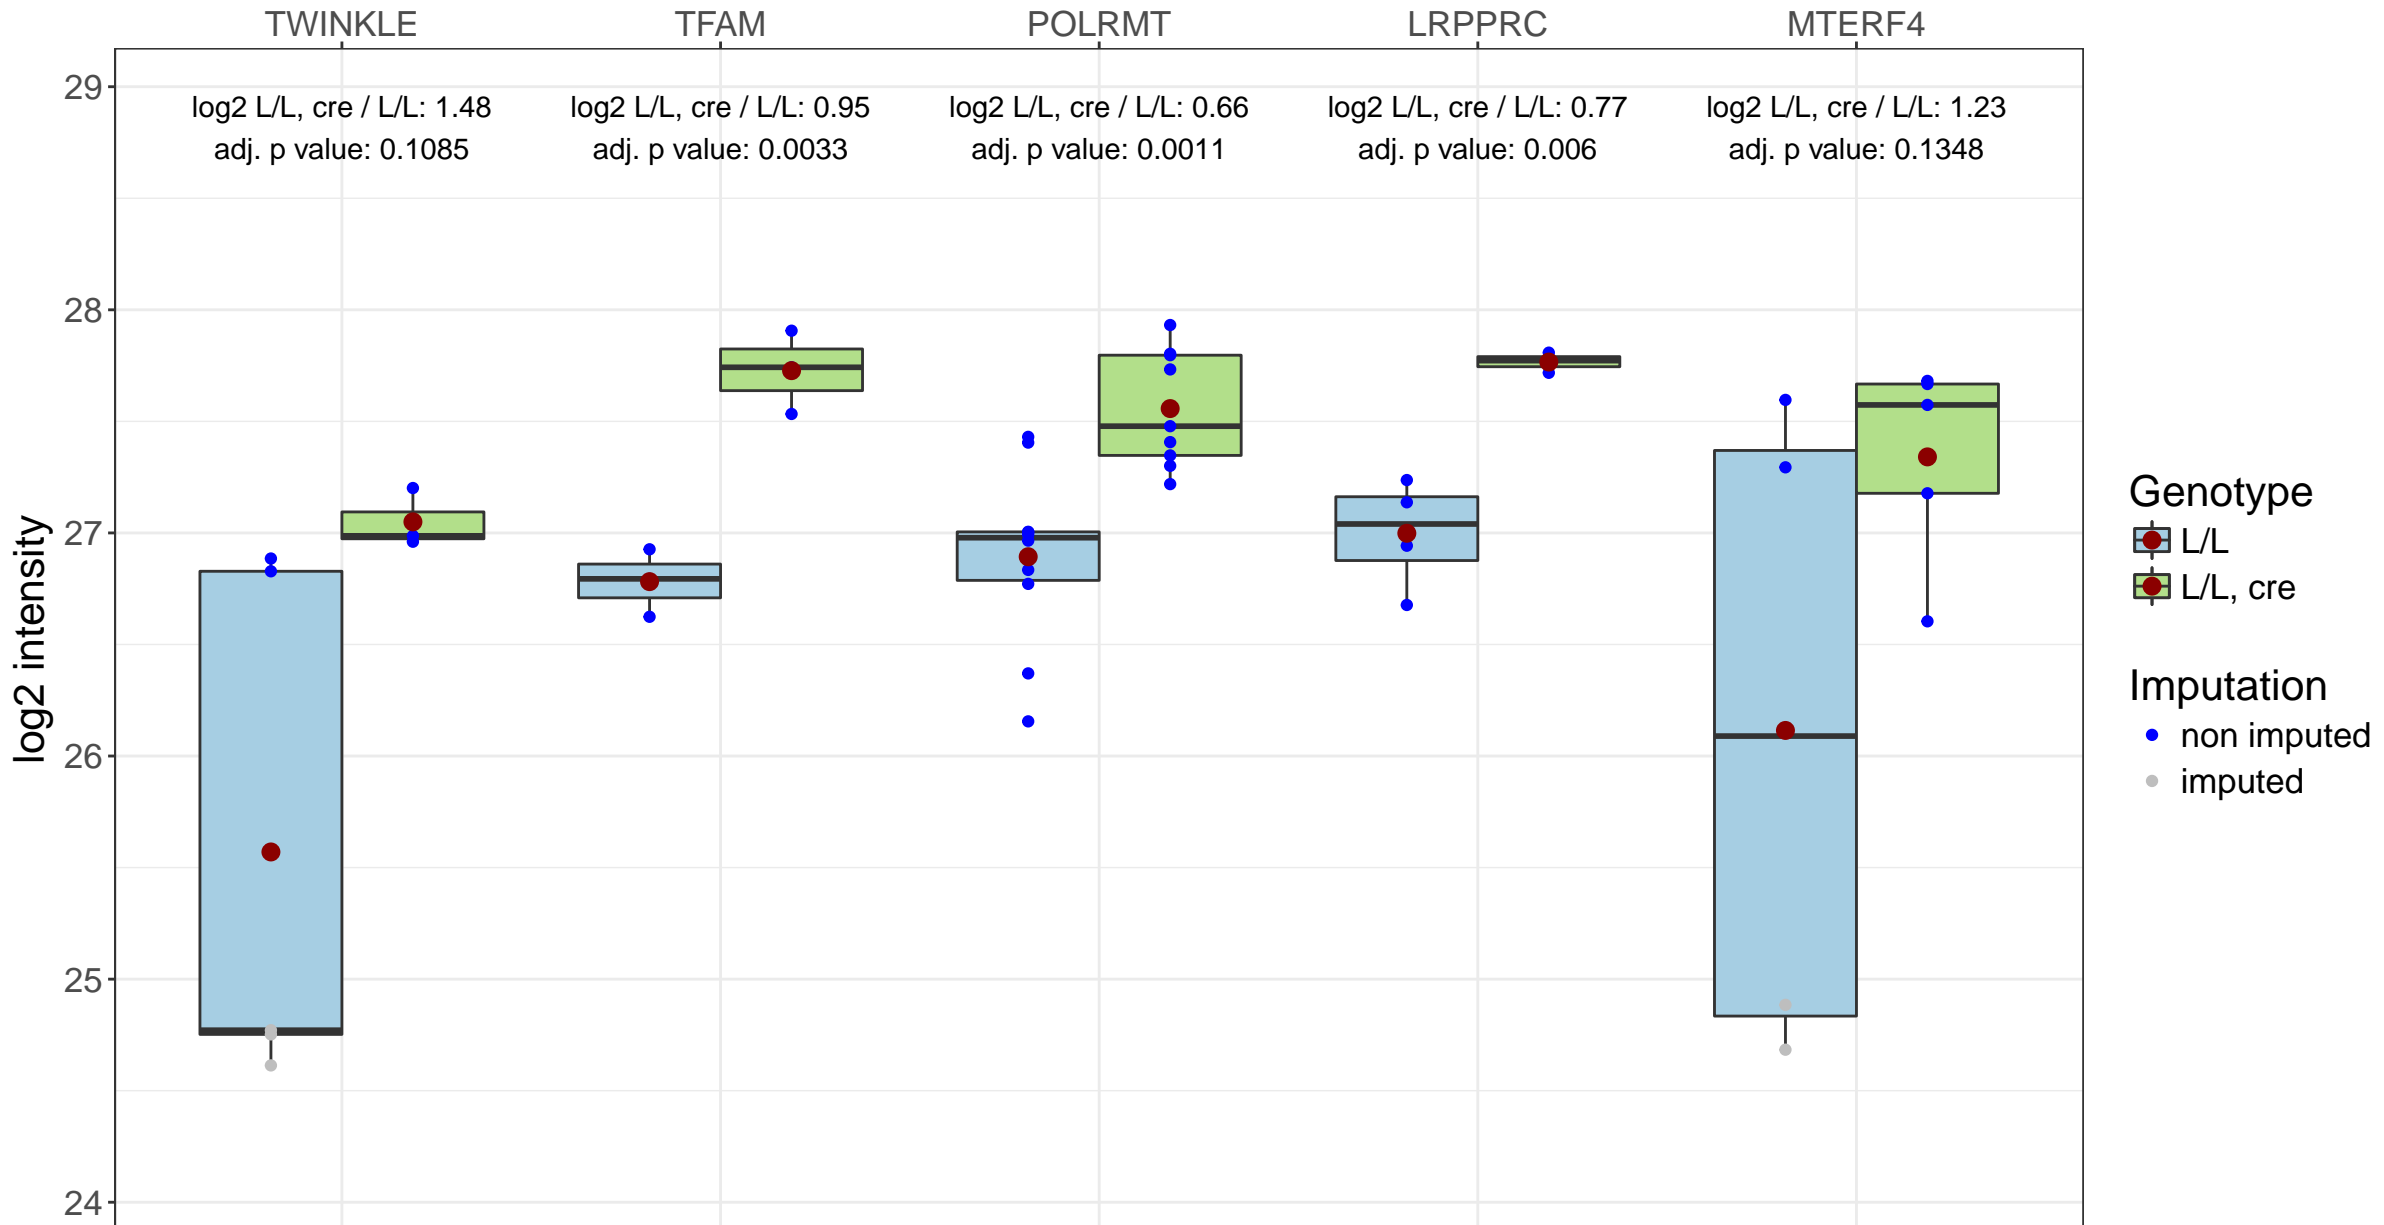

# FOXRED1 / Q3TQB2

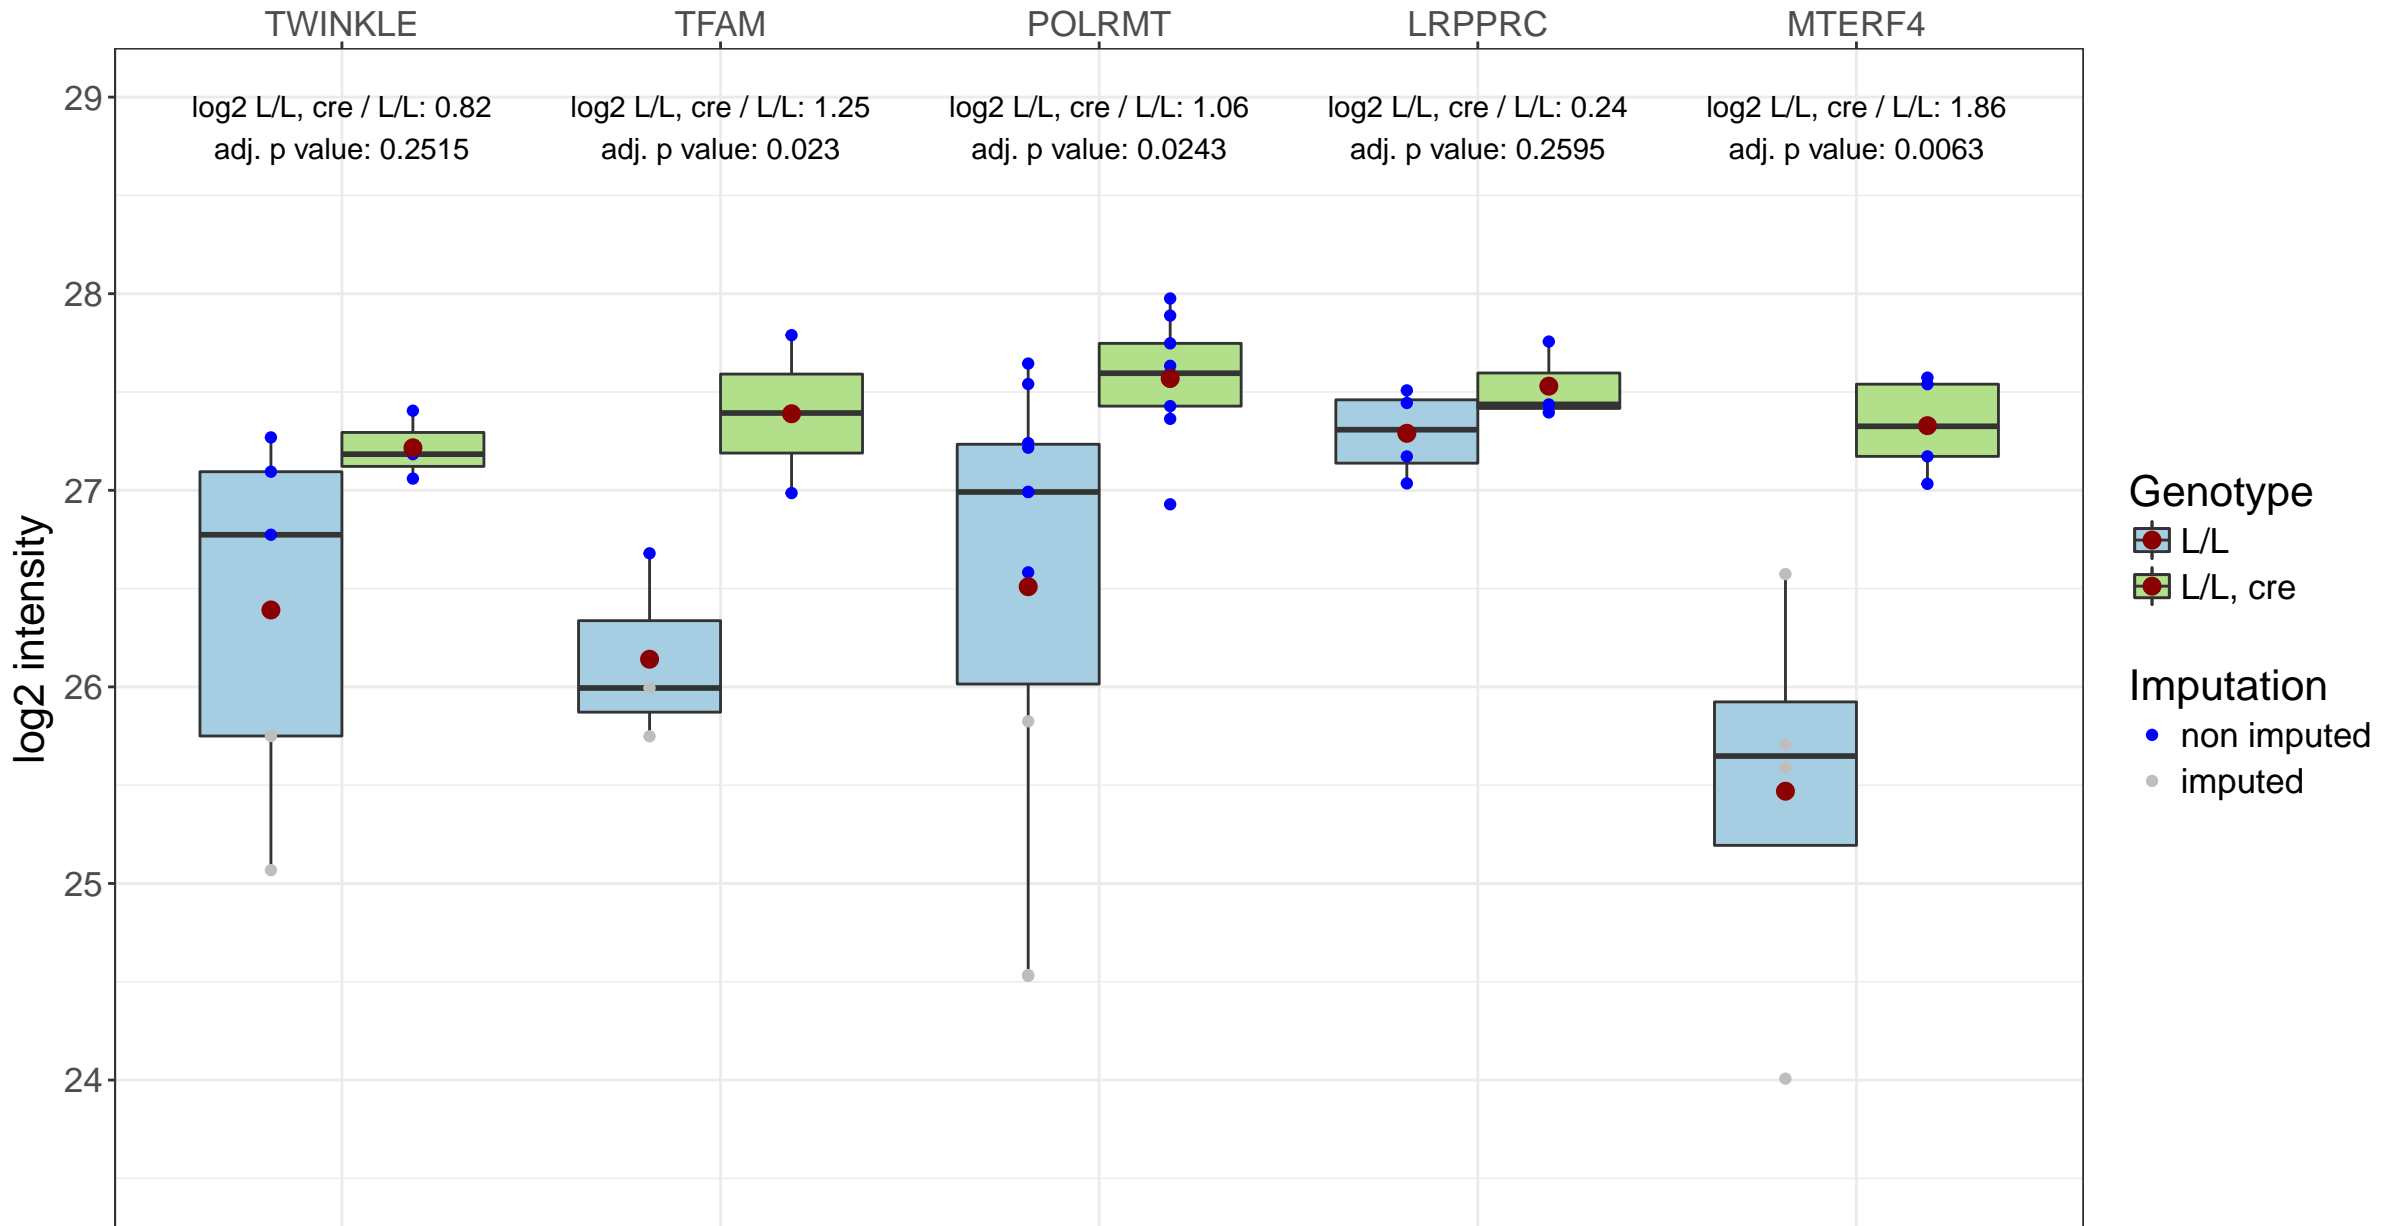

# FTSJ2 / Q9CPY0

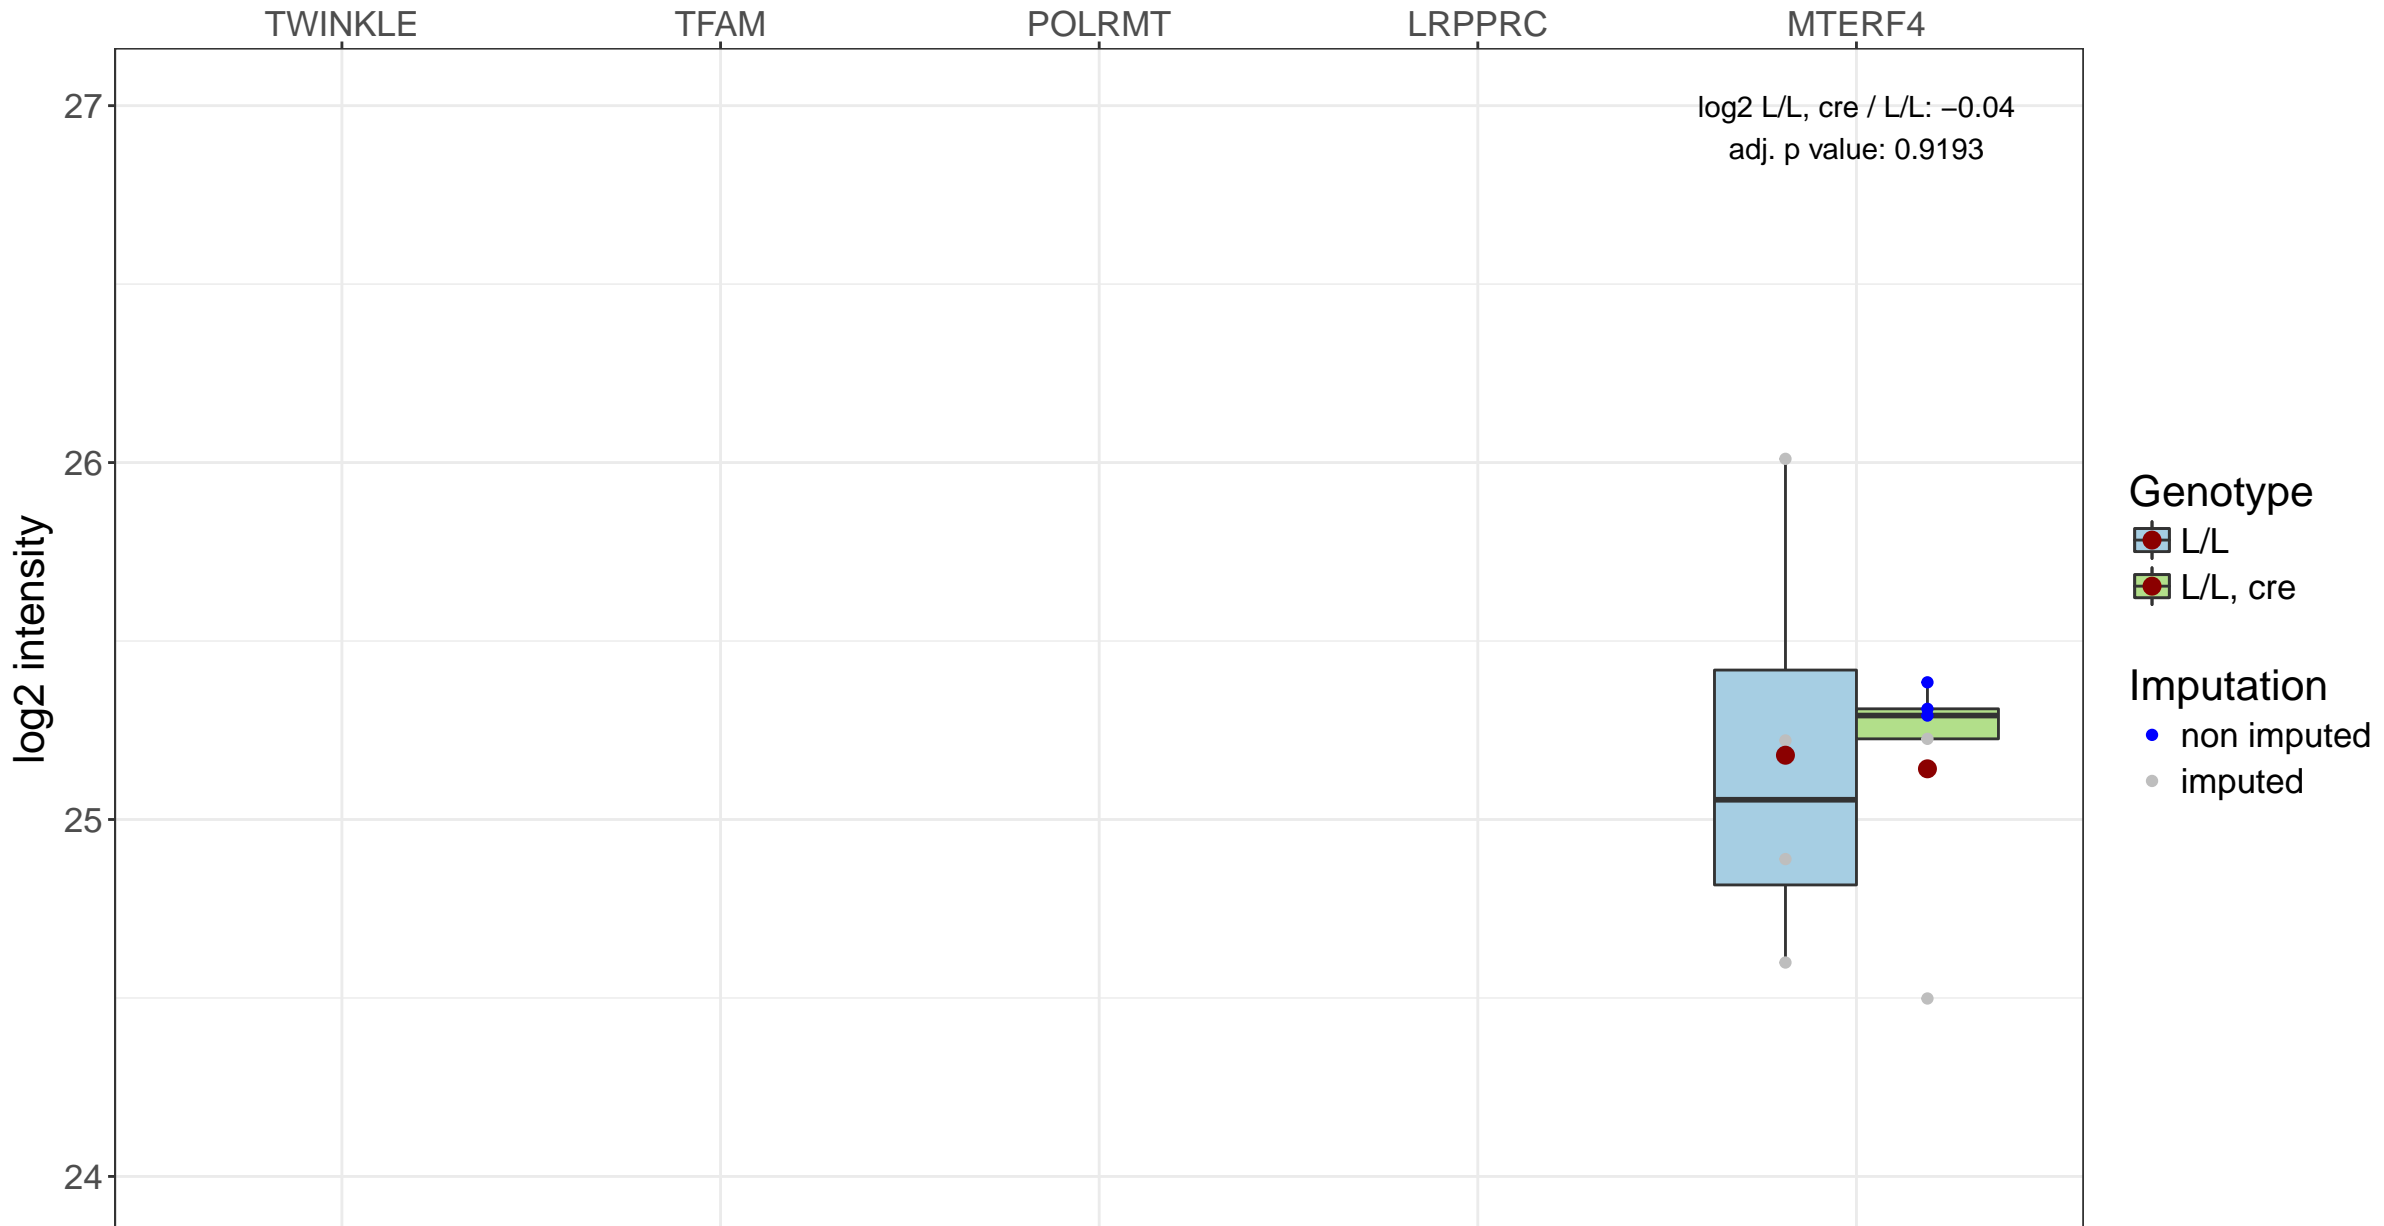

# FUNDC2 / Q9D6K8

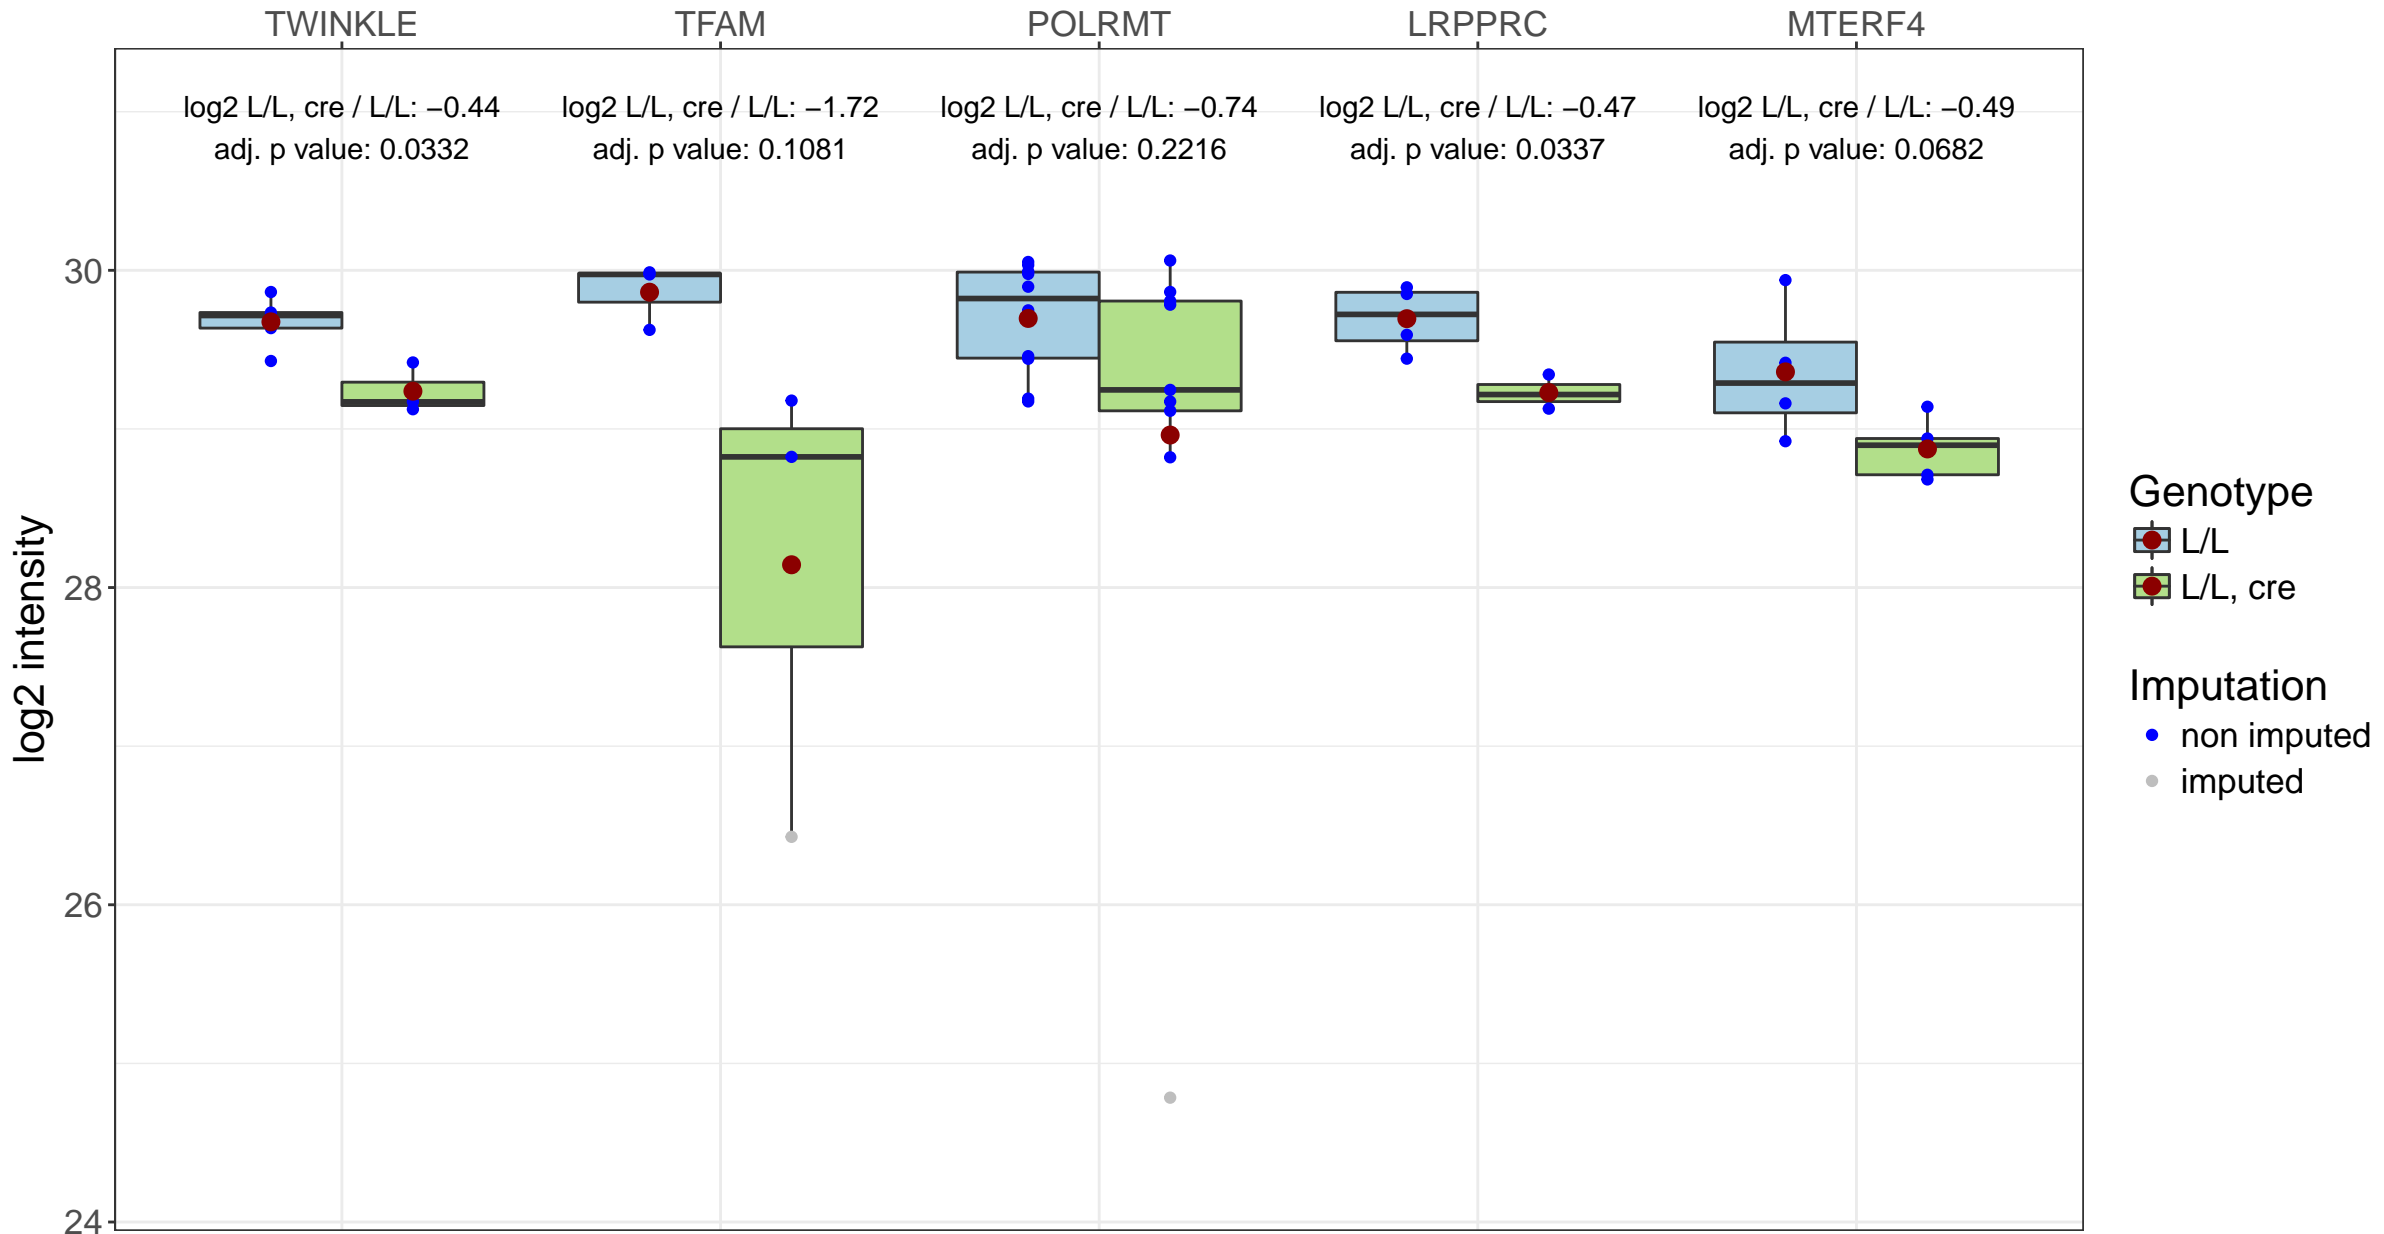

# FXN / O35943

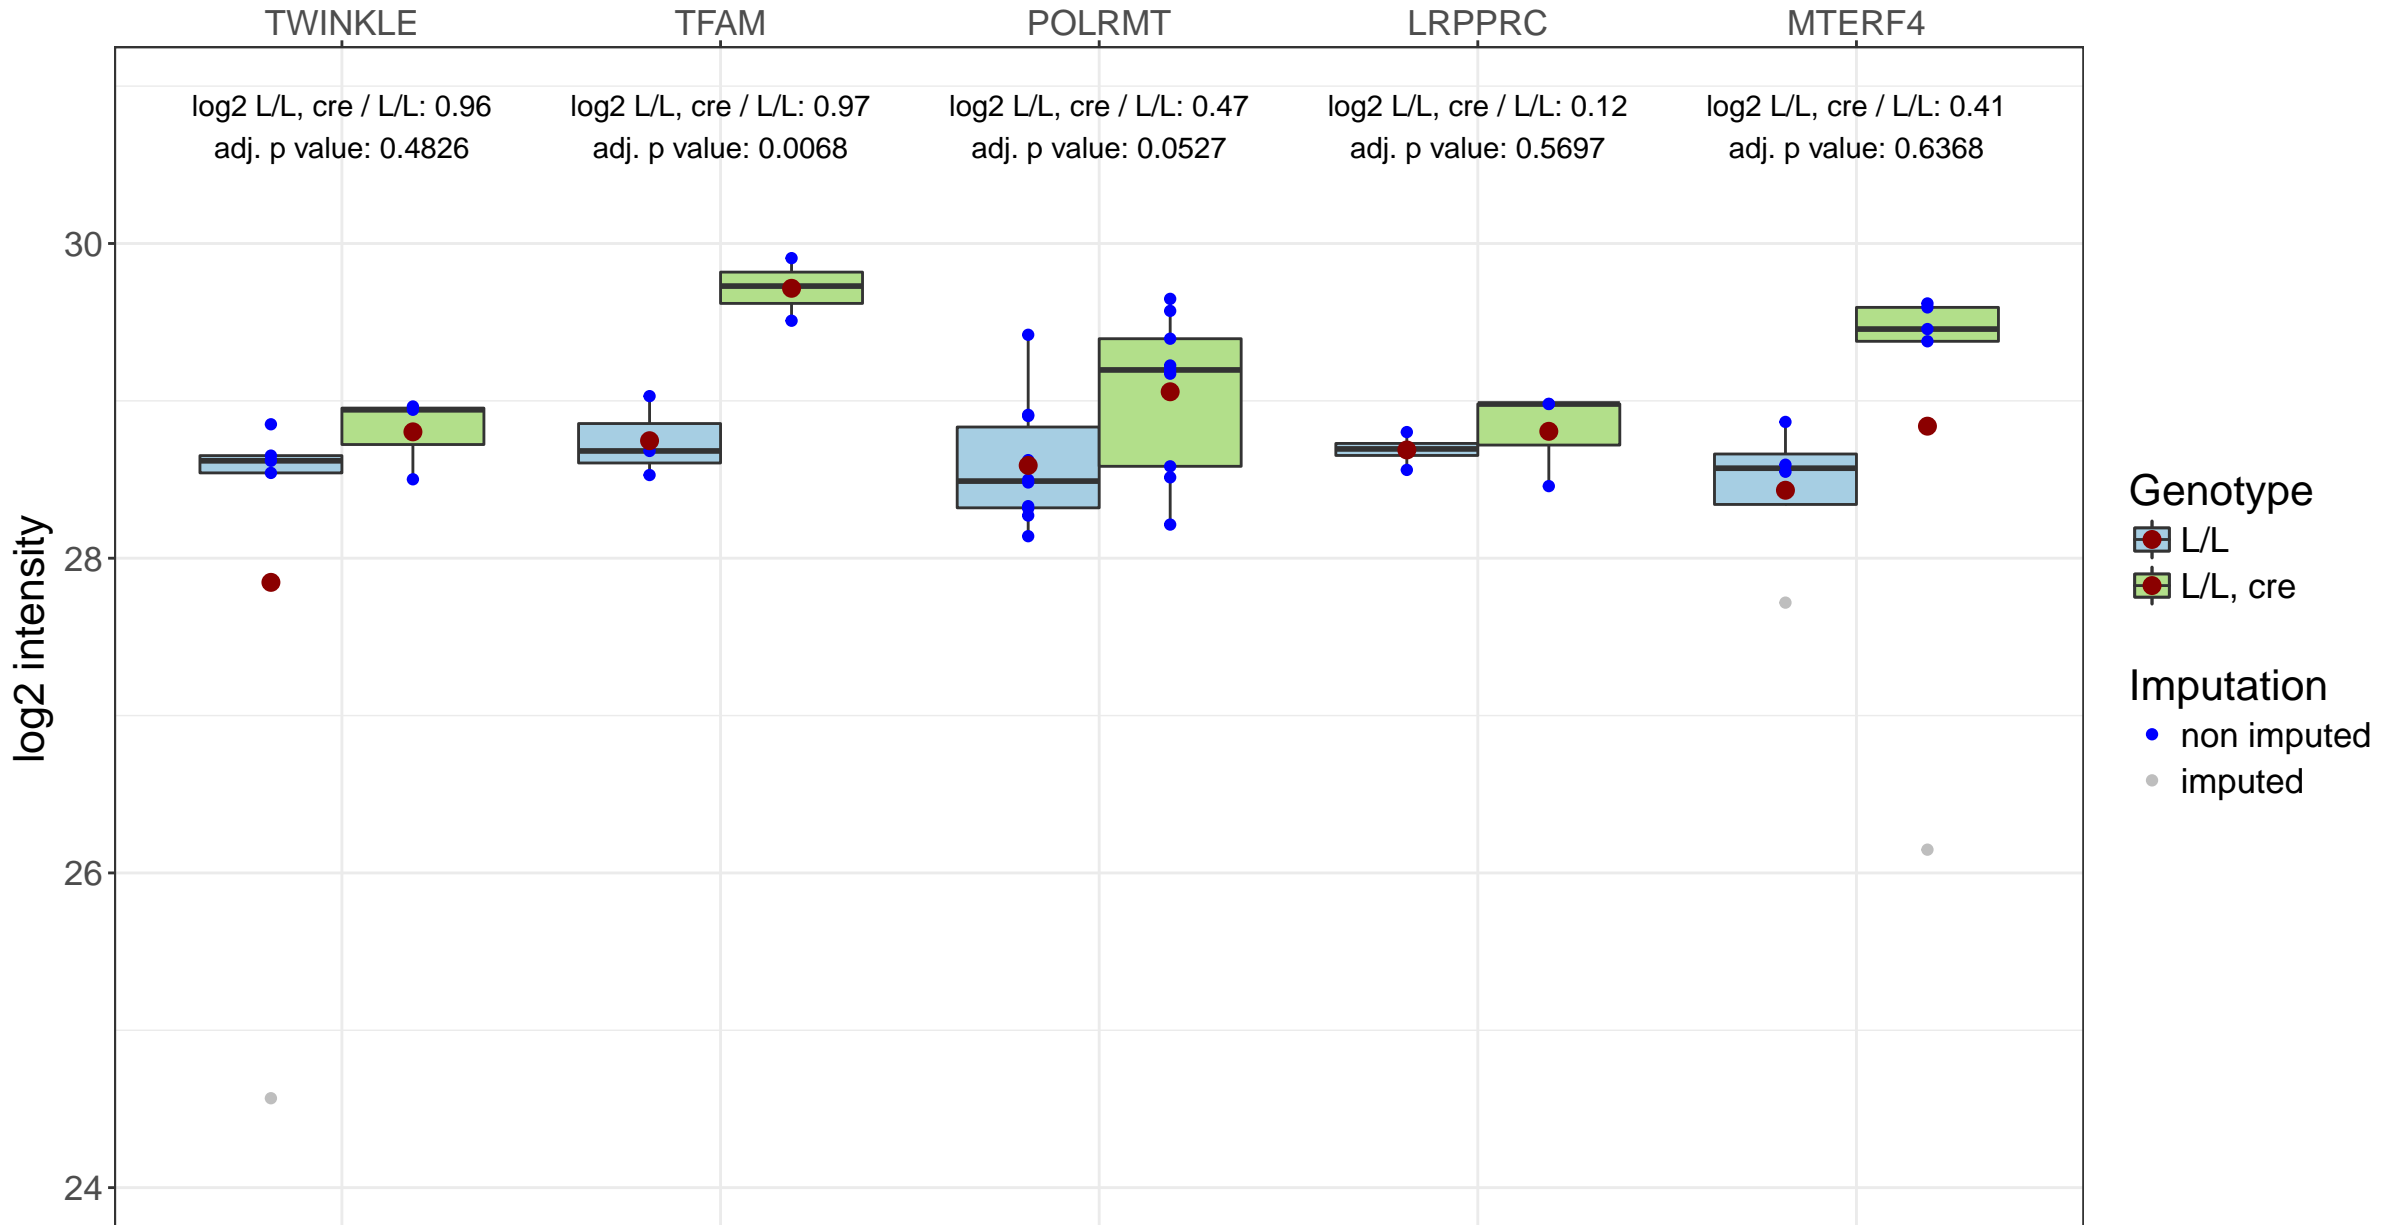

# GAPDH / P16858

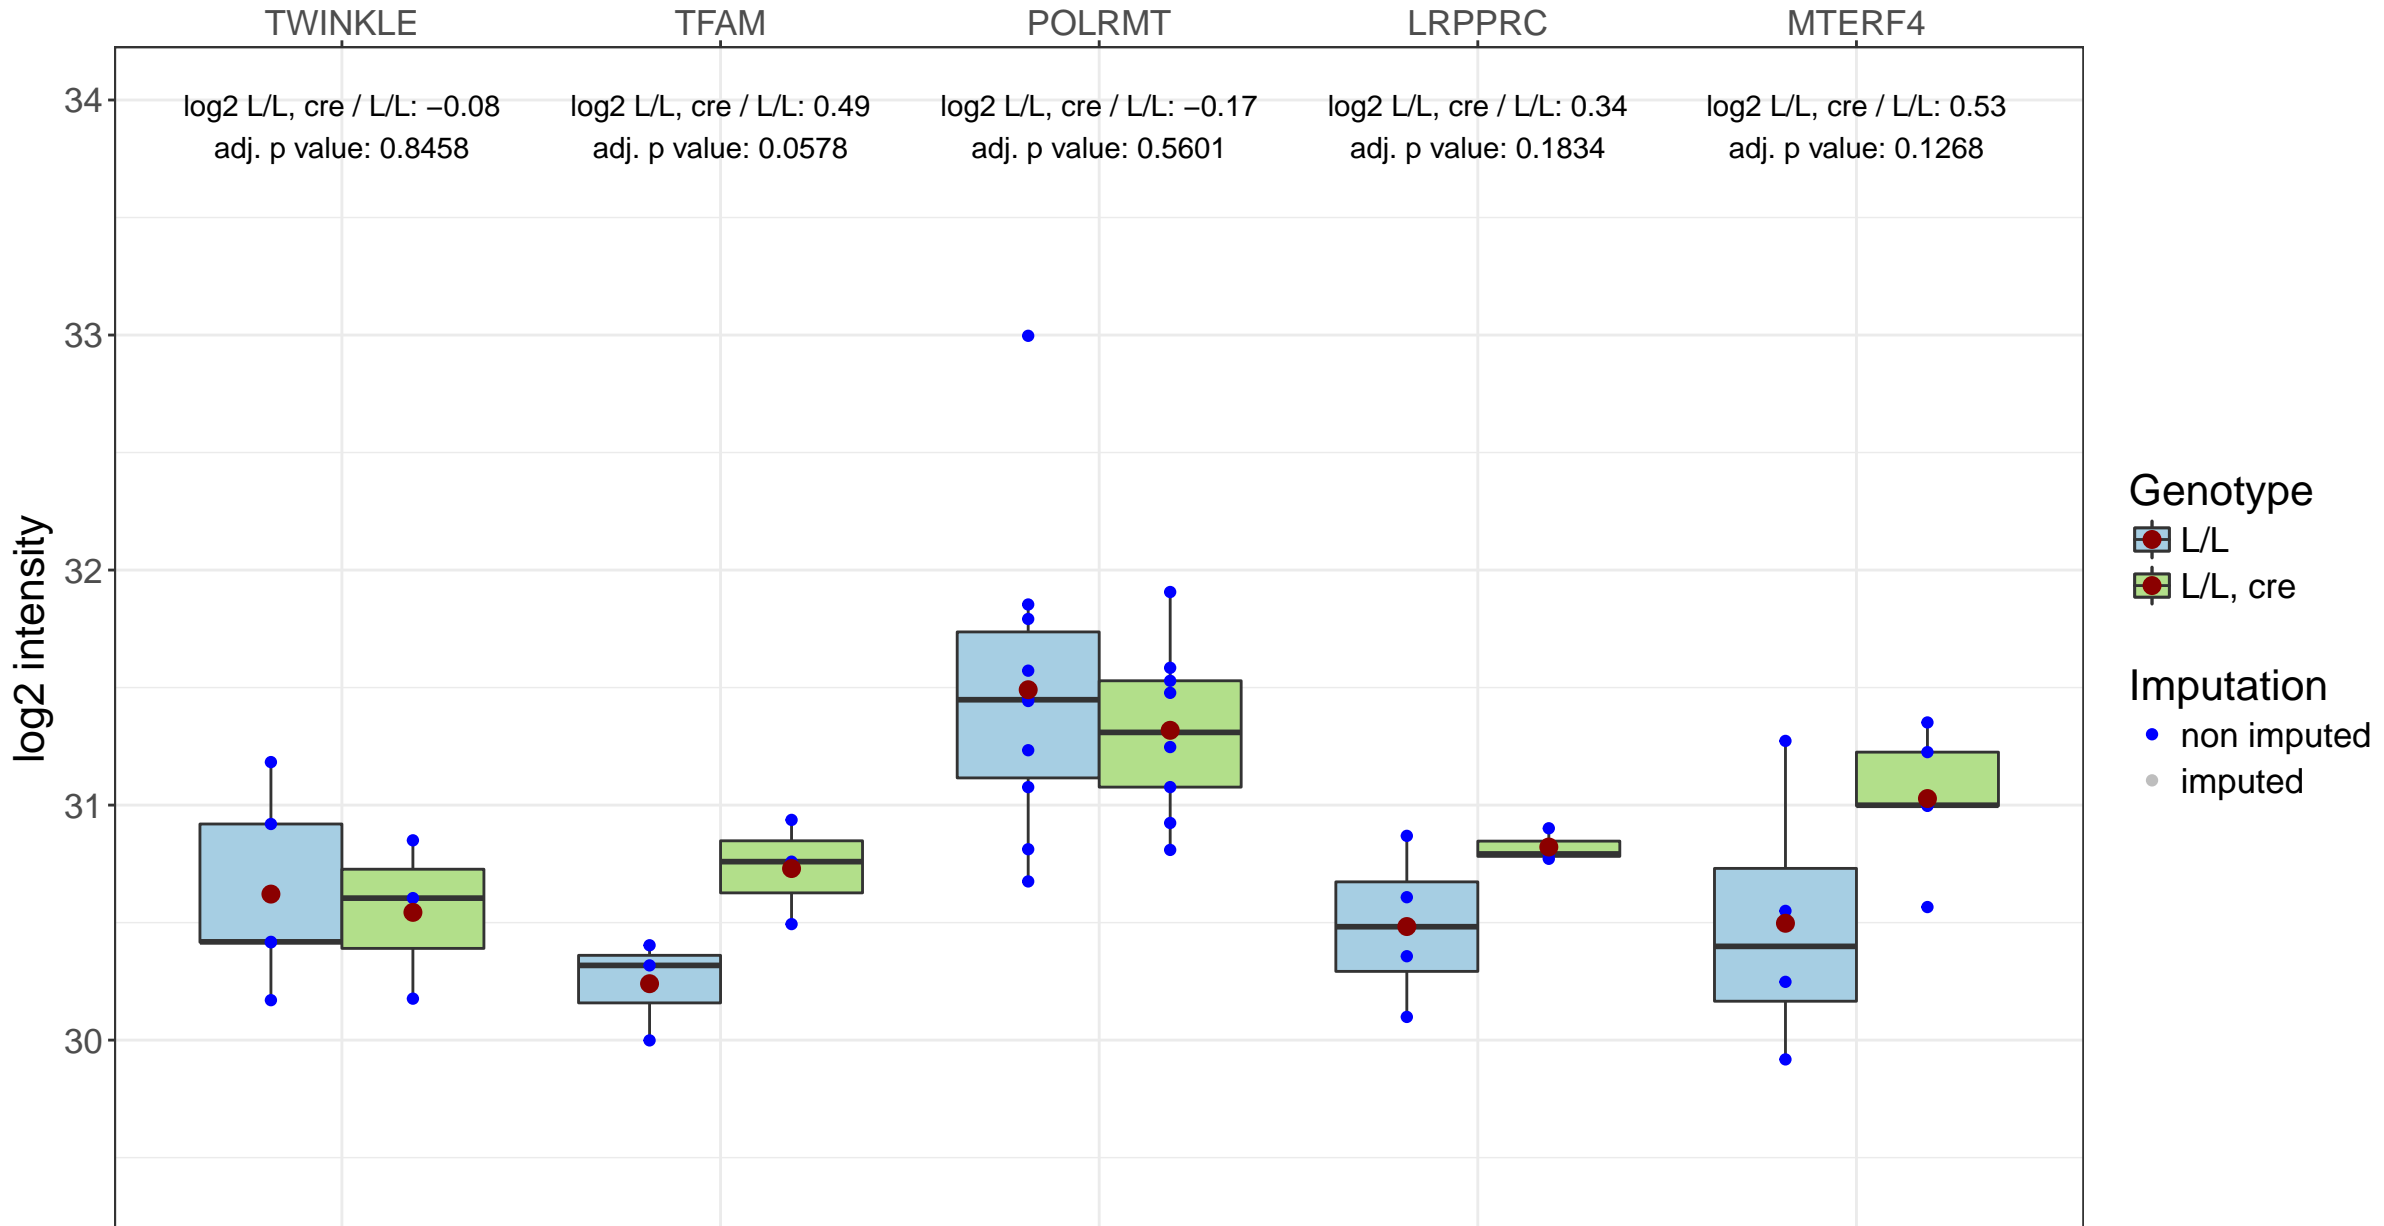



# GARS / Q9CZD3

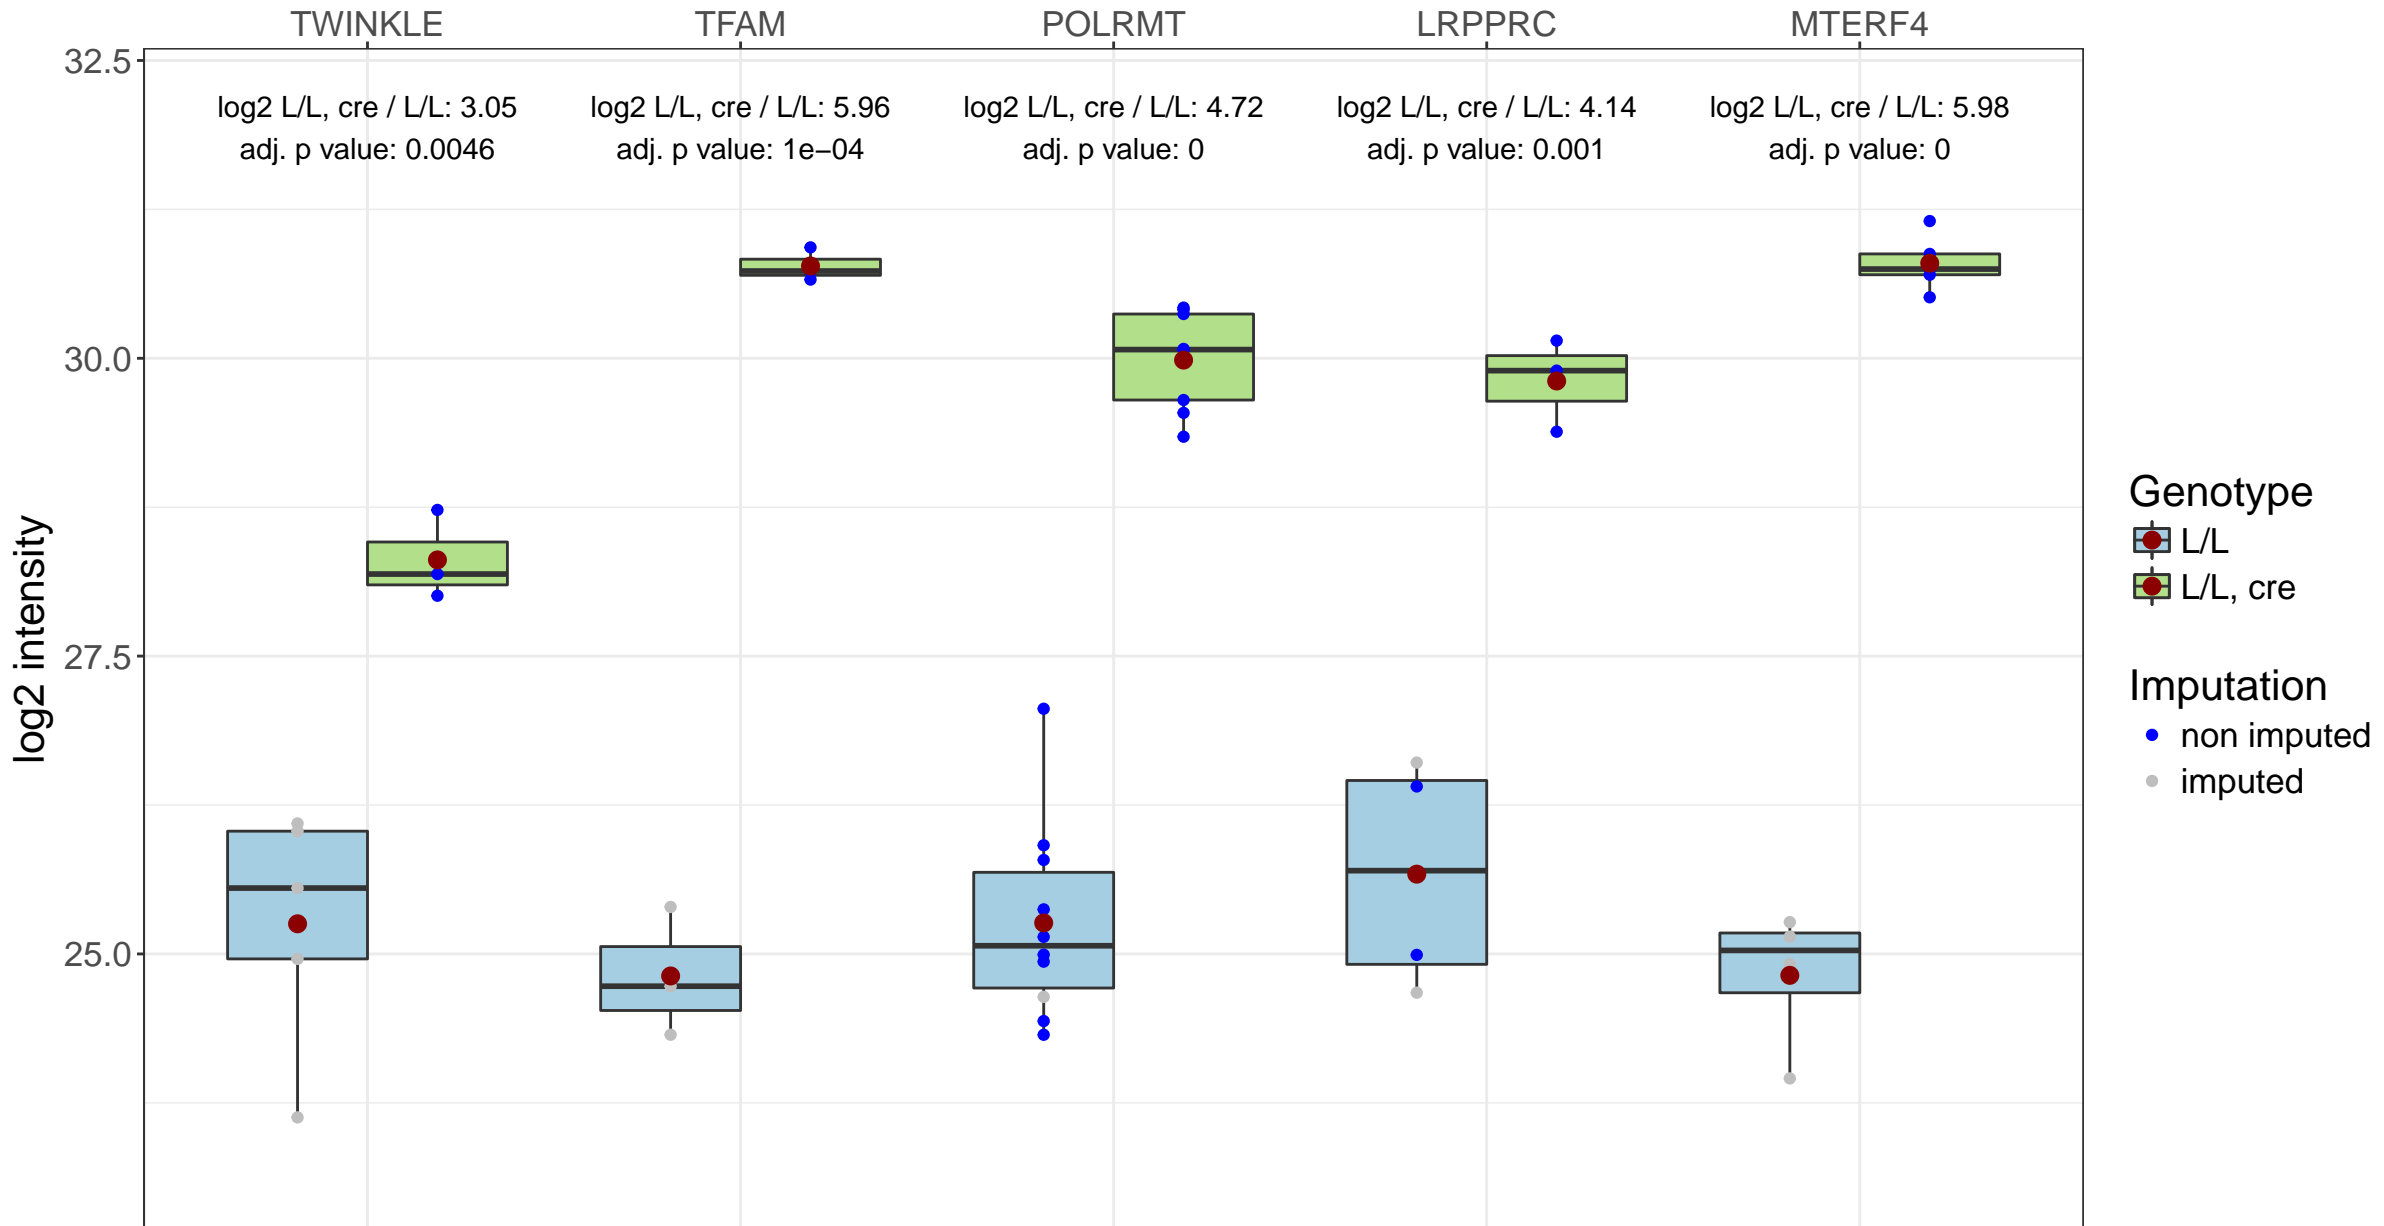

# GBAS / Q7TMG8

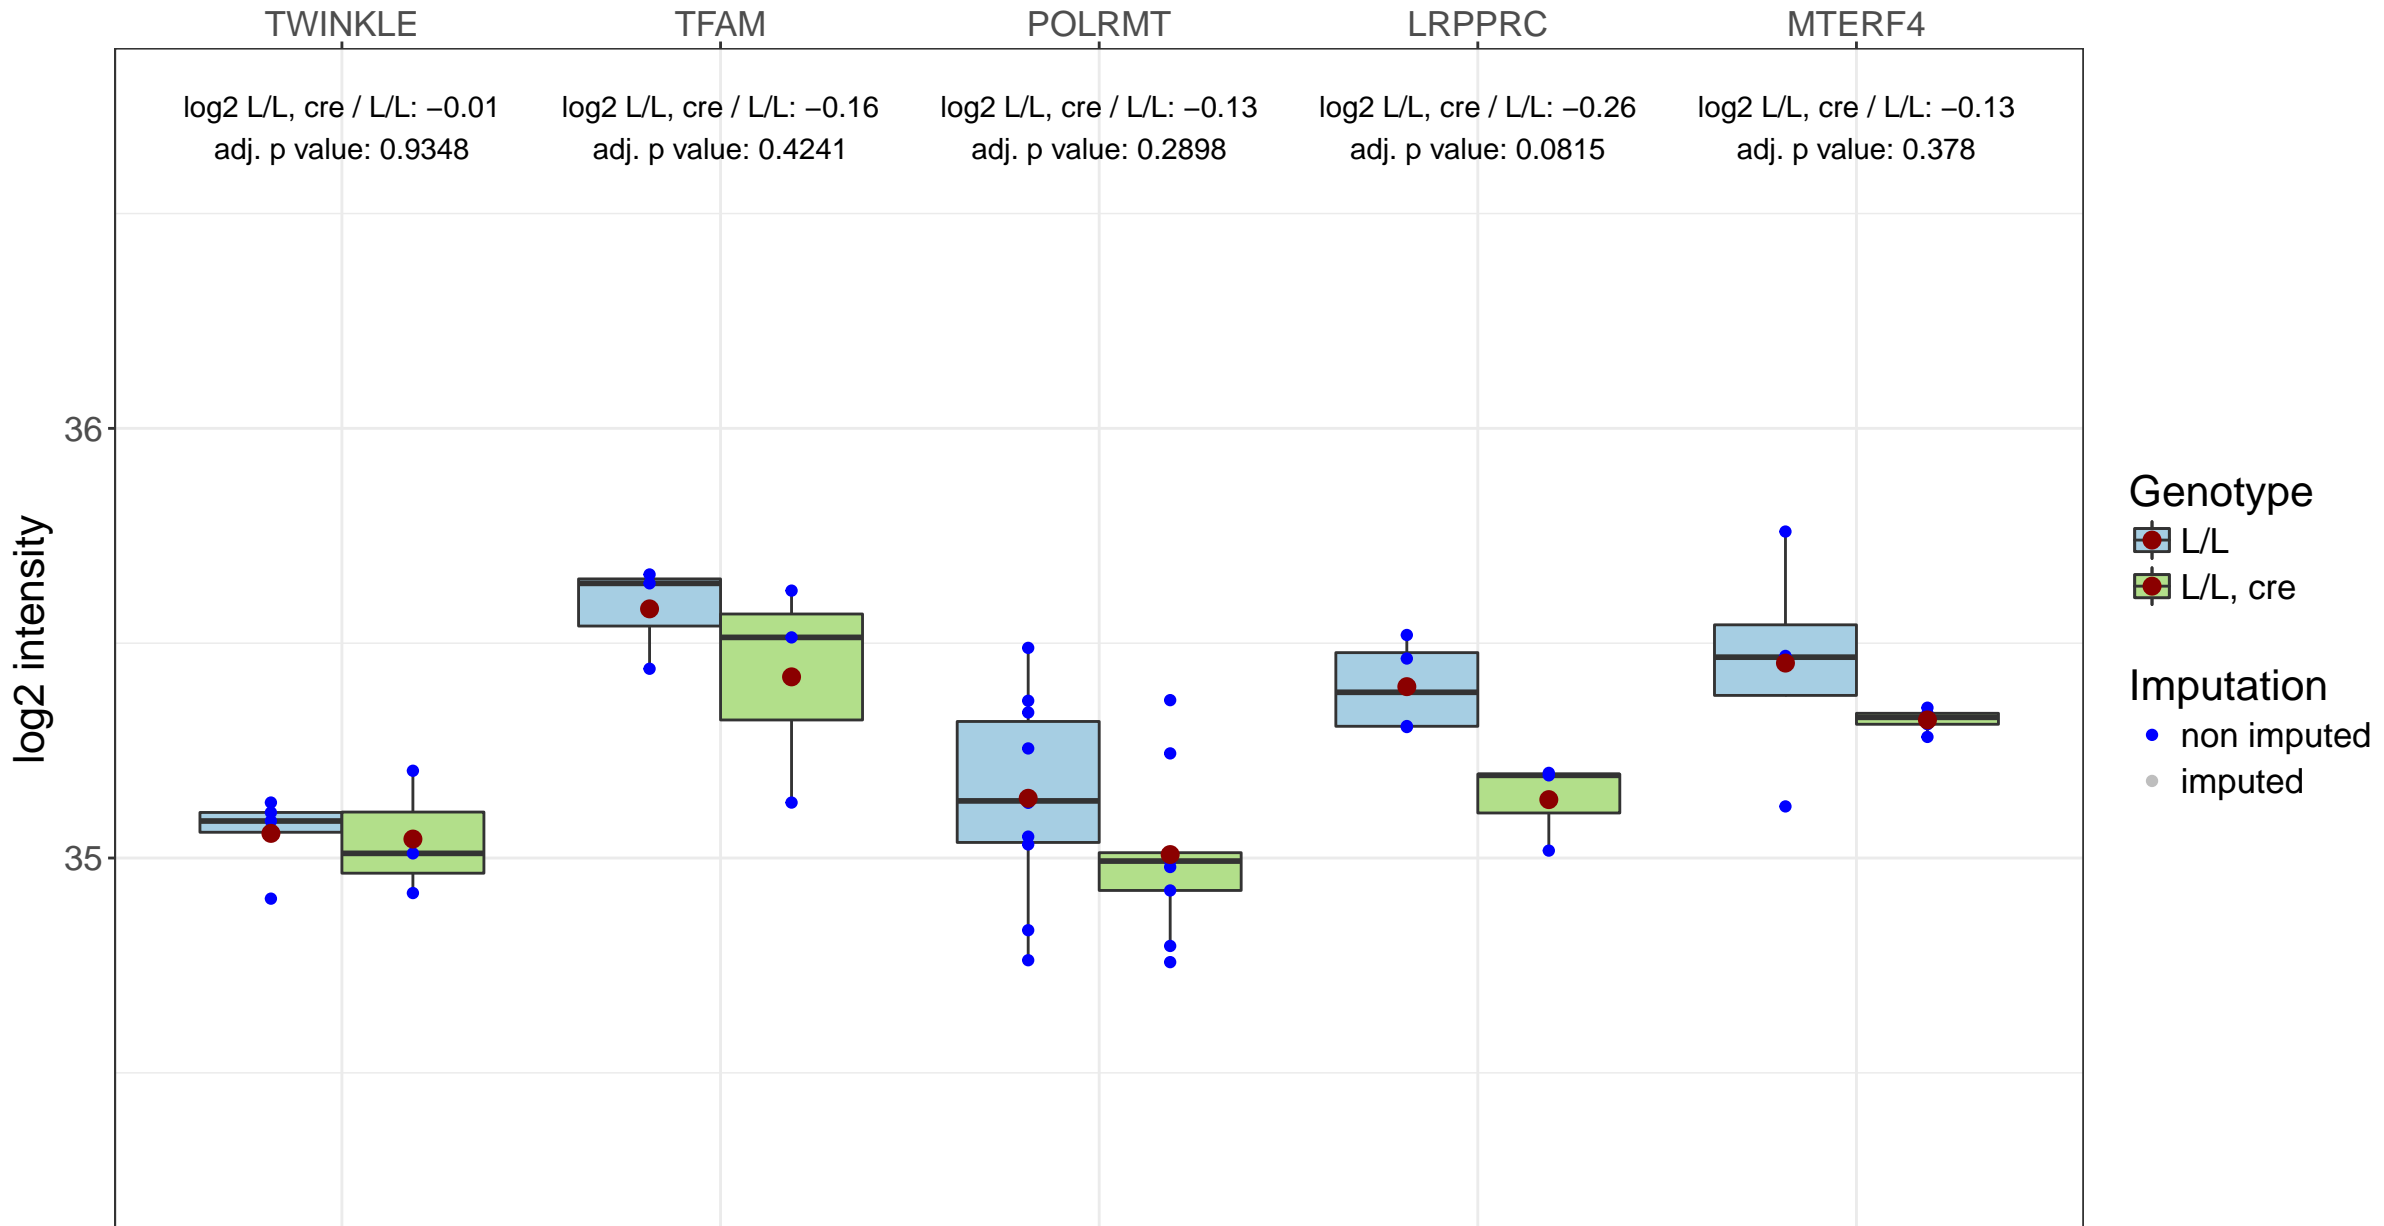

# GCAT / O88986

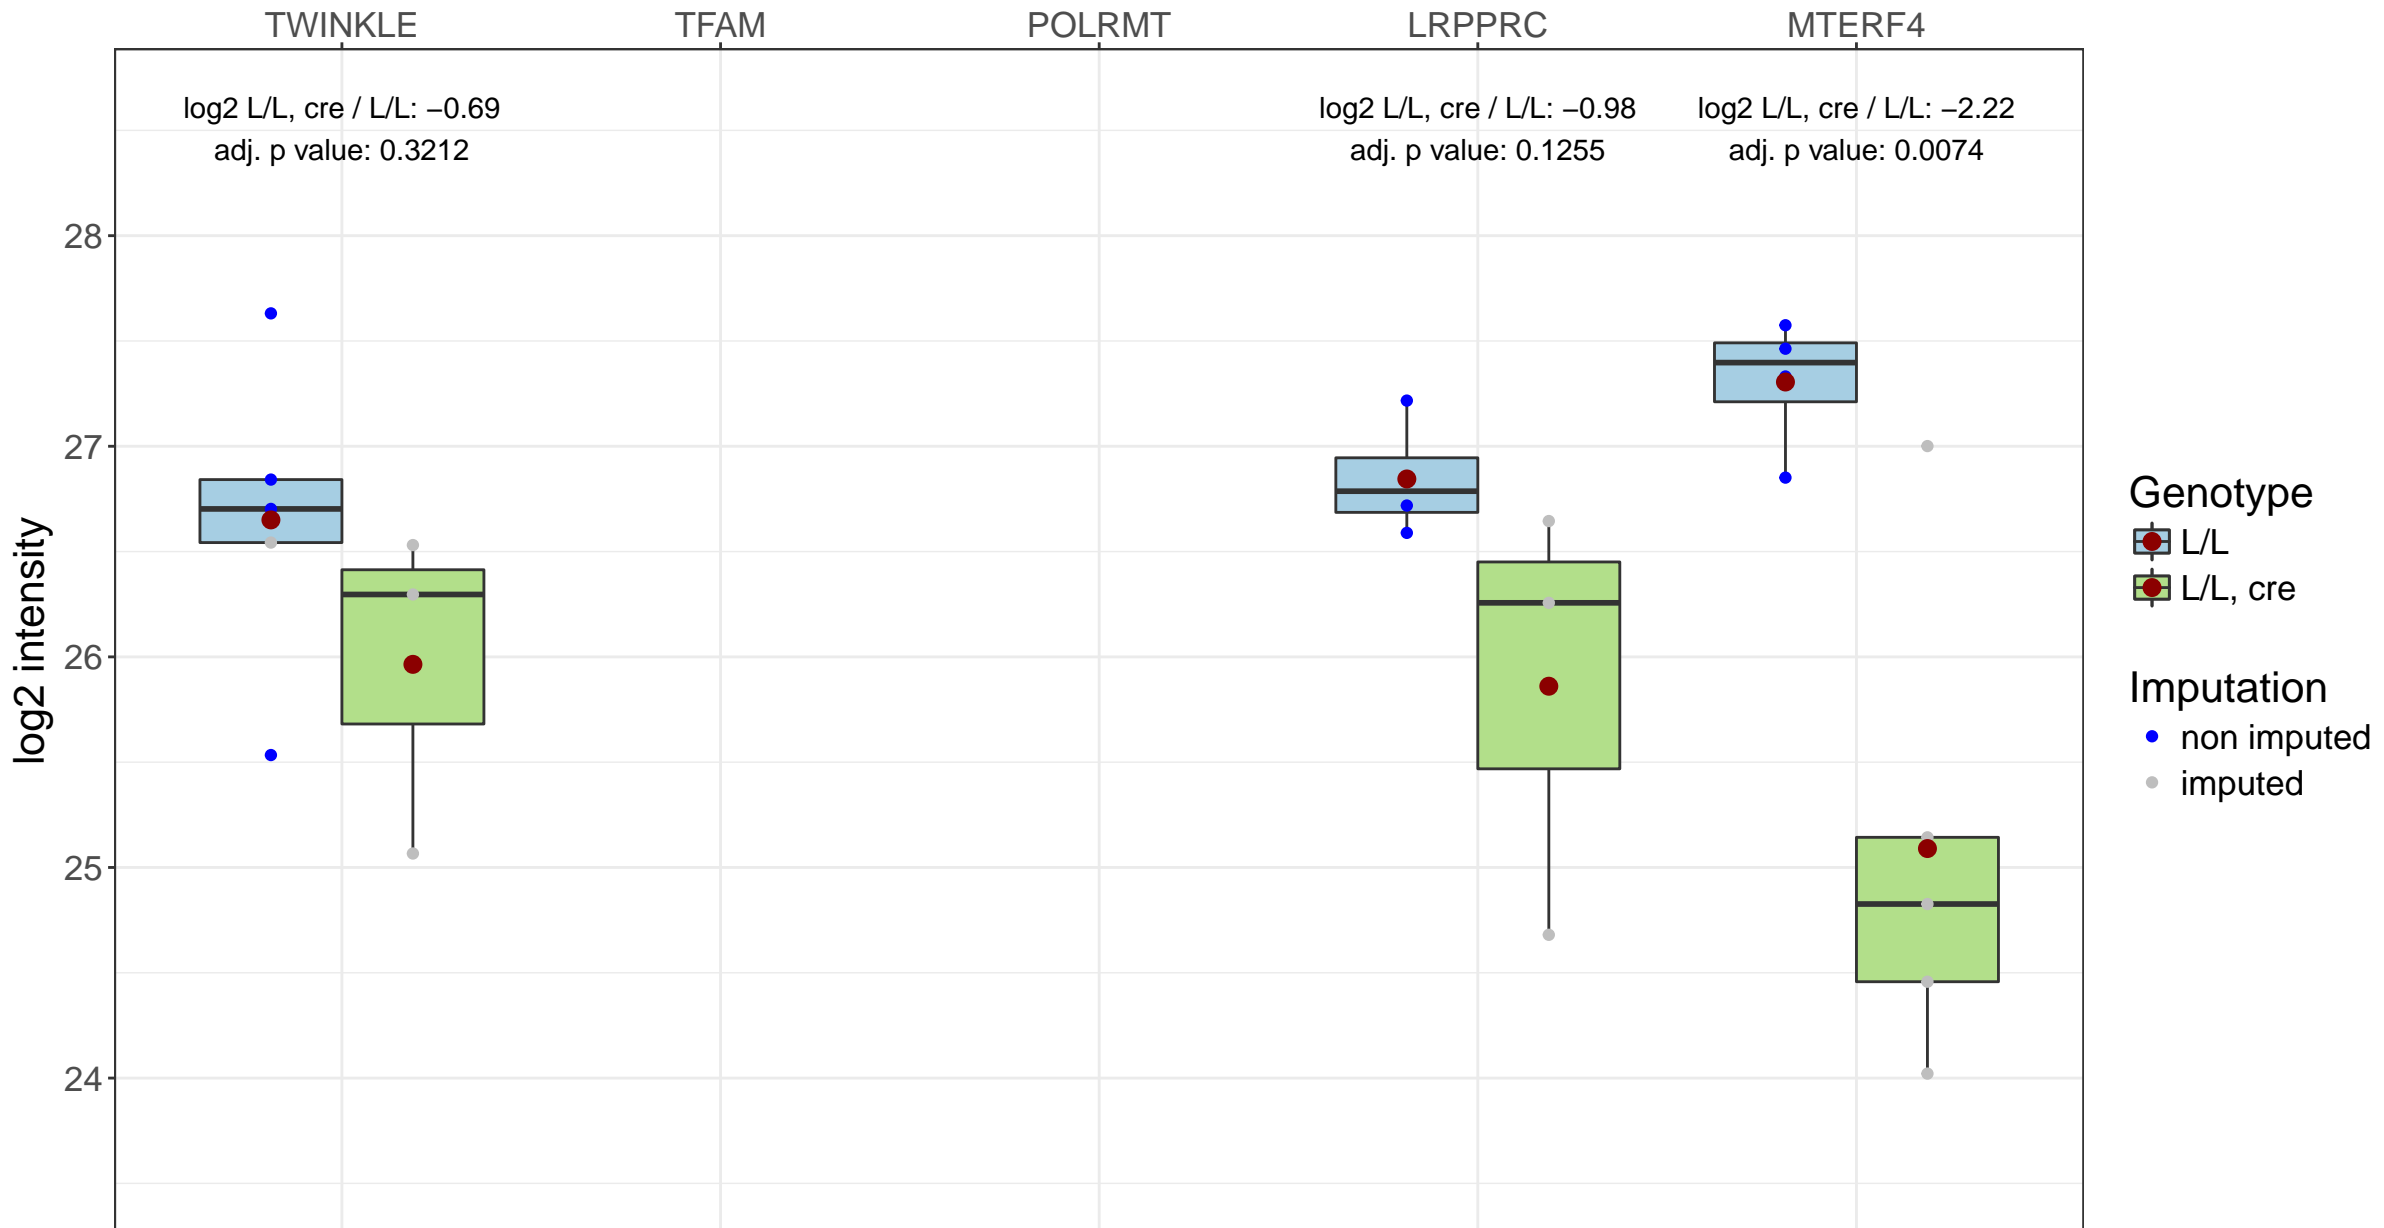

# GCDH / Q60759

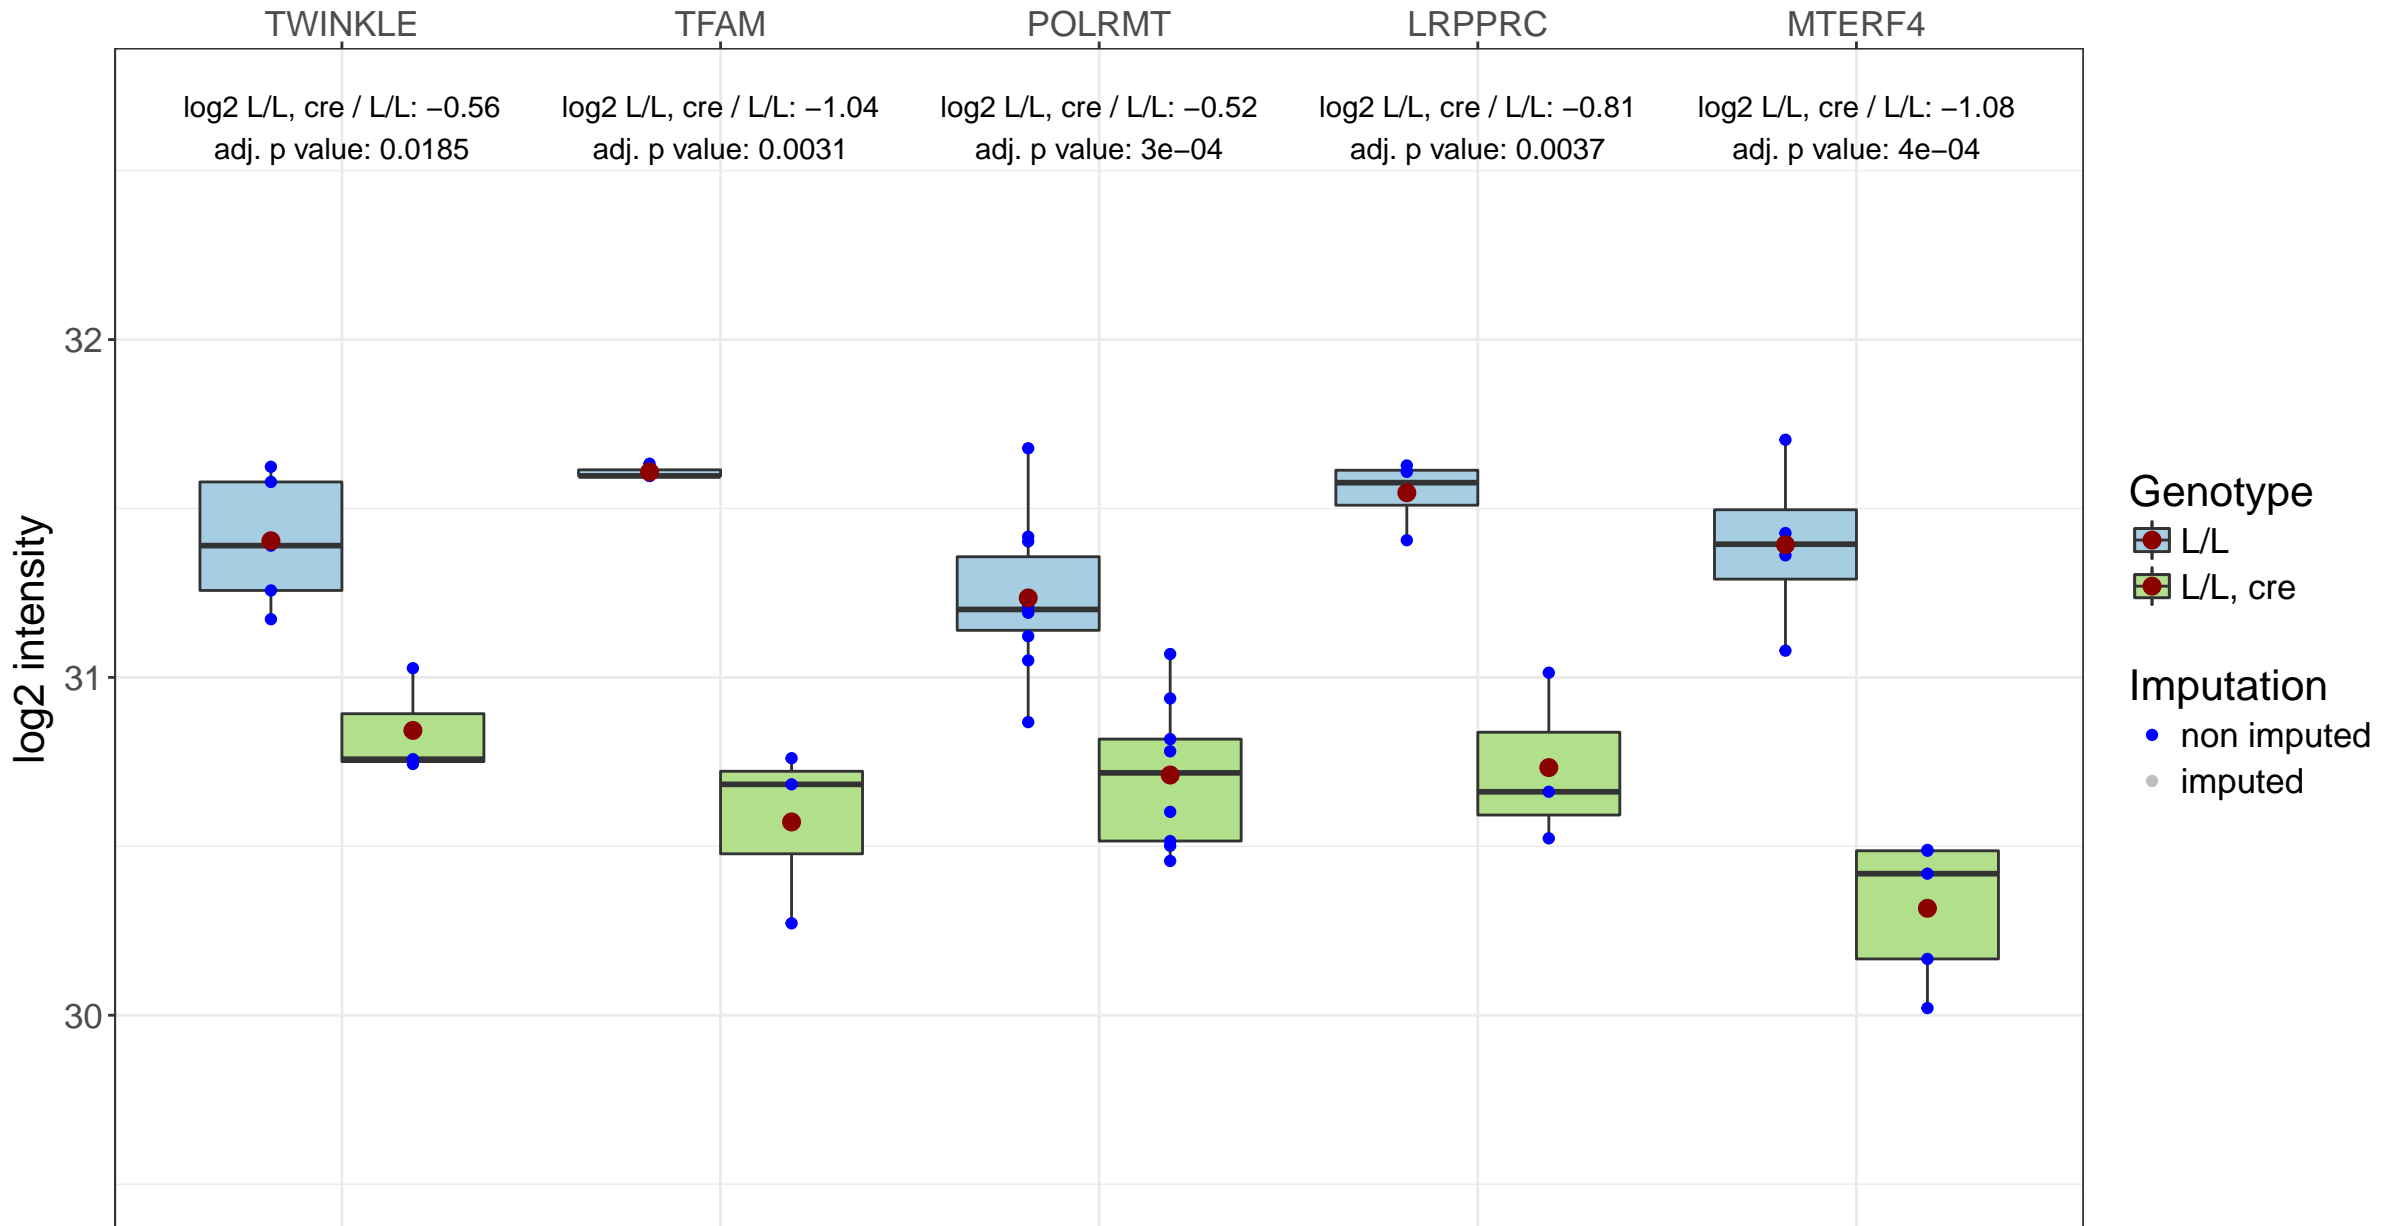

# GCSH / Q91WK5

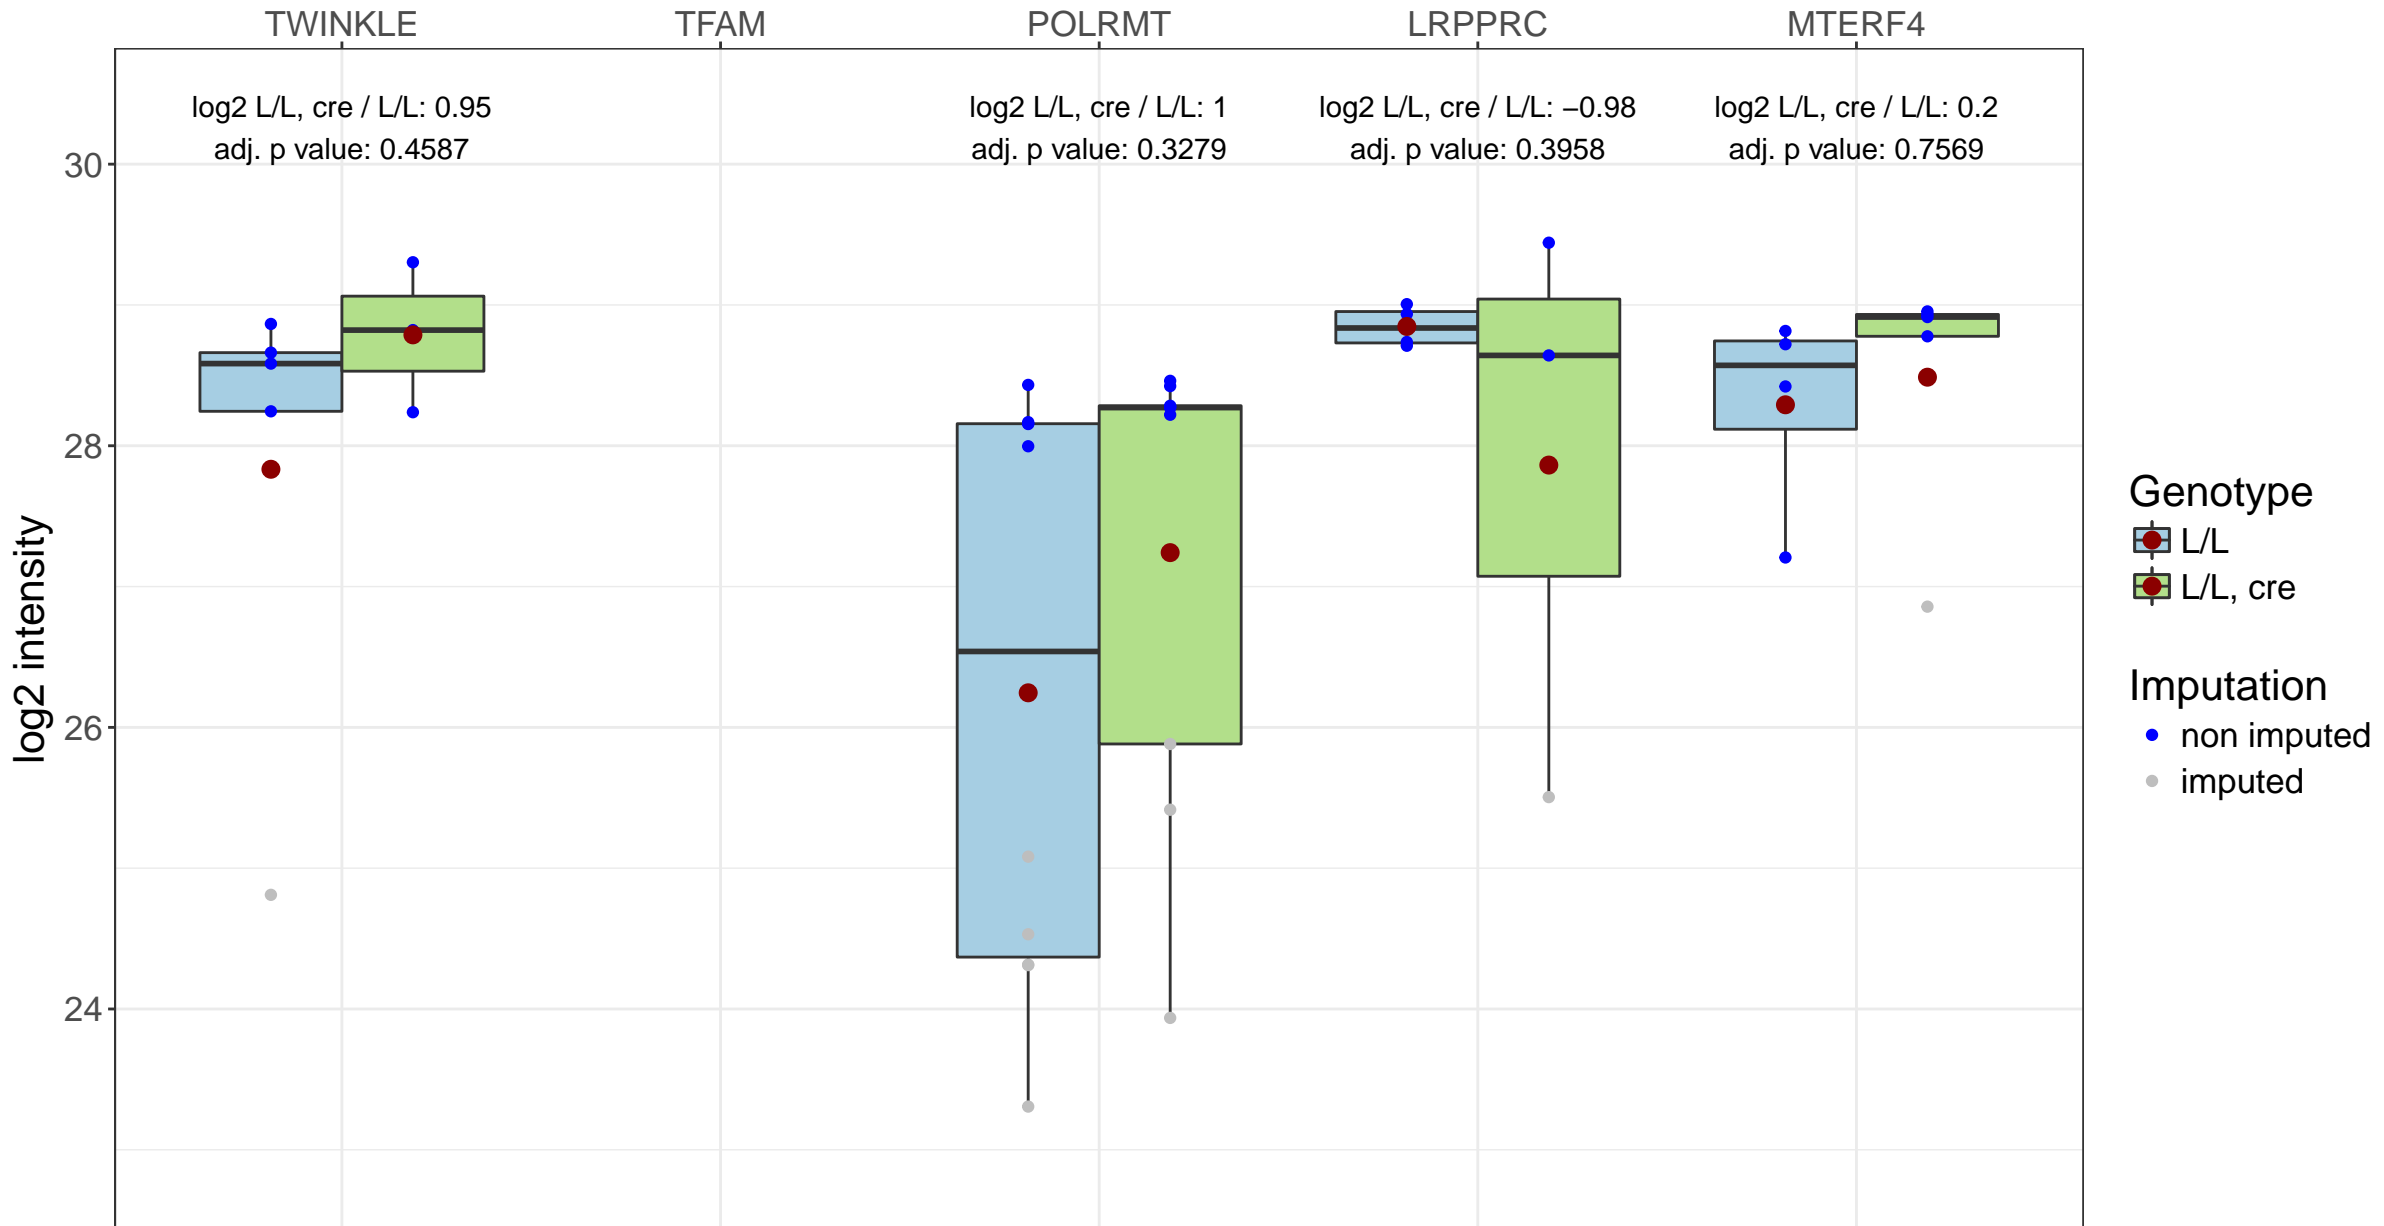

# GFER / P56213

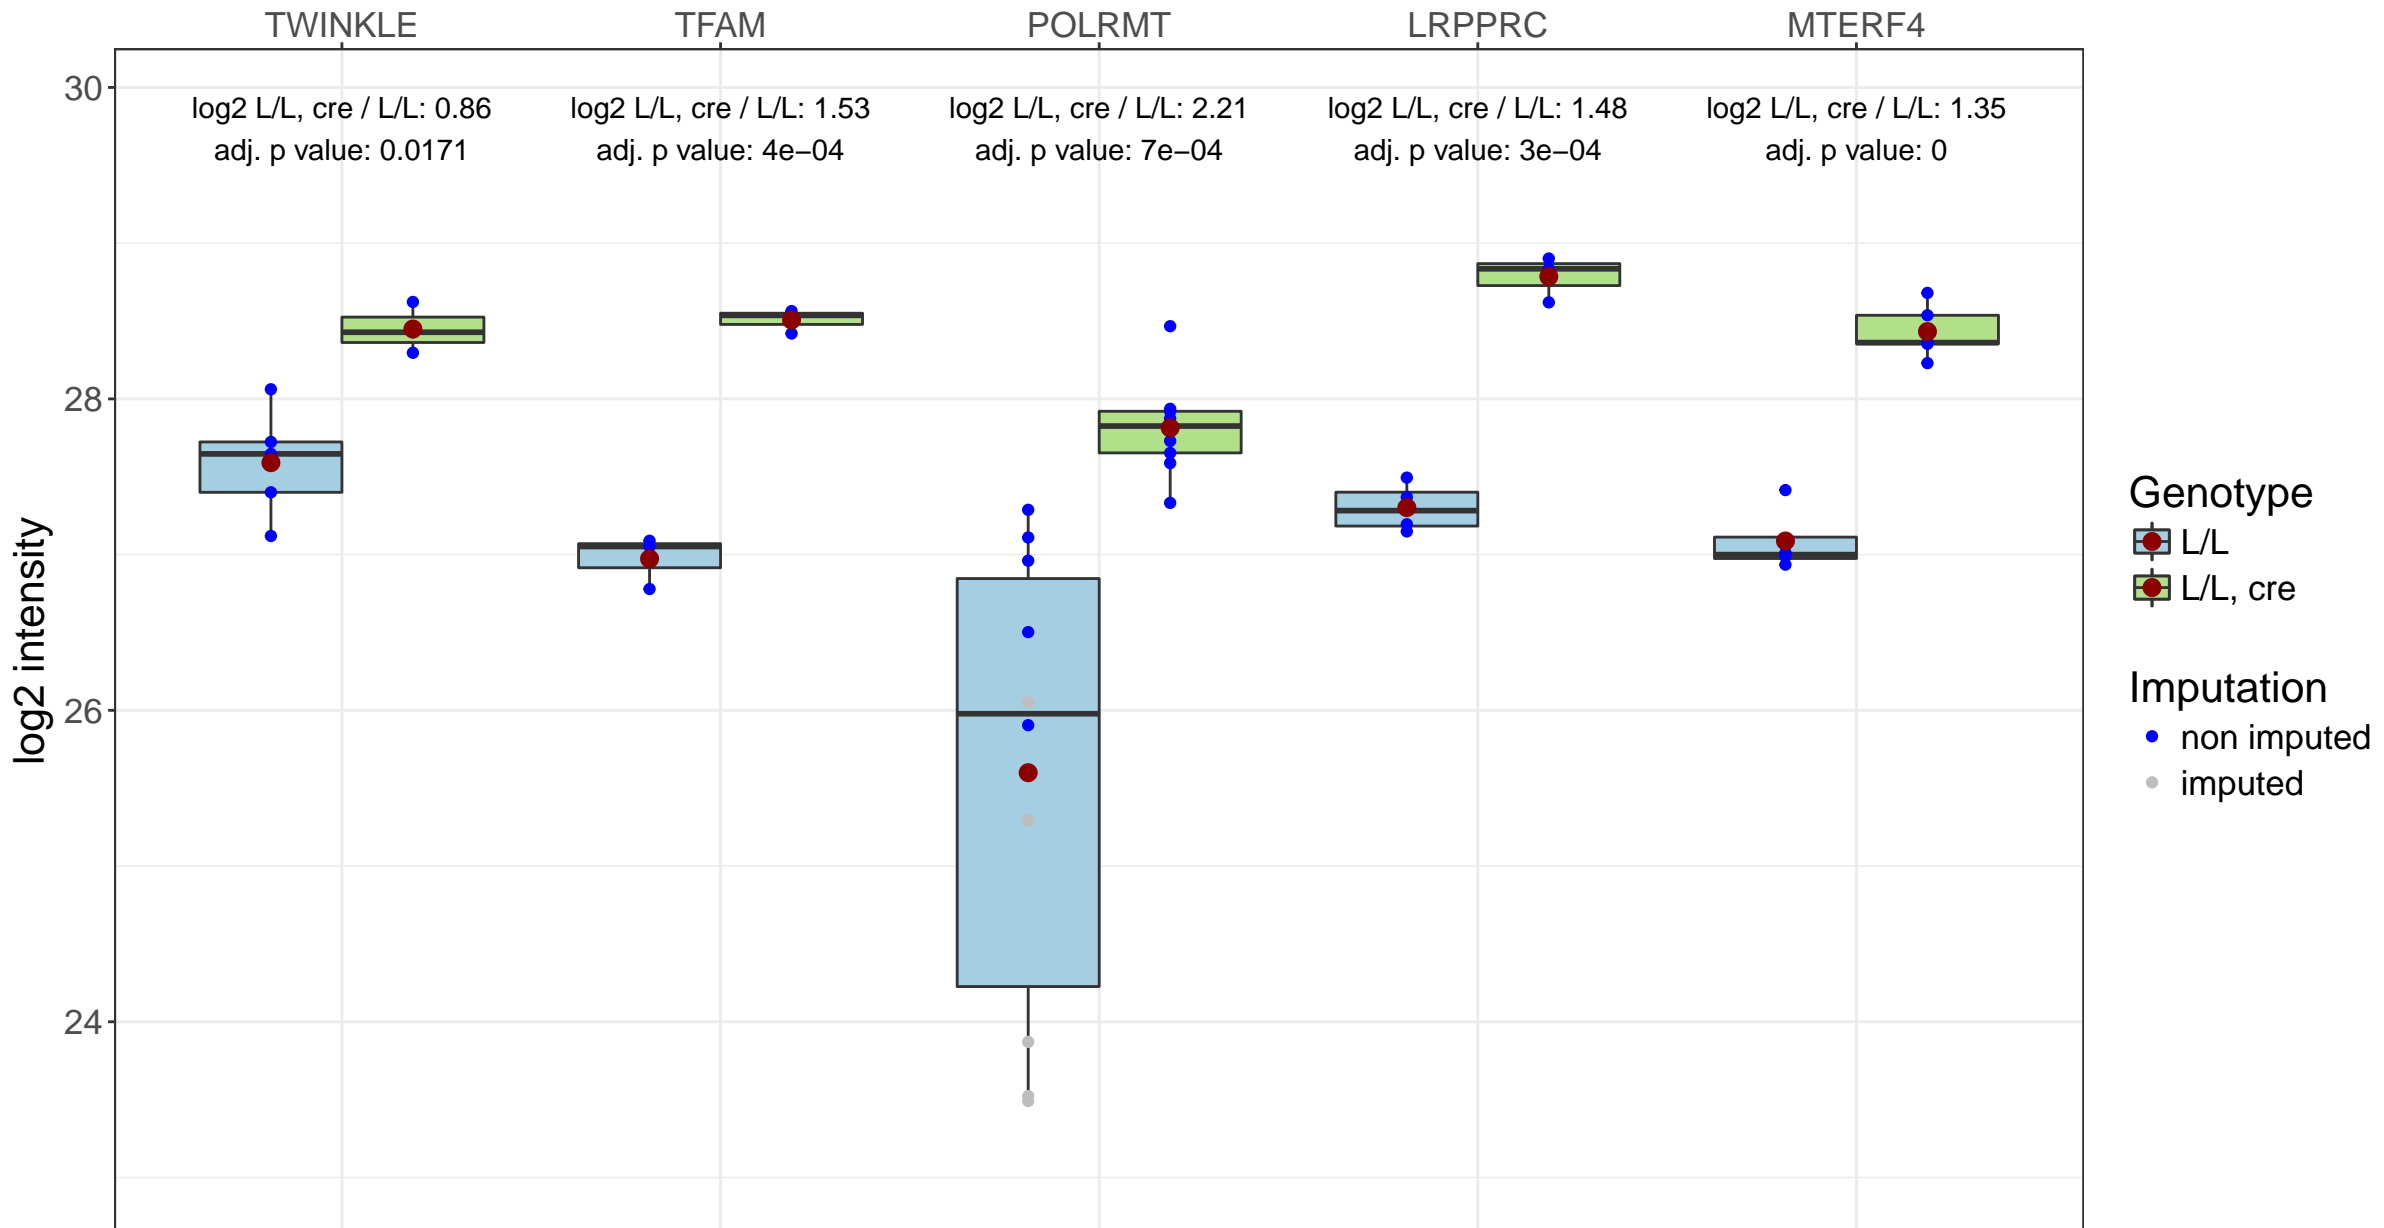

# GFM1 / Q8K0D5

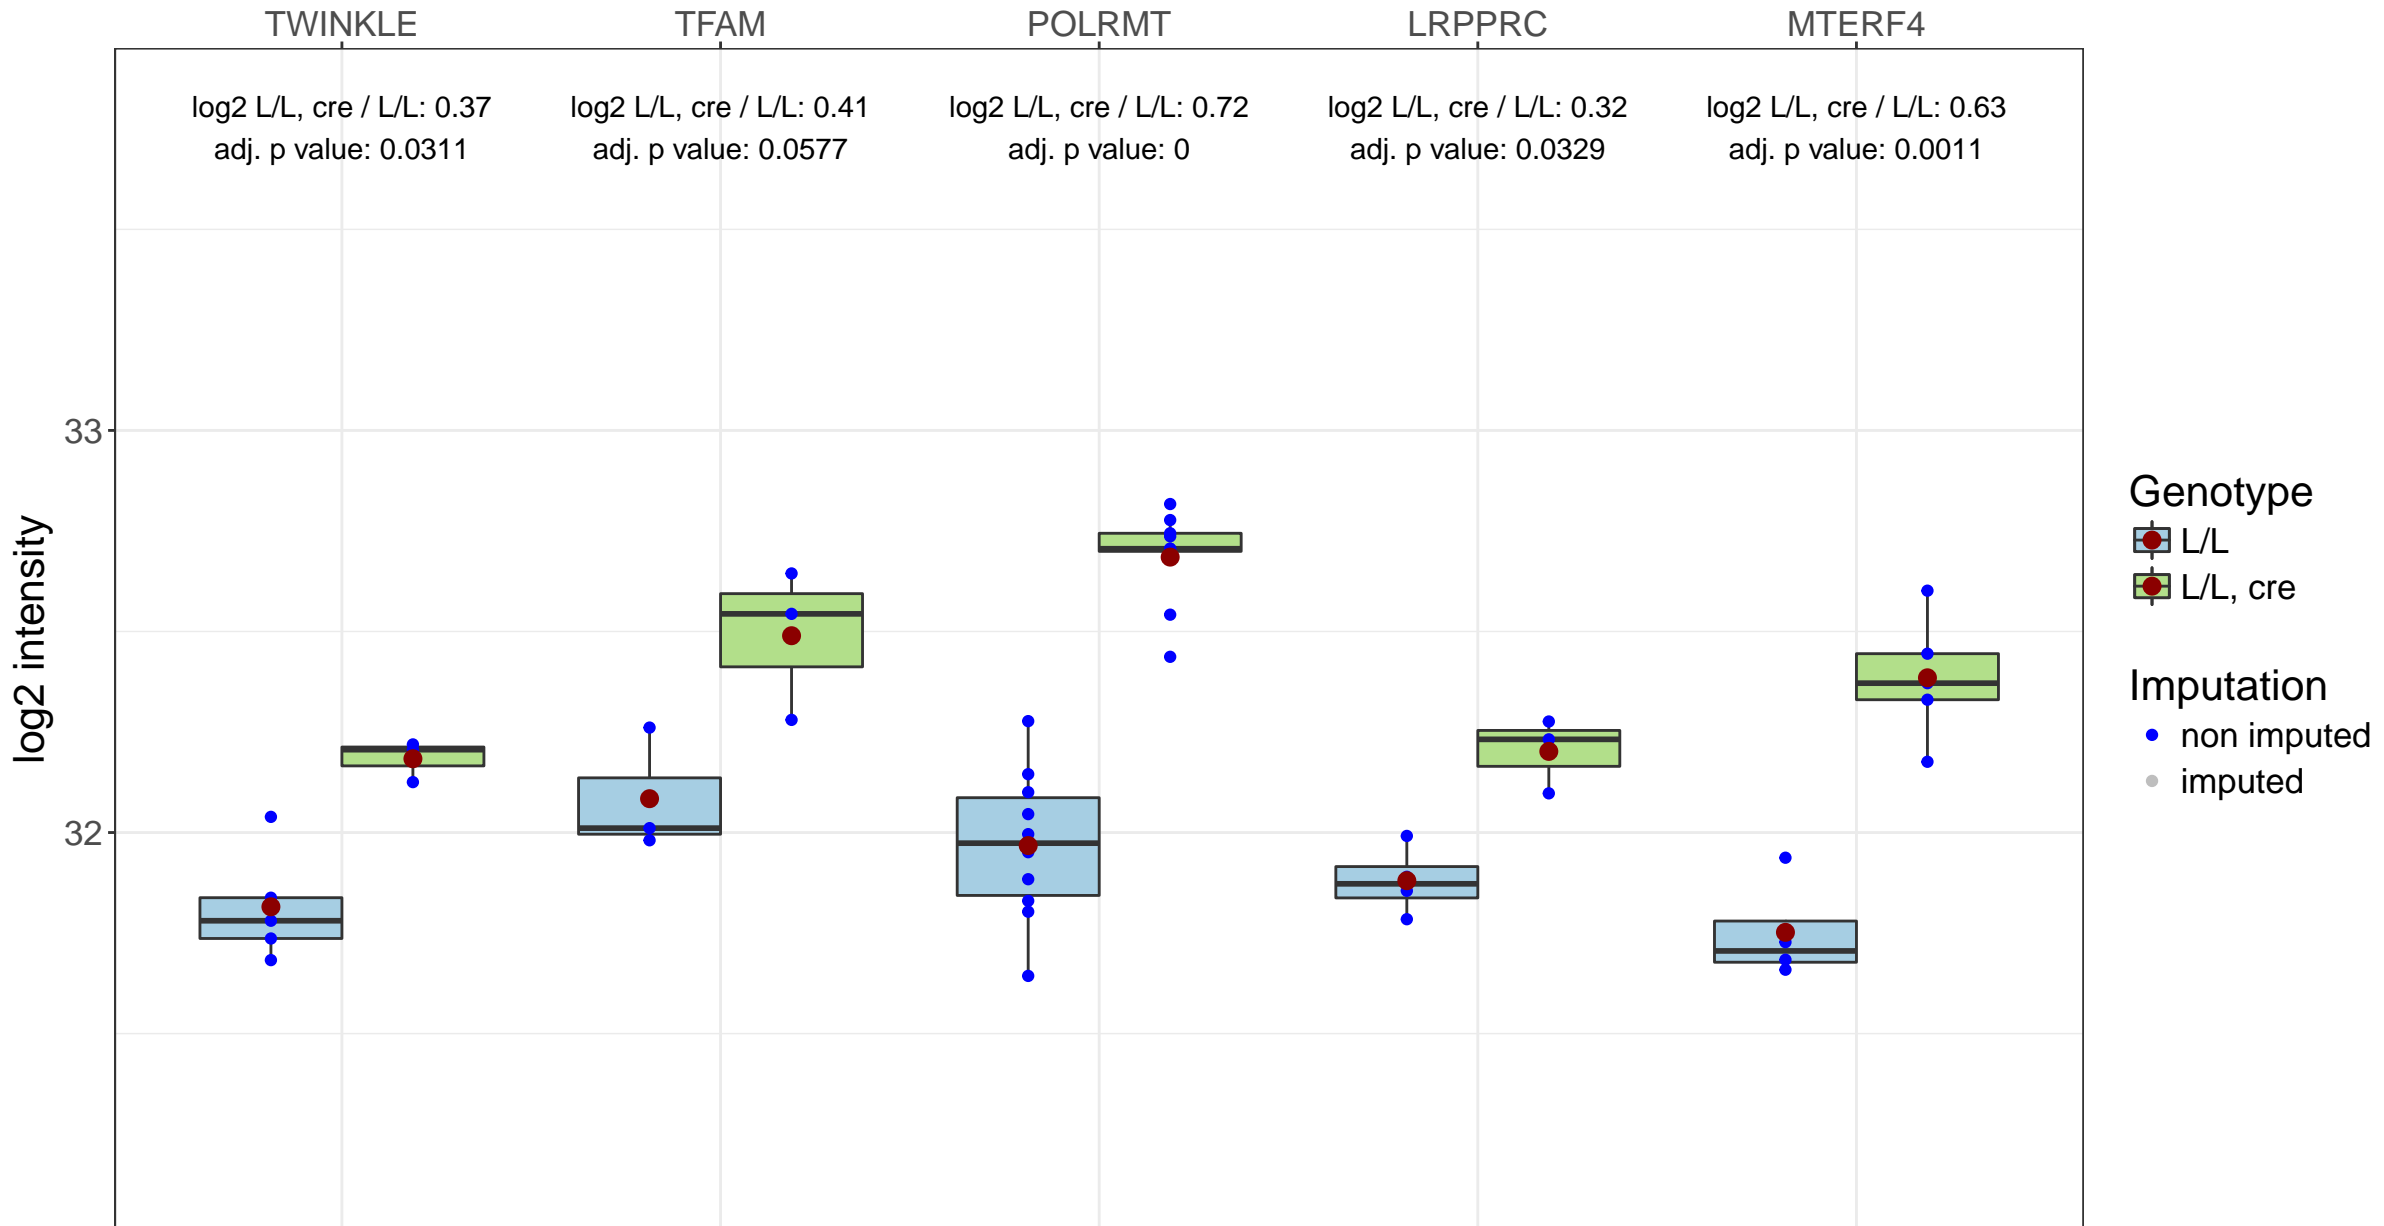

# GFM2 / Q8R2Q4-2

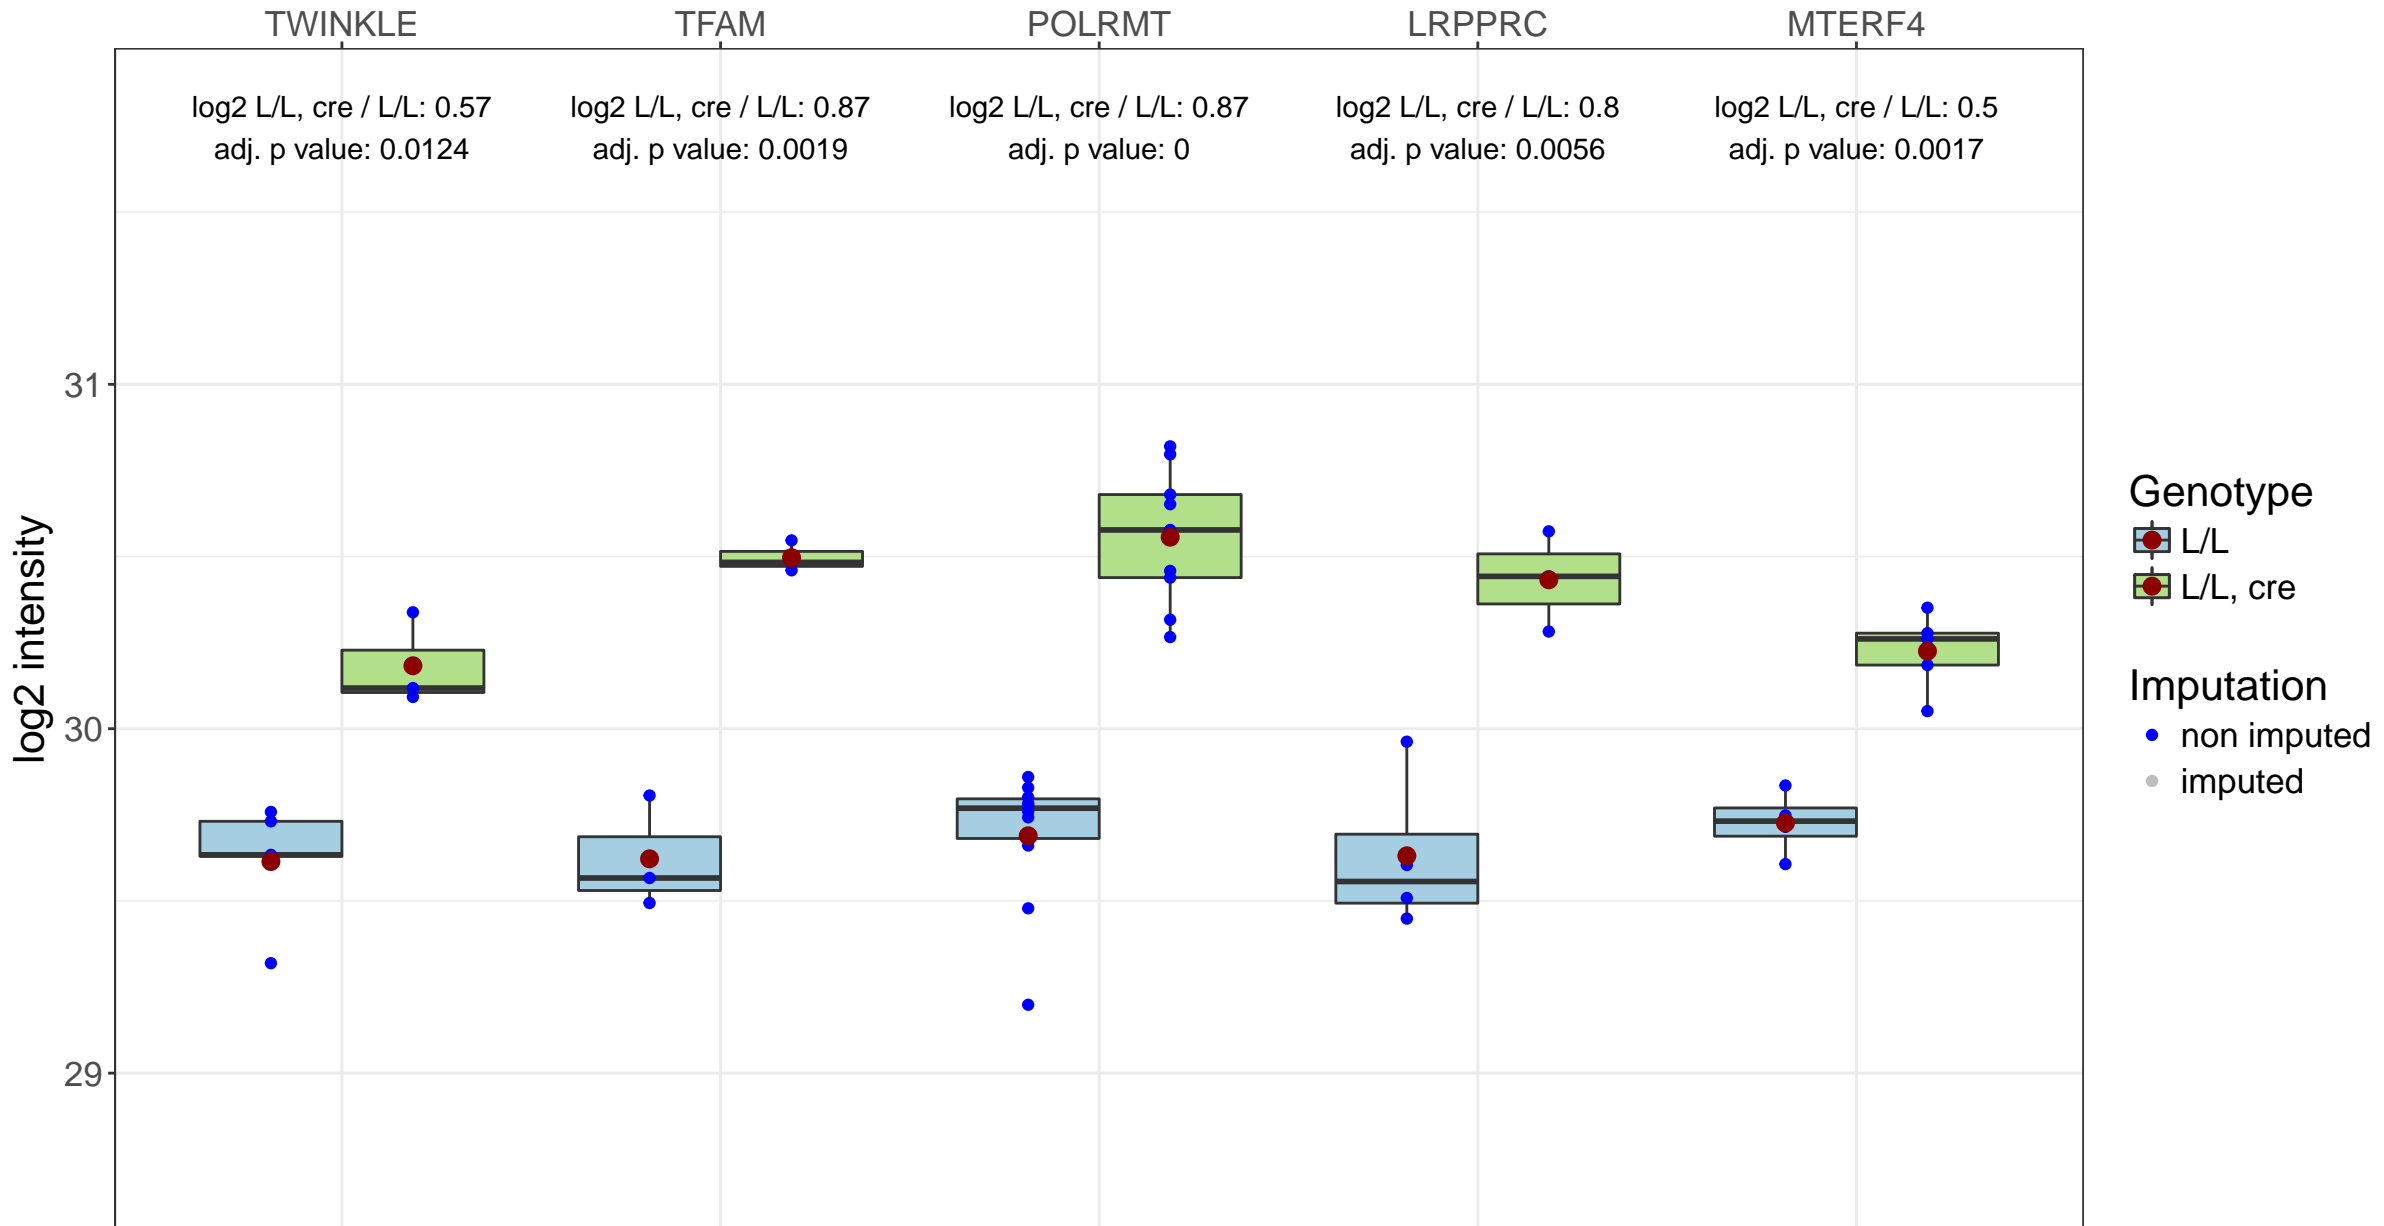



# GHITM / Q91VC9

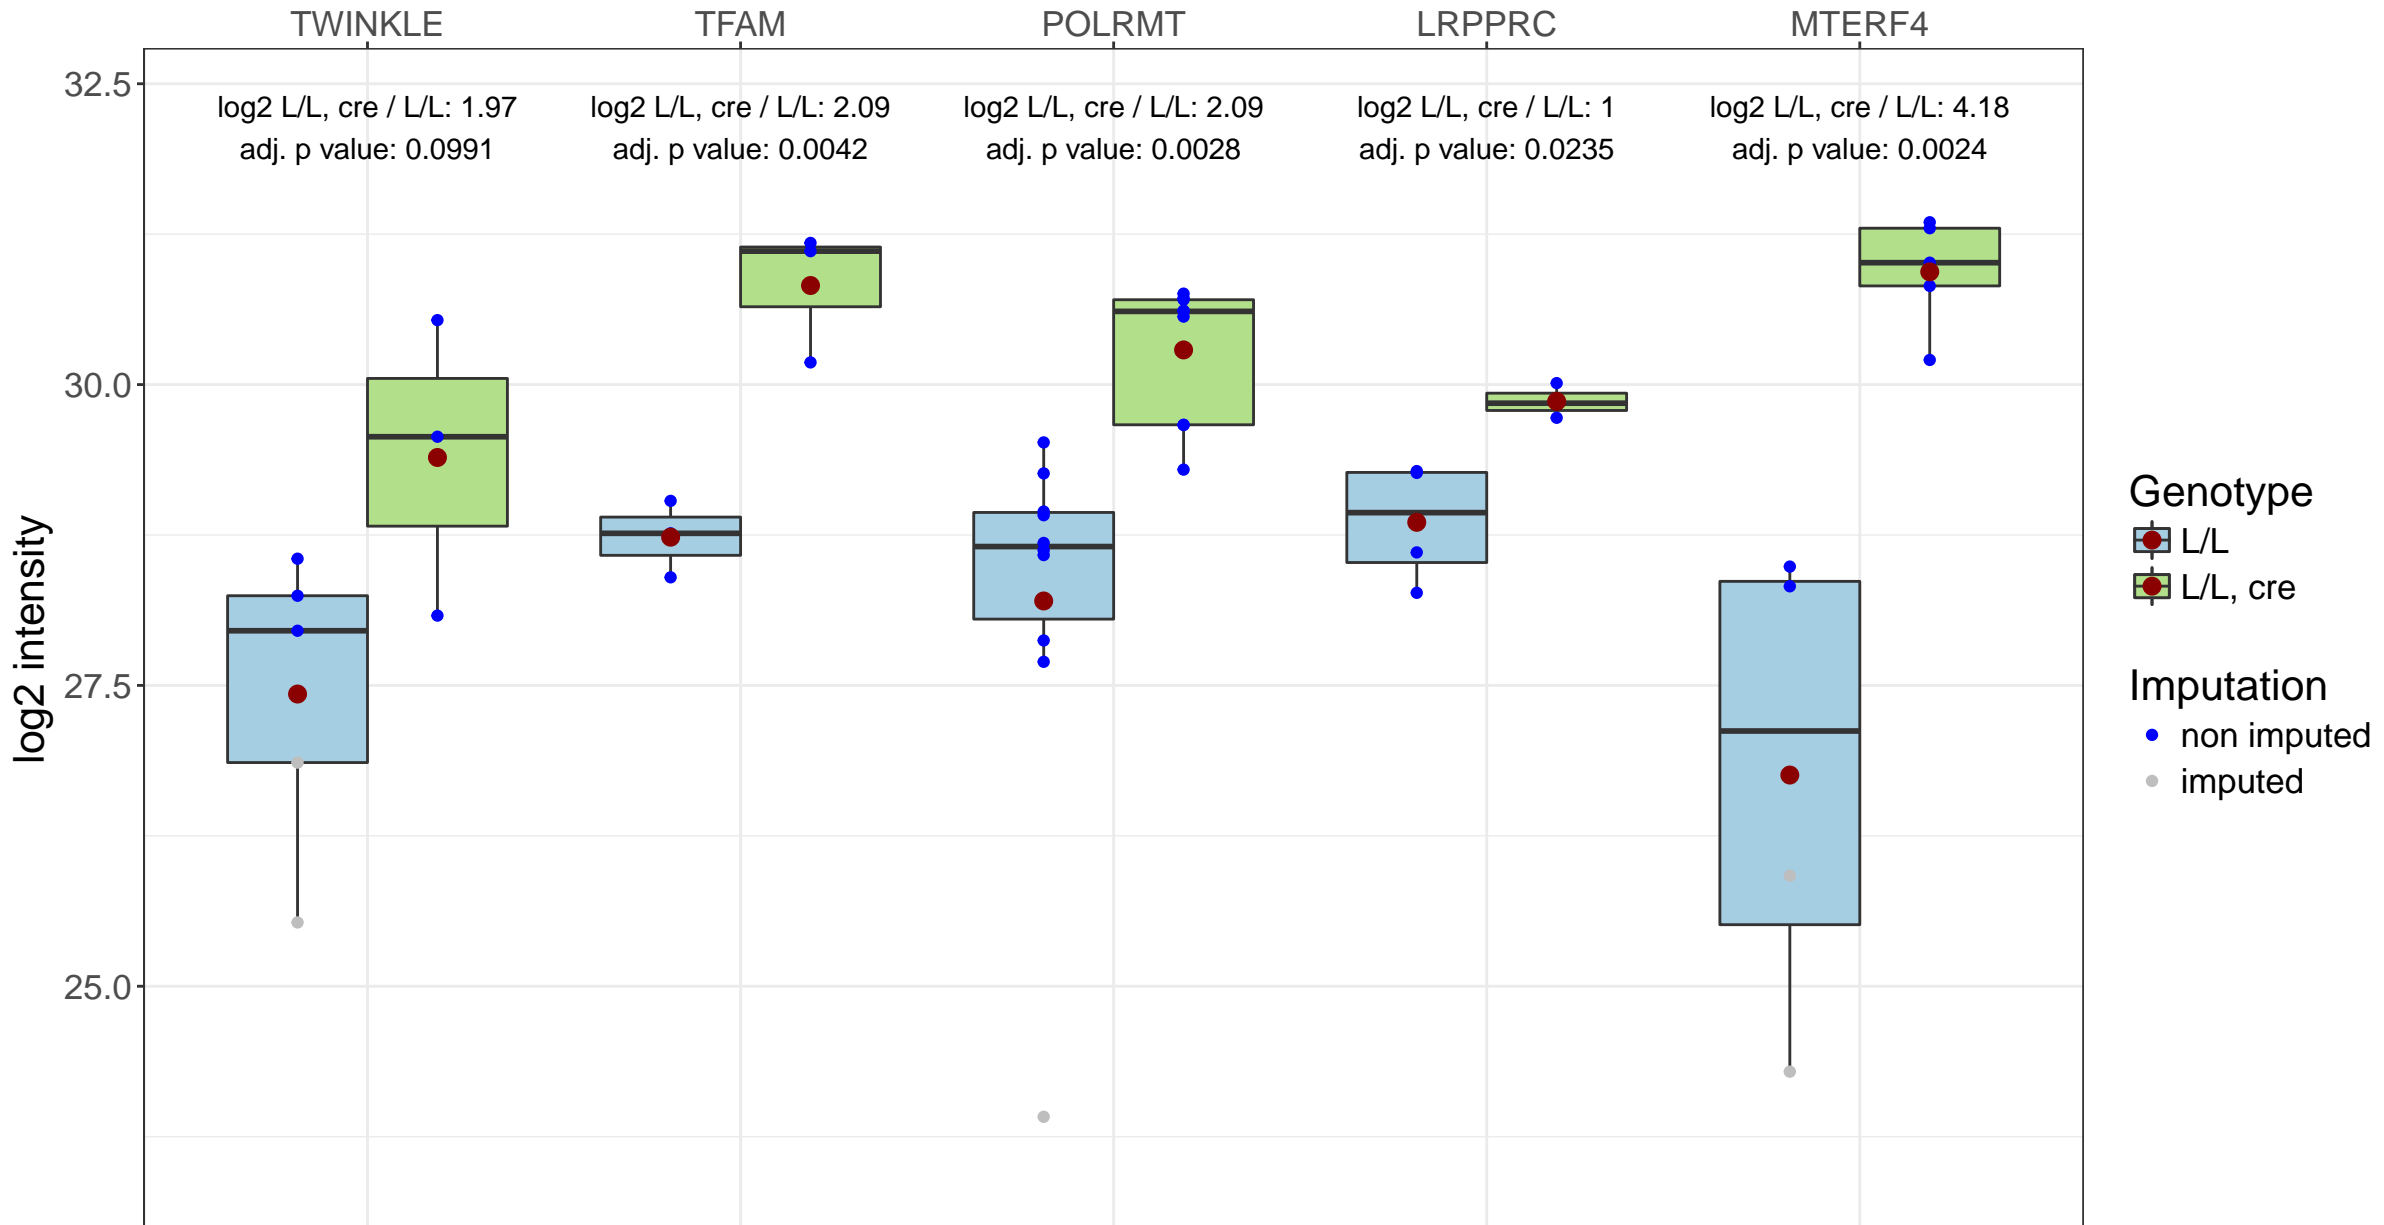

# GJA1 / P23242

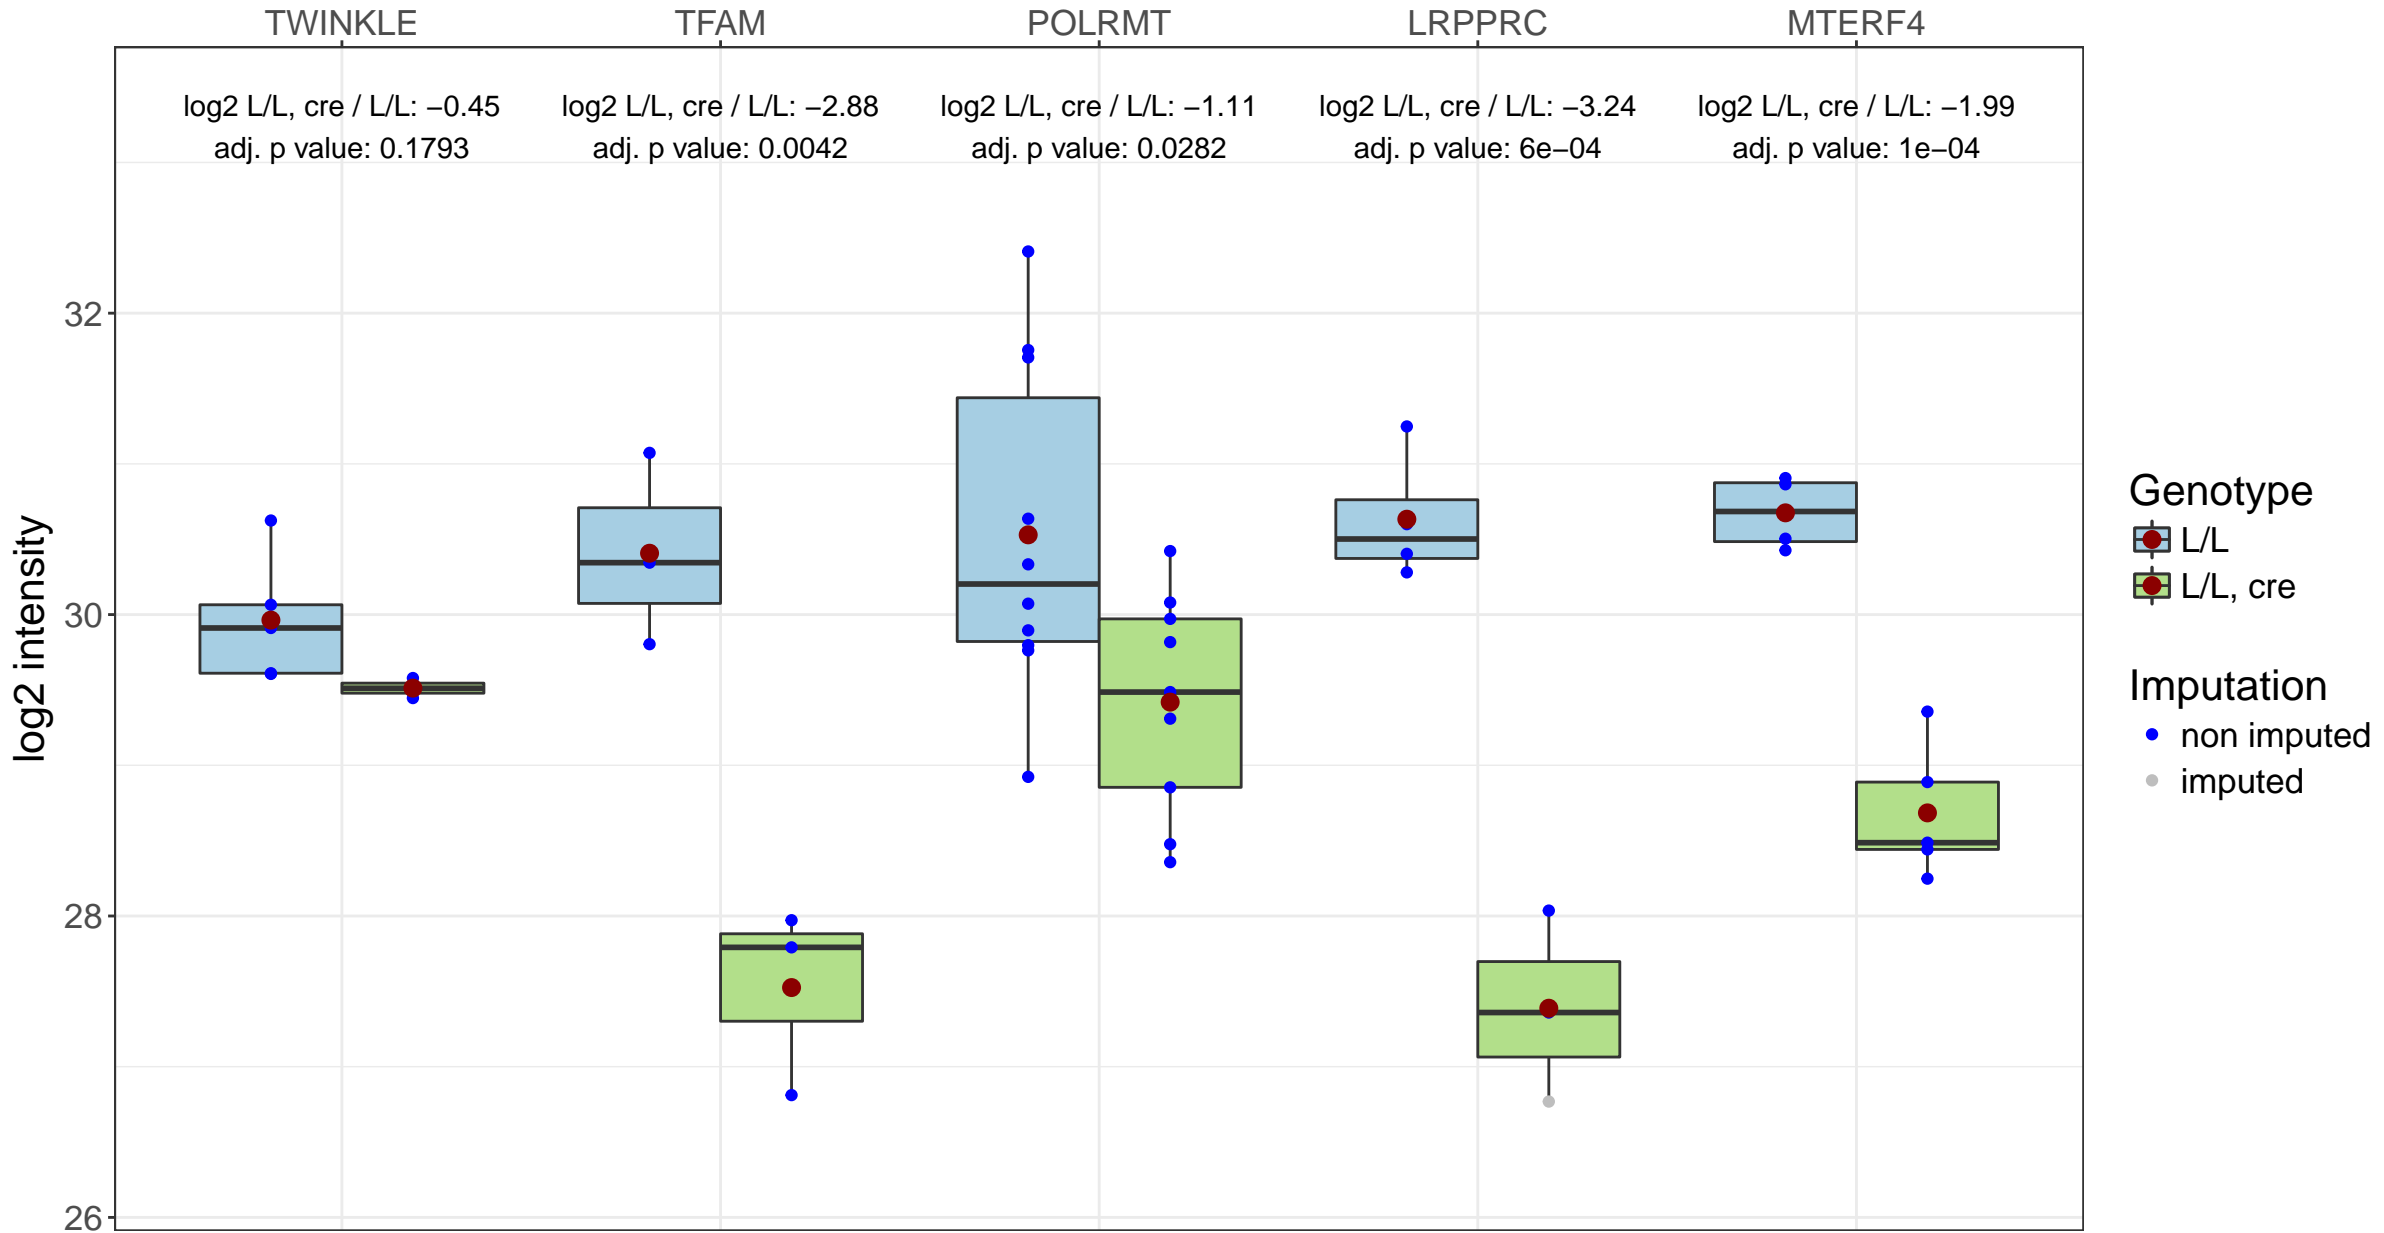

# GK / Q64516-1

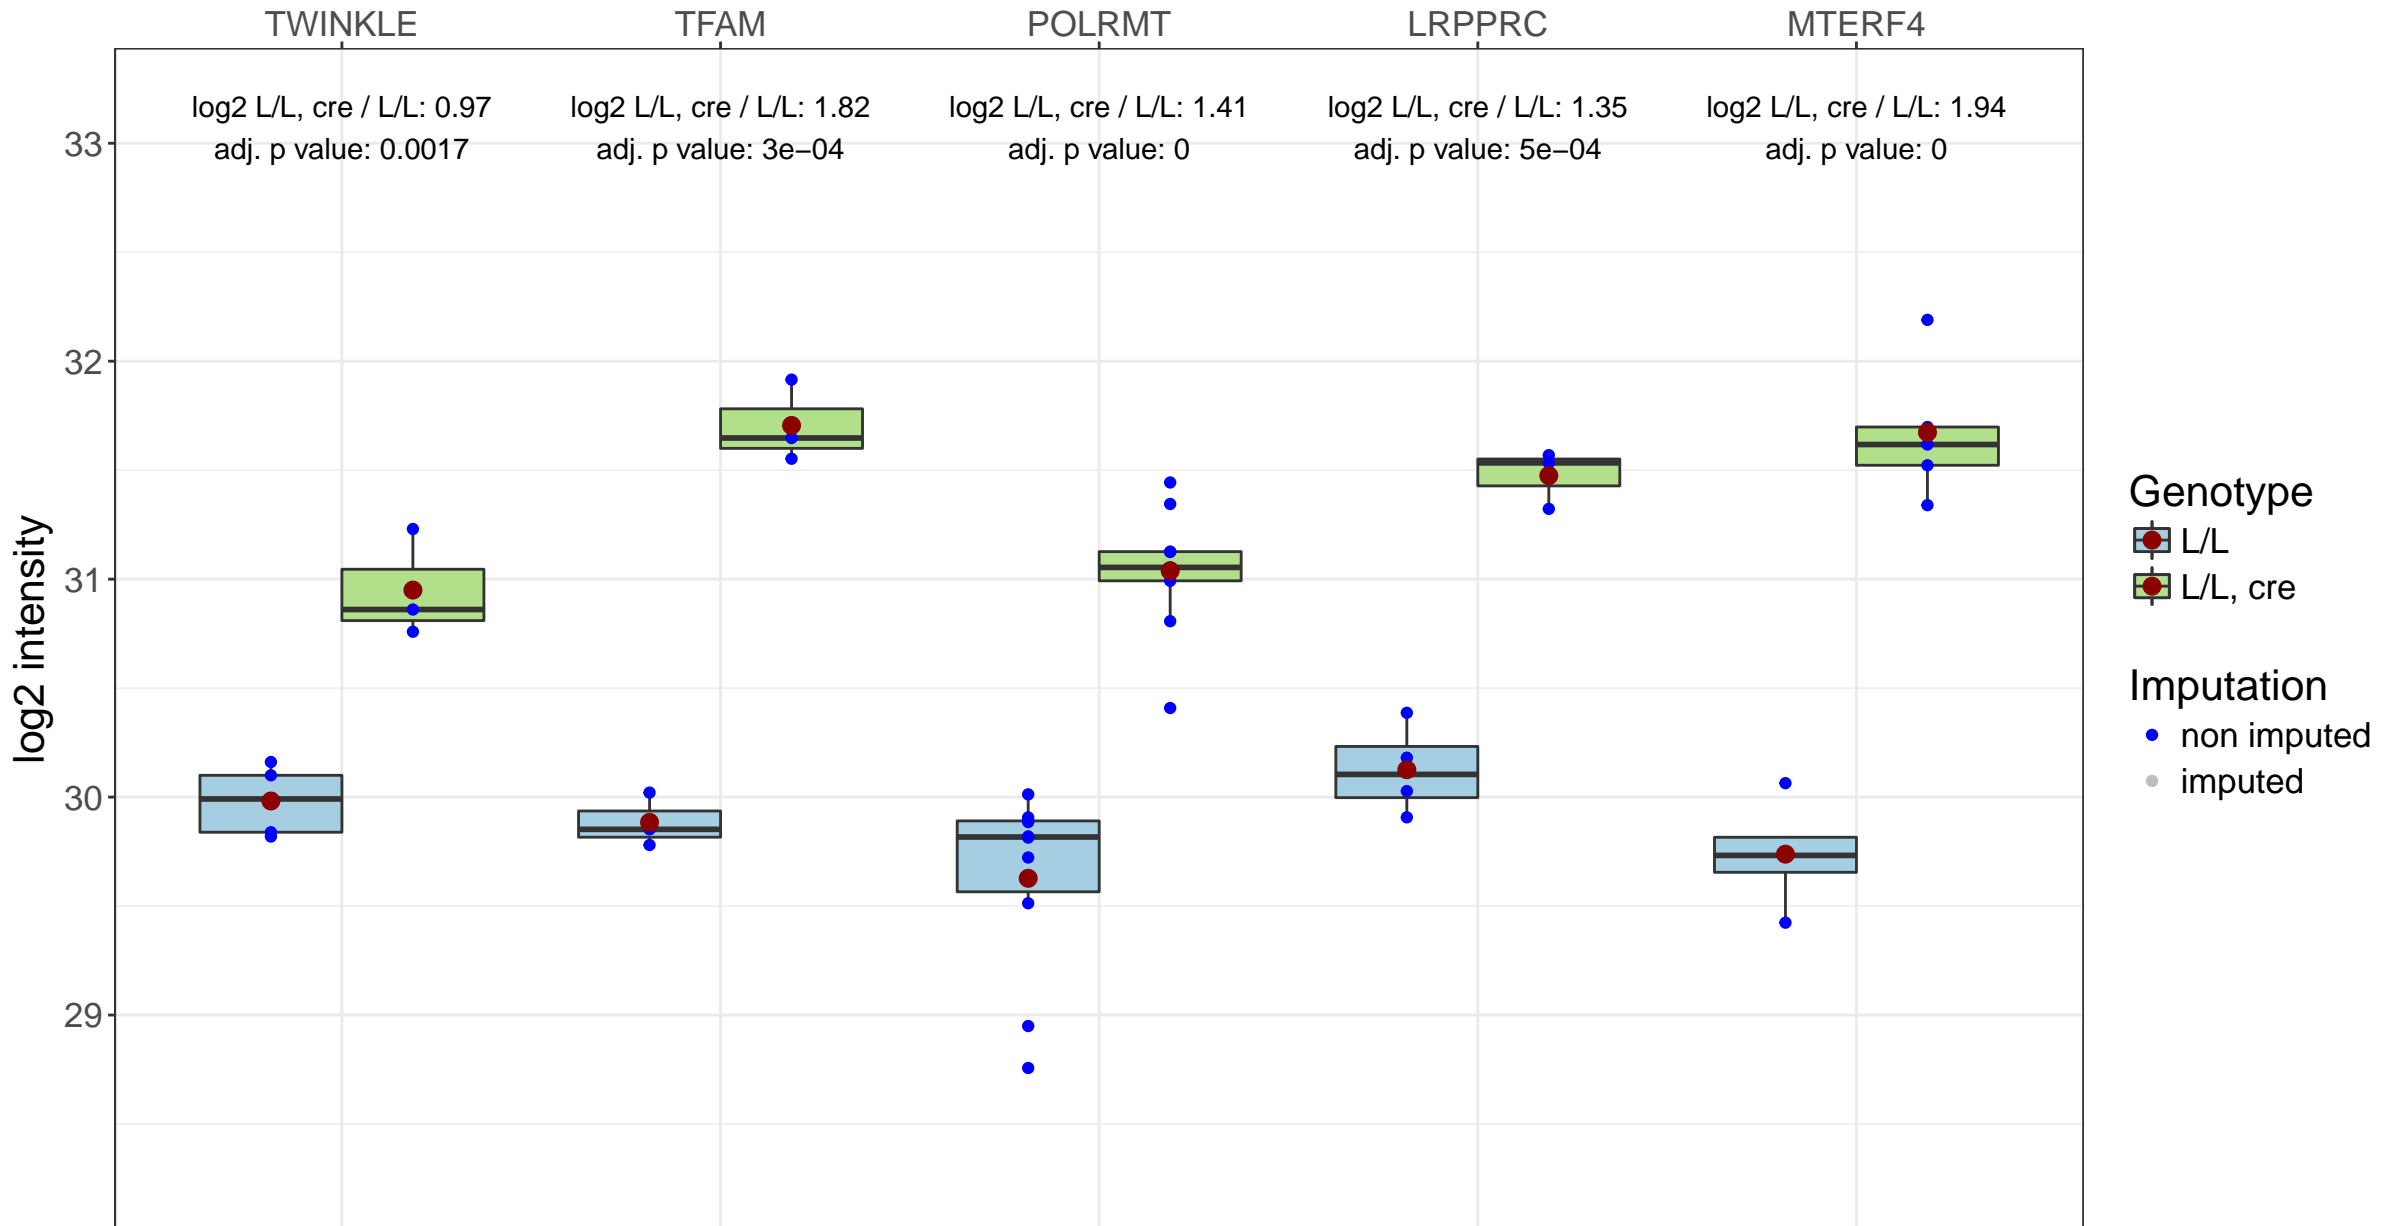

# GLG1 / F8WHM5

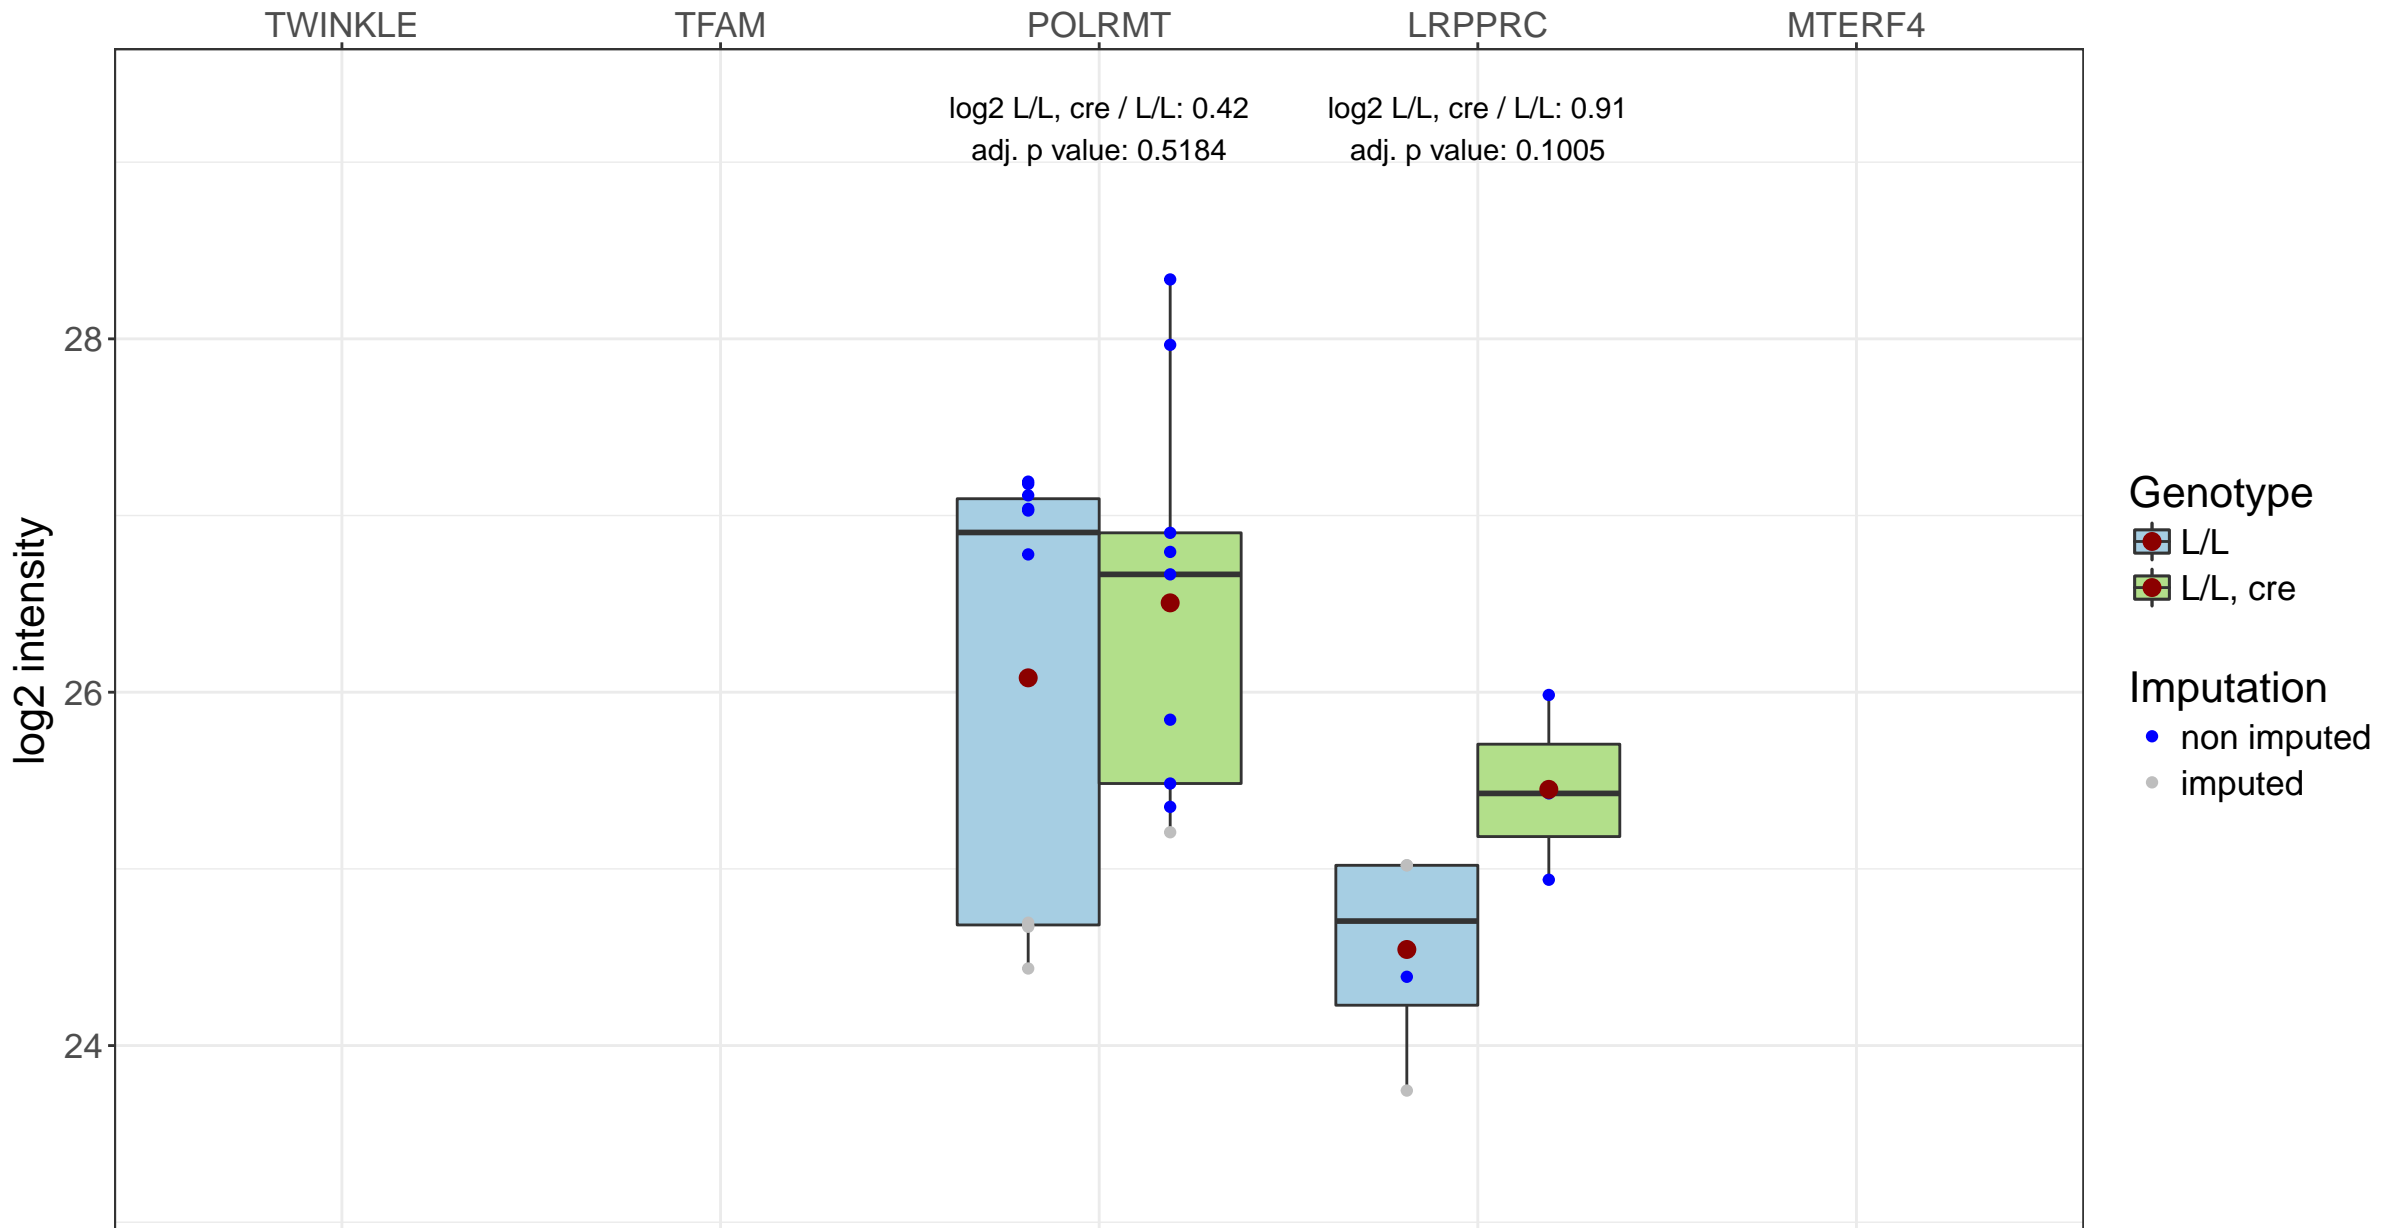

# GLOD4 / Q9CPV4

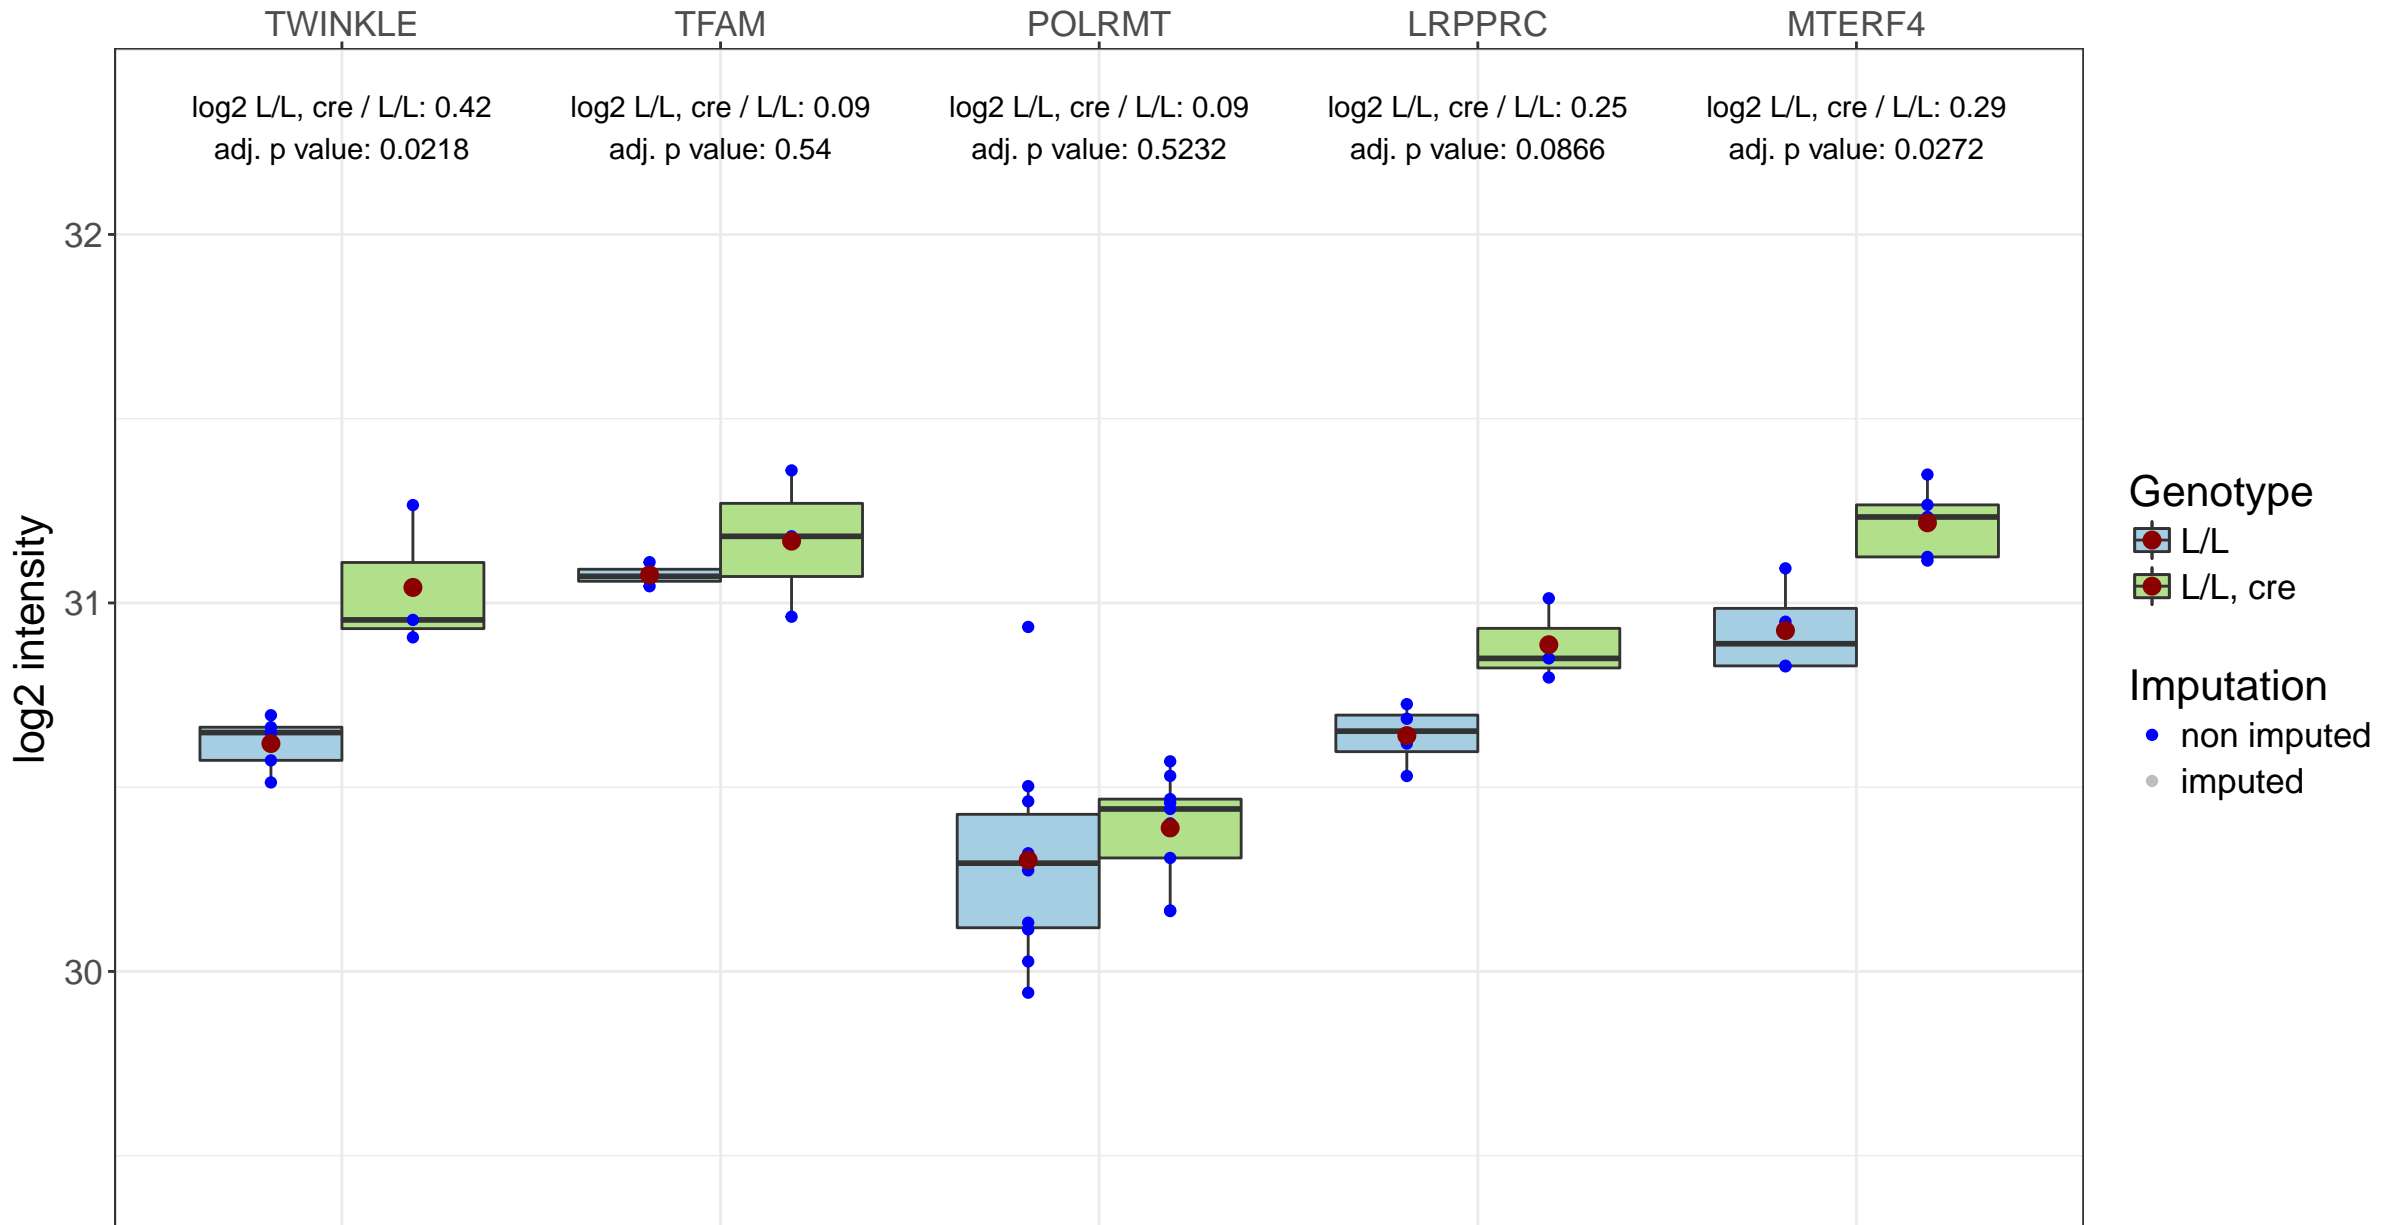

# GLRX2 / Q923X4-2

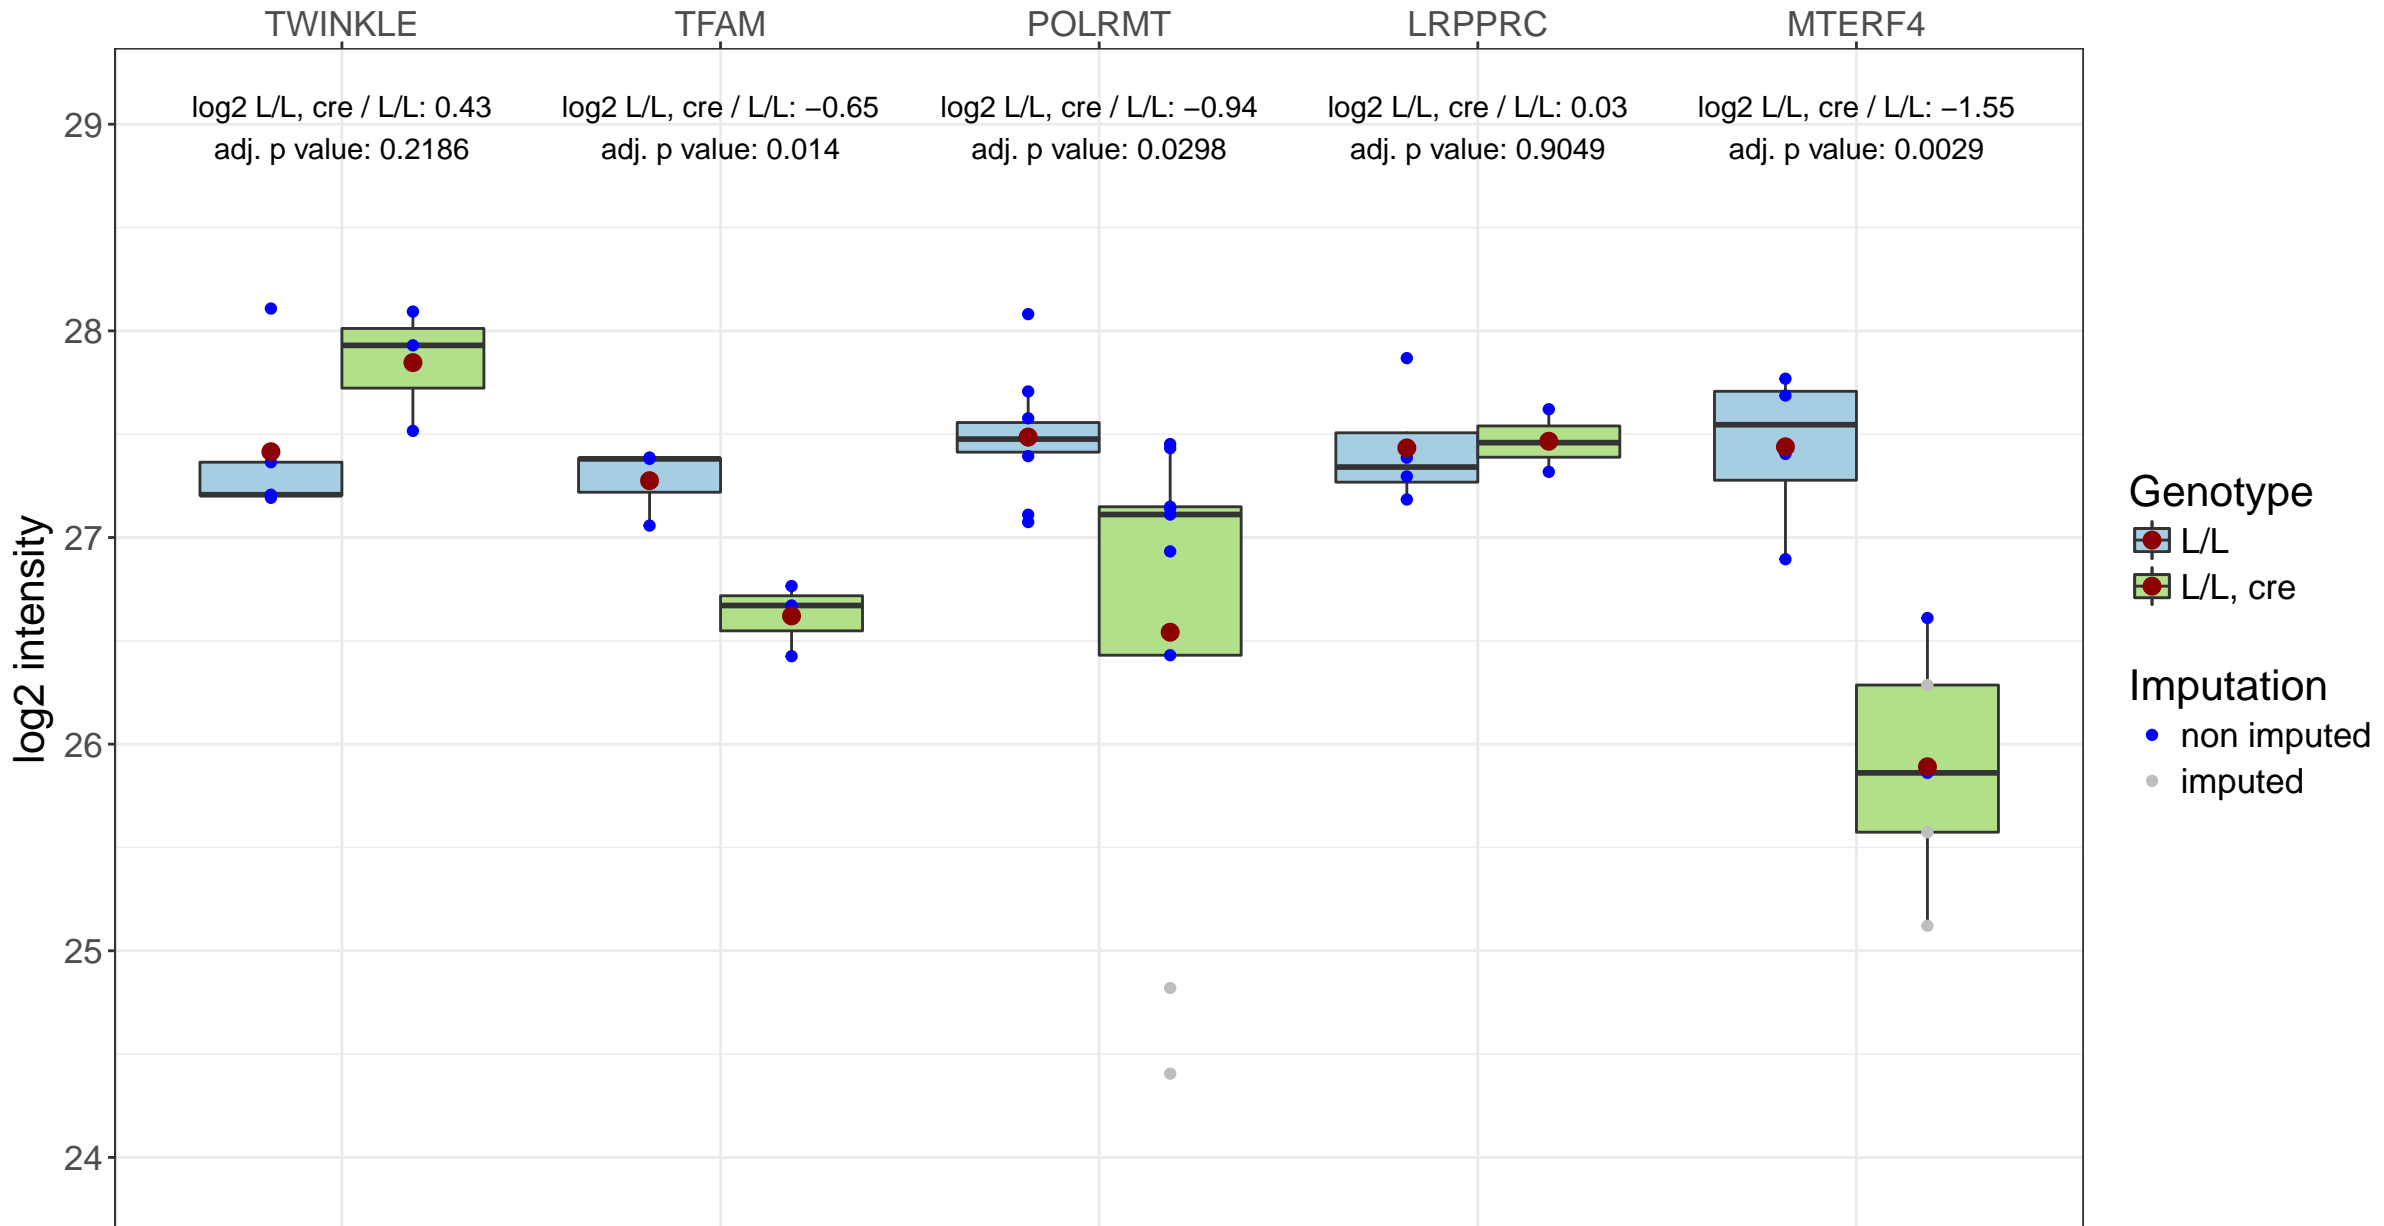

# GLRX5 / Q80Y14

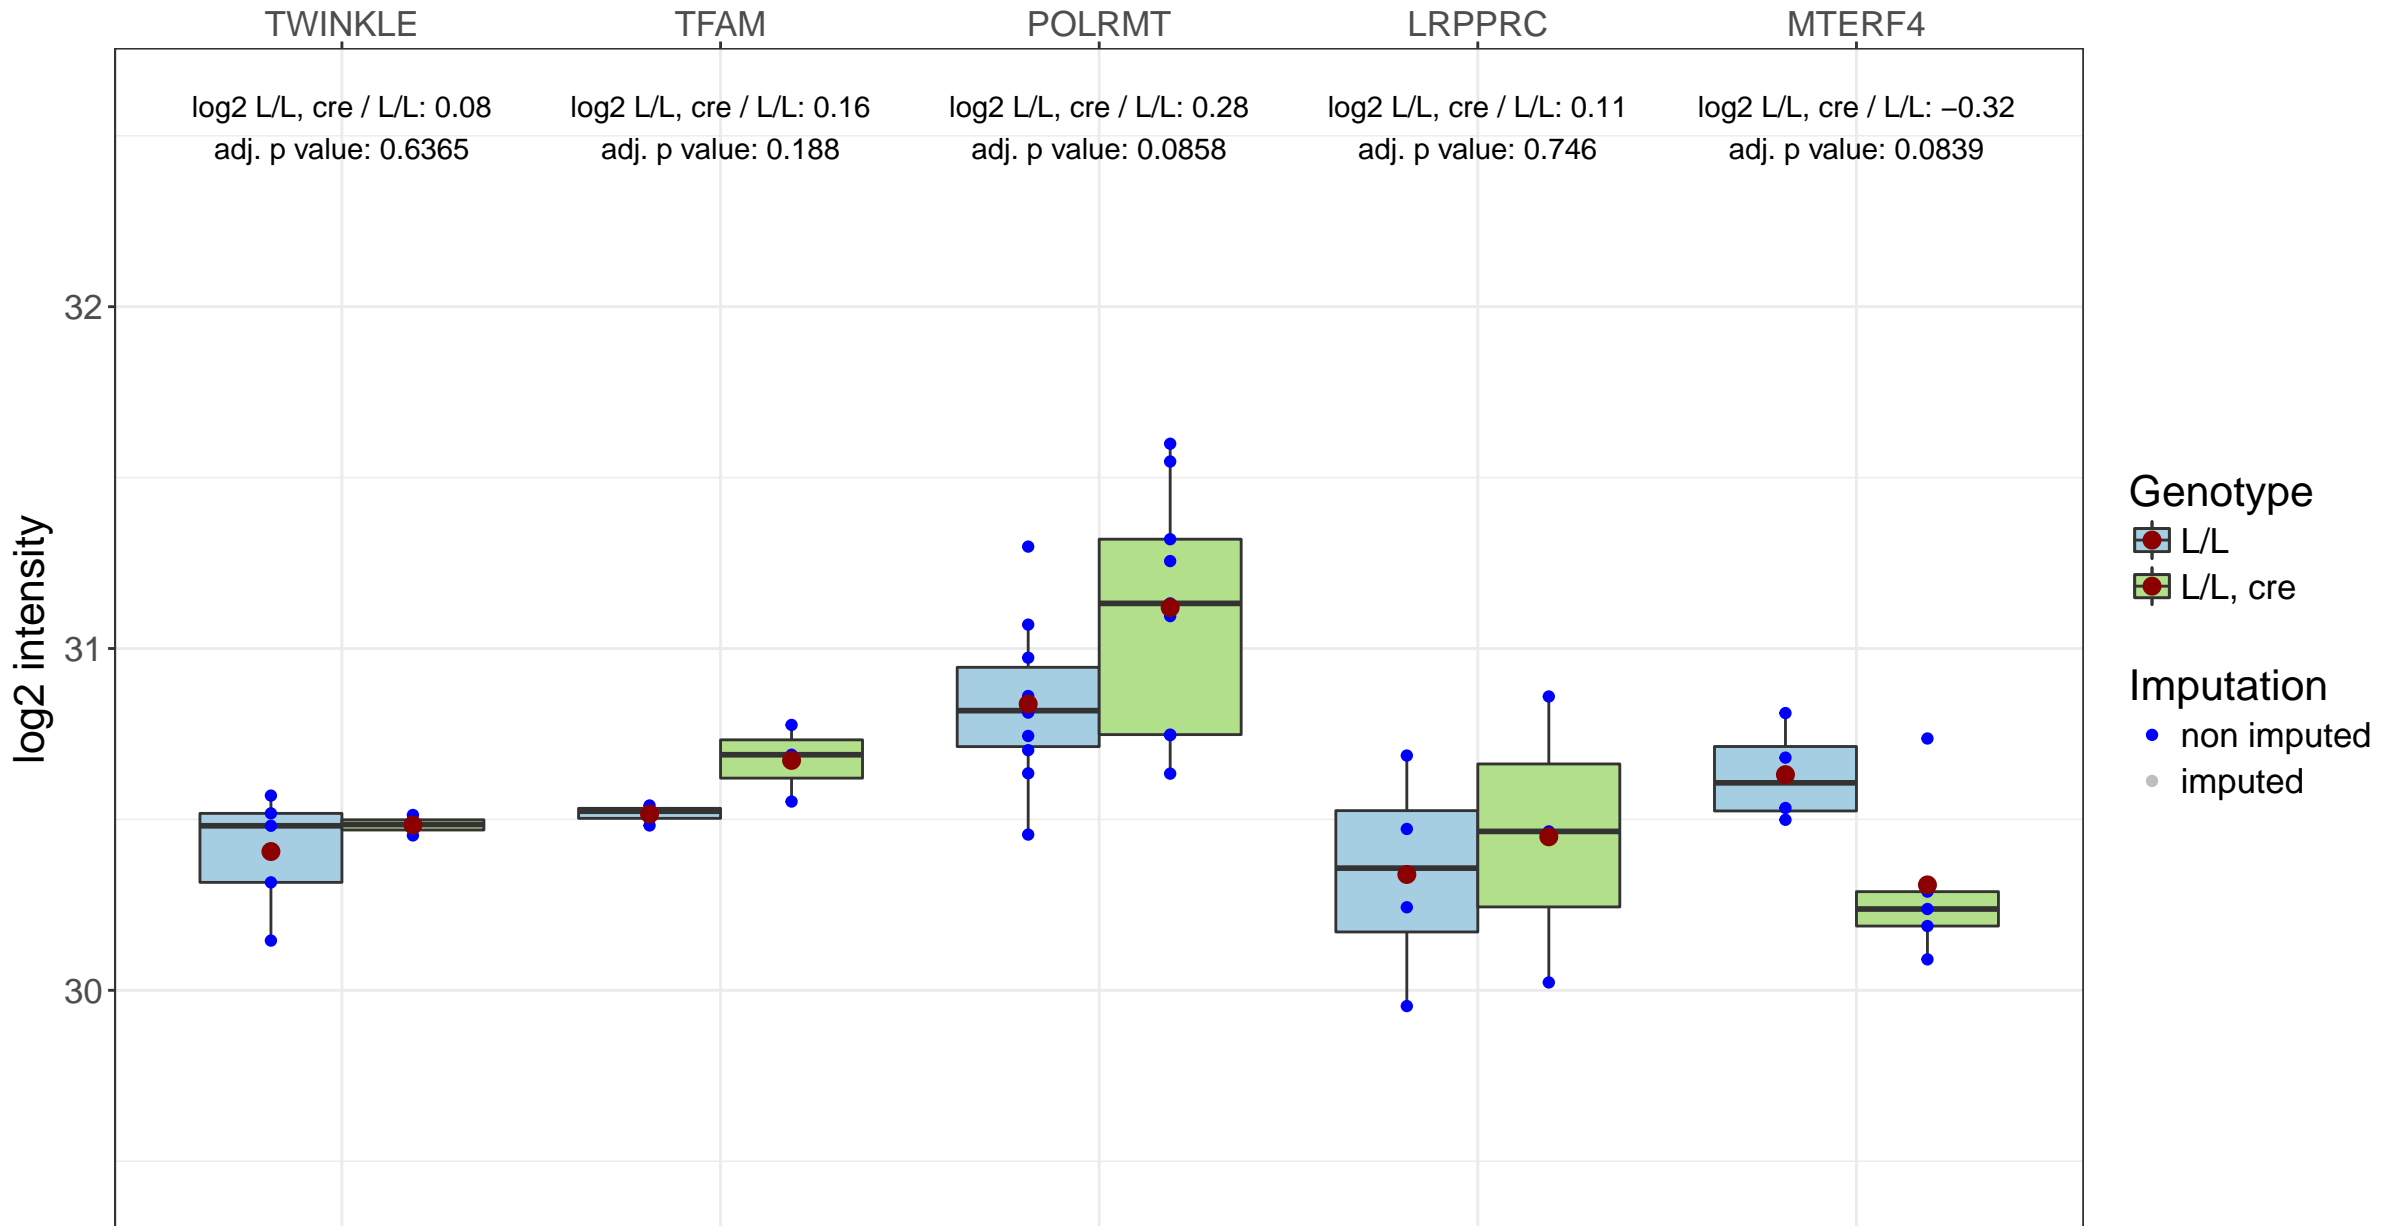

# GLS / D3Z7P3-2

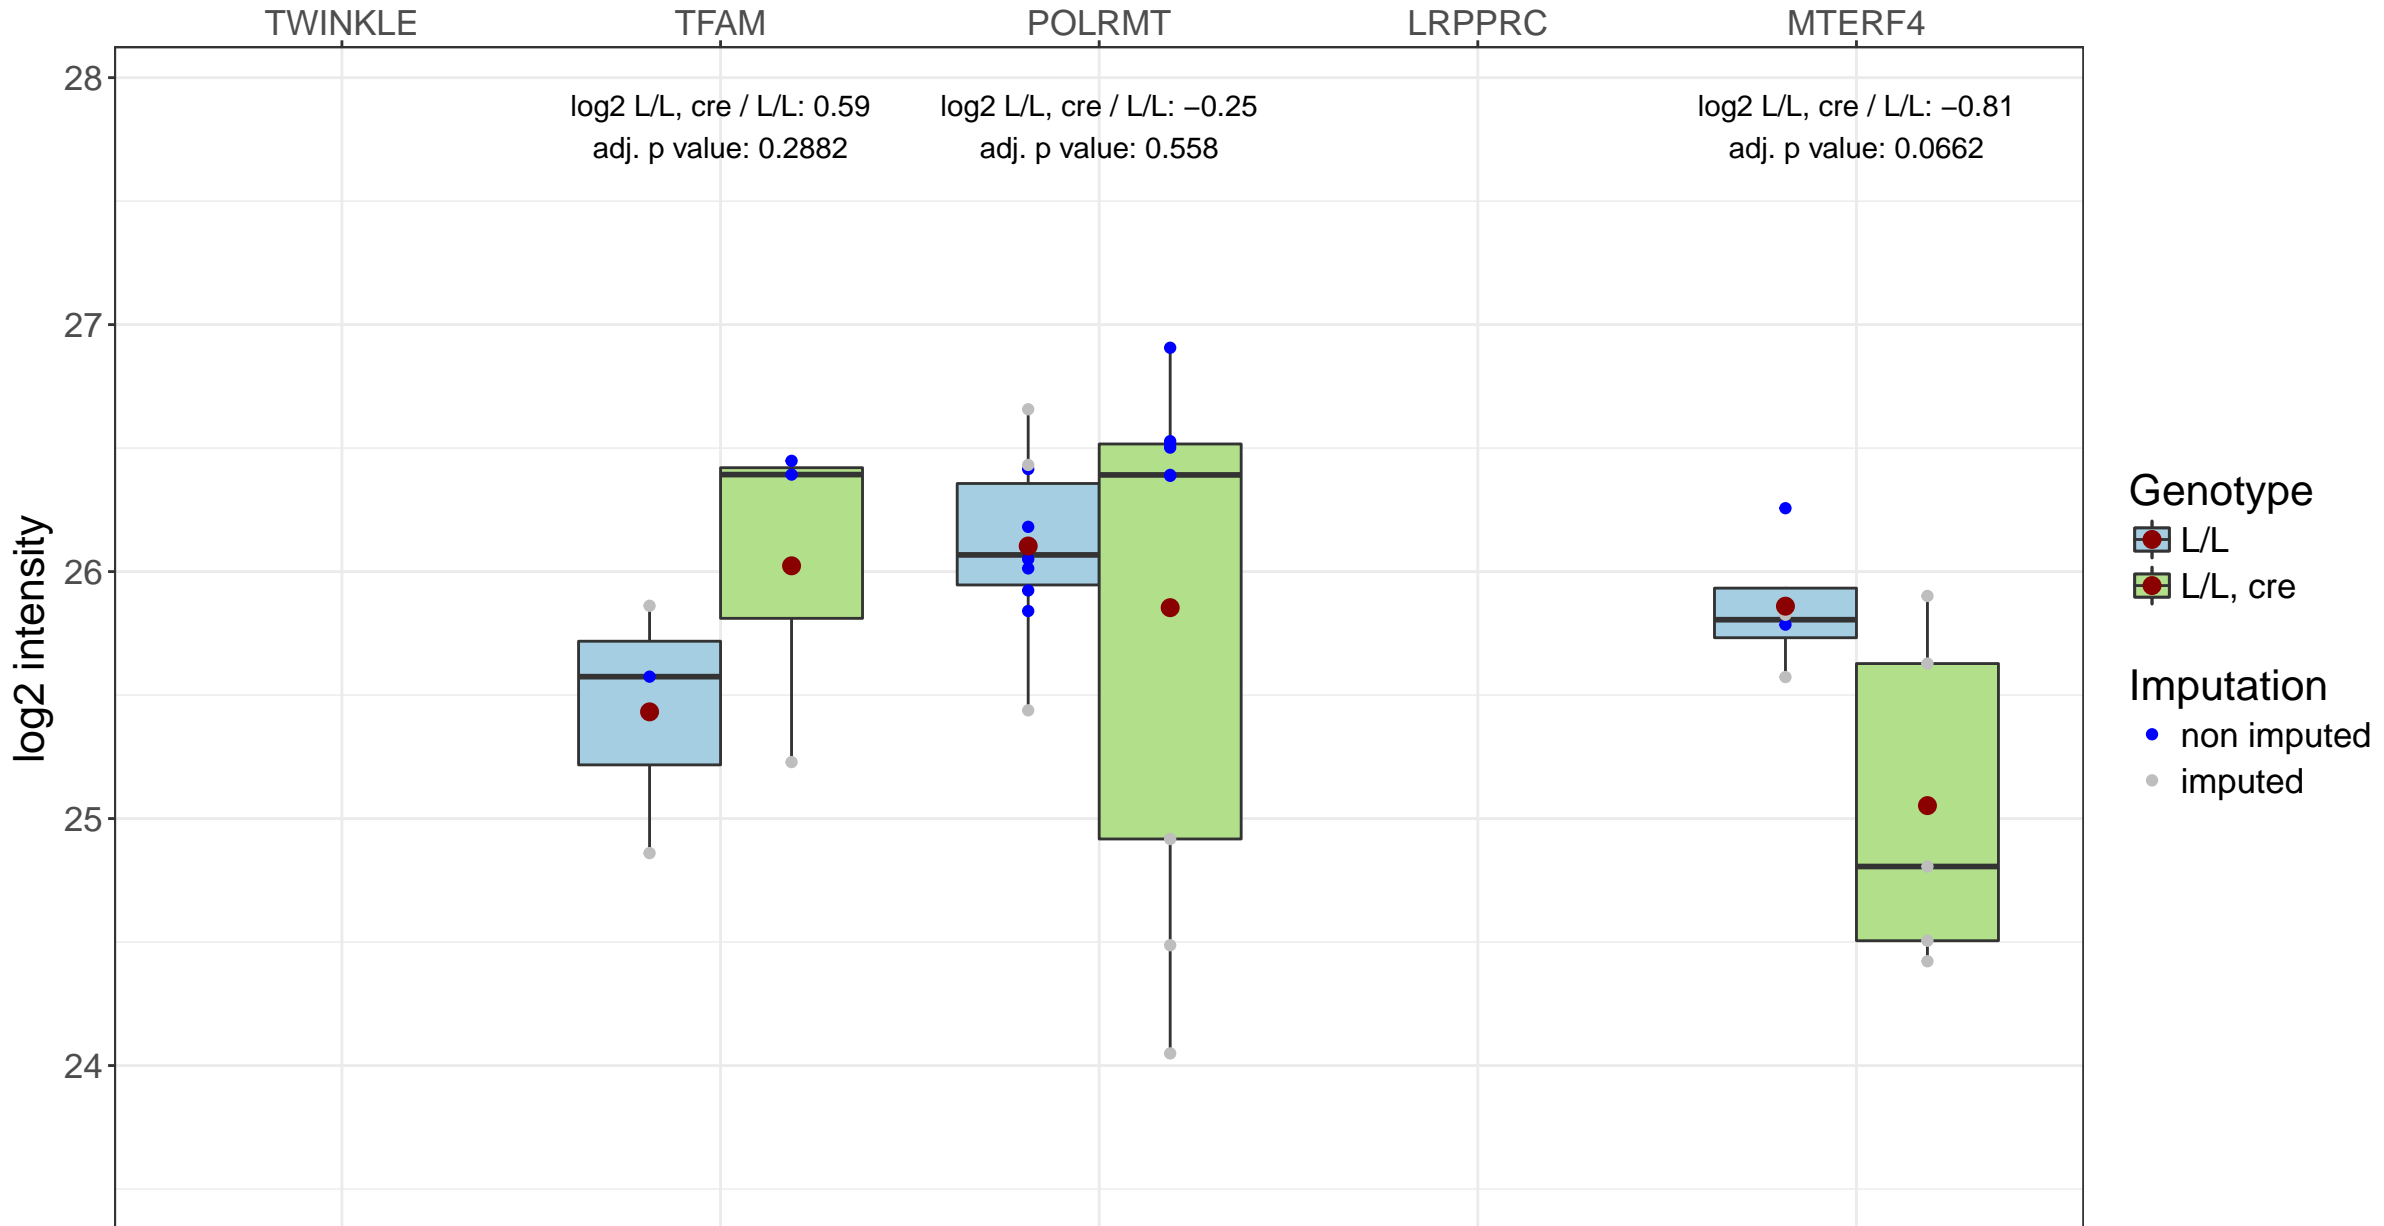



# GLS / D3Z7P3

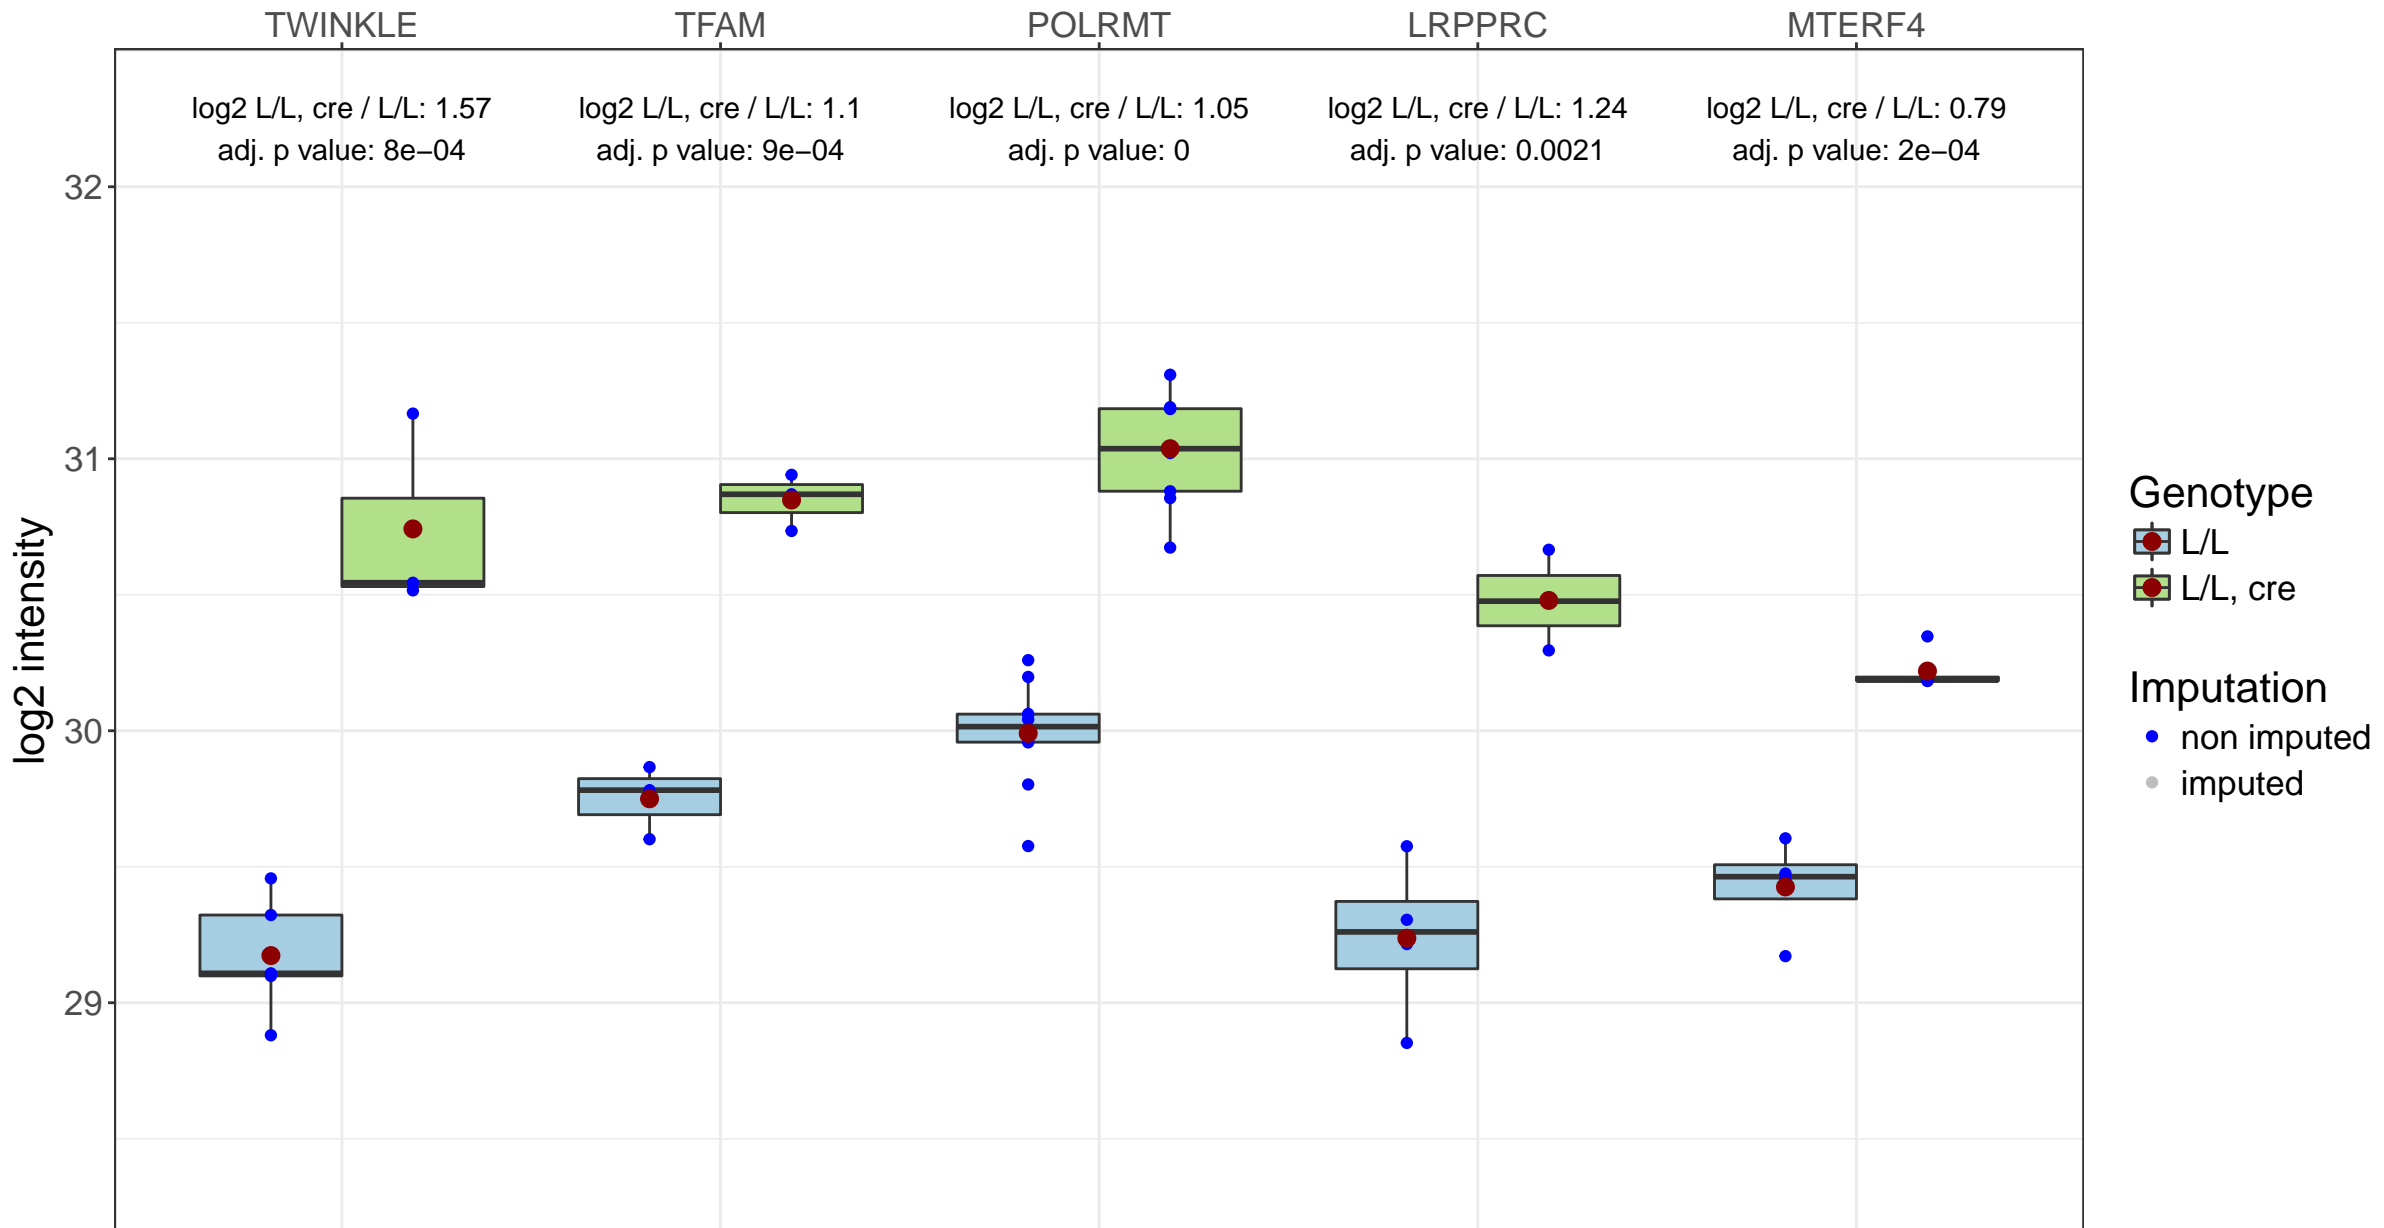

# GLUD1 / P26443

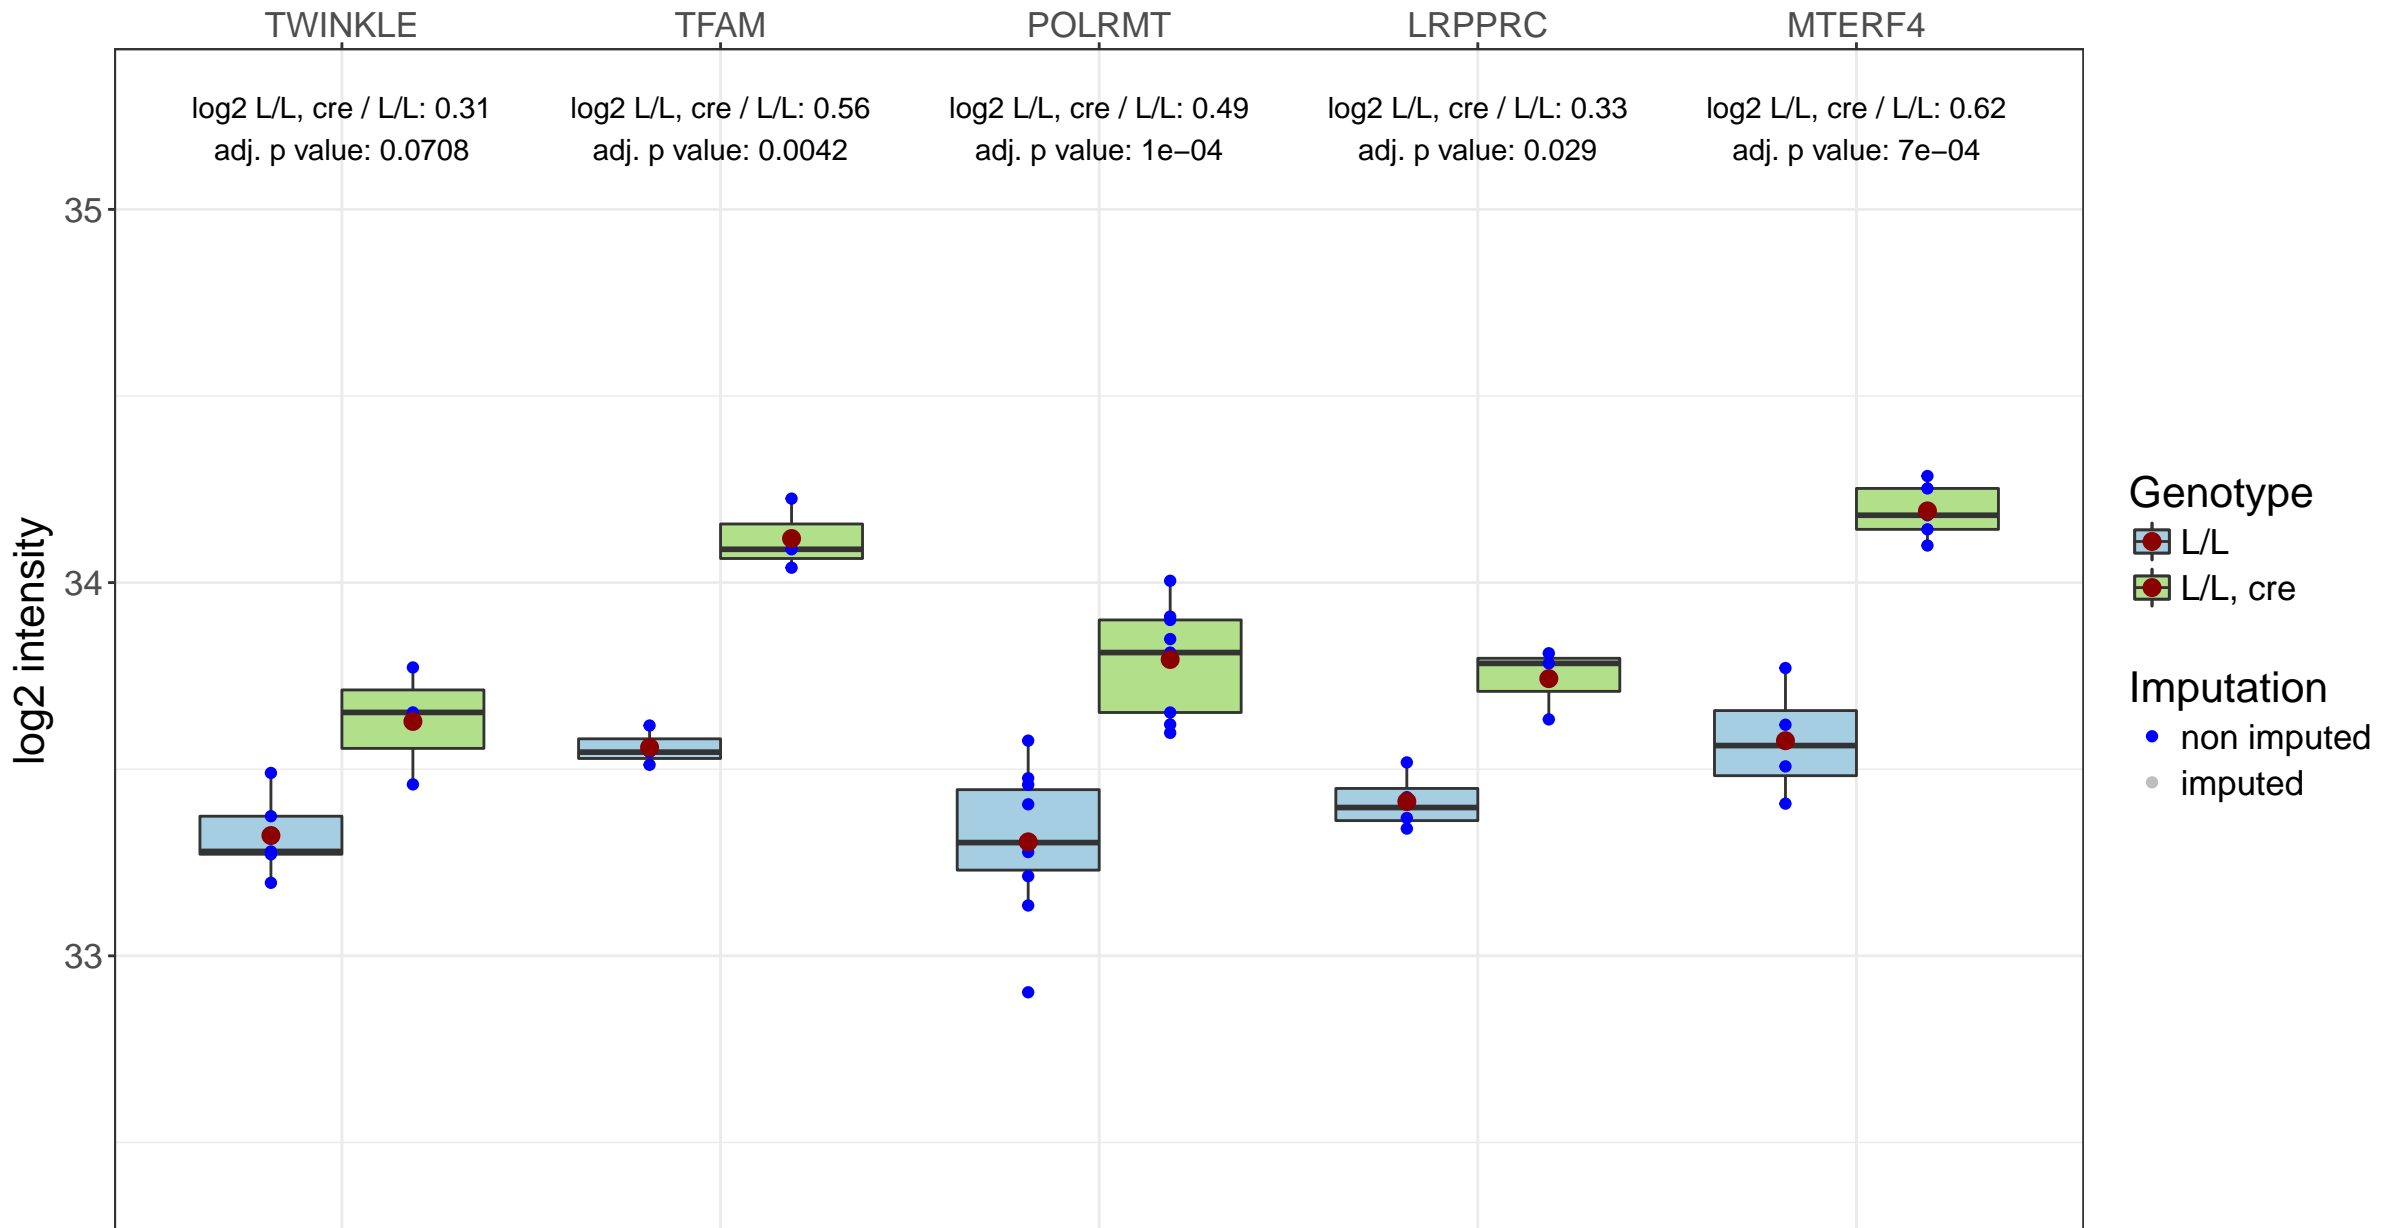

# GM10020 / E9QAZ2

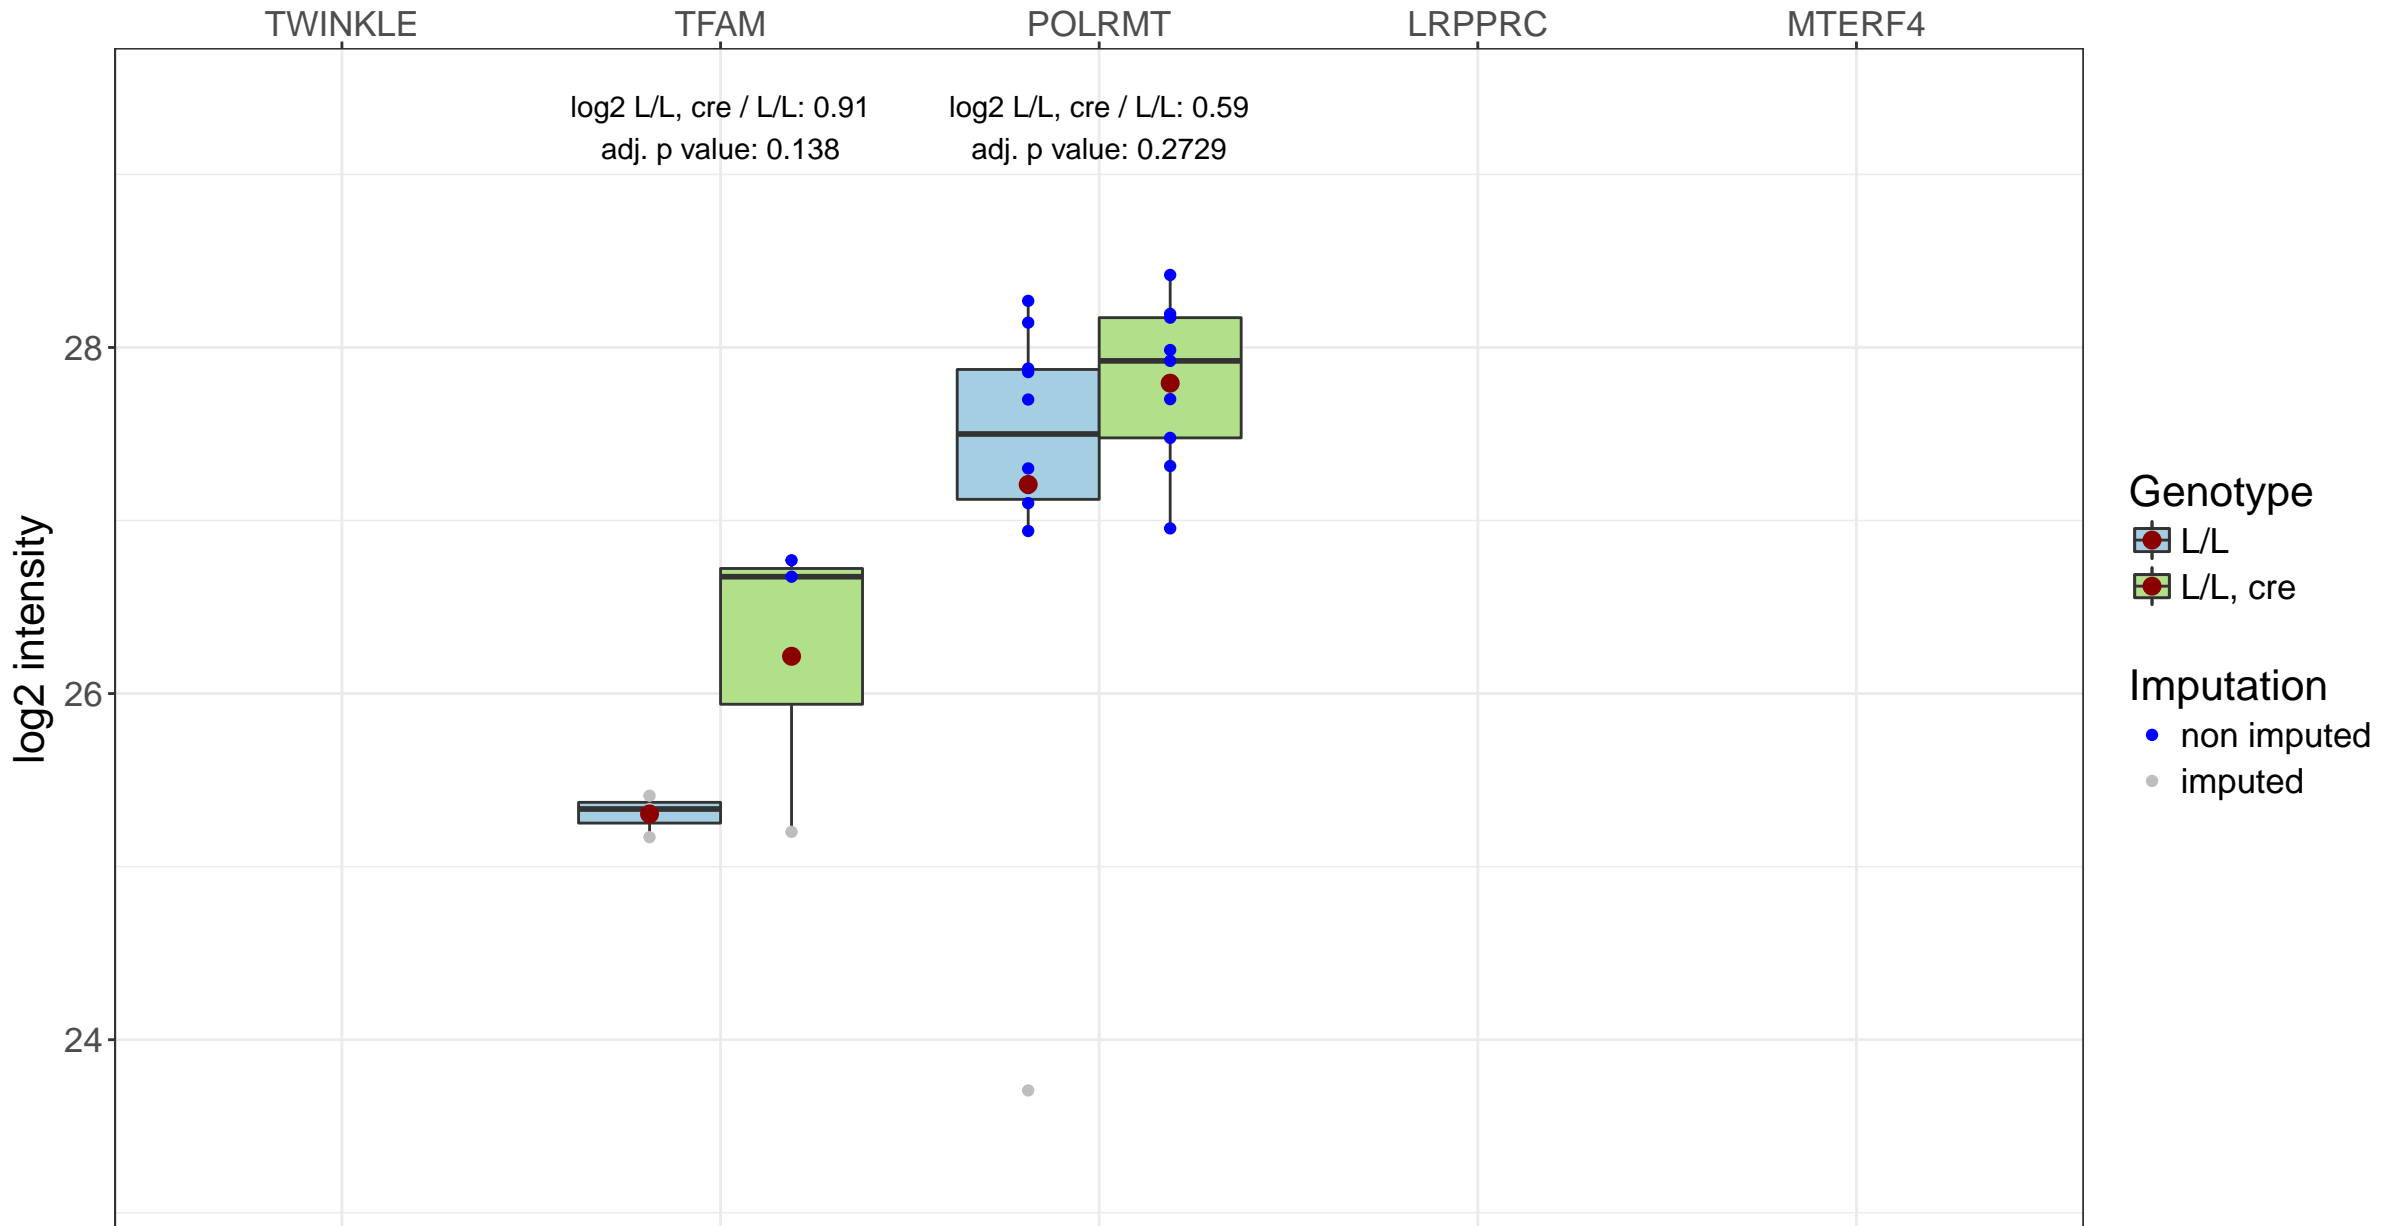

# GM10260 / F6YVP7

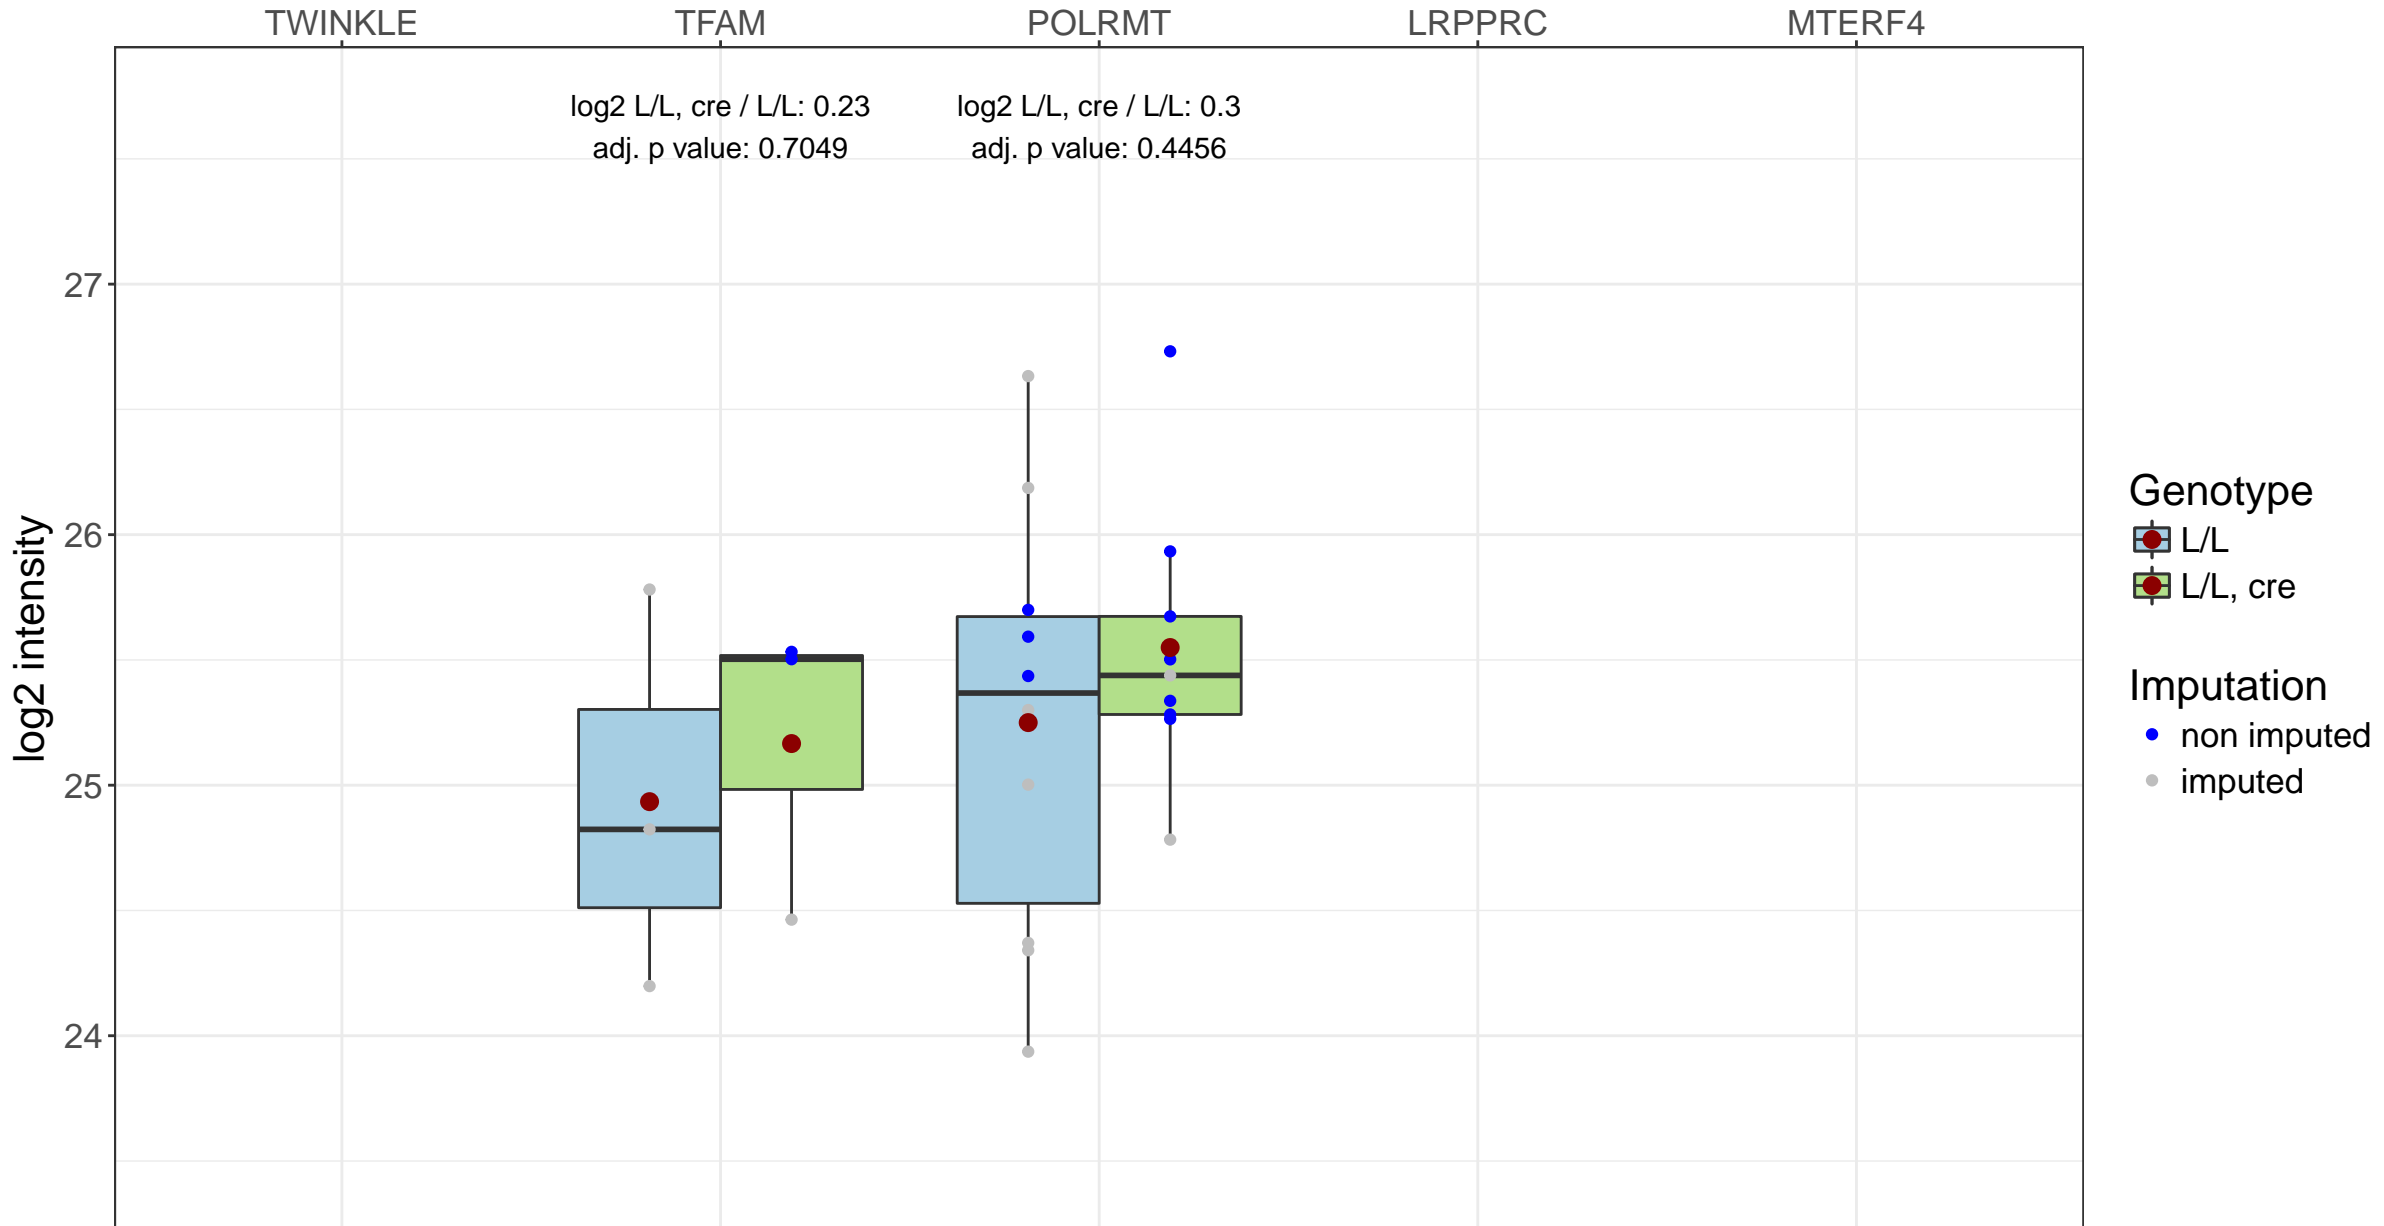

# GM1818 / E9Q4A5

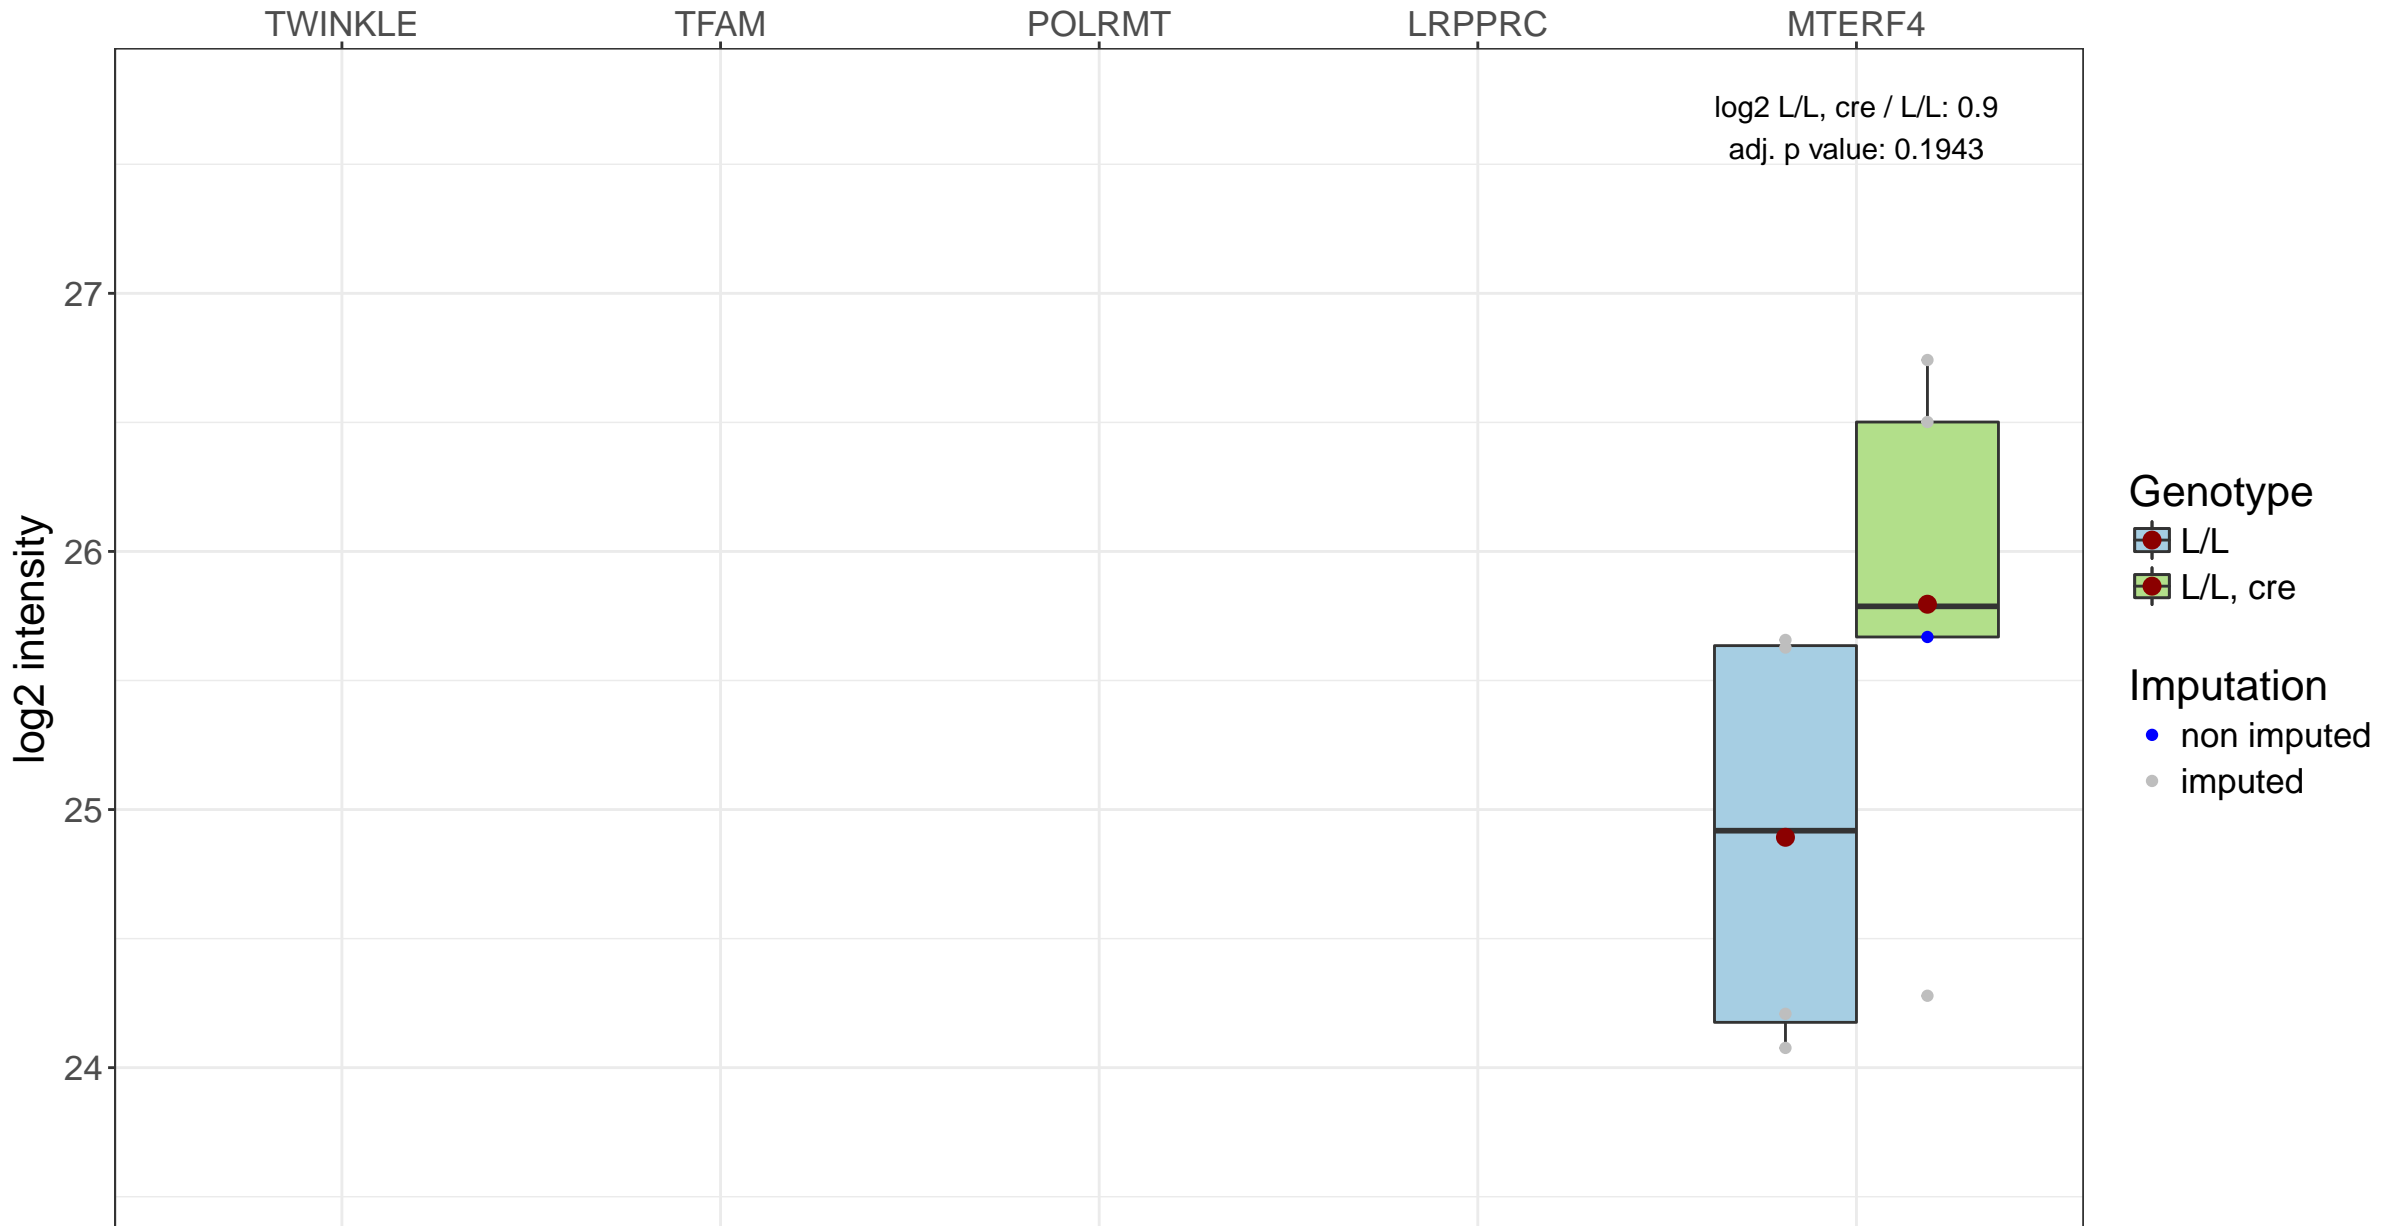

# GM20390 / E9PZF0

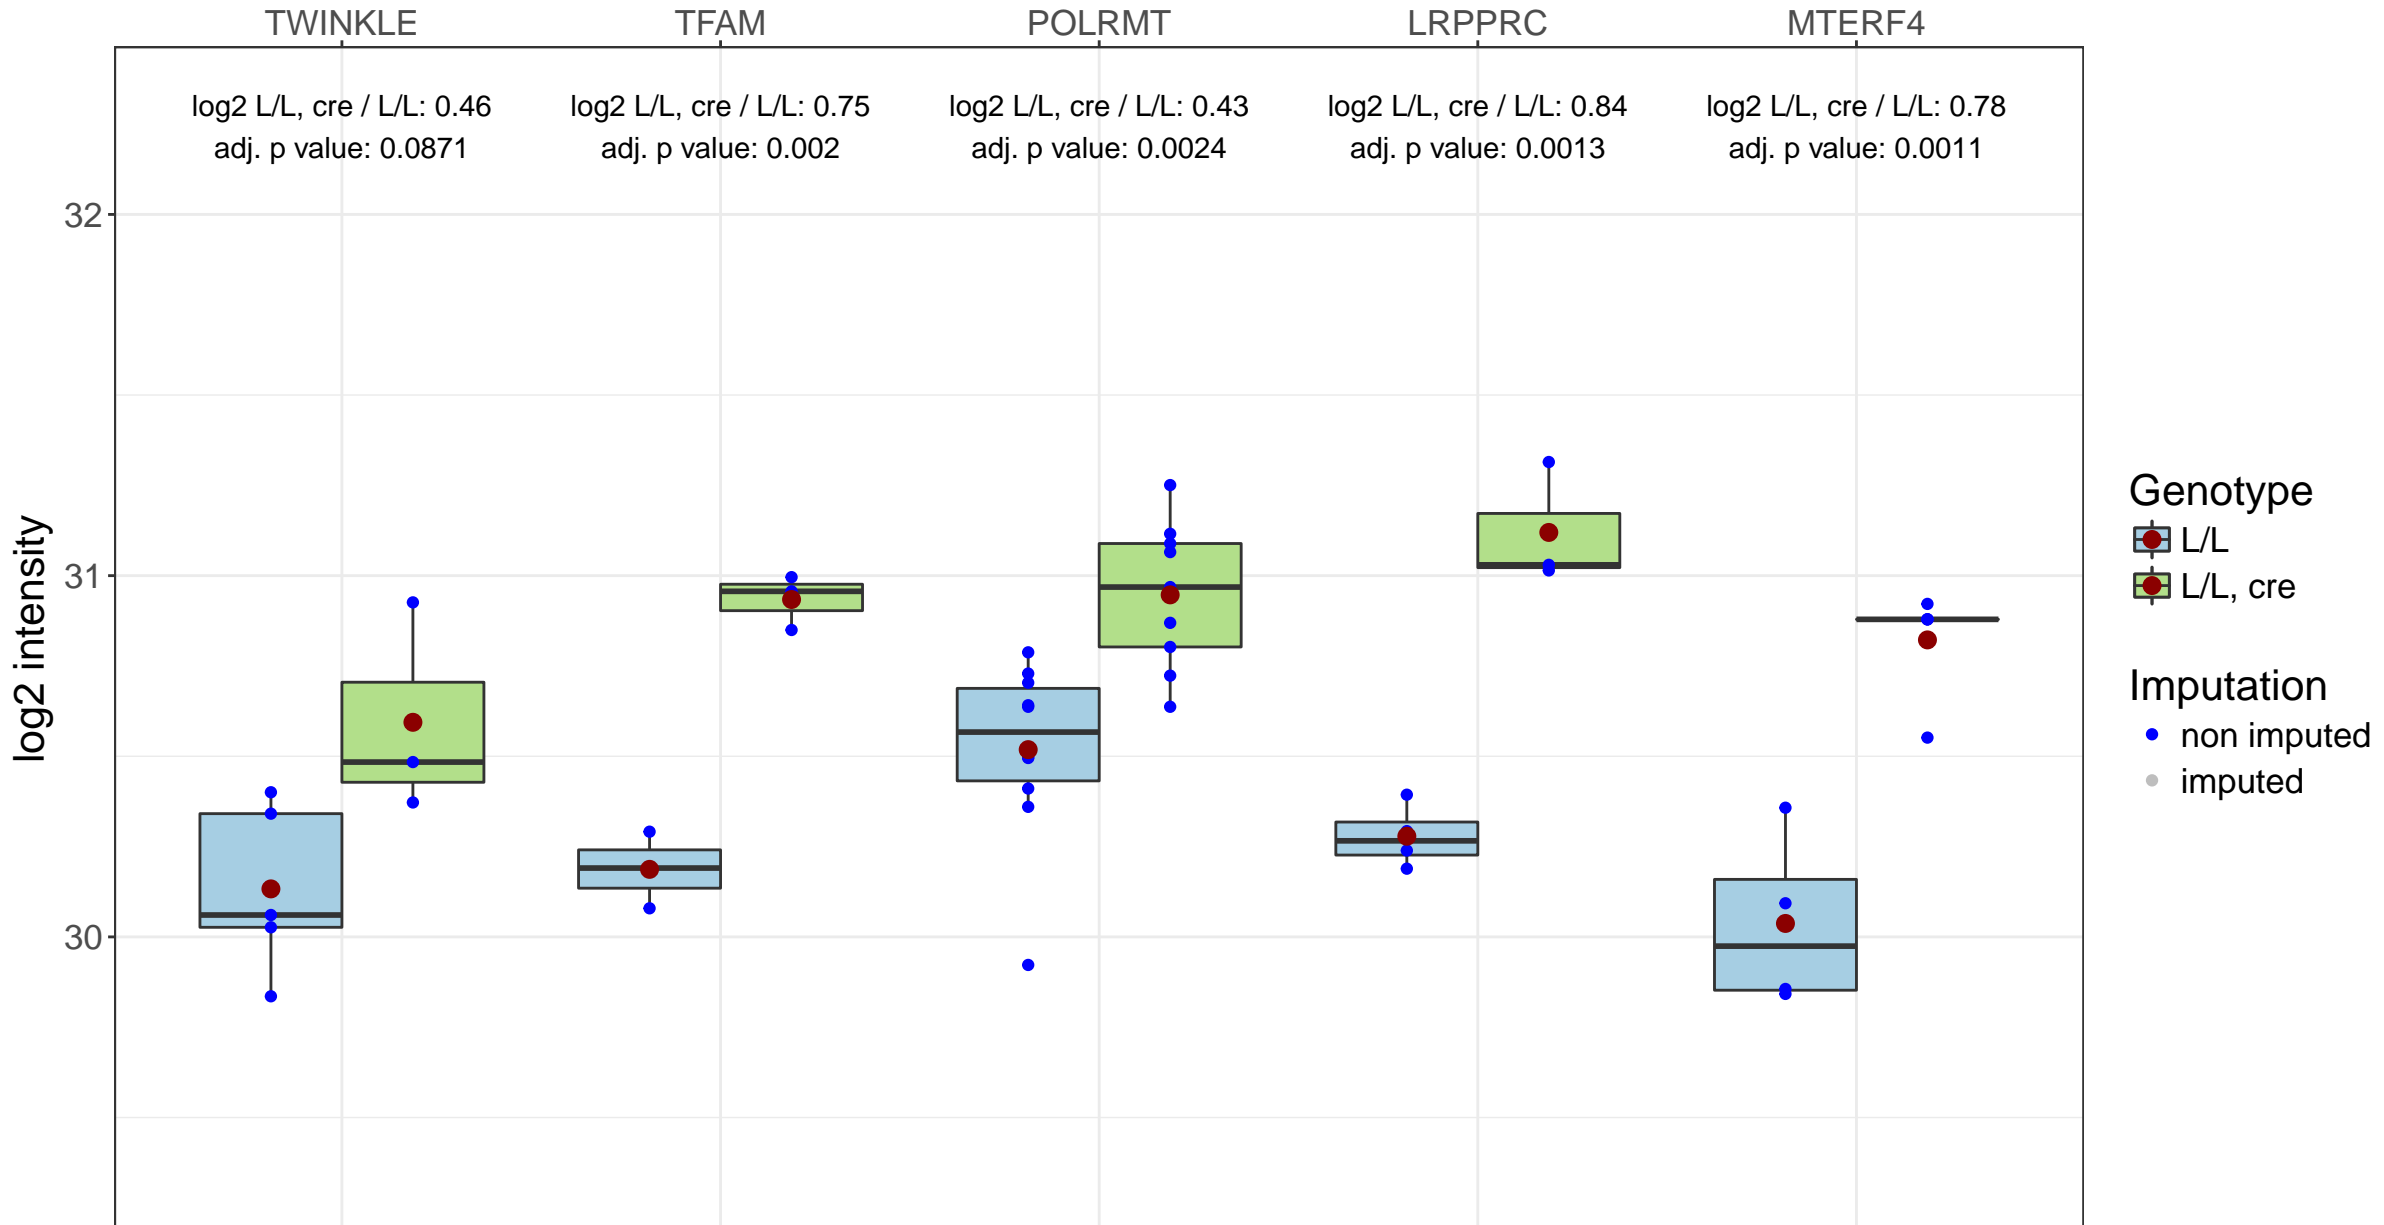

# GM20425 / E9Q035

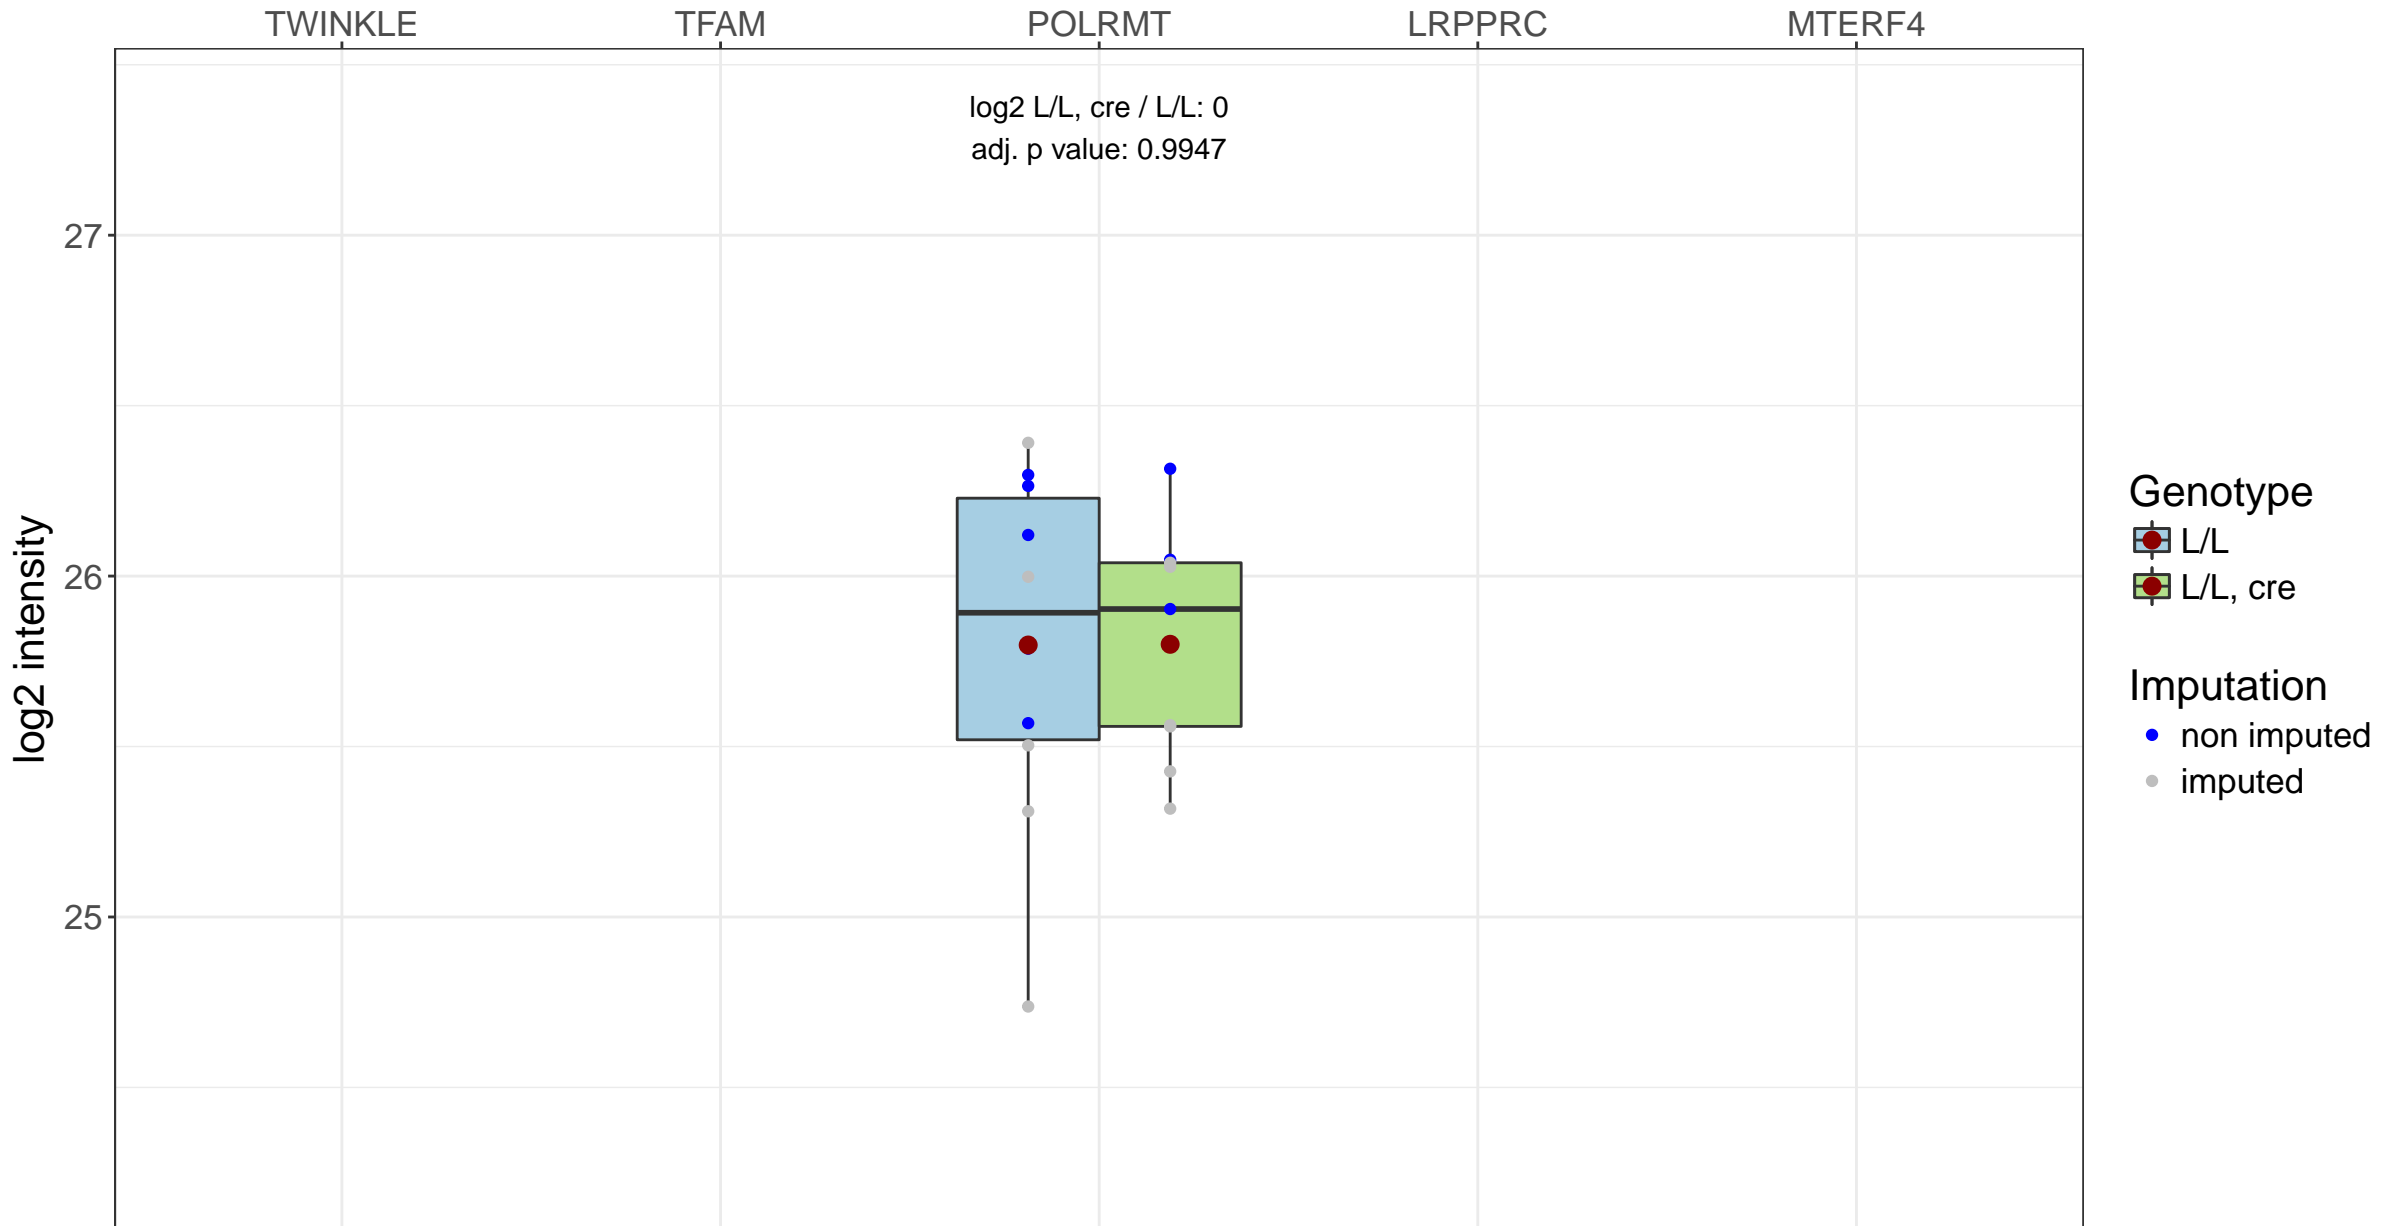

# GM20498 / E9PVN6

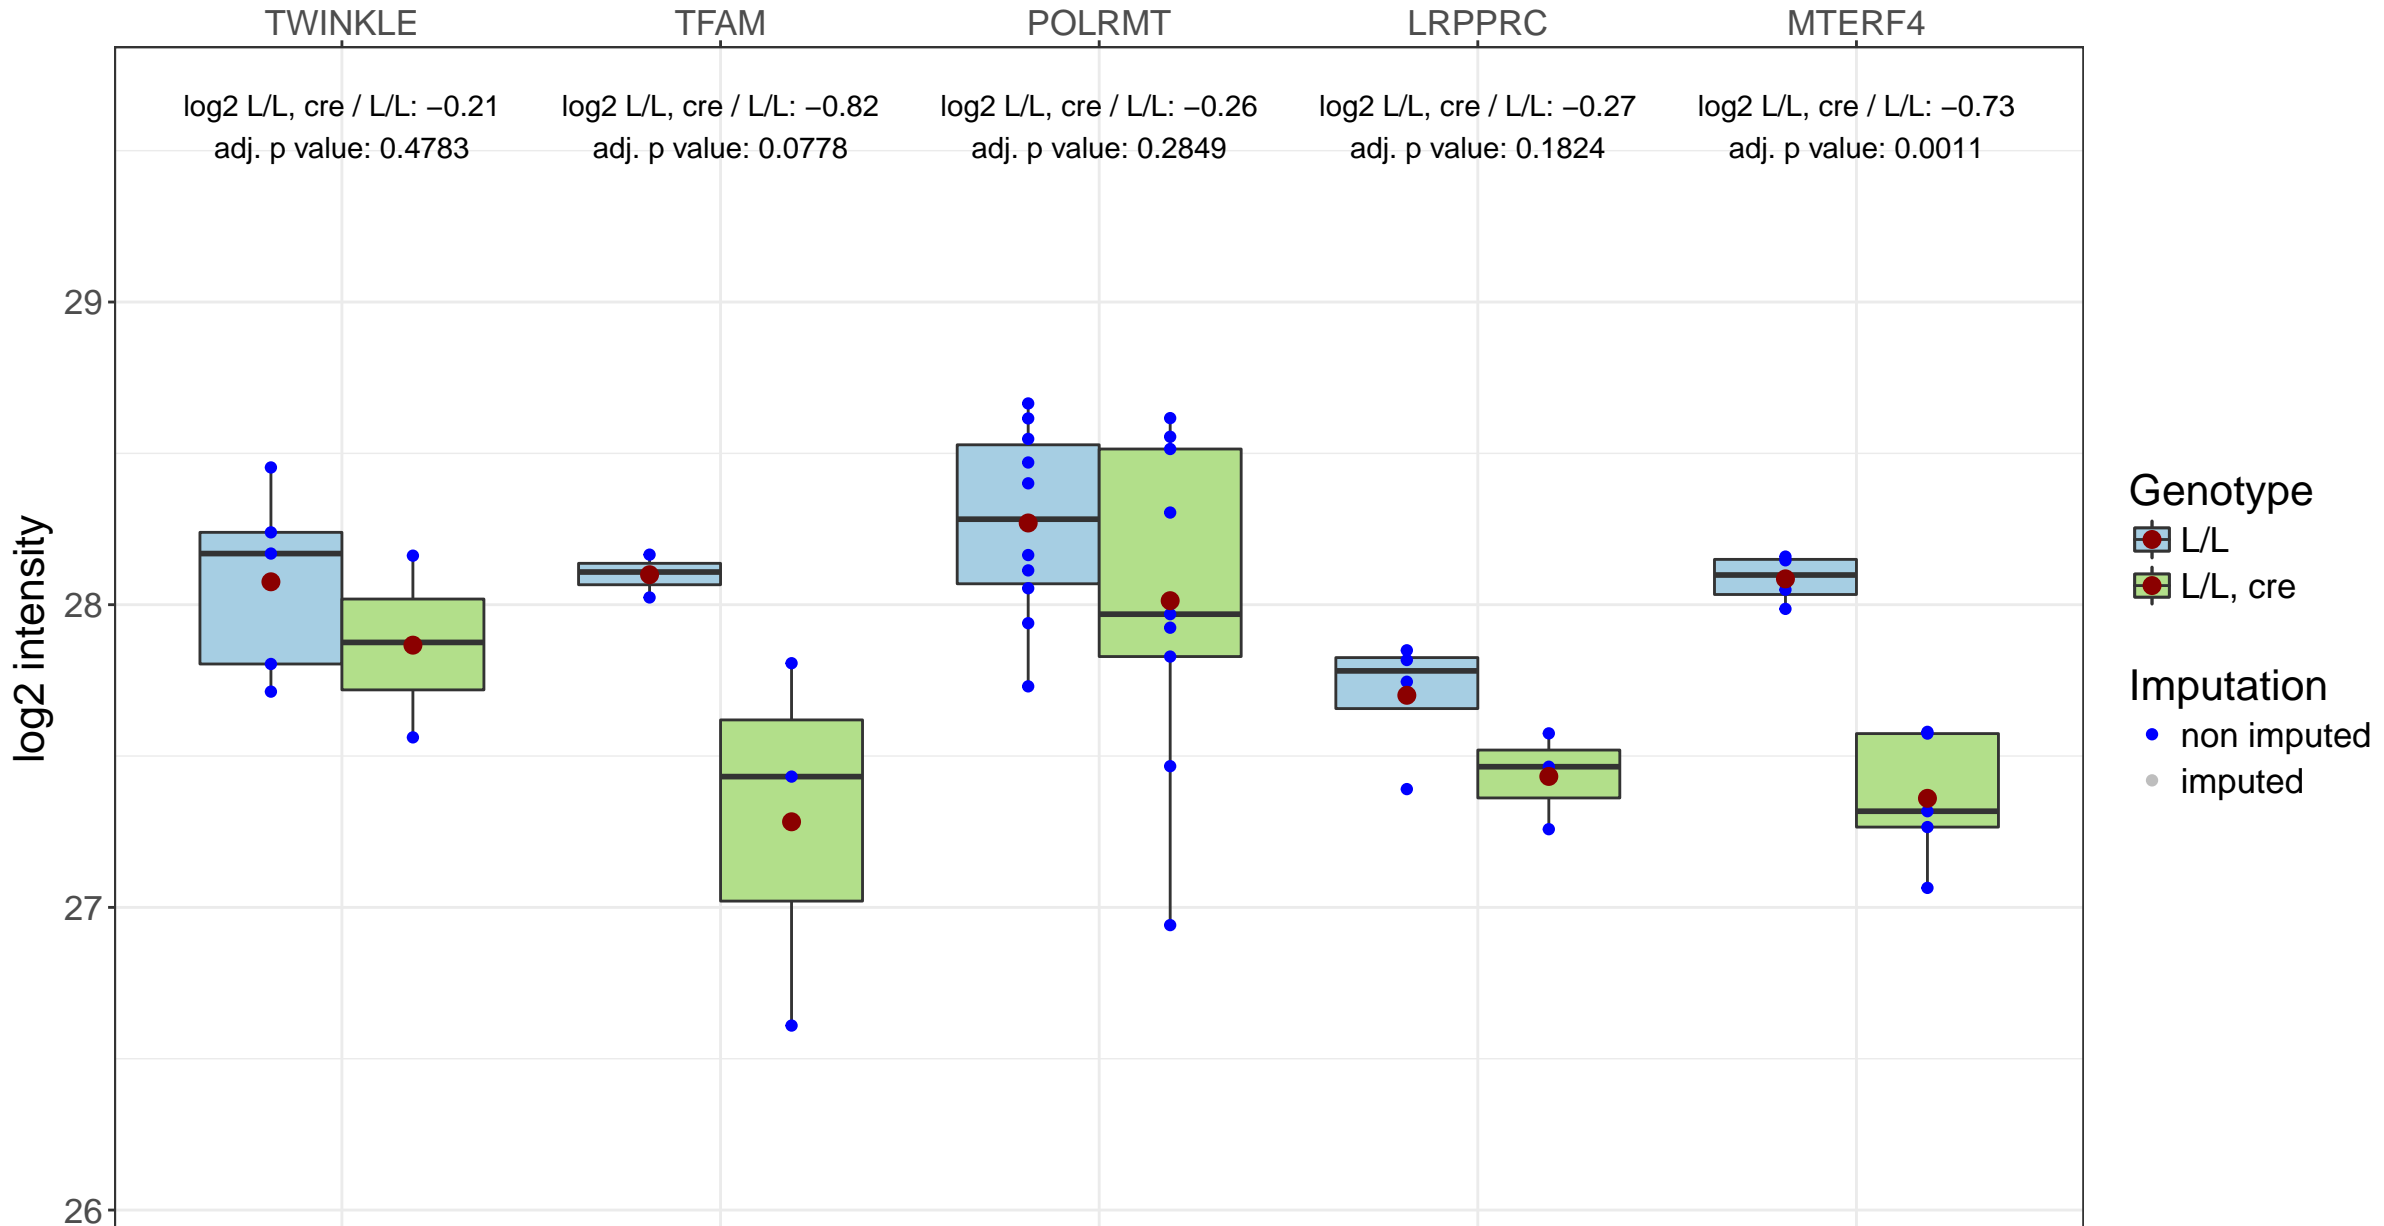



# GM20671 / F6TVX7

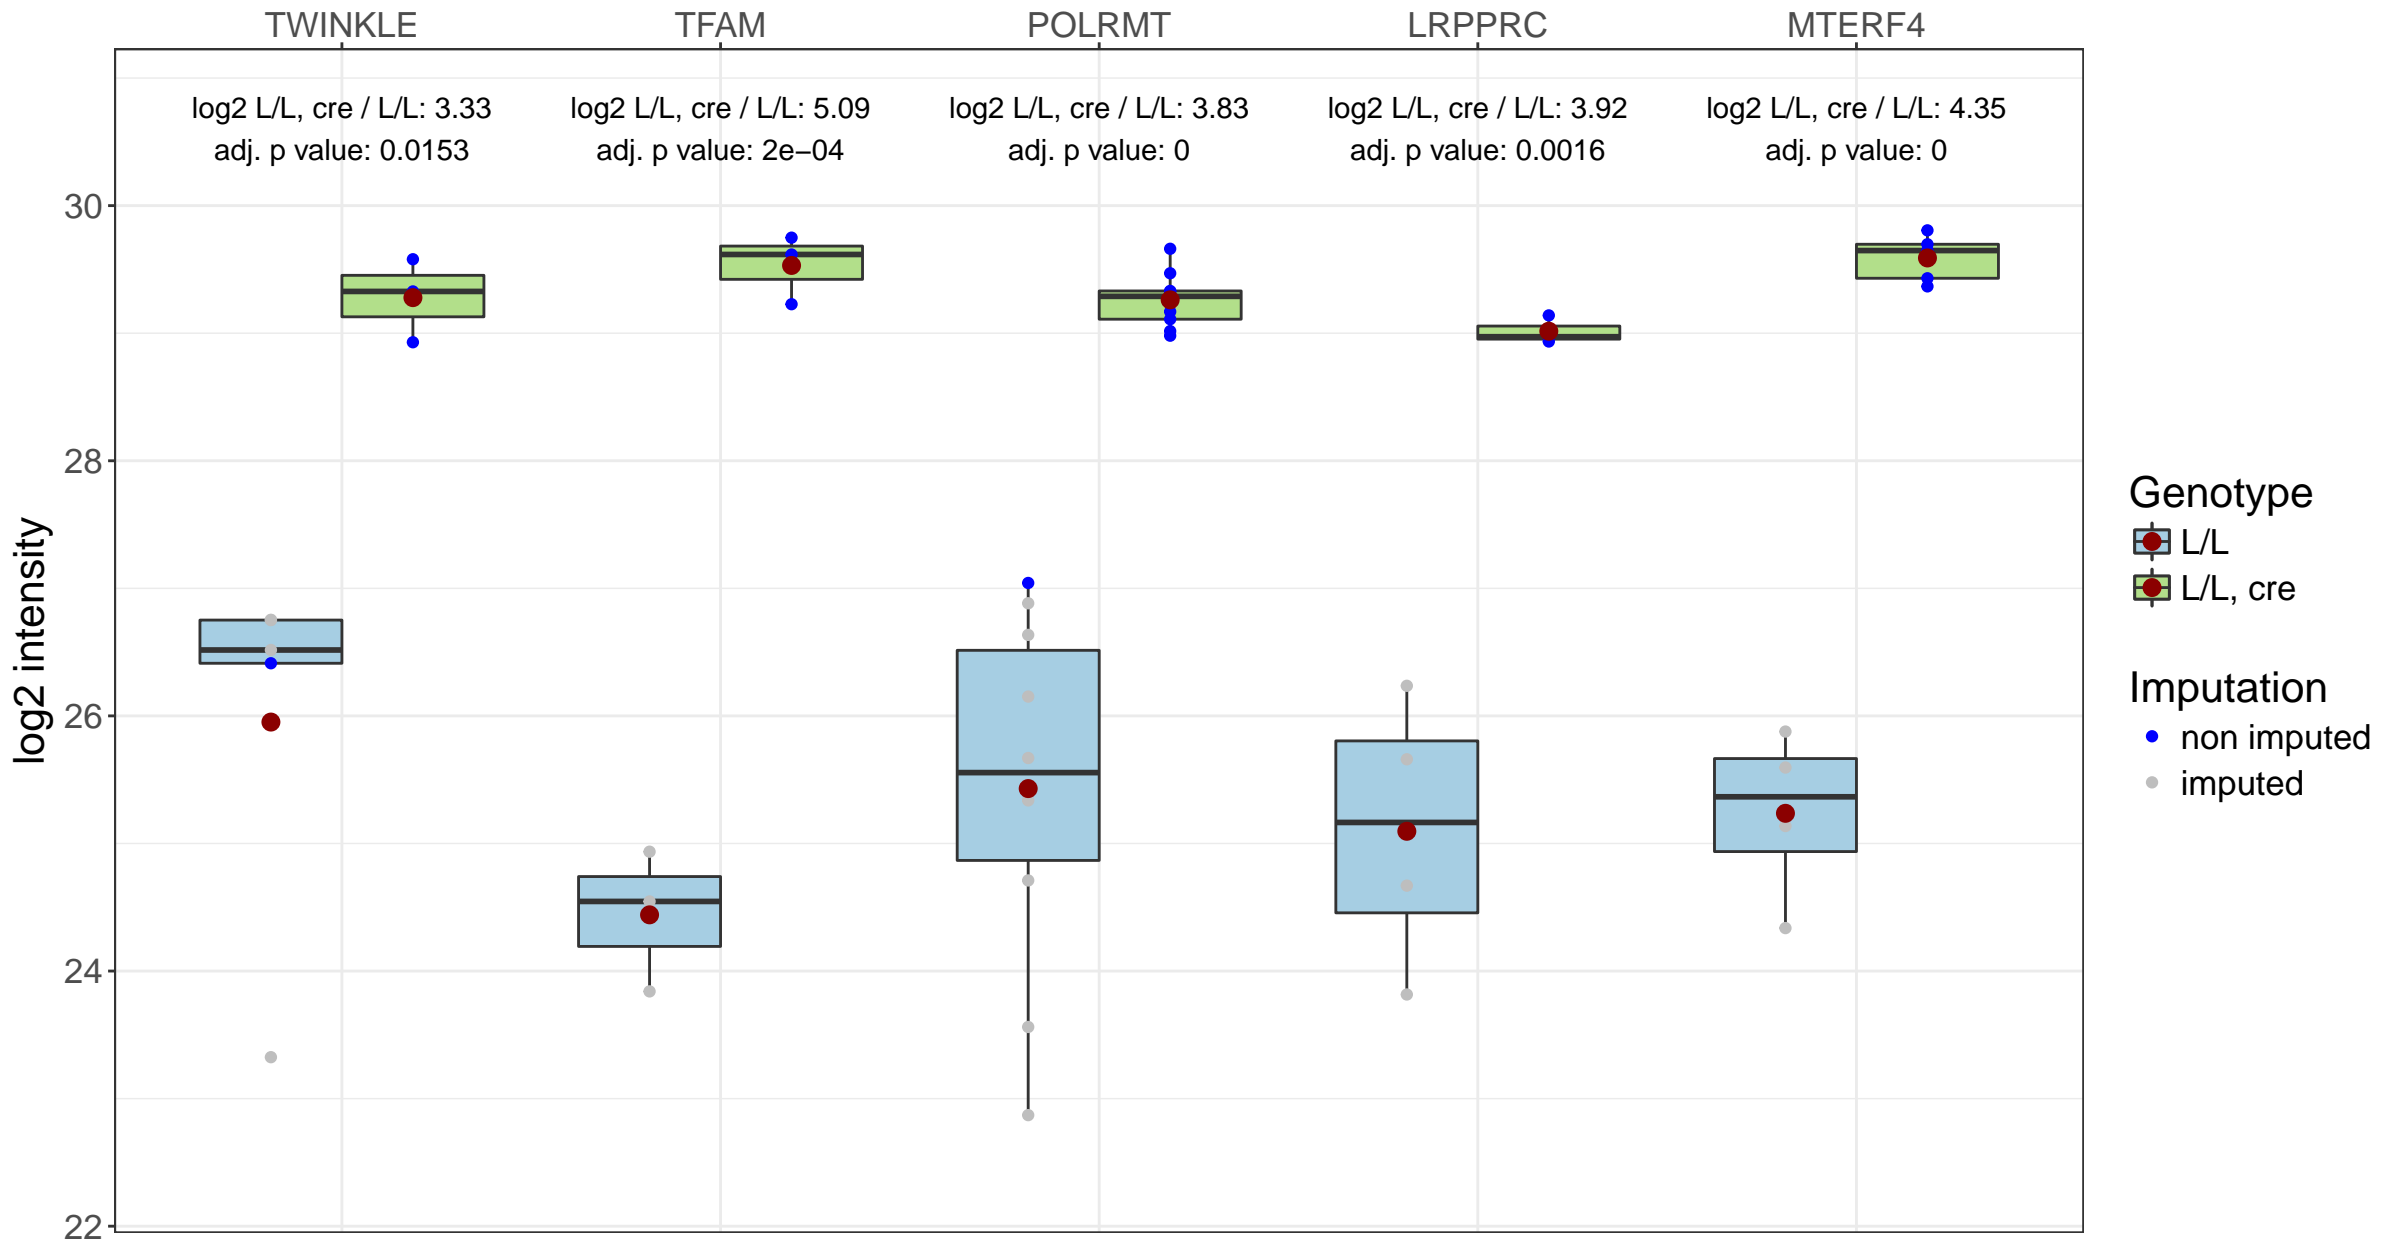

# GM561 / Q3V460

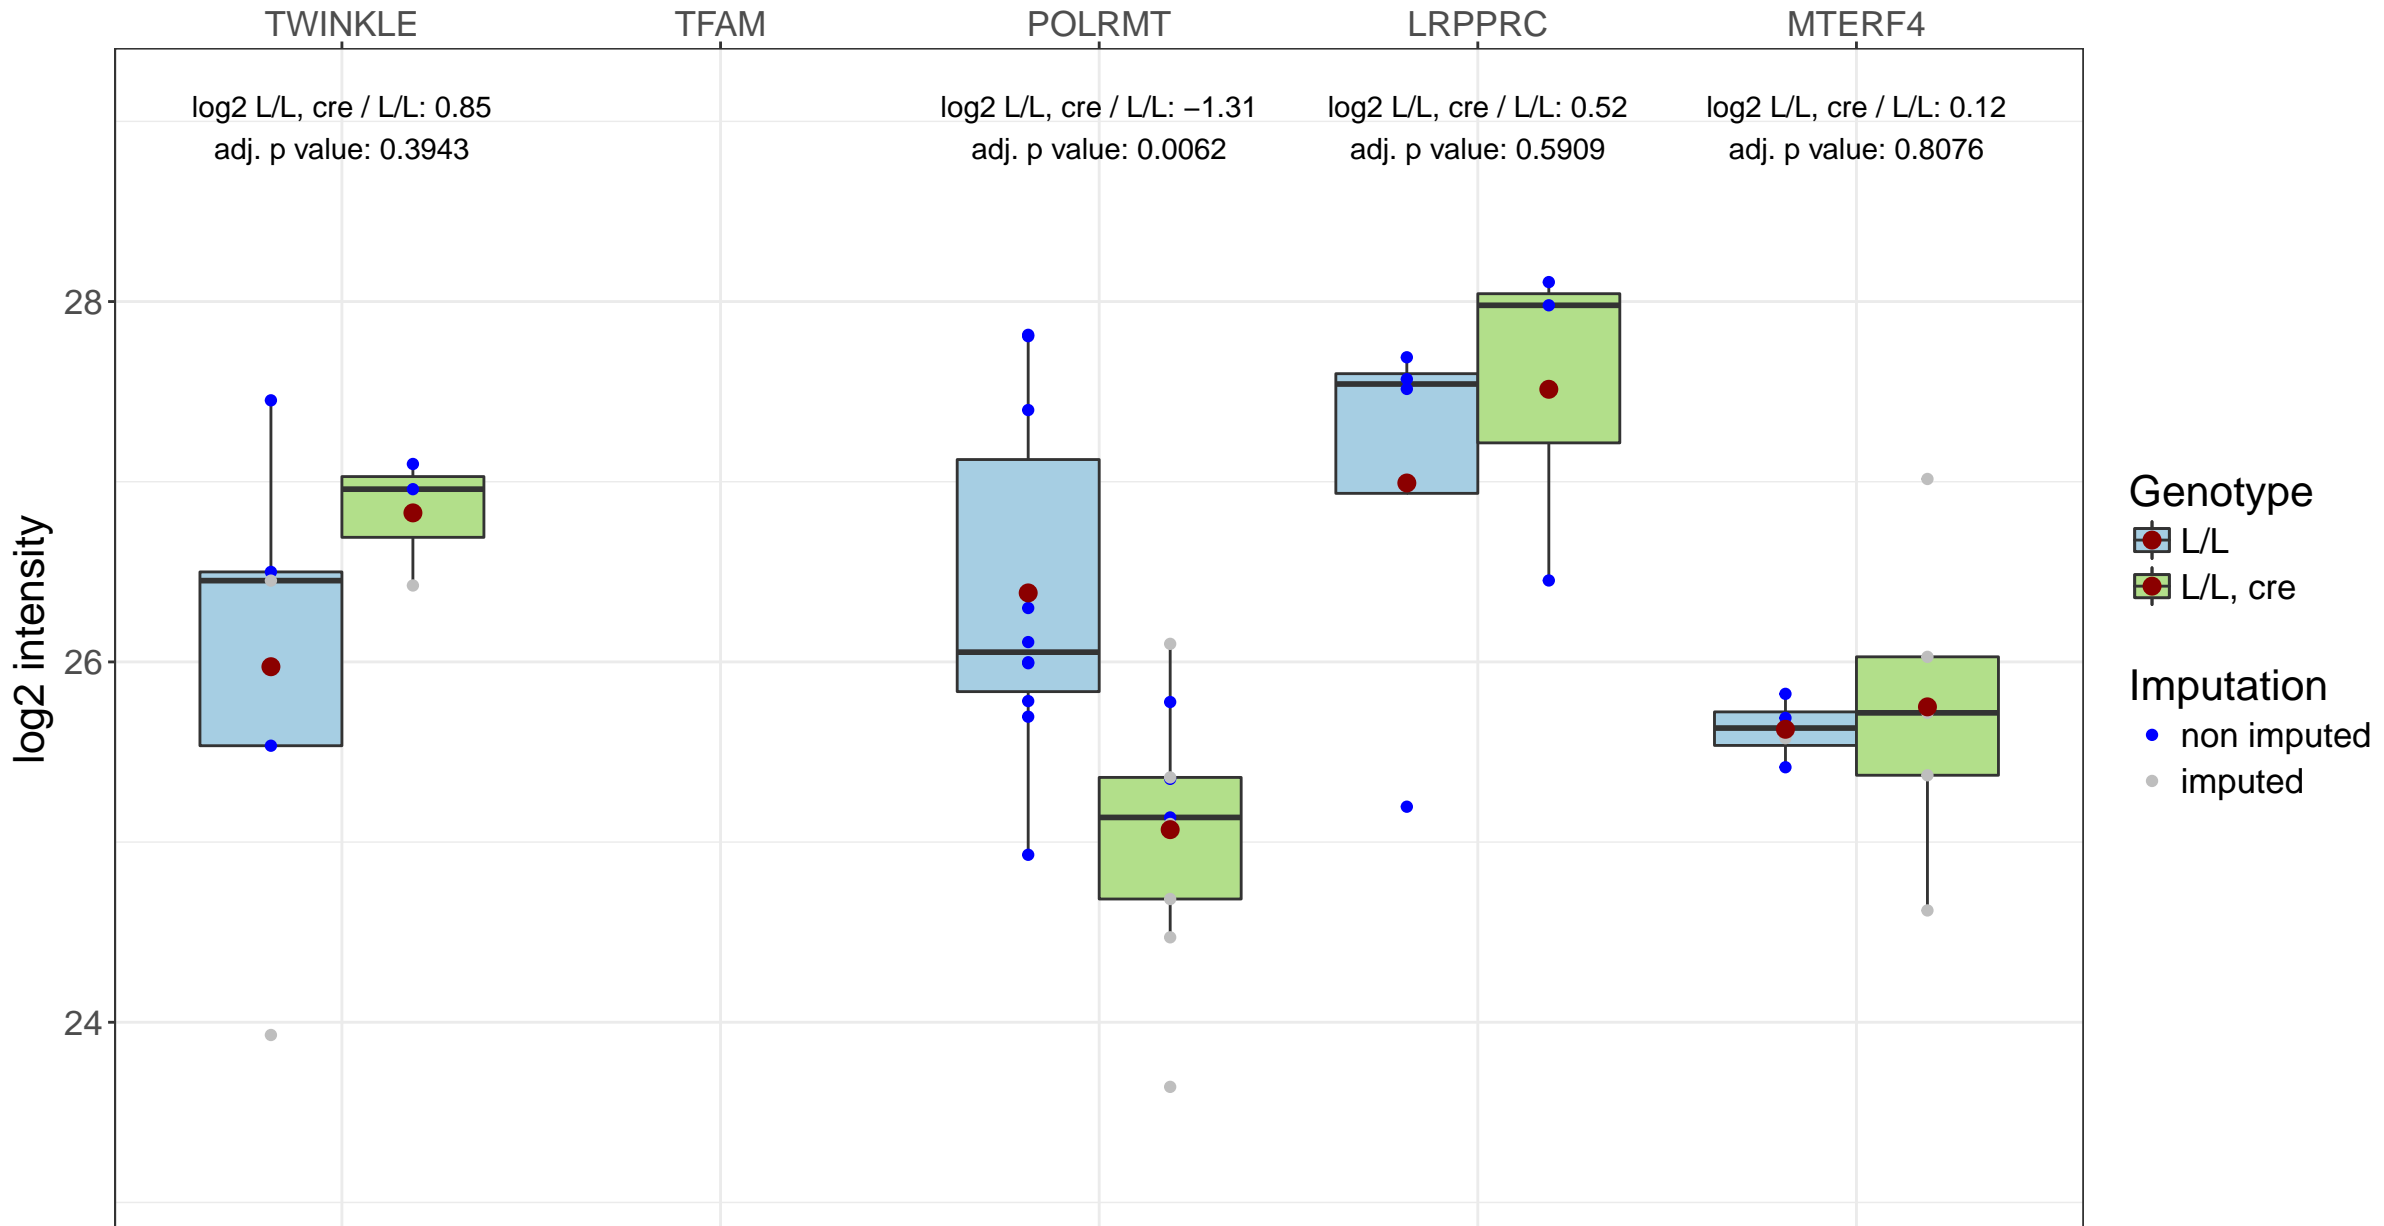

# GNAI2 / P08752

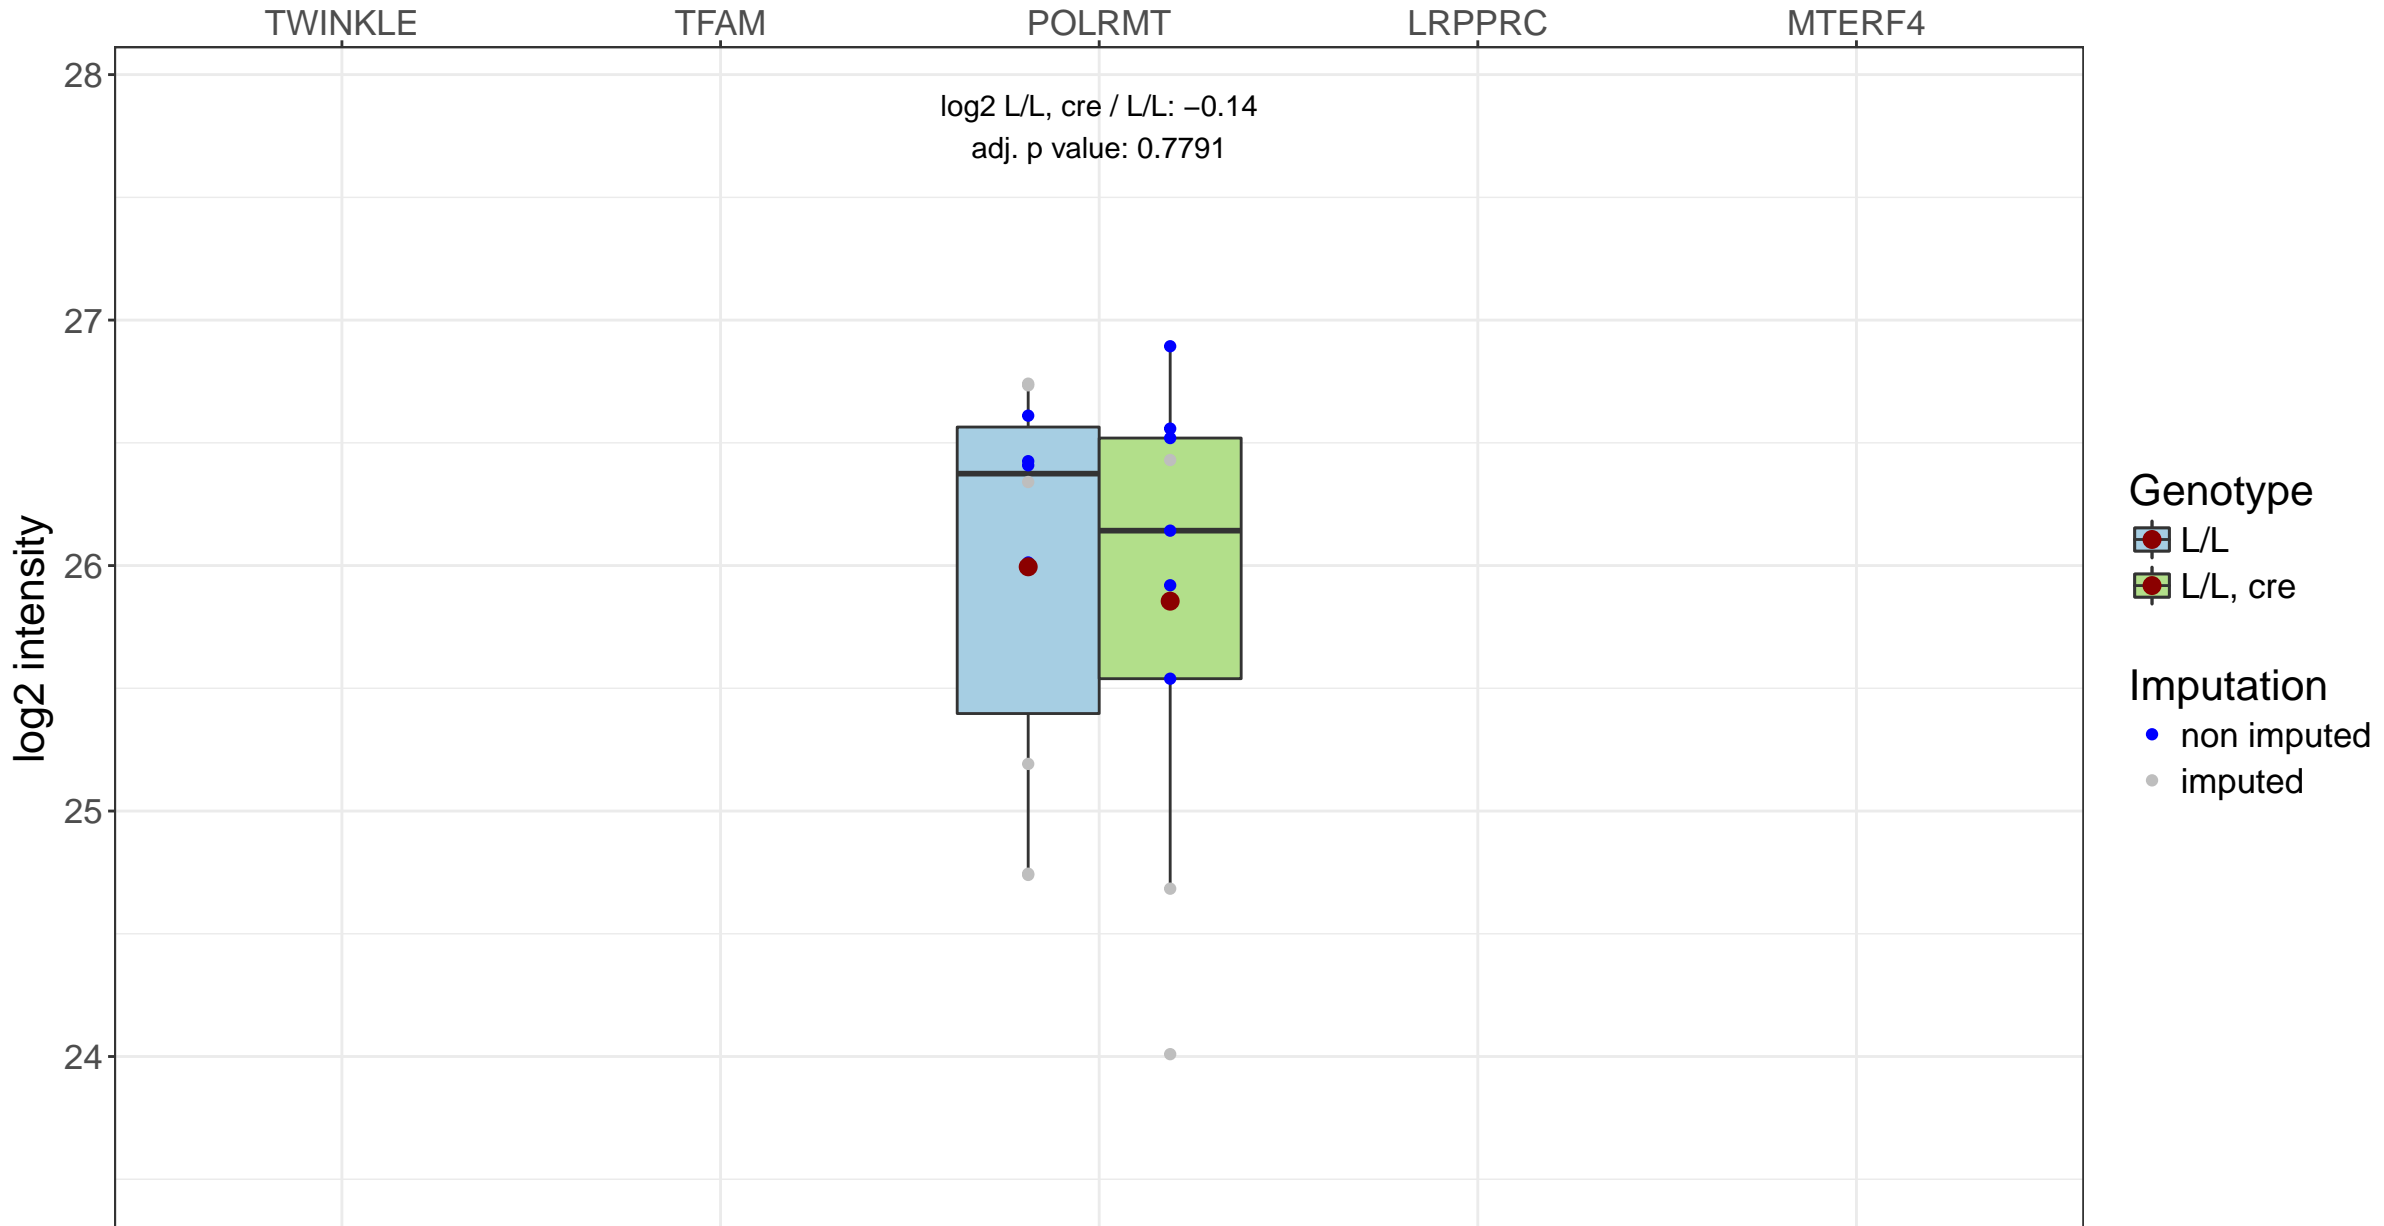

# GNB2 / P62880

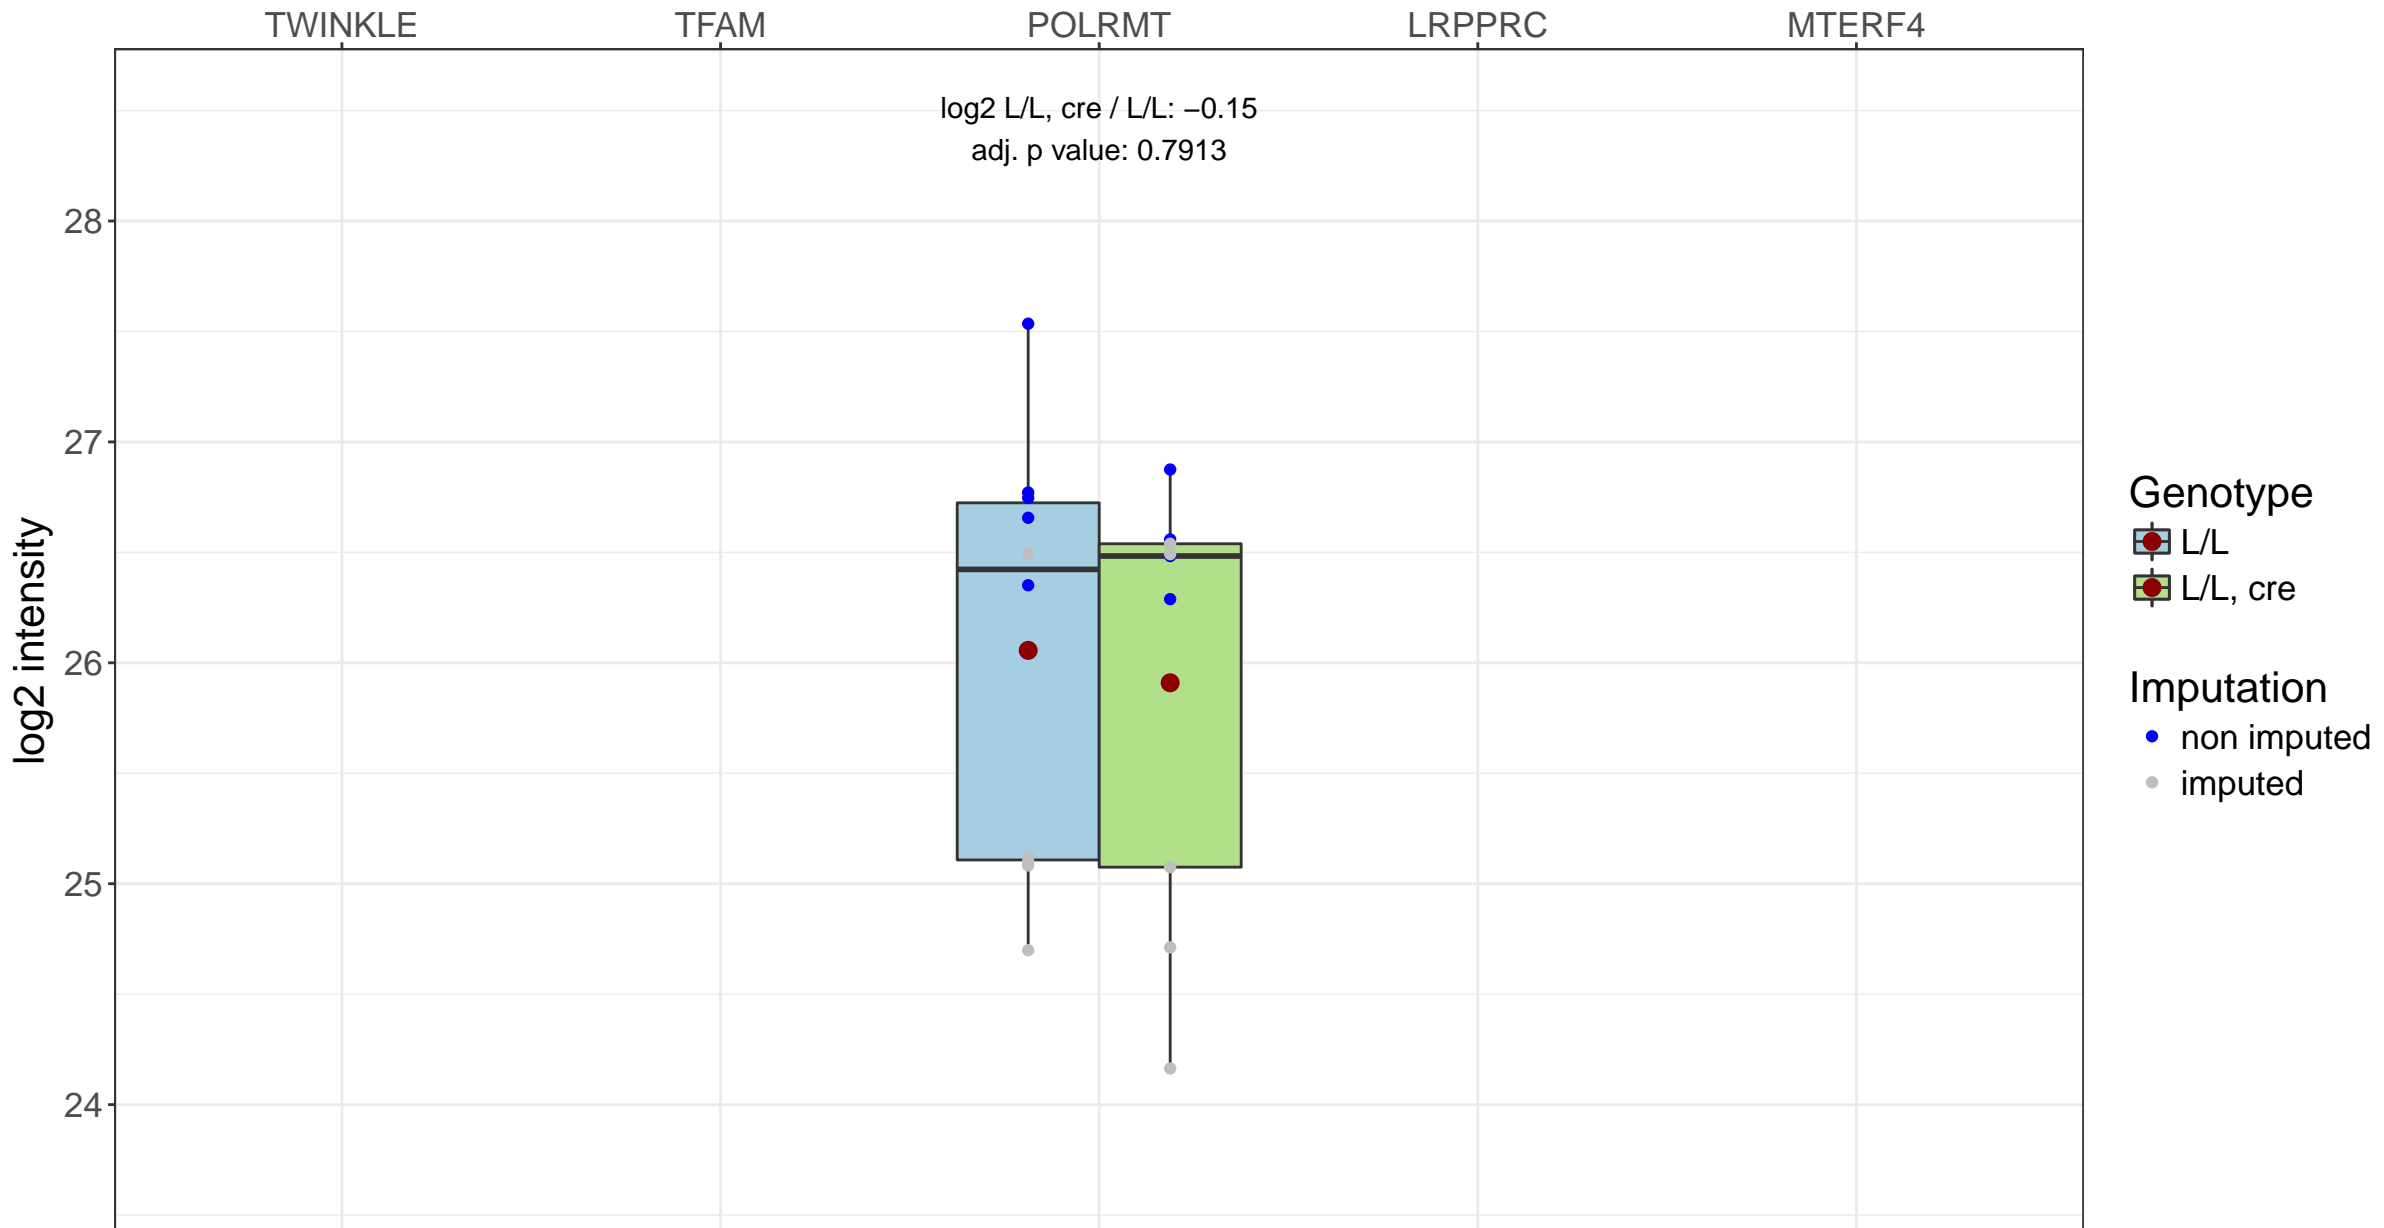

# GOLGB1 / E9QAH1

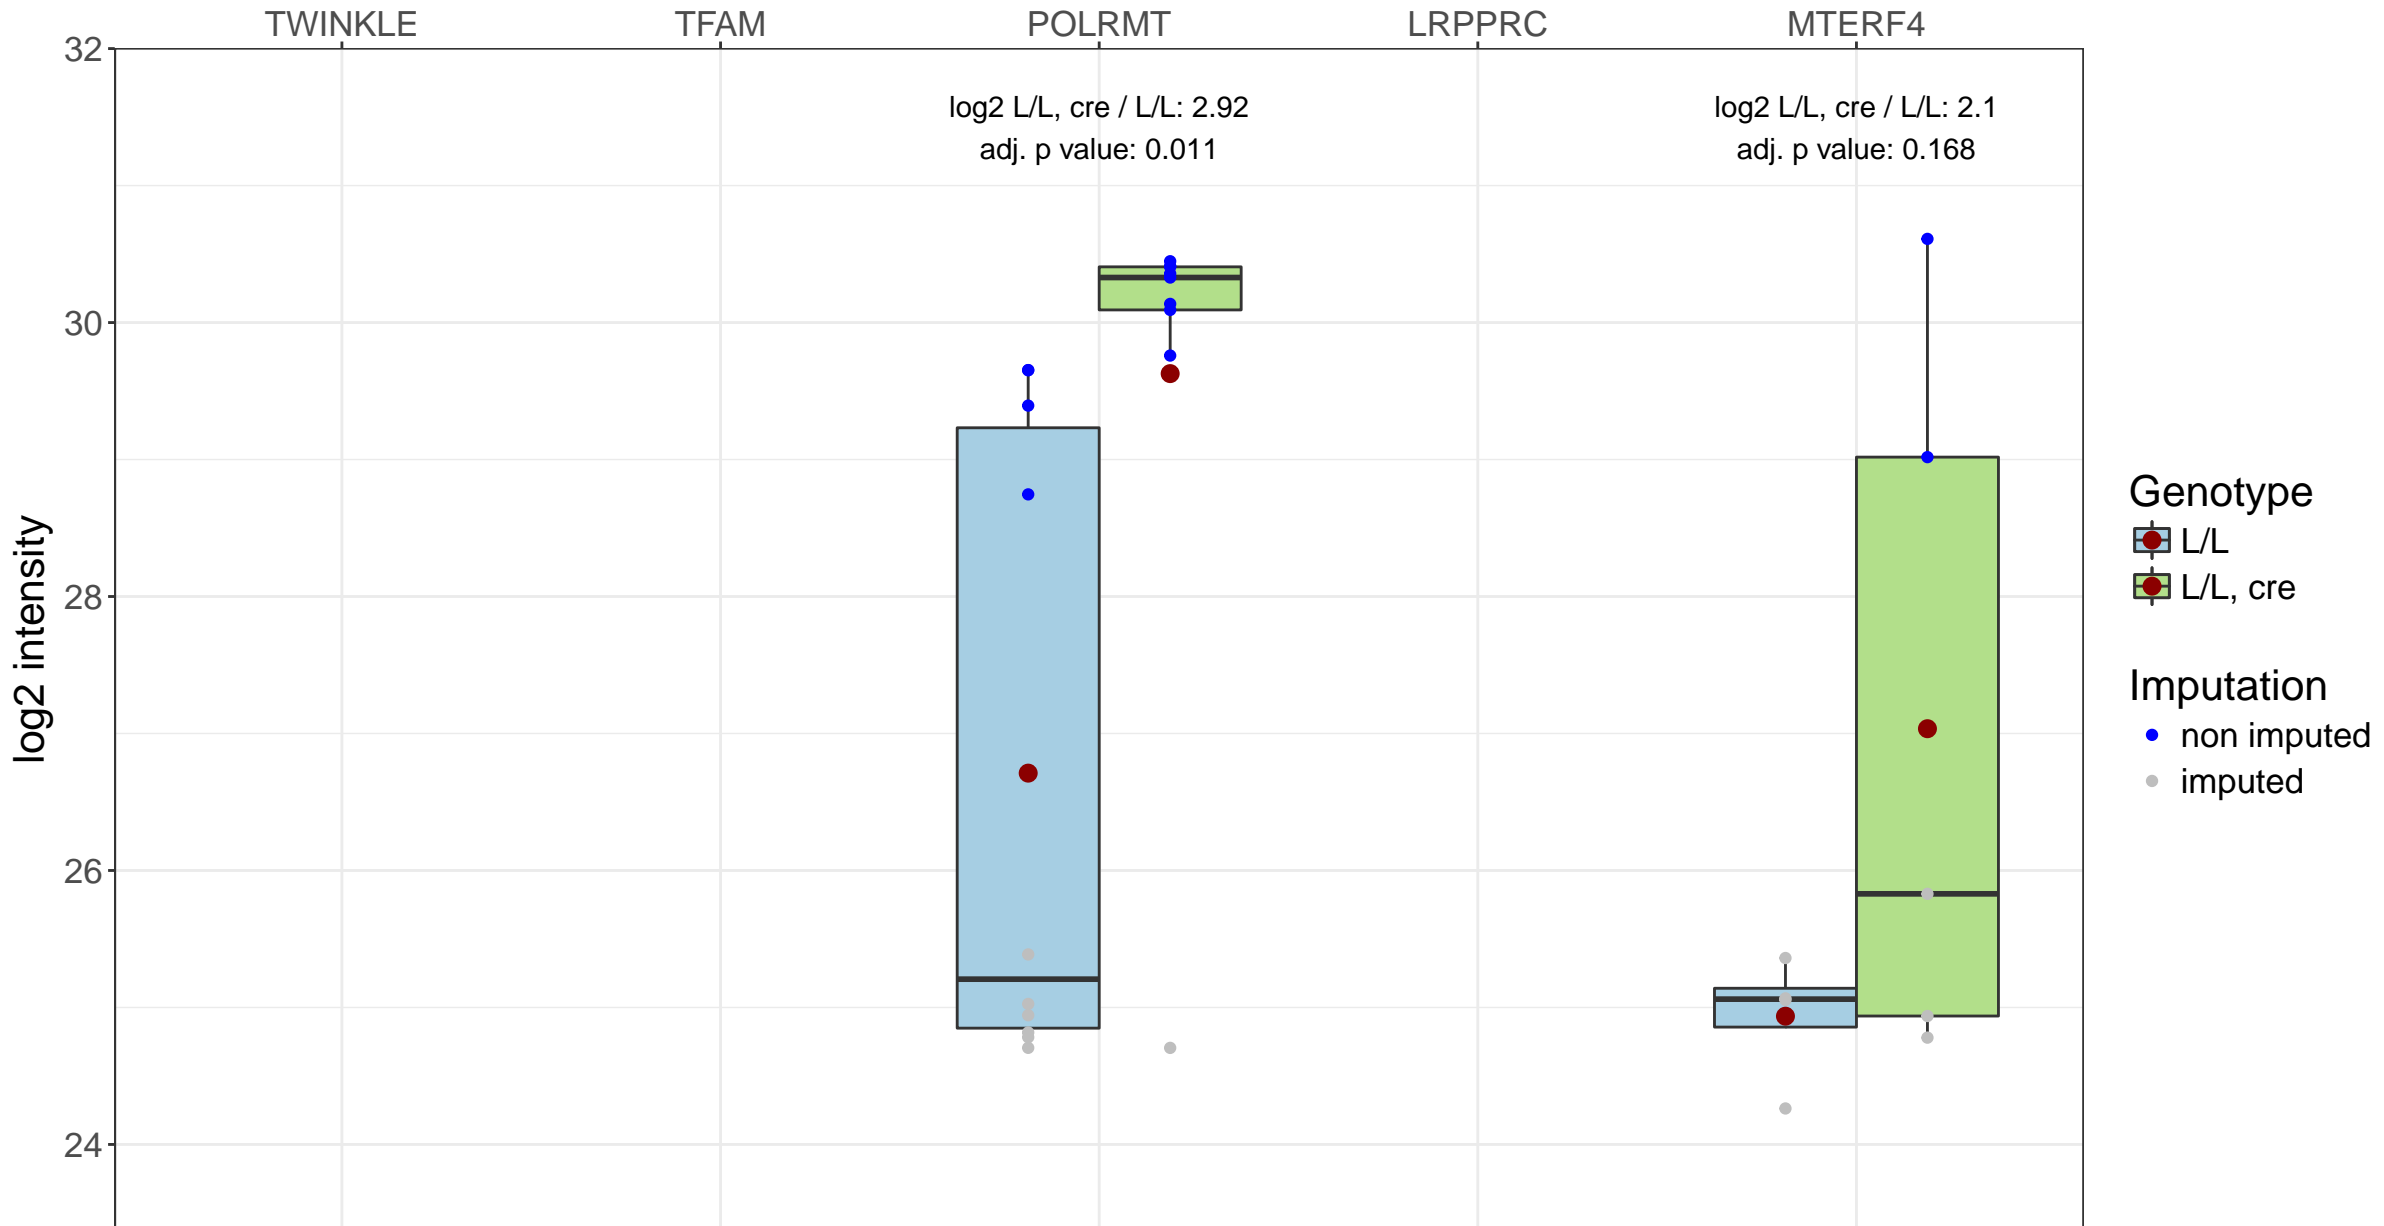

# GOT2 / P05202

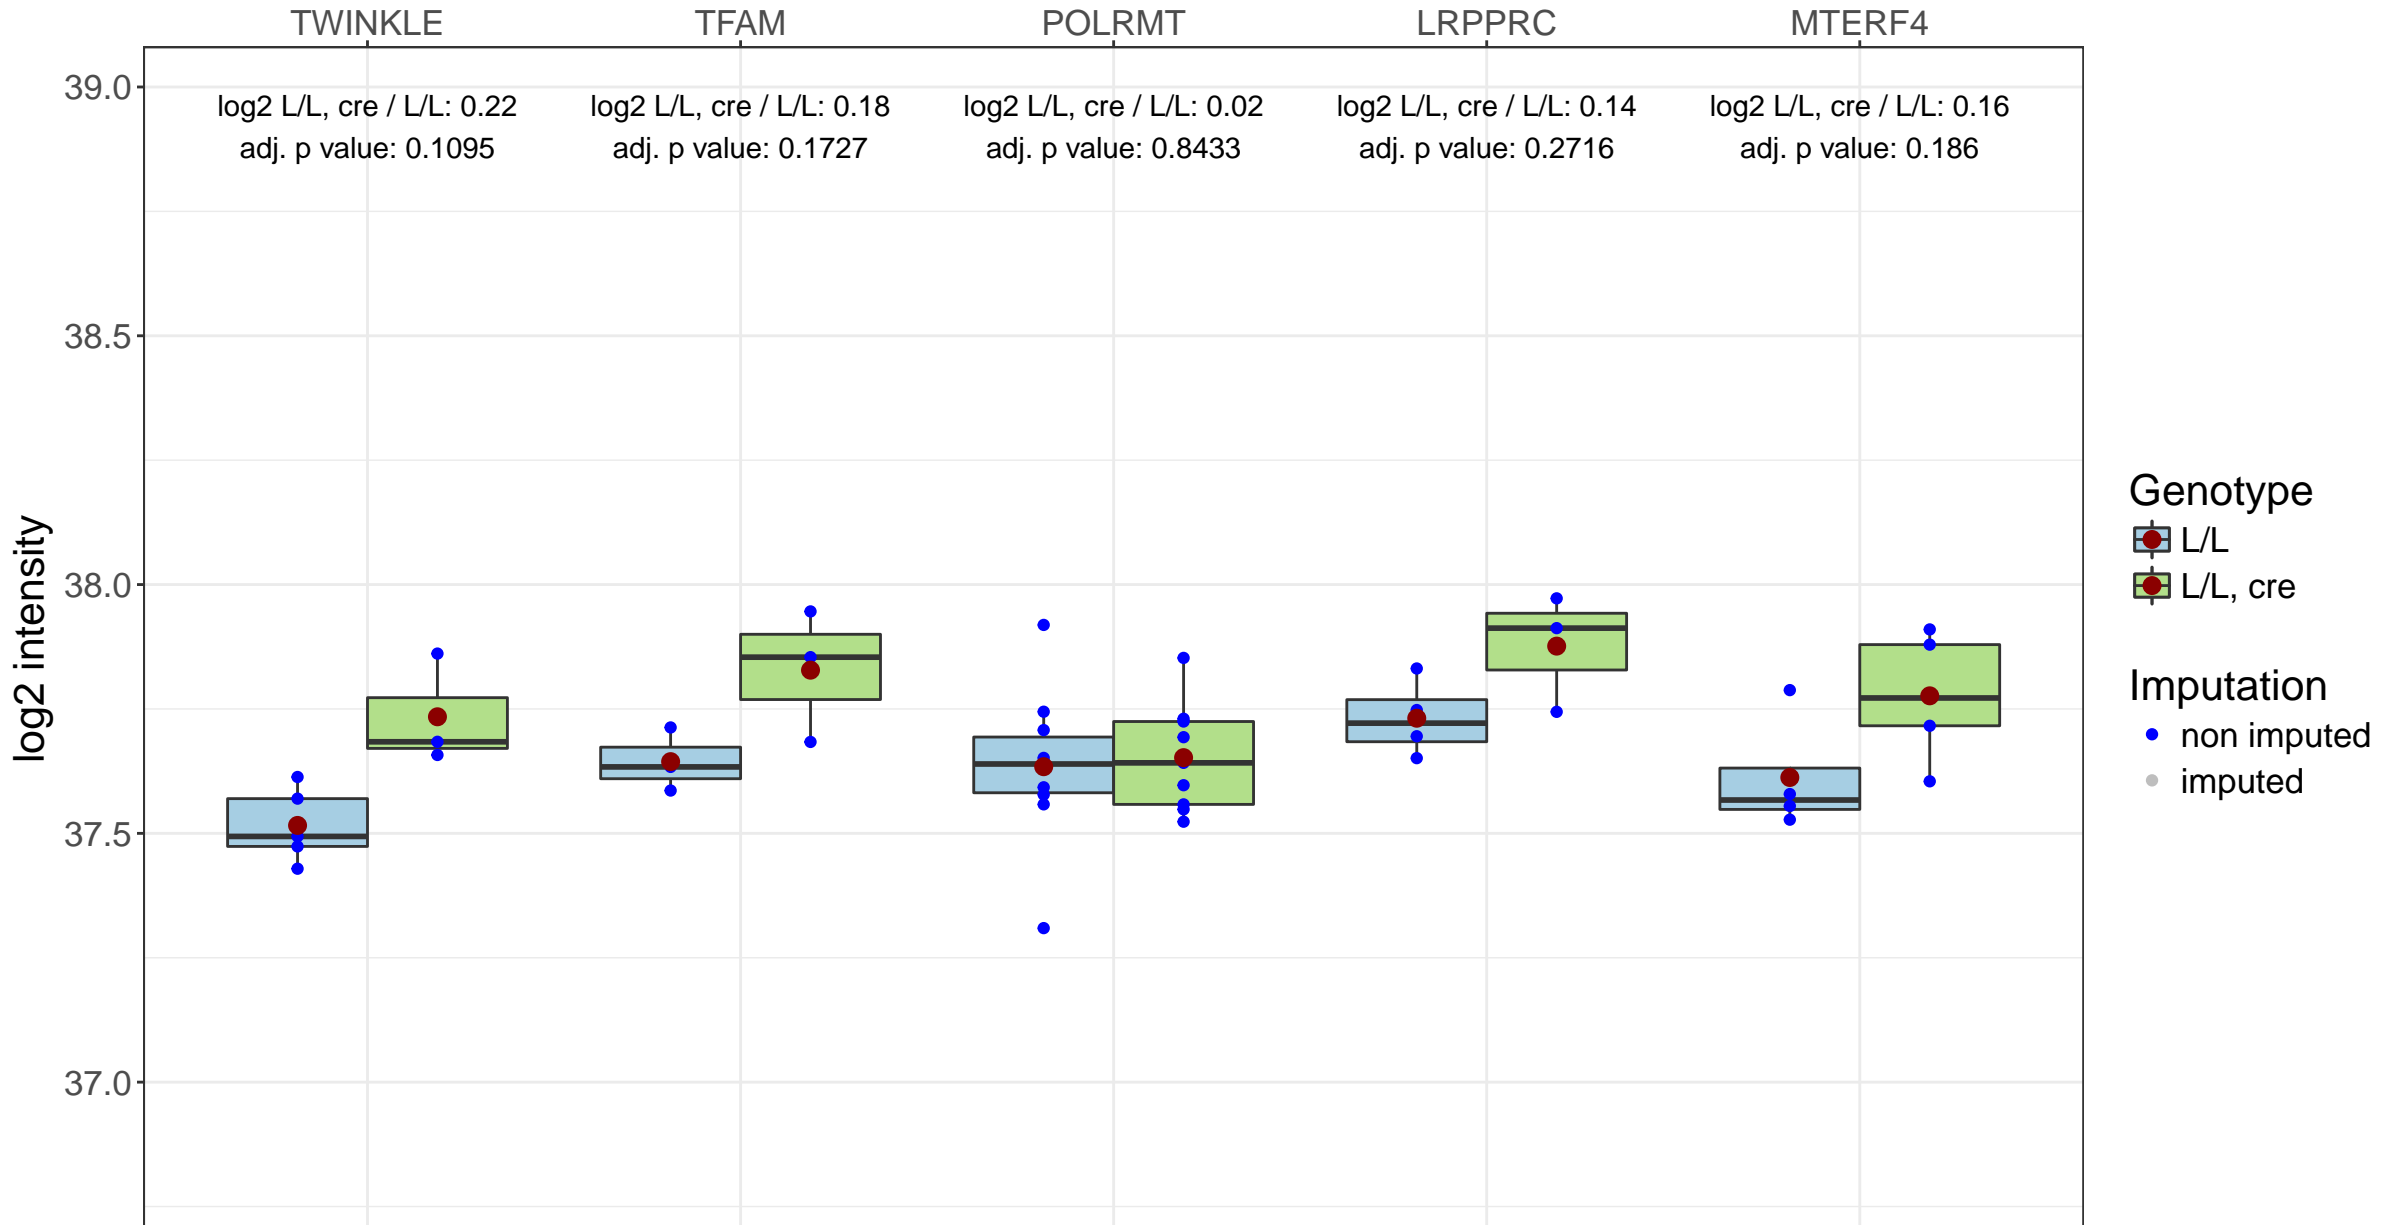

# GPAM / Q61586

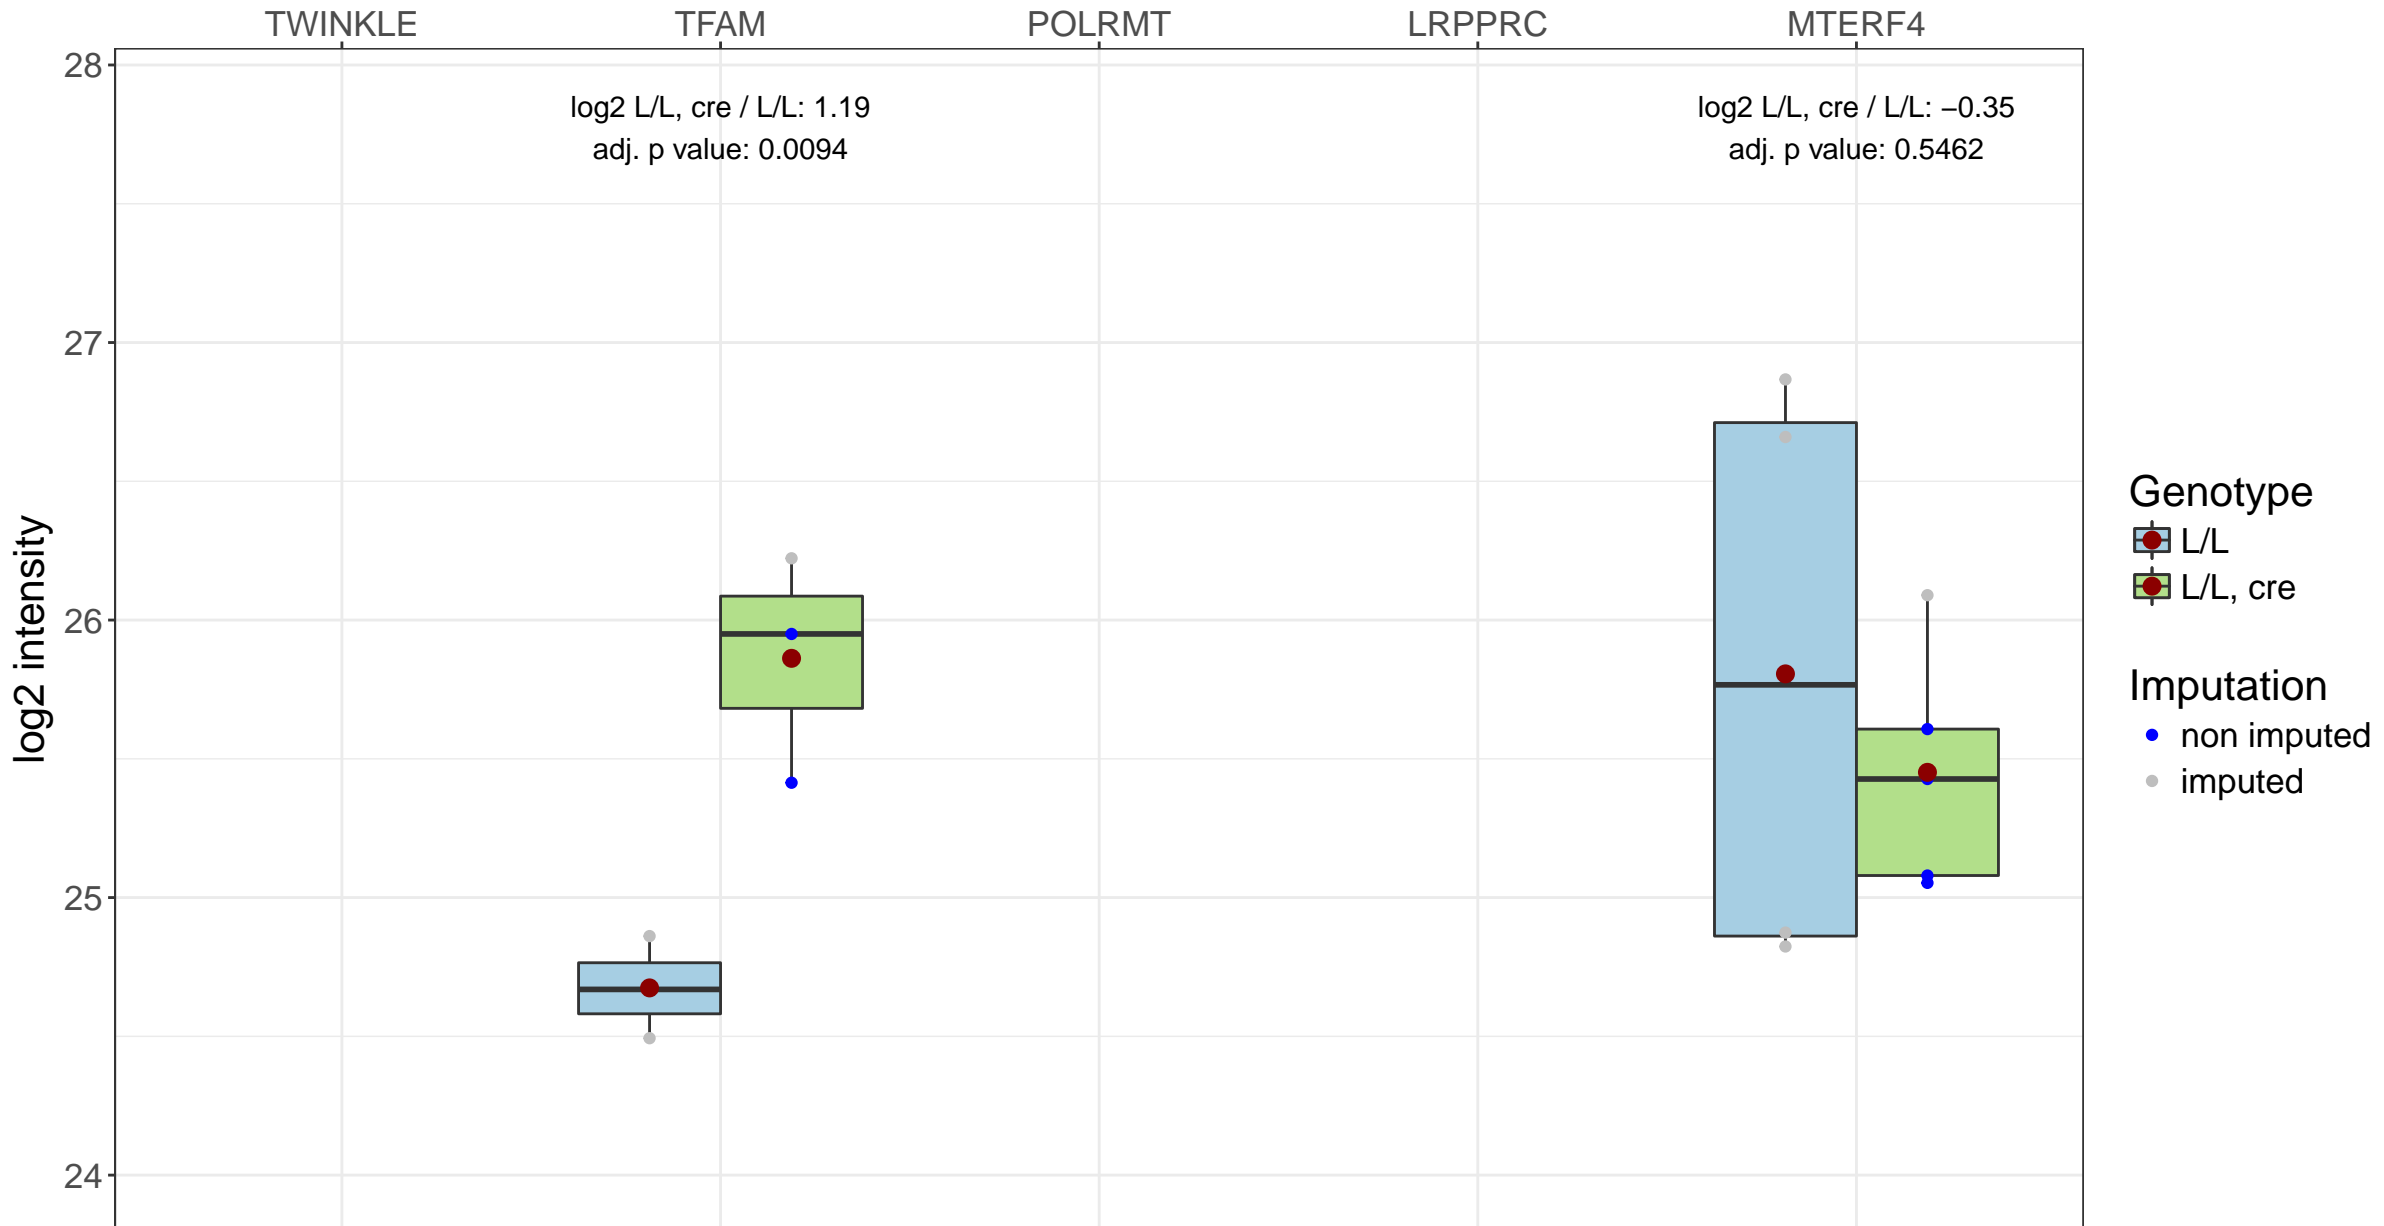

# GPD1L / Q3ULJ0

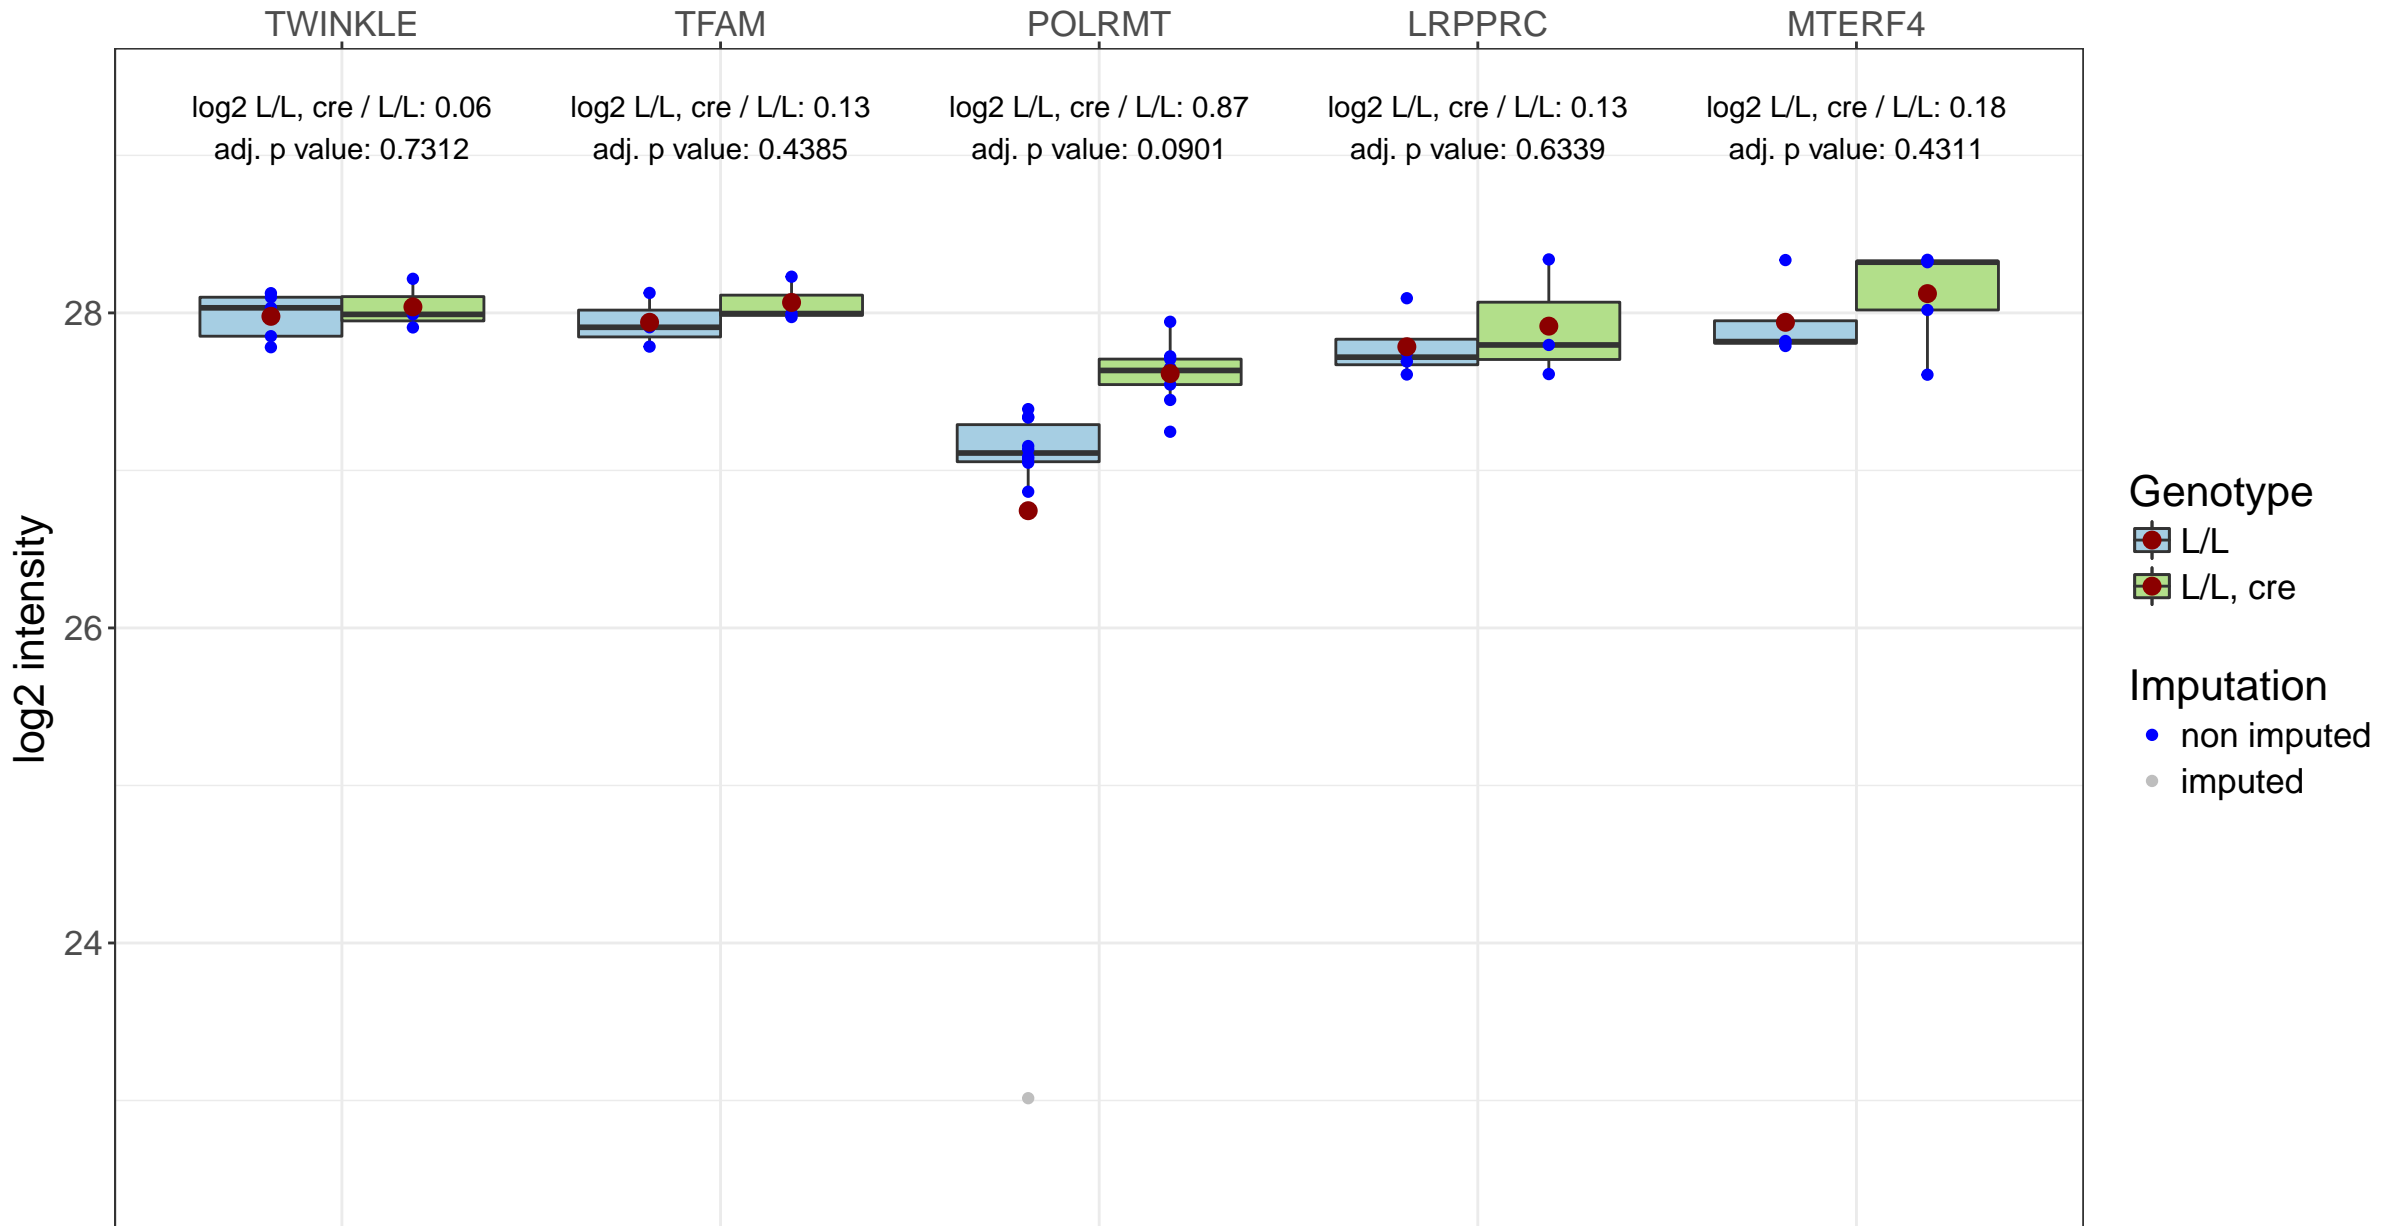



# GPD2 / Q64521

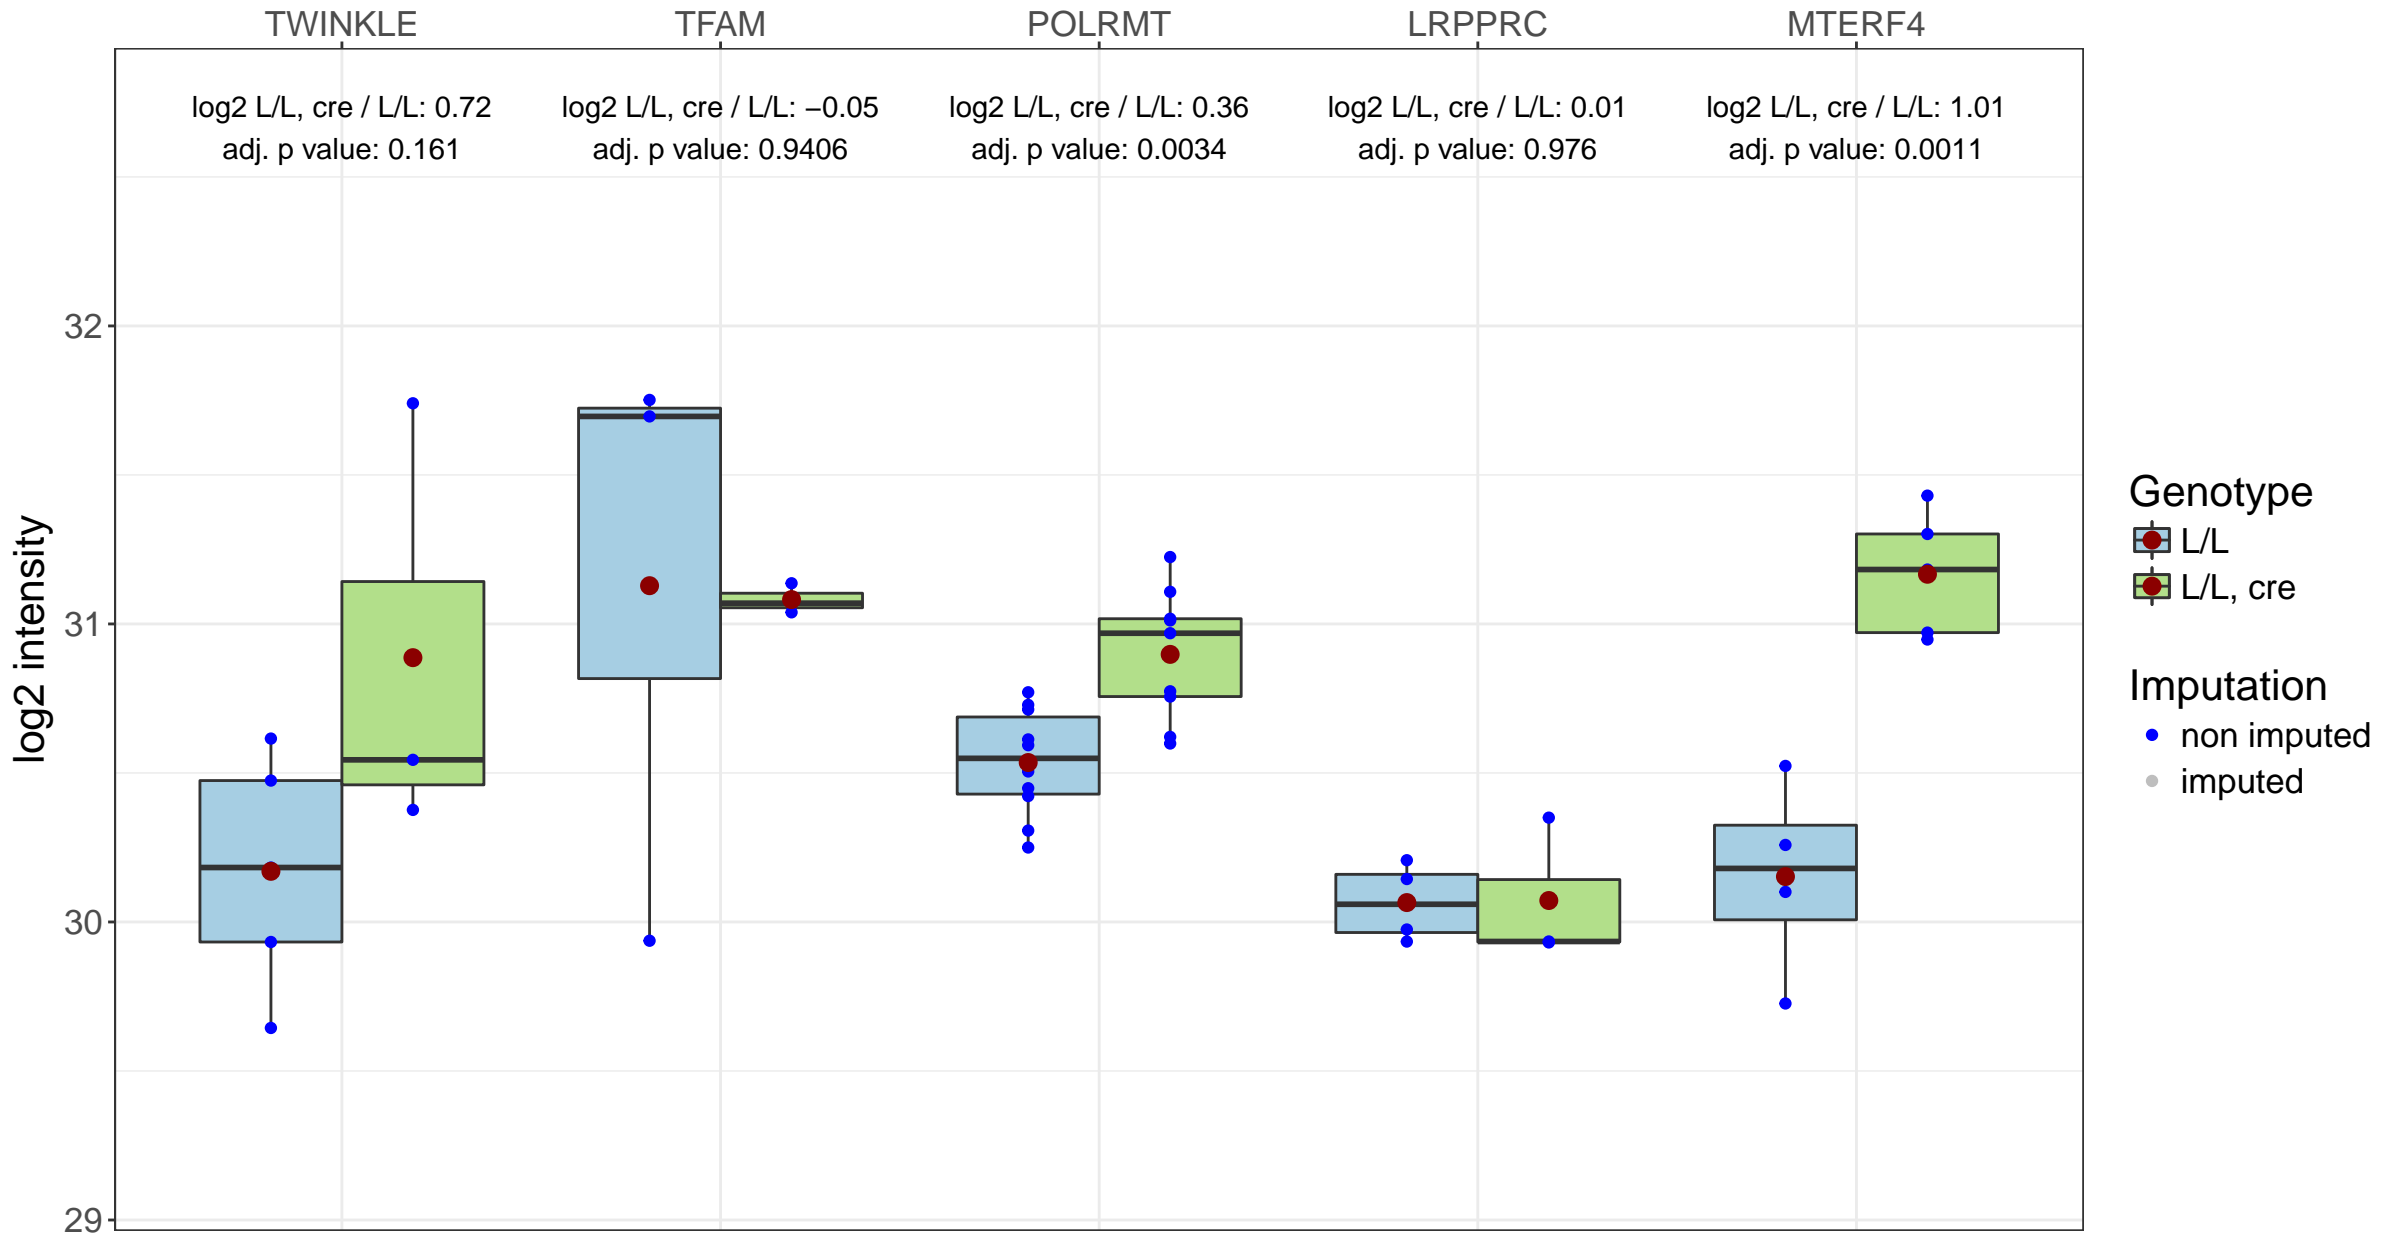

# GPI / P06745

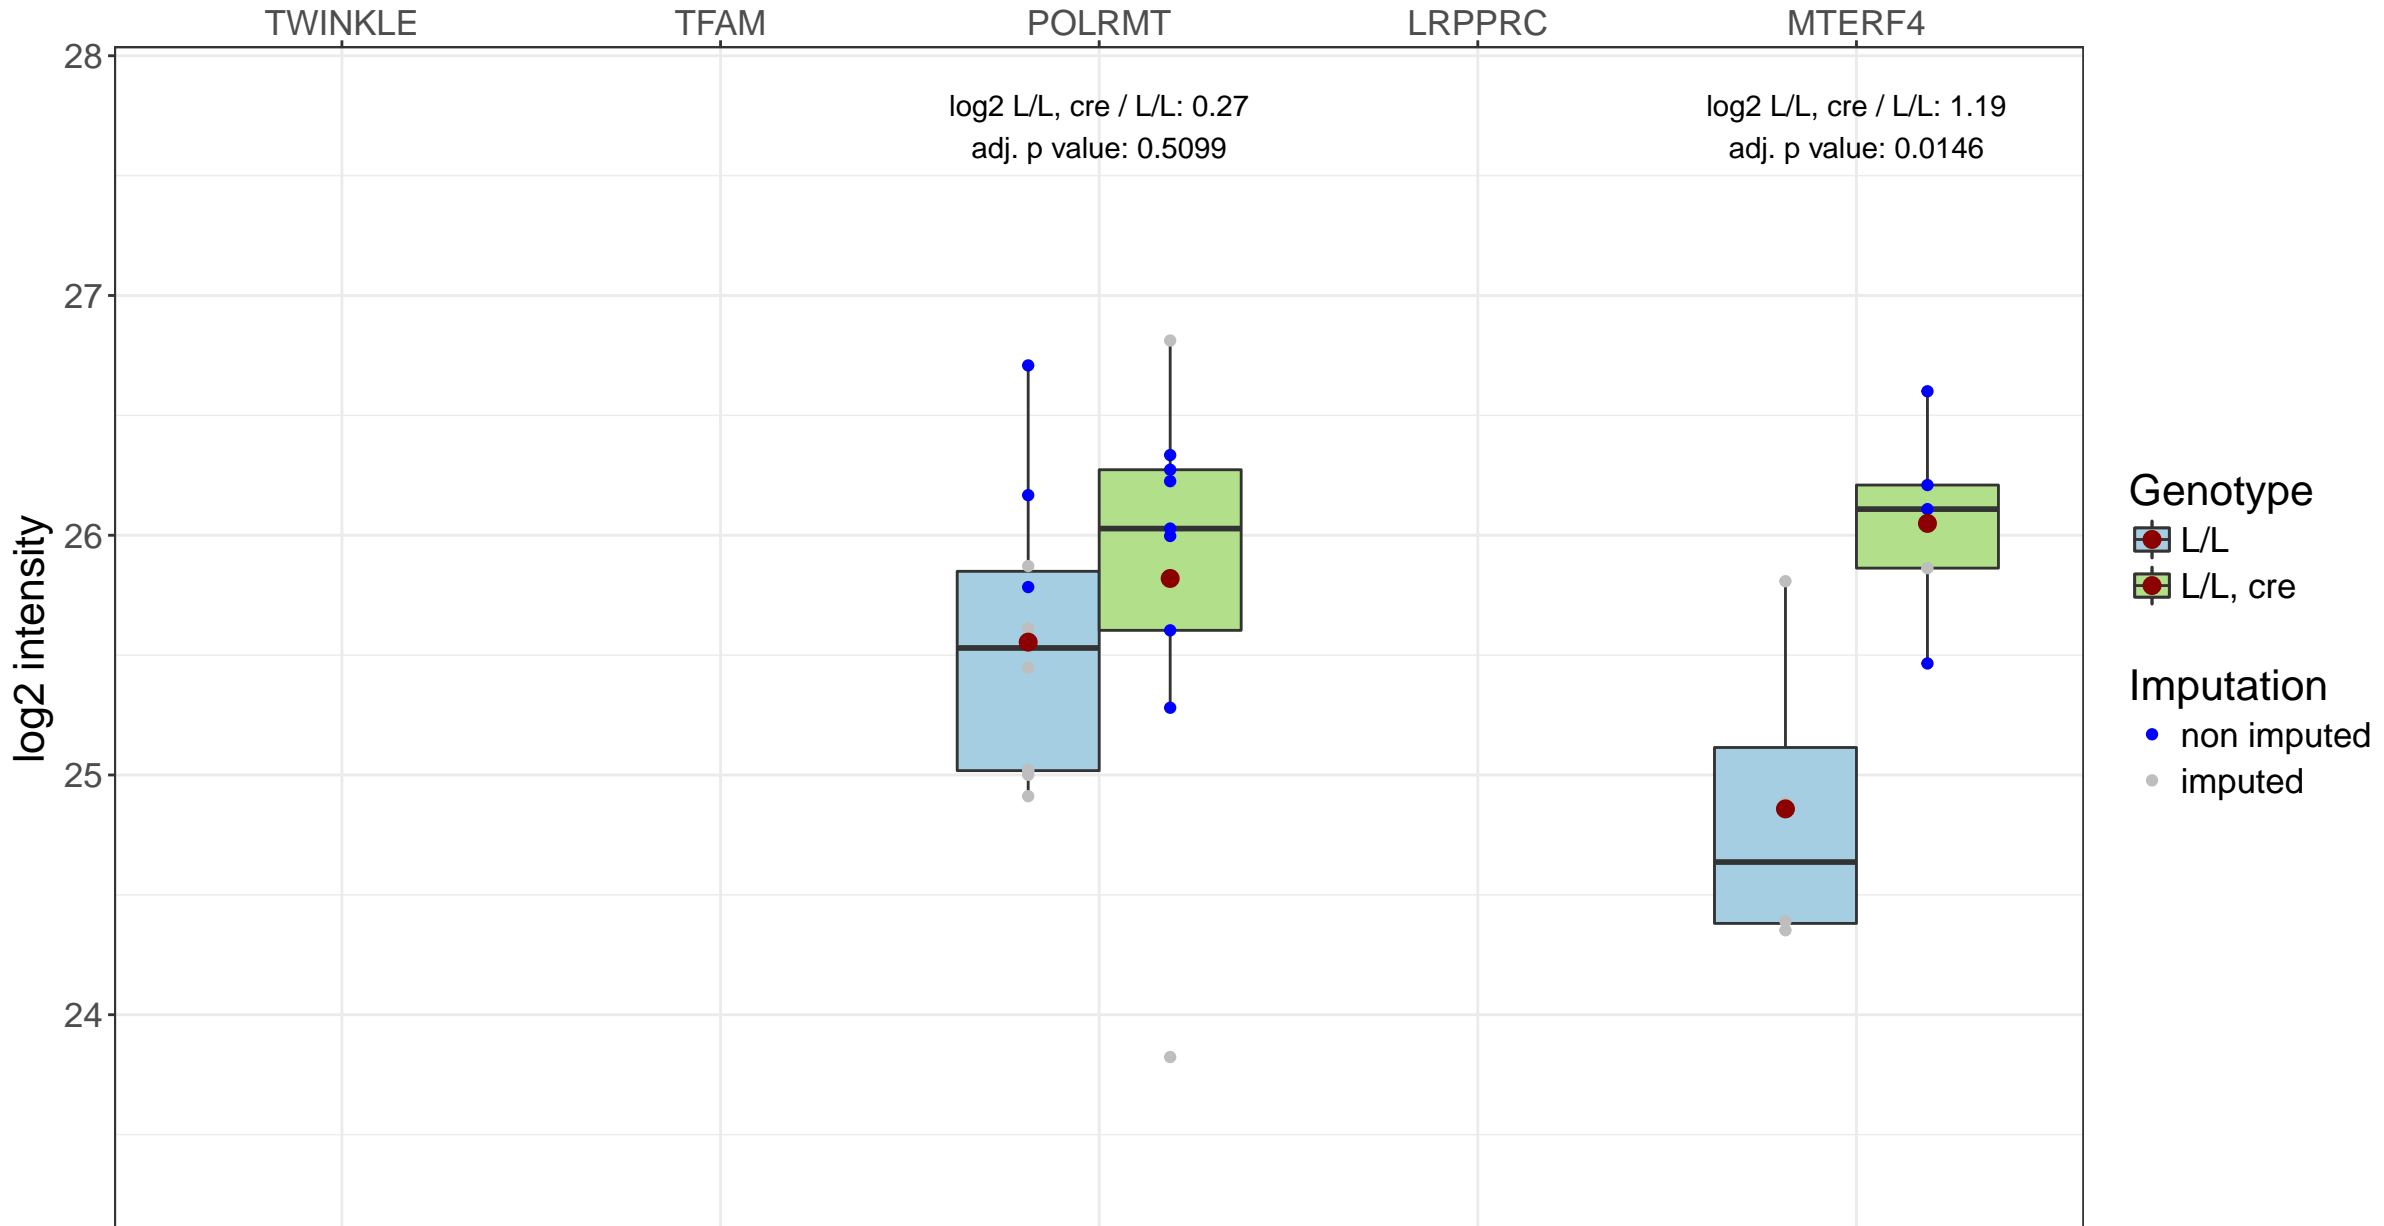

# GPT2 / Q8BGT5

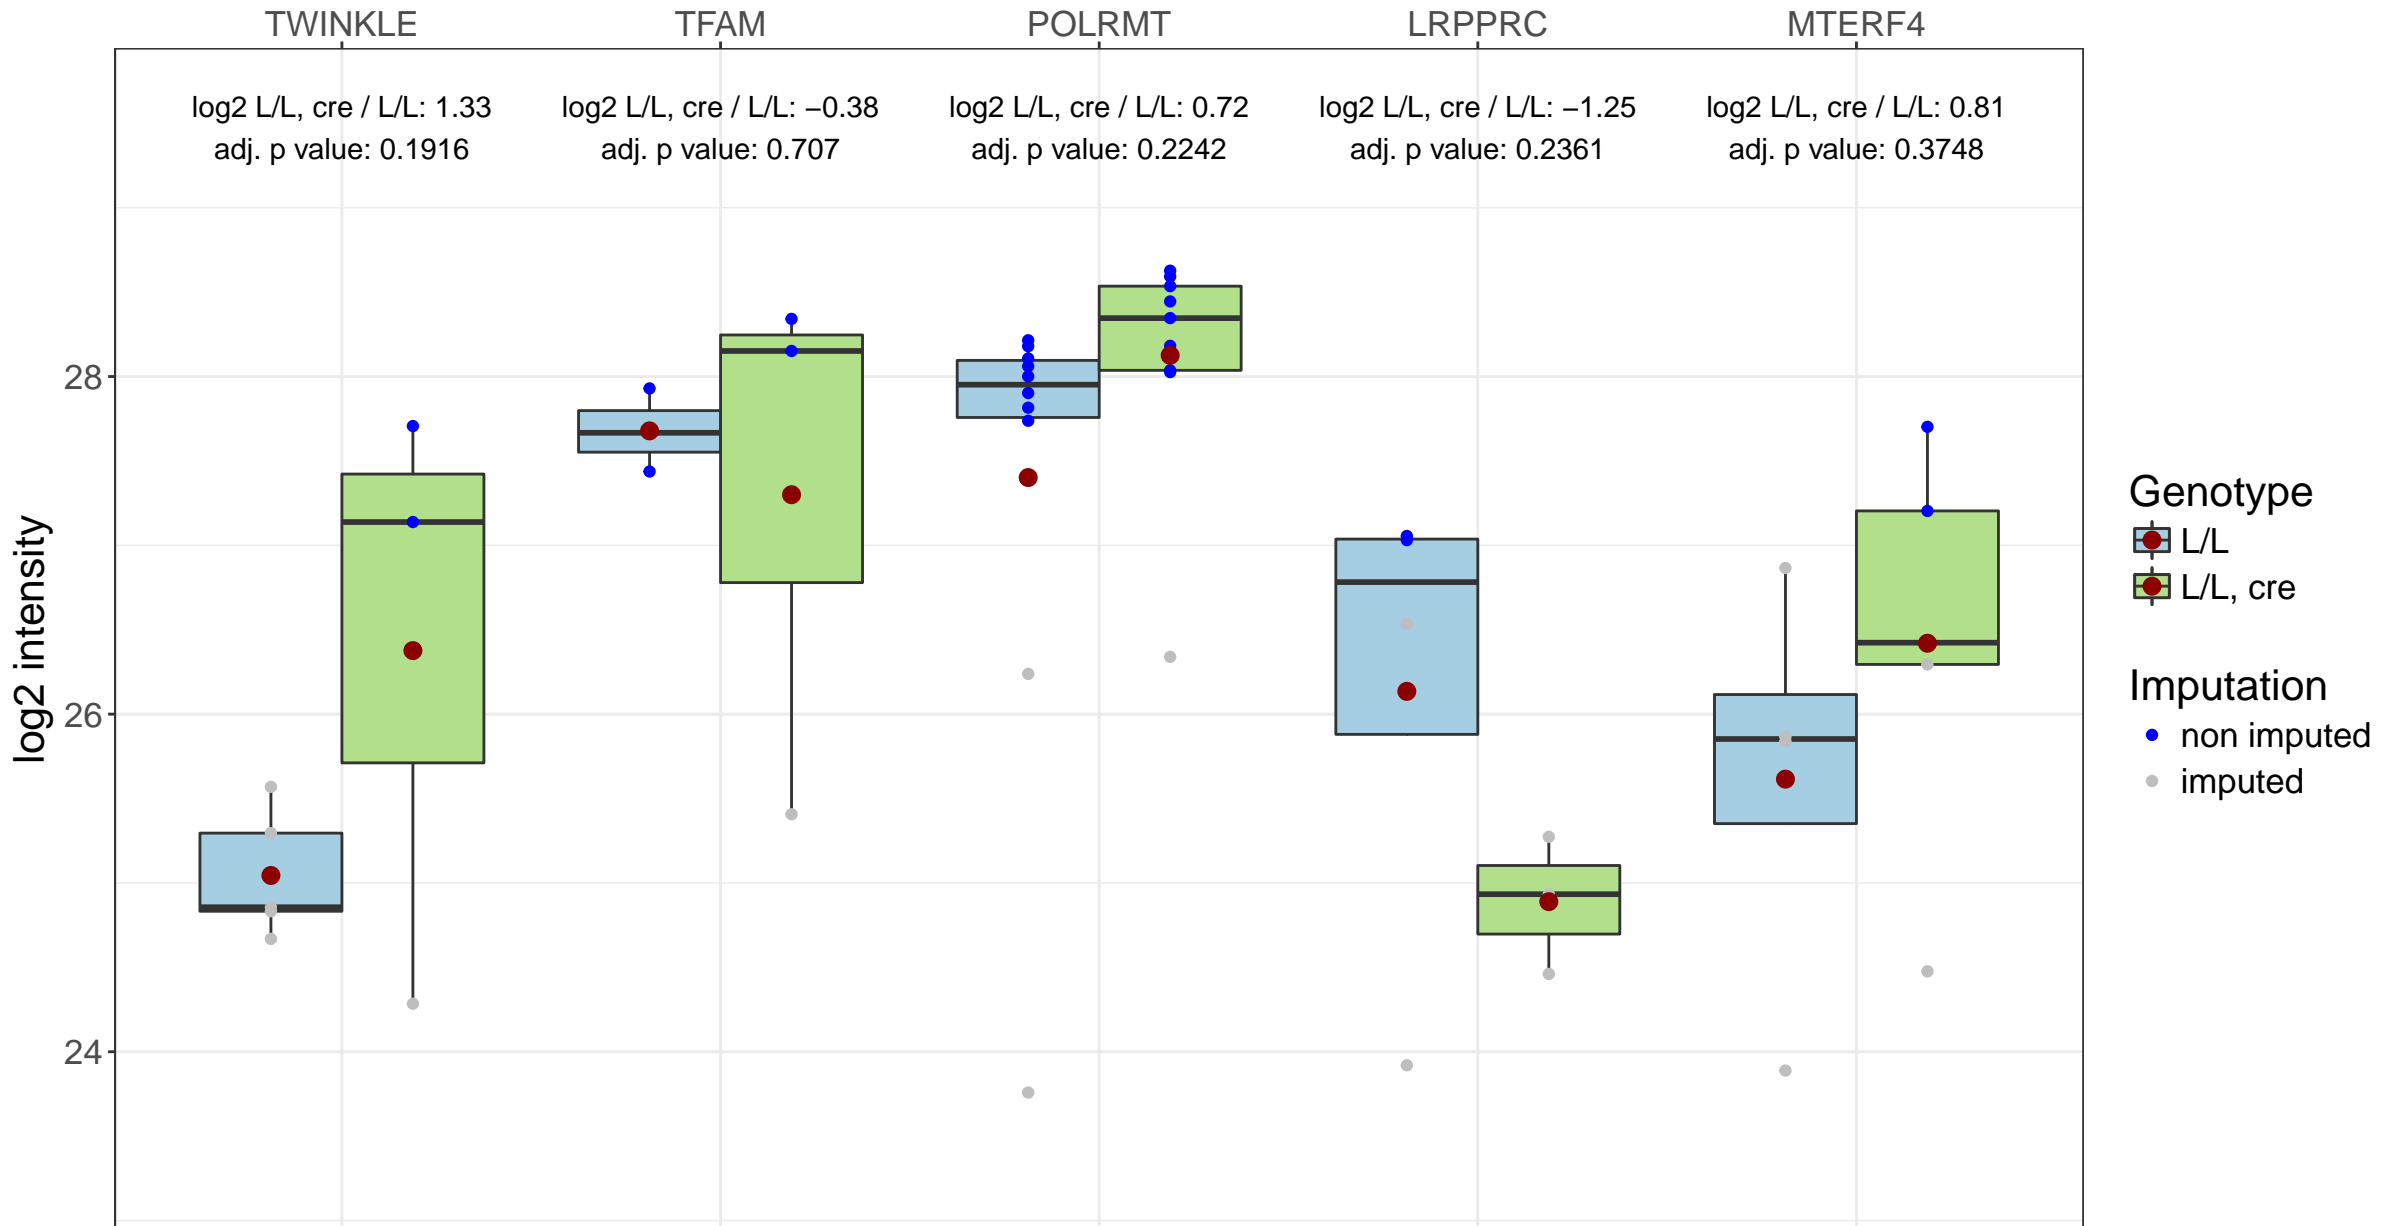

# GPX1 / P11352

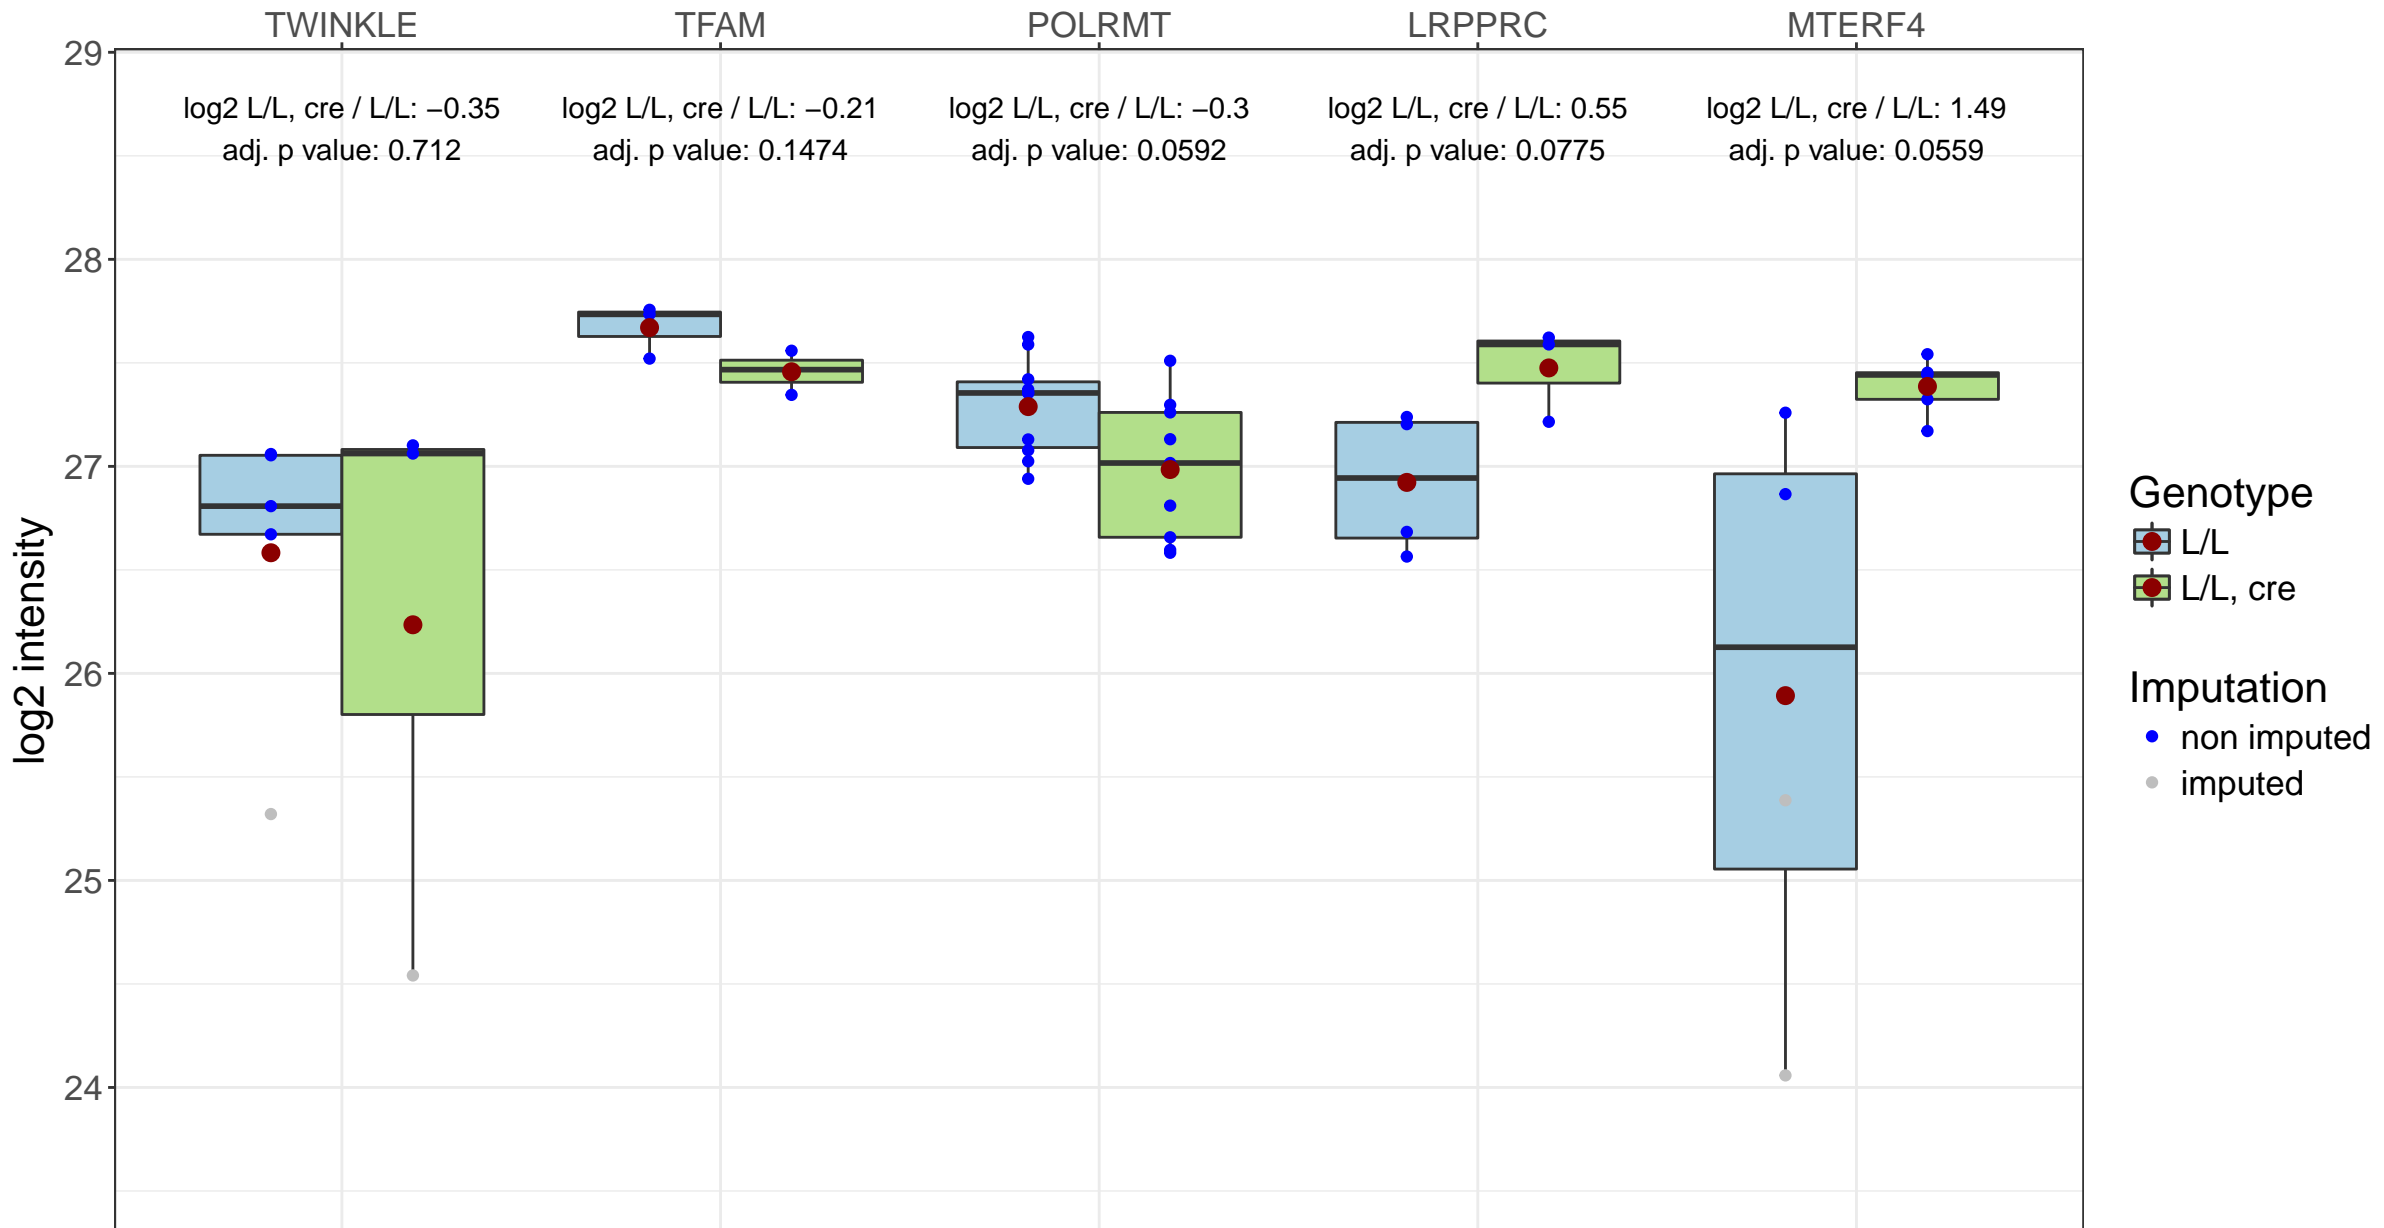

# GPX4 / Q76LV0

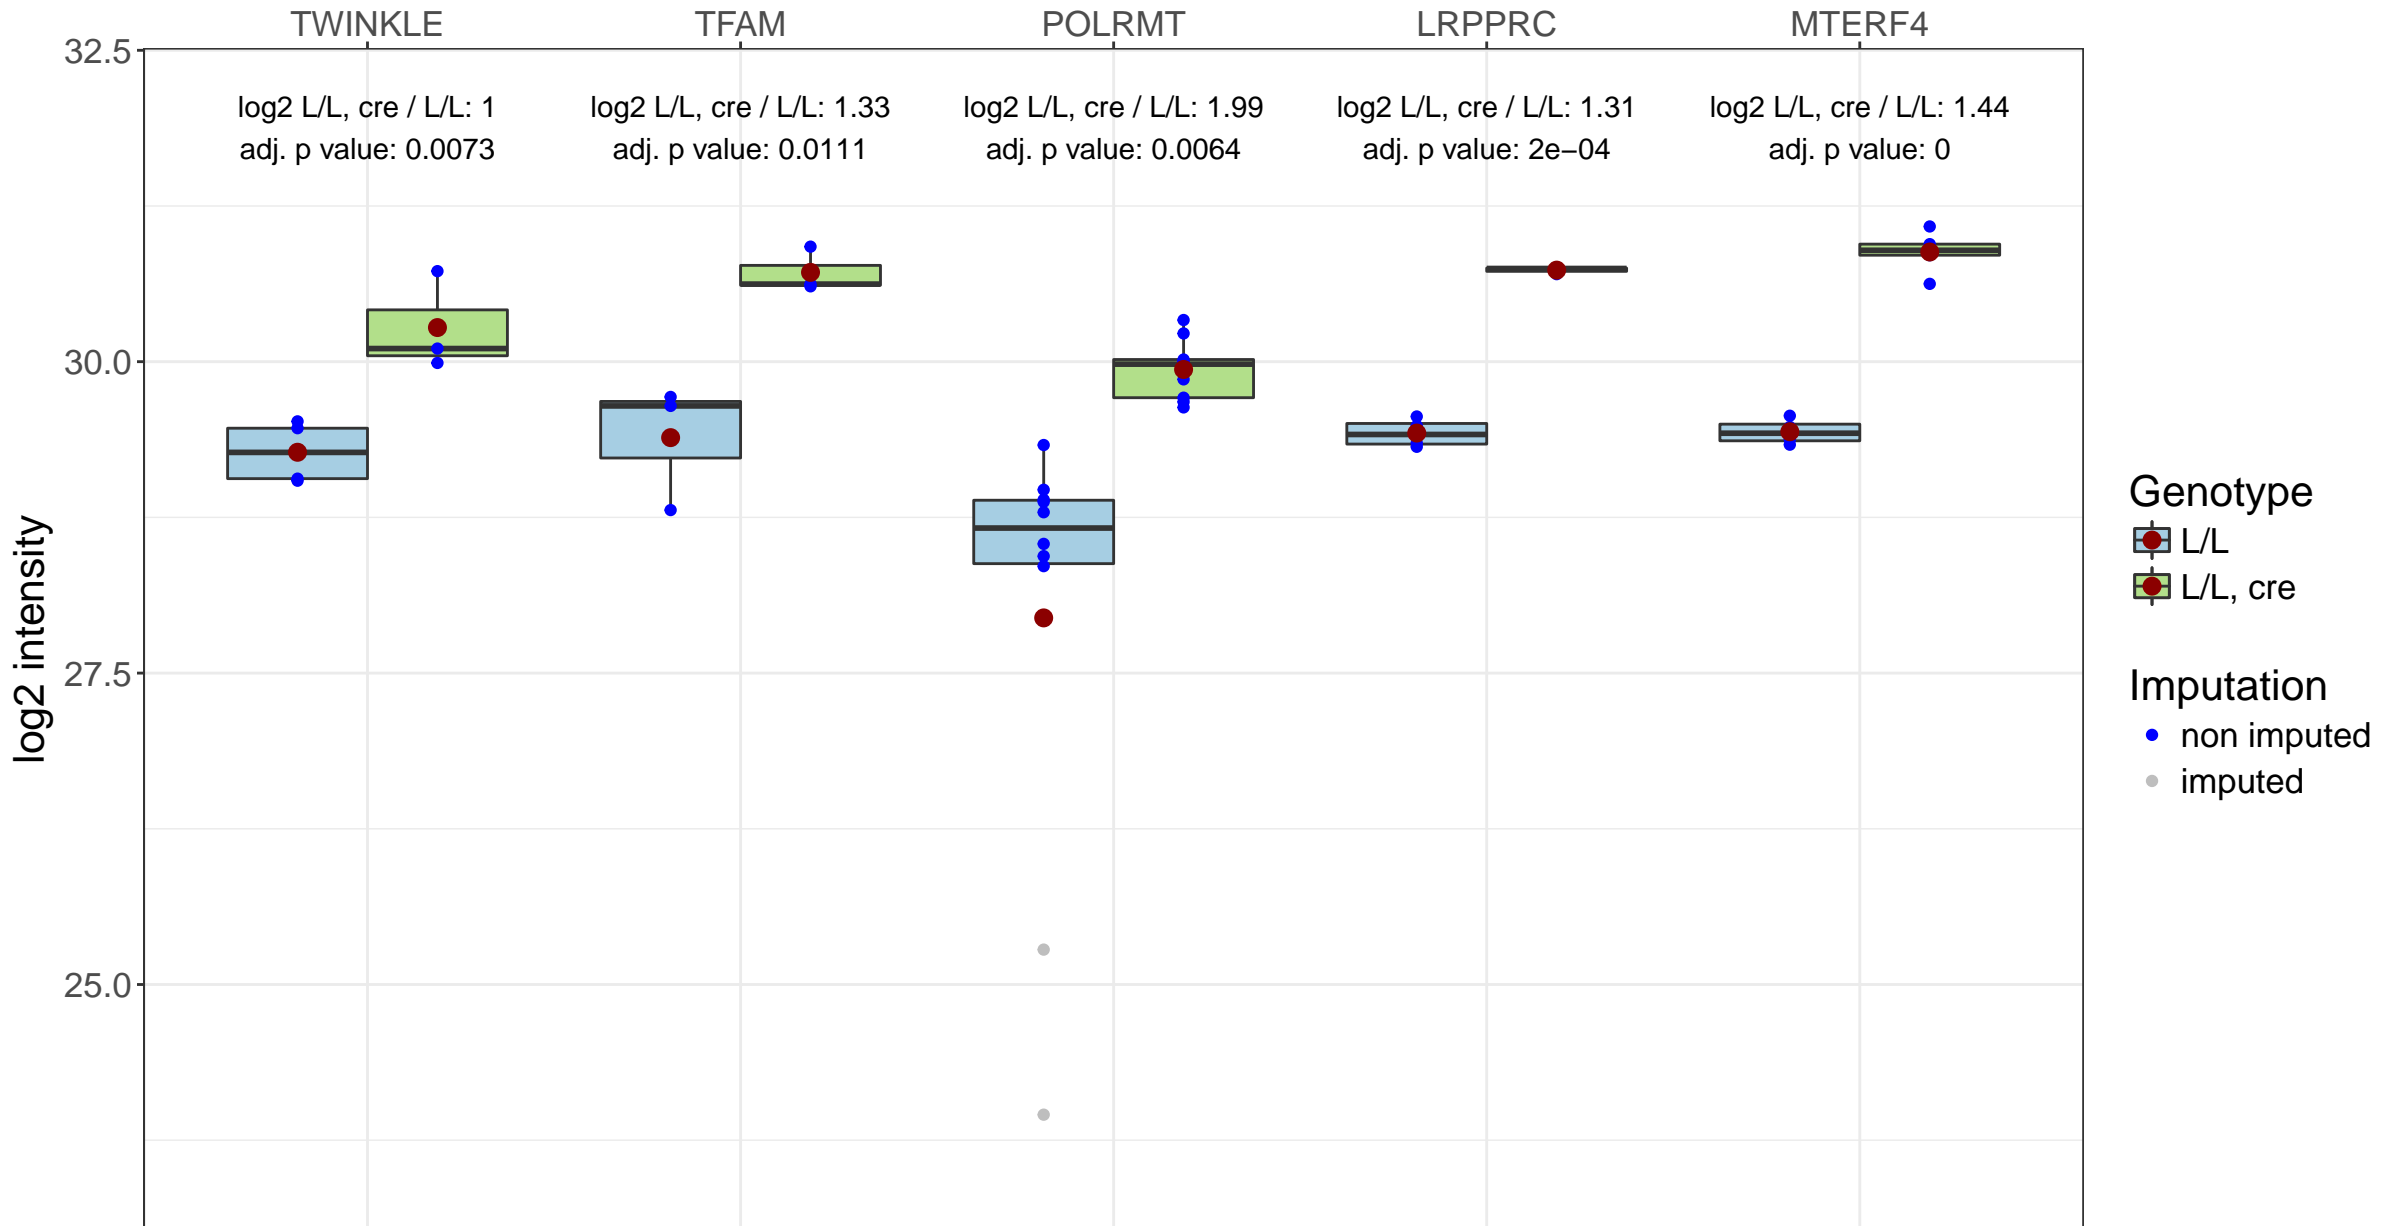

# GRHPR / Q91Z53

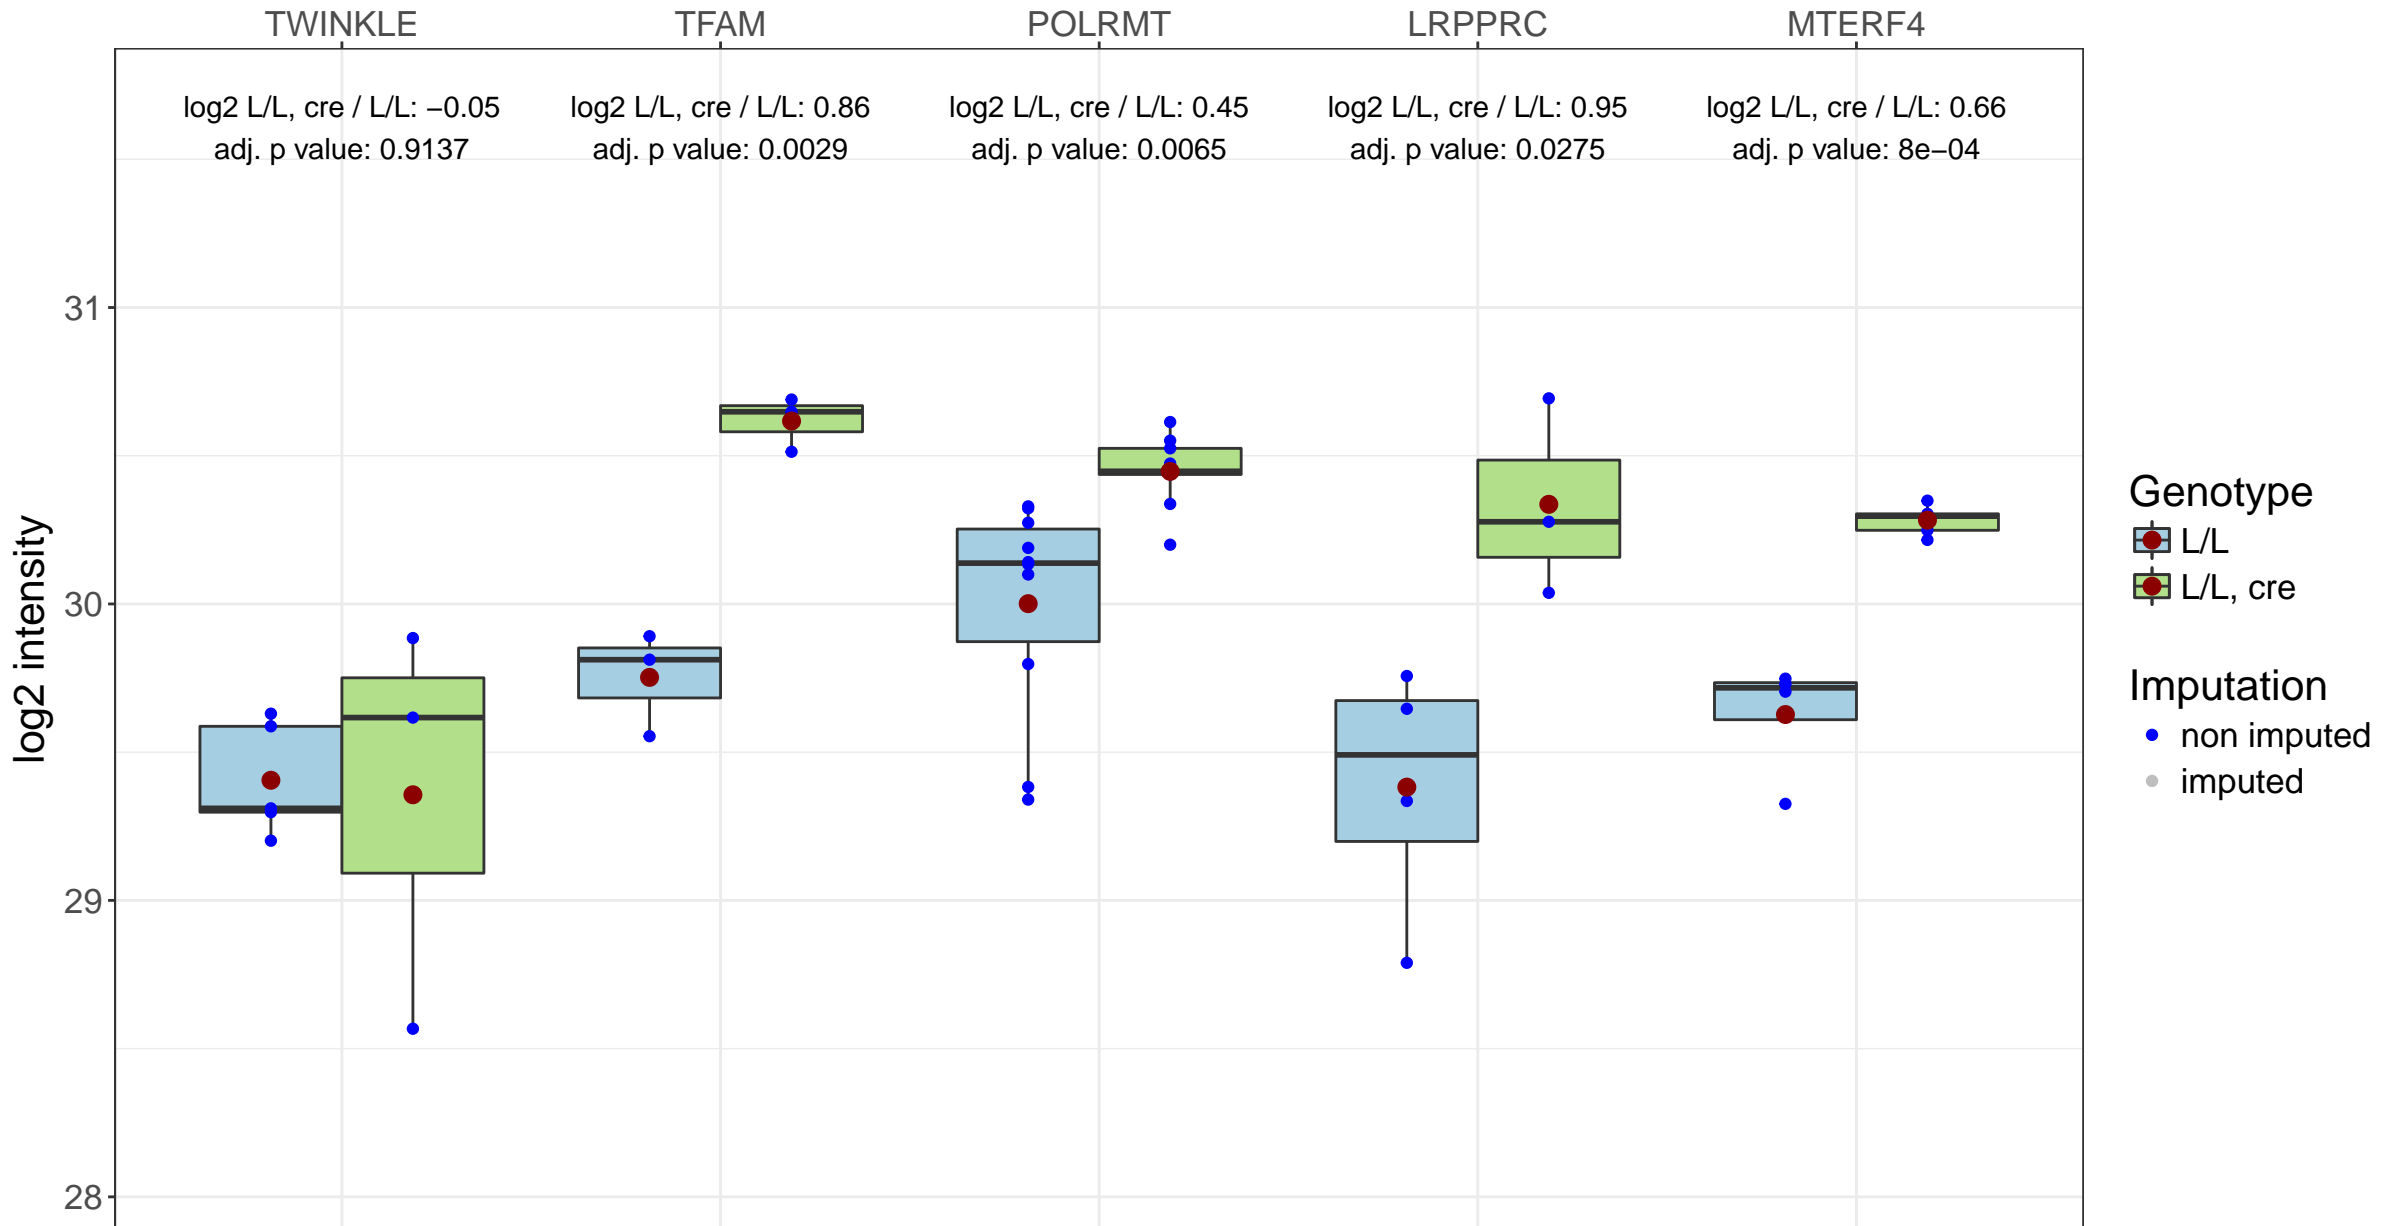

# GRN / Q3U9N4

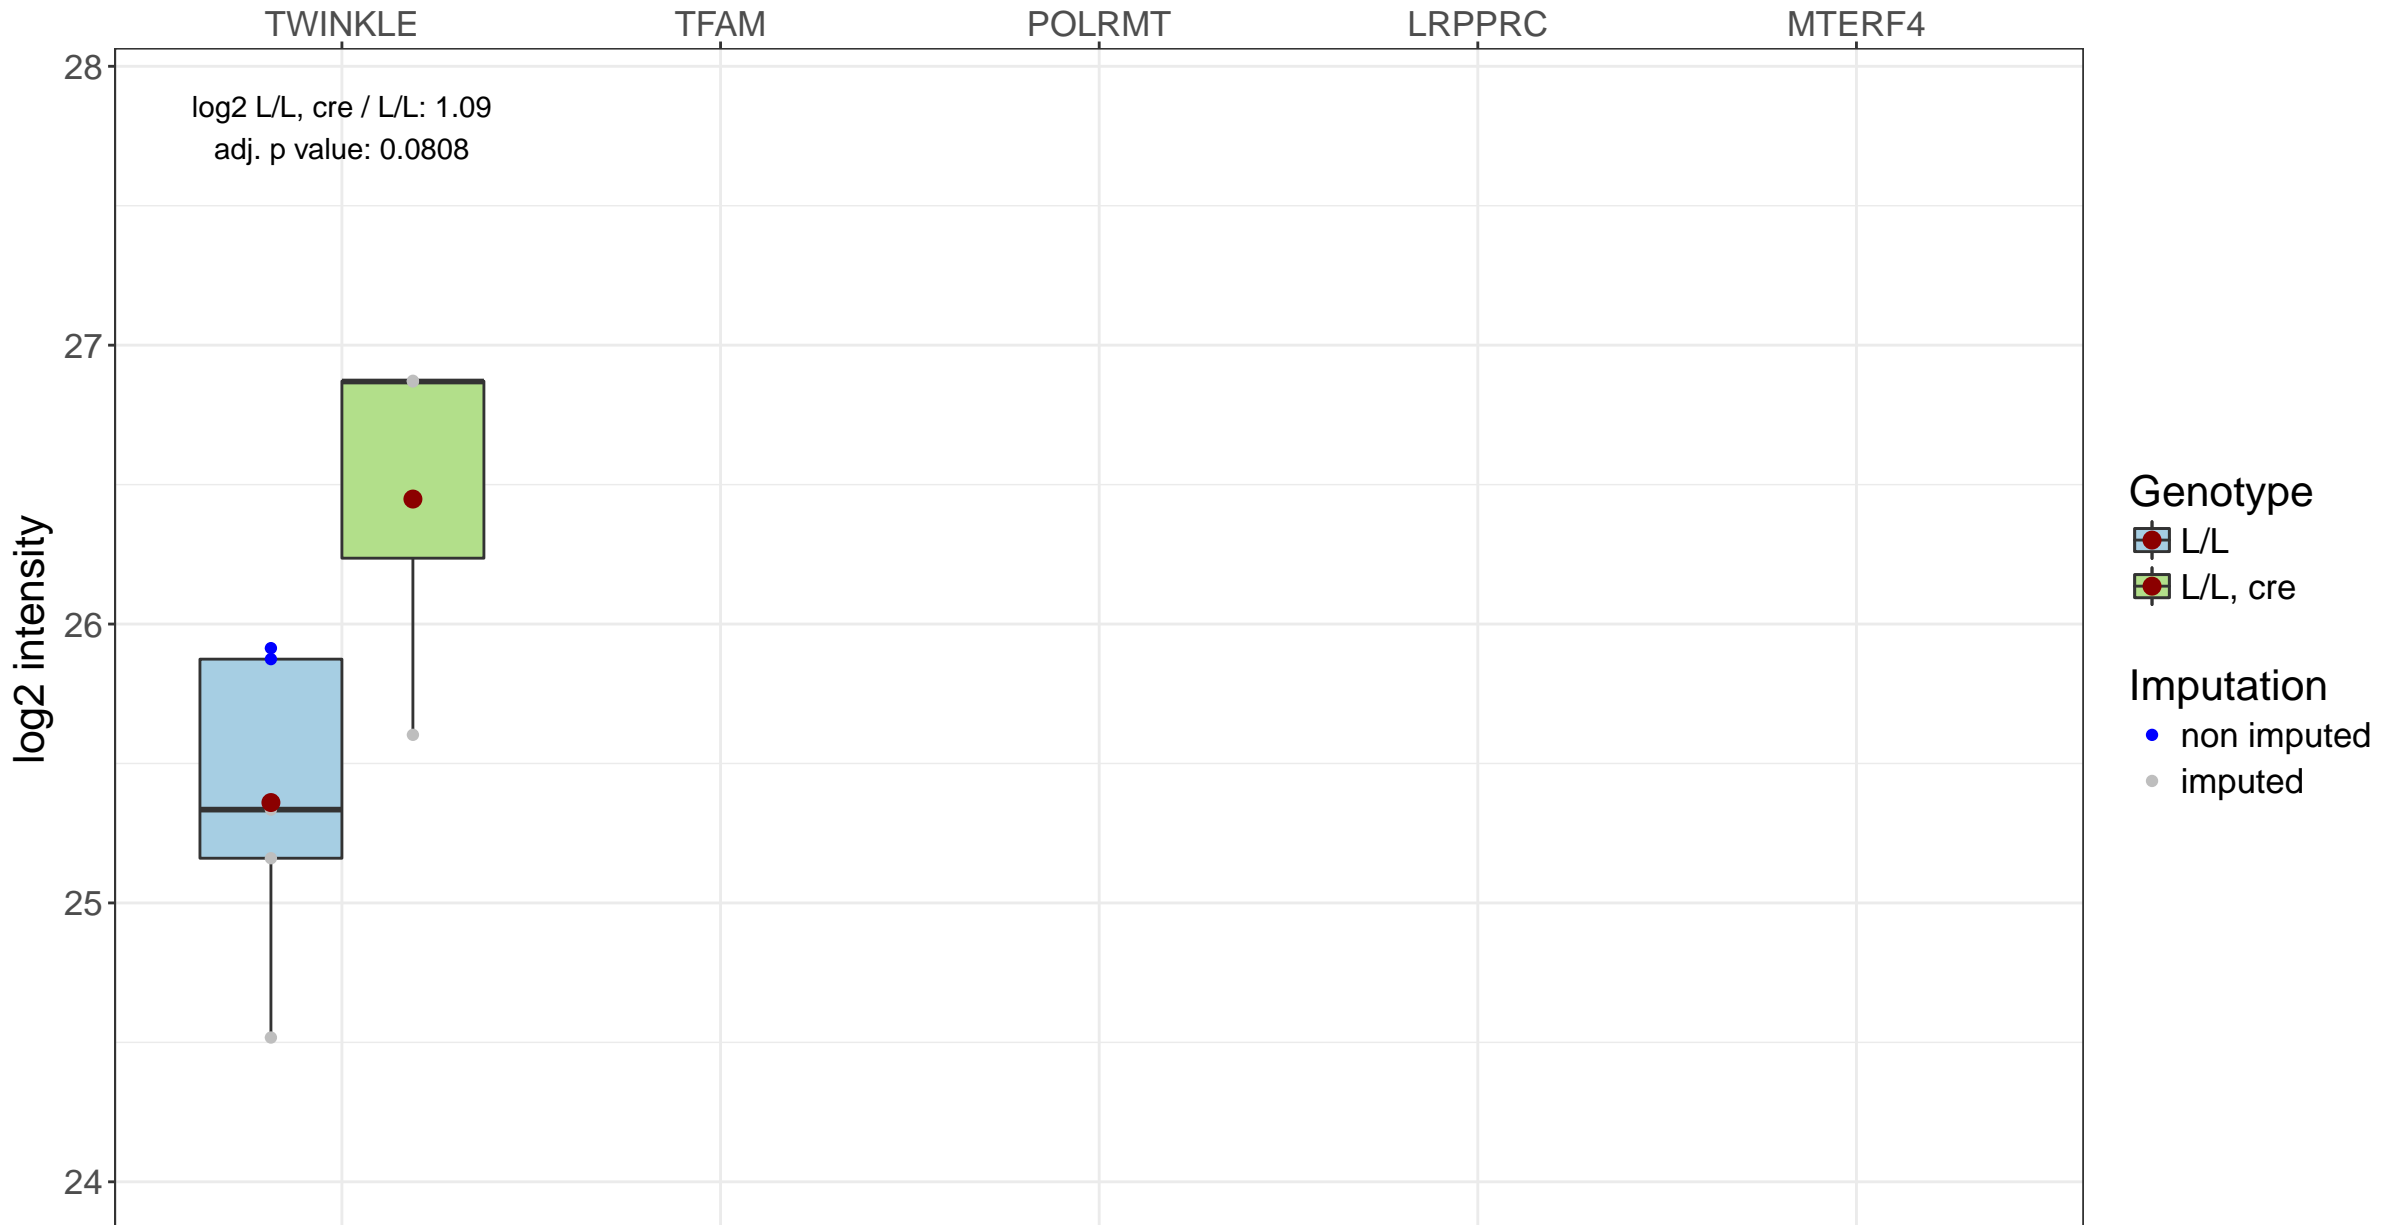

# GRPEL1 / Q99LP6

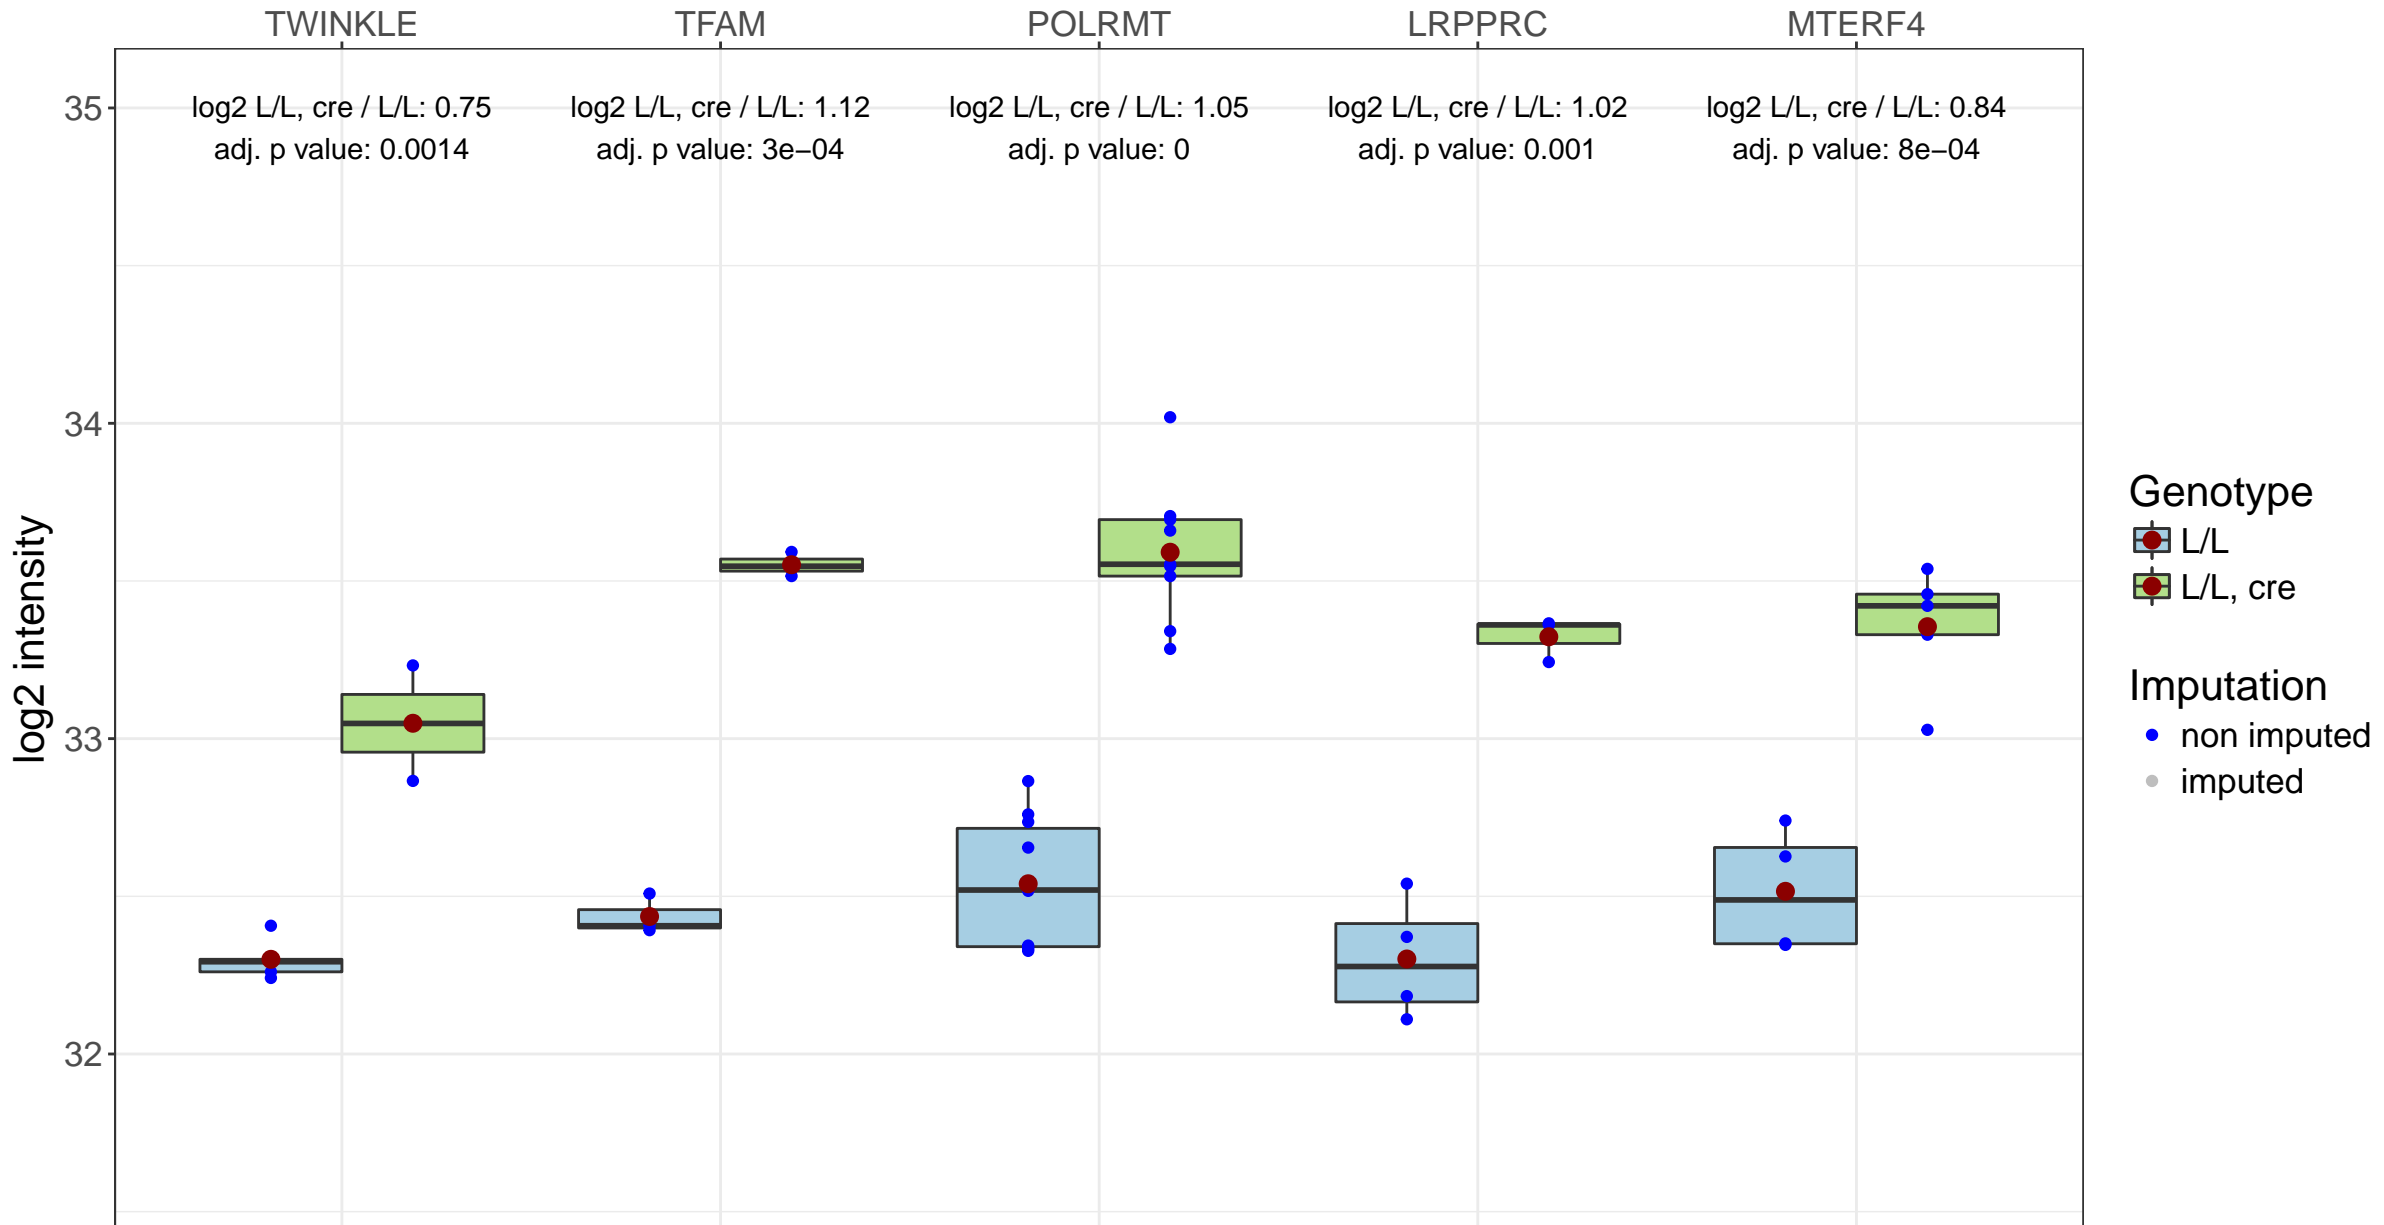



# GRPEL2 / O88396

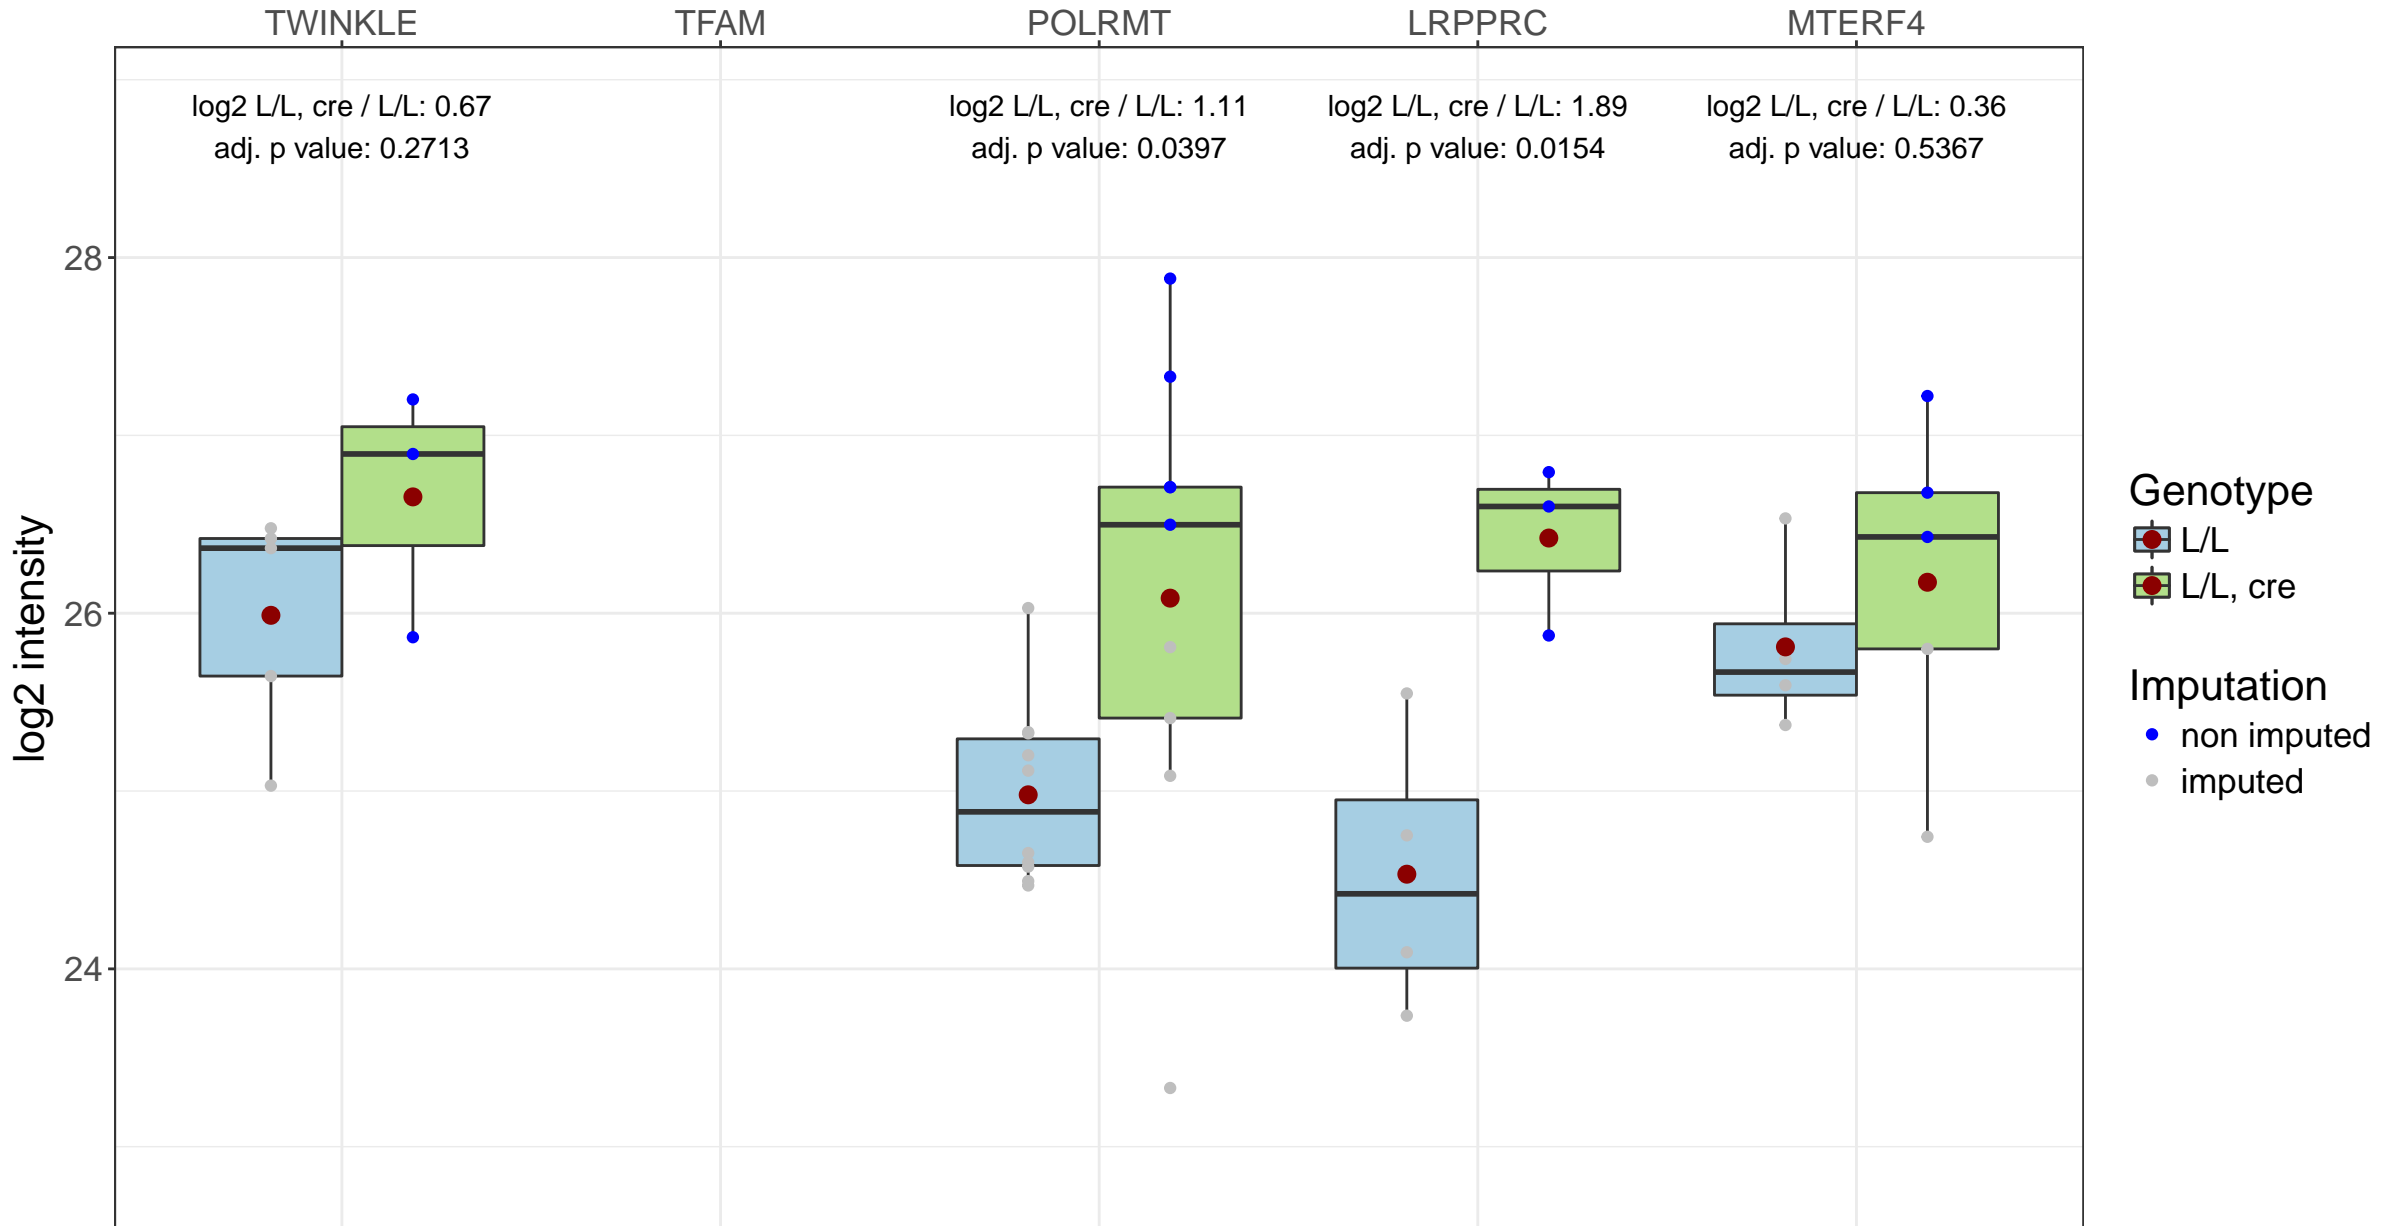

# GRSF1 / E9Q179

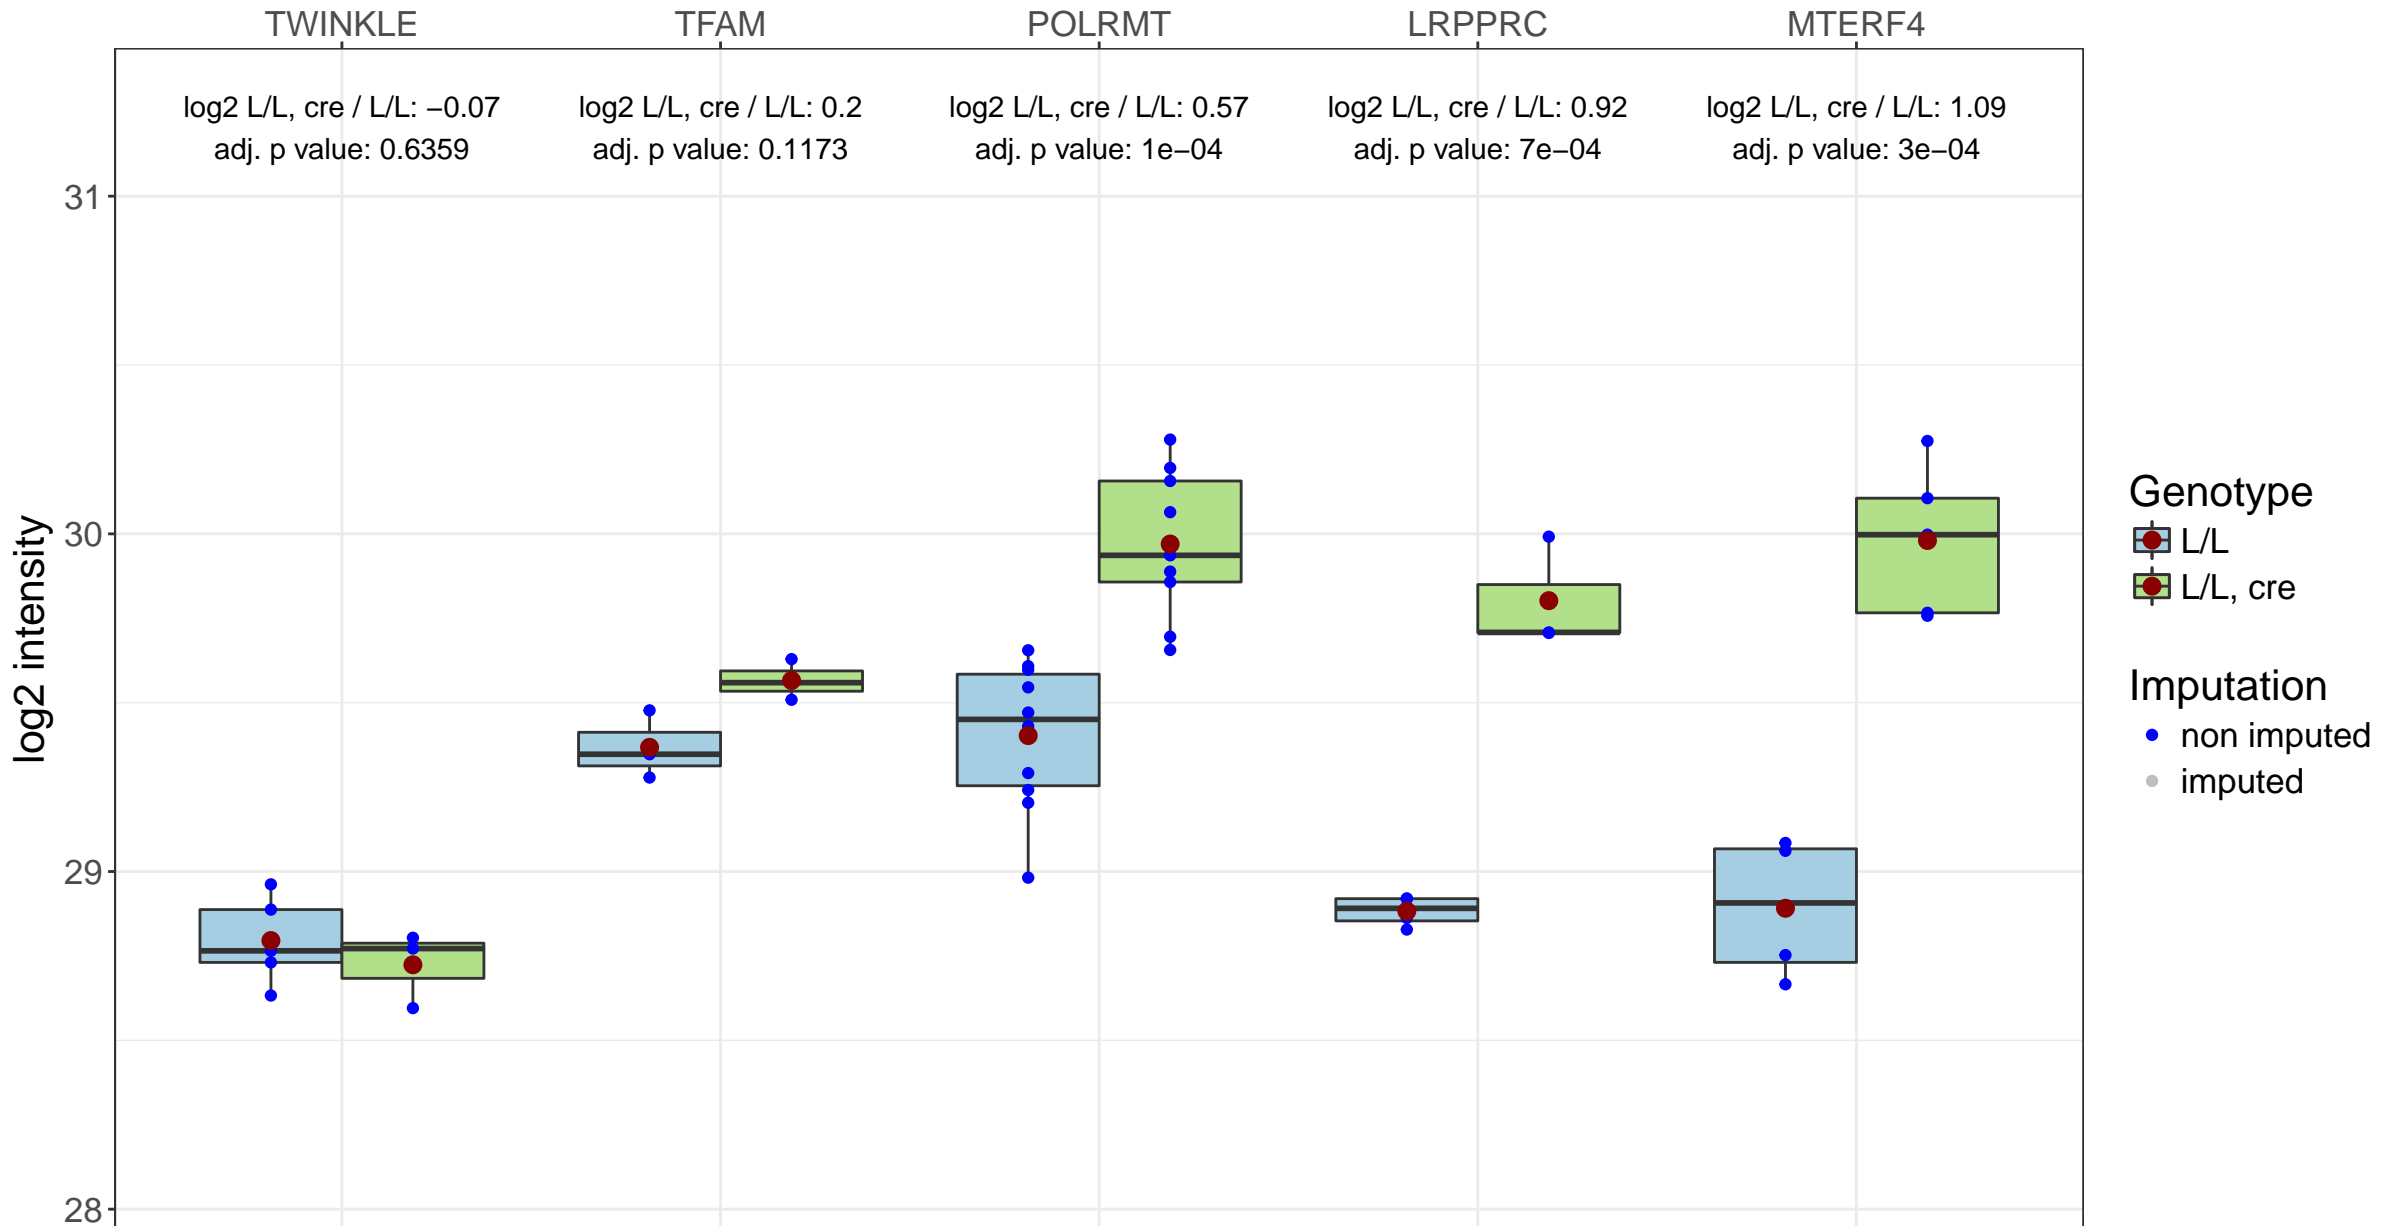

# GSR / P47791-2

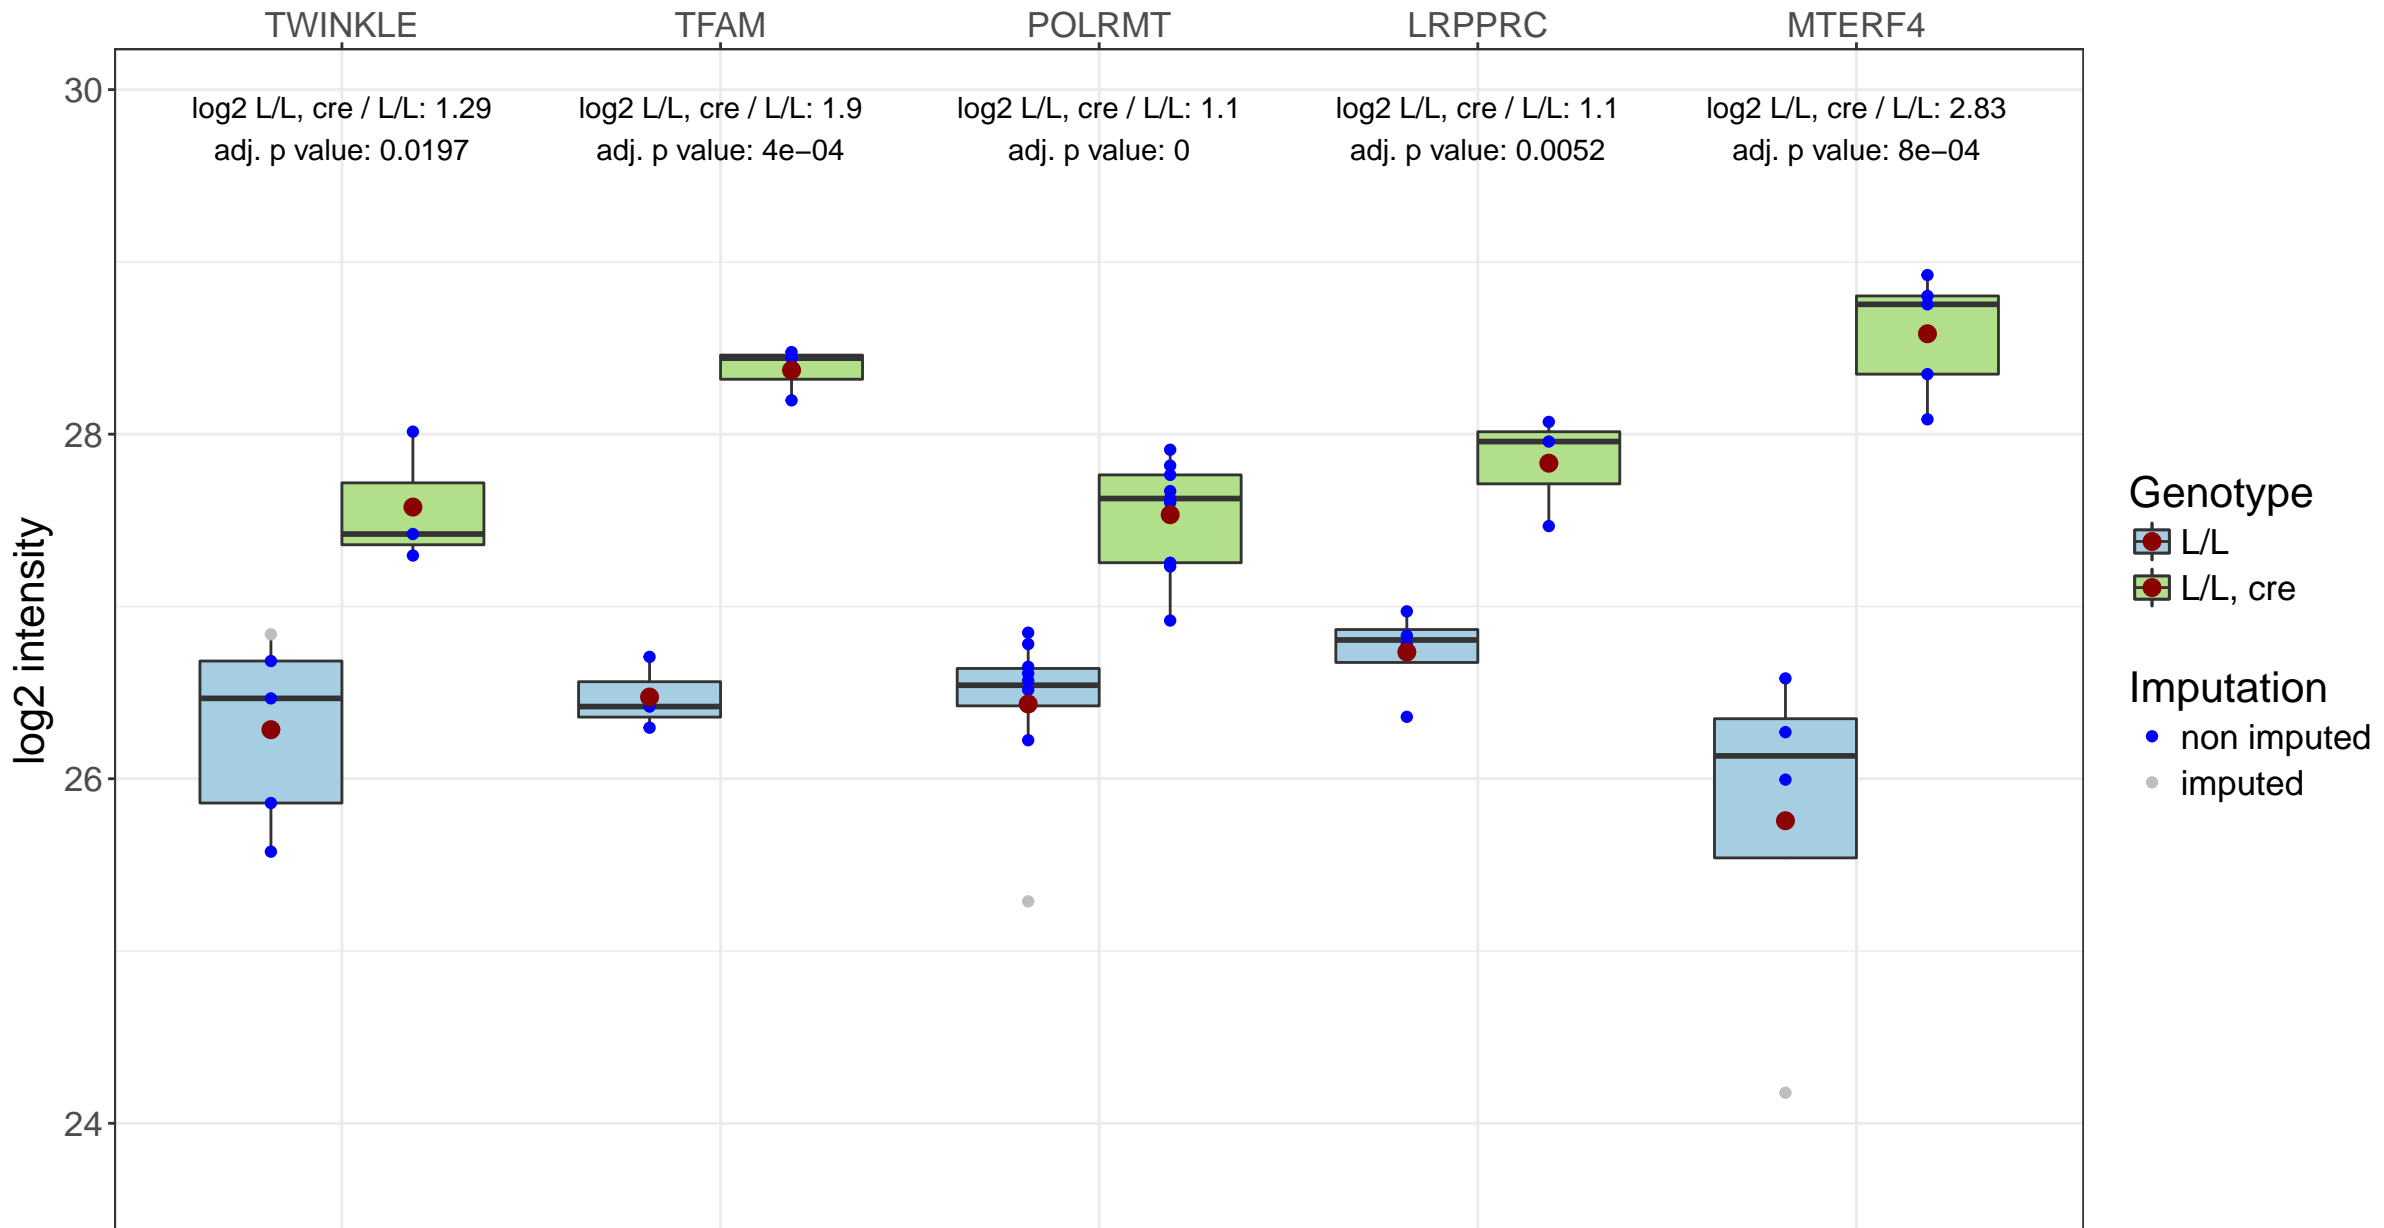

# GSTK1 / Q9DCM2

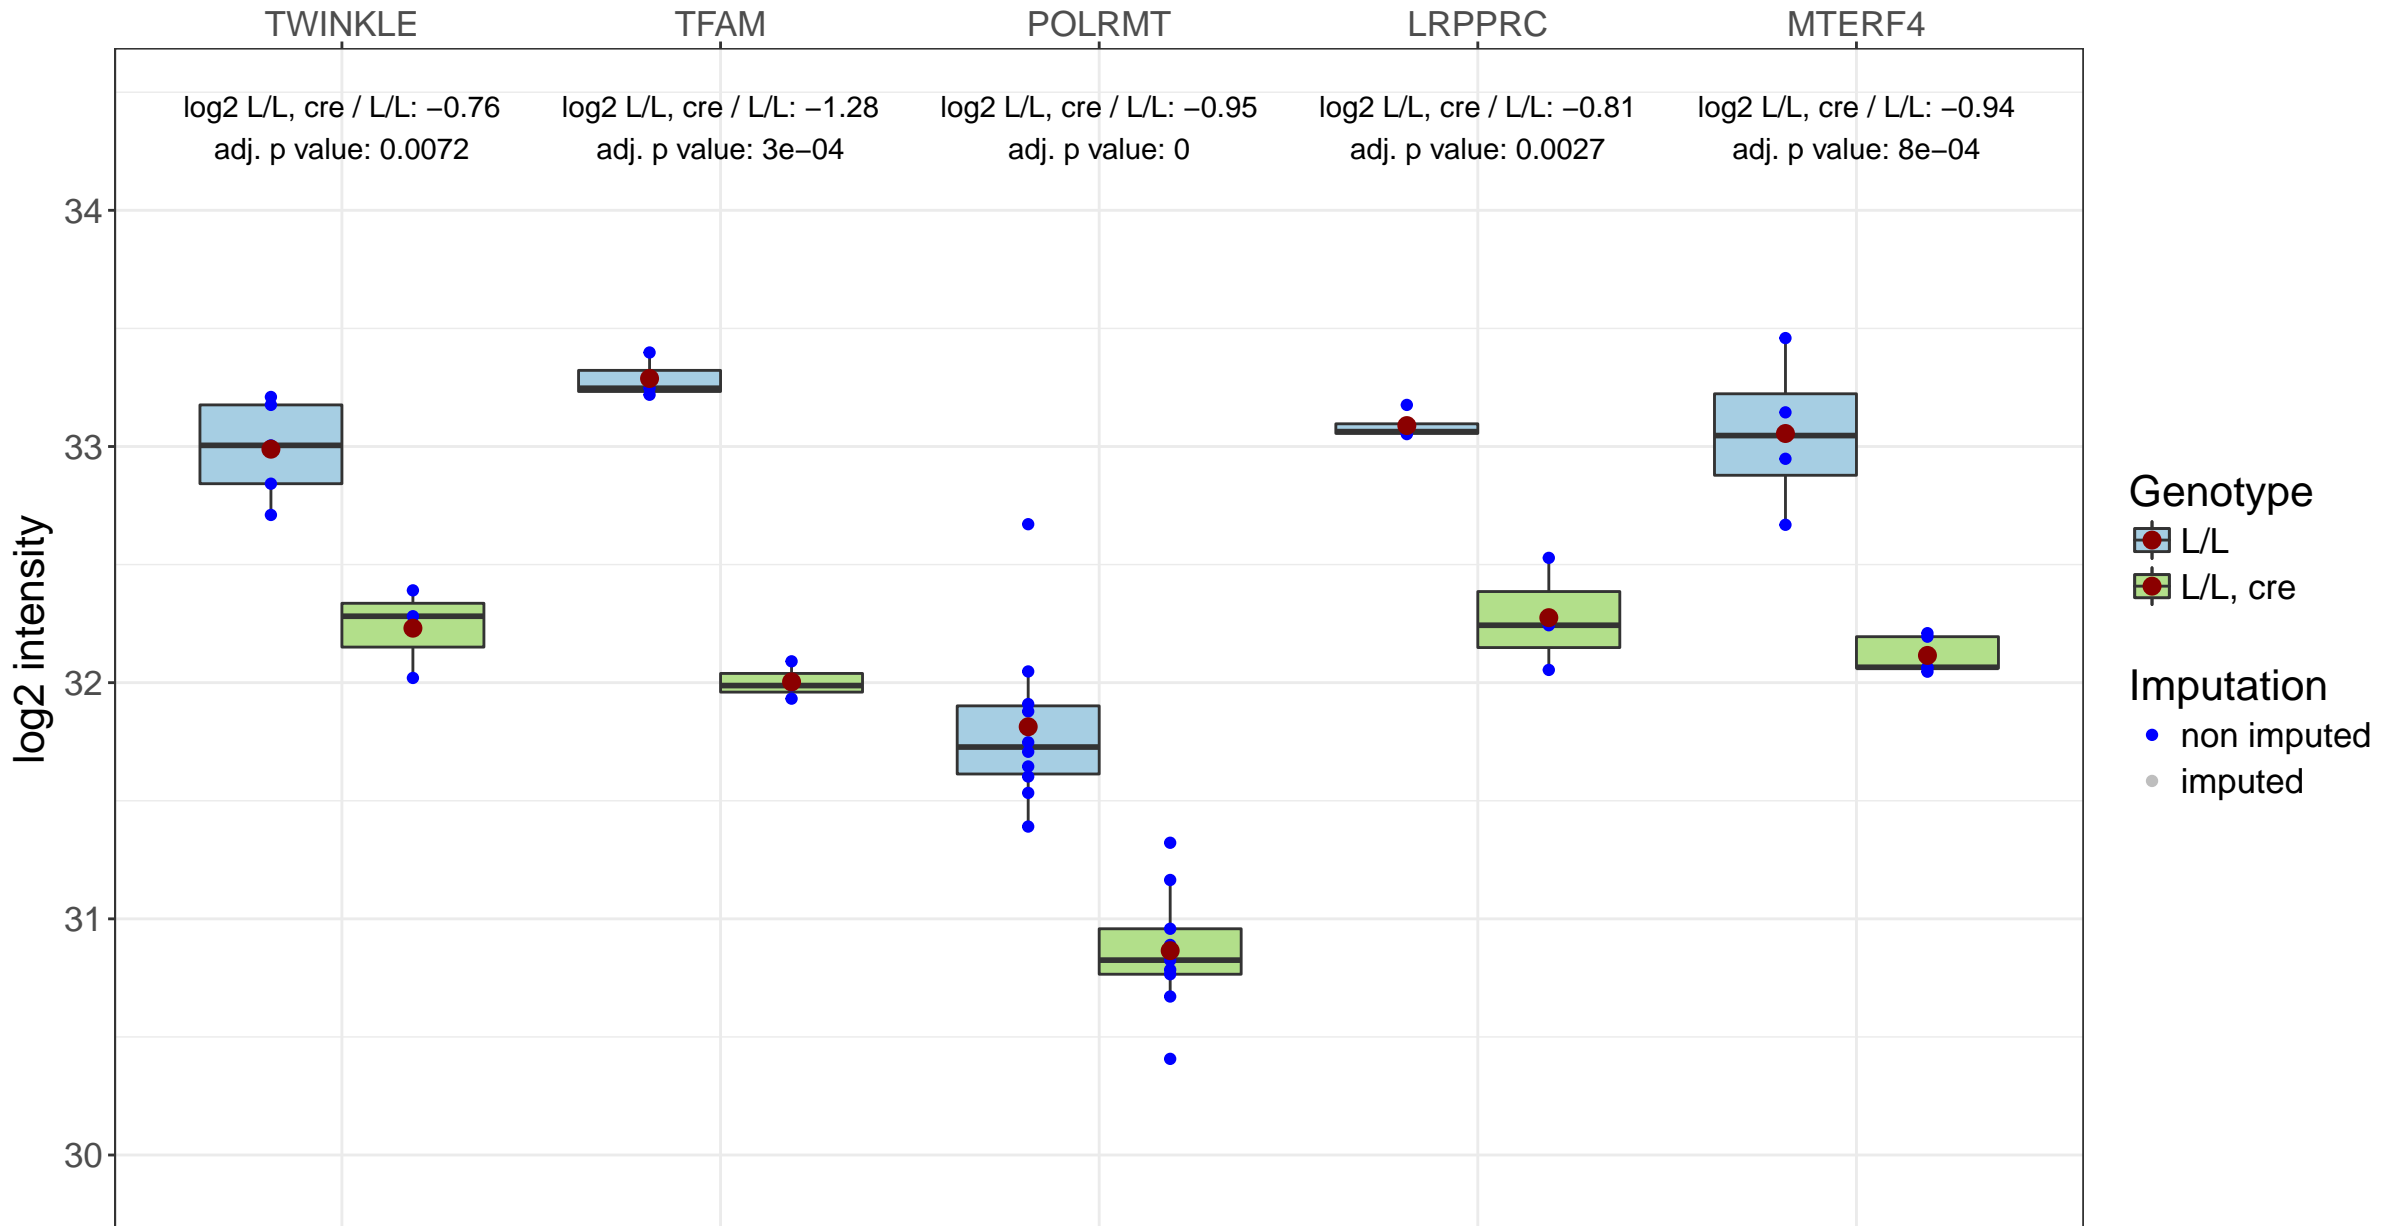

# GSTO1 / O09131

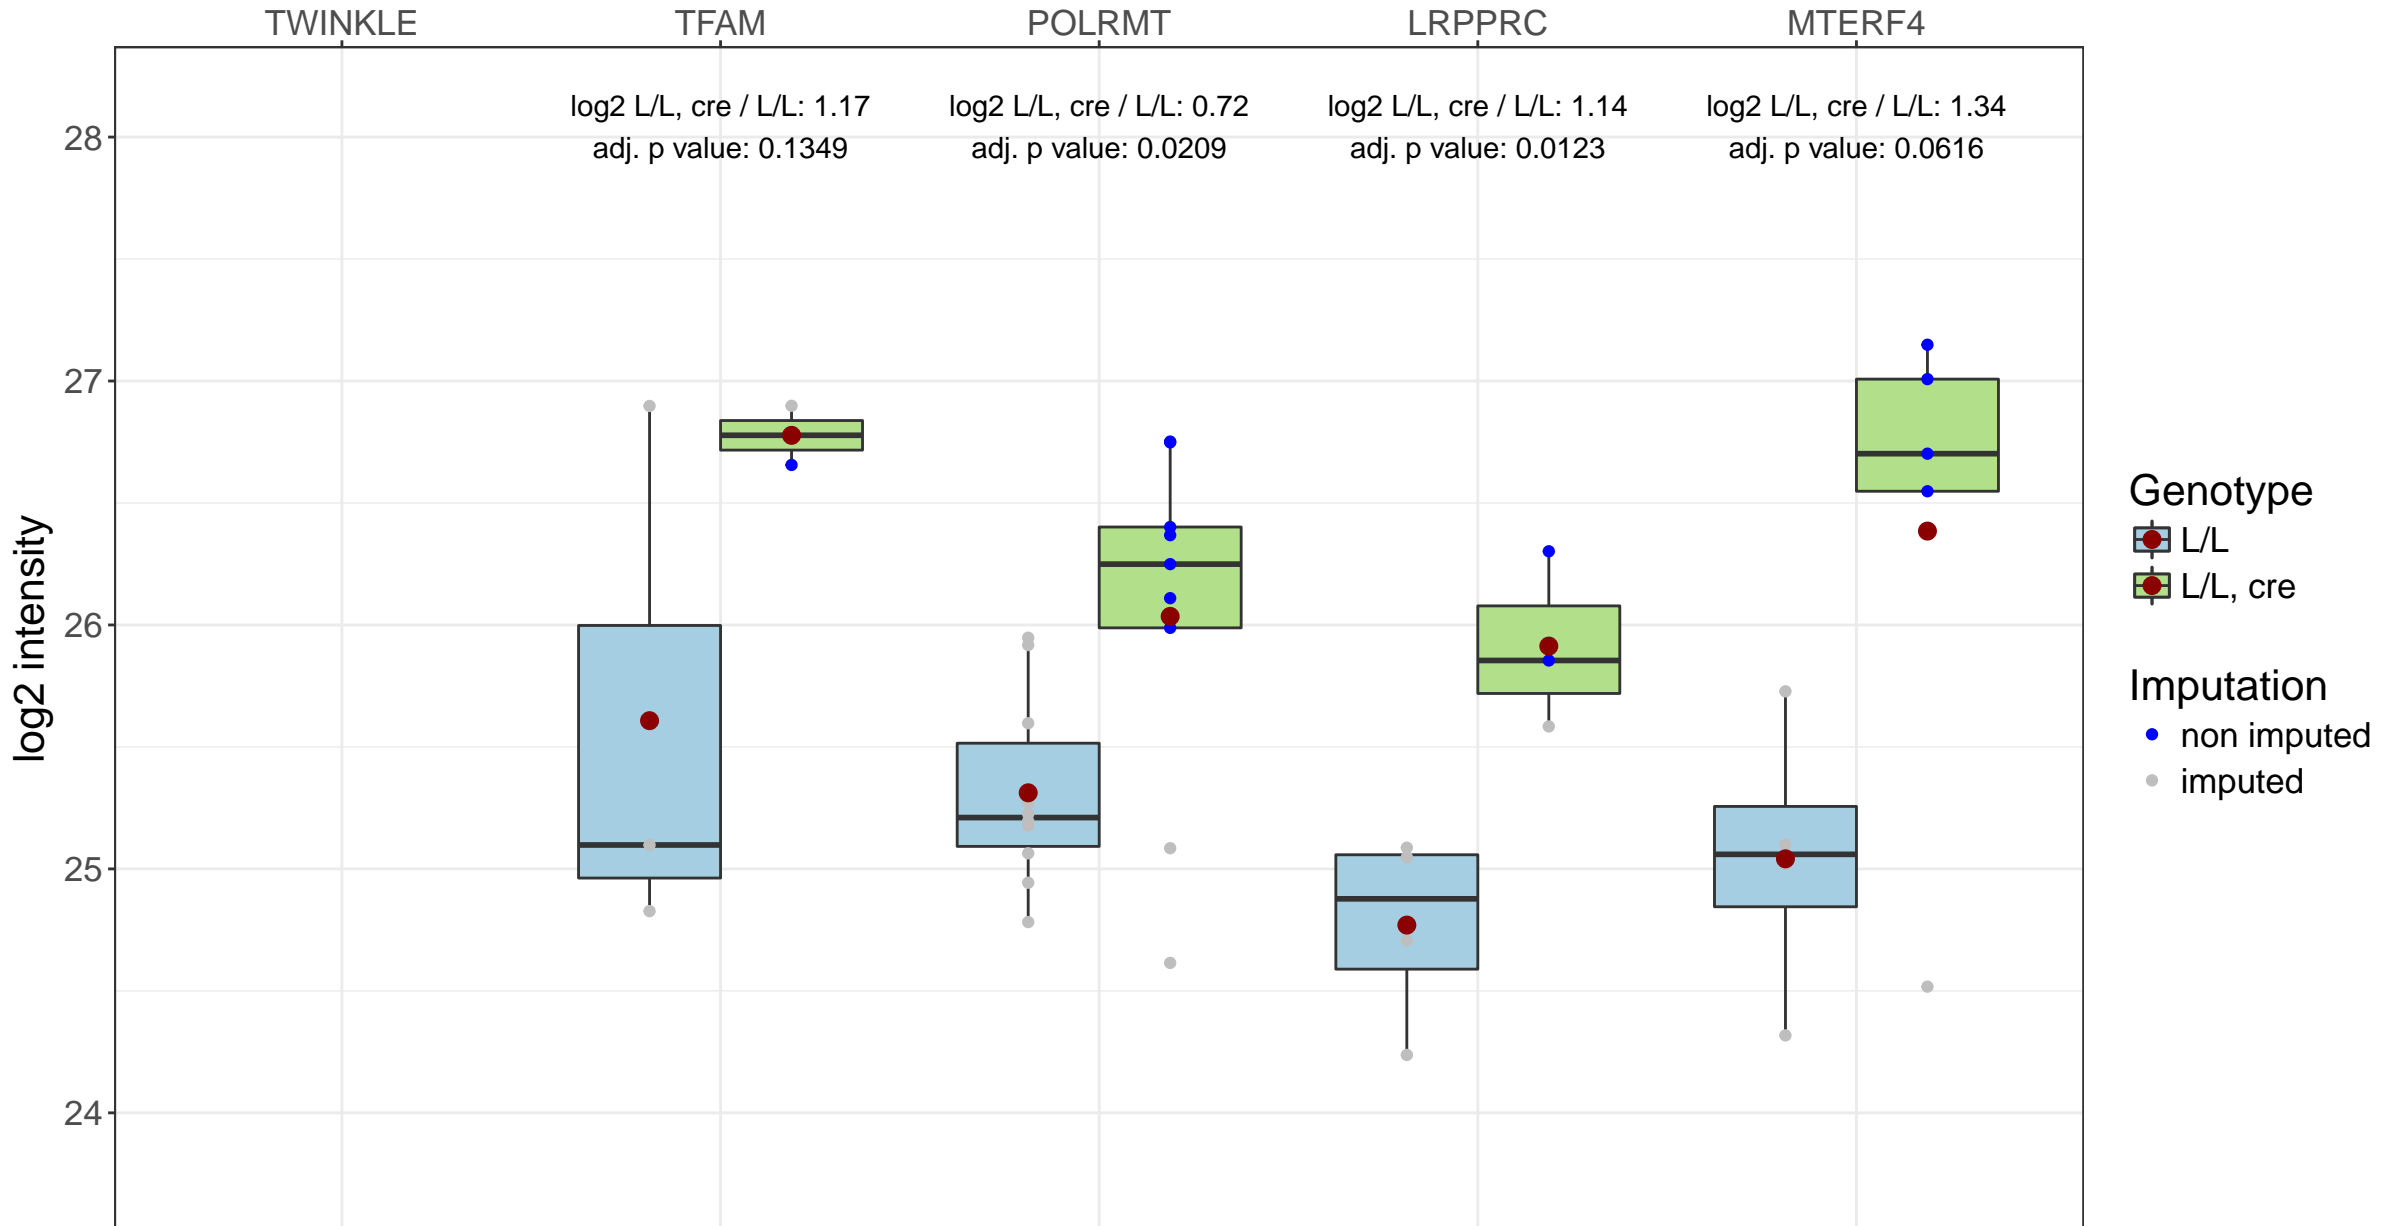

# GSTZ1 / Q9WVL0

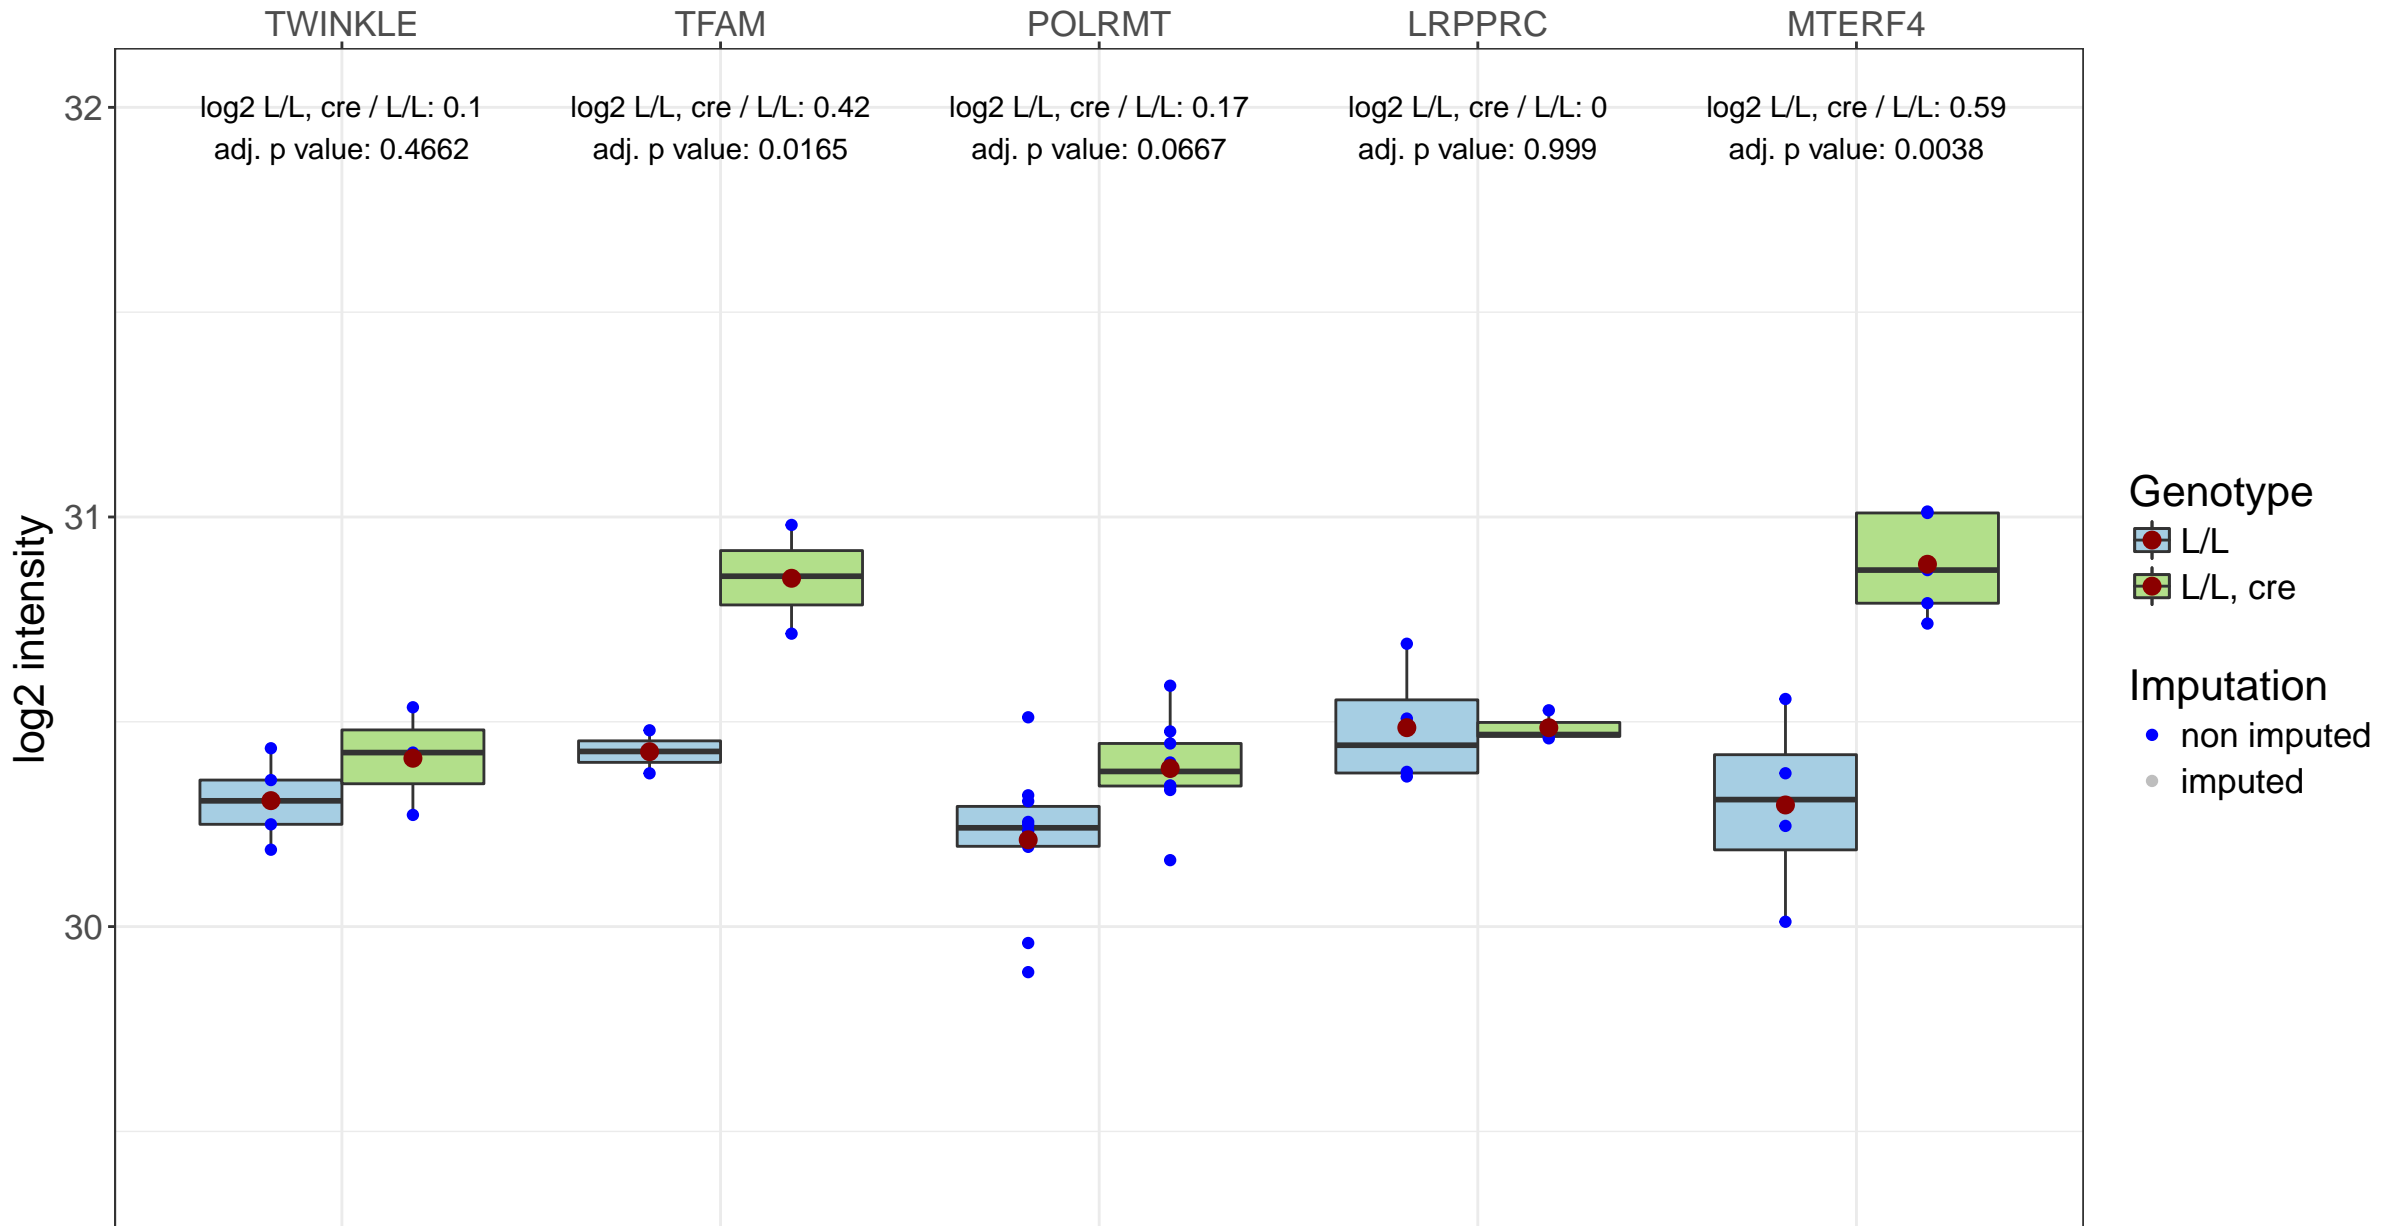

# GTPBP10 / Q8K013

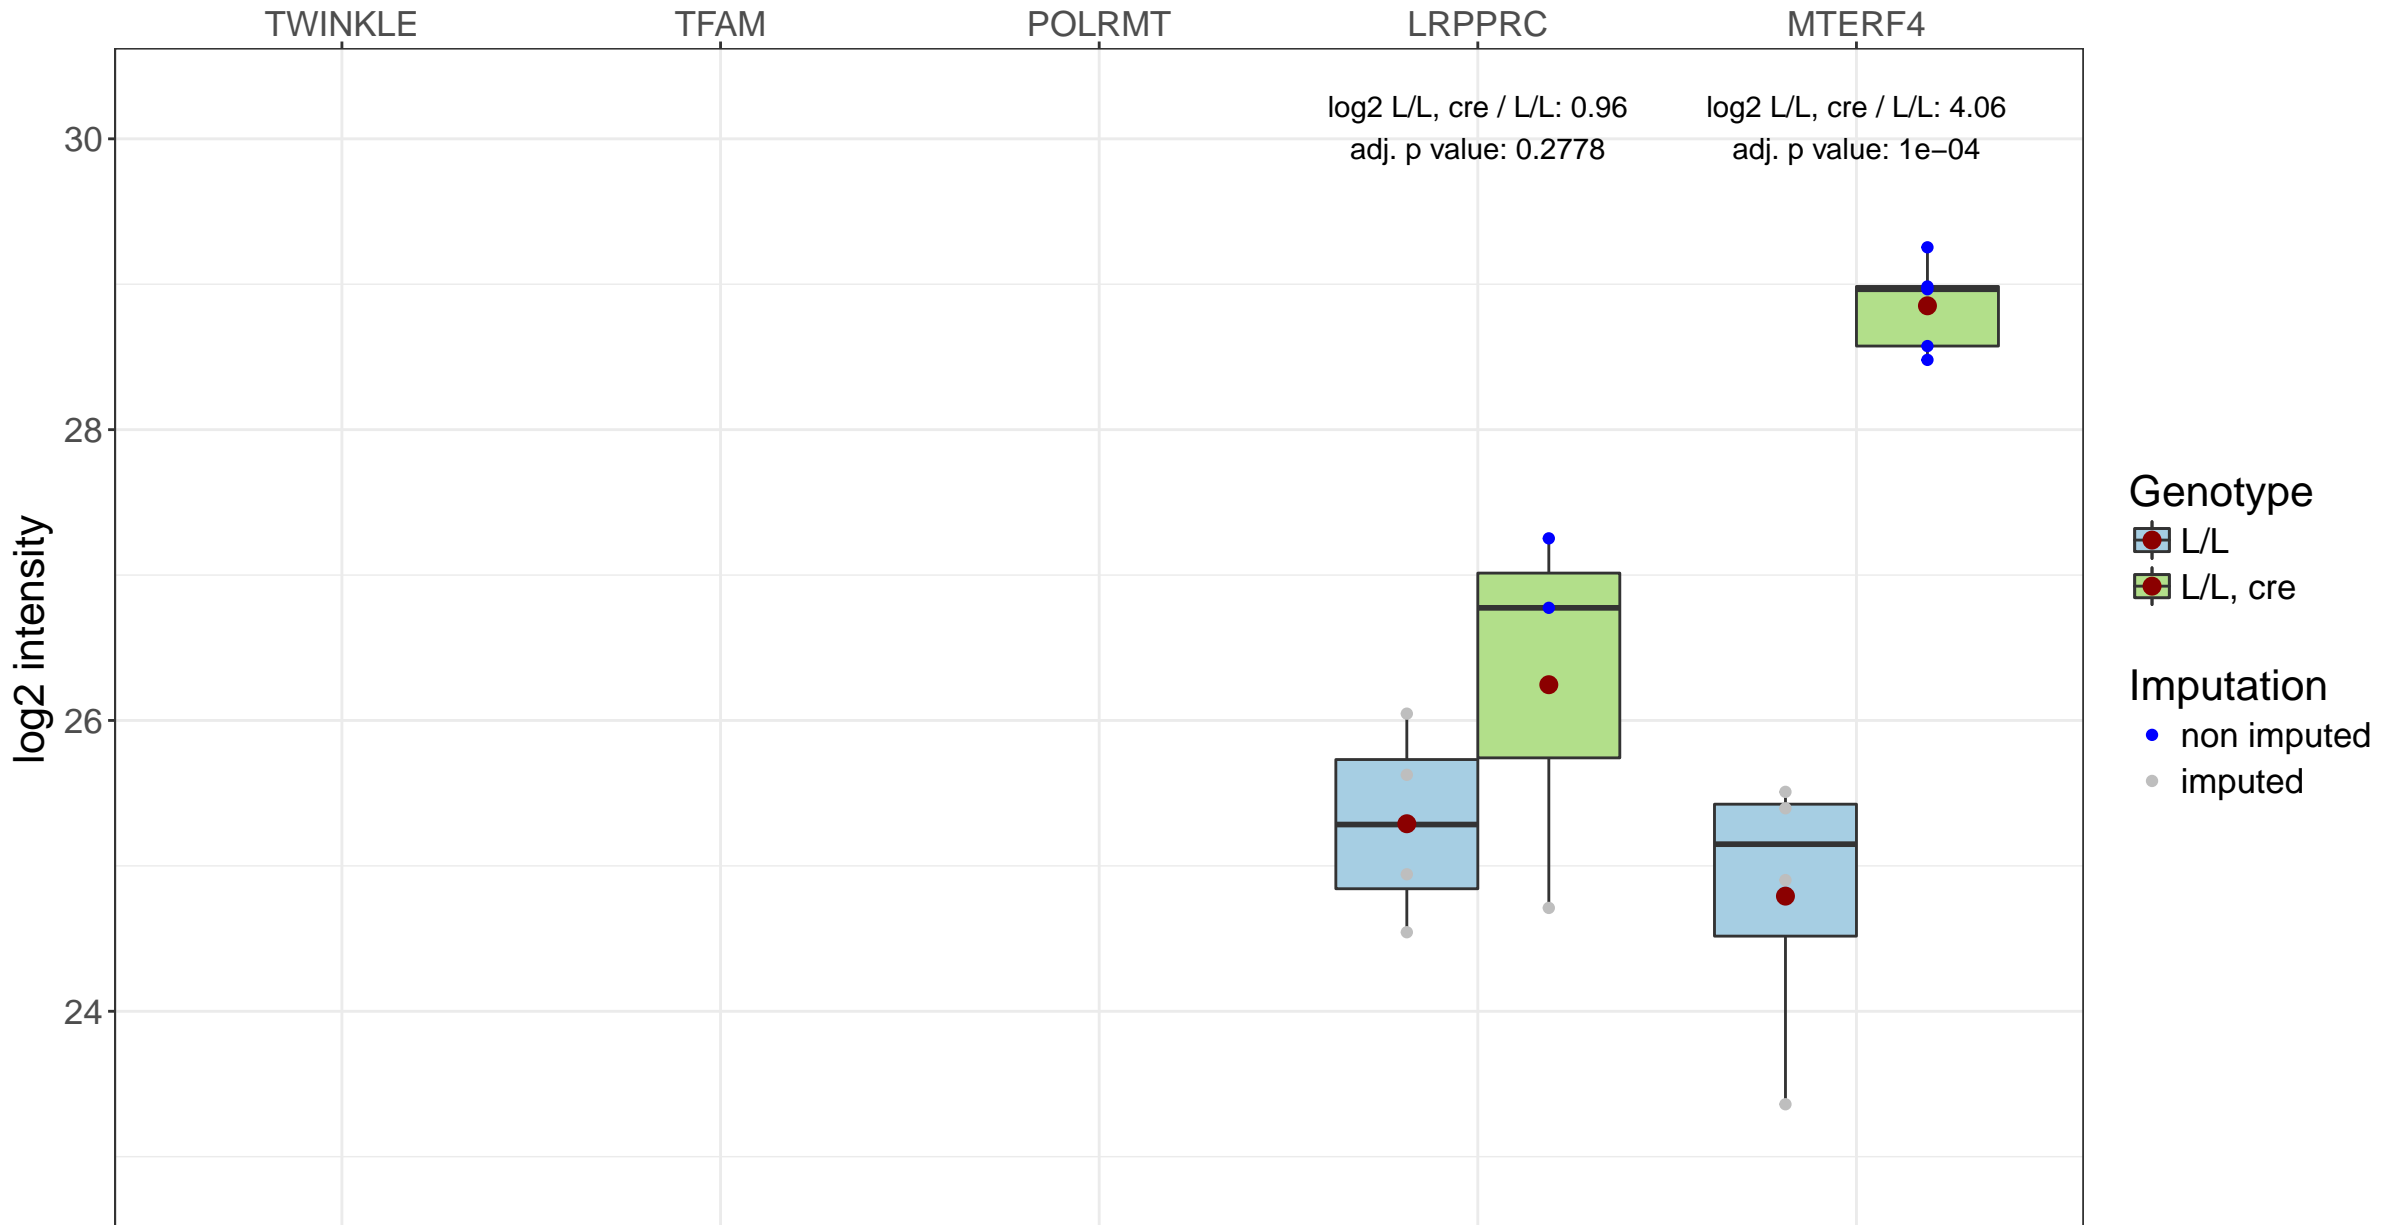

# GTPBP3 / E9PWV7

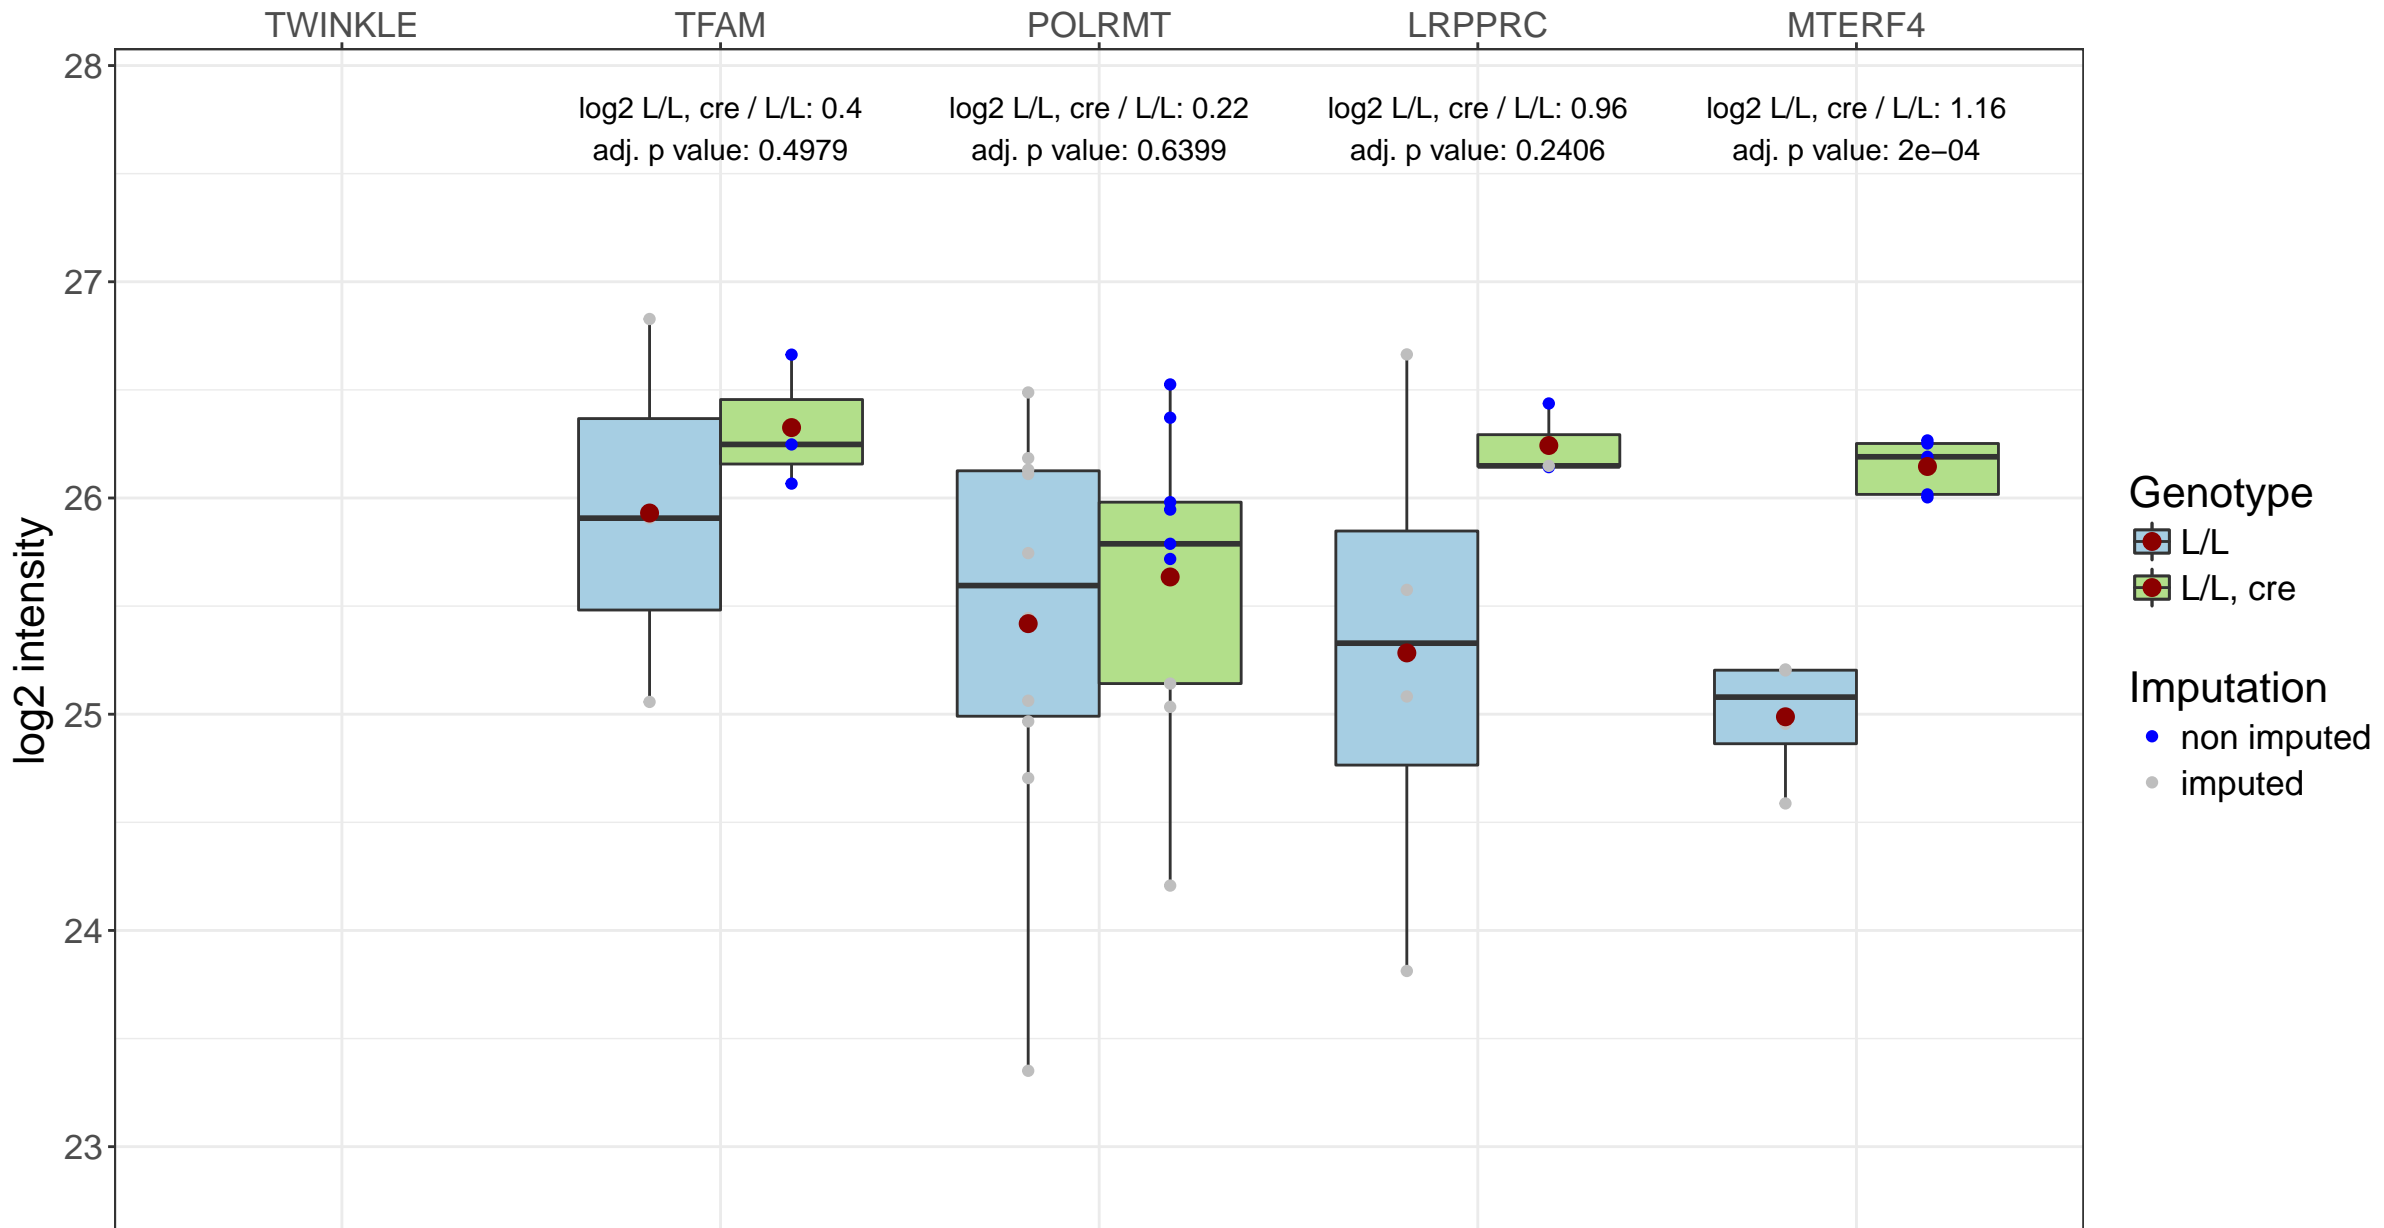



# GTPBP6 / Q3U6U5

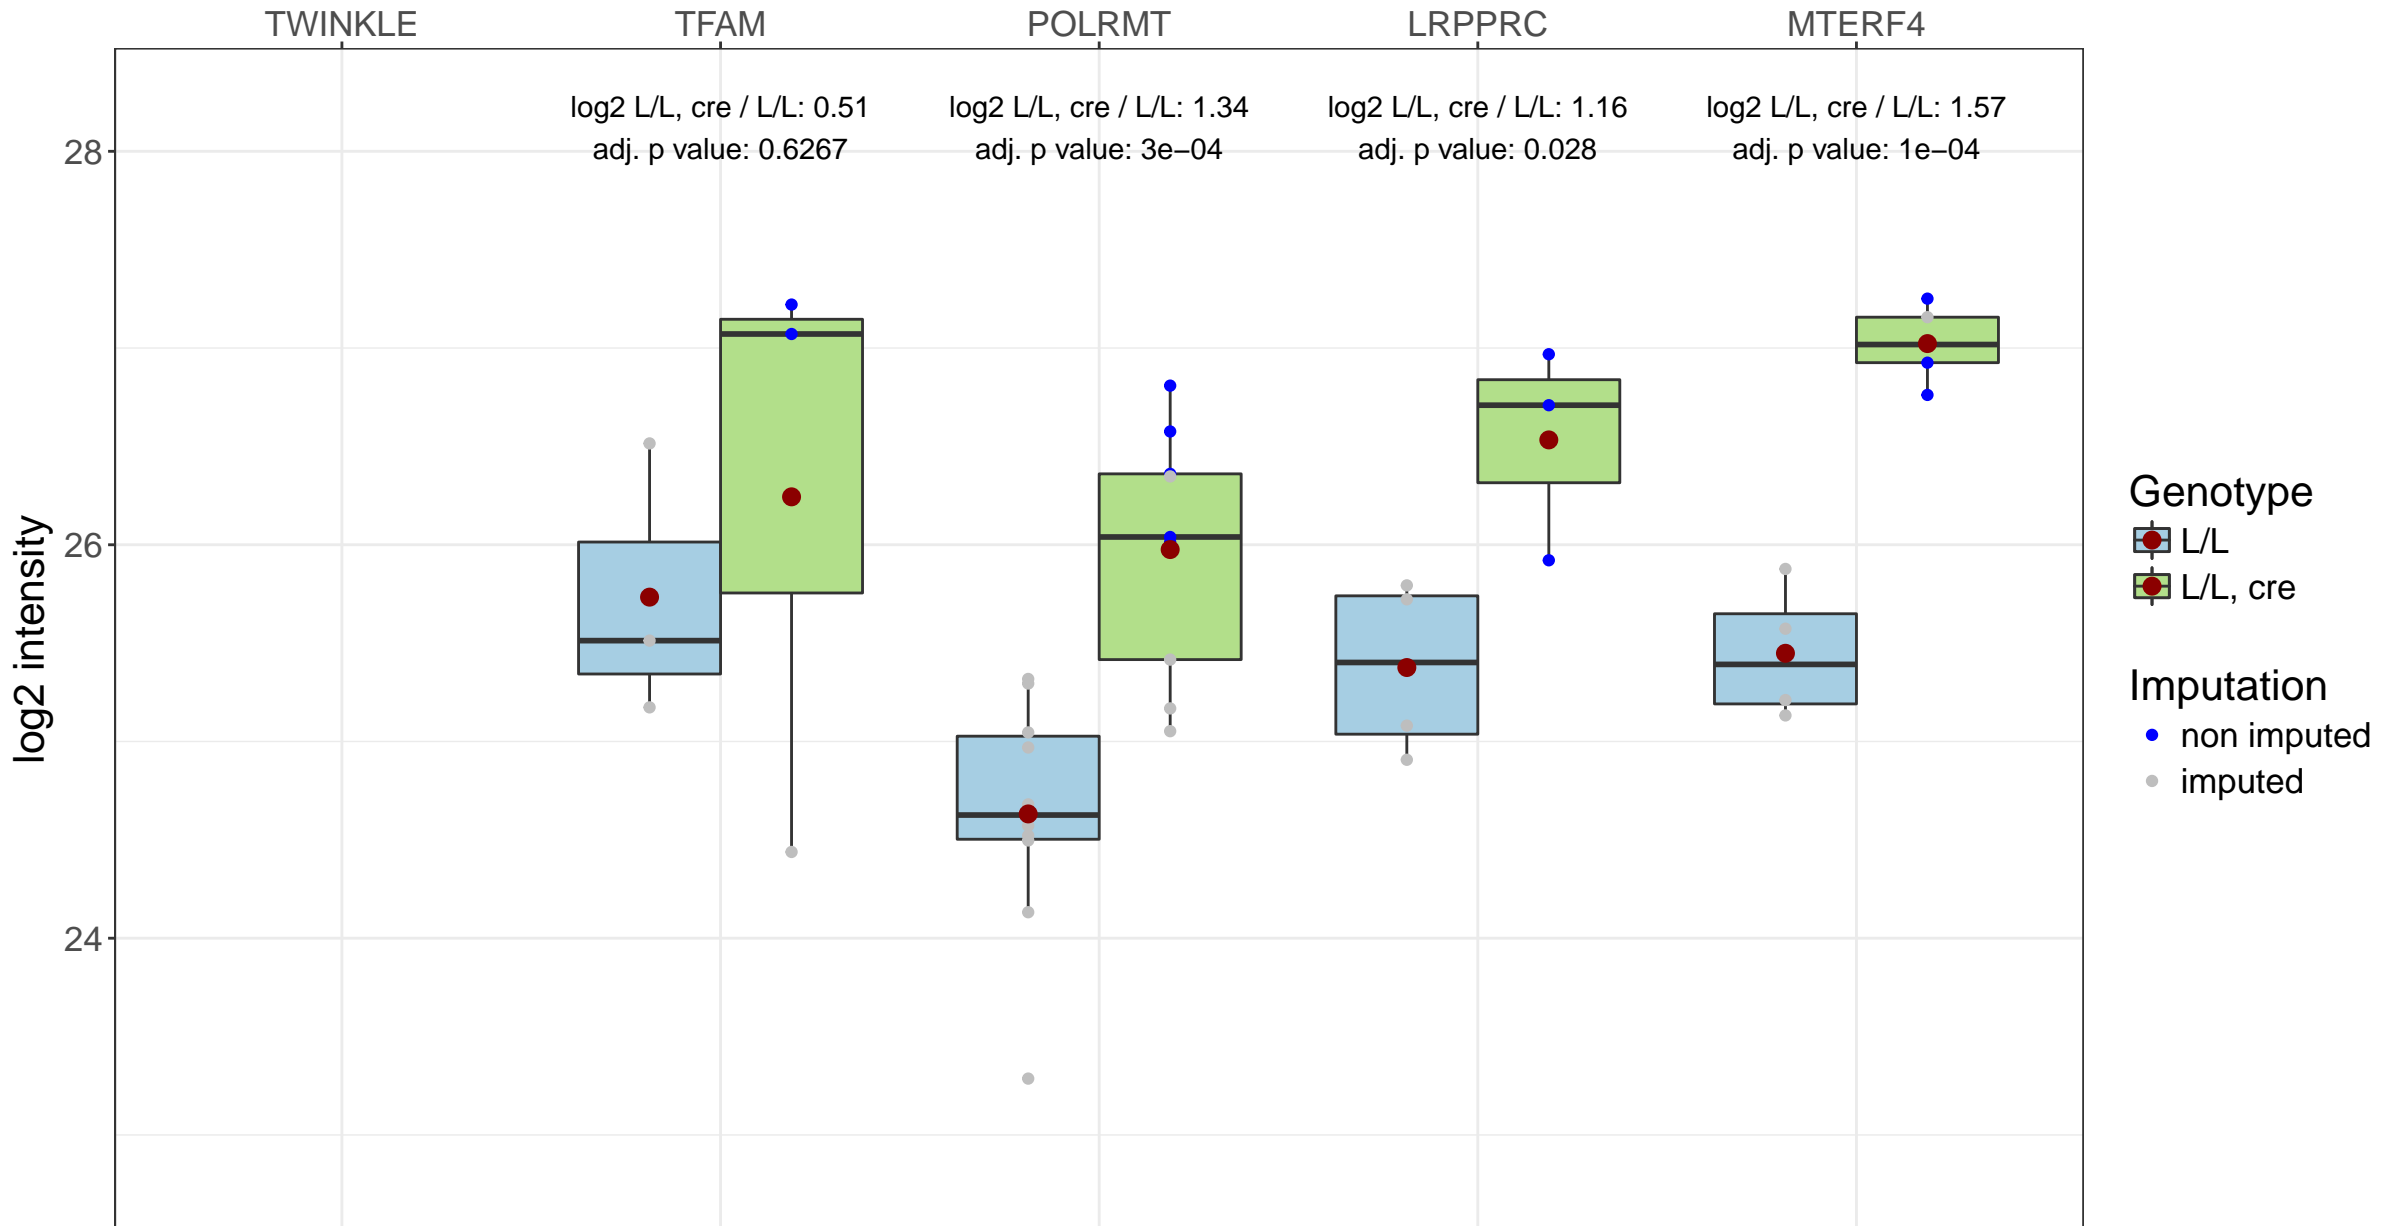

# GUF1 / Q8C3X4

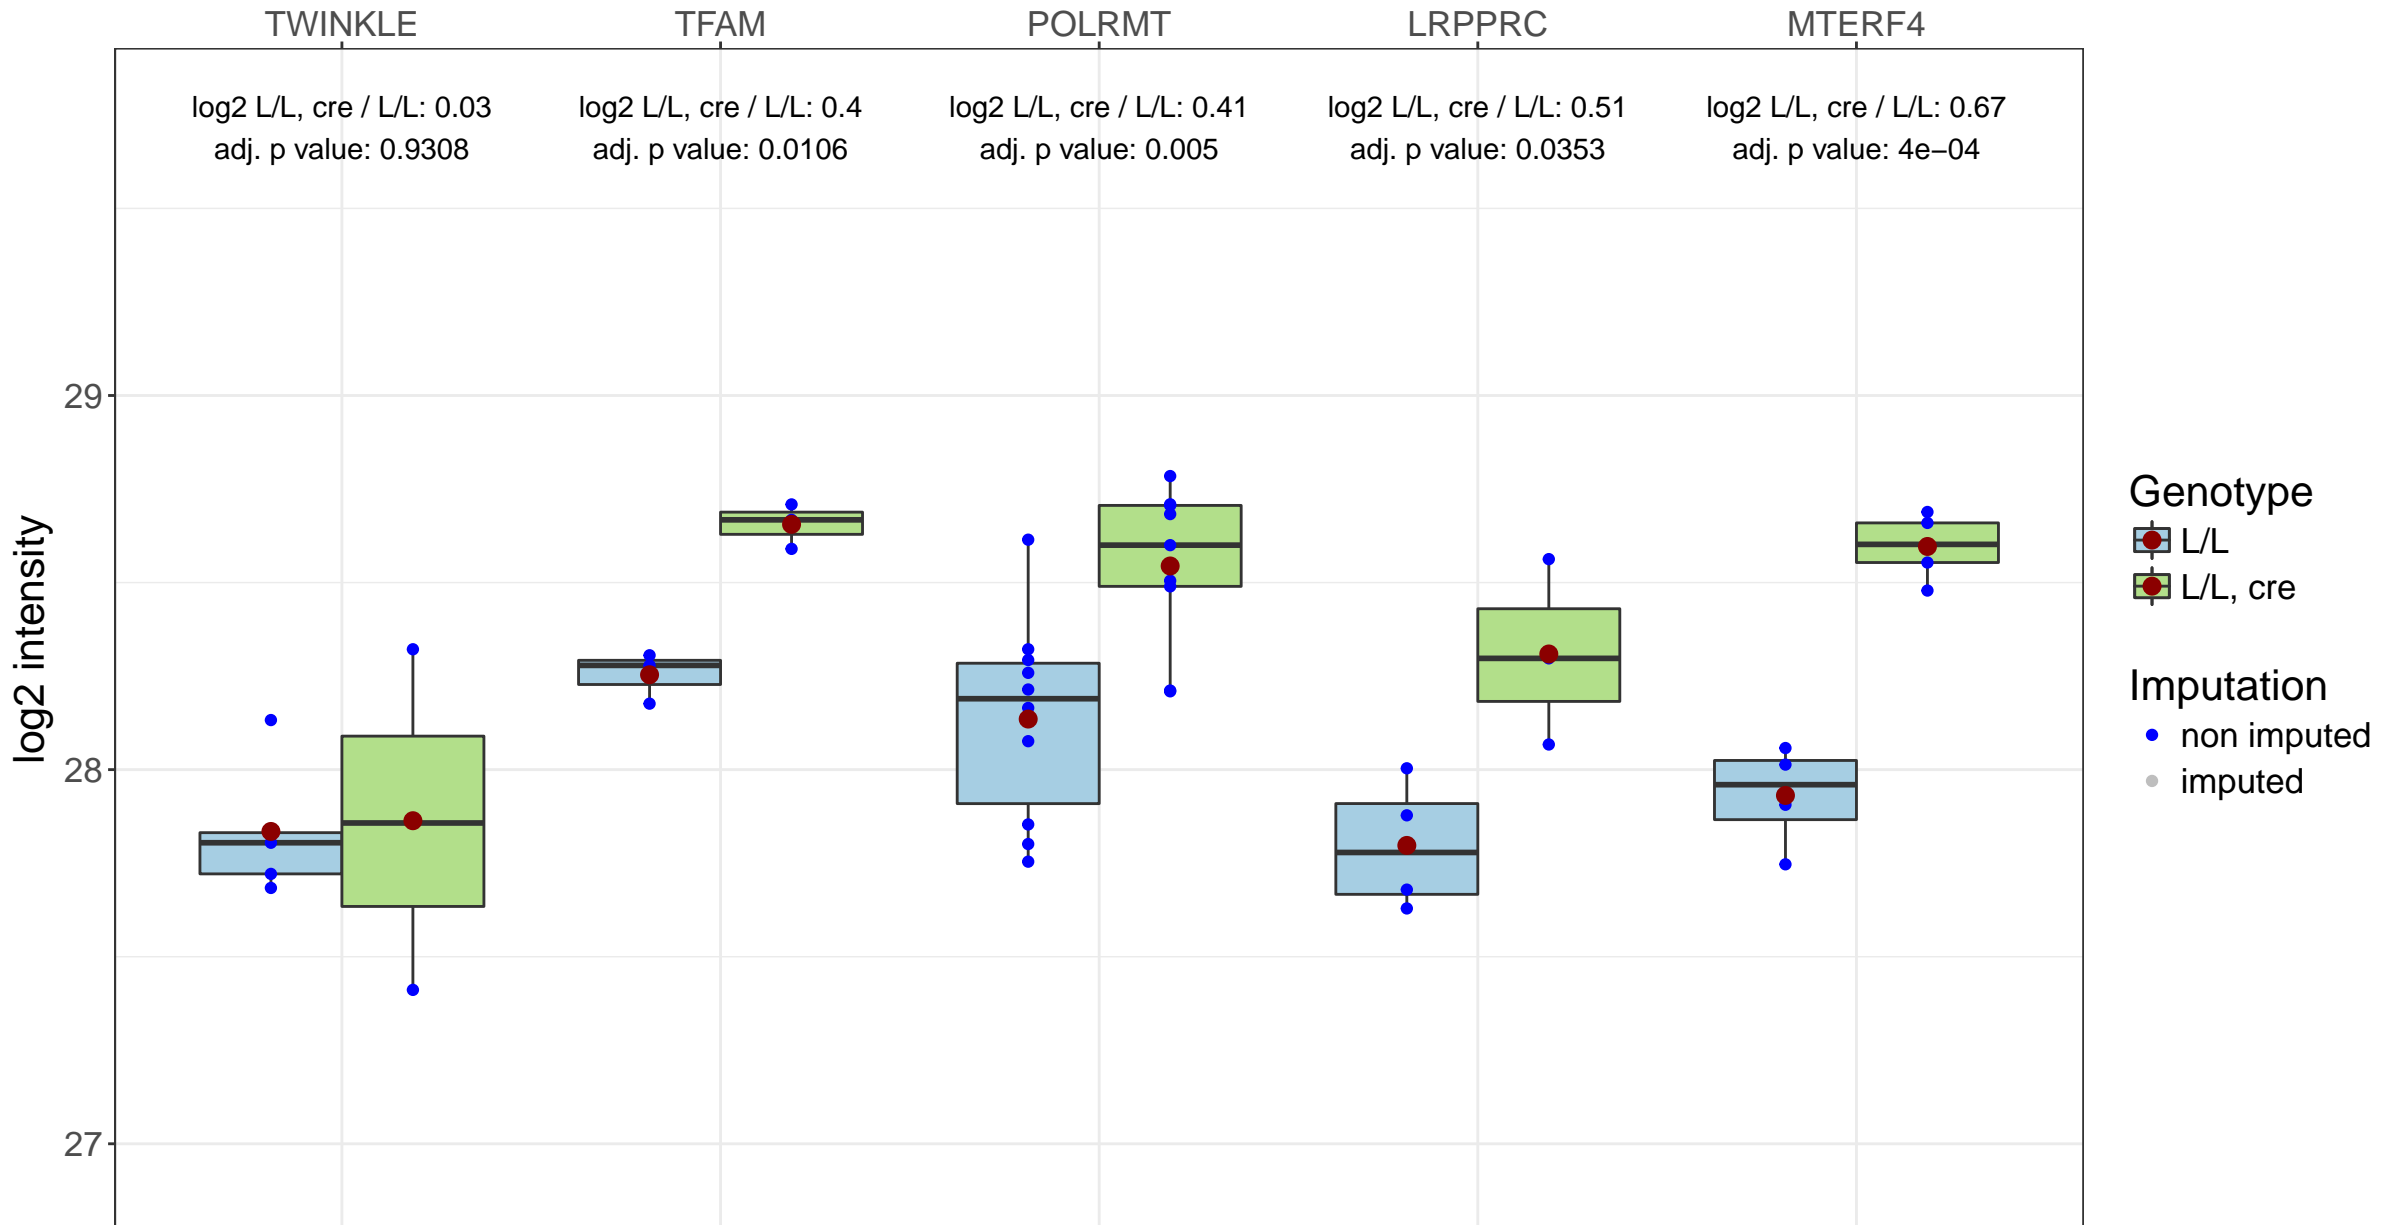

# GUK1 / Q64520

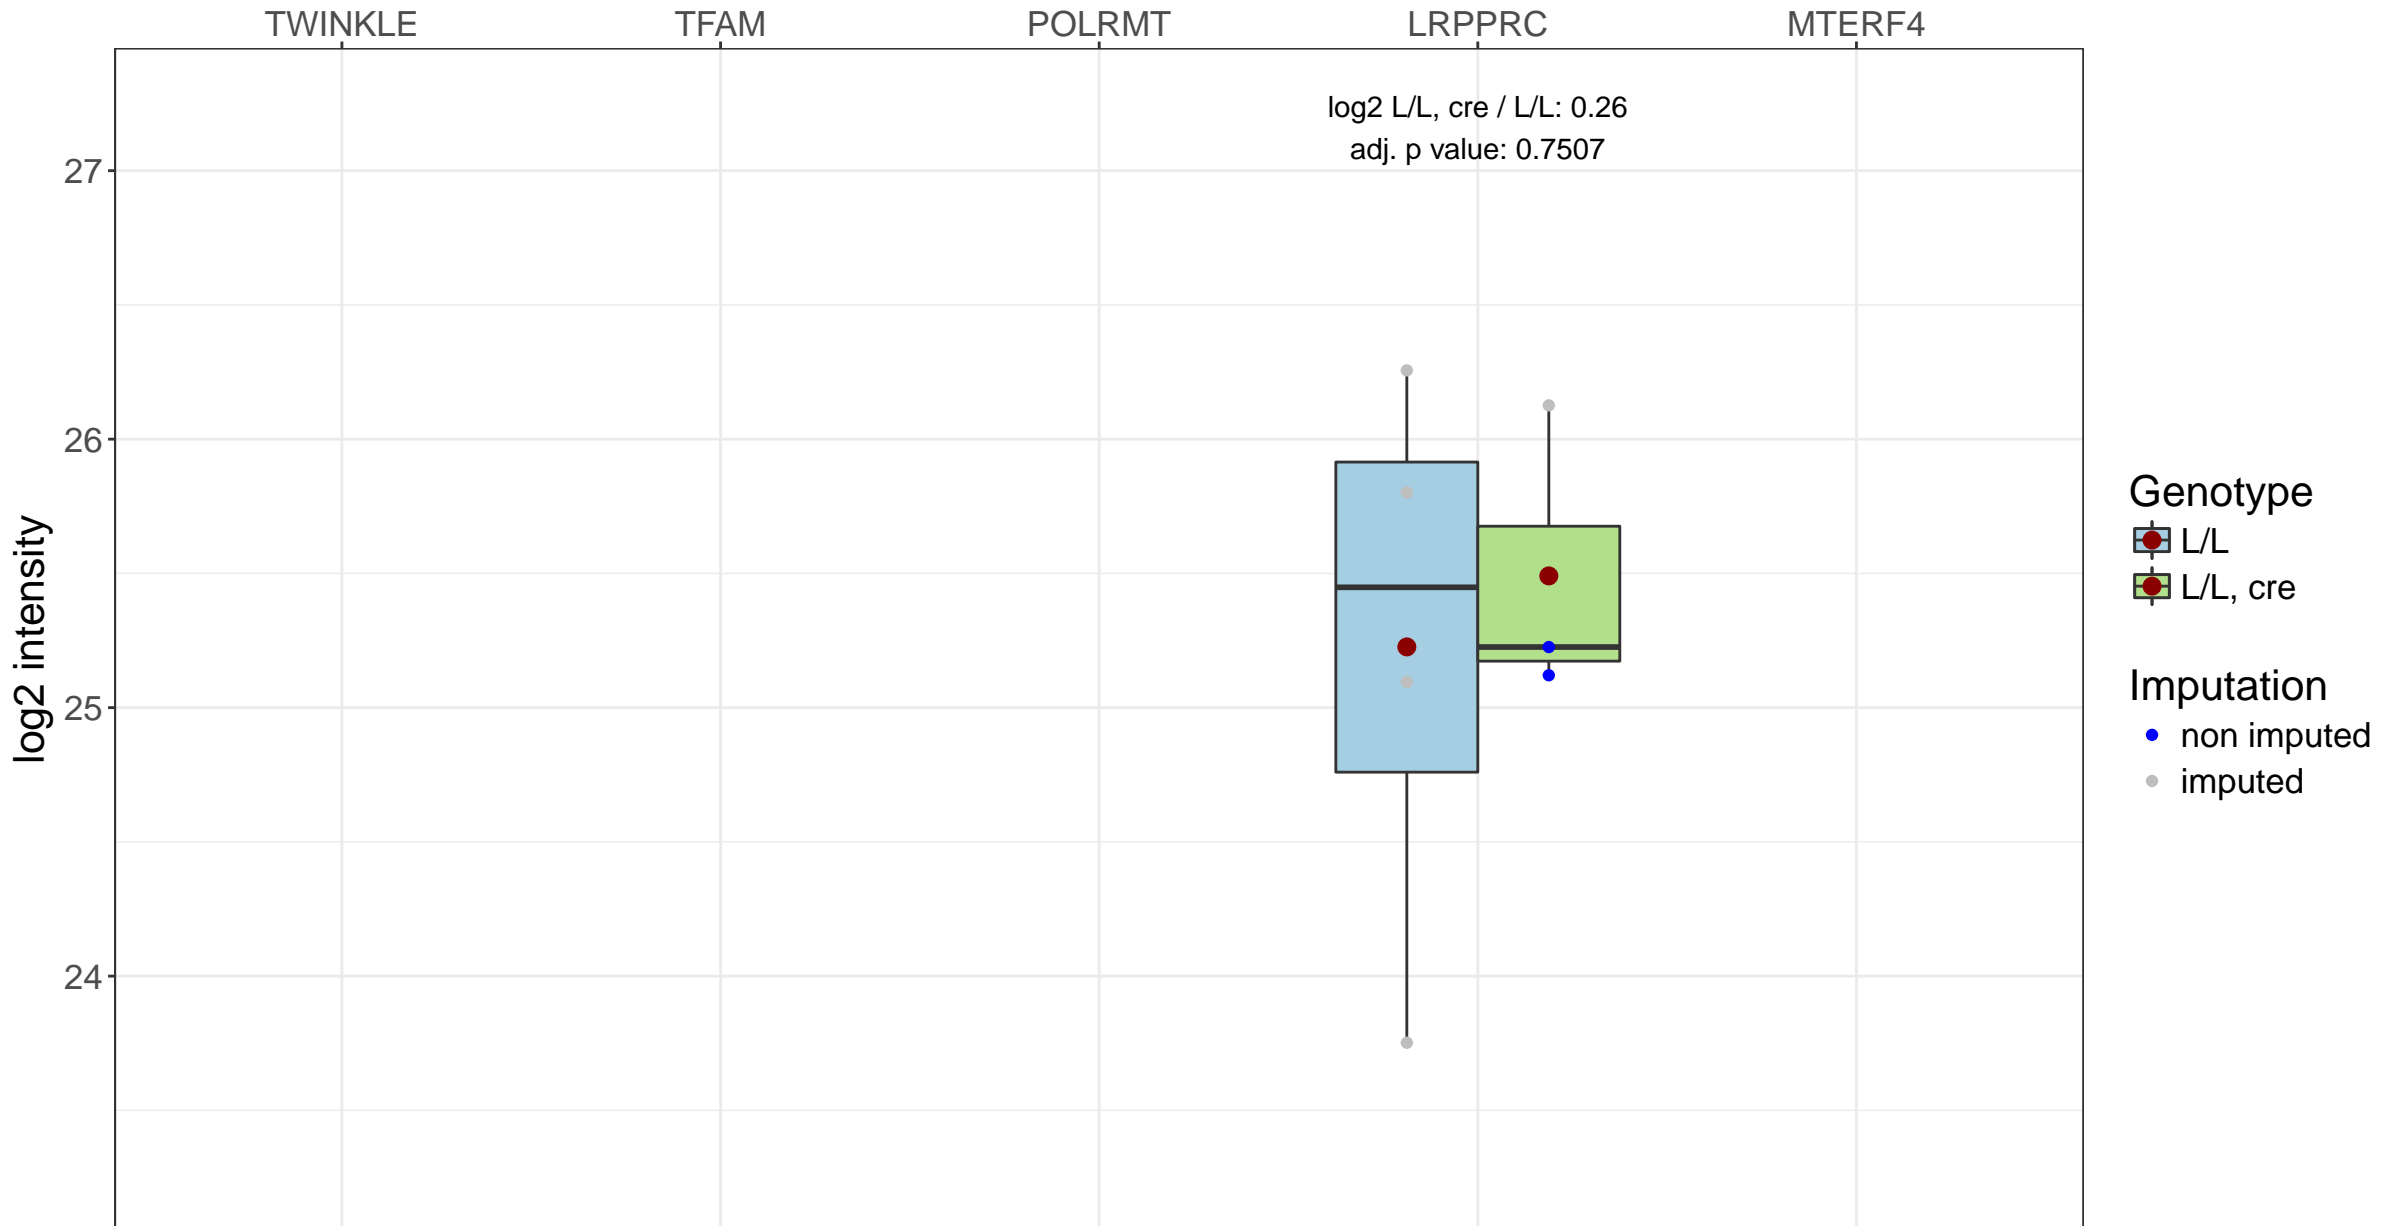

# HADH / Q61425

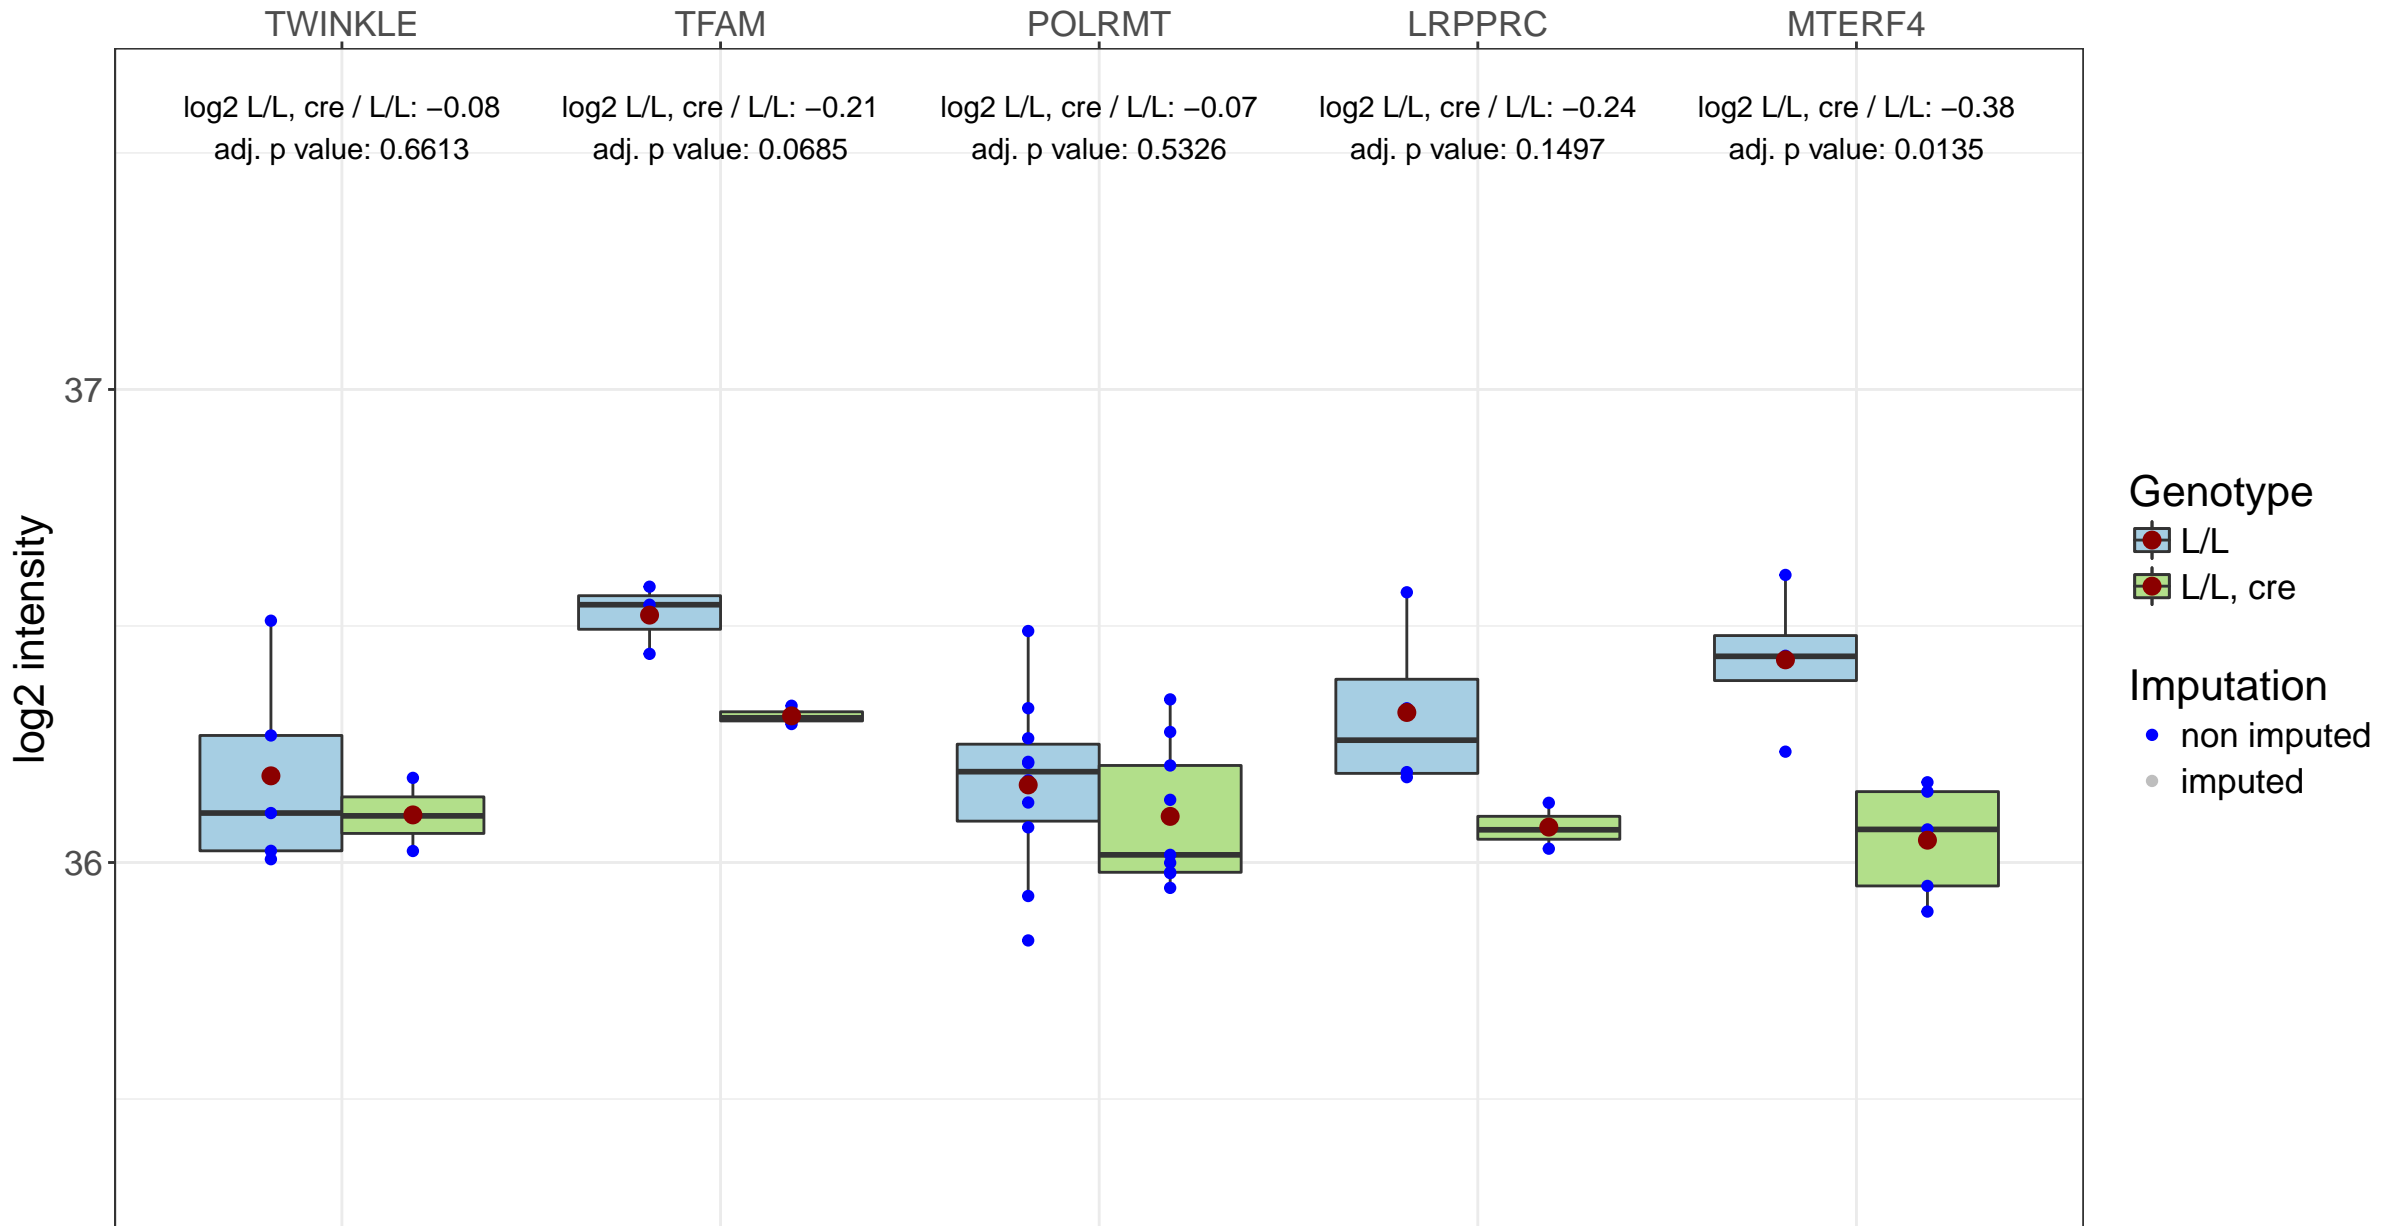

# HADHA / Q8BMS1

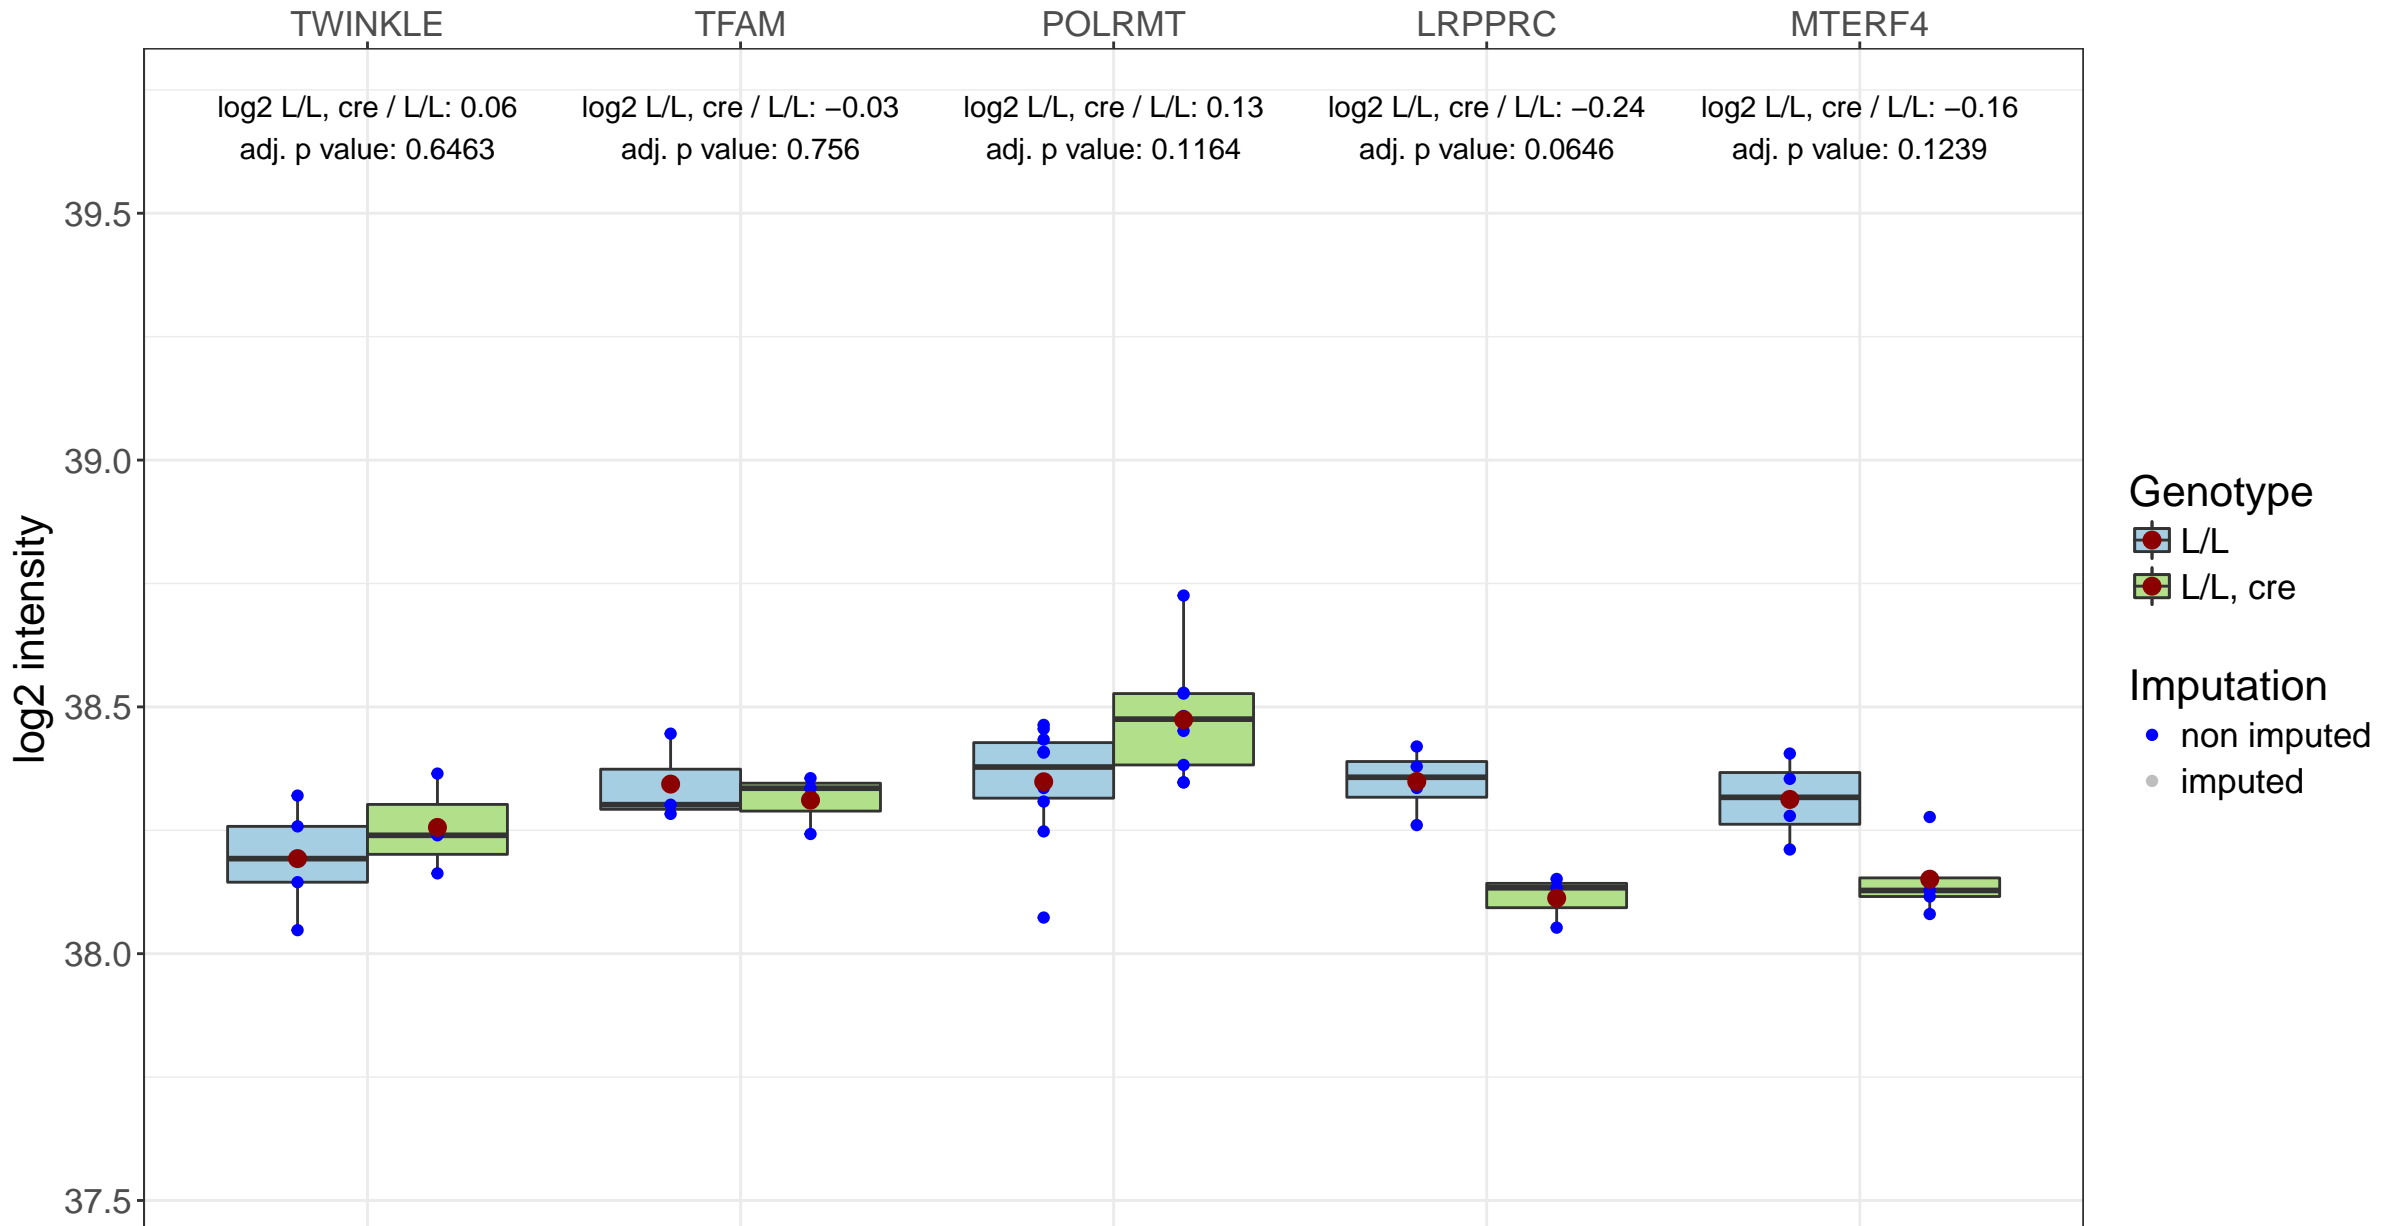

# HADHB / Q99JY0

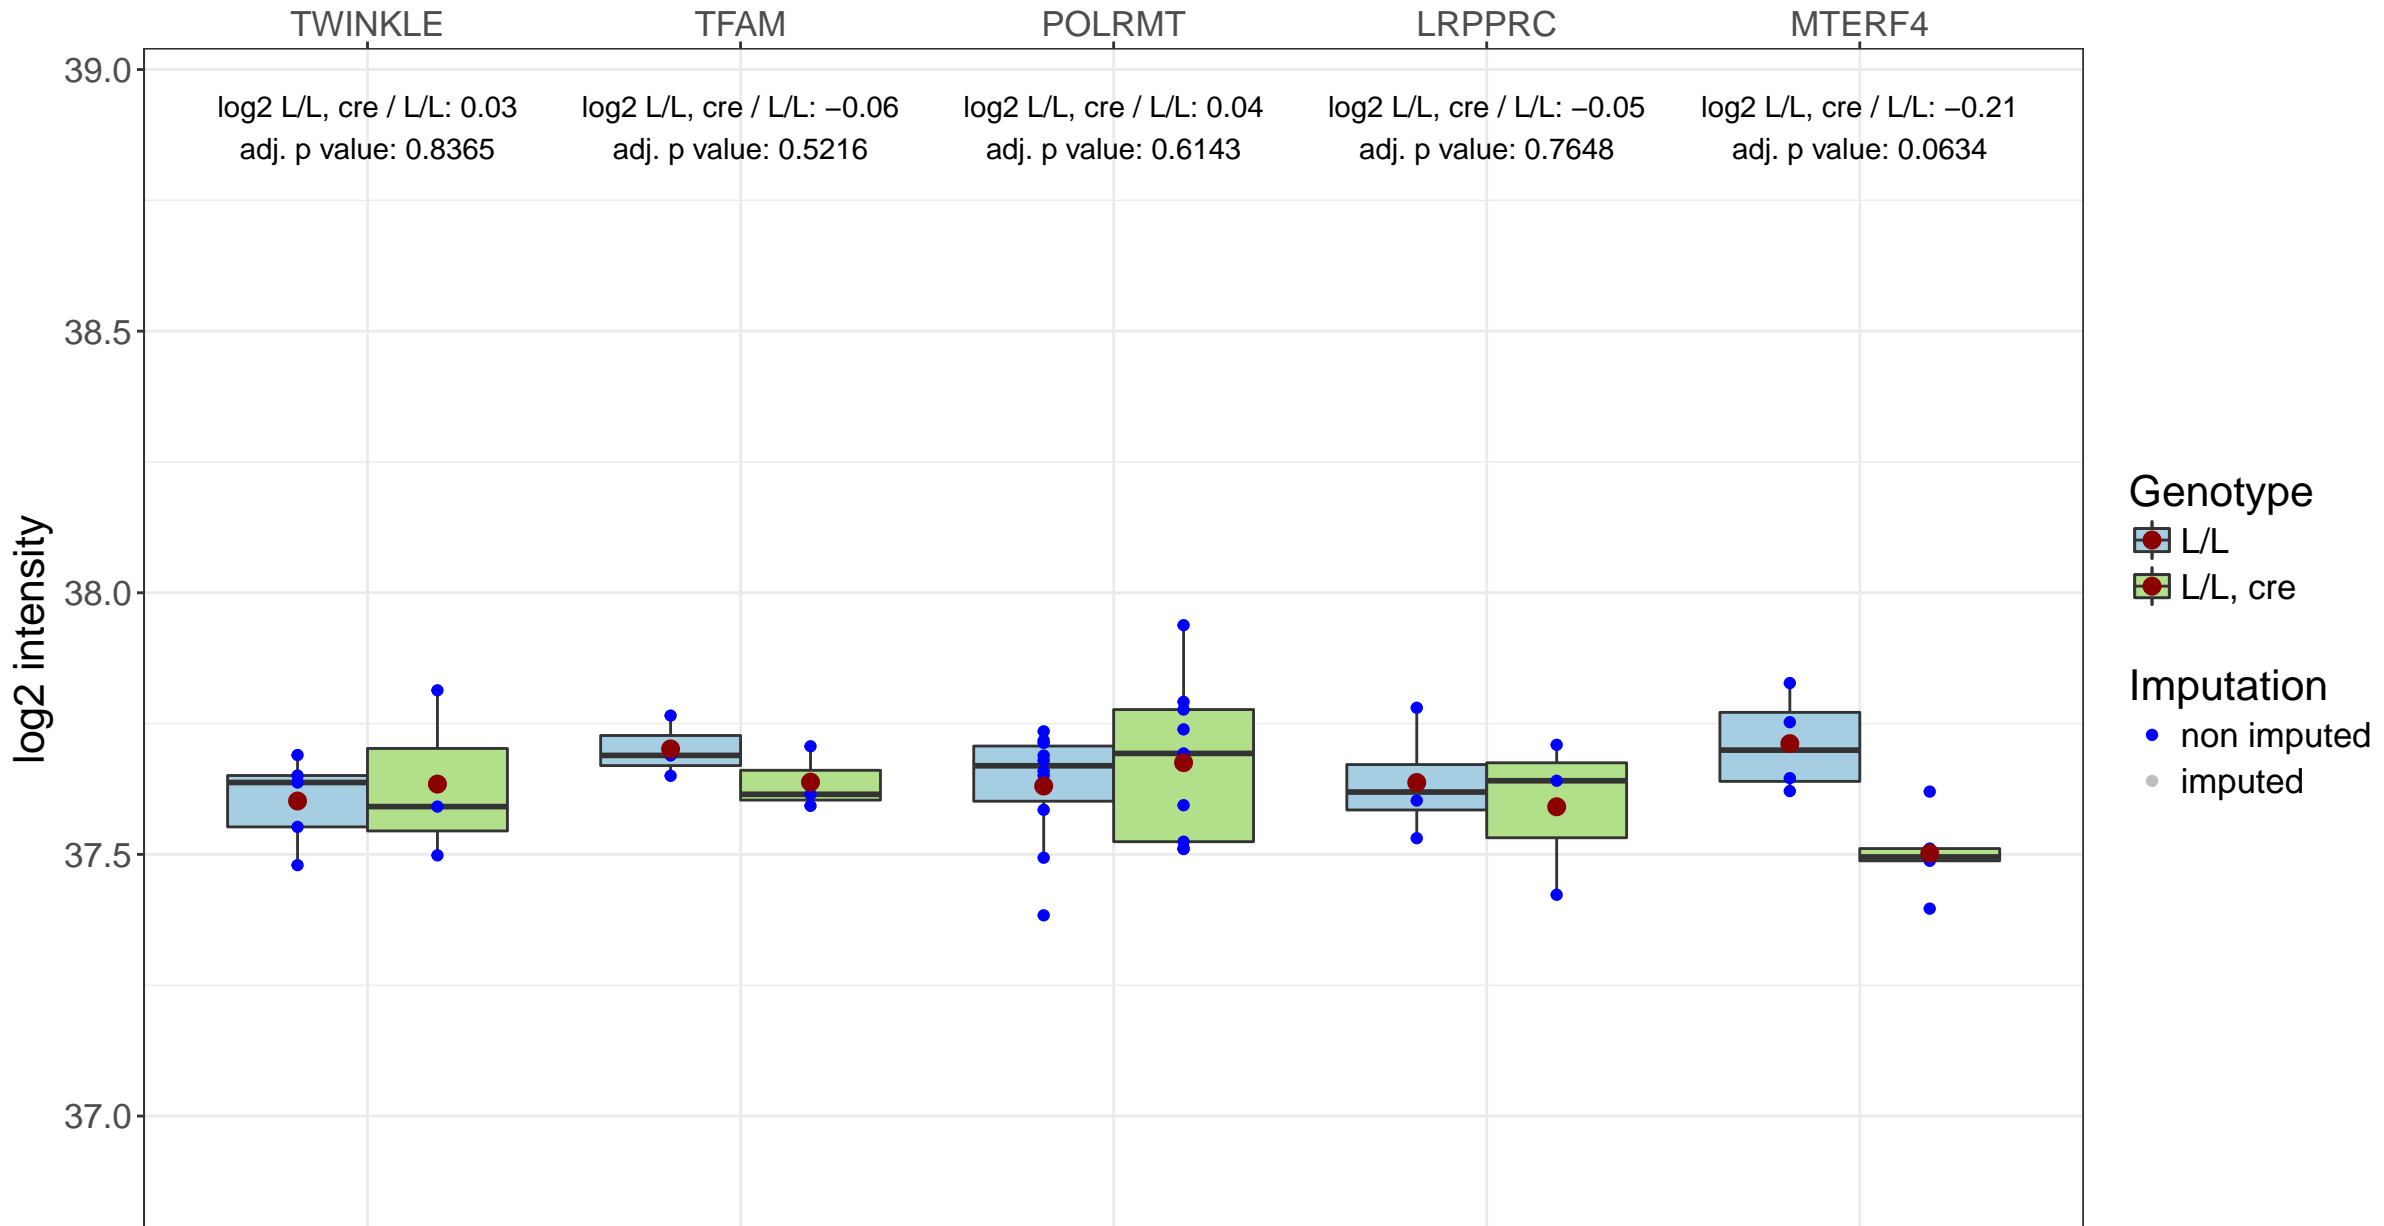

# HAGH / G5E8T9

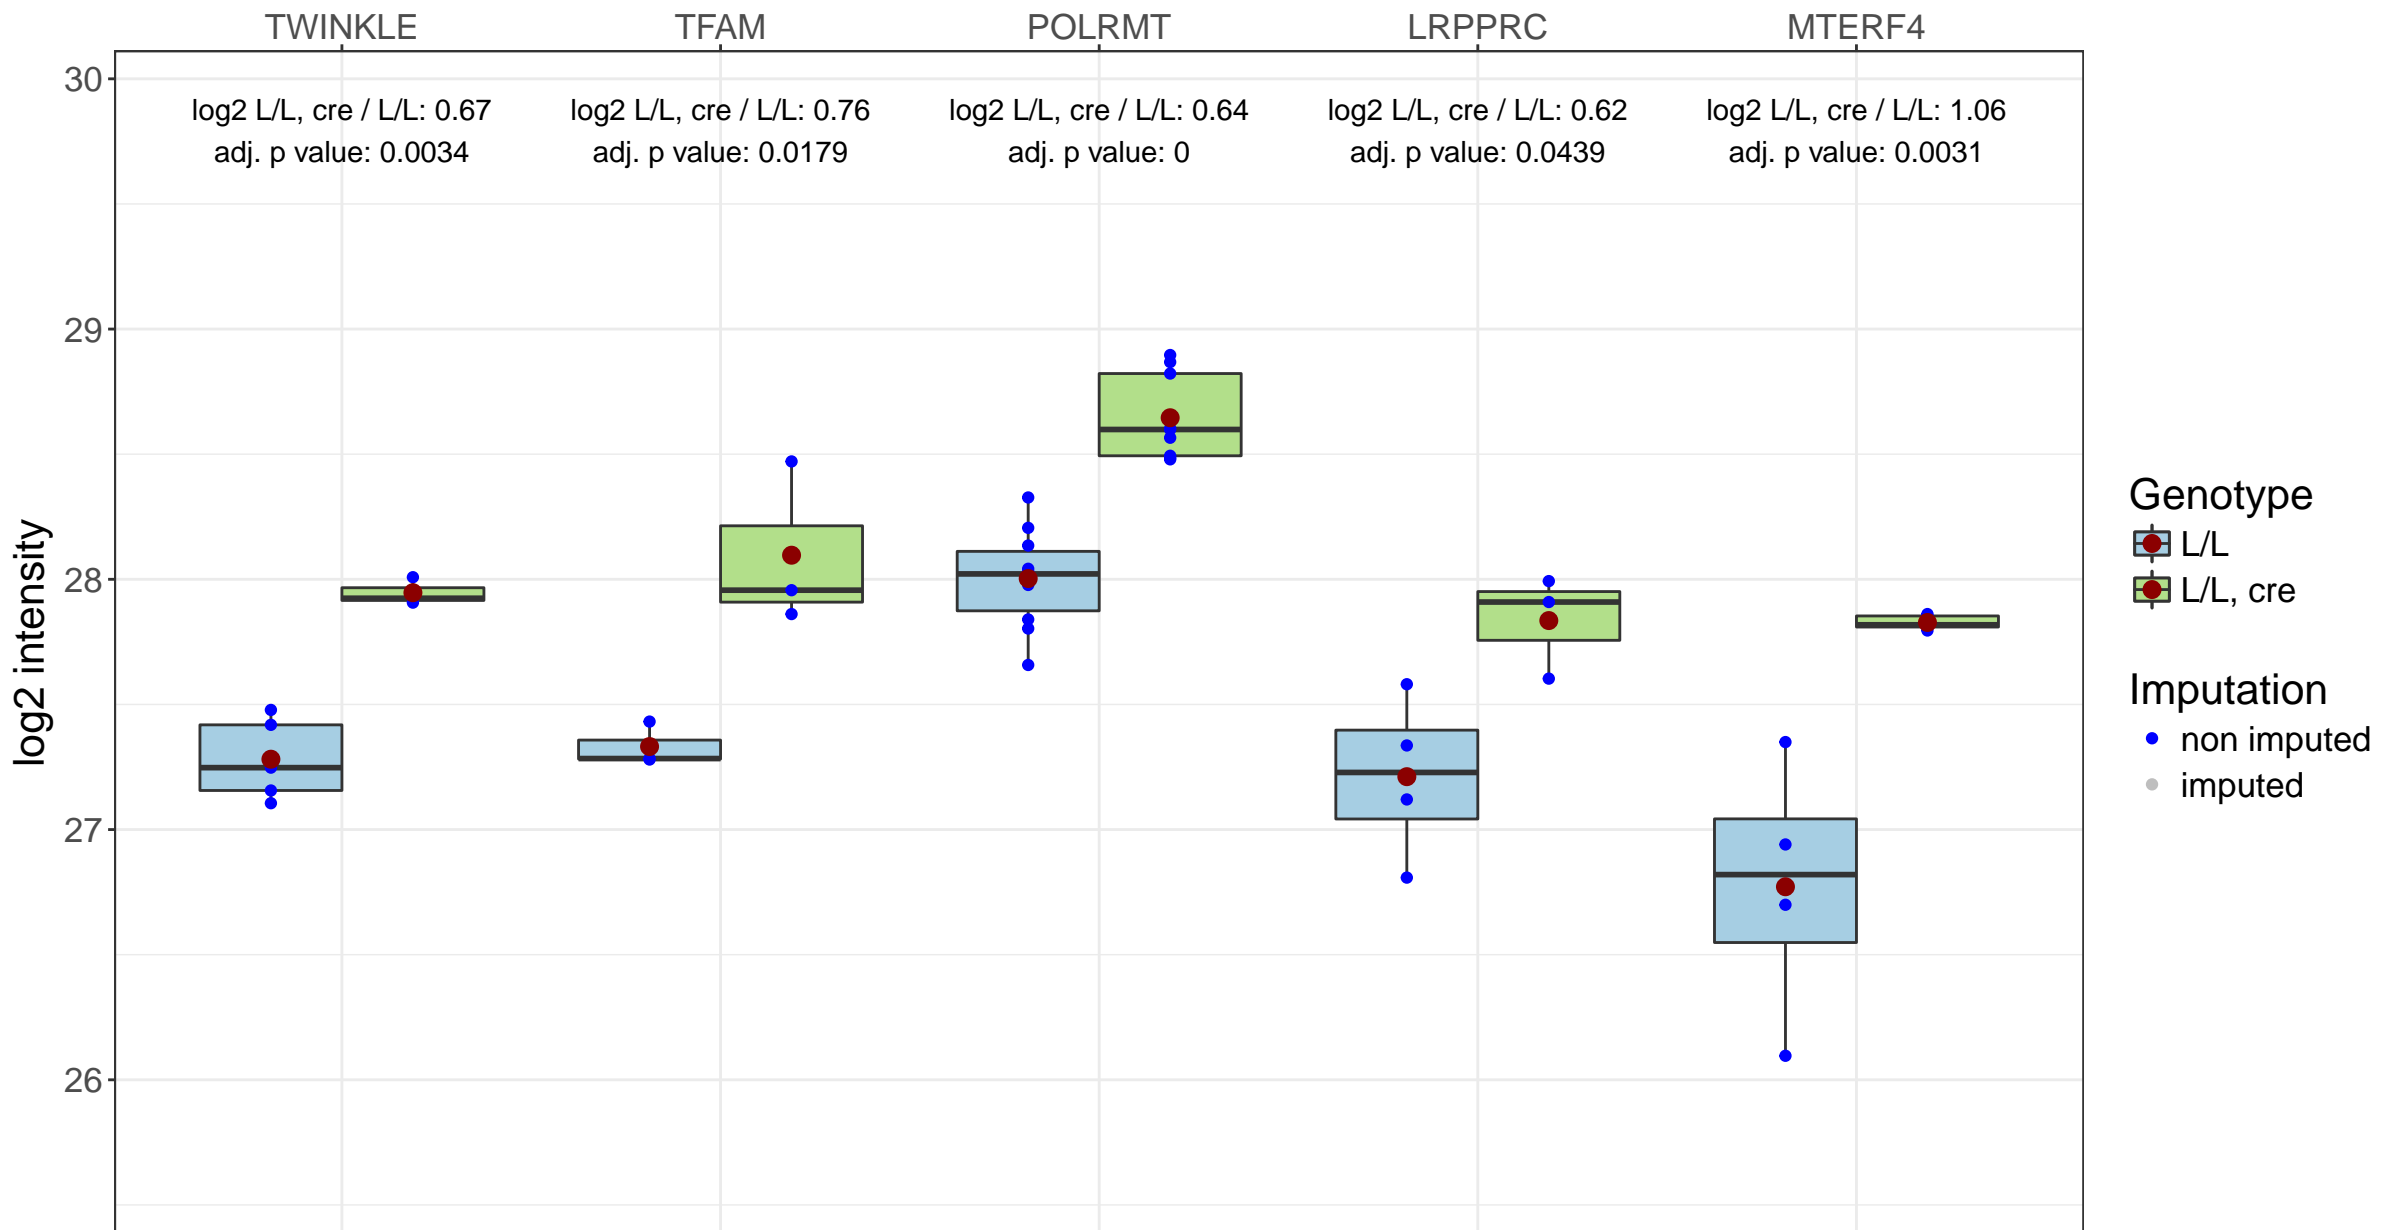

# HARS2 / Q99KK9

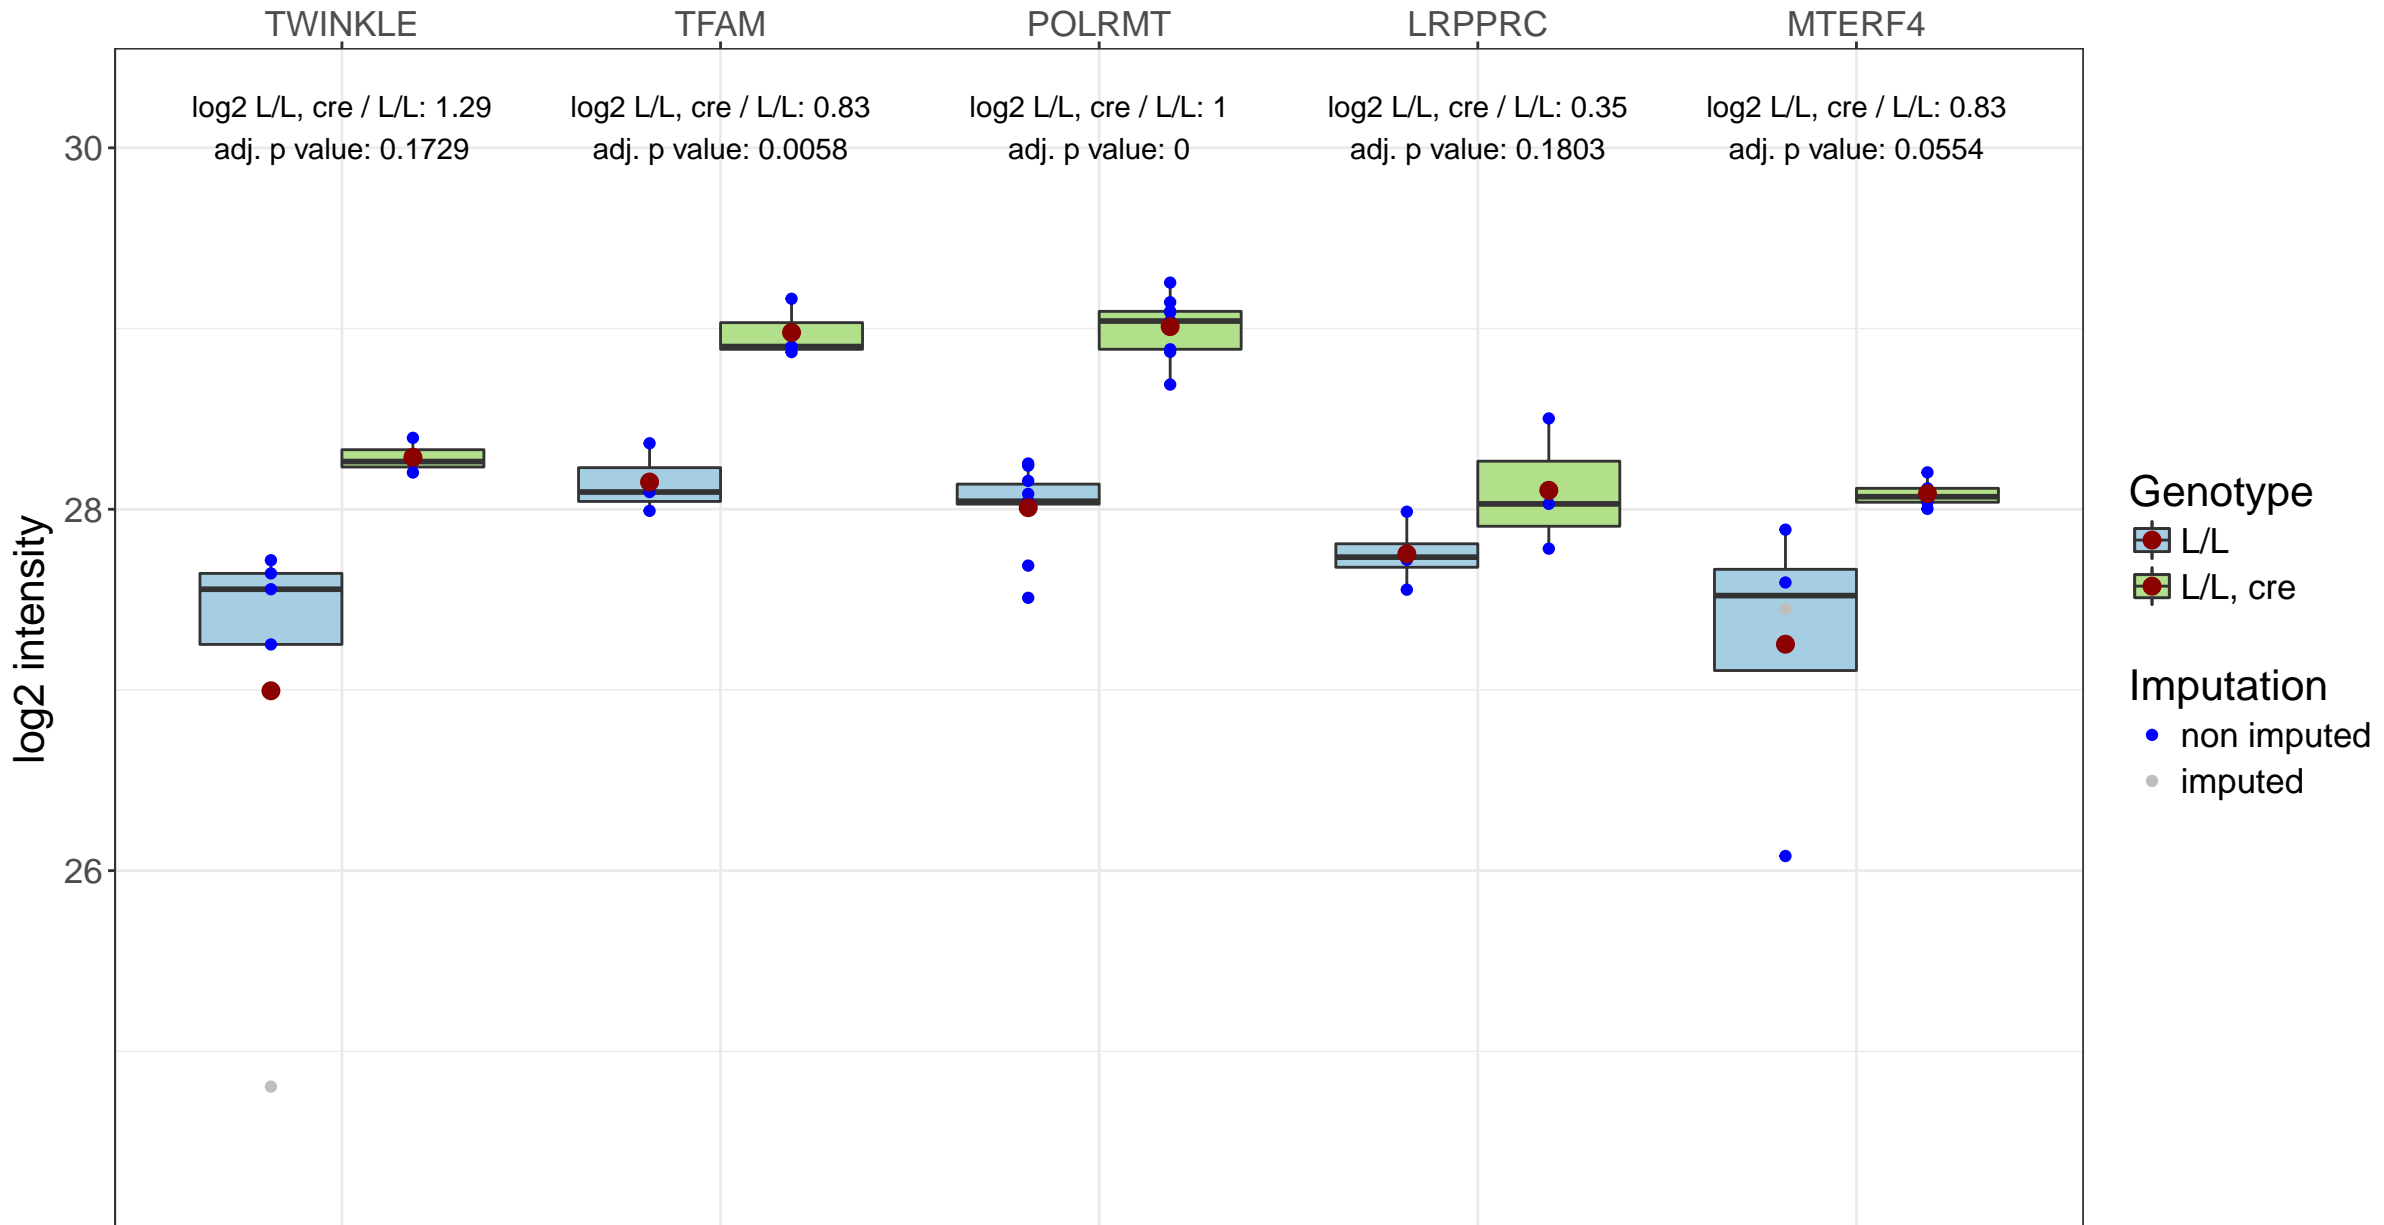



# HAX1 / O35387

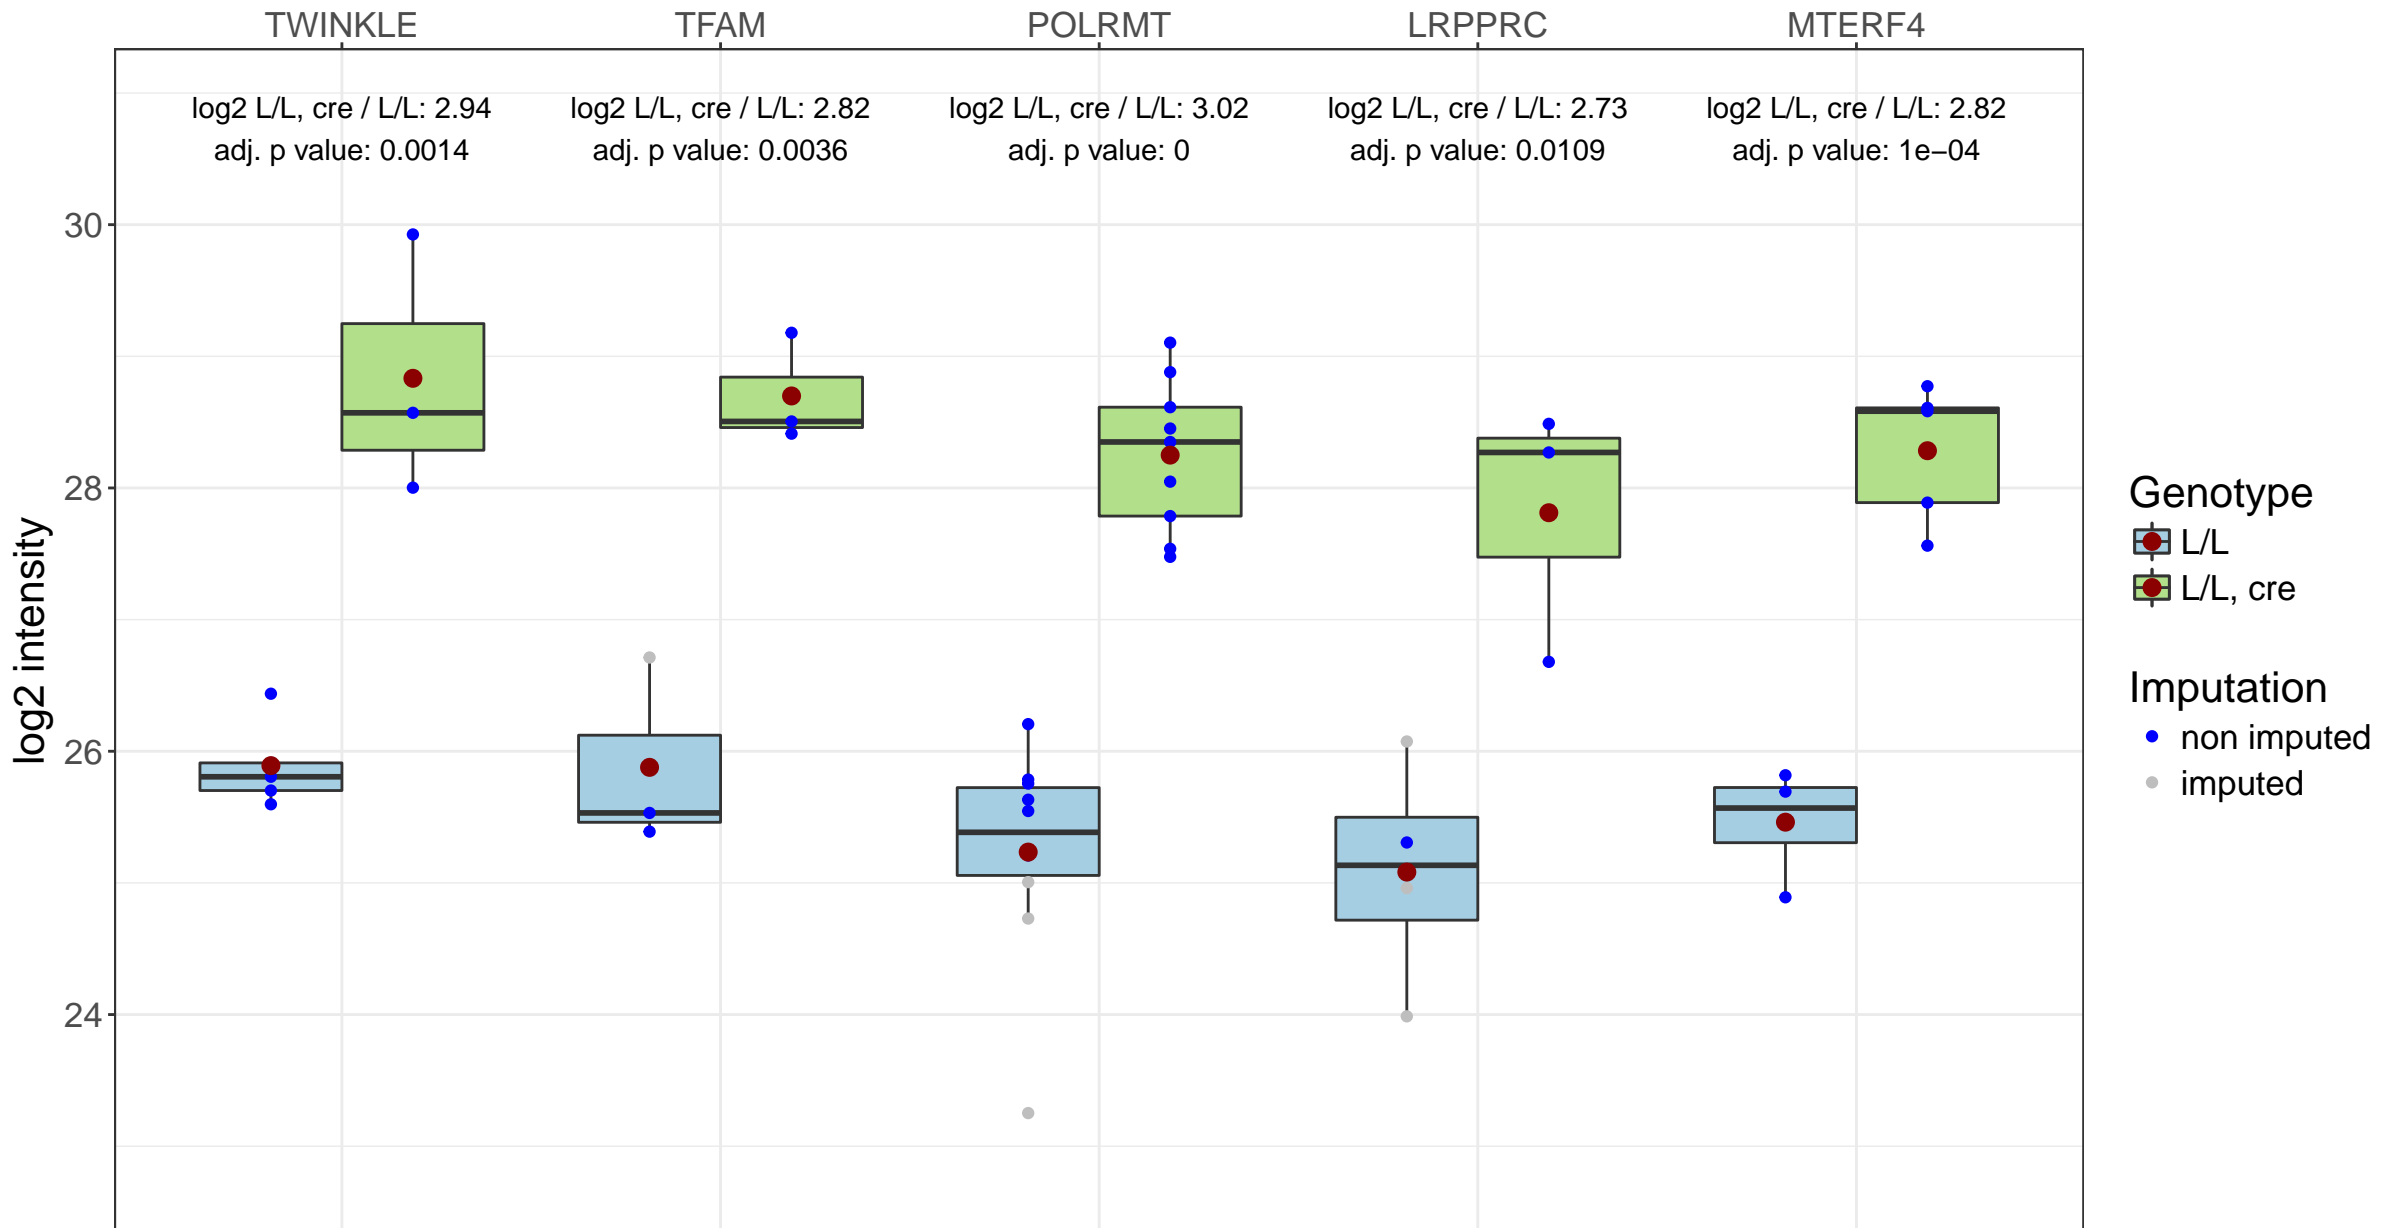

# HBA-A2 / Q91VB8

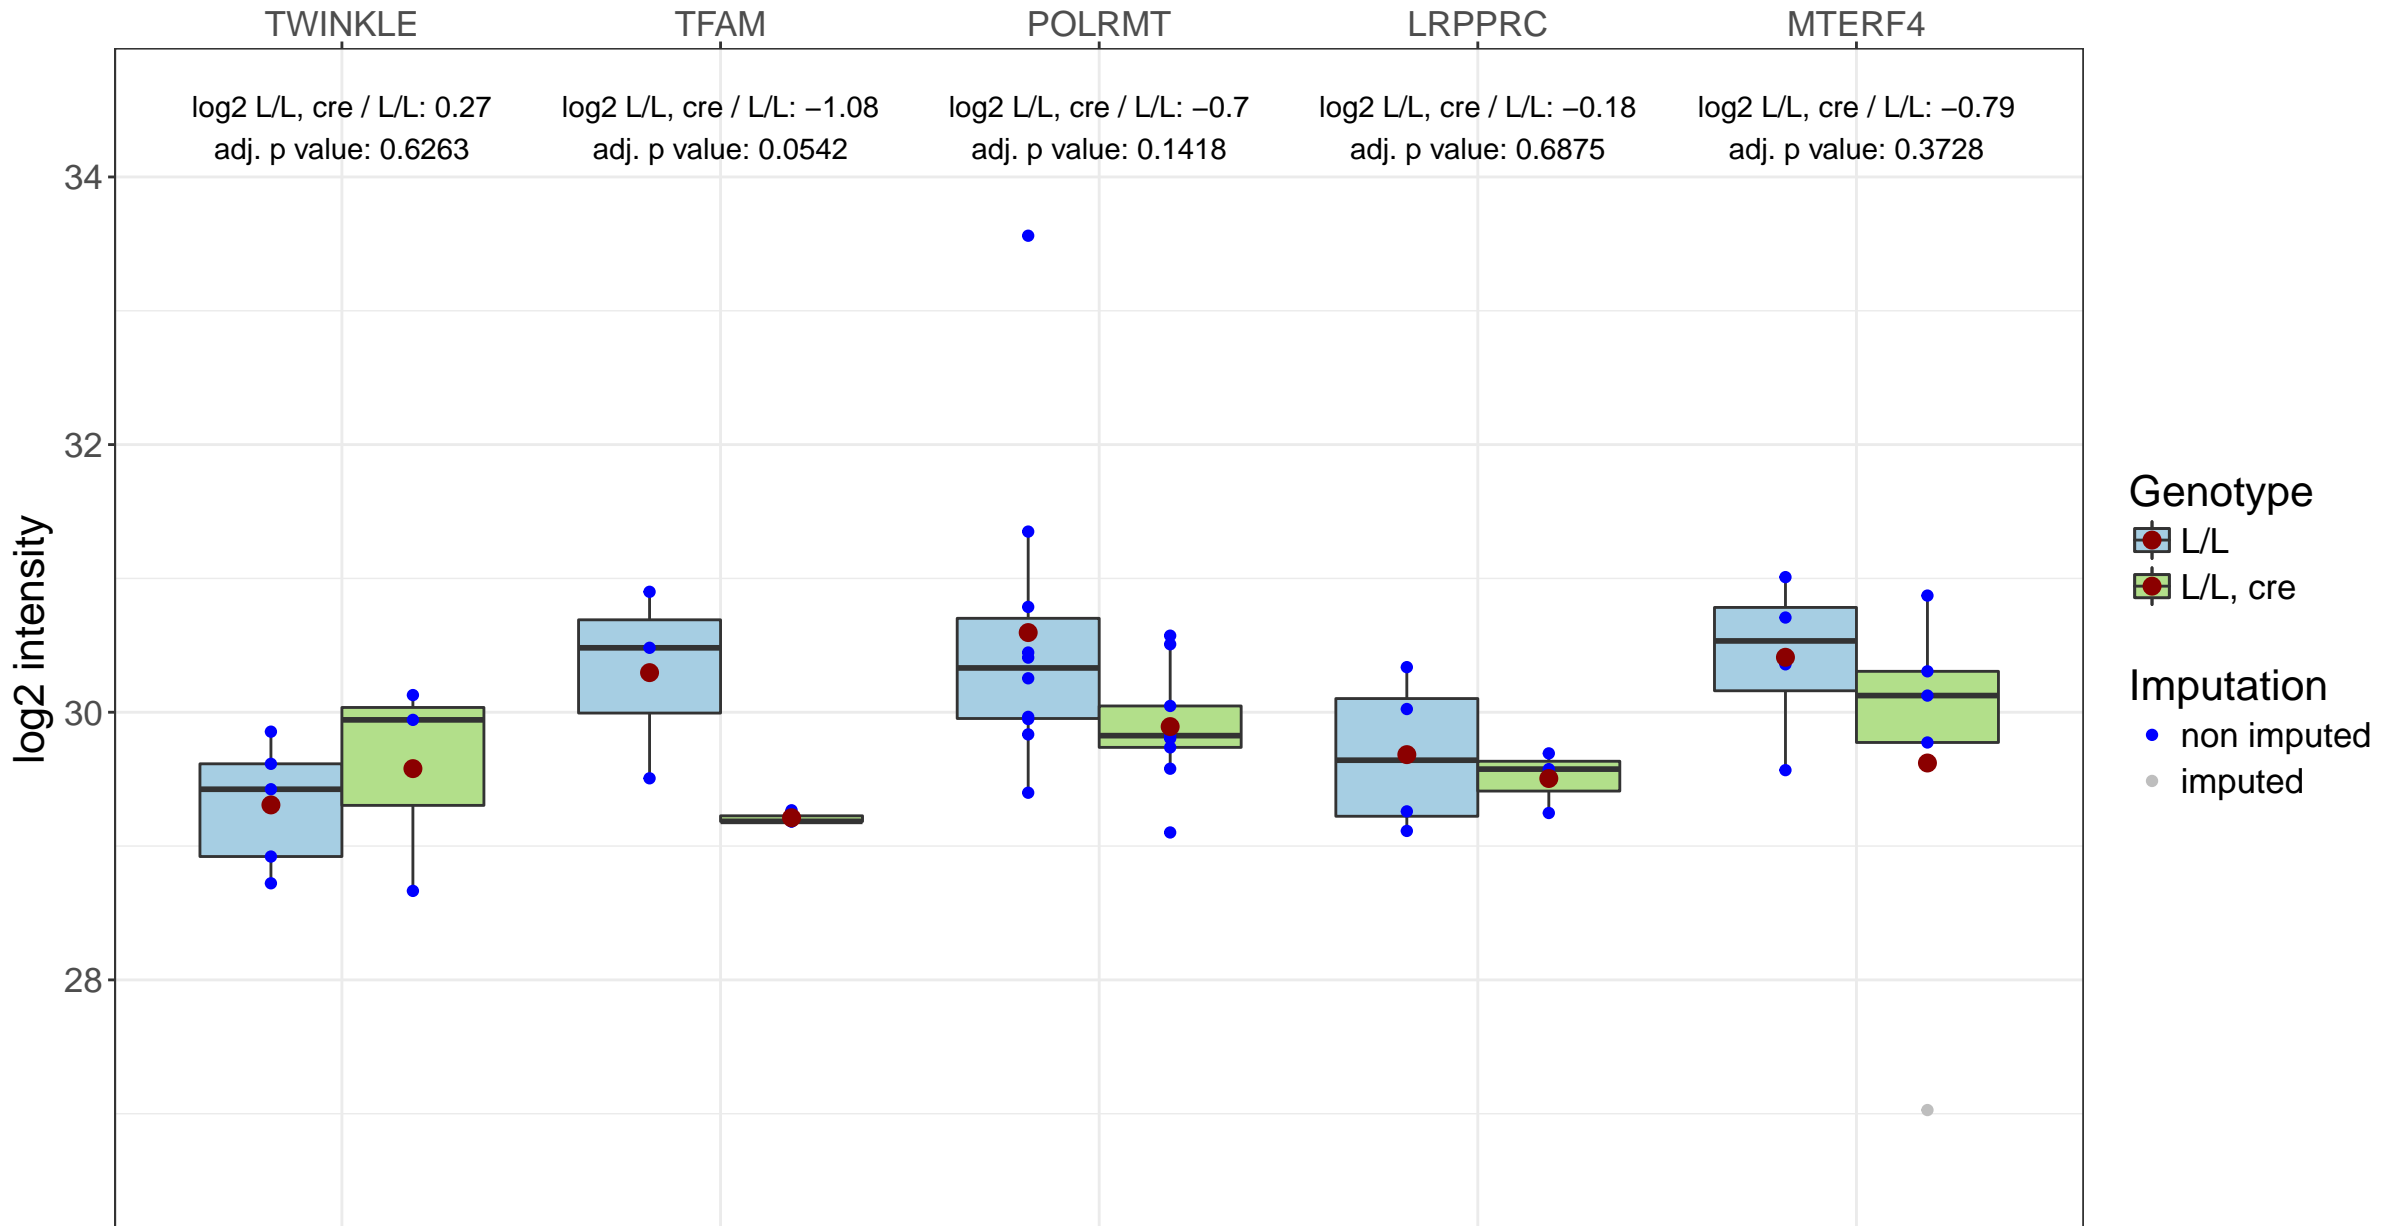

# HBBT1 / A8DUK4

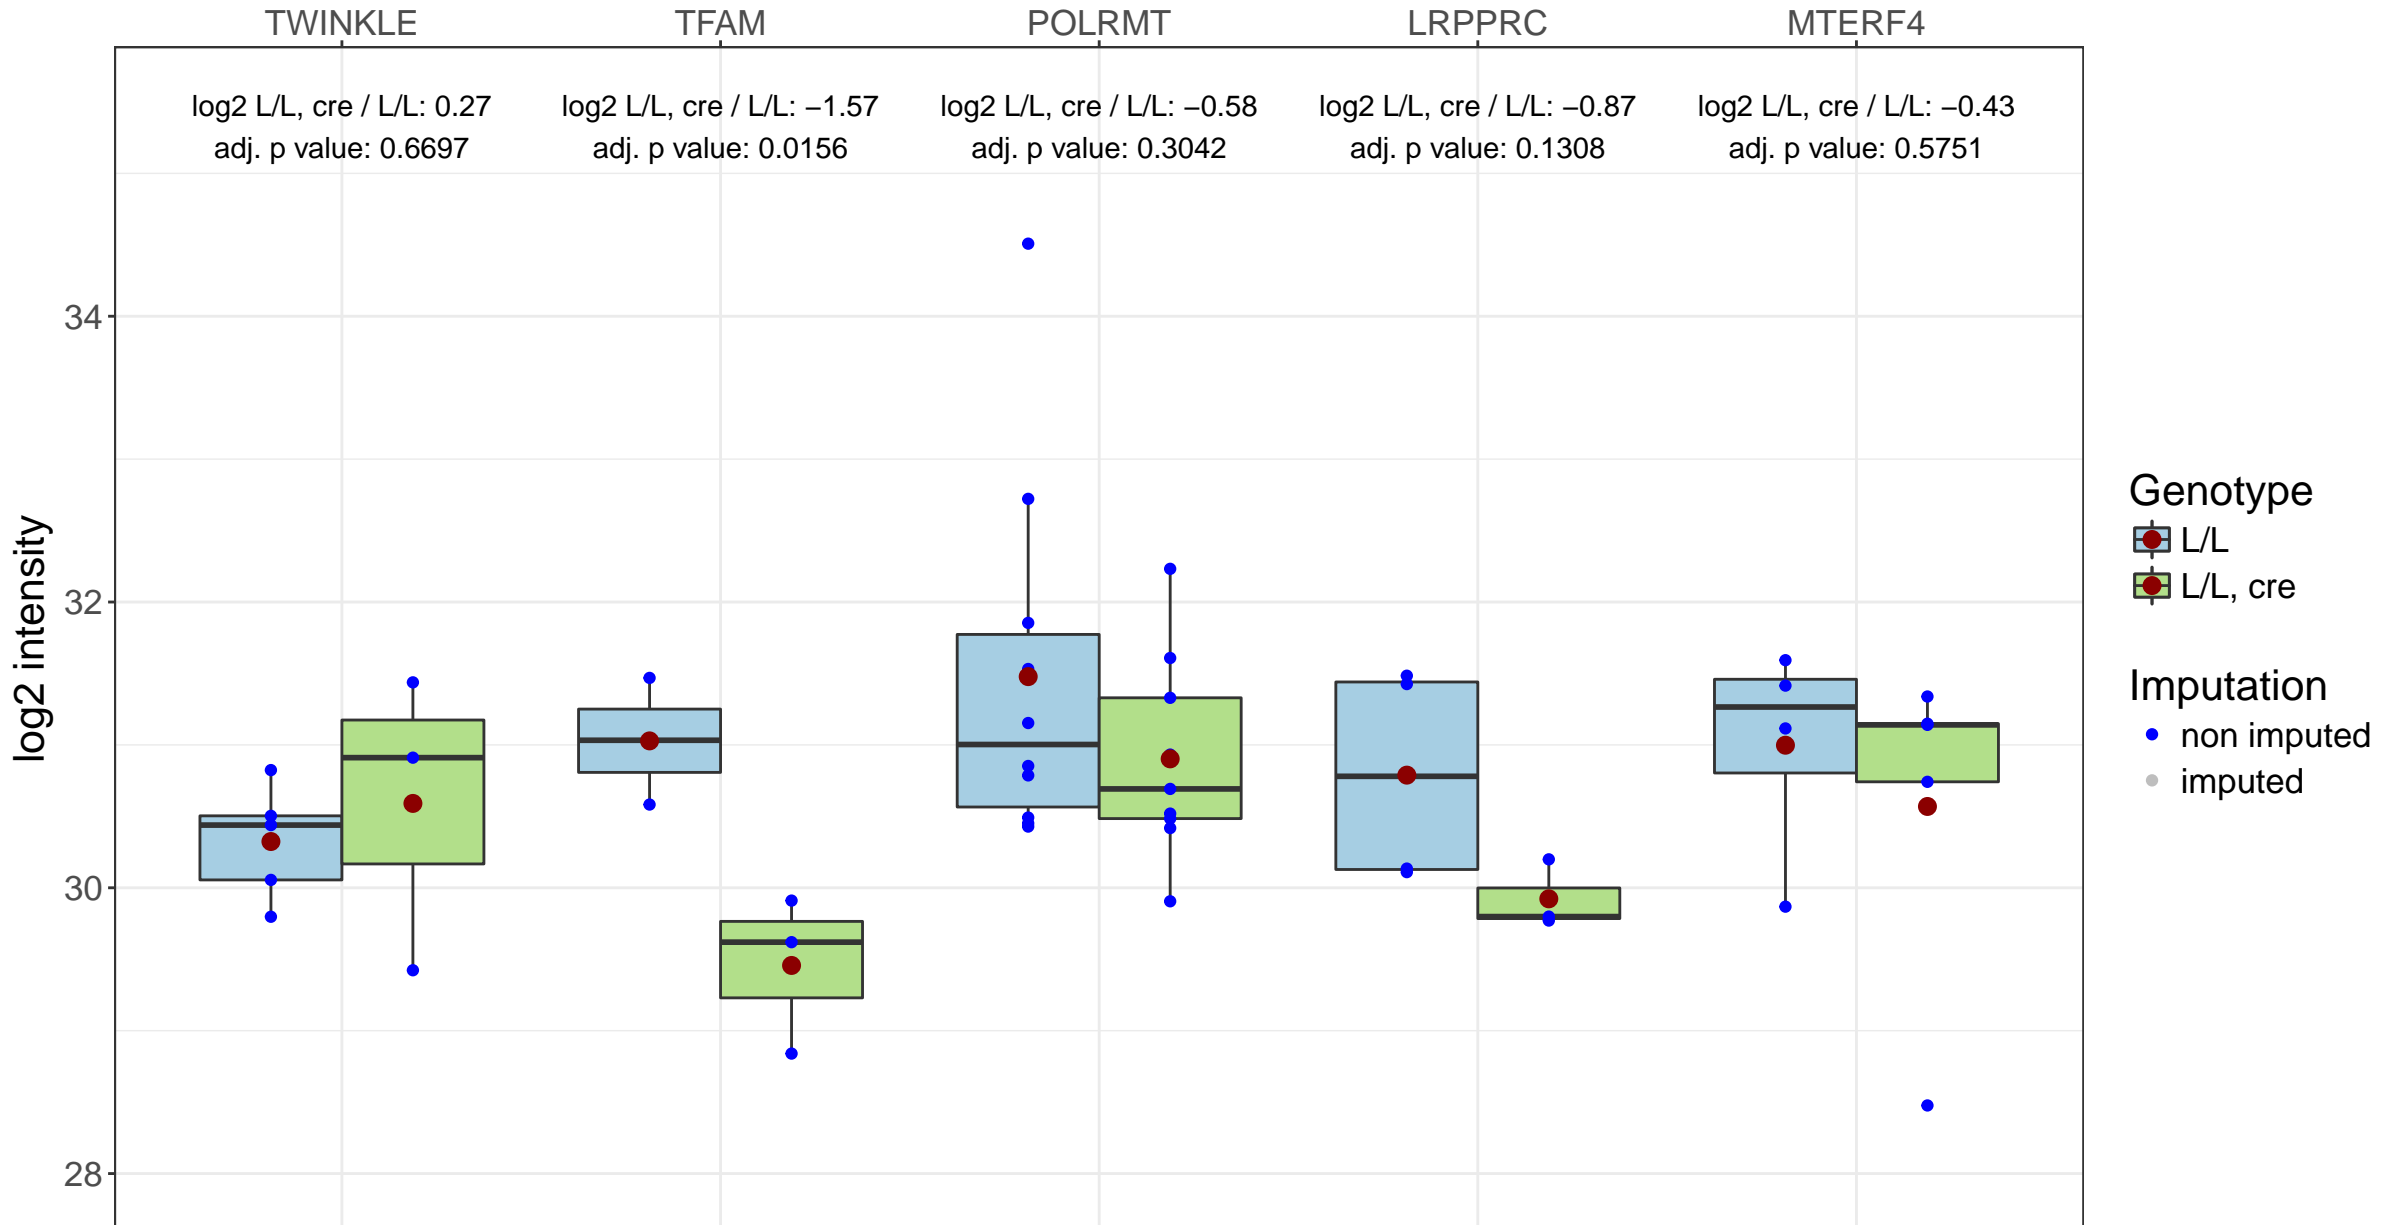

# HCCS / P53702

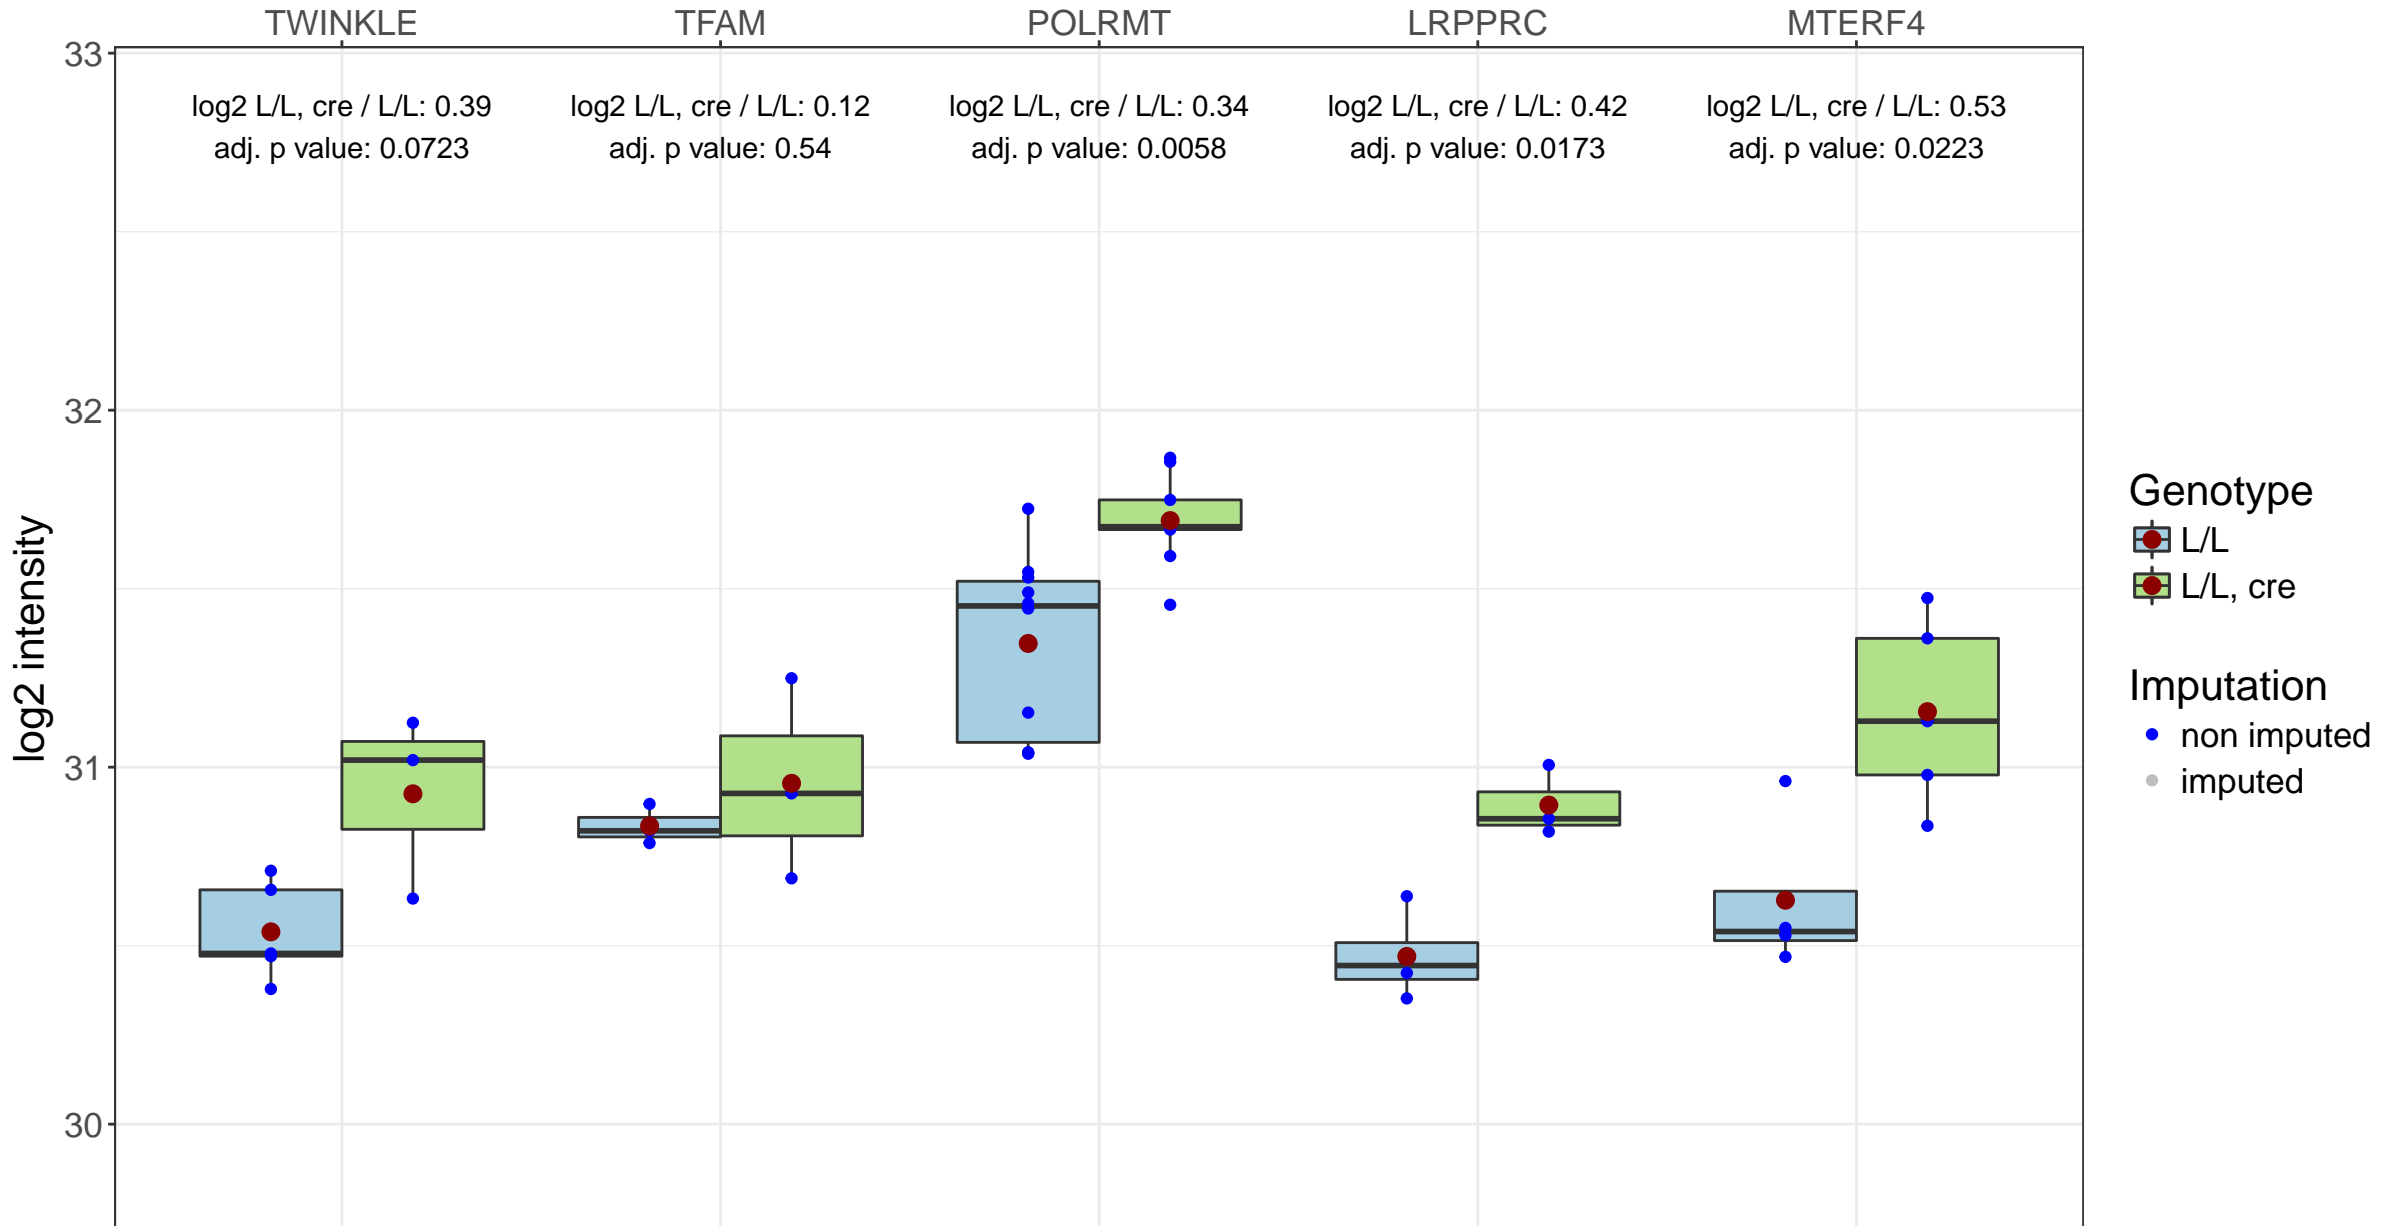

# HDDC2 / Q3SXD3

TWINKLE

TFAM

POLRMT

LRPPRC

MTERF4

log2 L/L, cre / L/L: 0.25  
adj. p value: 0.4195

log2 L/L, cre / L/L: 0.34  
adj. p value: 0.6318

log2 intensity

28

27

26

25

24

Genotype

L/L

L/L, cre

Imputation

non imputed

imputed

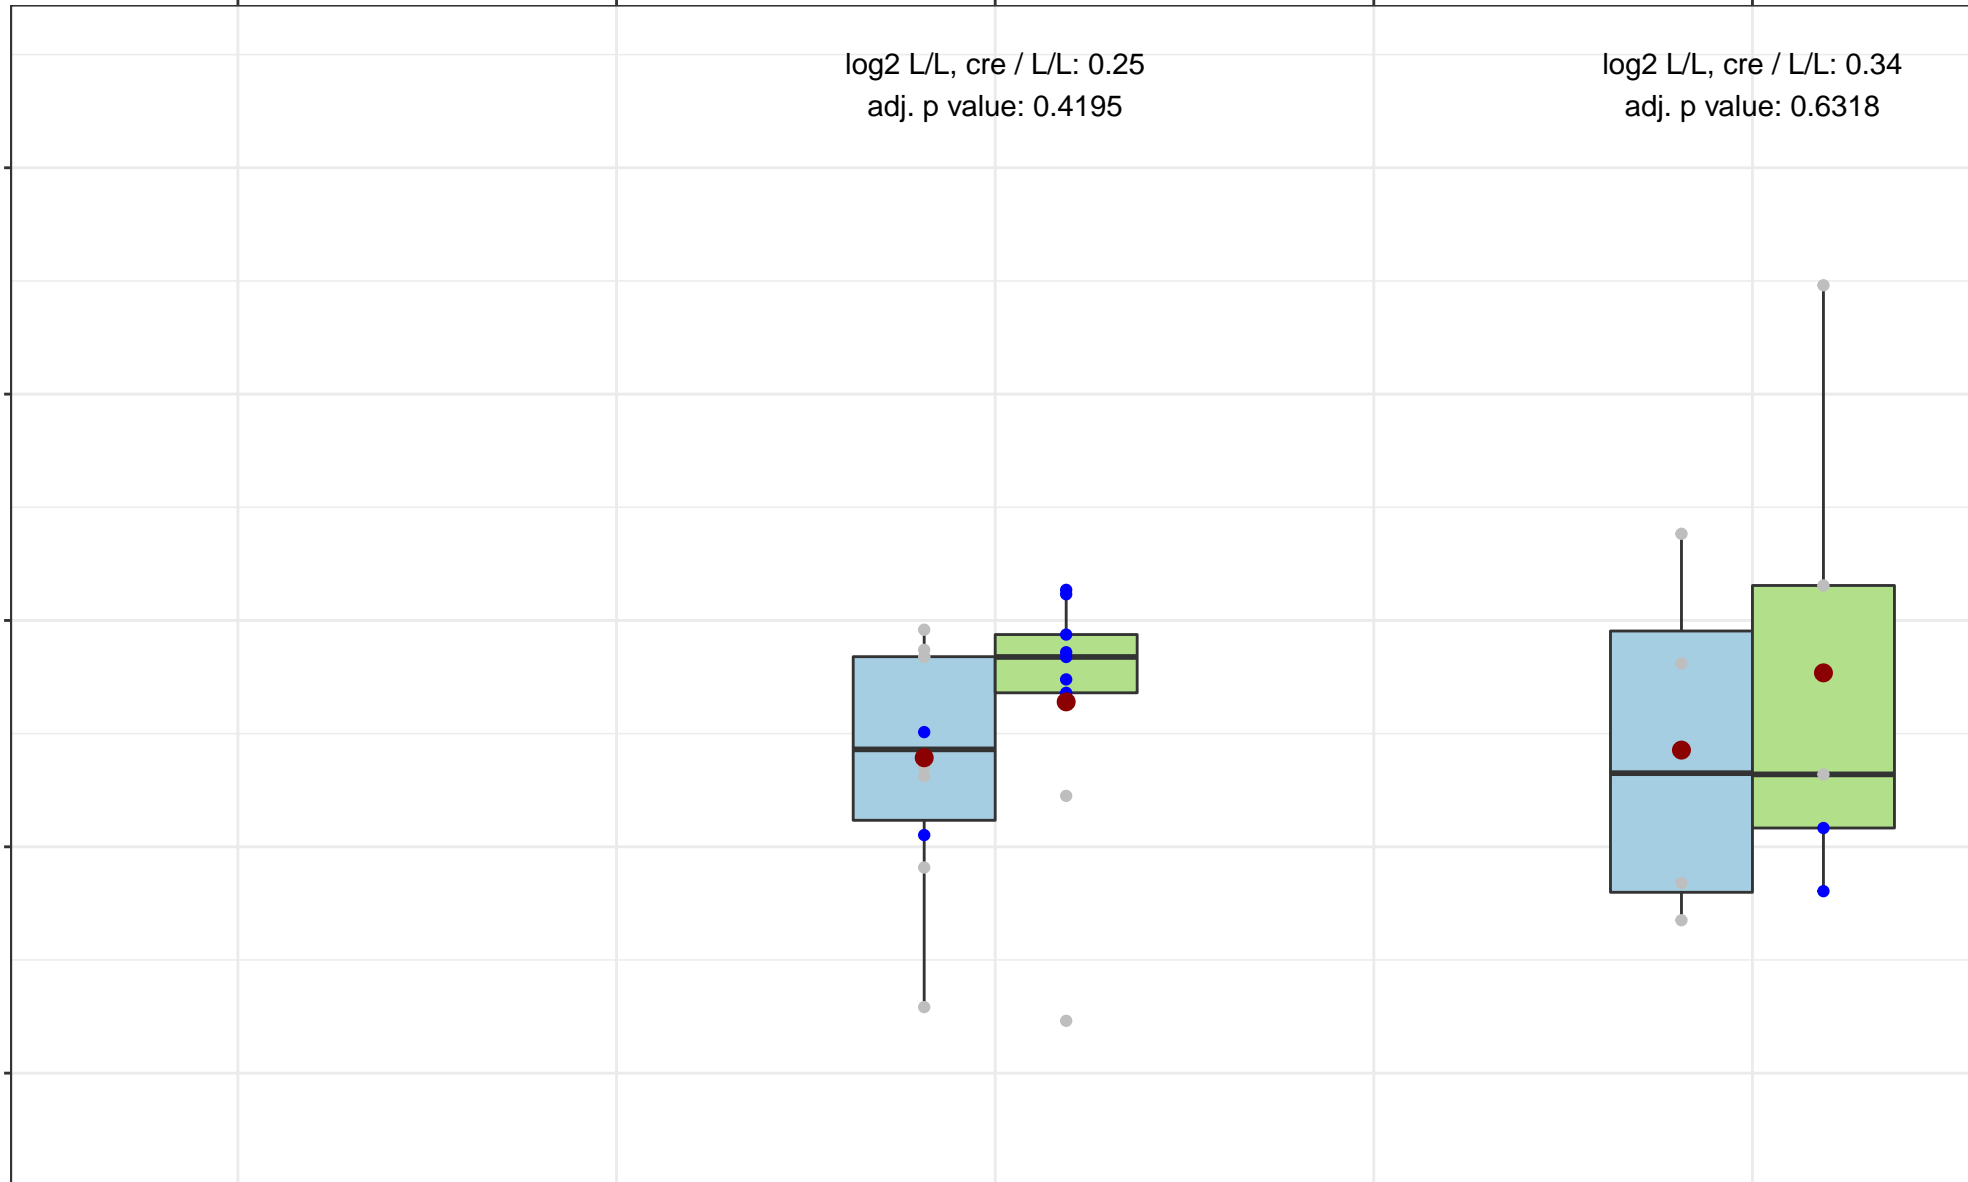

# HDHD2 / Q3UGR5

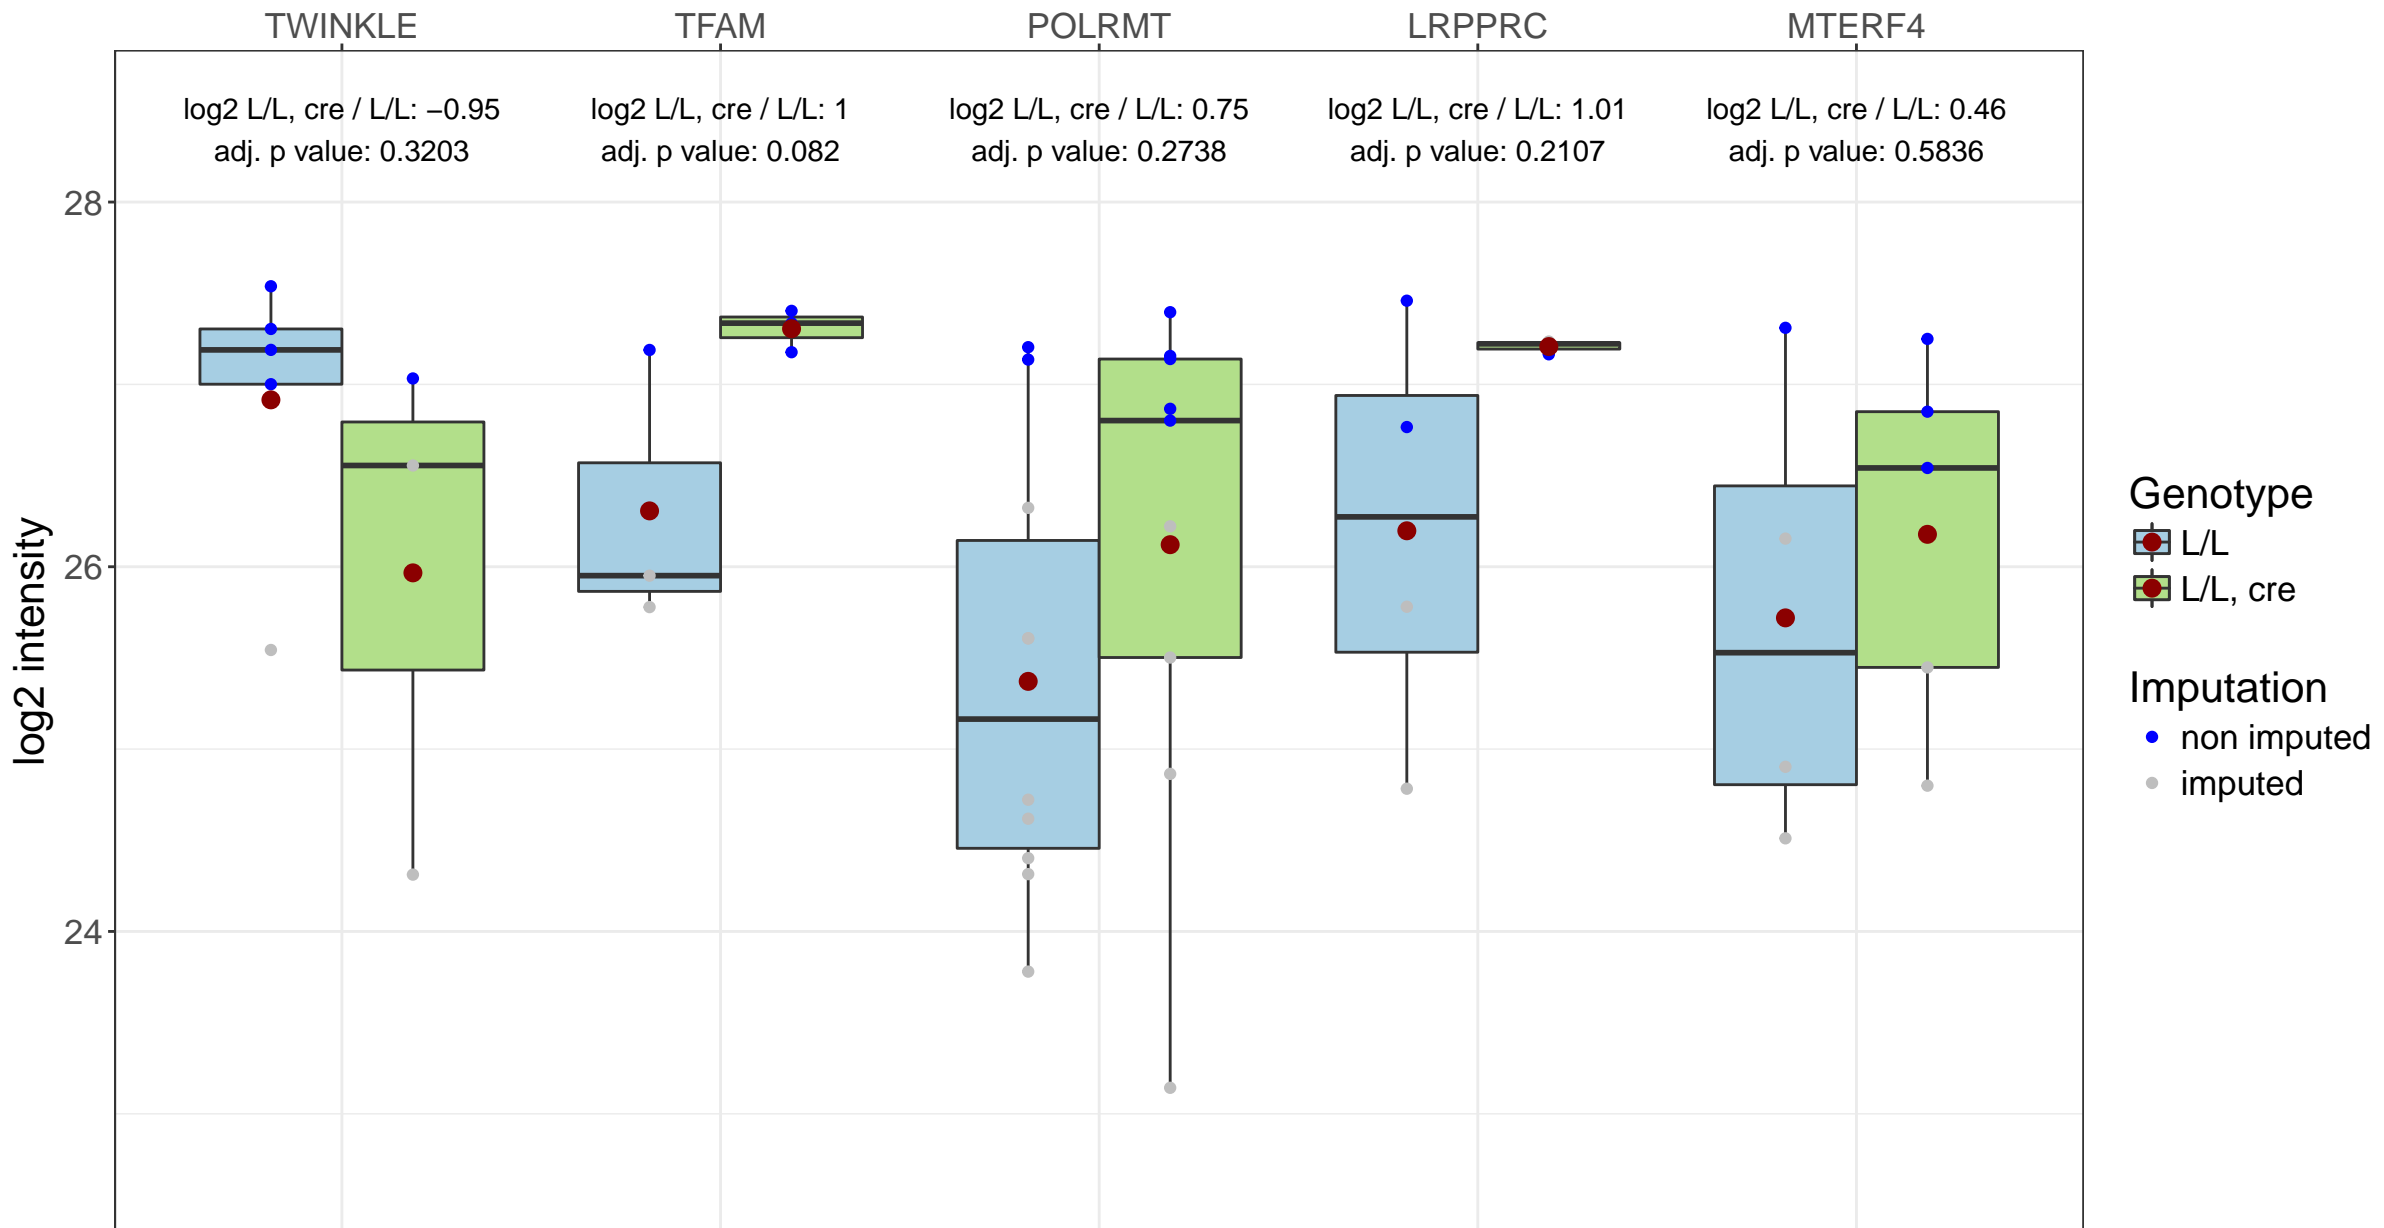

# HDHD3 / Q9CYW4

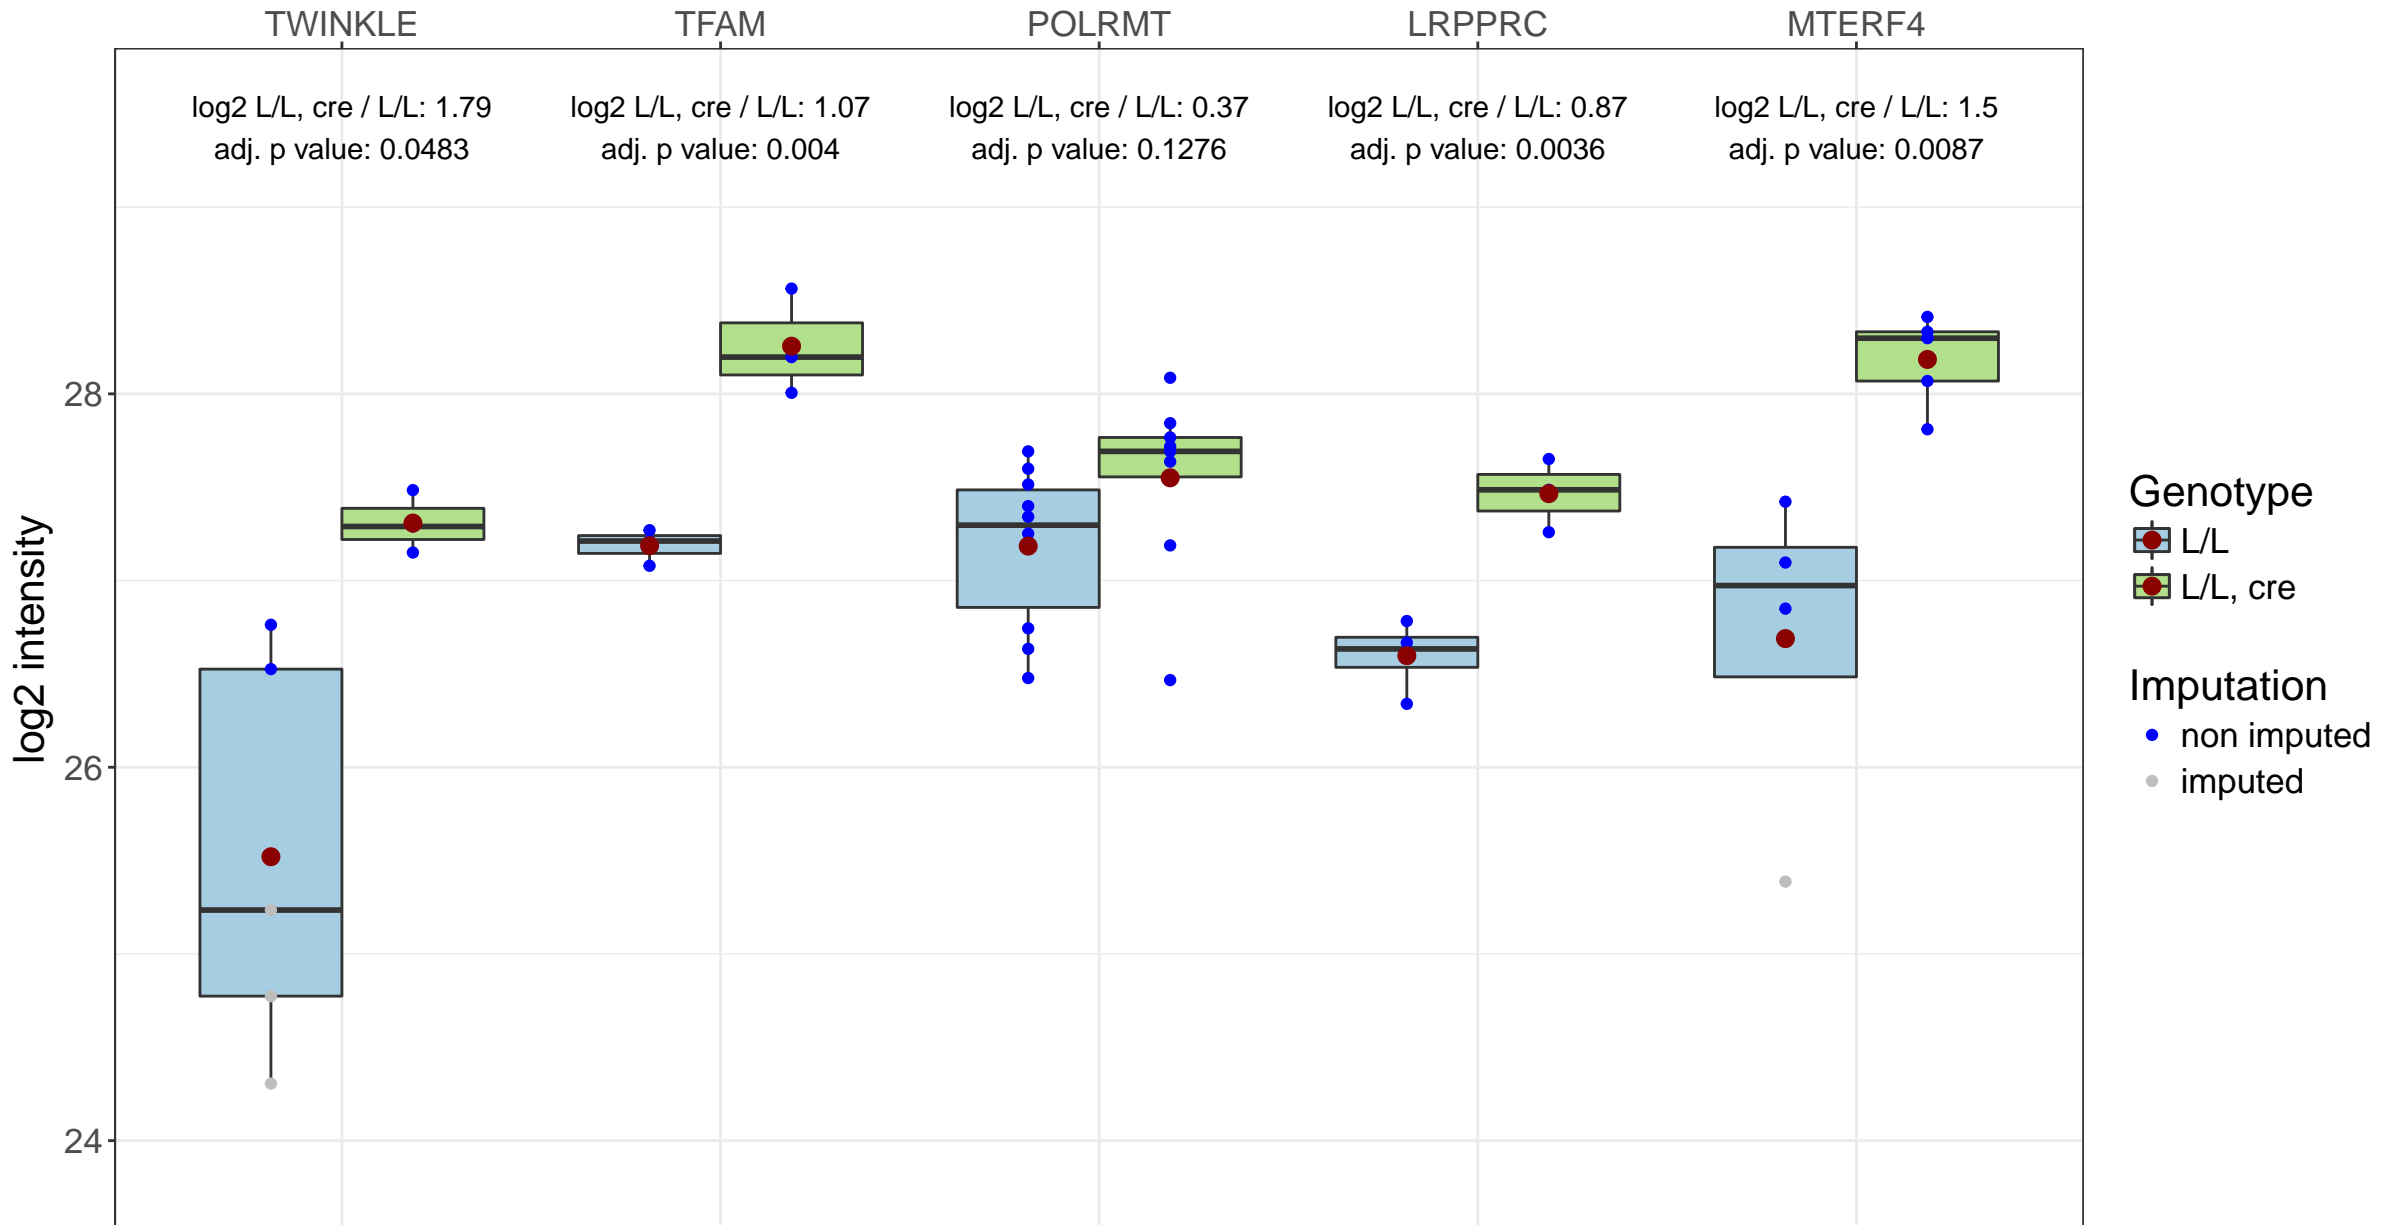

# HEBP1 / Q9R257

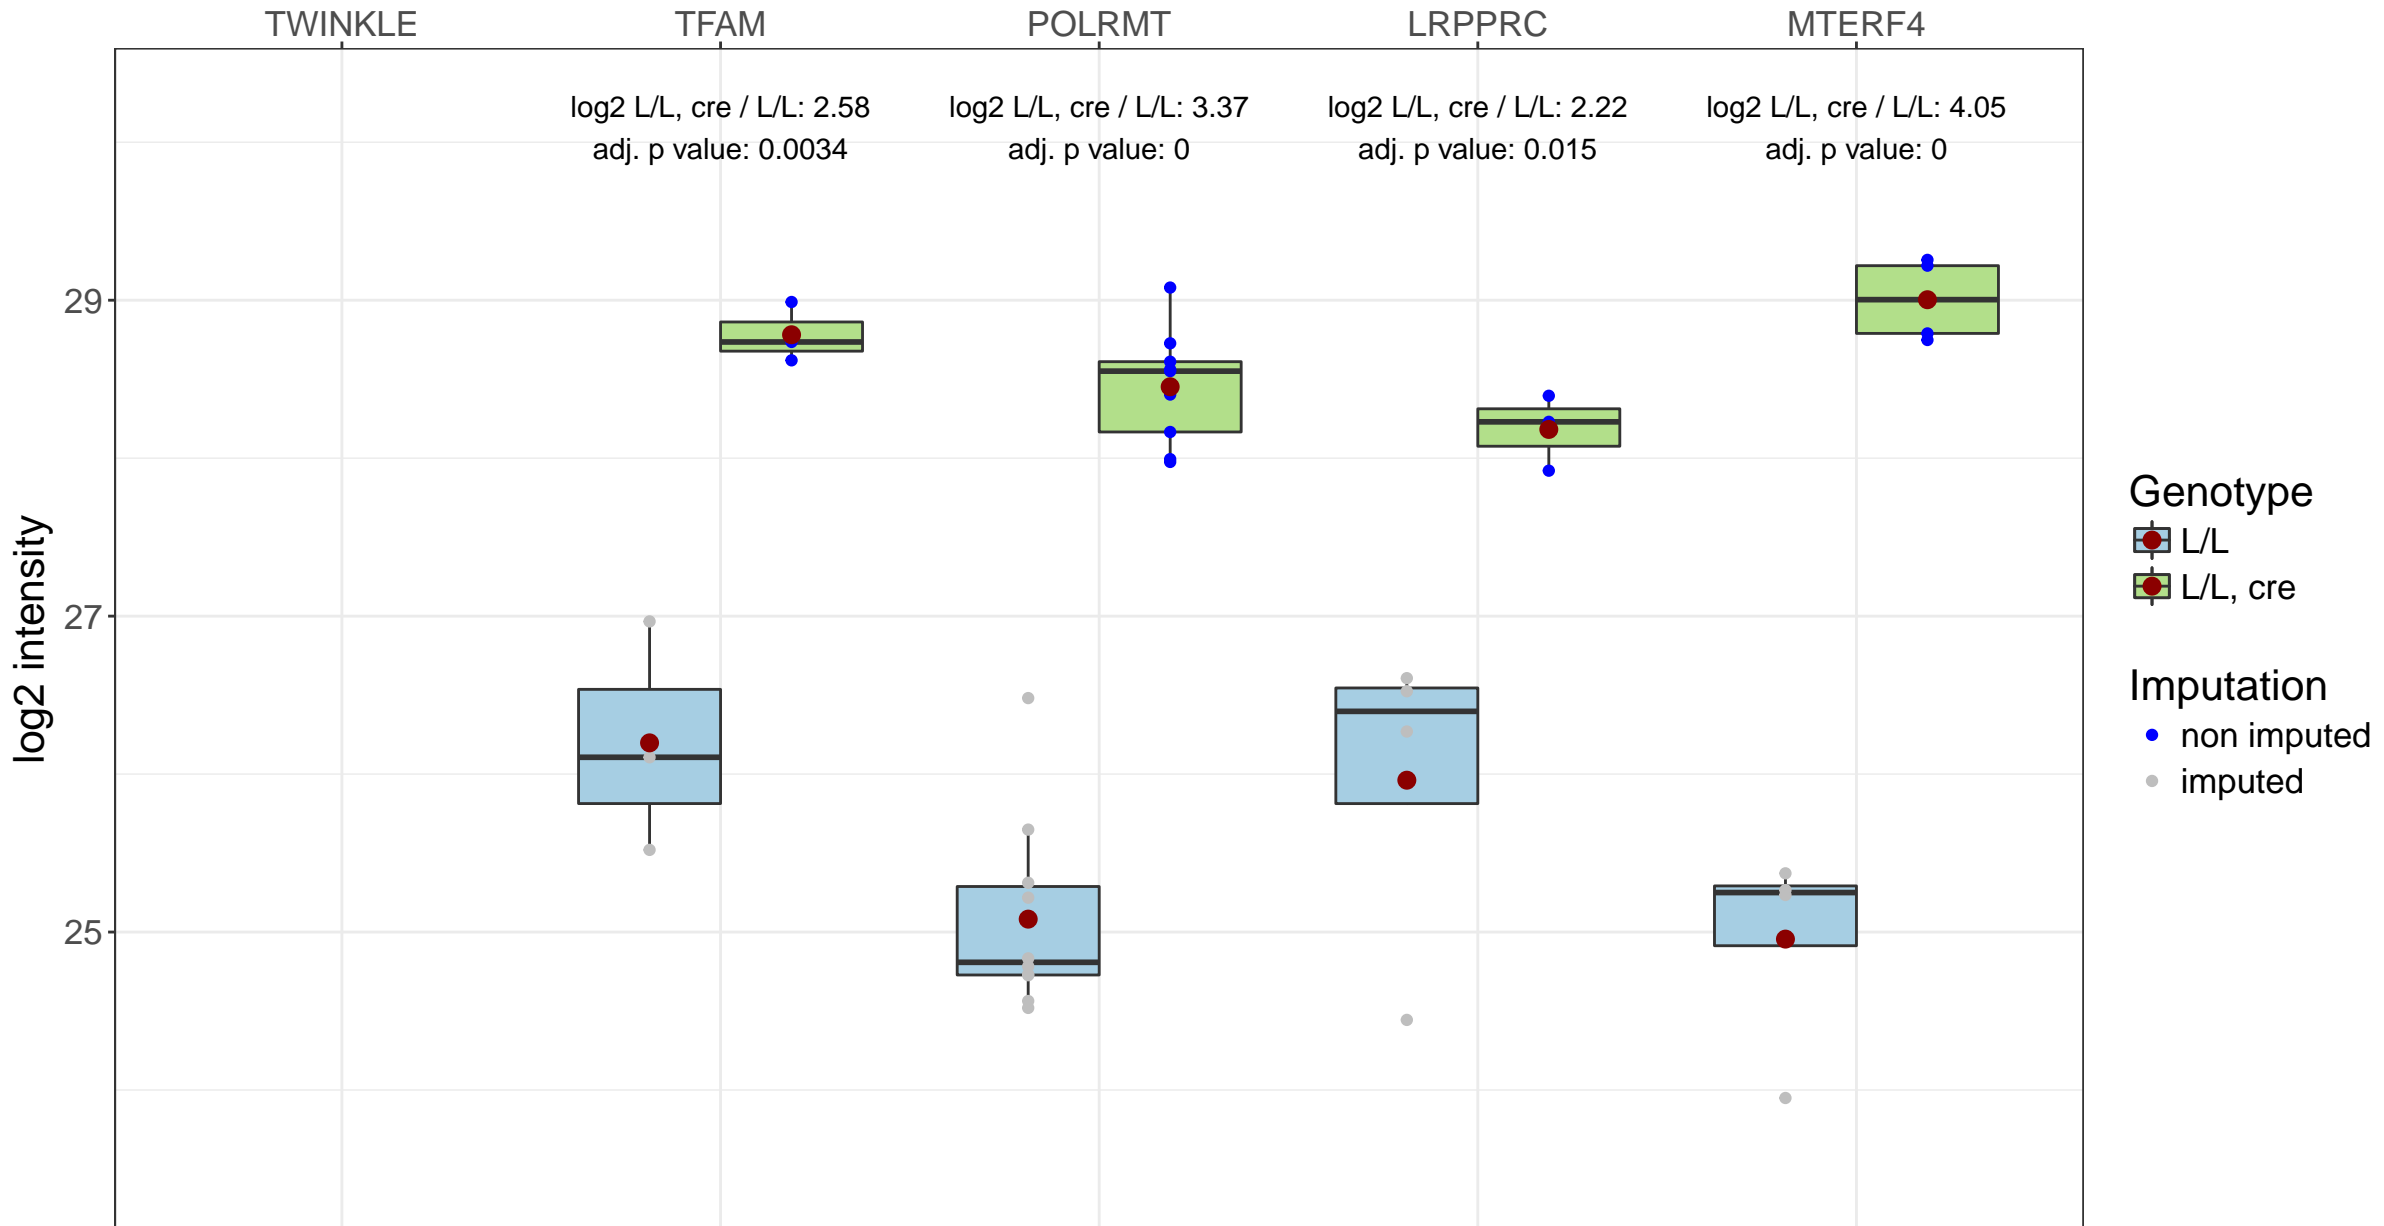



# HIBADH / Q99L13

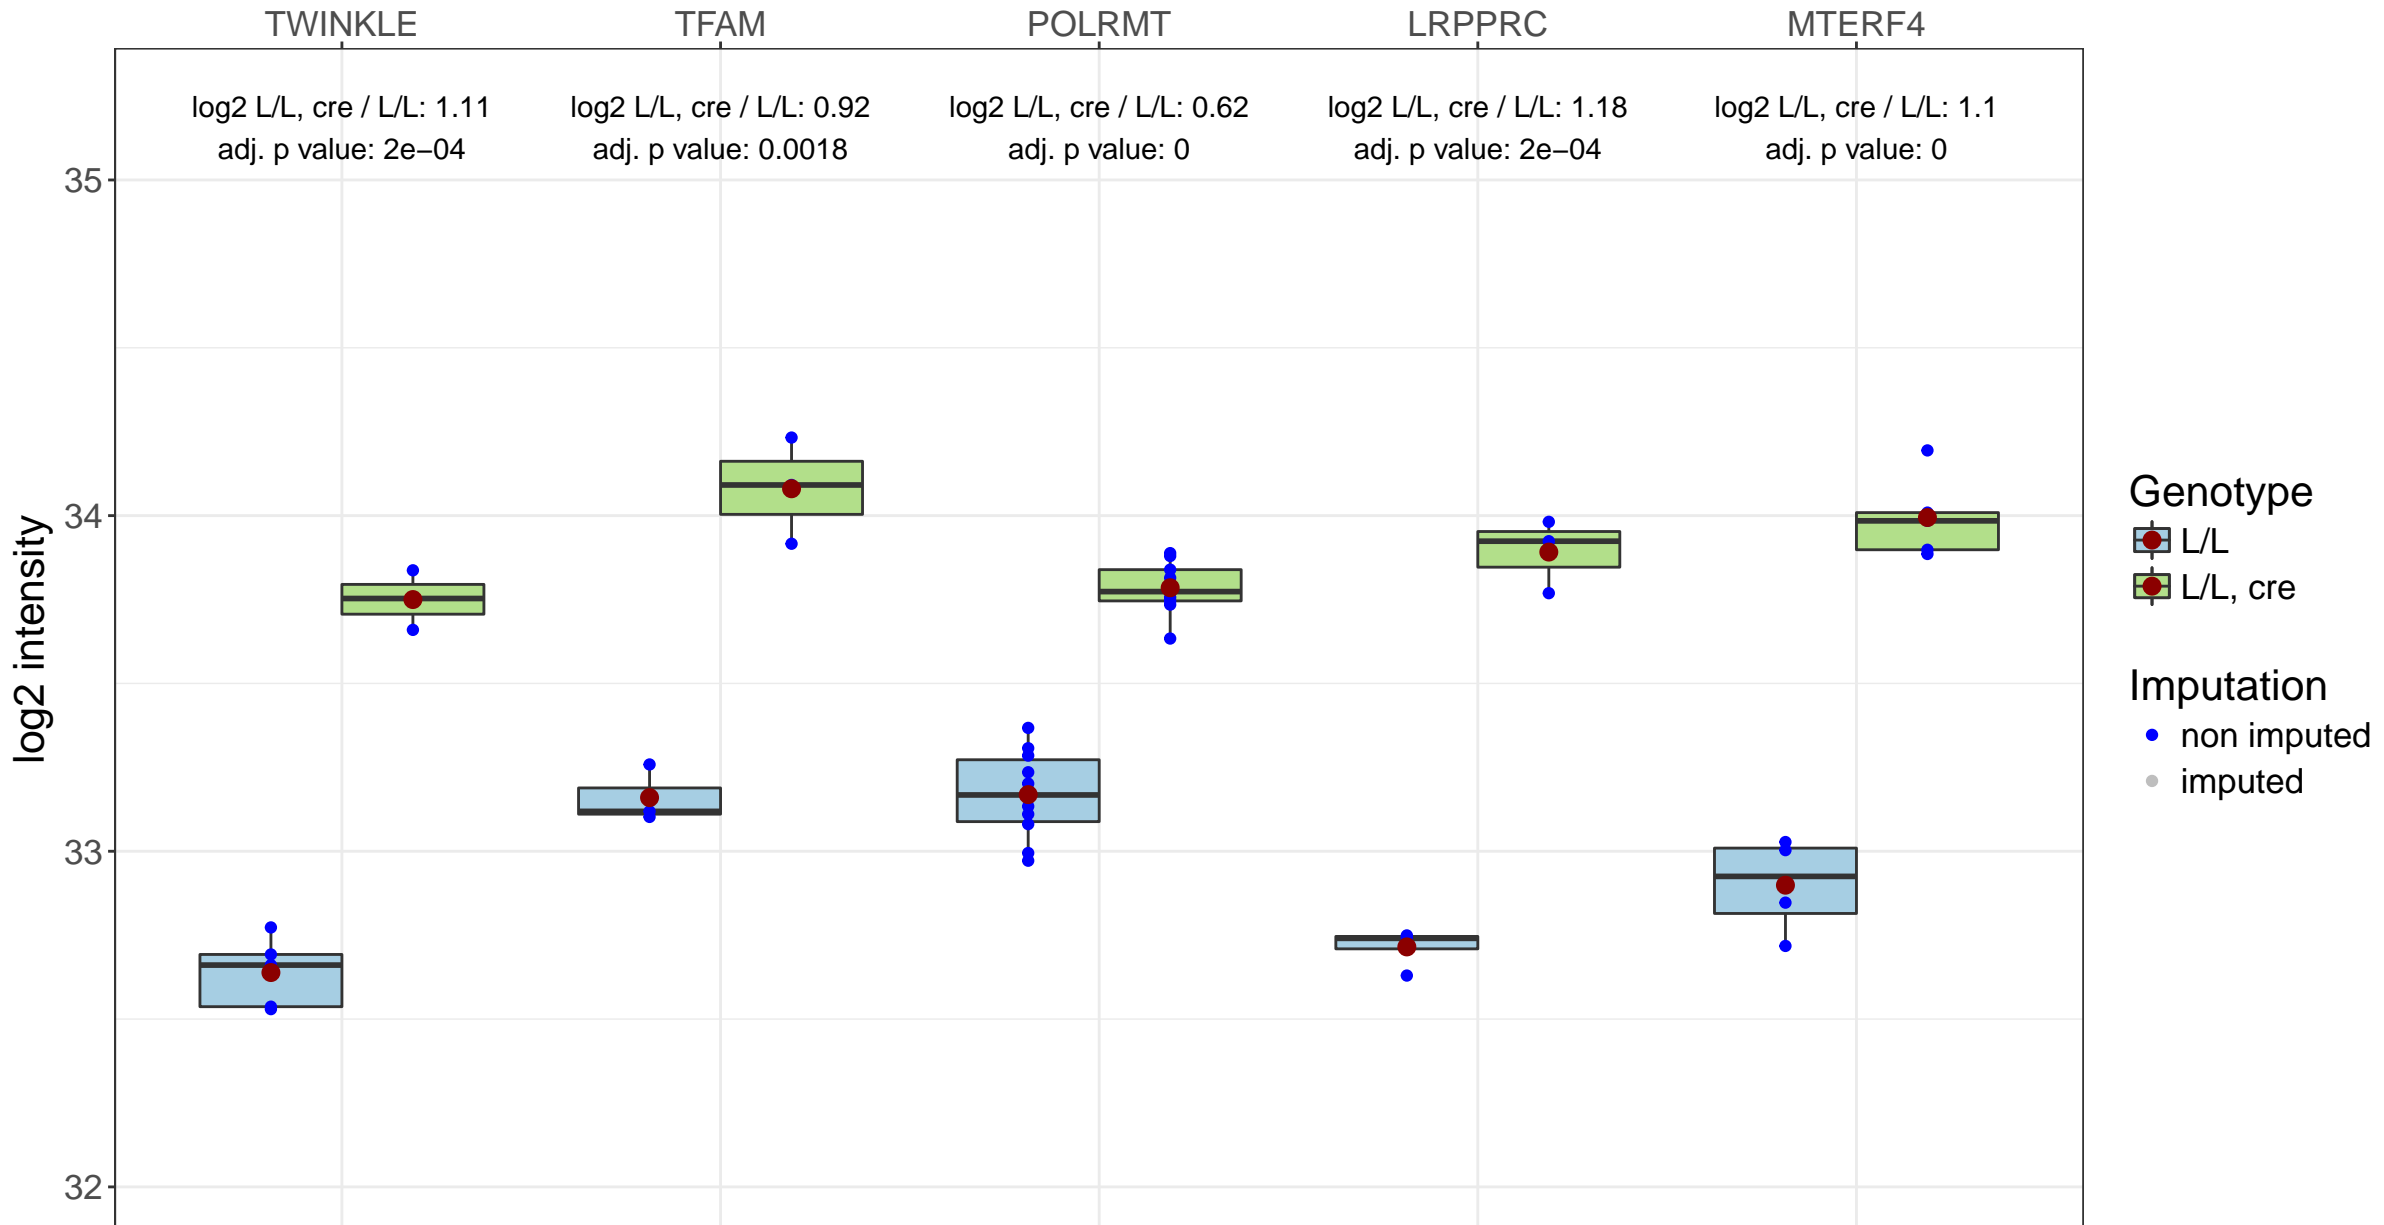

# HIBCH / Q8QZS1

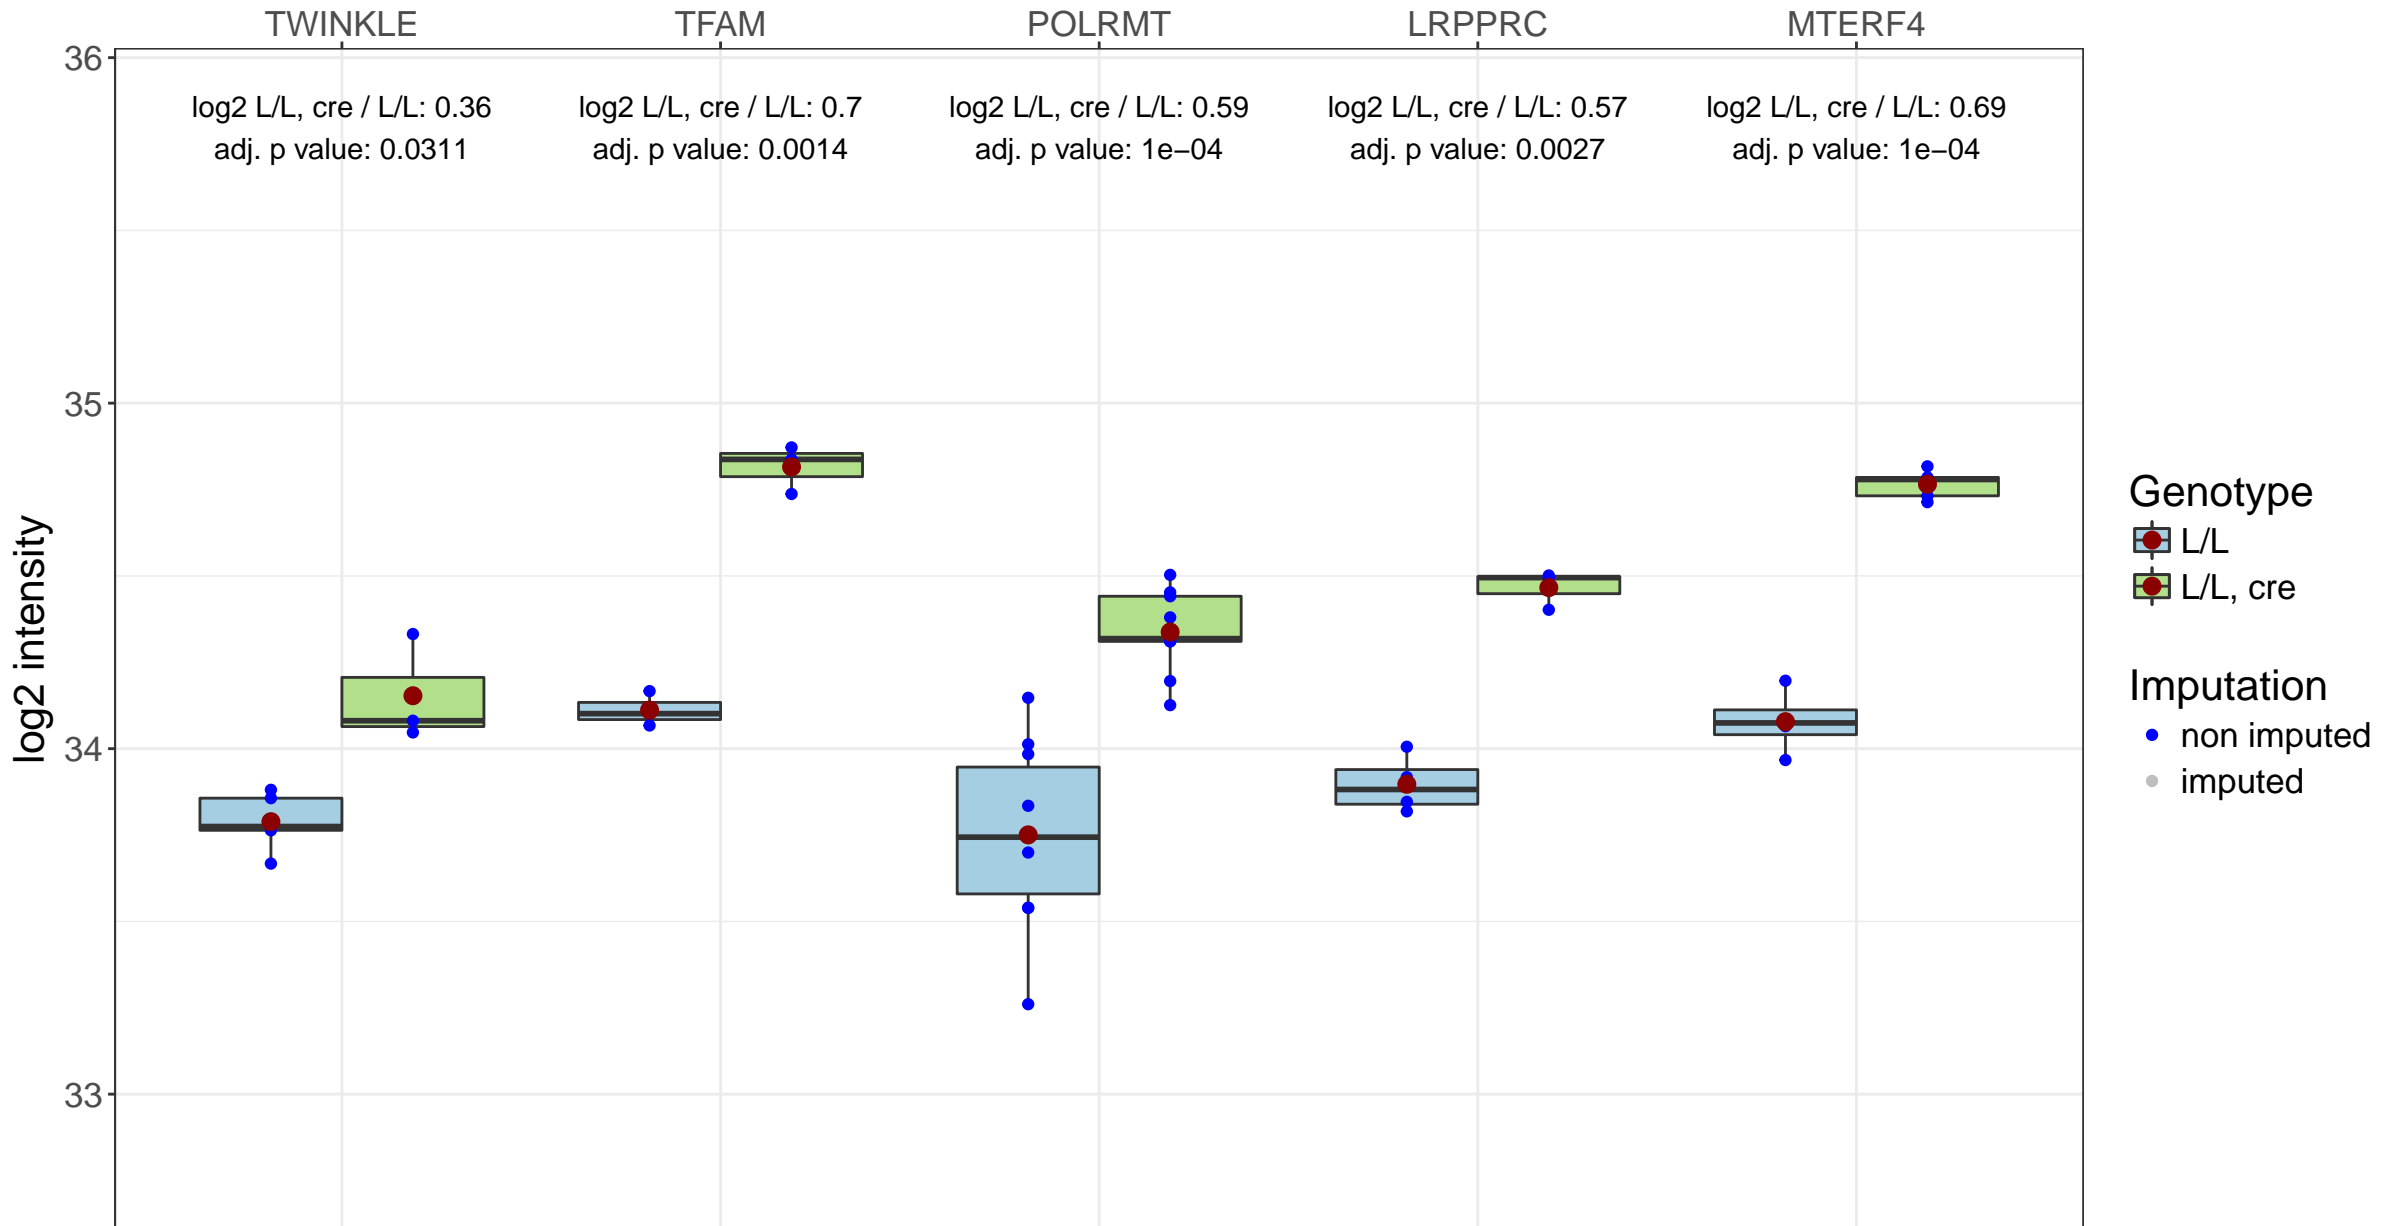

# HIGD1A / Q9JLR9

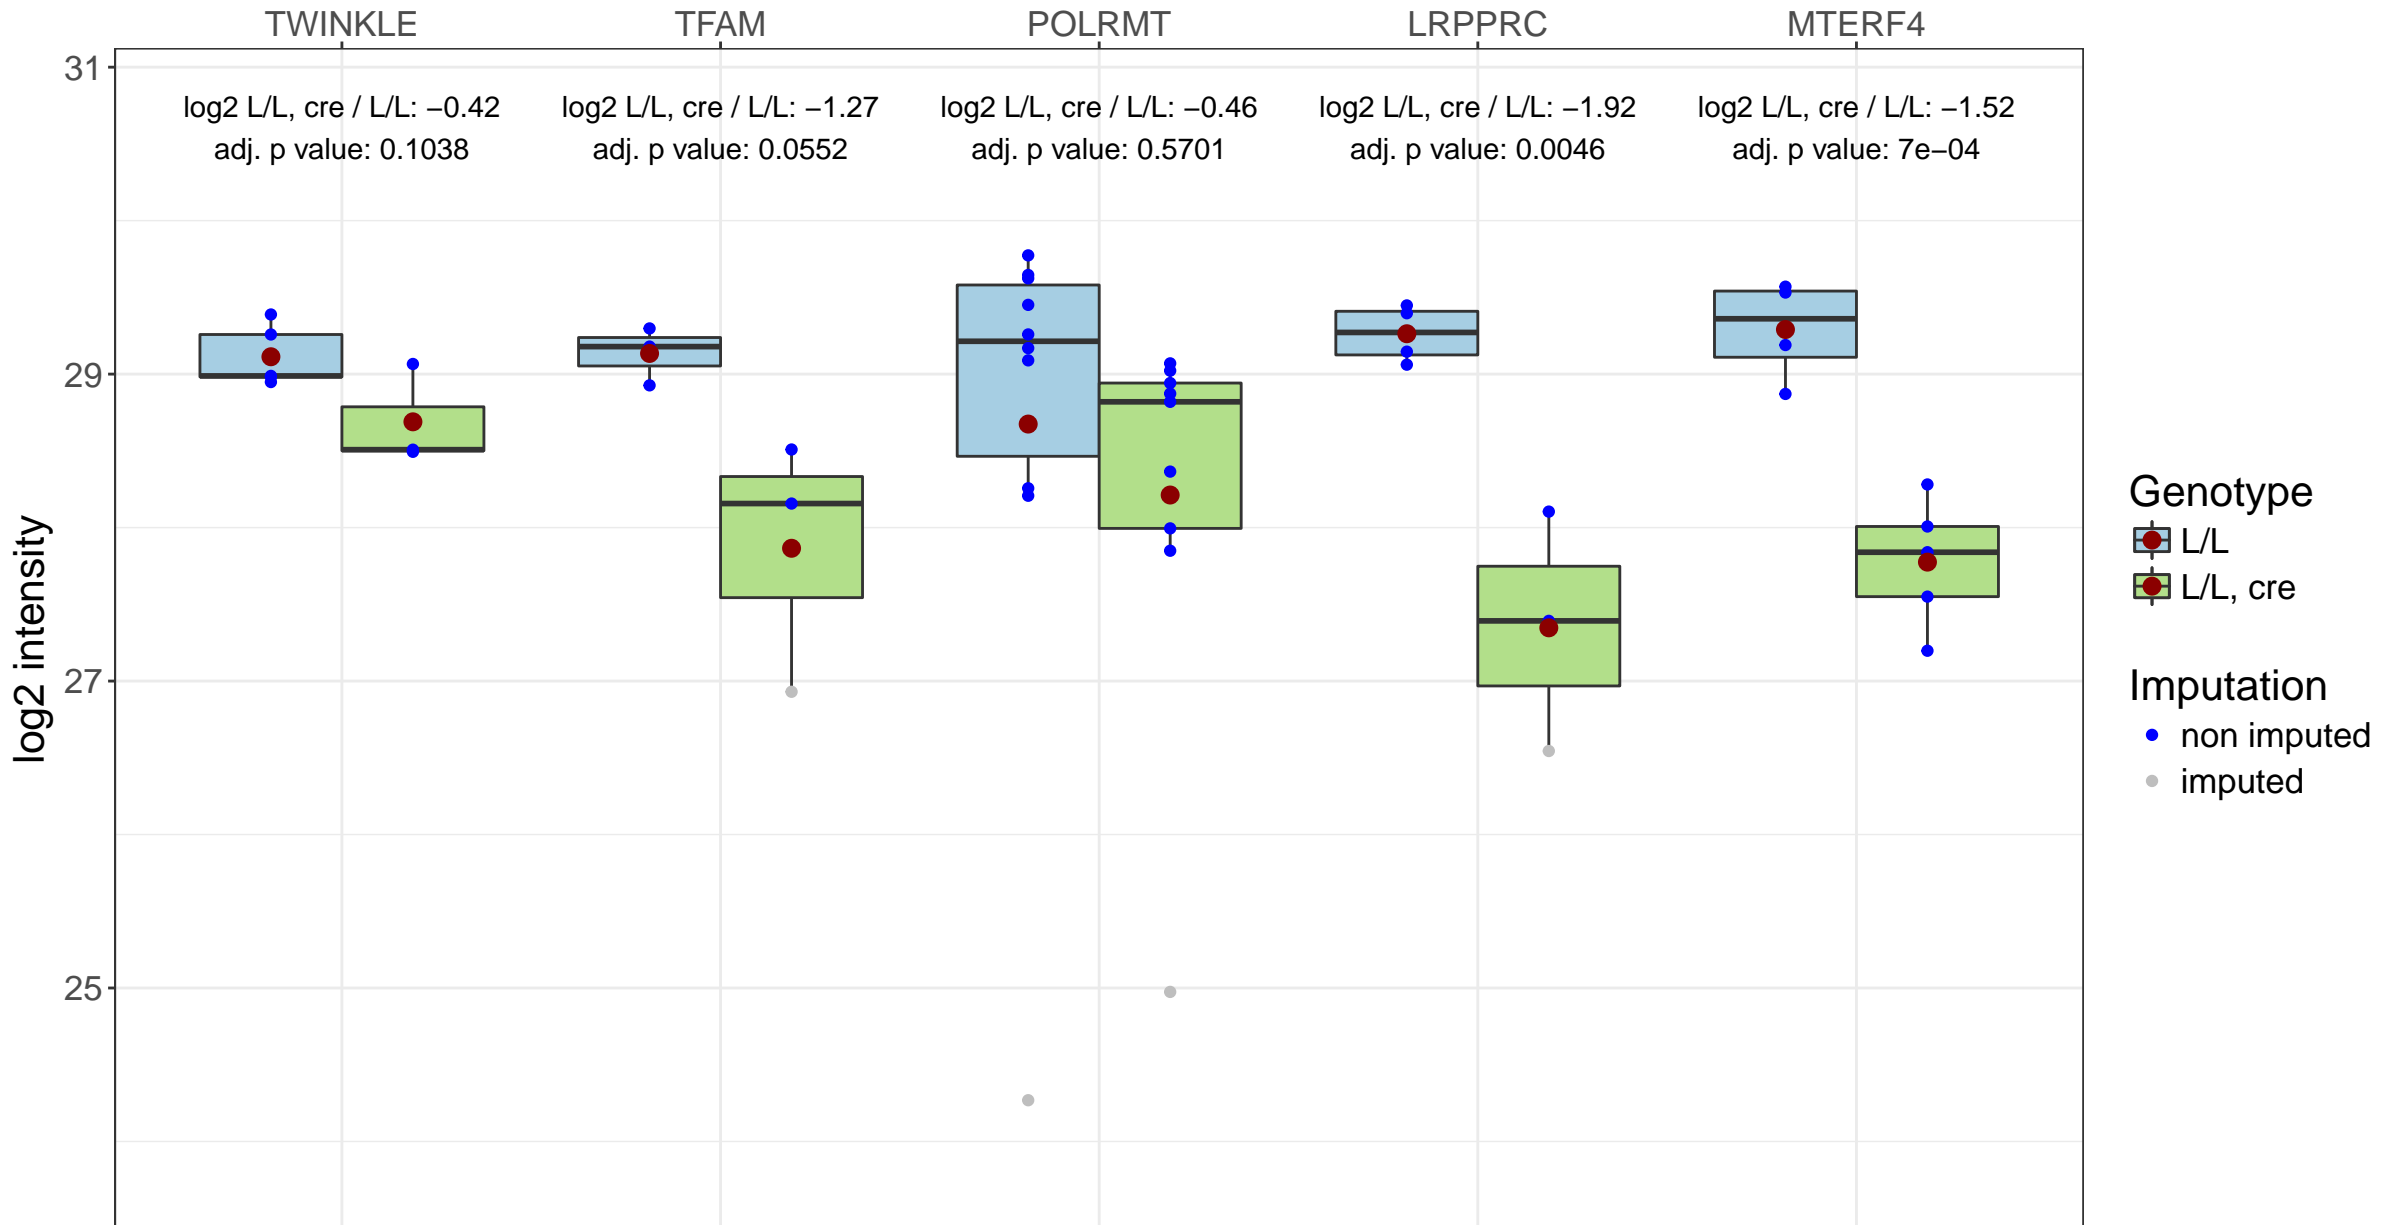

# HIGD2A / Q9CQJ1

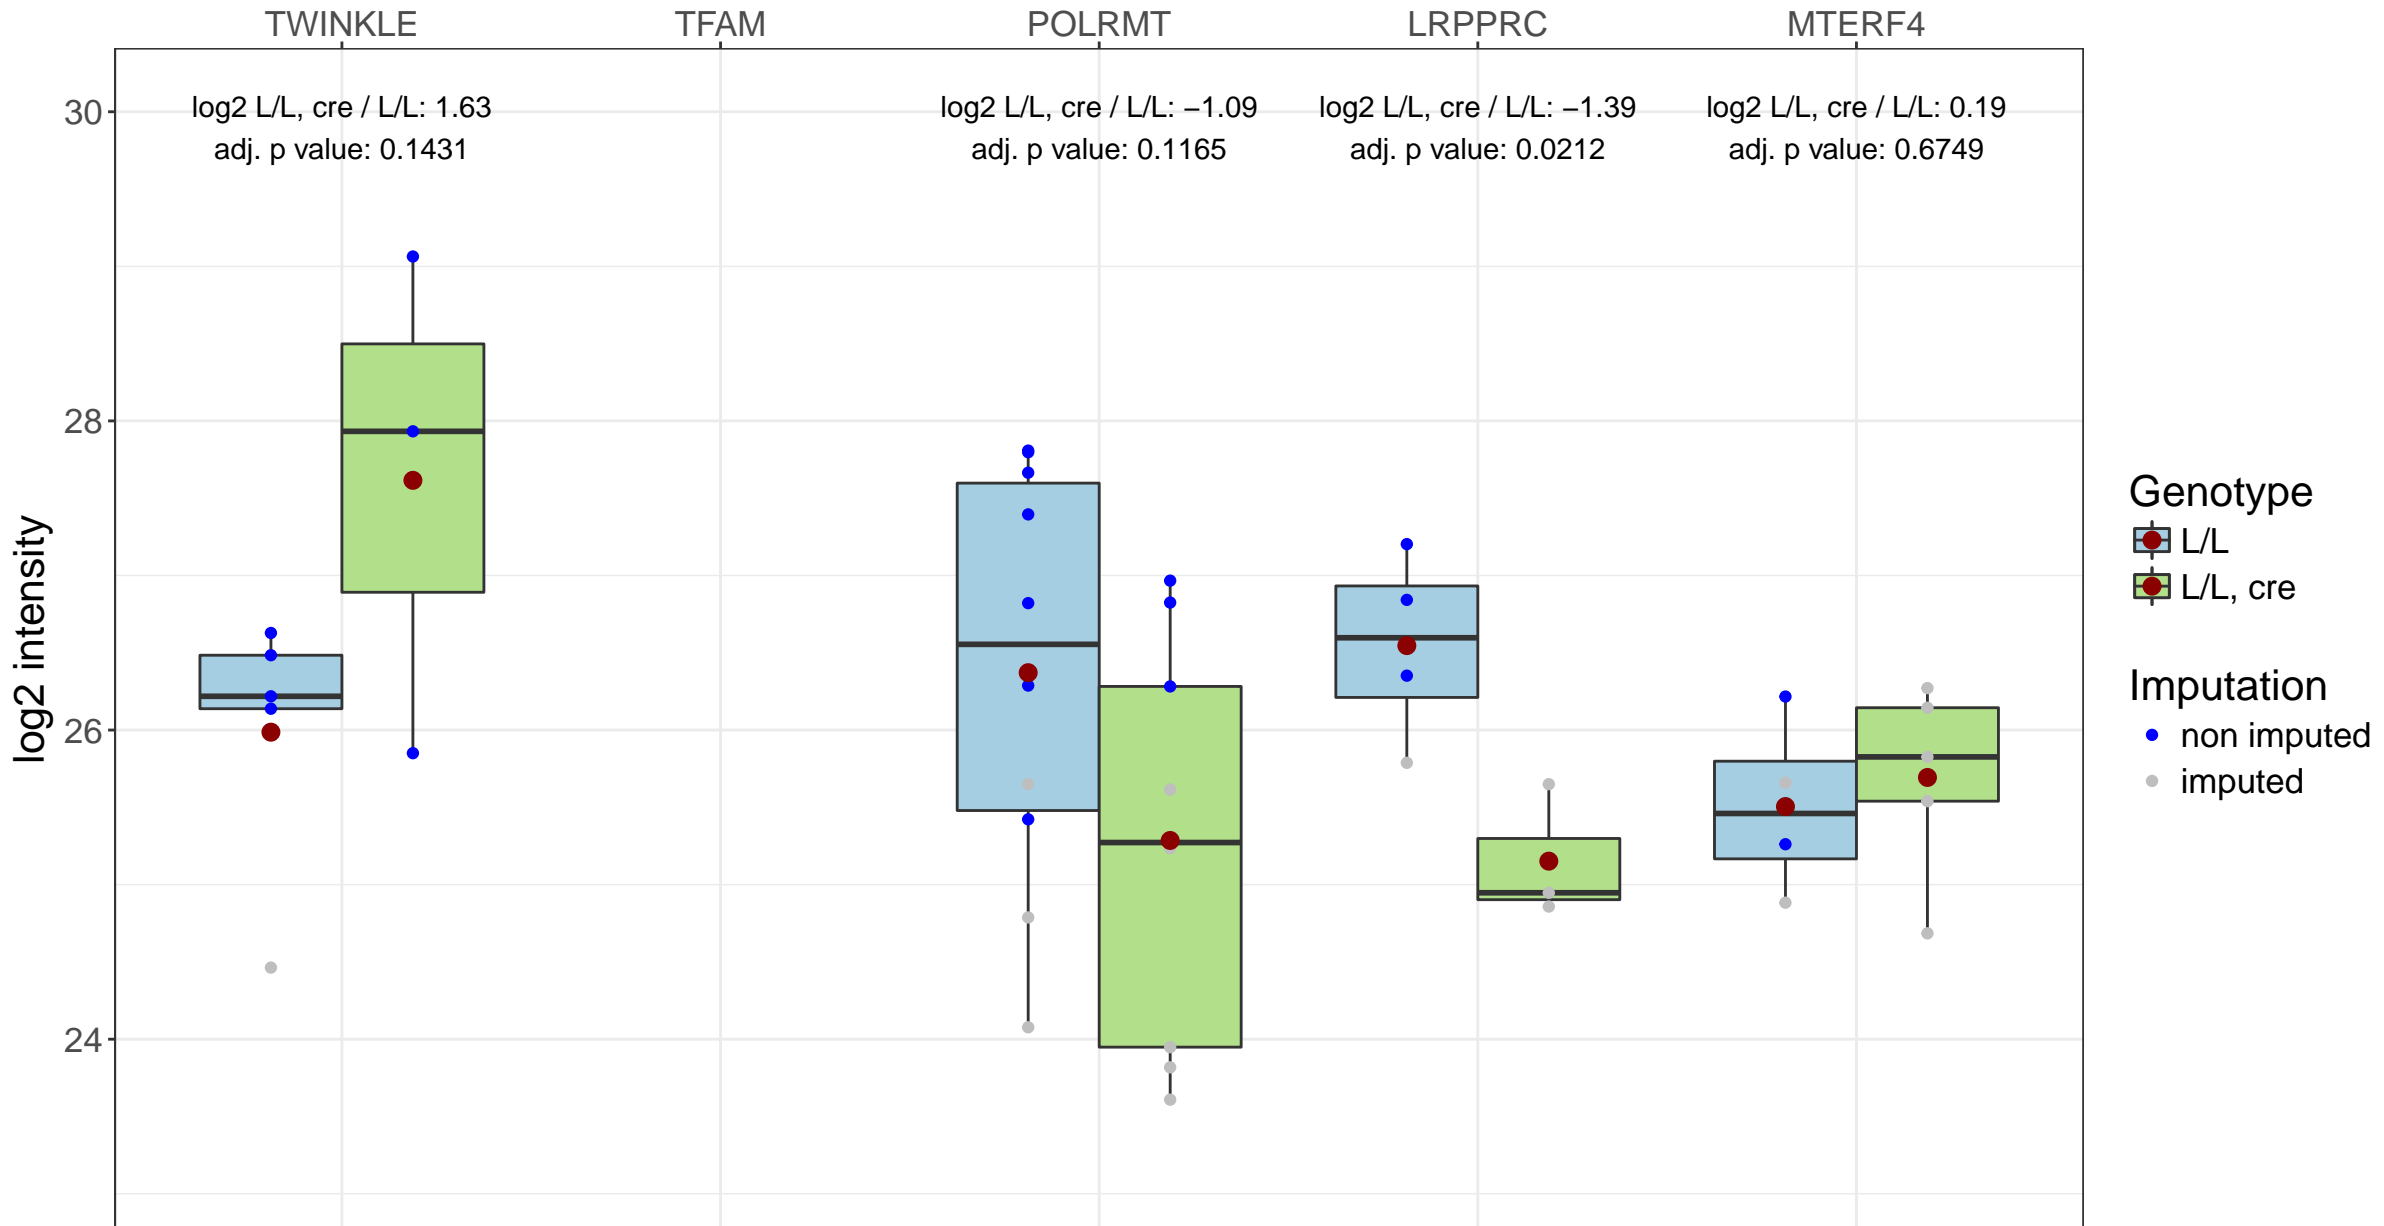

# HINT2 / Q9D0S9

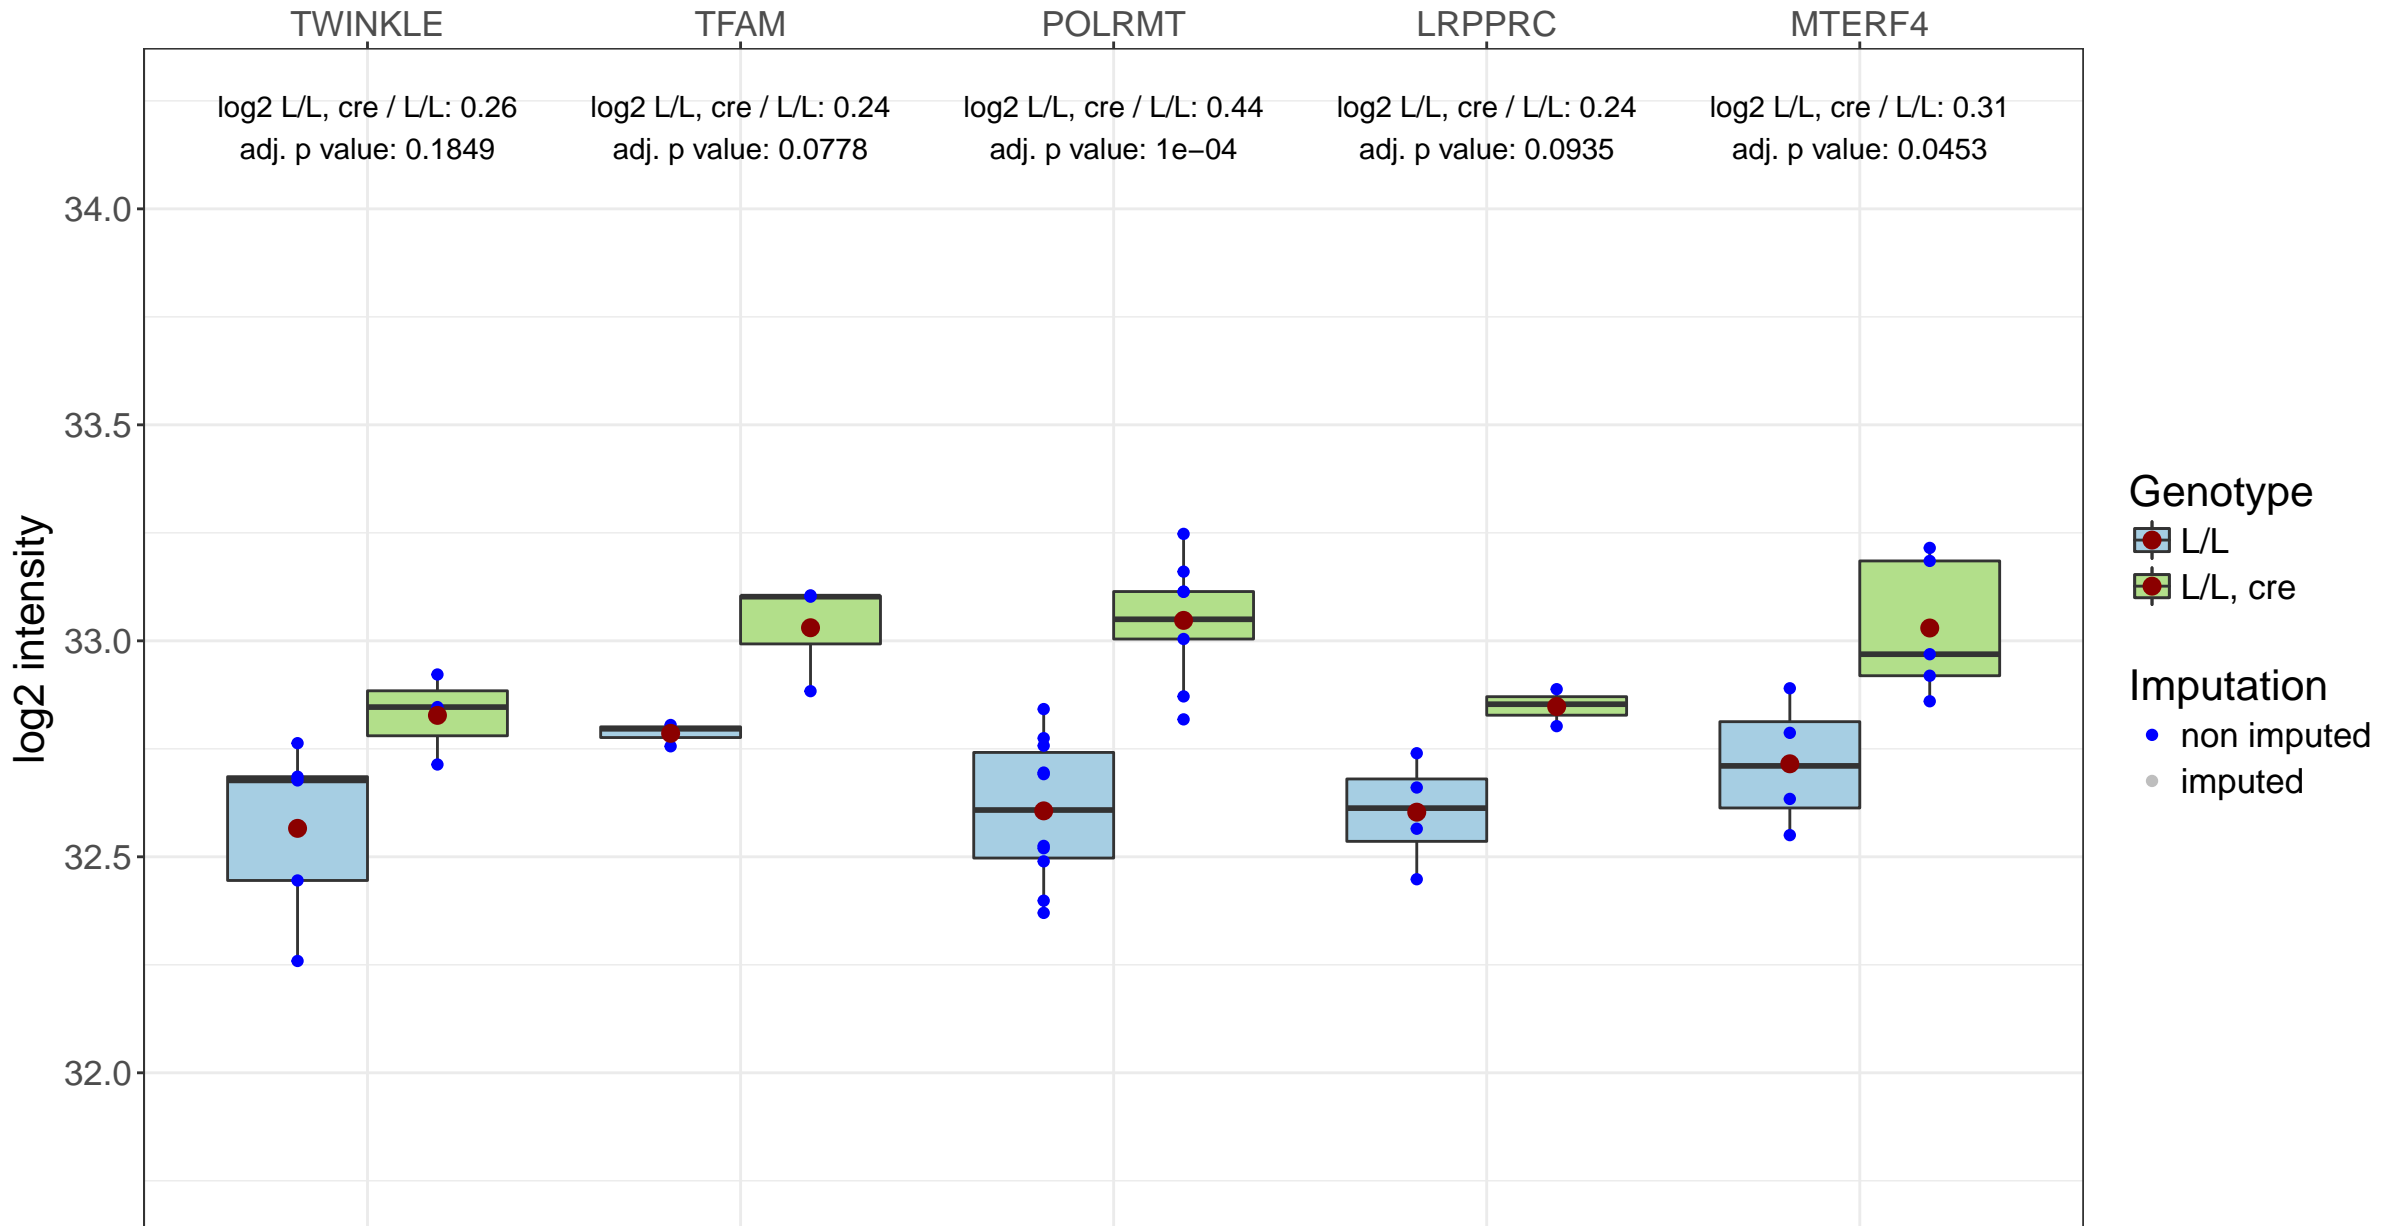

# HINT3 / Q9CPS6

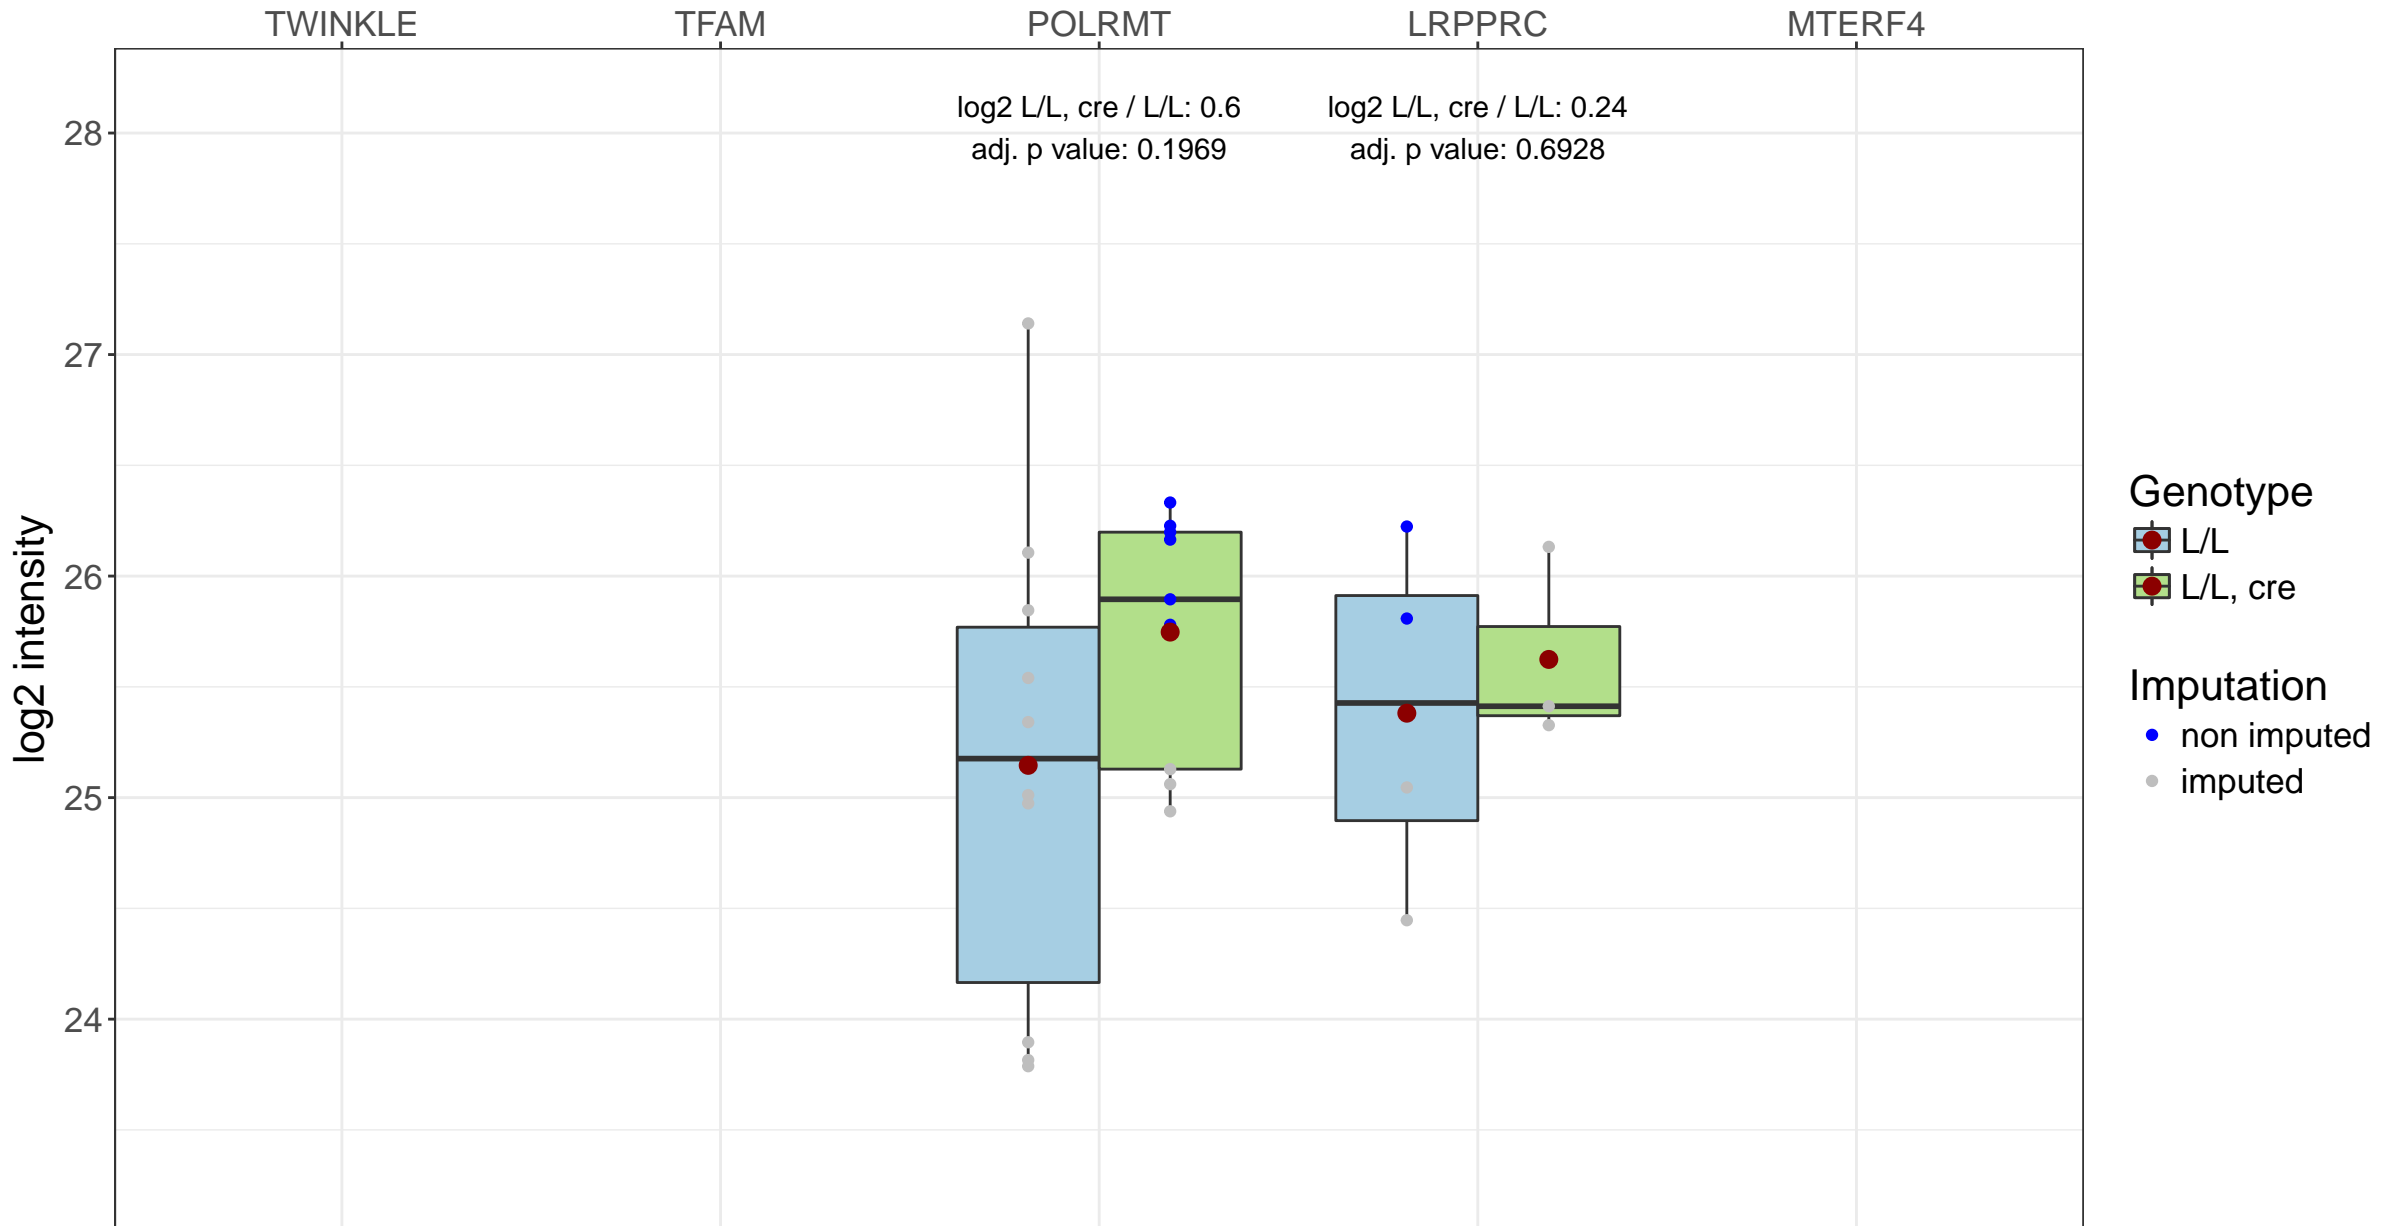

# HIST1H1C / P15864

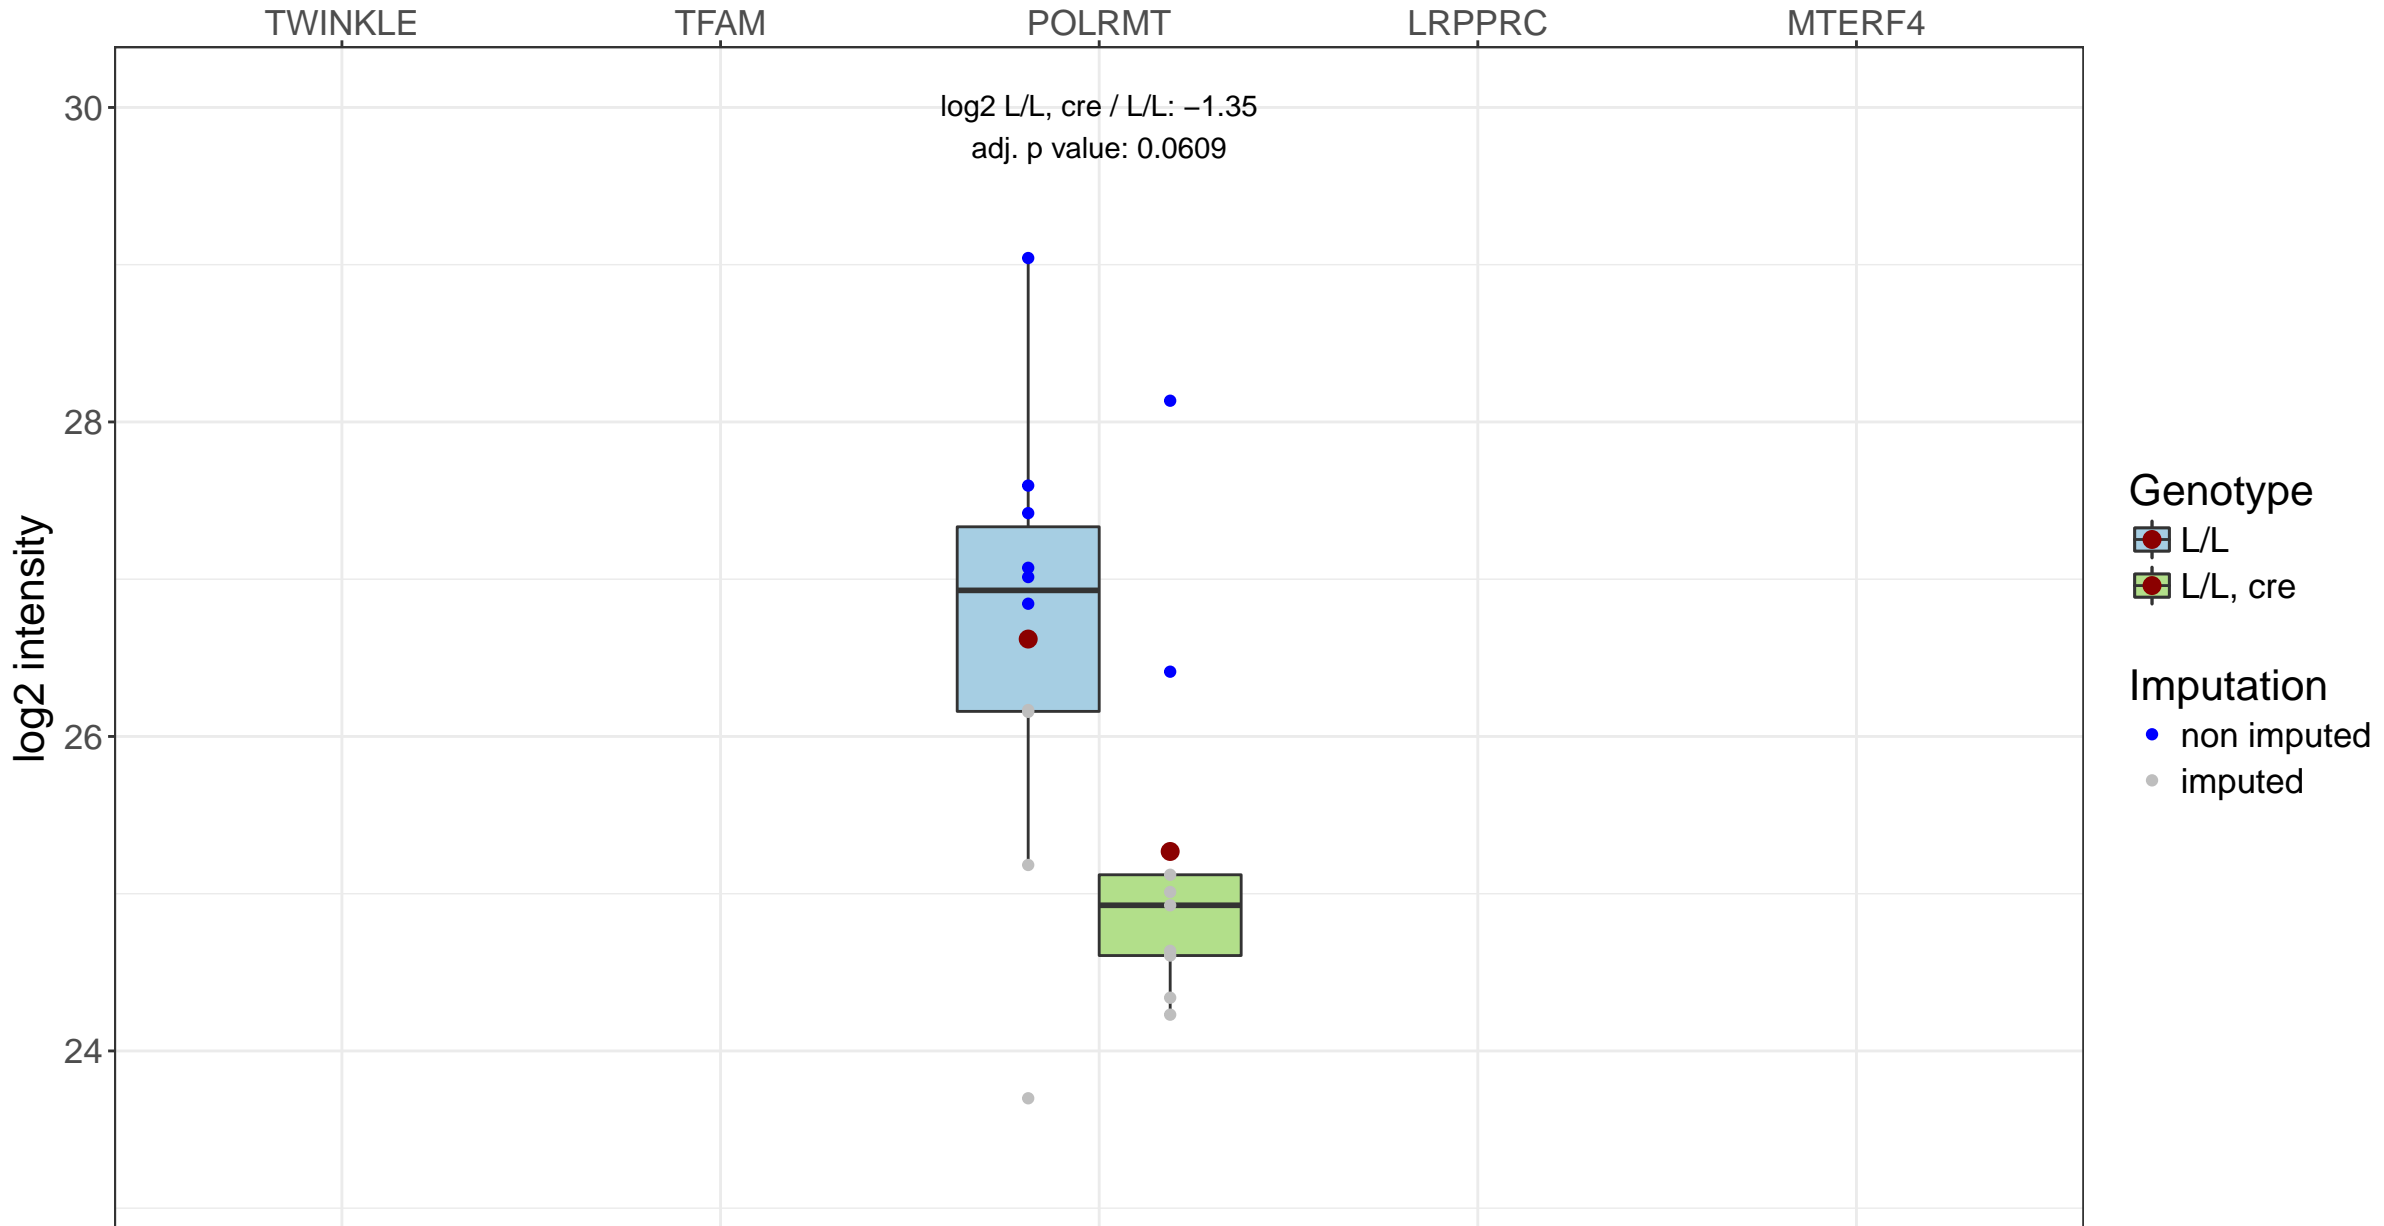

# HIST1H2AH / Q8CGP6

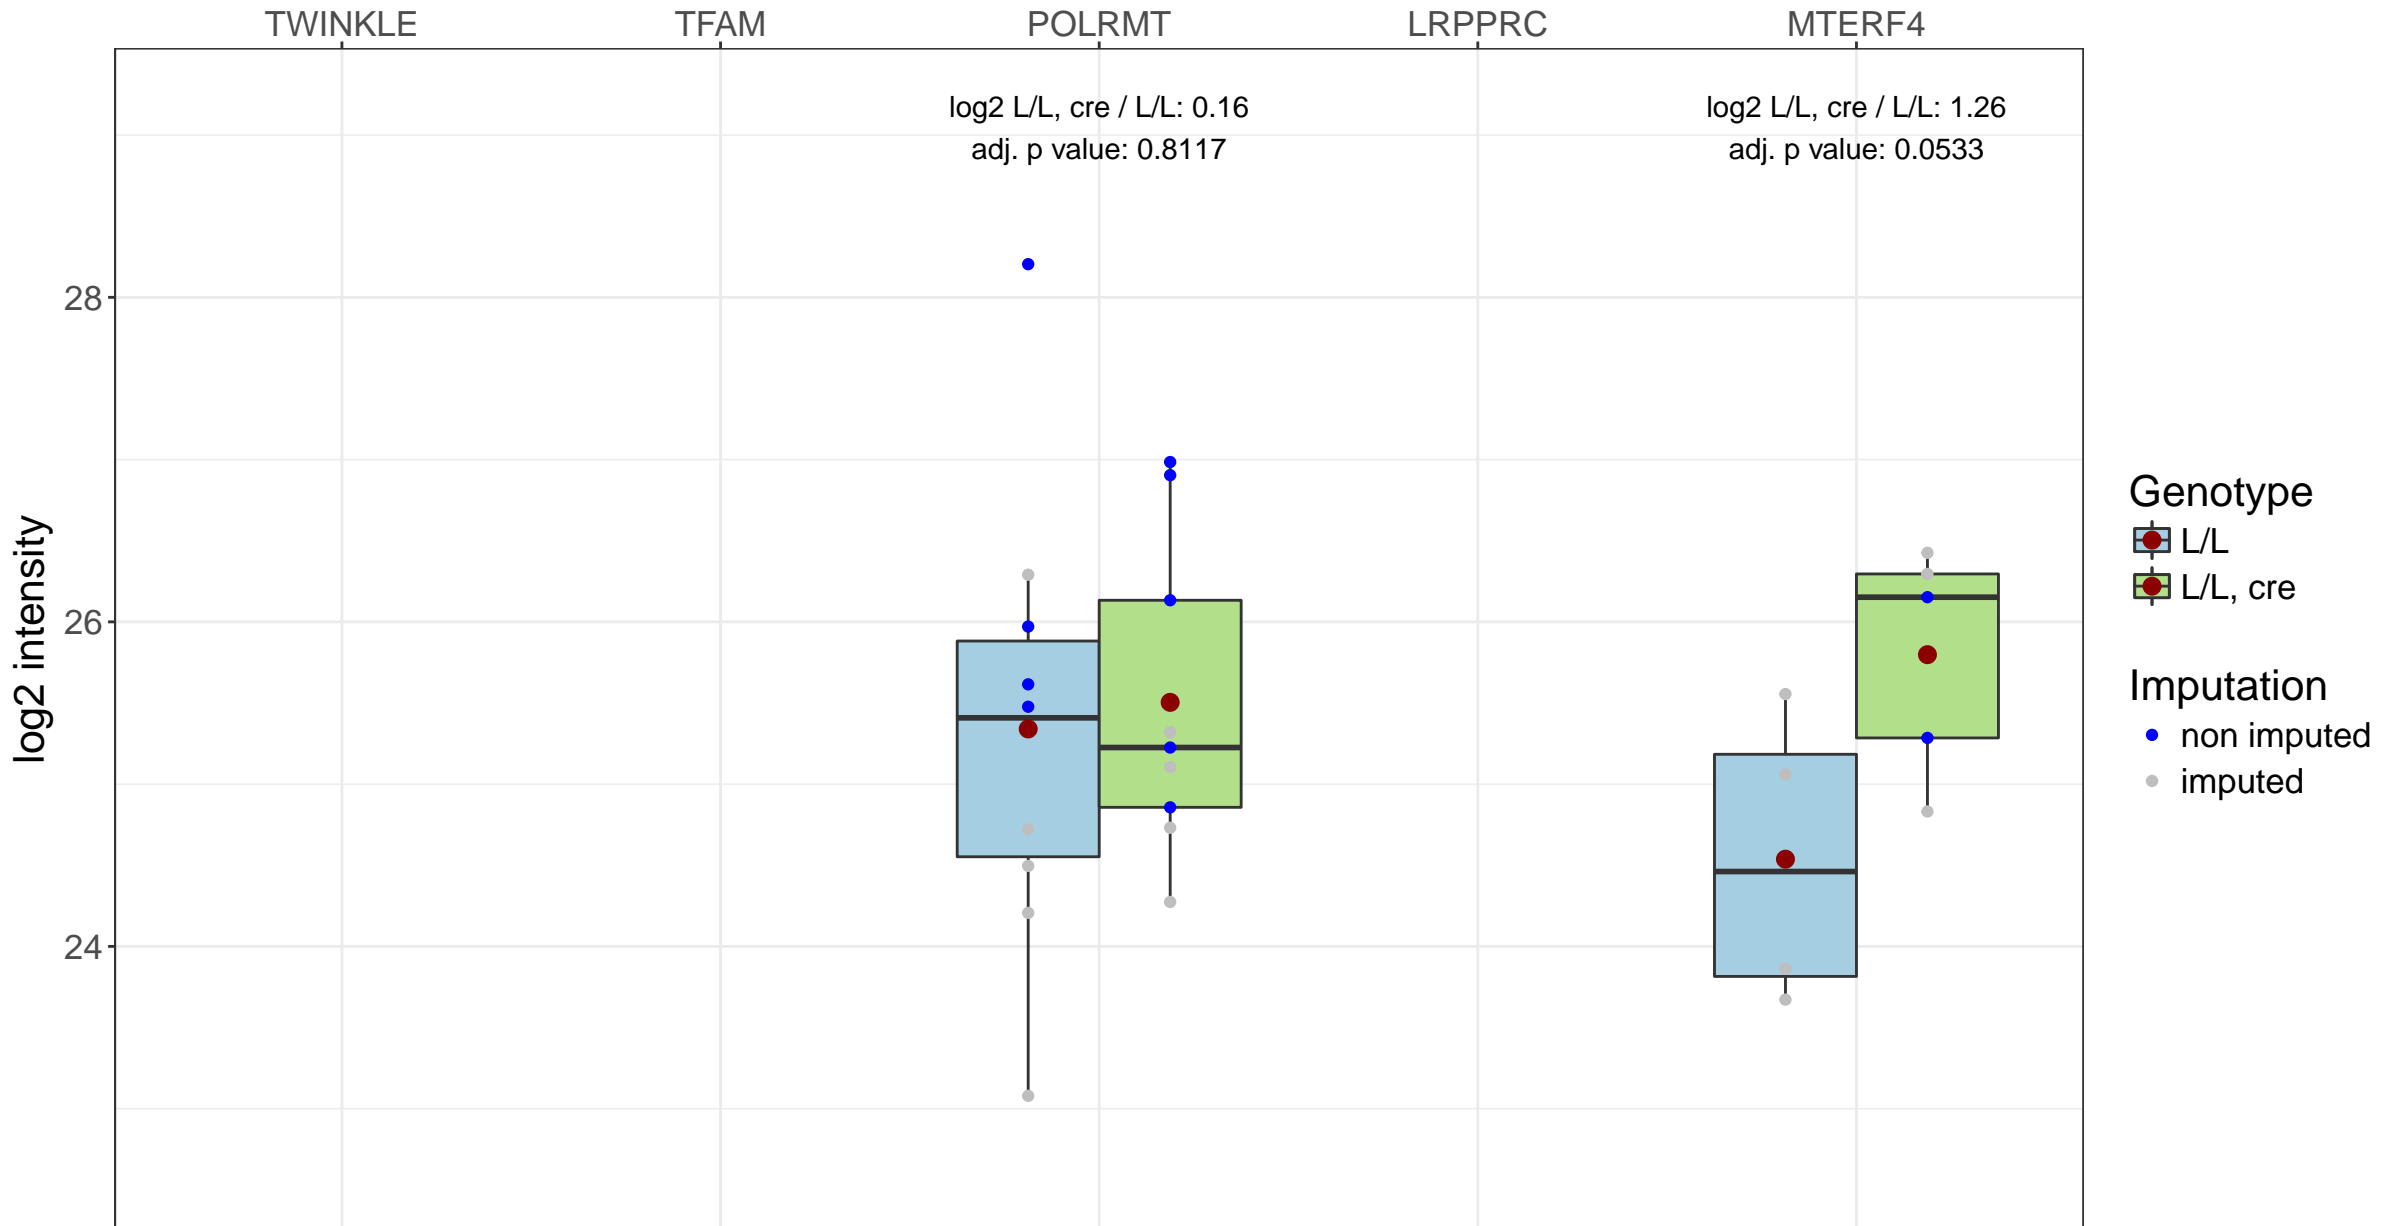



# HIST1H2AL / F8WIX8

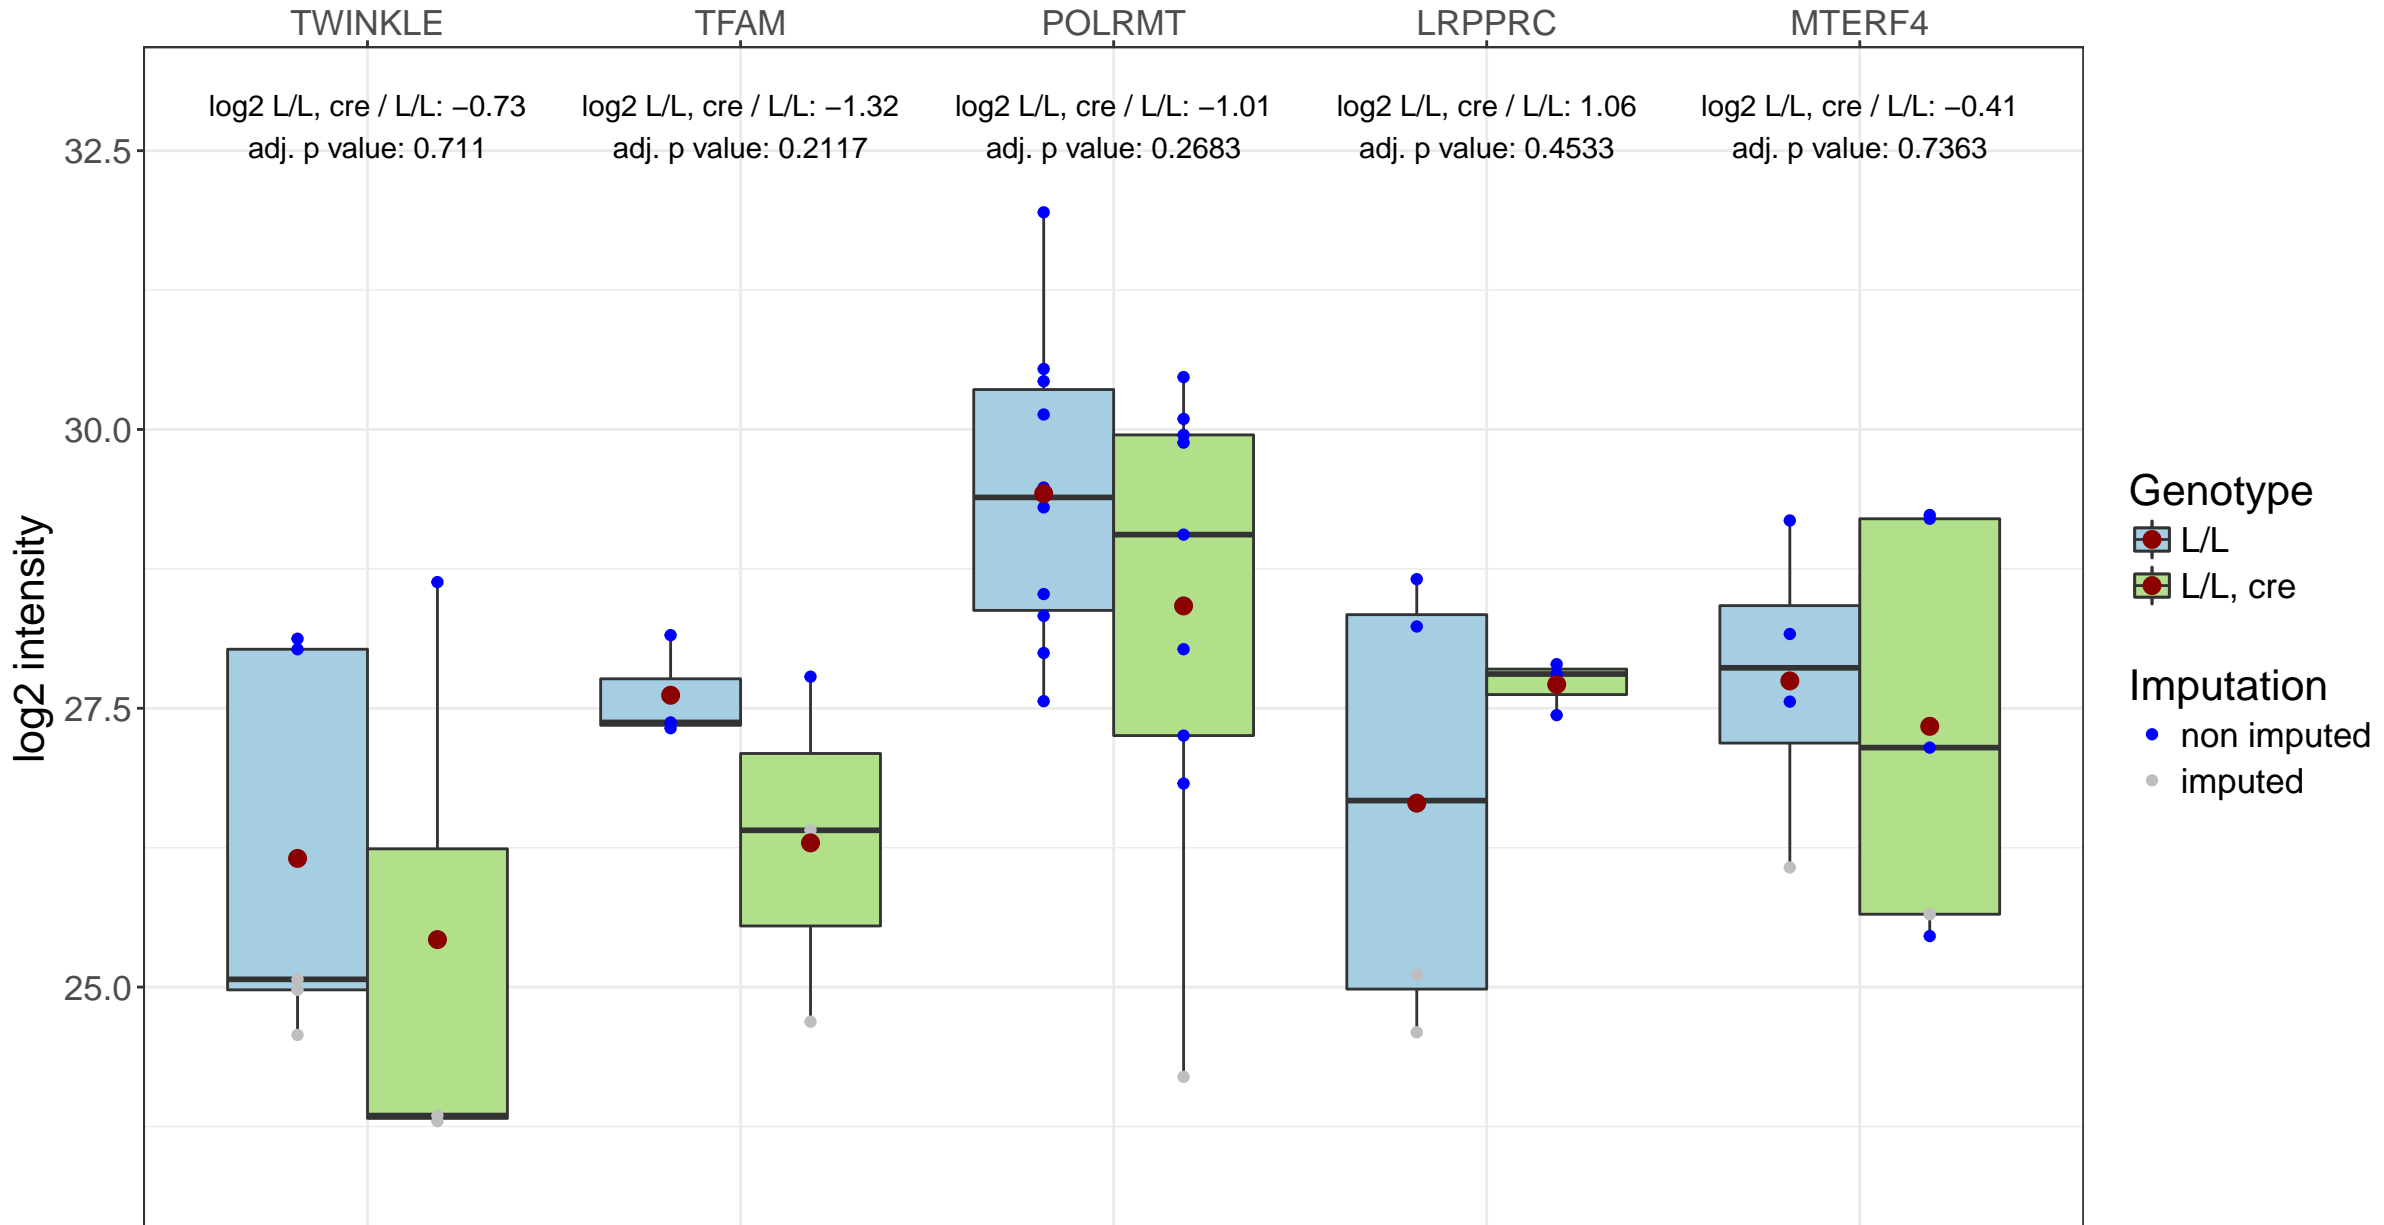

# HIST1H2BC / Q6ZWY9

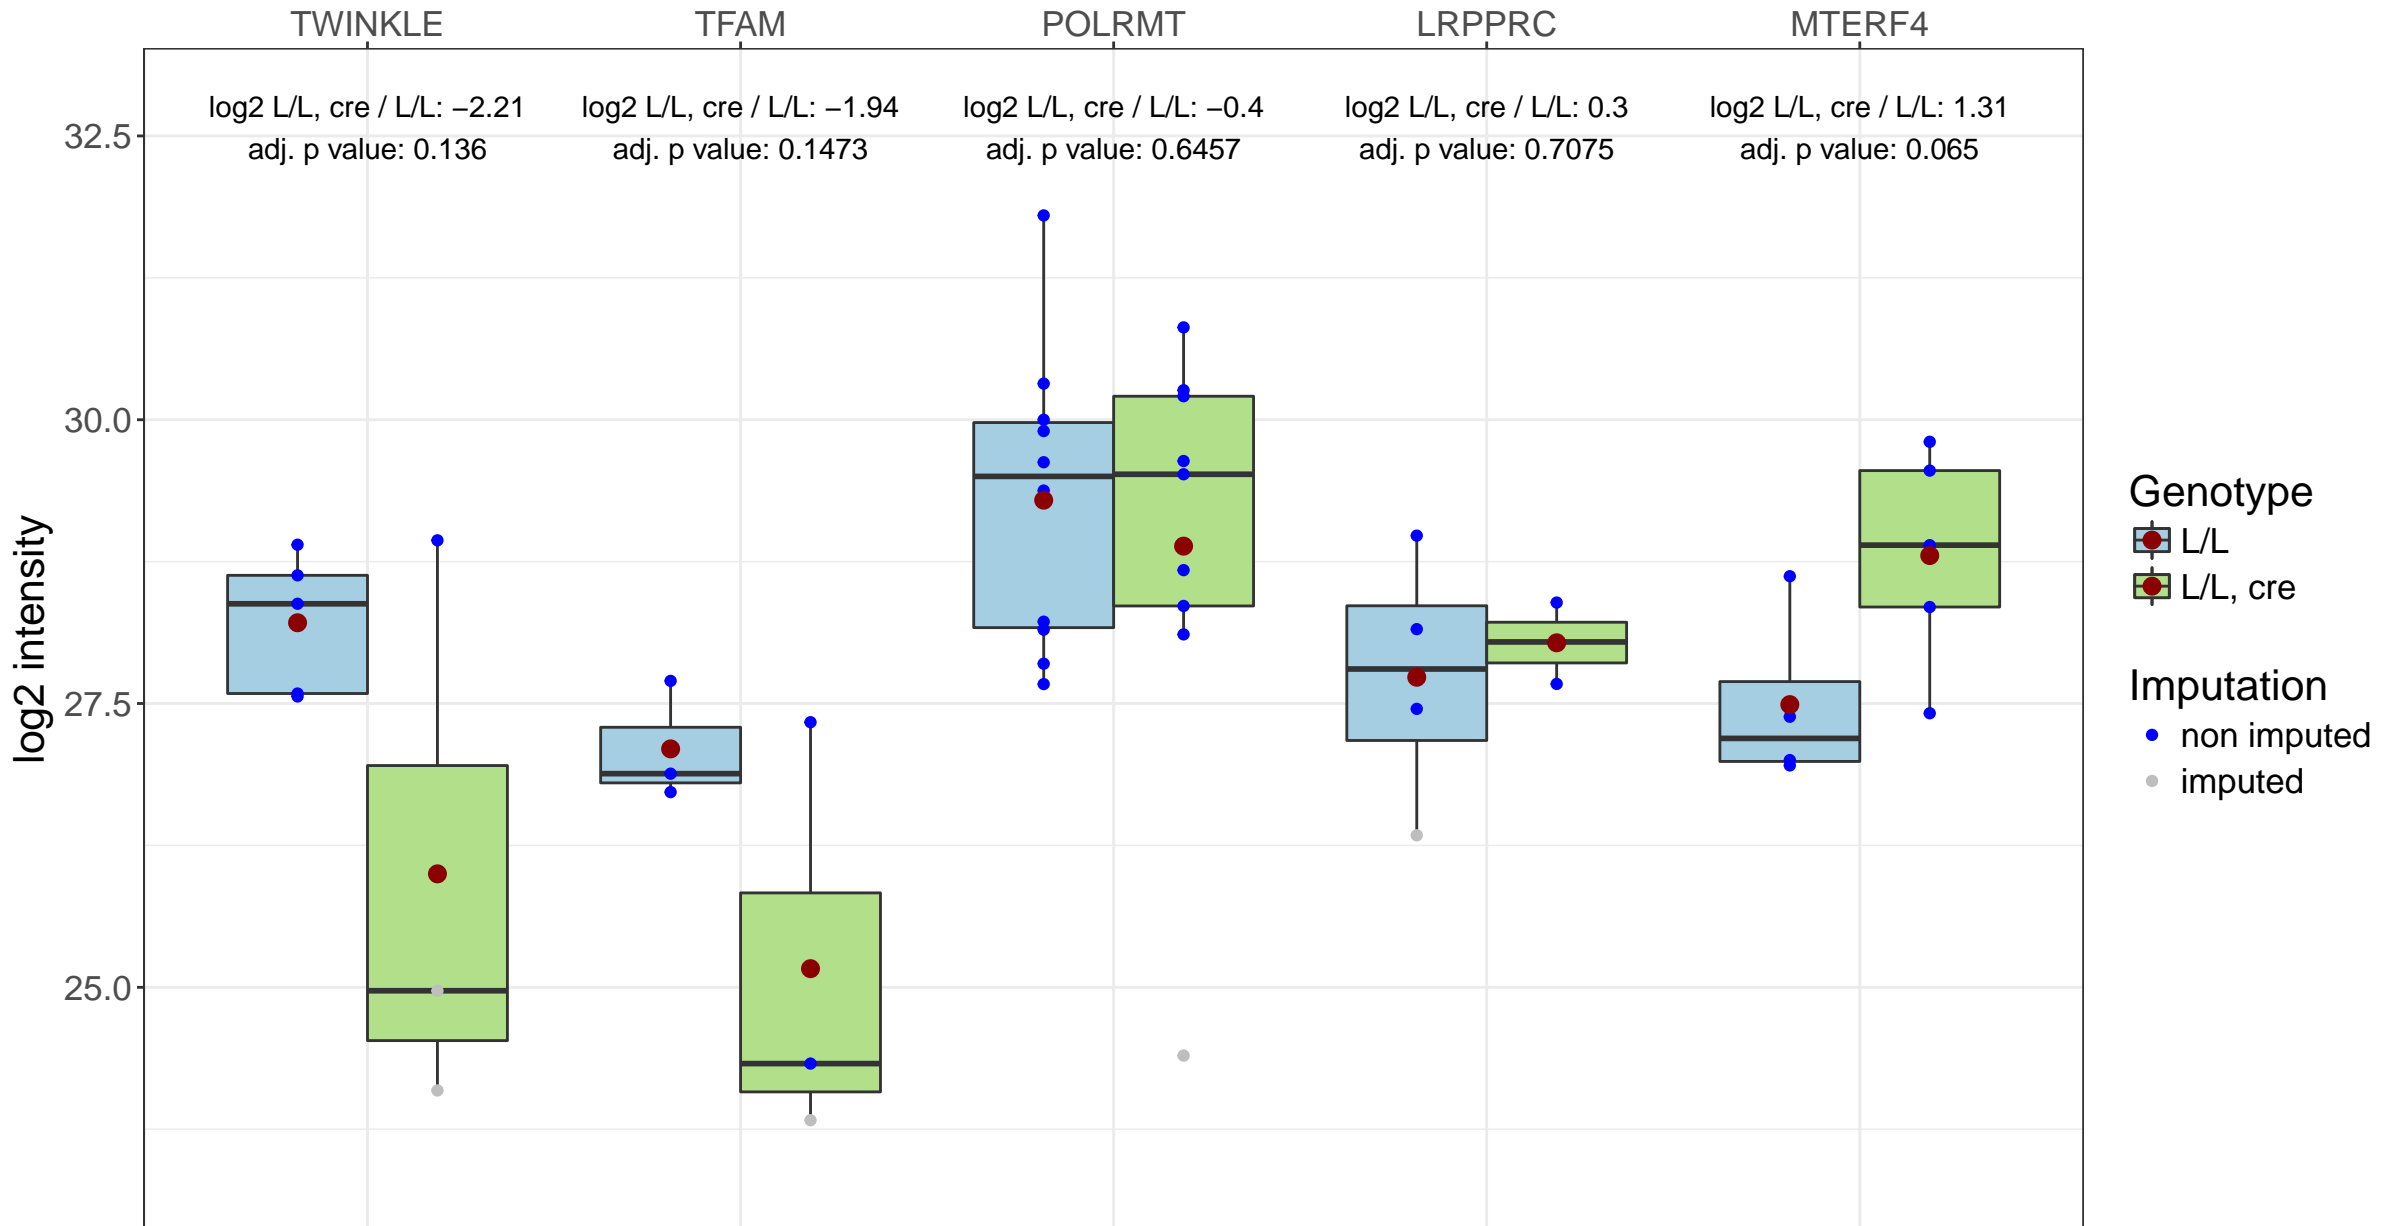

# HIST1H3B / P84228

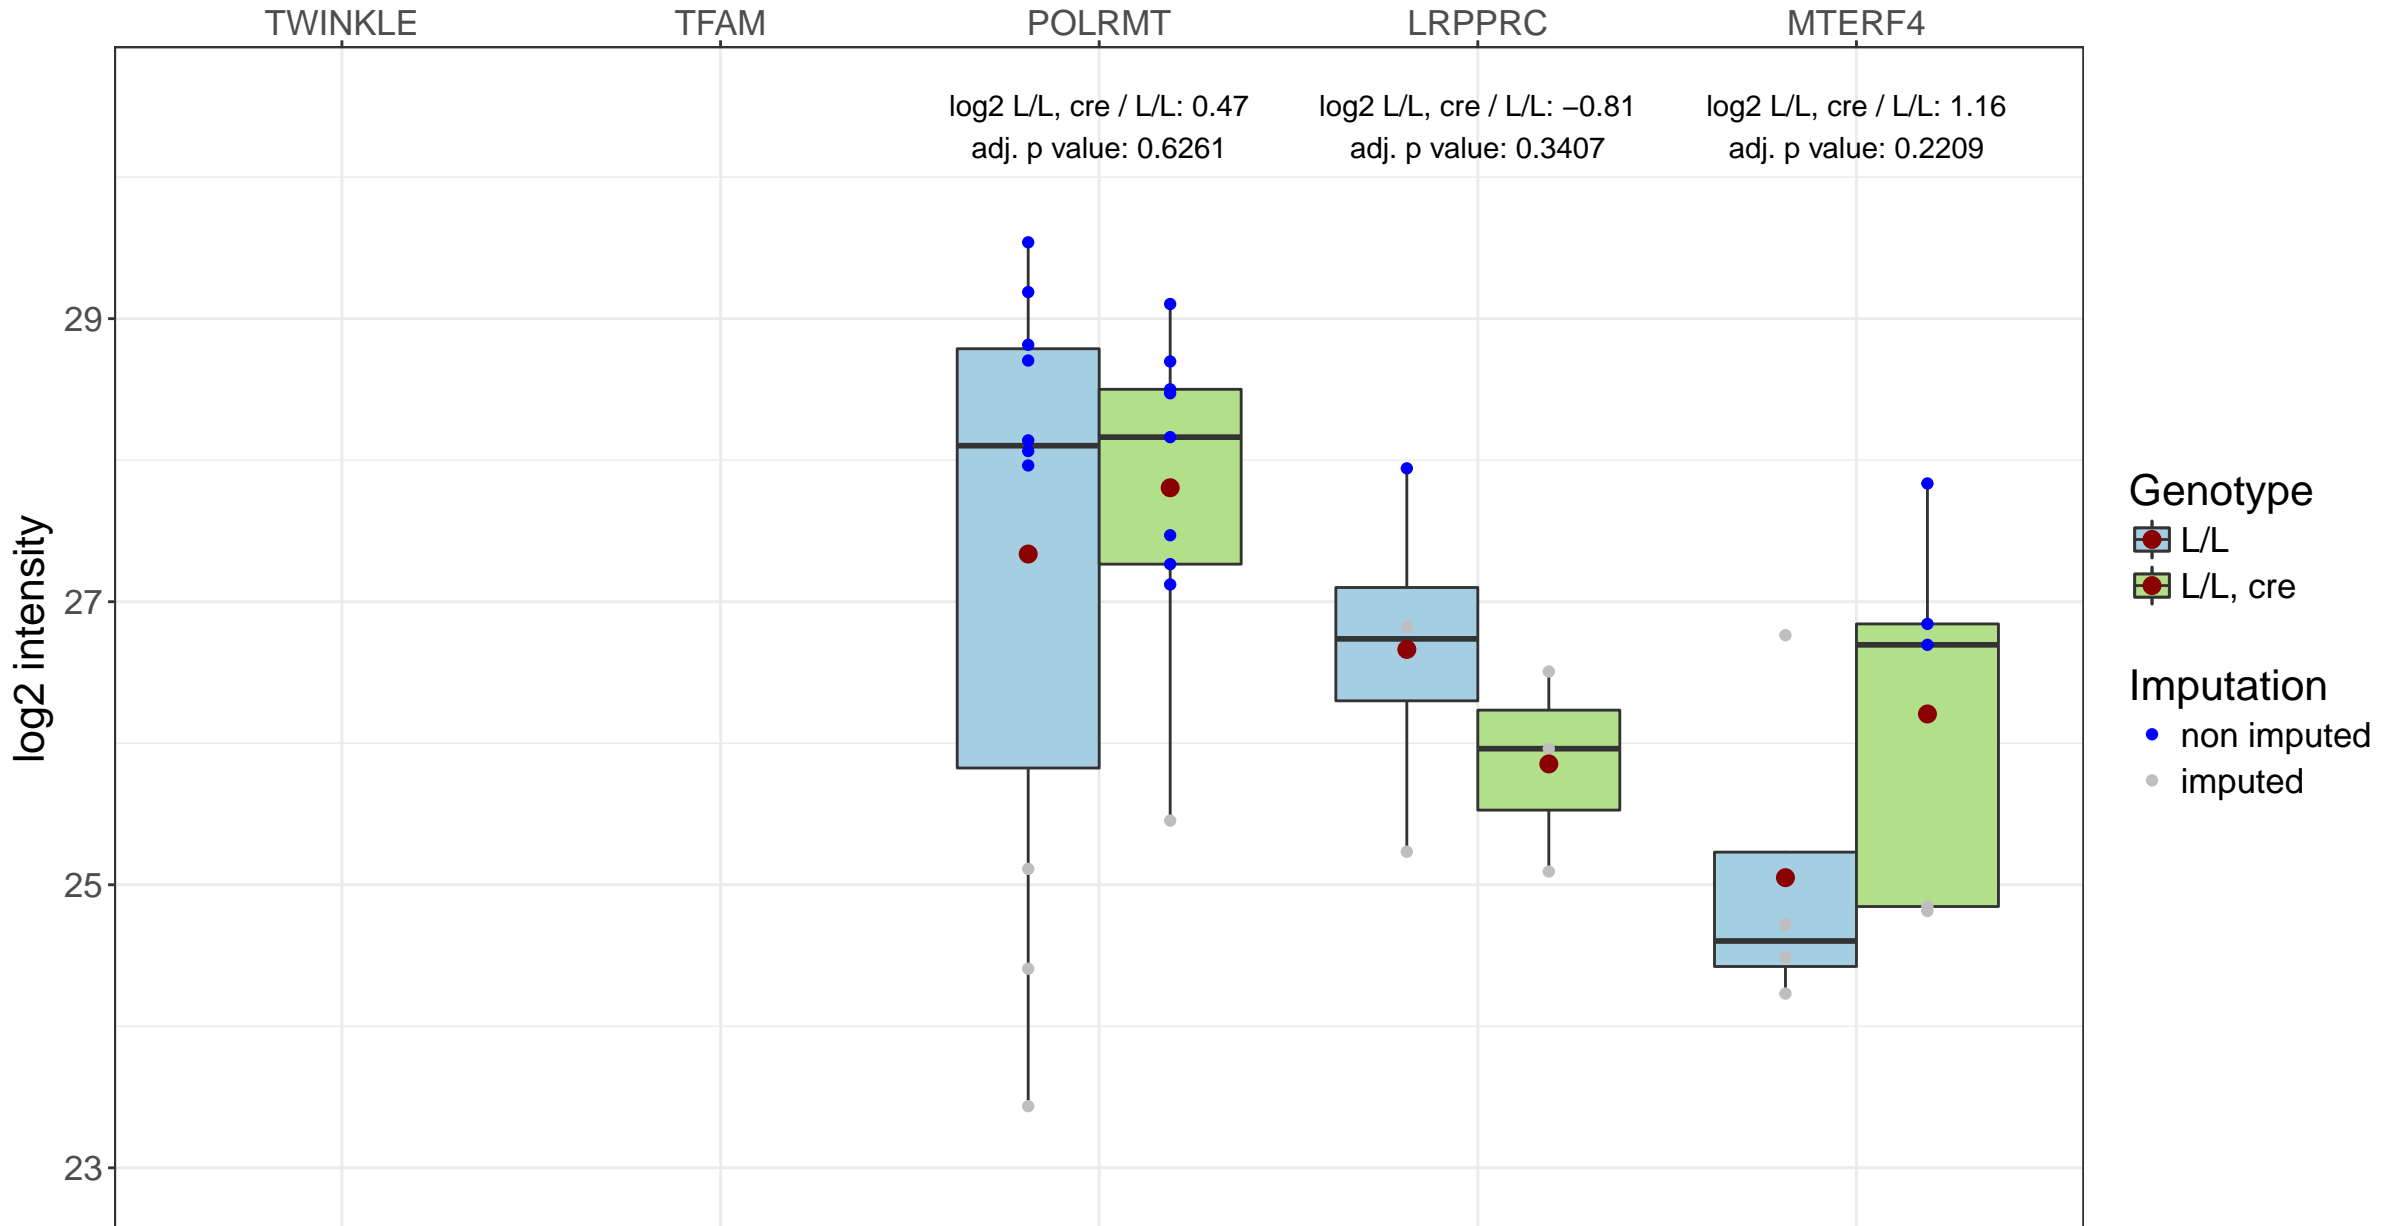

# HIST1H4A / P62806

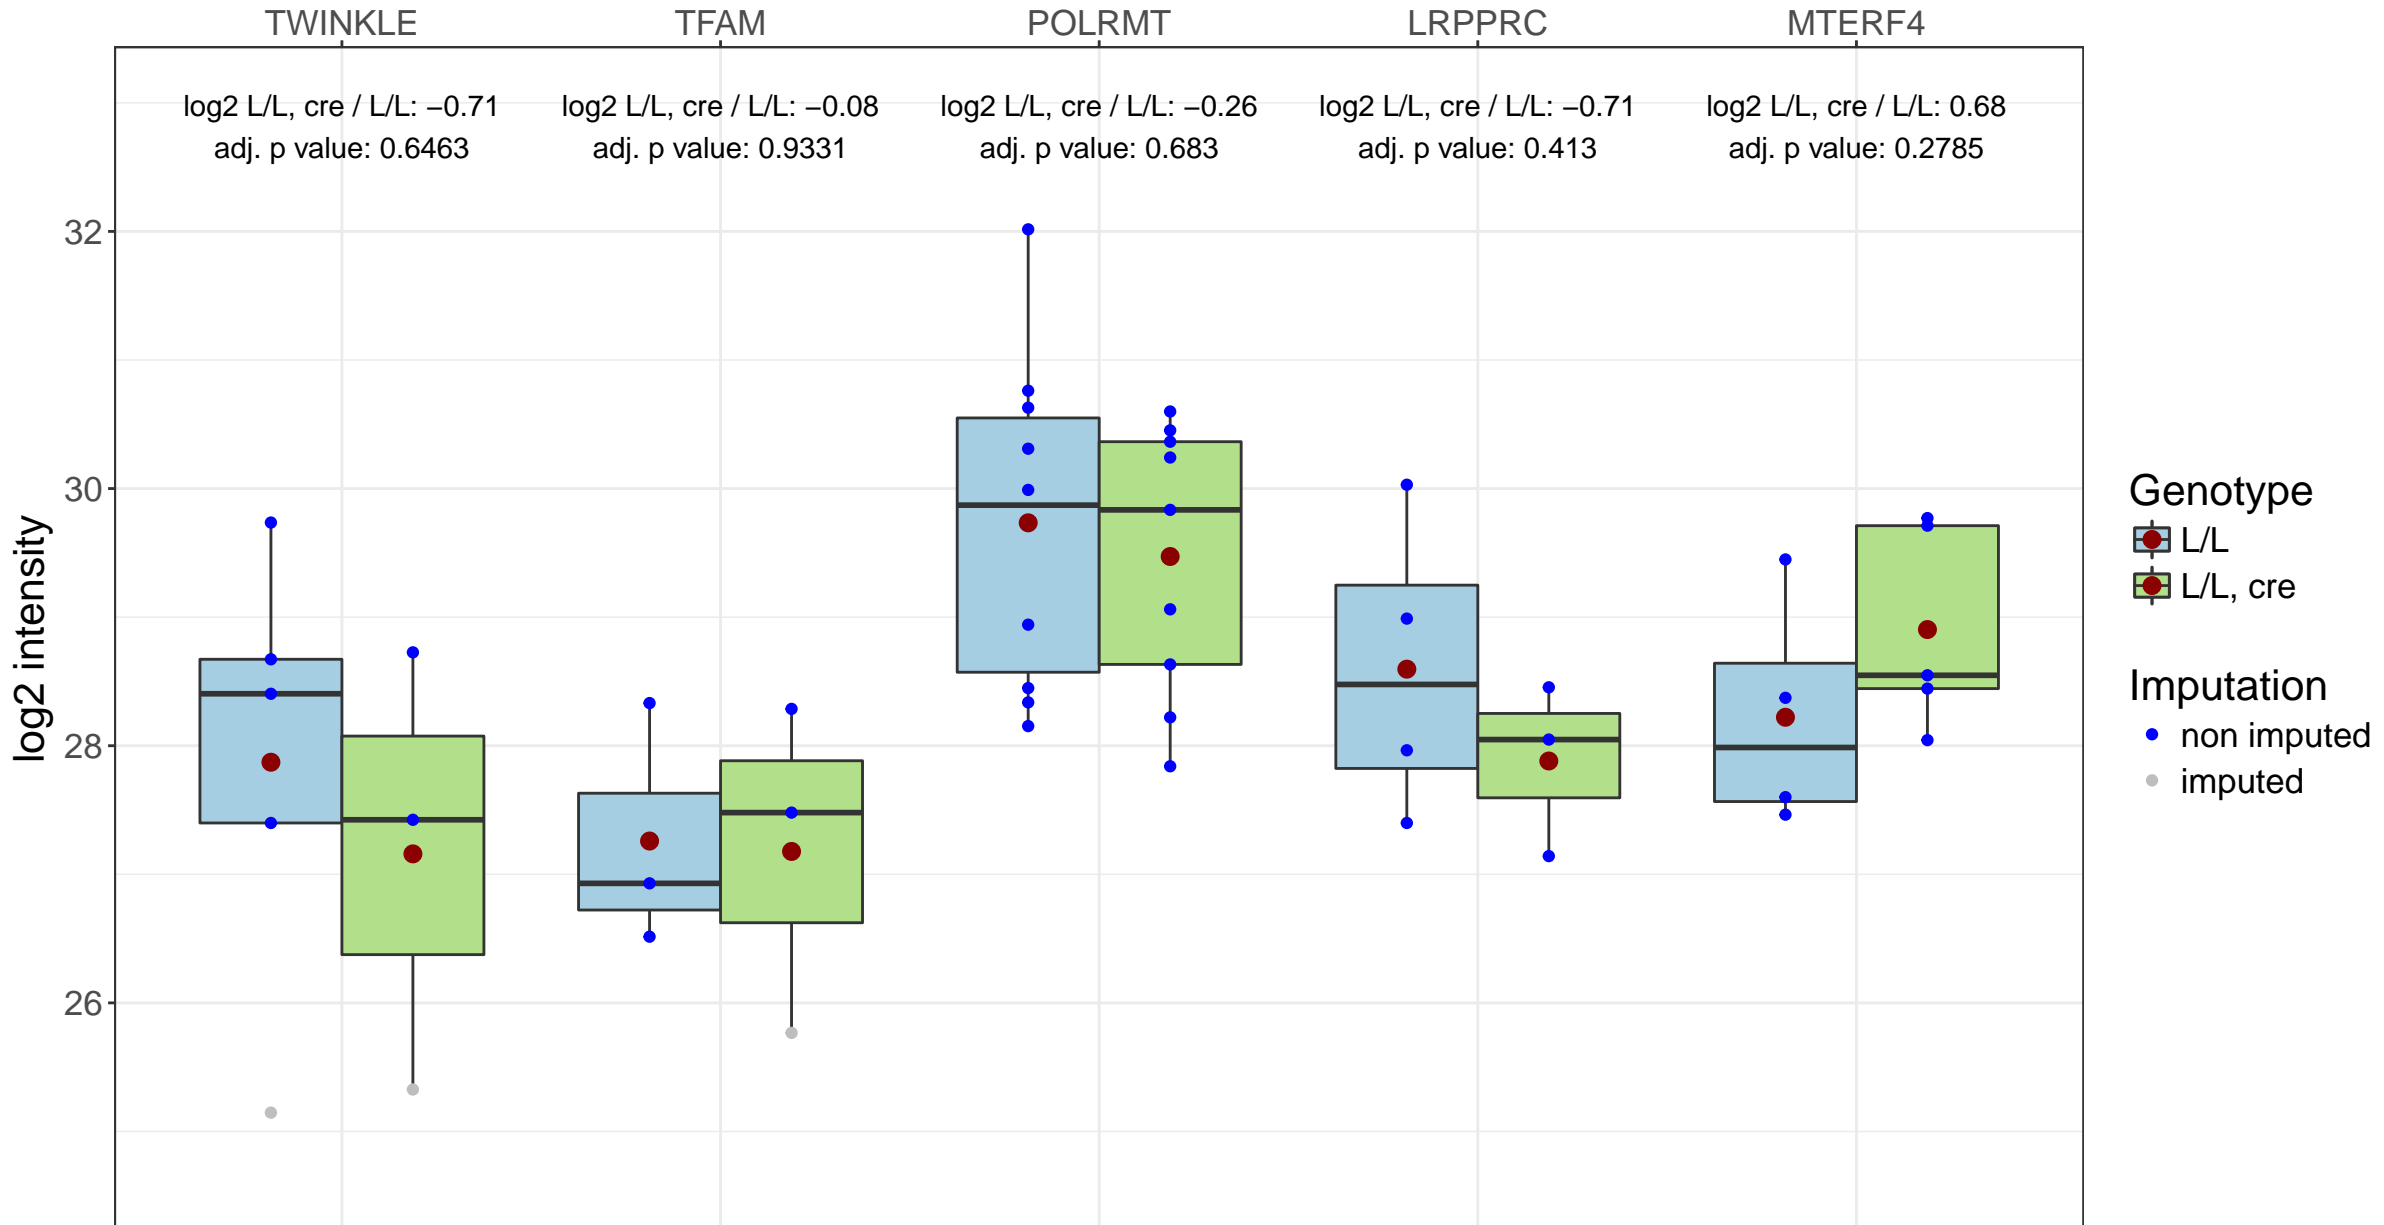

# HK1 / P17710-3

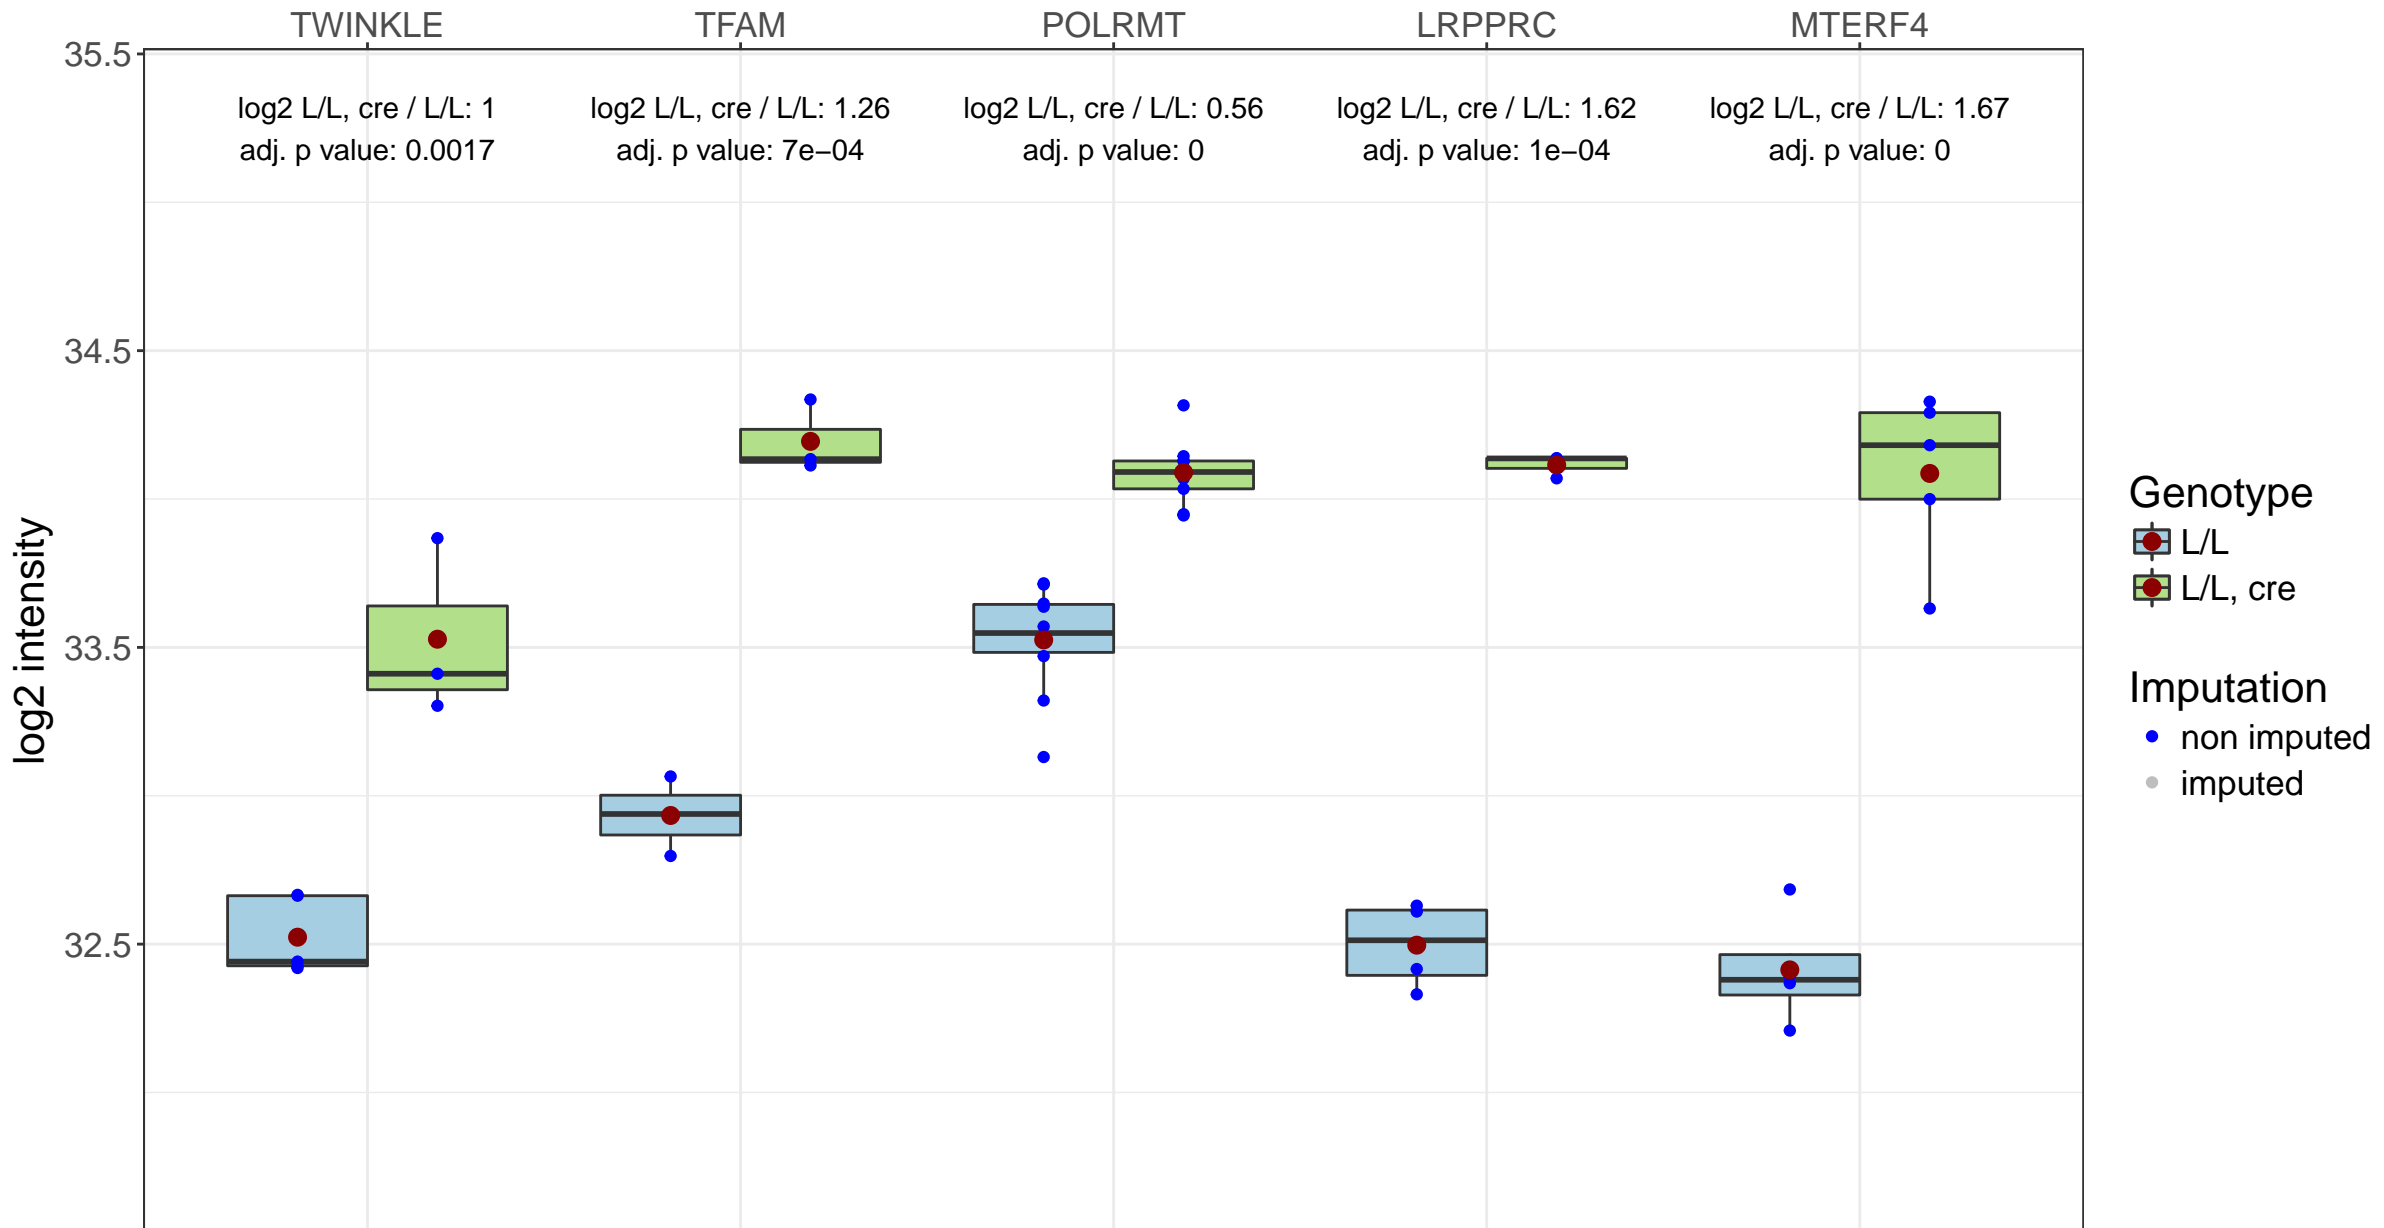

# HK2 / O08528

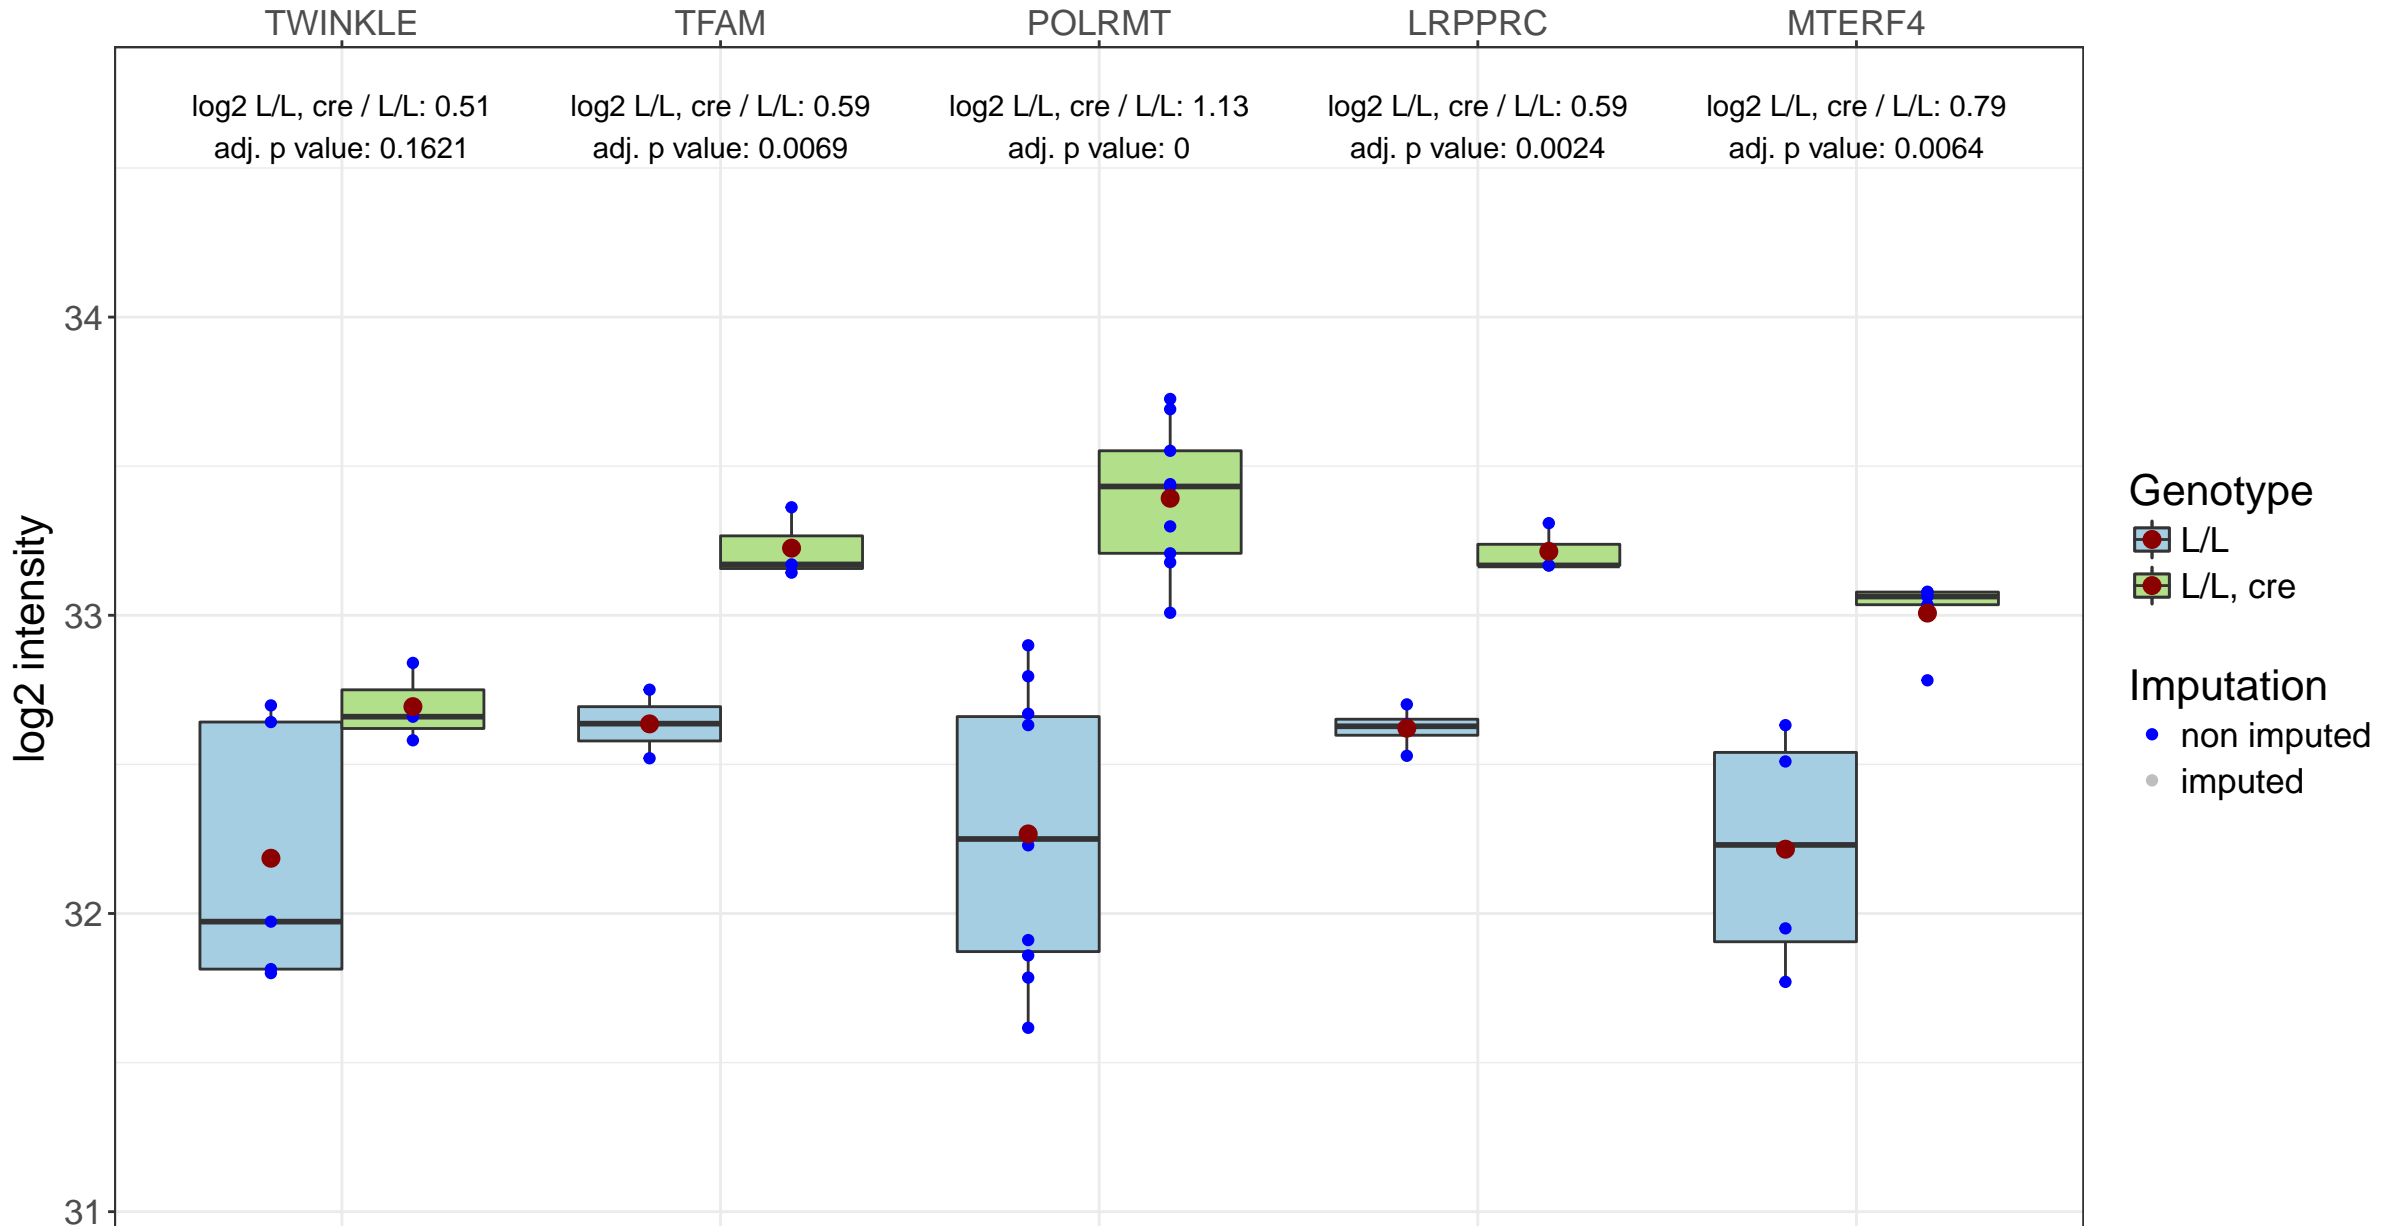

# HMGB1 / P63158

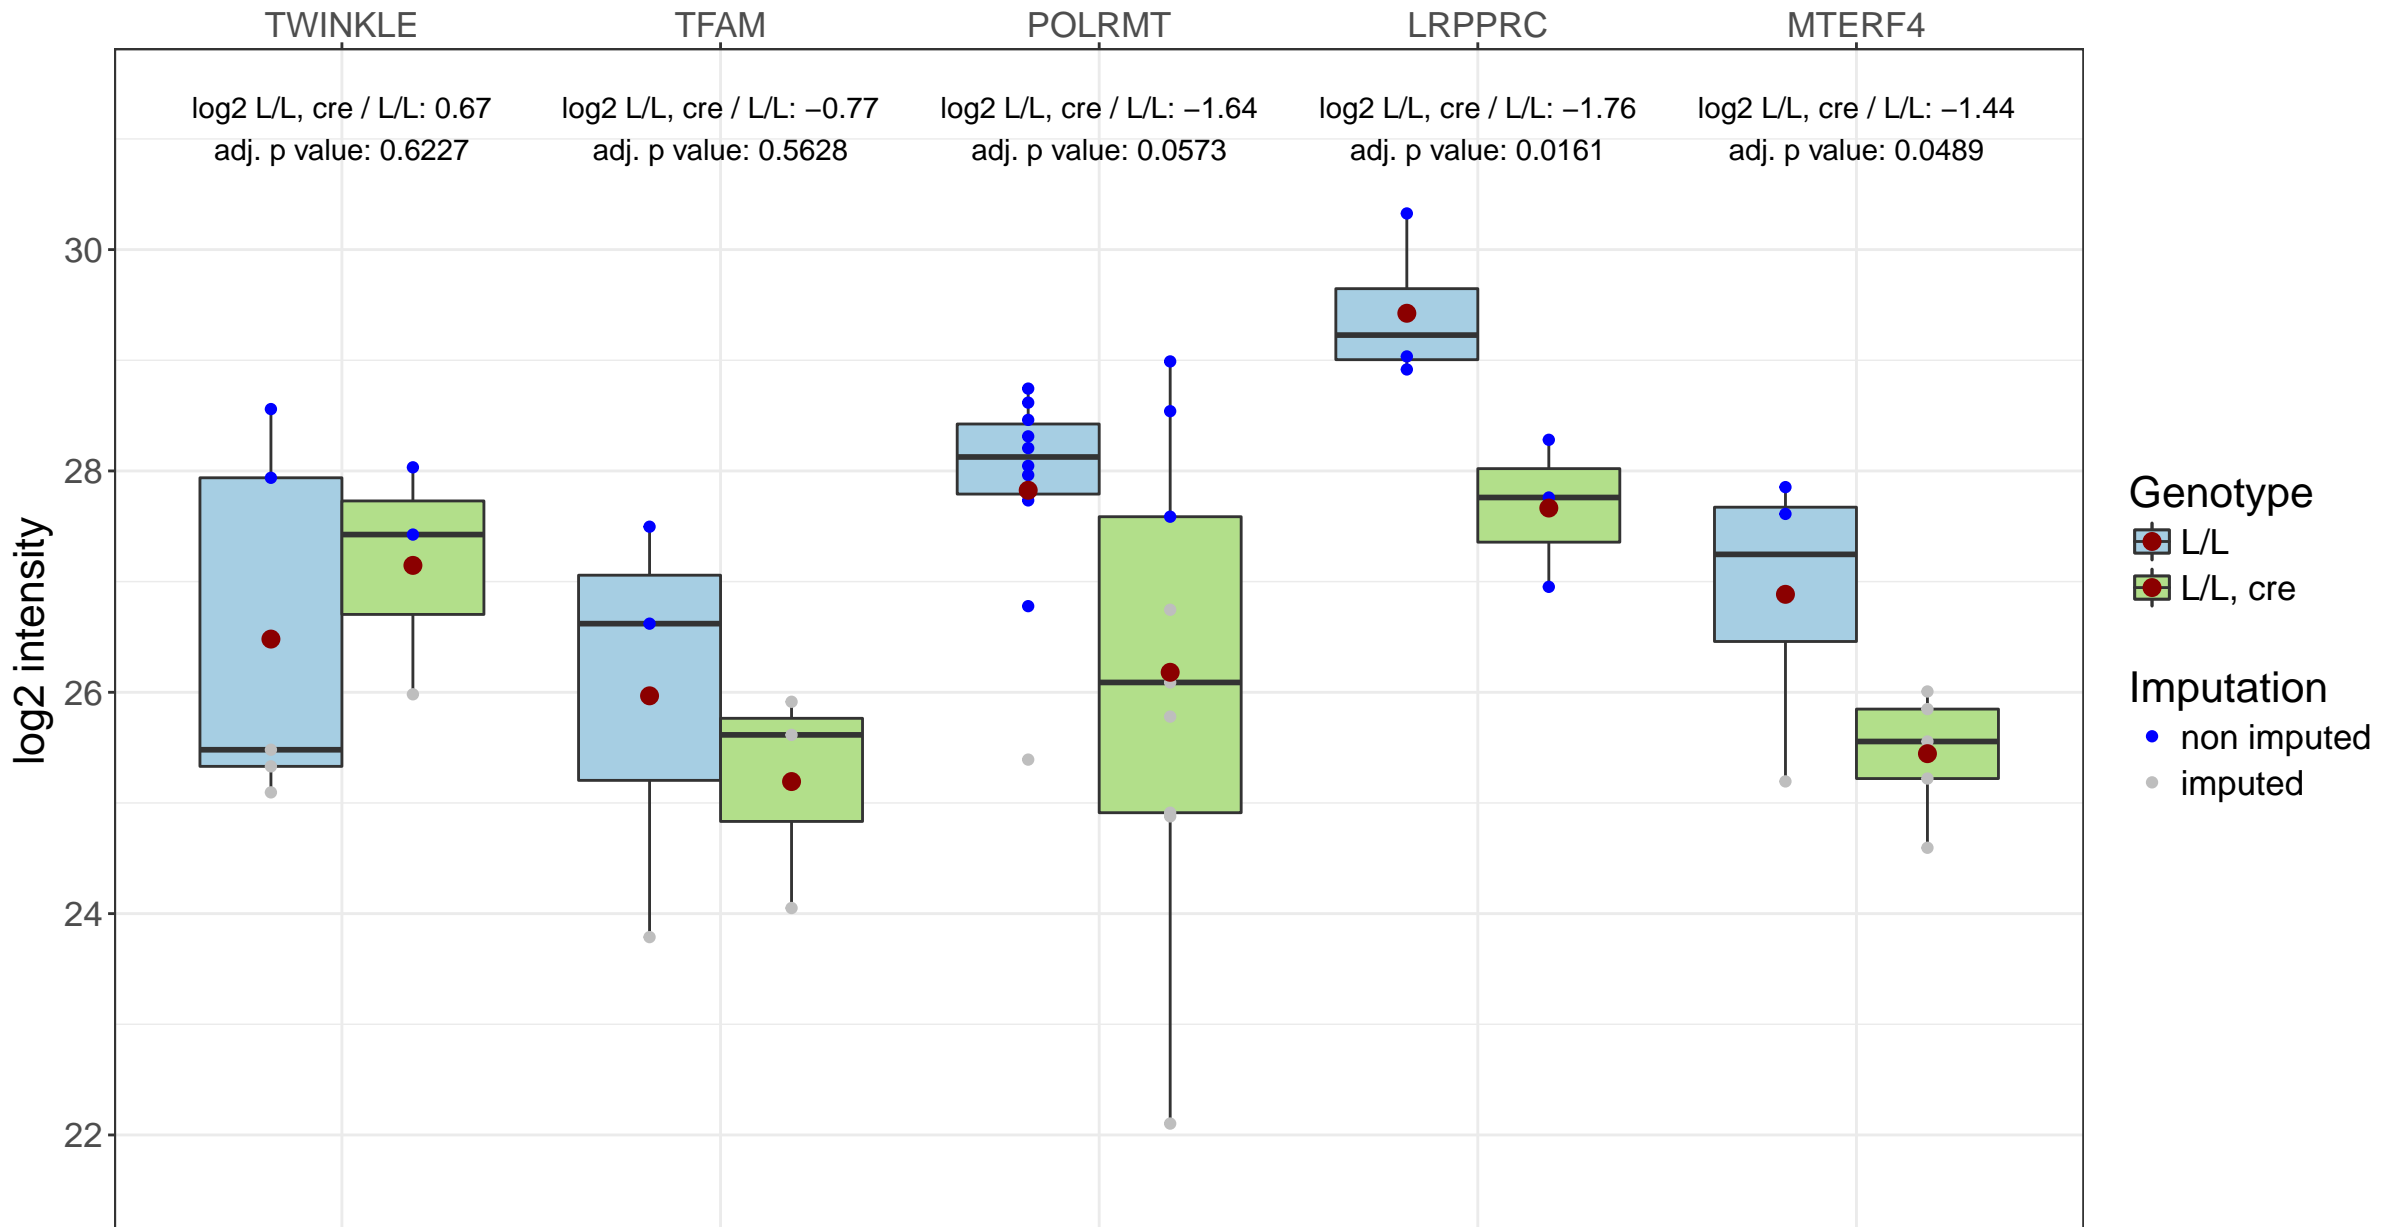

# HMGCL / P38060

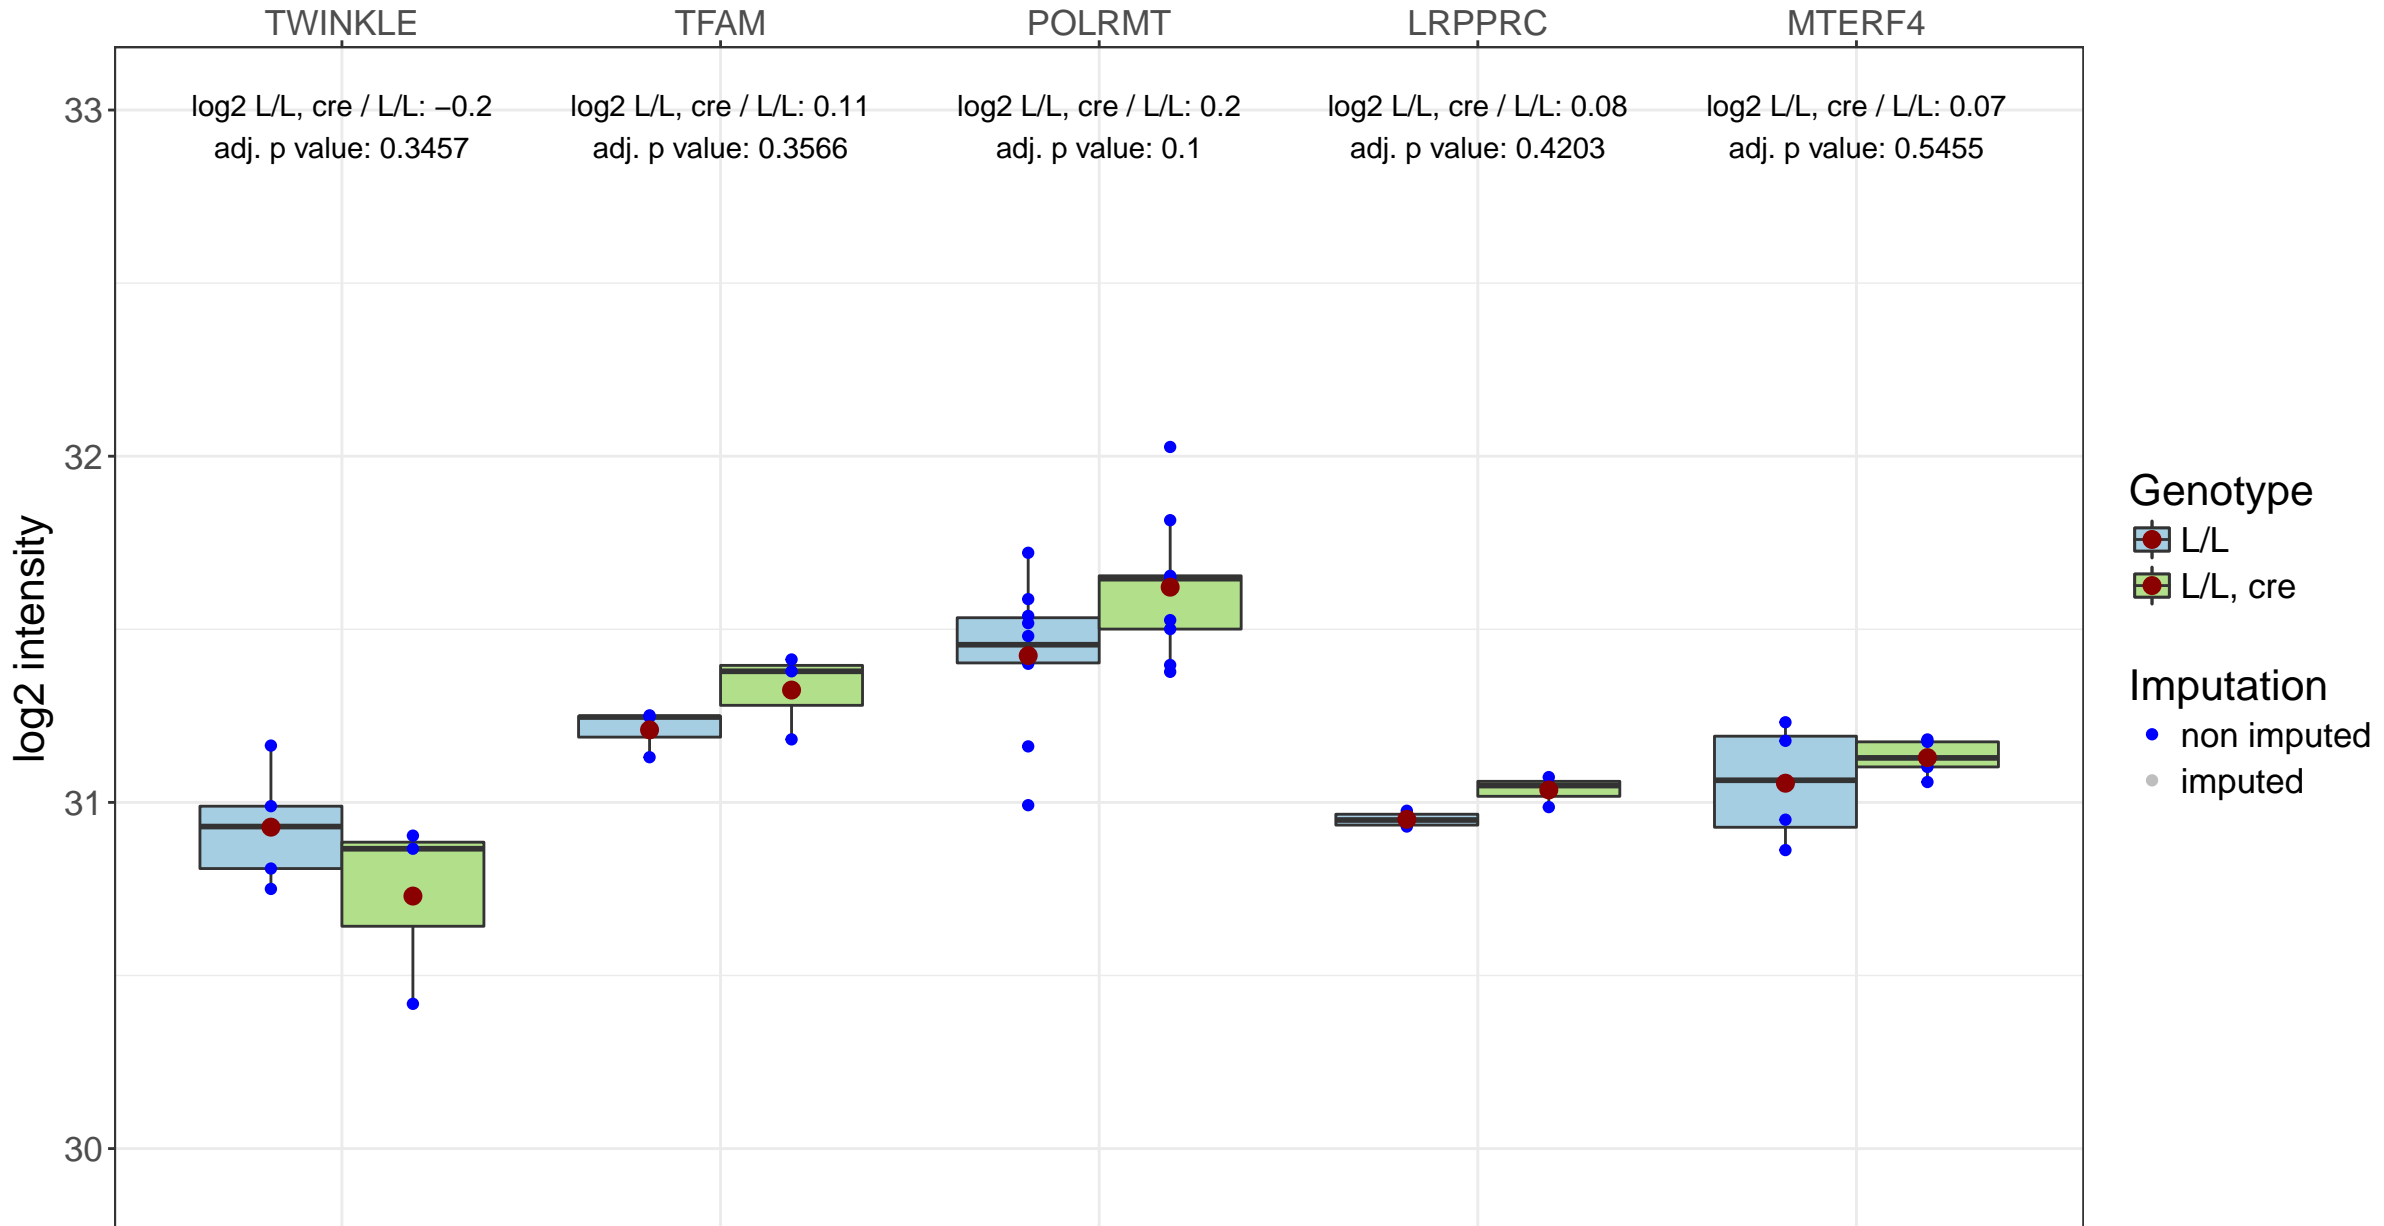



# HMGCS2 / P54869

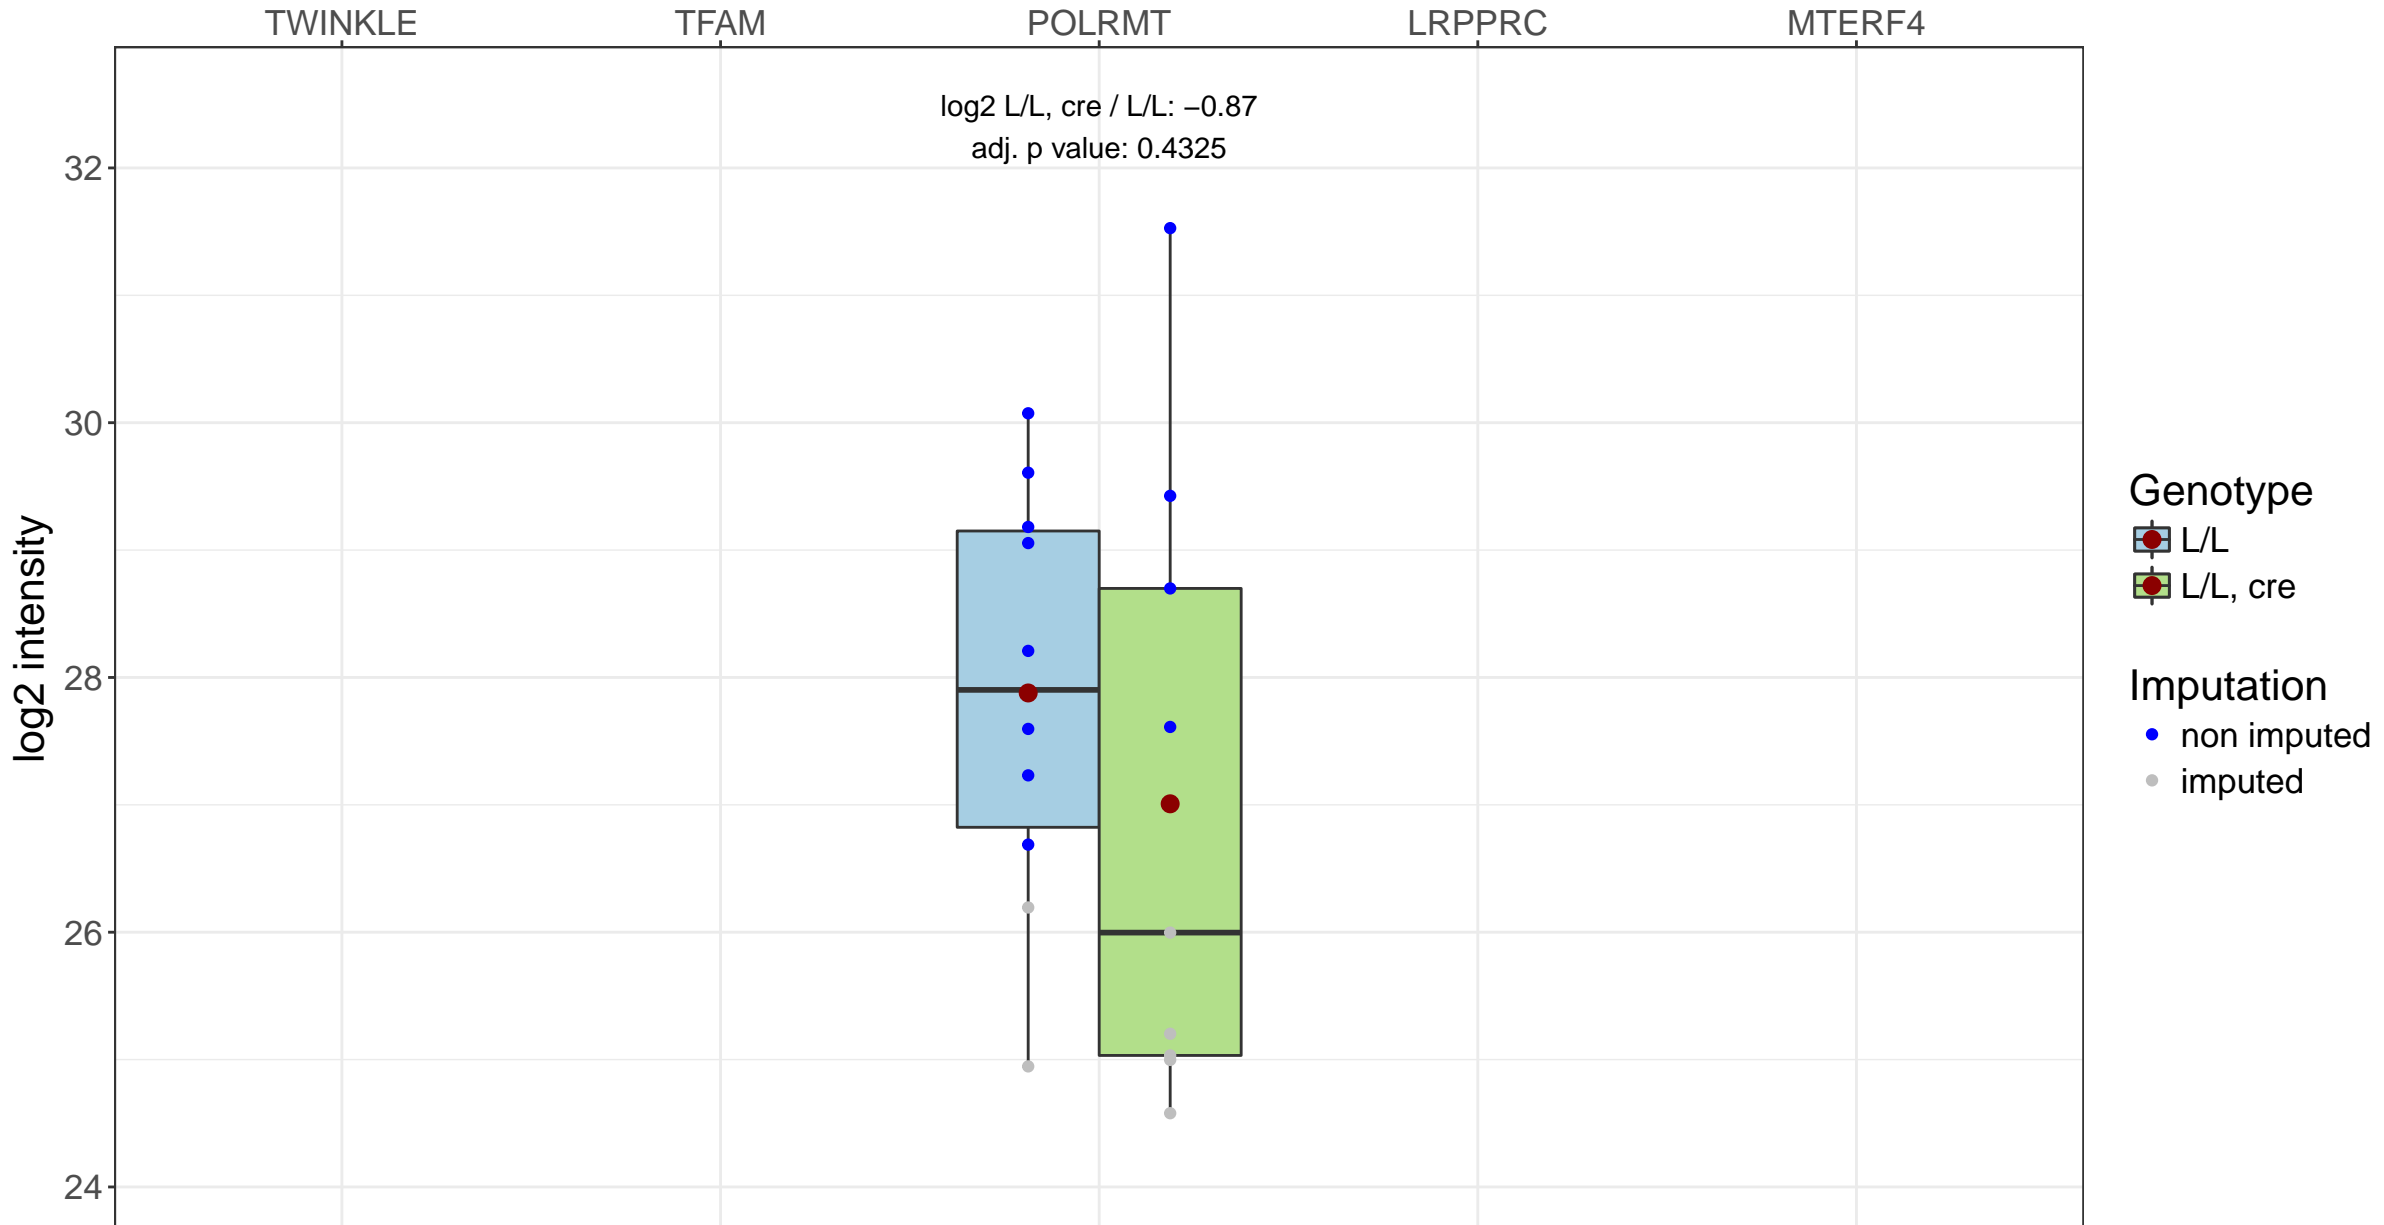

# HNRNPA2B1 / O88569

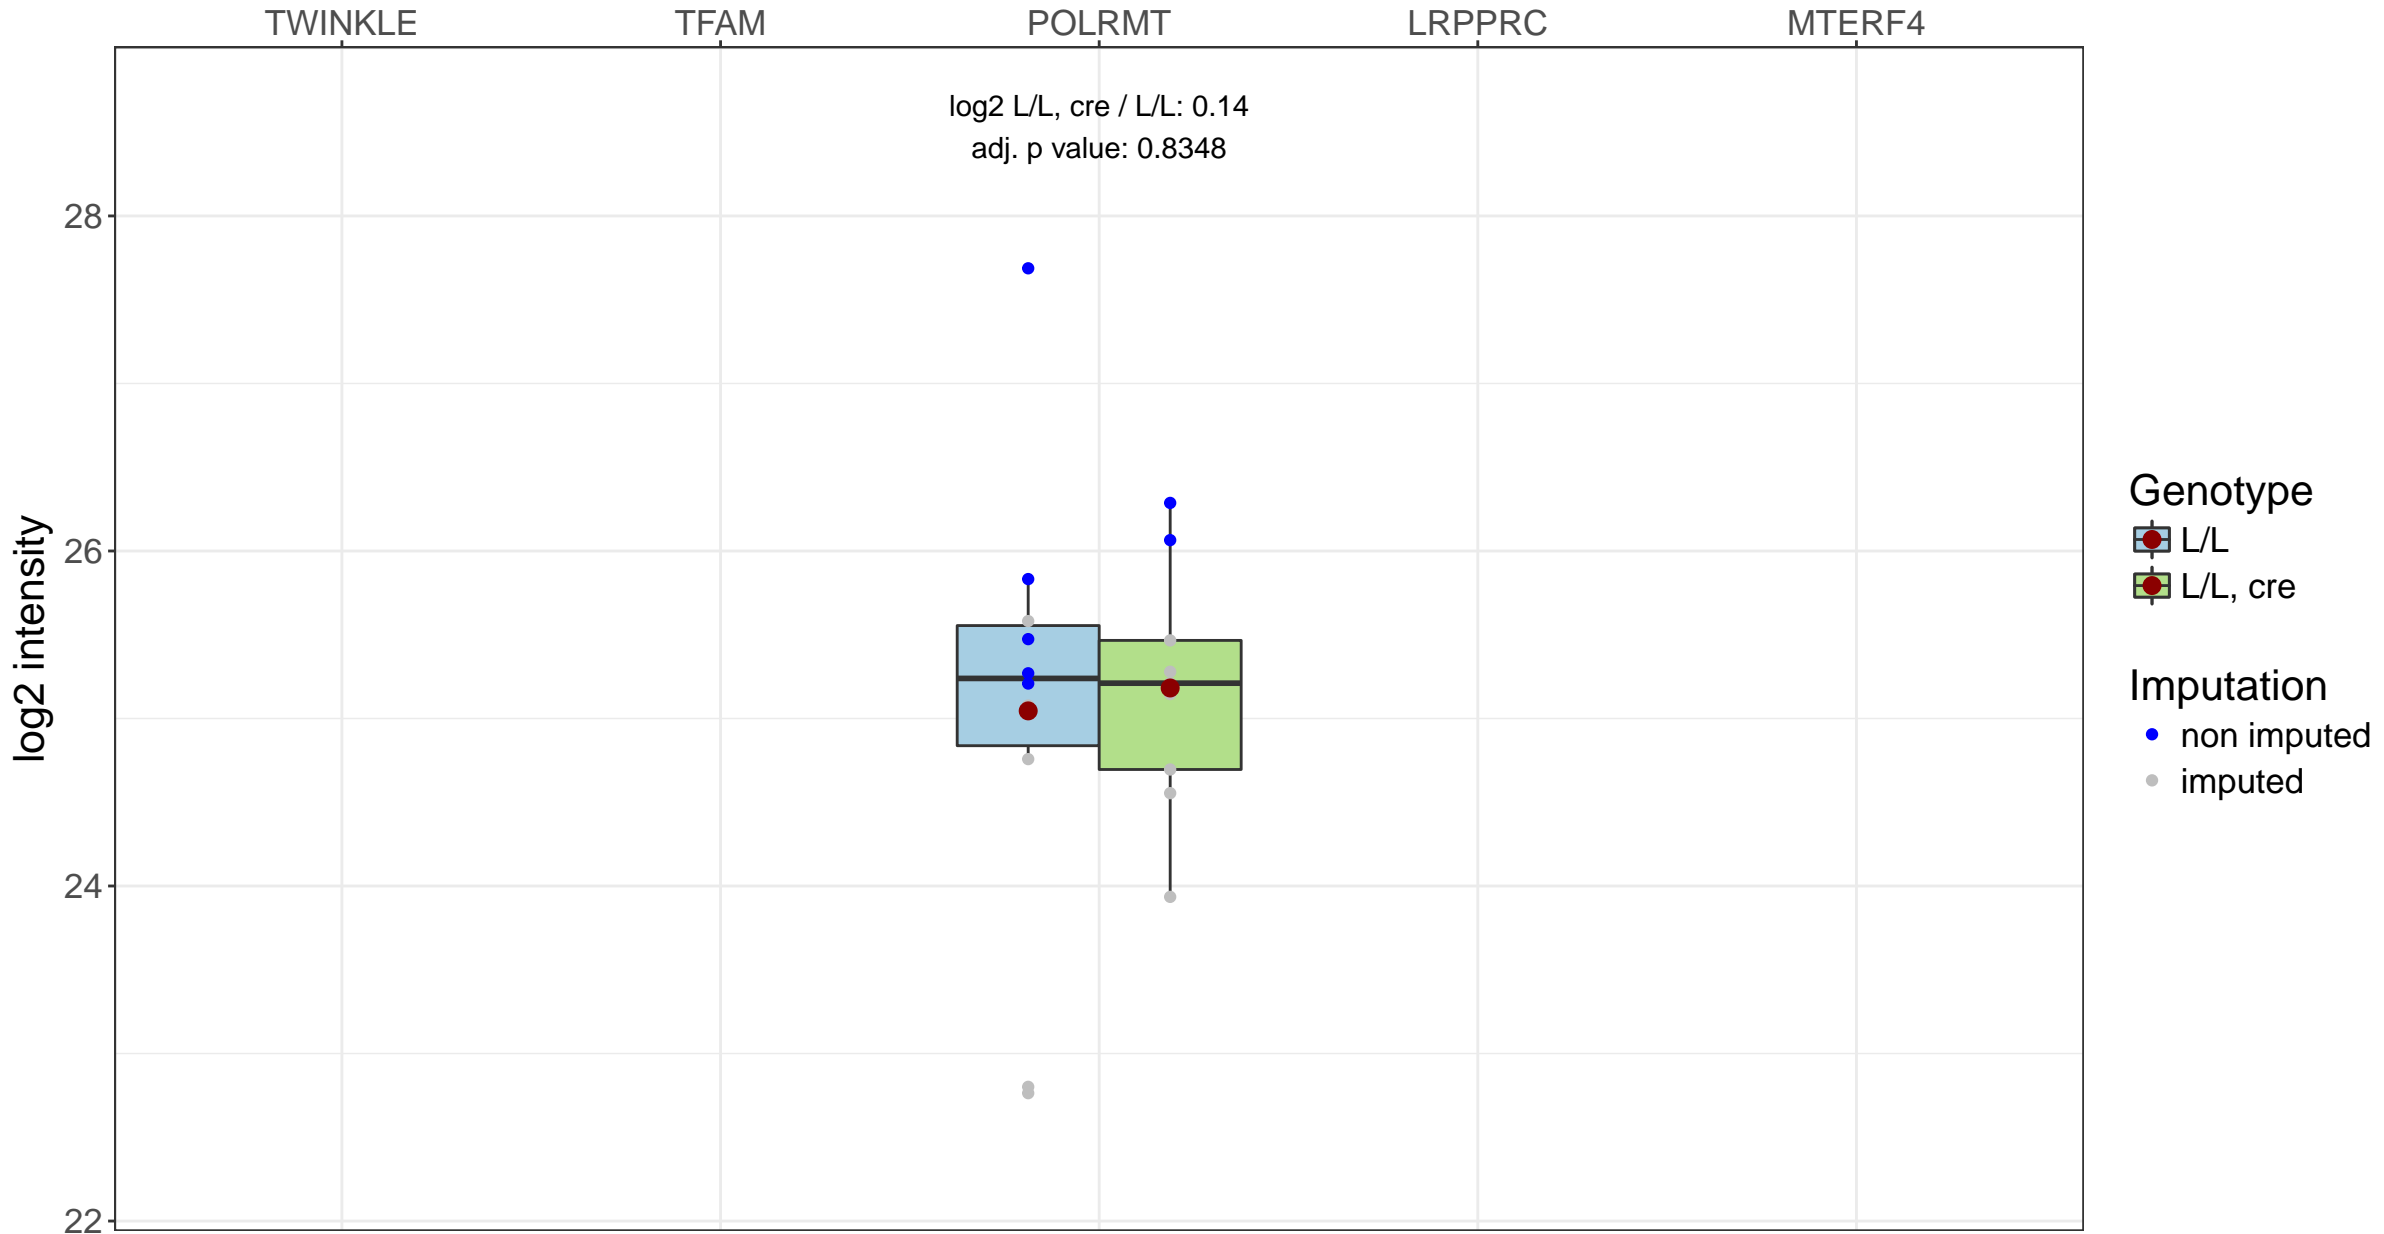

# HRC / G5E8J6

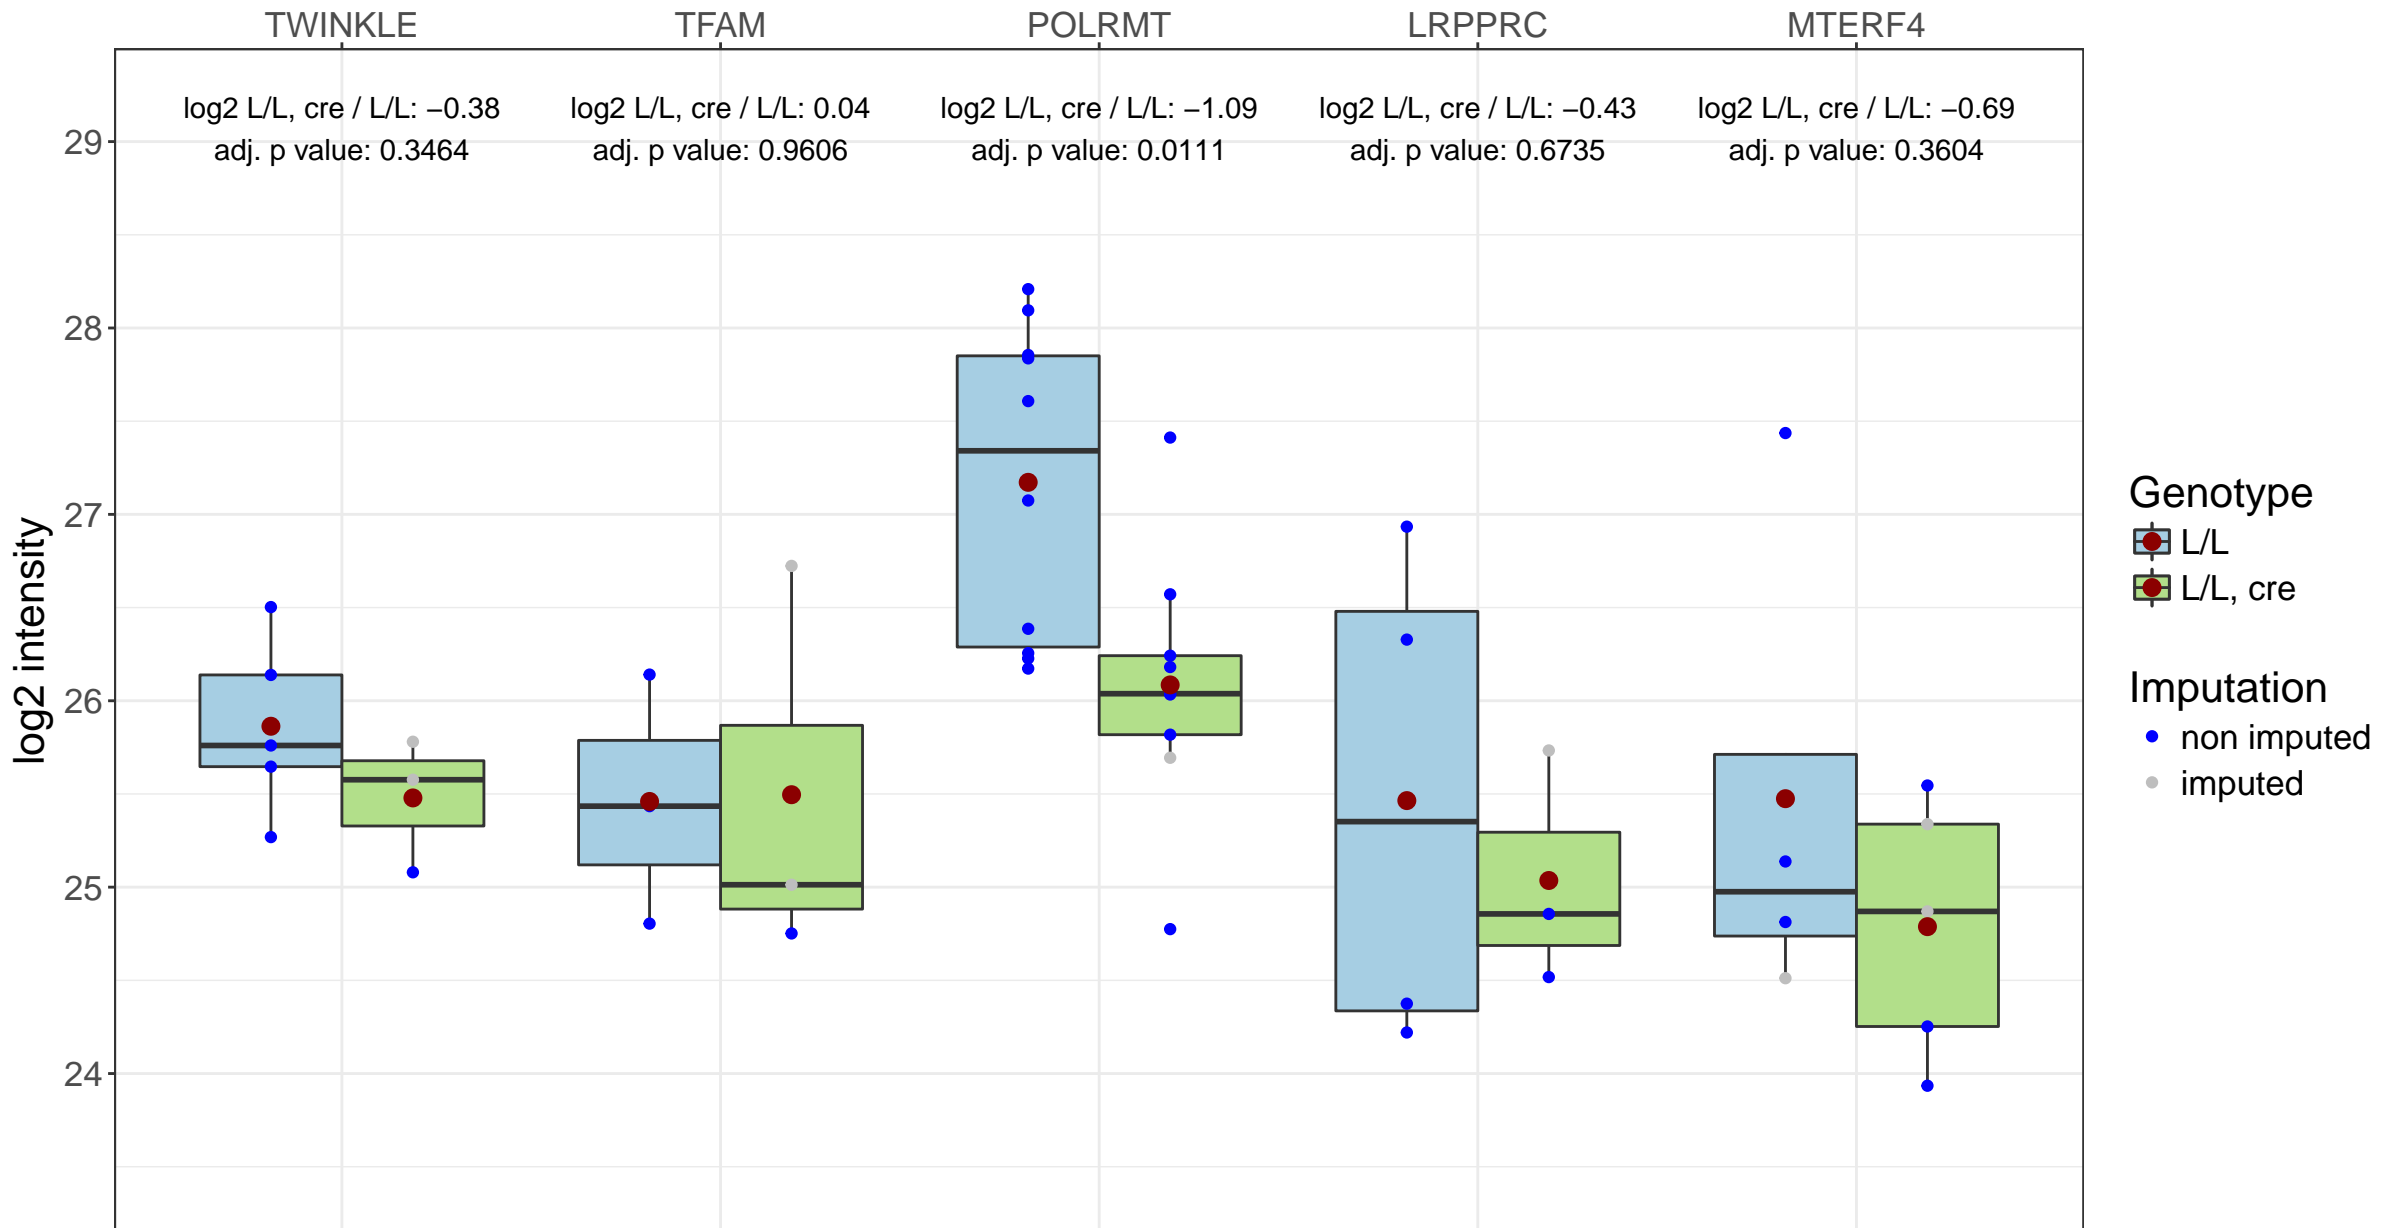

# HSCB / Q8K3A0

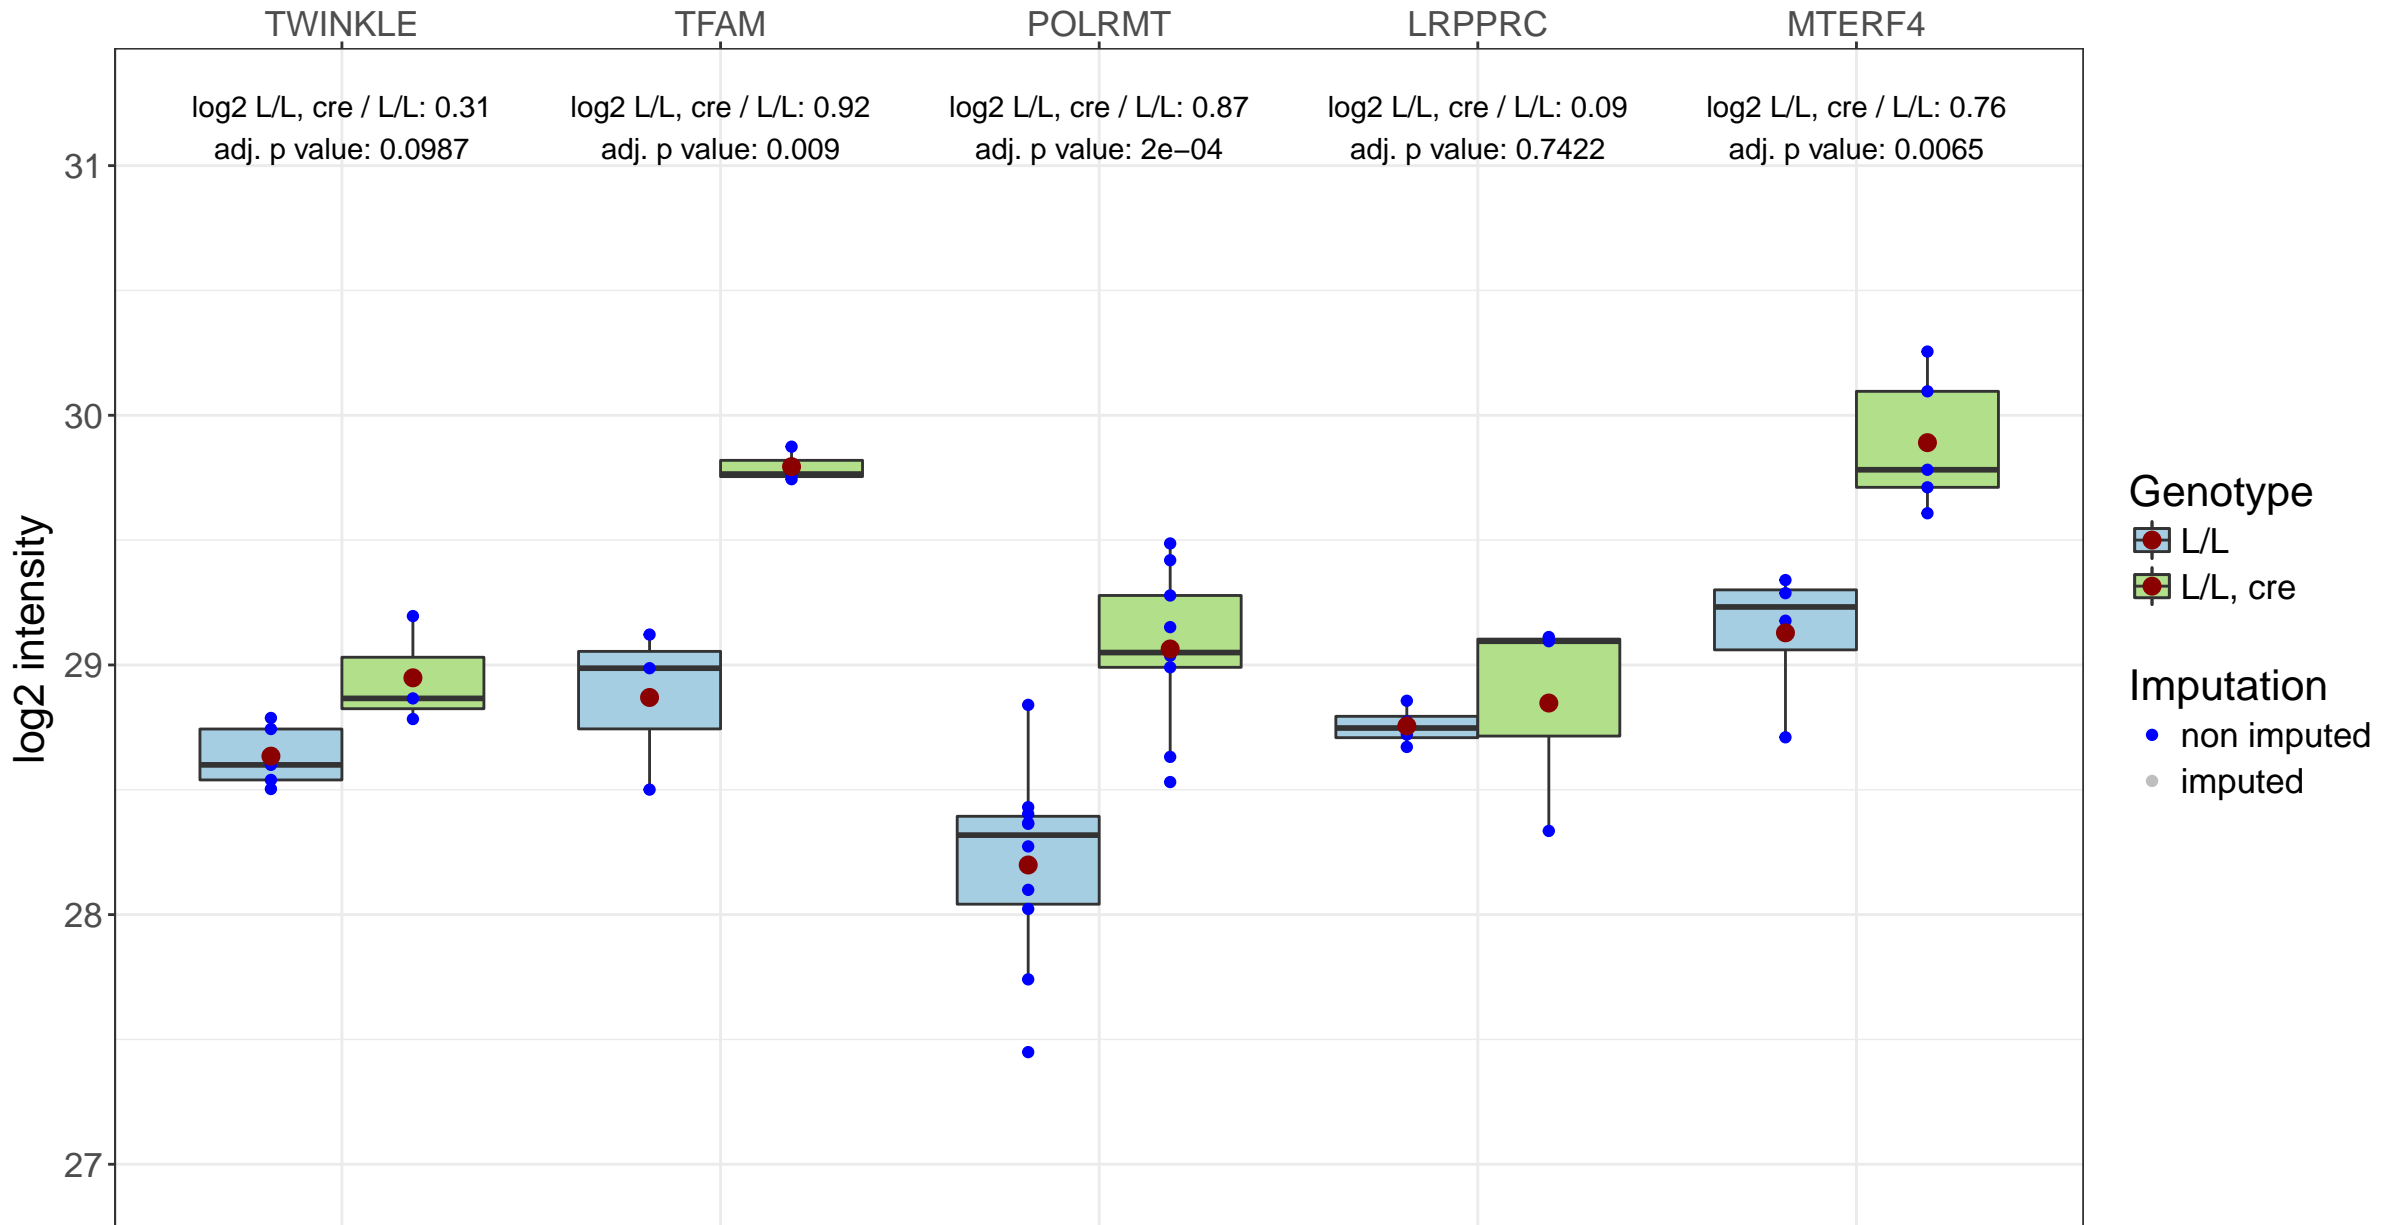

# HSD17B10 / Q99N15

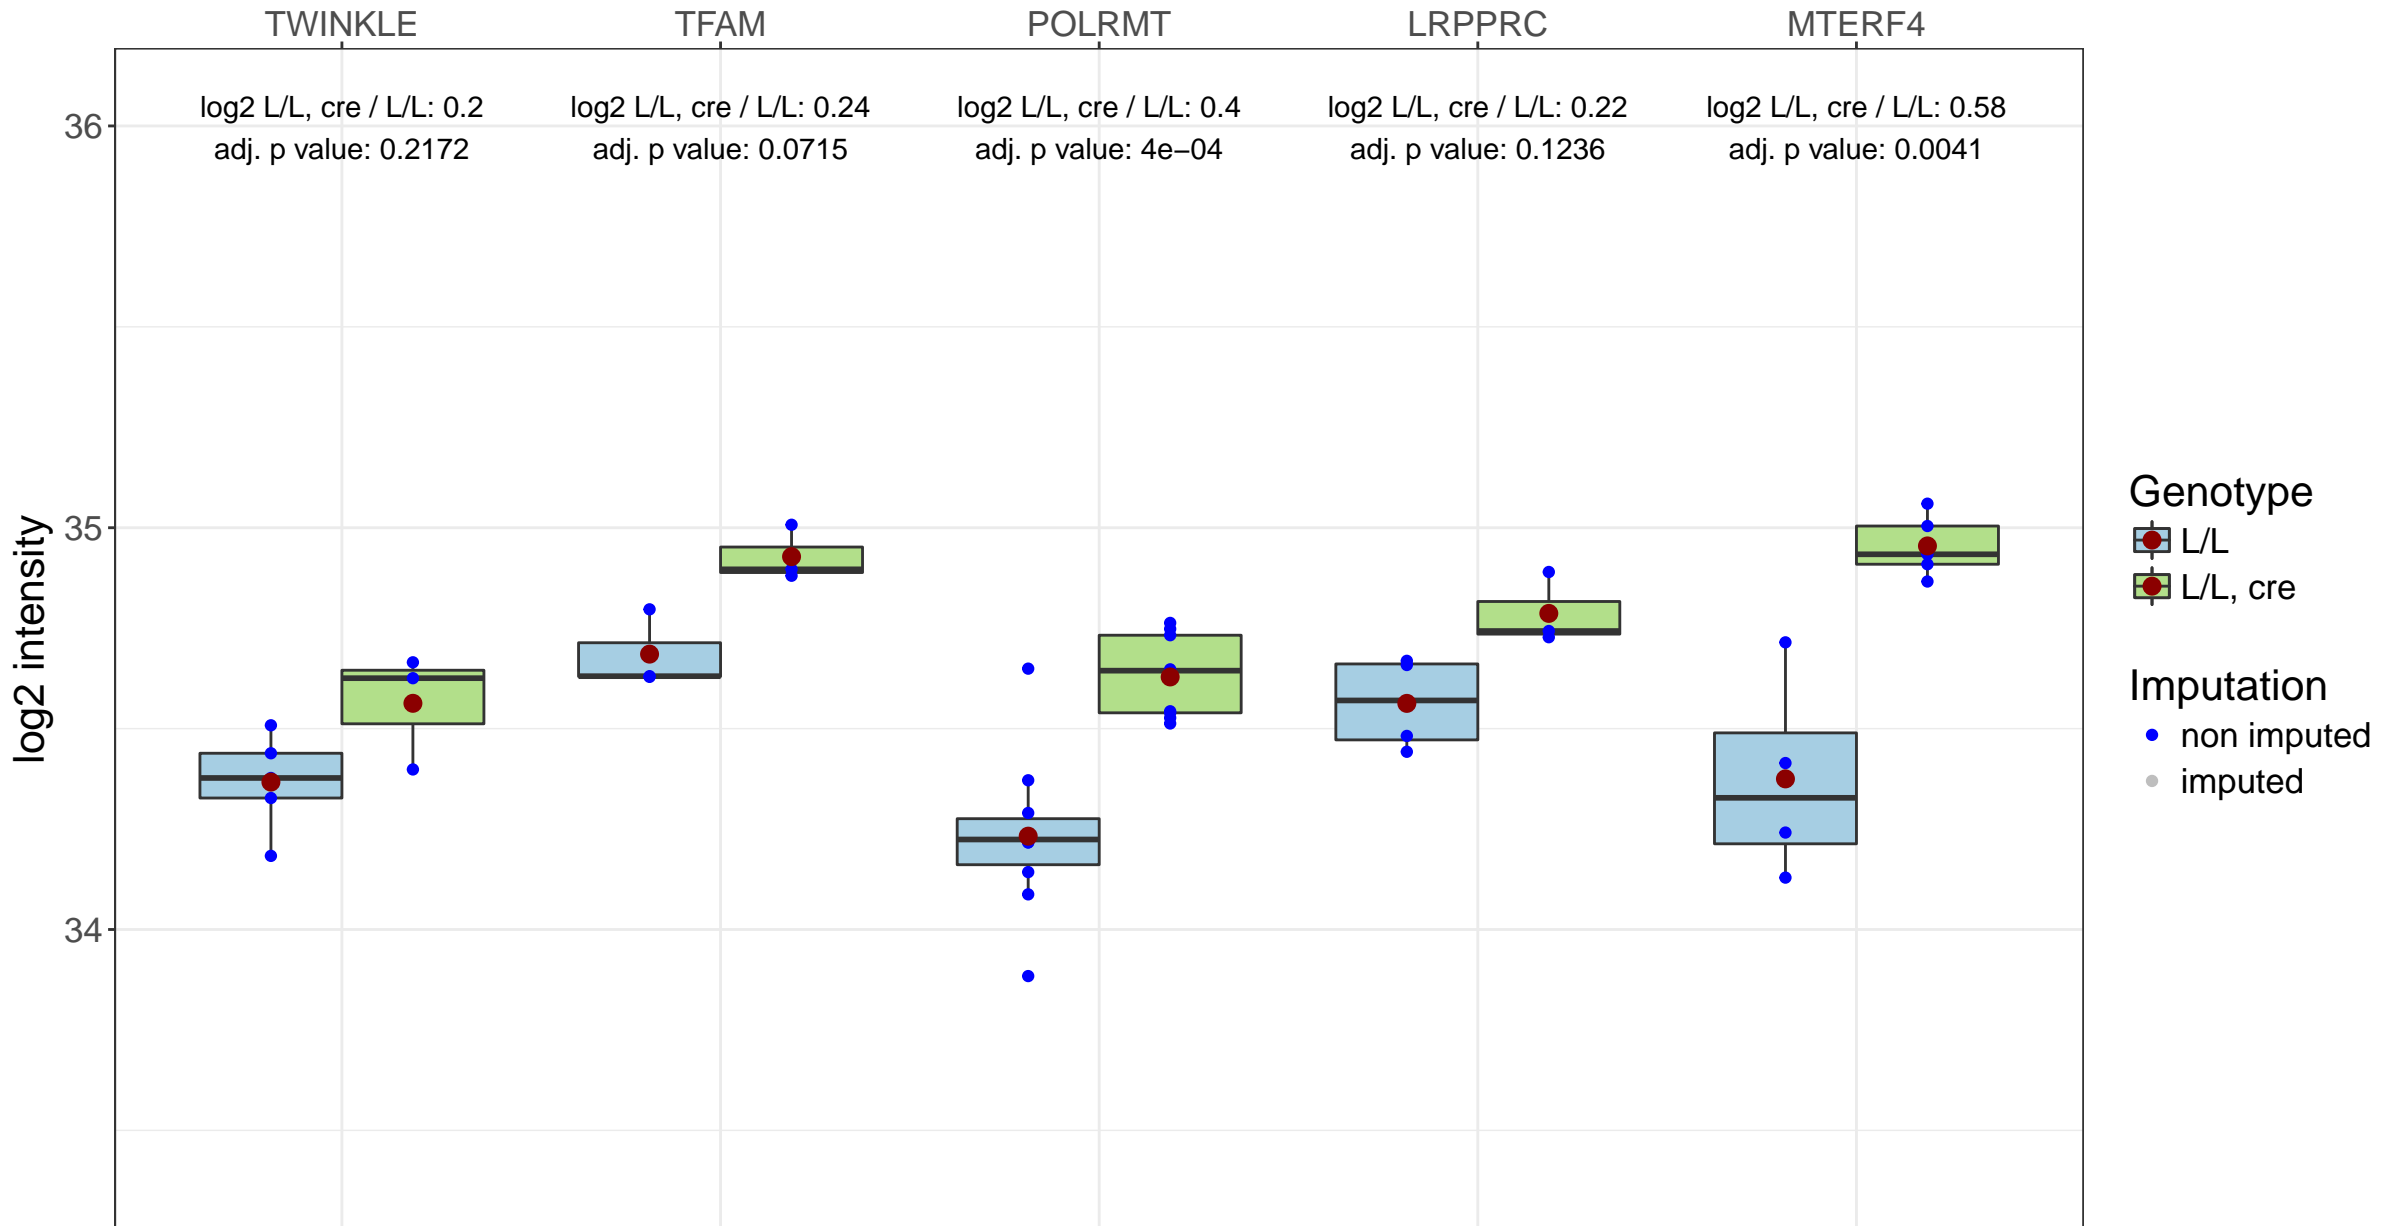

# HSD17B4 / P51660

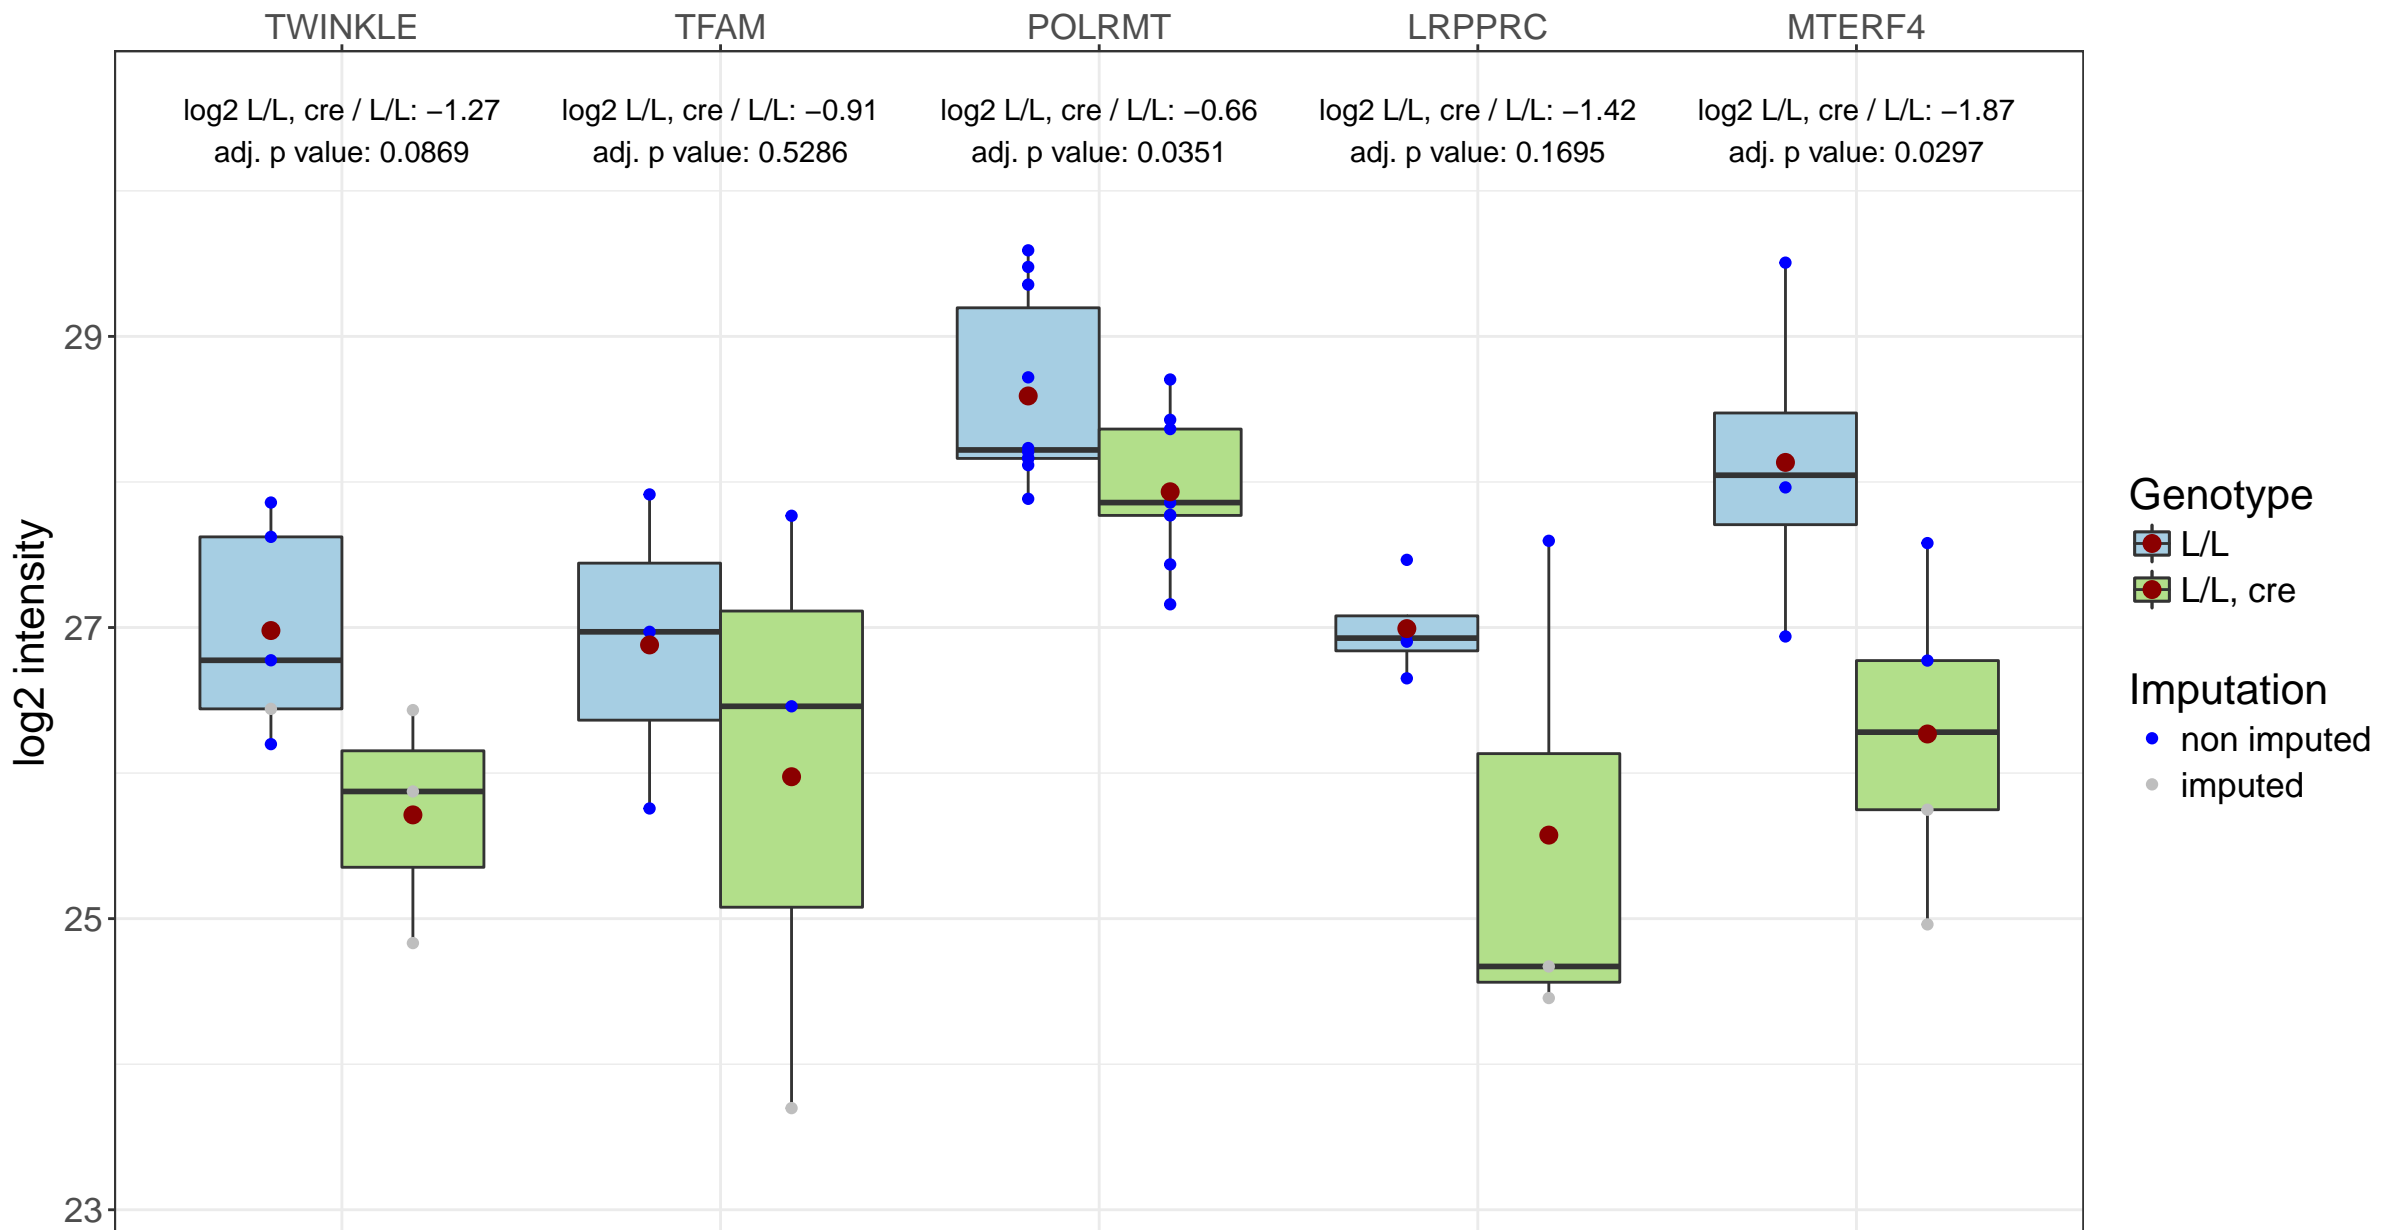

# HSD17B8 / P50171

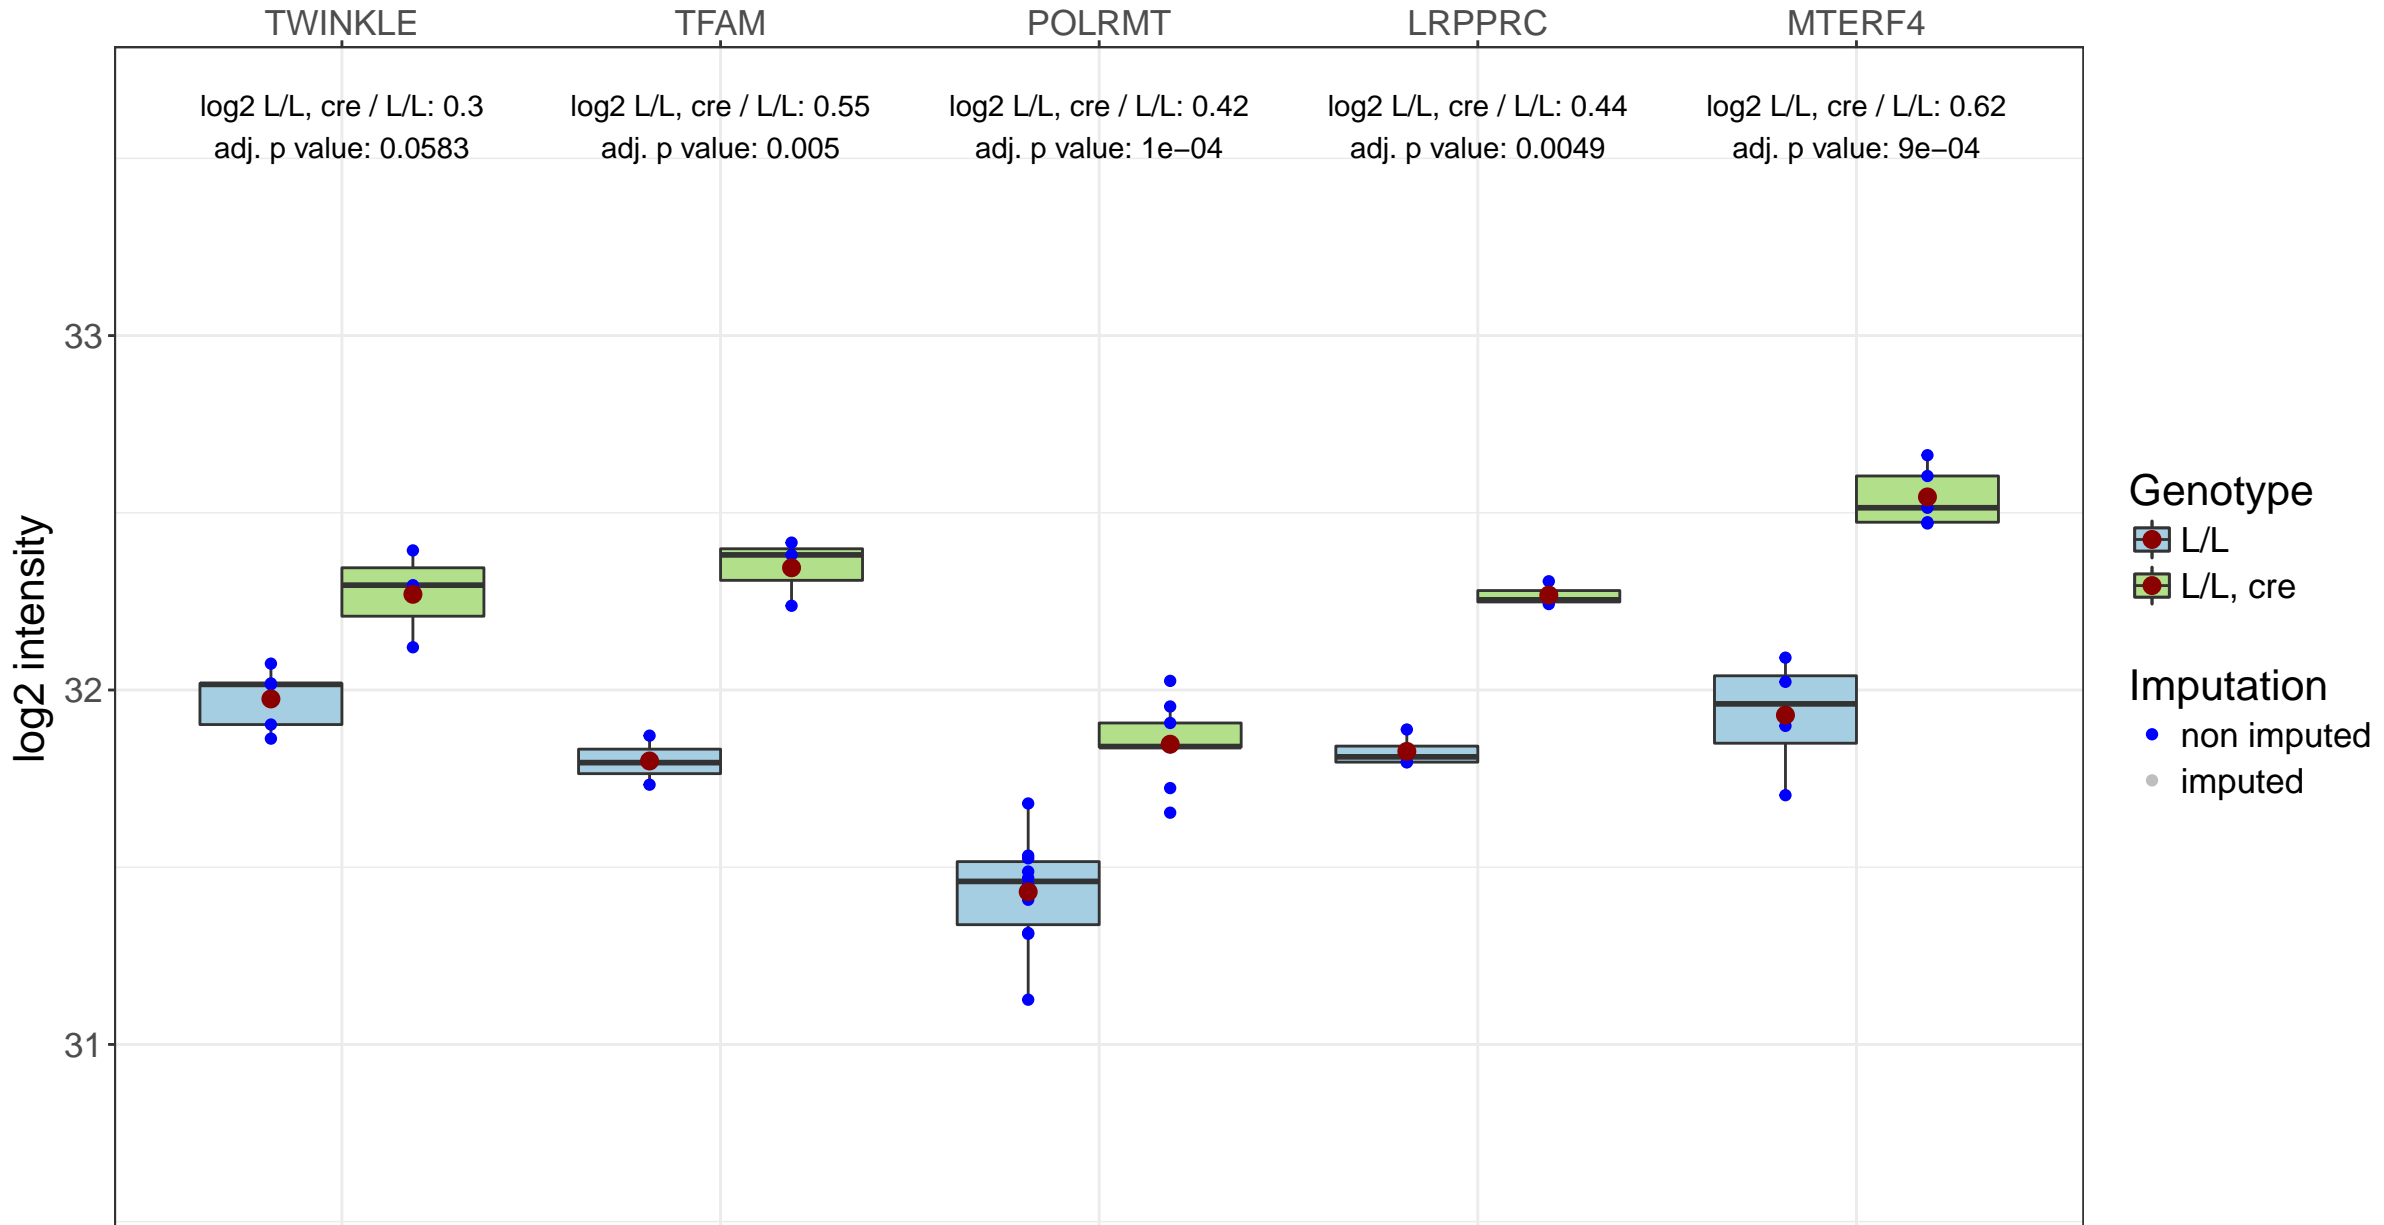

# HSDL1 / Q8BTX9

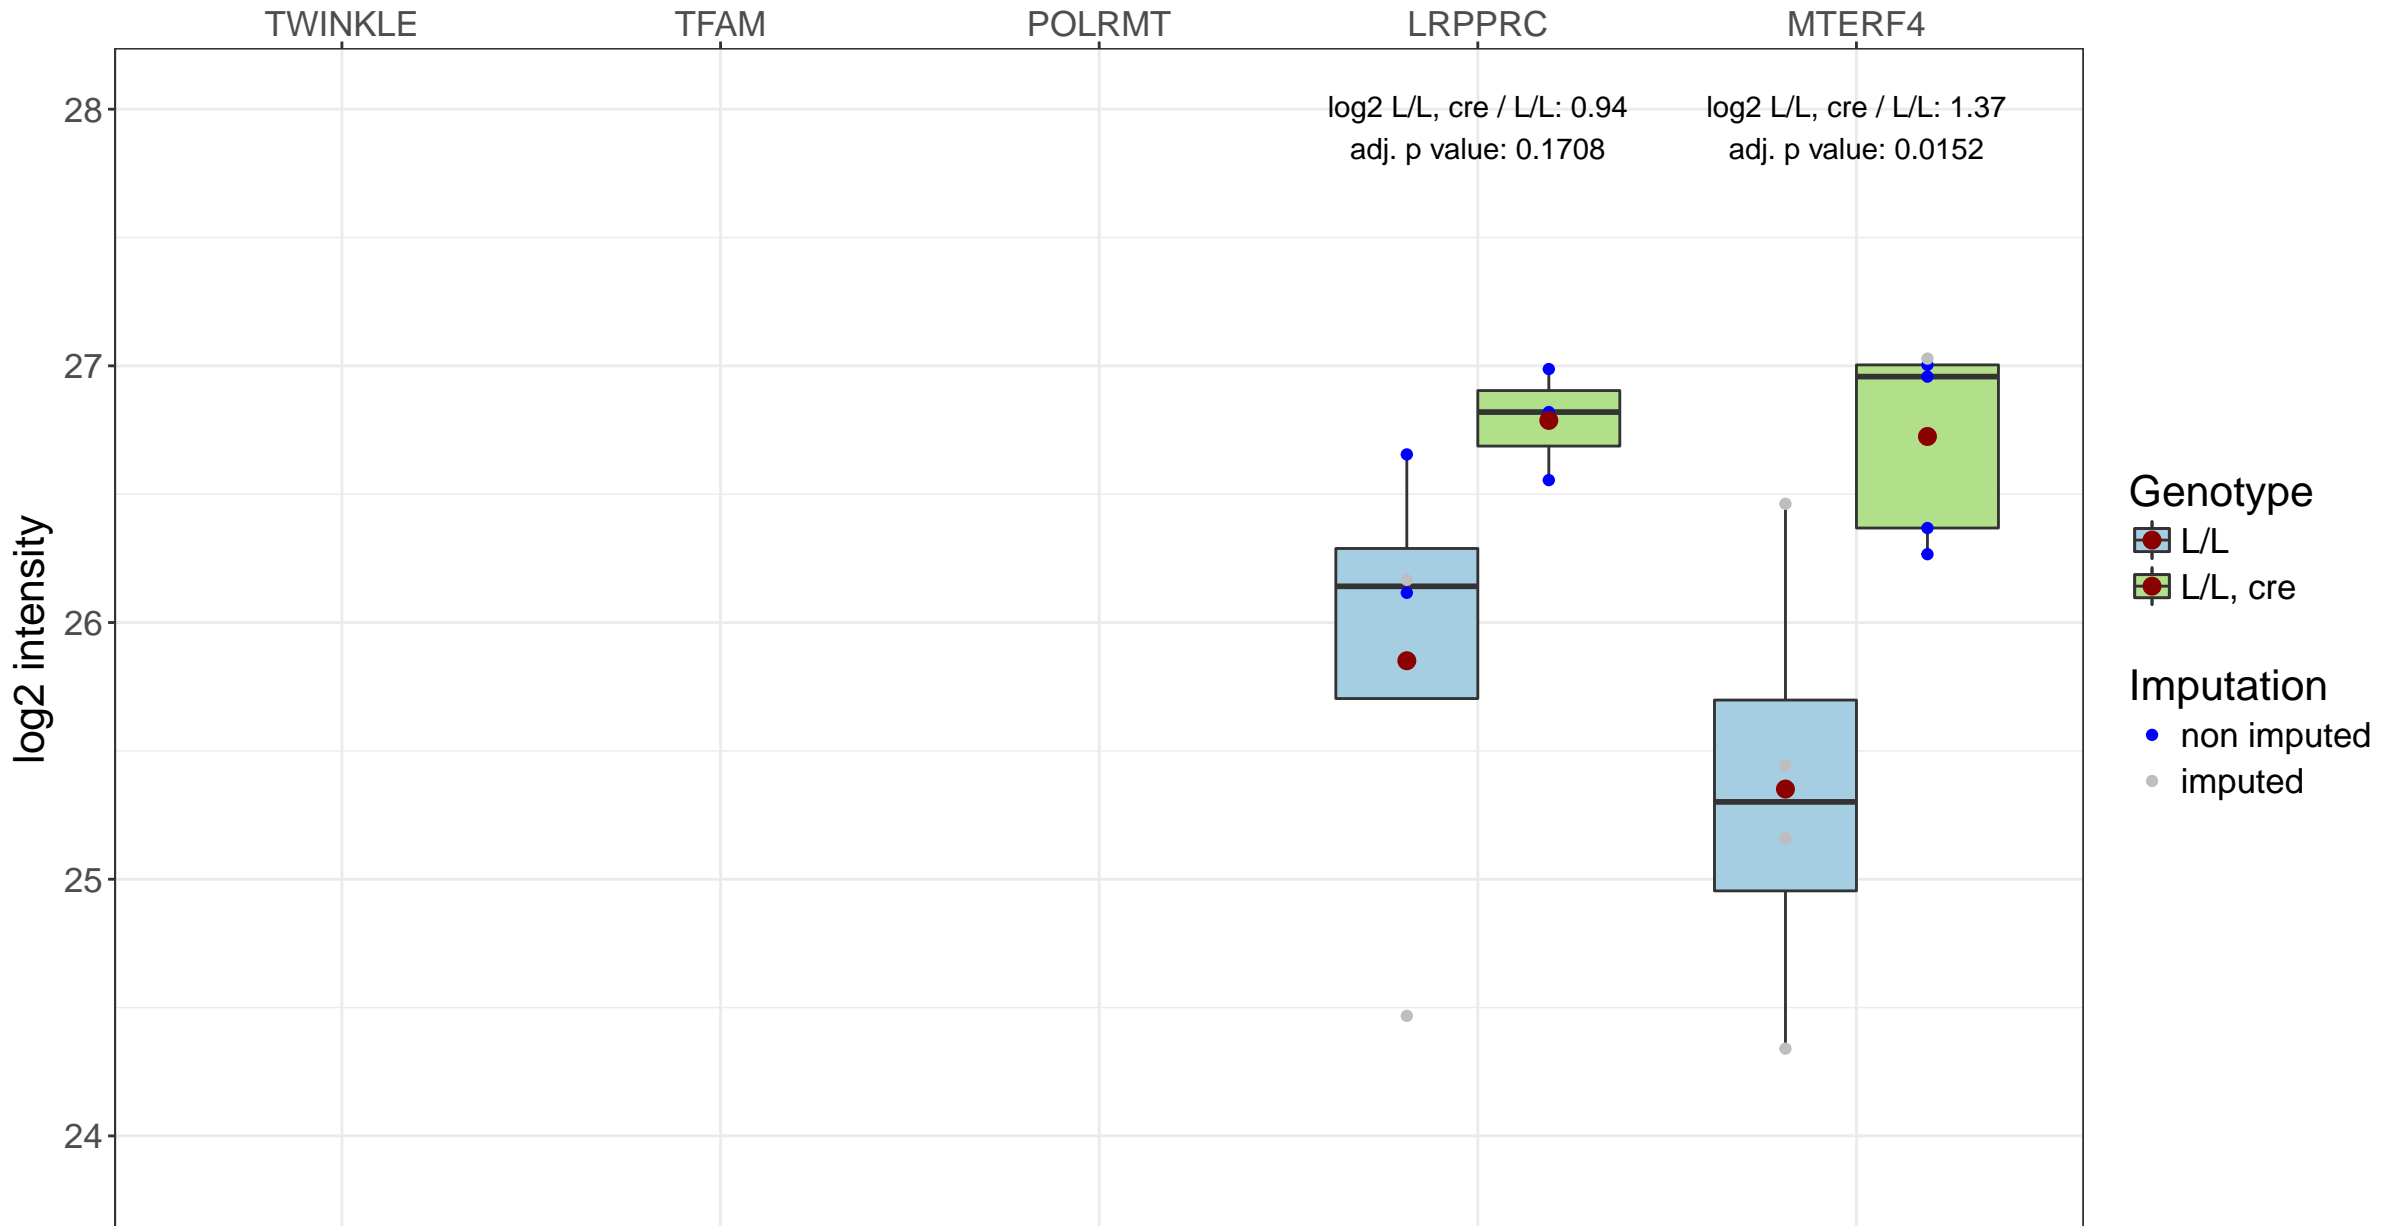



# HSDL2 / Q2TPA8

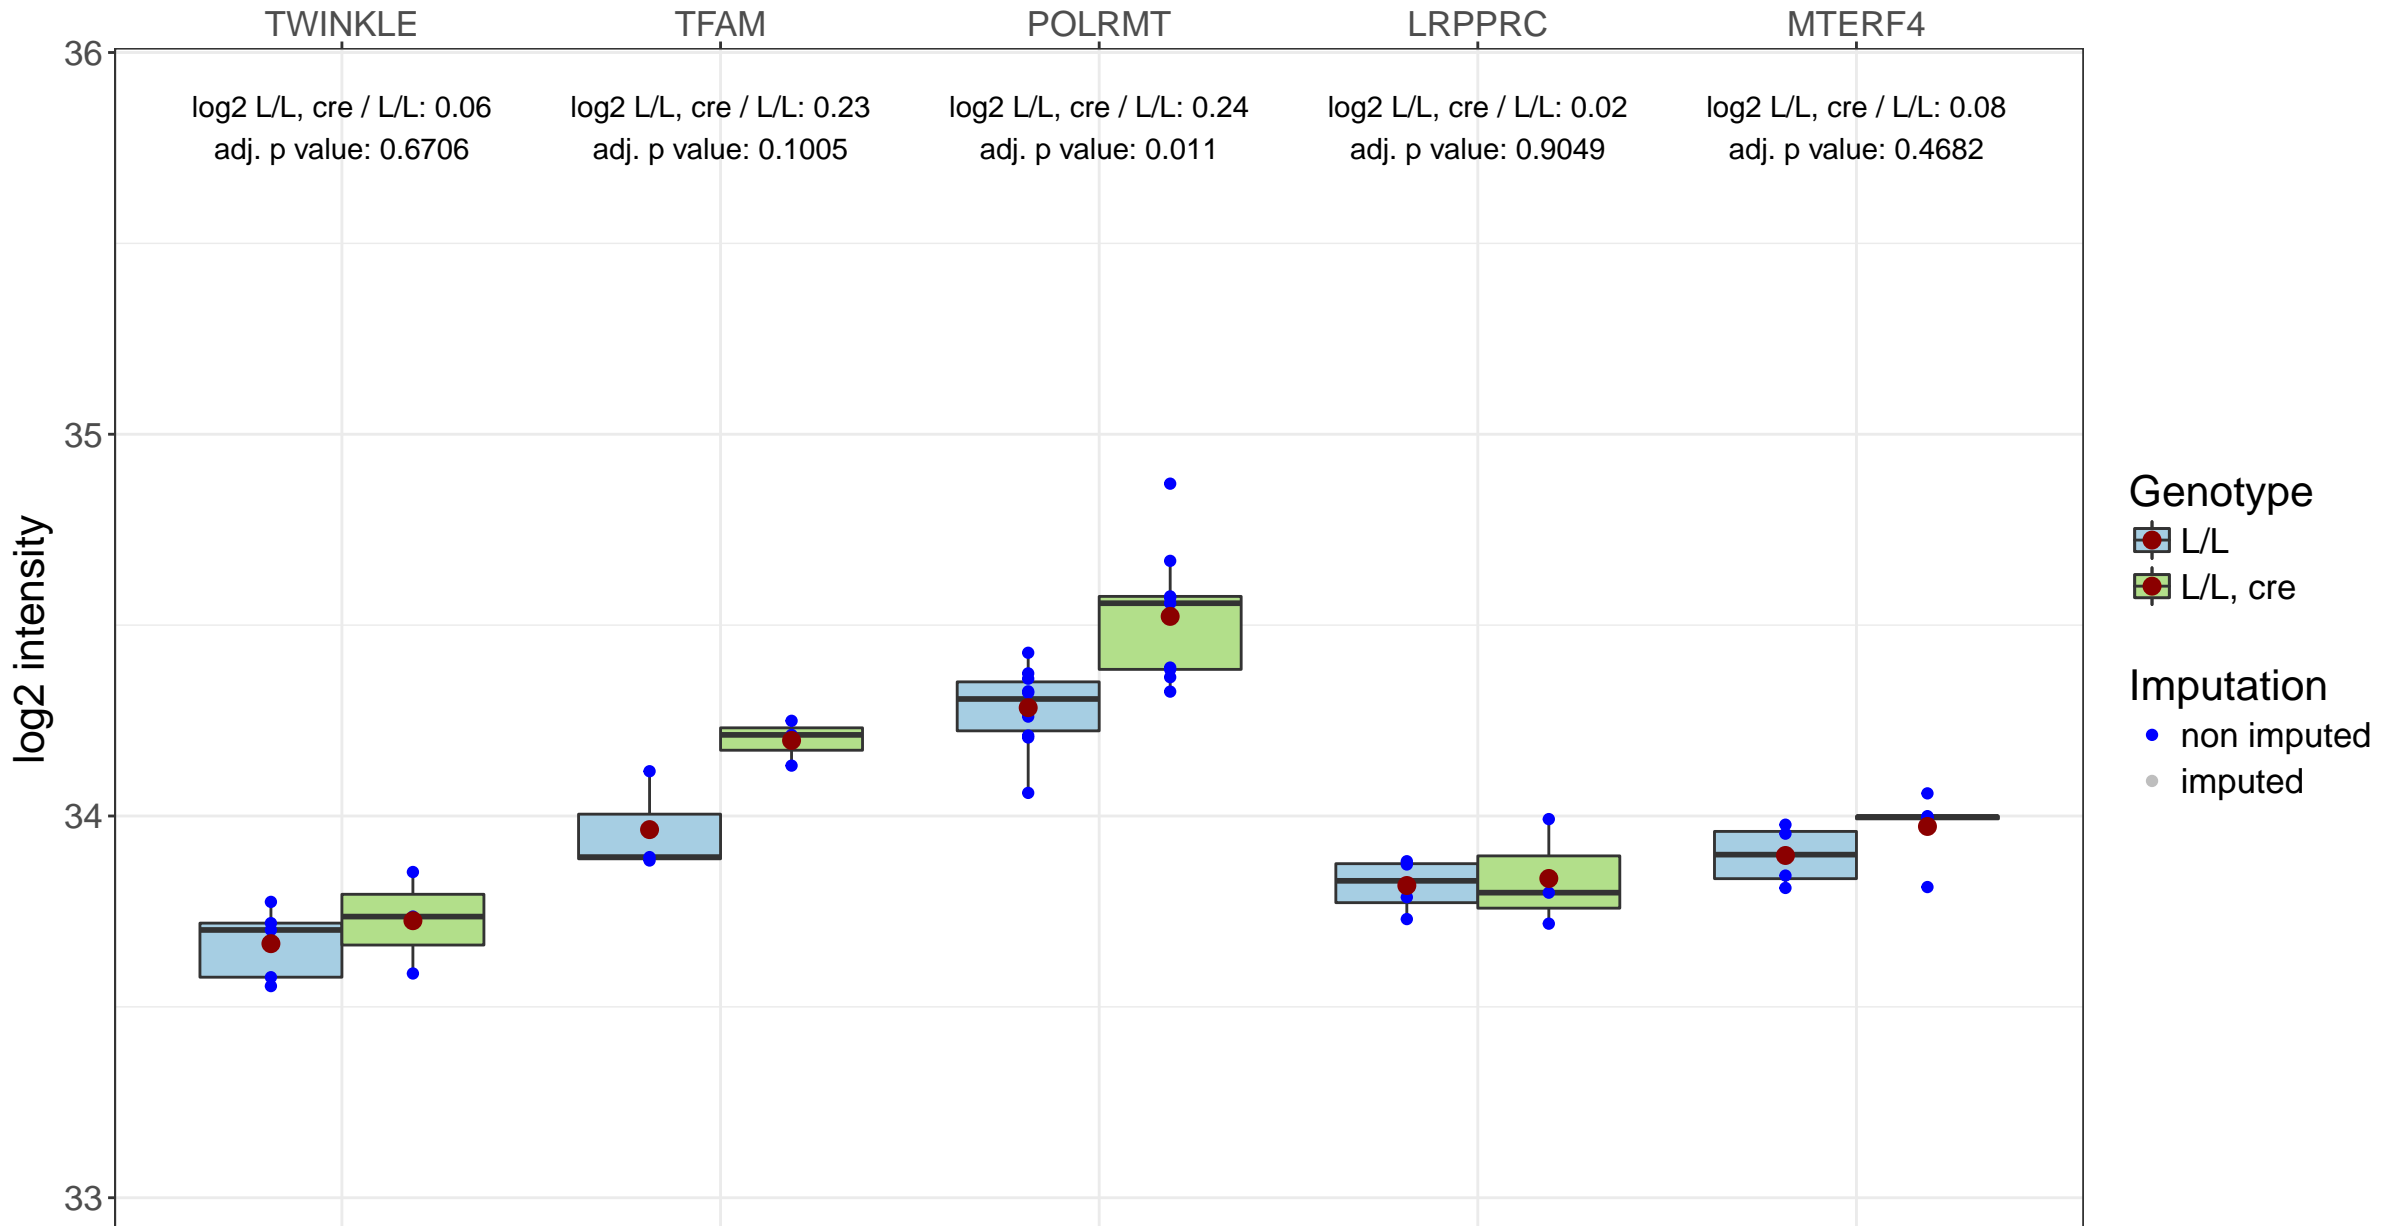

# HSP90AB1 / P11499

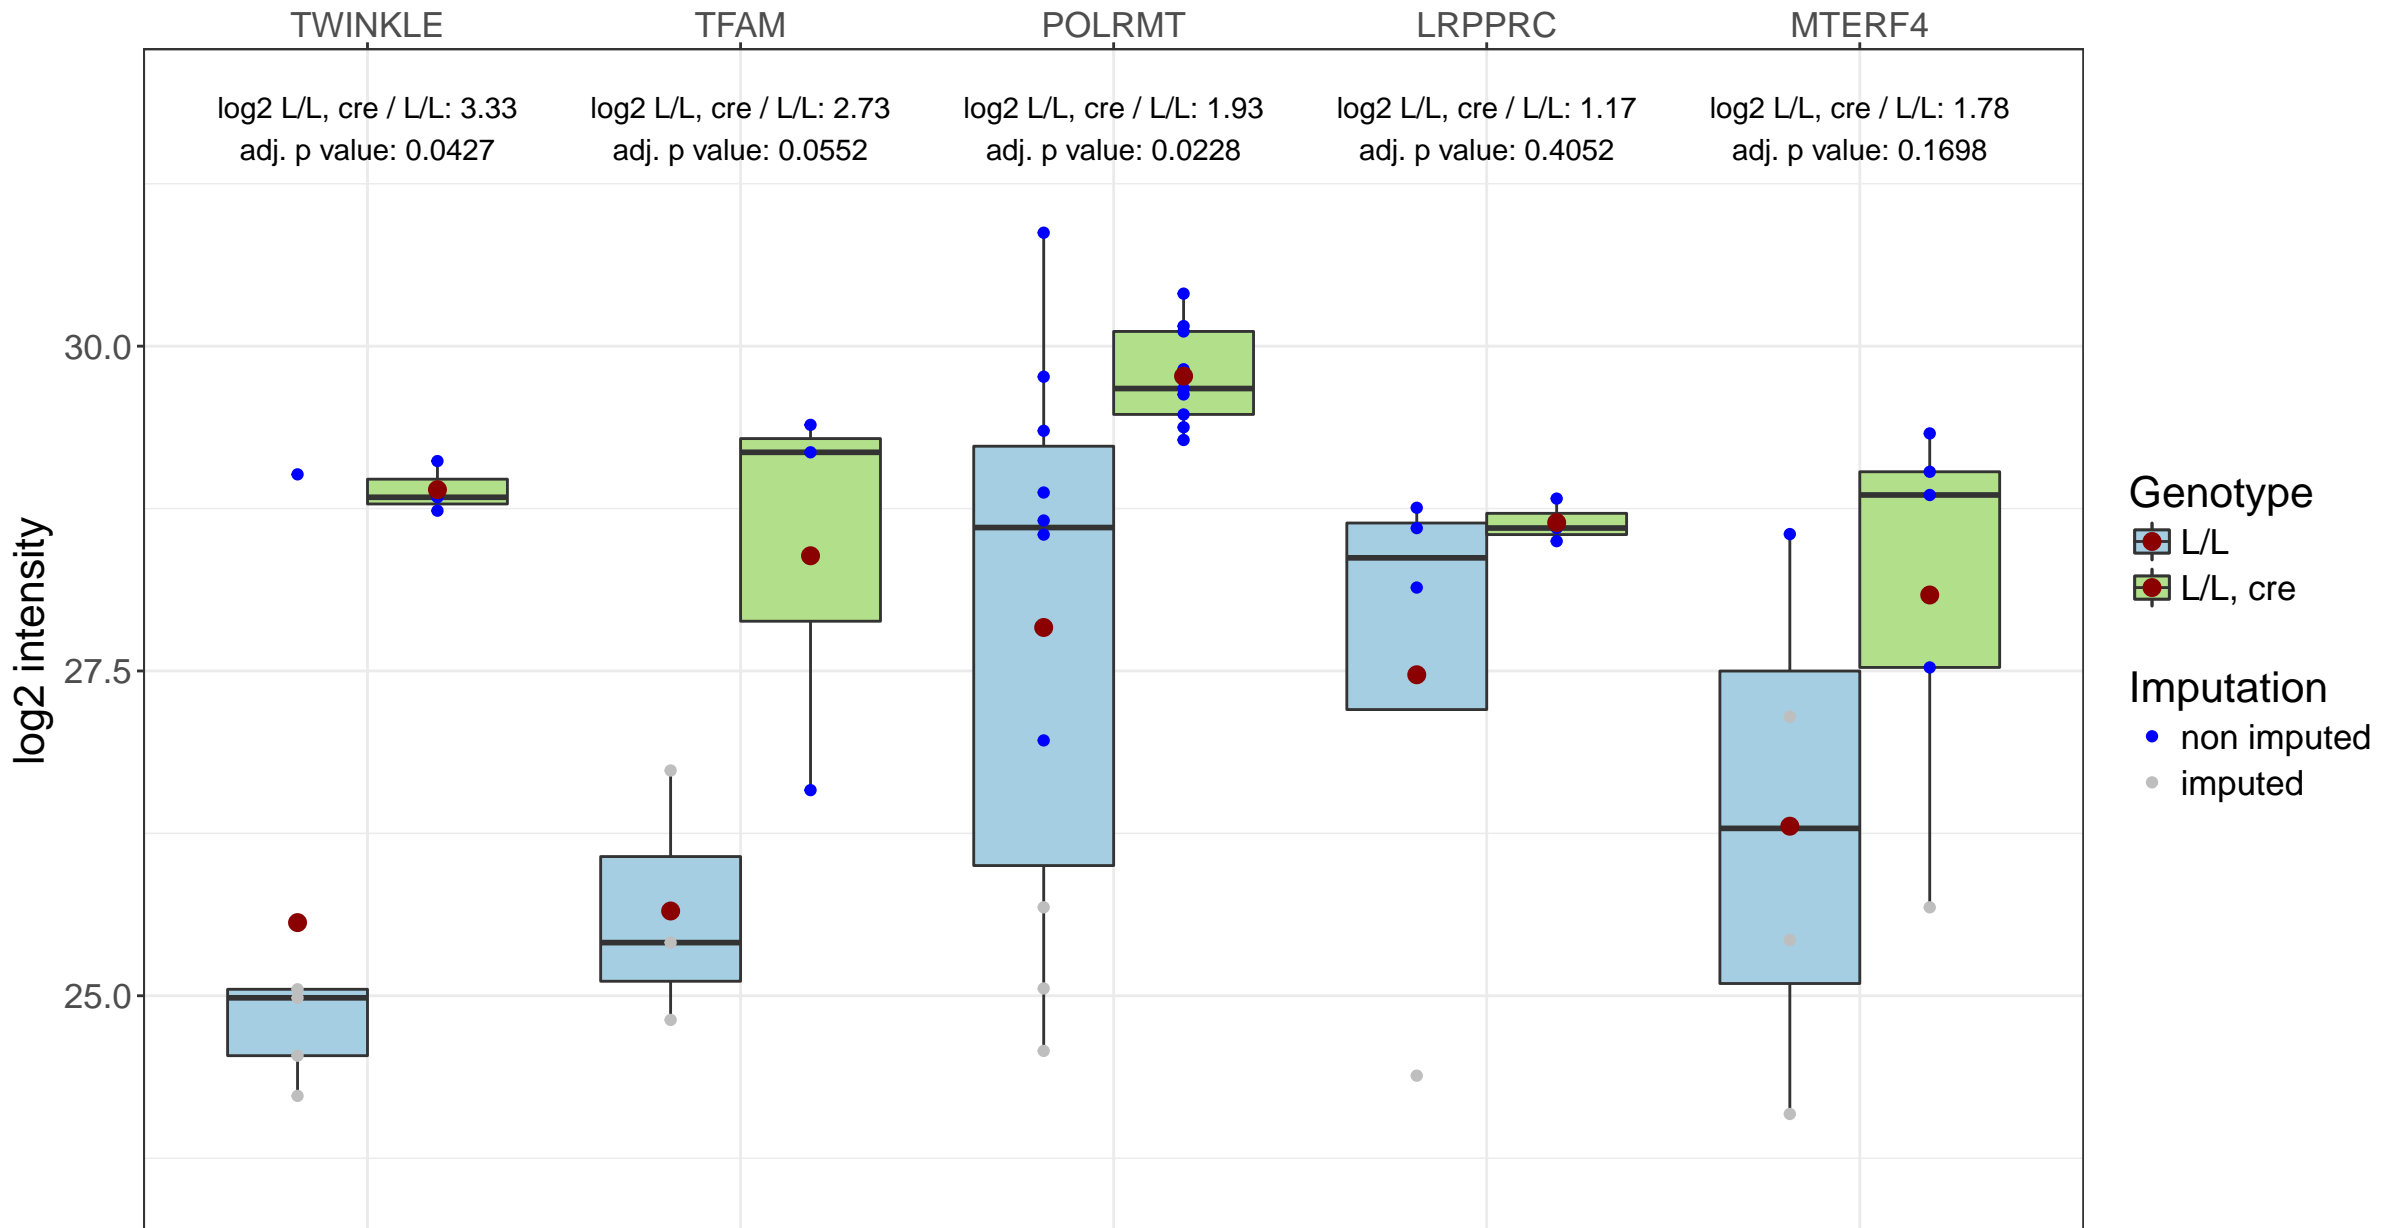

# HSP90B1 / P08113

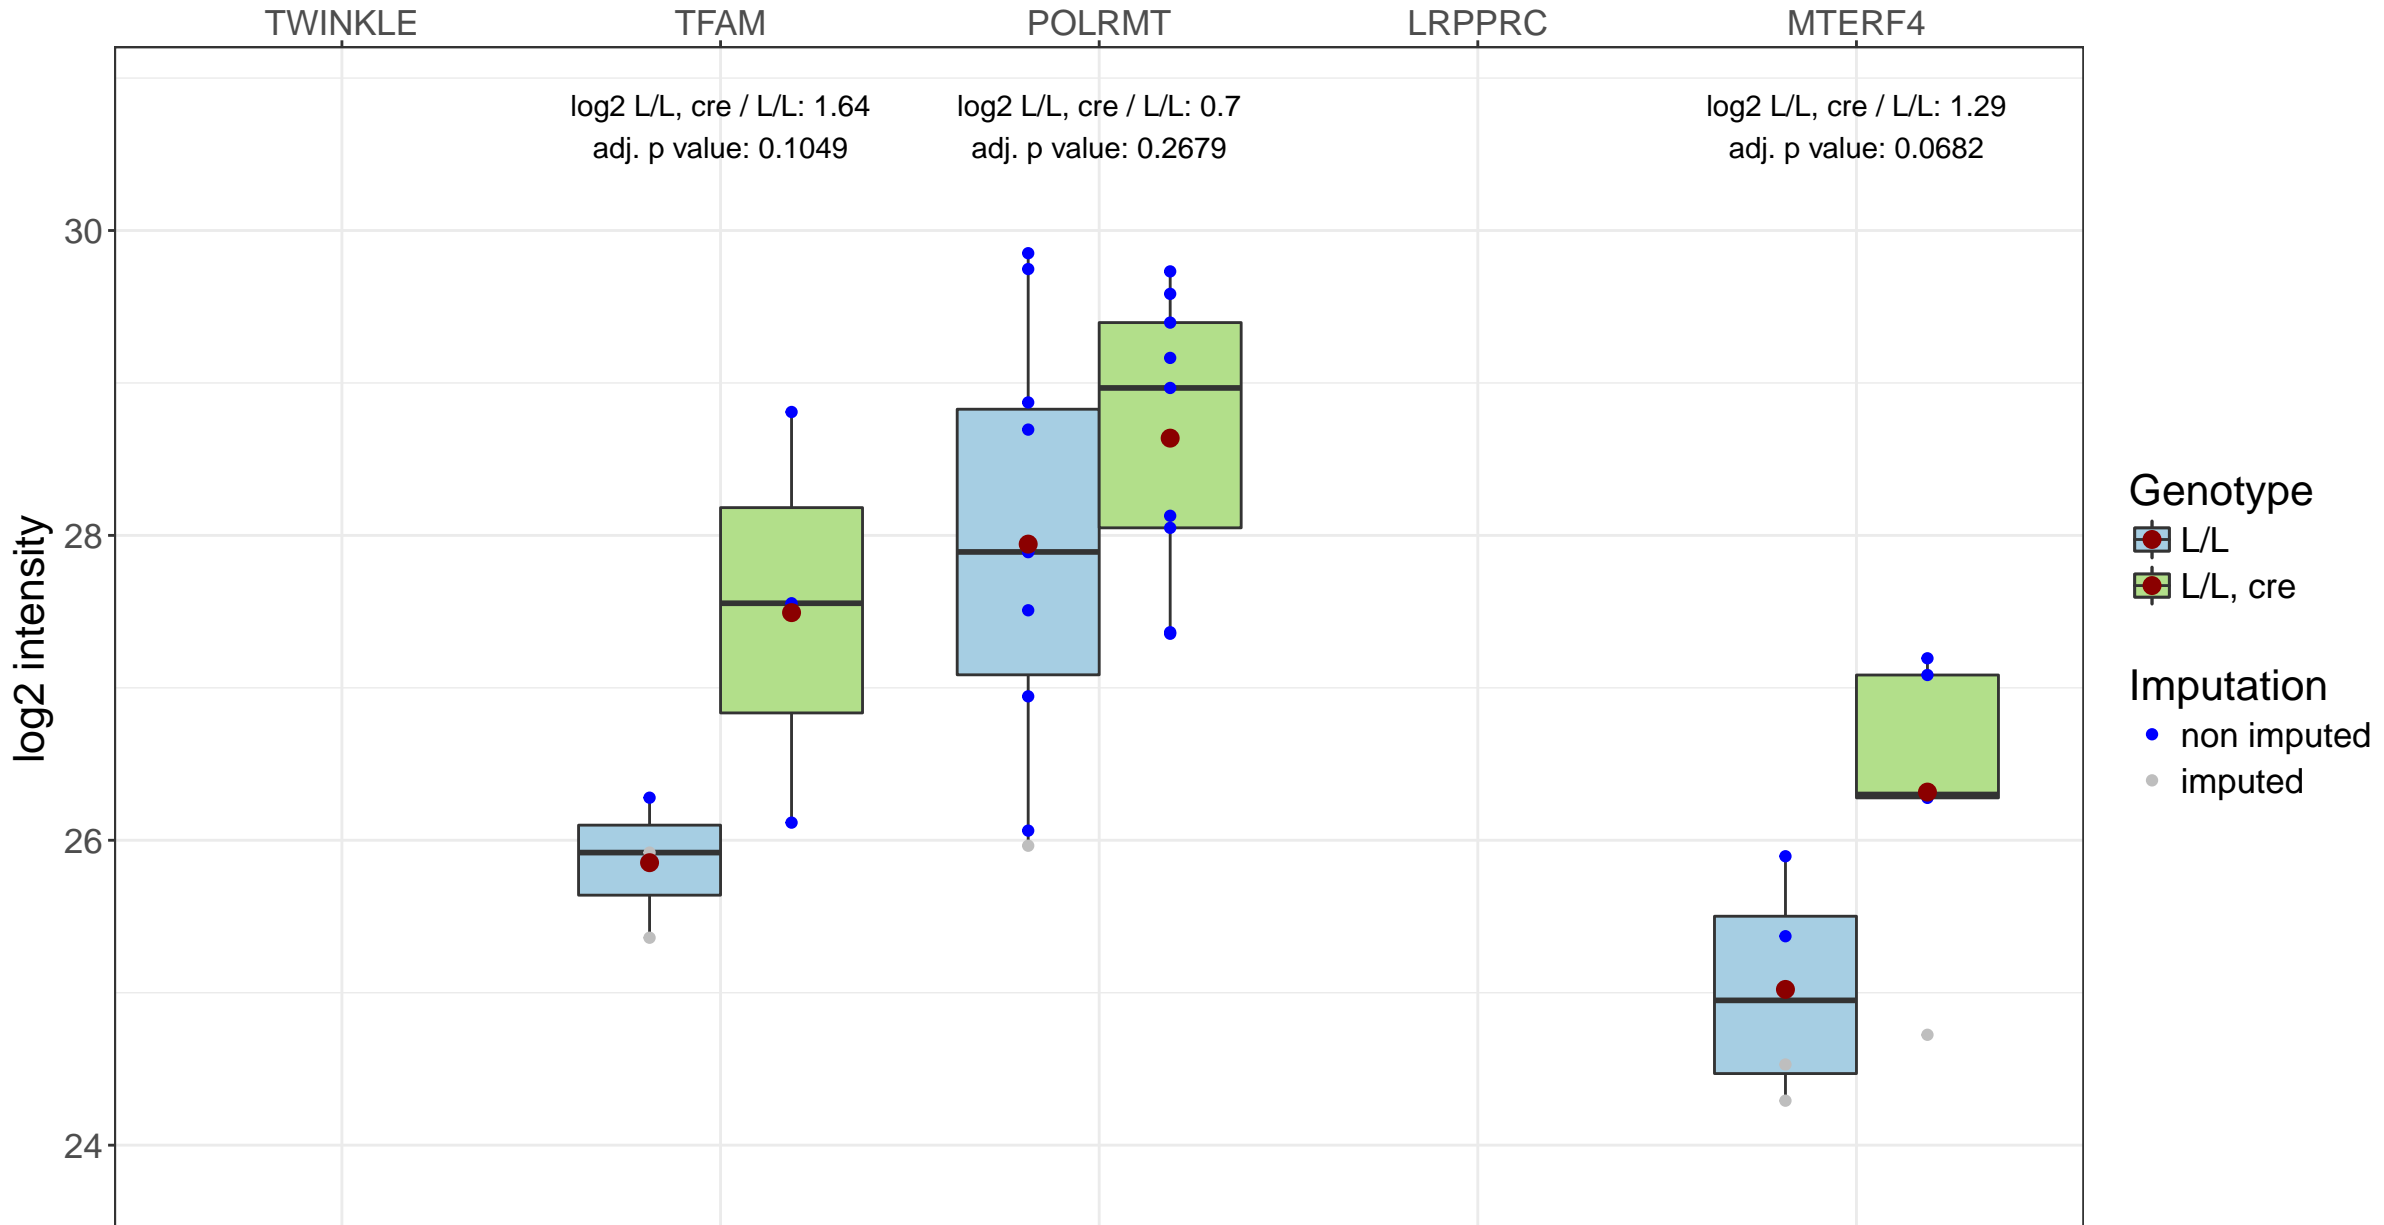

# HSPA5 / P20029

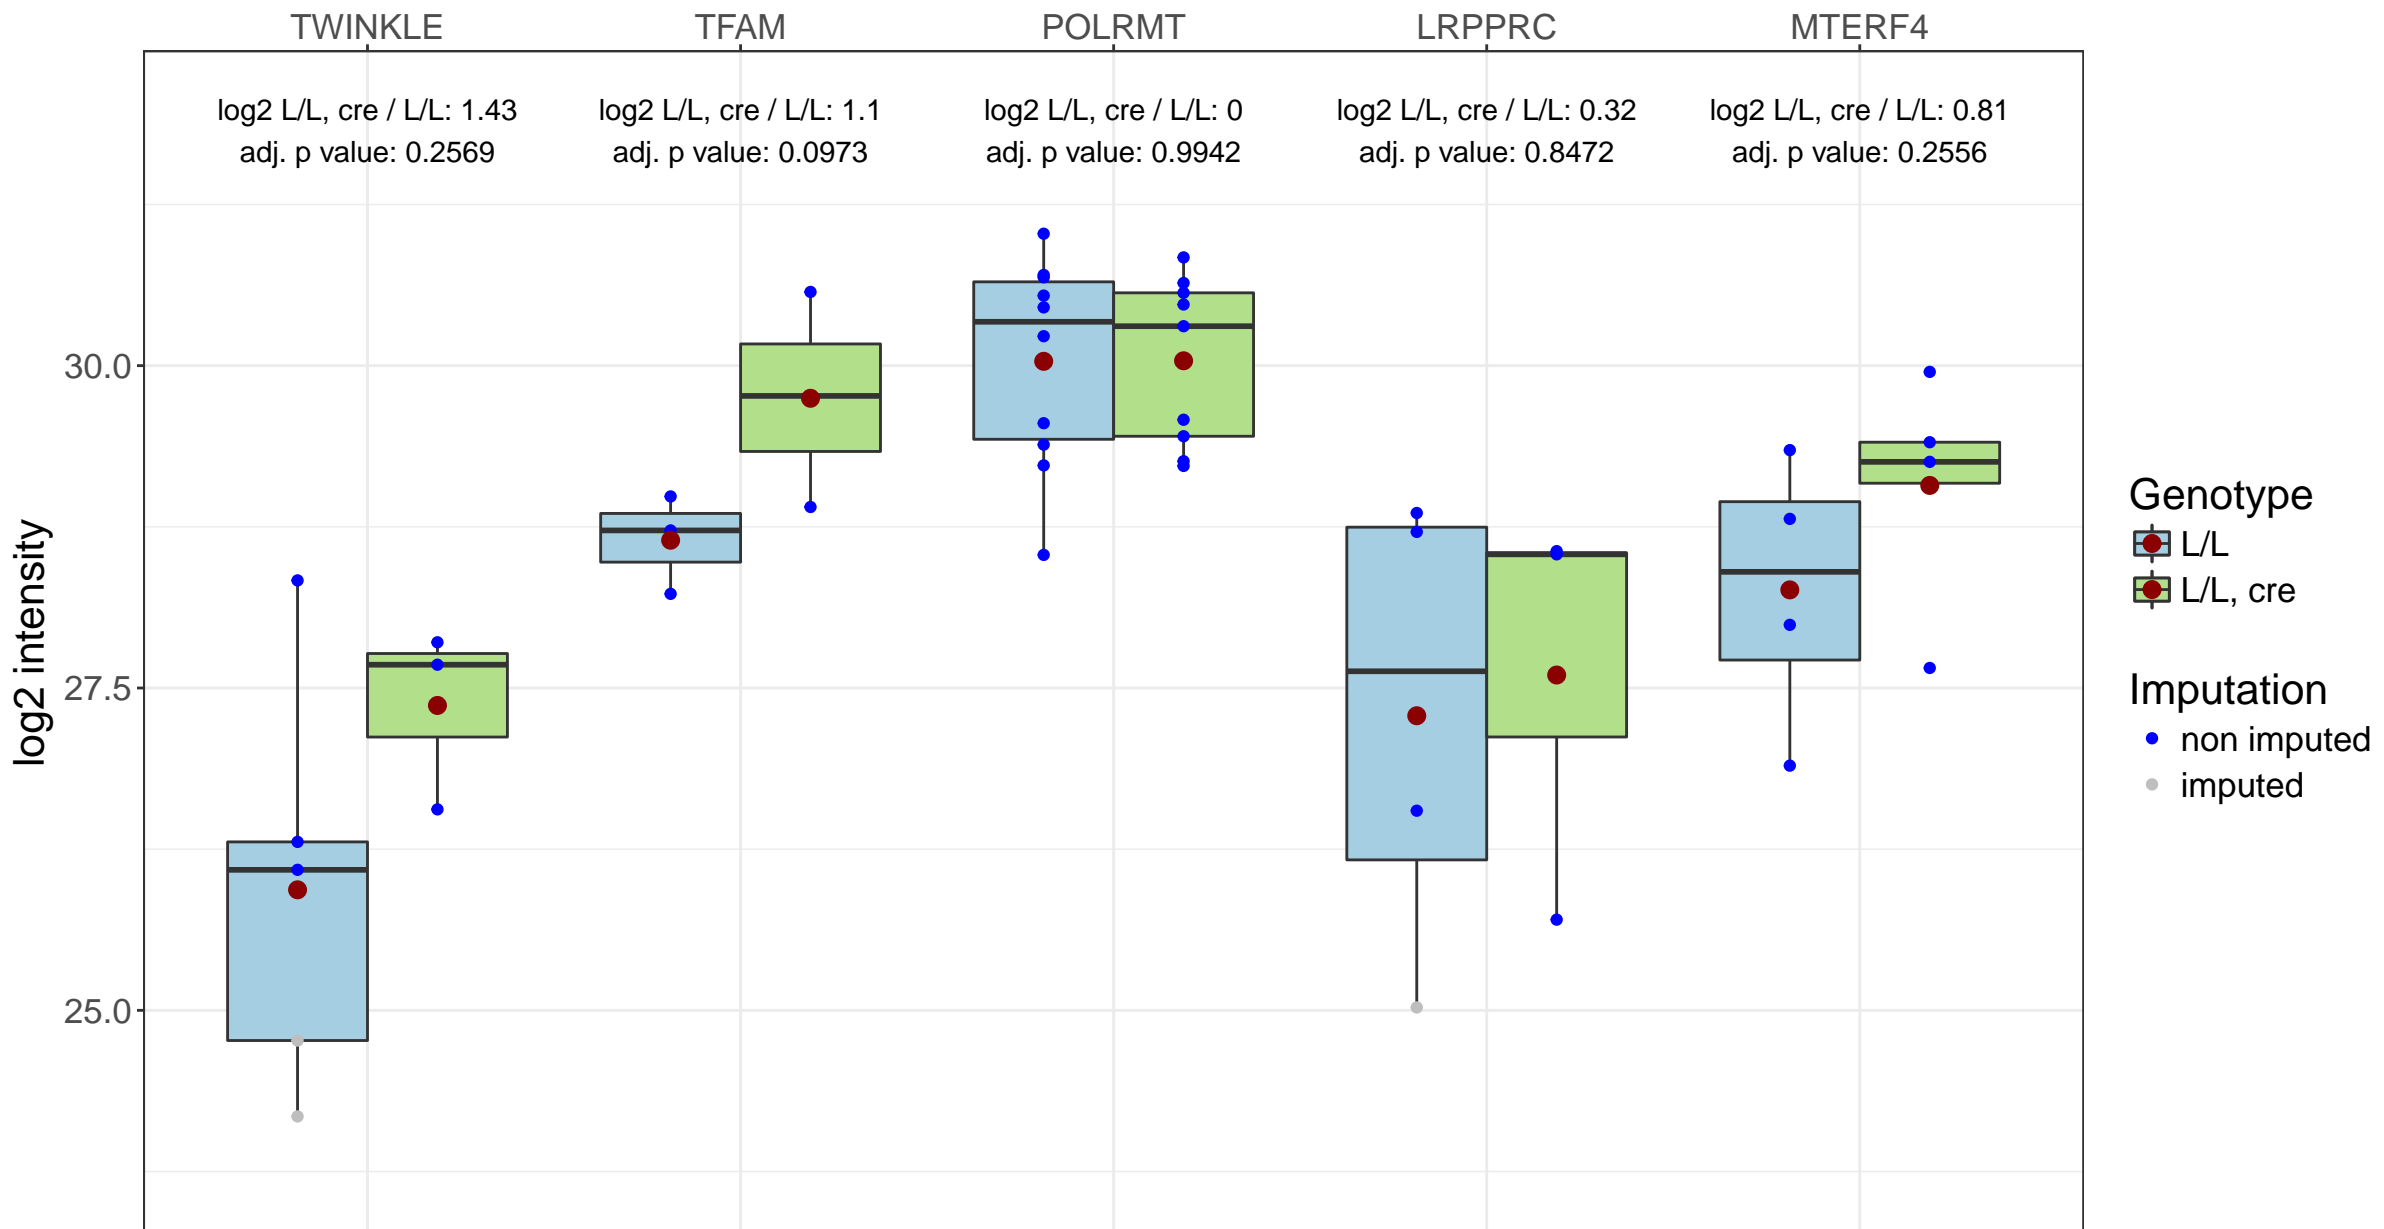

# HSPA8 / P63017

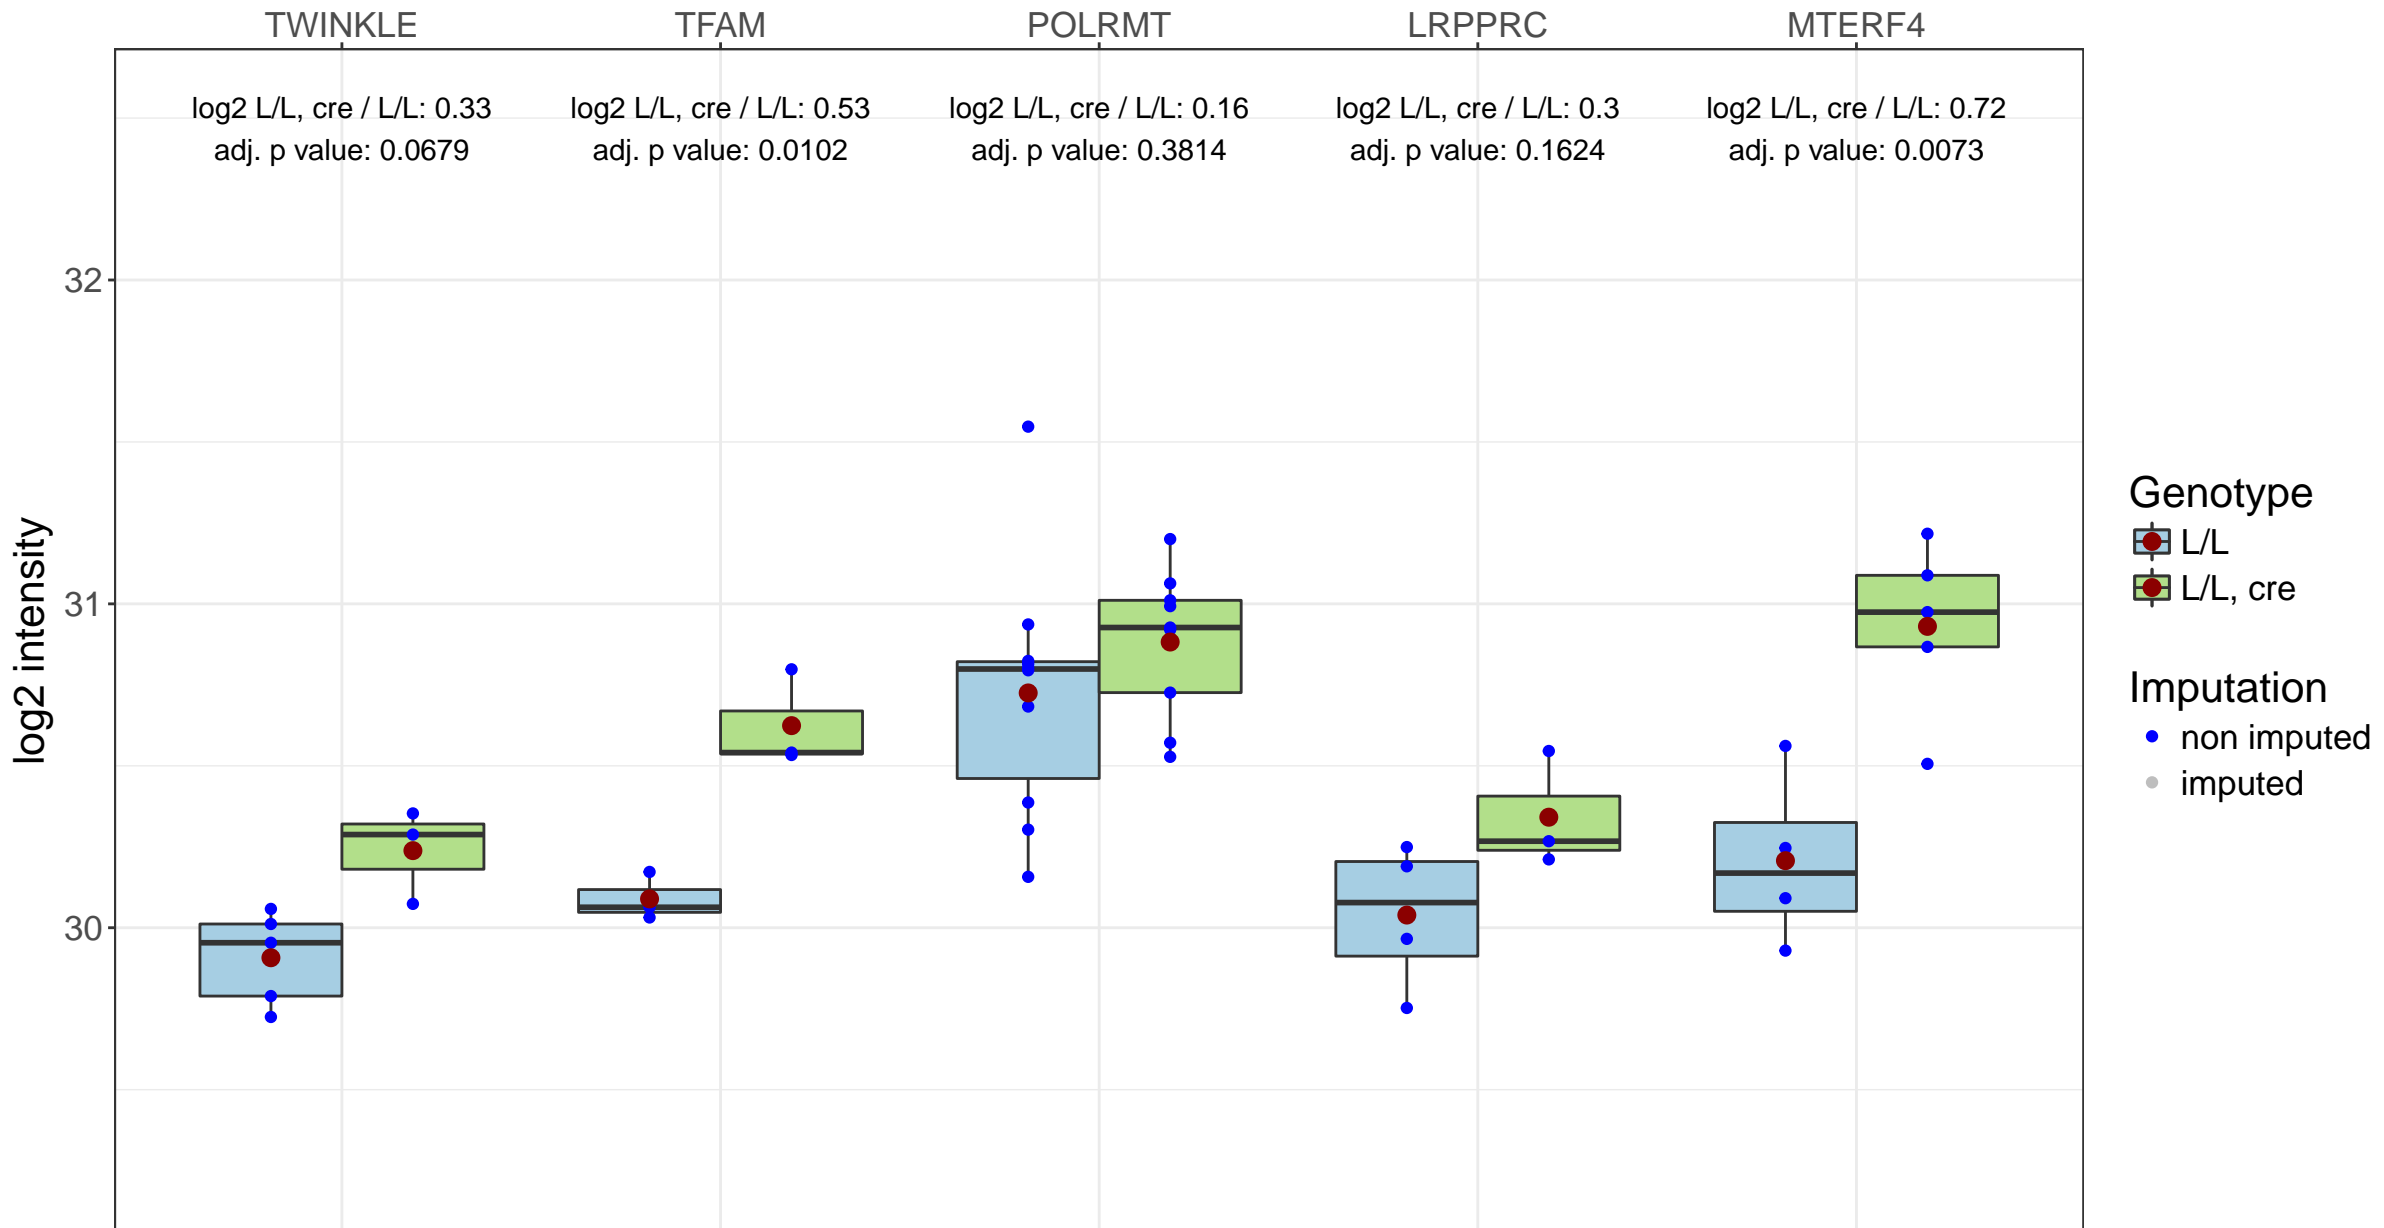

# HSPA9 / P38647

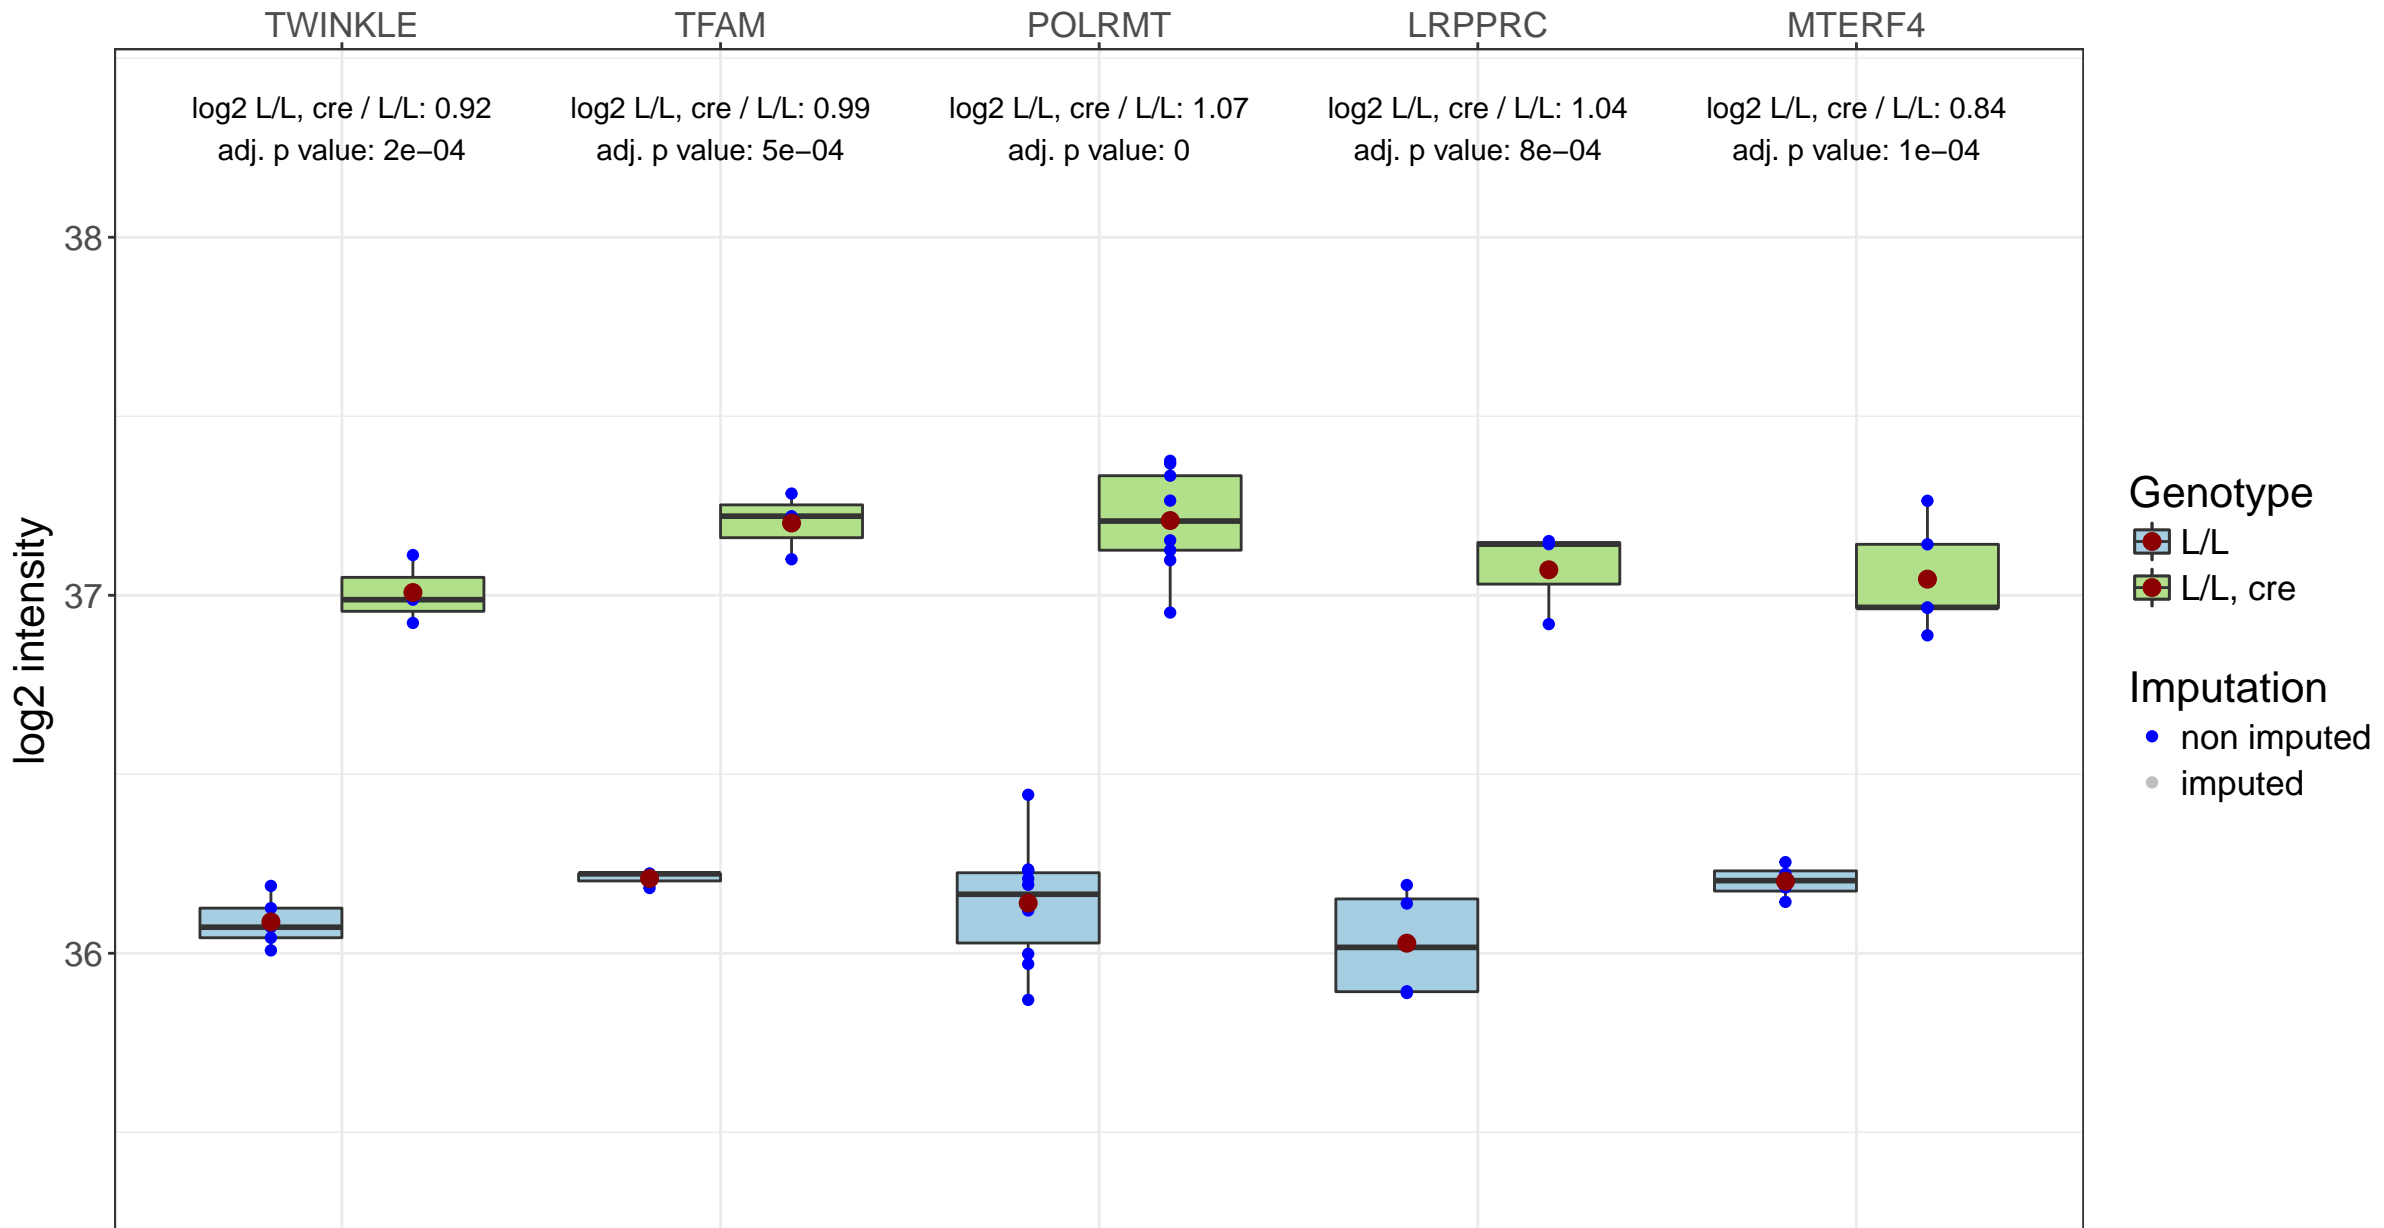

# HSPB1 / P14602

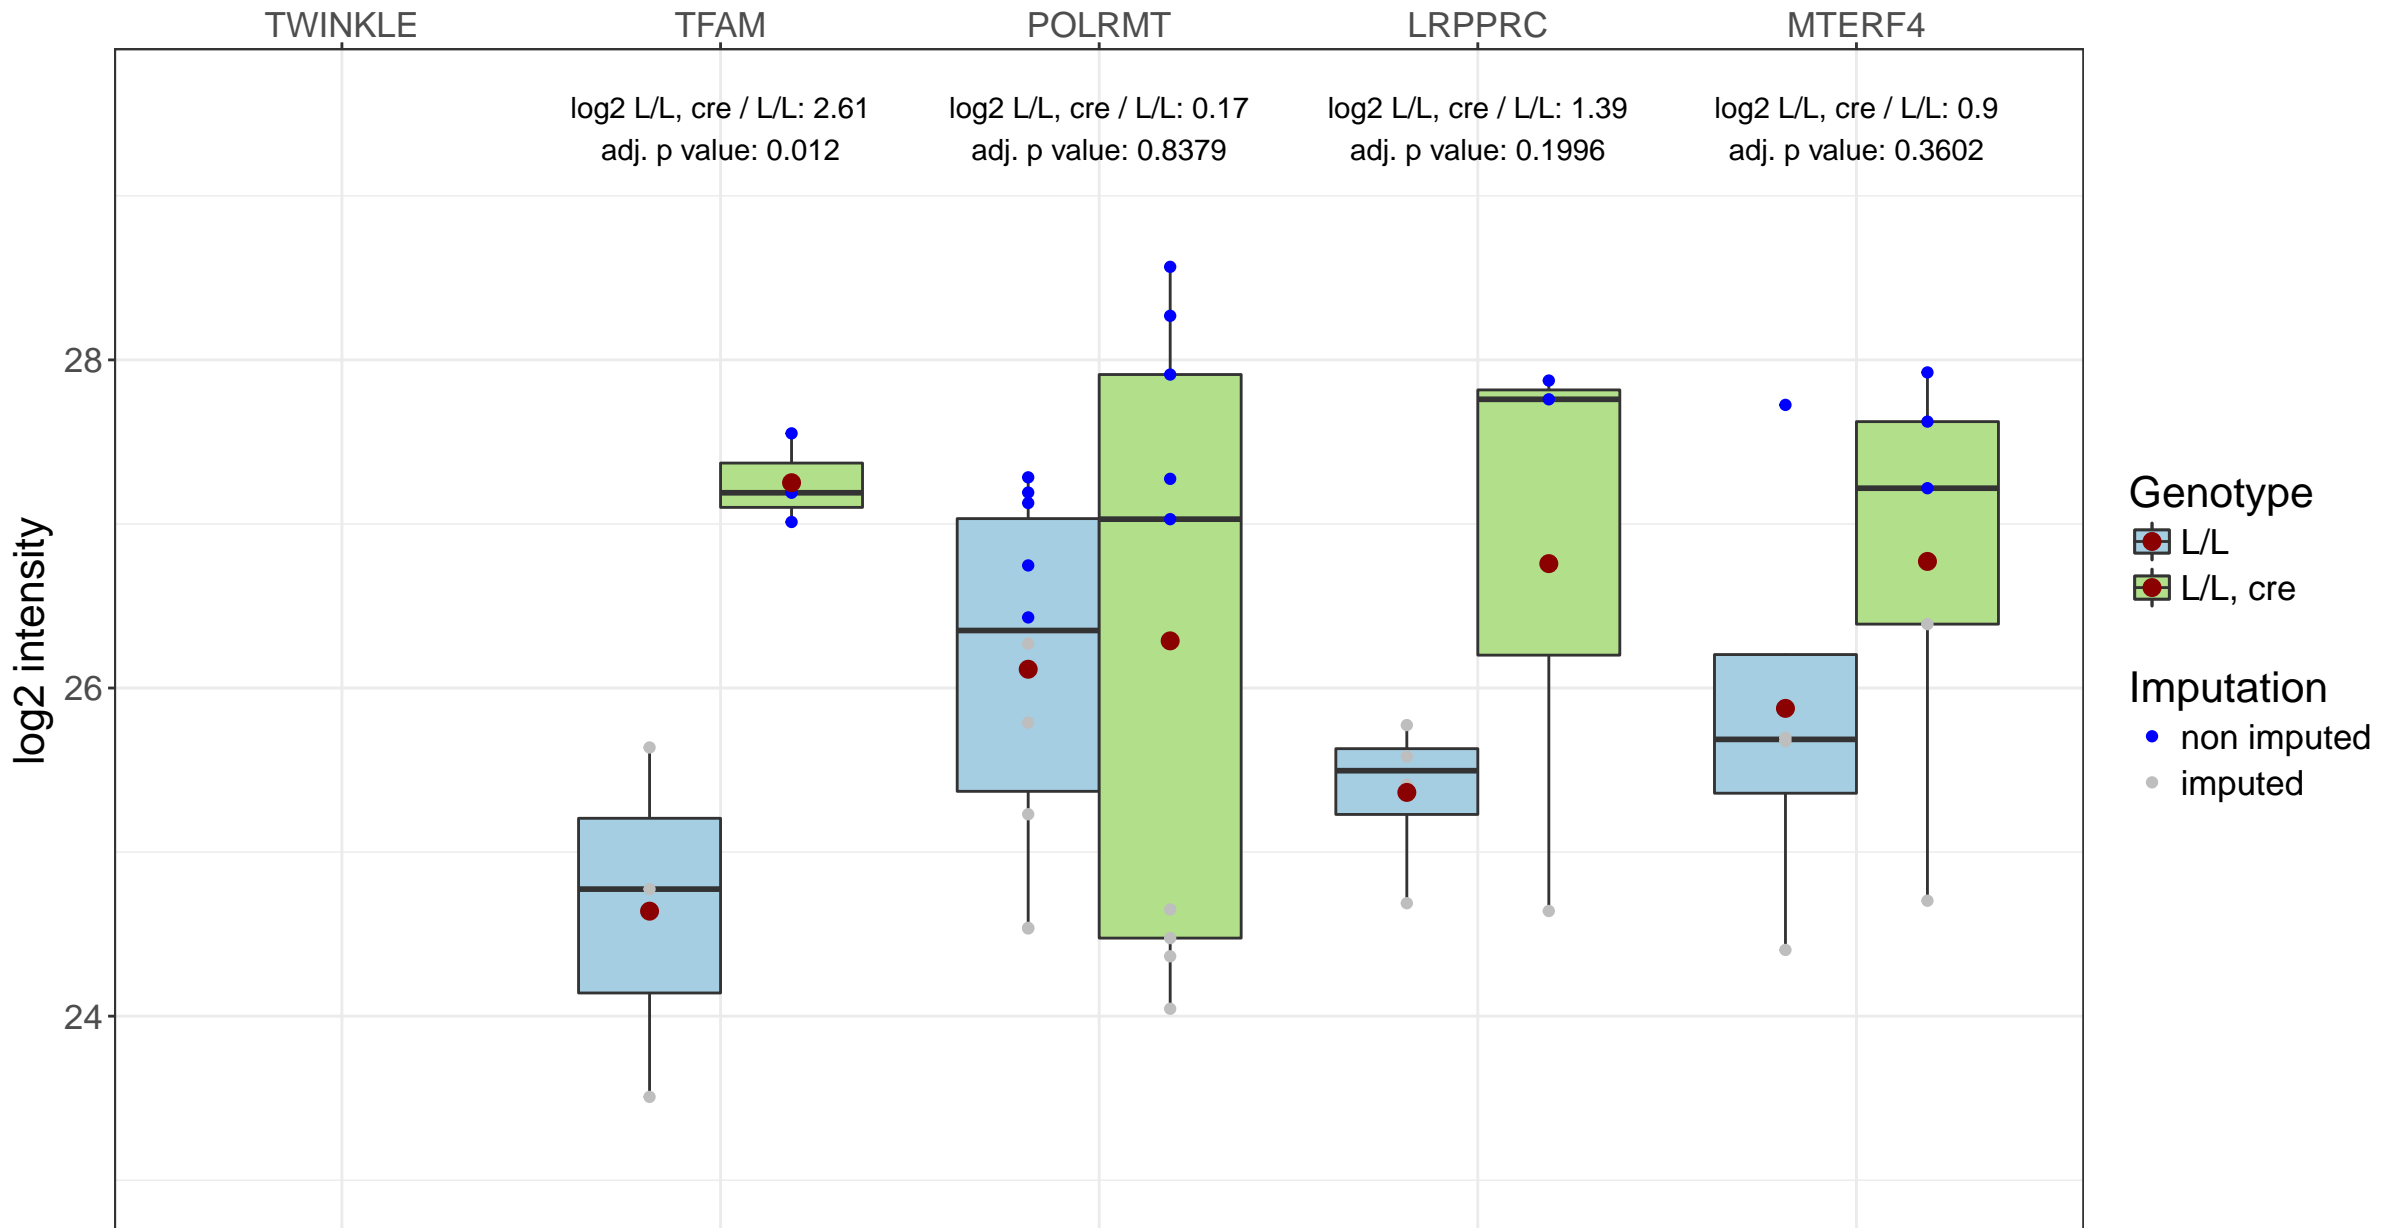

# HSPD1 / P63038

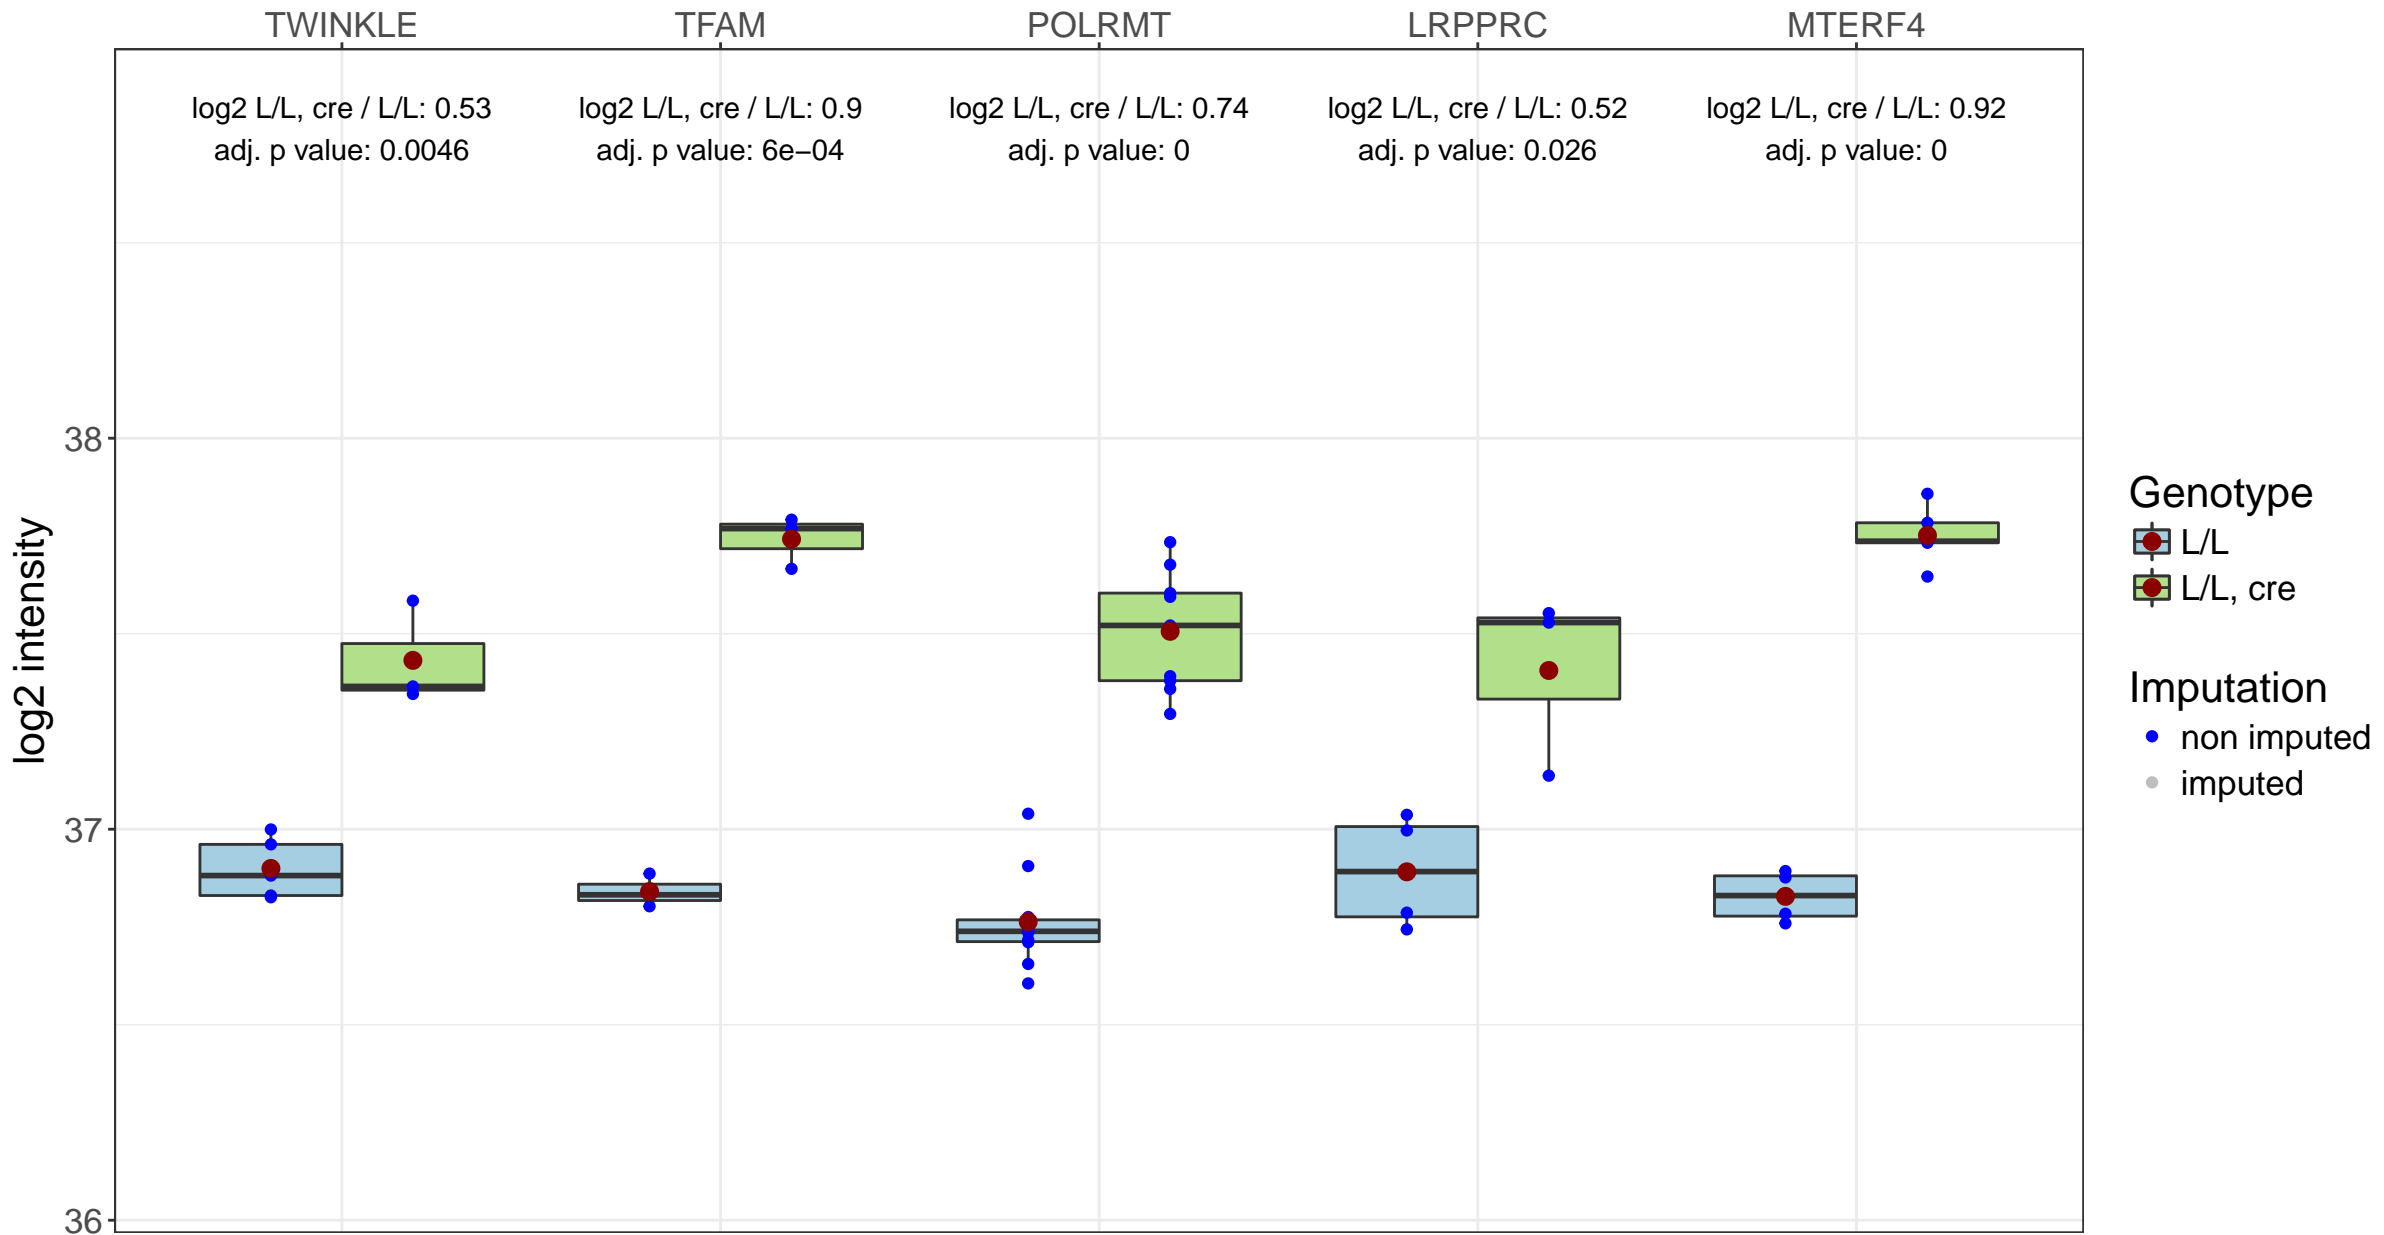



# HSPE1 / Q64433

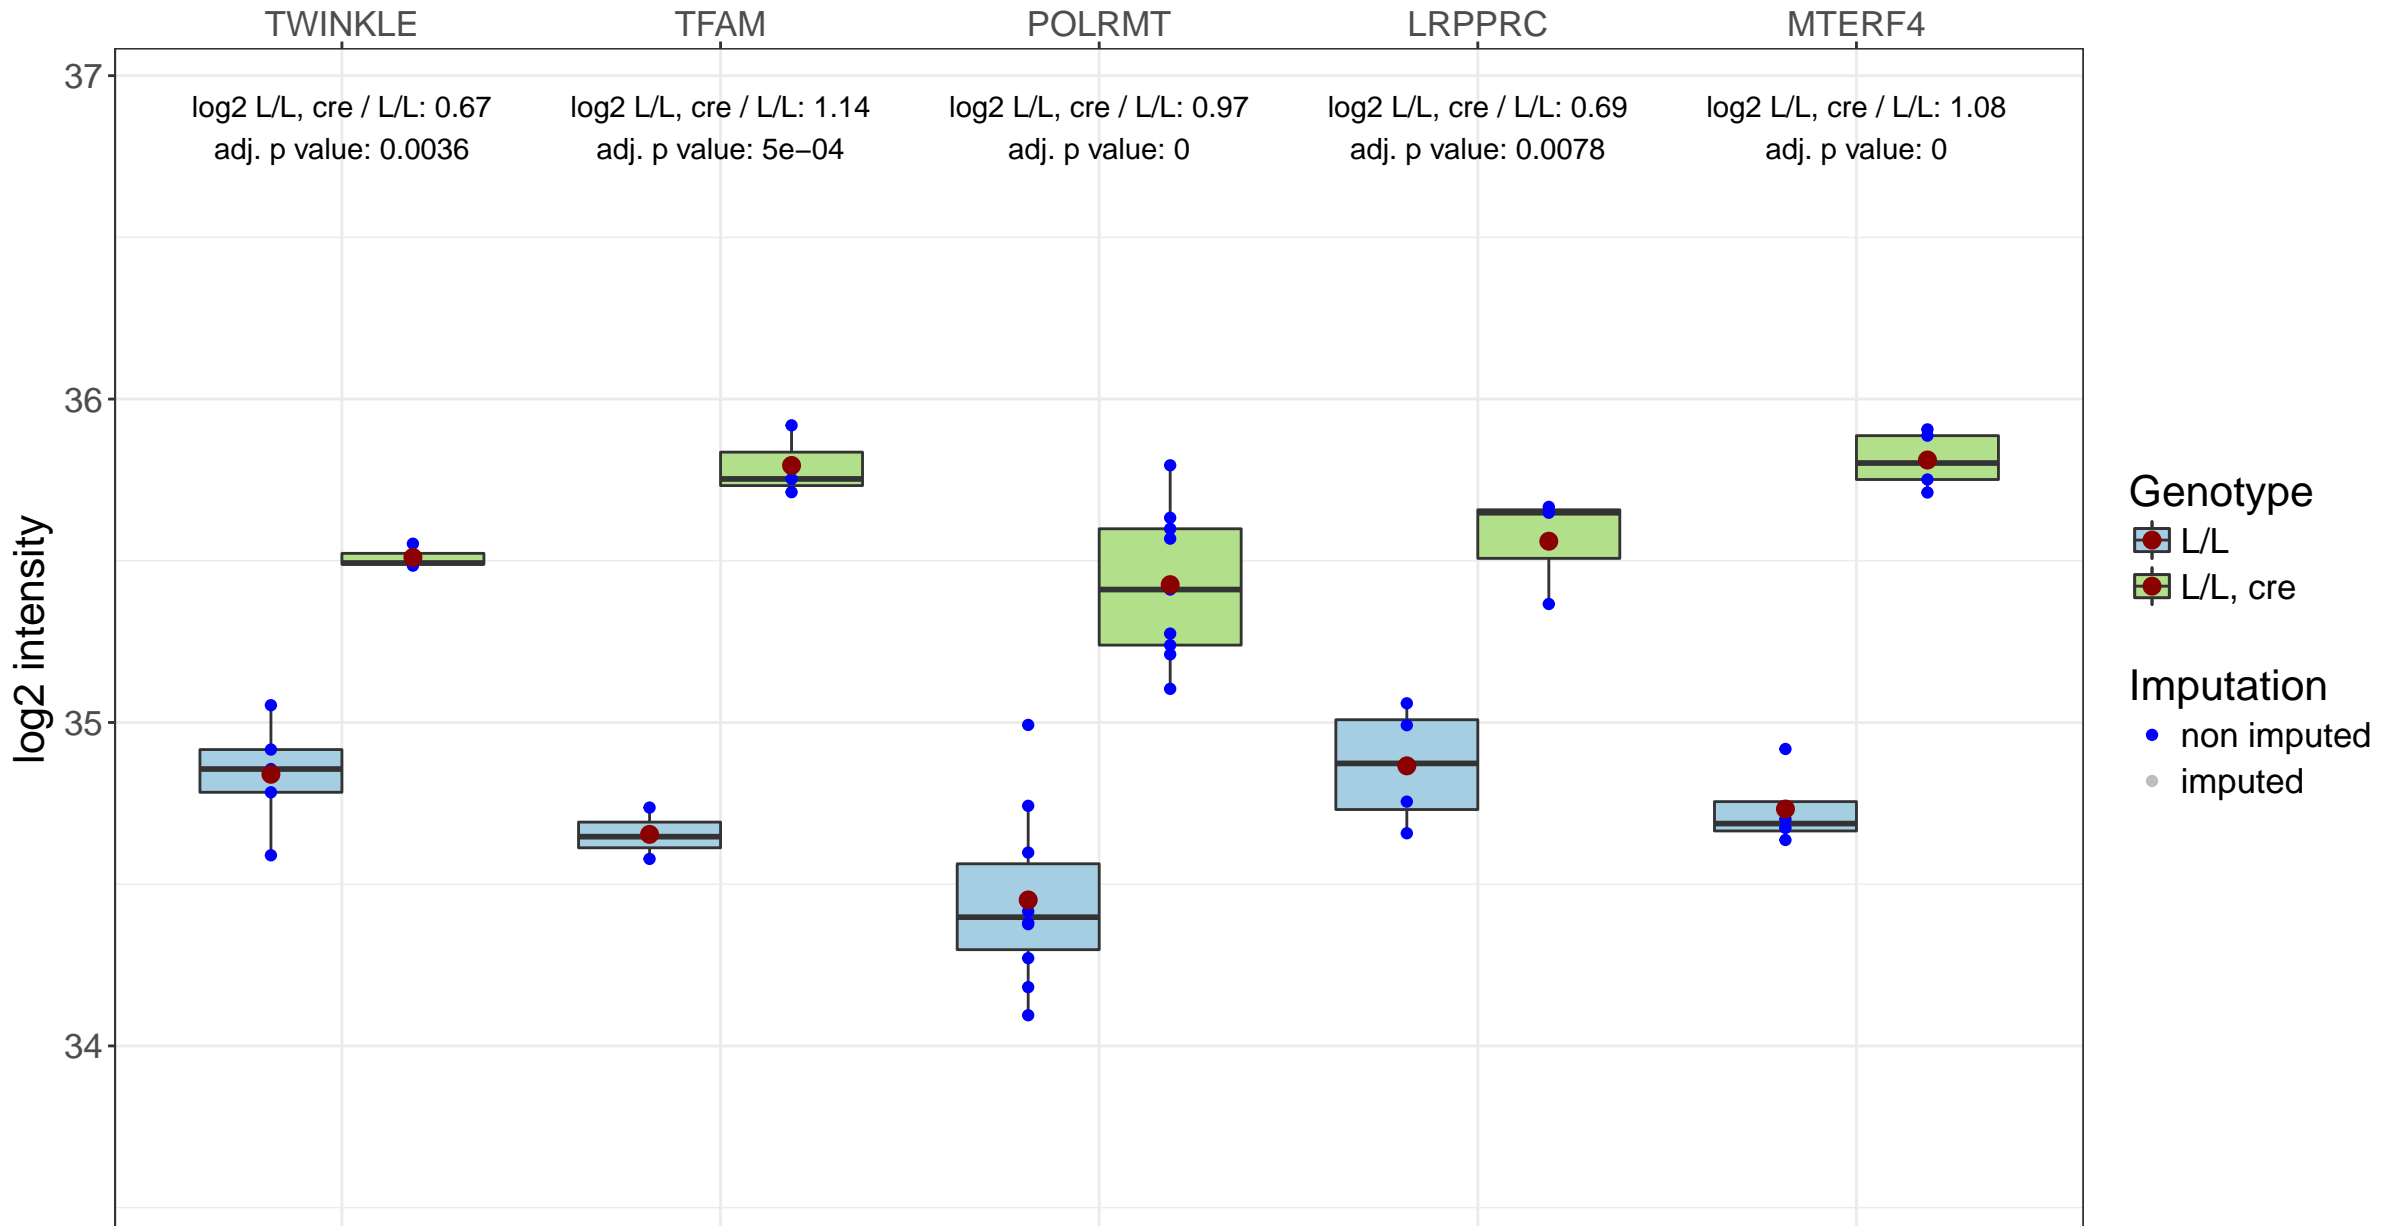

# HSPG2 / E9PZ16

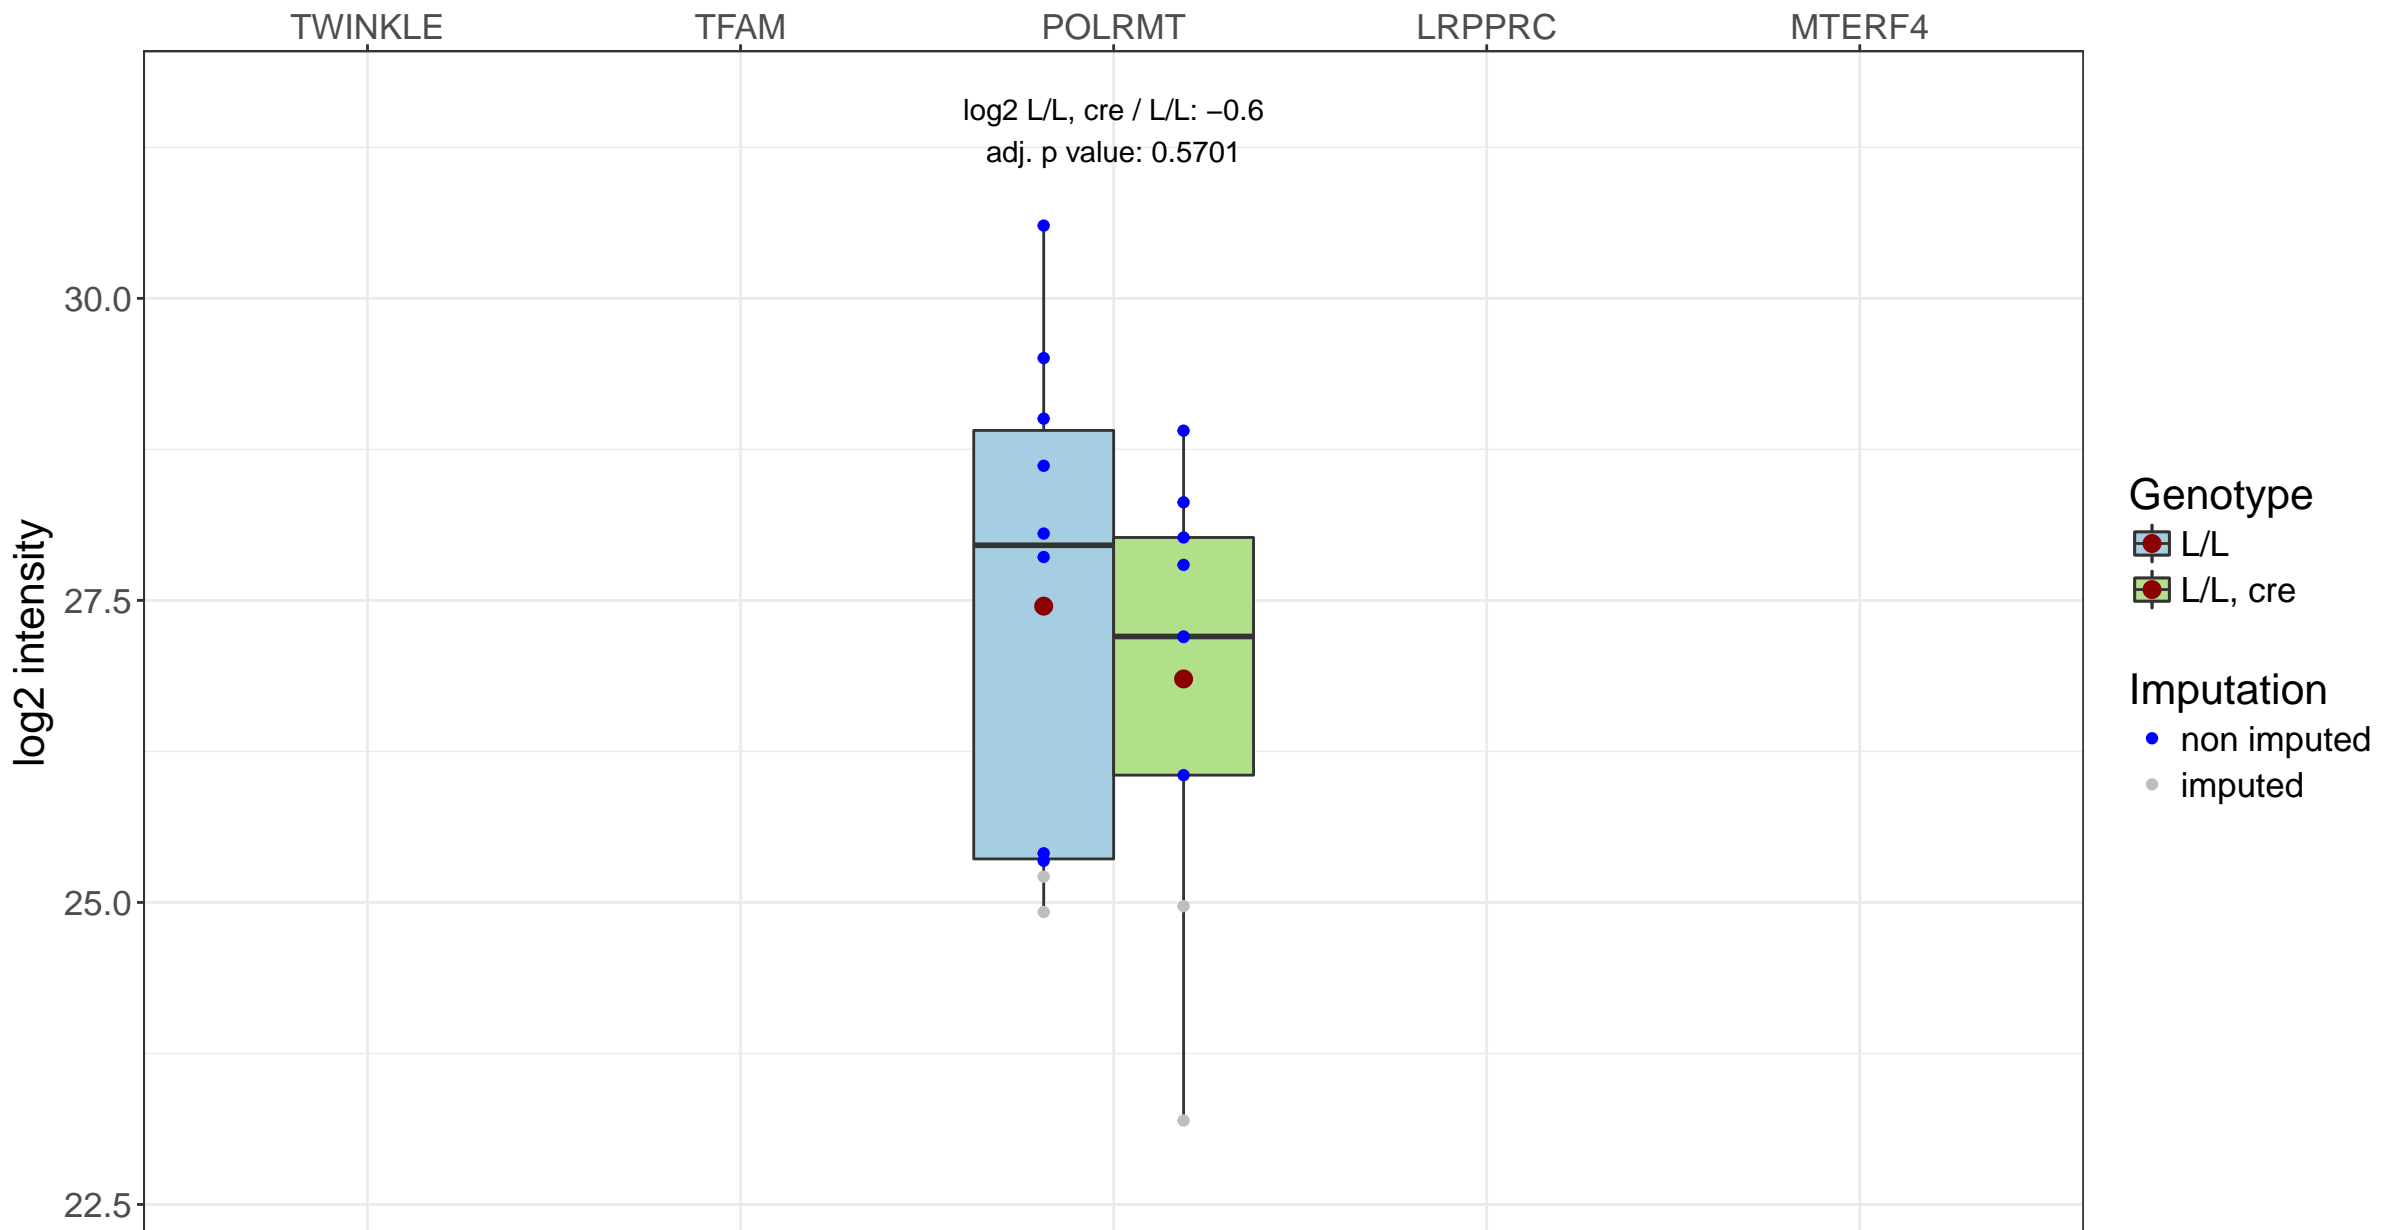

# HTATIP2 / Q9Z2G9

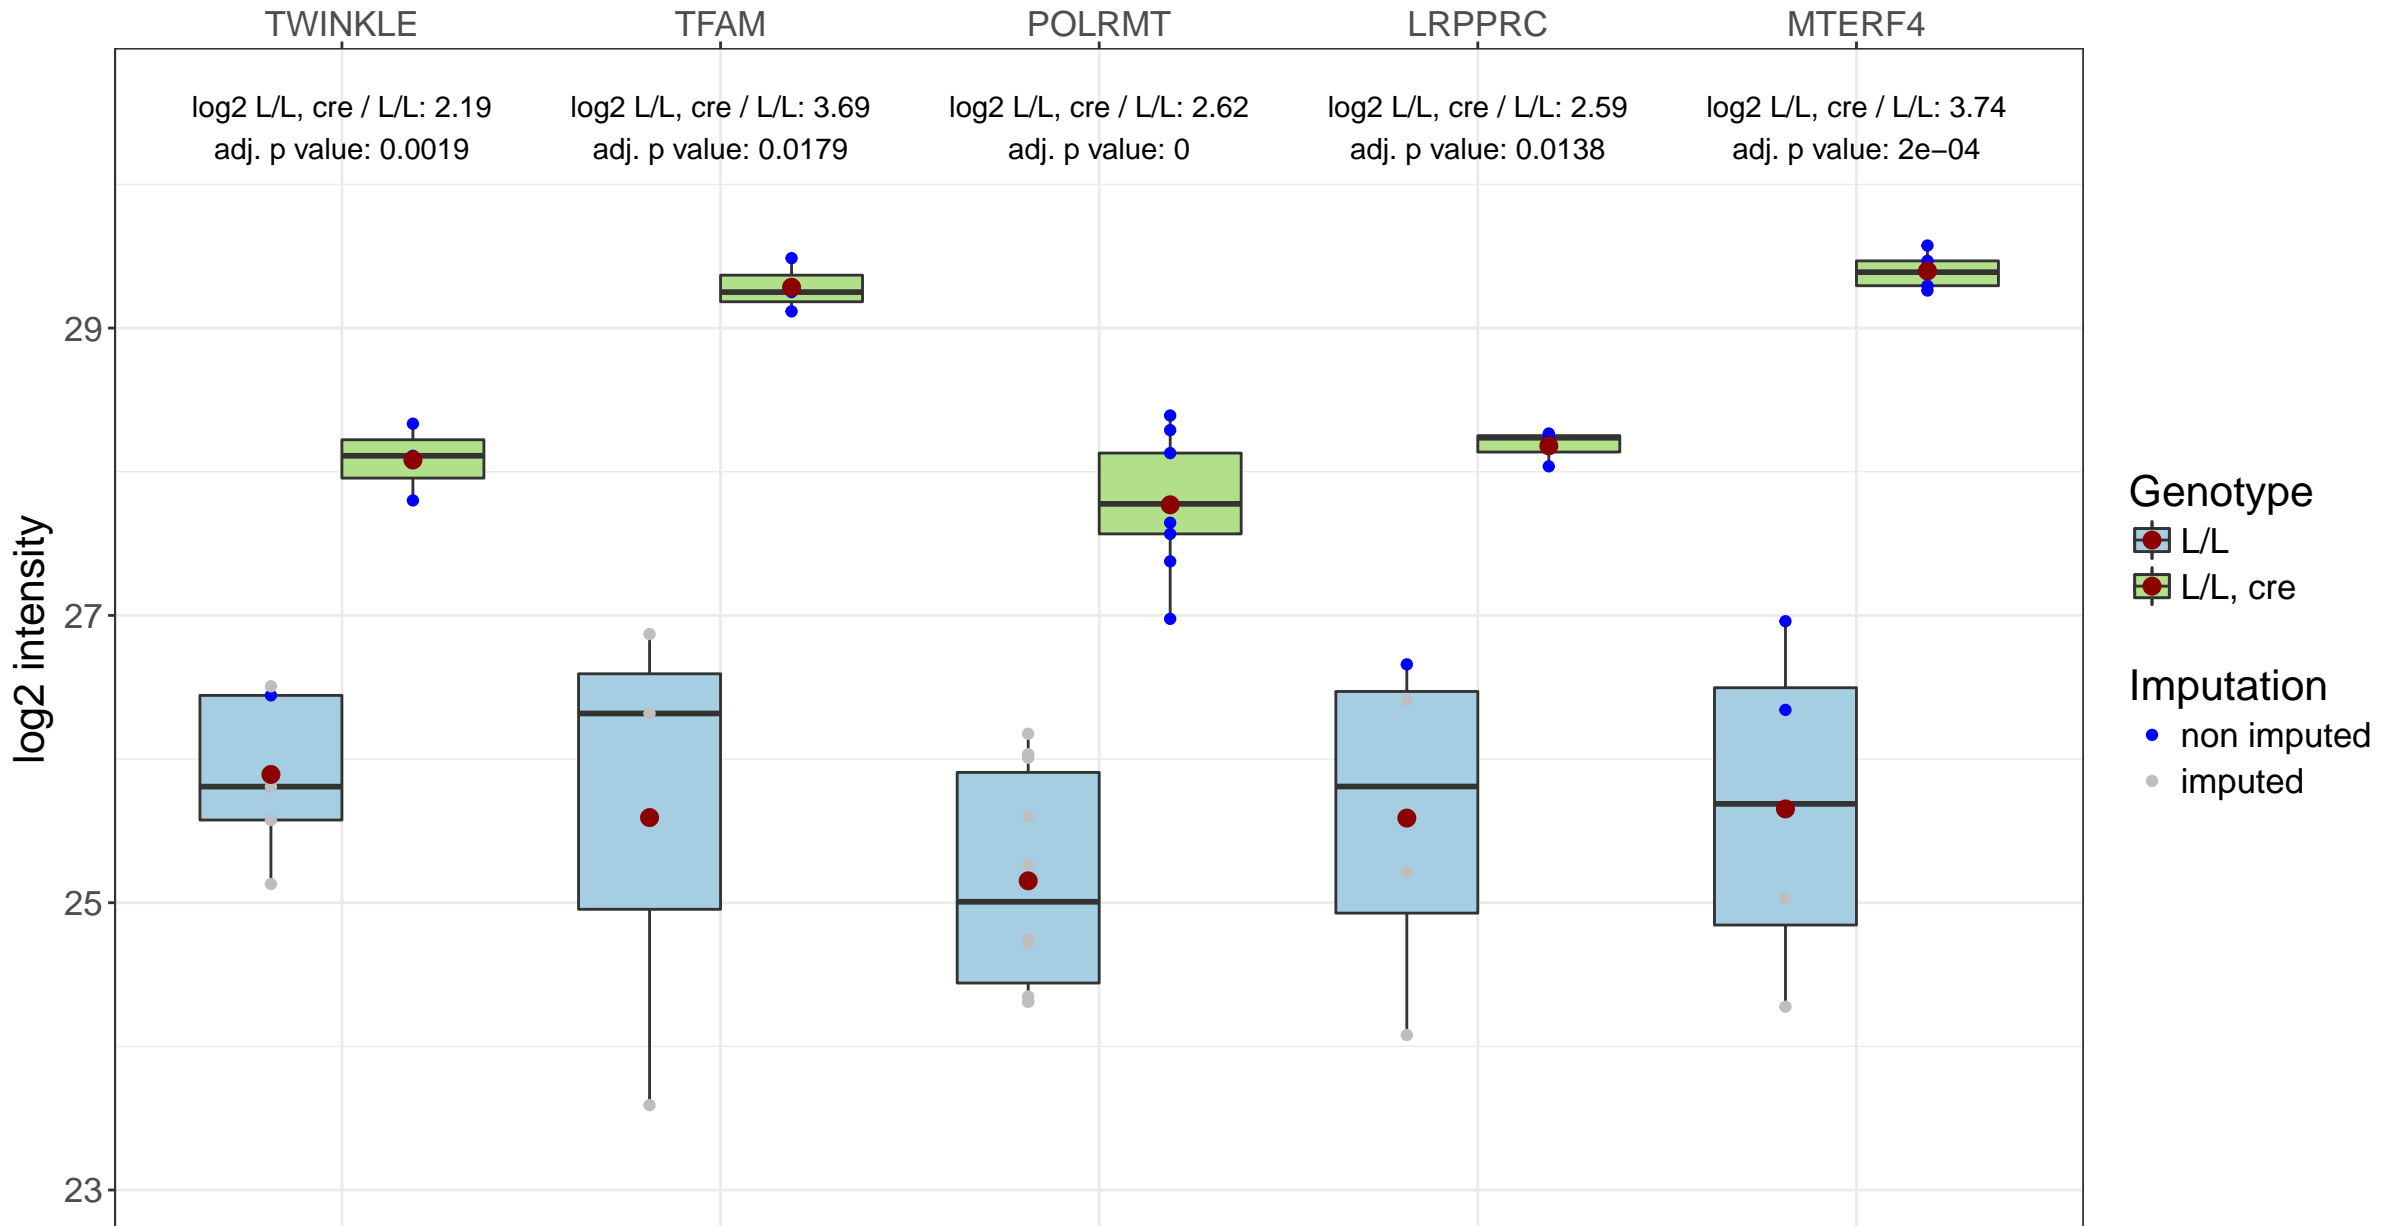

# HTRA2 / Q9JIY5

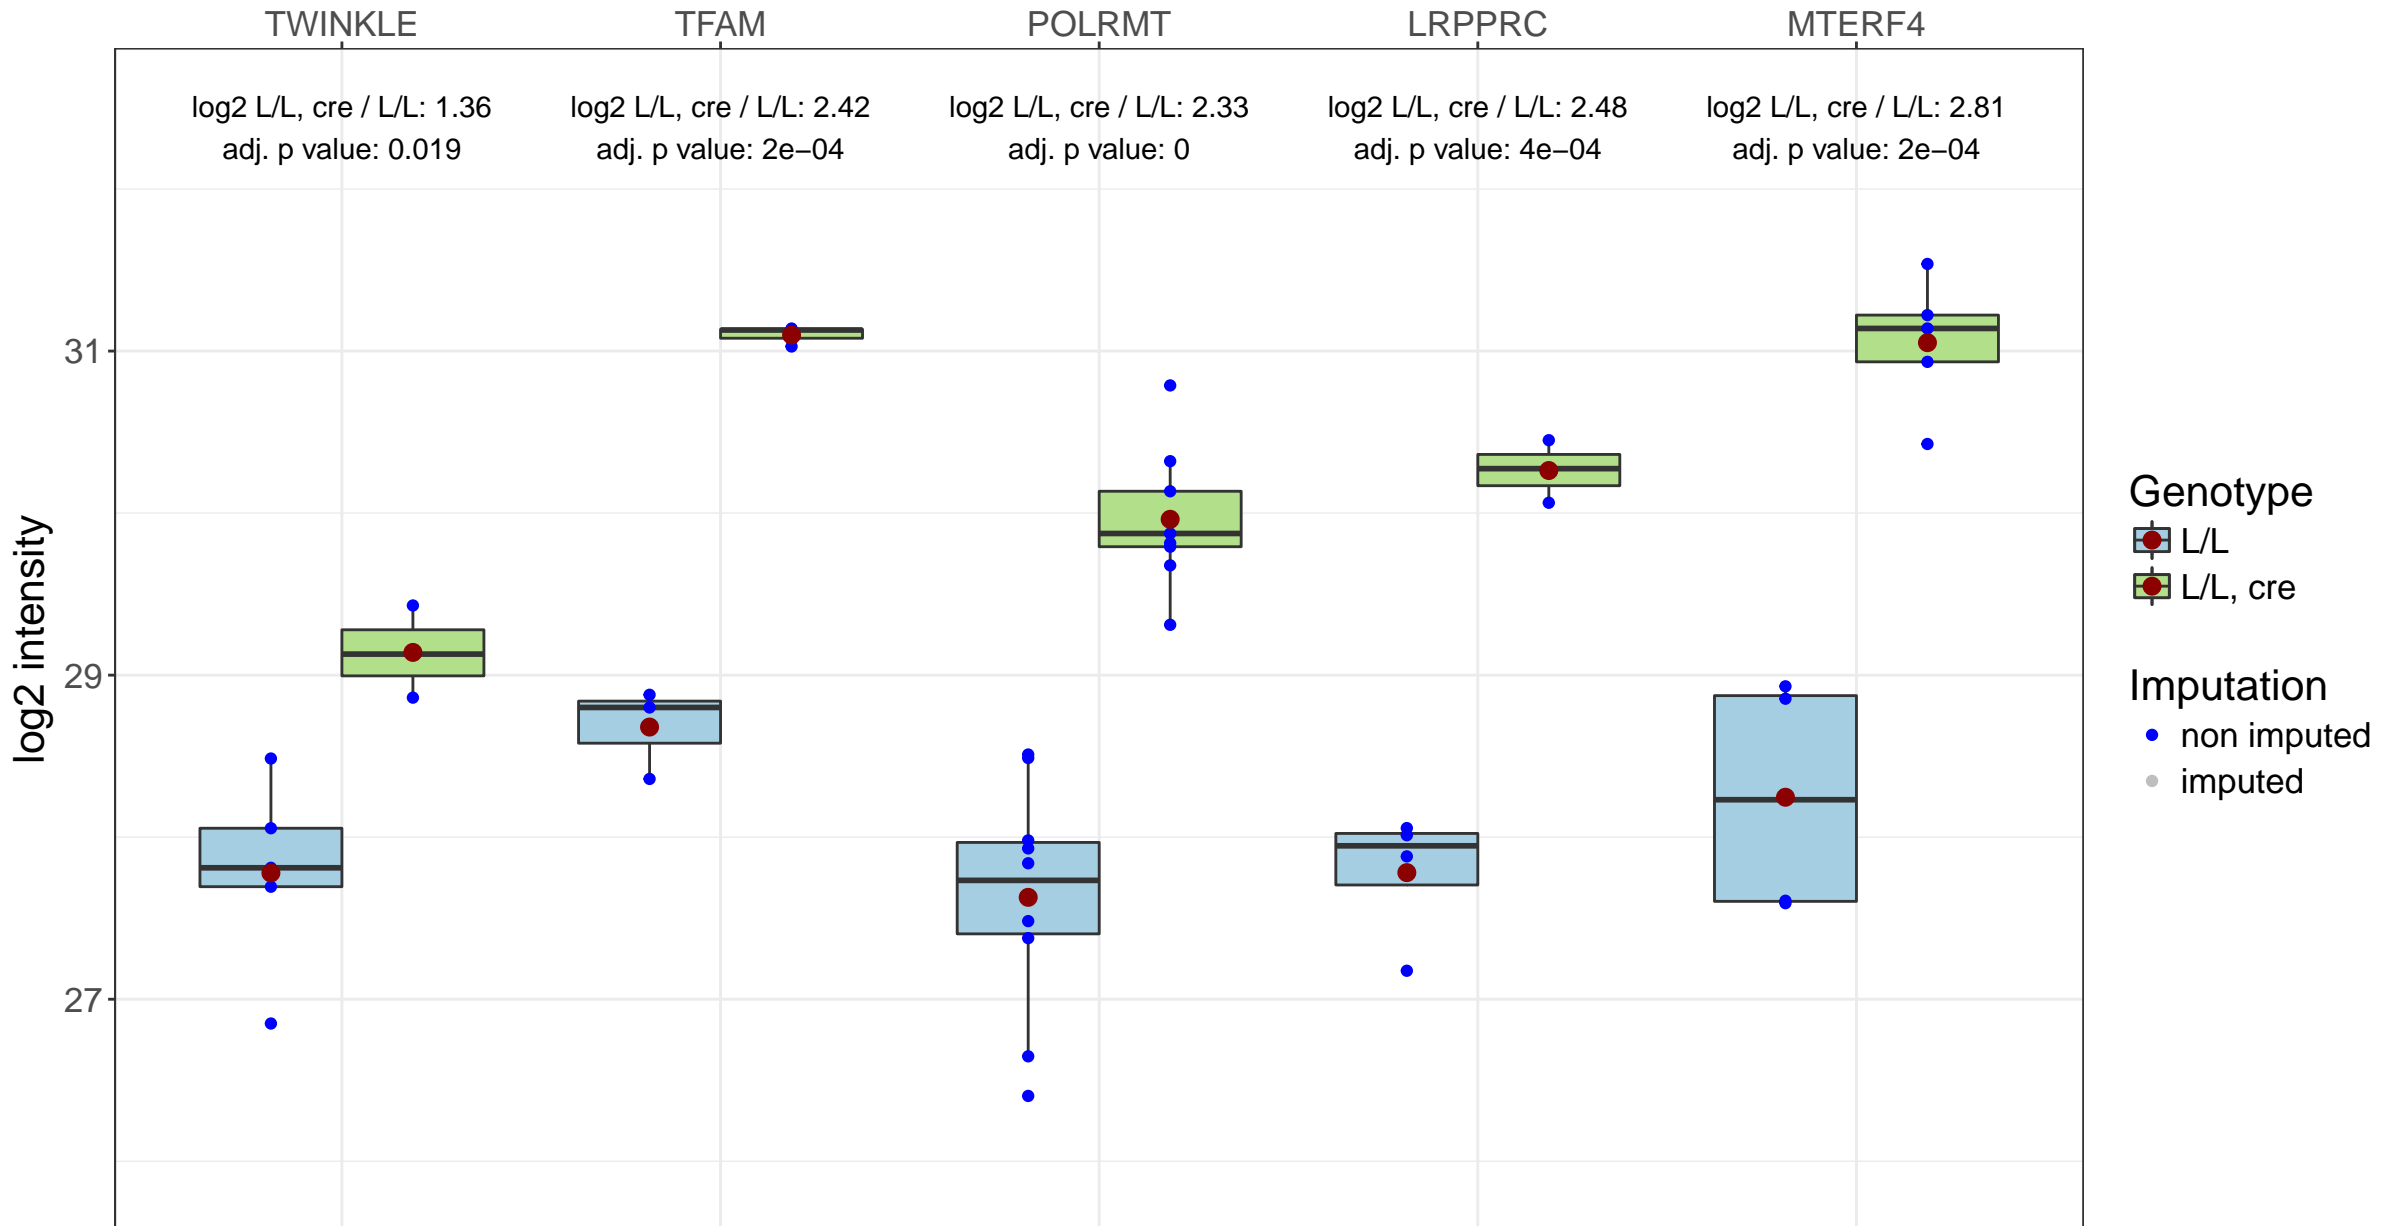

# IARS2 / Q8BIJ6

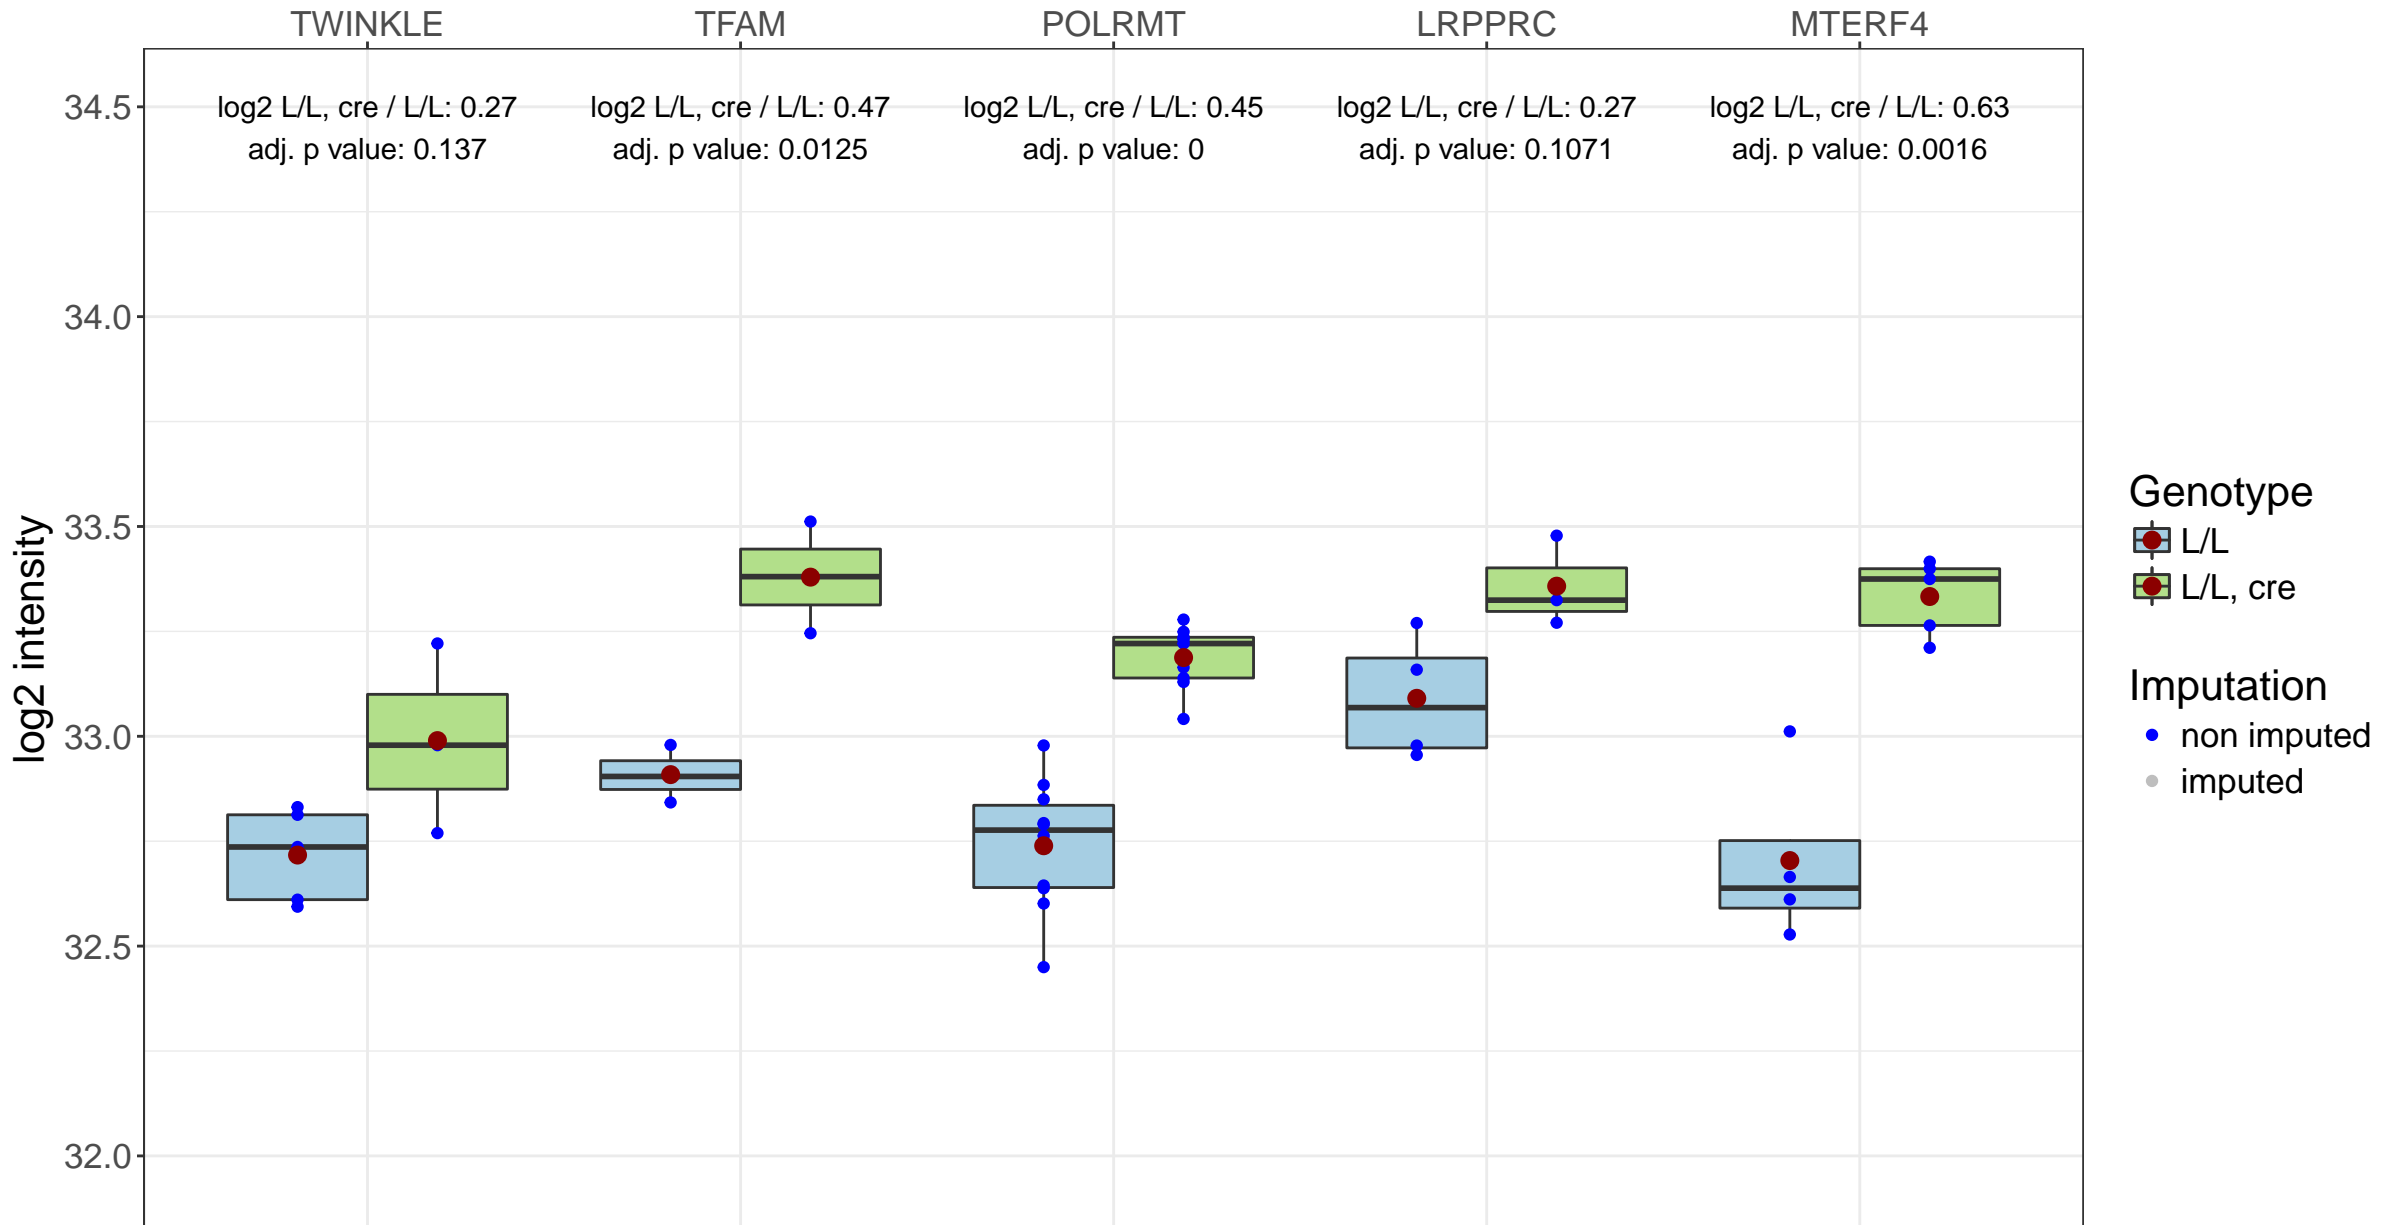

# IBA57 / Q8CAK1

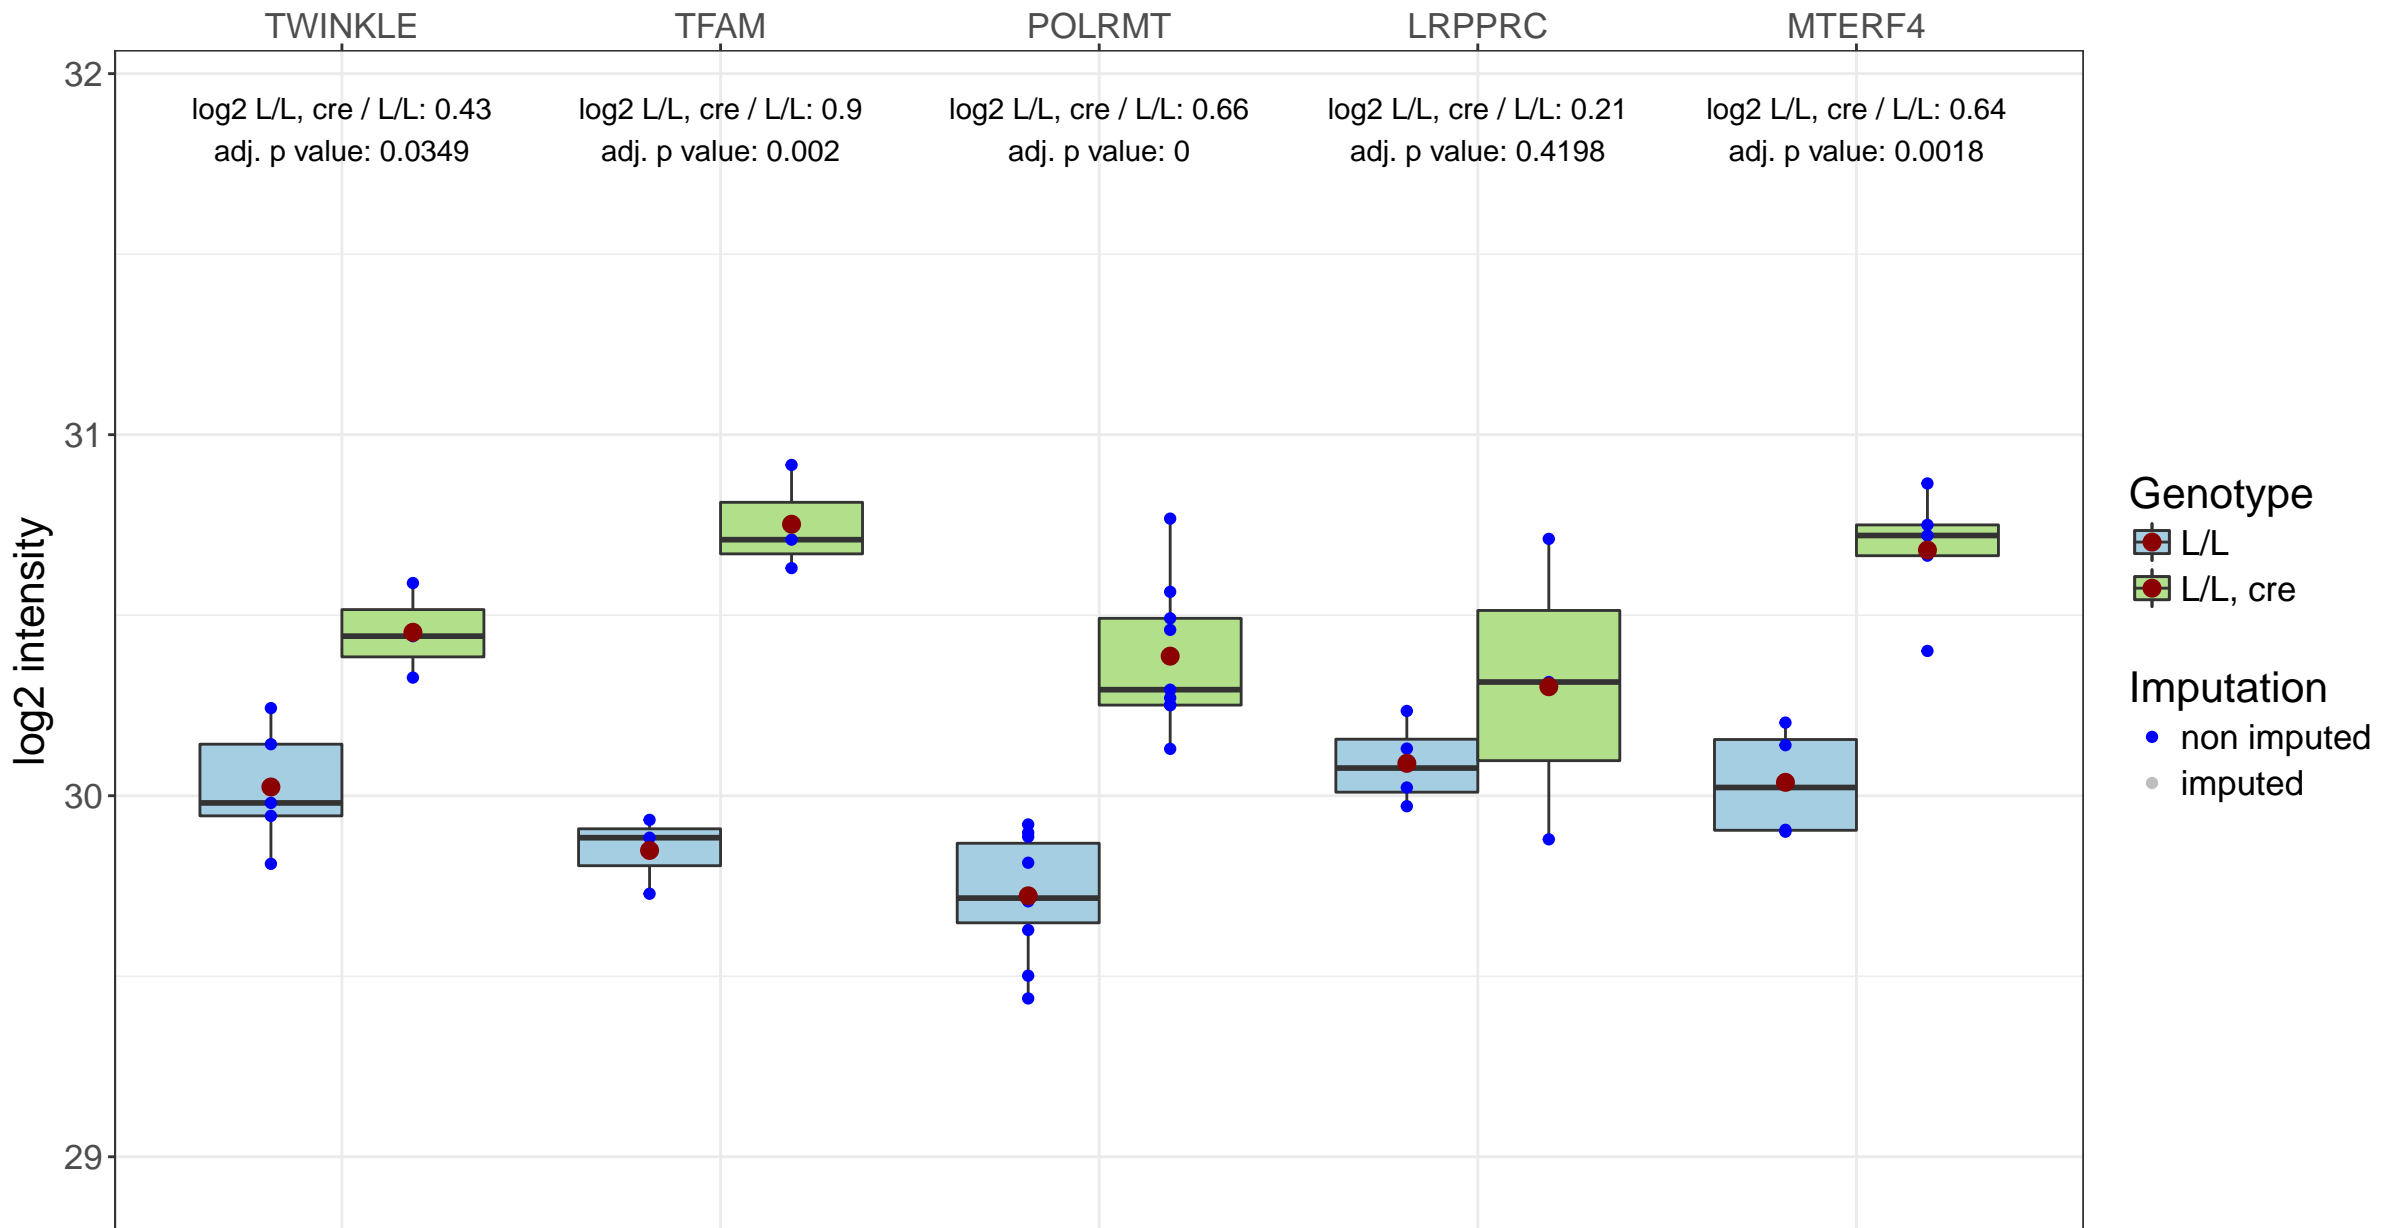

# ICAM2 / G3UWJ5

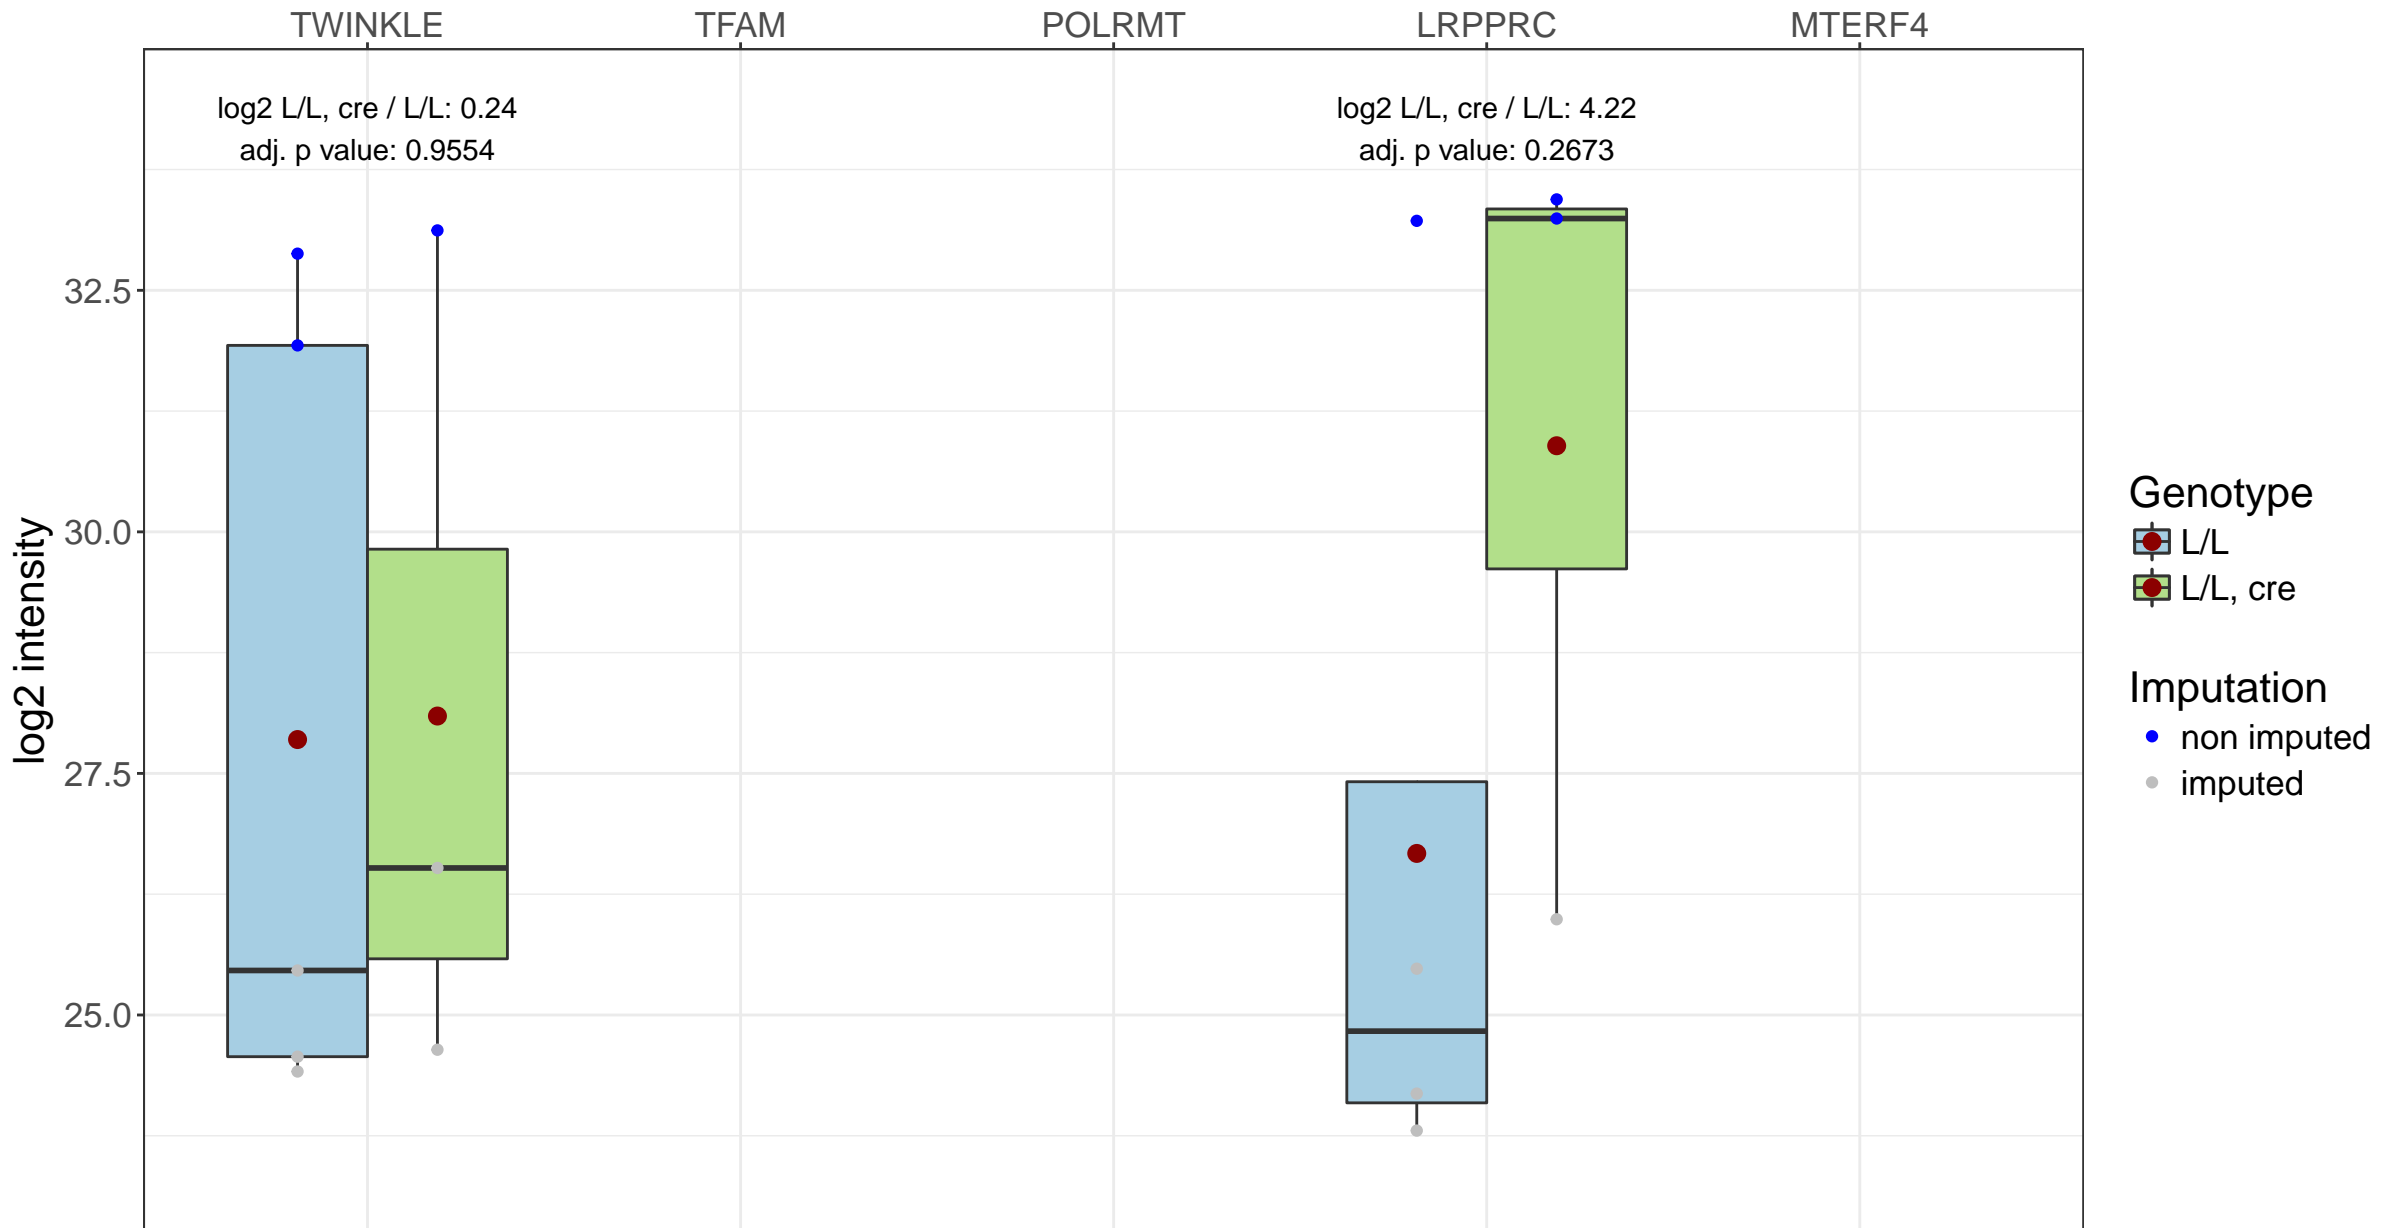

# IDH2 / P54071

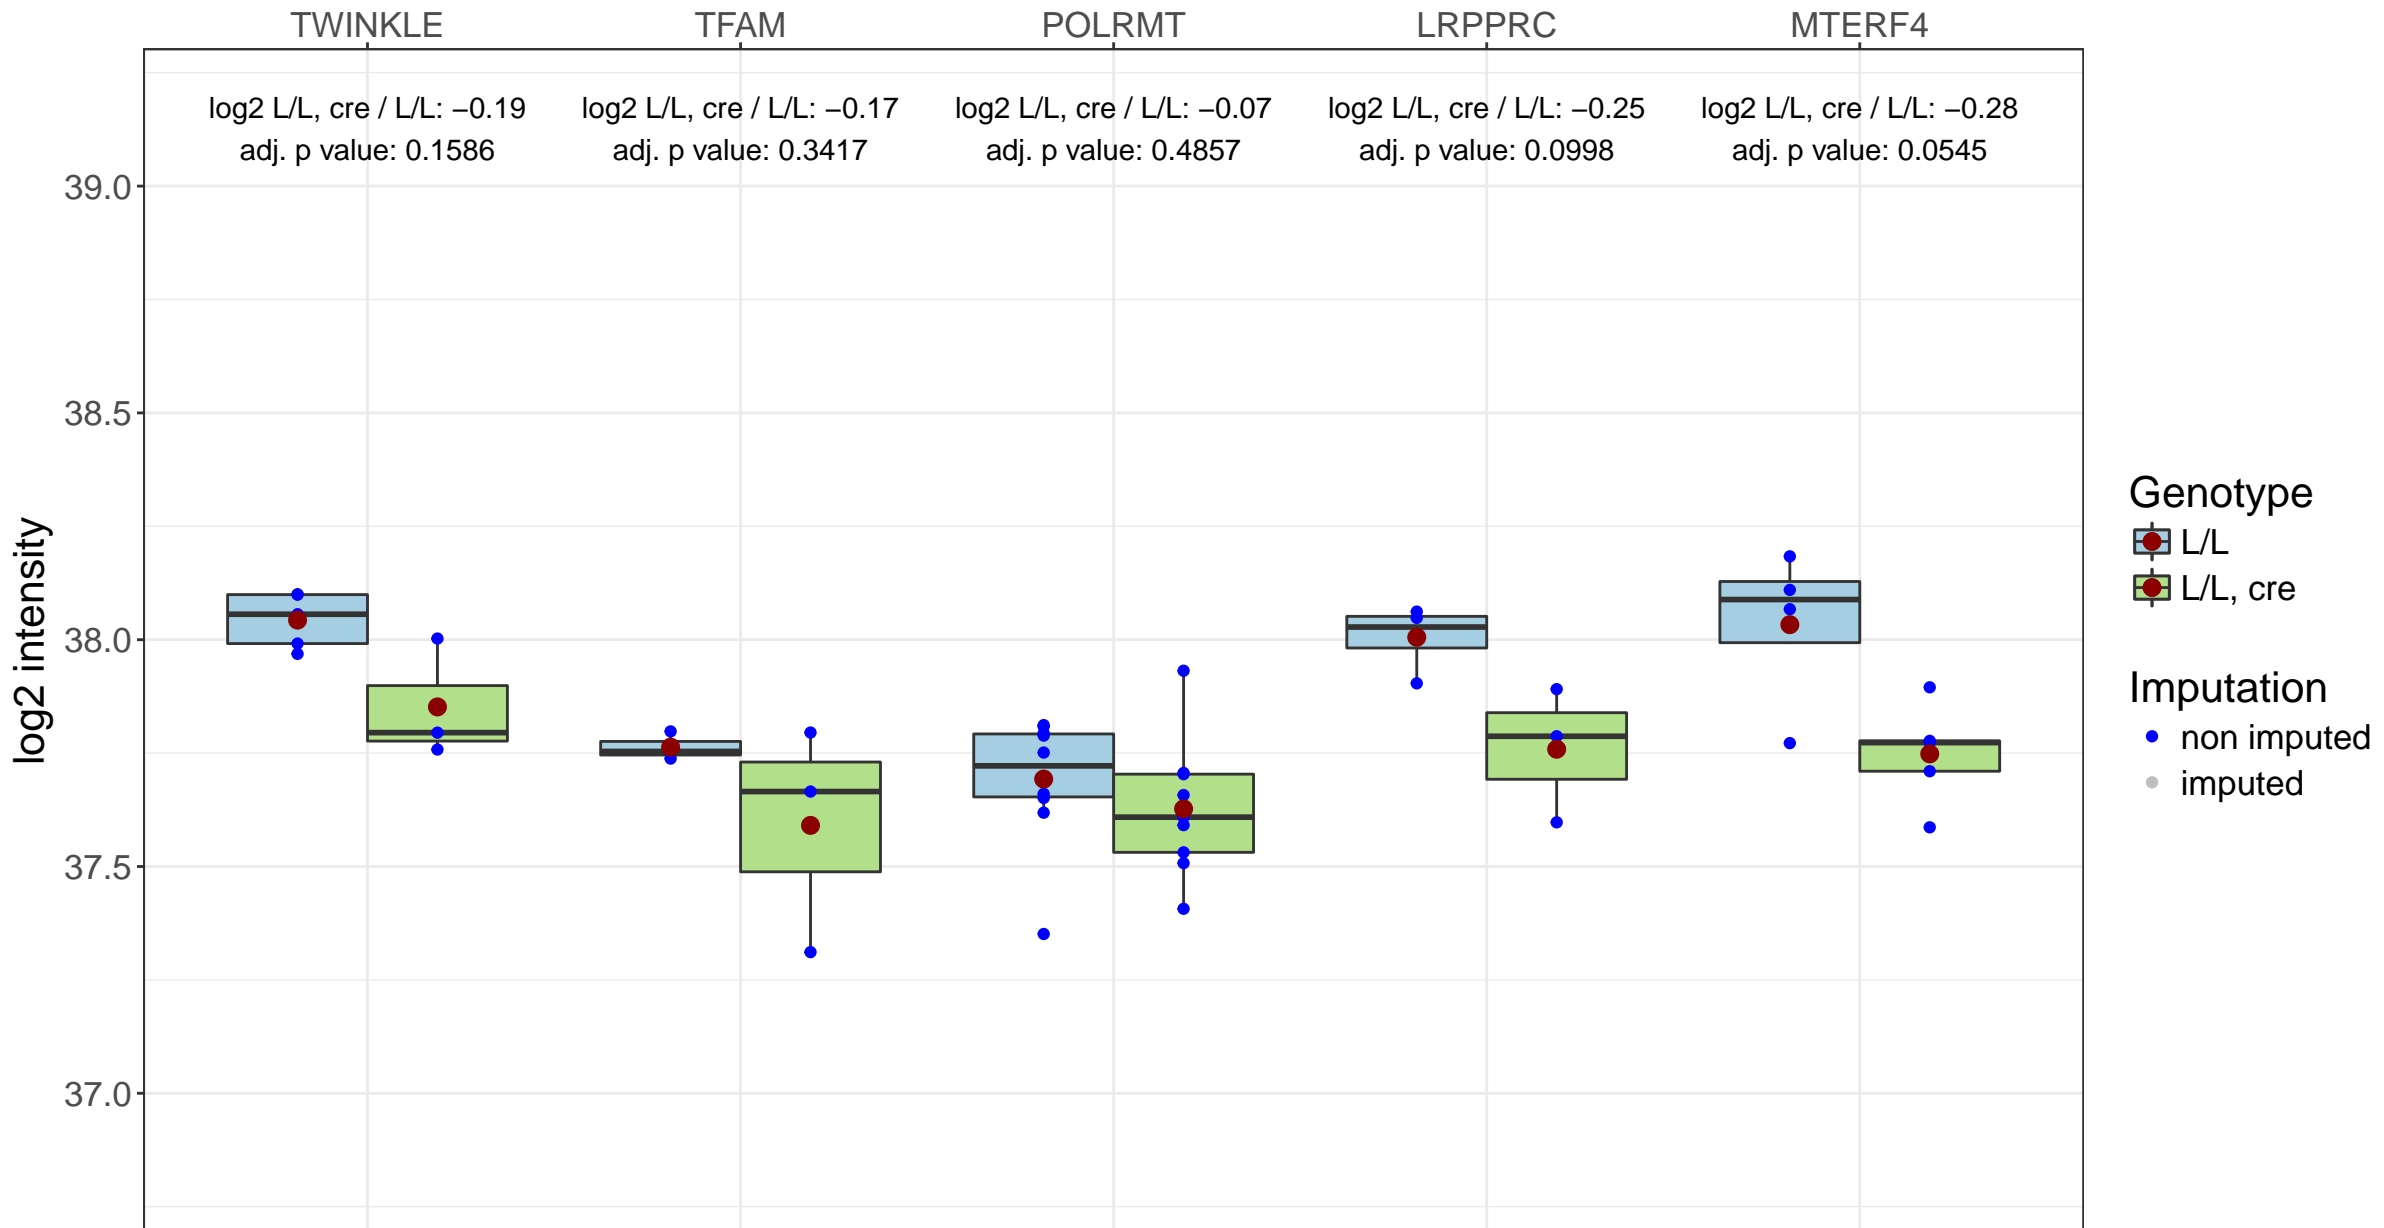



# IDH3A / Q9D6R2

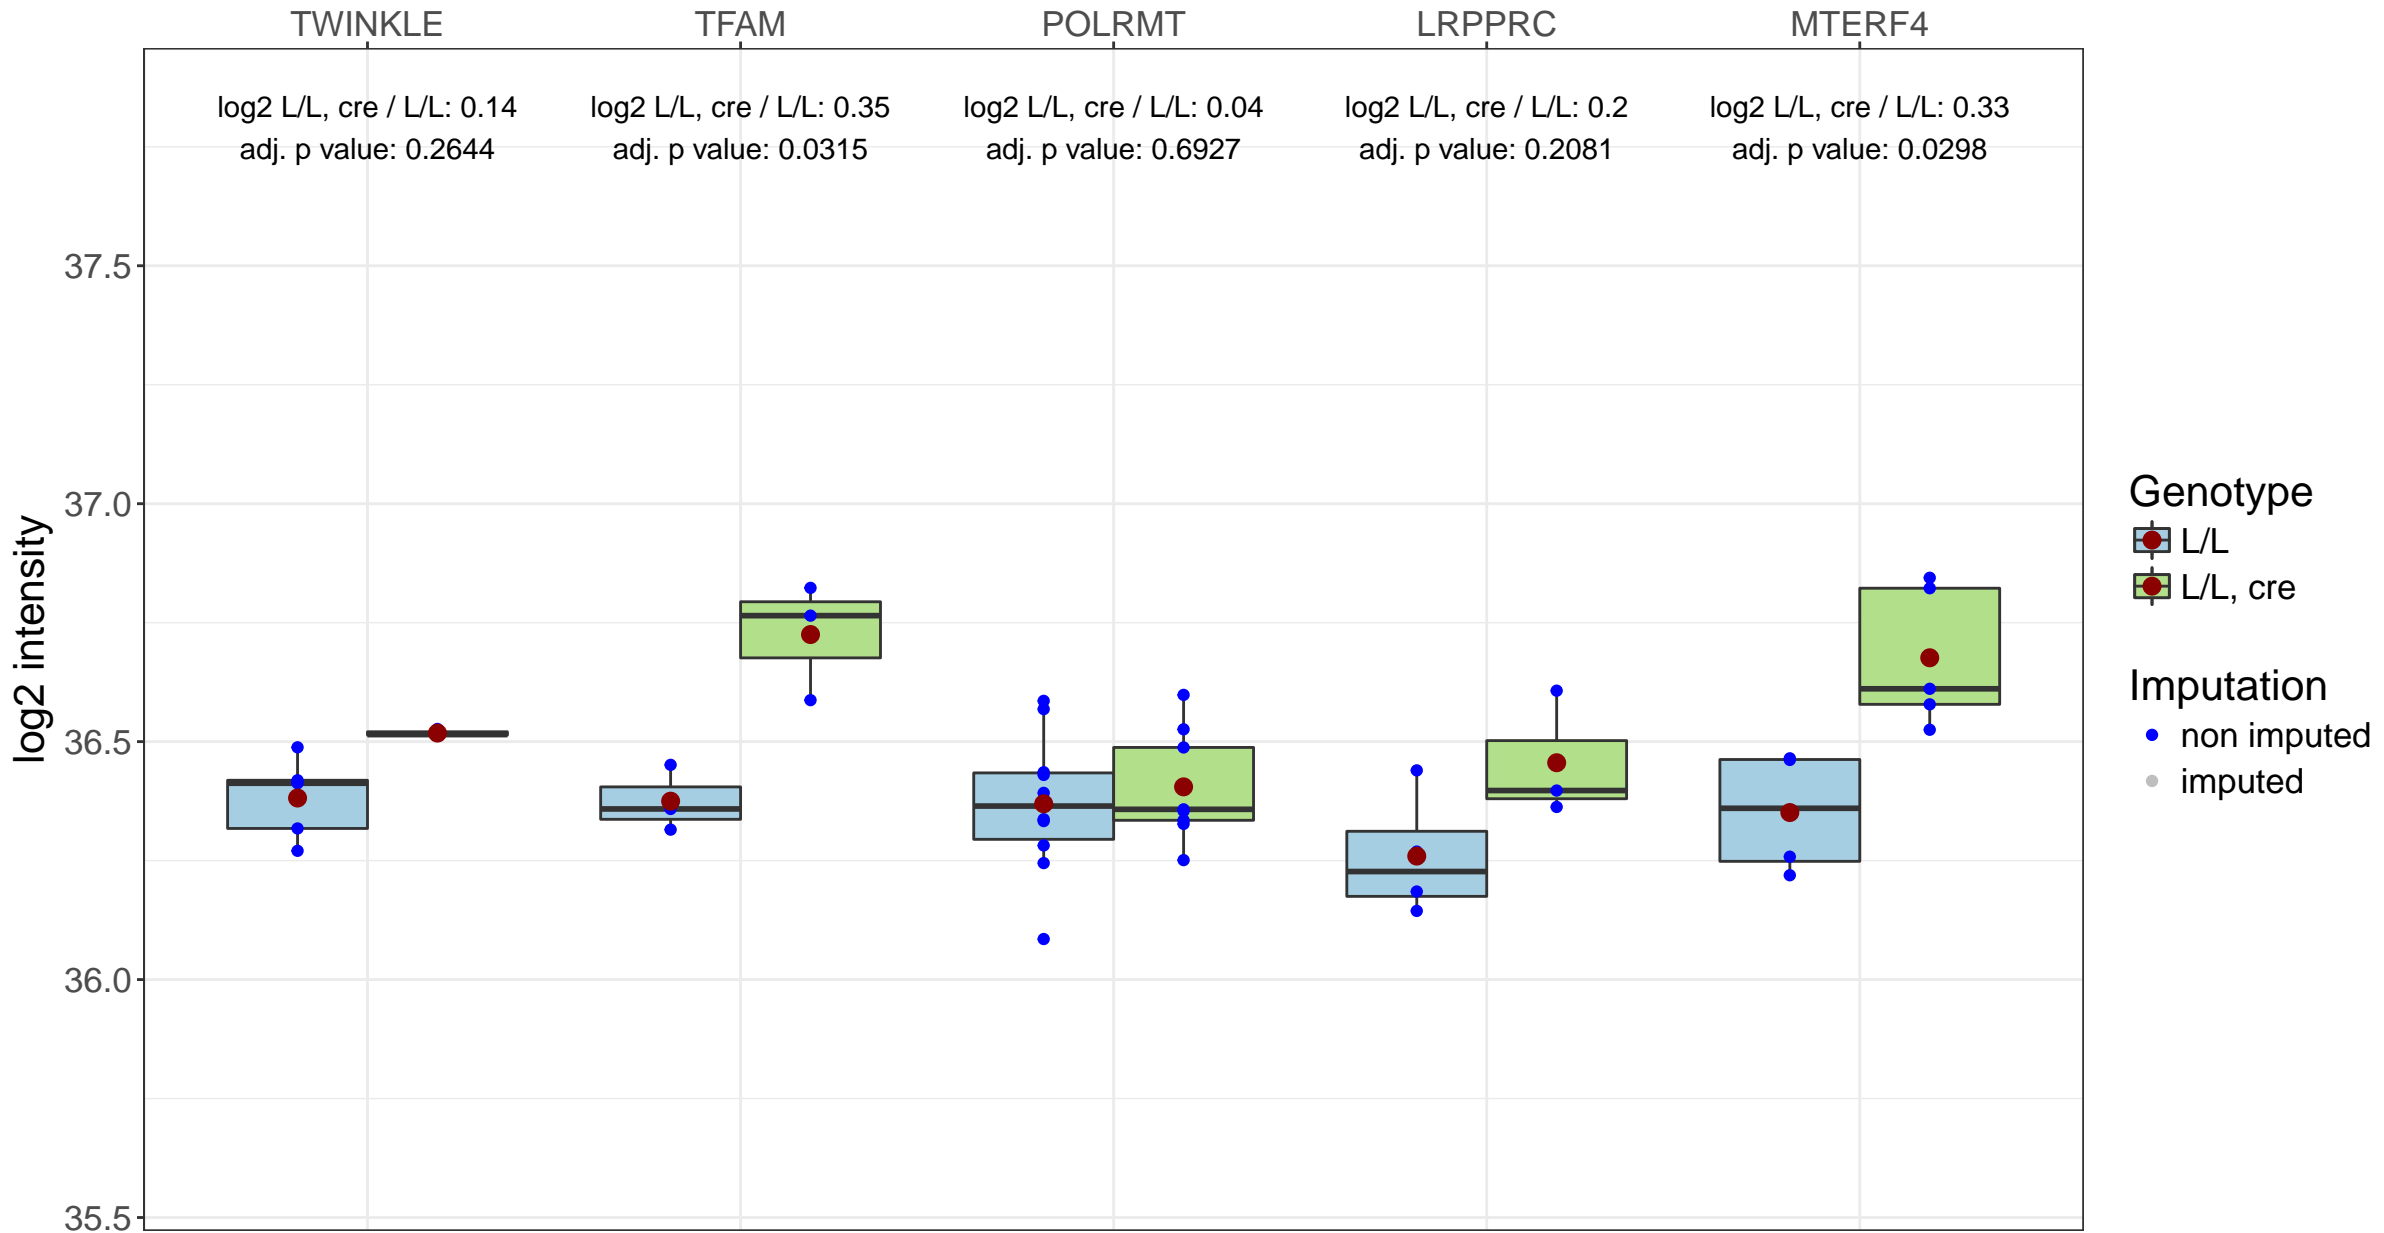

# IDH3B / Q91VA7

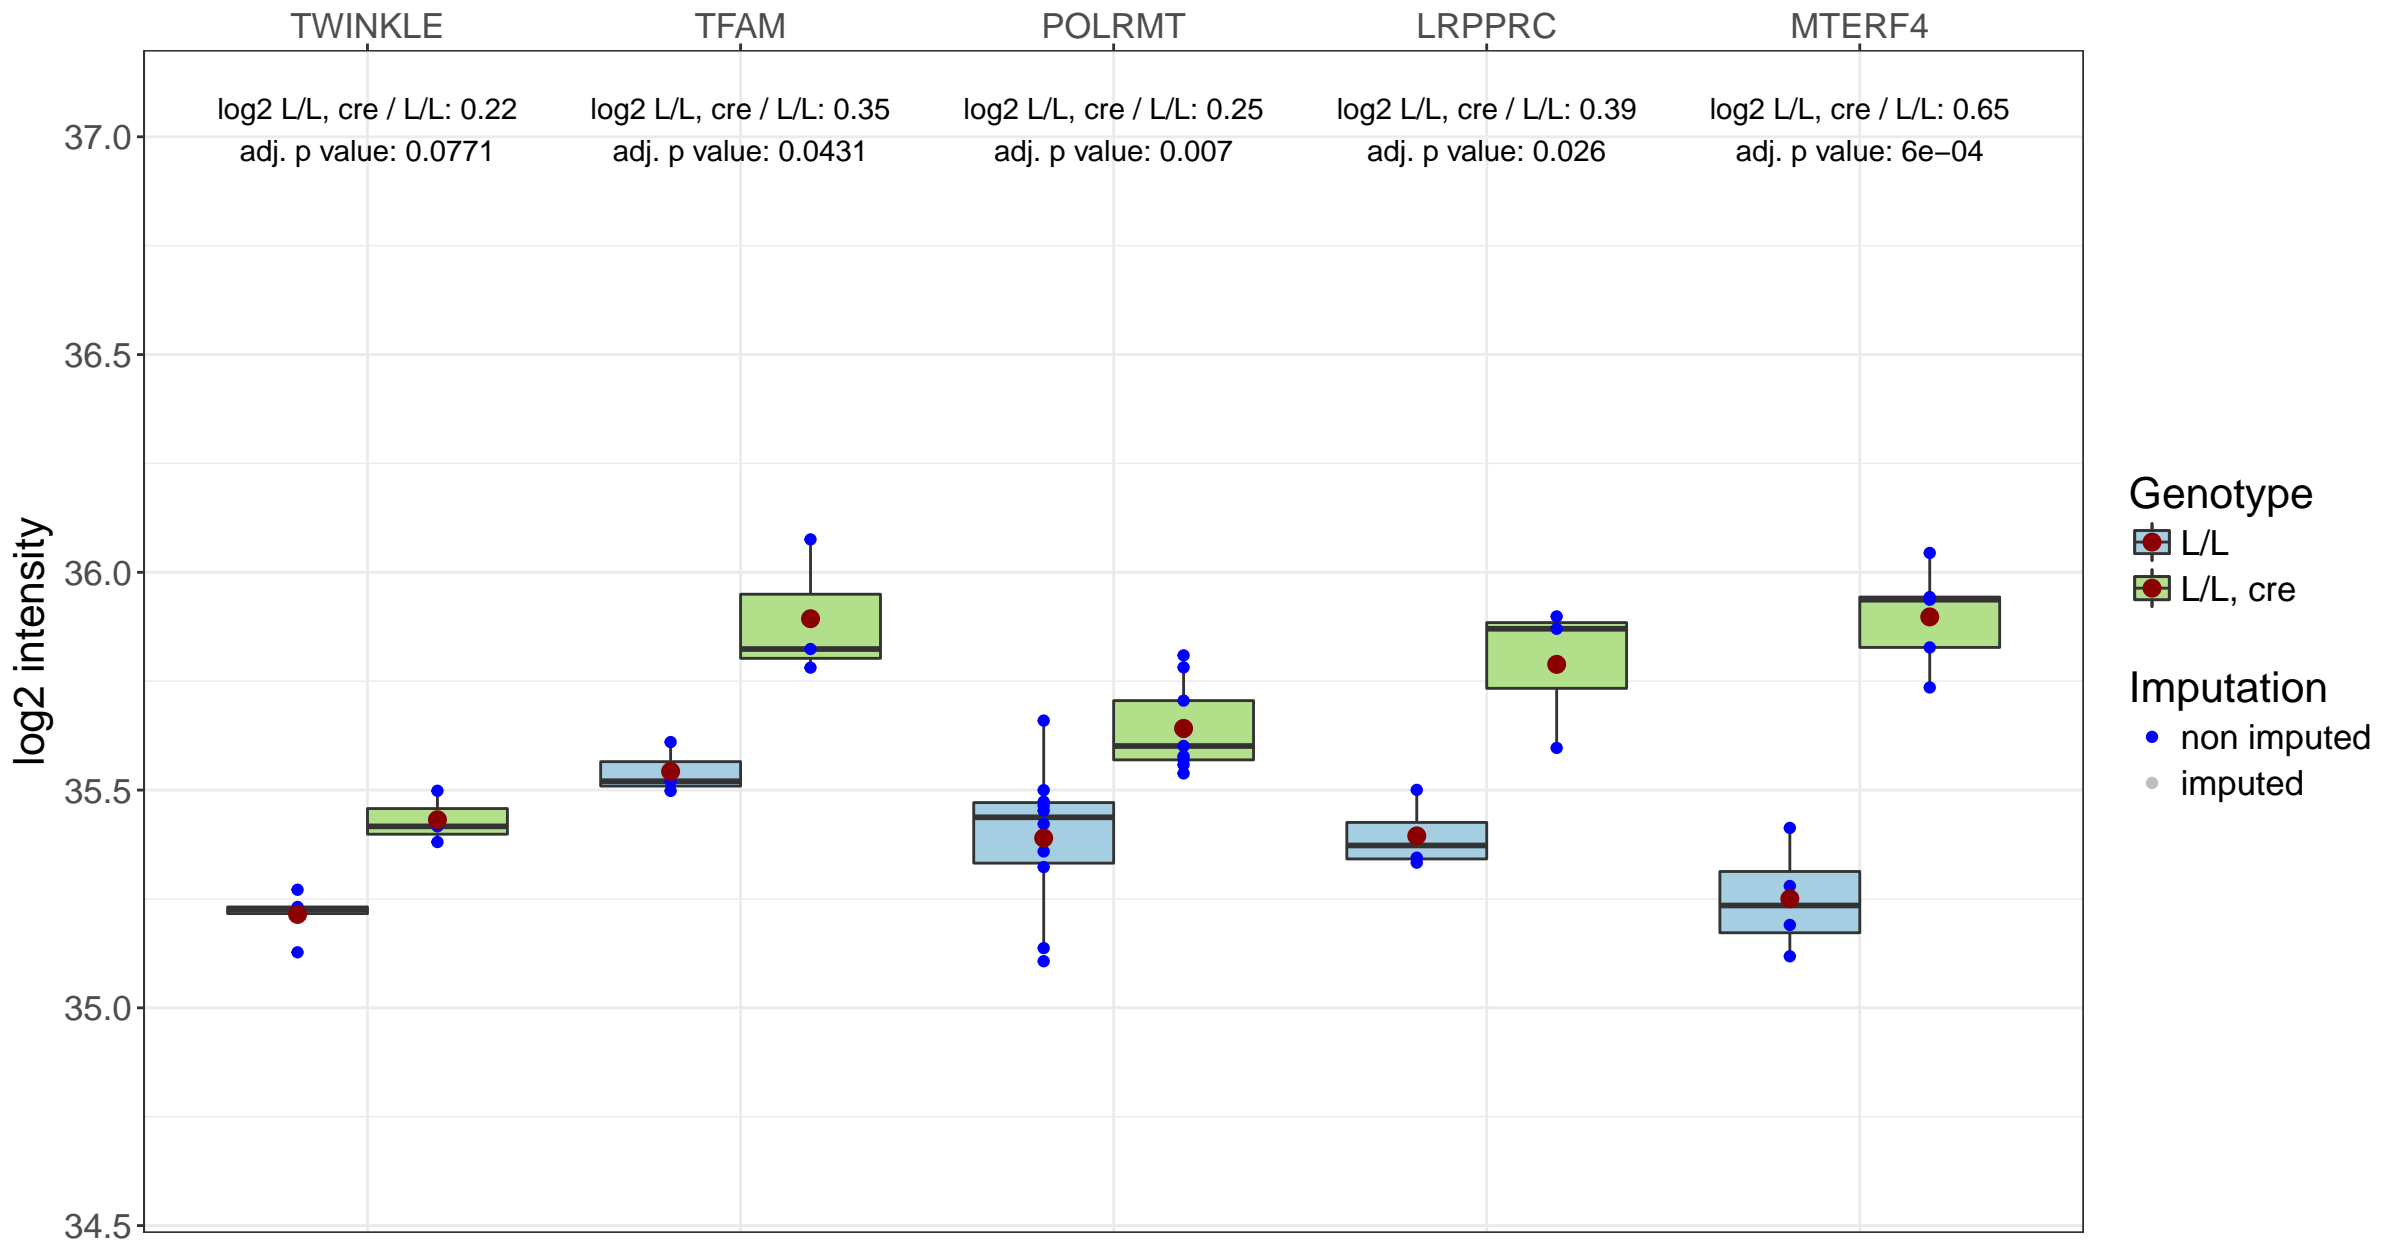

# IDH3G / P70404

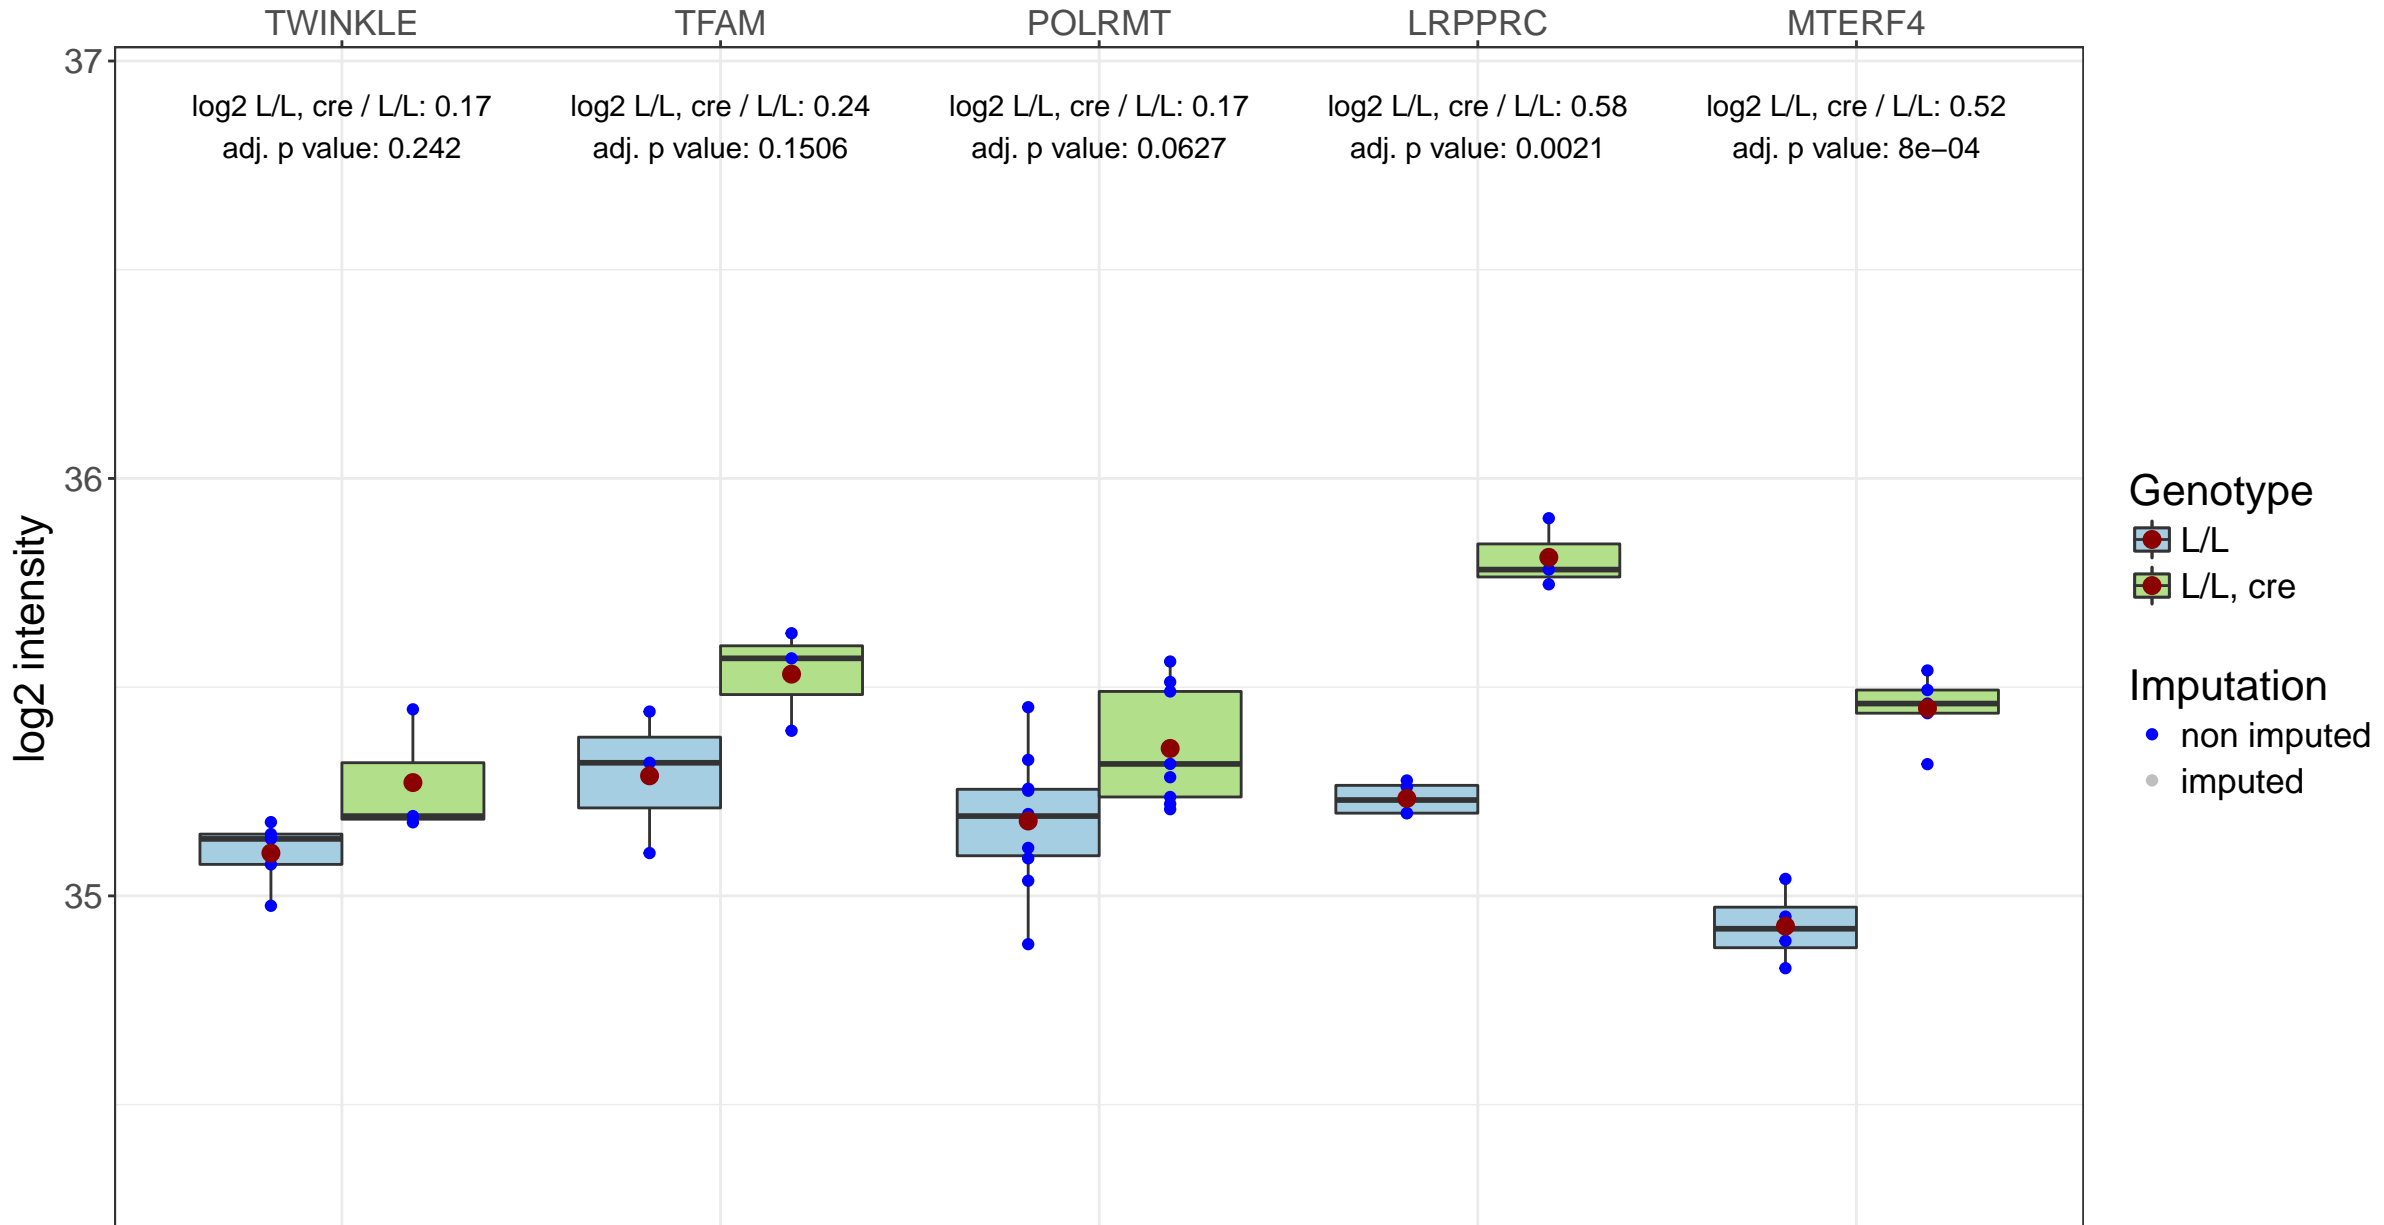

# IGFBP7 / F8WH23

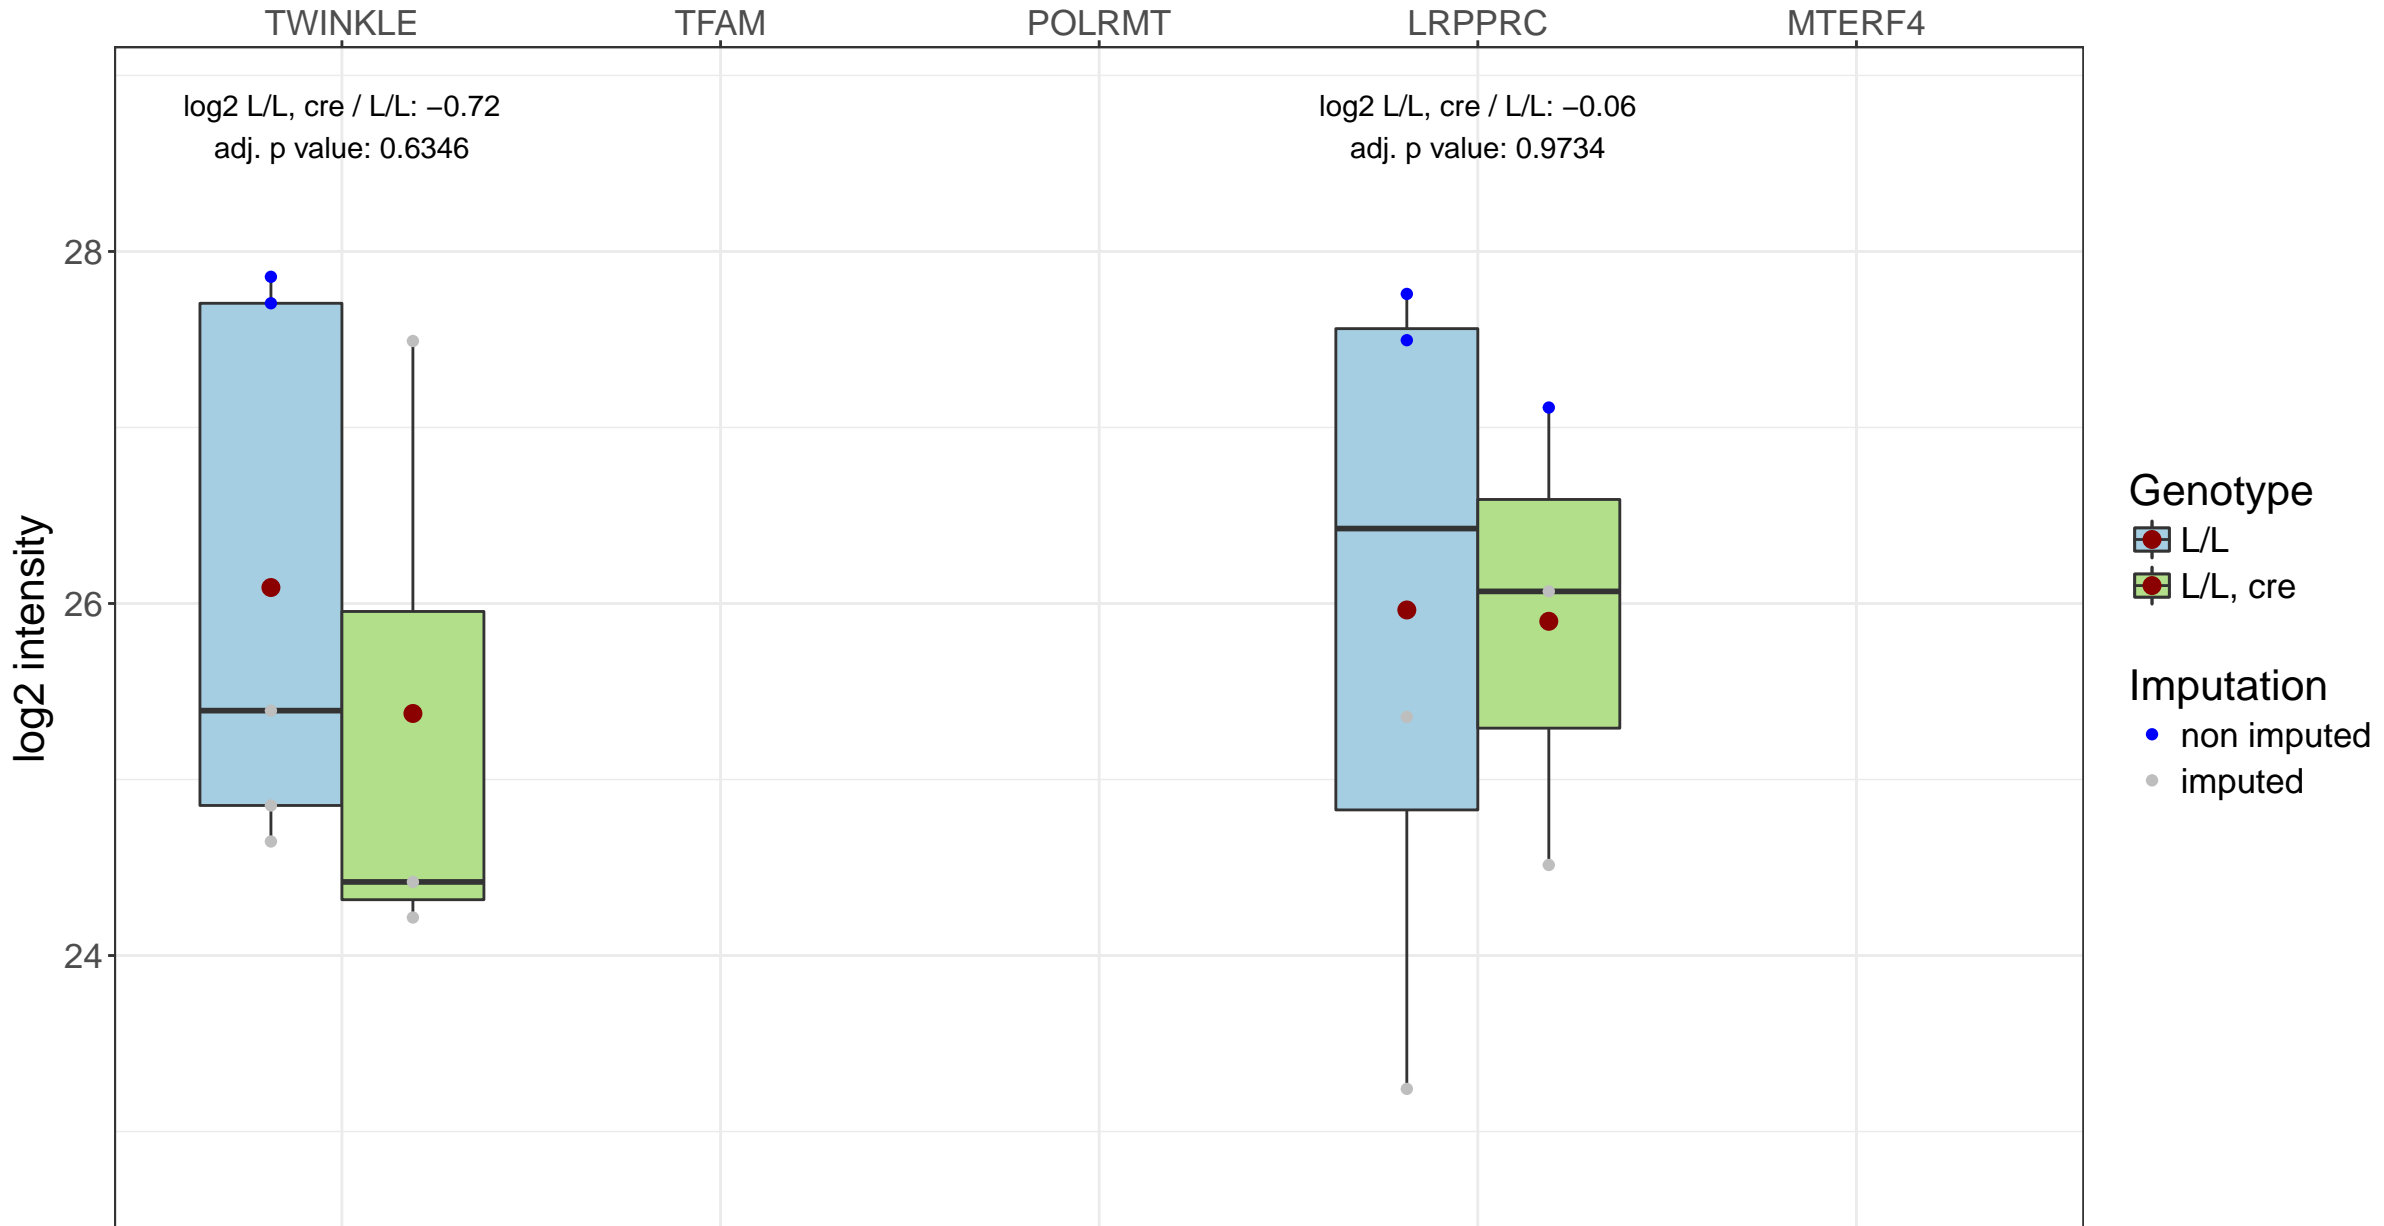

# IKBIP / E9QMH7

TWINKLE

TFAM

POLRMT

LRPPRC

MTERF4

log2 intensity

28

27

26

25

24

23

log2 L/L, cre / L/L: 0.39

adj. p value: 0.5056

Genotype

L/L

L/L, cre

Imputation

non imputed

imputed

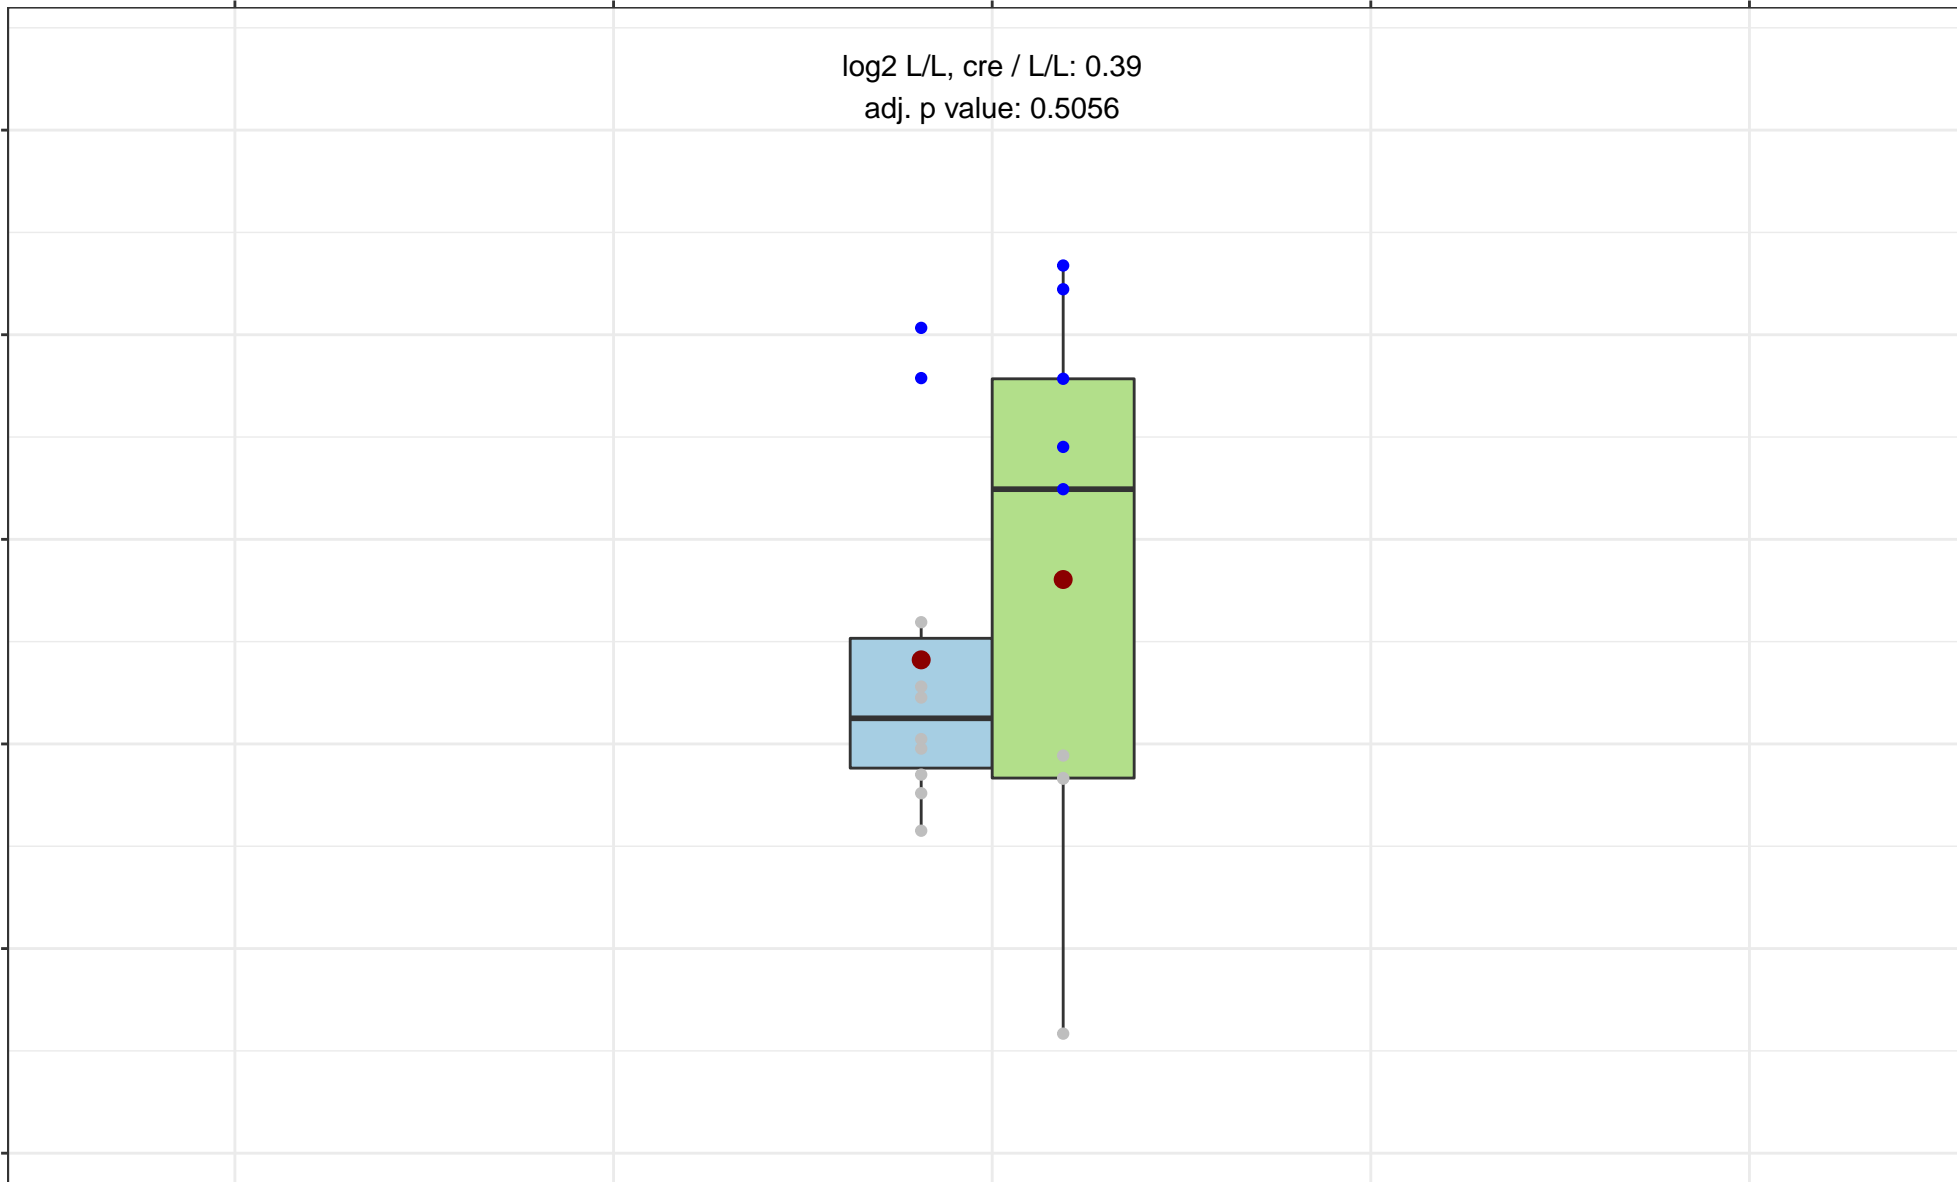

# IMMP2L / Q8BPT6

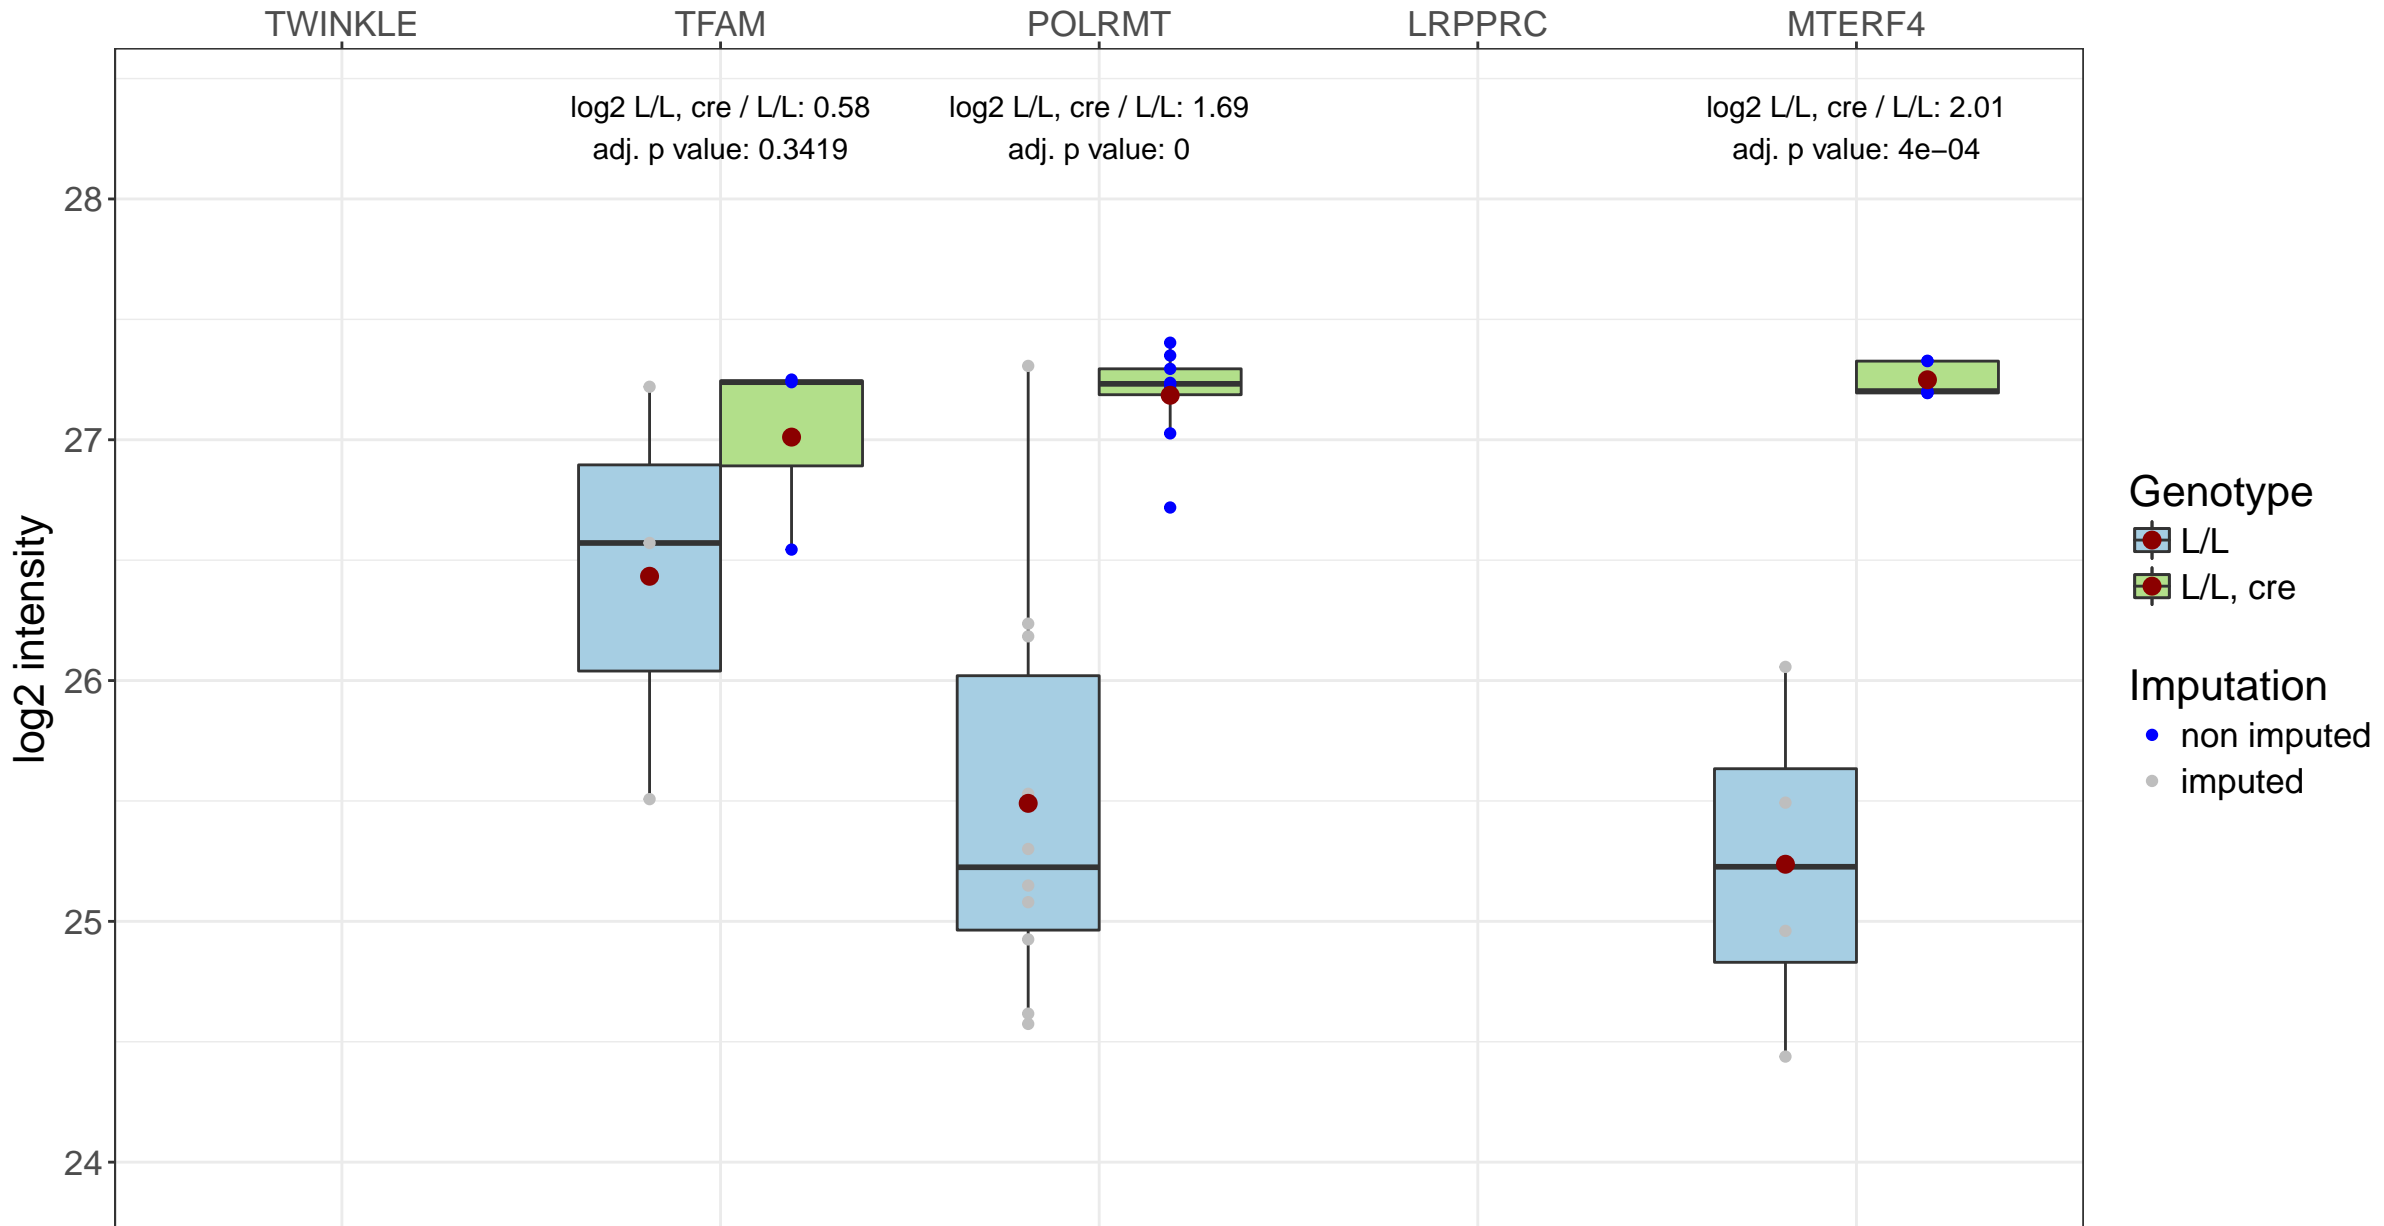

# IMMT / E9Q800

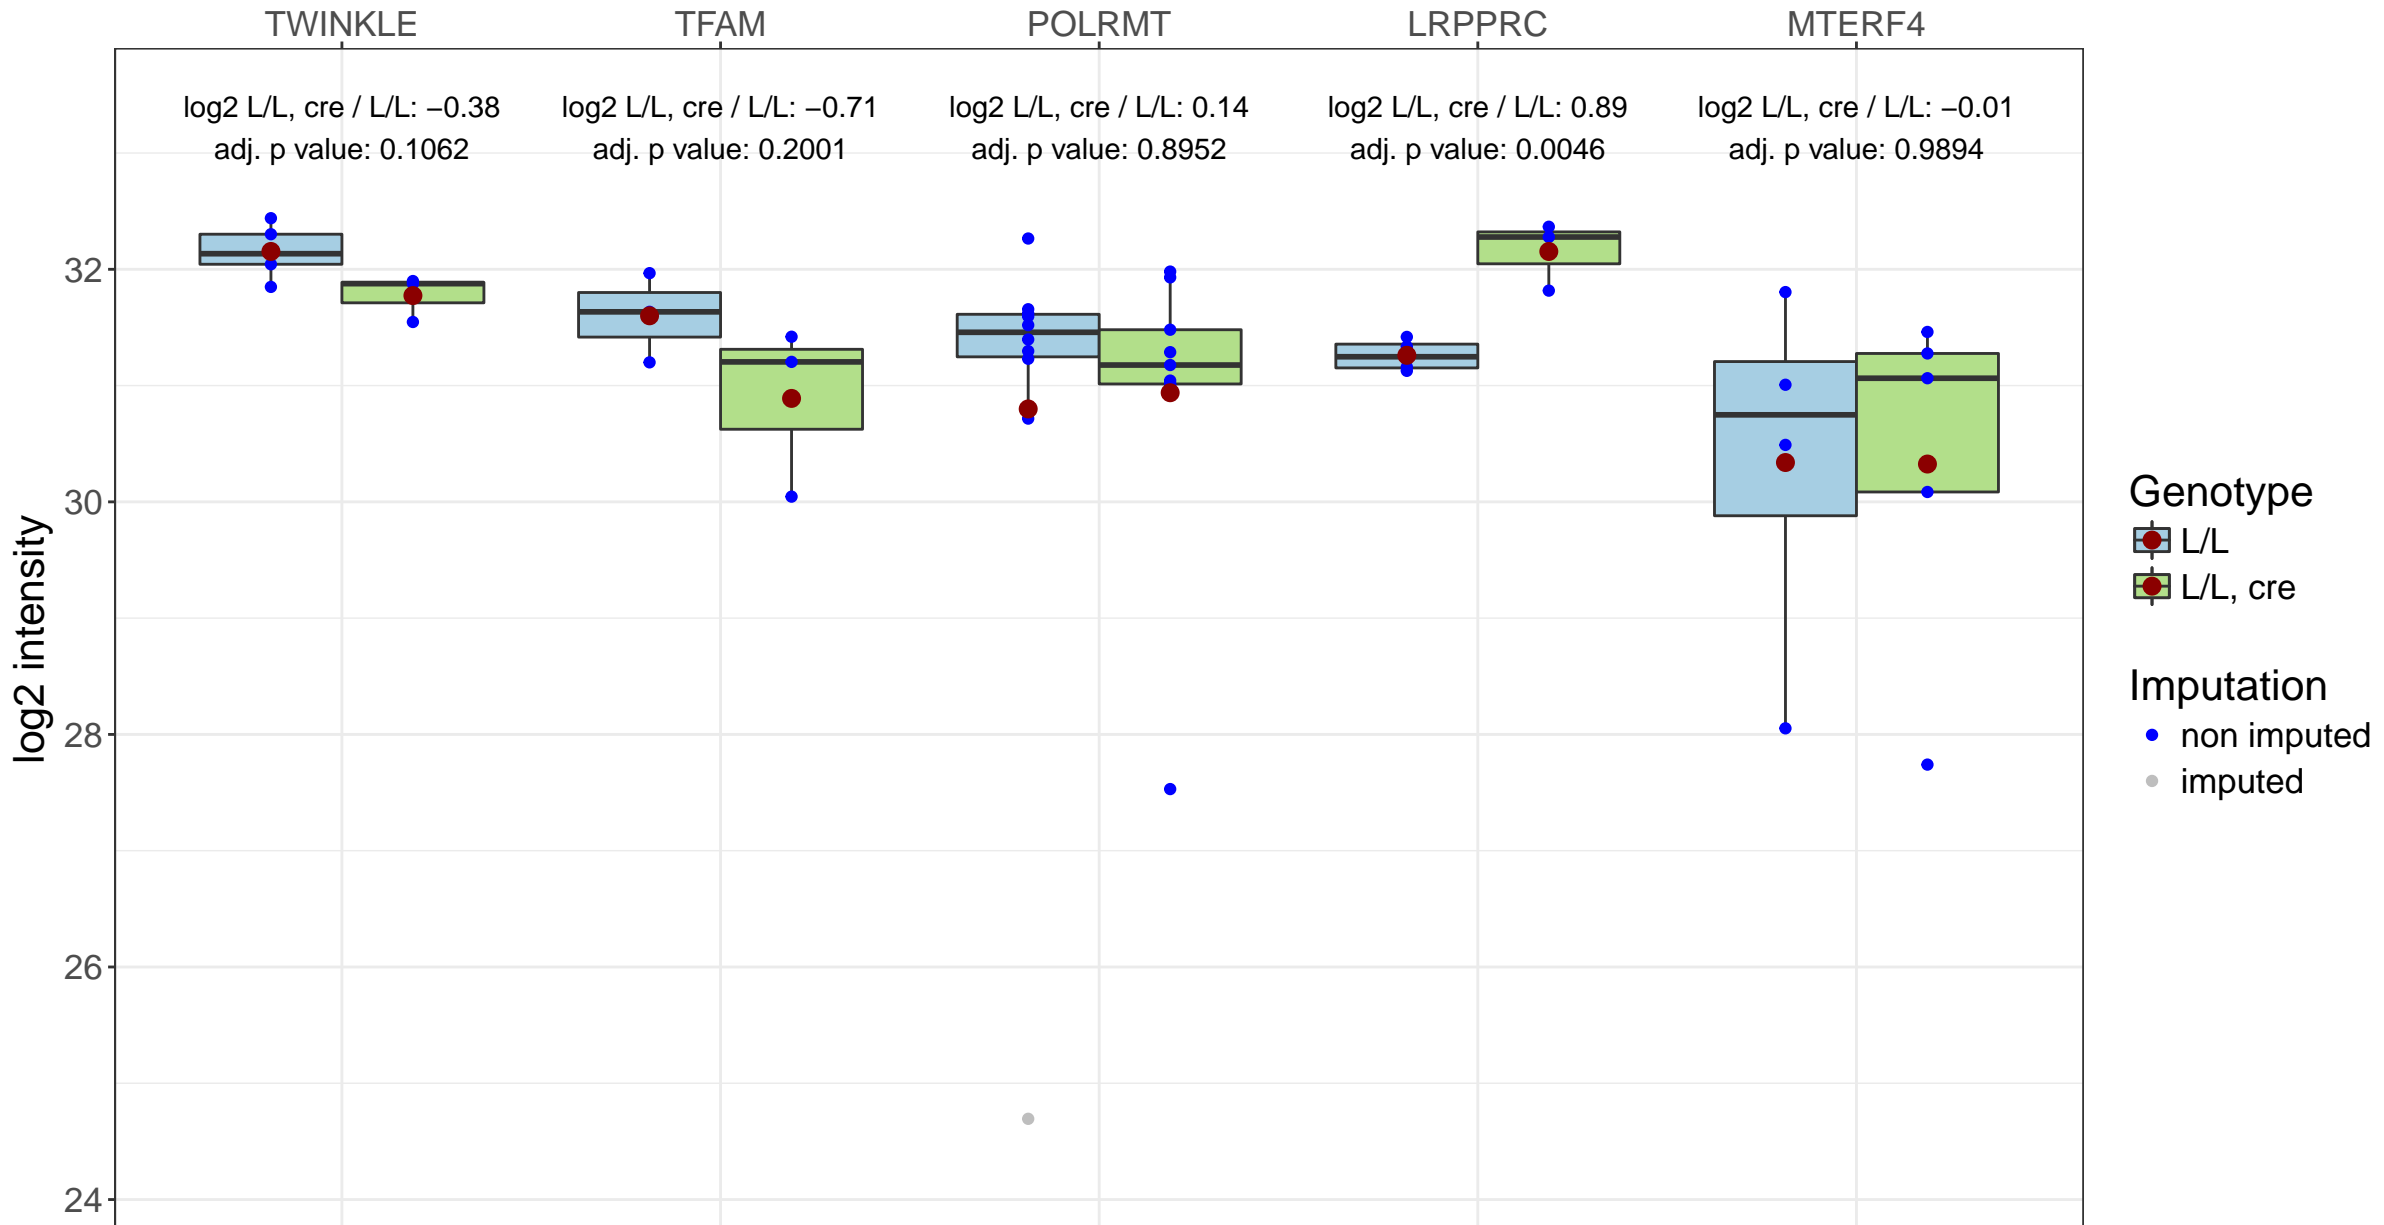

# IMMT / Q8CAQ8-2

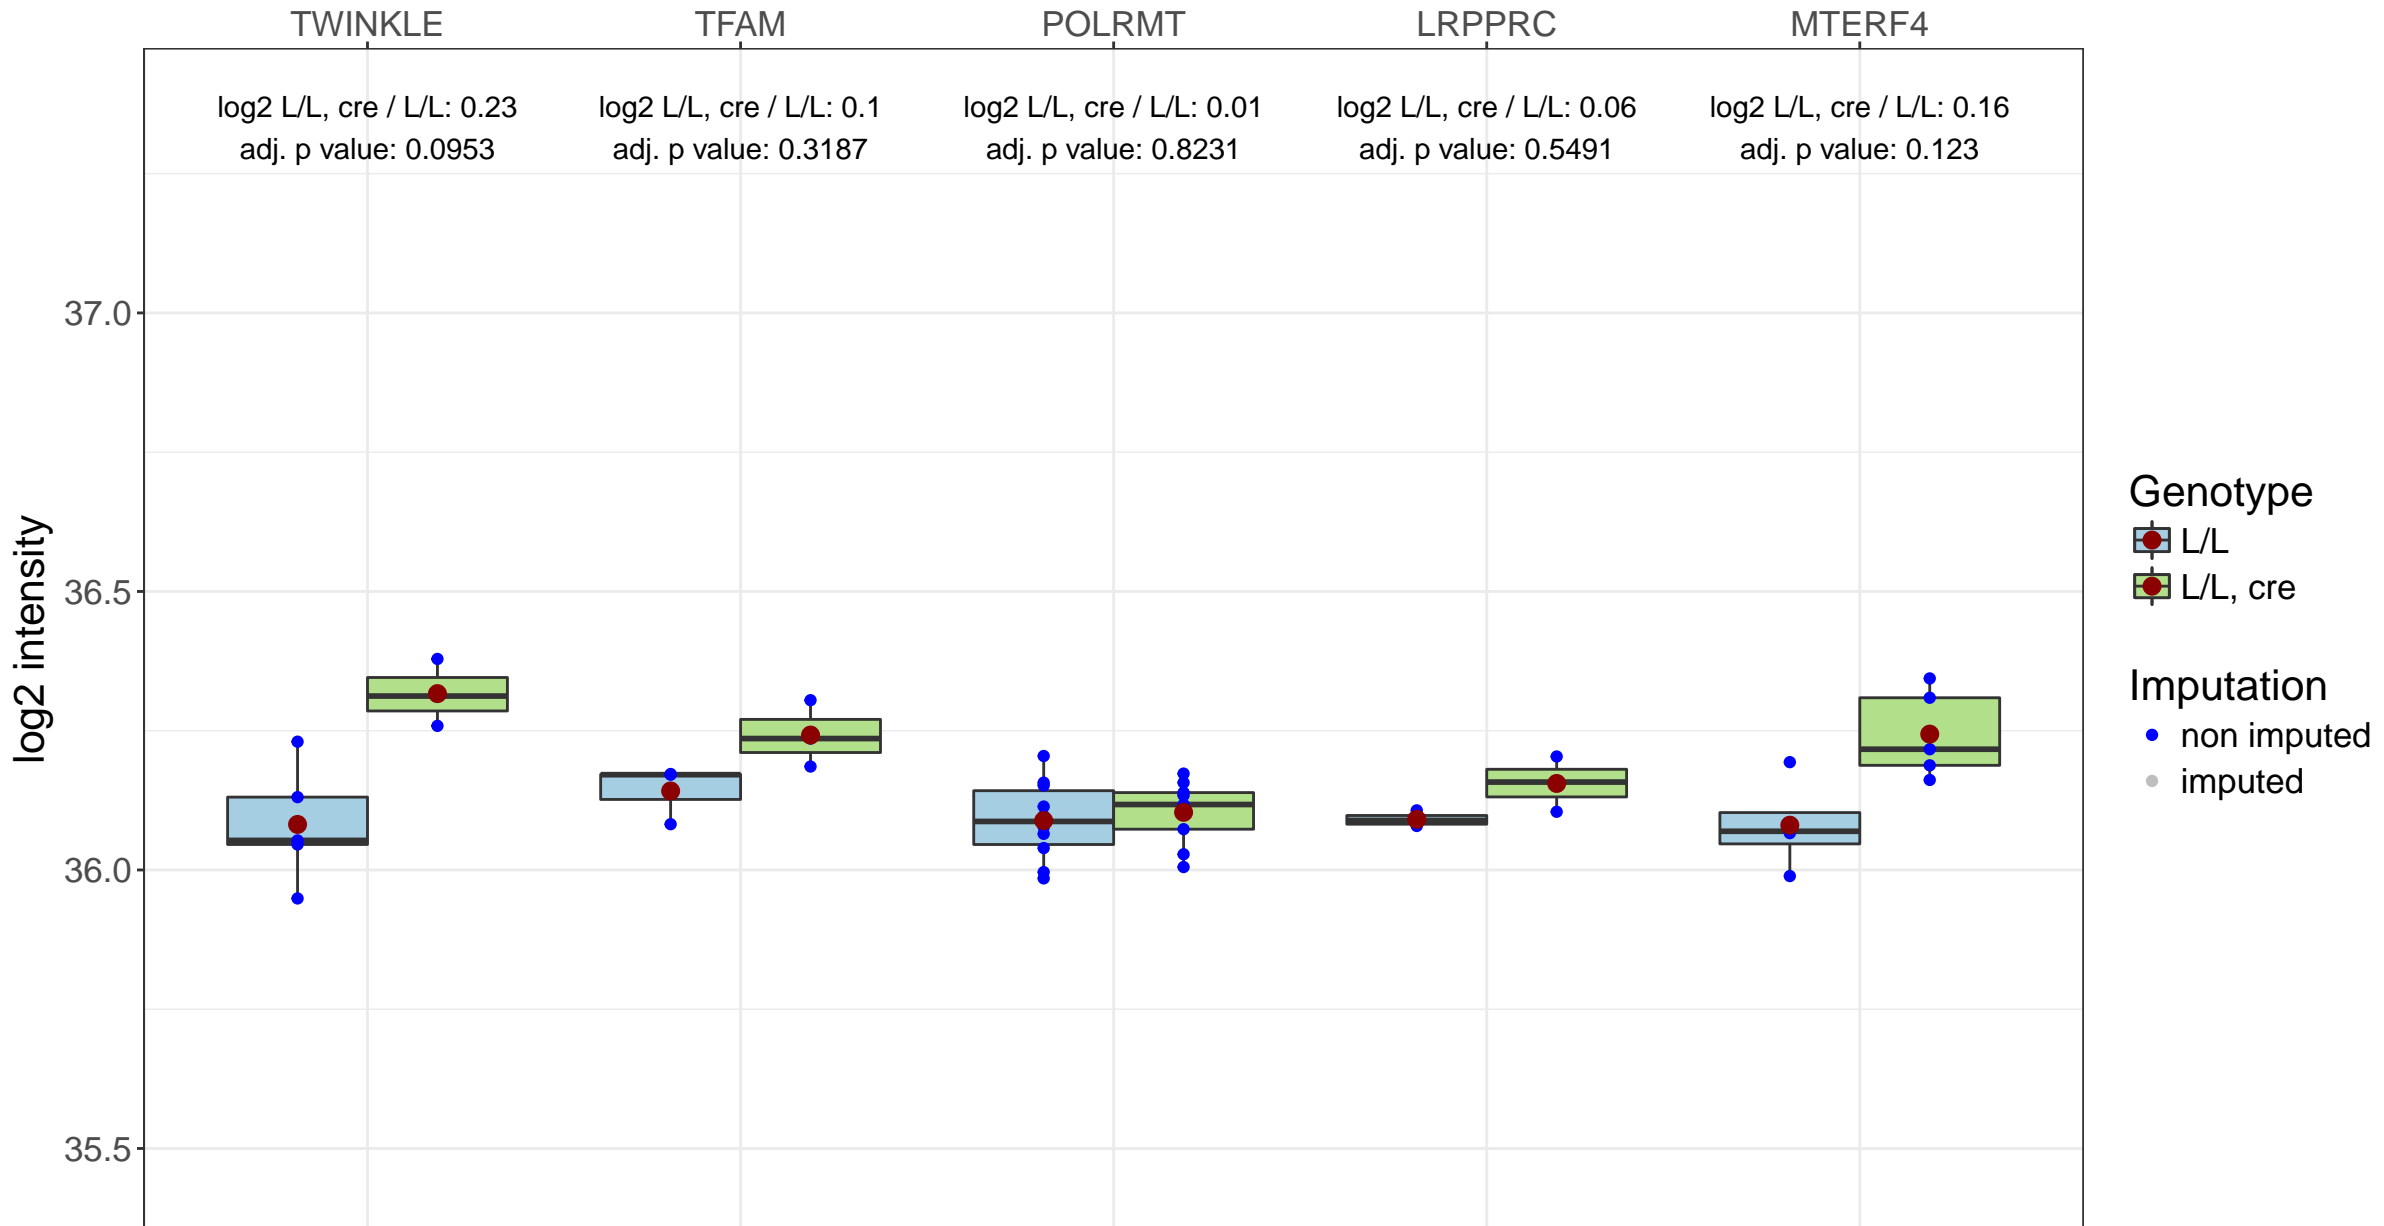



# ISCA2 / Q9DCB8

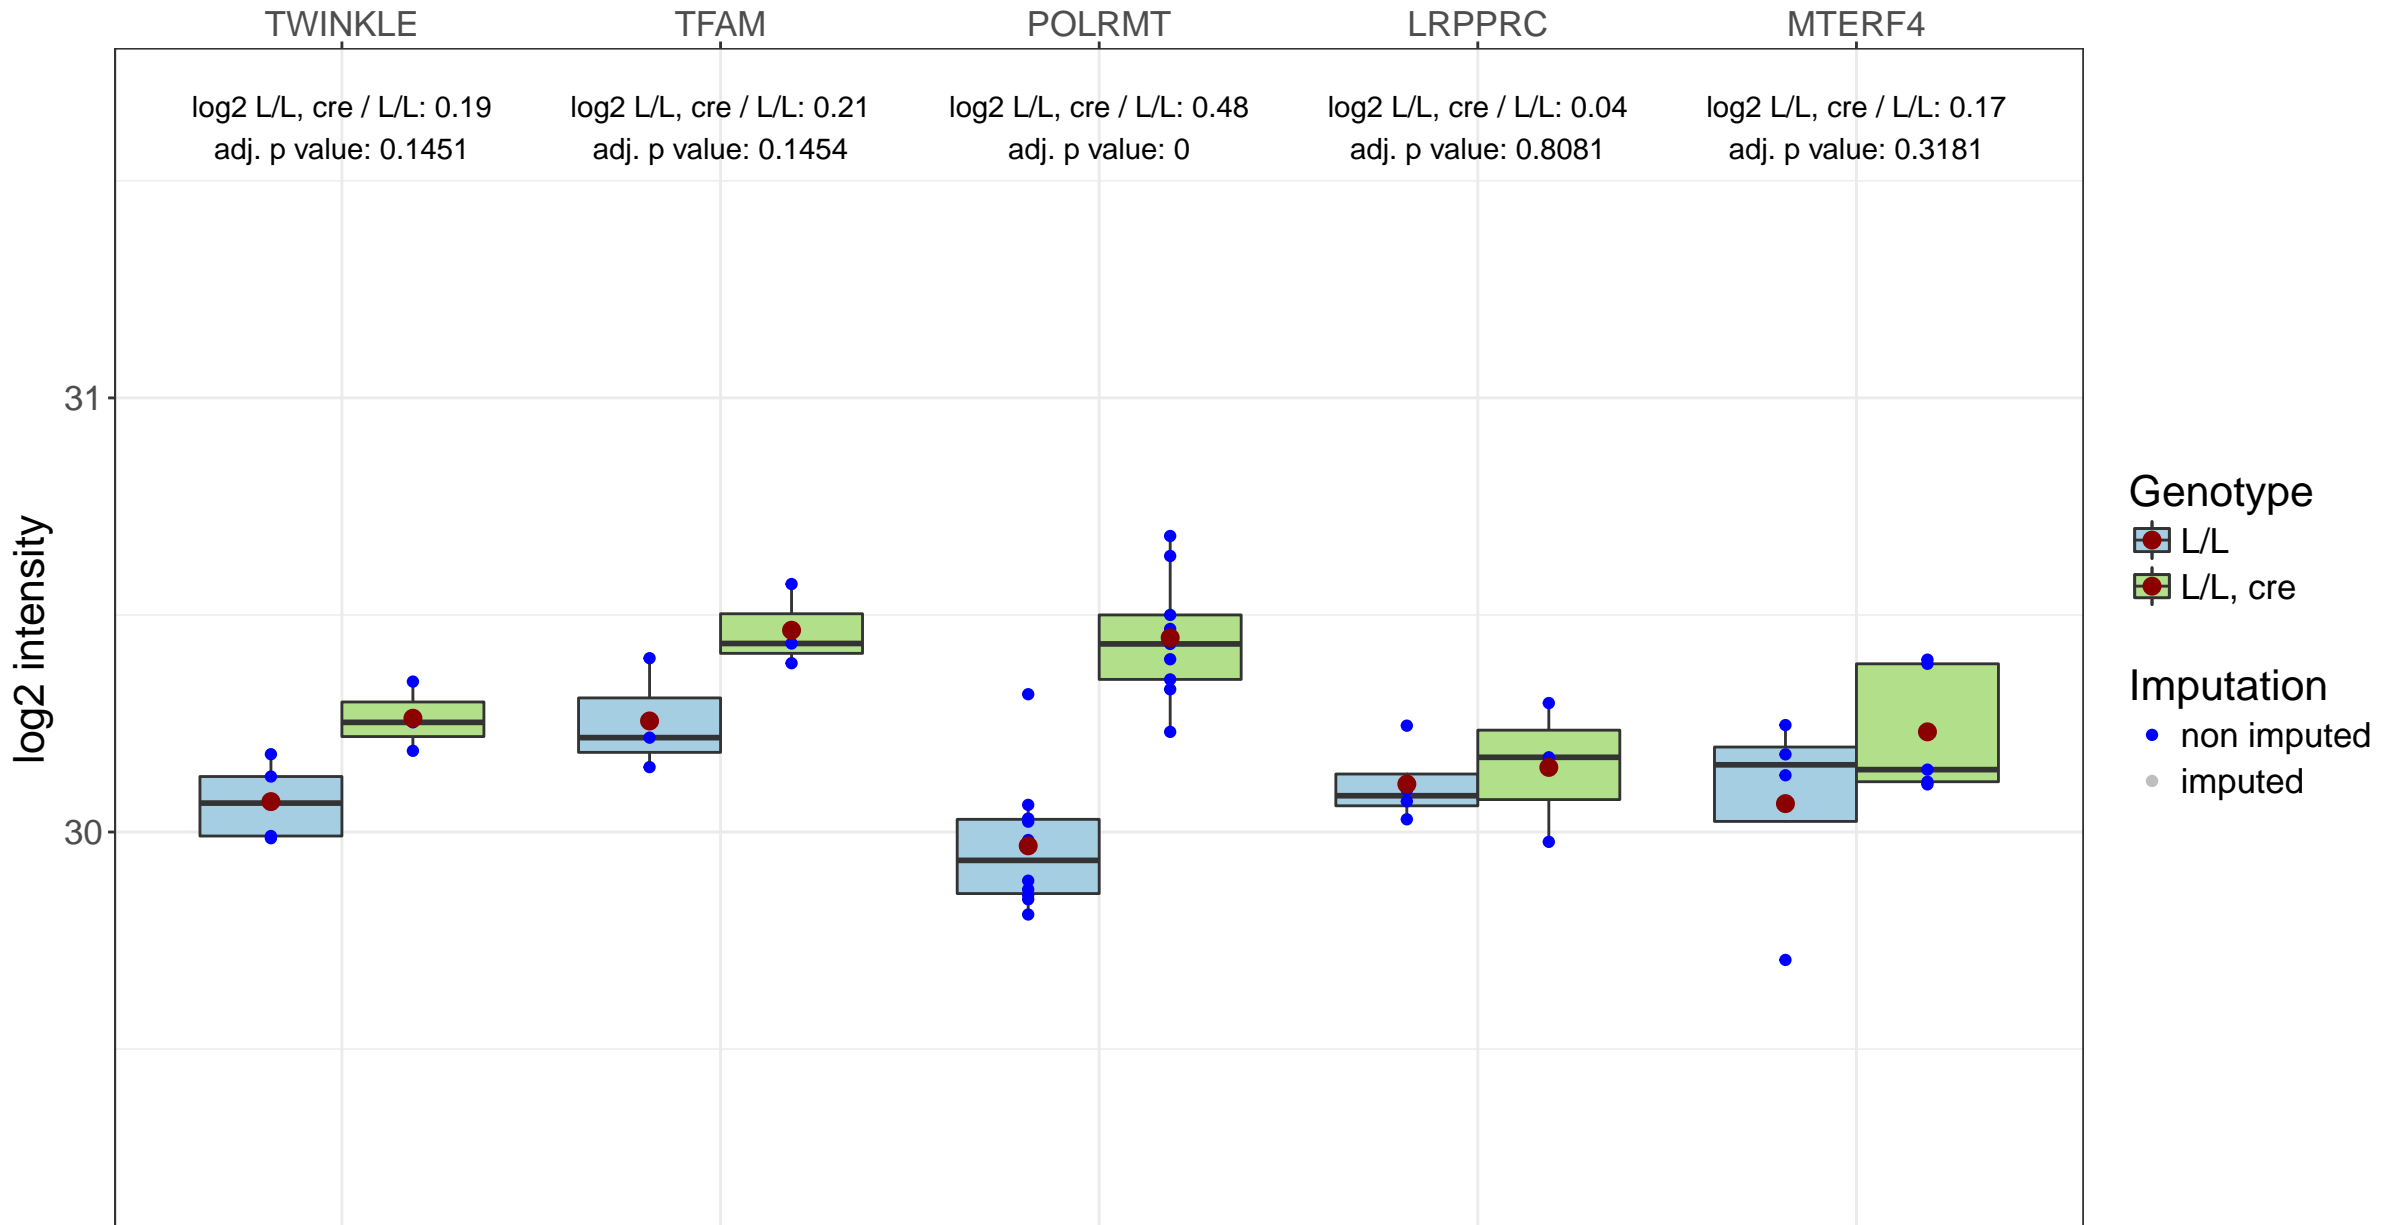

# ISCU / Q9D7P6

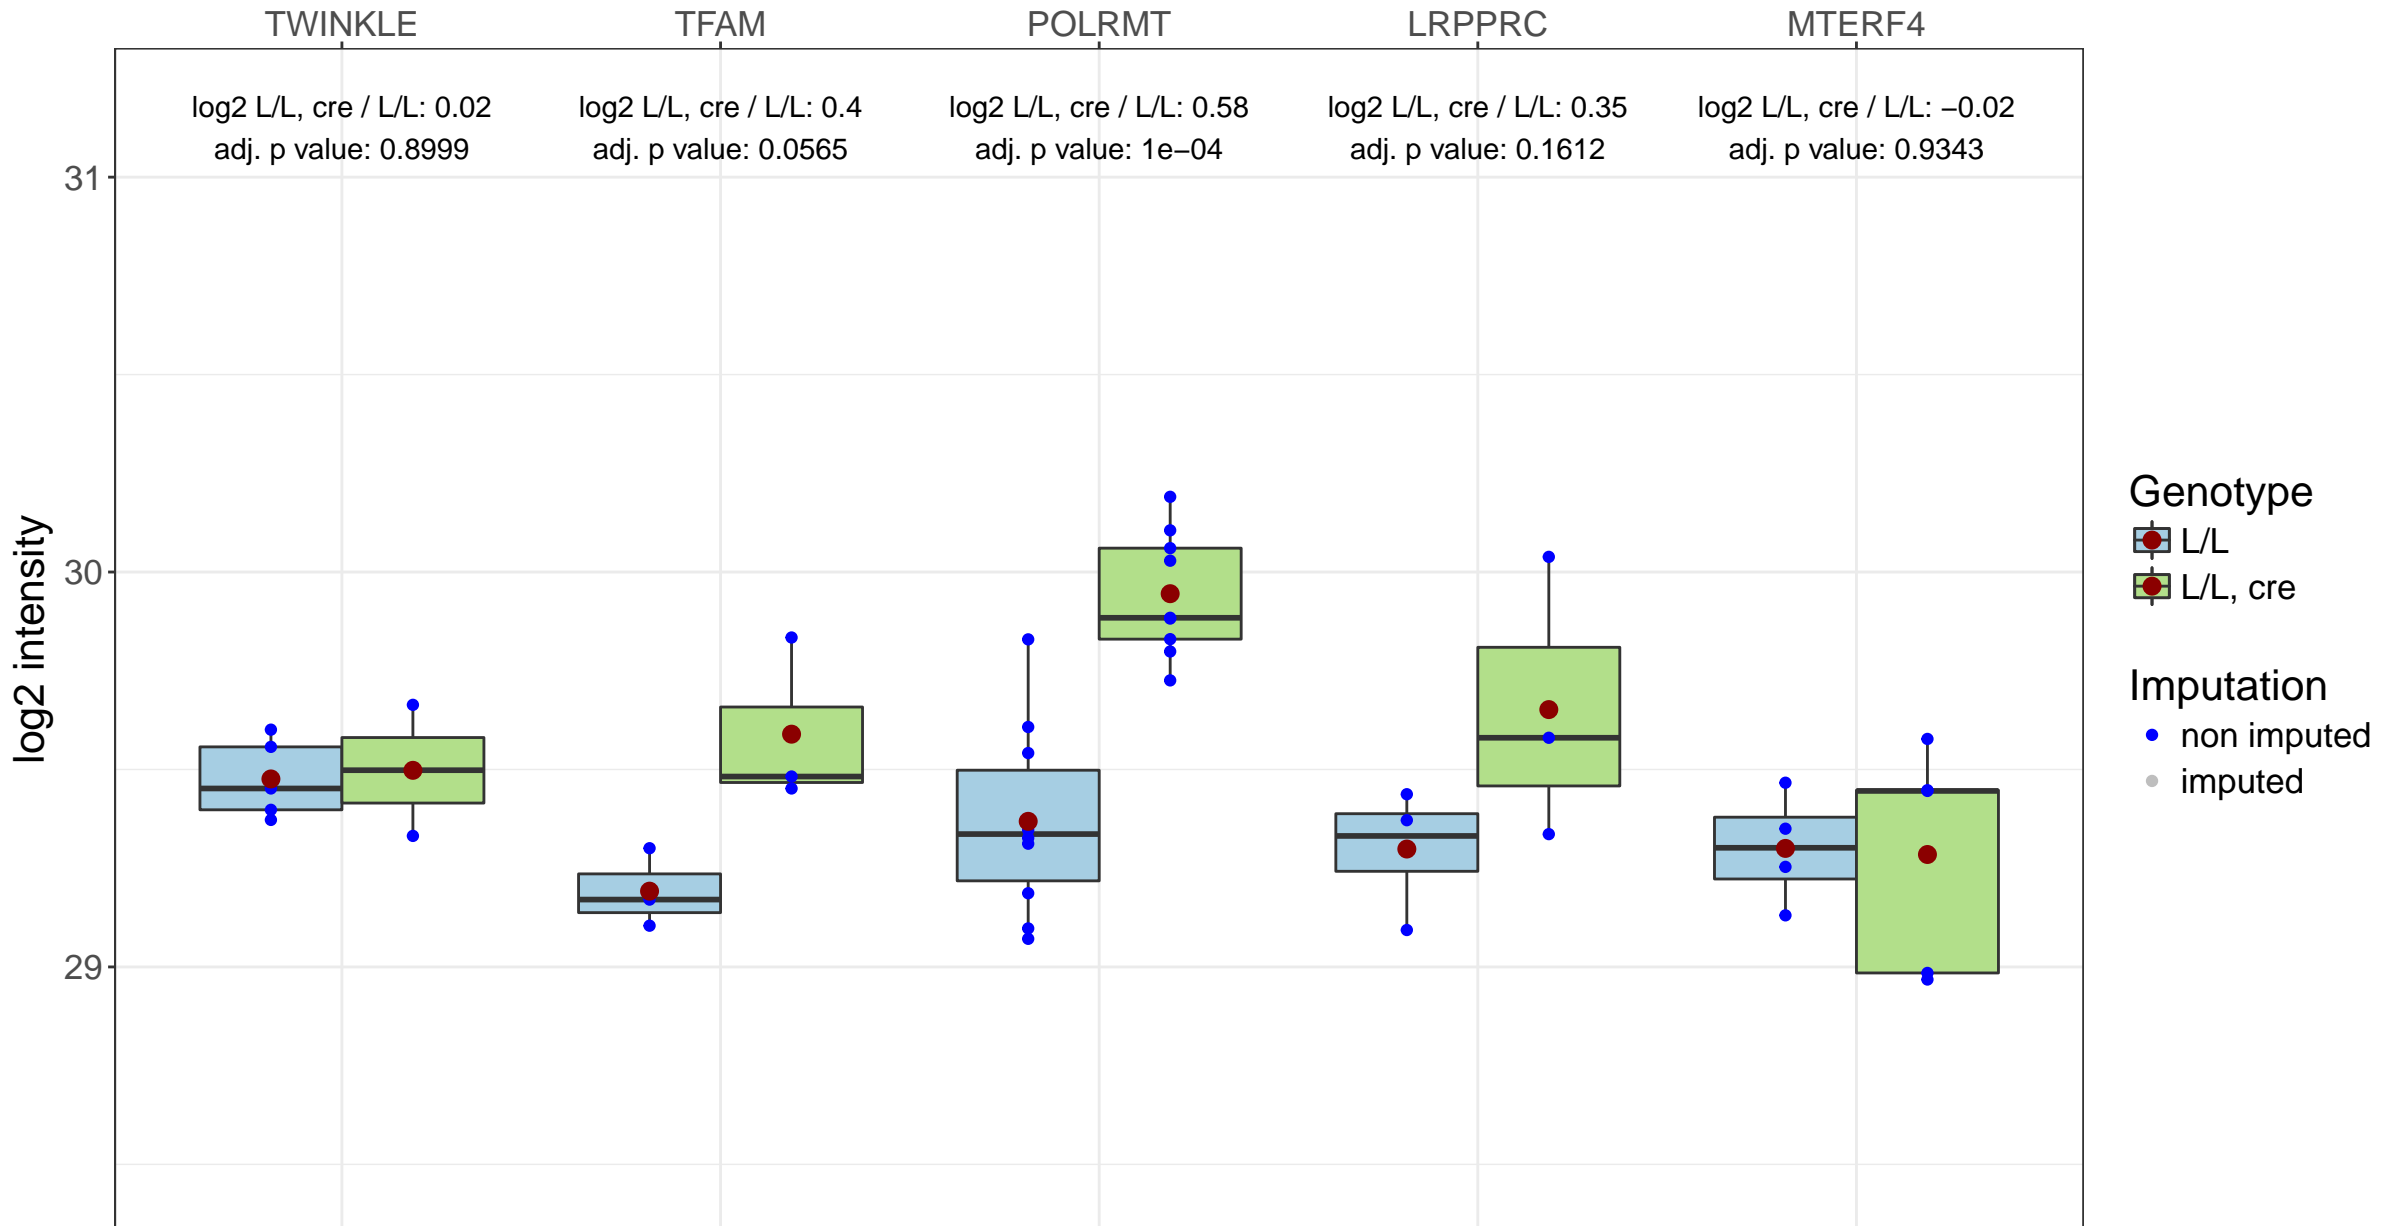

# ISOC2A / P85094

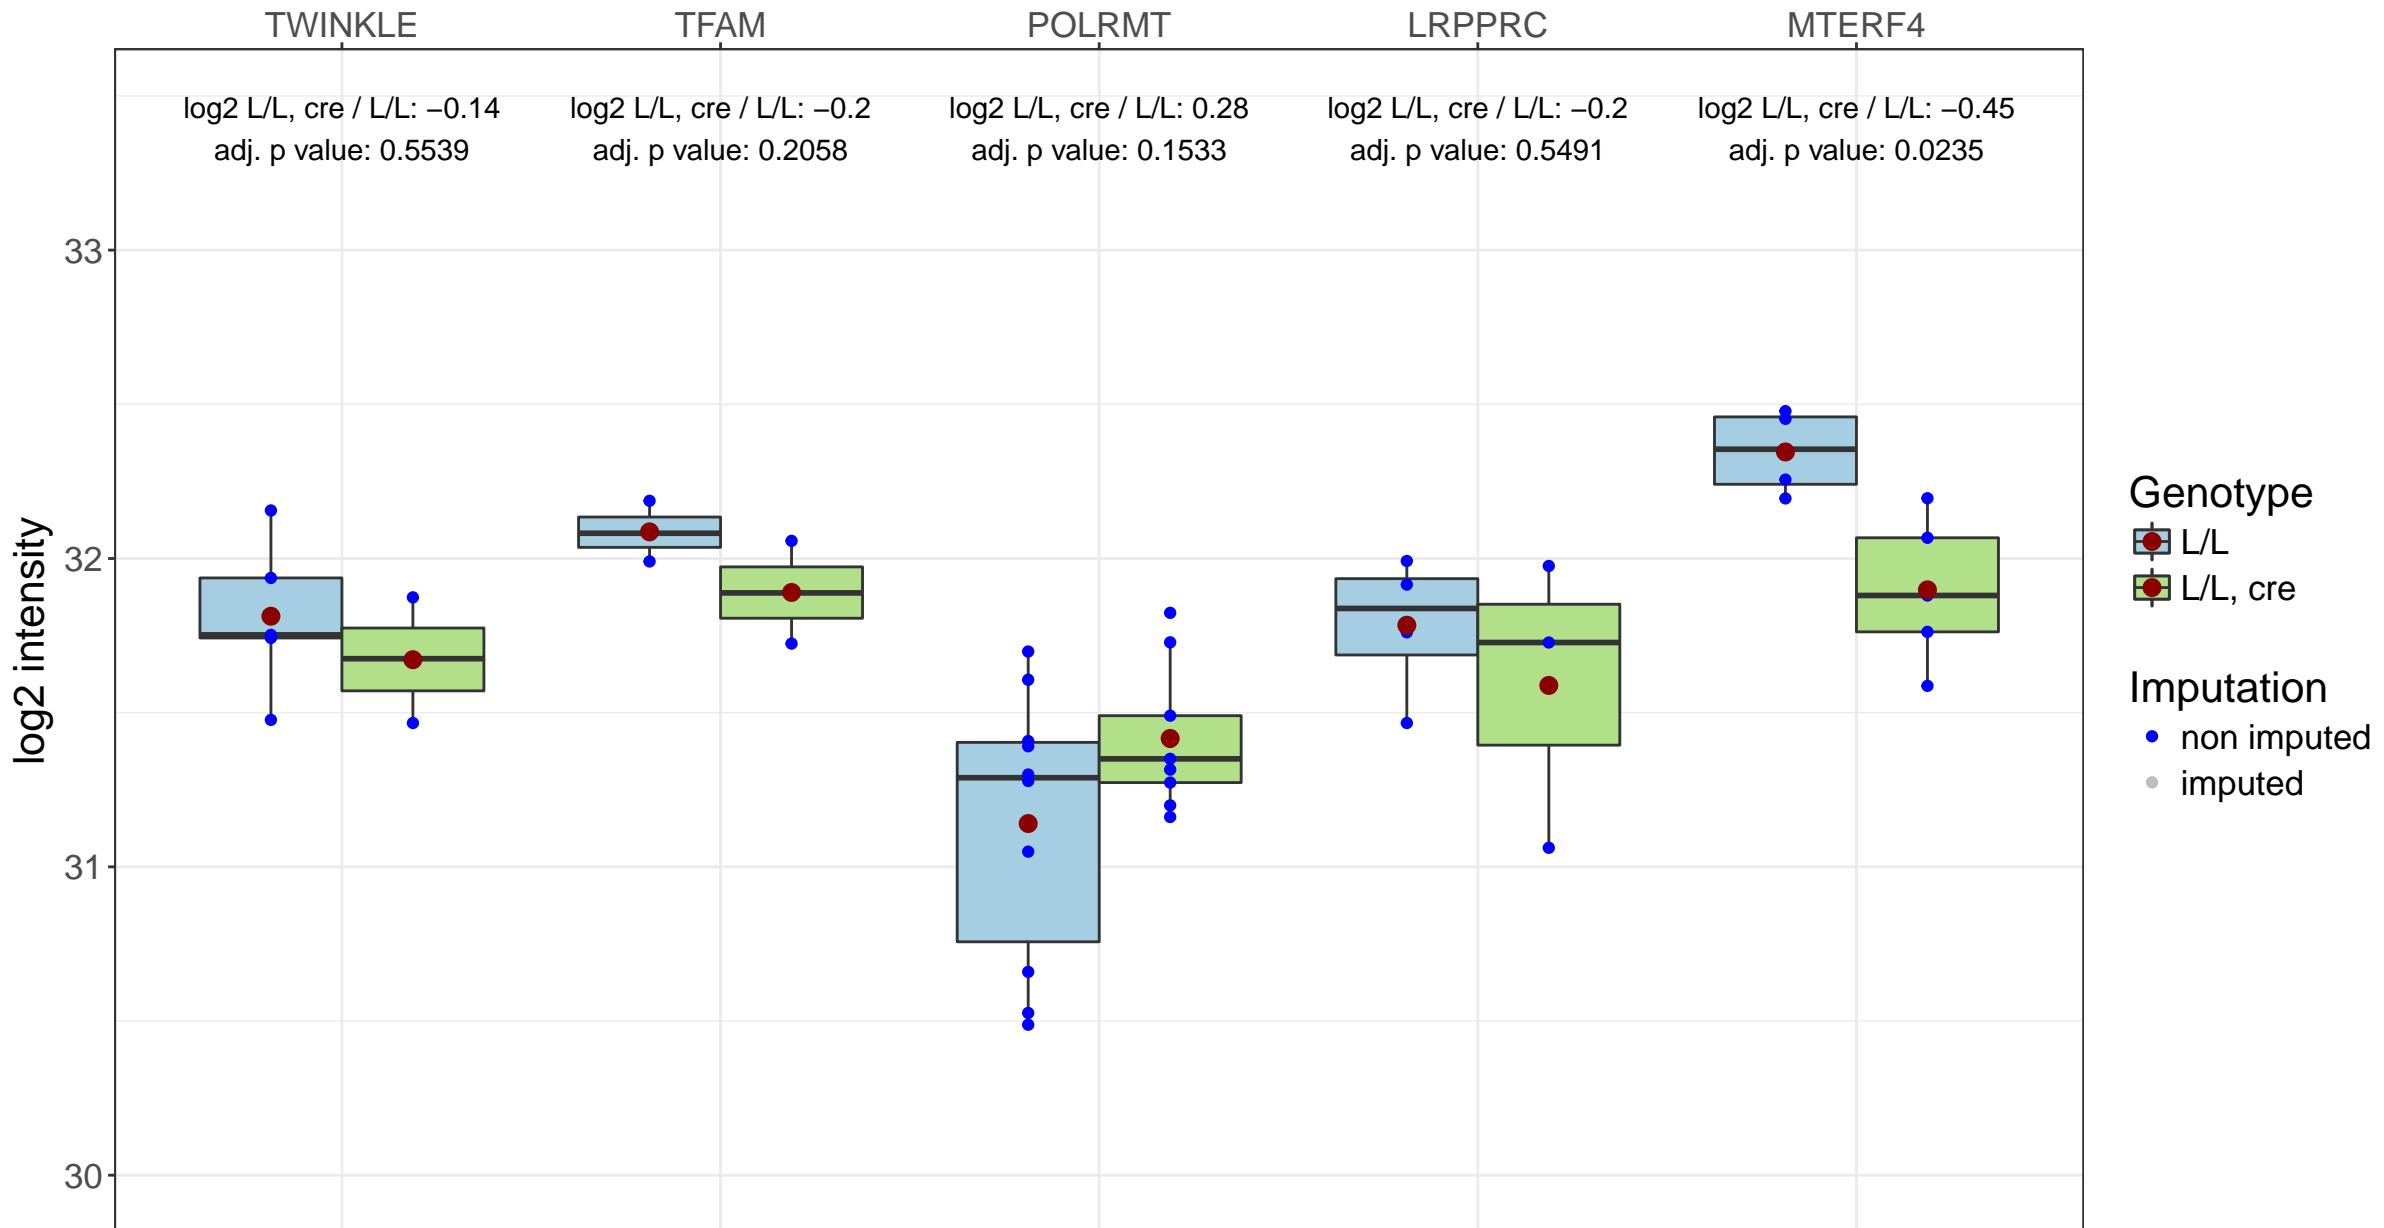

# ITSN1 / E9Q3I8

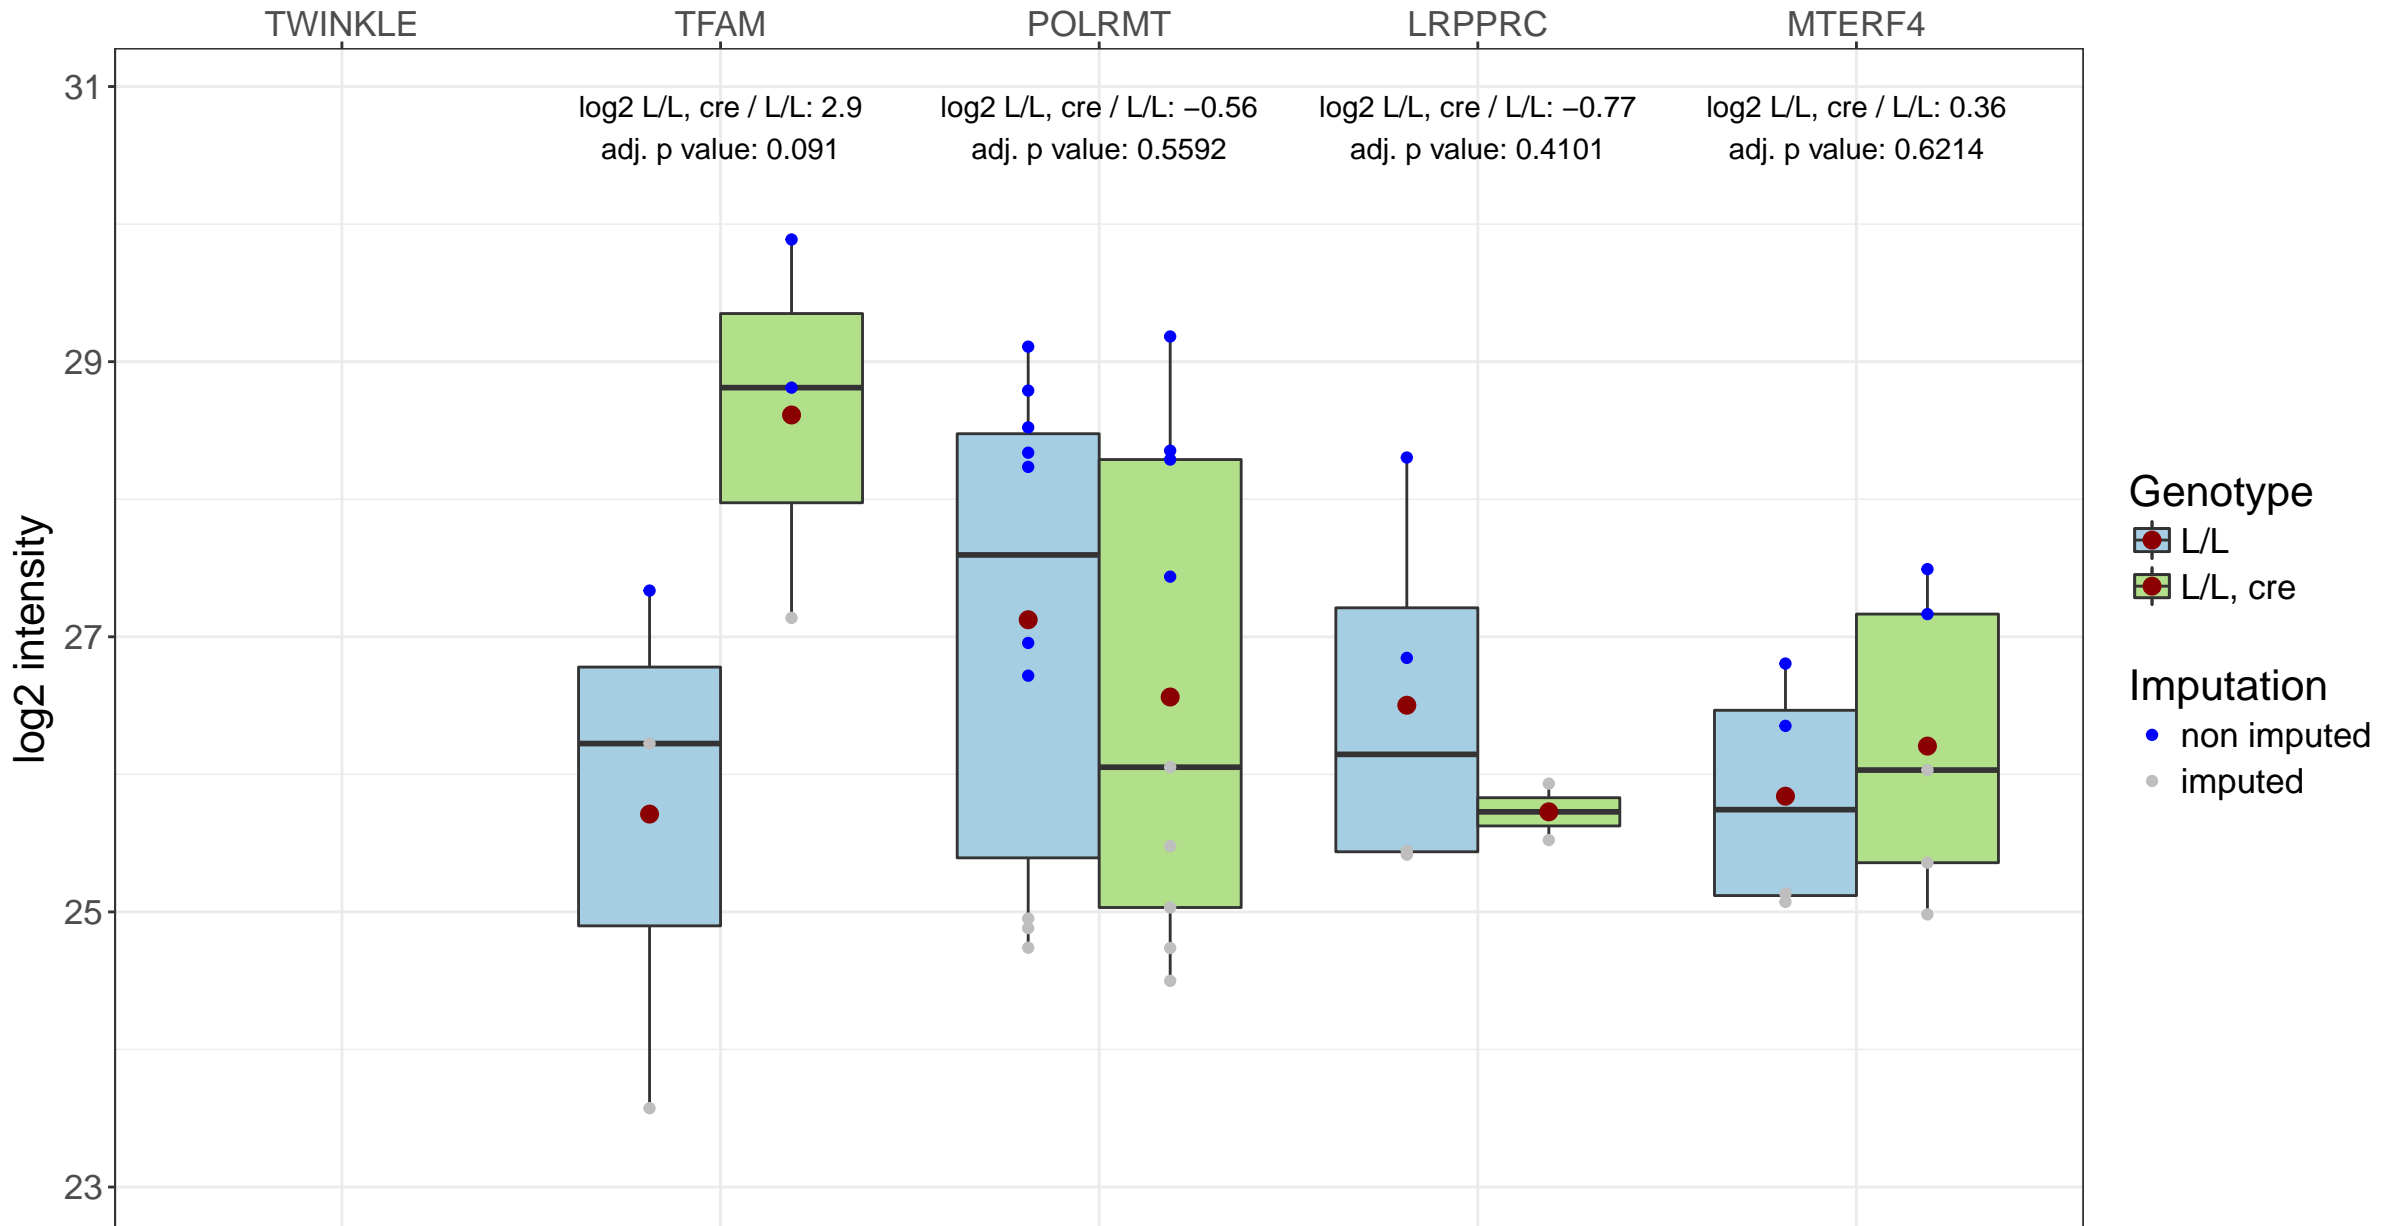

# IVD / Q9JHI5

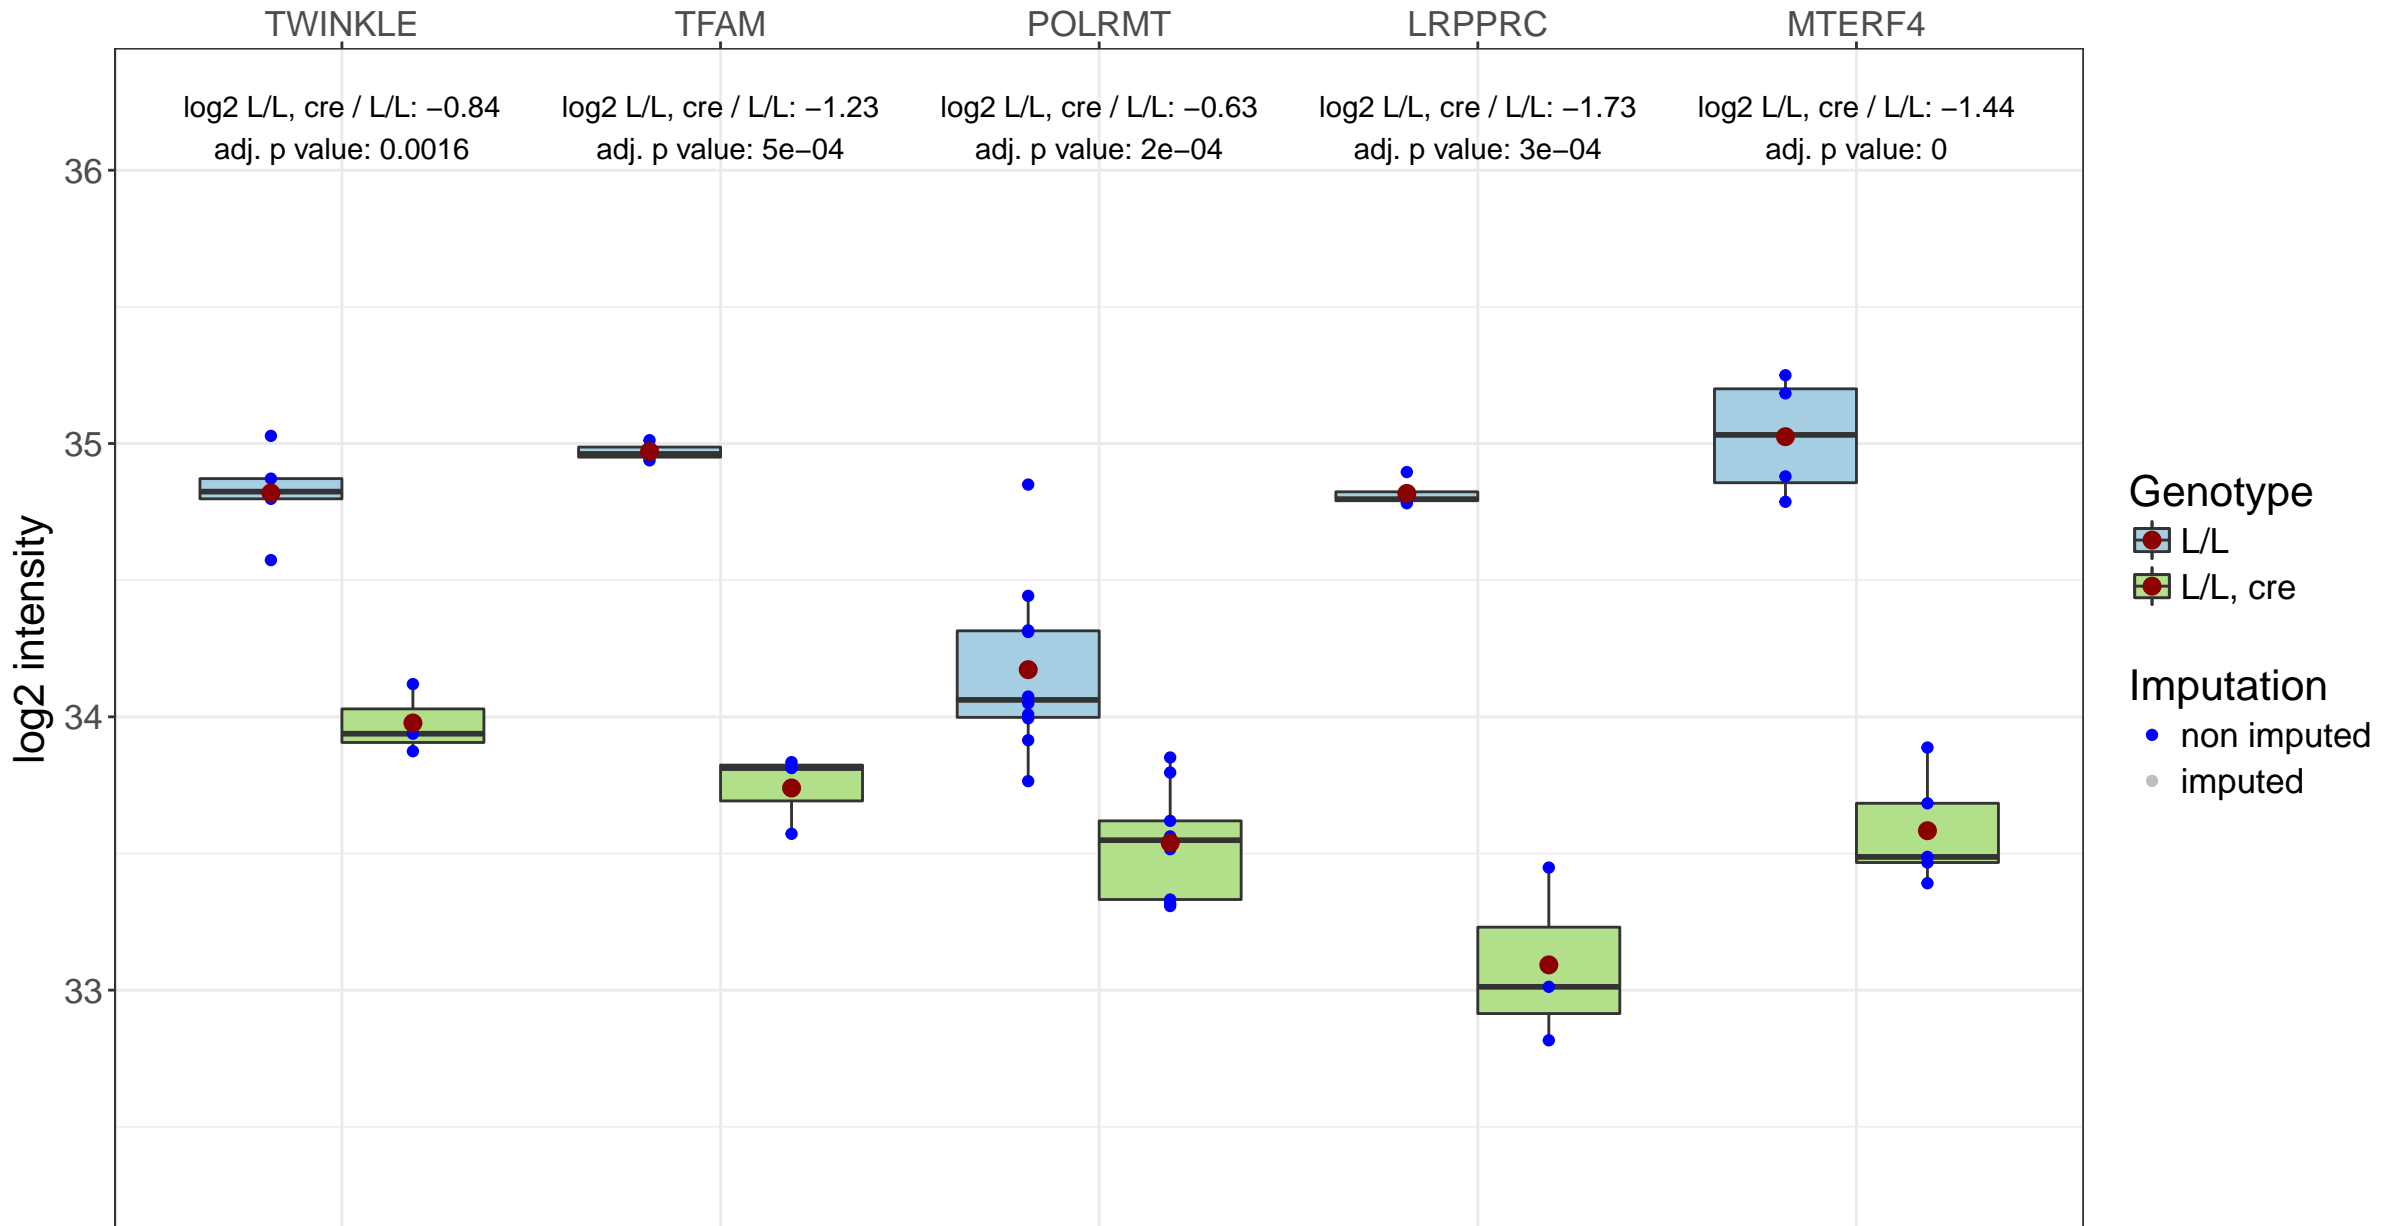

# KARS / Q99MN1

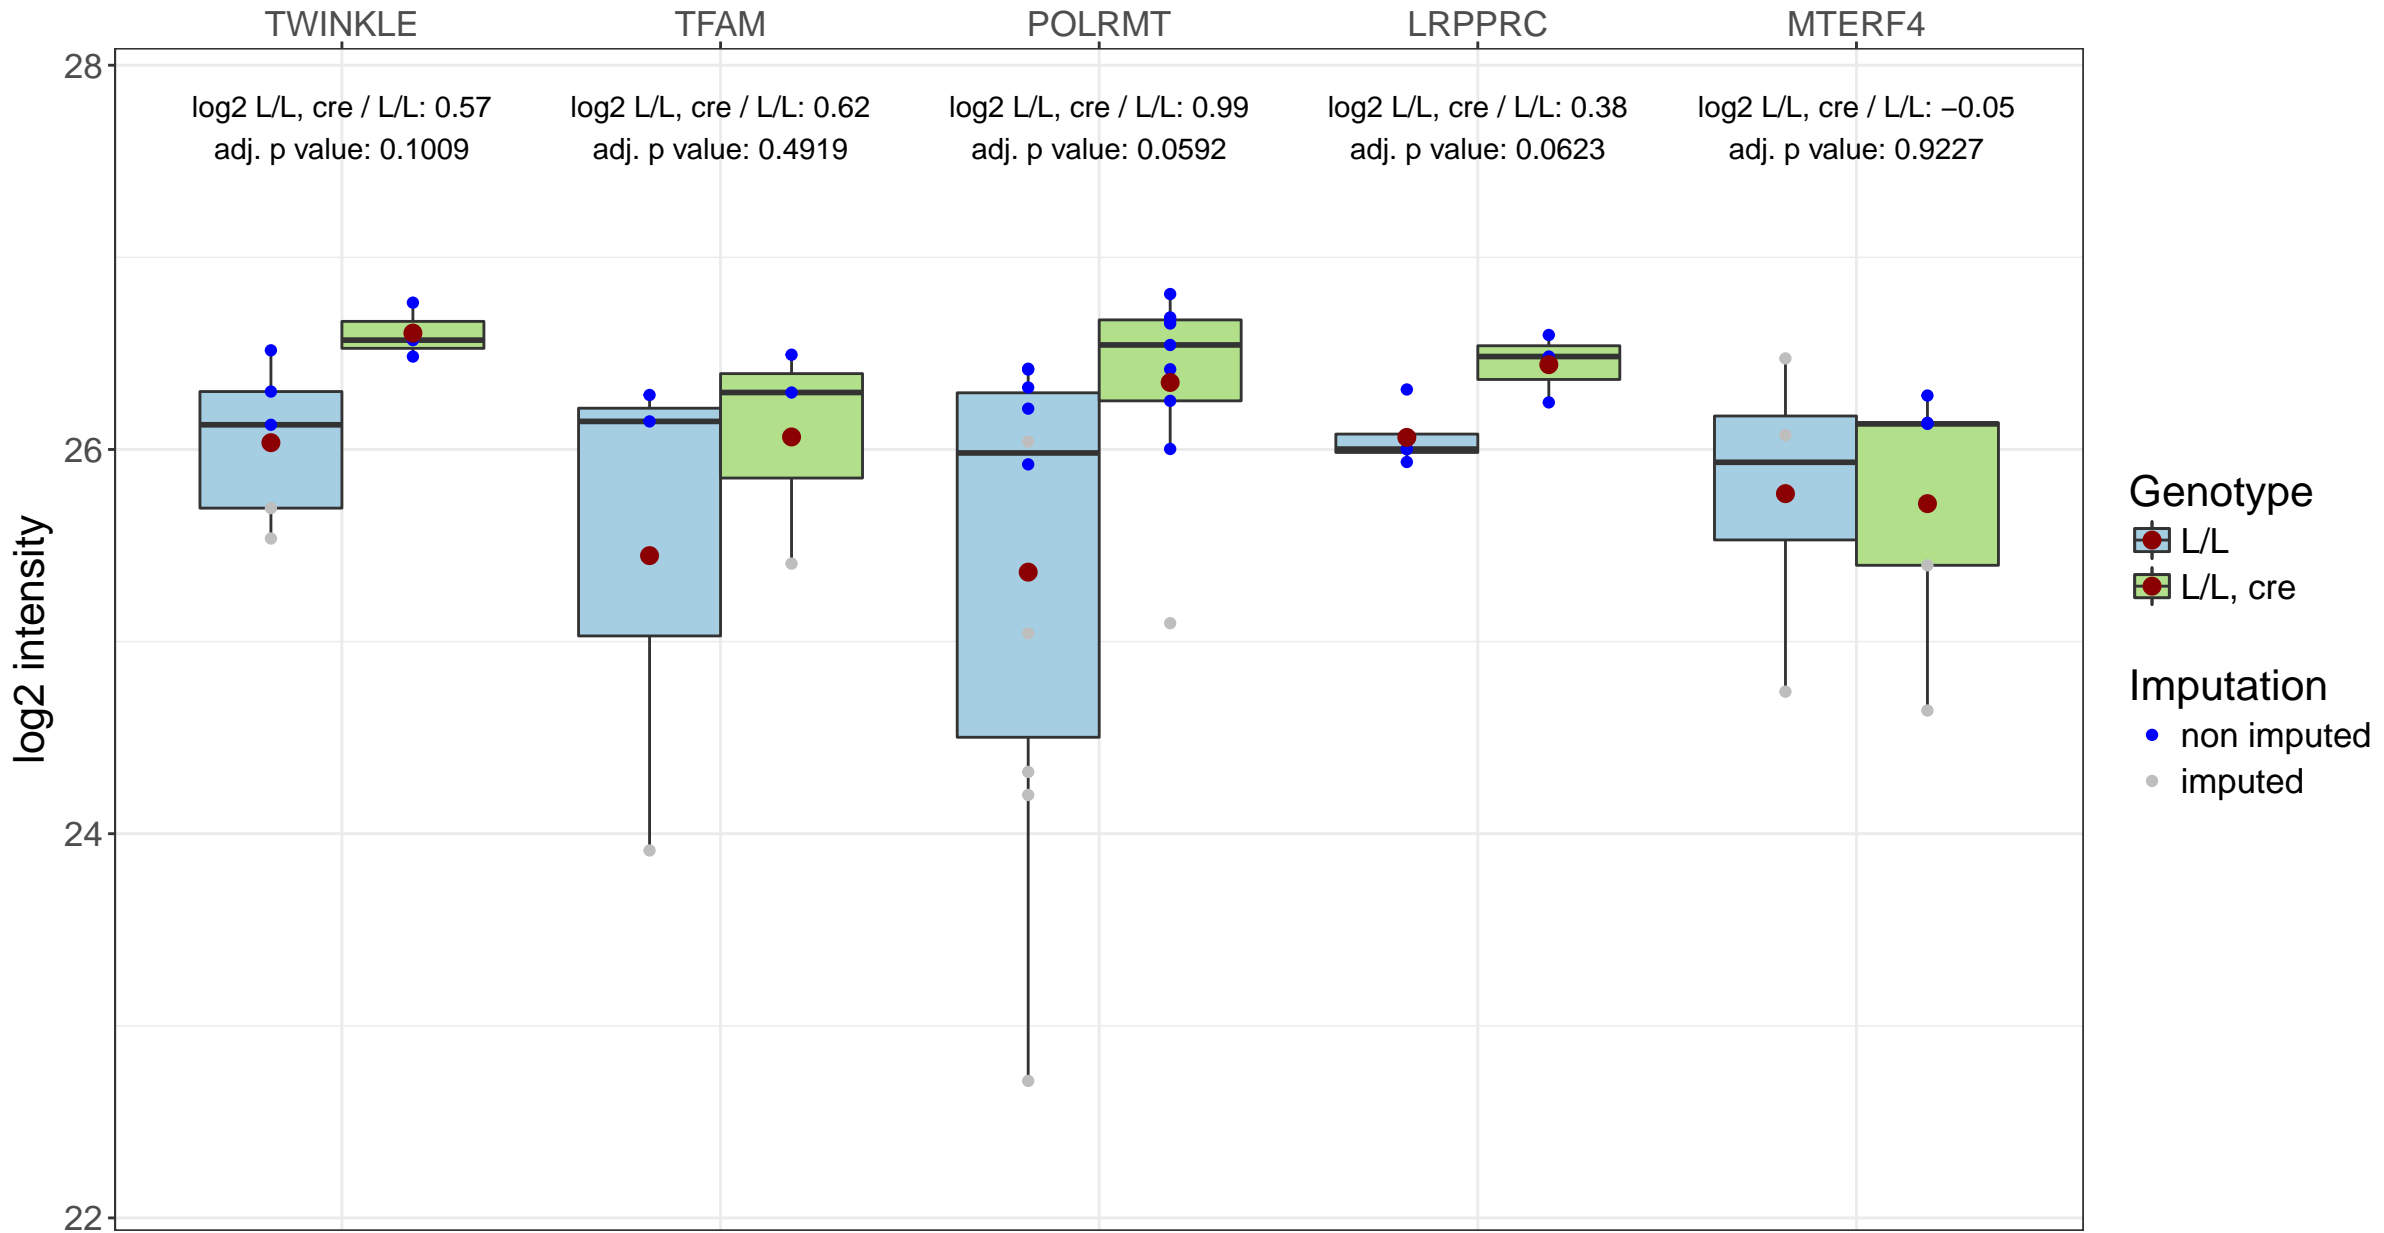

# KIAA0391 / Q8JZY4

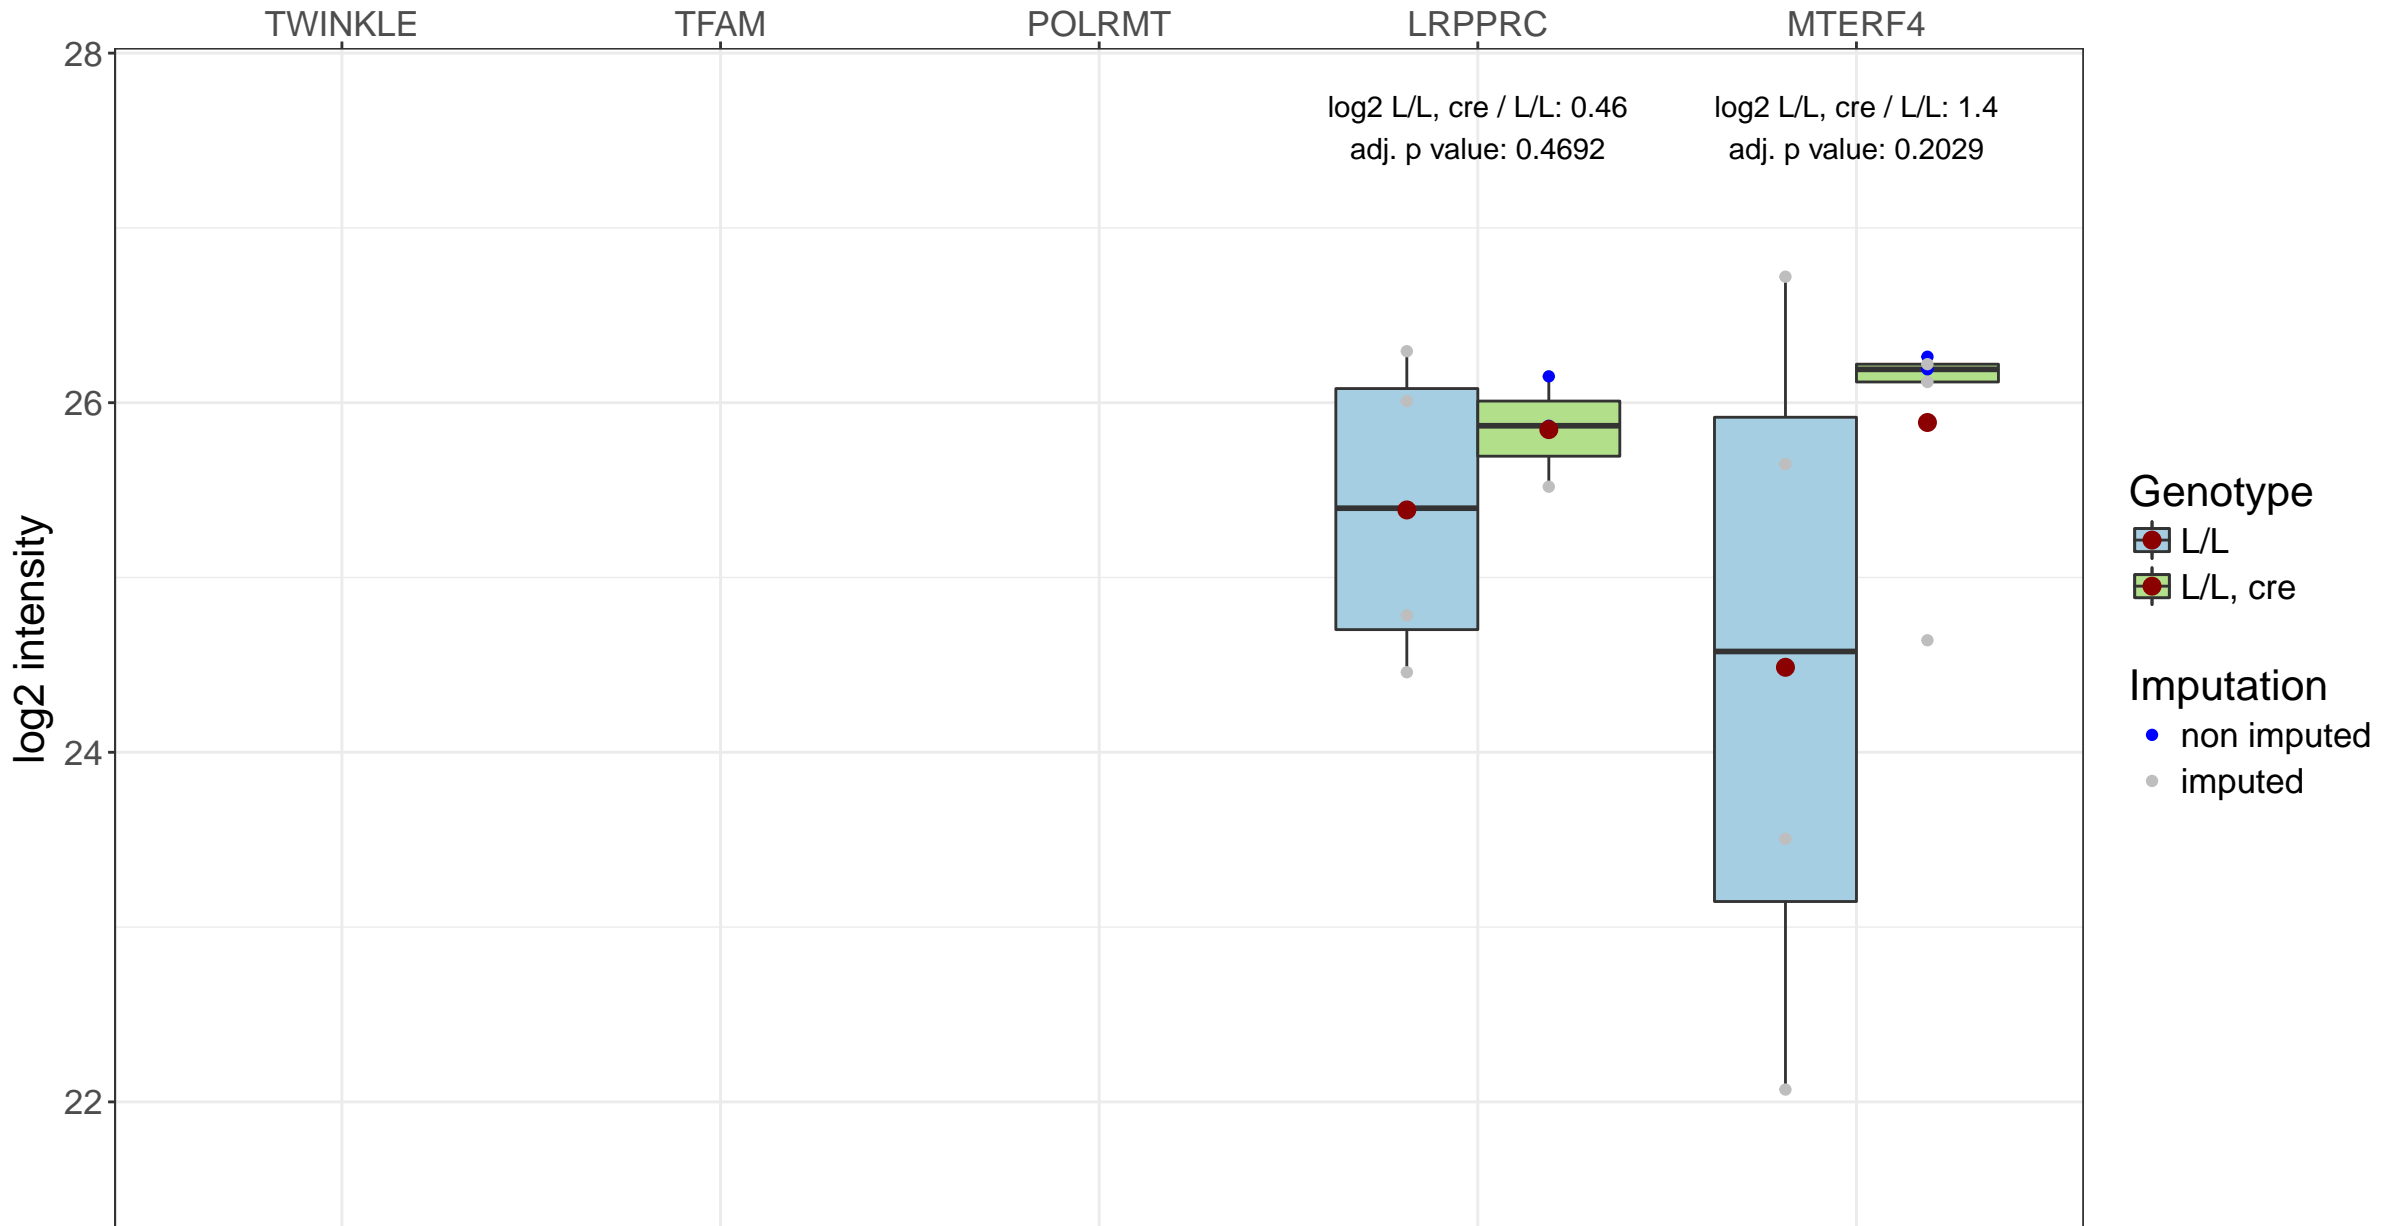

# KIF5B / Q61768

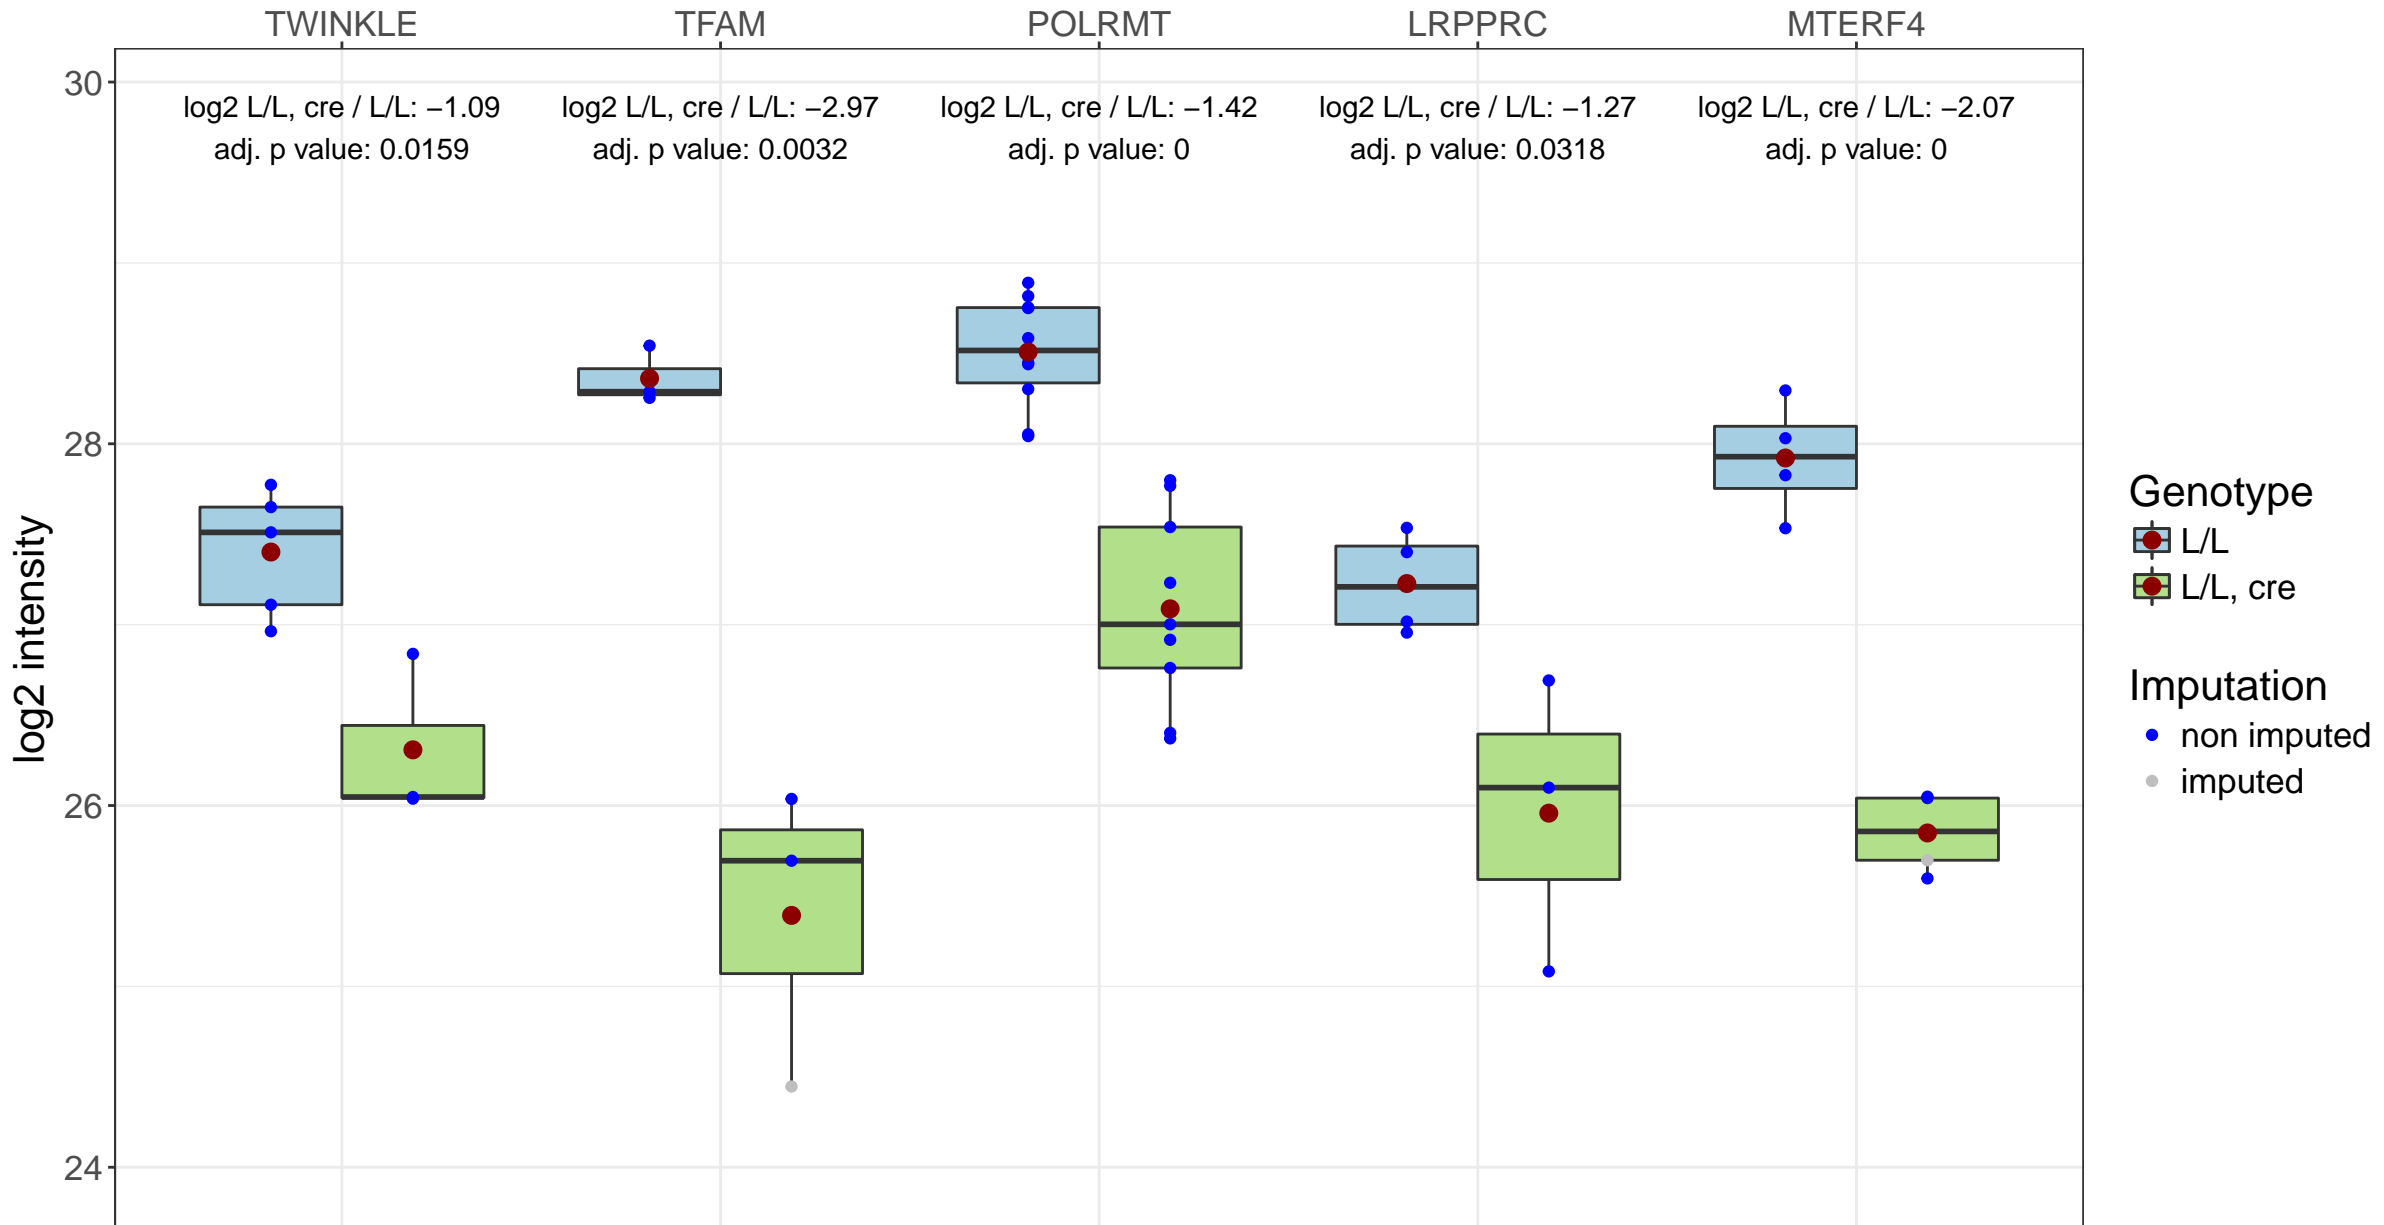



# KTN1 / F8VQC7

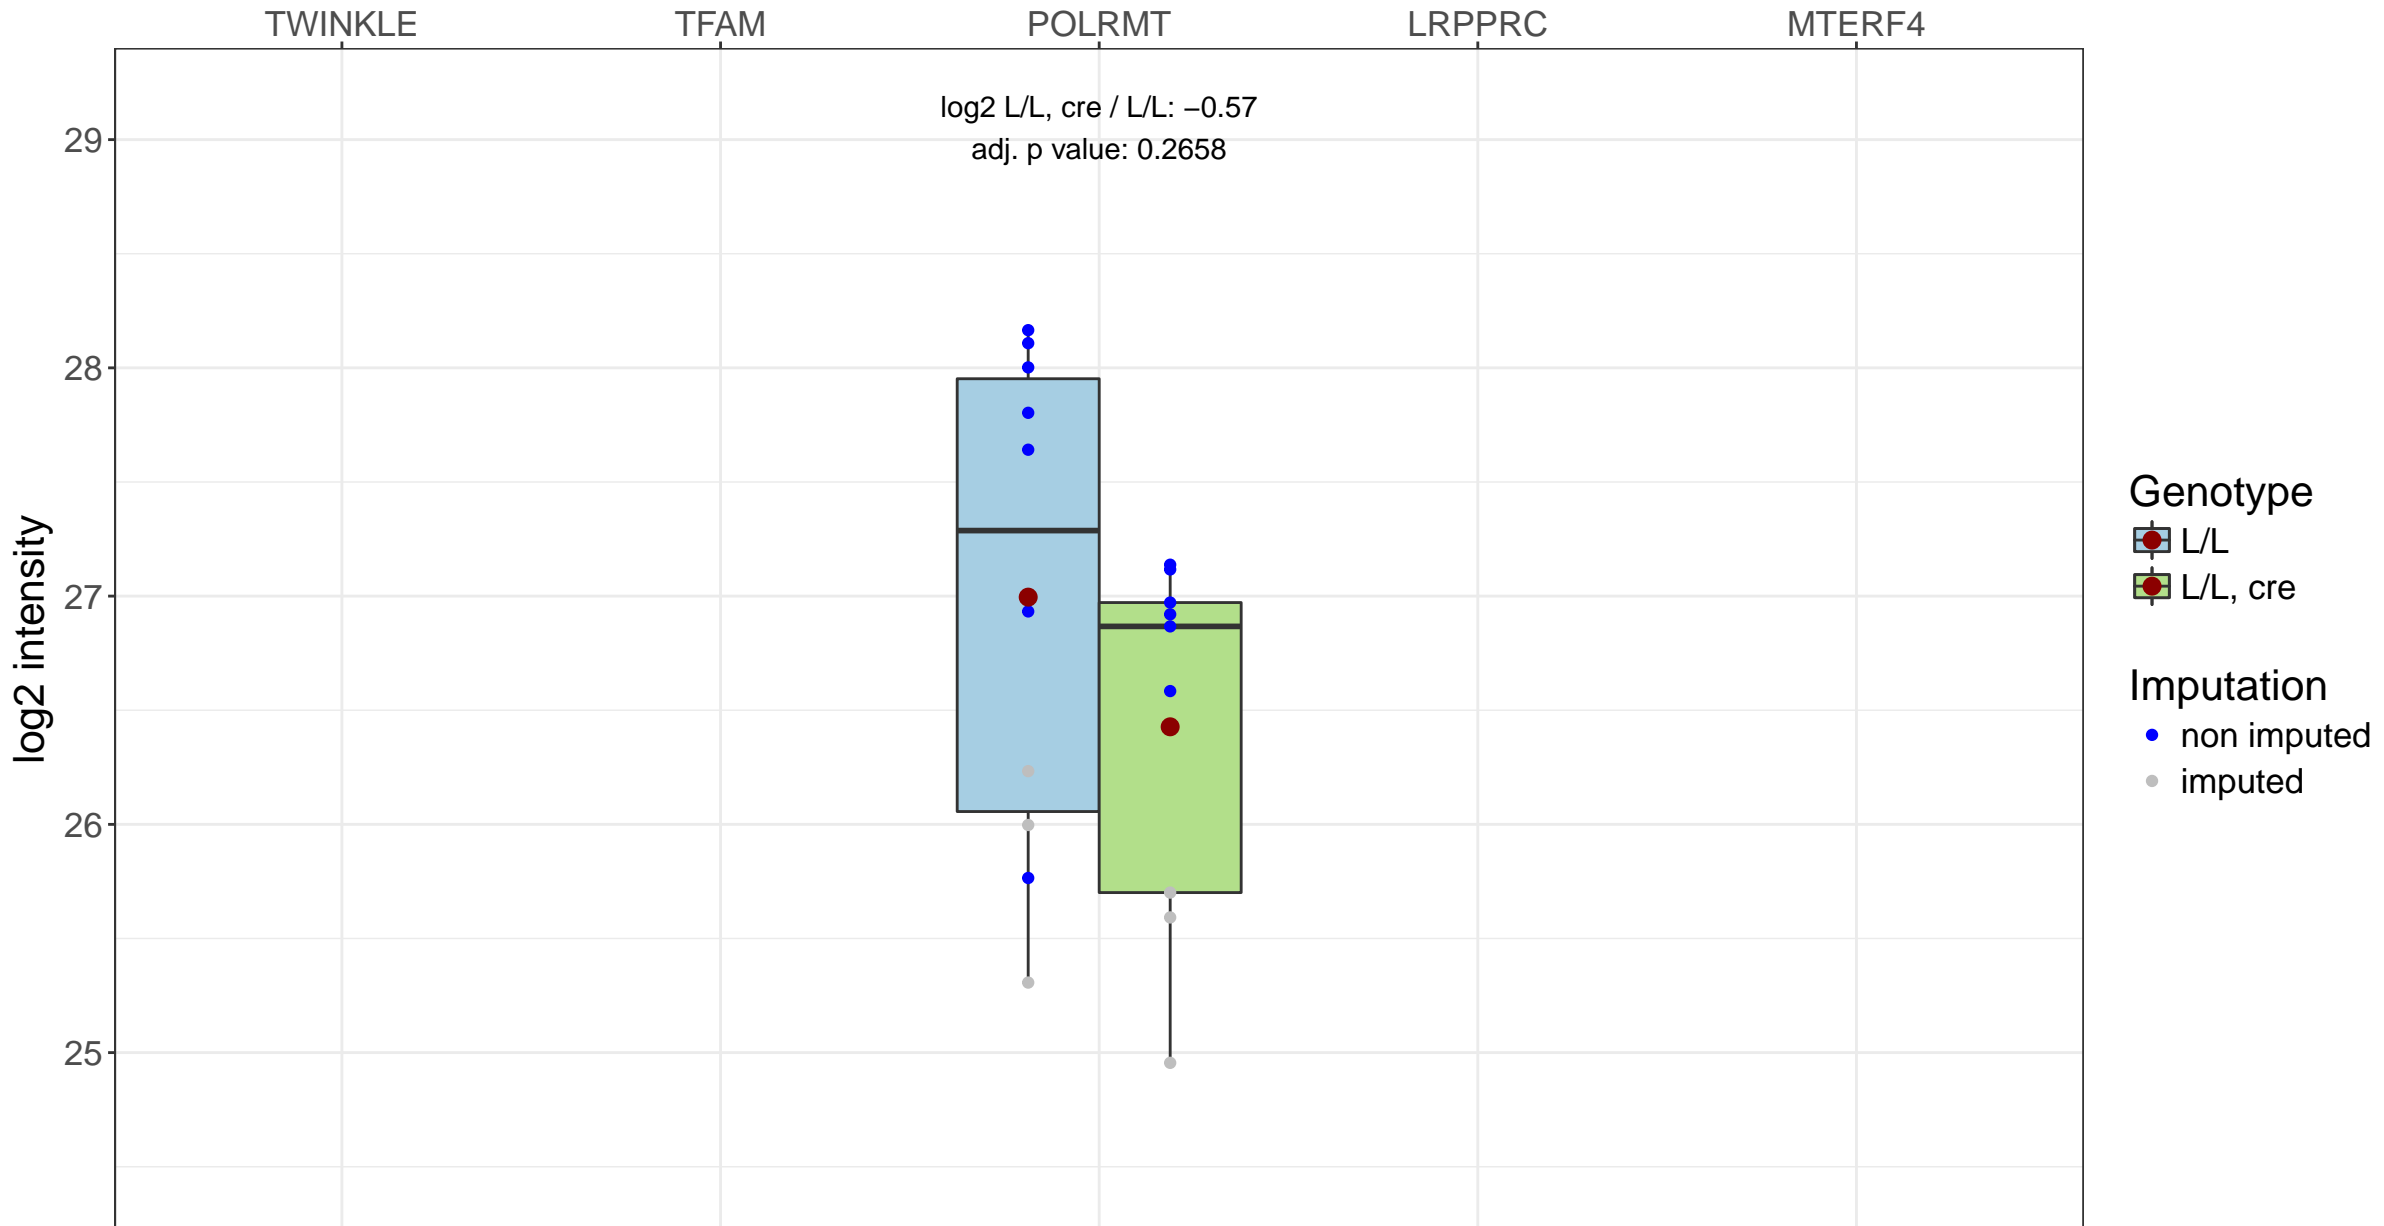

# L2HGDH / Q91YP0

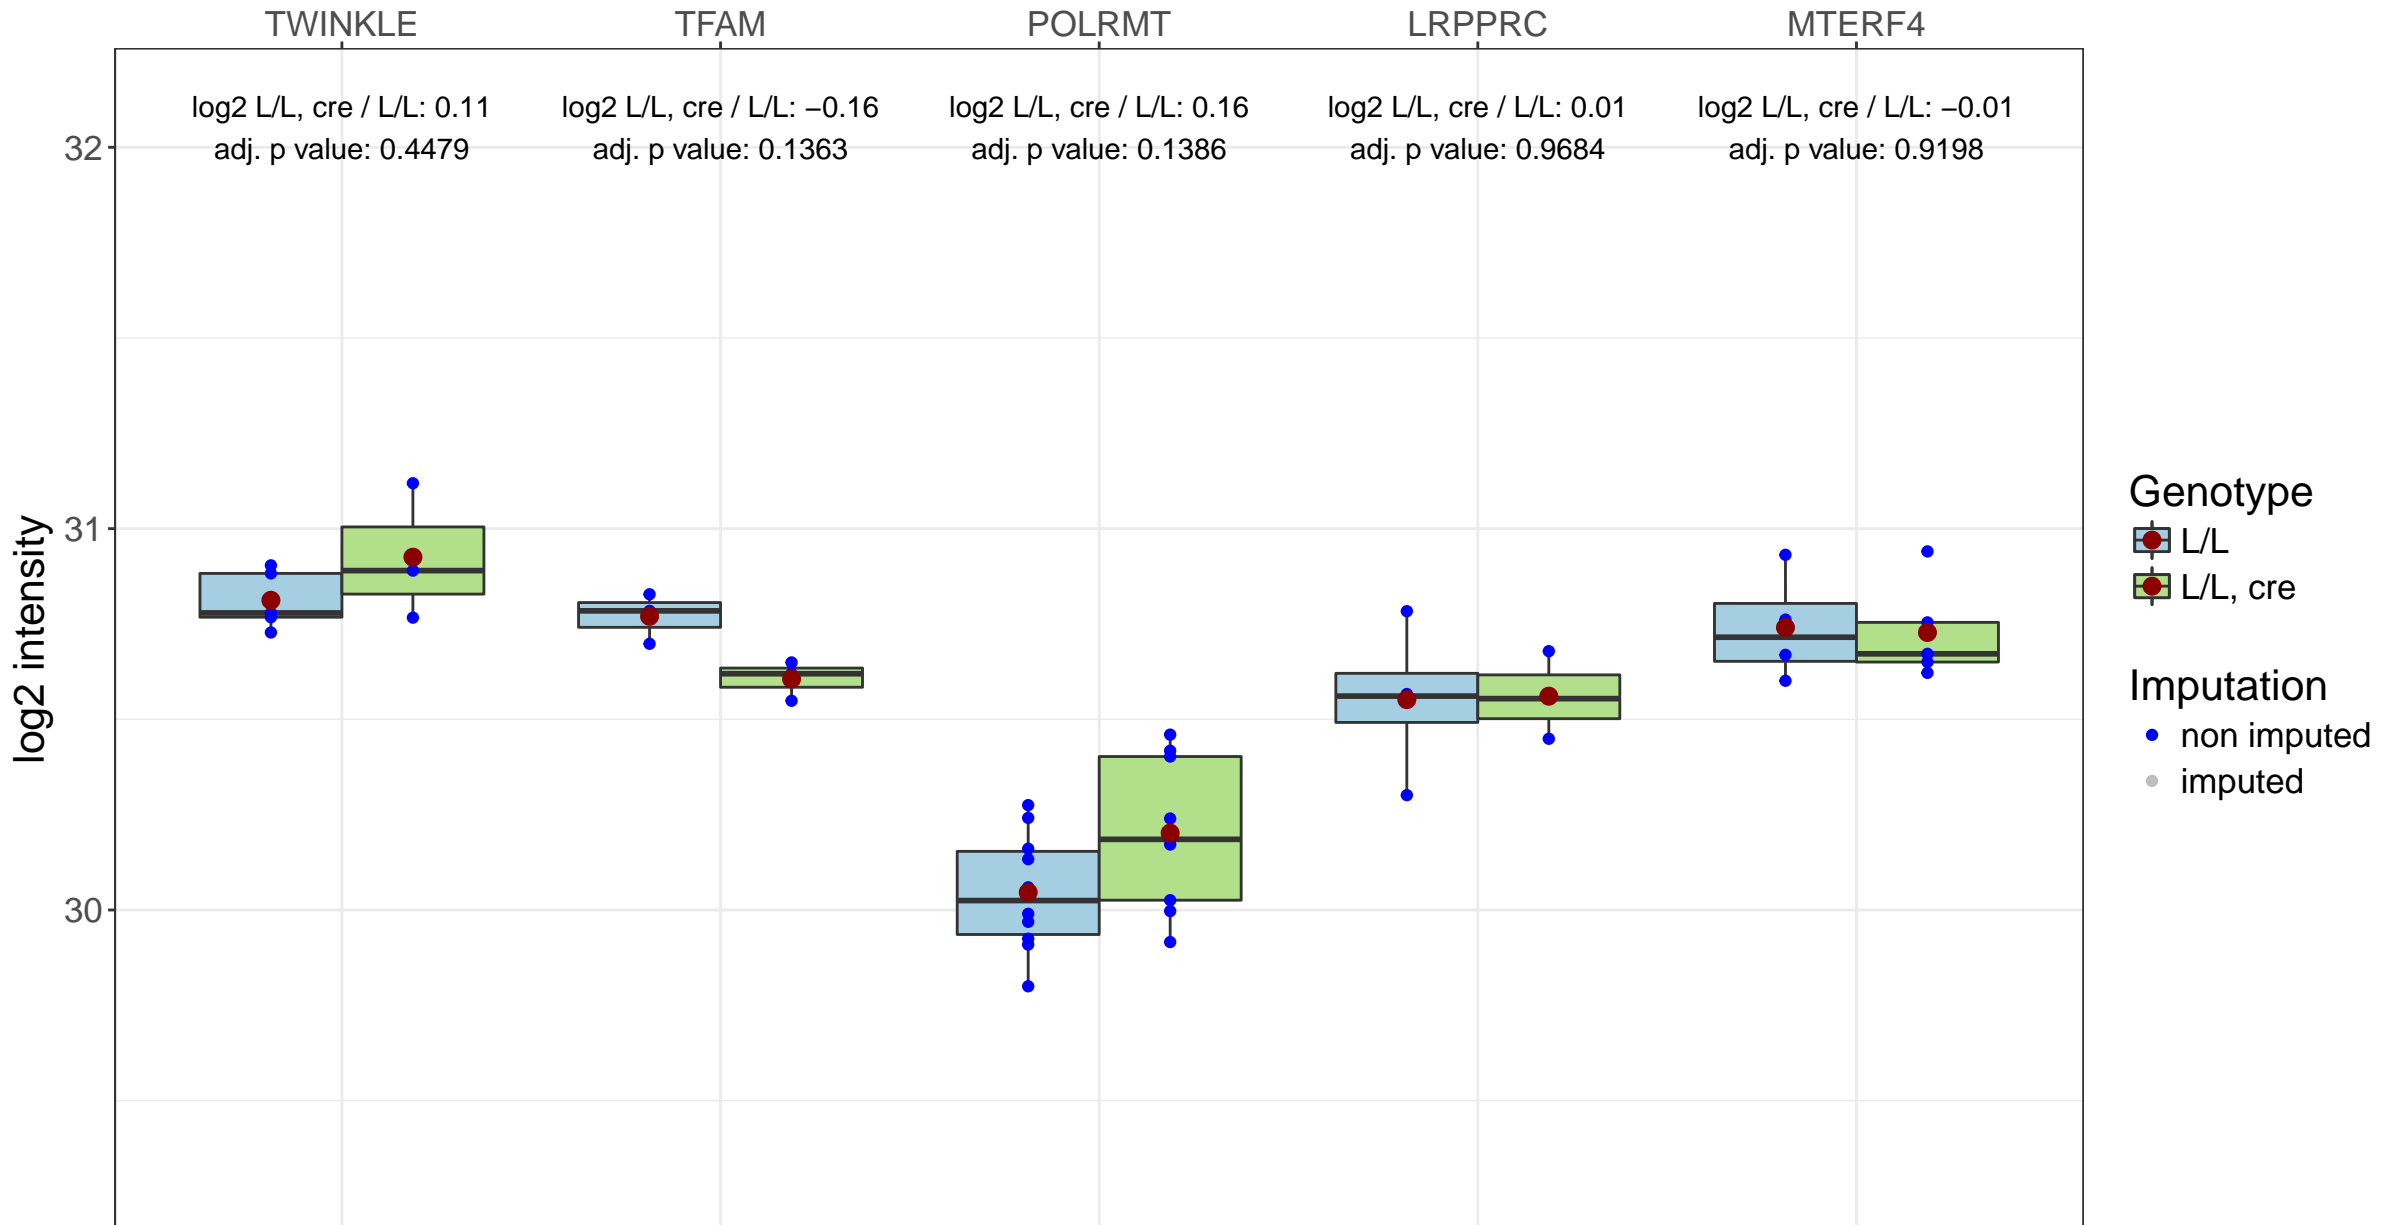

# LACE1 / Q3V384

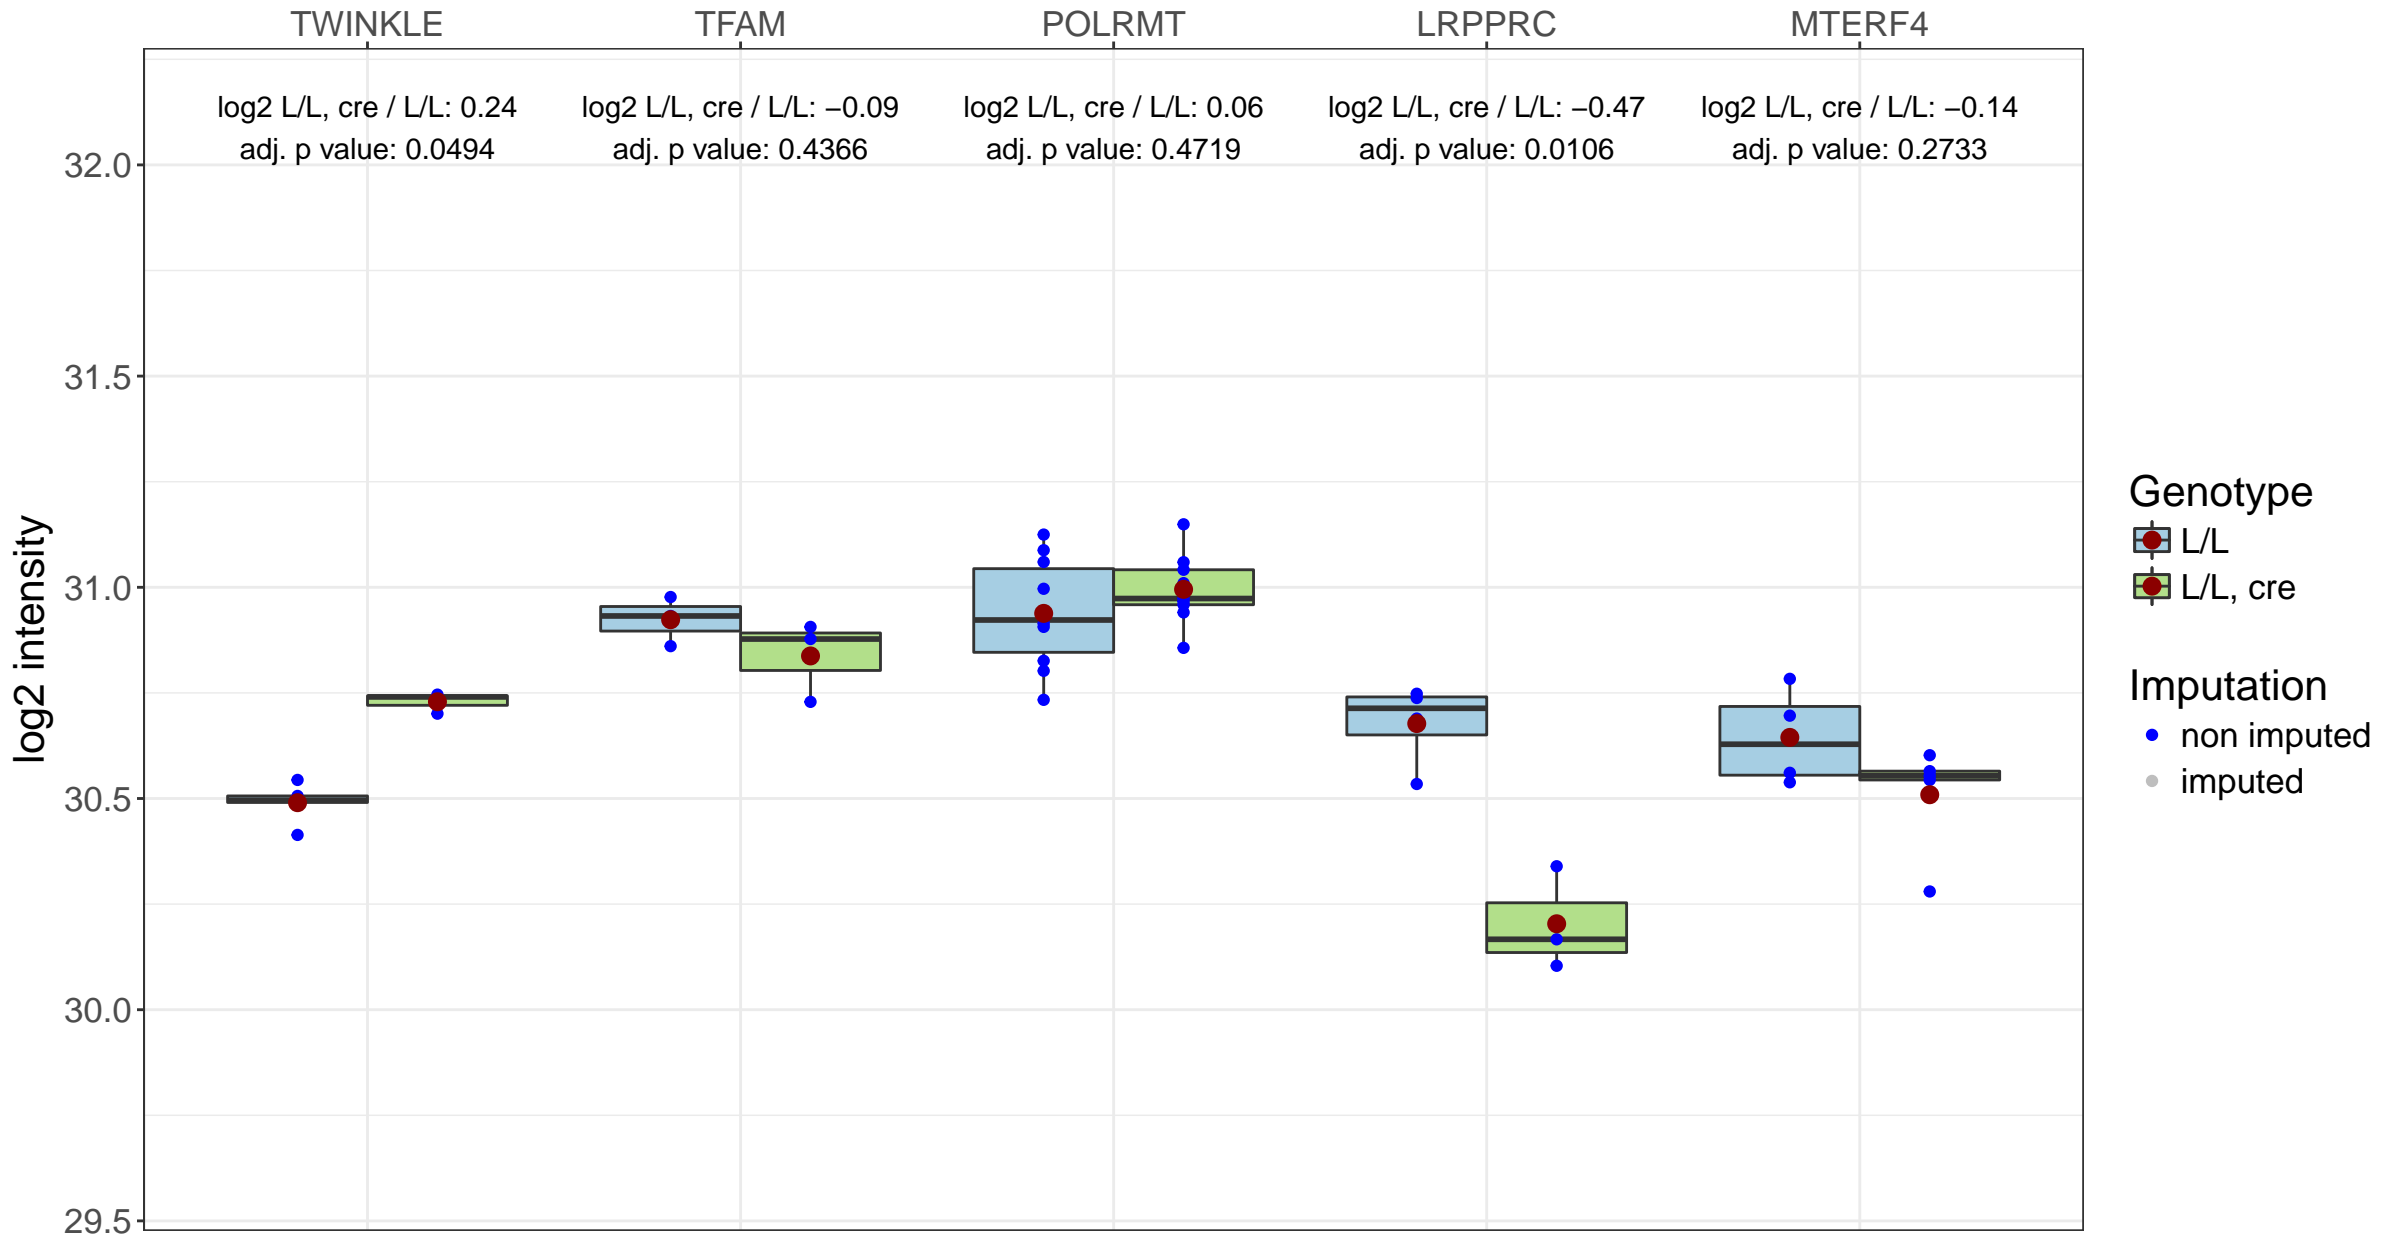

# LACTB / Q9EP89

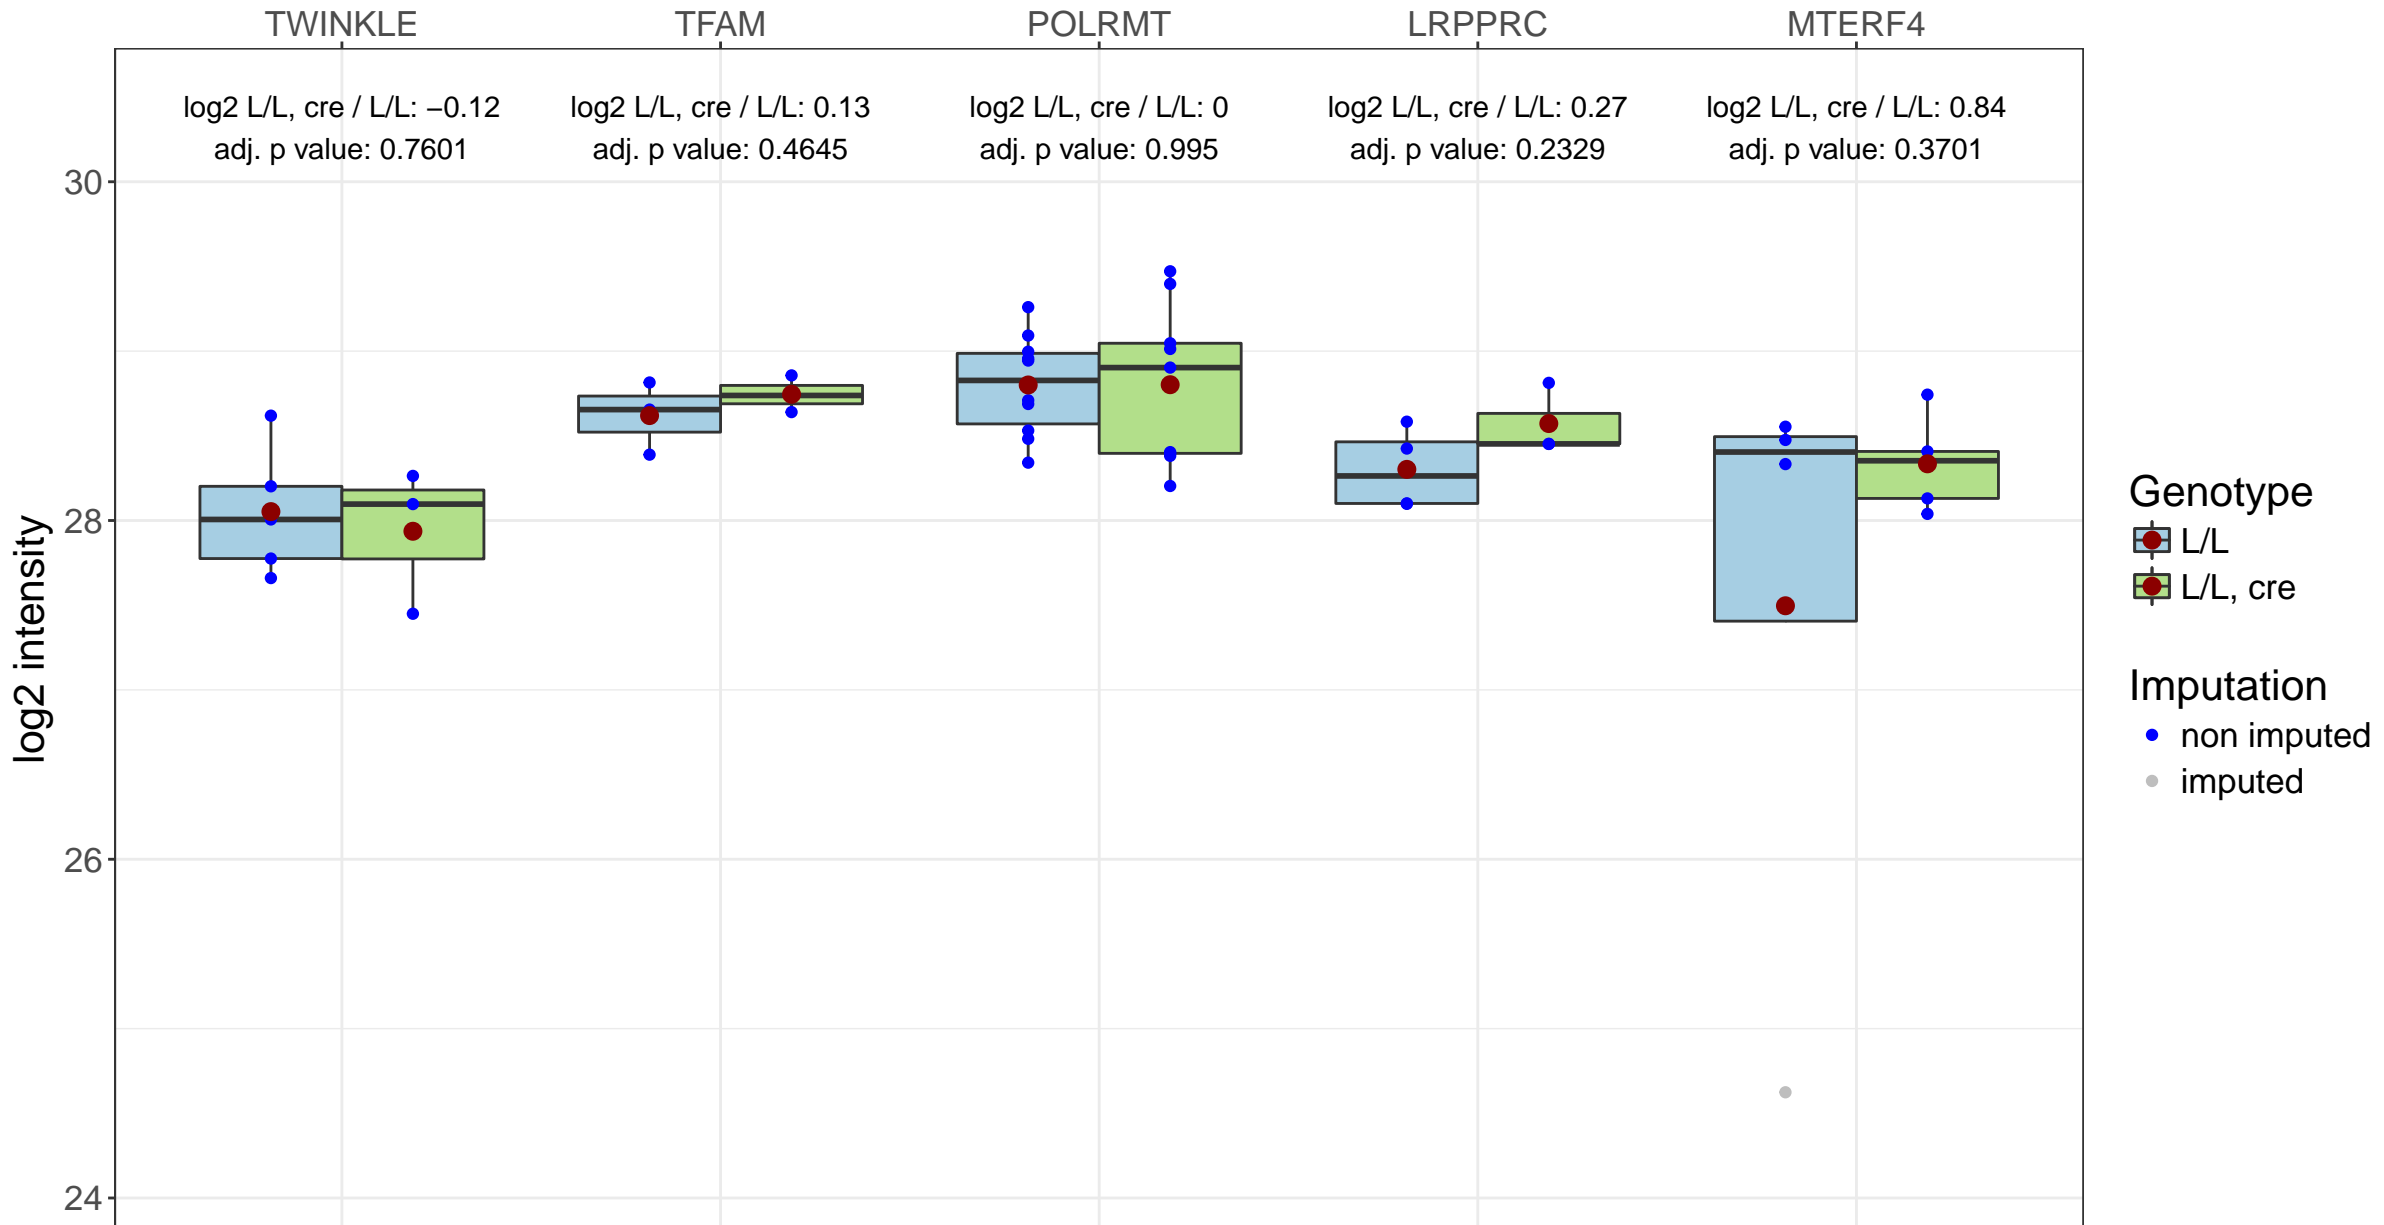

# LAMC1 / F8VQJ3

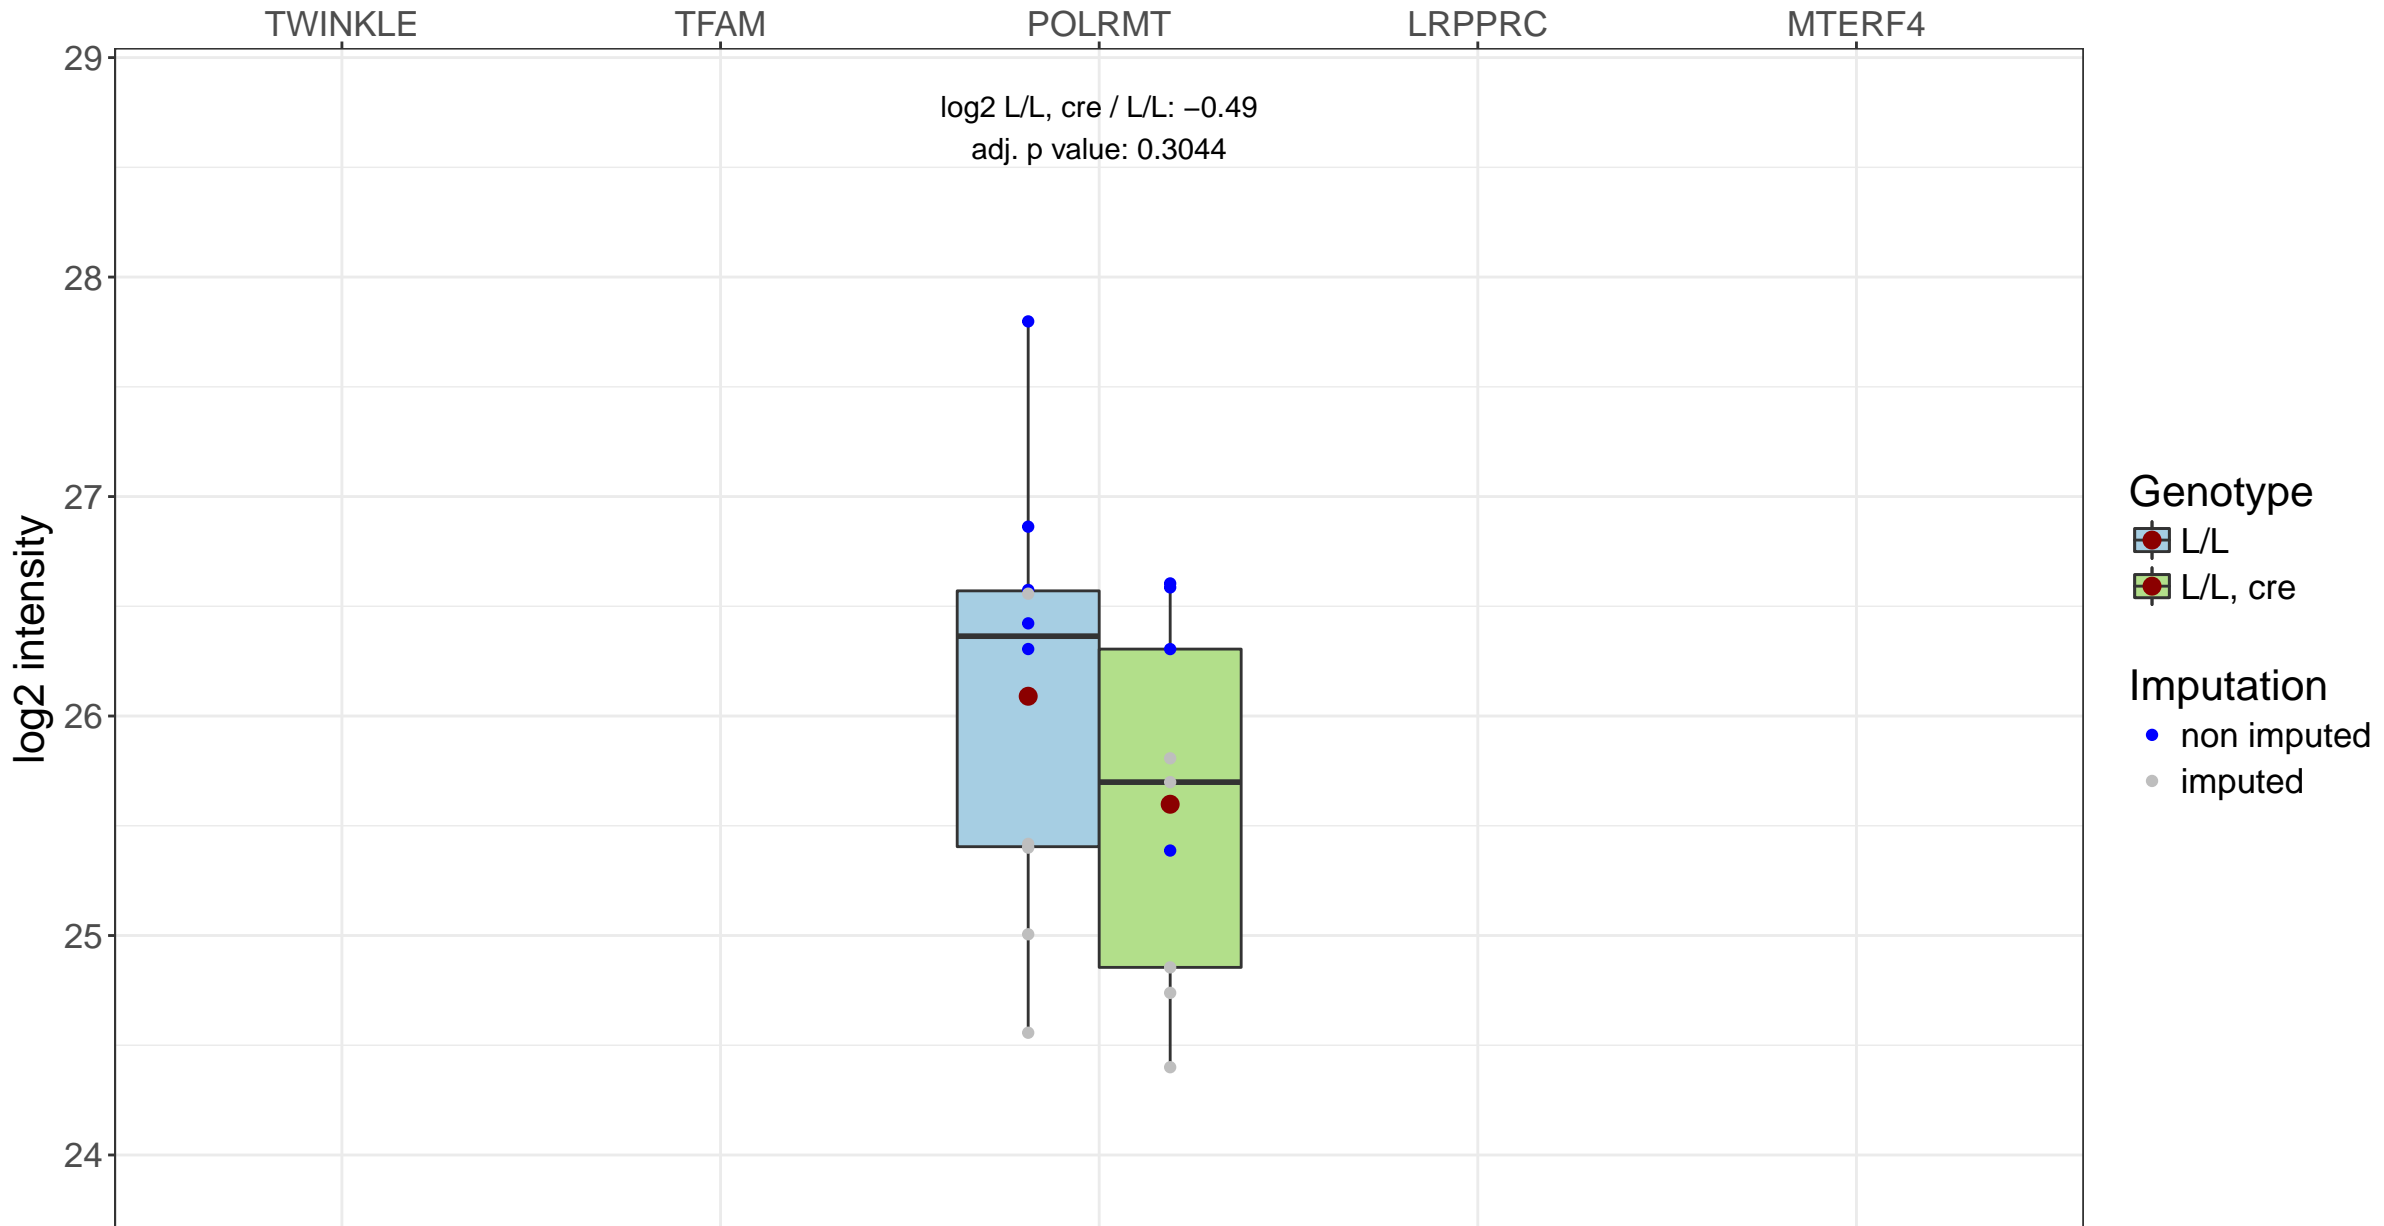

# LAMP1 / P11438

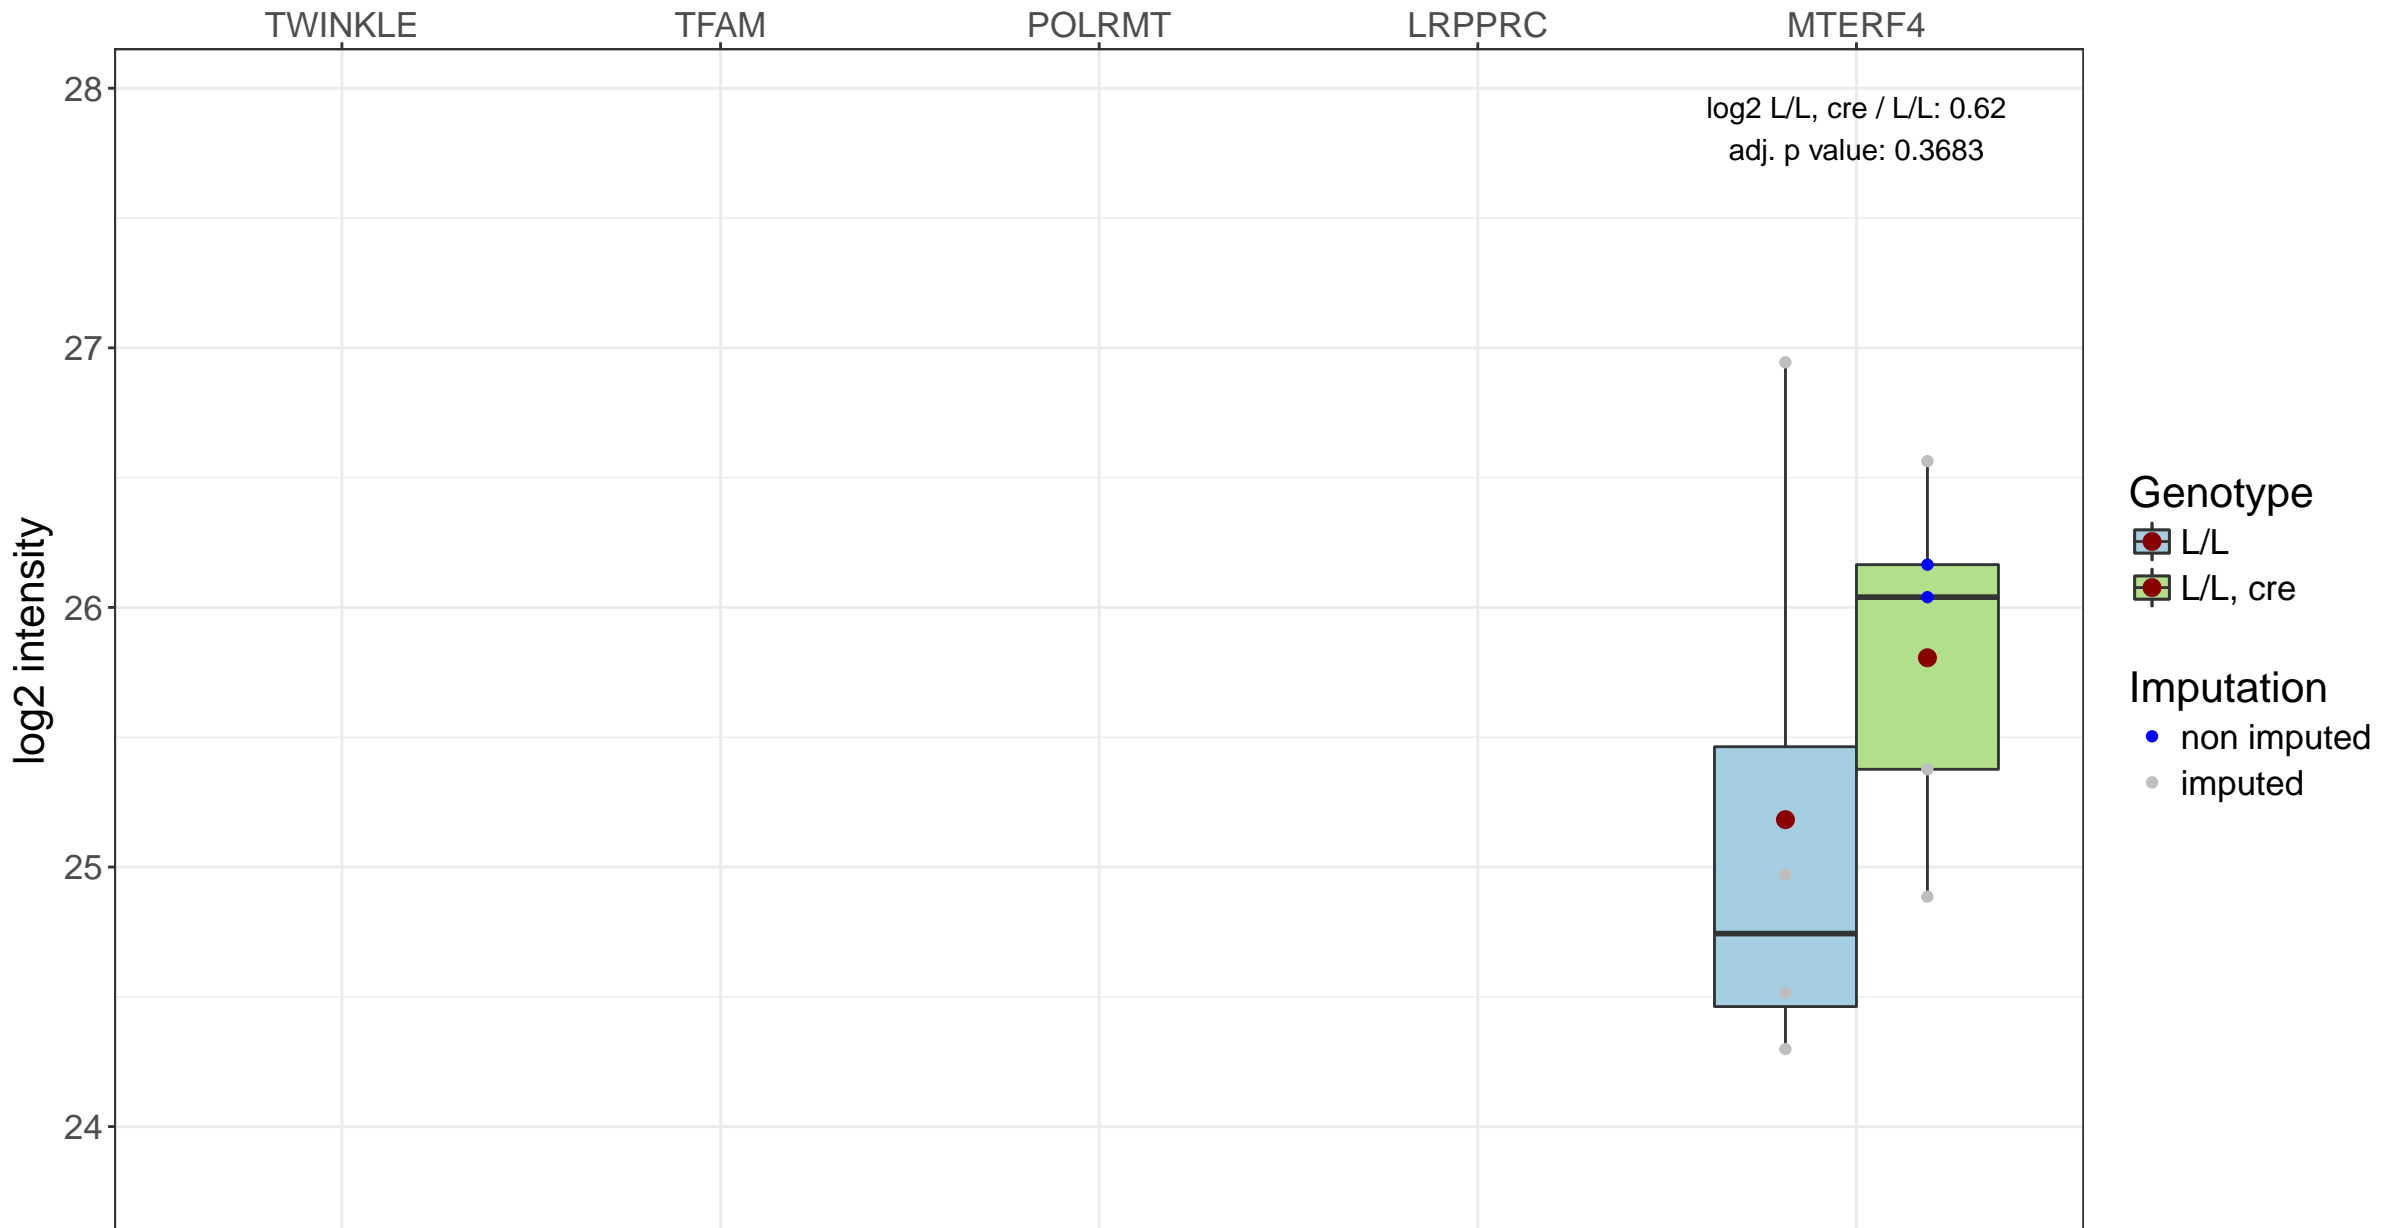

# LAP3 / Q9CPY7

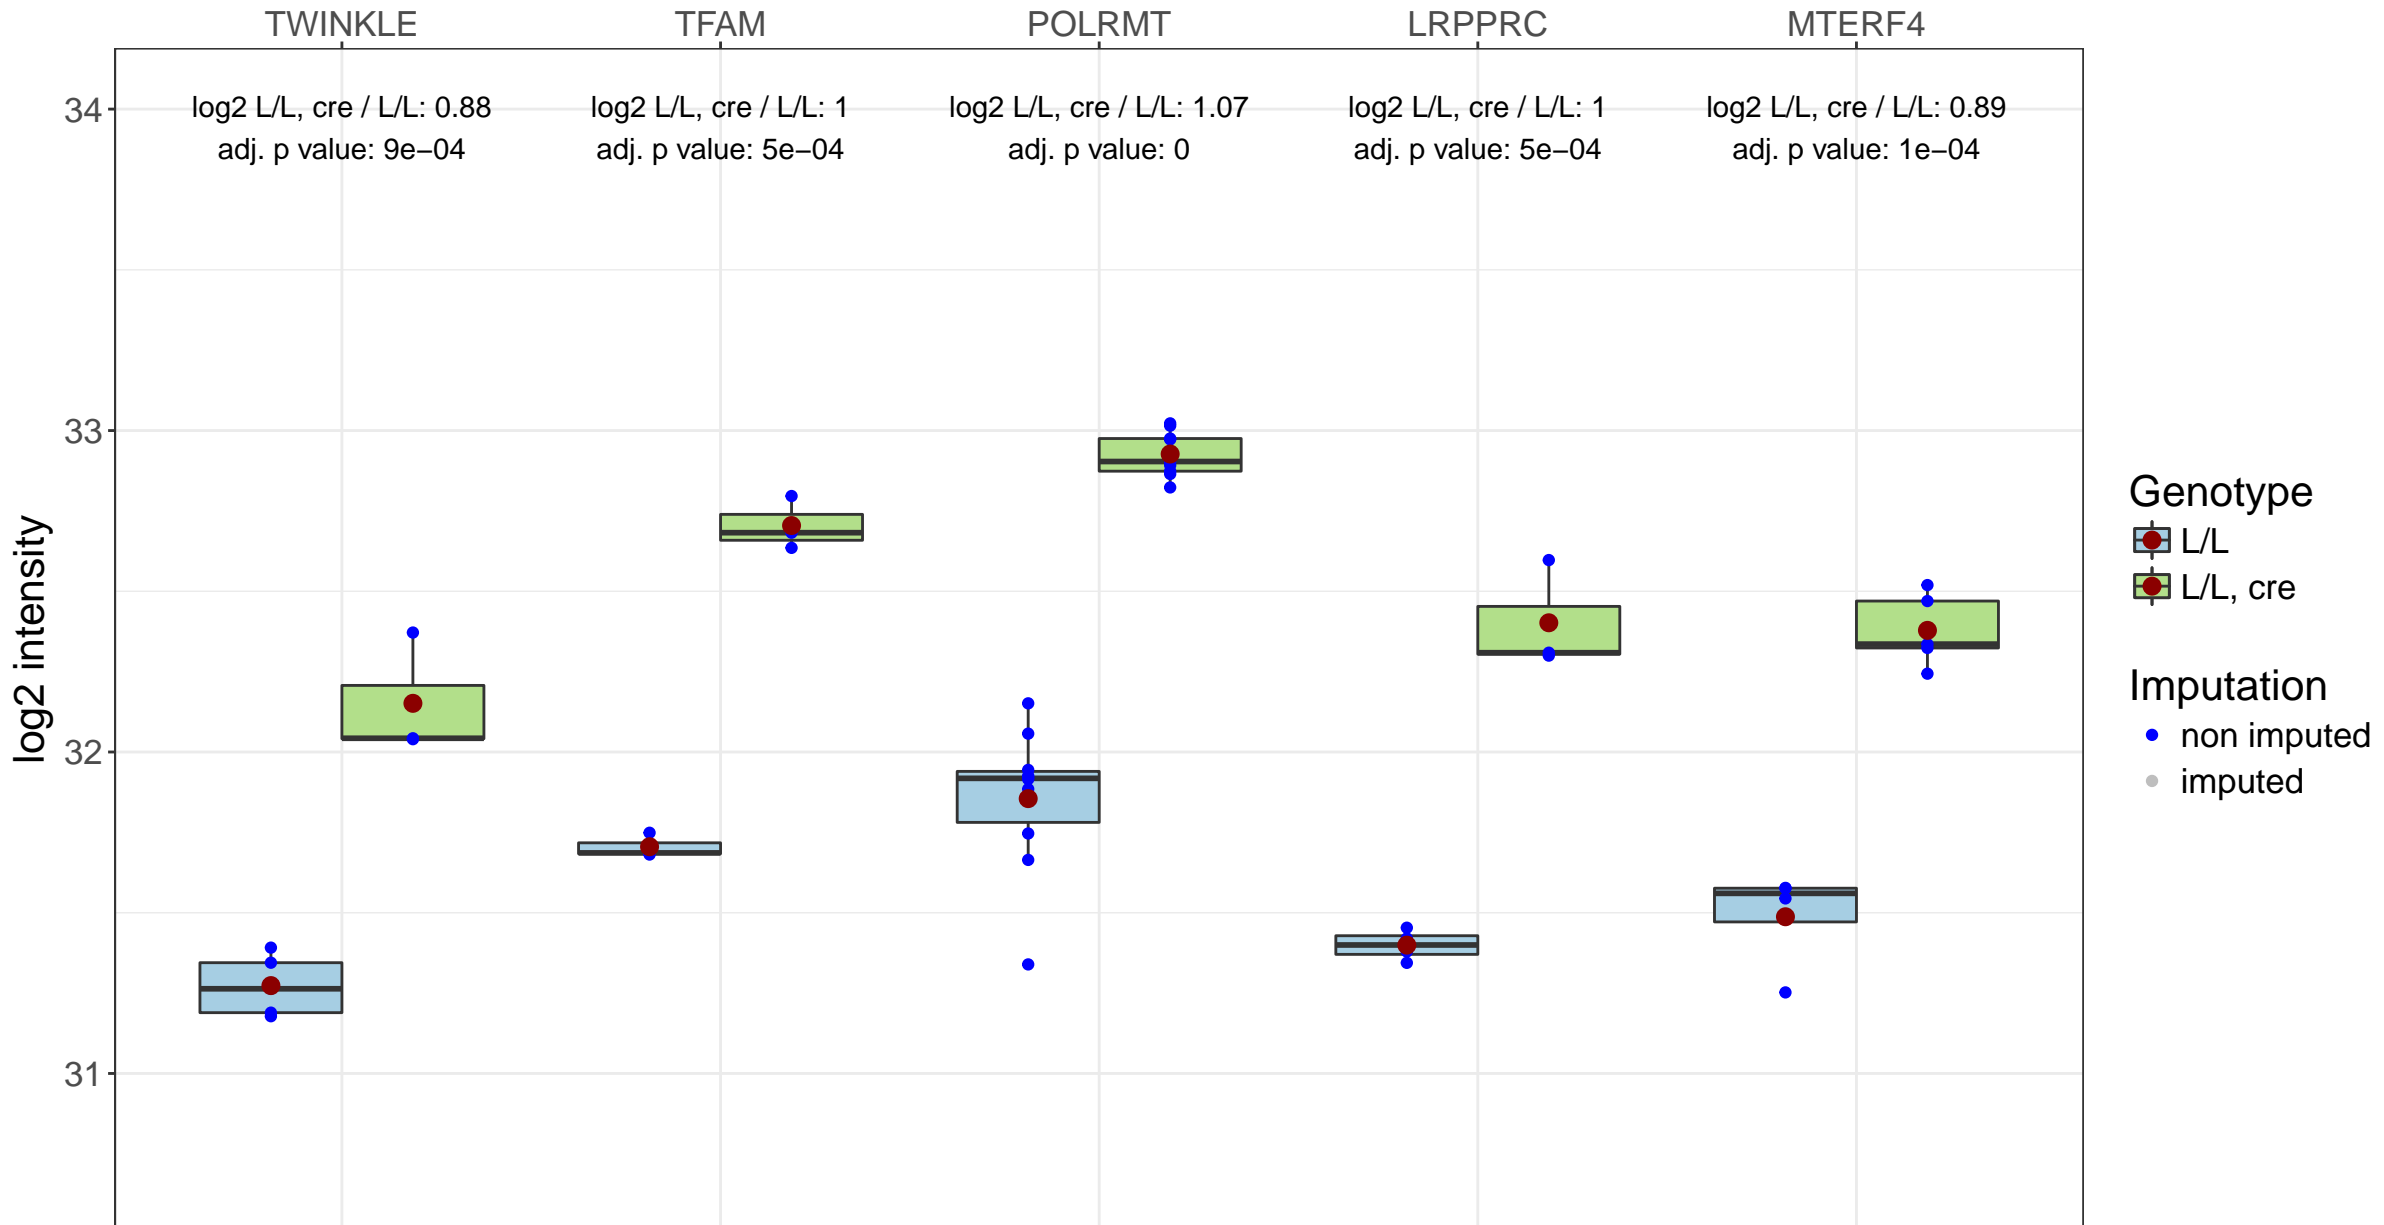

# LARS2 / Q8VDC0

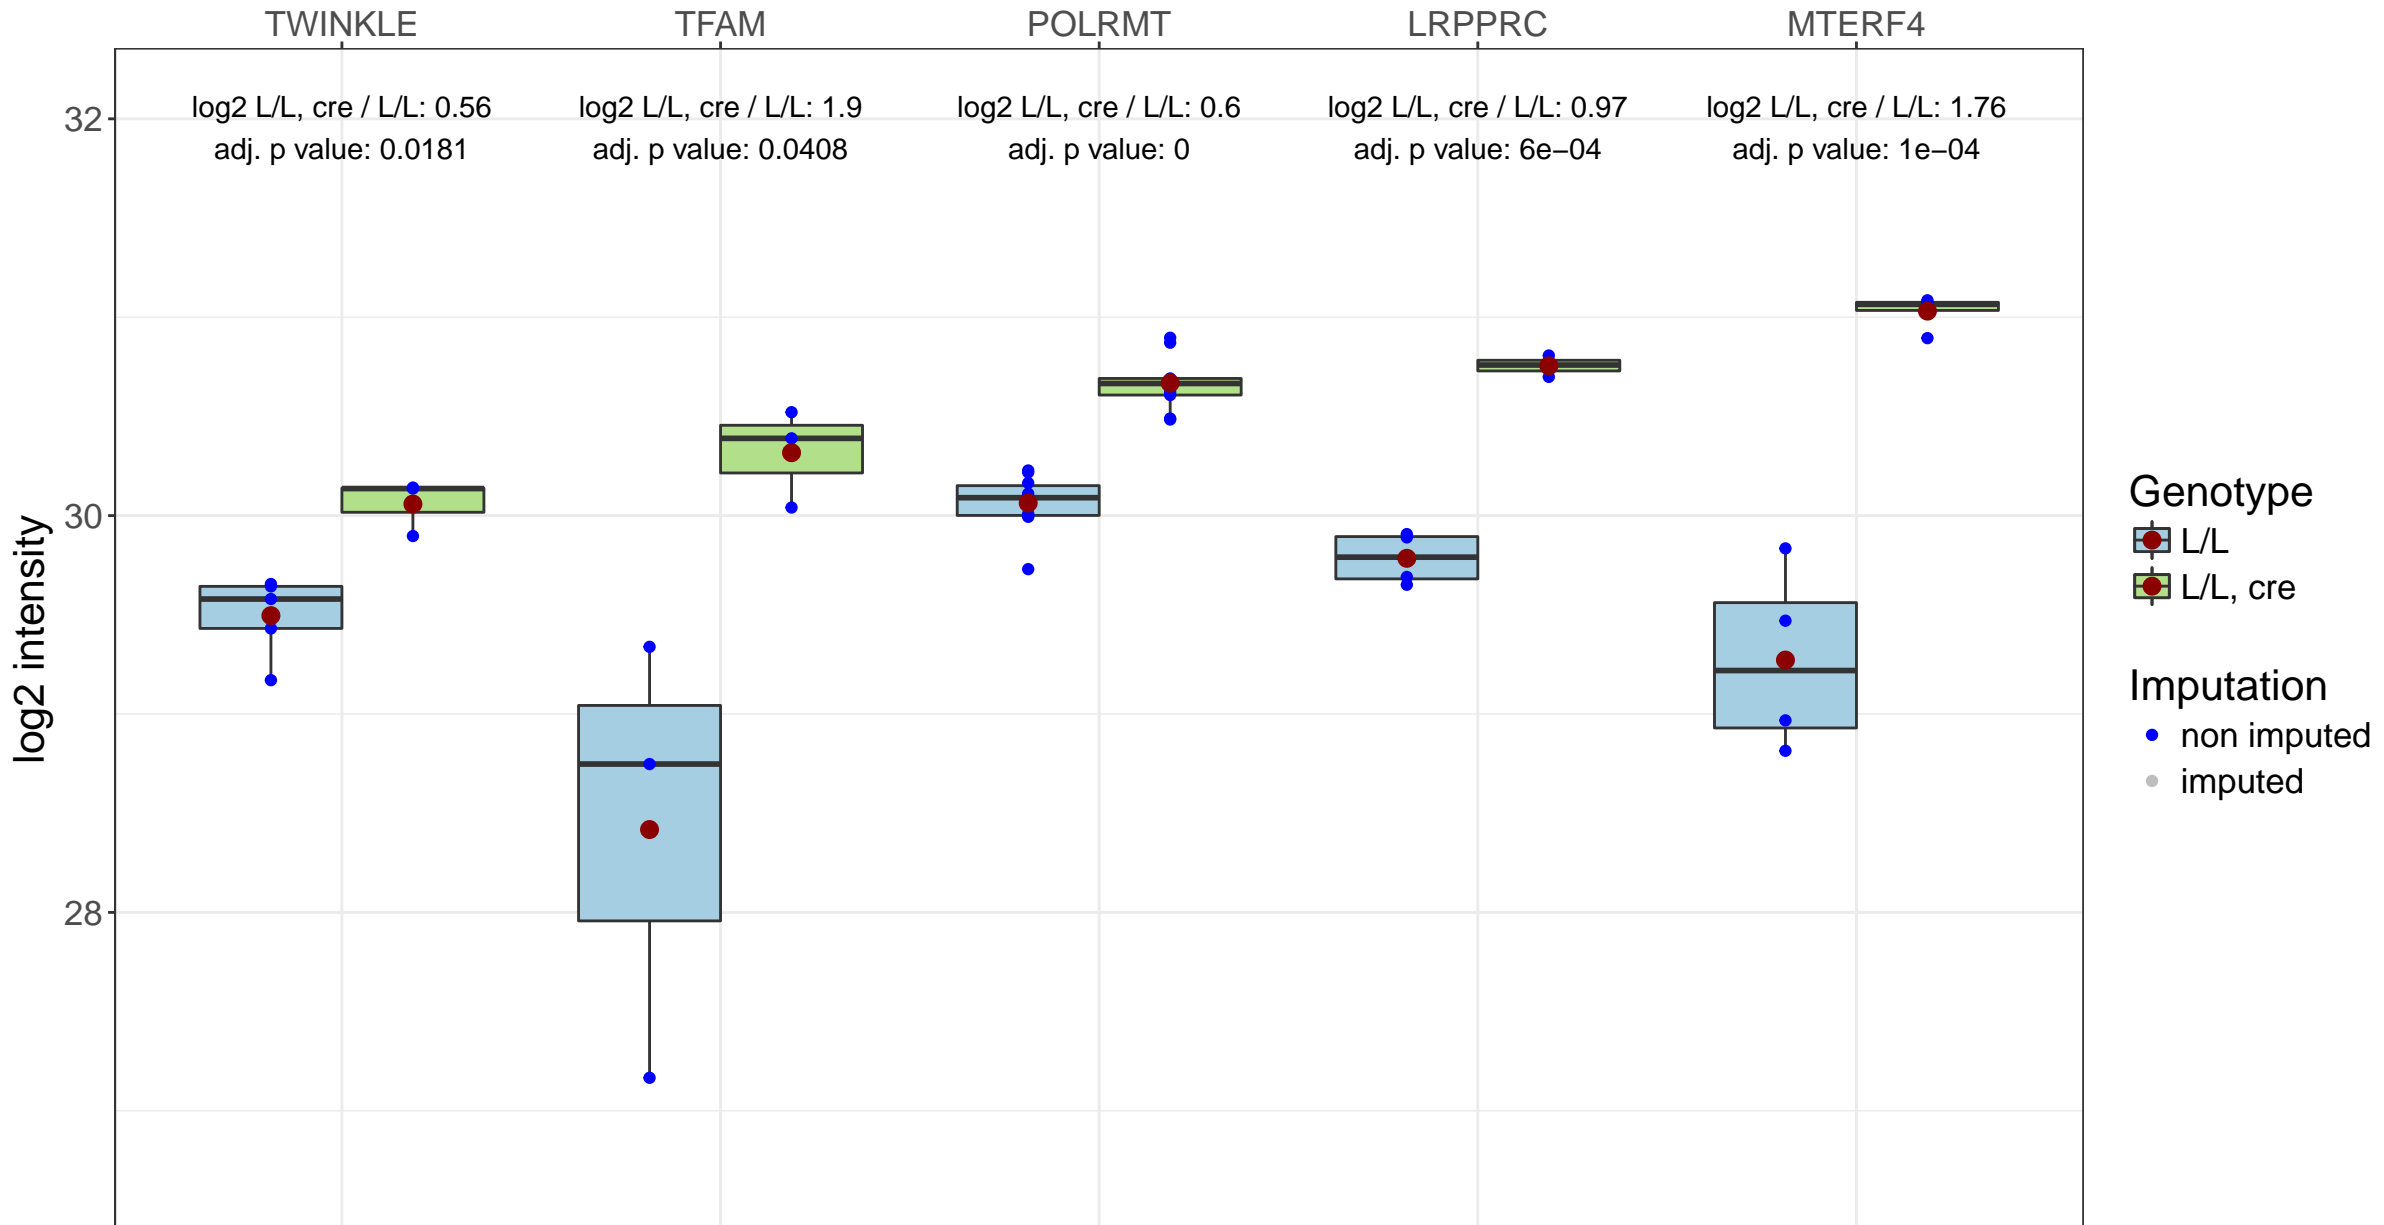



# LDB3 / Q9JKS4-3

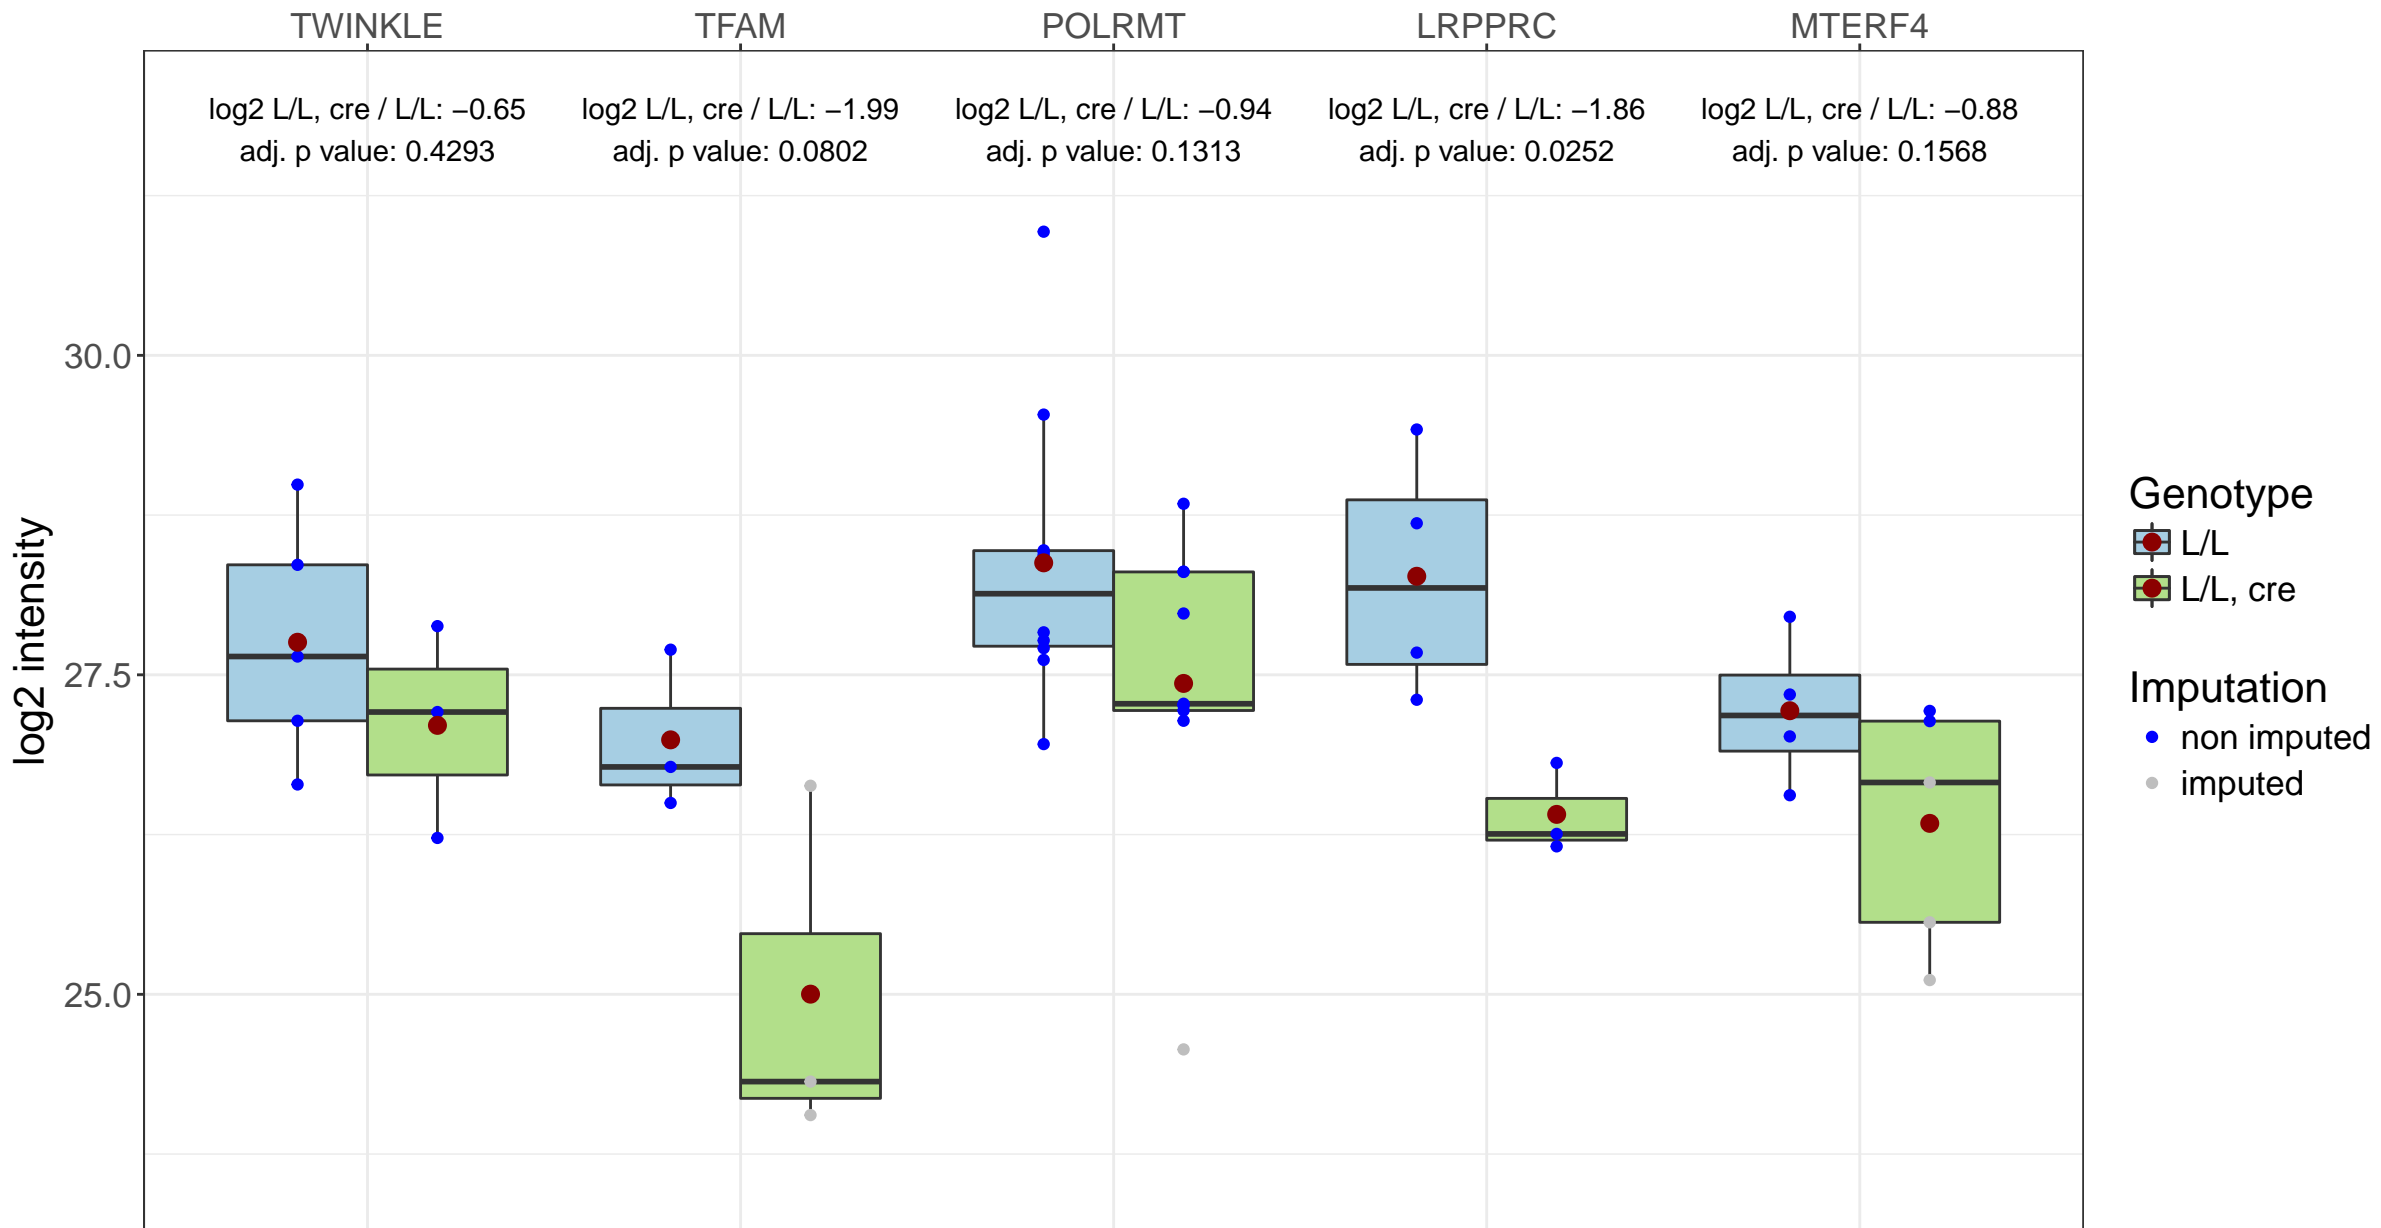

# LDHD / Q7TNG8

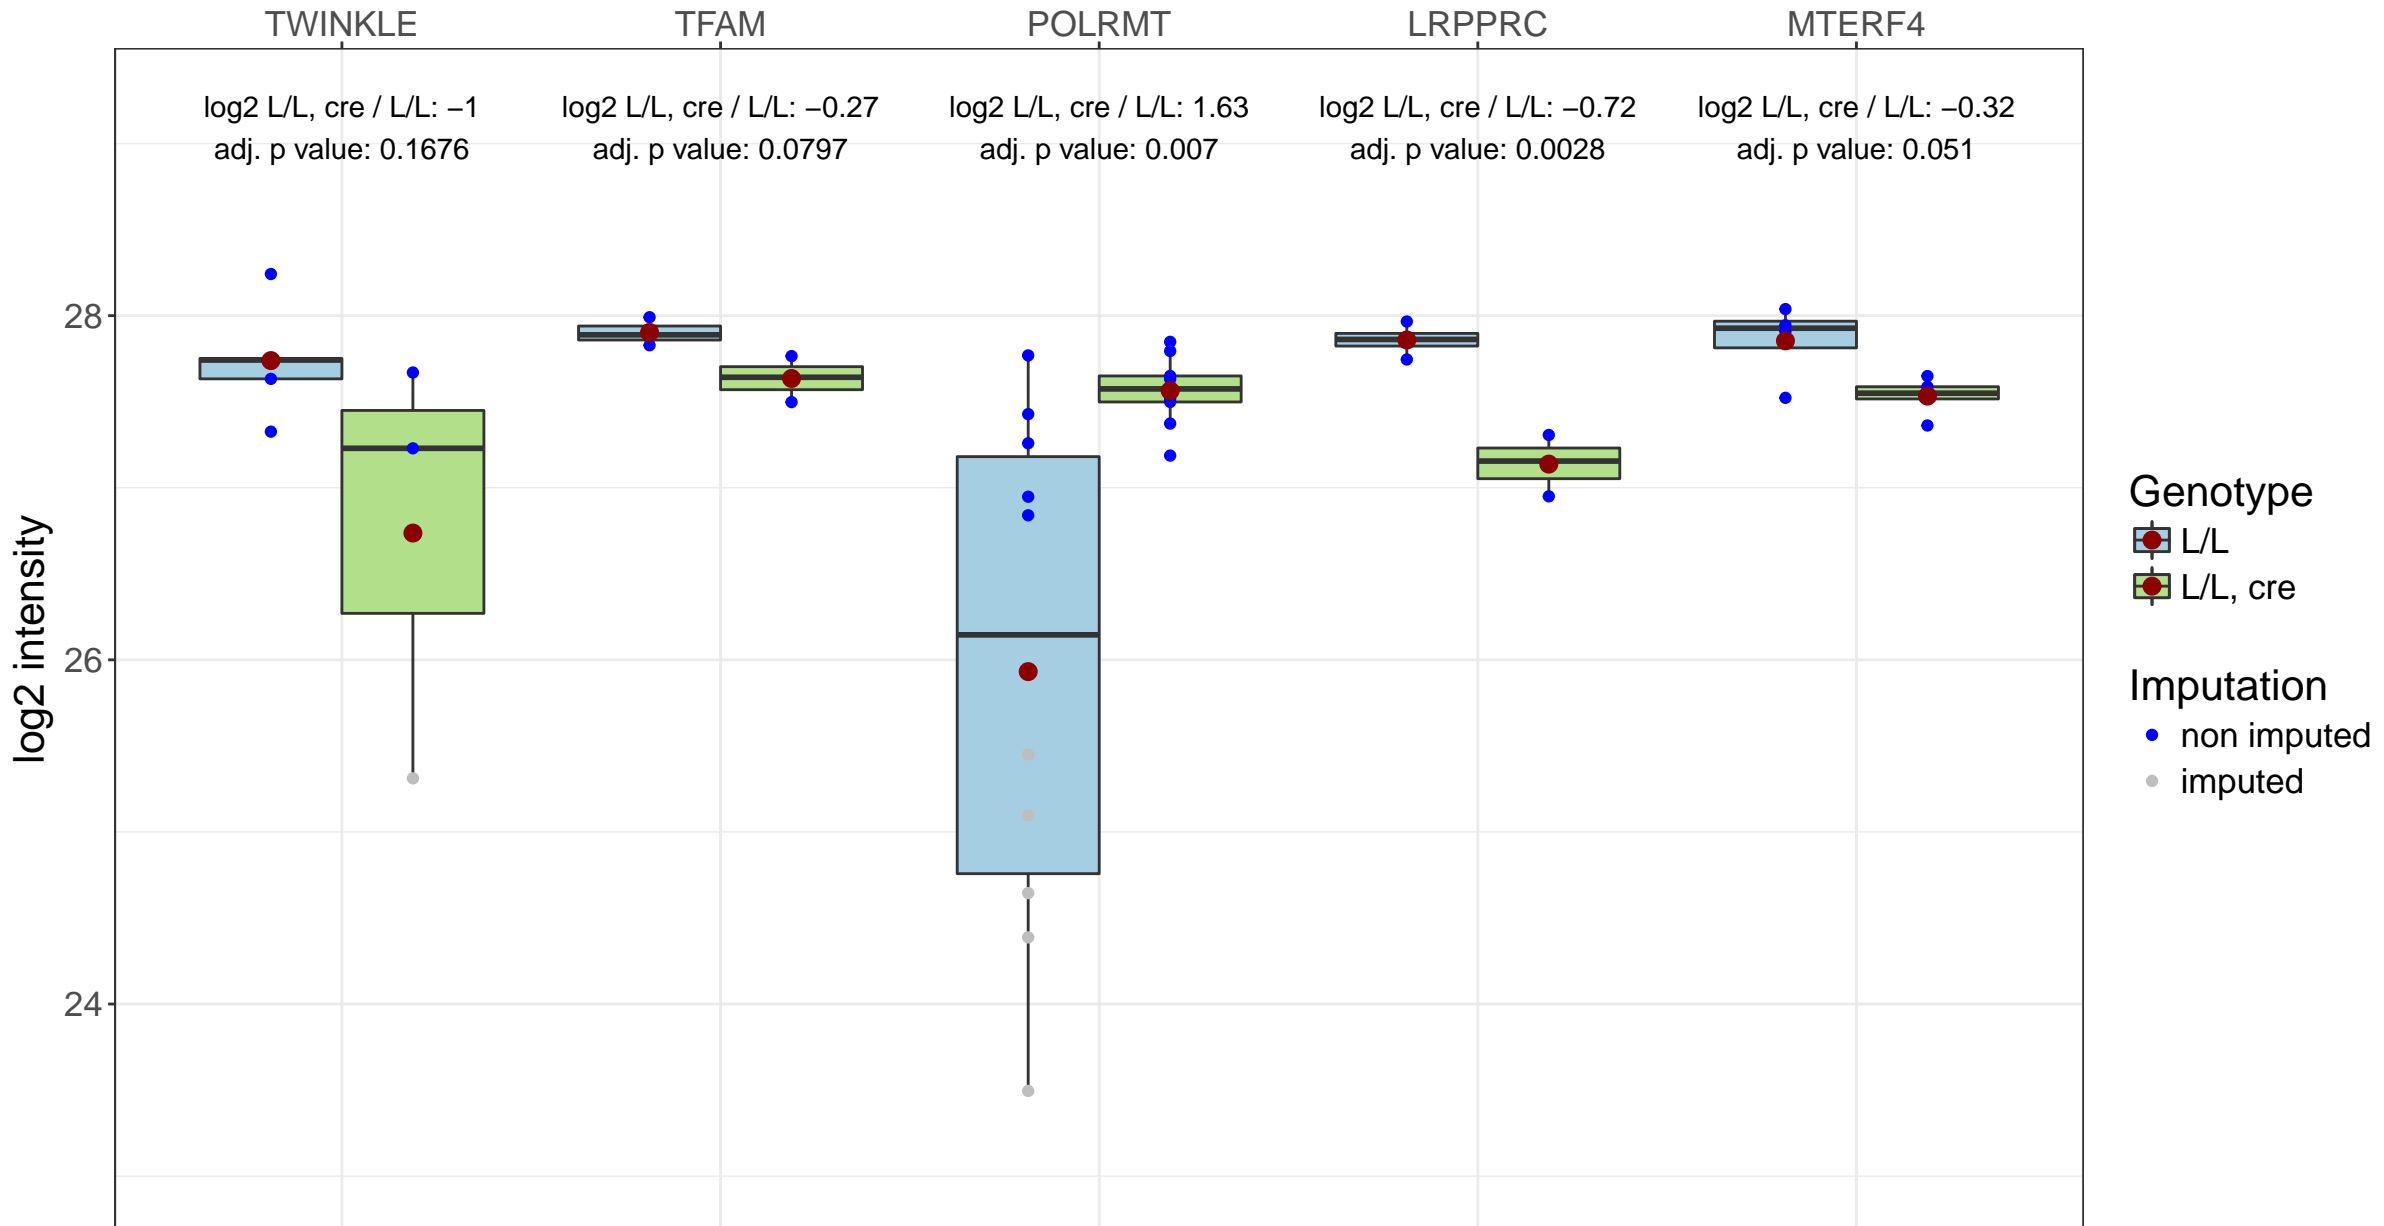

# LETM1 / Q9Z2I0

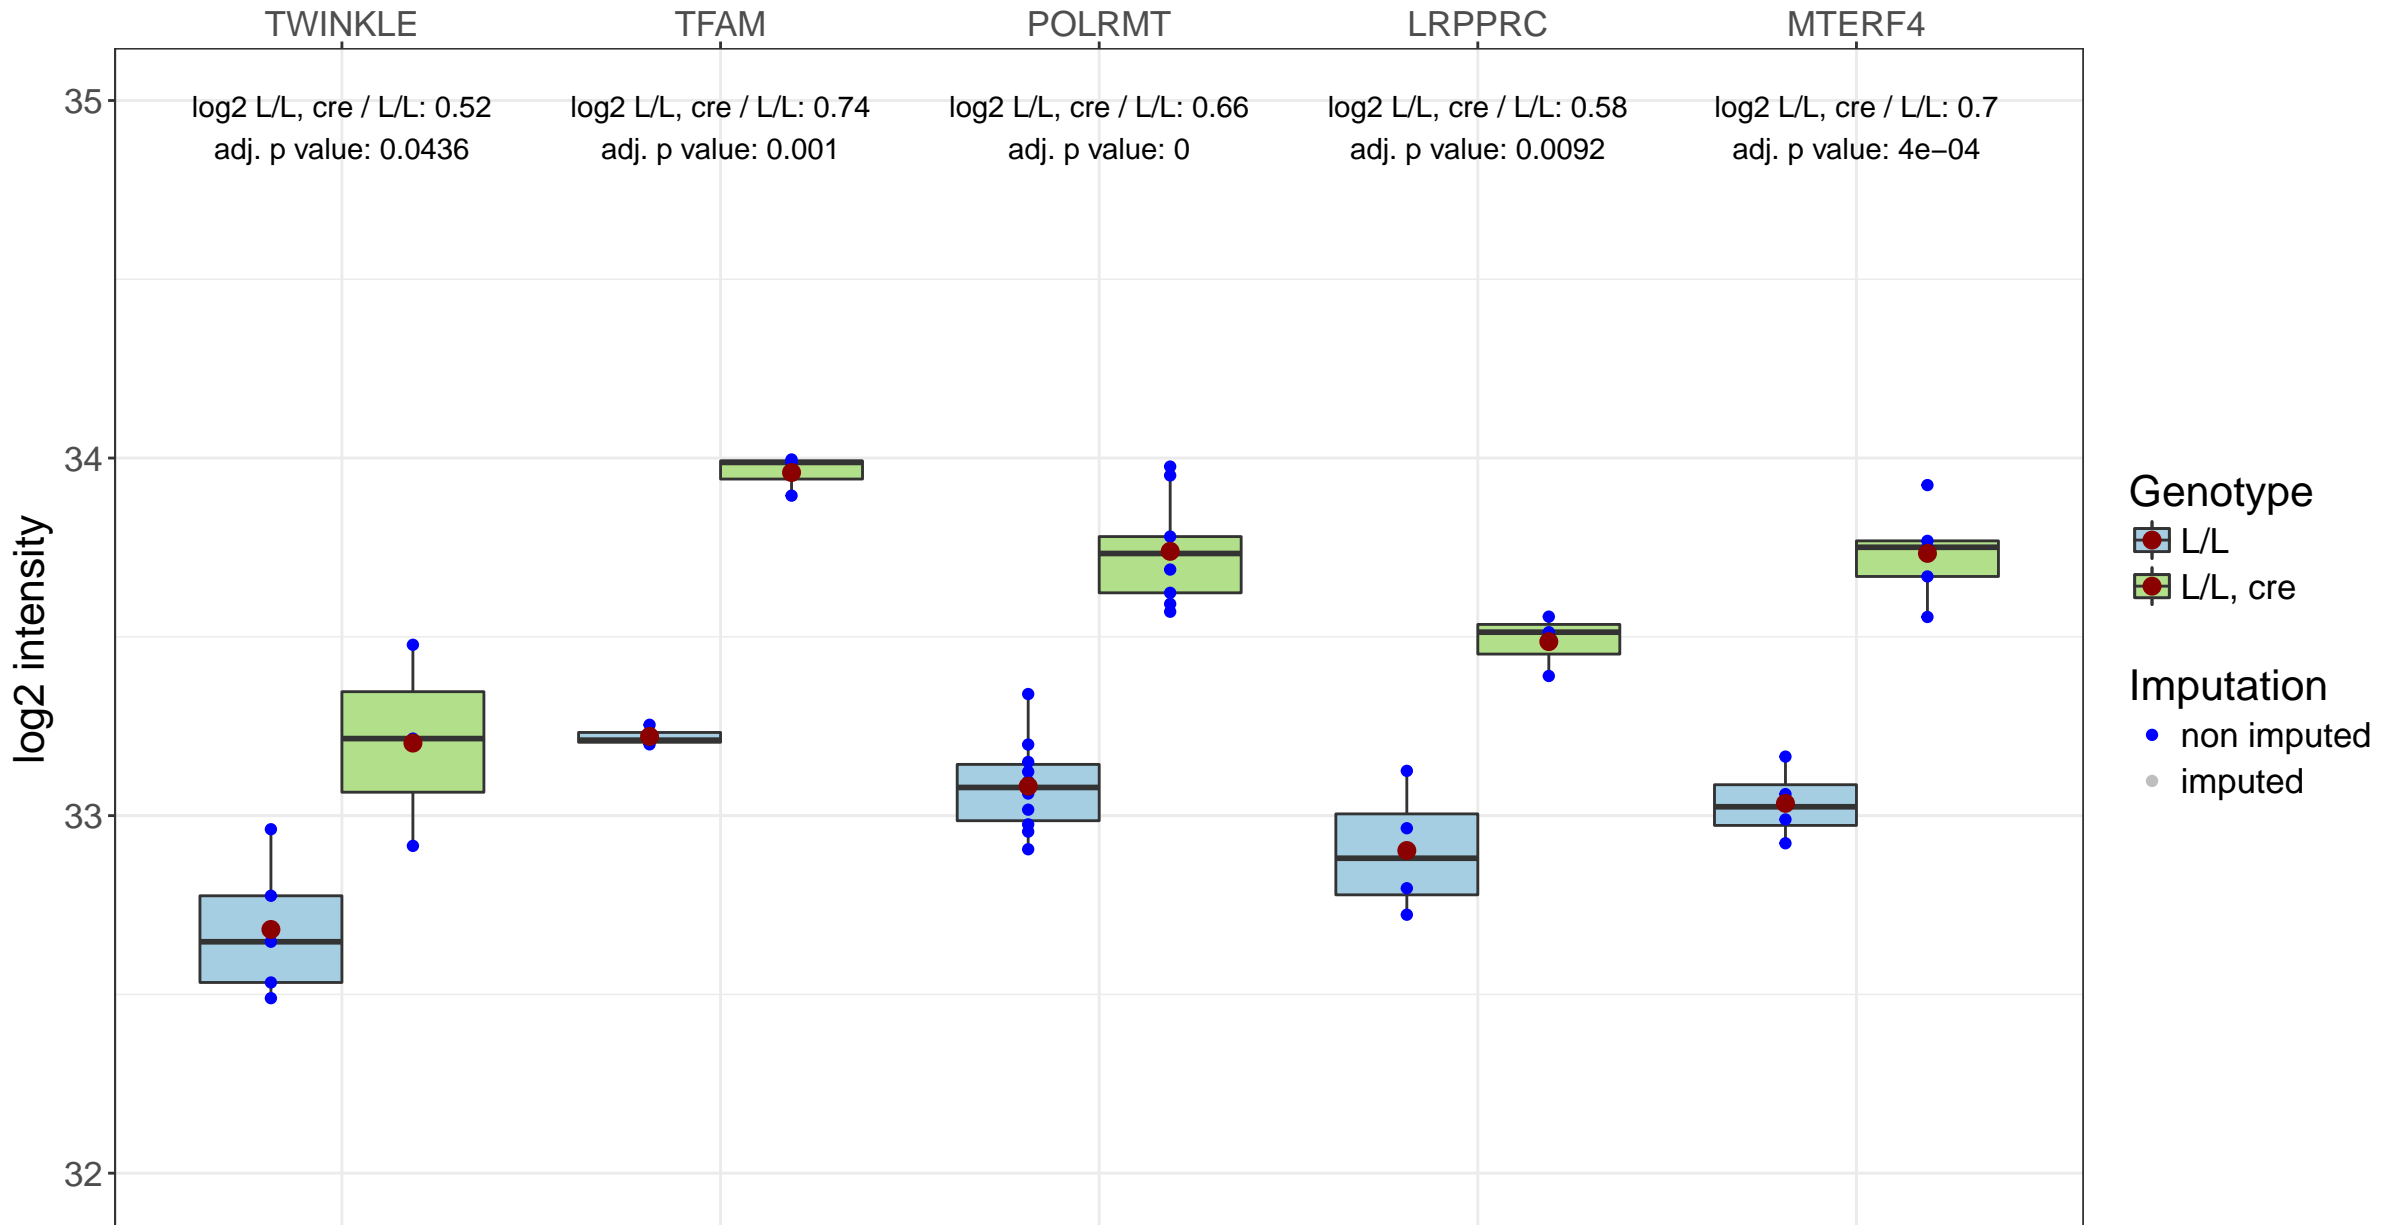

# LETMD1 / Q924L1

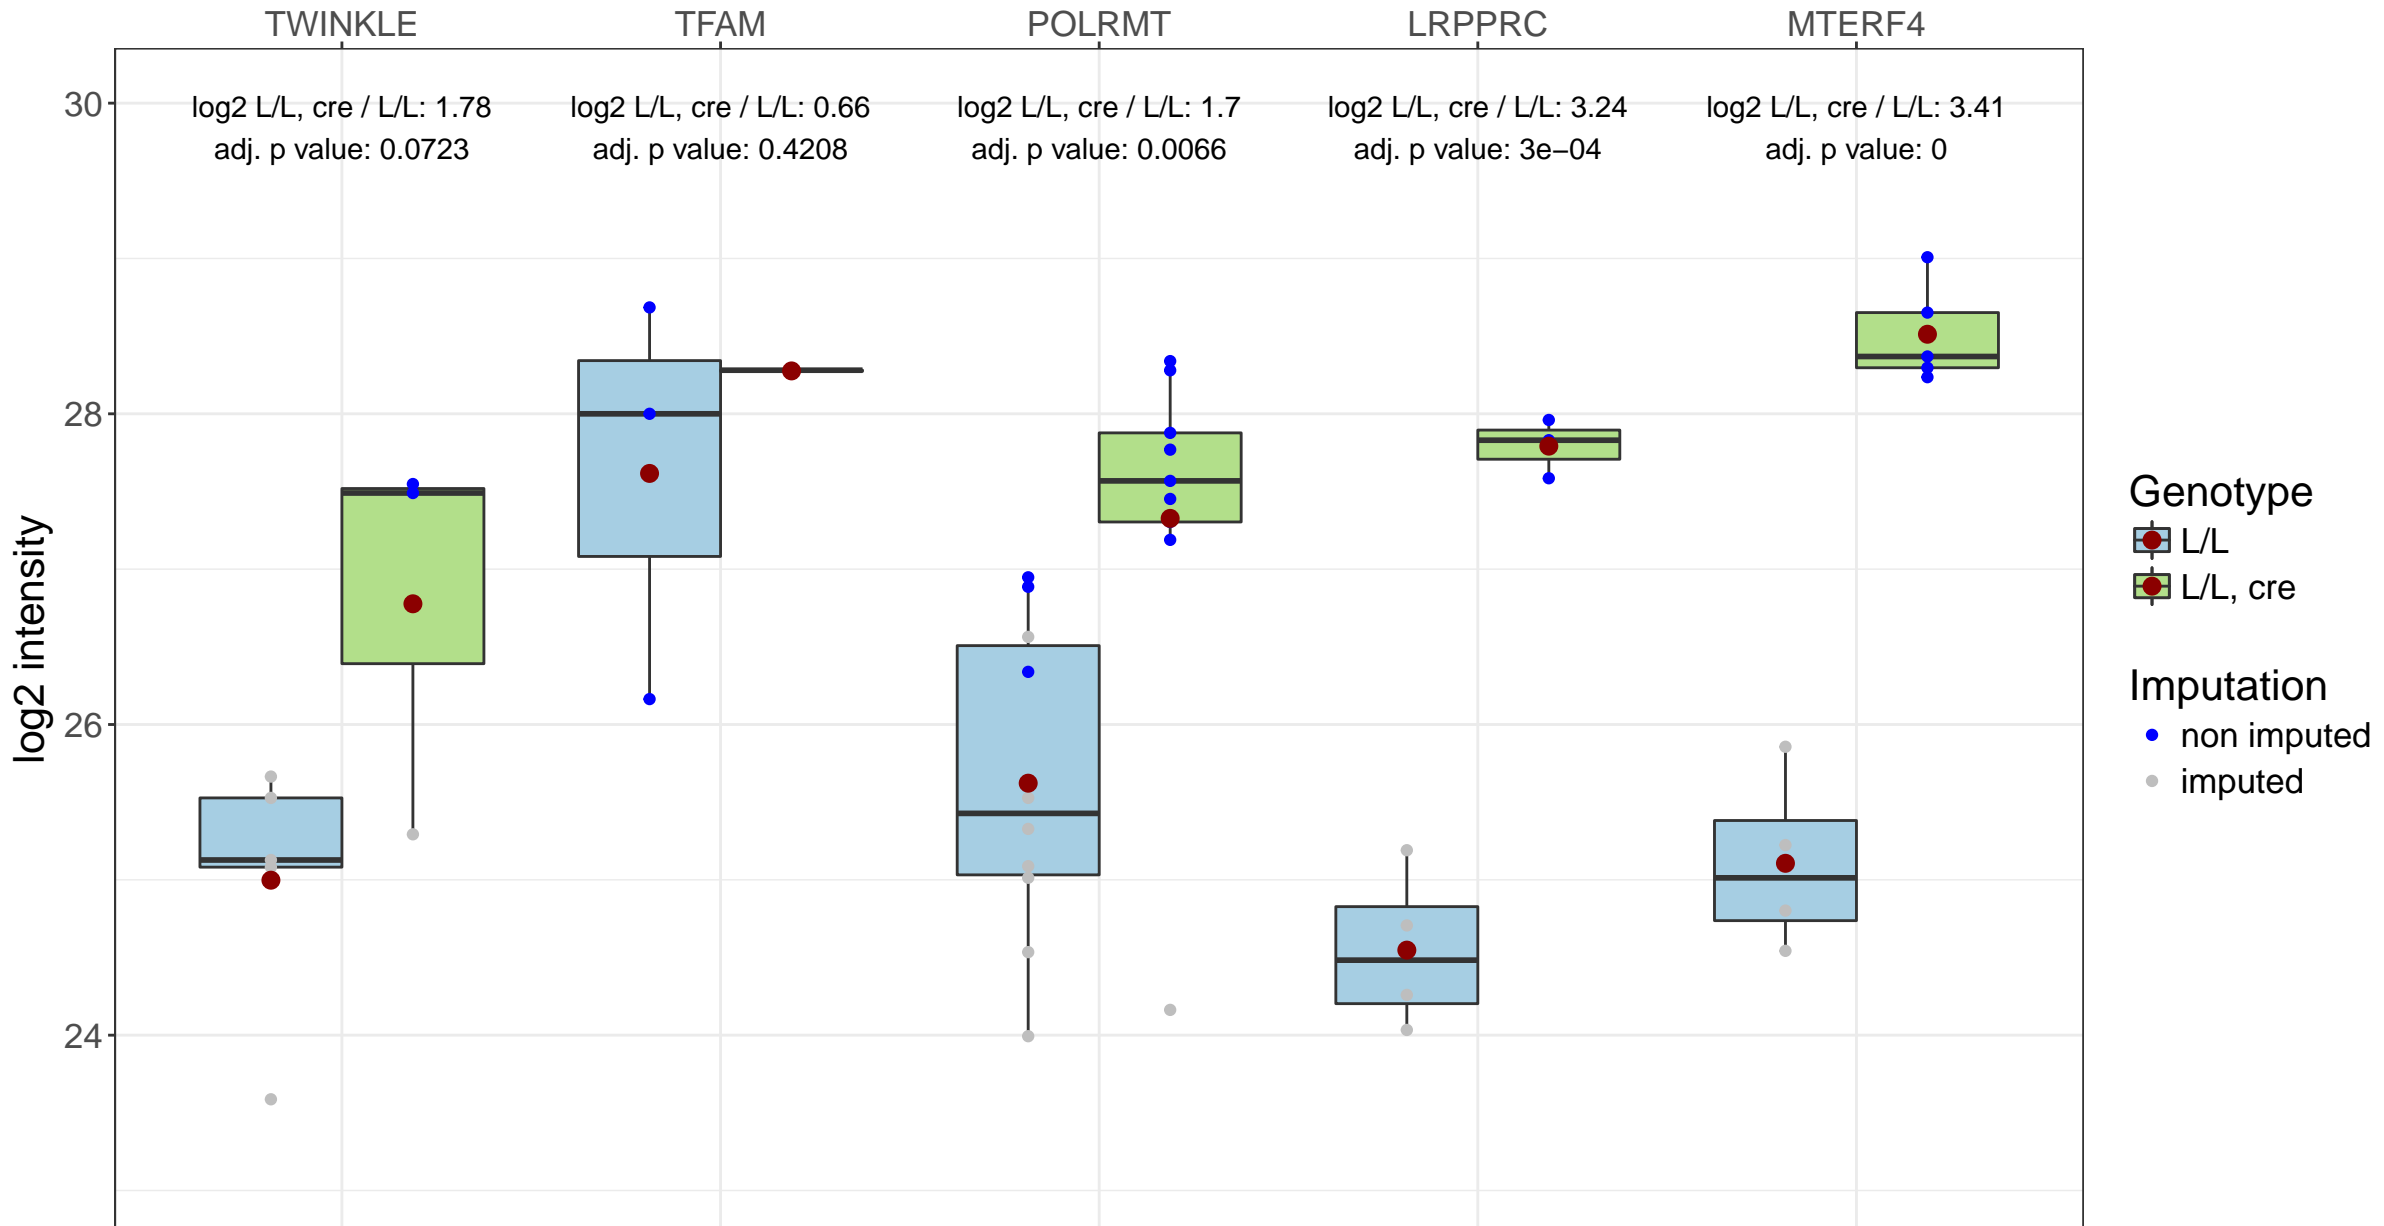

# LGALS3 / Q8C253

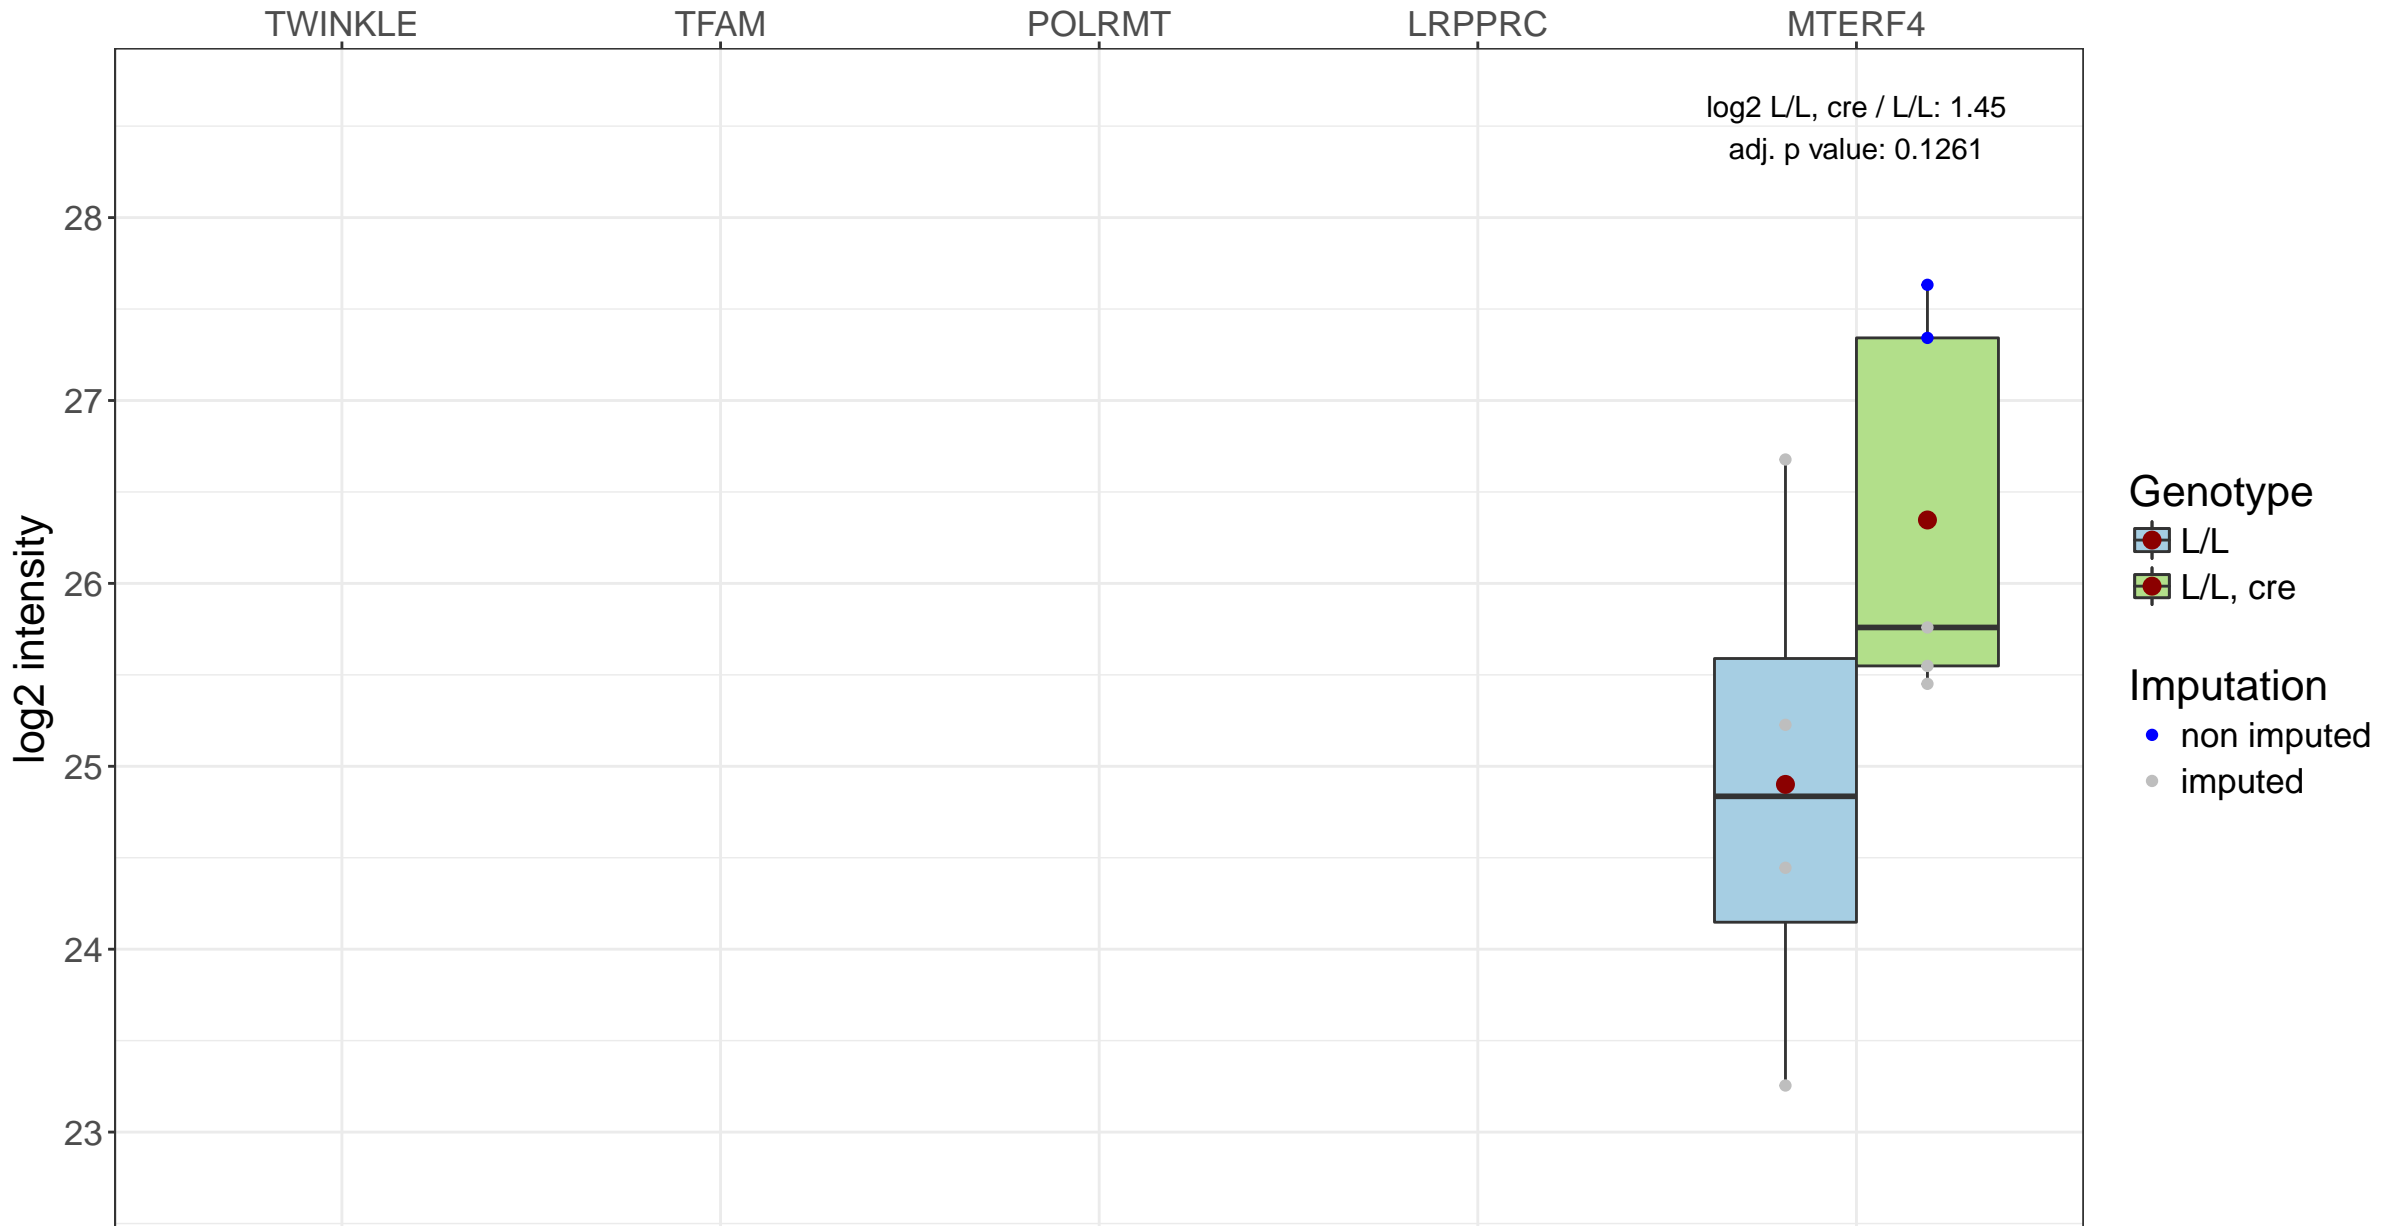

# LIAS / Q99M04

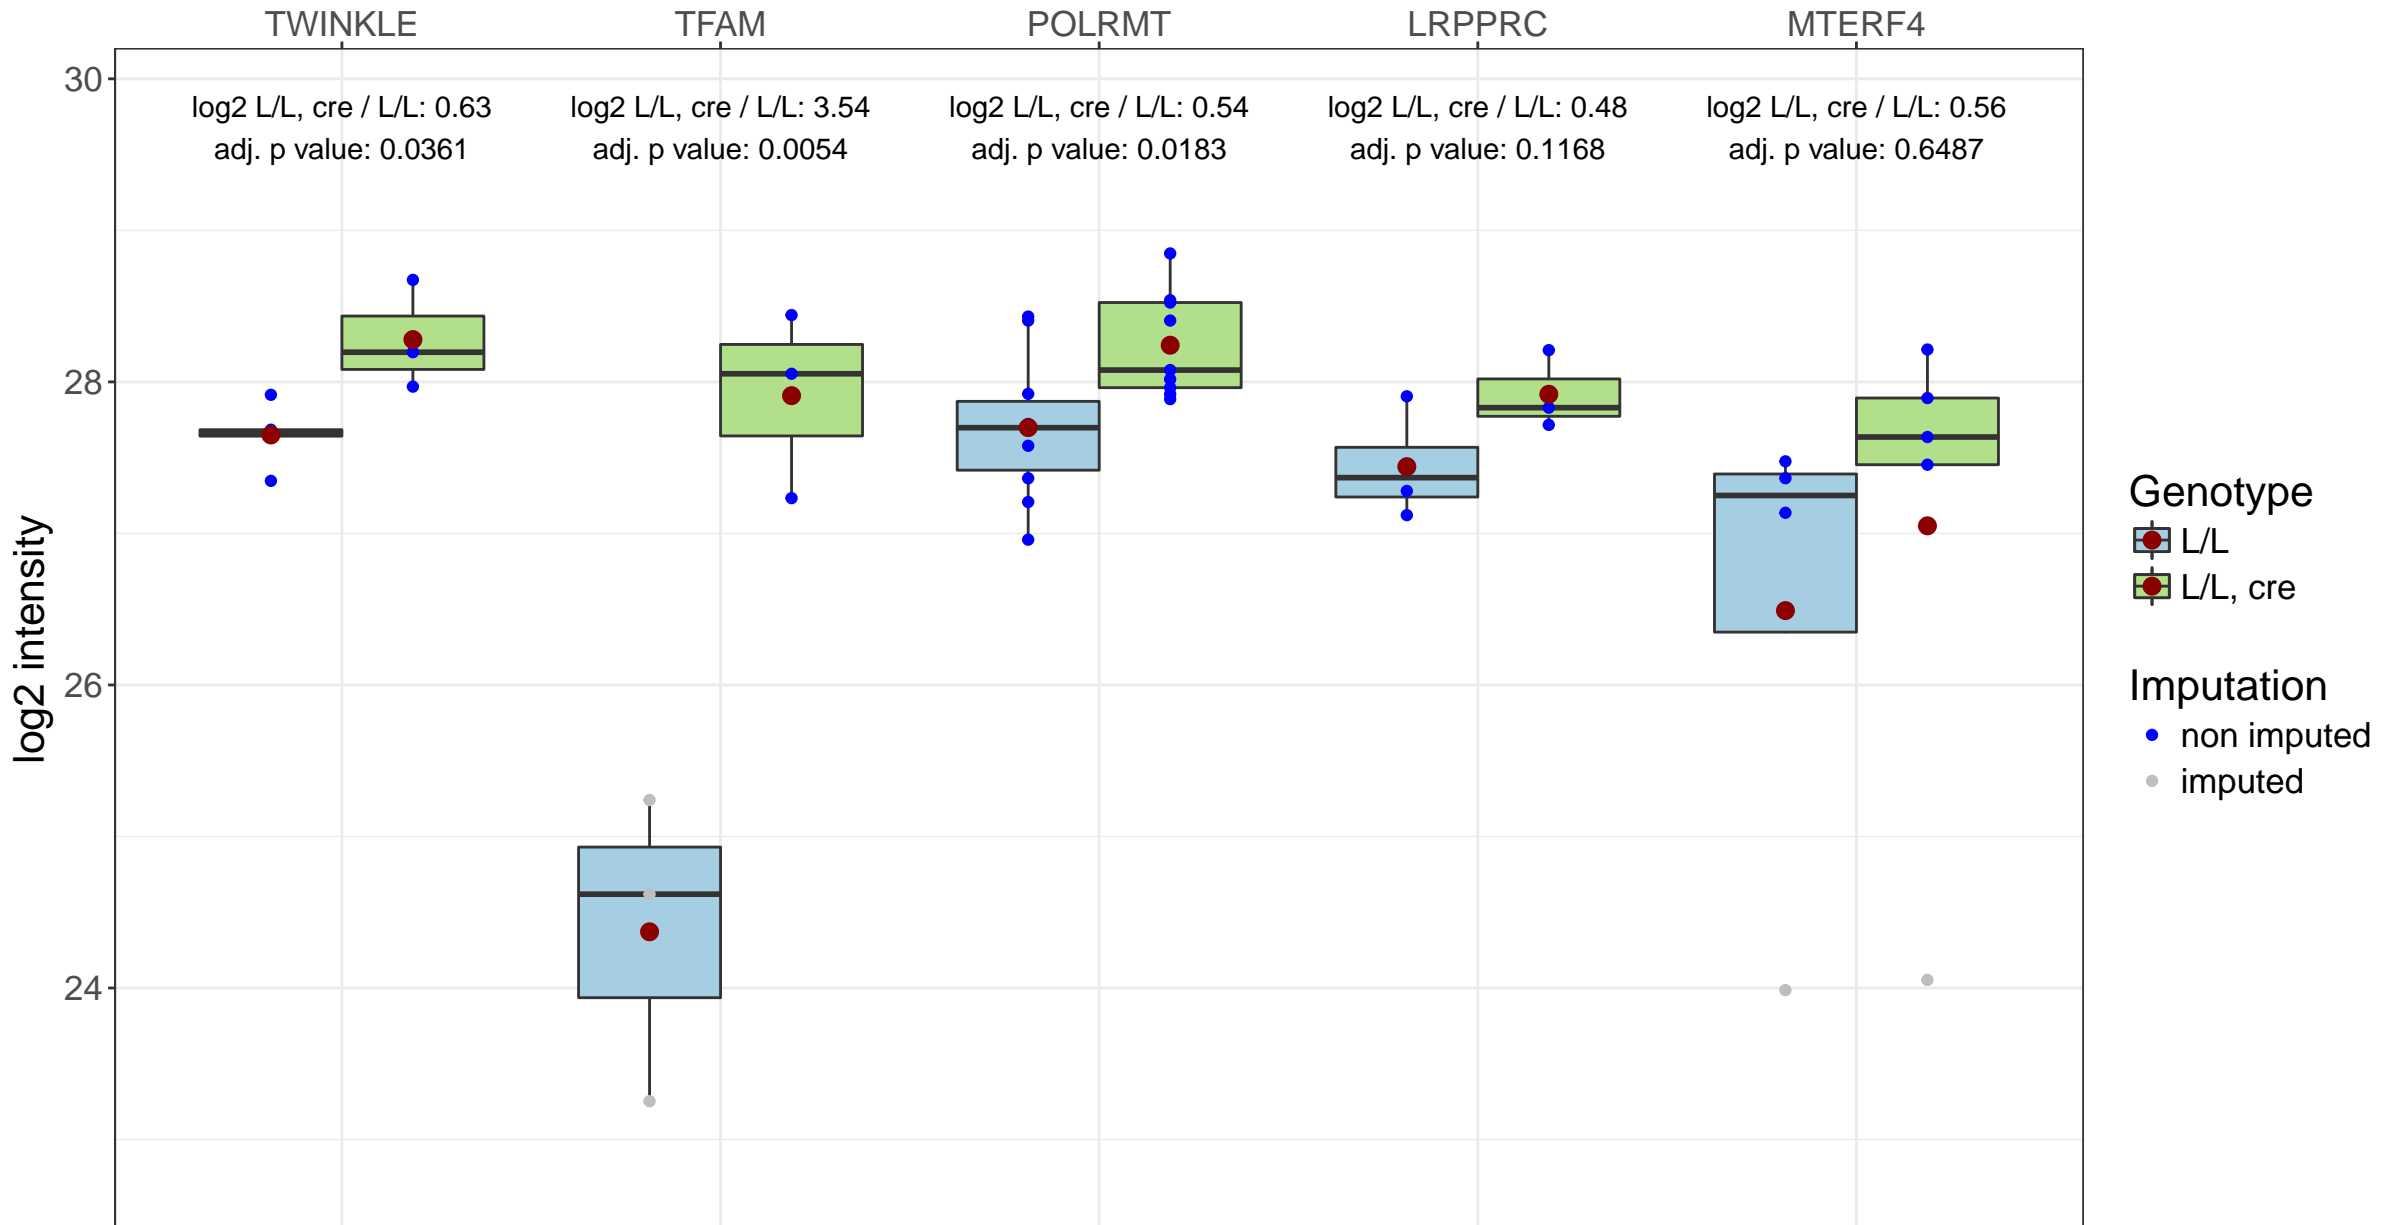

# LIPT1 / Q8VCM4

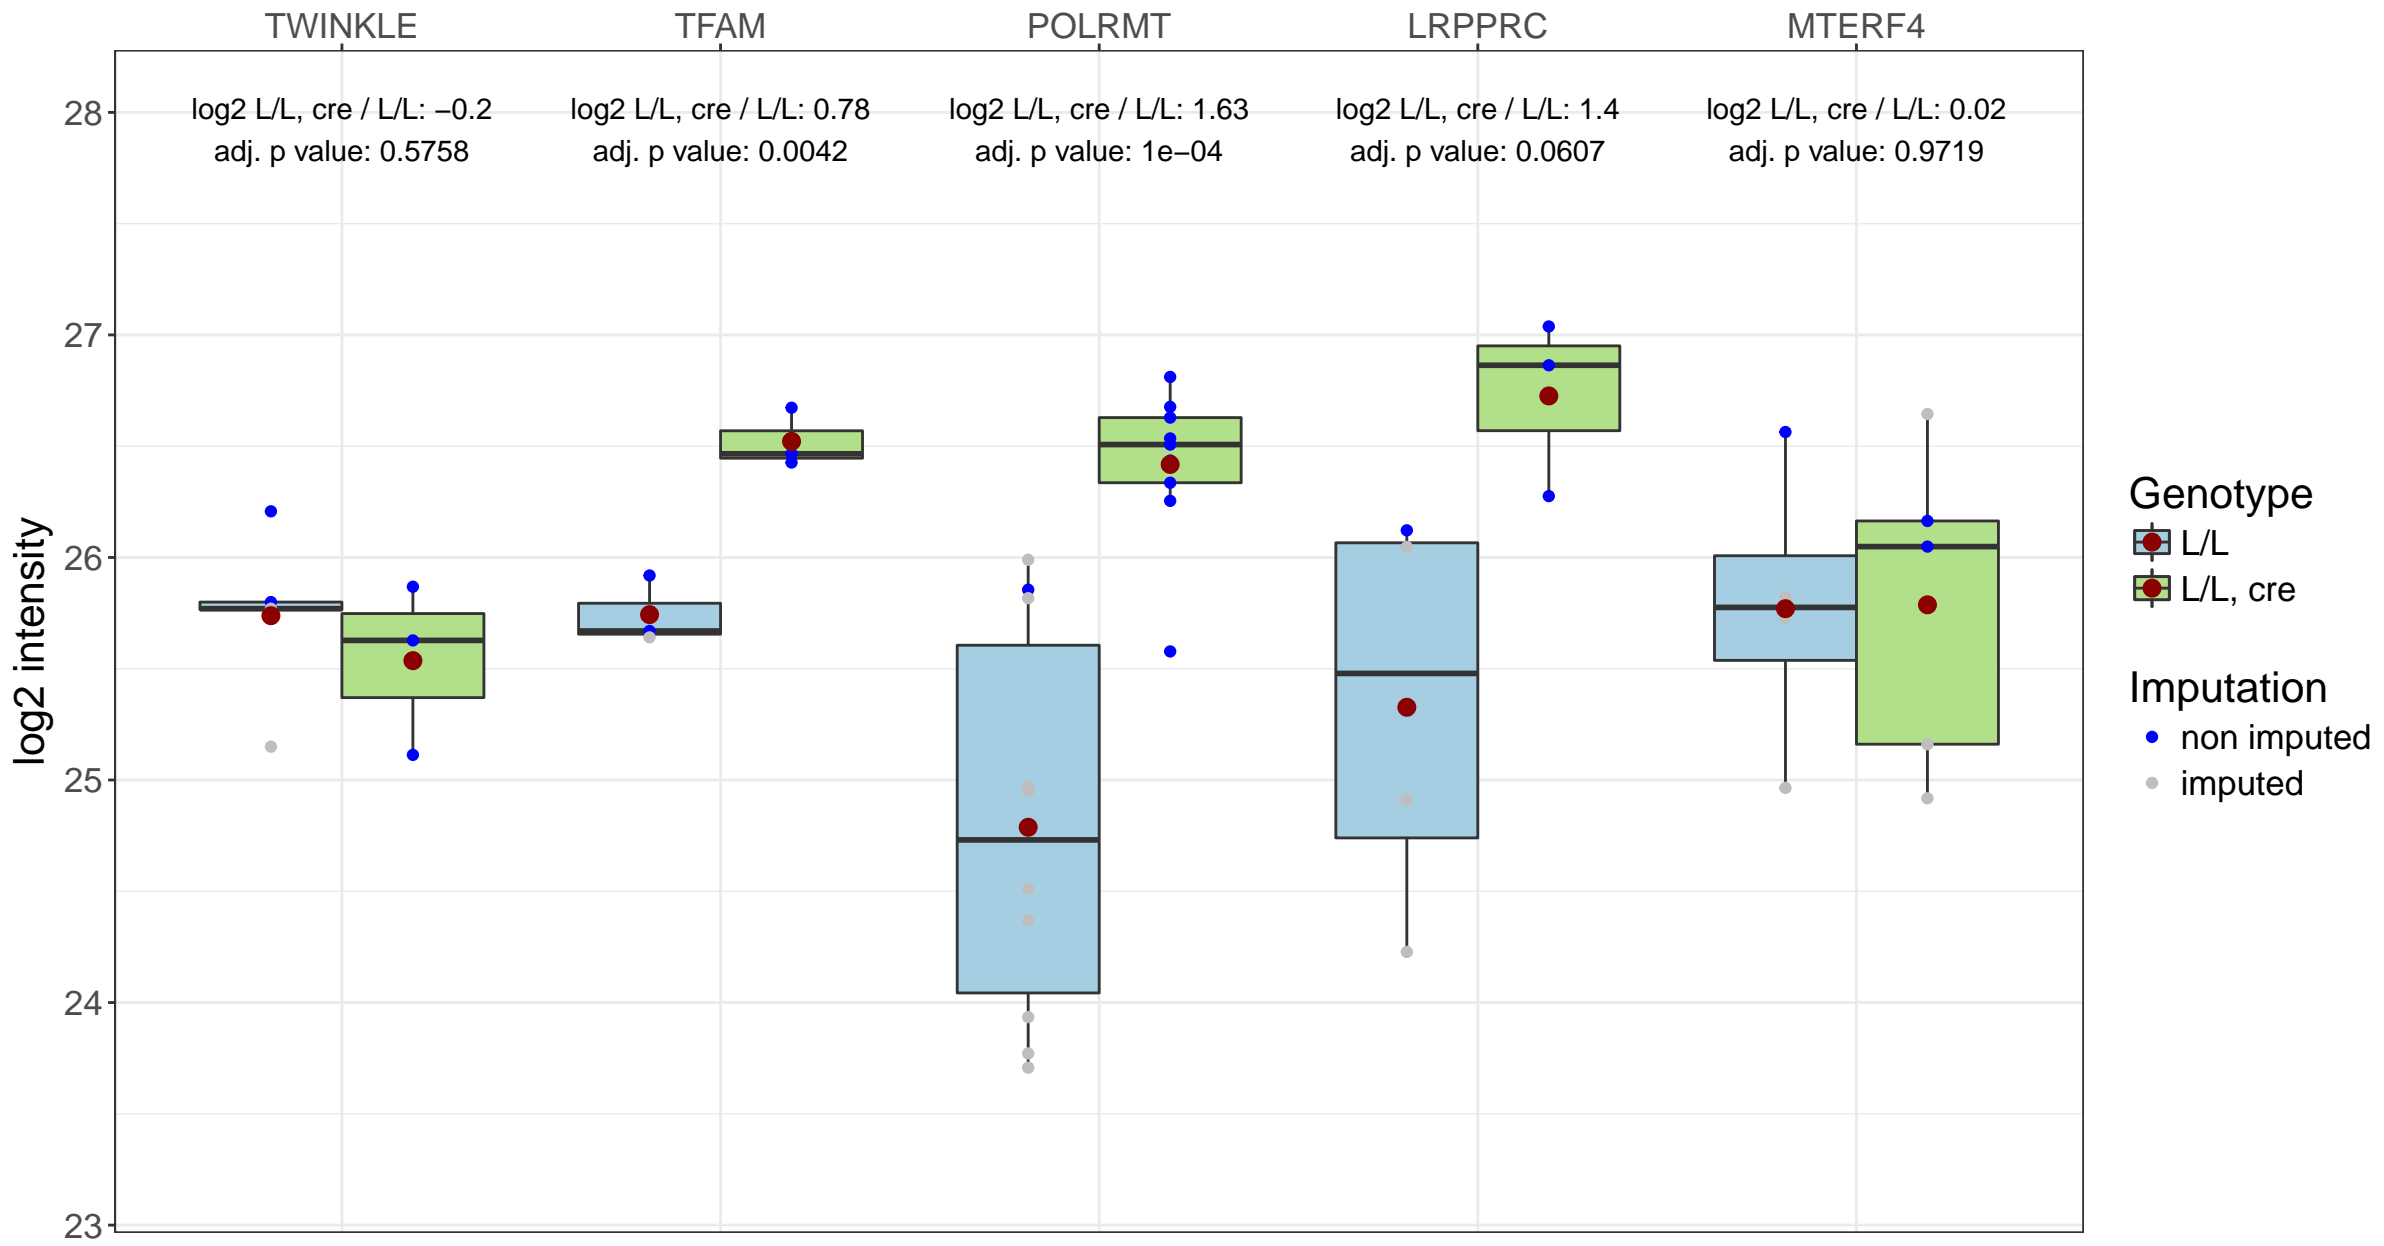

# LIPT2 / Q9D009

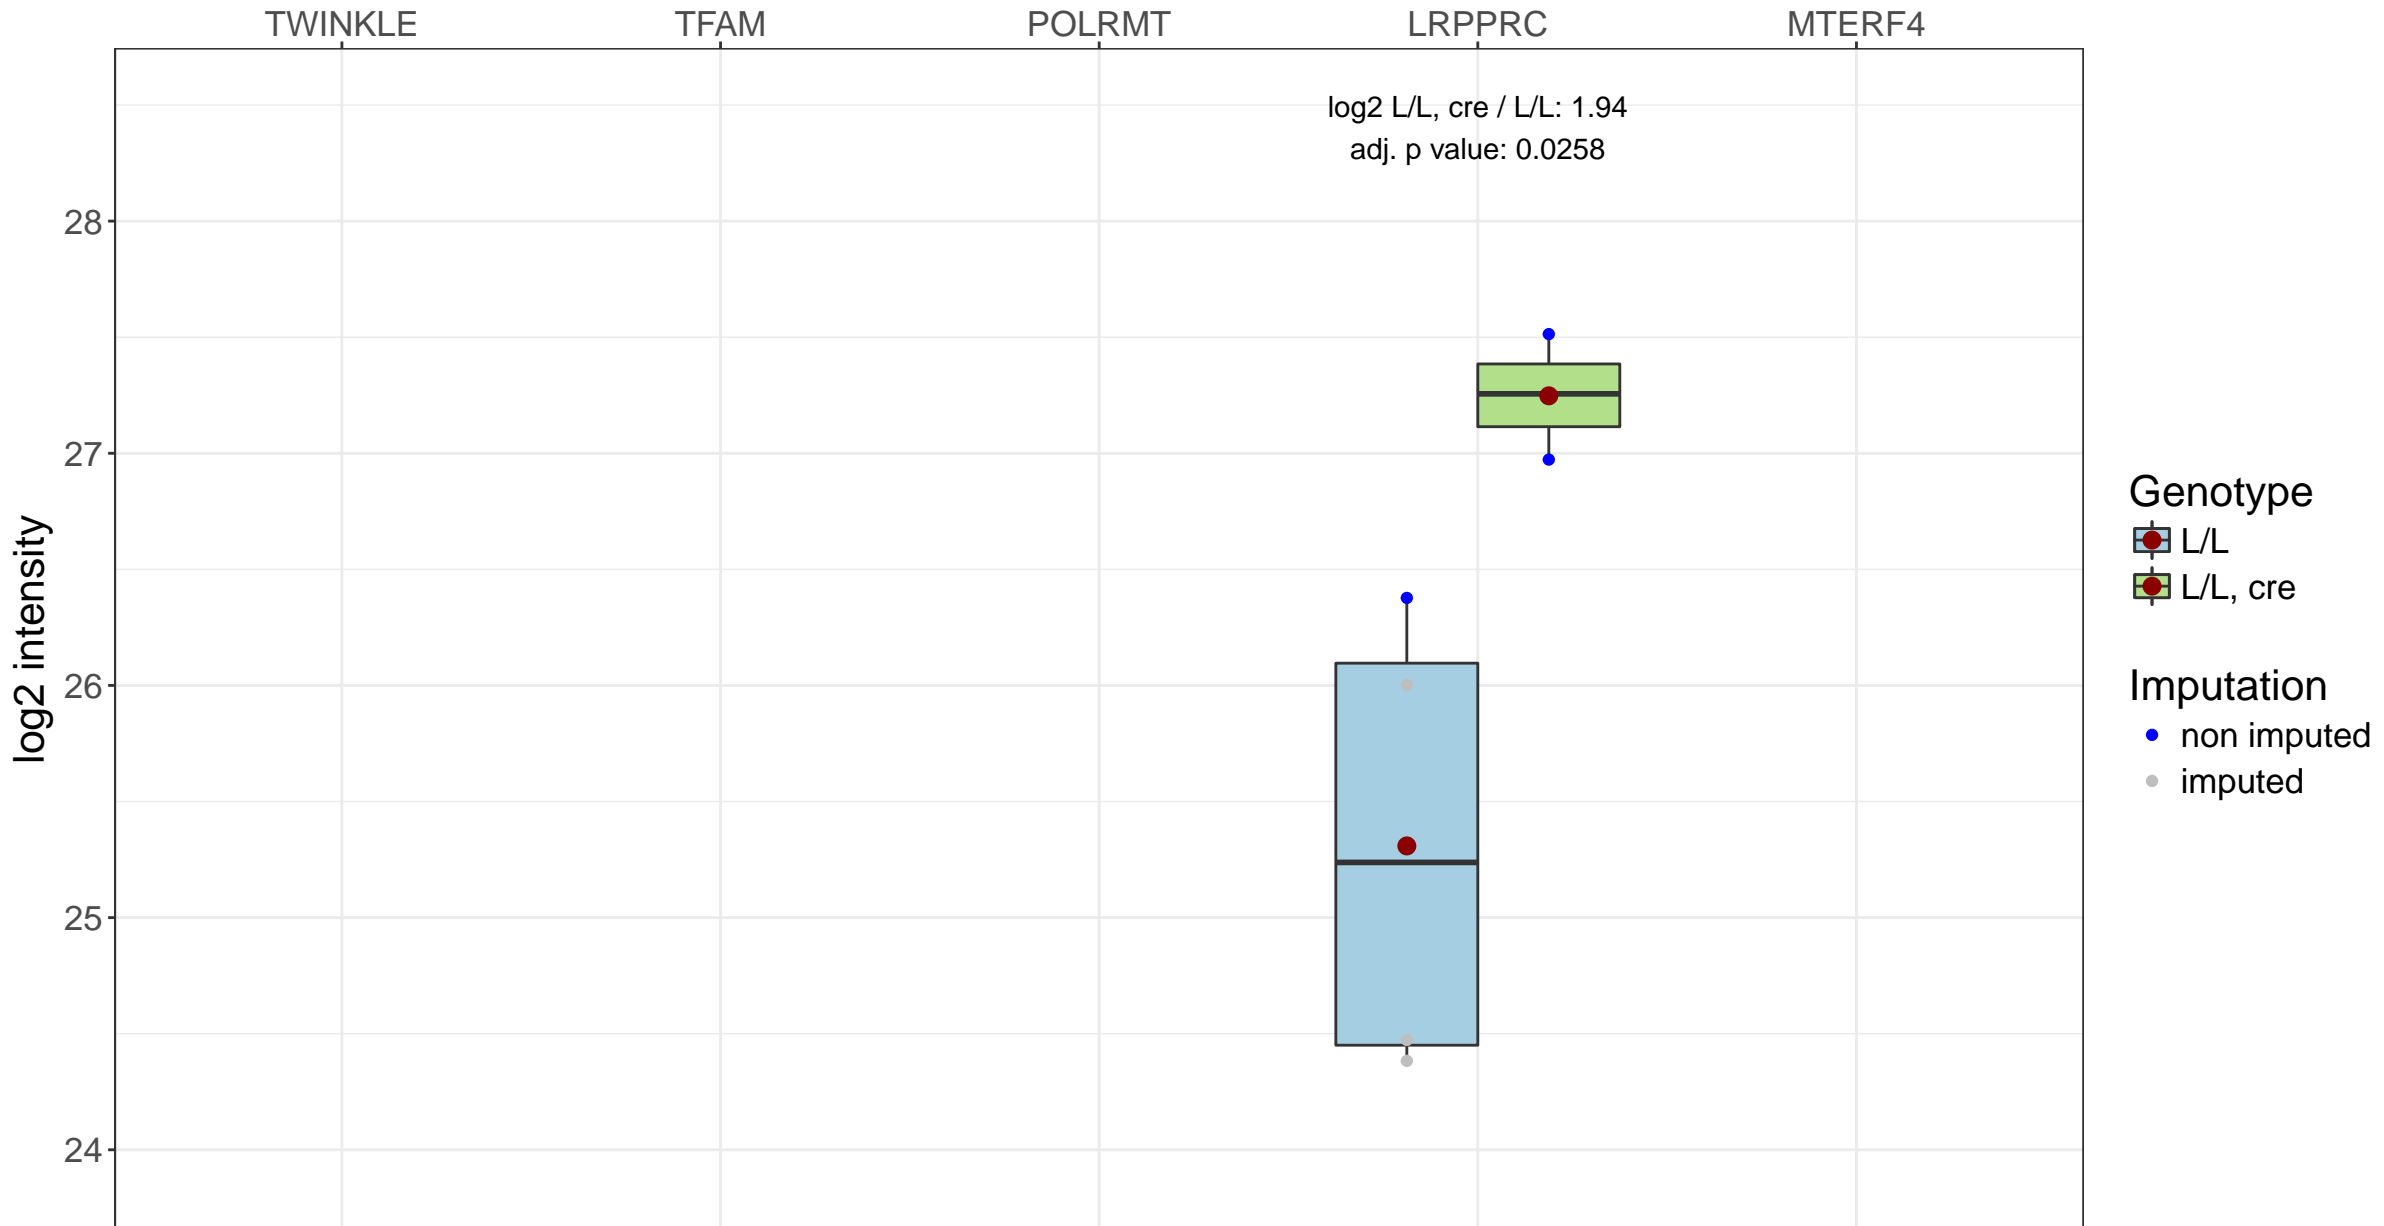



# LONP1 / Q8CGK3

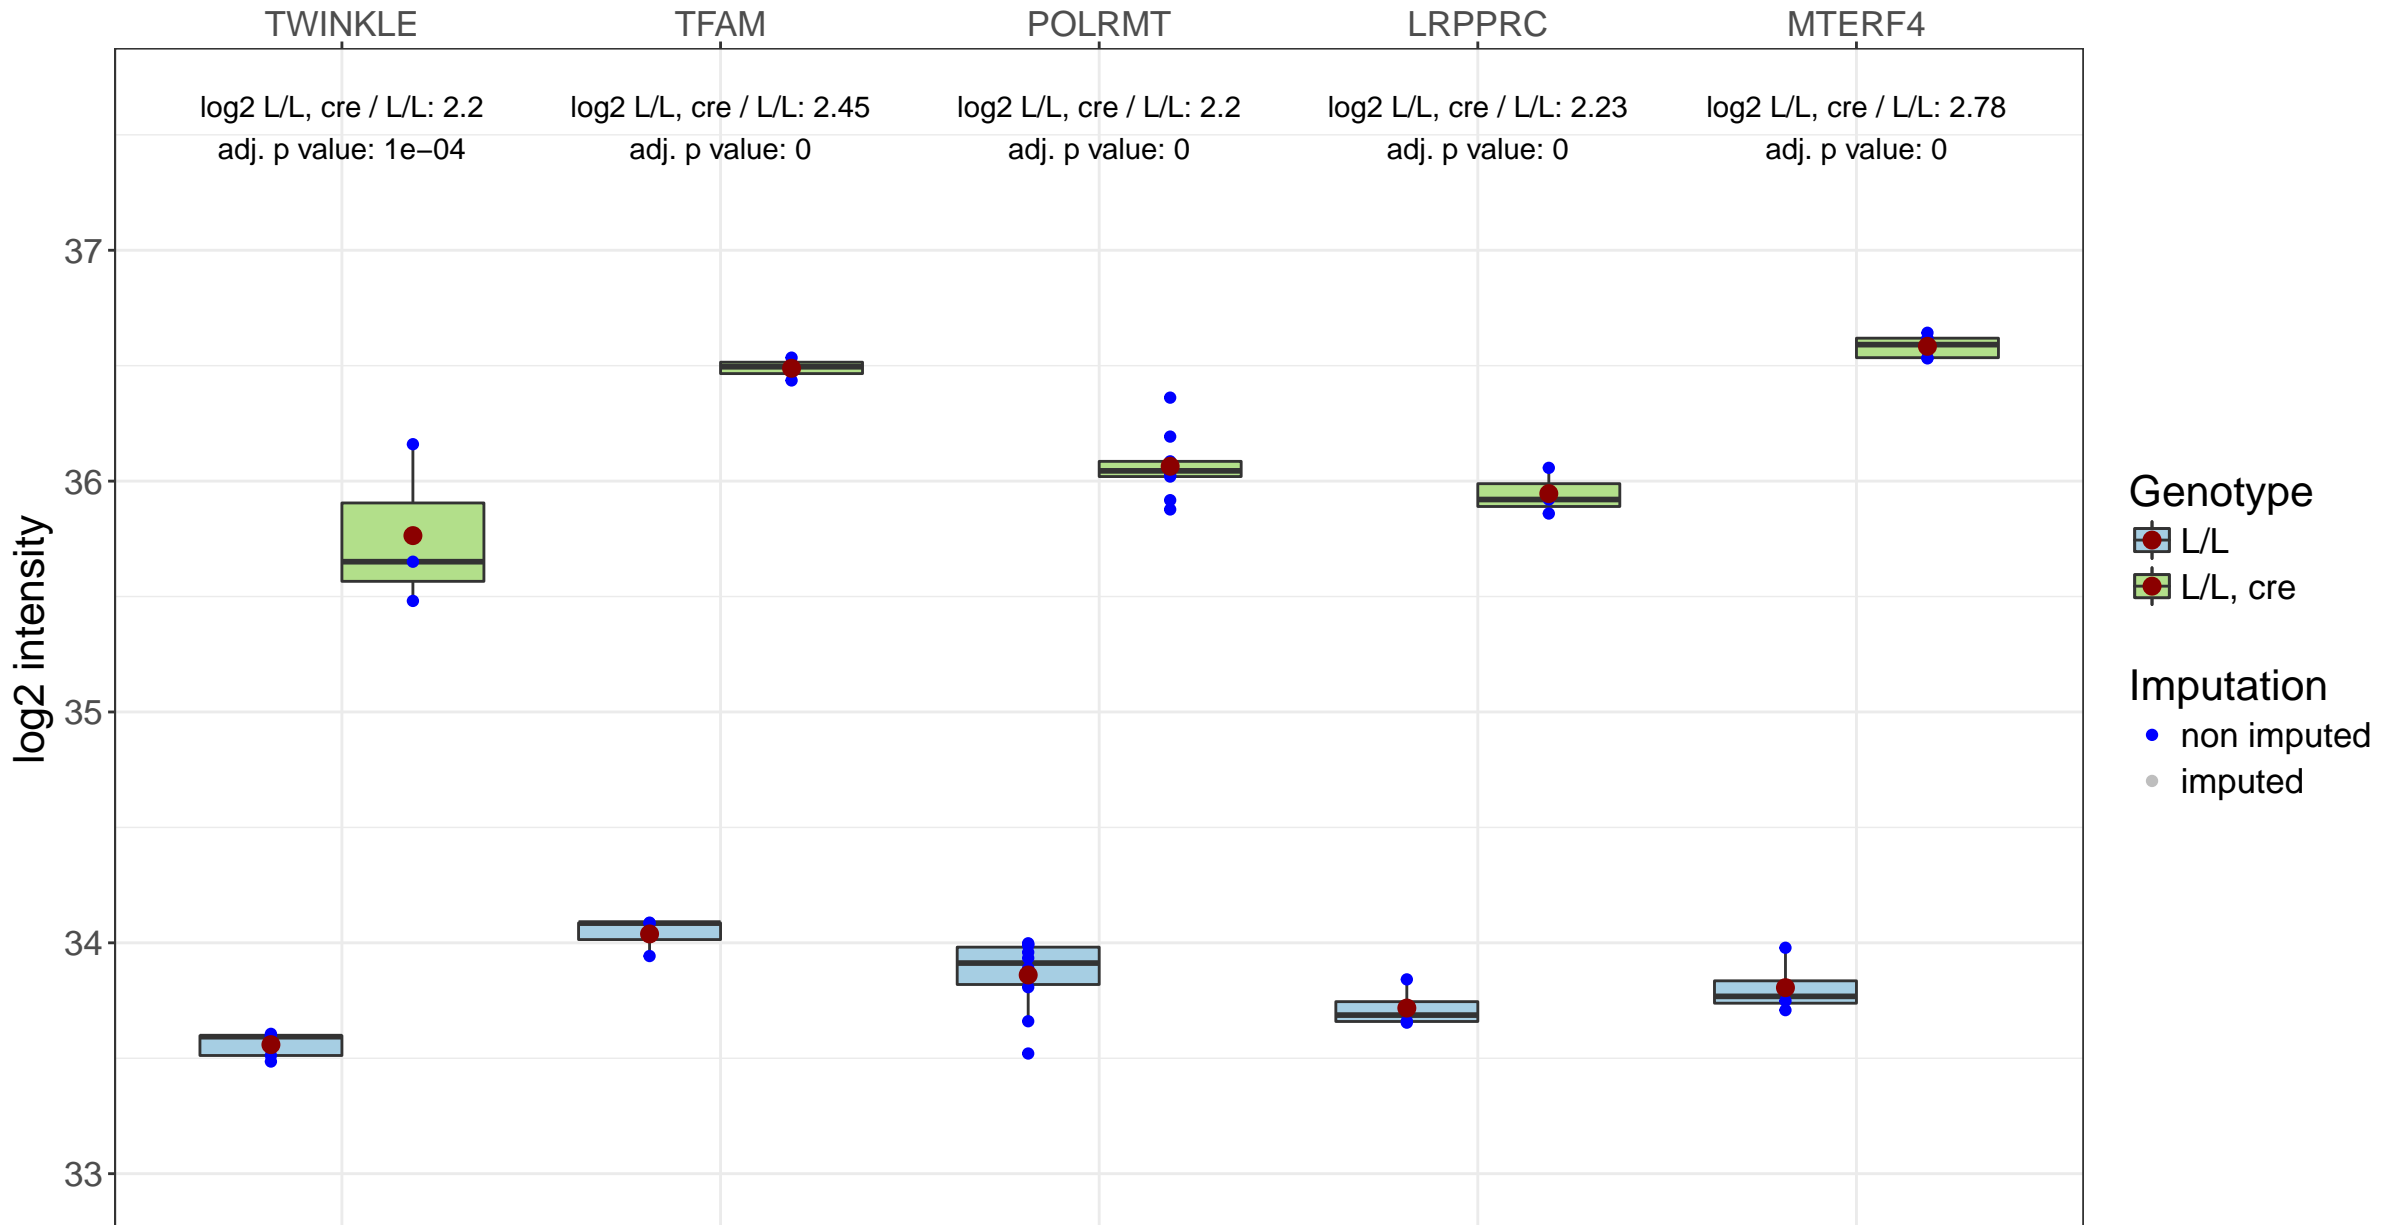

# LRPPRC / Q6PB66

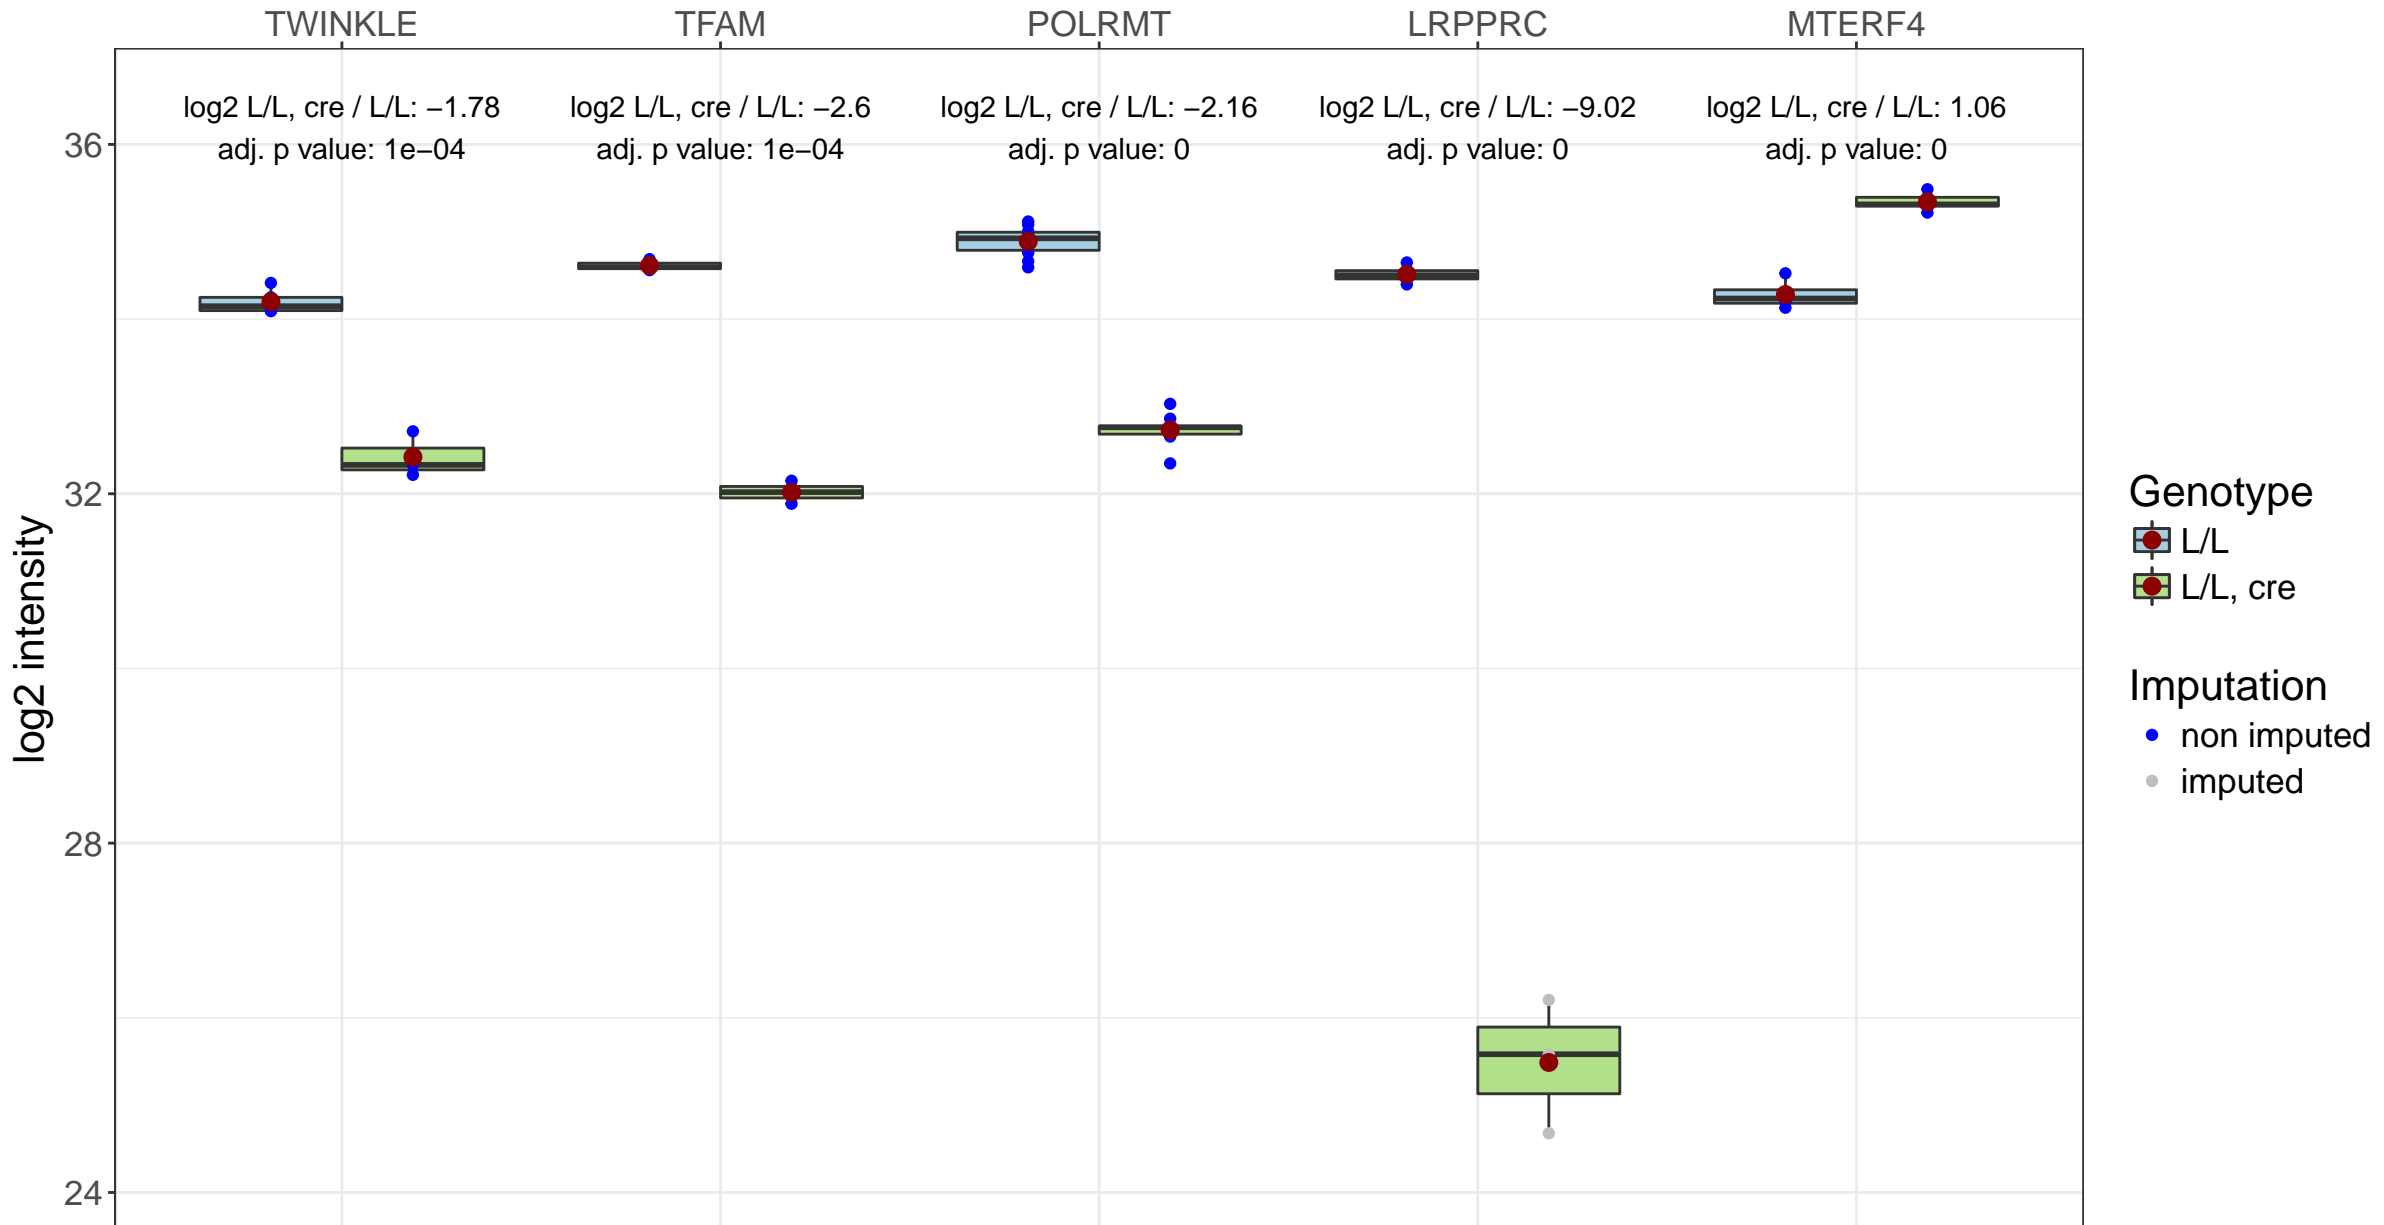

# LRRC59 / Q922Q8

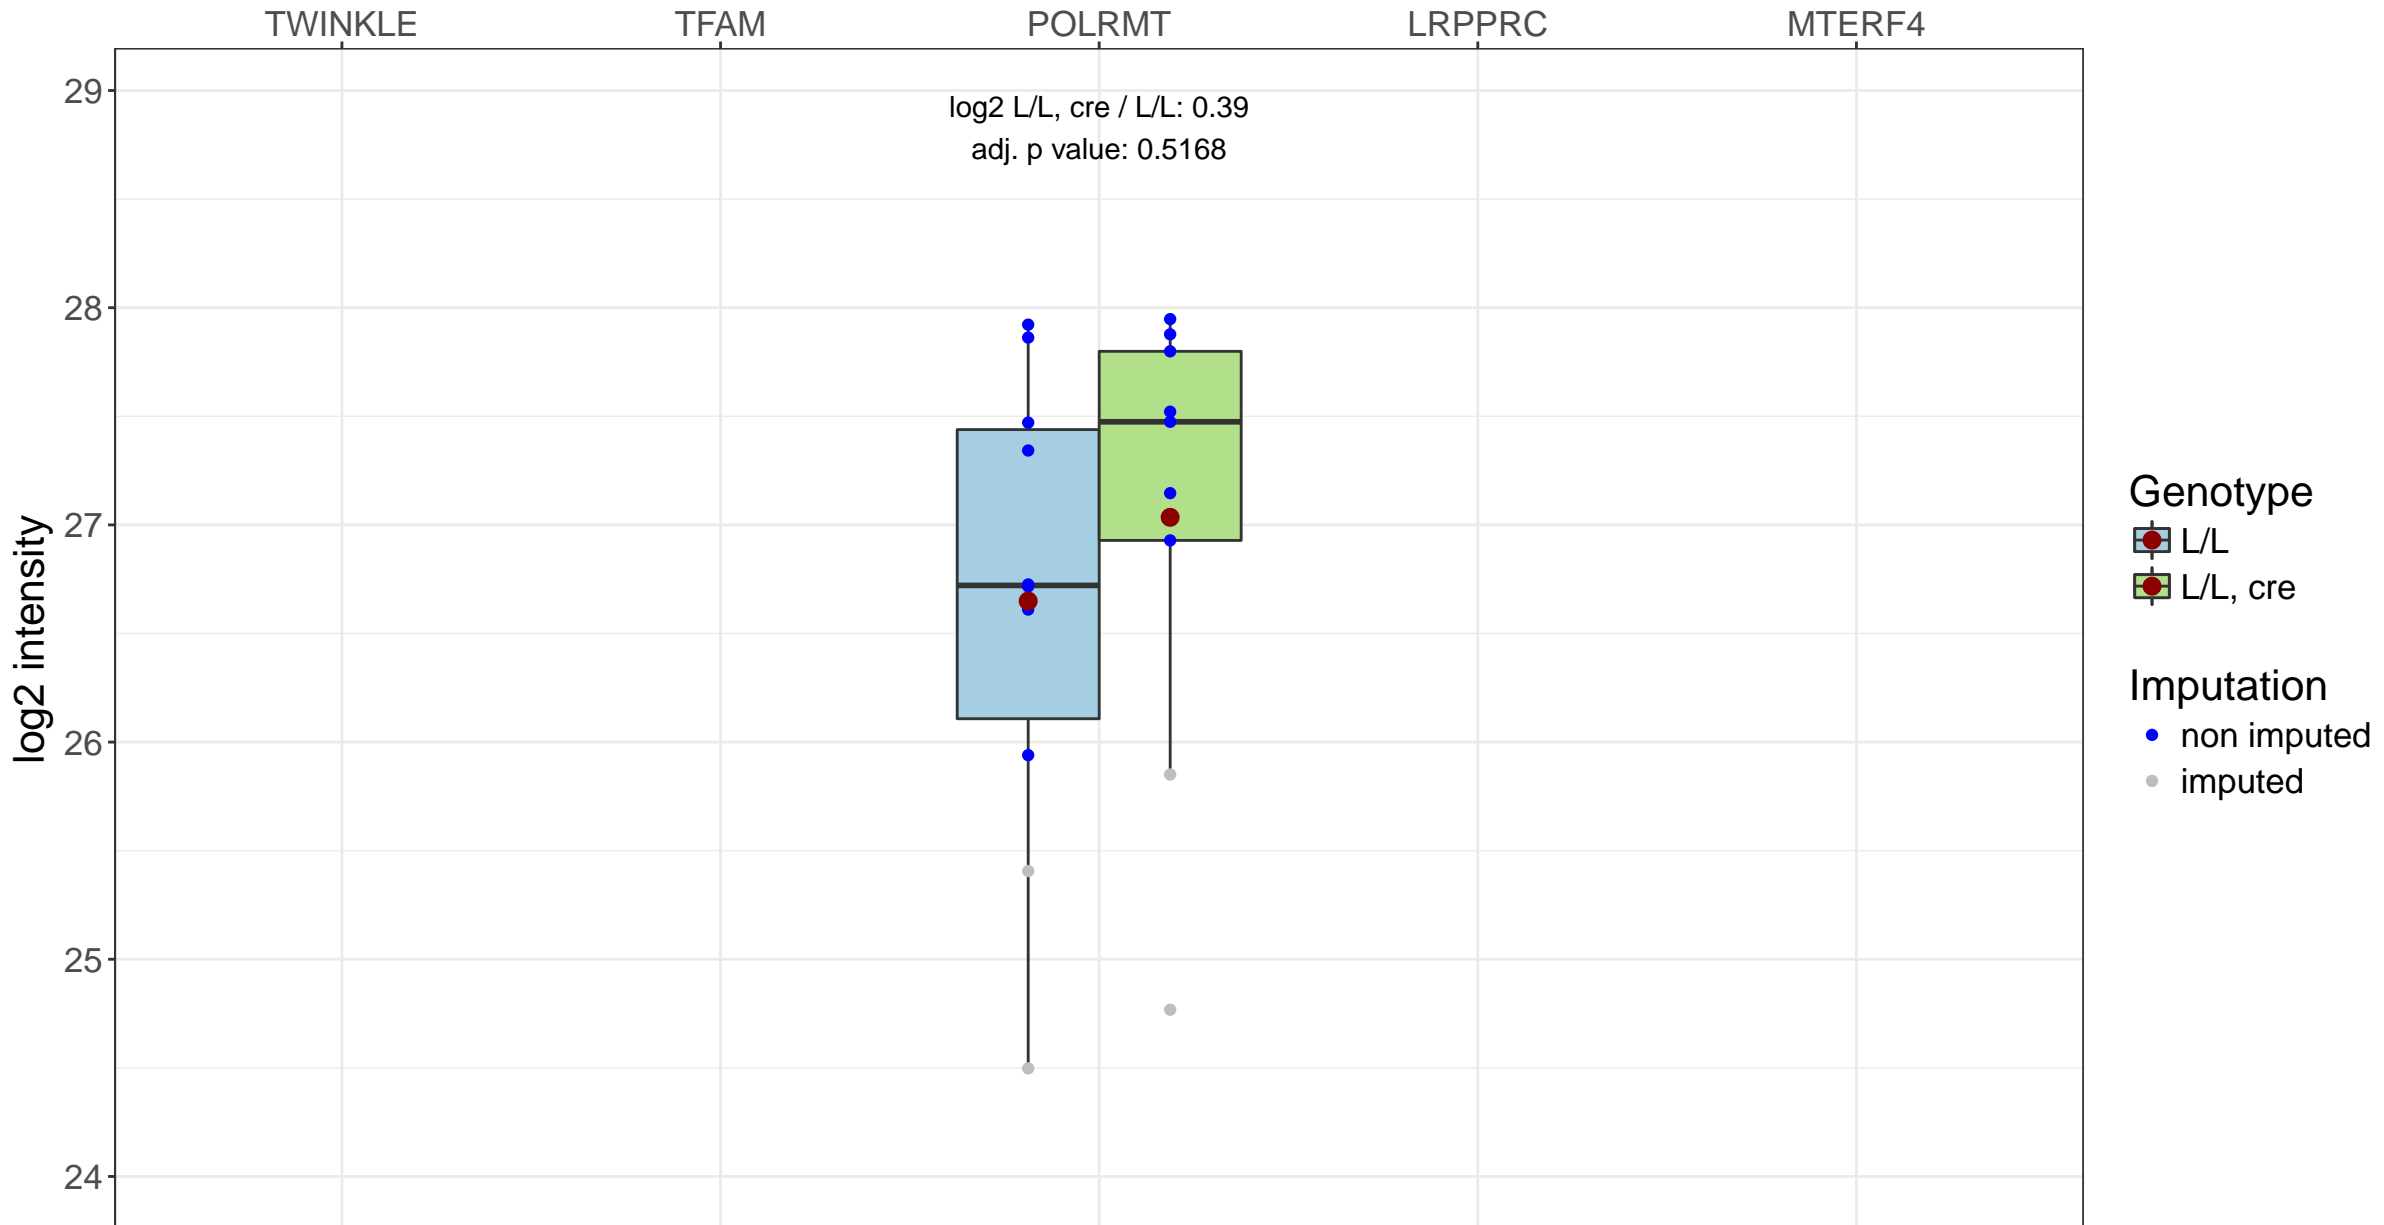

# LYPLA1 / P97823

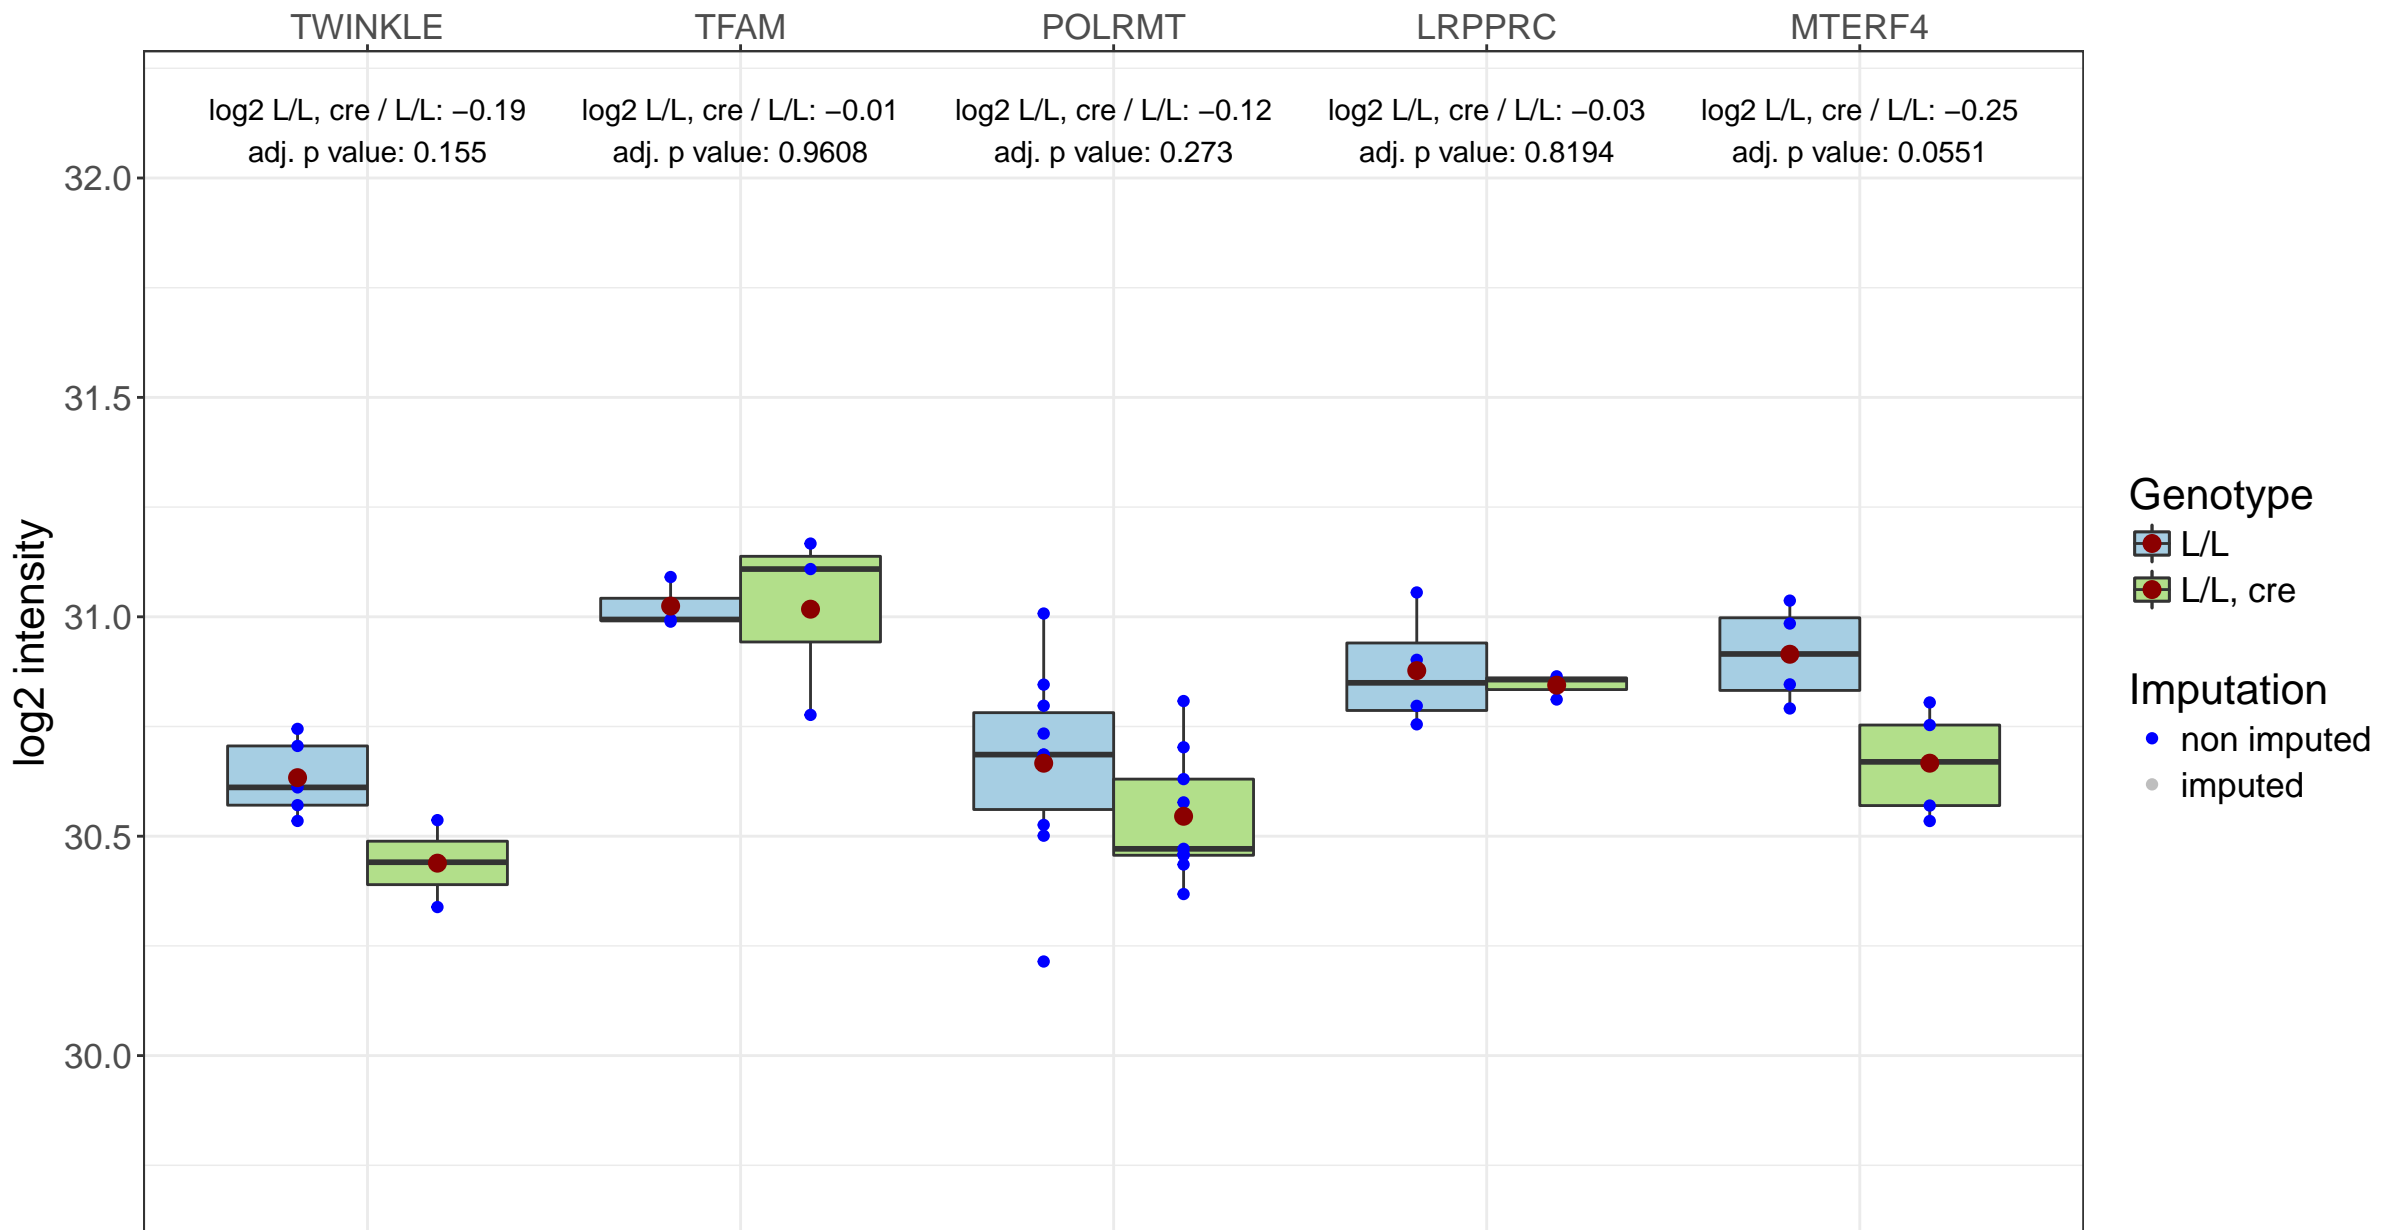

# LYRM1 / Q9CQB7

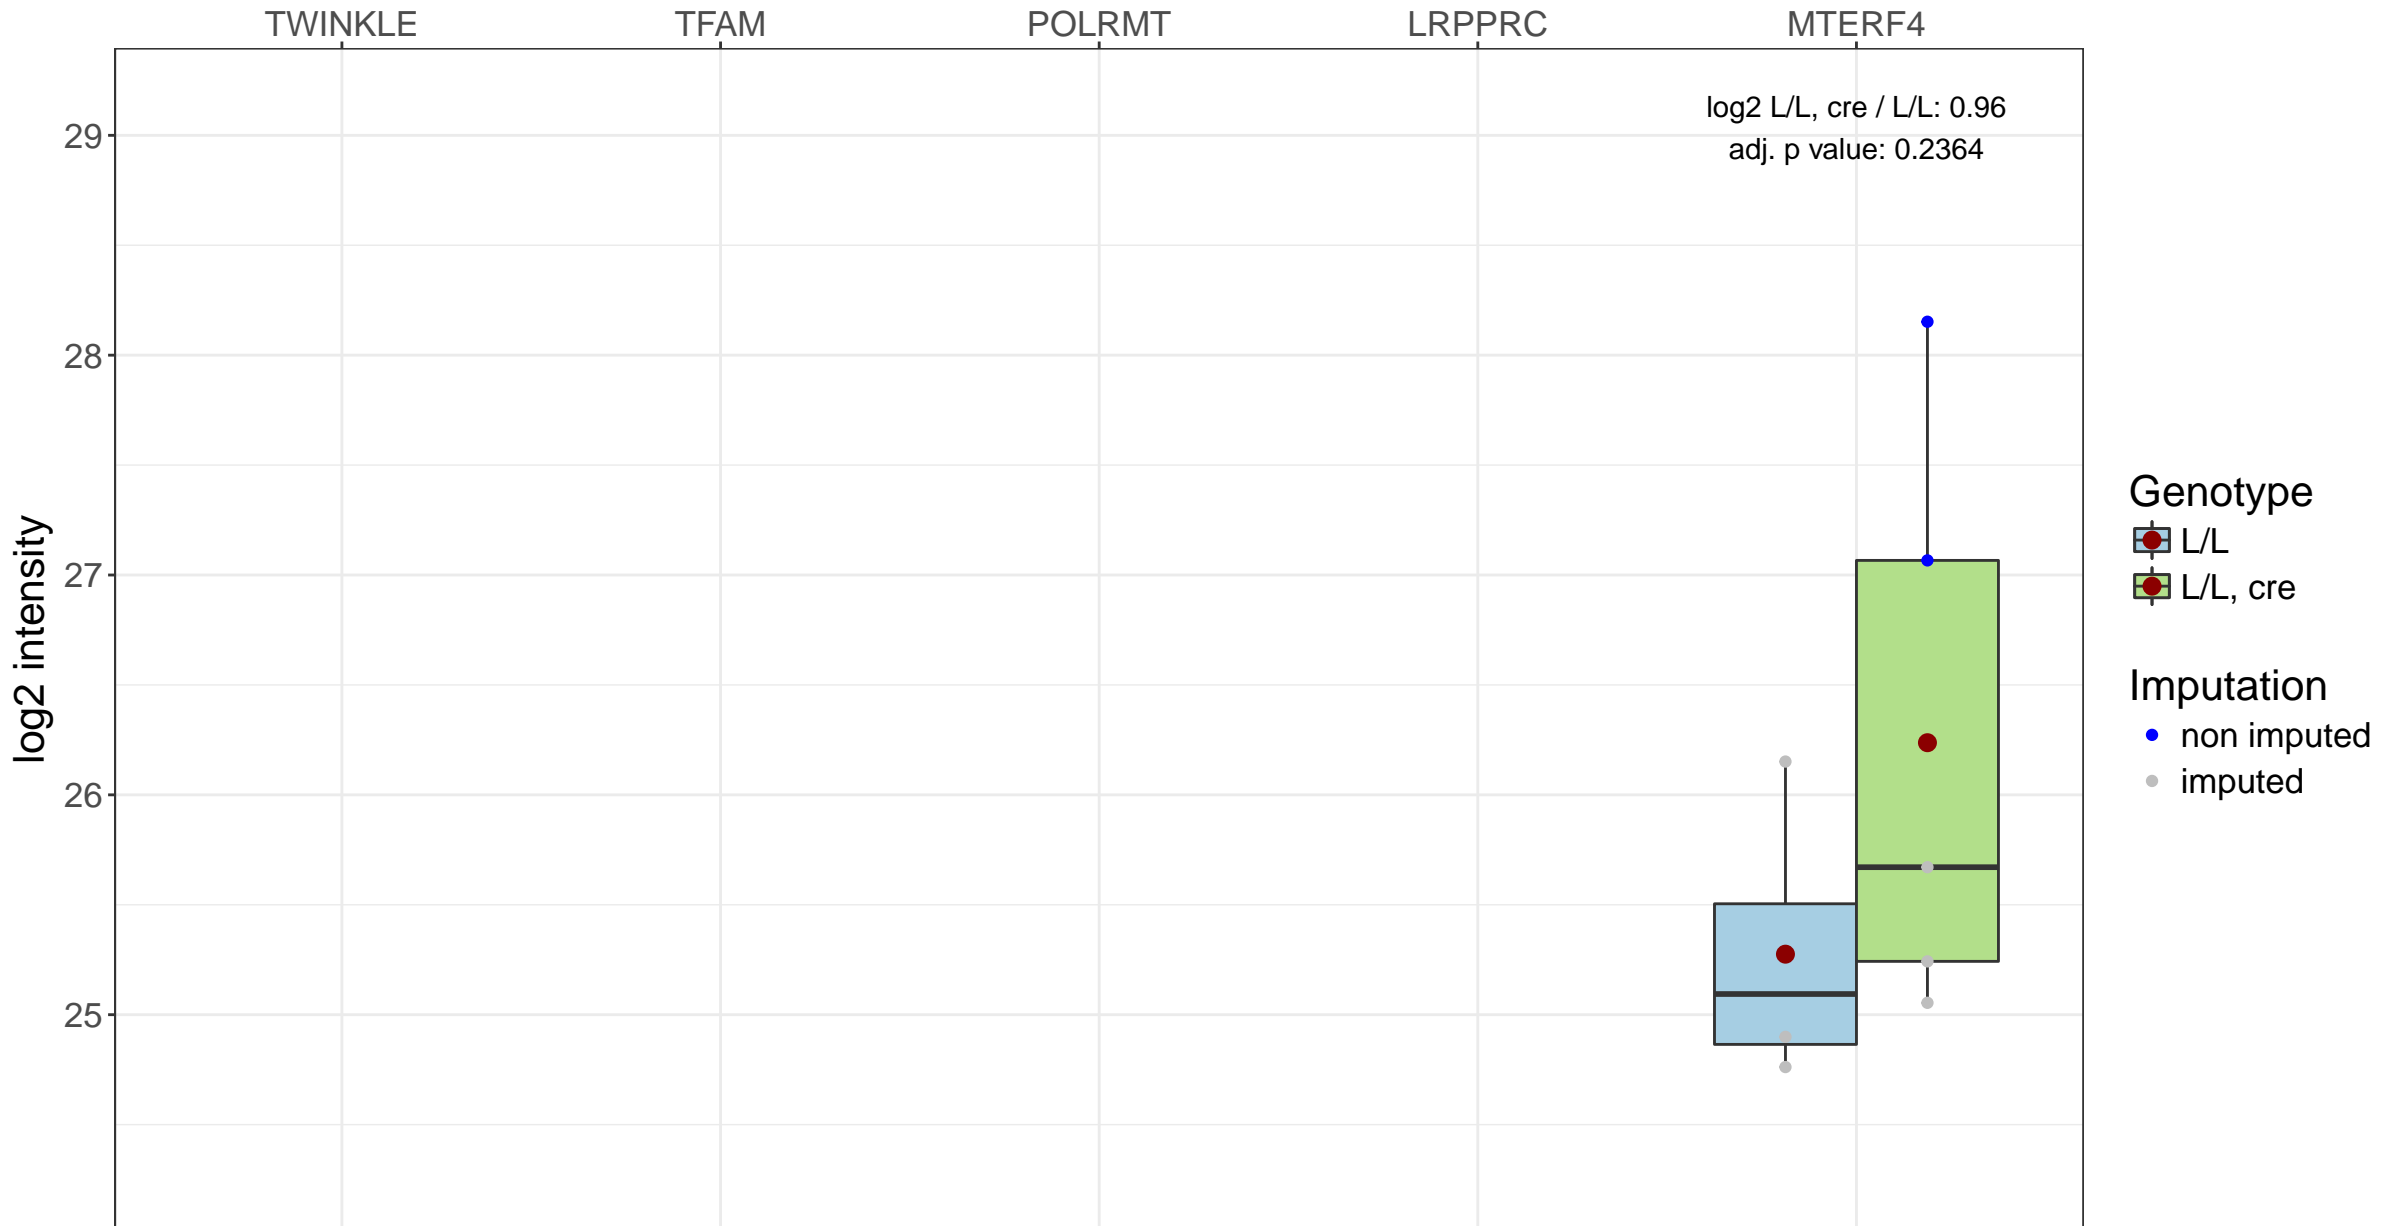

# LYRM2 / Q8R033

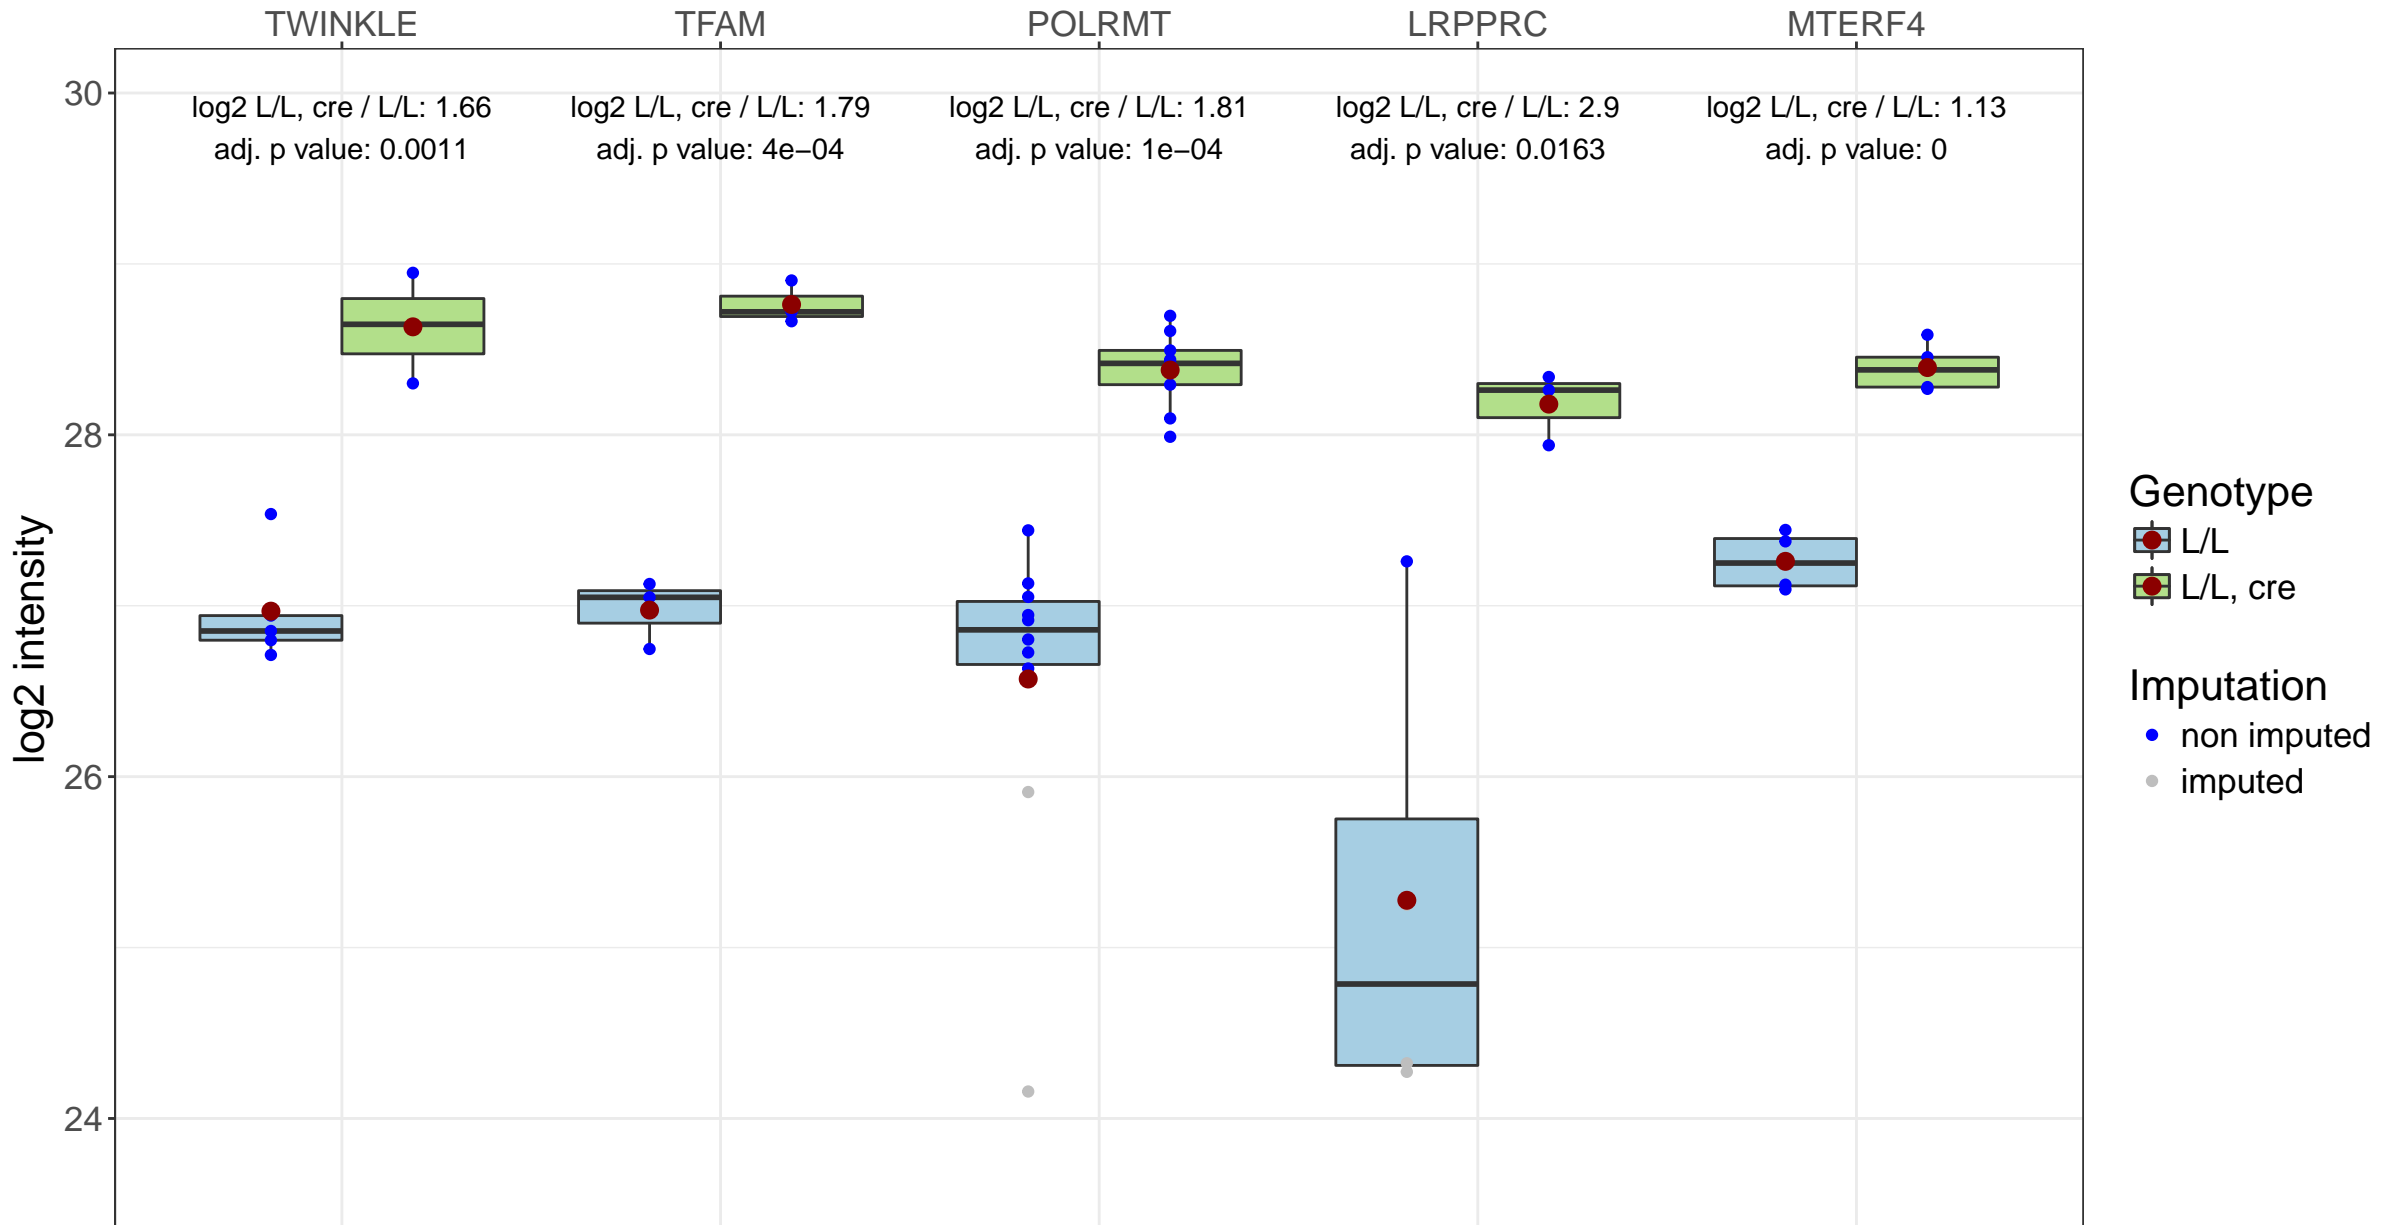

# LYRM4 / Q8K215

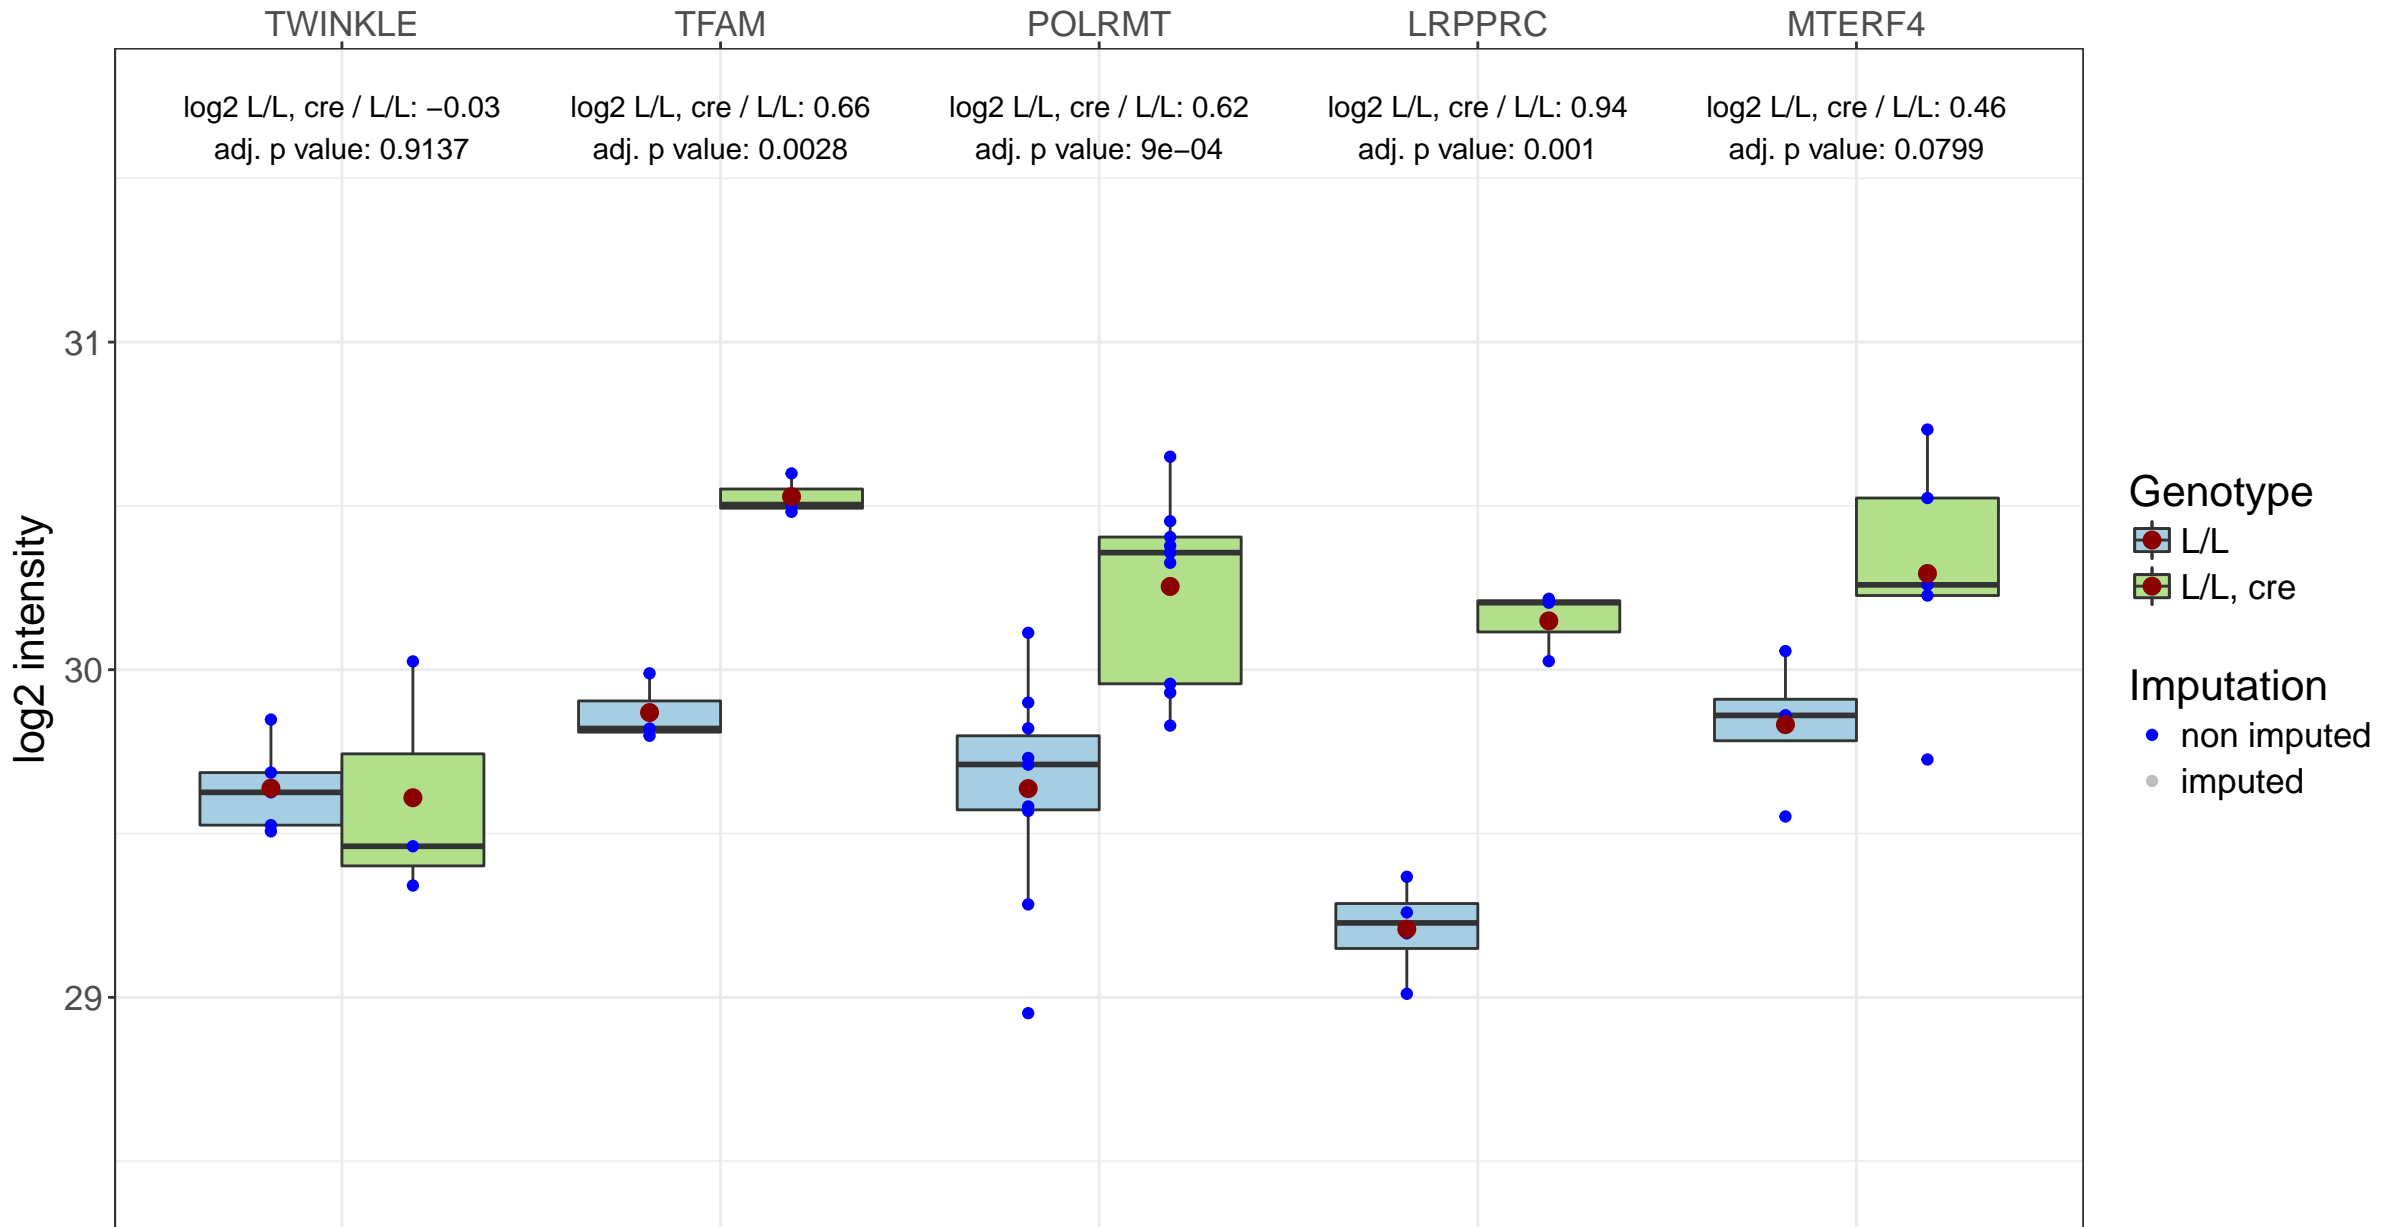

# LYRM5 / Q91V16

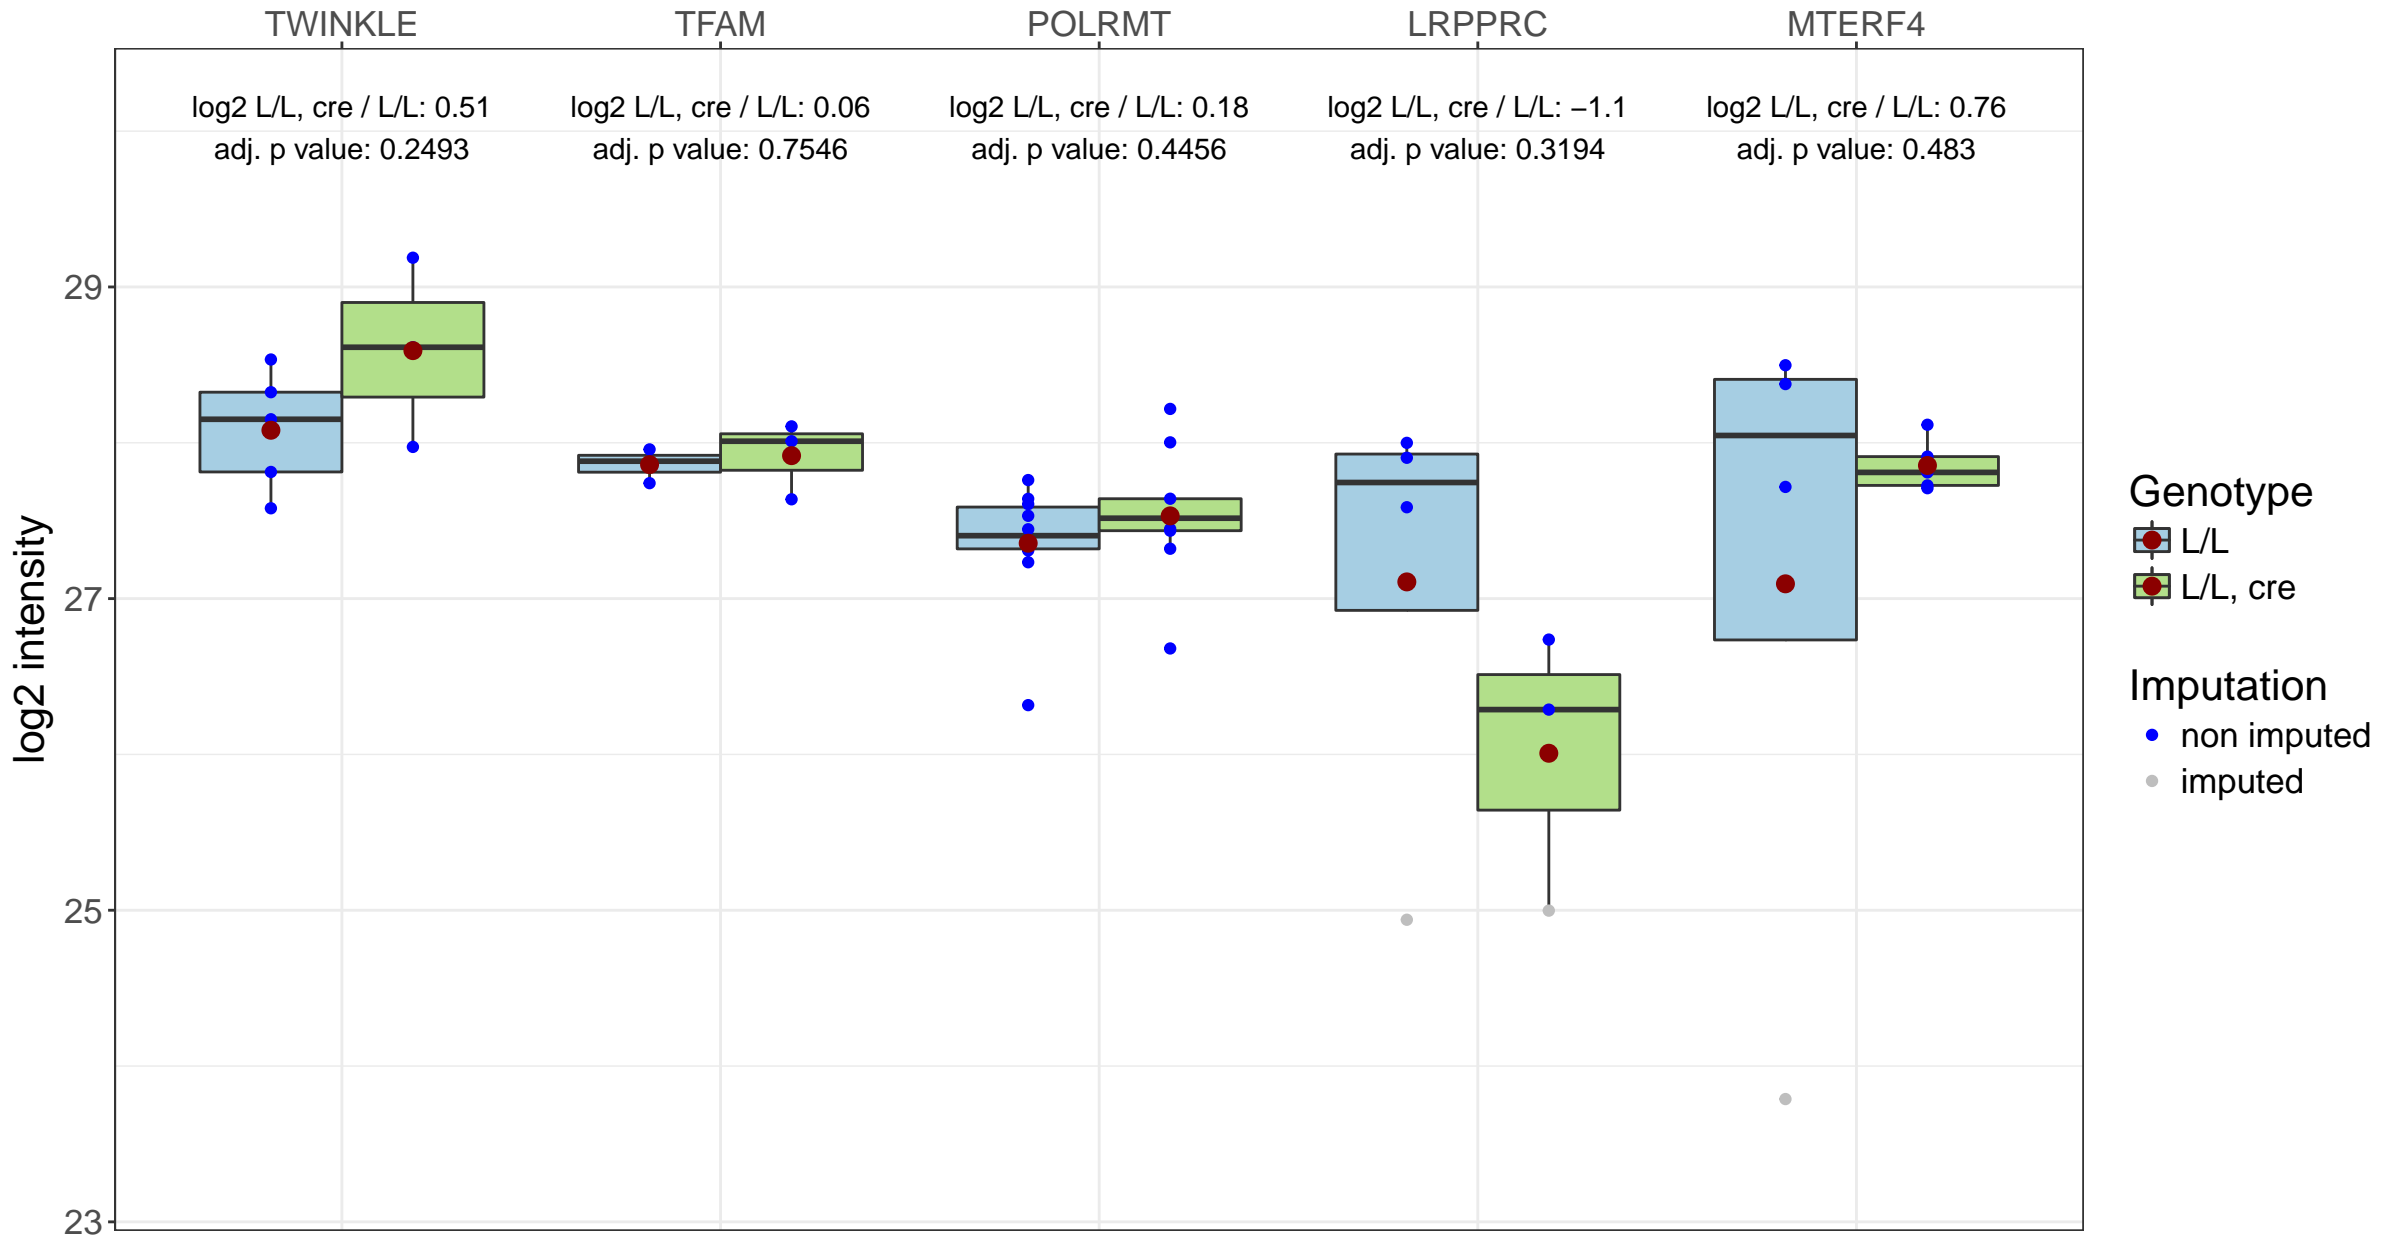



# LYRM7 / Q9DA03

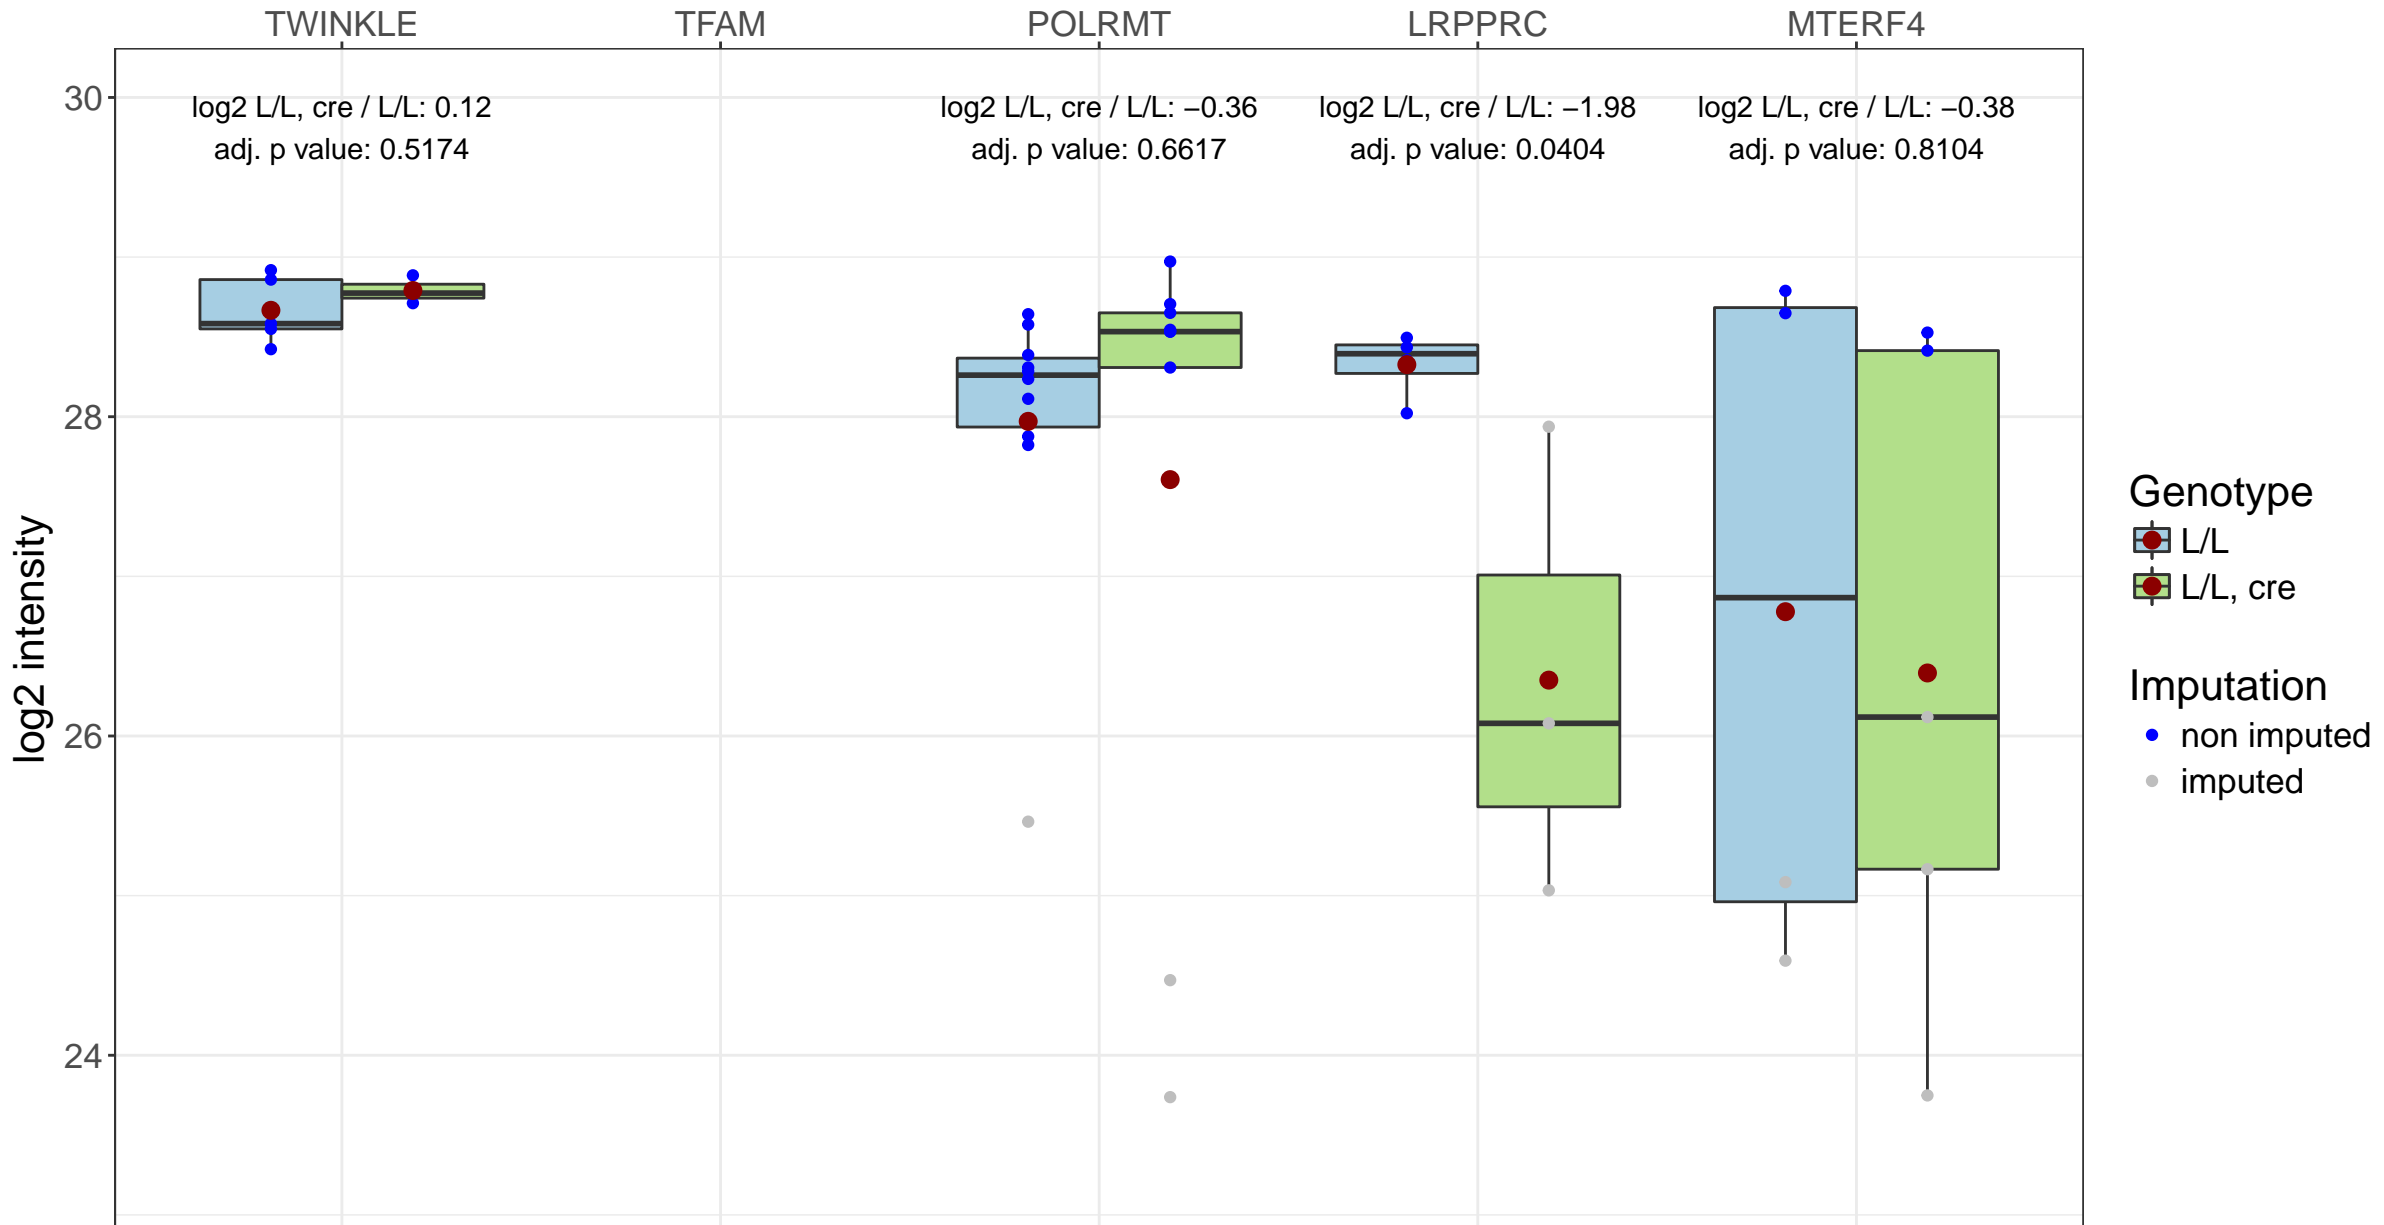

# LYRM9 / E9PX24

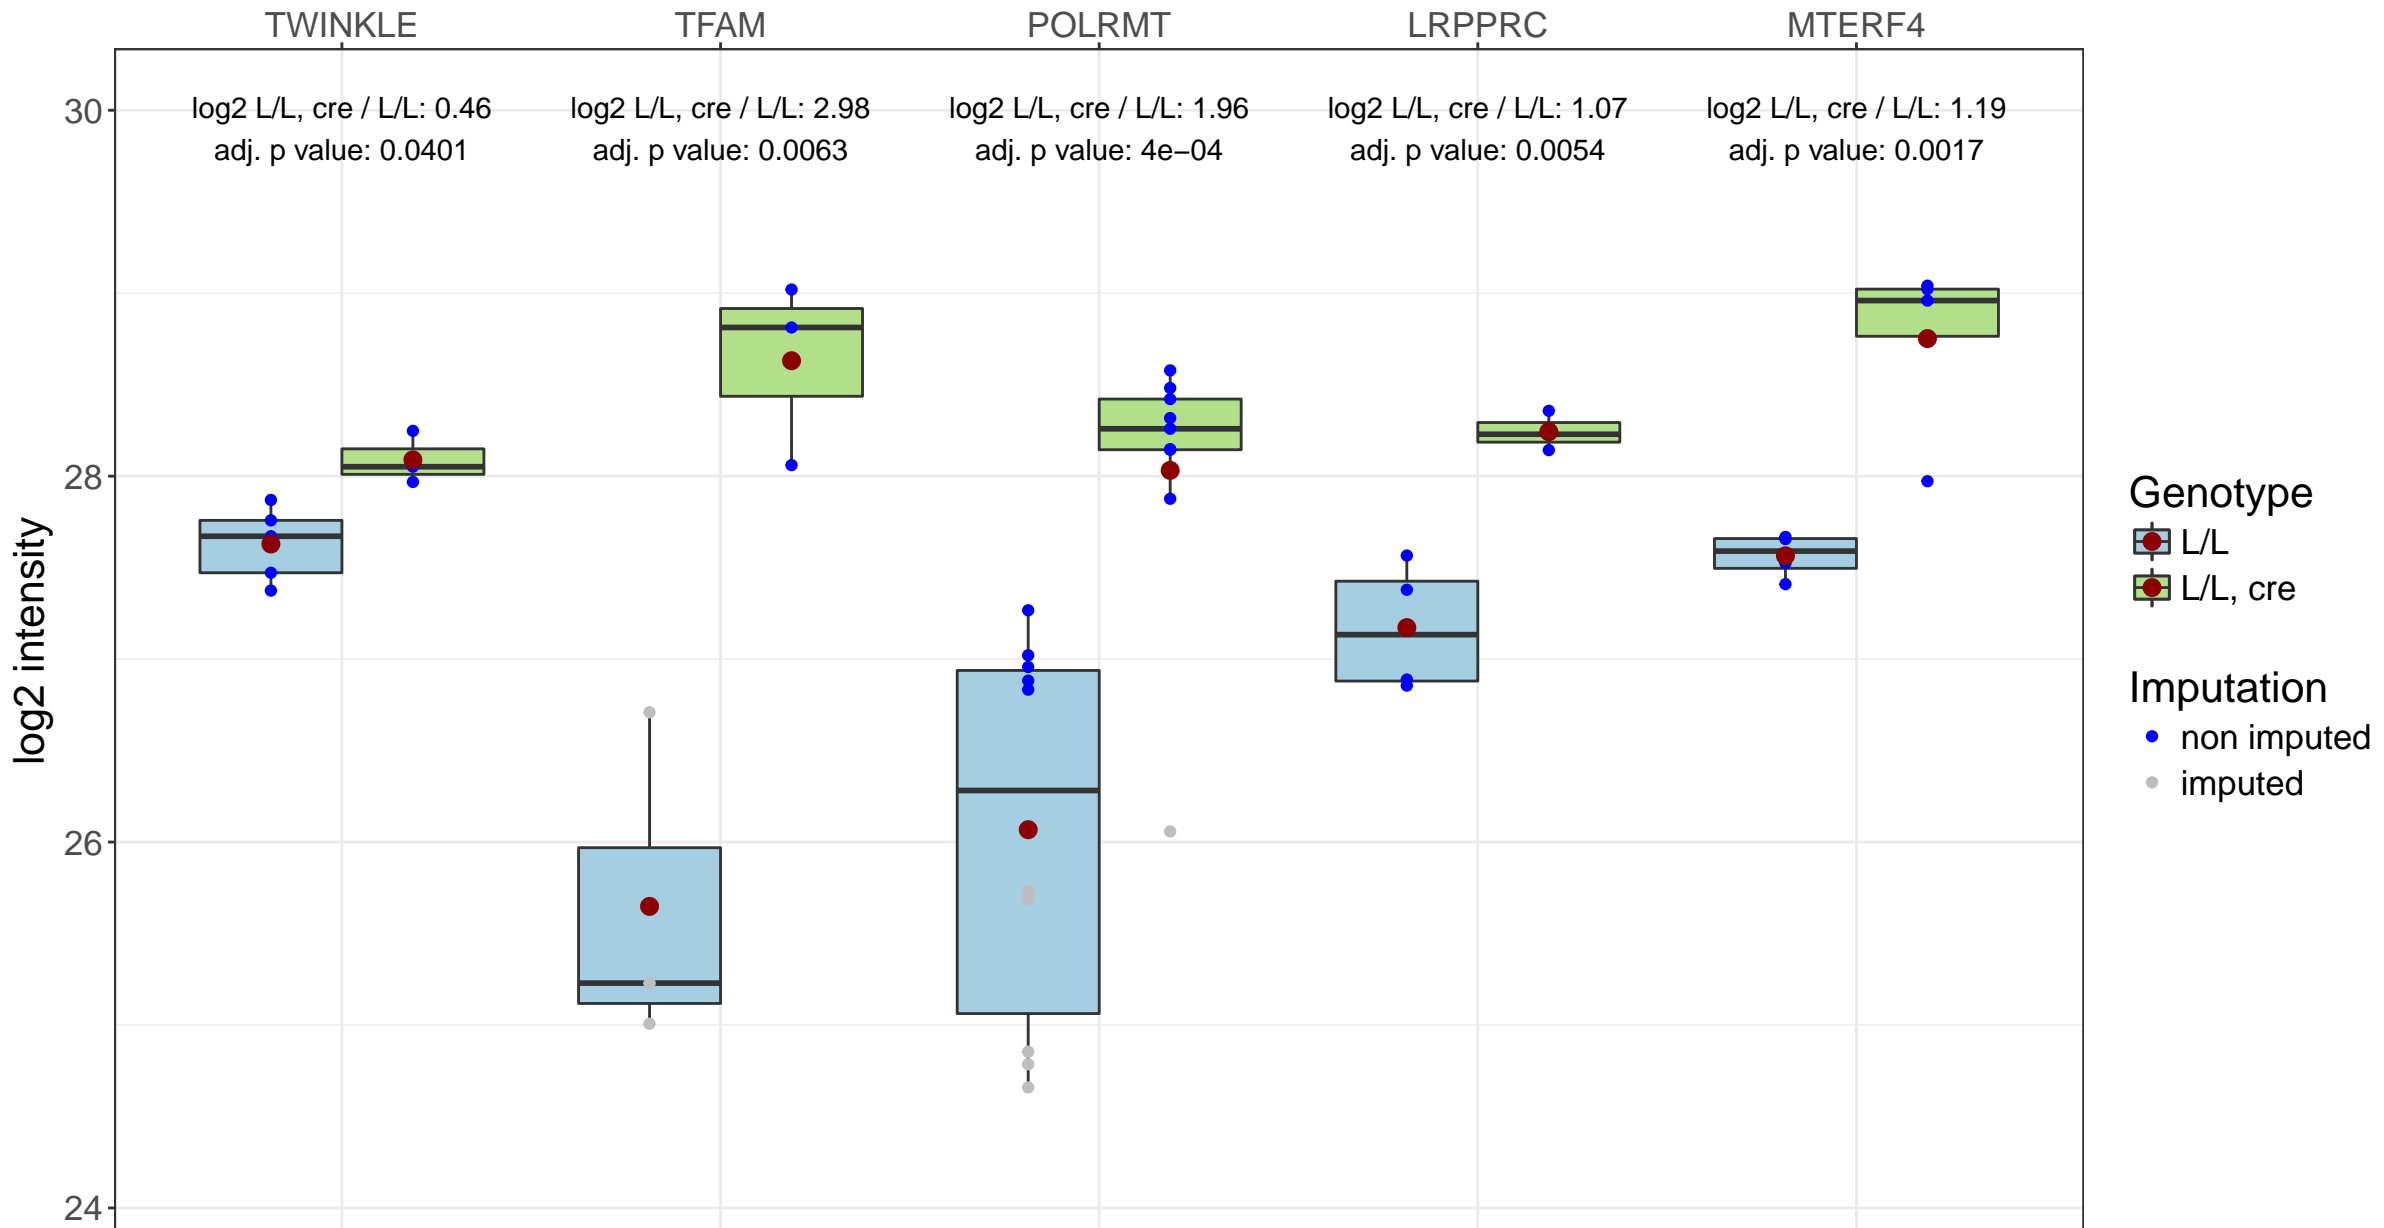

# MACROD1 / Q922B1

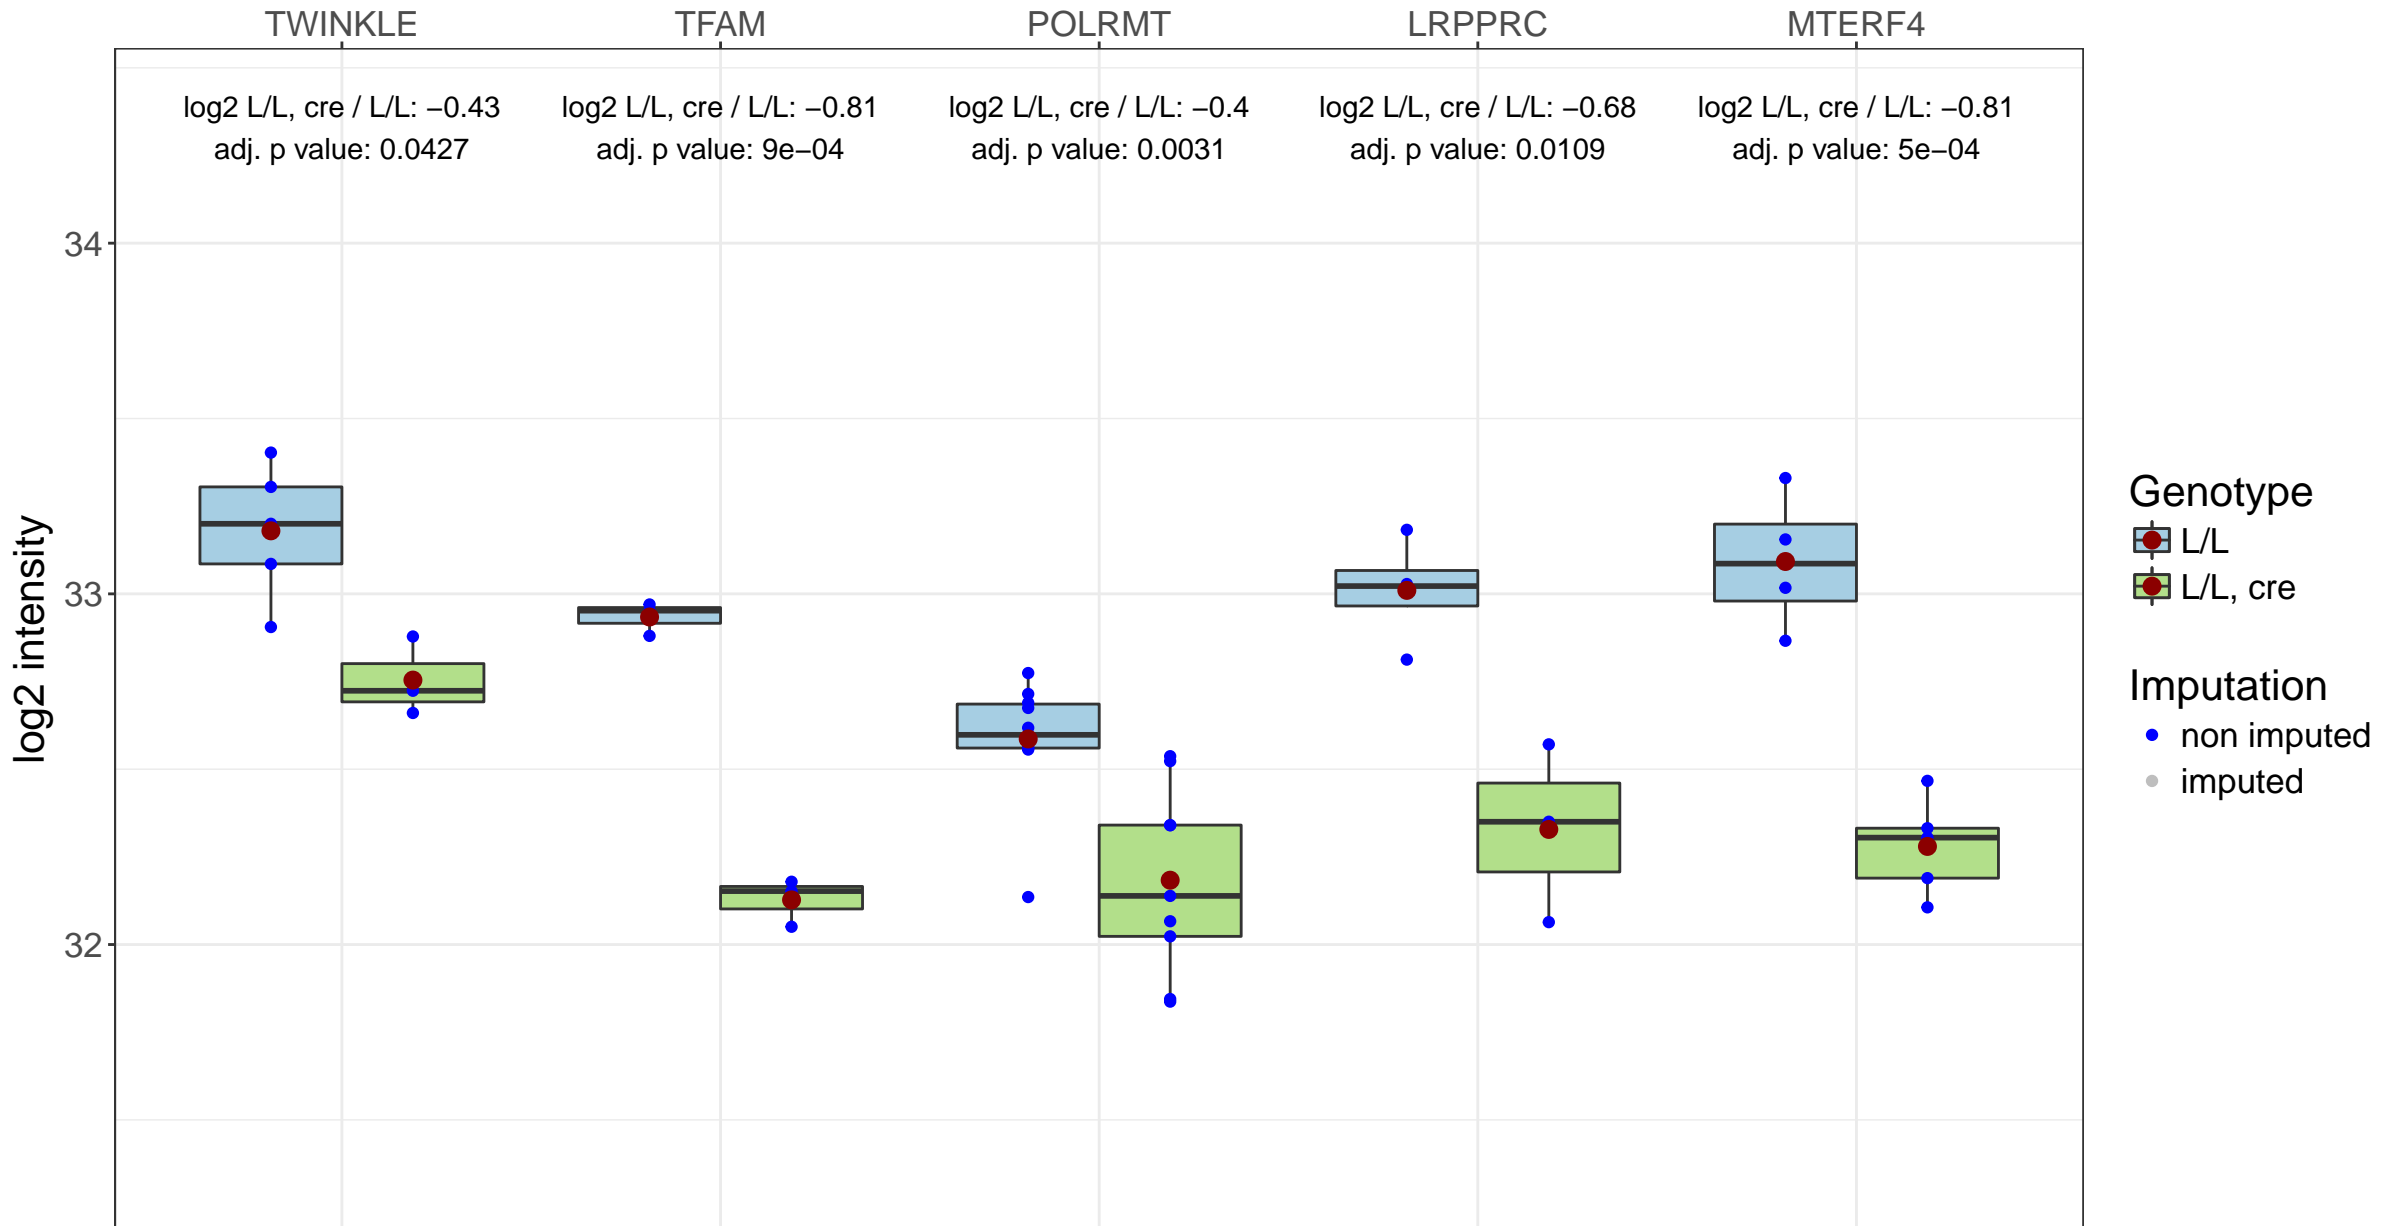

# MALSU1 / F7ASG0

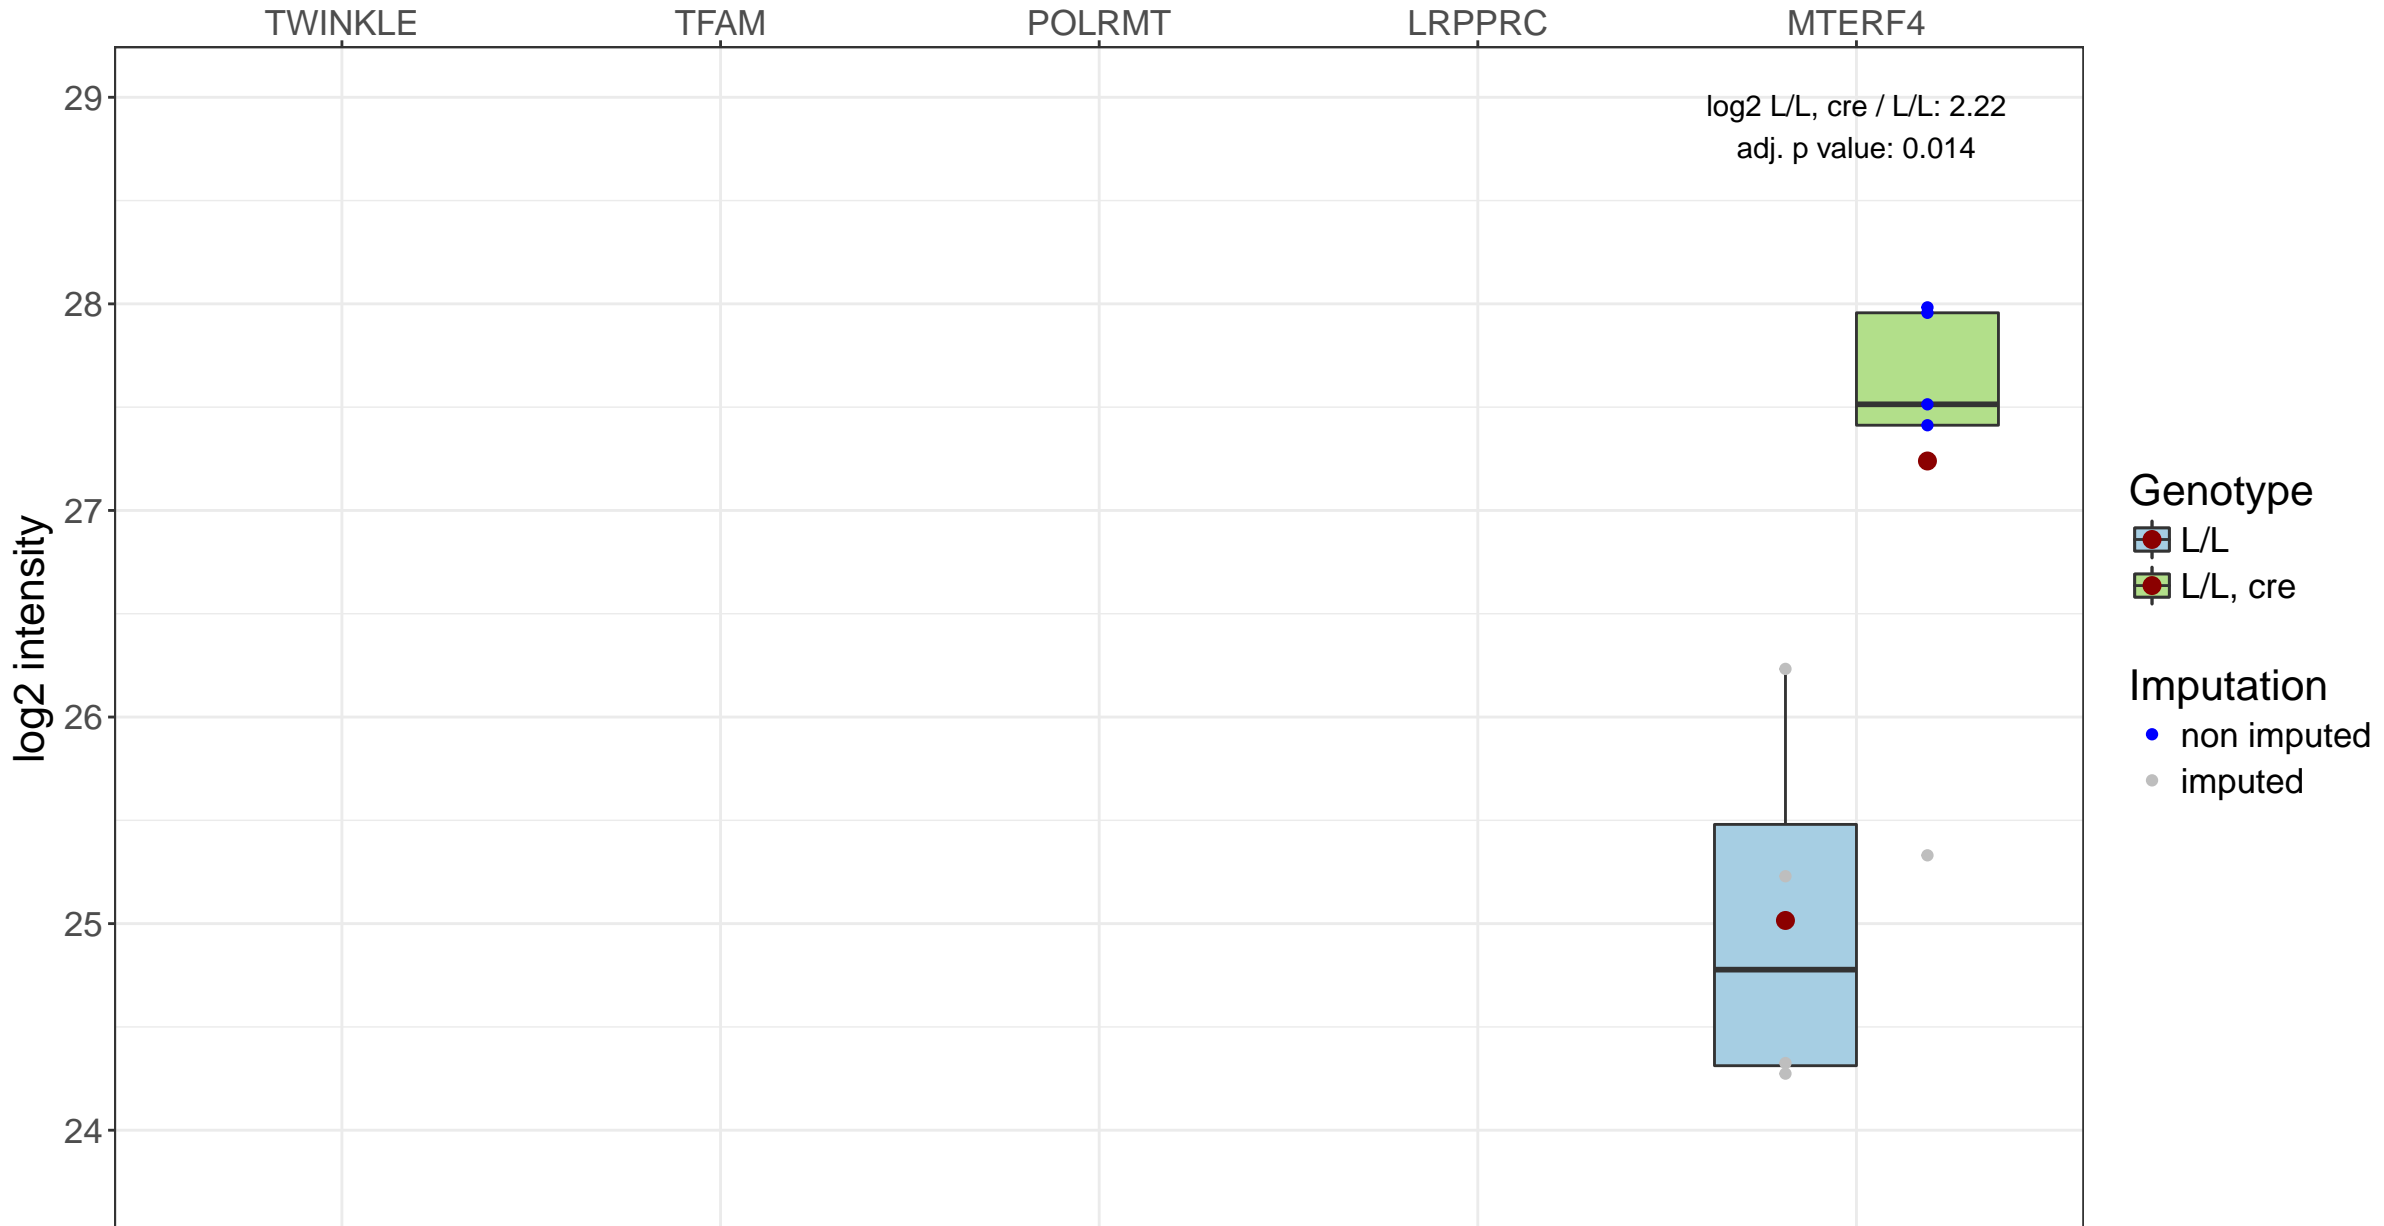

# MAOA / Q64133

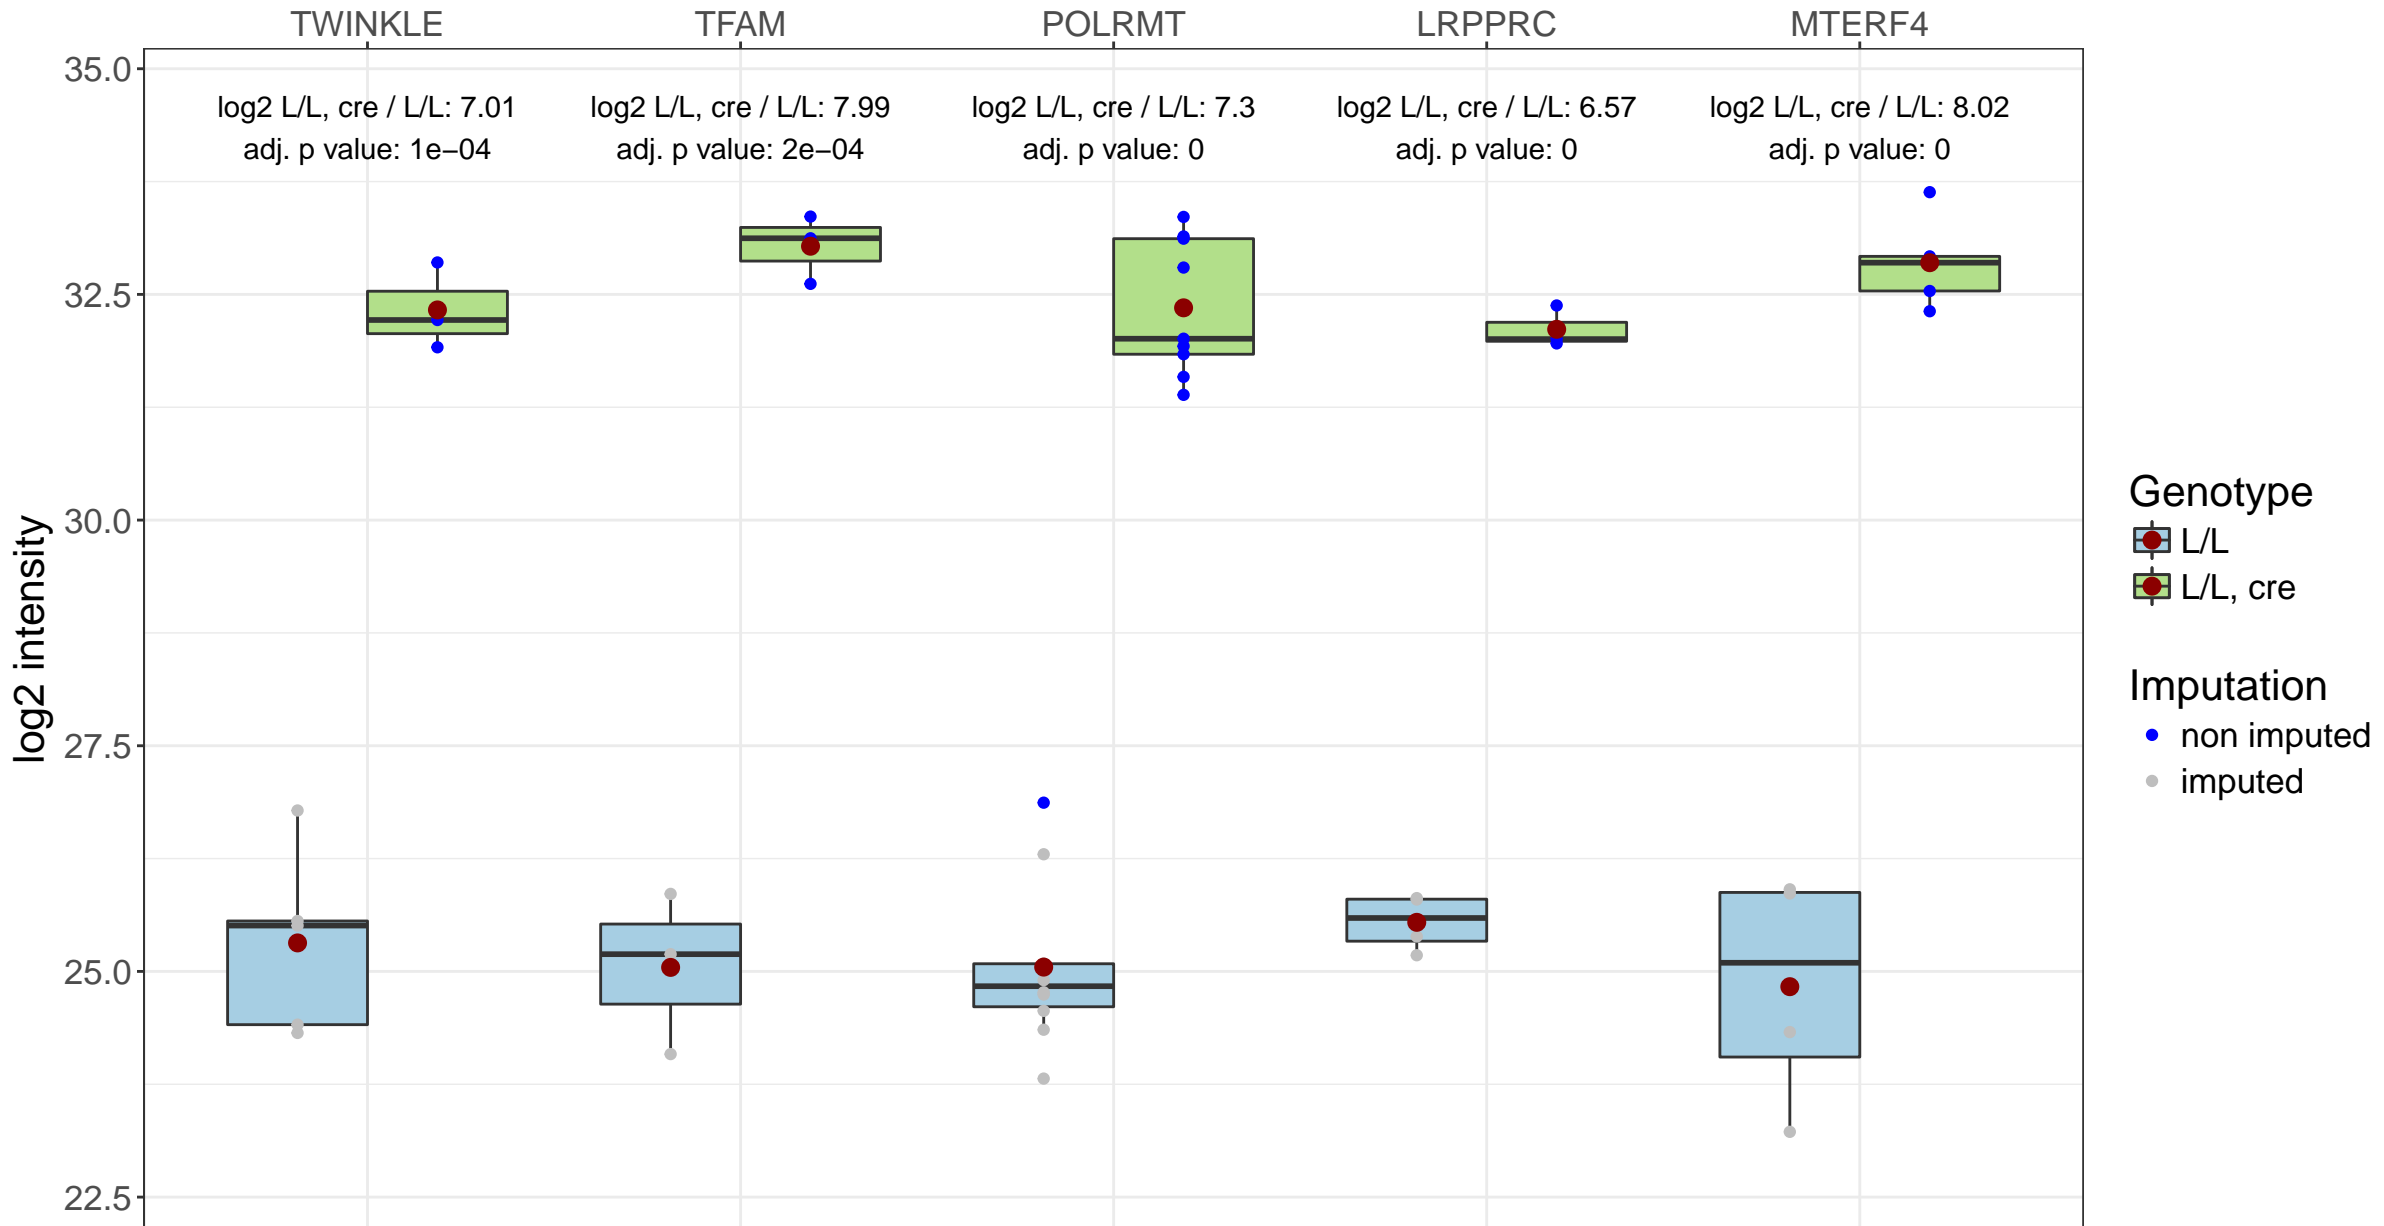

# MAOB / Q8BW75

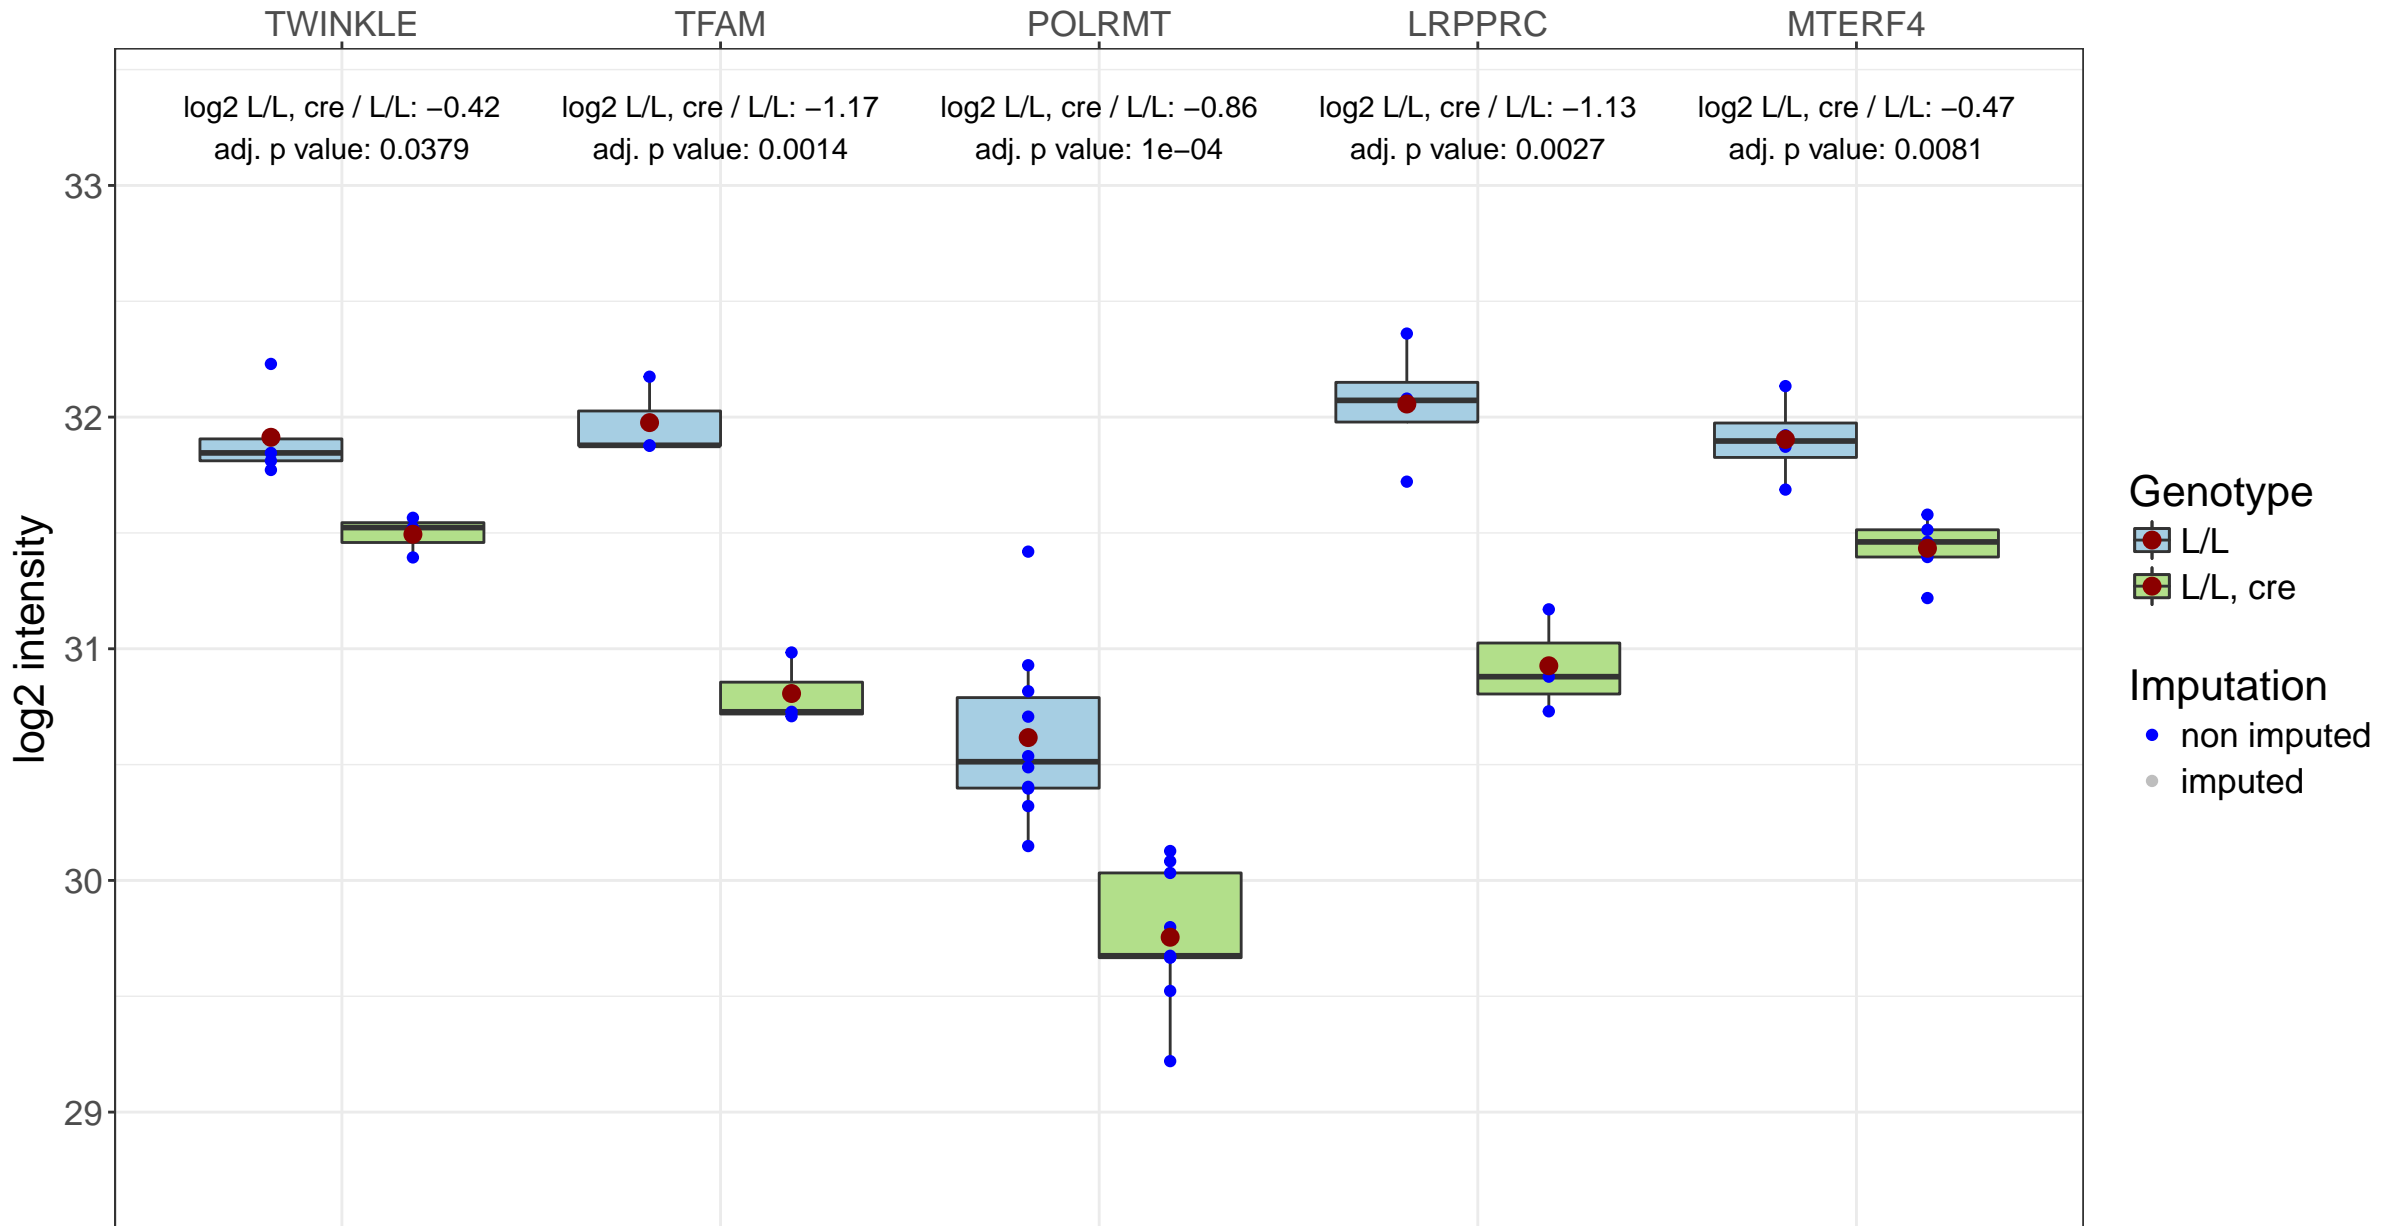

# MAP4 / P27546-2

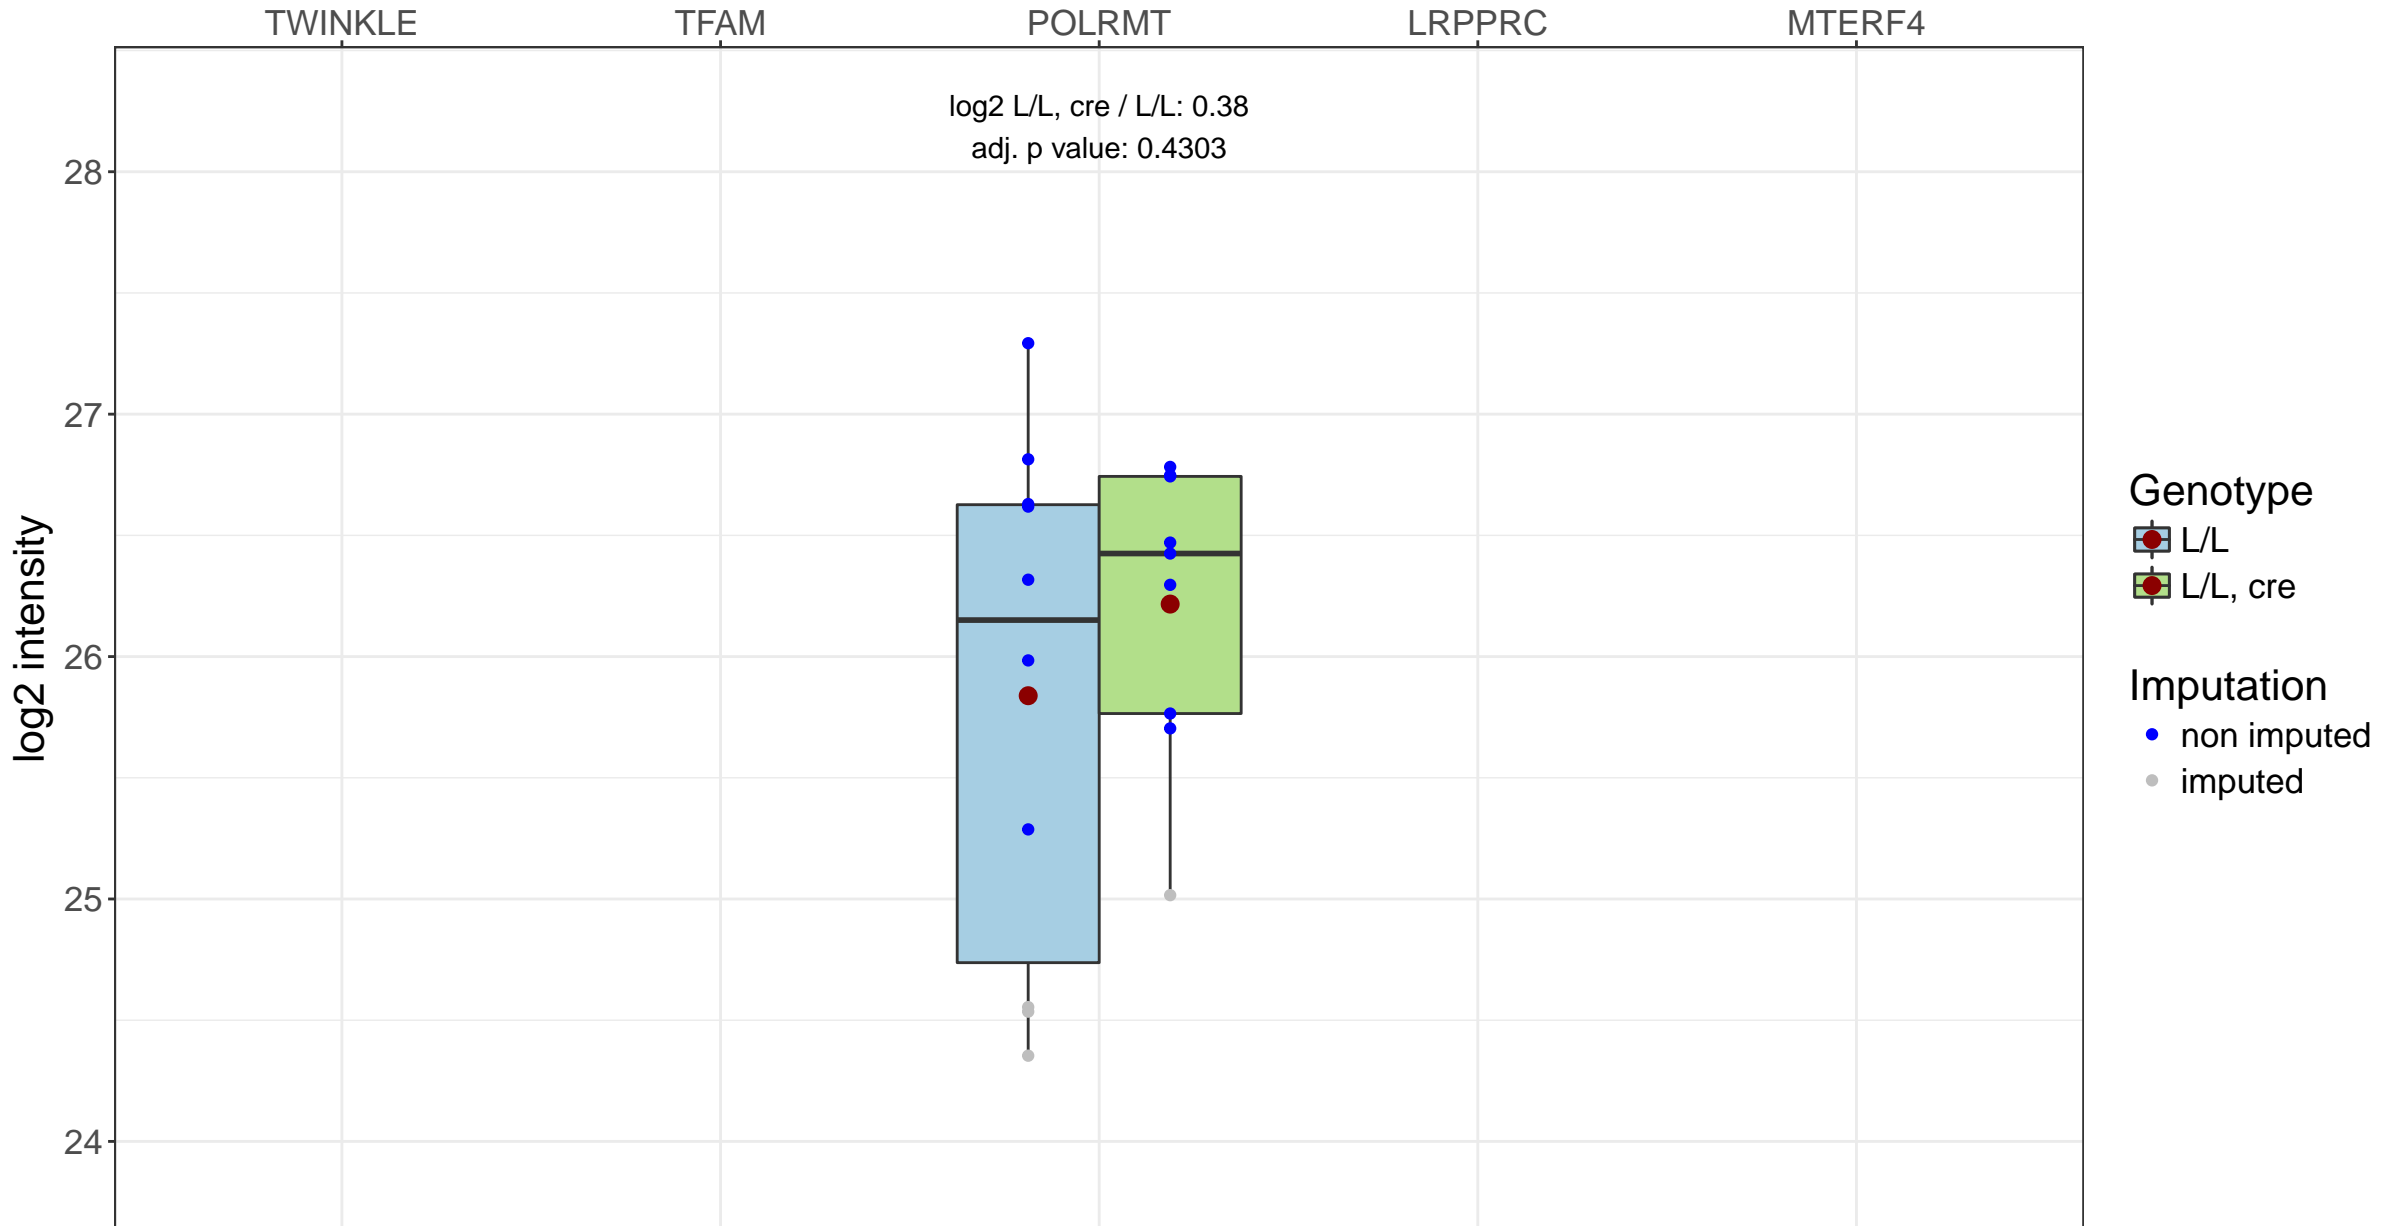

# MAP7D1 / A2AJI0

TWINKLE

TFAM

POLRMT

LRPPRC

MTERF4

log<sub>2</sub> intensity

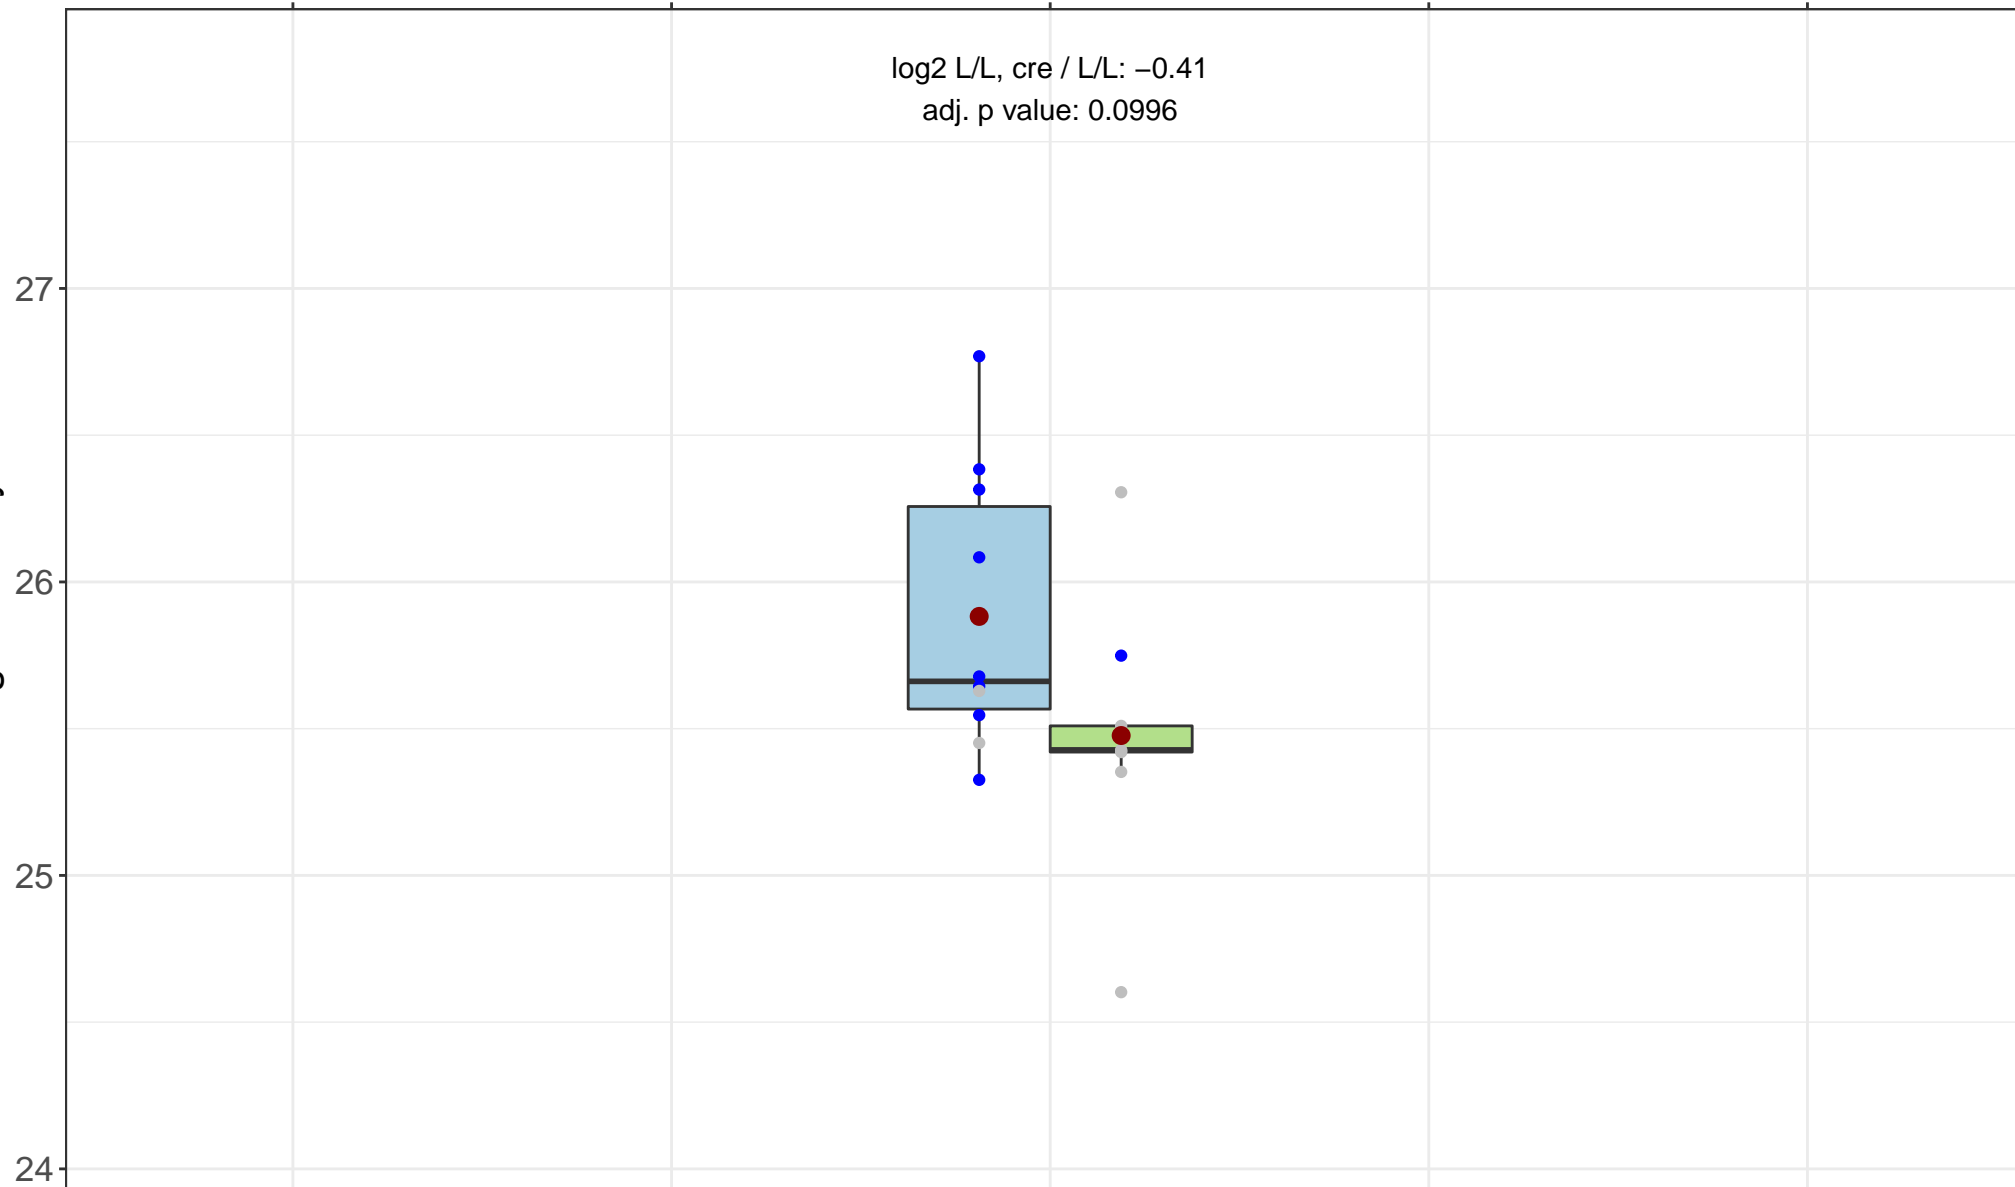

Genotype

L/L

L/L, cre

Imputation

non imputed

imputed



# MARC2 / Q922Q1

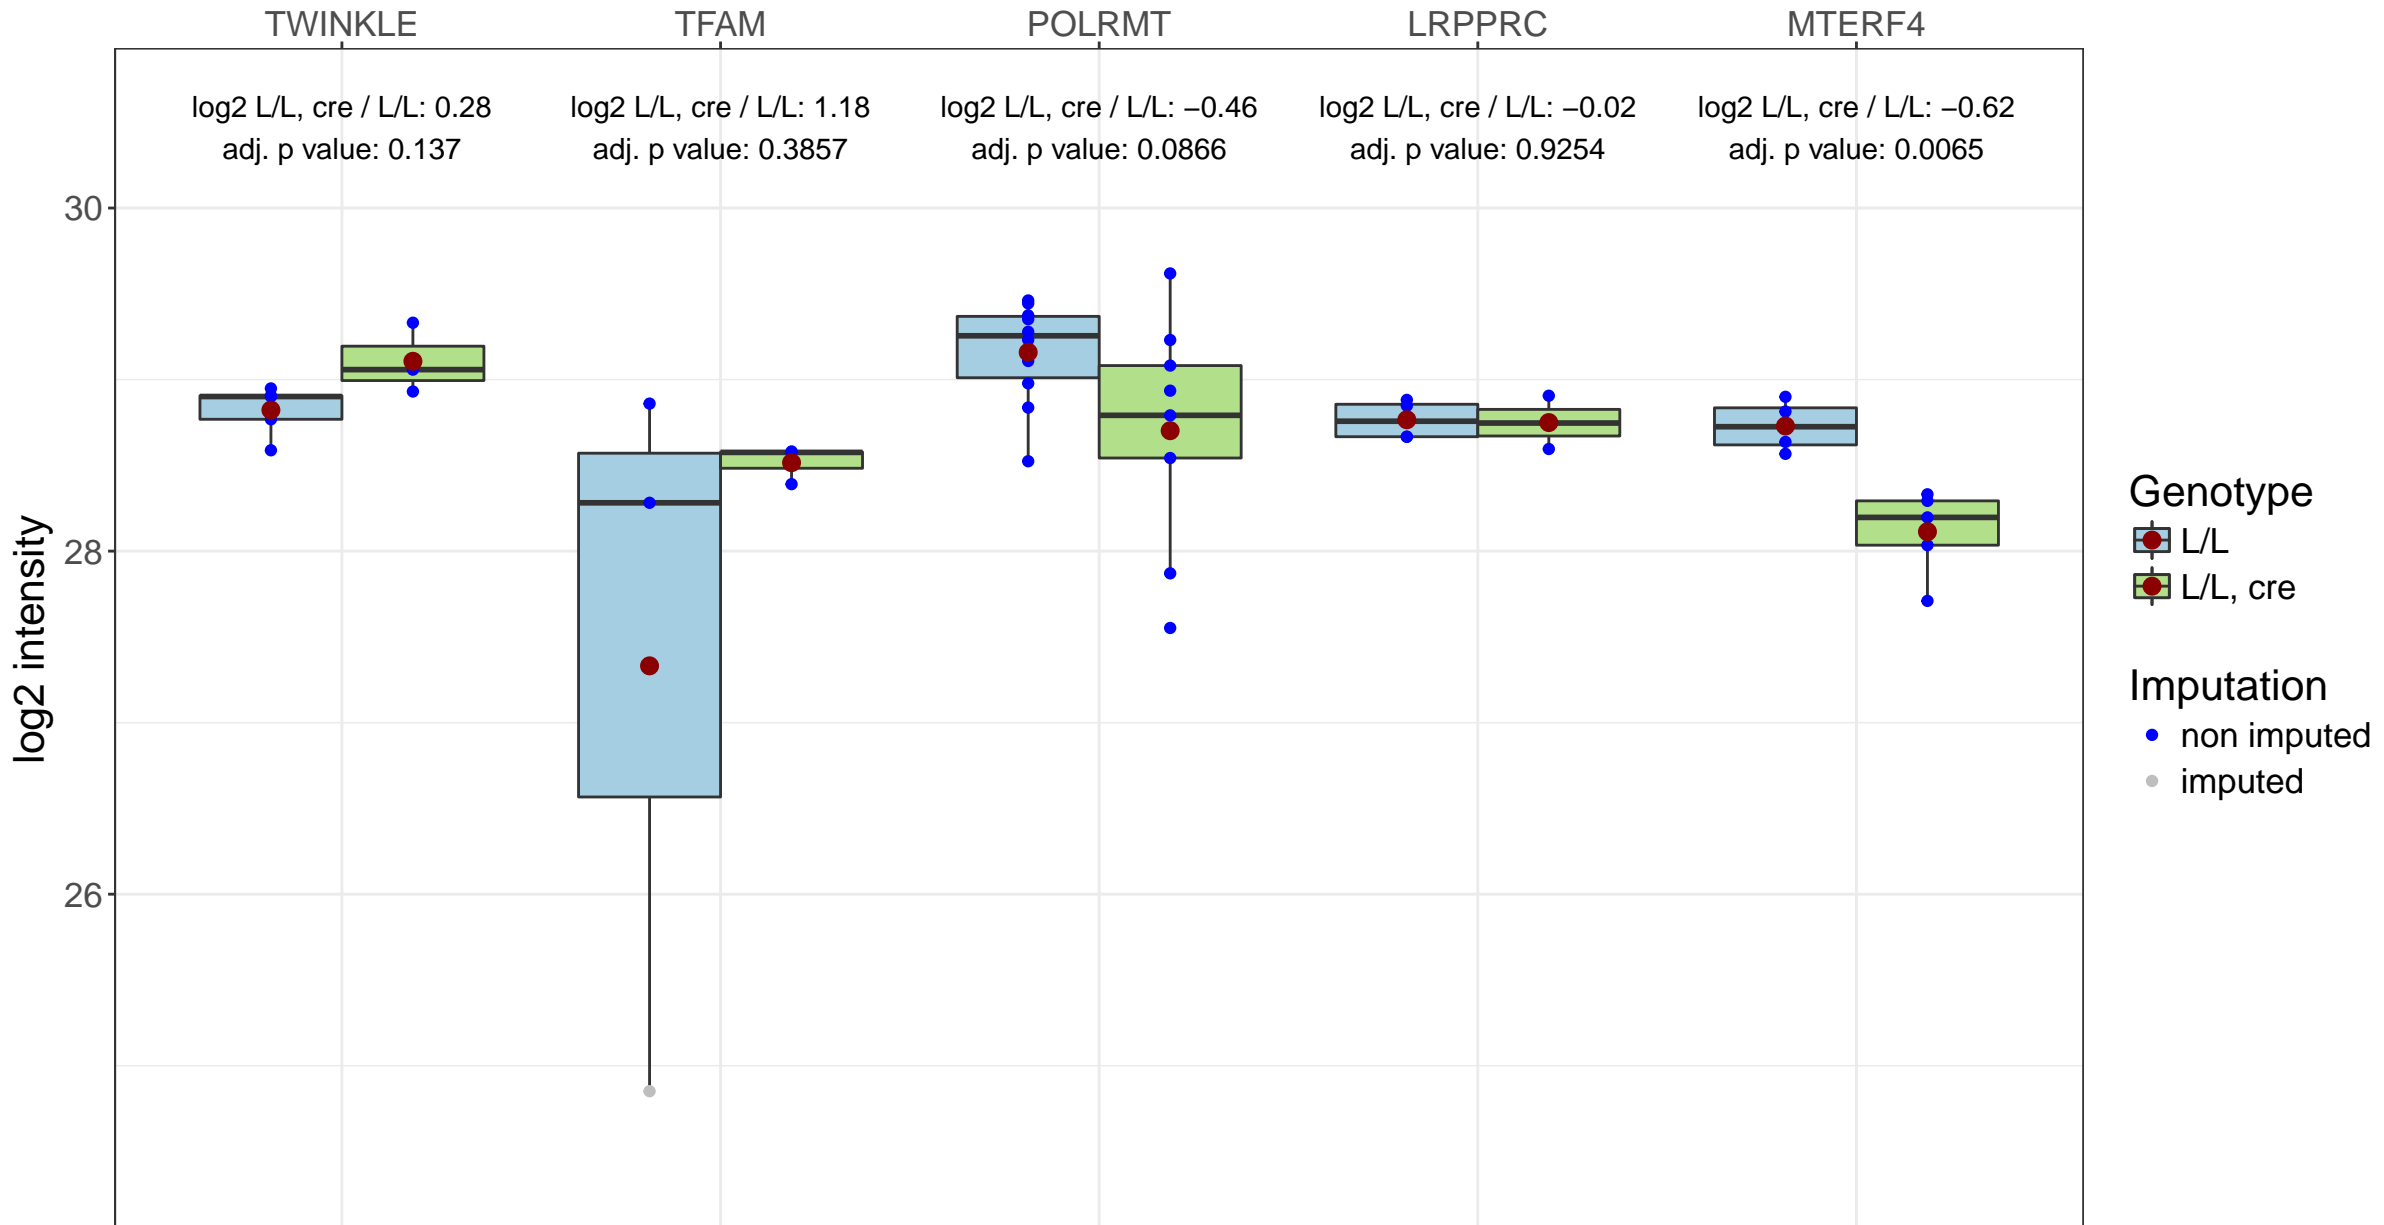

# MARCH5 / Q3KNM2

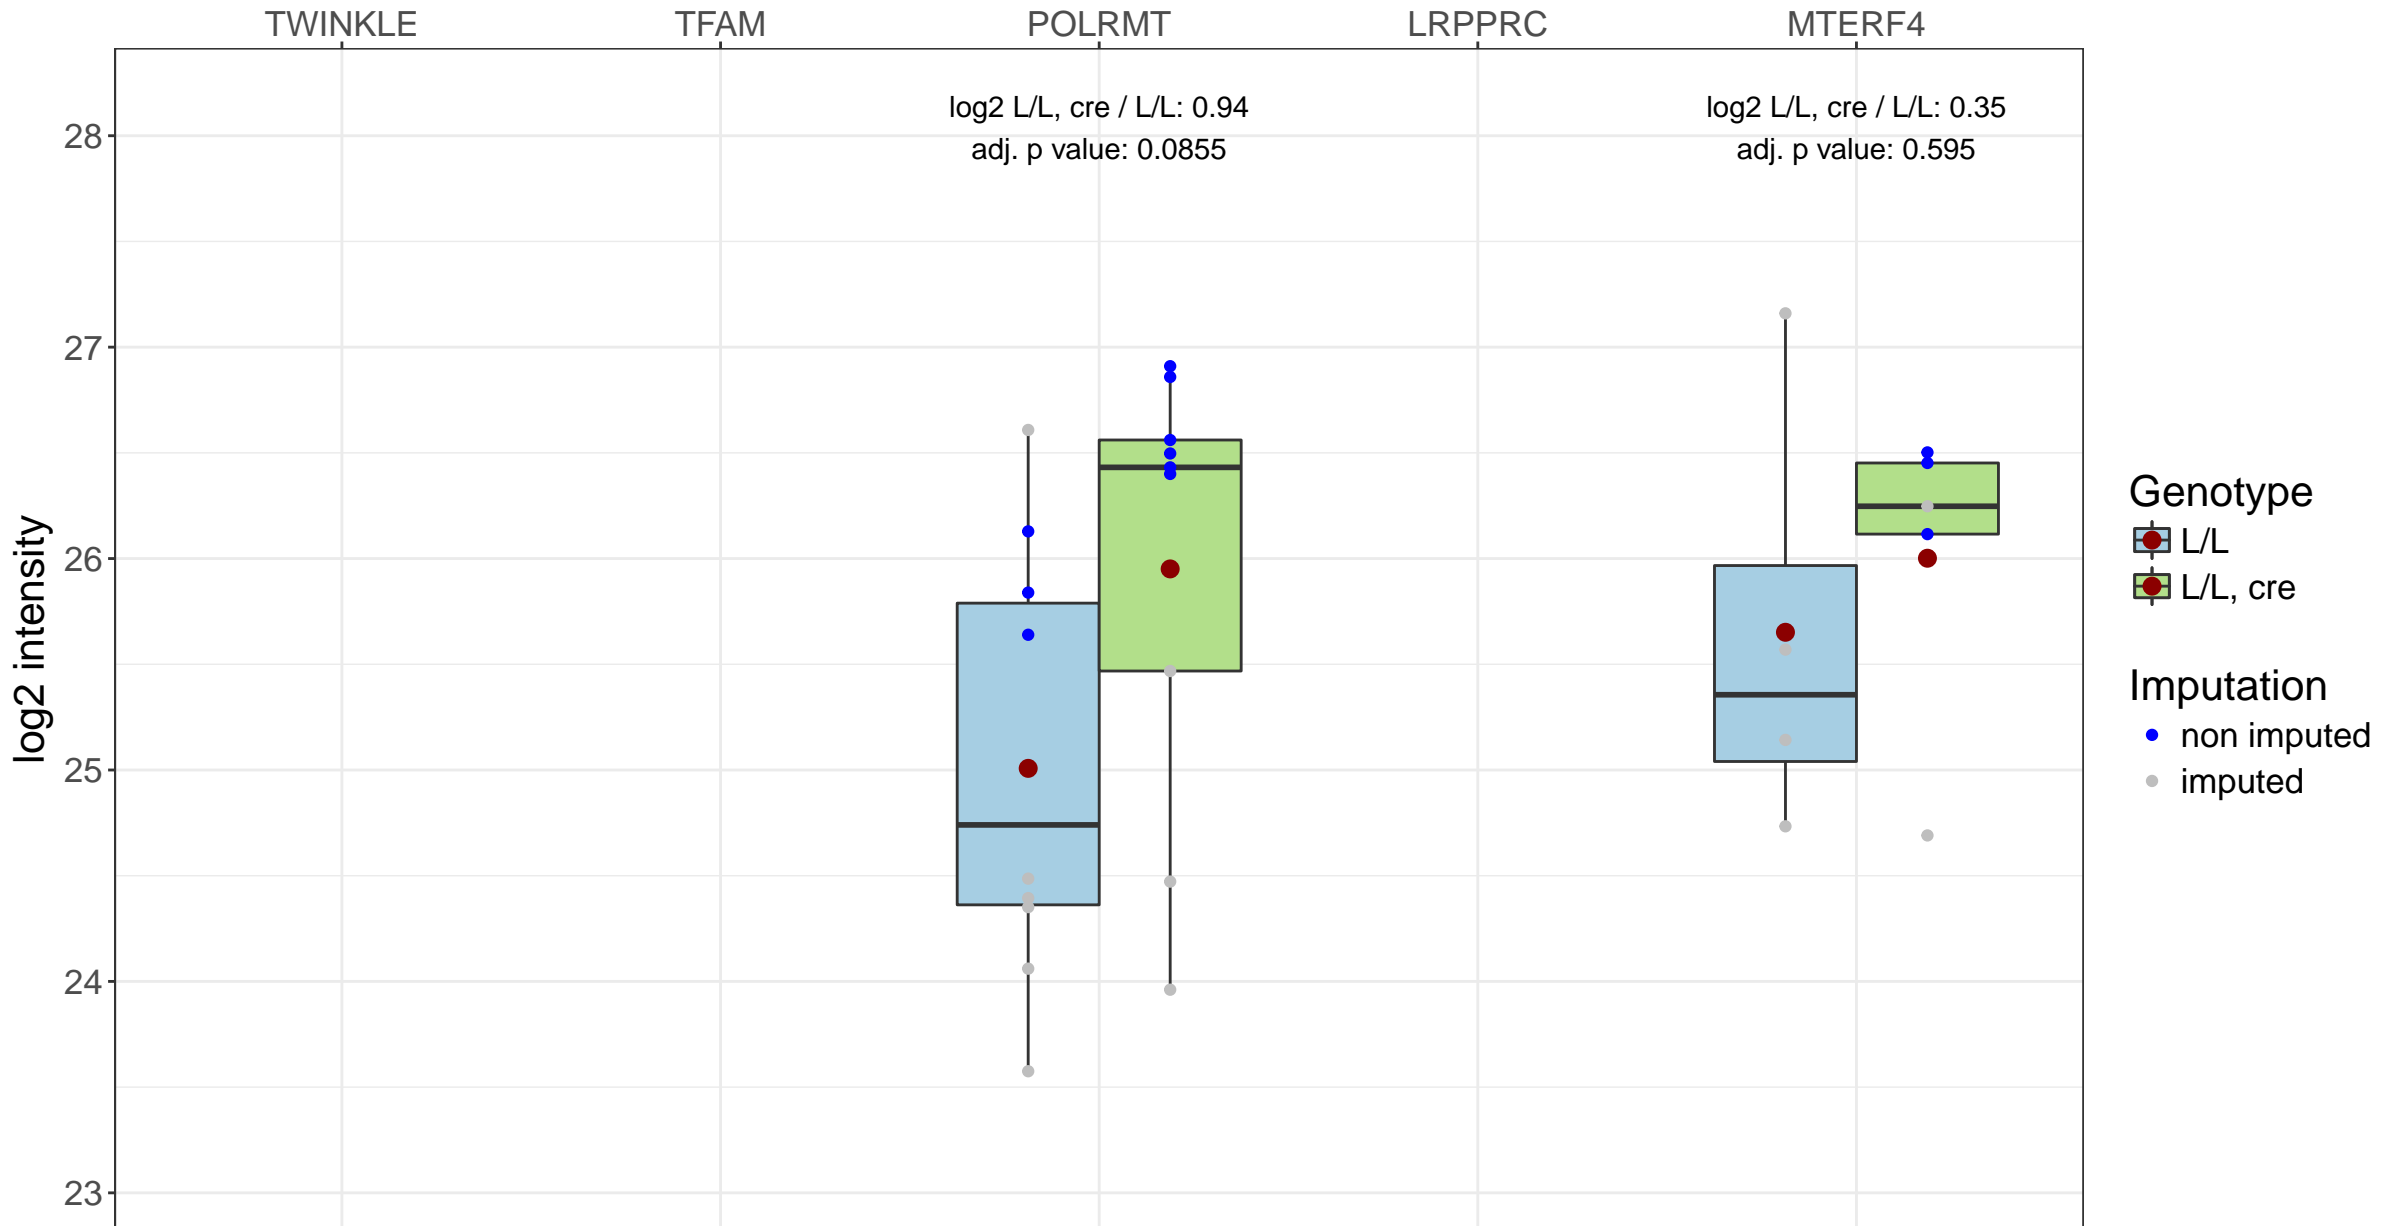

# MARS2 / Q499X9

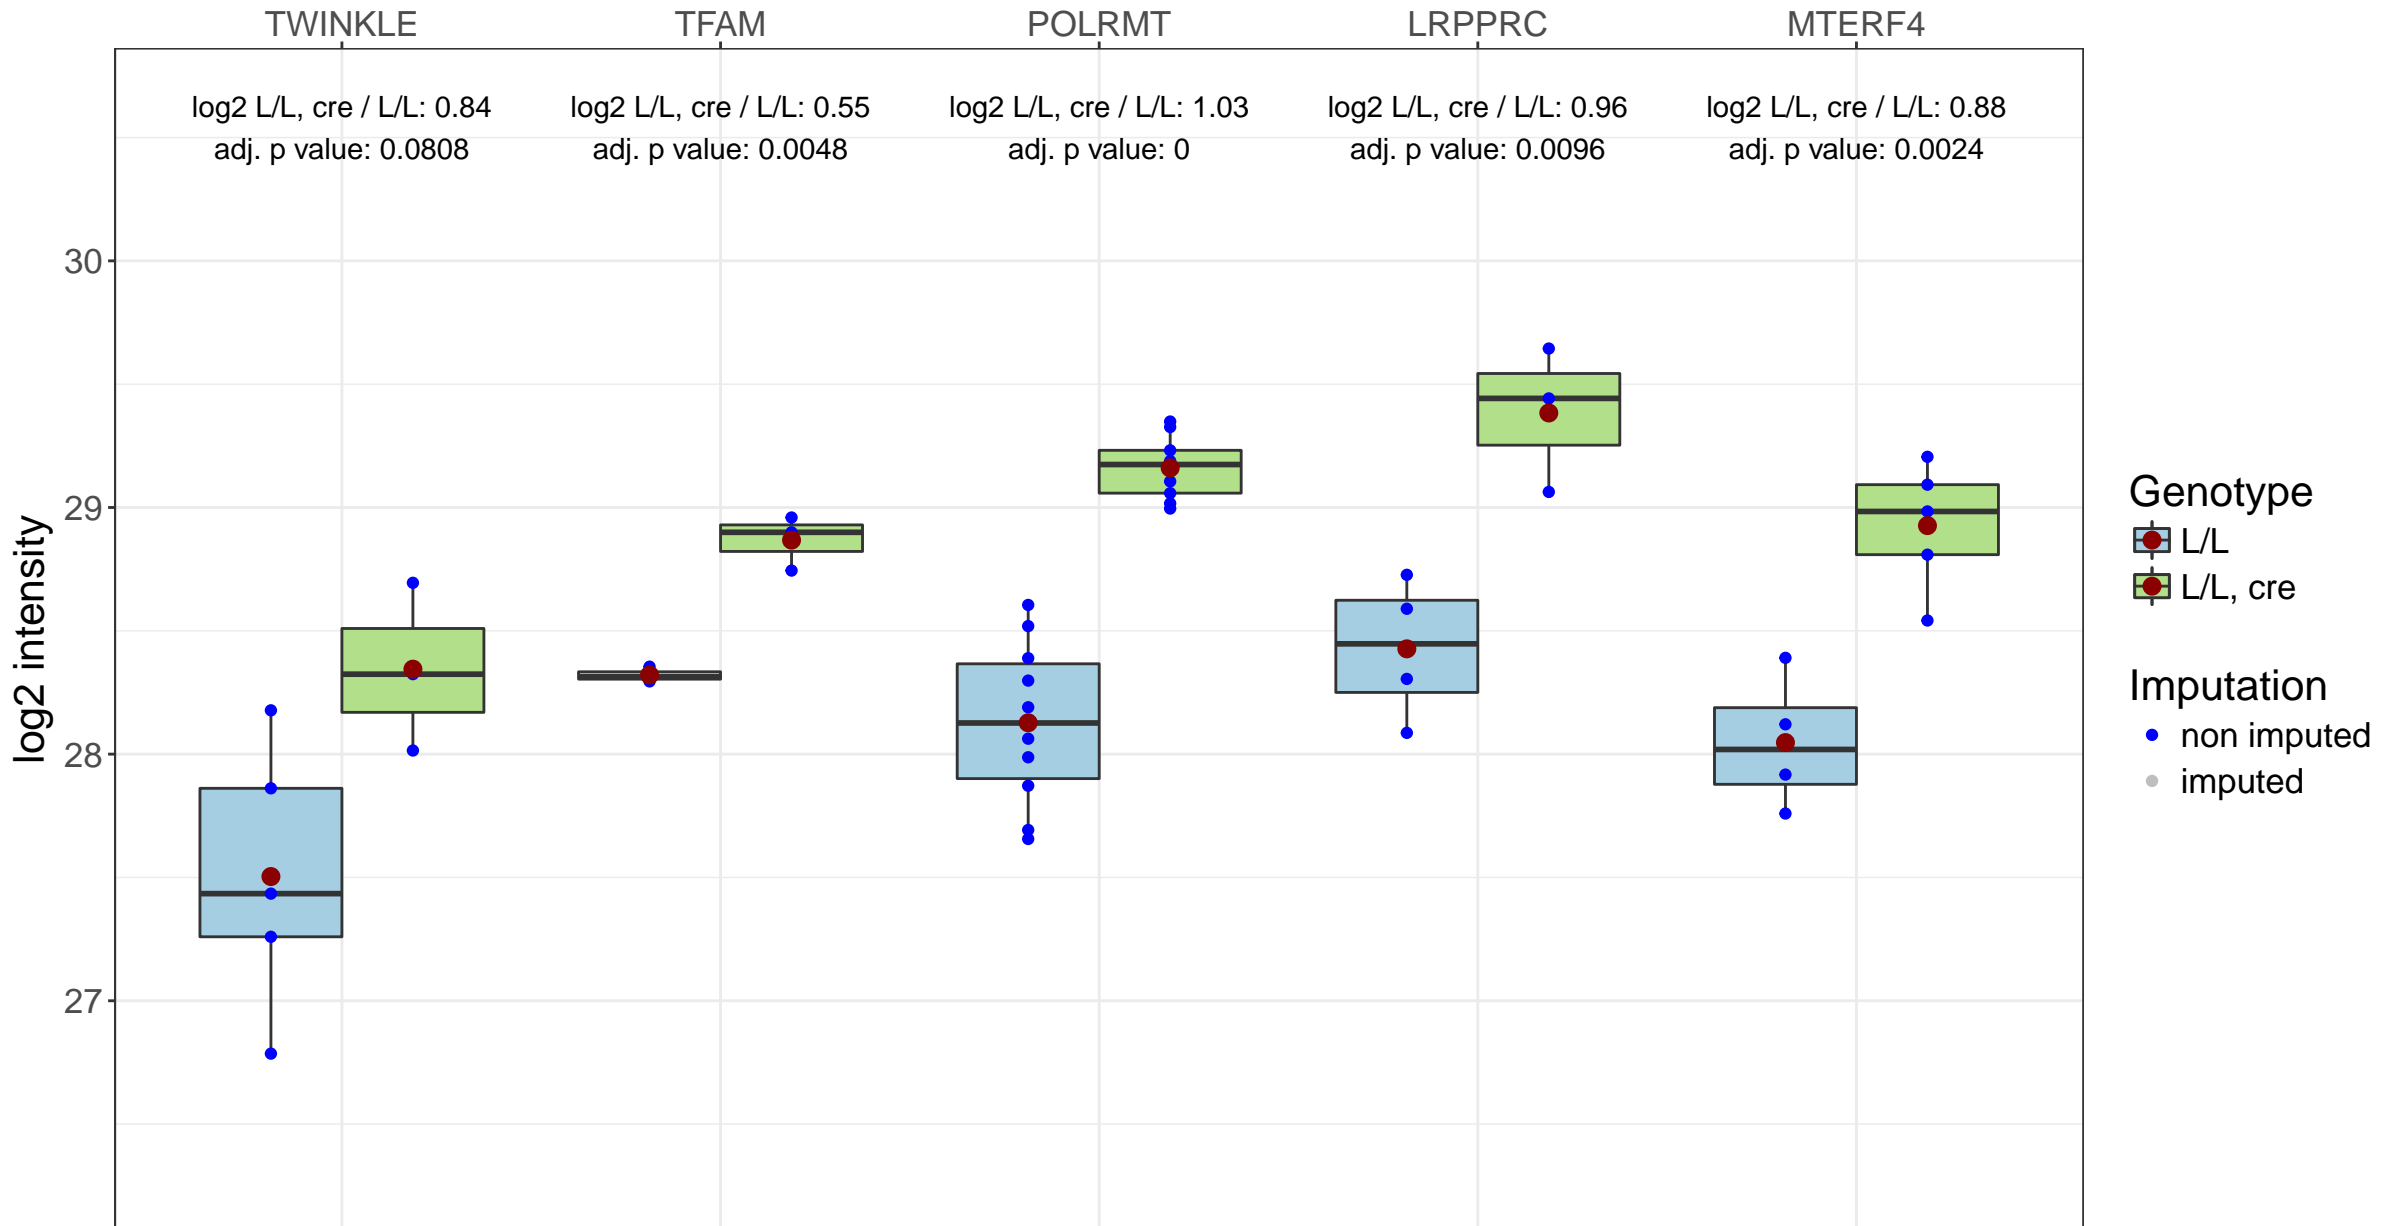

# MAVS / Q8VCF0

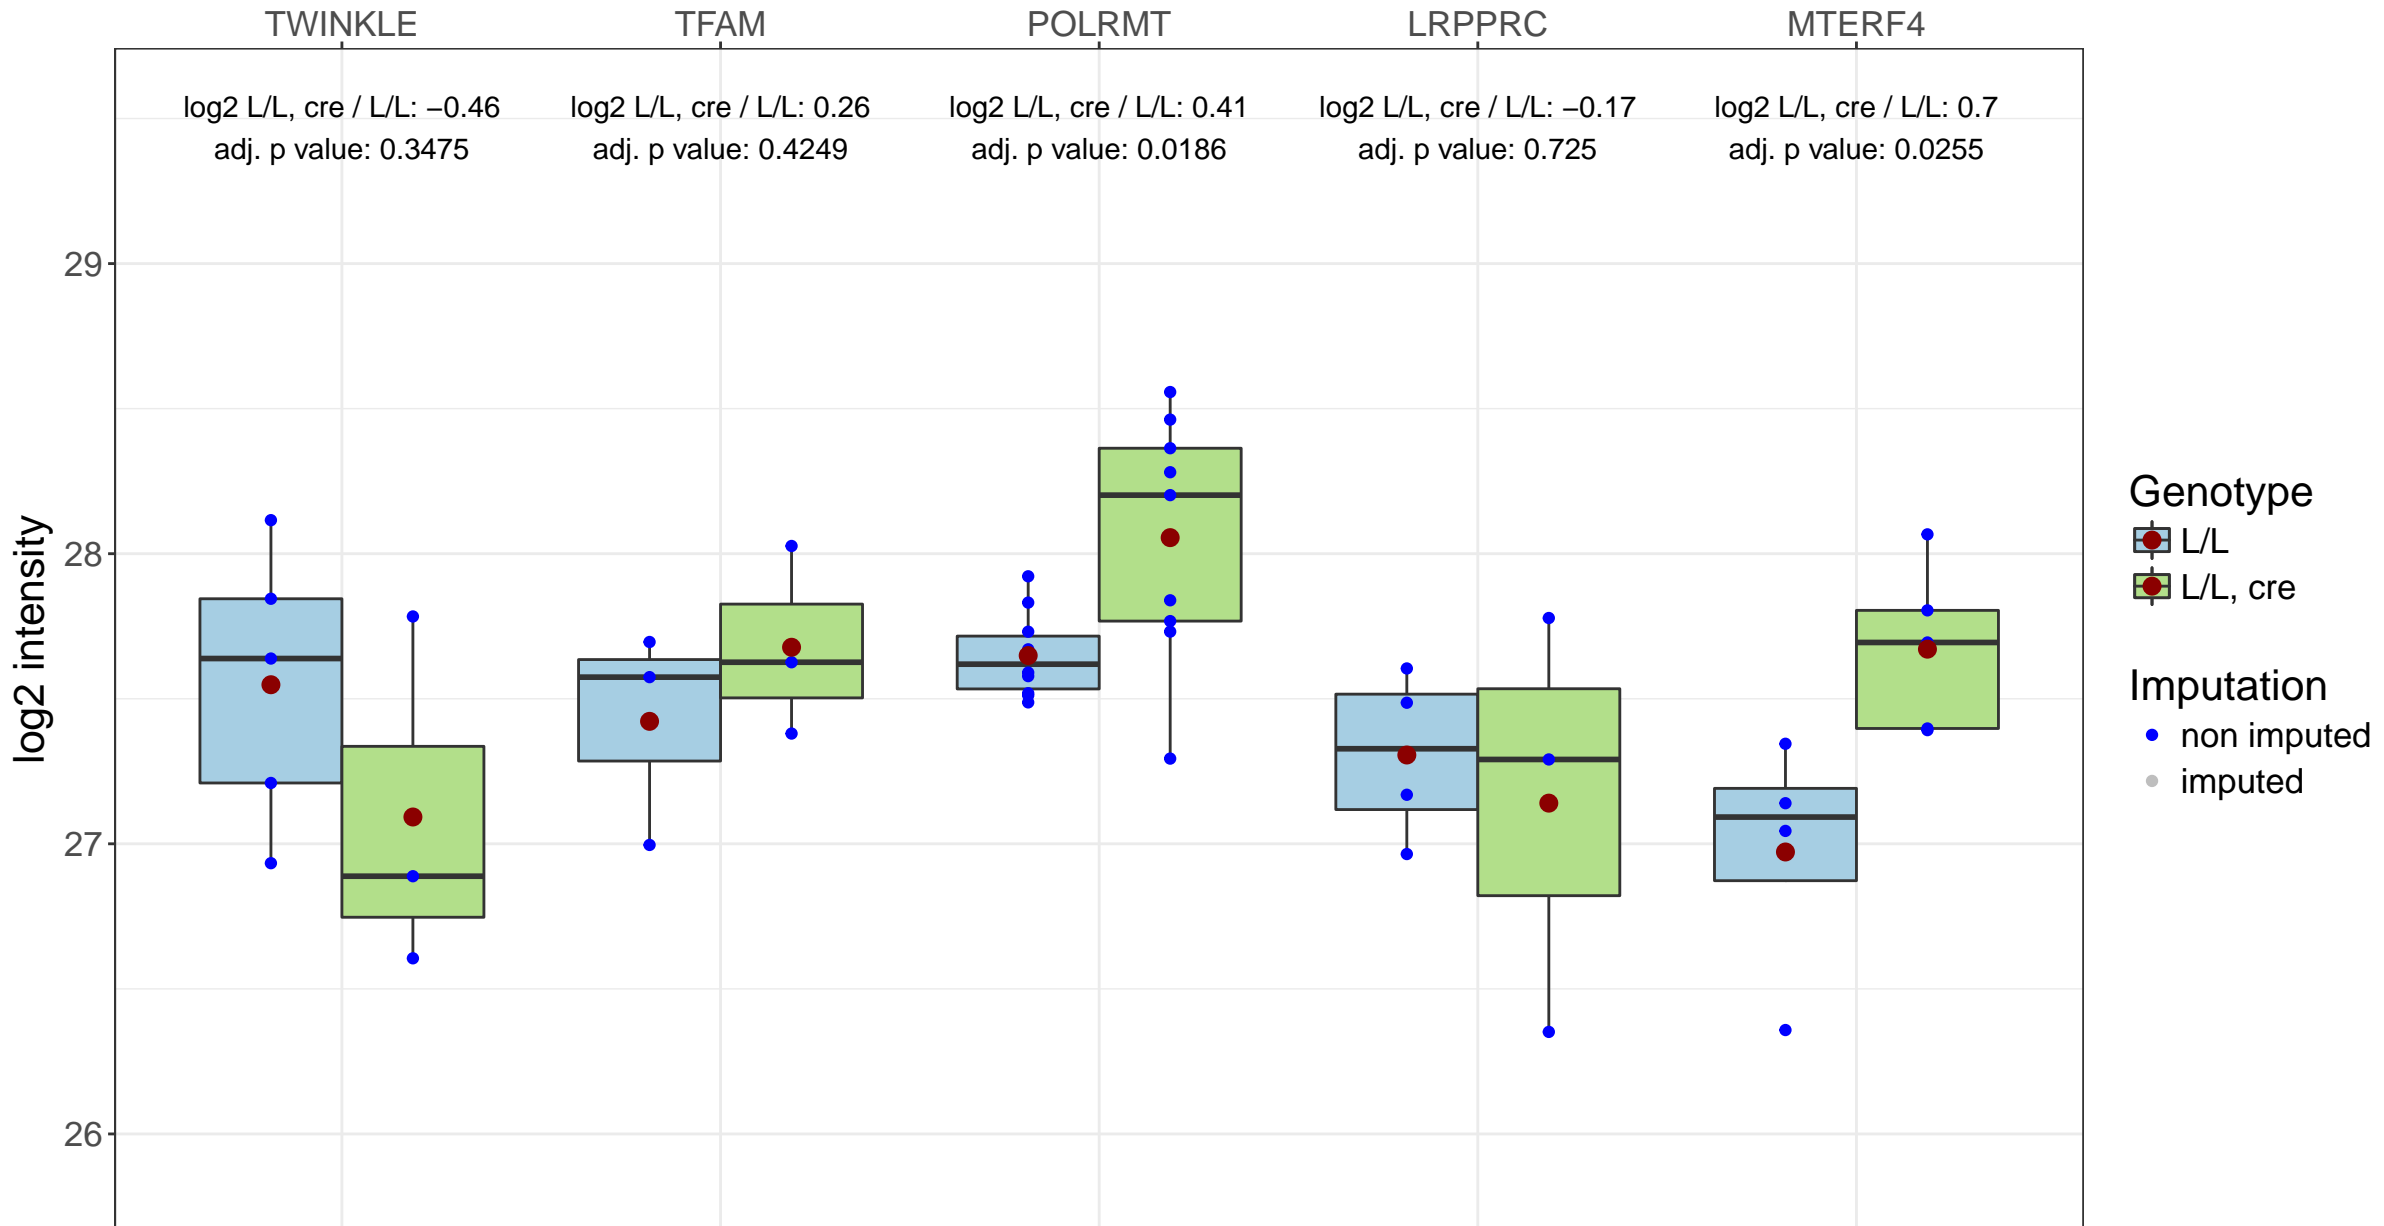

# MB / P04247

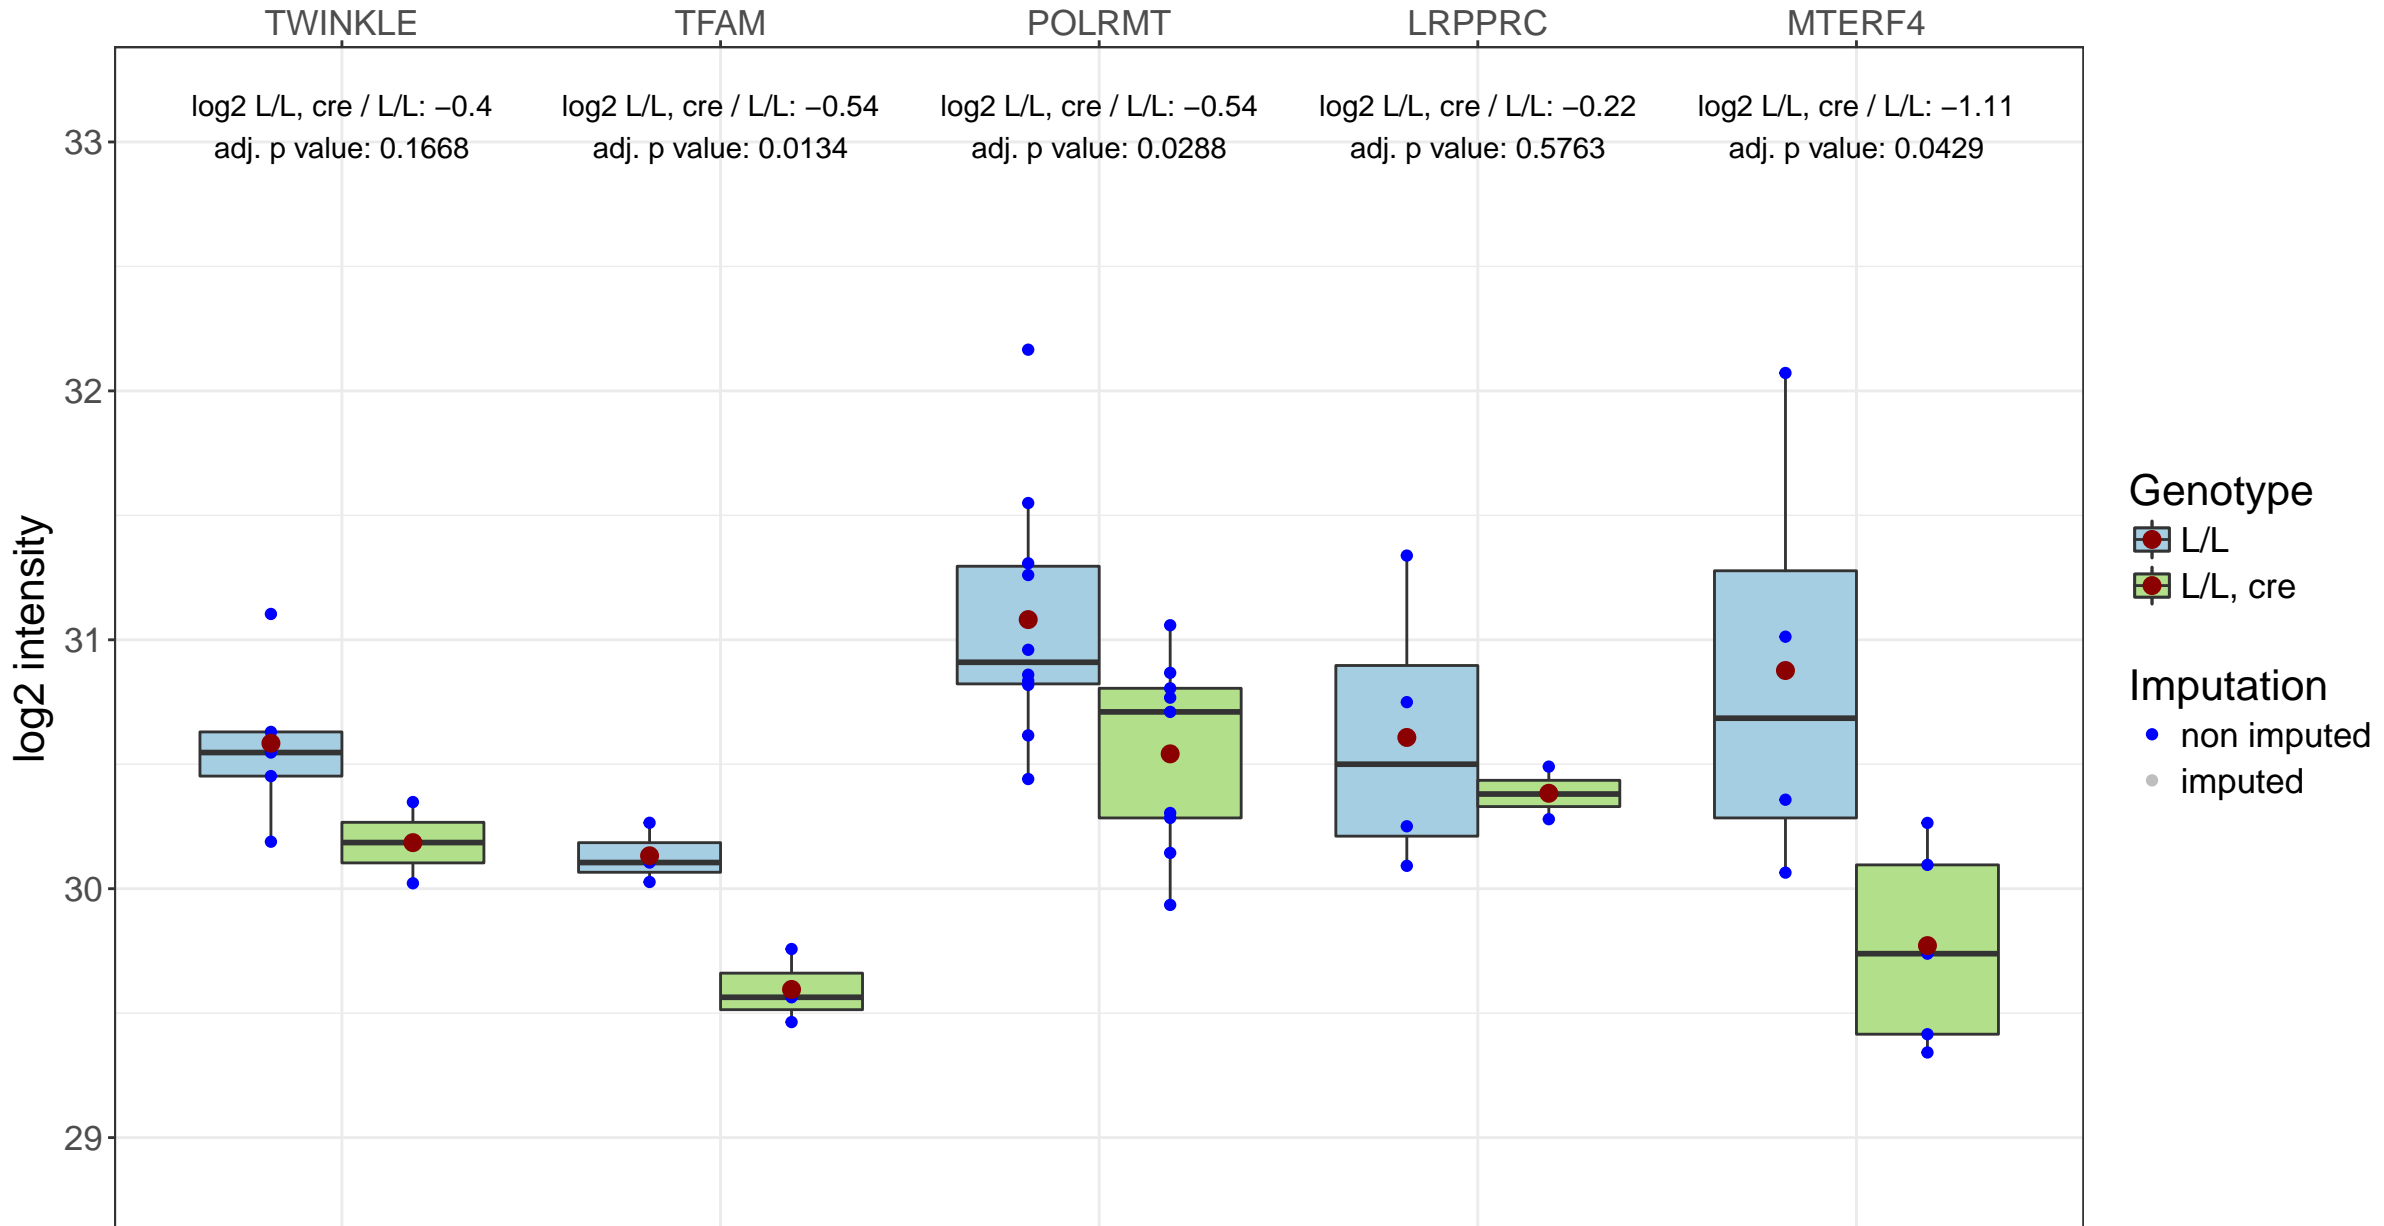

# MCAT / Q8R3F5

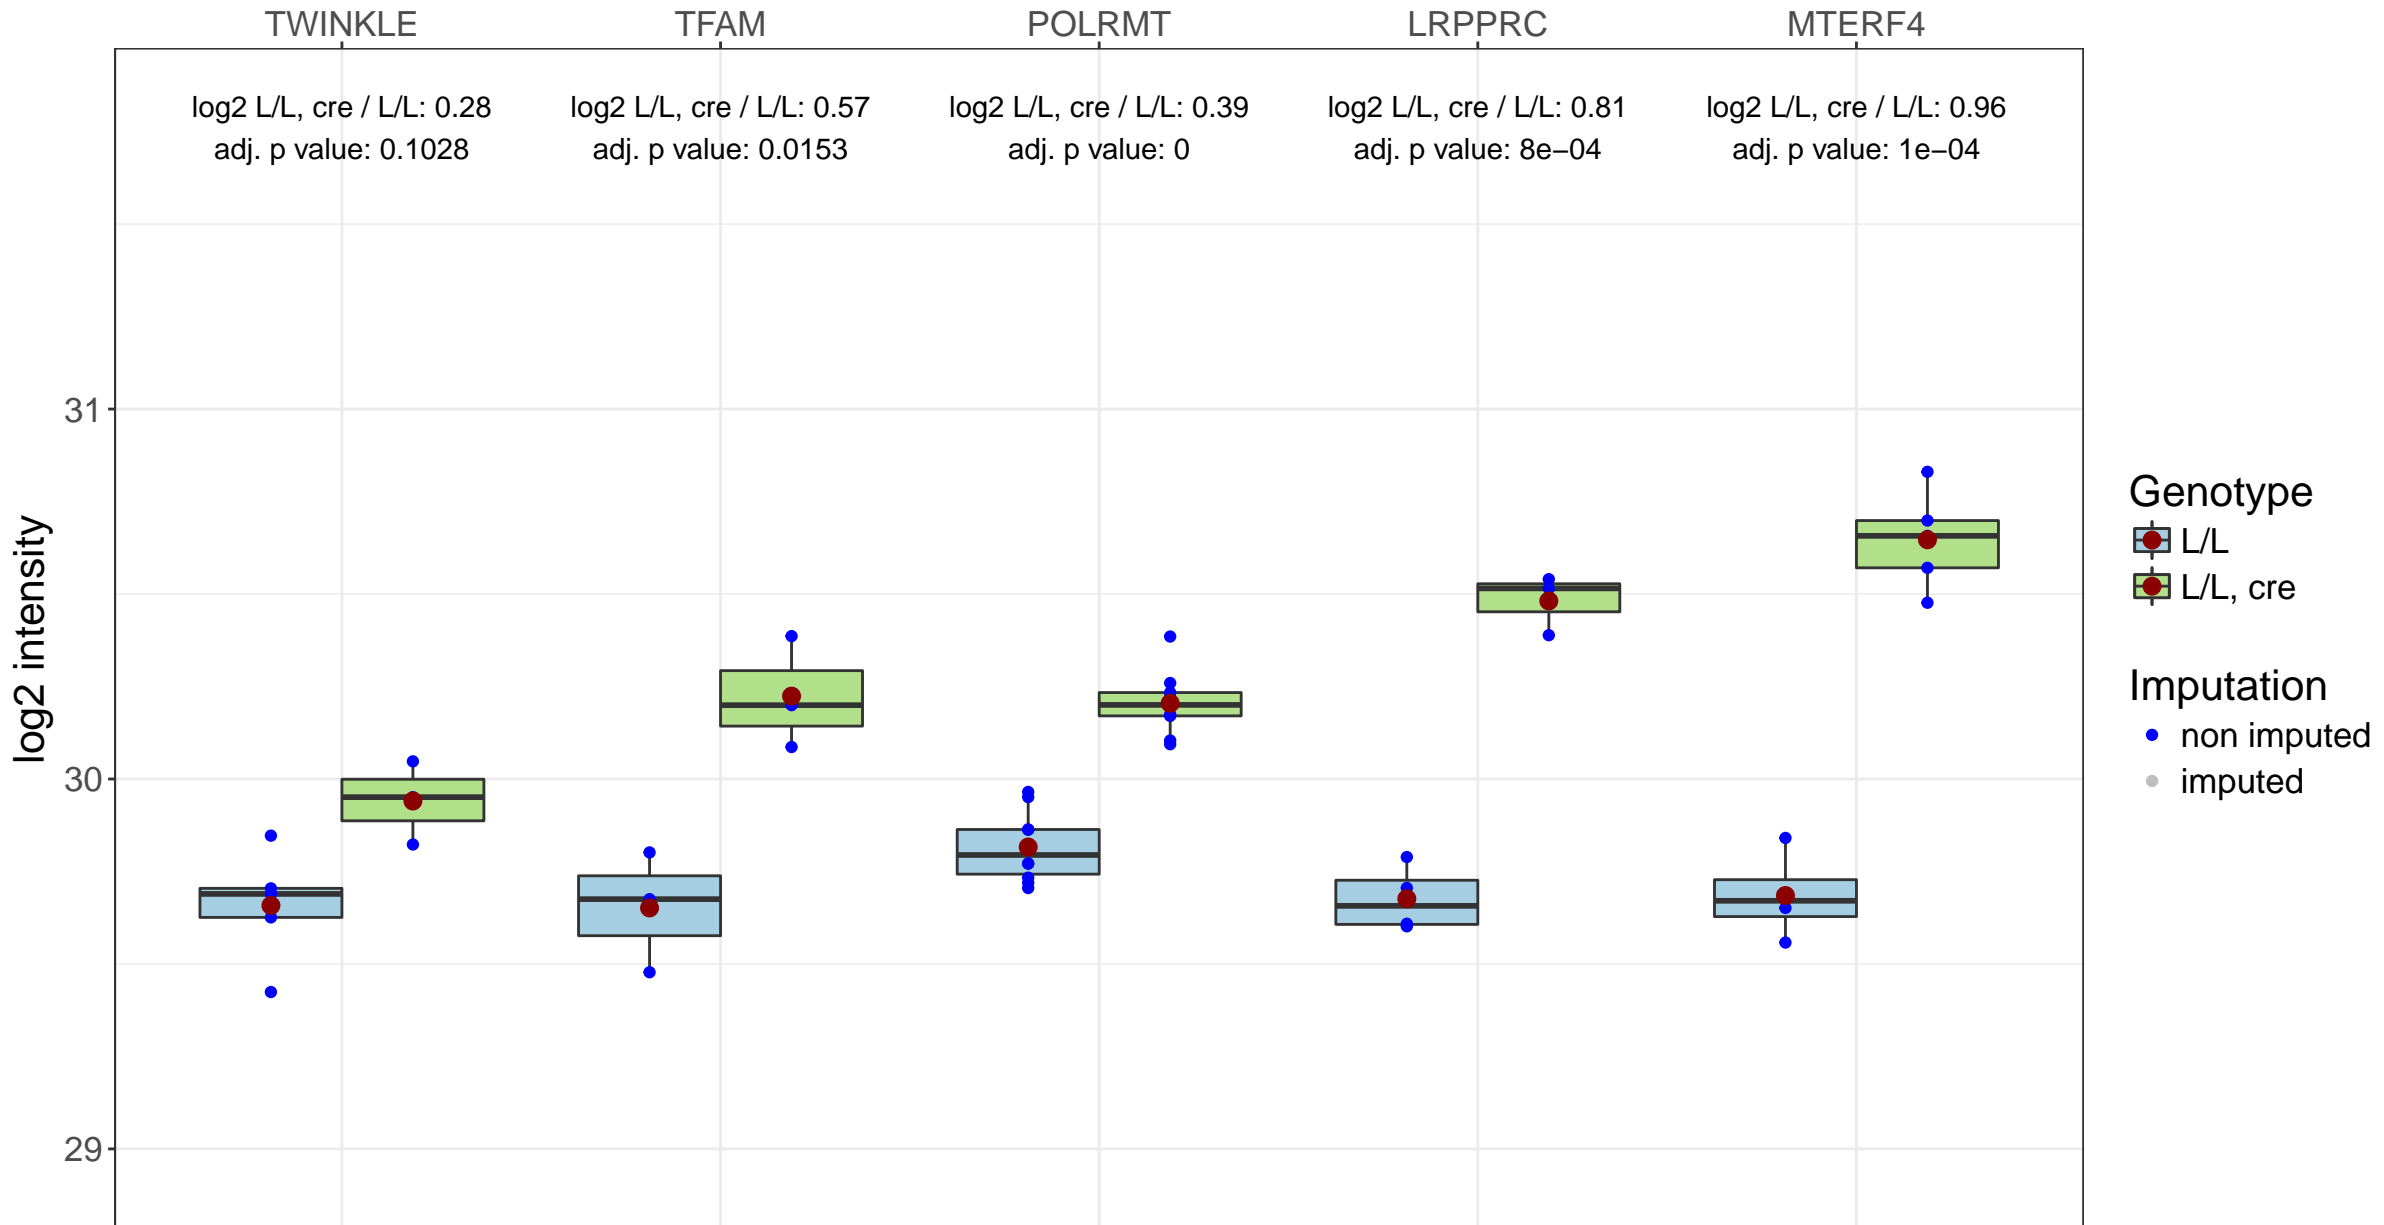

# MCCC1 / Q99MR8

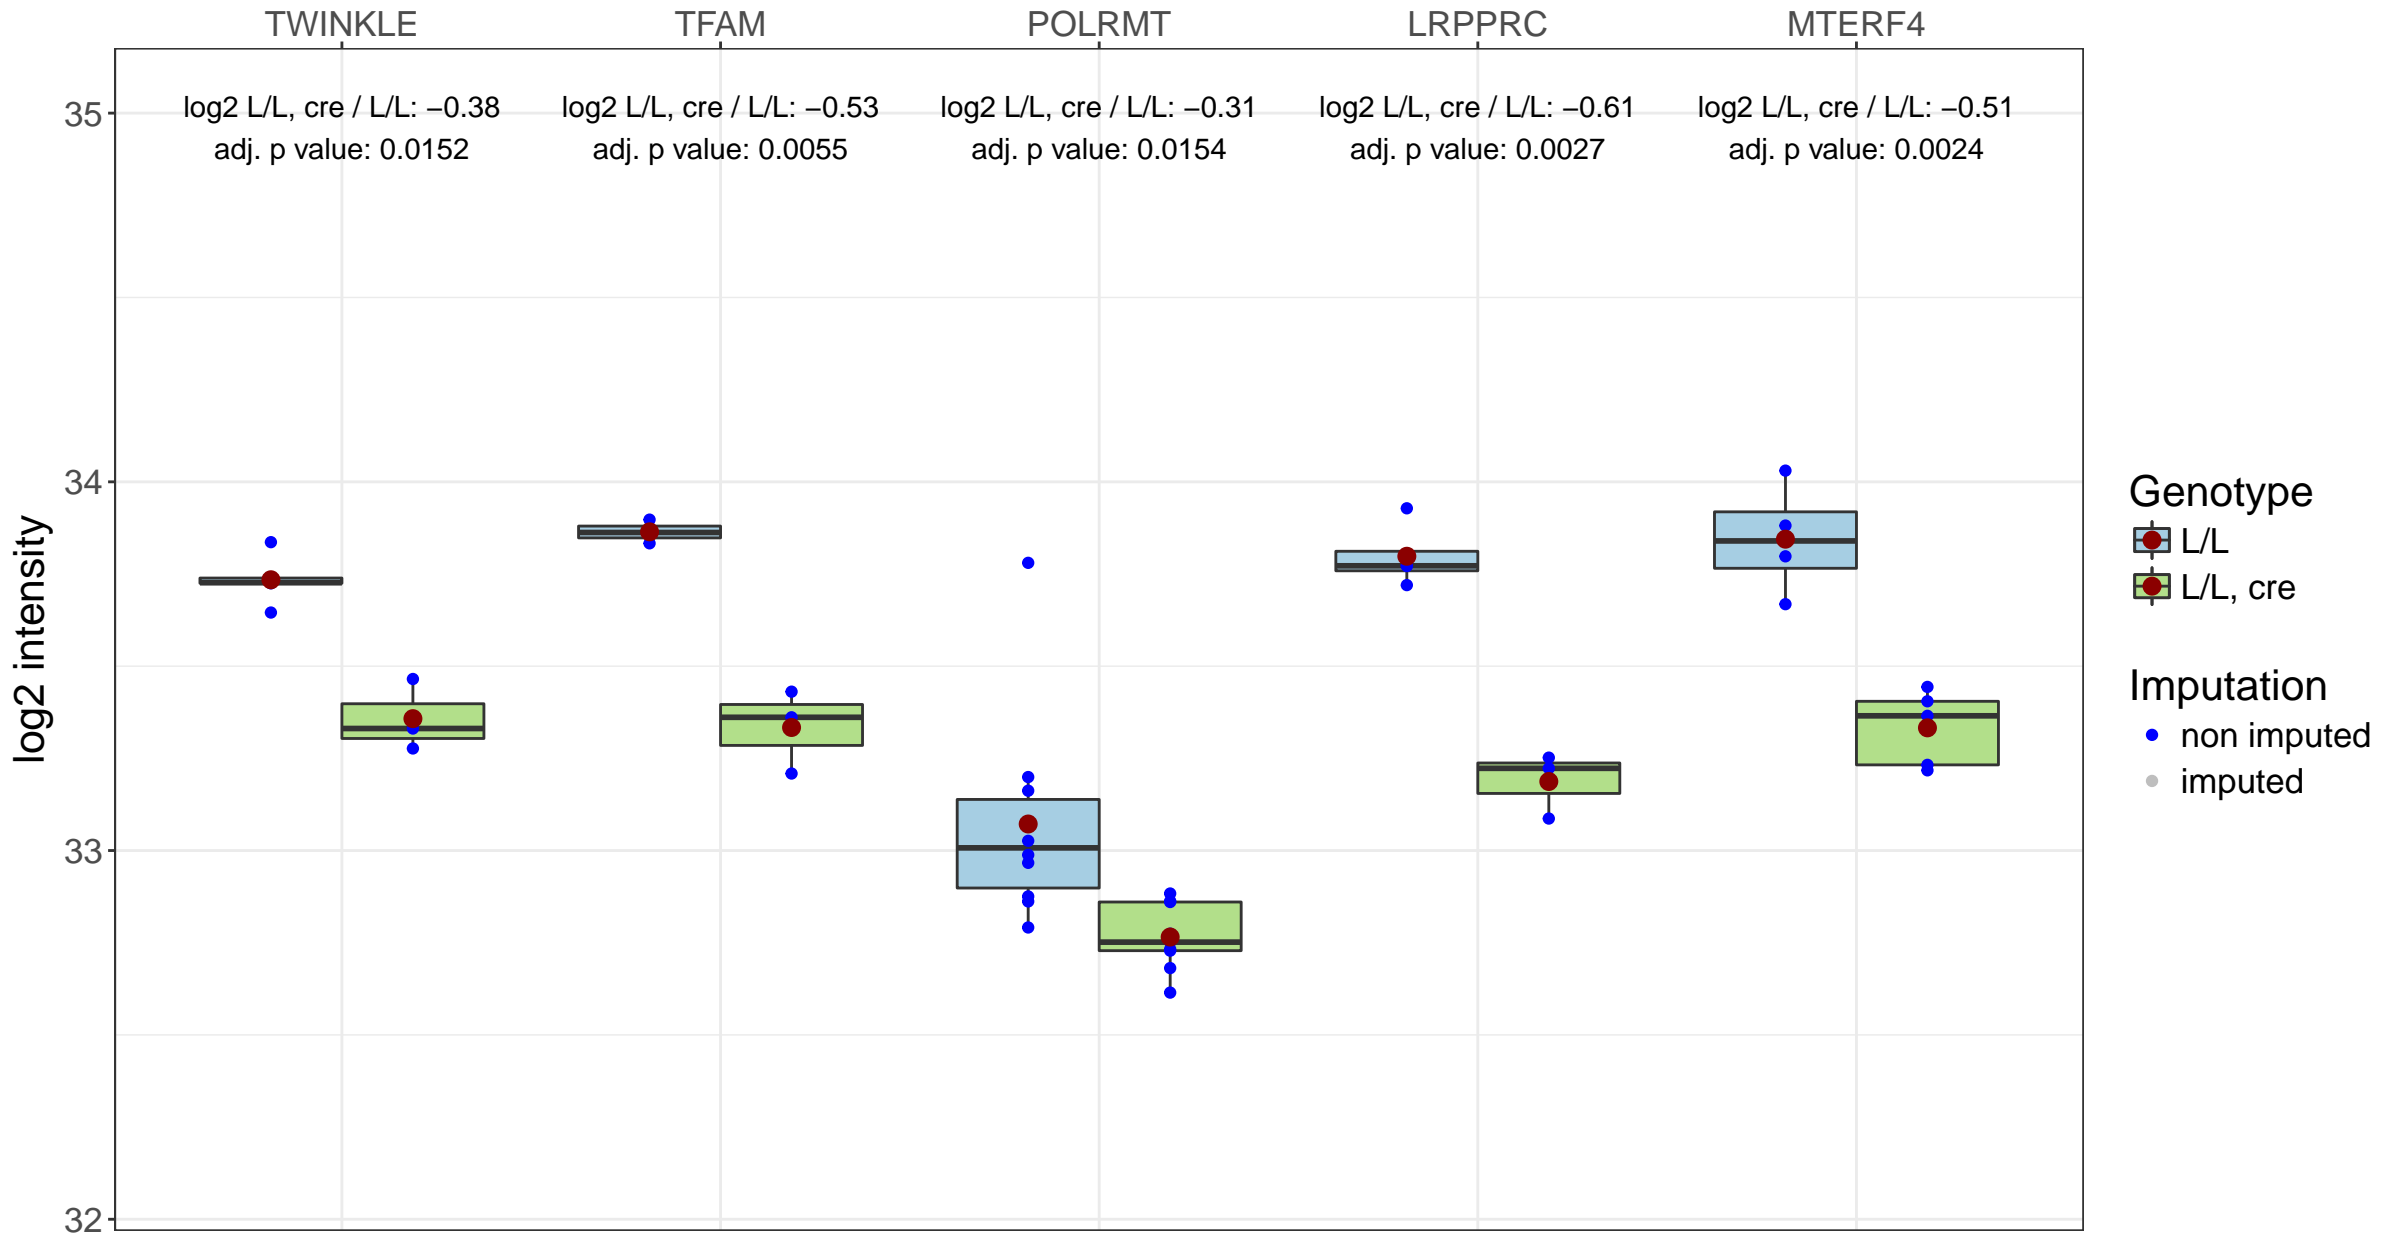

# MCCC2 / Q3ULD5

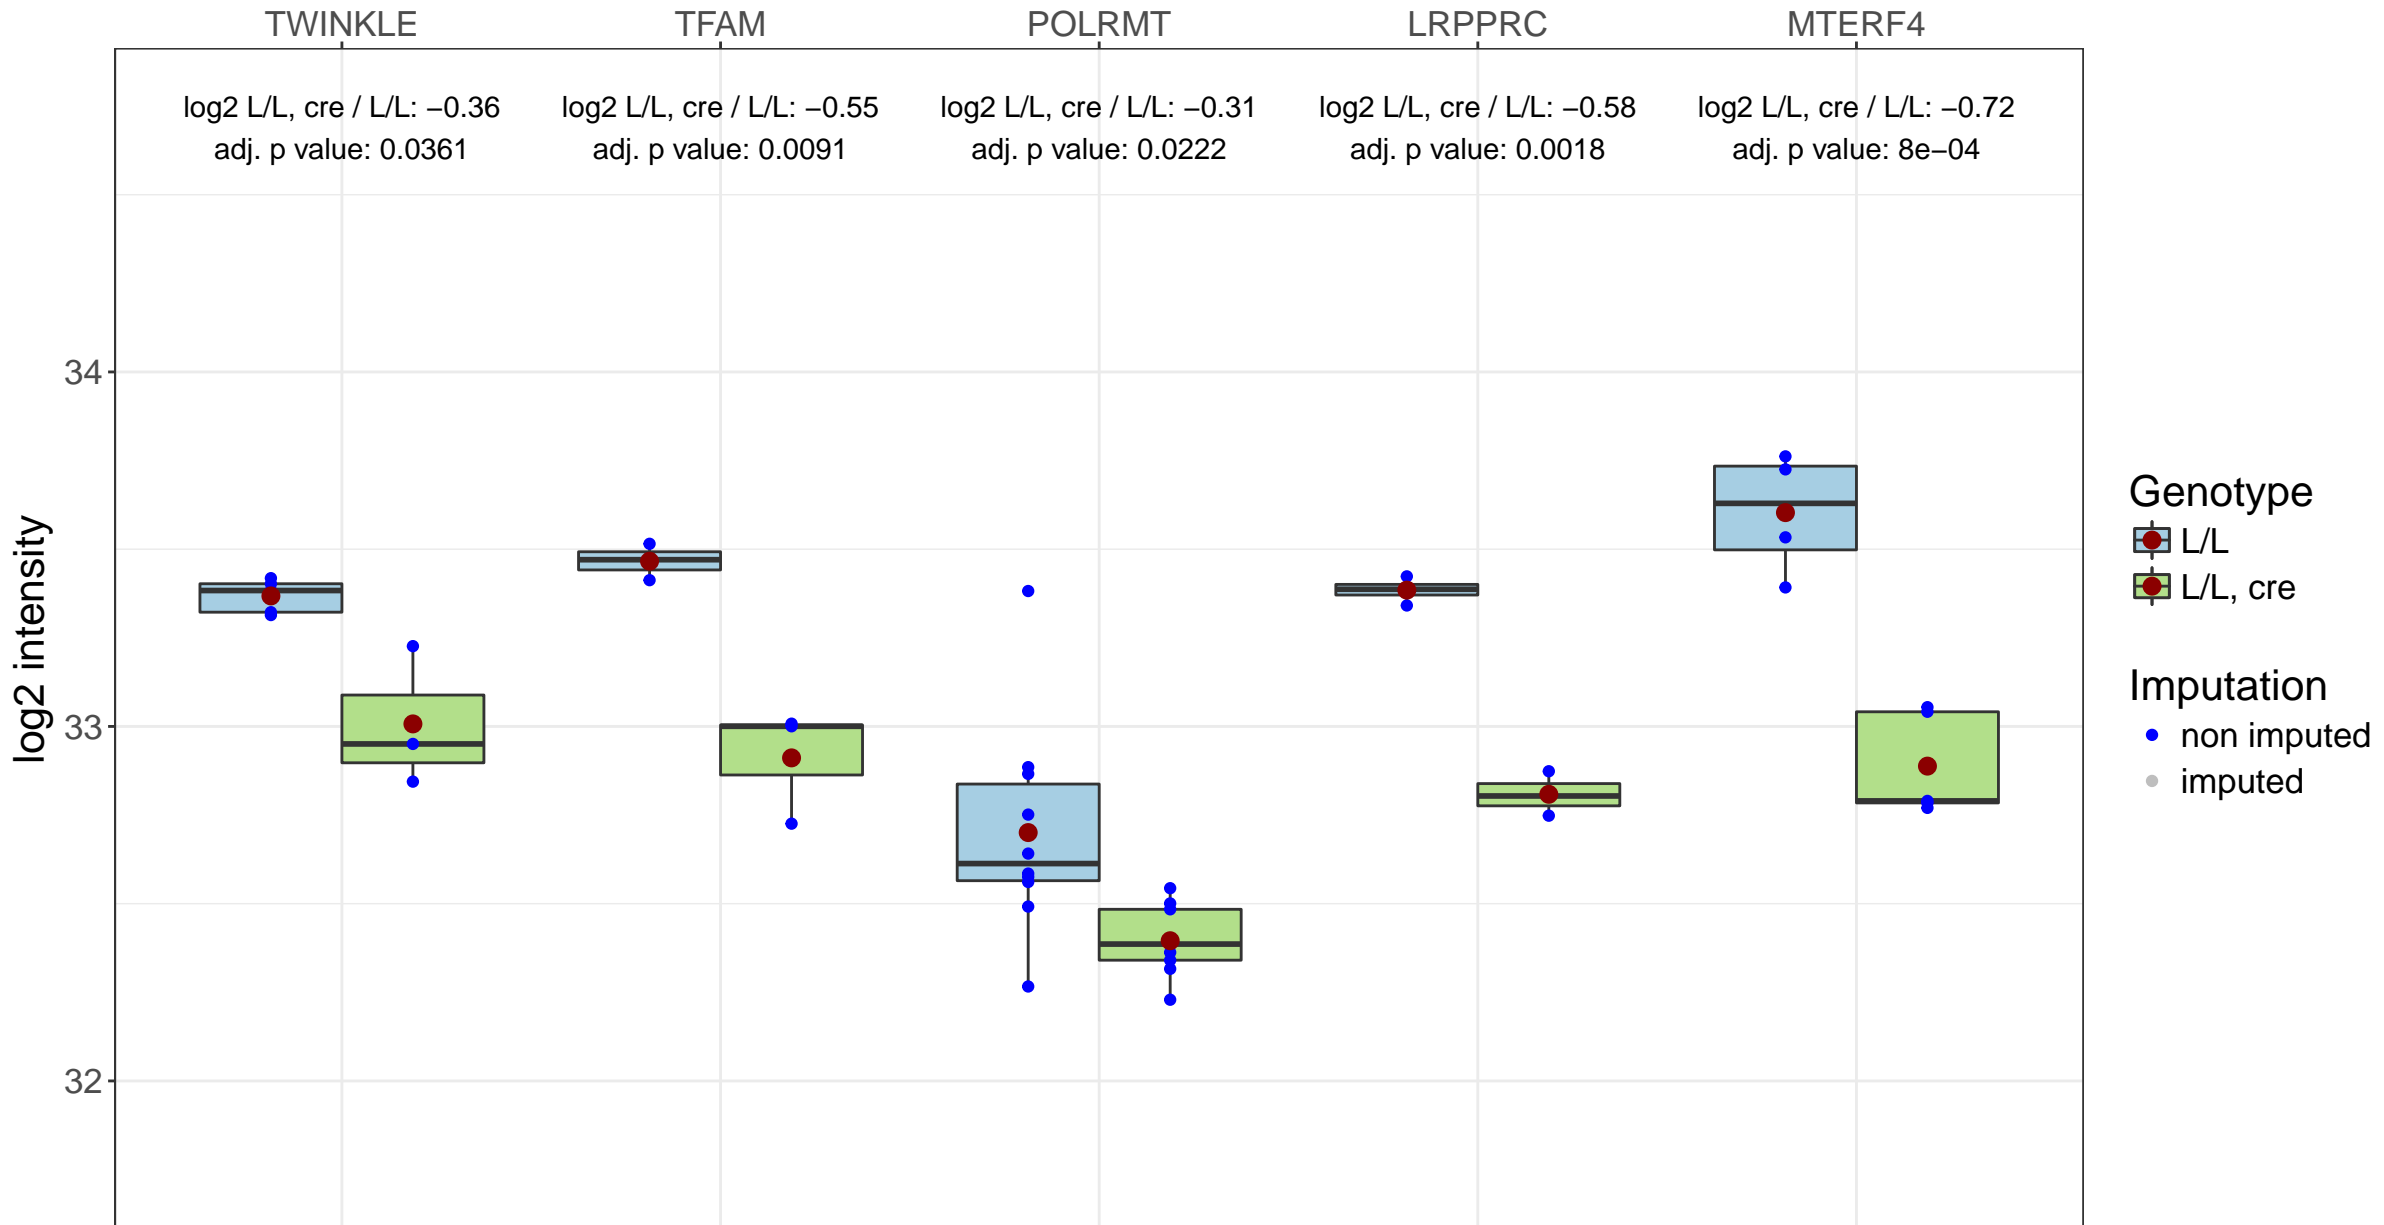



# MCEE / Q9D1I5

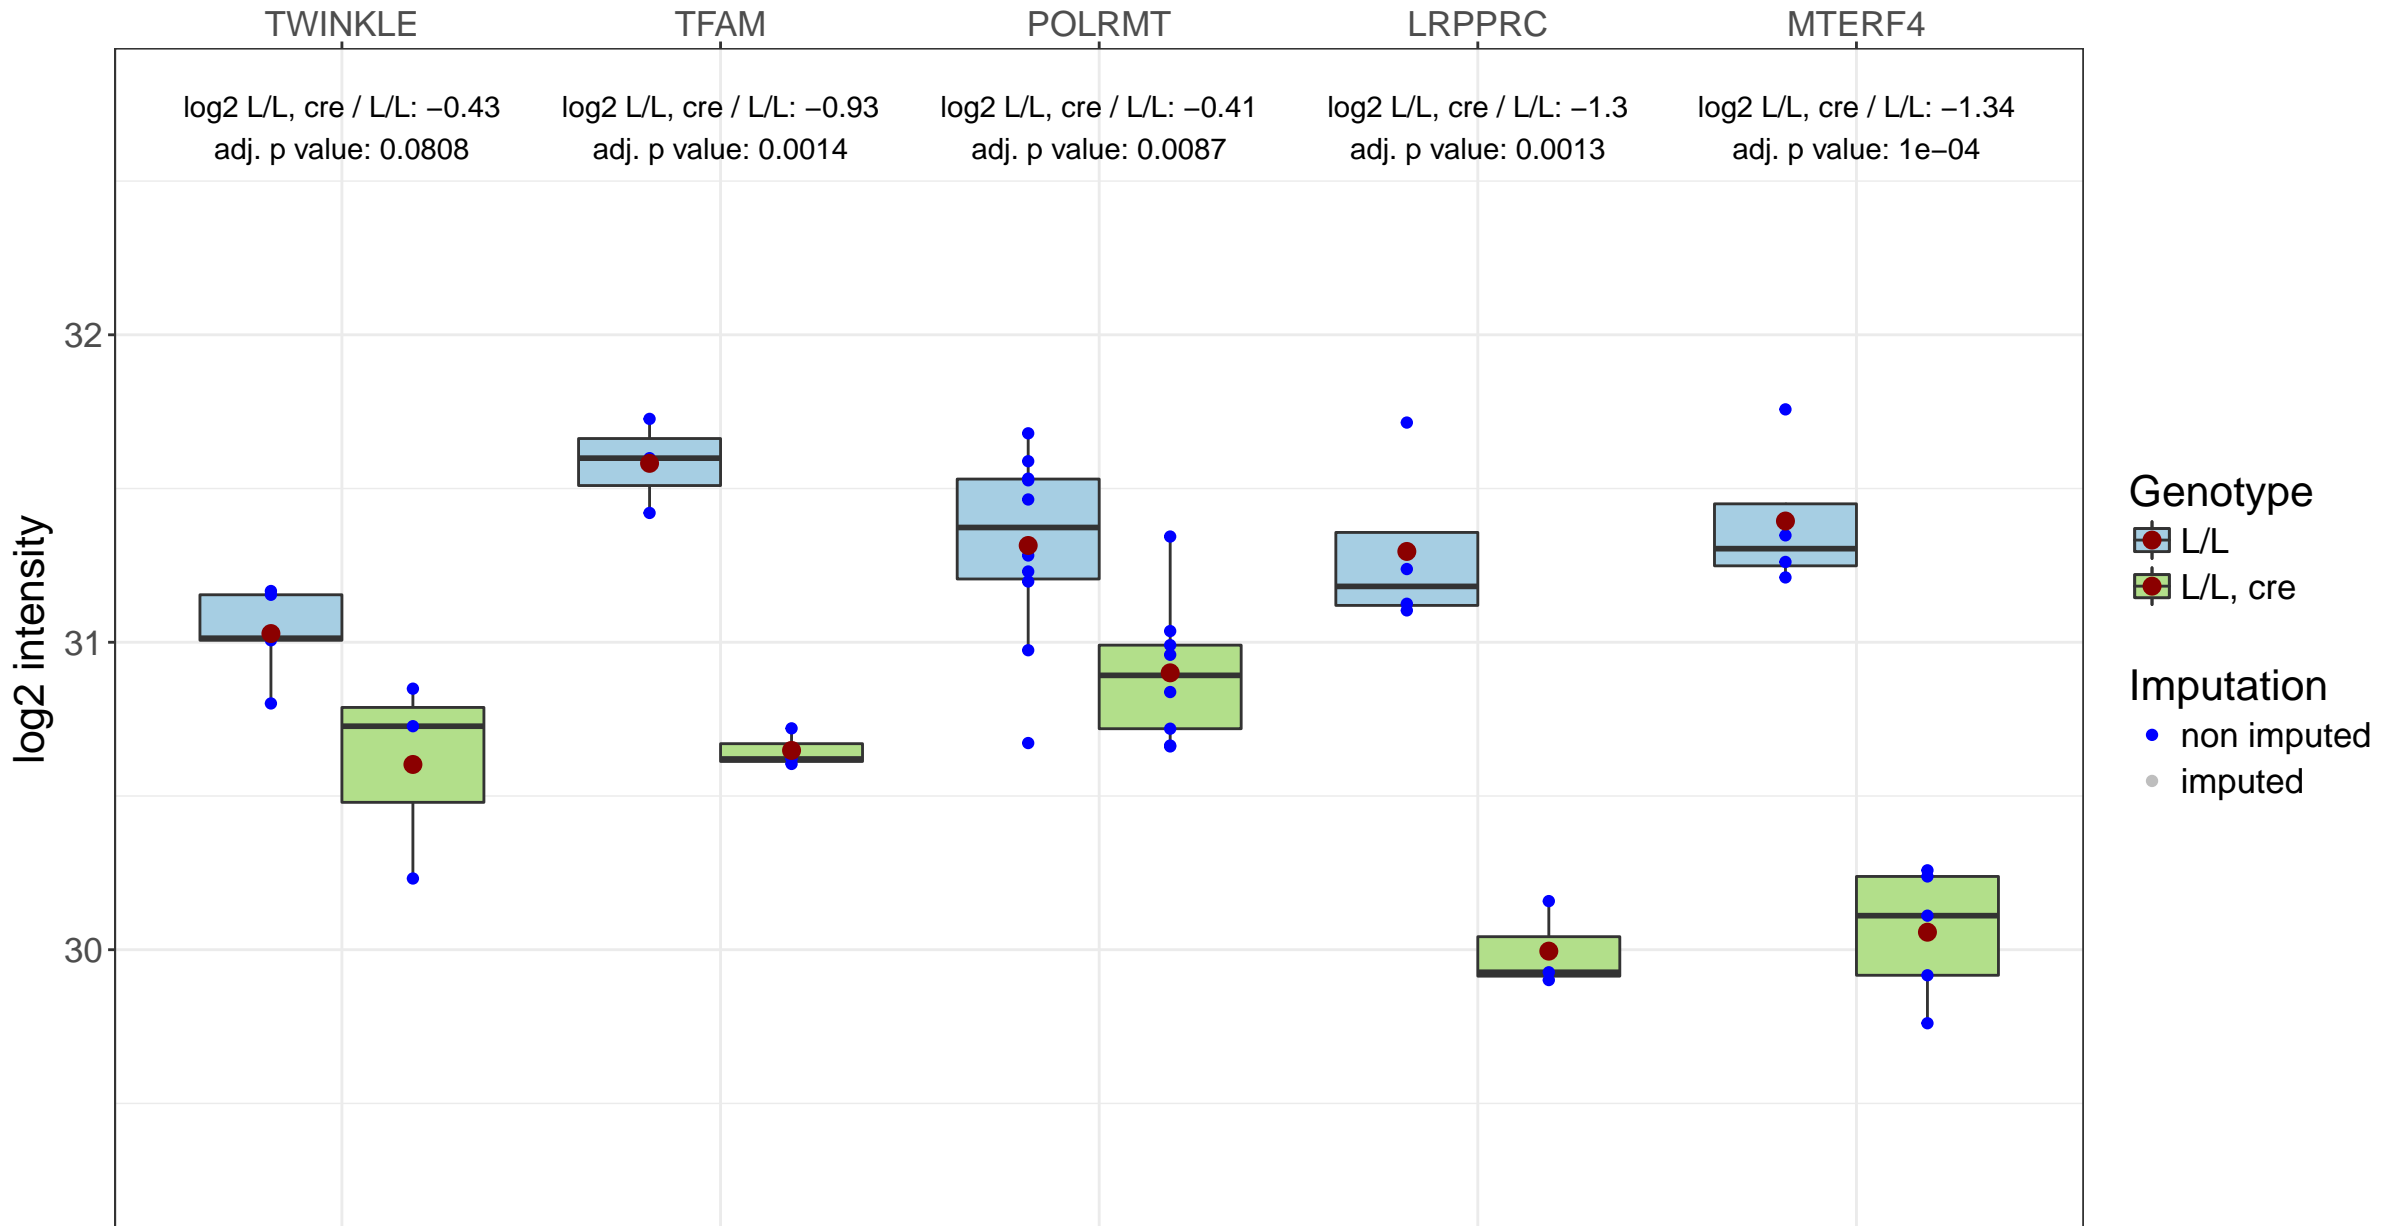

# MCPT4 / Q3UN88

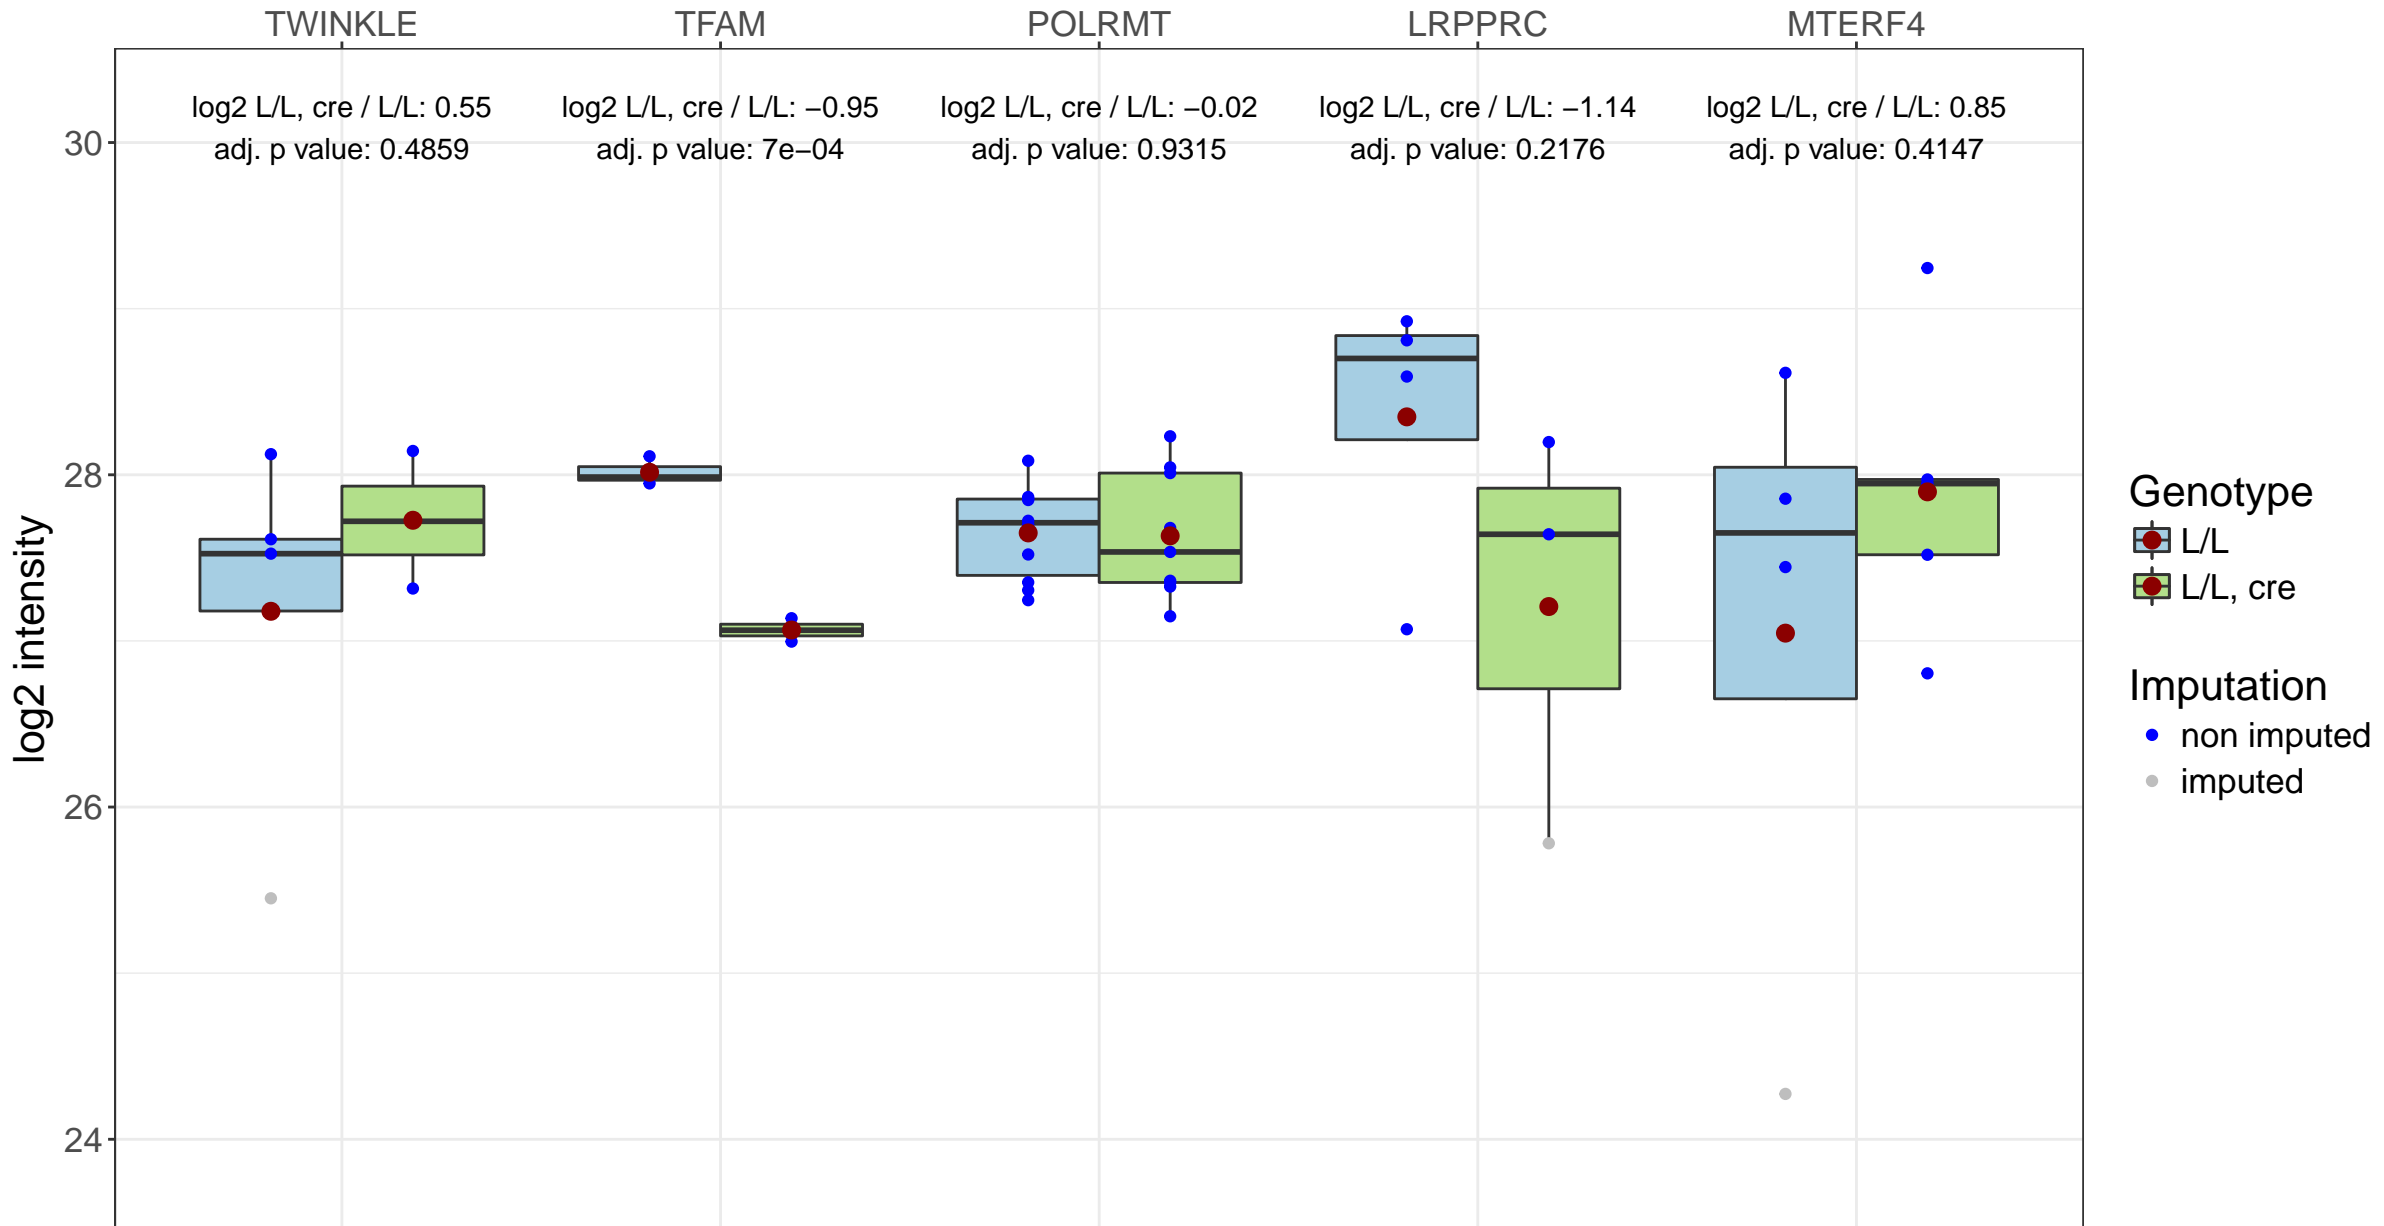

# MCU / Q3UMR5

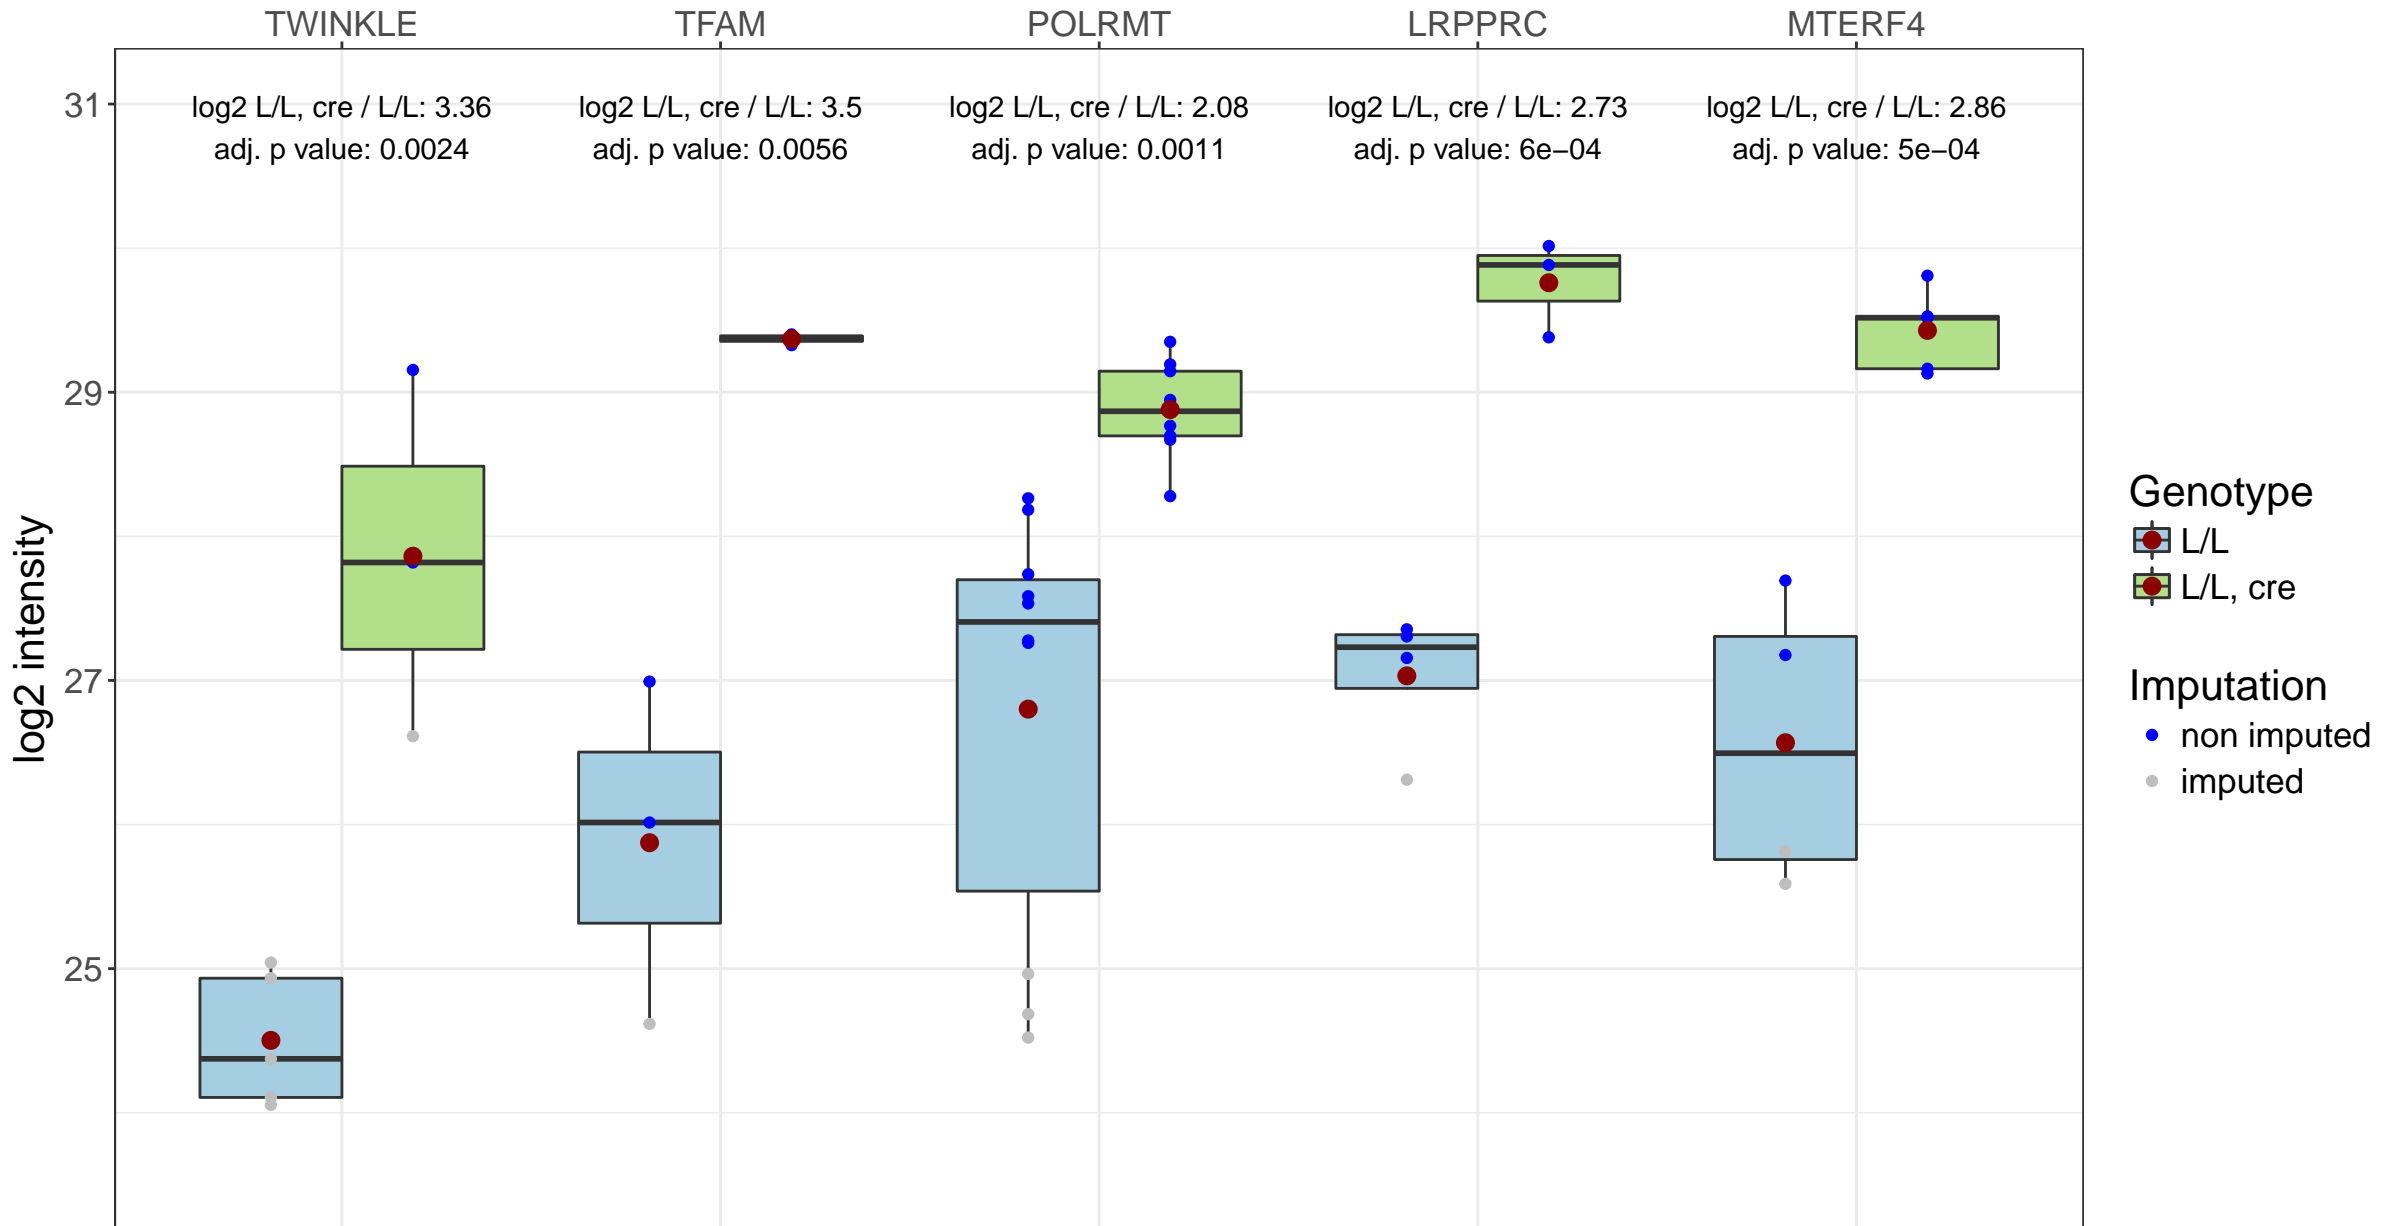

# MCUR1 / Q9CXD6

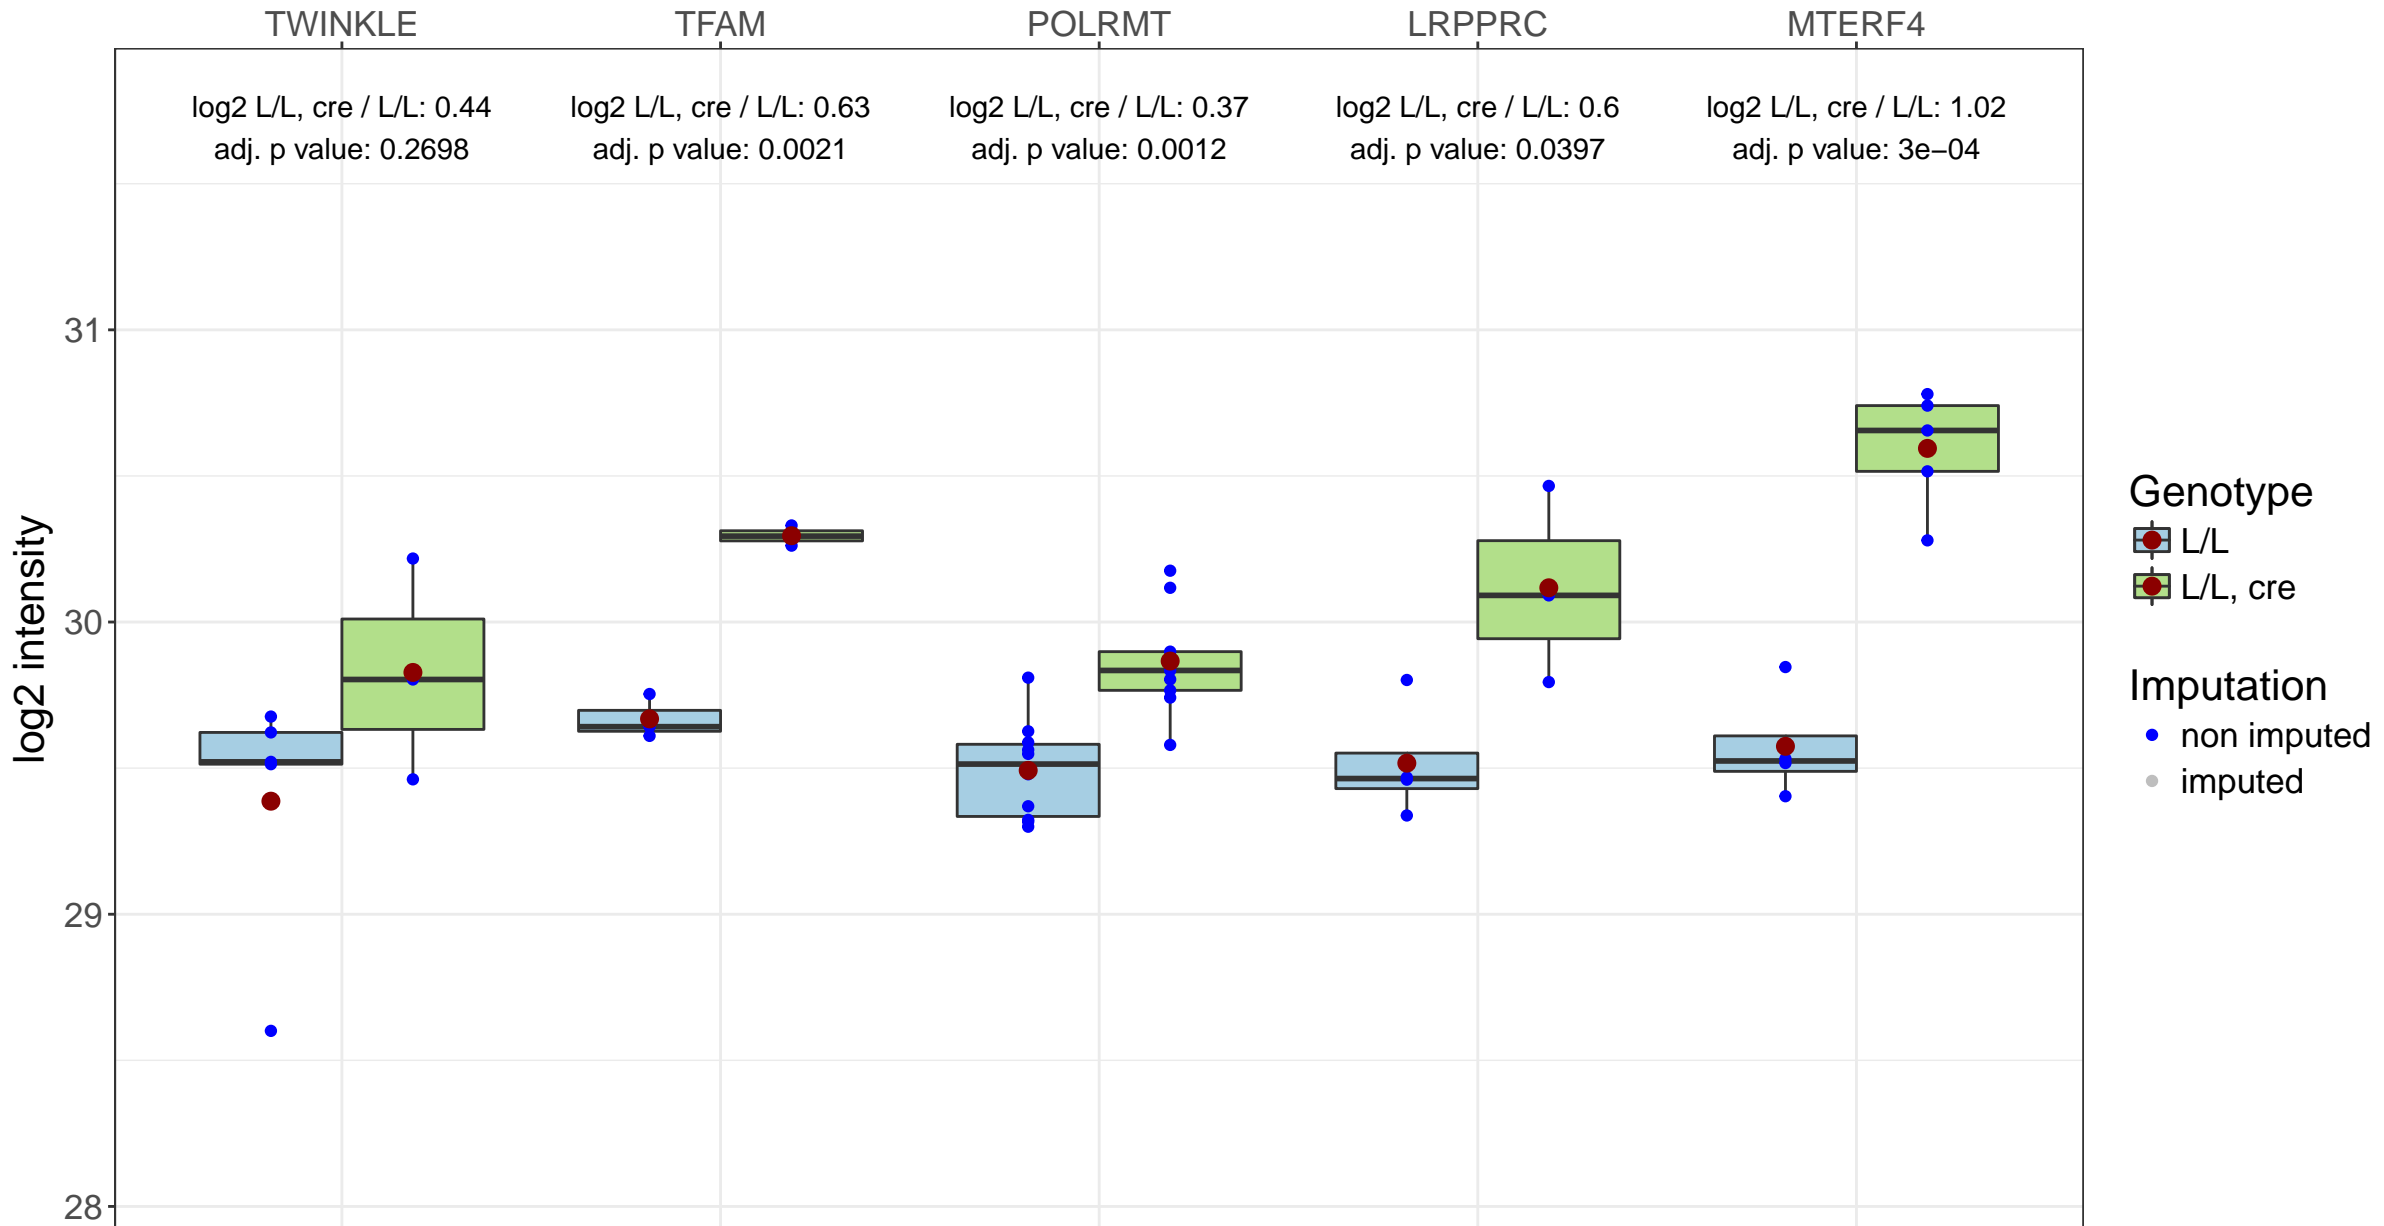

# MDH1 / P14152

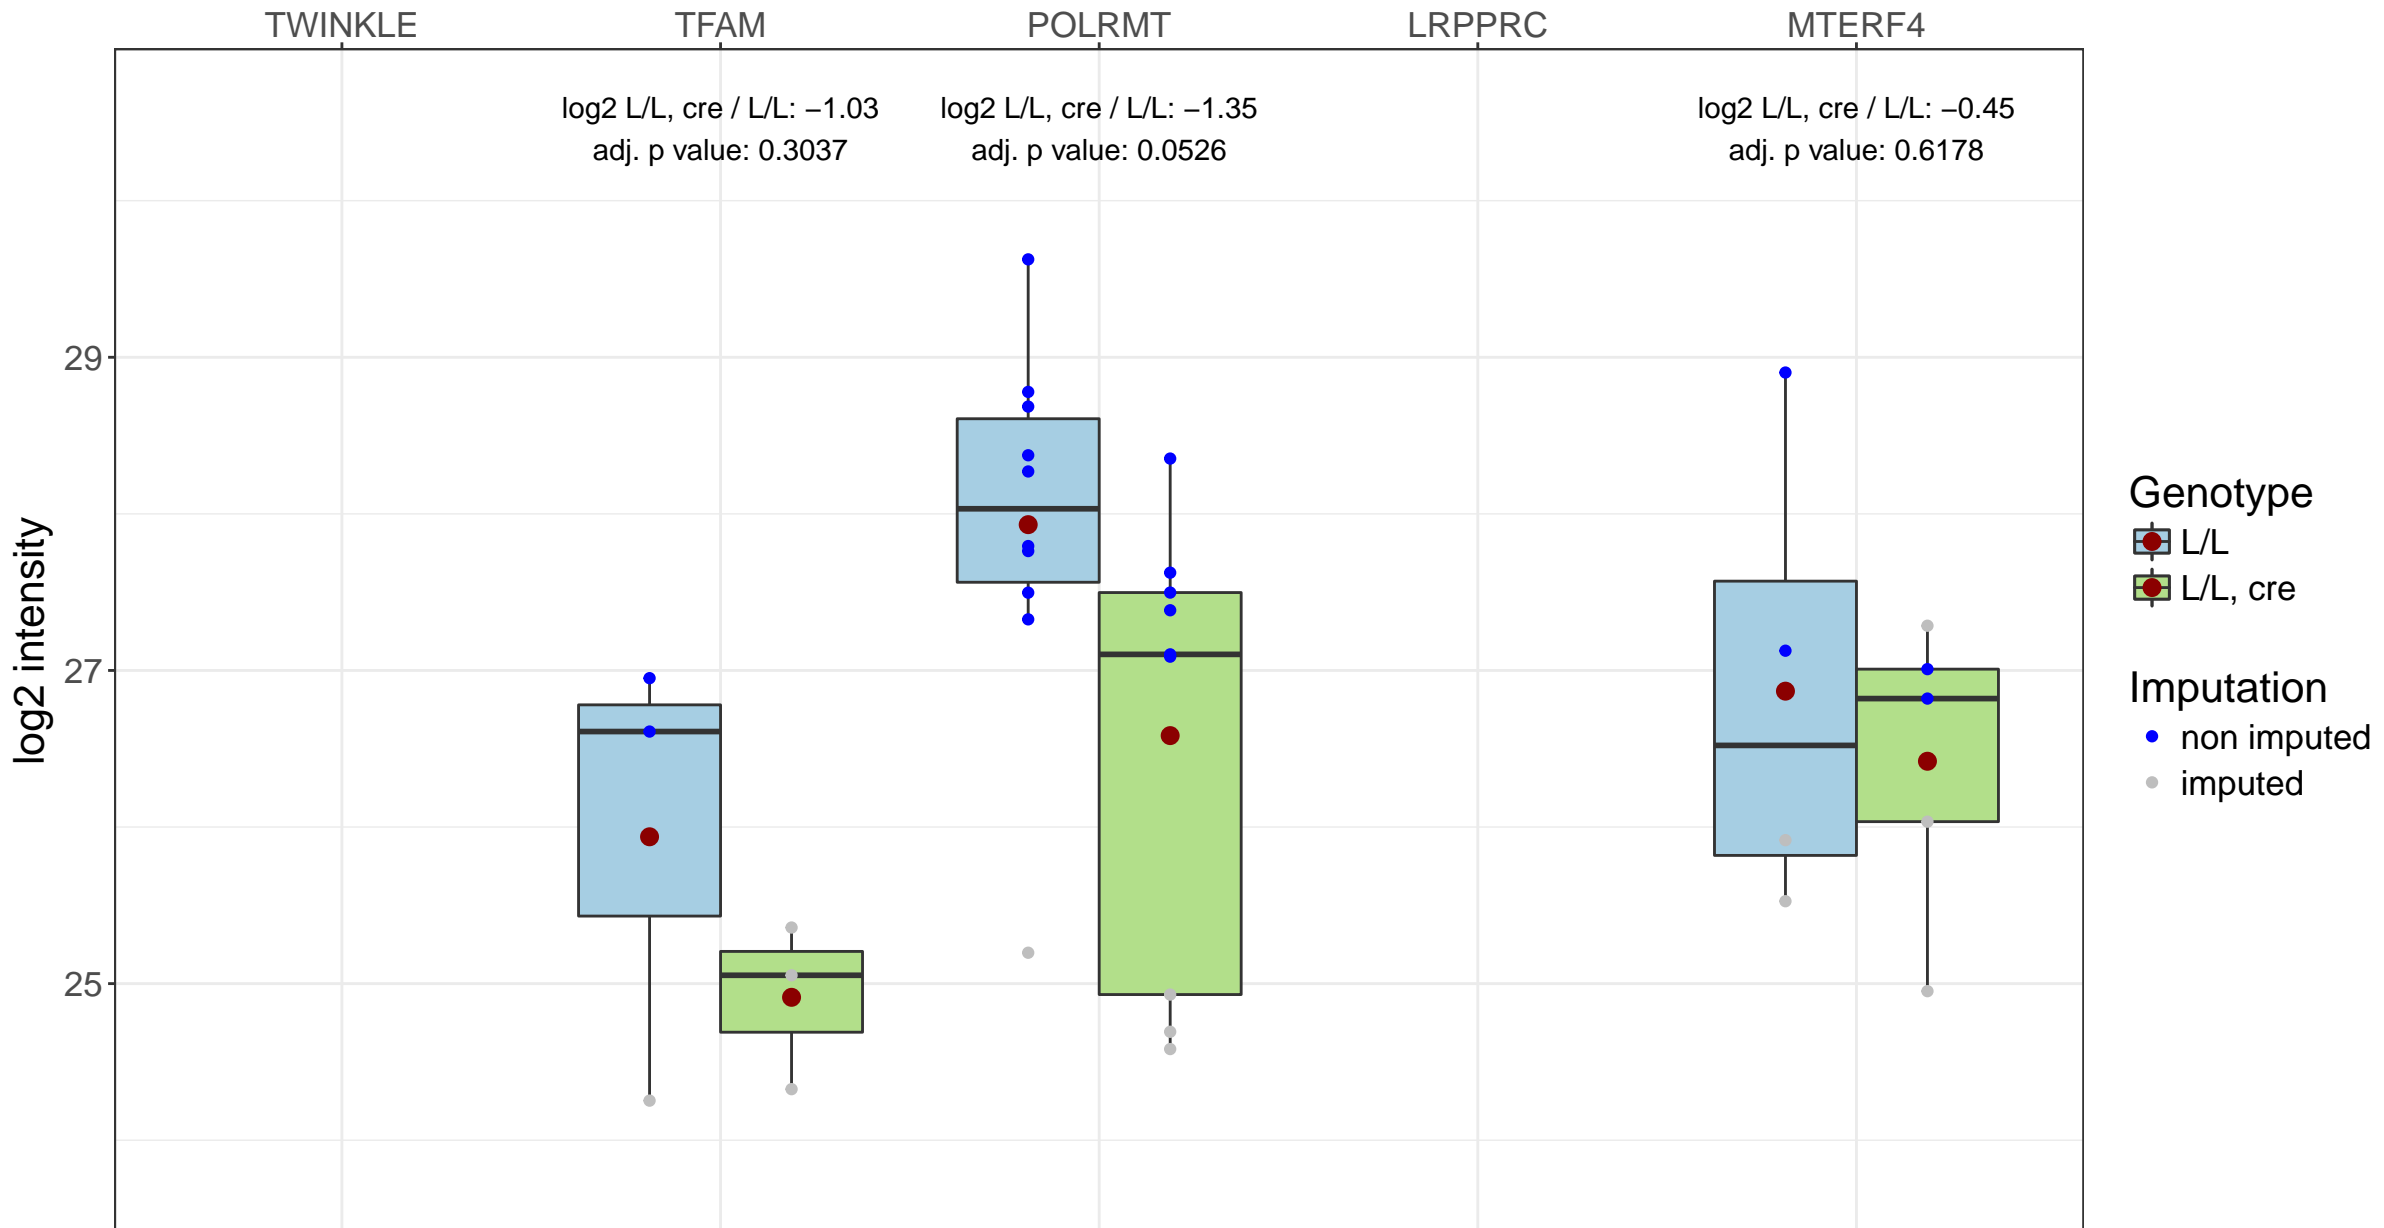

# MDH2 / P08249

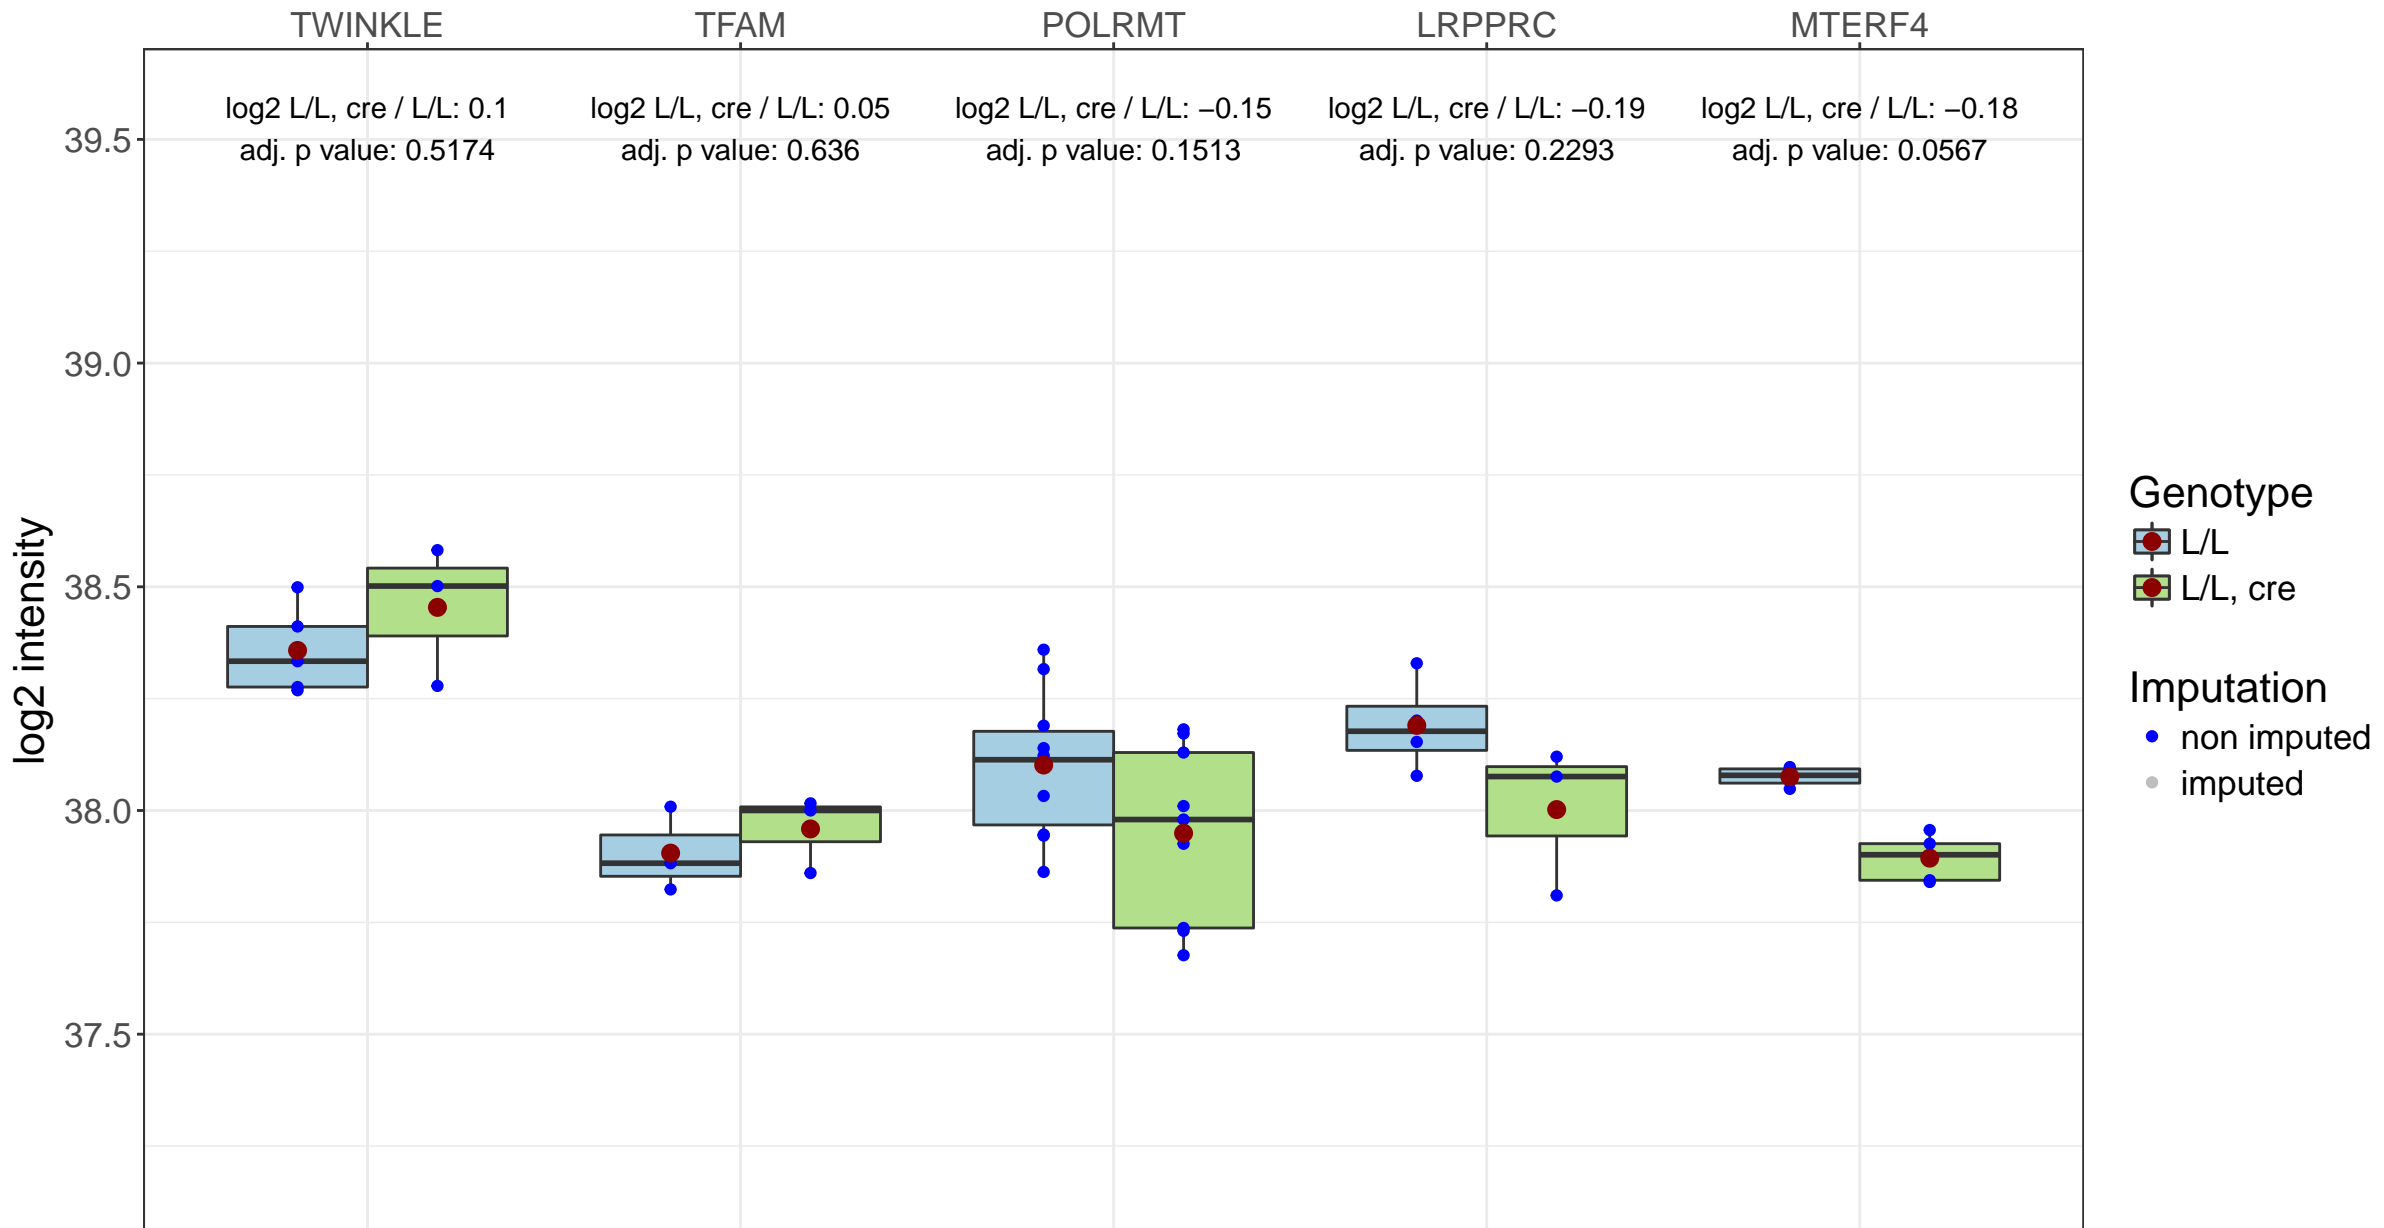

# ME2 / Q99KE1

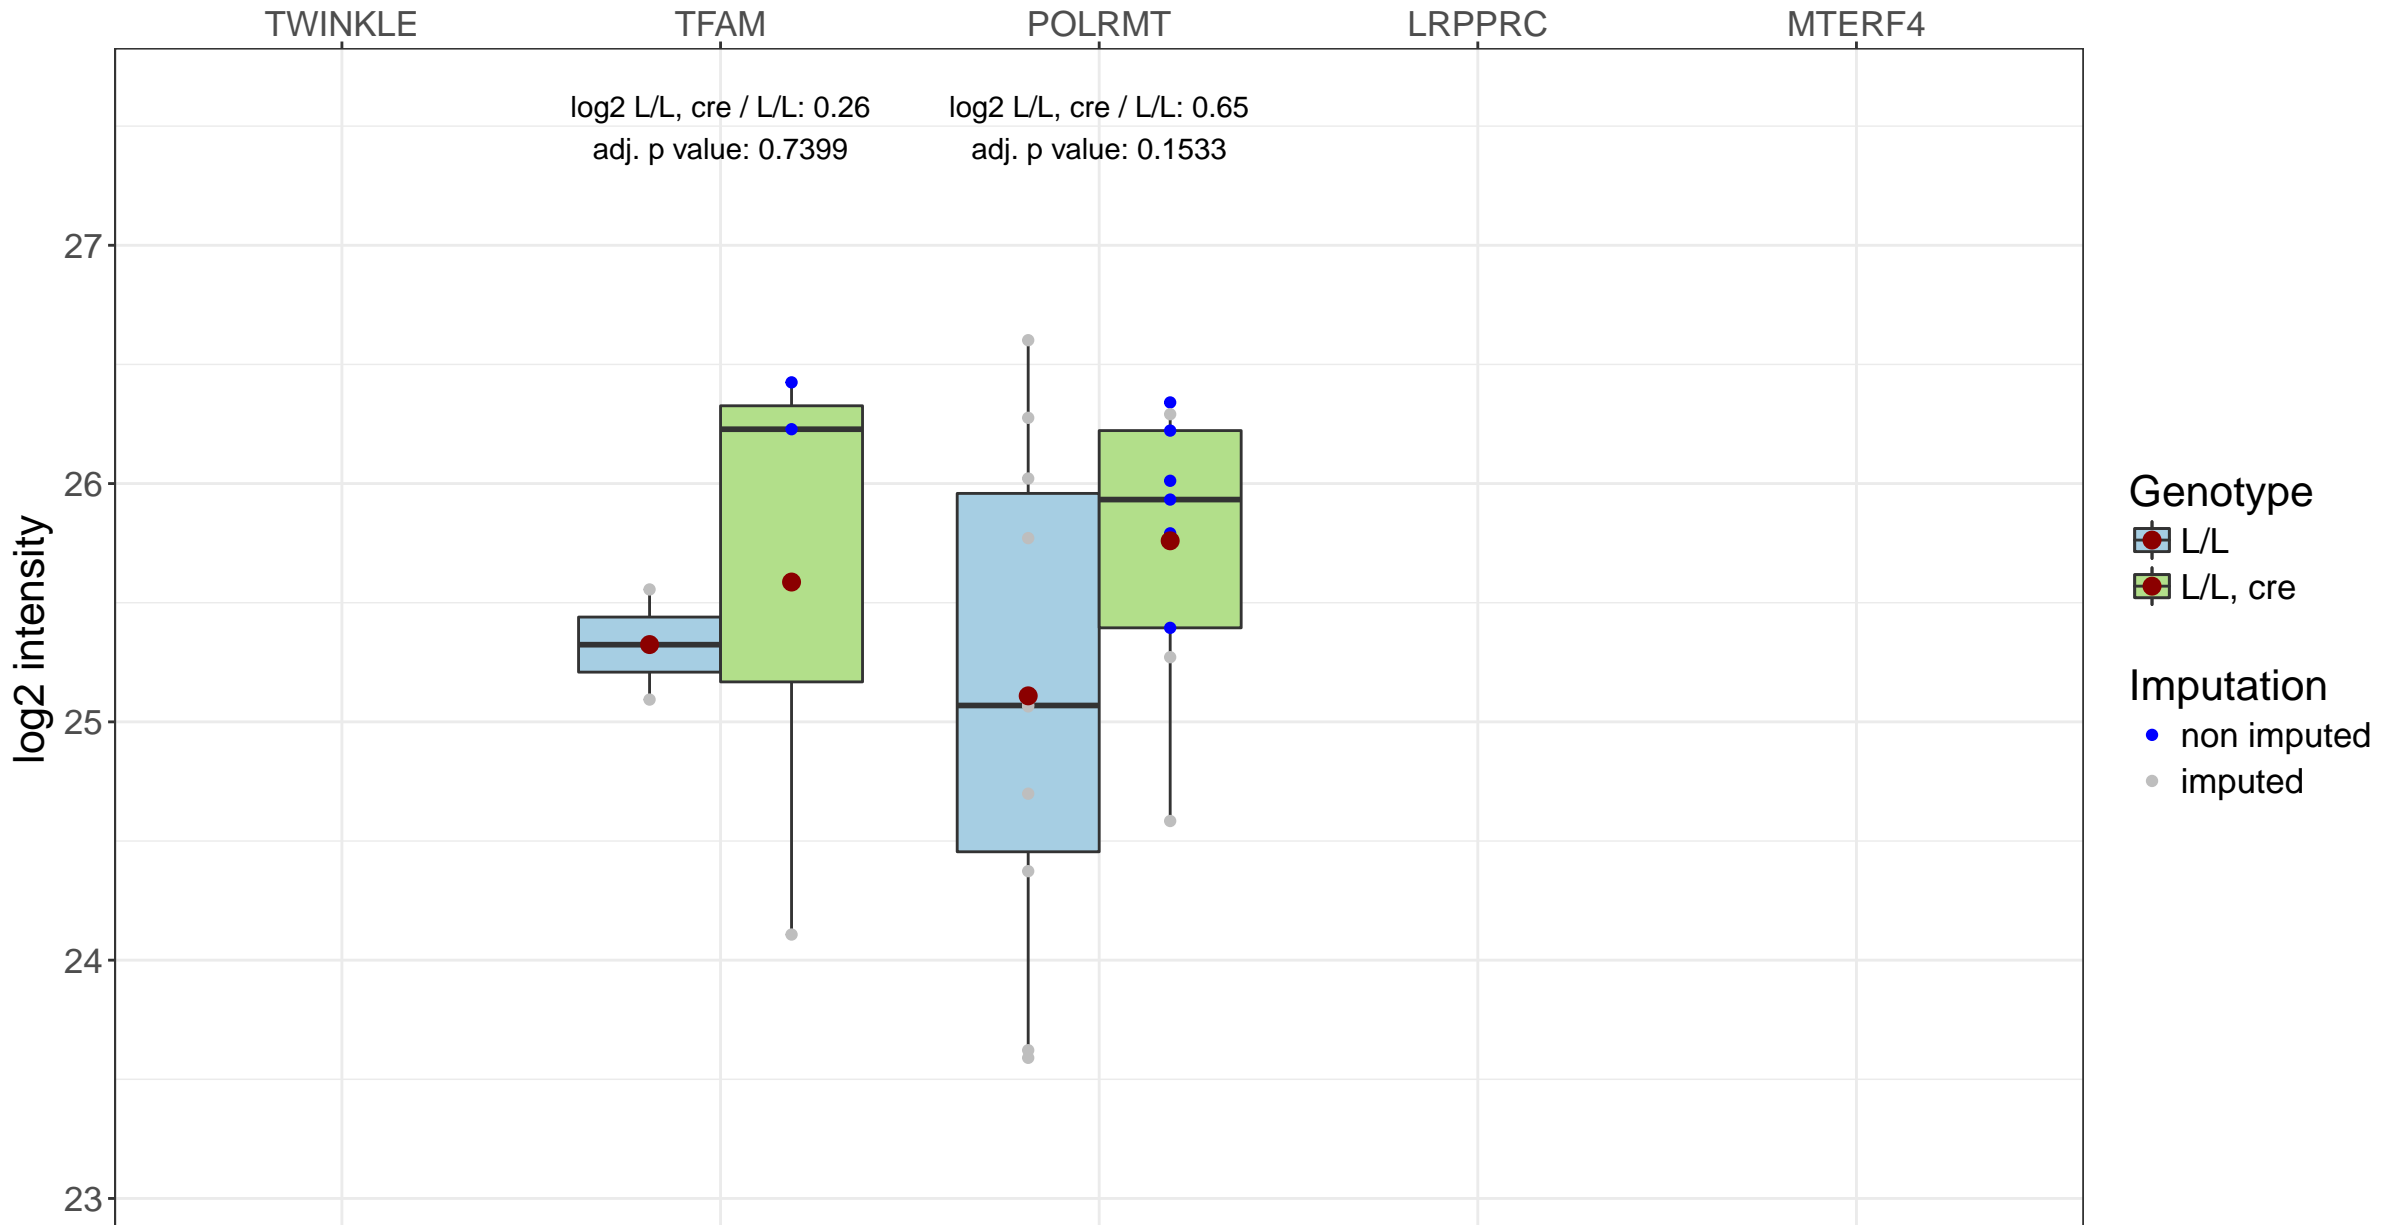

# ME3 / Q8BMF3

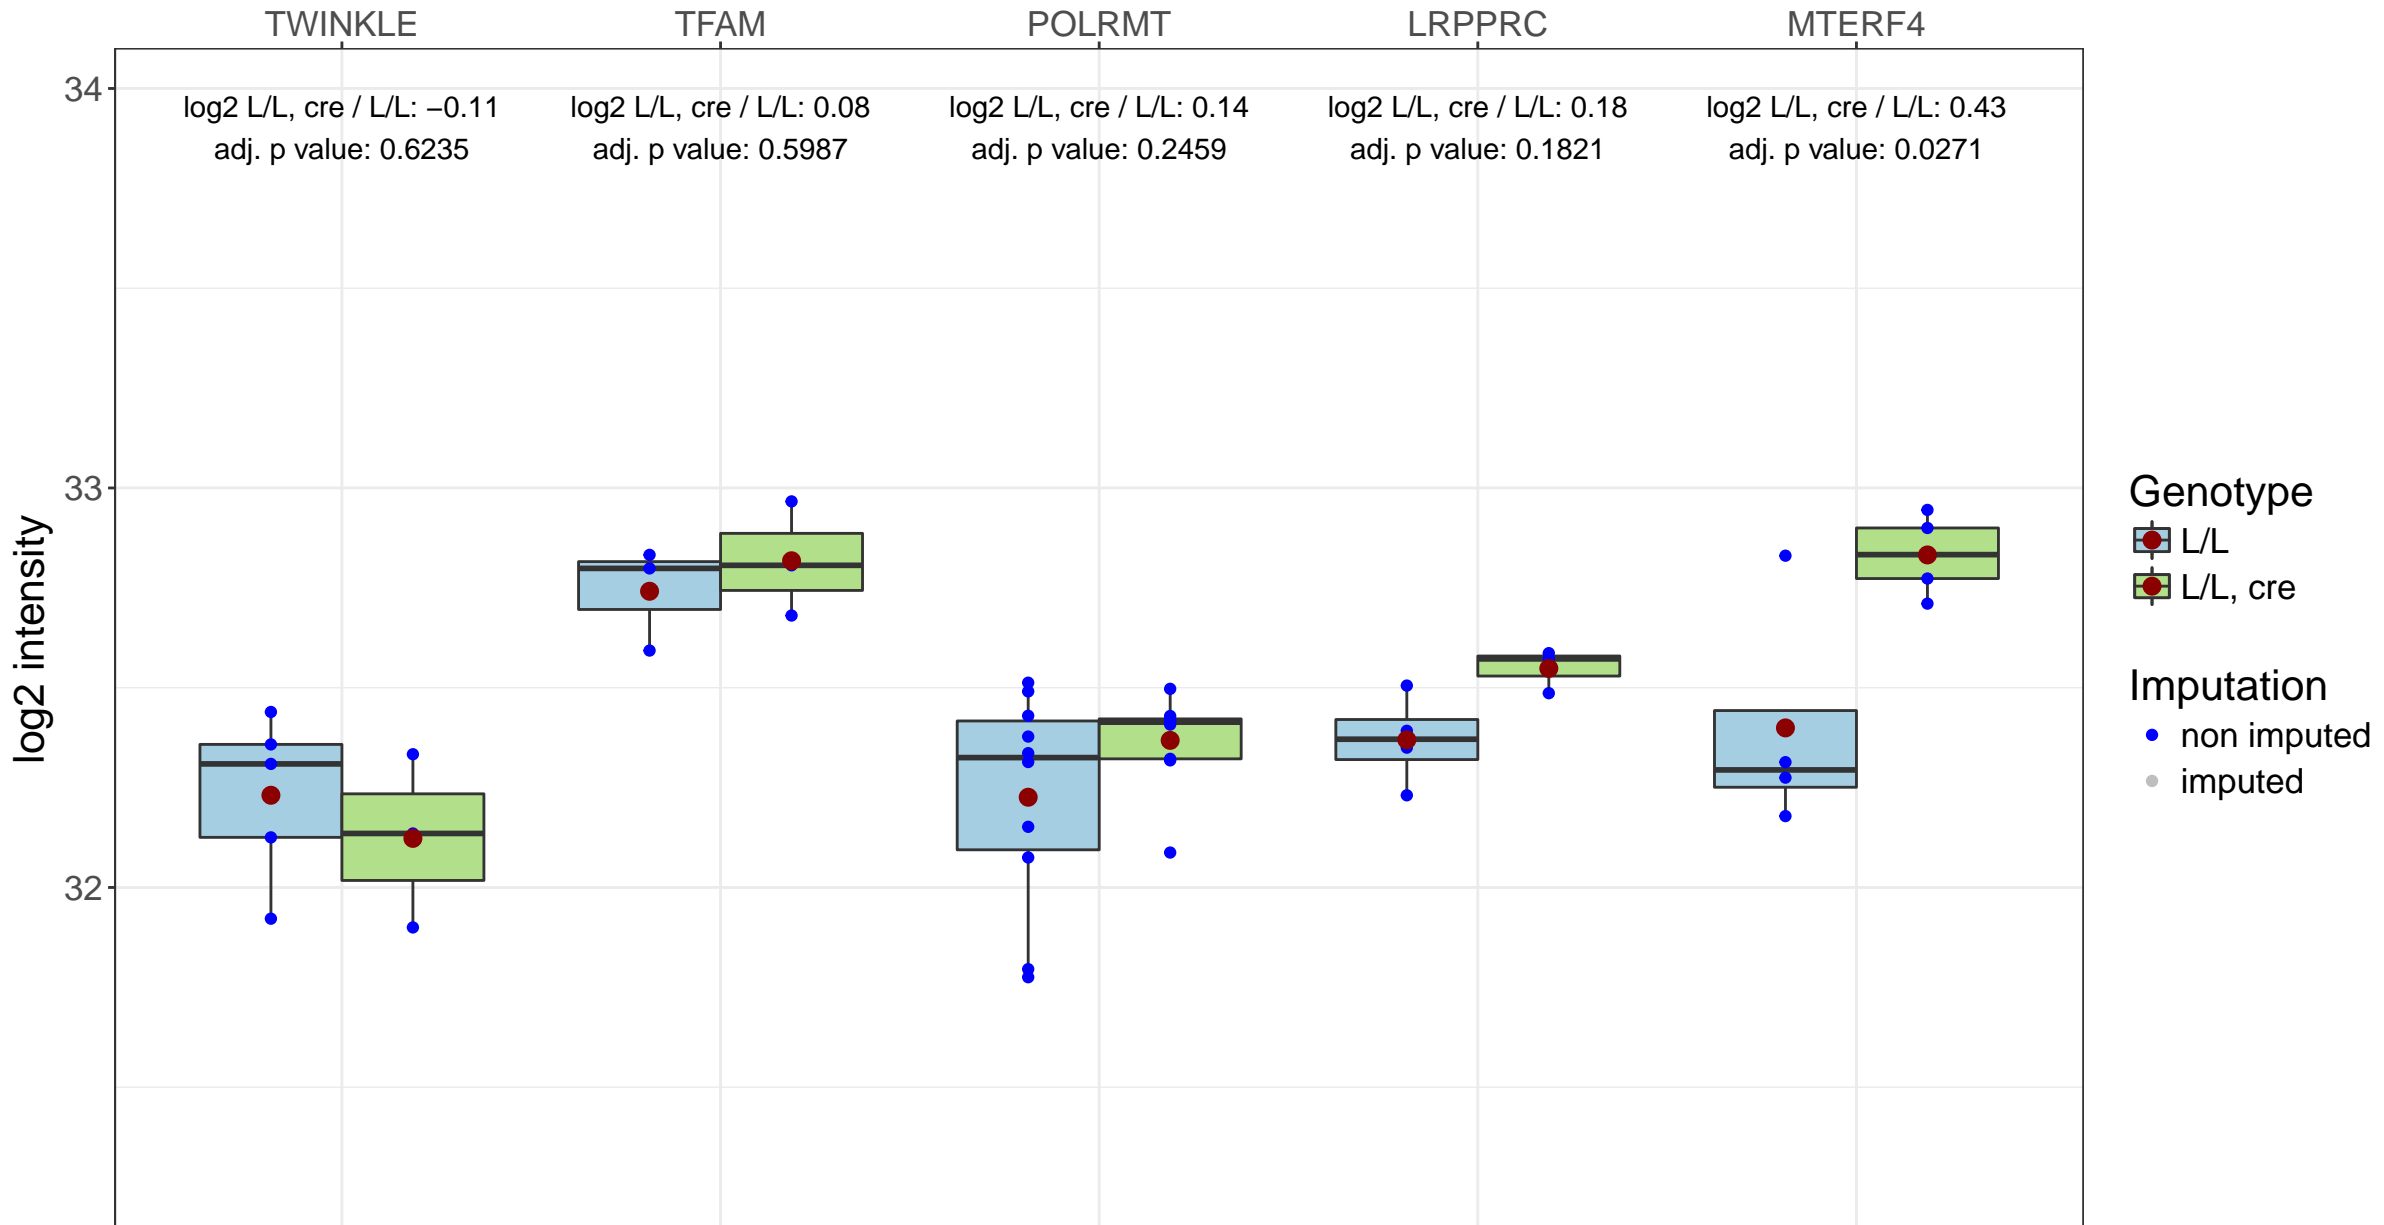



# MECR / Q9DCS3

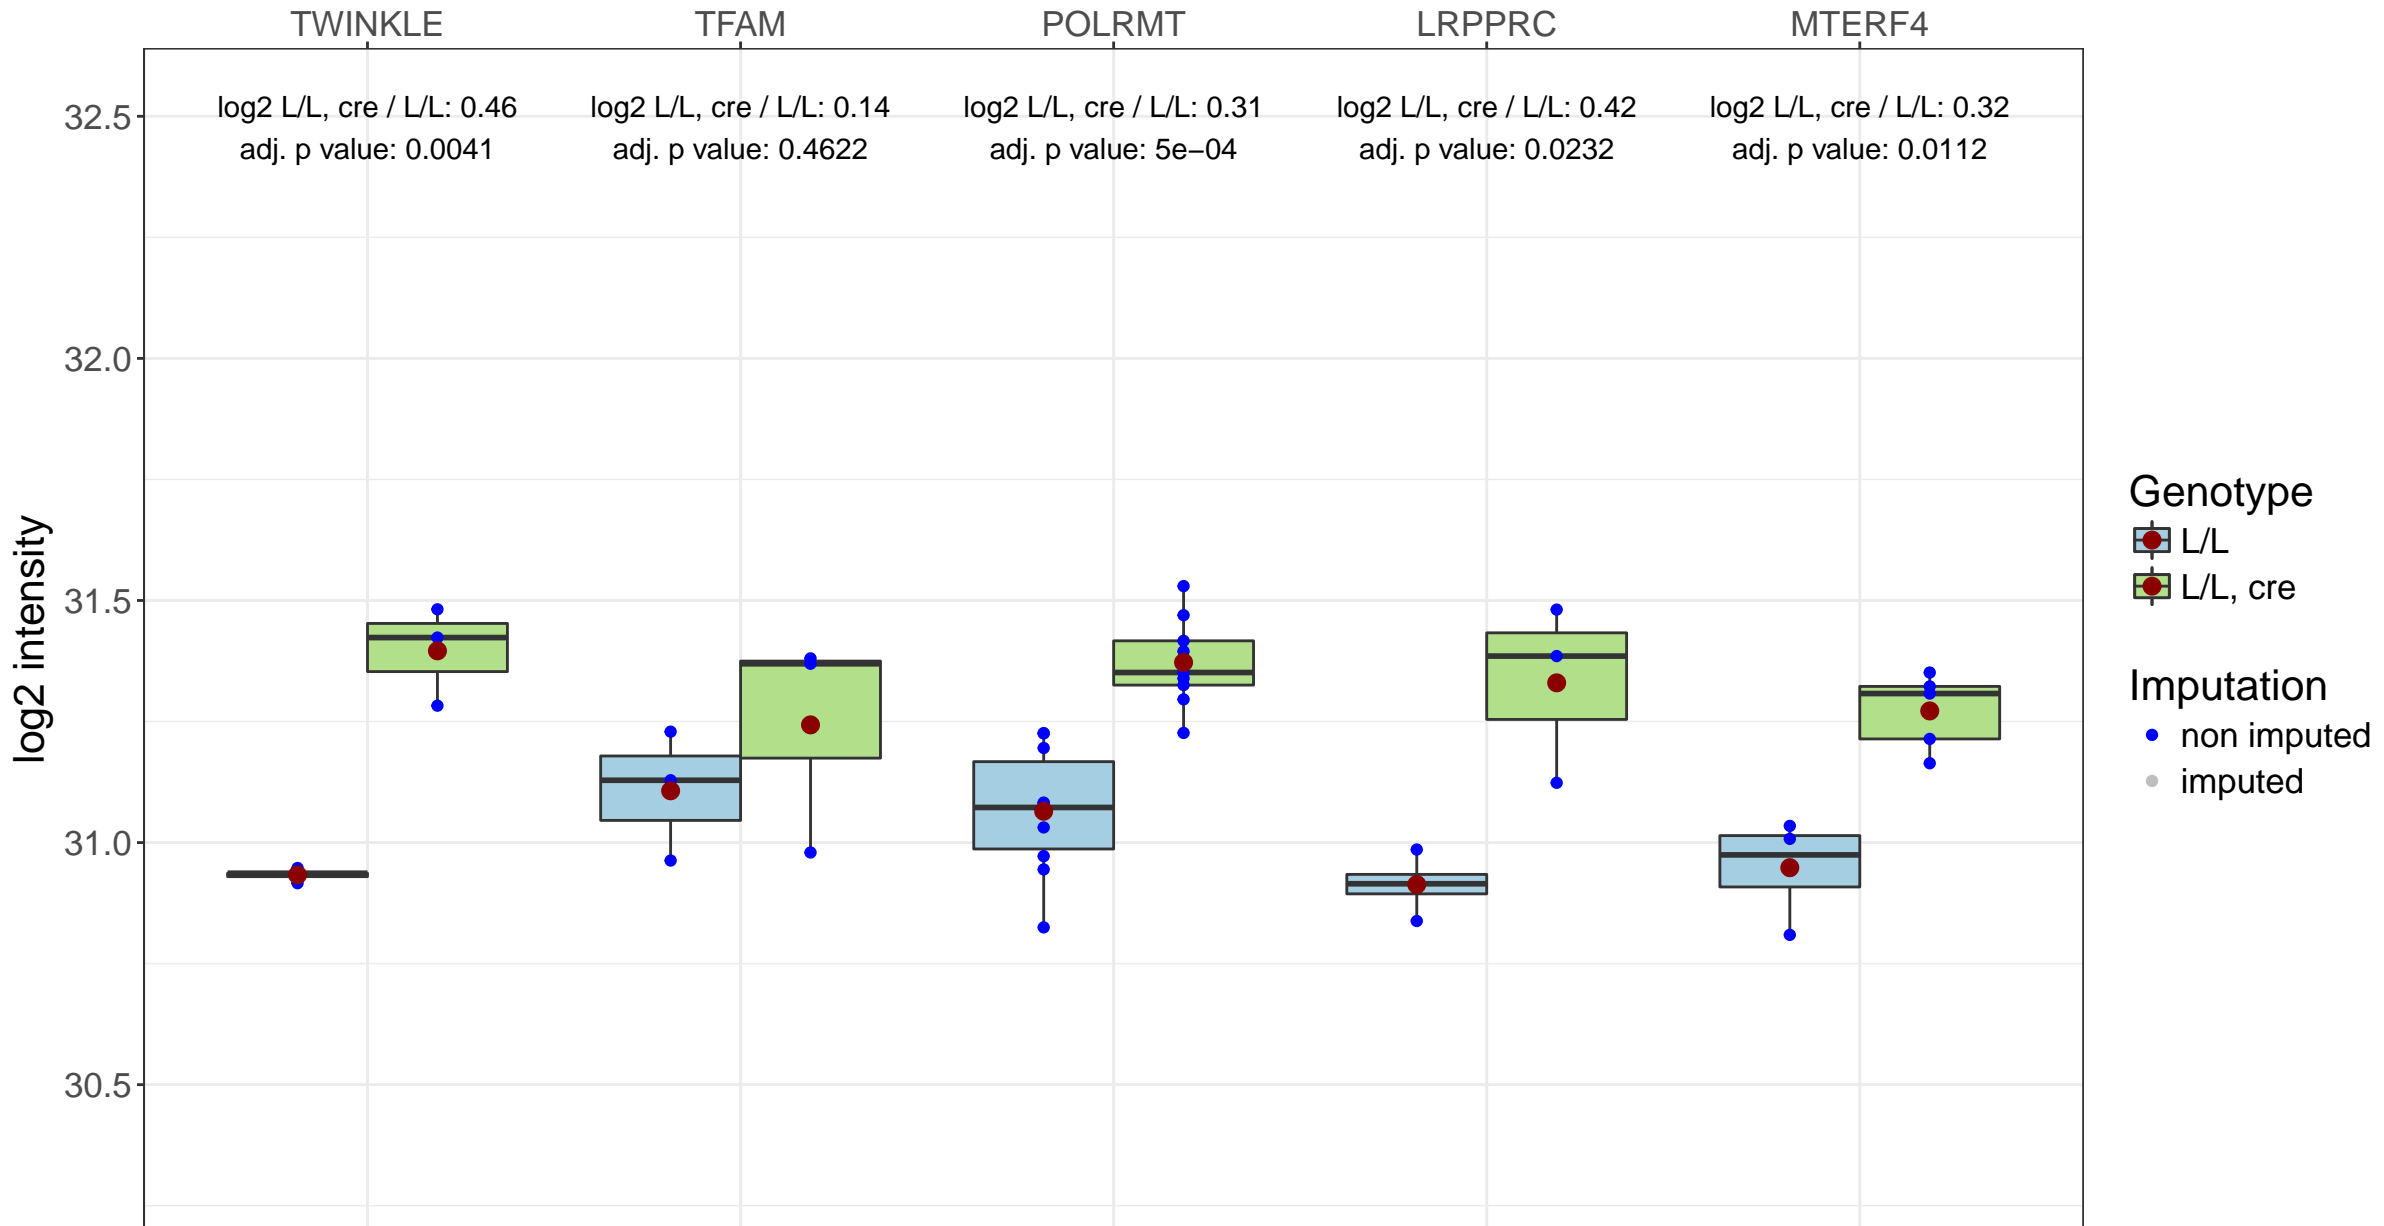

# METAP1D / Q9CPW9

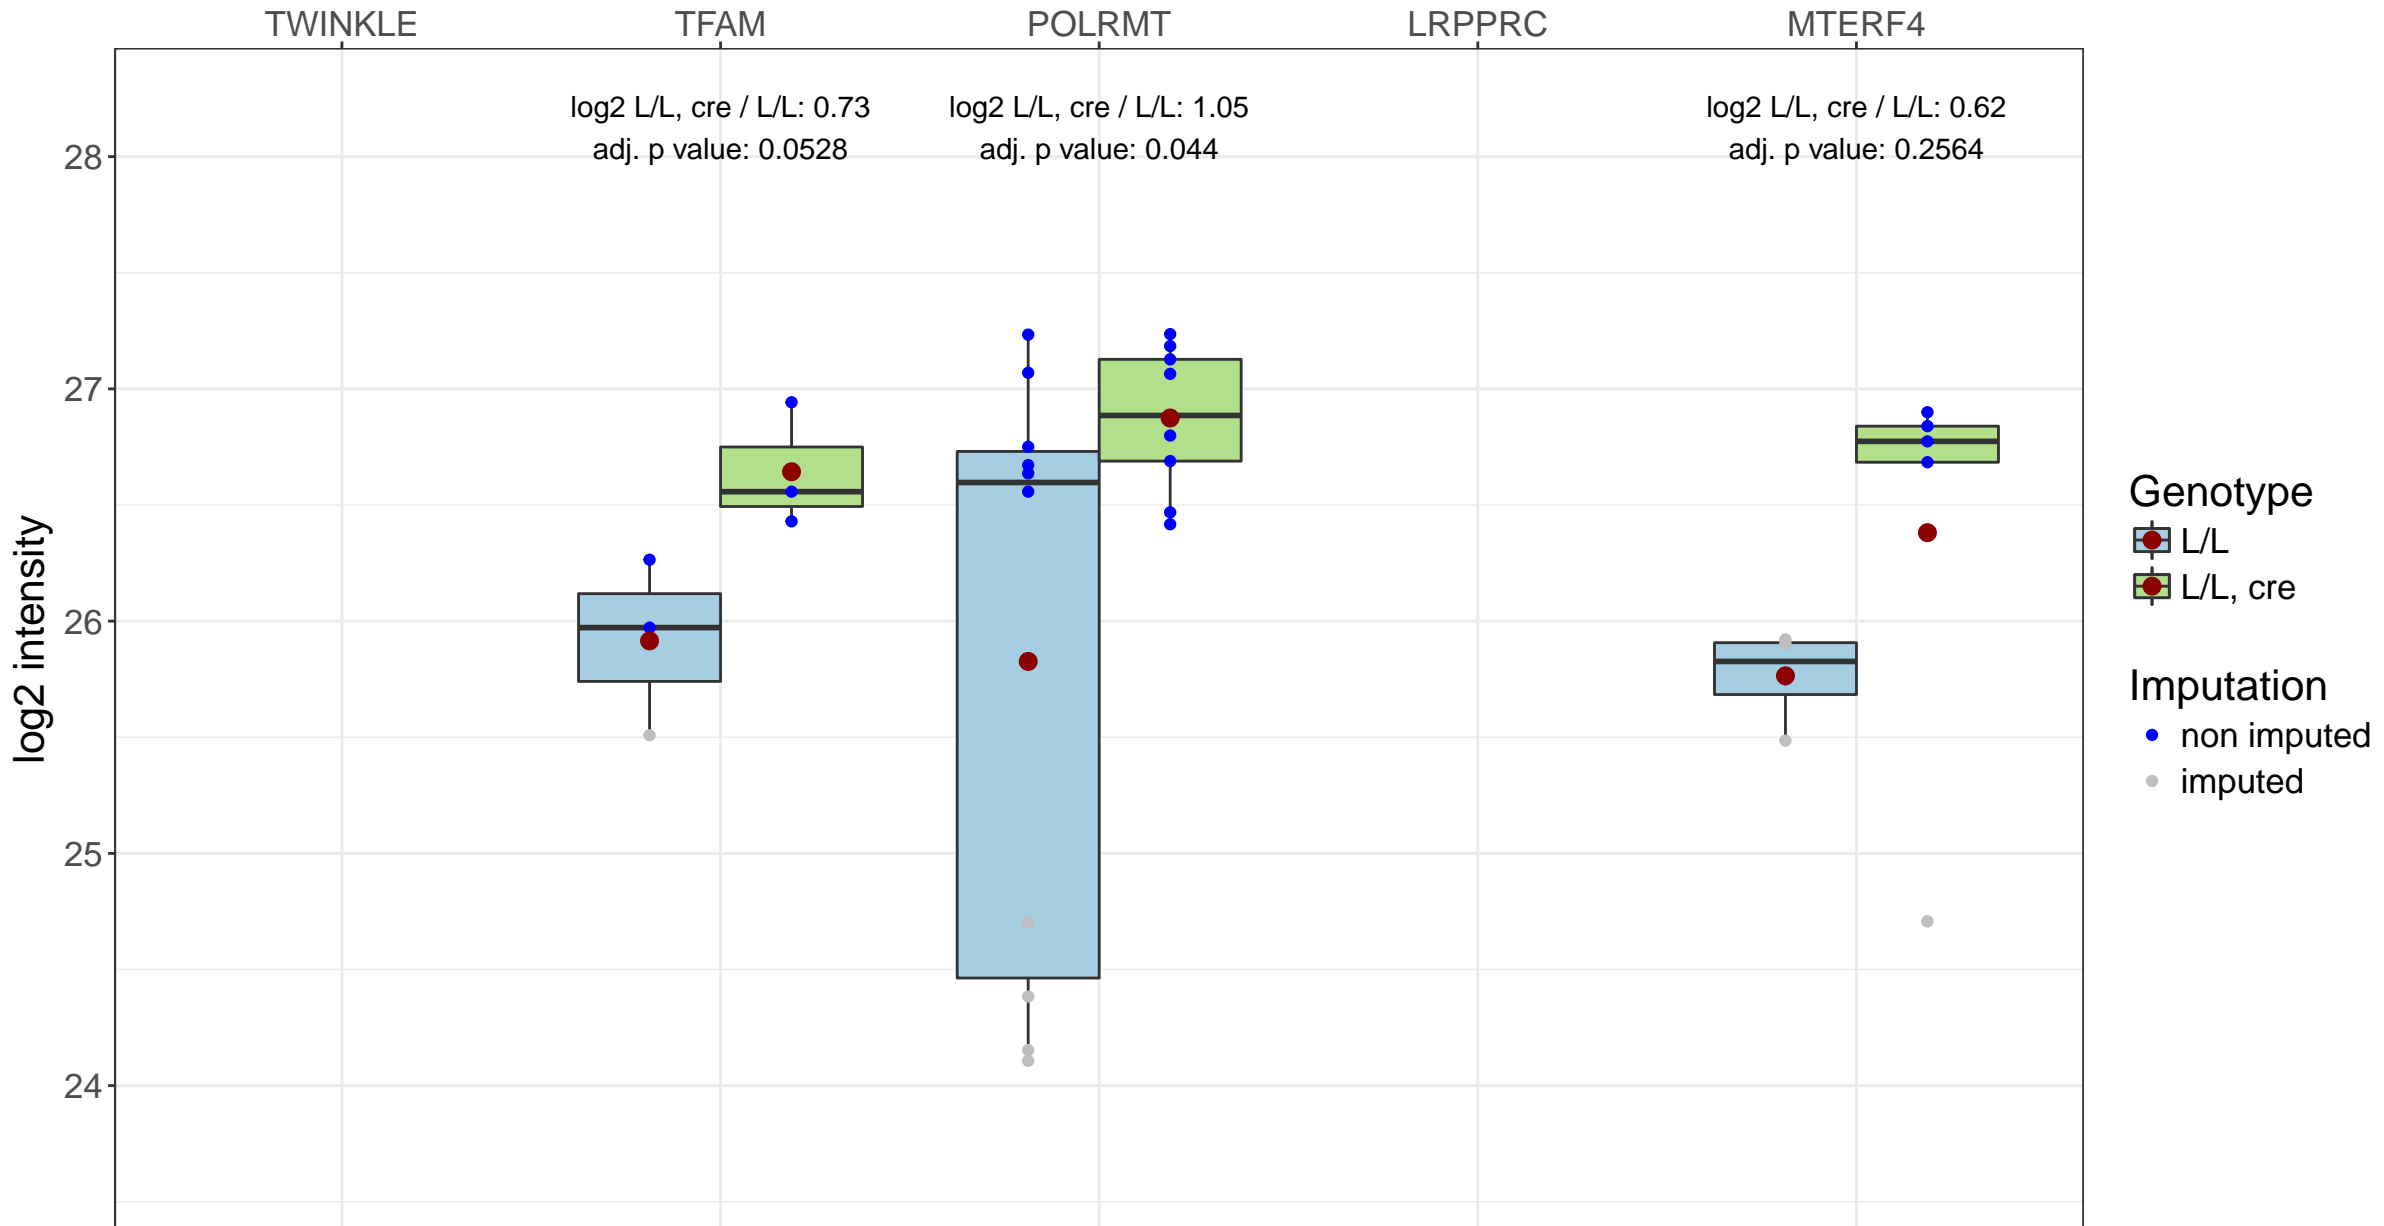

# METTTL15 / Q9DCL4

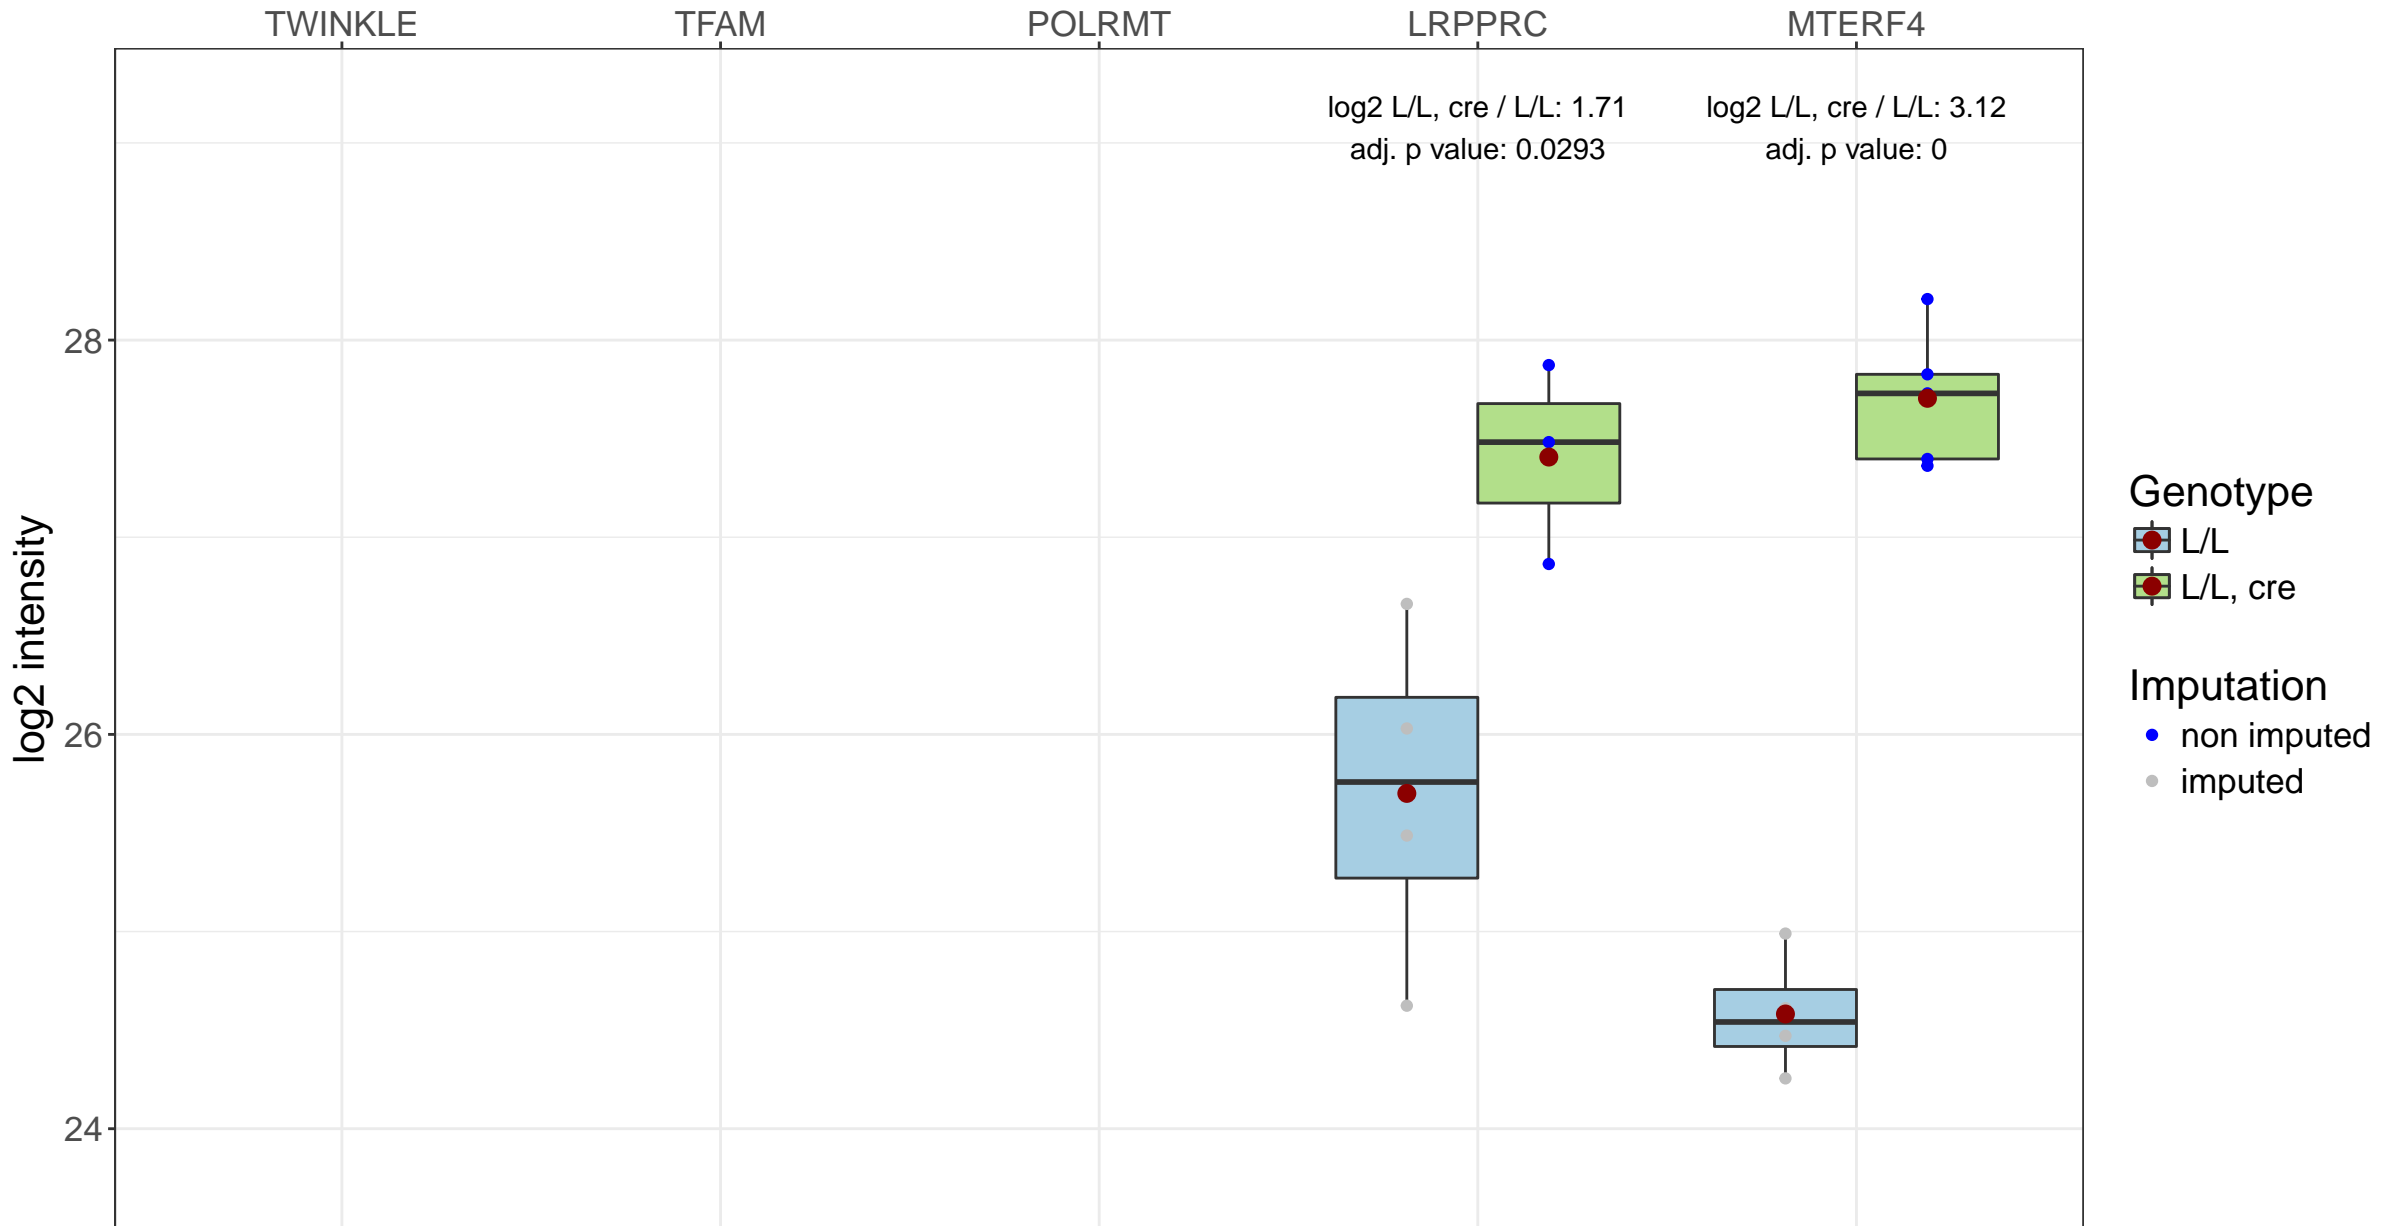

# MFF / E0CYB9

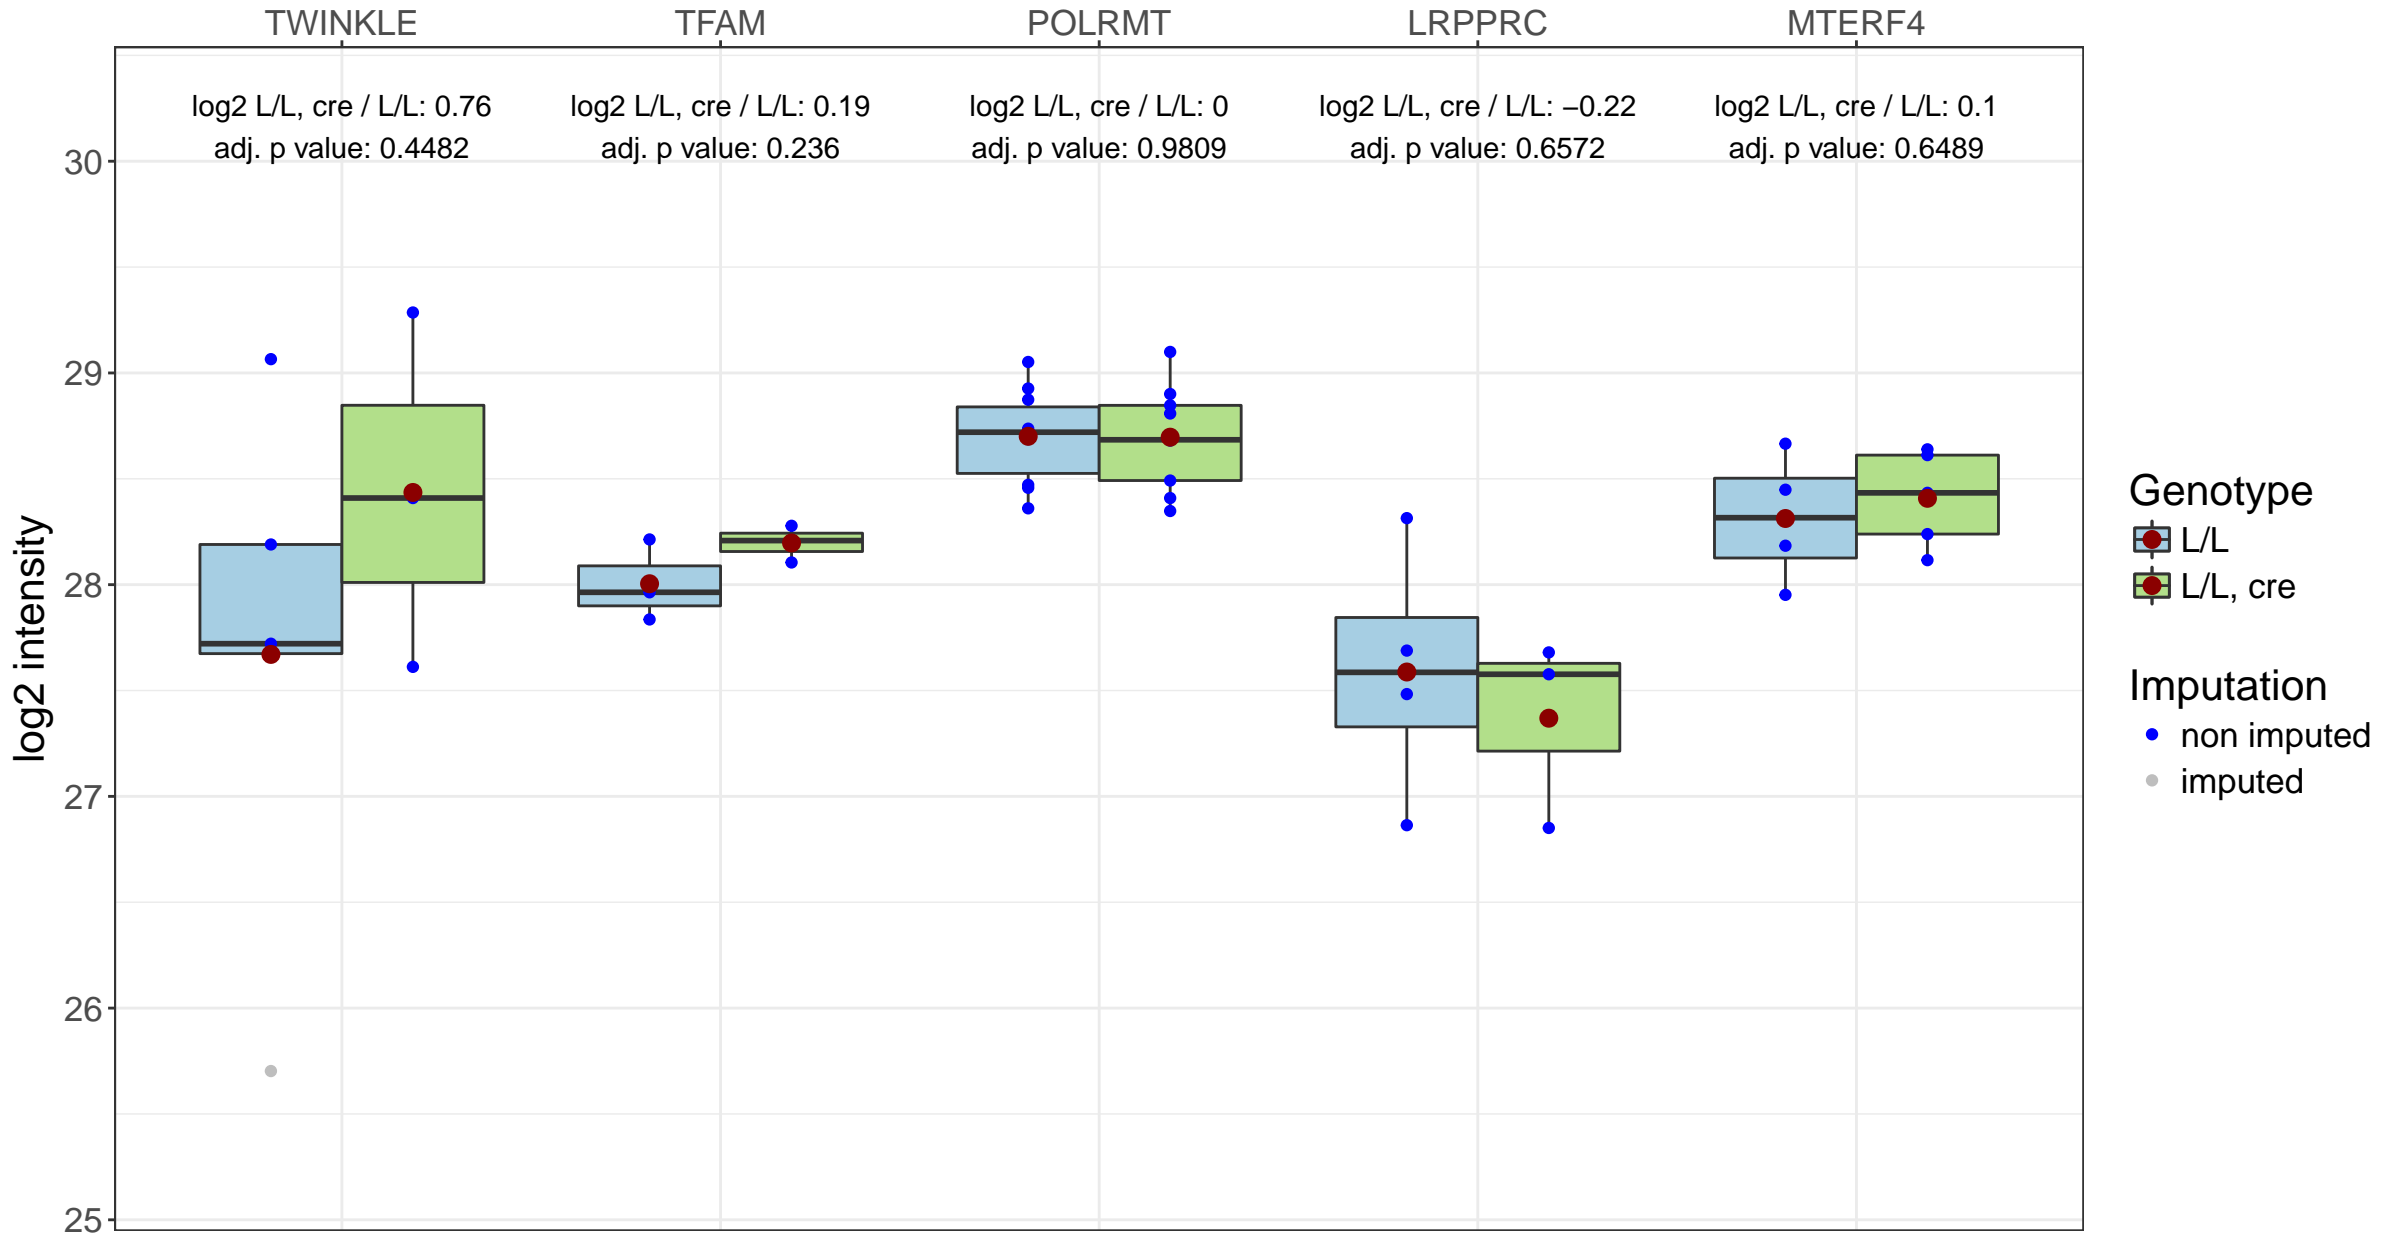

# MFN1 / Q811U4

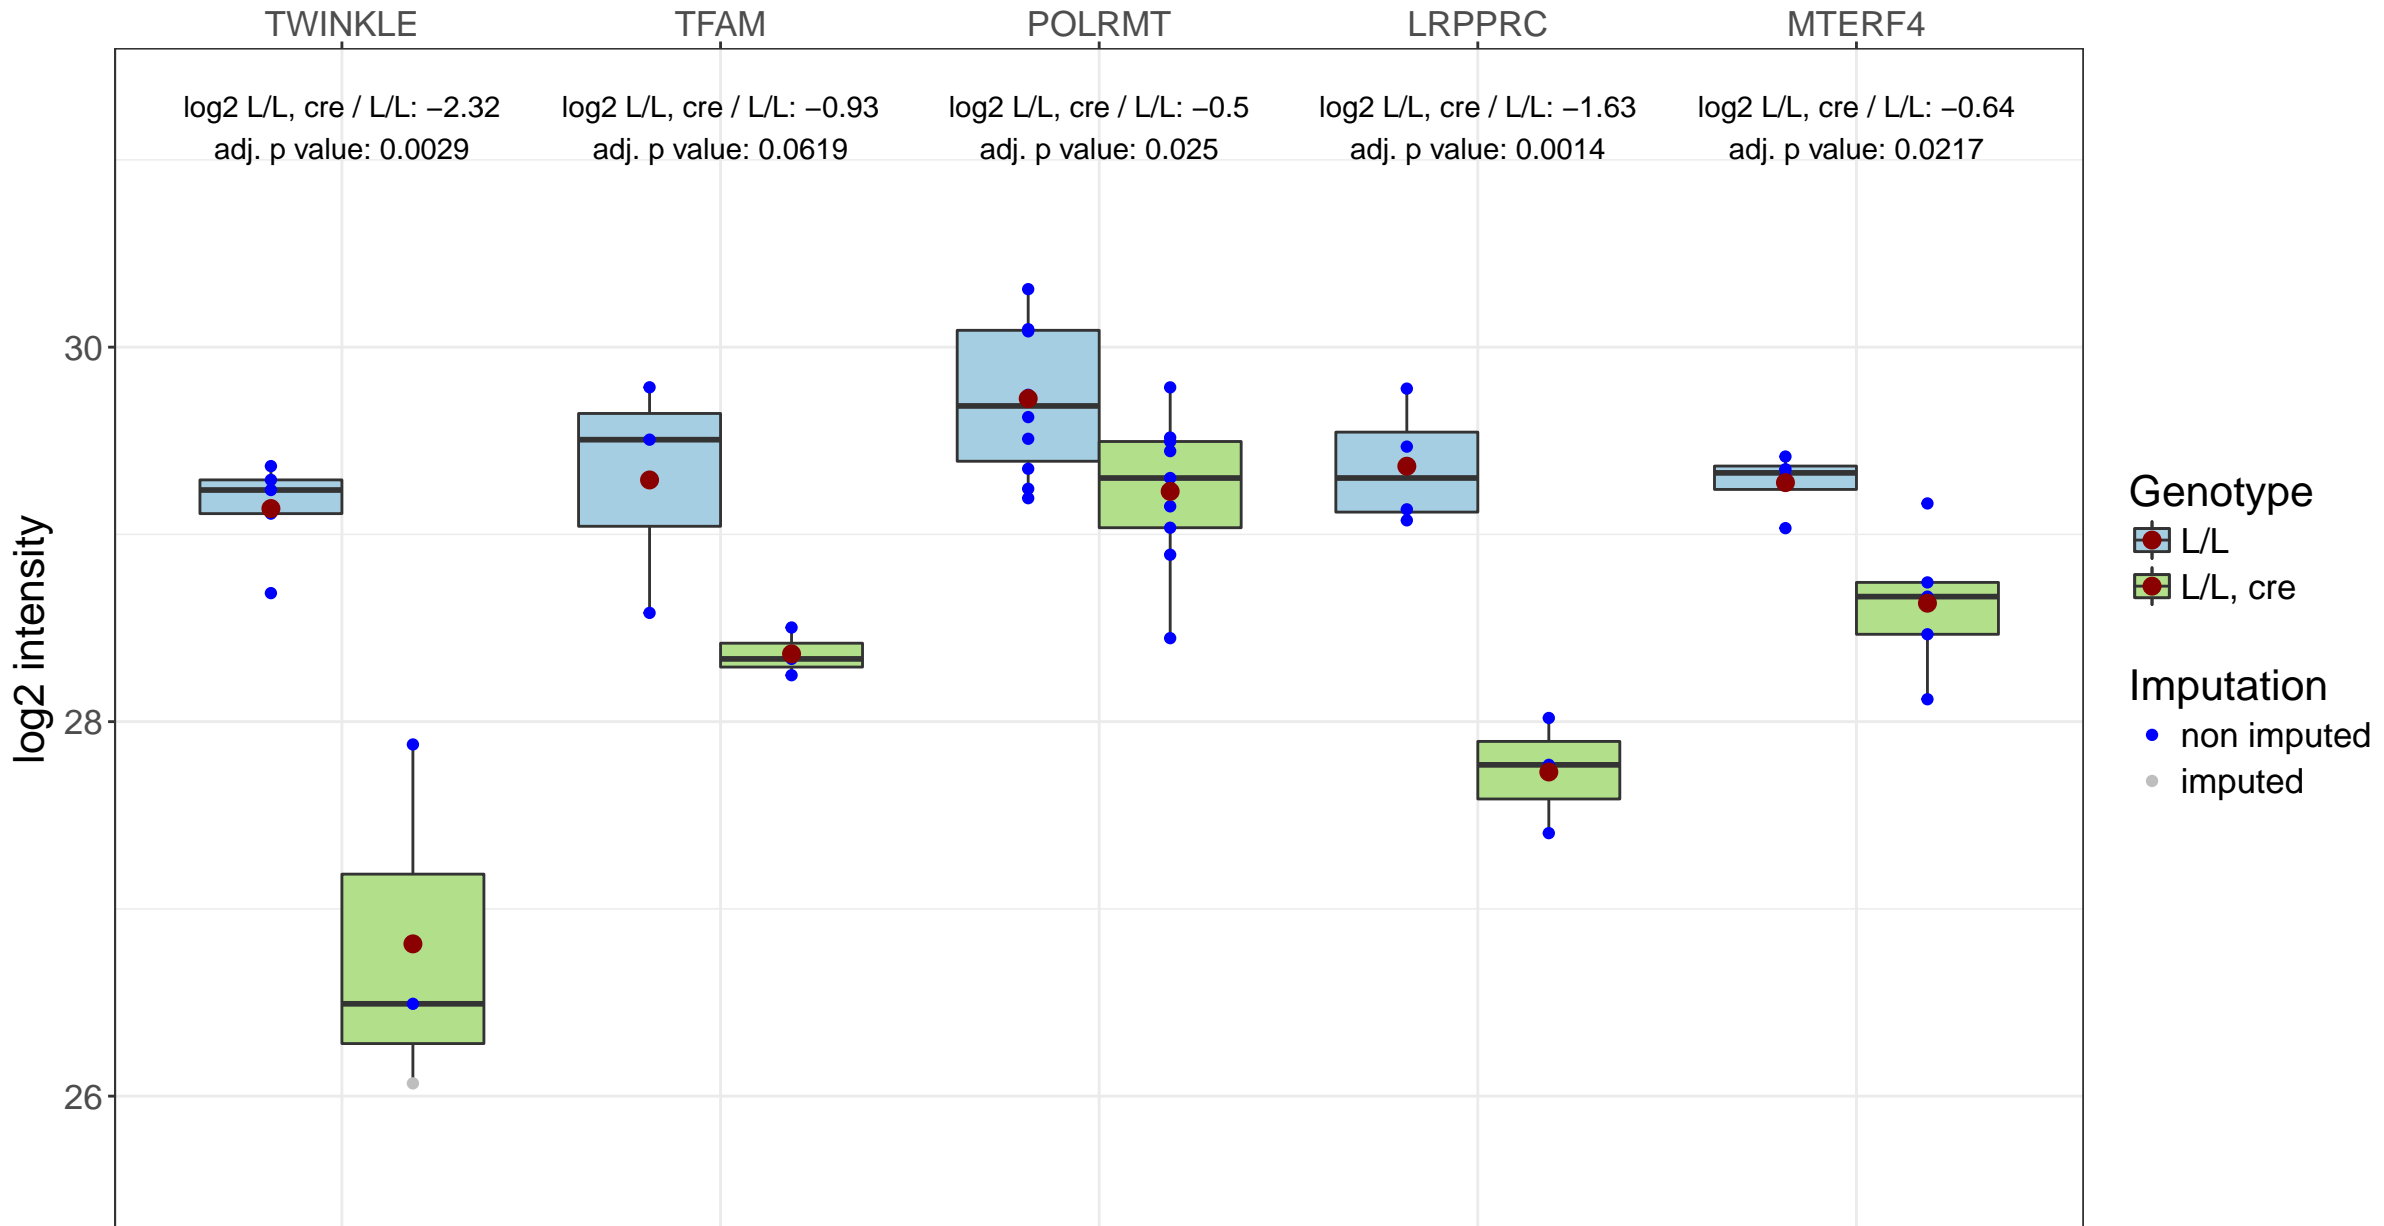

# MFN2 / Q80U63

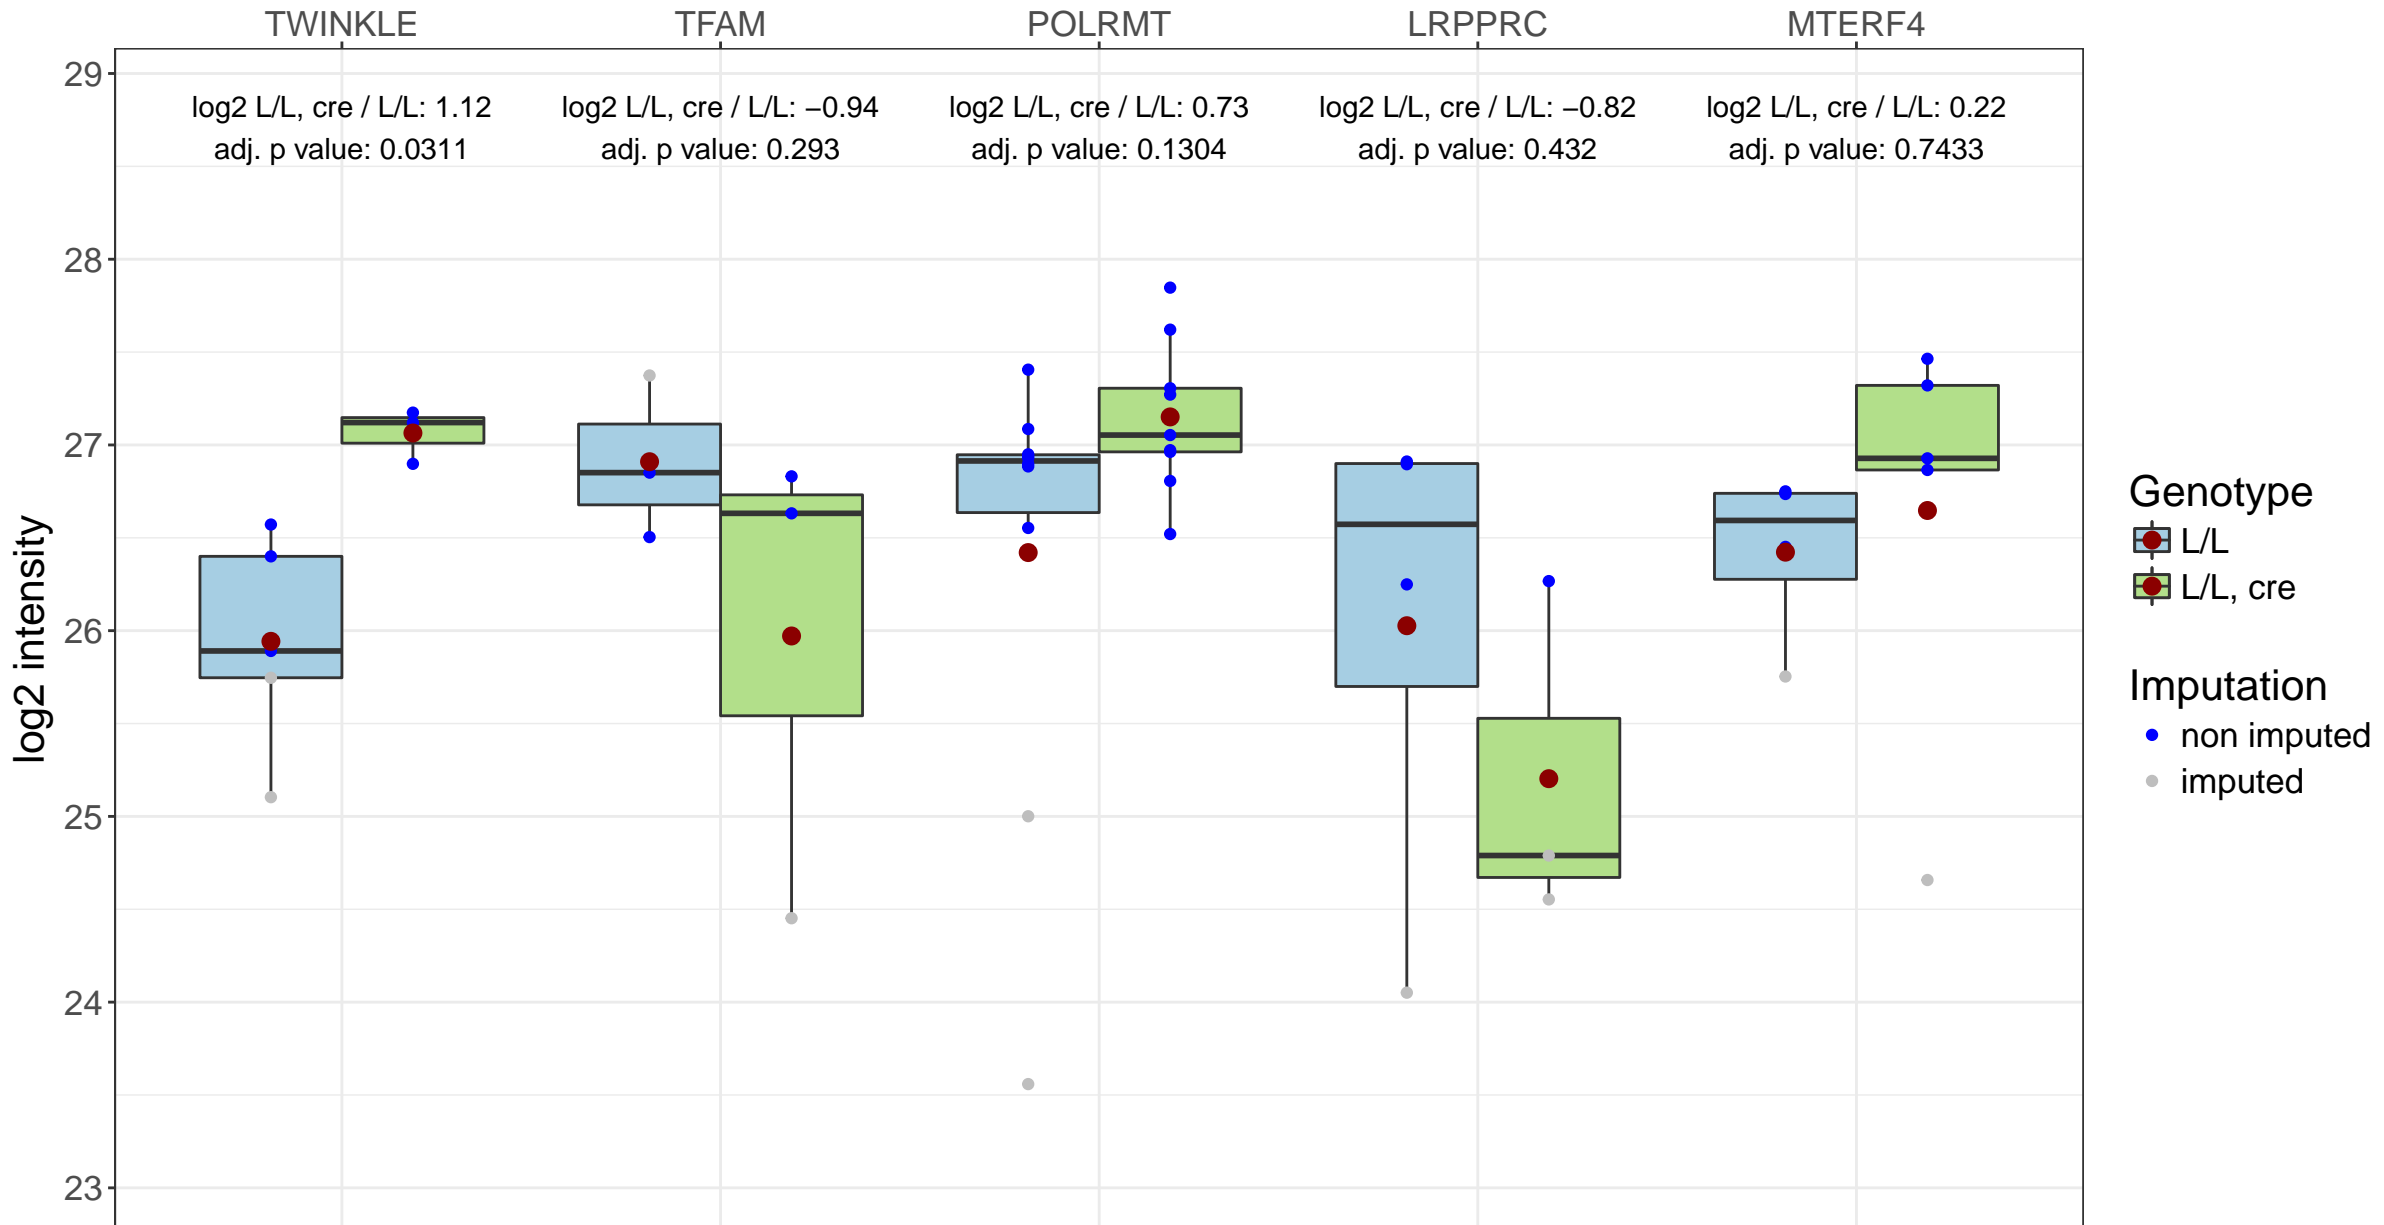

# MGST3 / Q9CPU4

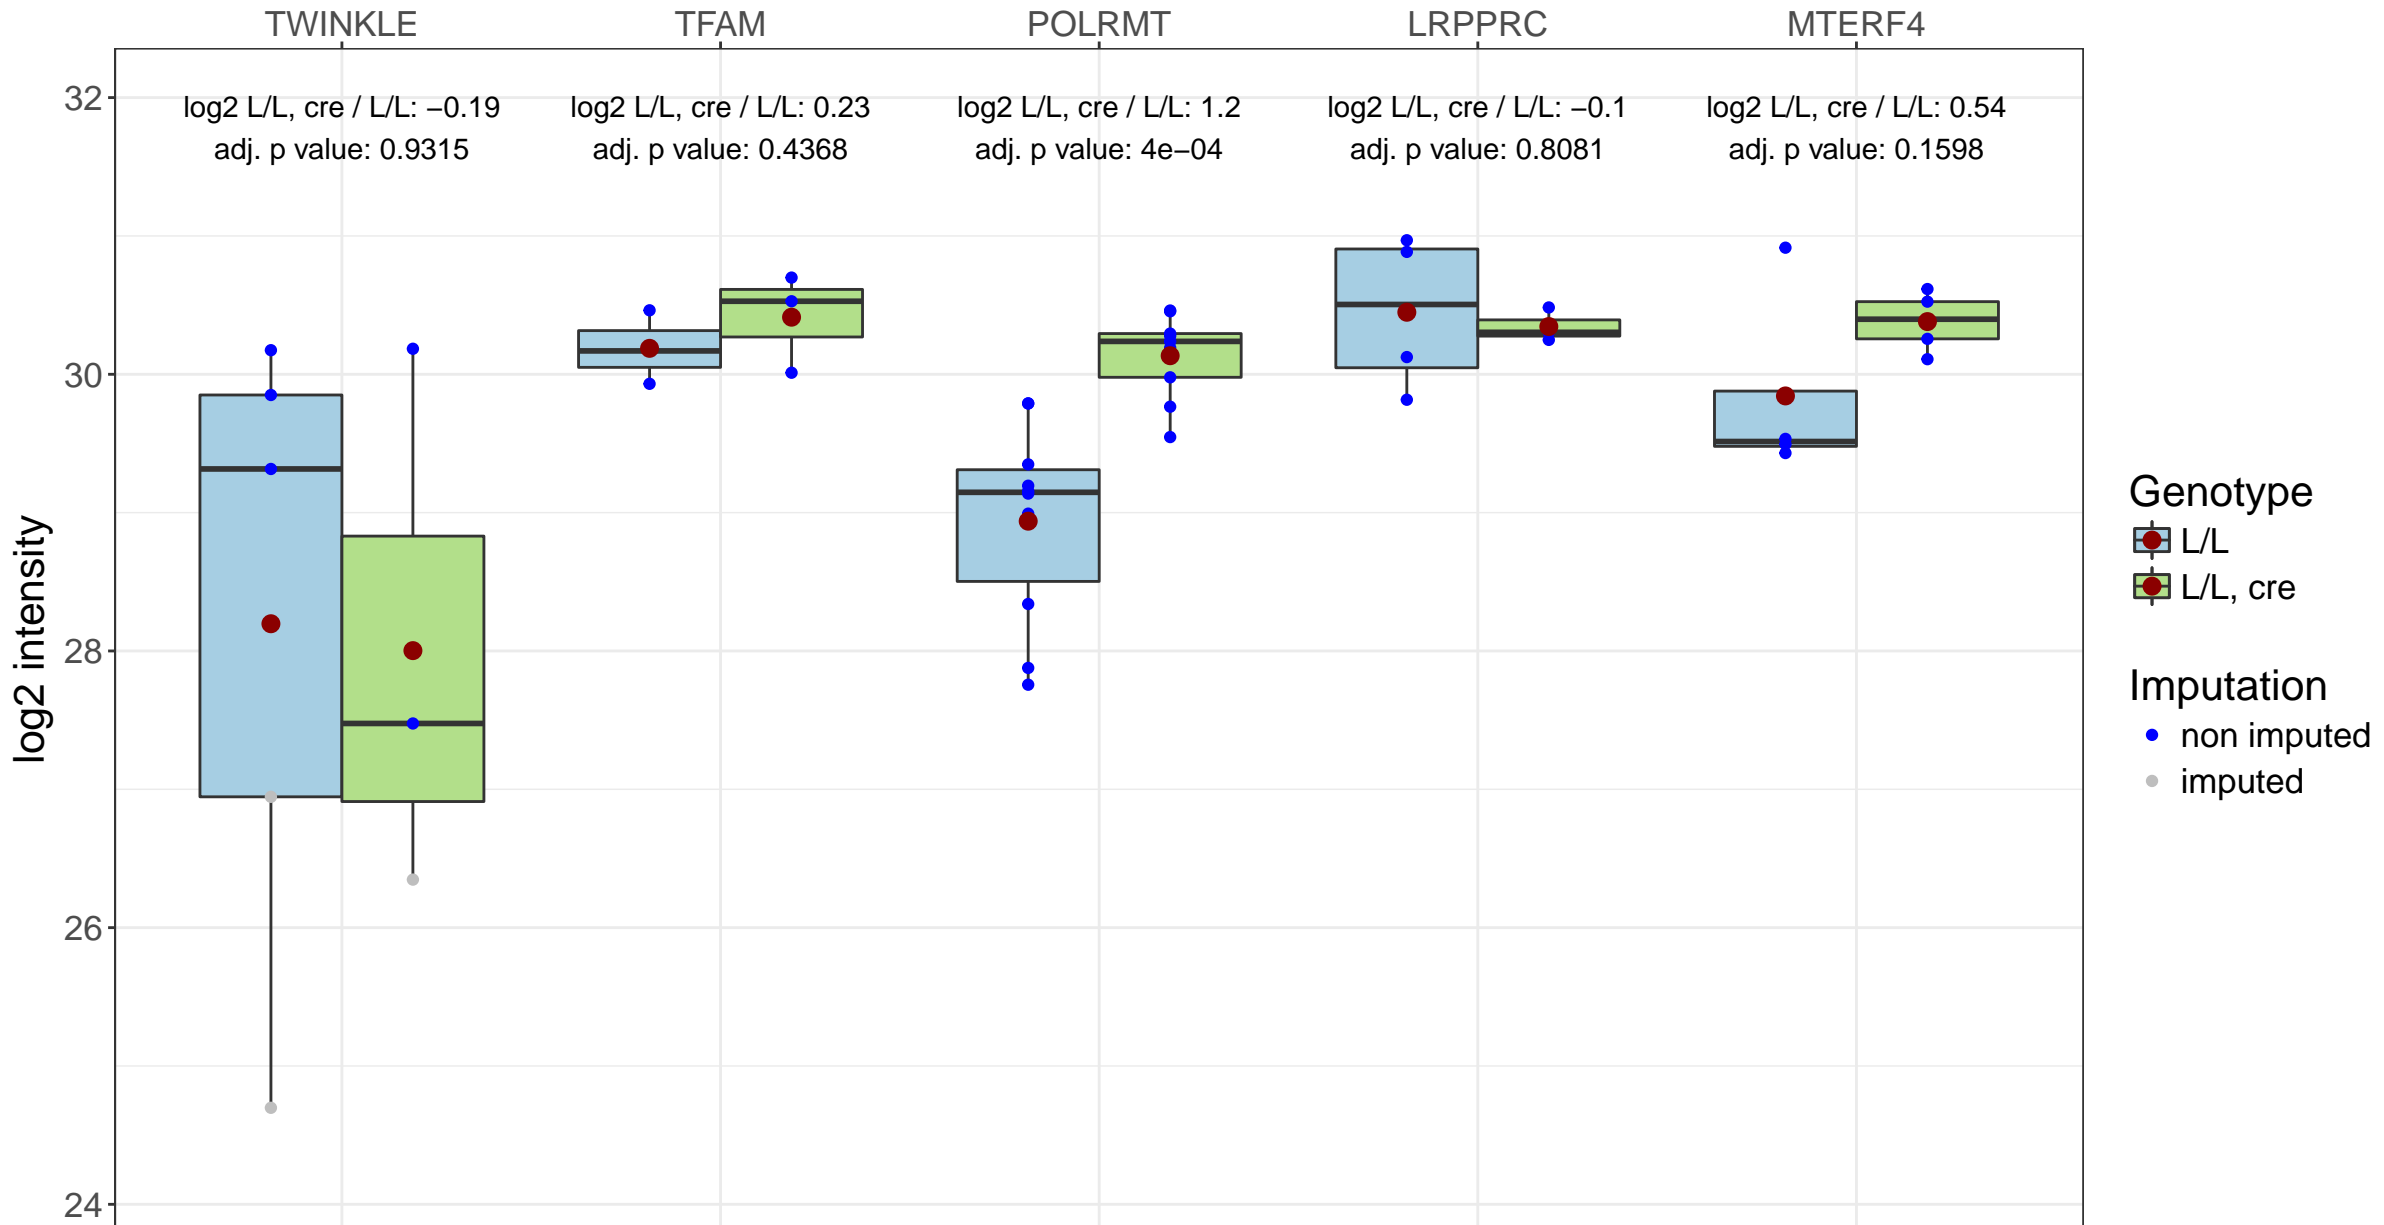

# MICU1 / Q8VCX5

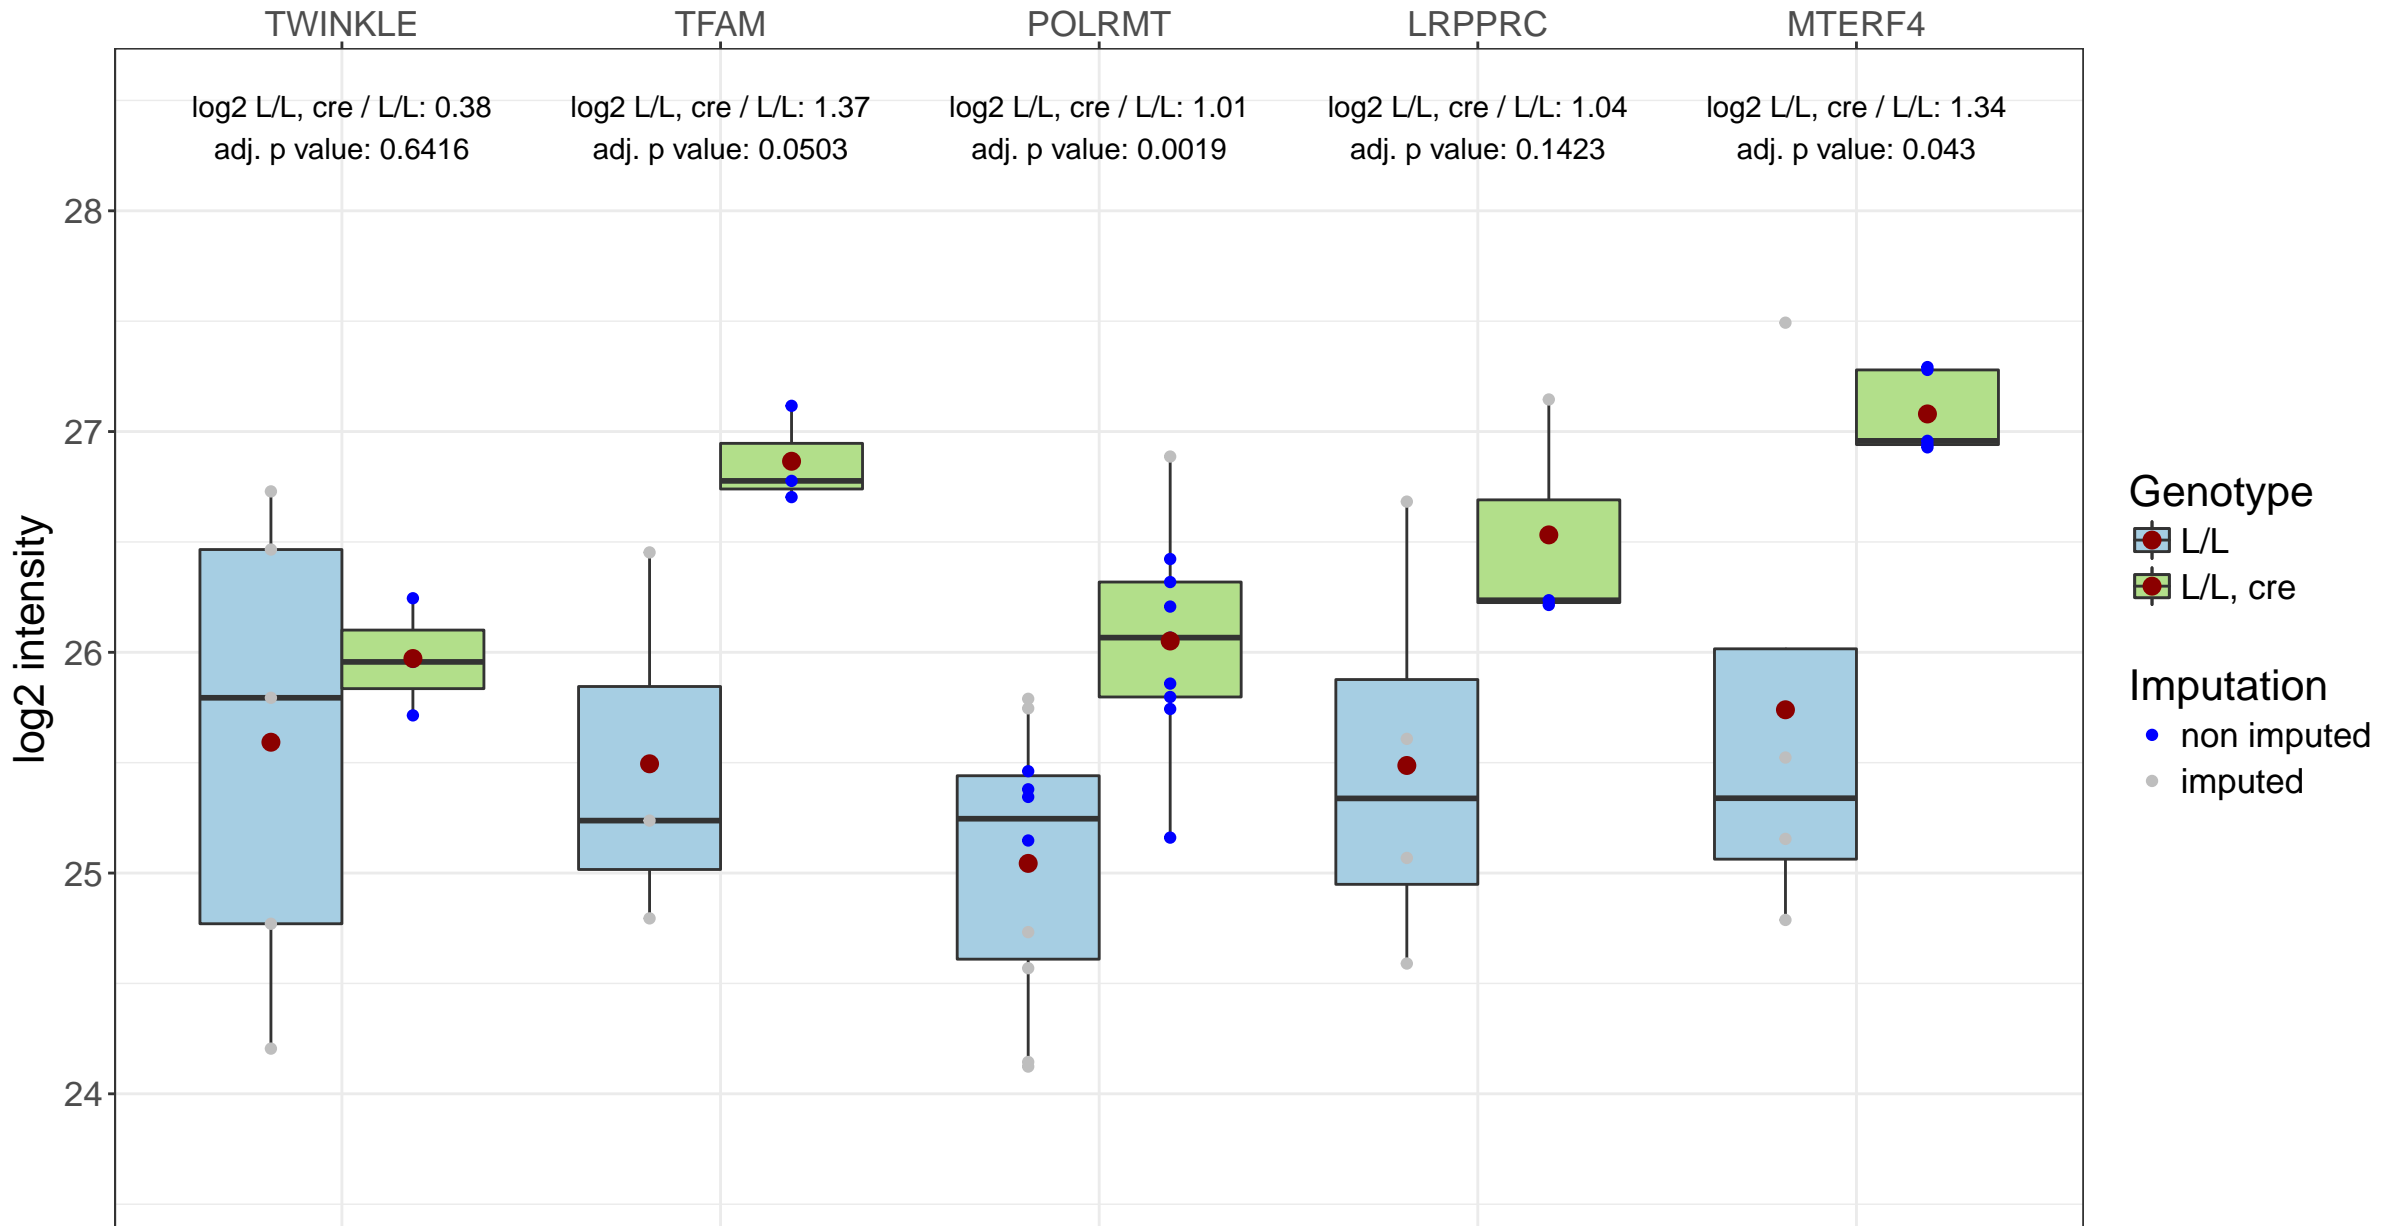



# MIEN1 / Q9CQ86

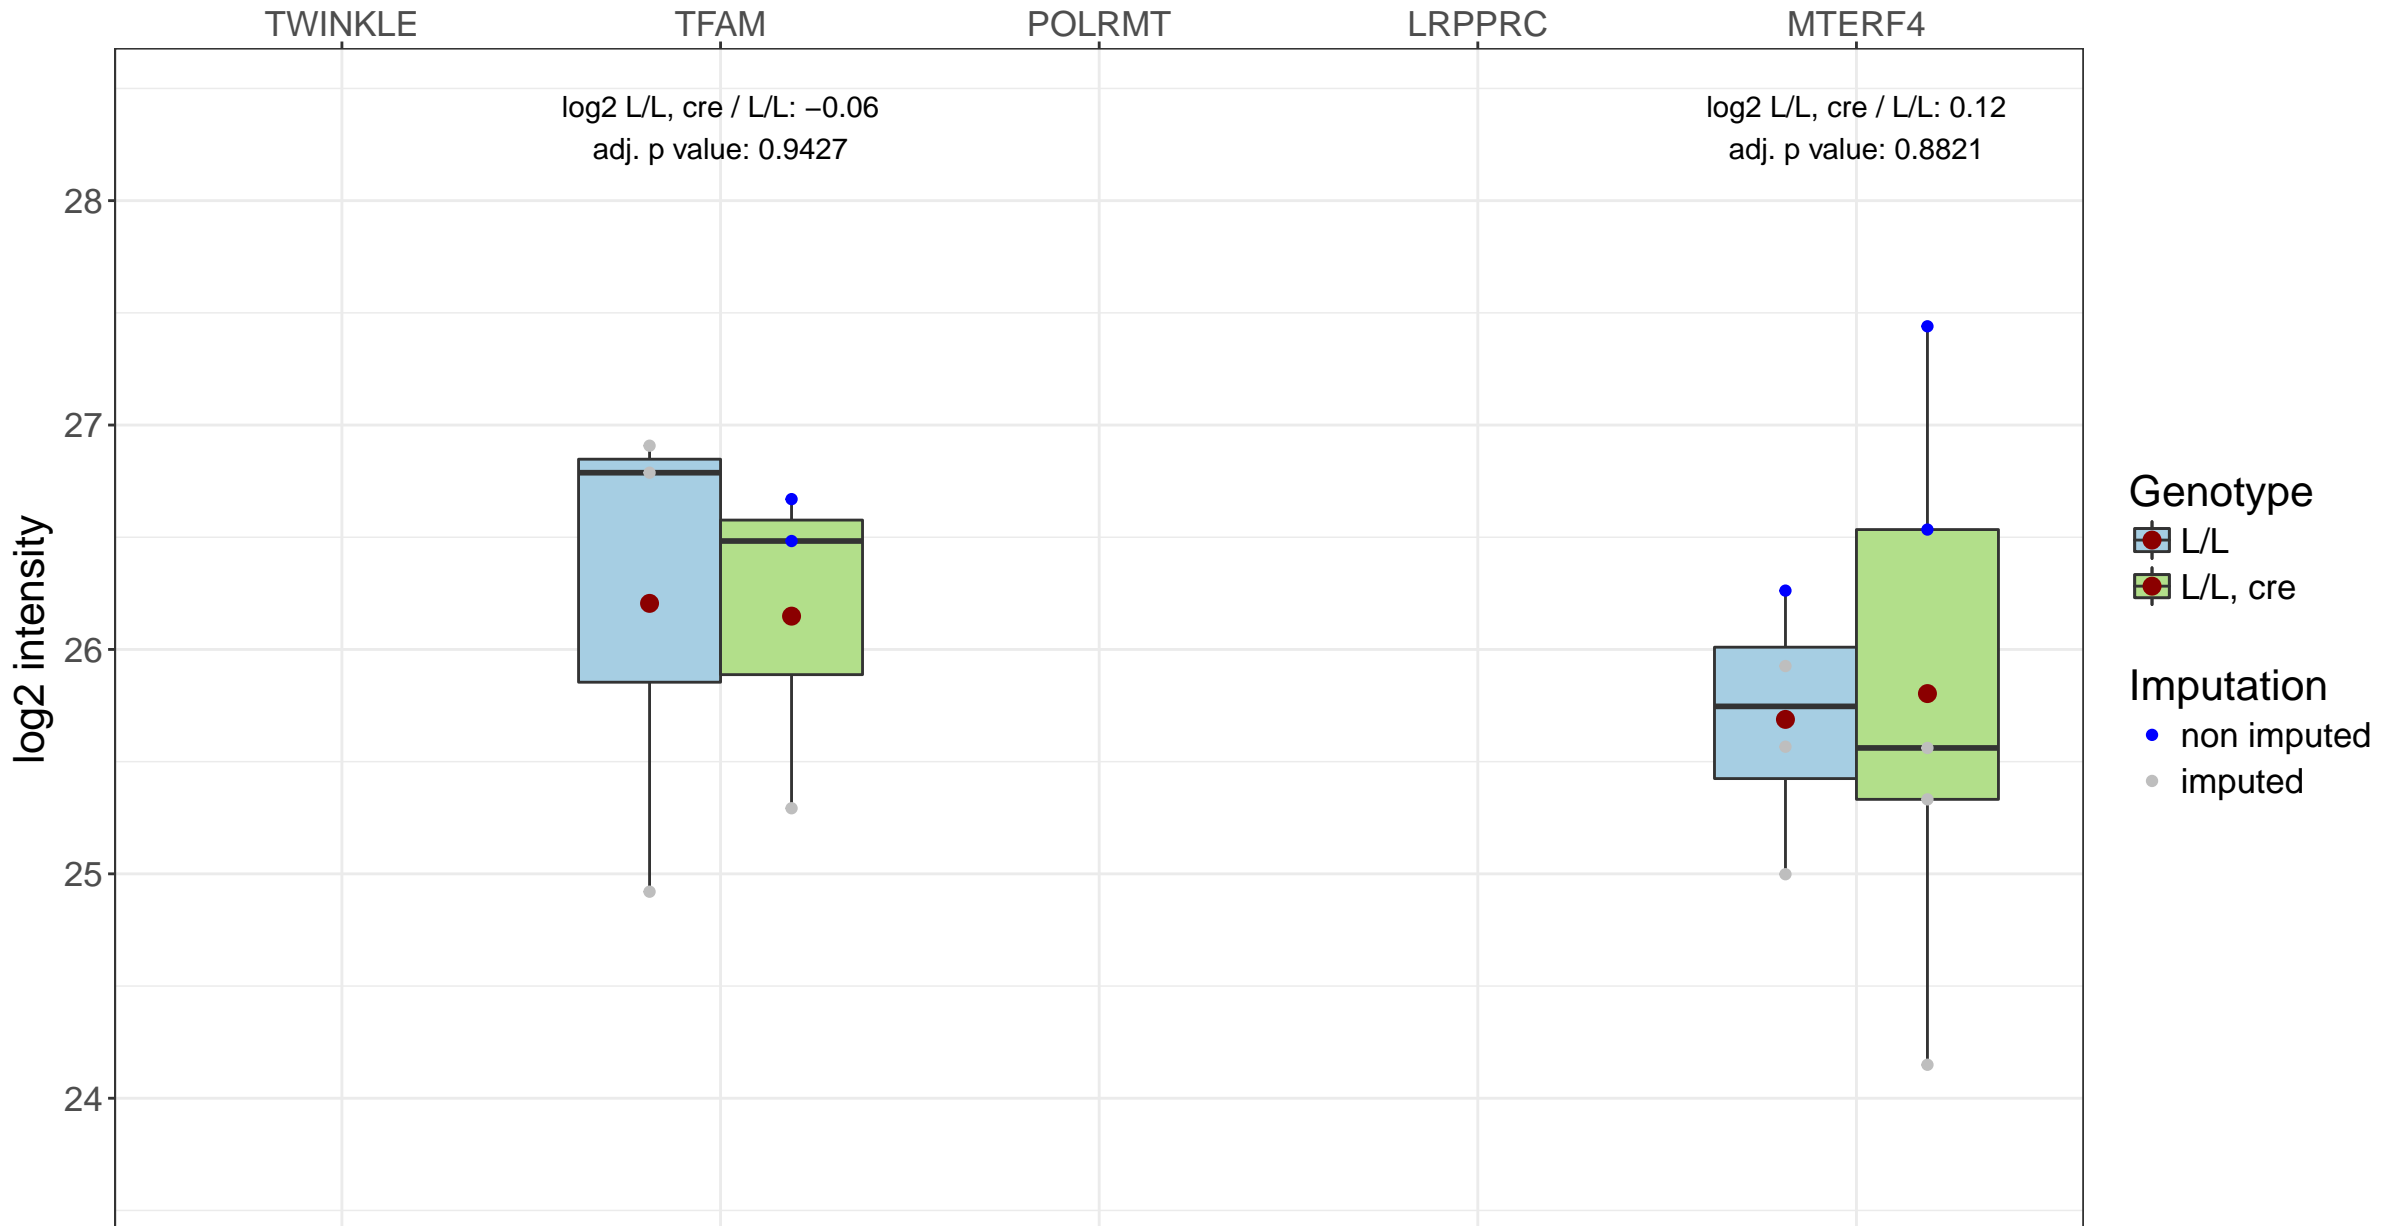

# MIF / P34884

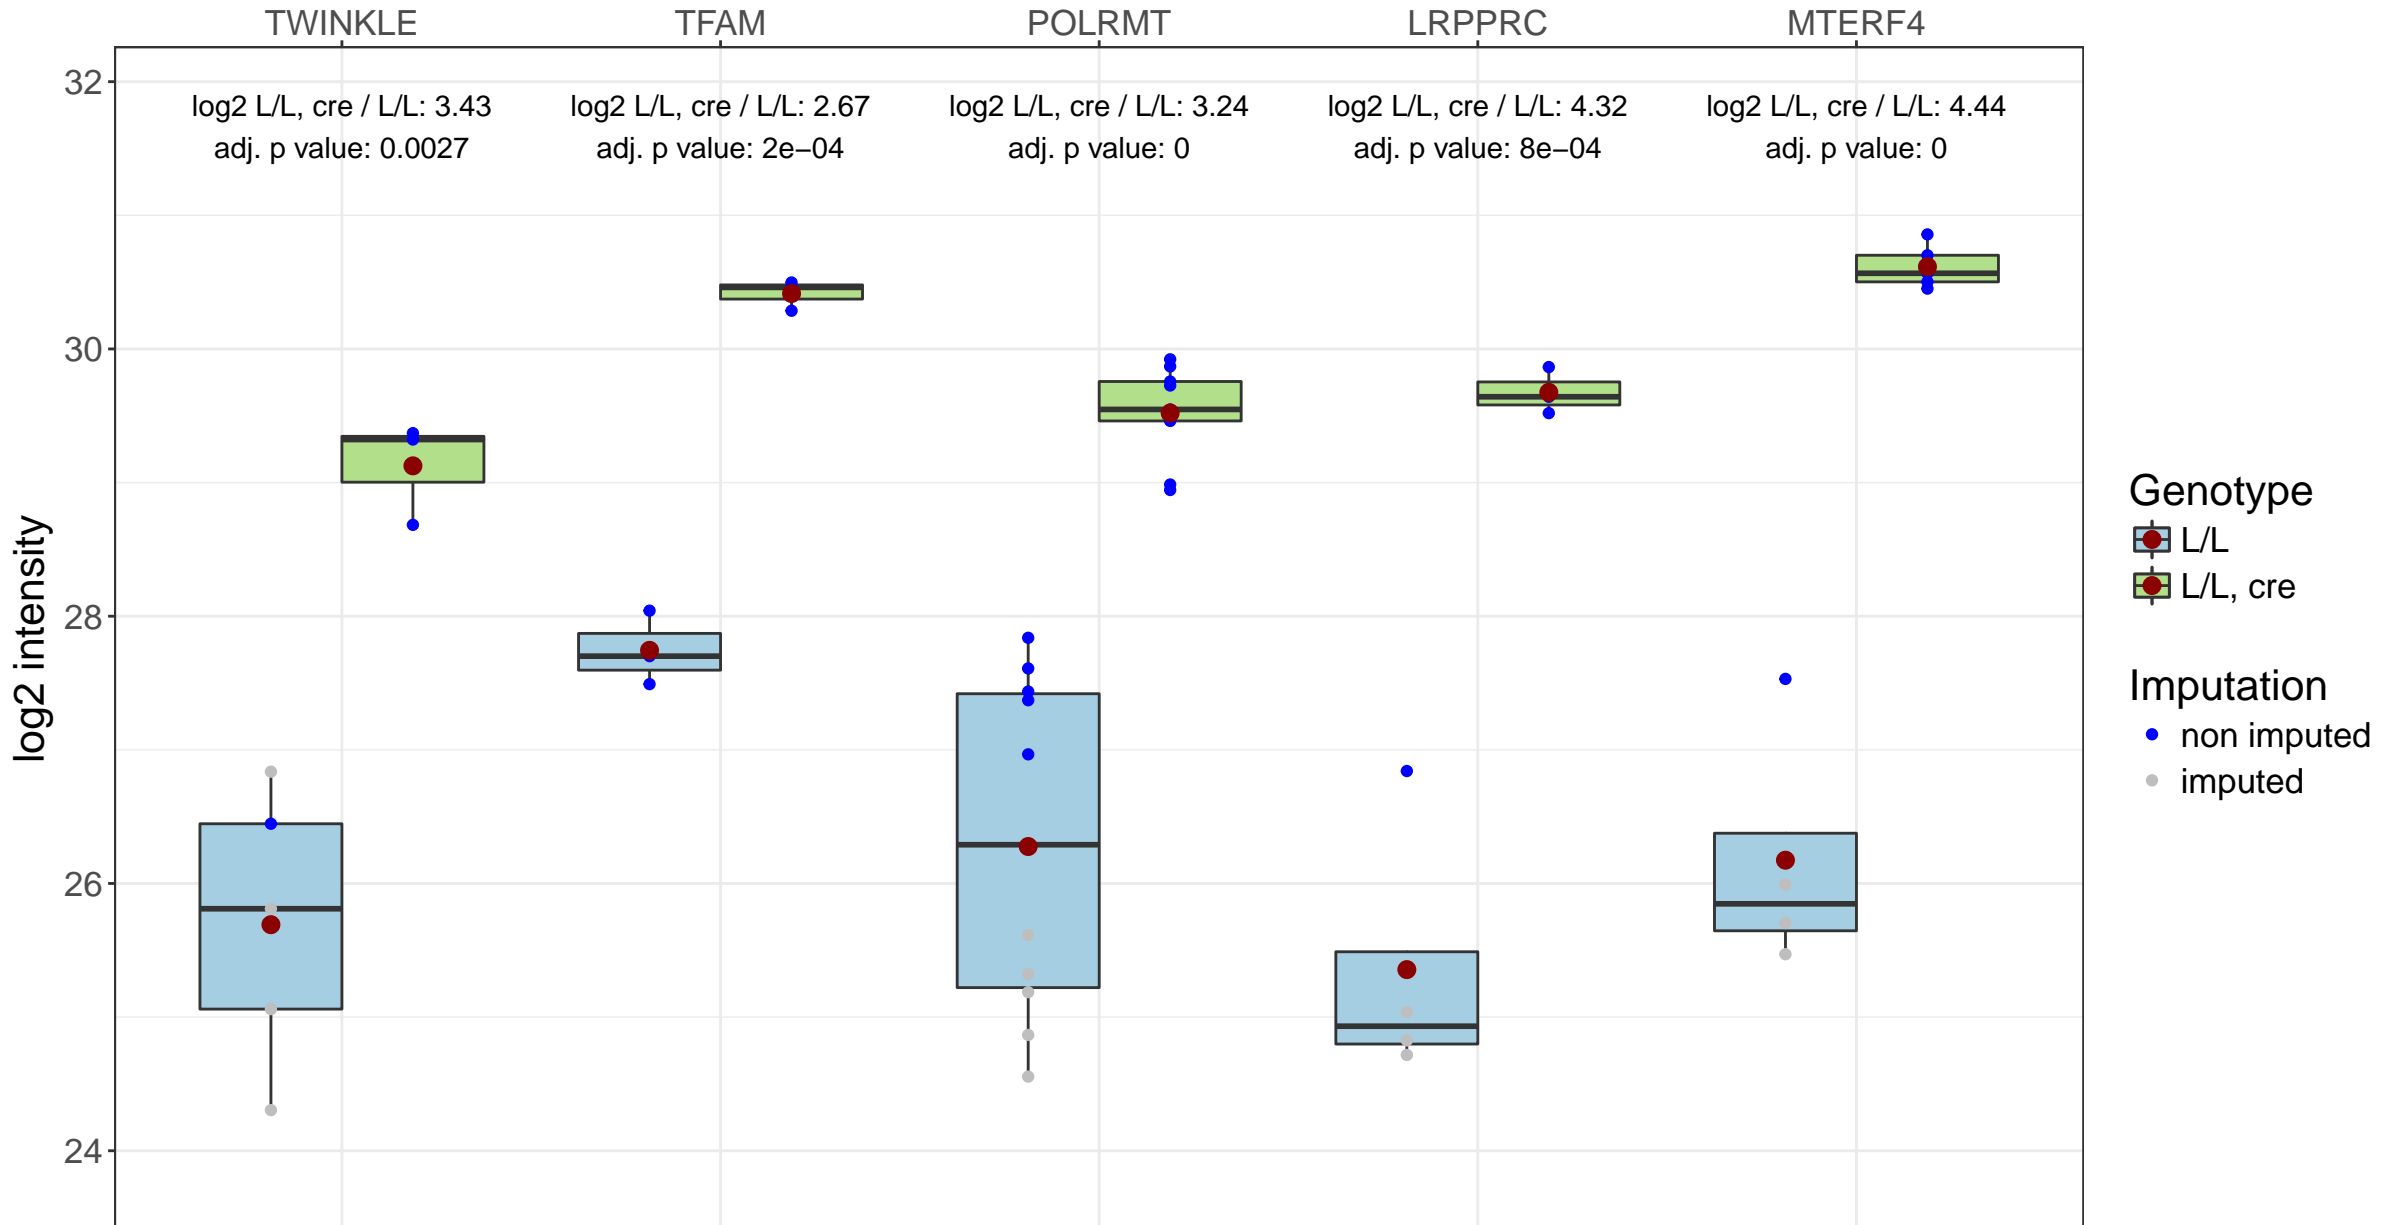

# MINOS1 / Q7TNS2

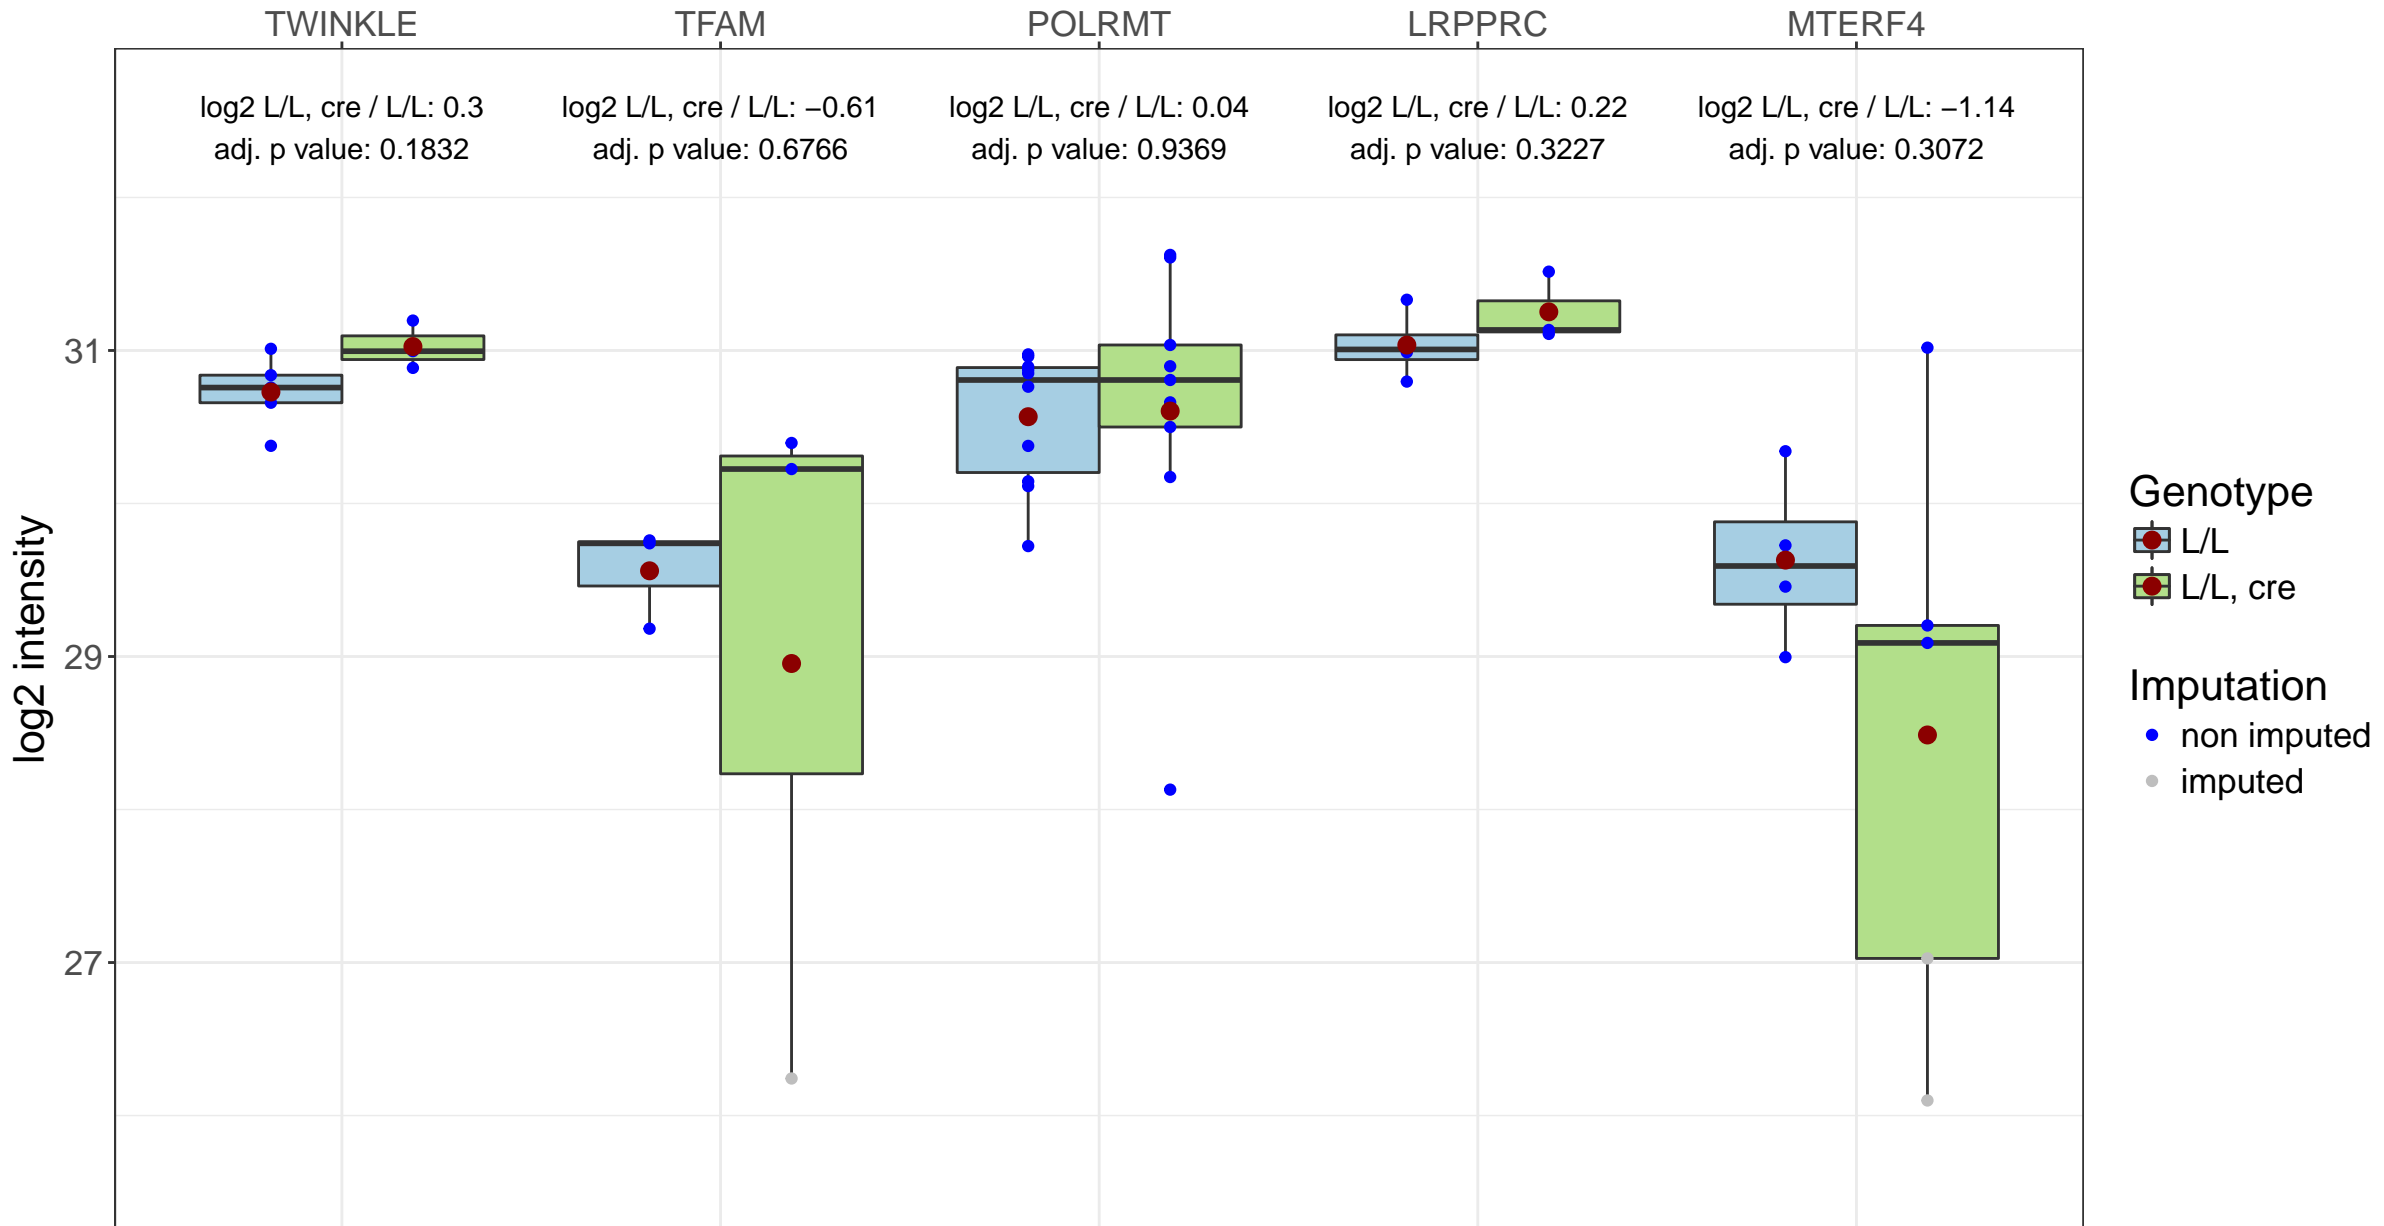

# MIPEP / A6H611

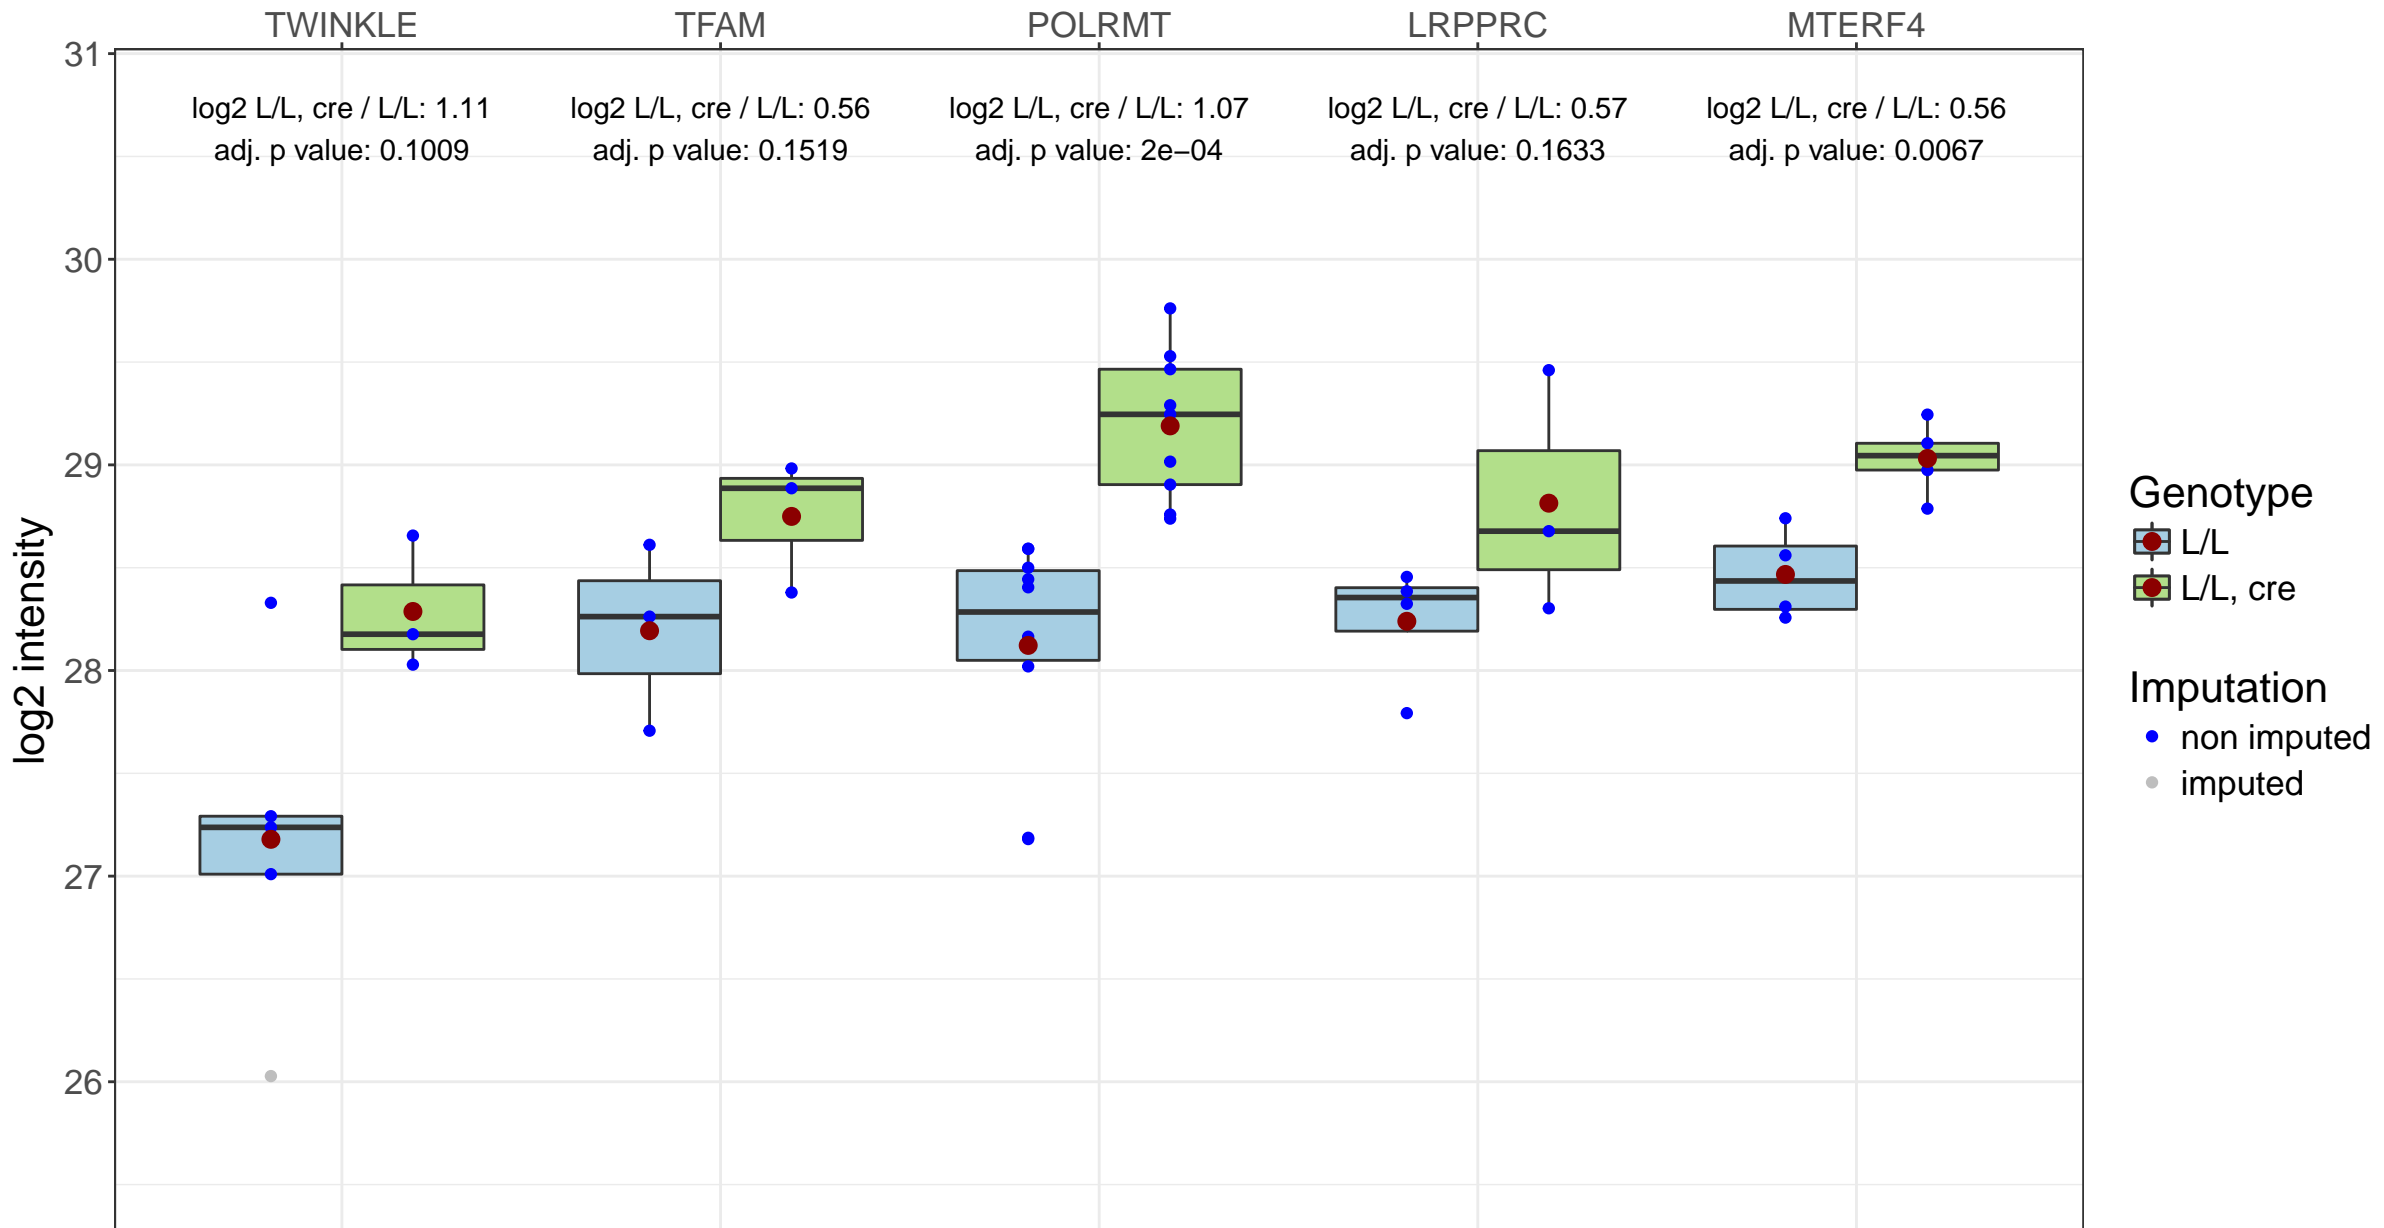

# MLYCD / Q99J39-2

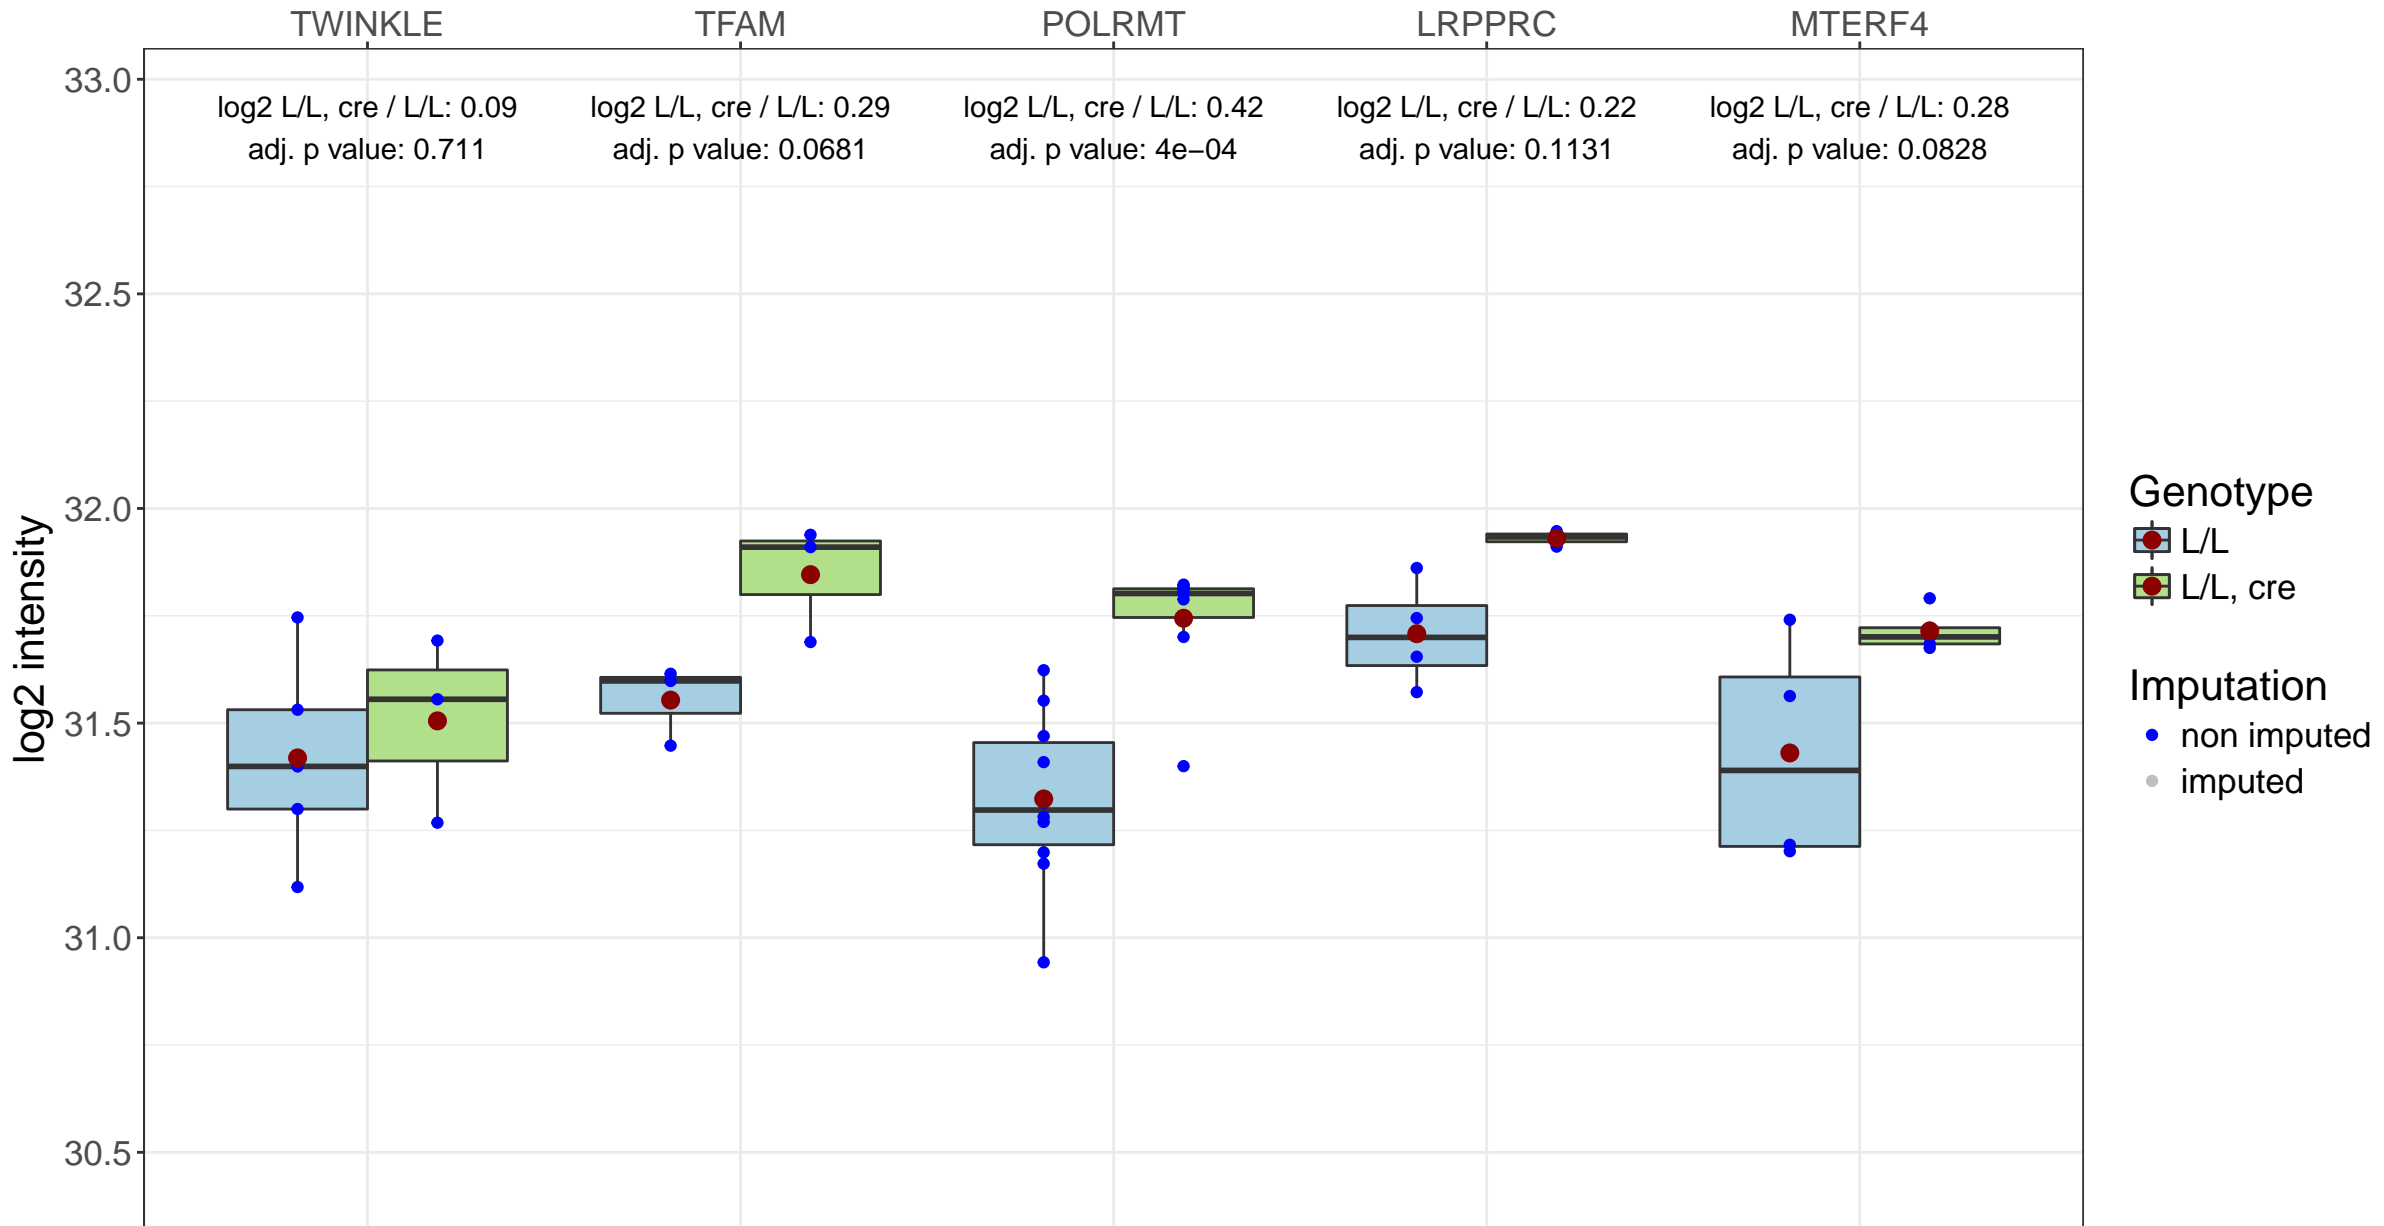

# MMAA / Q8C7H1

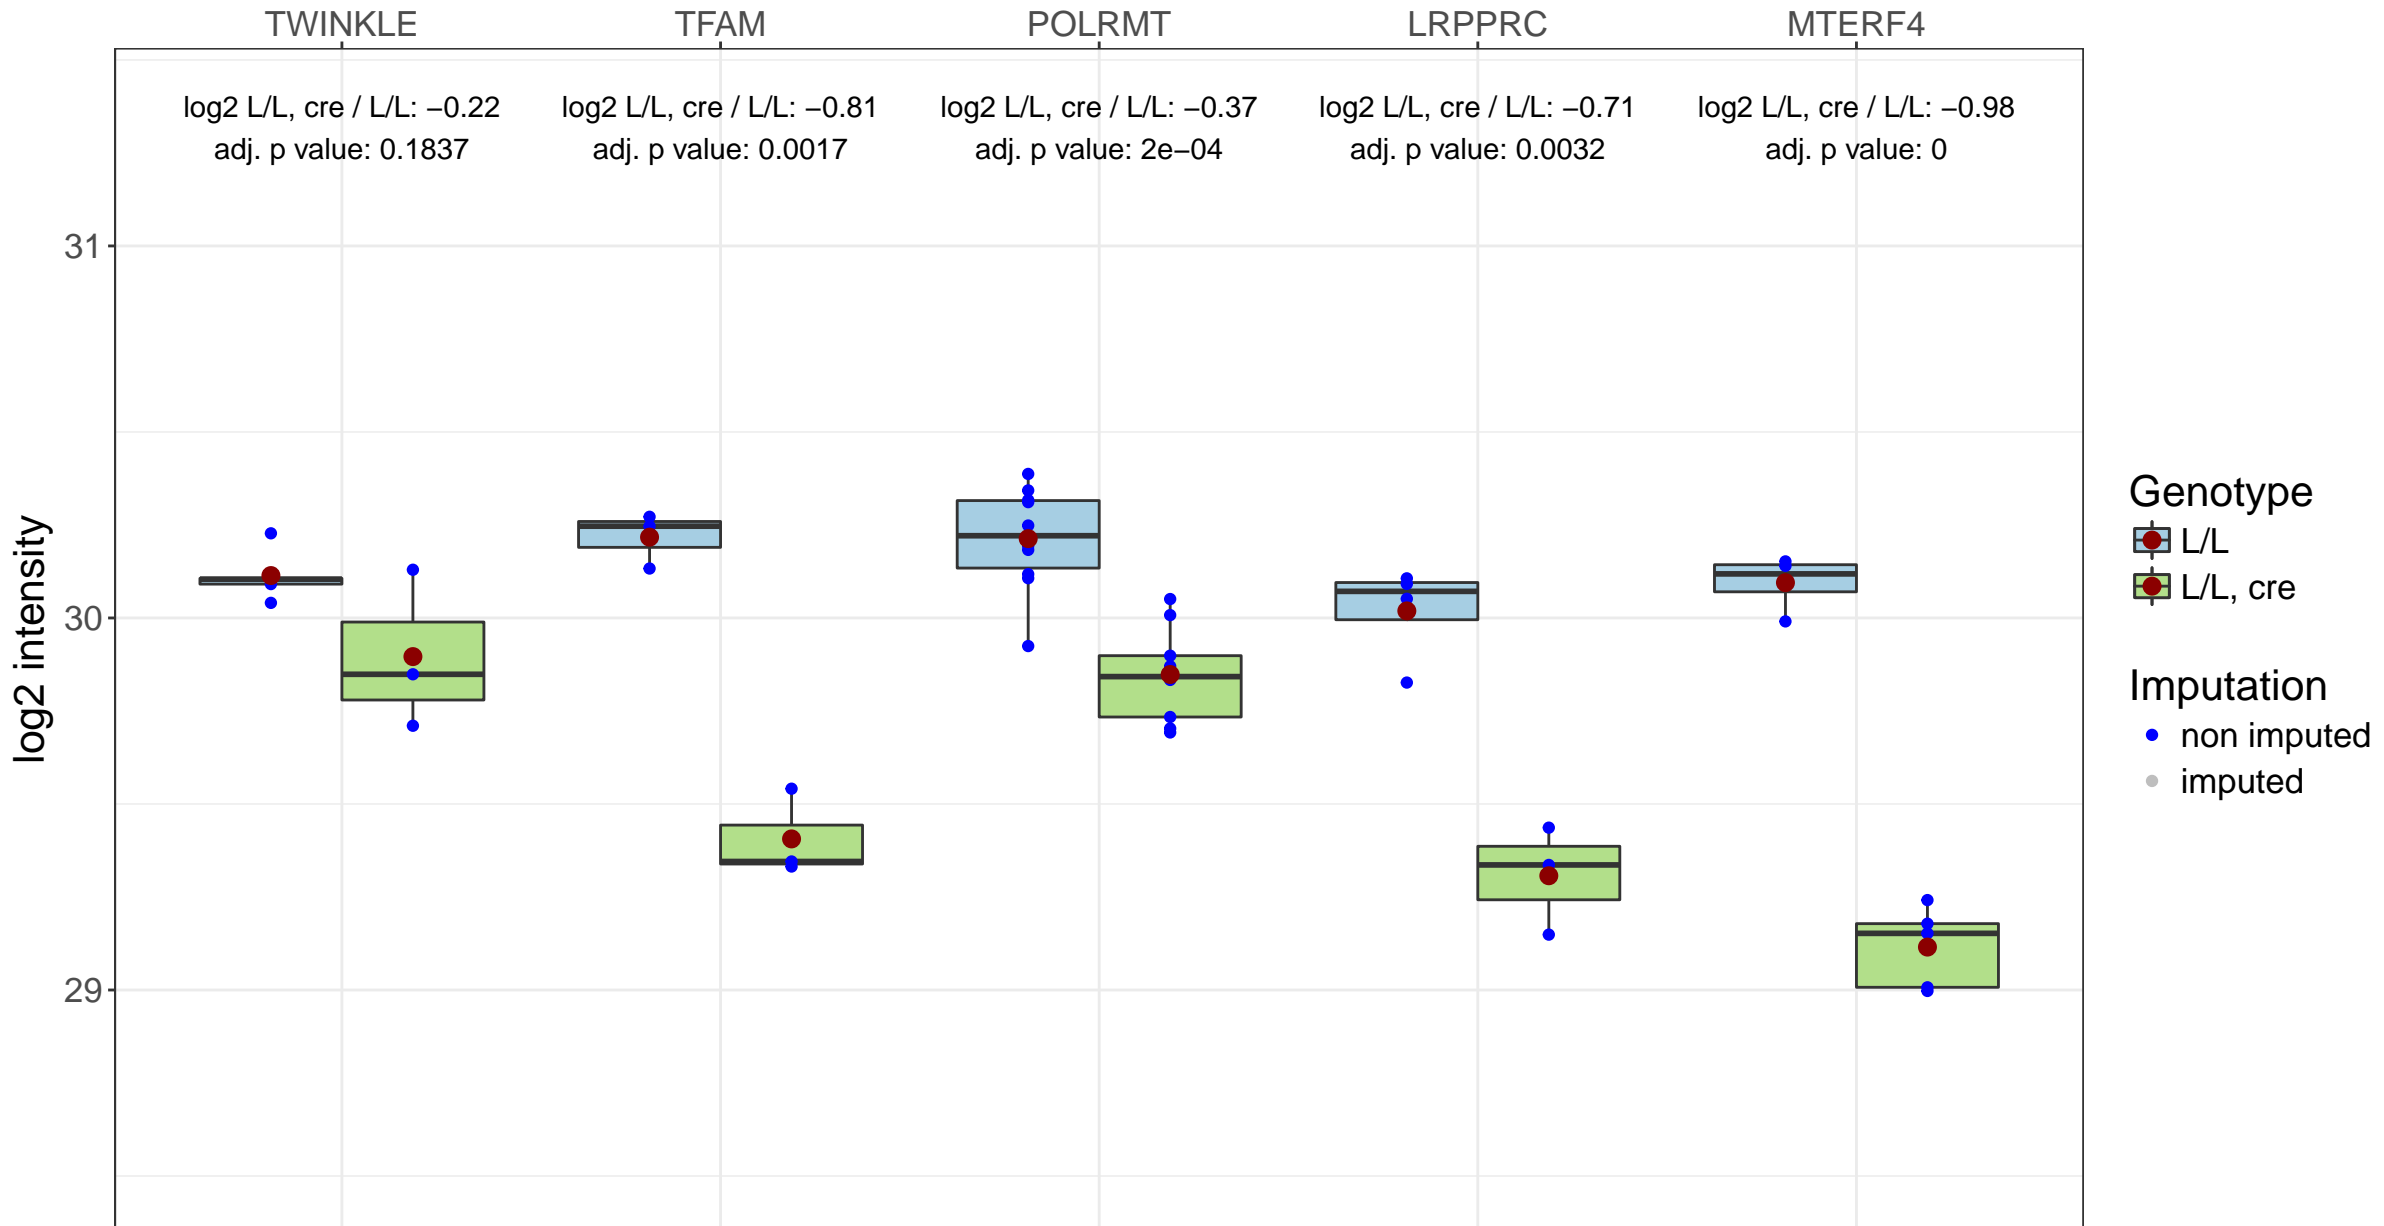

# MMAB / Q9D273

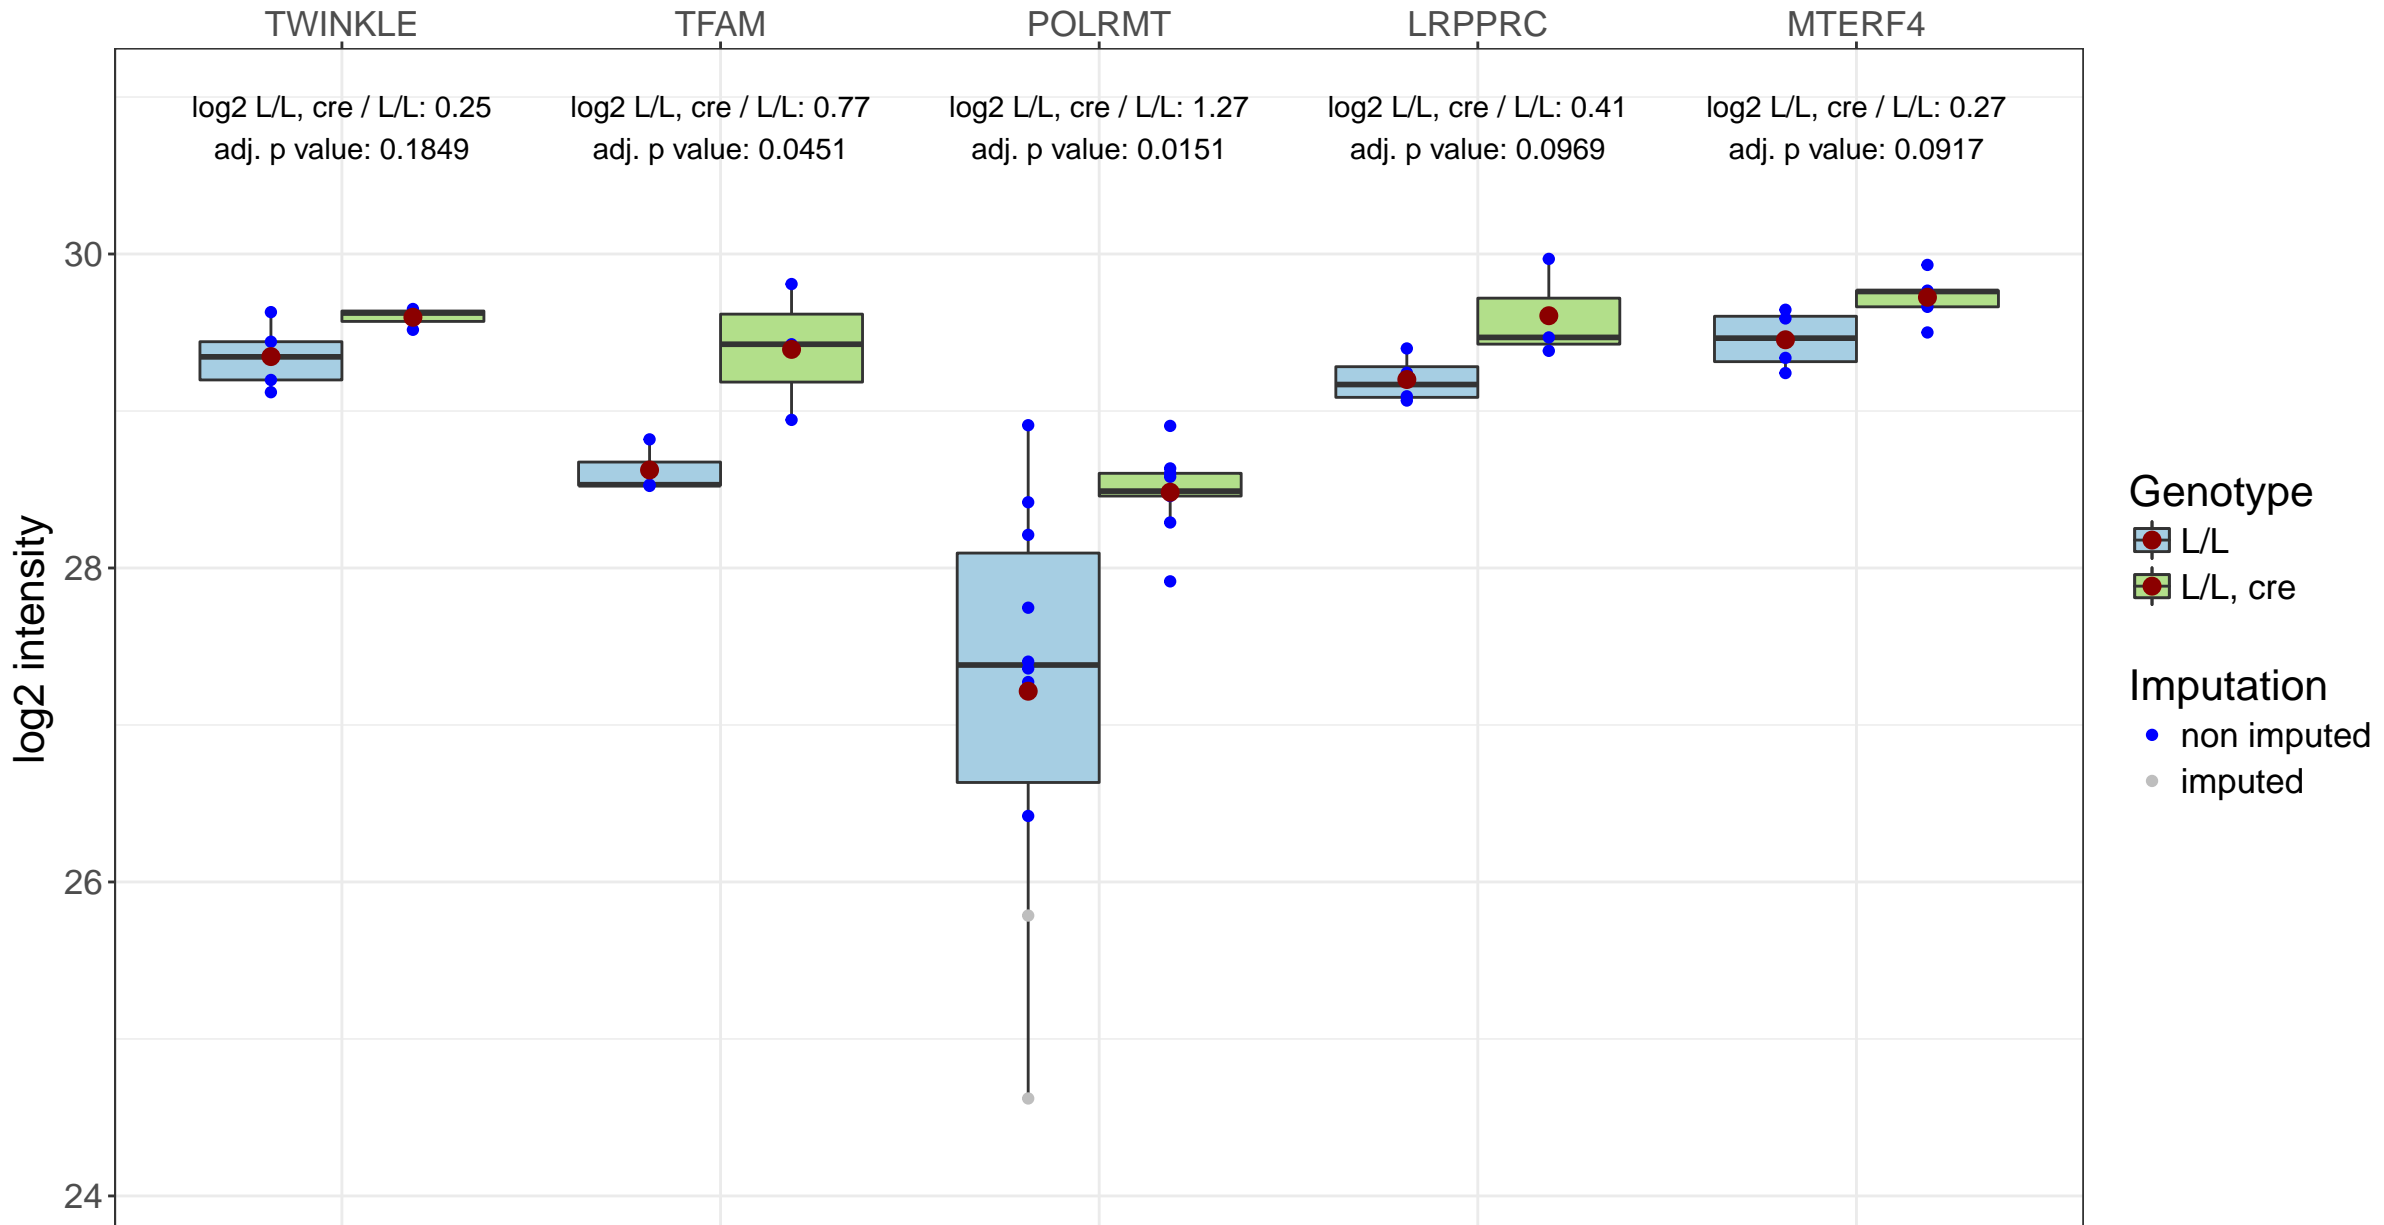

# MOCS1 / Q5RKZ7

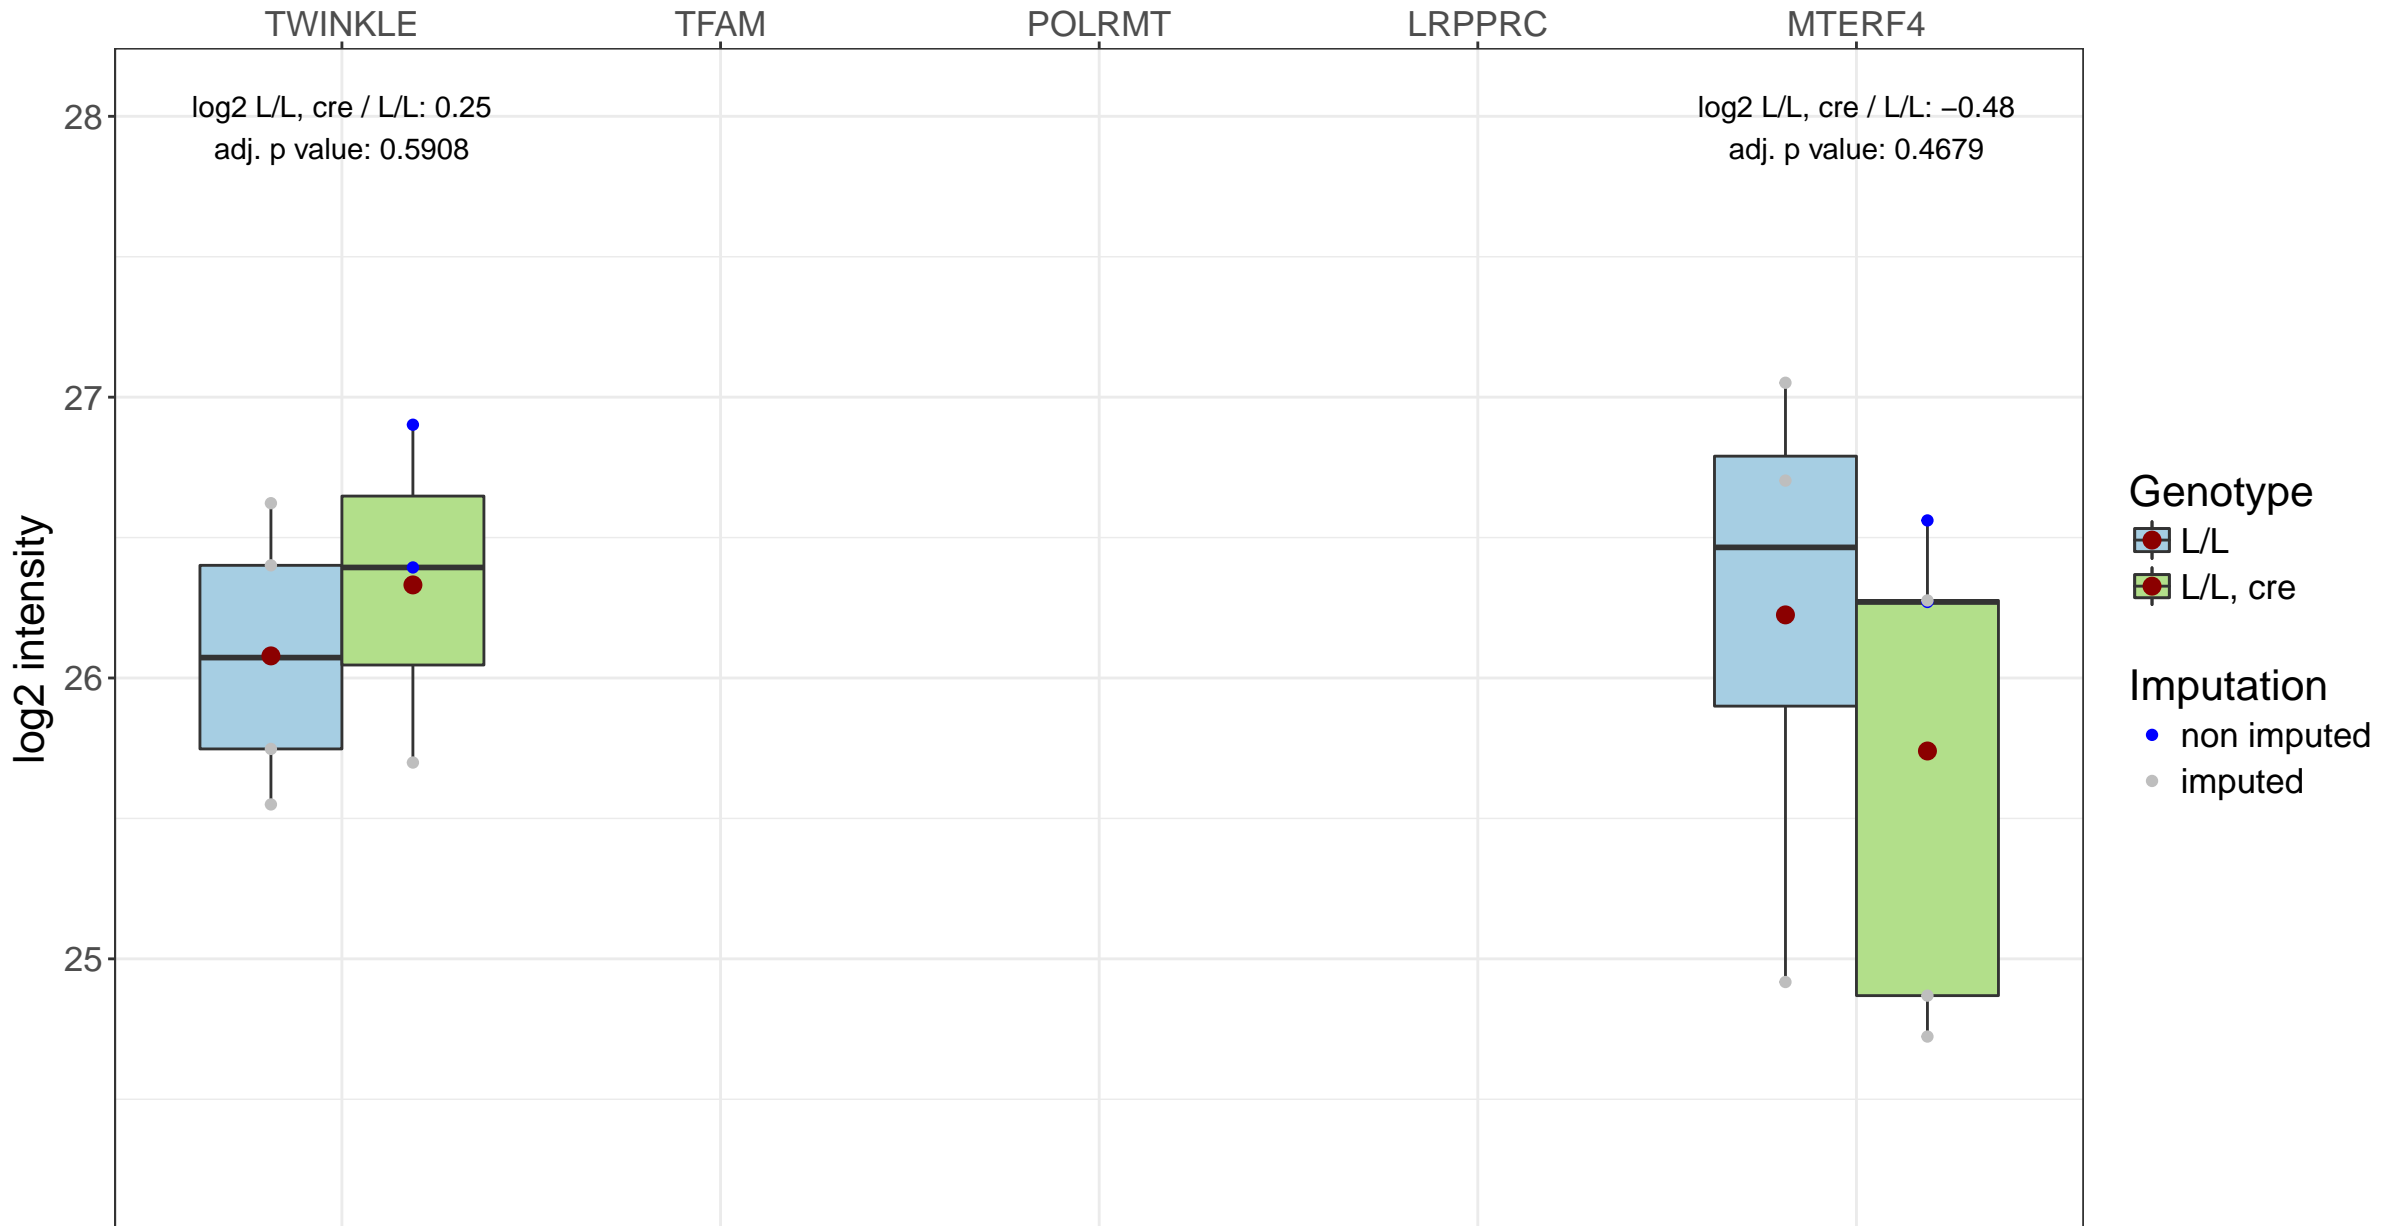



# MP68 / P56379

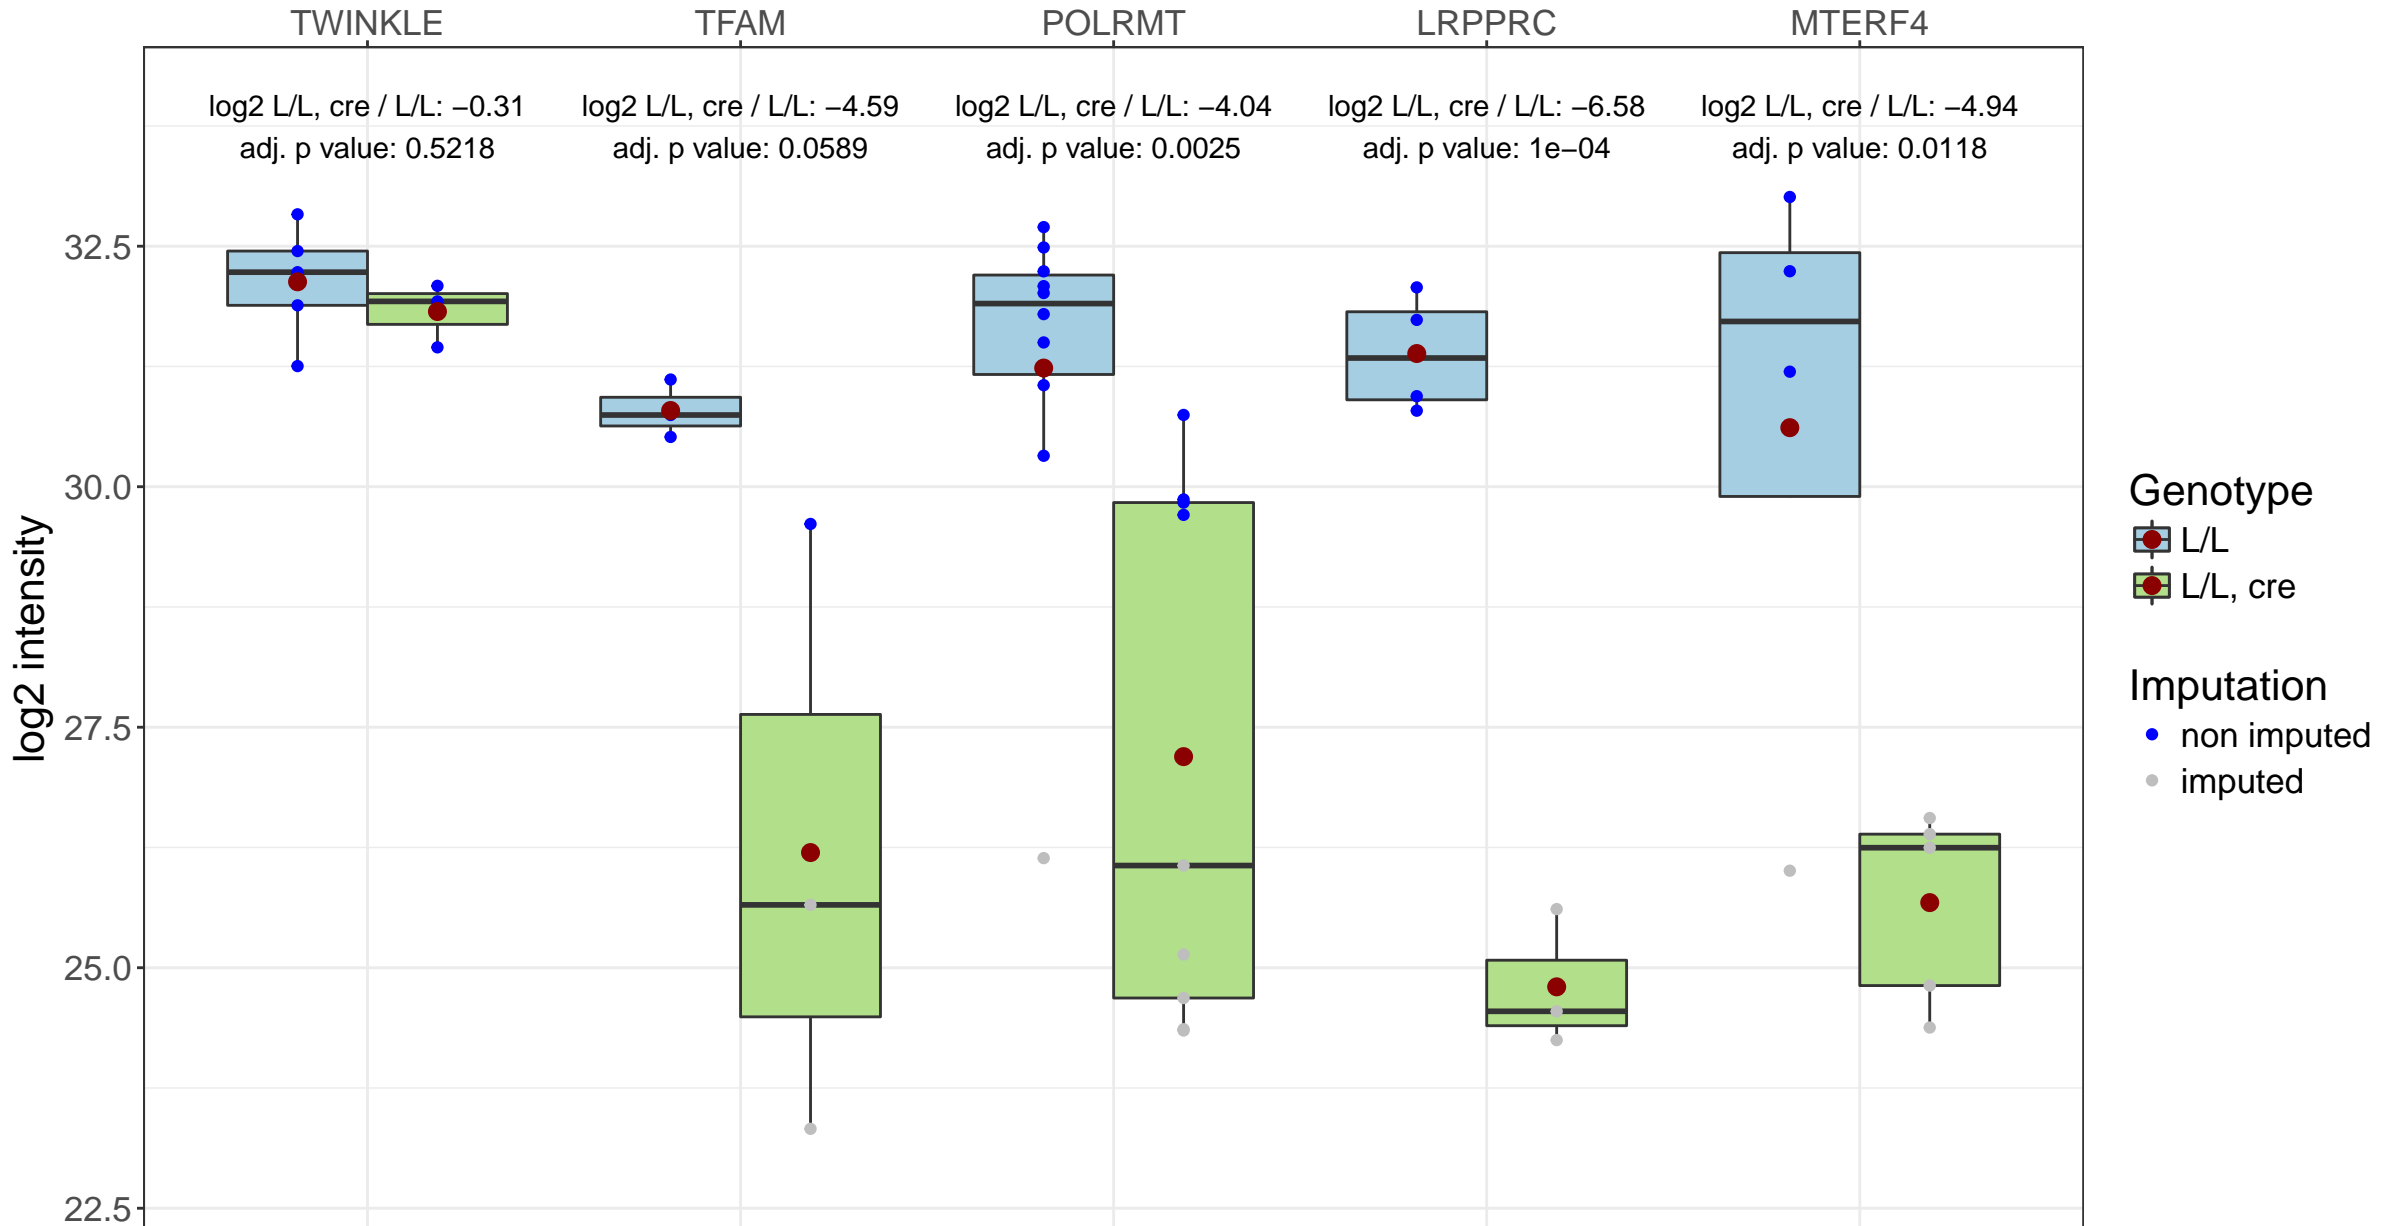

# MPC1 / P63030

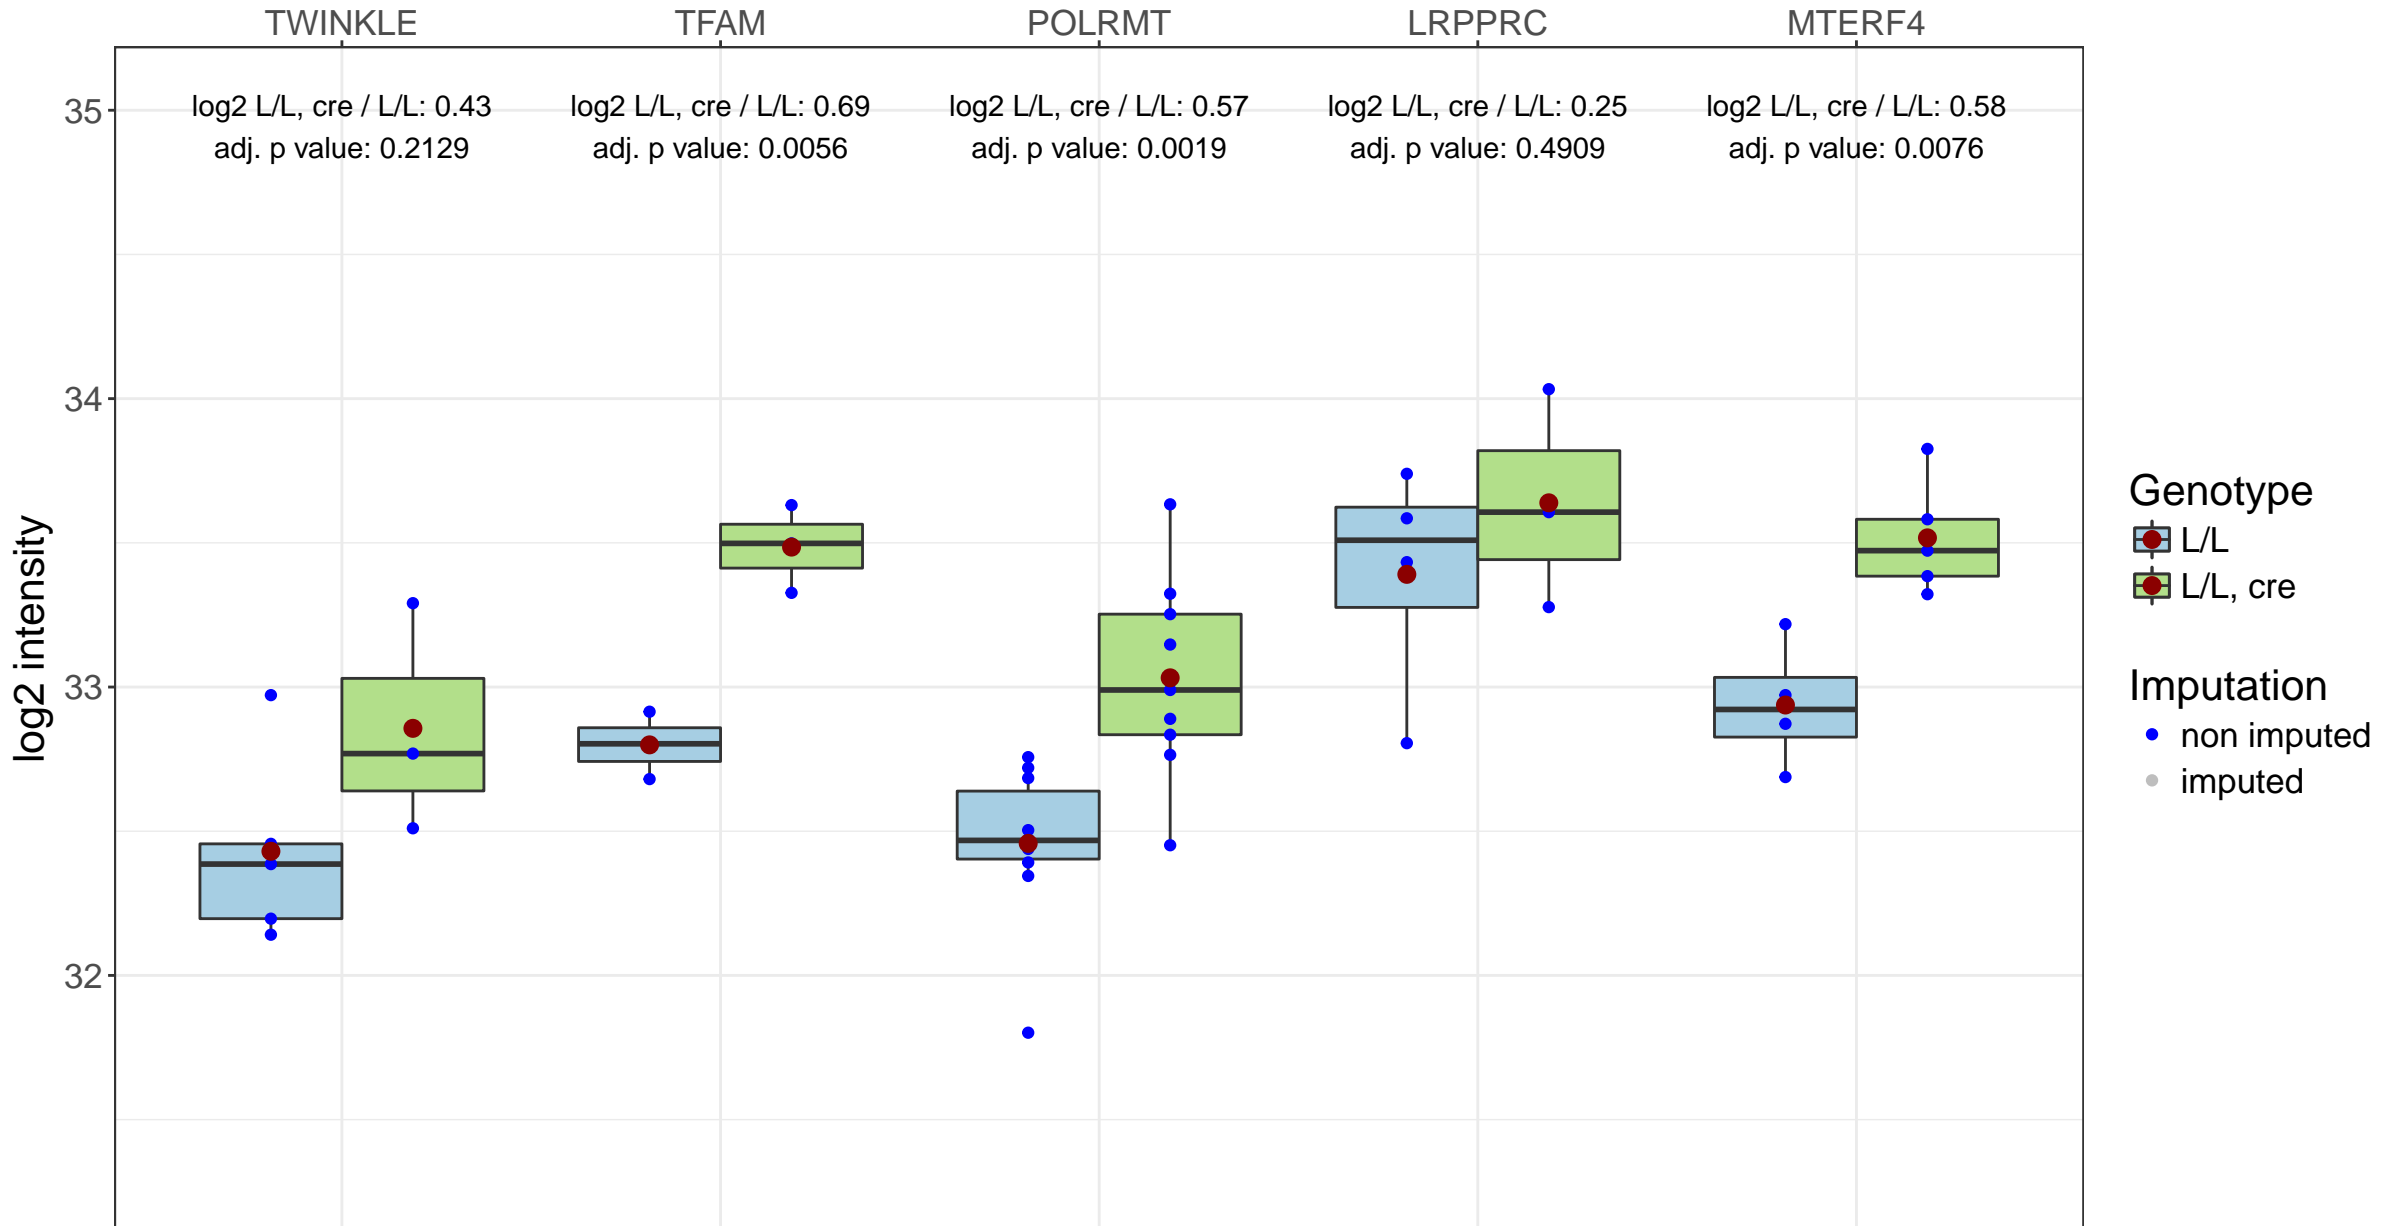

# MPC2 / Q9D023

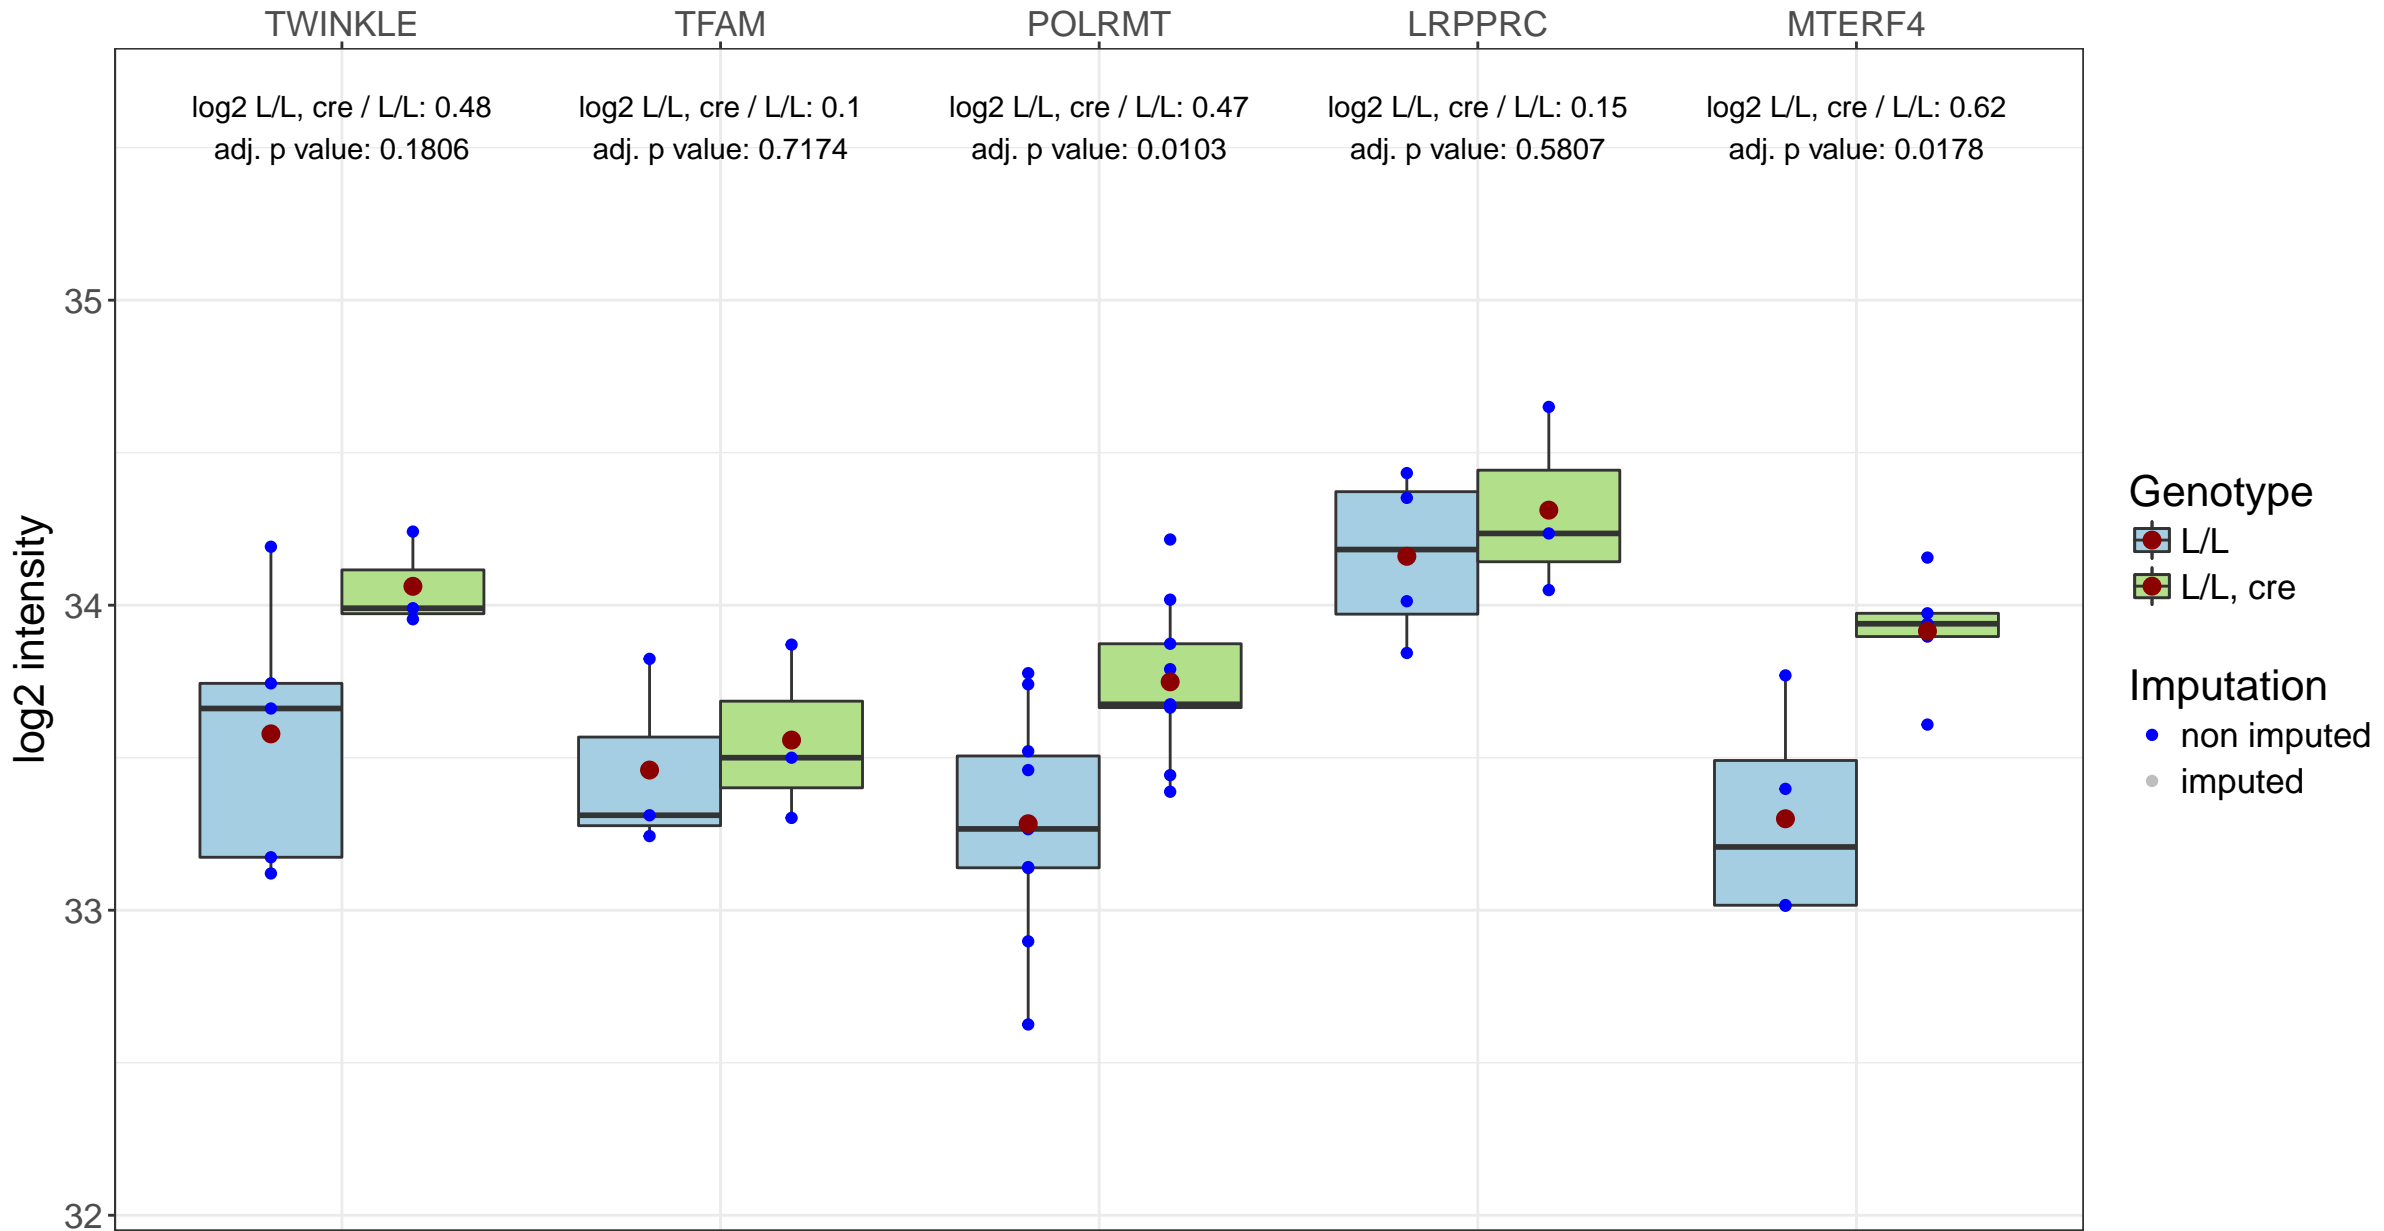

# MPST / Q3UW66

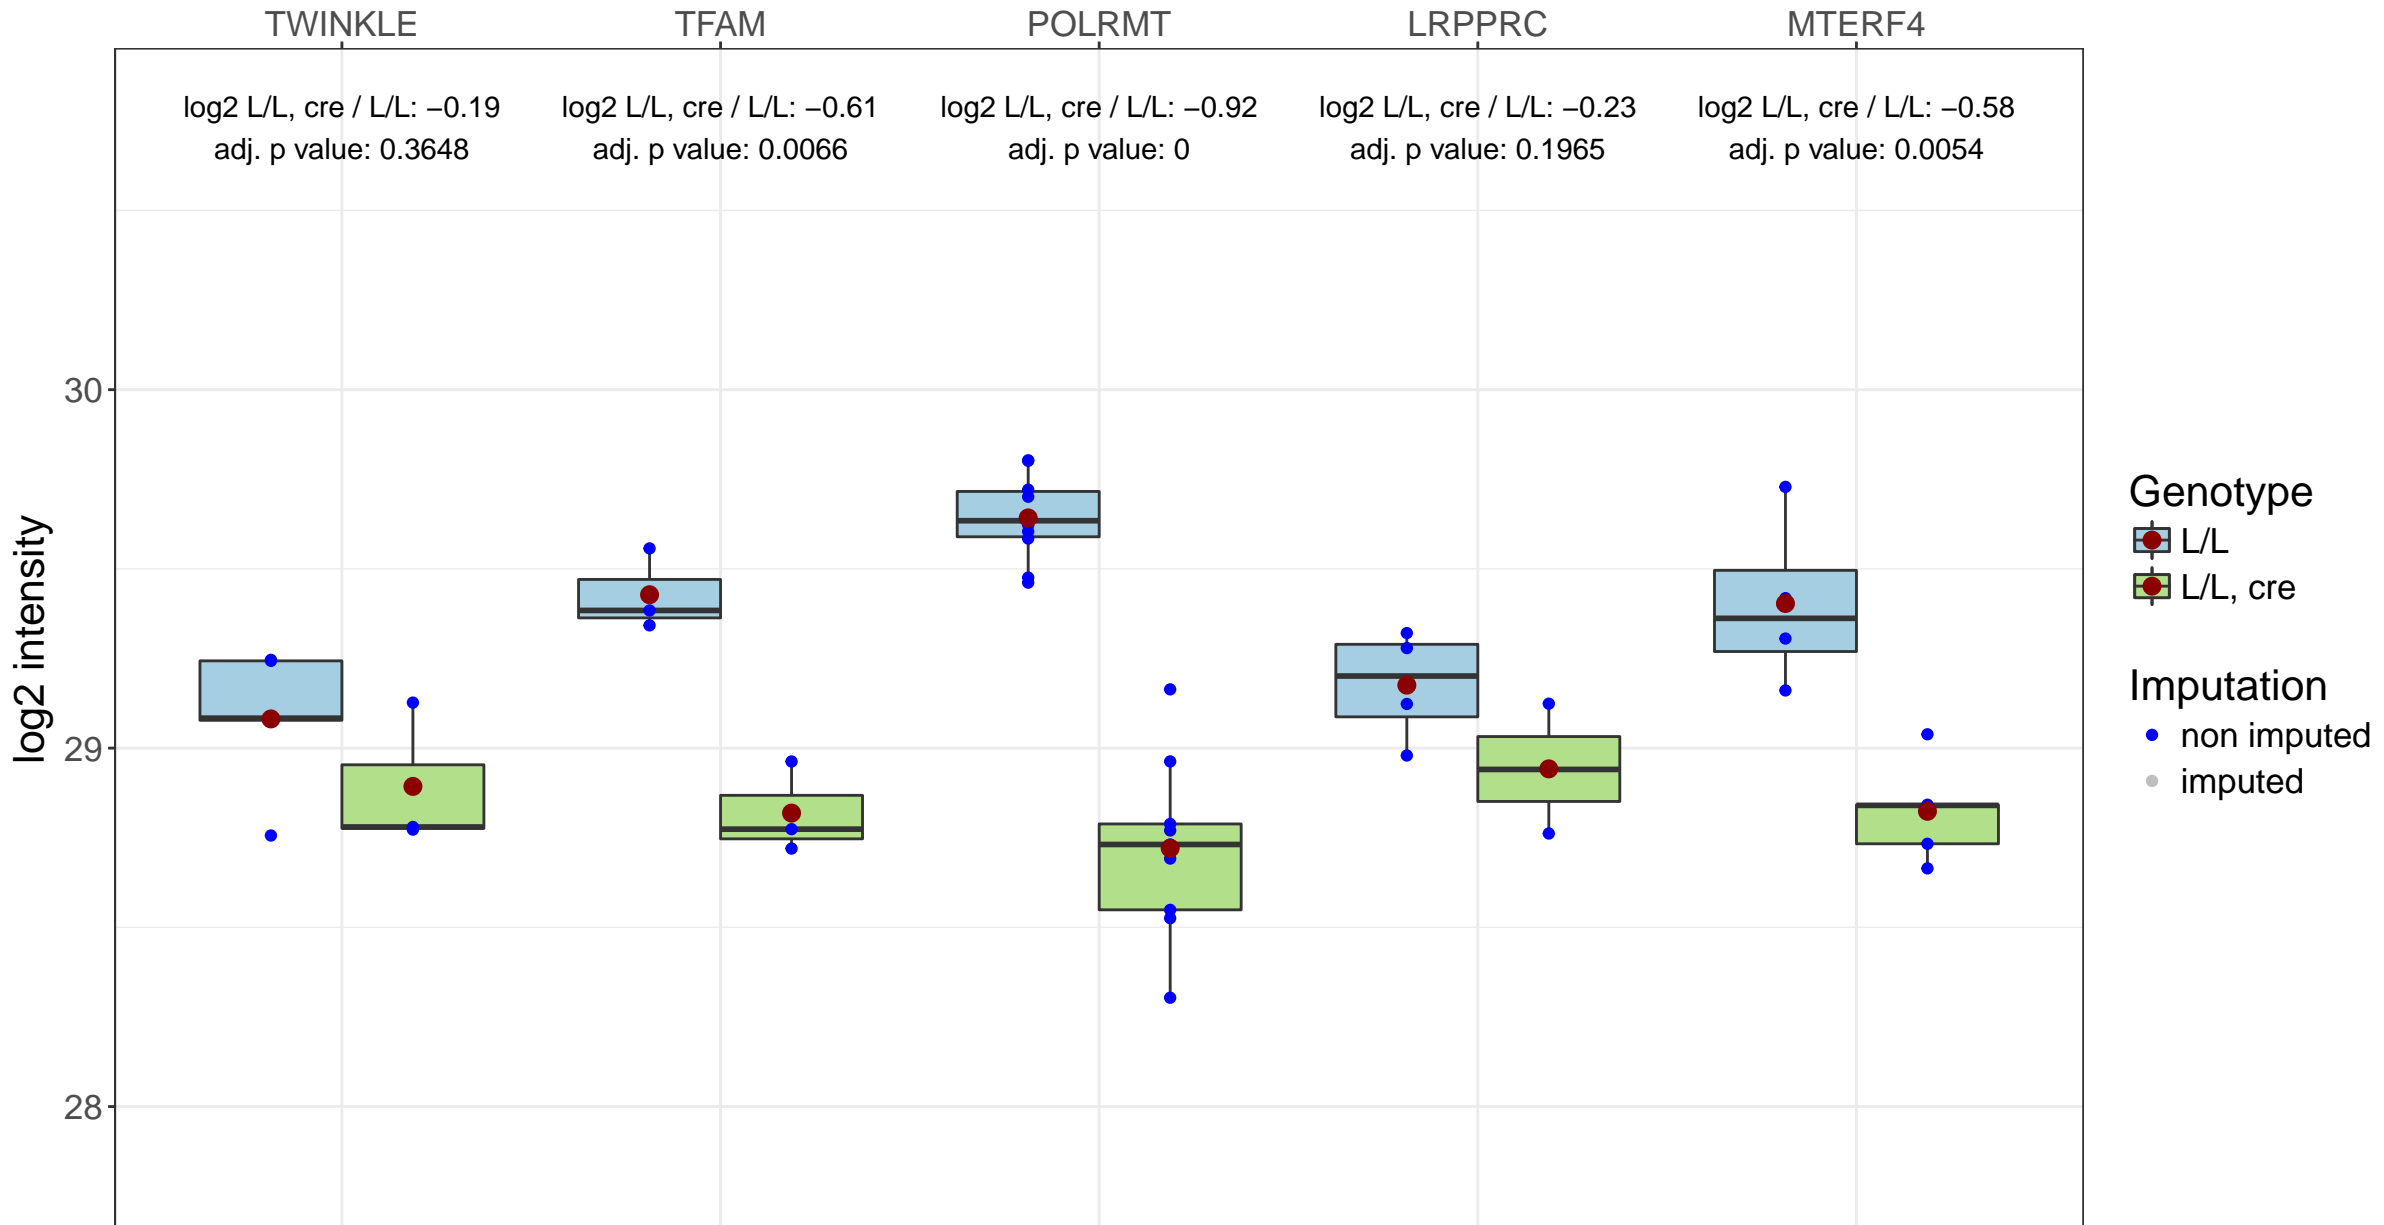

# MPV17 / F6T1N2

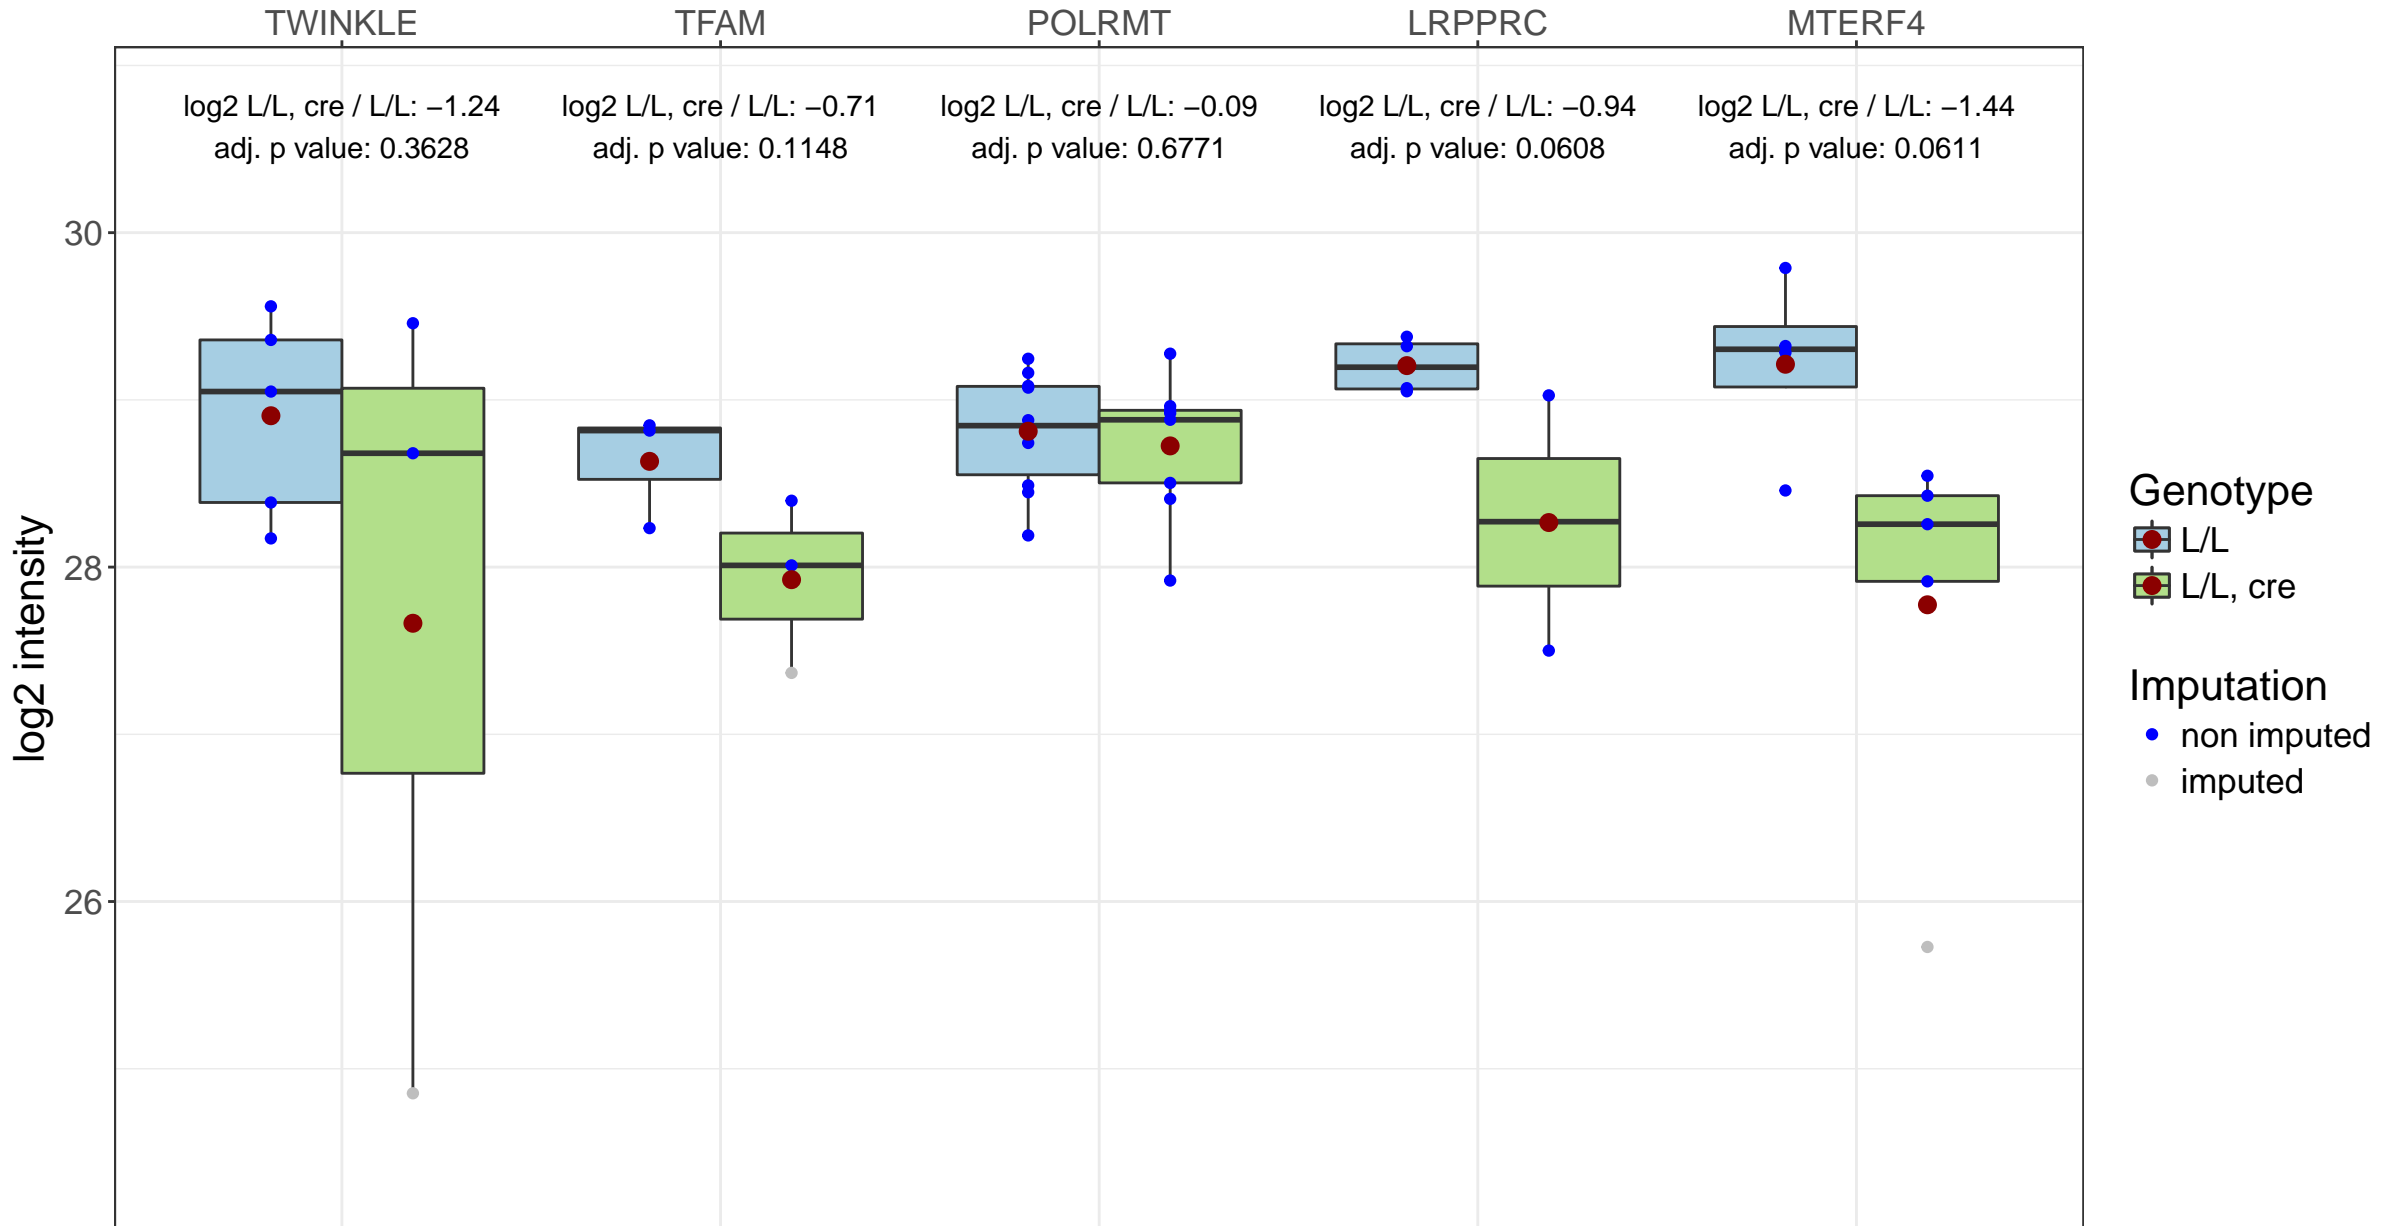

# MRM1 / Q99J25

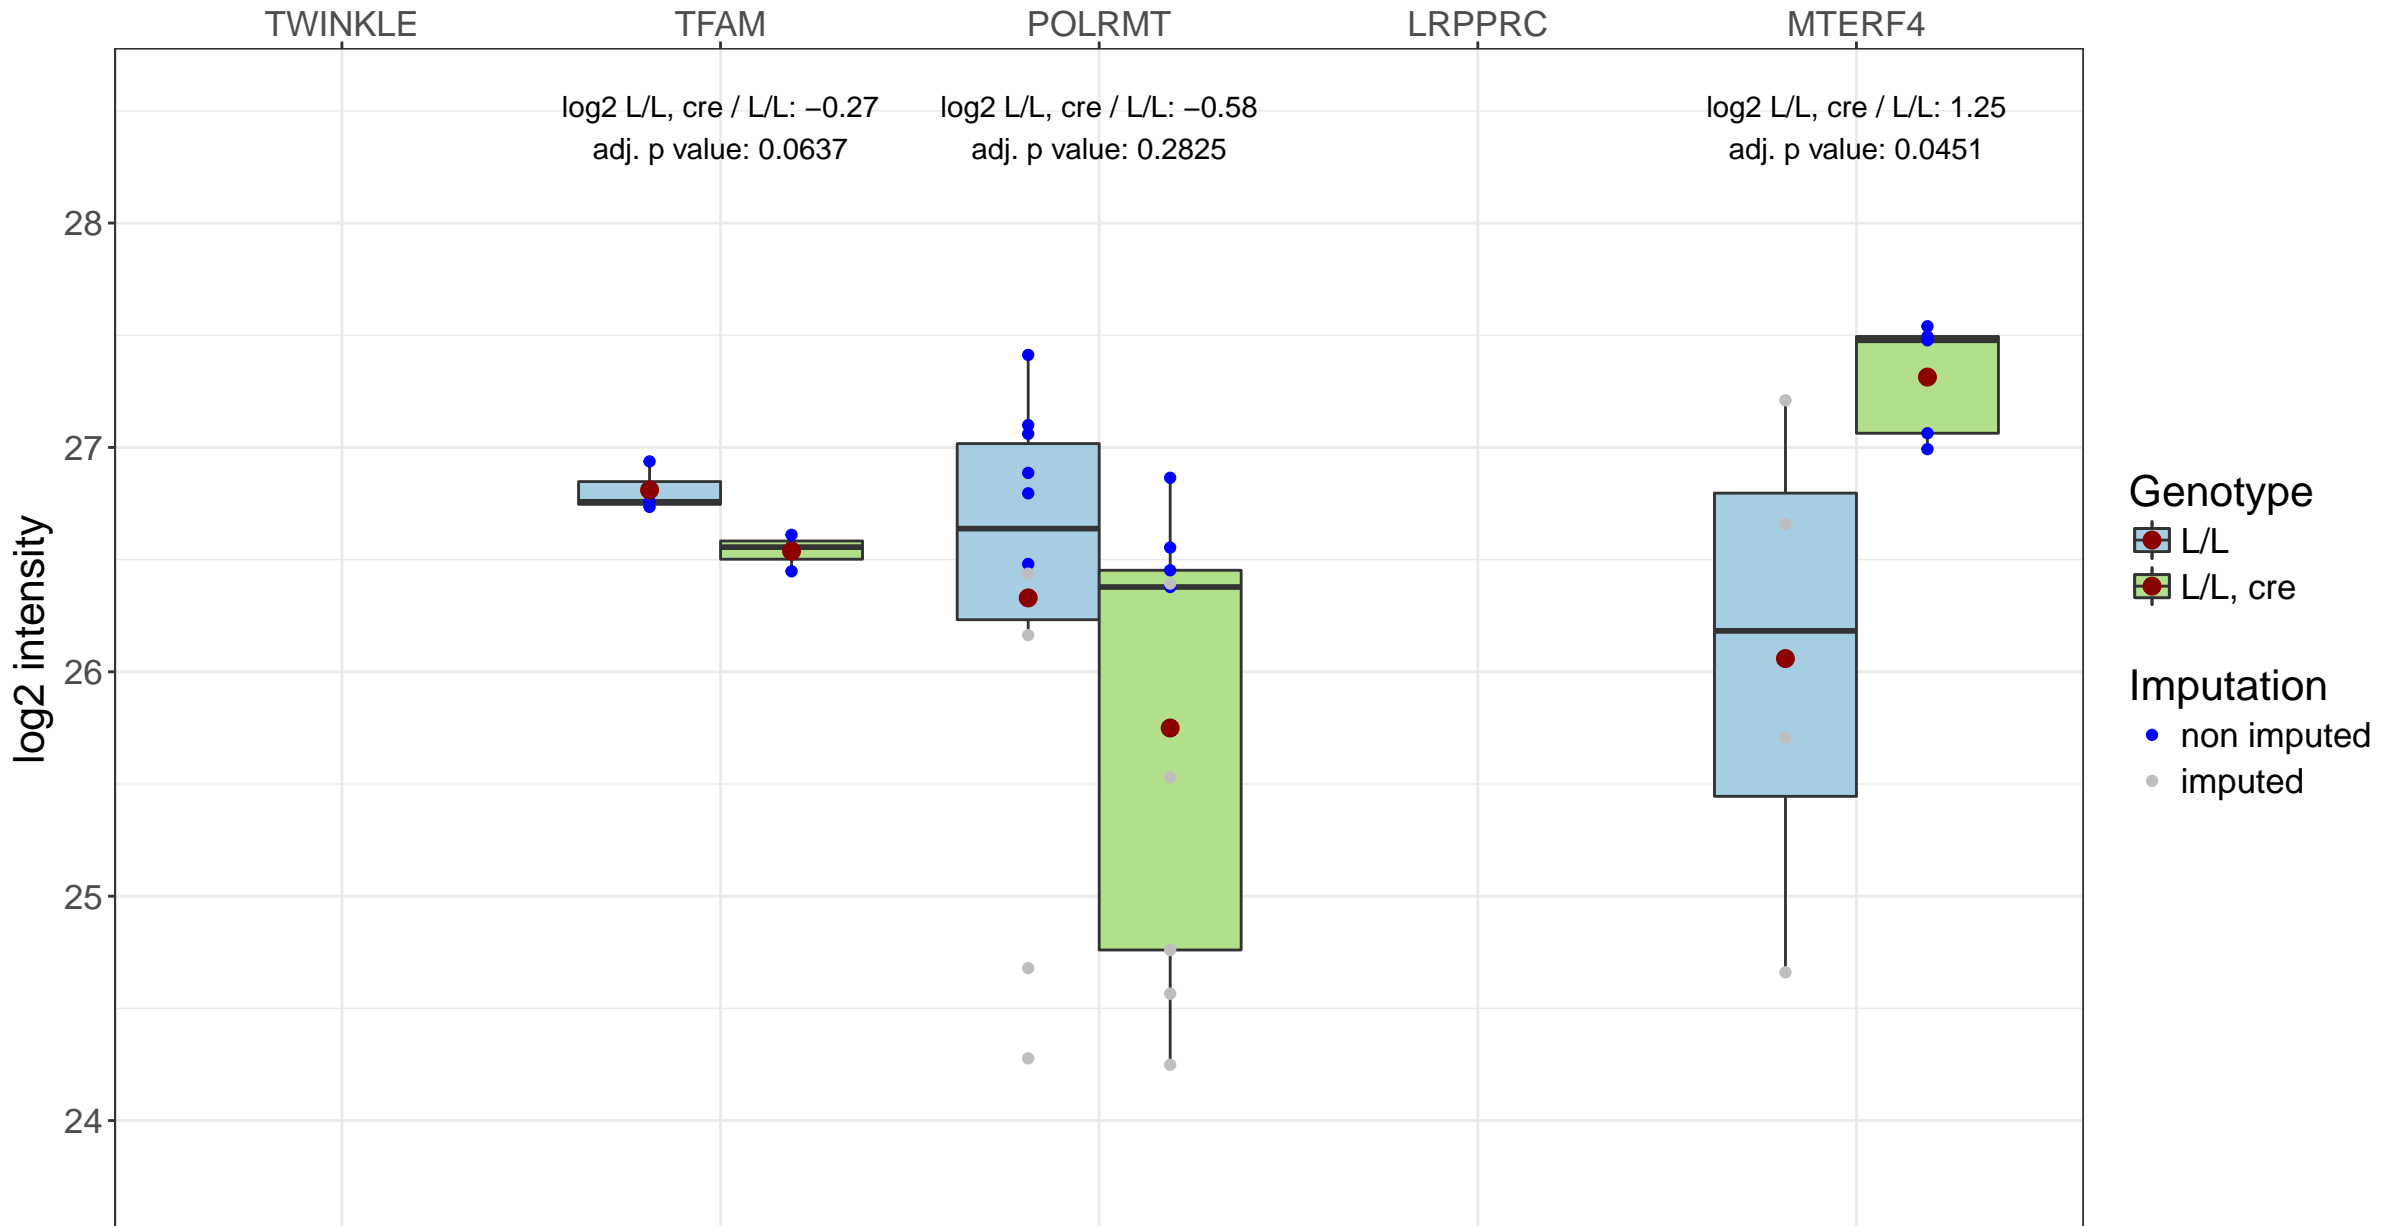

# MRPL1 / Q99N96

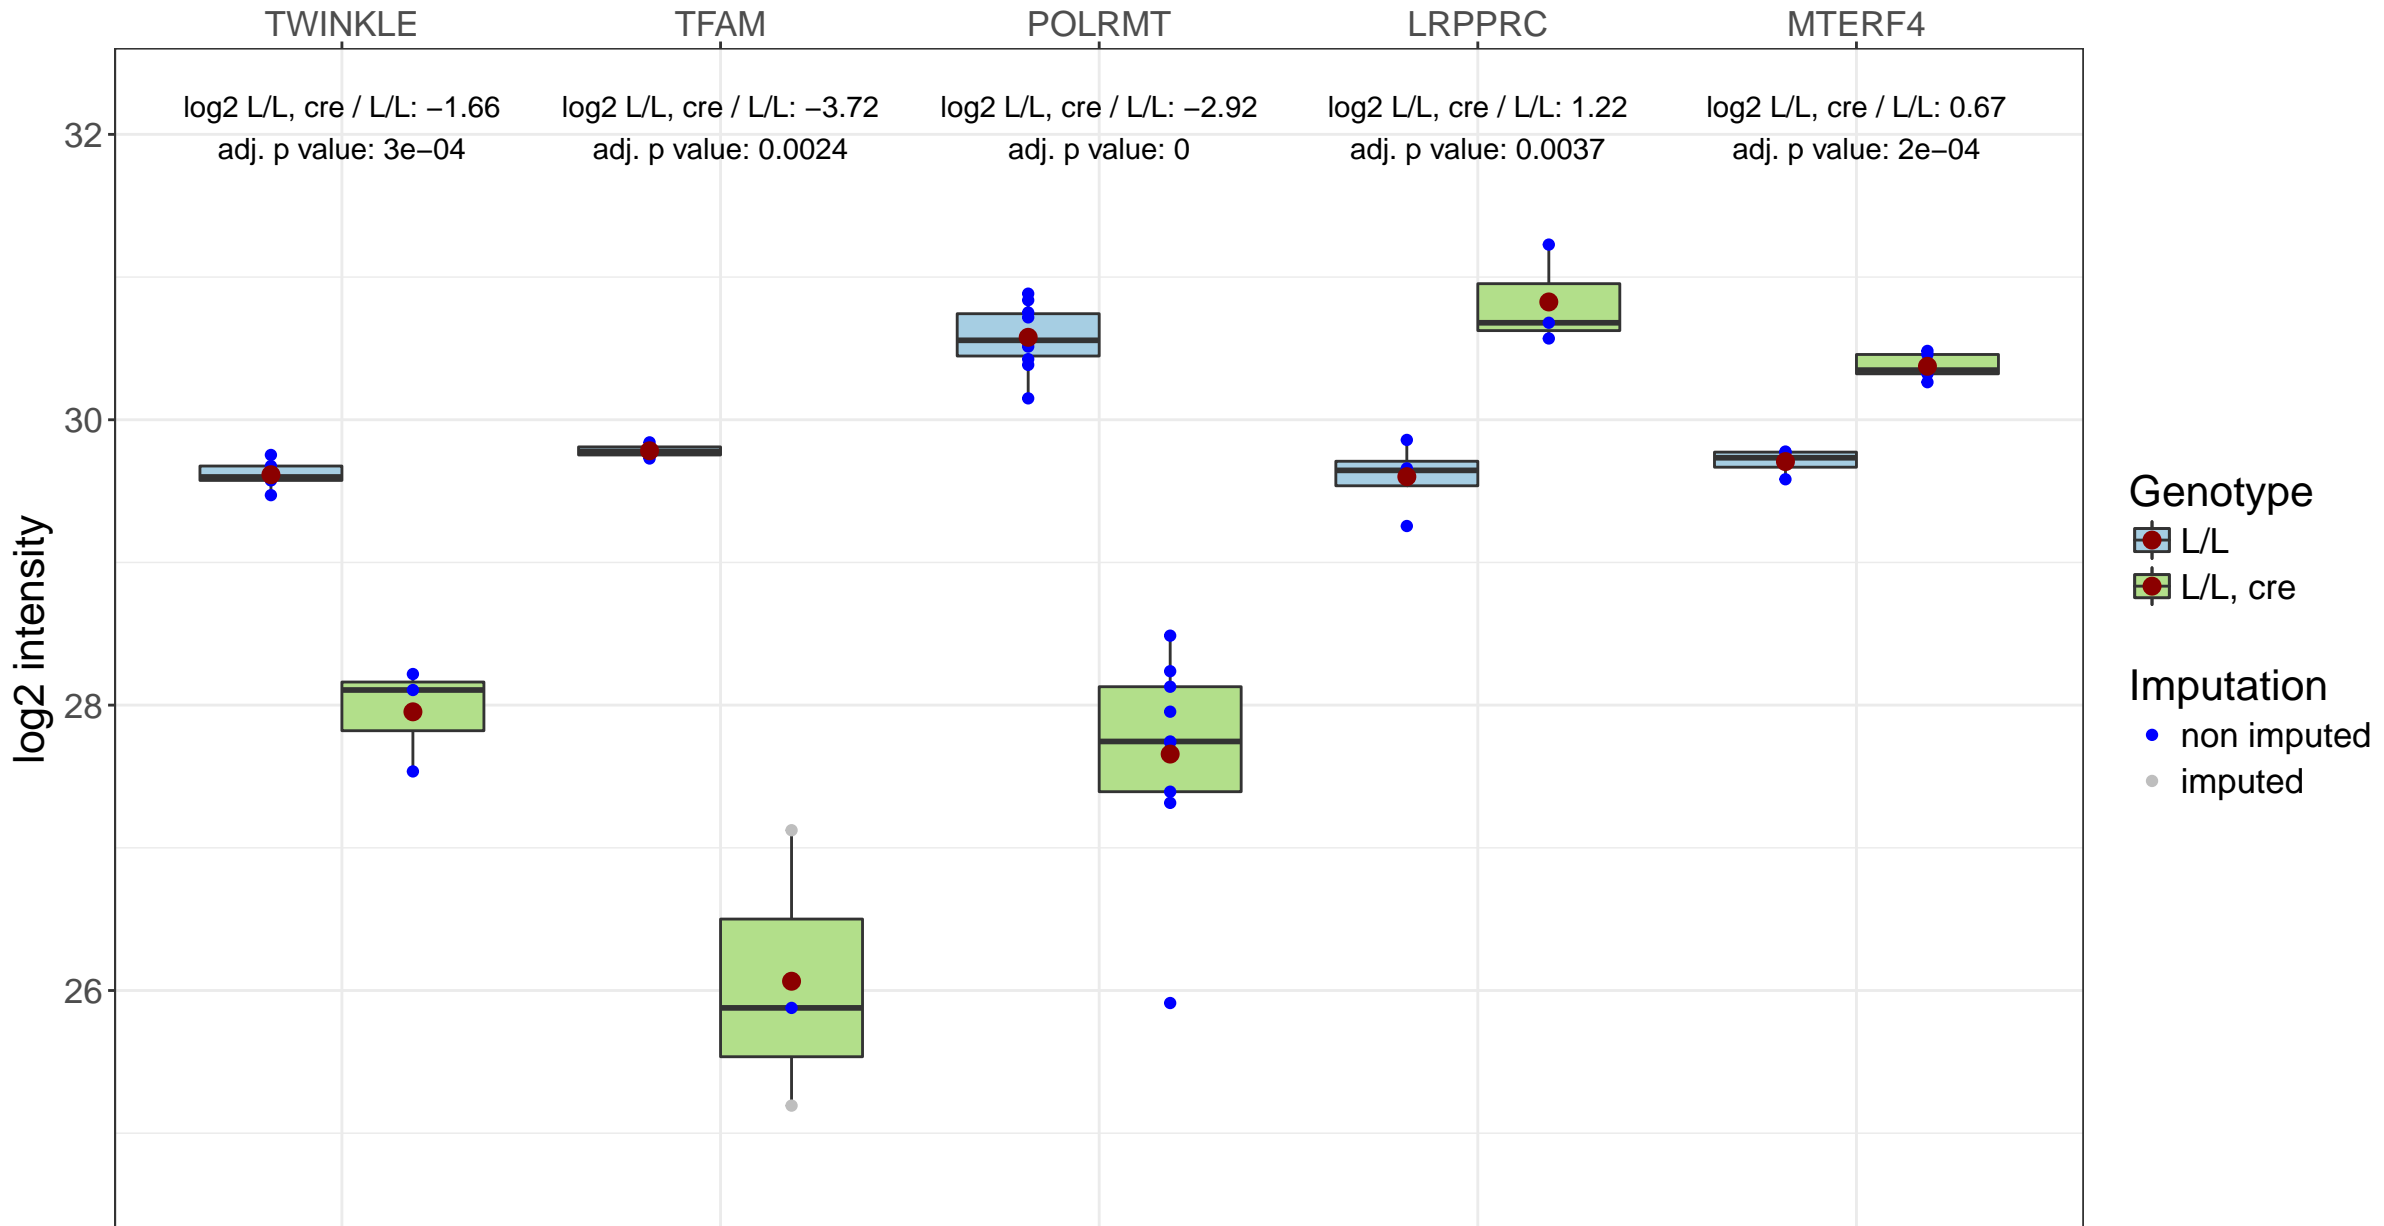

# MRPL10 / Q3TBW2

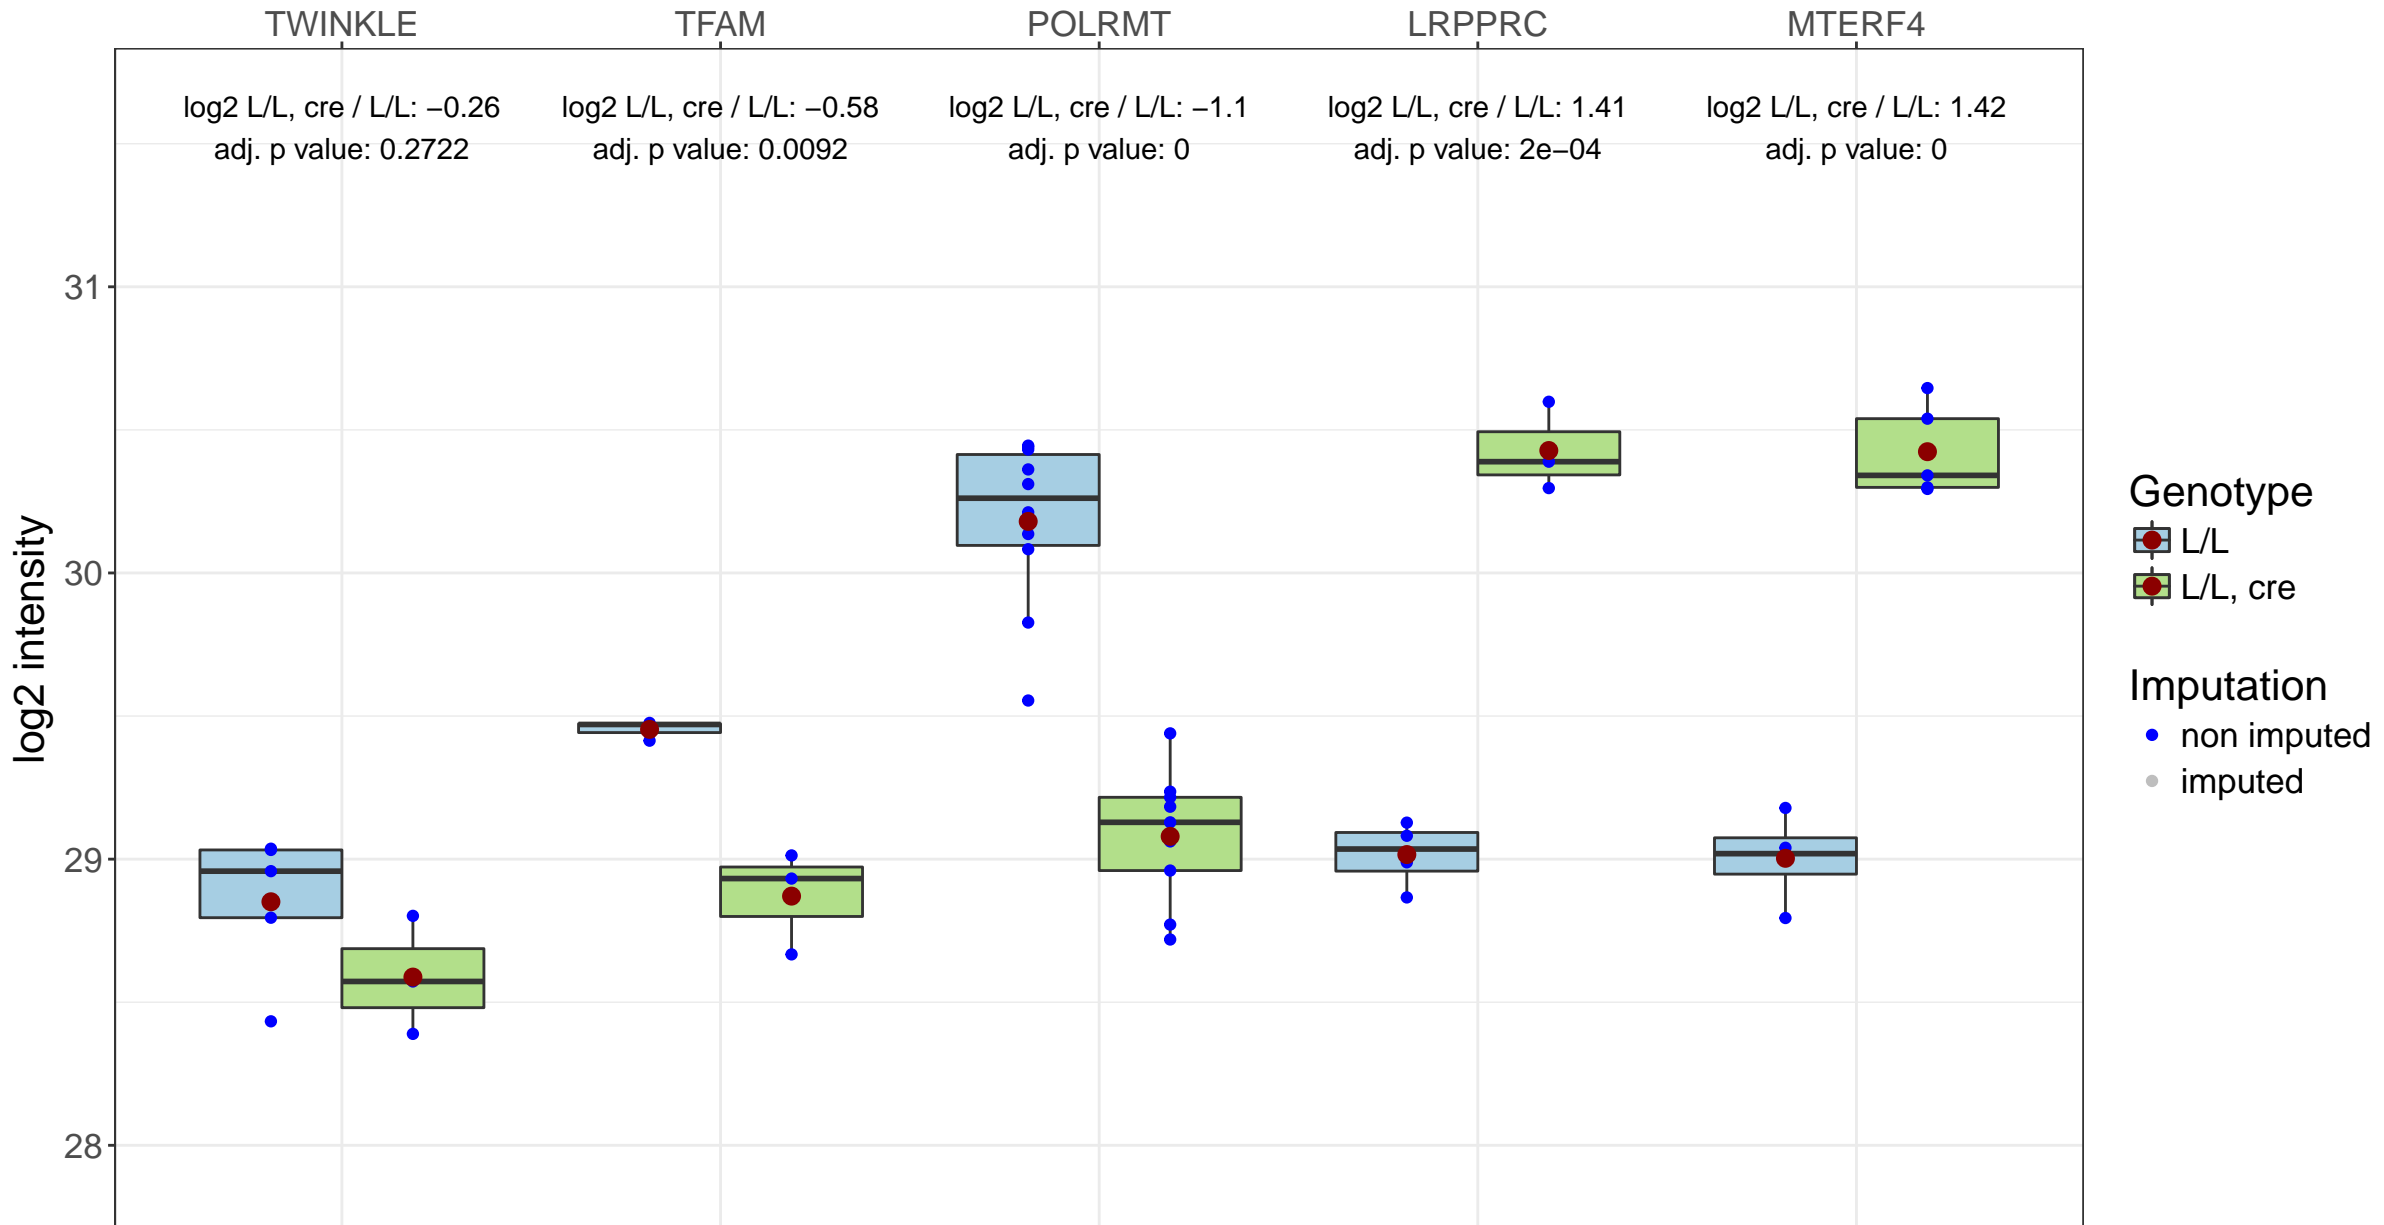



# MRPL11 / Q9CQF0

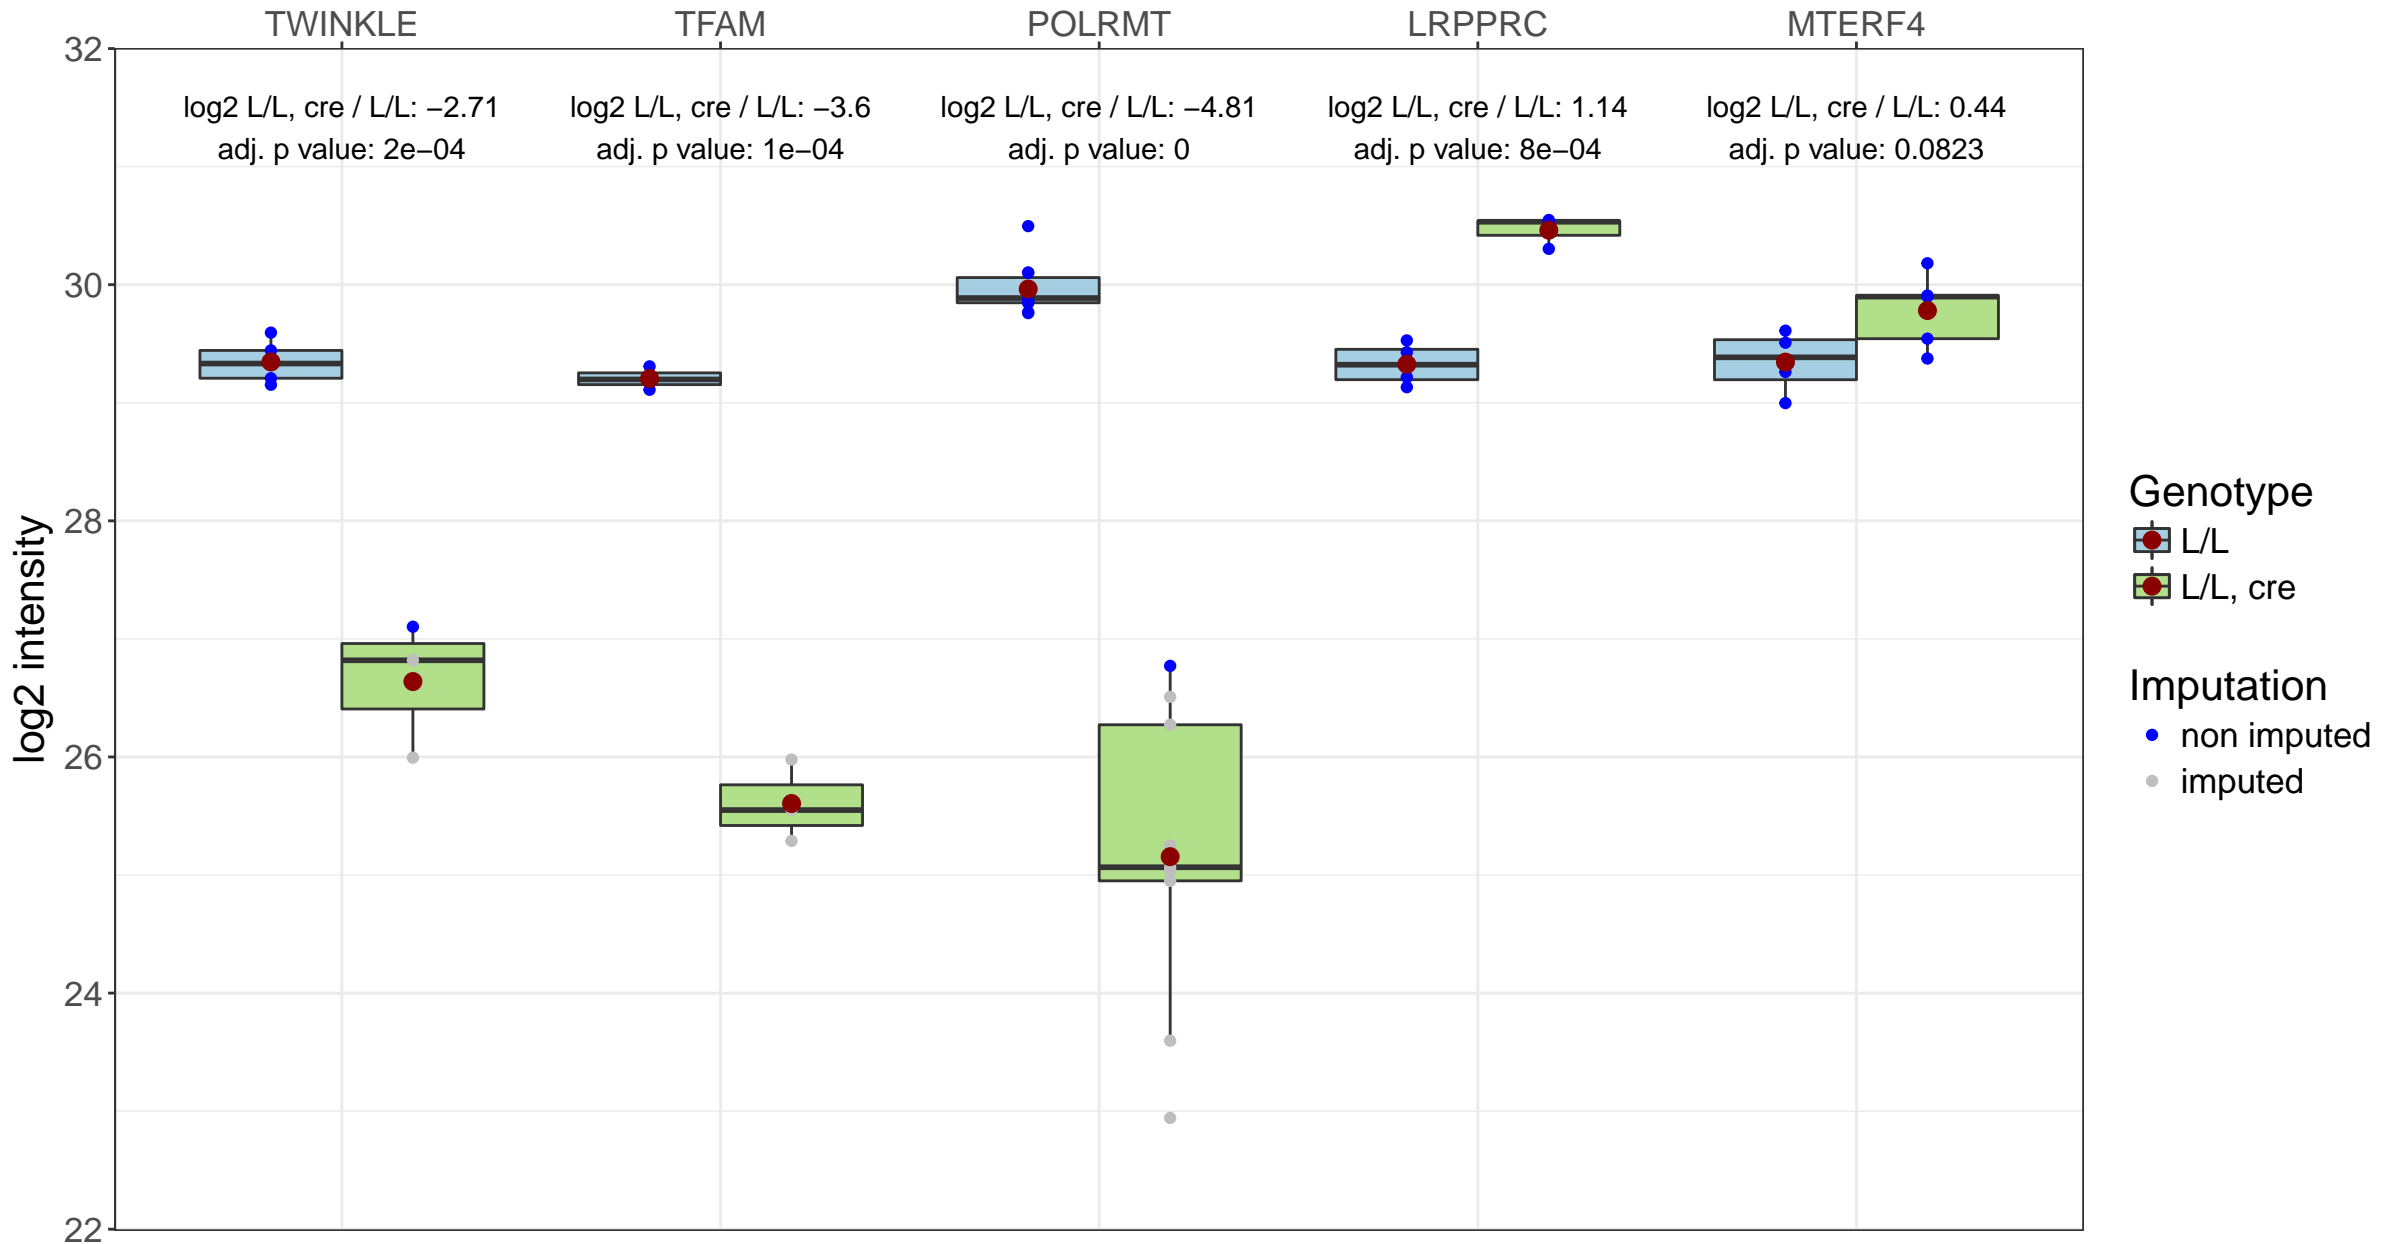

# MRPL12 / Q9DB15

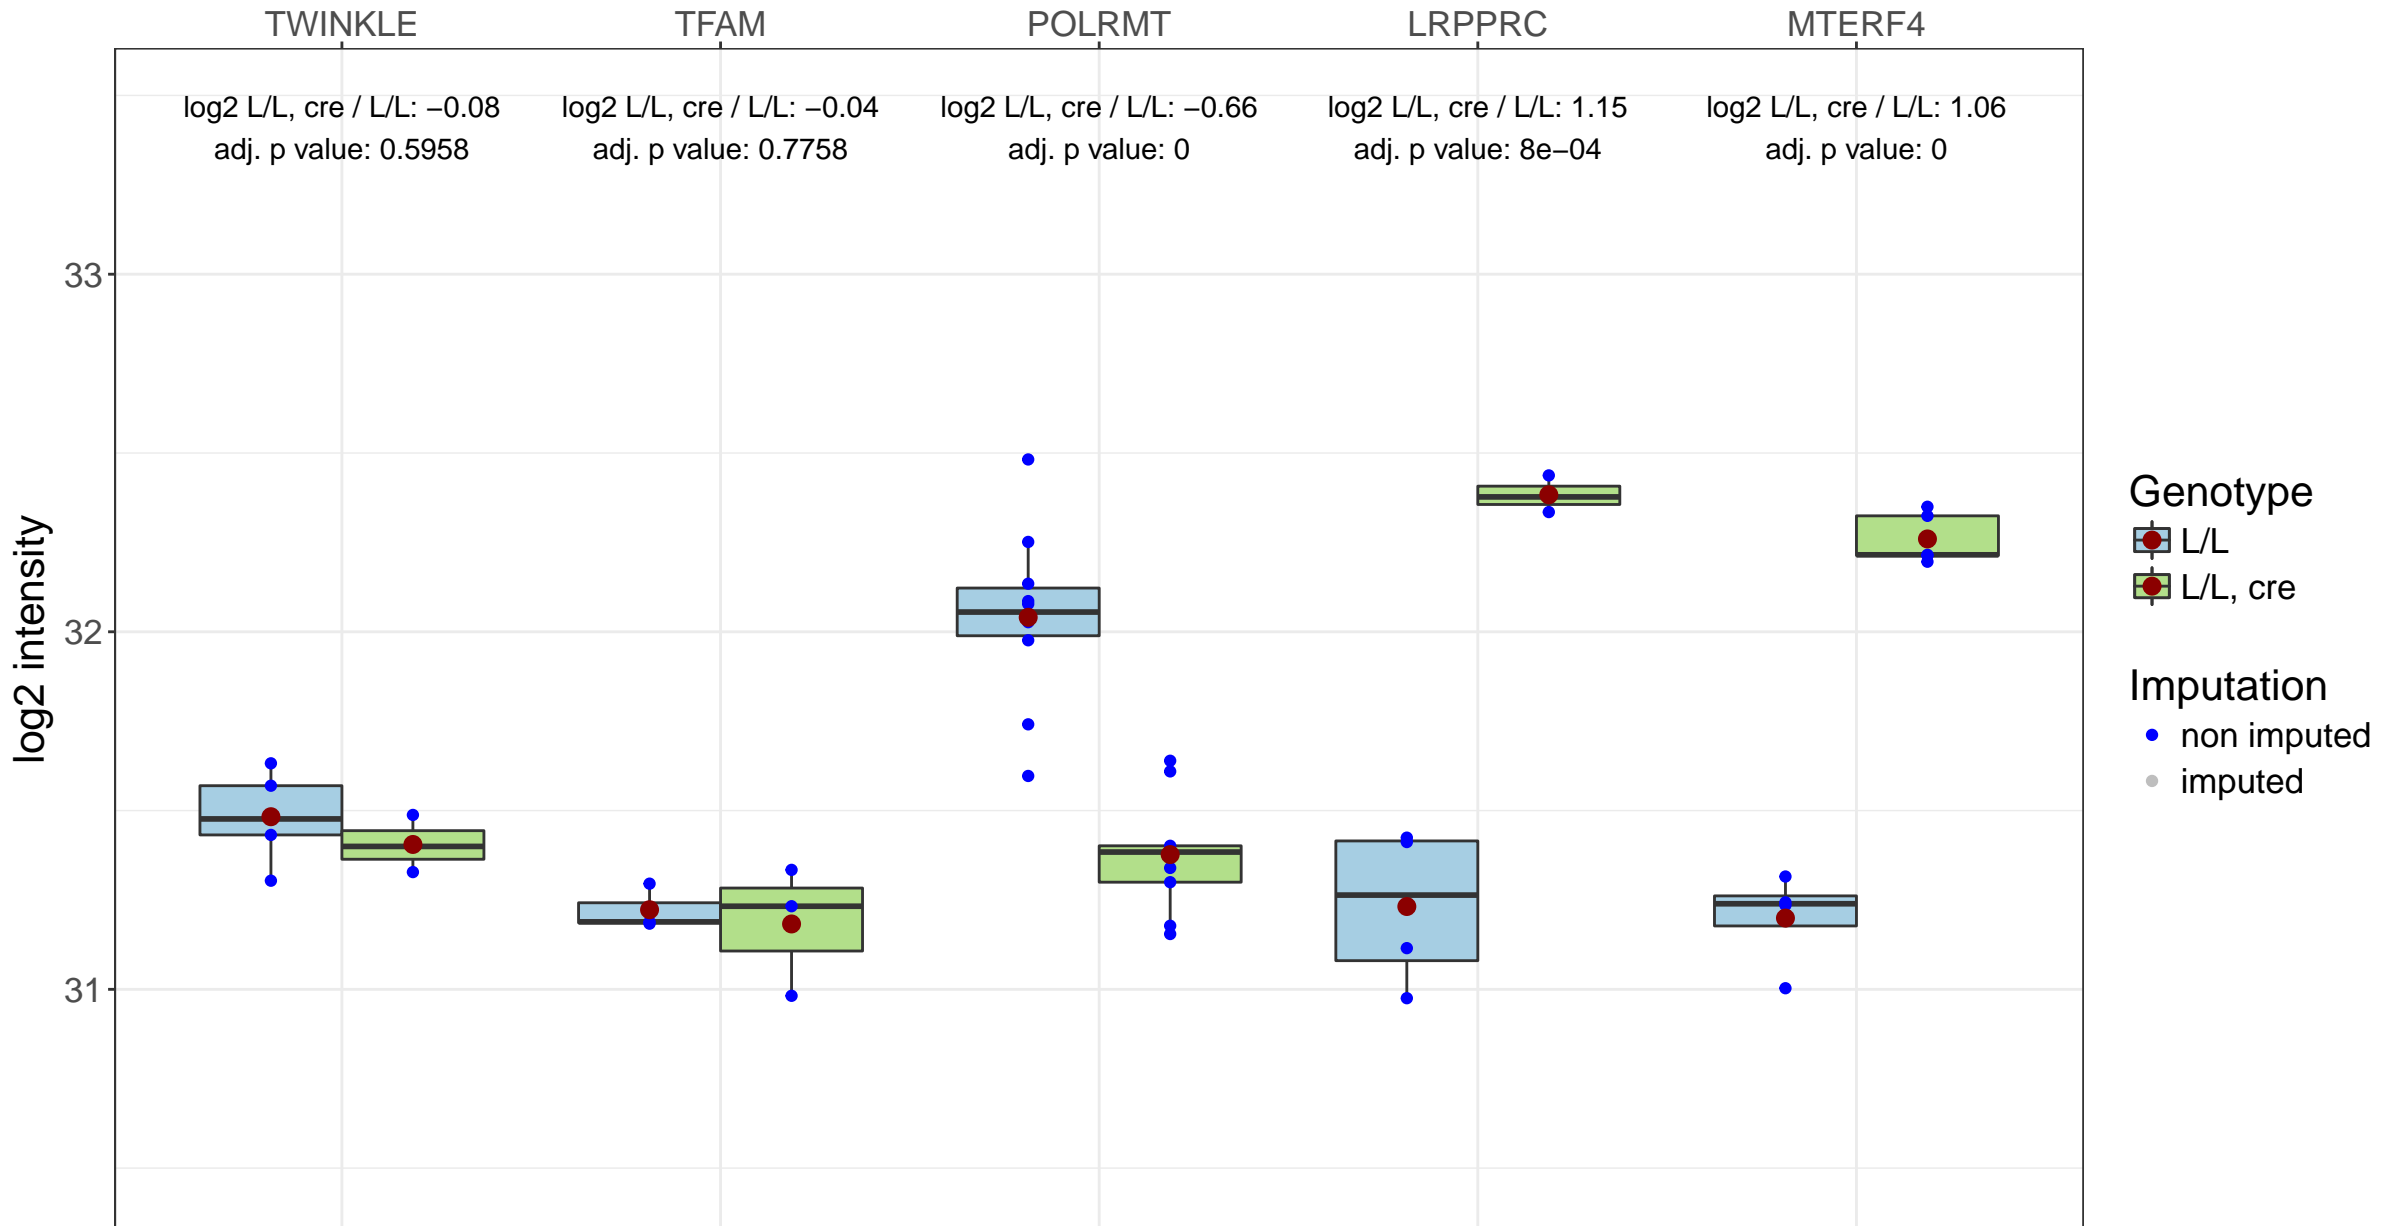

# MRPL13 / Q9D1P0

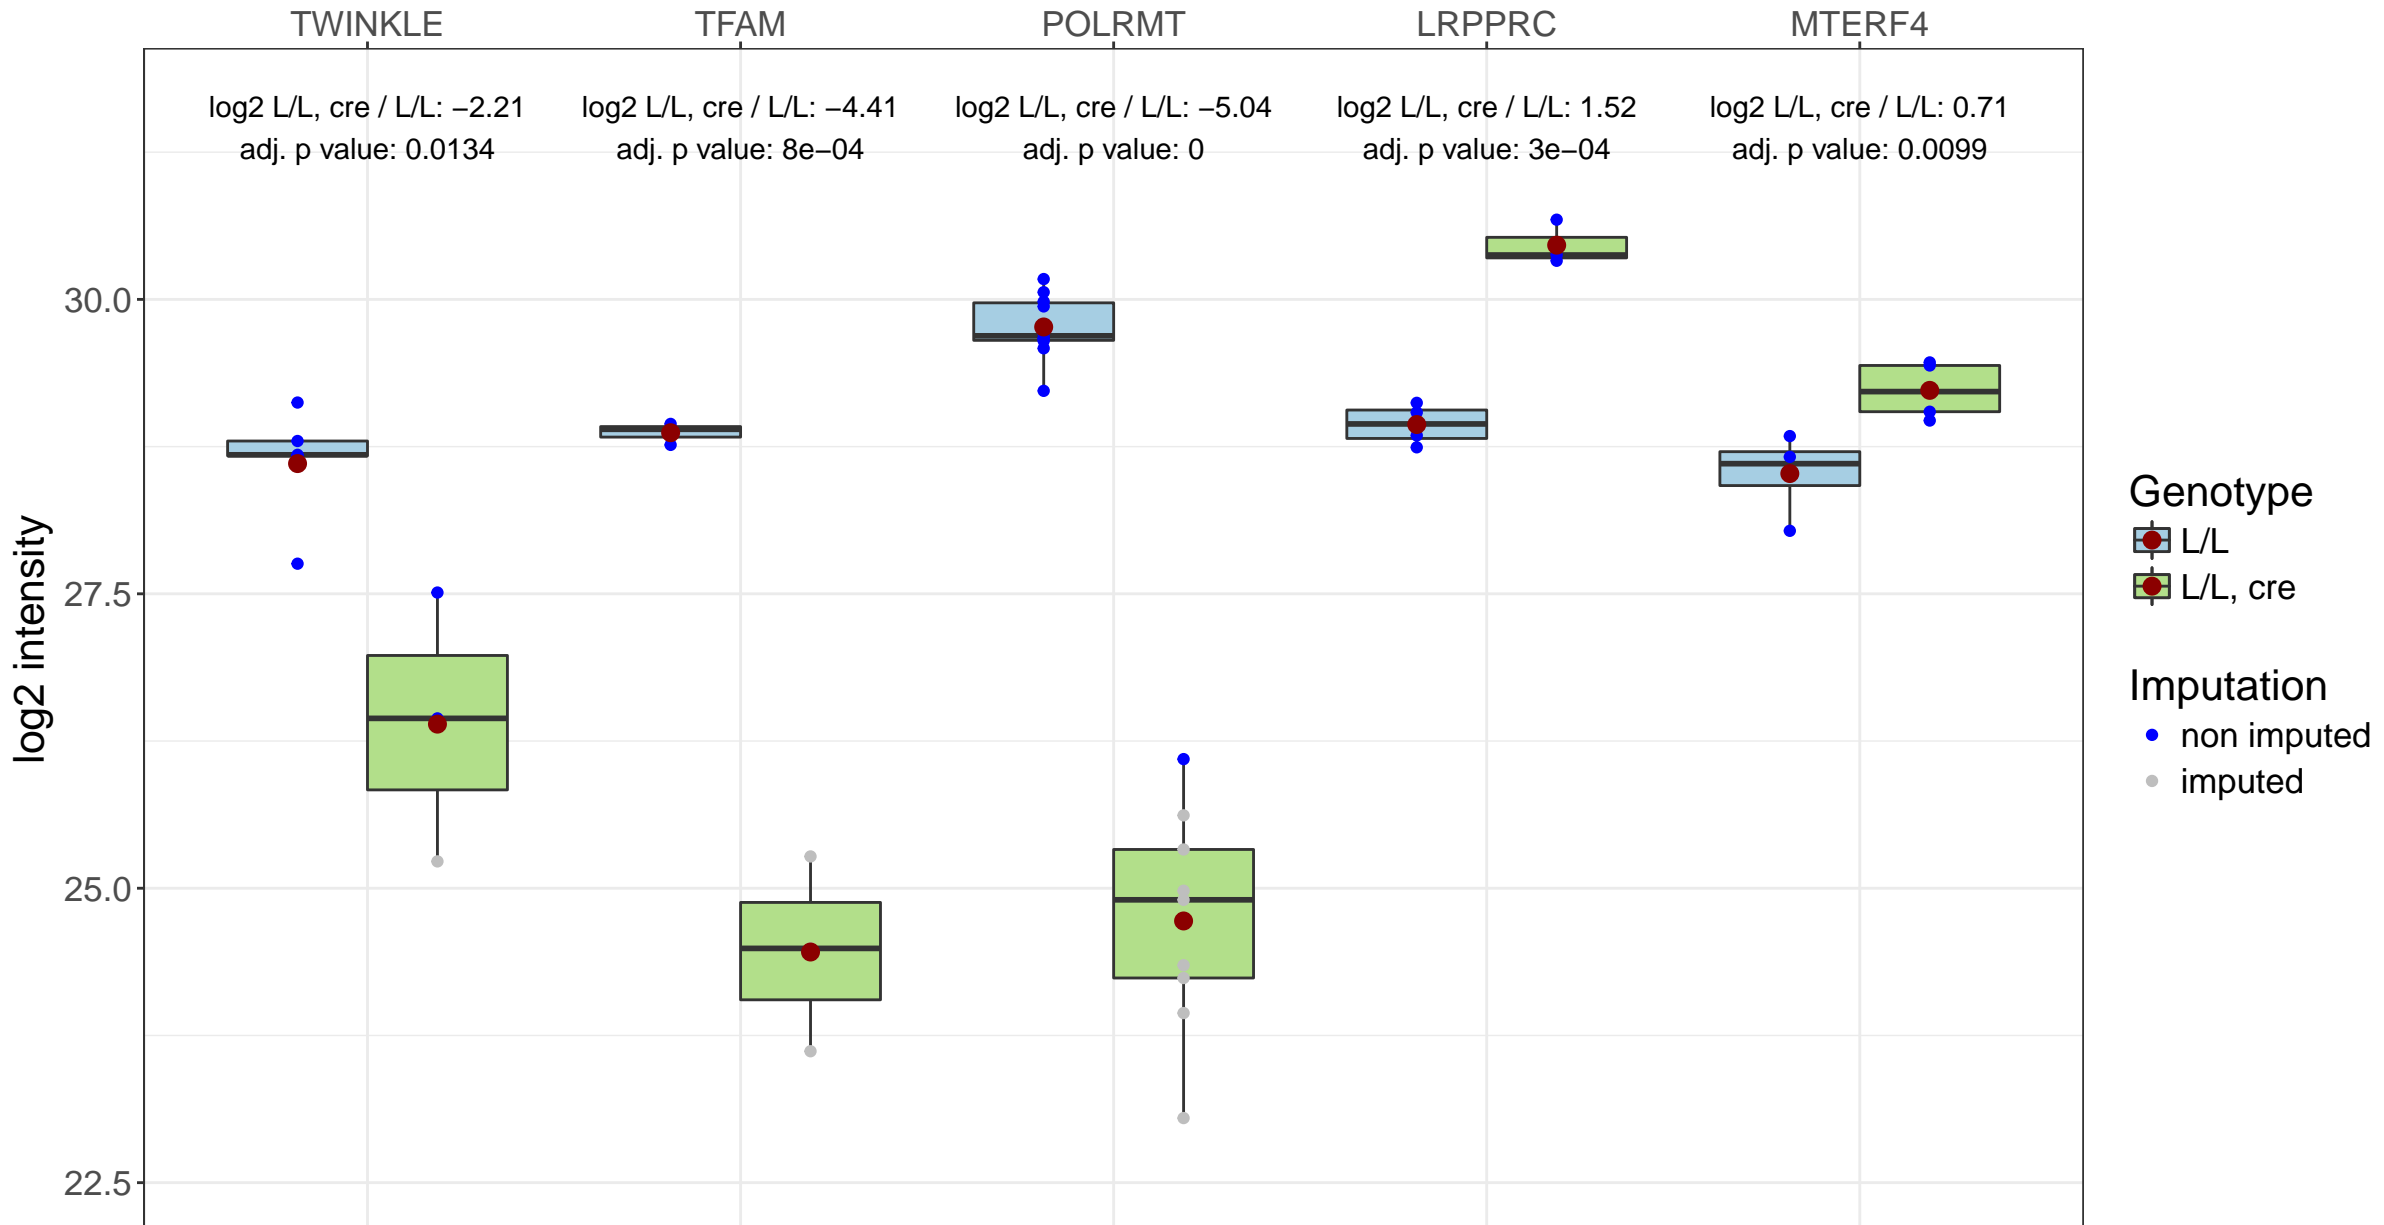

# MRPL14 / Q9D1I6

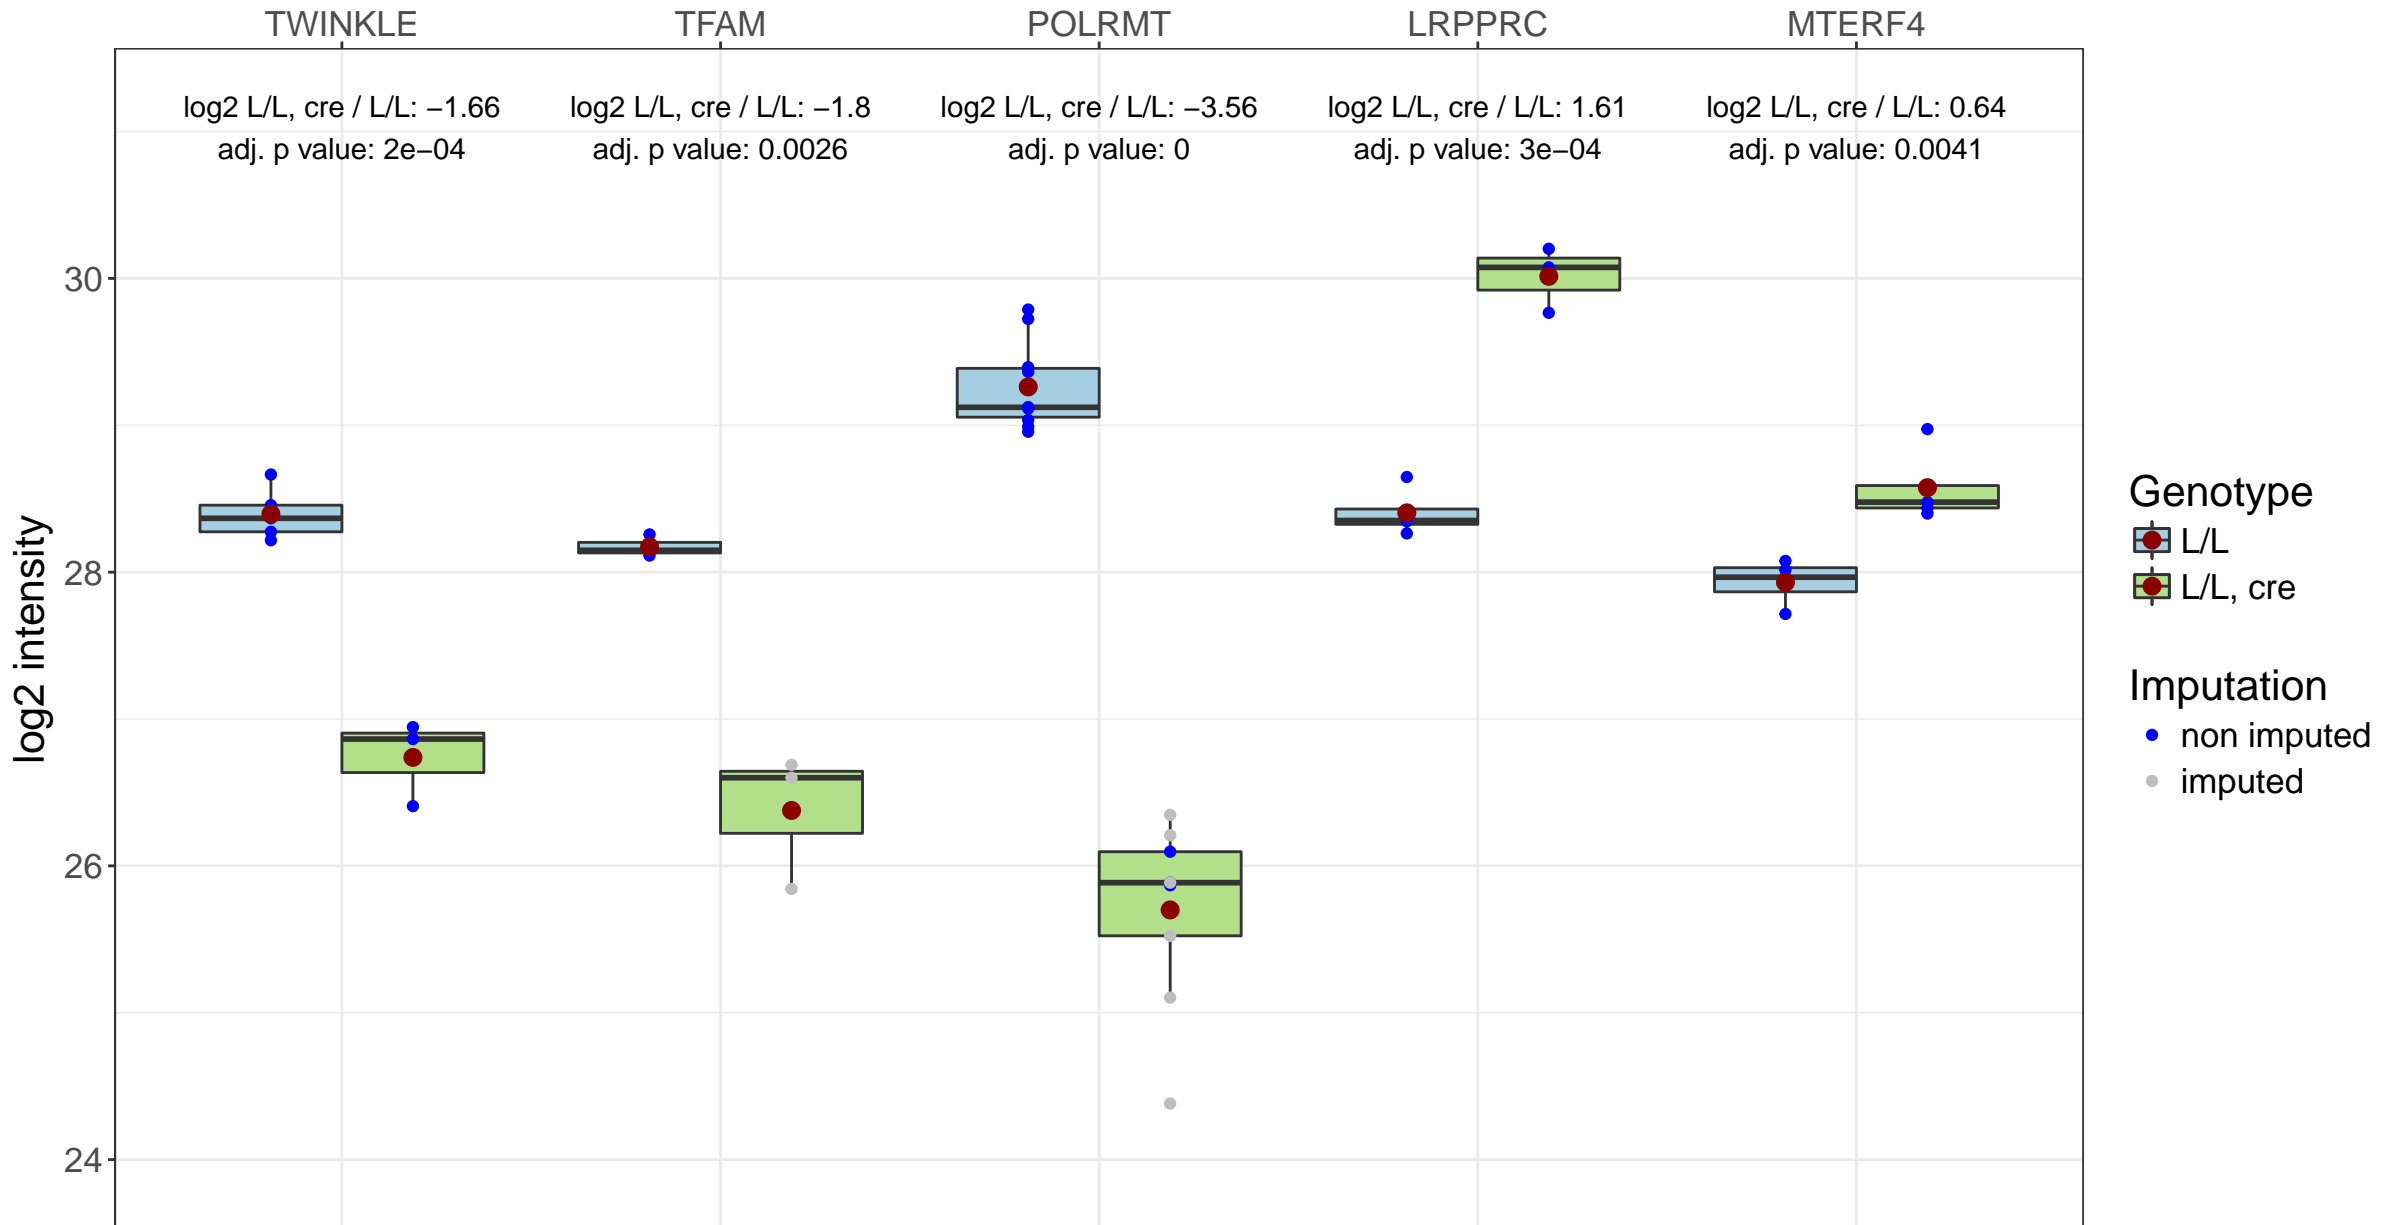

# MRPL15 / Q9CPR5

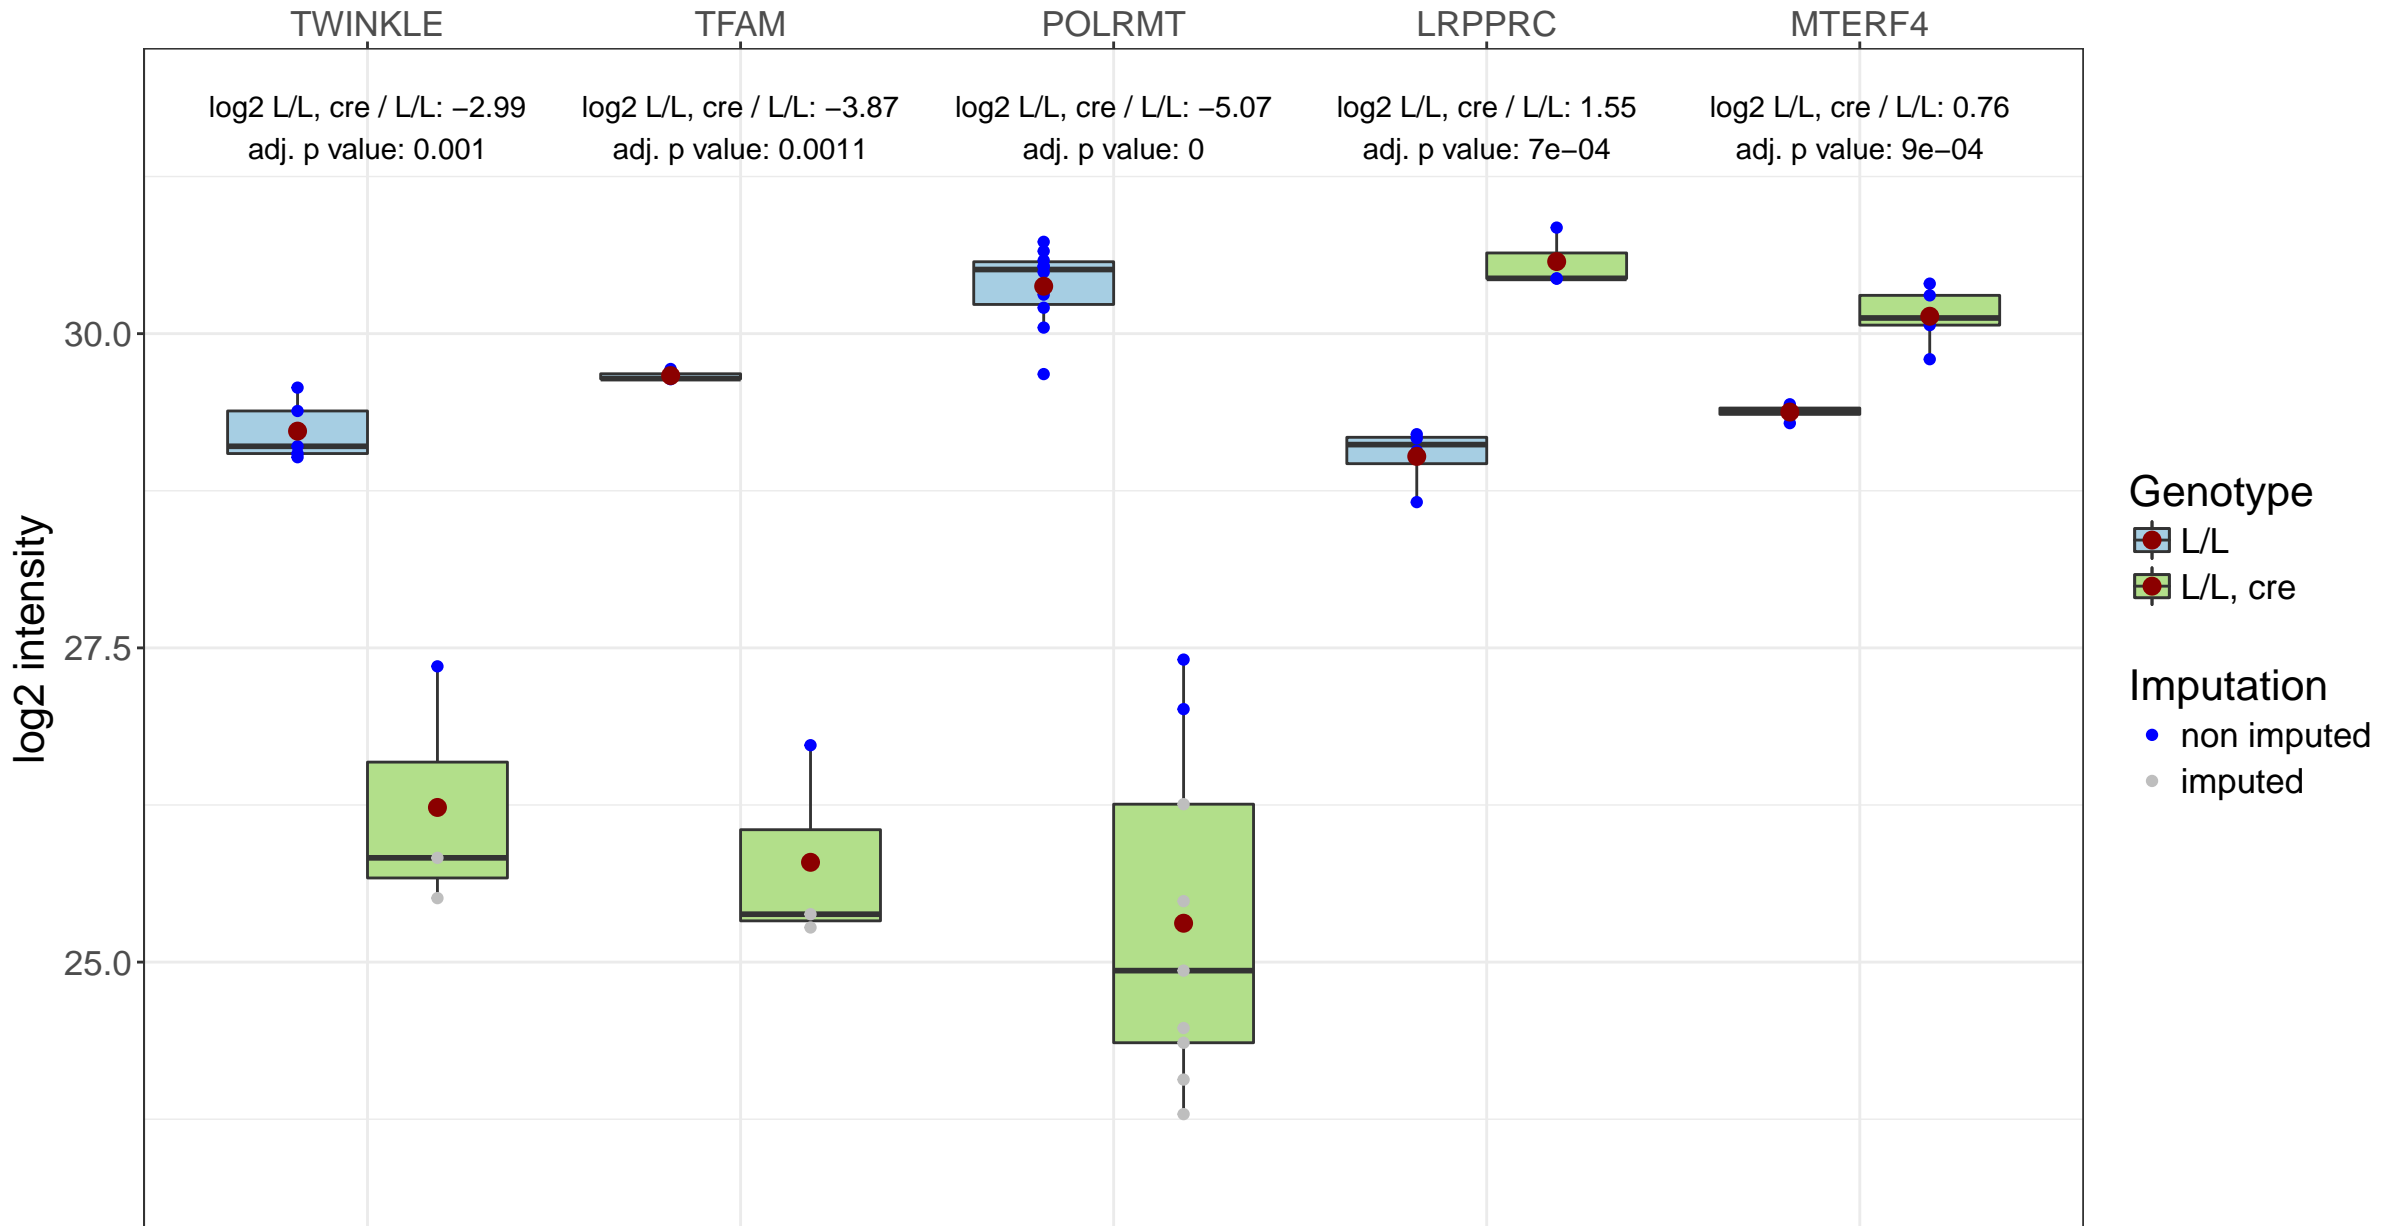

# MRPL16 / Q99N93

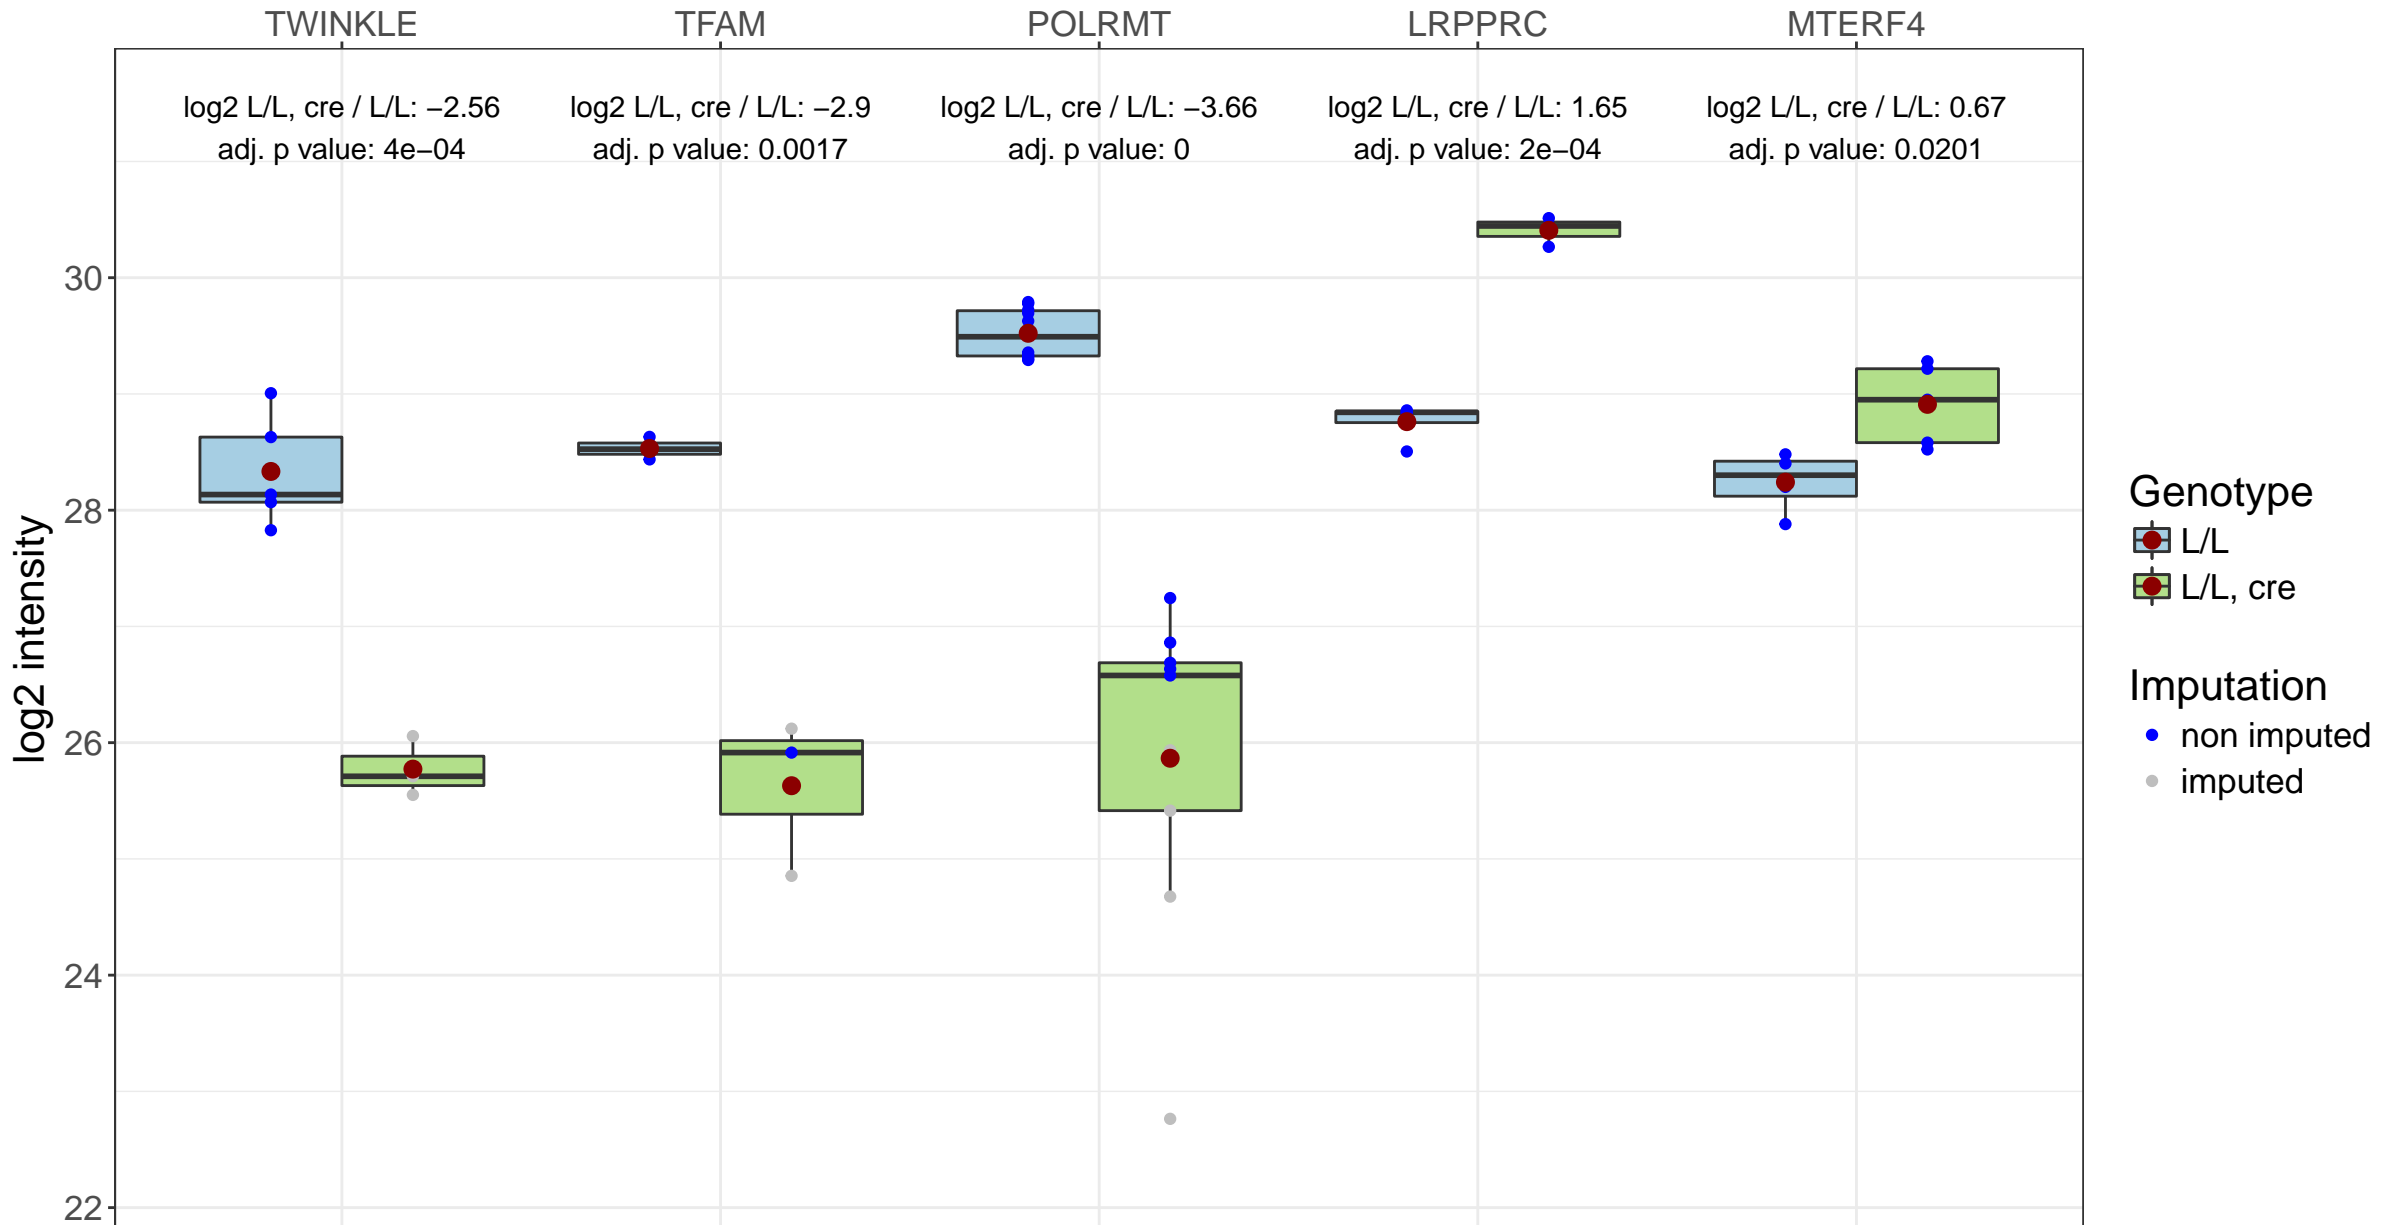

# MRPL17 / Q9D8P4

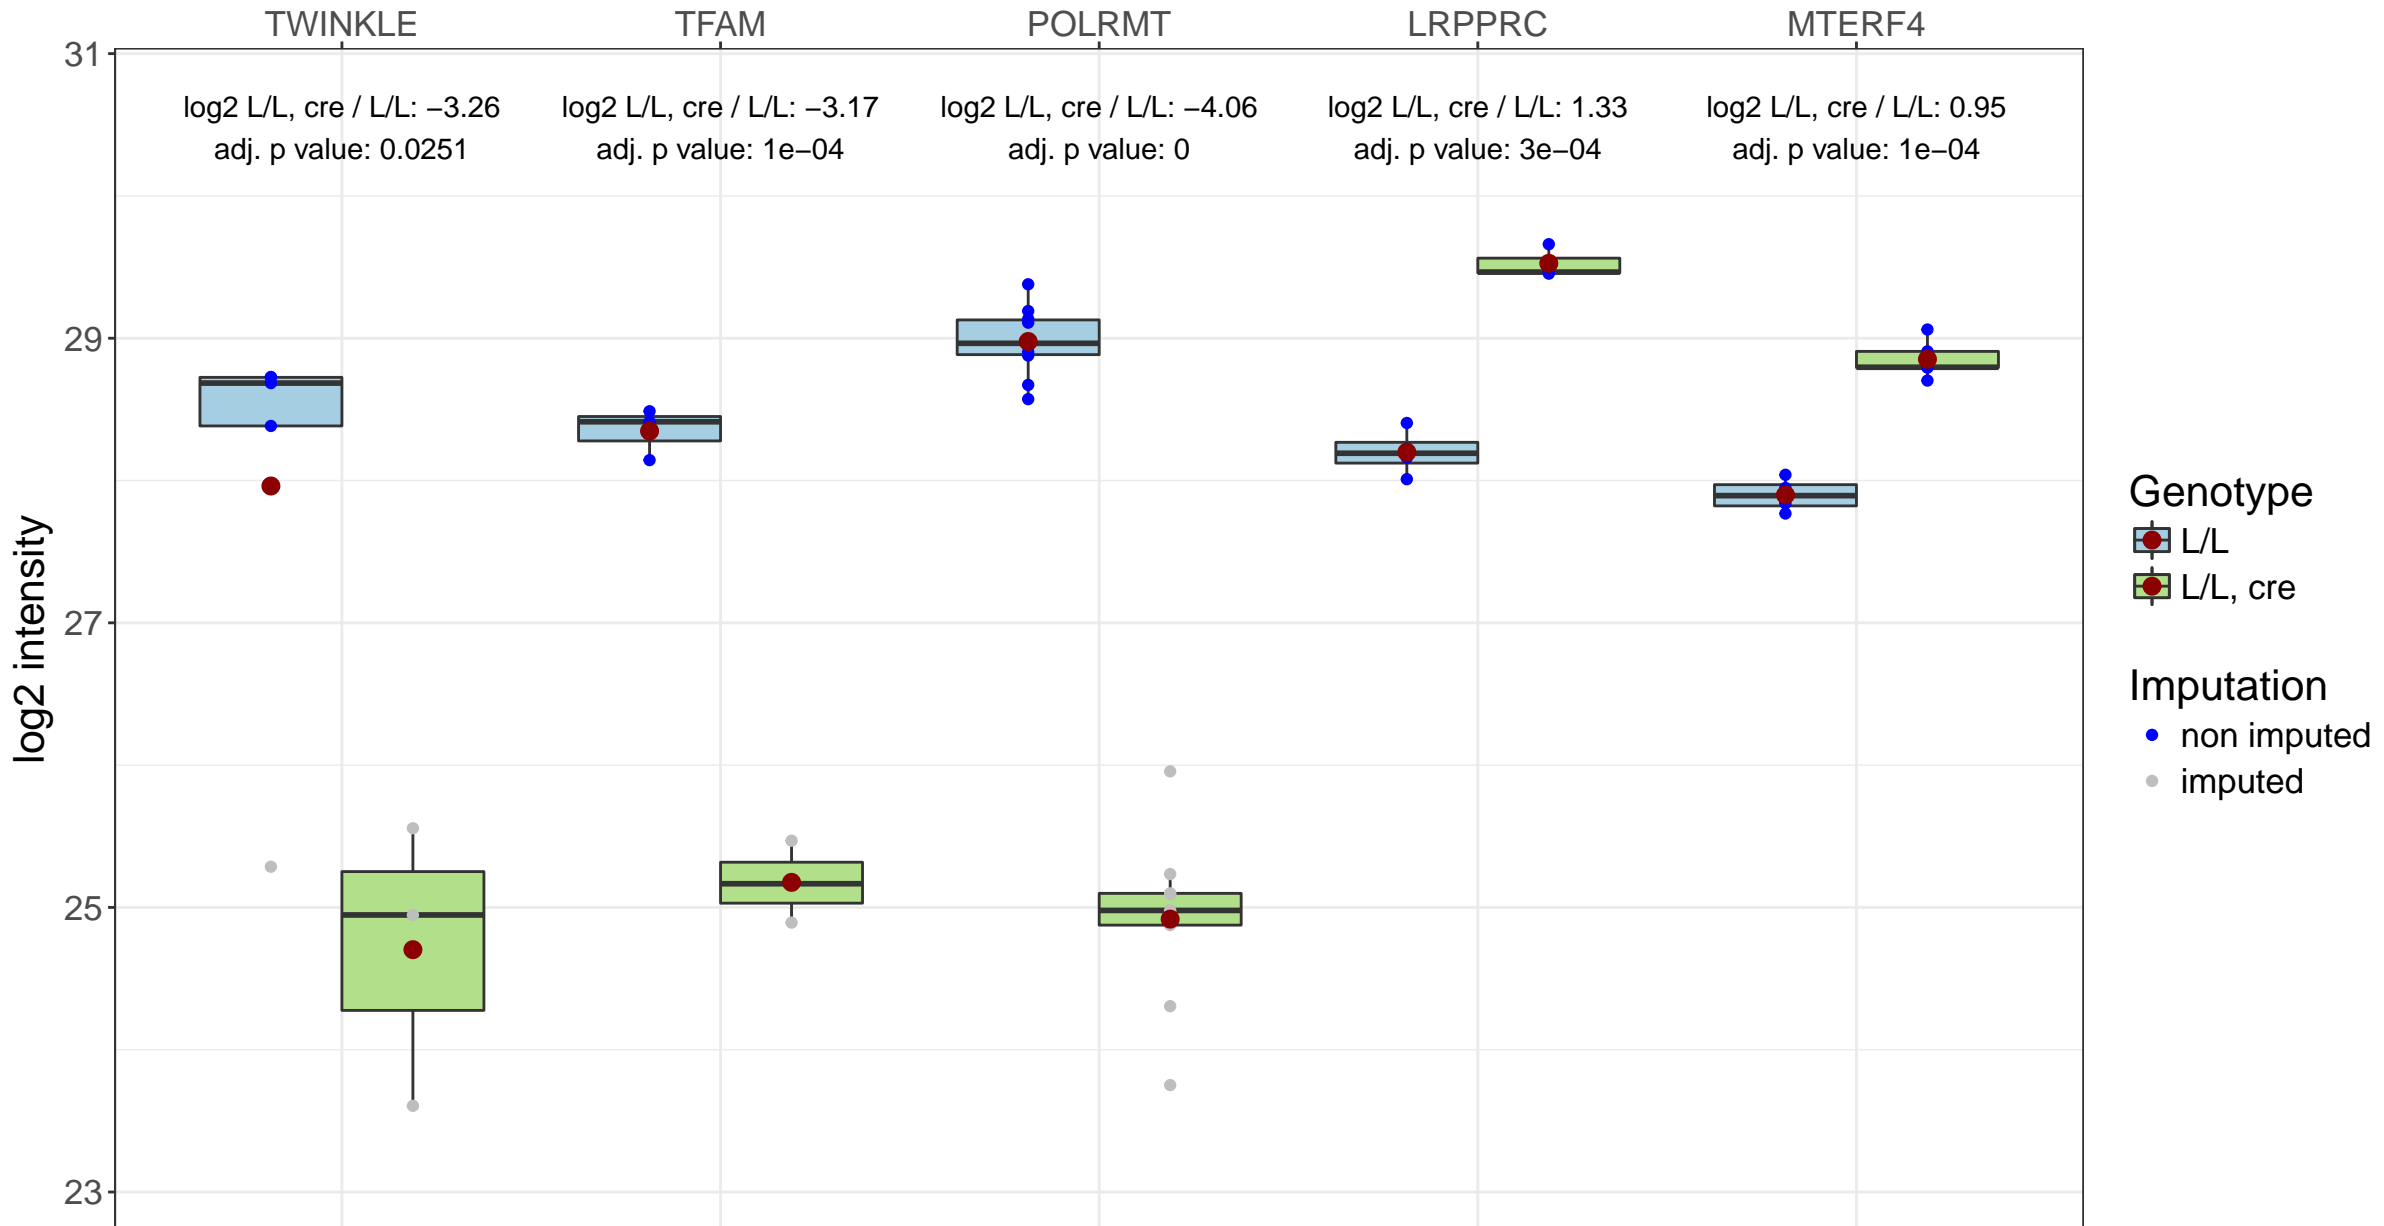

# MRPL18 / Q9CQL5

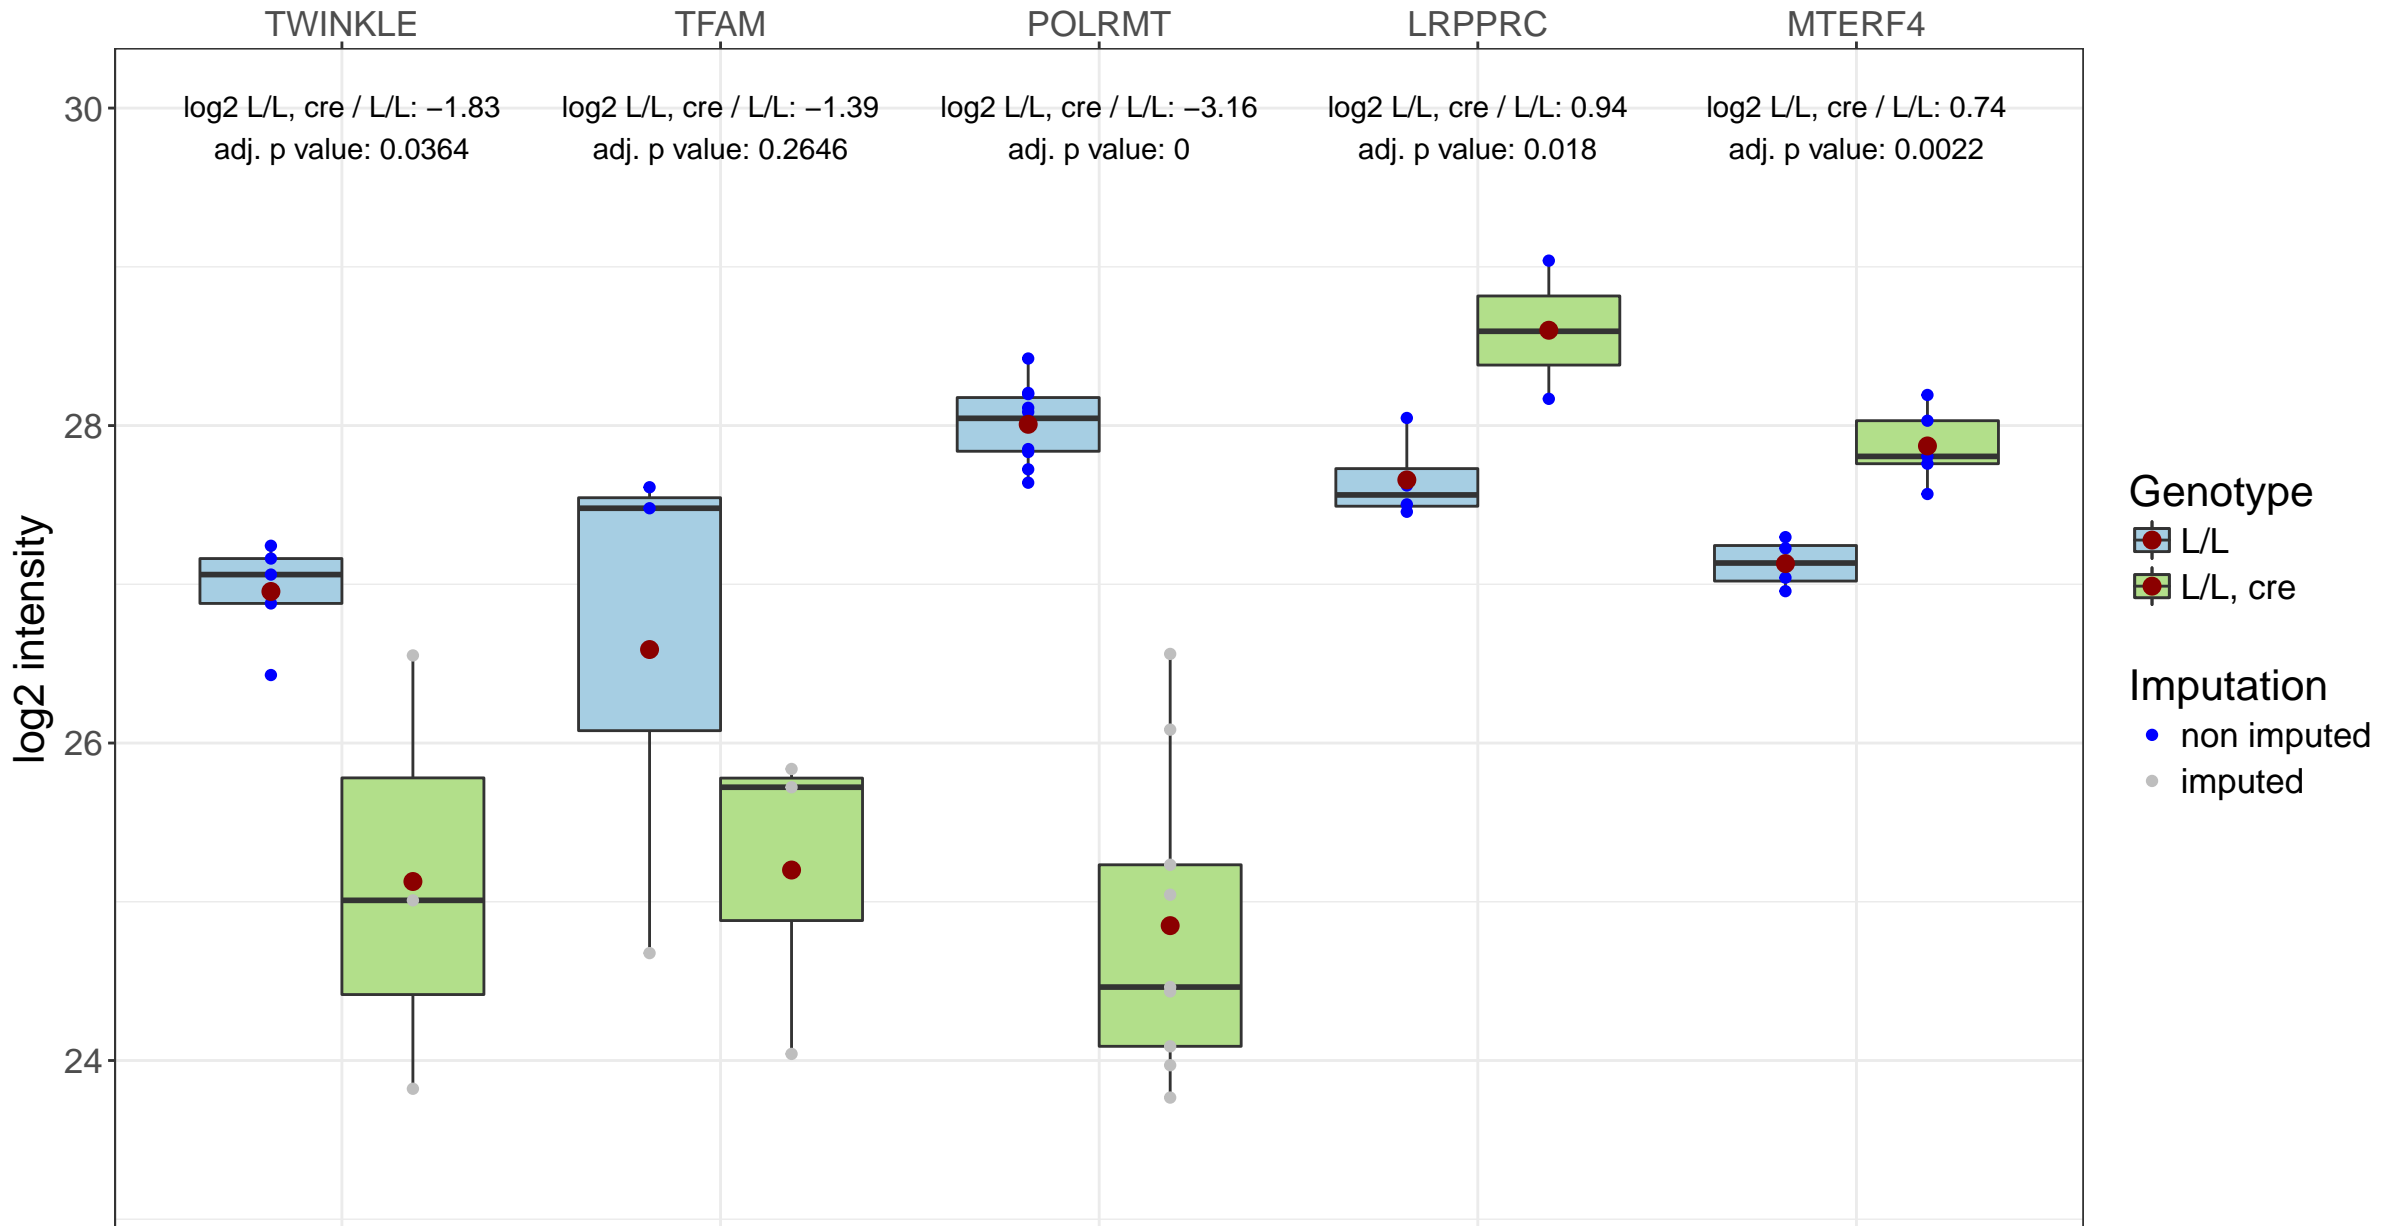



# MRPL19 / Q9D338

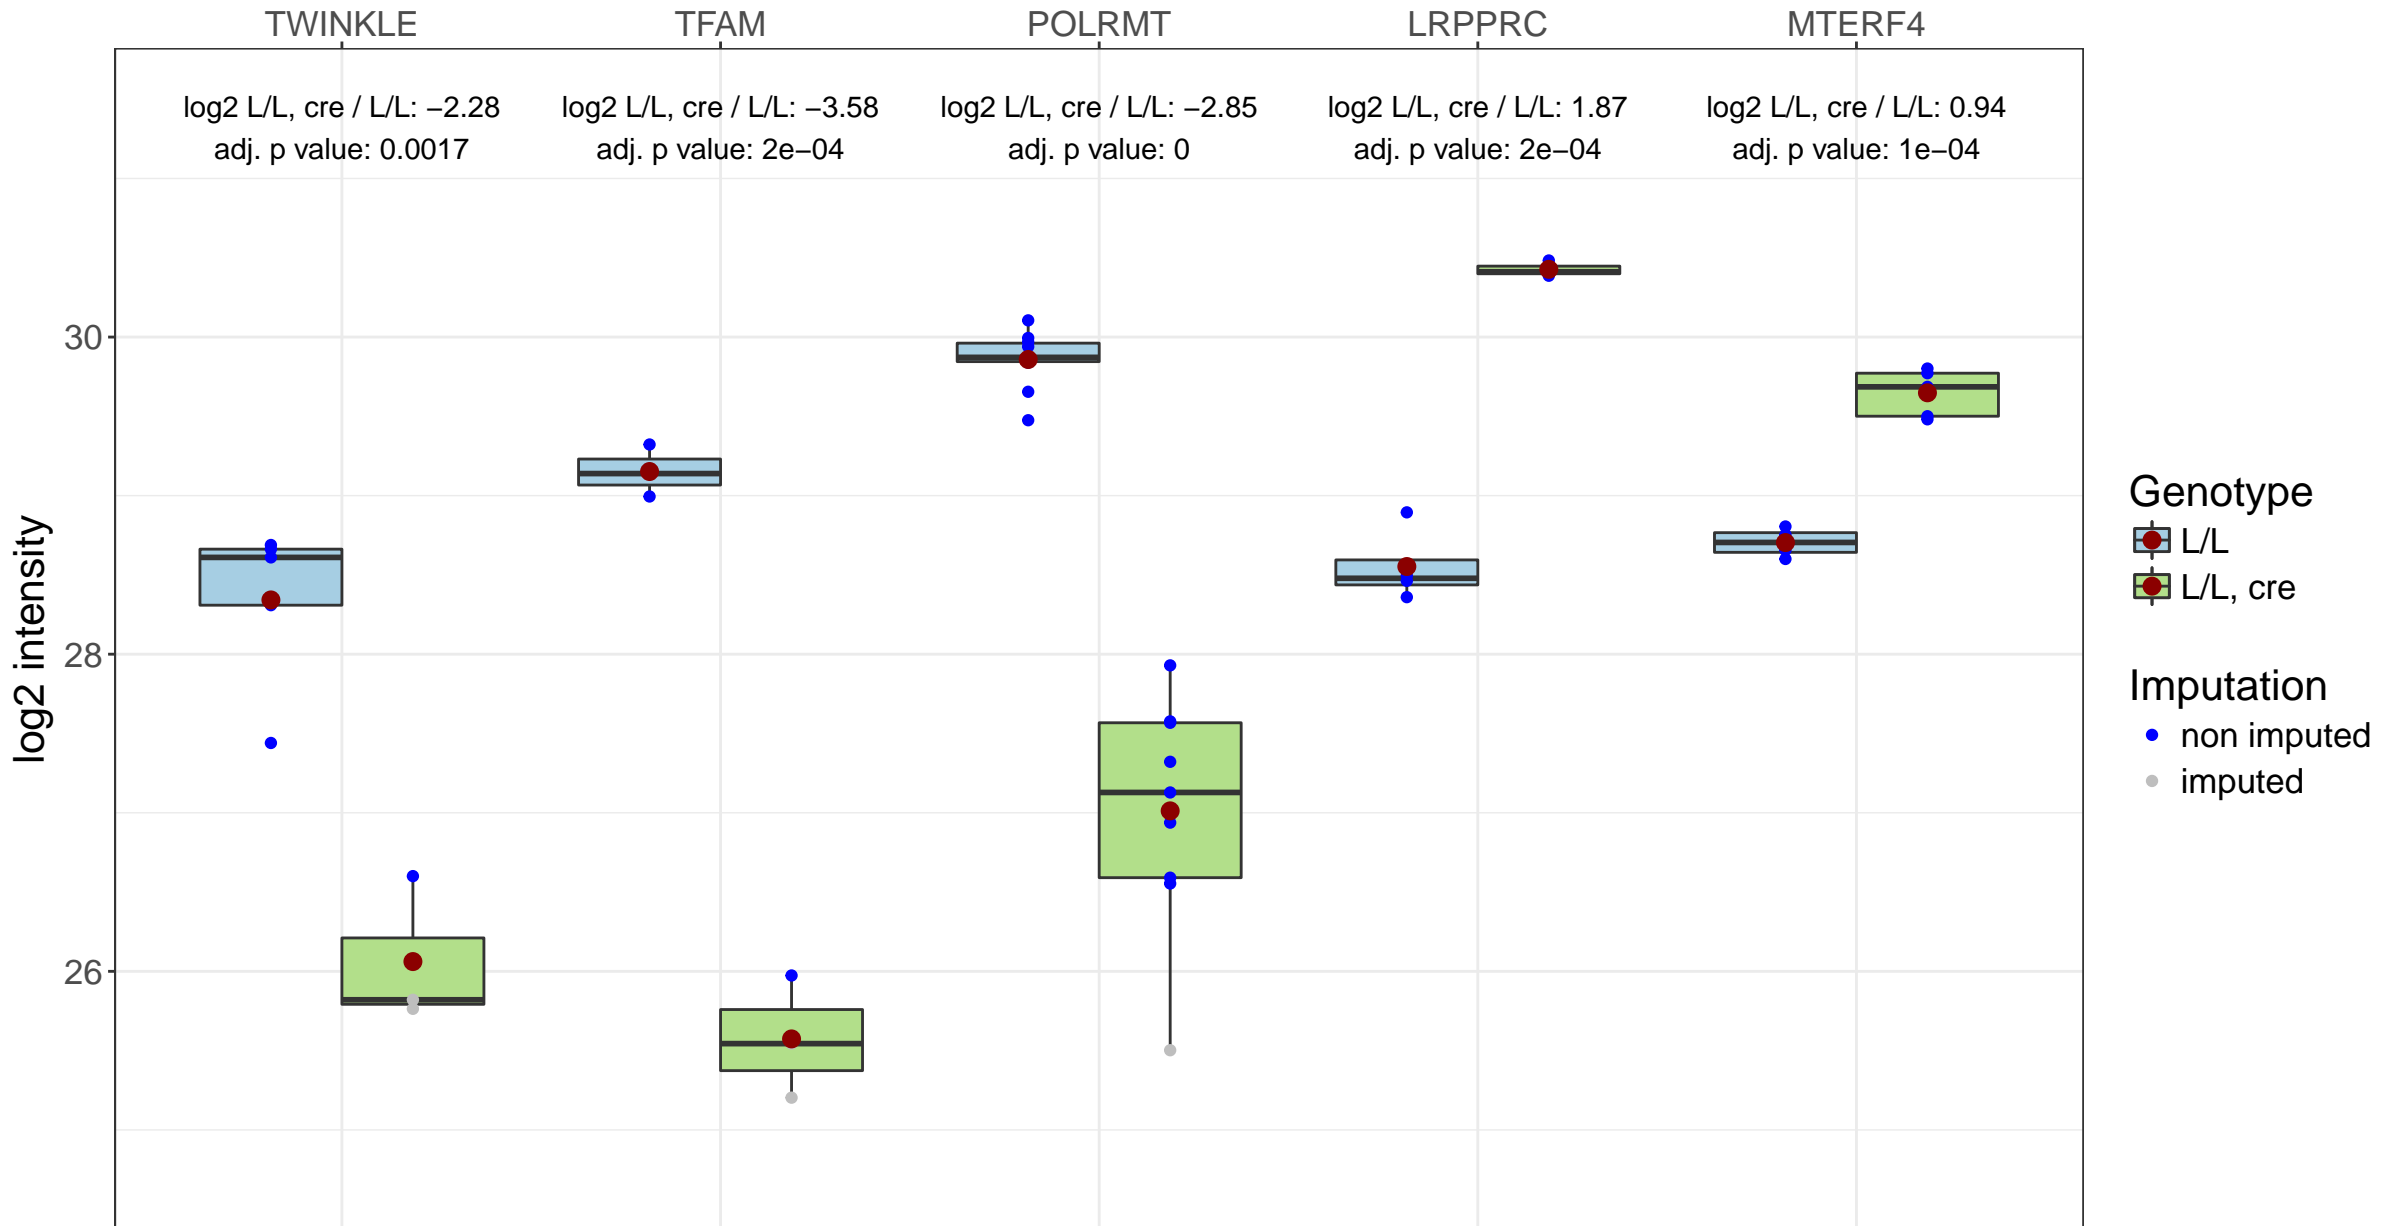

# MRPL2 / B1B1D8

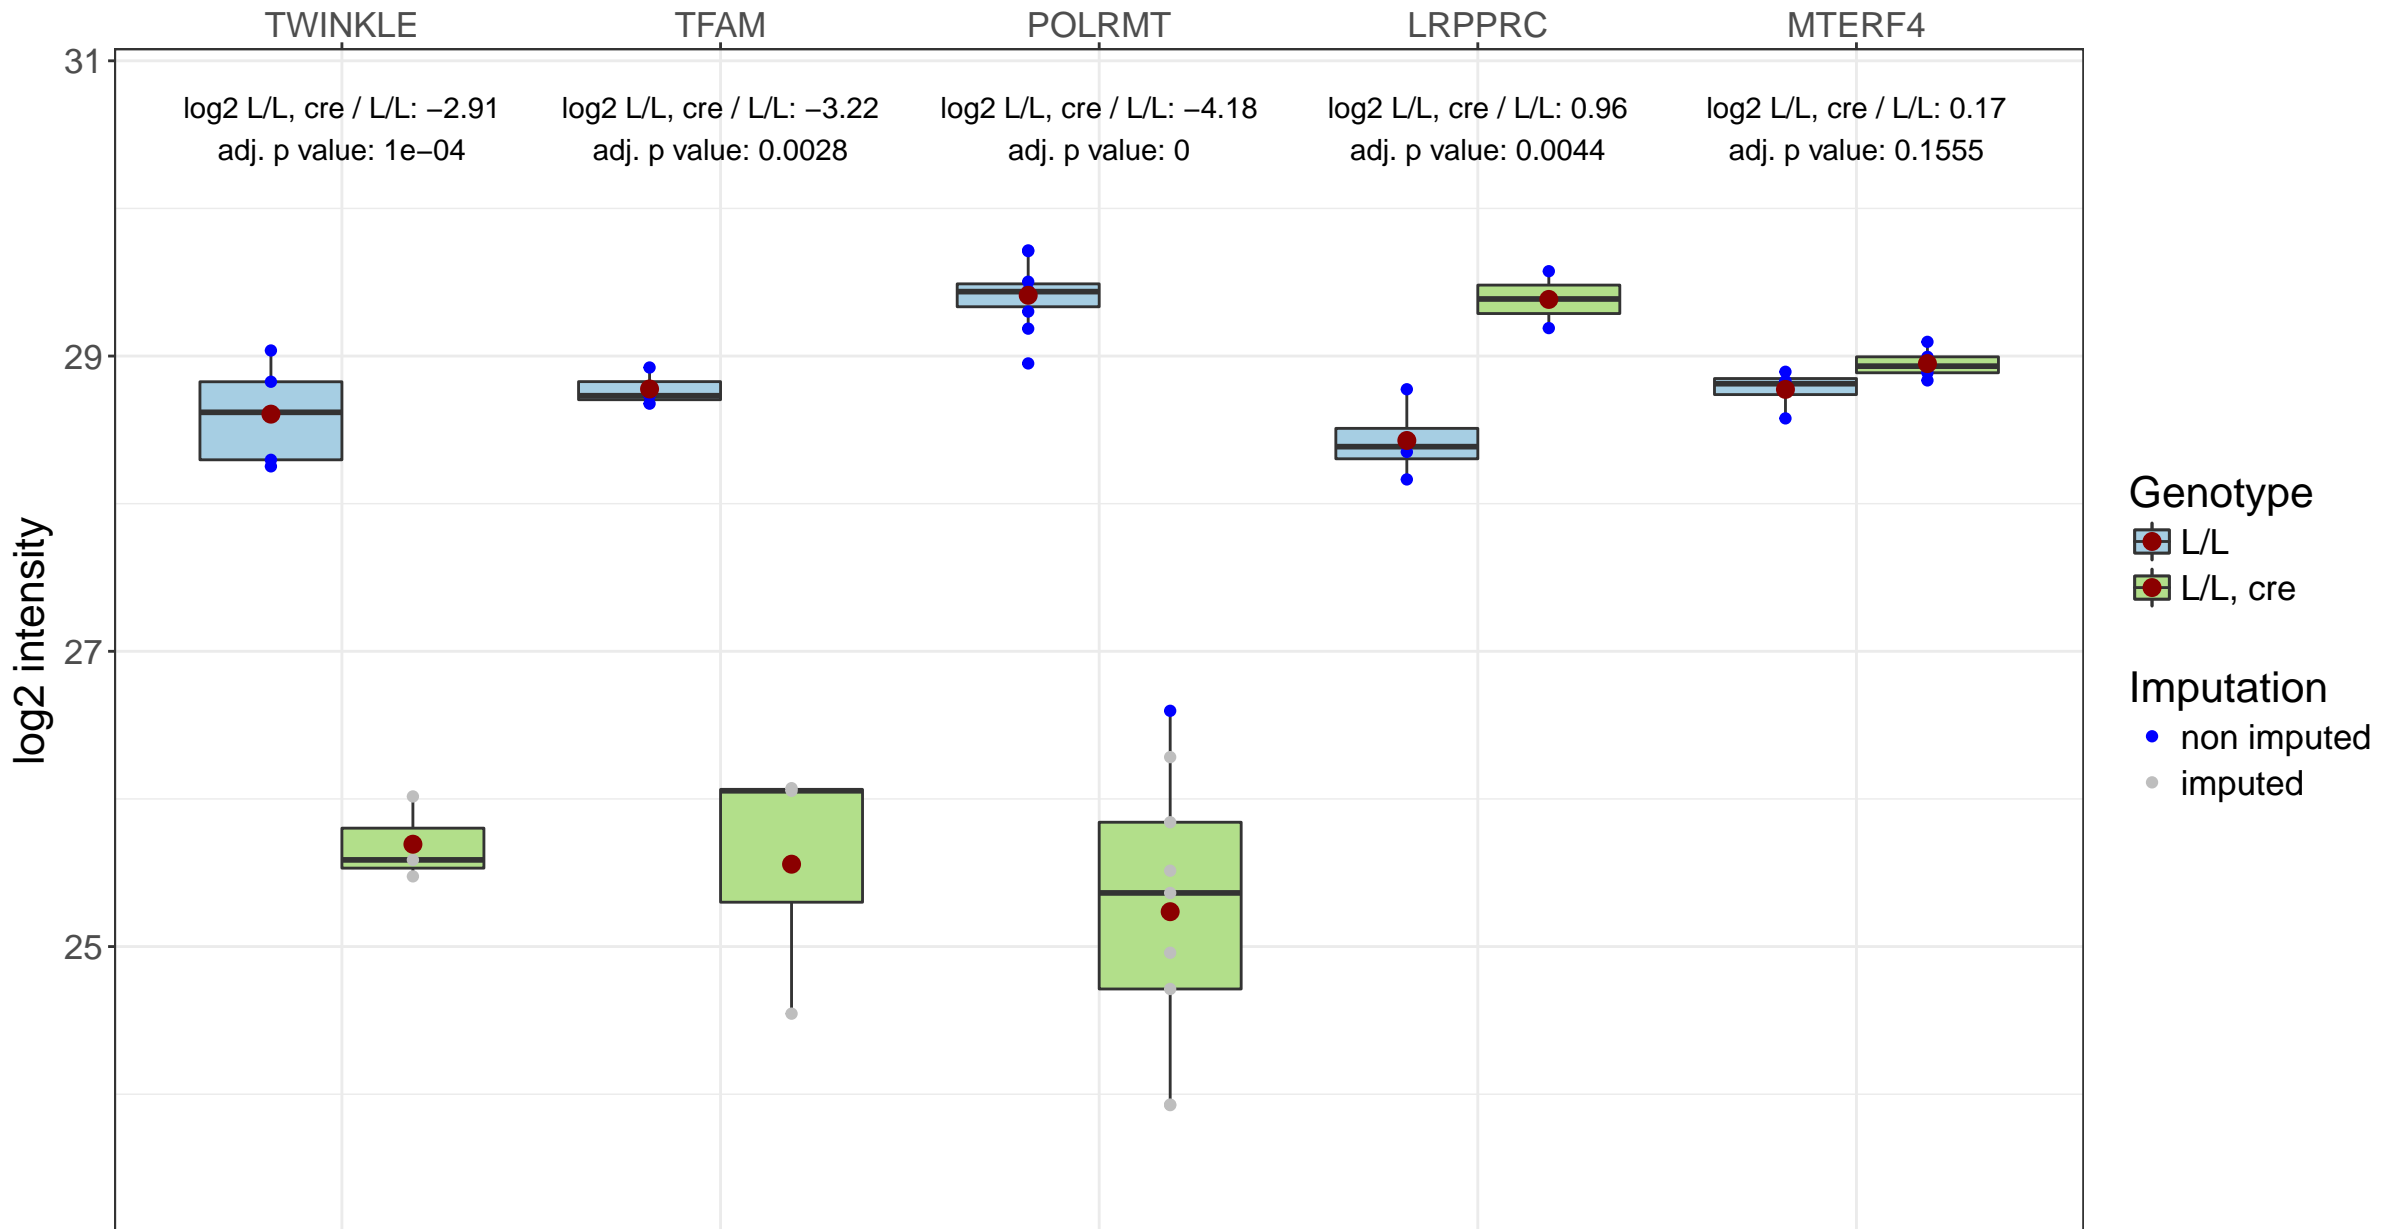

# MRPL20 / V9GX17

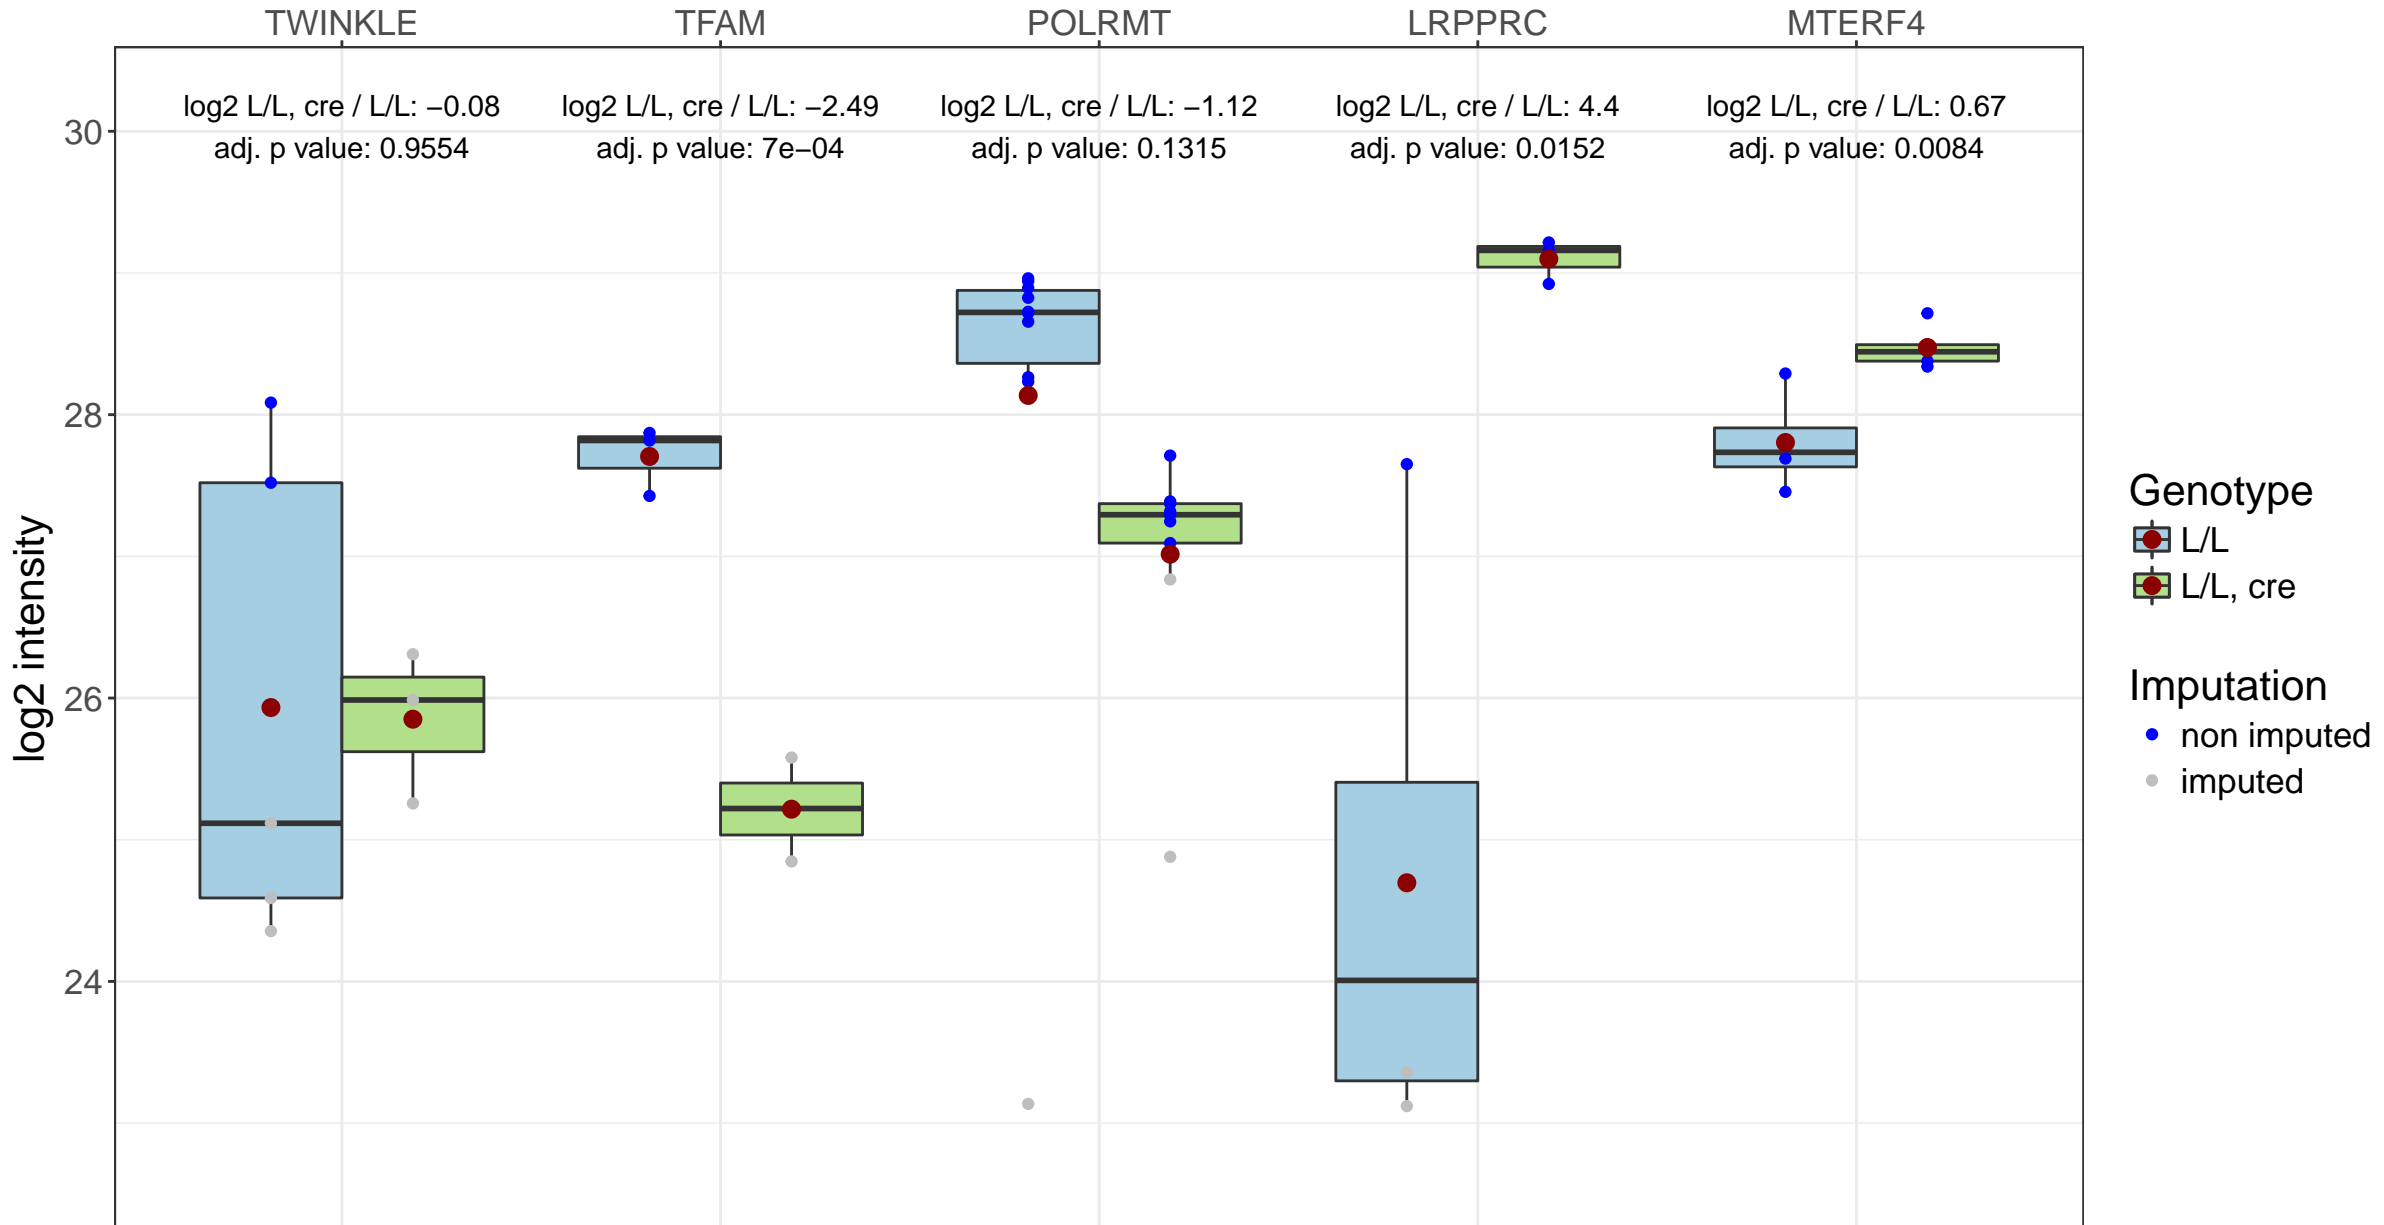

# MRPL21 / Q9D1N9

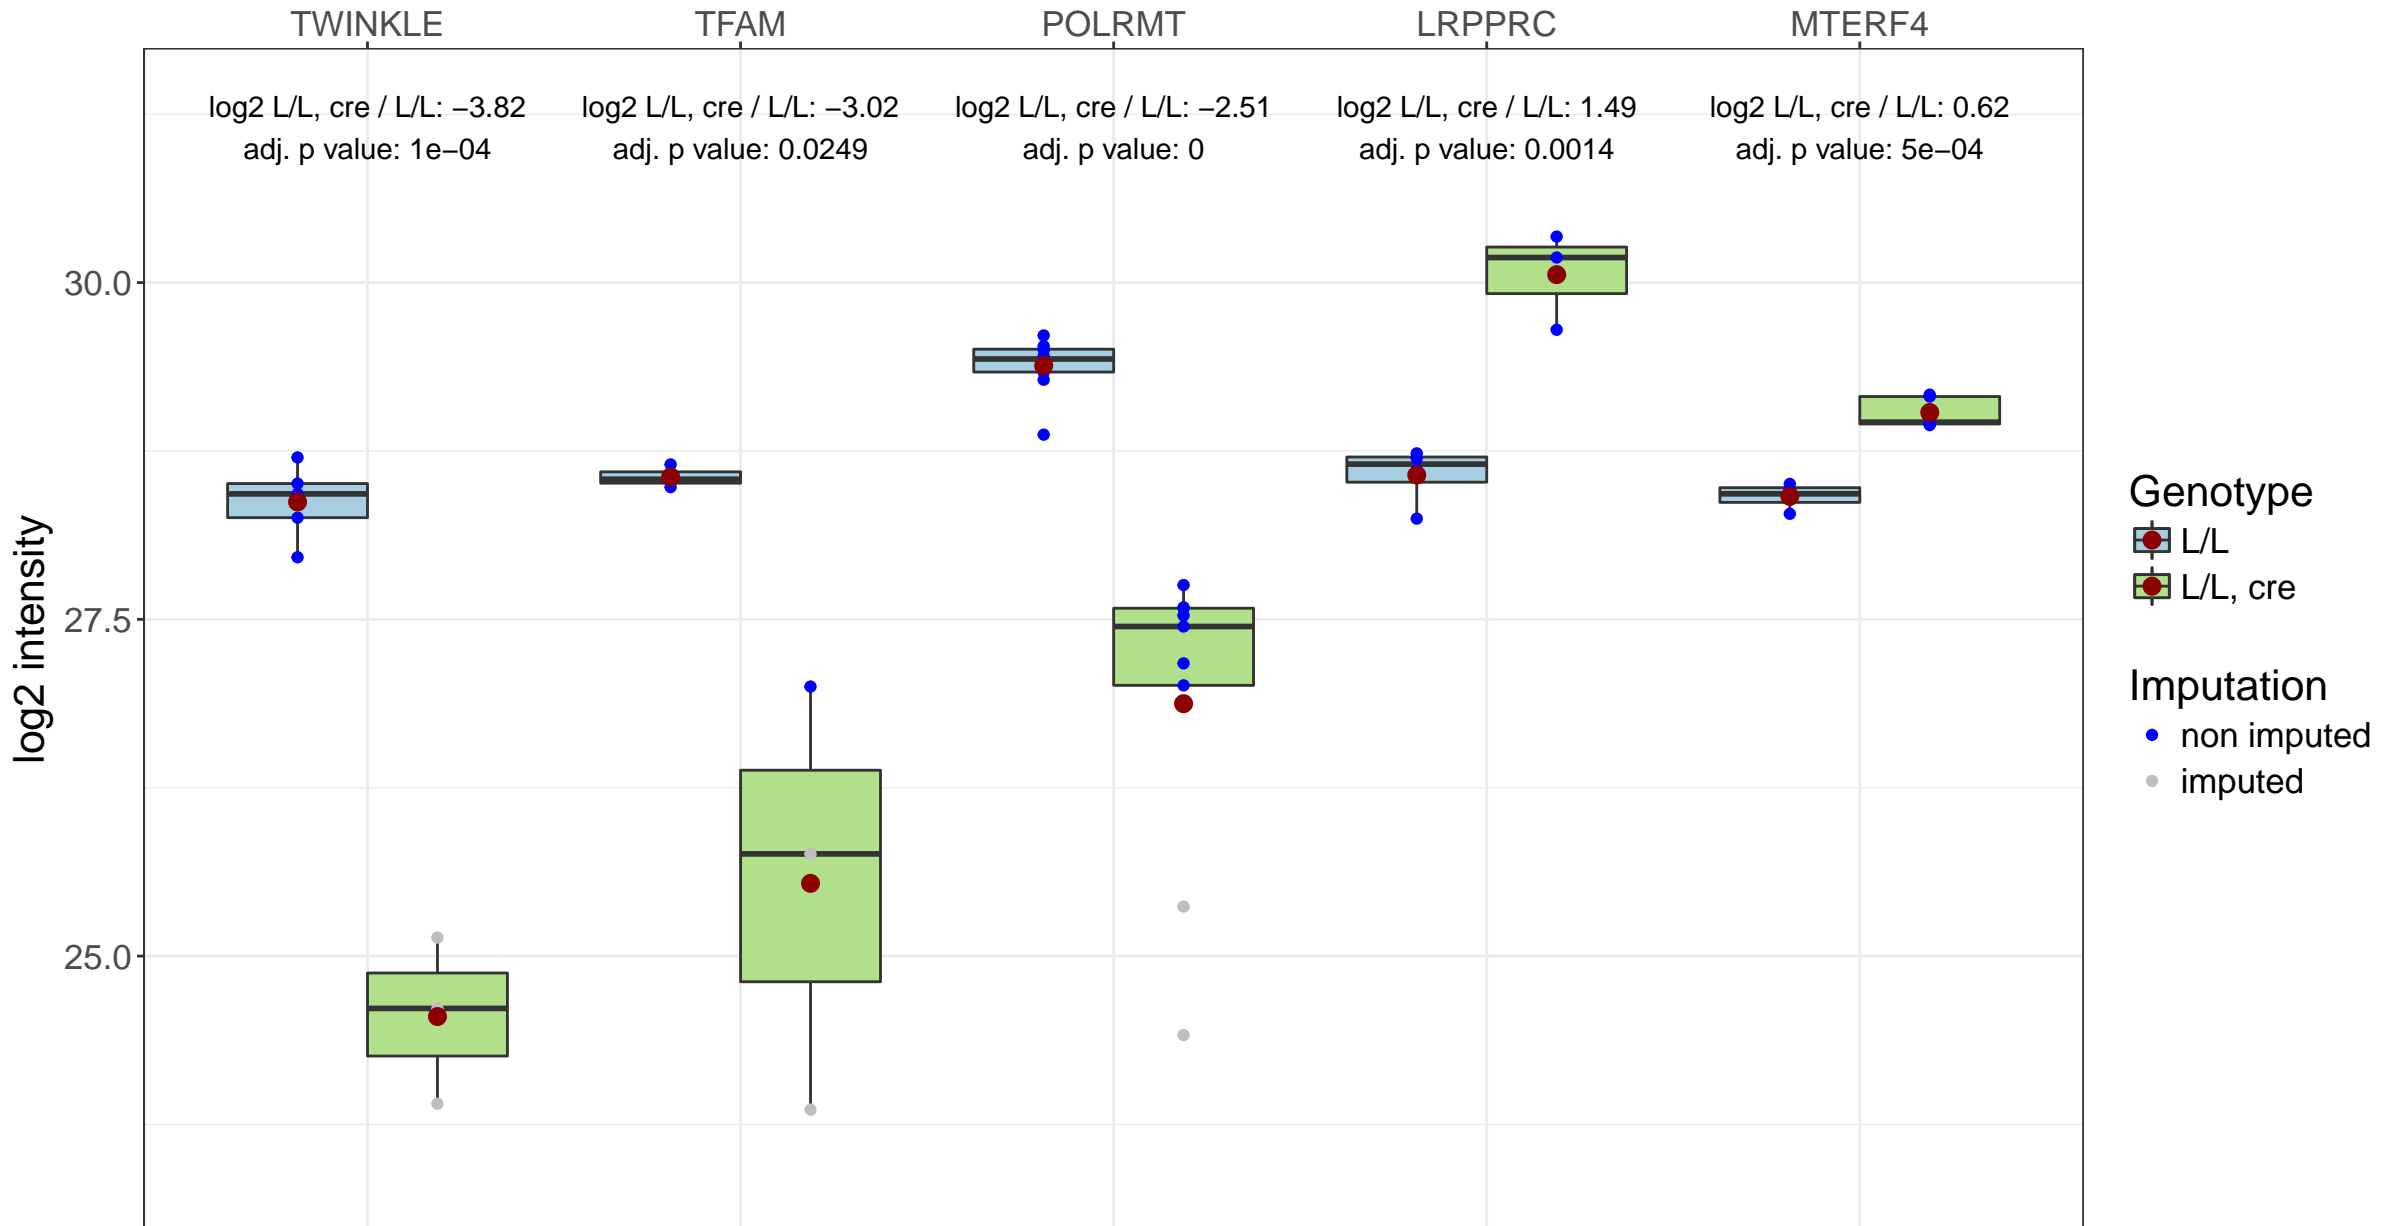

# MRPL22 / Q8BU88

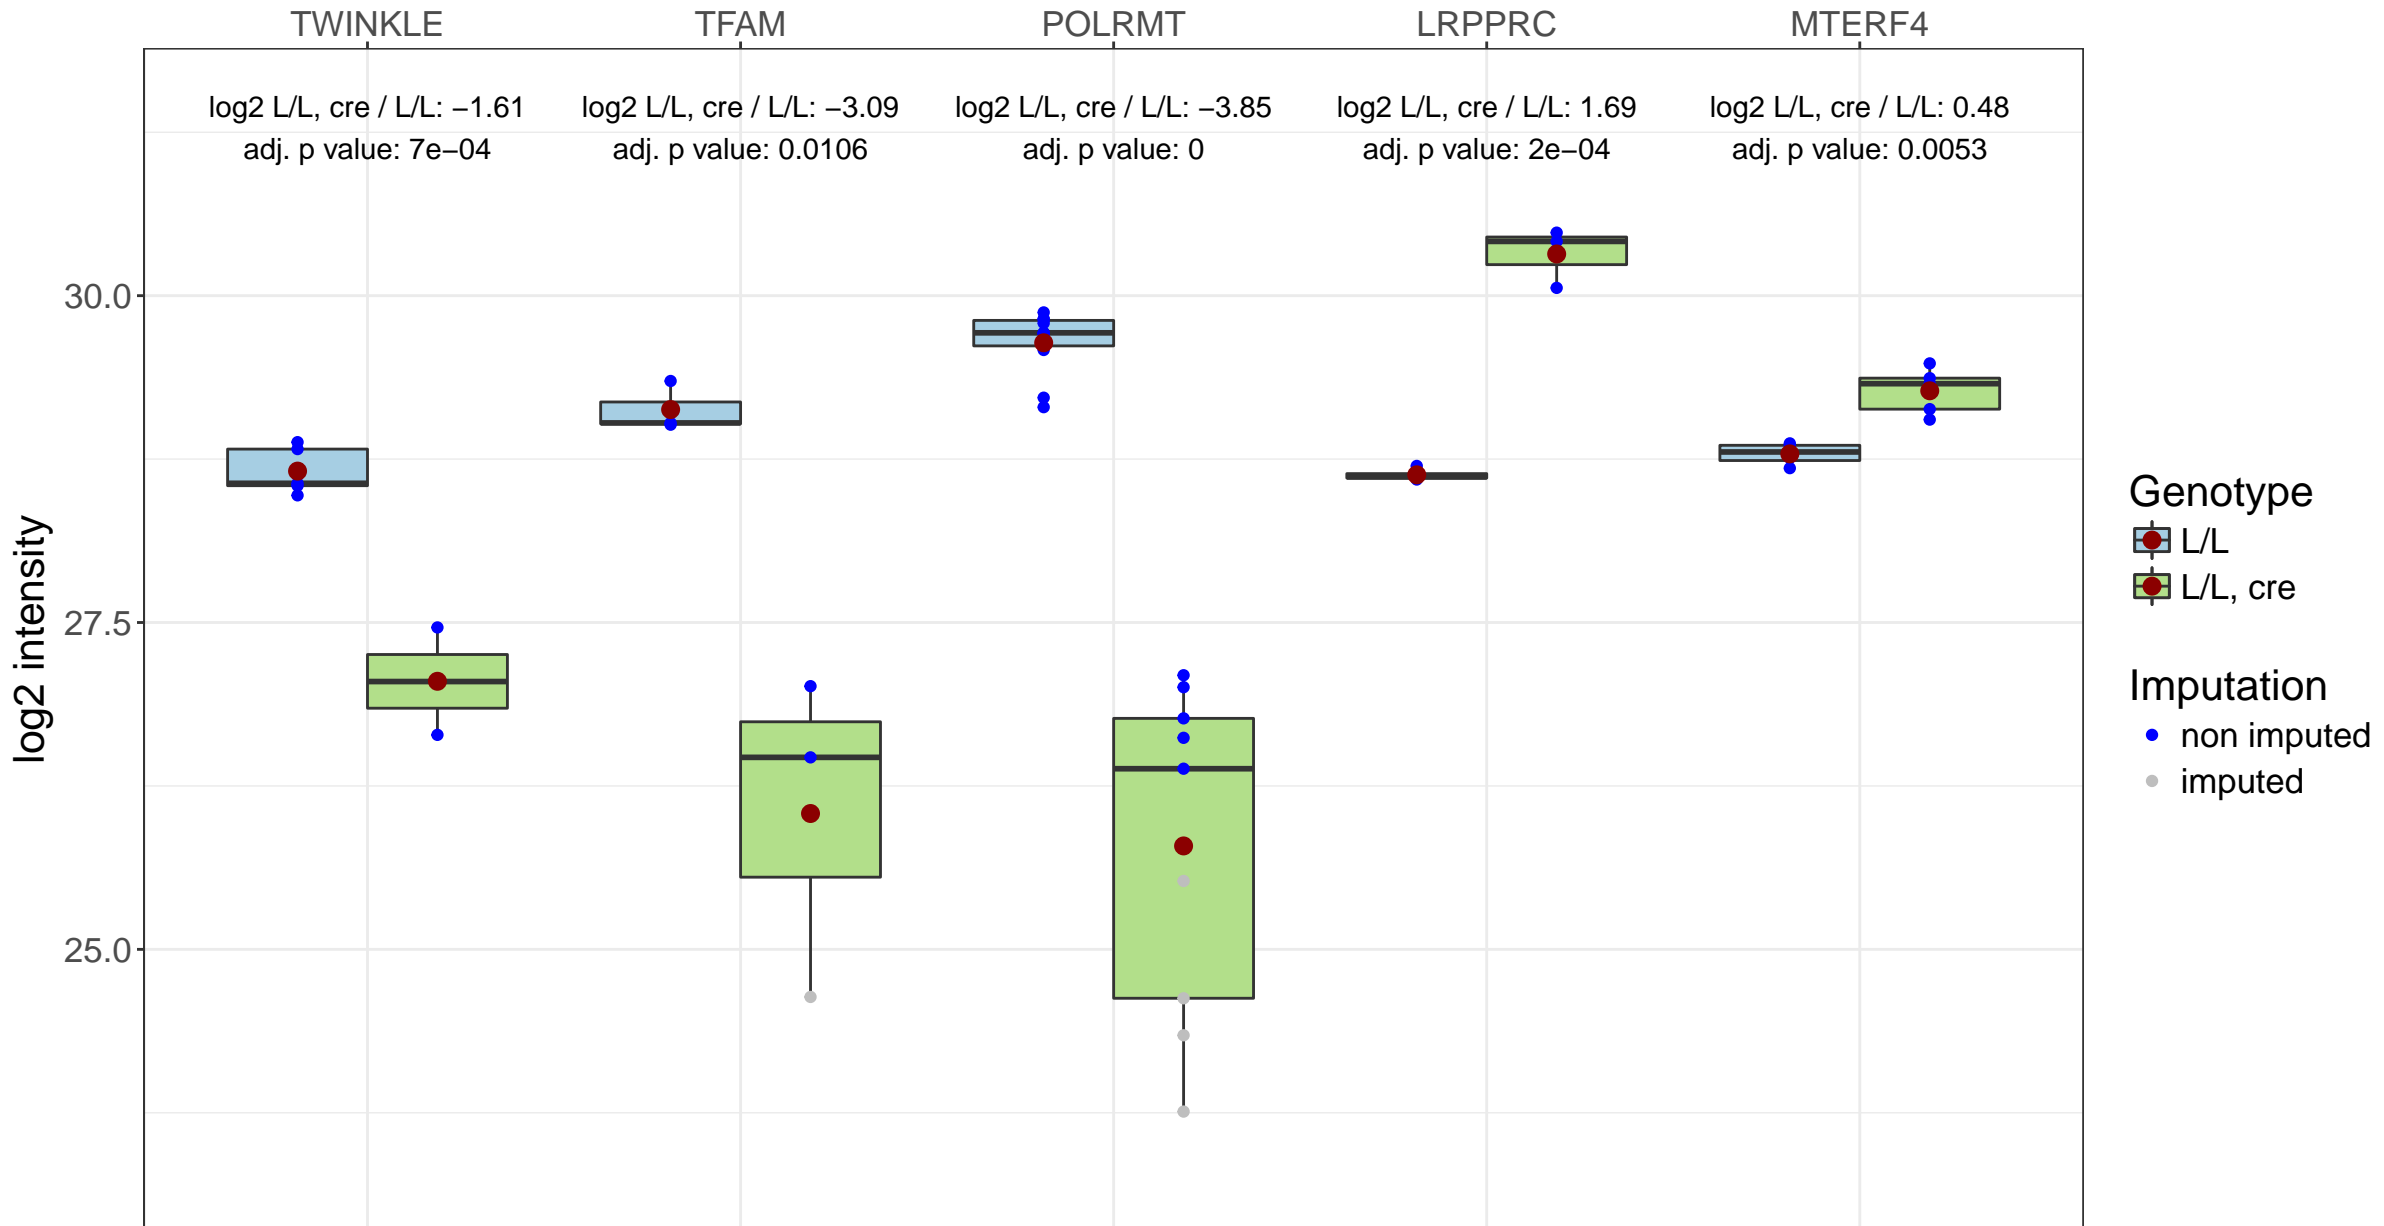

# MRPL23 / O35972

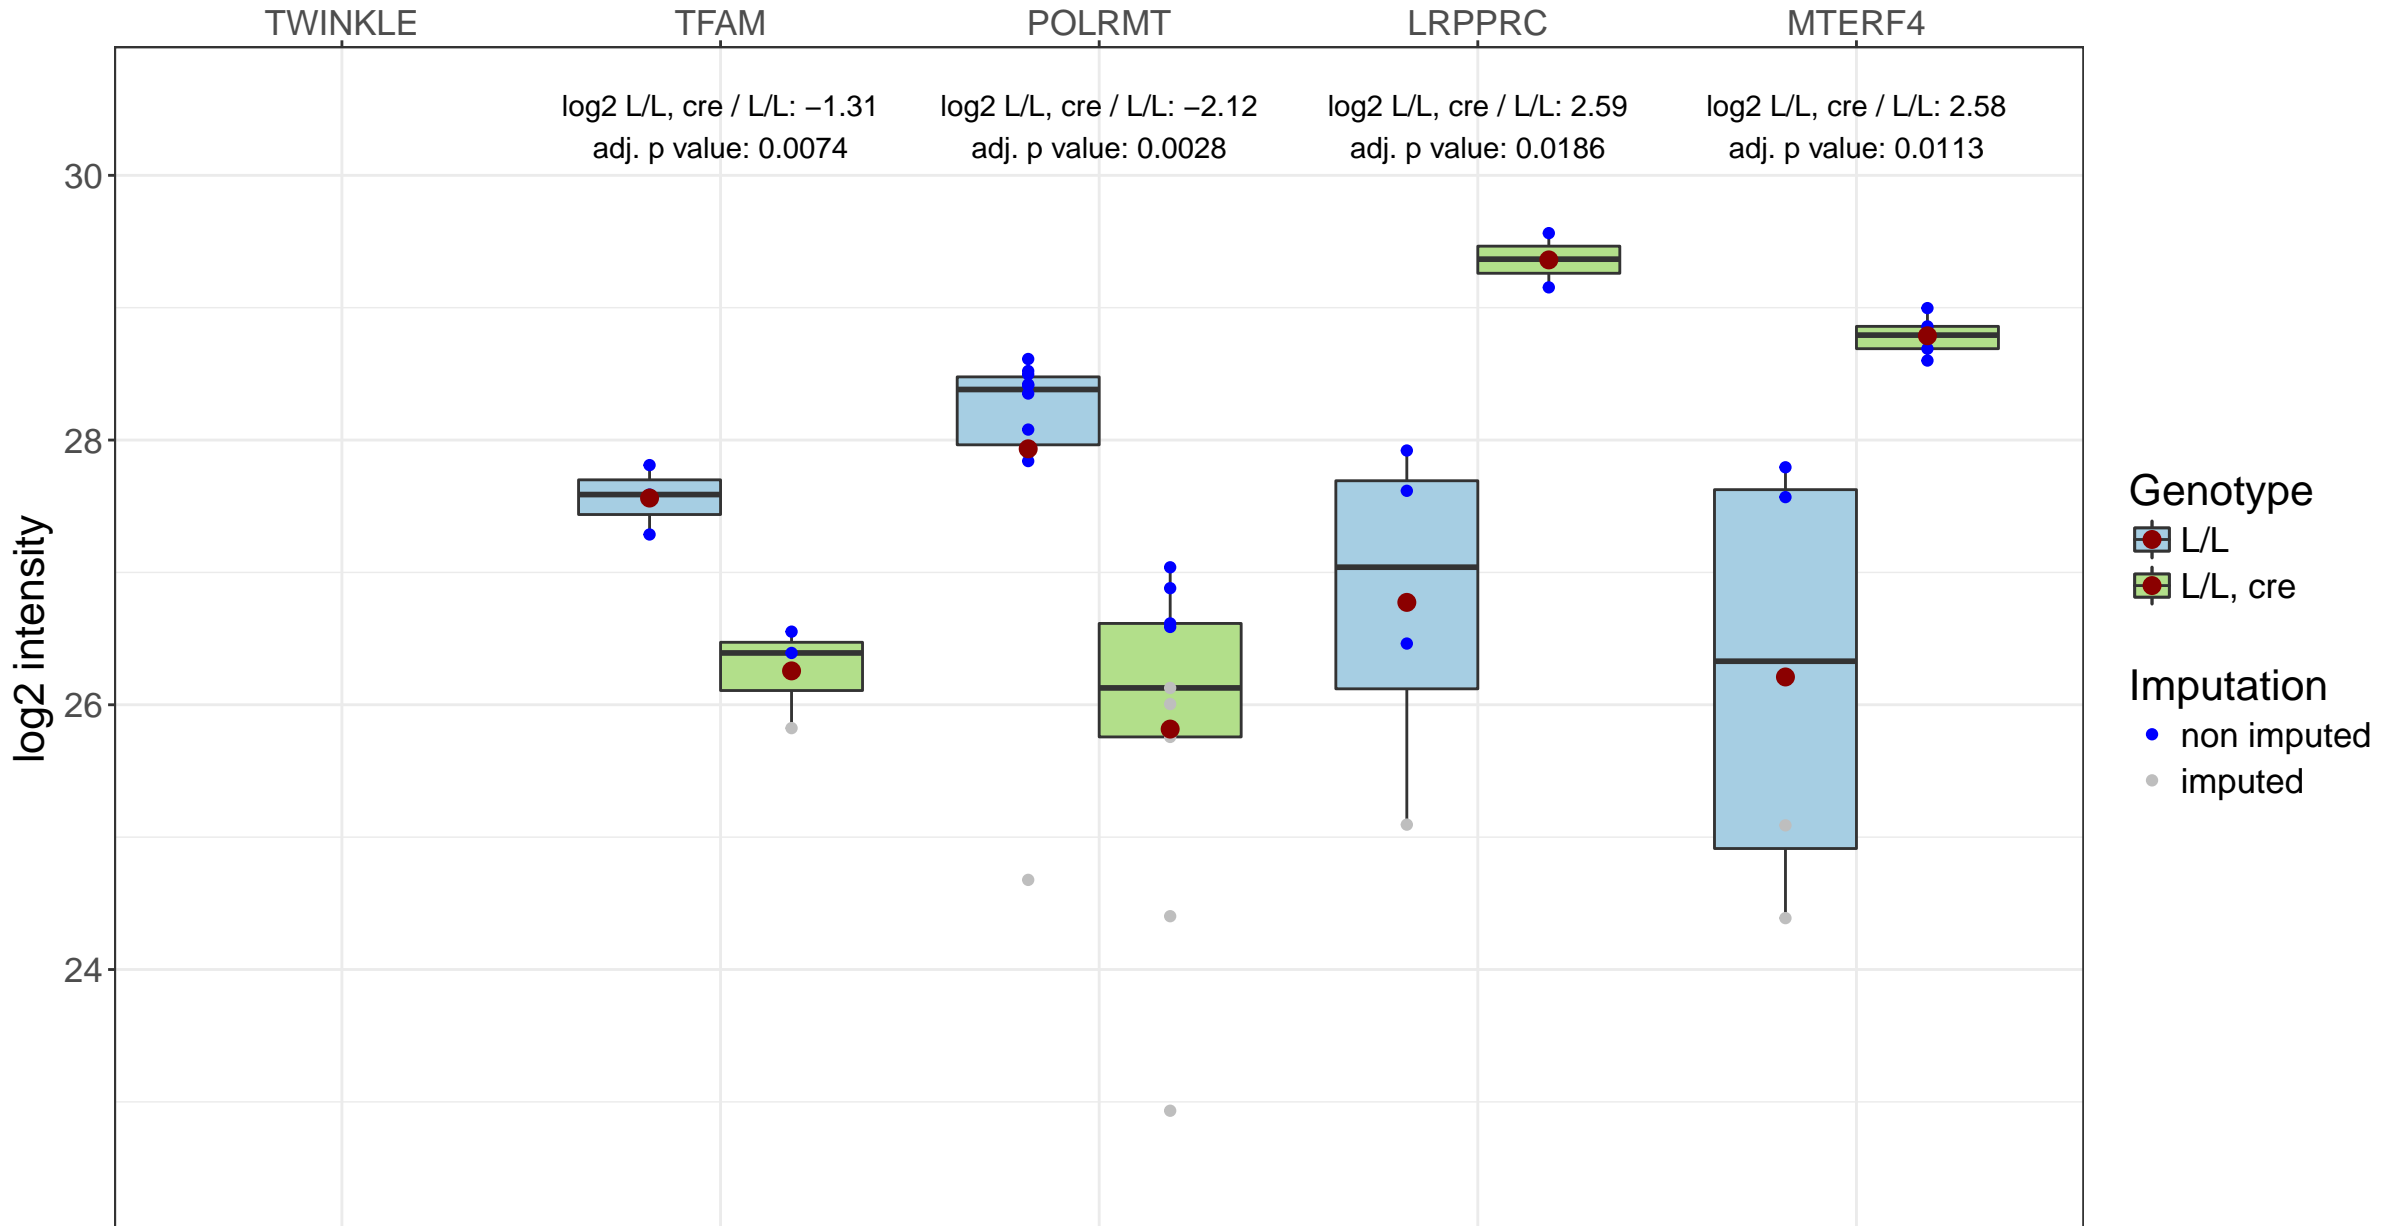

# MRPL24 / Q9CQ06

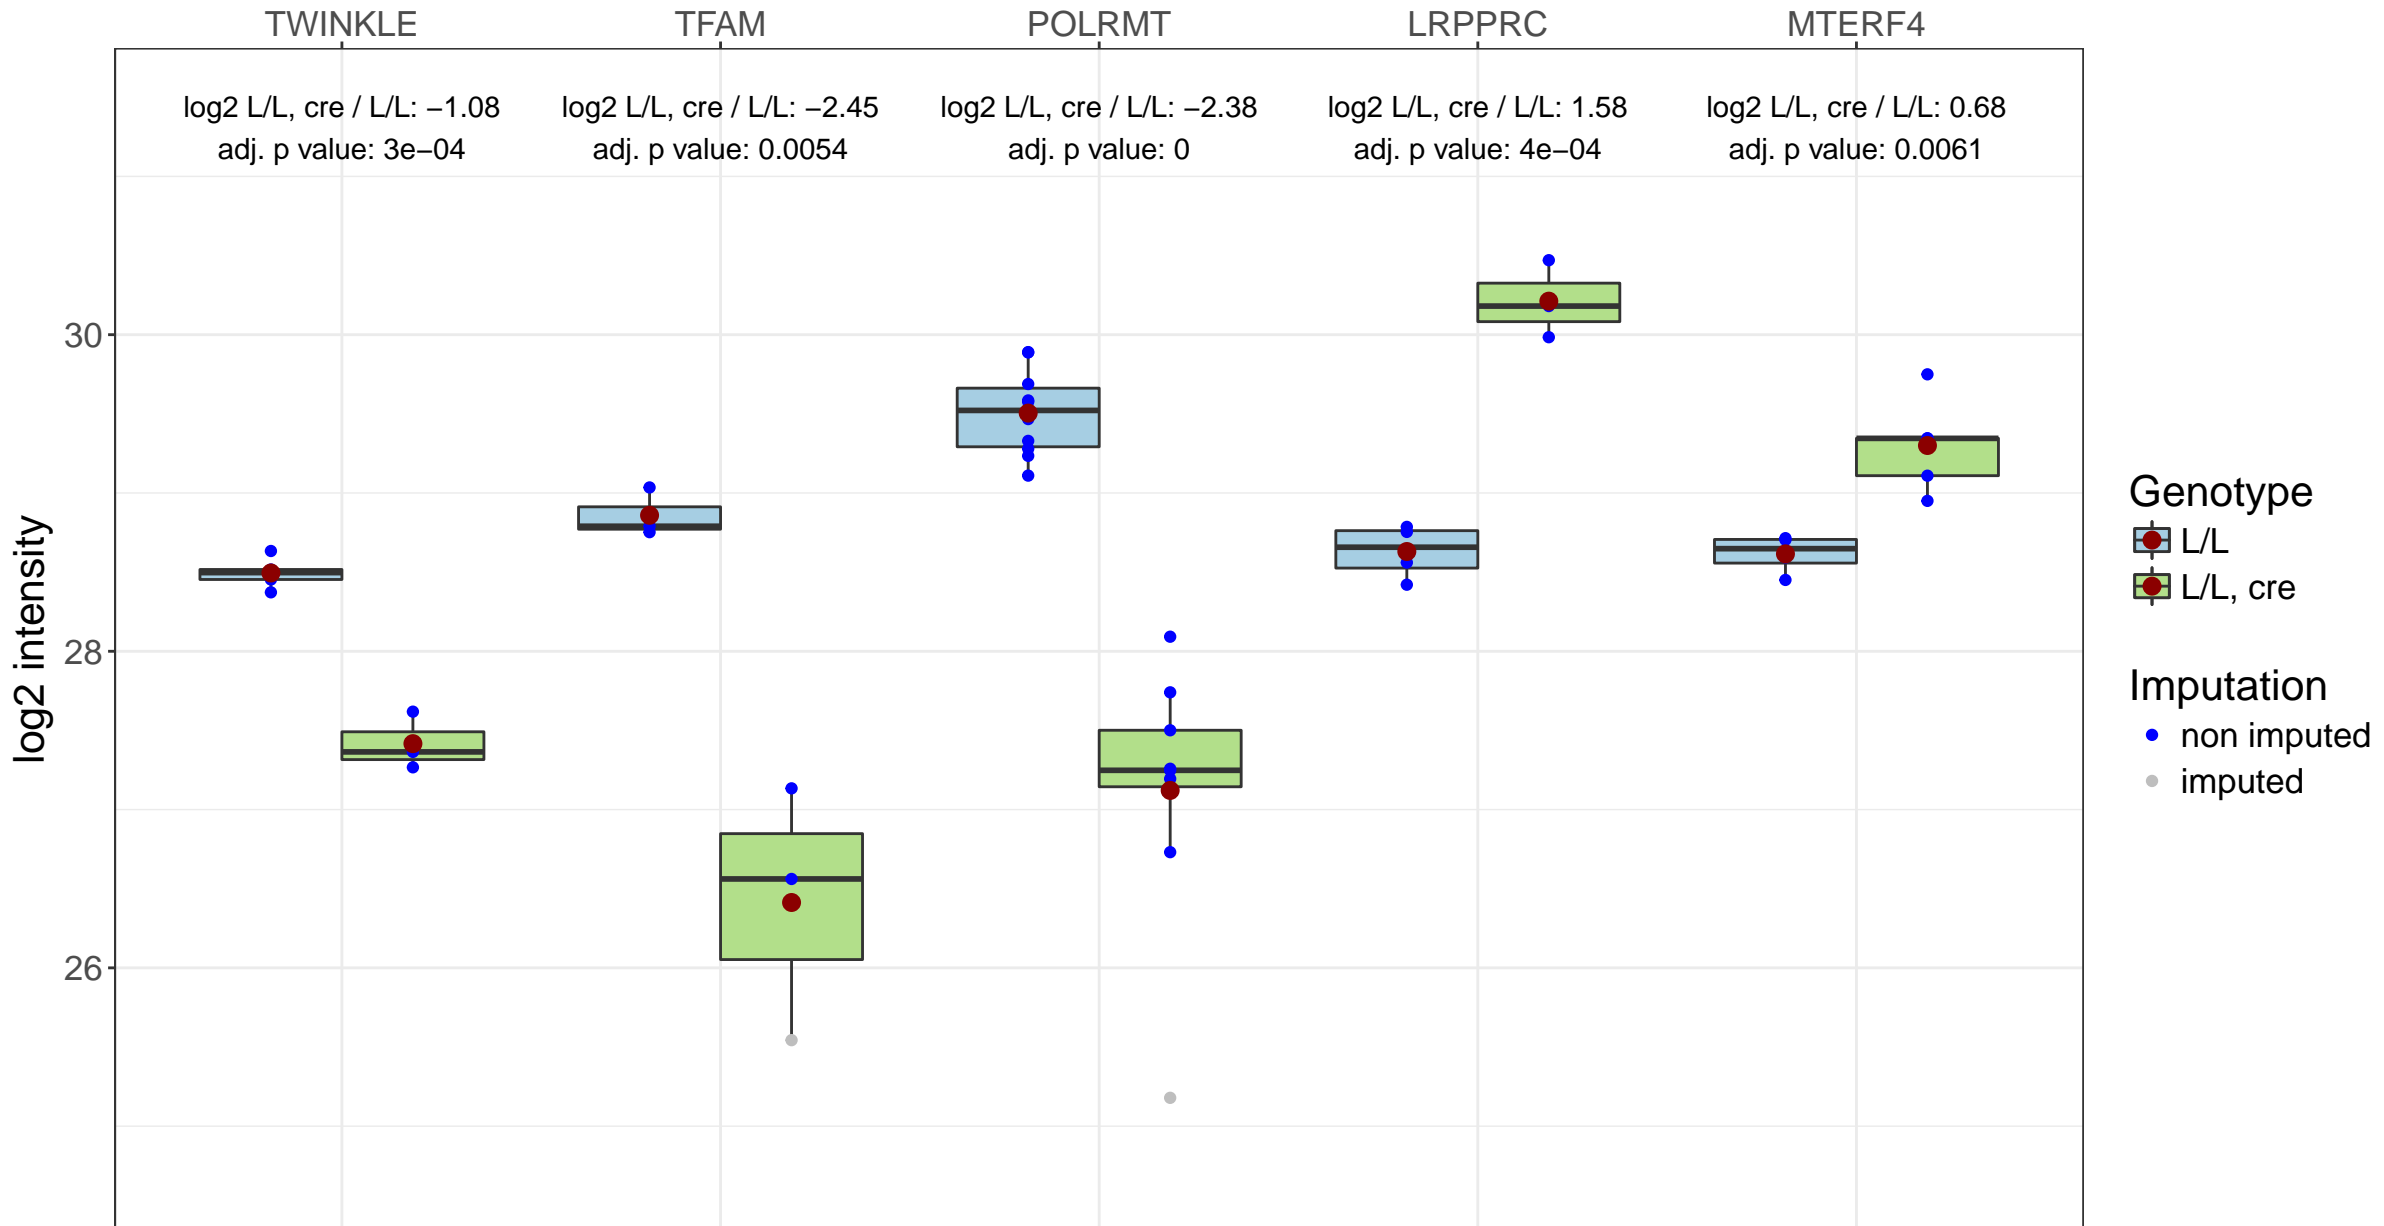

# MRPL27 / Q99N92

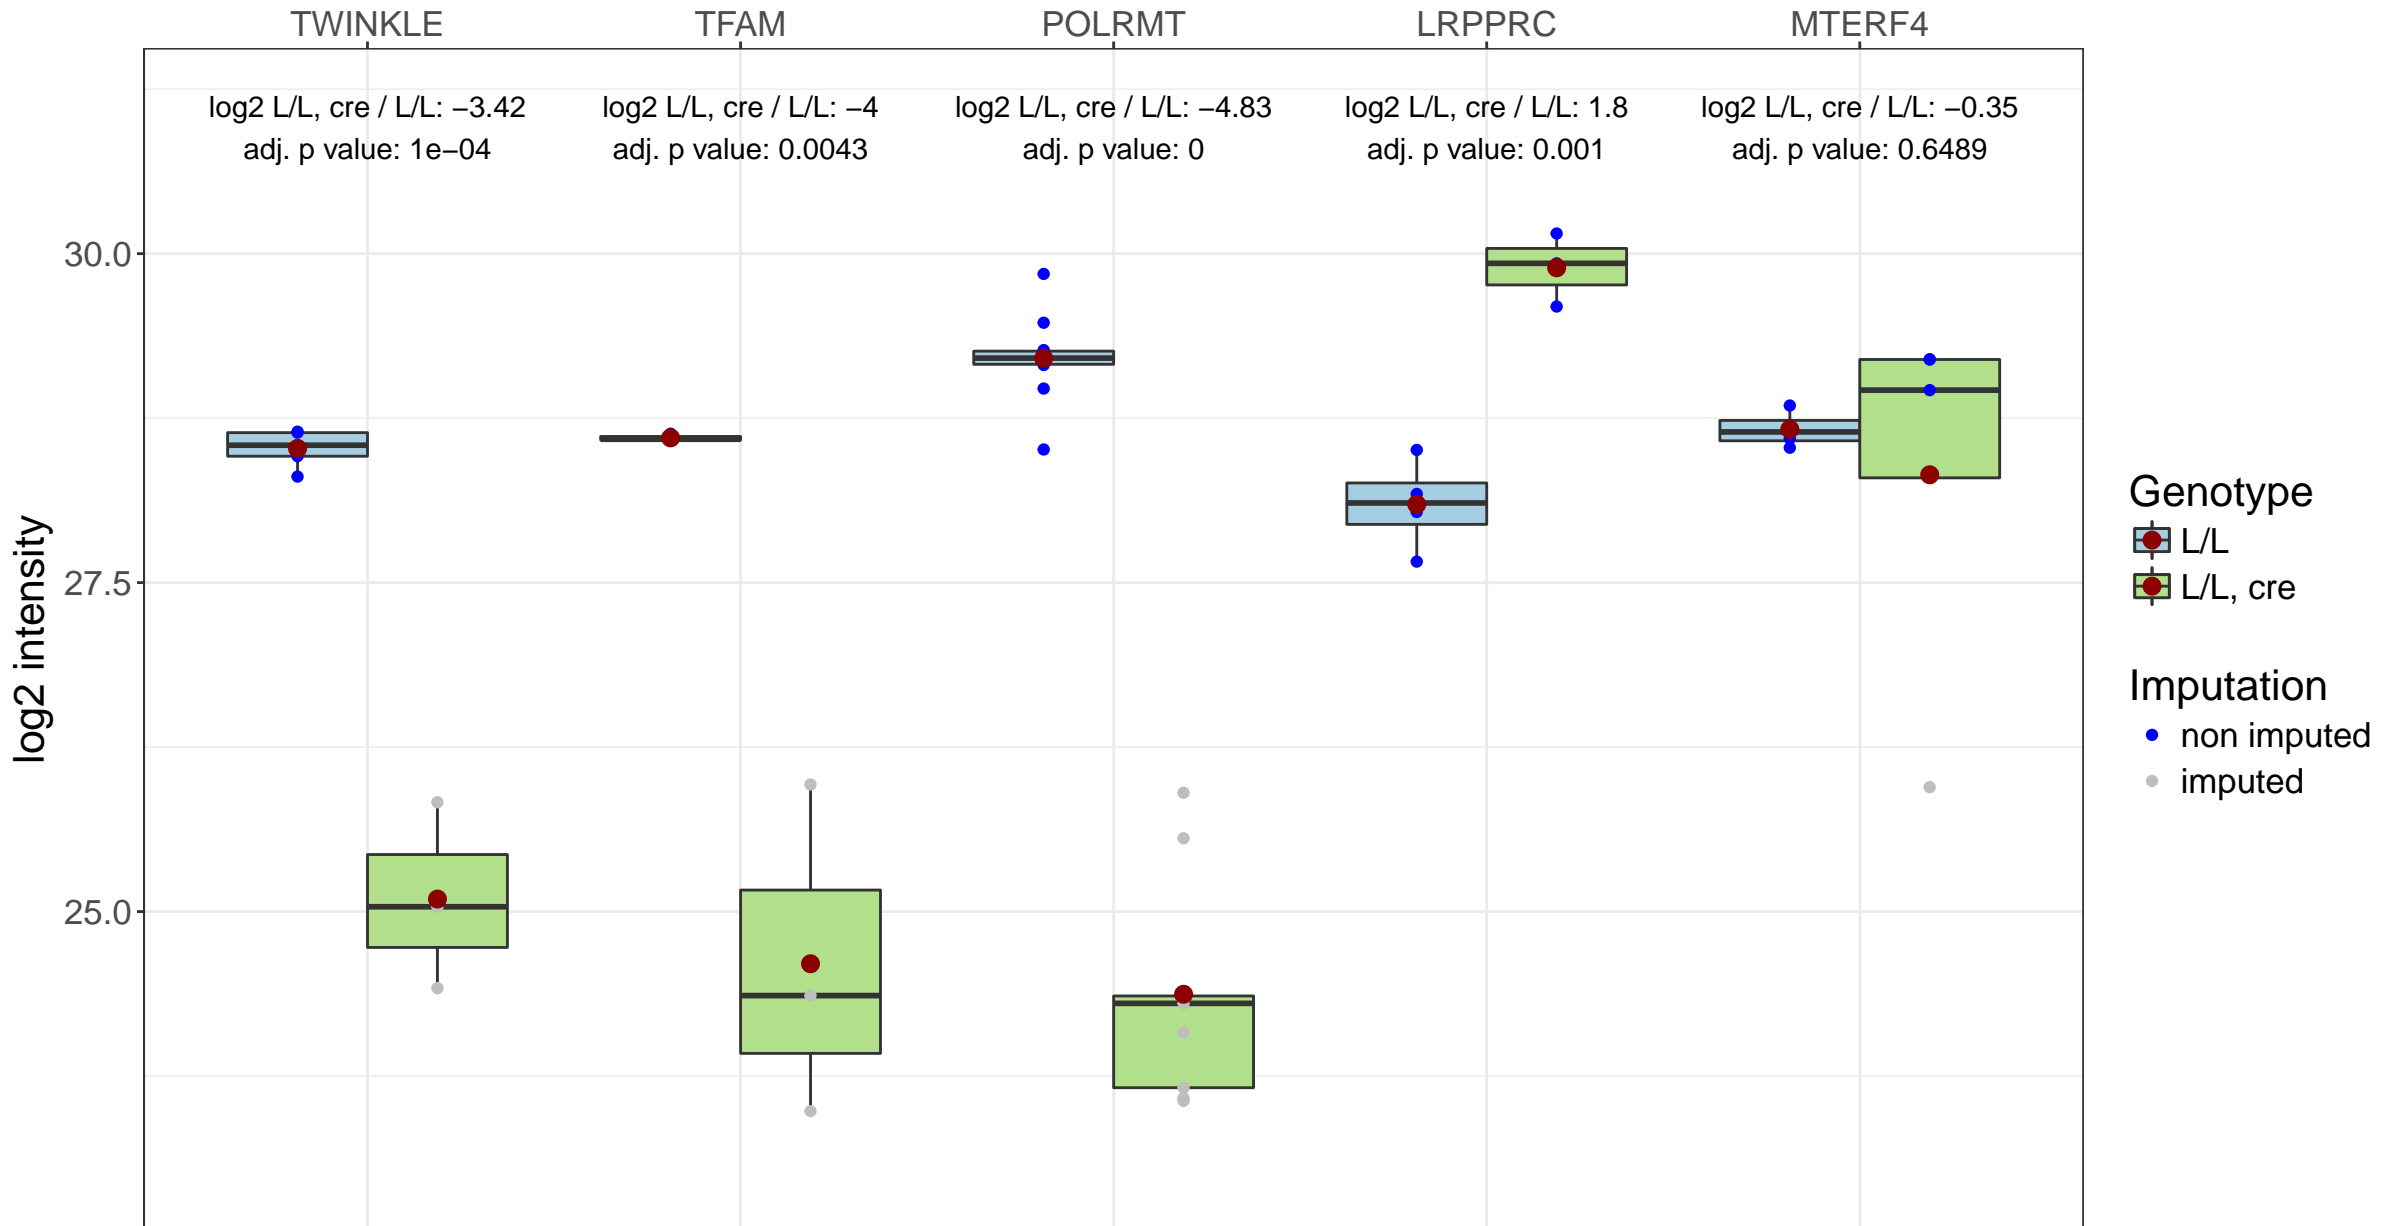



# MRPL28 / Q9D1B9

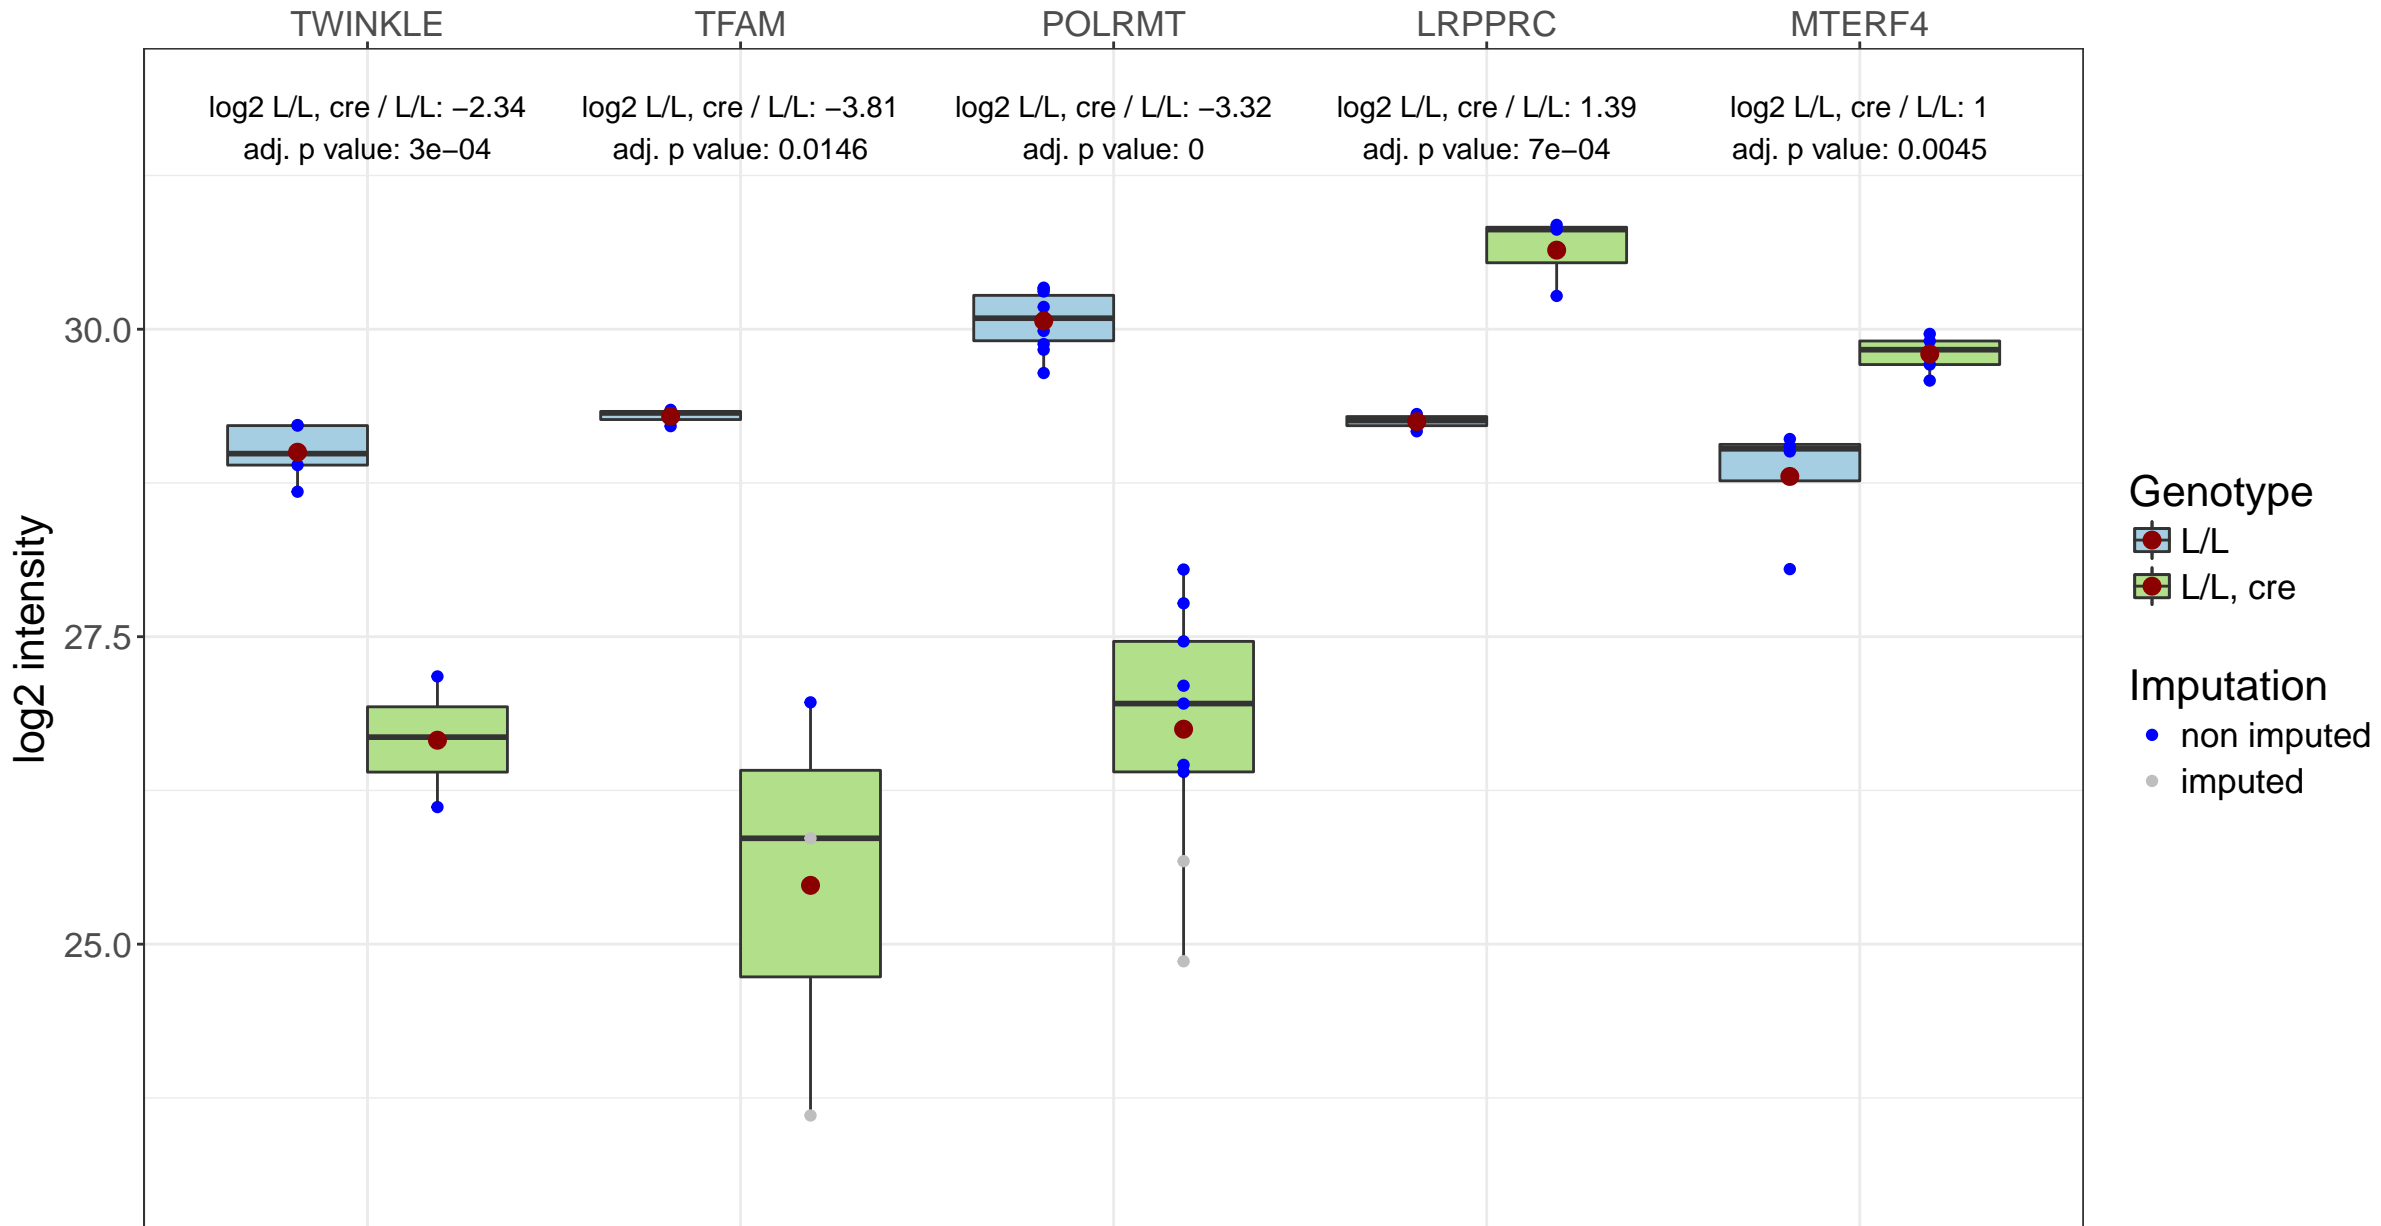

# MRPL3 / Q99N95

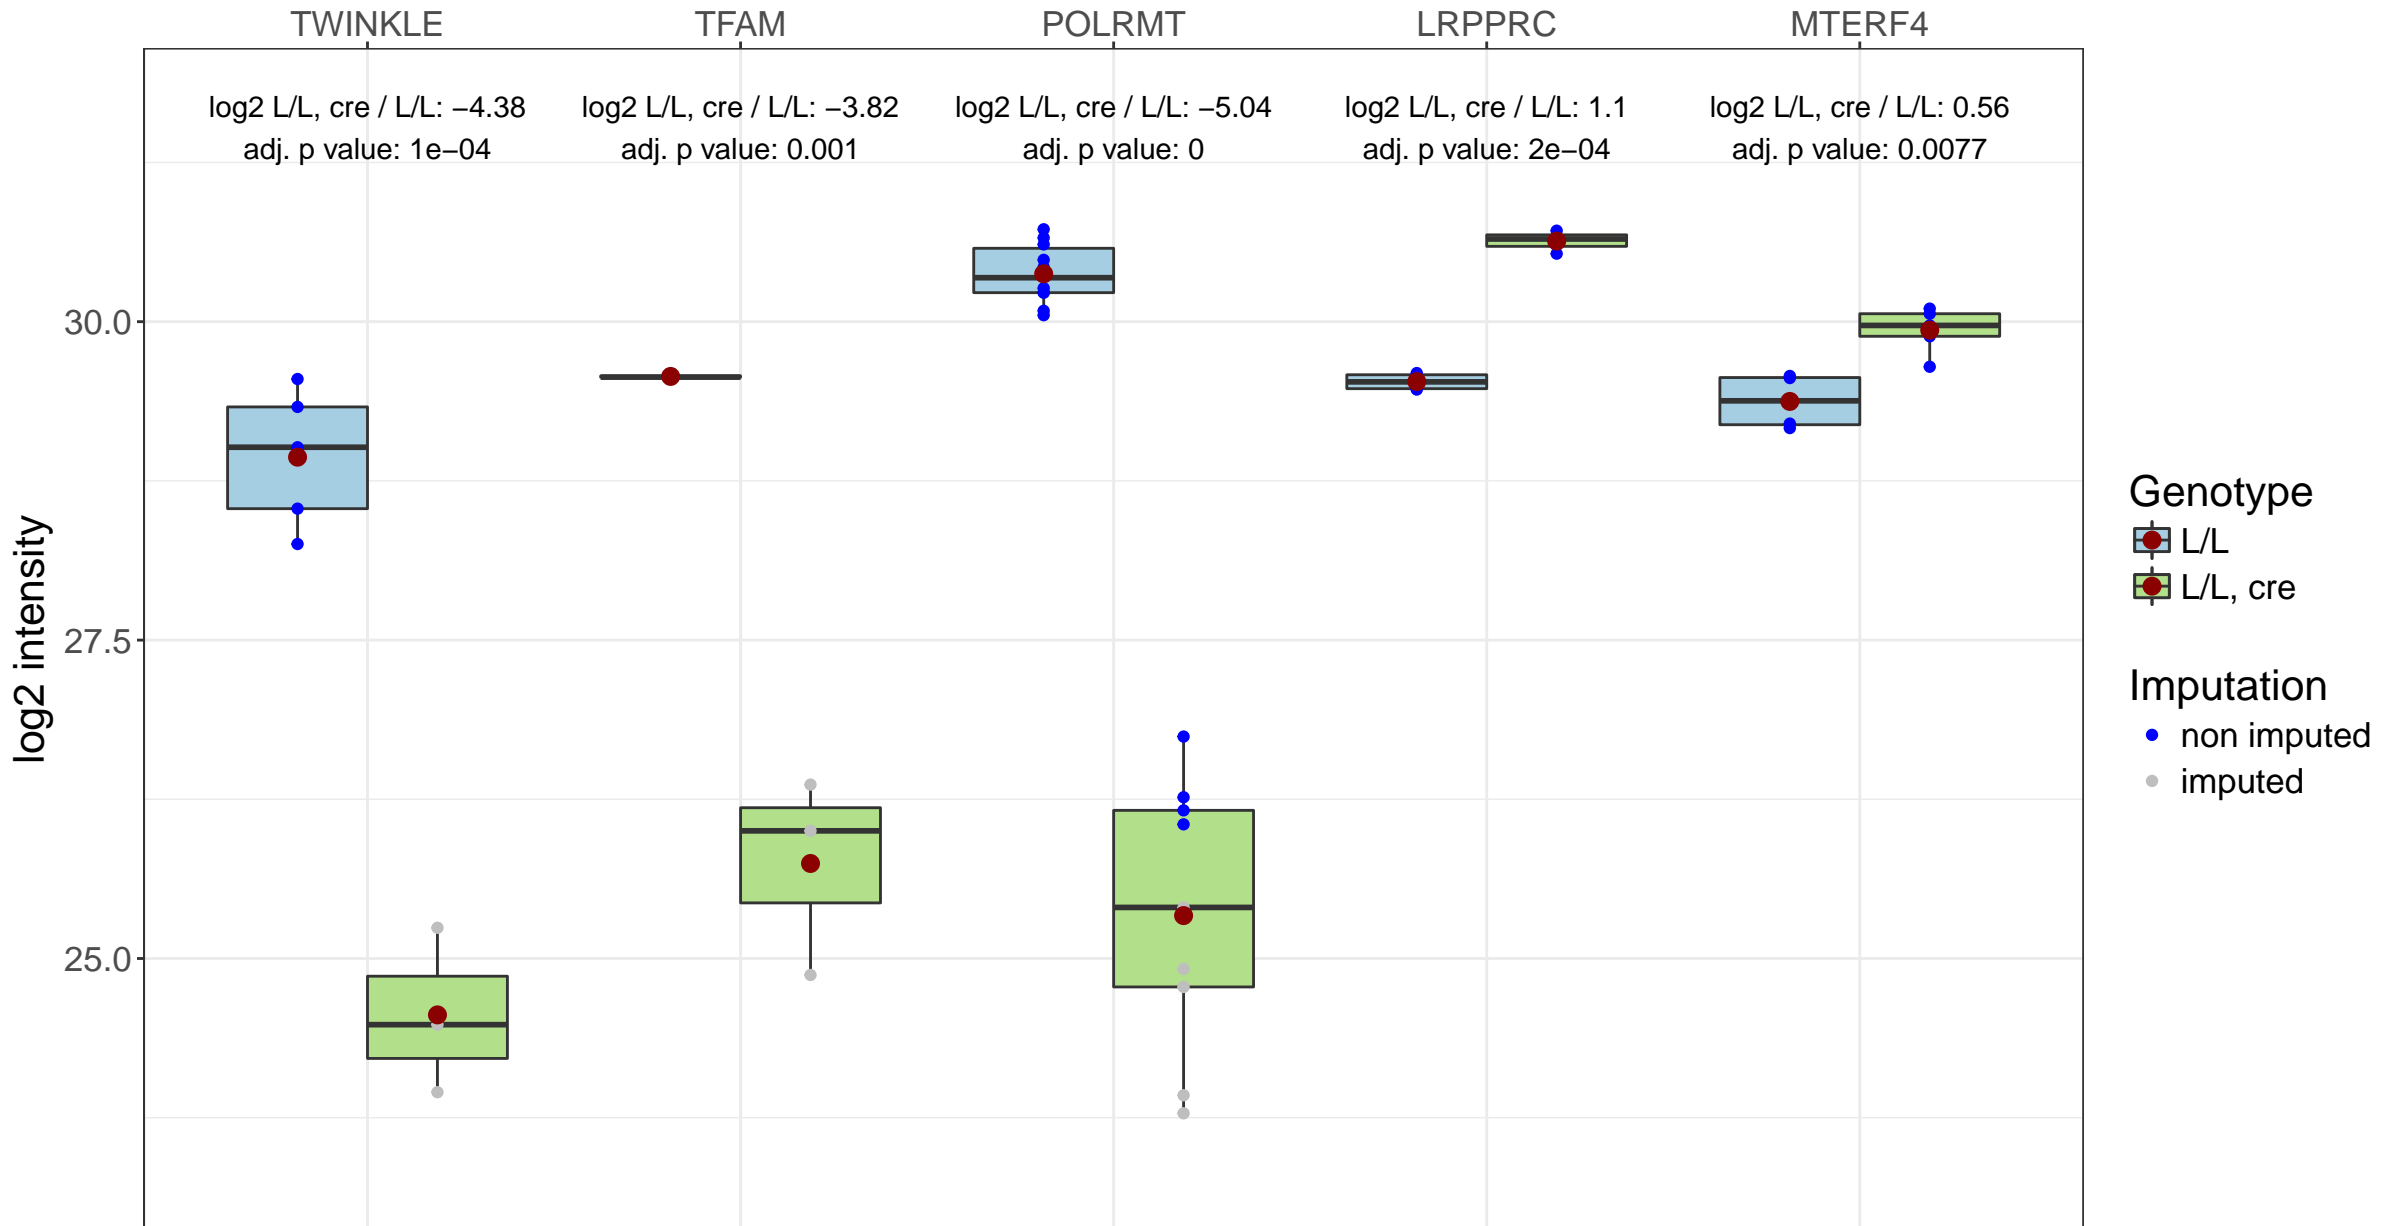

# MRPL30 / Q9D7N6

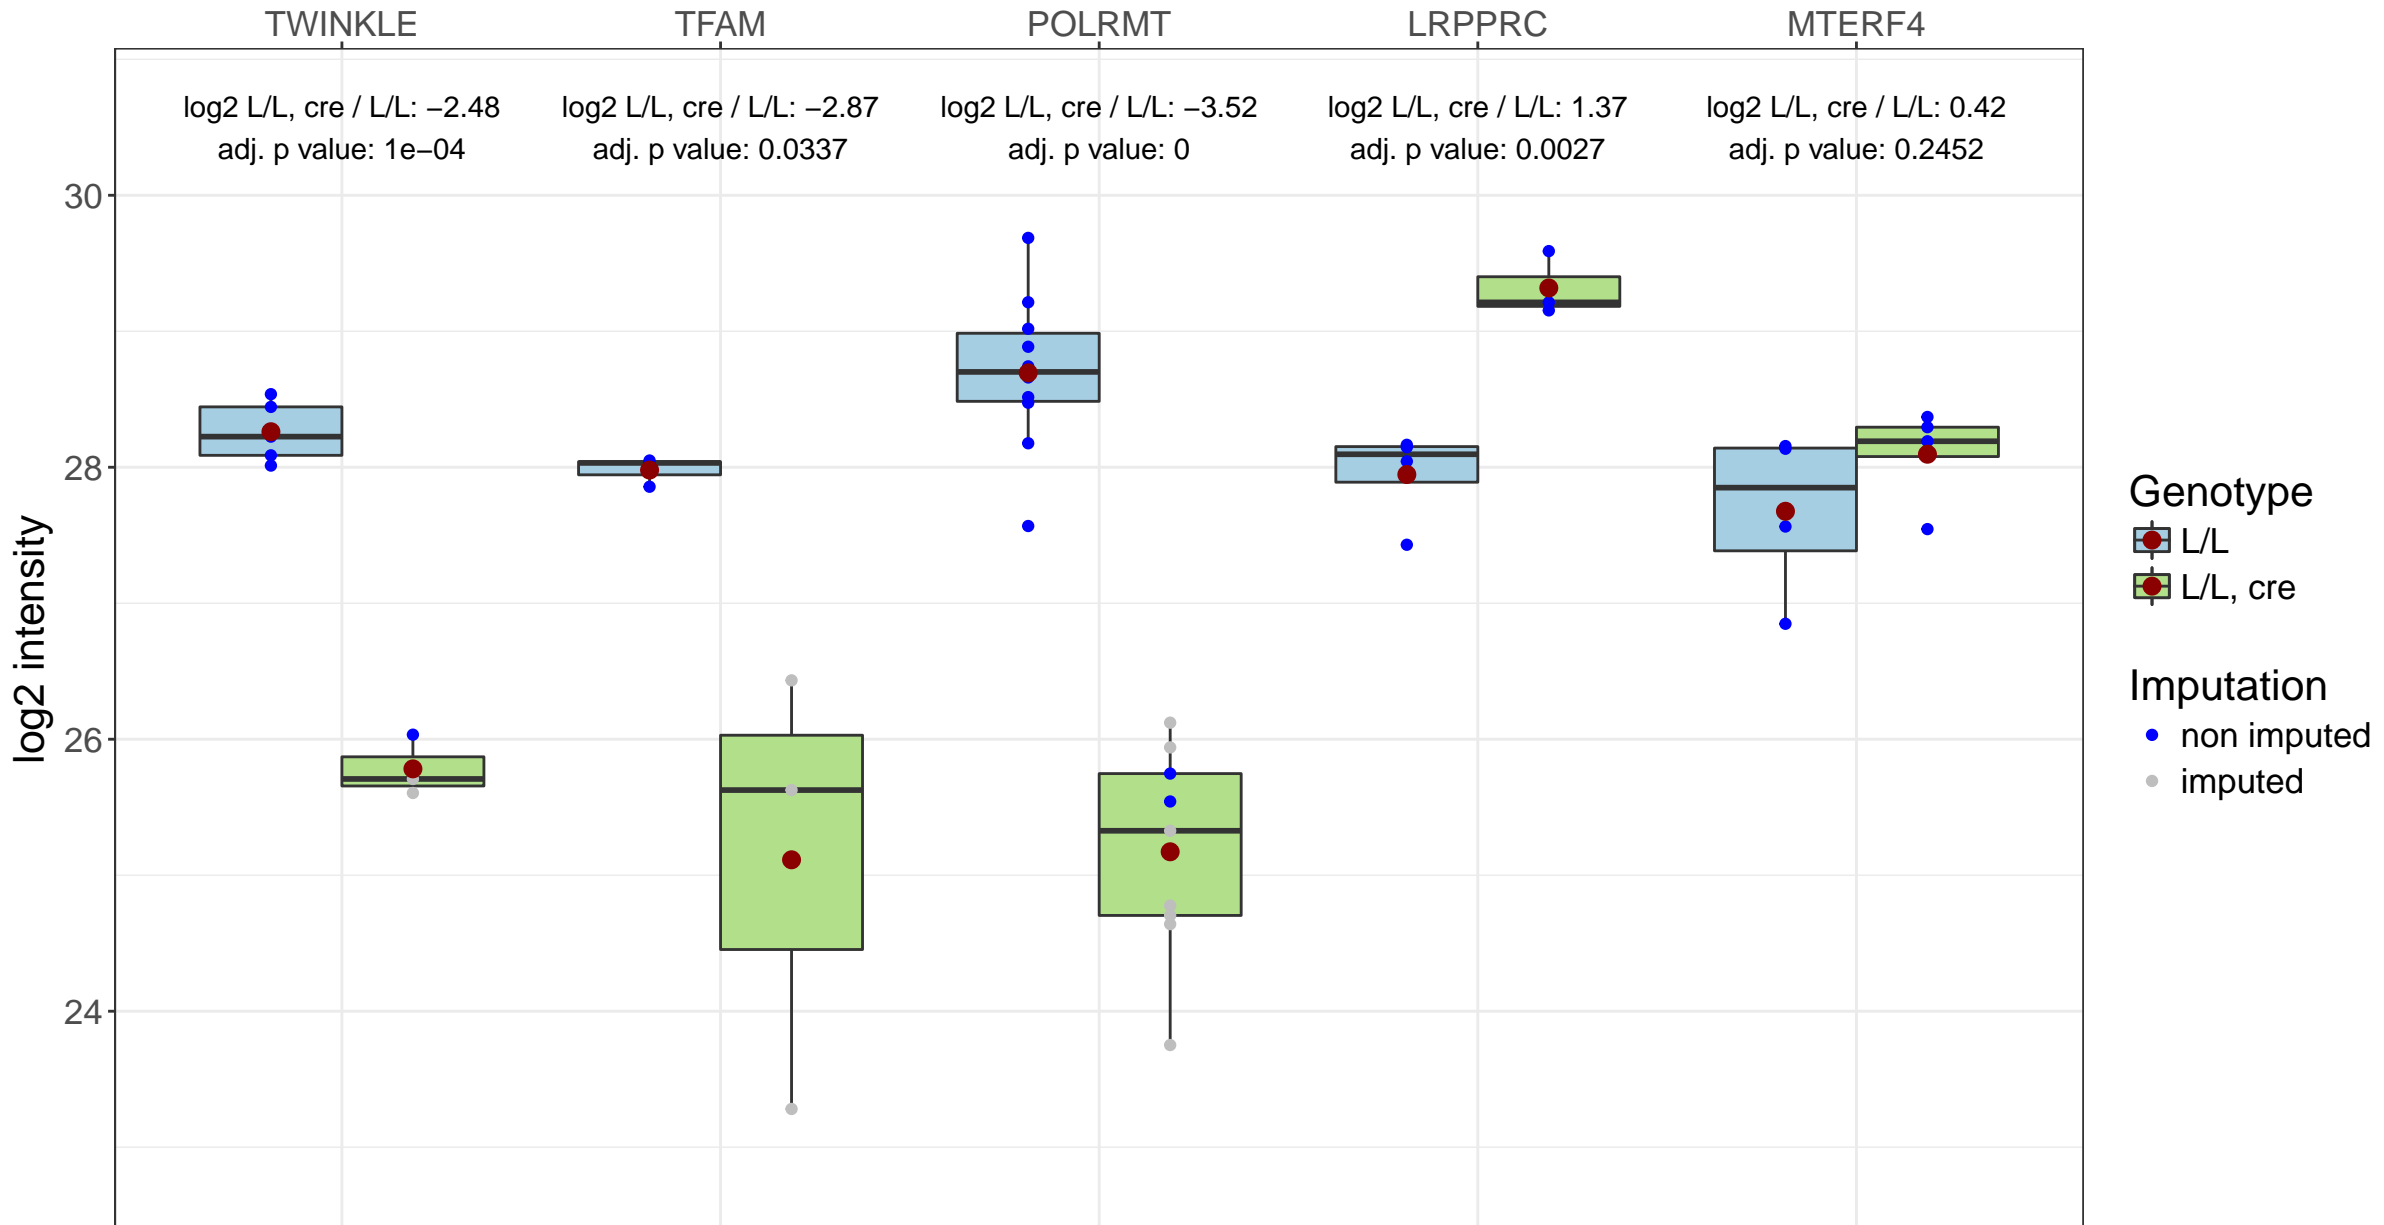

# MRPL32 / Q9DCI9

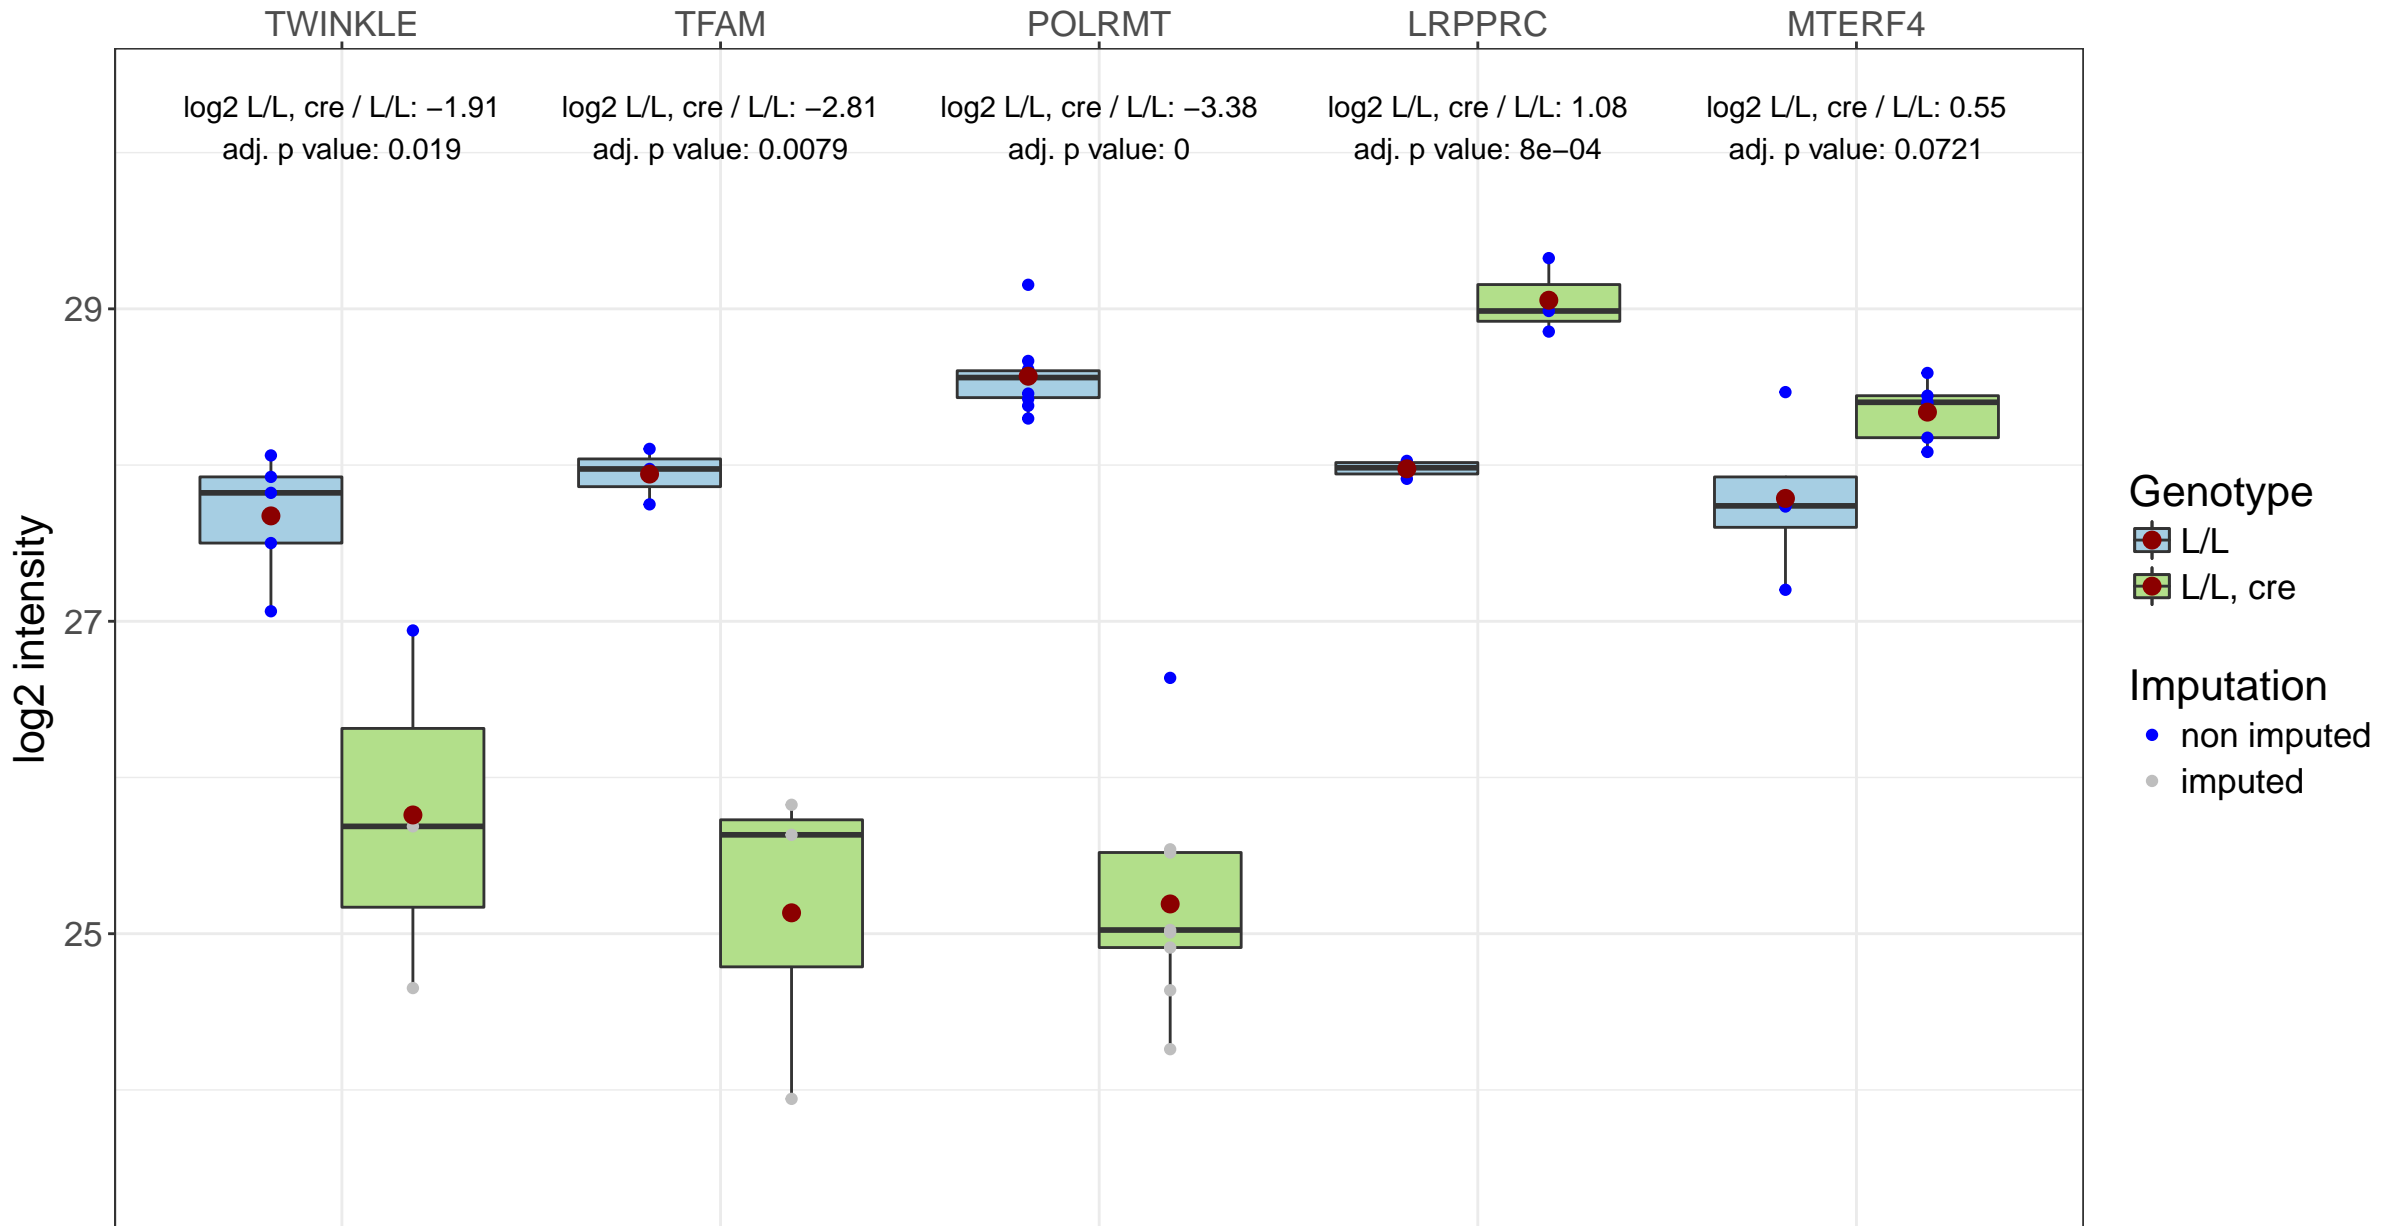

# MRPL33 / Q9CQP0

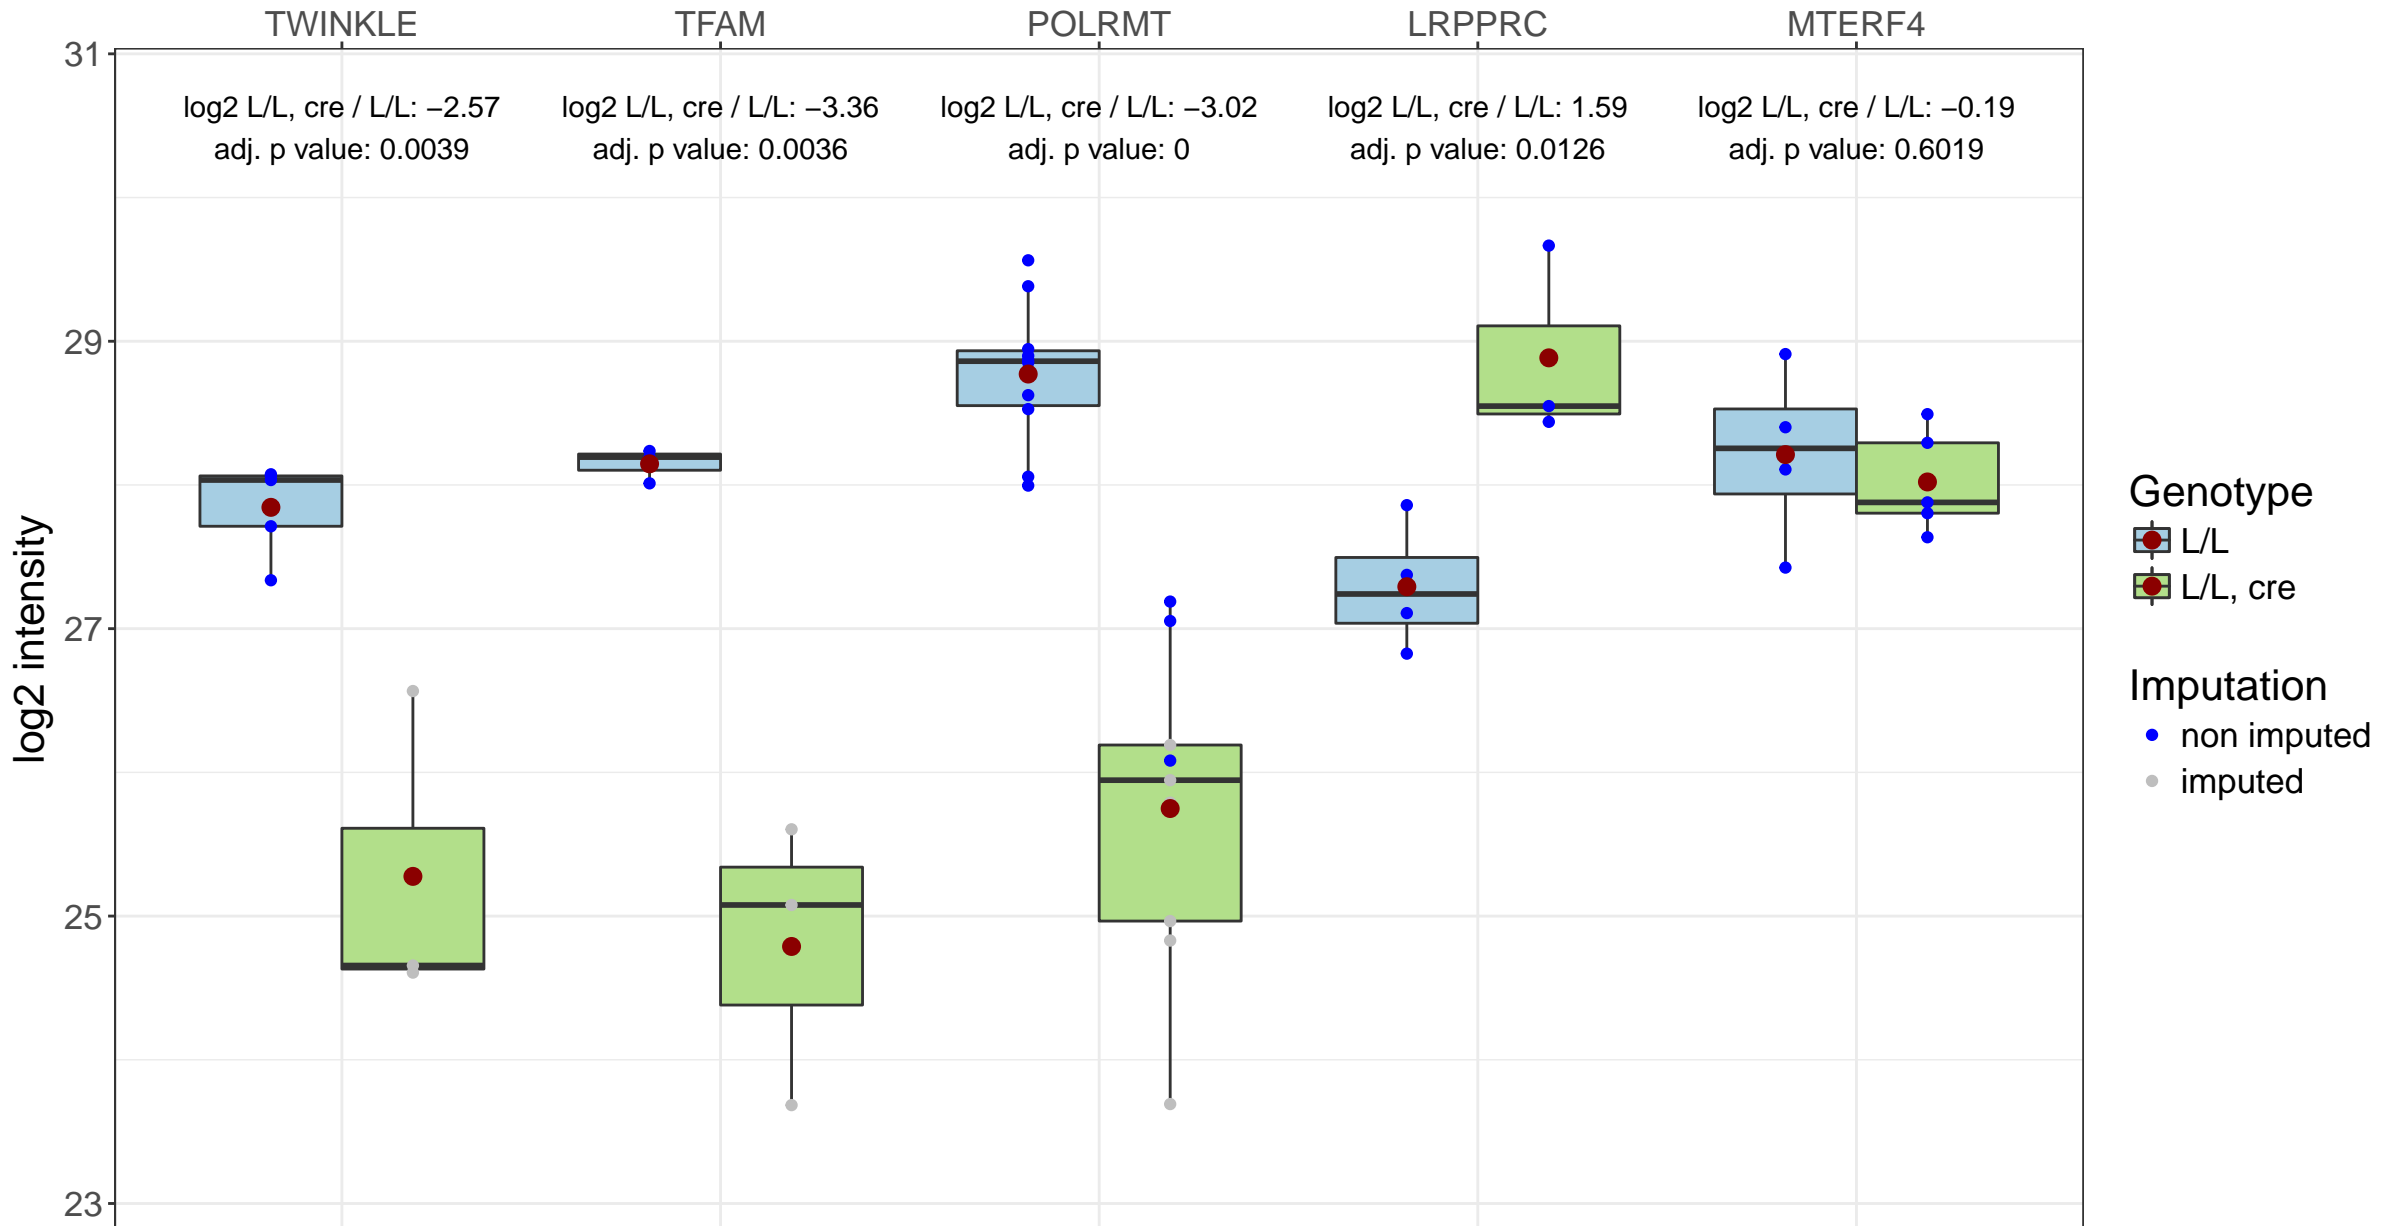

# MRPL34 / Q99N91

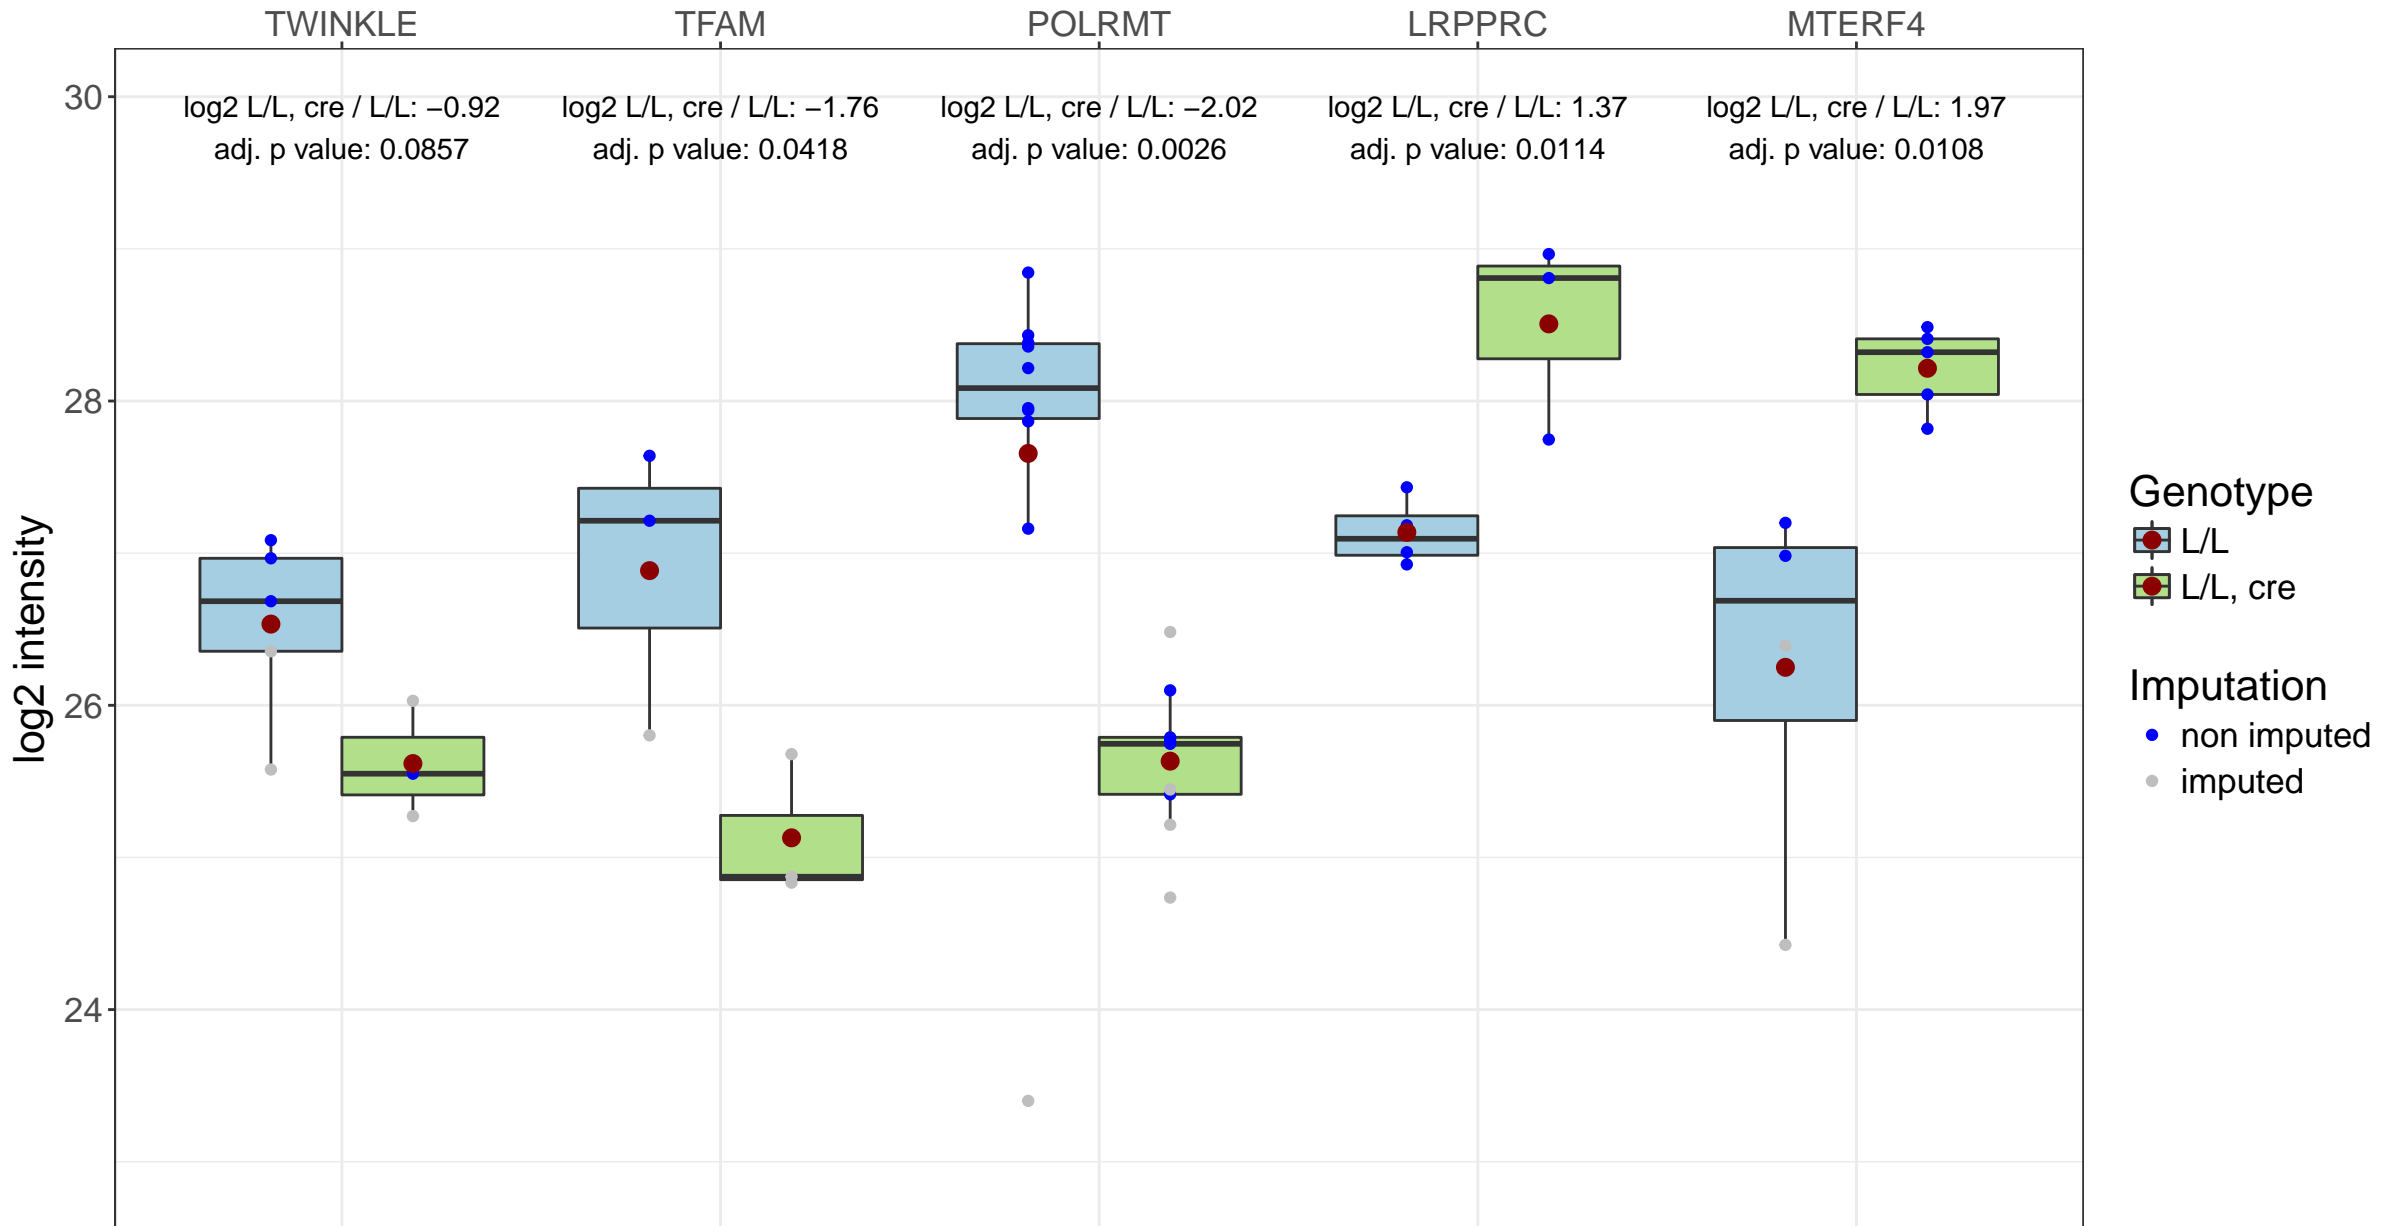

# MRPL35 / Q9CQL6

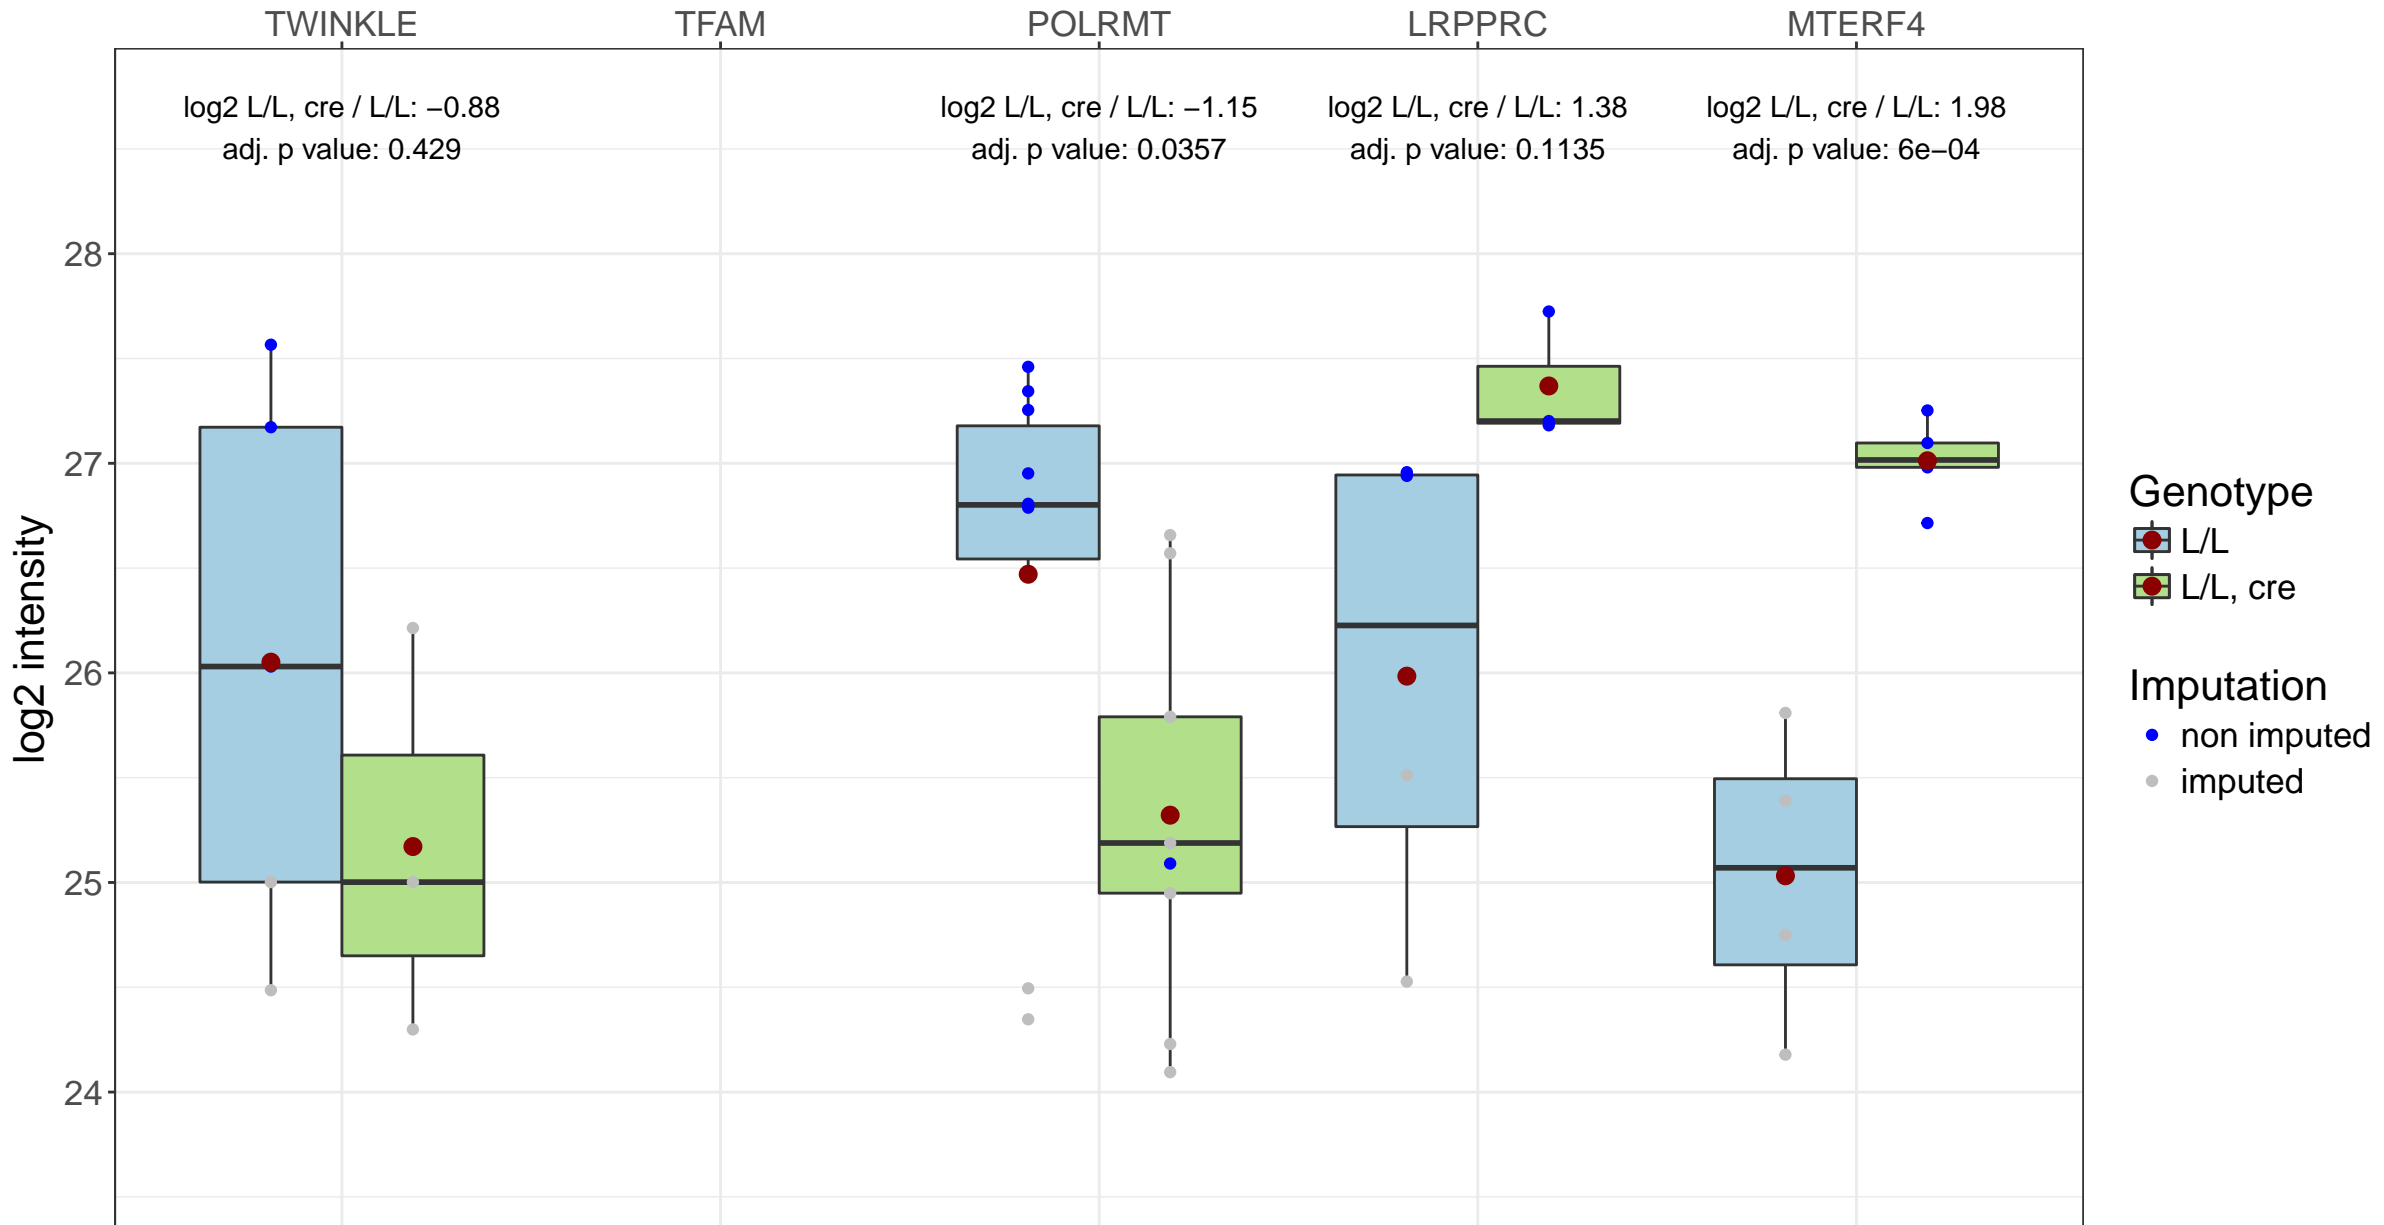

# MRPL37 / Q921S7

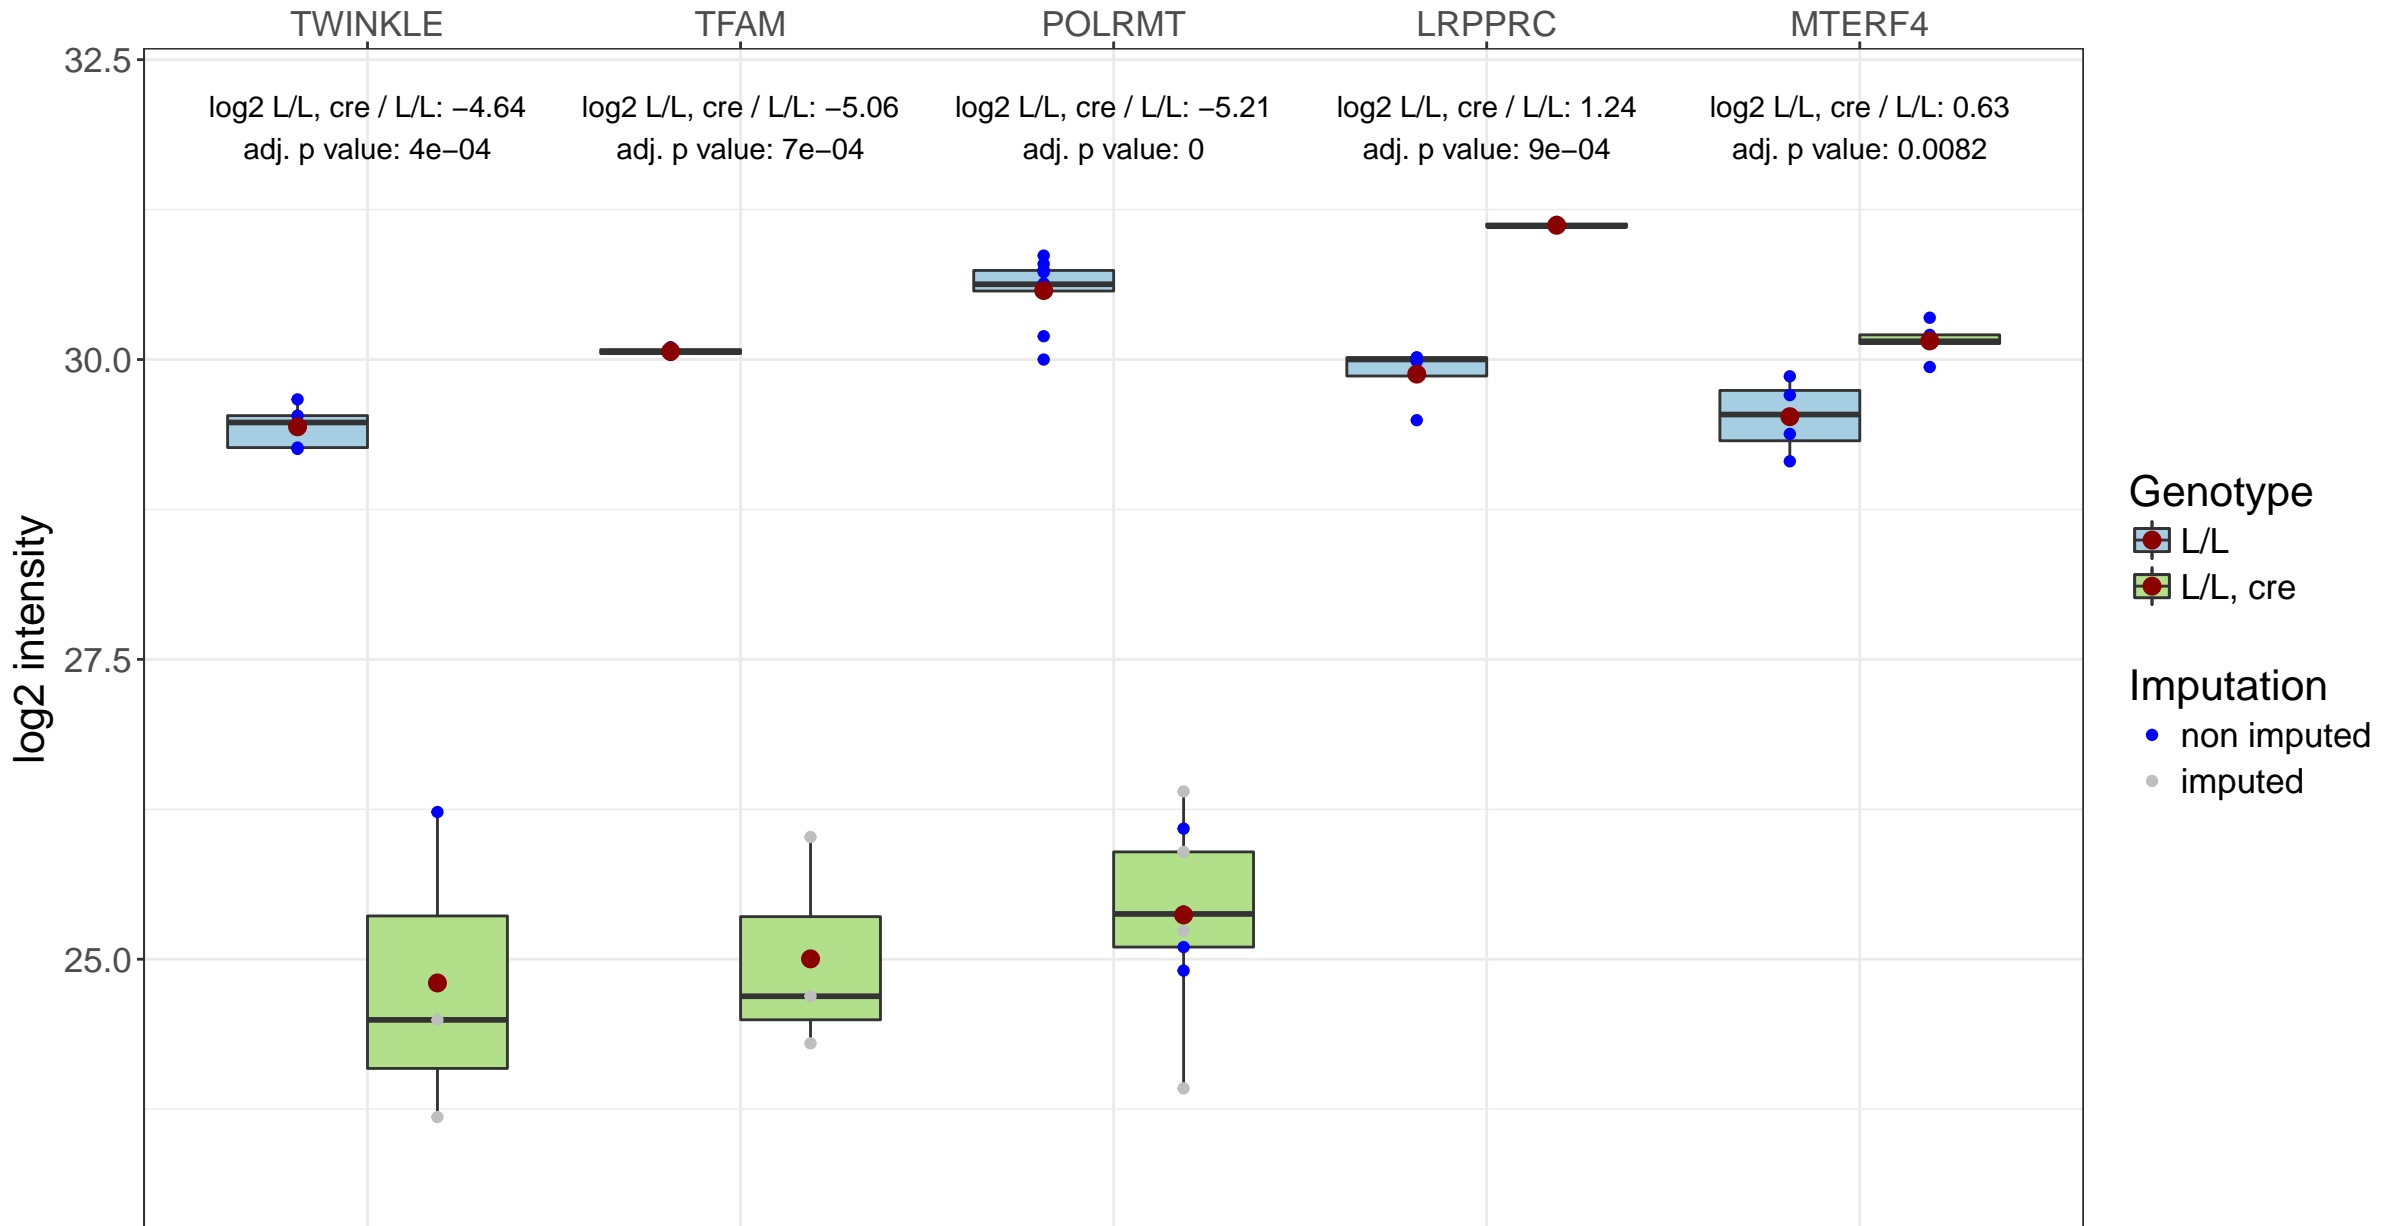



# MRPL38 / Q8K2M0

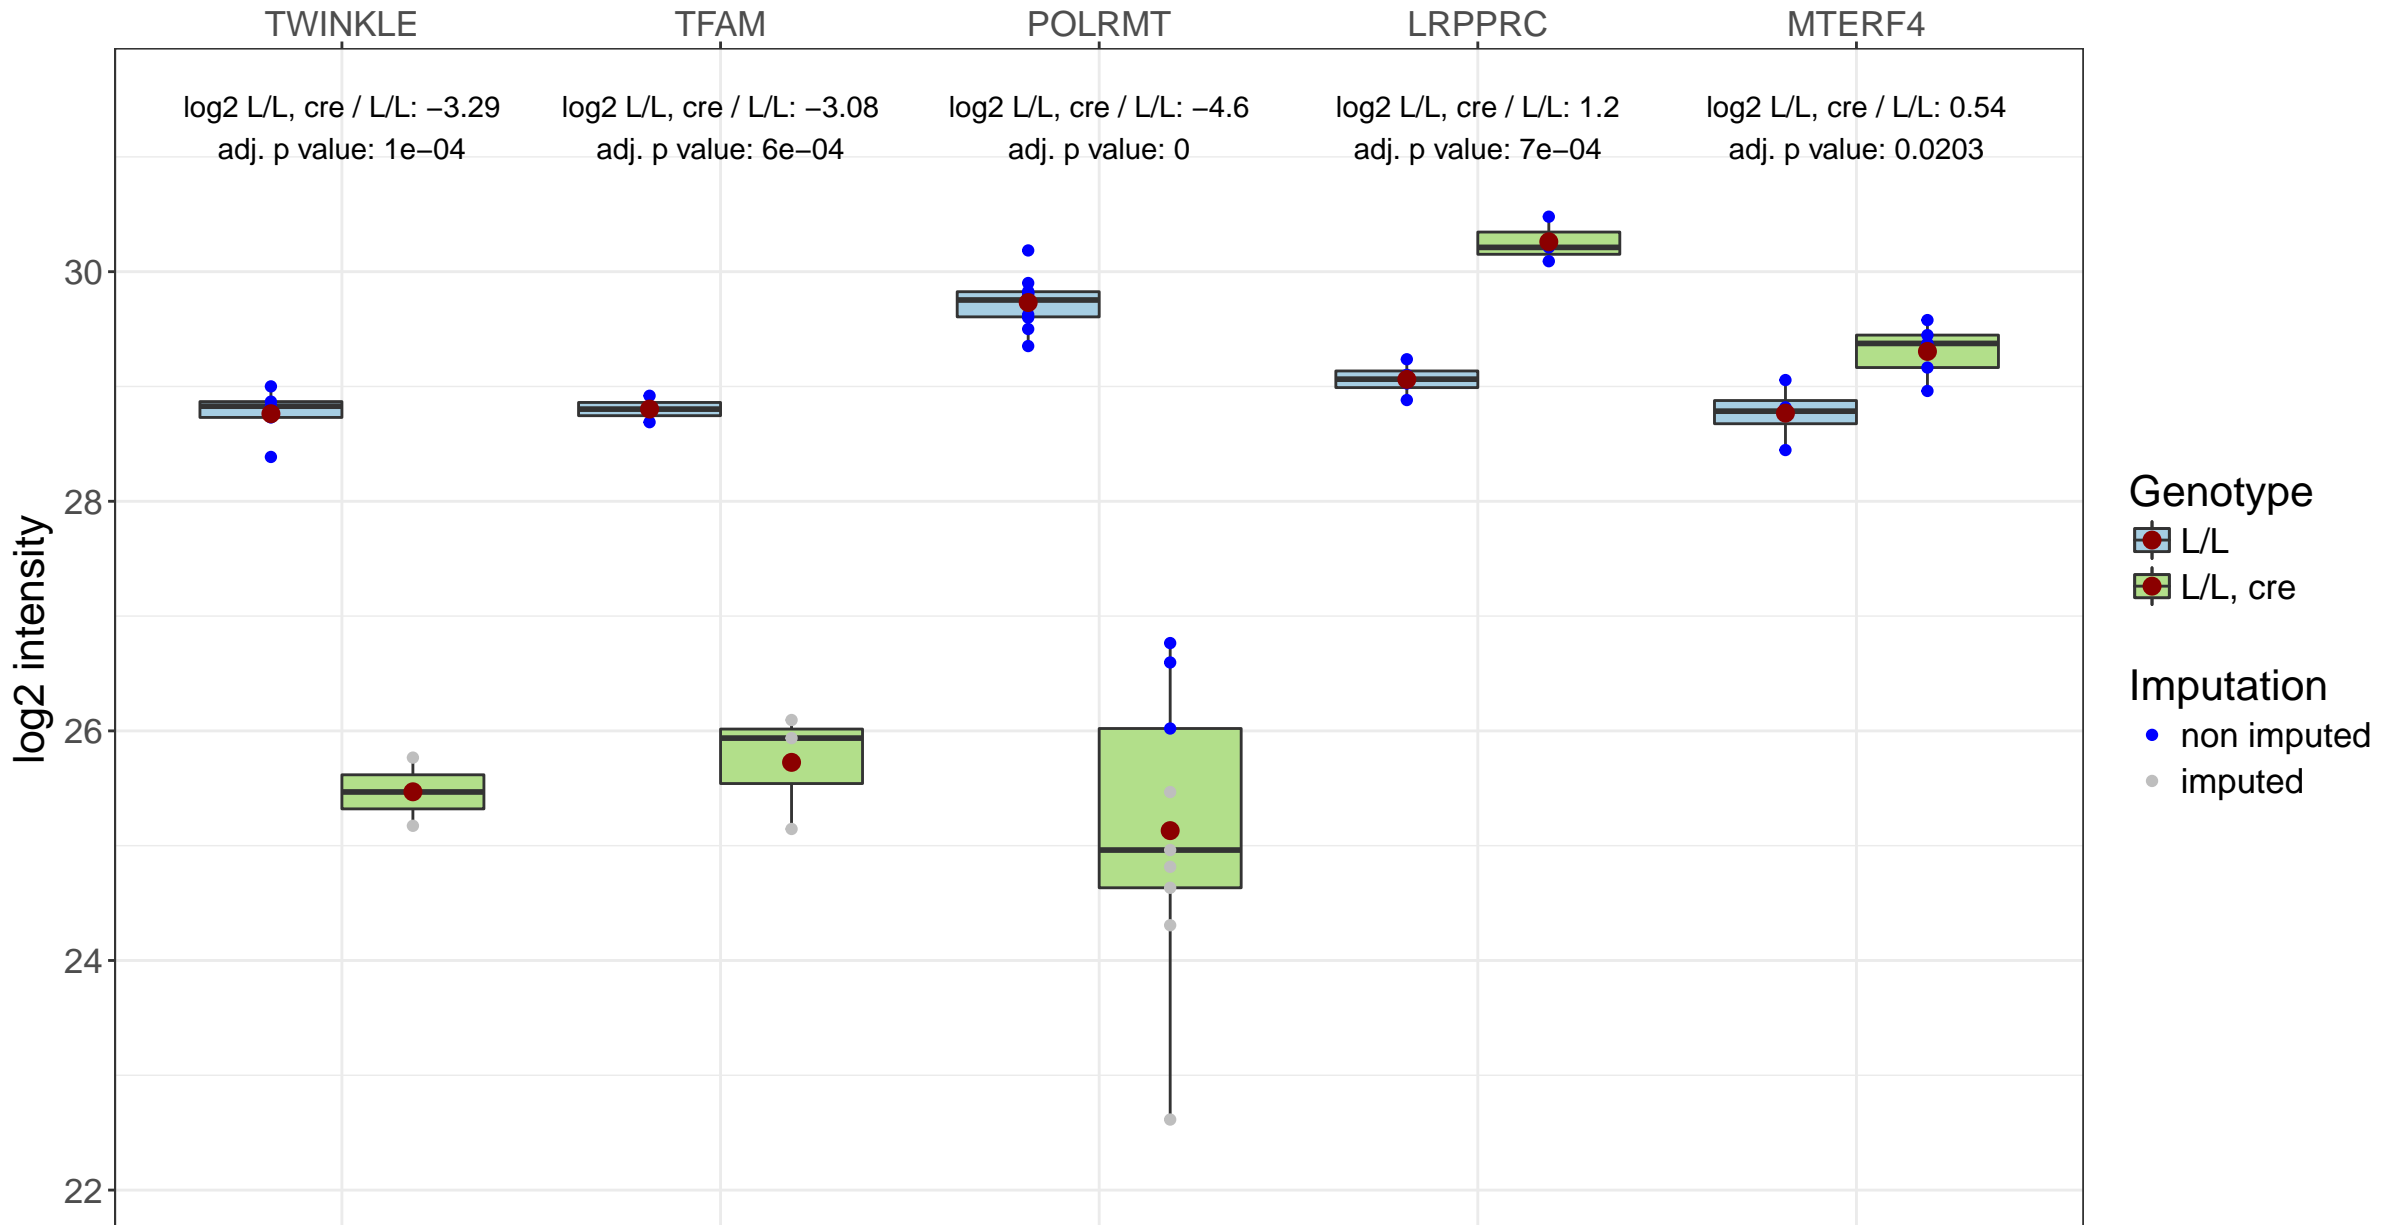

# MRPL39 / Q9JKF7

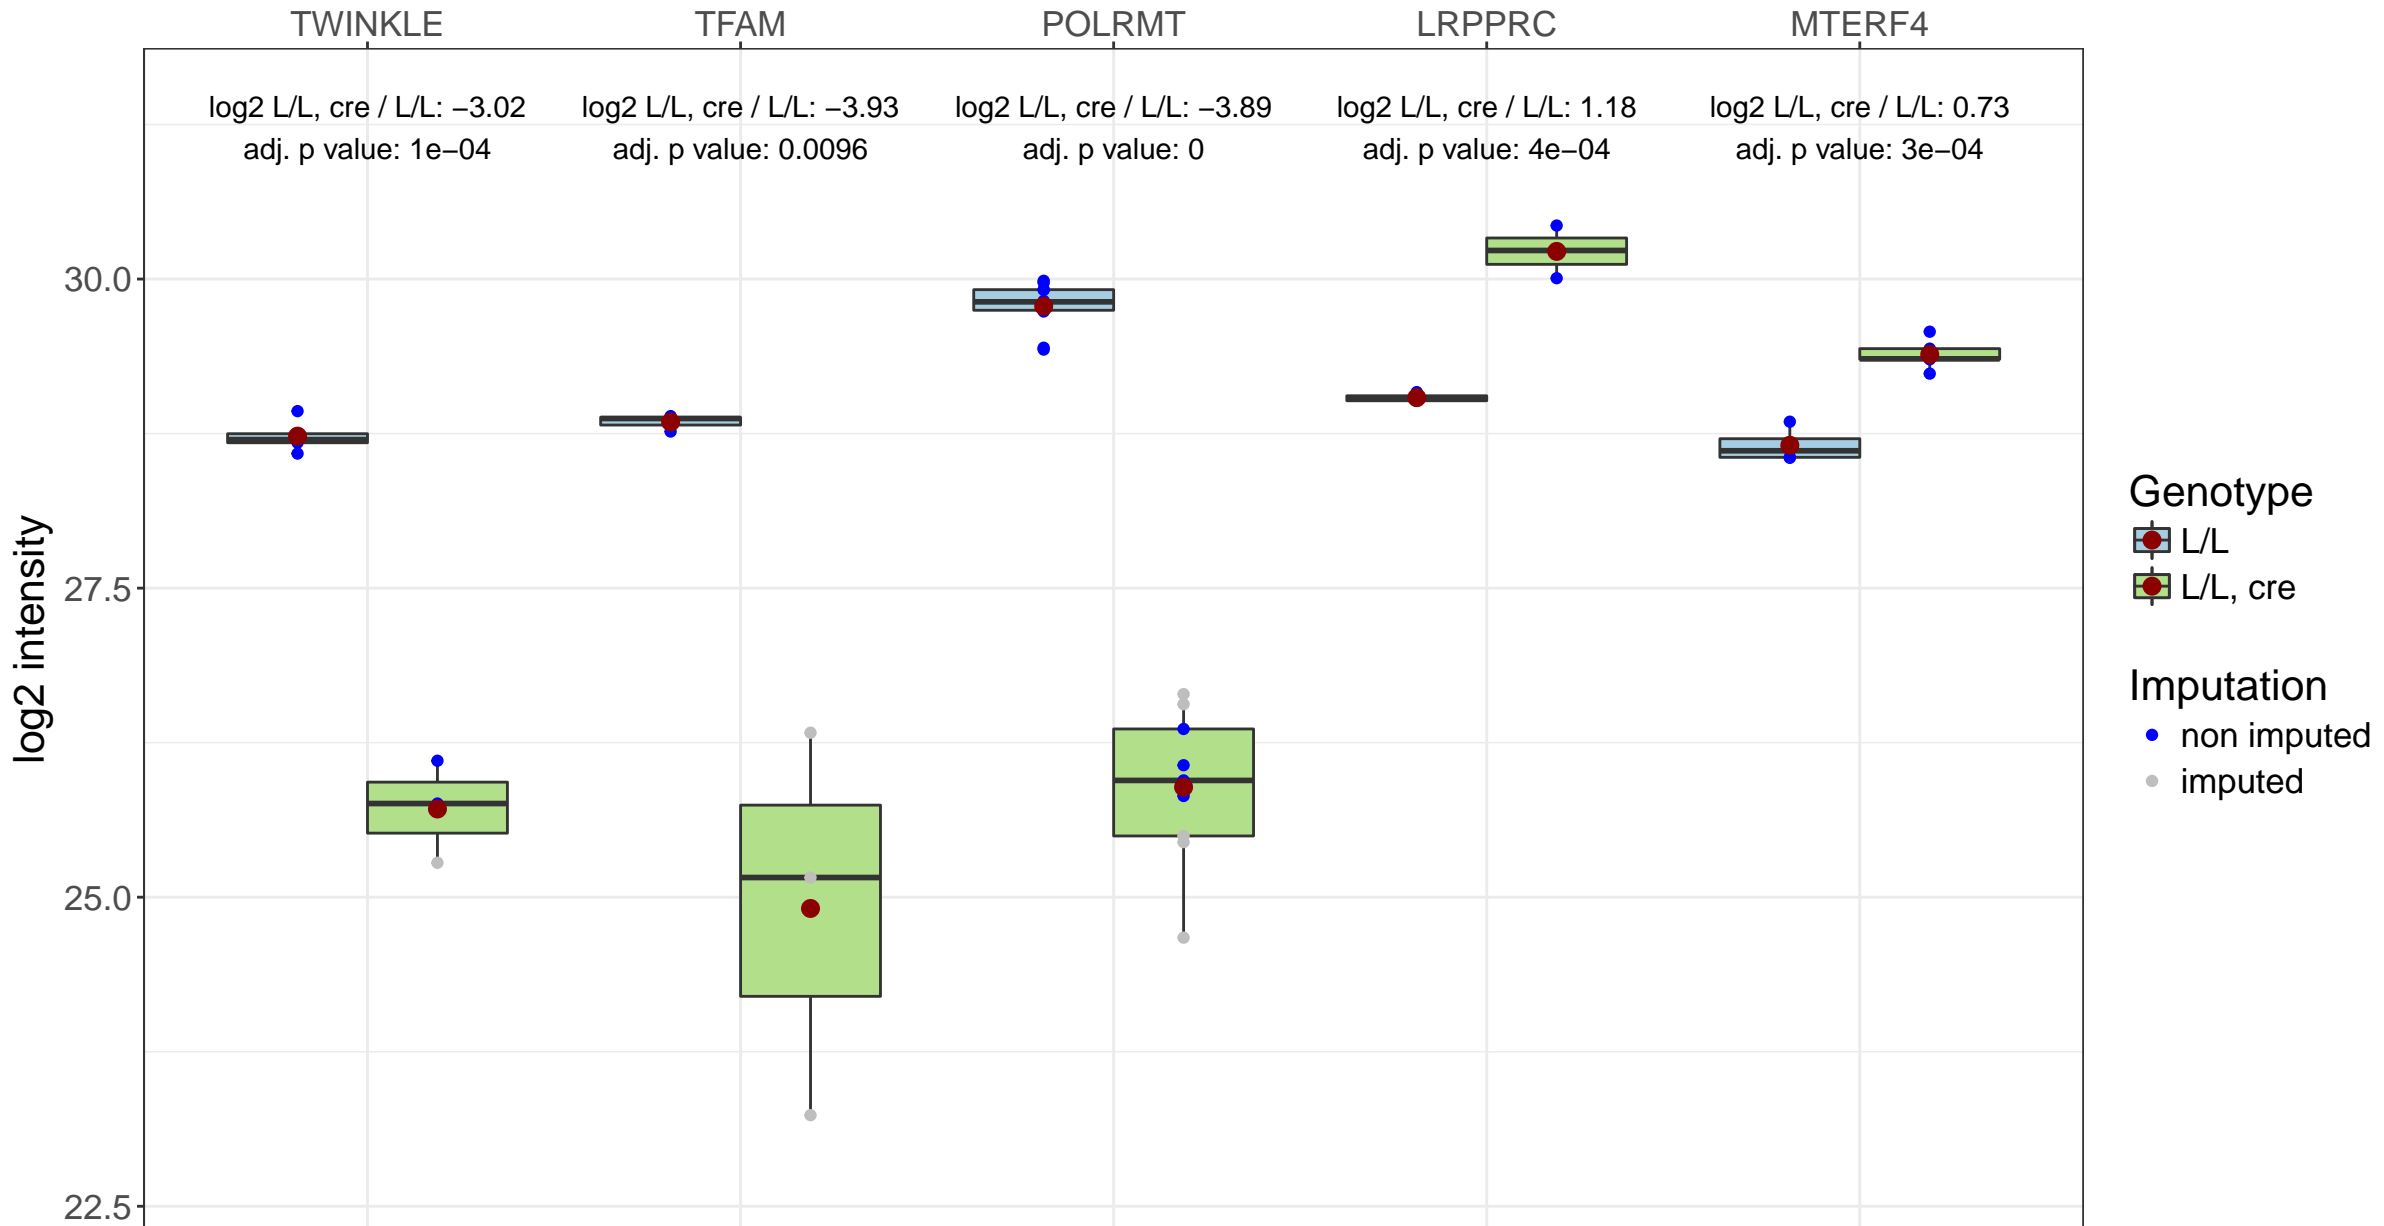

# MRPL4 / Q9DCU6

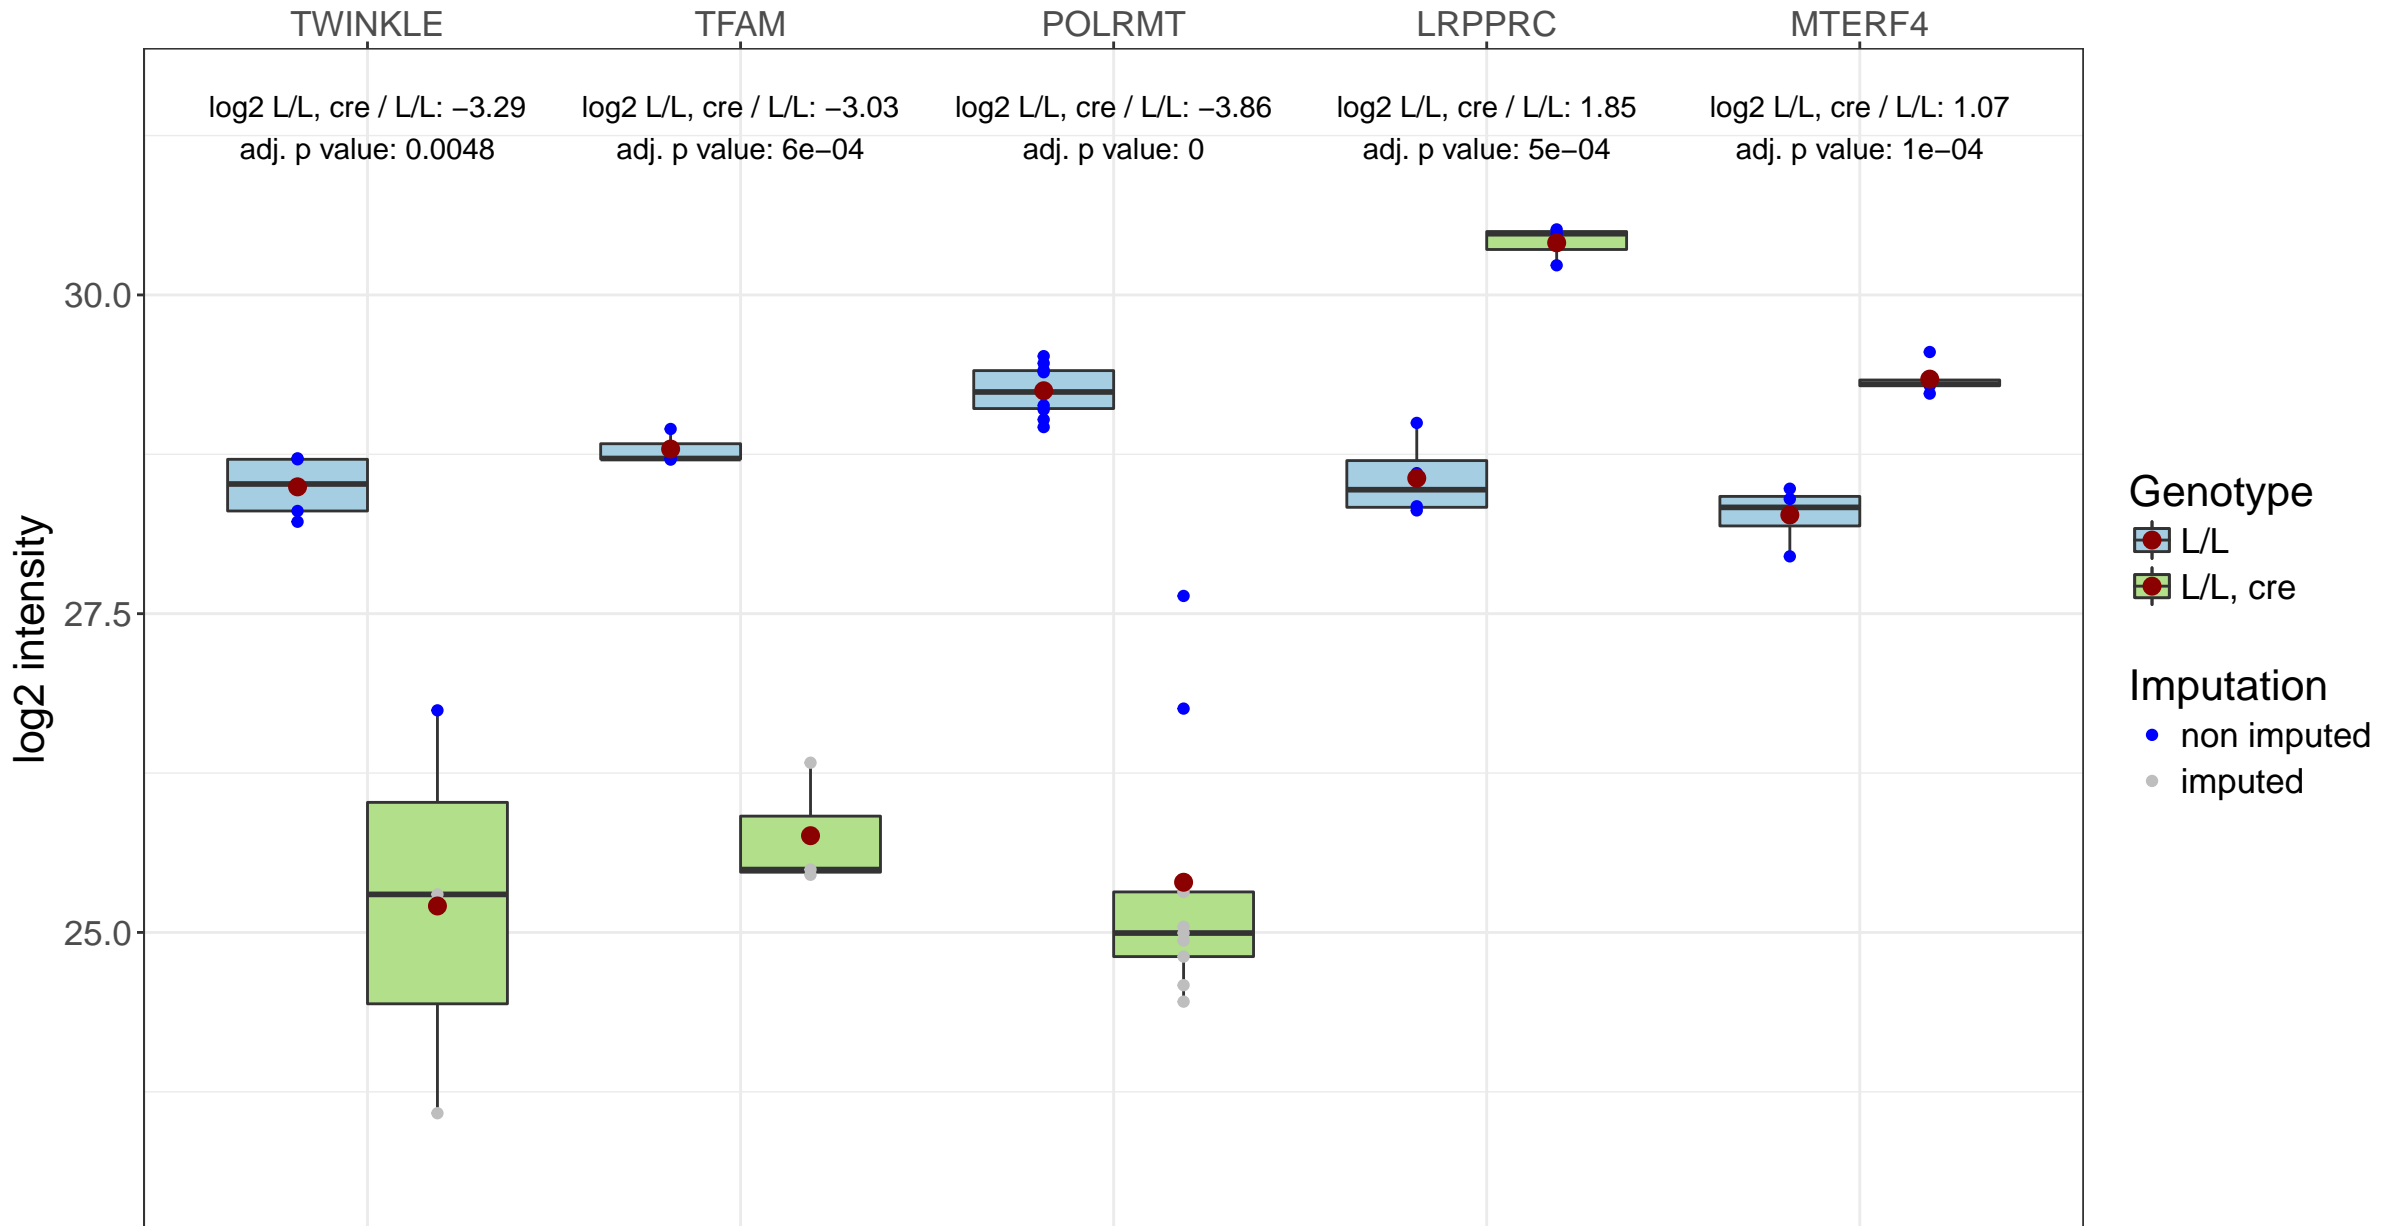

# MRPL40 / D3Z7C0

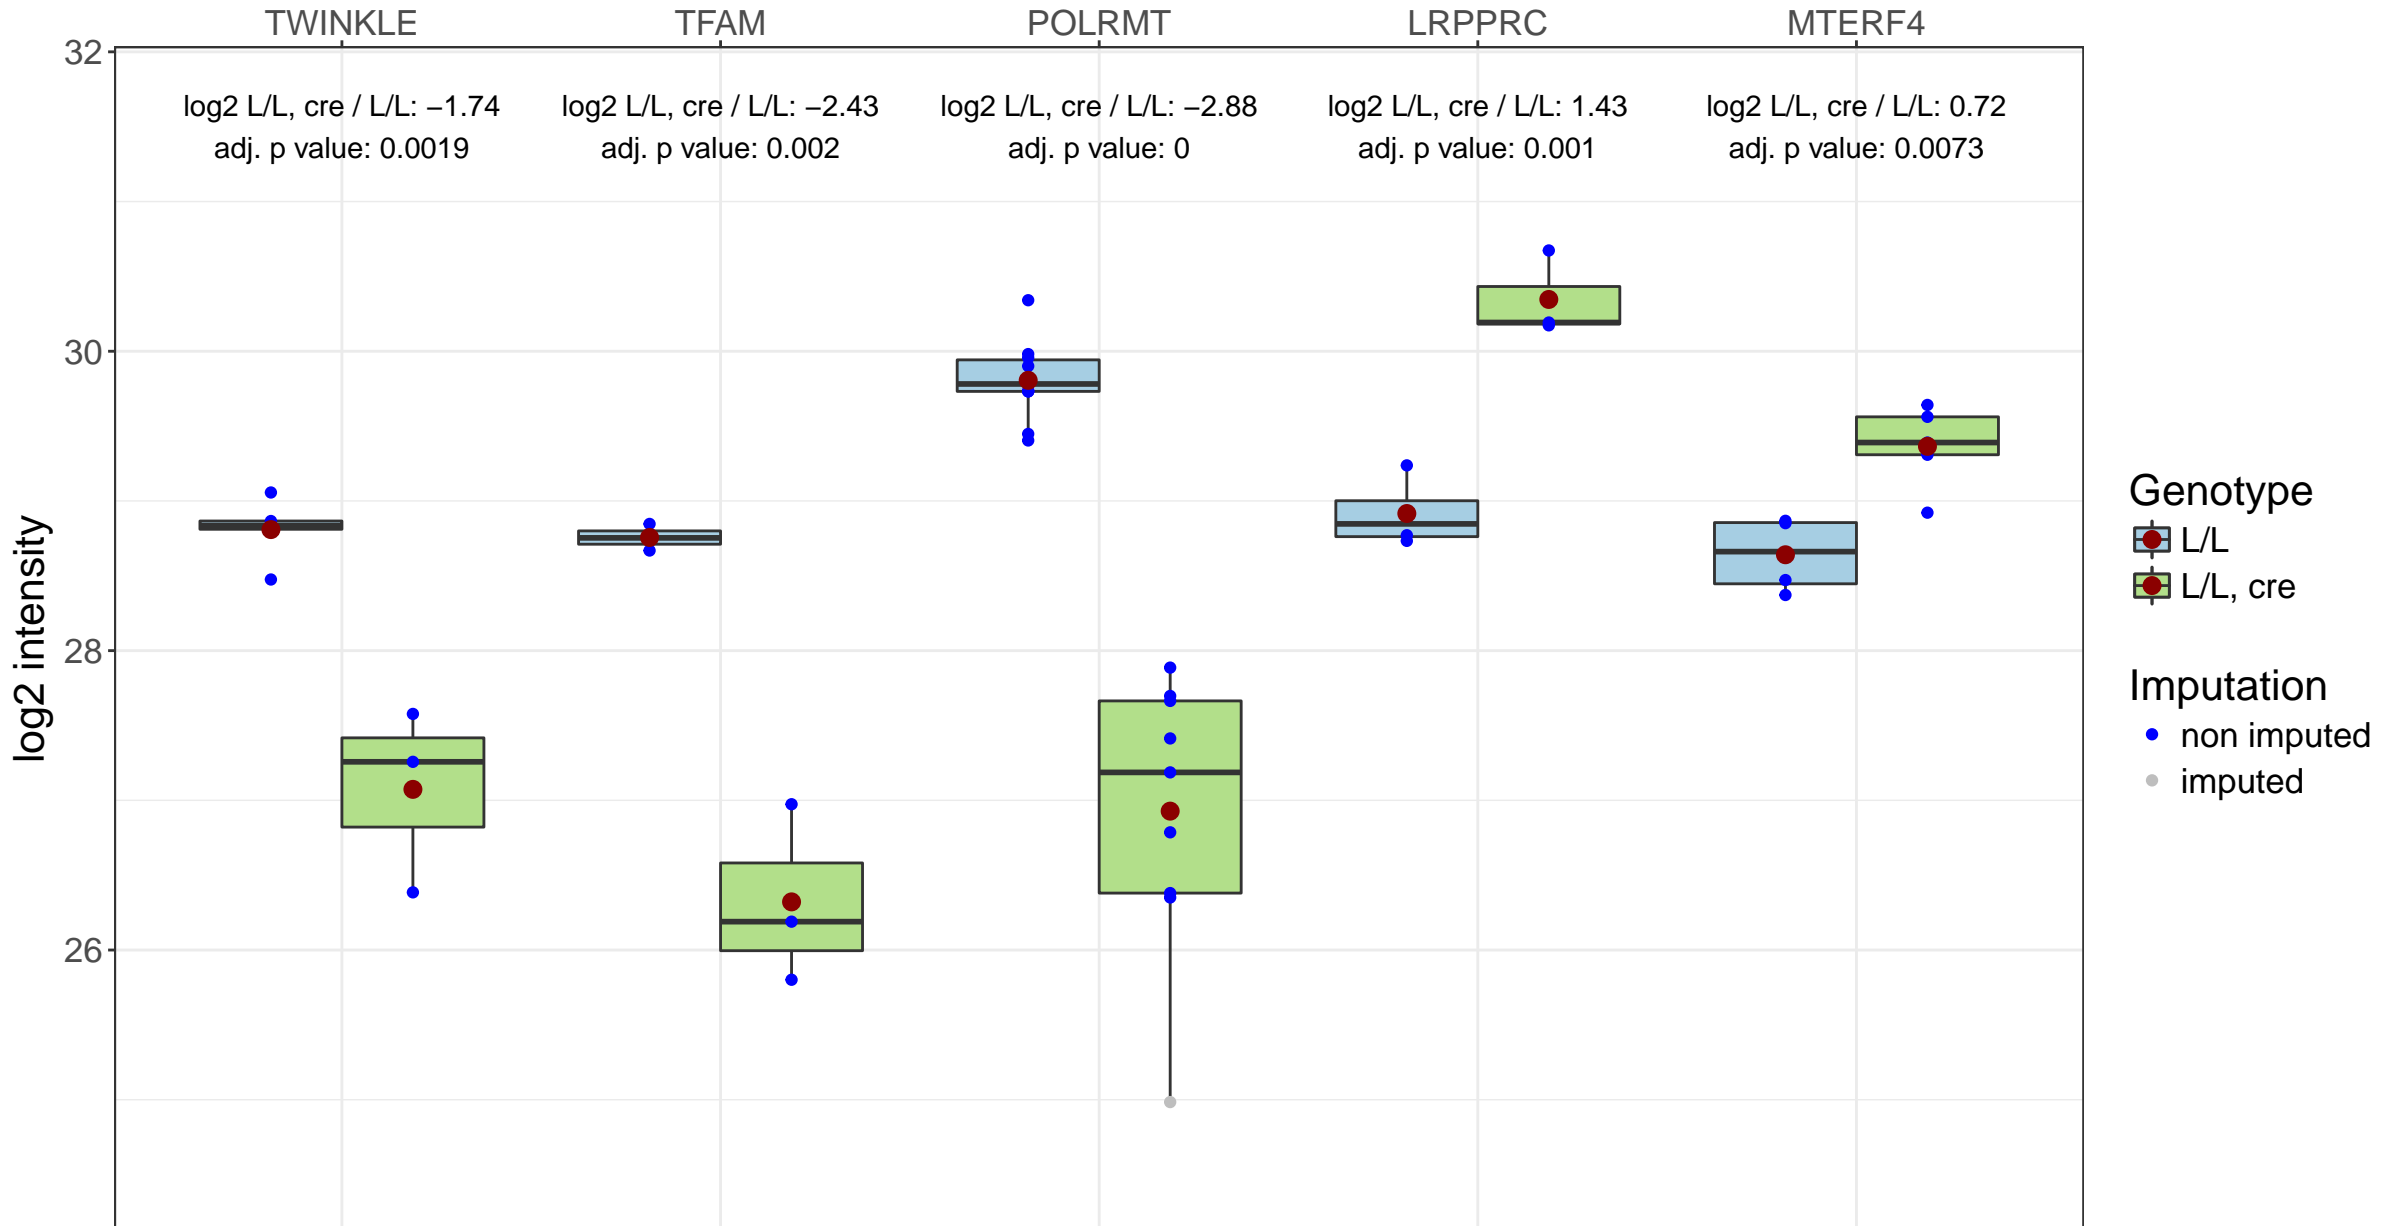

# MRPL41 / Q9CQN7

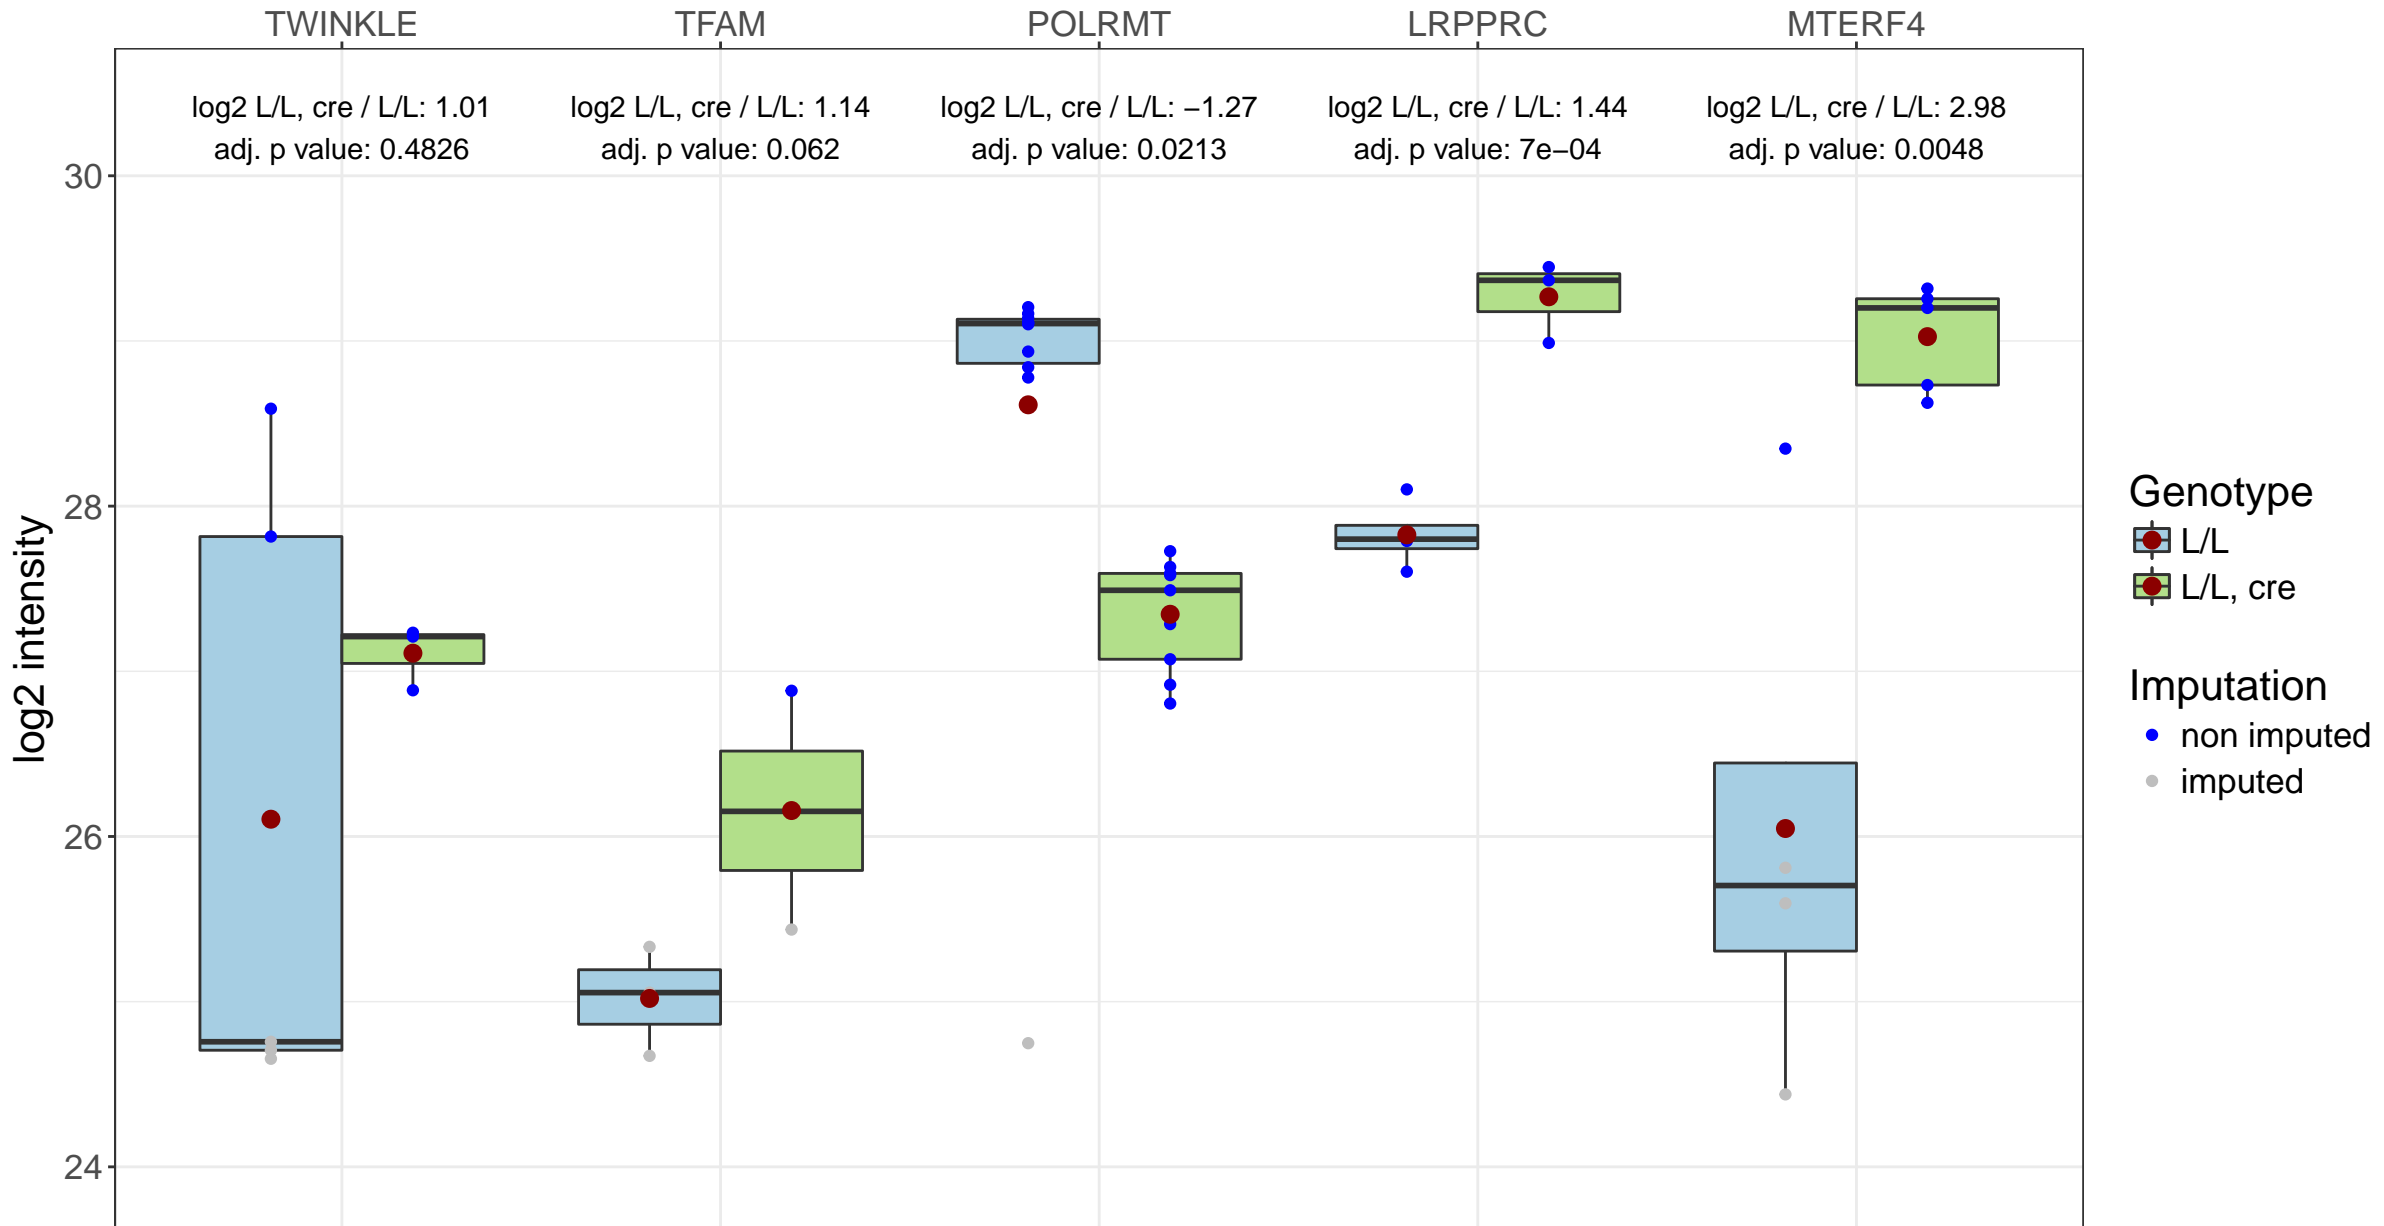

# MRPL42 / Q9CPV3

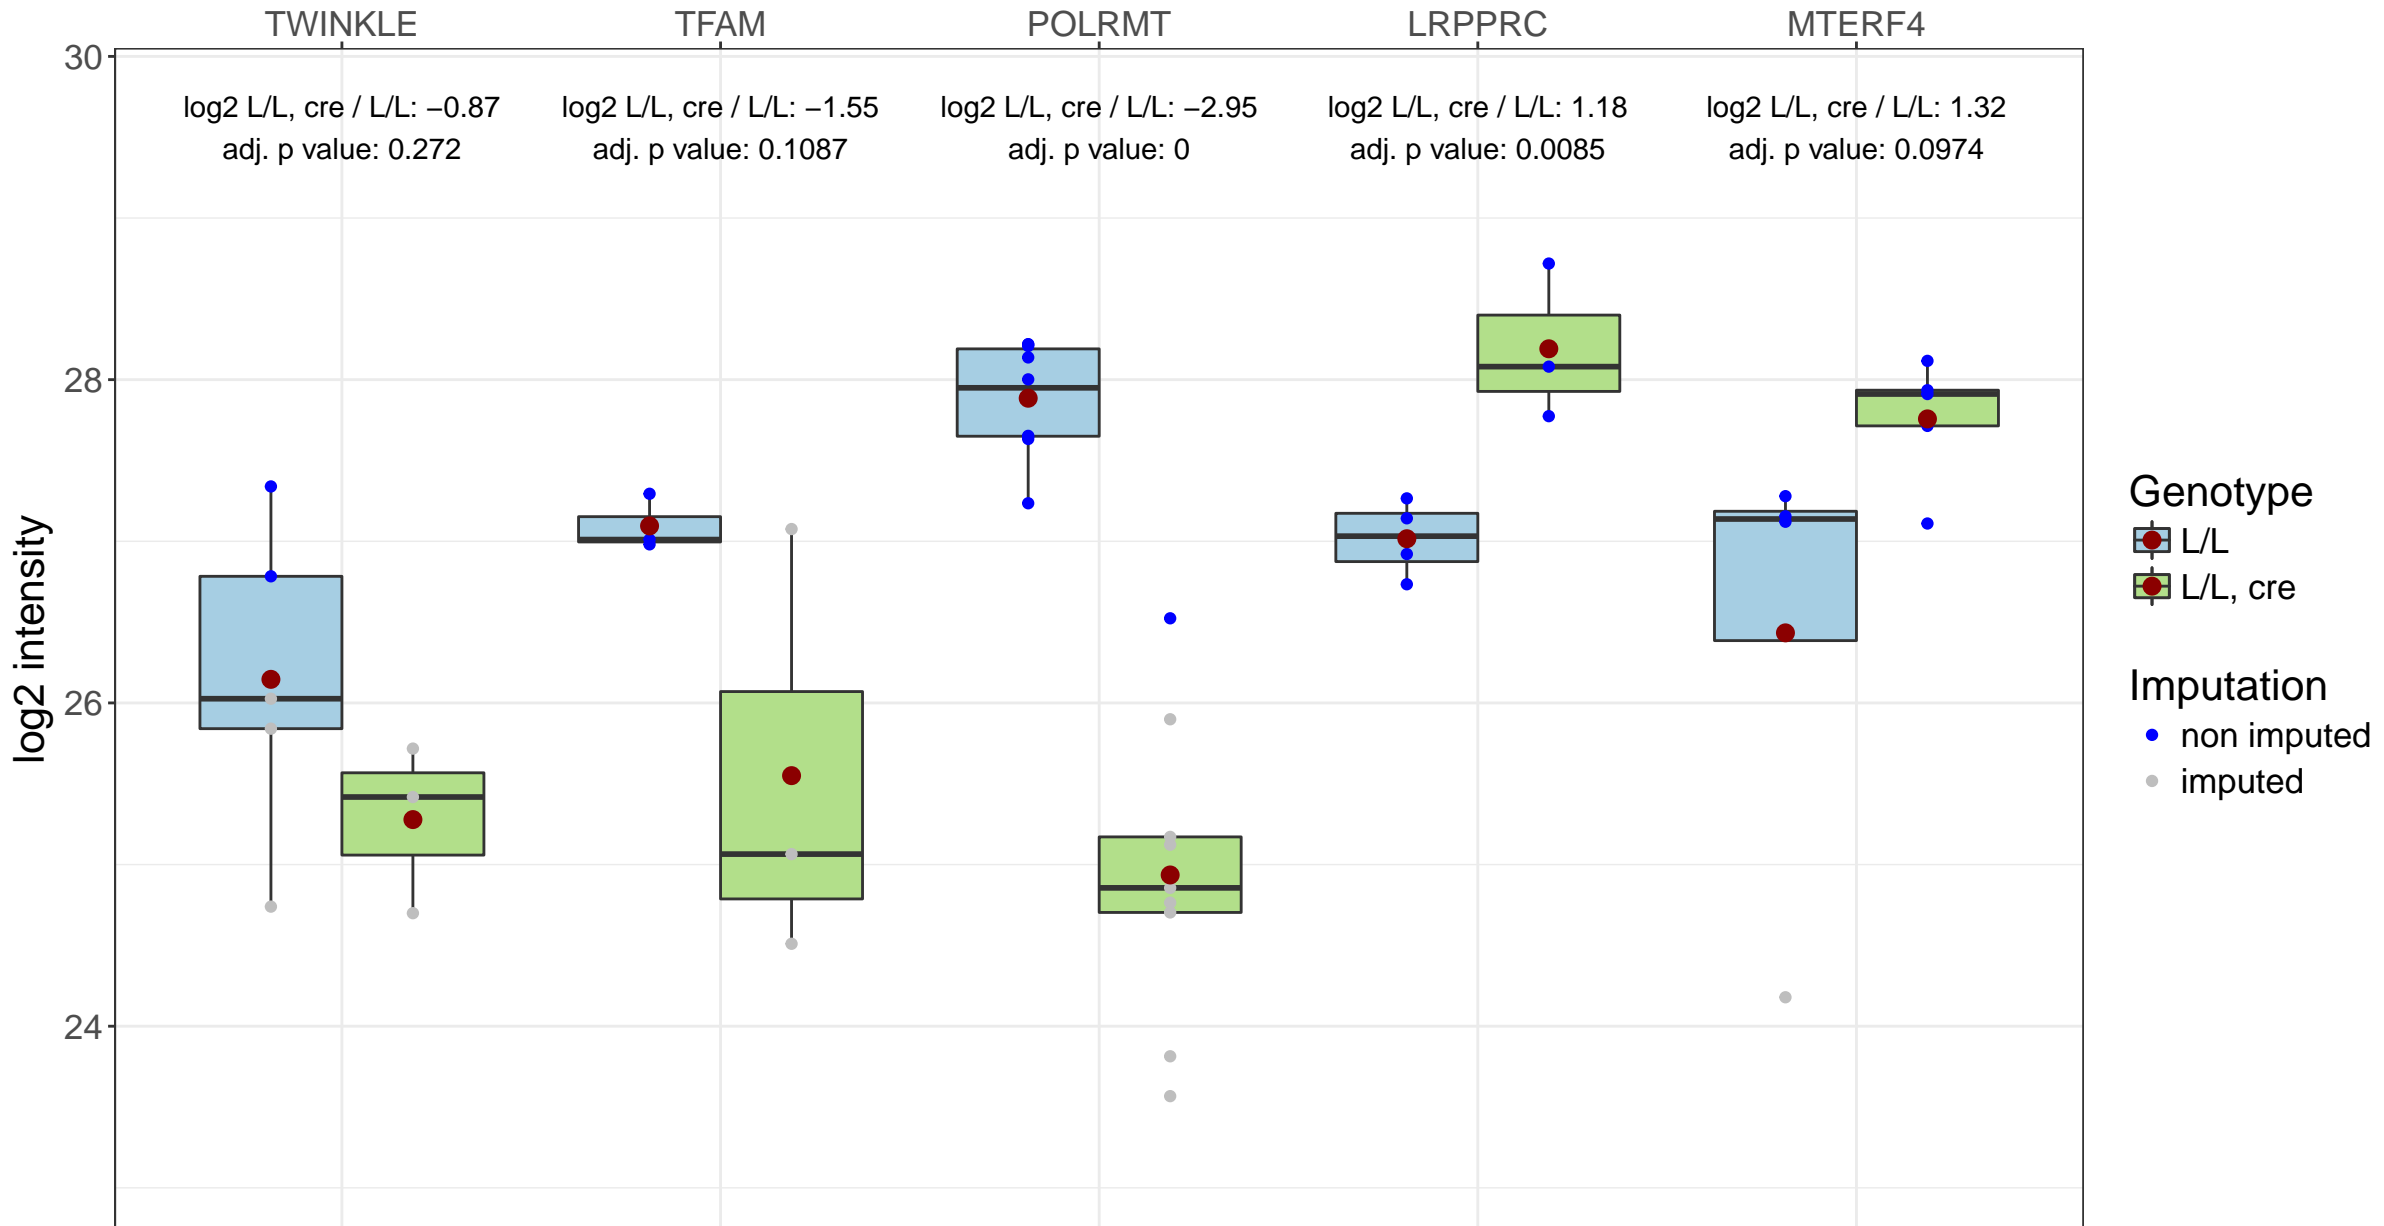

# MRPL43 / Q5RL20

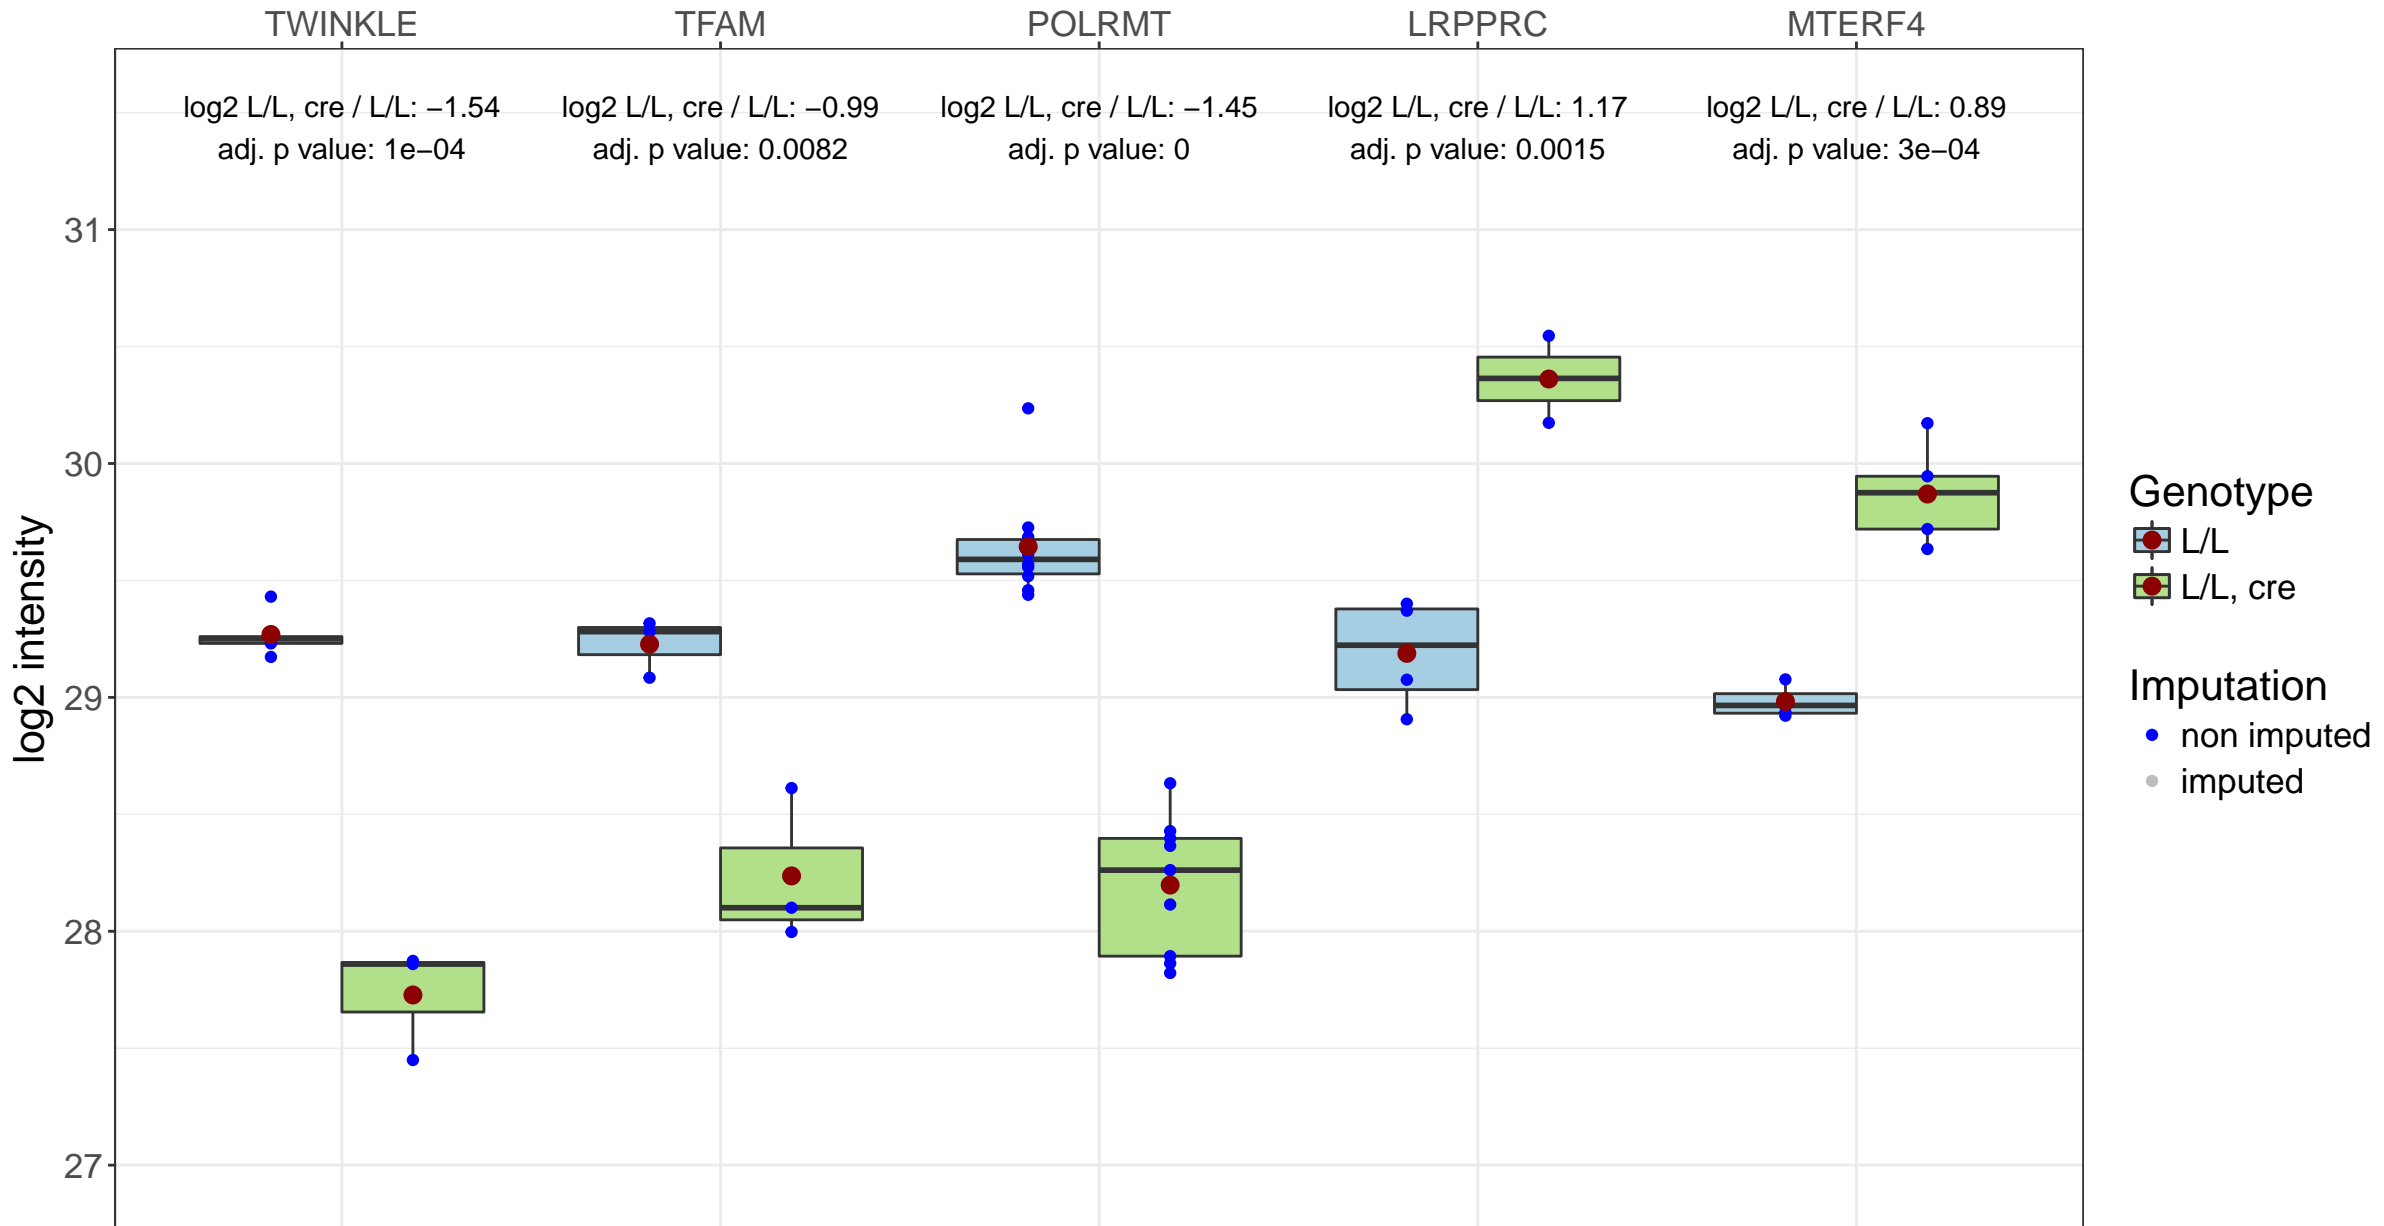

# MRPL44 / Q9CY73

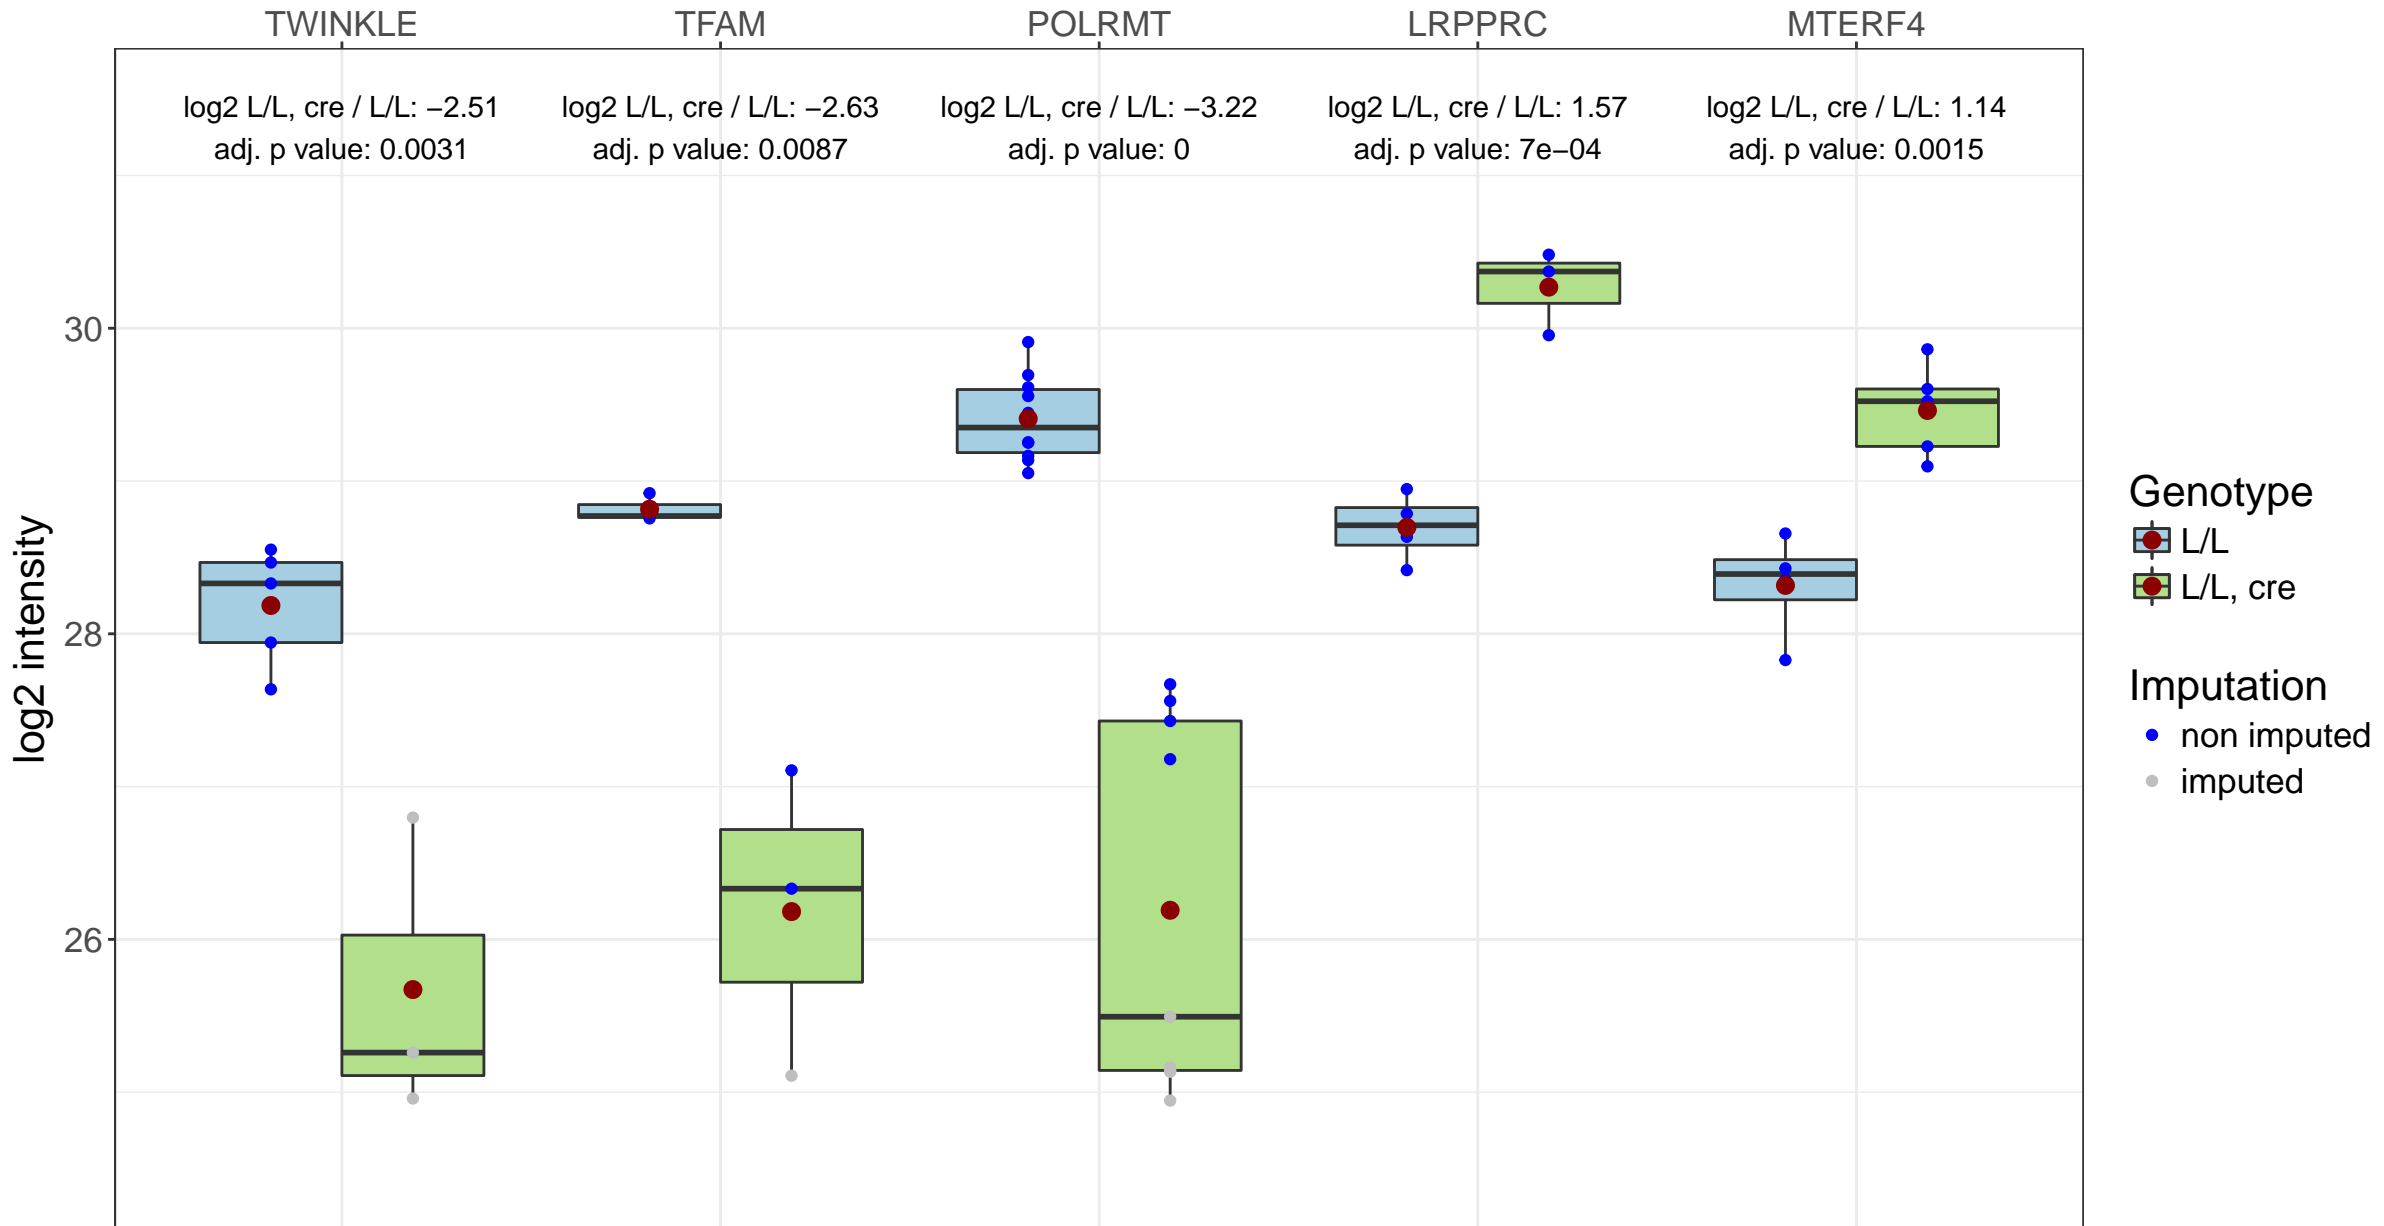



# MRPL45 / Q9D0Q7

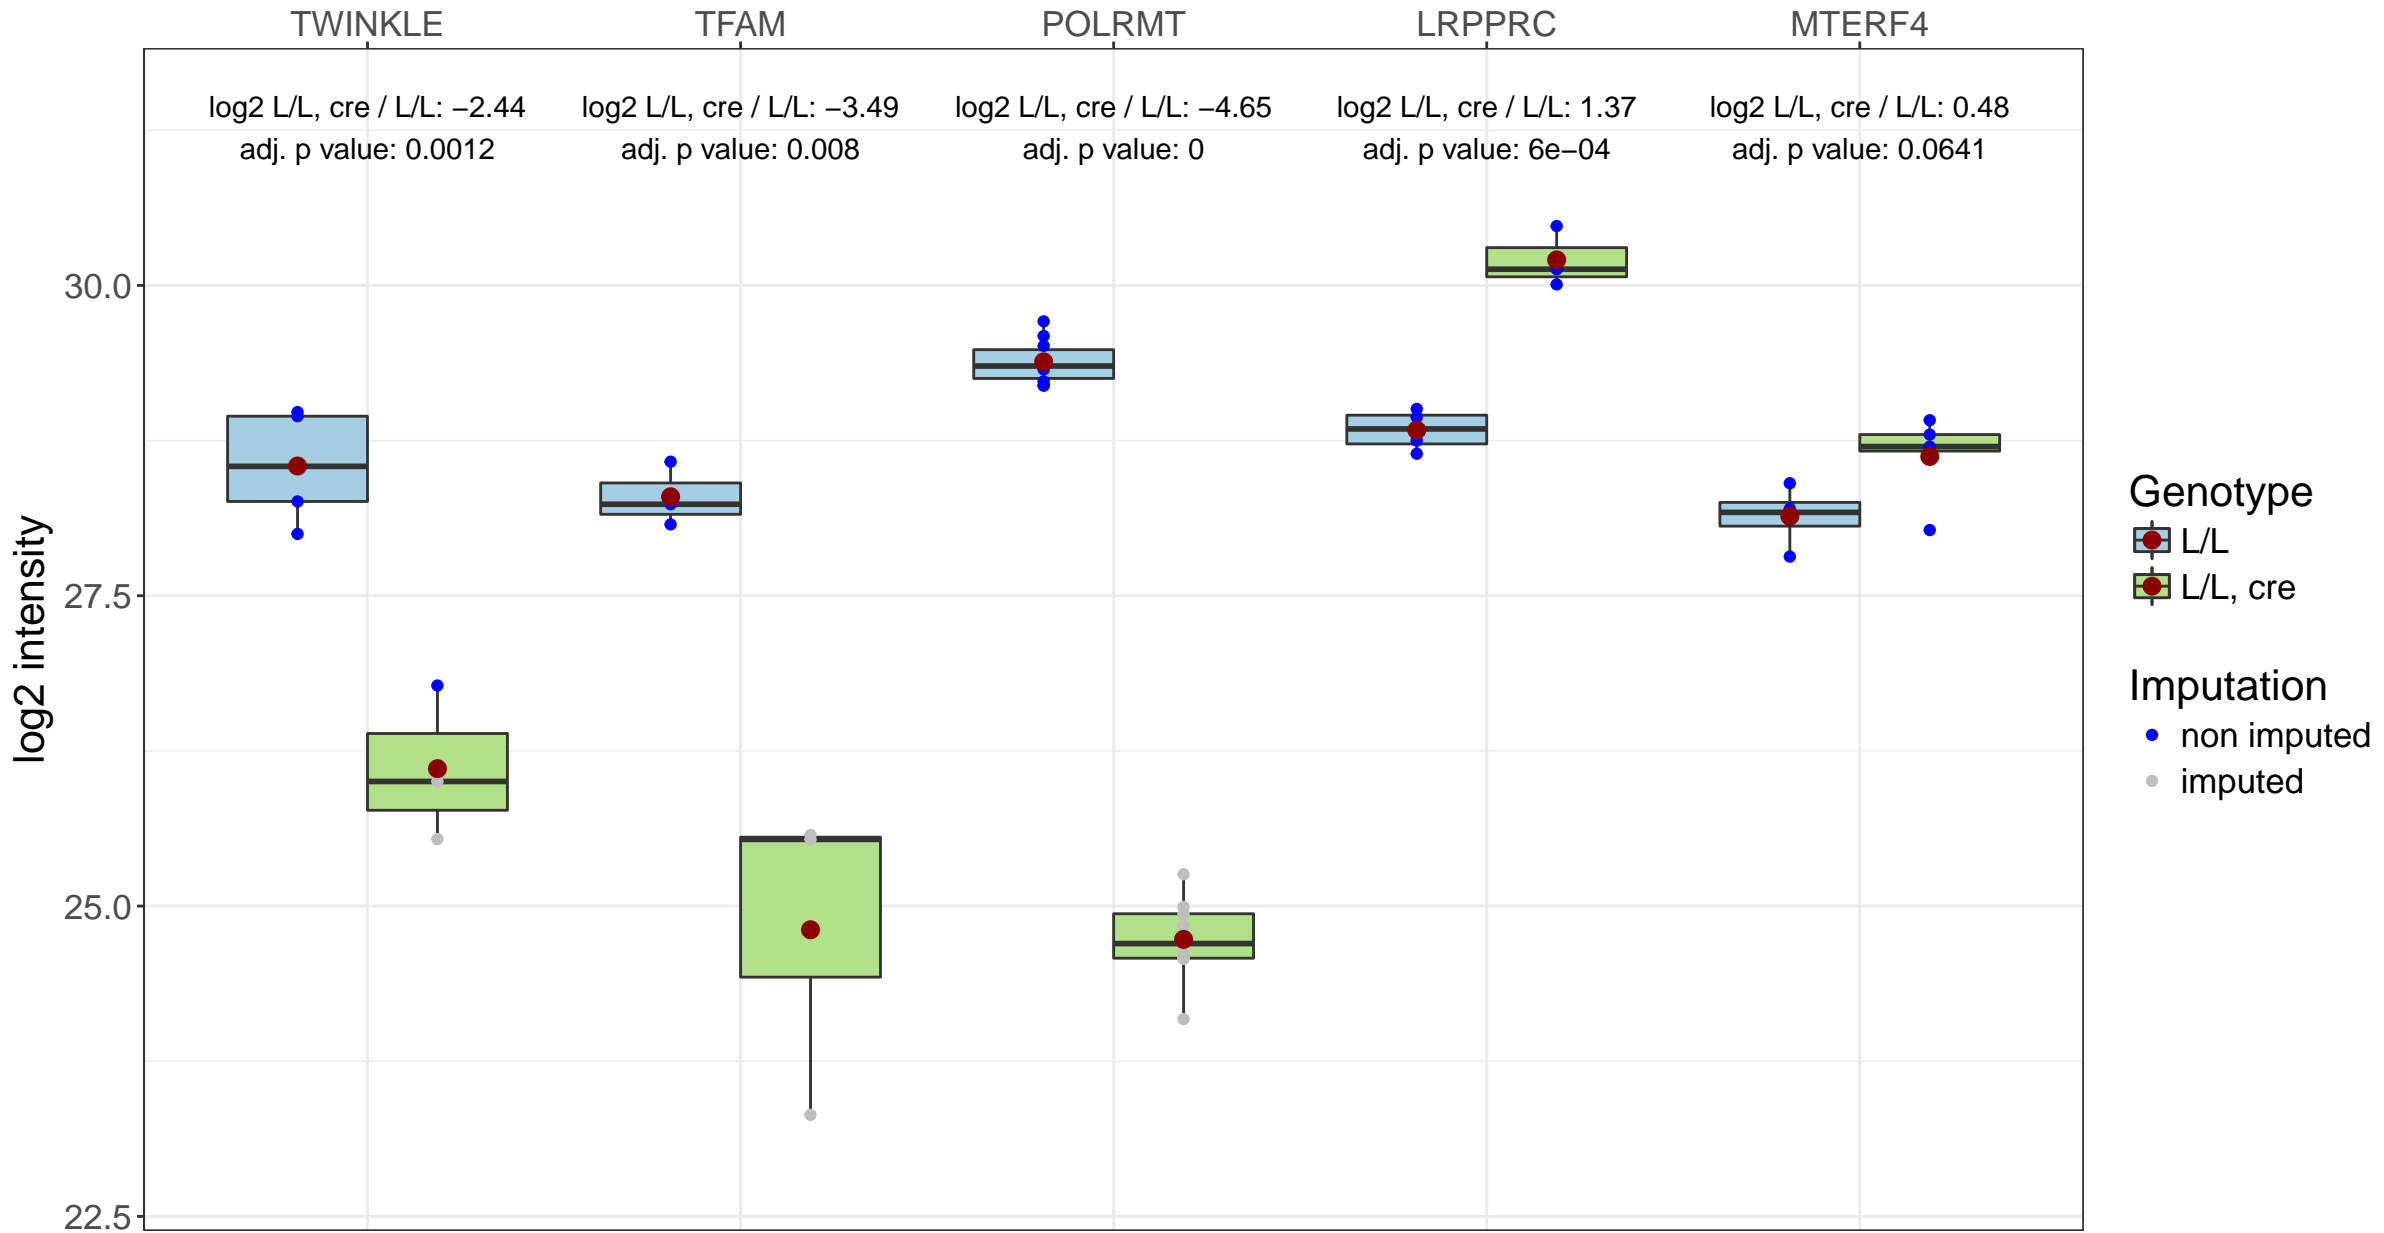

# MRPL46 / Q9EQI8

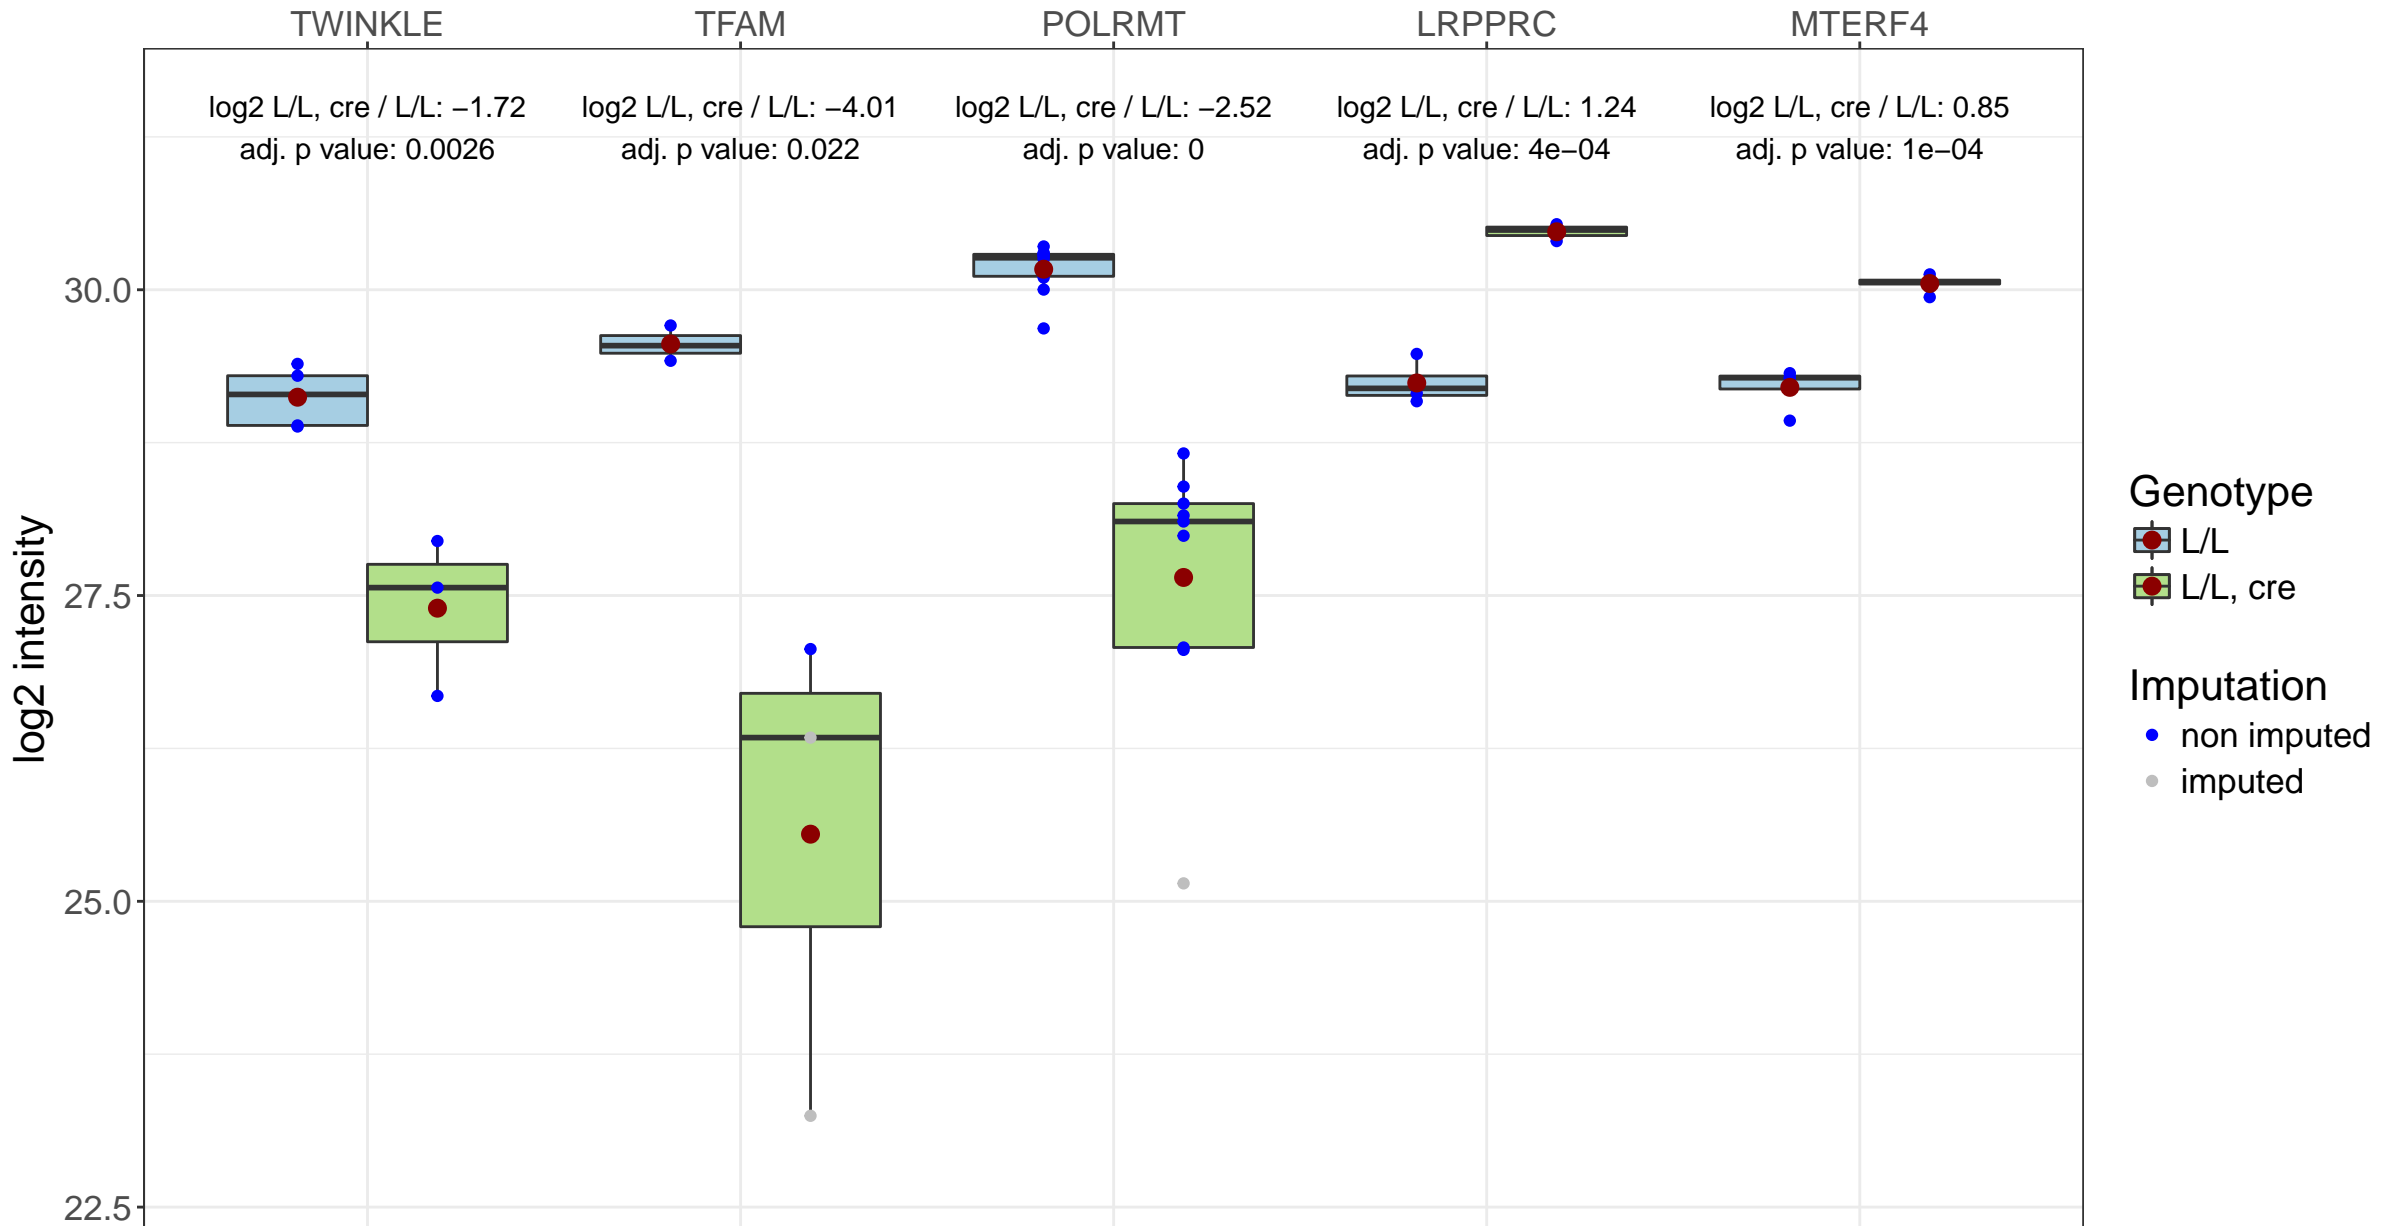

# MRPL47 / Q8K2Y7

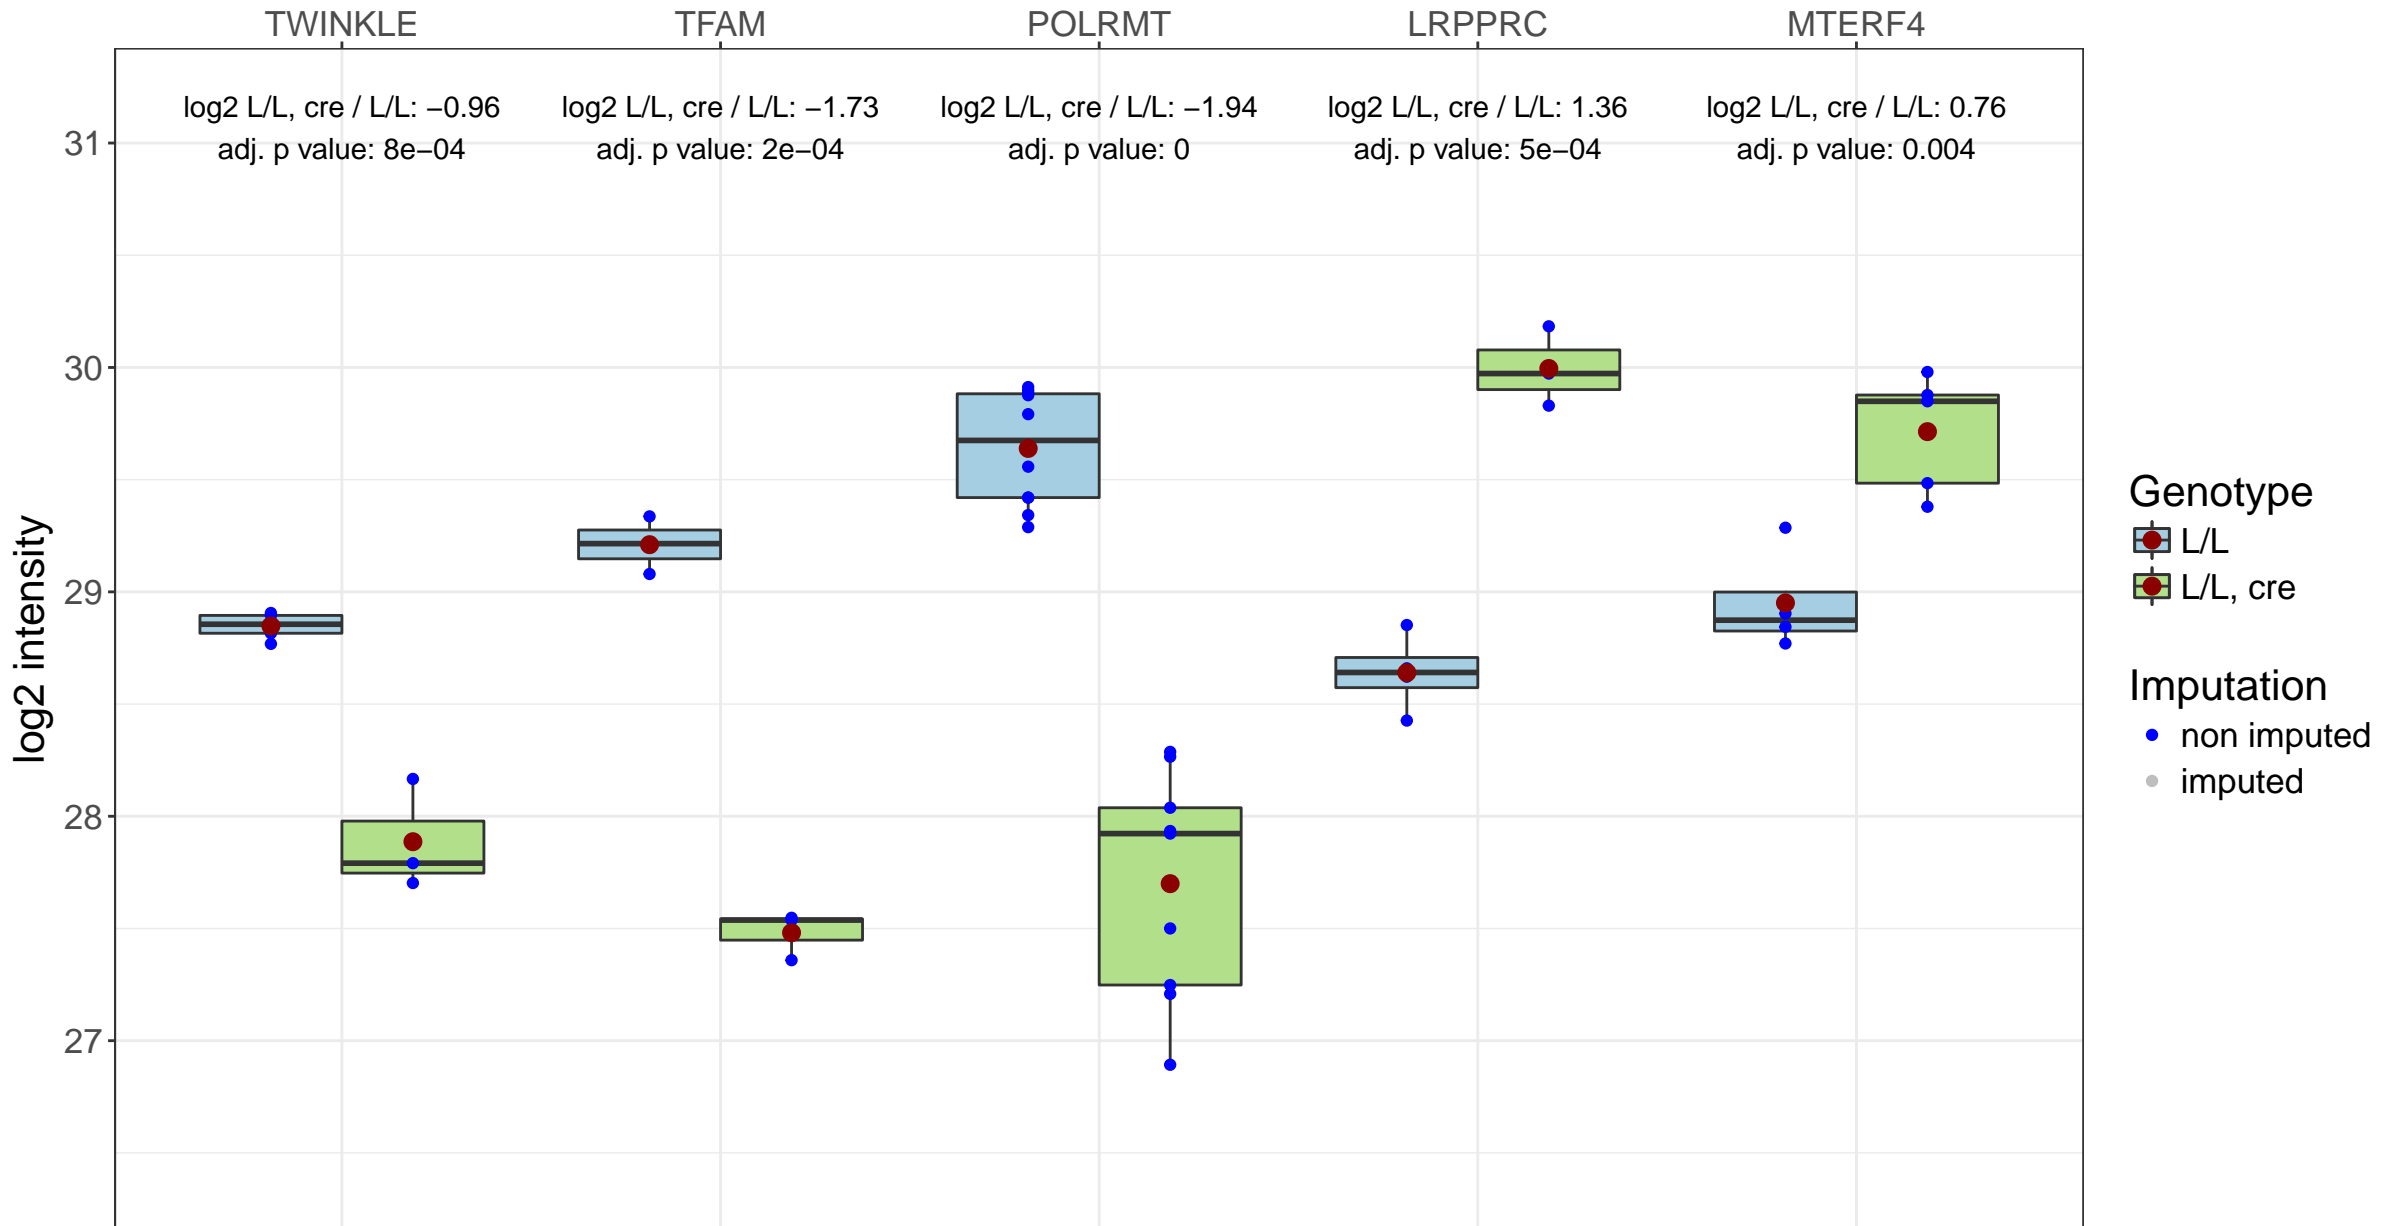

# MRPL48 / E9QPQ8

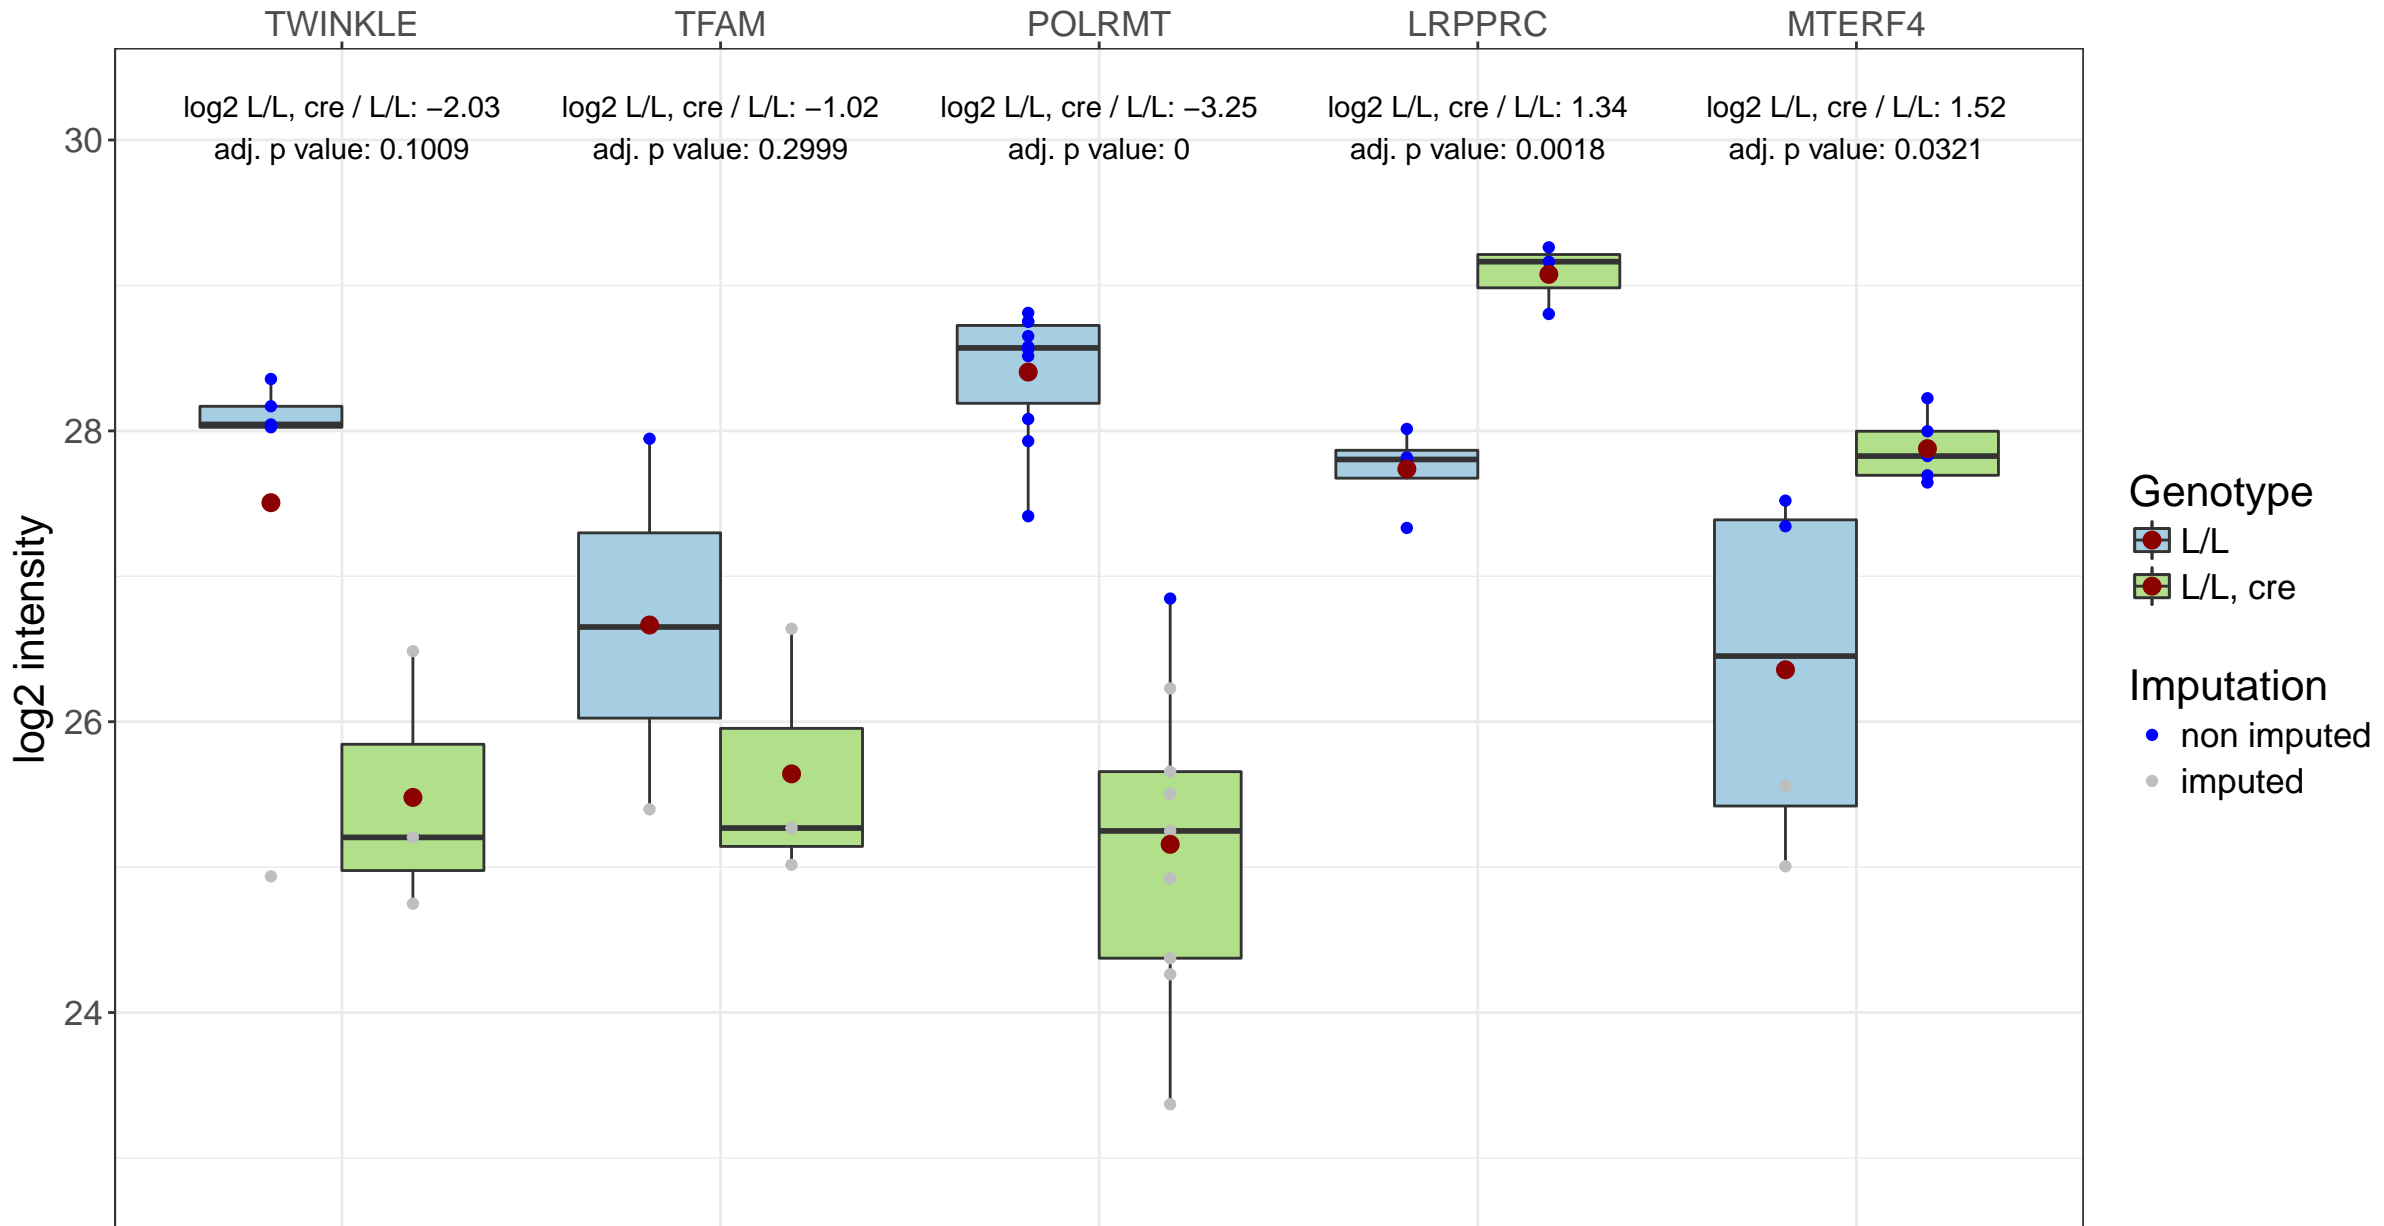

# MRPL49 / Q9CQ40

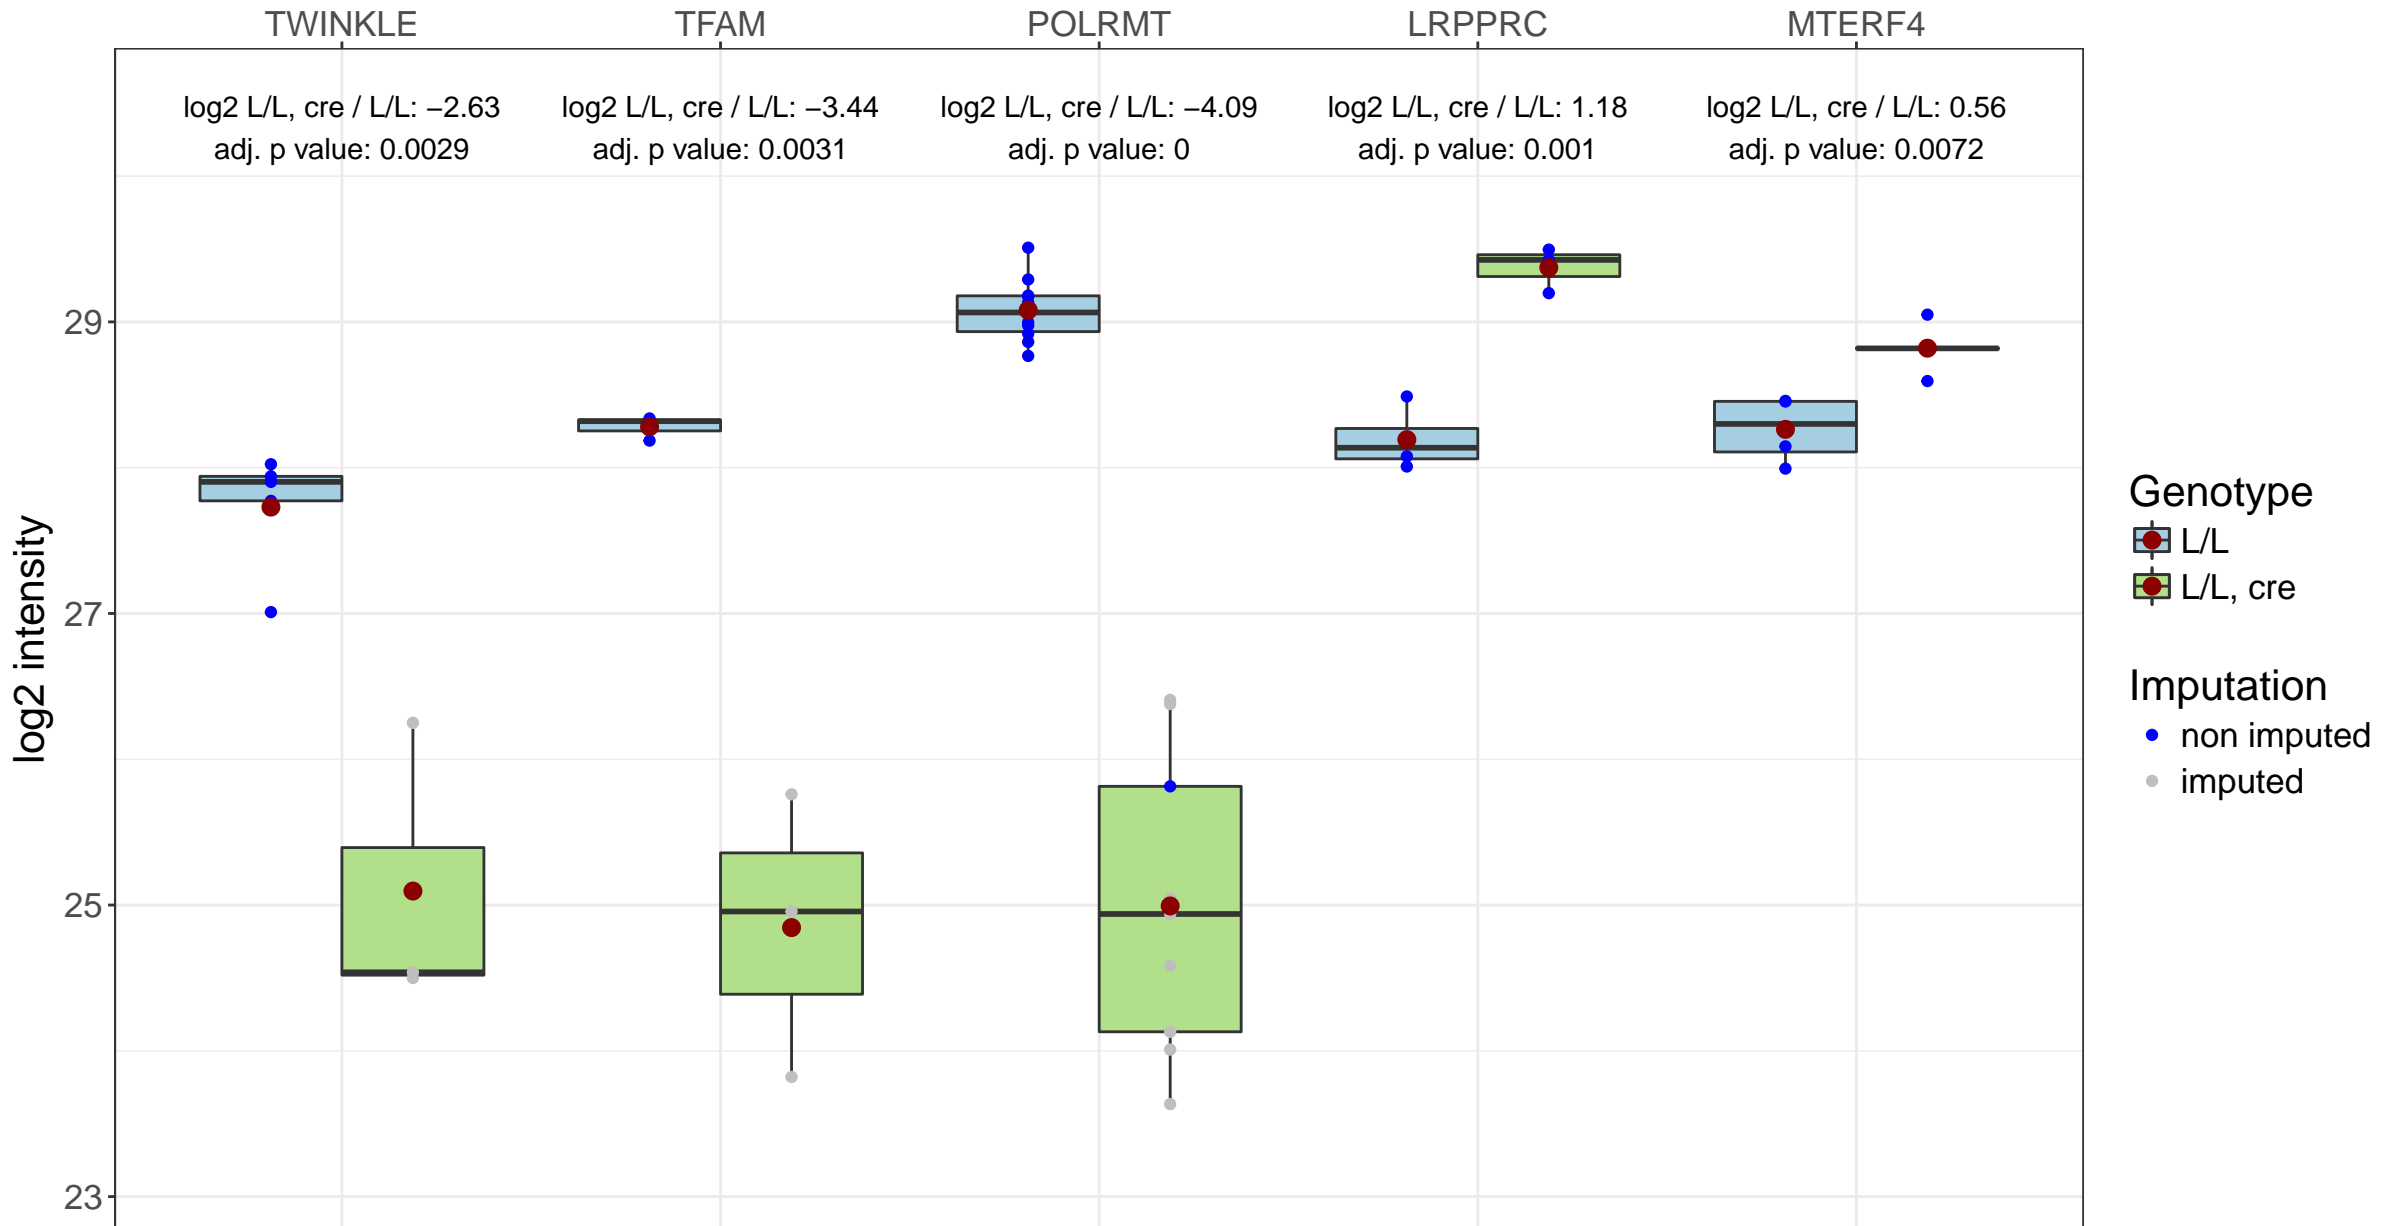

# MRPL50 / Q8VDT9

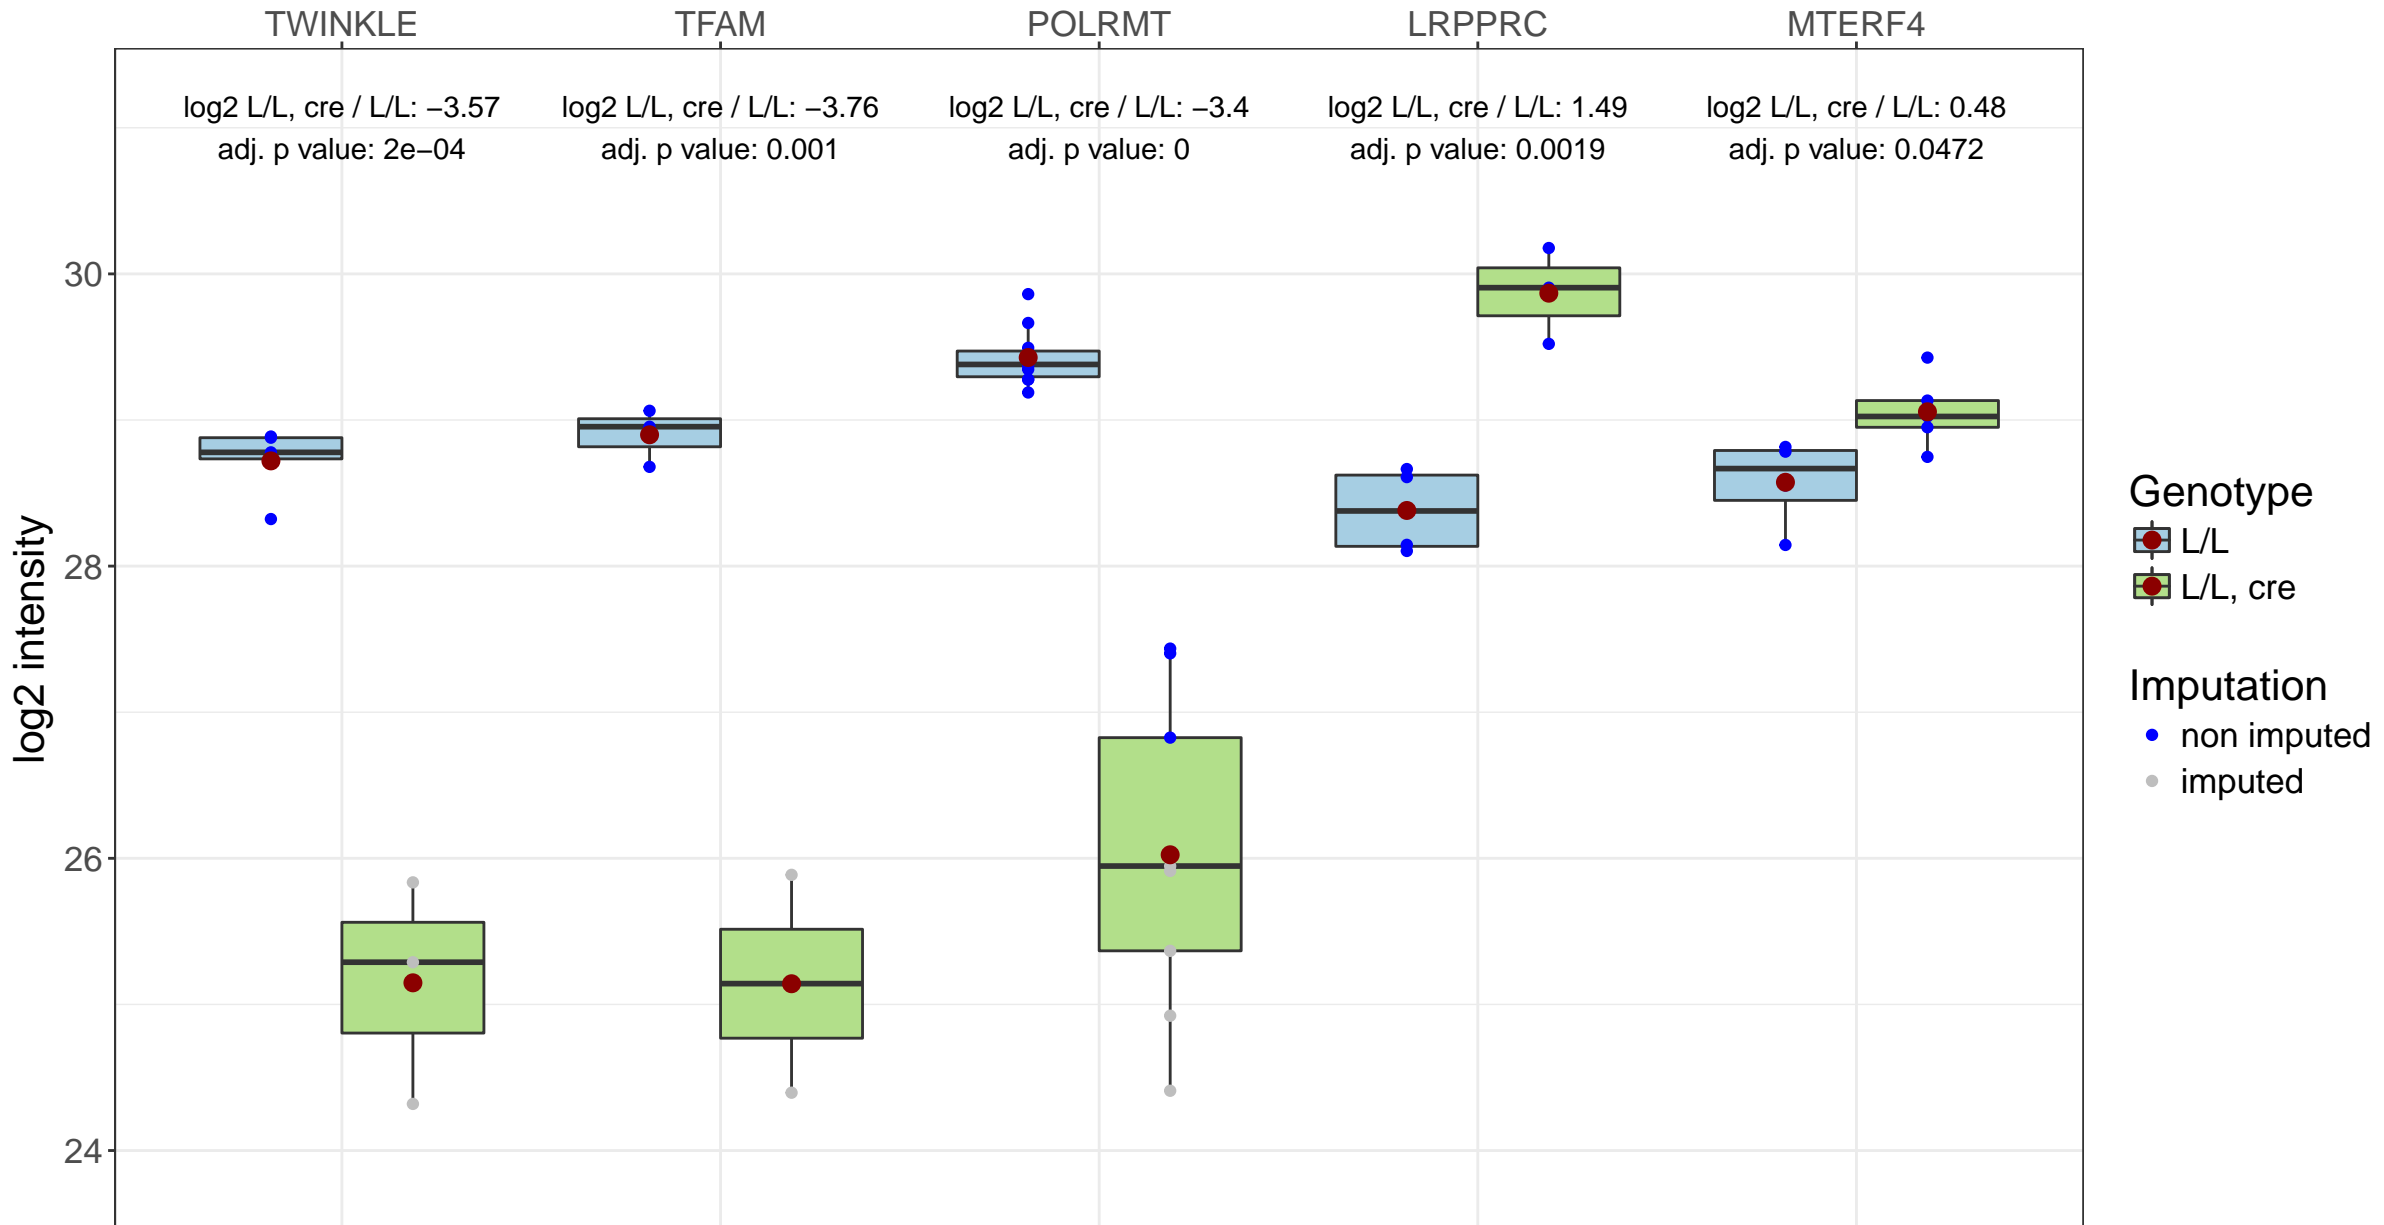

# MRPL51 / Q9CPY1

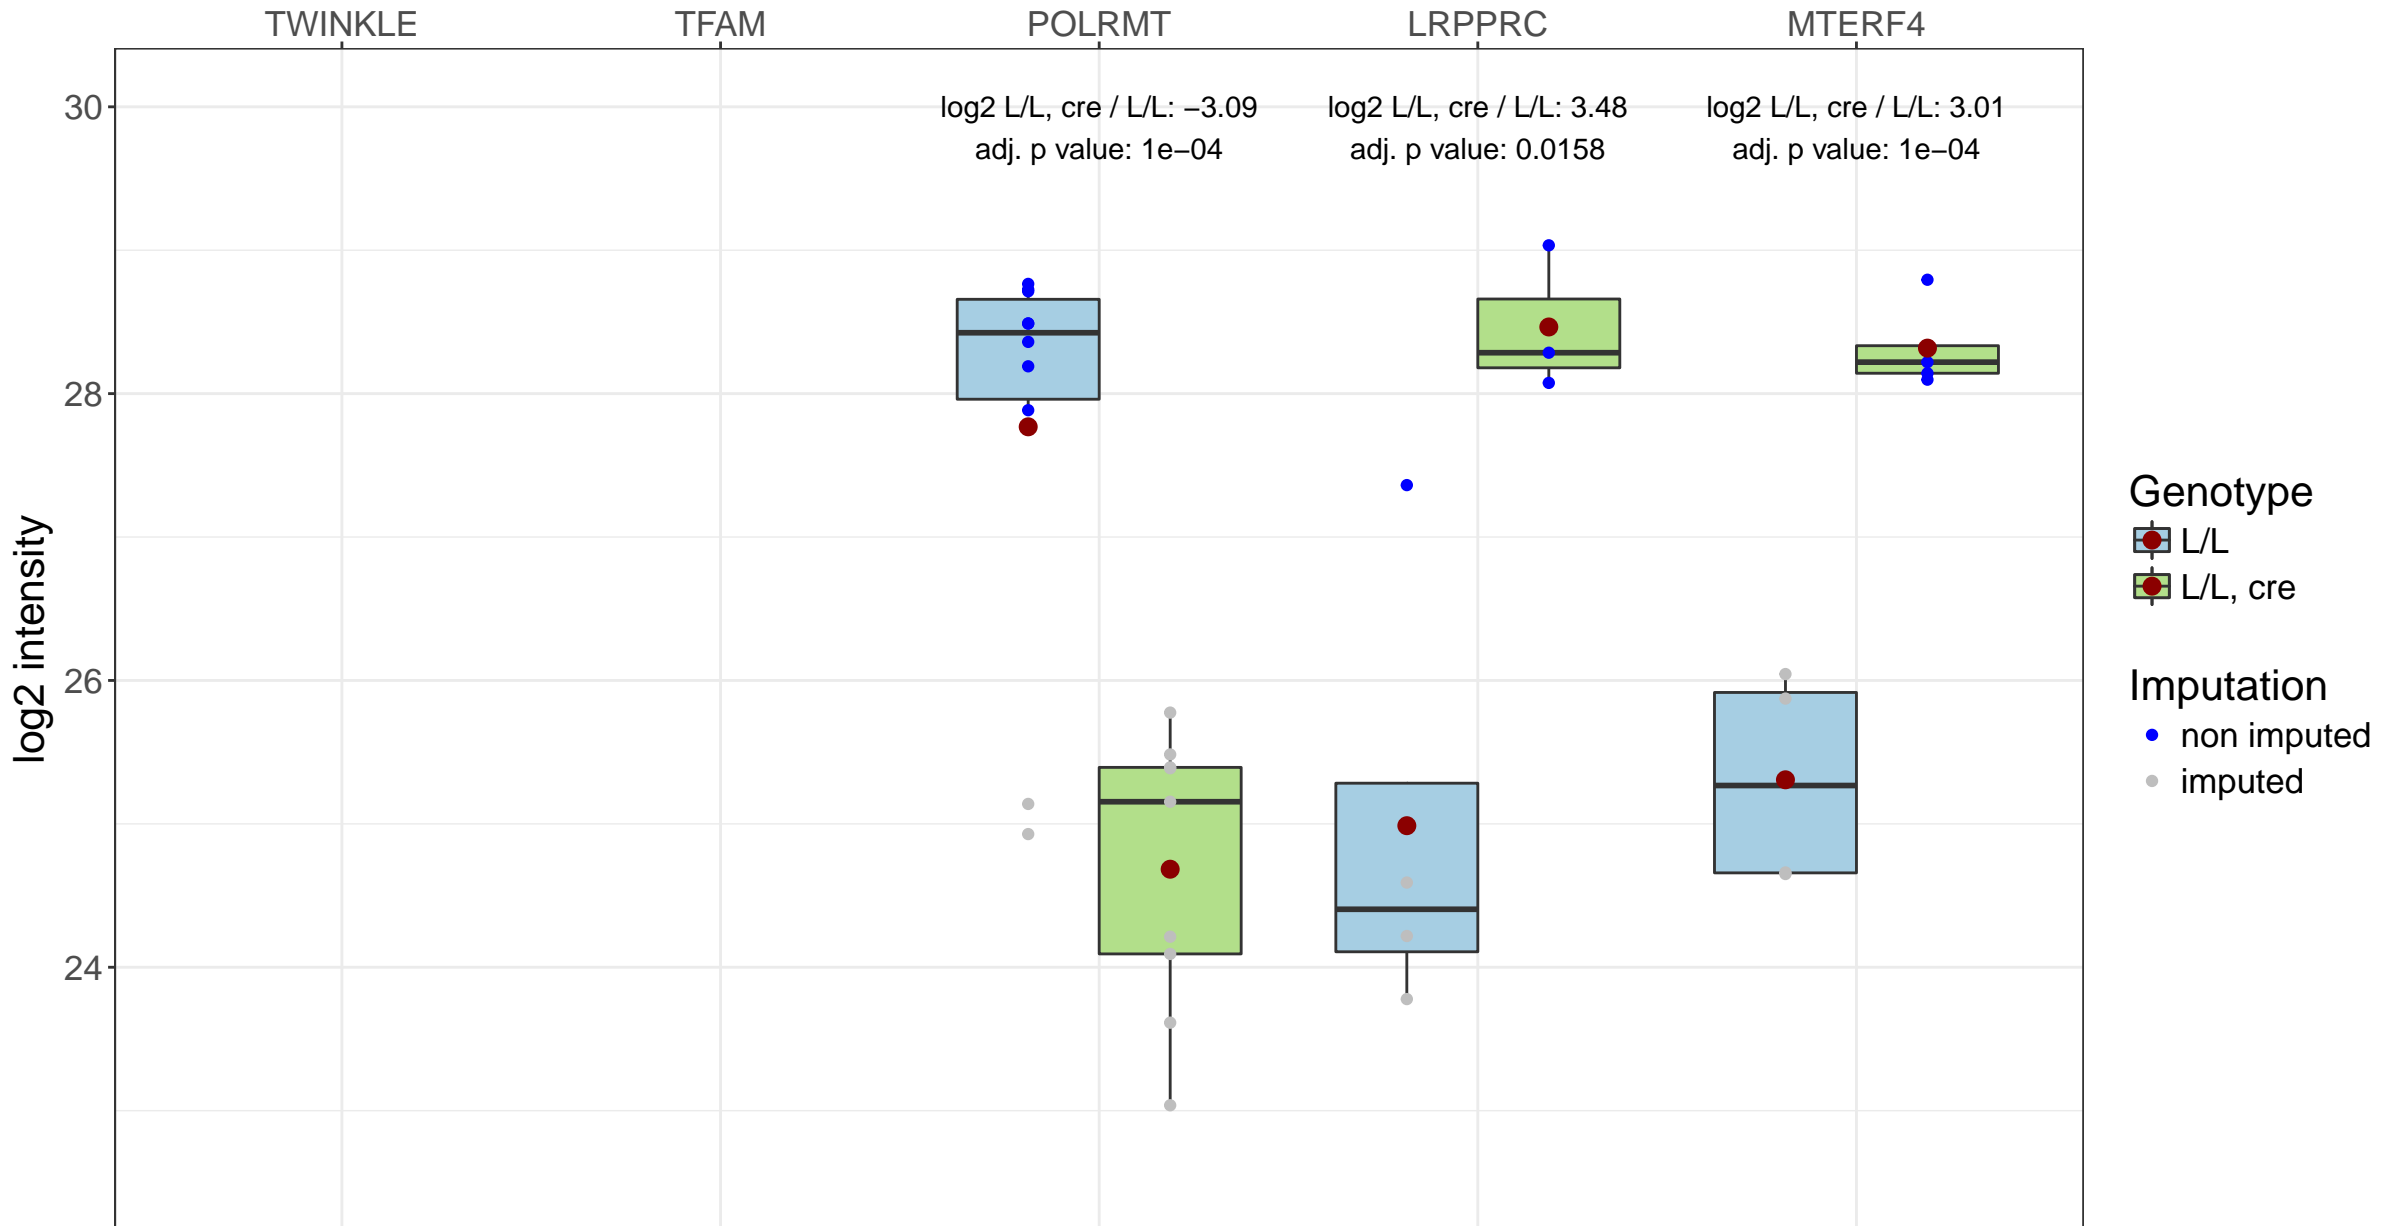

# MRPL53 / Q9D1H8

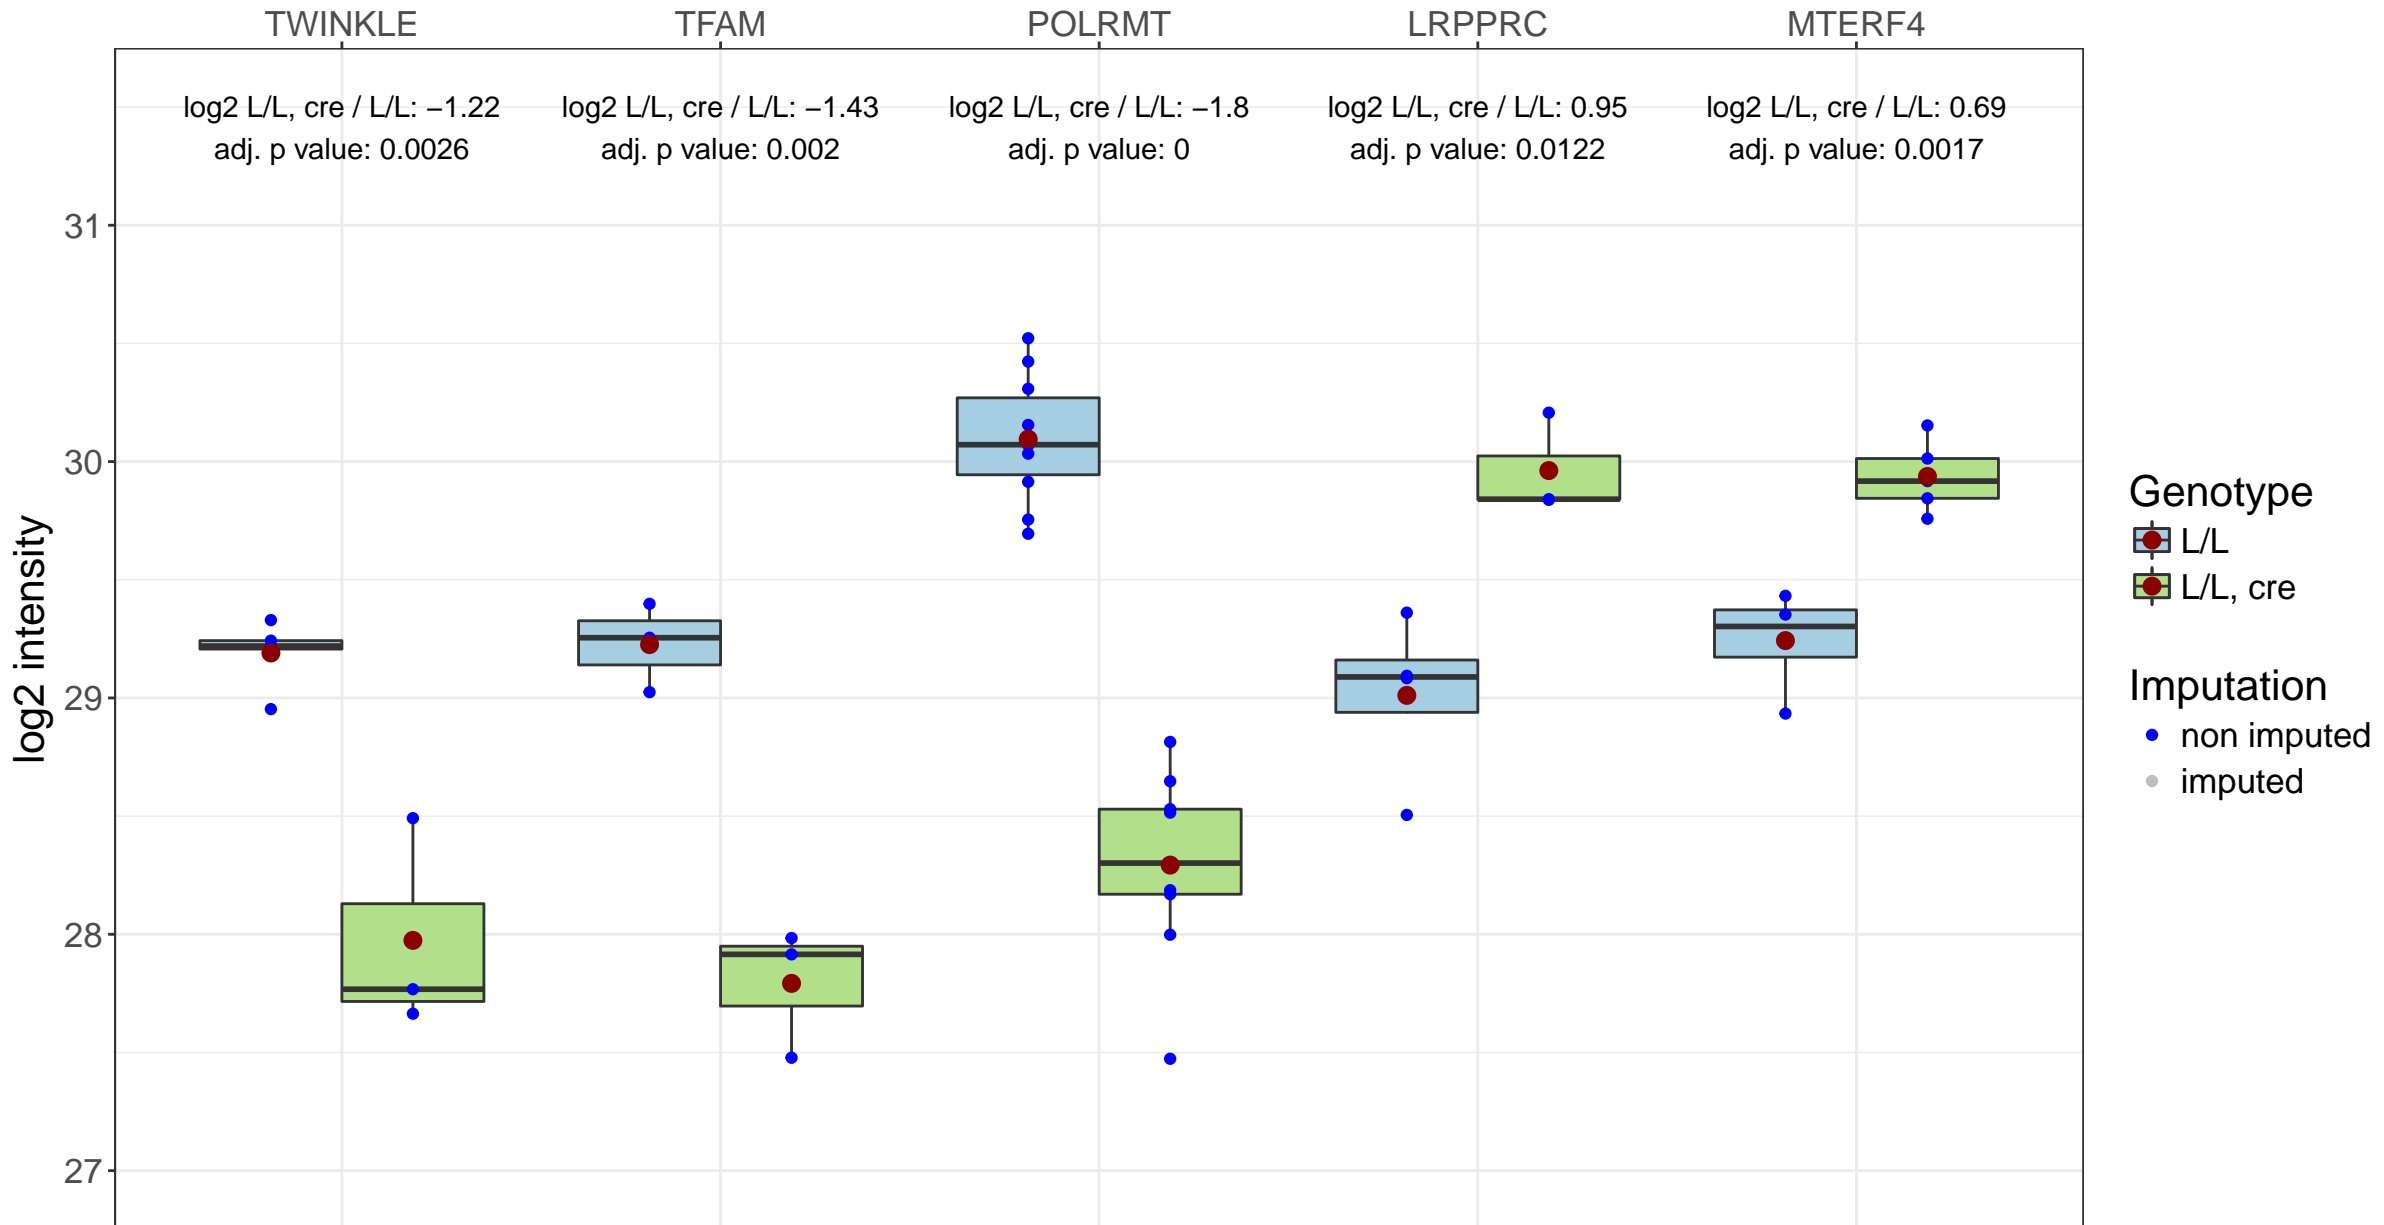



# MRPL54 / Q9CPW3

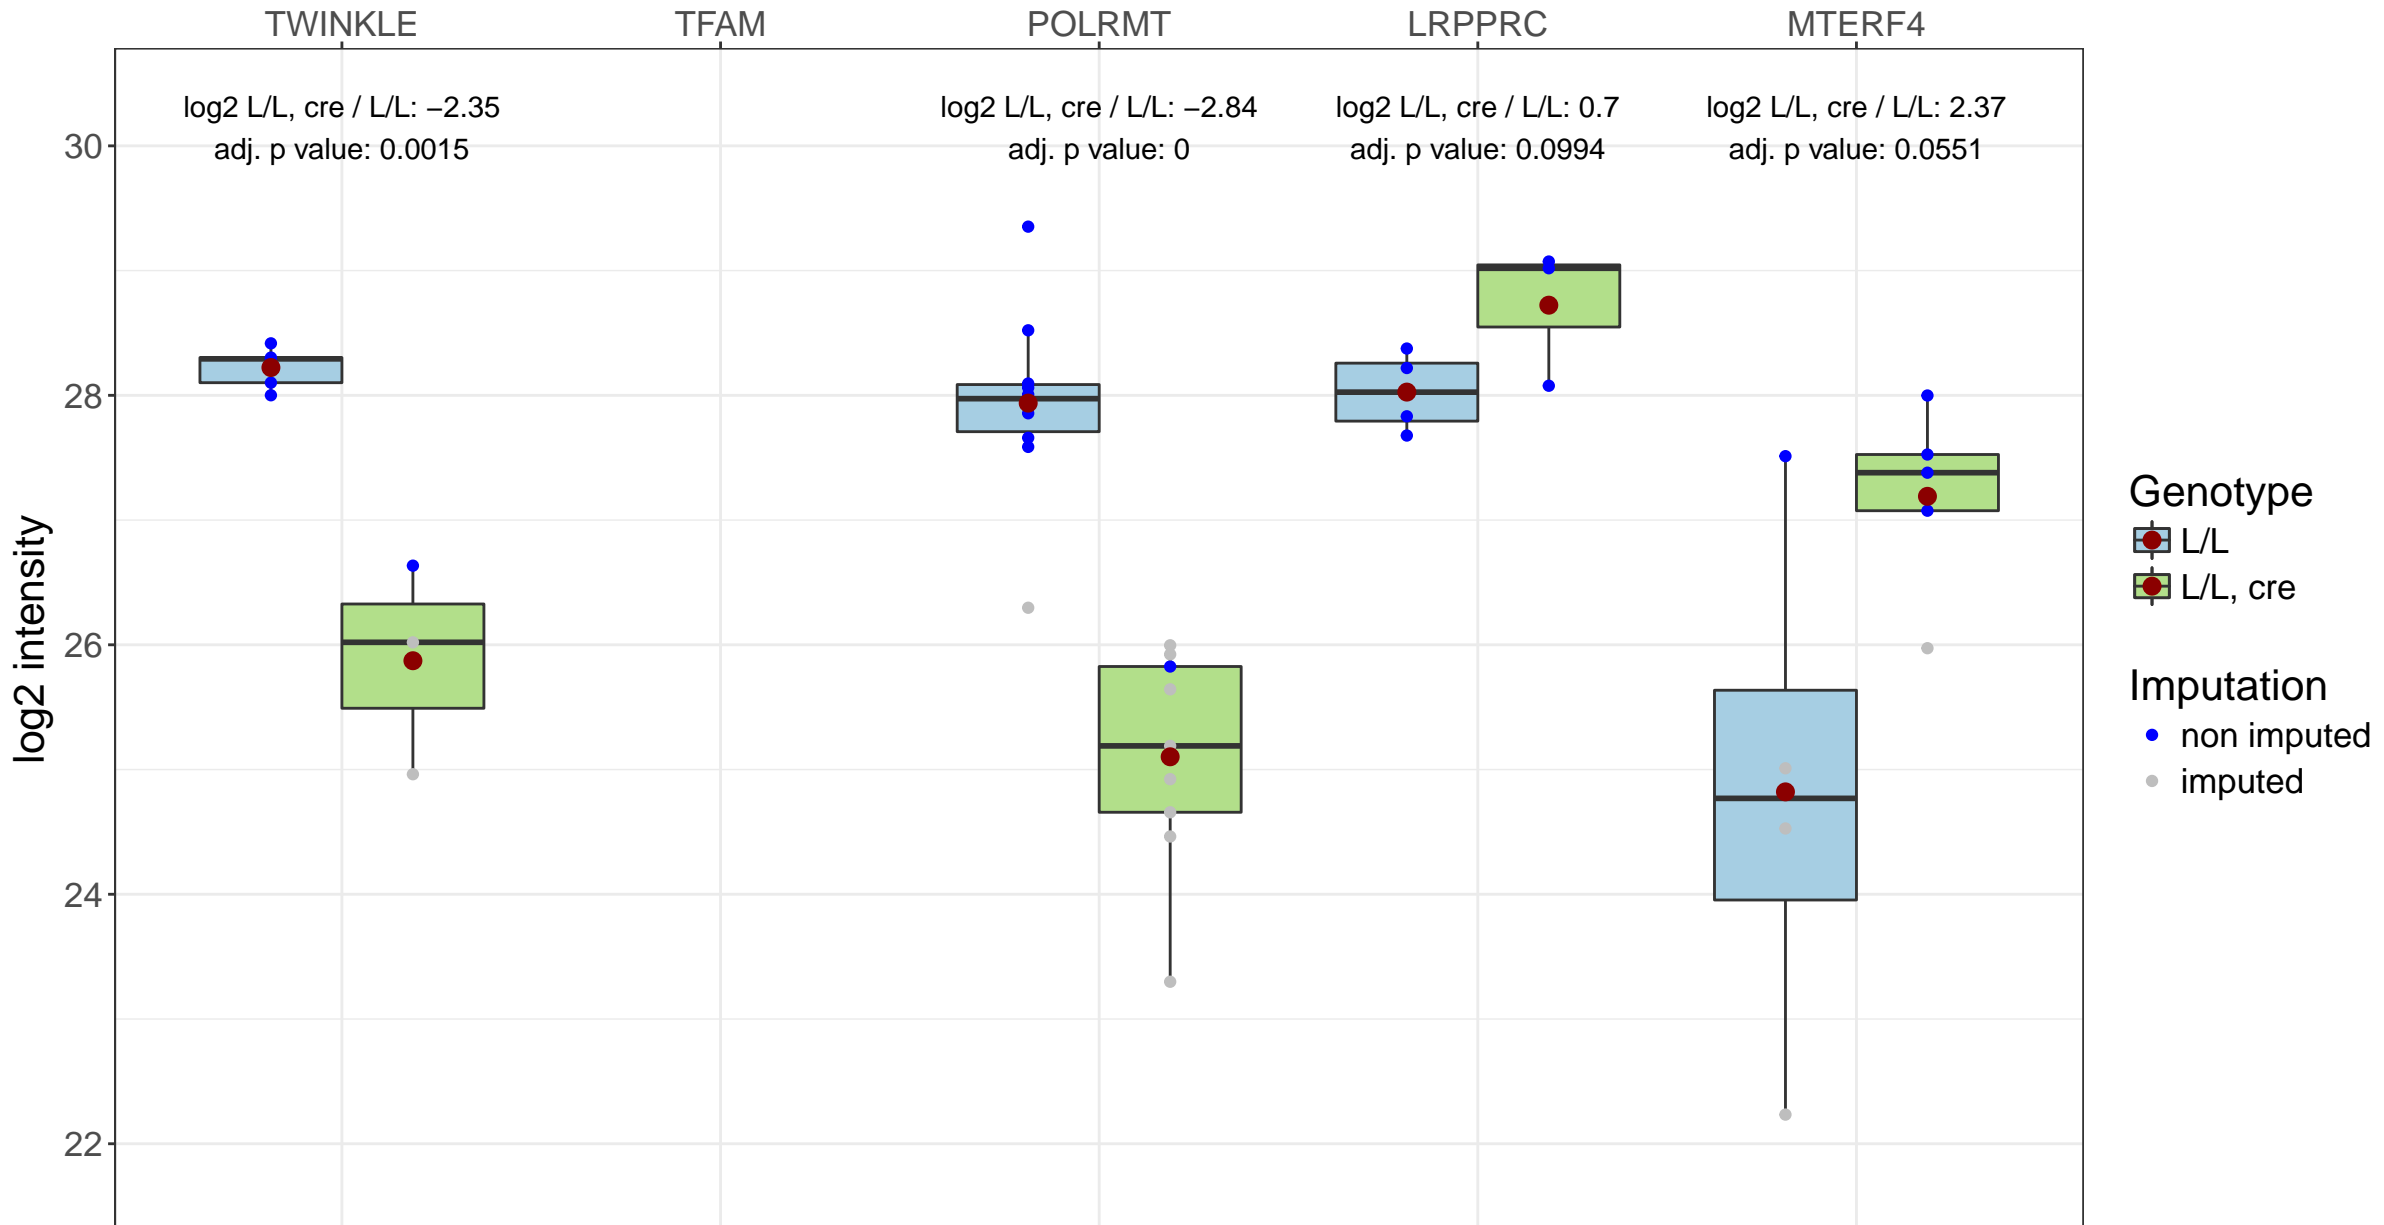

# MRPL55 / Q9CZ83

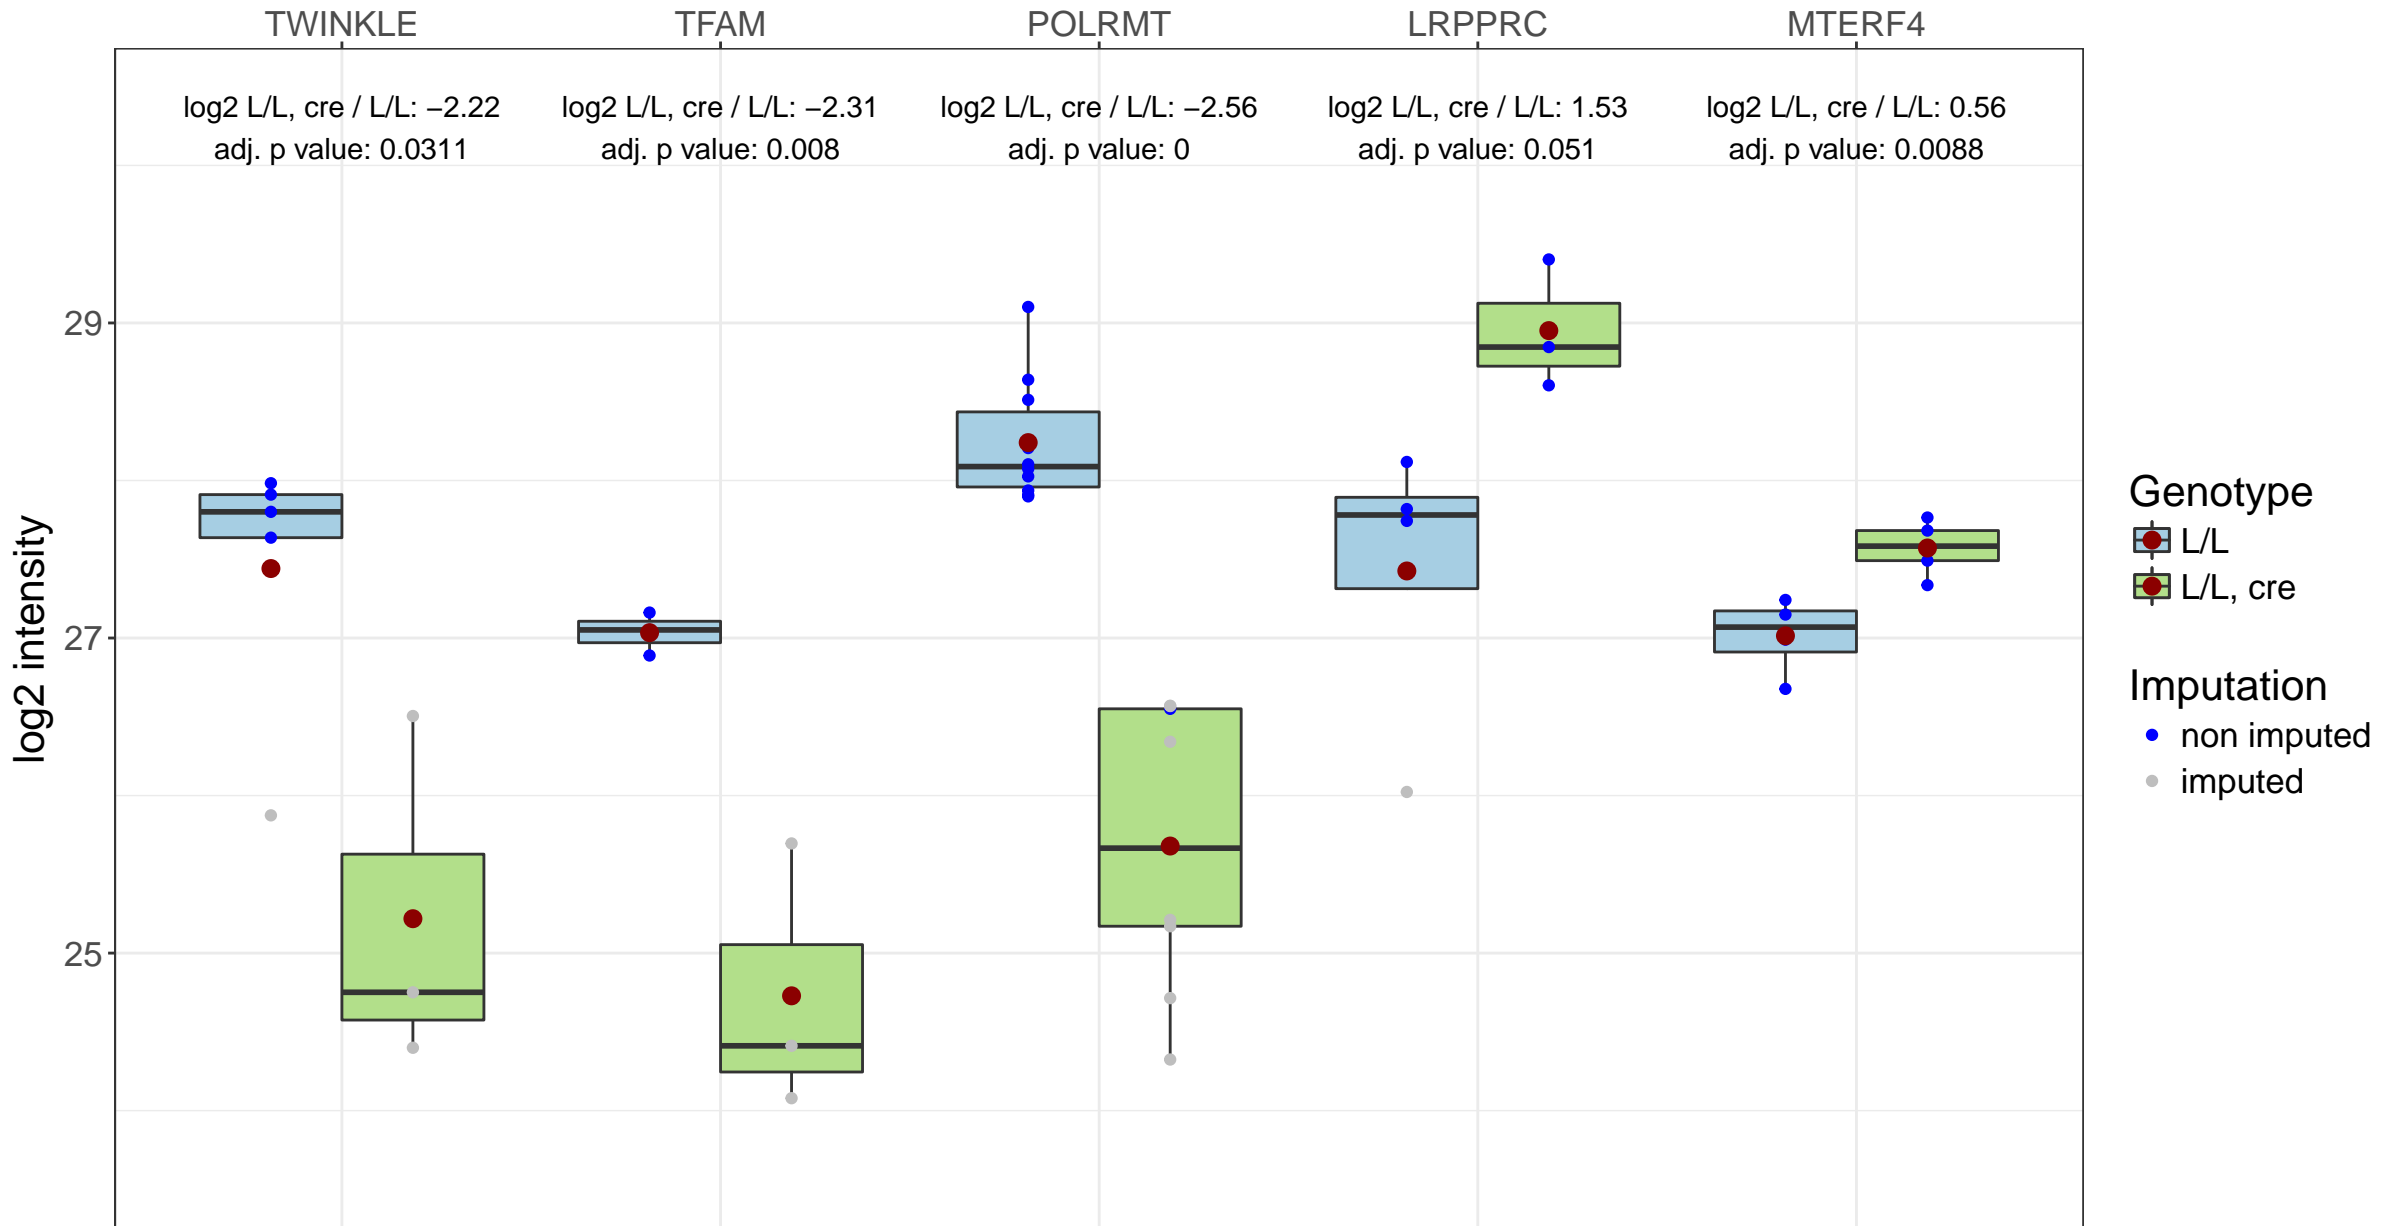

# MRPL58 / Q8R035

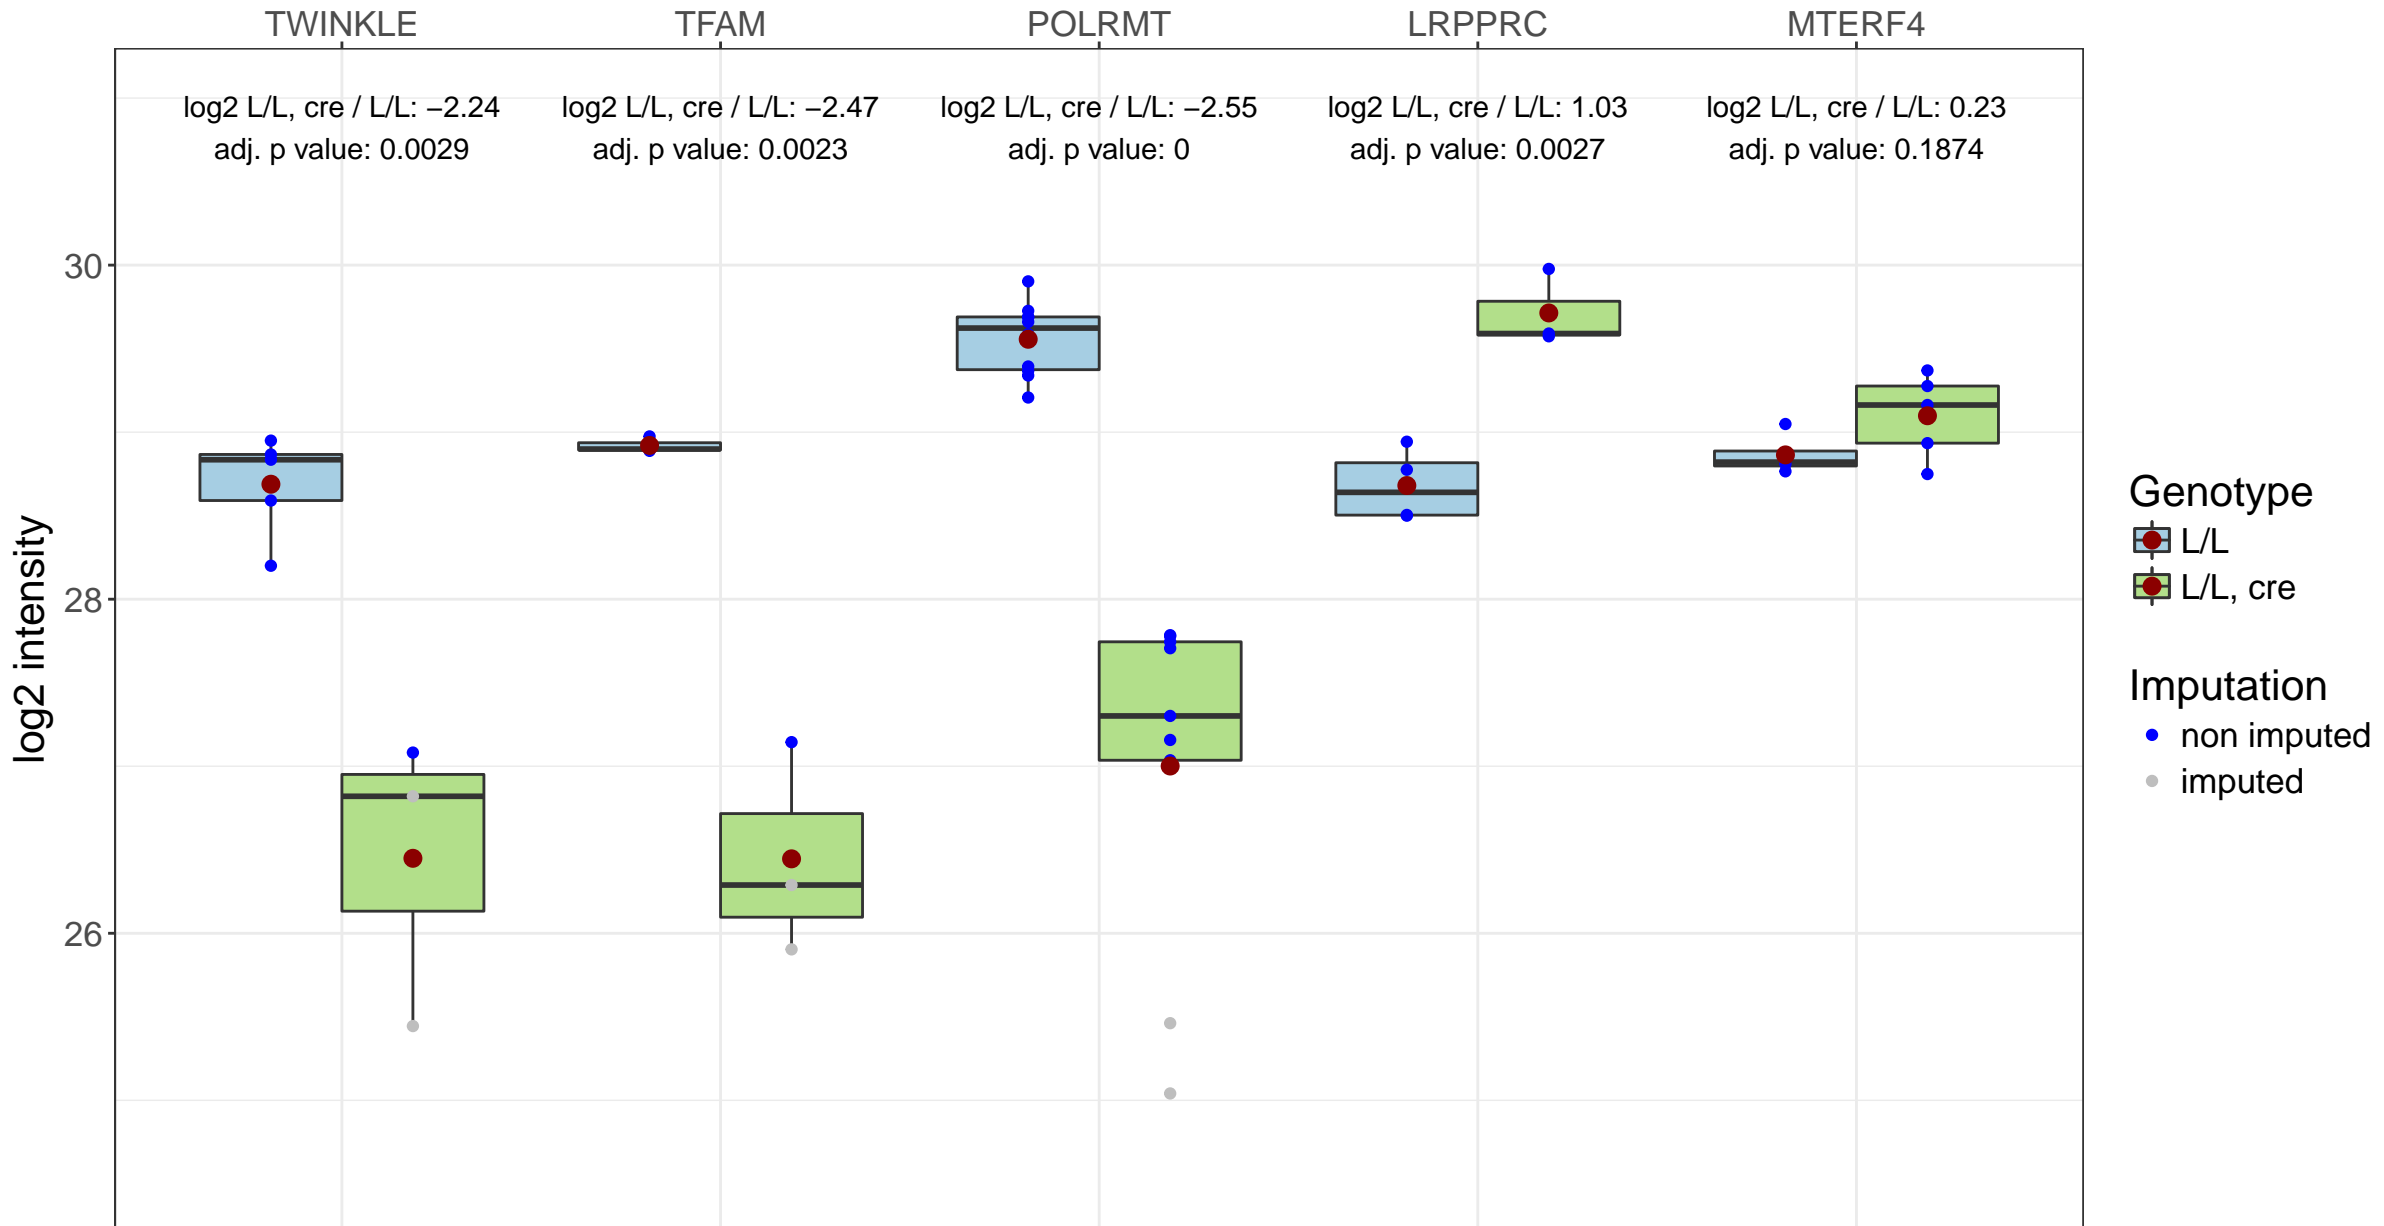

# MRPL59 / Q9CR59

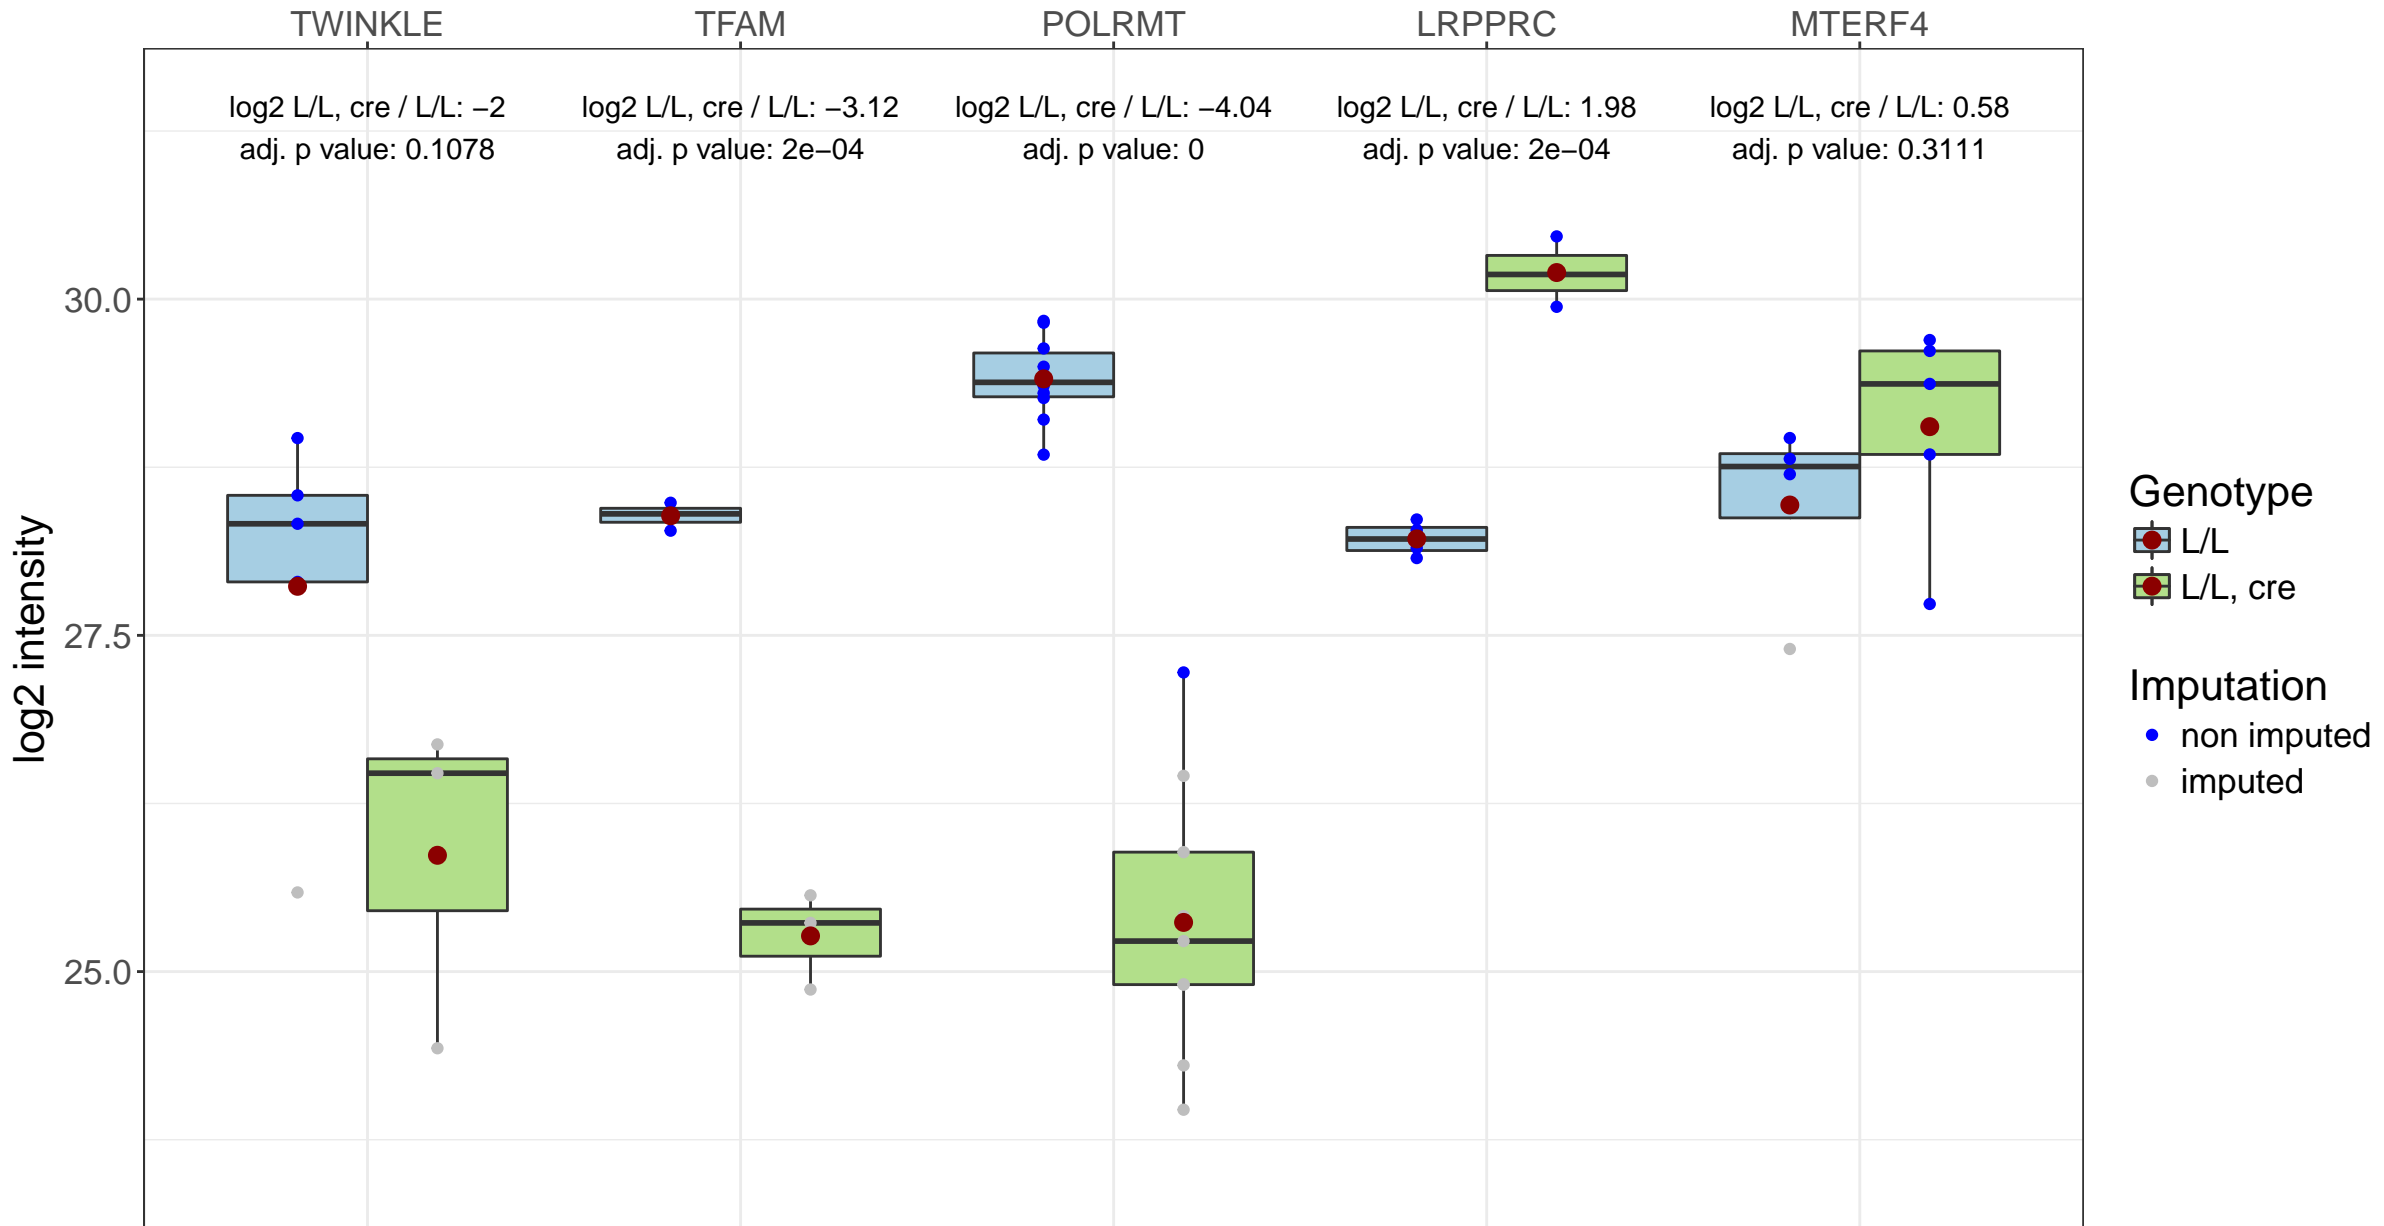

# MRPL9 / Q99N94

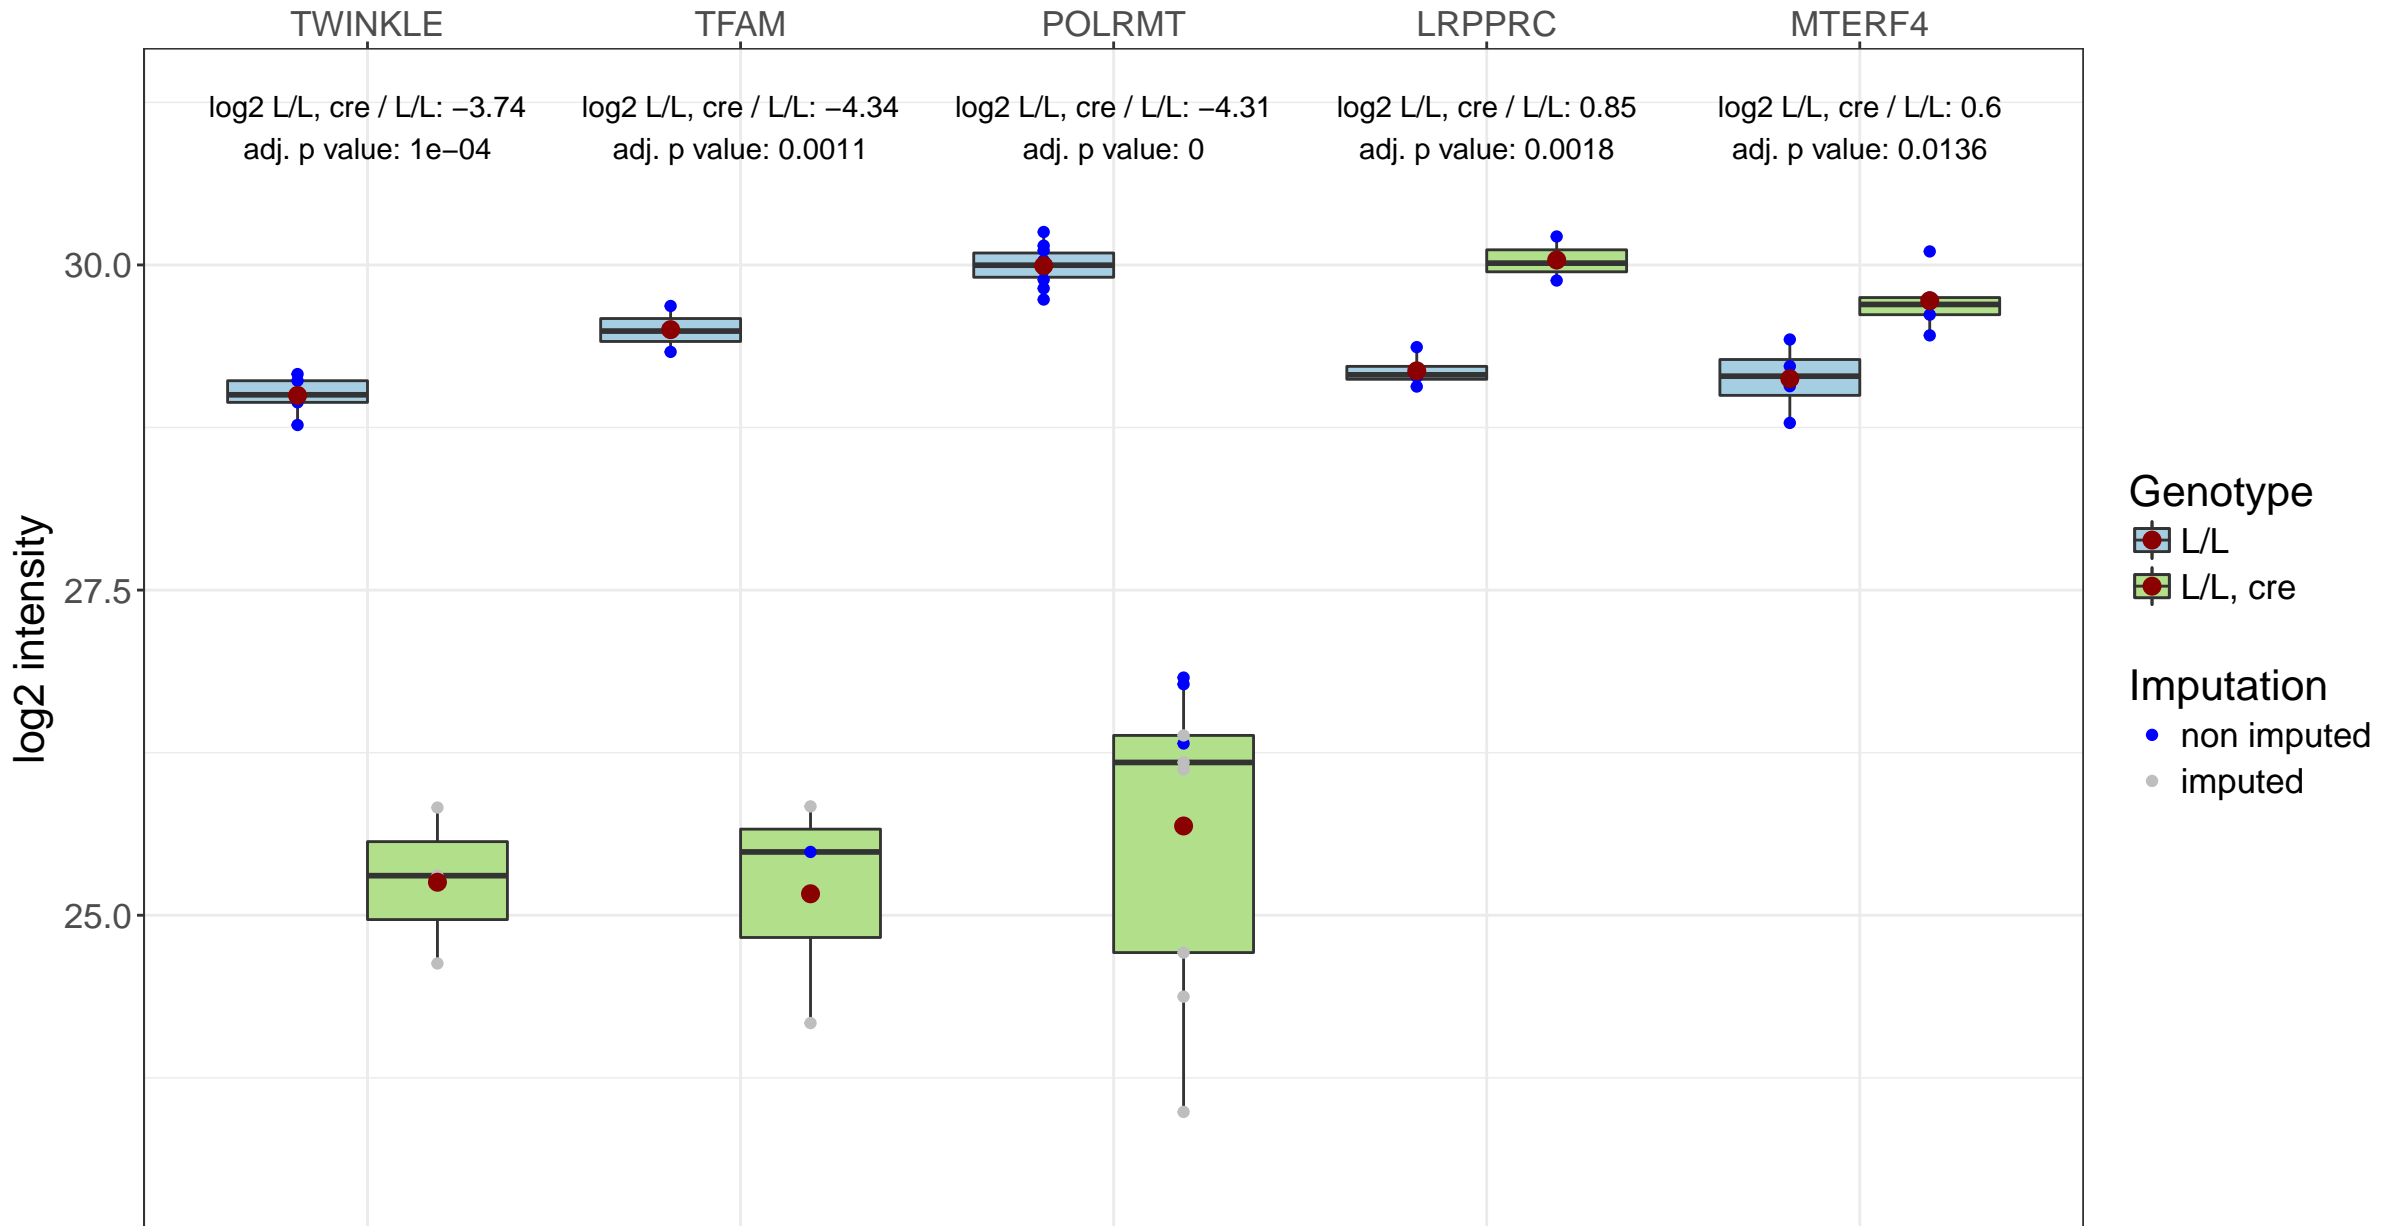

# MRPS10 / E9QJS0

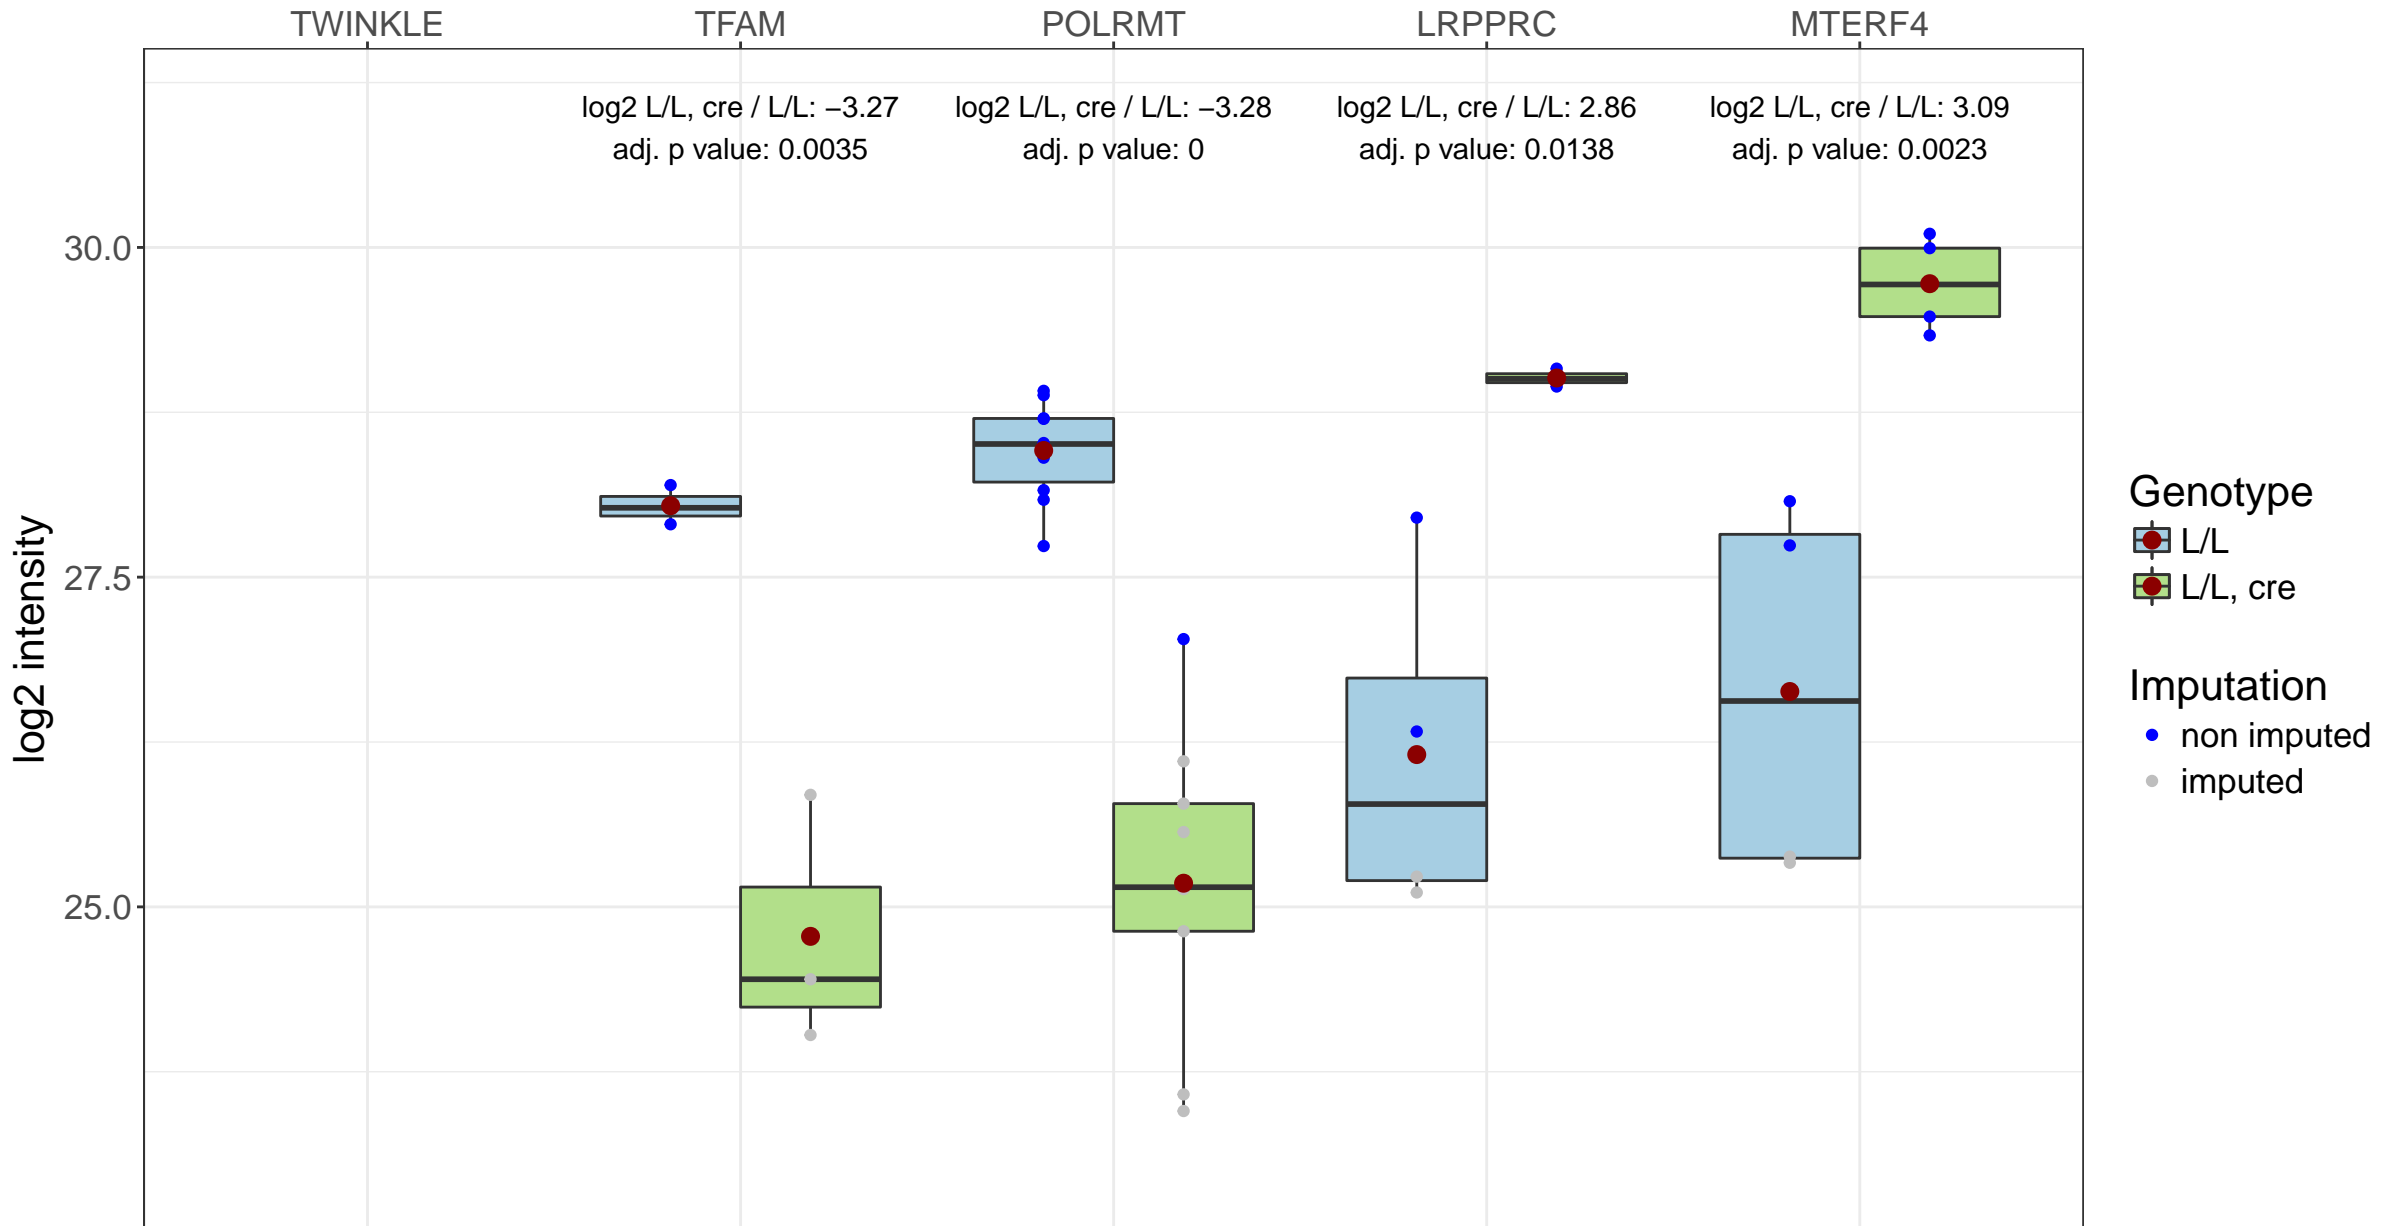

# MRPS11 / Q3U8Y1

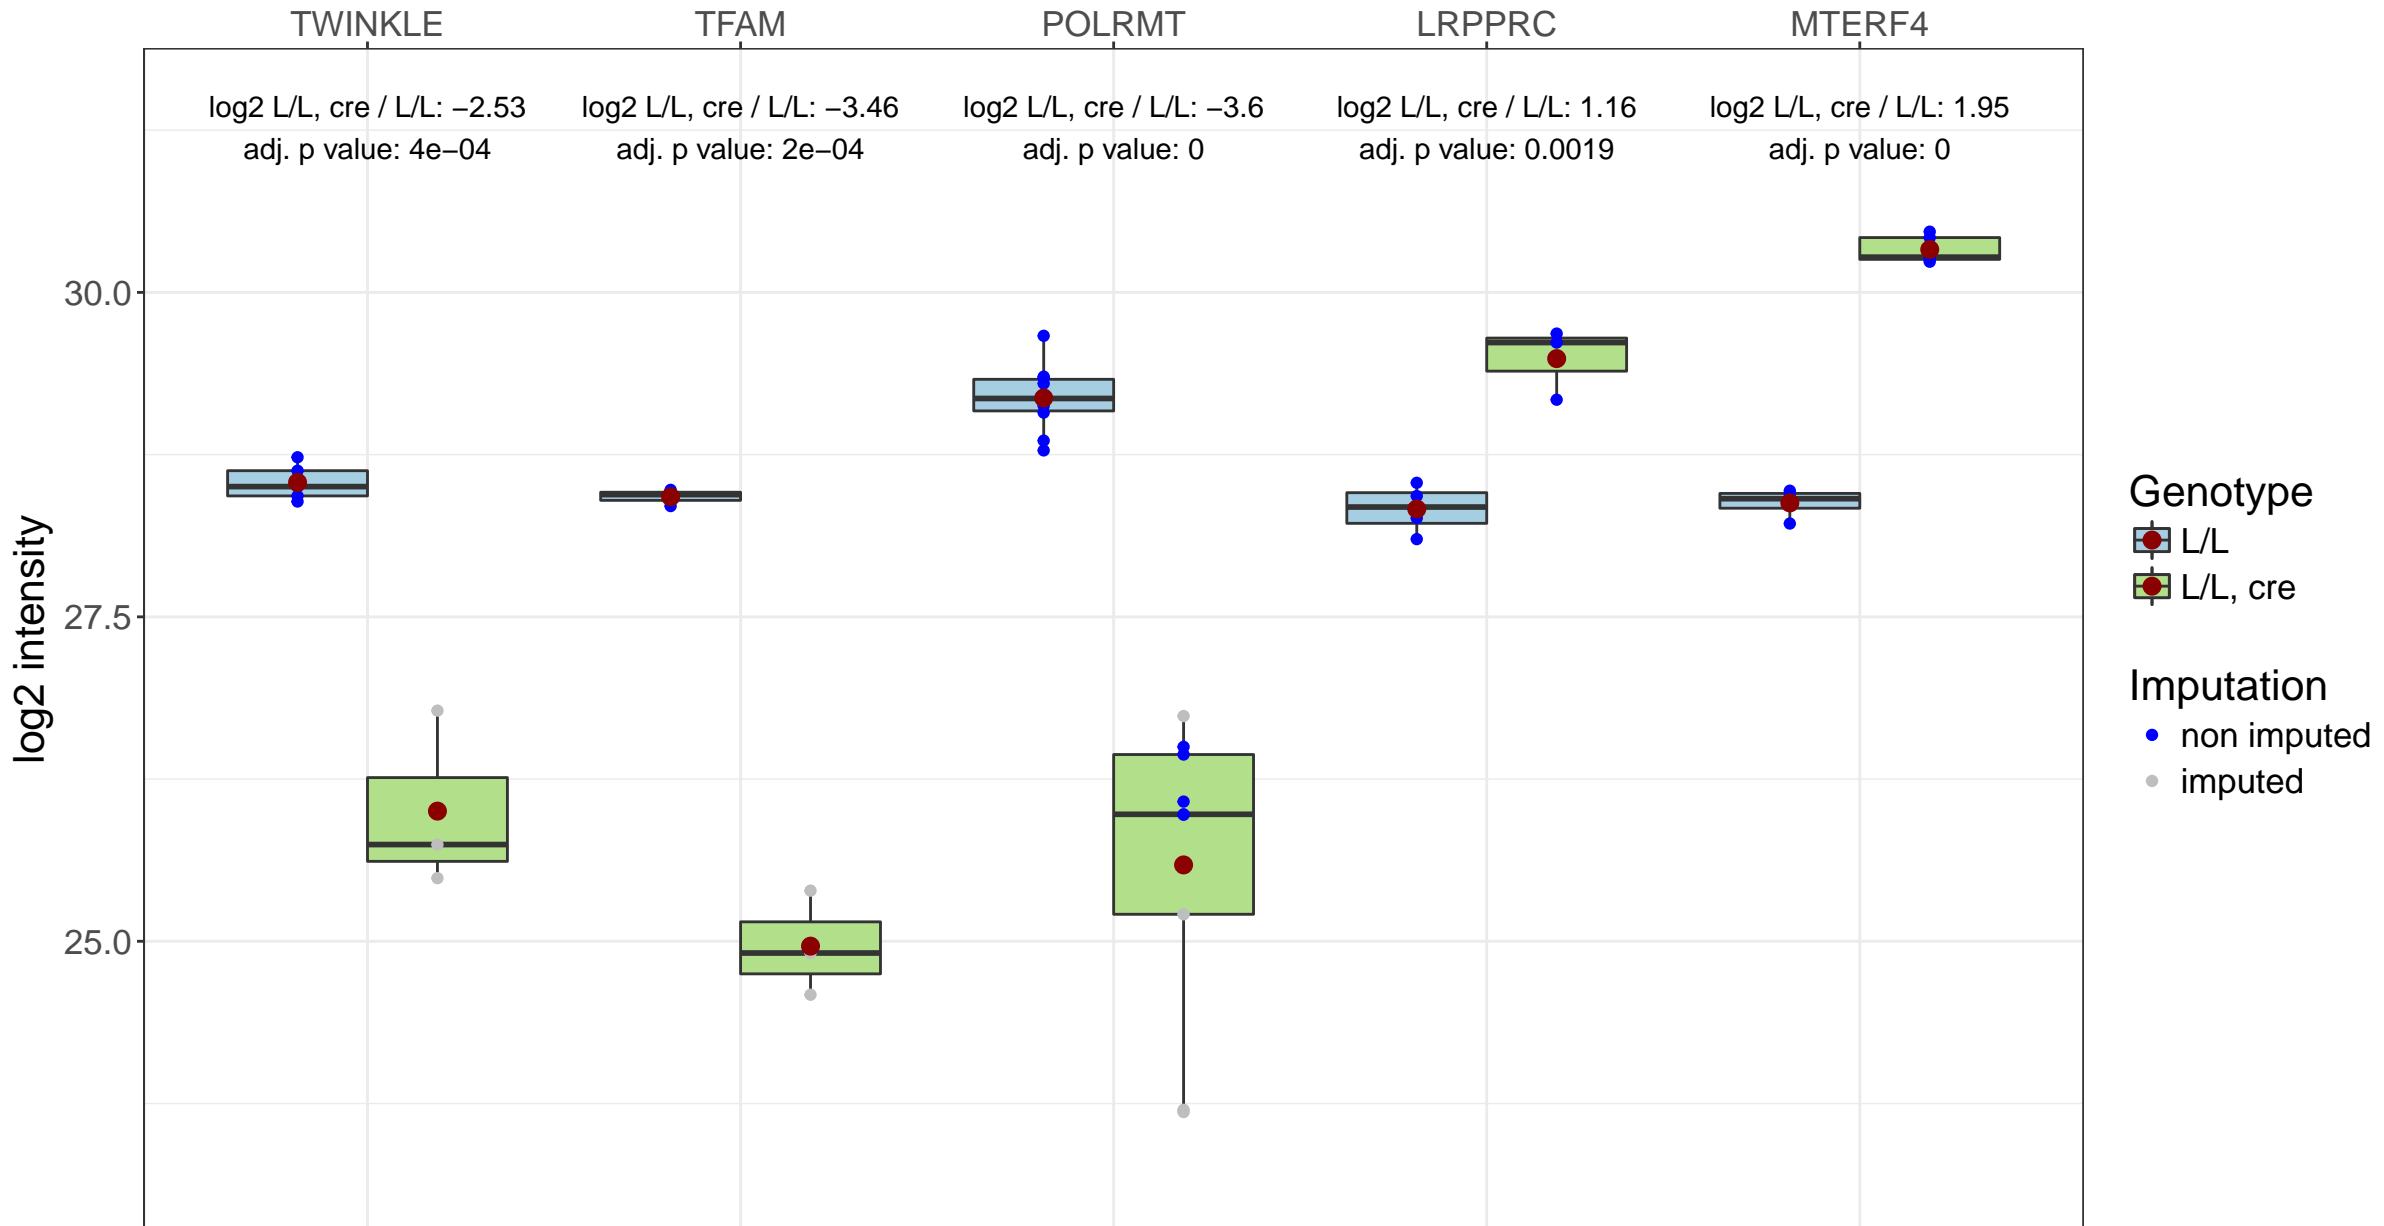

# MRPS14 / D3Z2K2

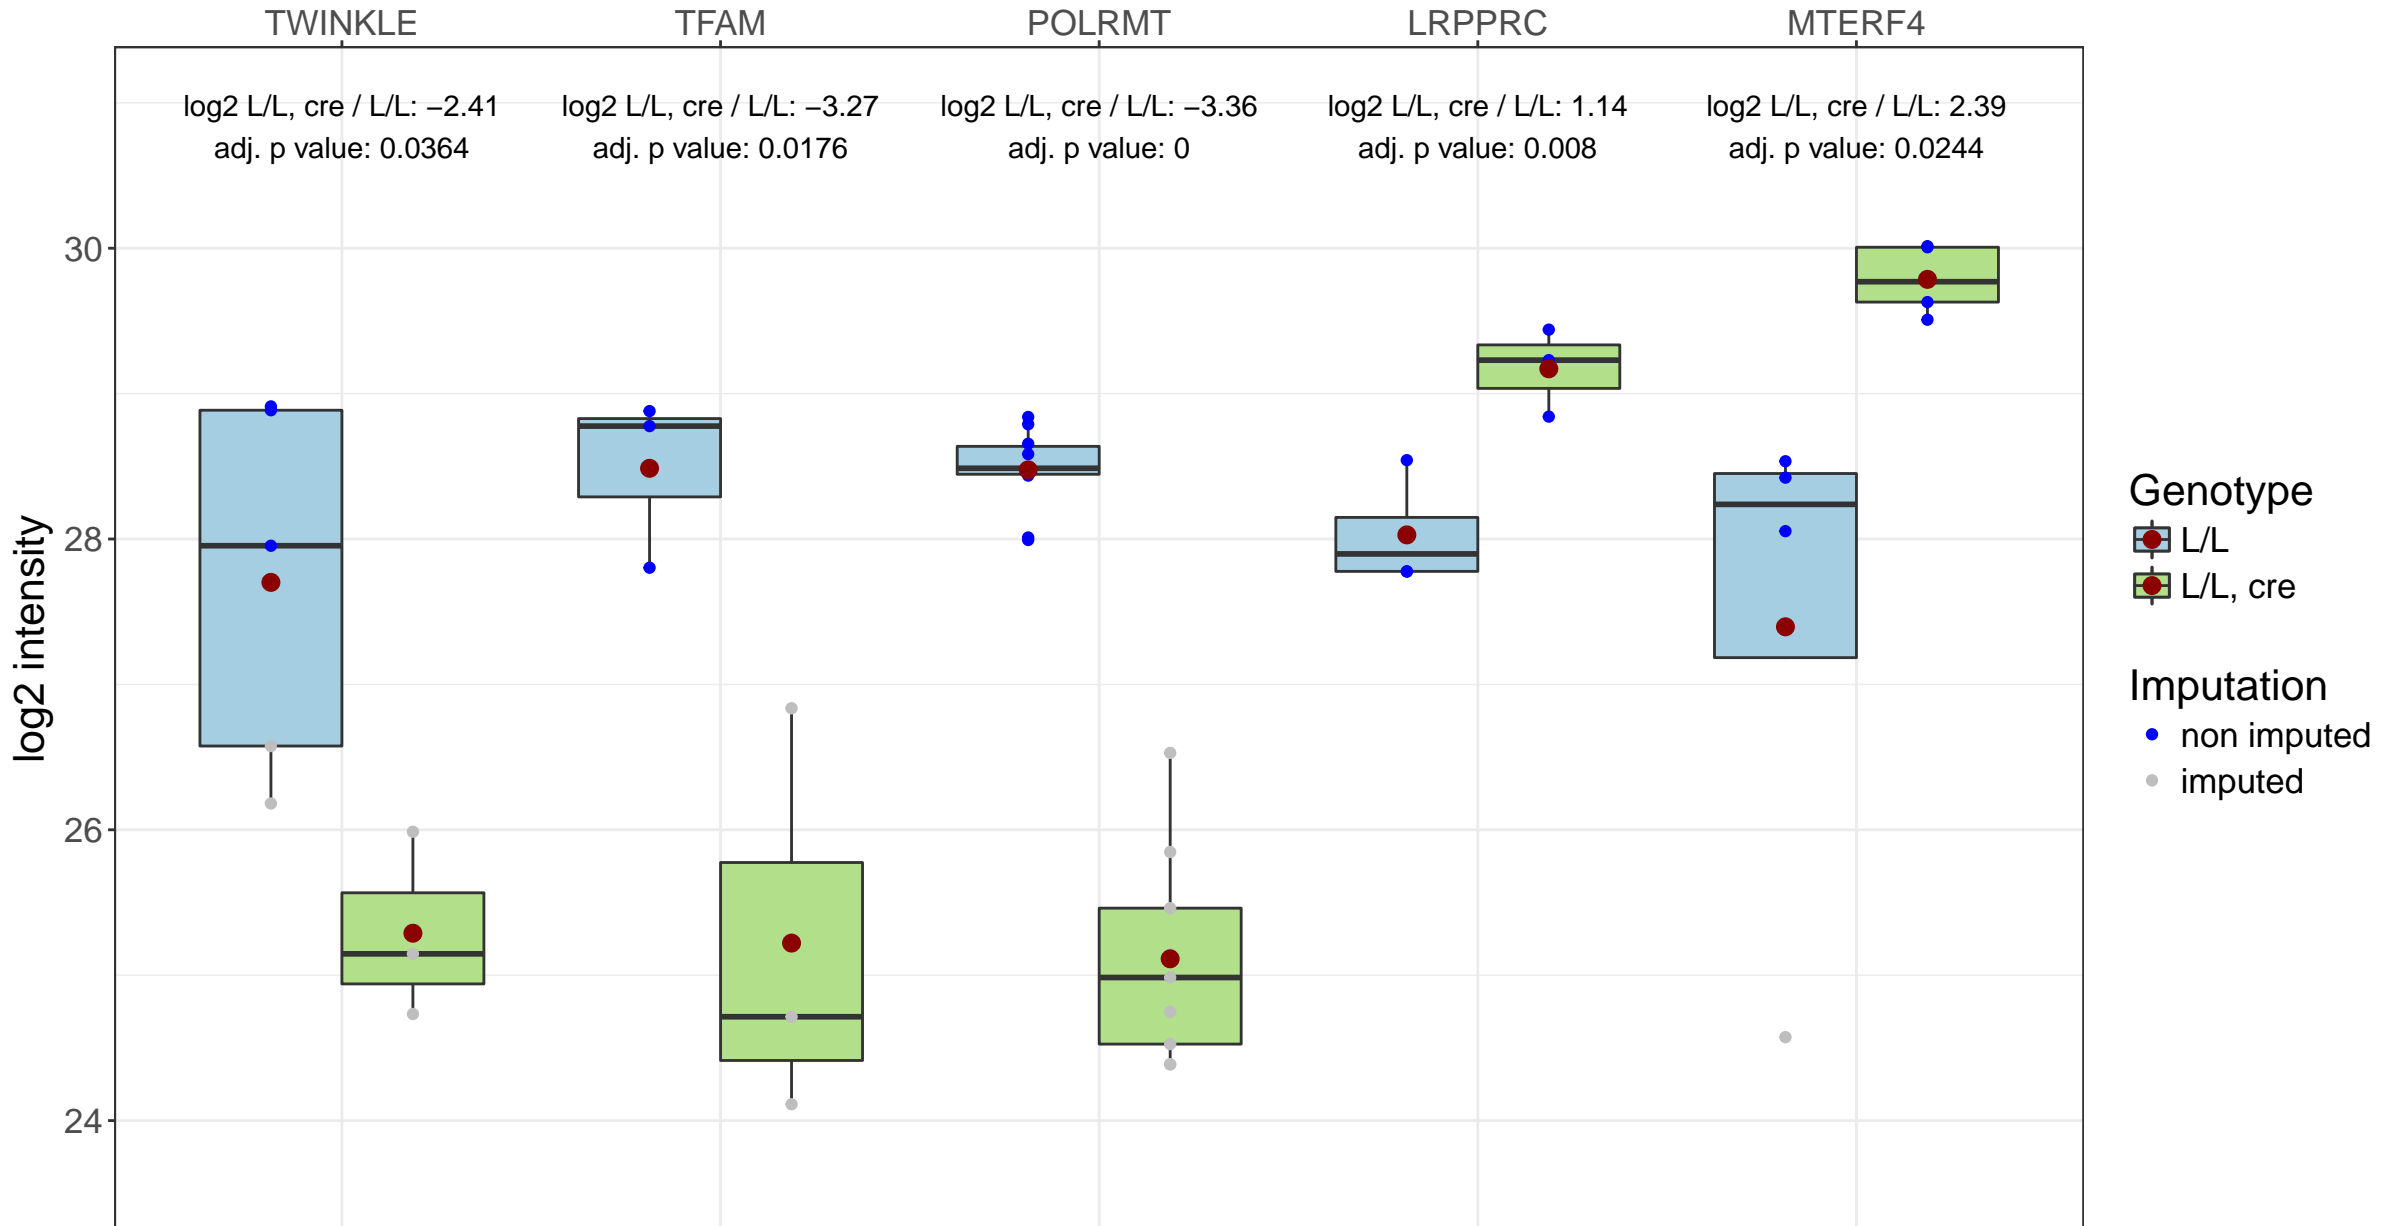



# MRPS15 / Q9DC71

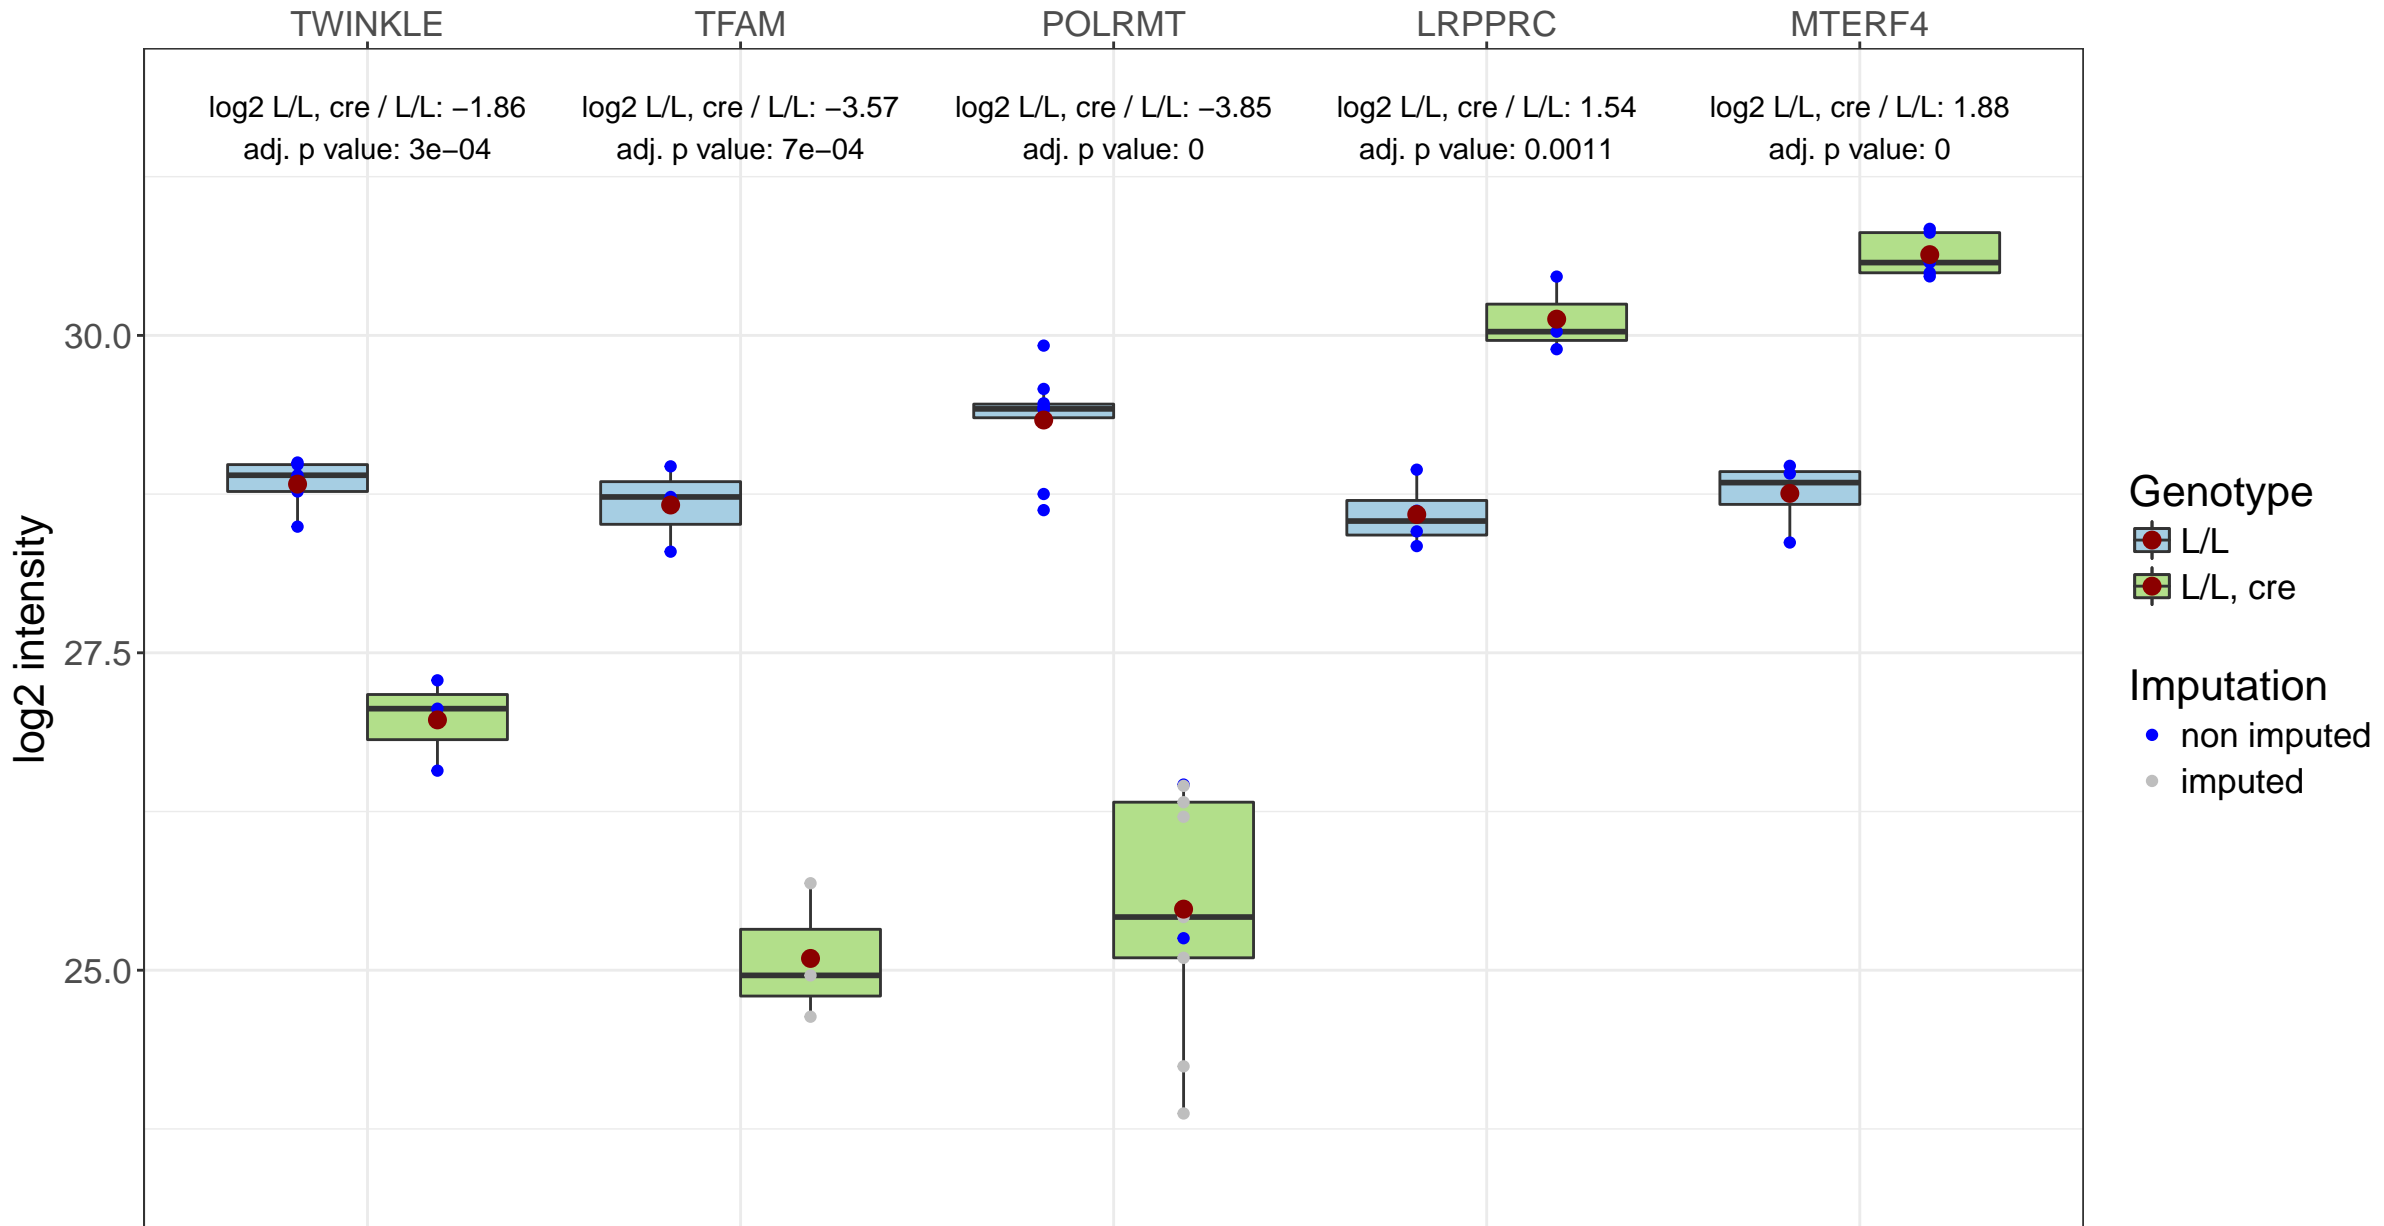

# MRPS16 / Q9CPX7

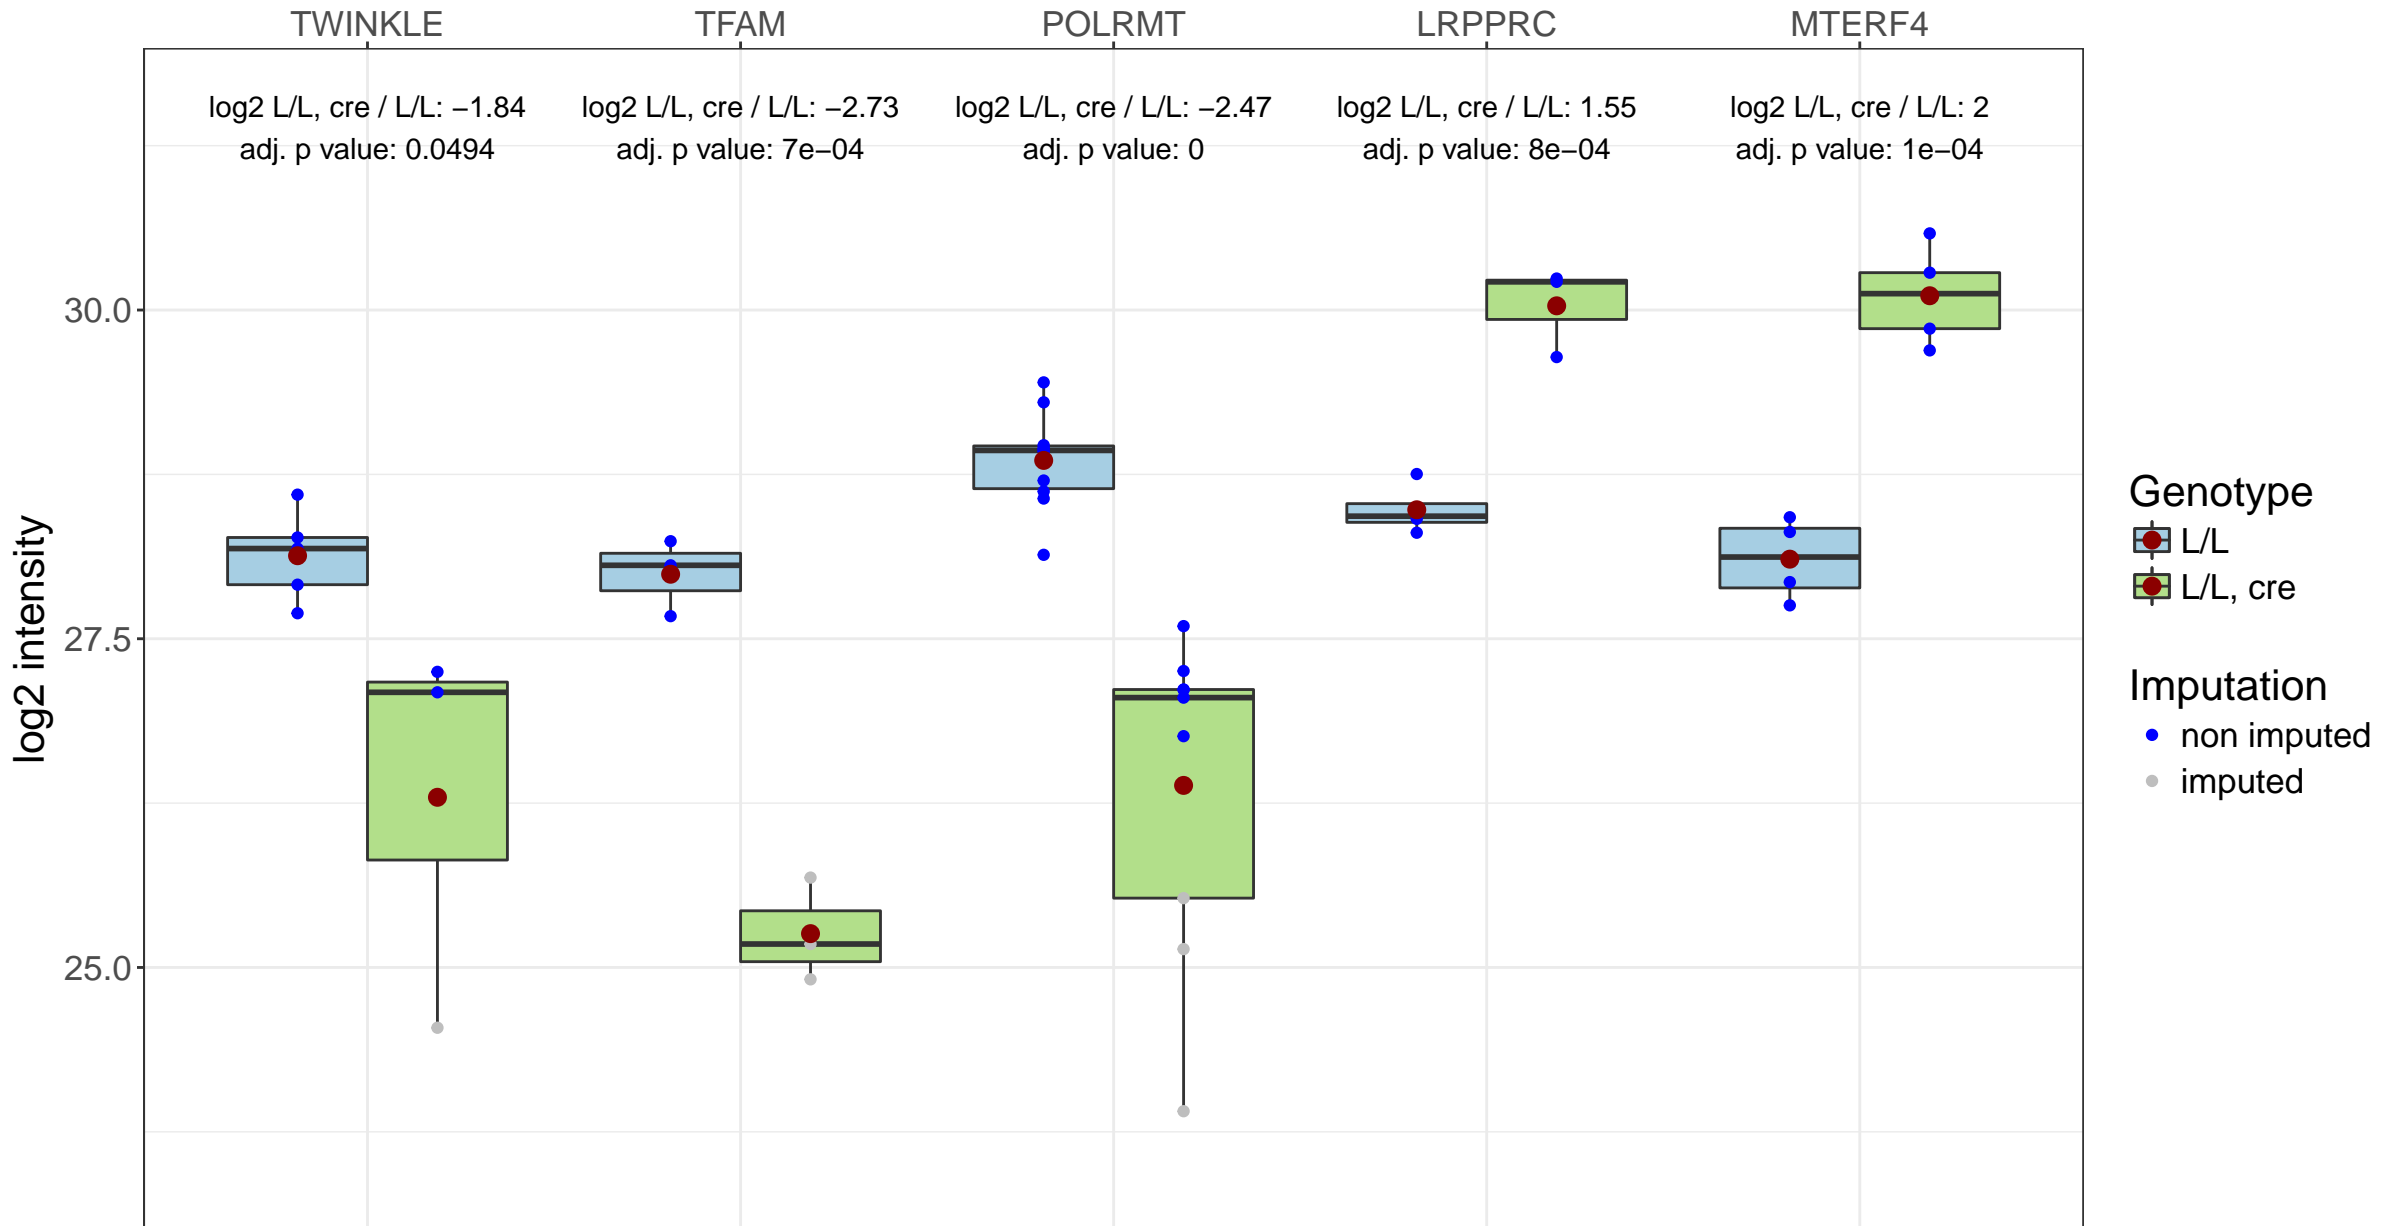

# MRPS17 / Q9CQE3

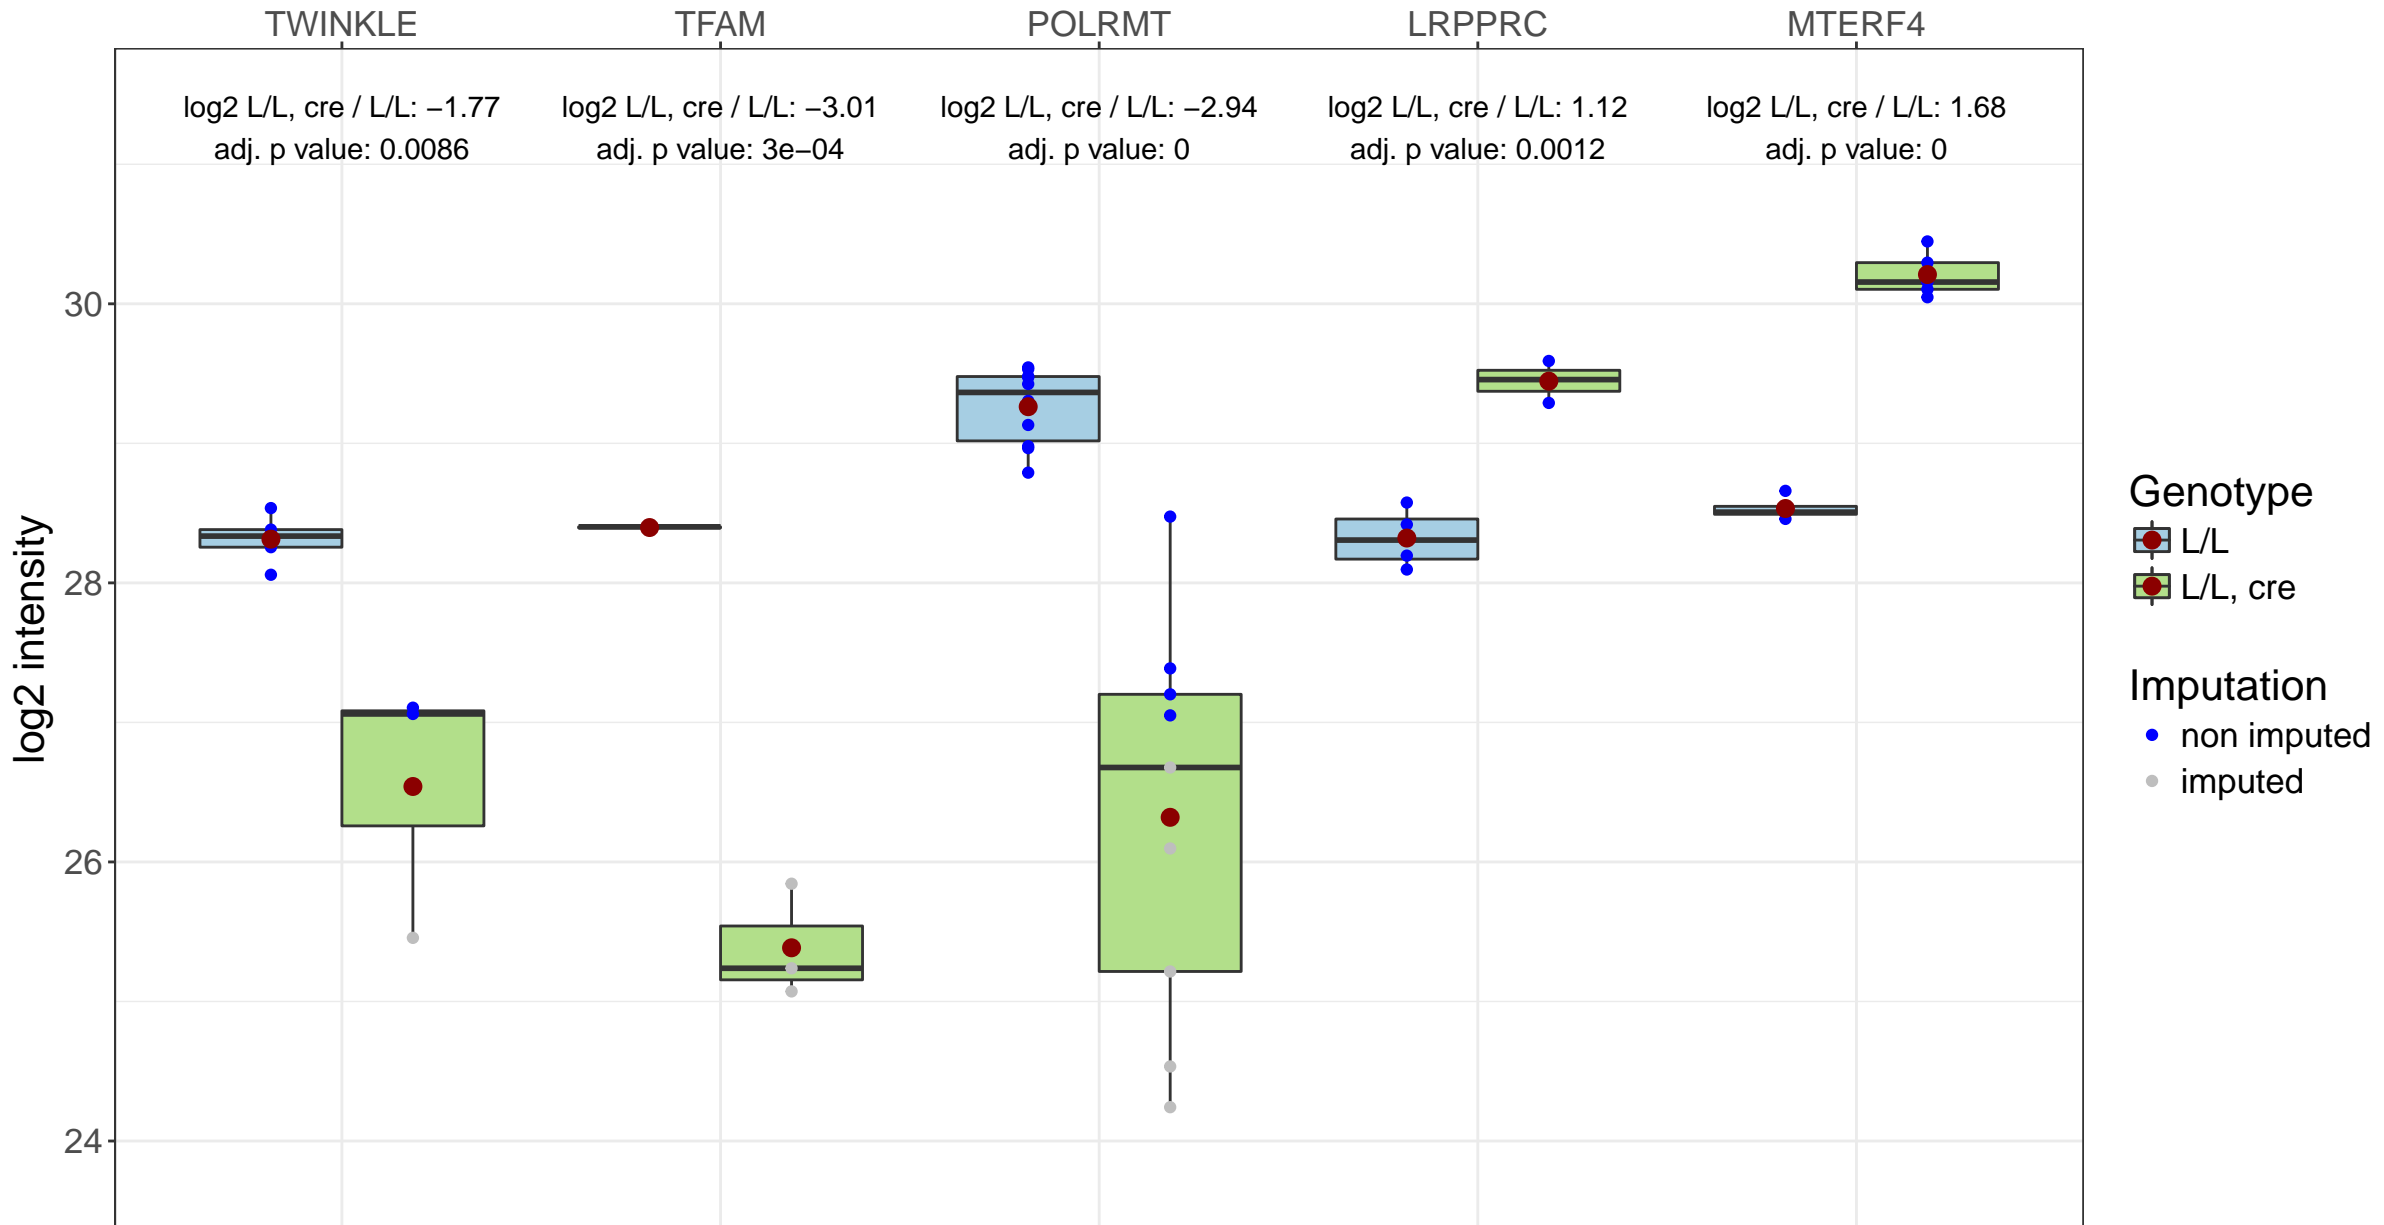

# MRPS18A / Q5U5I3

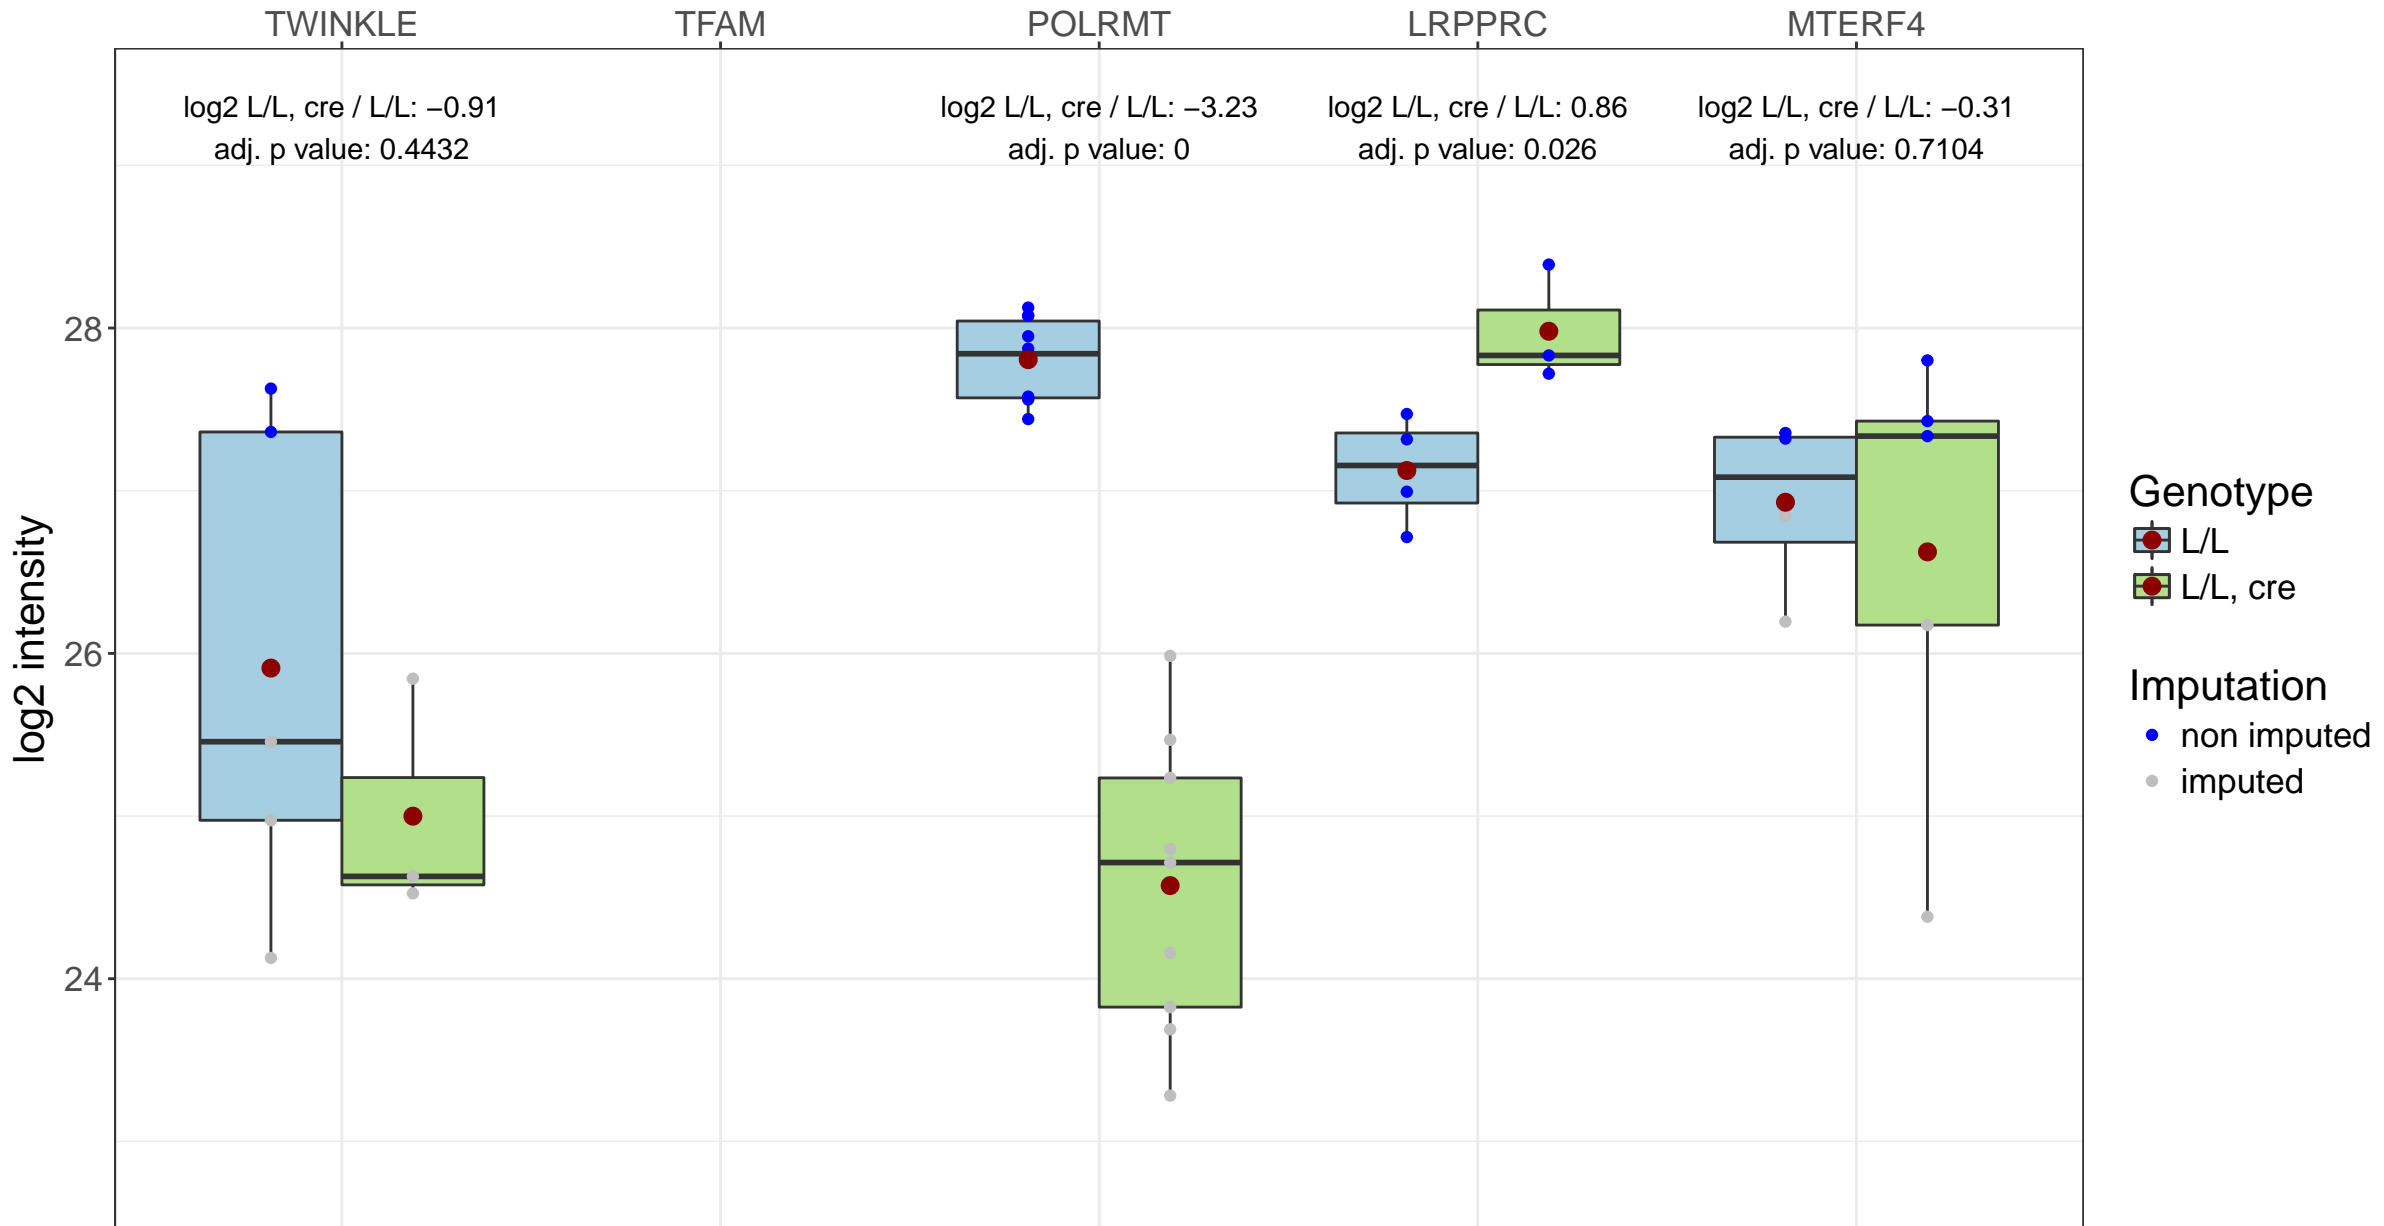

# MRPS18B / Q99N84

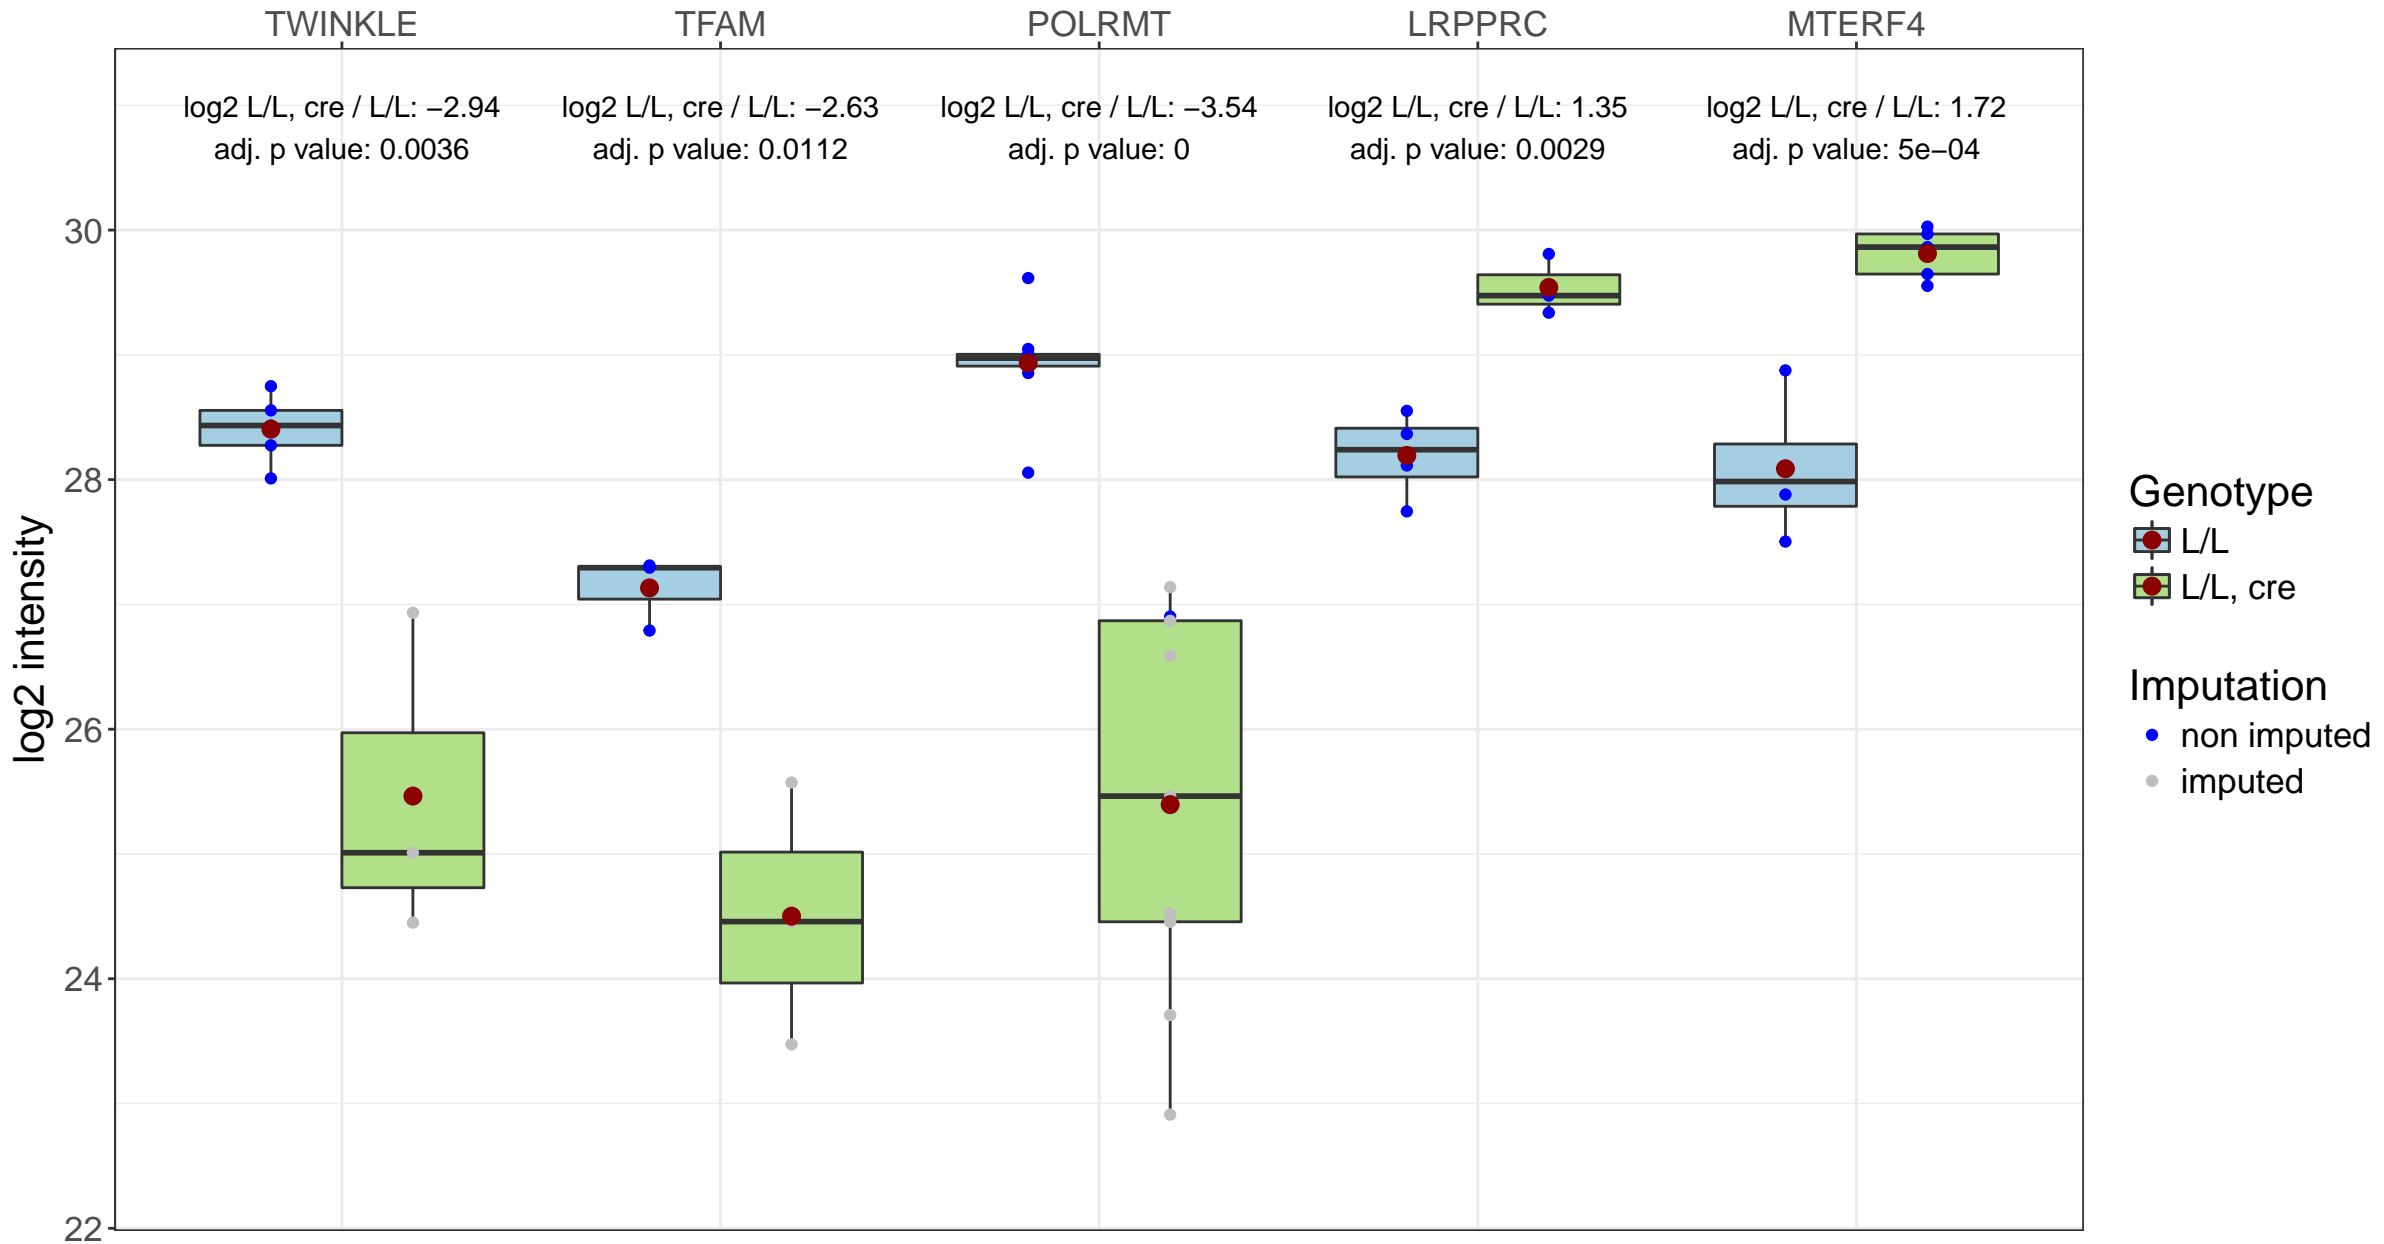

# MRPS18C / Q8R2L5

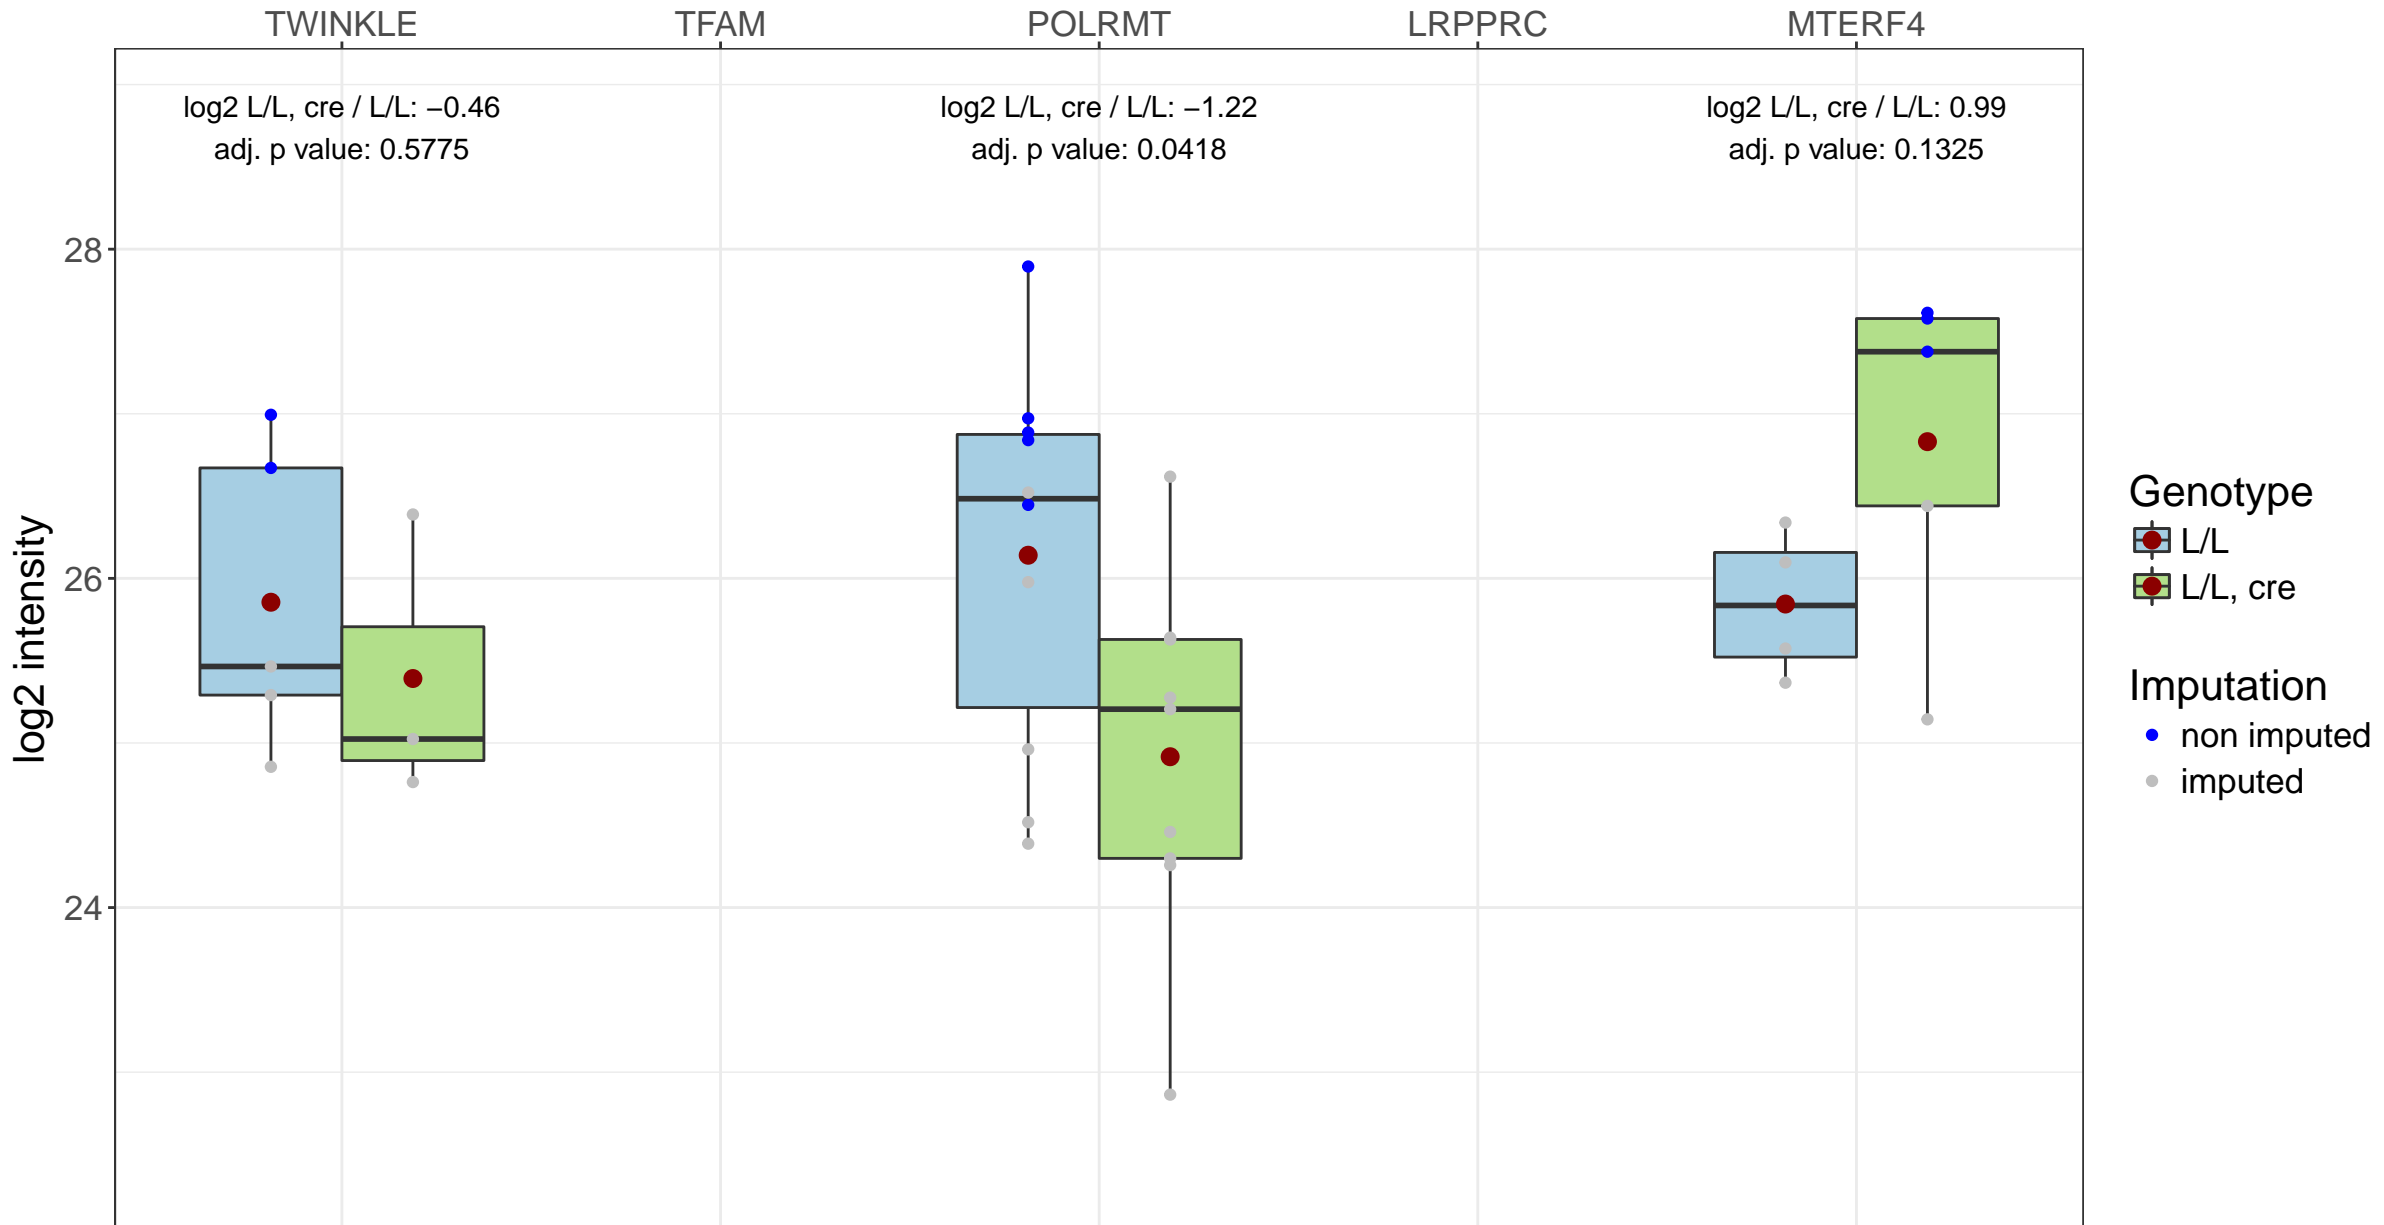

# MRPS2 / Q924T2

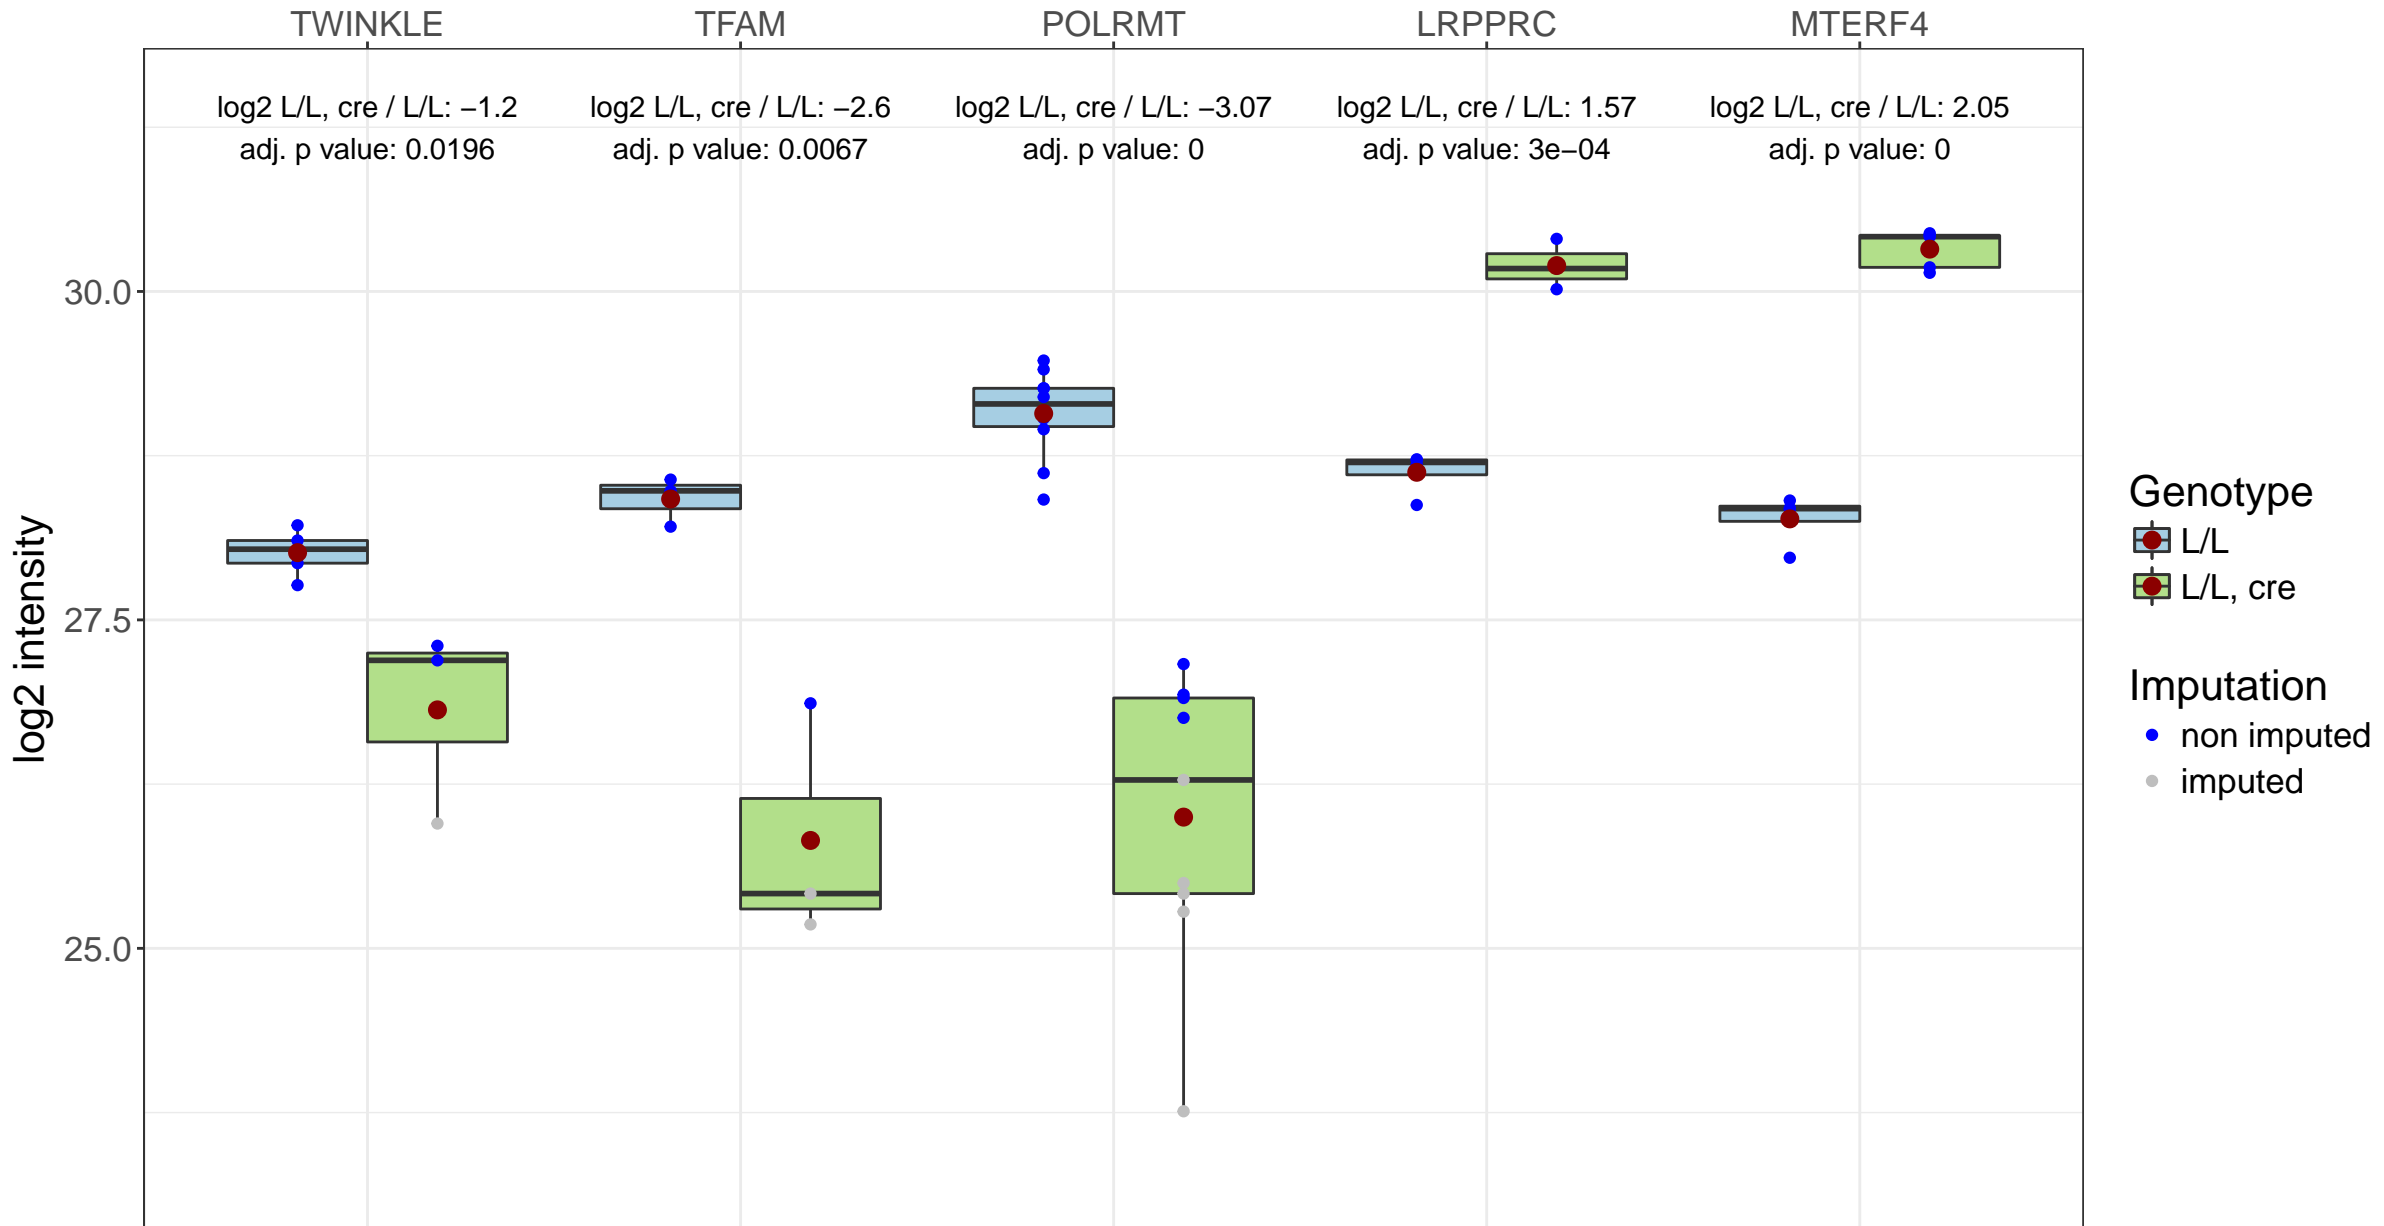

# MRPS21 / P58059

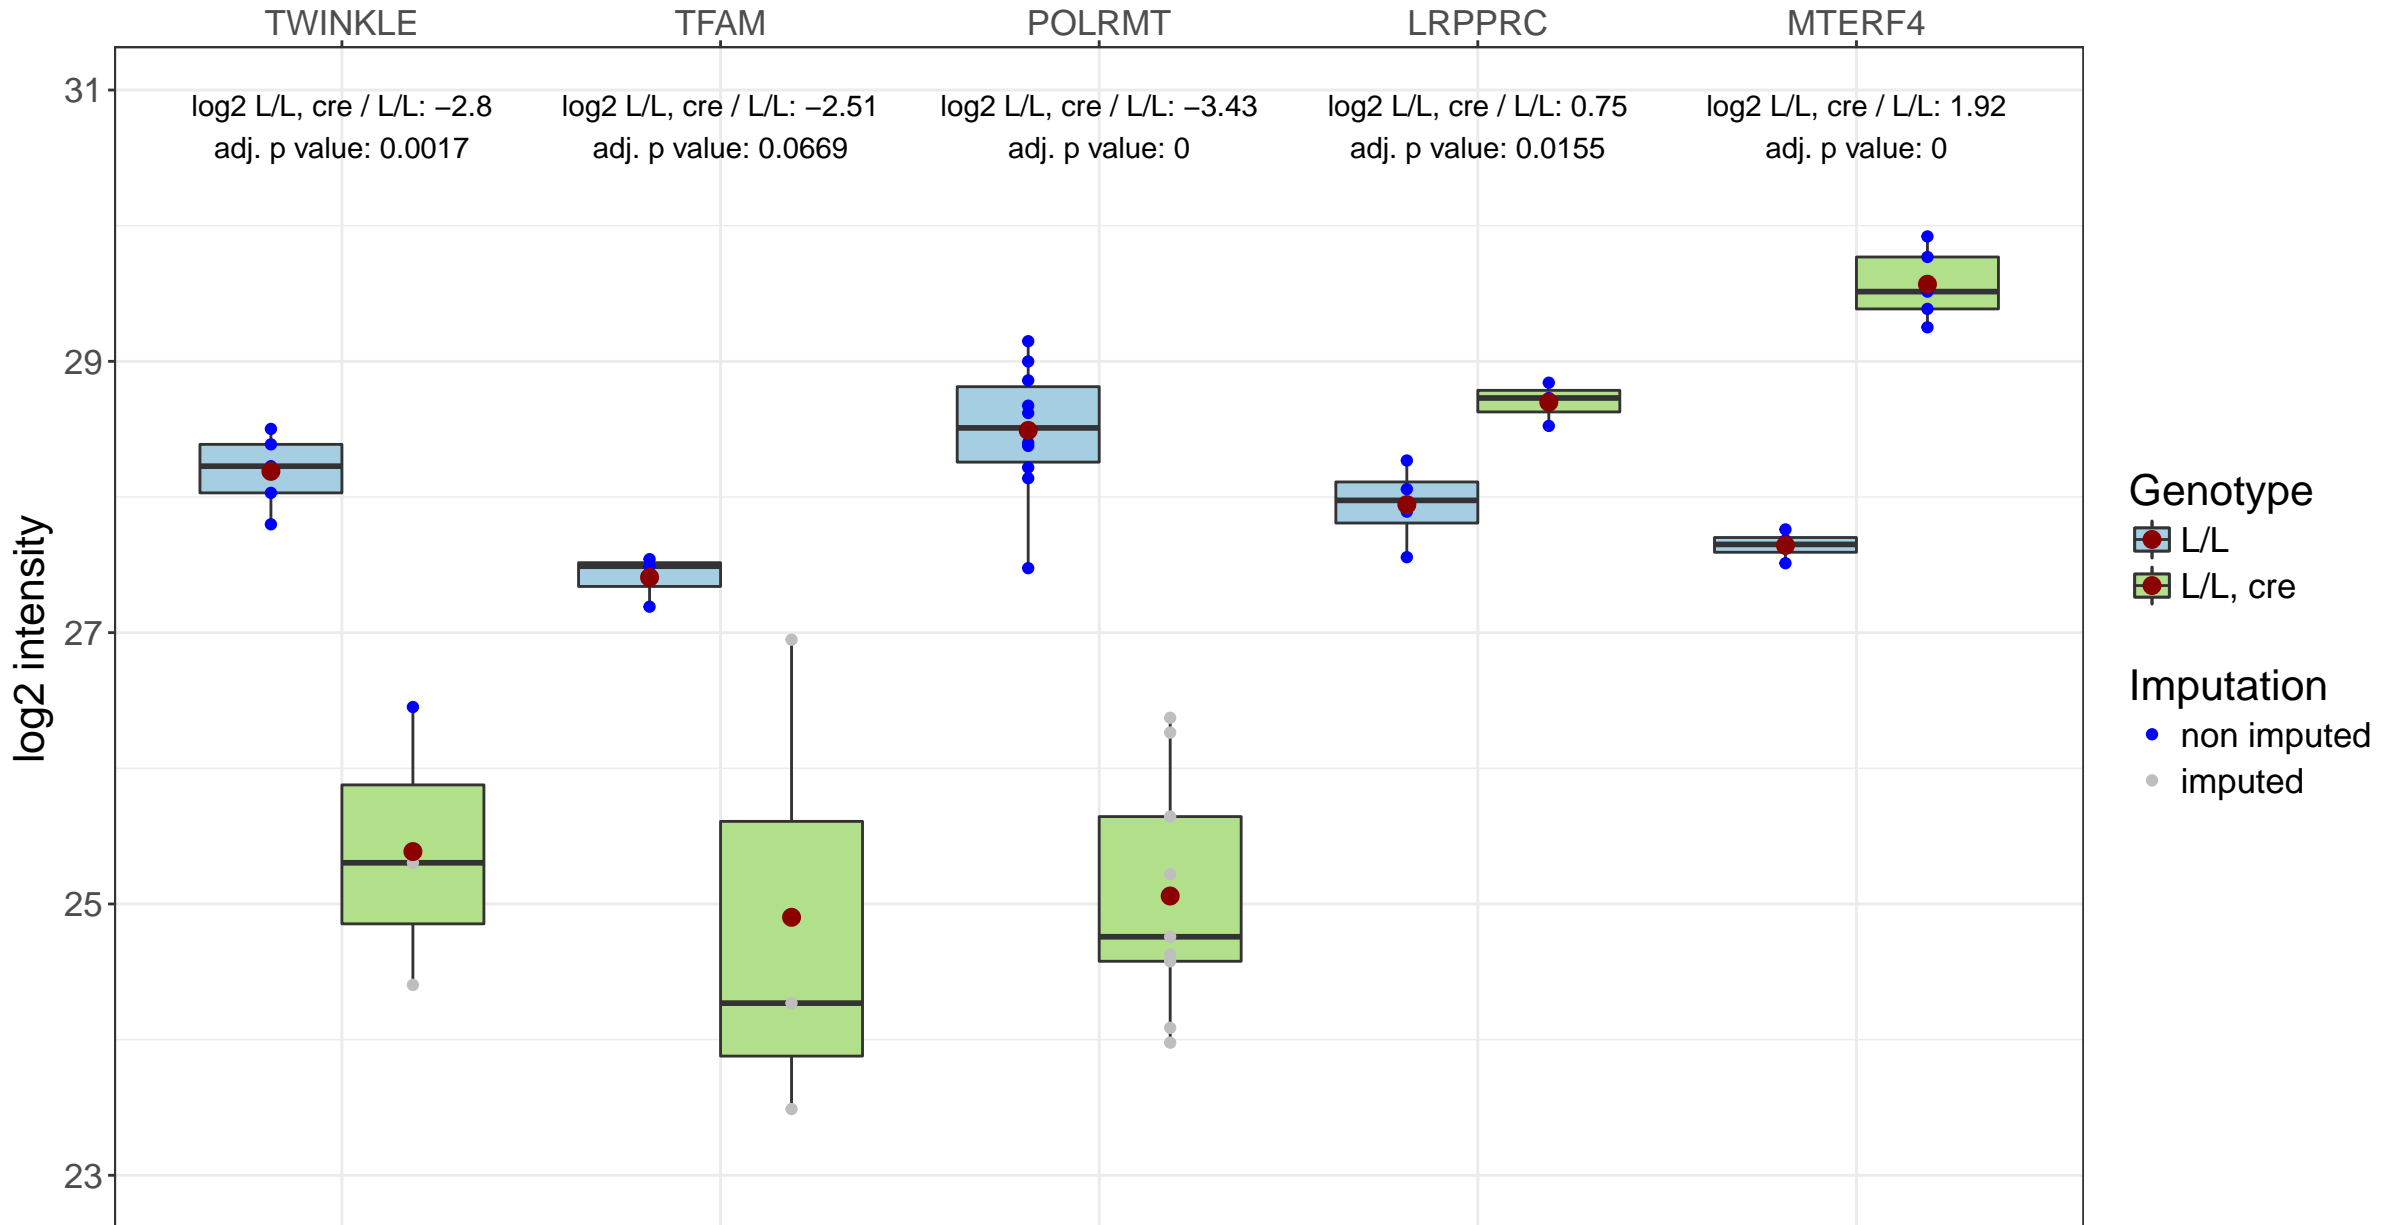



# MRPS22 / Q9CXW2

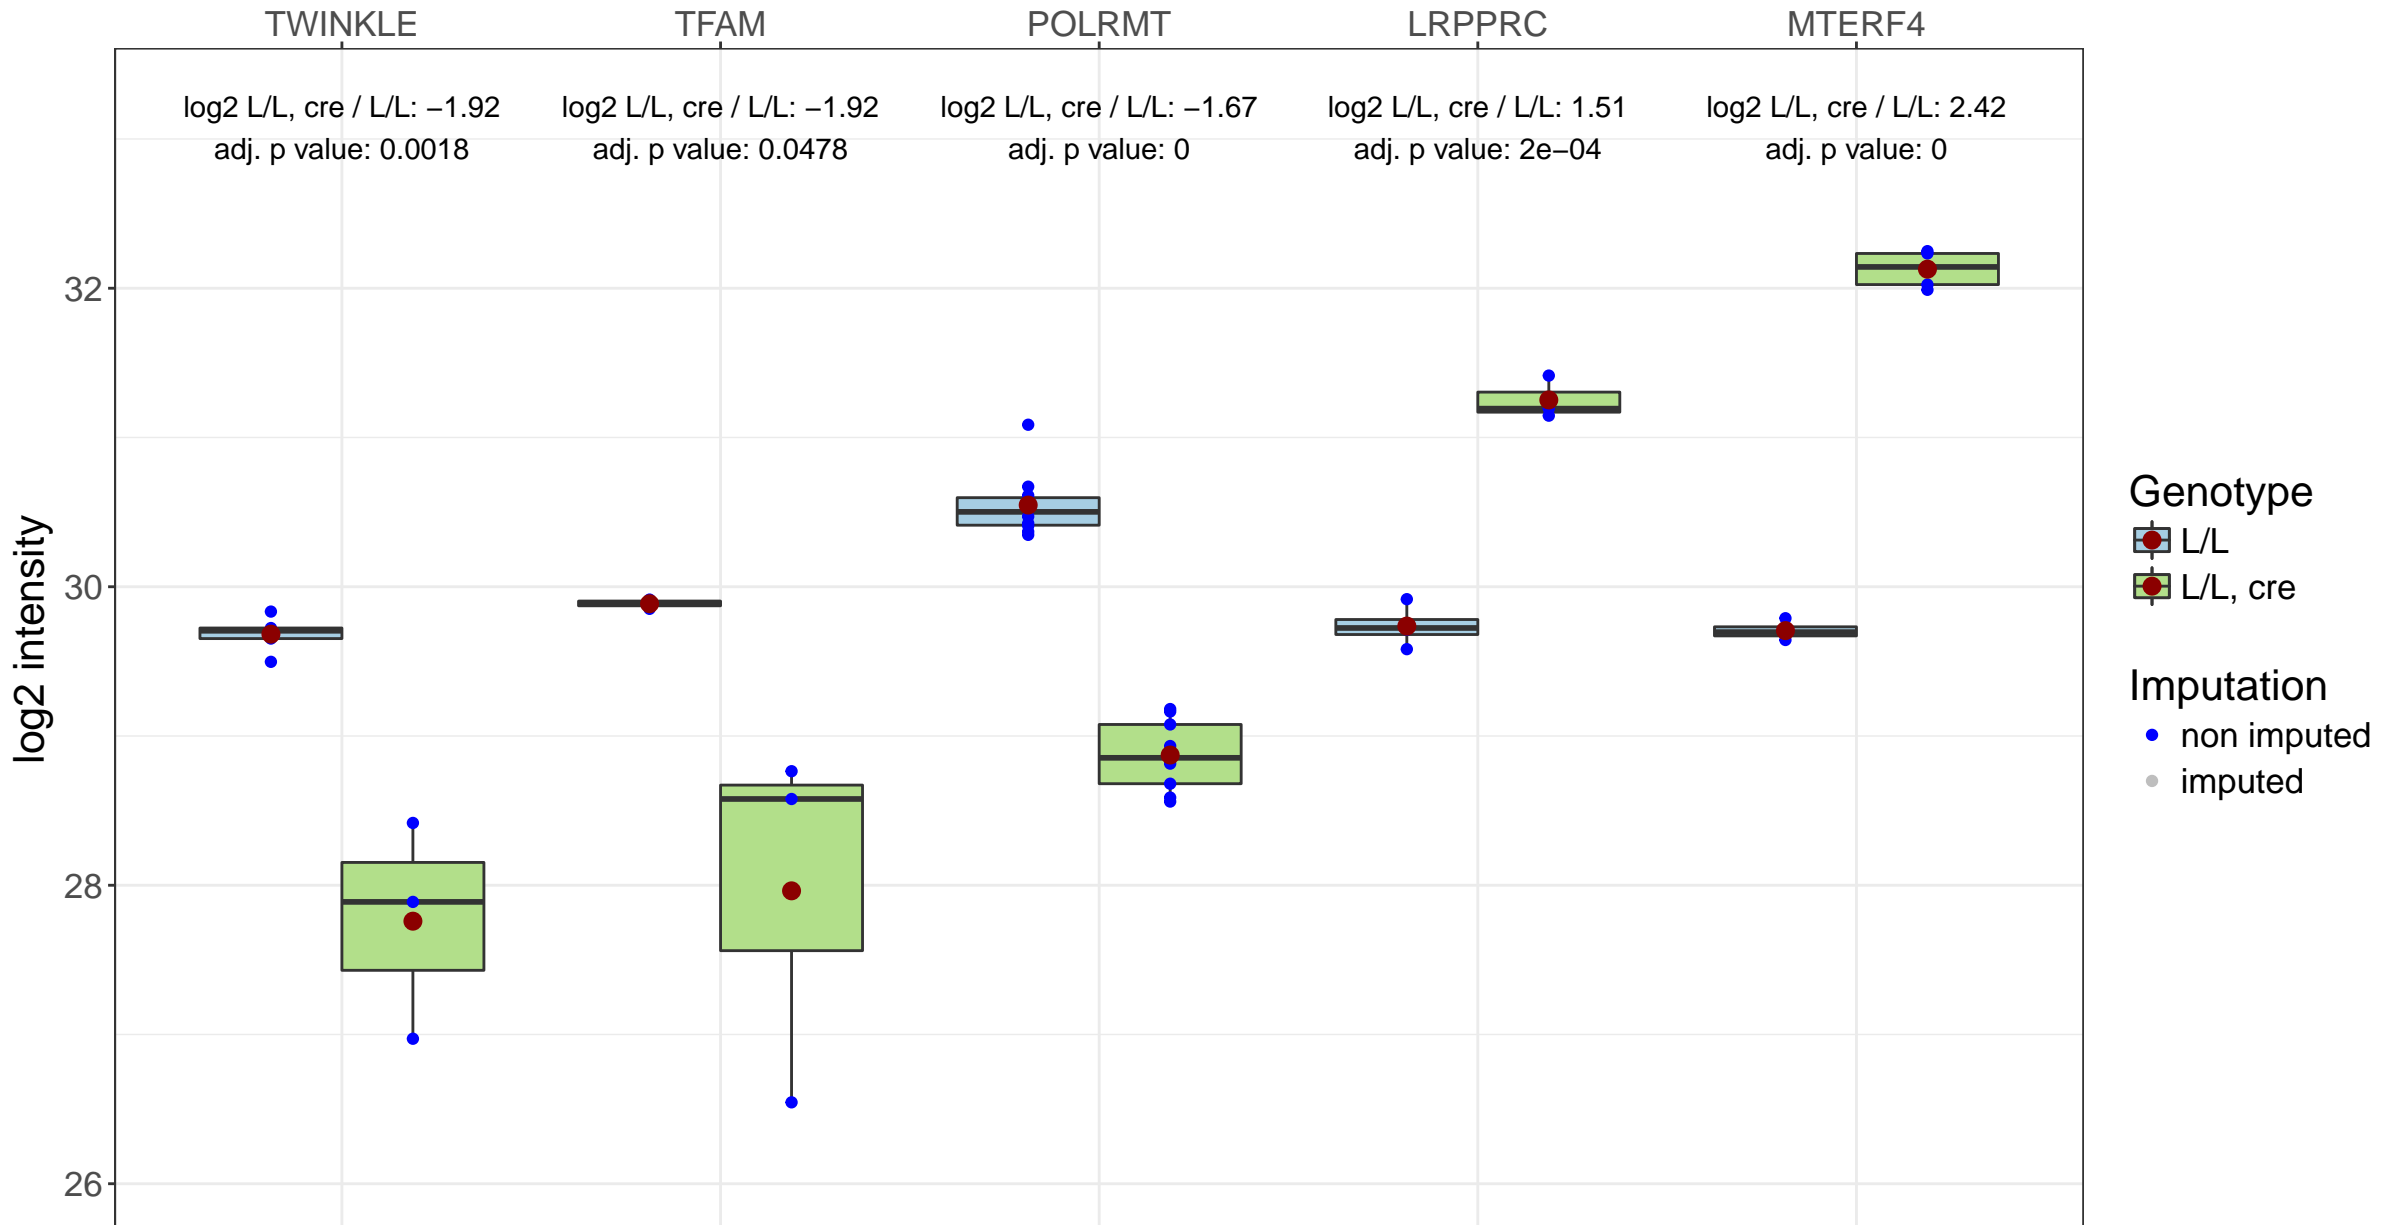

# MRPS23 / Q8VE22

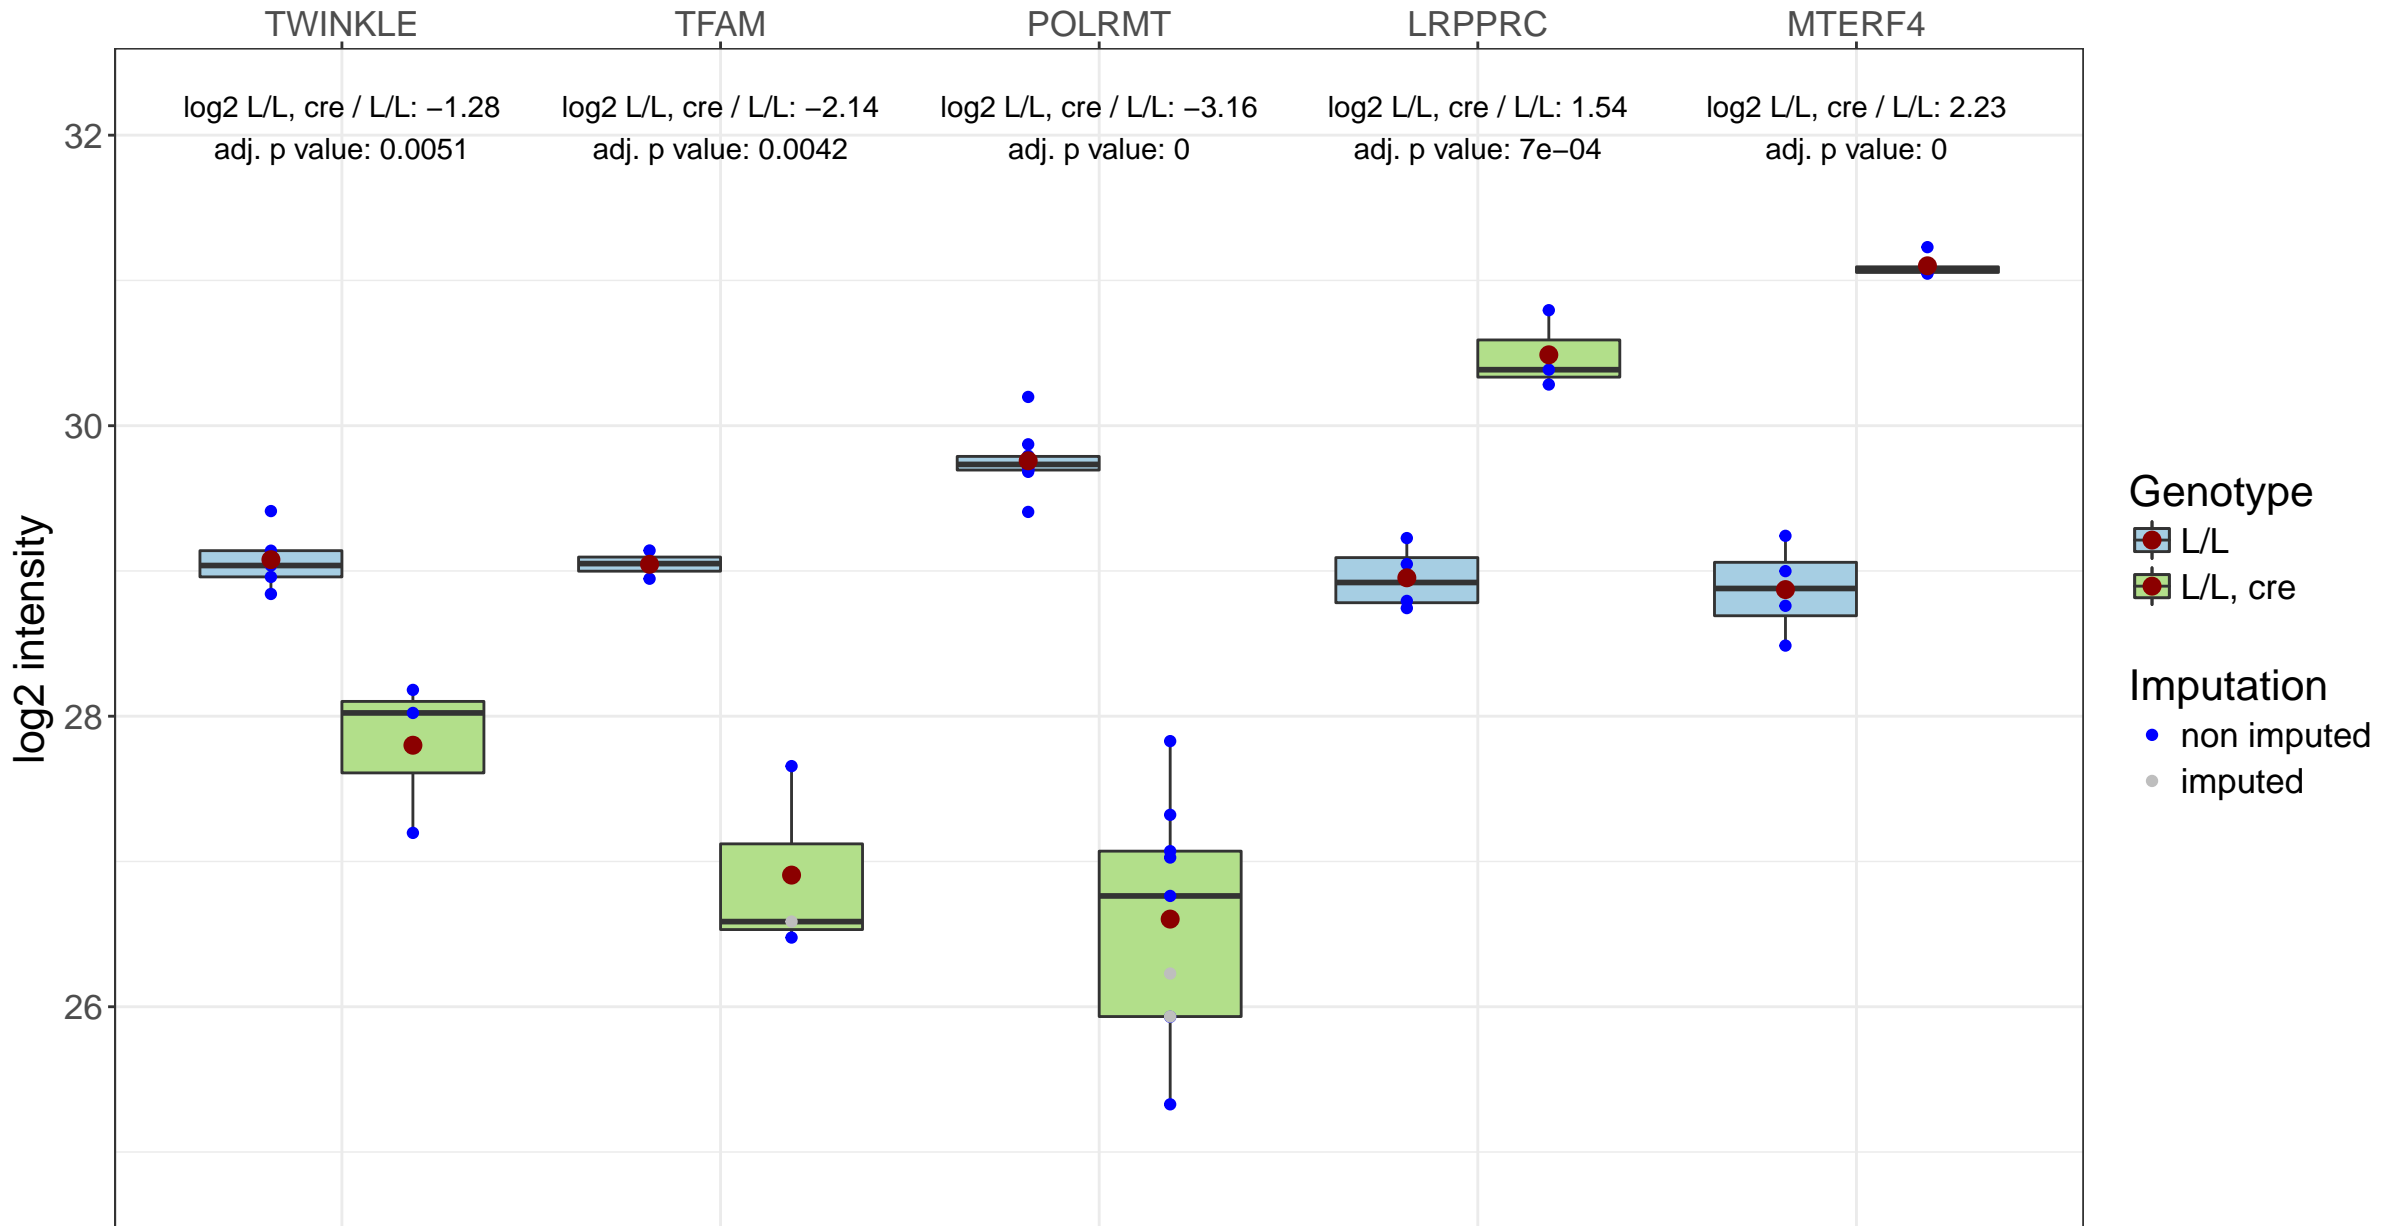

# MRPS24 / Q9CQV5

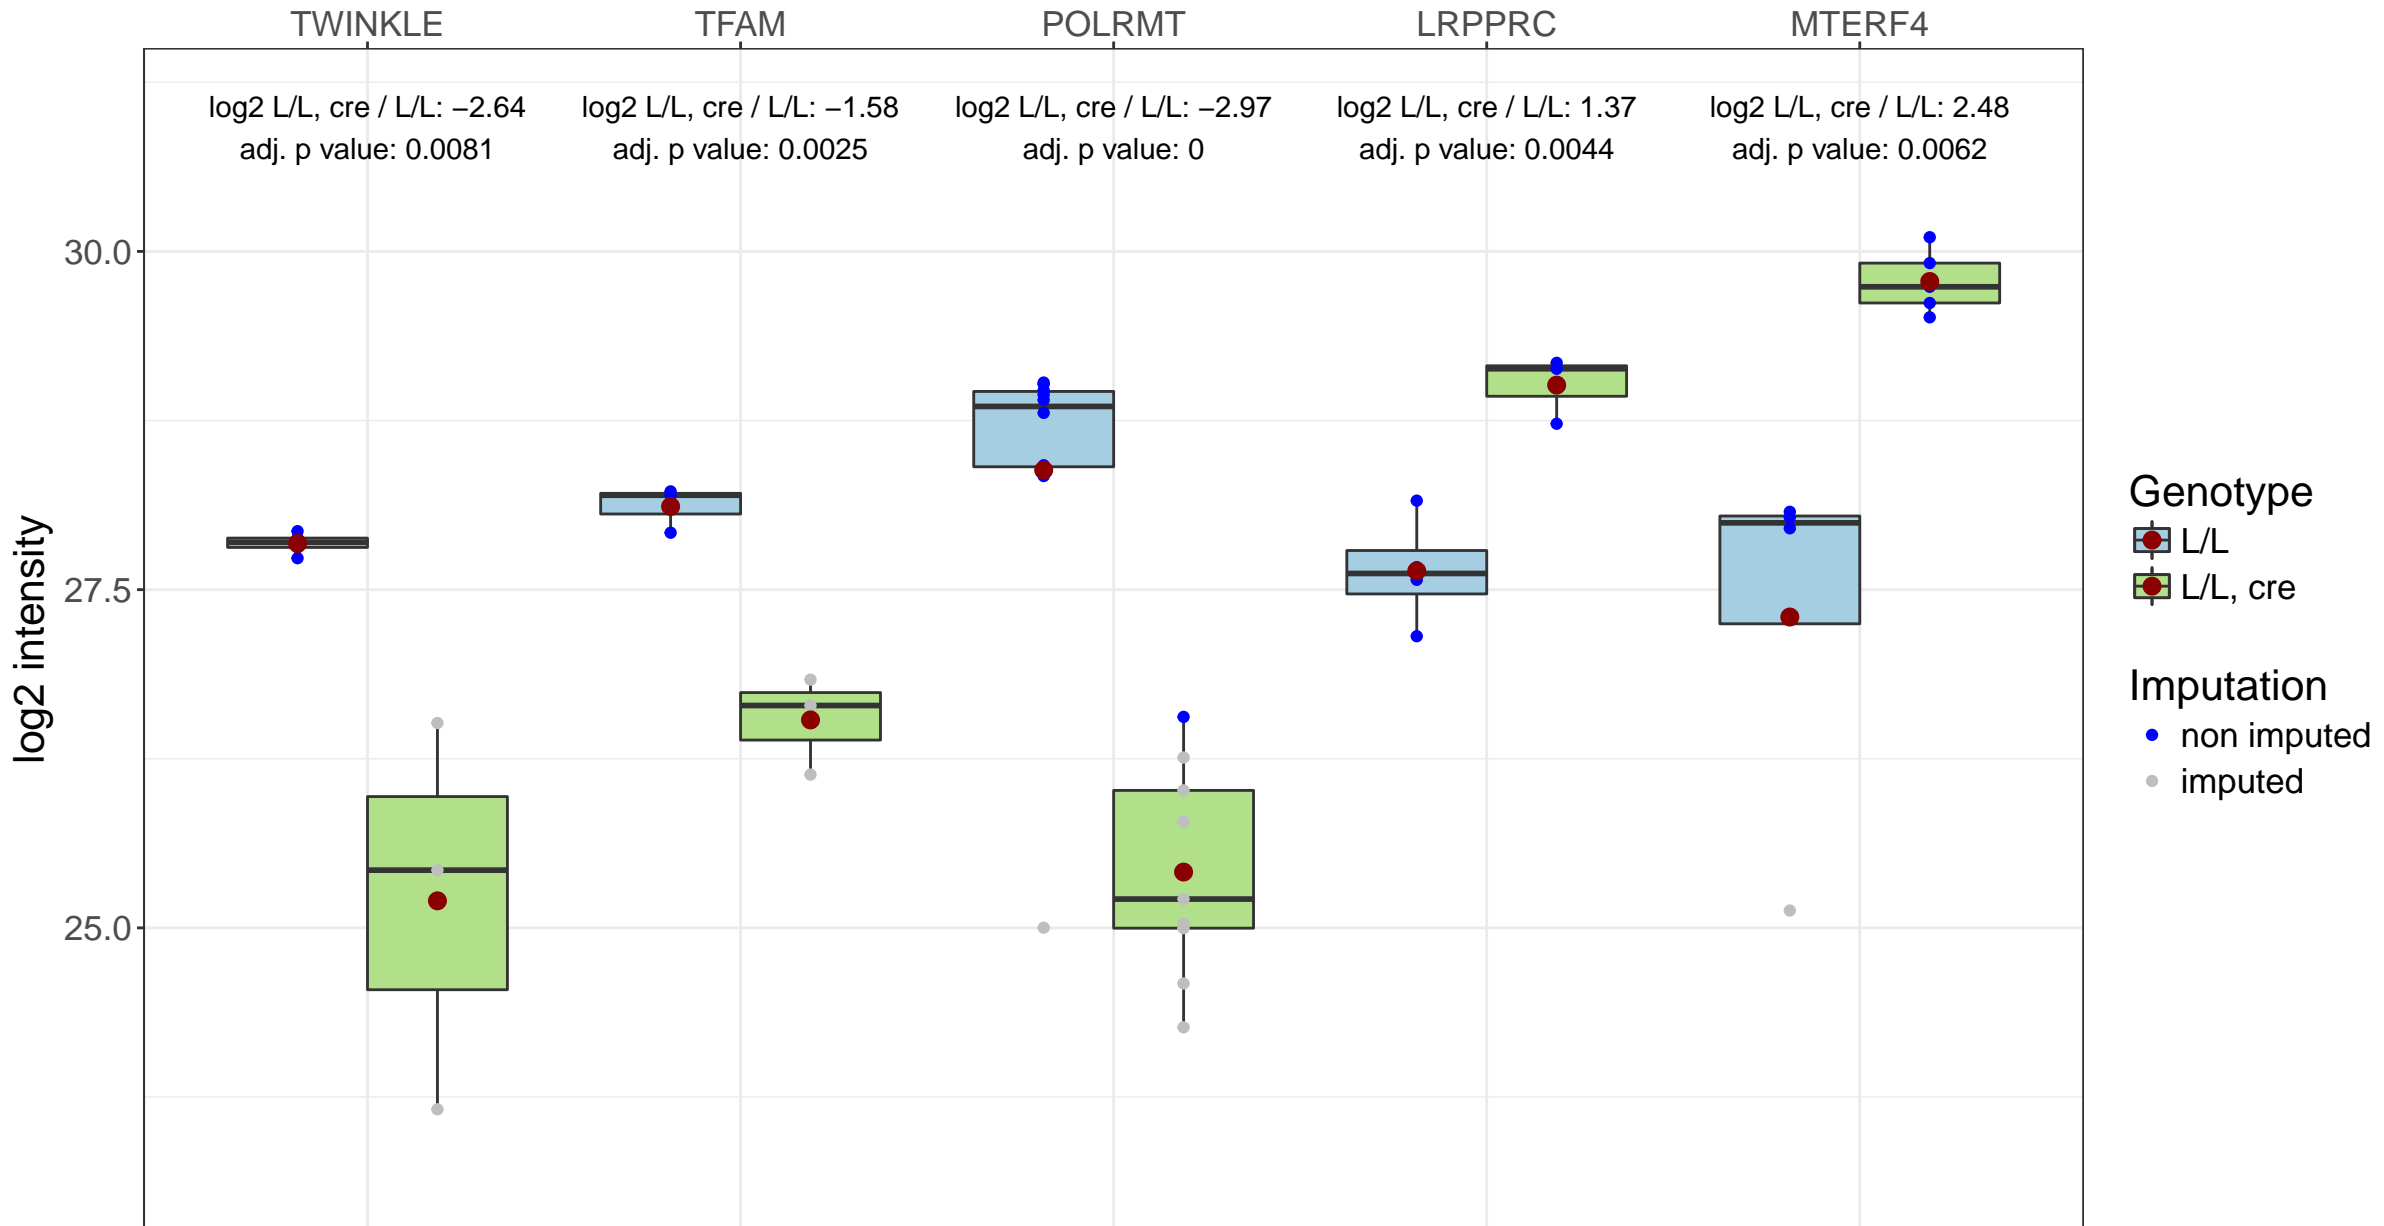

# MRPS25 / Q9D125

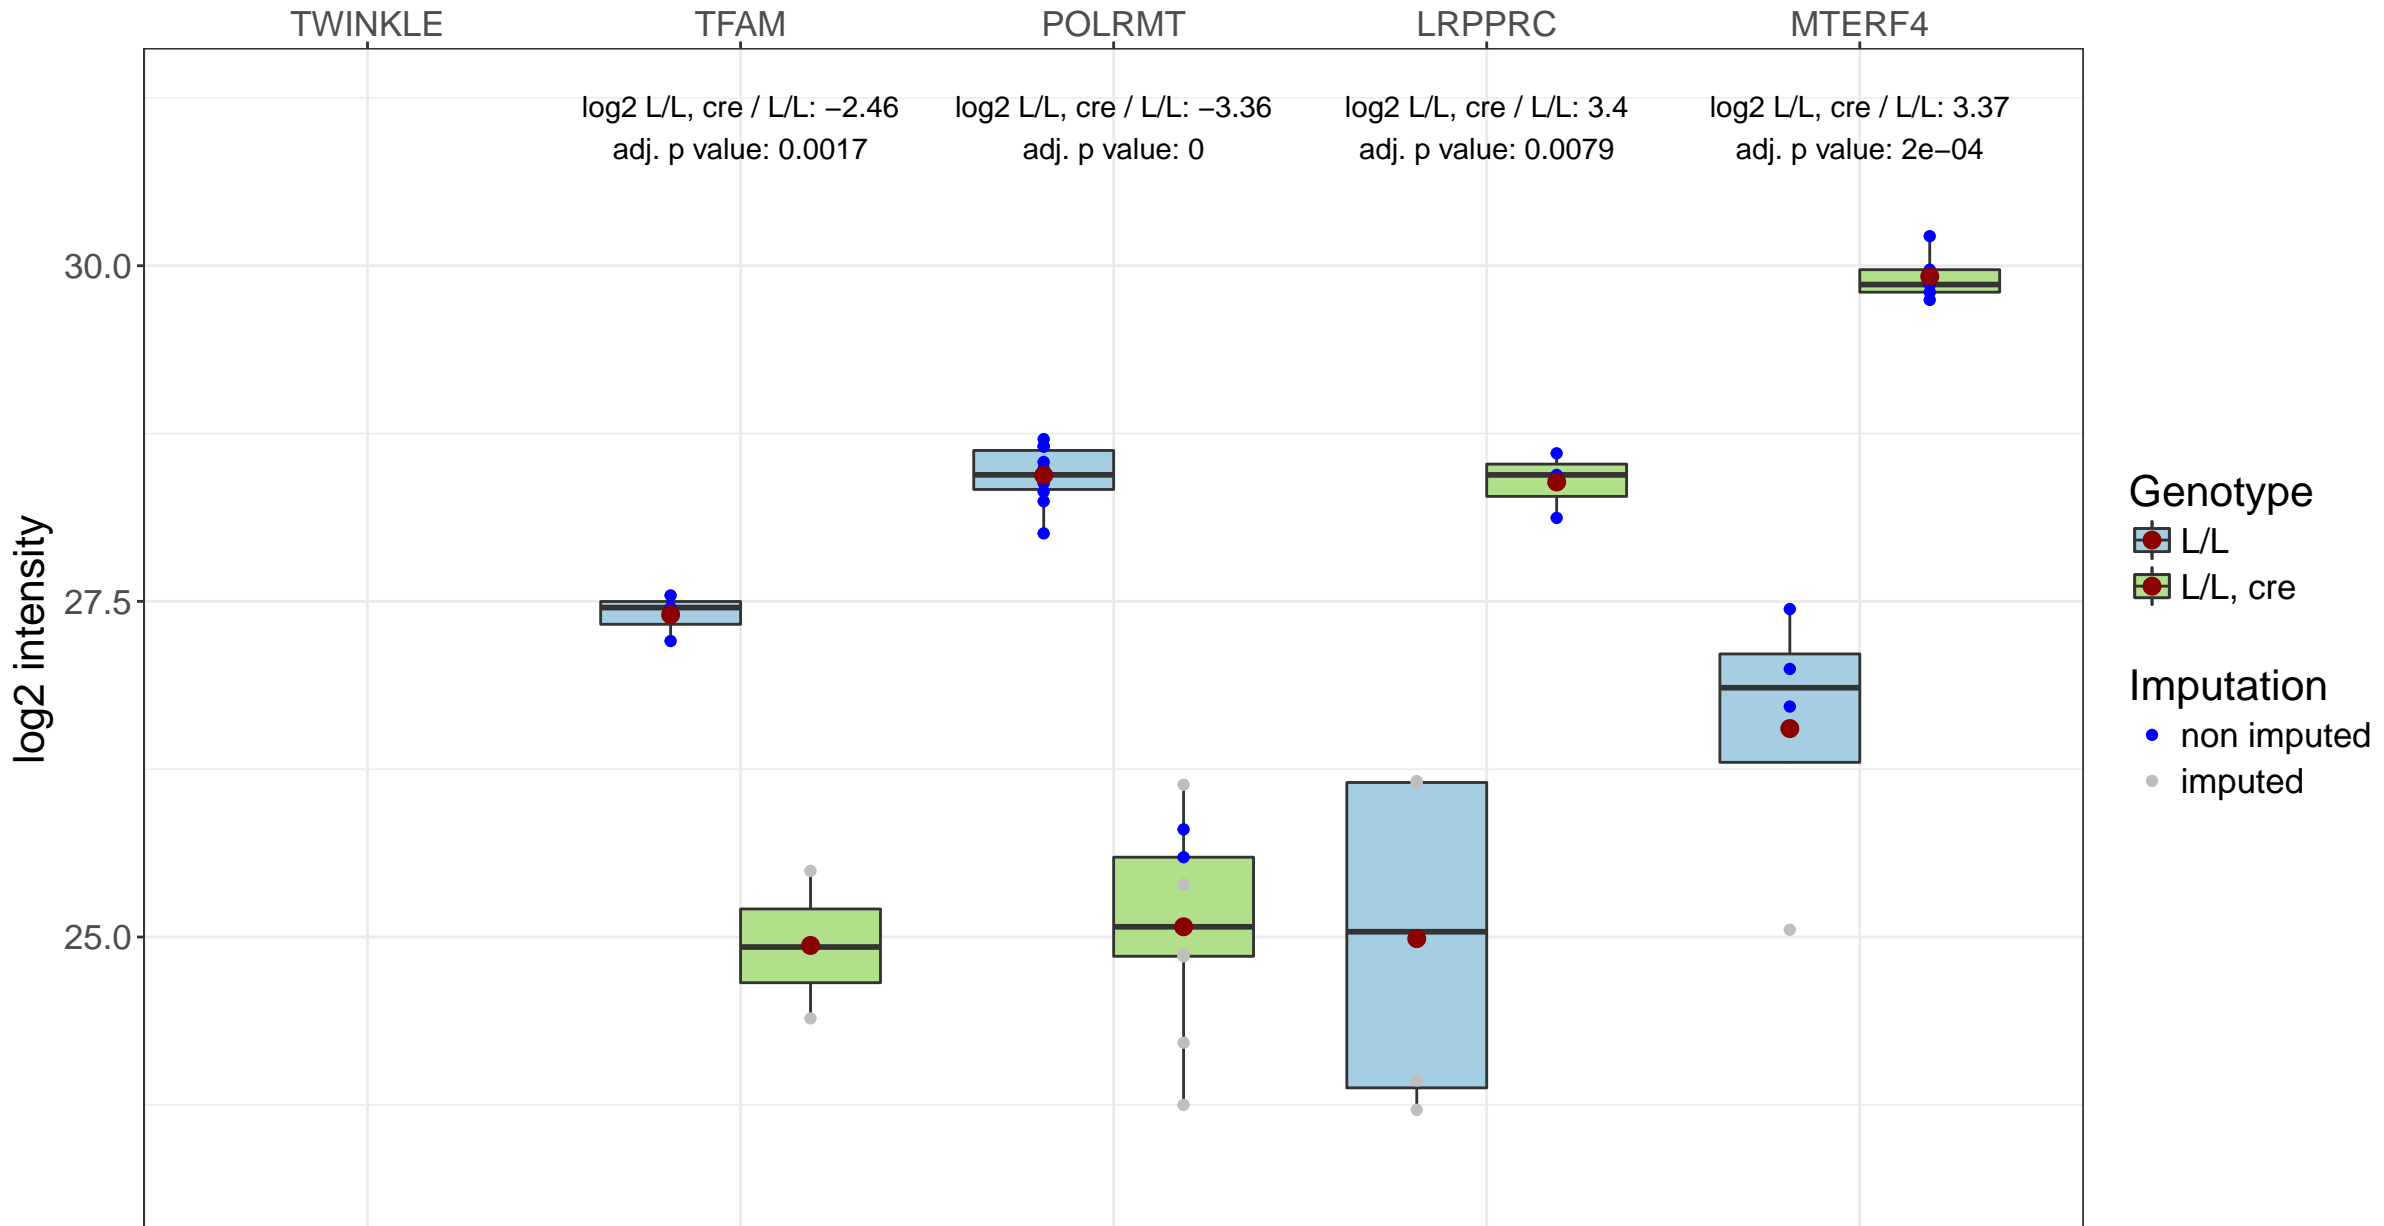

# MRPS26 / Q80ZS3

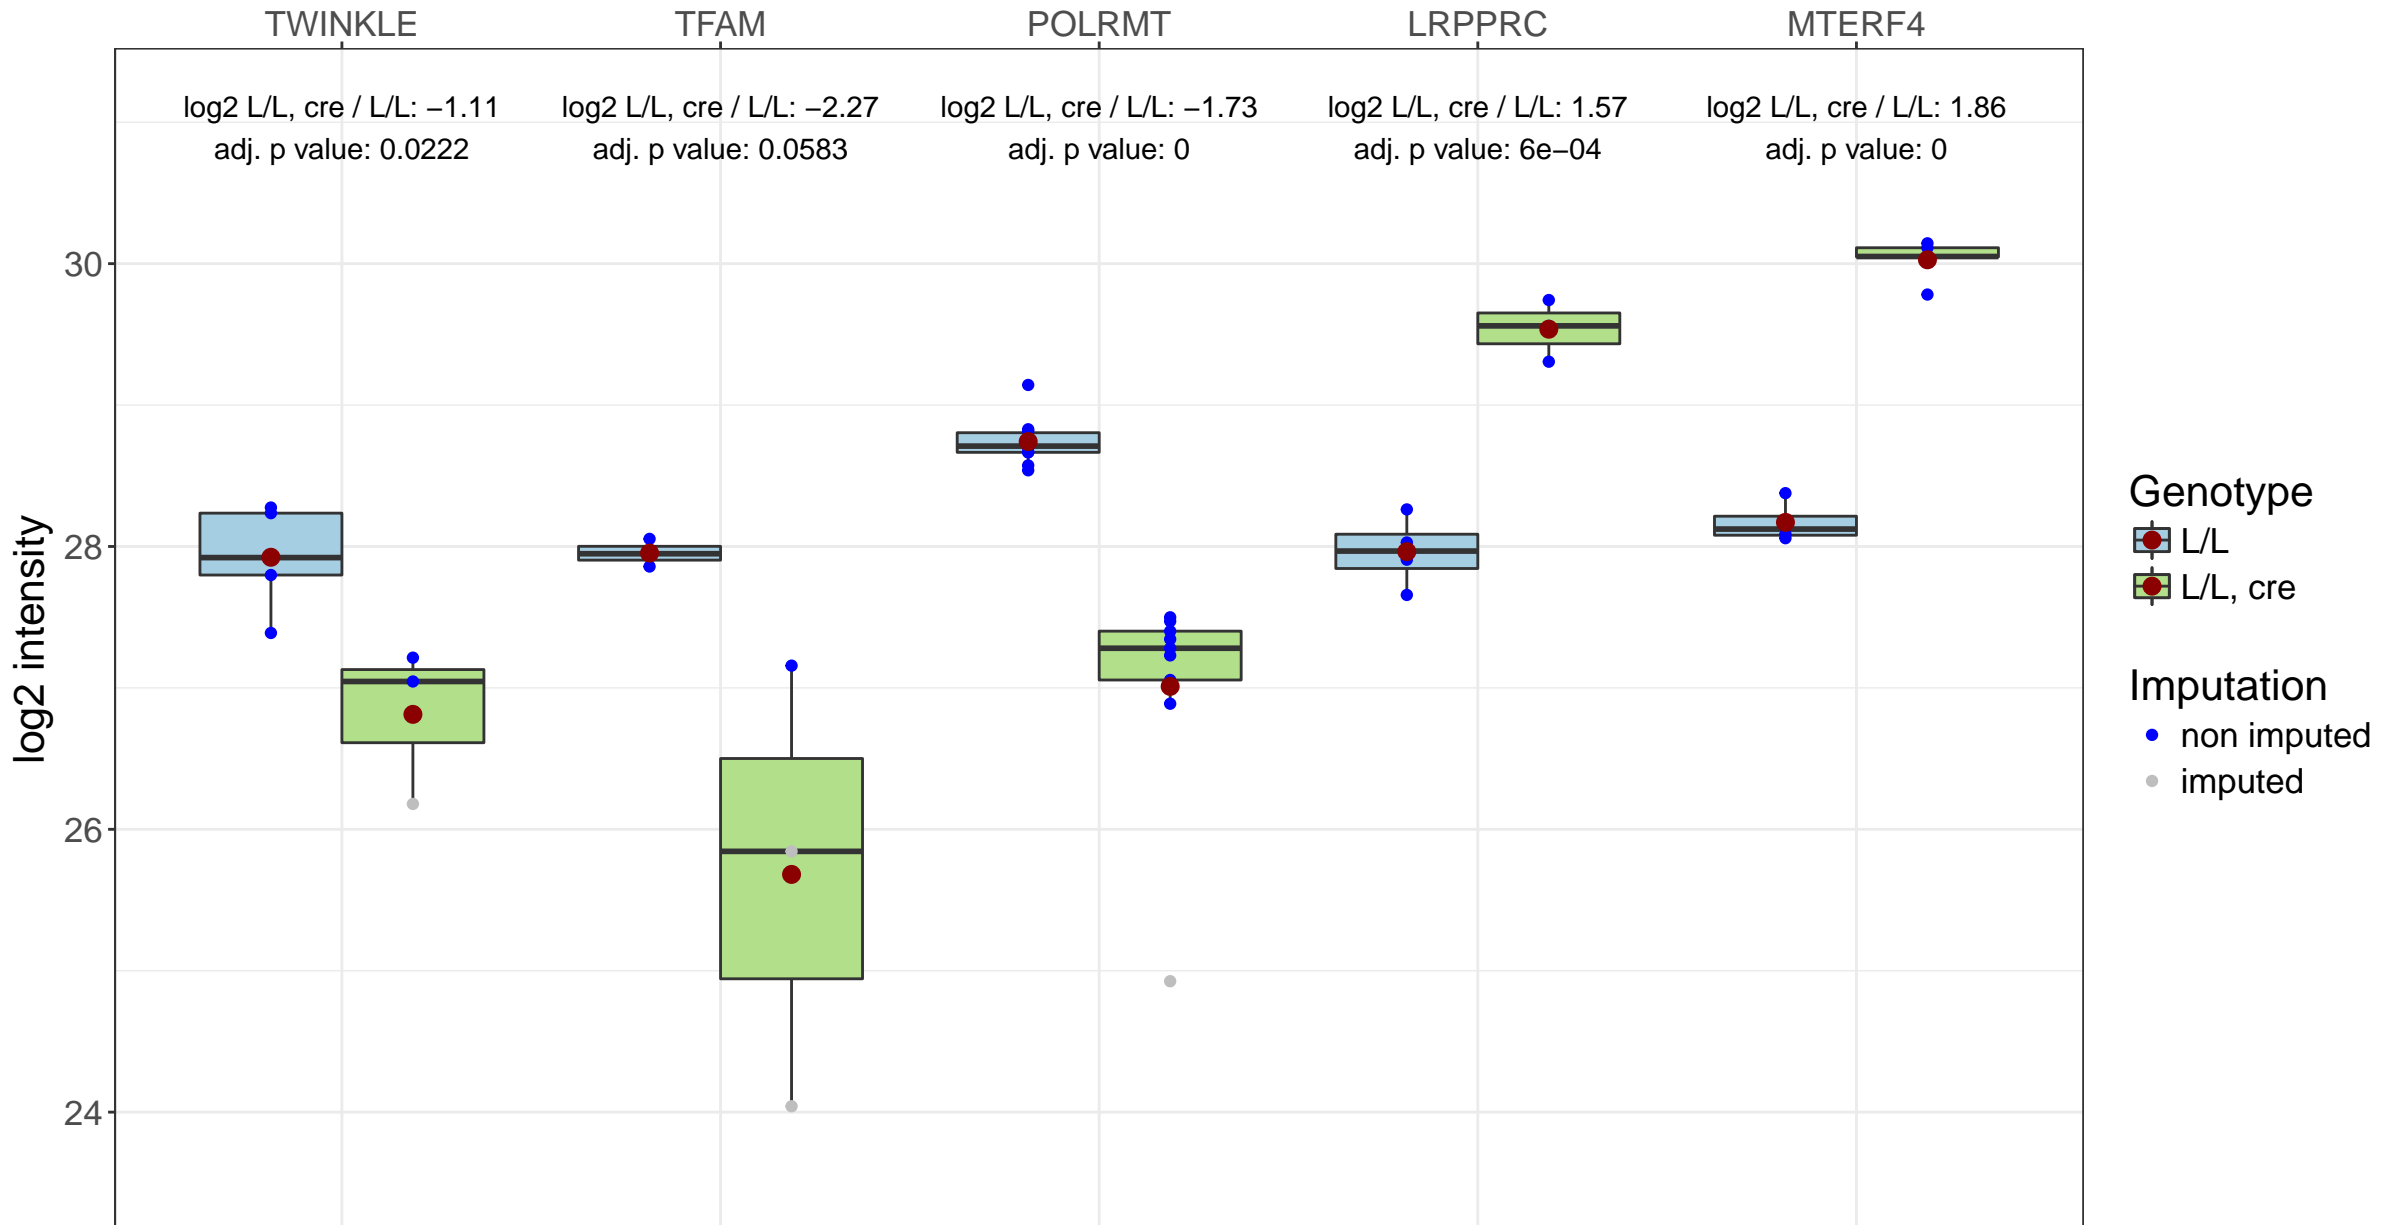

# MRPS27 / Q8BK72

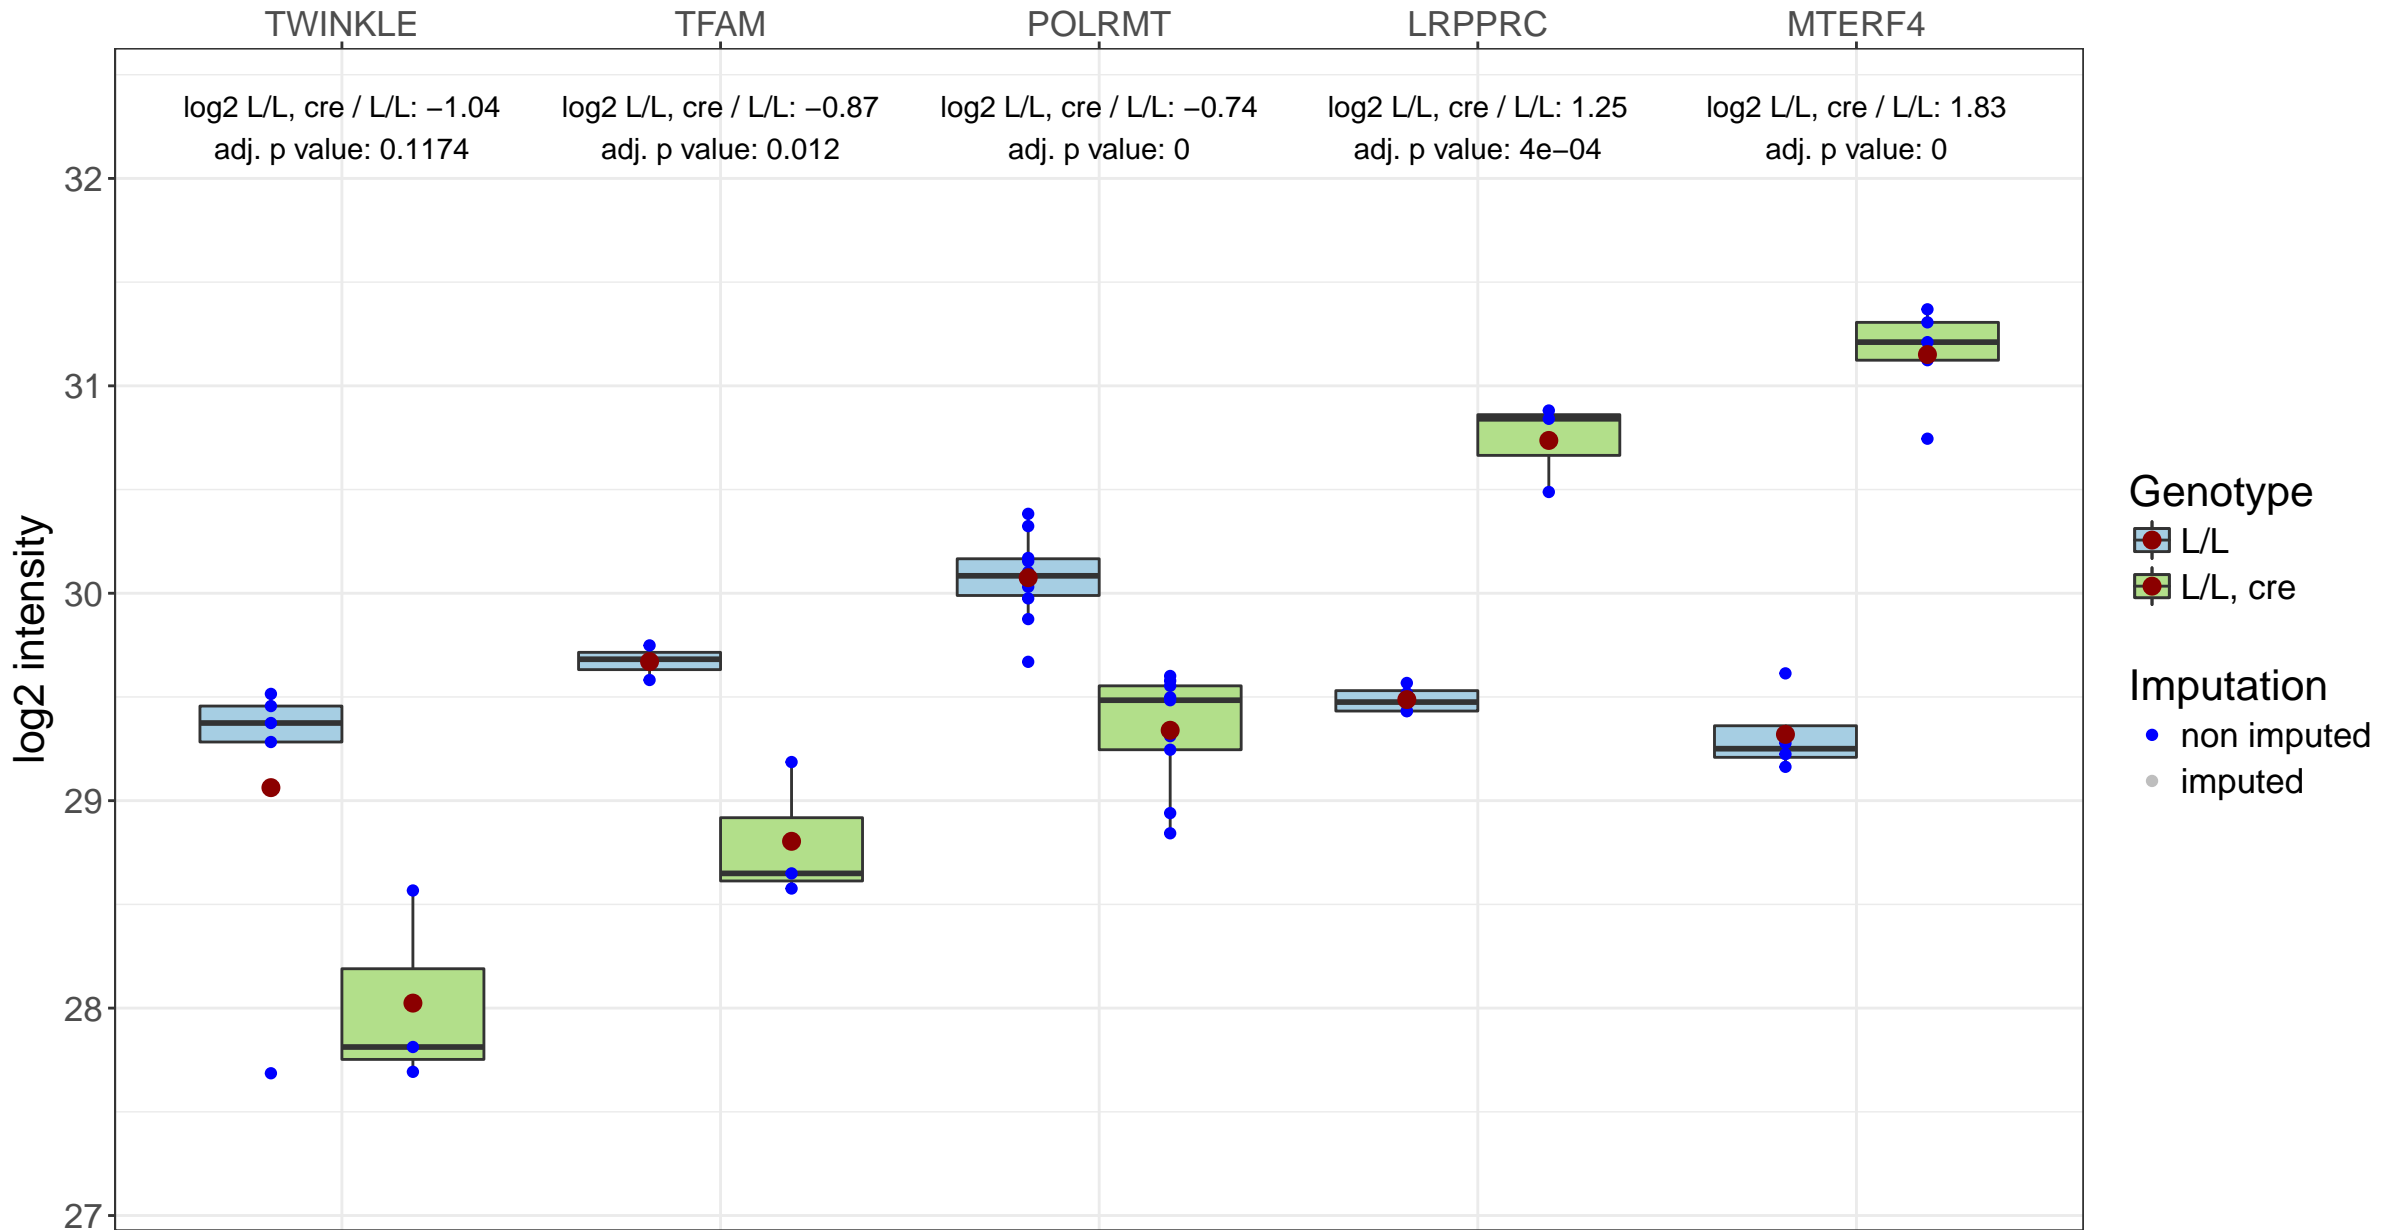

# MRPS28 / Q9CY16

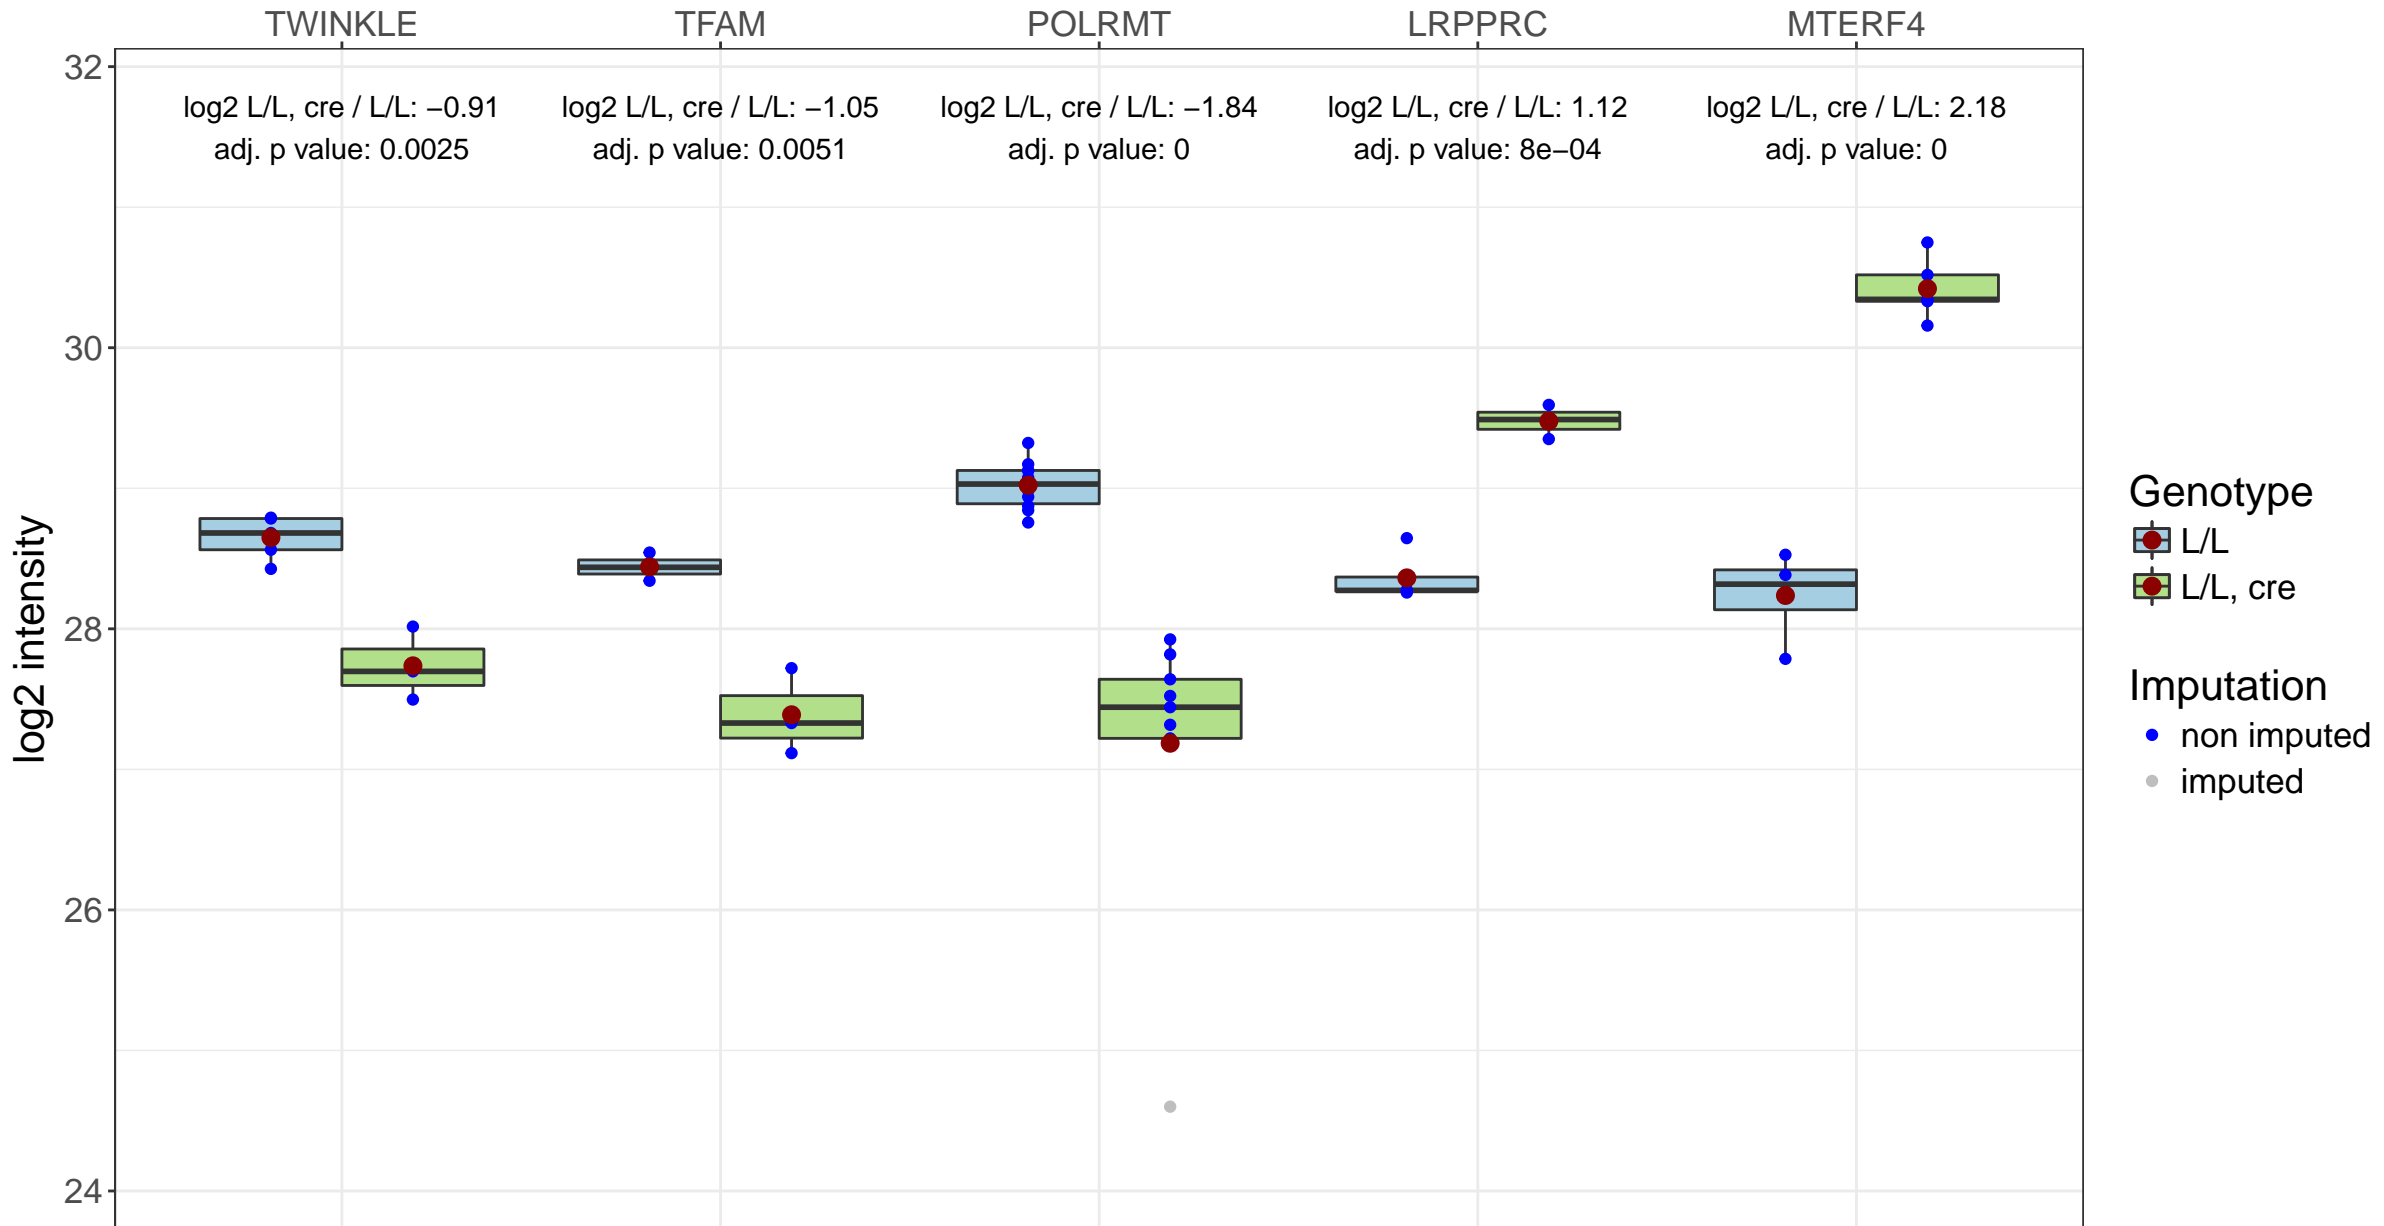

# MRPS29 / G3X9M0

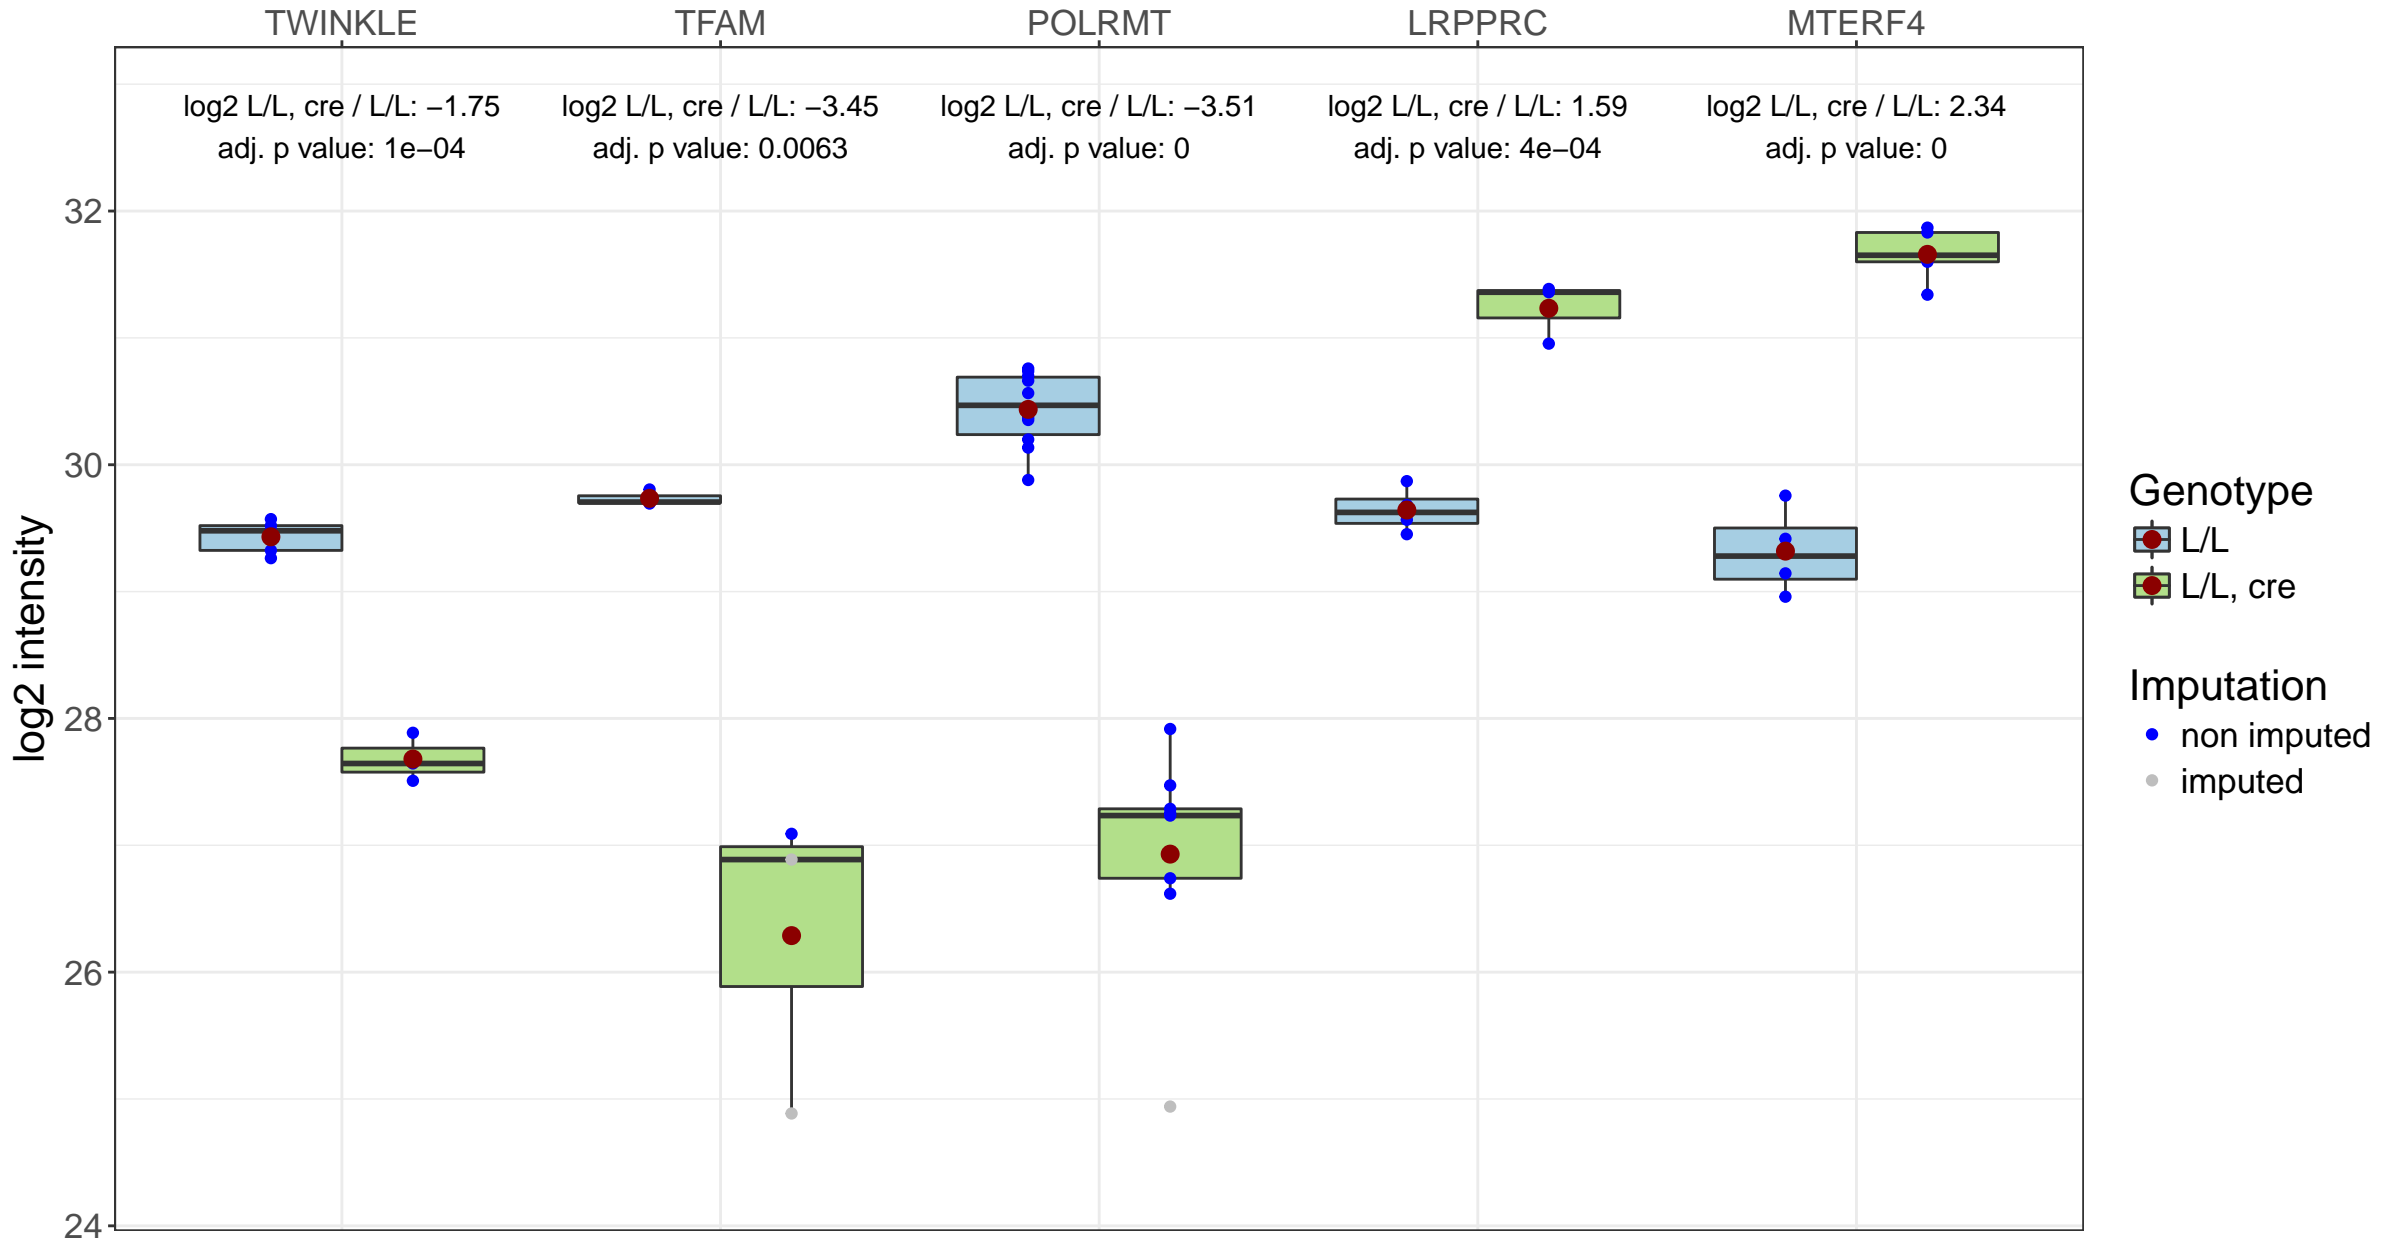



# MRPS30 / Q9D0G0

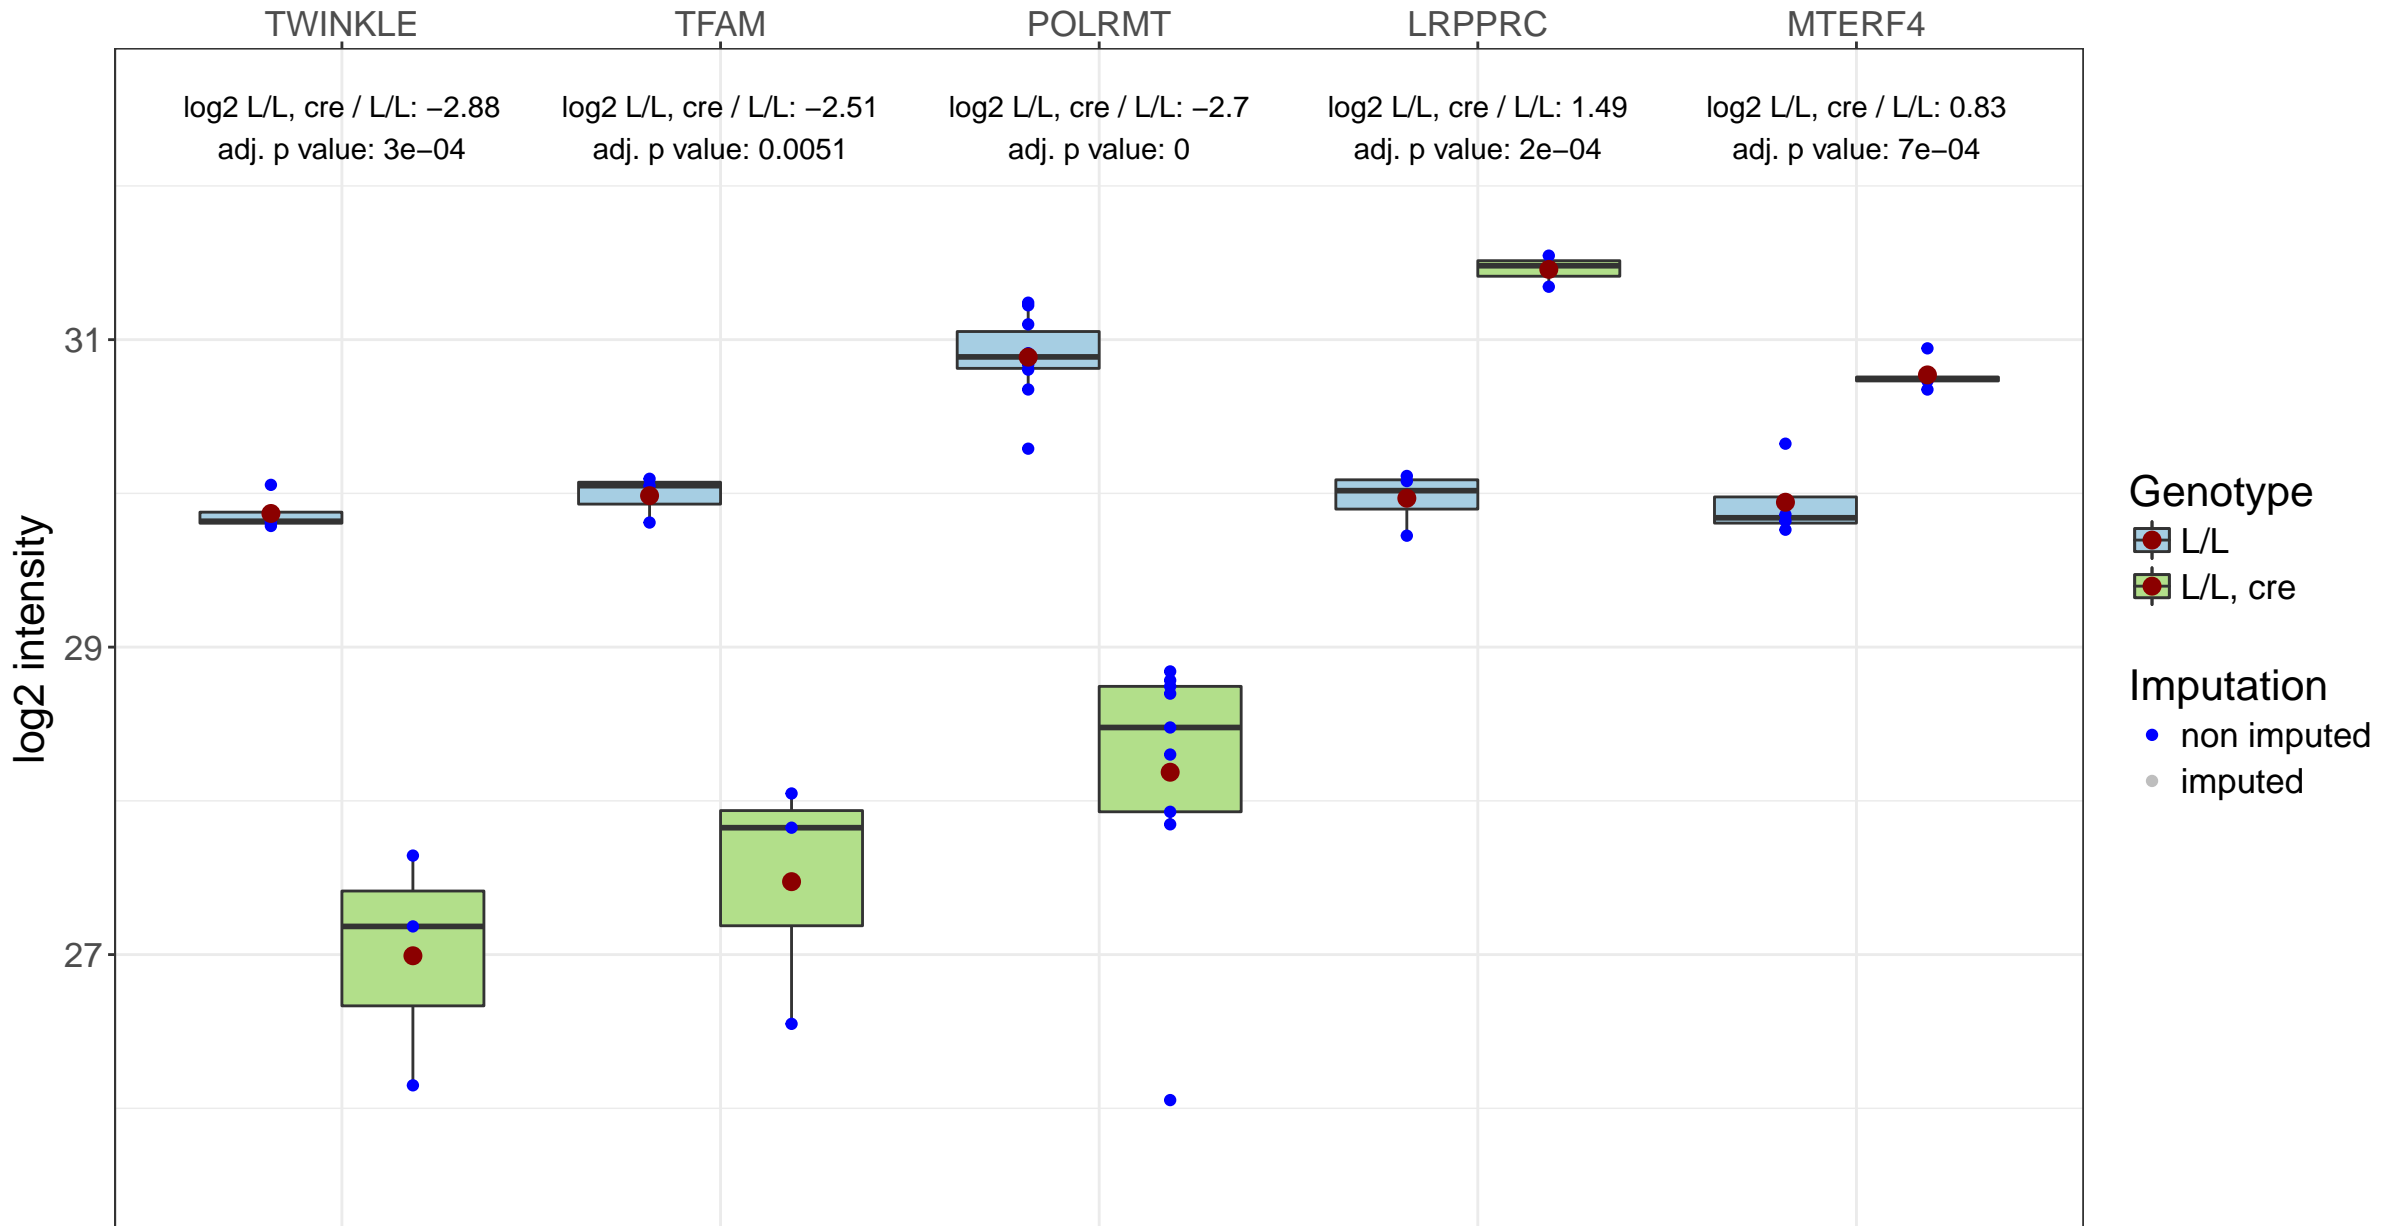

# MRPS31 / Q61733

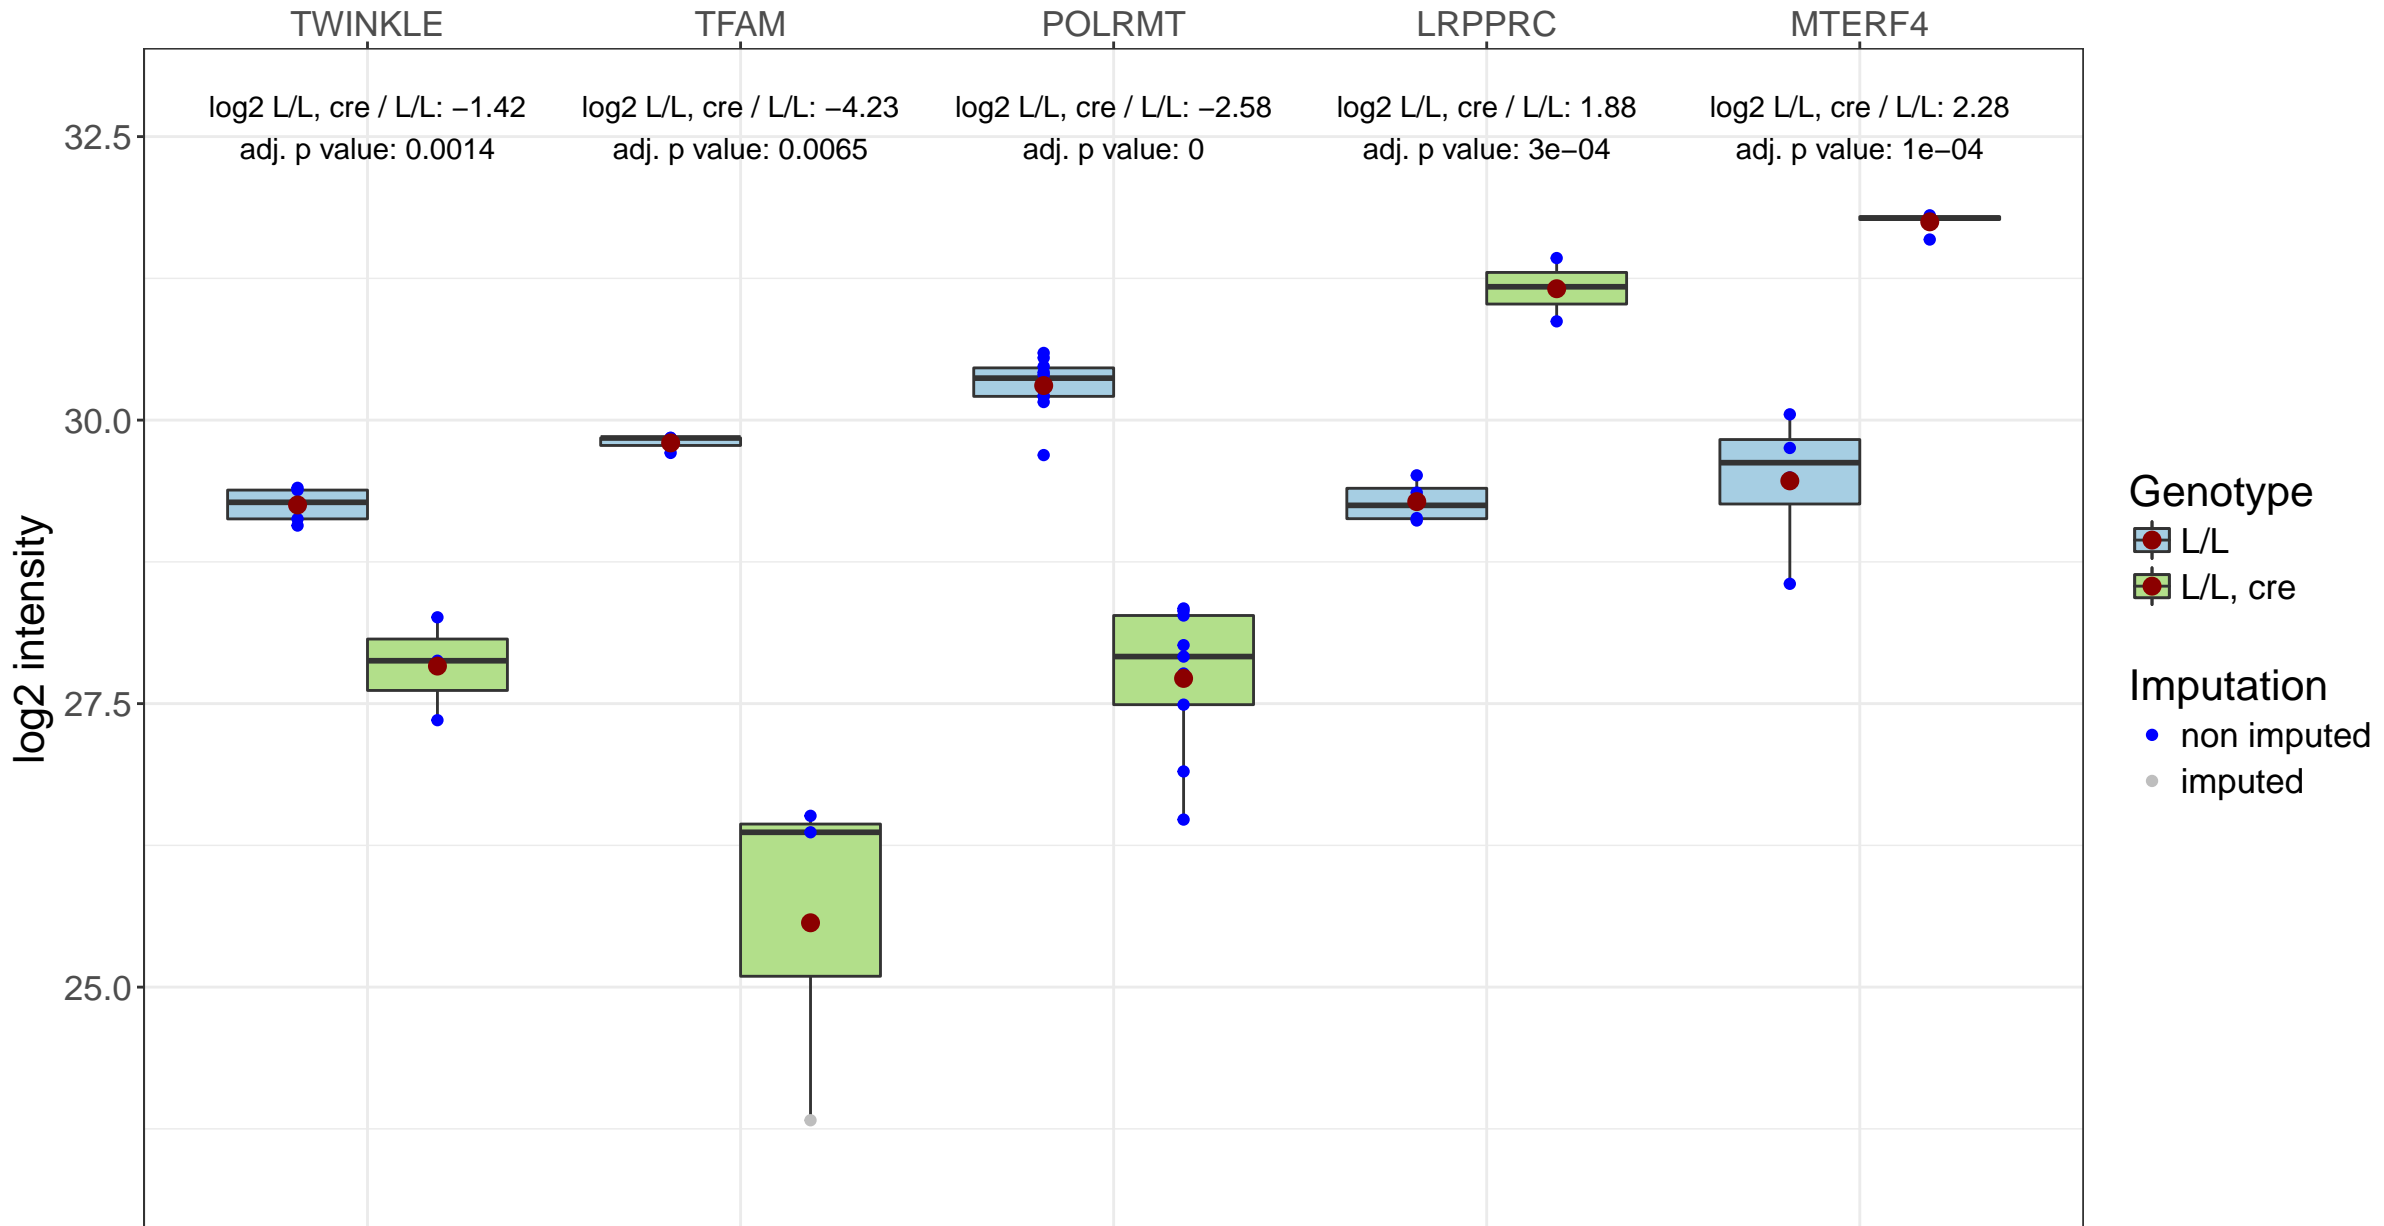

# MRPS33 / Q9D2R8

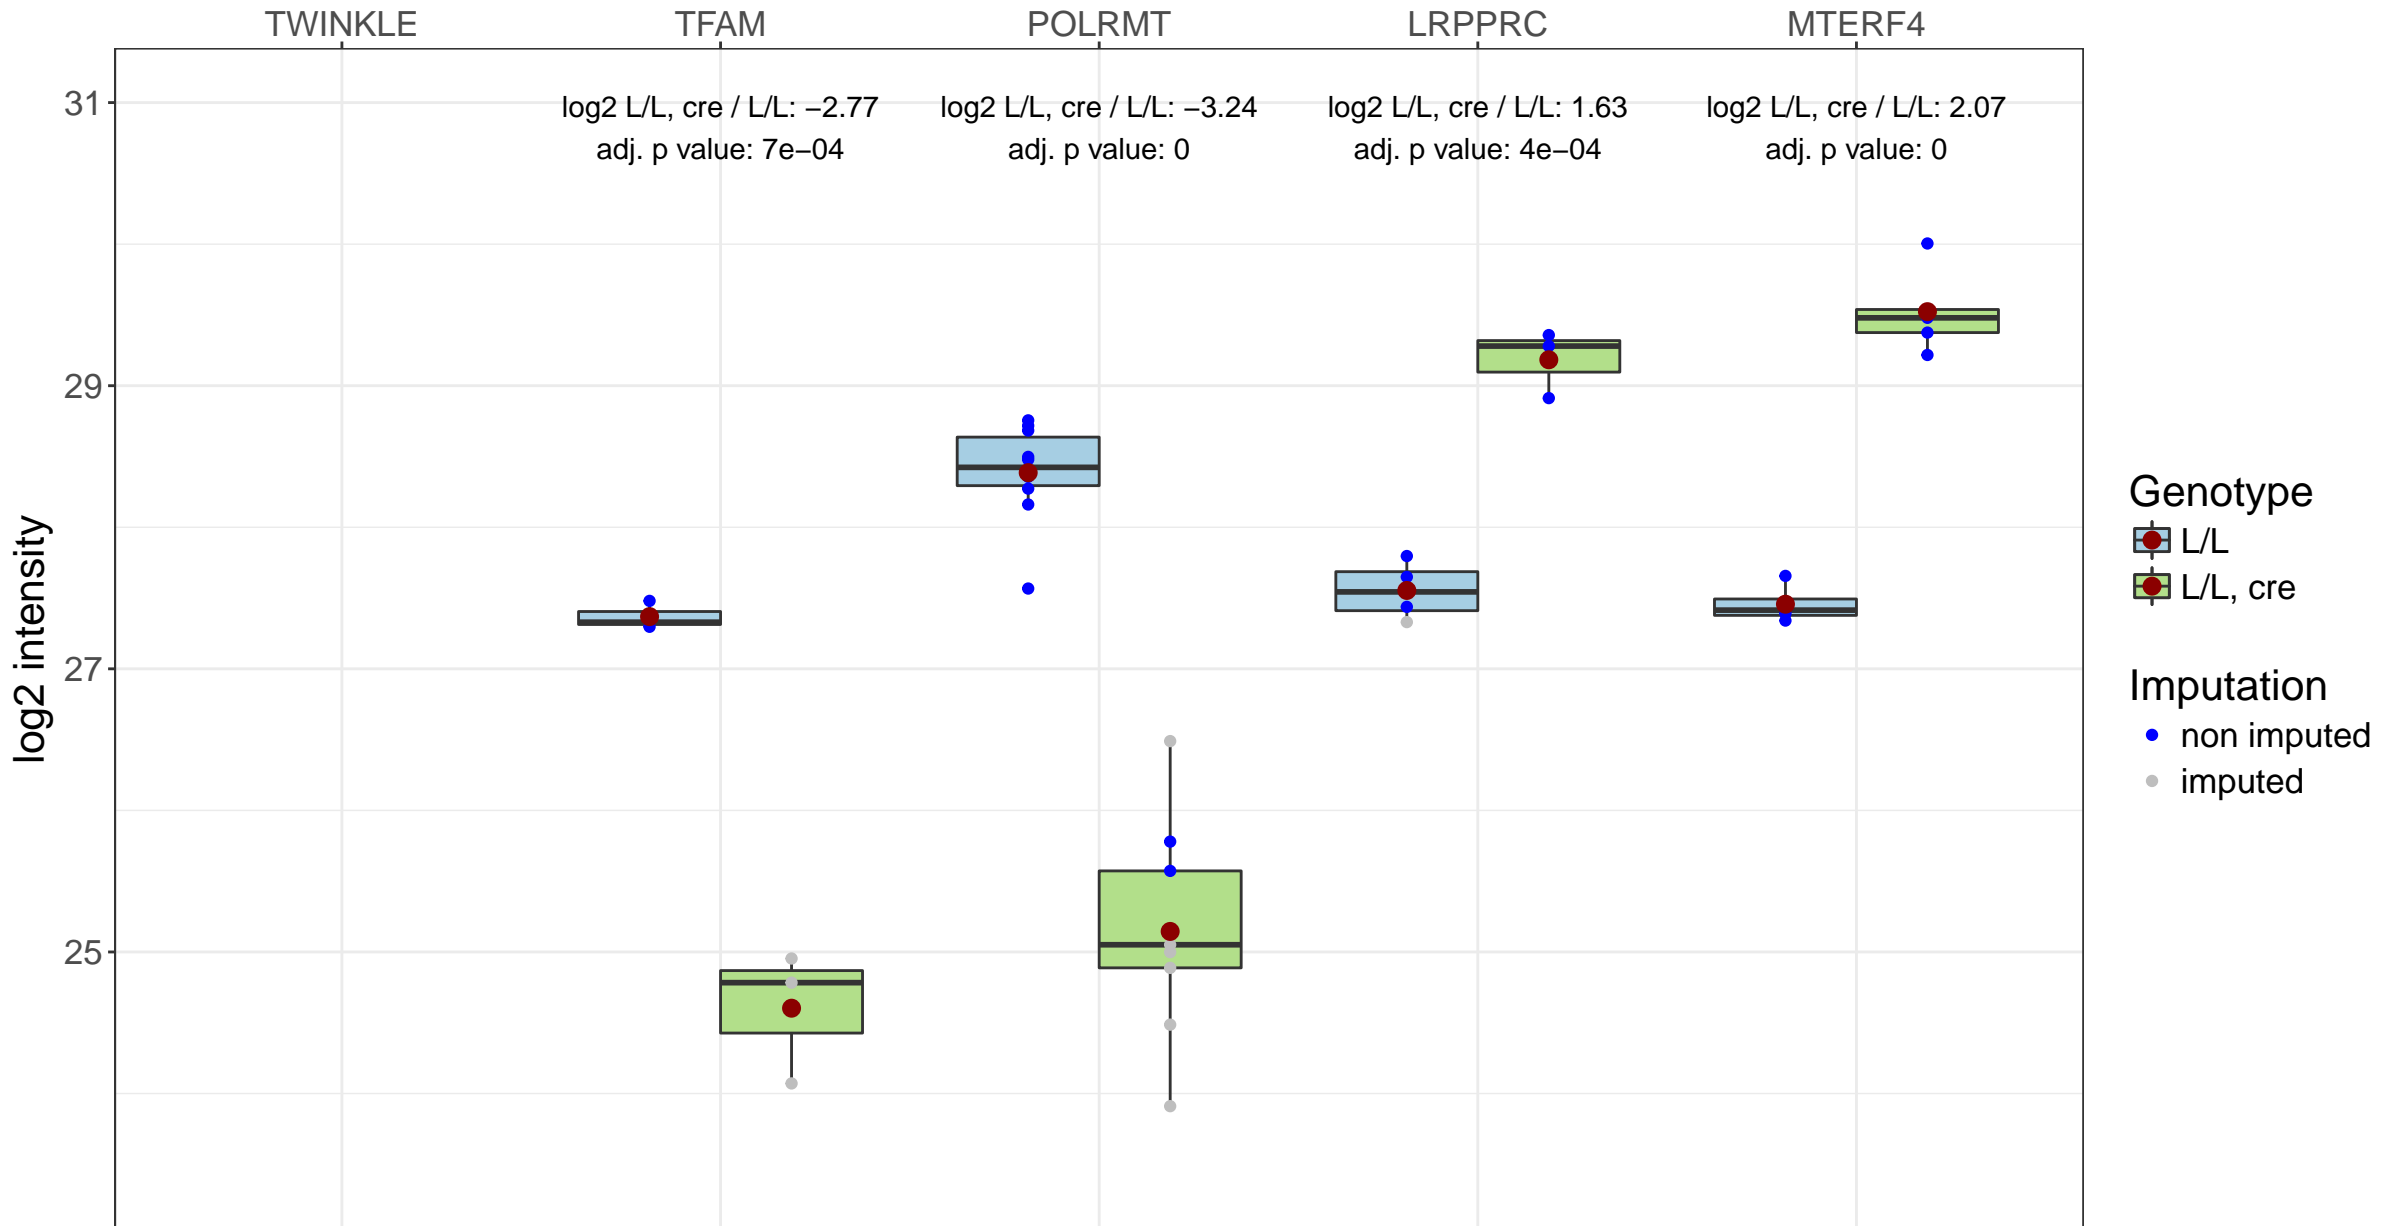

# MRPS34 / Q9JIK9

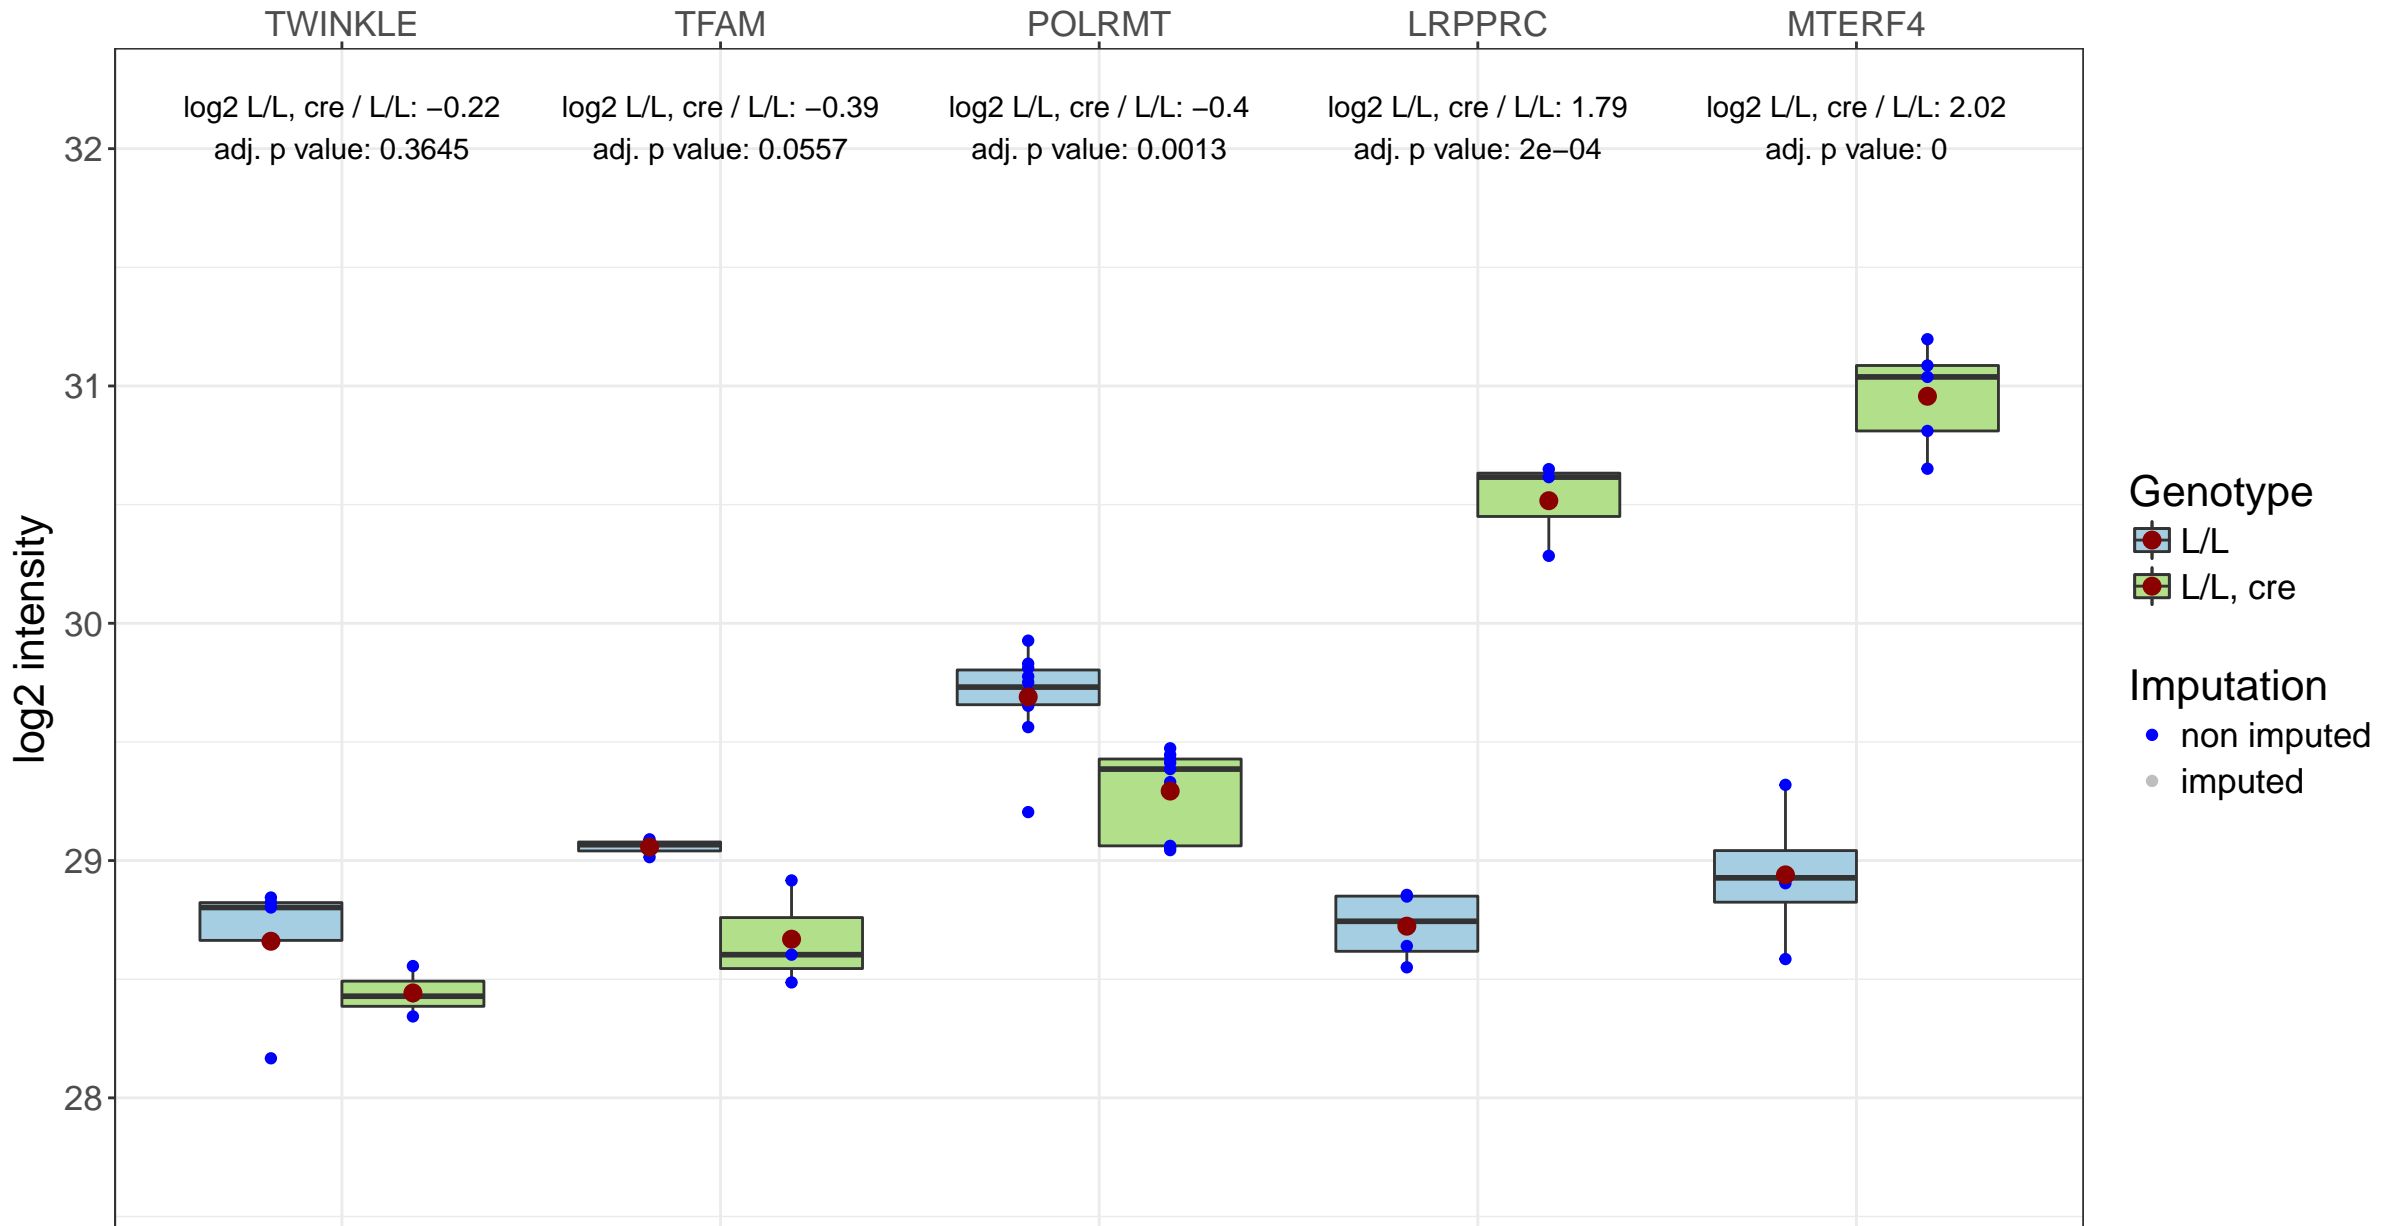

# MRPS35 / Q8BJZ4

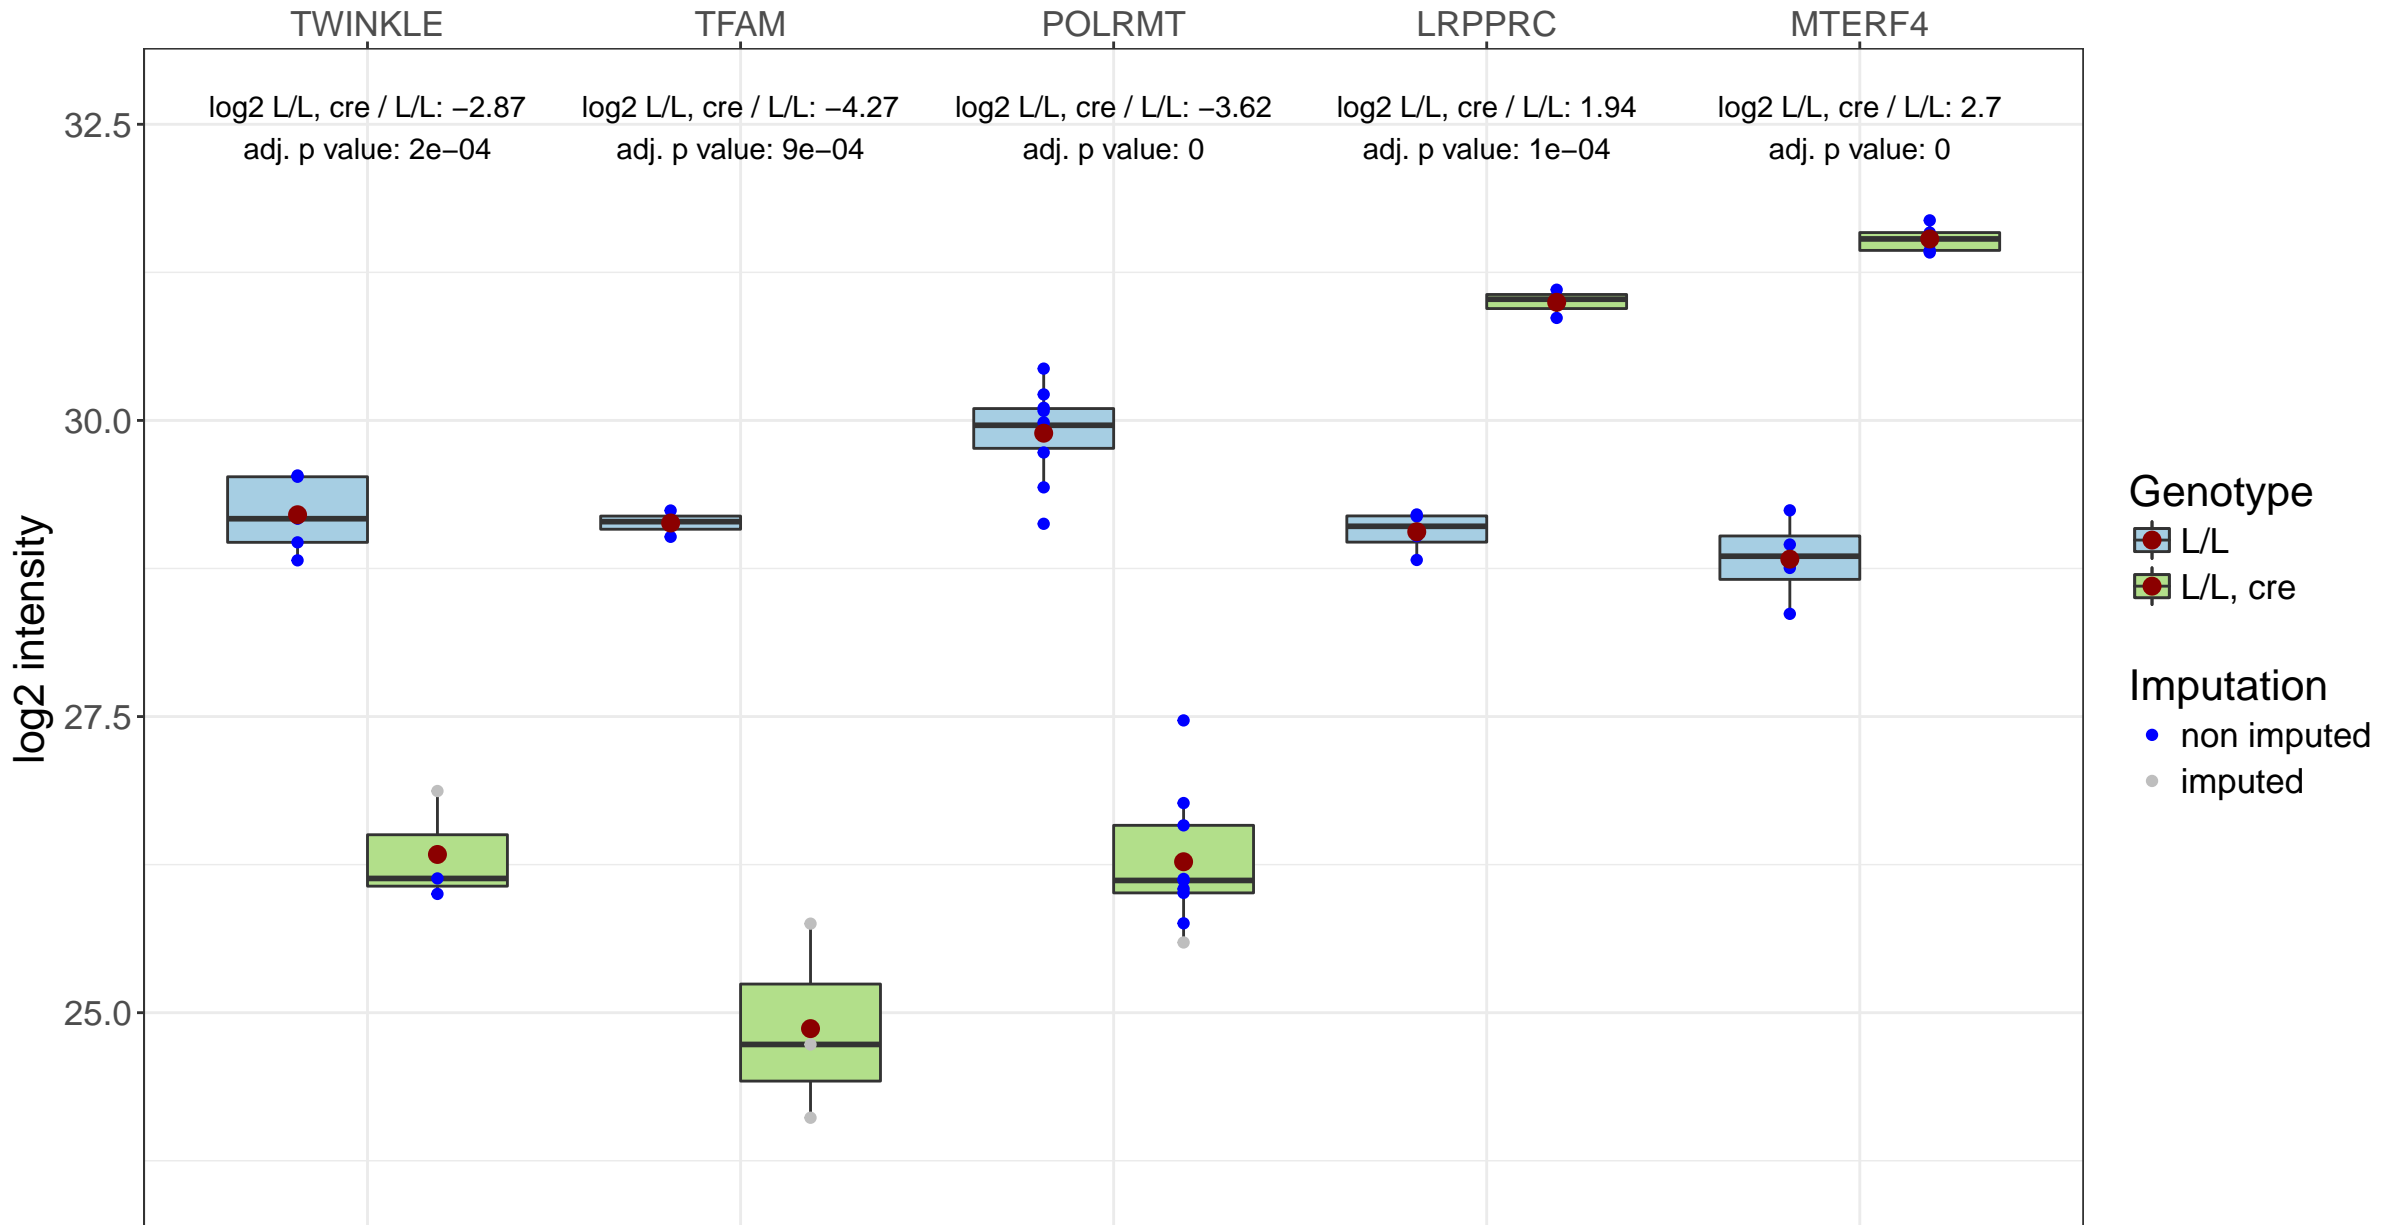

# MRPS36 / Q9CQX8

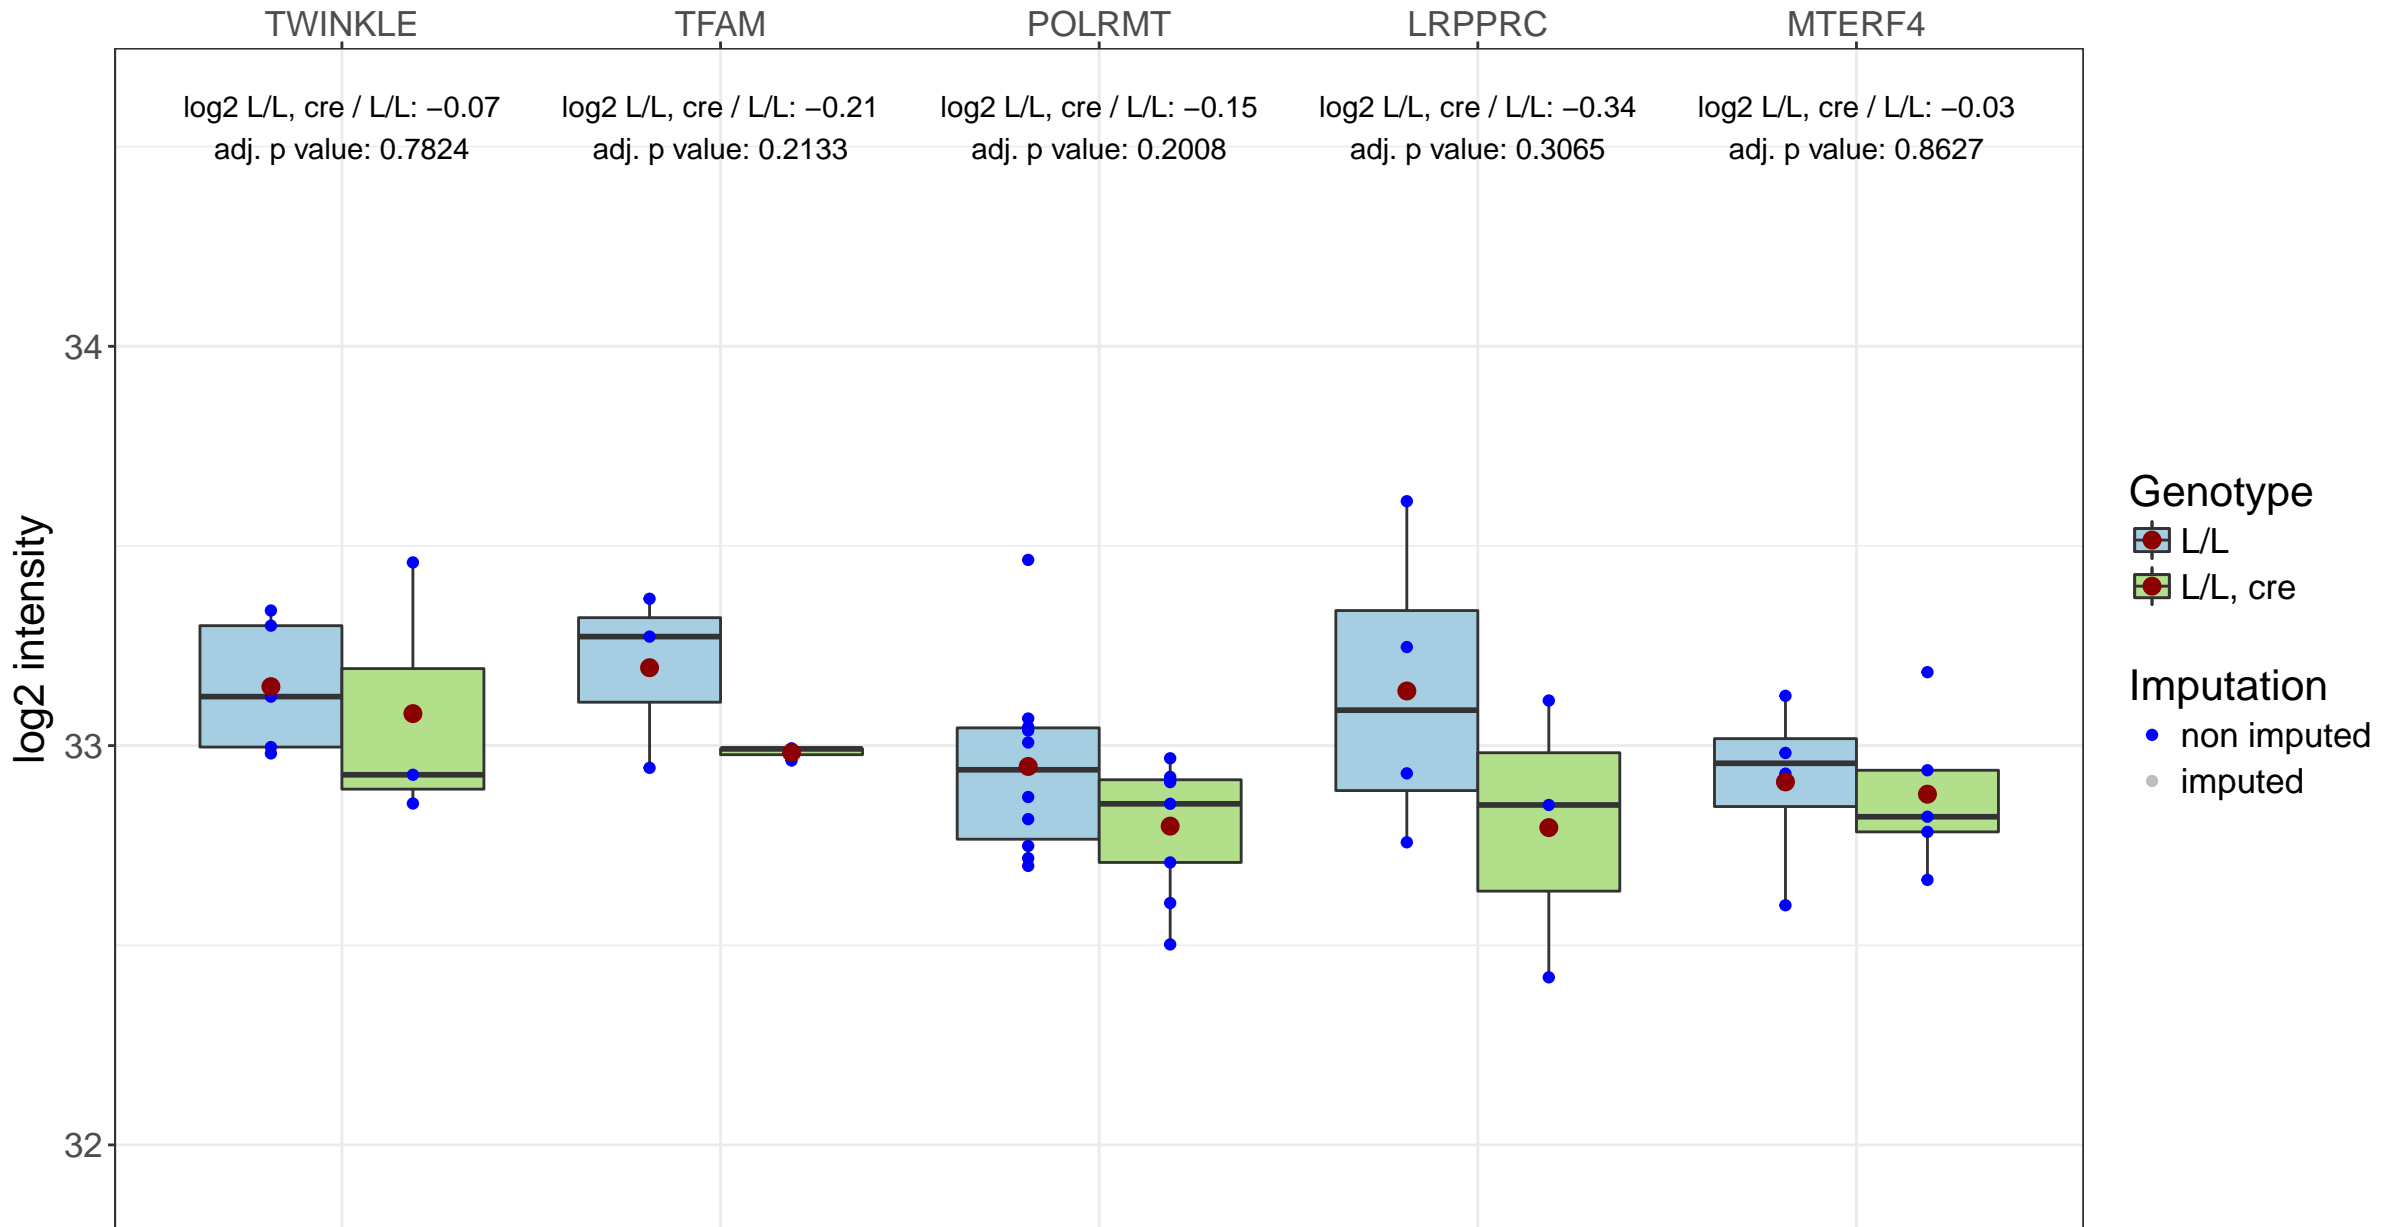

# MRPS36 / Q9D6T9

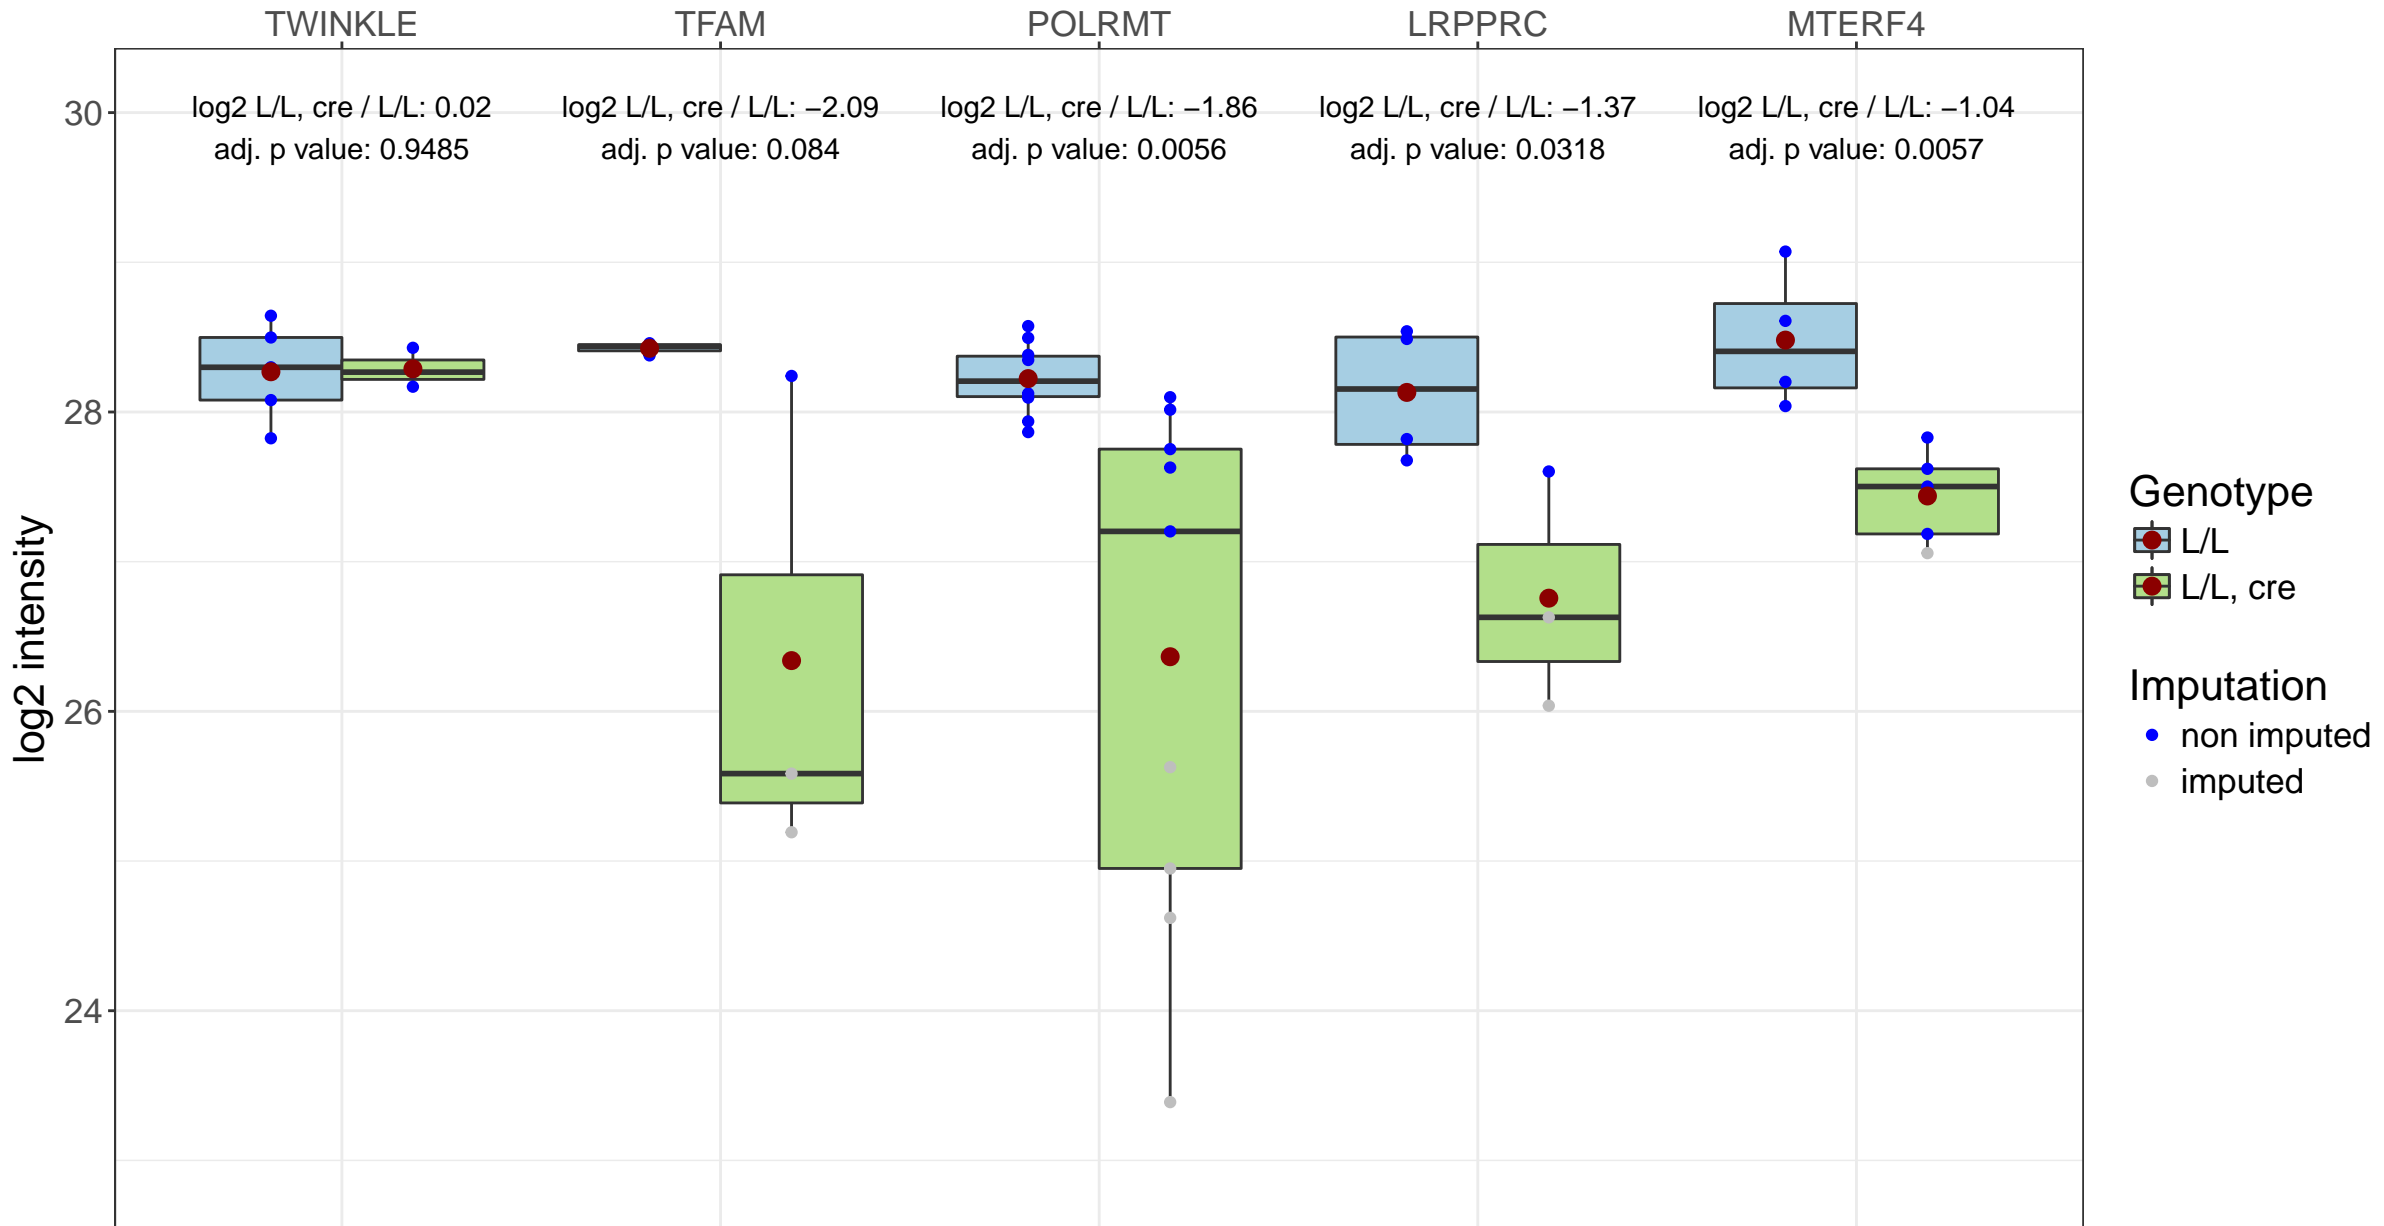

# MRPS37 / Q9CQA6

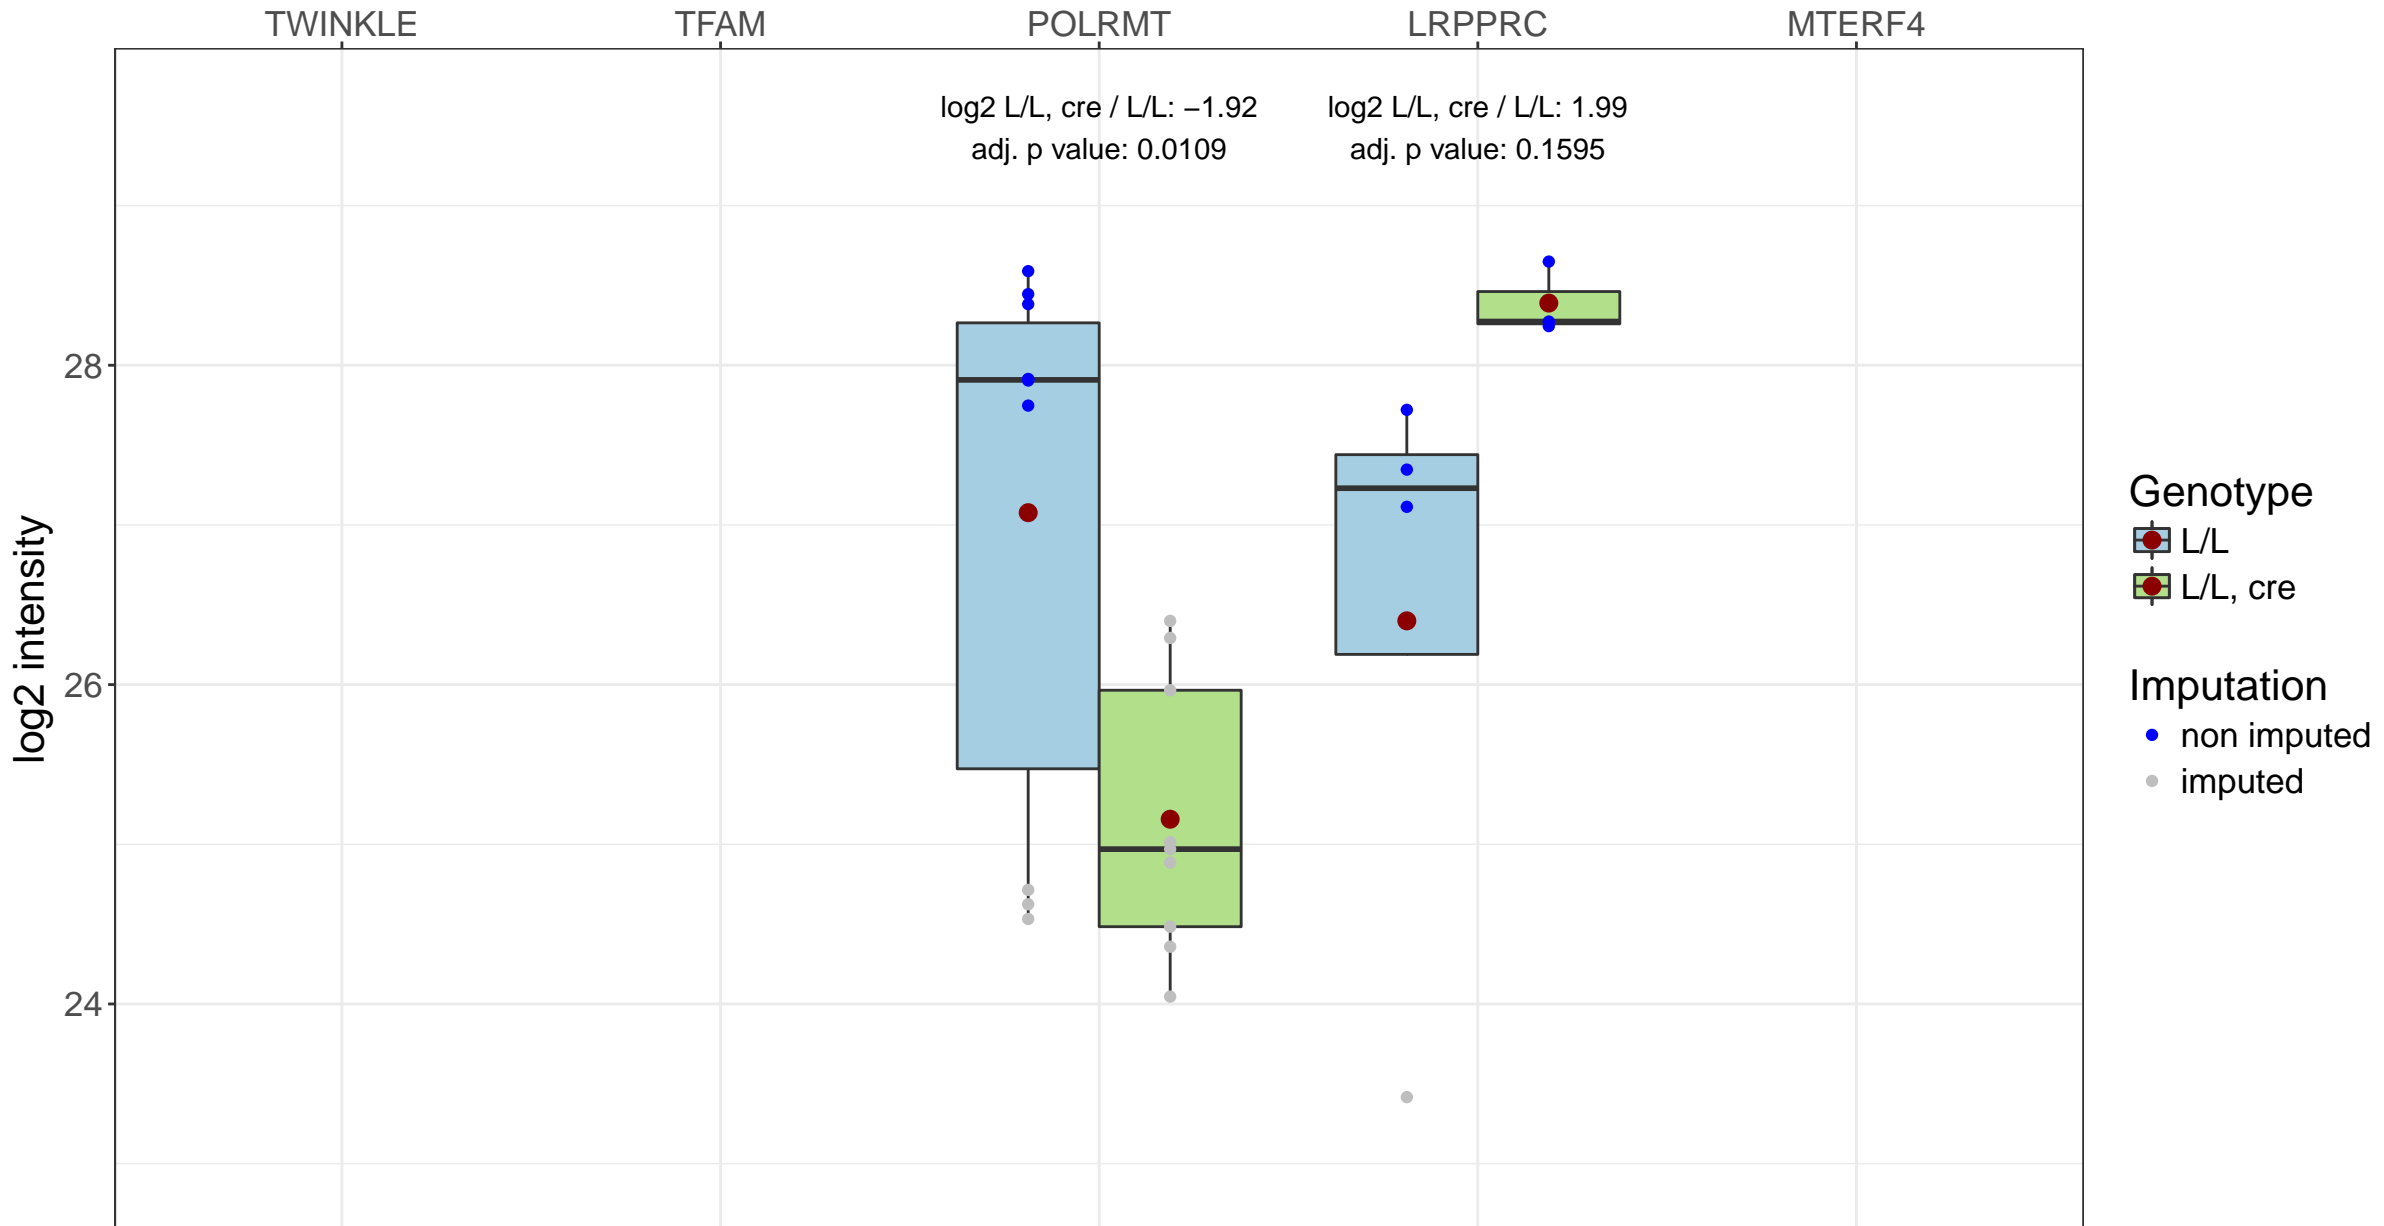



# MRPS39 / Q14C51

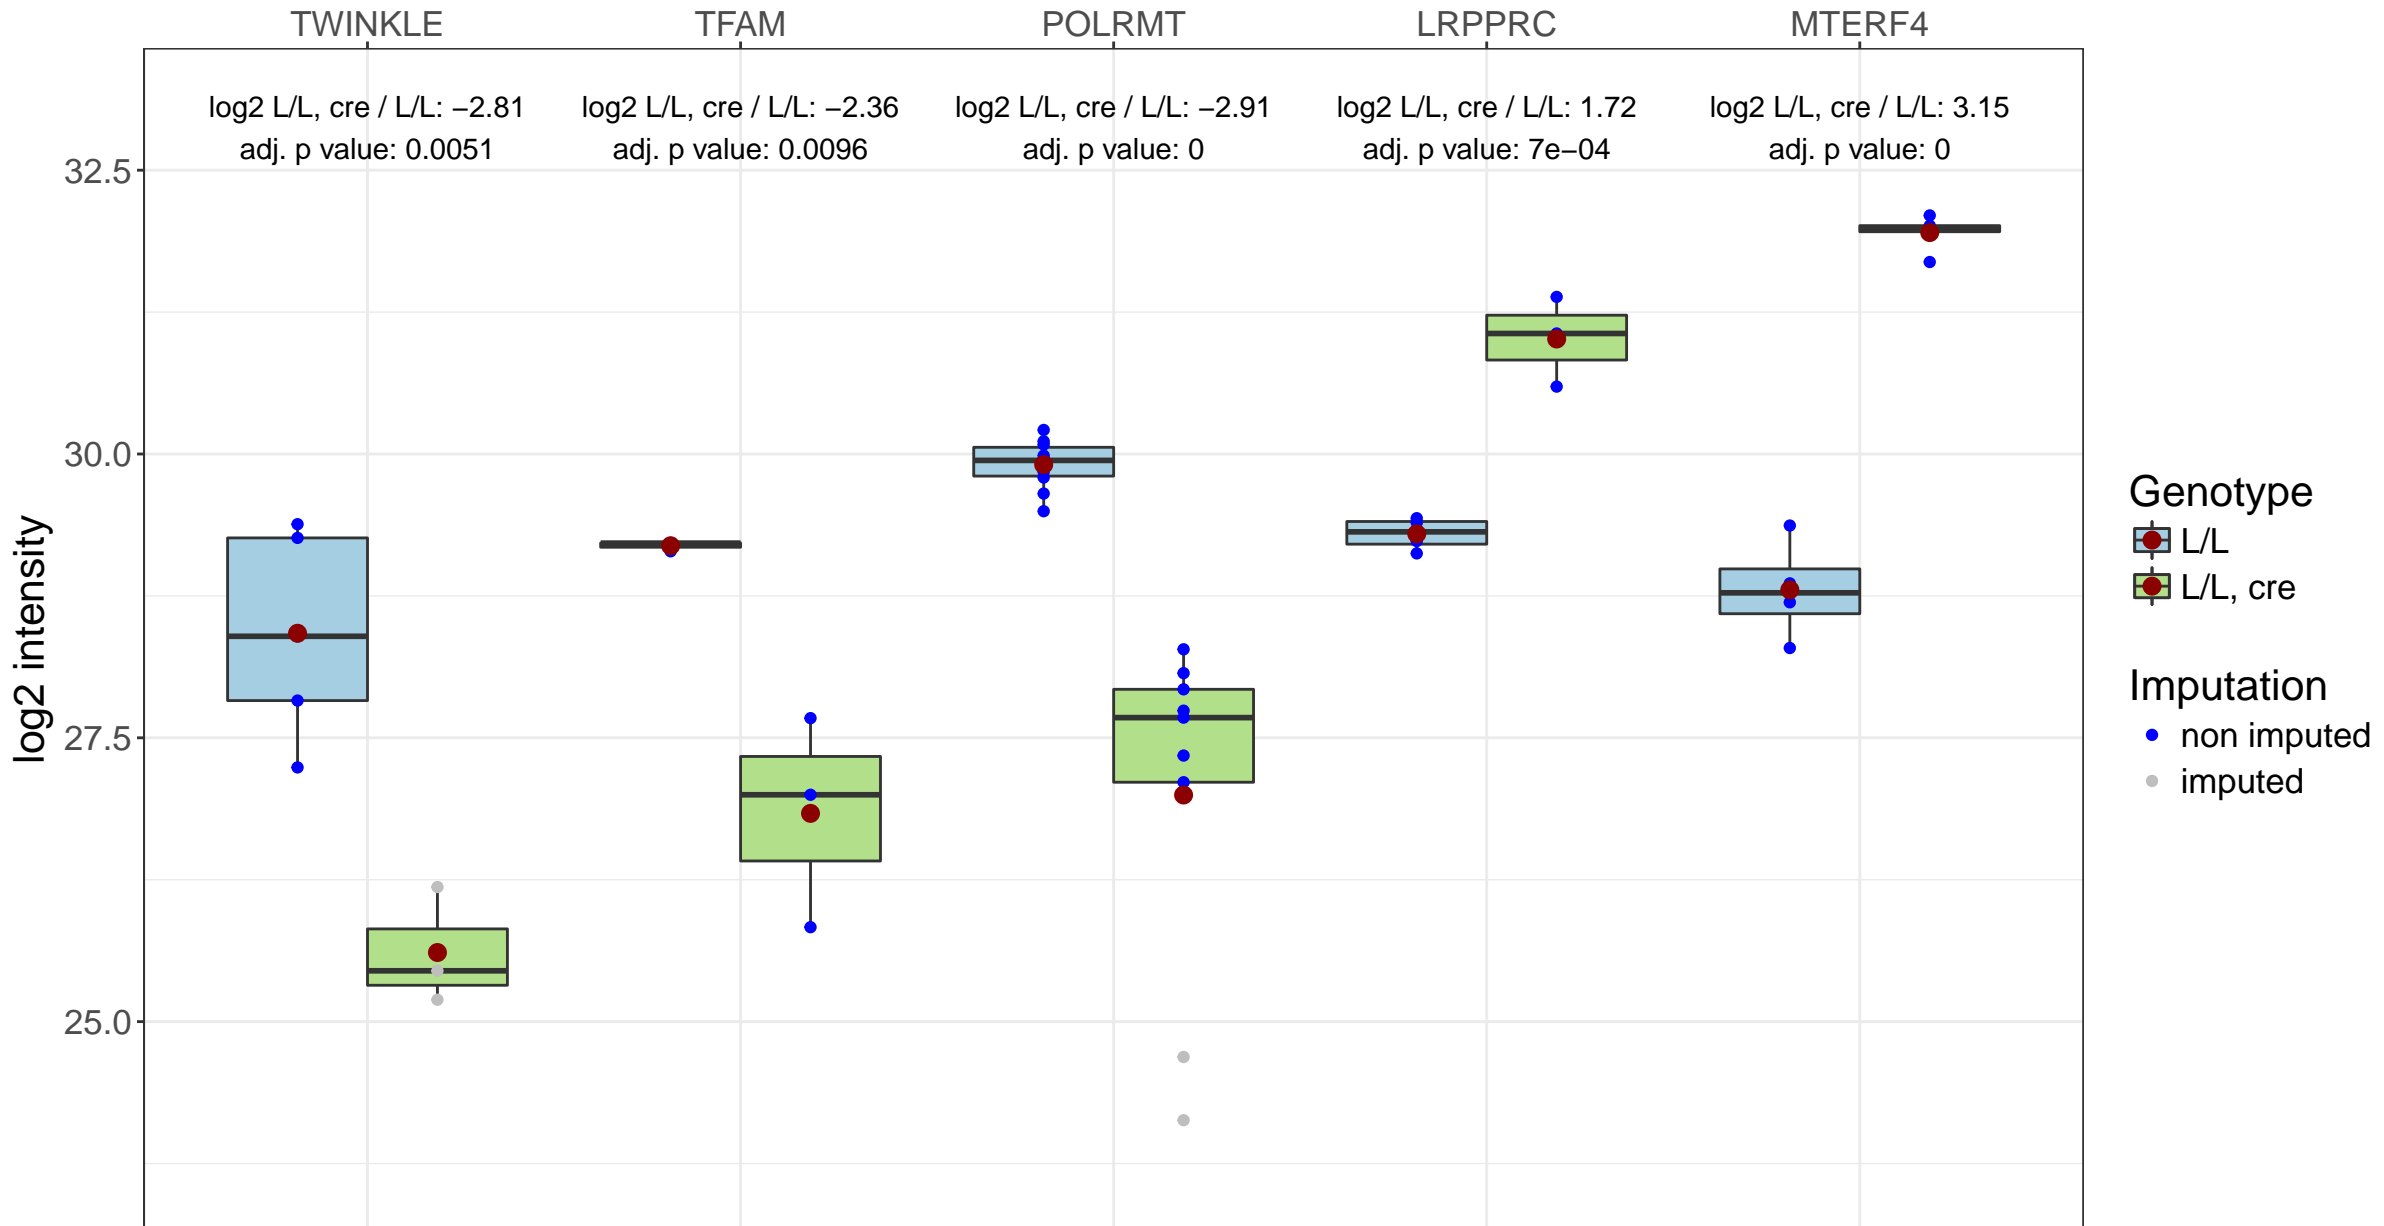

# MRPS5 / Q99N87

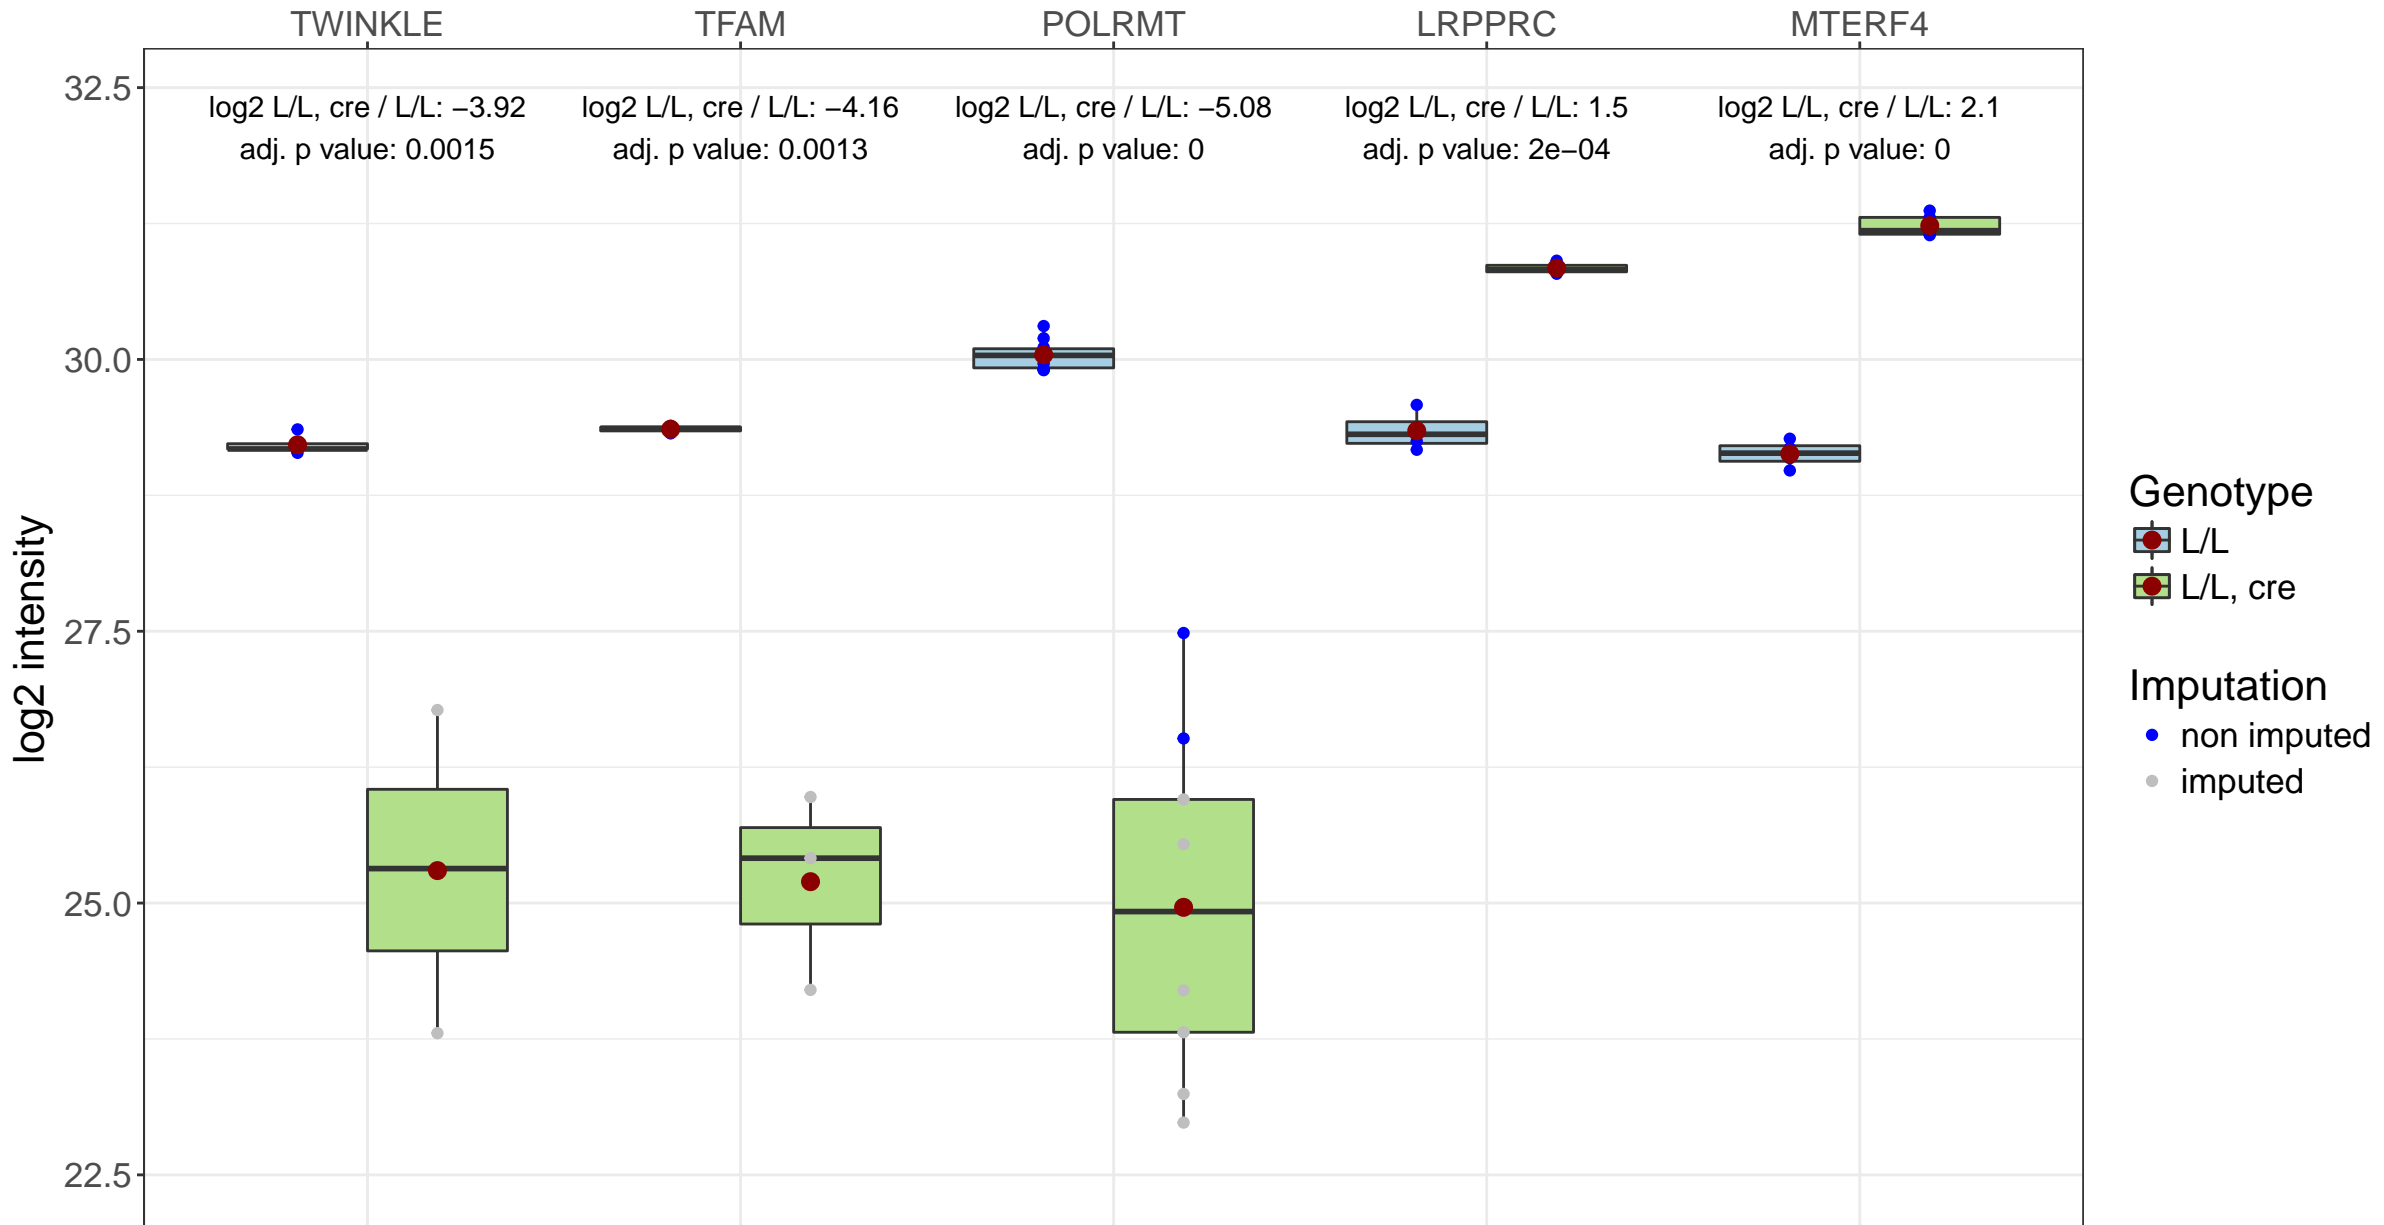

# MRPS6 / P58064

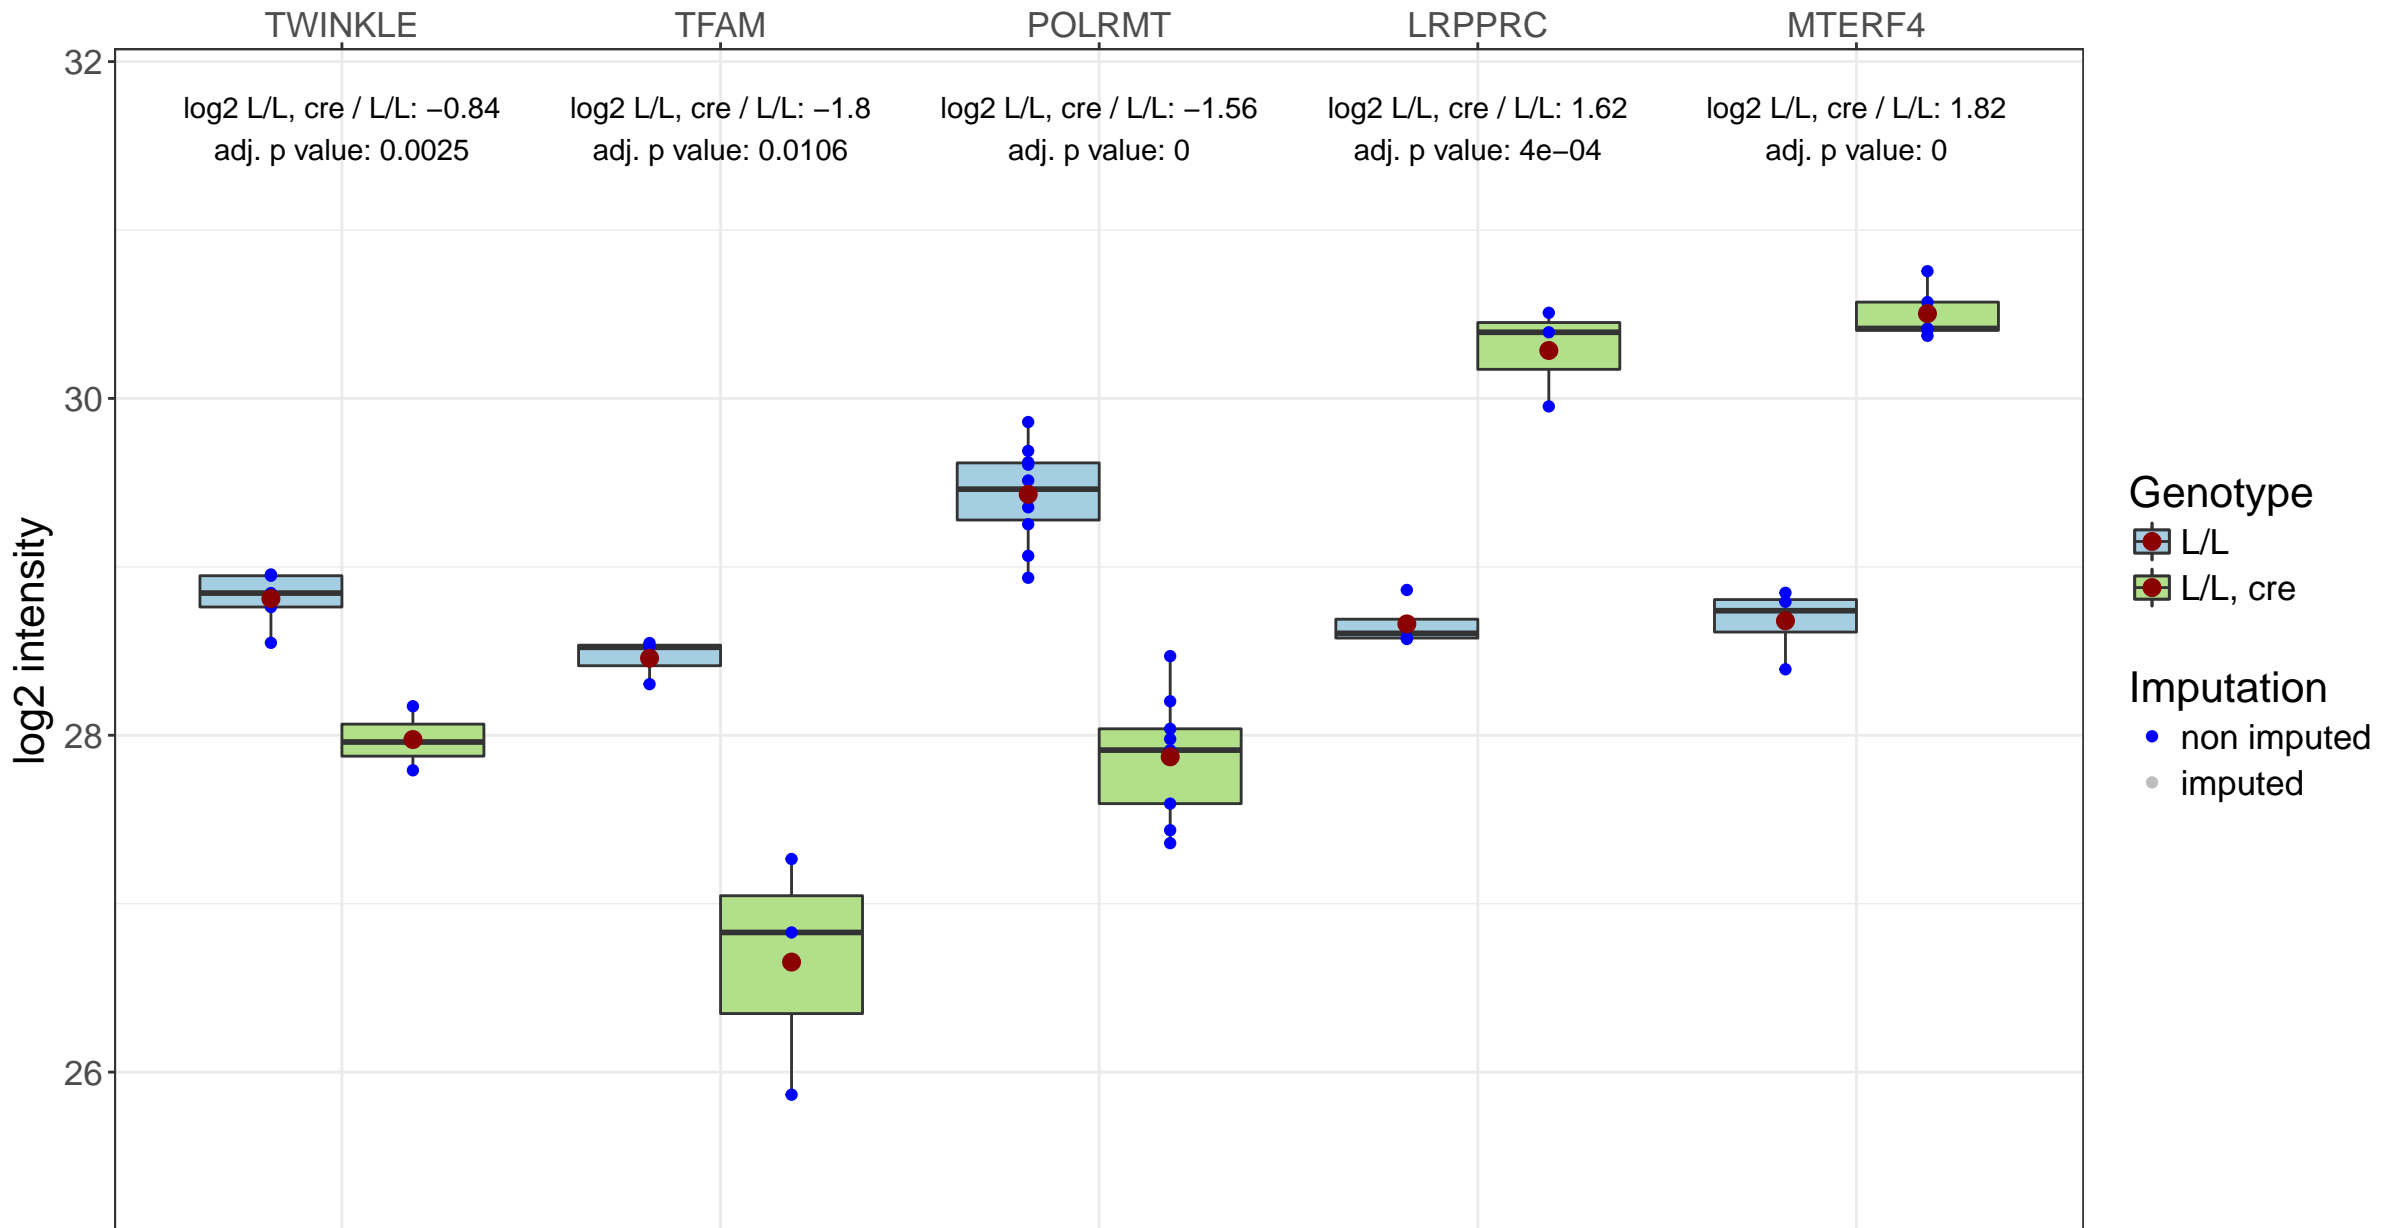

# MRPS7 / Q80X85

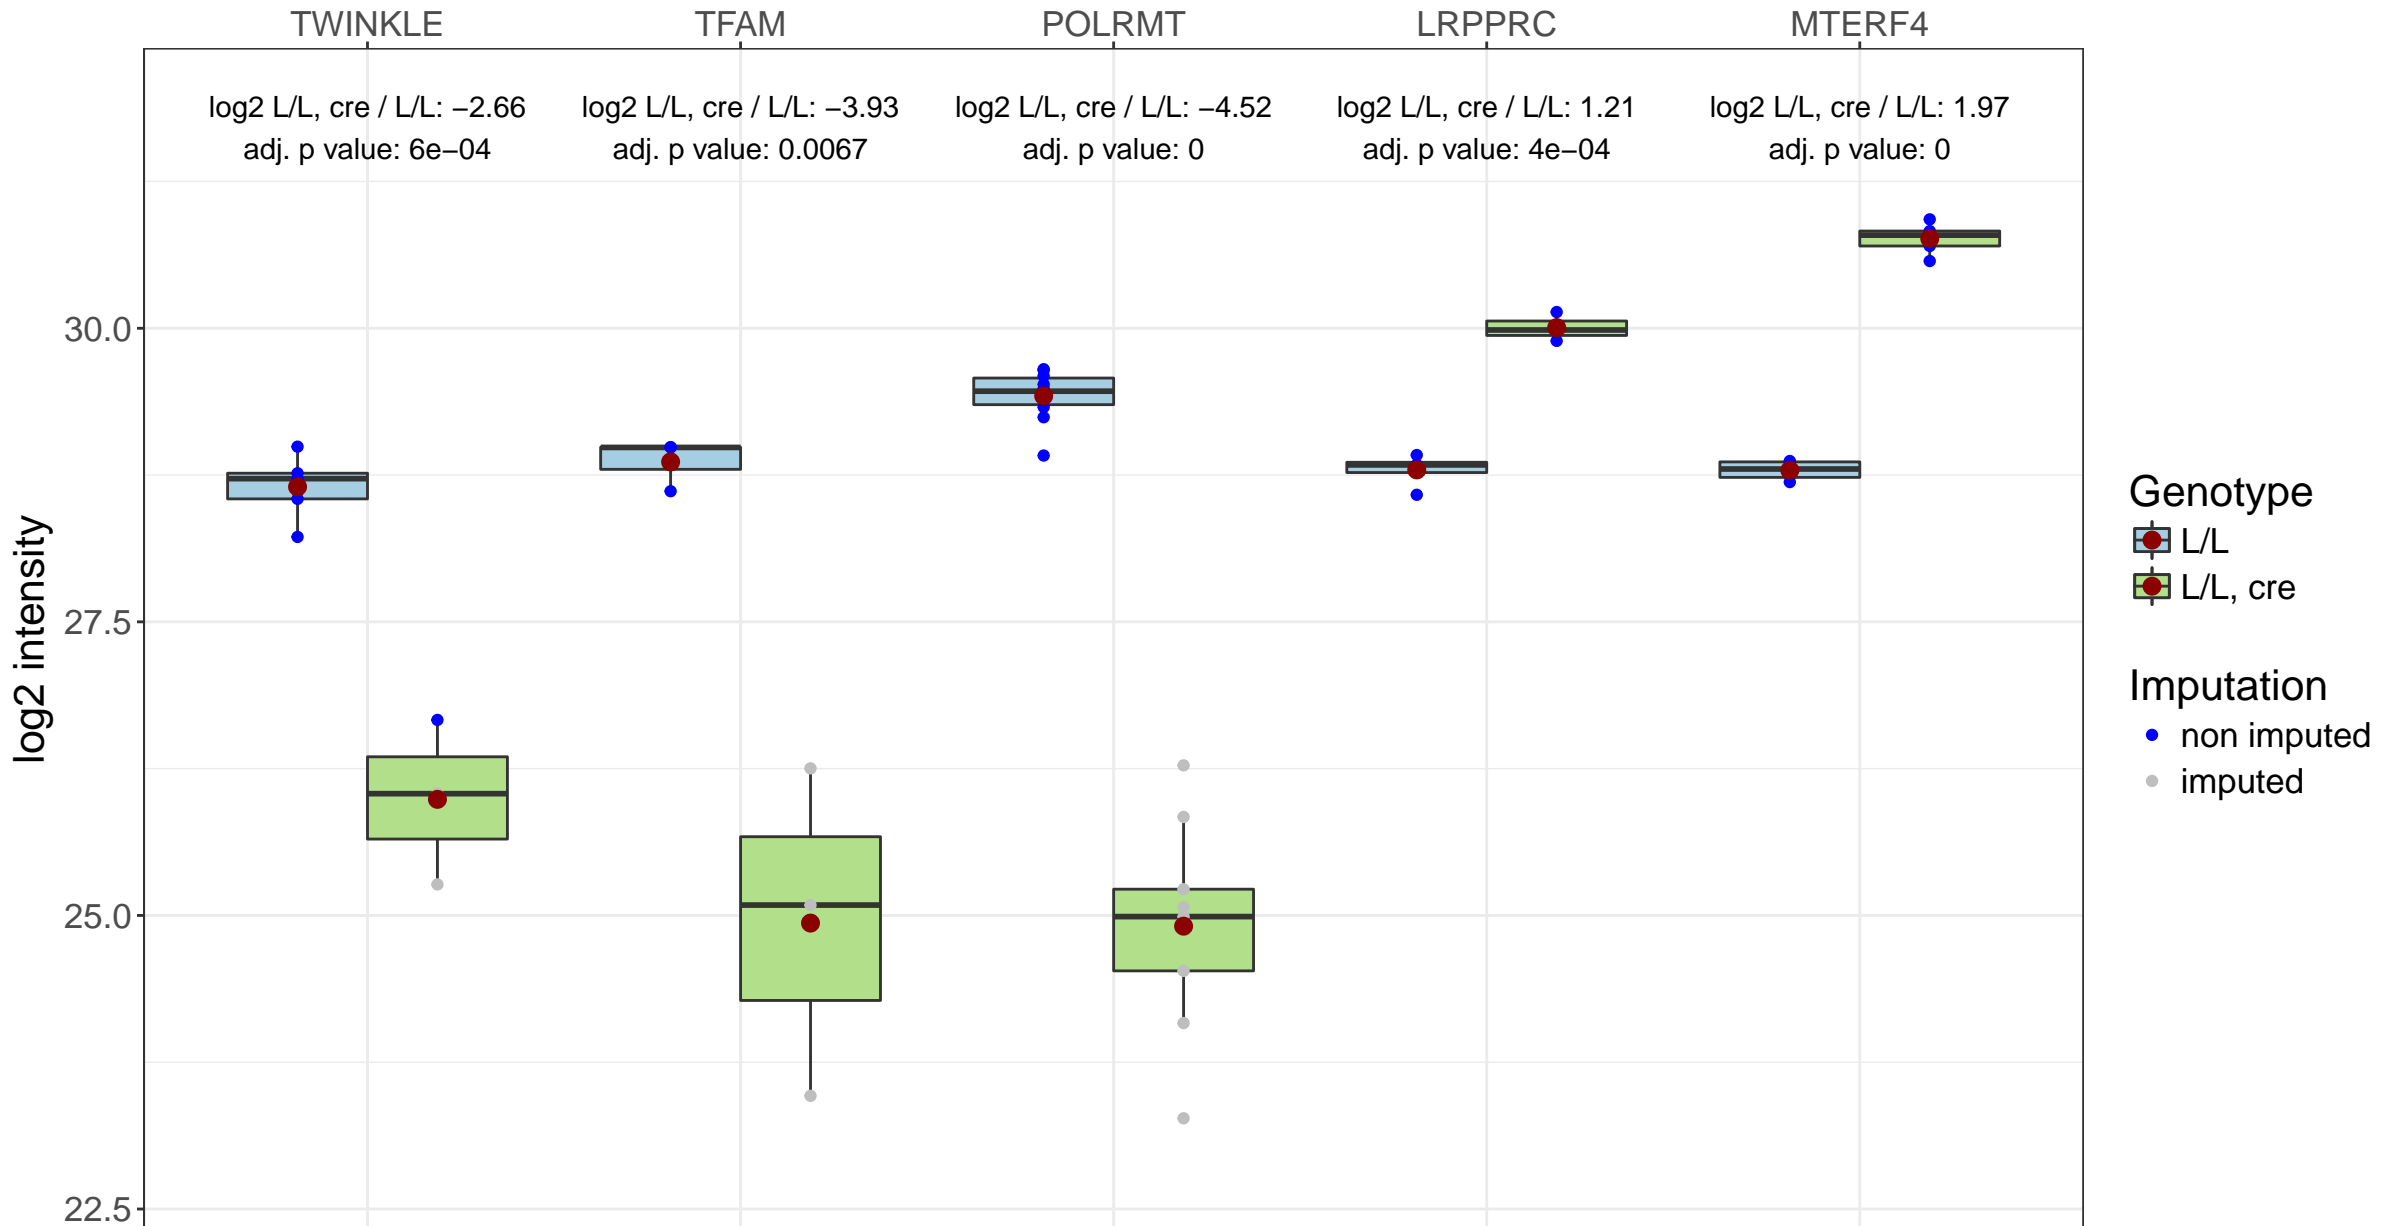

# MRPS9 / Q9D7N3

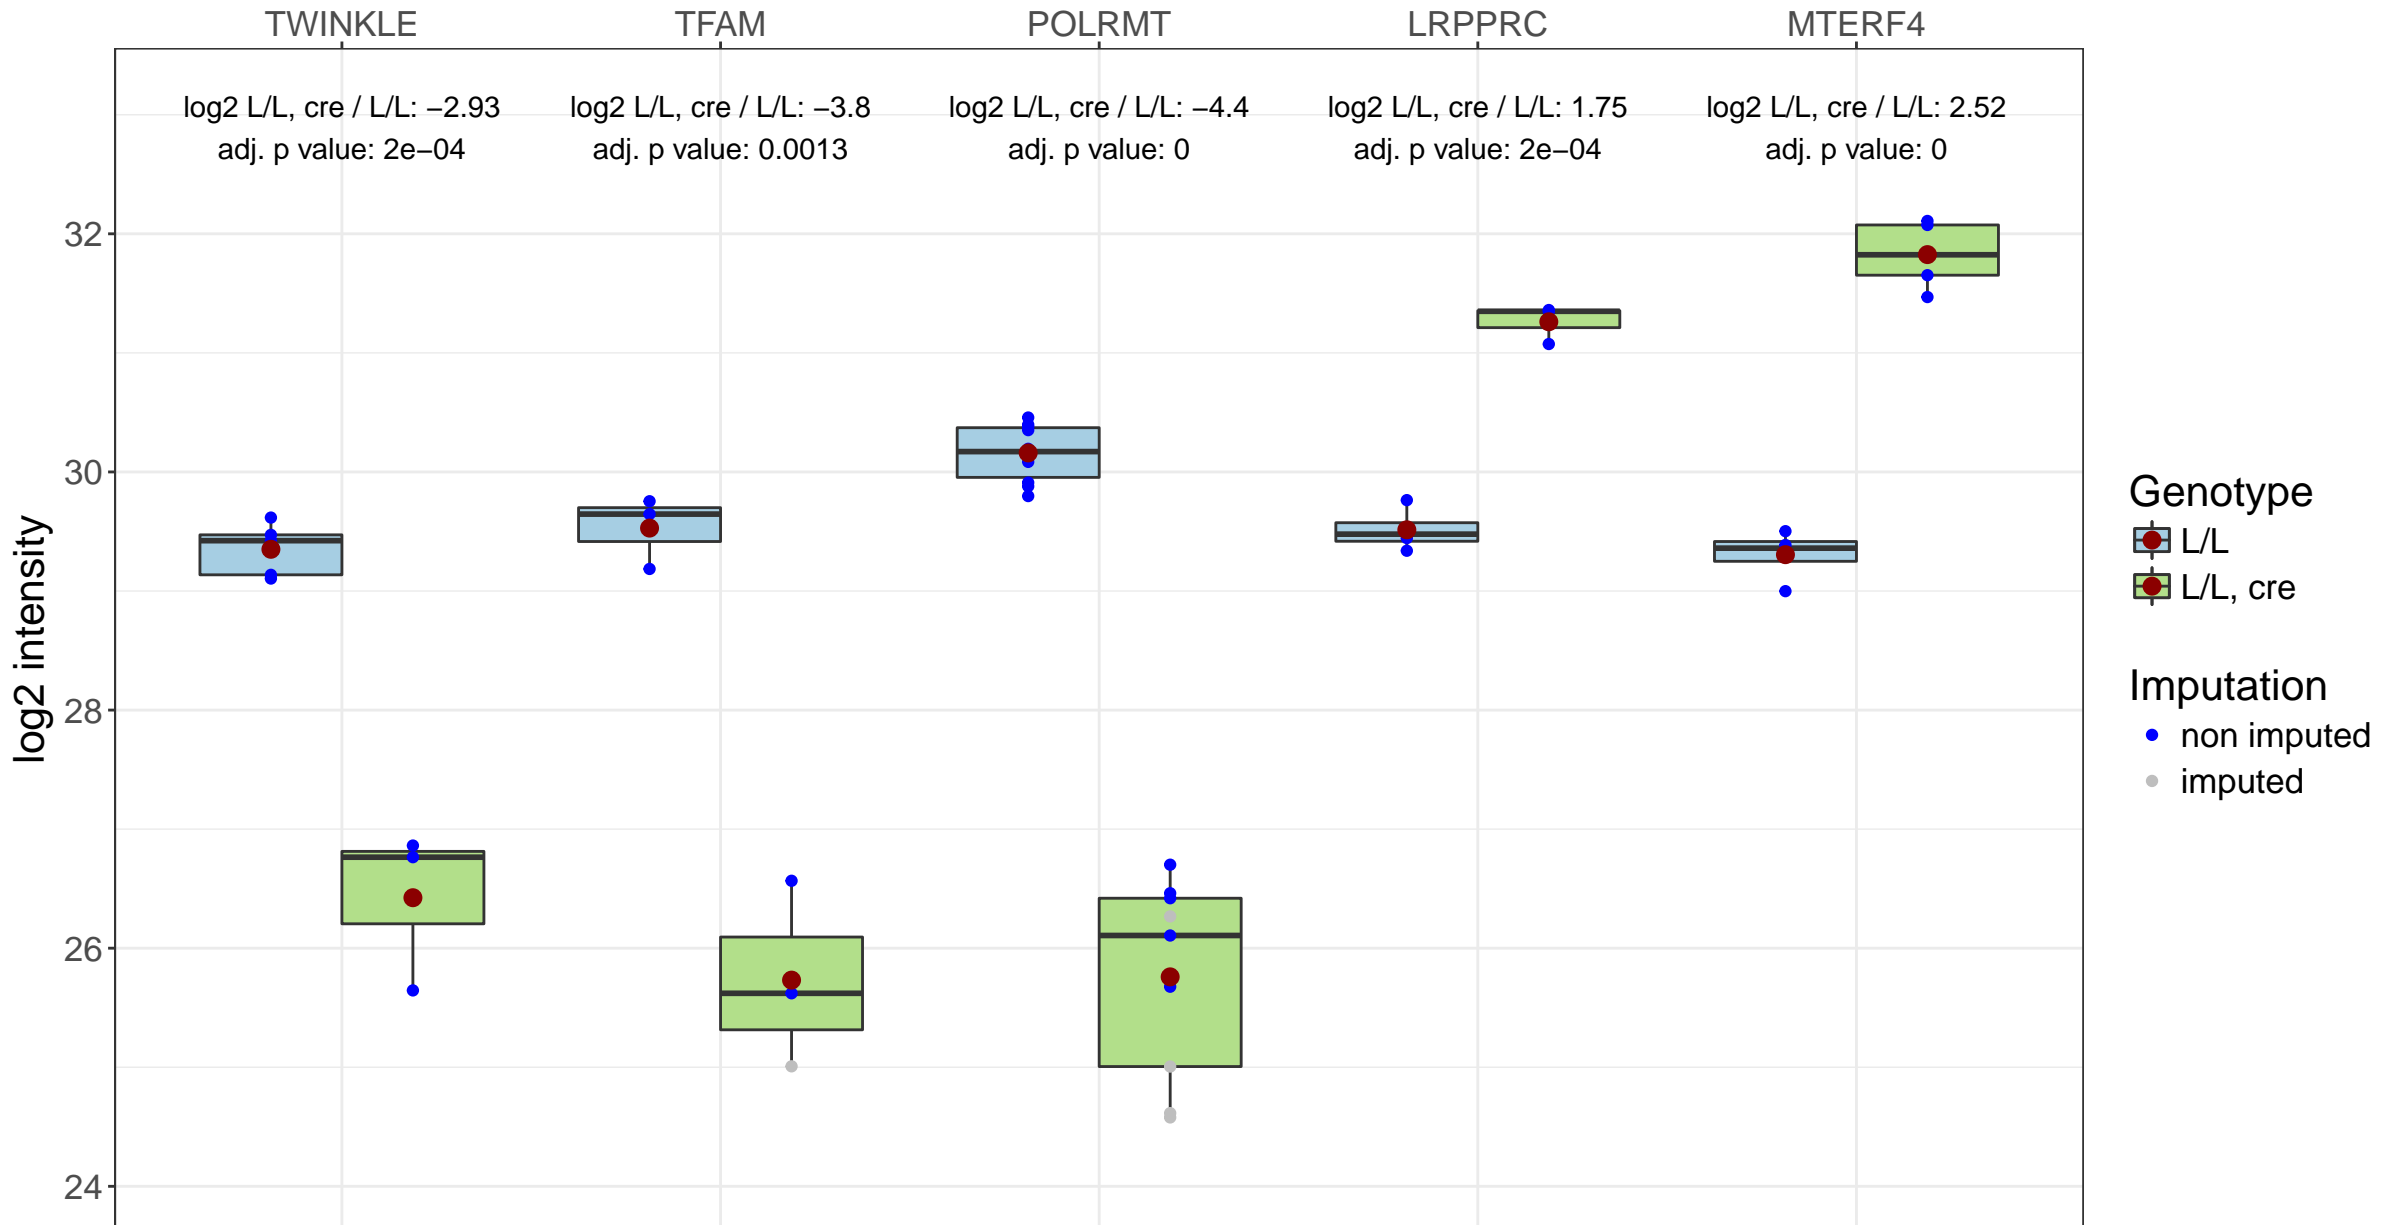

# MRRF / Q9D6S7

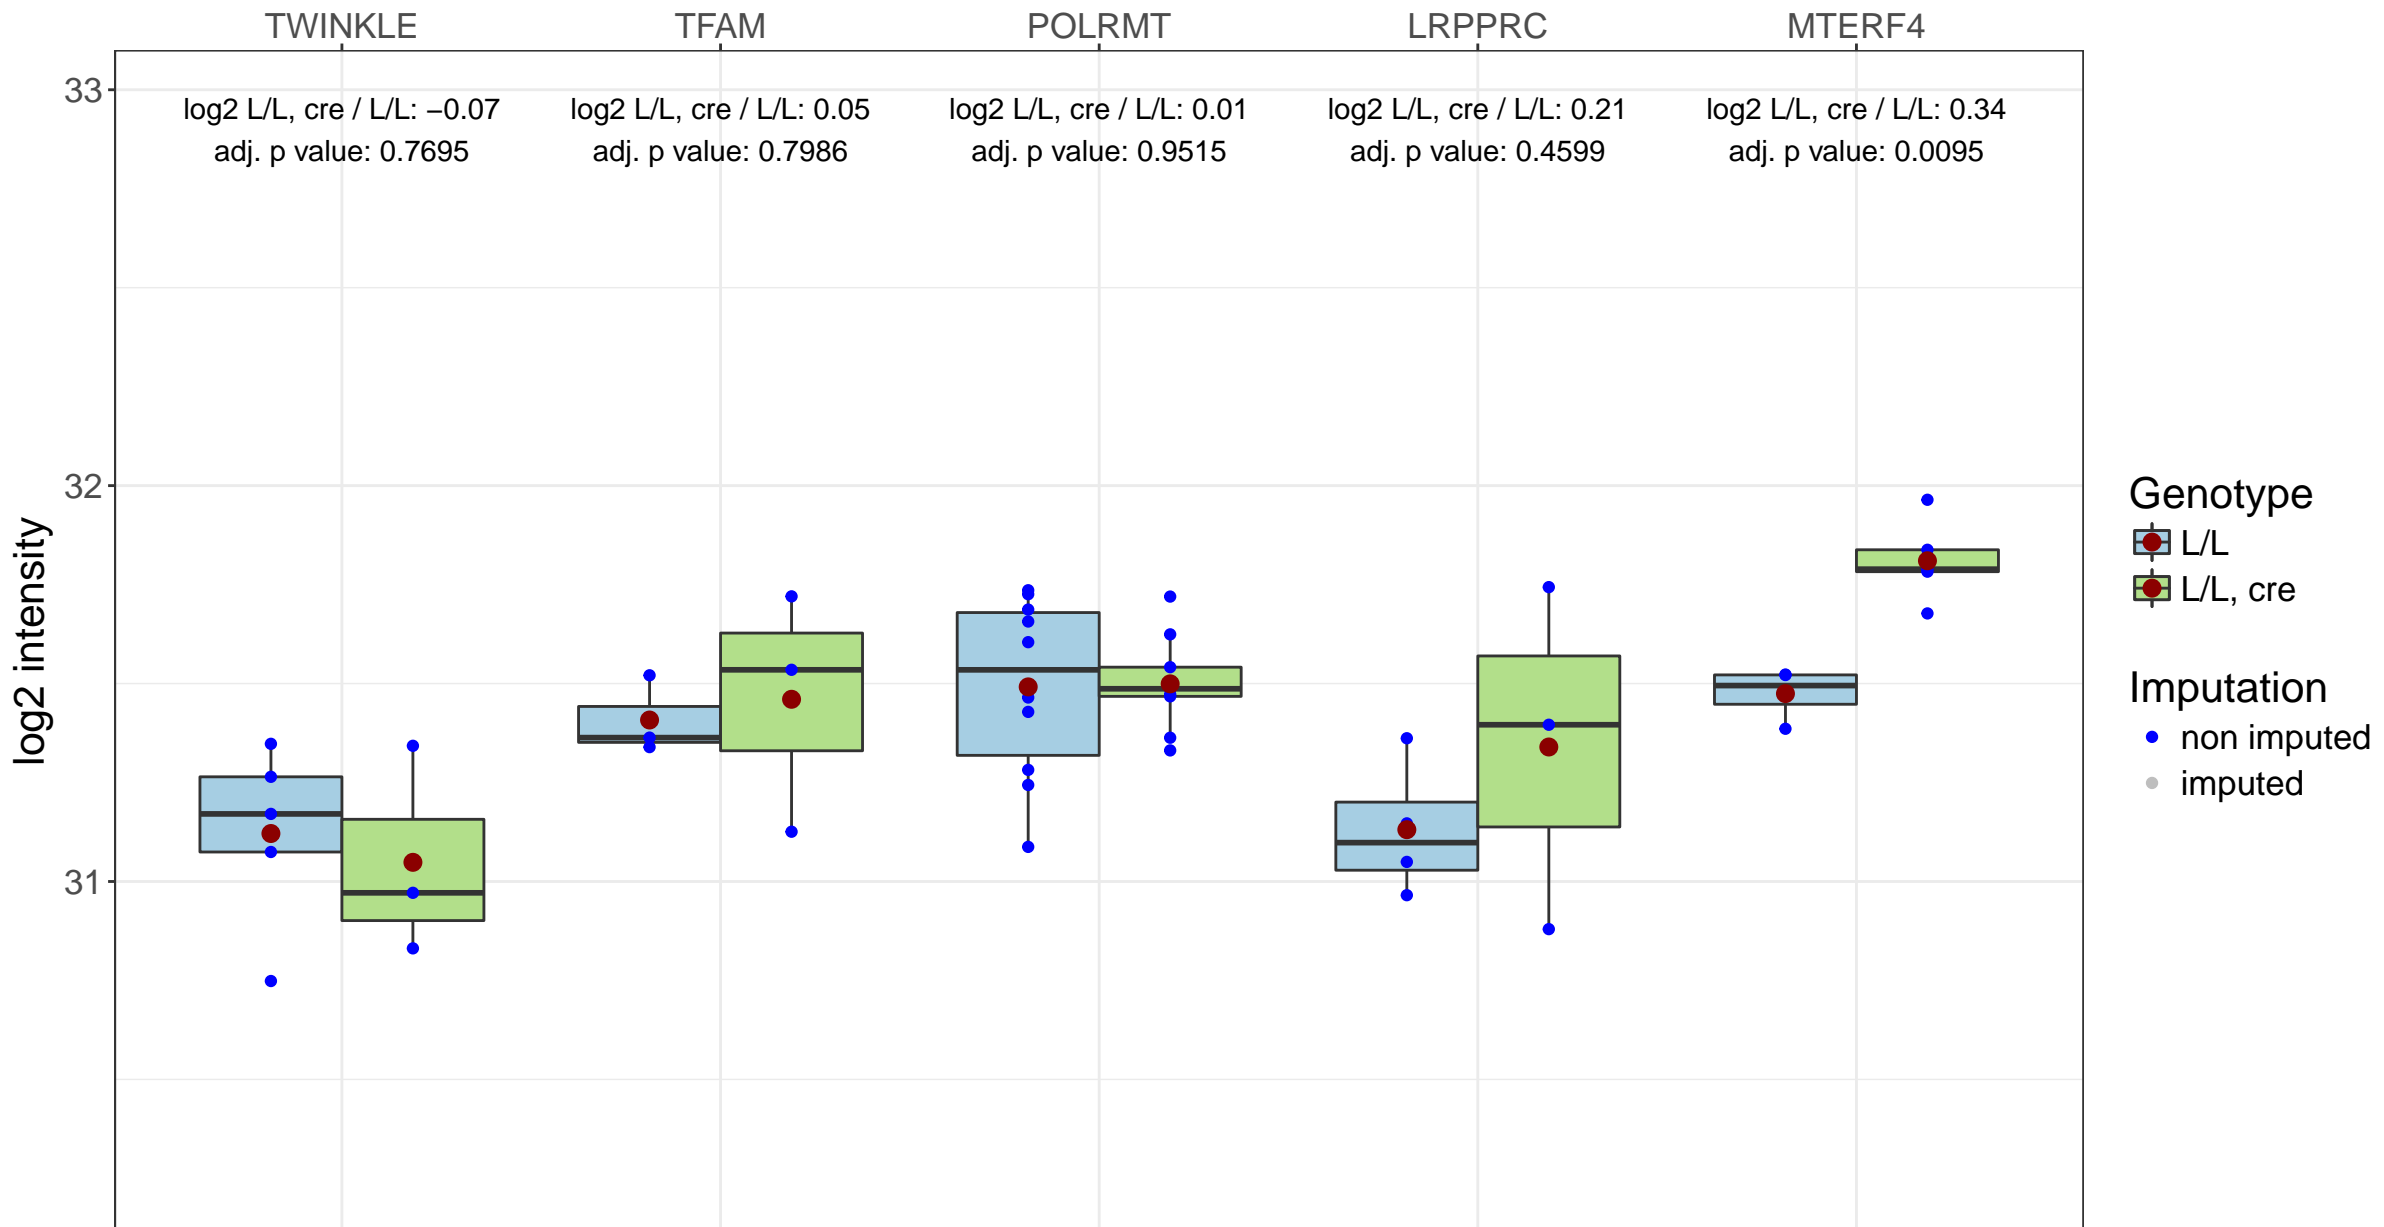

# MRS2 / Q5NCE8

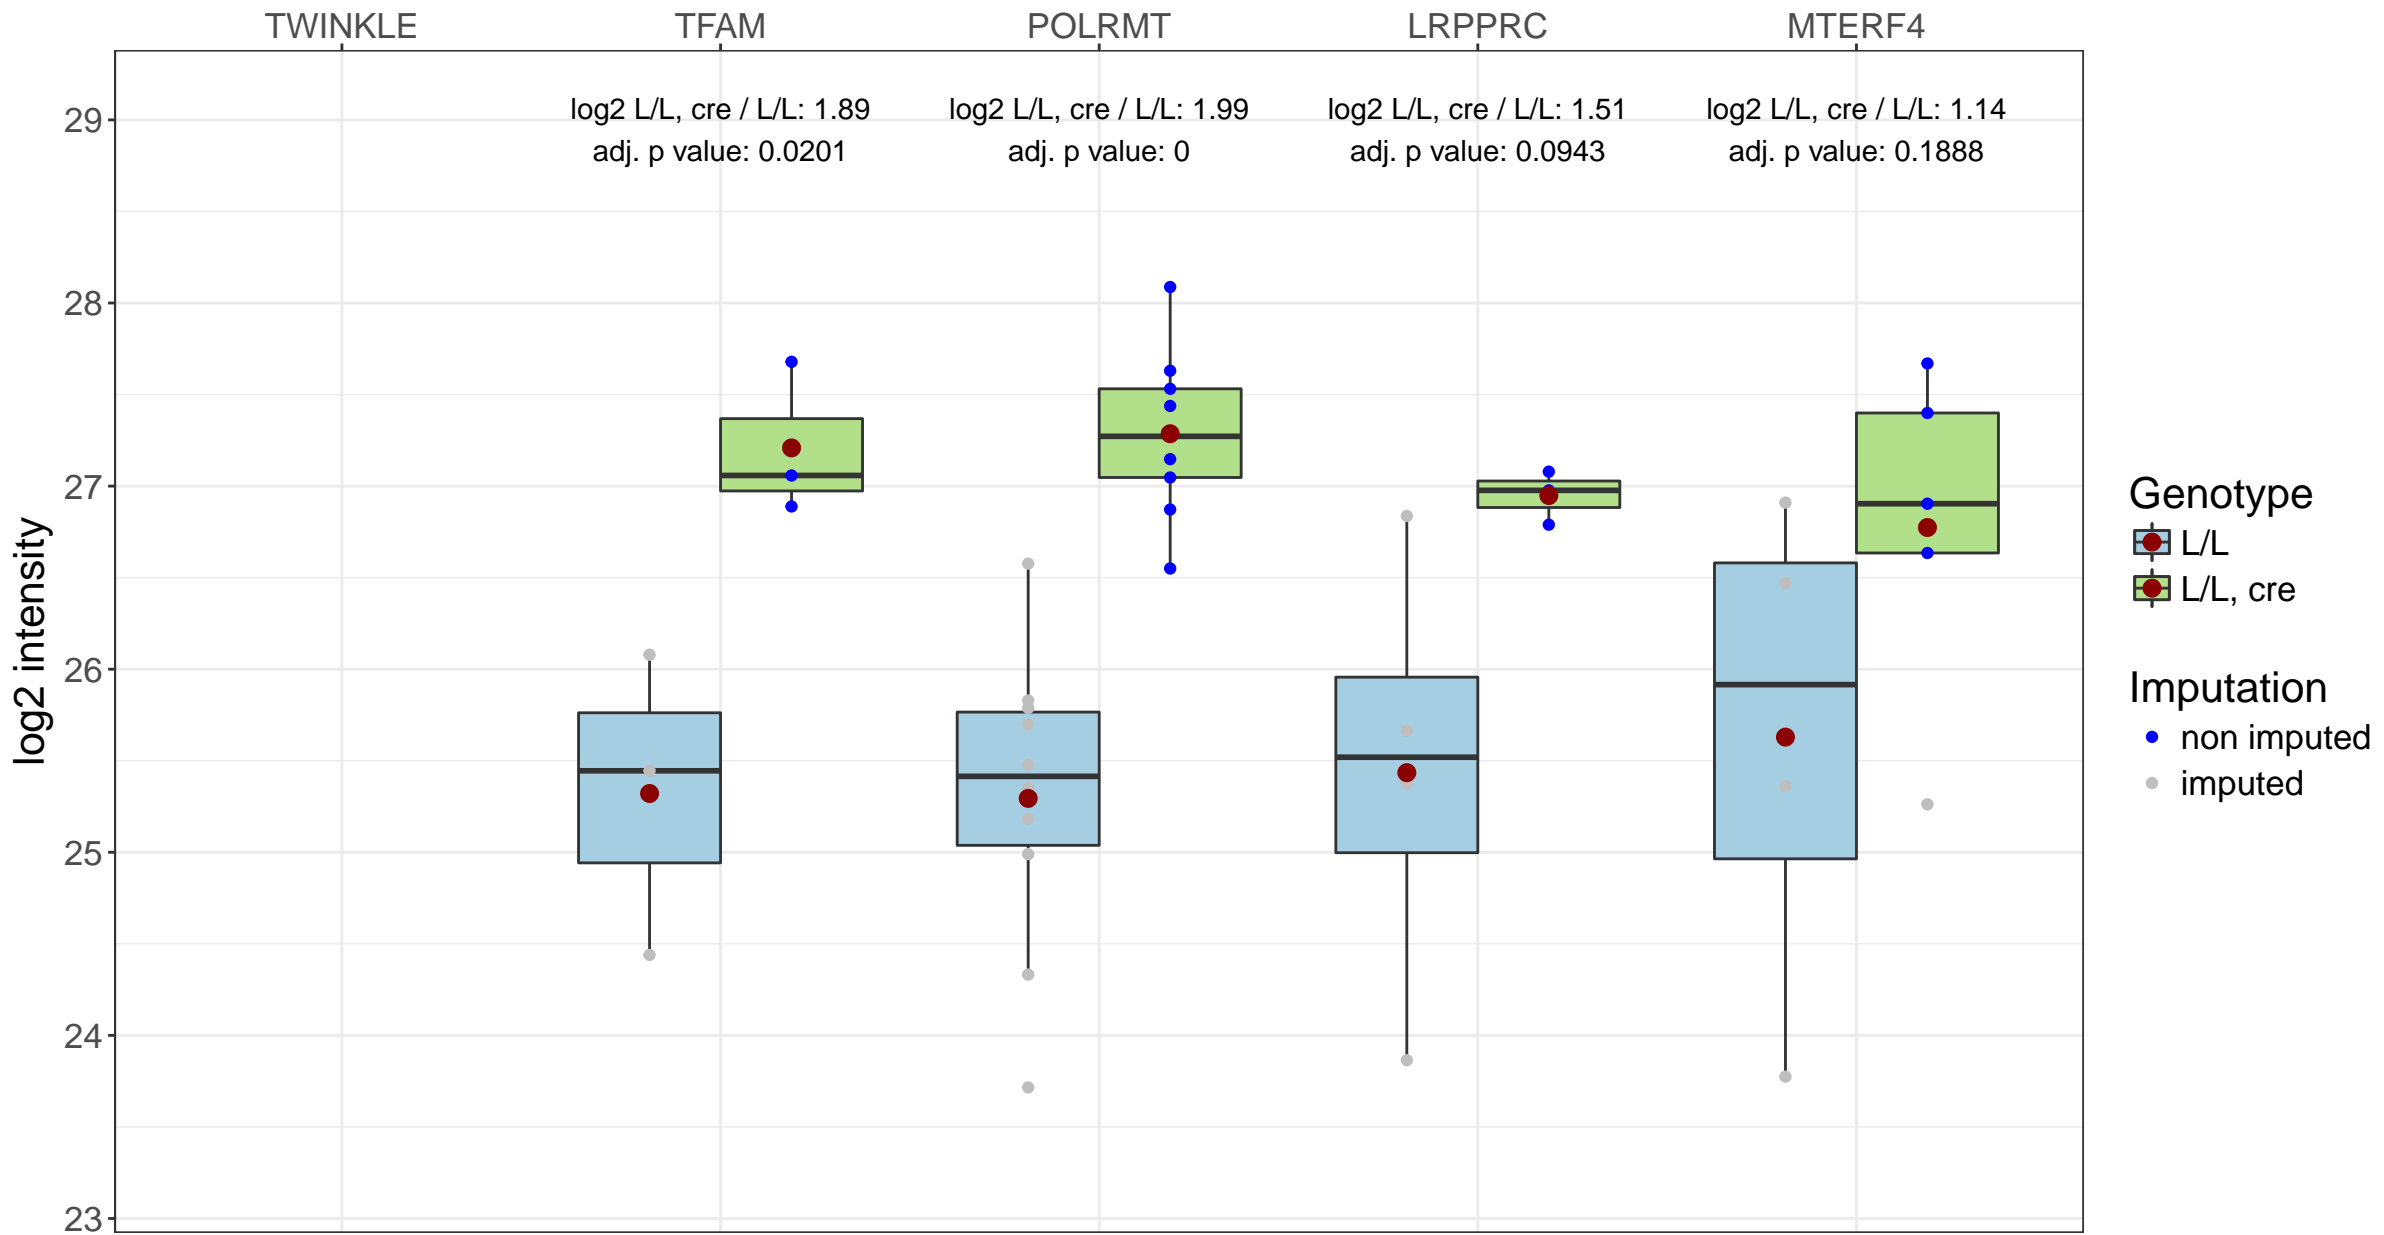

# MSN / P26041

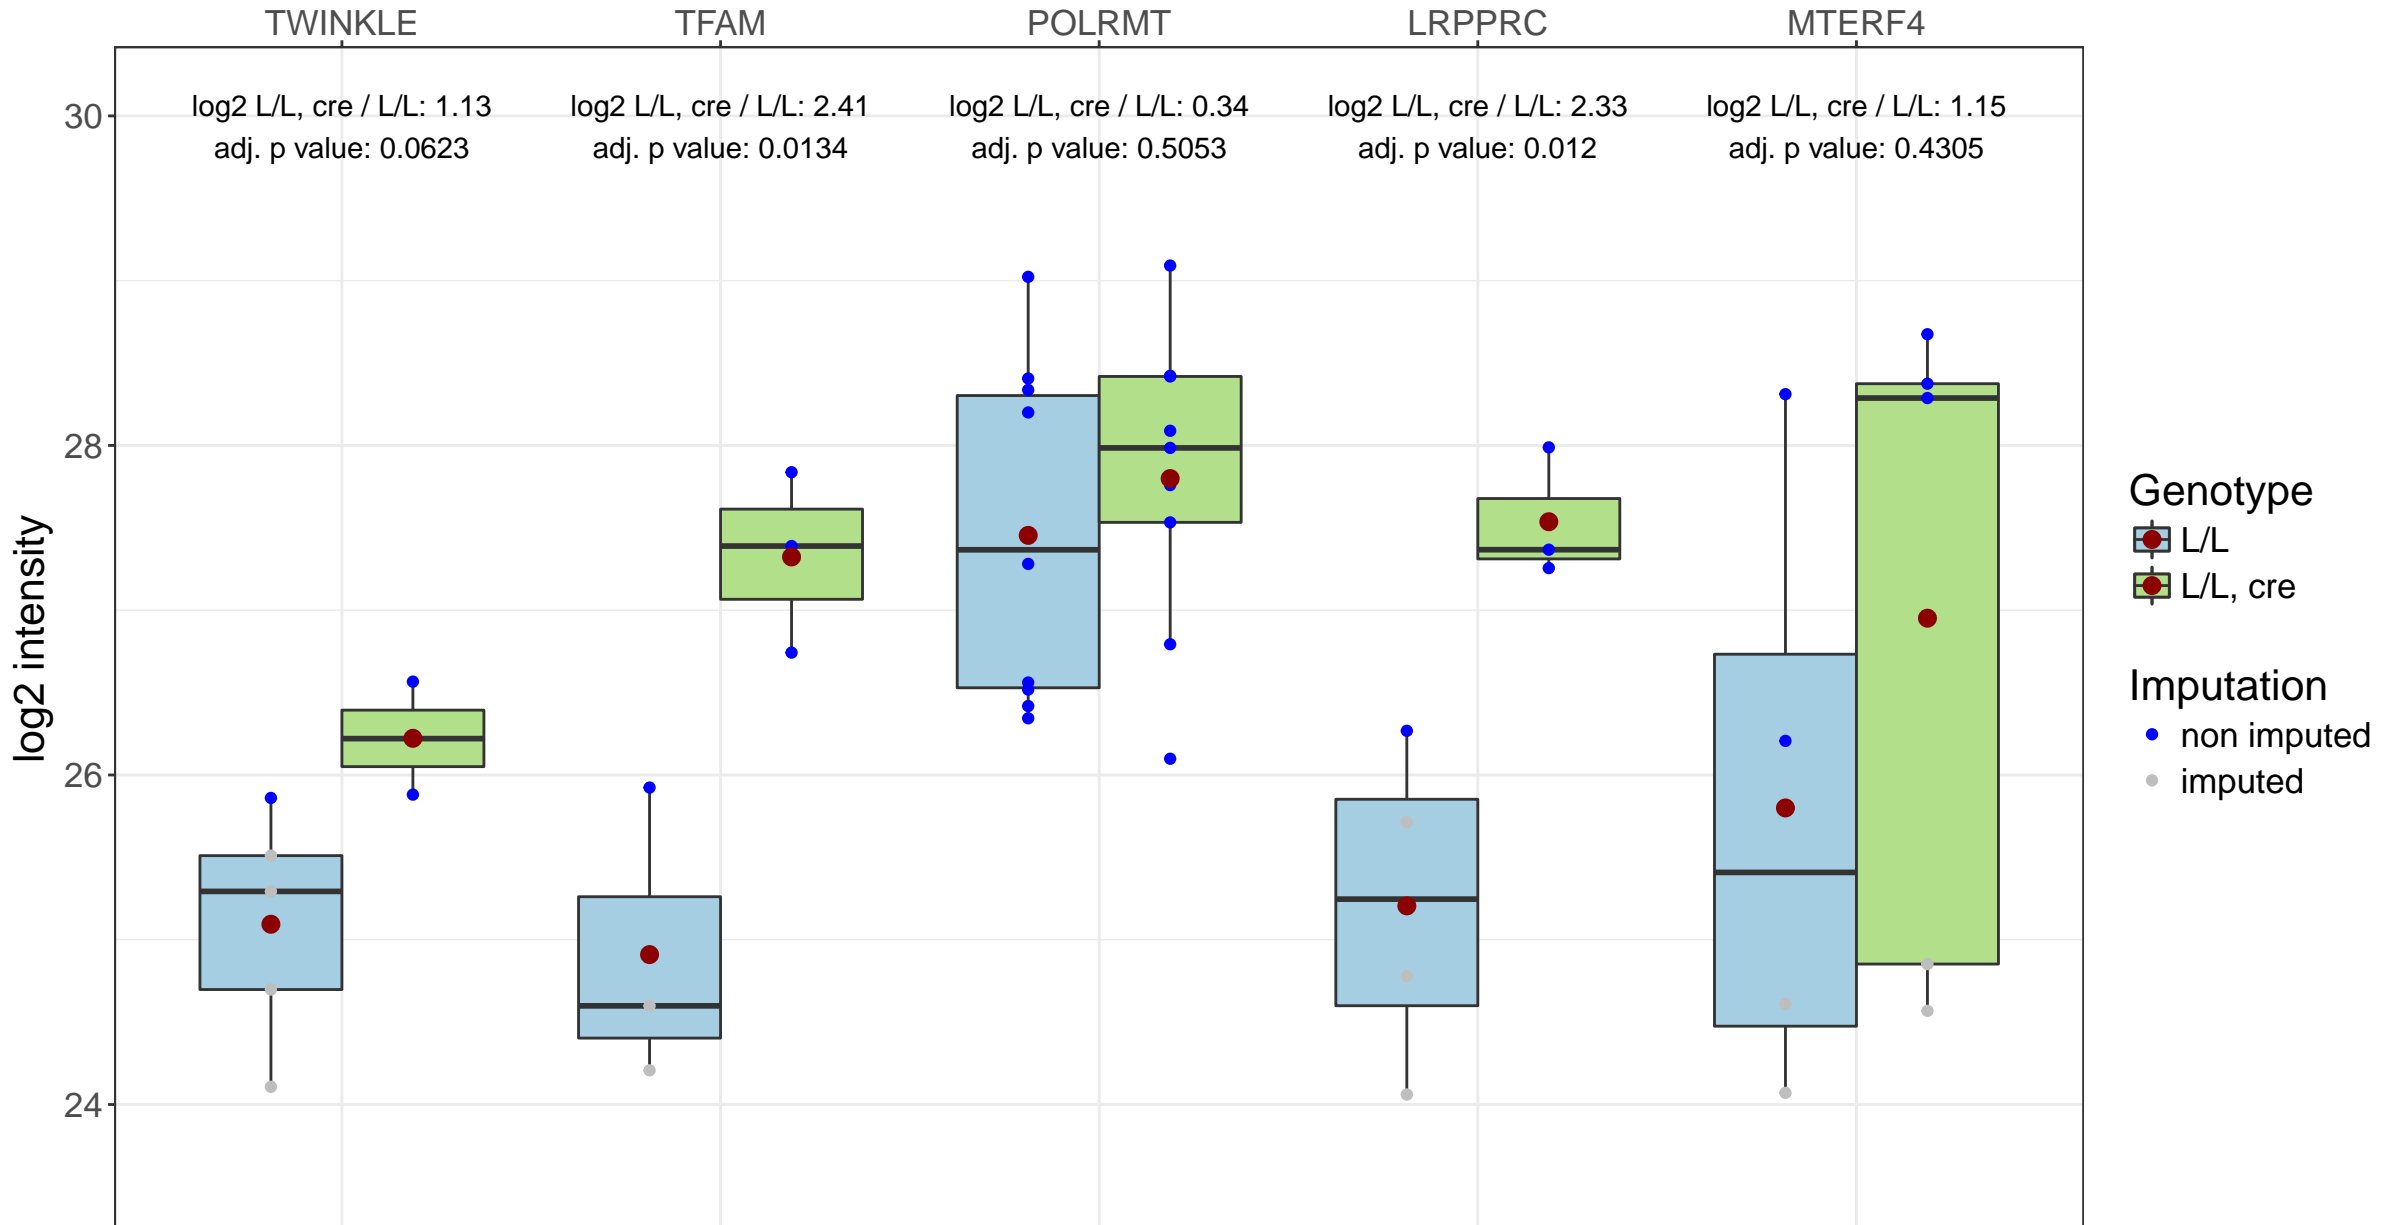



# MSRA / Q9D6Y7-2

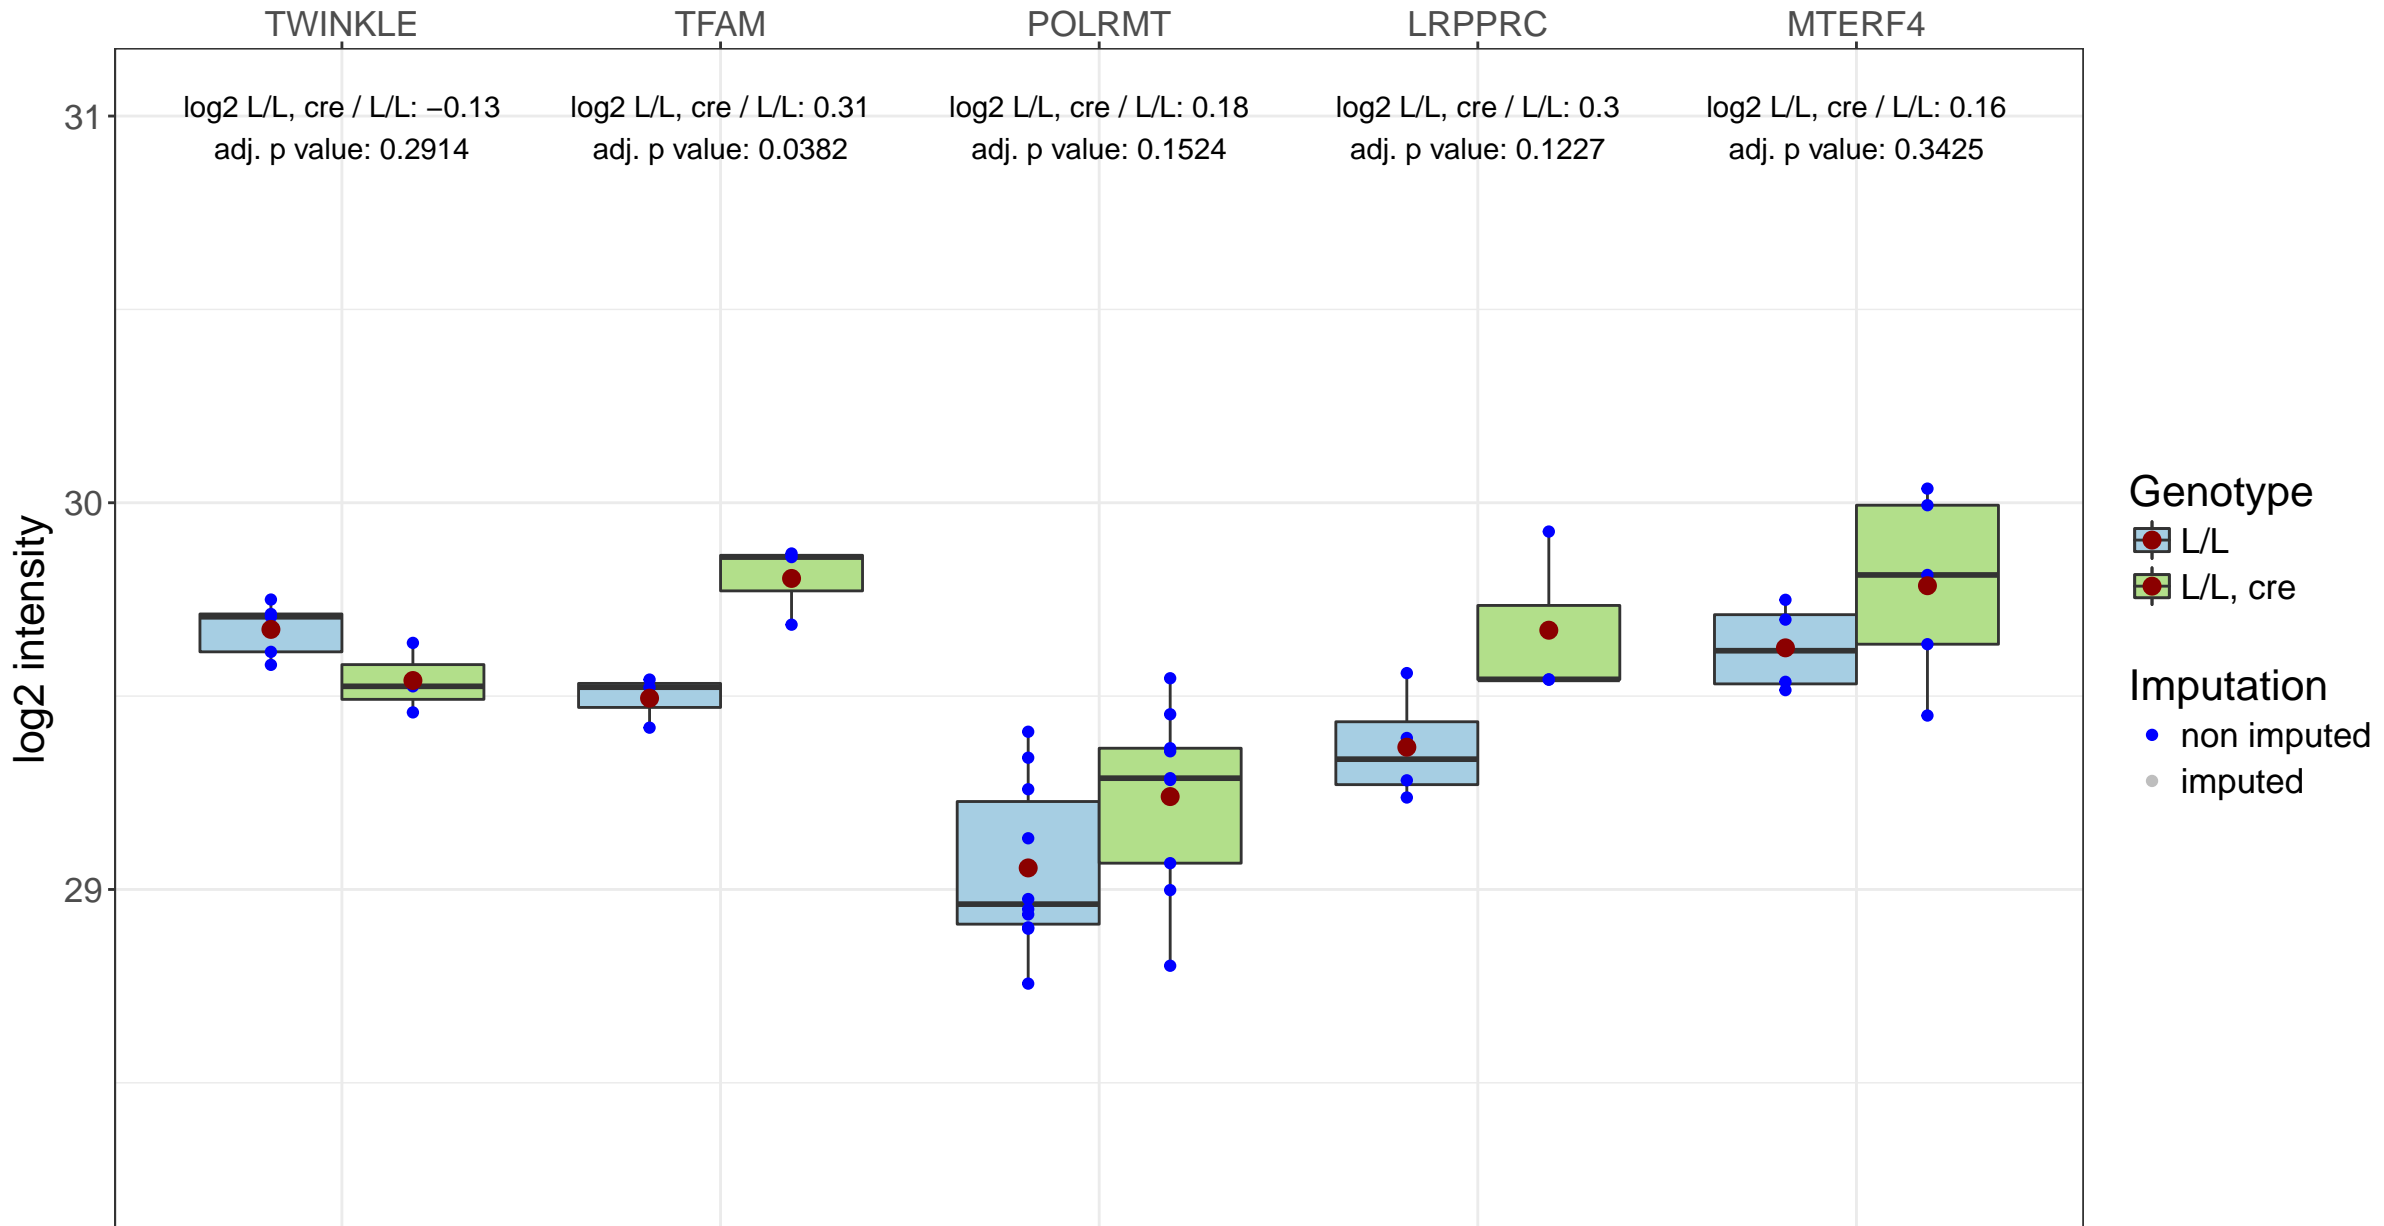

# MSRB2 / Q78J03

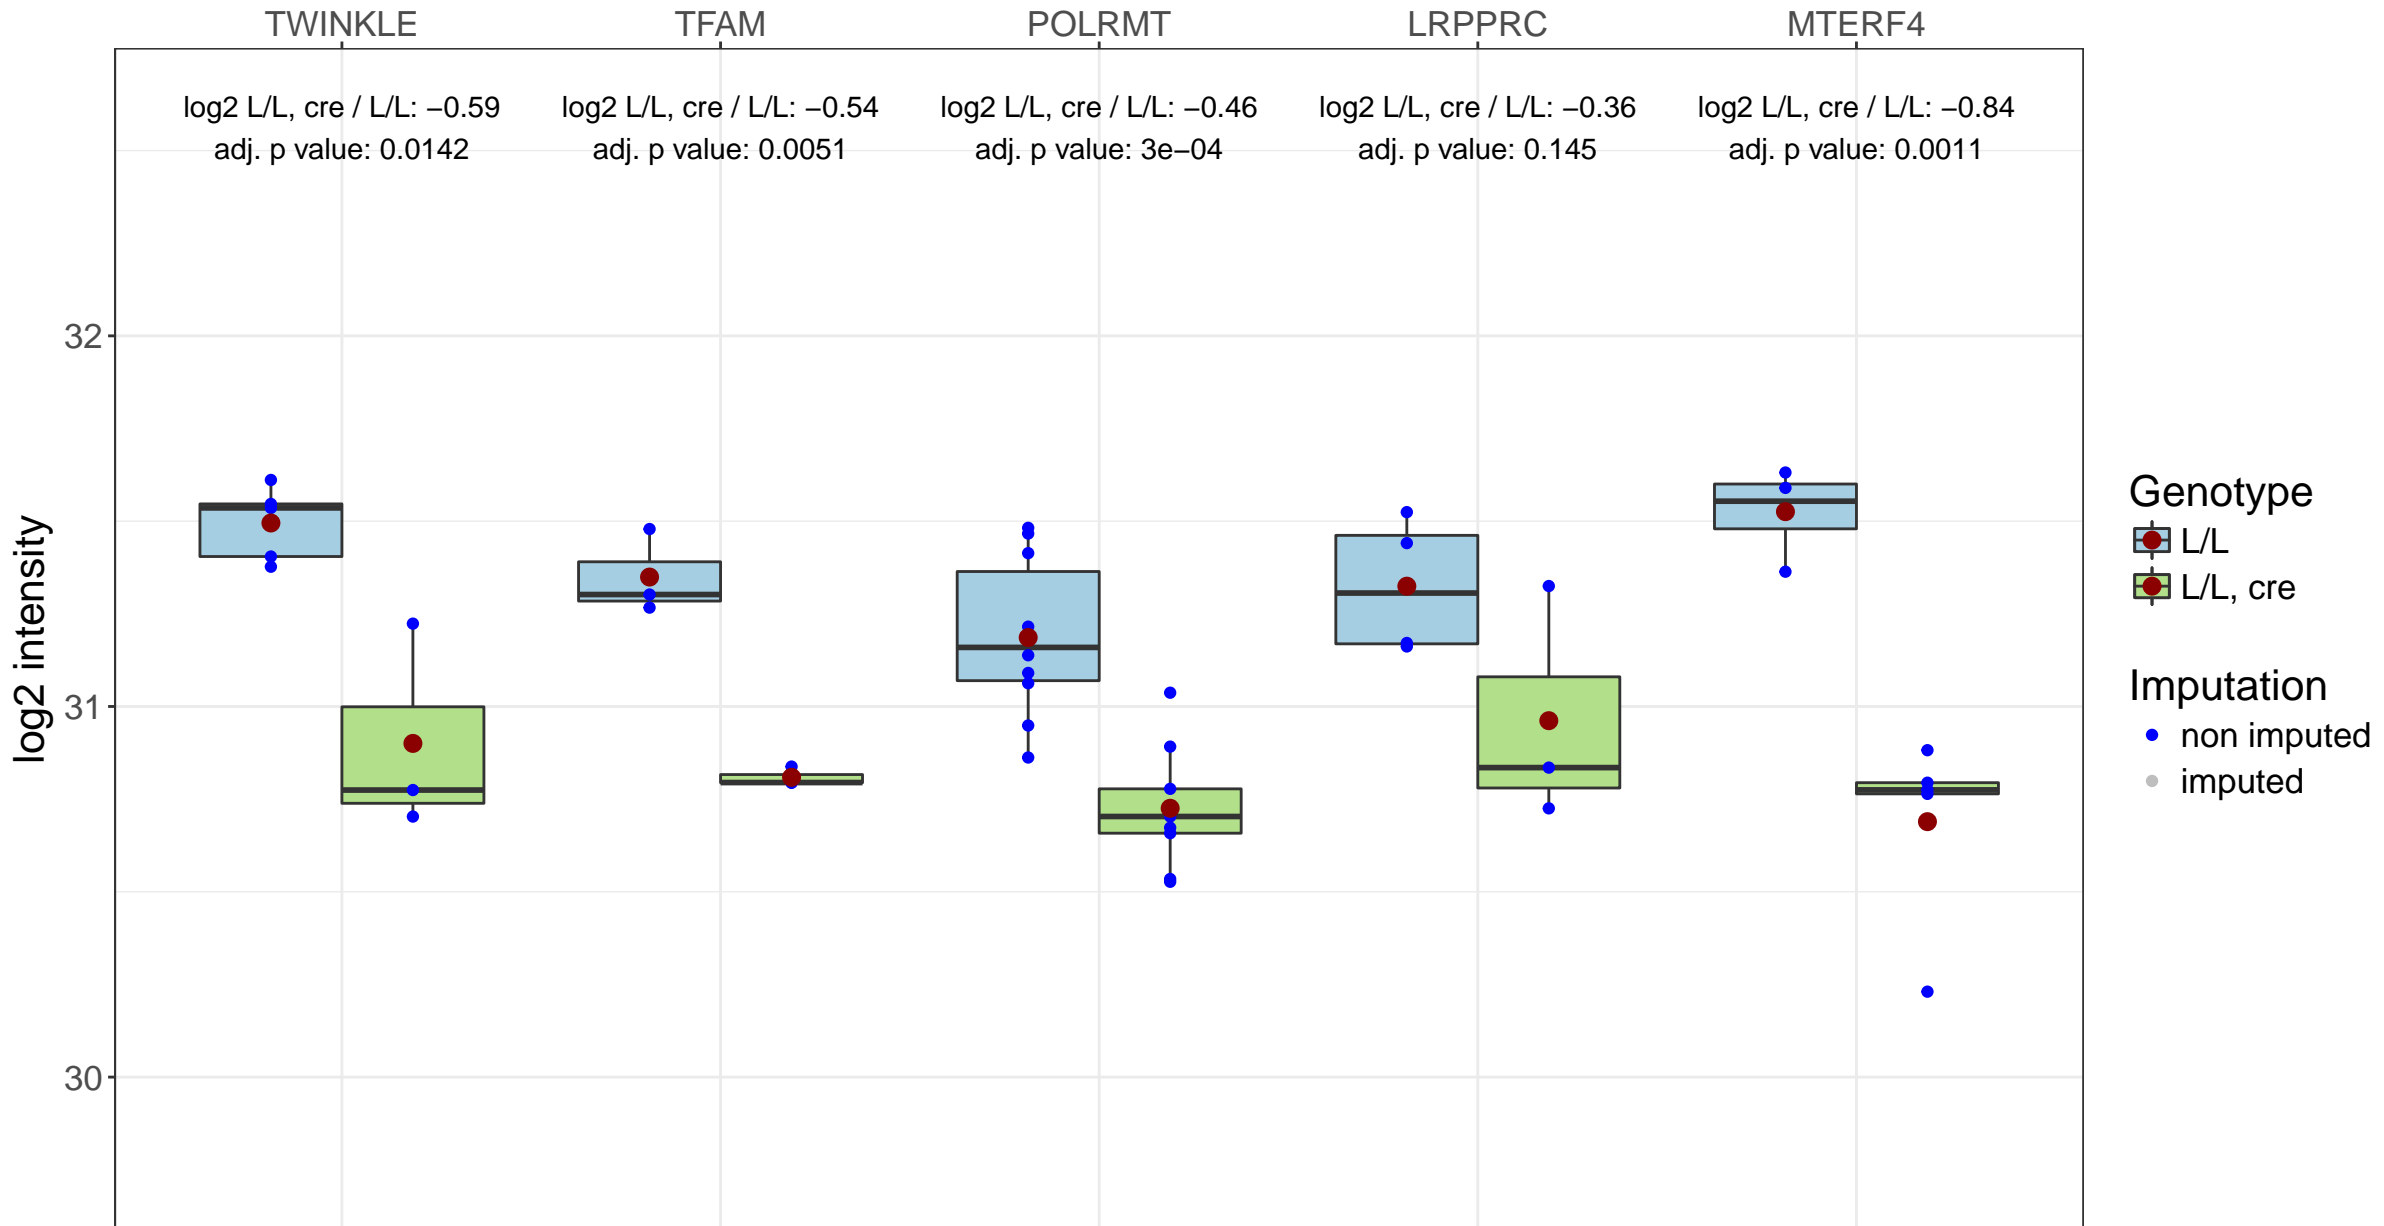

# MT-ATP6 / Q7JCY9

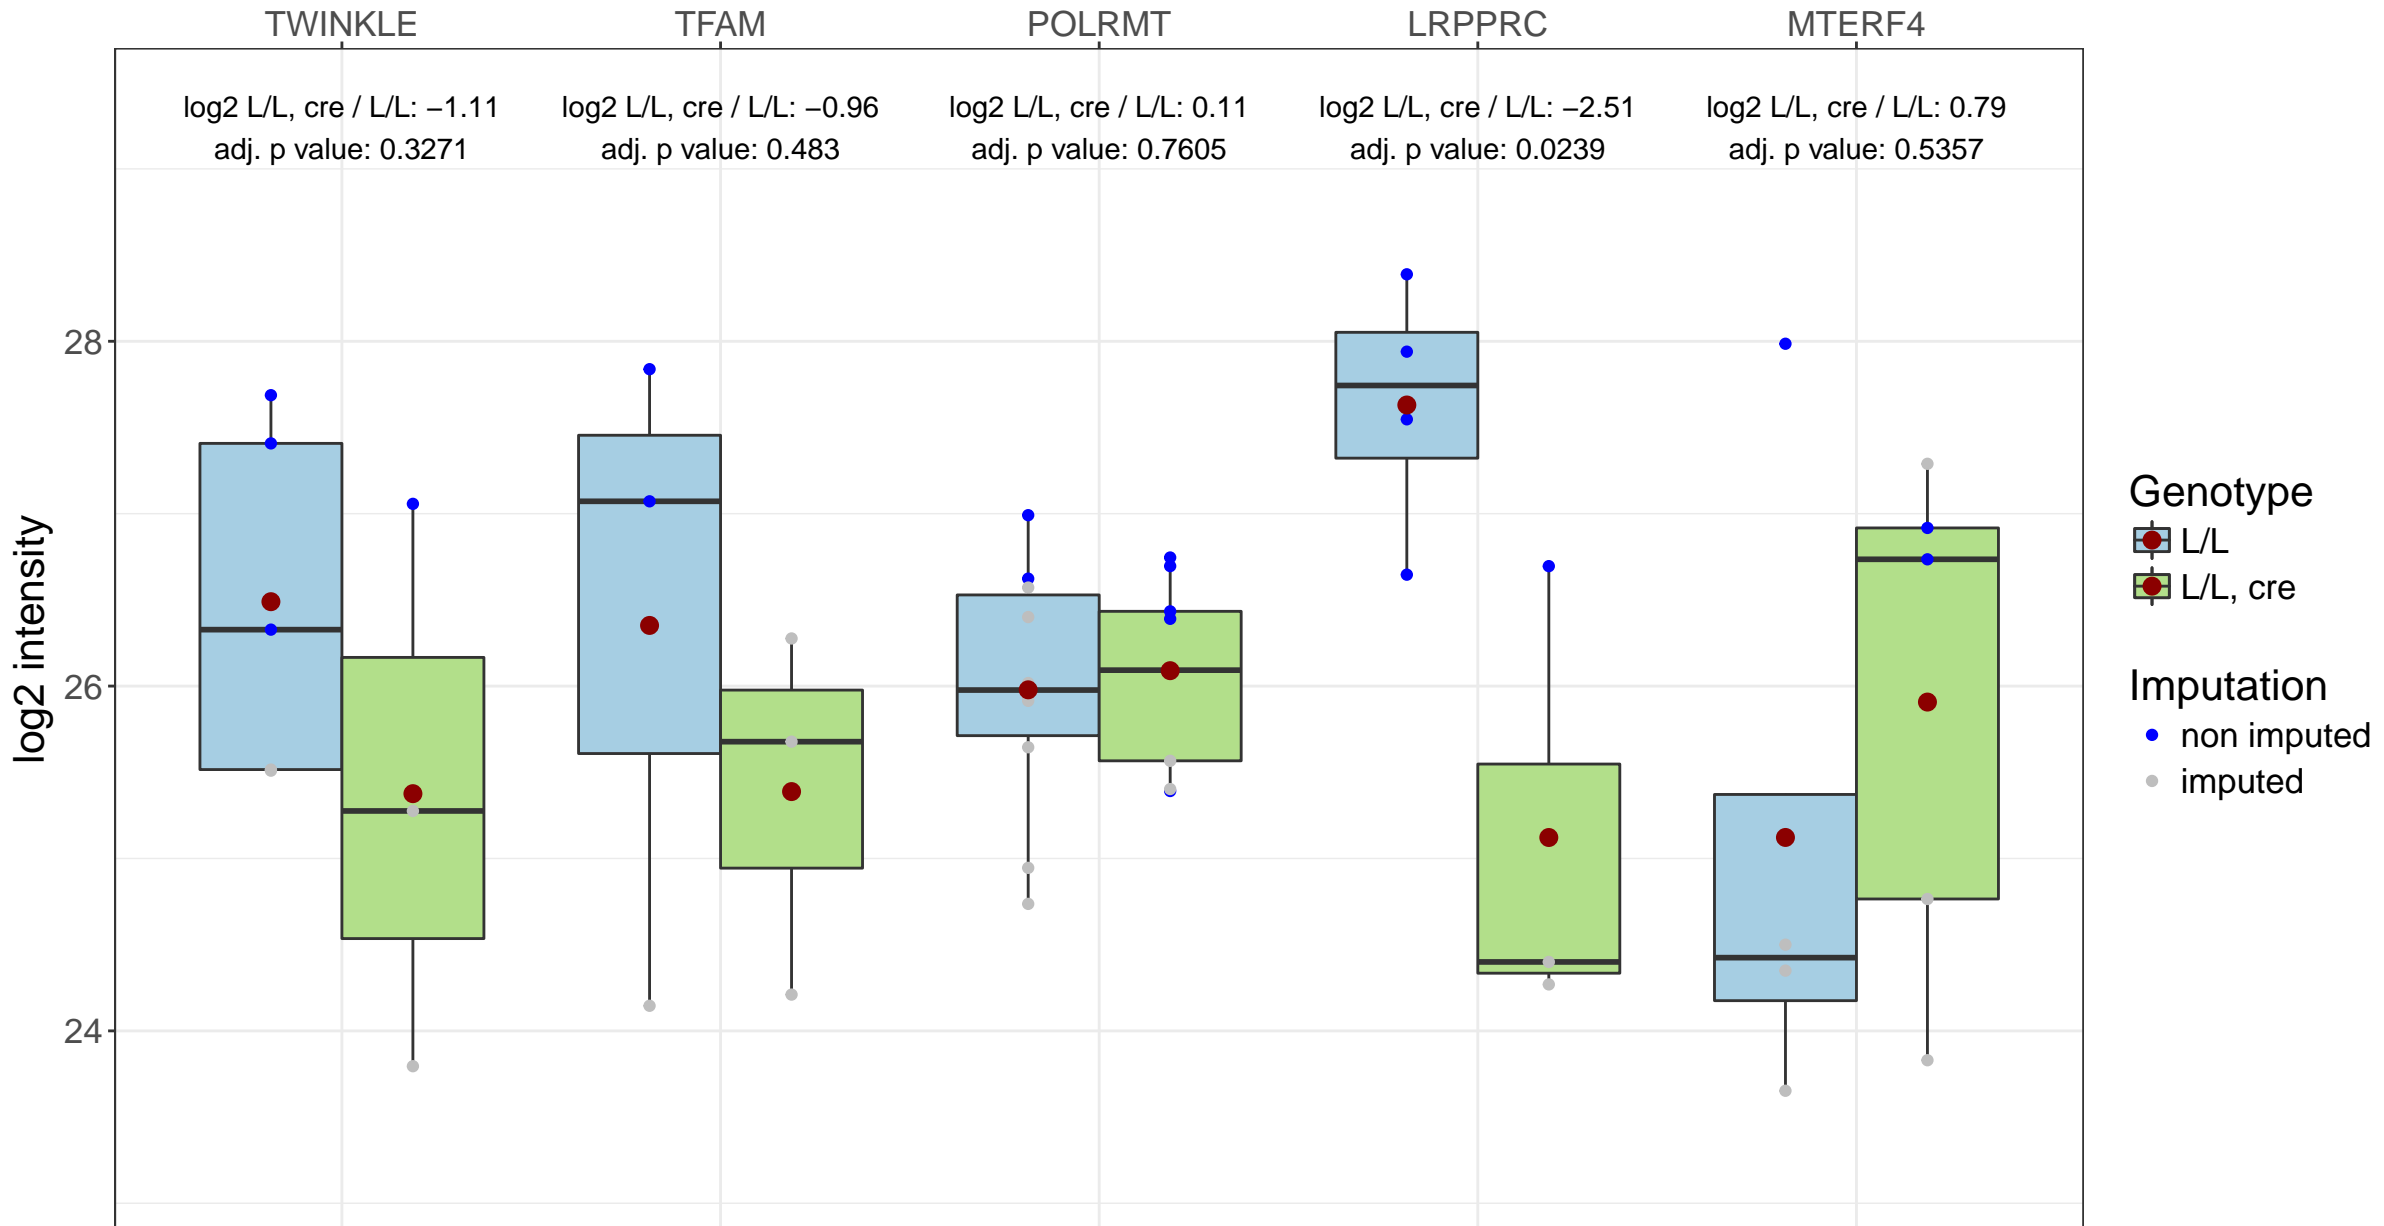

# MT-ATP8 / Q7JCZ0

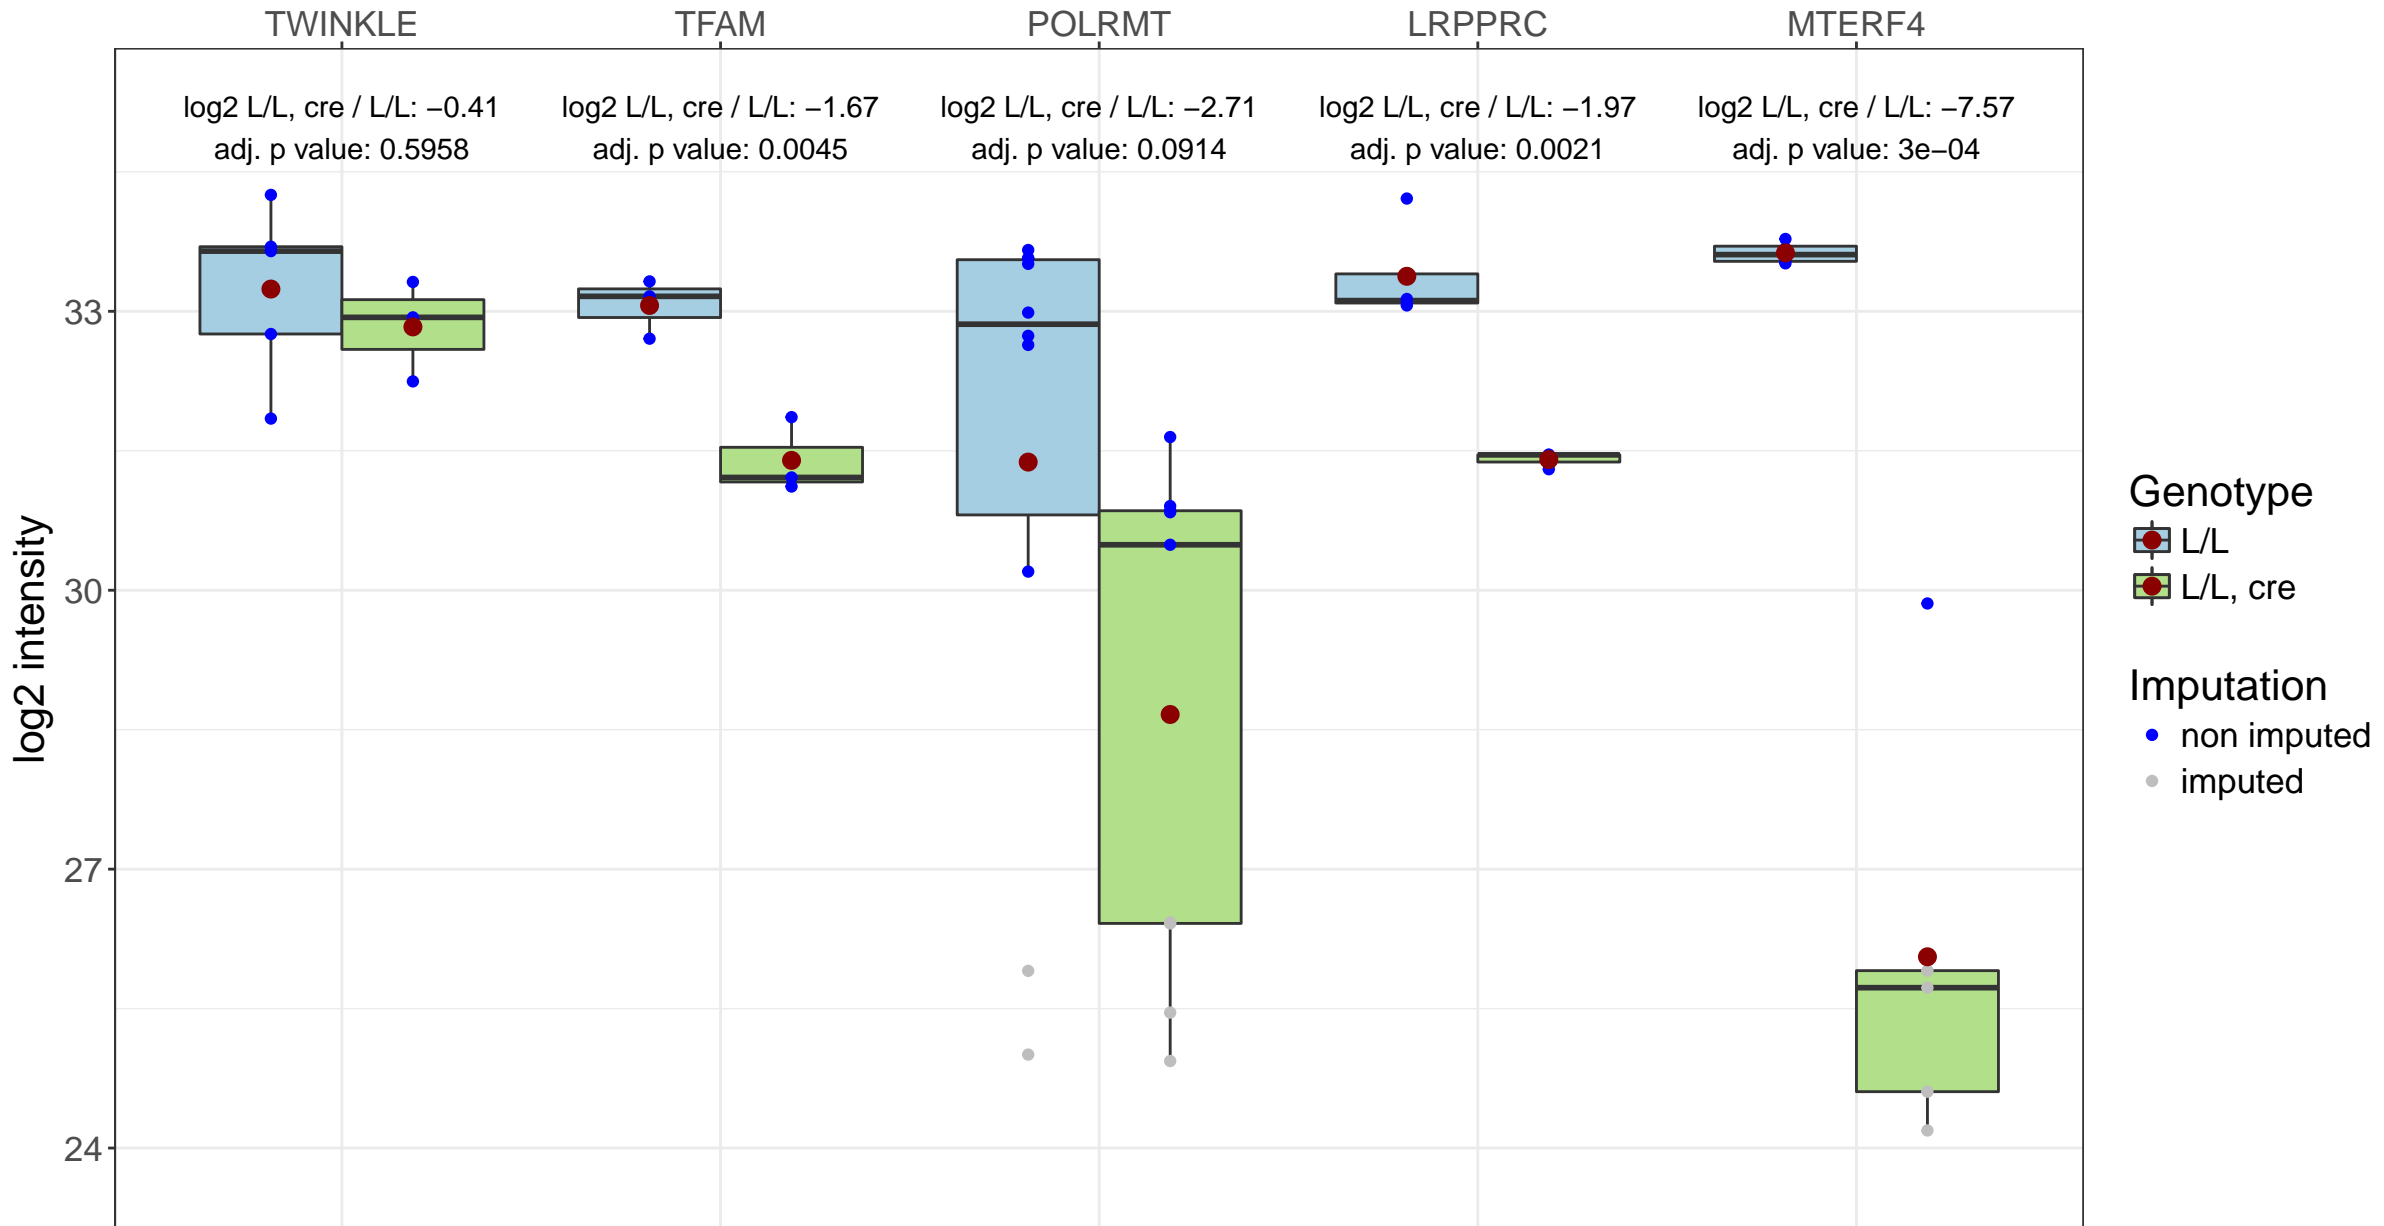

# MT-CO1 / Q9MD68

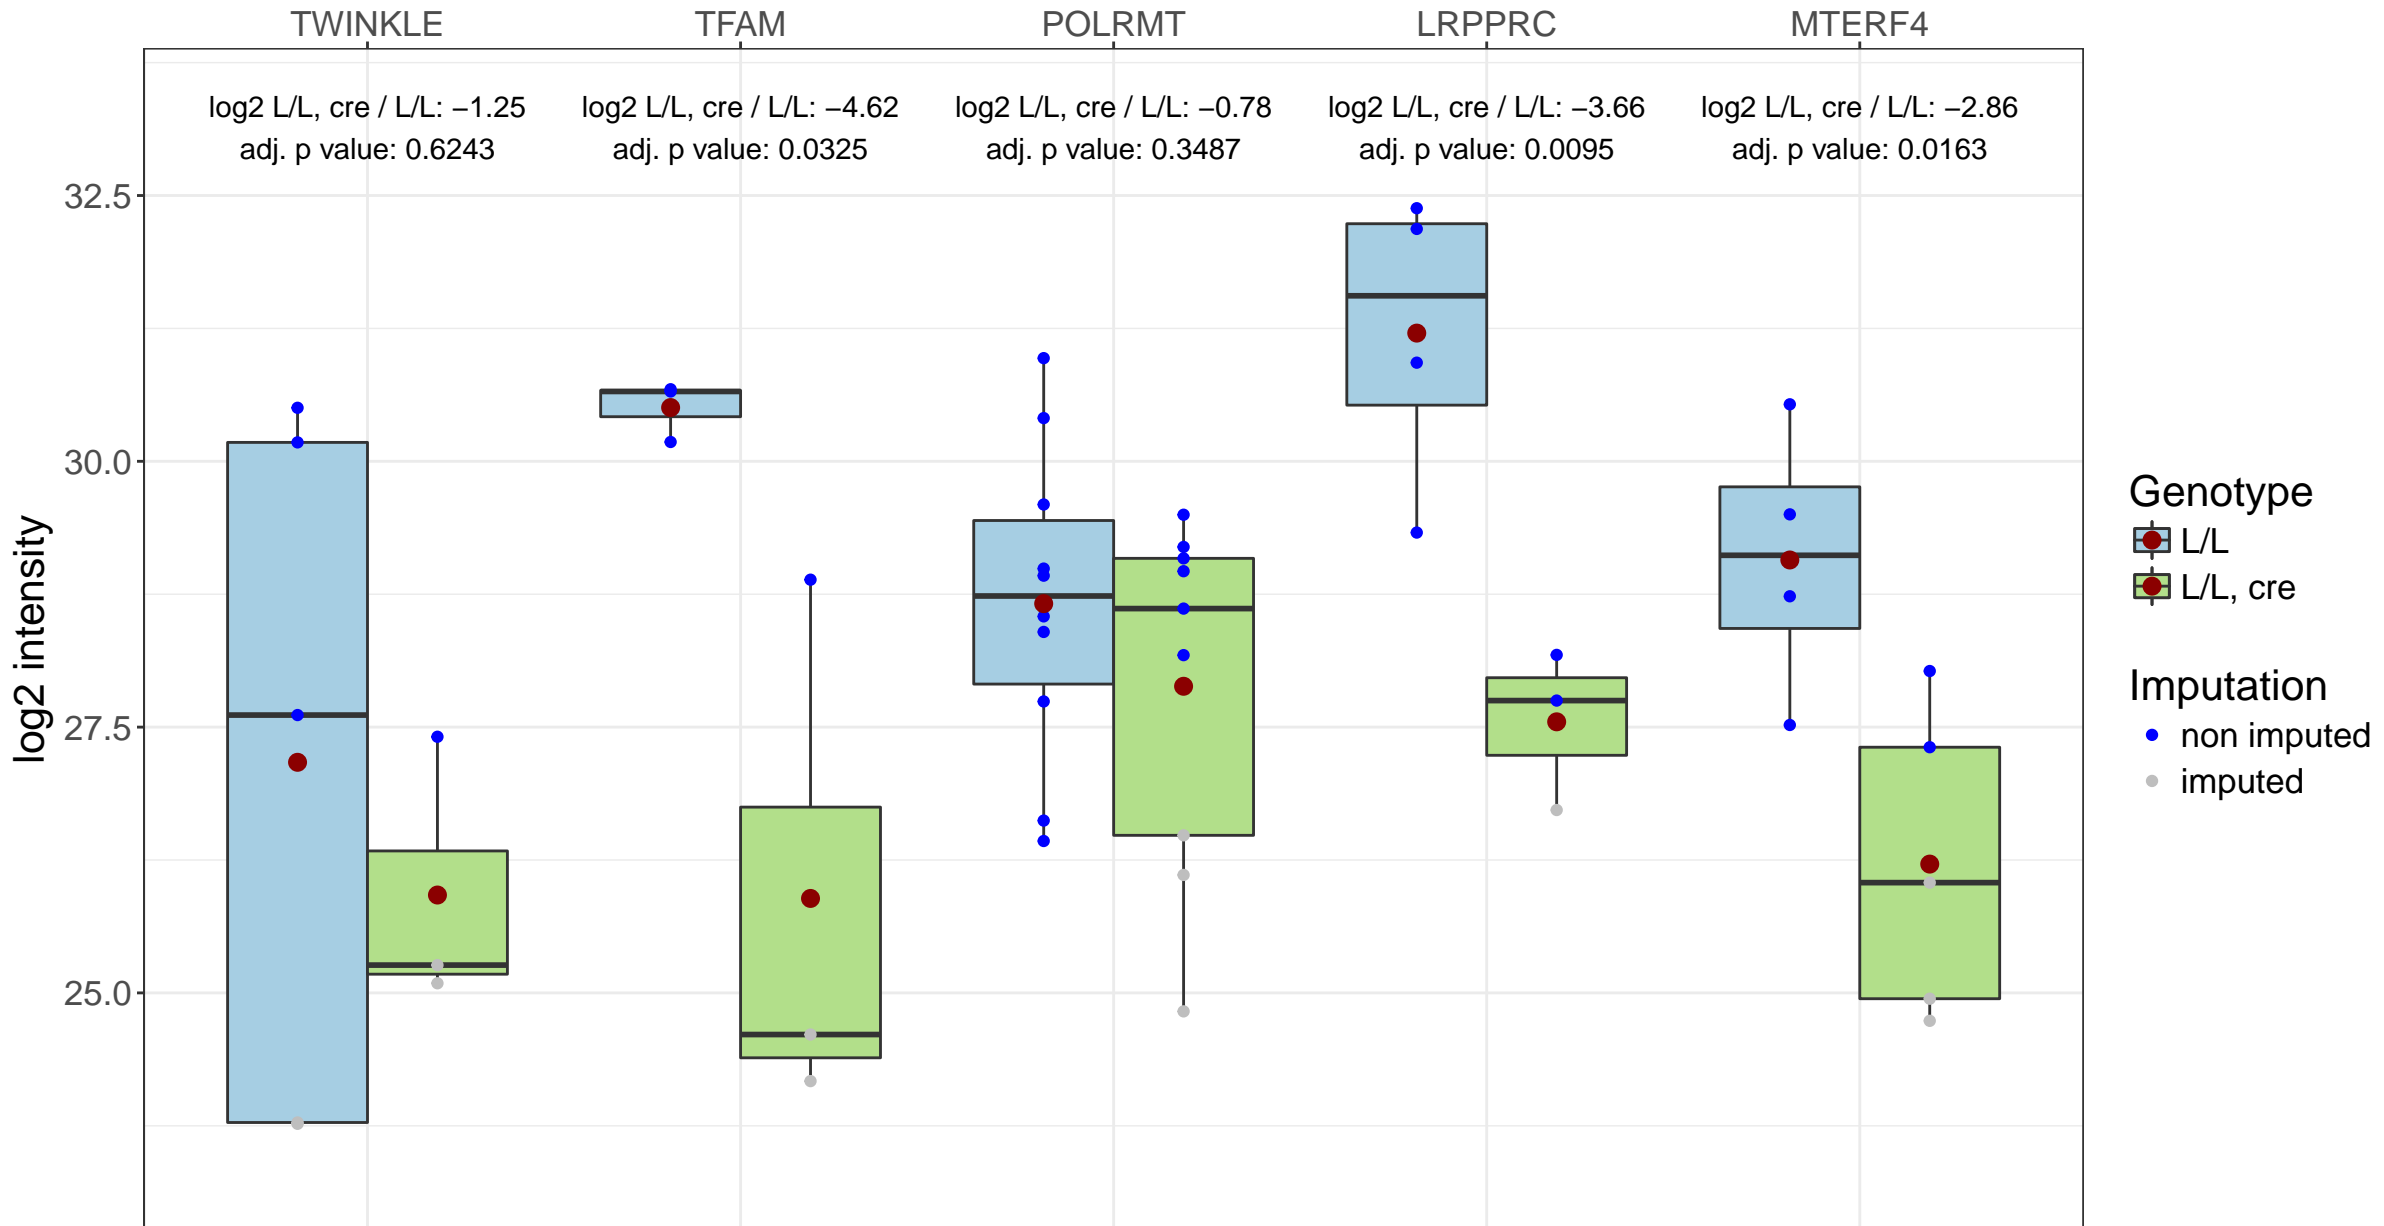

# MT-CO2 / Q7JCZ1

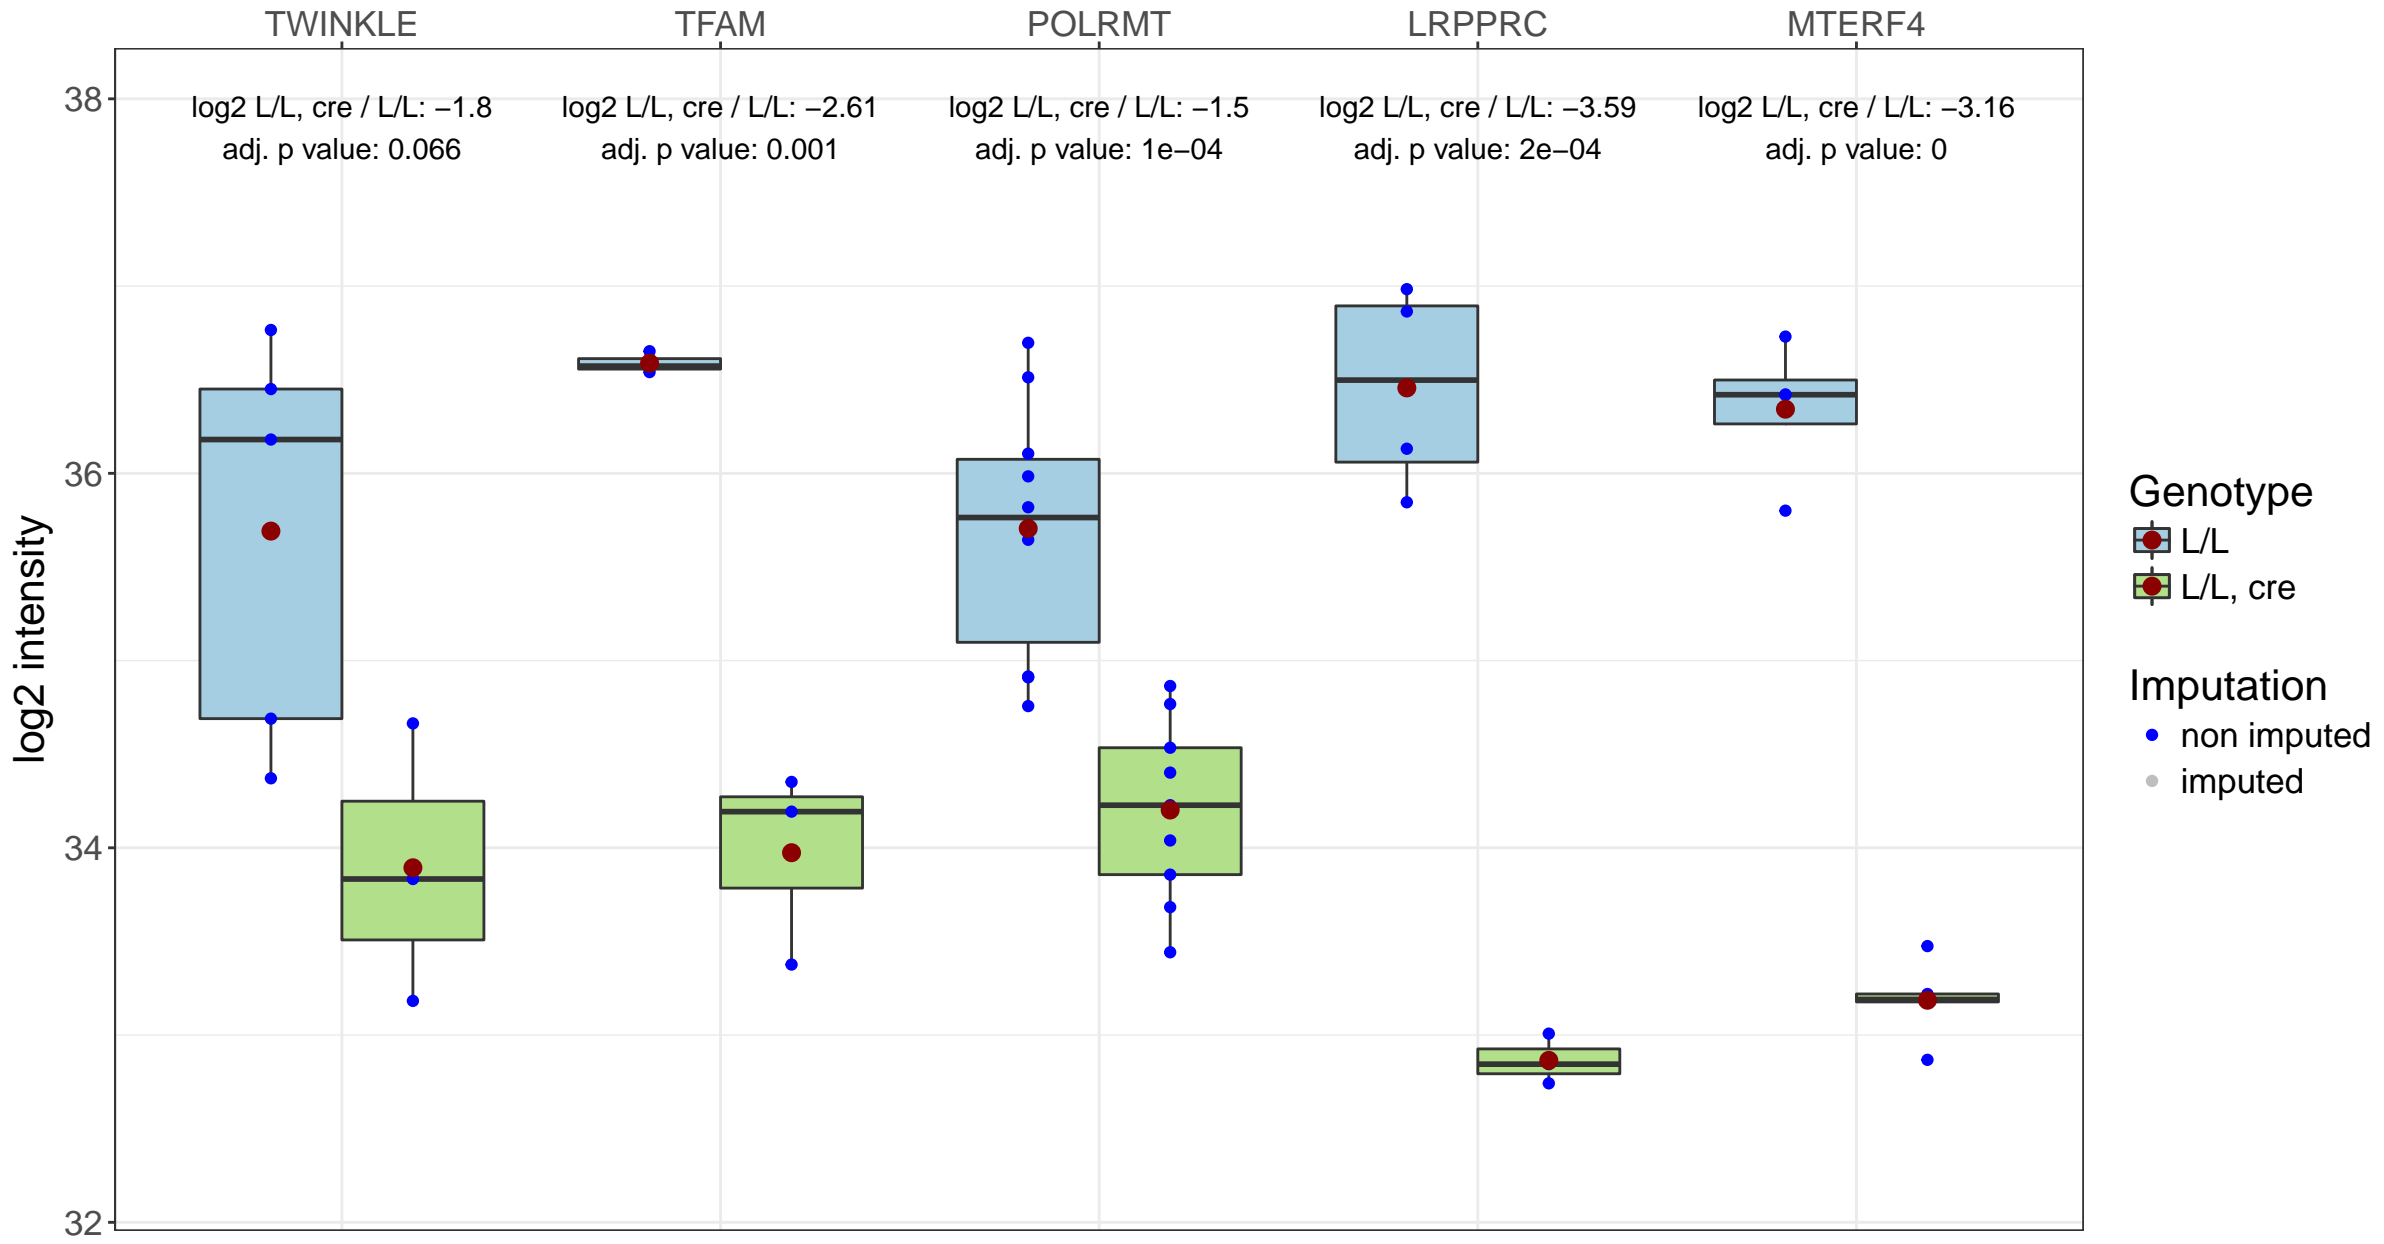

# MT-CO3 / Q7JCX7

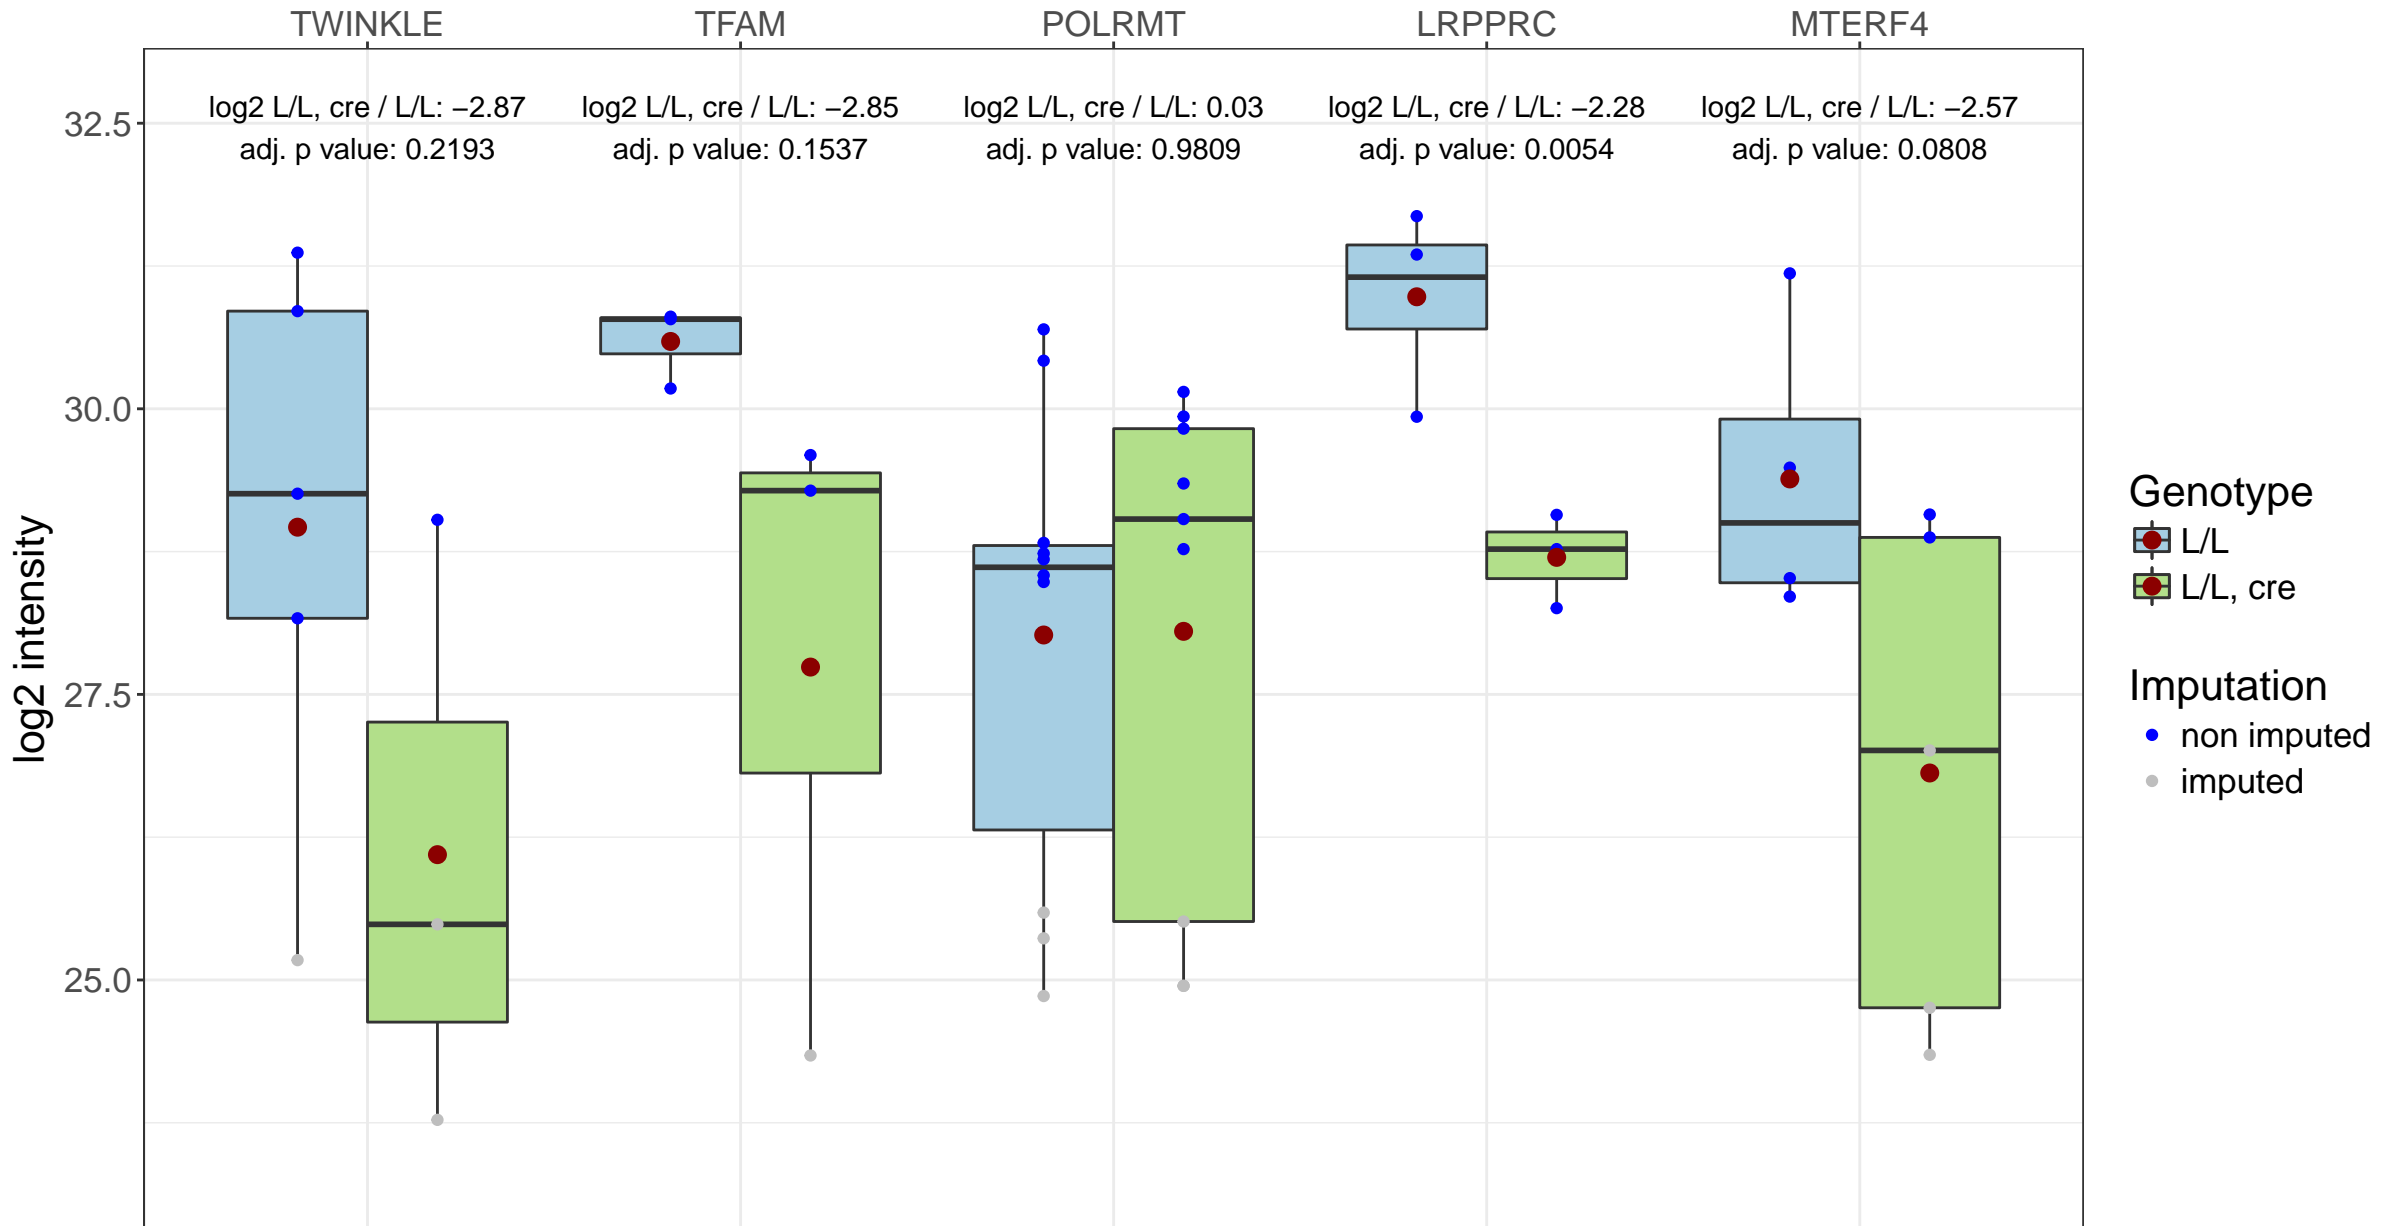

# MT-CYTB / Q7JCZ3

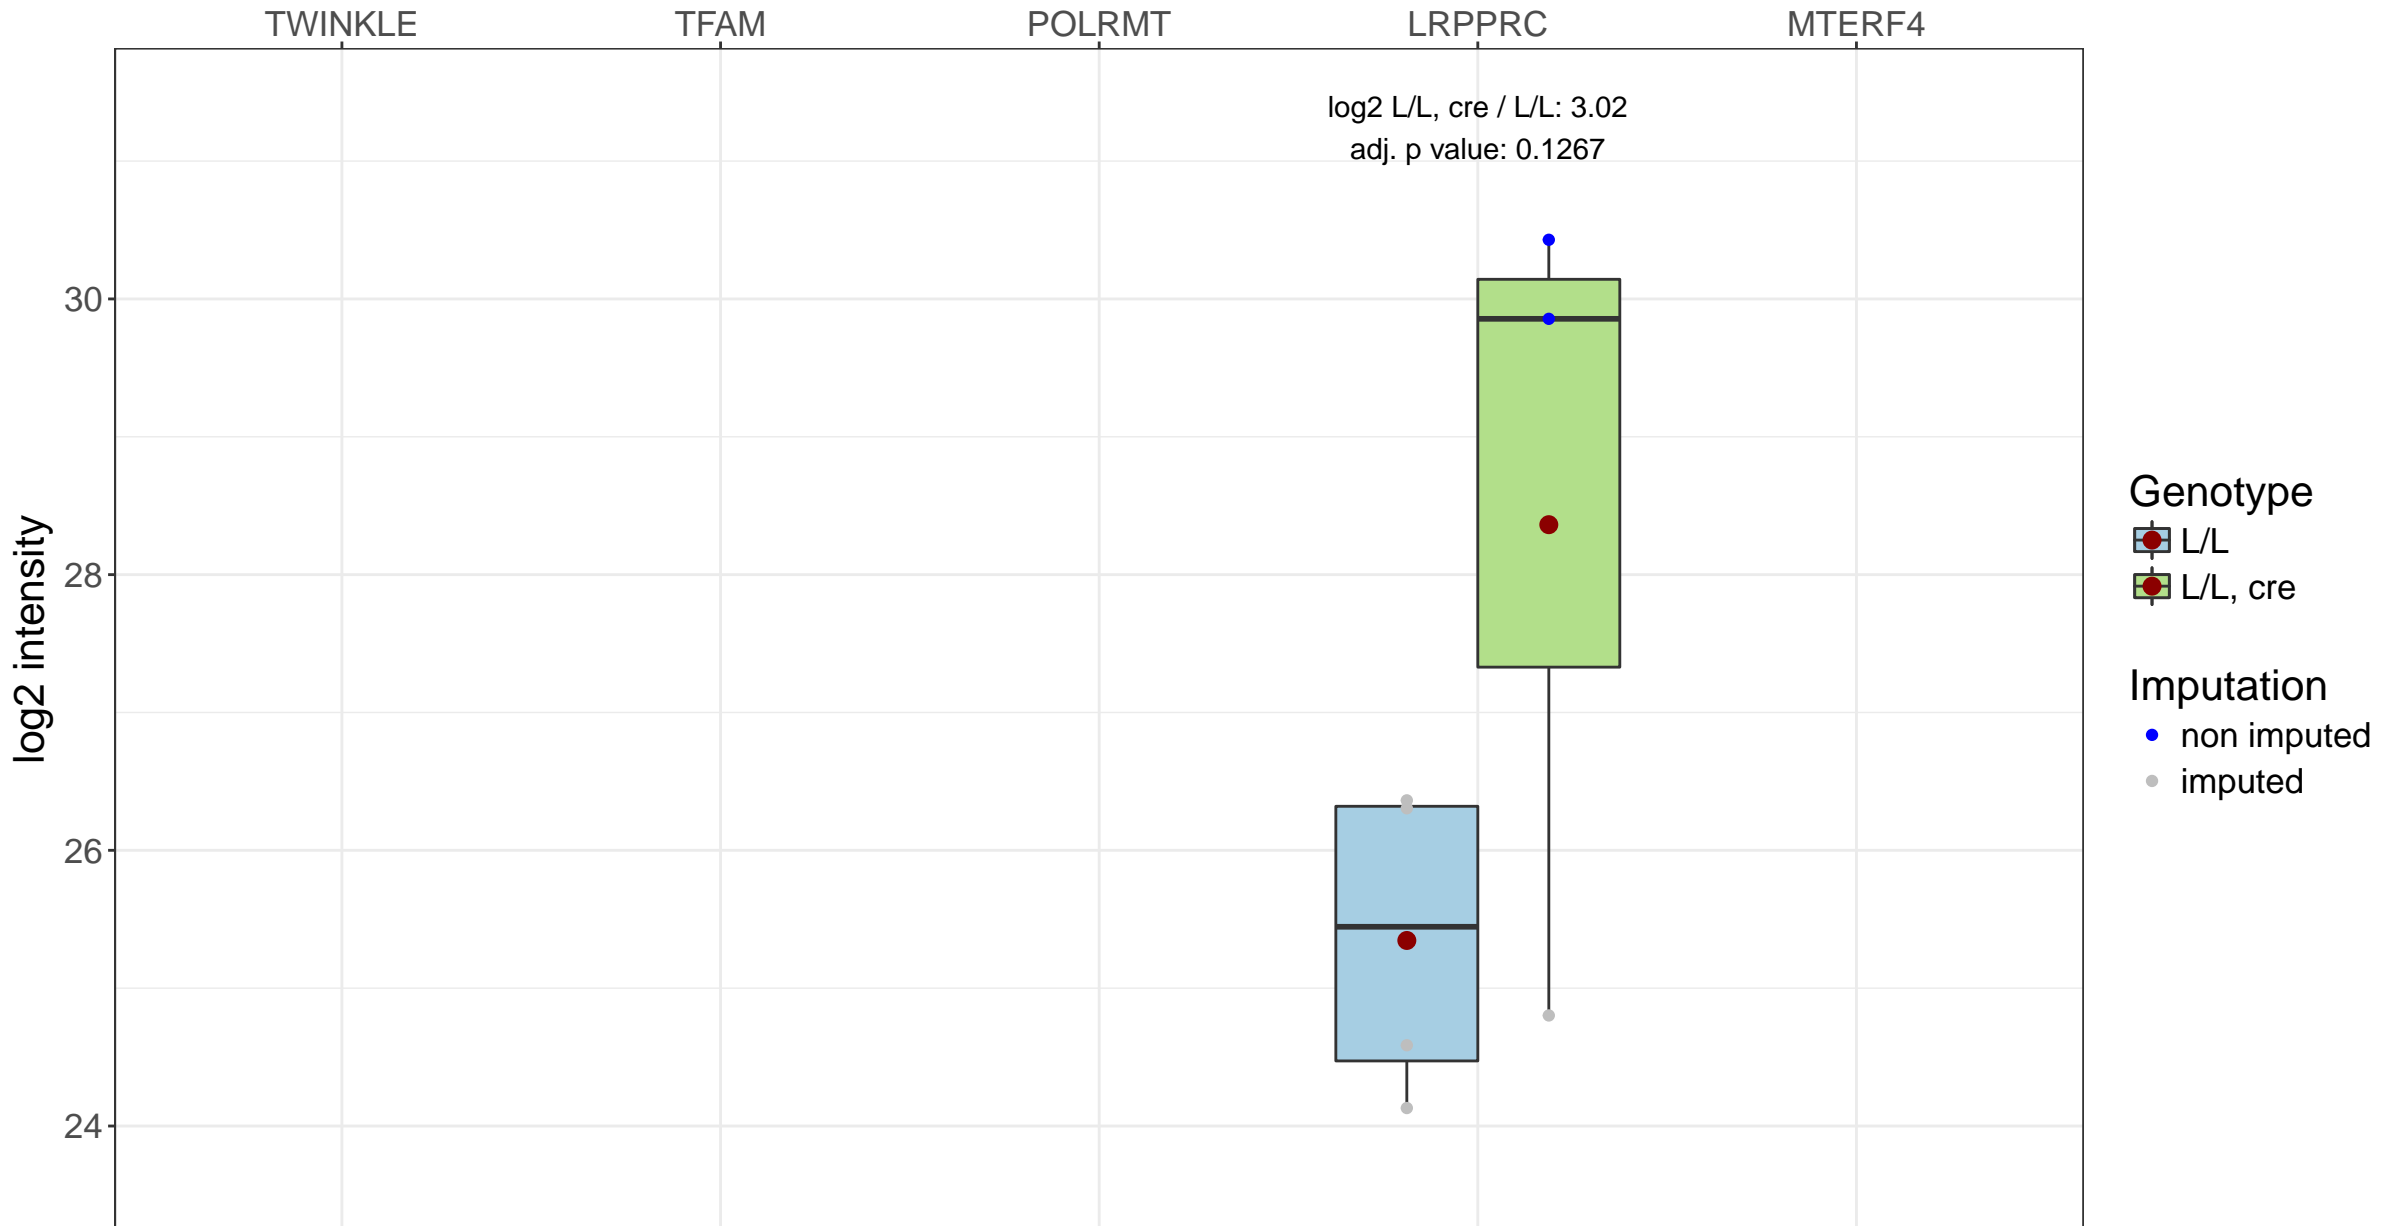



# MT-ND2 / Q9MD59

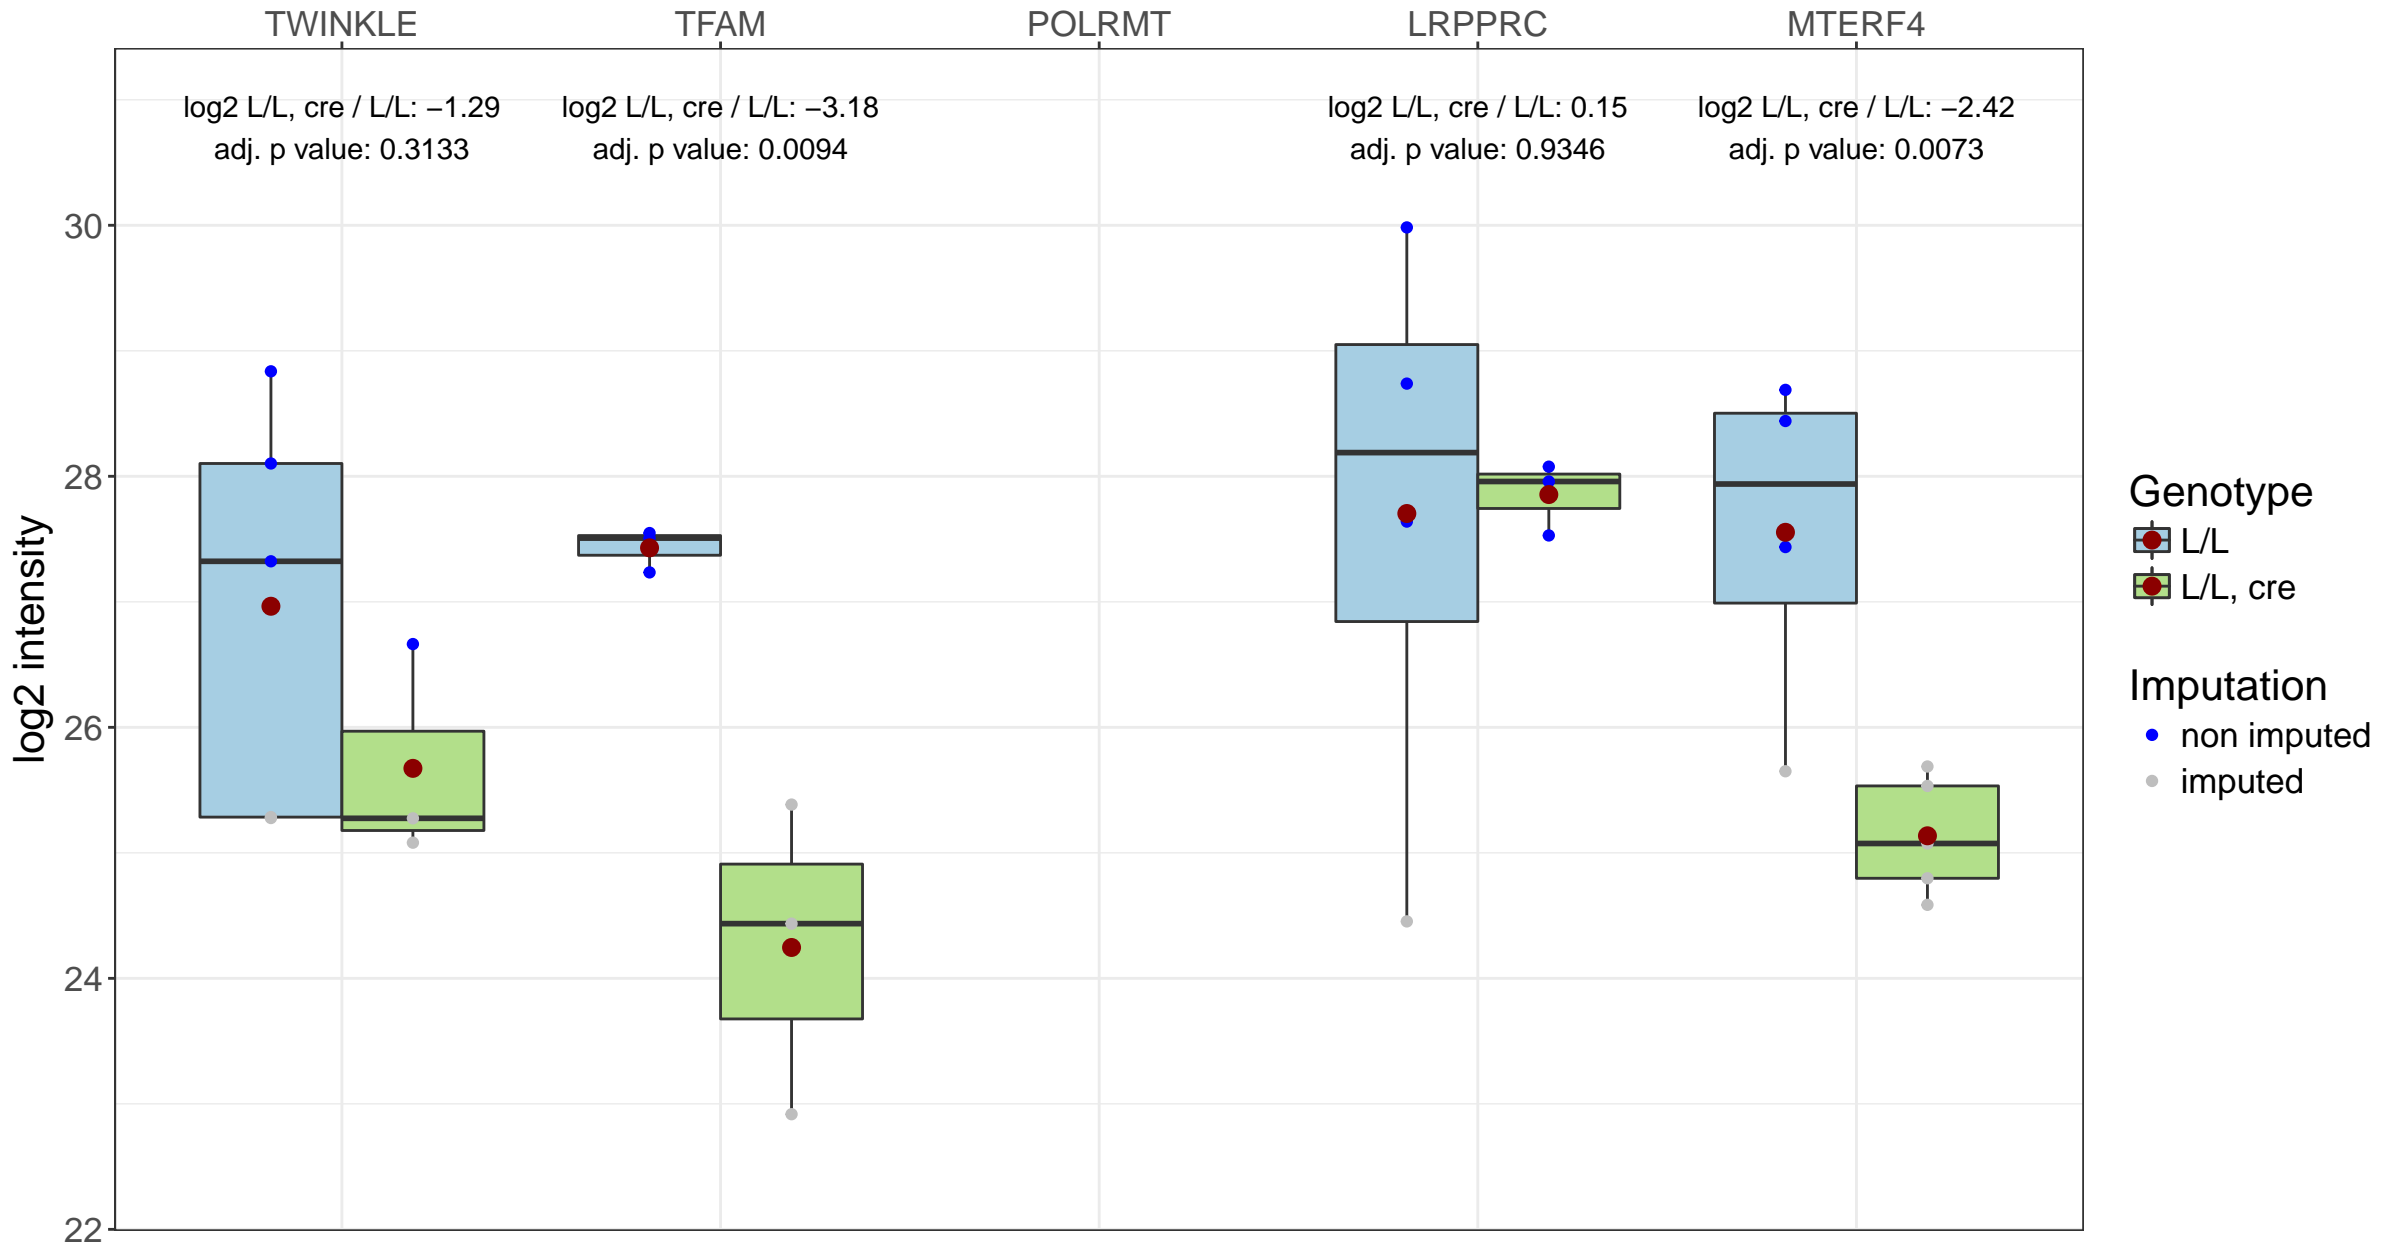

# MT-ND4 / Q7JCY6

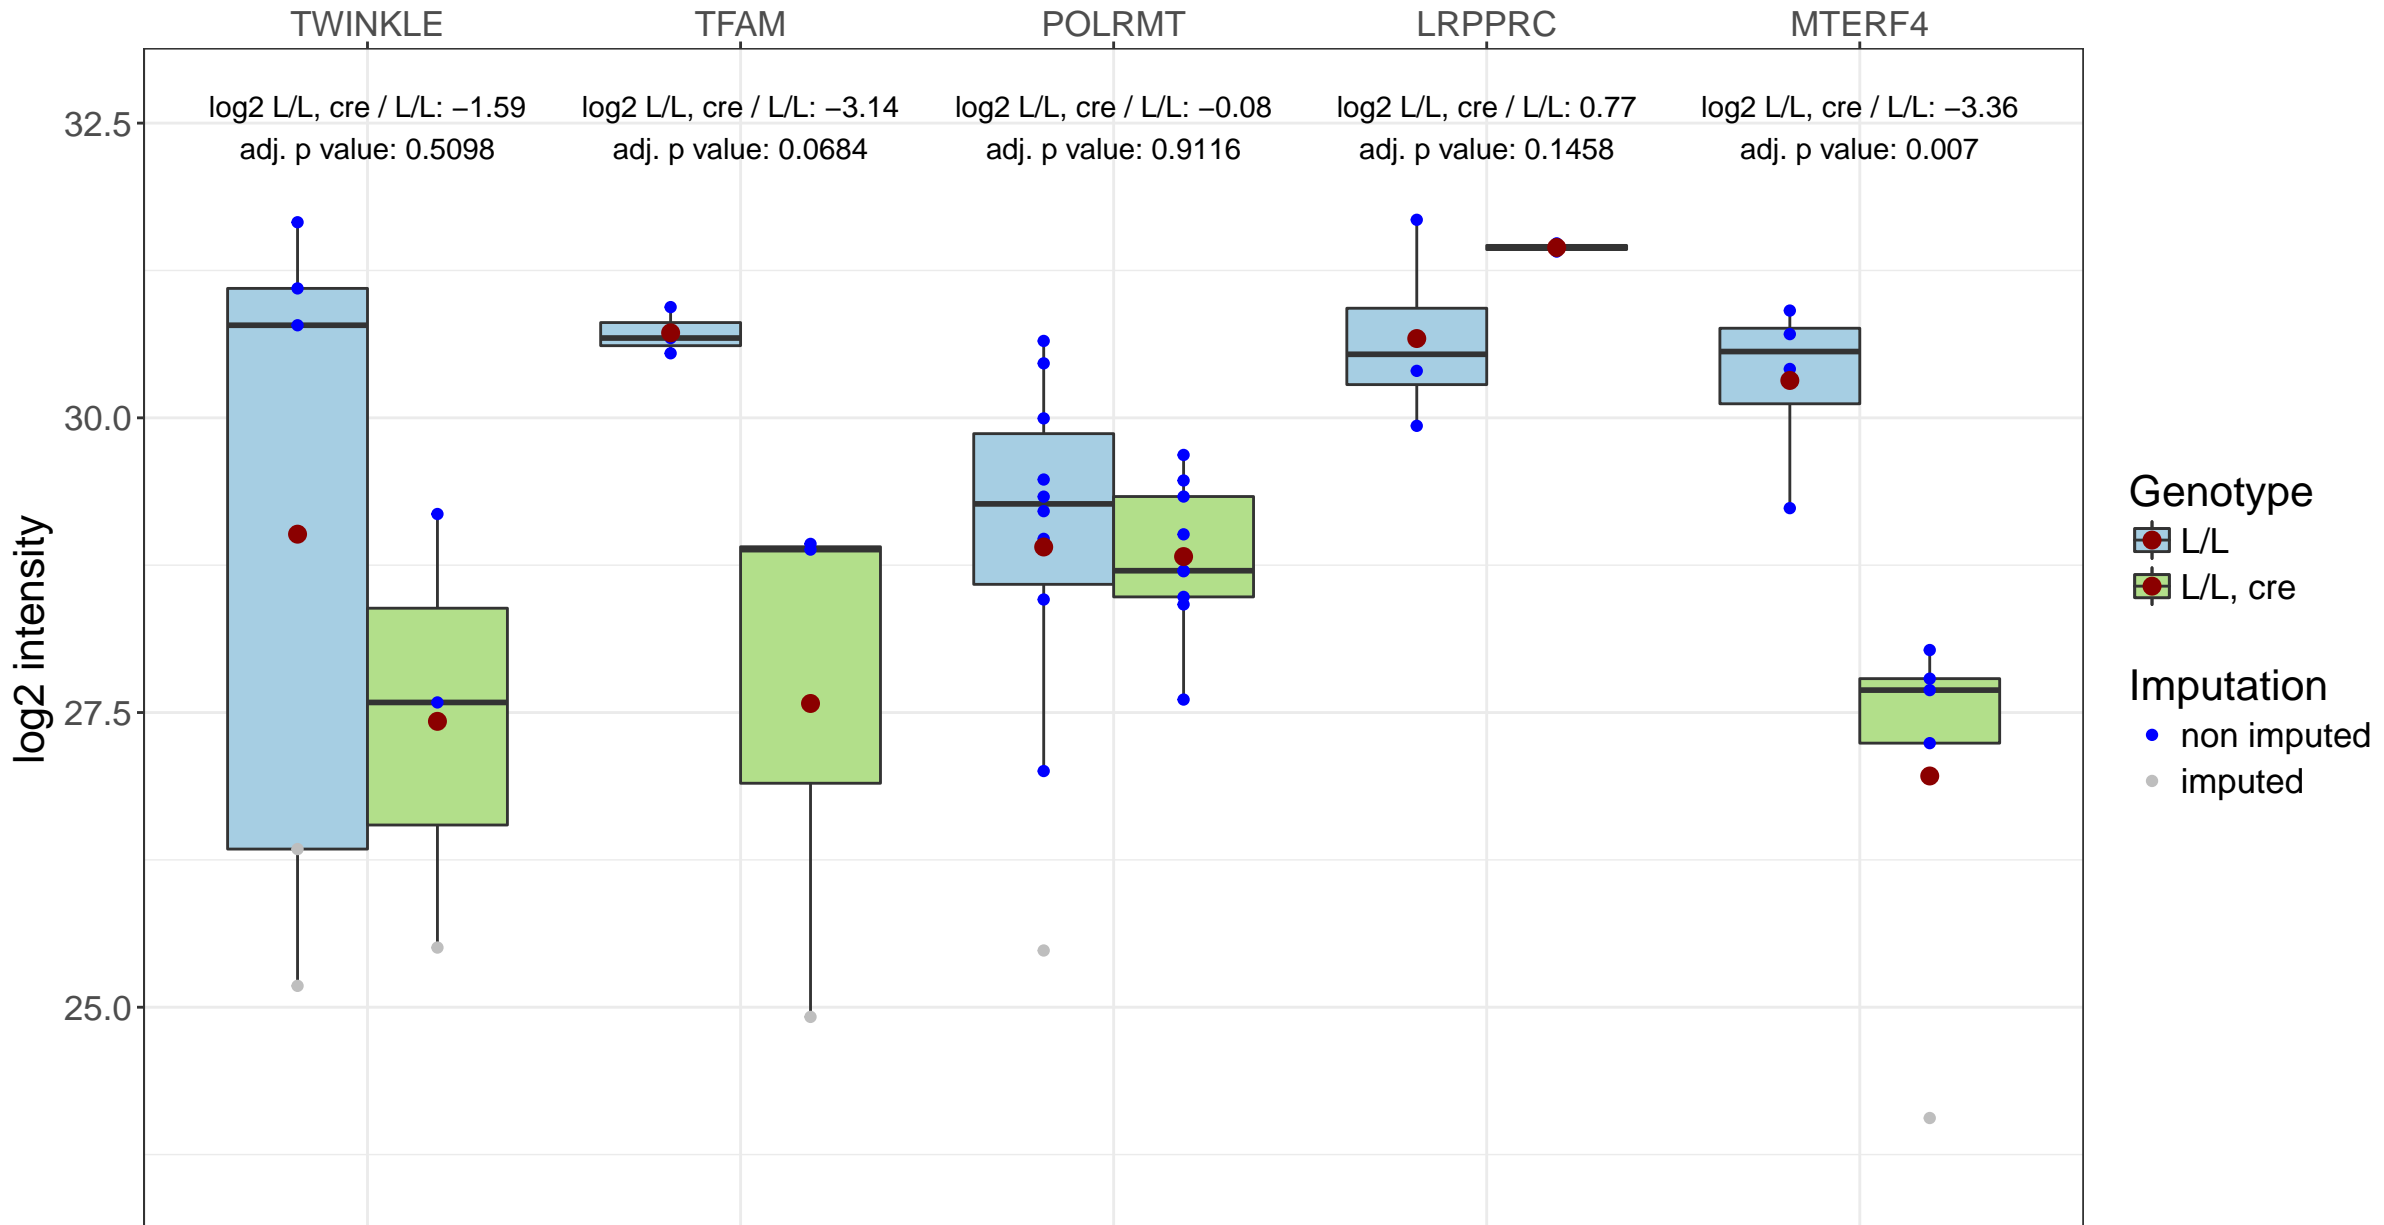

# MT-ND5 / Q9MD82

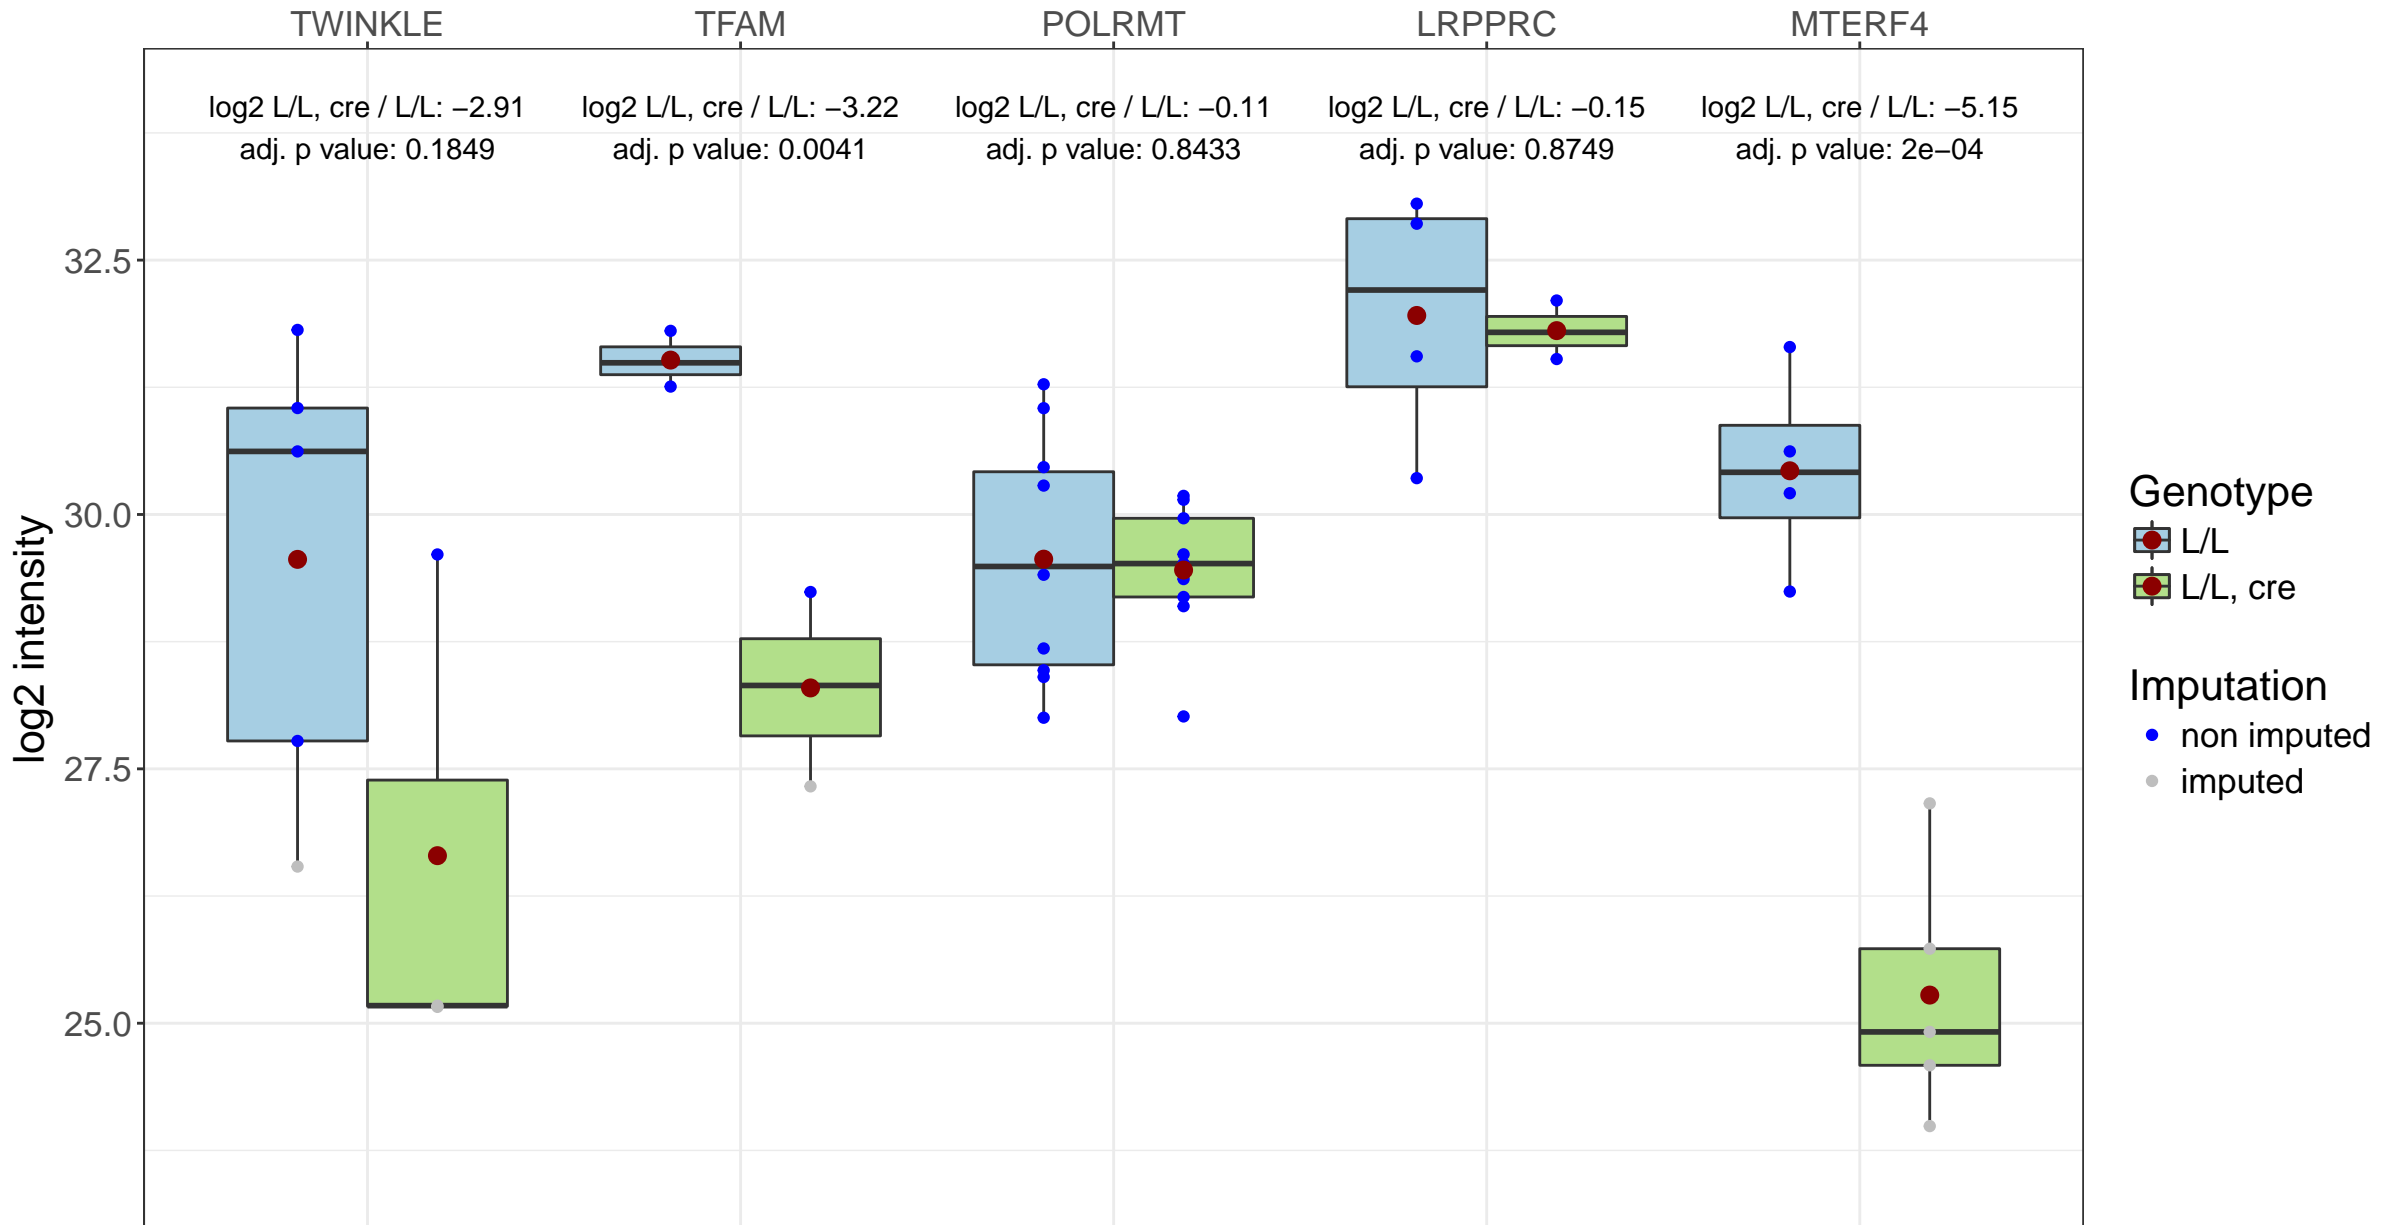

# MTCH1 / Q791T5-2

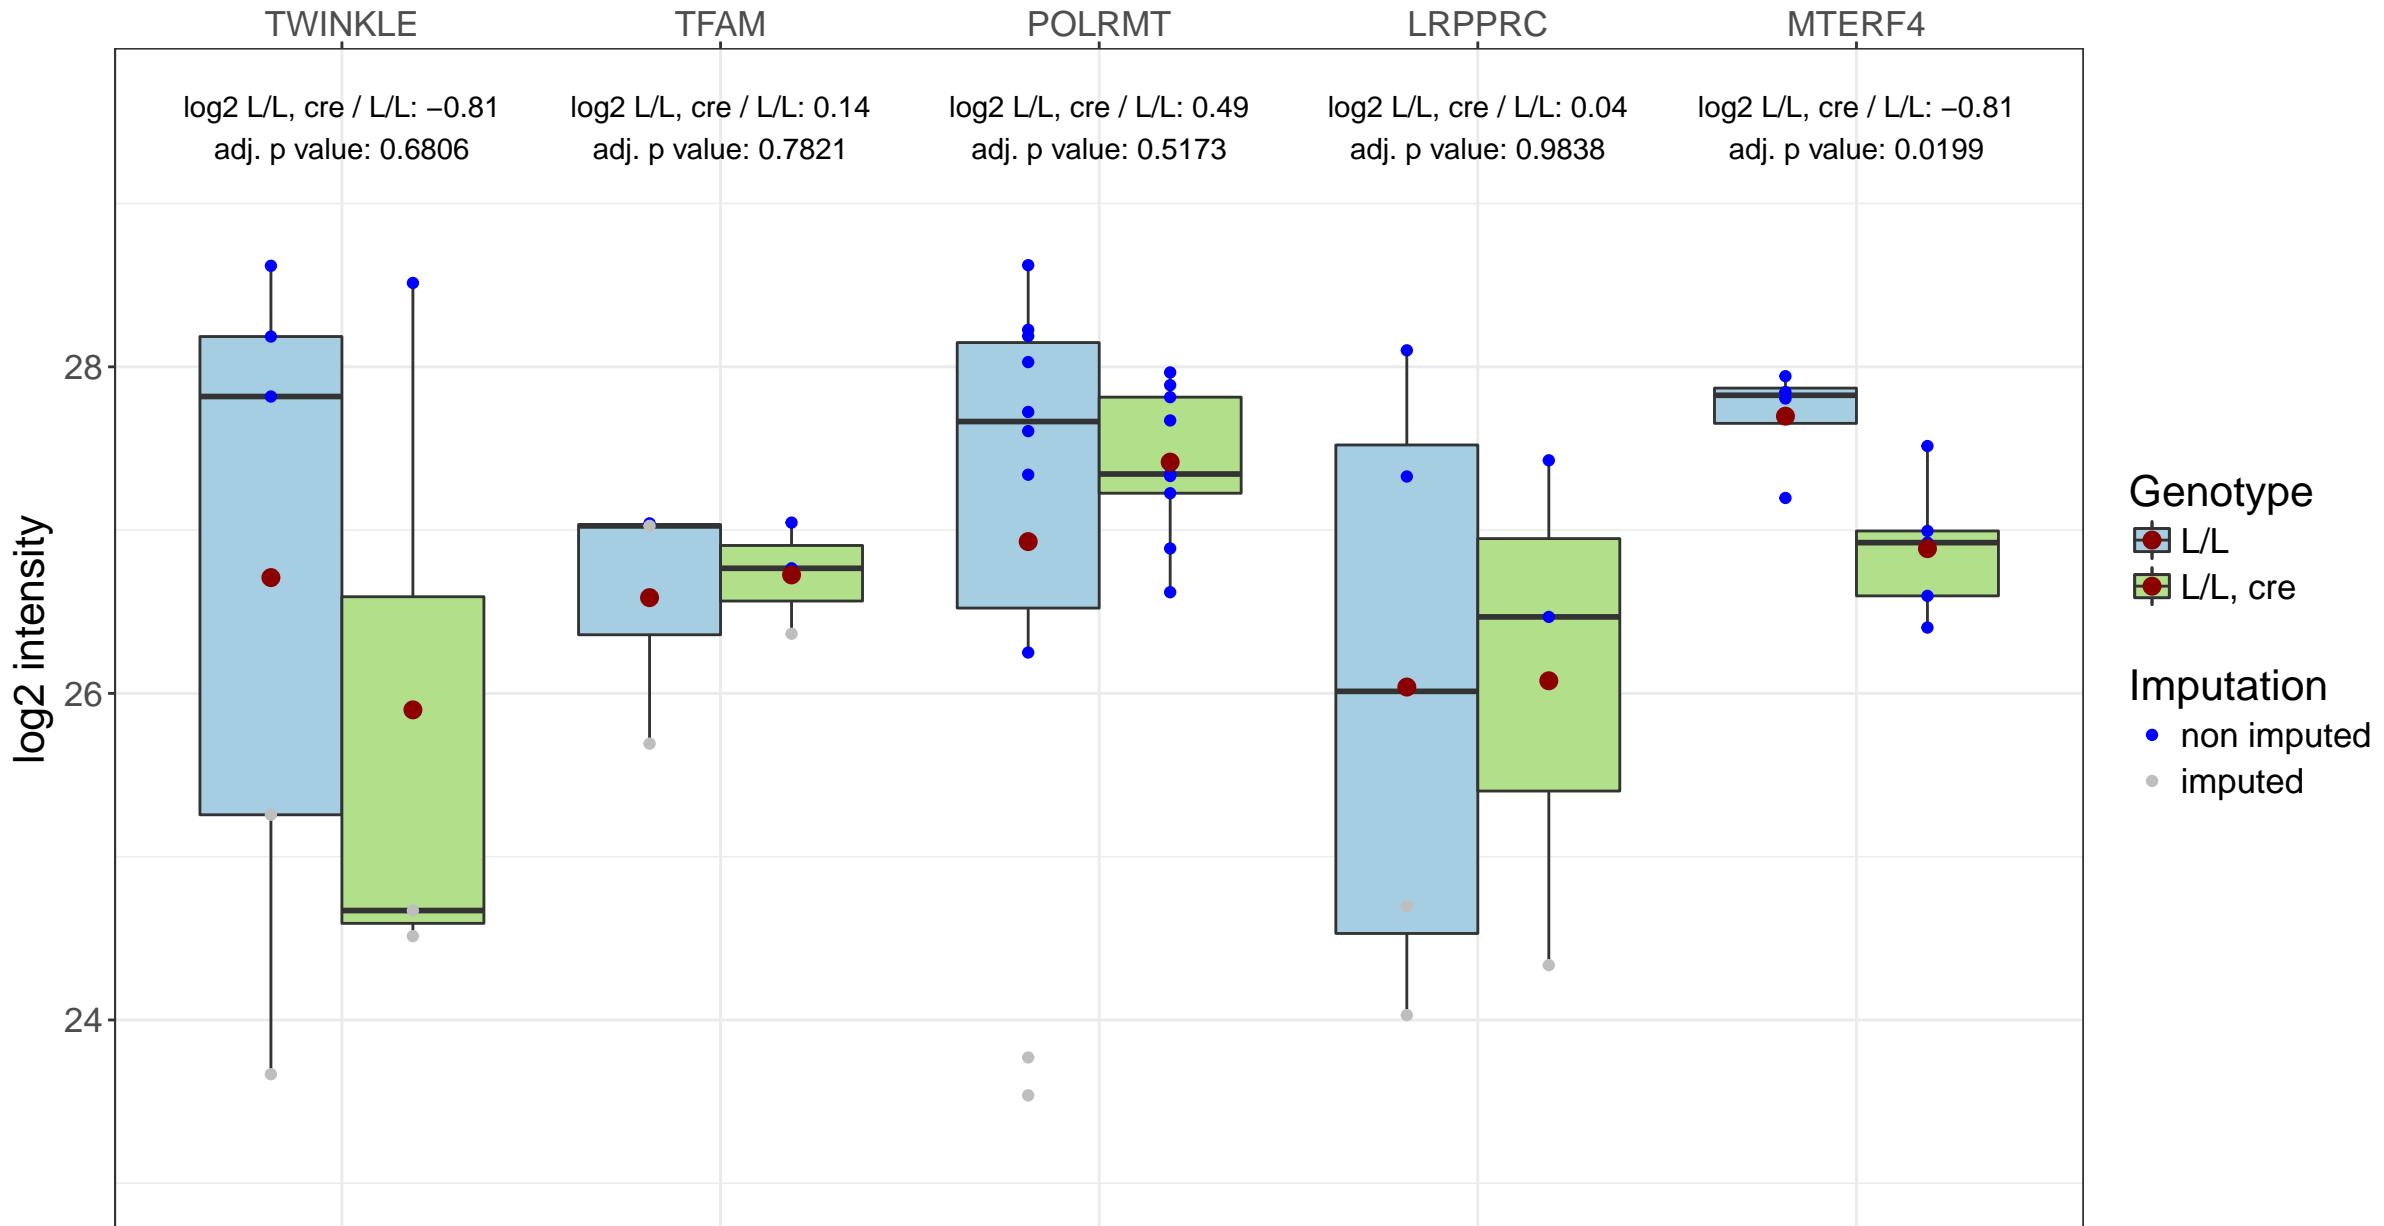

# MTCH2 / Q791V5

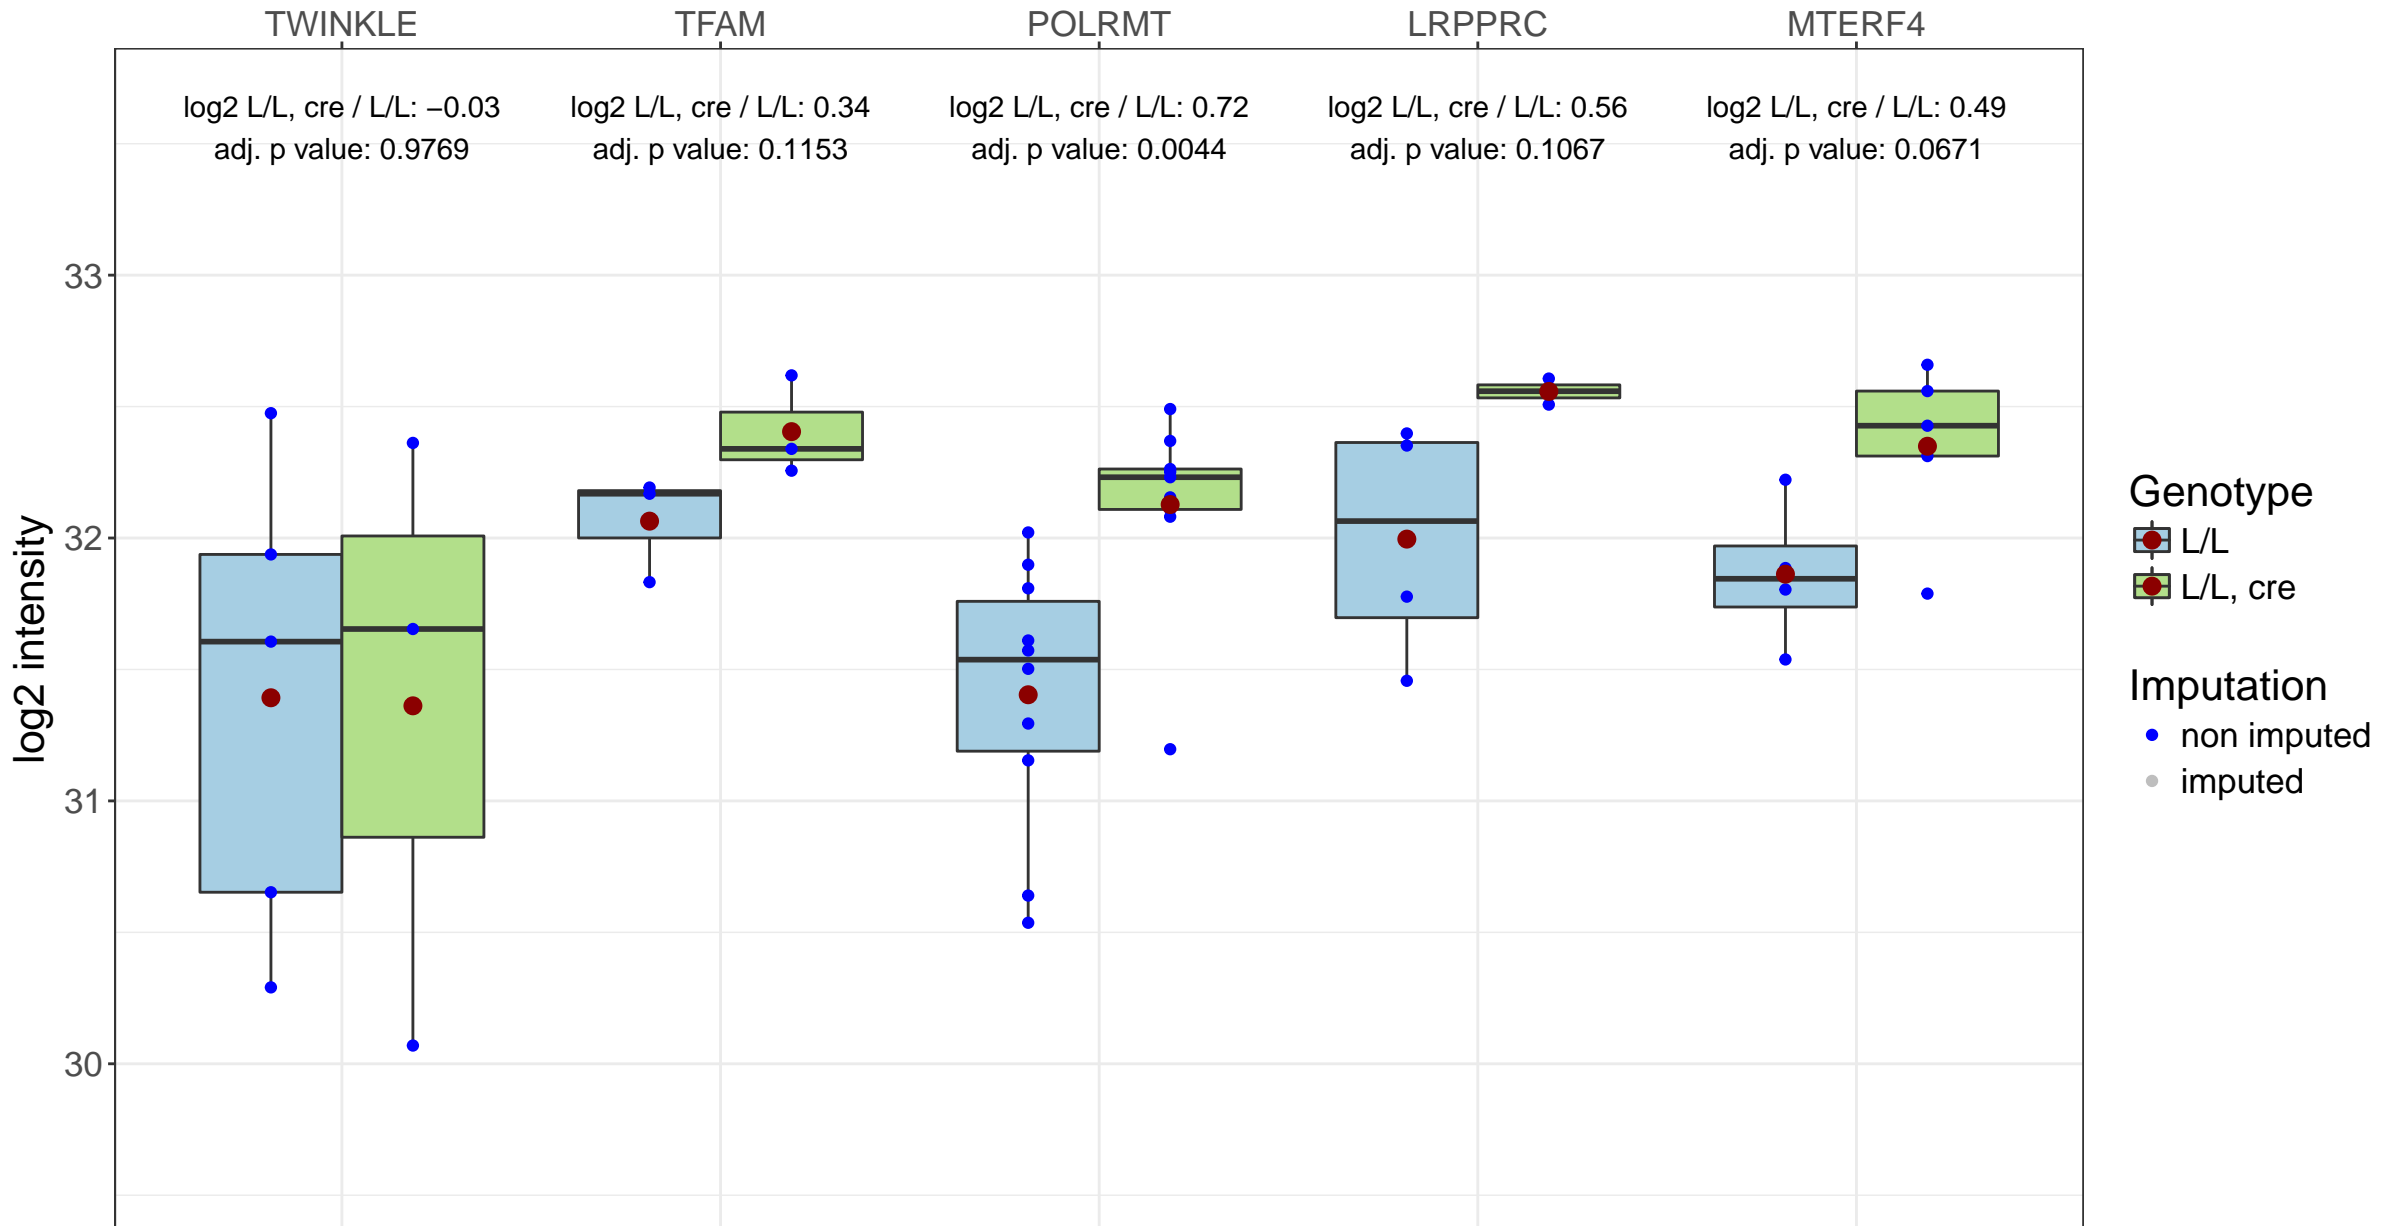

# MTERF2 / Q8BKY8

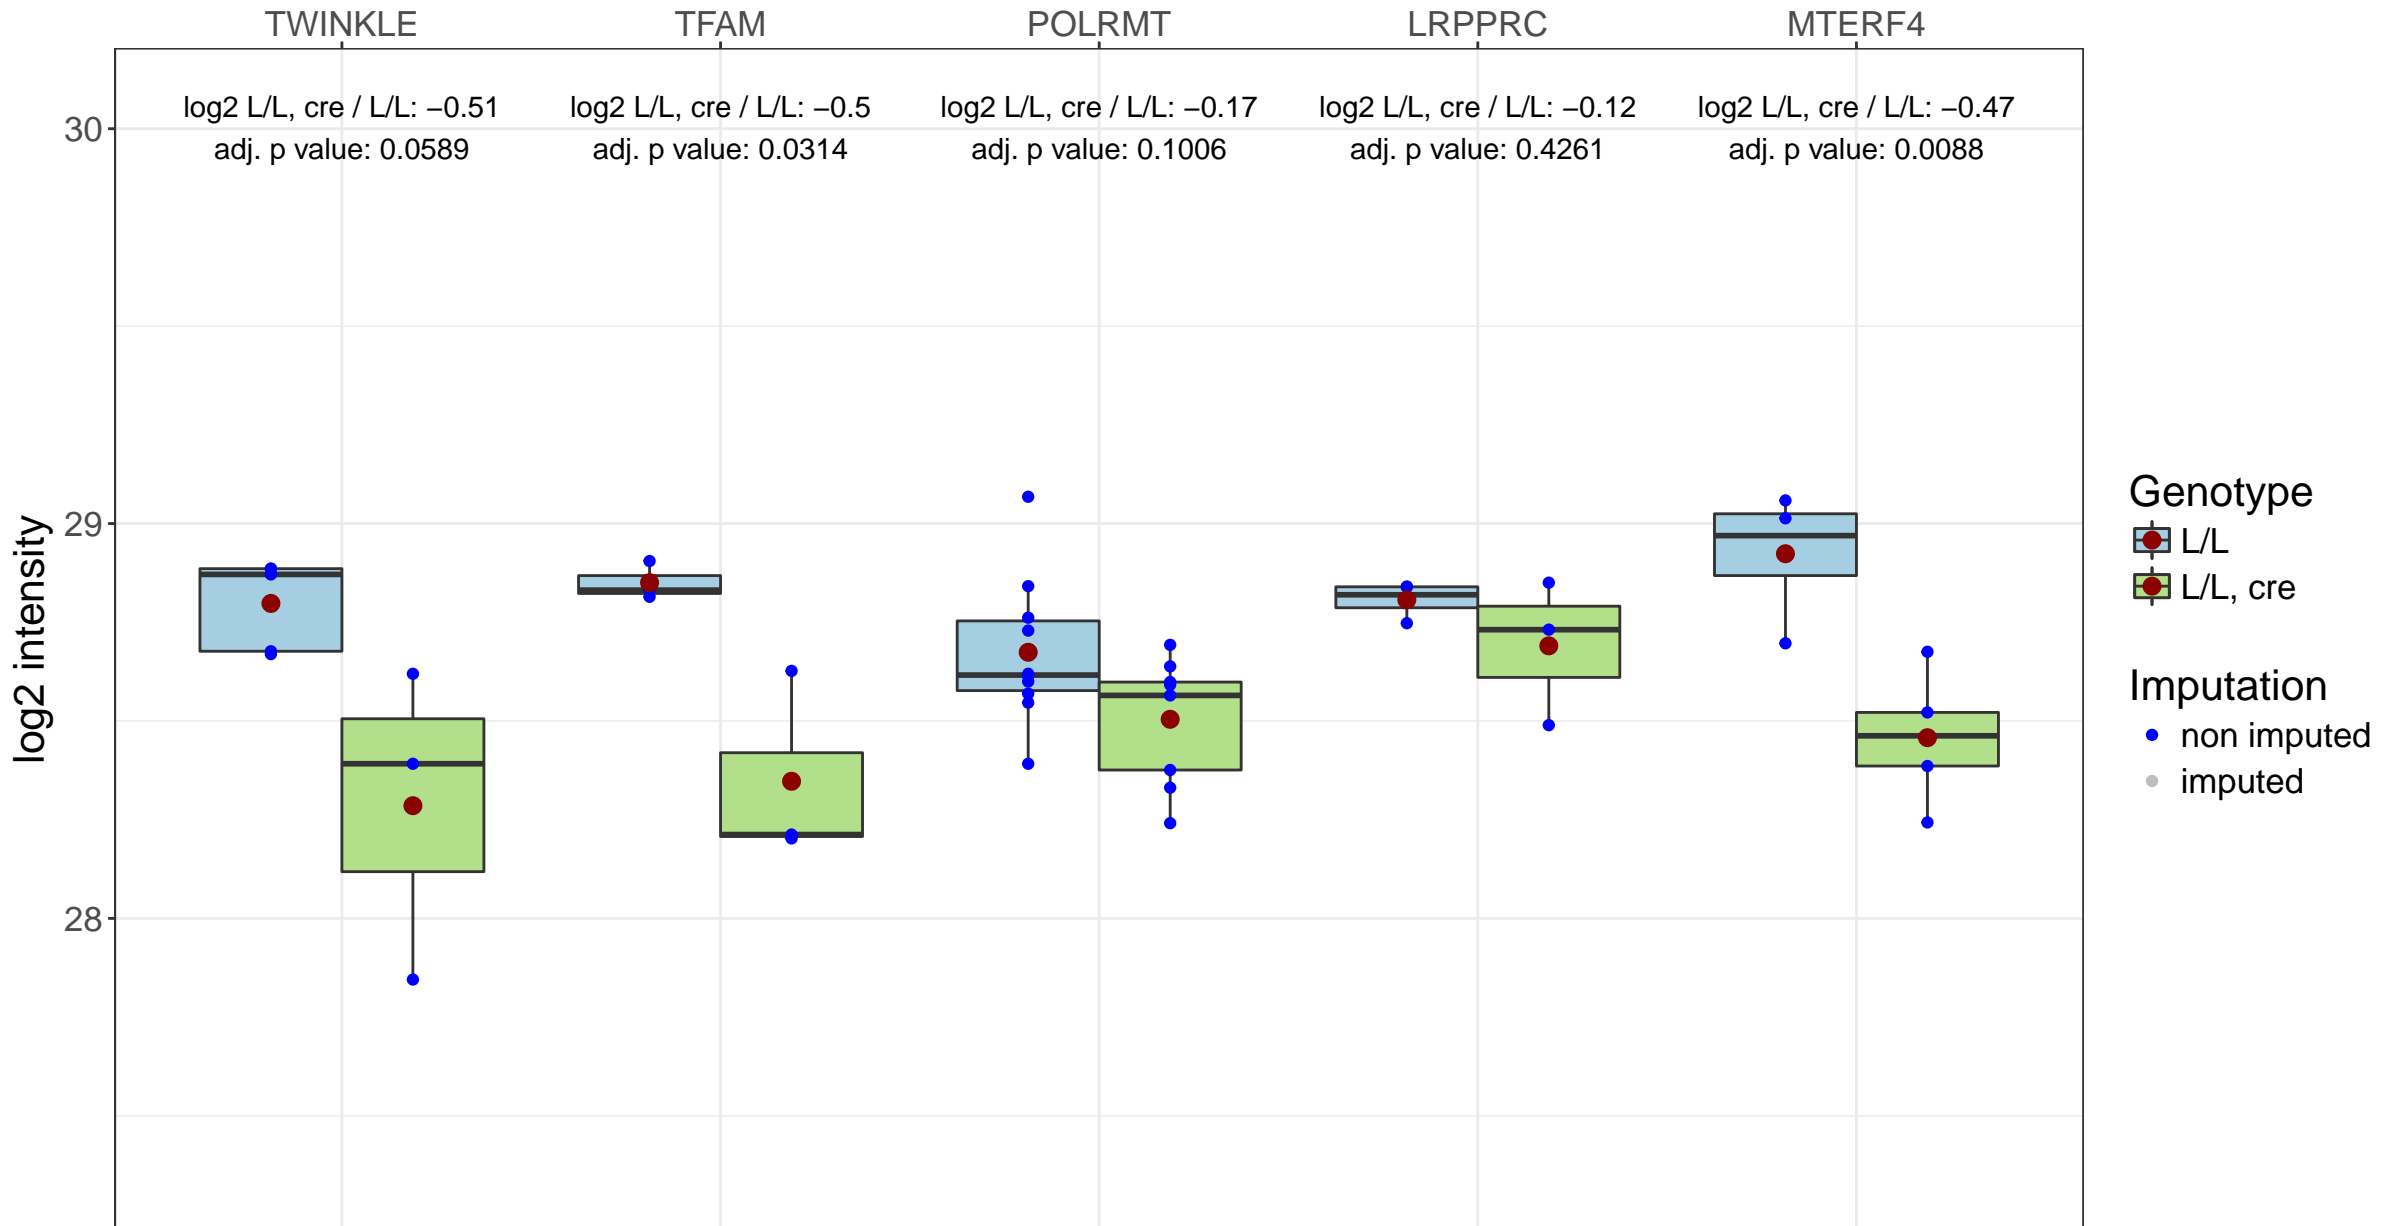

# MTFMT / Q9D799

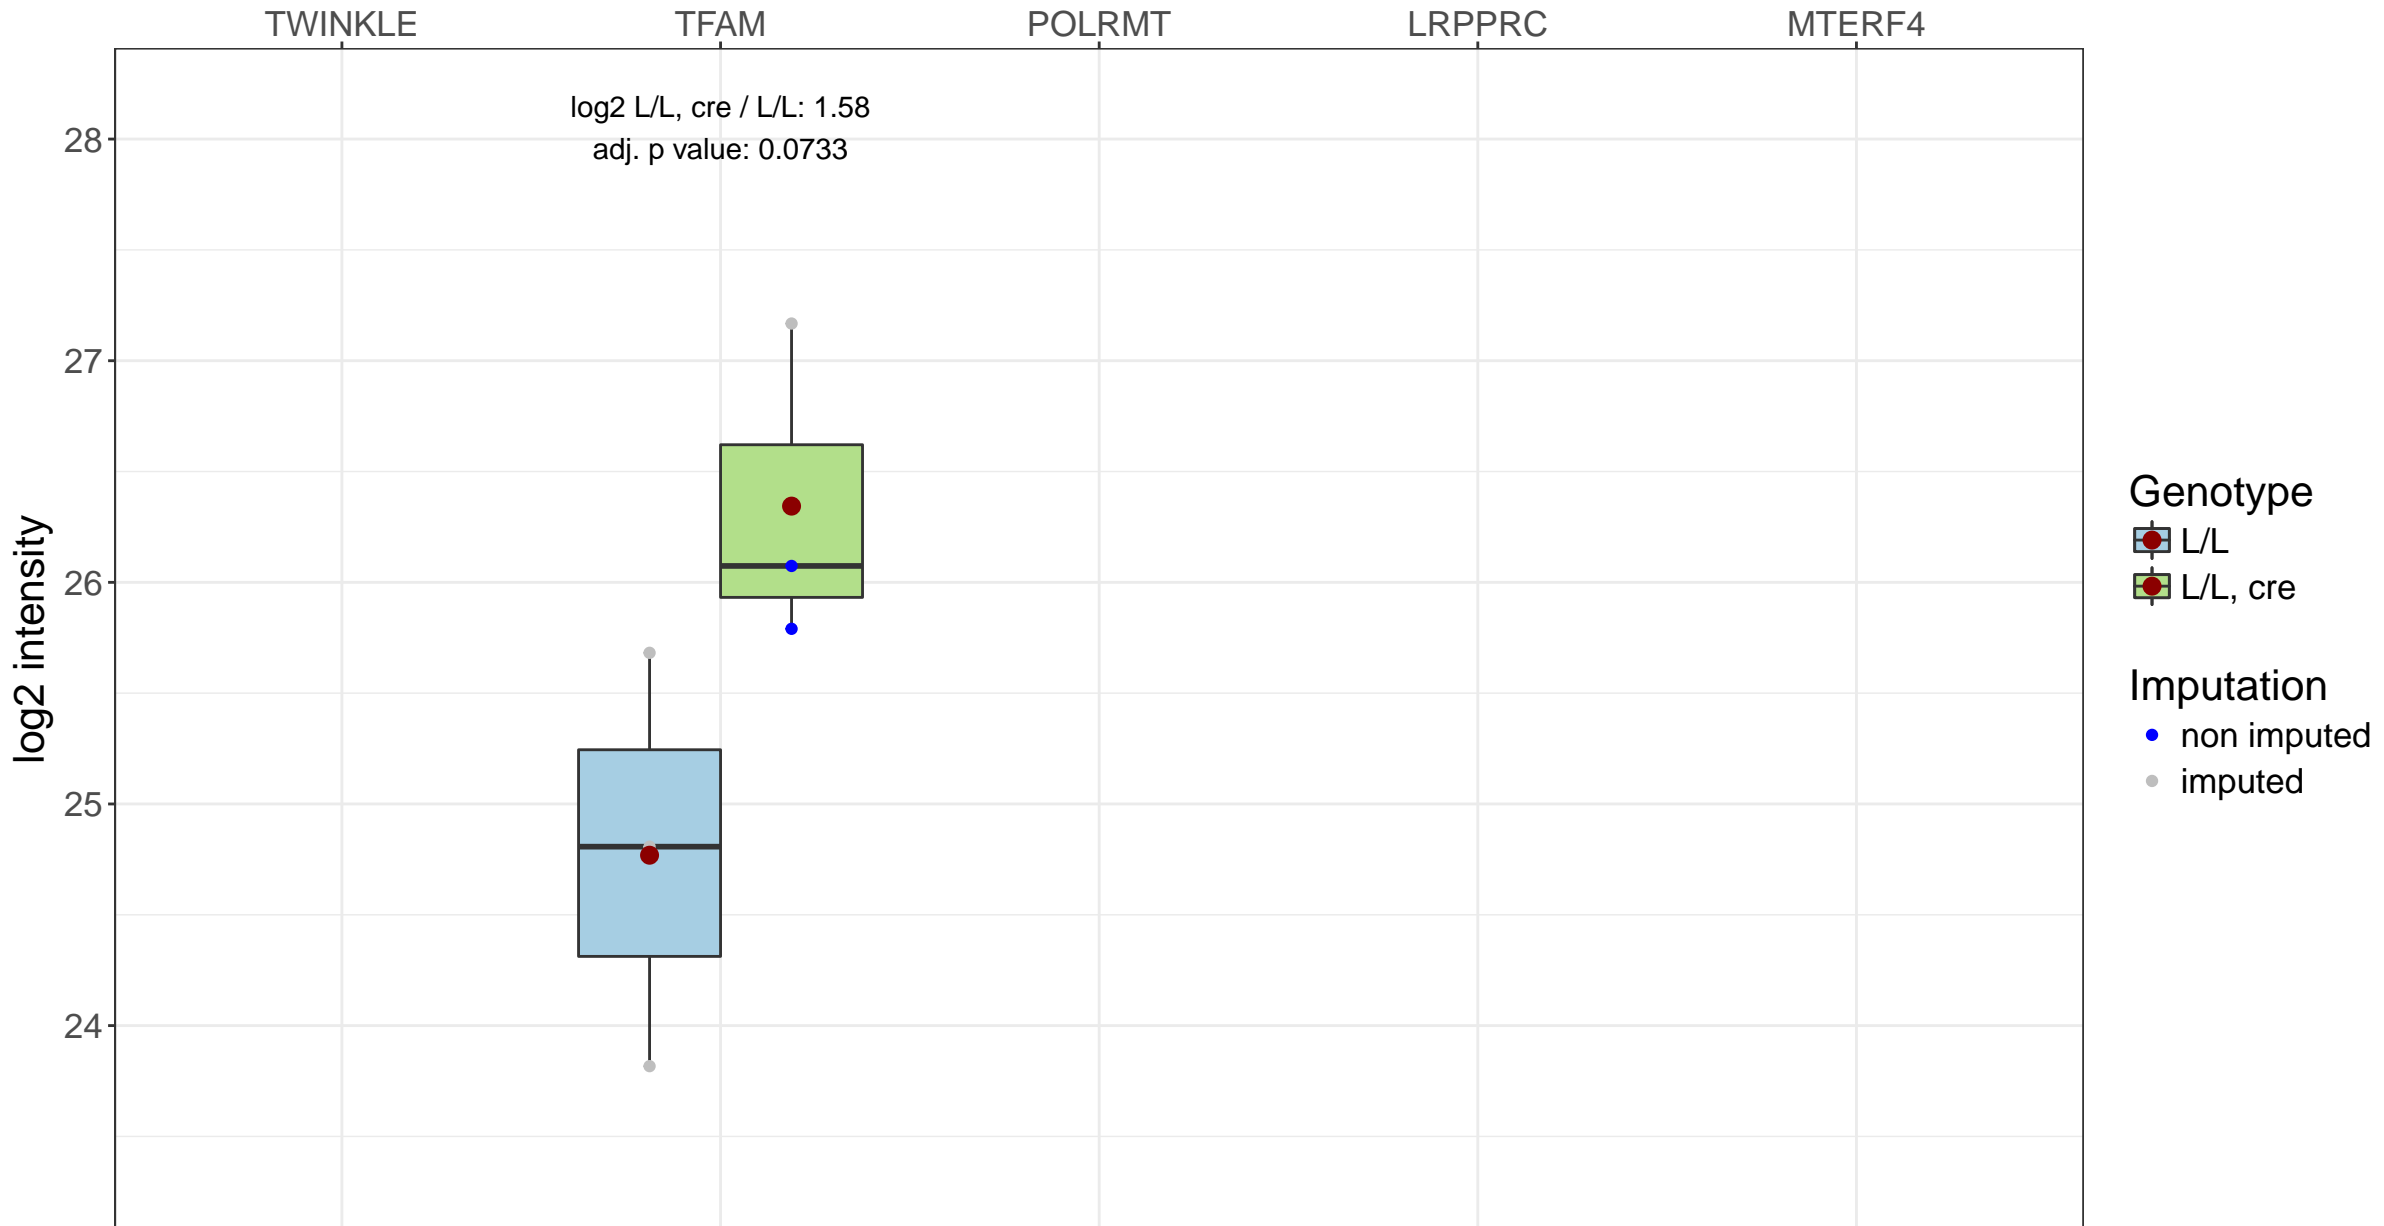

# MTFP1 / Q9CRB8

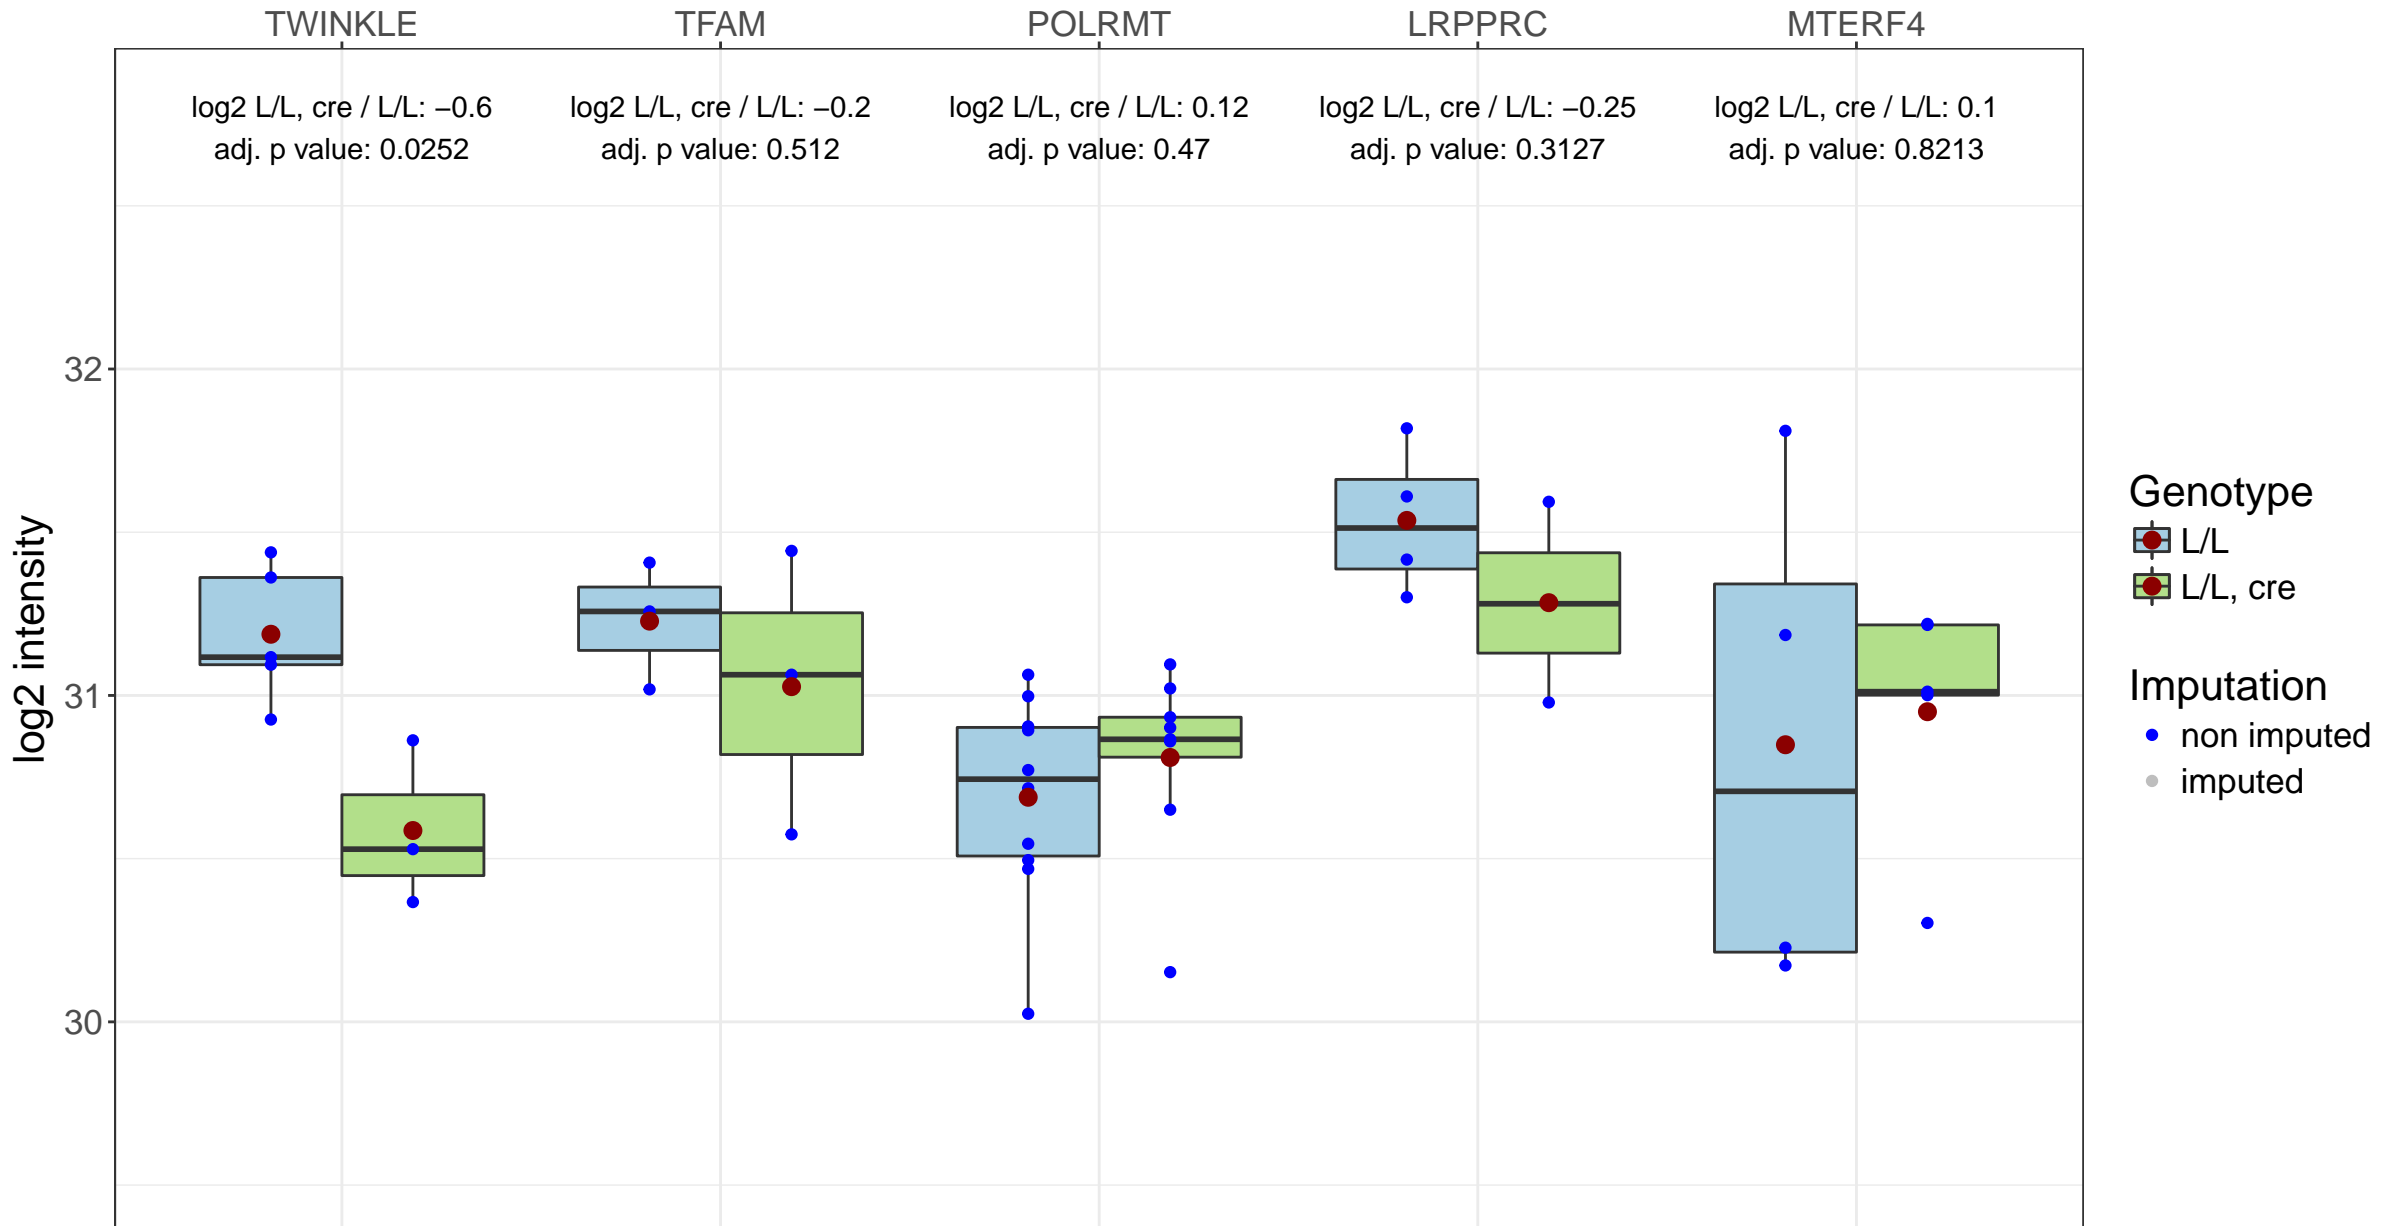



# MTFR1L / Q9CWE0

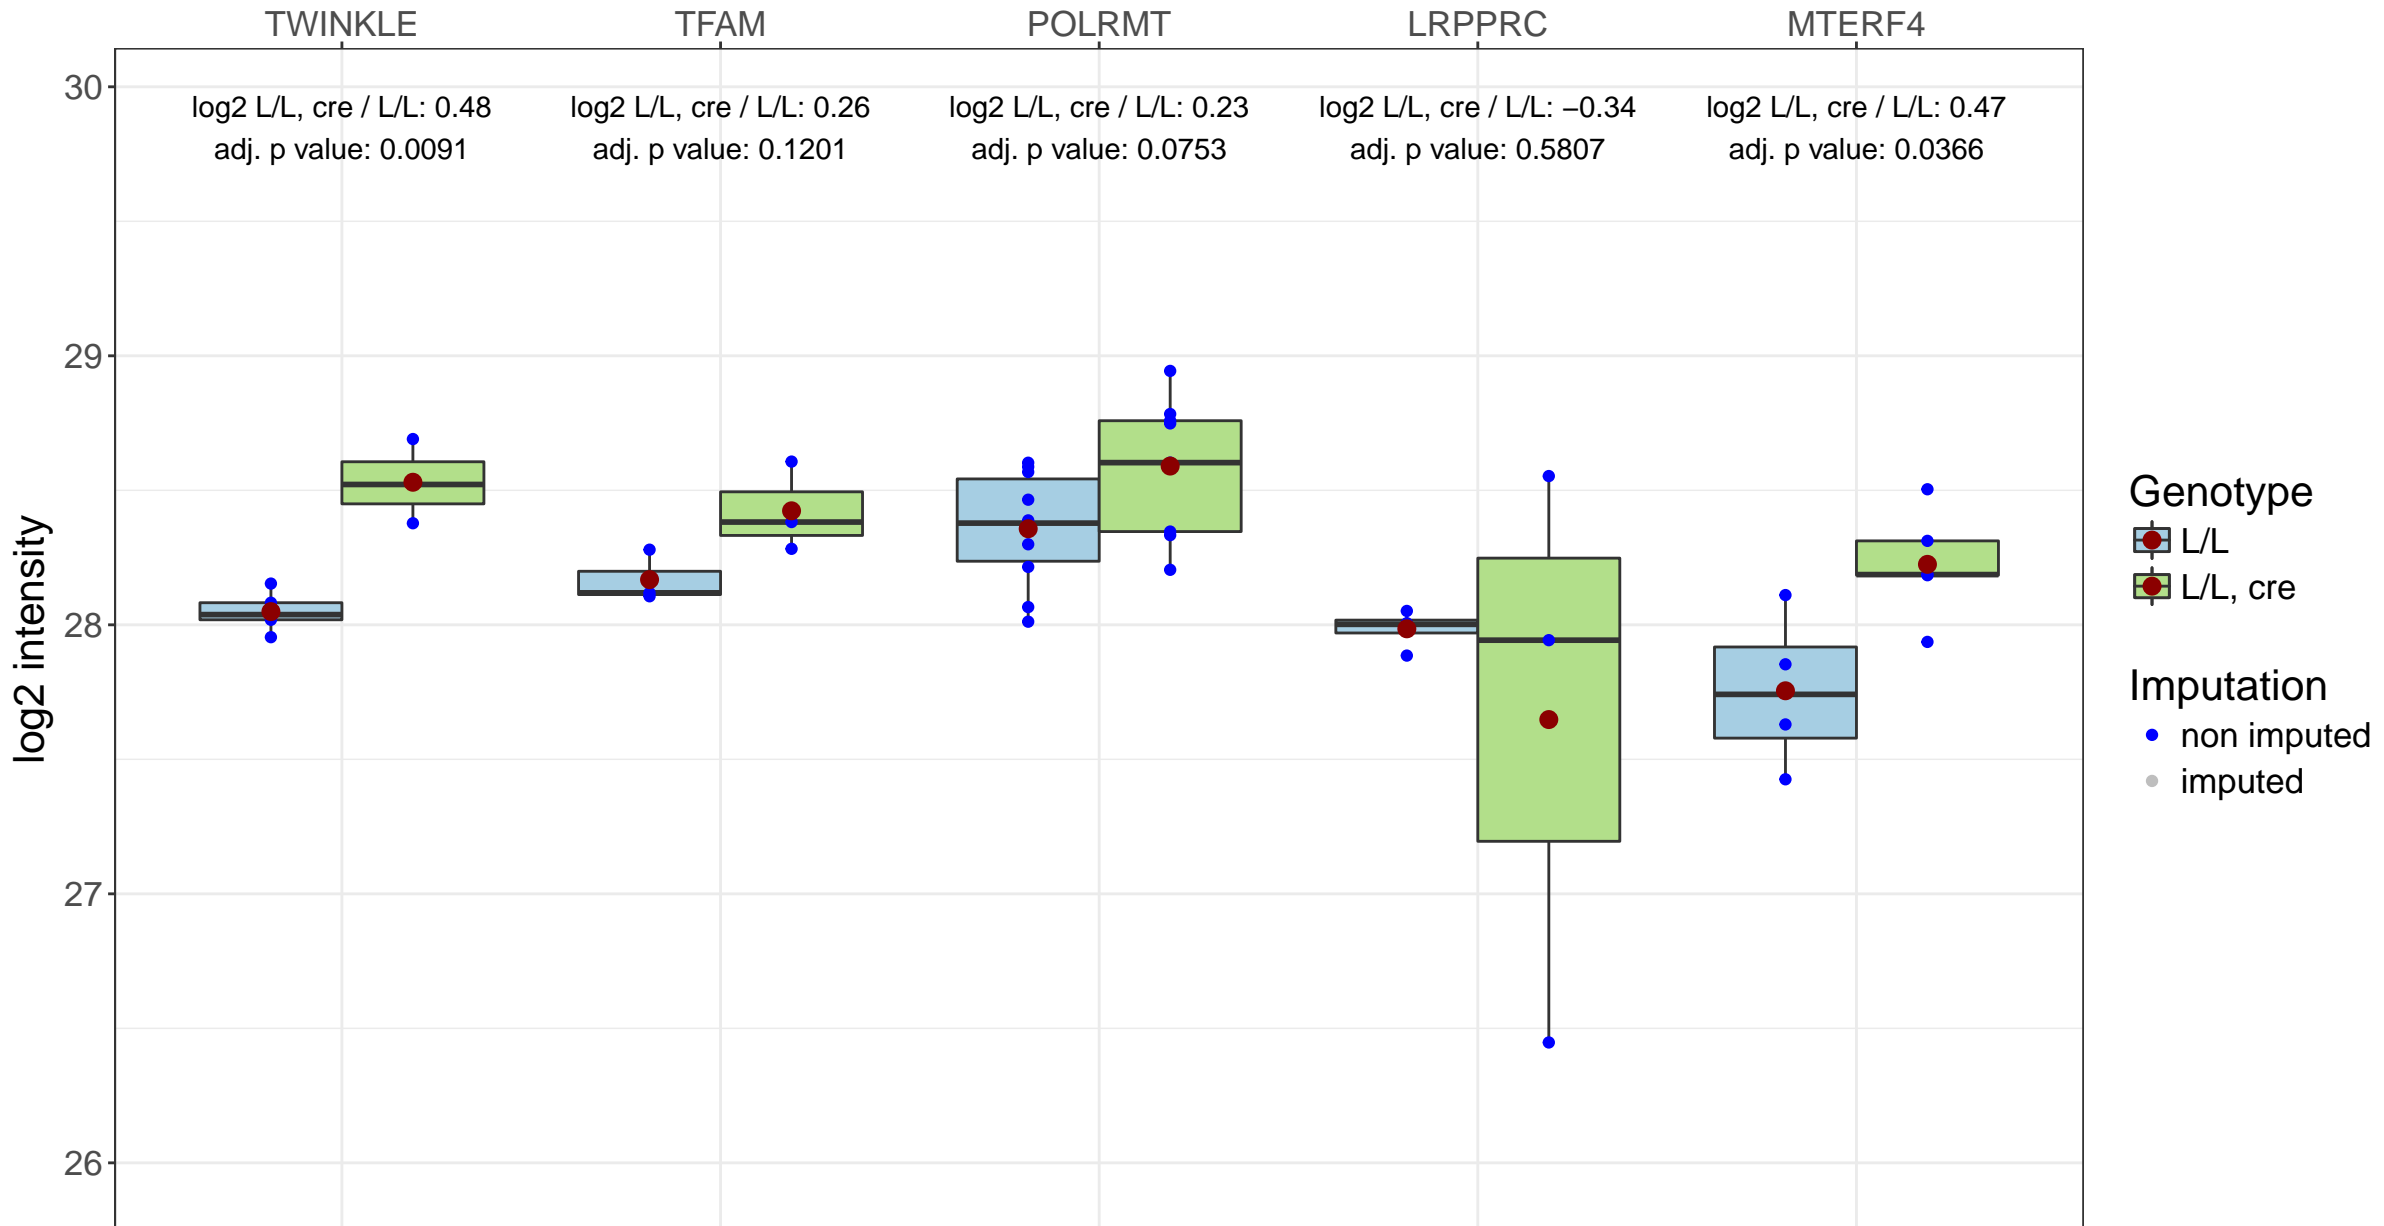

# MTG1 / Q8R2R6

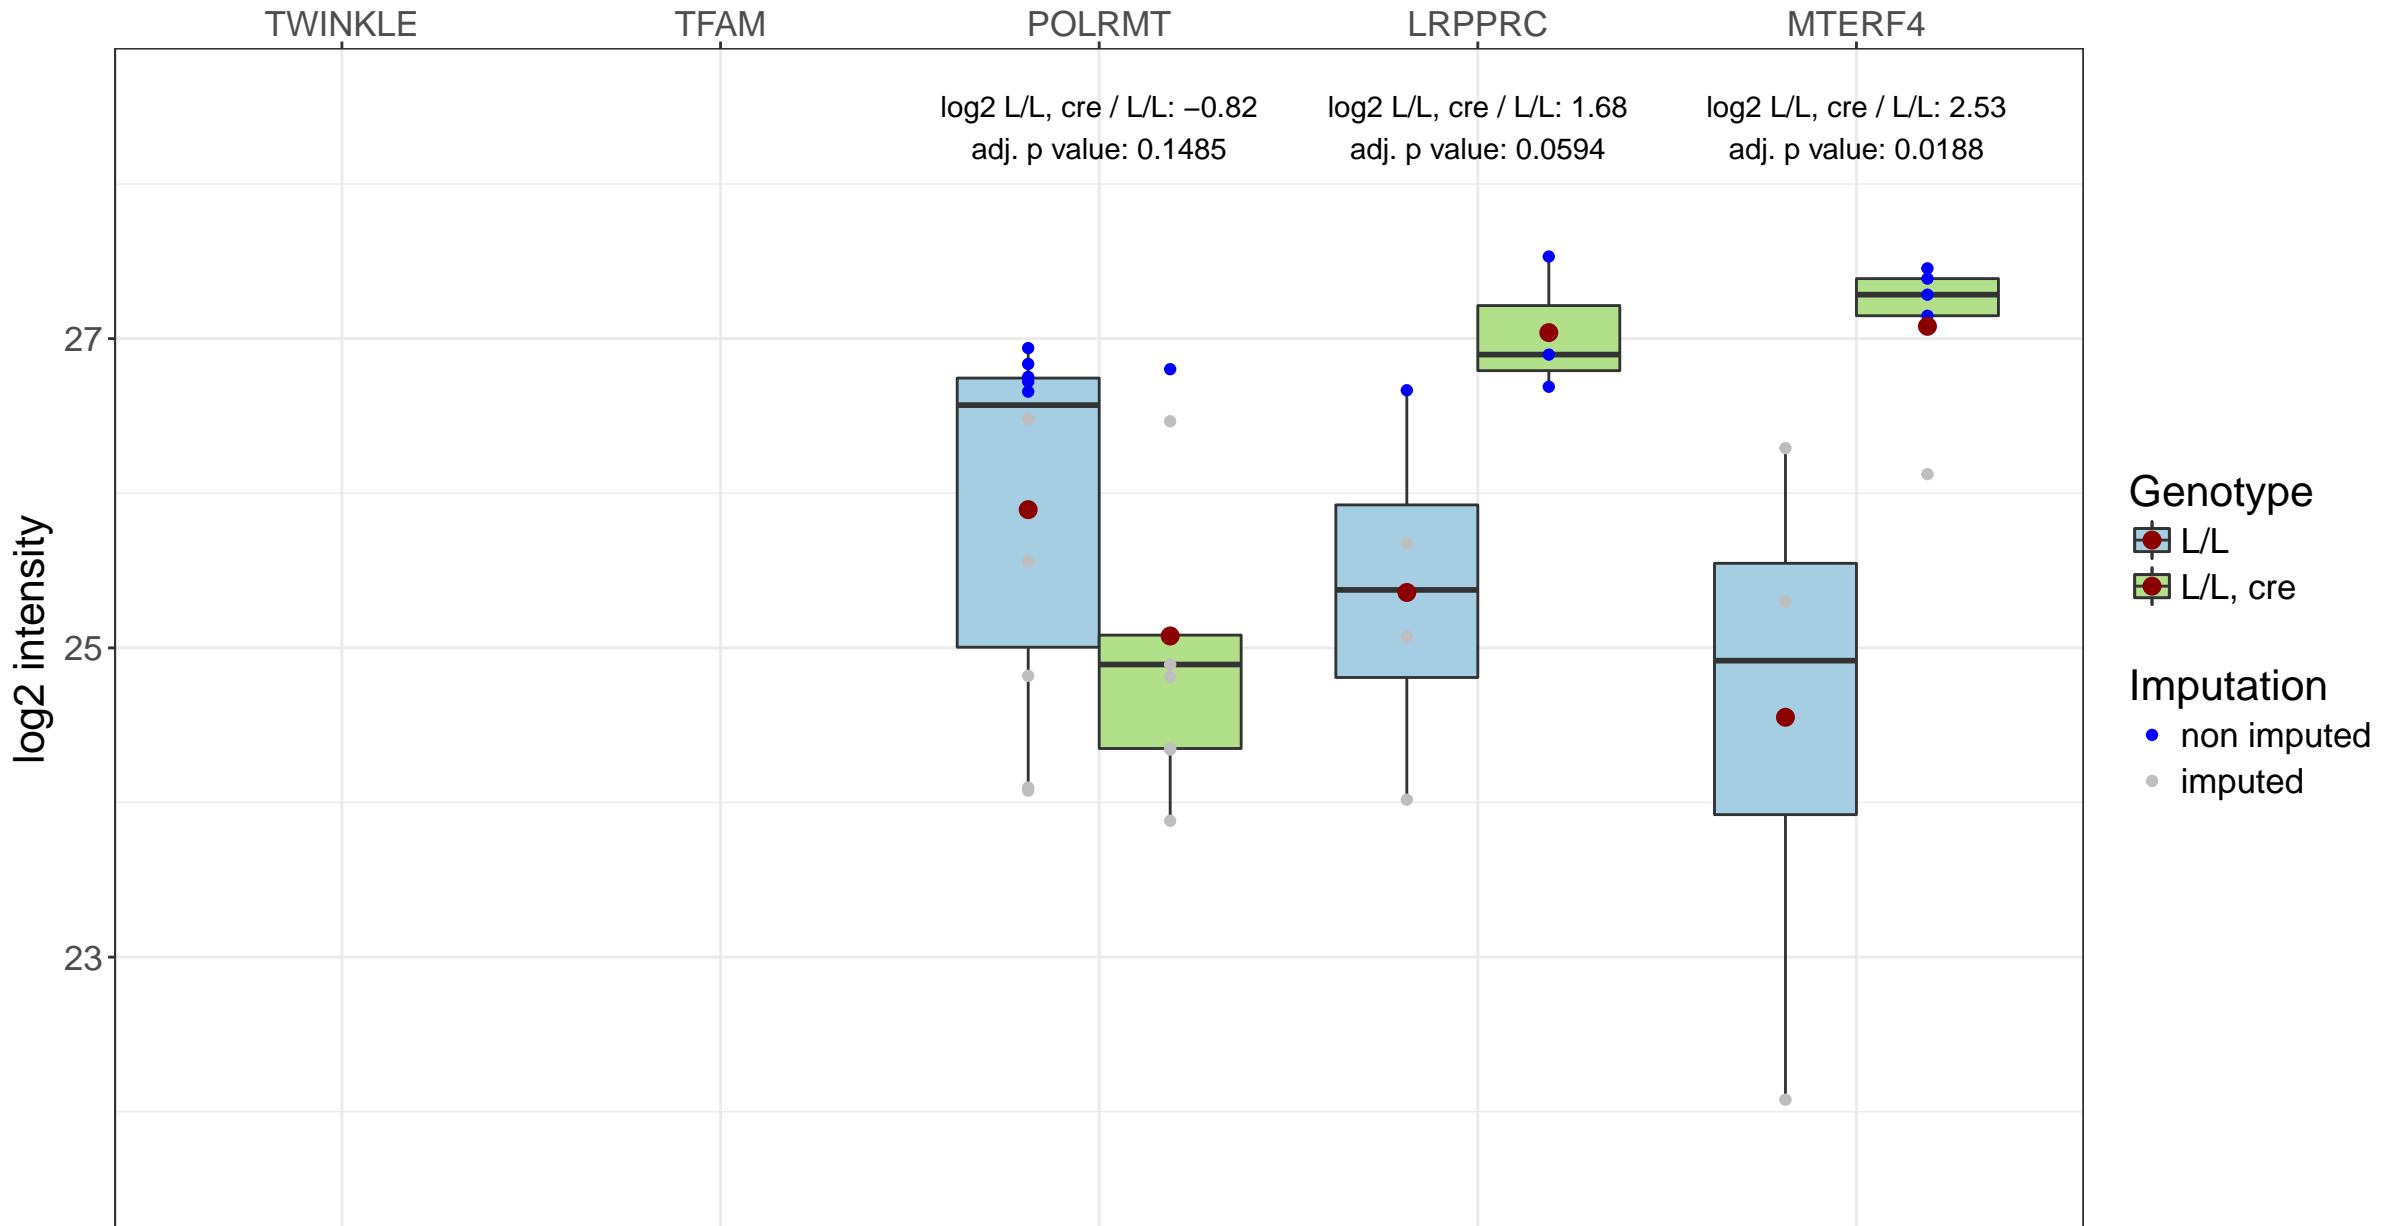

# MTHFD1L / Q3V3R1

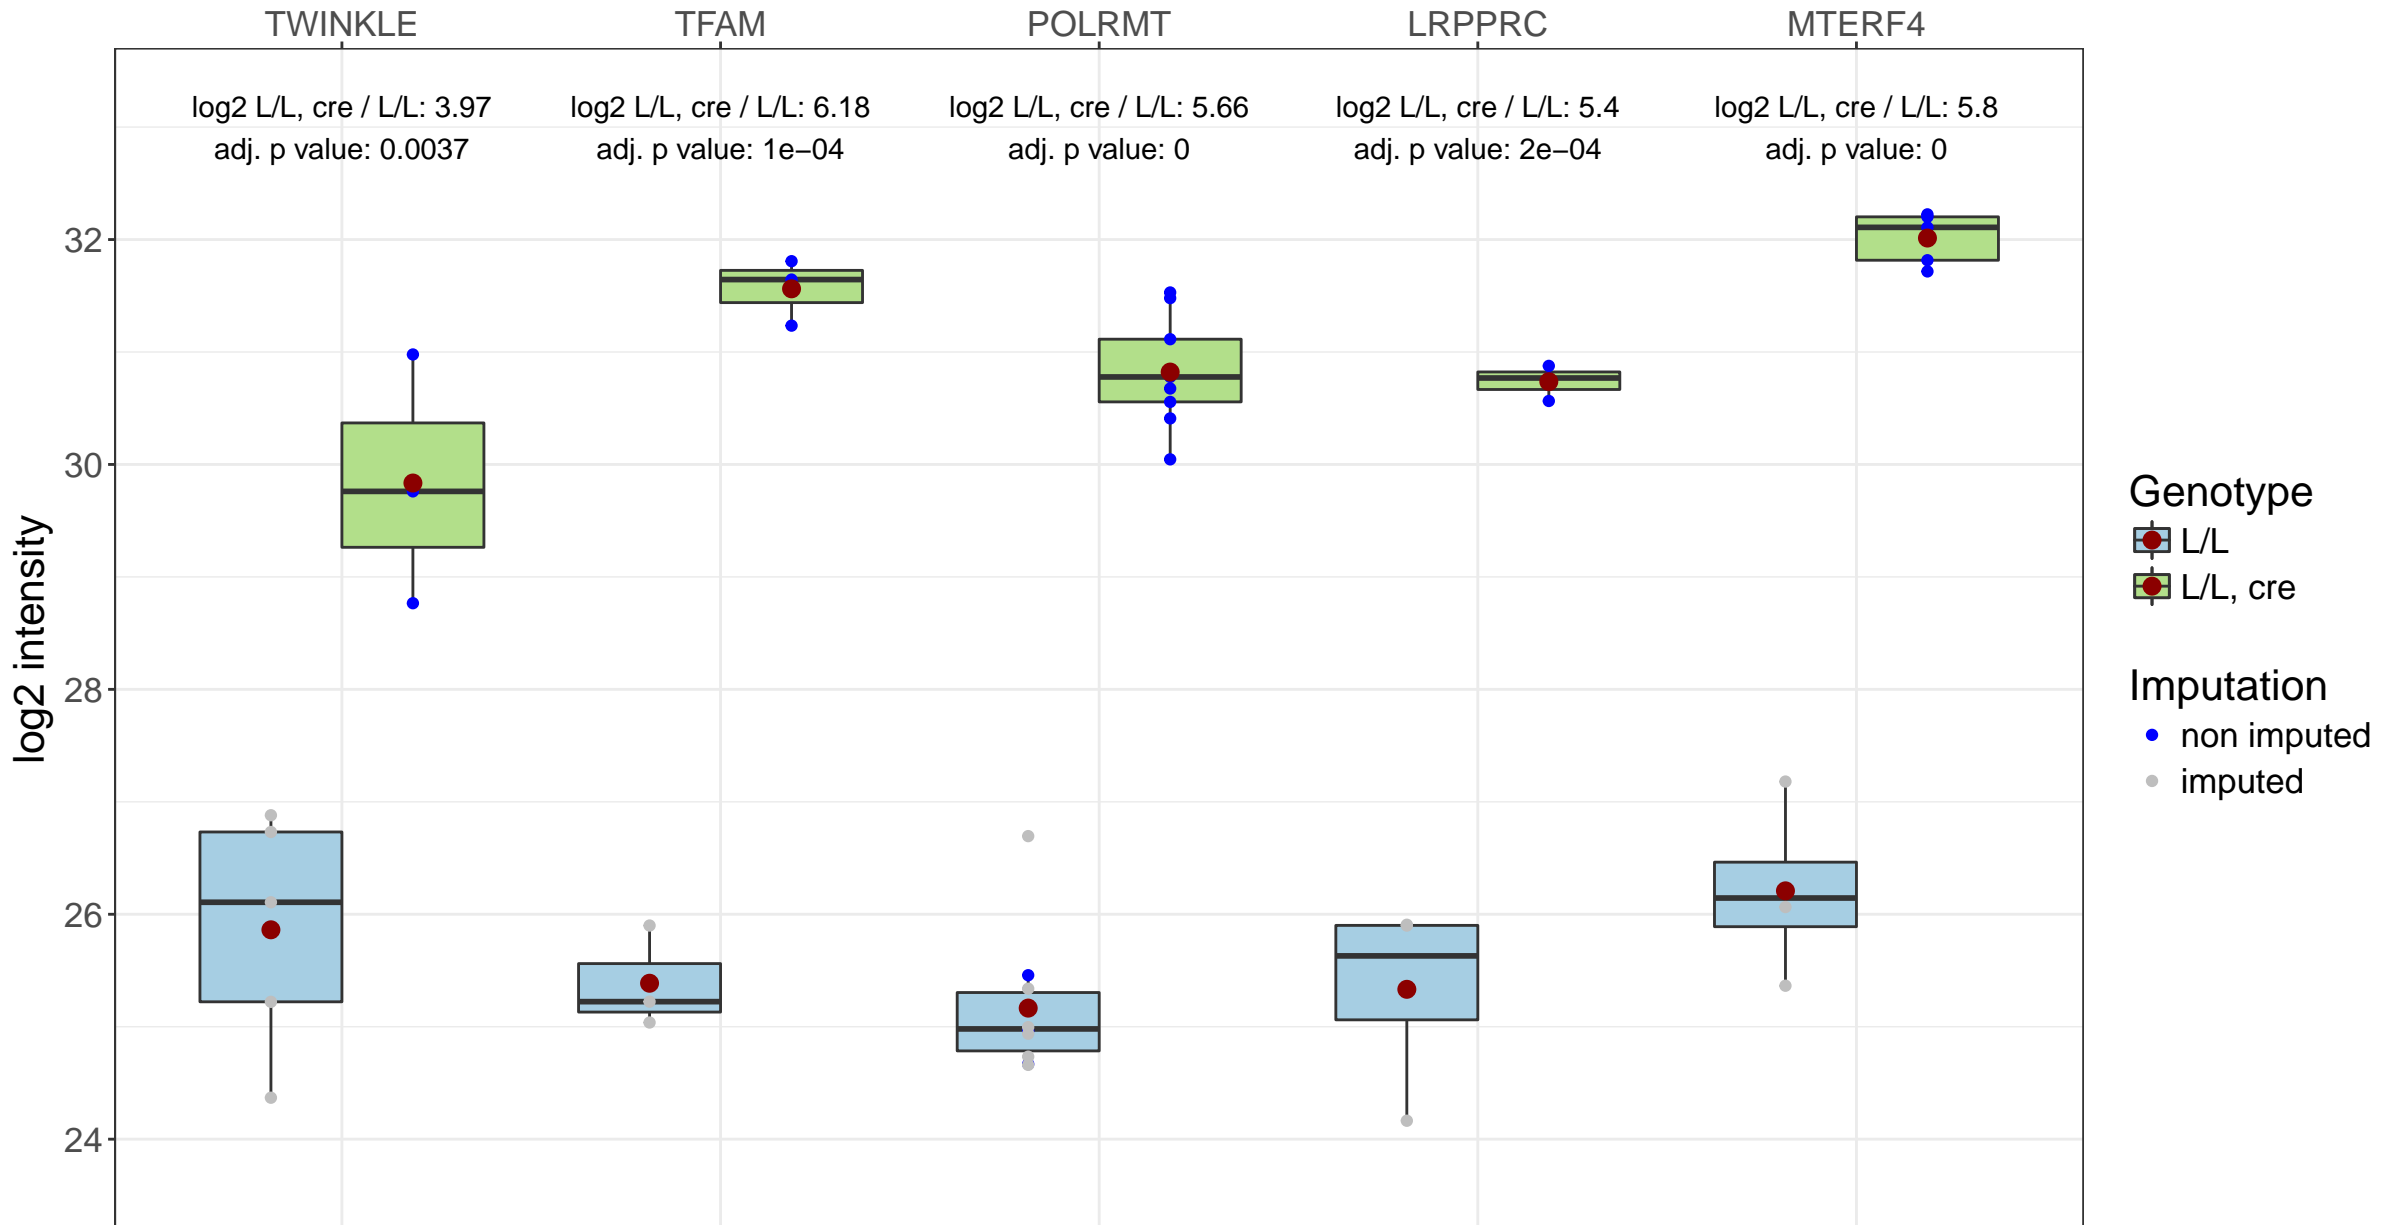

# MTHFD2 / P18155

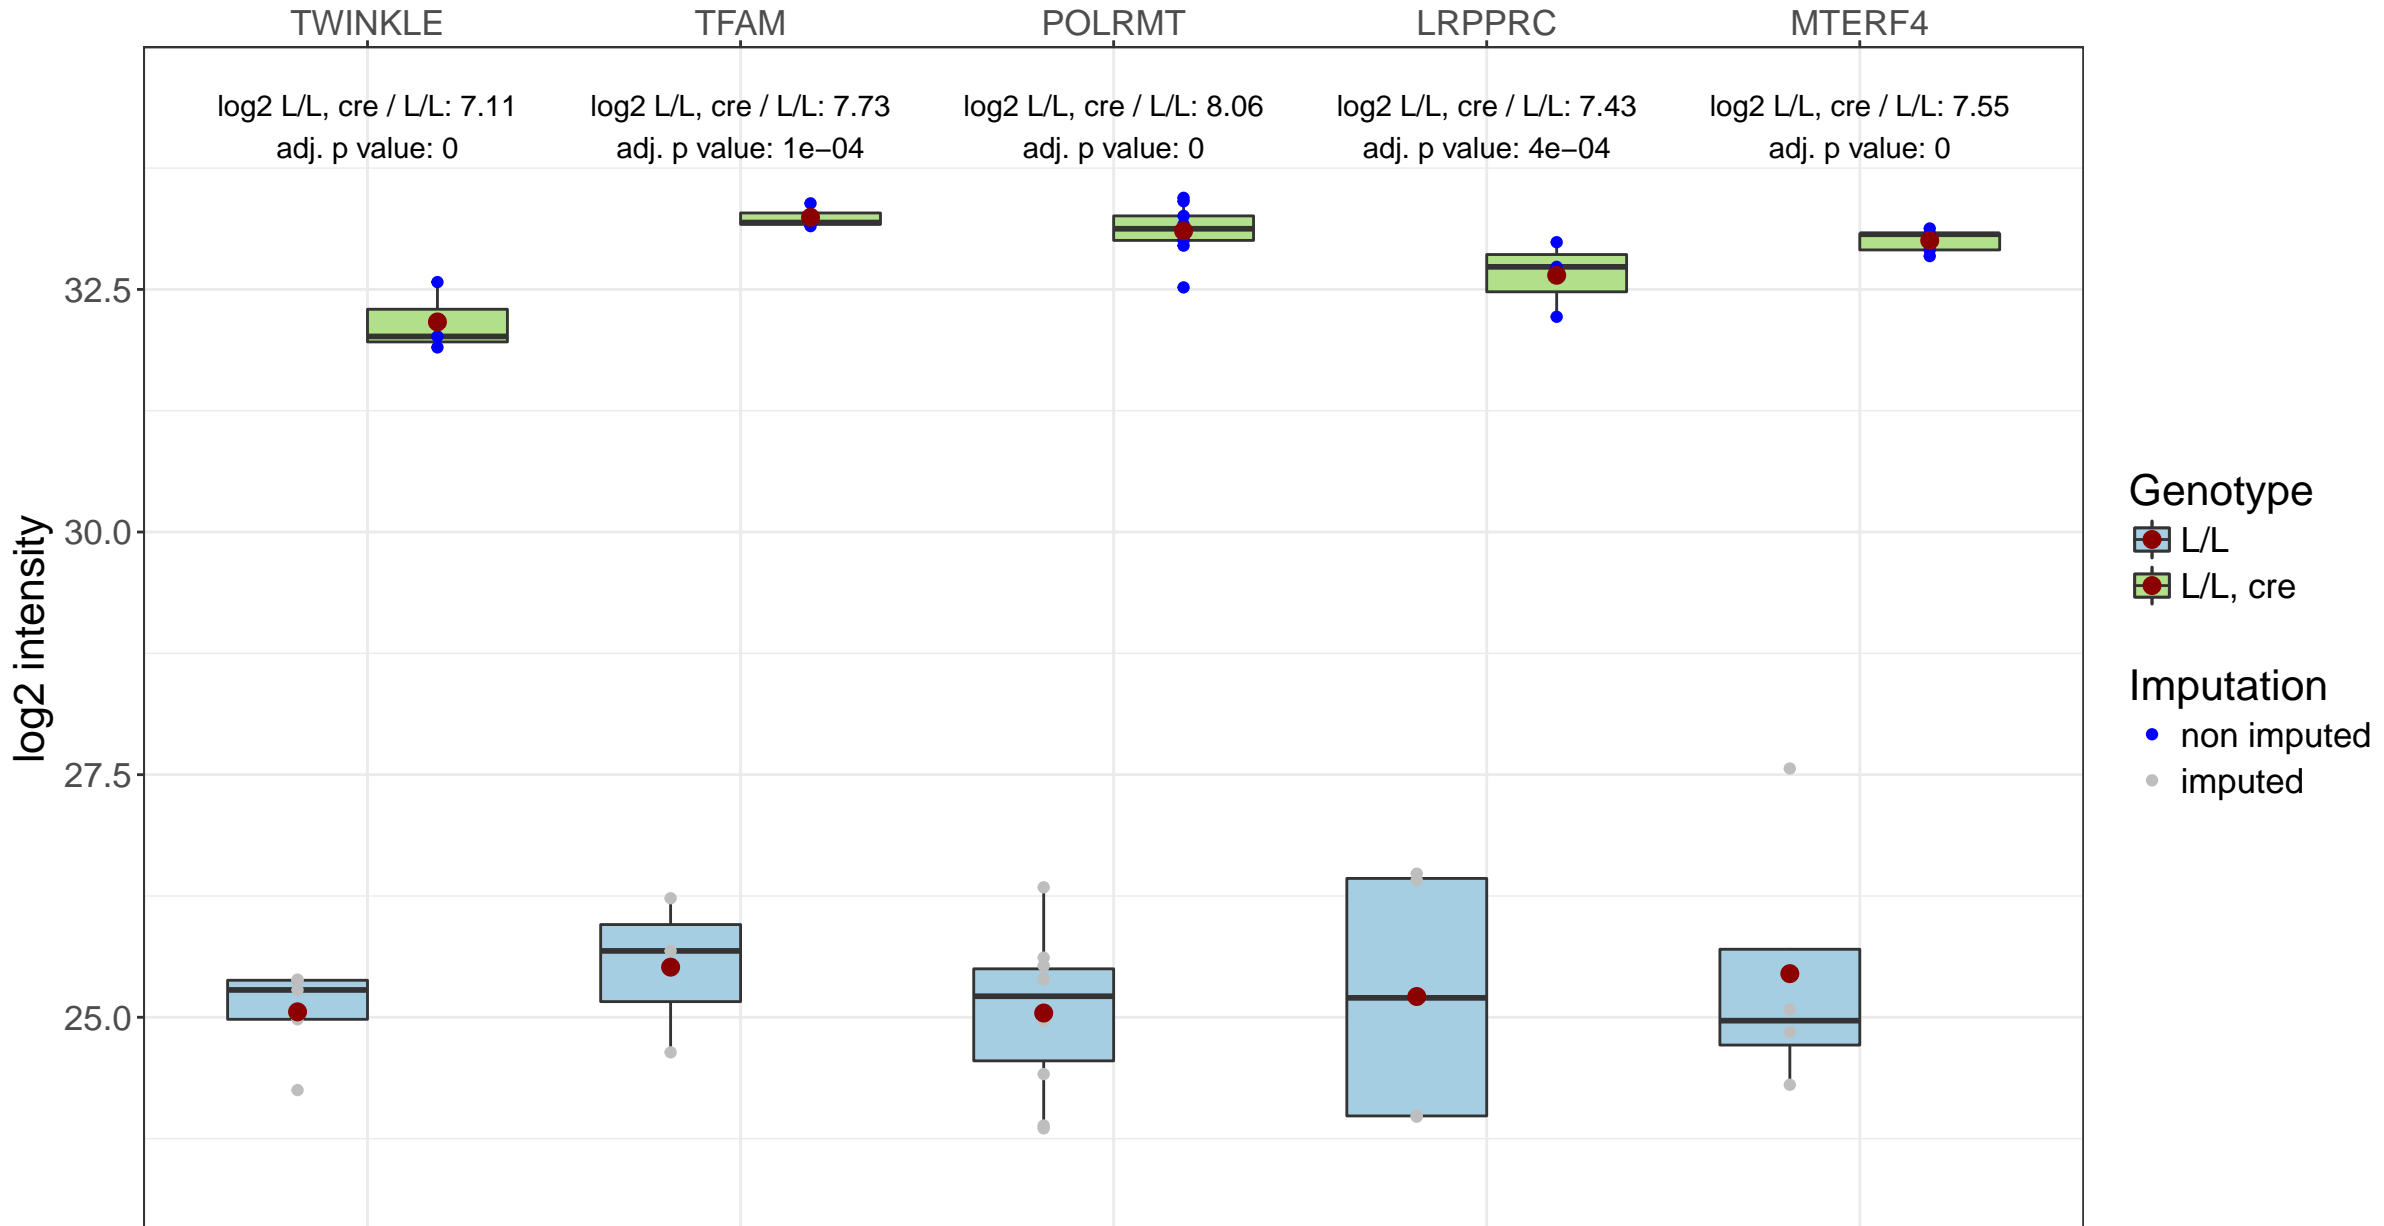

# MTIF2 / Q91YJ5

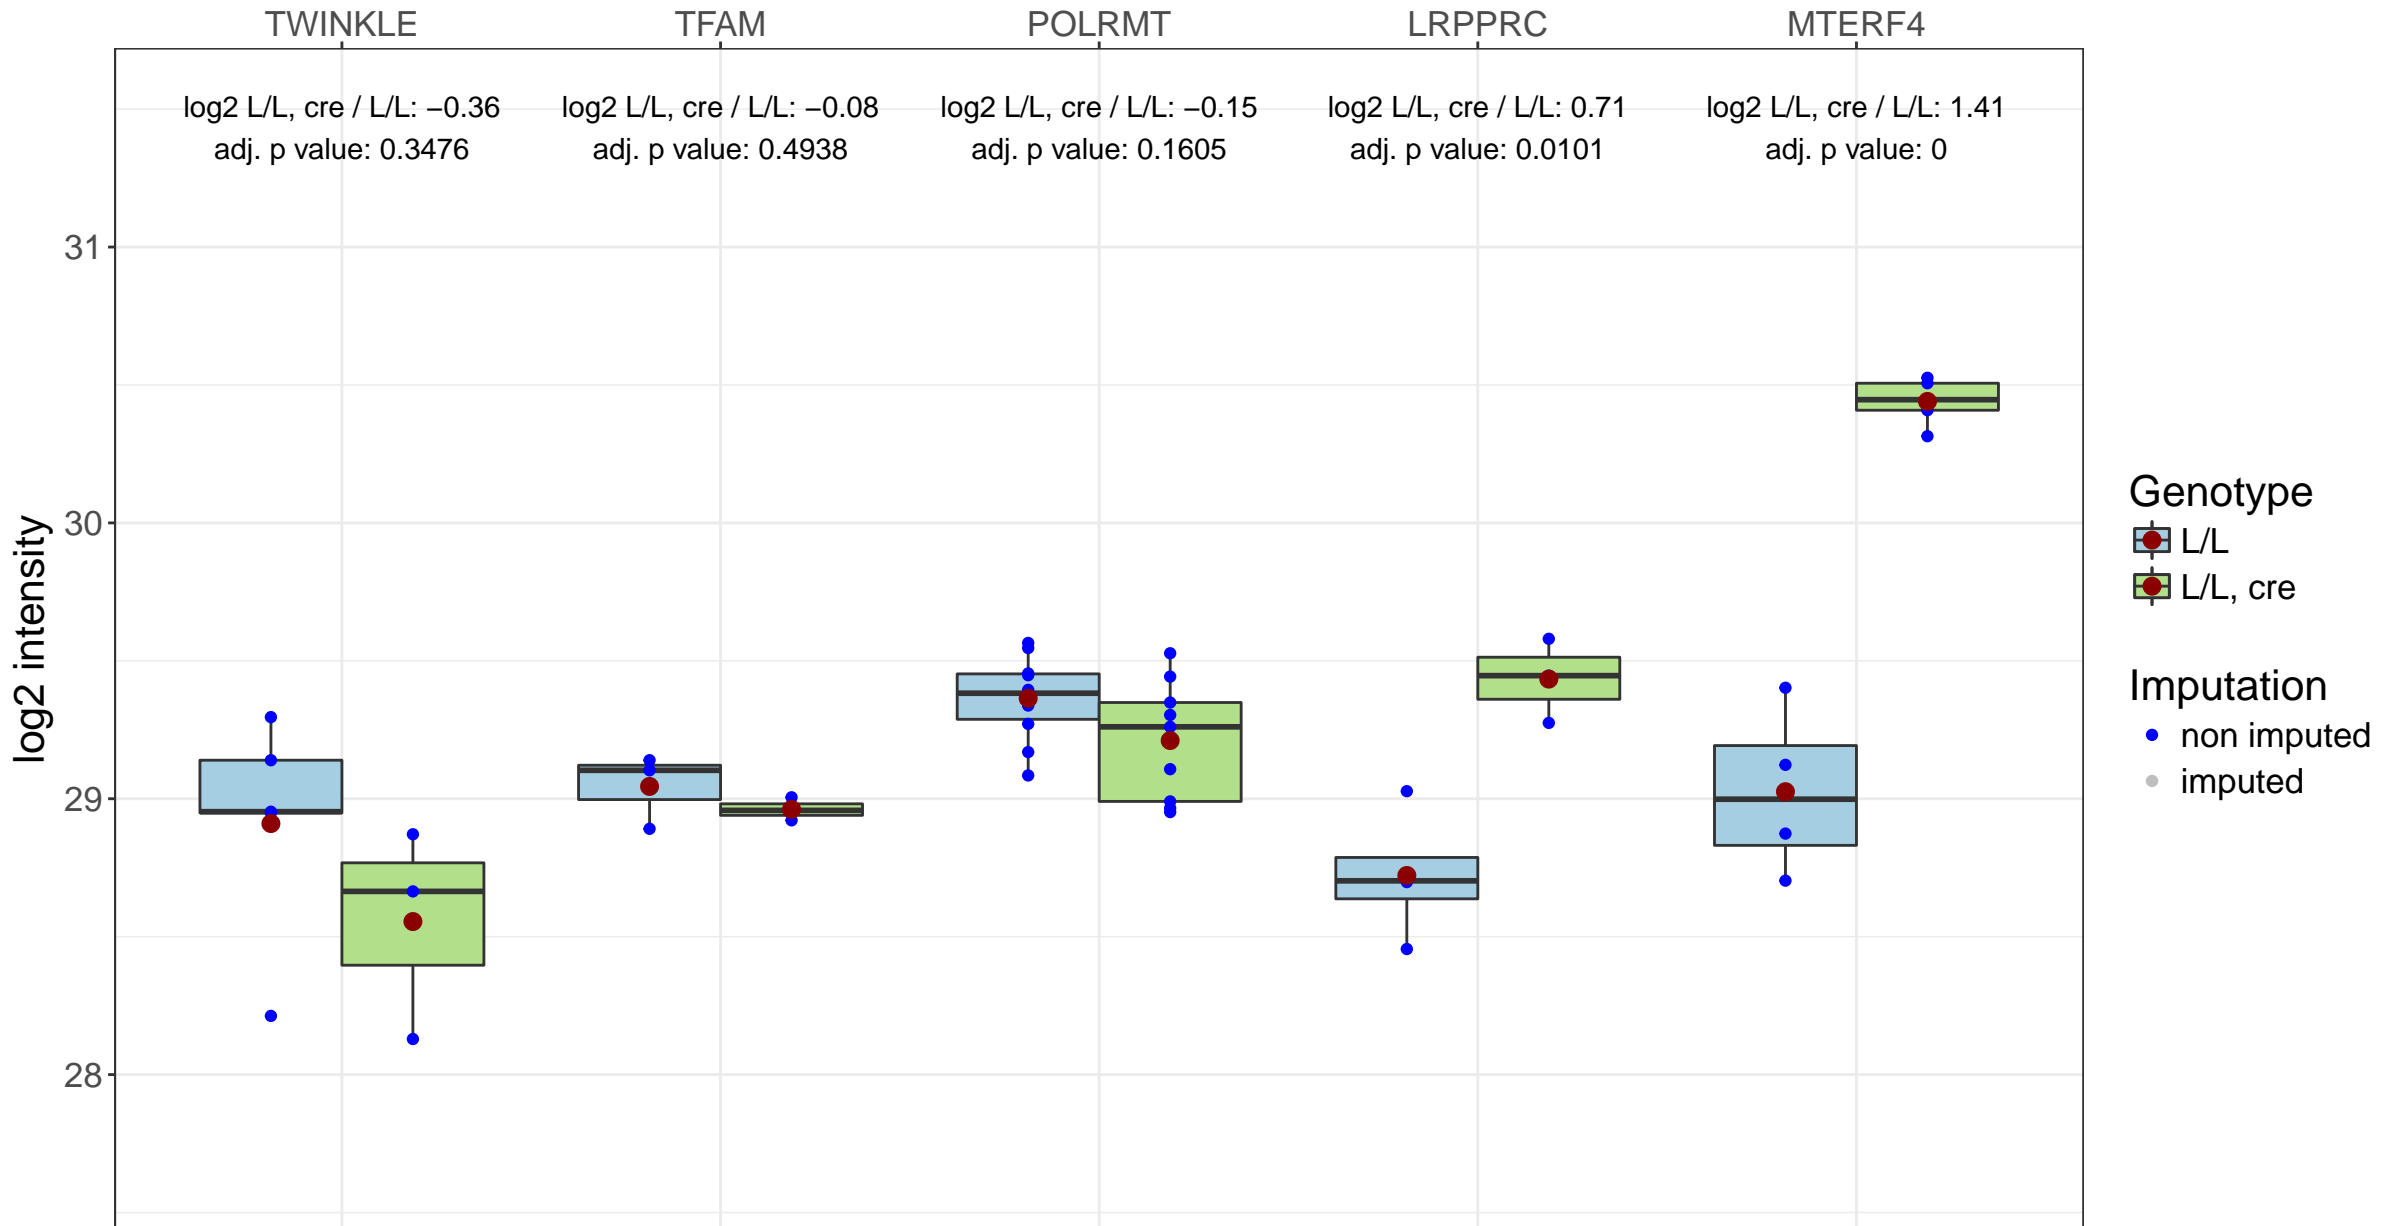

# MTIF3 / Q9CZD5

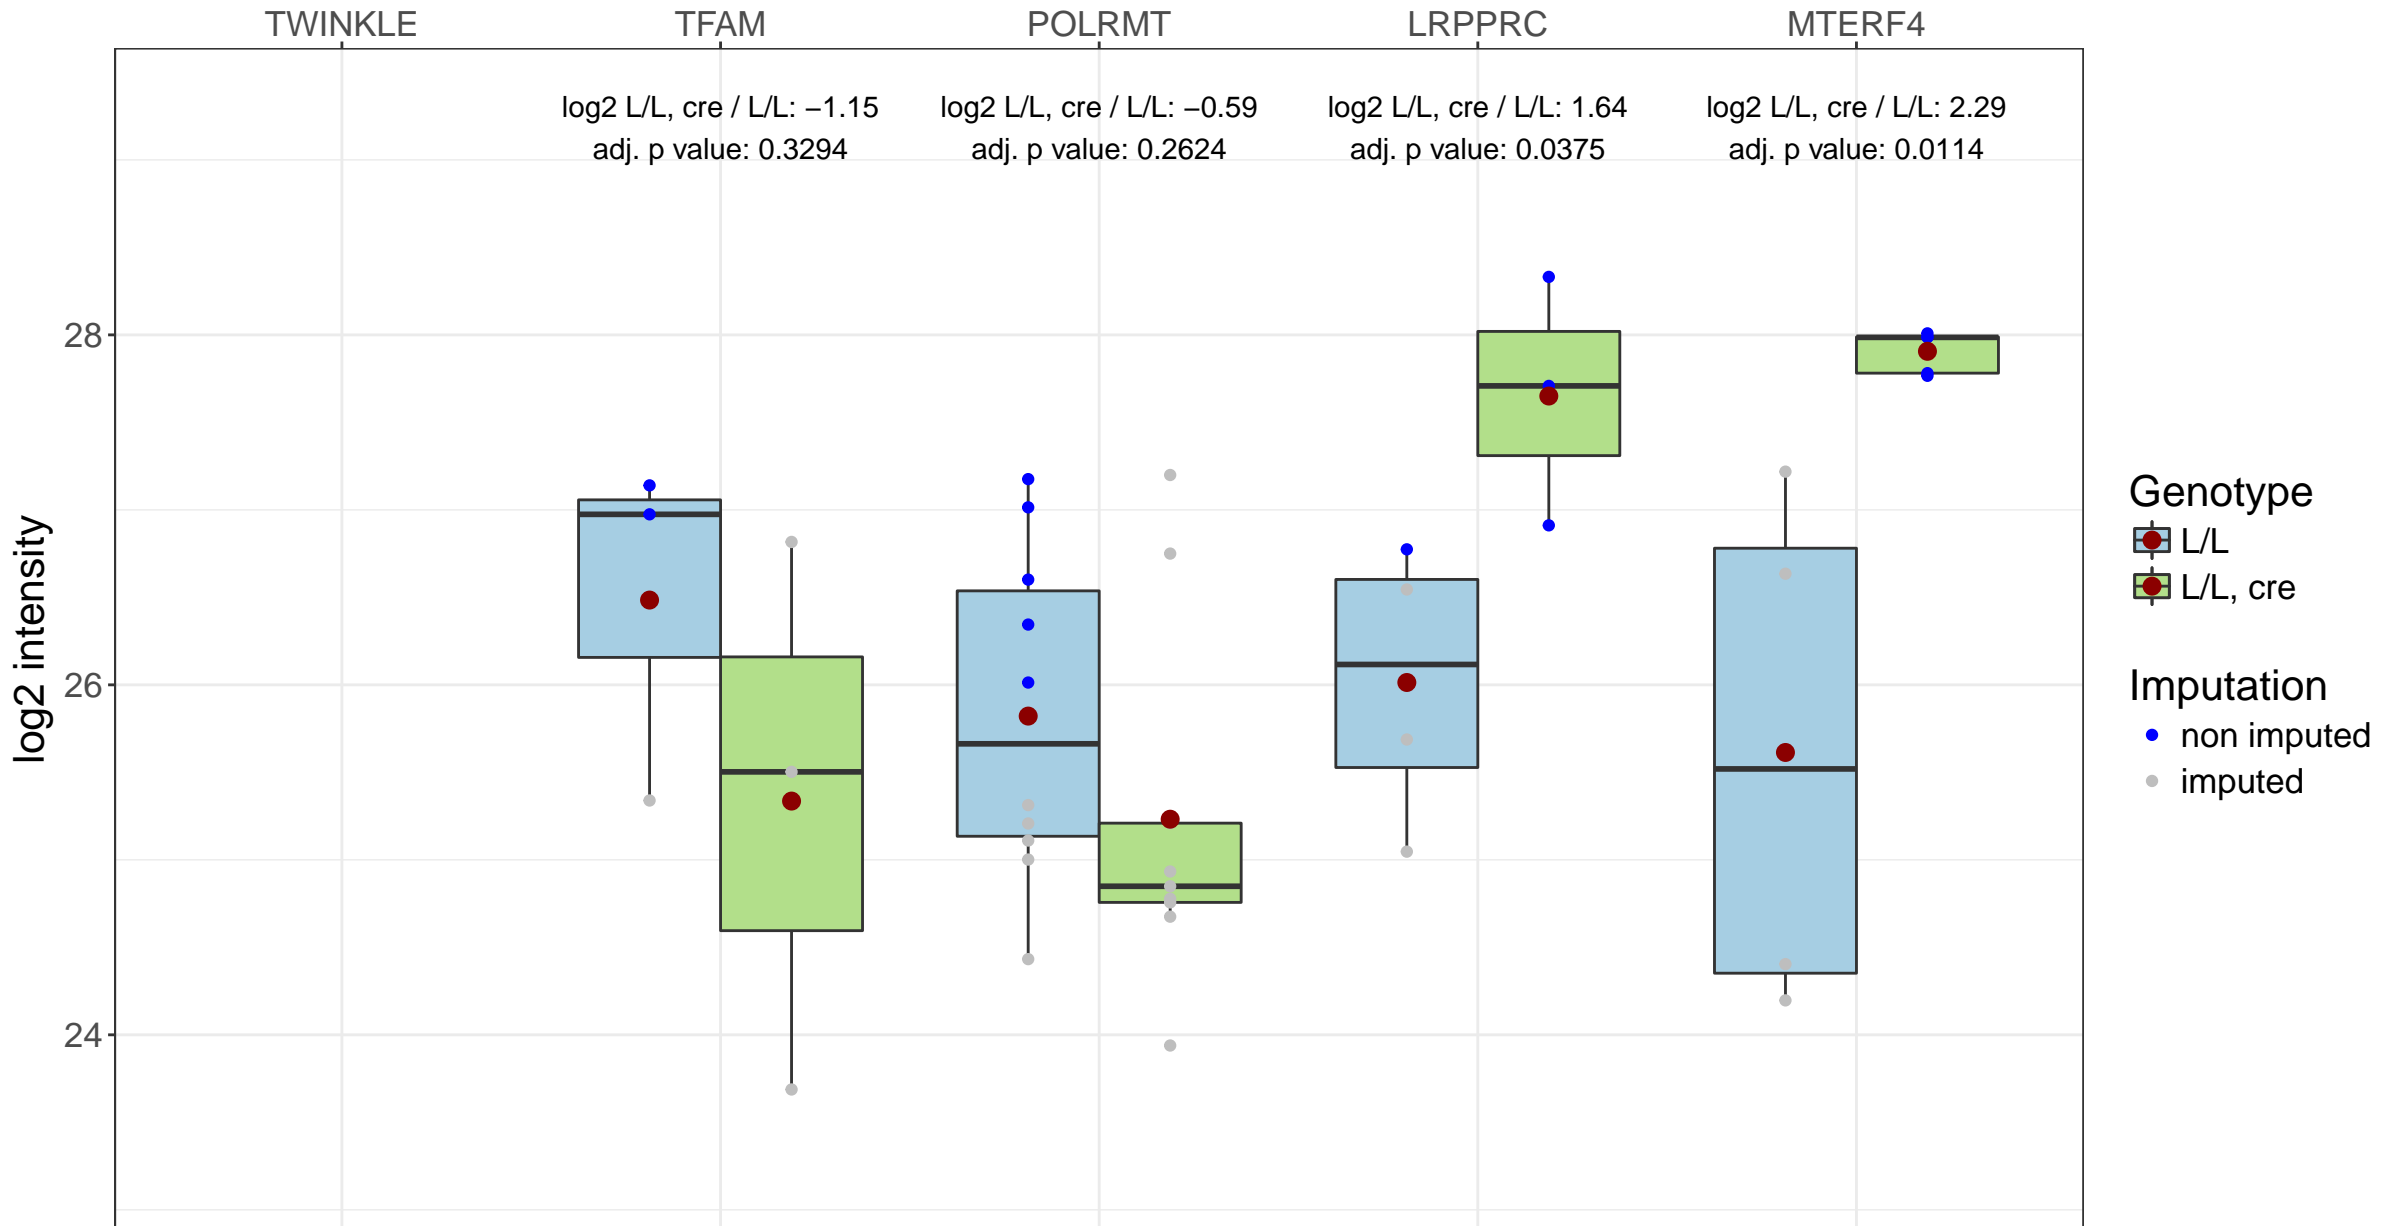

# MTND1 / P03888

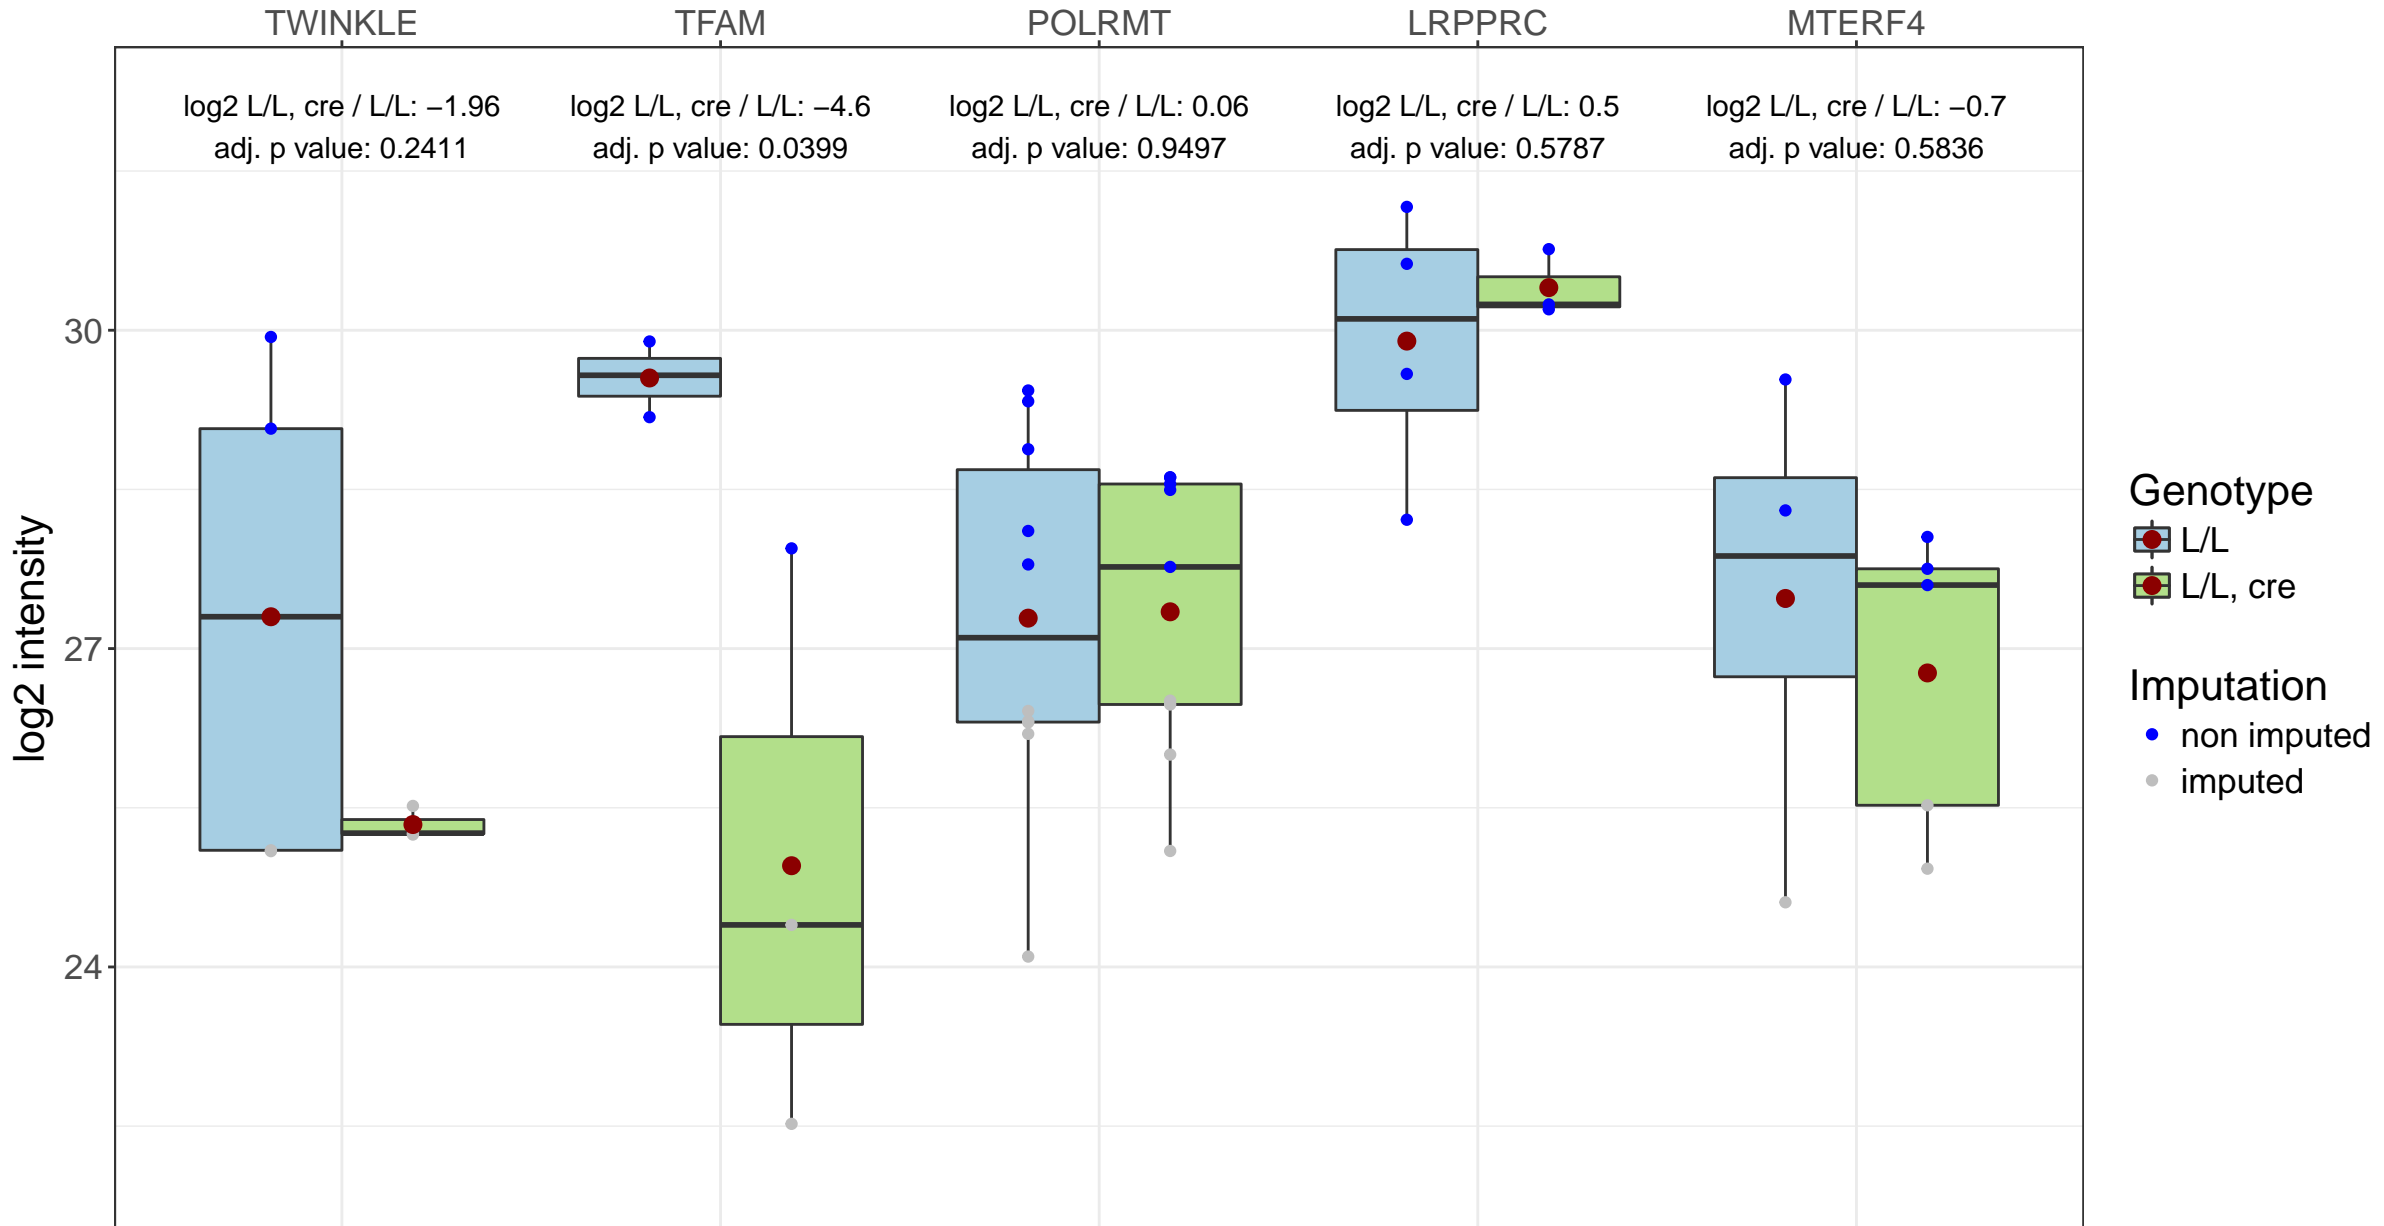

# MTO1 / G5E889

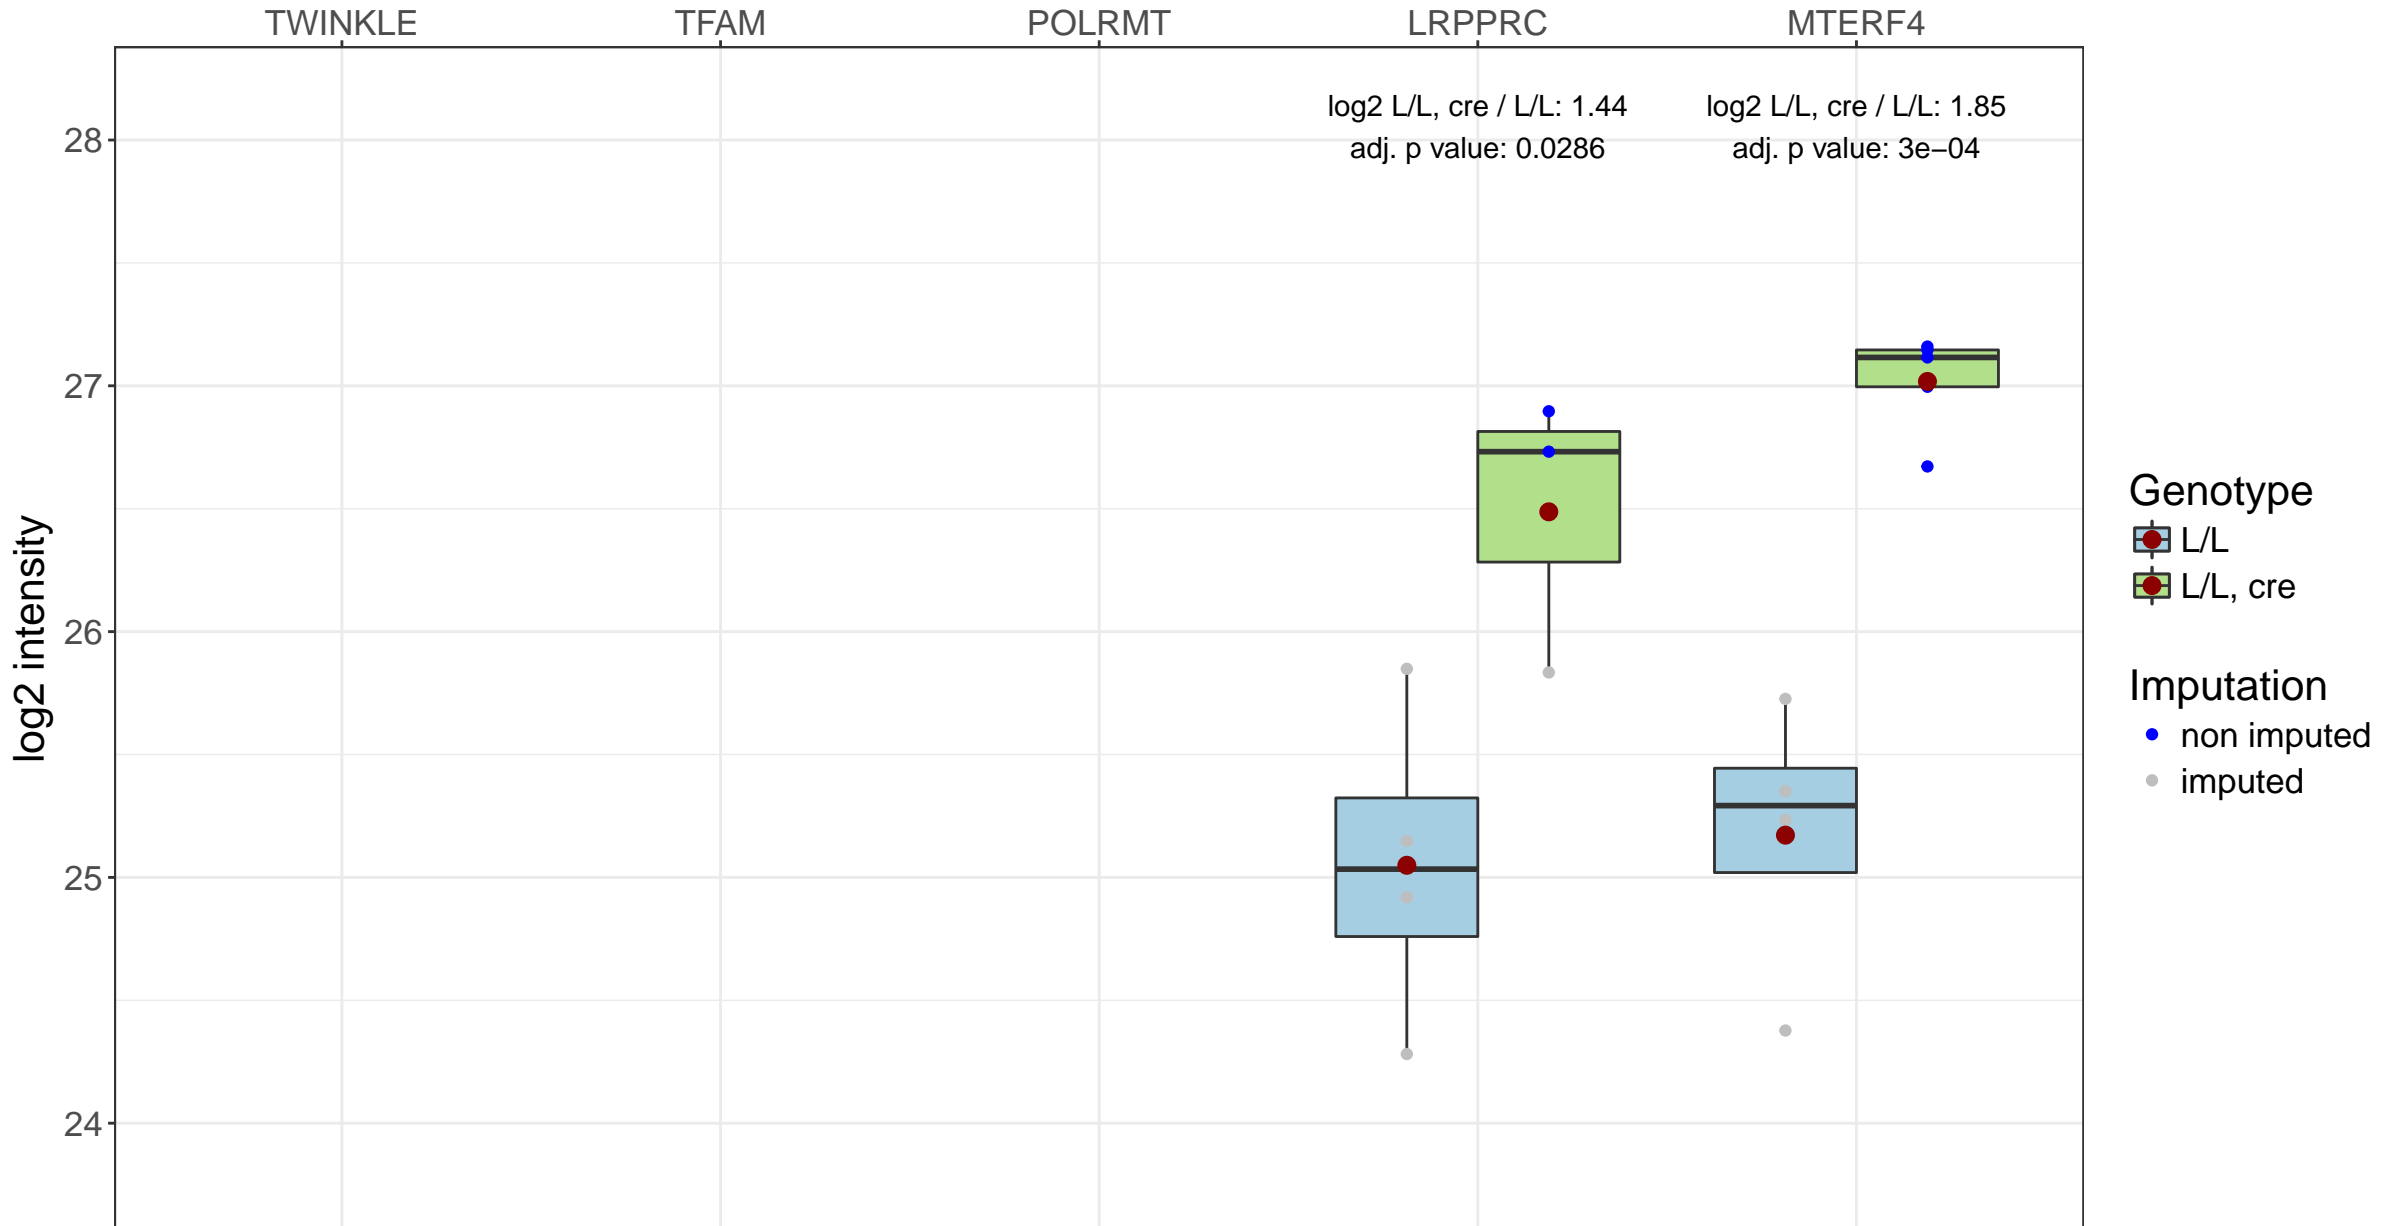



# MTPAP / Q9D0D3

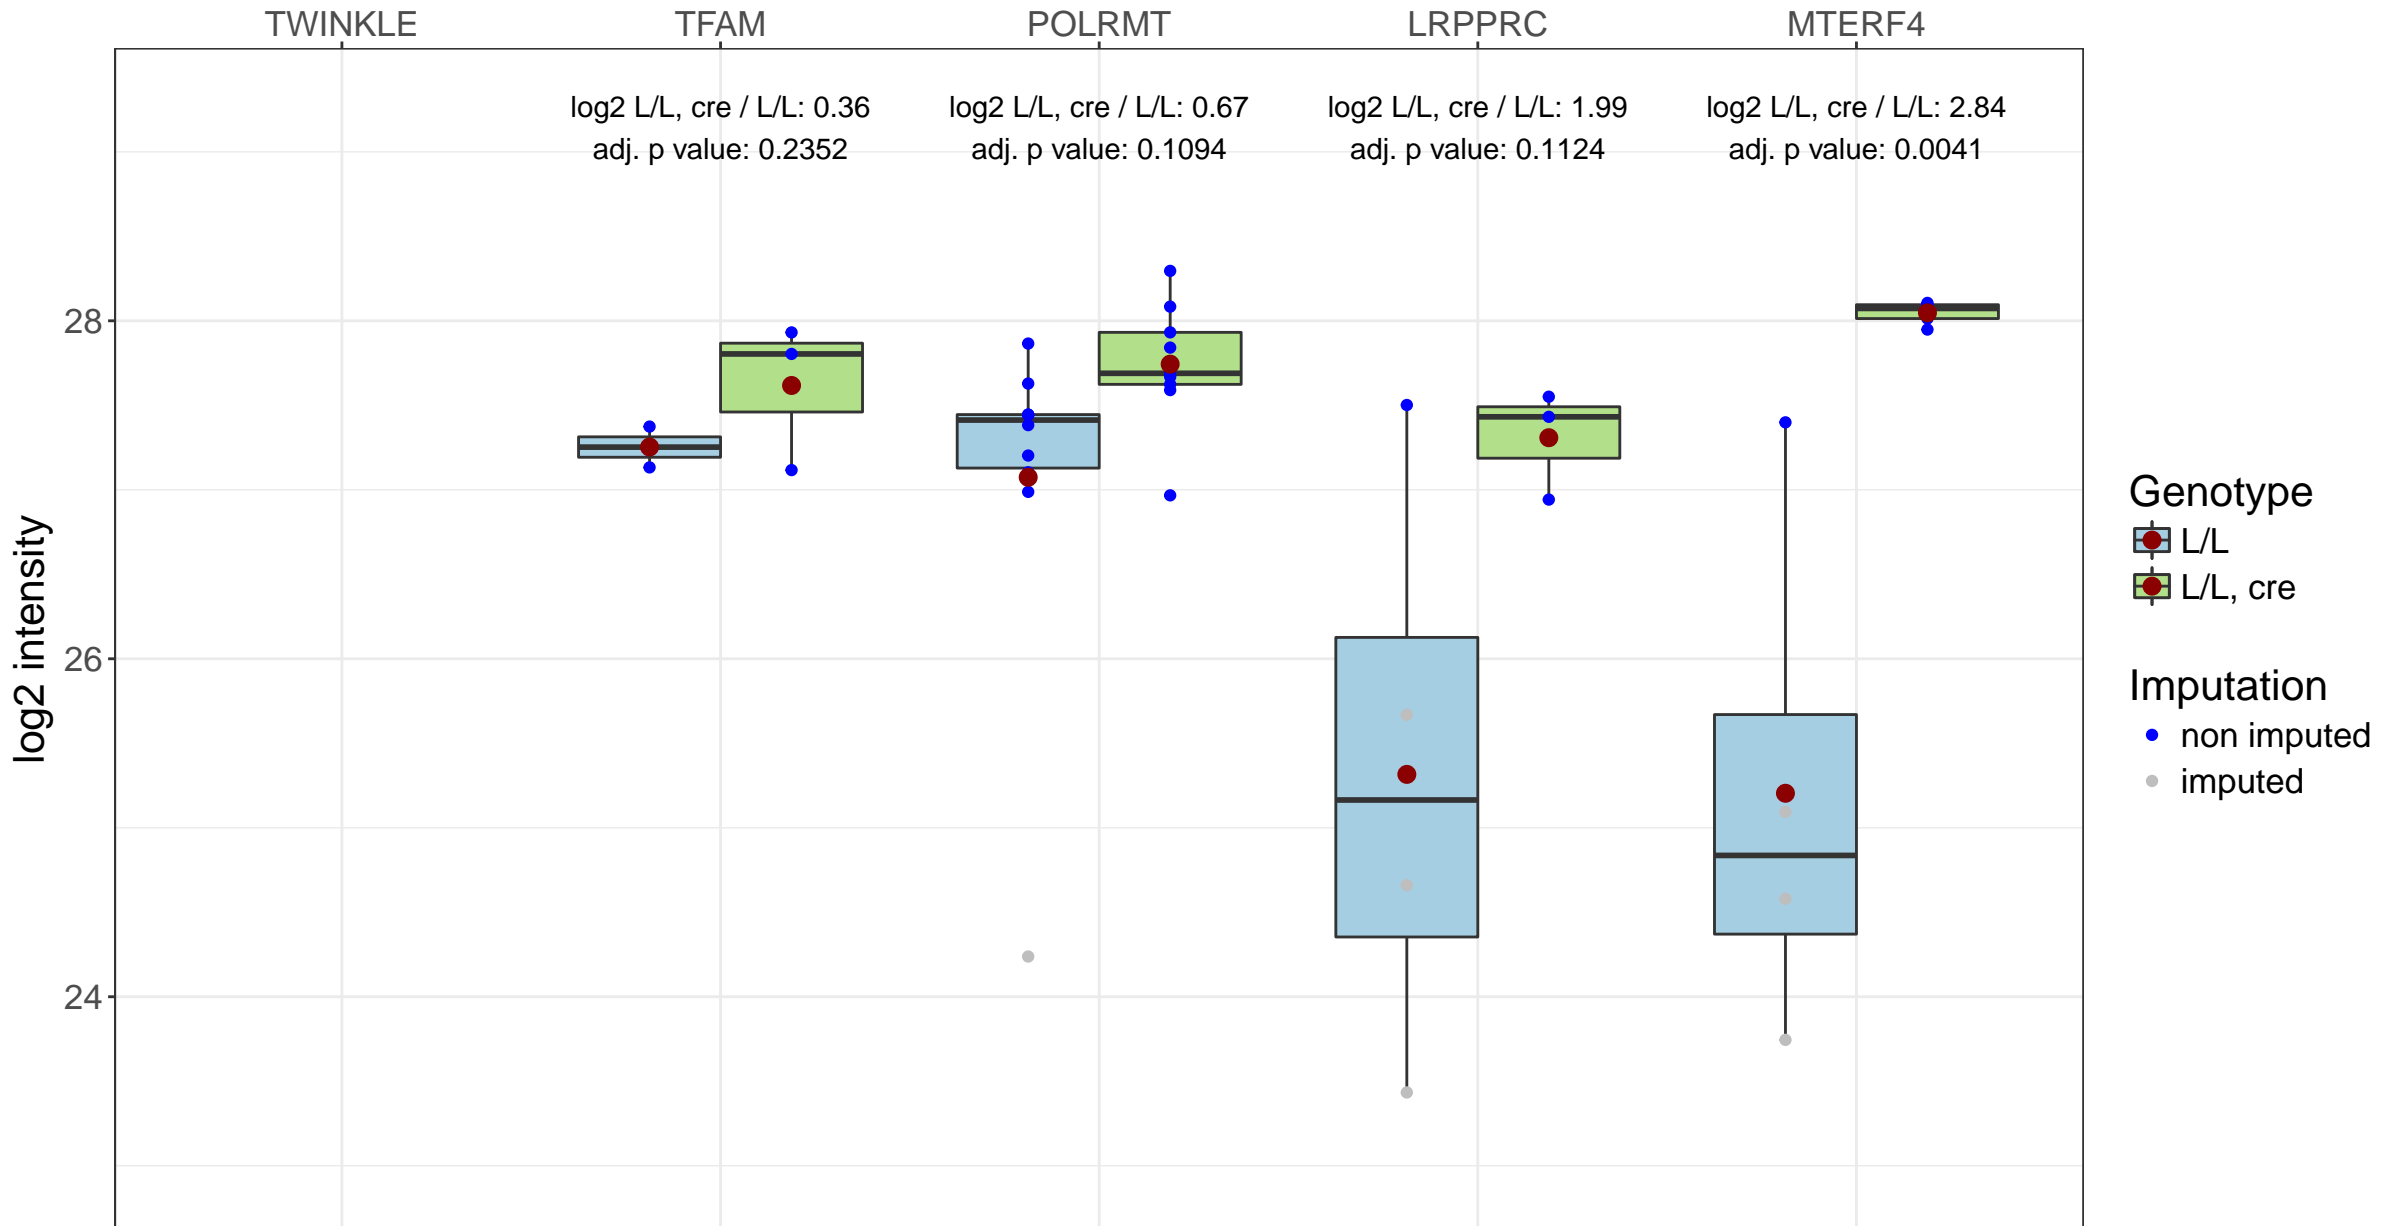

# MTRF1 / Q8K126

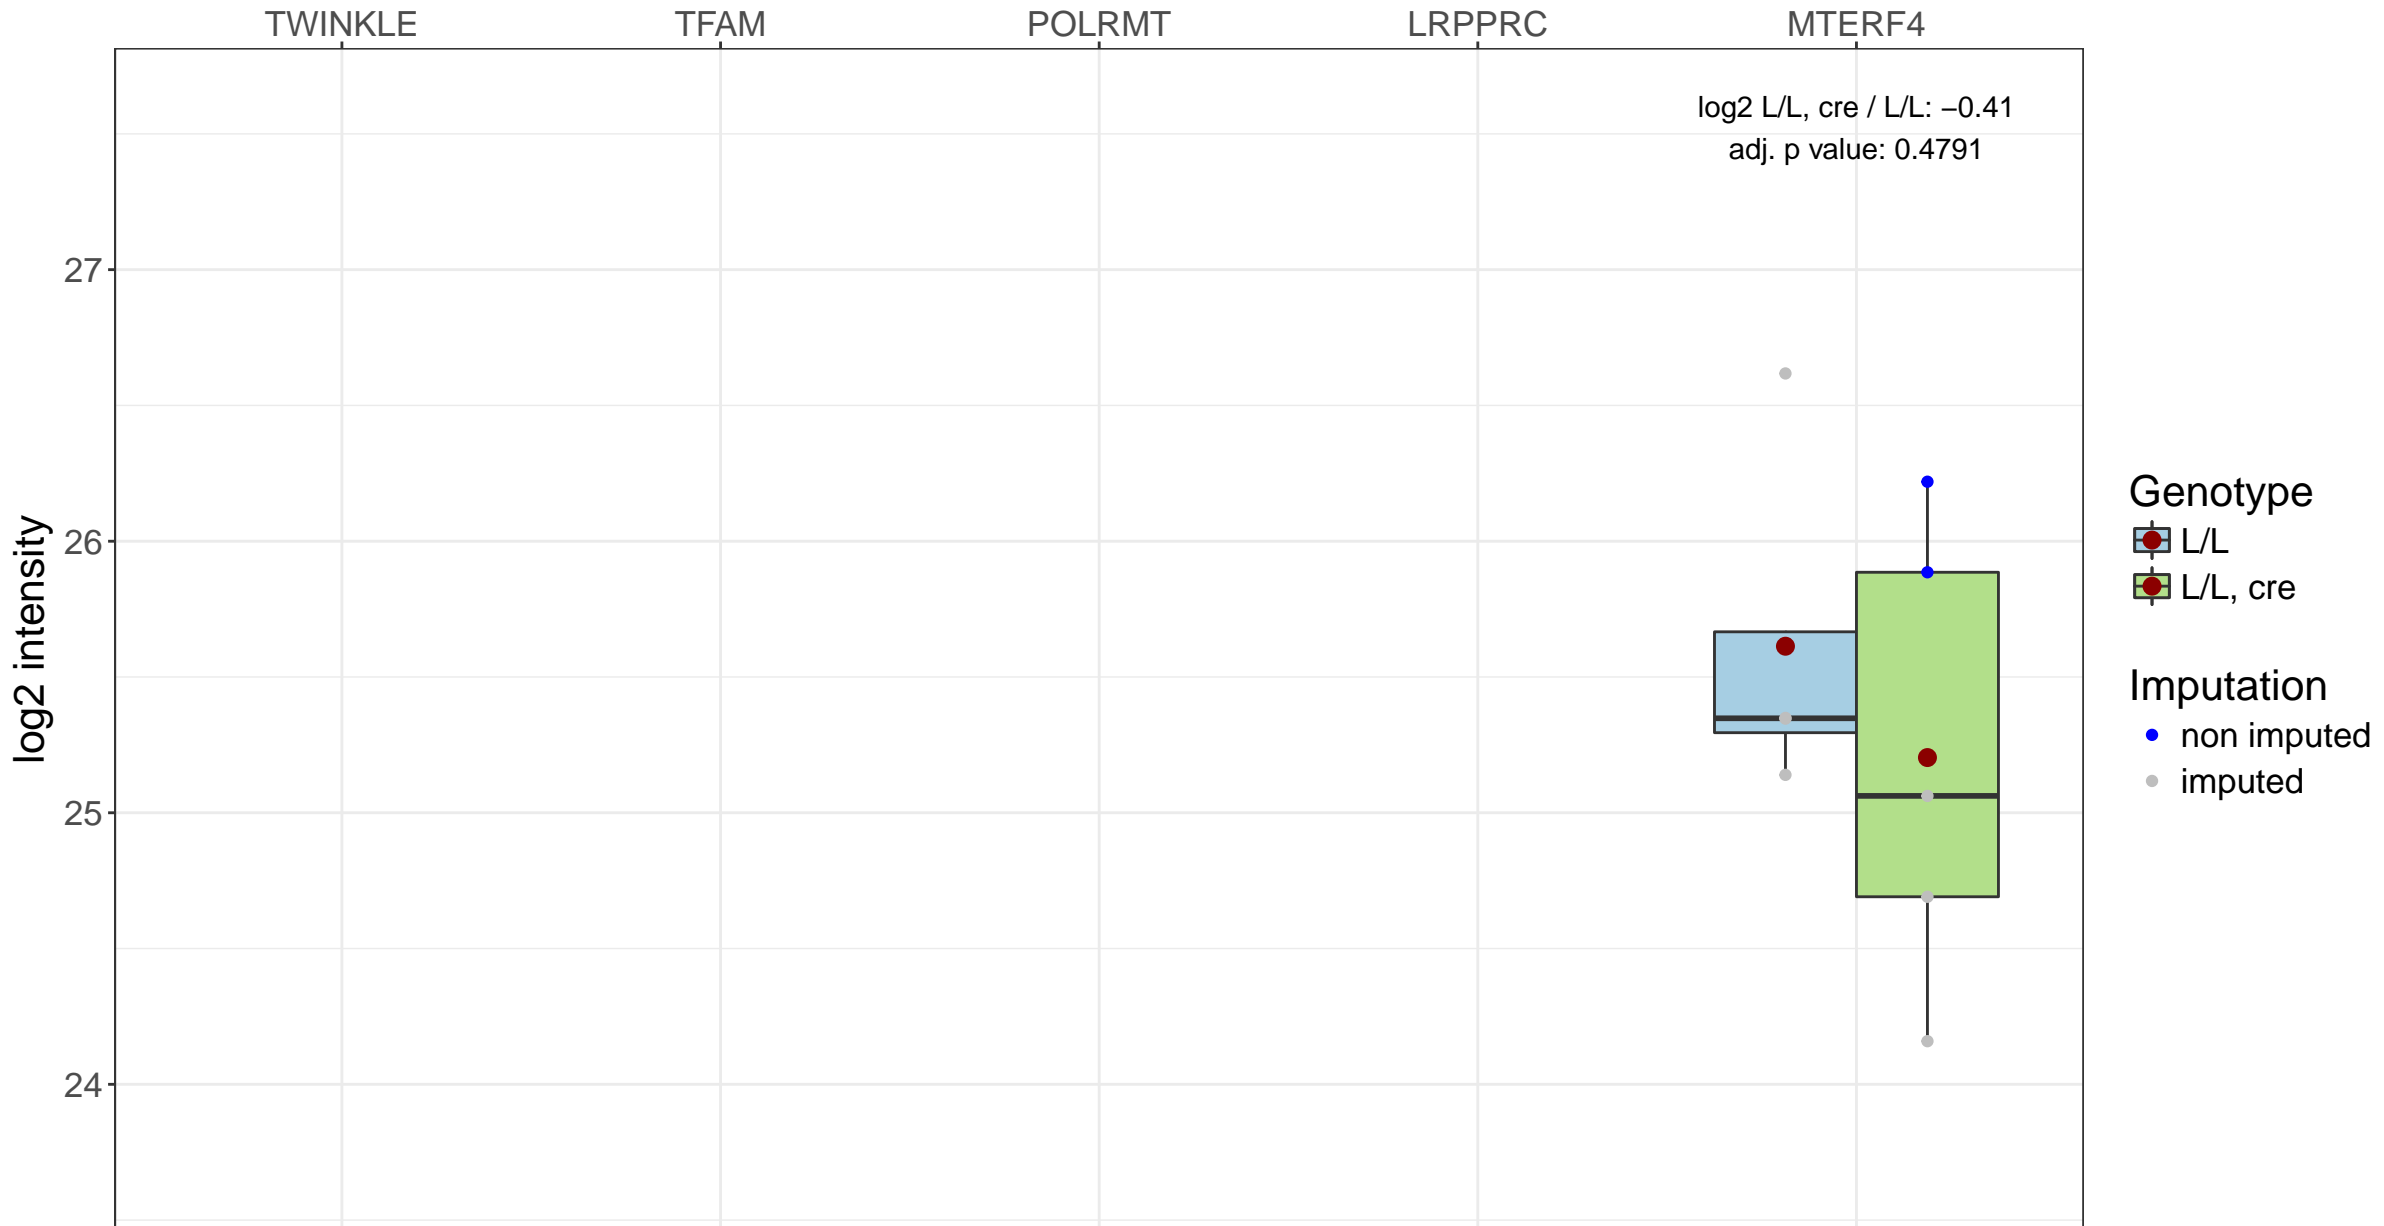

# MTRF1L / Q8BJU9

TWINKLE

TFAM

POLRMT

LRPPRC

MTERF4

log2 intensity

27

26

25

24

log2 L/L, cre / L/L: 1.07

adj. p value: 0.1134

Genotype

L/L

L/L, cre

Imputation

non imputed

imputed

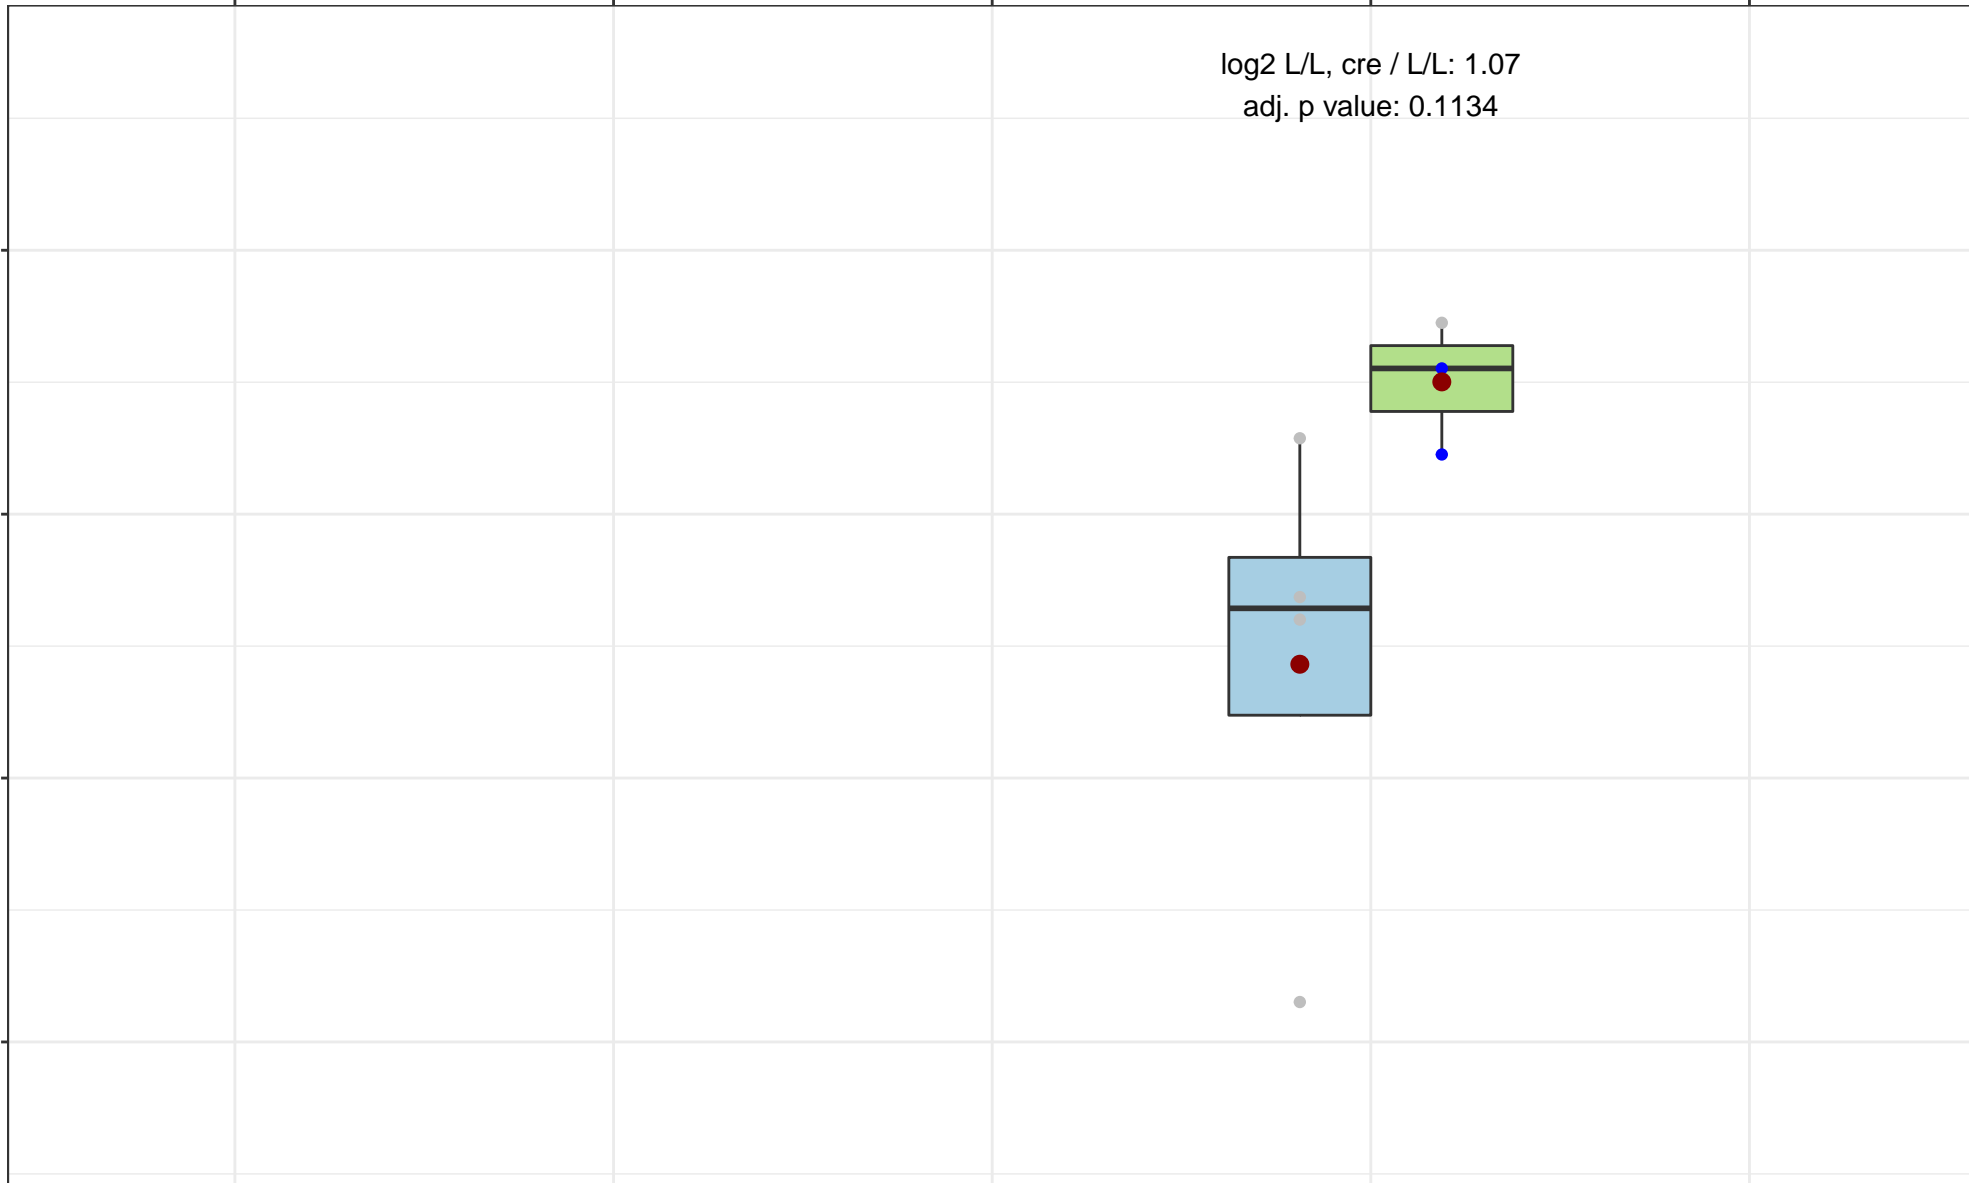

# MTX1 / F7C846

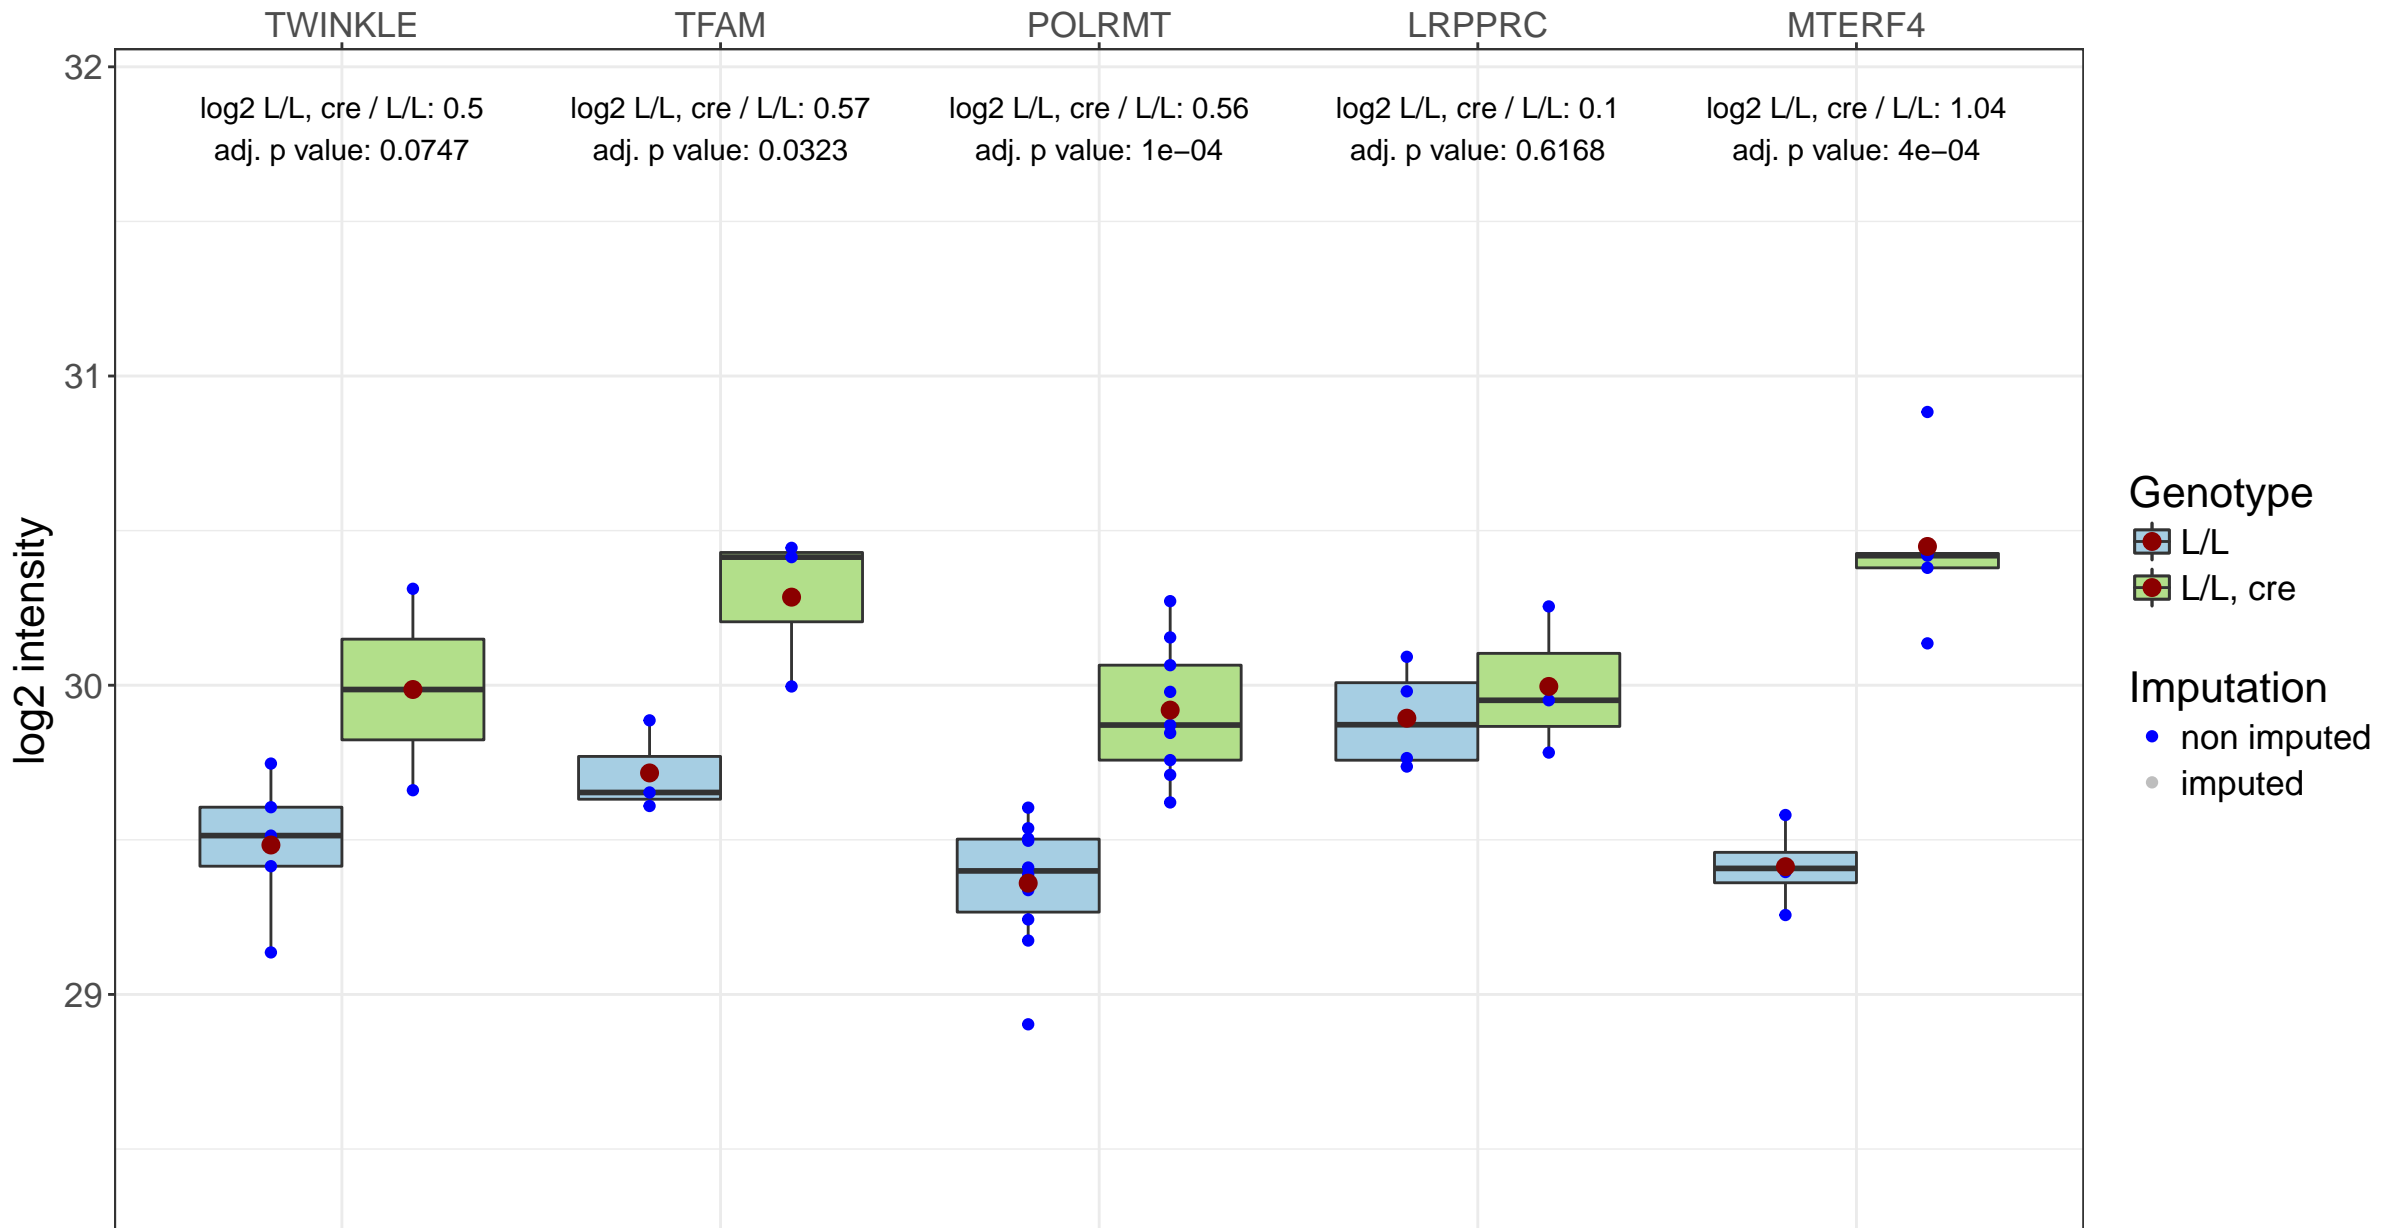

# MTX2 / O88441

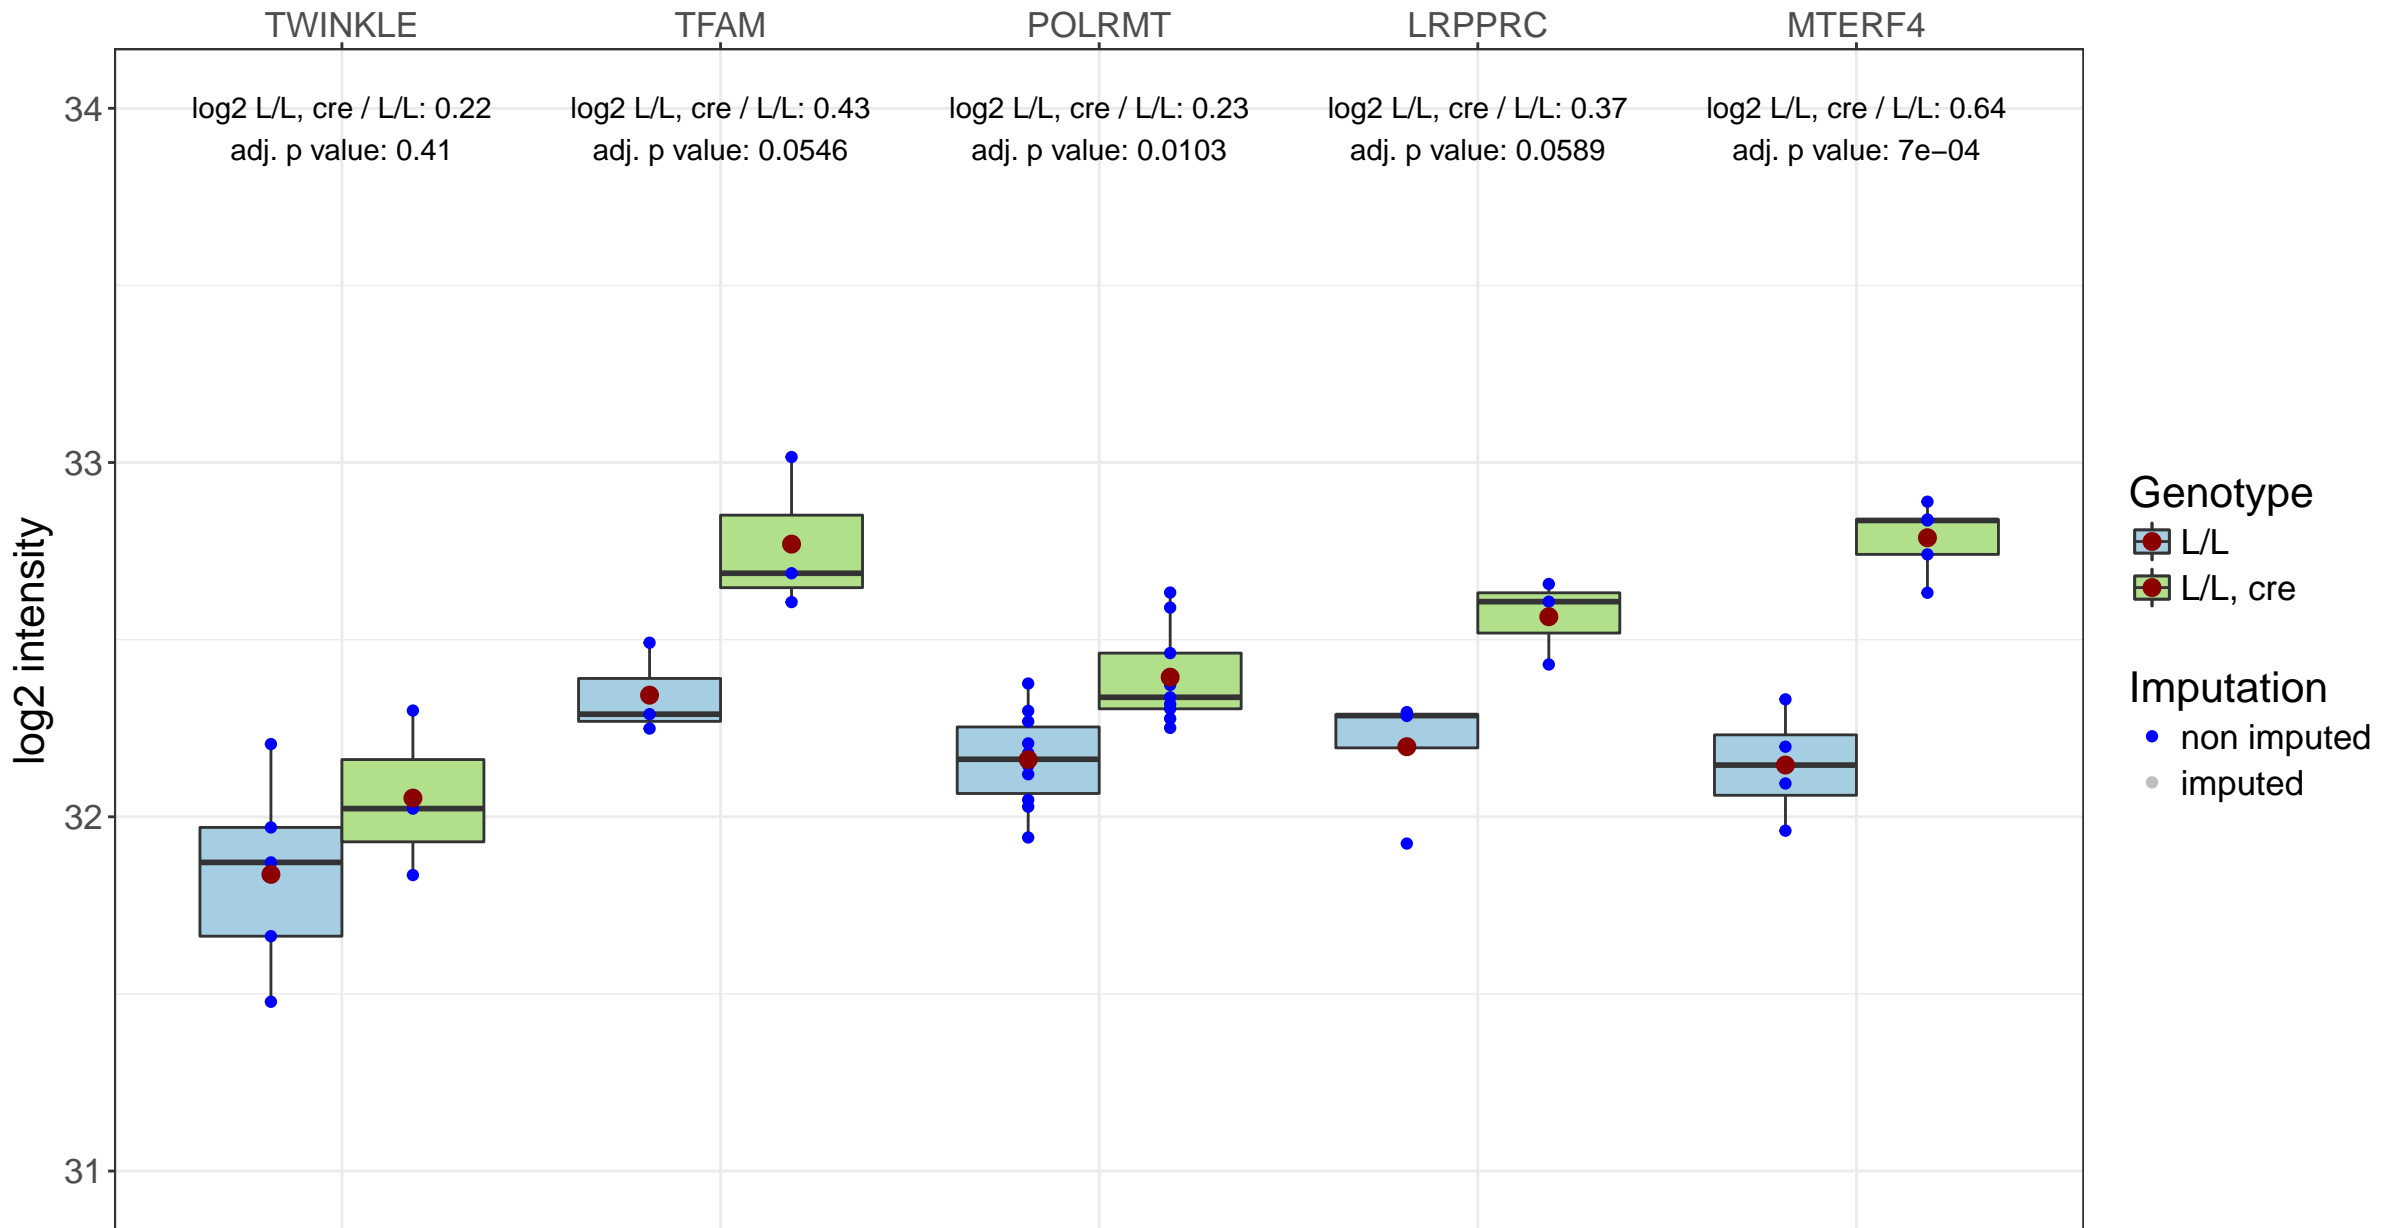

# MUL1 / Q8VCM5

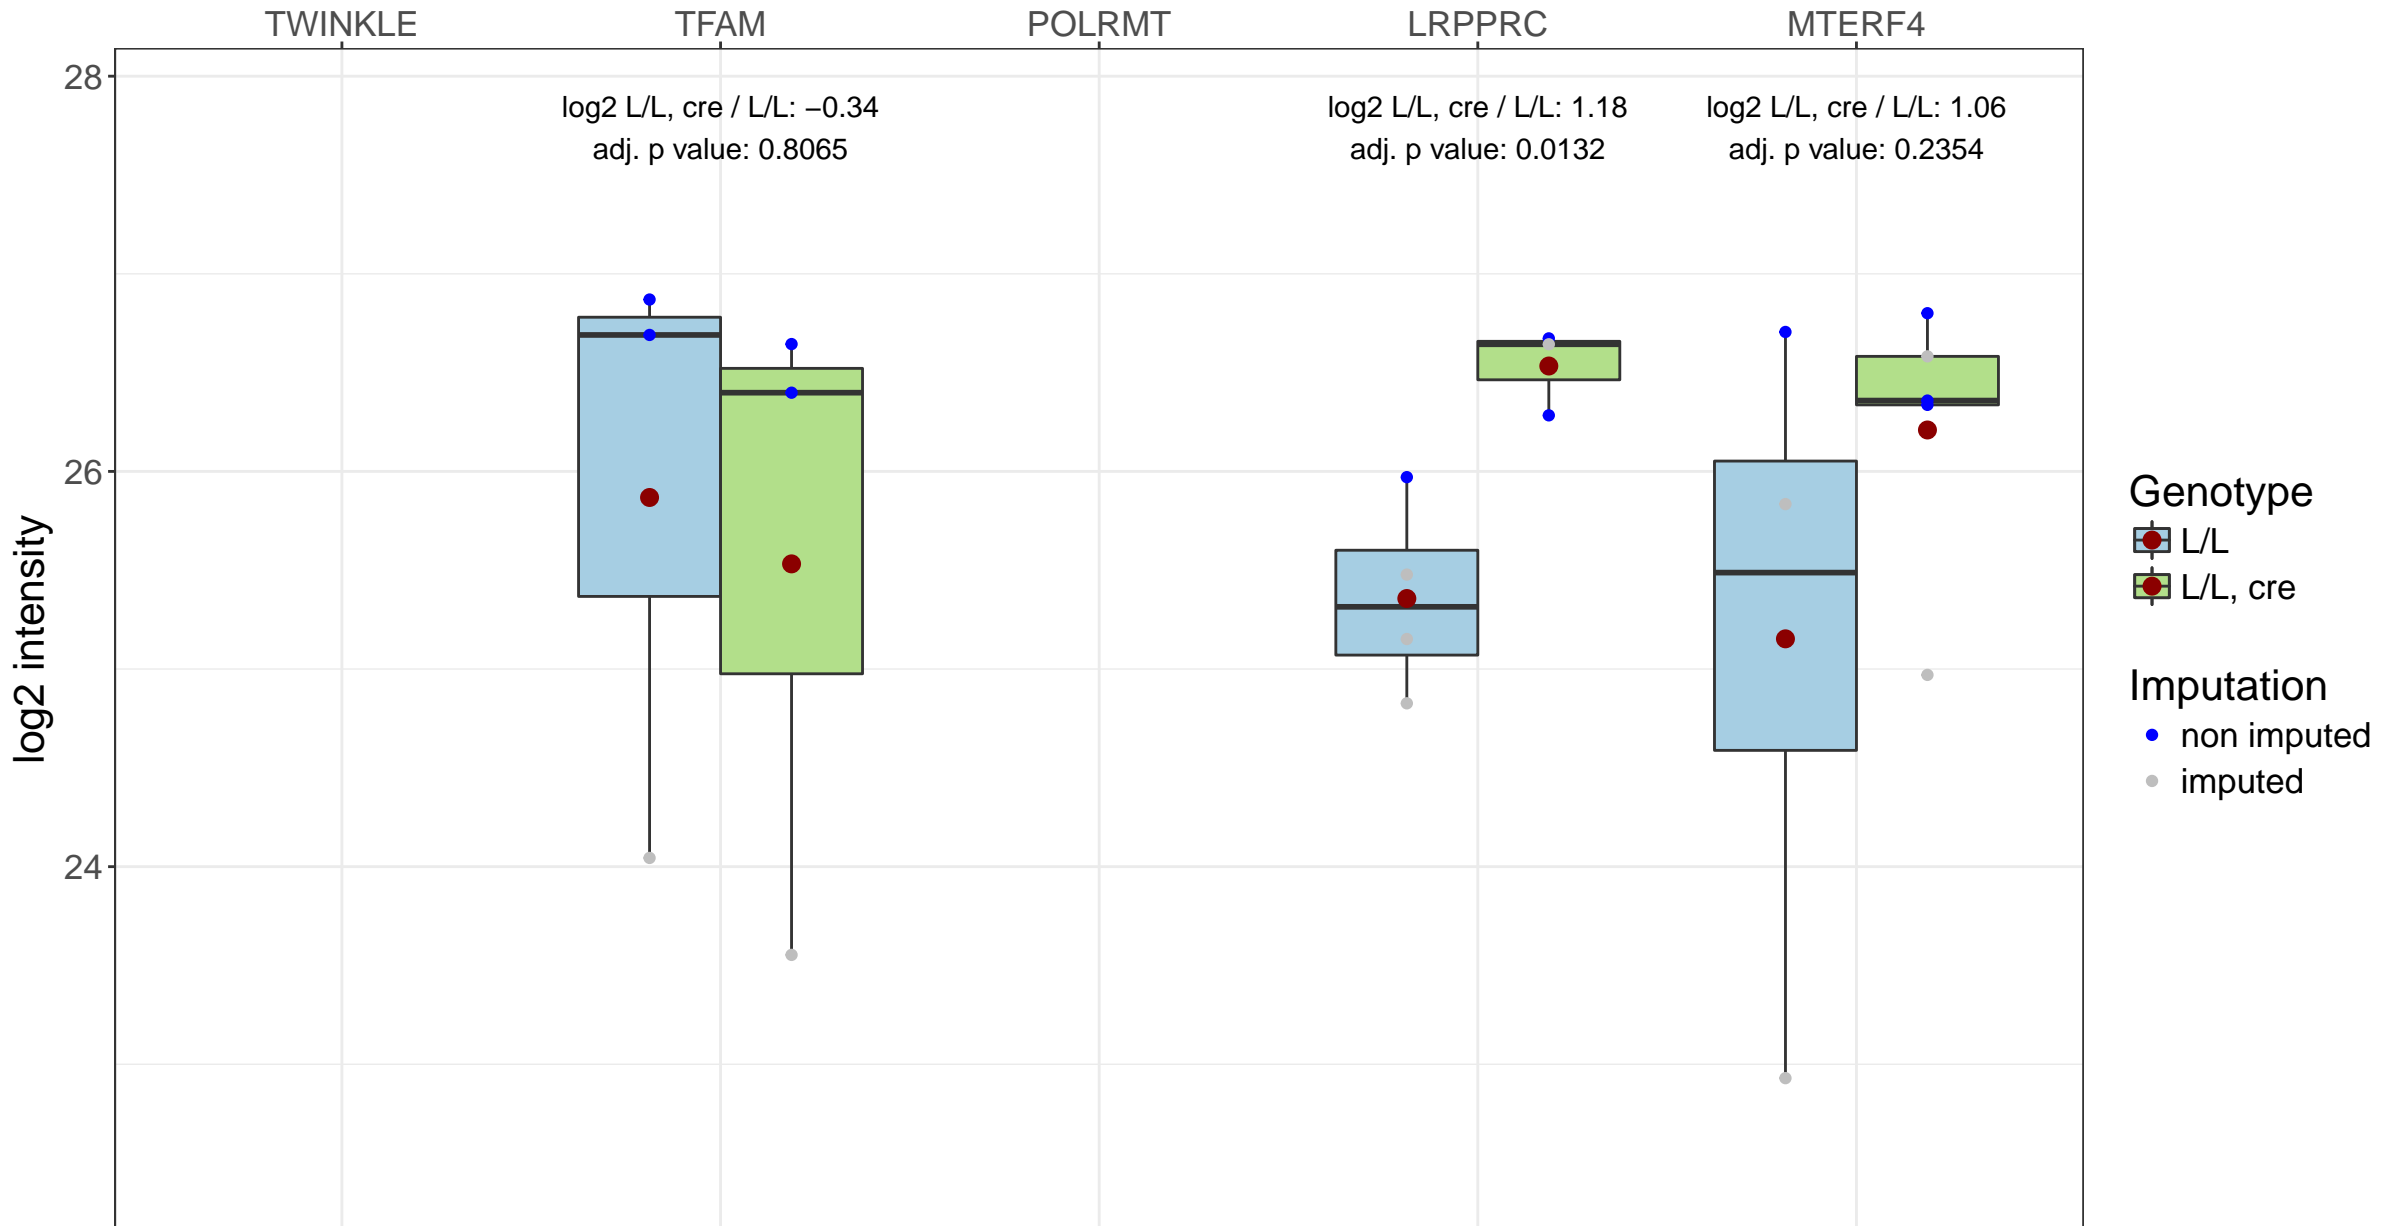

# MUT / P16332

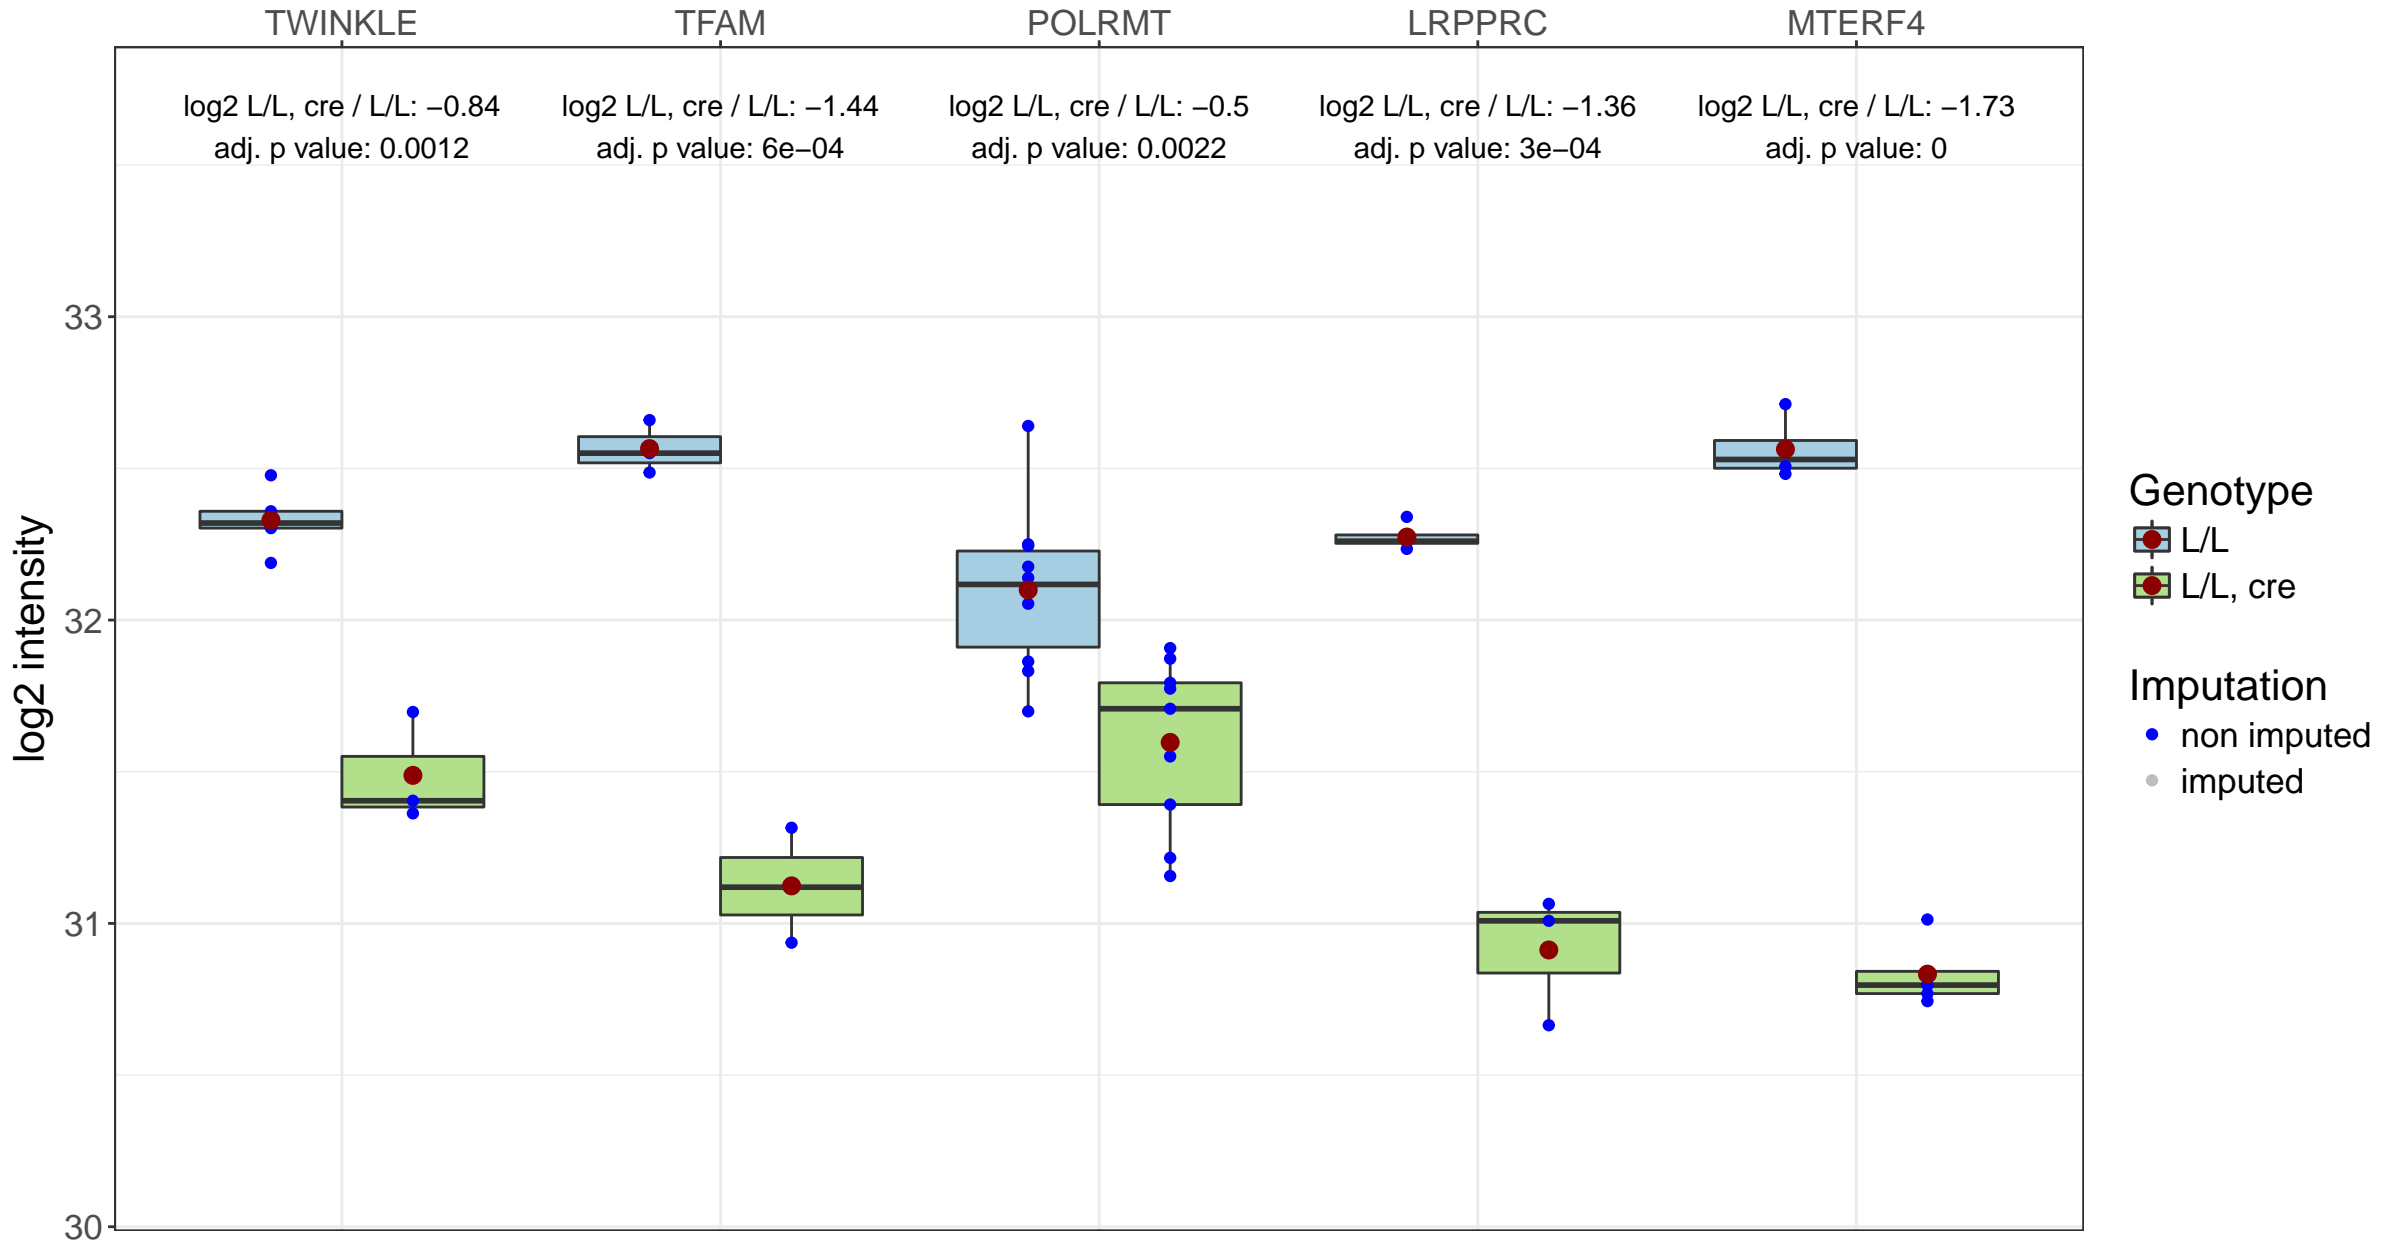

# MYADM / O35682

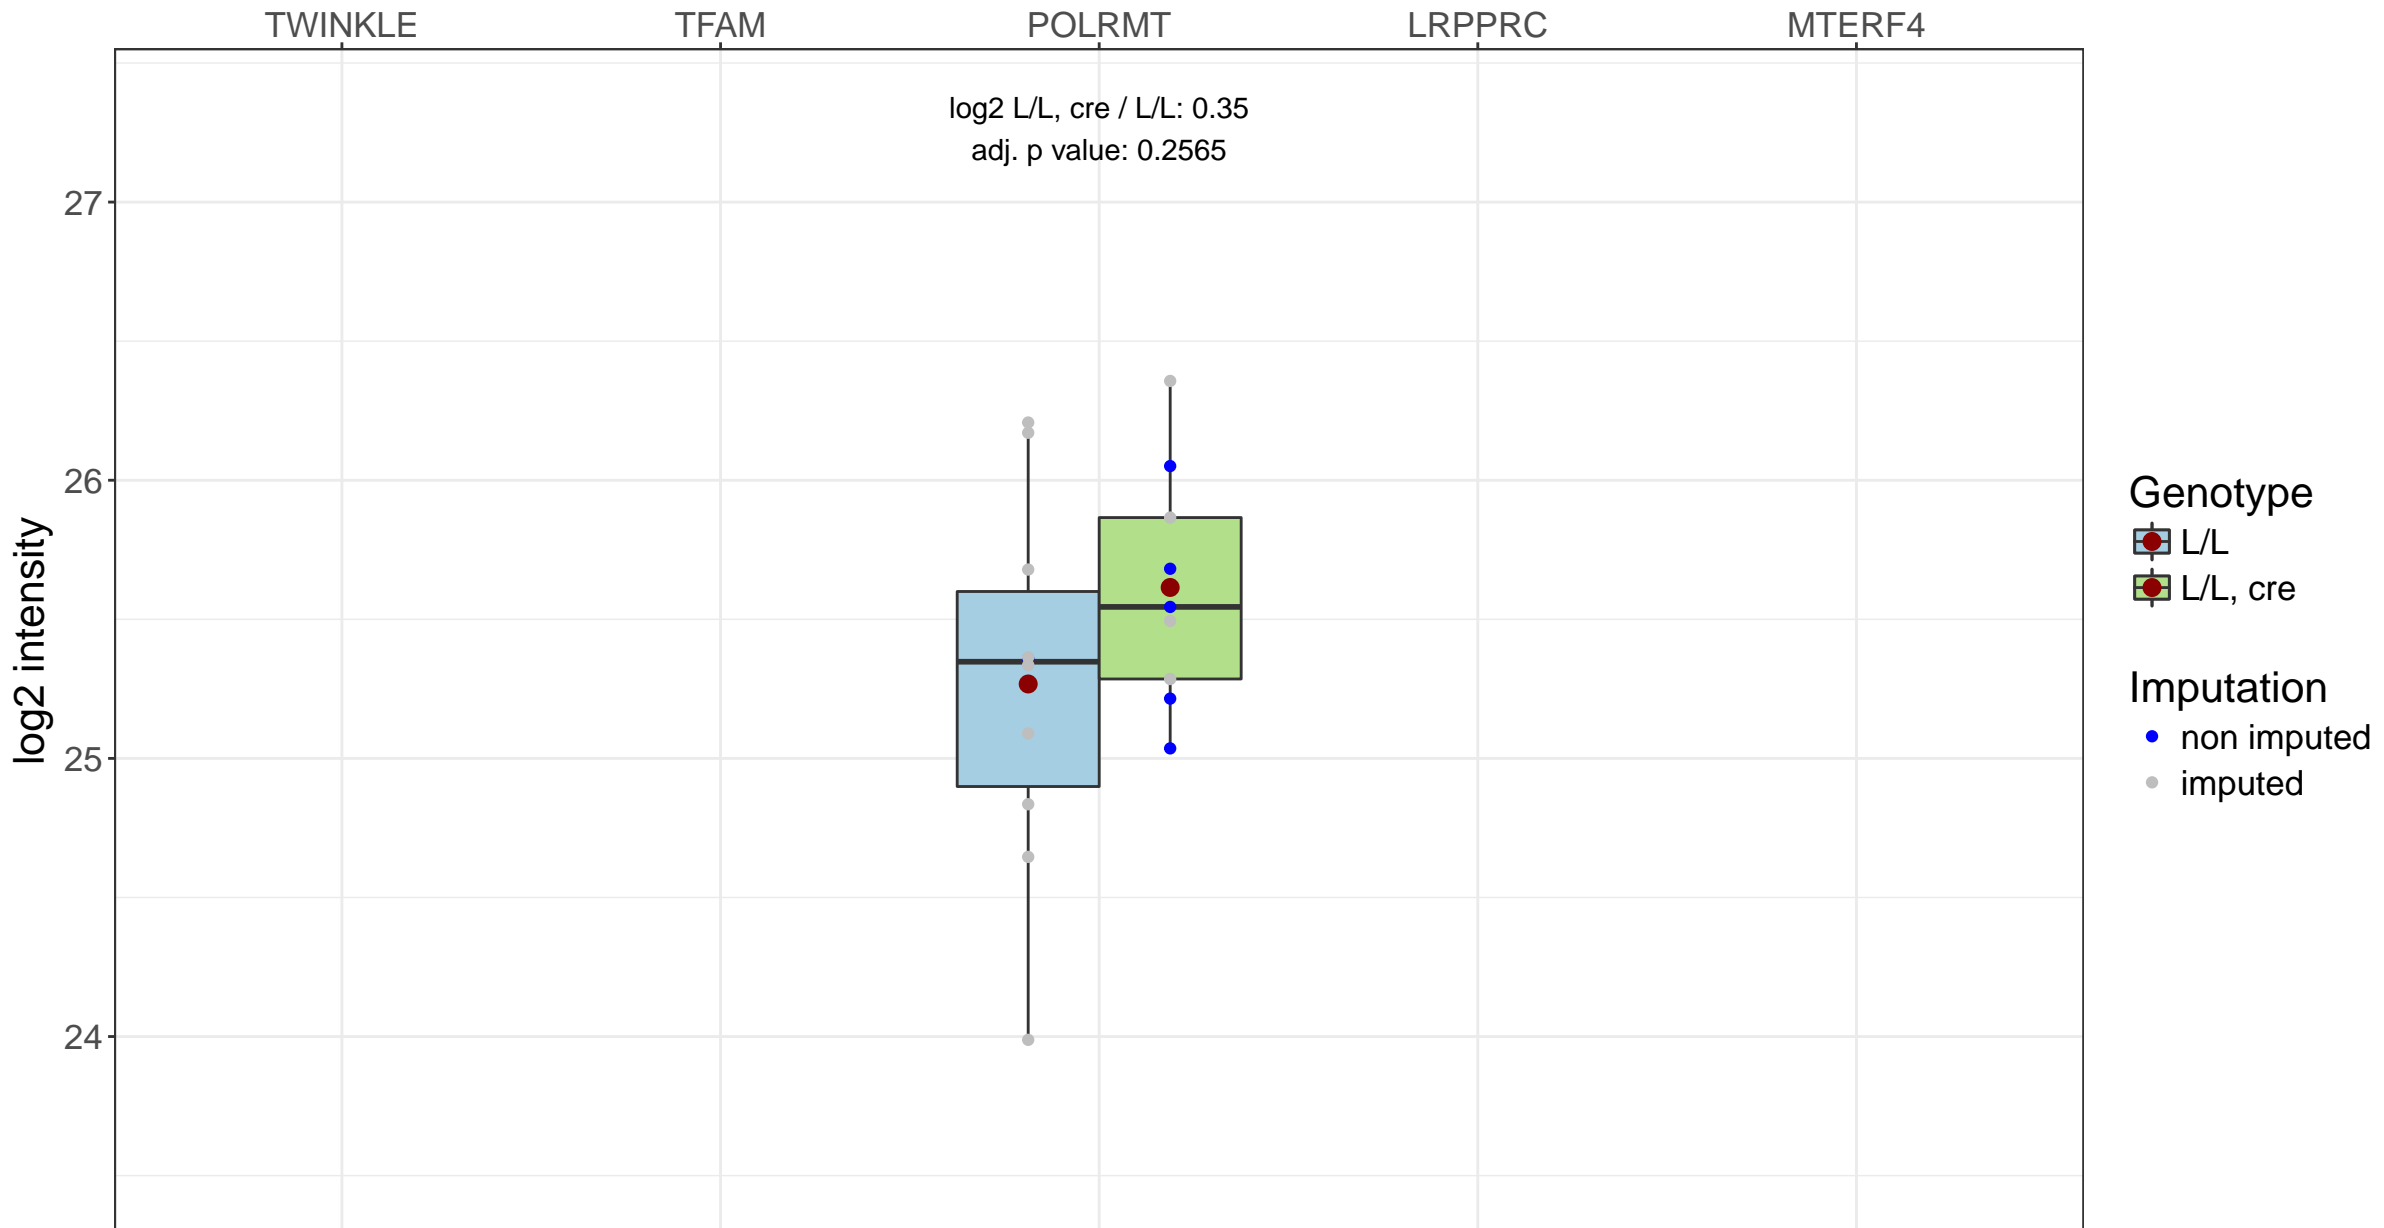



# MYBPC3 / E9Q9T8

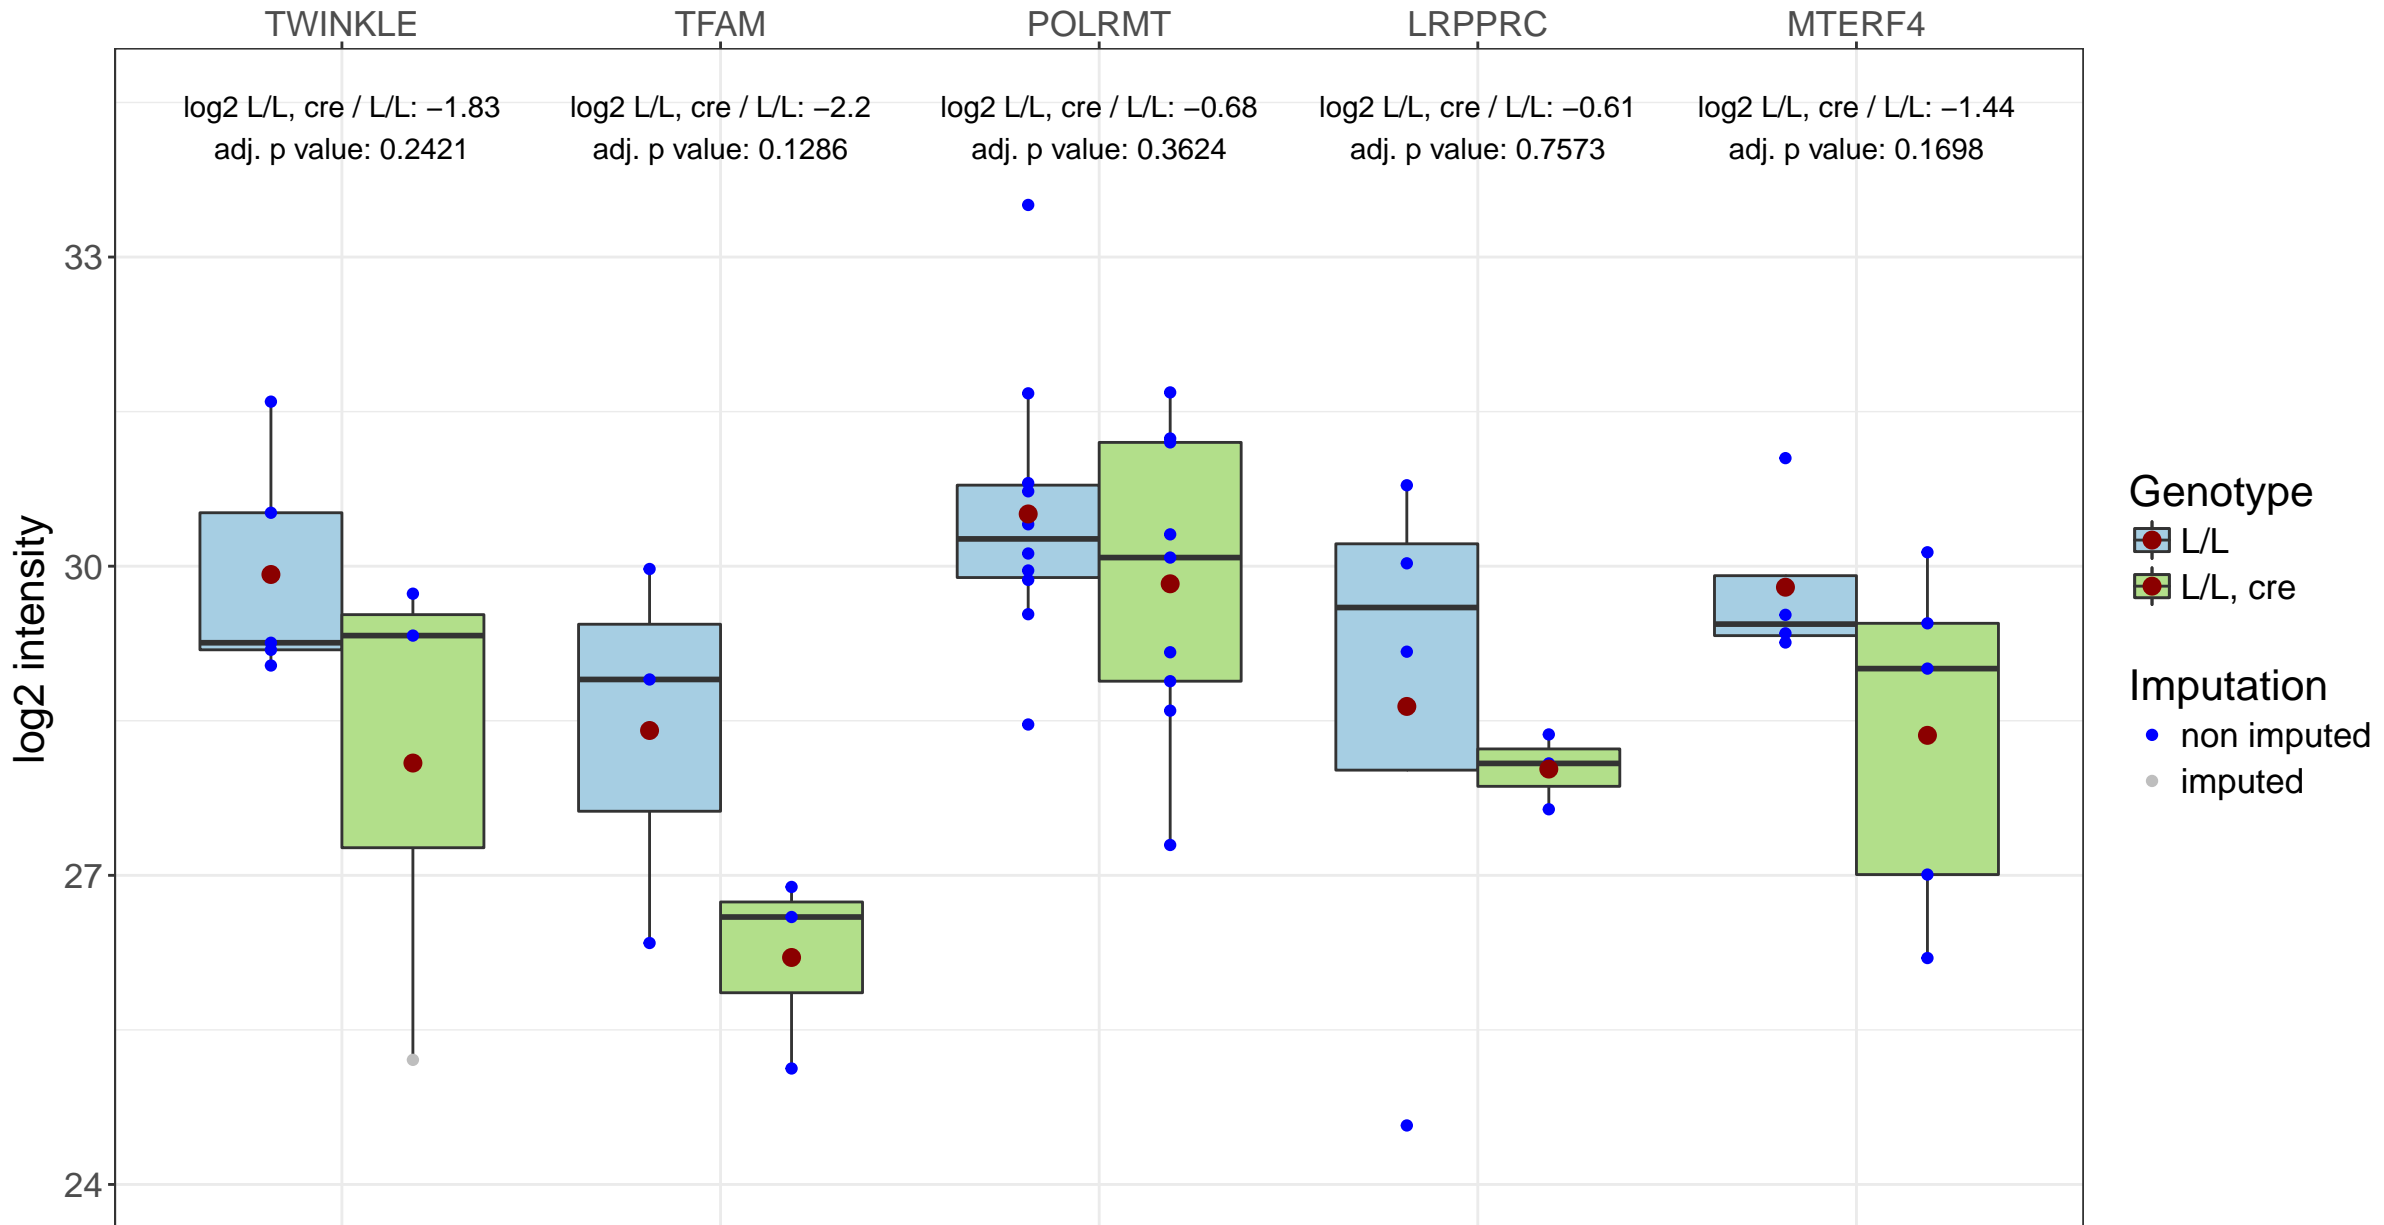

# MYH6 / Q02566

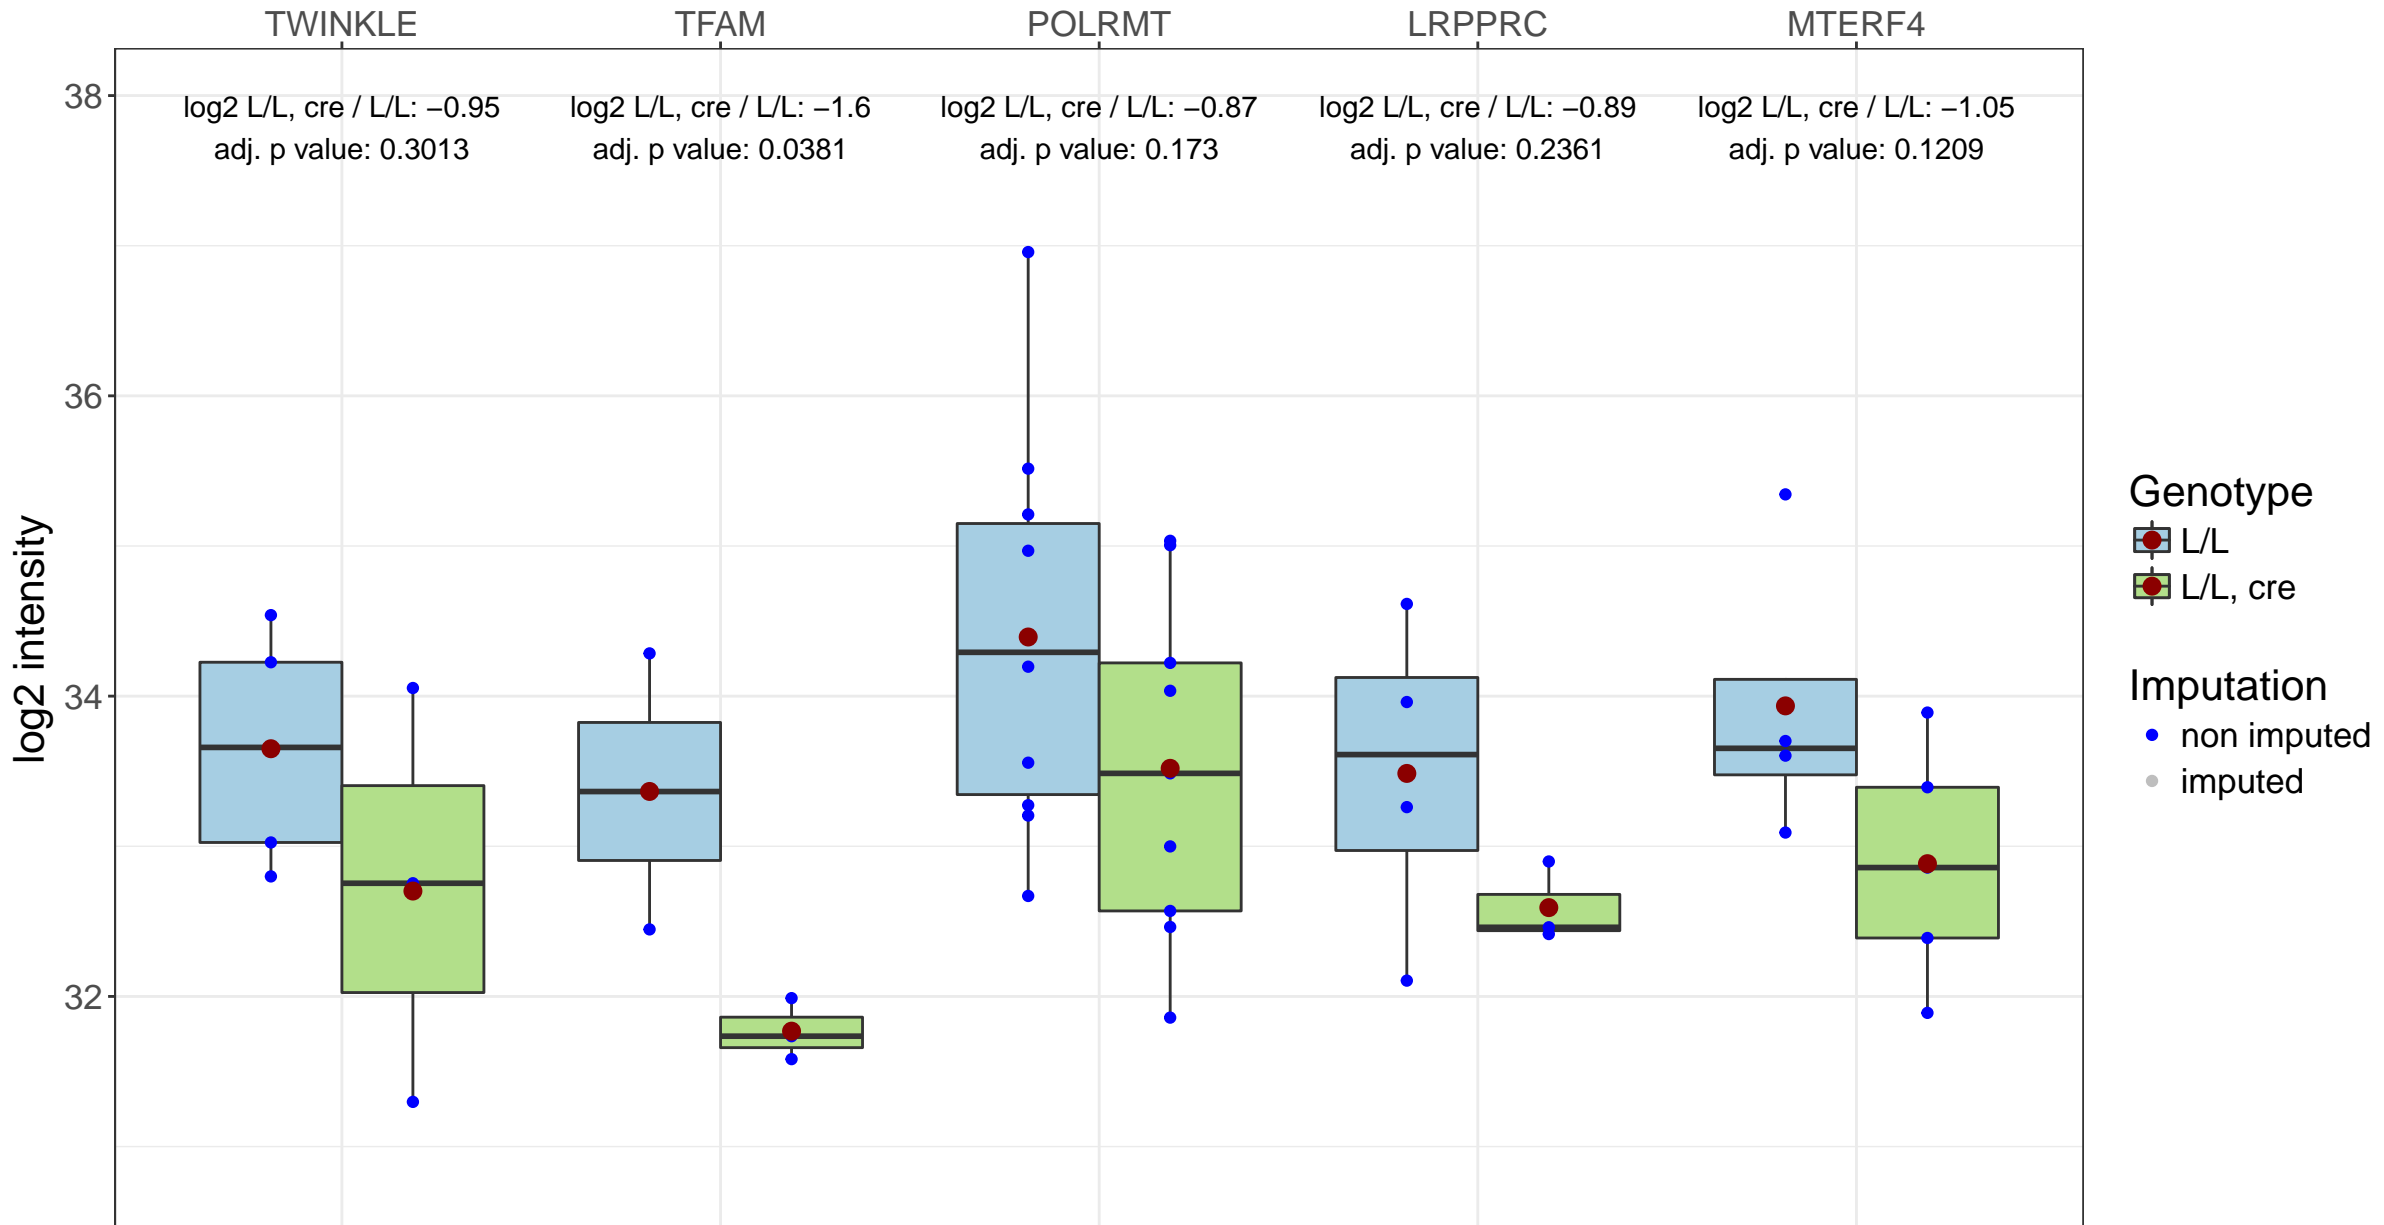

# MYH7 / Q91Z83

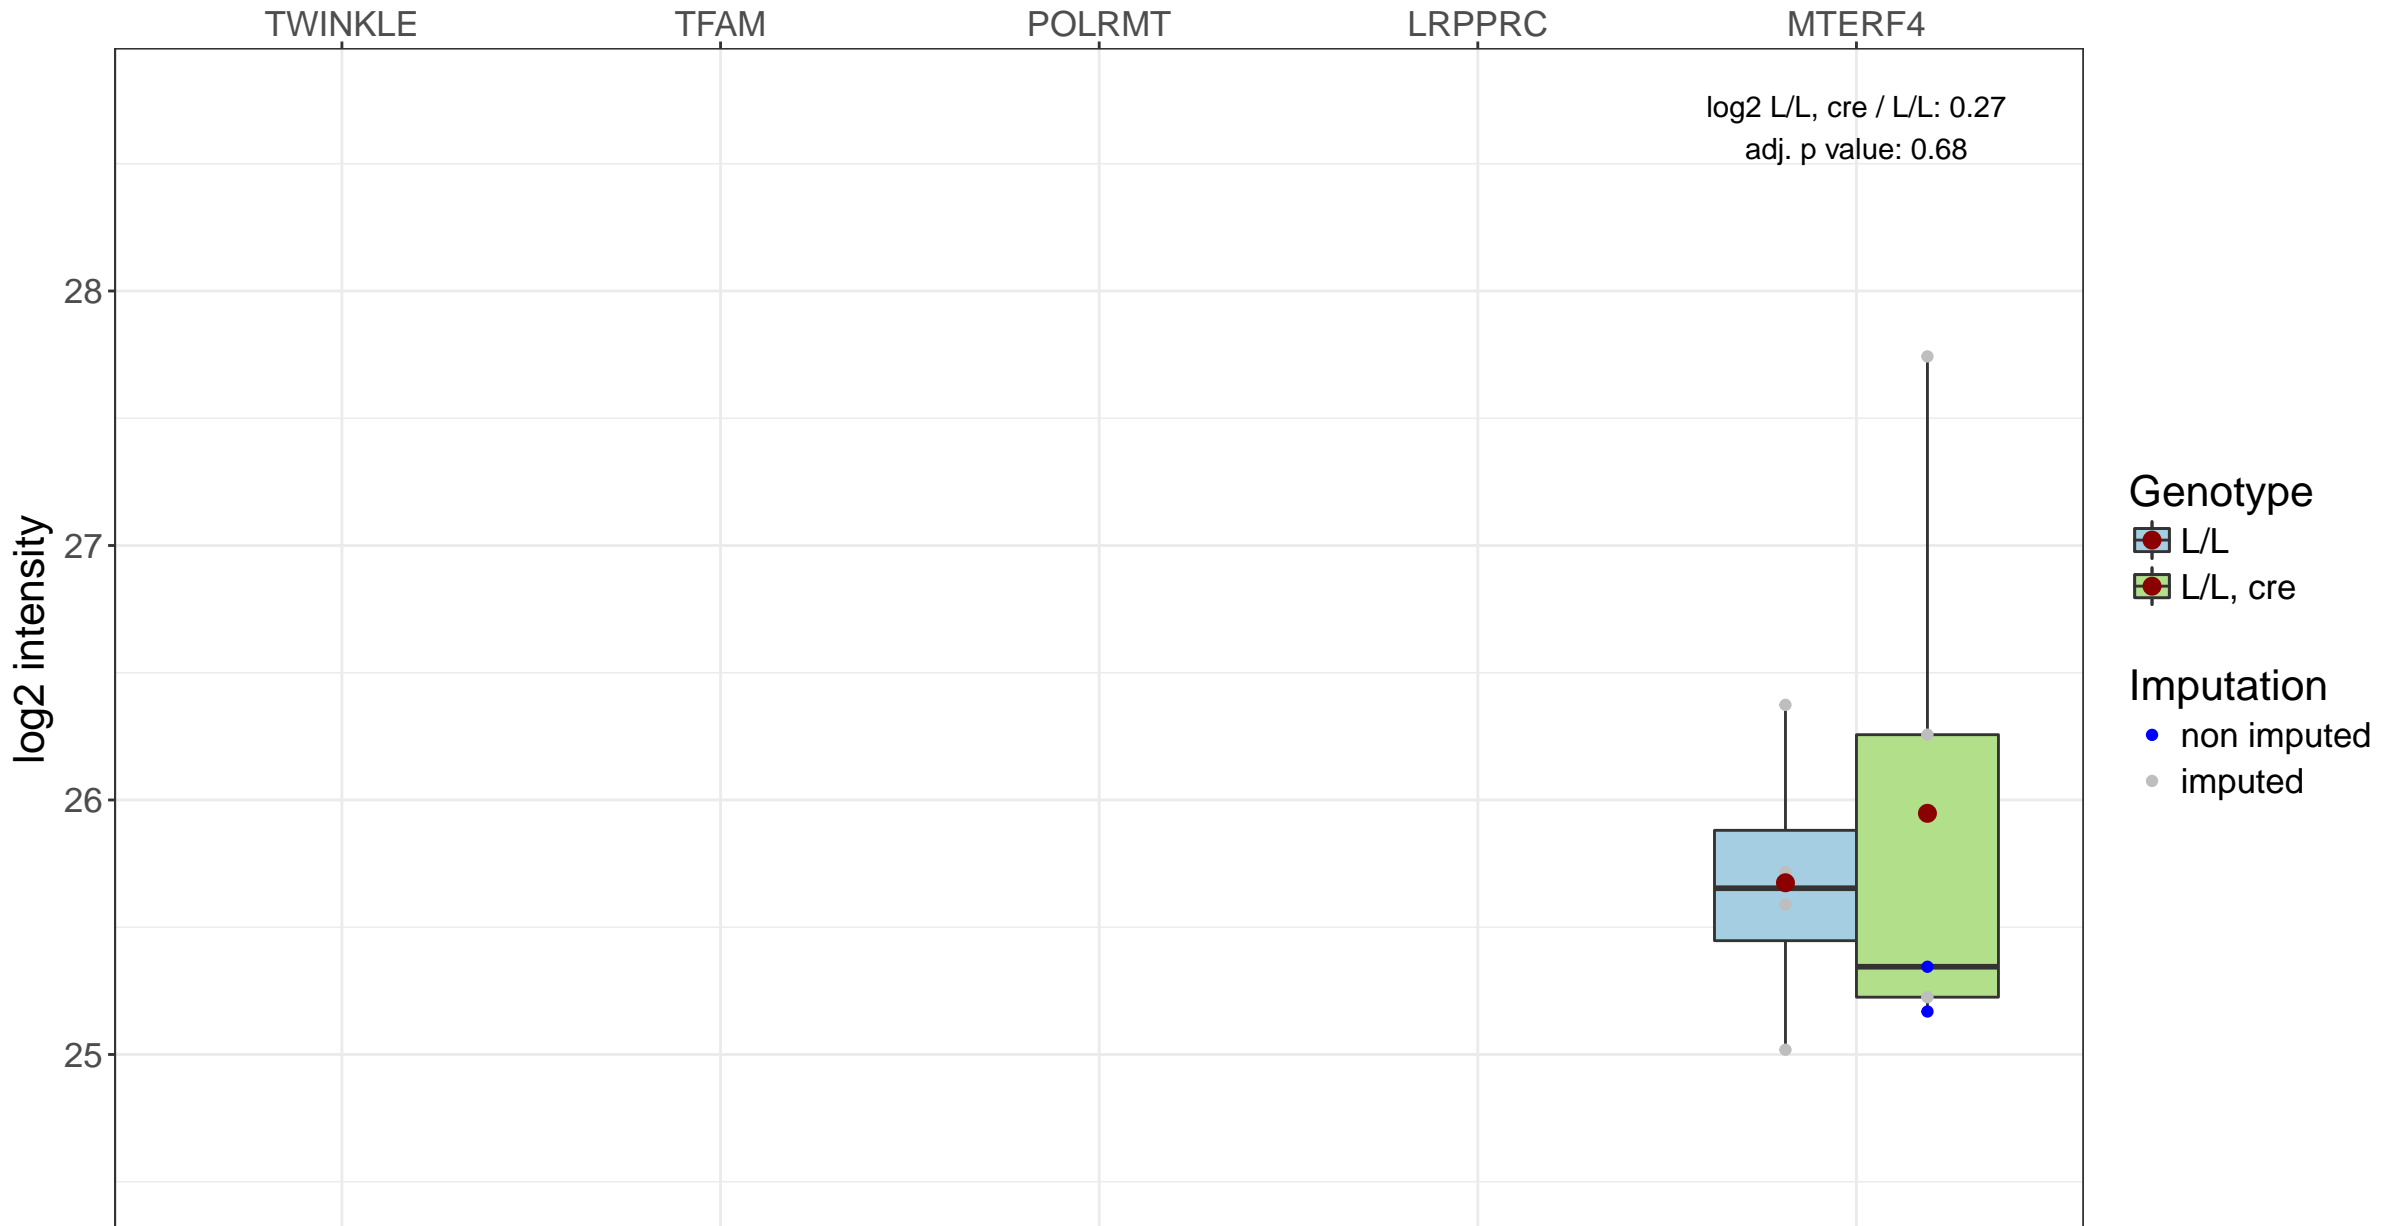

# MYH9 / Q8VDD5

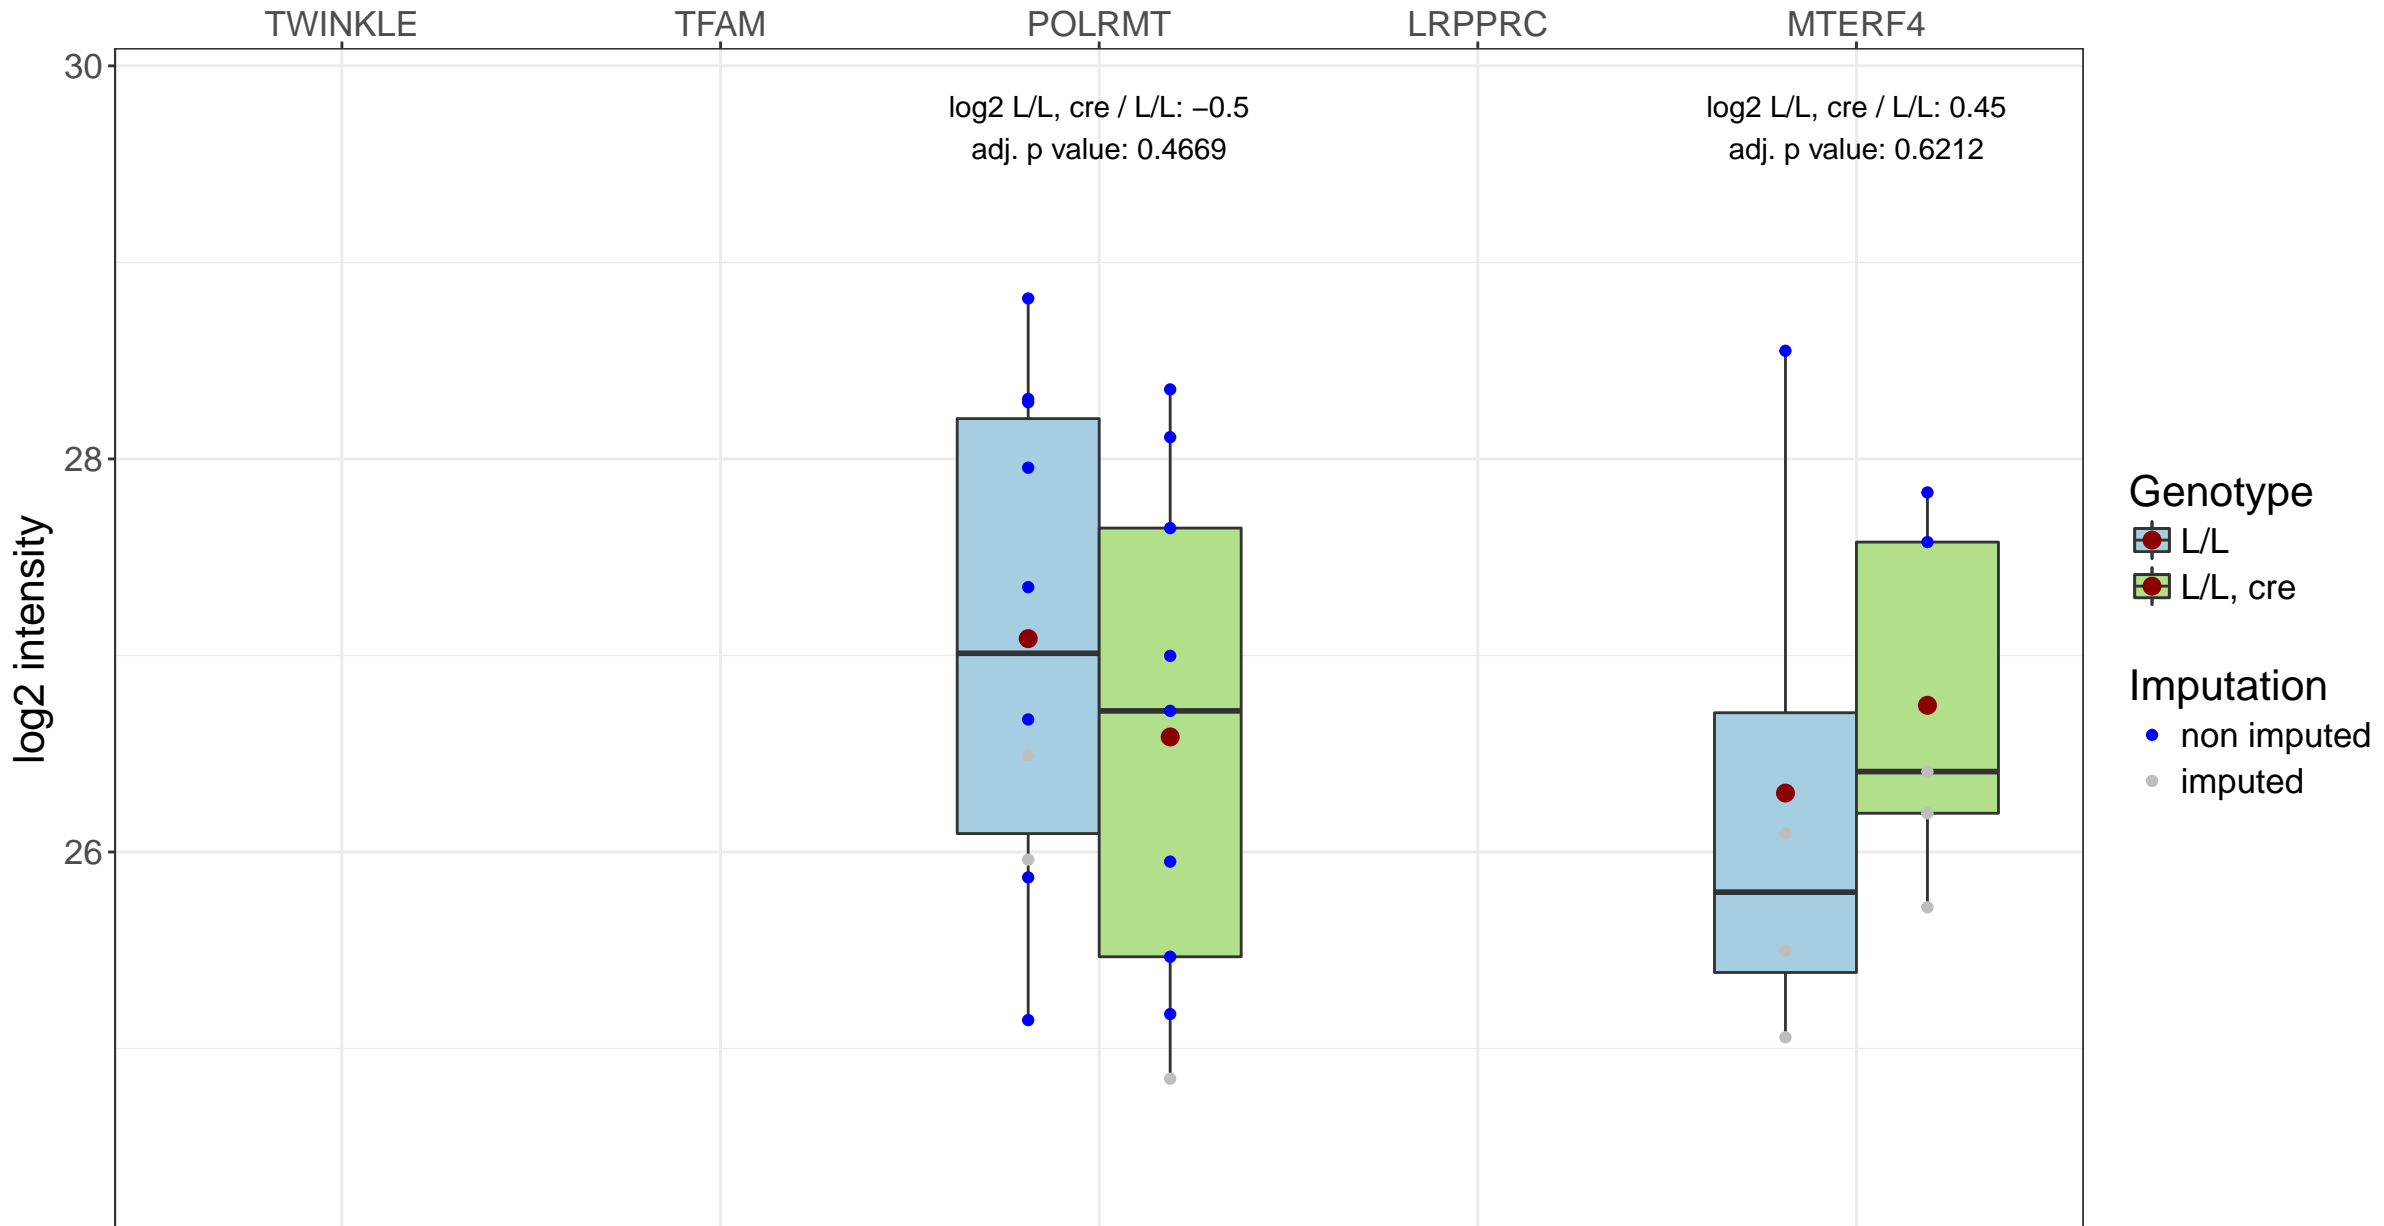

# MYL2 / P51667

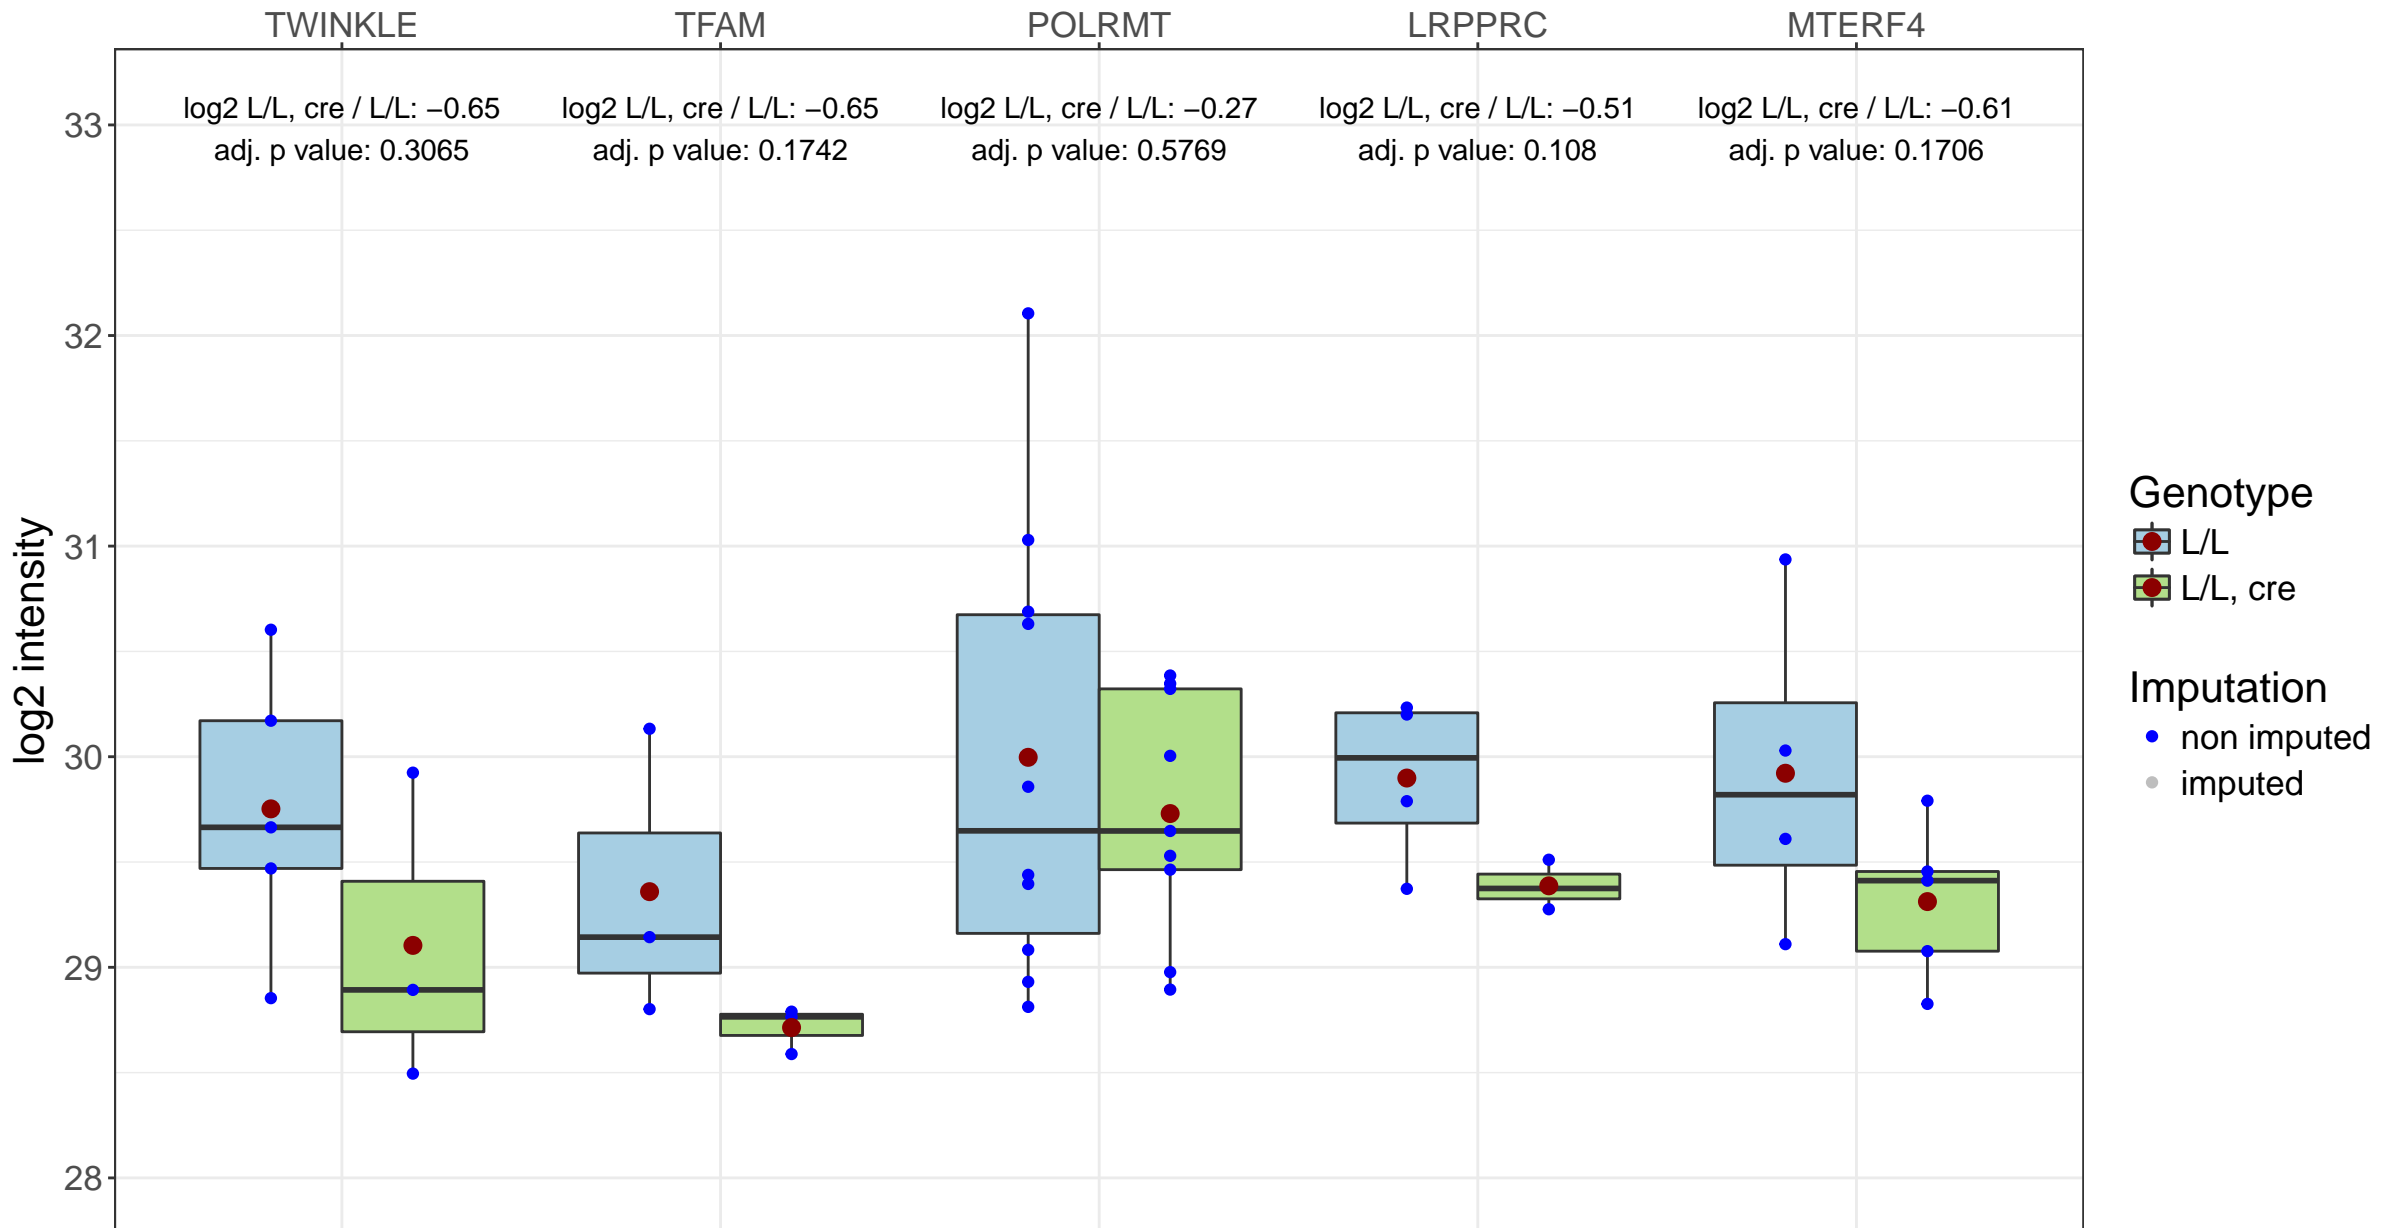

# MYL3 / P09542

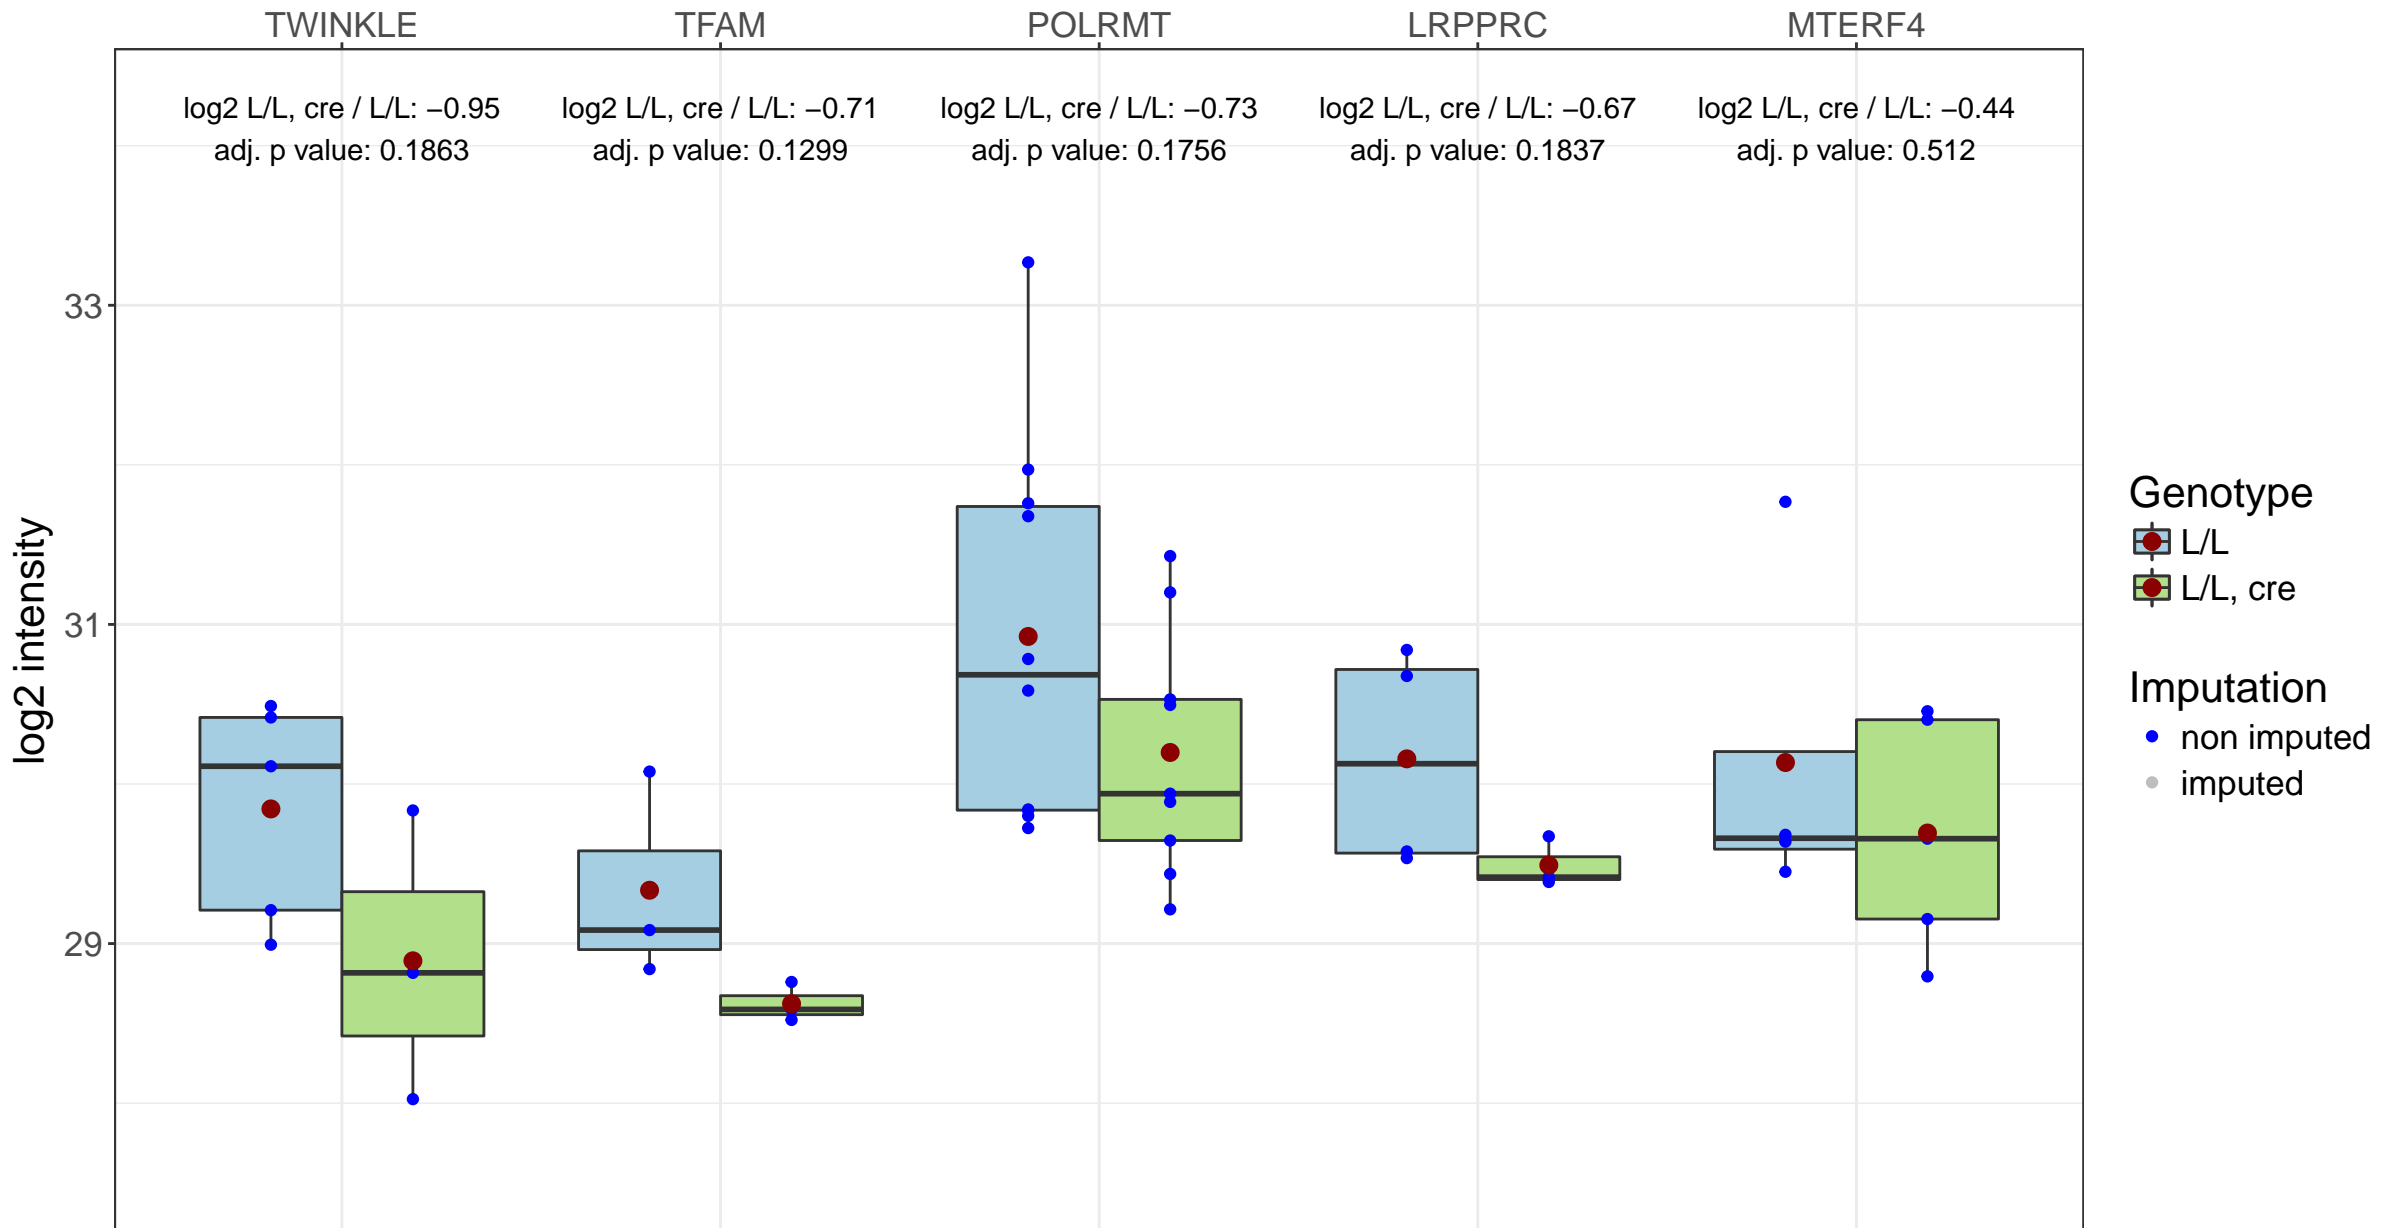

# MYL4 / A2A6Q8

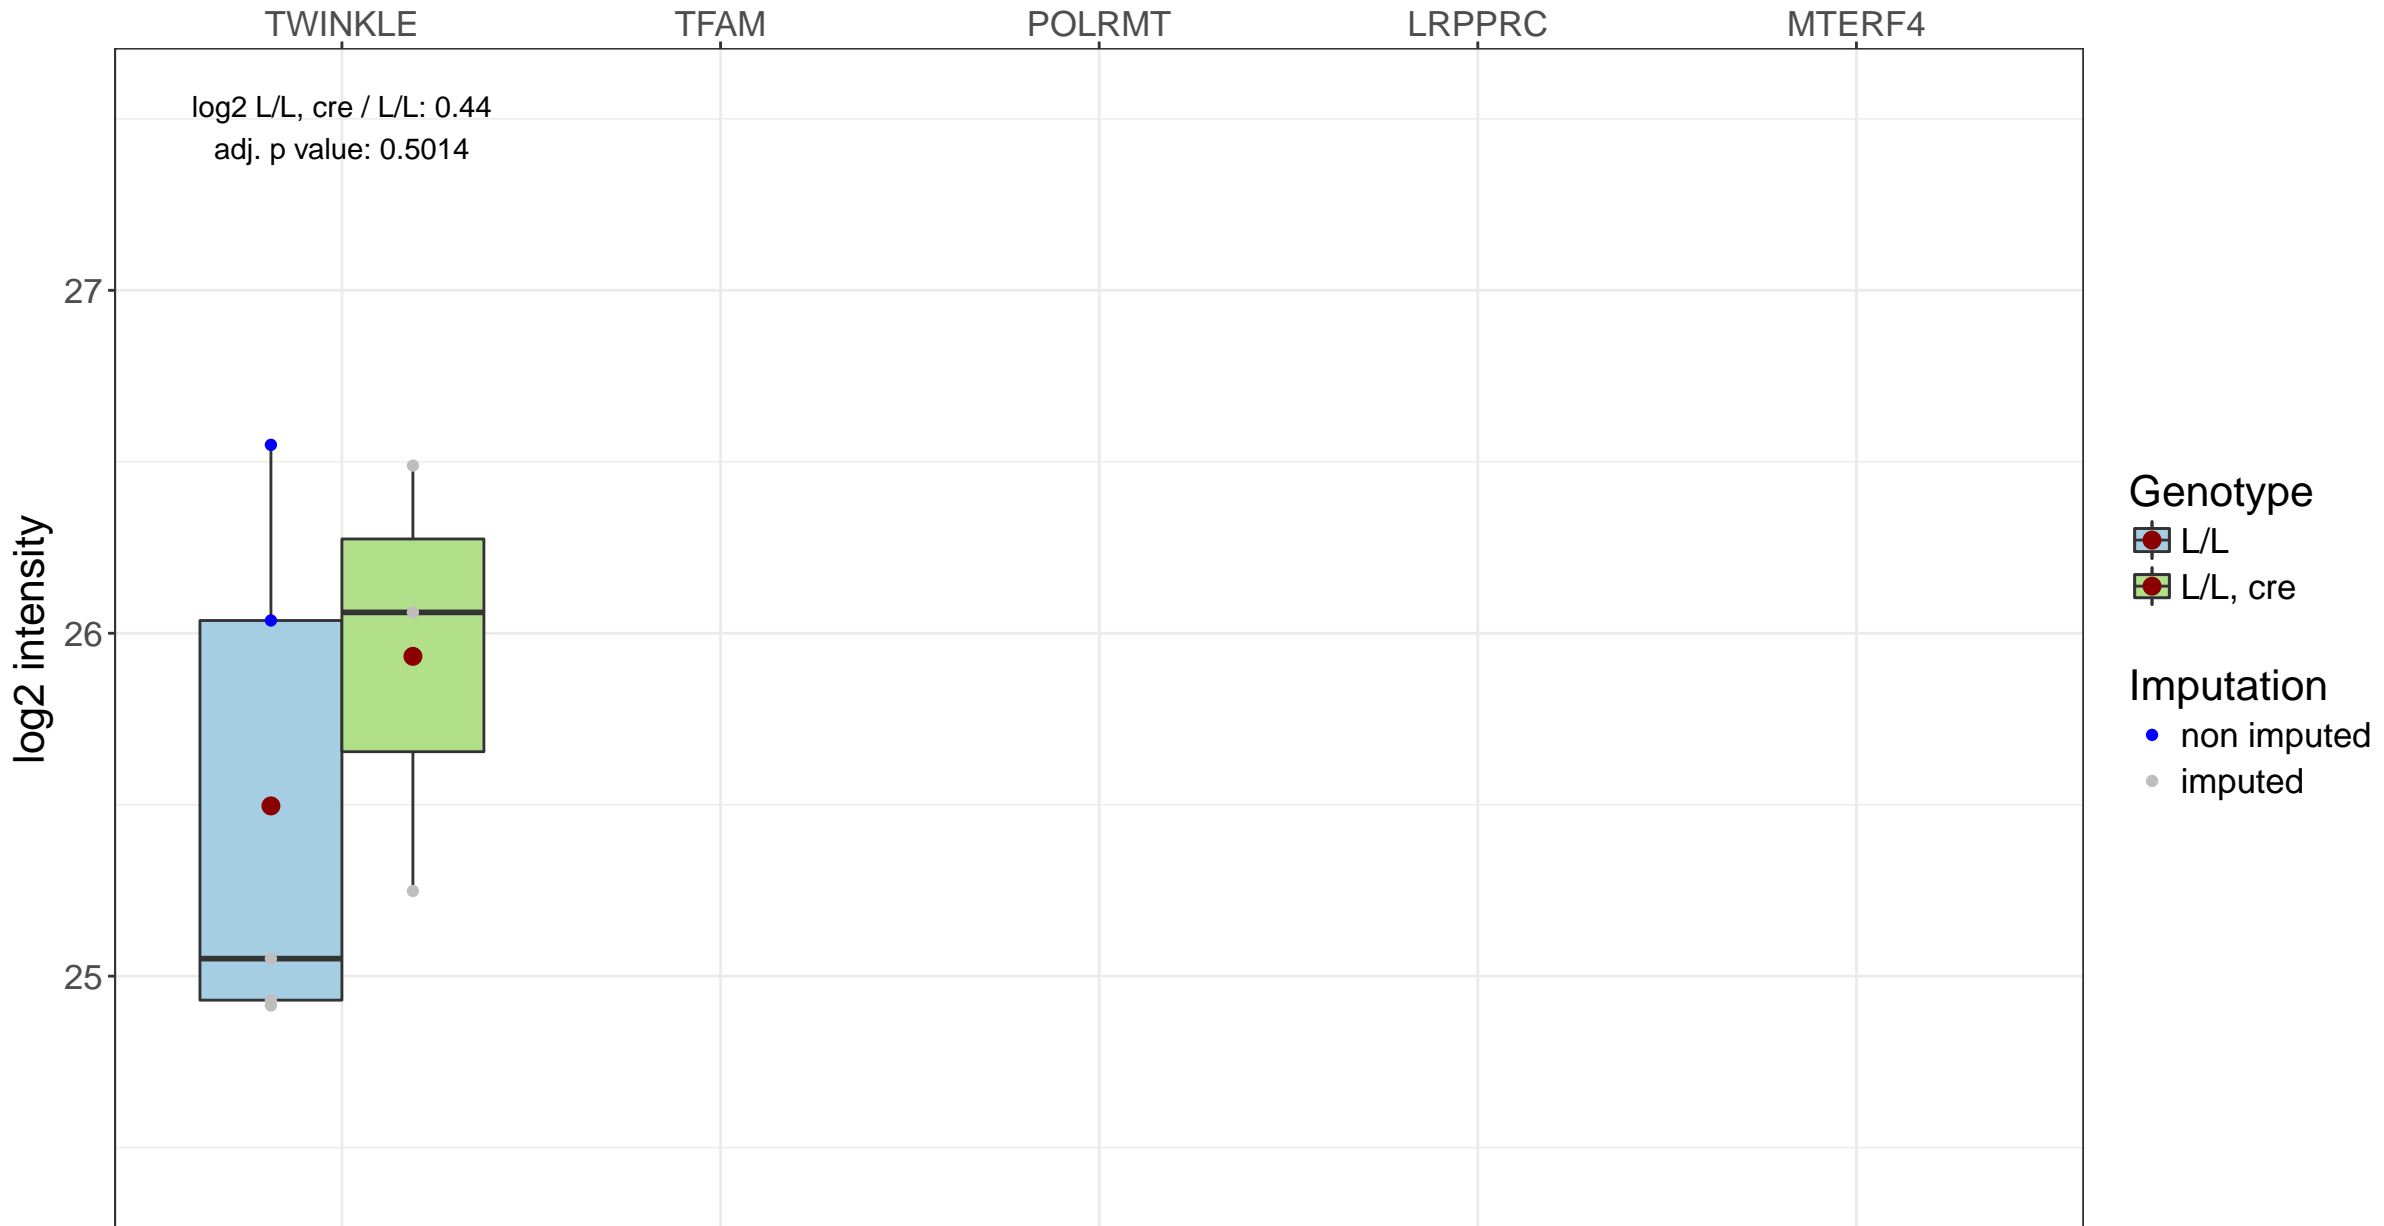

# MYL6 / Q60605-2

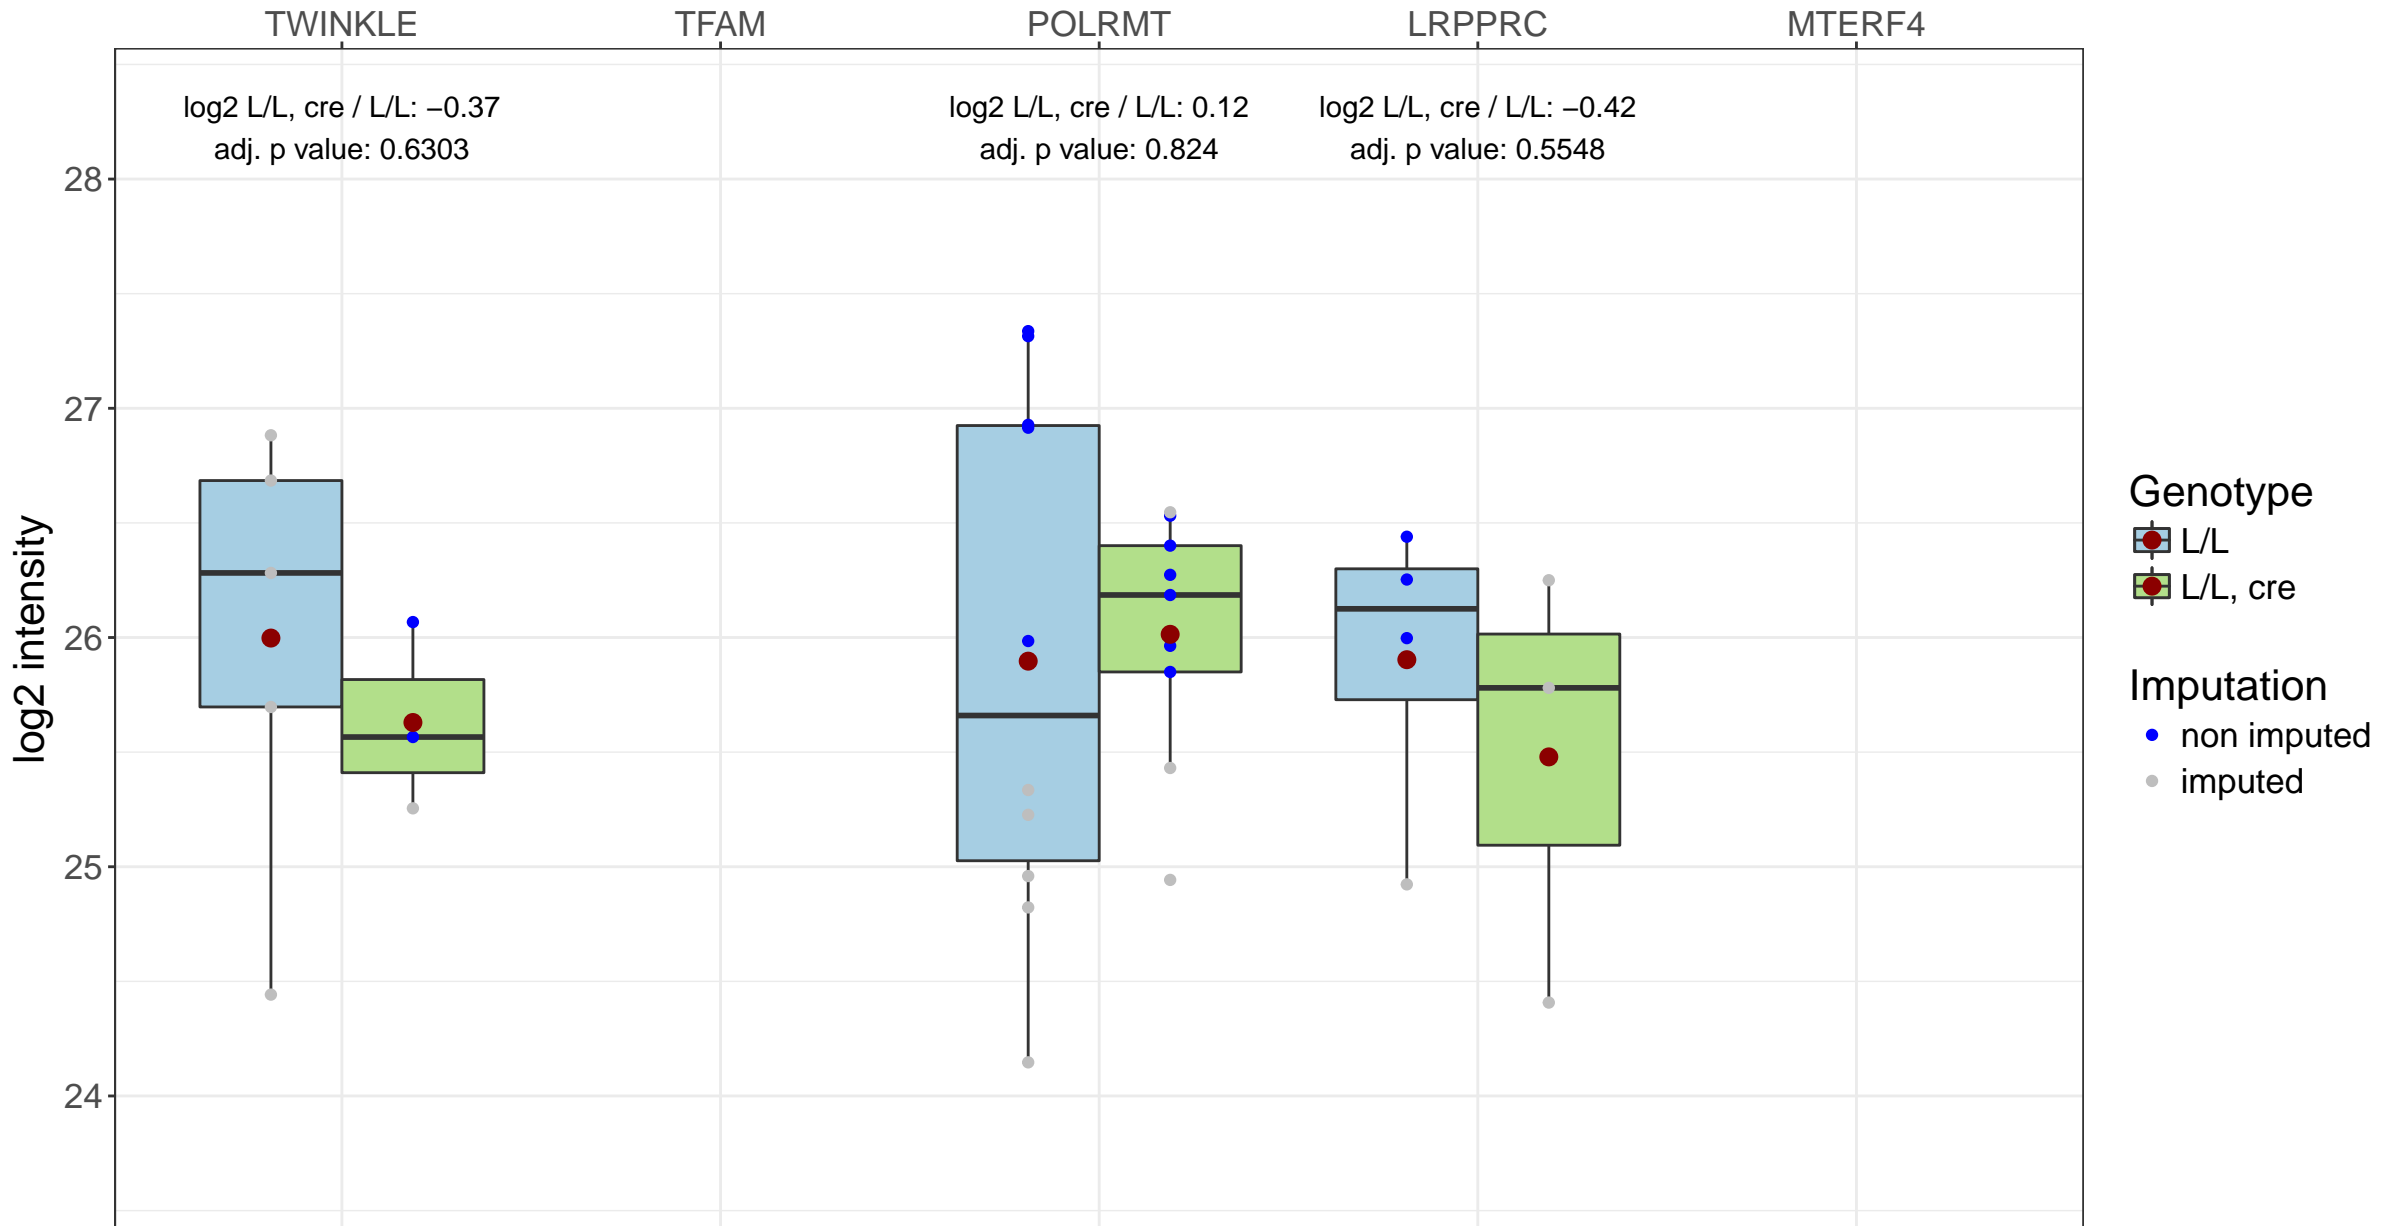



# MYOM2 / Q14BI5

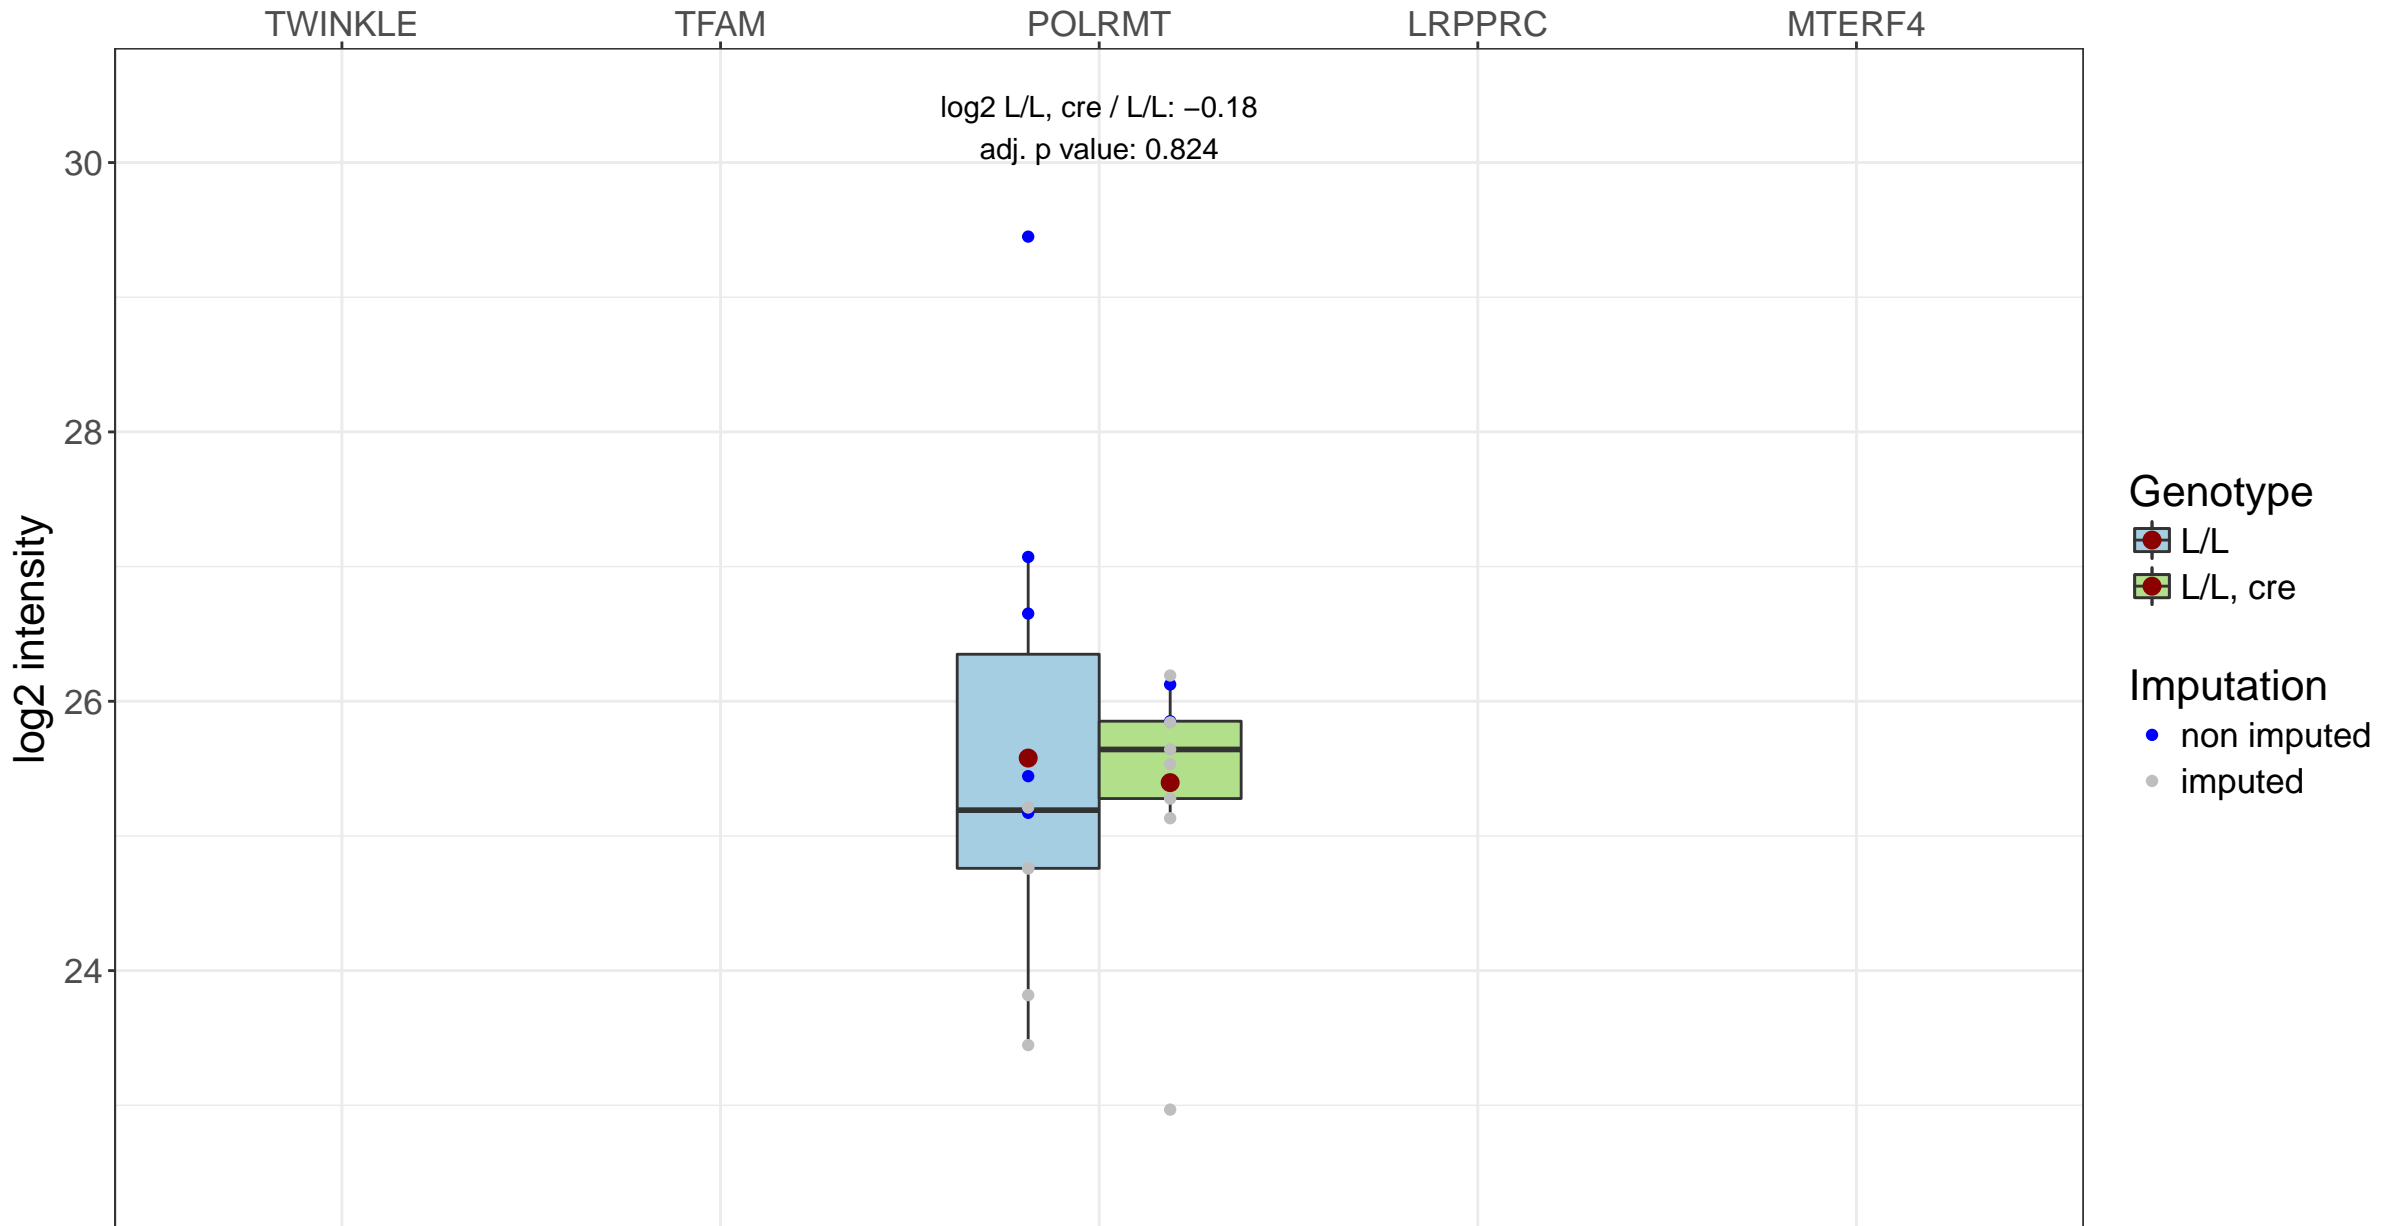



# NACA / P70670

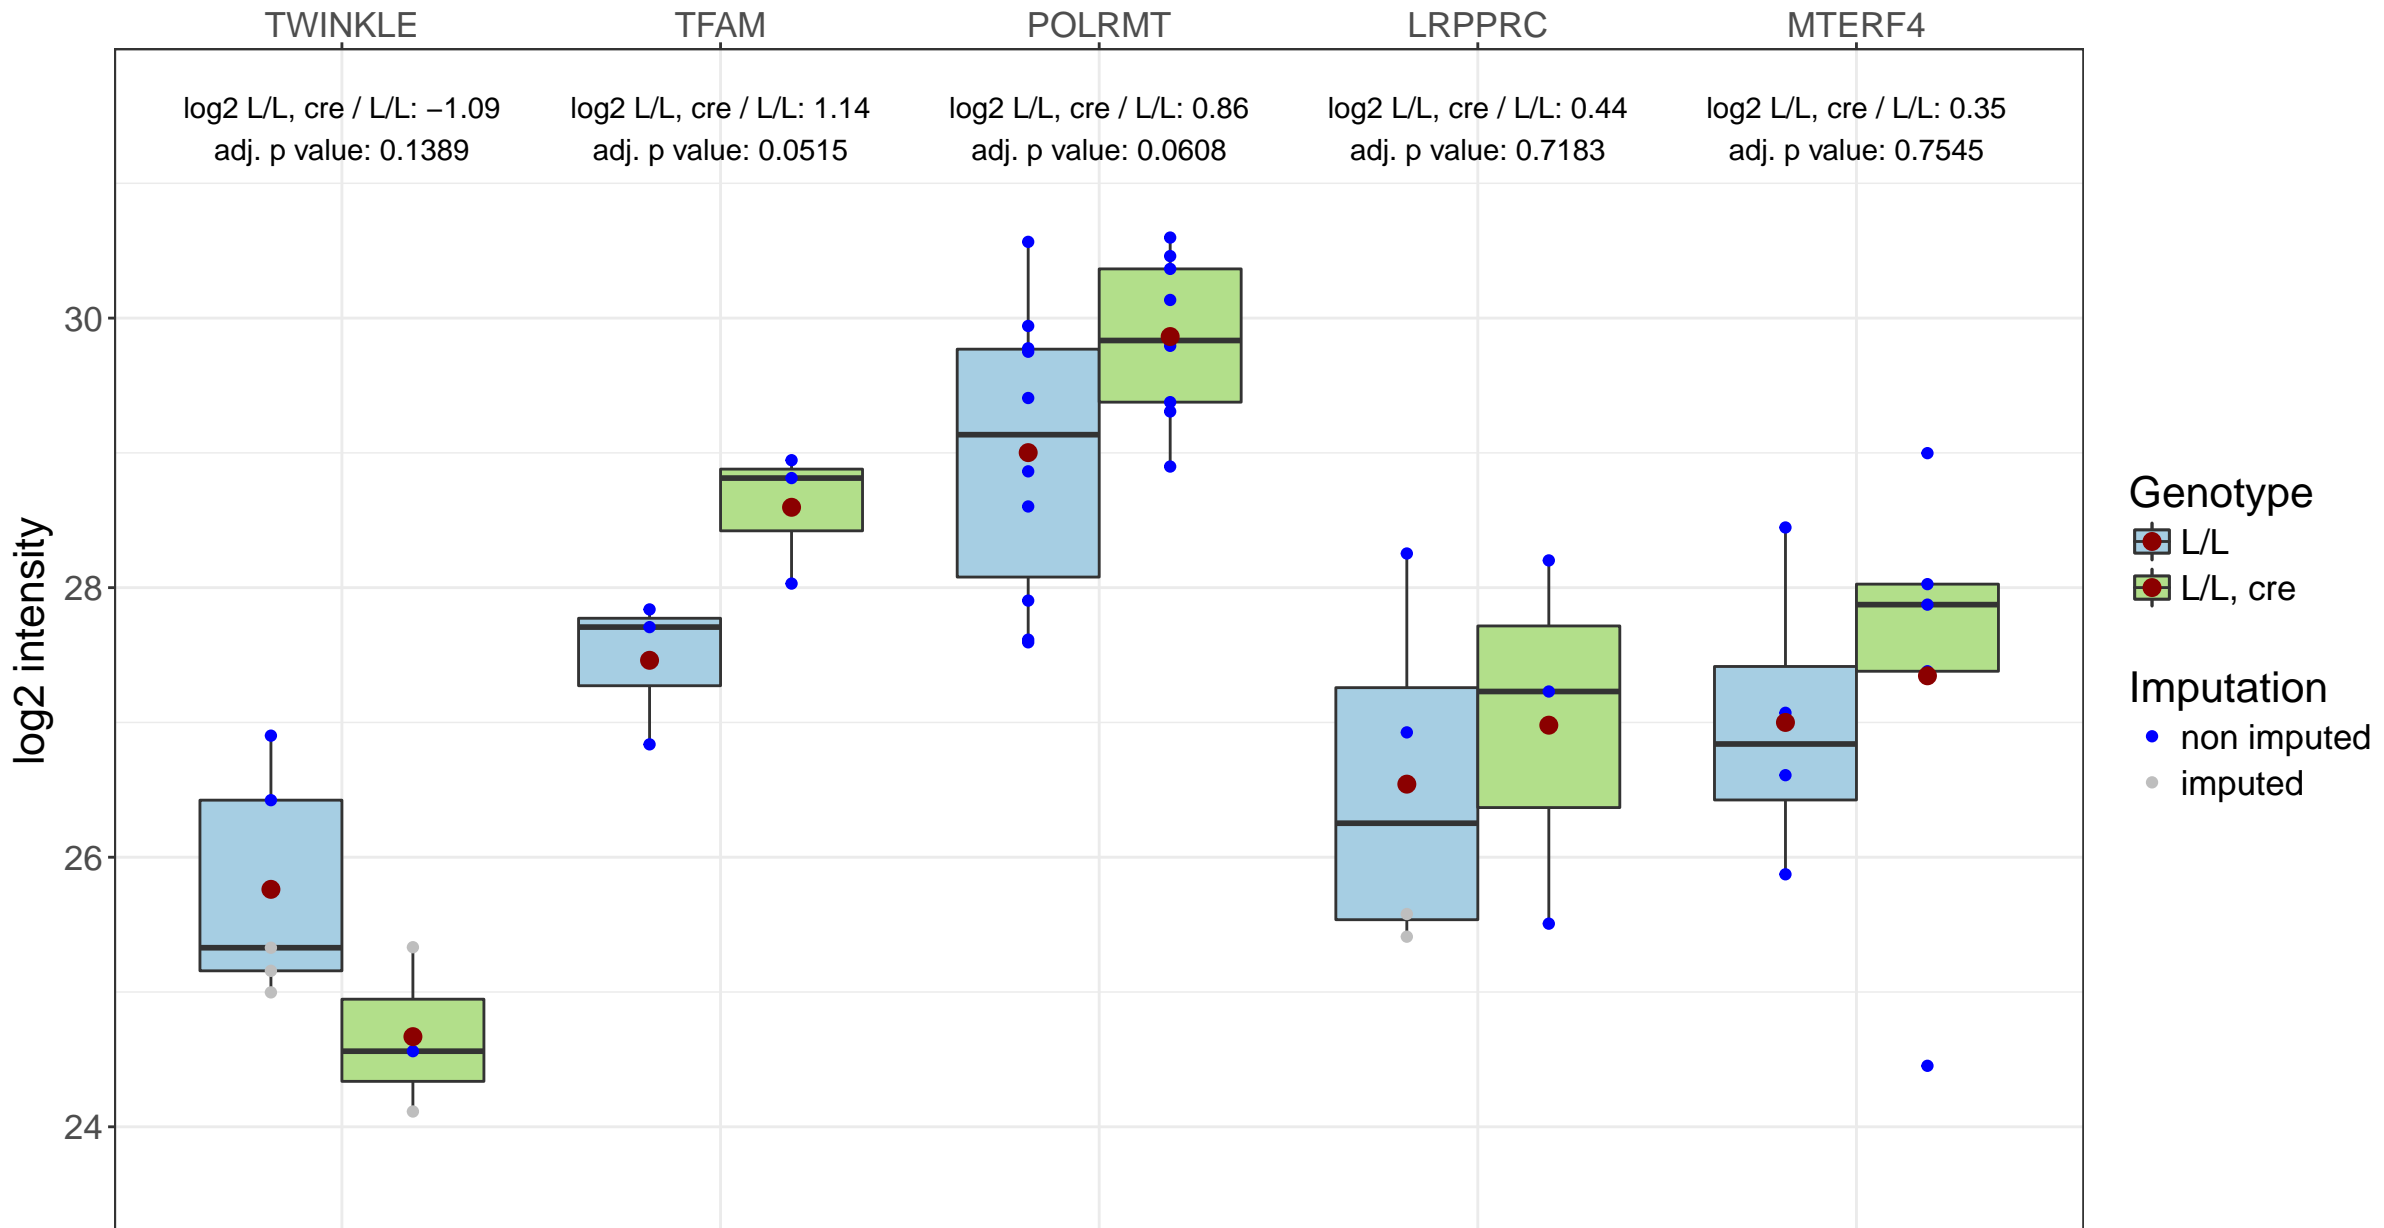

# NADK2 / Q8C5H8-2

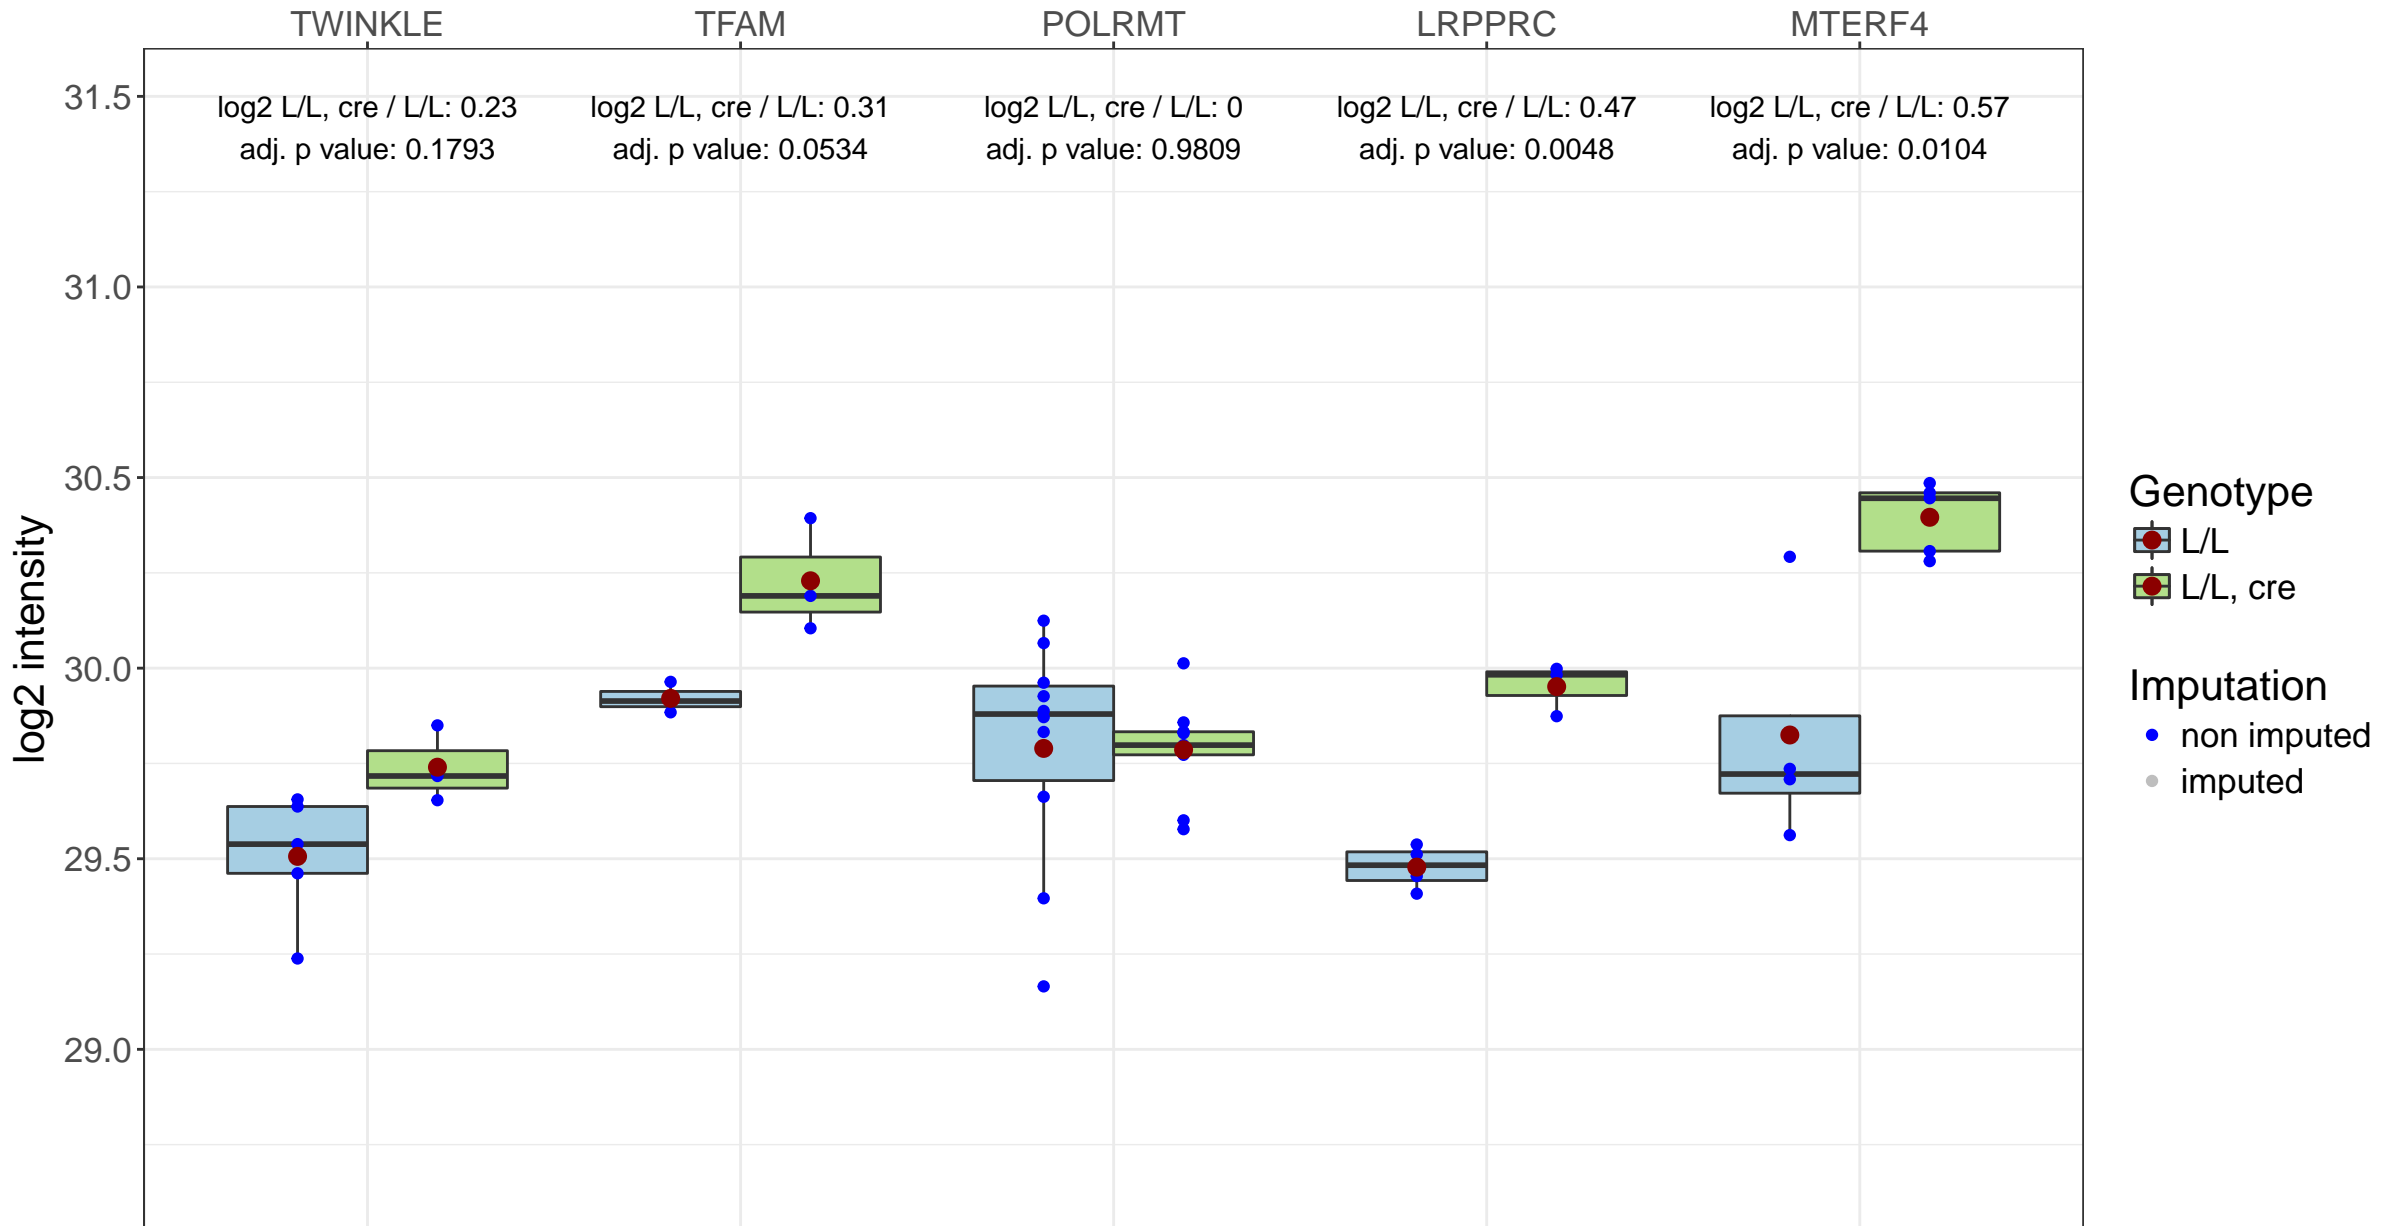

# NARS2 / Q8BGV0

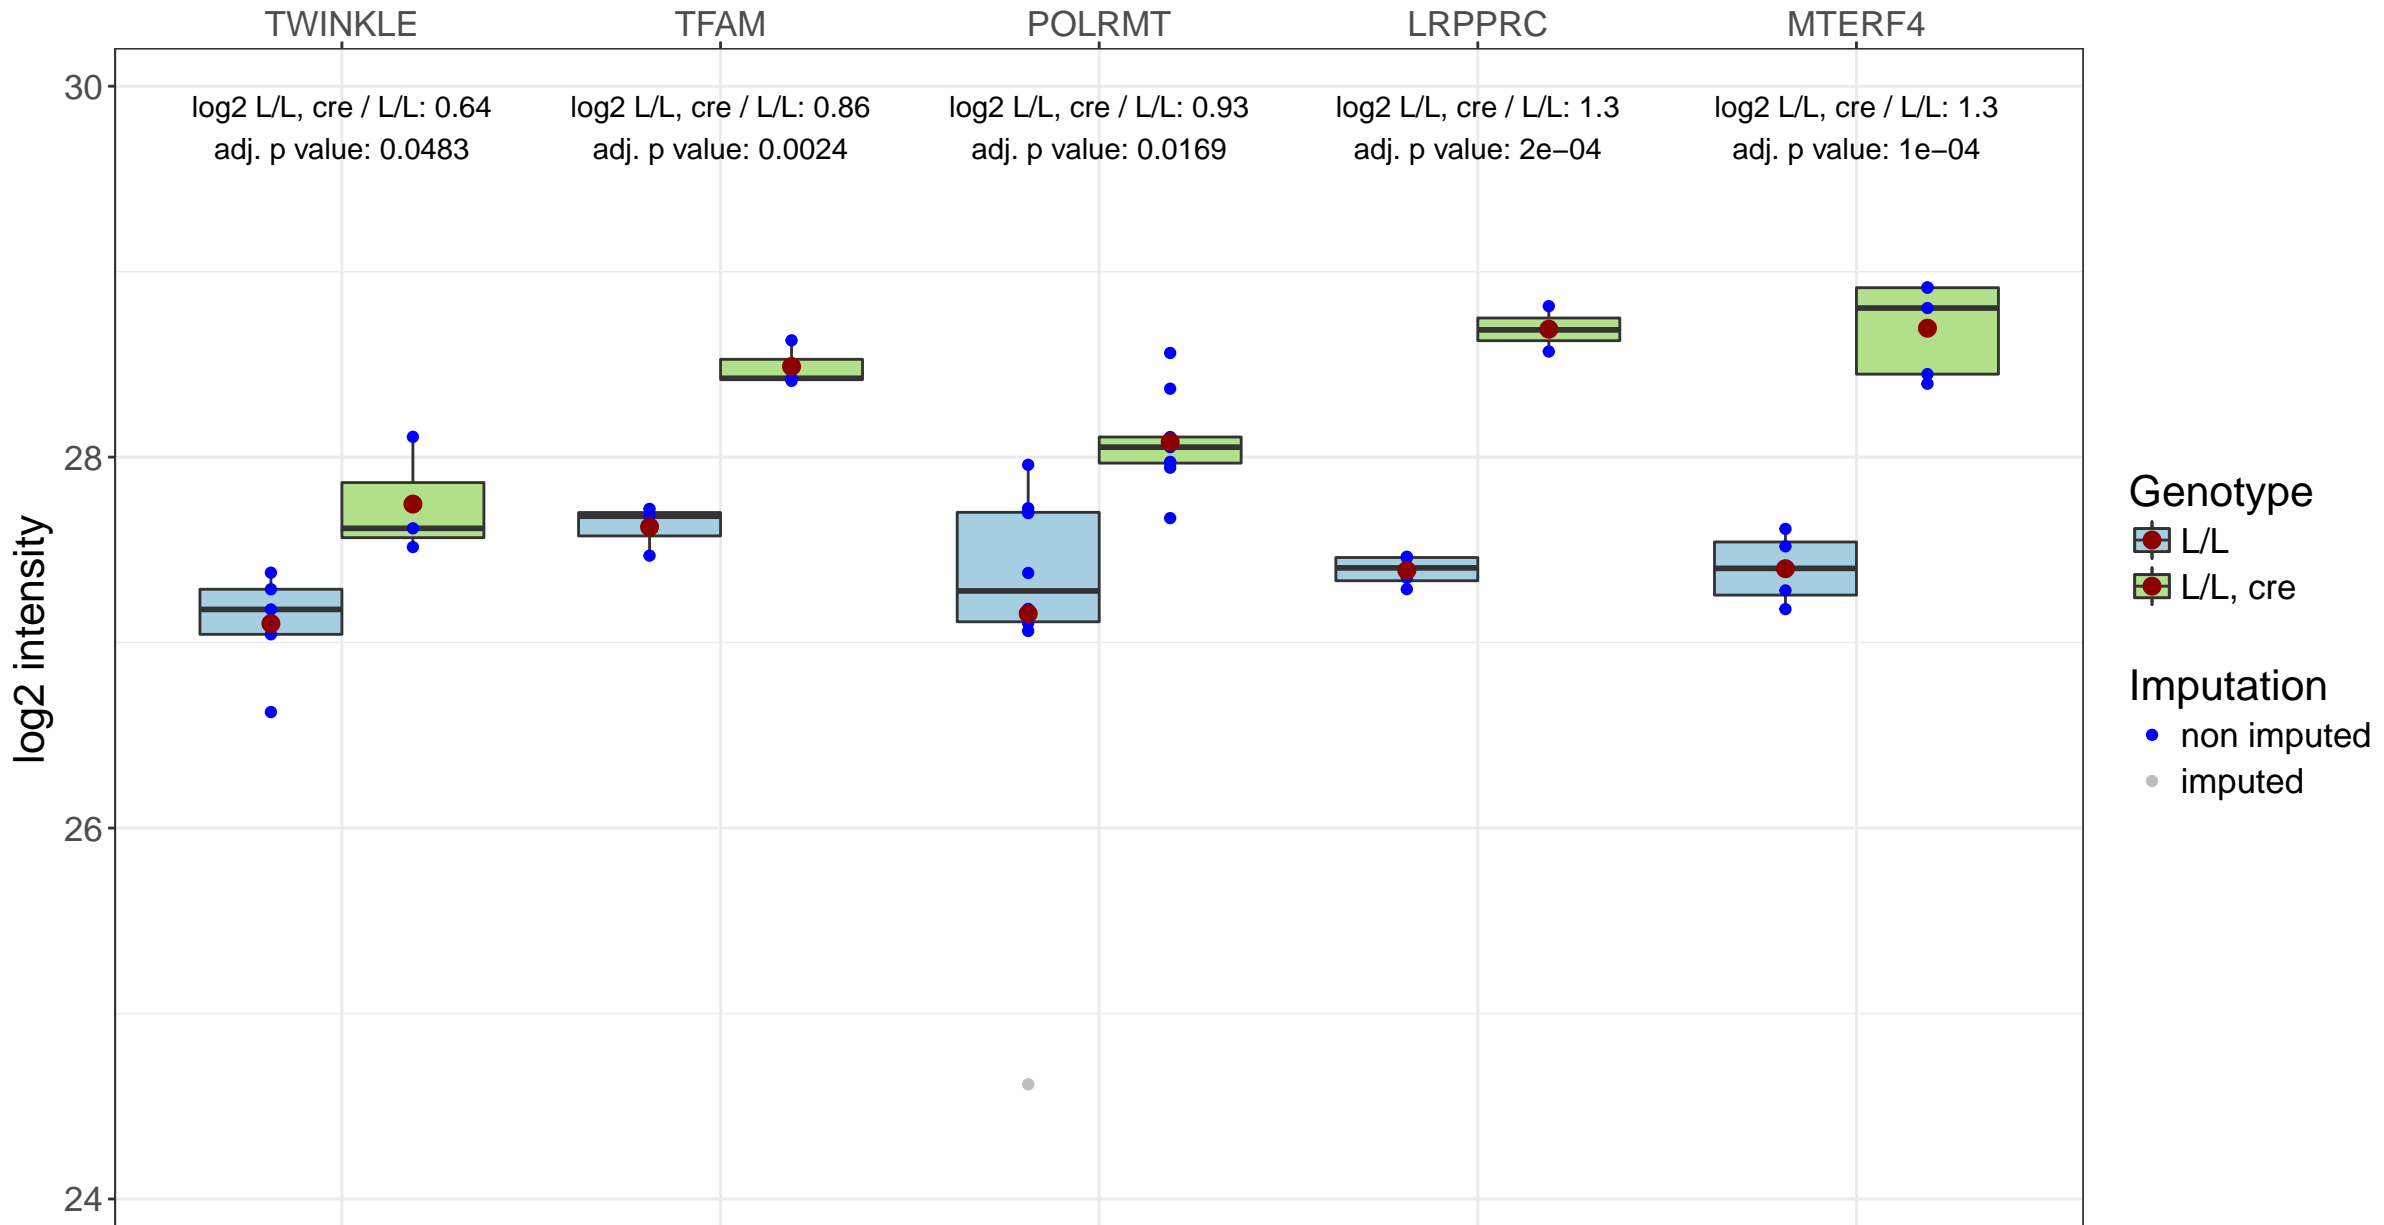

# NDRG2 / Q9QYG0

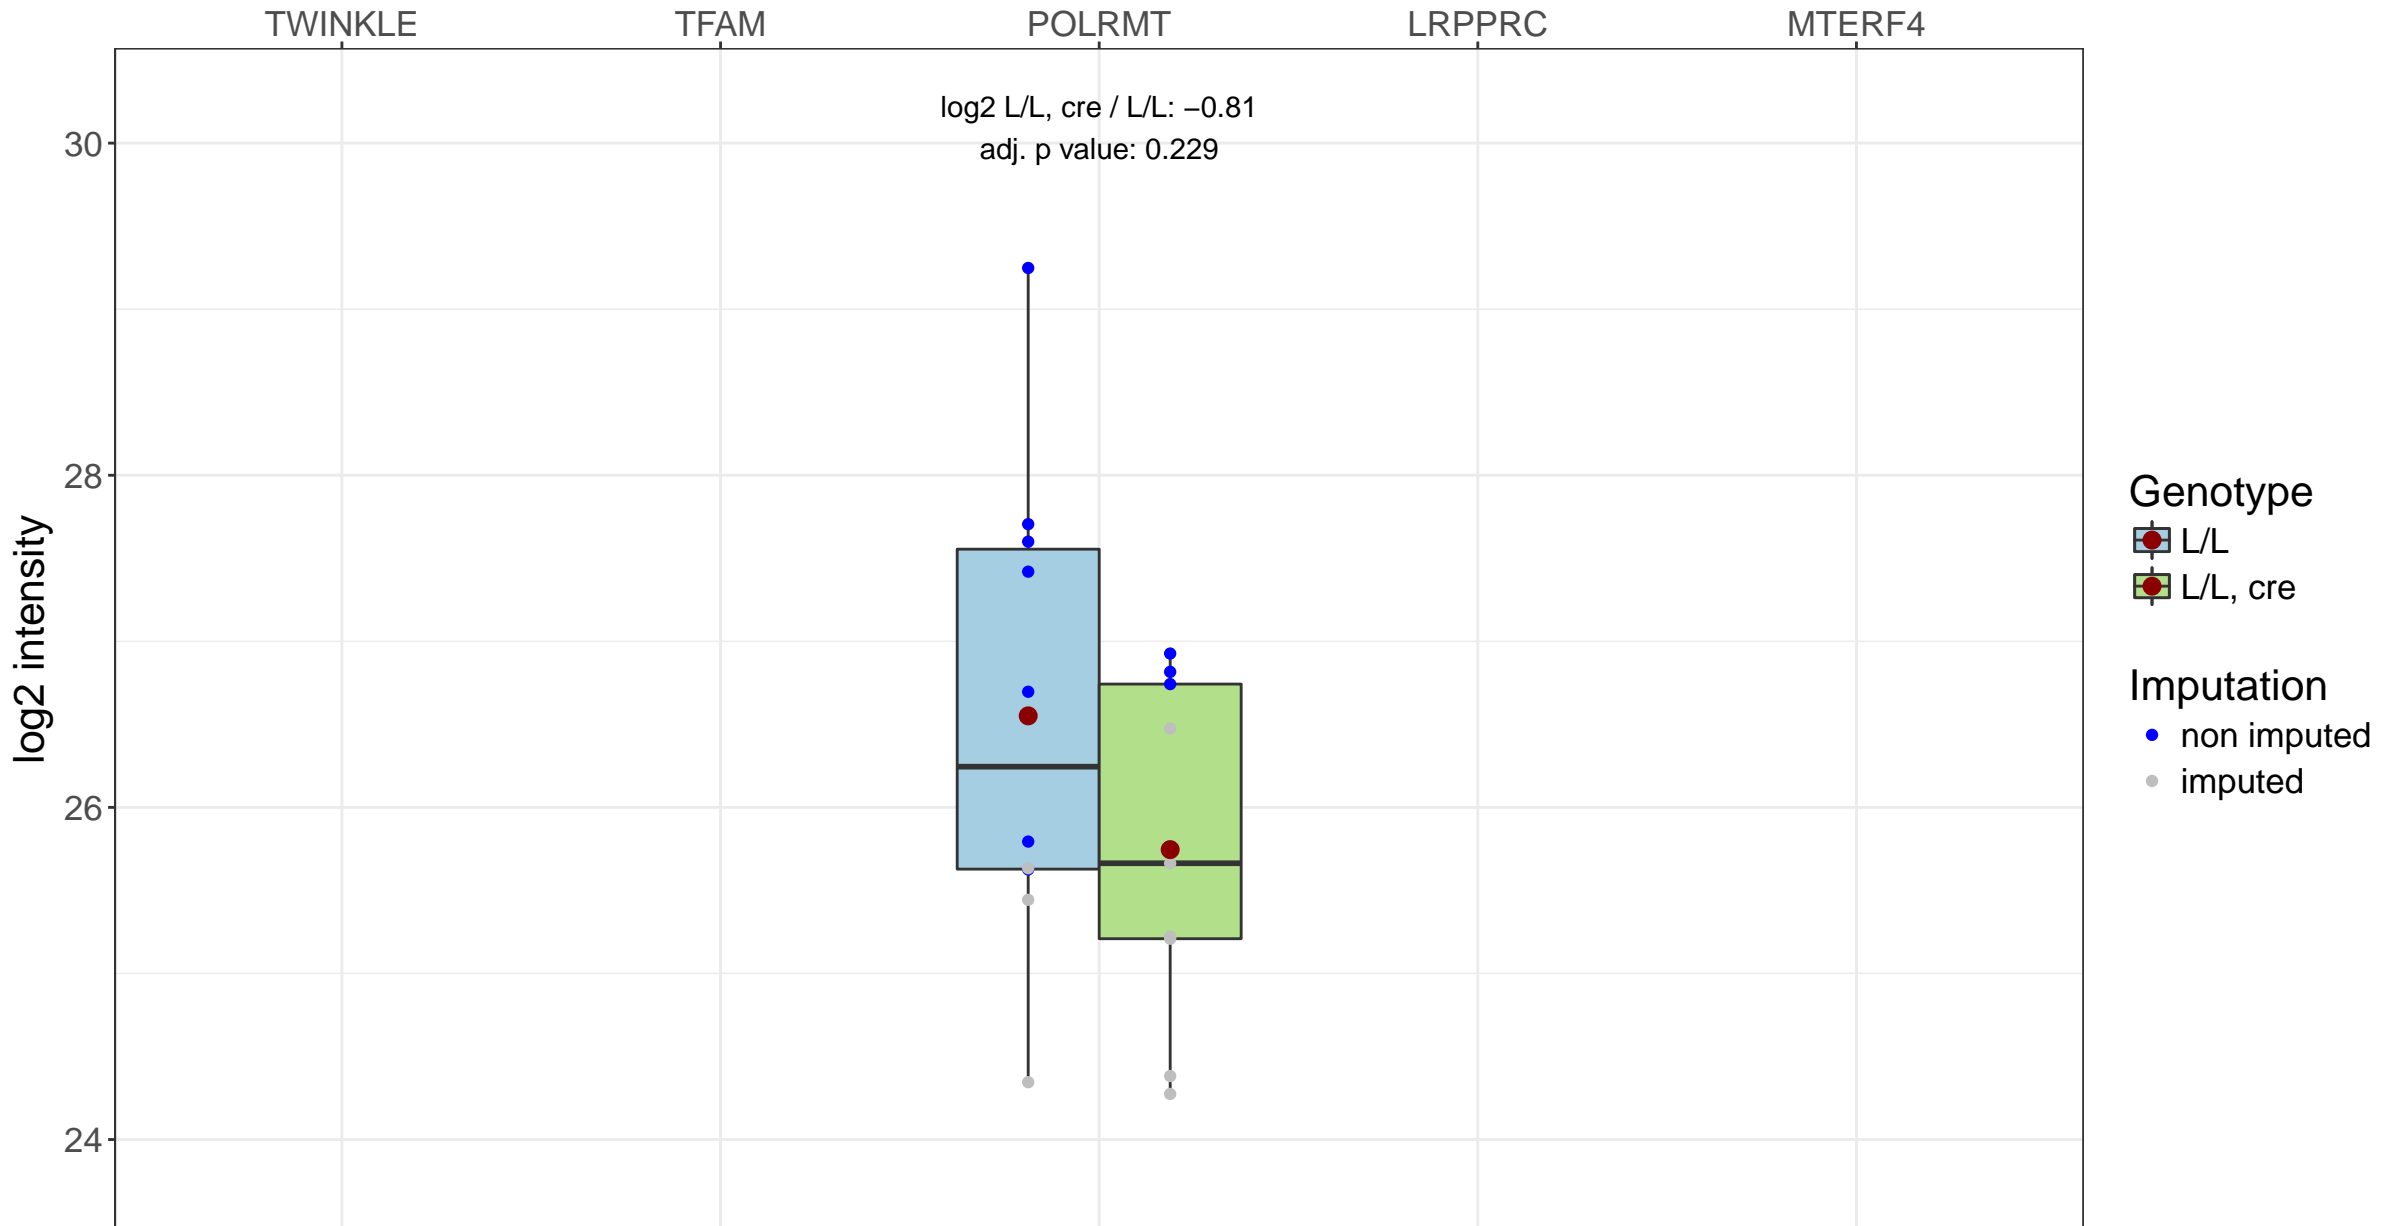

# NDUFA1 / O35683

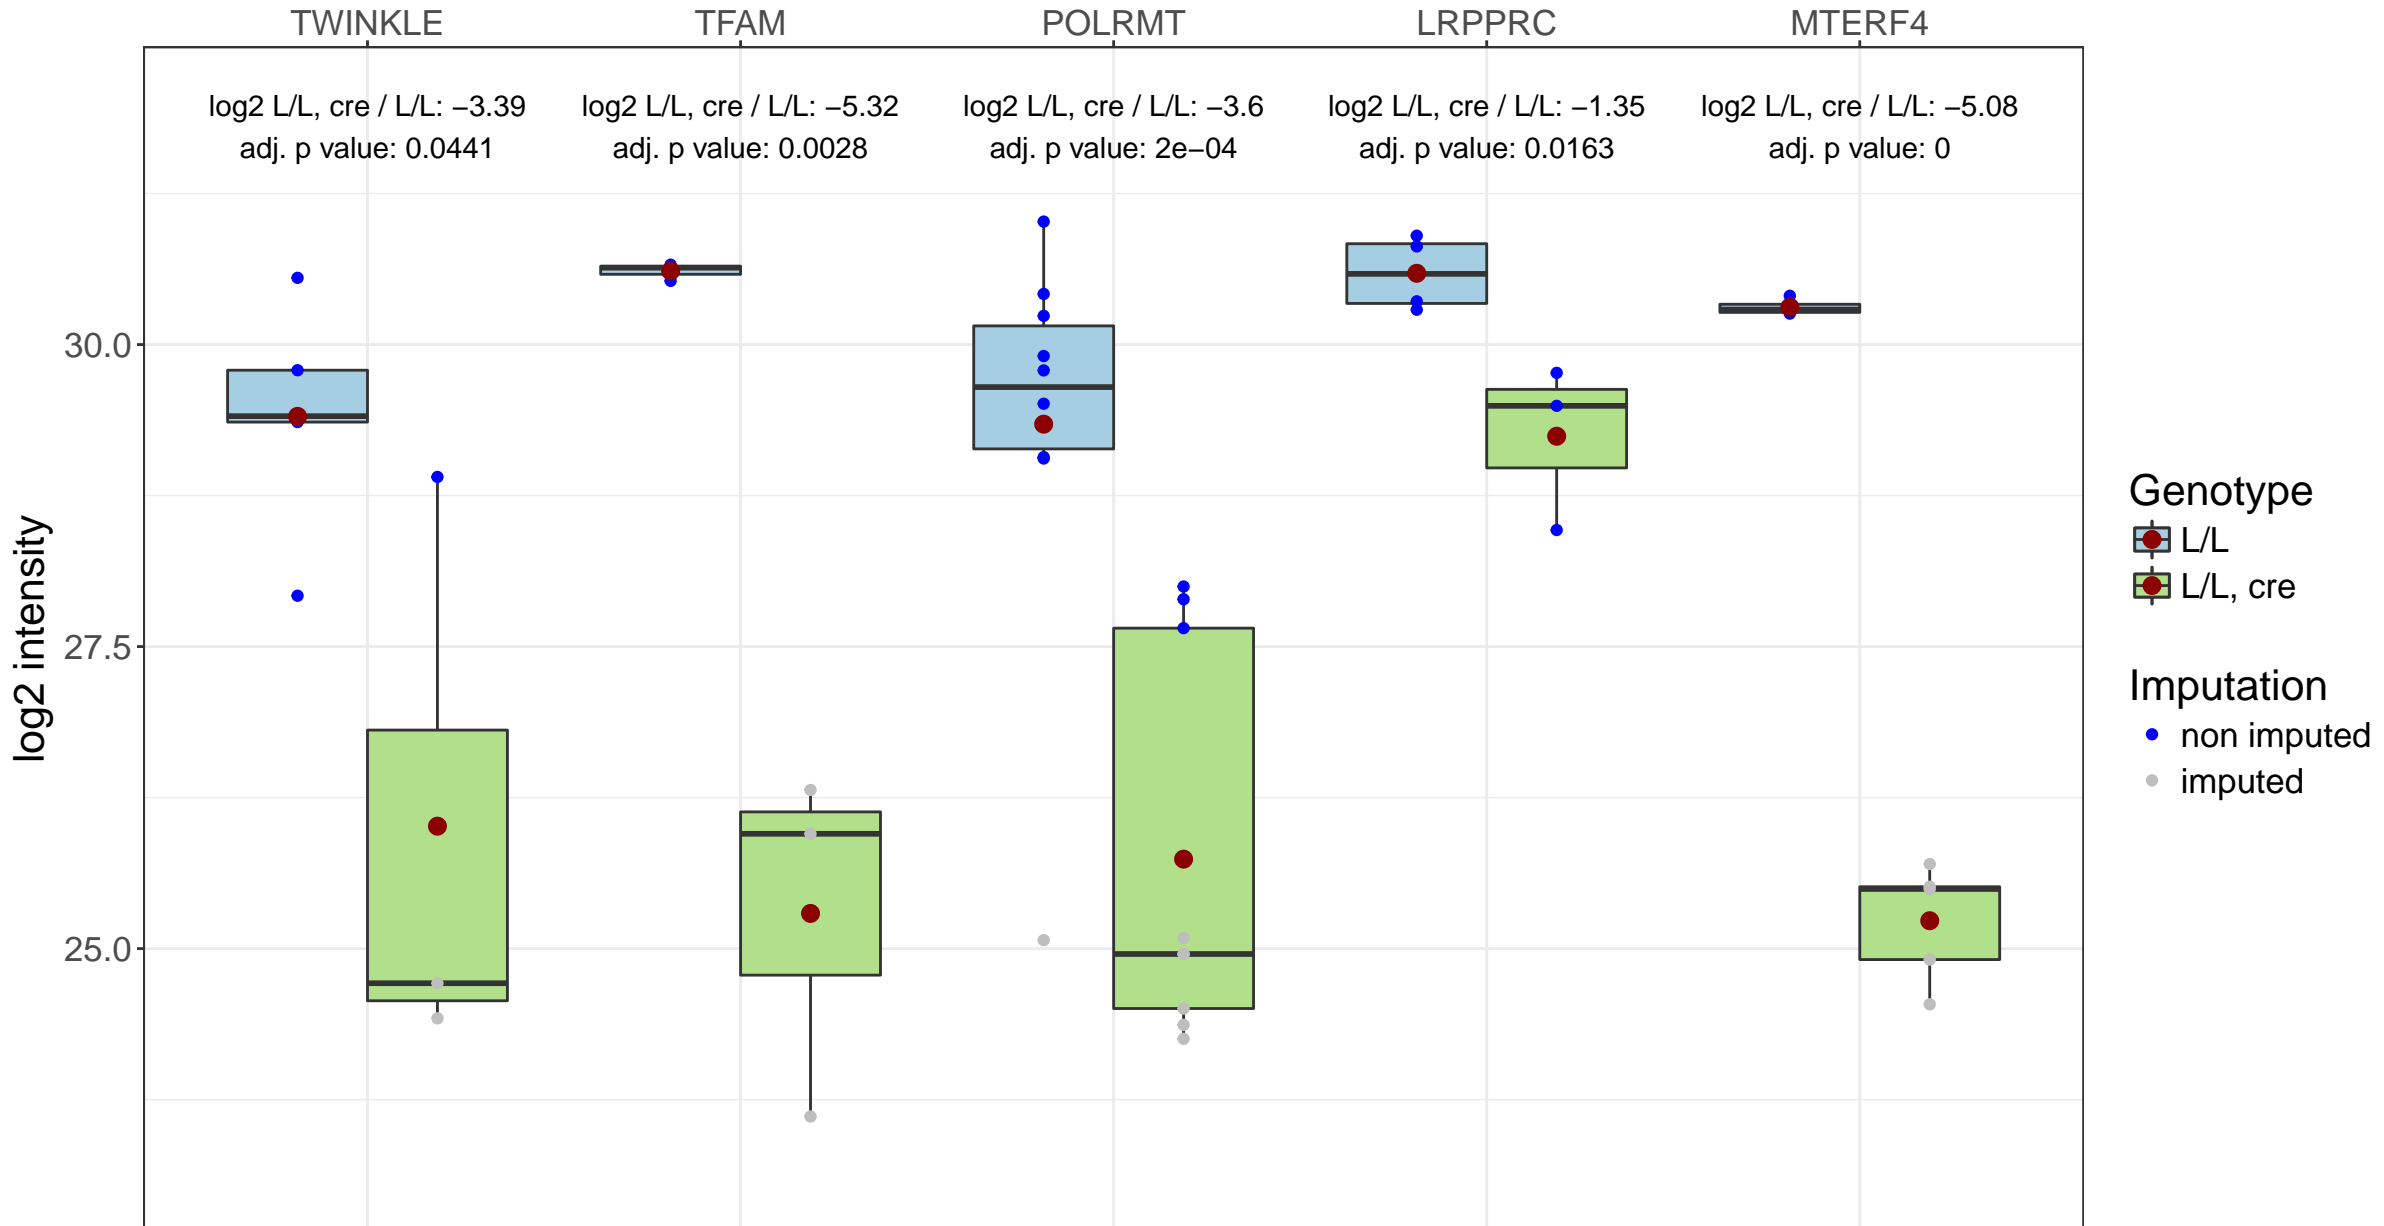

# NDUFA10 / Q99LC3

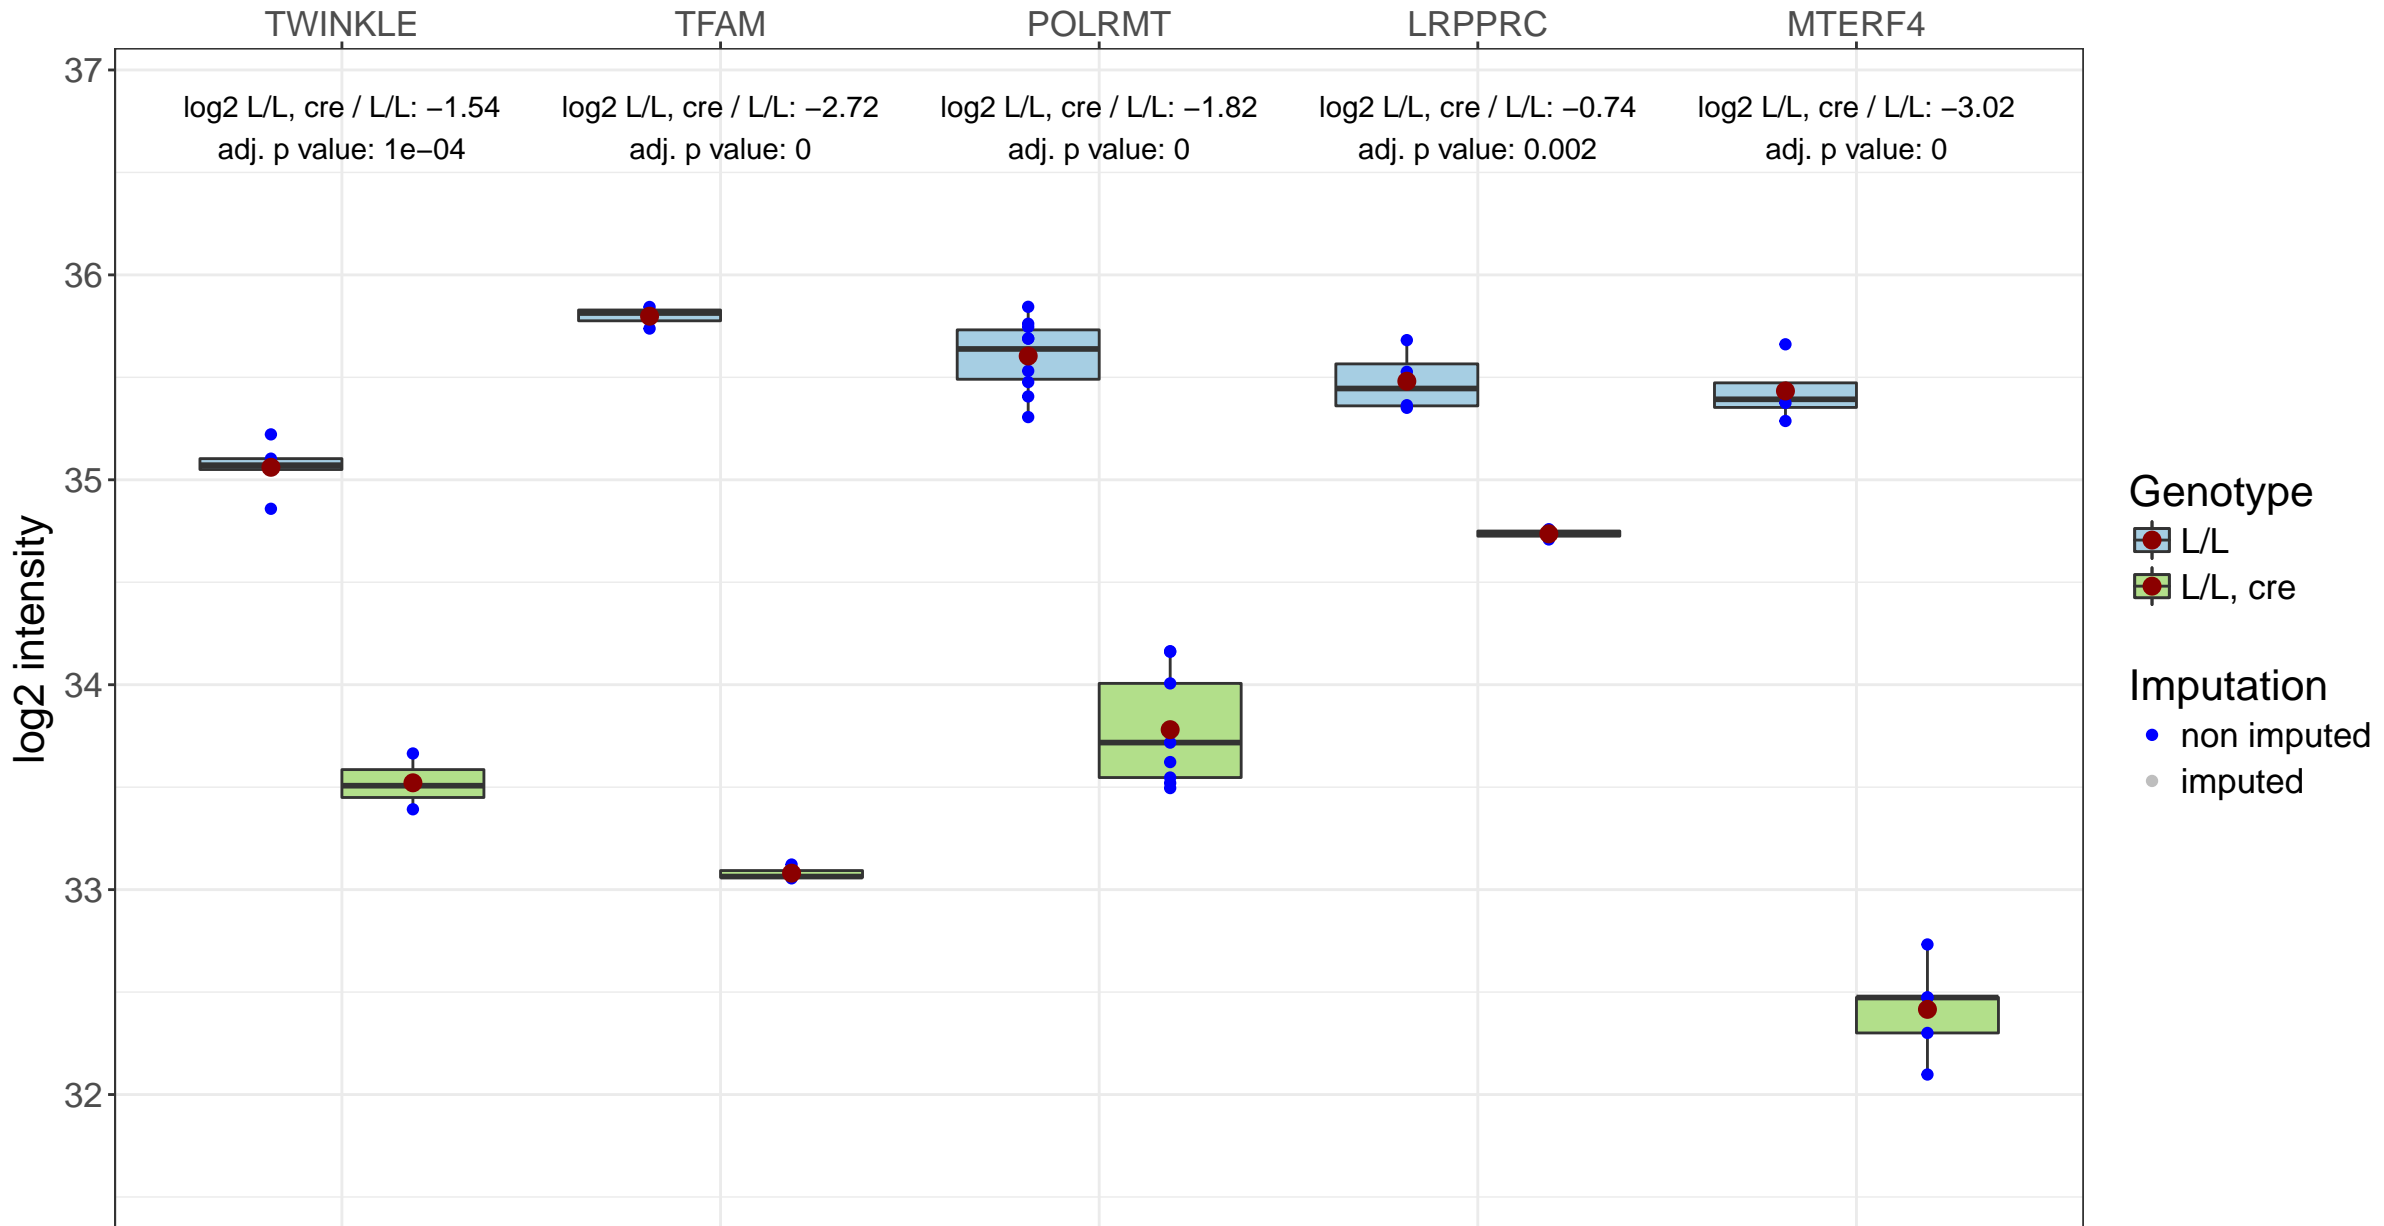



# NDUFA11 / G5E814

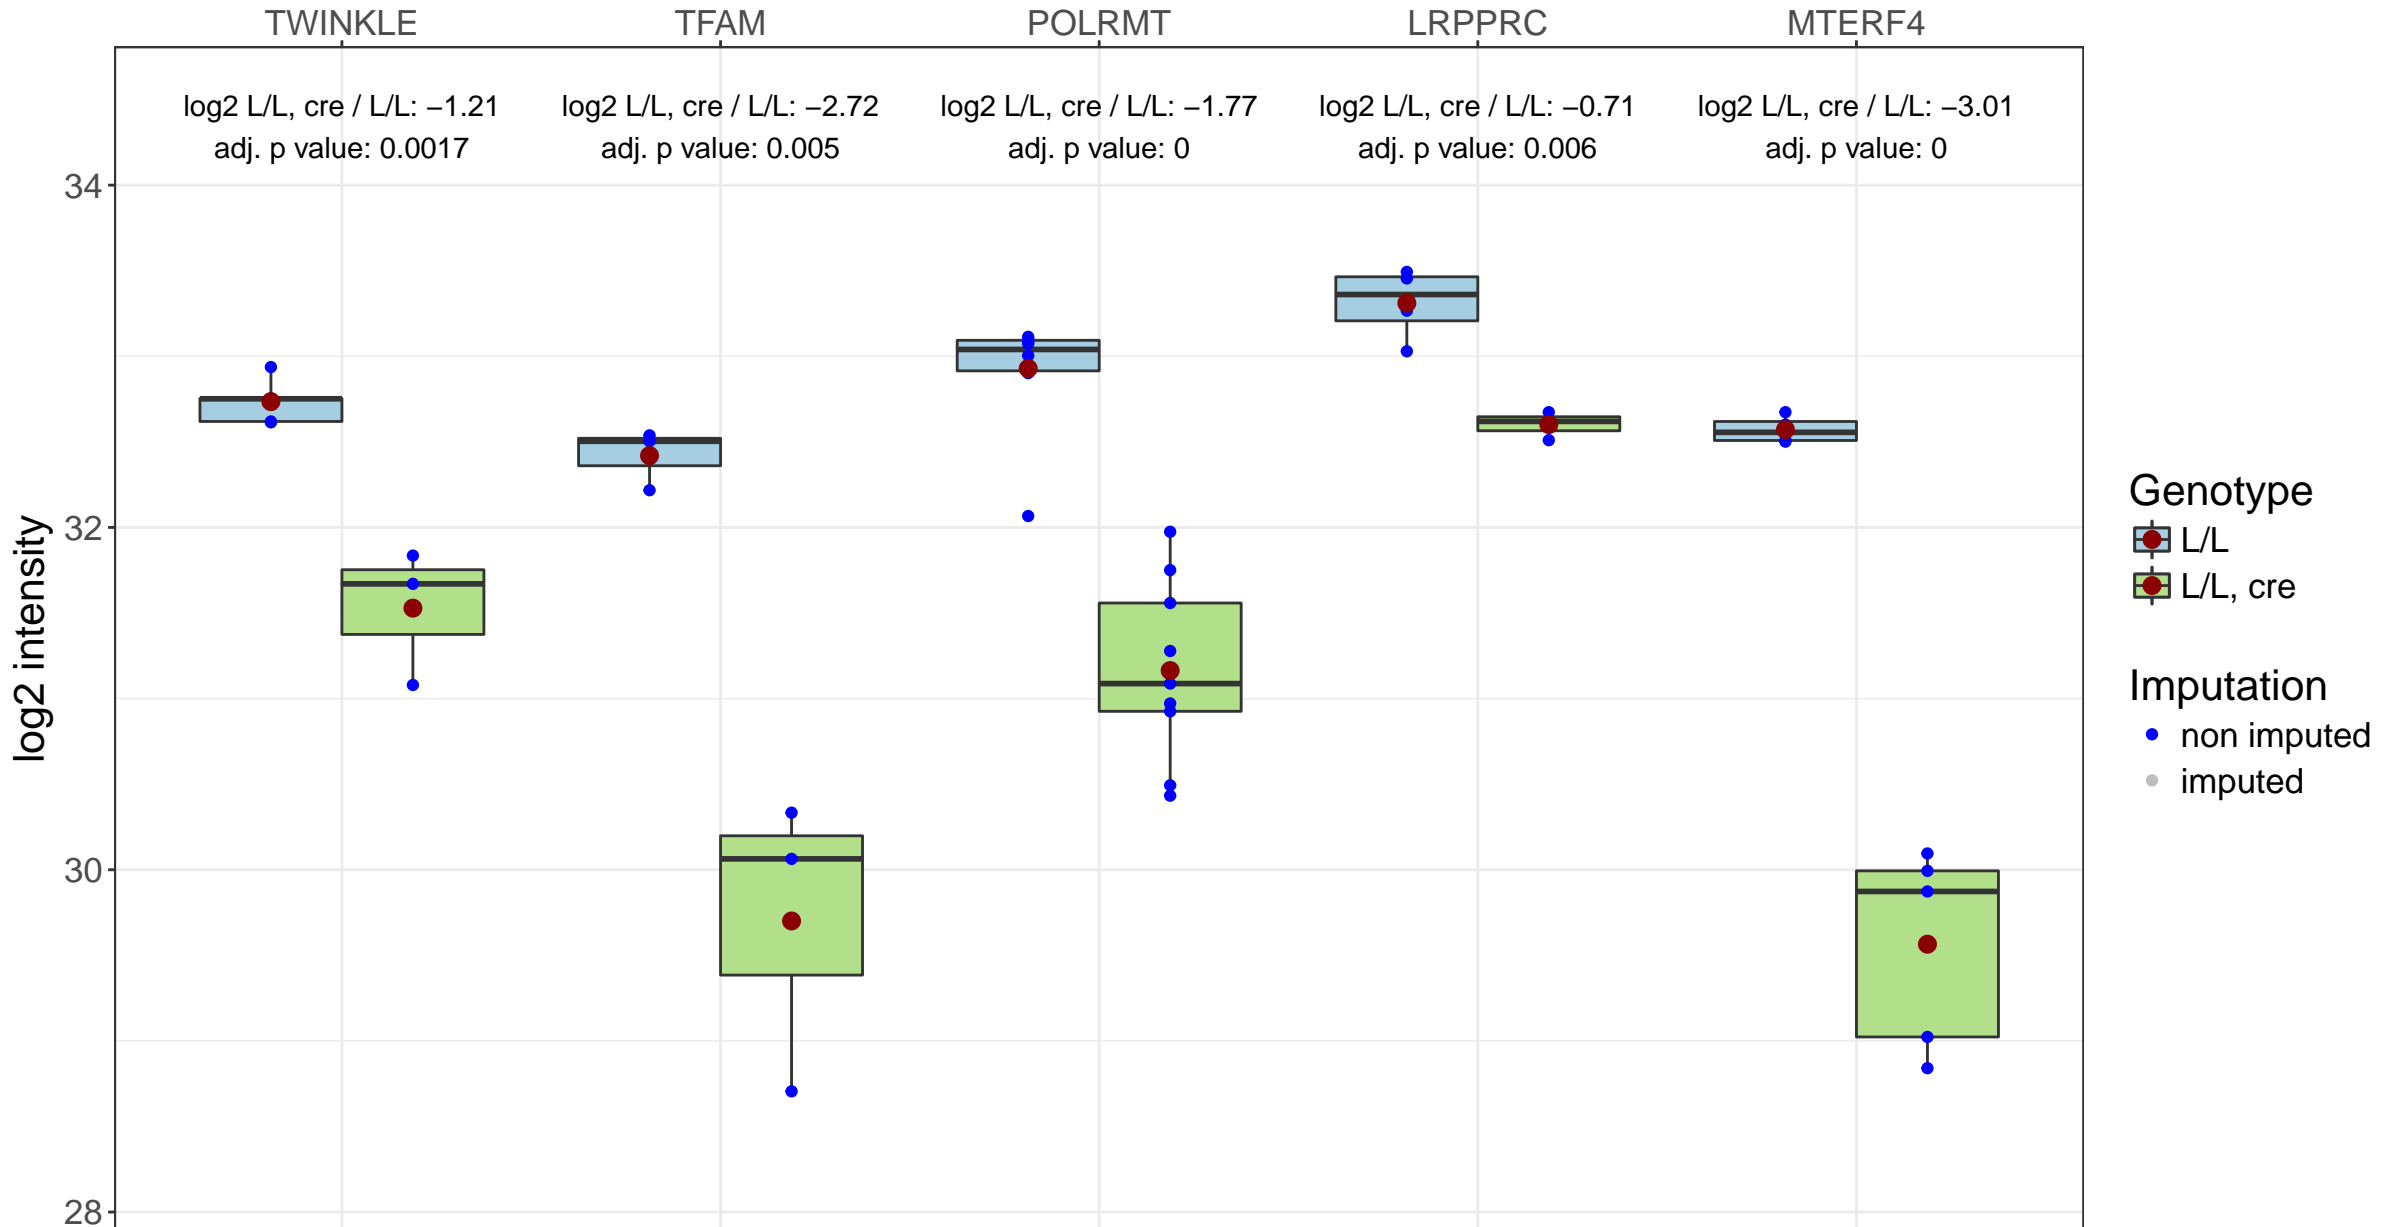

# NDUFA12 / Q7TMF3

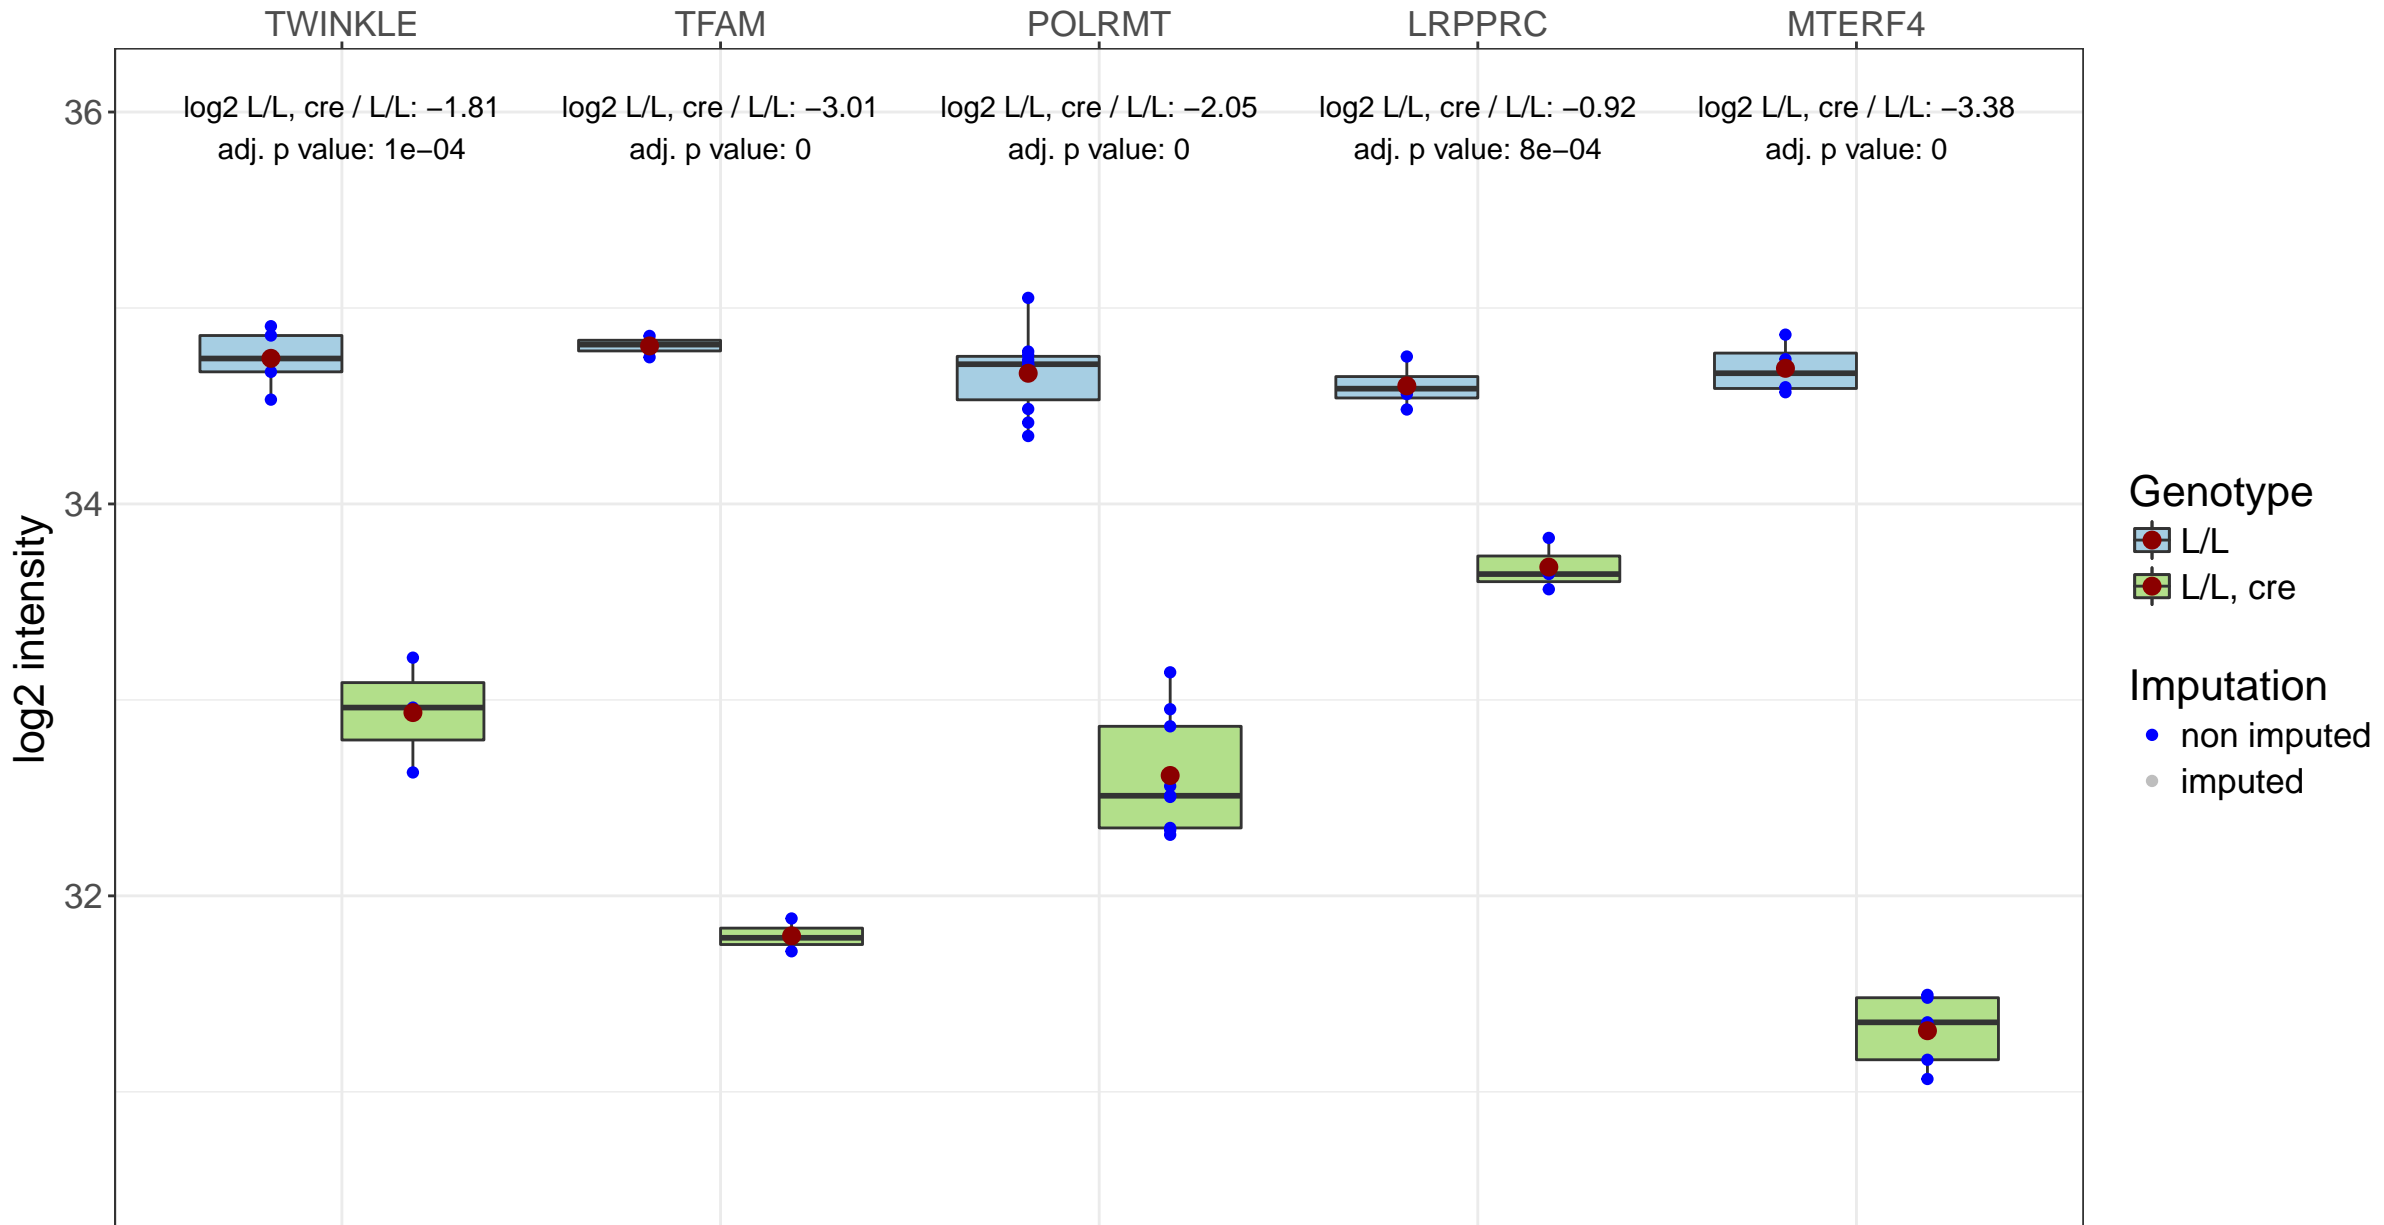

# NDUFA13 / Q9ERS2

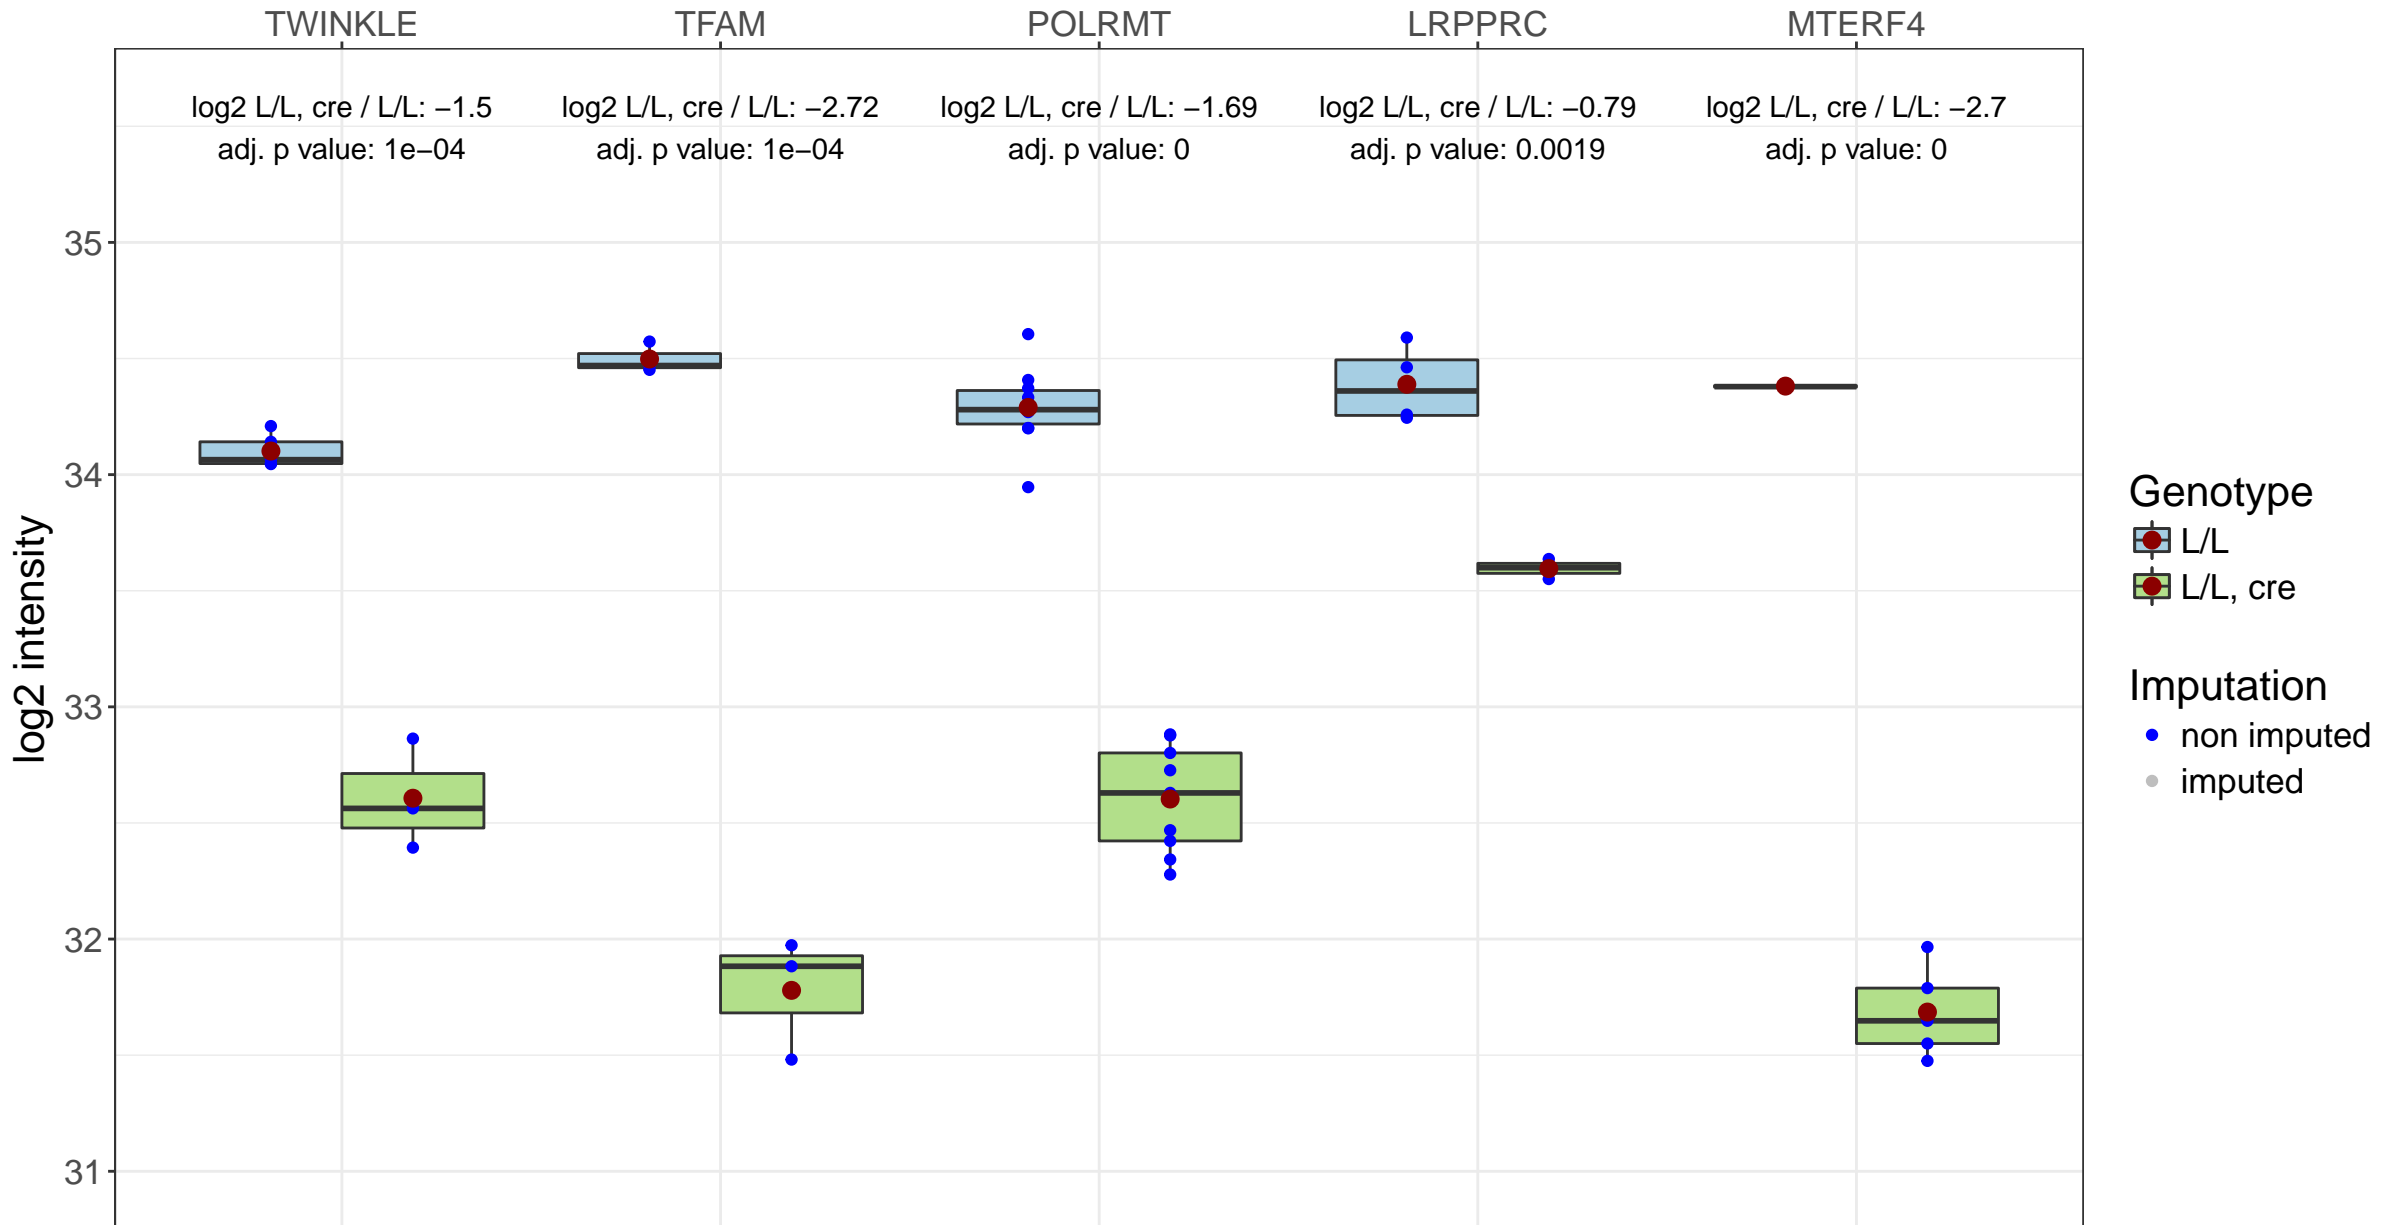

# NDUFA2 / Q9CQ75

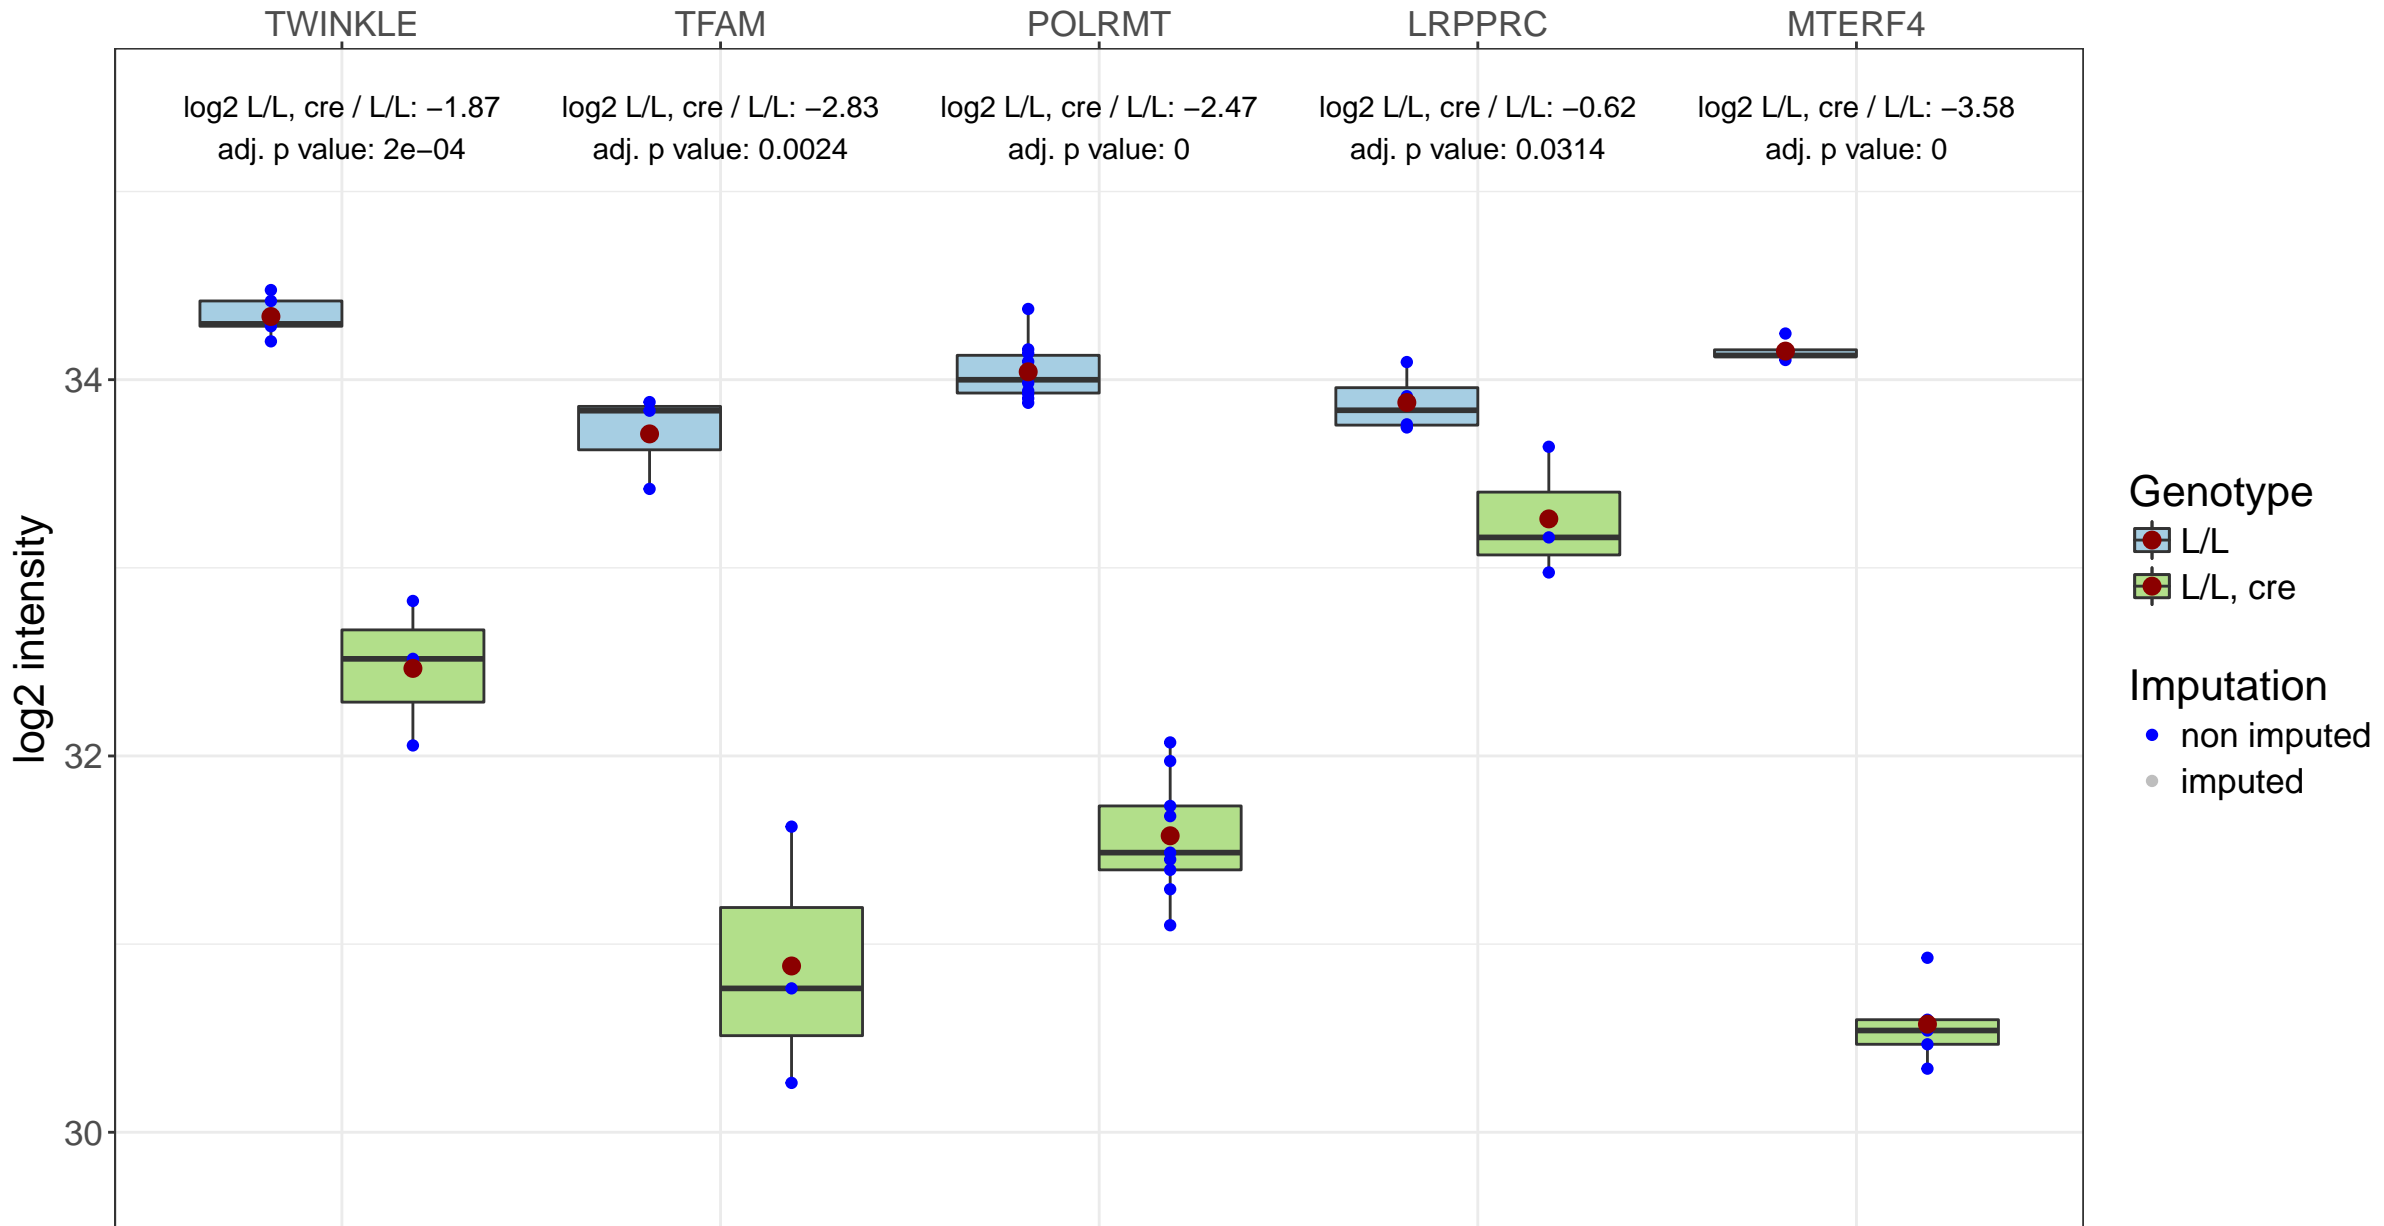

# NDUFA3 / Q9CQ91

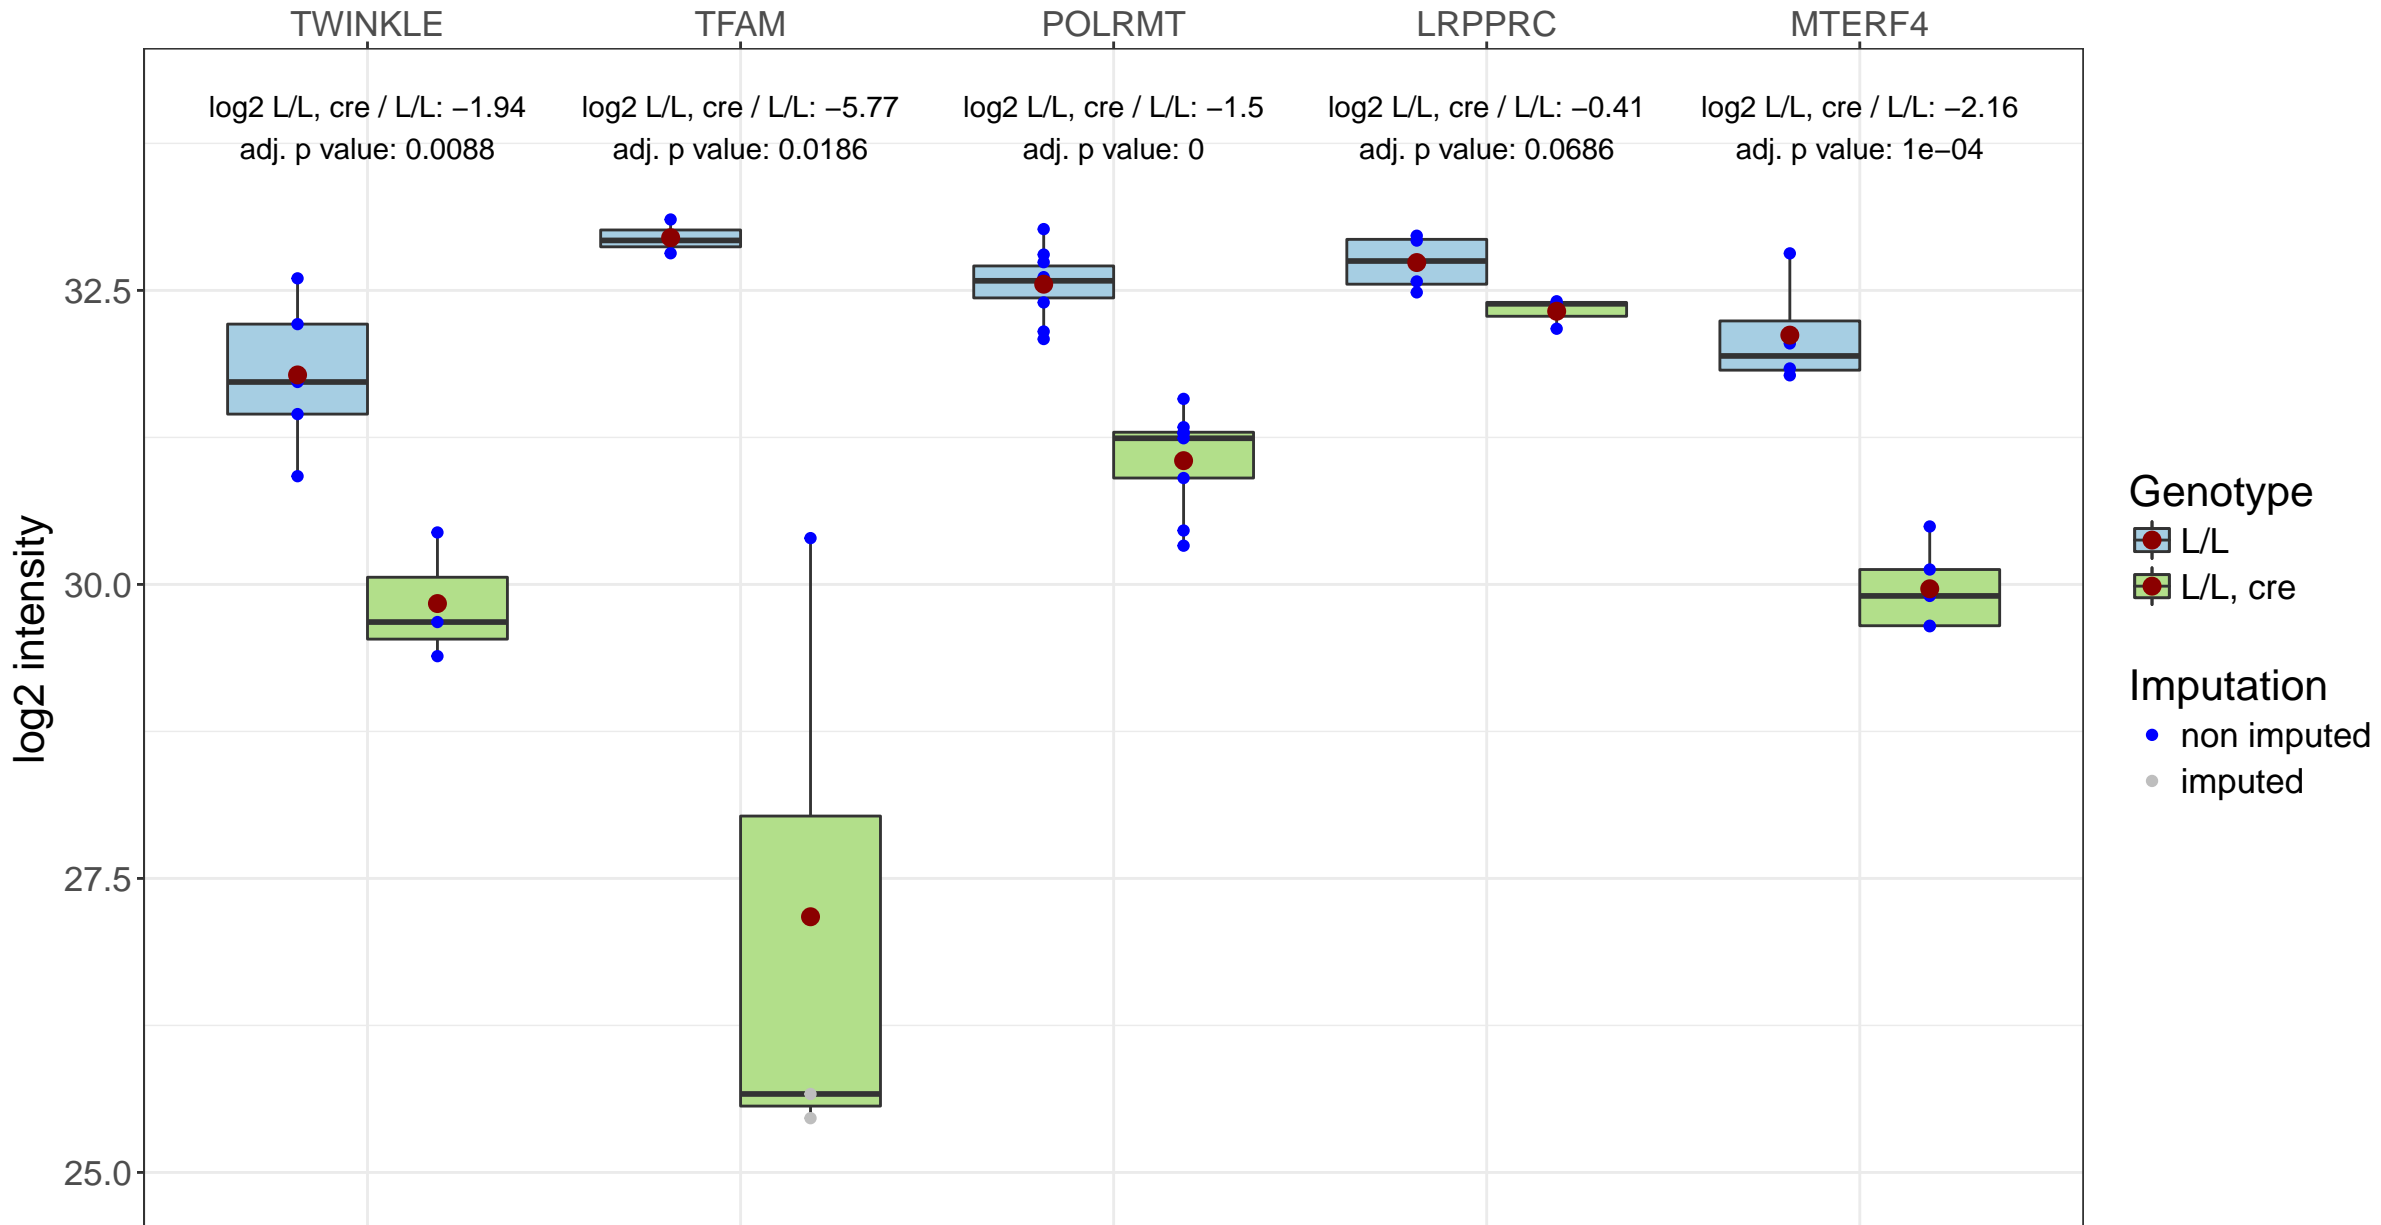

# NDUFA4 / Q62425

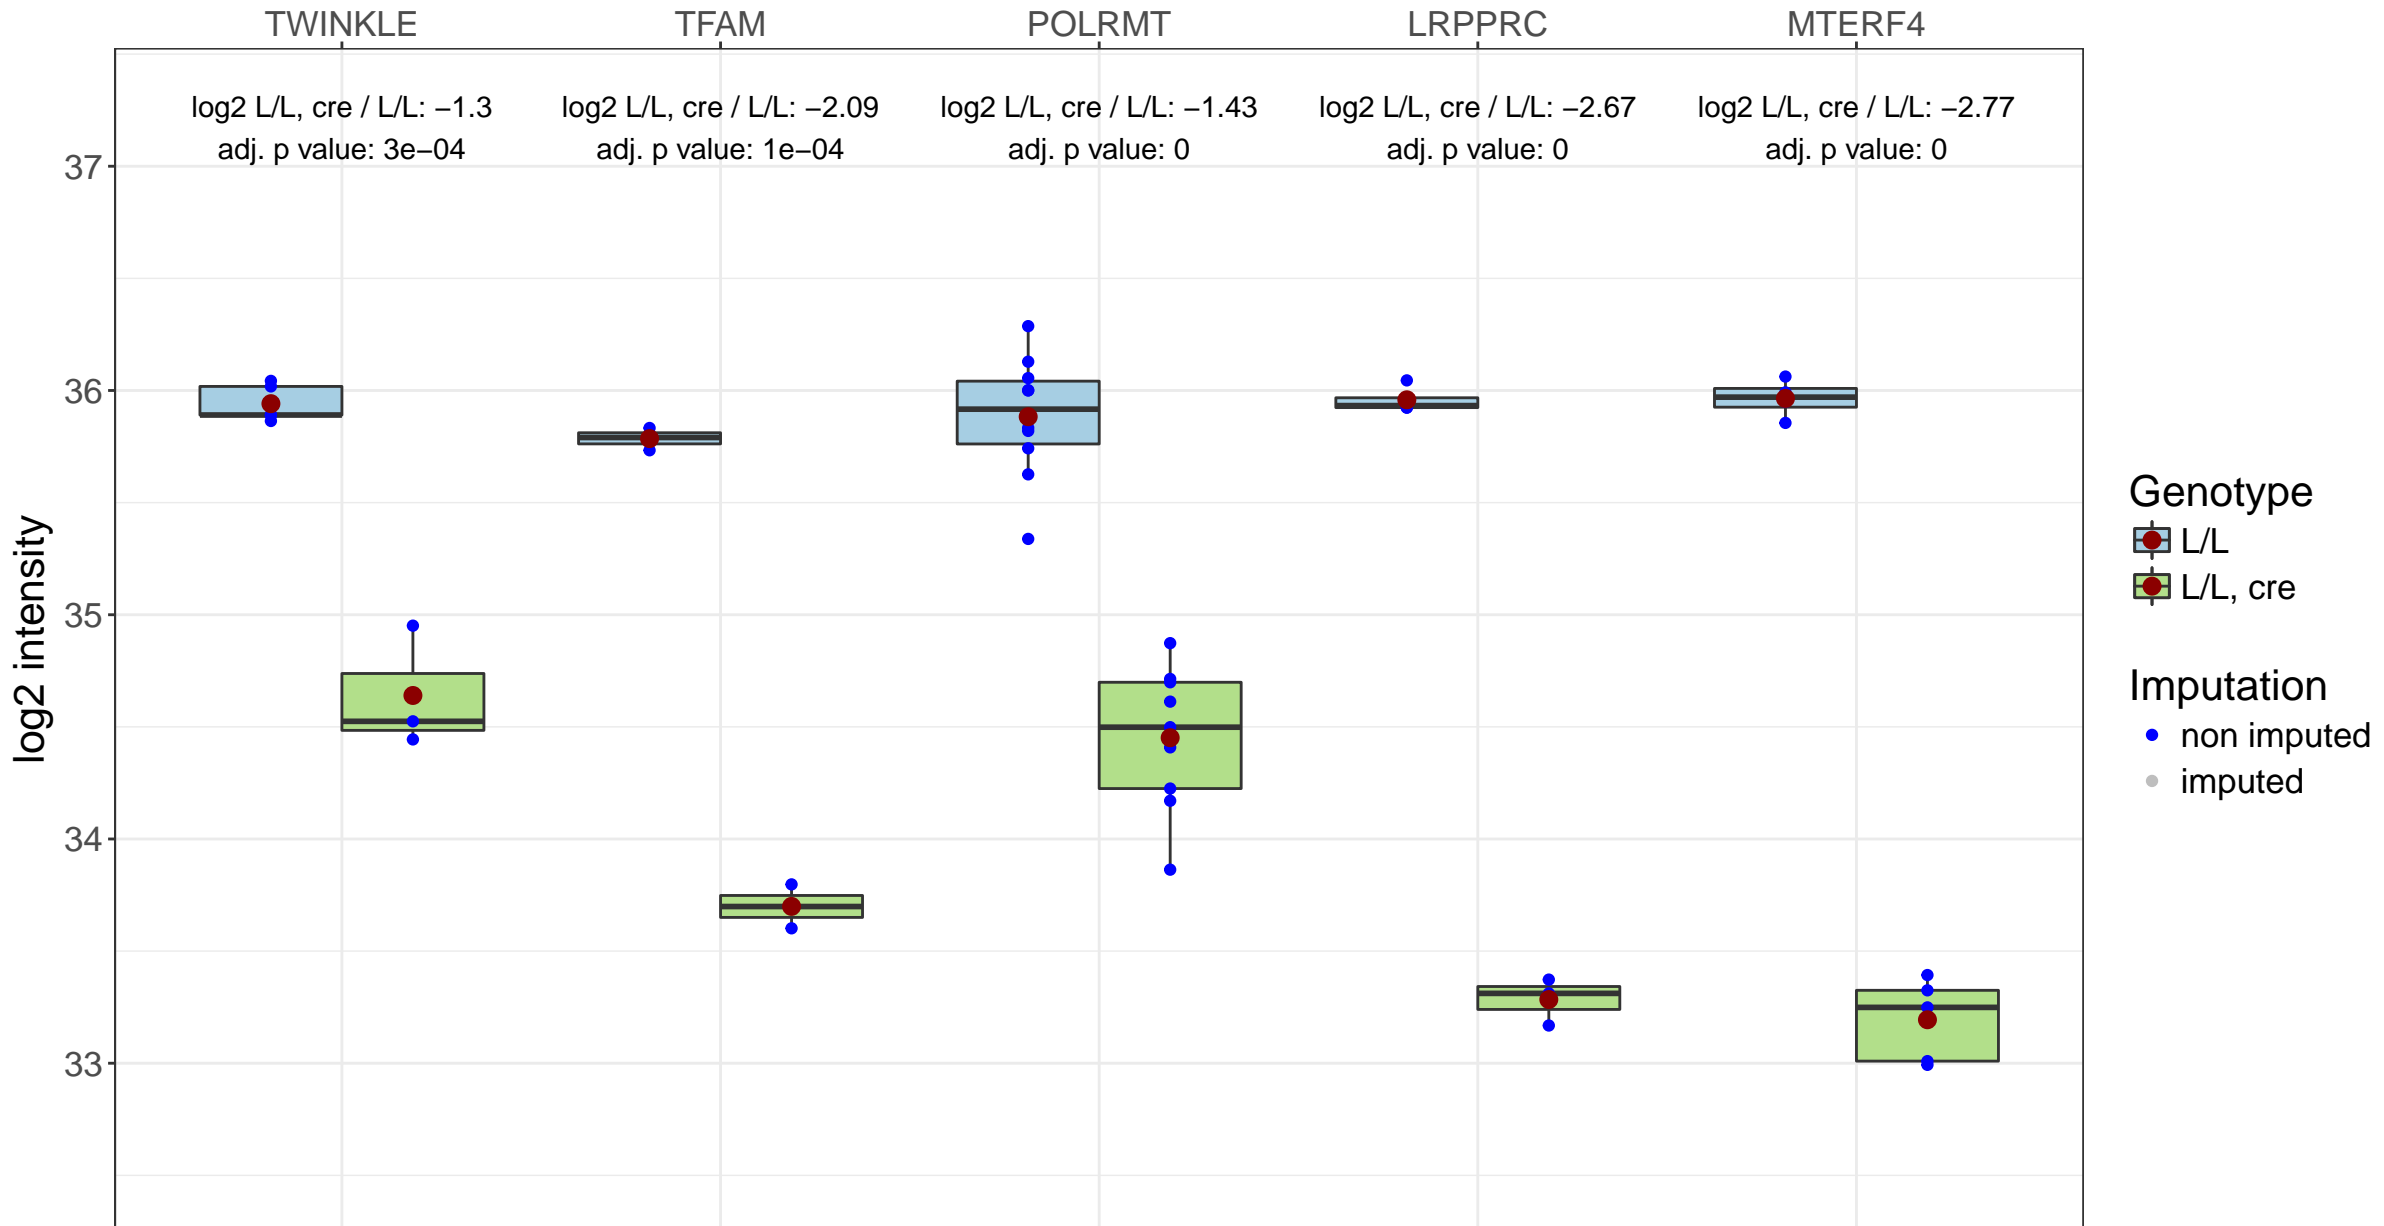

# NDUFA5 / Q9CPP6

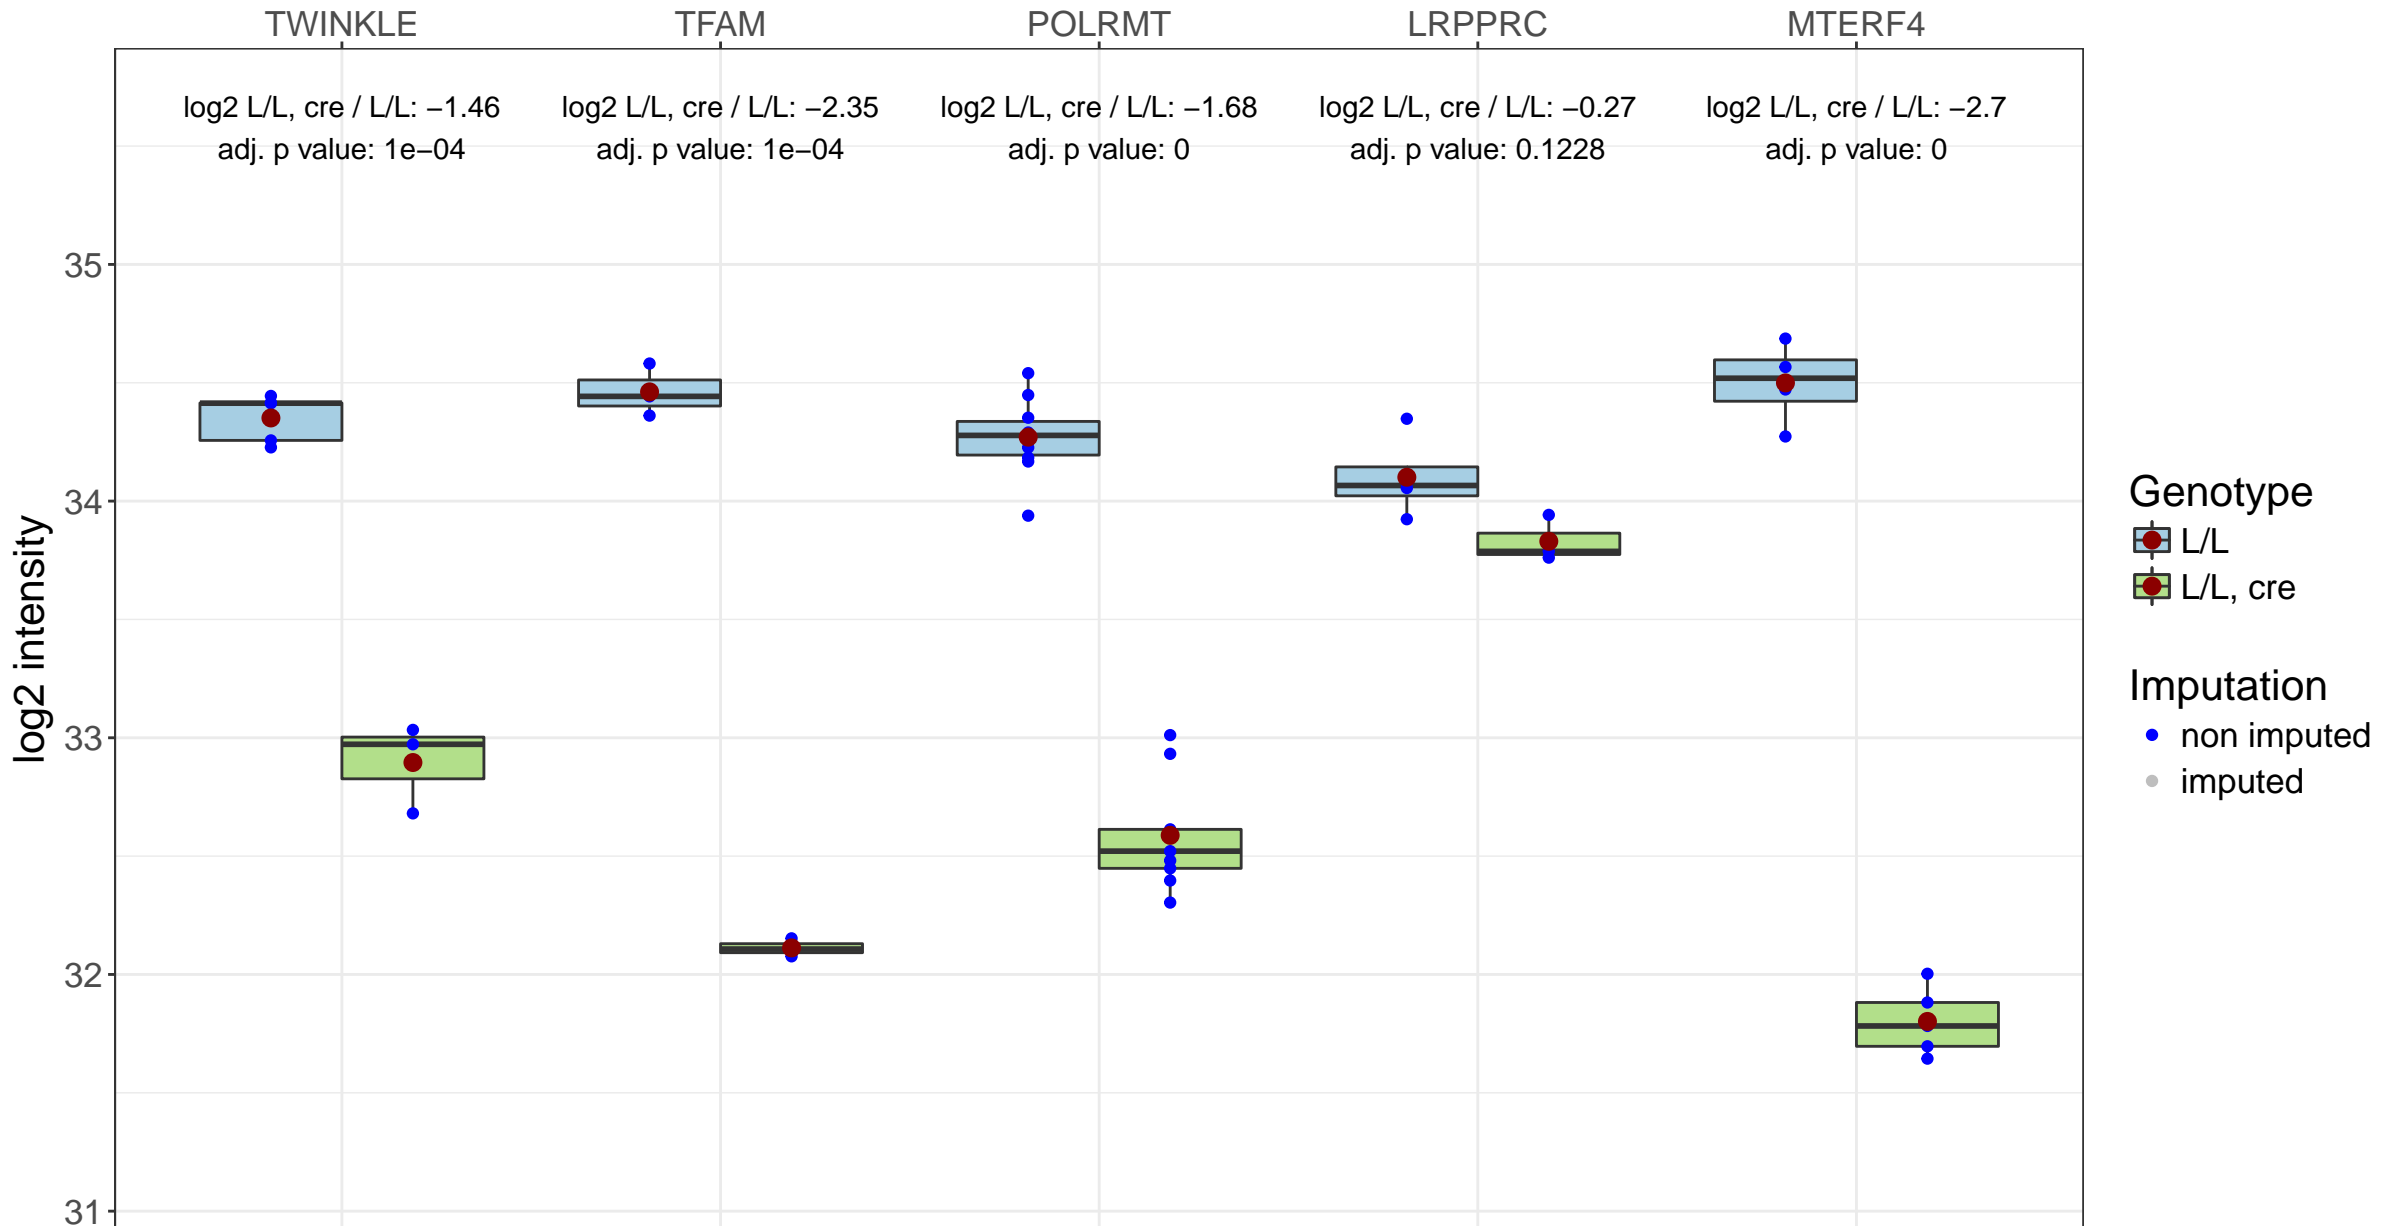

# NDUFA6 / Q9CQZ5

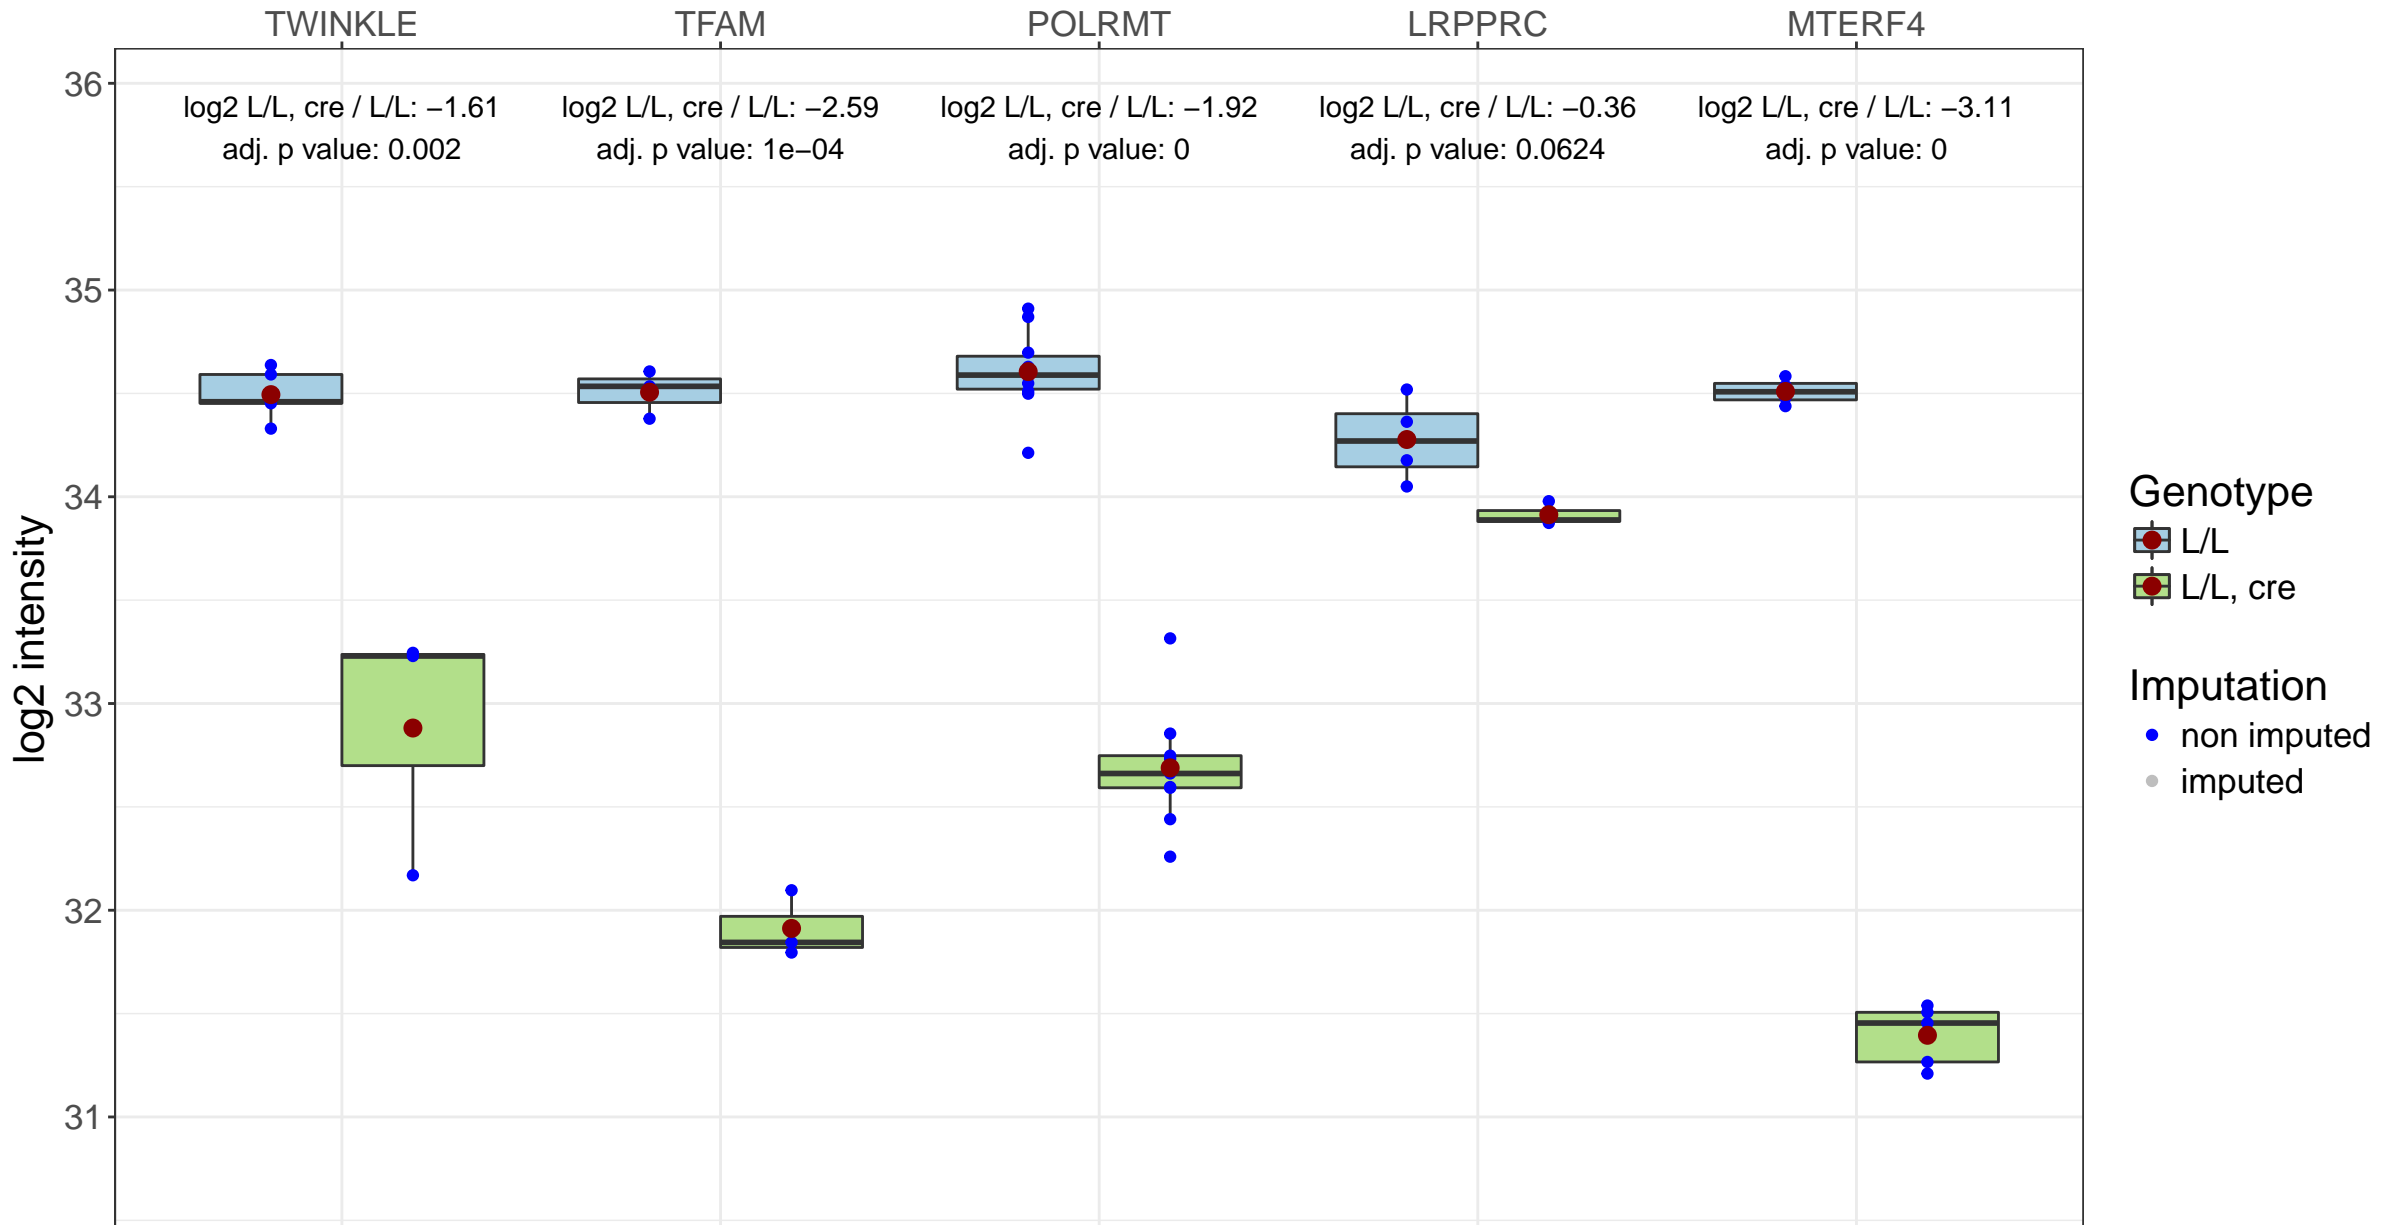



# NDUFA7 / Q9Z1P6

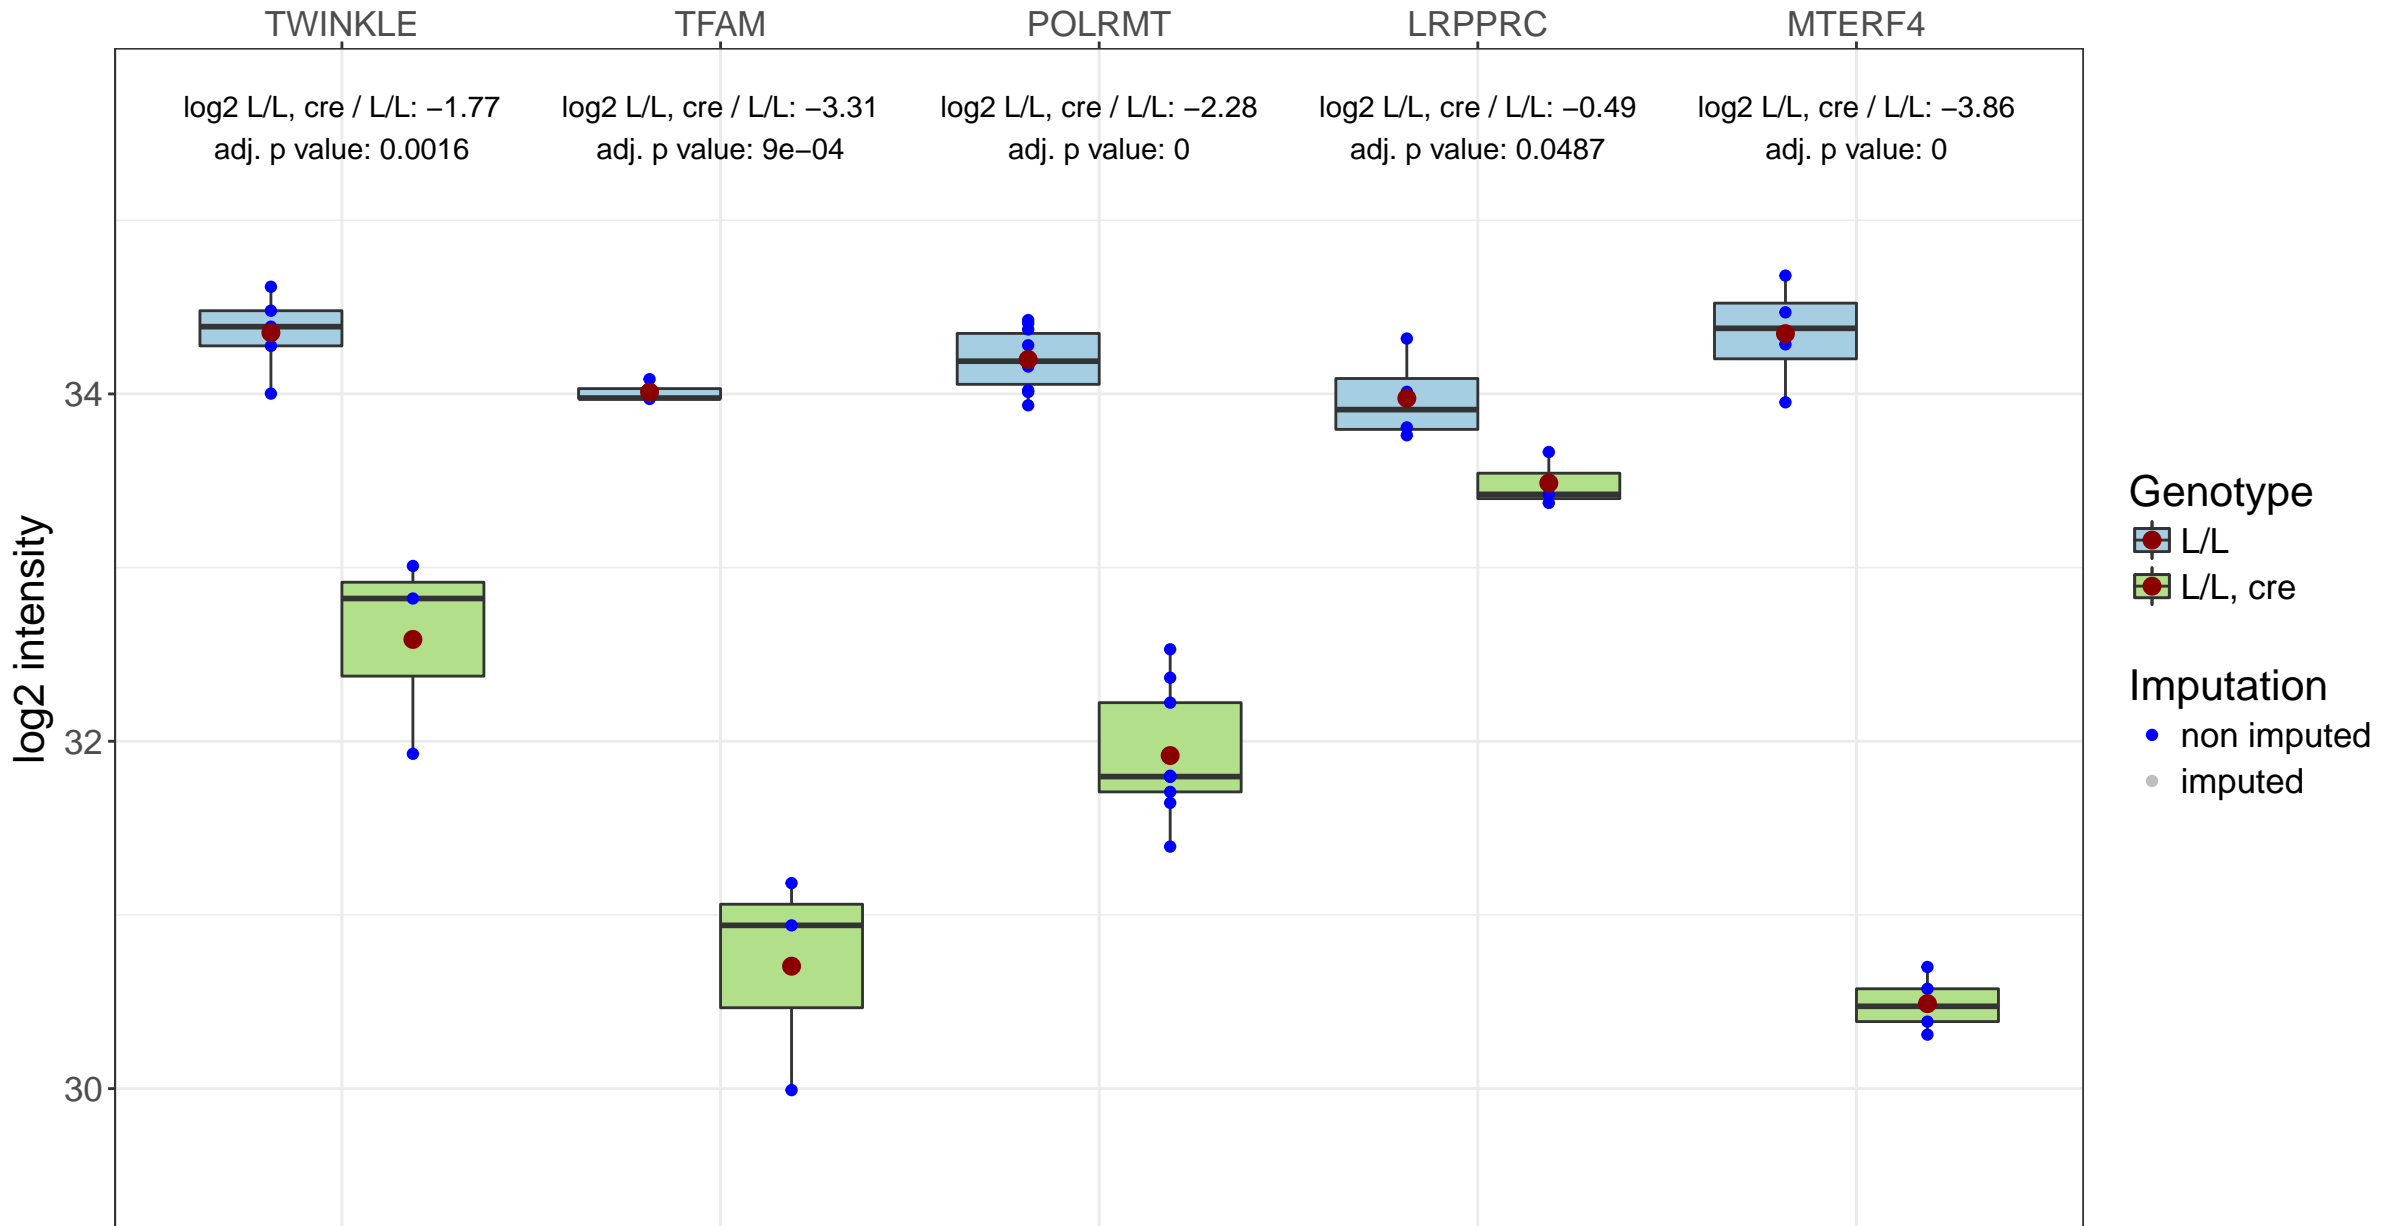

# NDUFA8 / Q9DCJ5

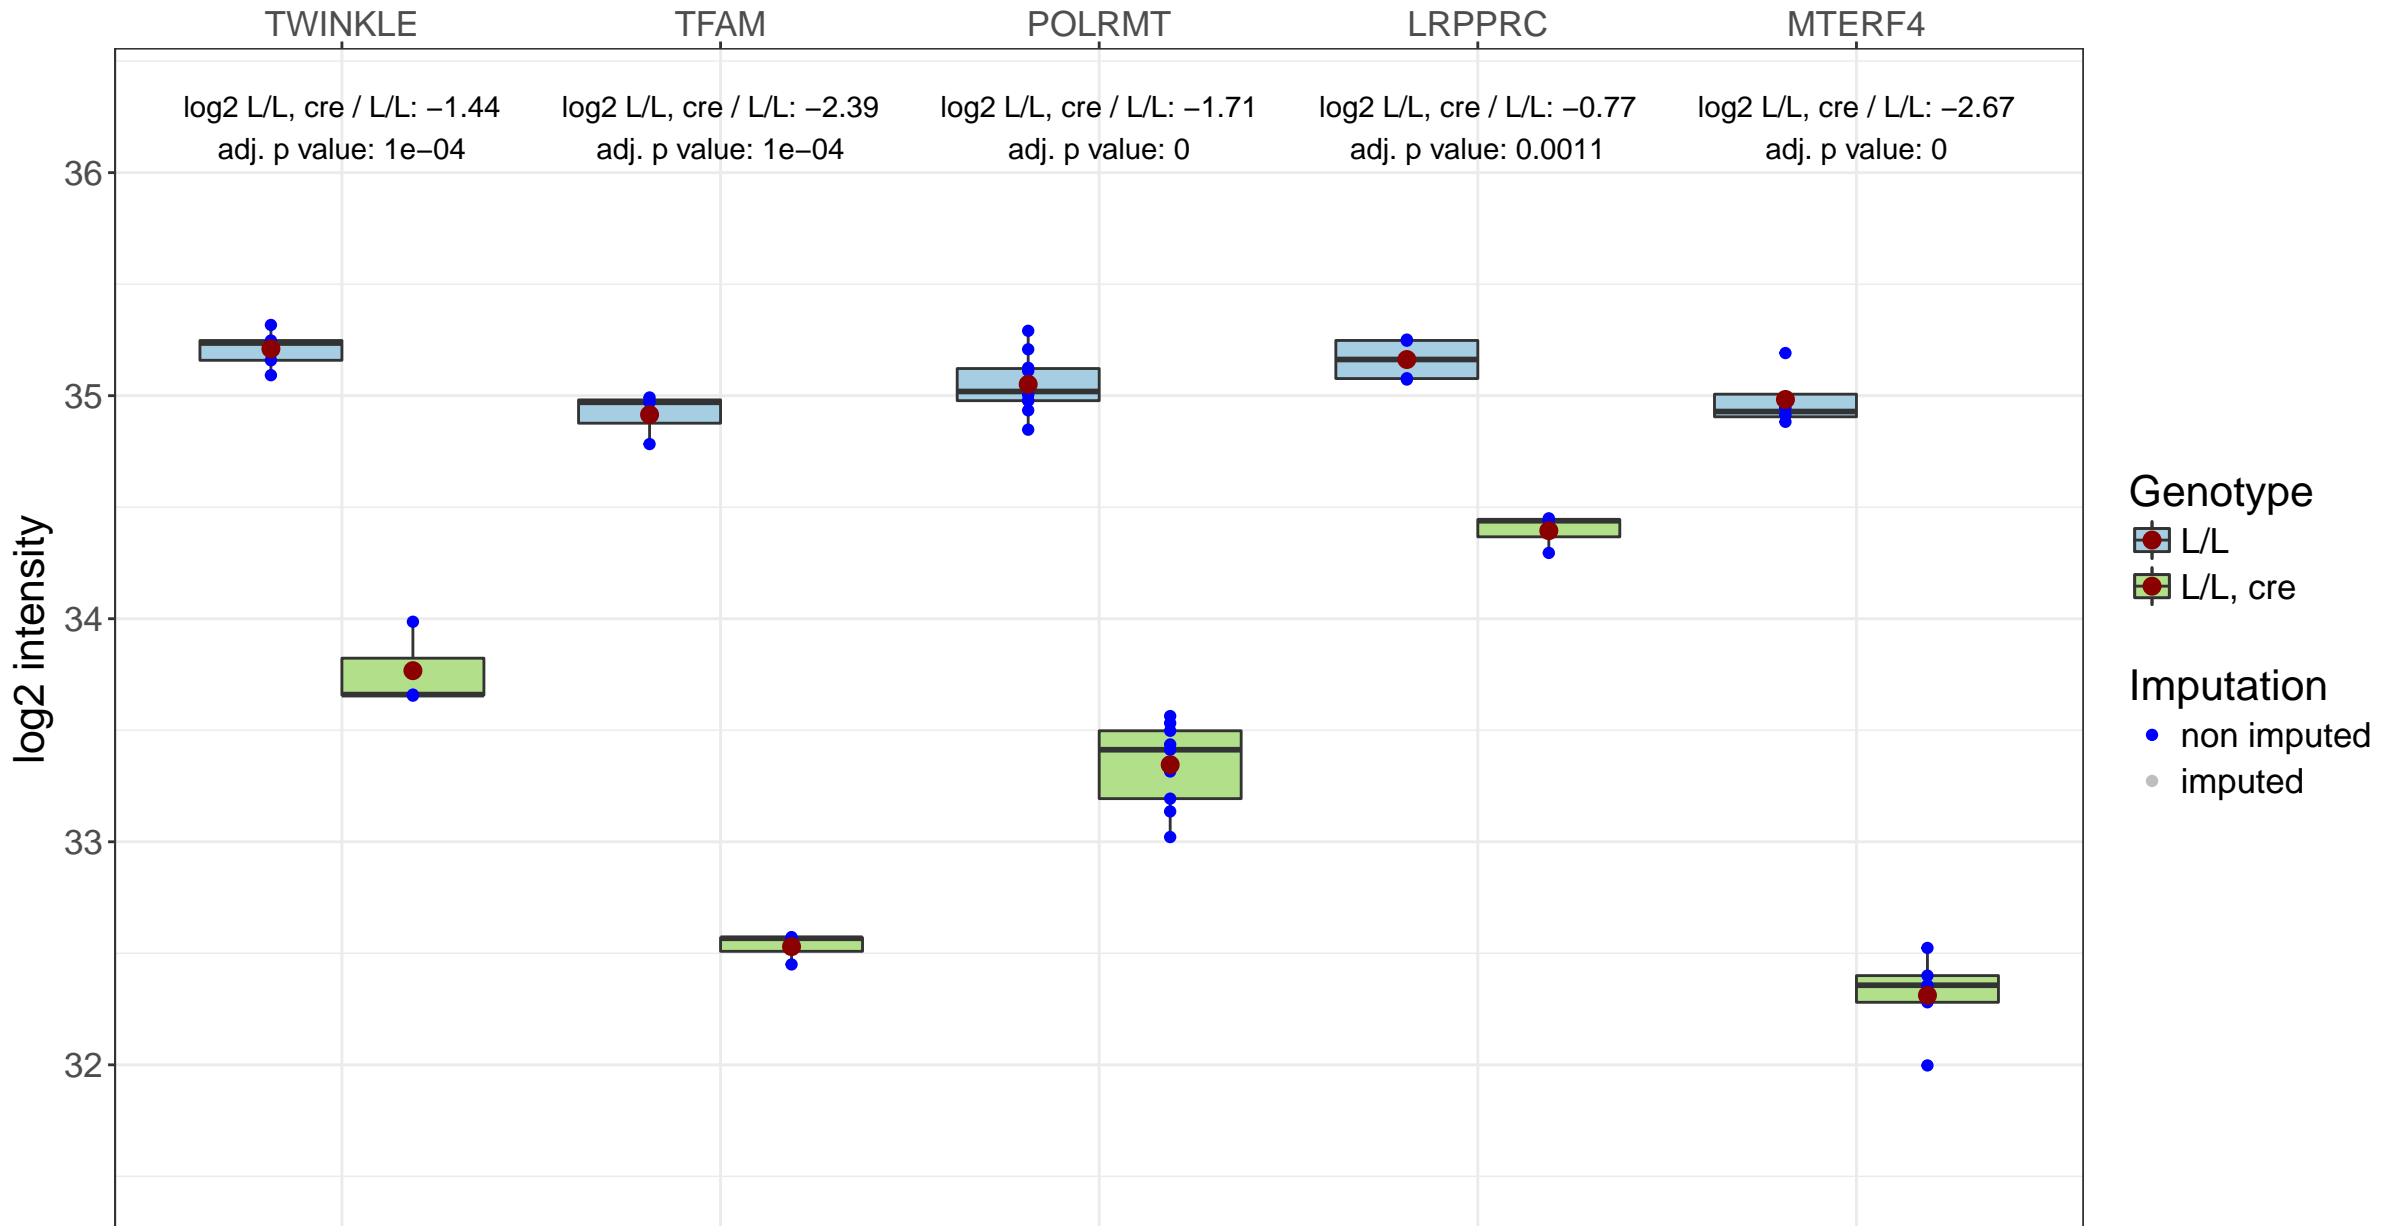

# NDUFA9 / Q9DC69

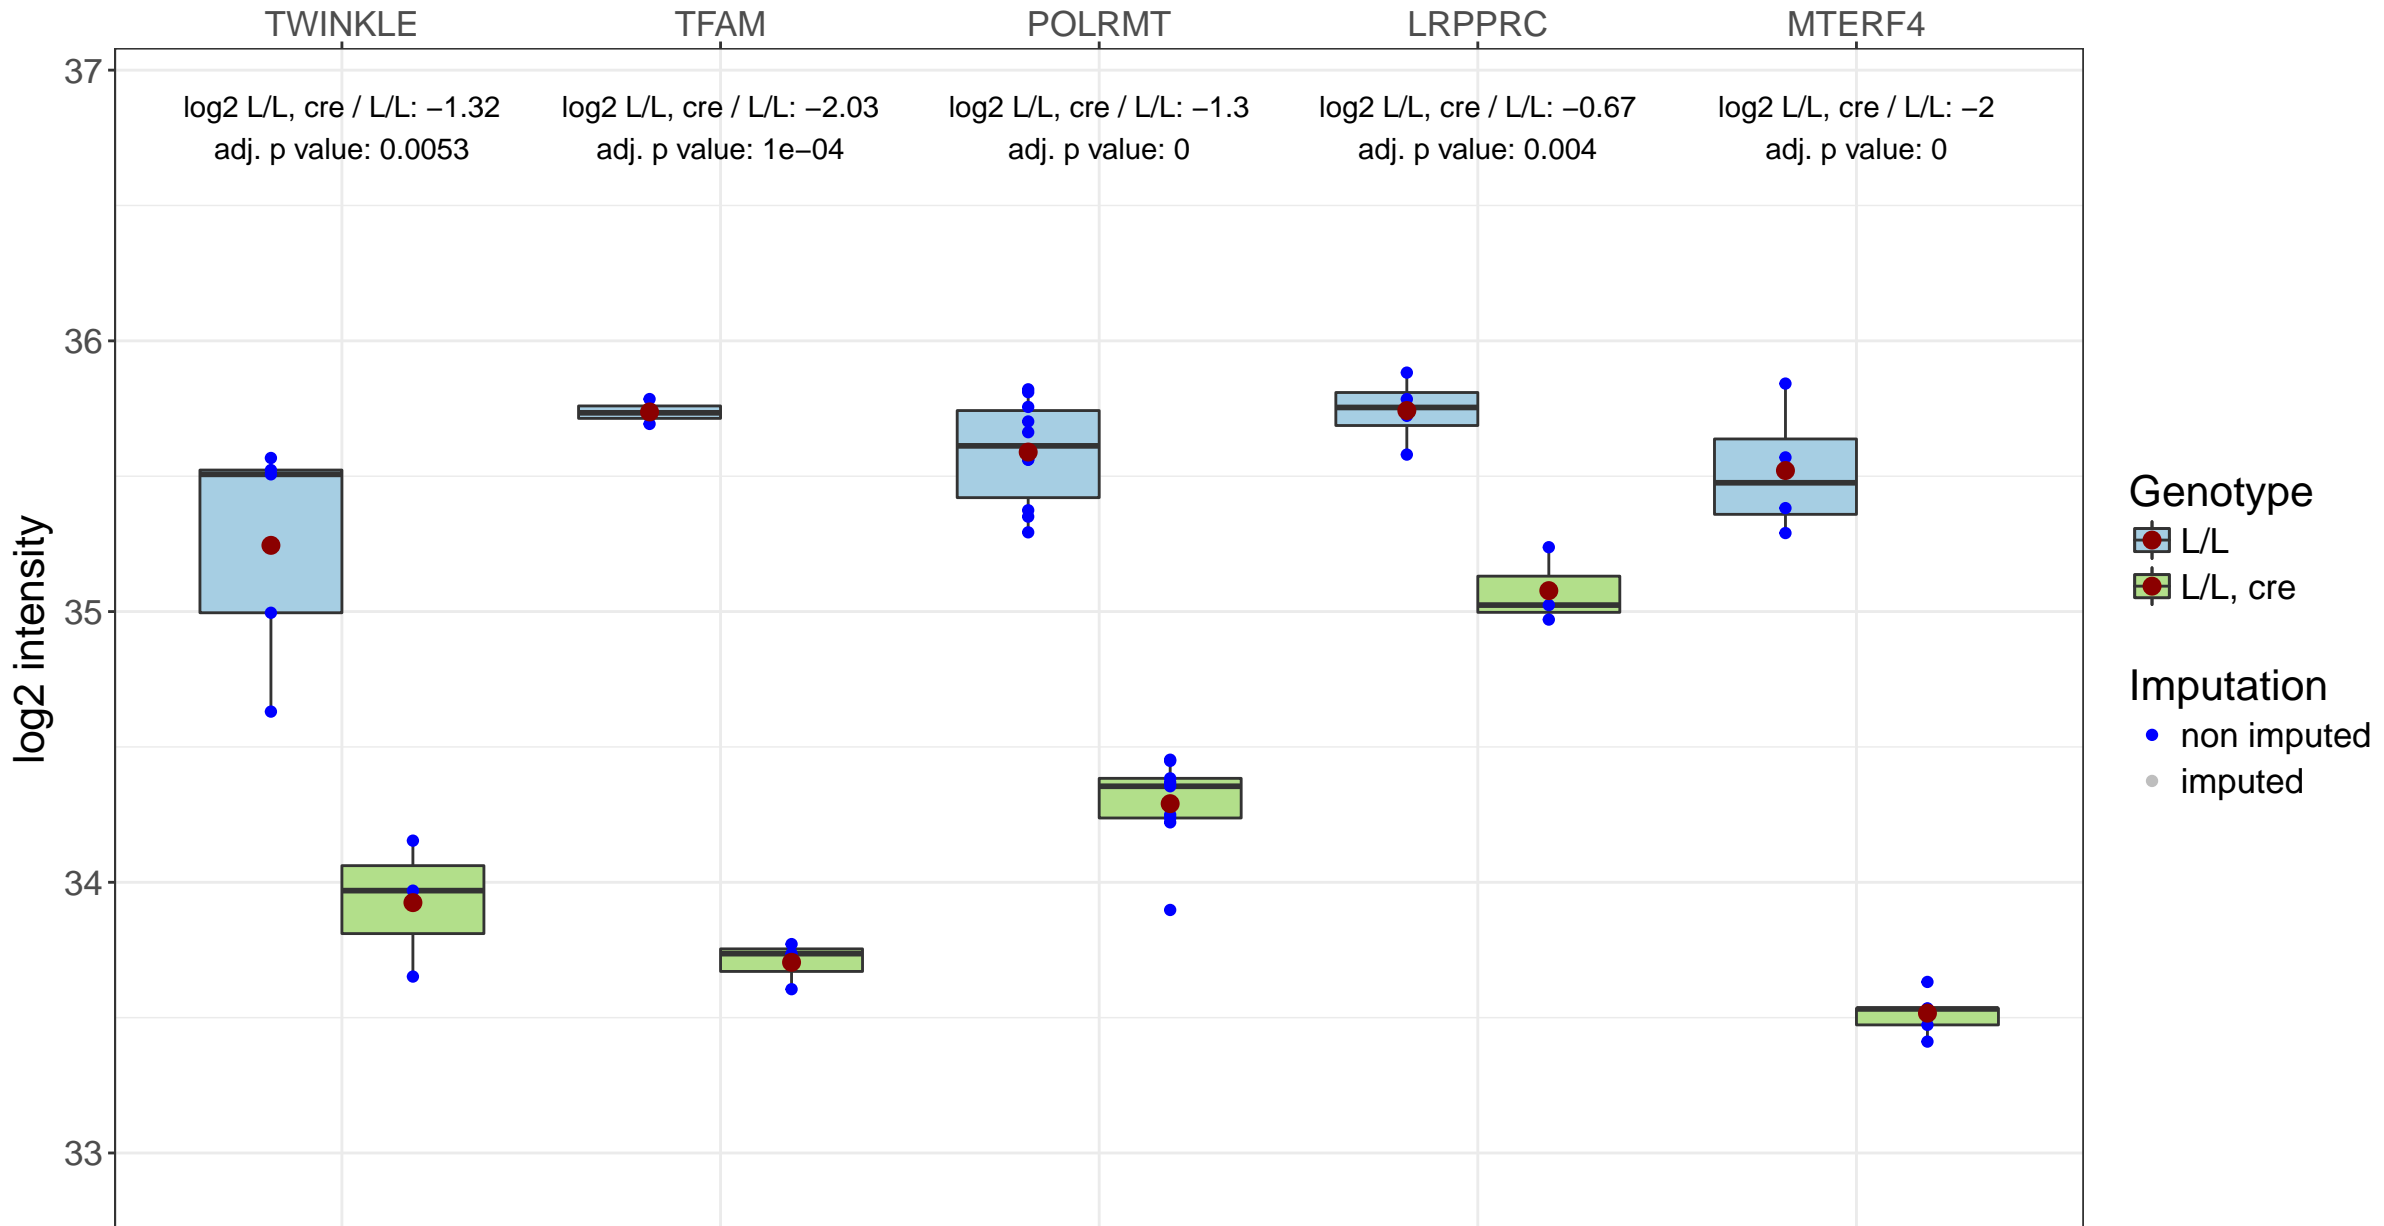

# NDUFAB1 / F6ZFT1

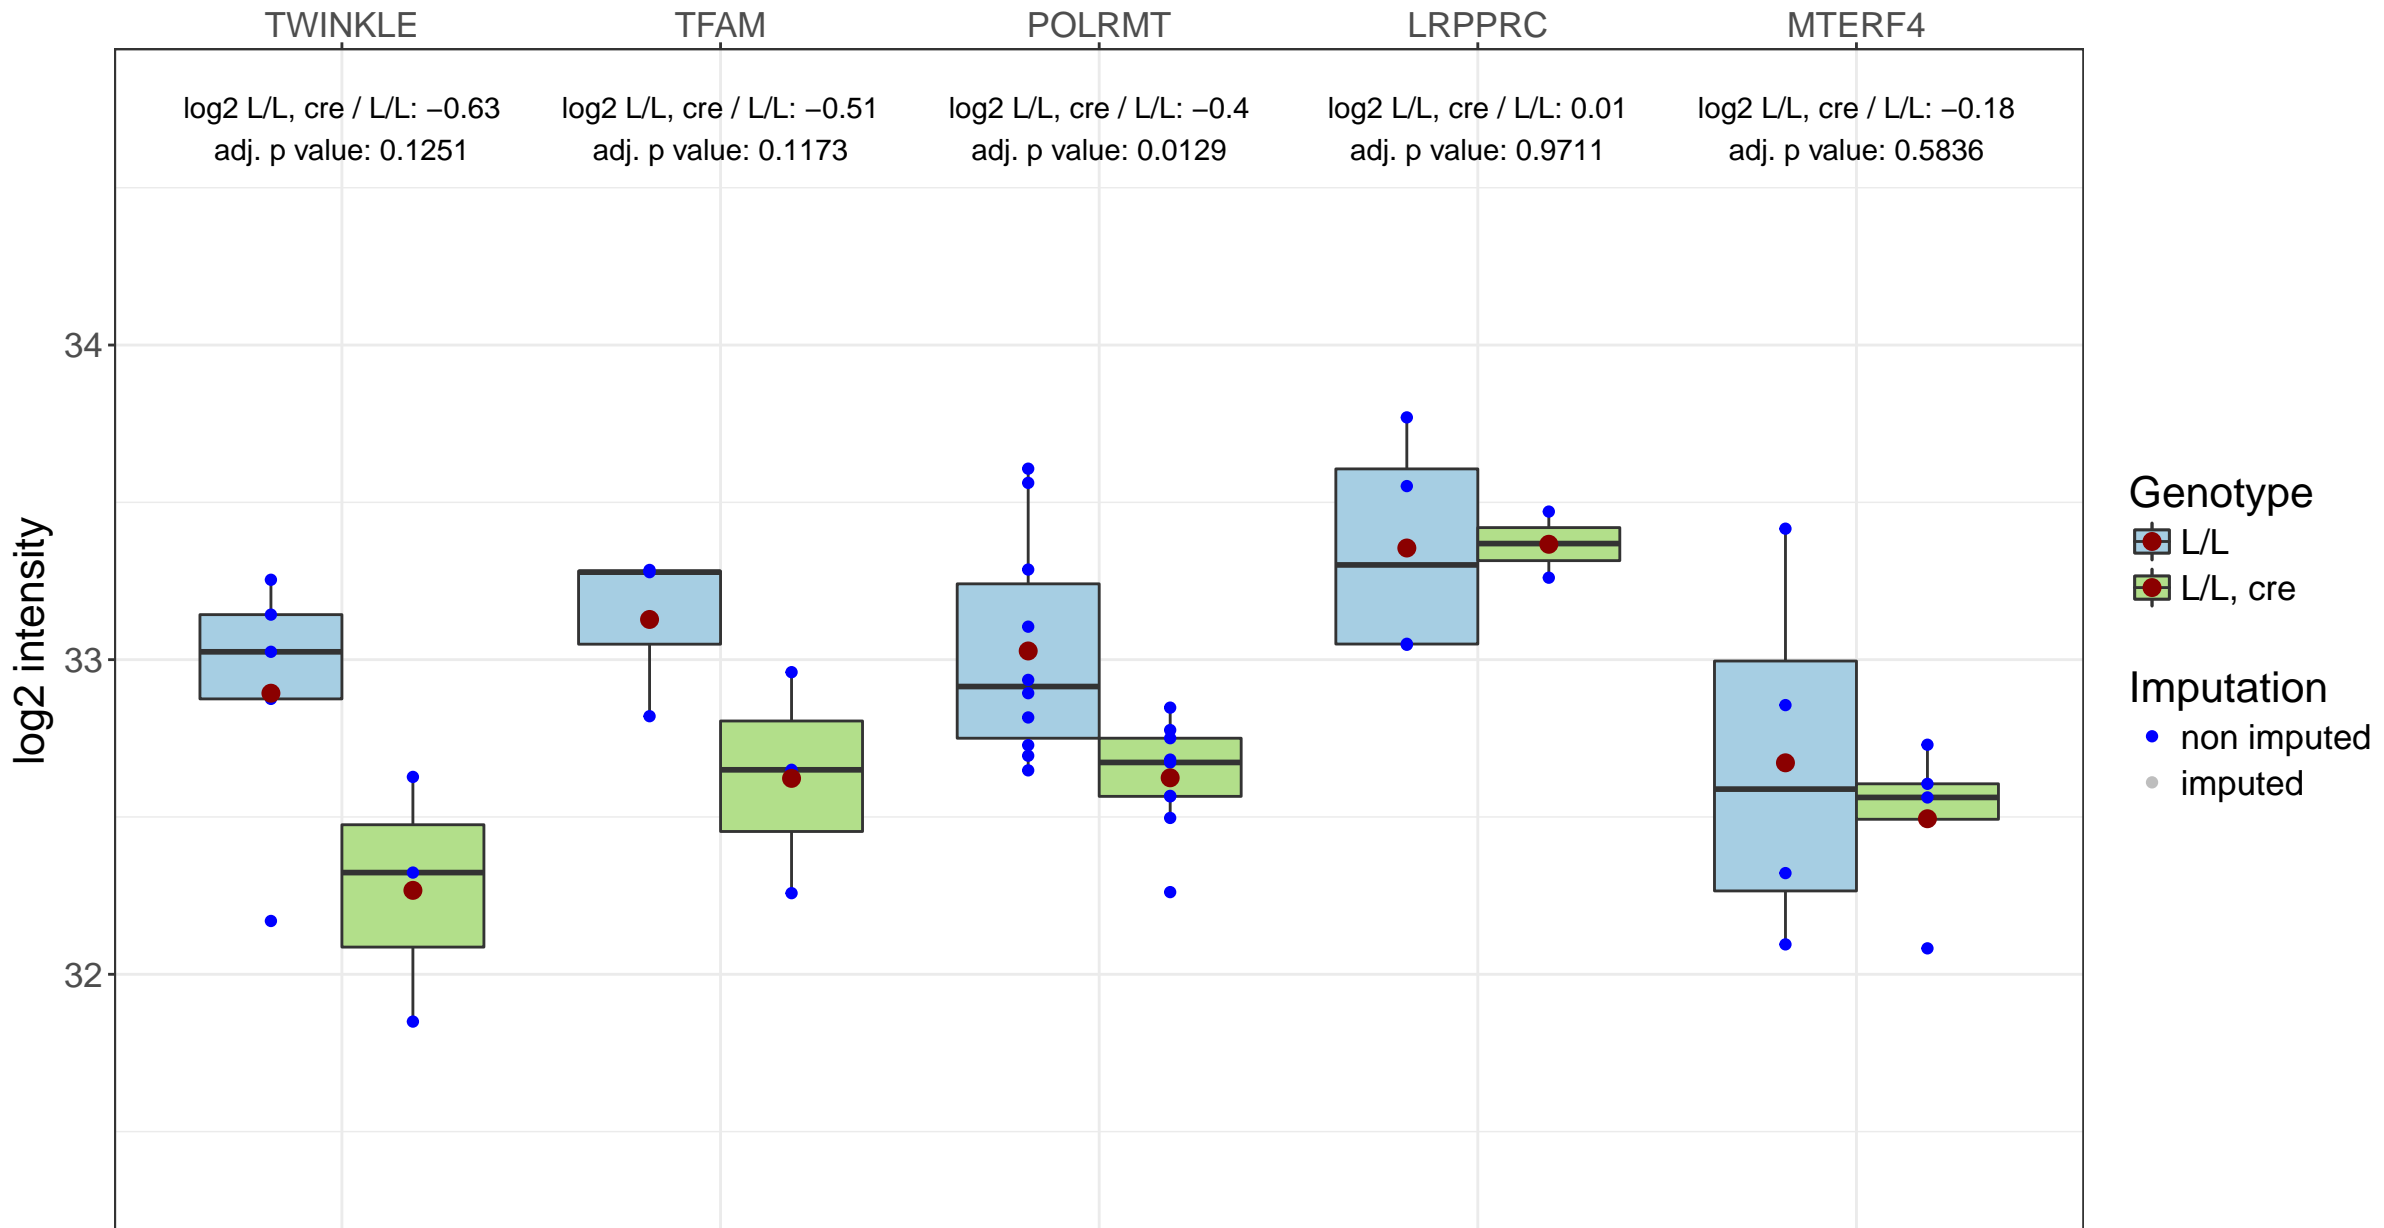

# NDUFAF1 / A2AQ17

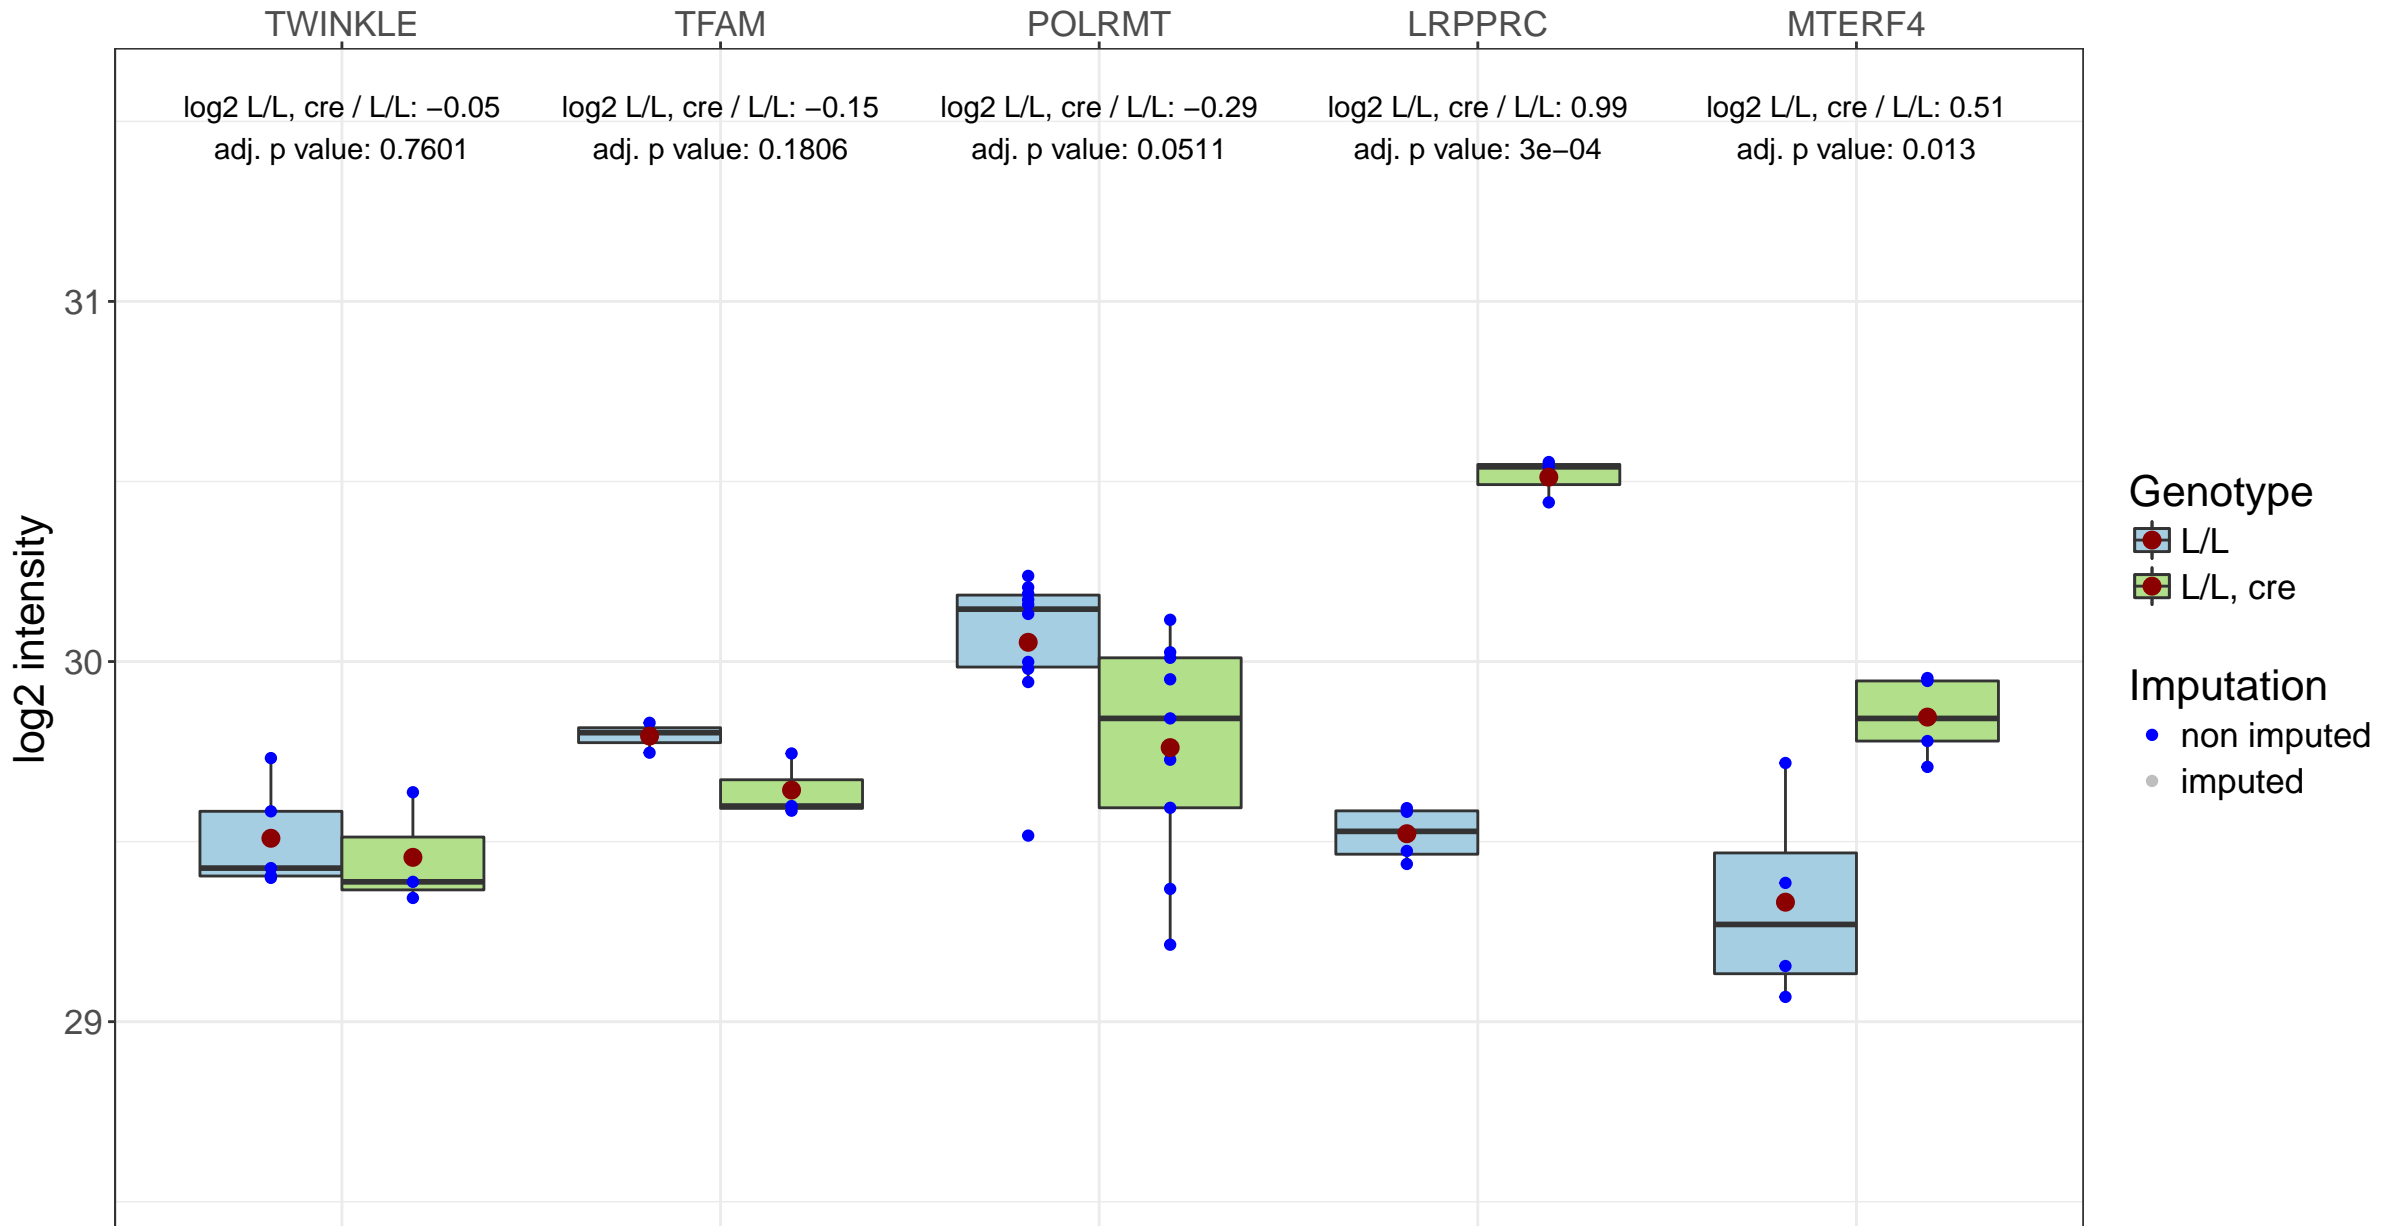

# NDUFAF2 / Q59J78

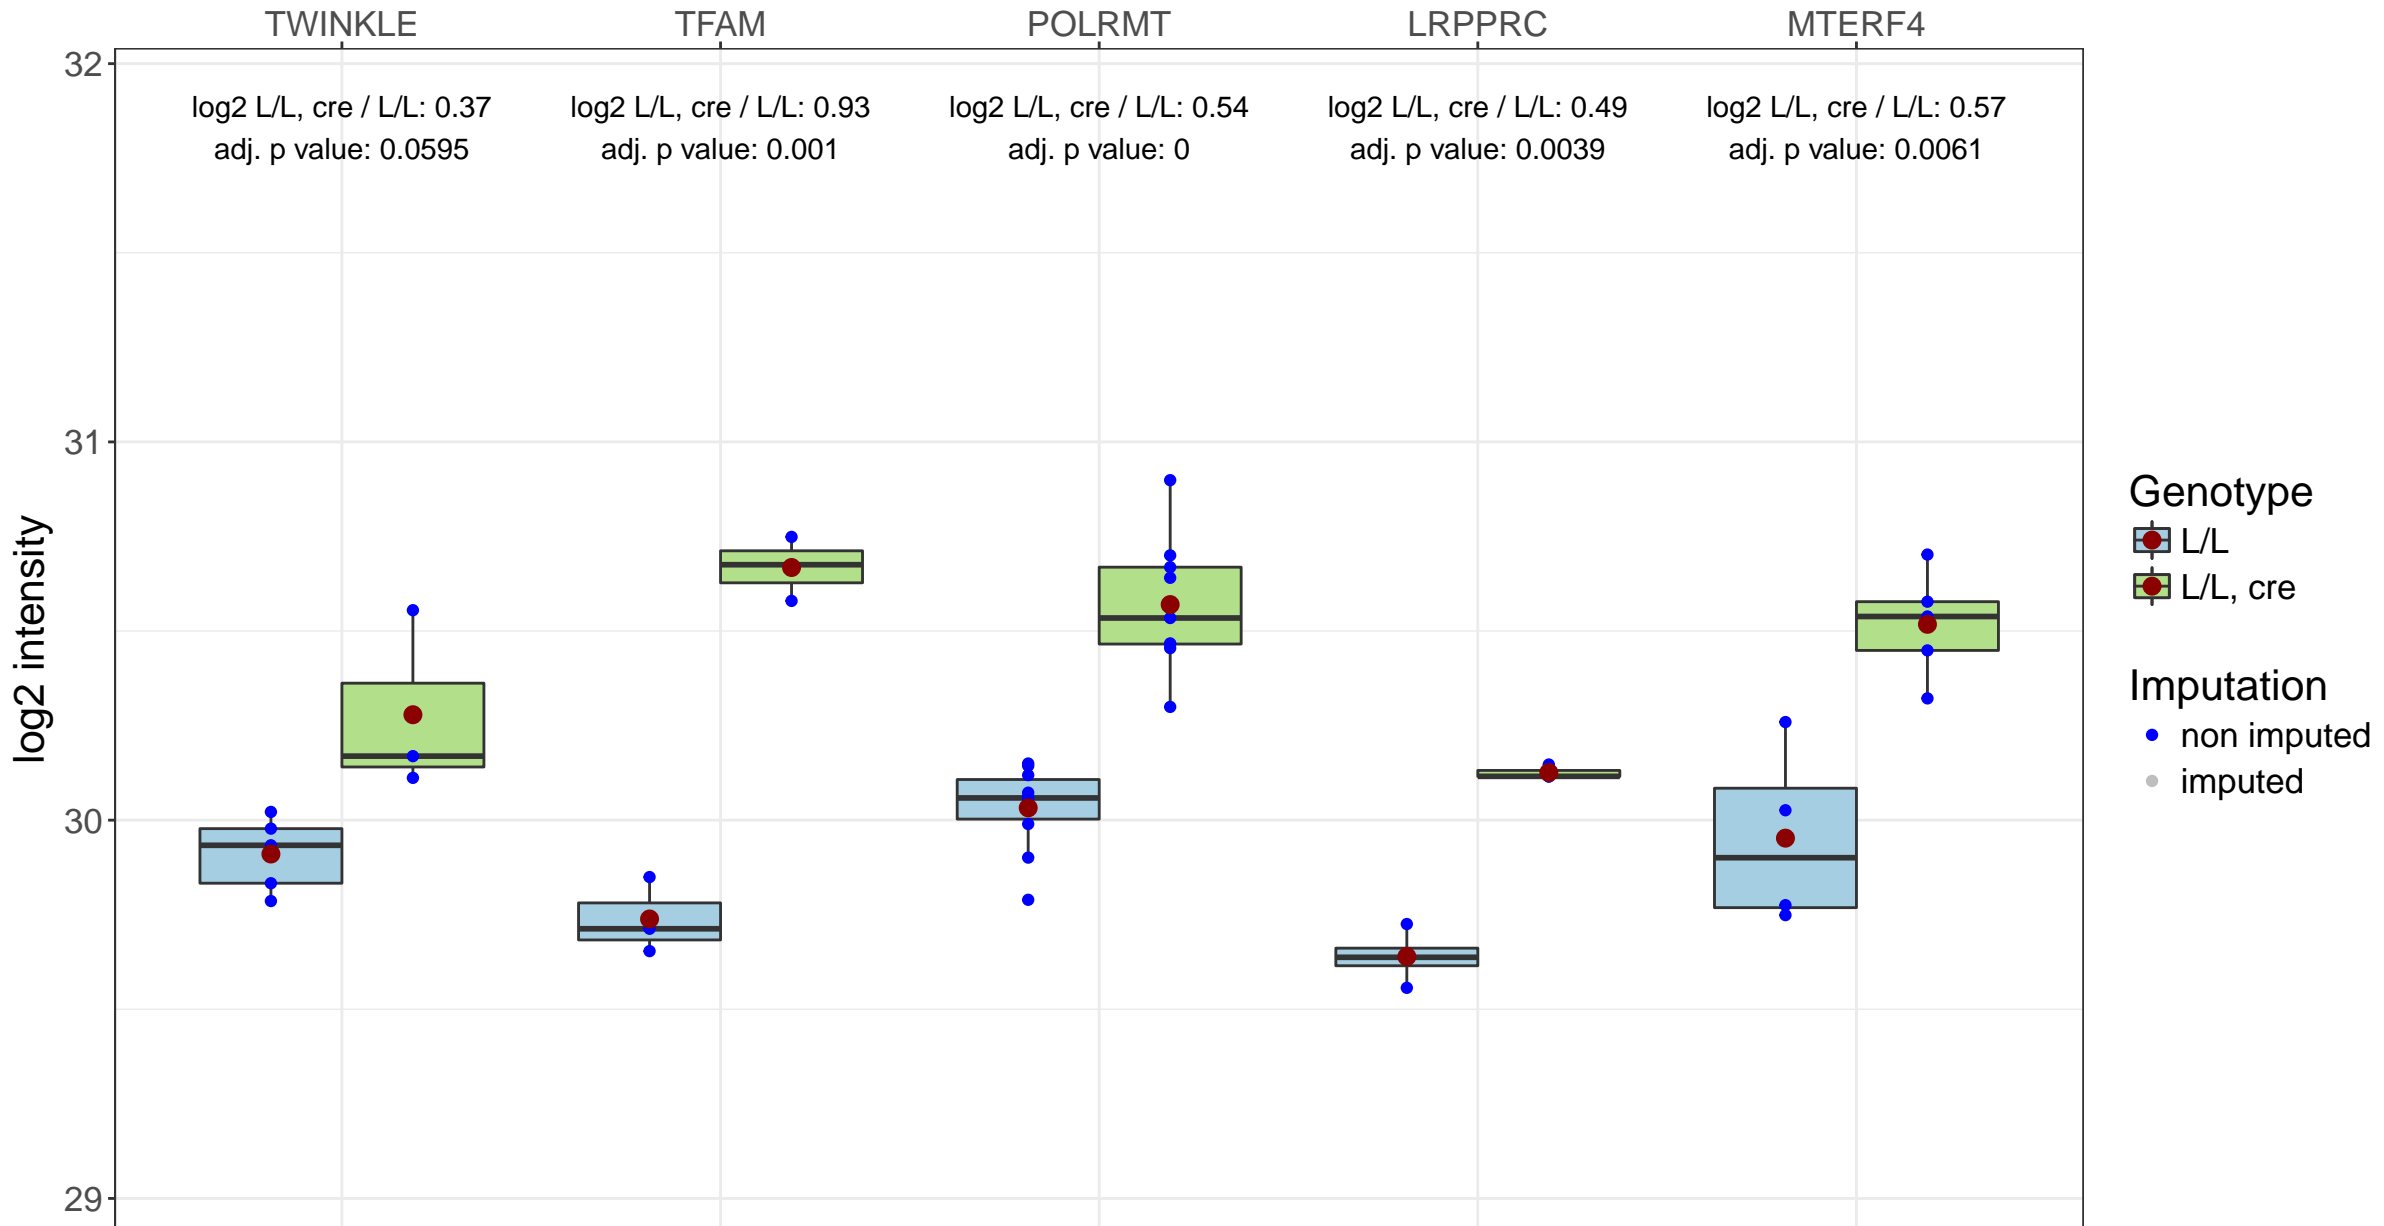

# NDUFAF3 / Q9JKL4

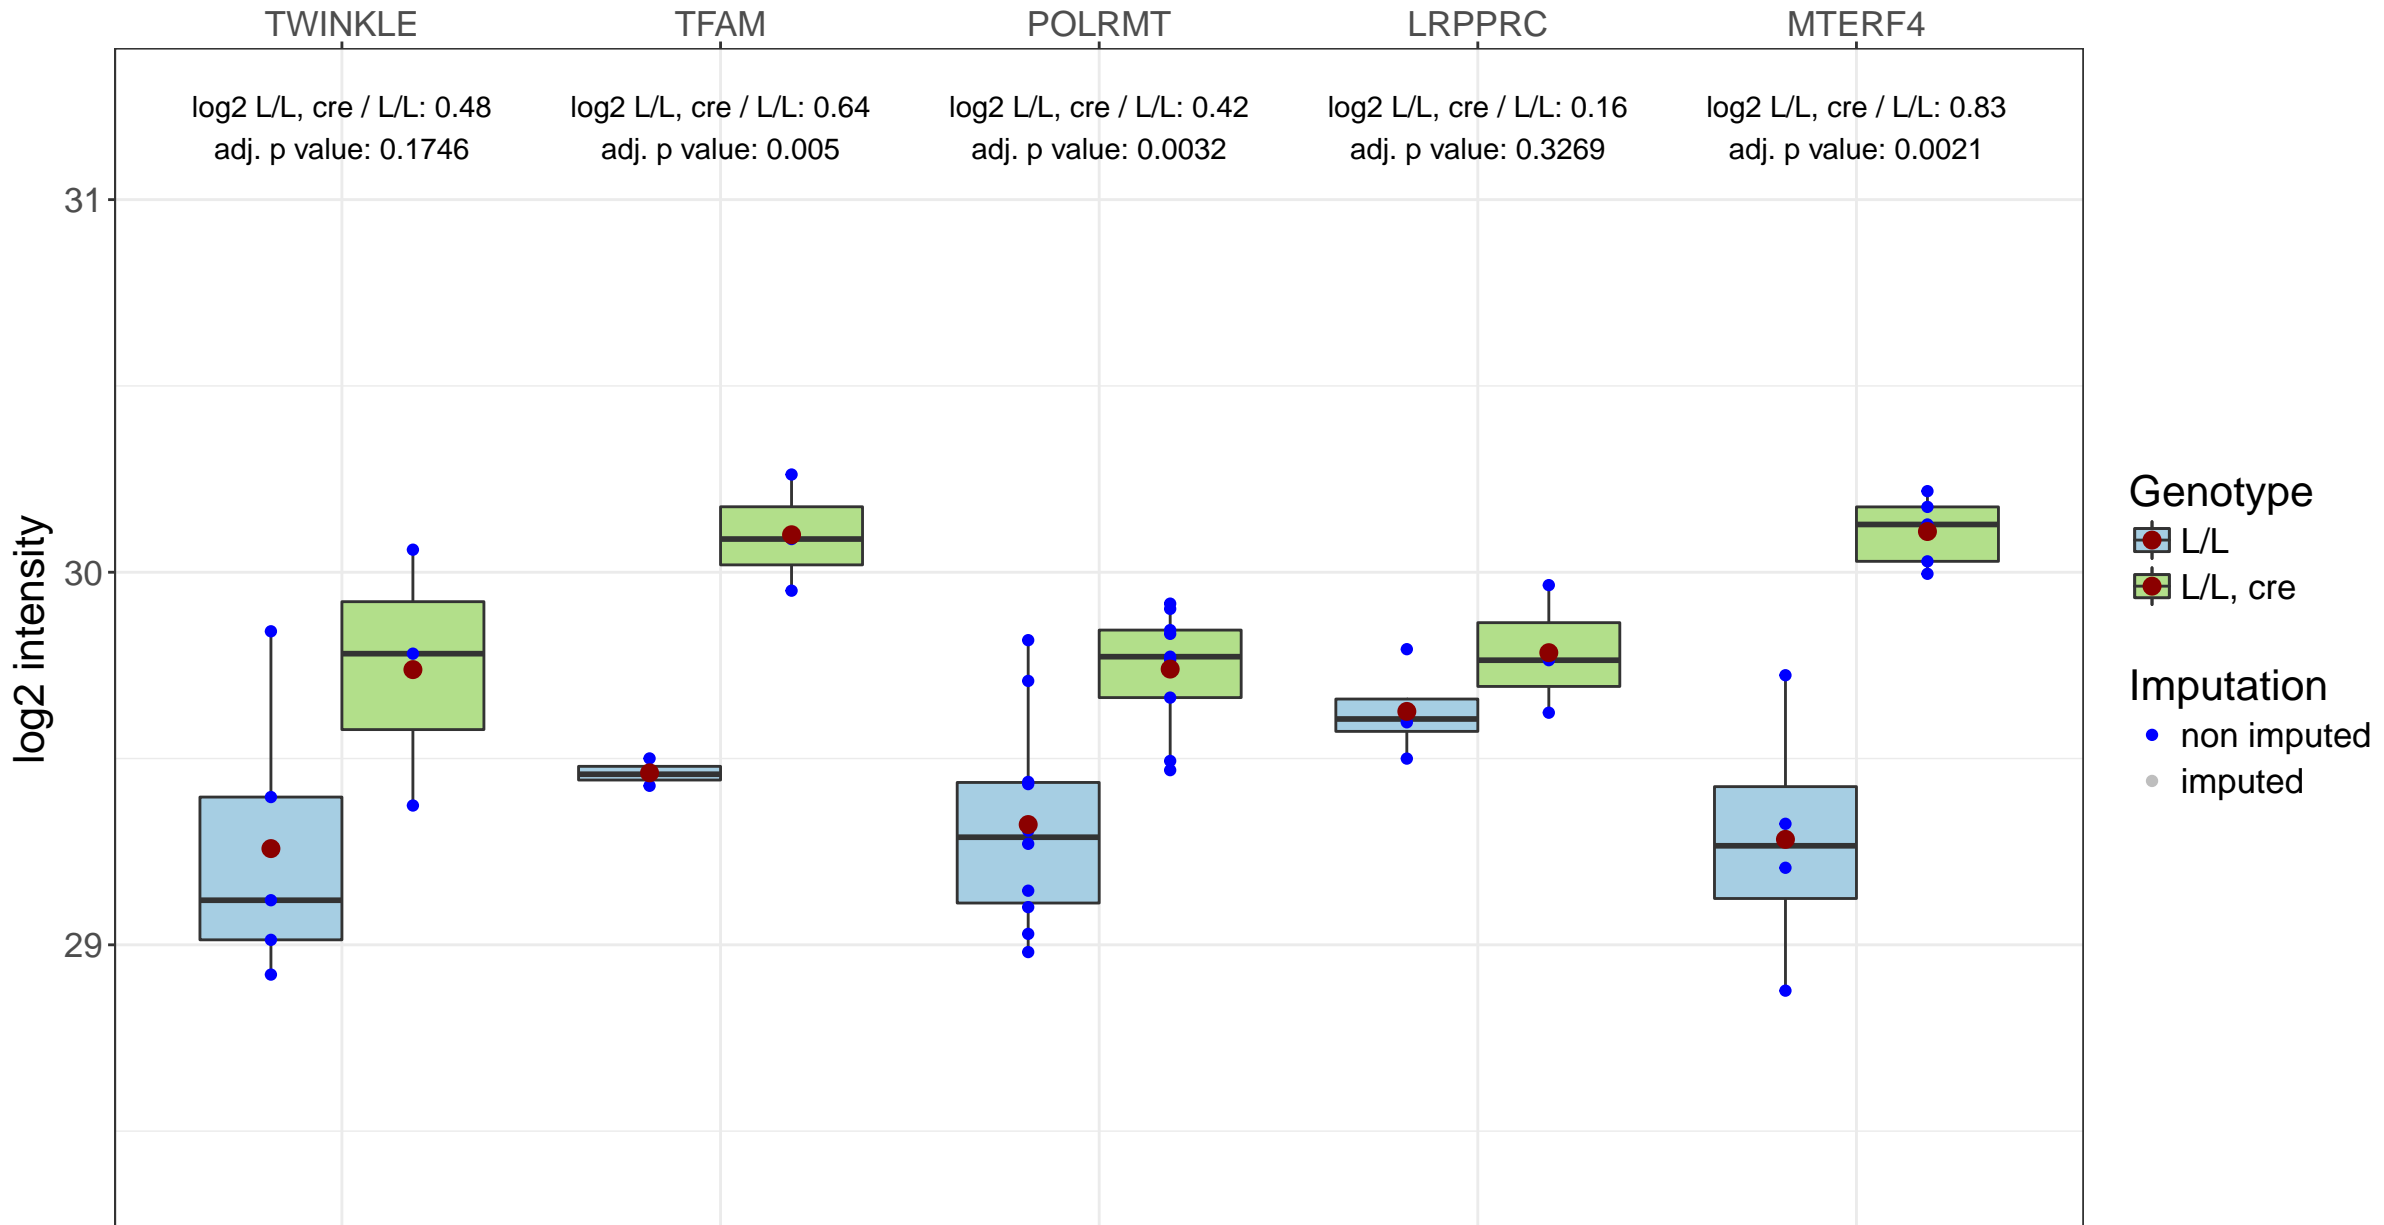

# NDUFAF4 / Q9D1H6

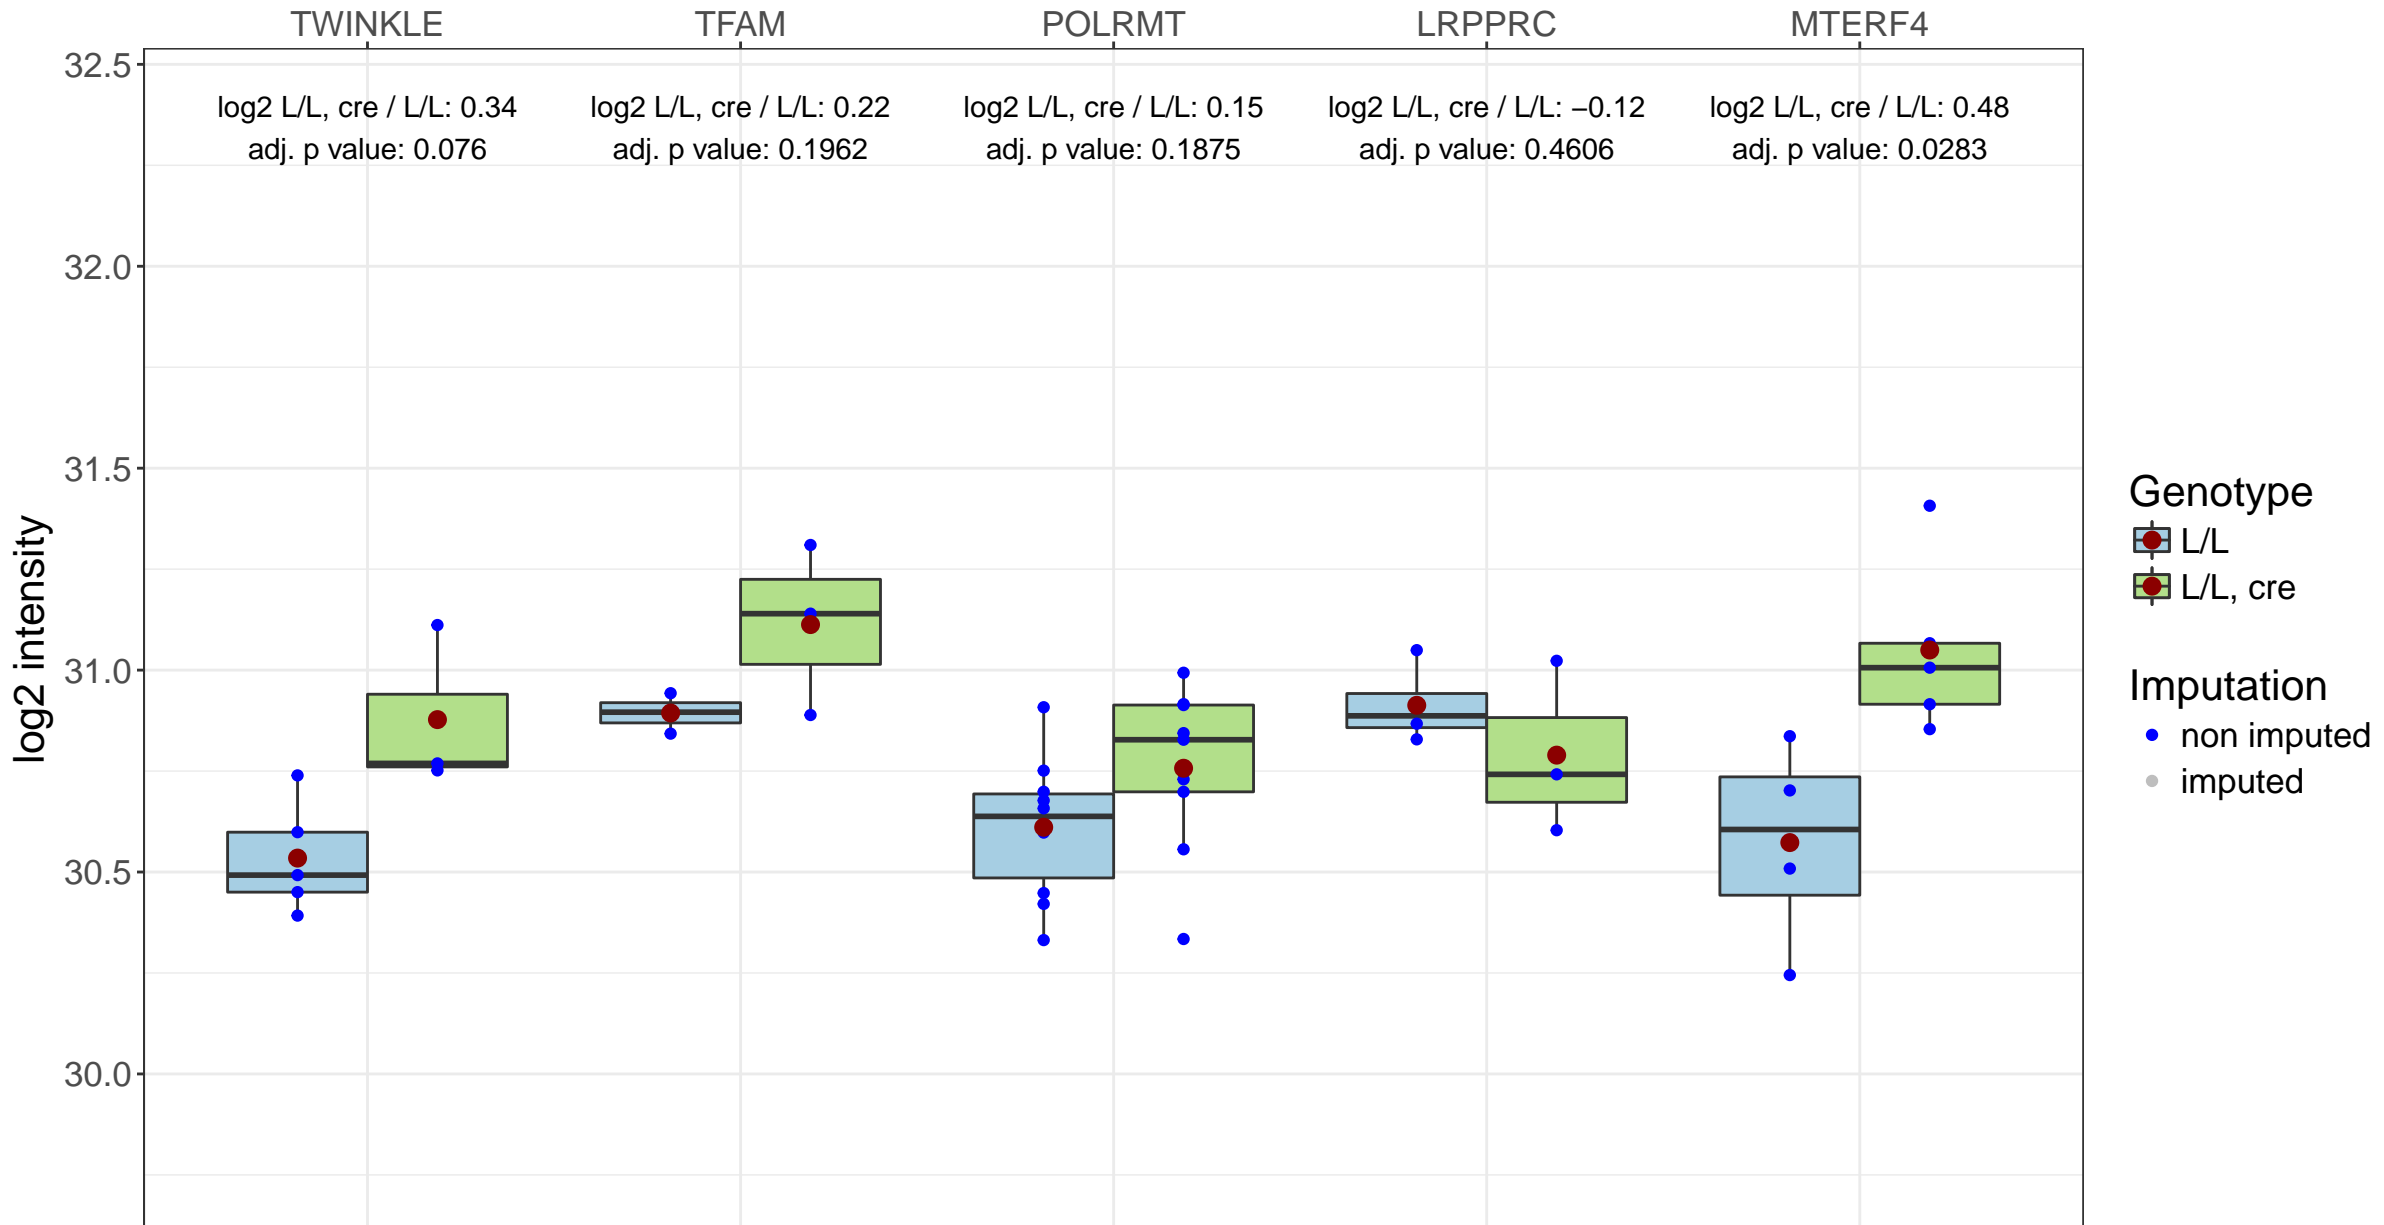



# NDUFAF5 / A2APY7

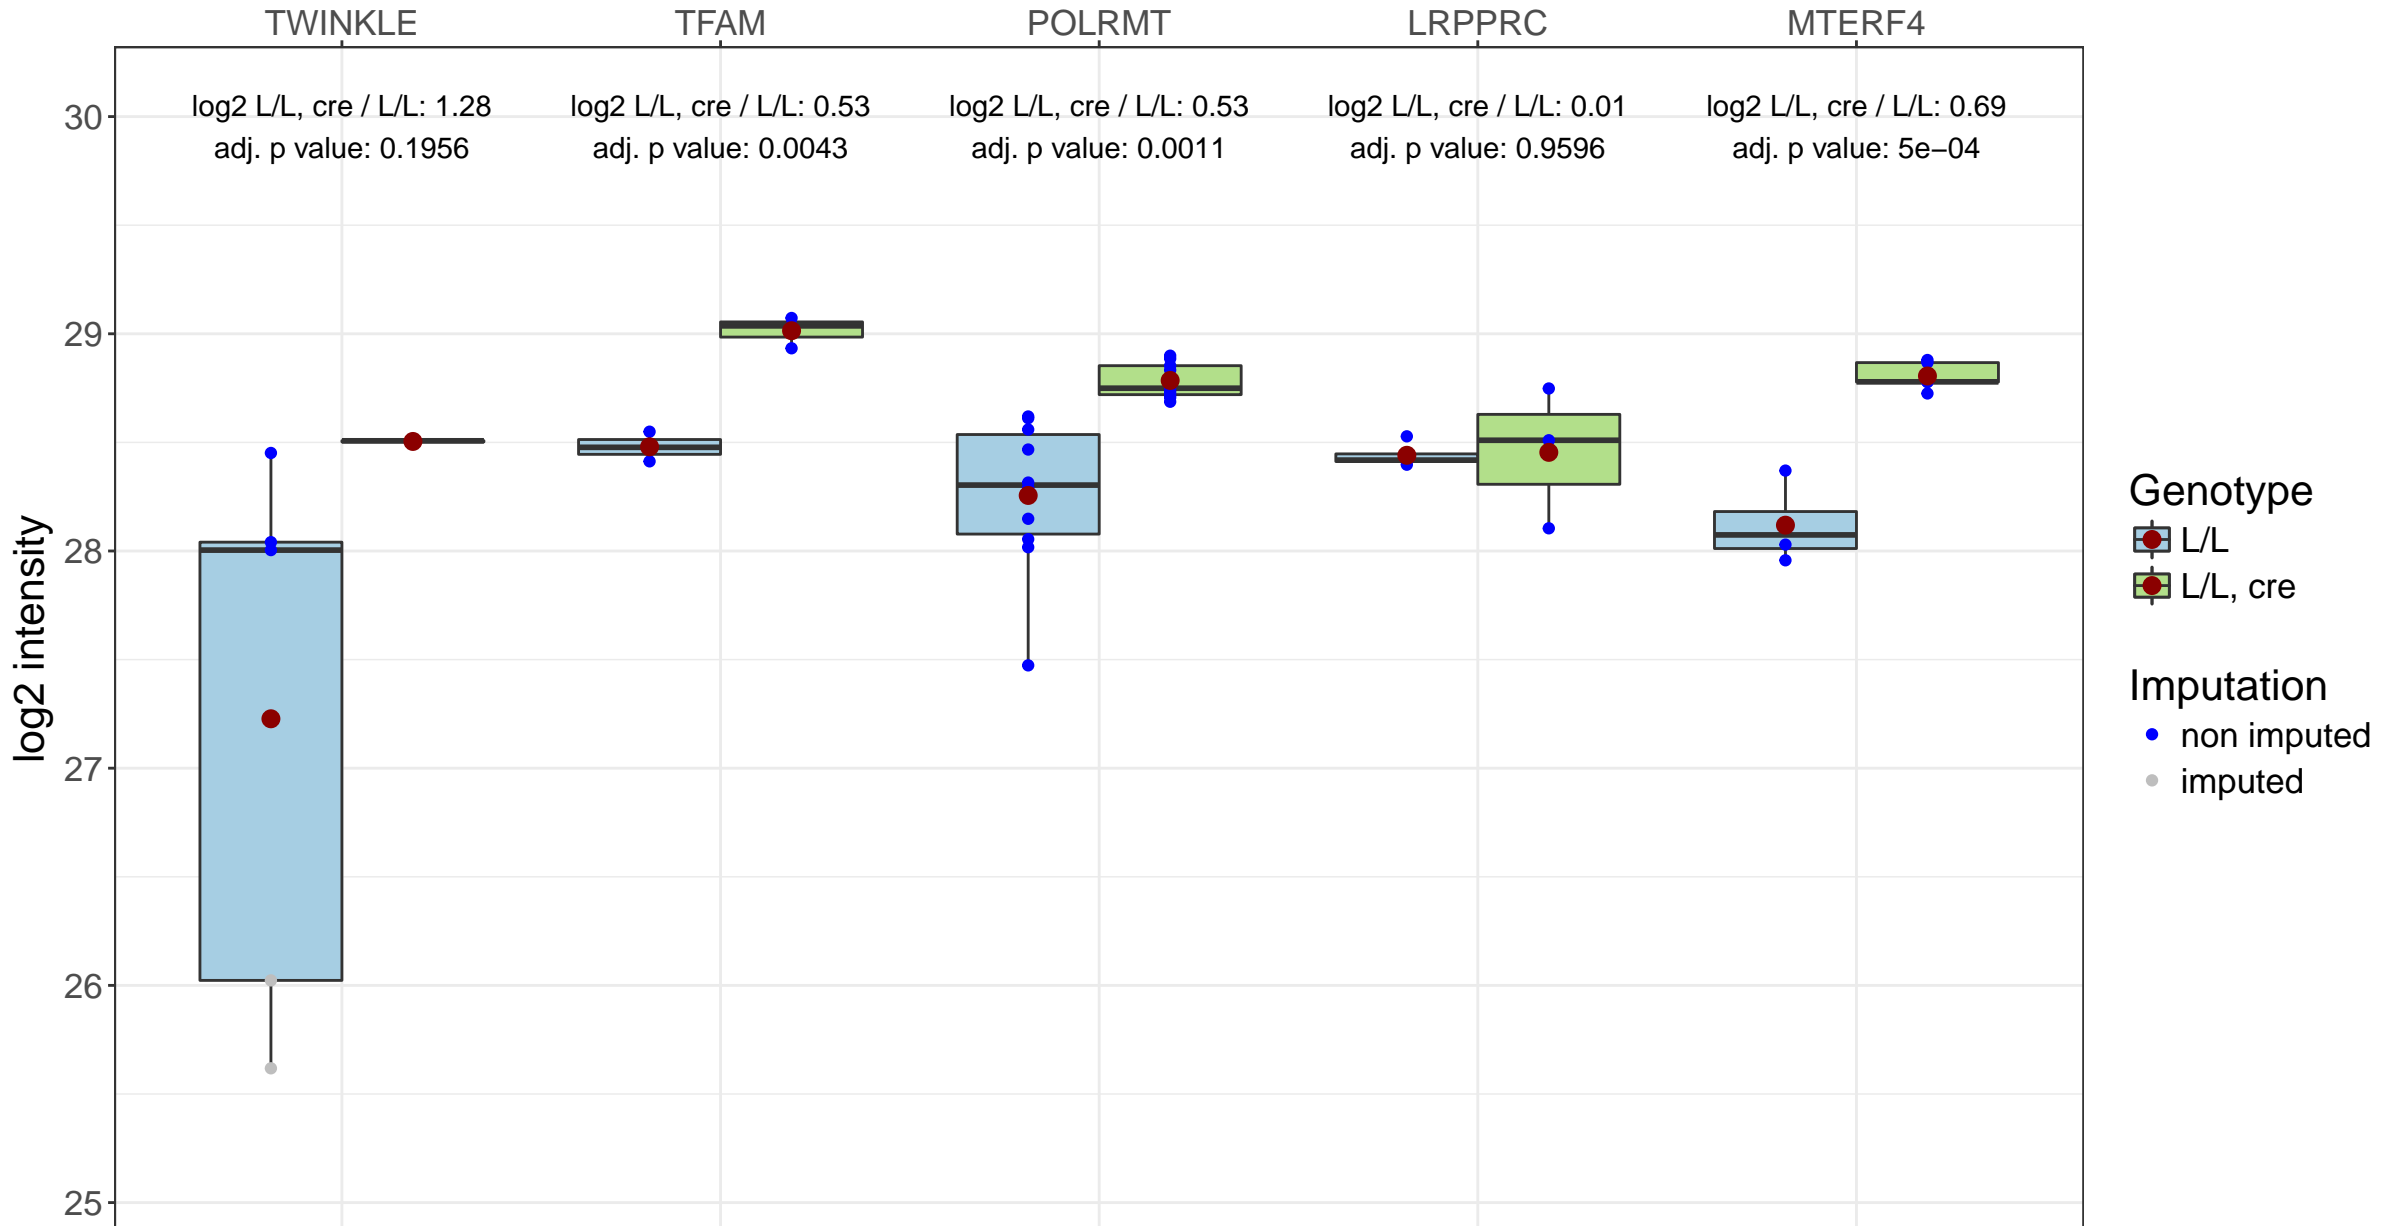

# NDUFAF6 / A2AIL4

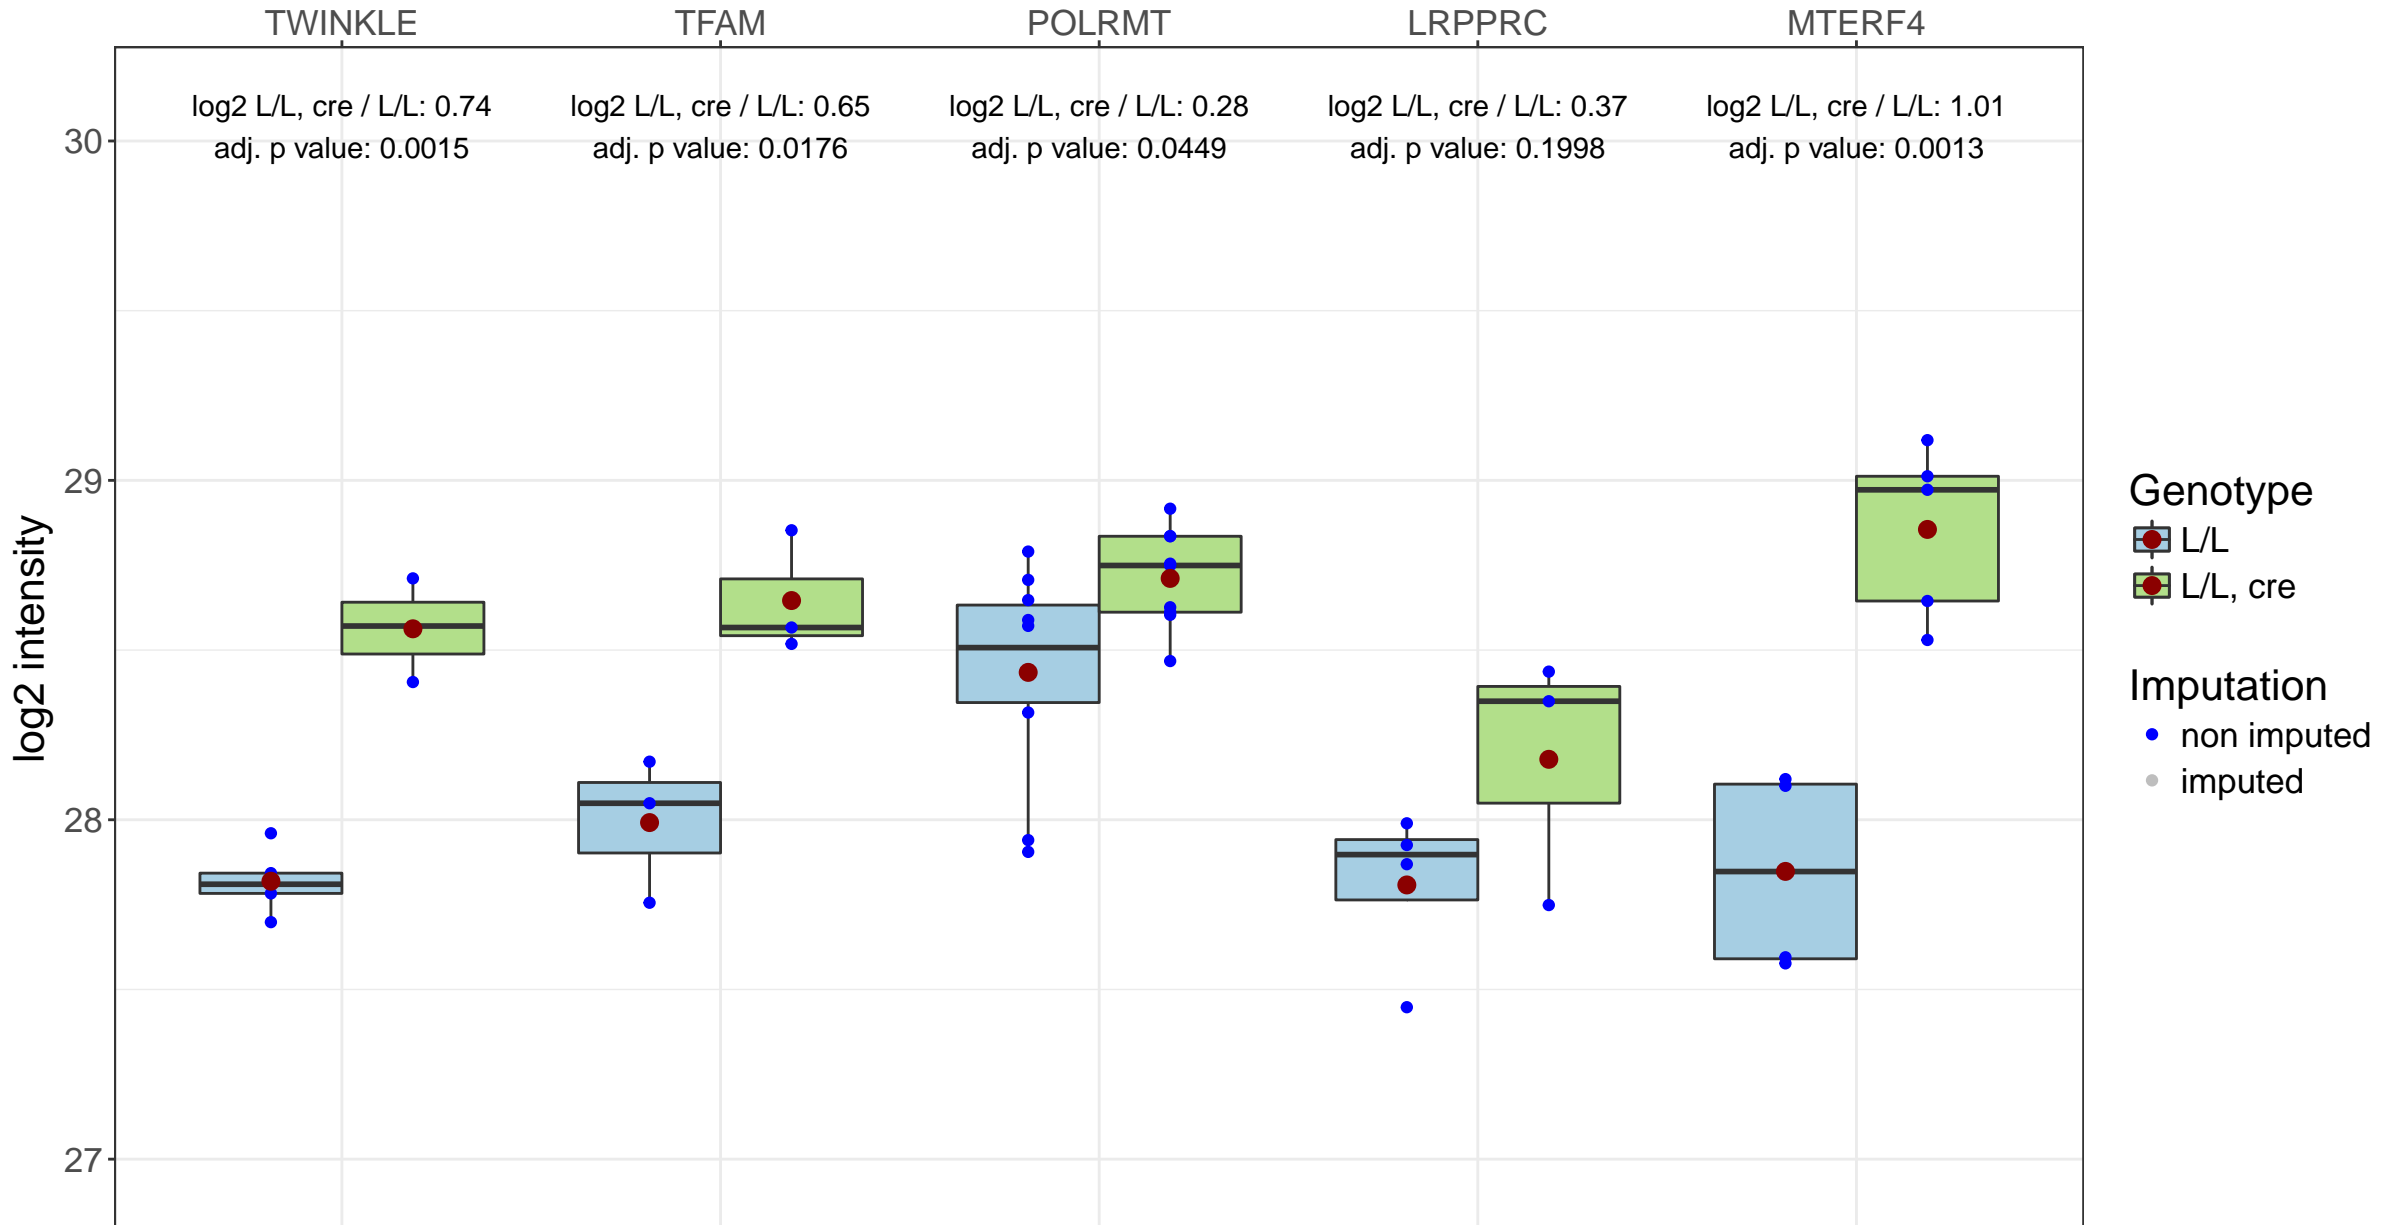

# NDUFAF7 / Q9CWG8

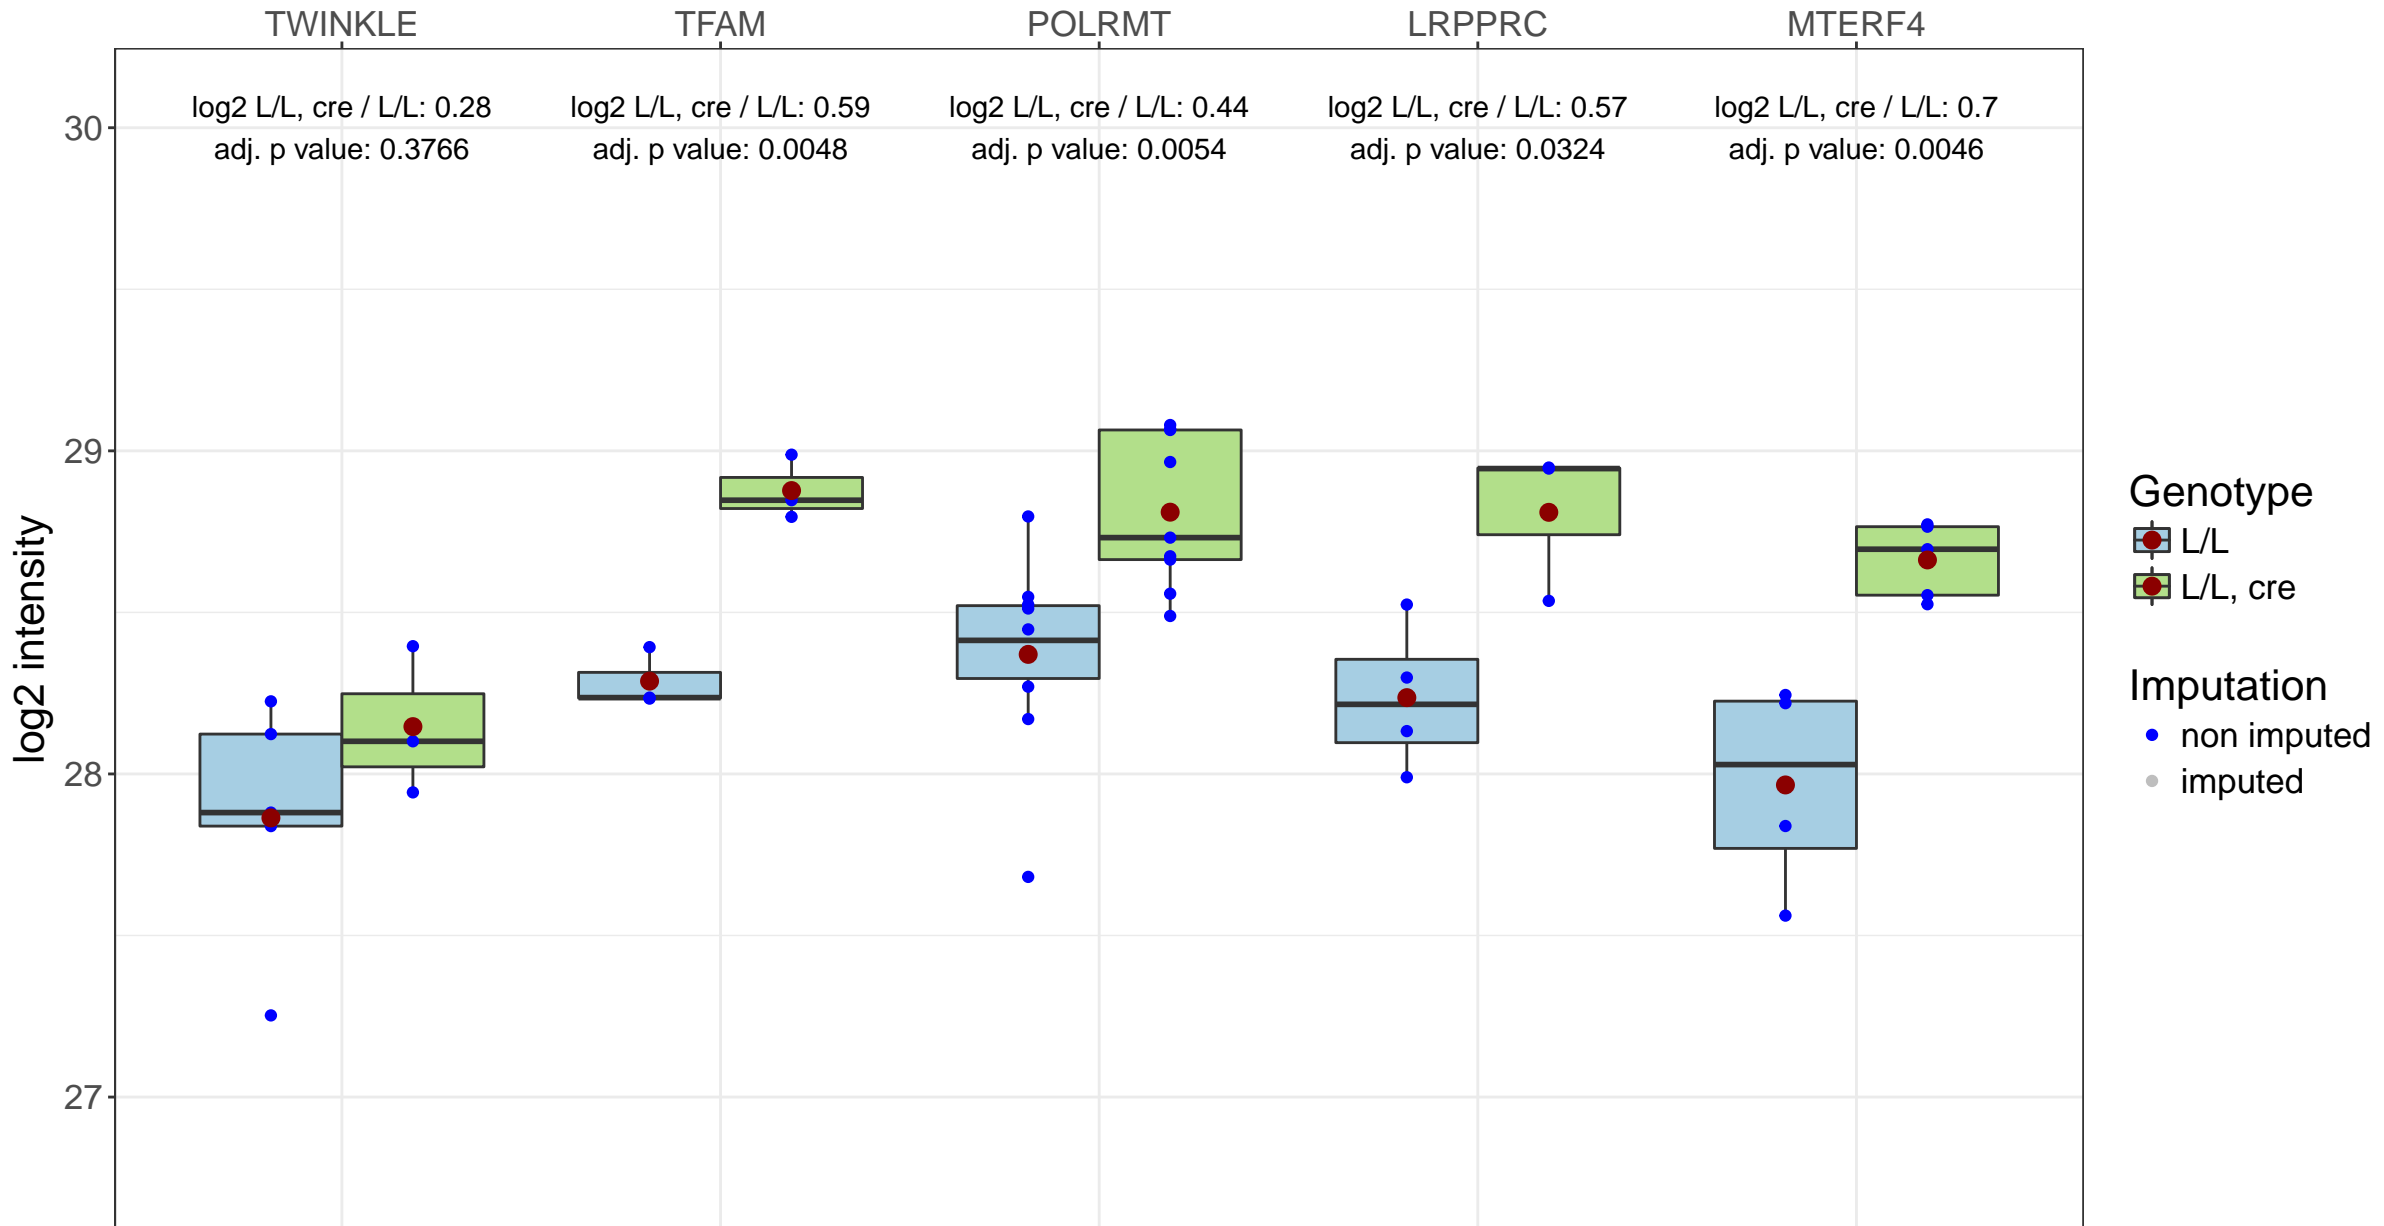

# NDUFB10 / Q9DCS9

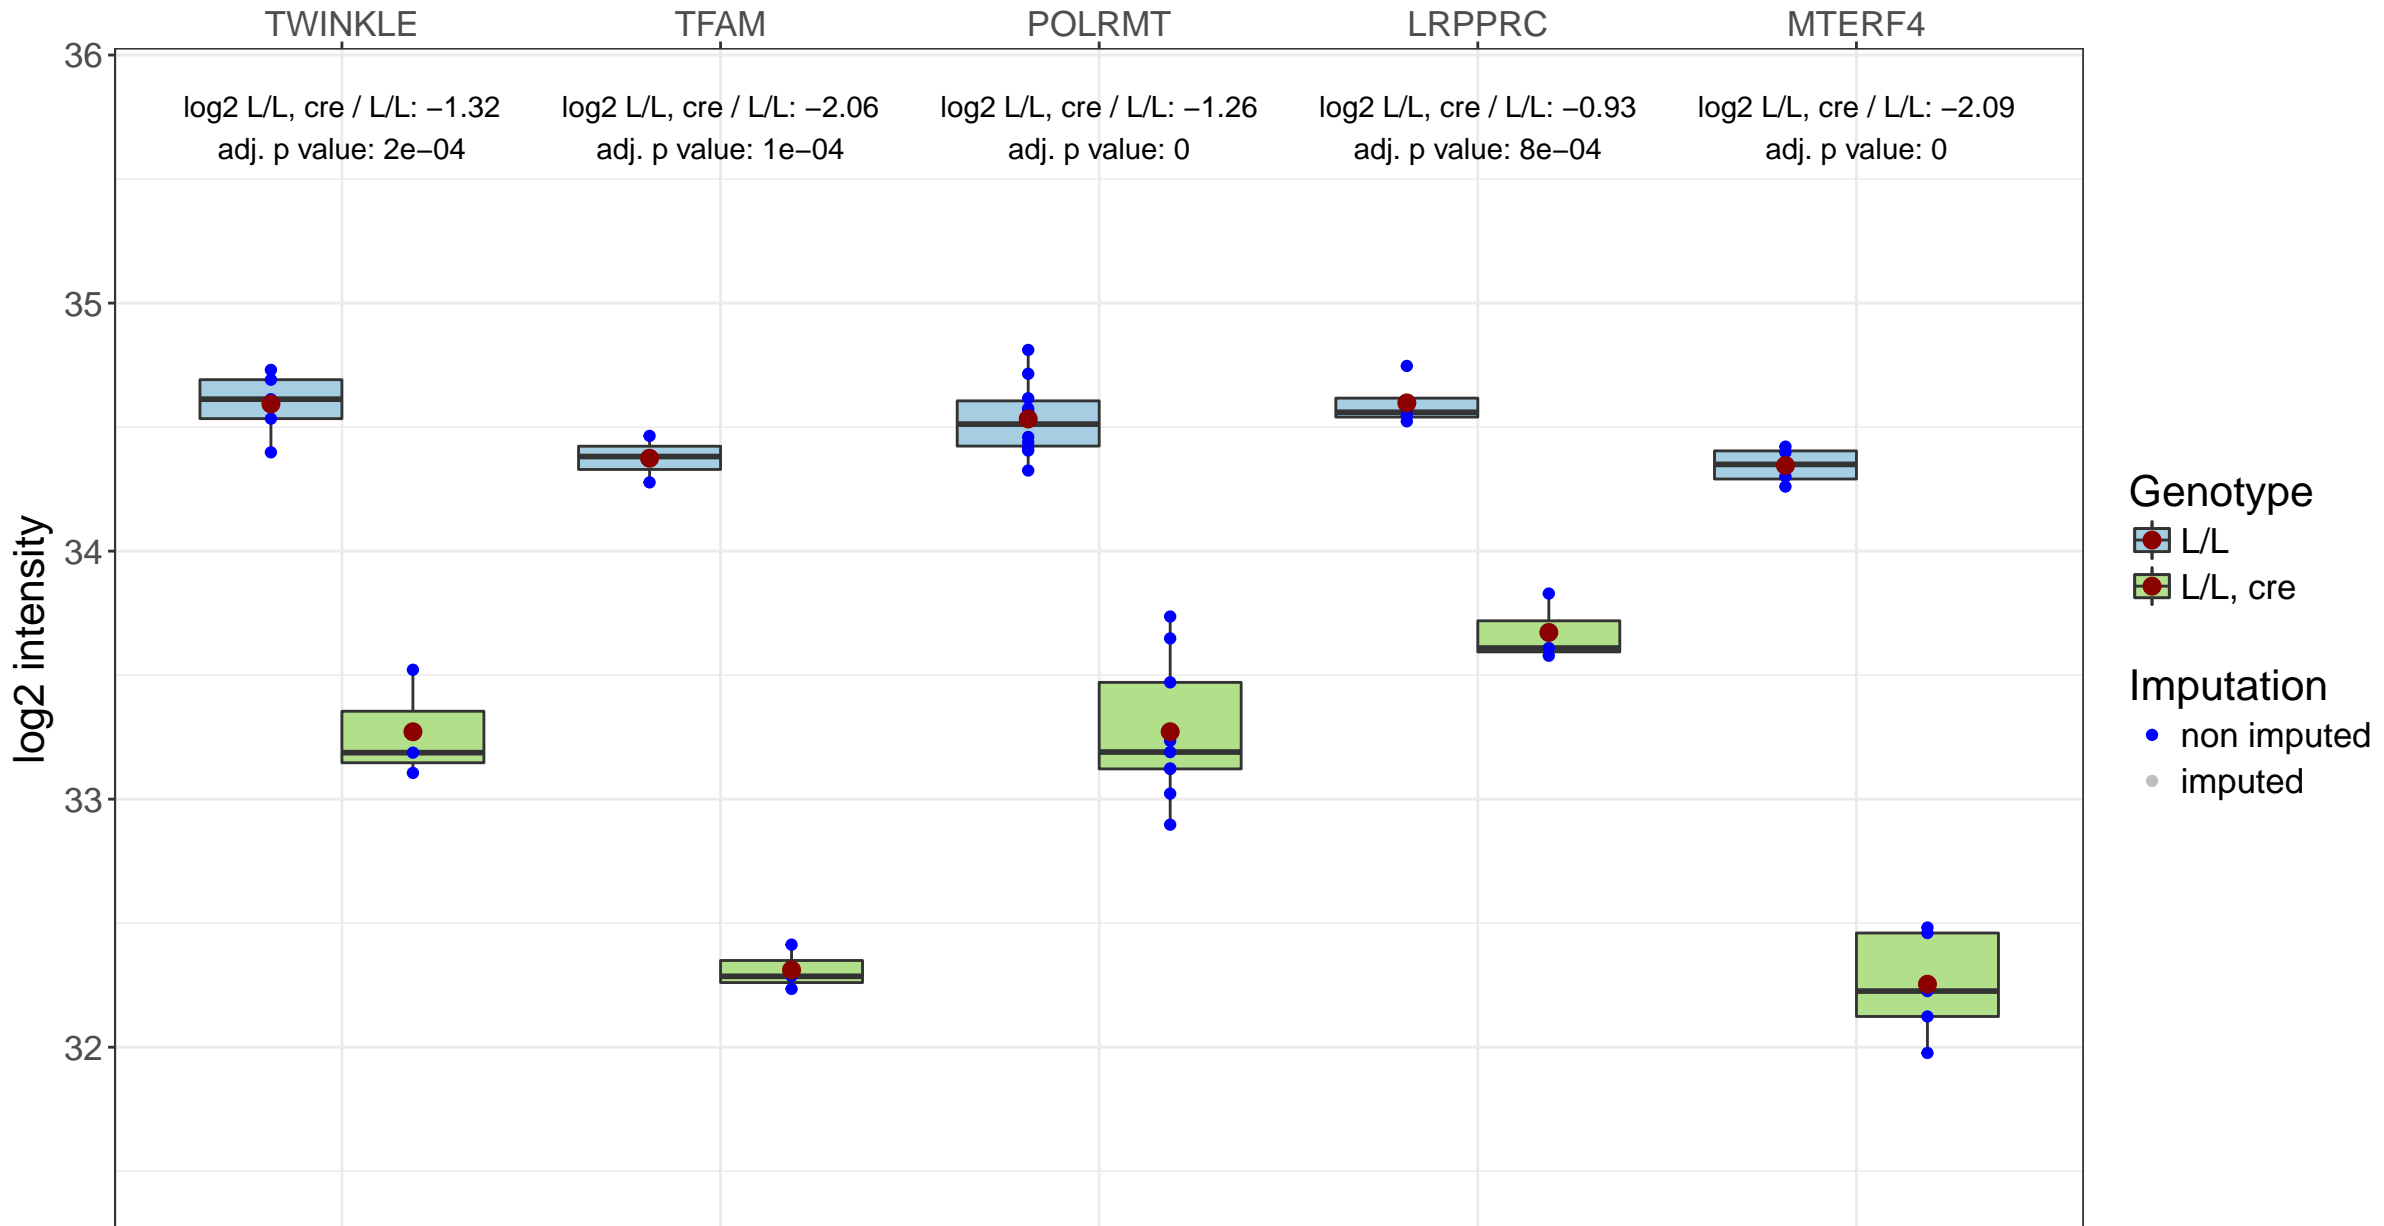

# NDUFB11 / O09111

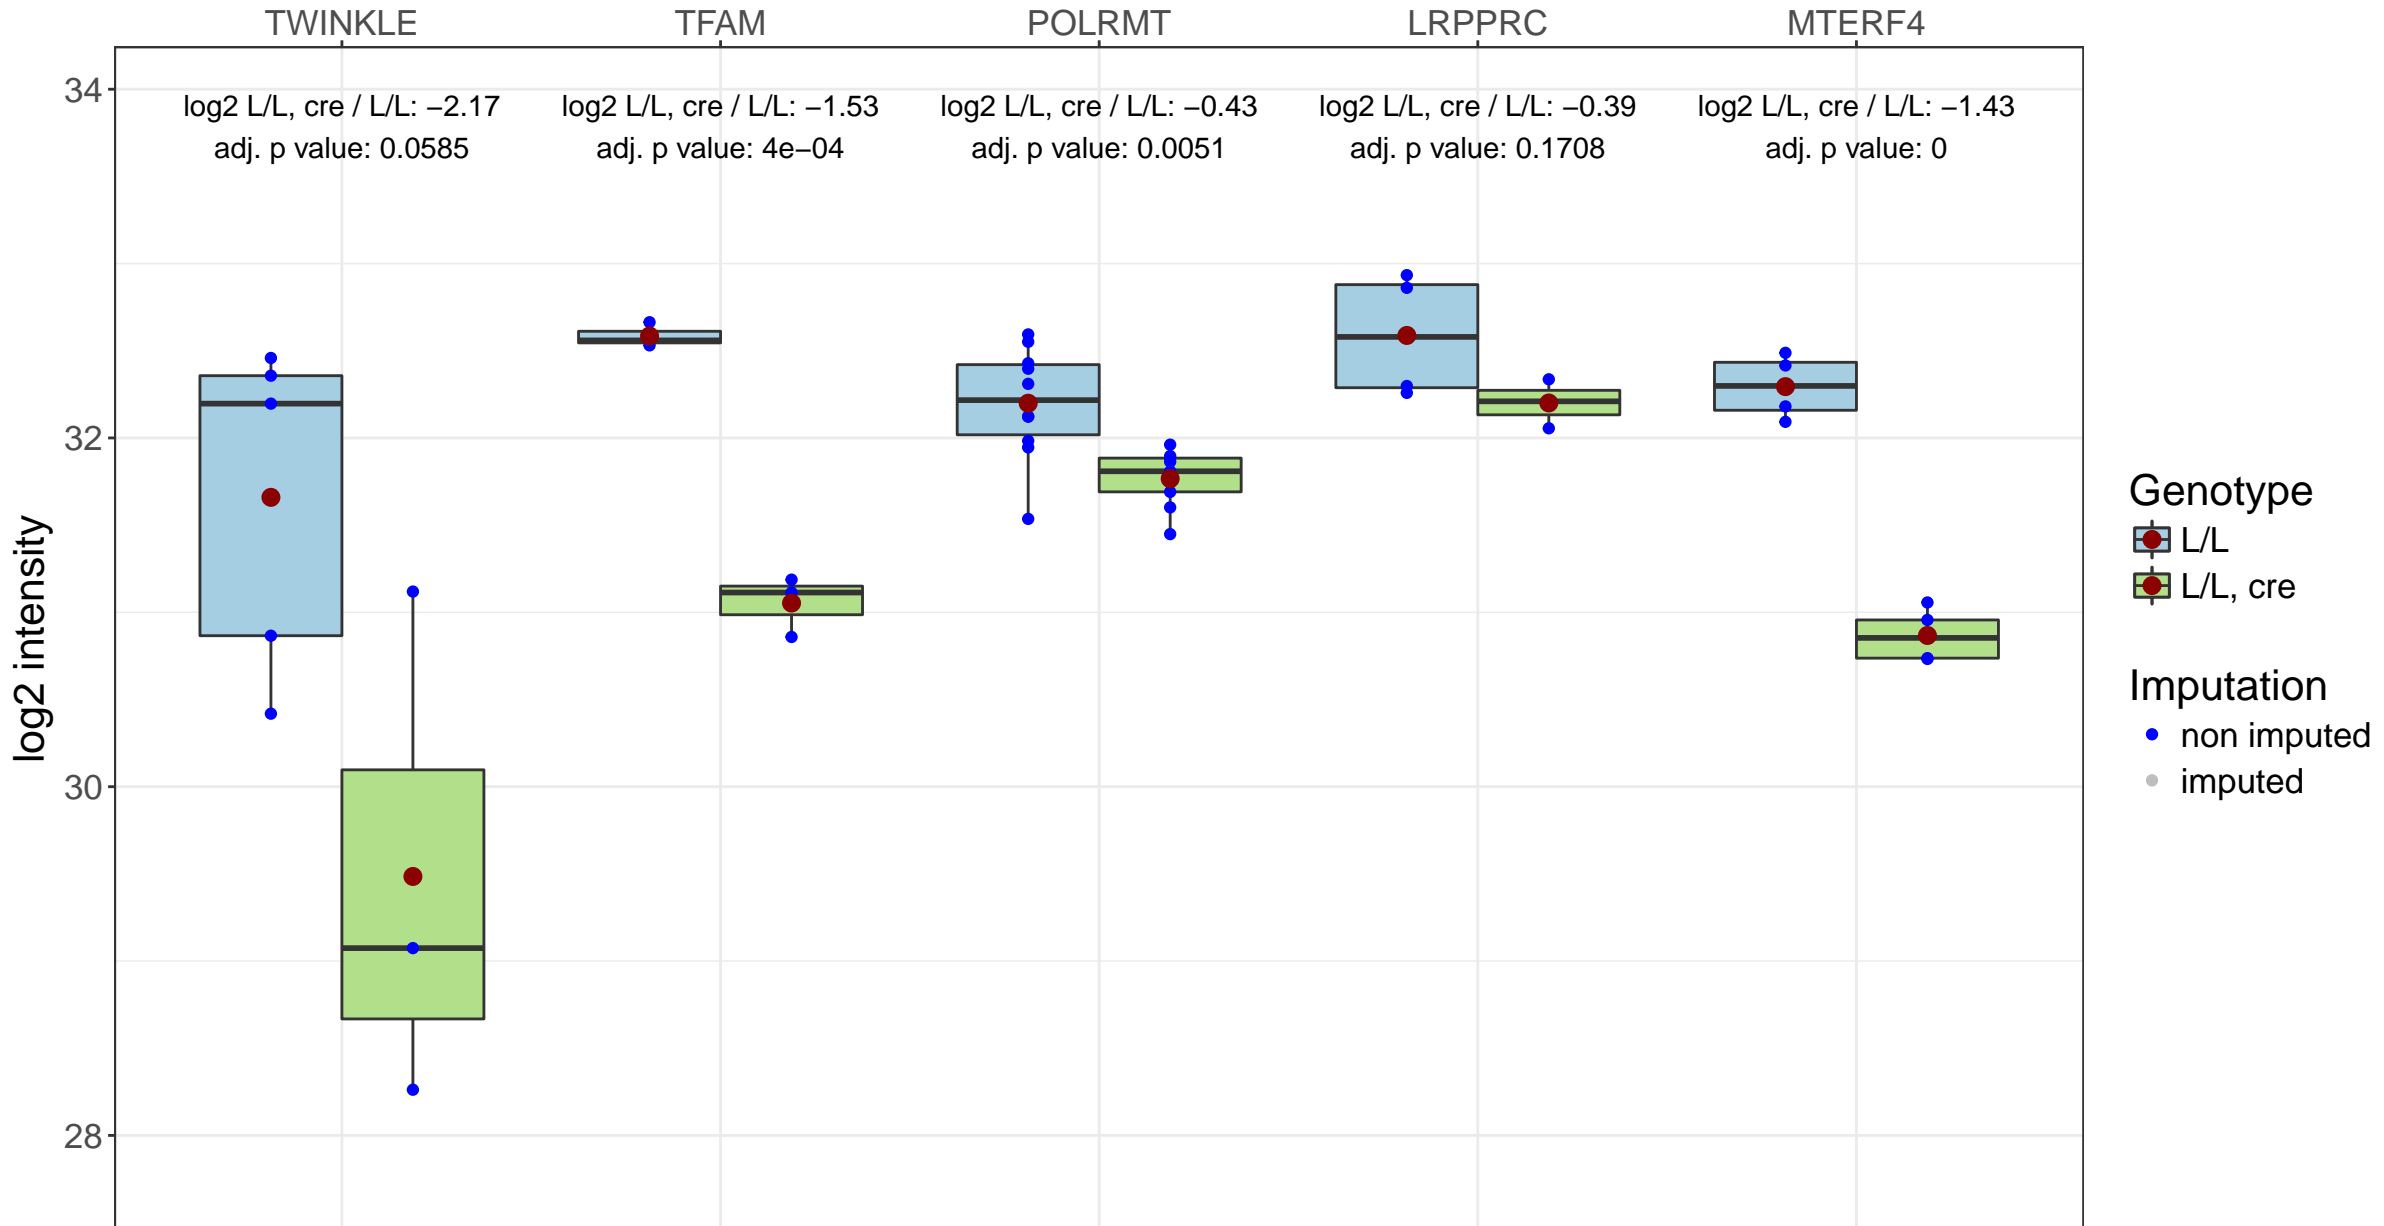

# NDUFB2 / Q9CPU2

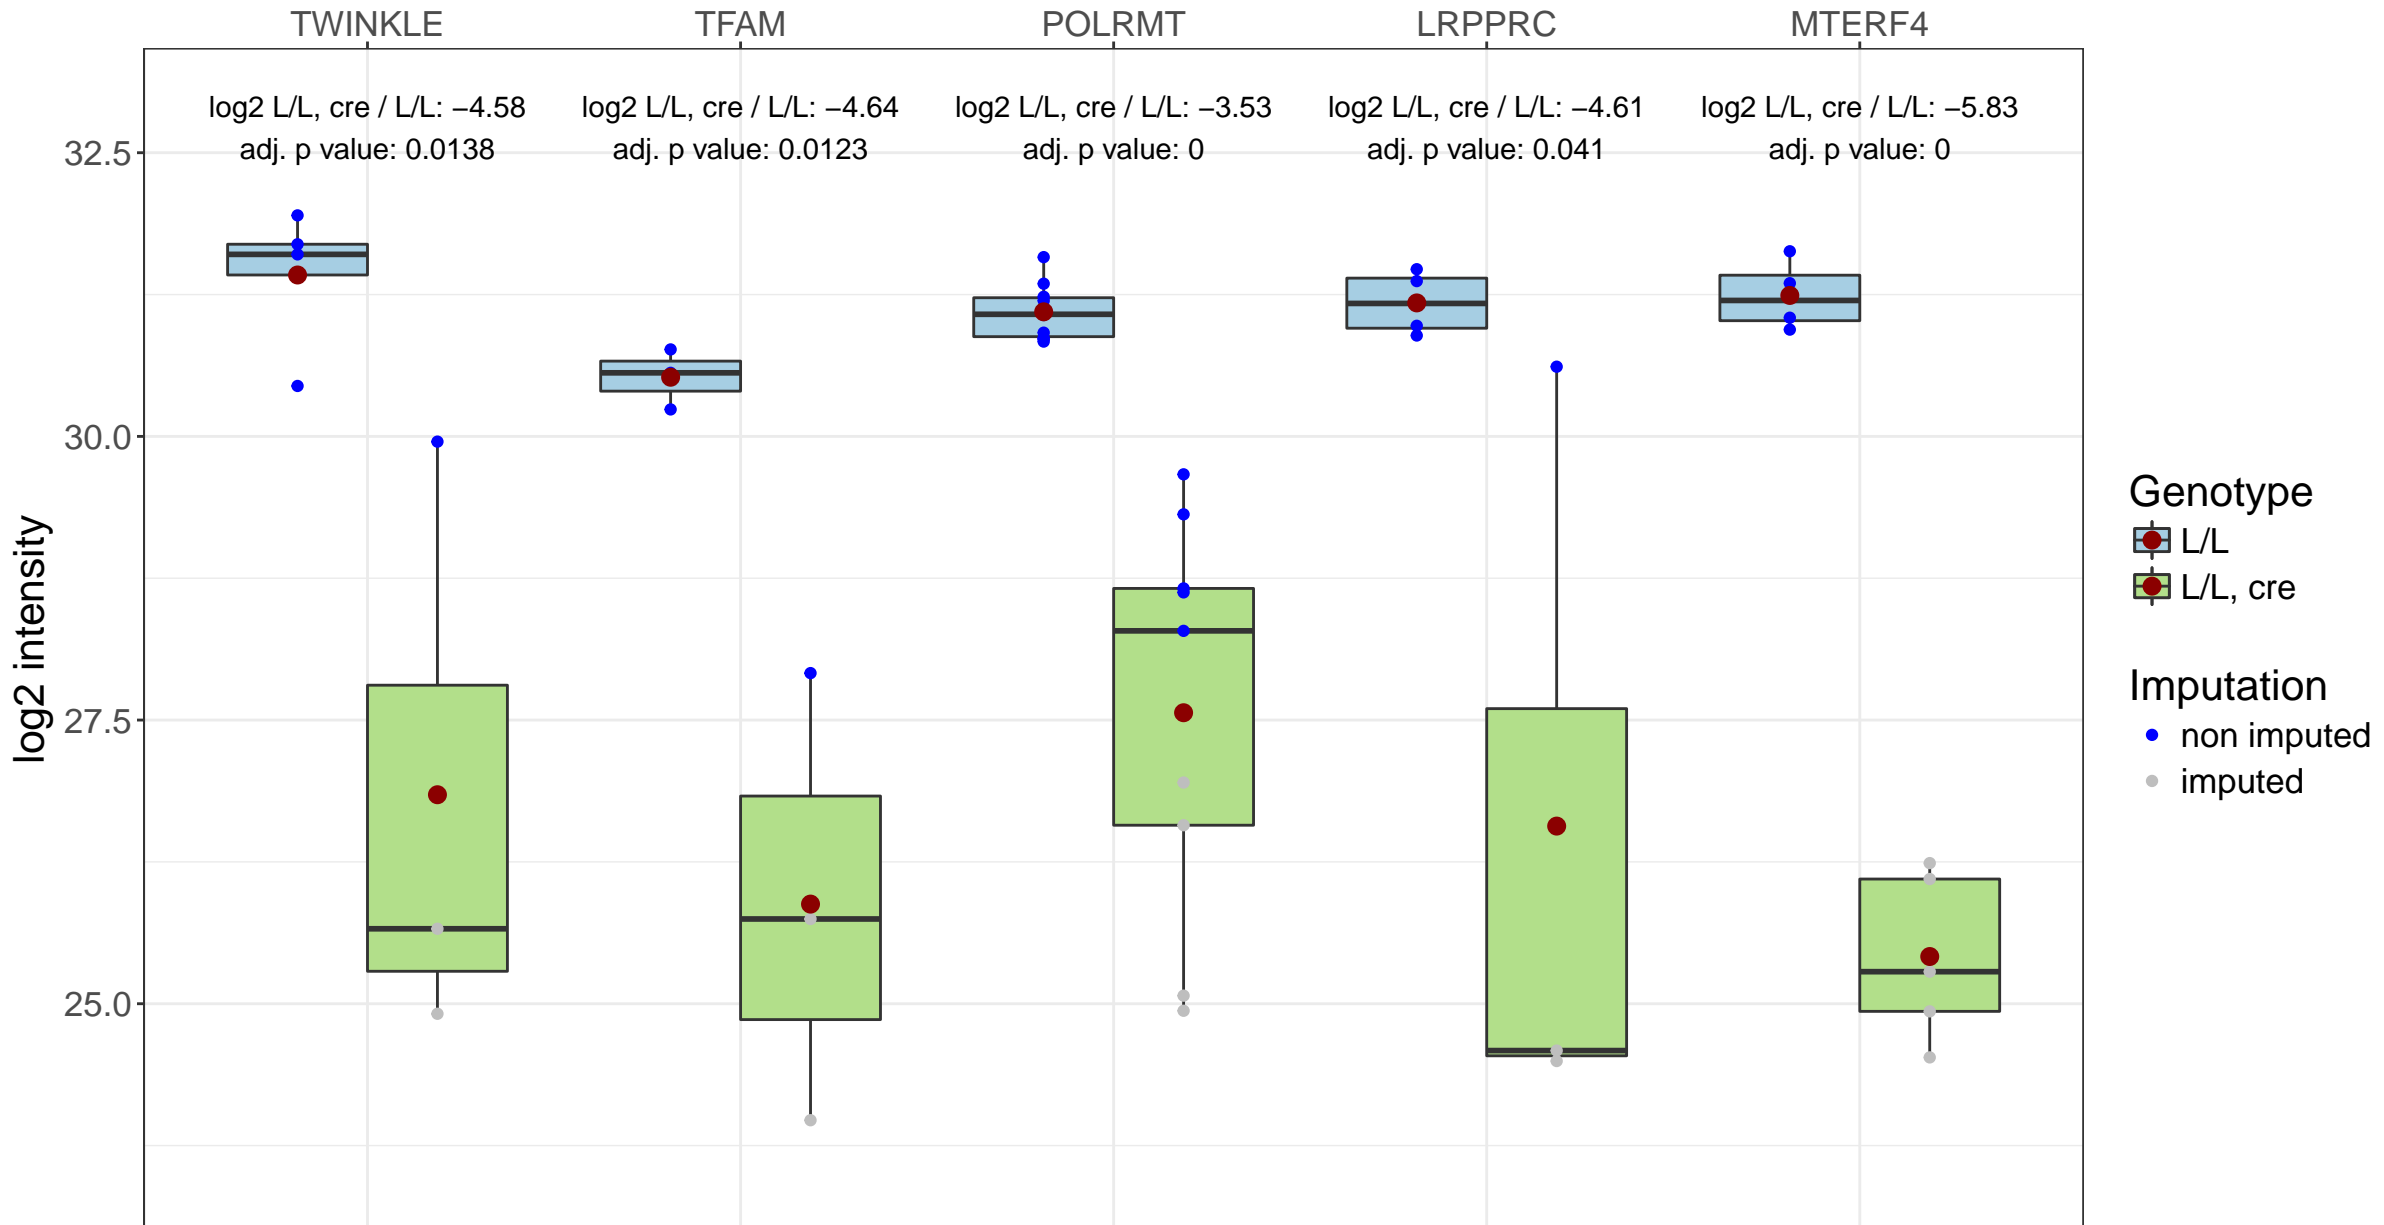

# NDUFB3 / Q9CQZ6

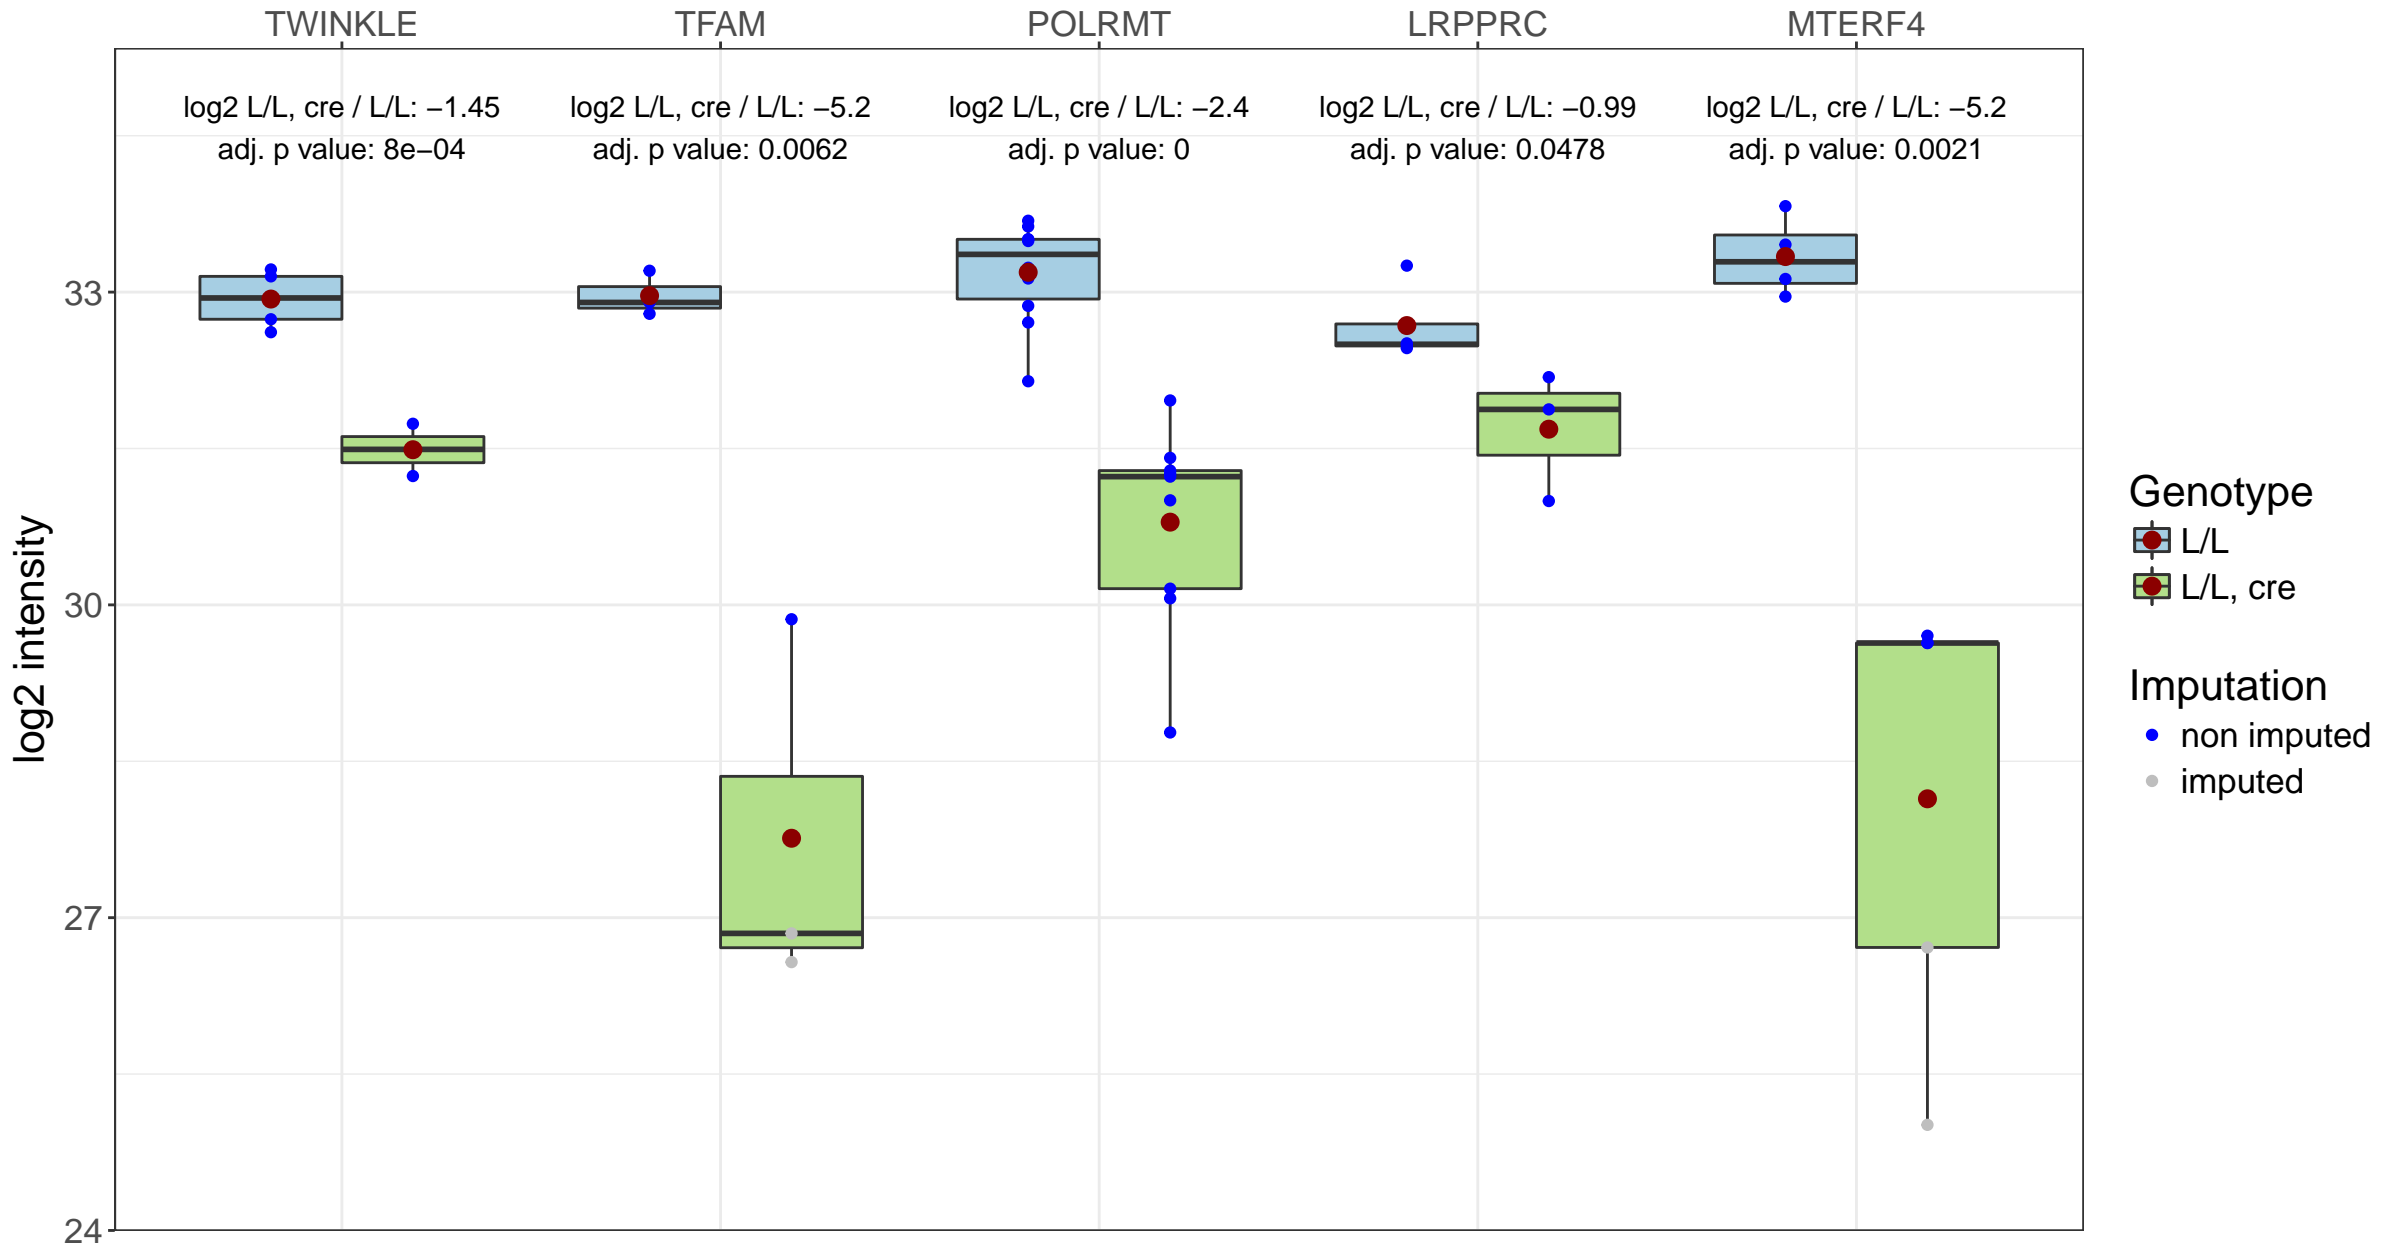

# NDUFB4 / Q9CQC7

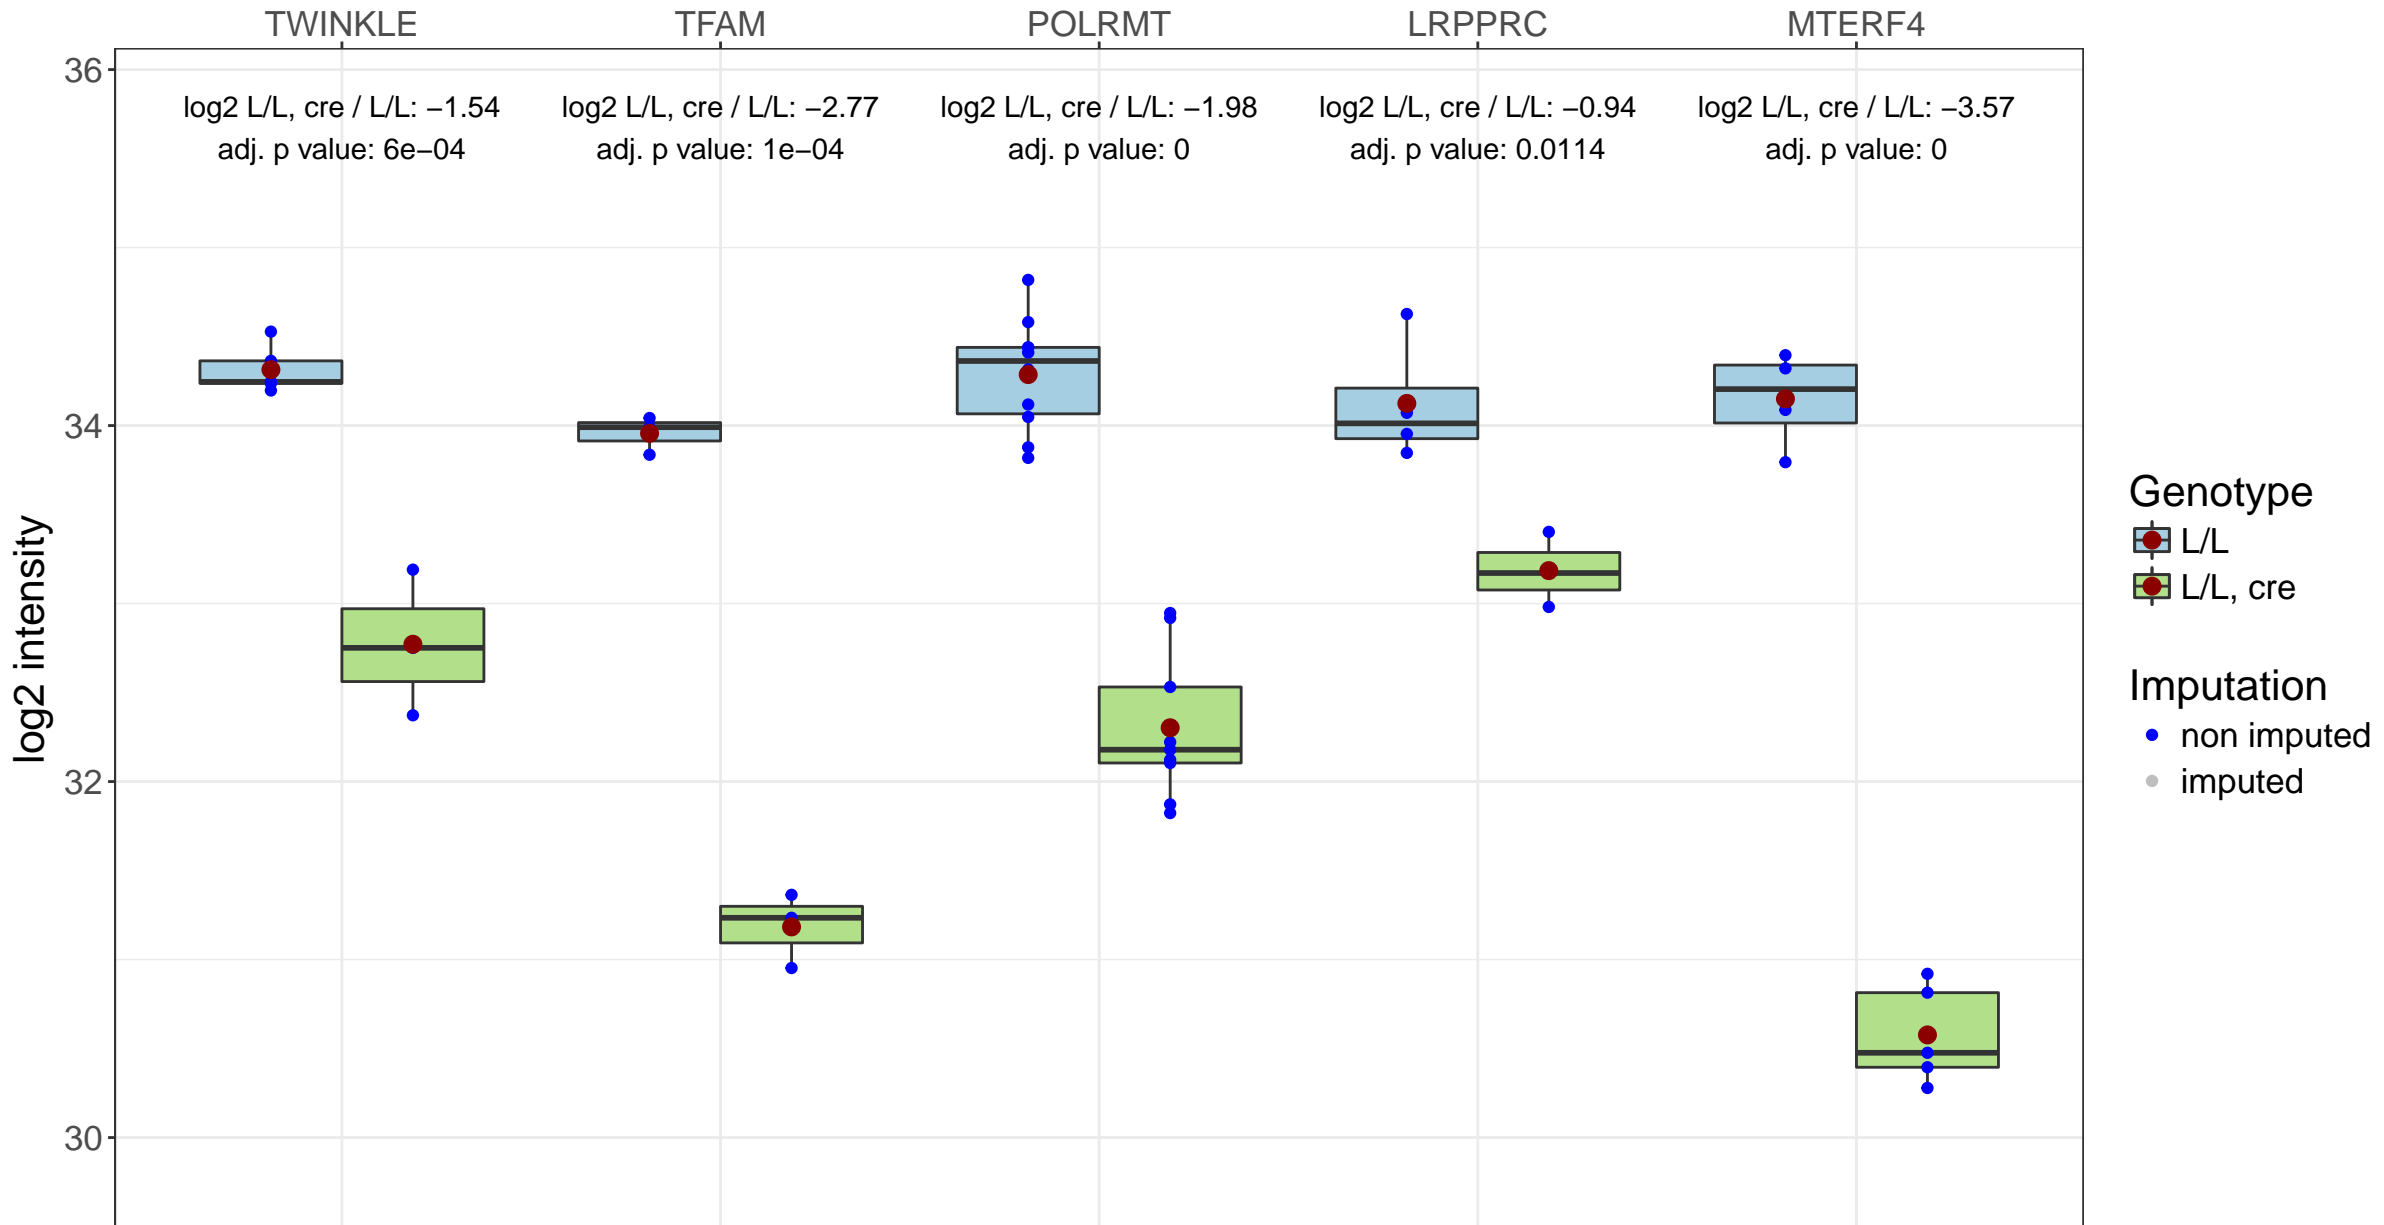



# NDUFB5 / Q9CQH3

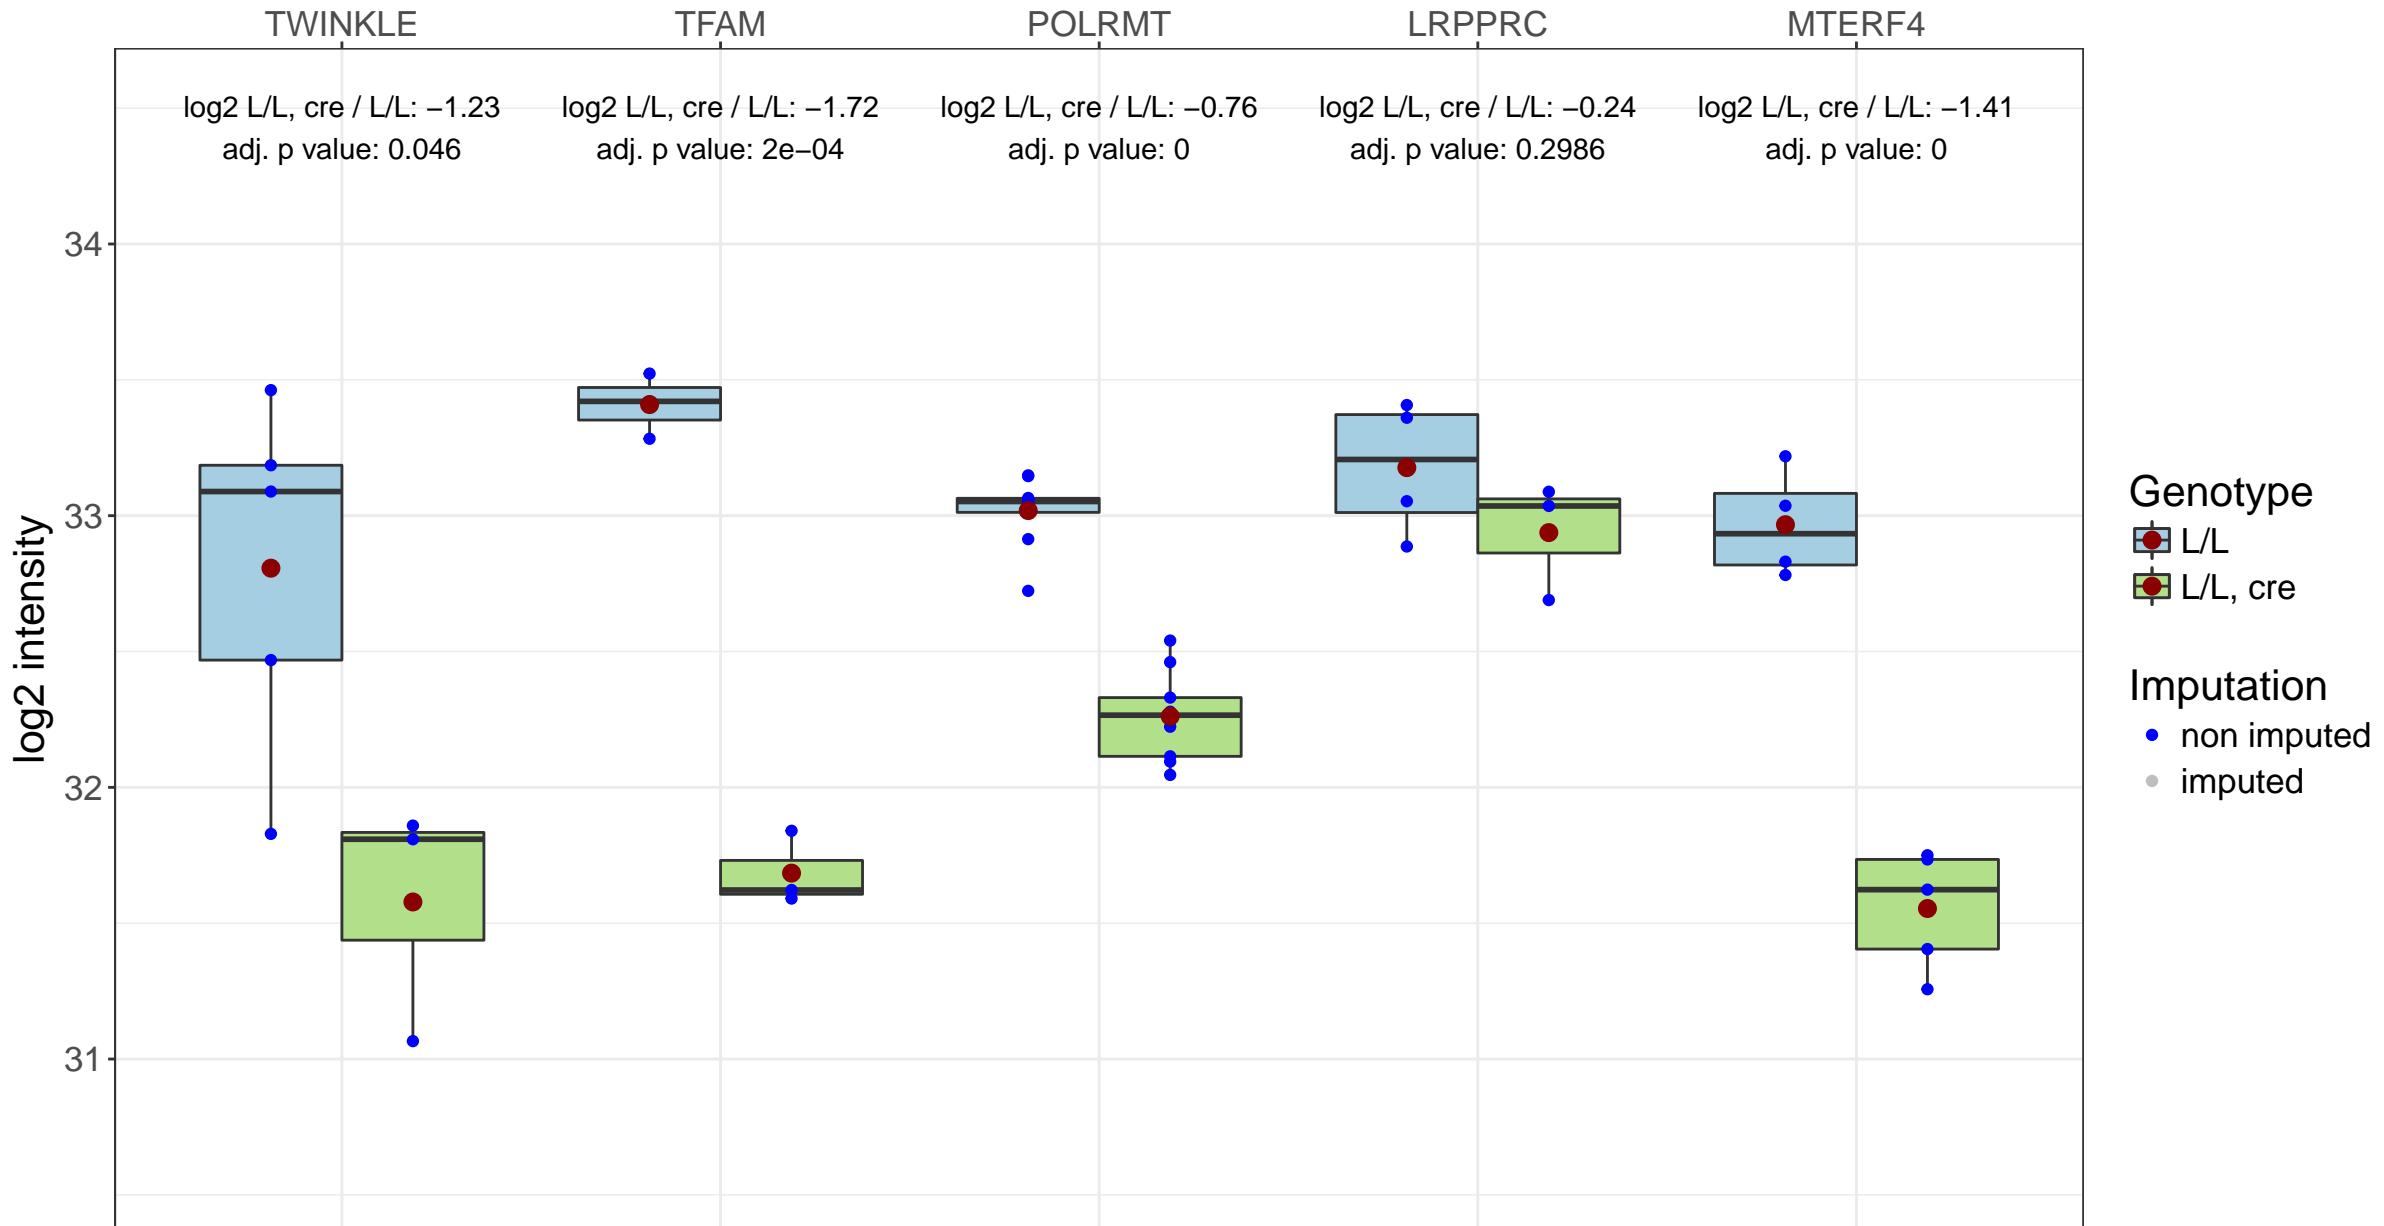

# NDUFB6 / Q3UIU2

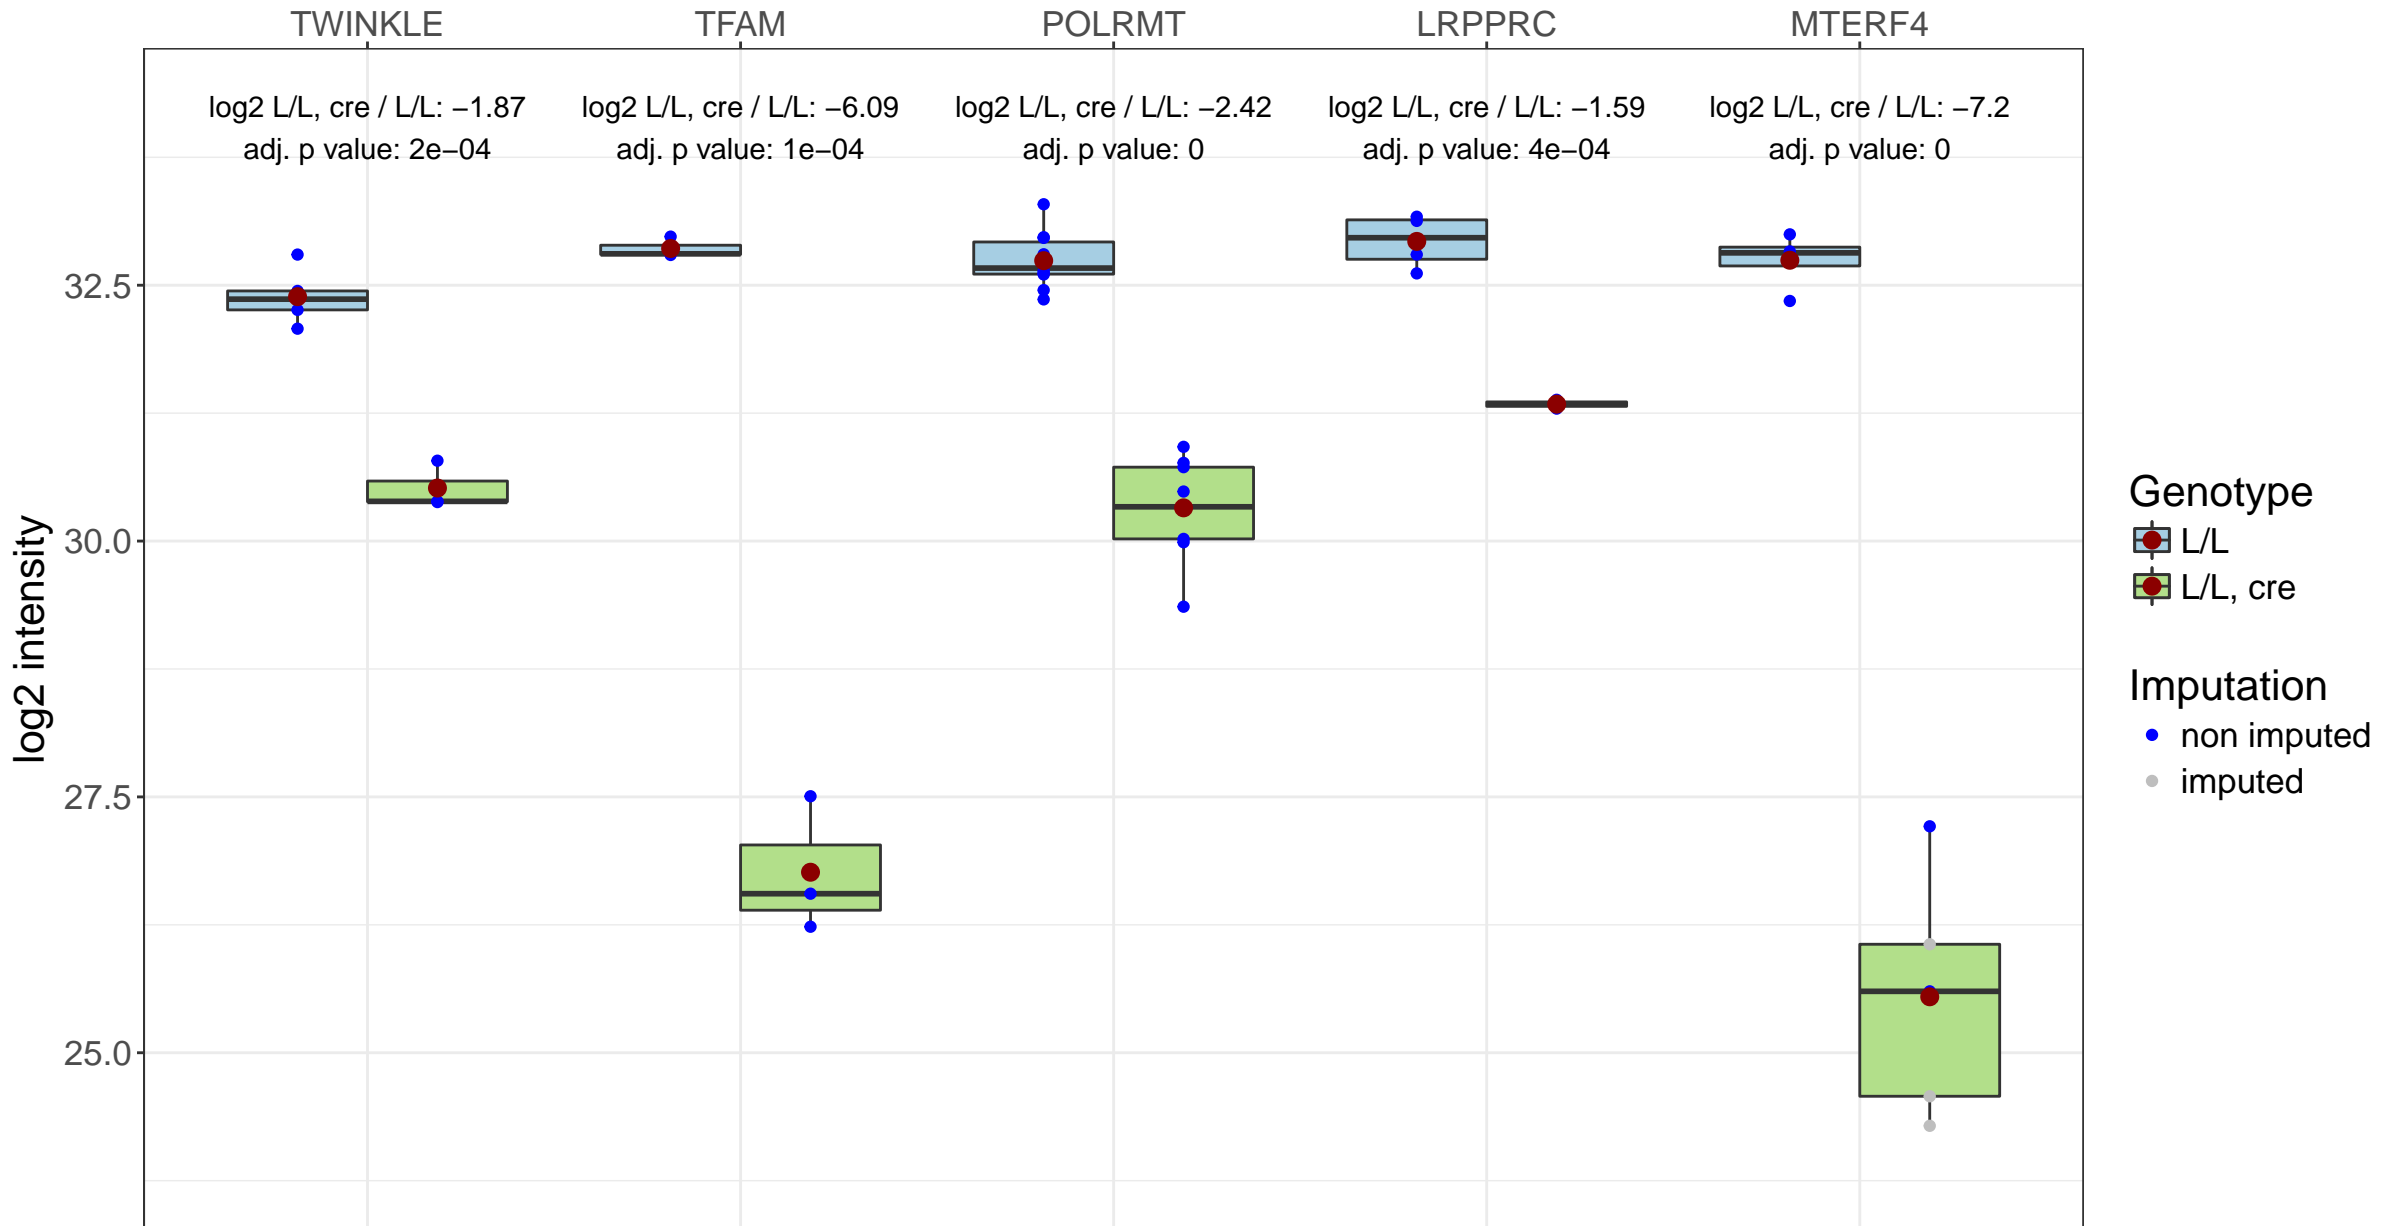

# NDUFB7 / Q9CR61

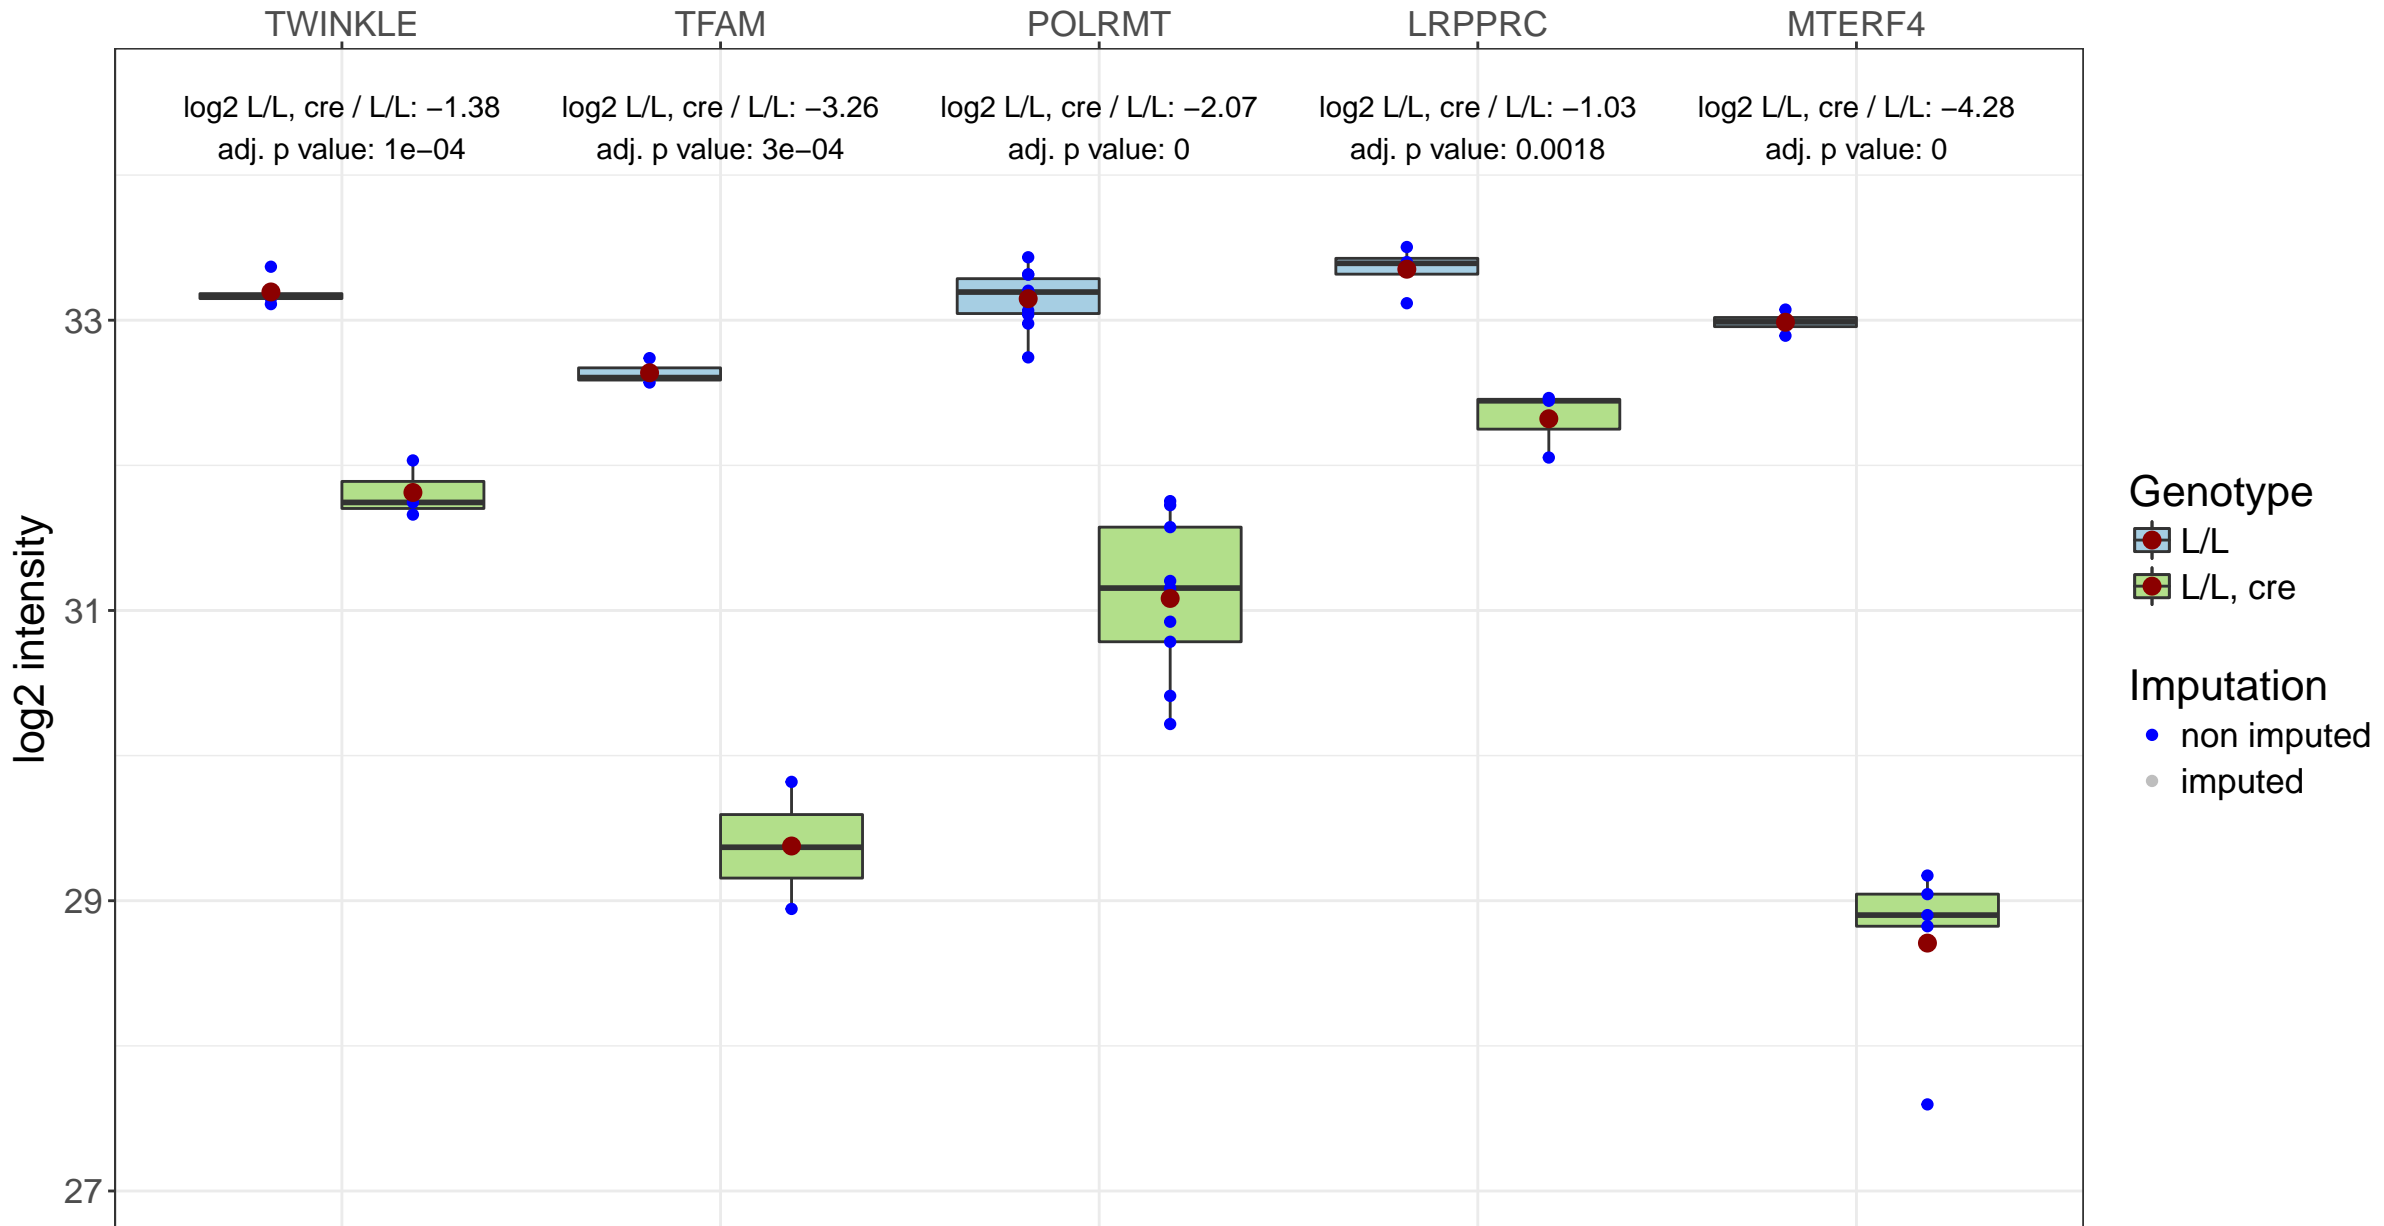

# NDUFB8 / Q9D6J5

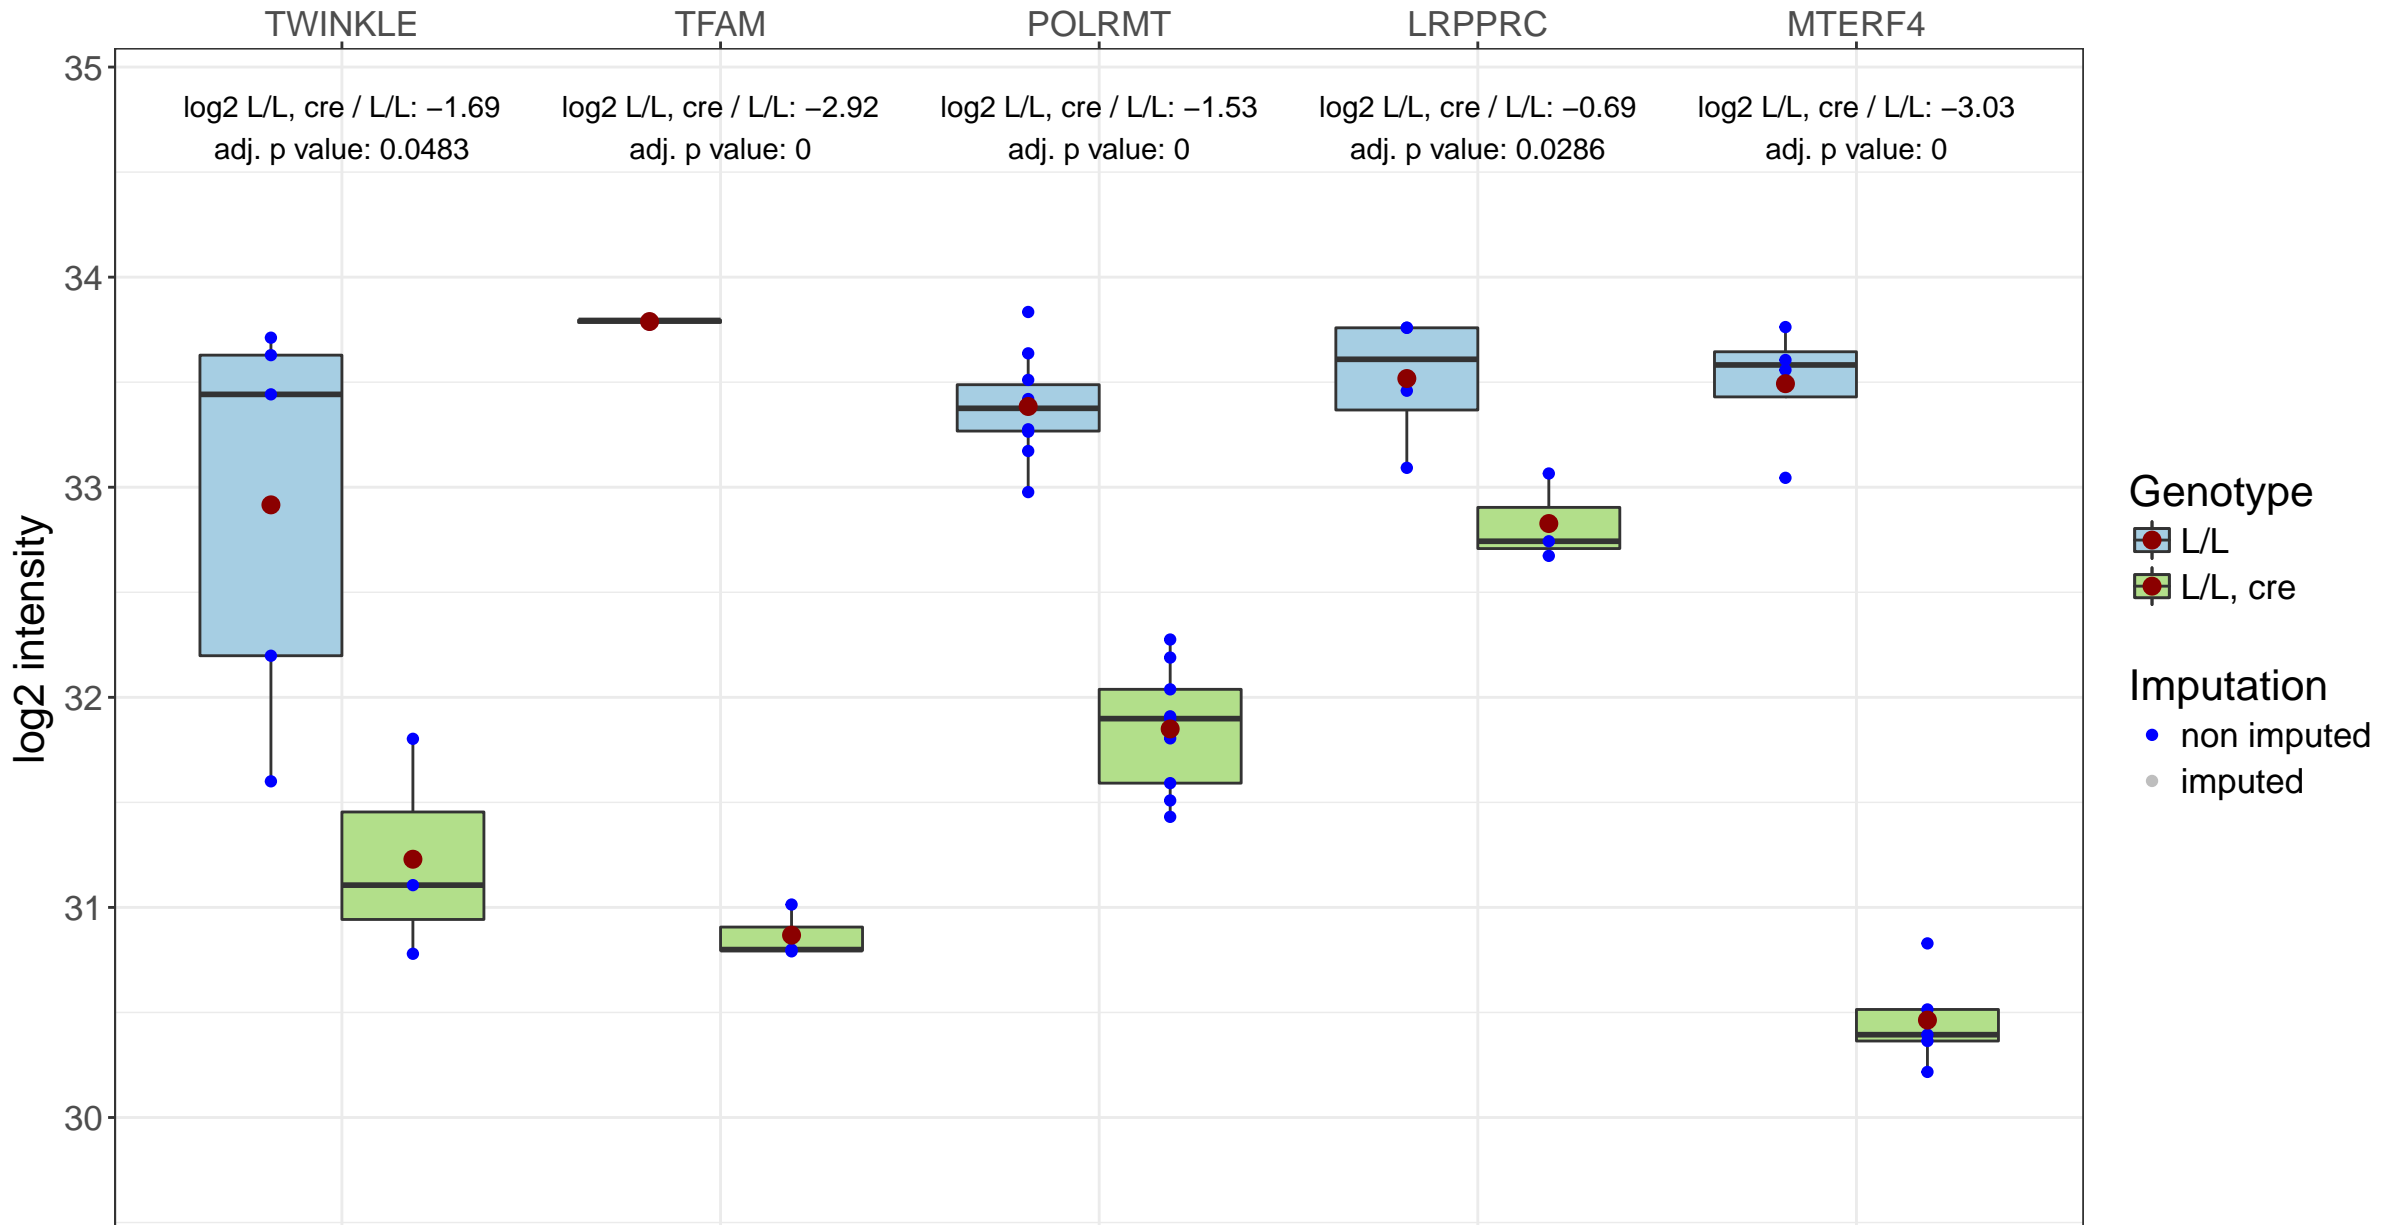

# NDUFB9 / Q9CQJ8

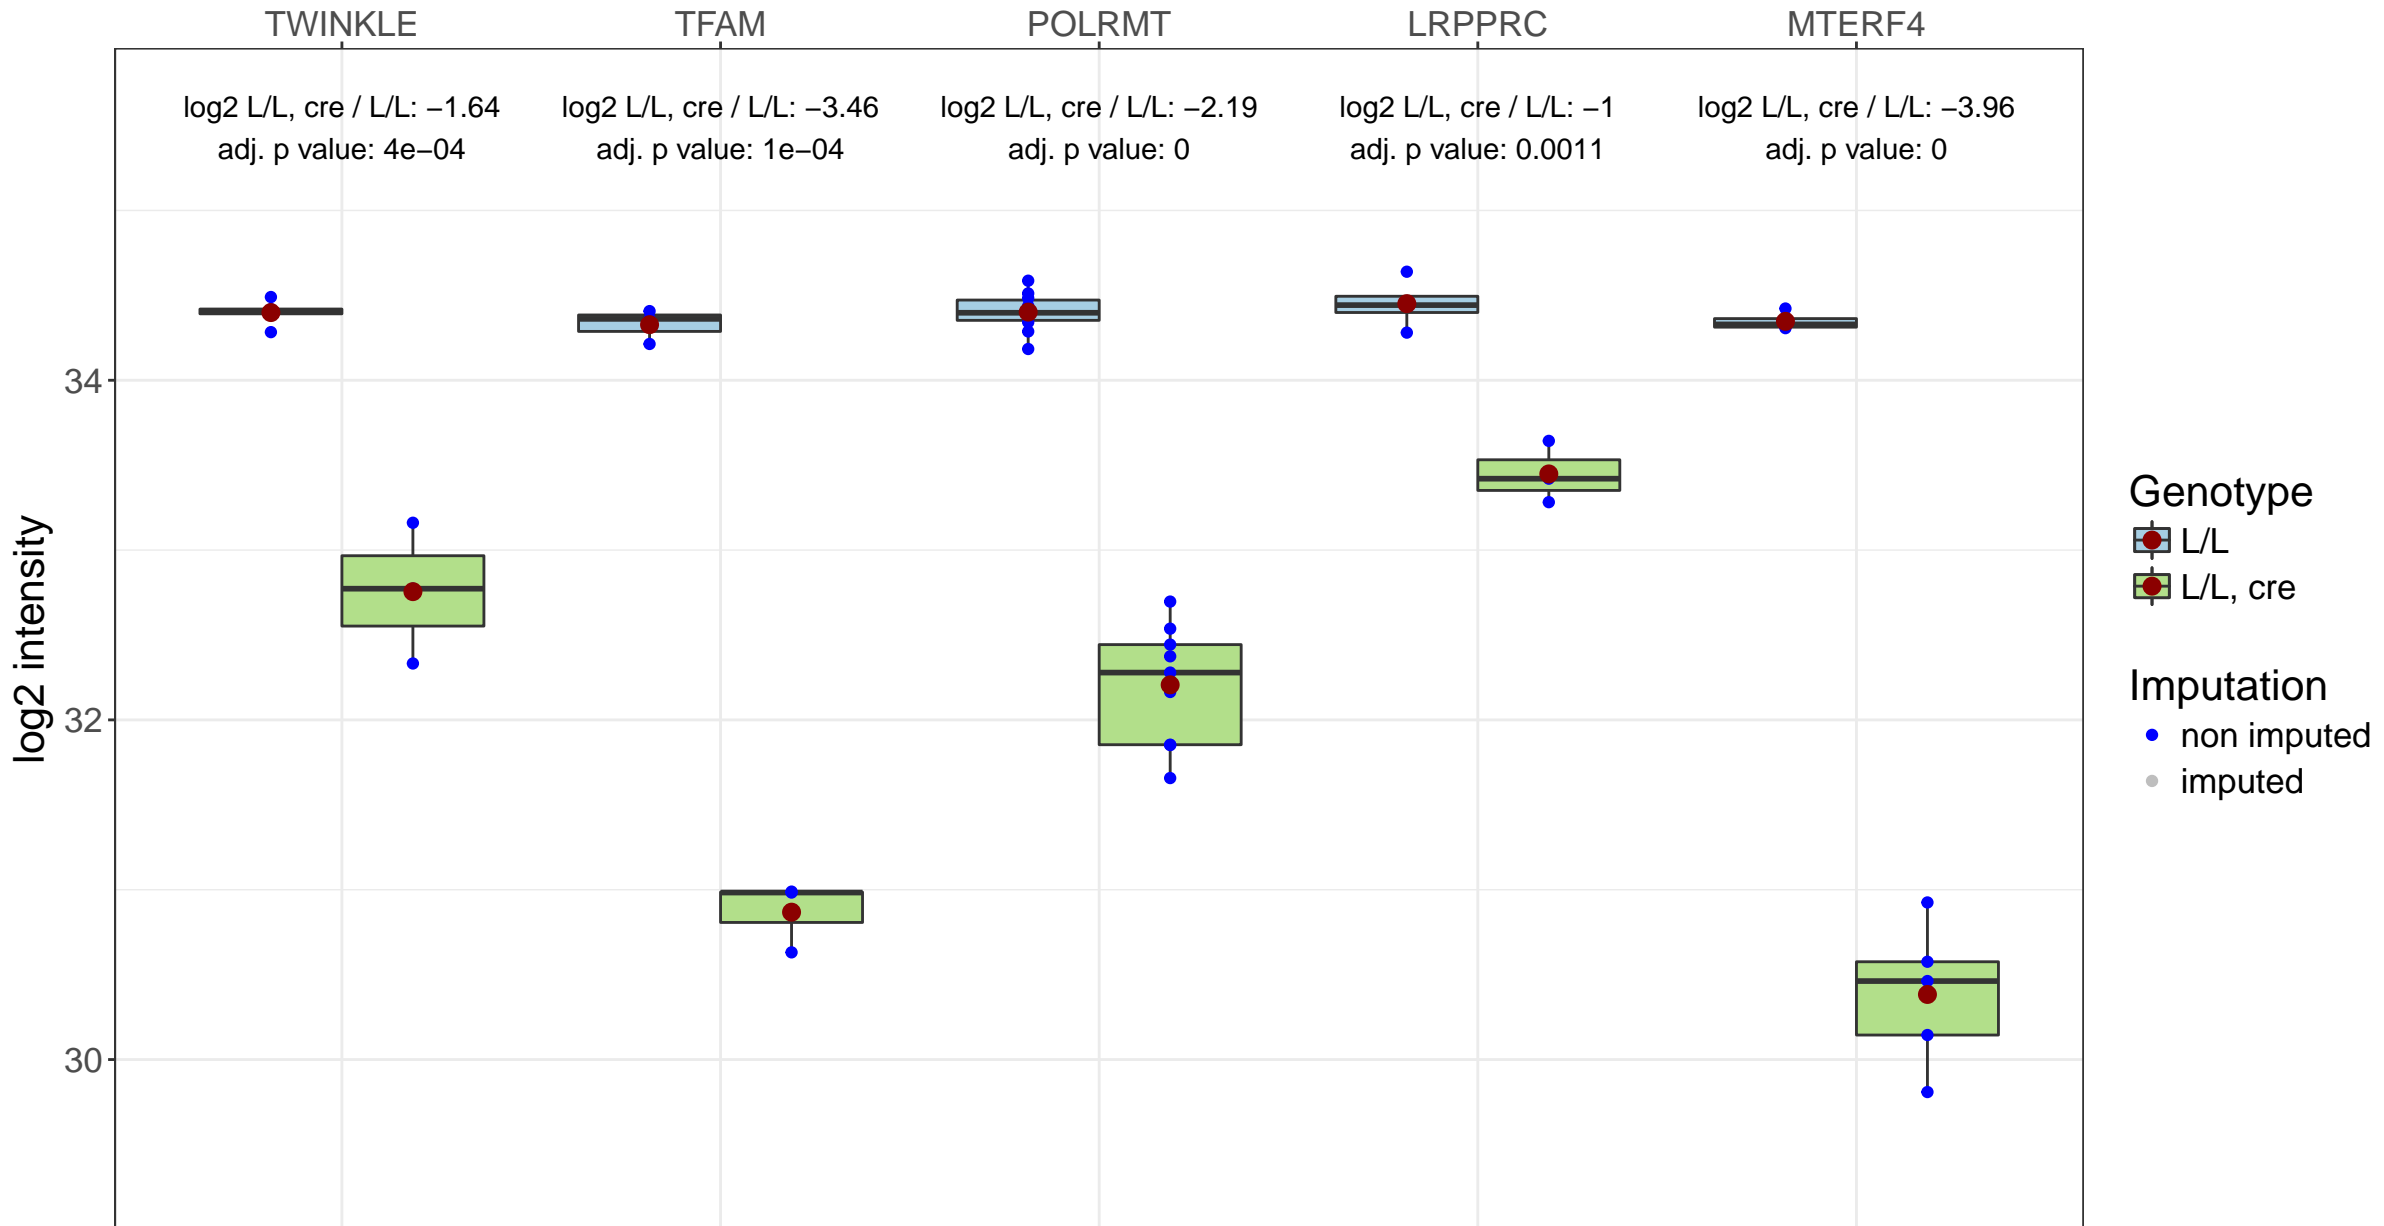

# NDUFC1 / Q9CQY9

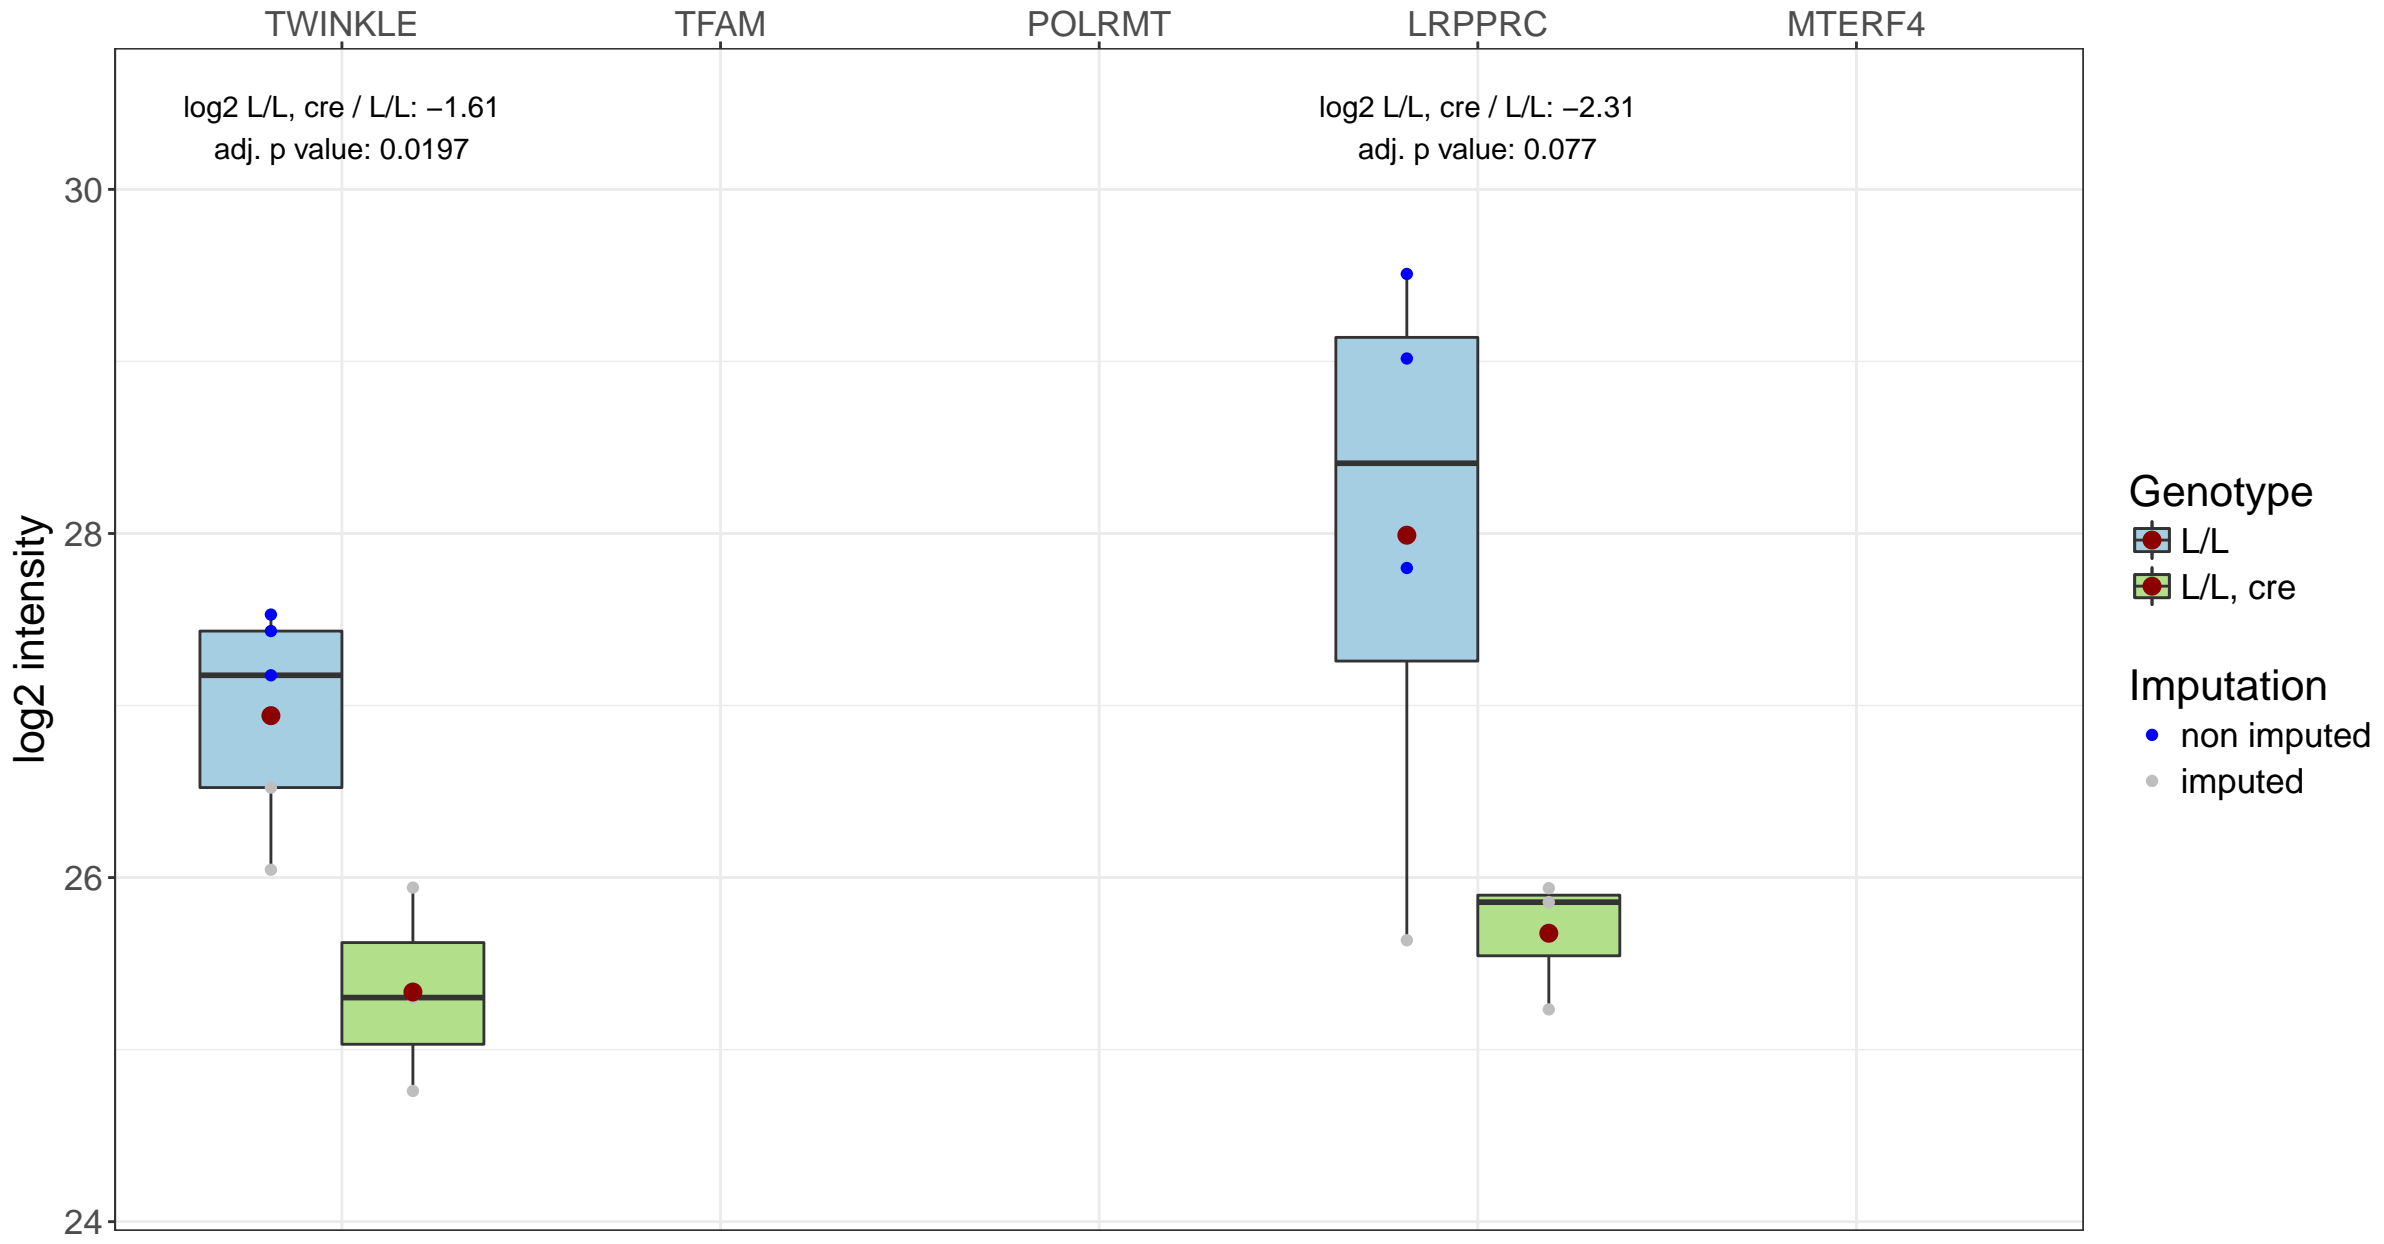

# NDUFC2 / Q9CQ54

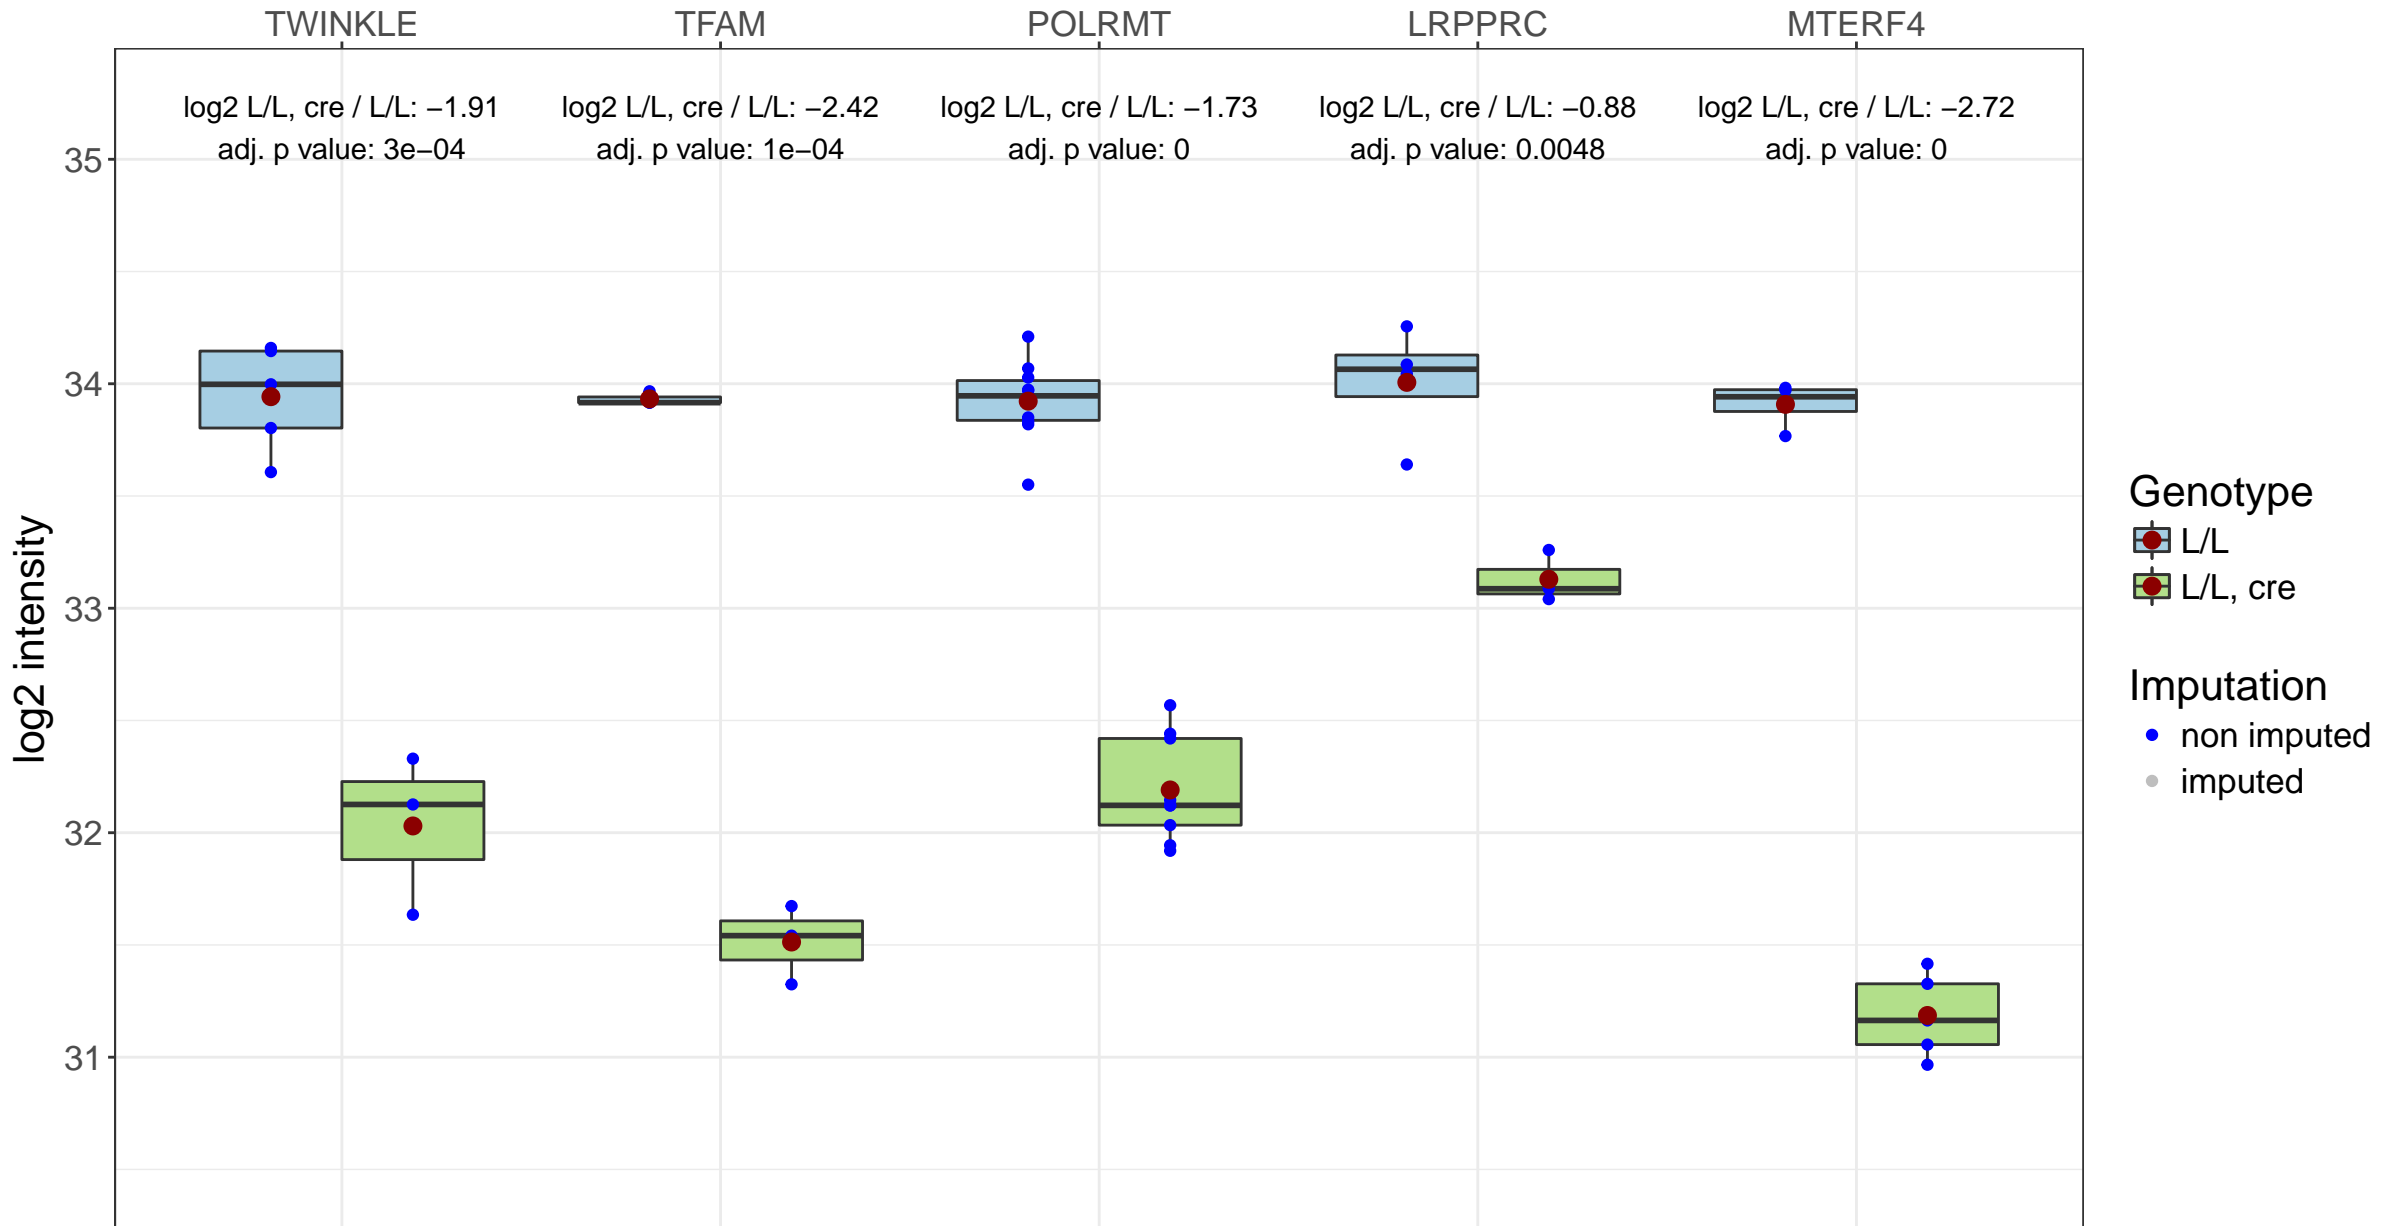

# NDUFS1 / Q91VD9

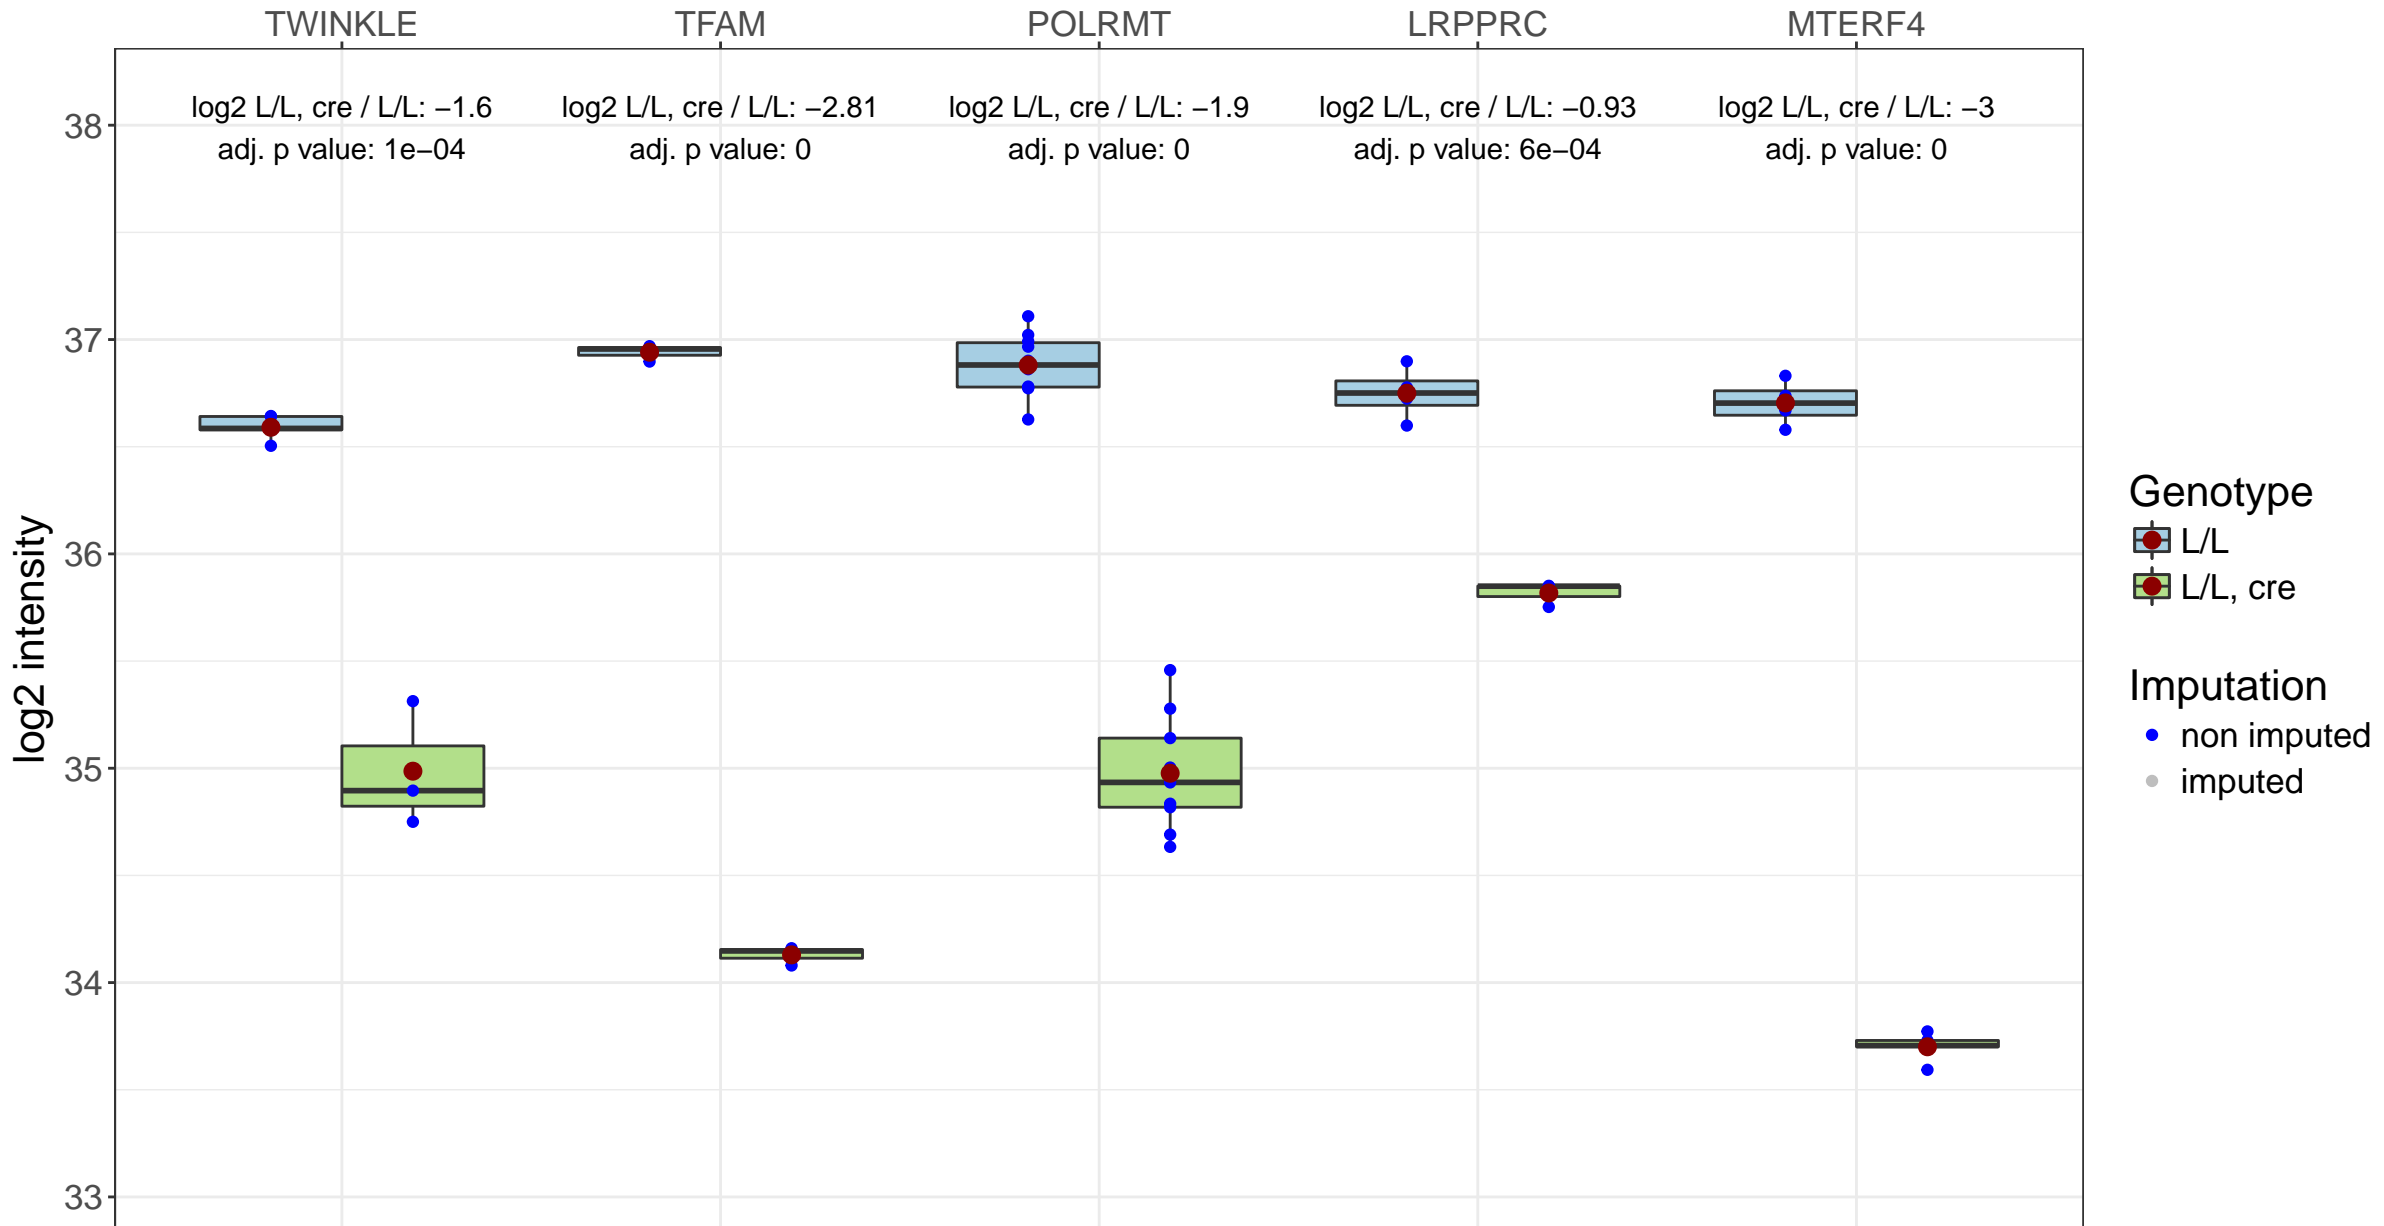



# NDUFS2 / Q91WD5

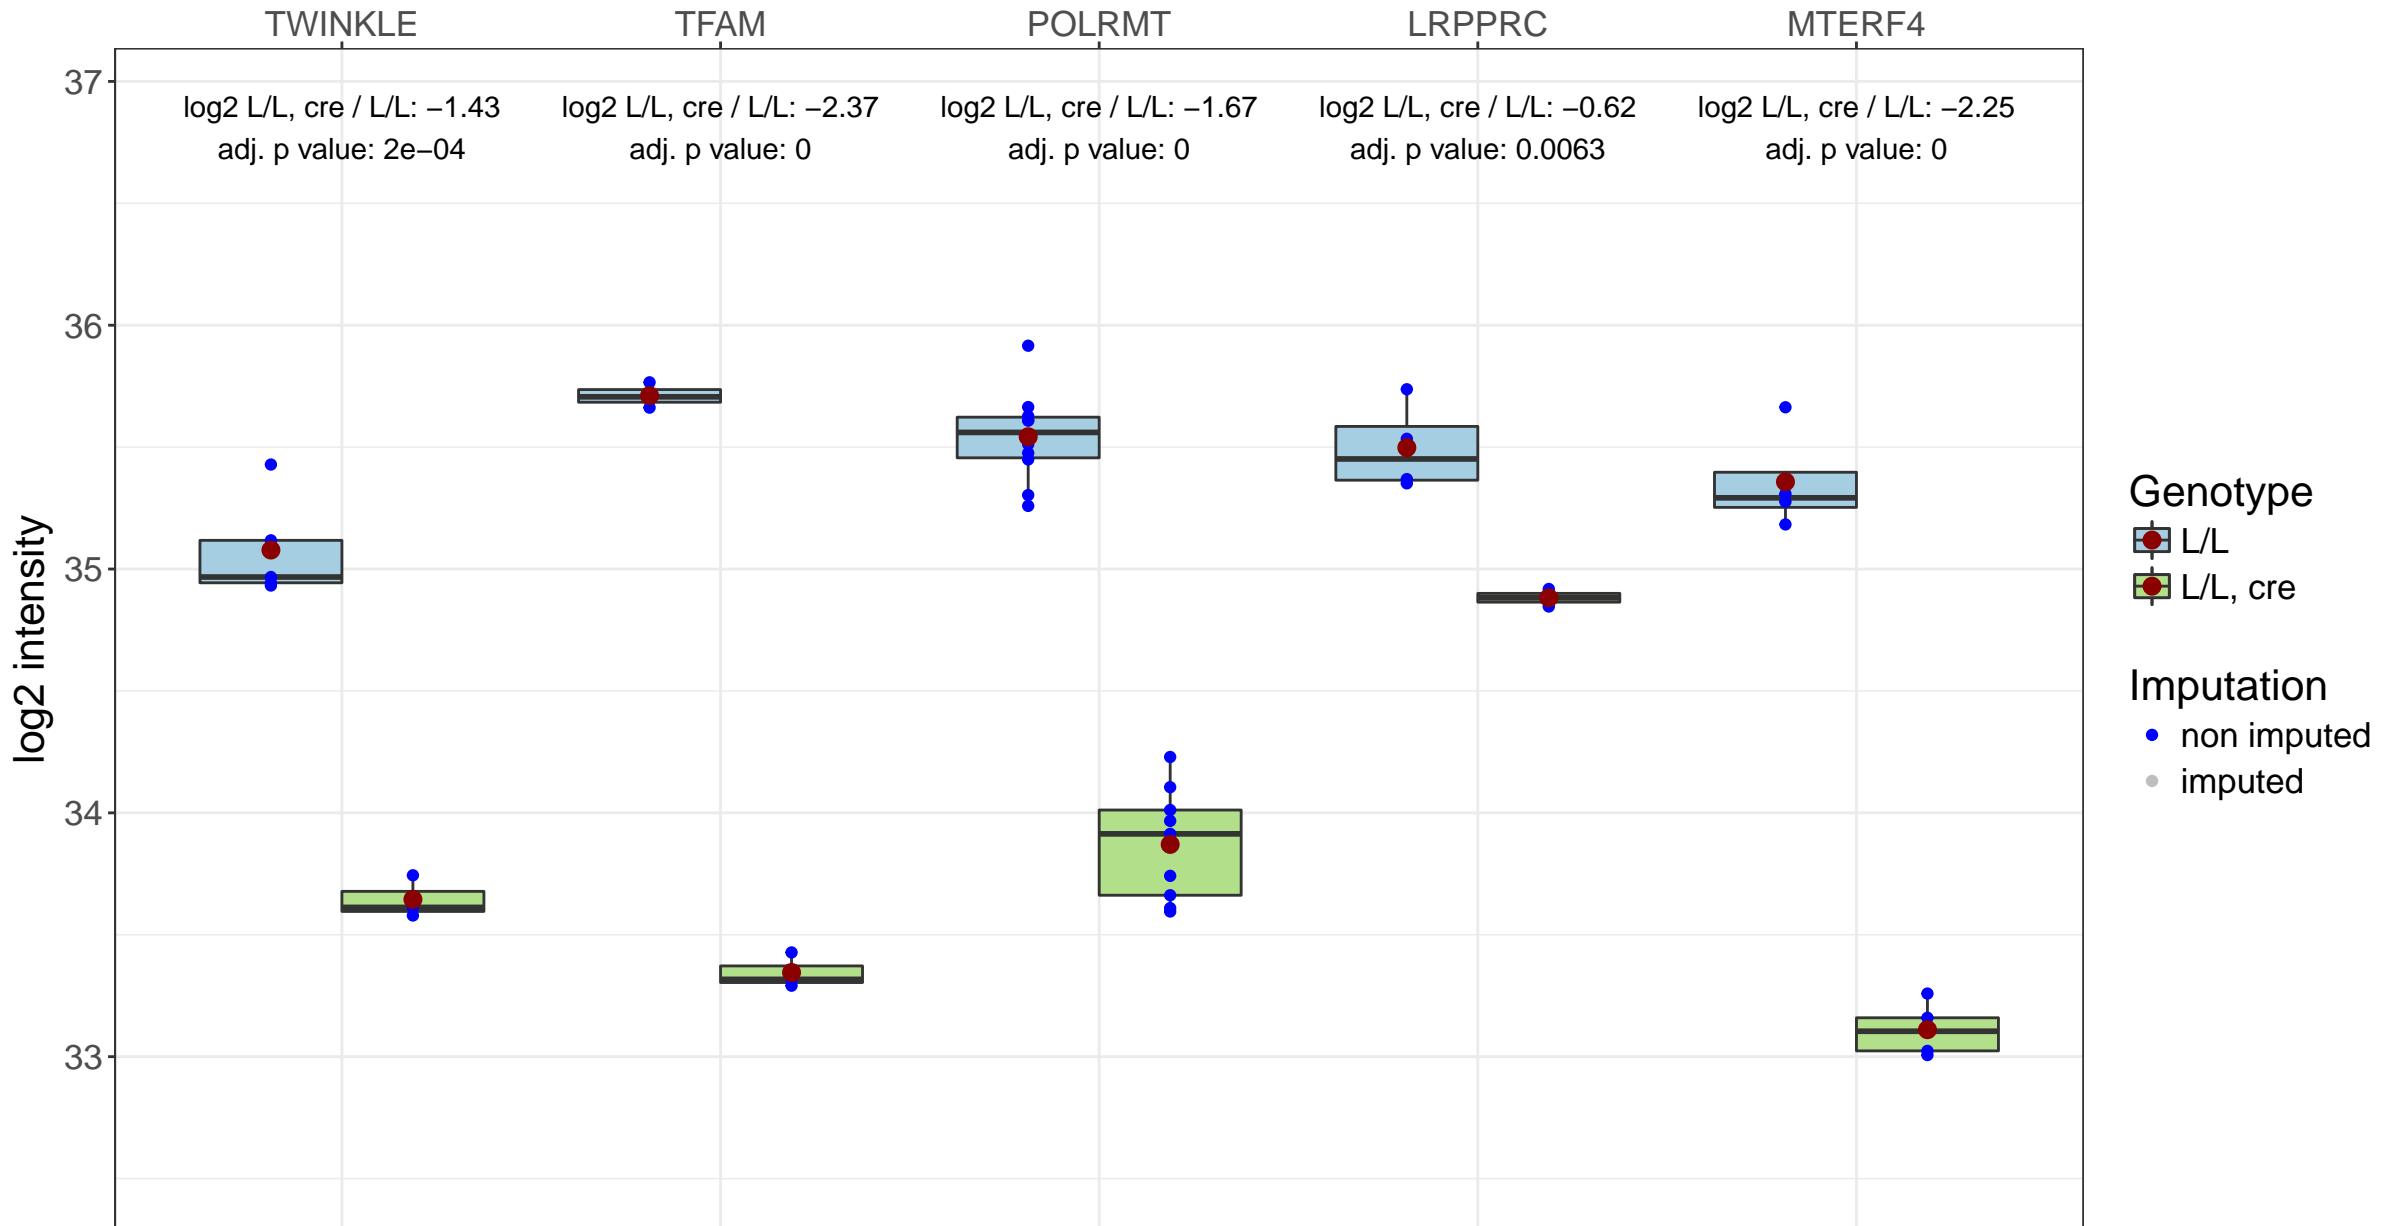

# NDUFS3 / Q9DCT2

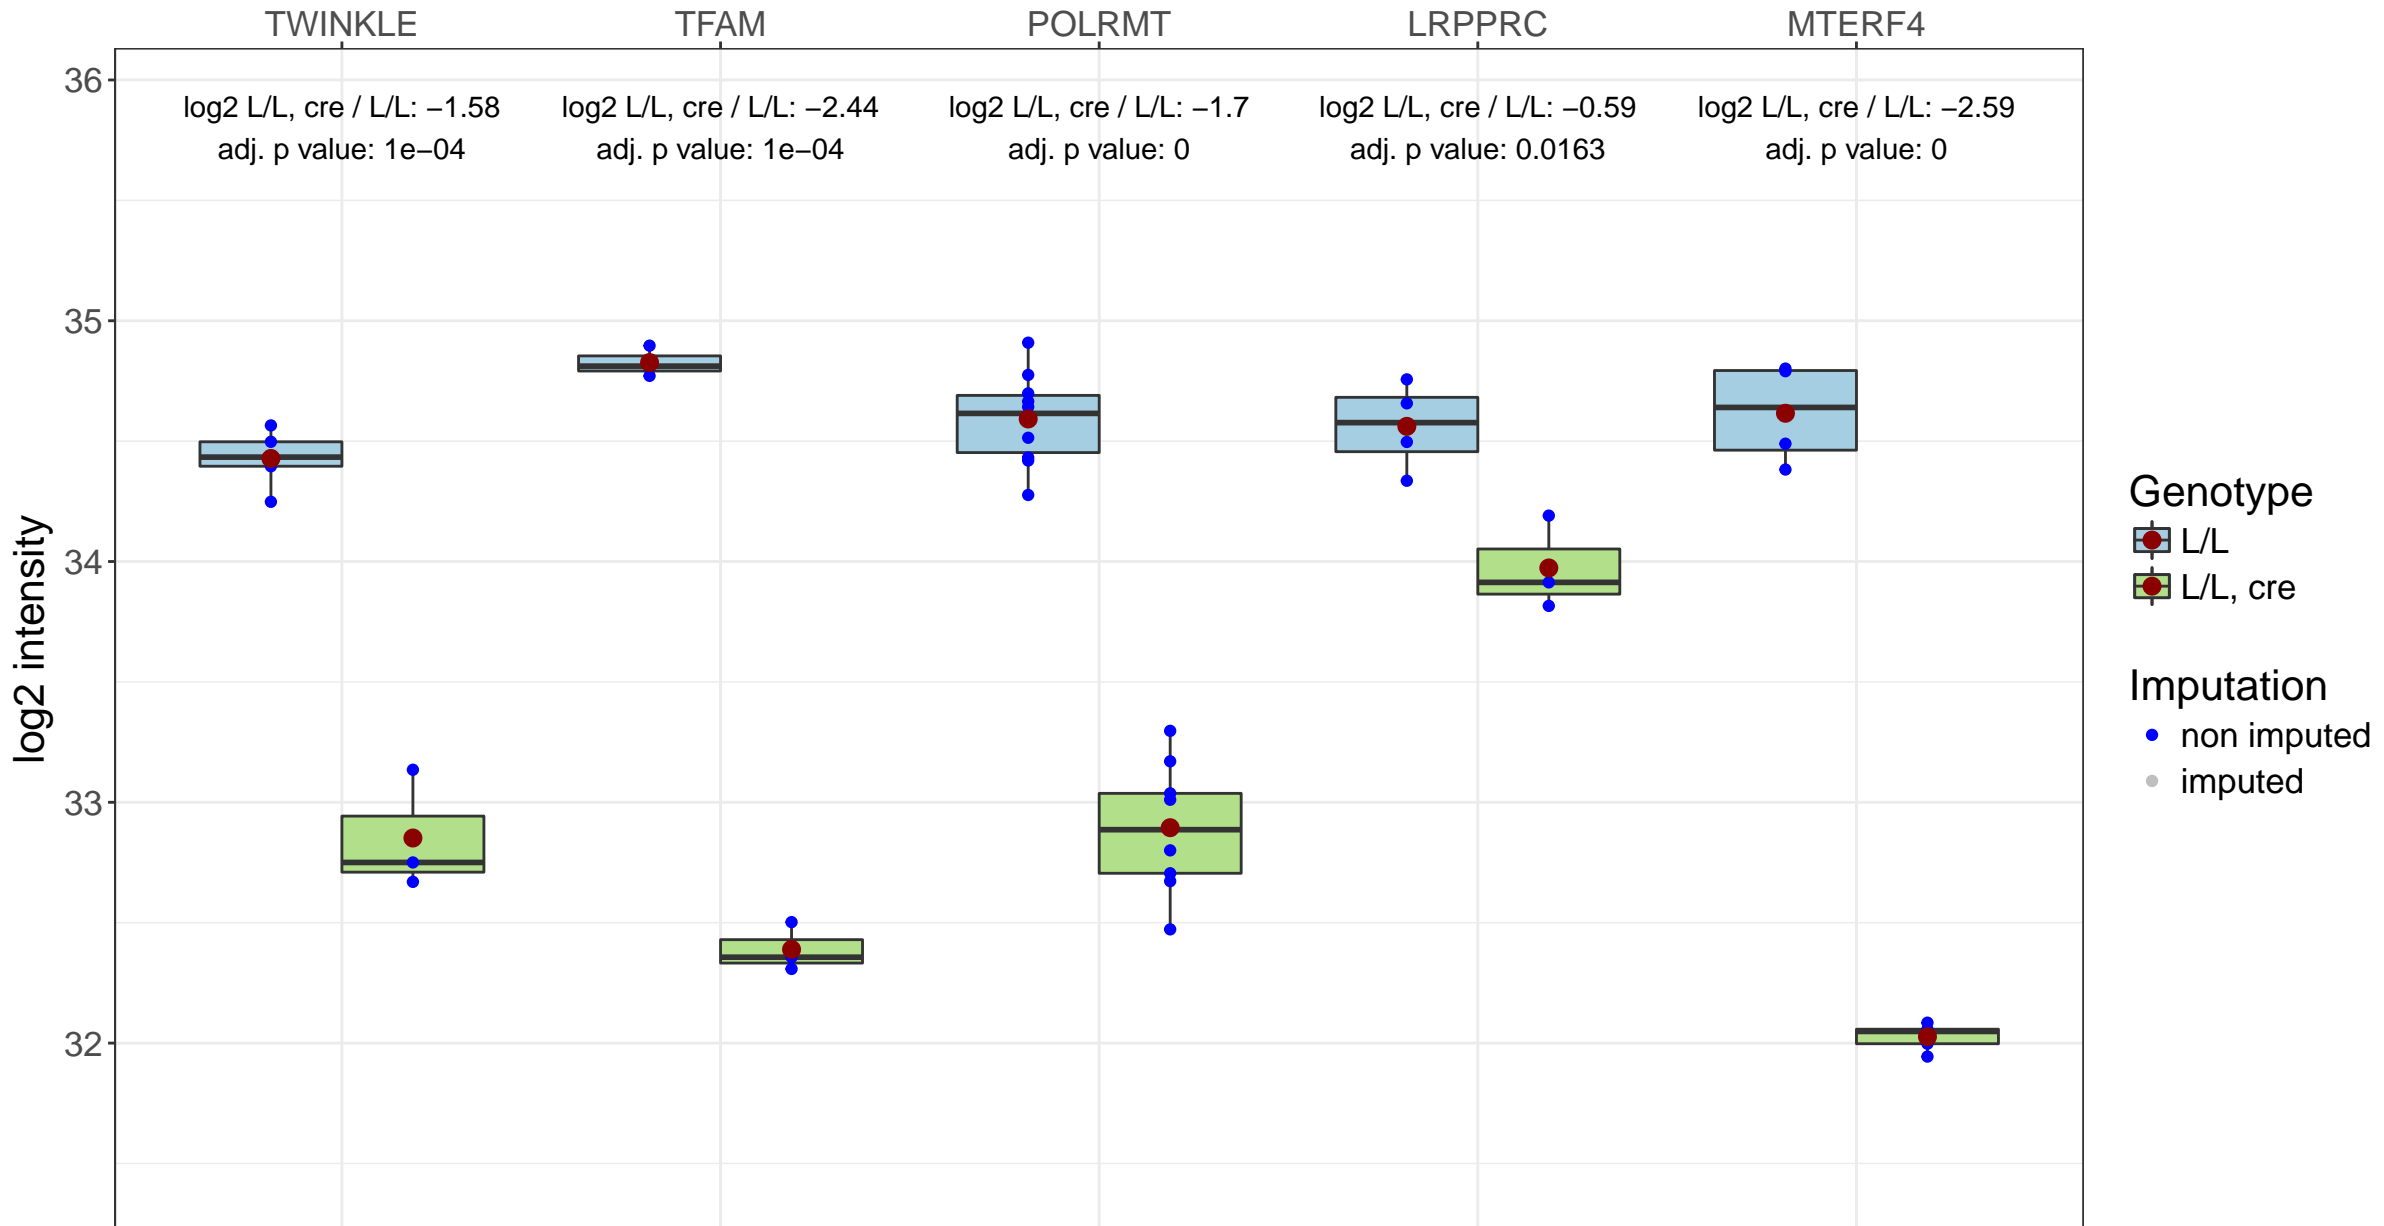

# NDUFS4 / E9QPX3

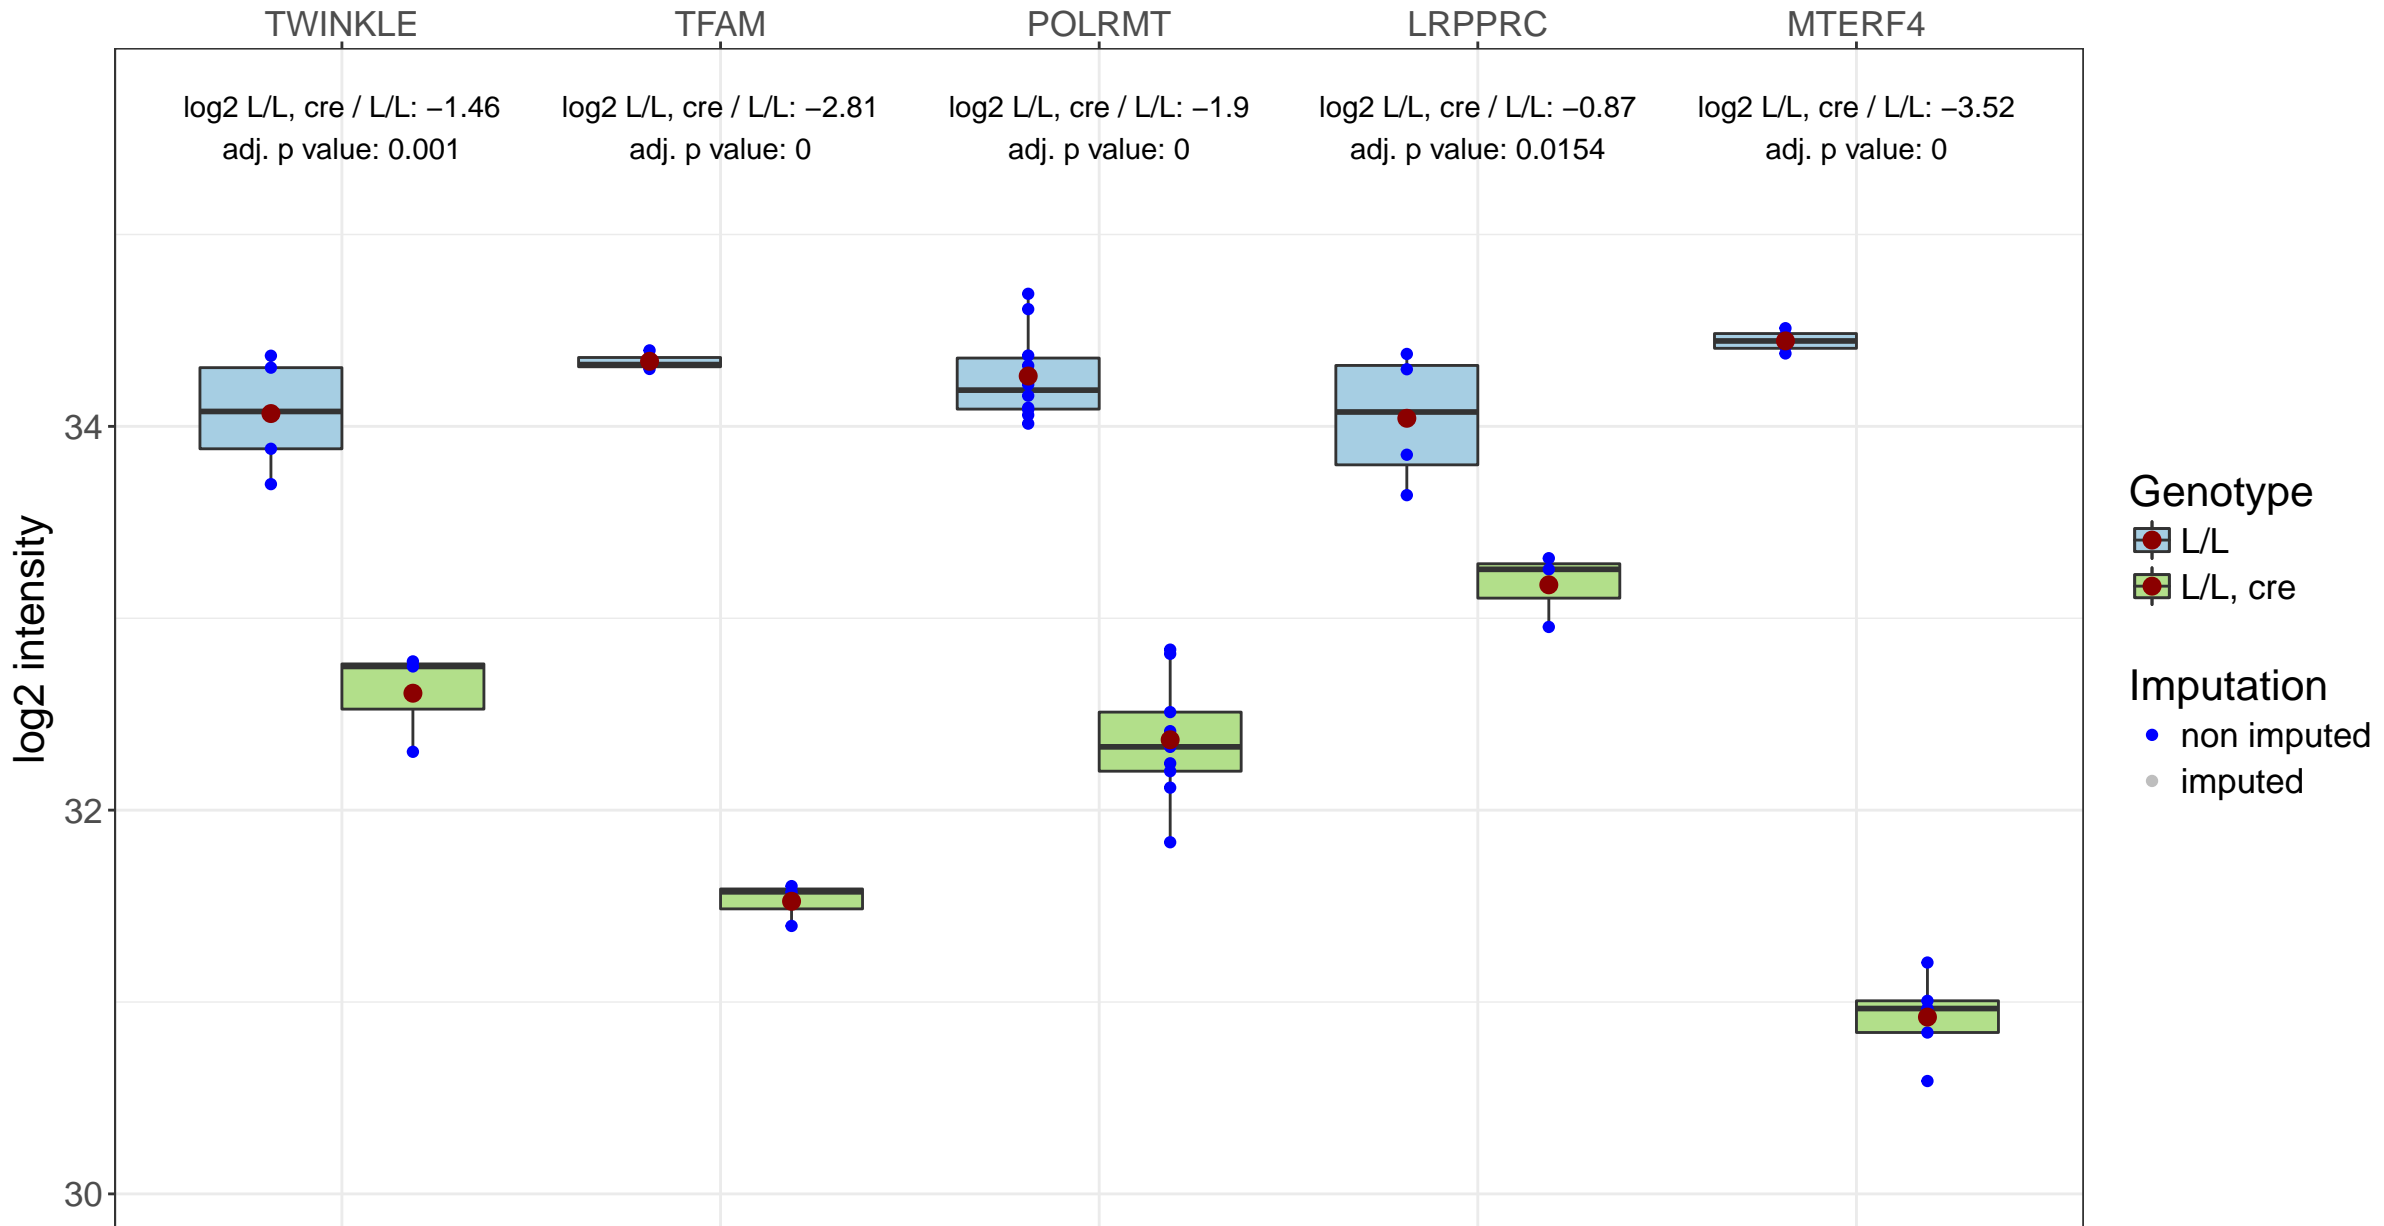

# NDUFS5 / Q99LY9

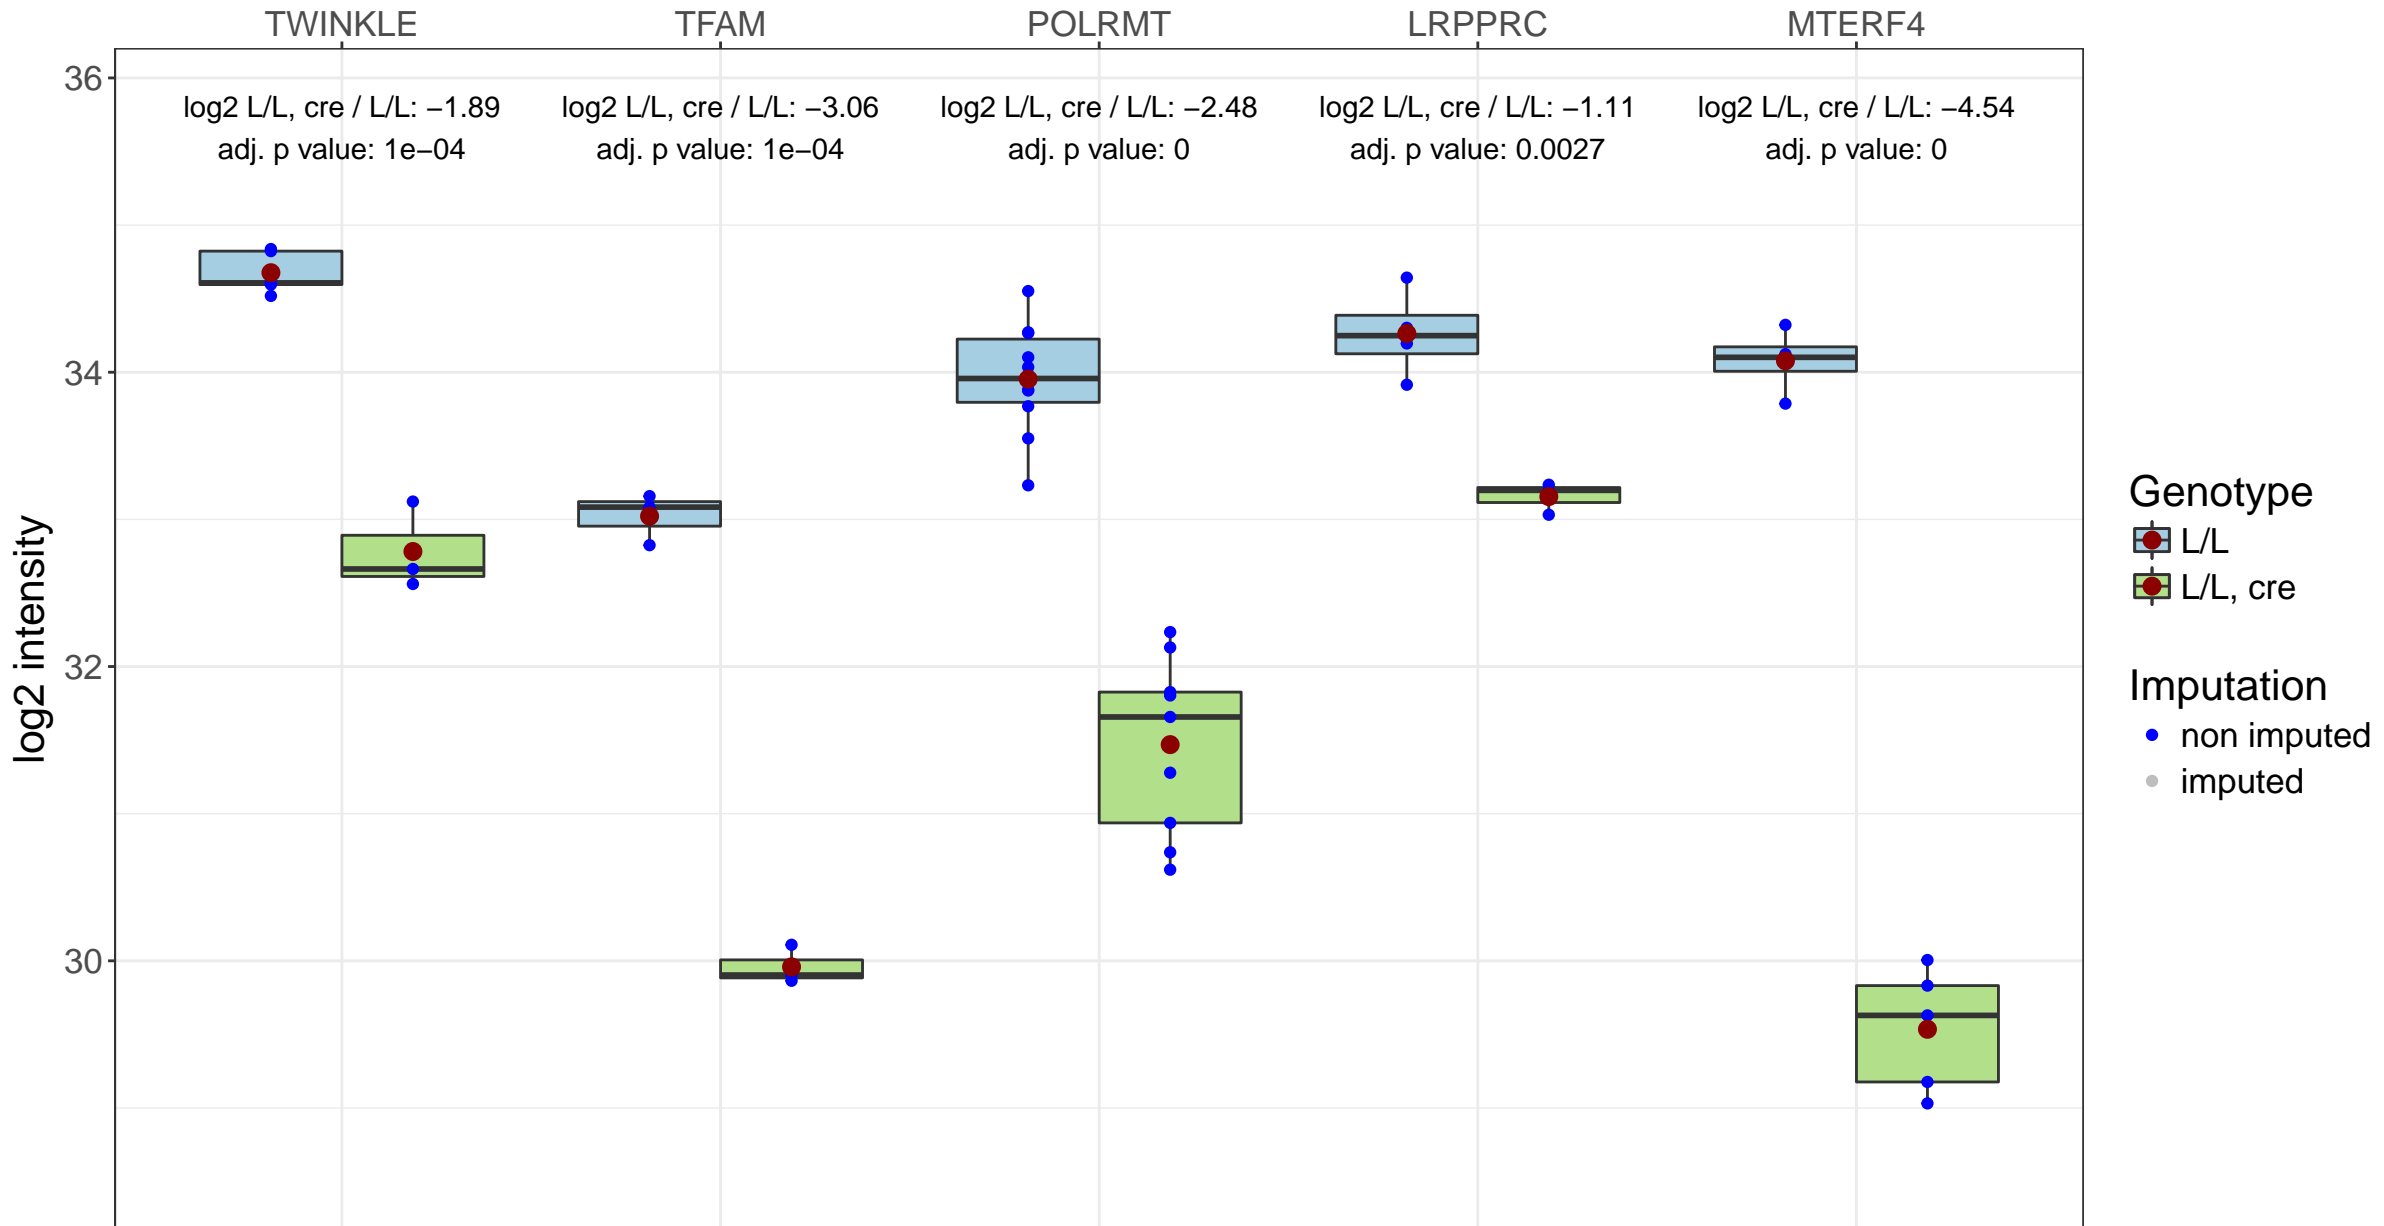

# NDUFS6 / P52503

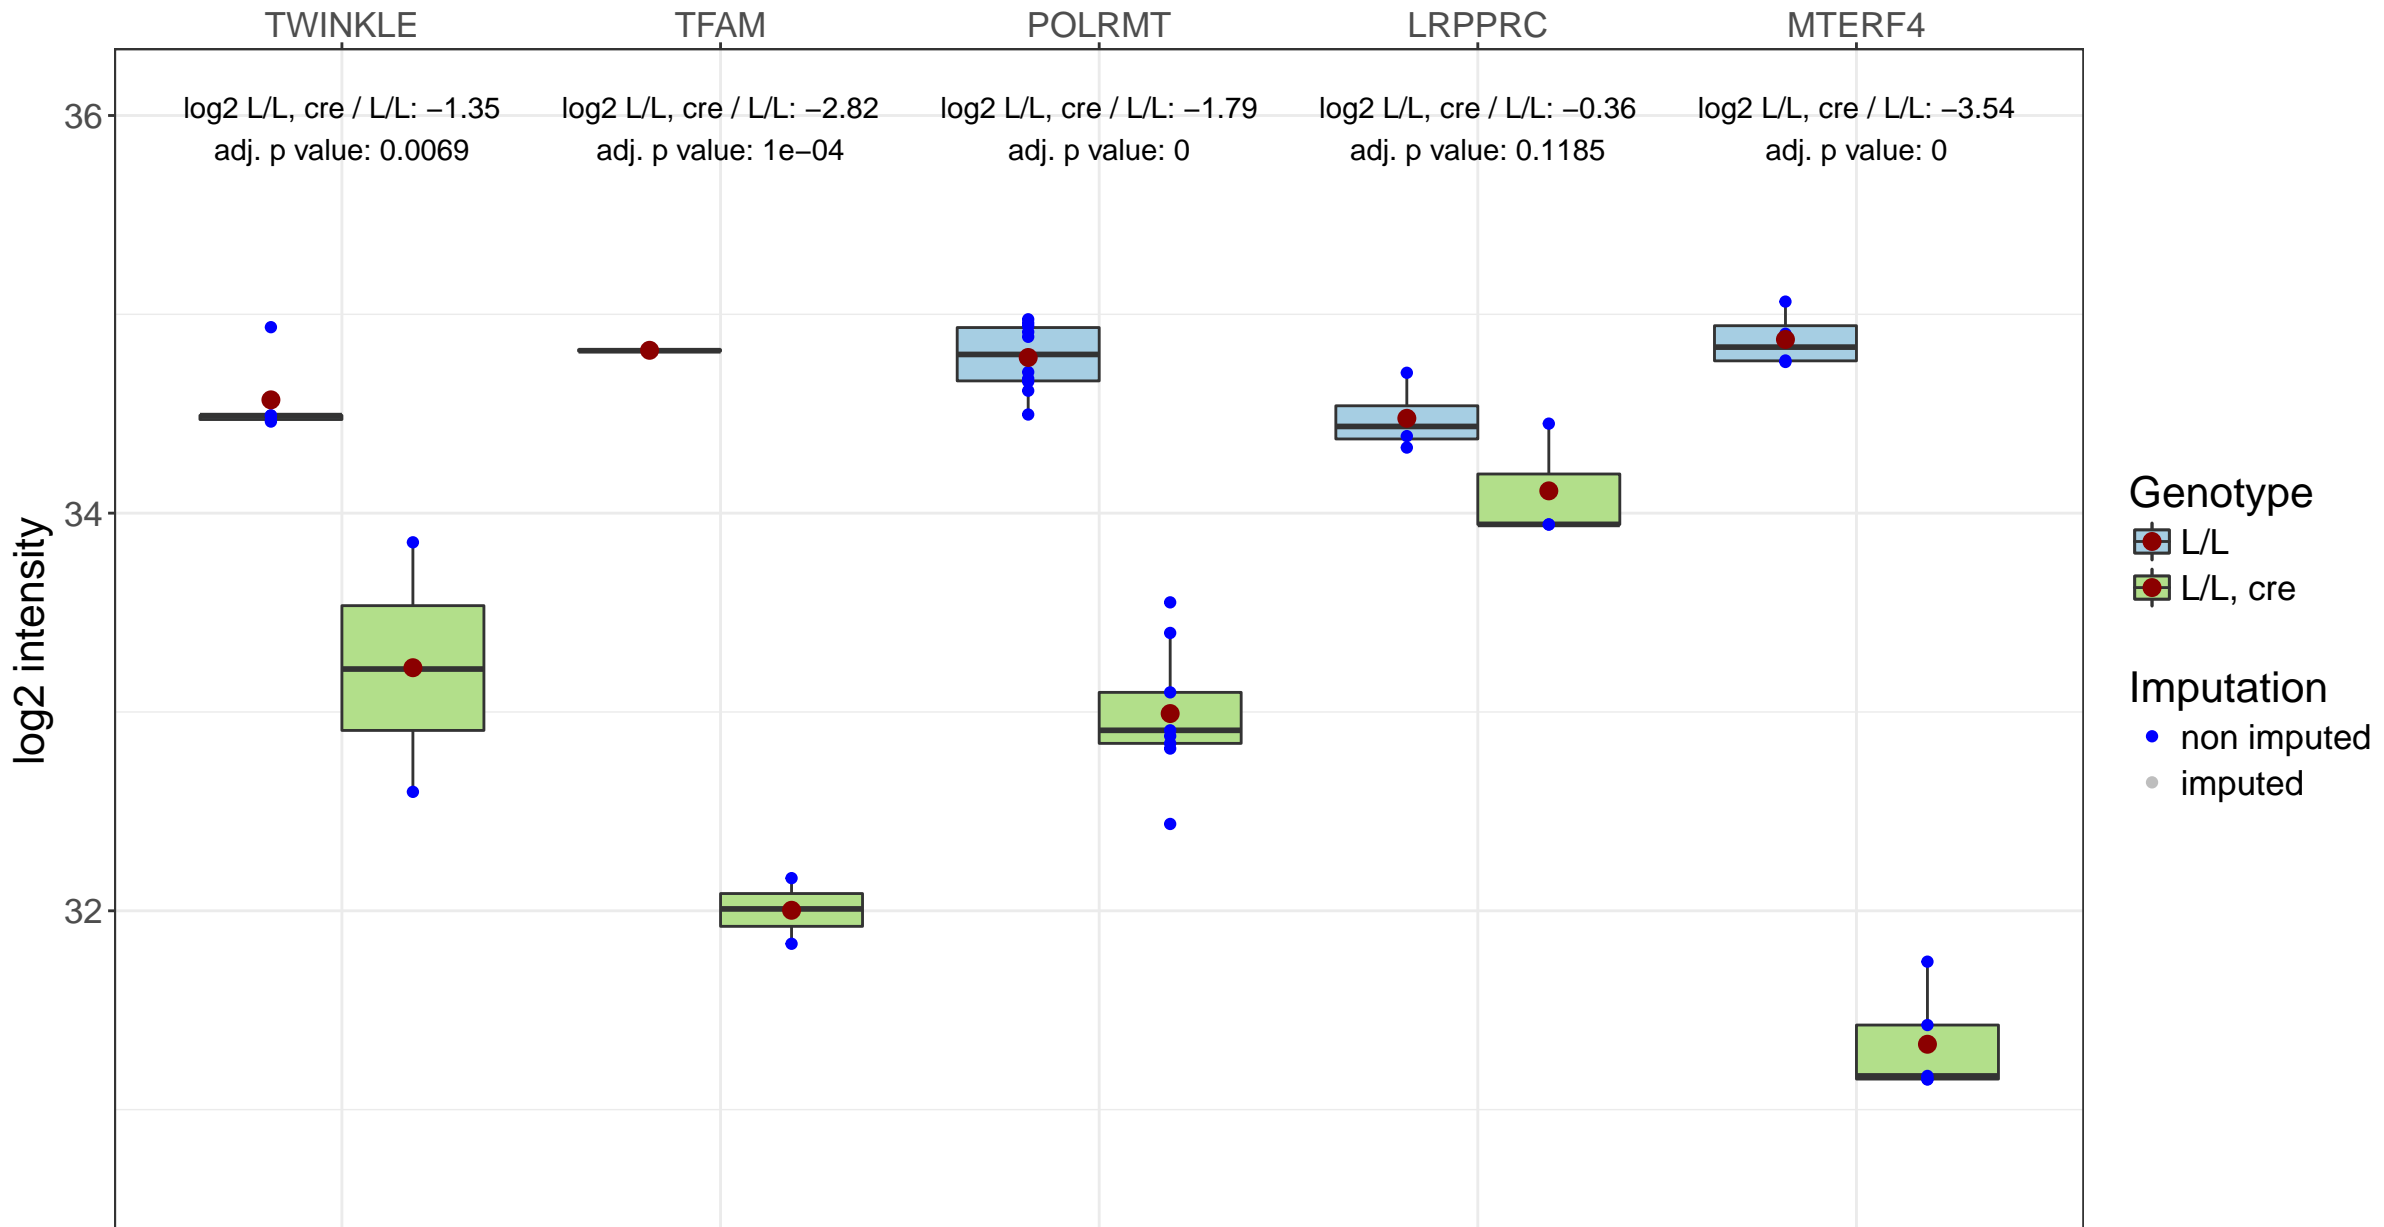

# NDUFS7 / Q9DC70

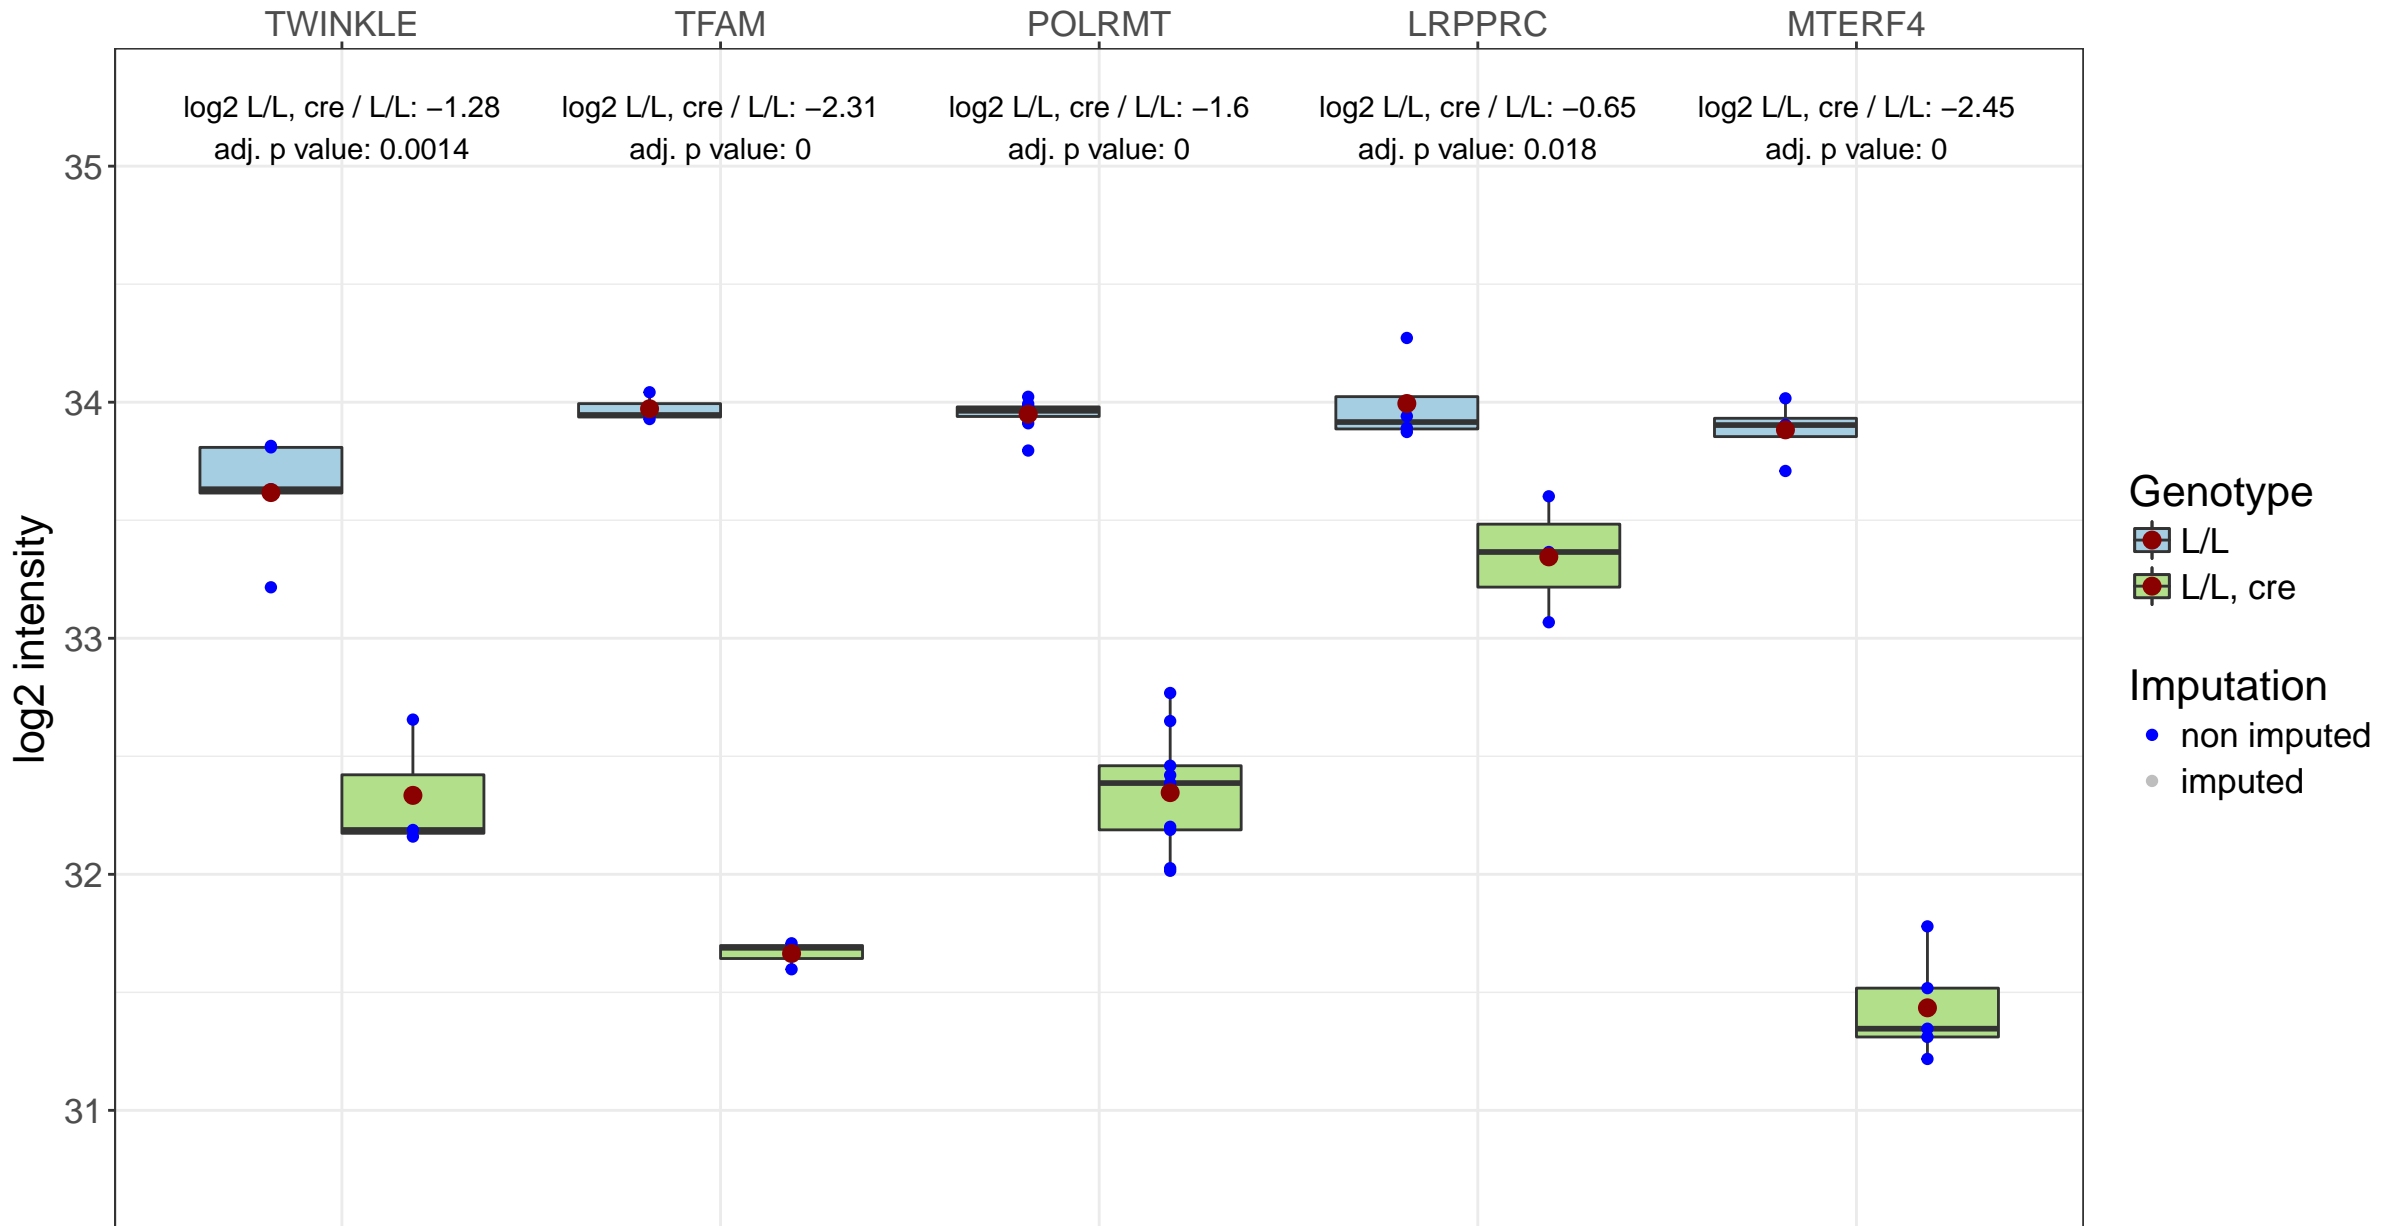

# NDUFS8 / Q8K3J1

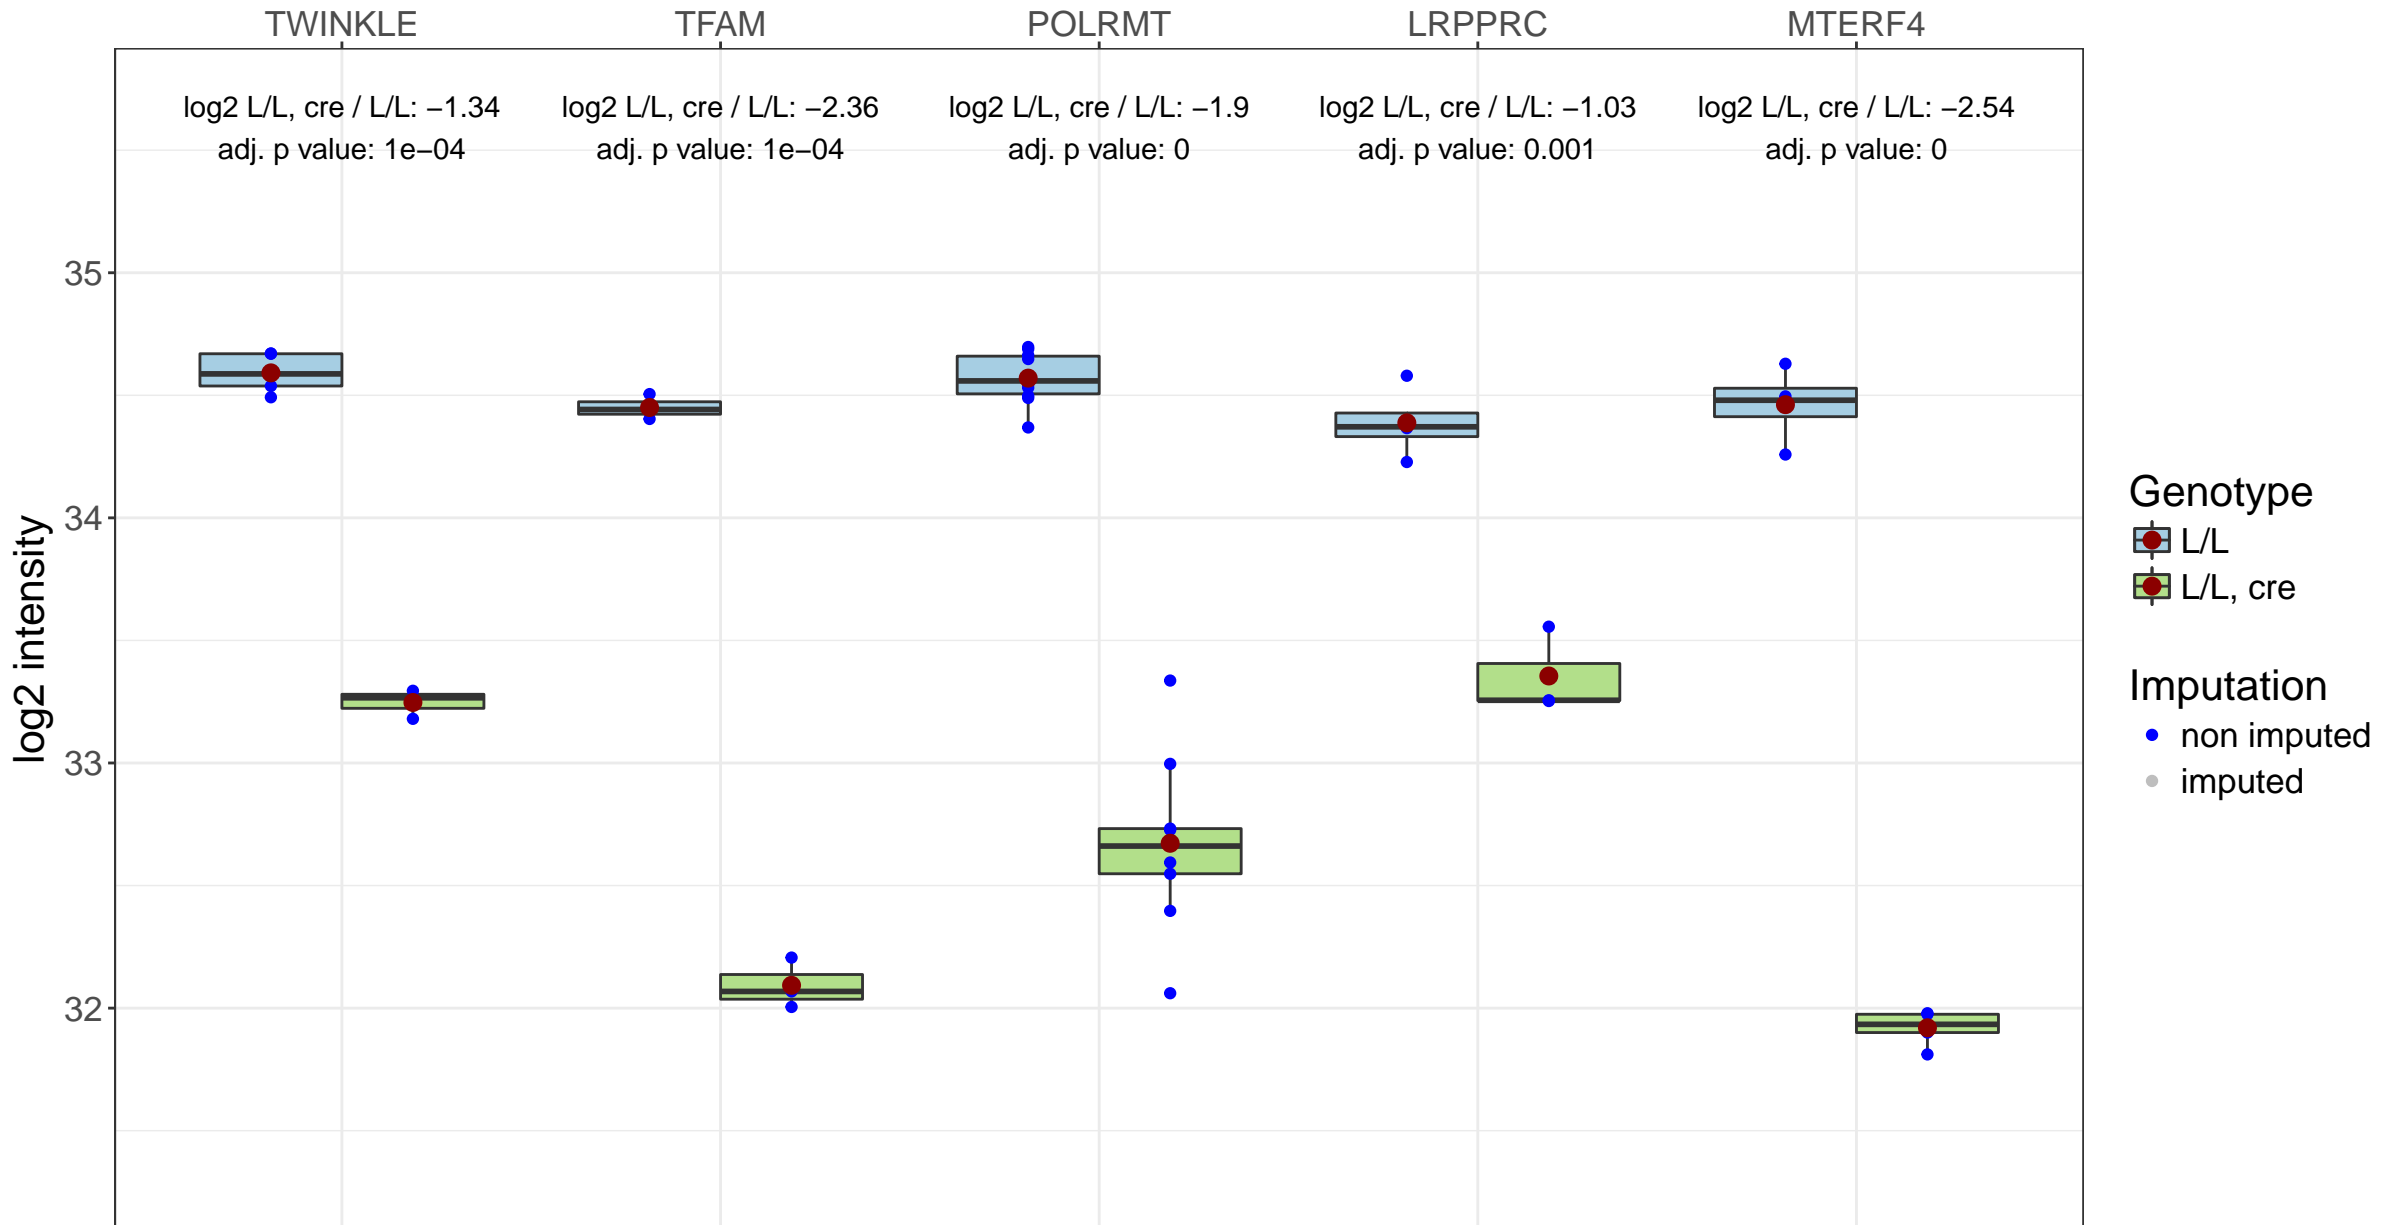

# NDUFV1 / D3YUM1

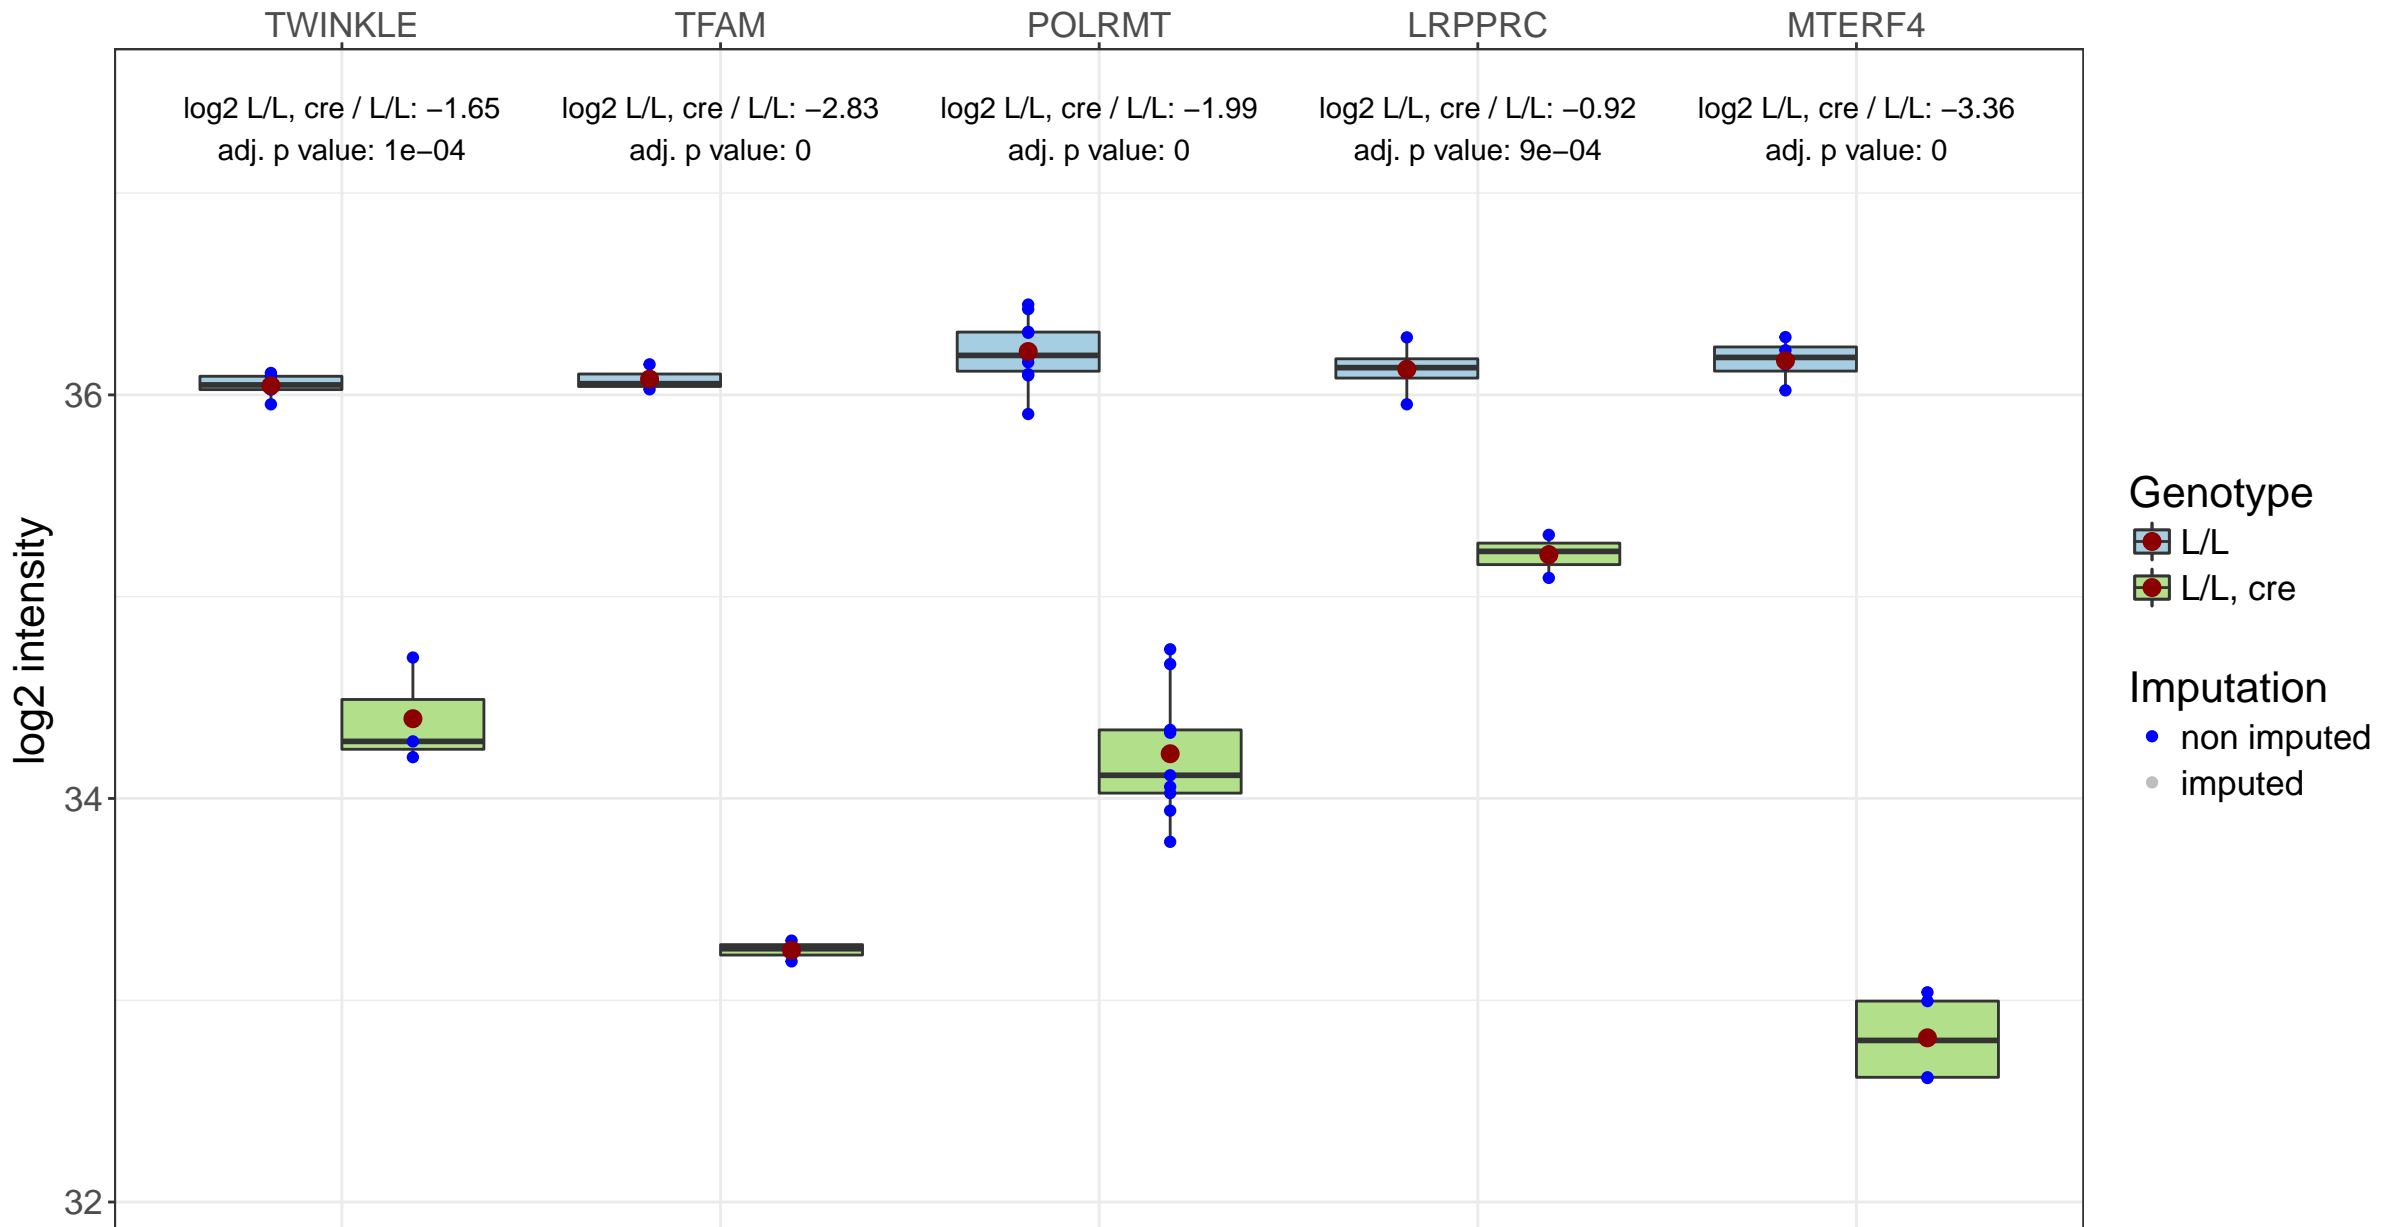



# NDUFV2 / Q9D6J6

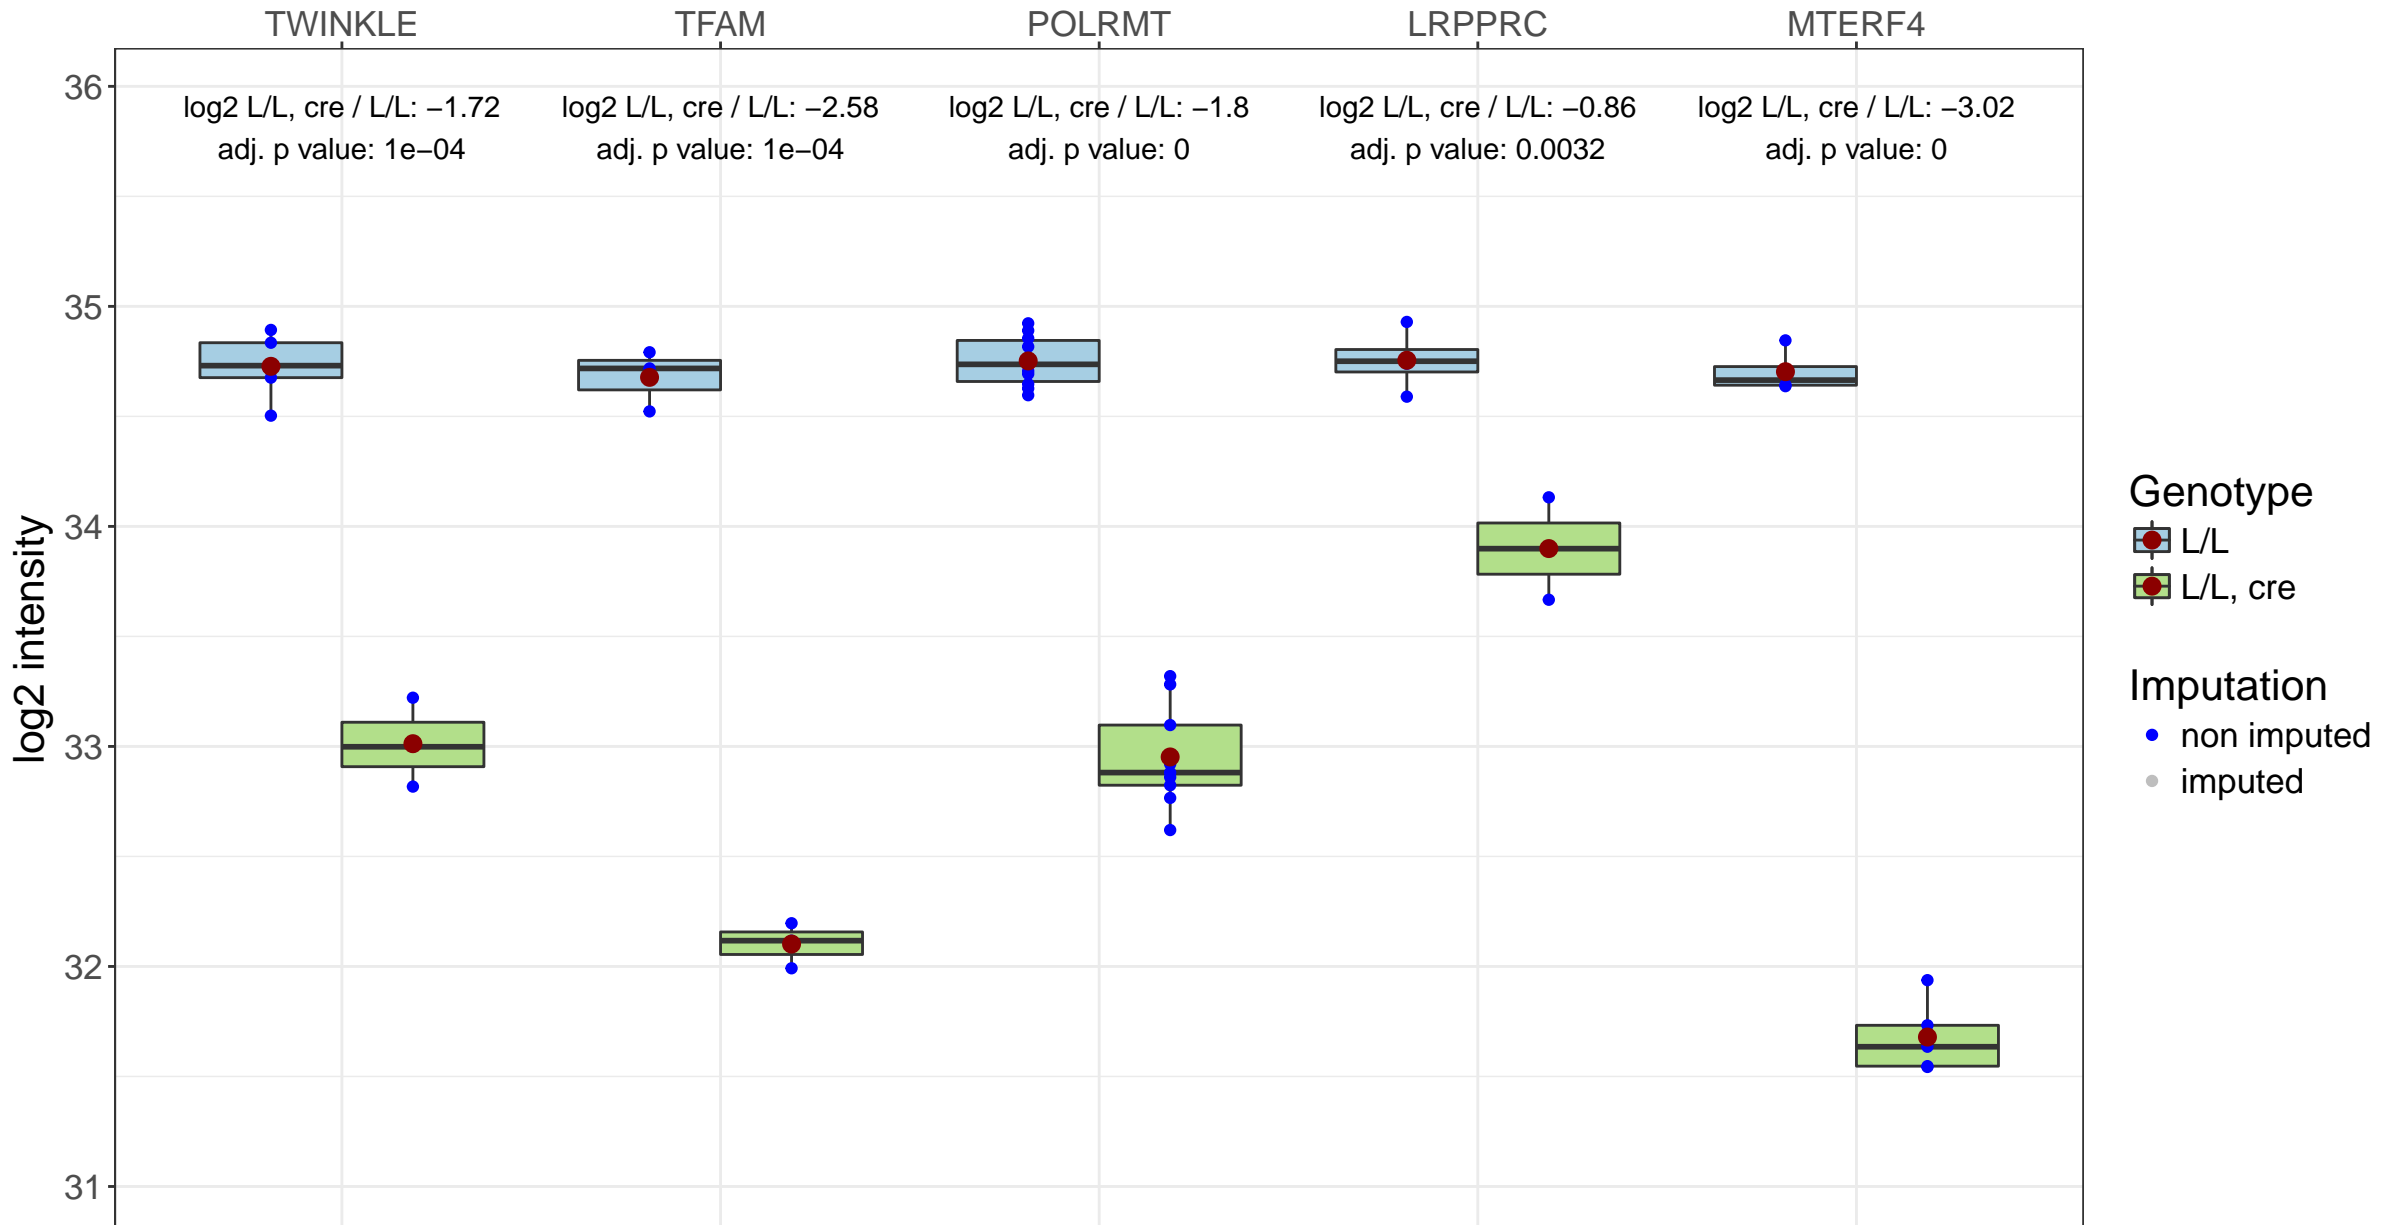

# NDUFV3 / Q3U422

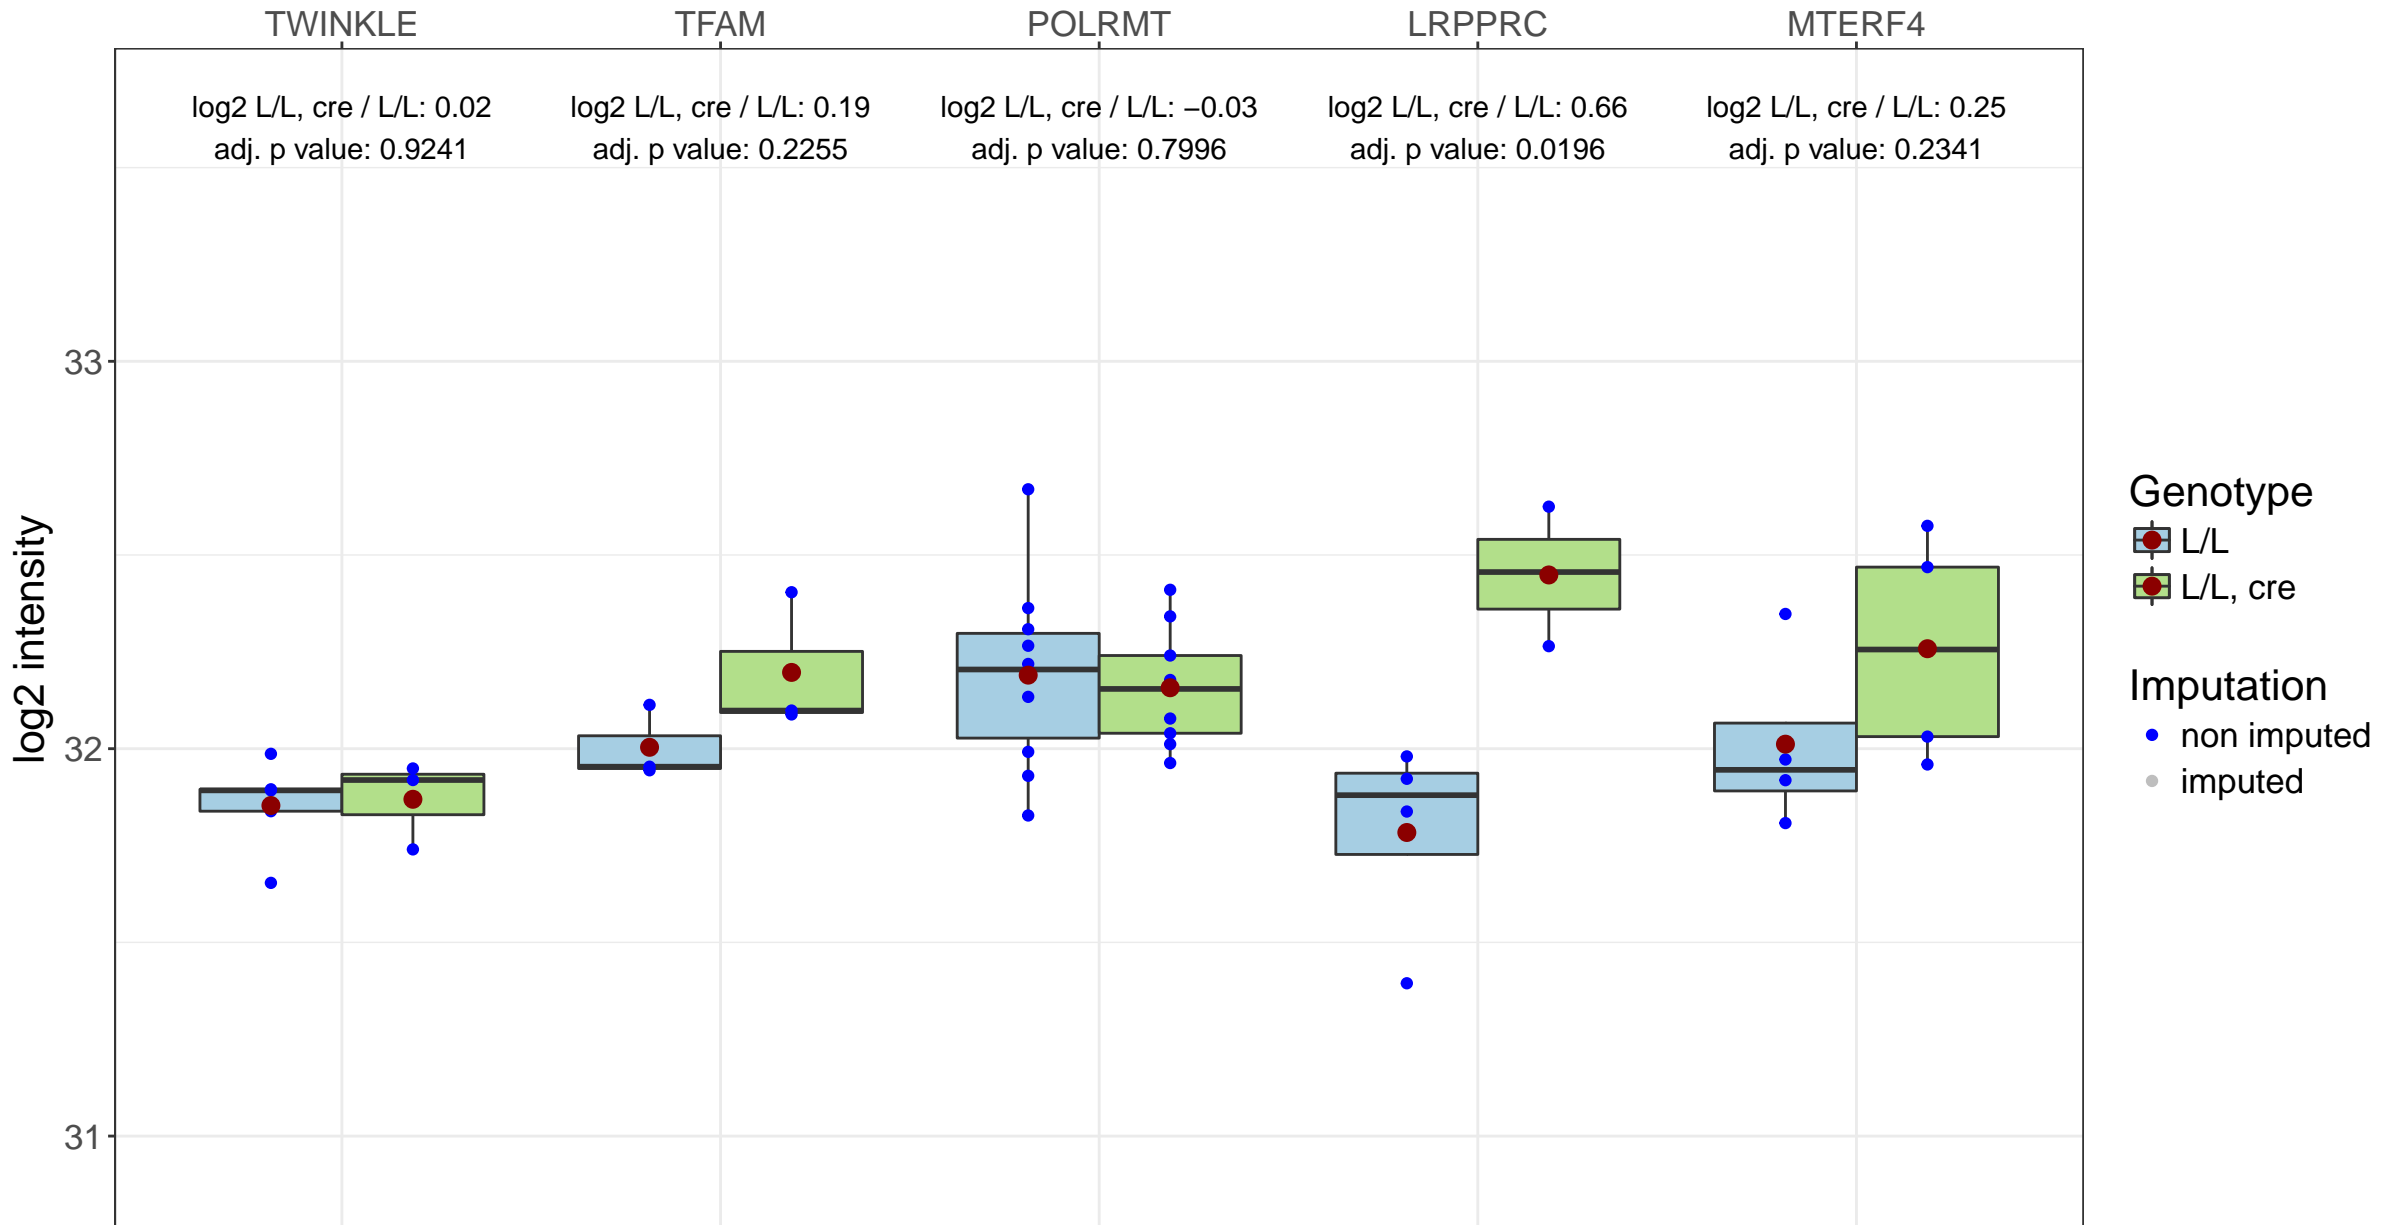

# NDUFV3 / Q8BK30

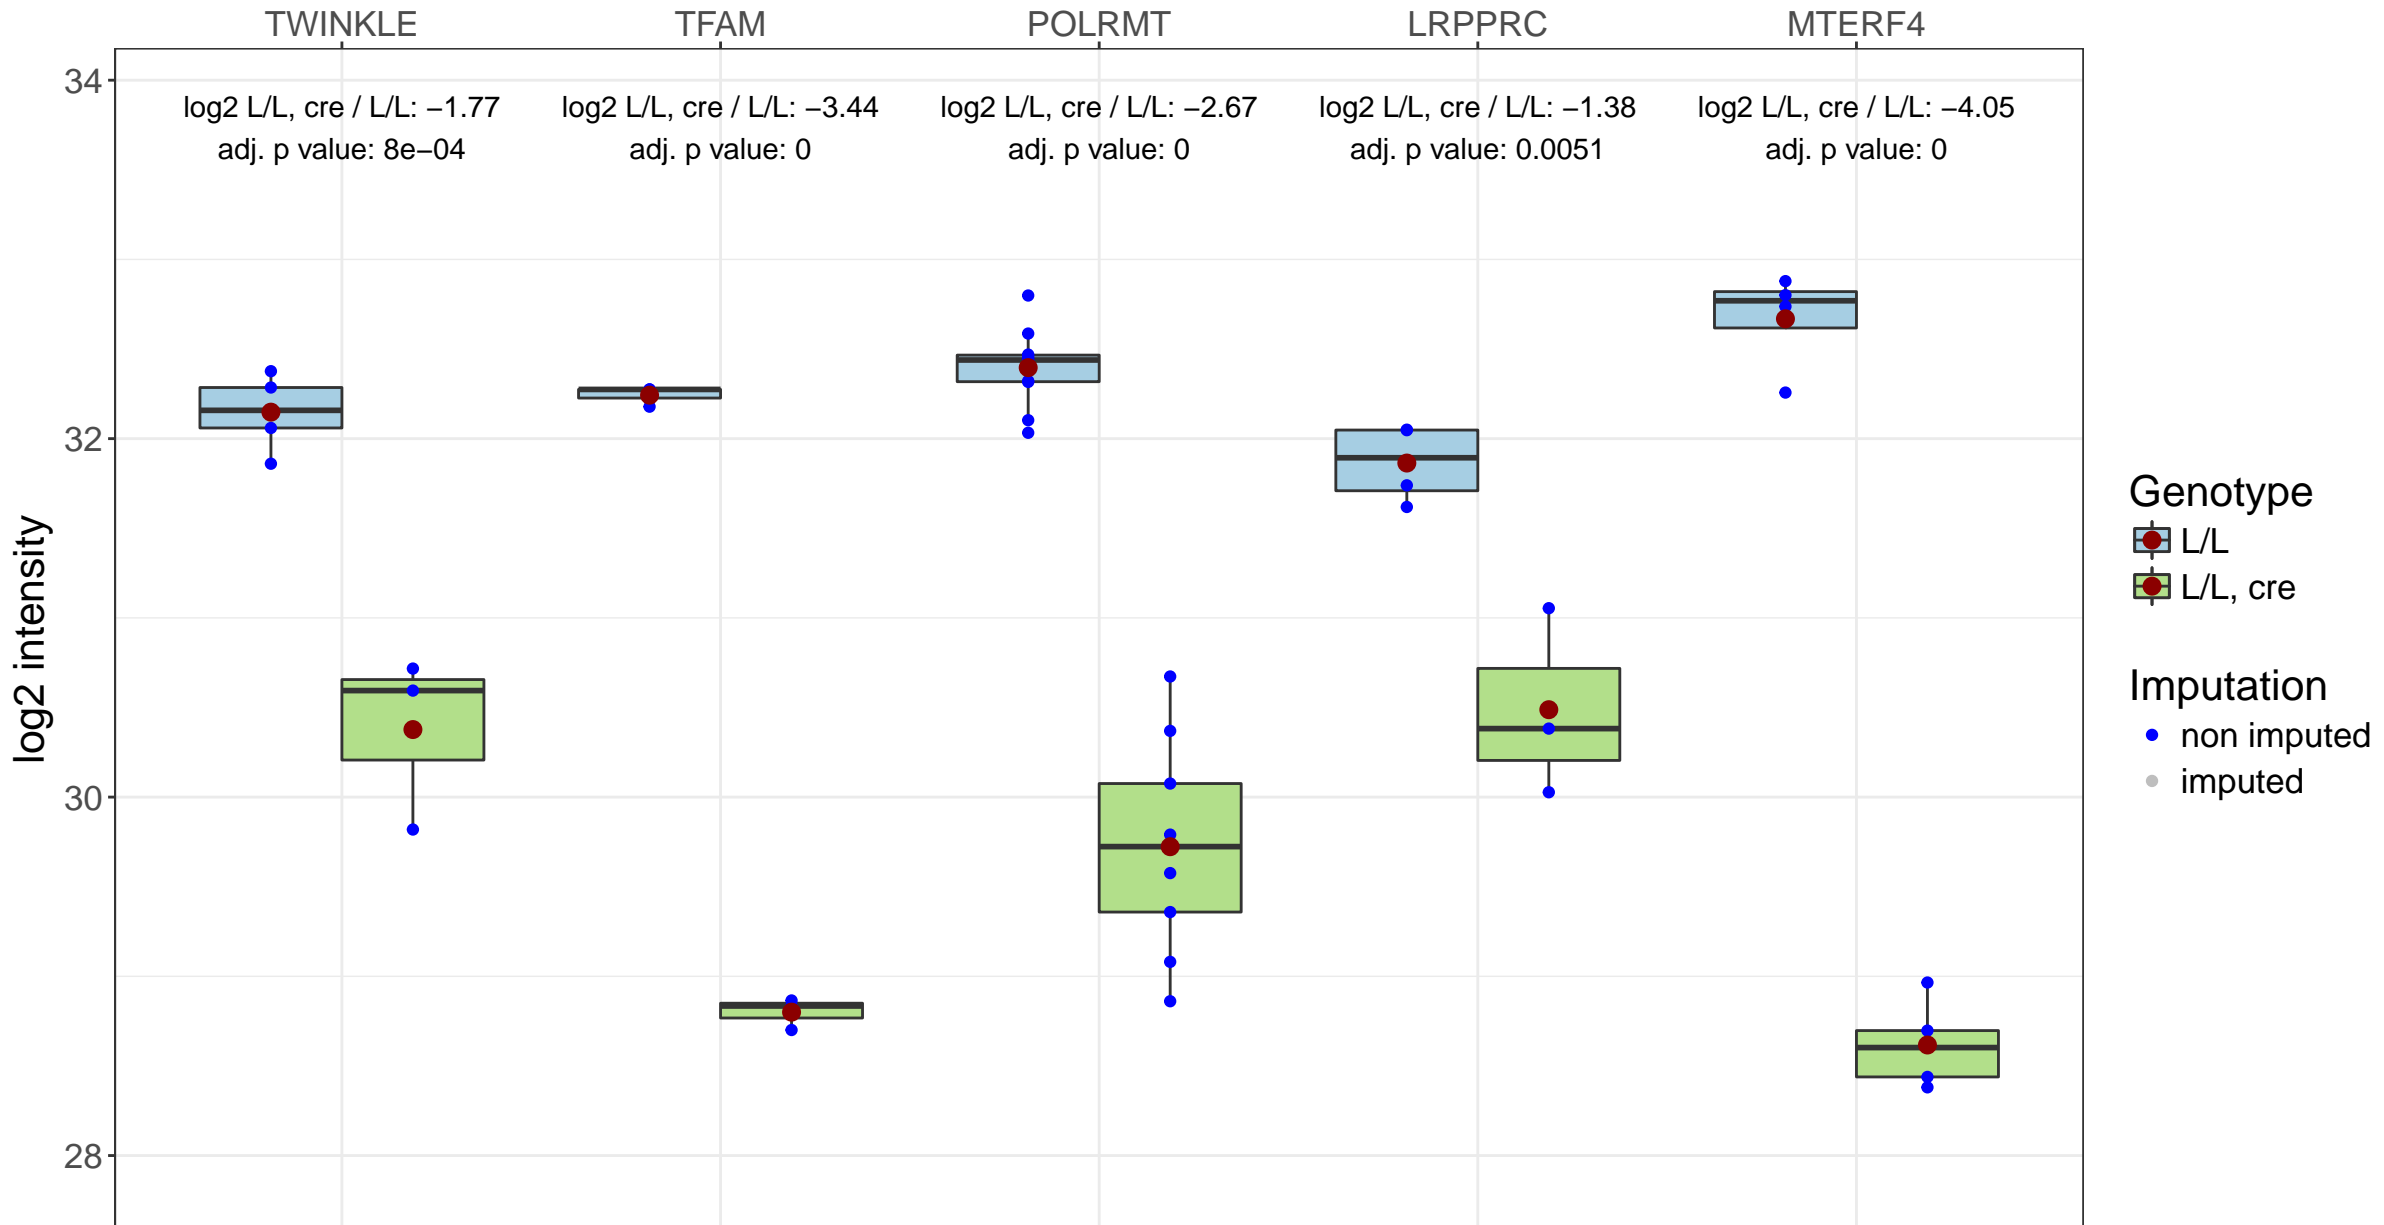

# NFS1 / Q9Z1J3-2

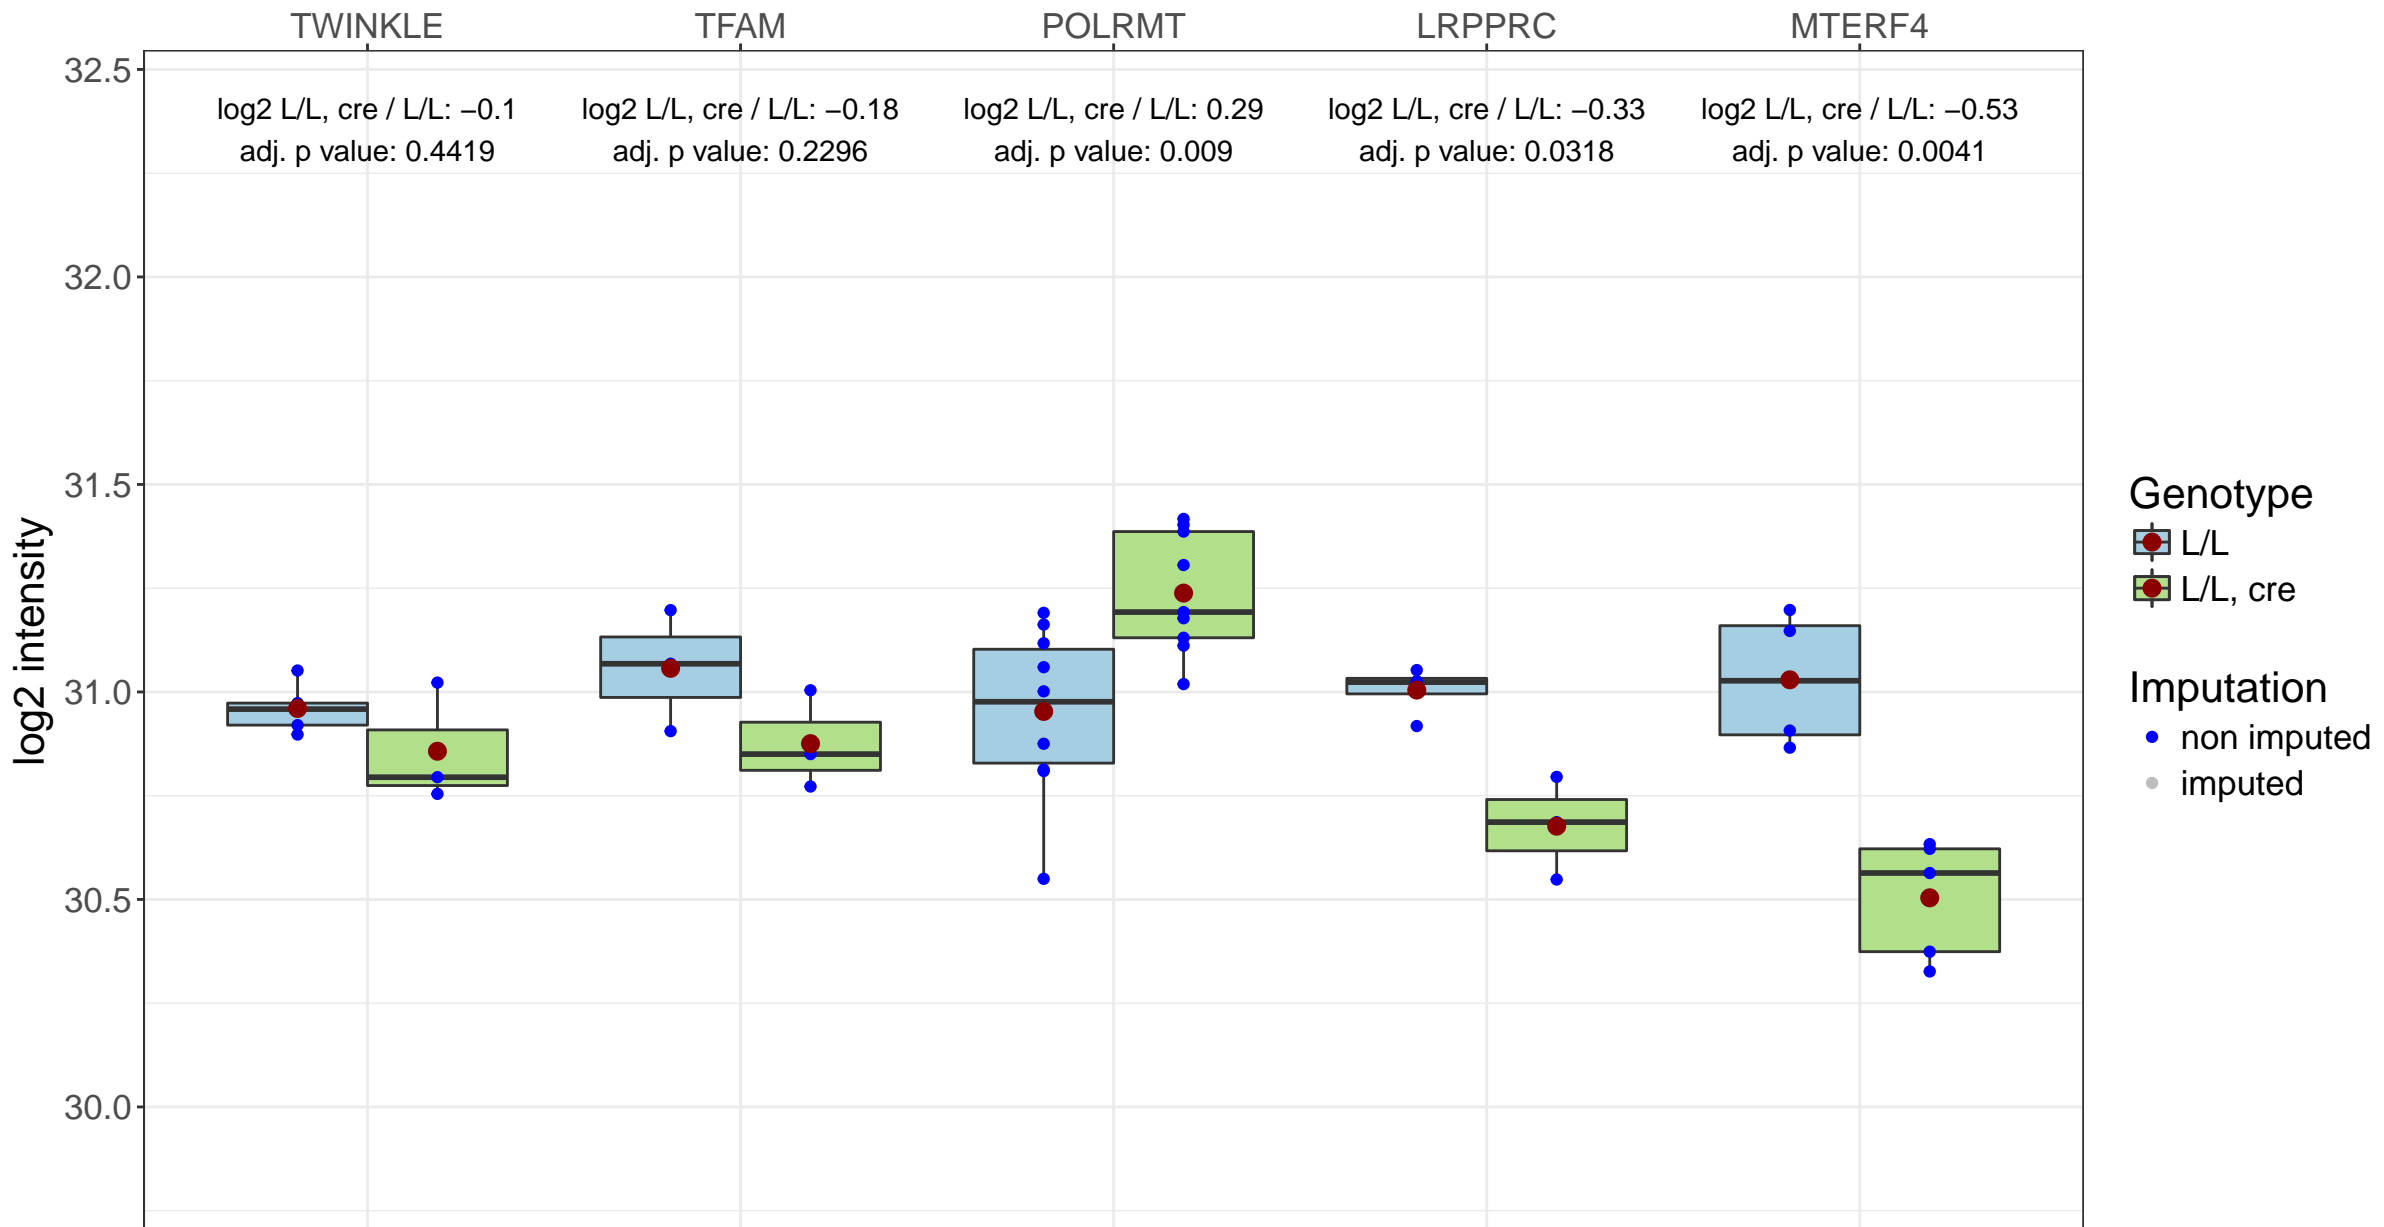

# NFU1 / D3Z285

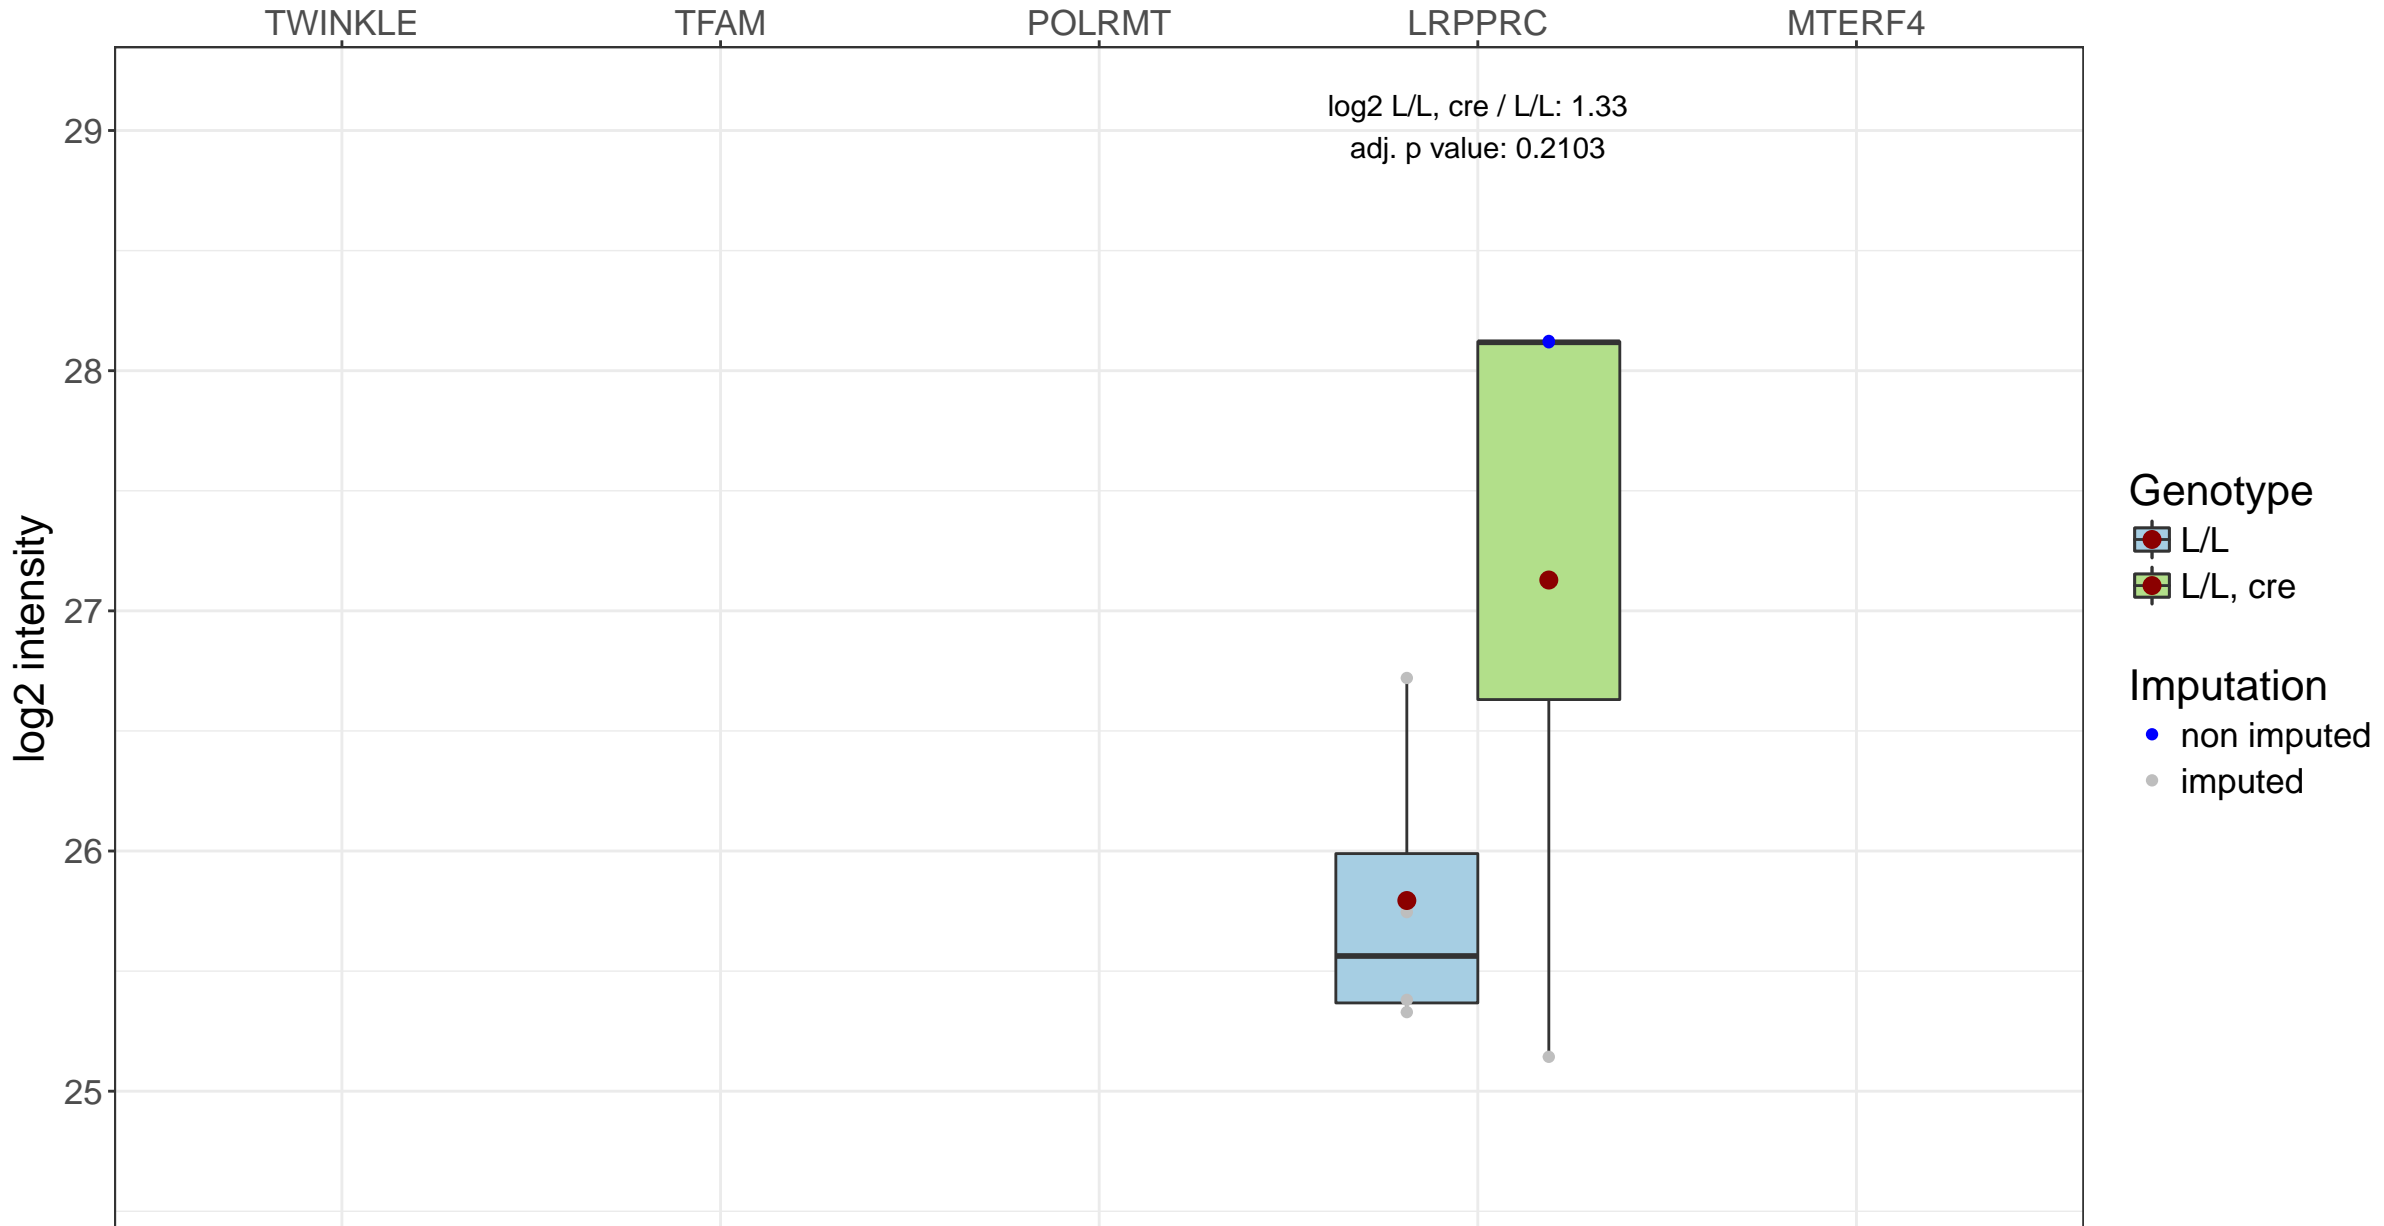

# NFU1 / Q9QZ23

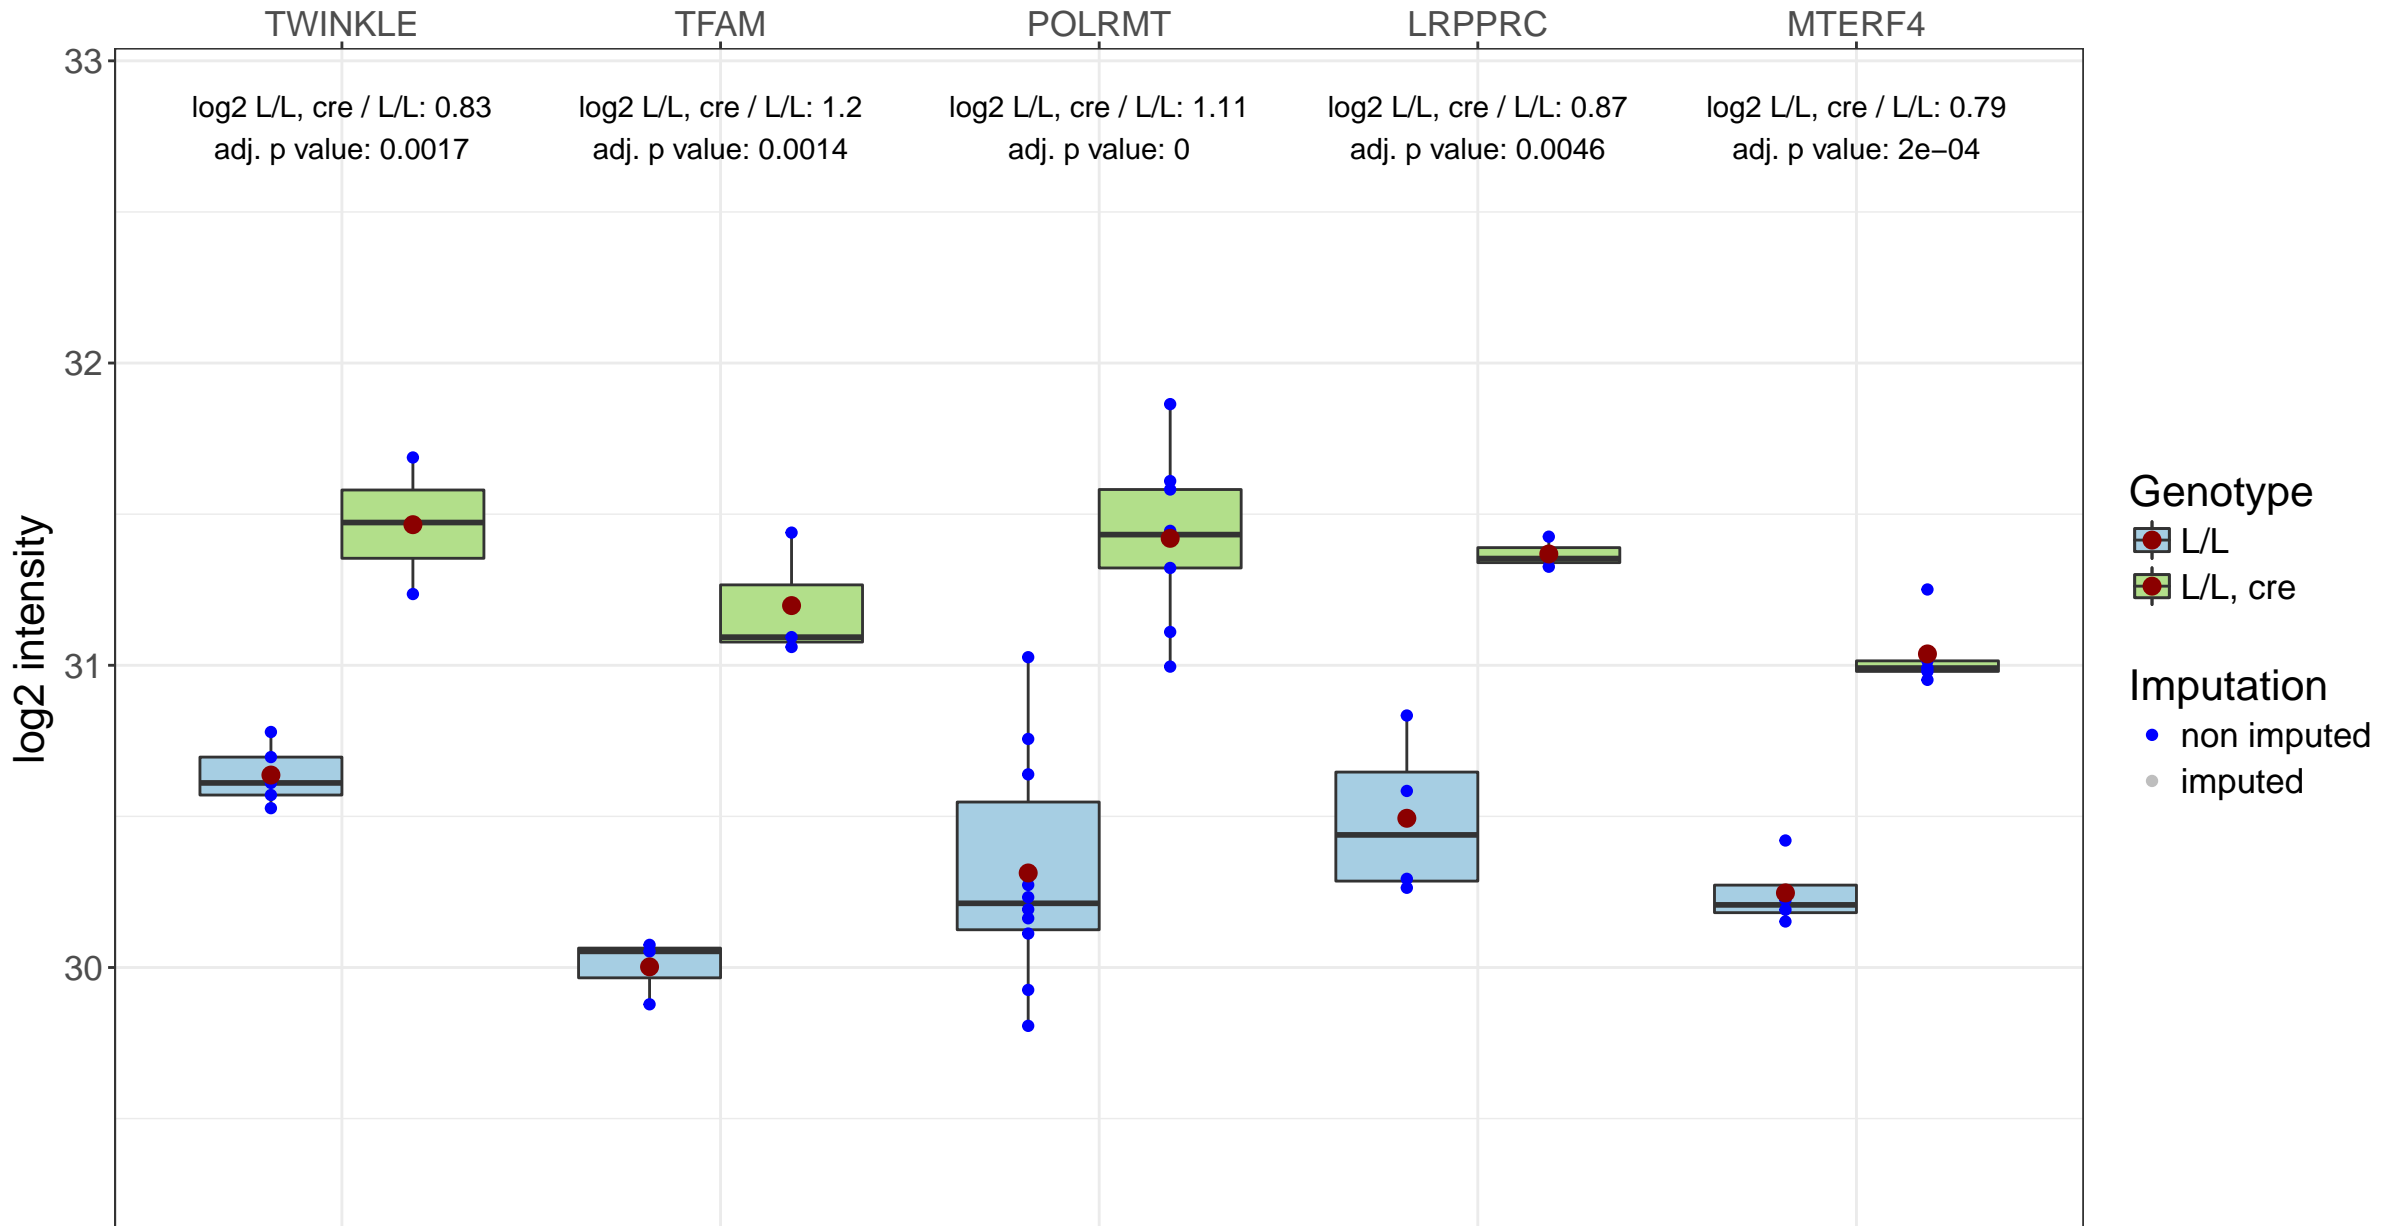

# NIF3L1 / Q9EQ80

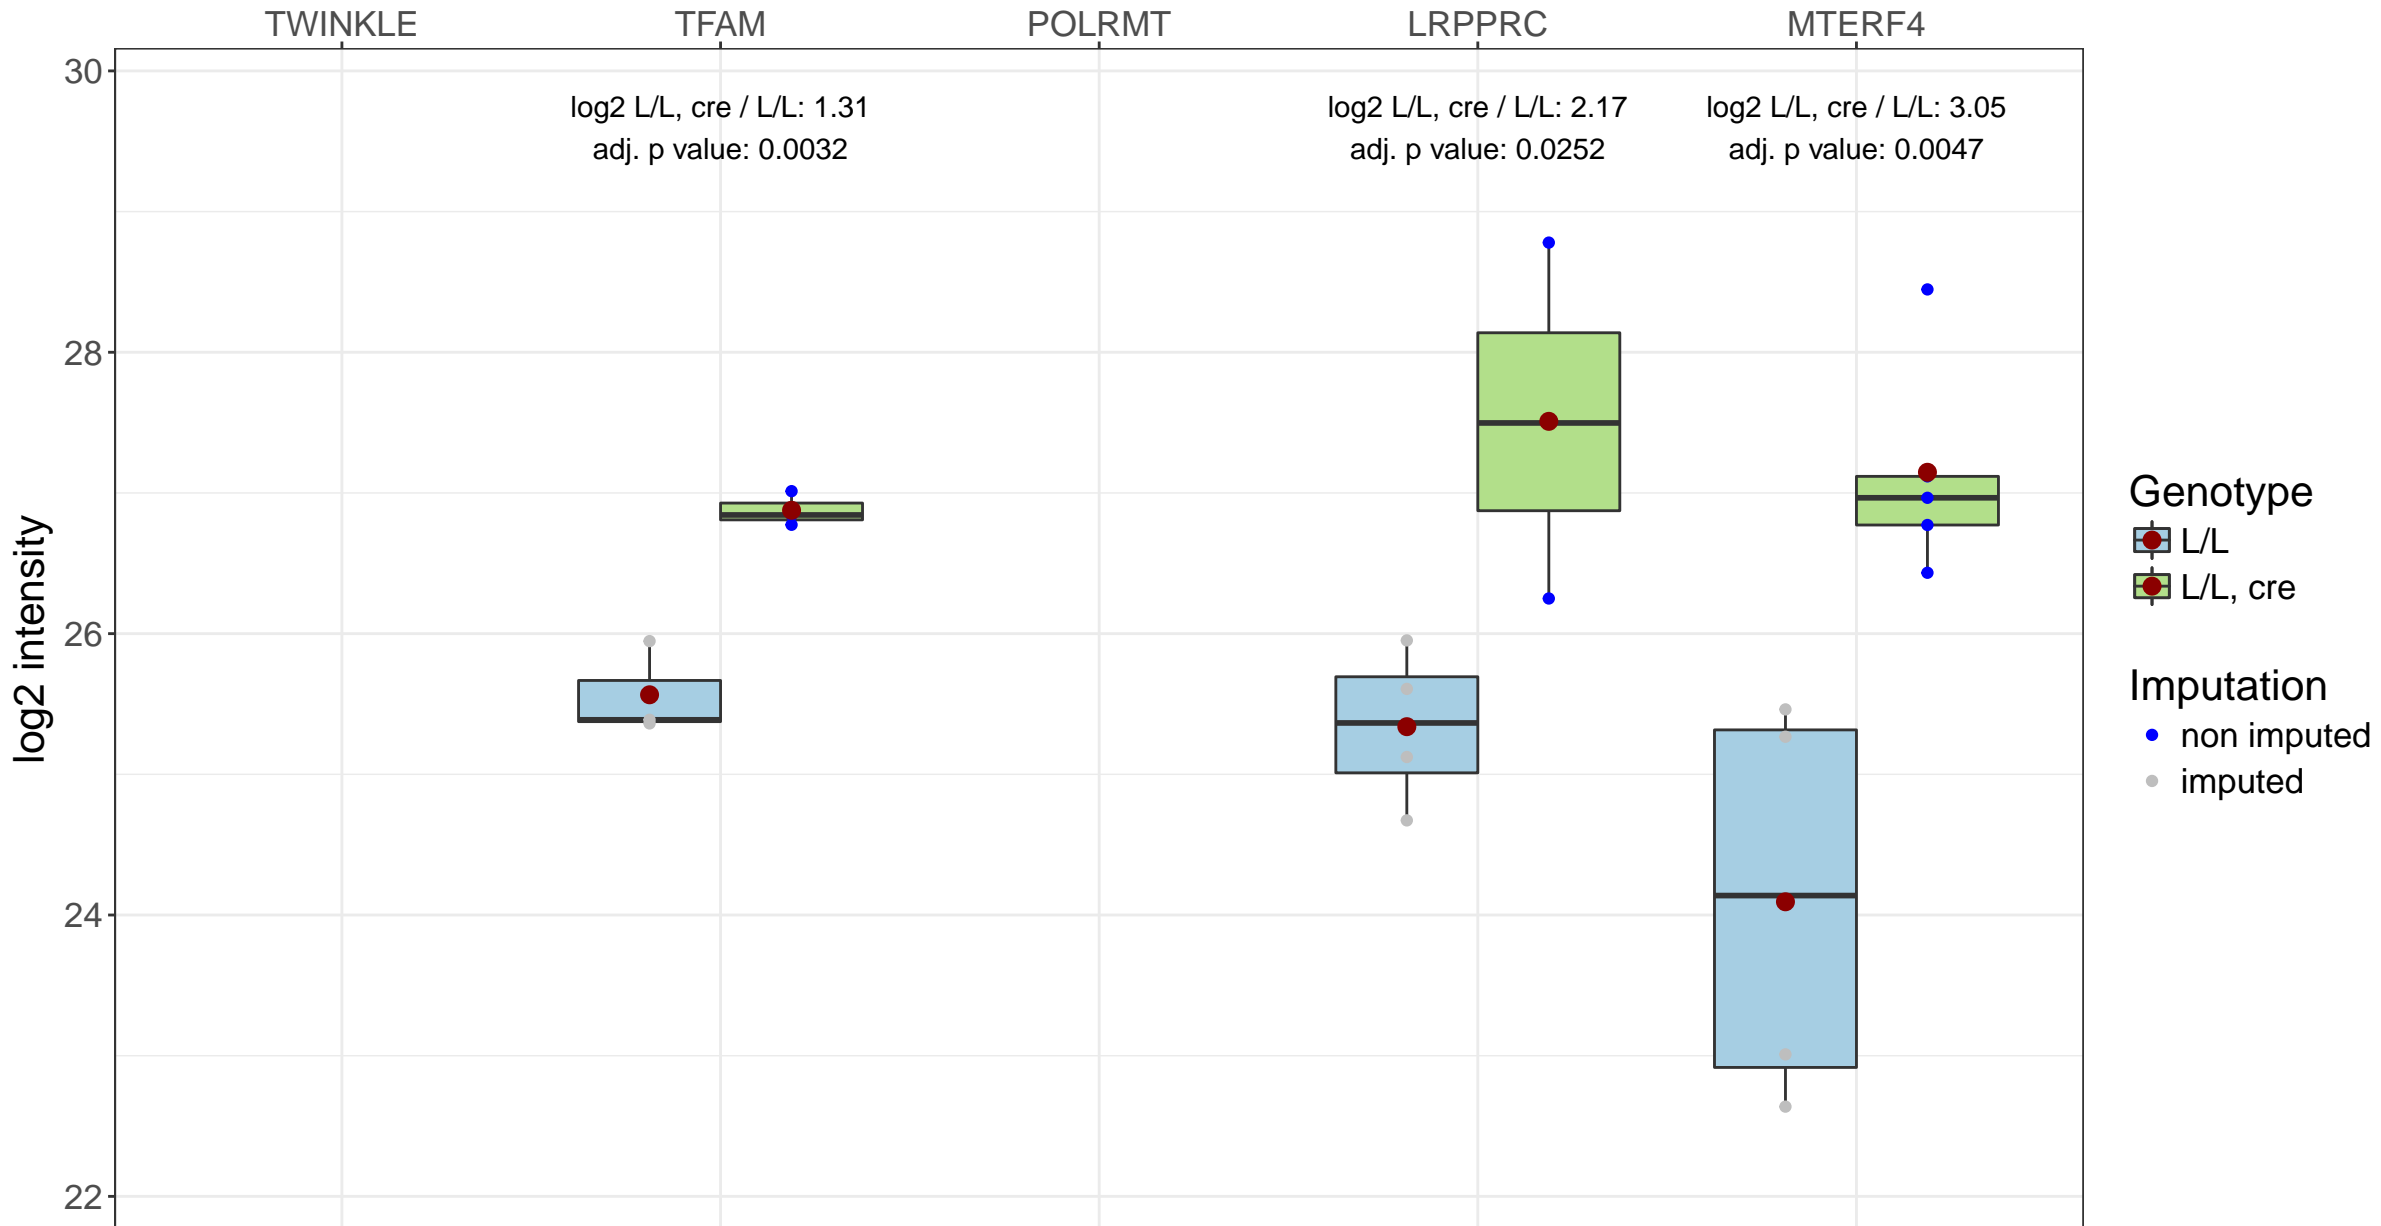

# NIPSNAP3B / Q9CQE1

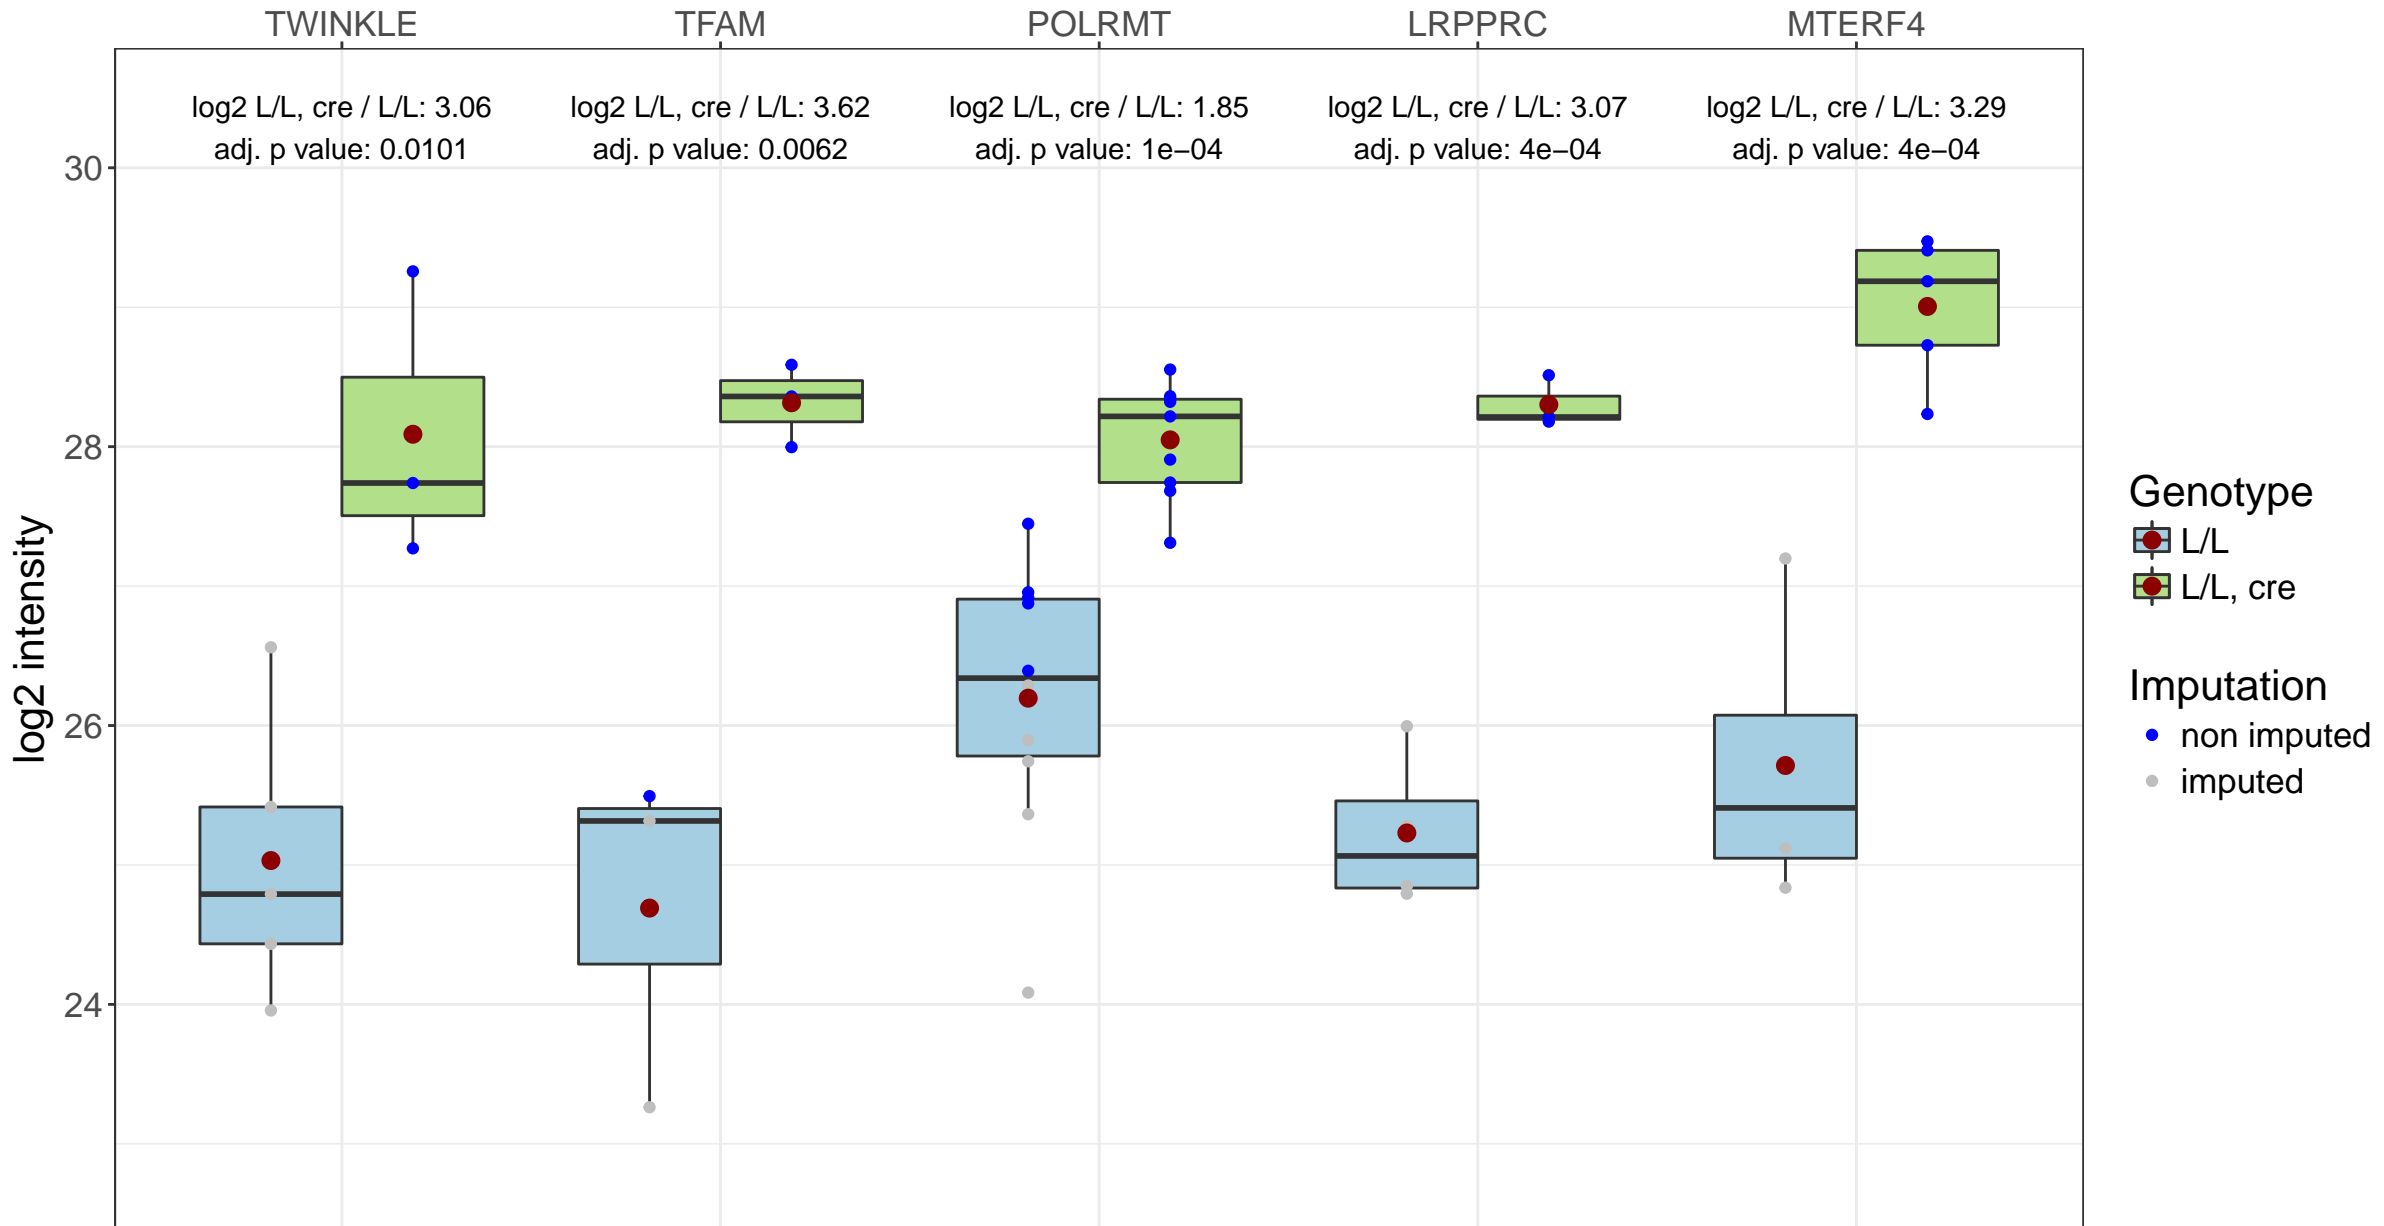



# NIT1 / Q8VDK1-2

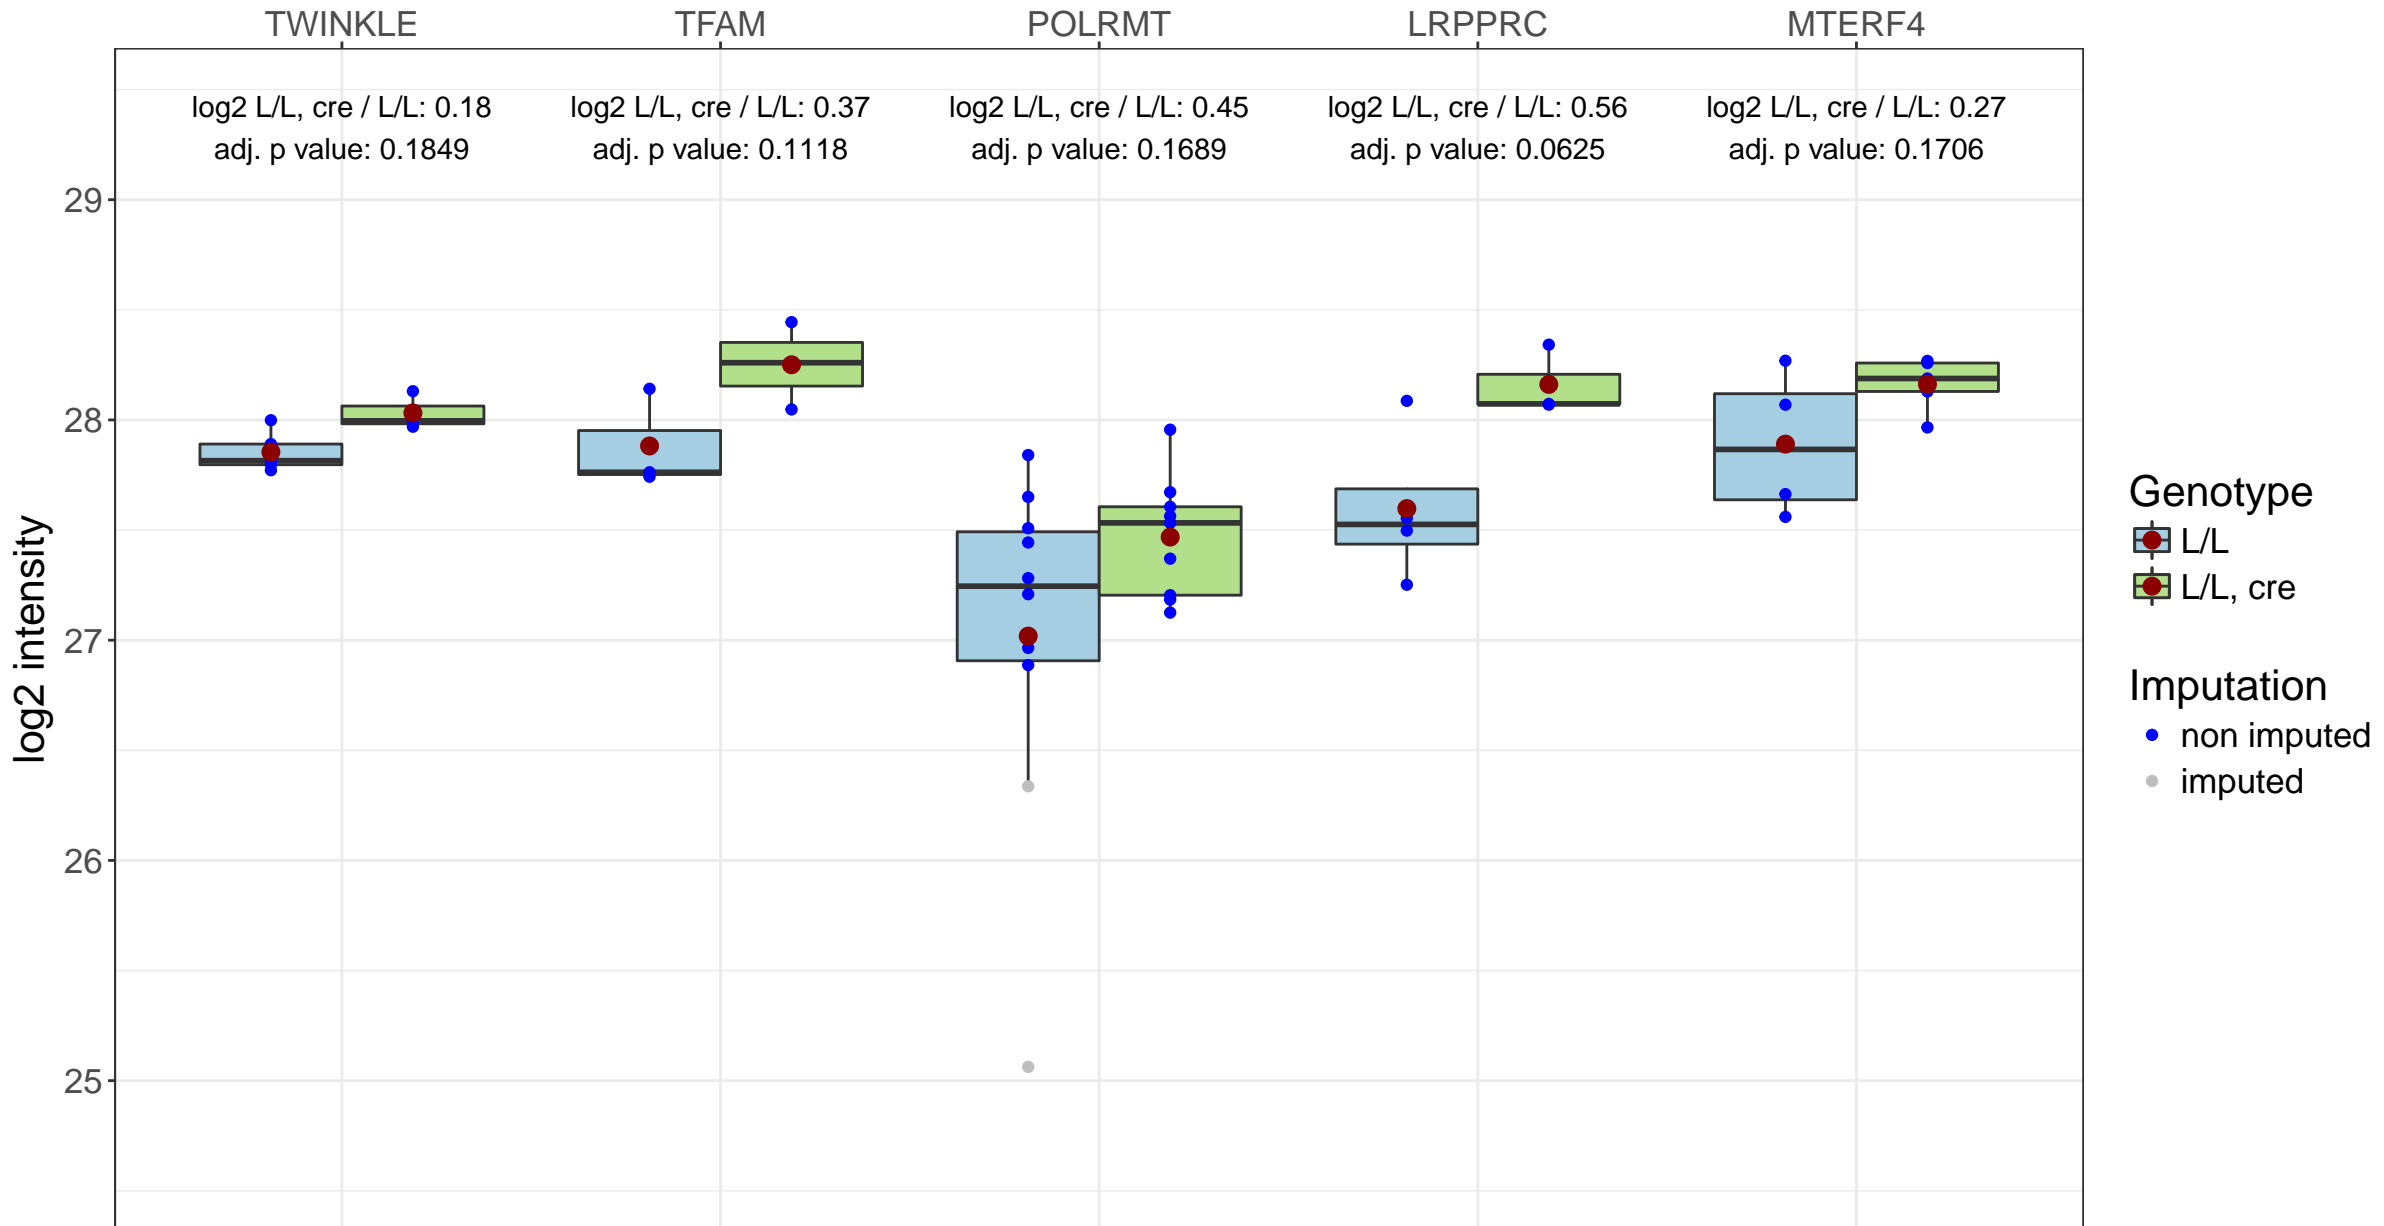

# NIT2 / Q9JHW2

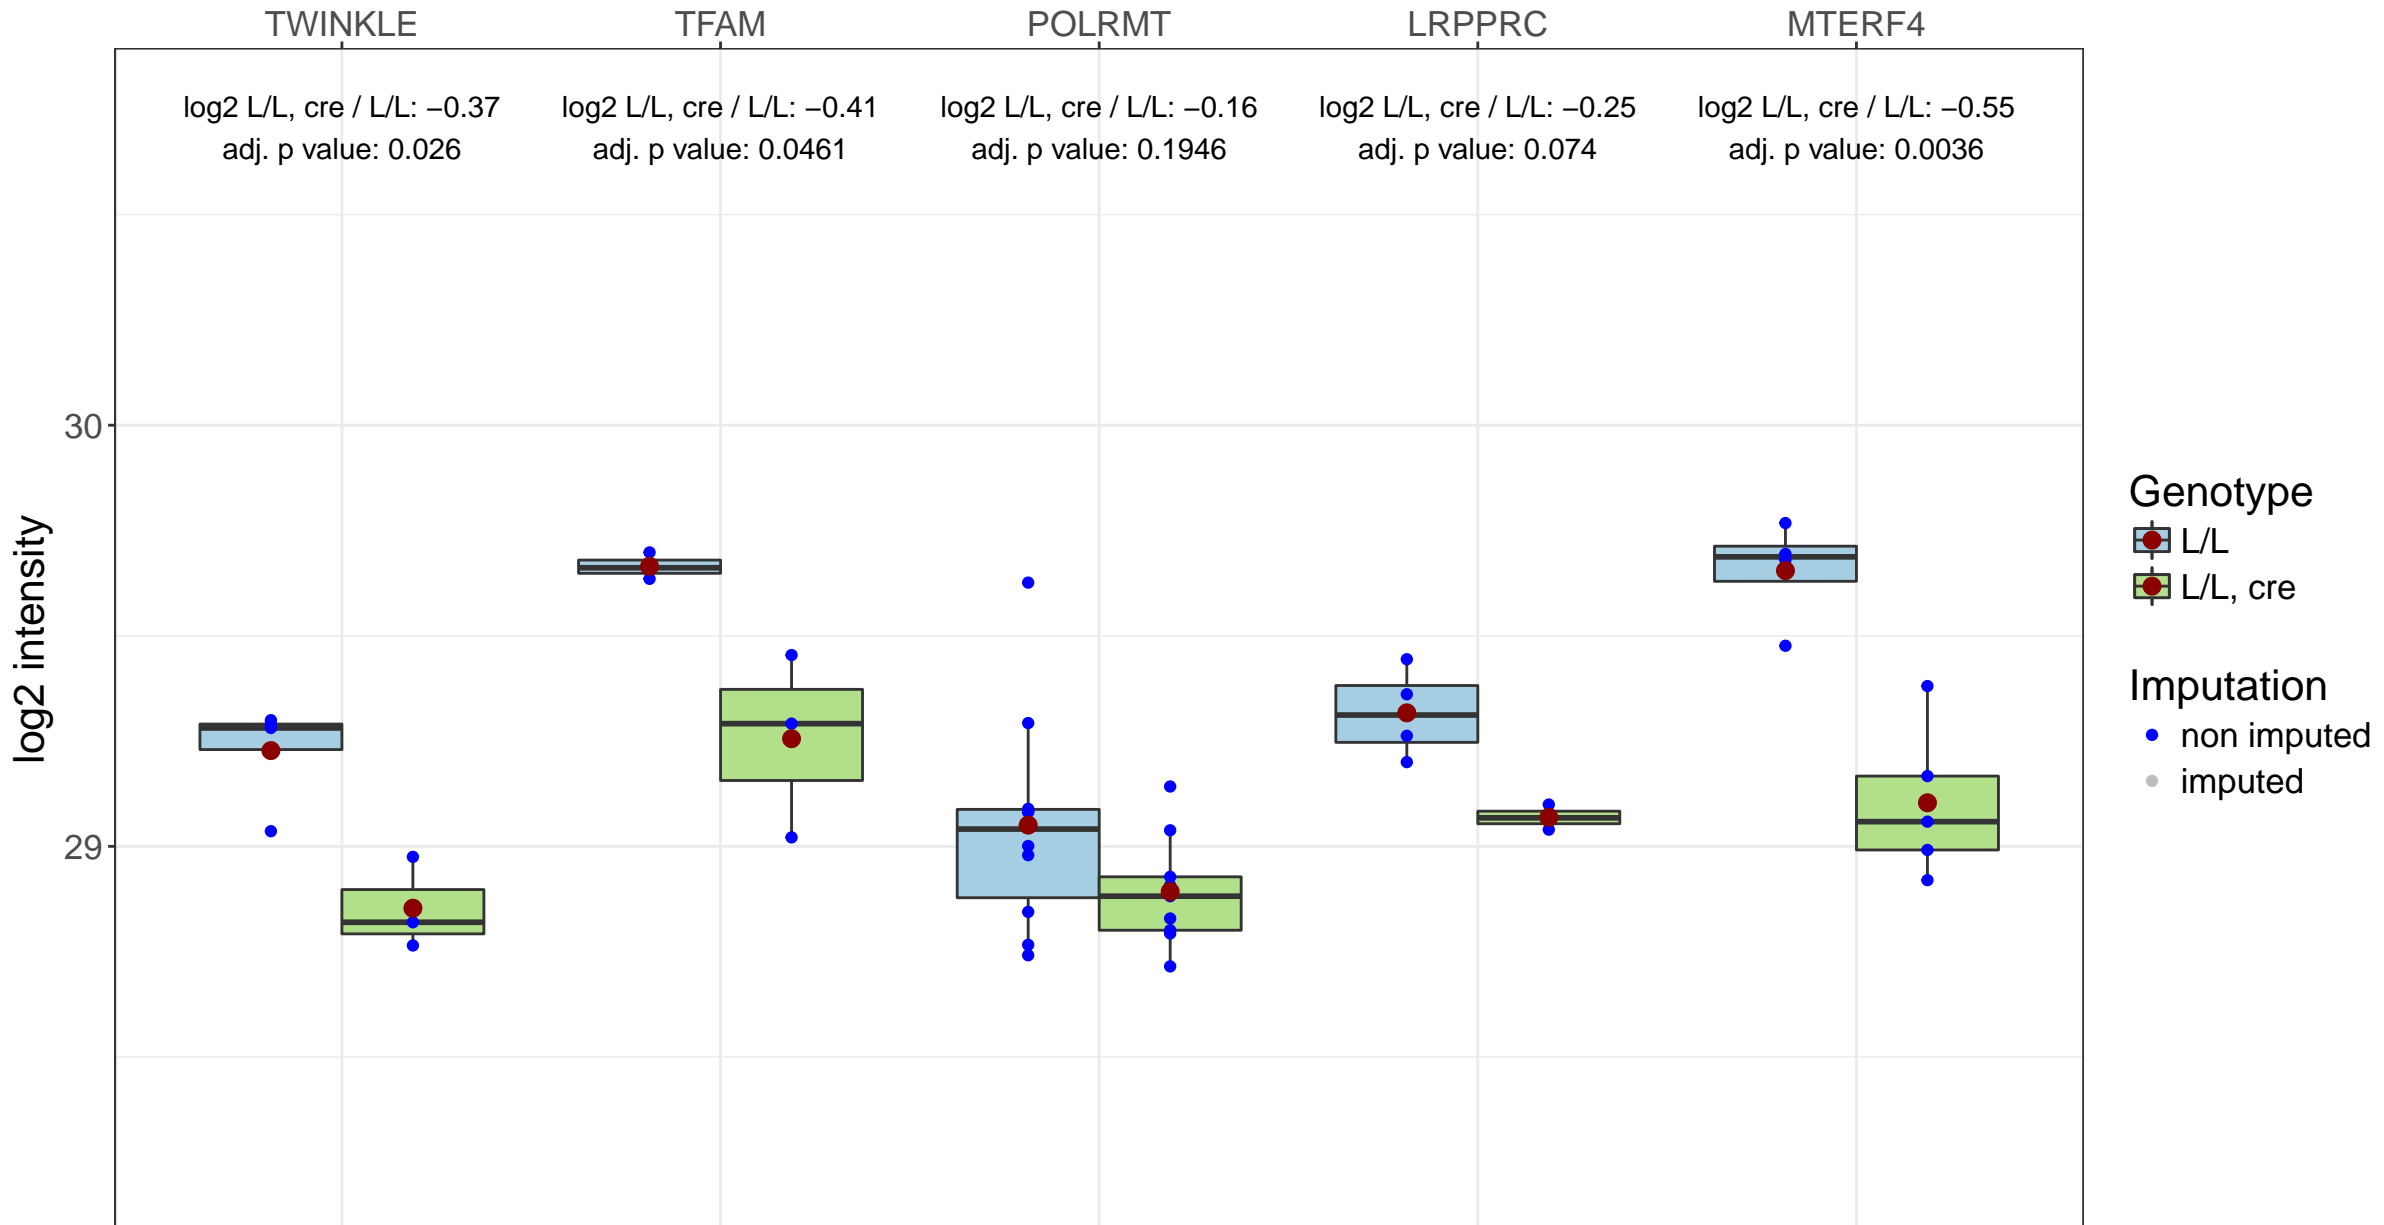

# NLN / Q91YP2

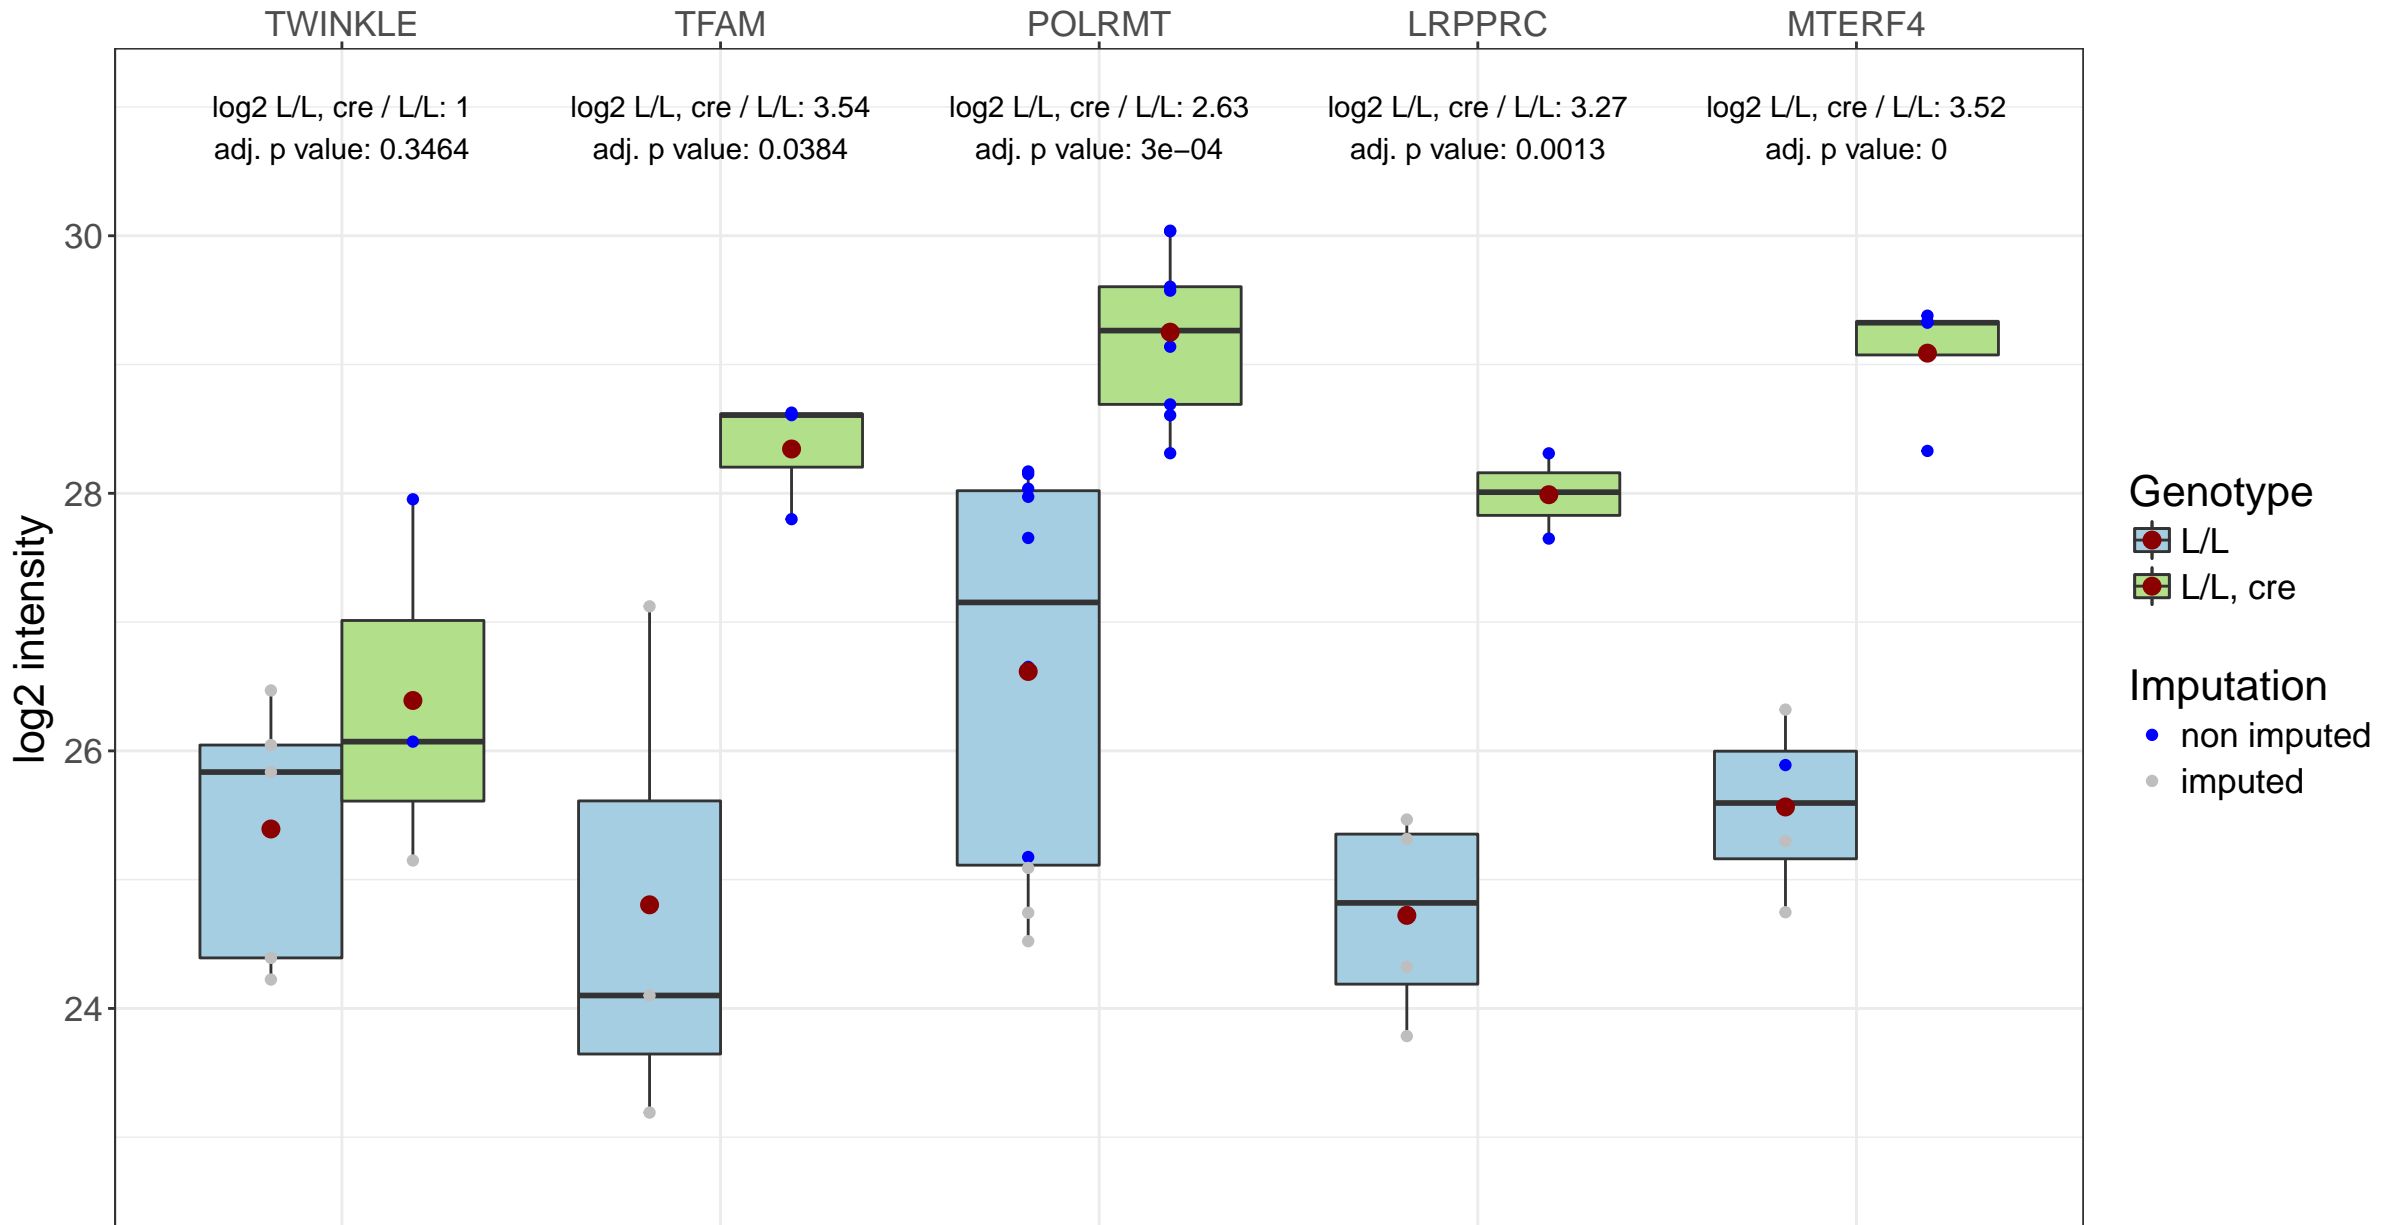

# NLRX1 / Q3TL44

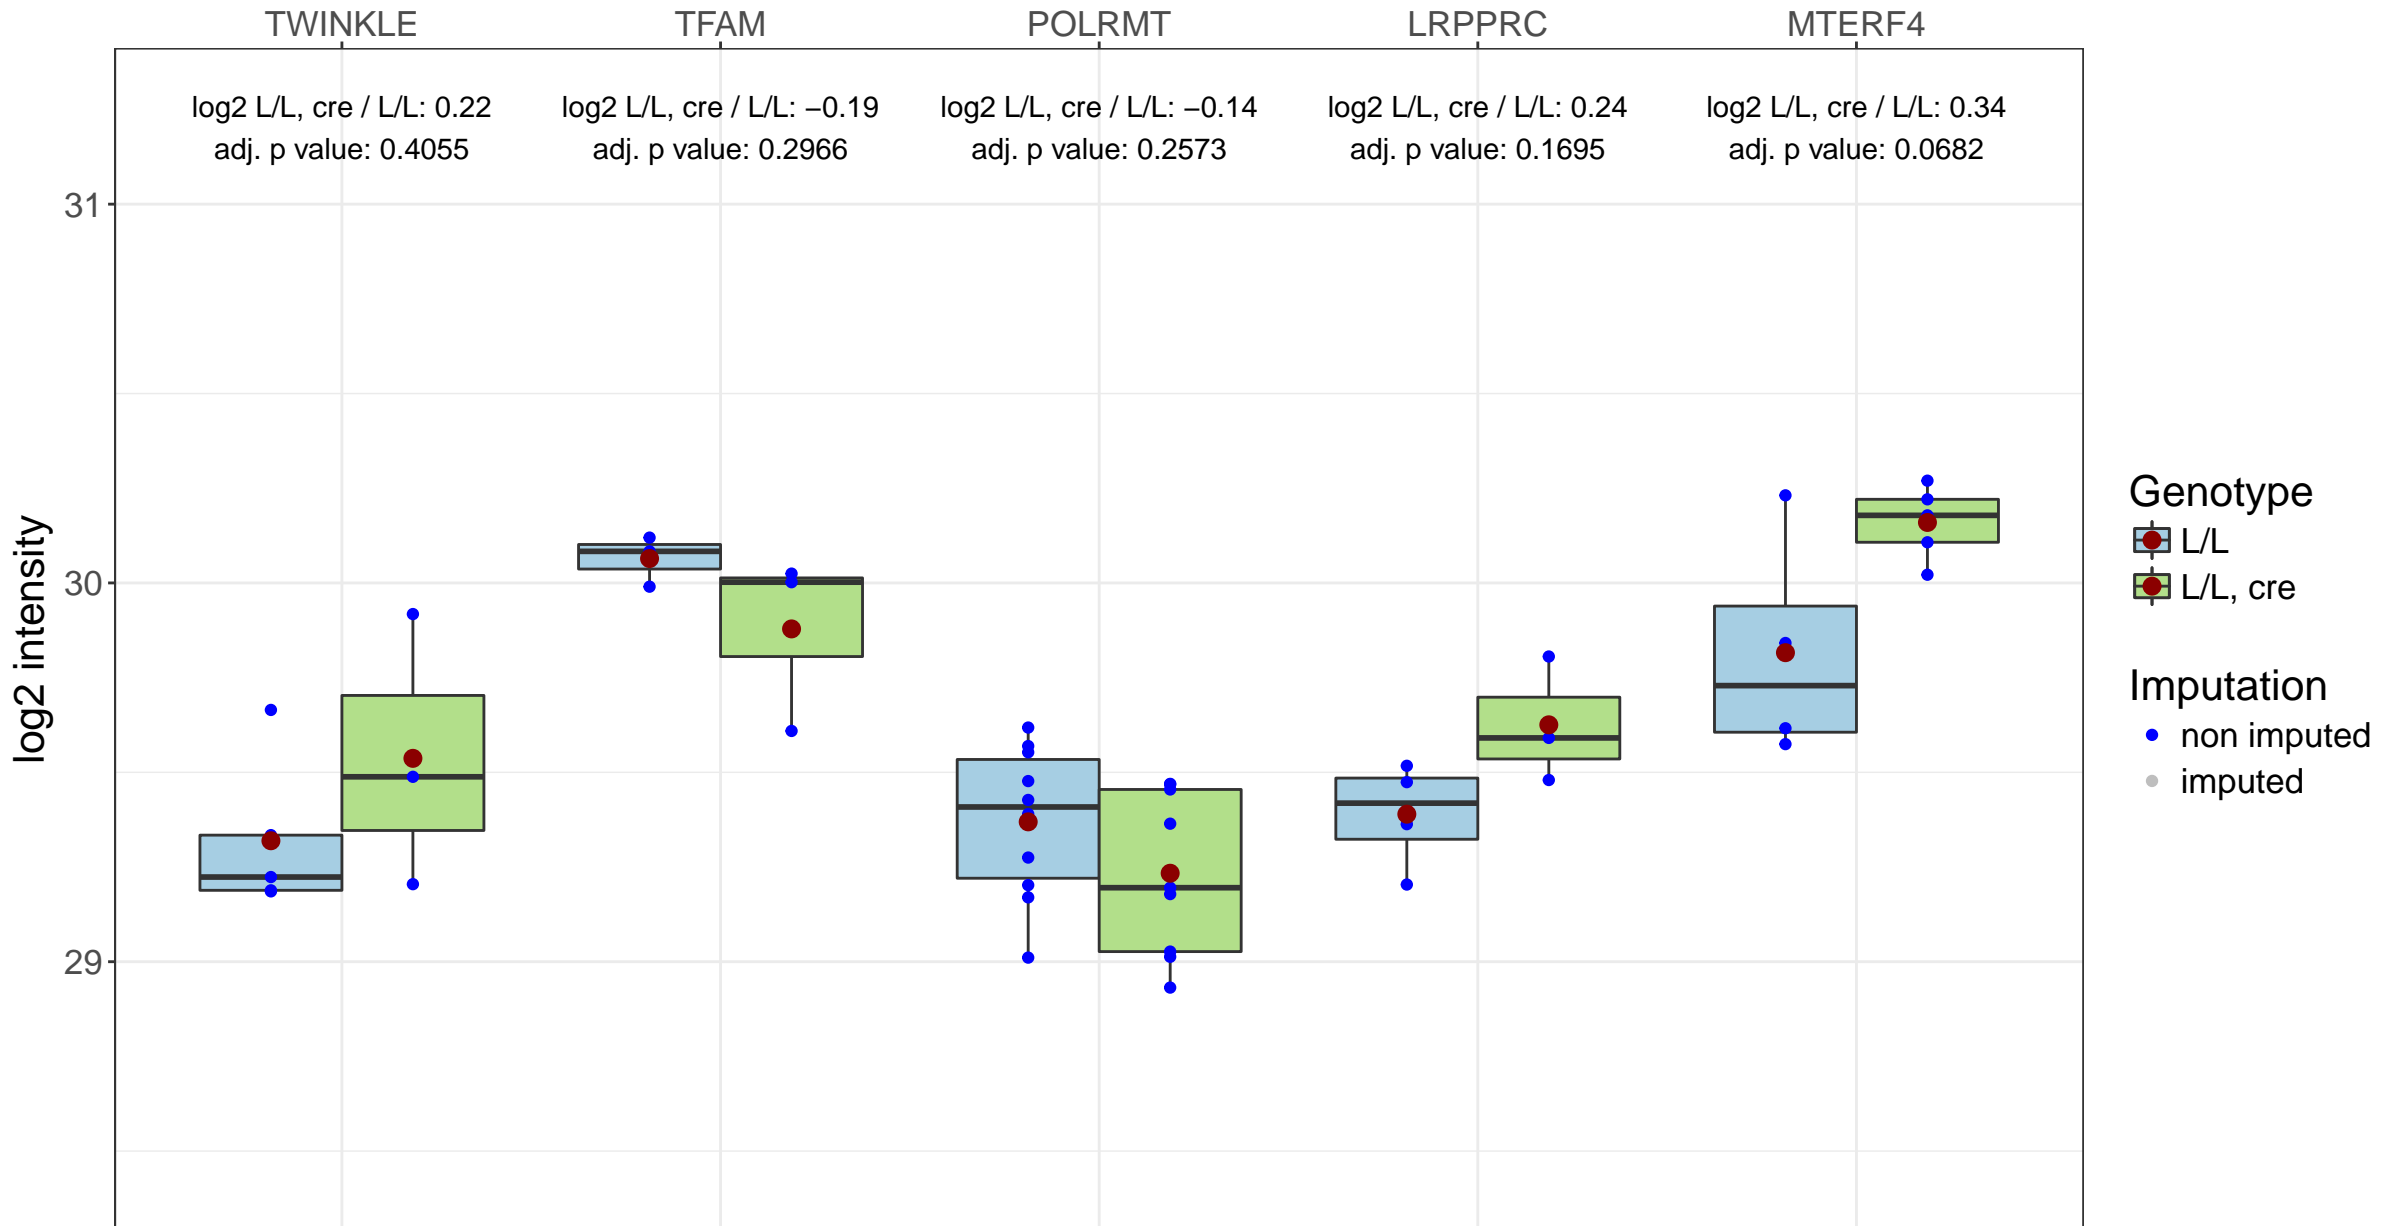

# NME3 / Q9WV85

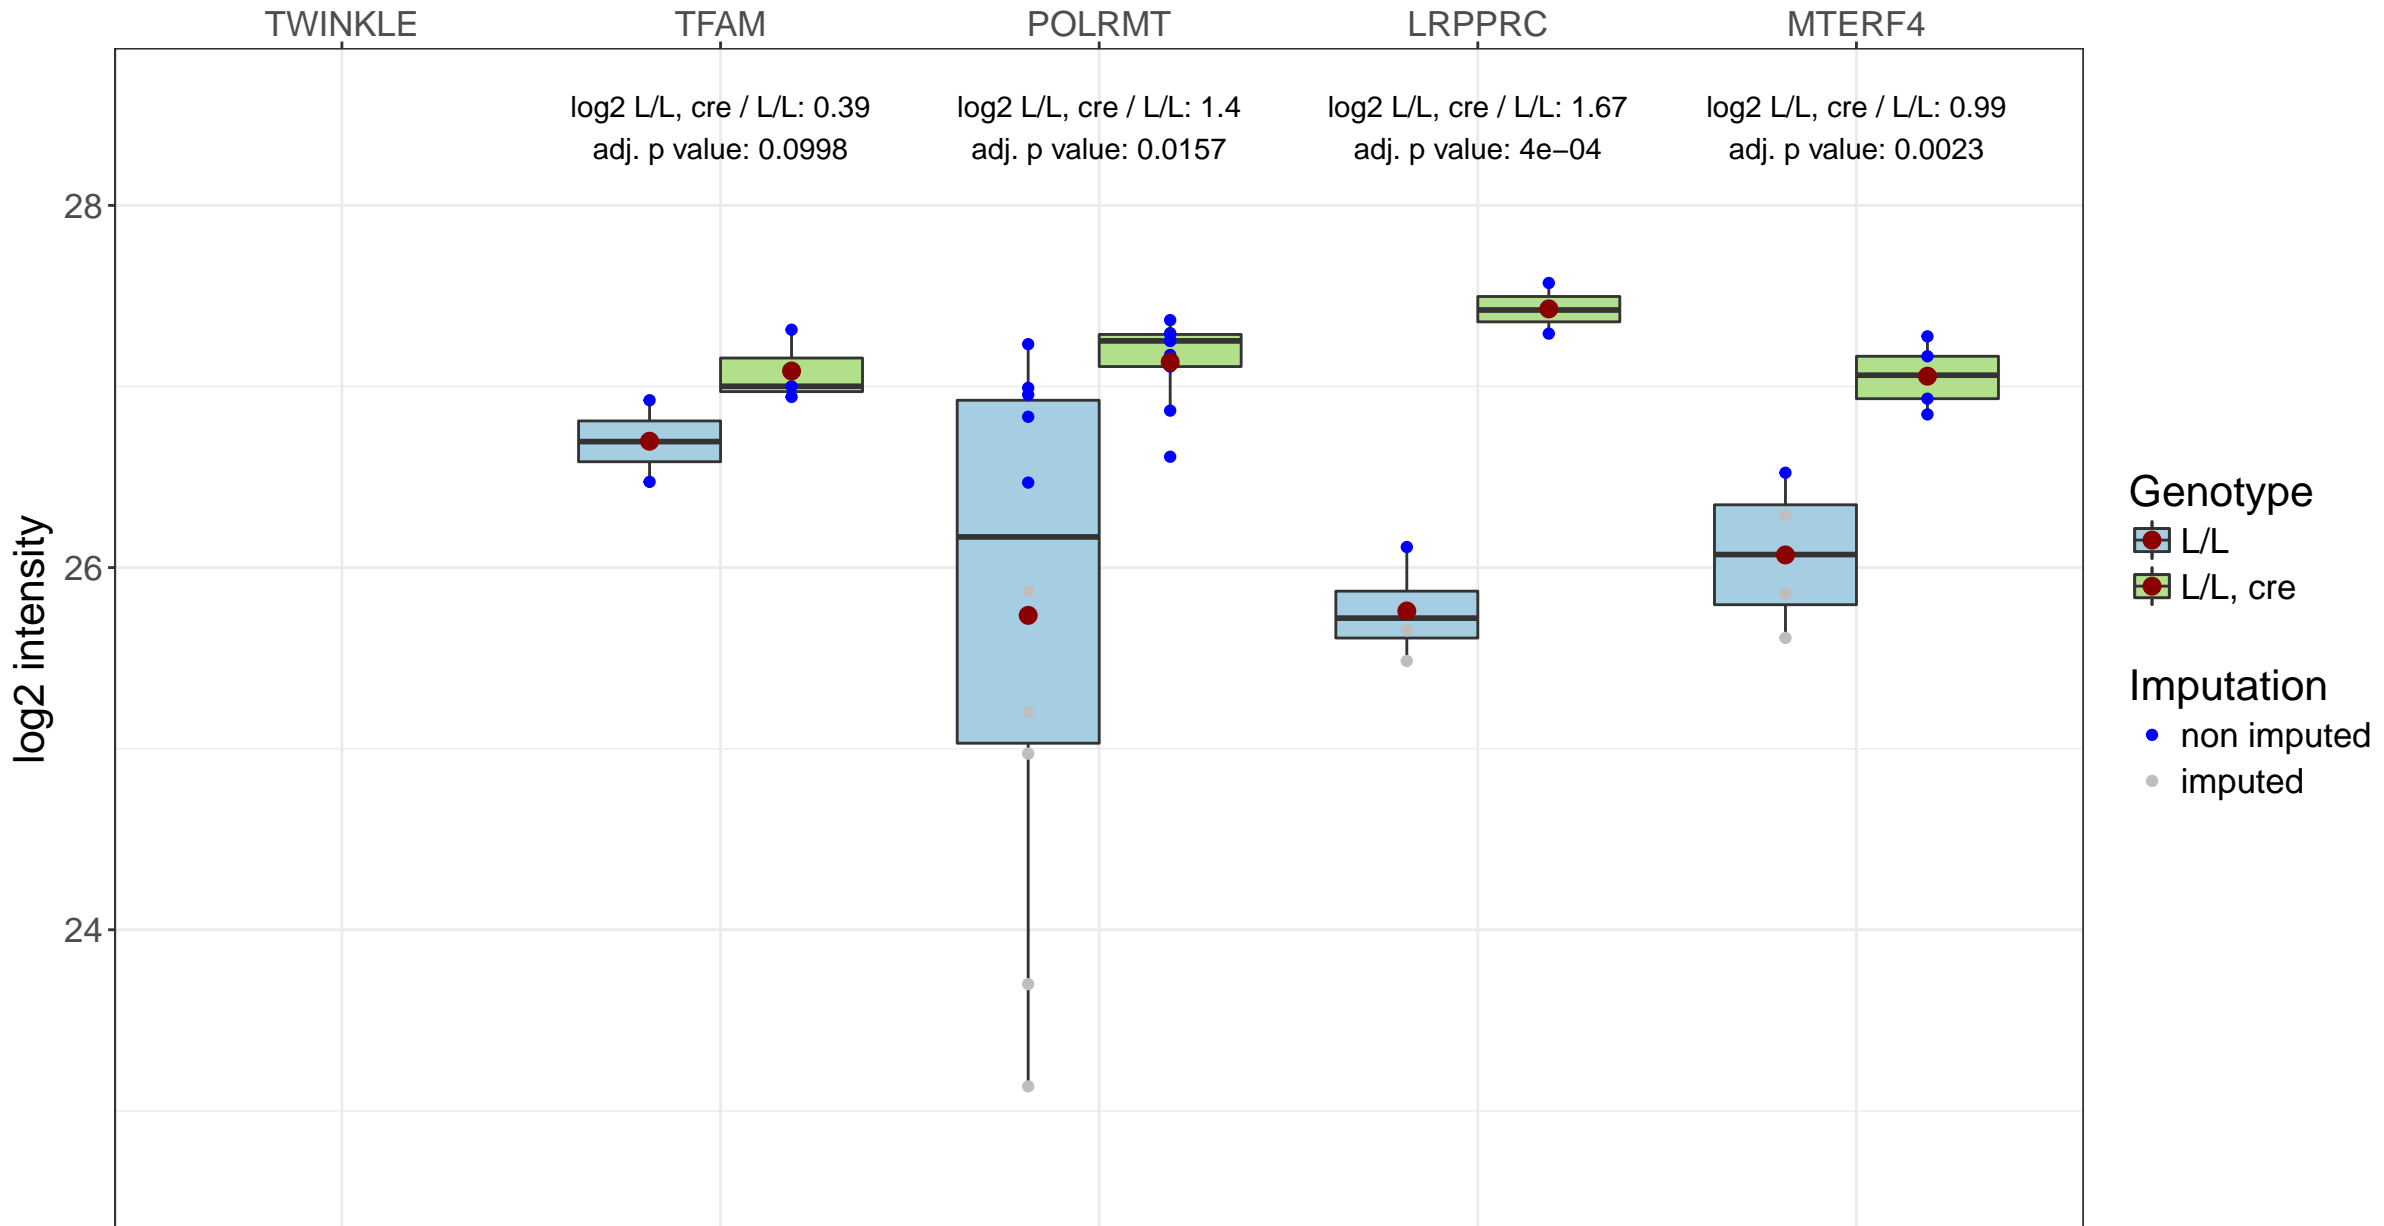

# NME6 / D3Z206

TWINKLE

TFAM

POLRMT

LRPPRC

MTERF4

log2 intensity

26

25

24

log2 L/L, cre / L/L: 0.21

adj. p value: 0.7057

Genotype

L/L

L/L, cre

Imputation

non imputed

imputed

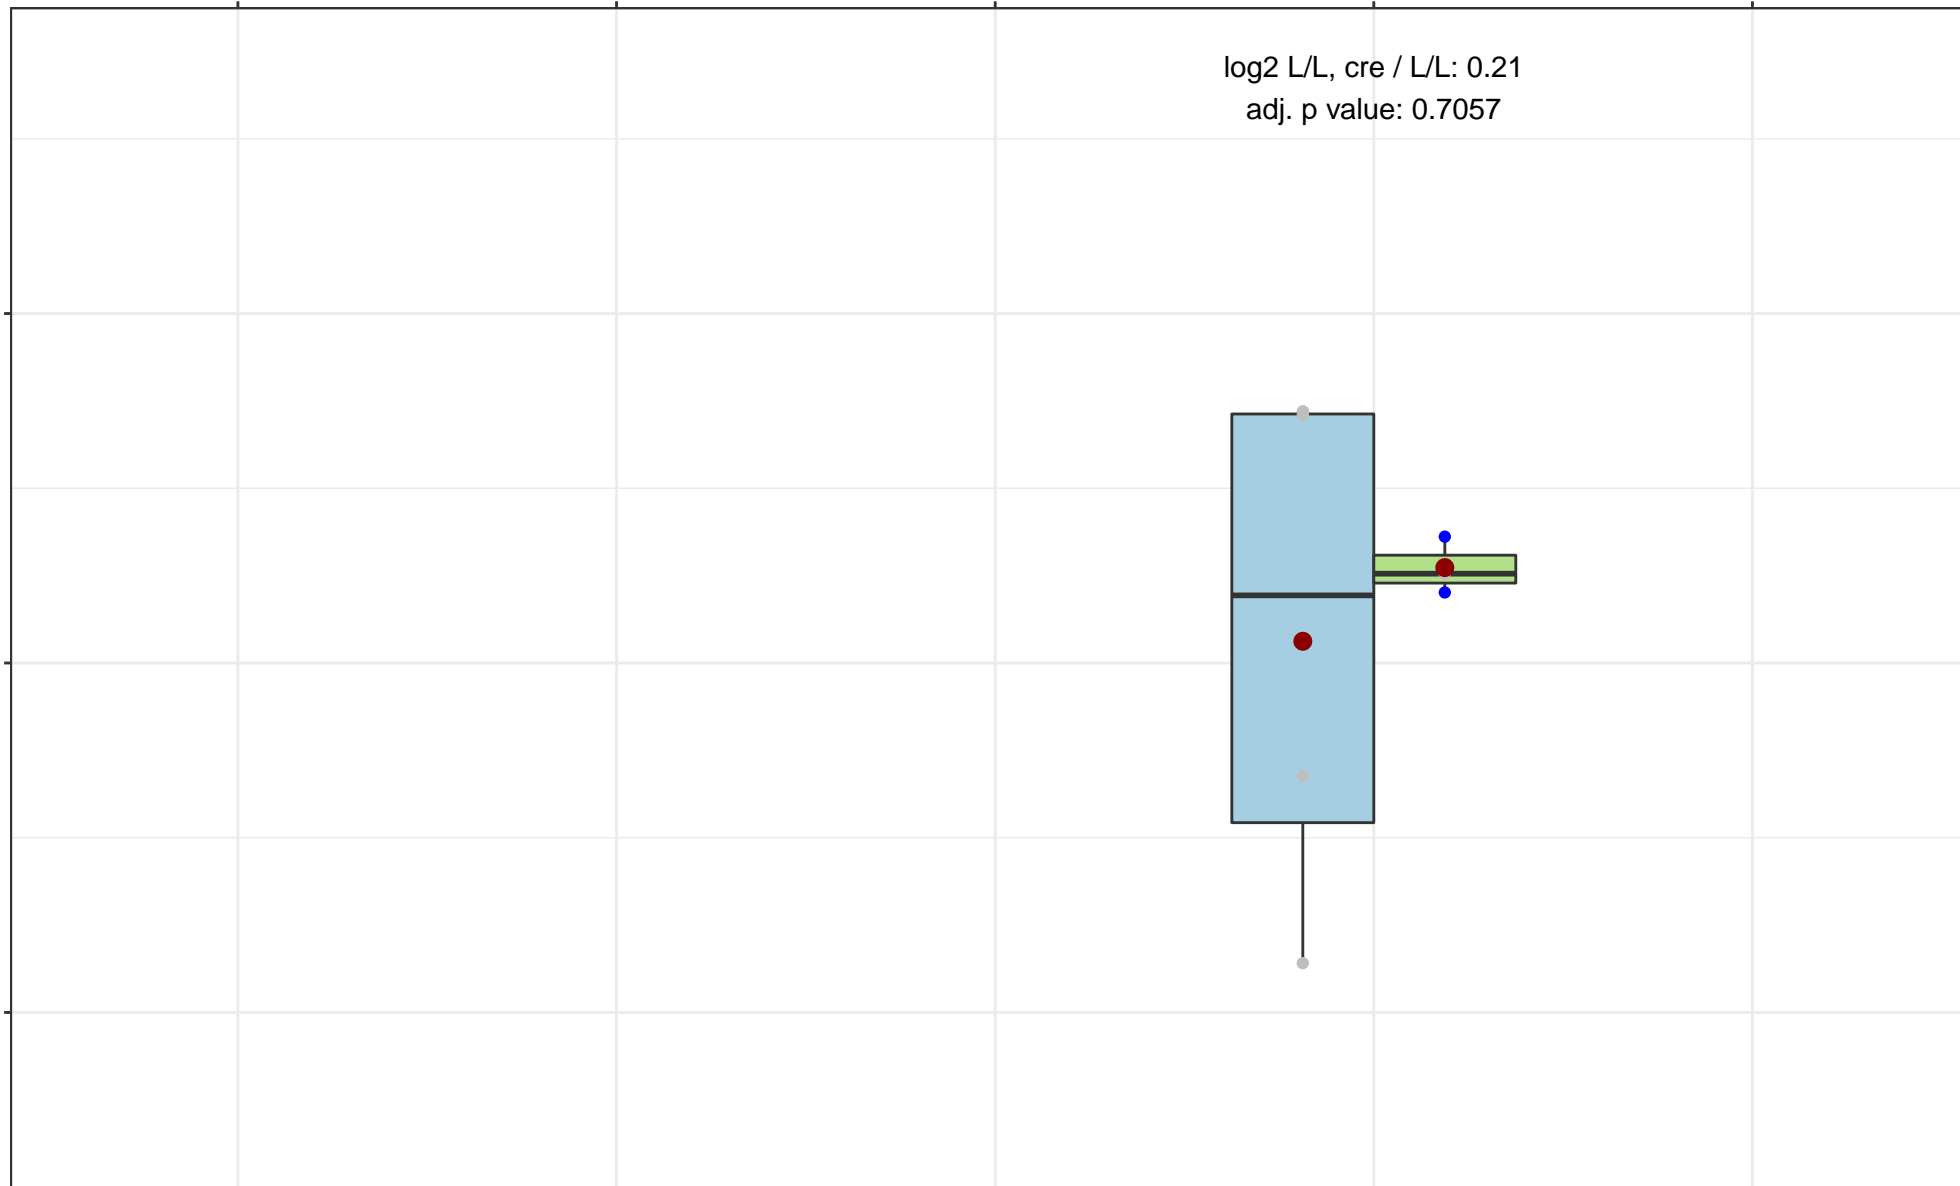

# NMNAT3 / Q99JR6

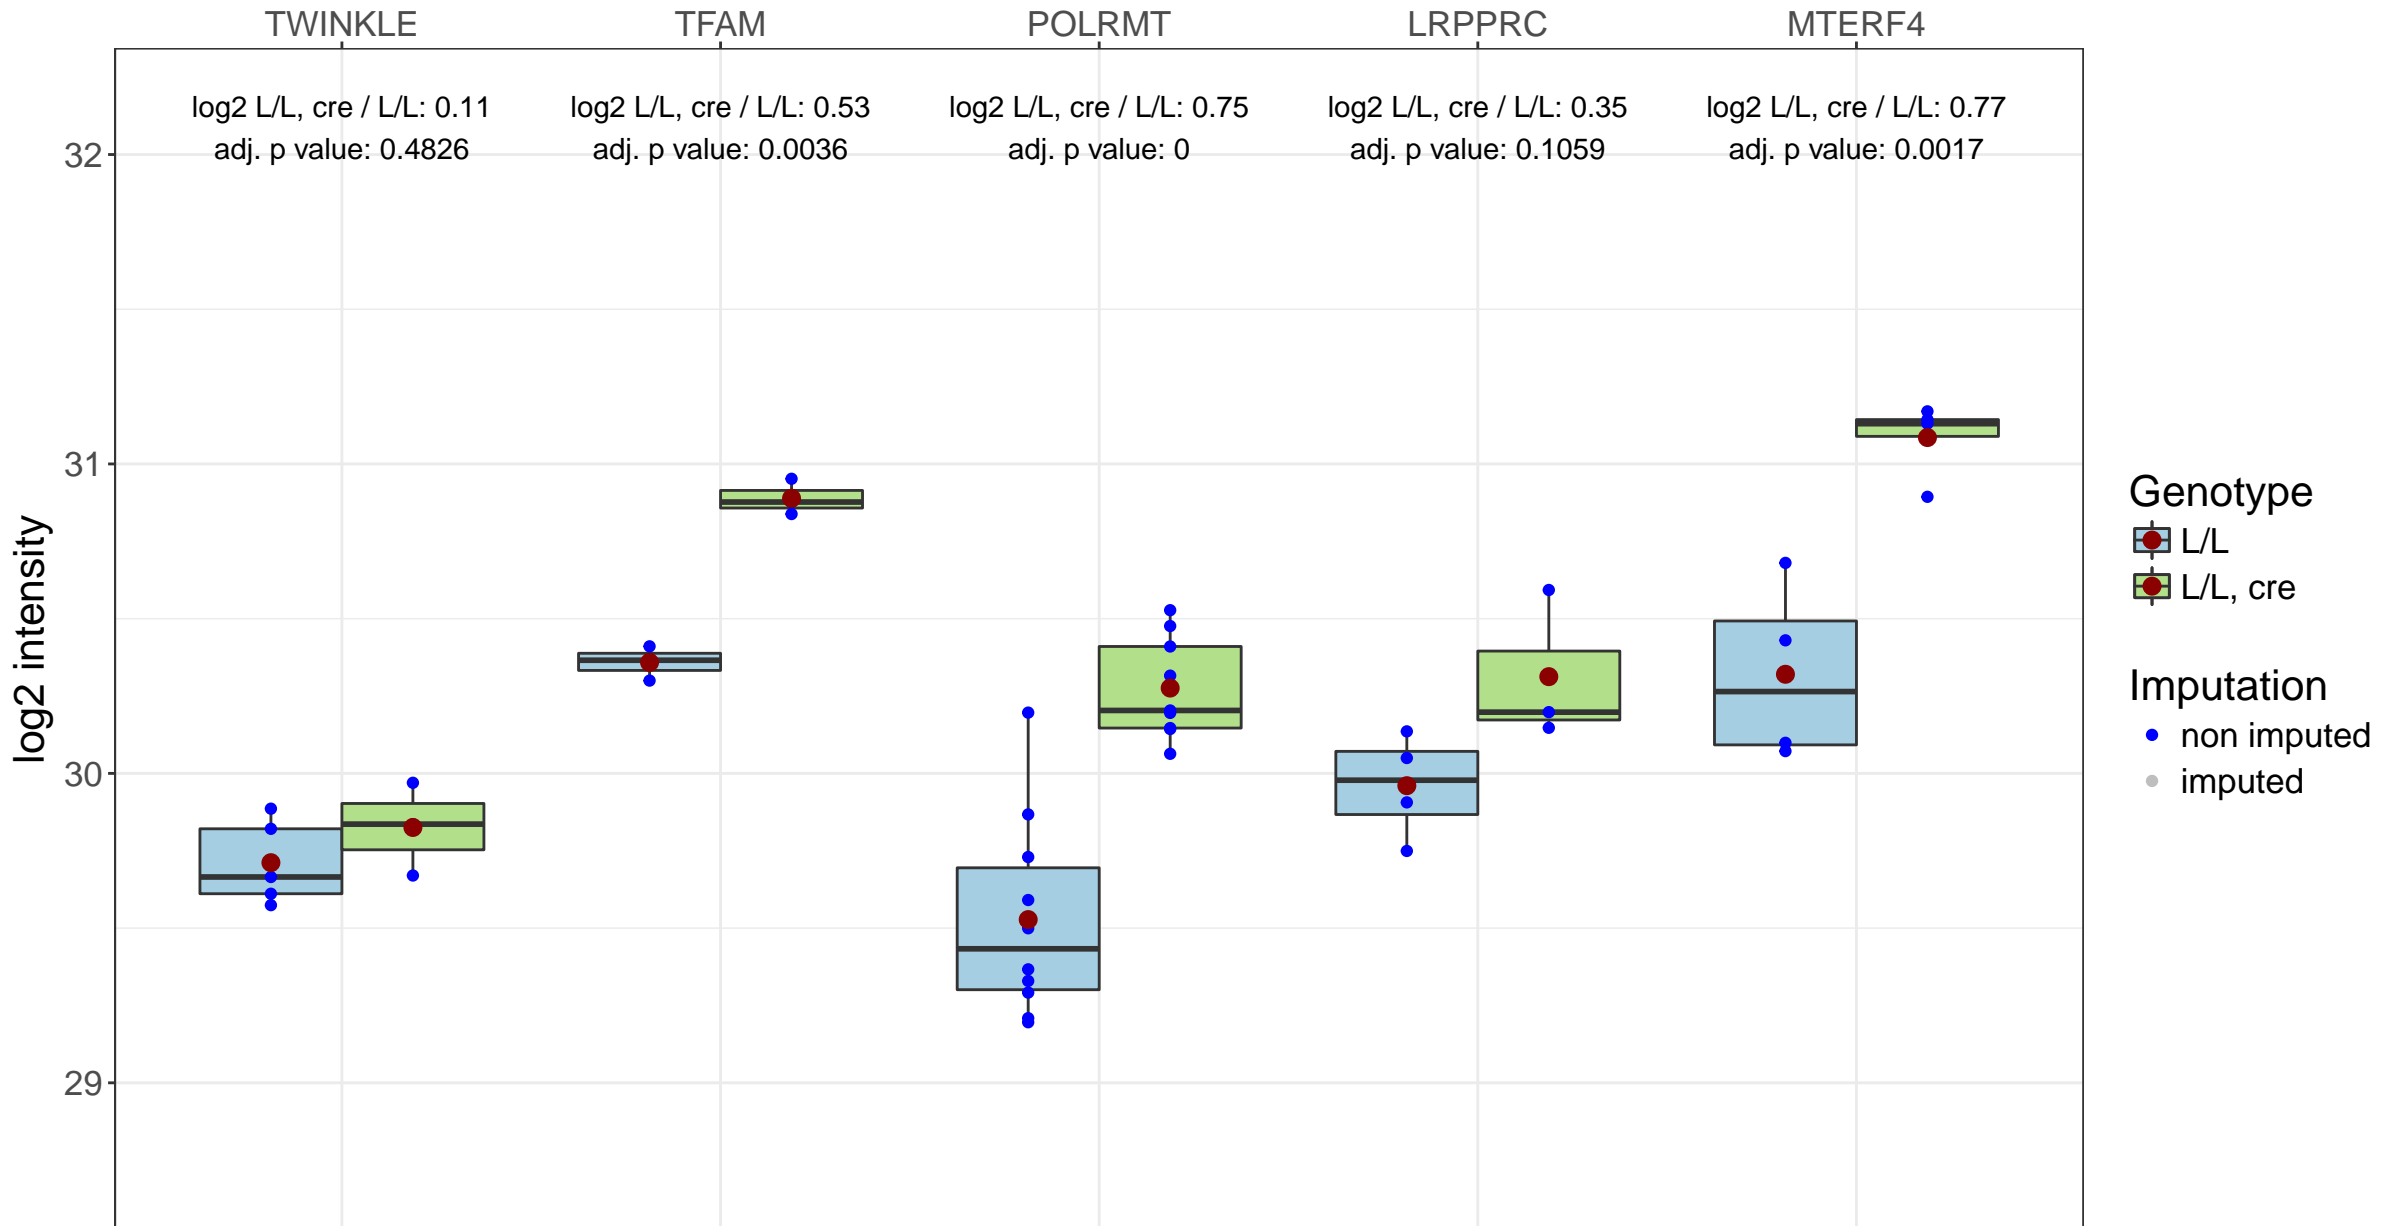

# NNT / Q61941

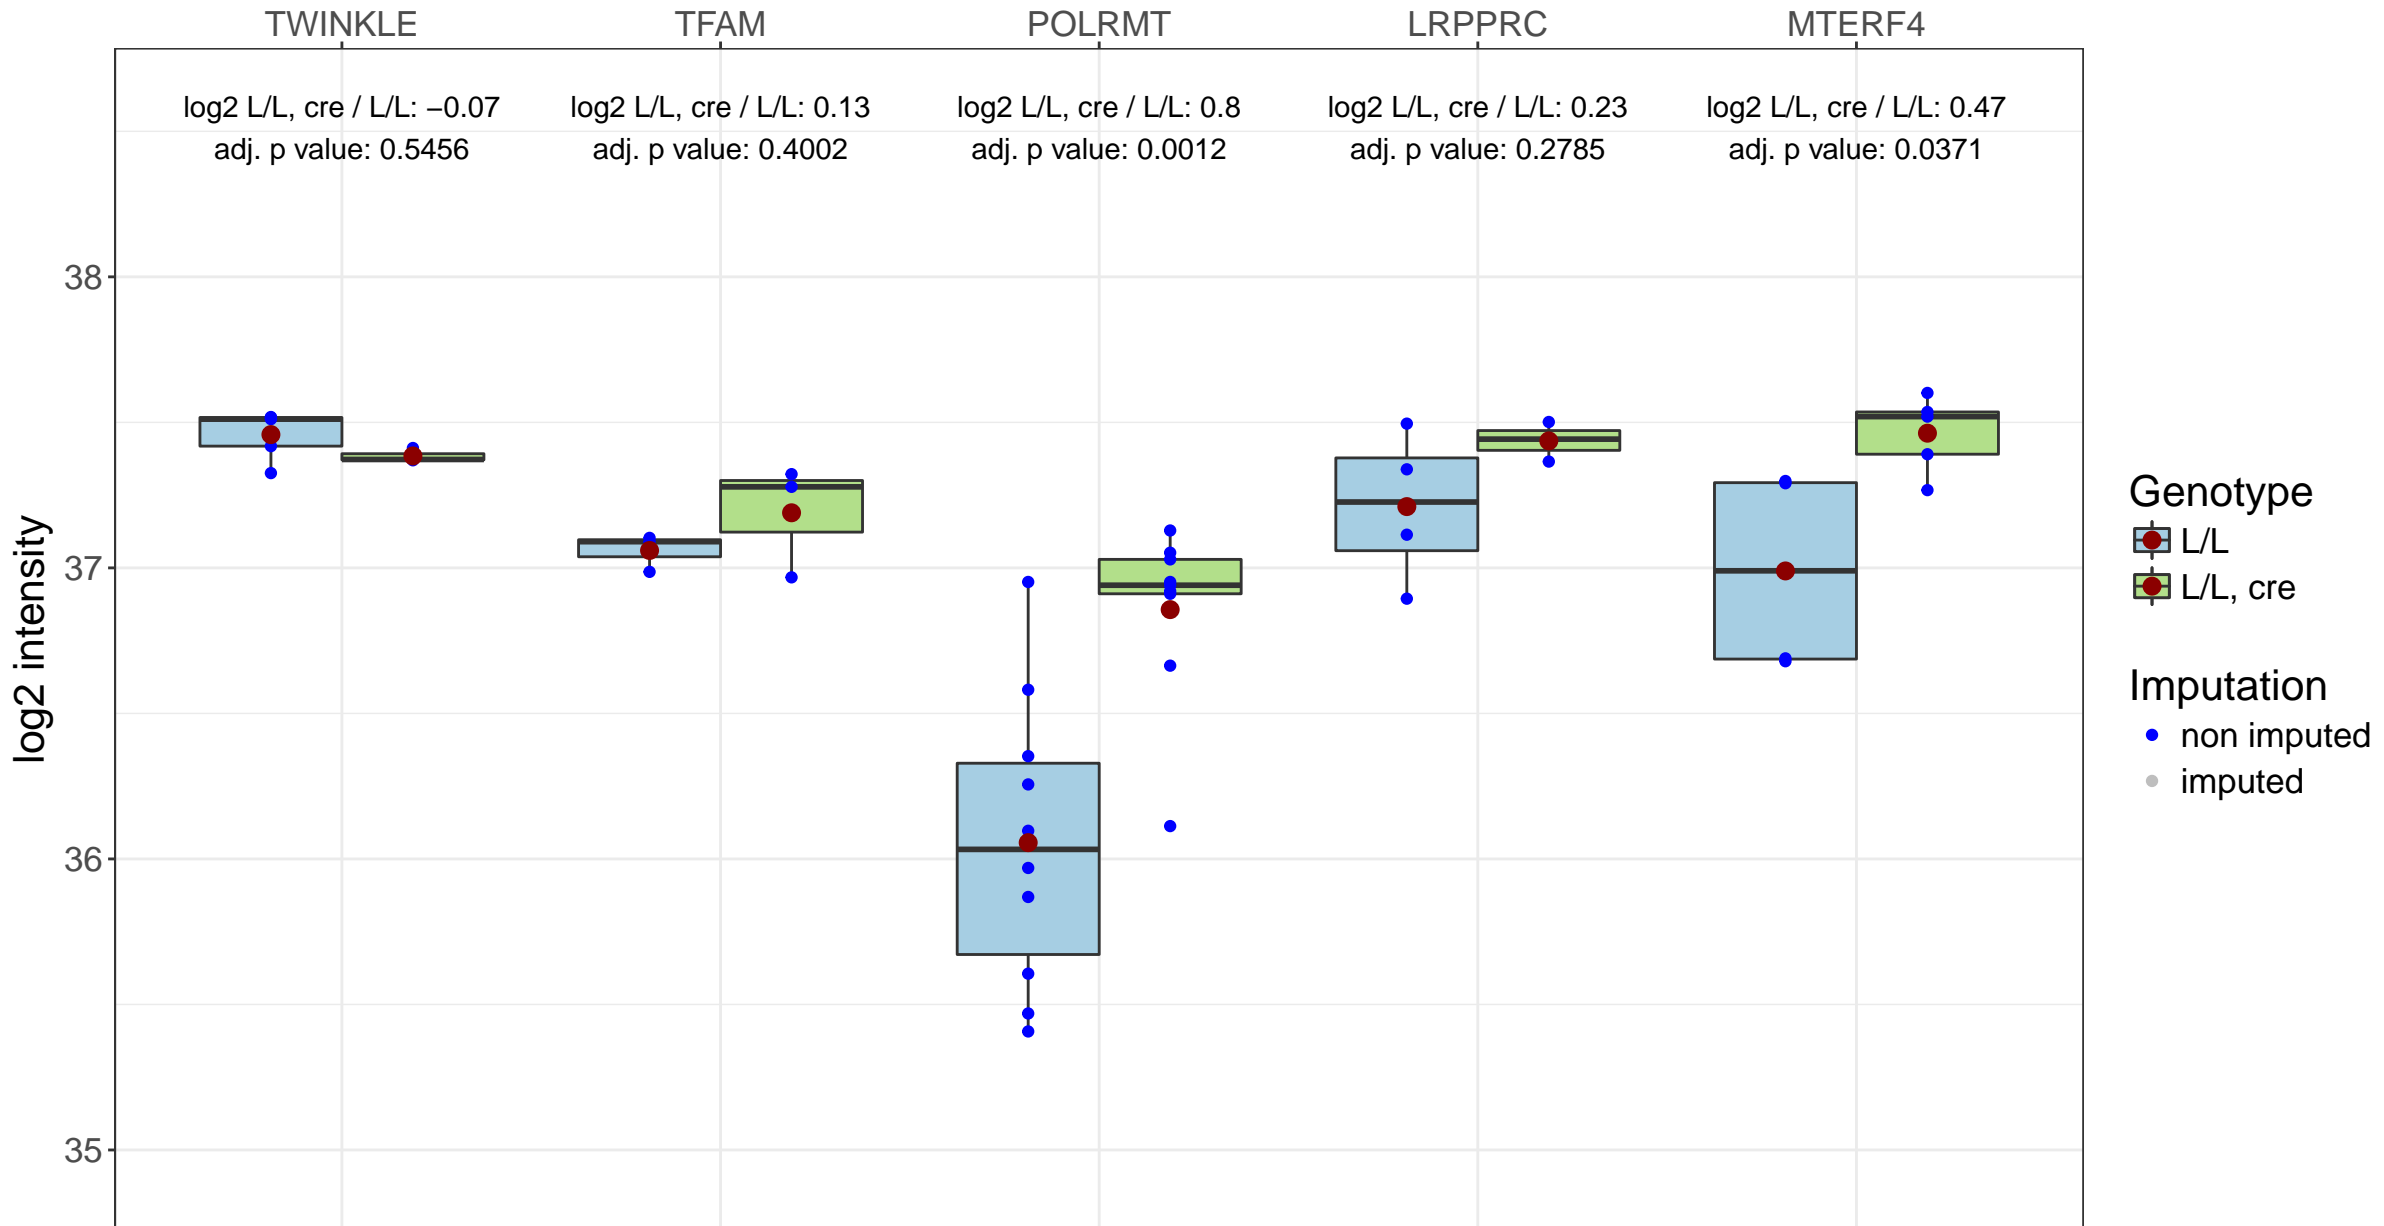



# NOA1 / Q9JJG9

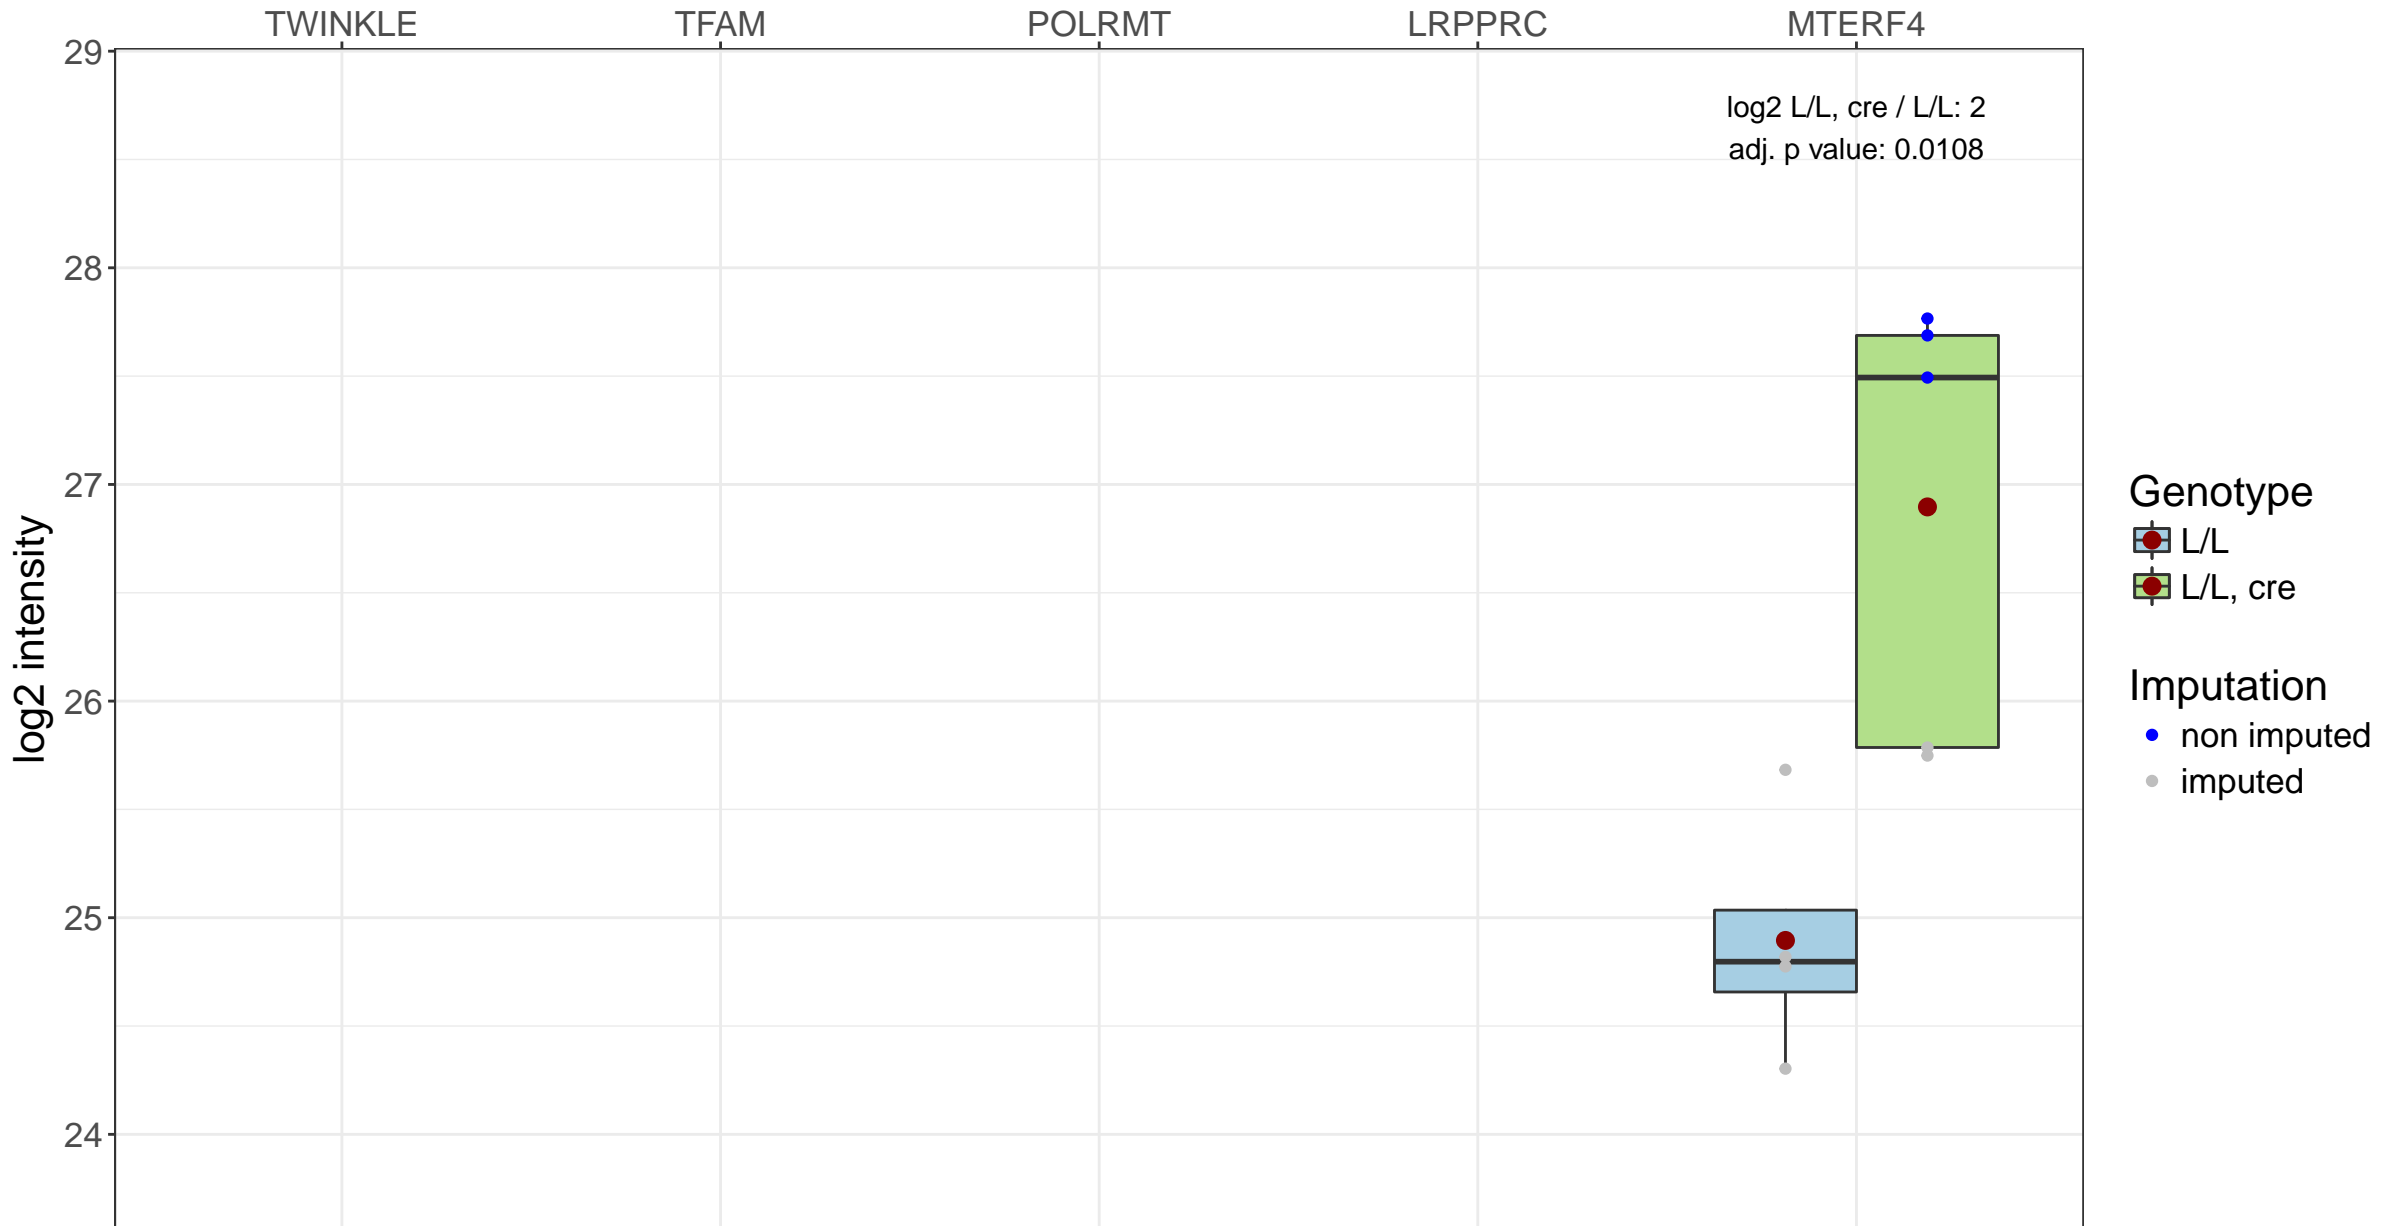

# NPEPPS / Q11011

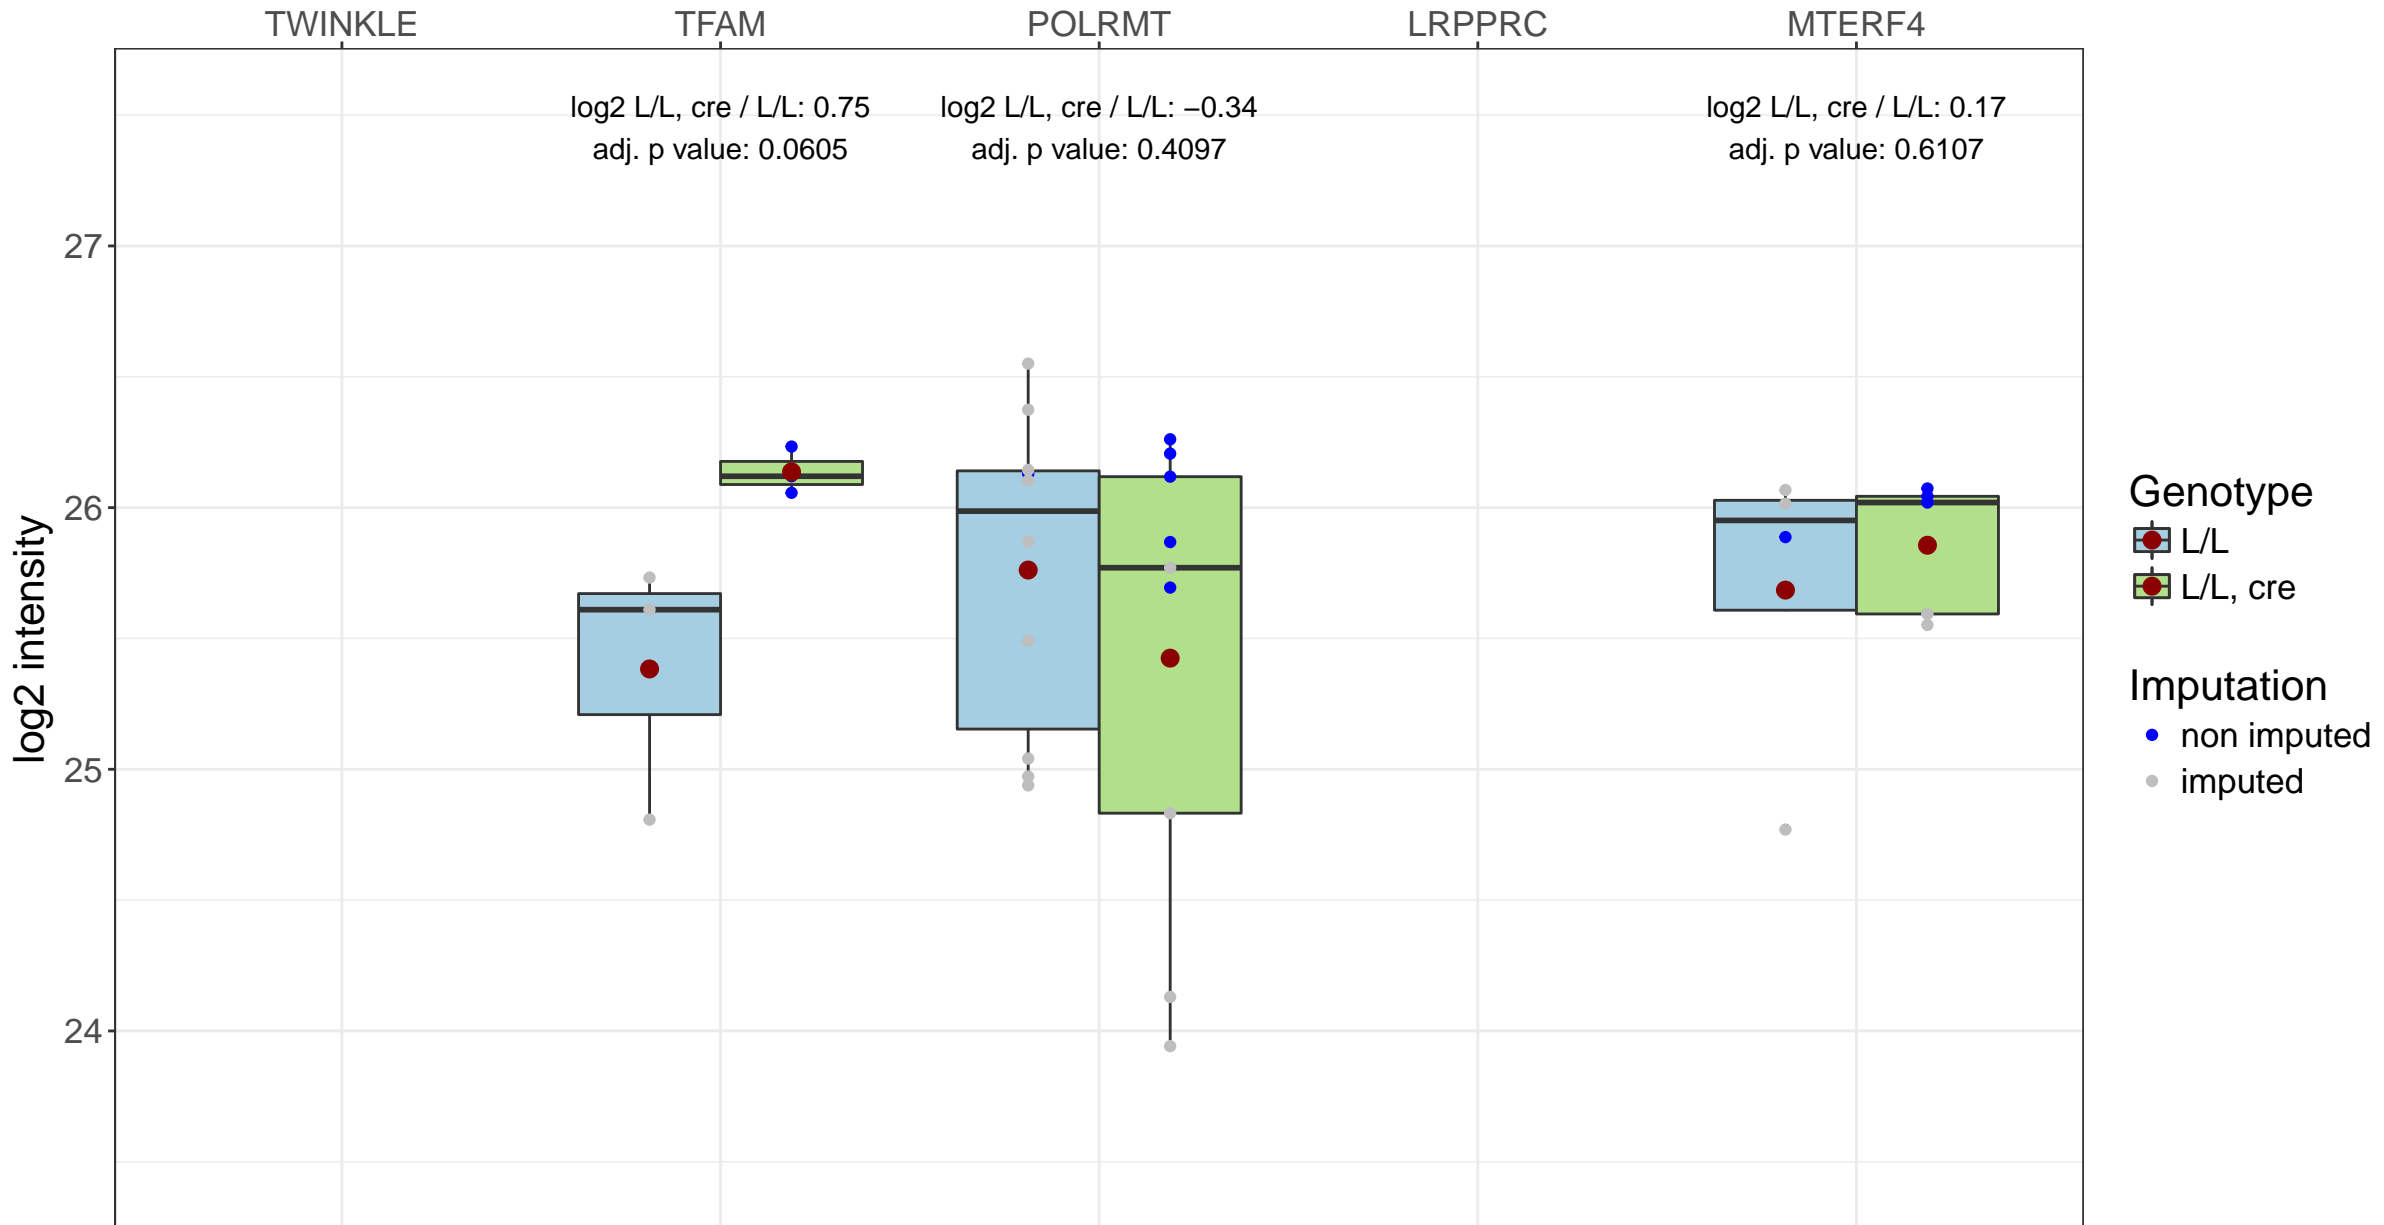

# NPPA / P05125

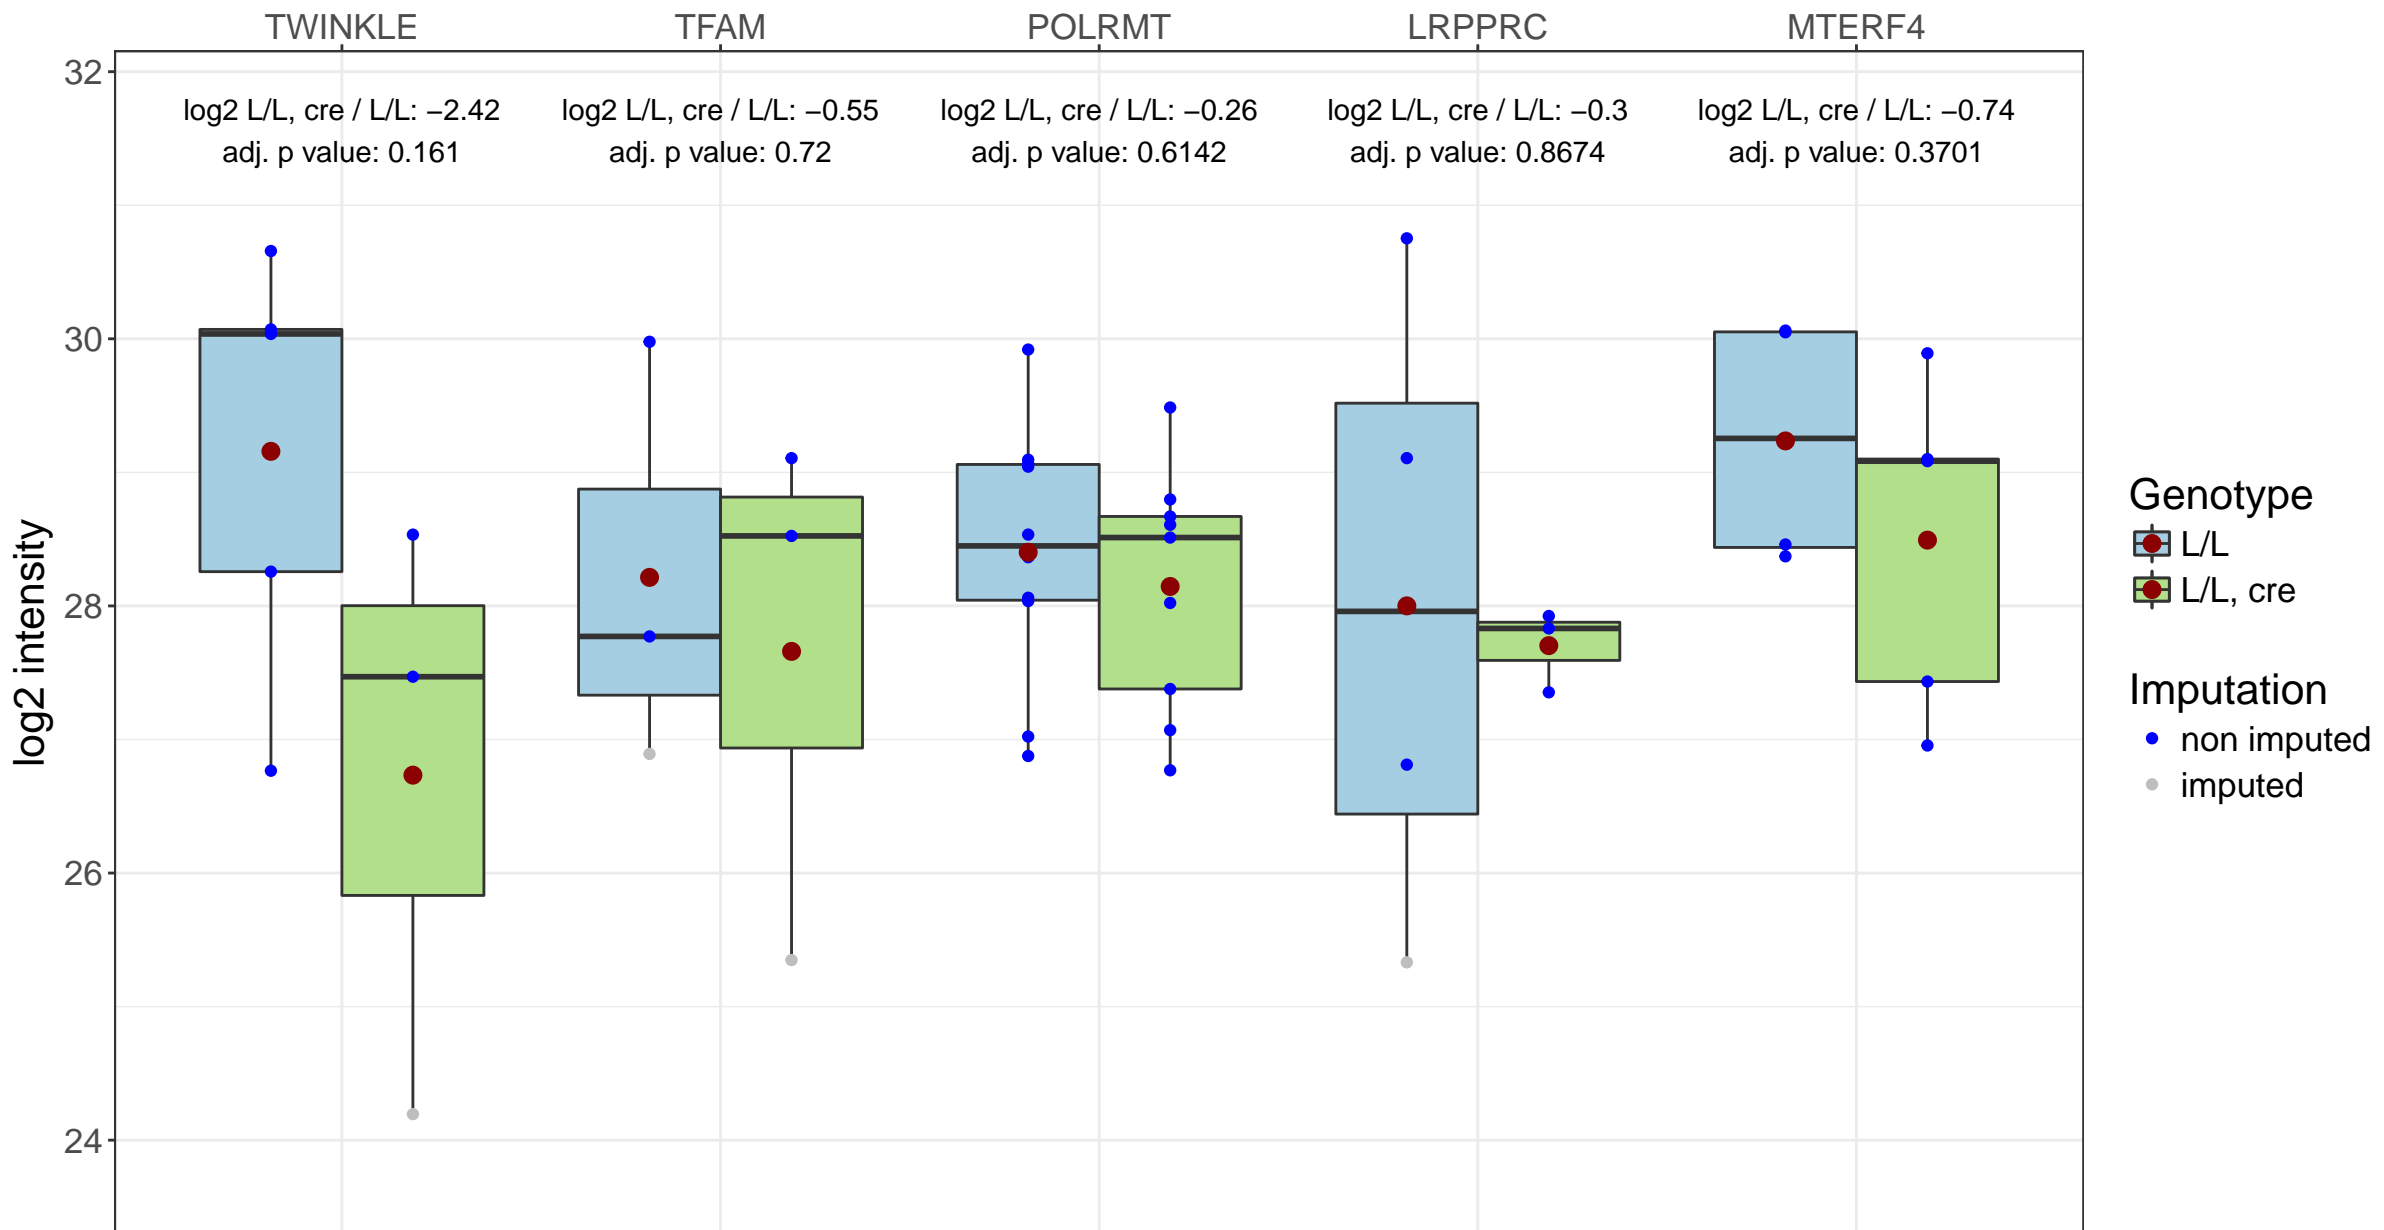

# NQO1 / Q64669

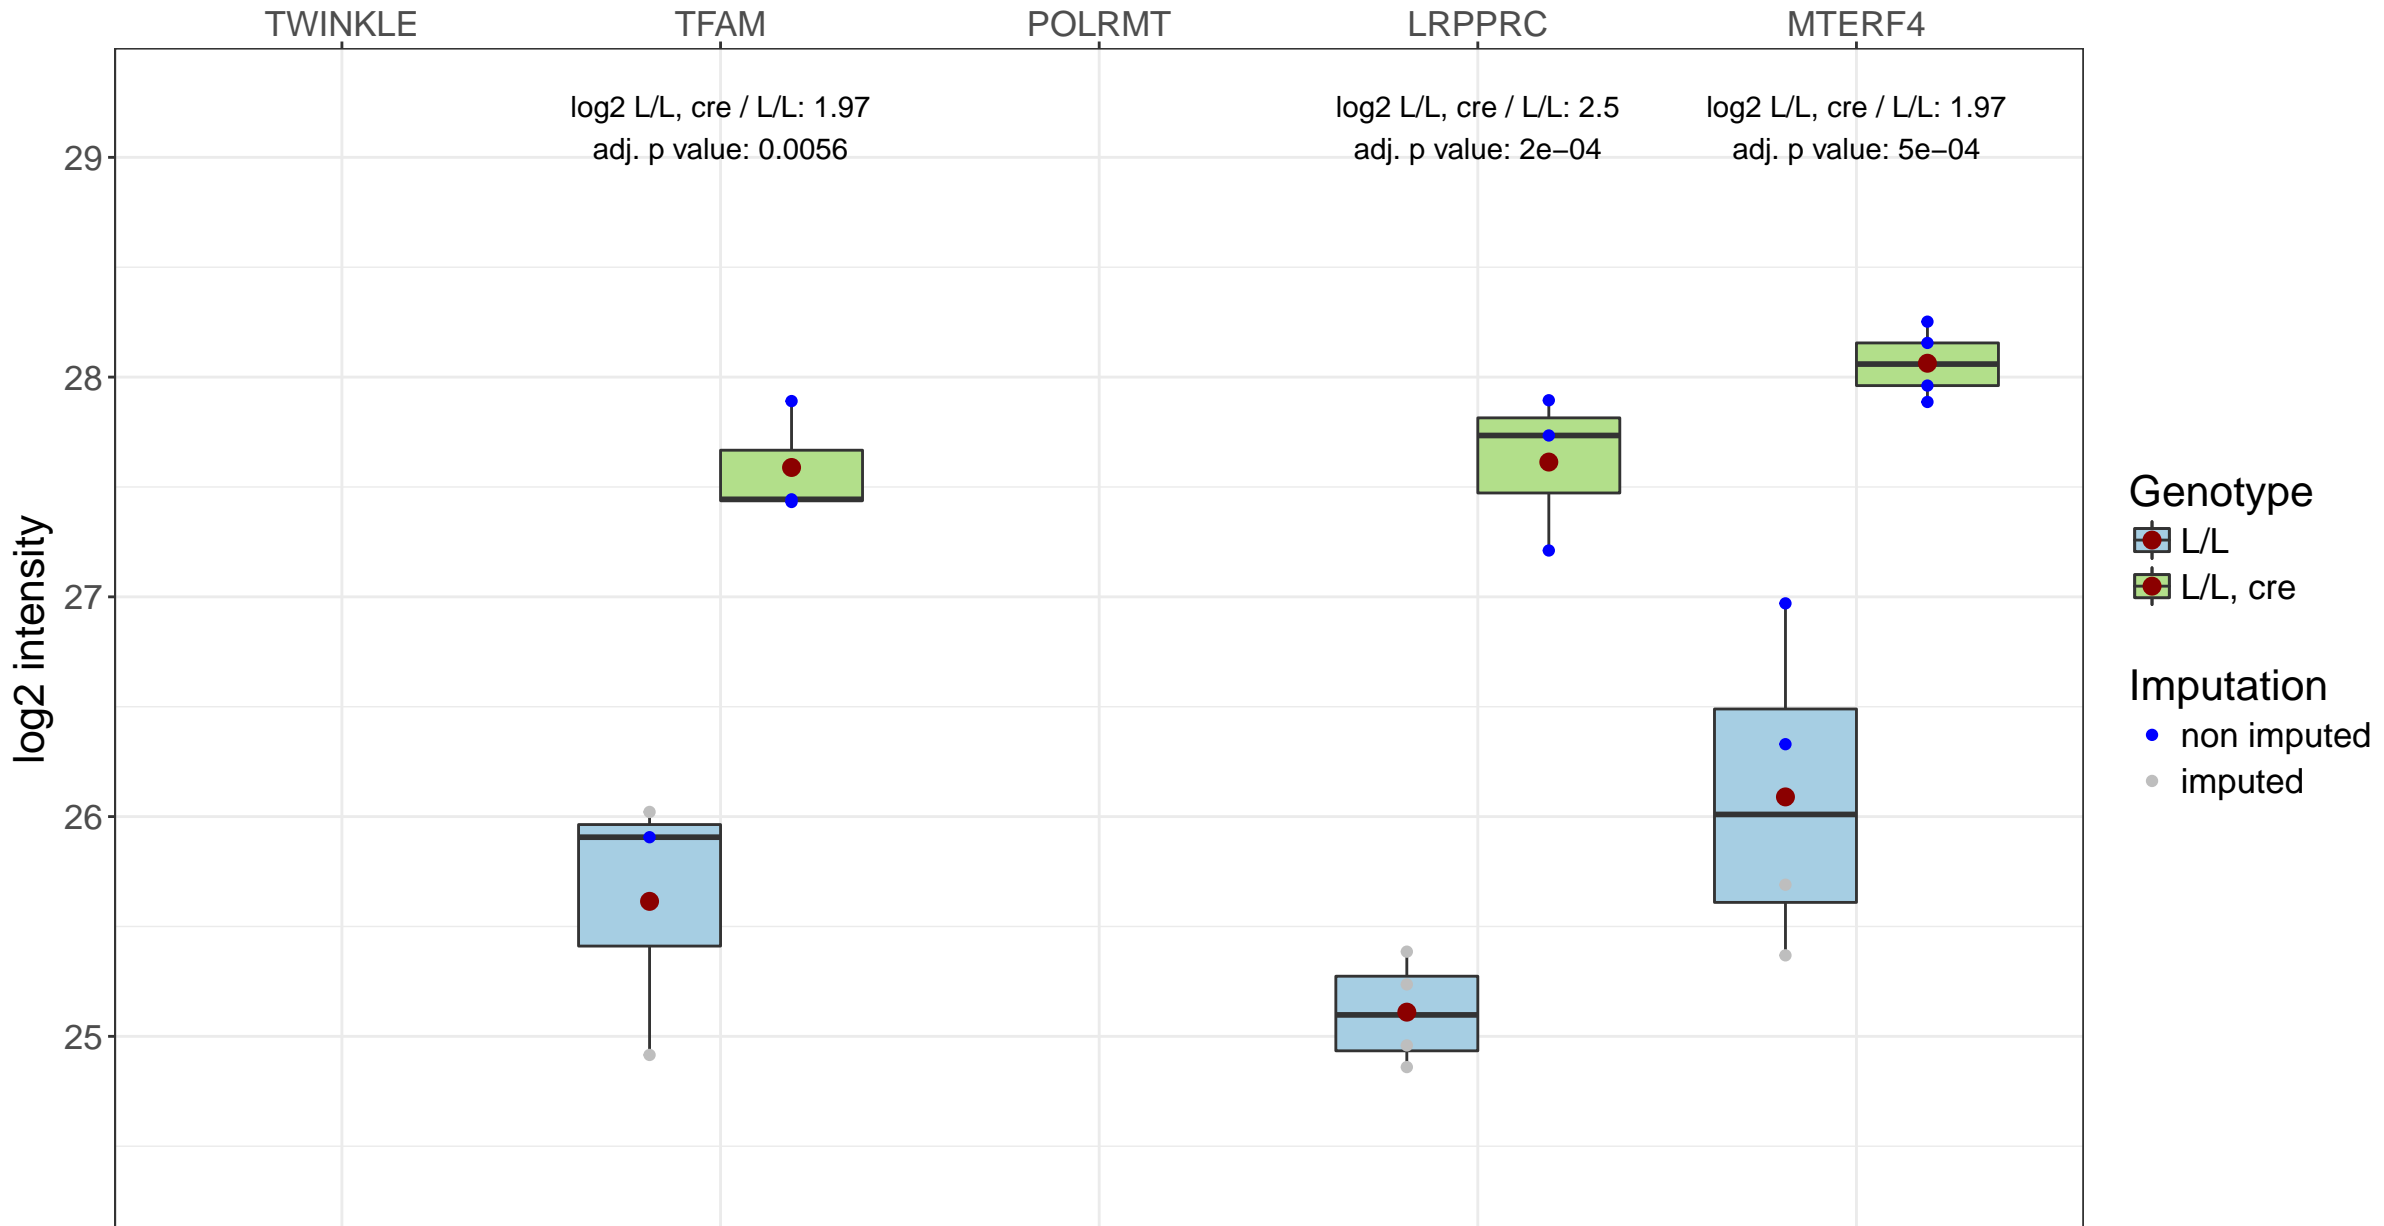

# NSUN4 / Q9CZ57

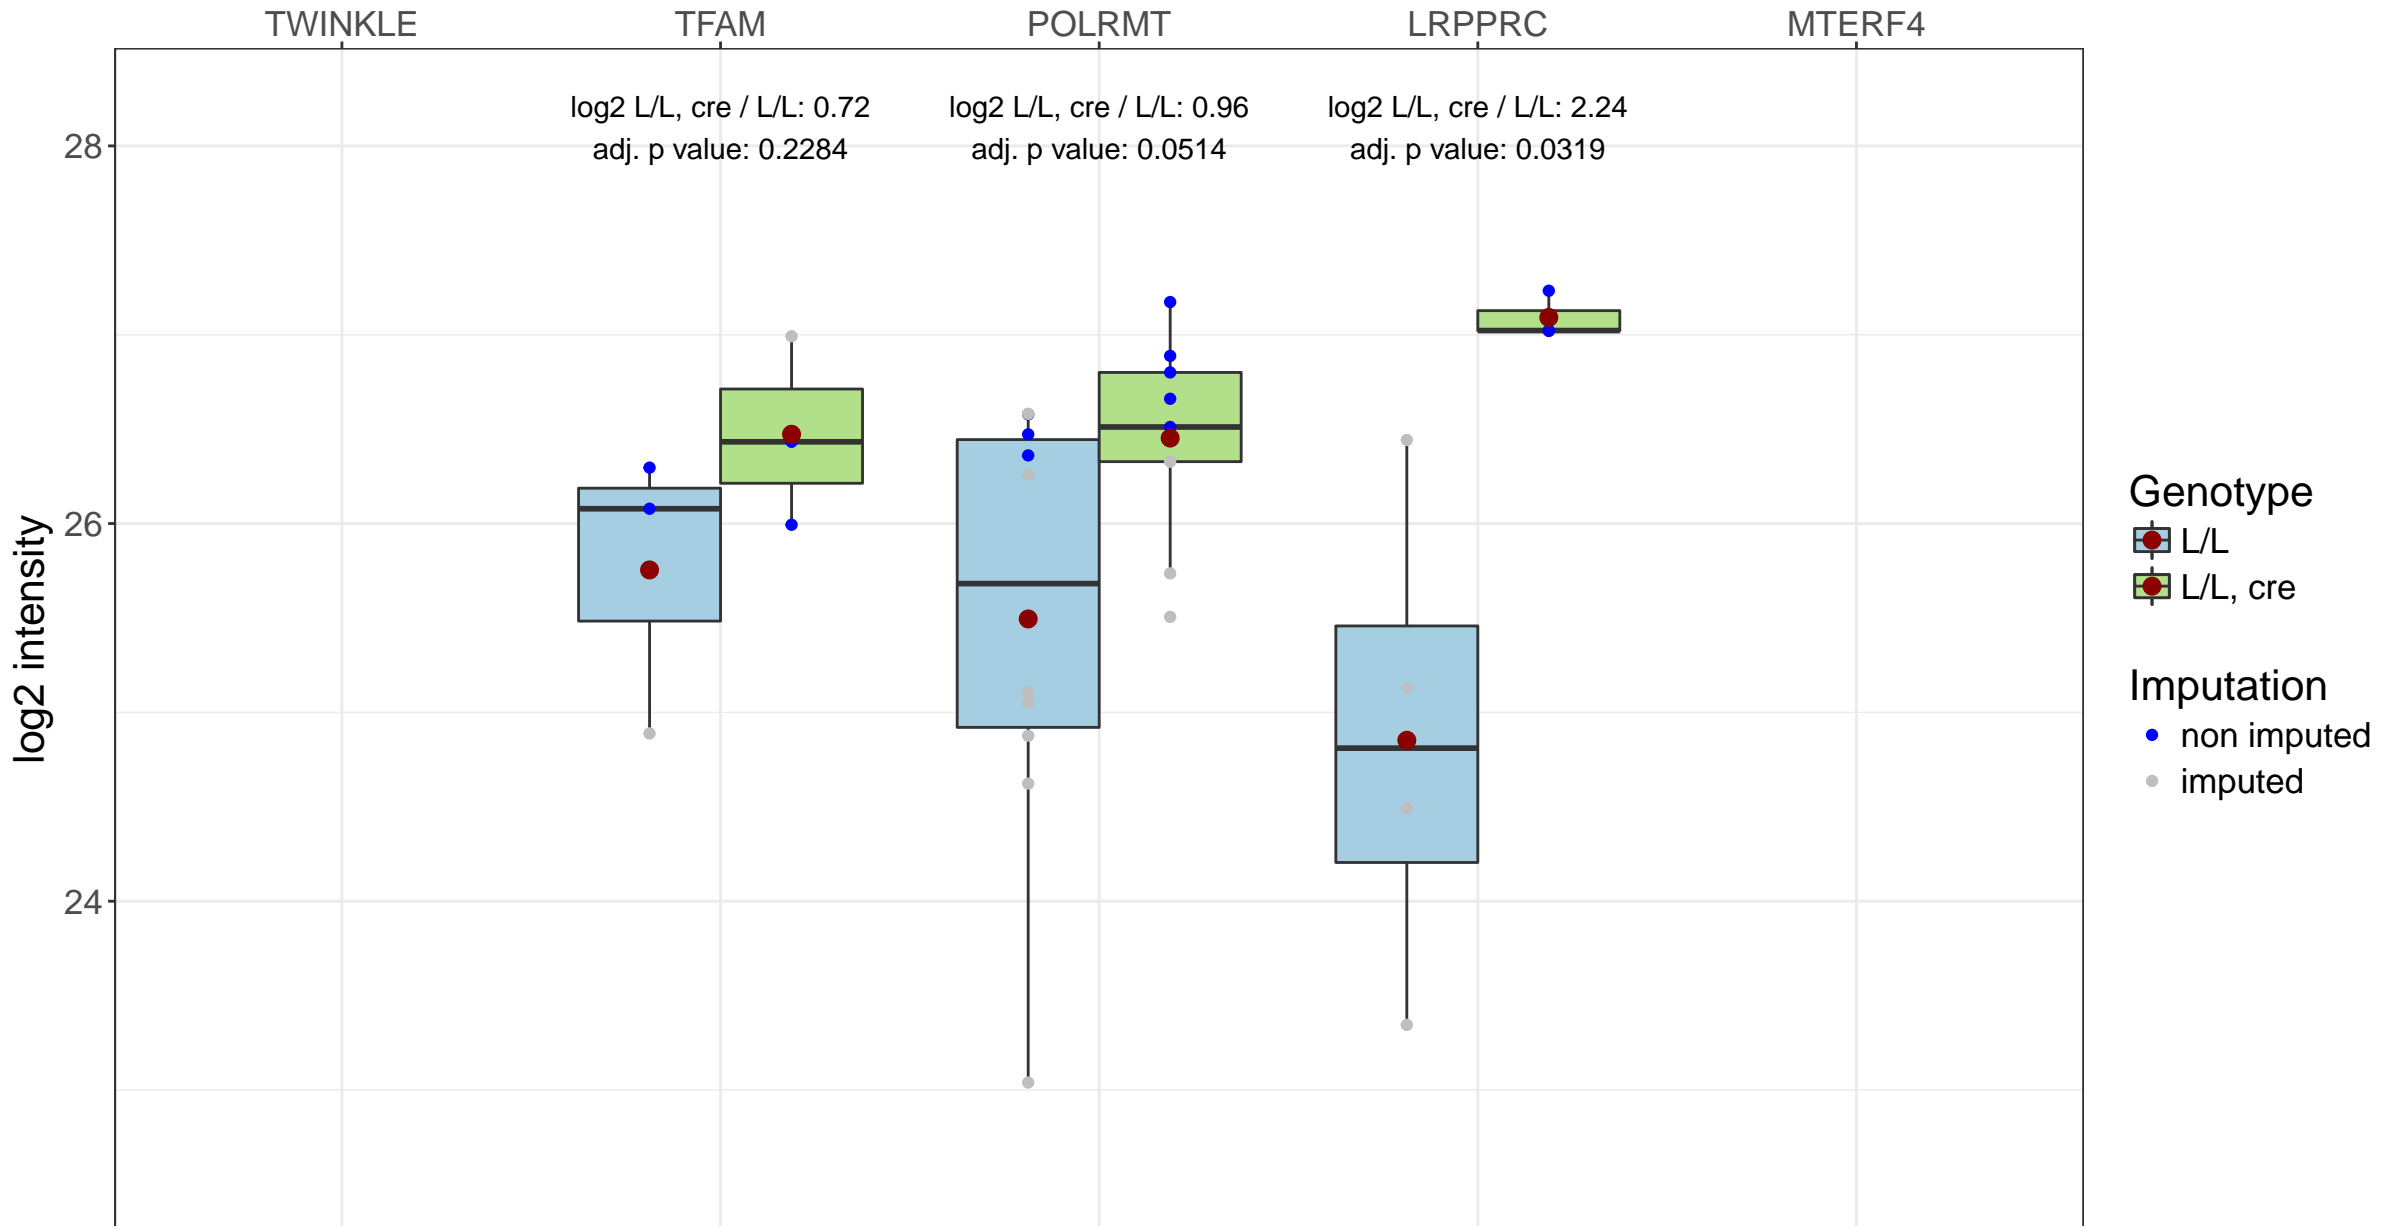

# NT5C3A / Q9D020

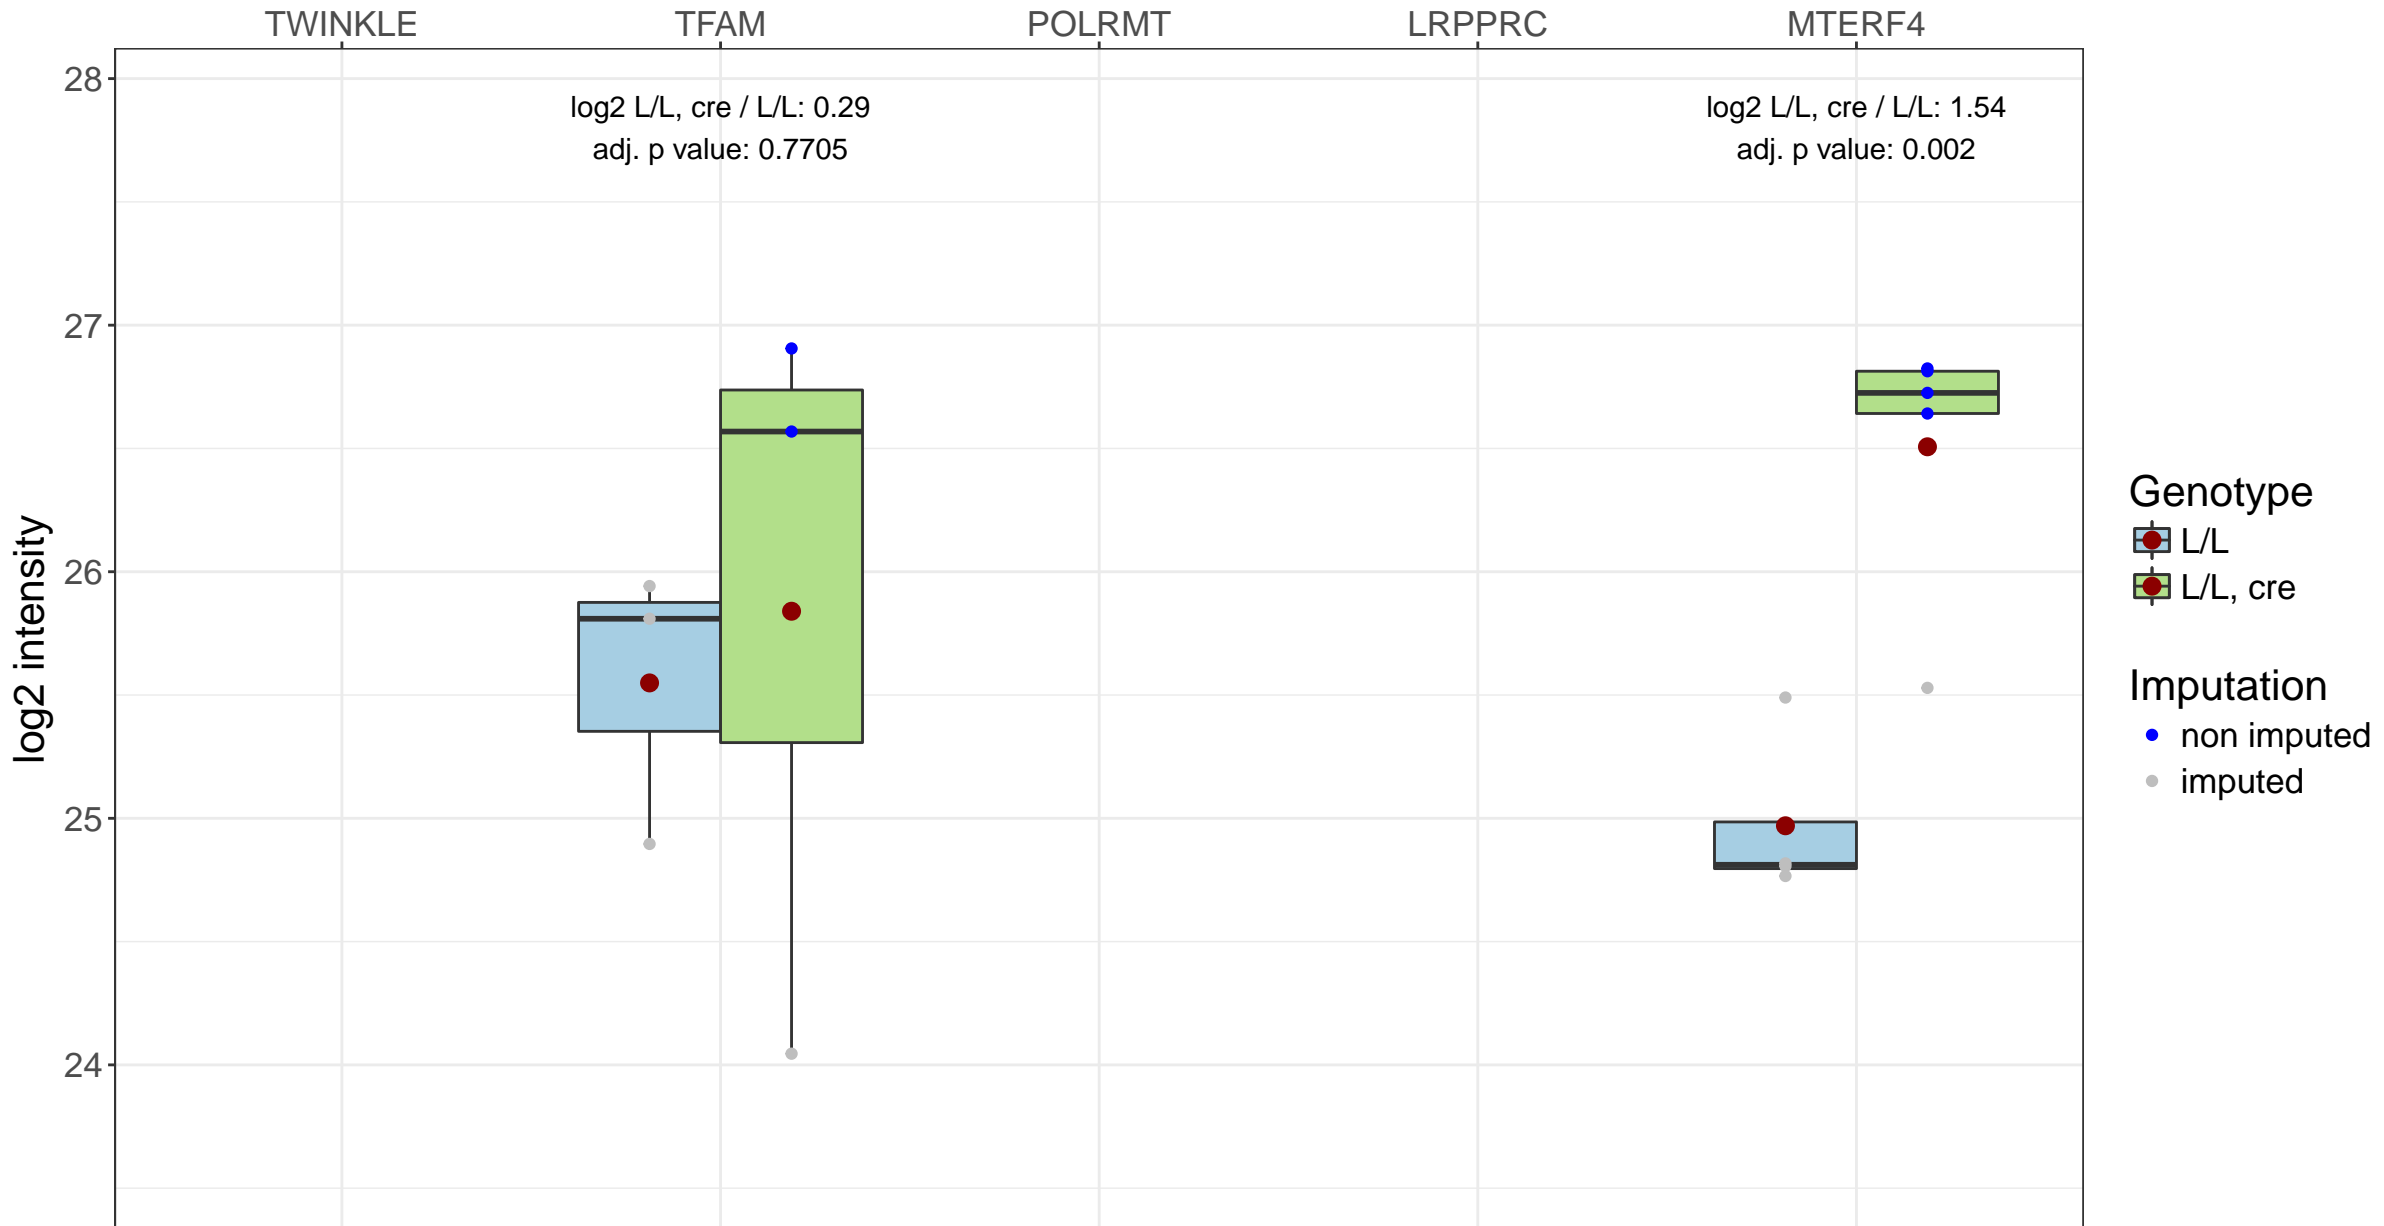

# NT5DC2 / Q91X76

TWINKLE

TFAM

POLRMT

LRPPRC

MTERF4

log2 L/L, cre / L/L: 0.17  
adj. p value: 0.5592

log2 intensity

27

26

25

24

Genotype

L/L

L/L, cre

Imputation

non imputed

imputed

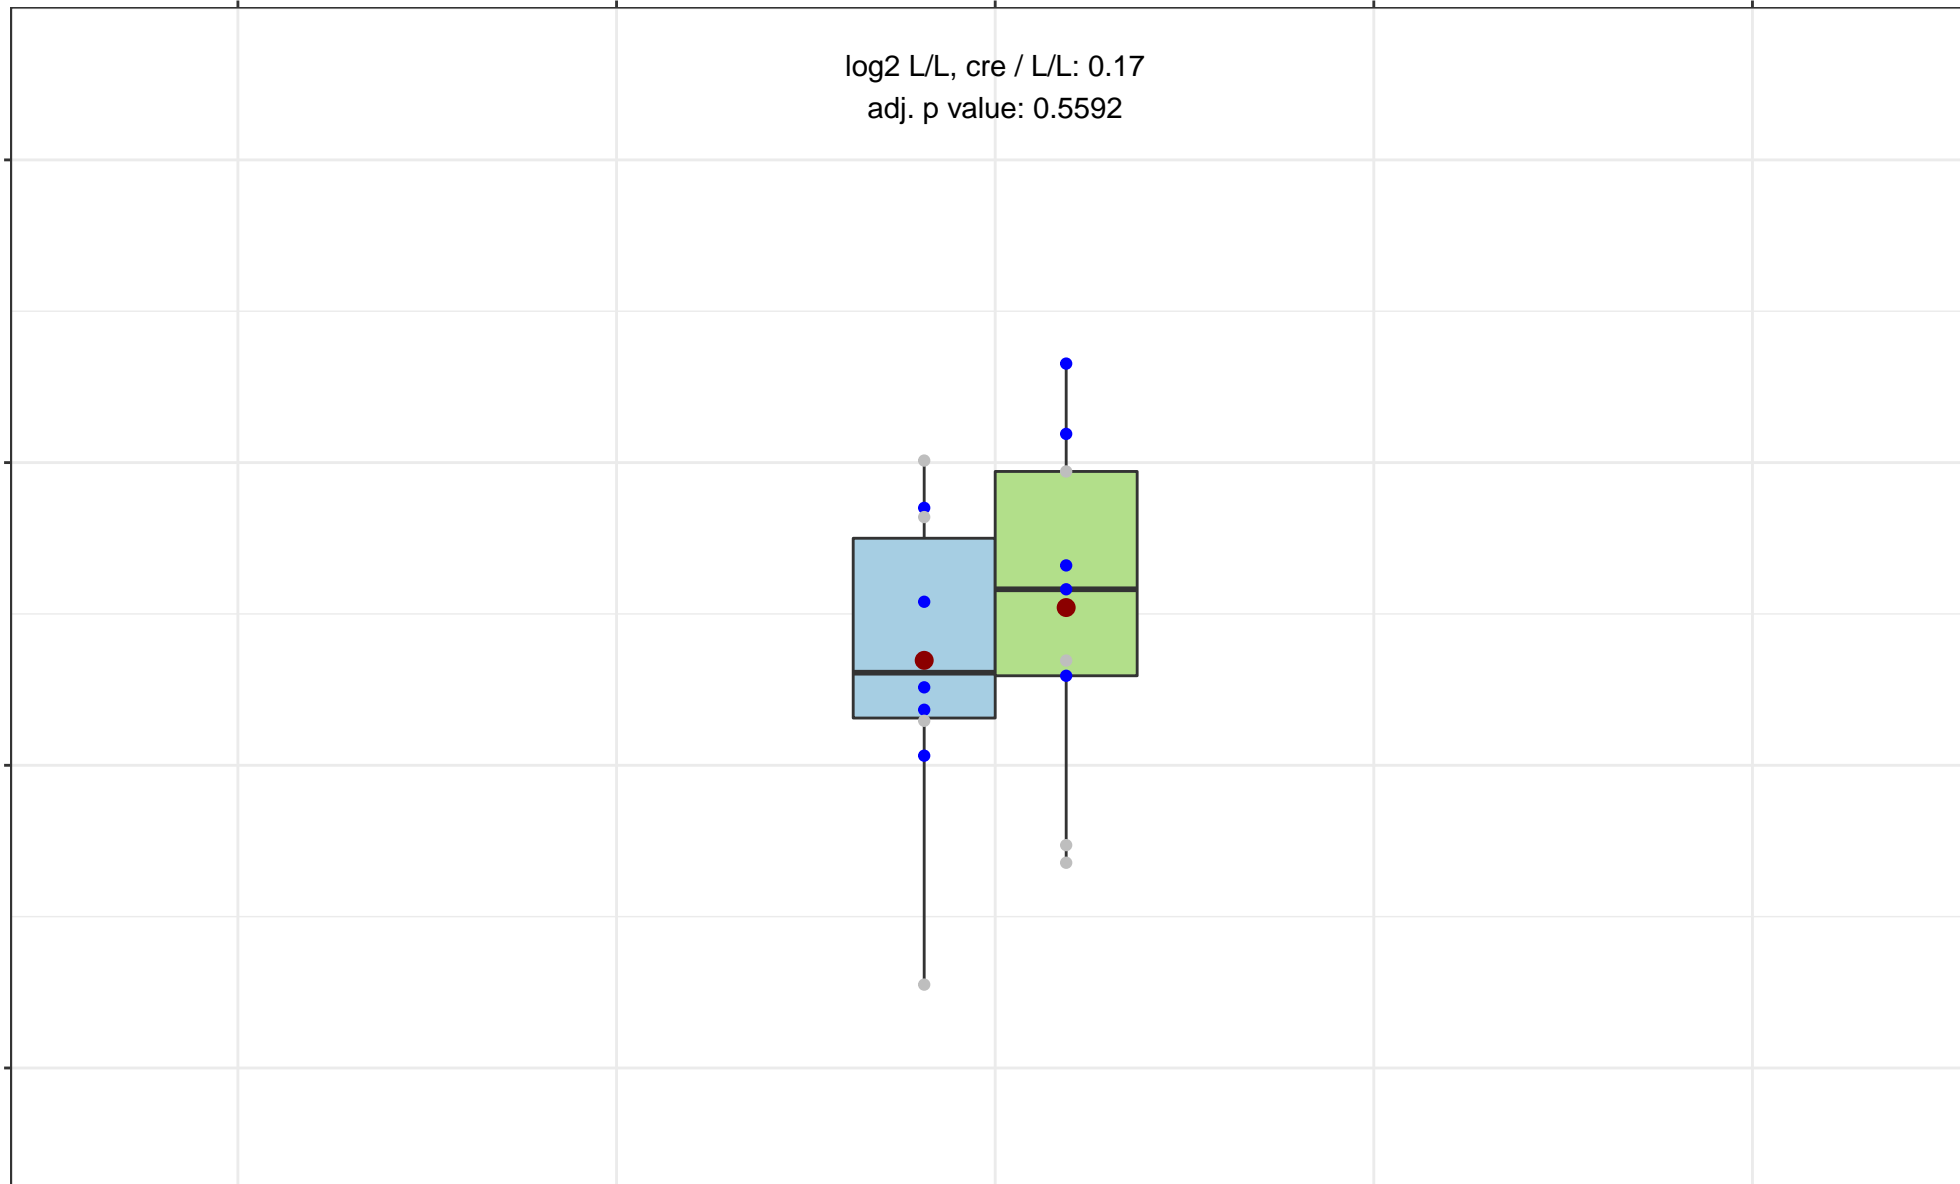

# NT5DC3 / Q3UHB1

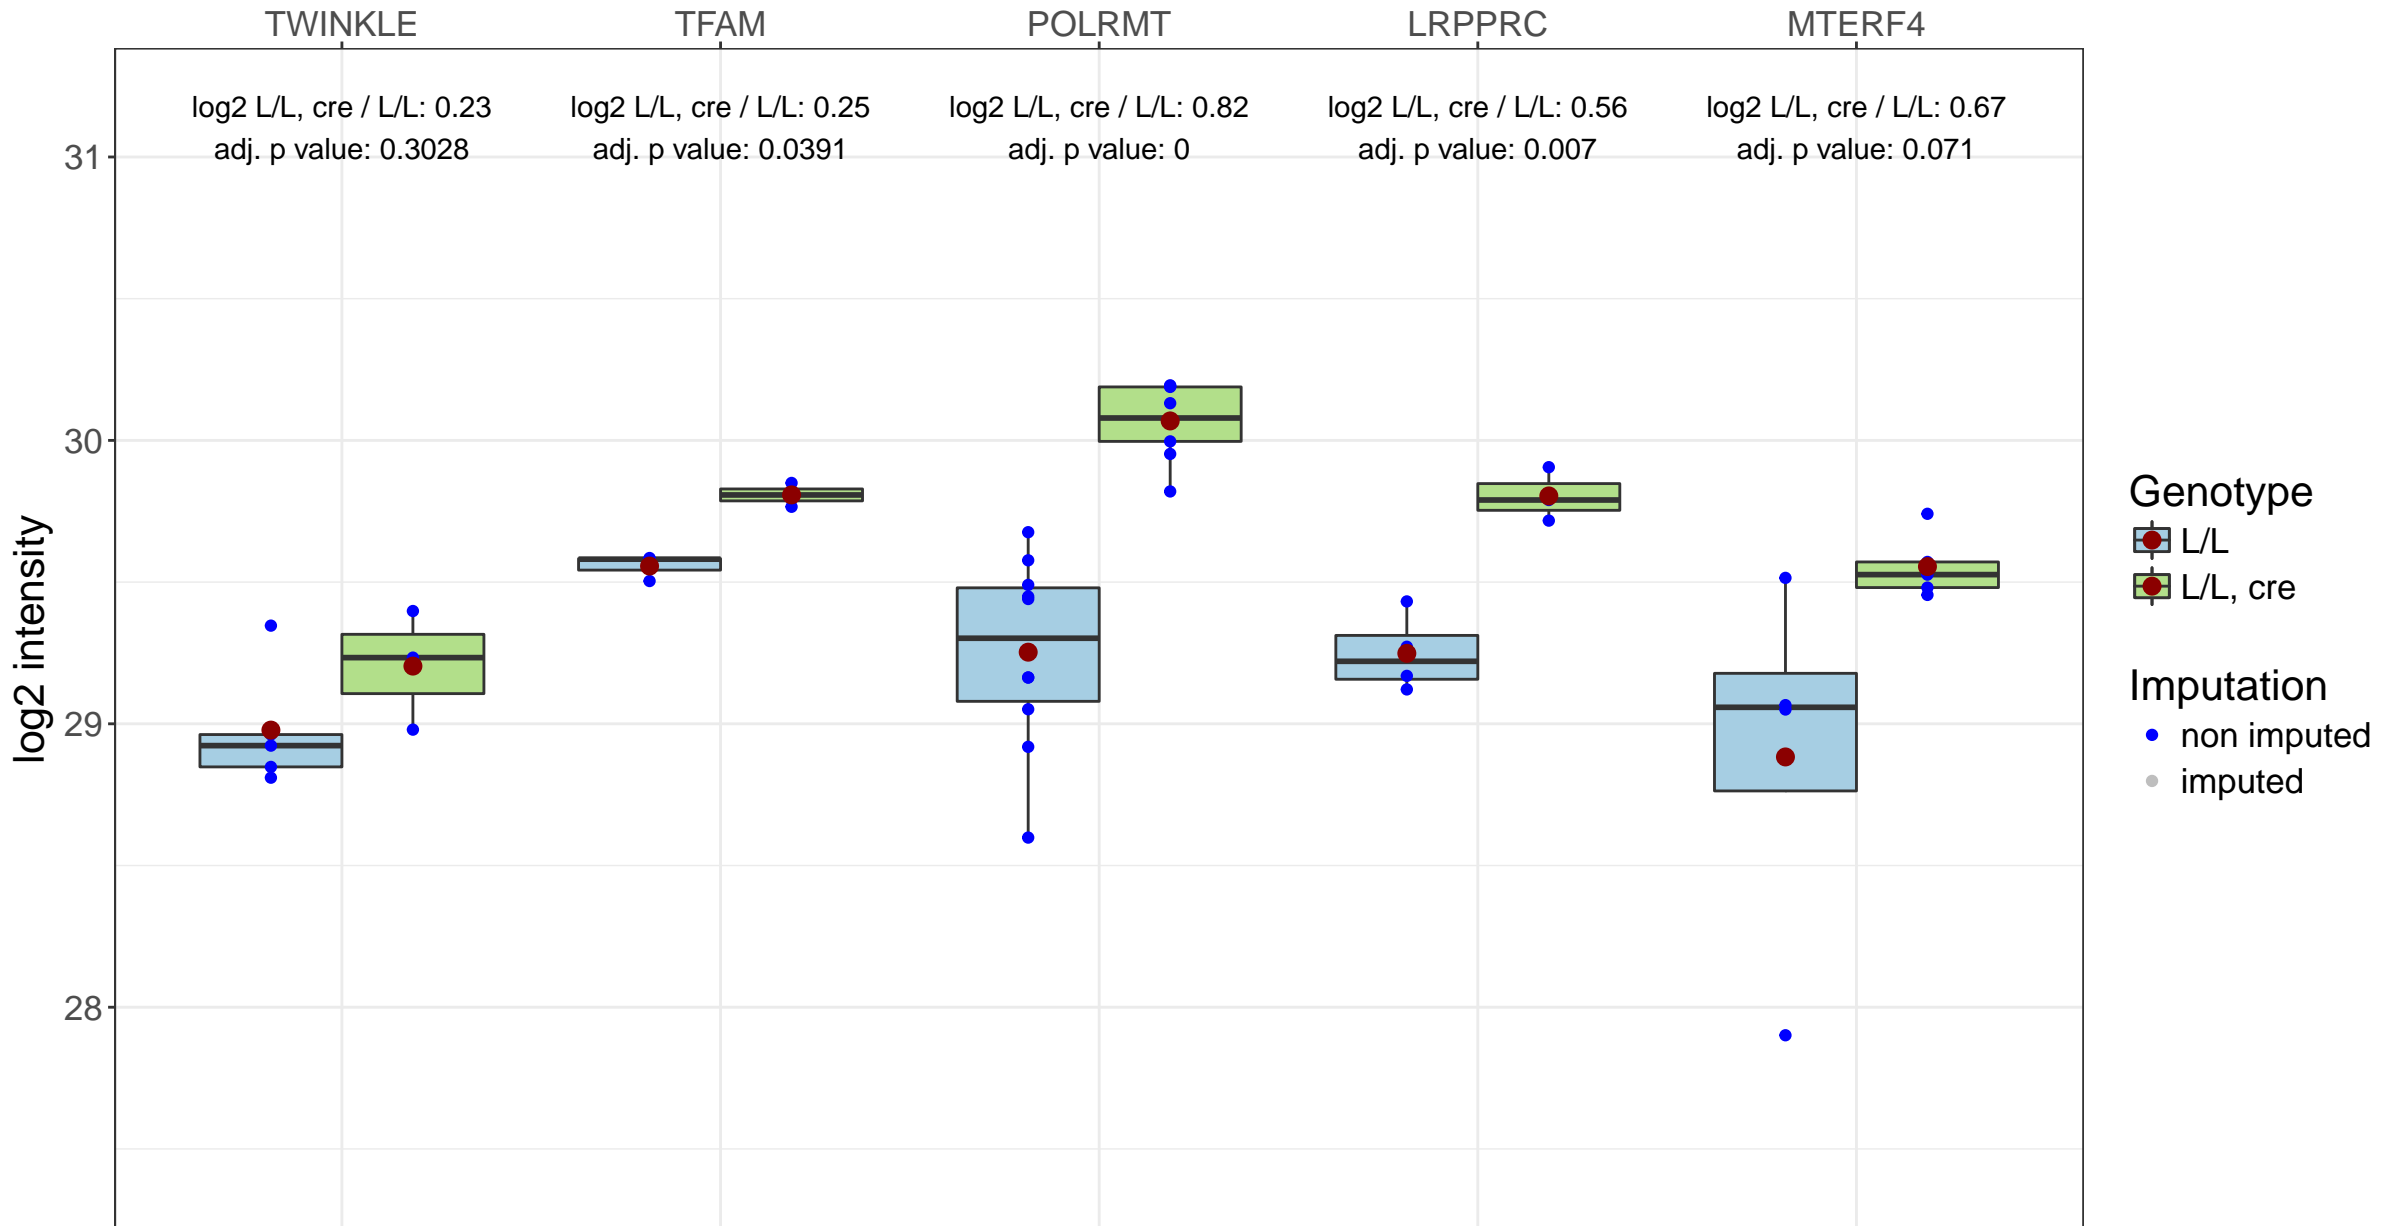



# NT5M / Q8VCE6

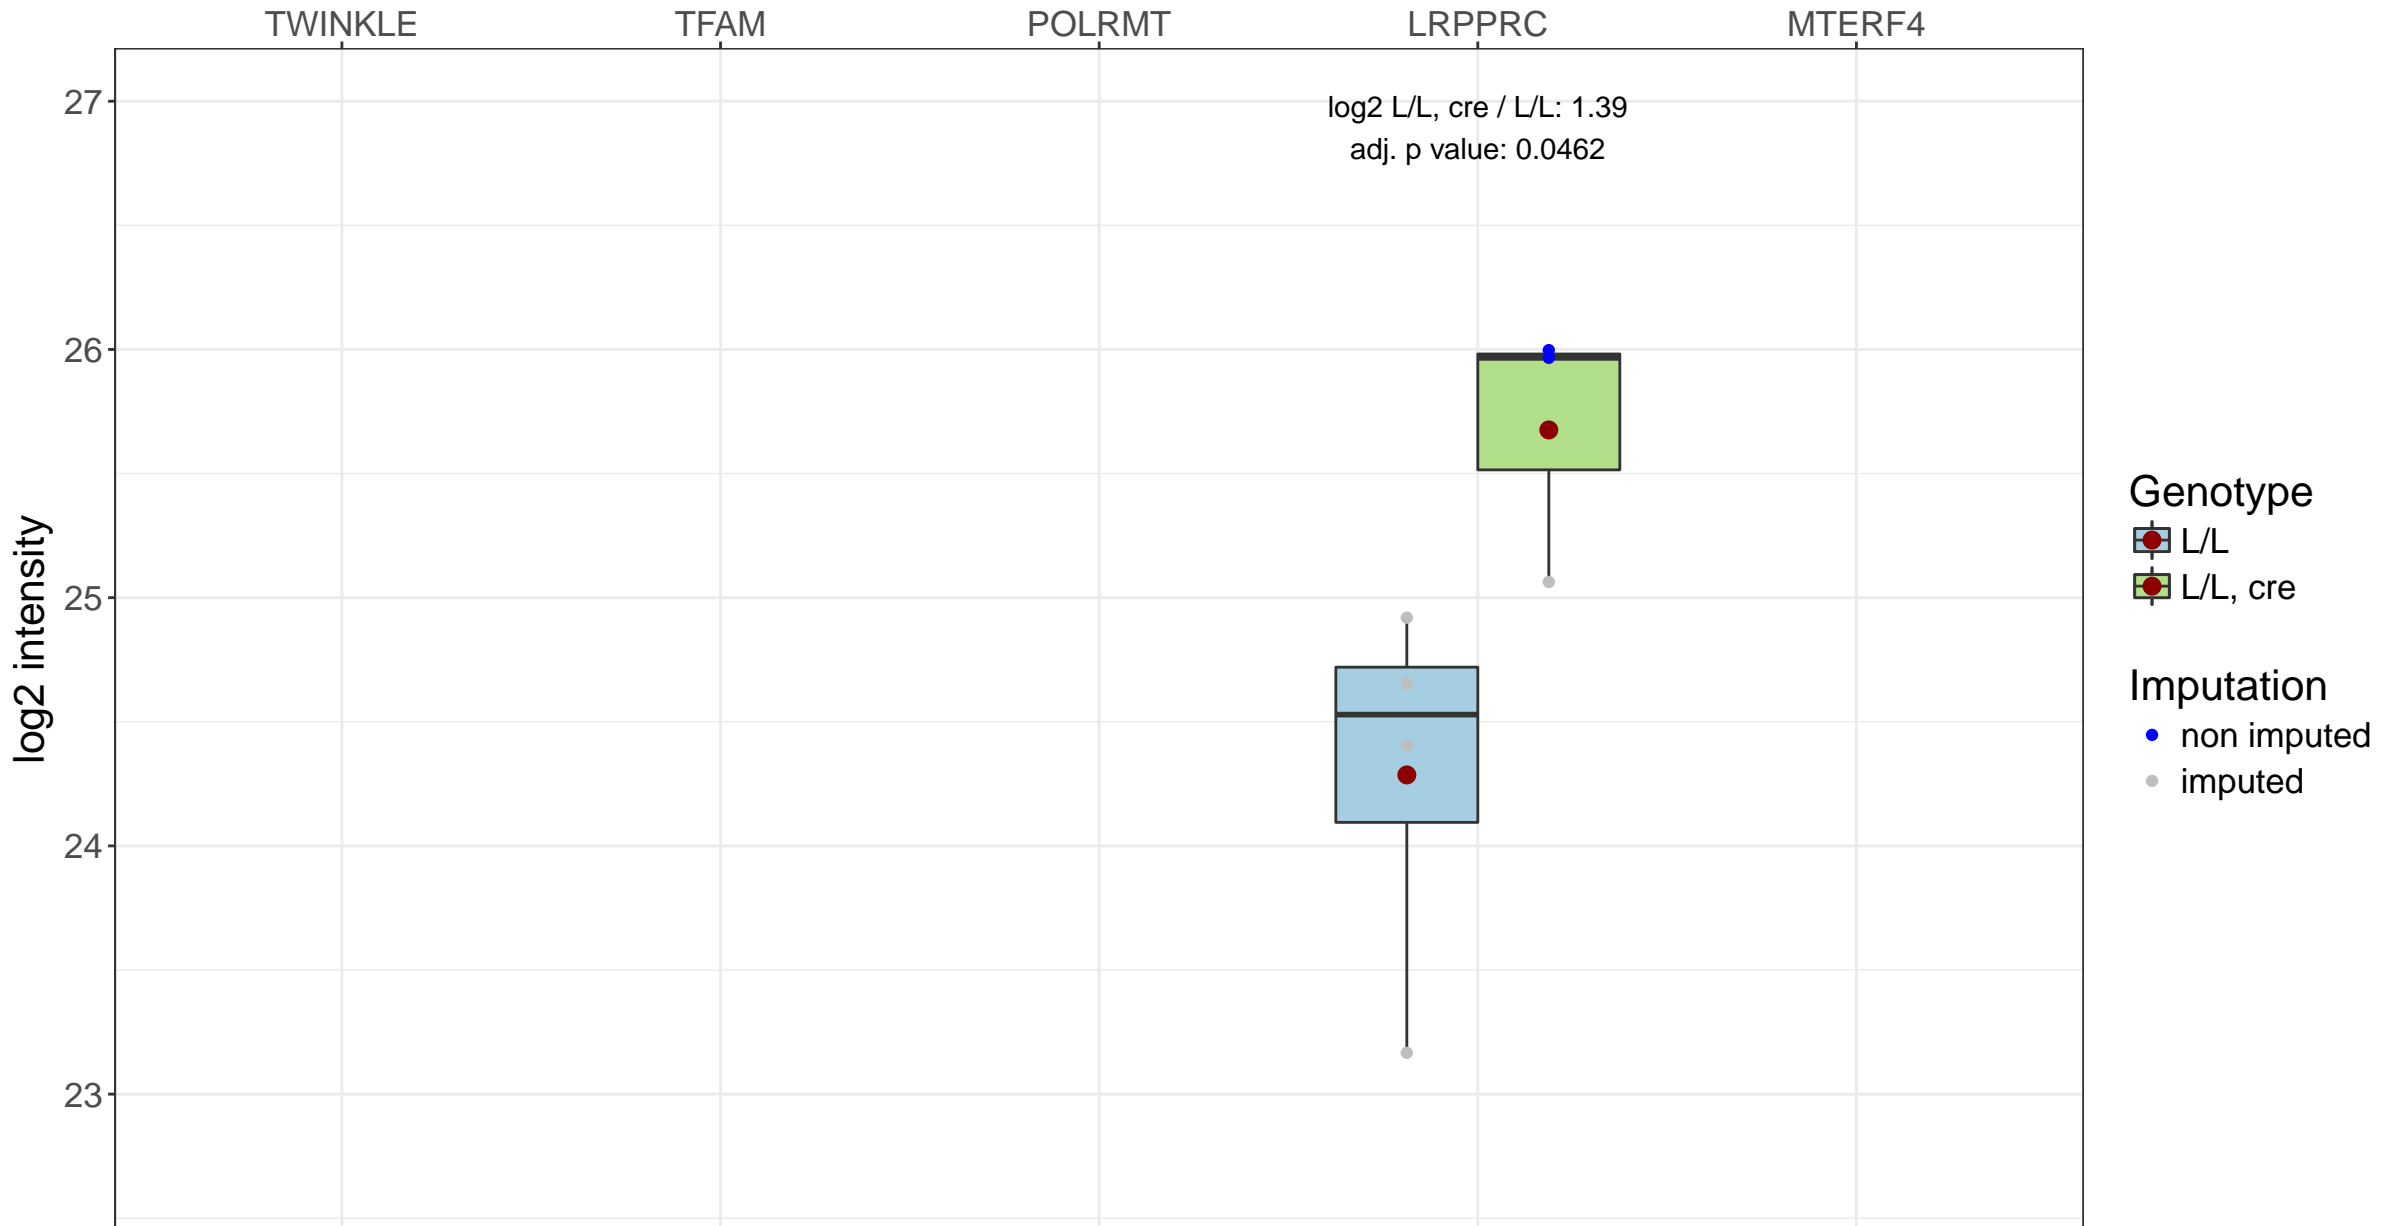

# NUBPL / Q9CWD8

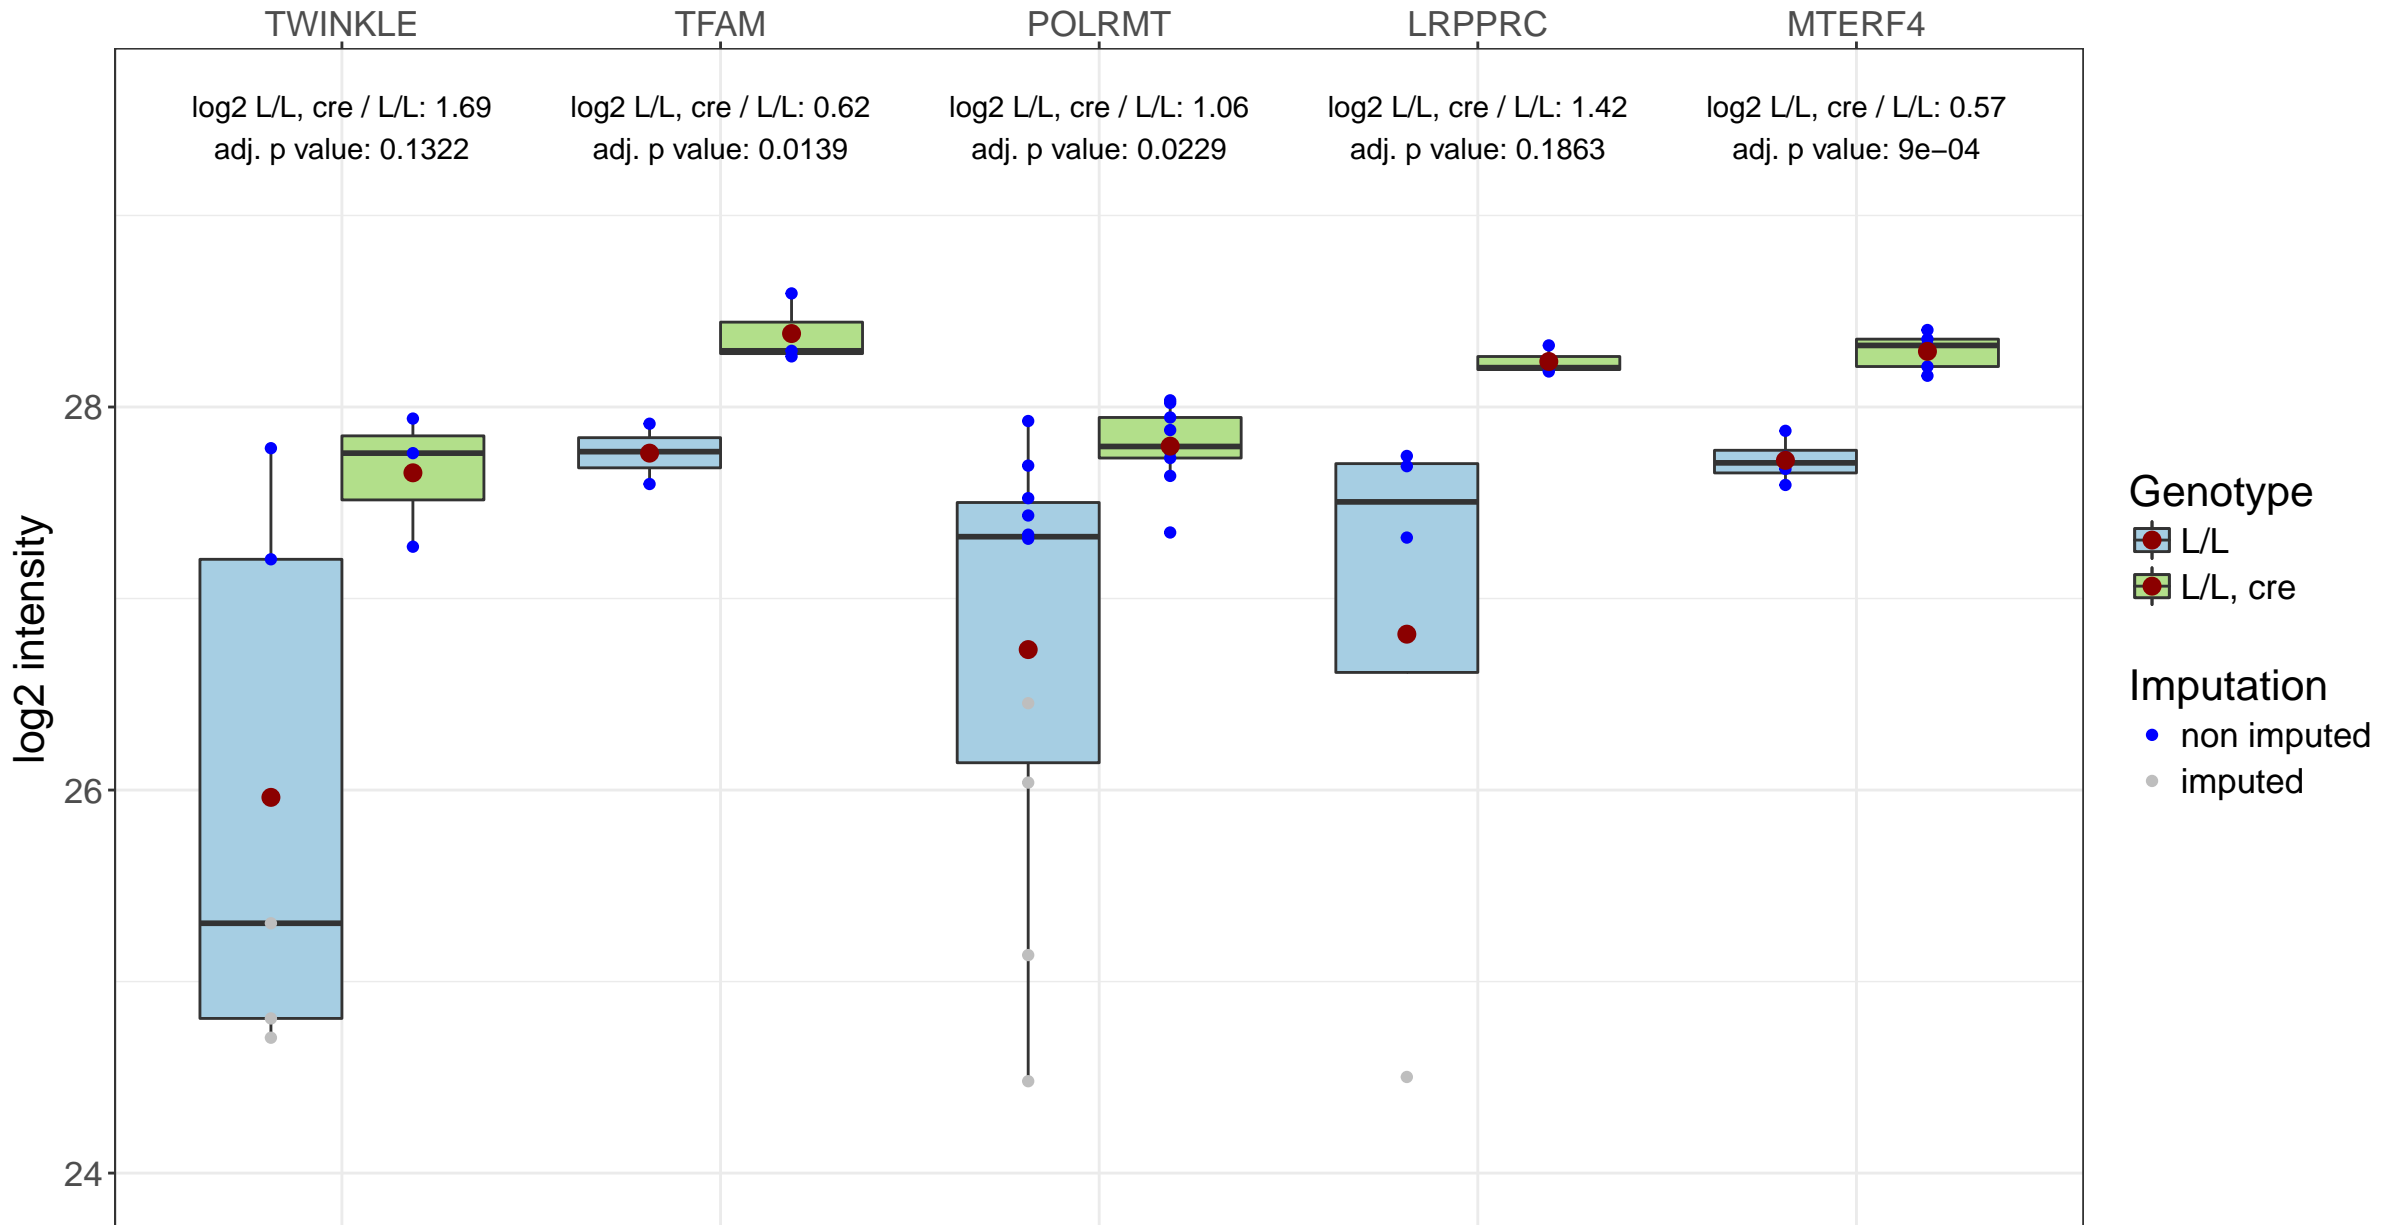

# NUDT13 / Q8JZU0

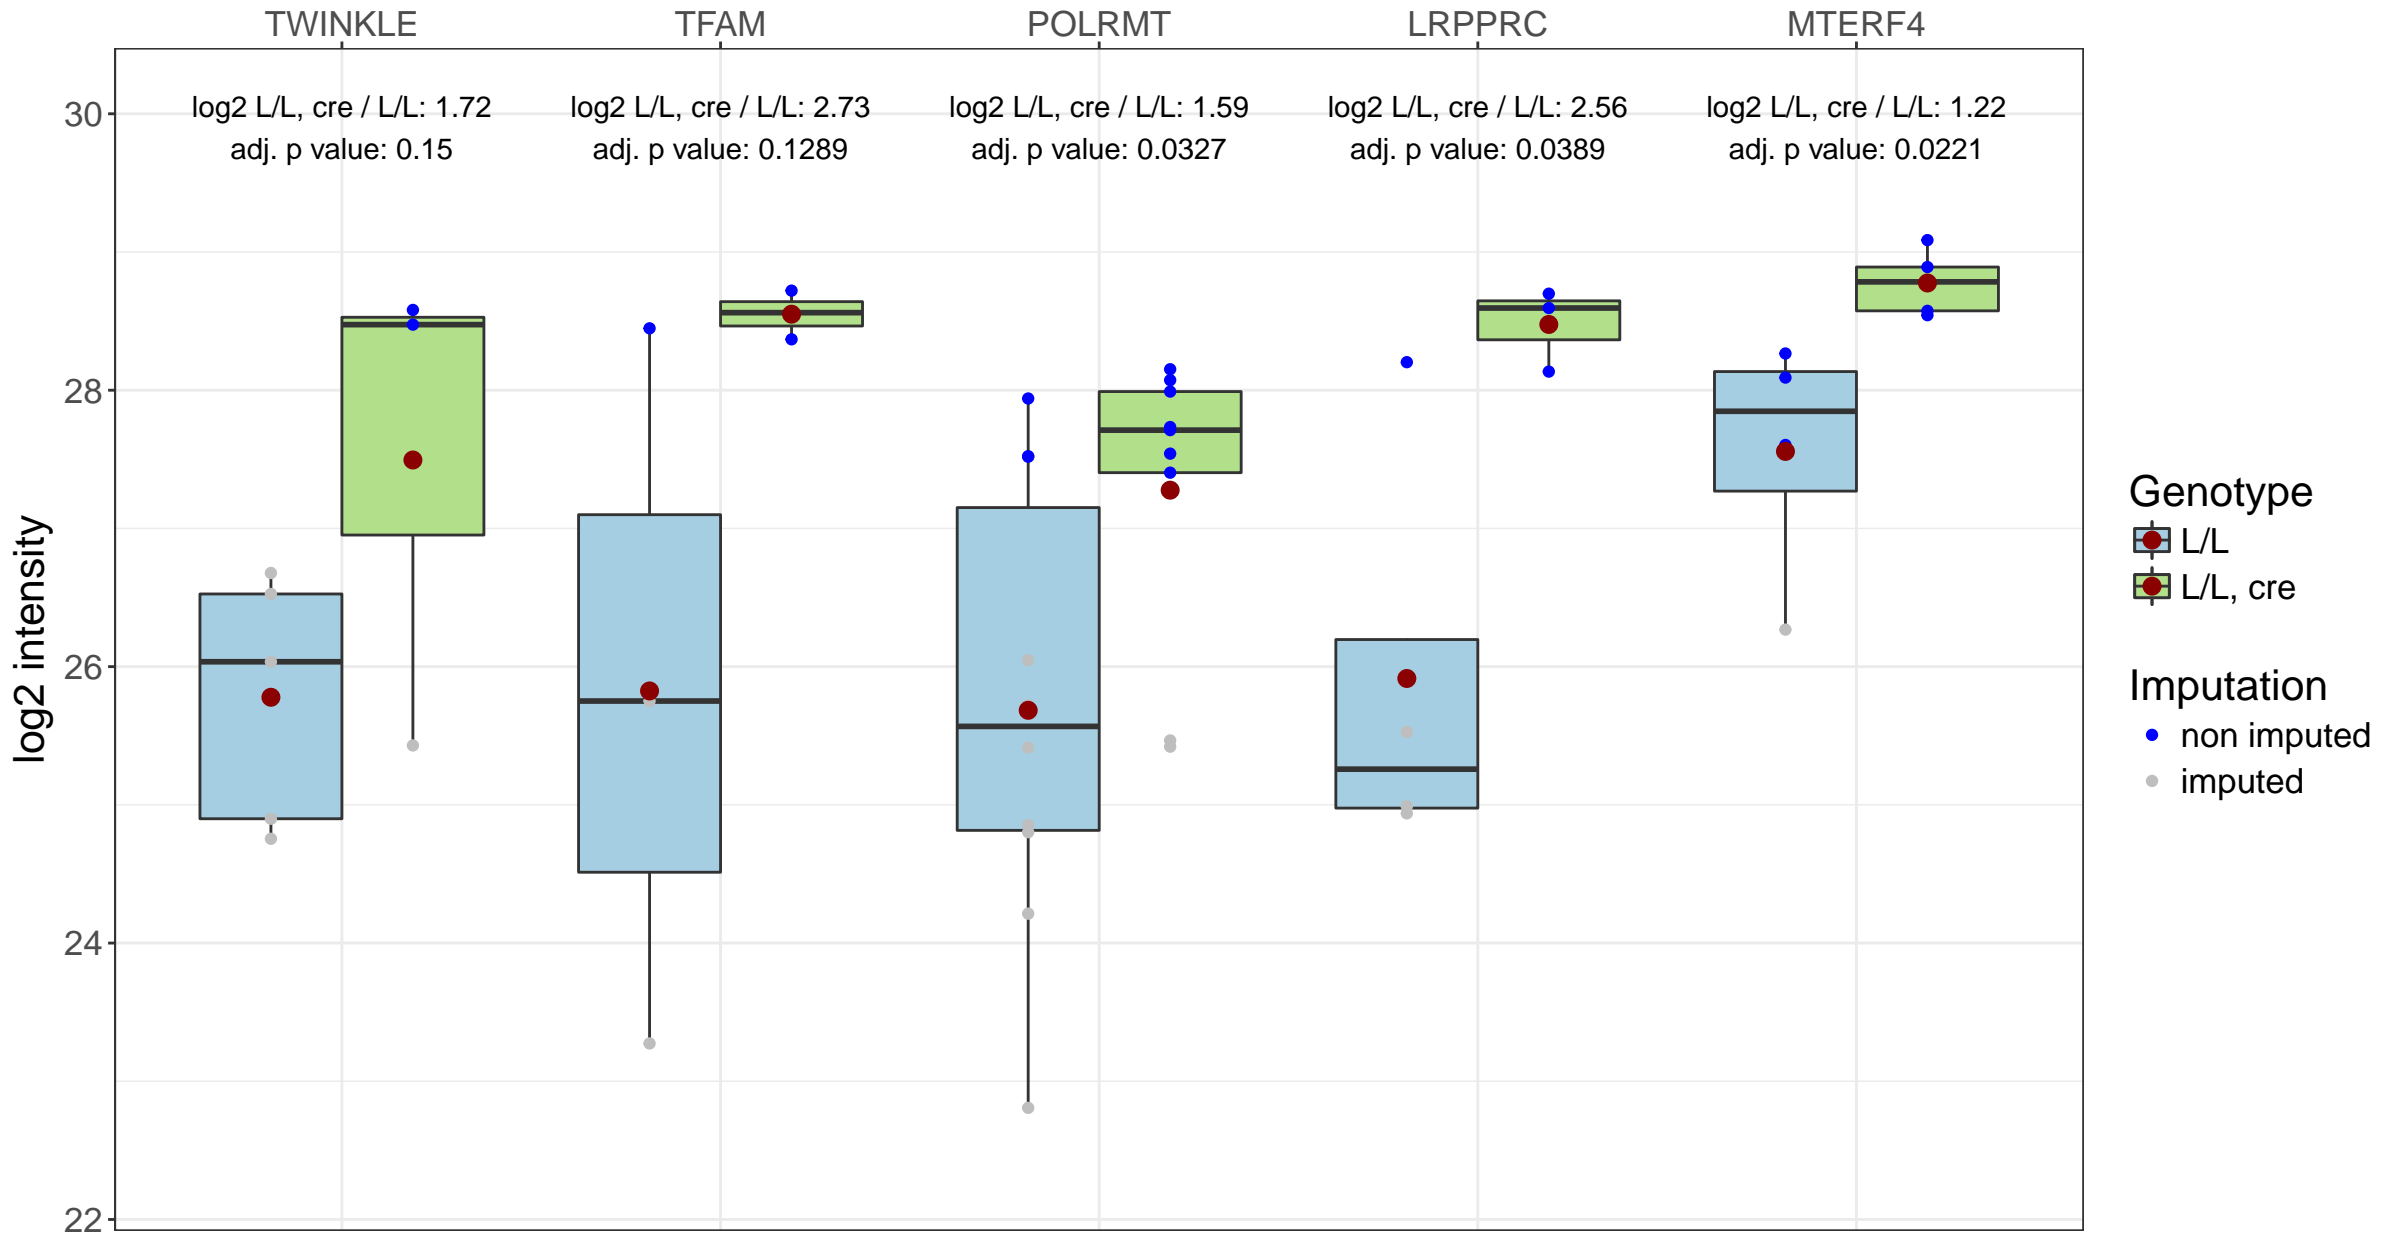

# NUDT17 / Q9CWD3

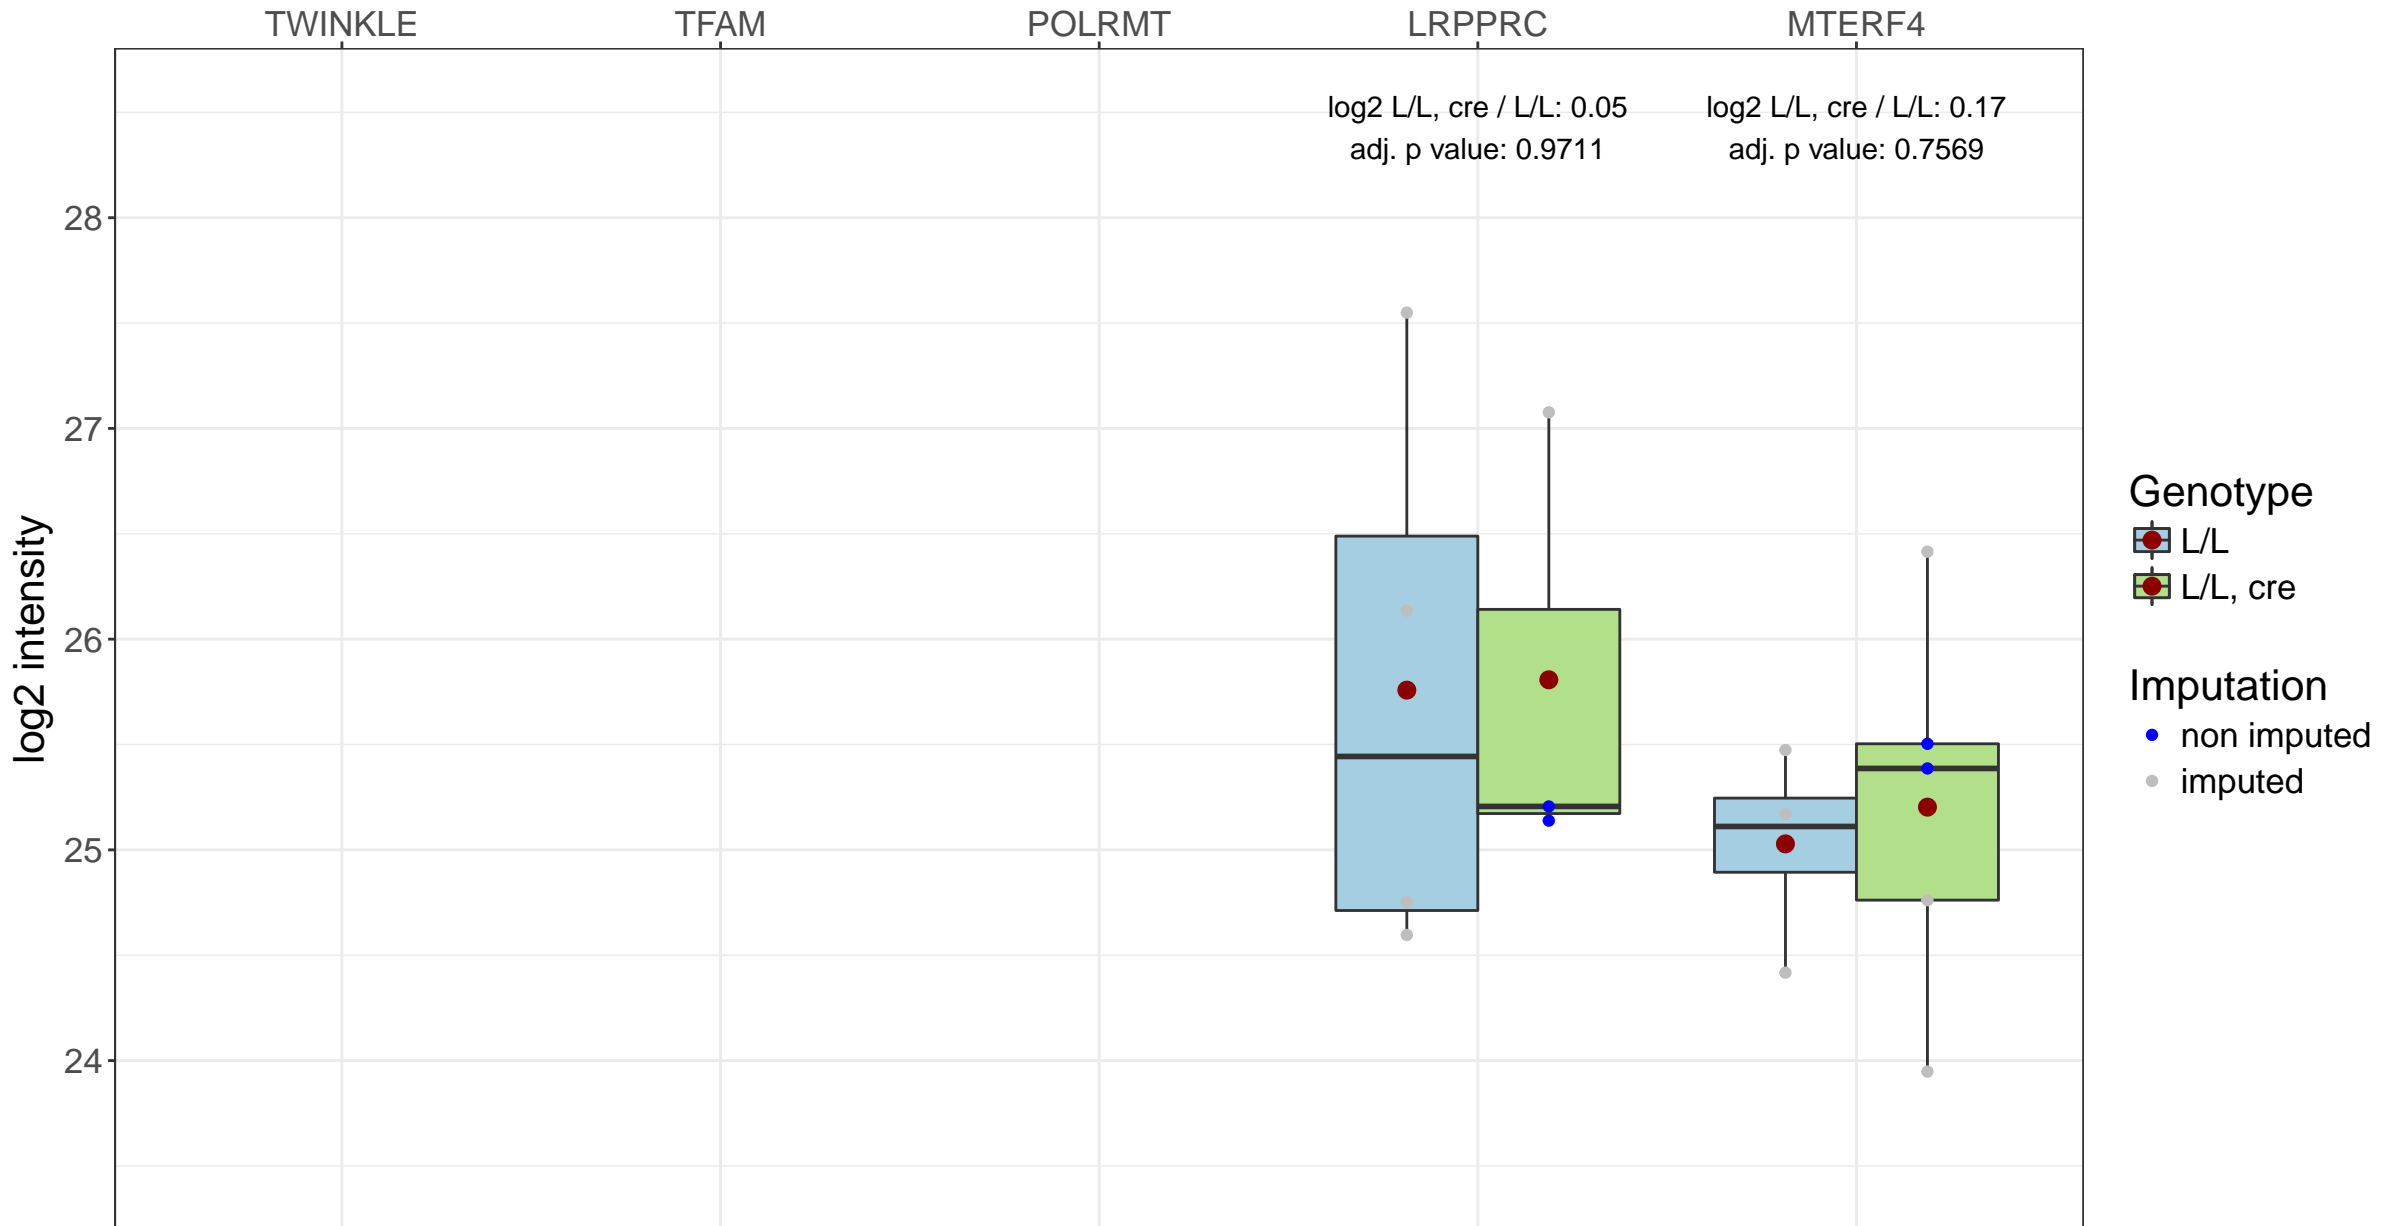

# NUDT19 / P11930

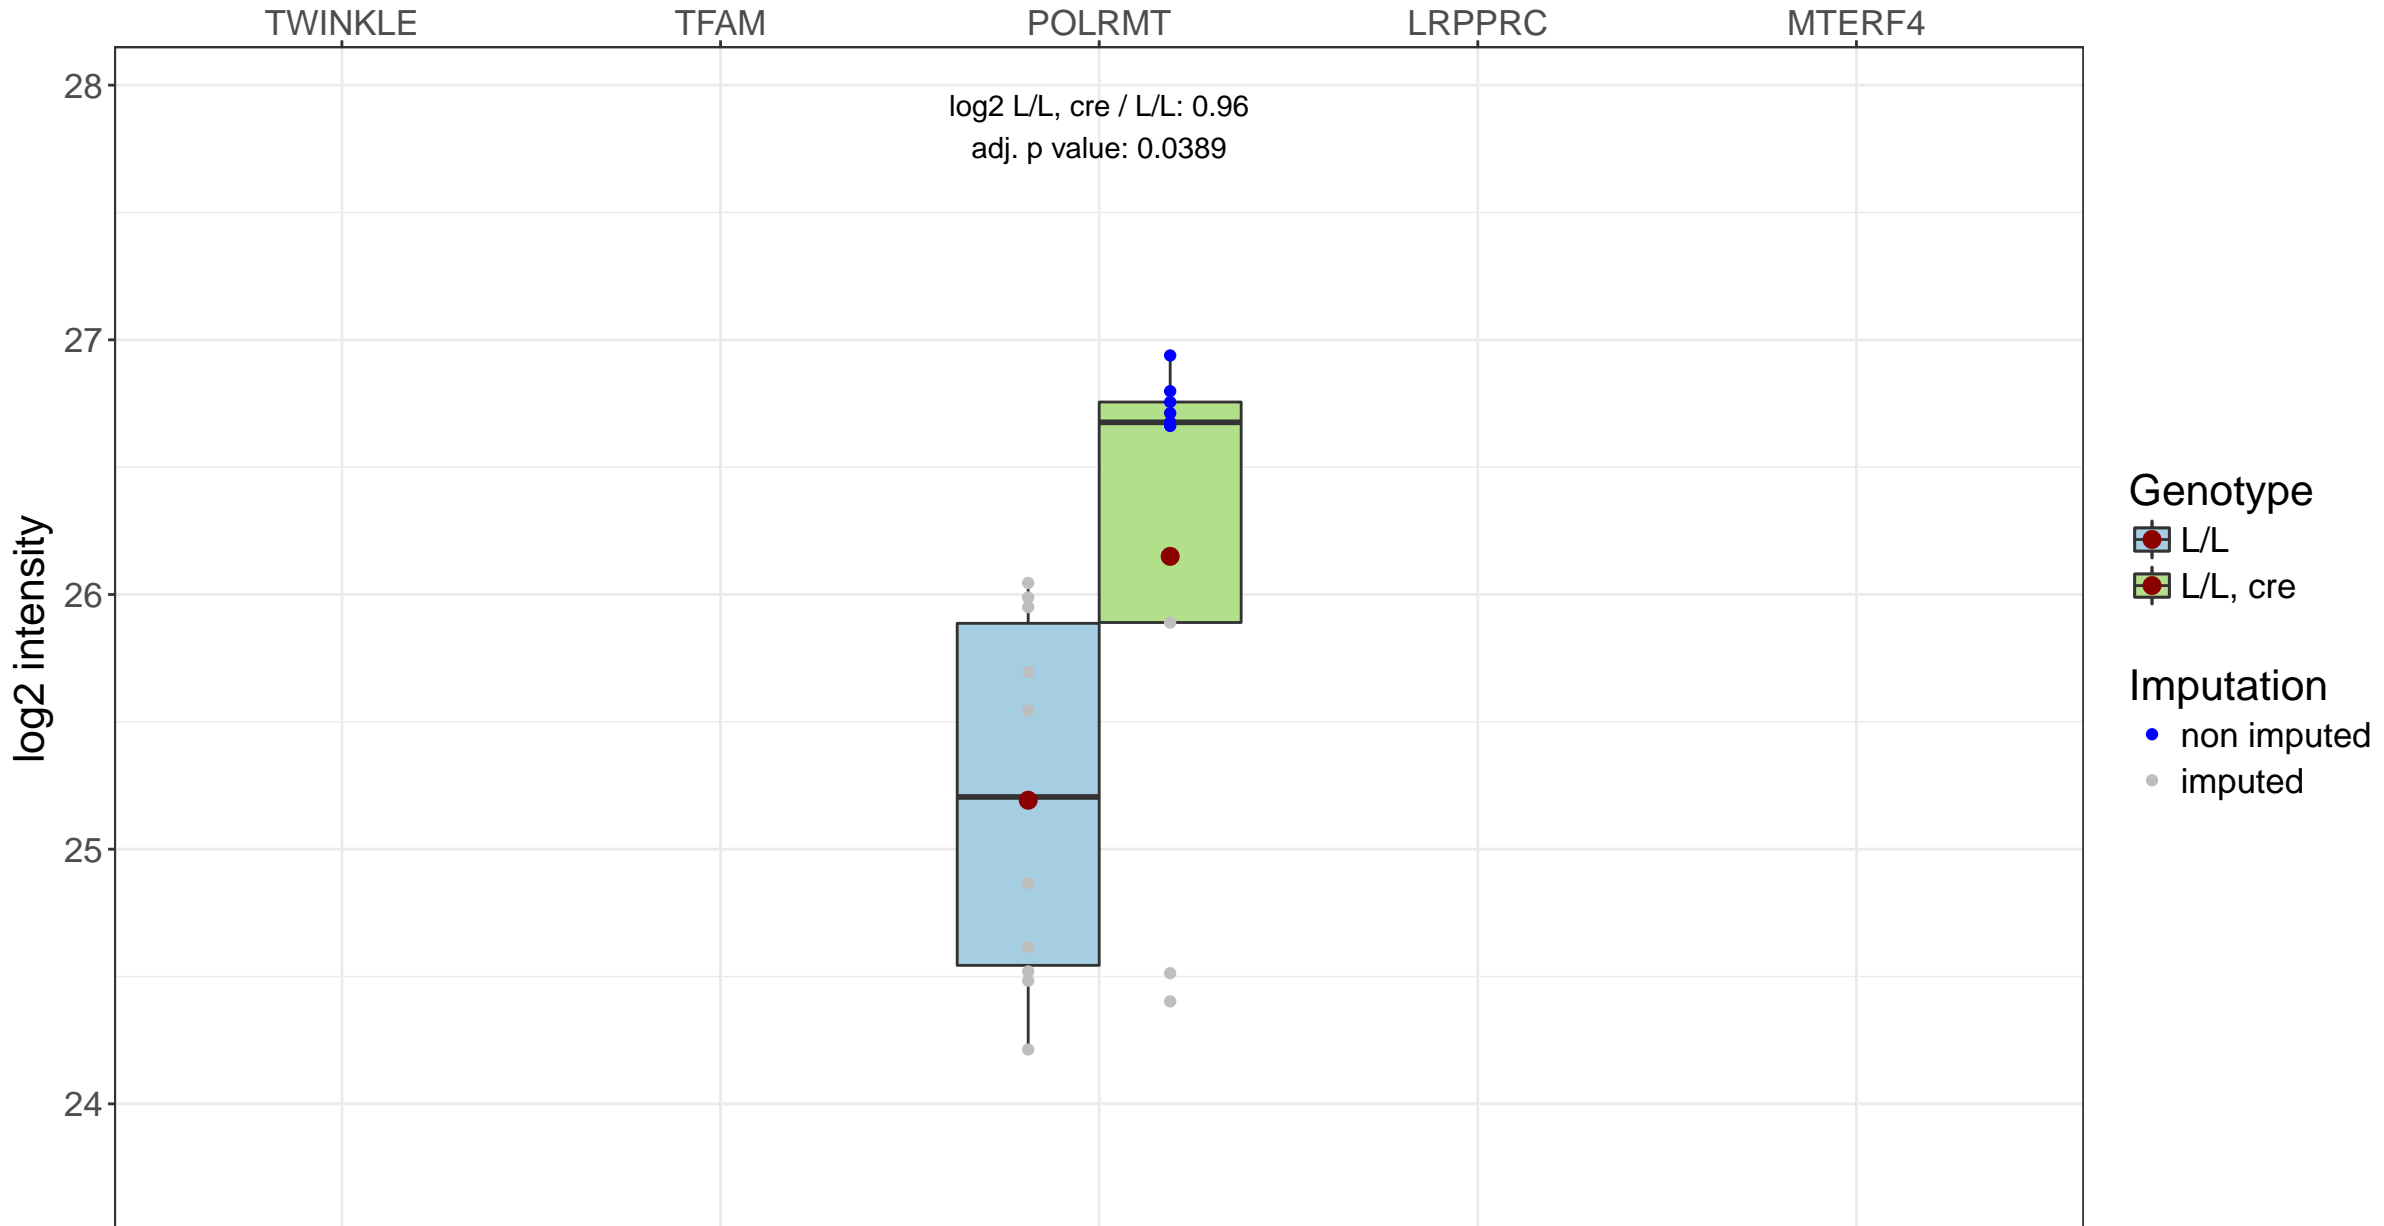

# NUDT2 / P56380

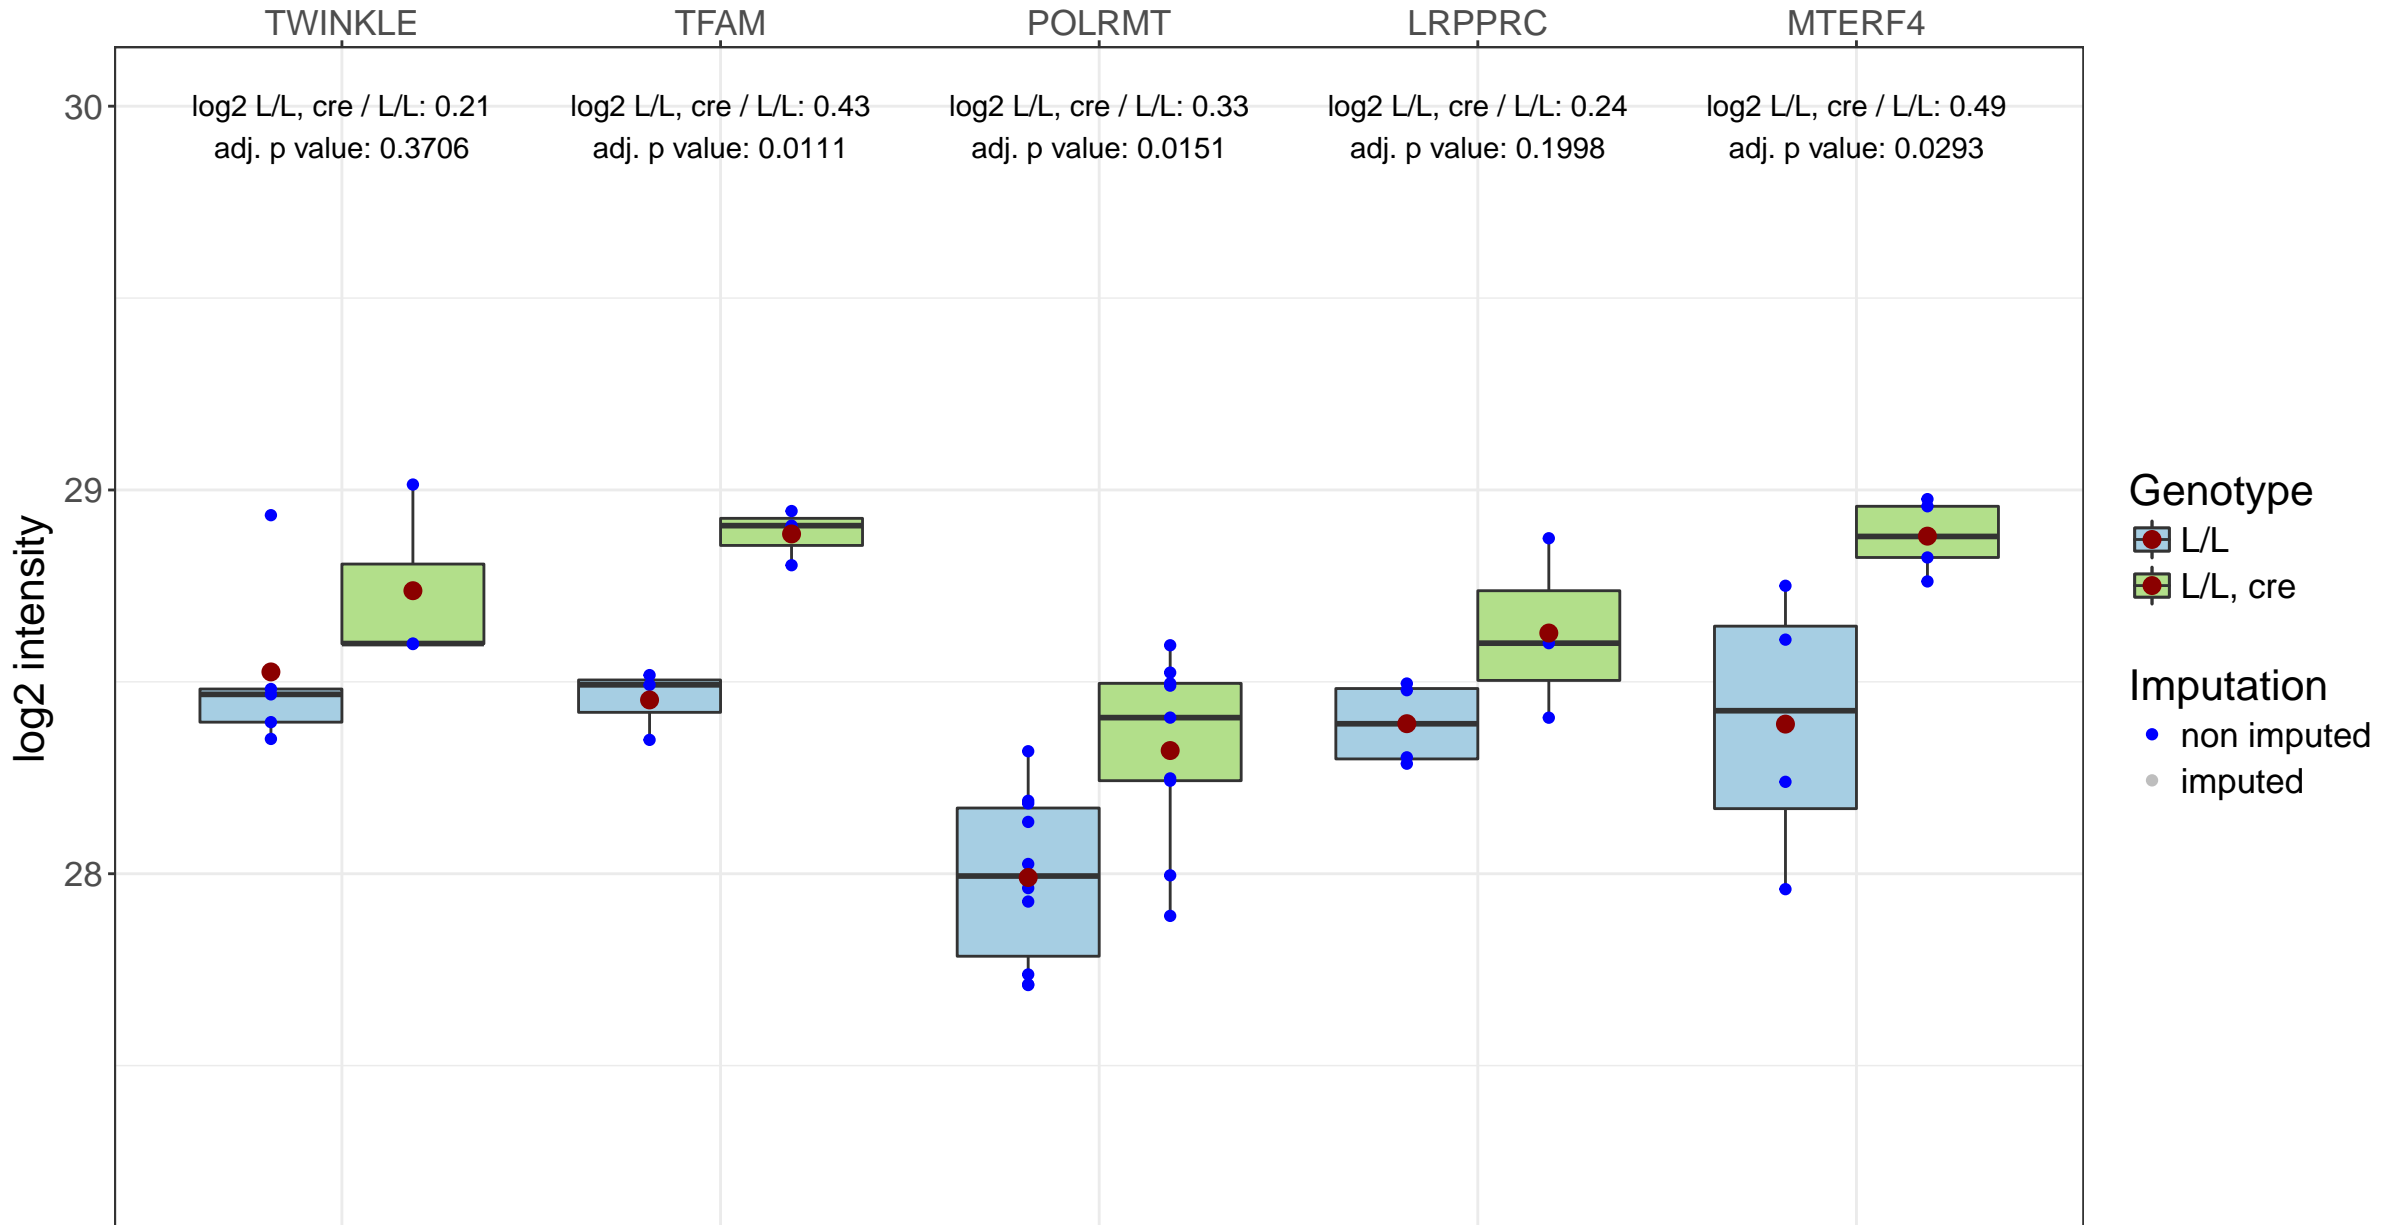

# NUDT6 / Q3ULU4

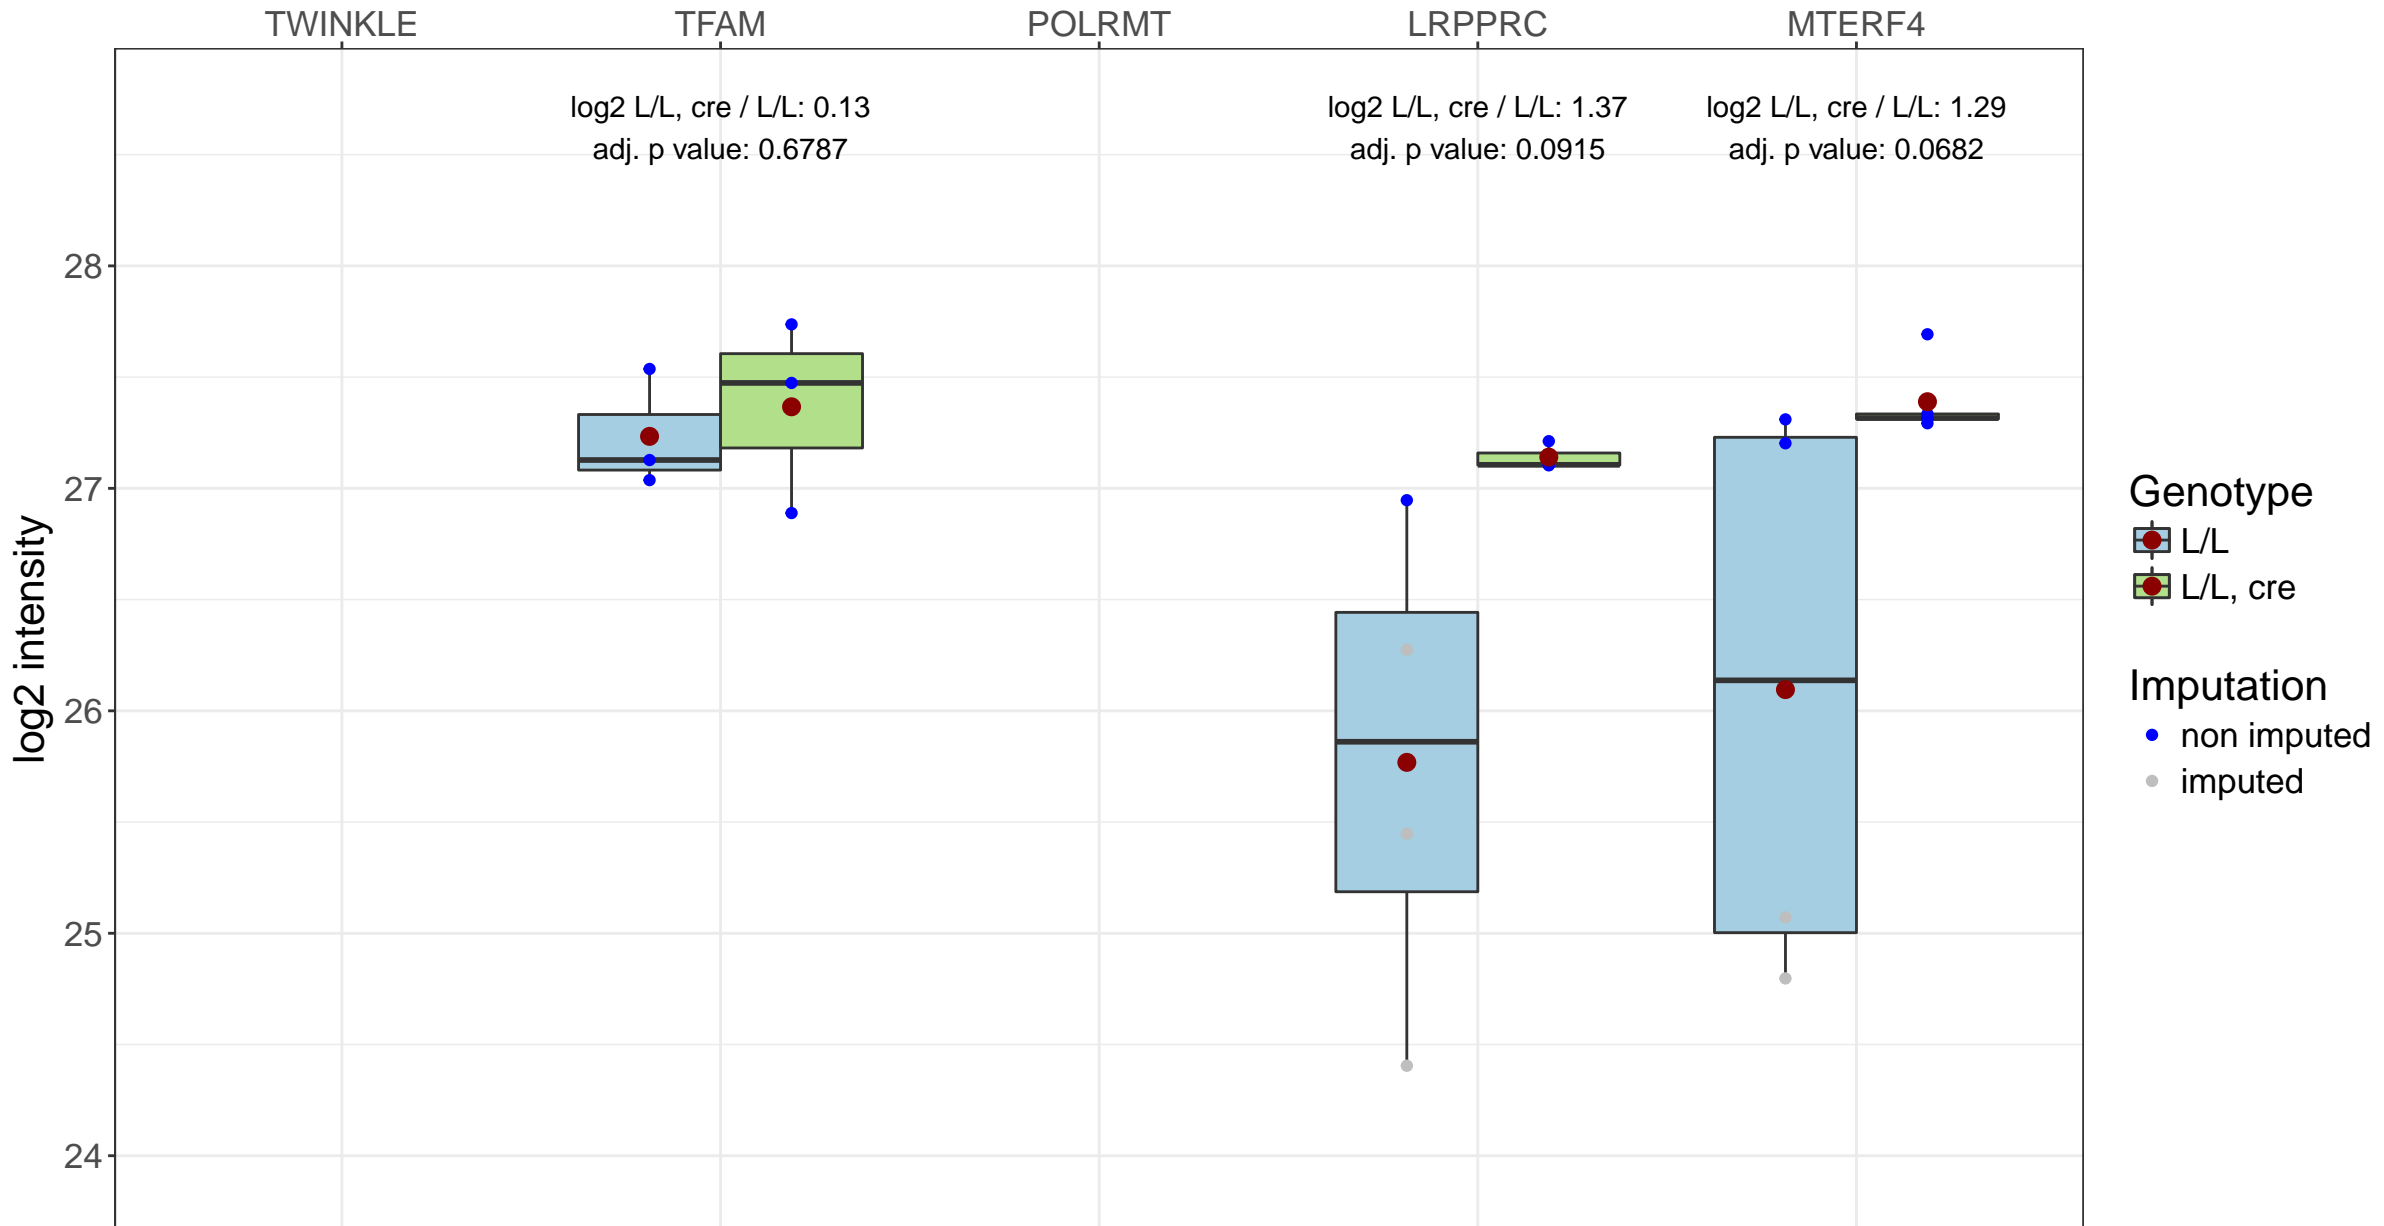

# NUDT8 / Q9CR24

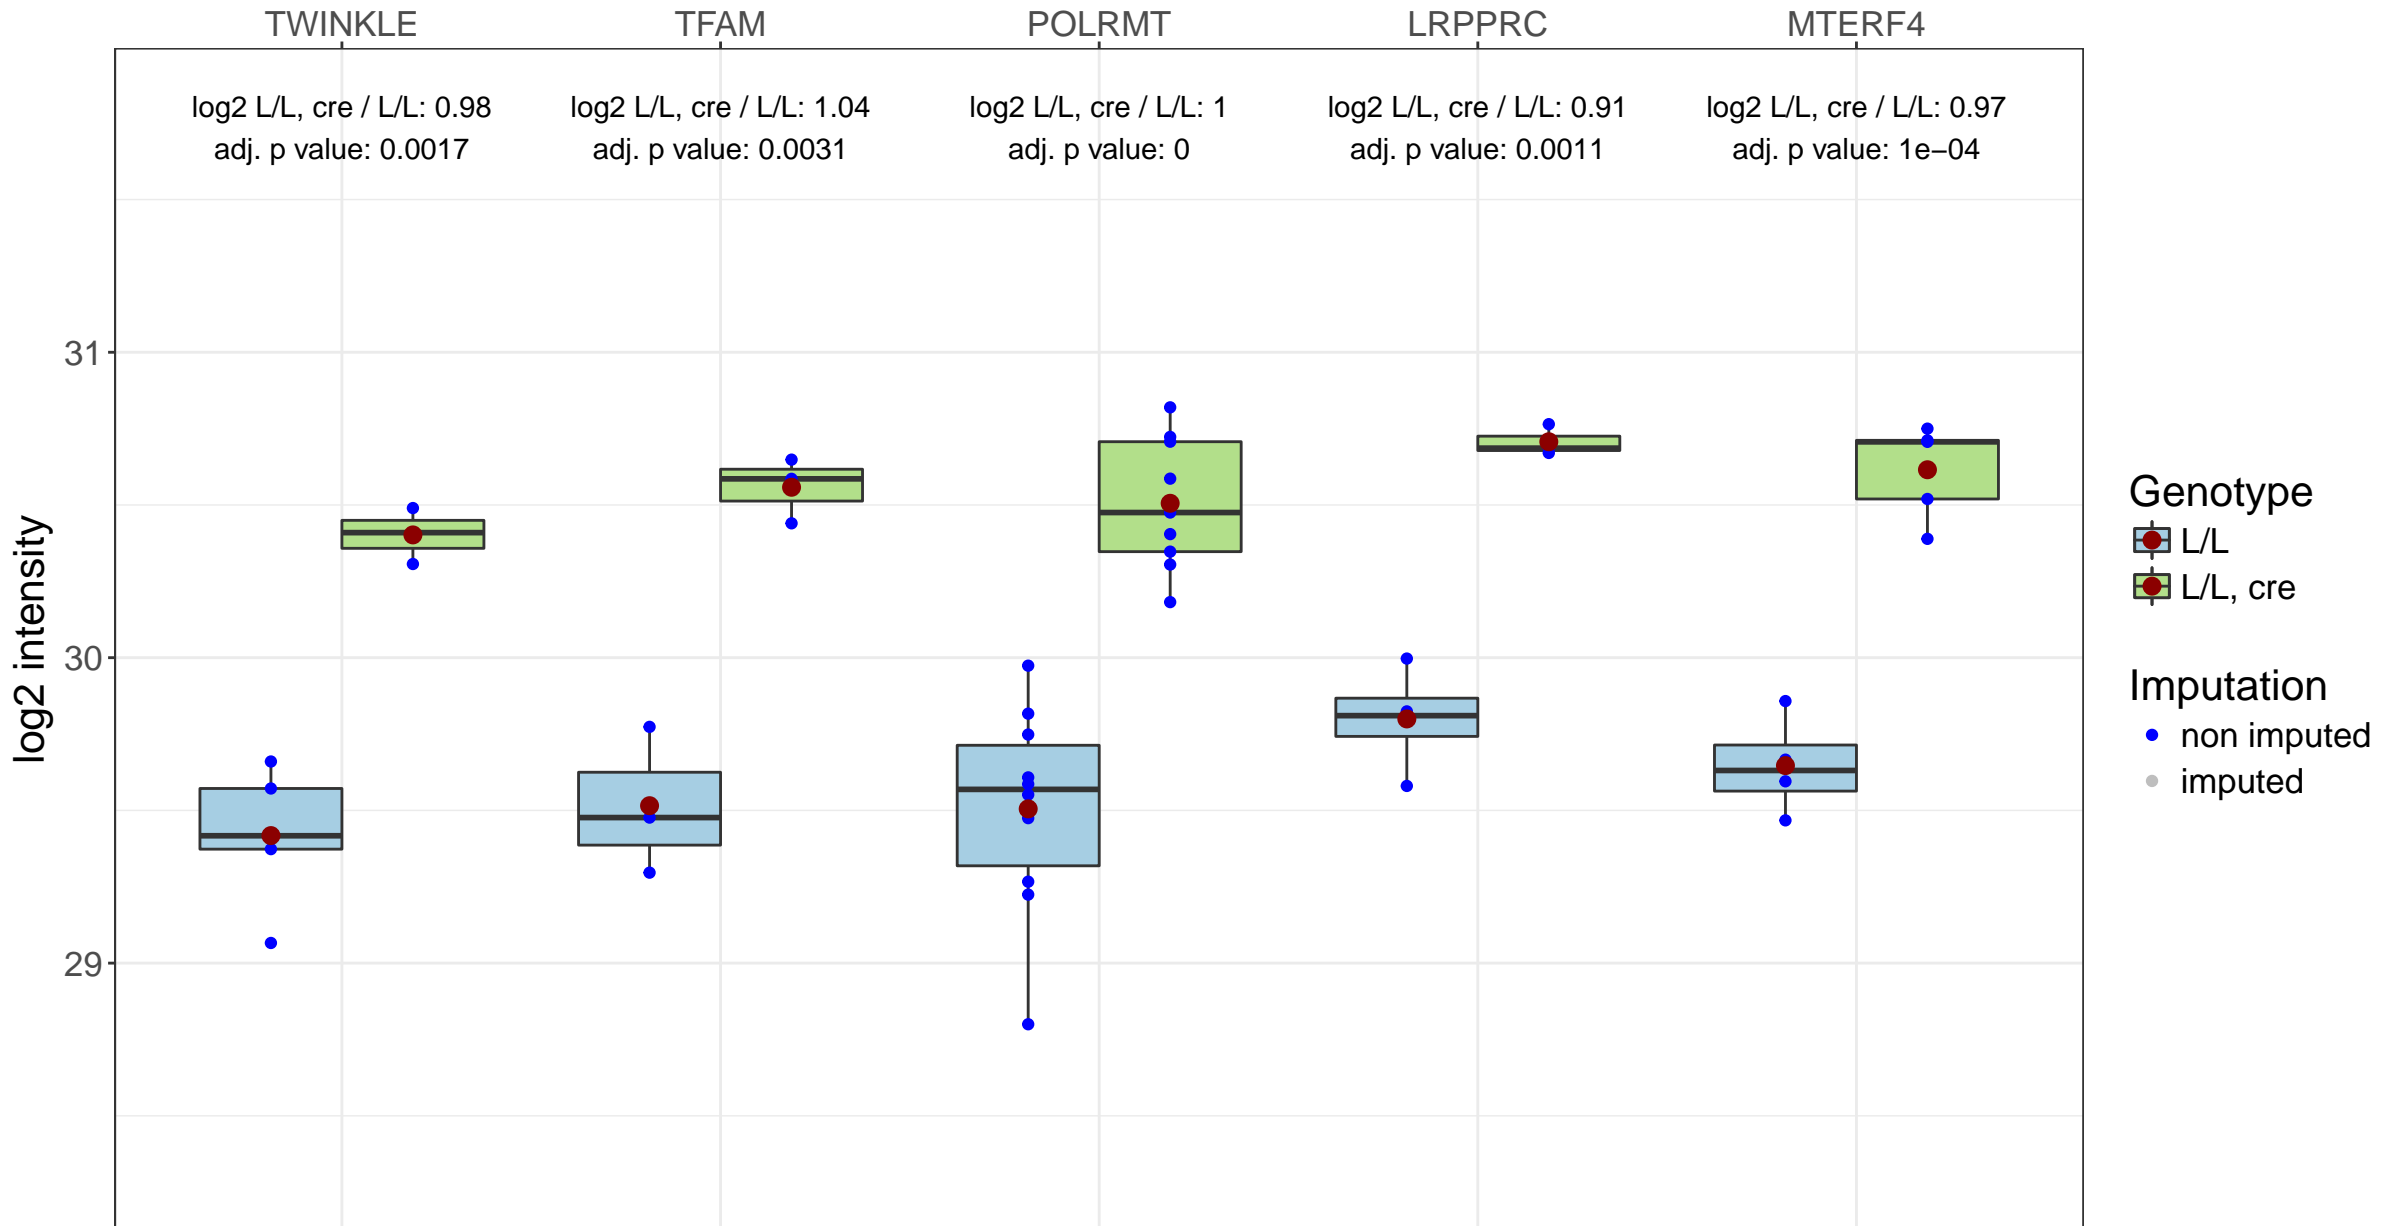



# NUDT9 / Q8BVU5

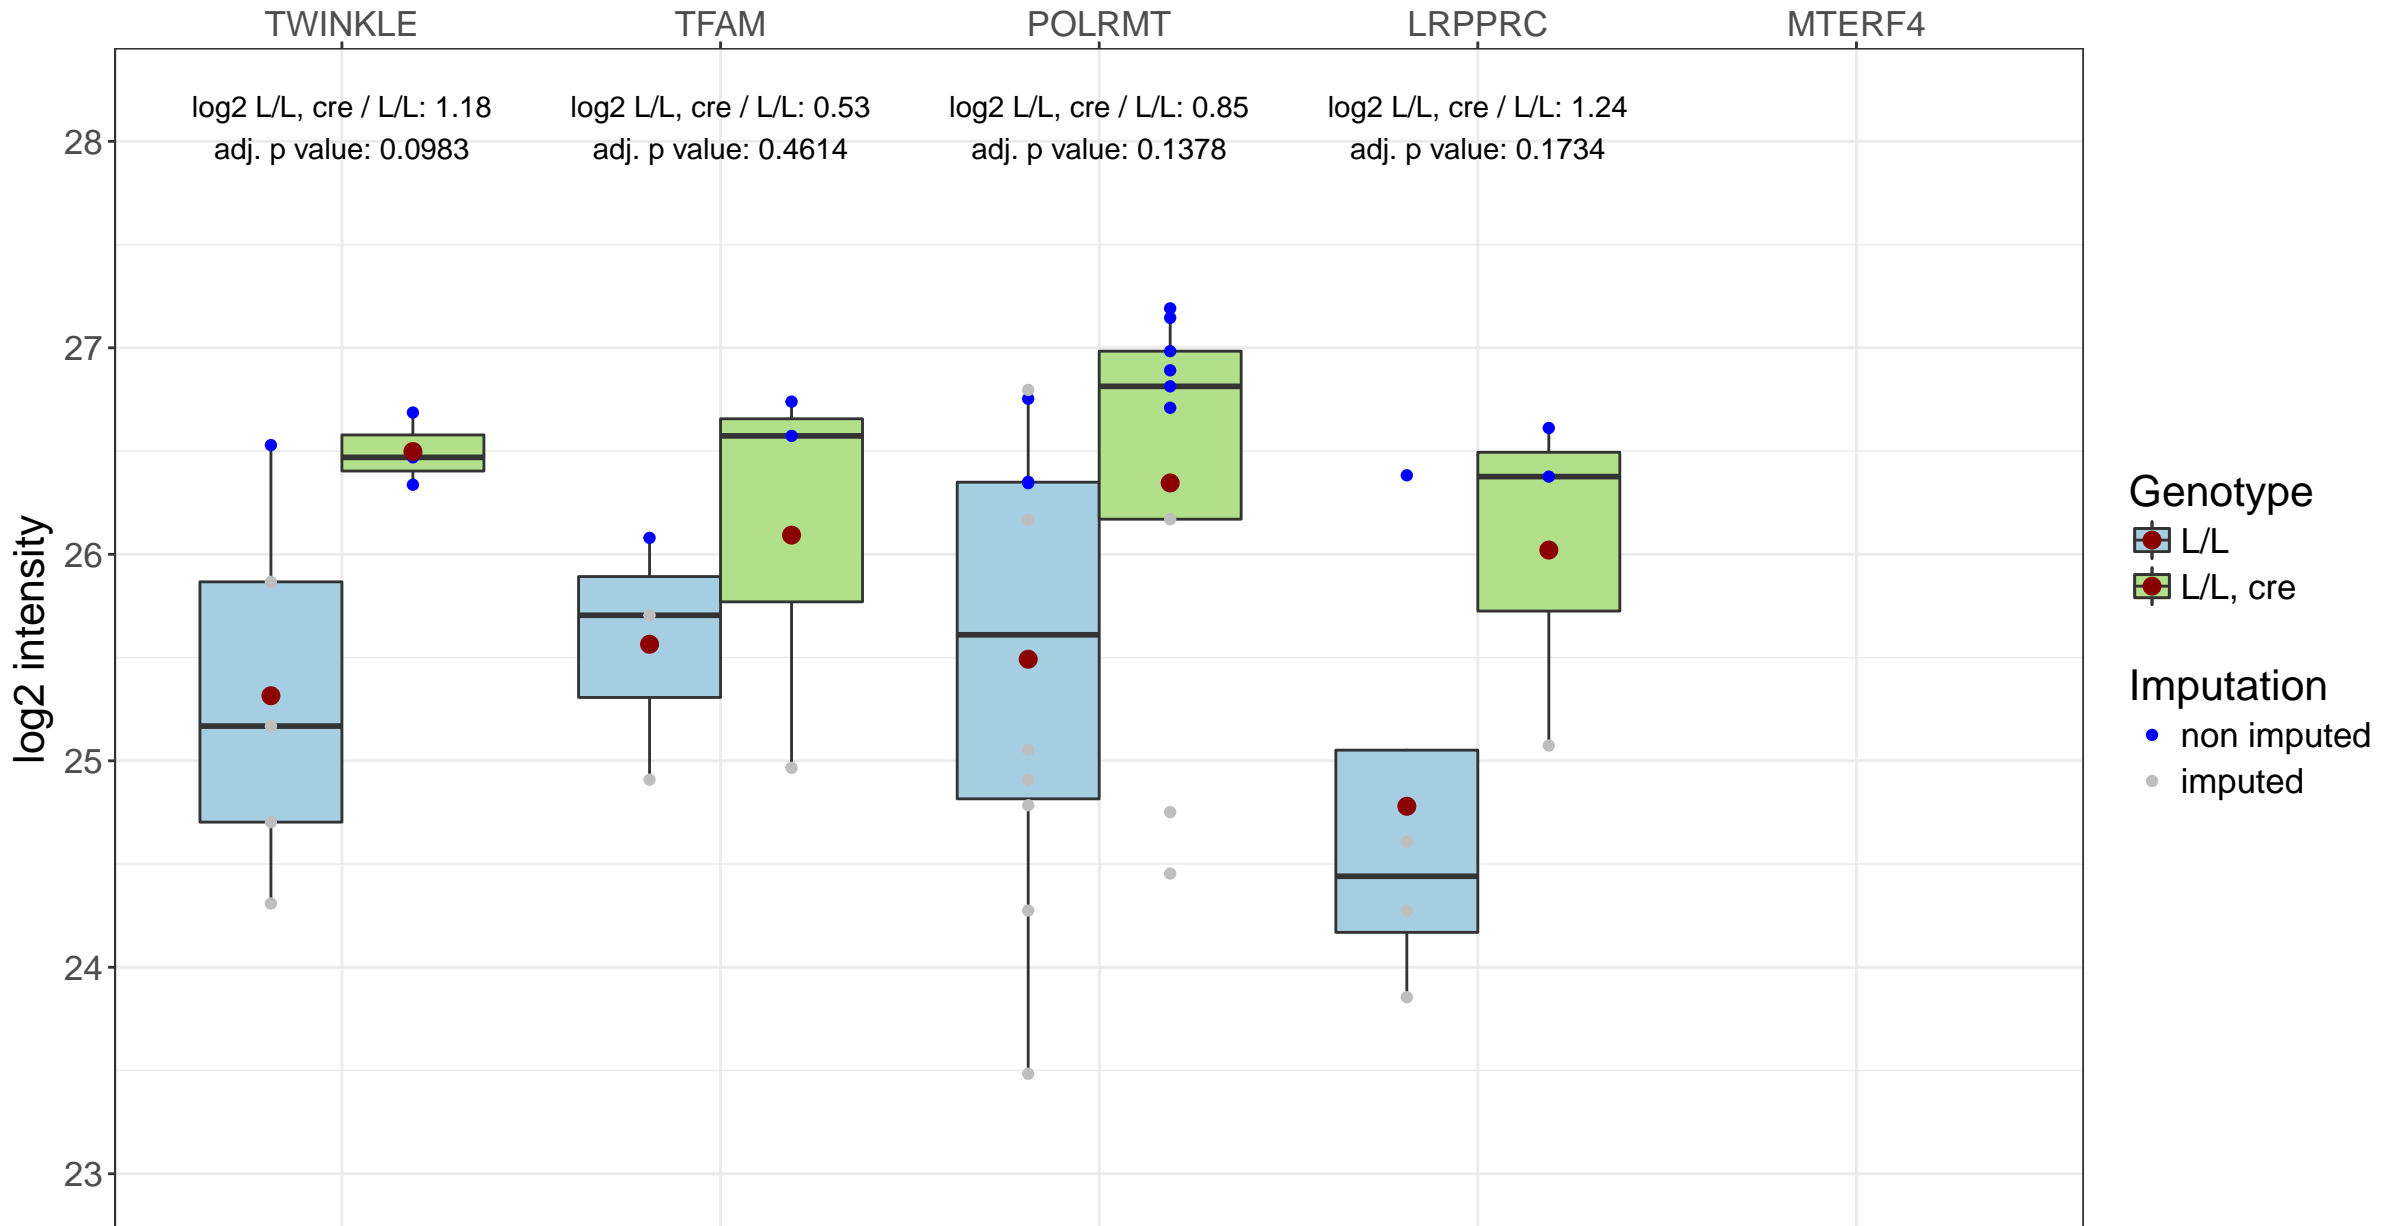

# OAT / P29758

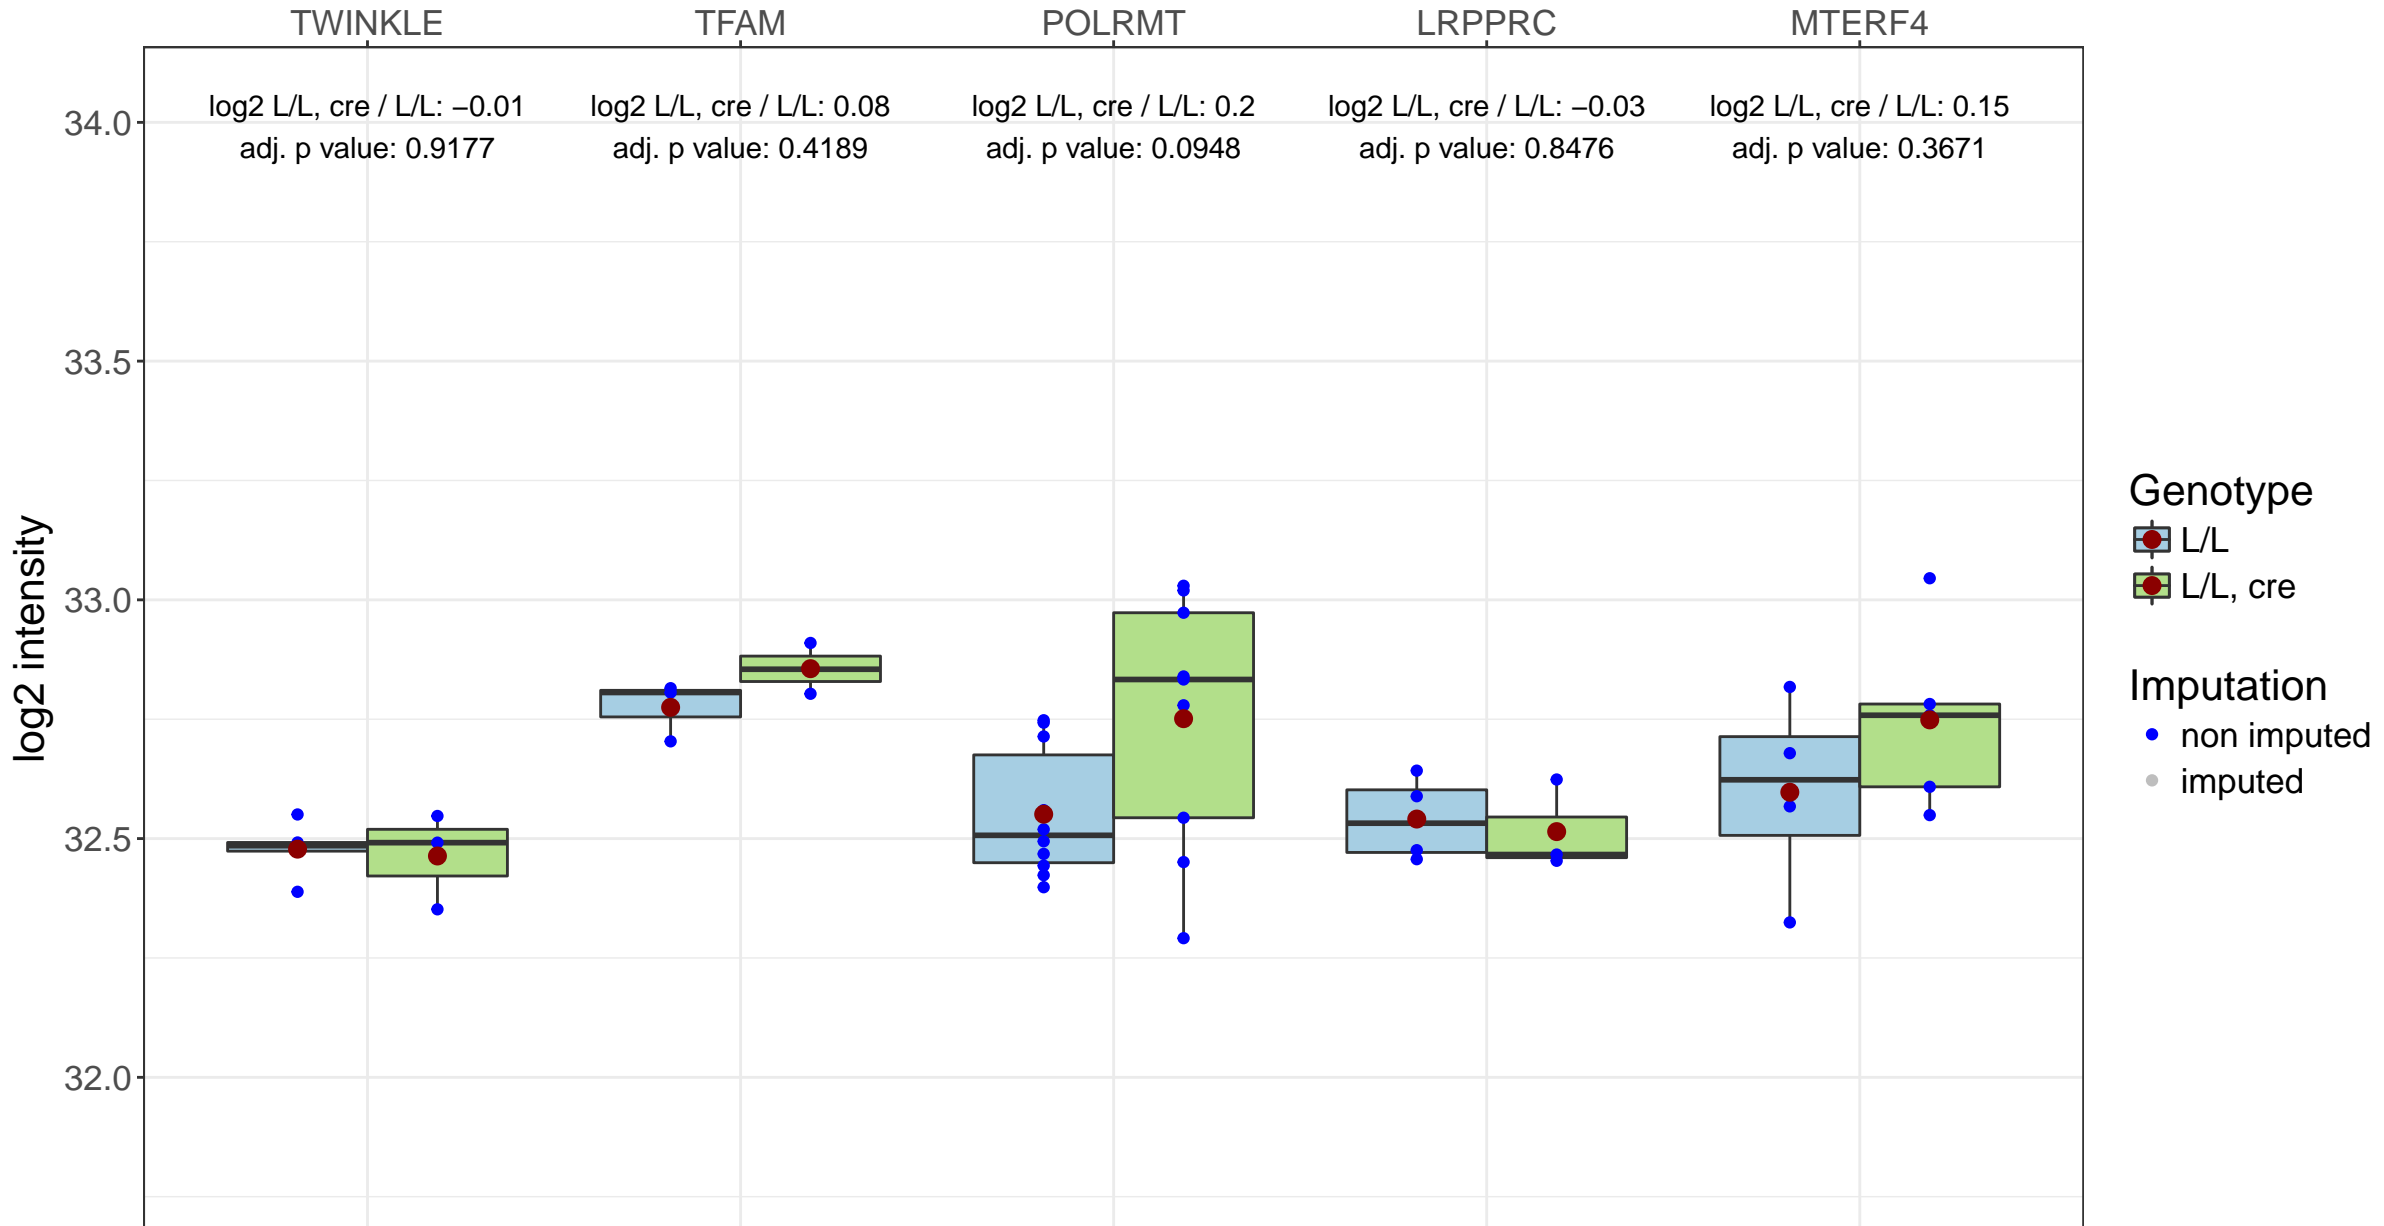

# OCIAD1 / Q9CRD0

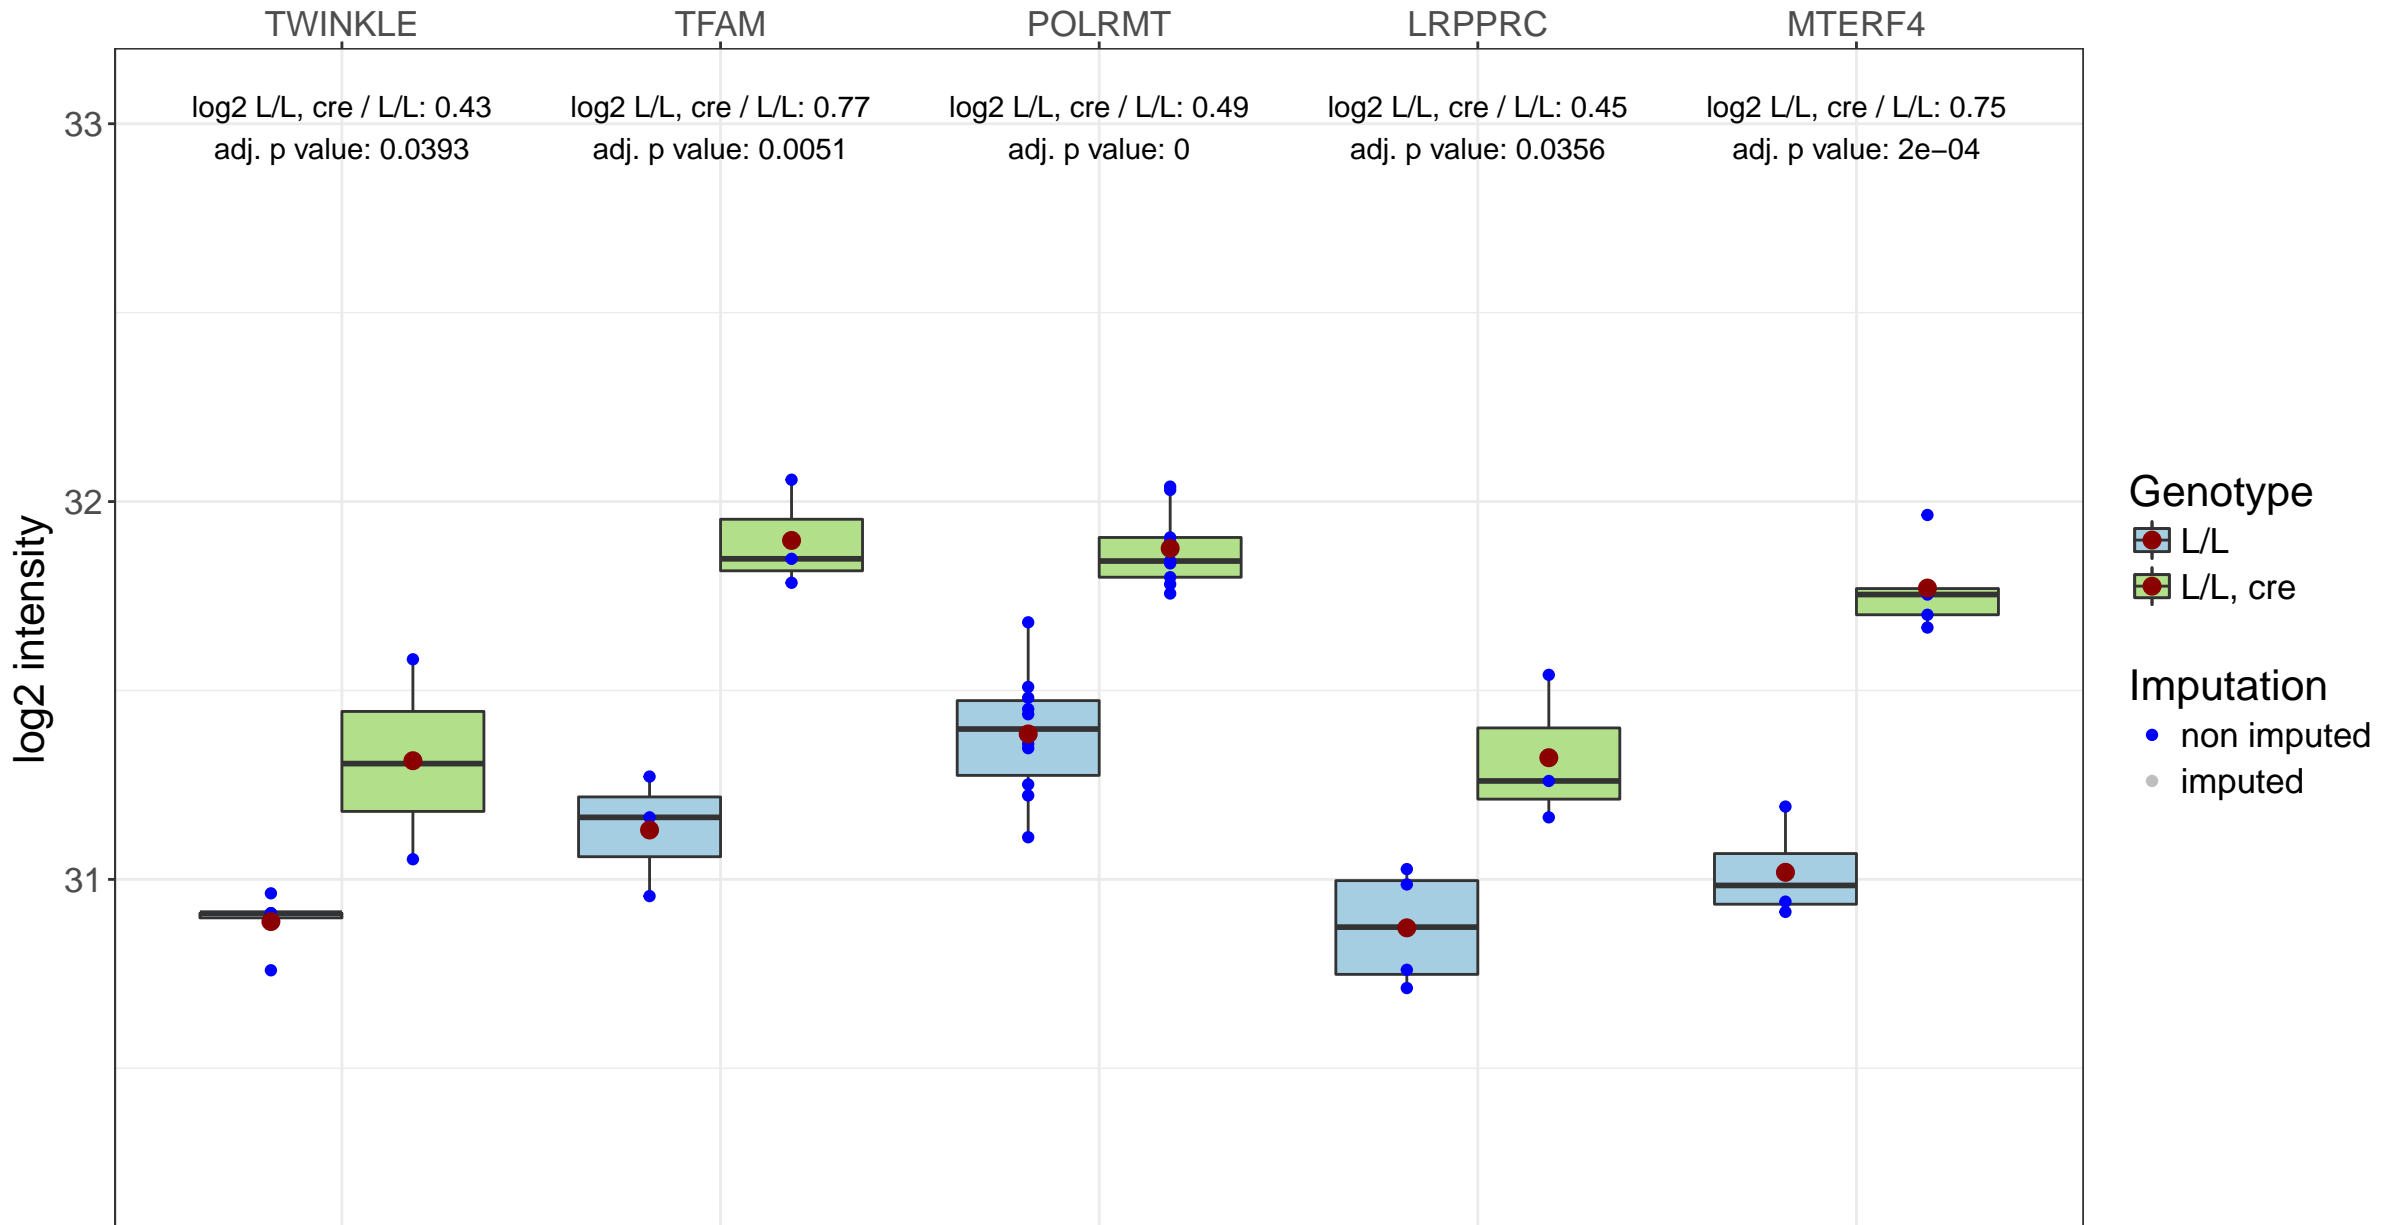

# OGDH / Q60597

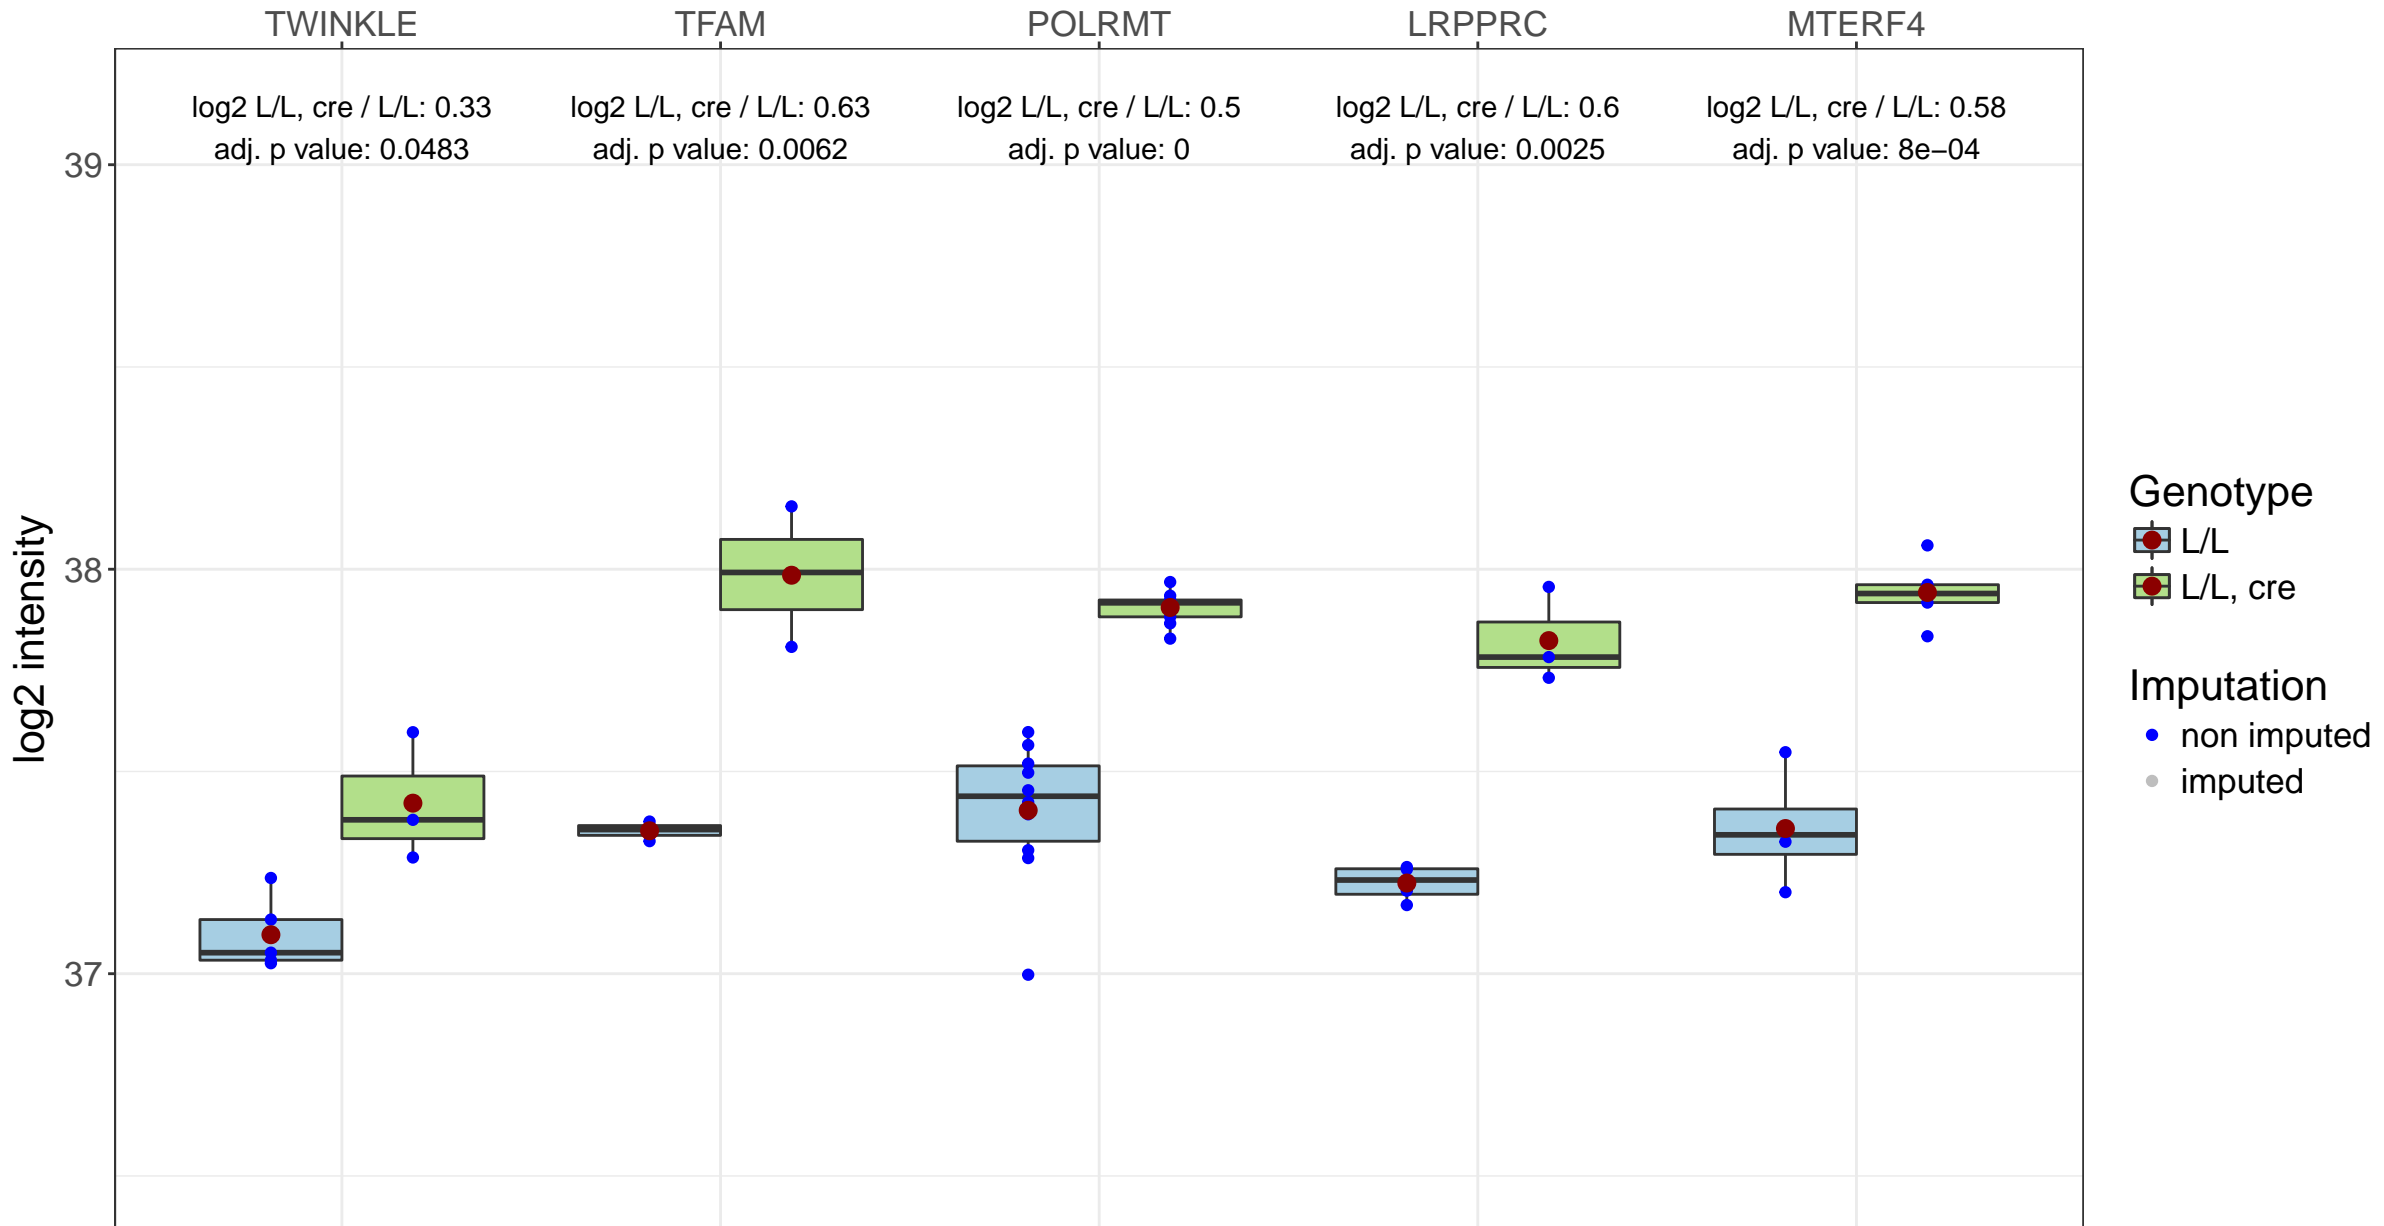

# OGDHL / E9Q7L0

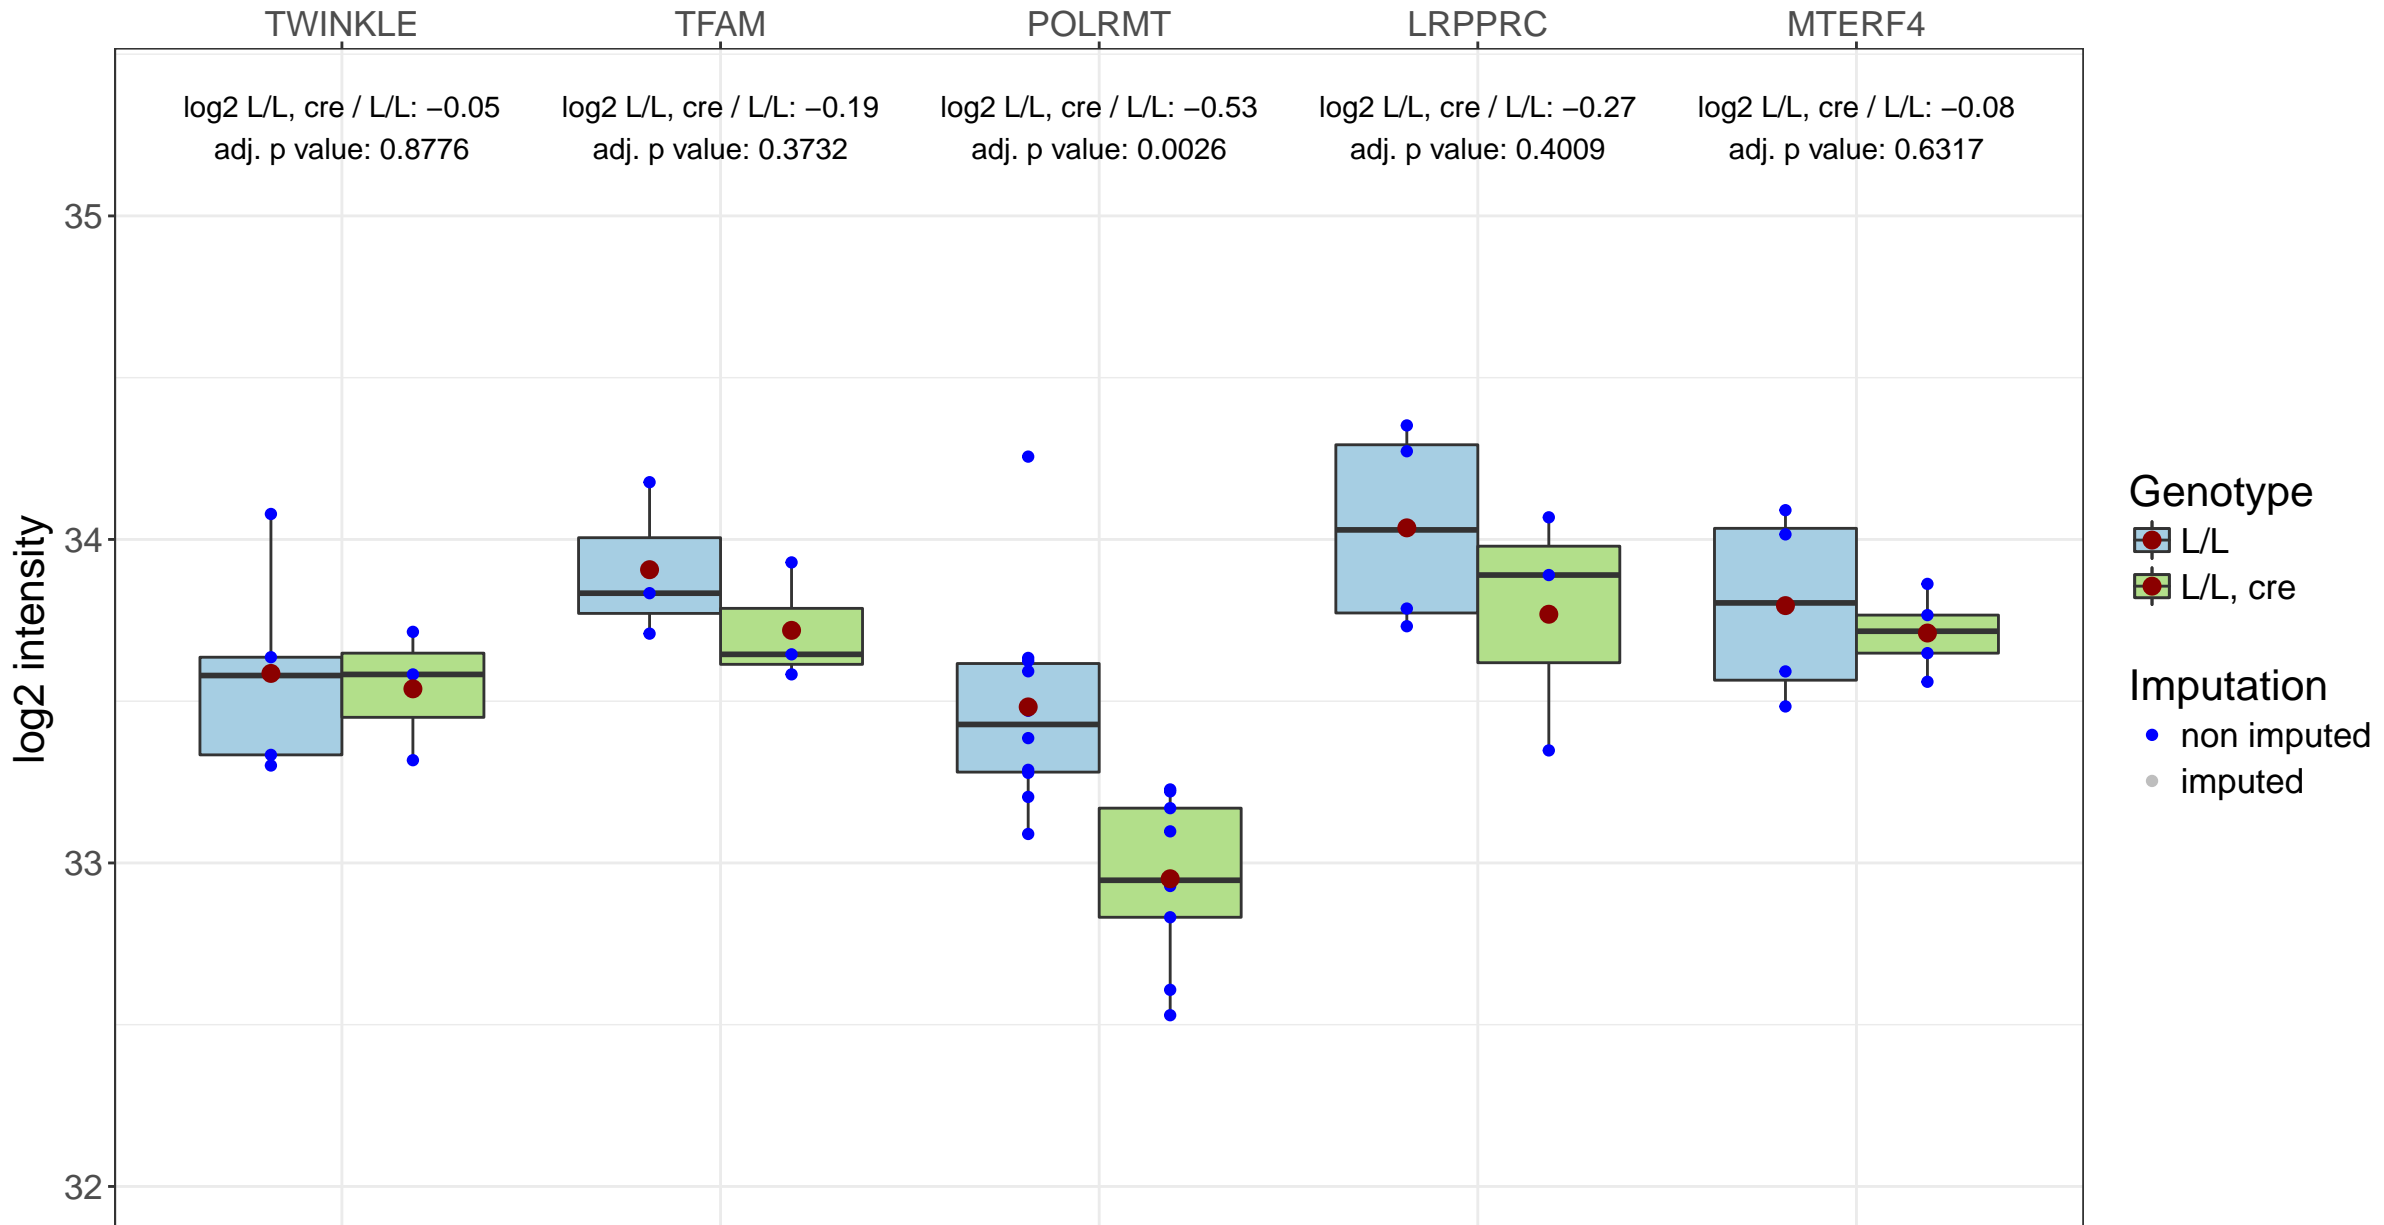

# OMA1 / Q9D8H7

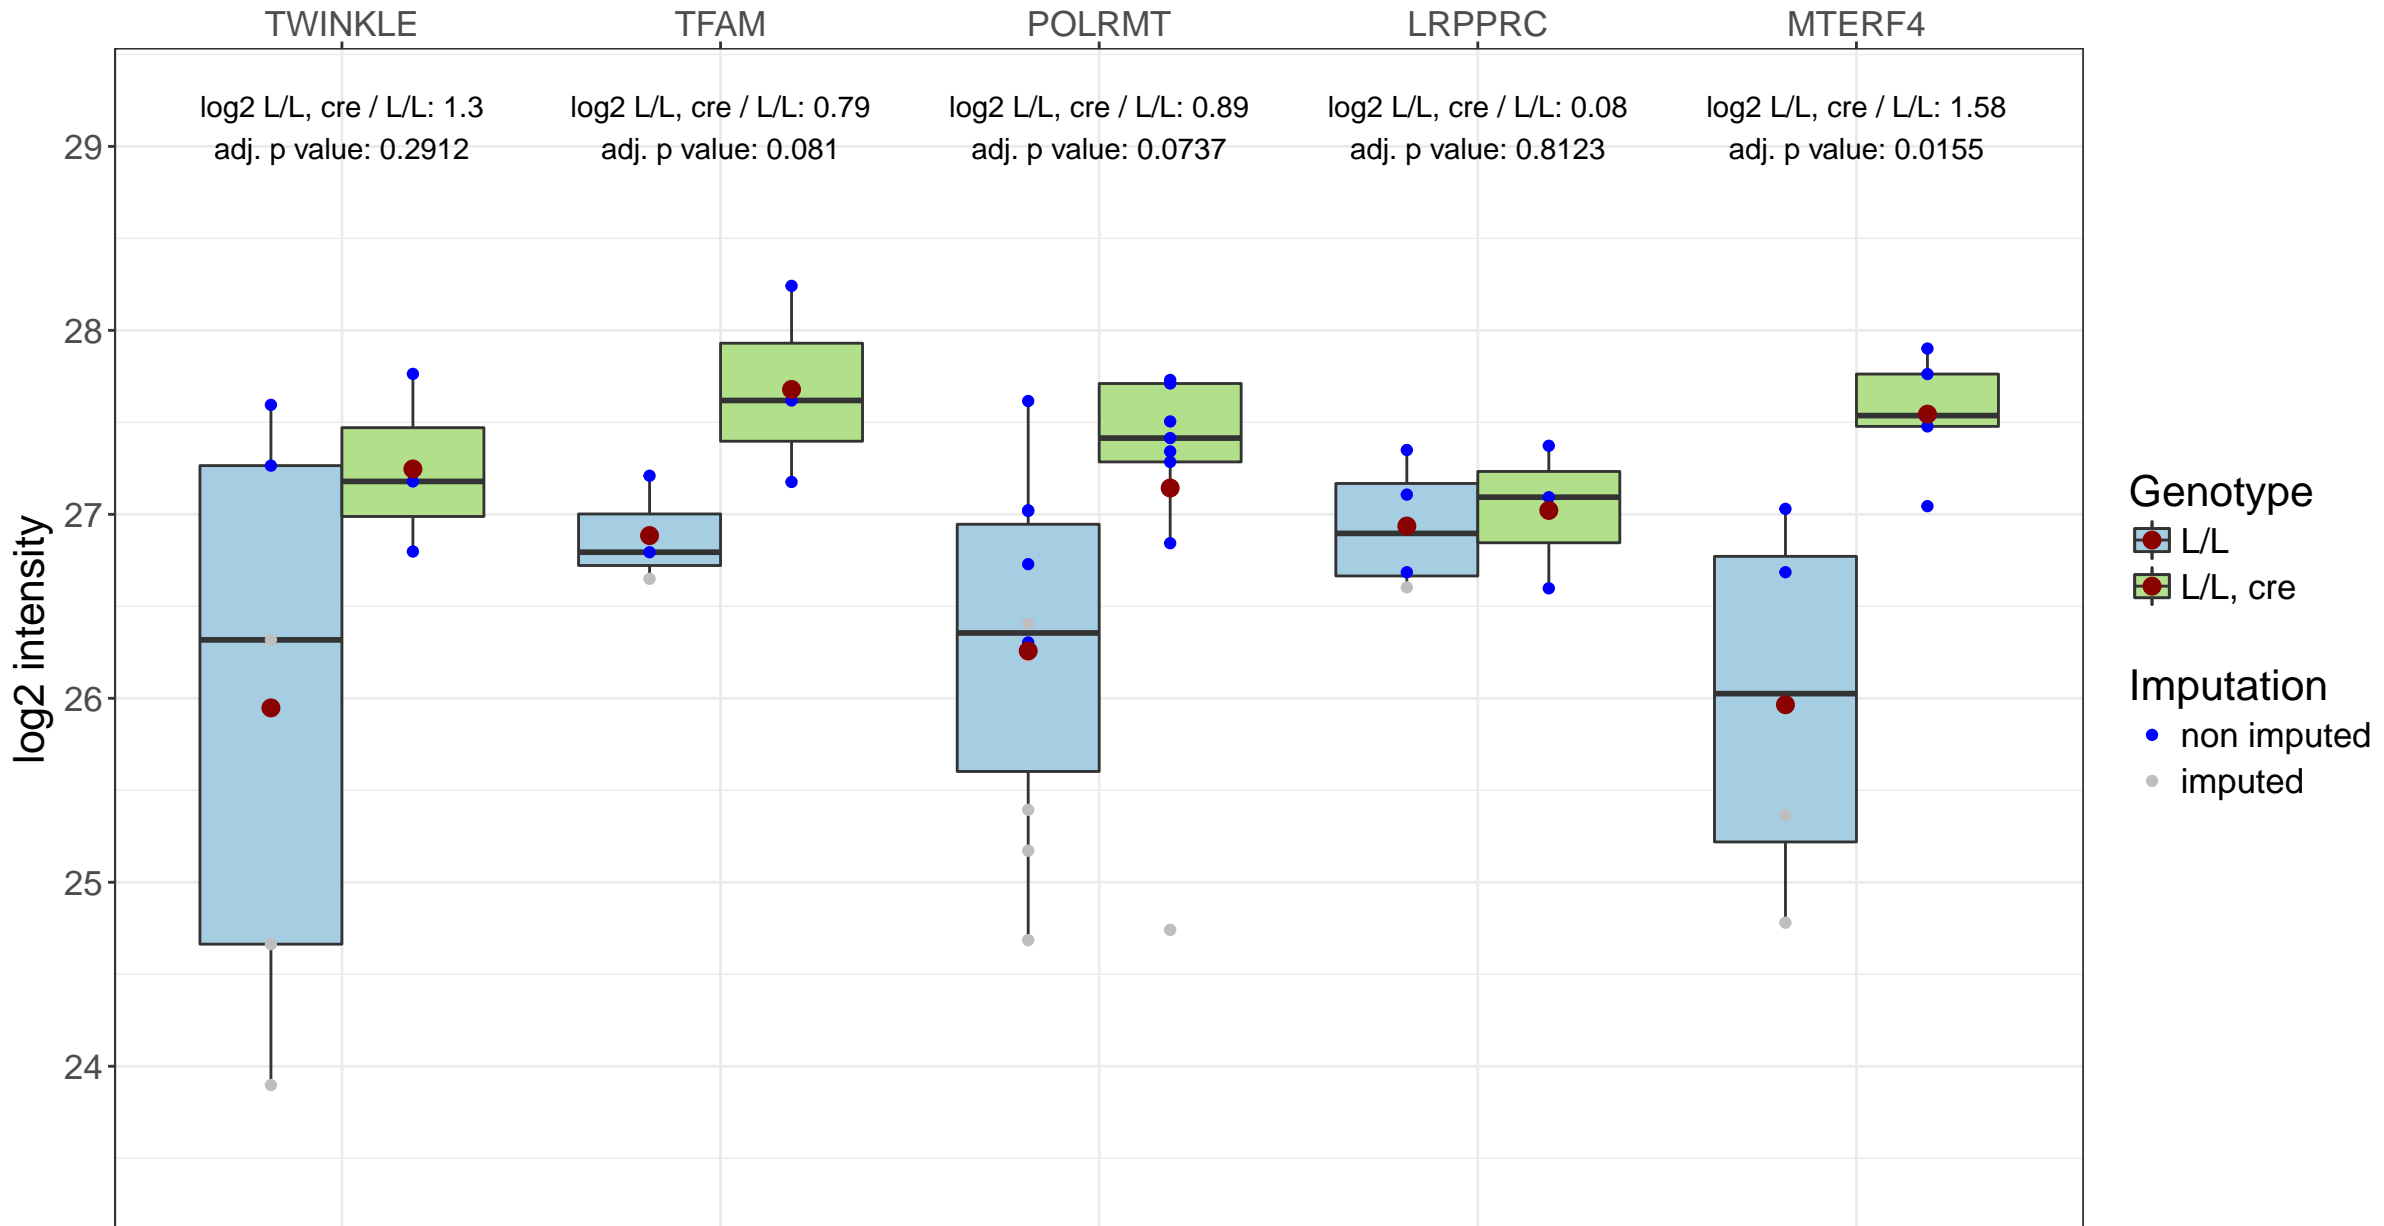

# OPA1 / P58281-2

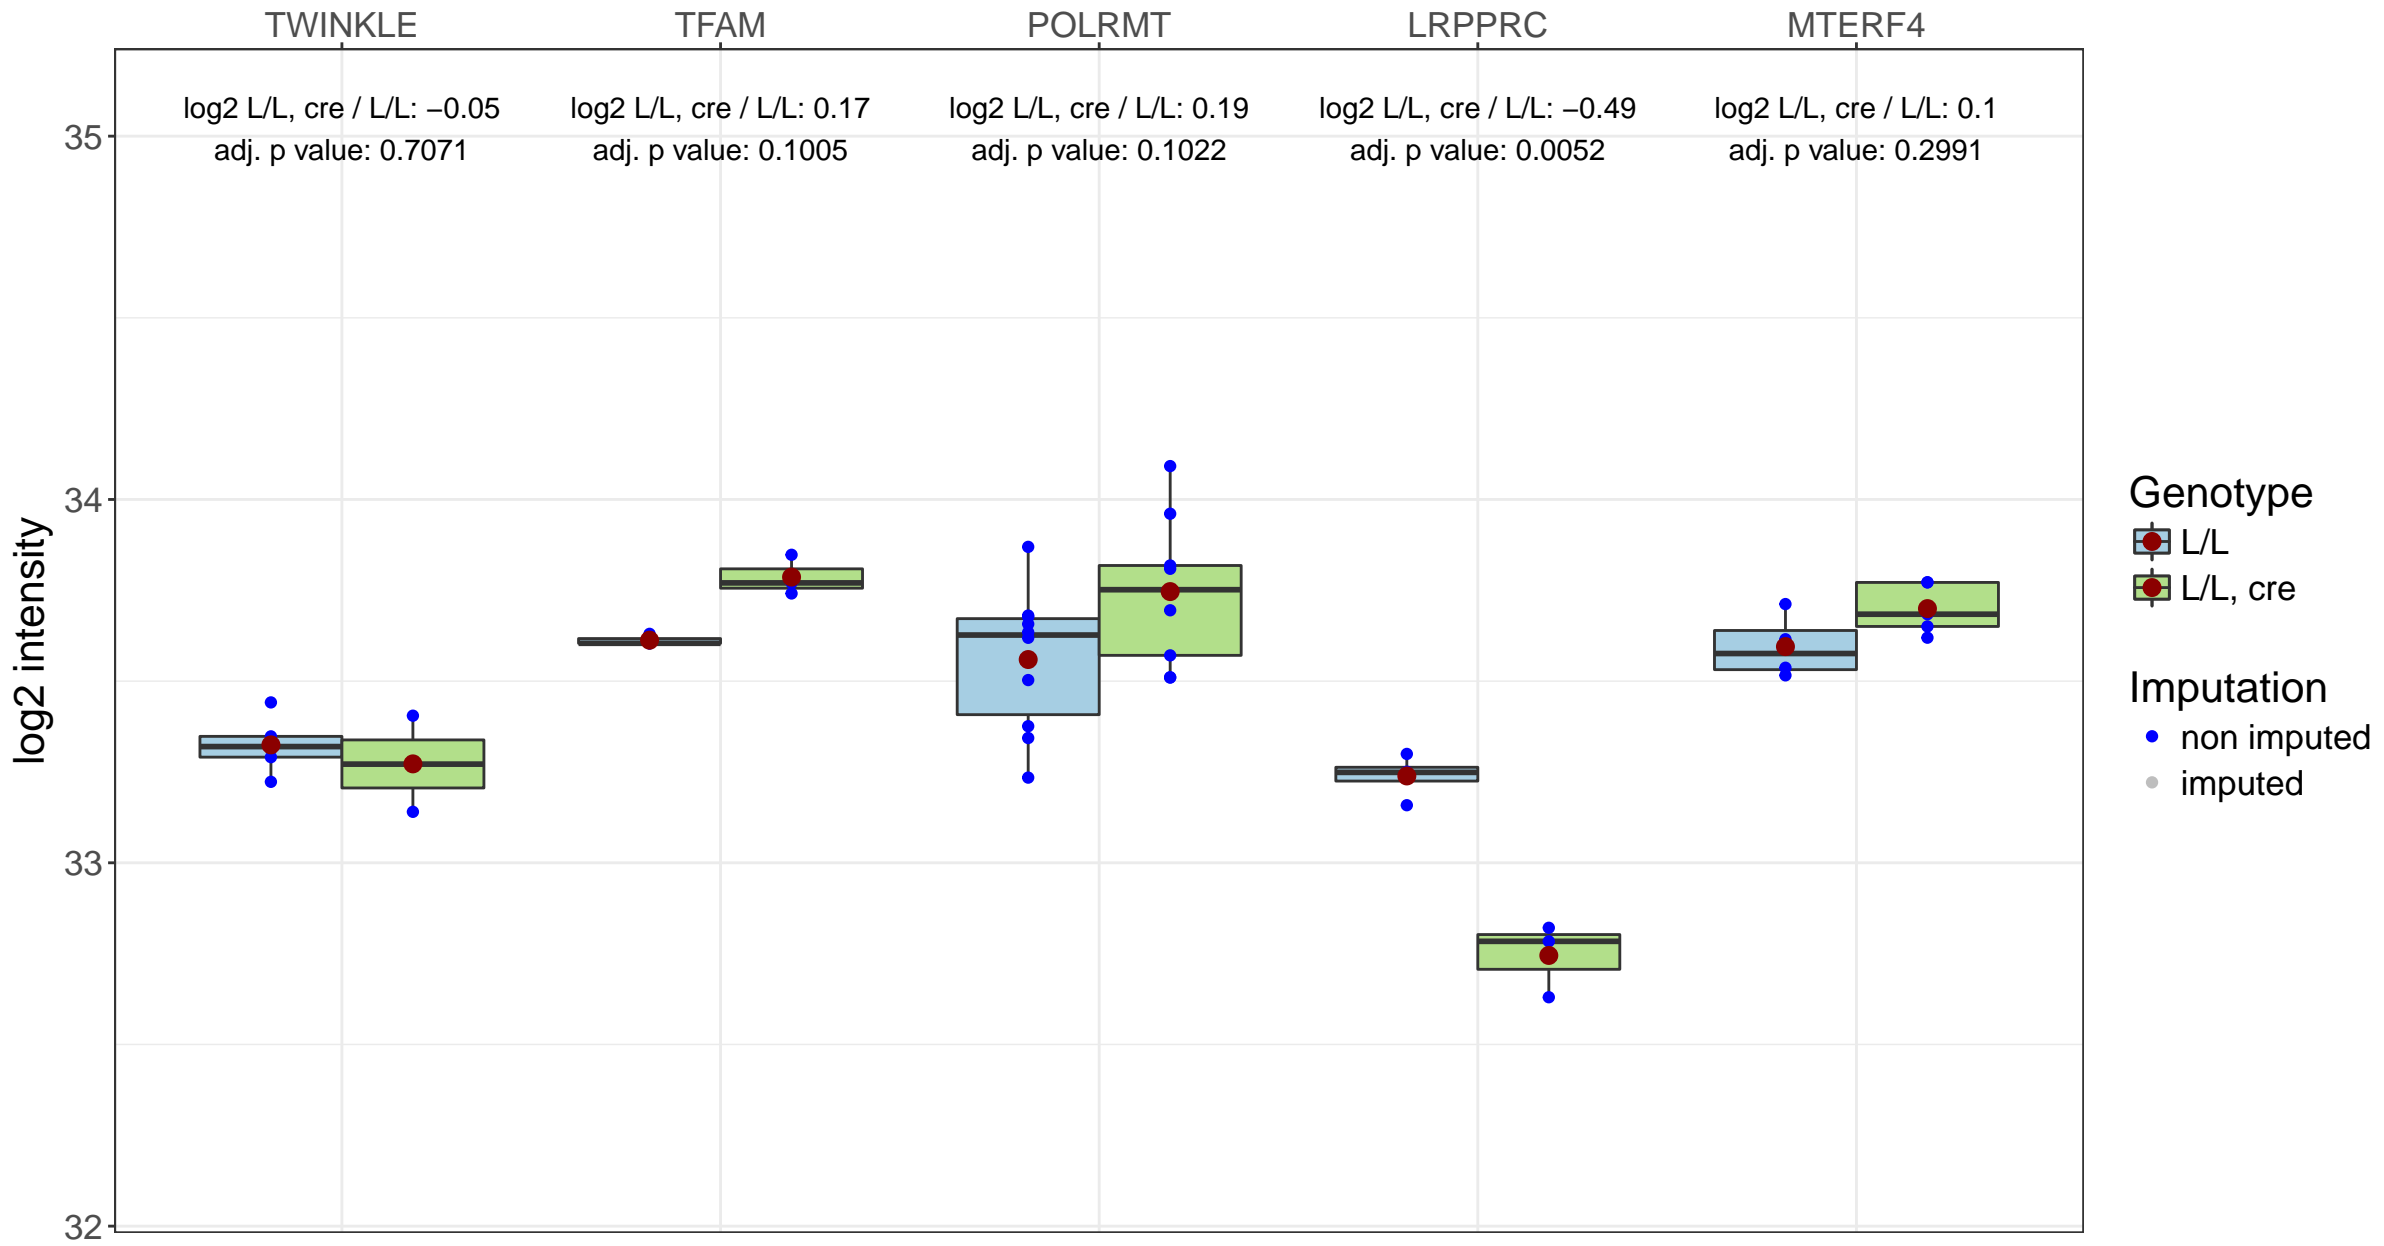

# OPA3 / Q505D7

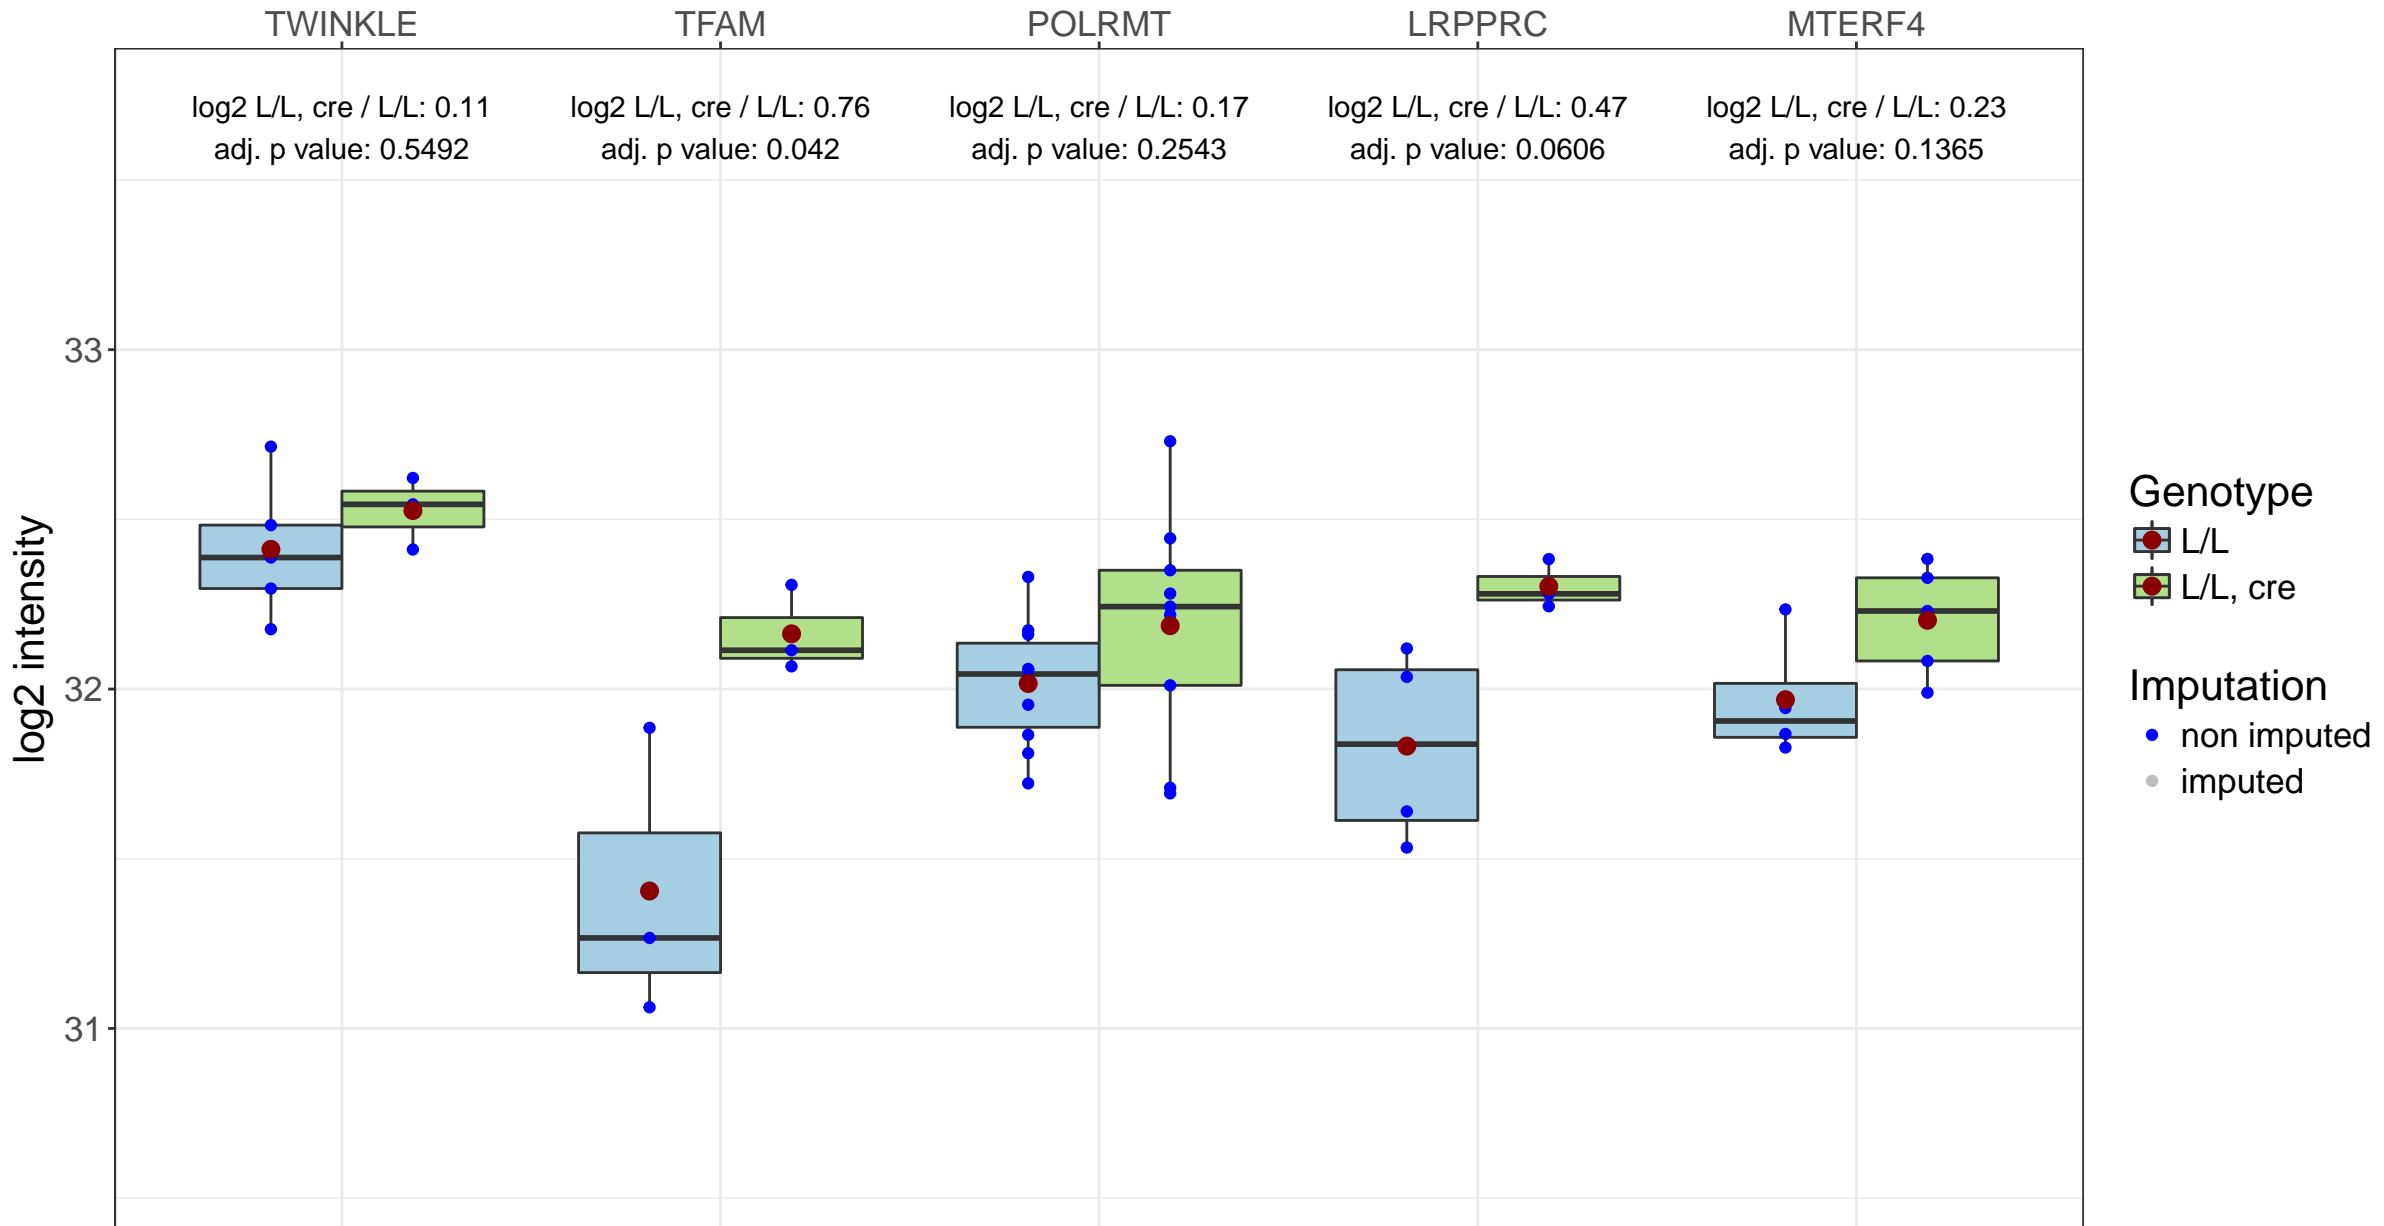



# OSGEPL1 / Q6PEB4

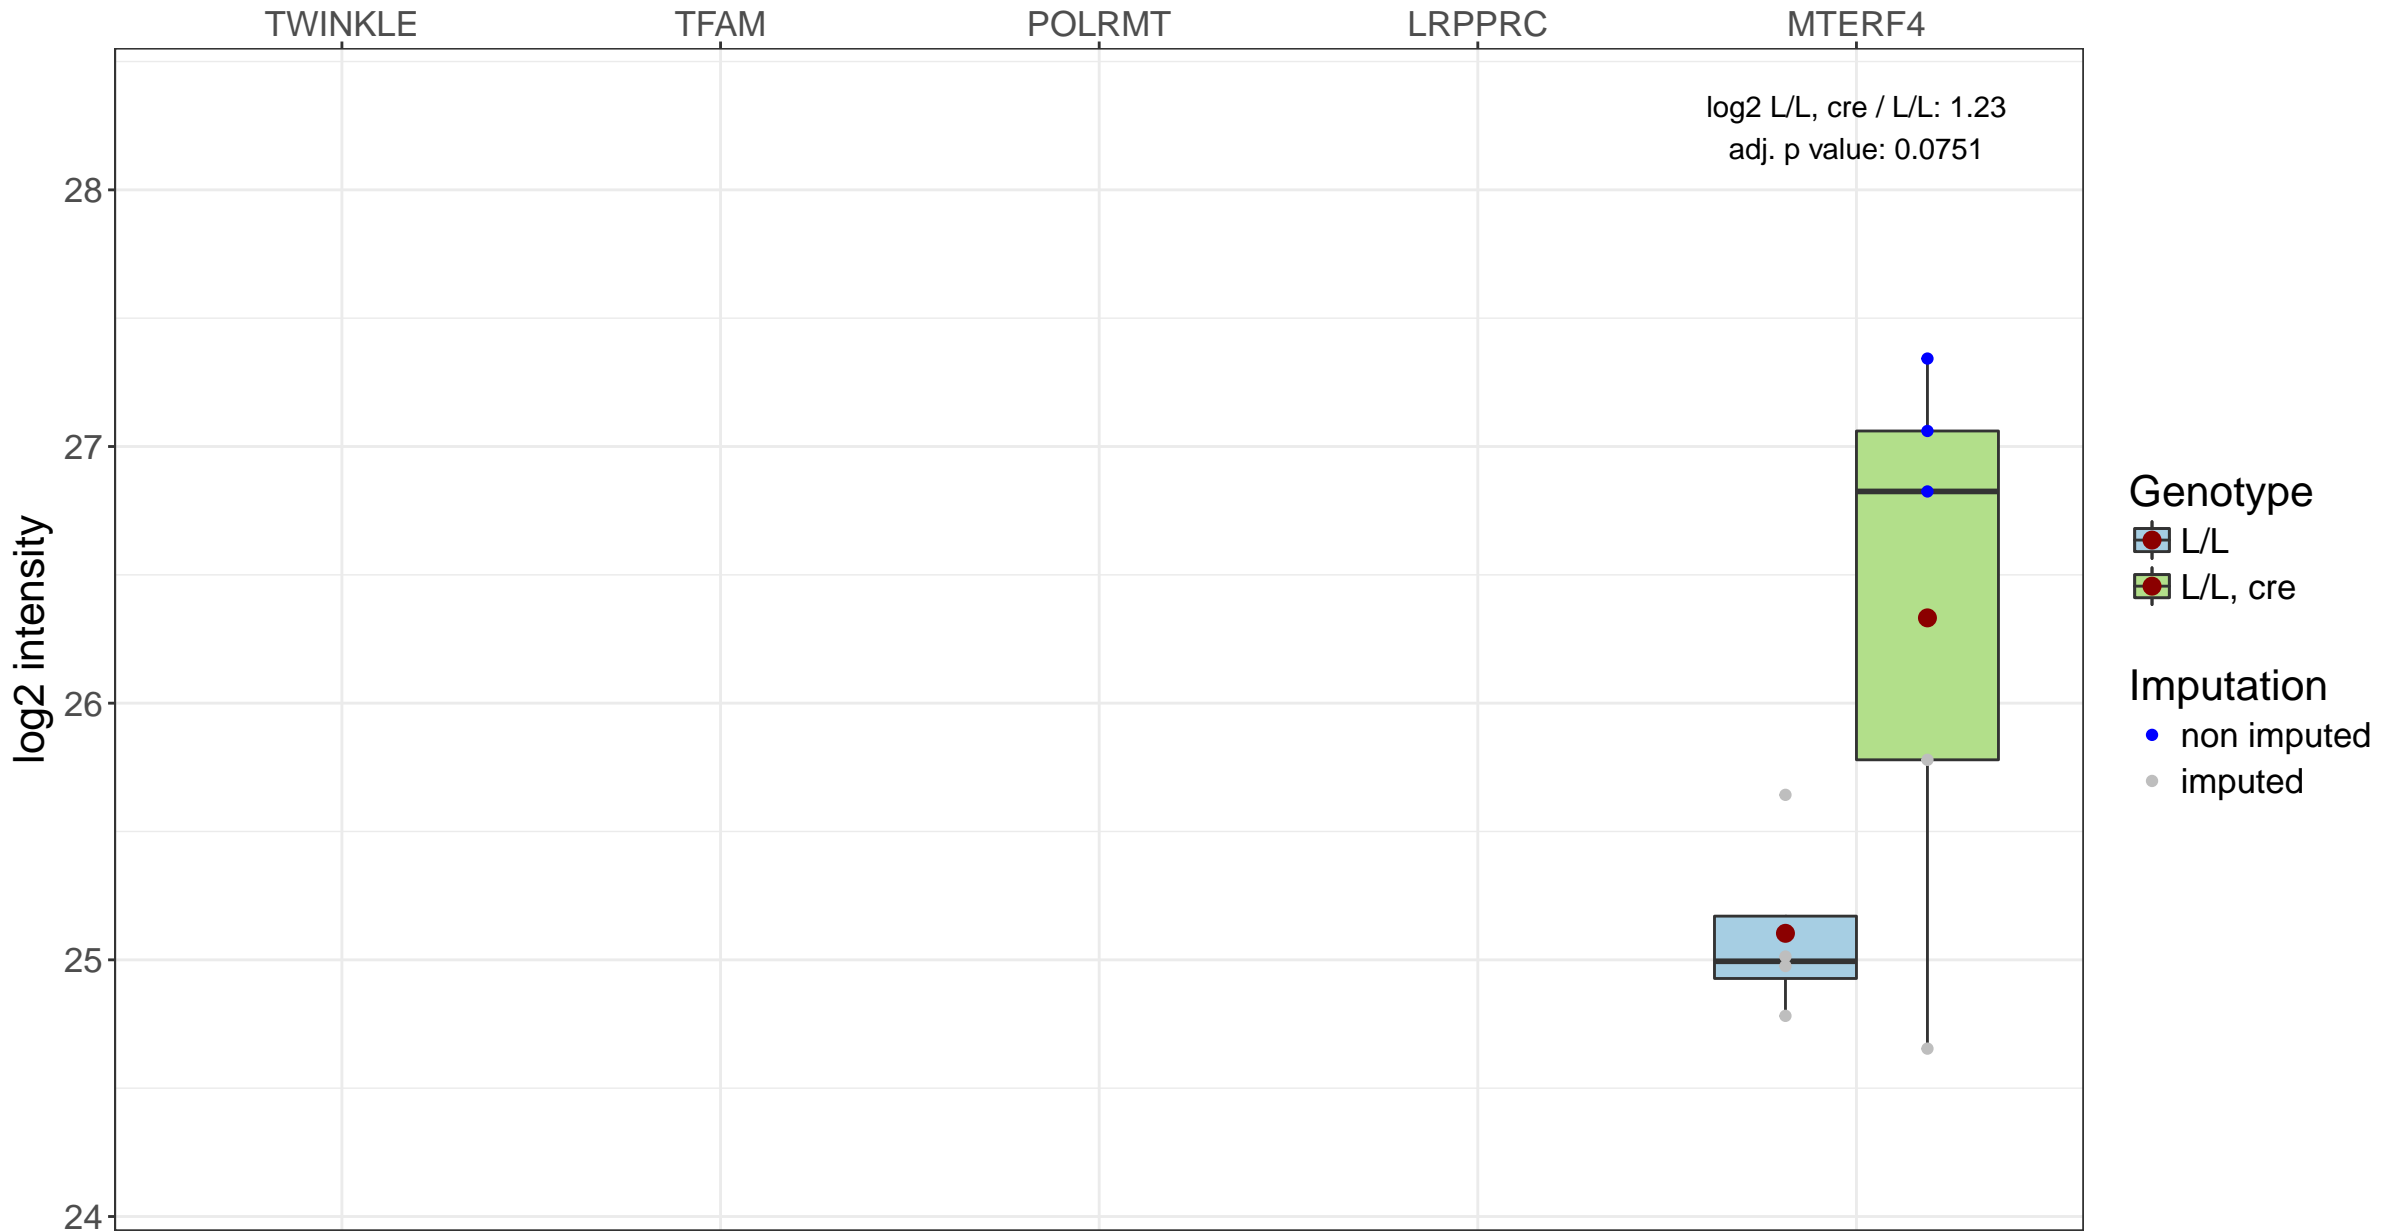

# OXA1L / Q8BGA9

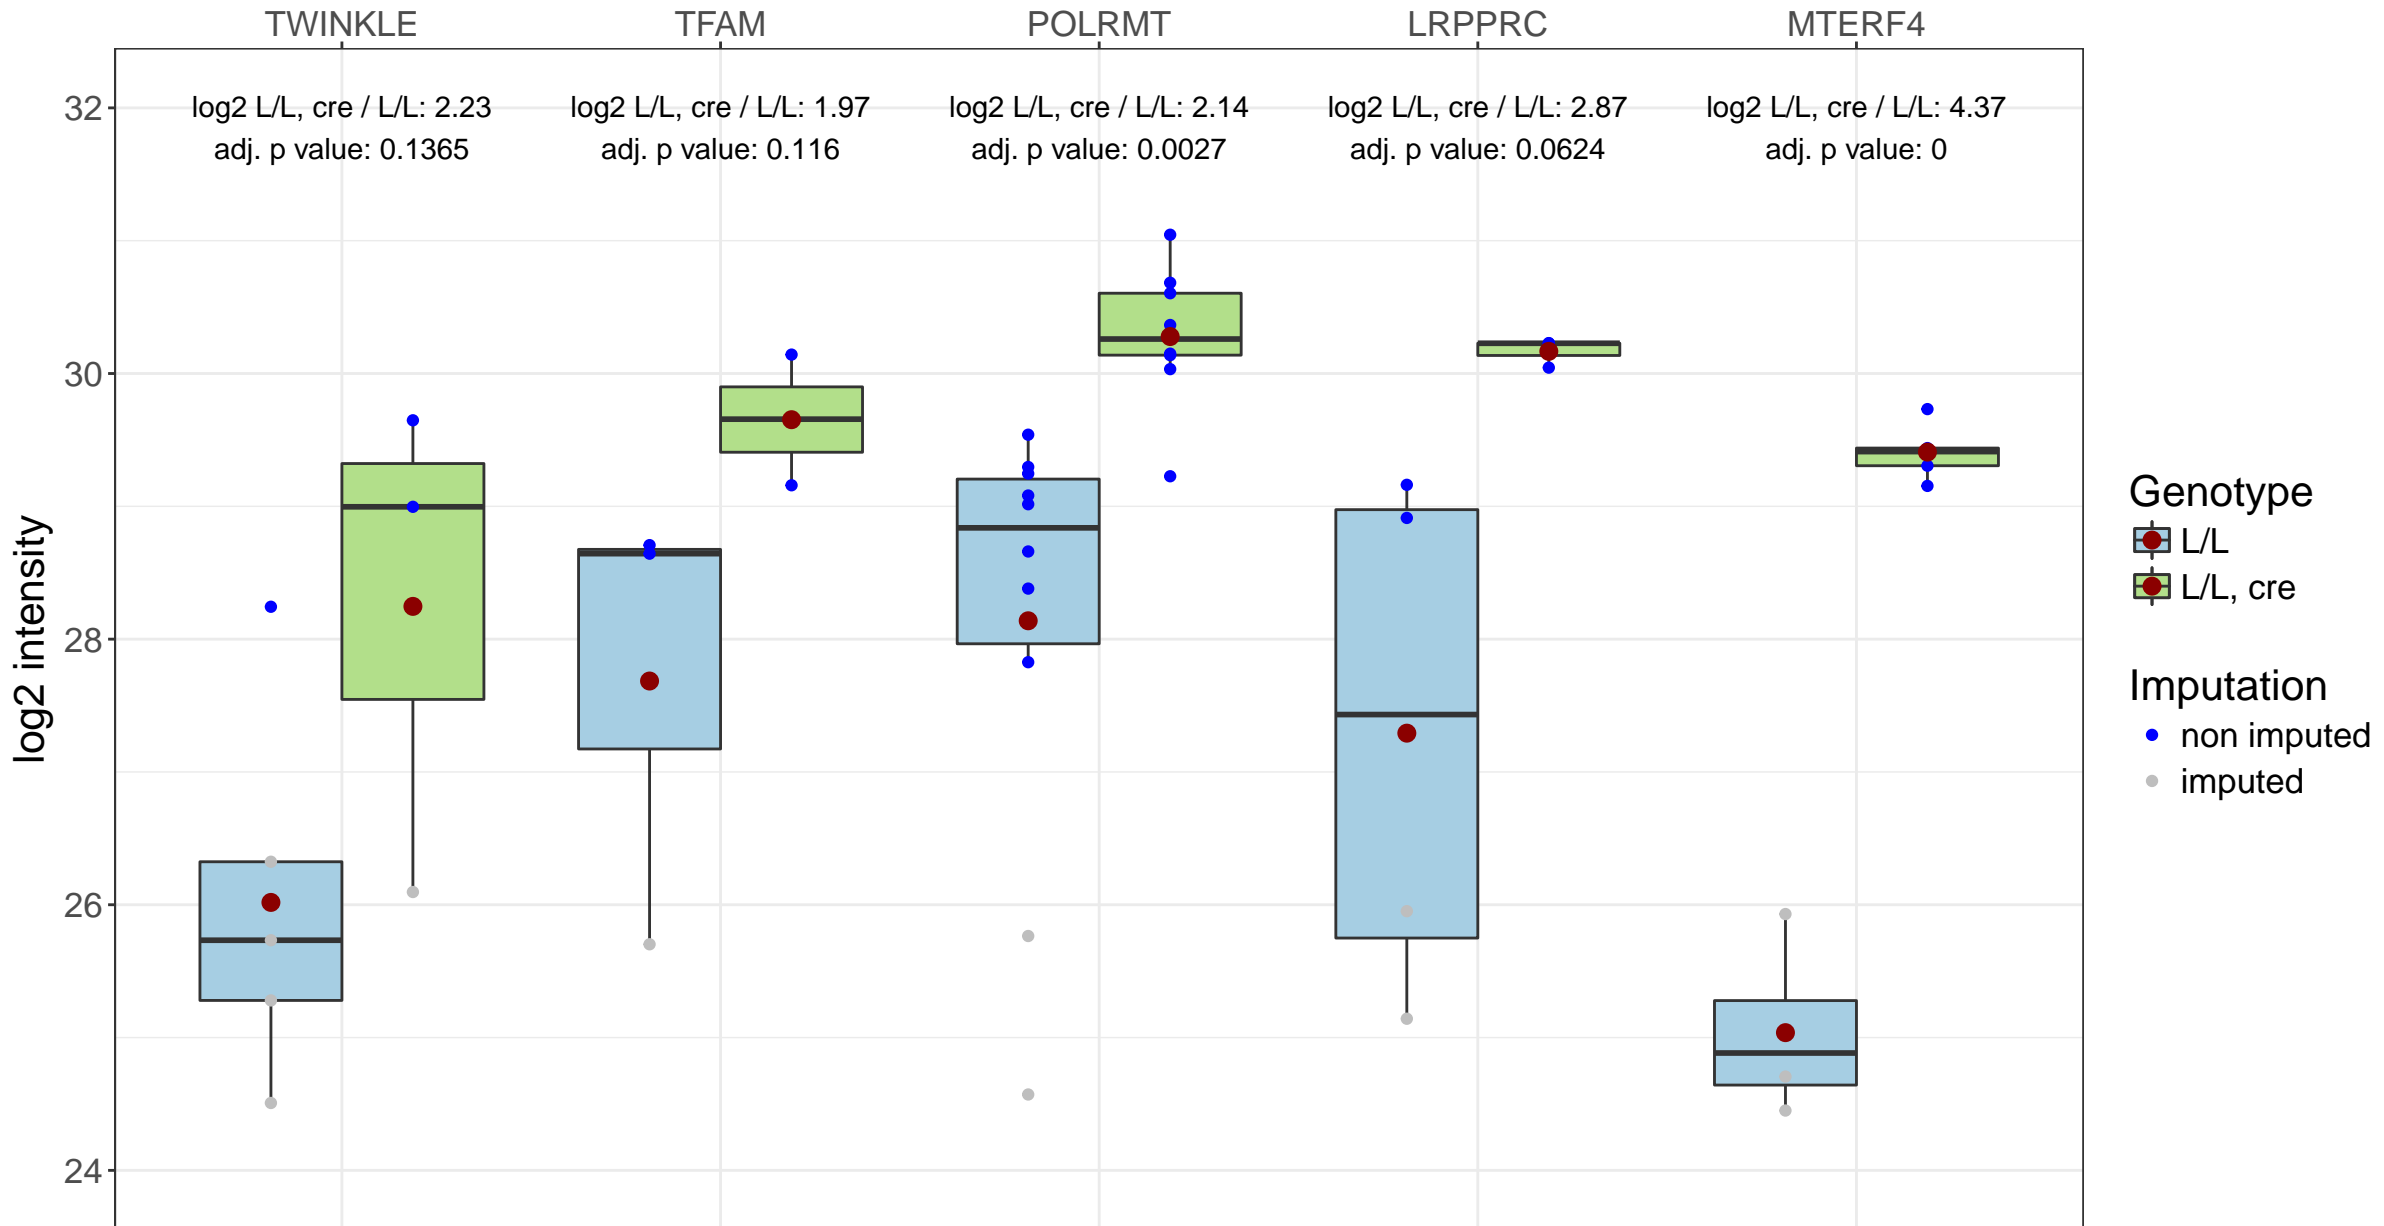

# OXCT1 / Q9D0K2

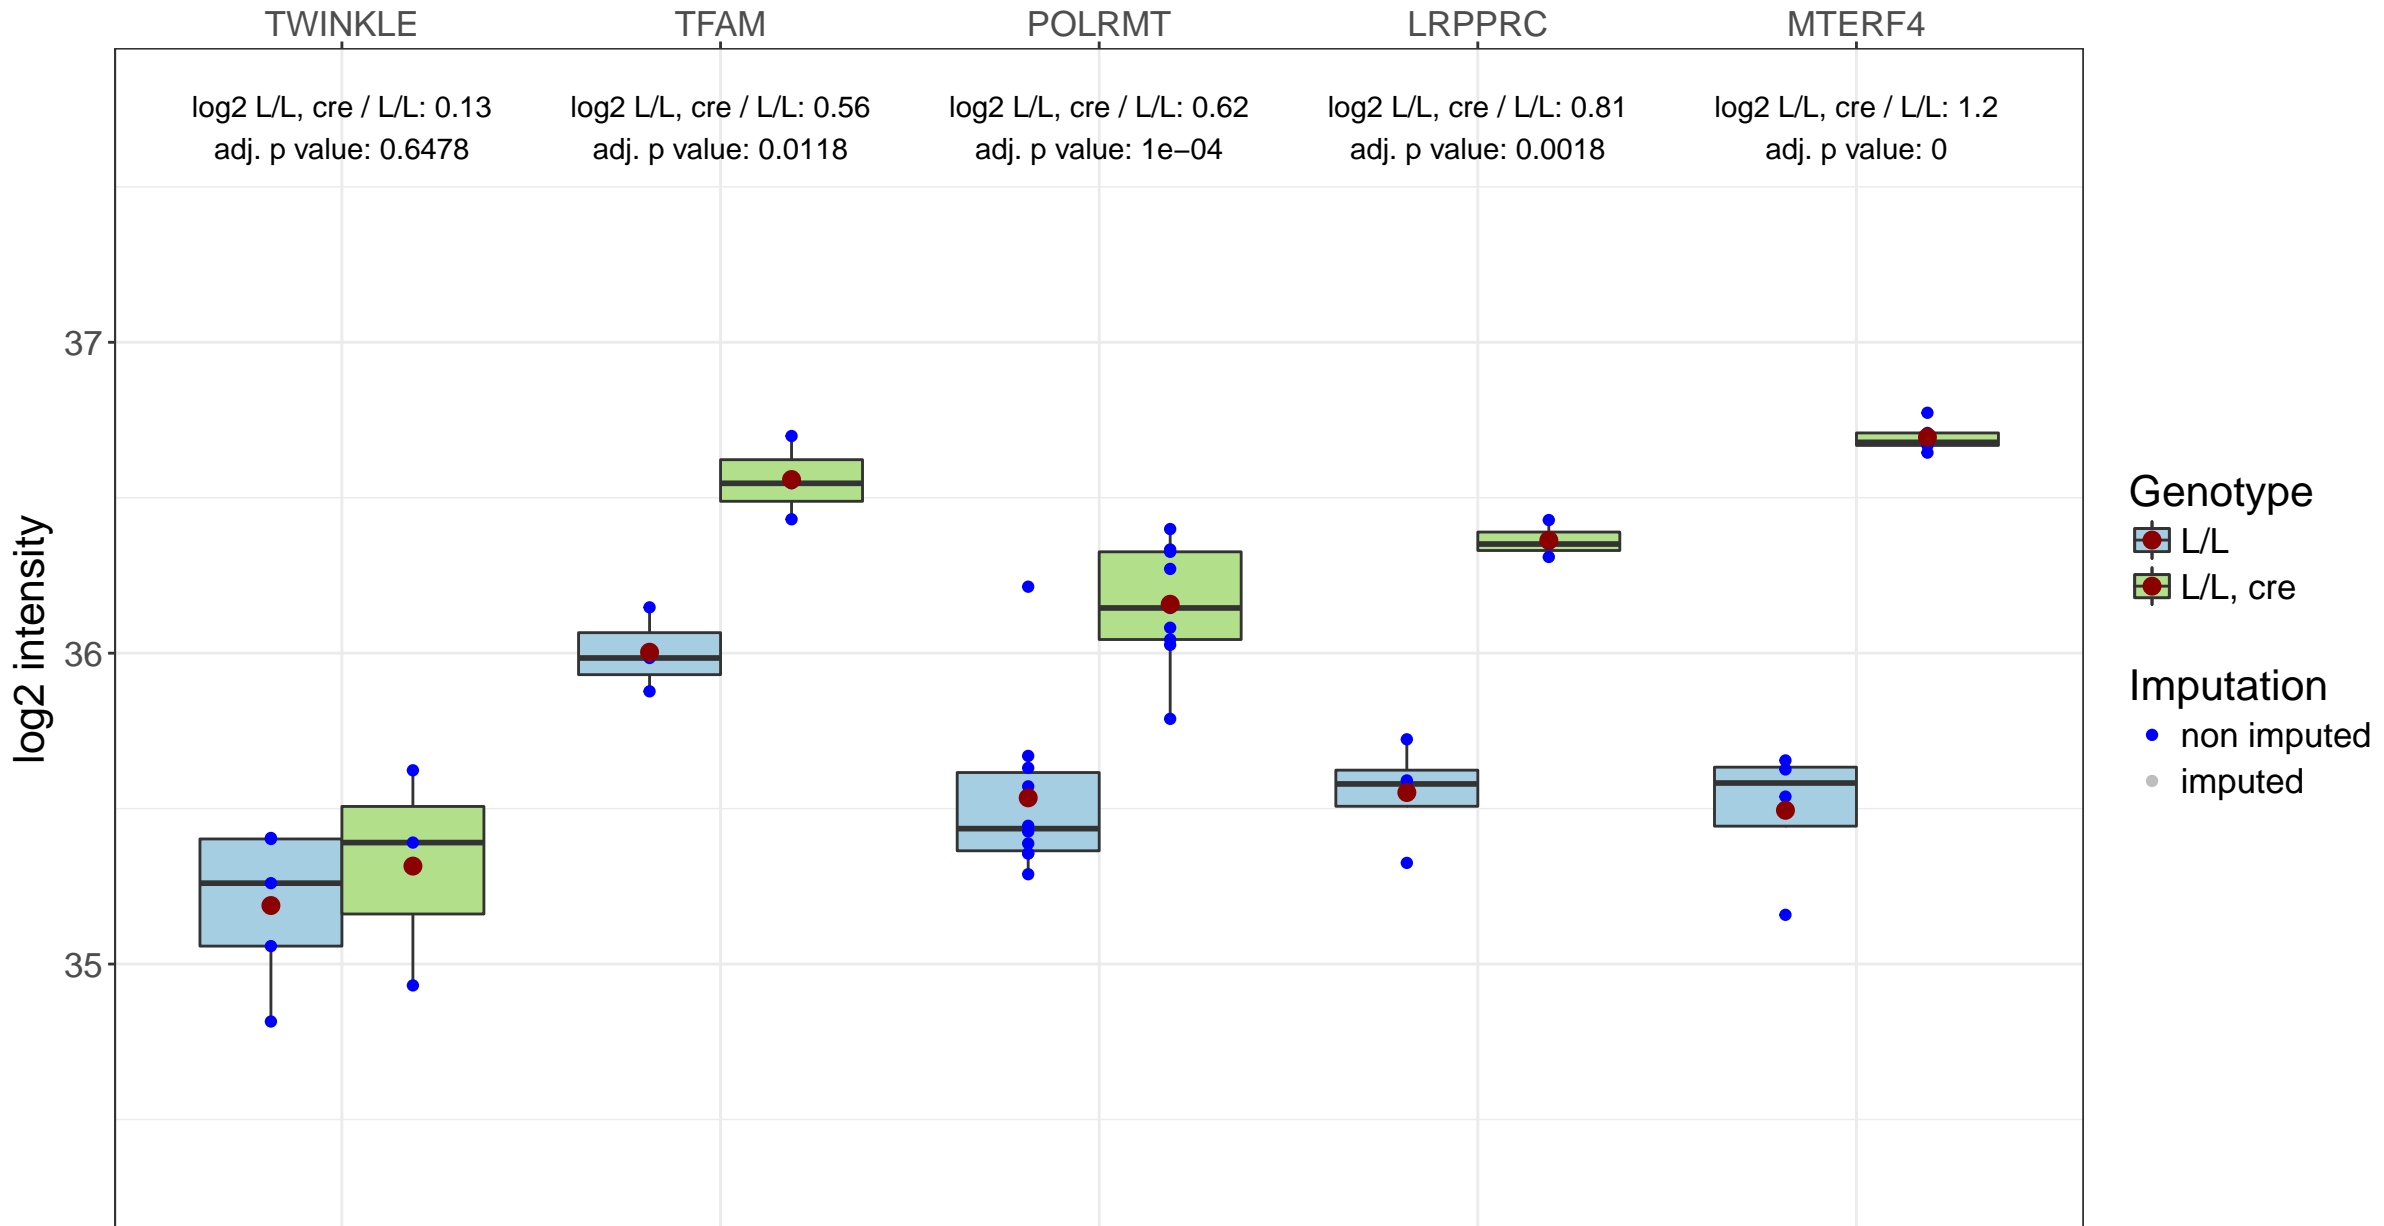

# OXLD1 / Q9CR10

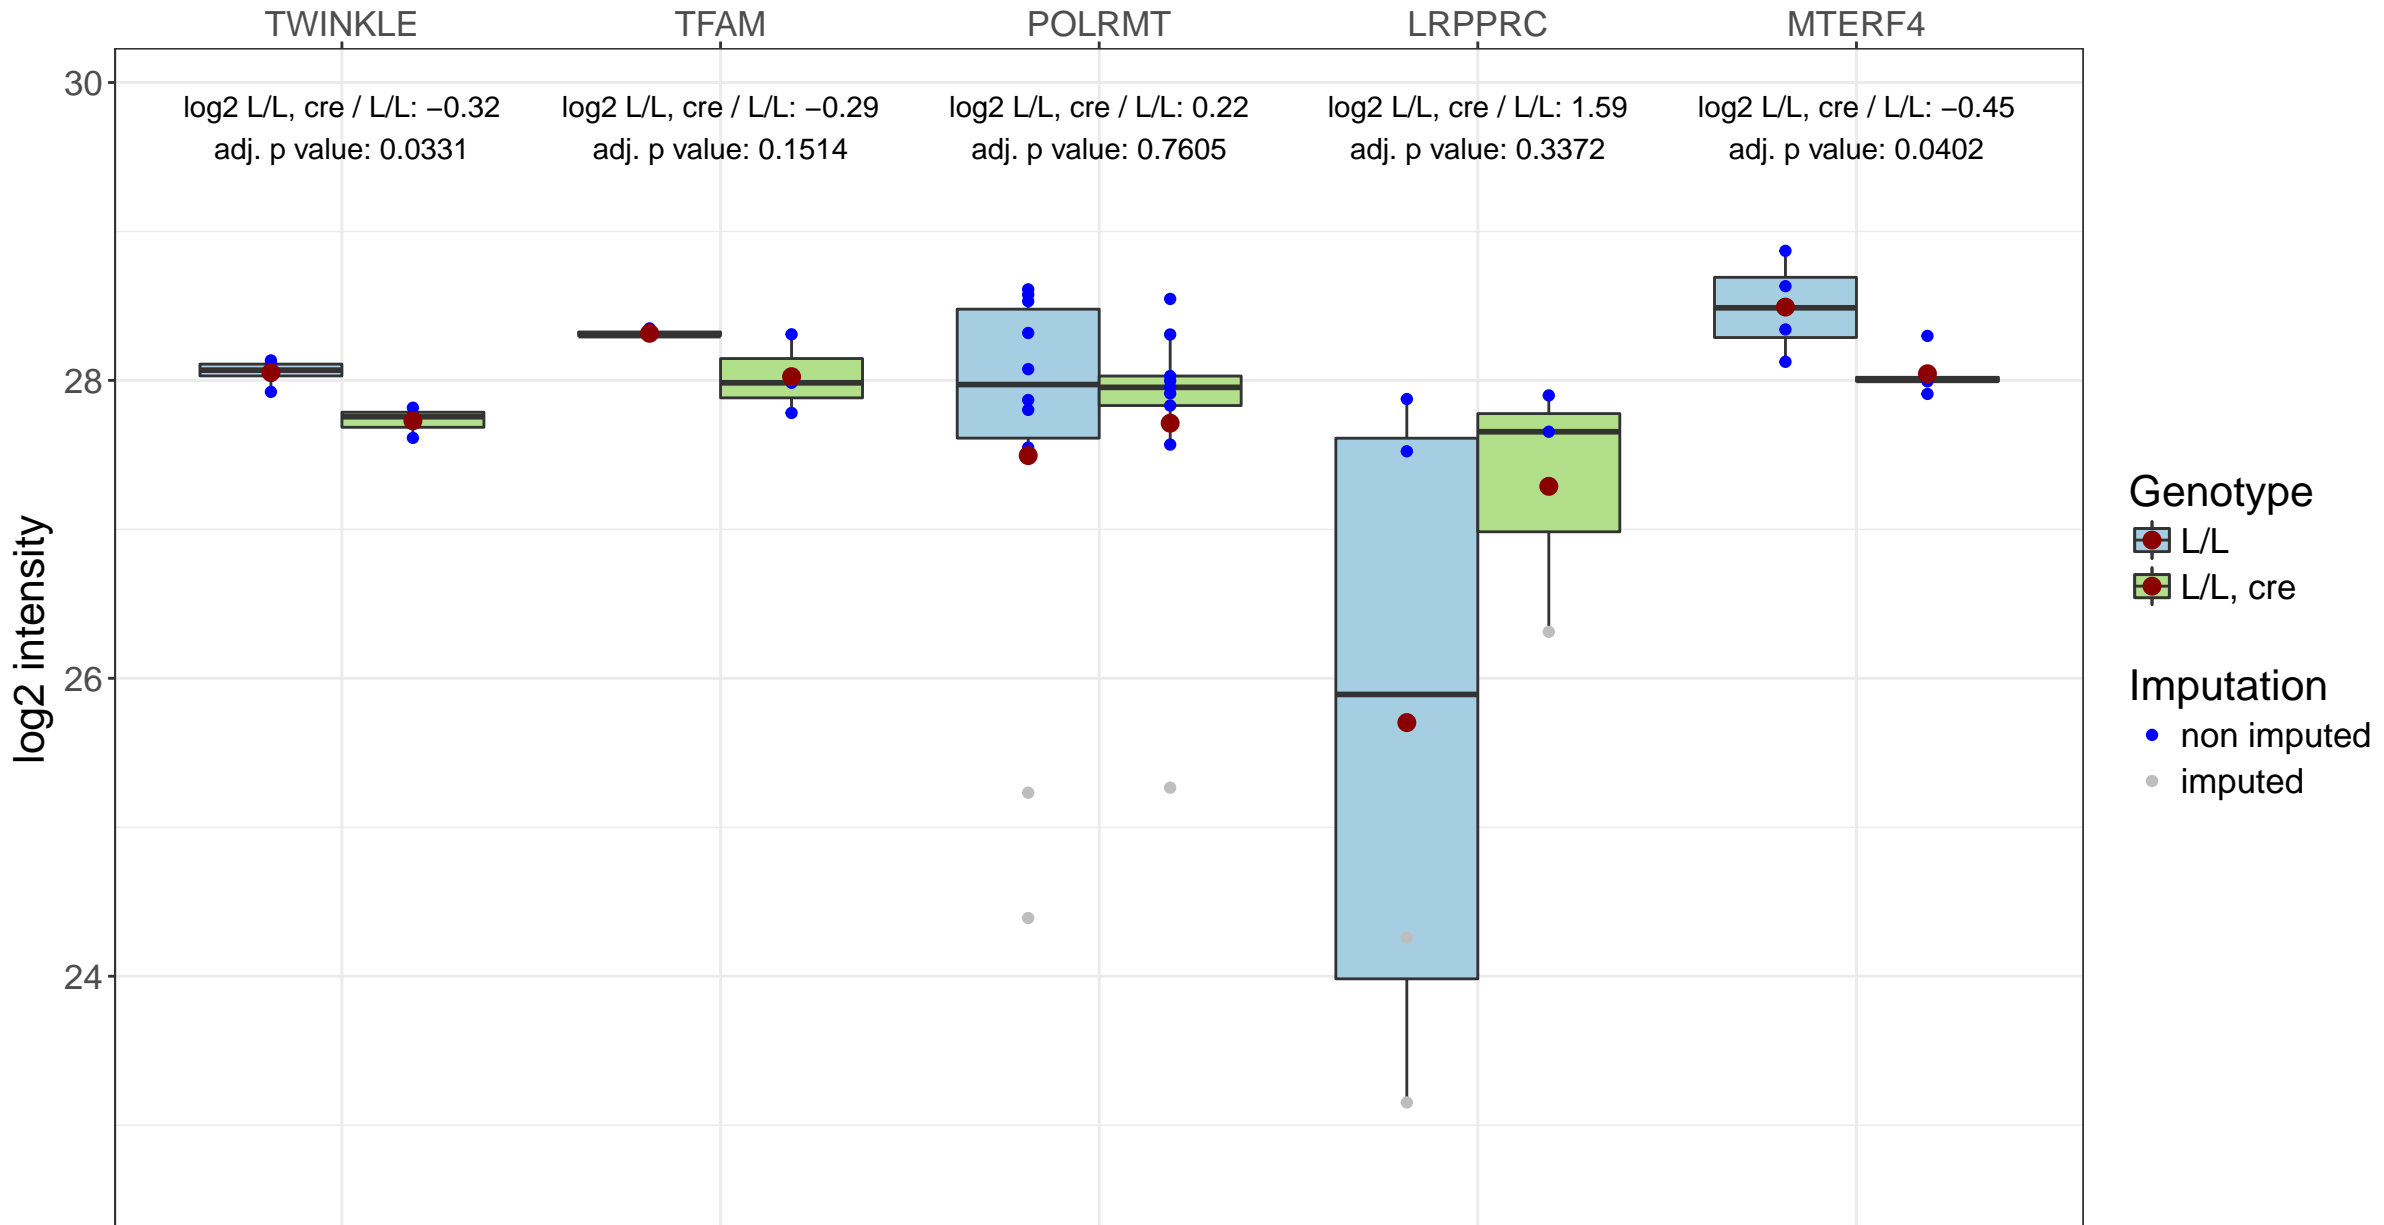

# OXNAD1 / Q8VE38-2

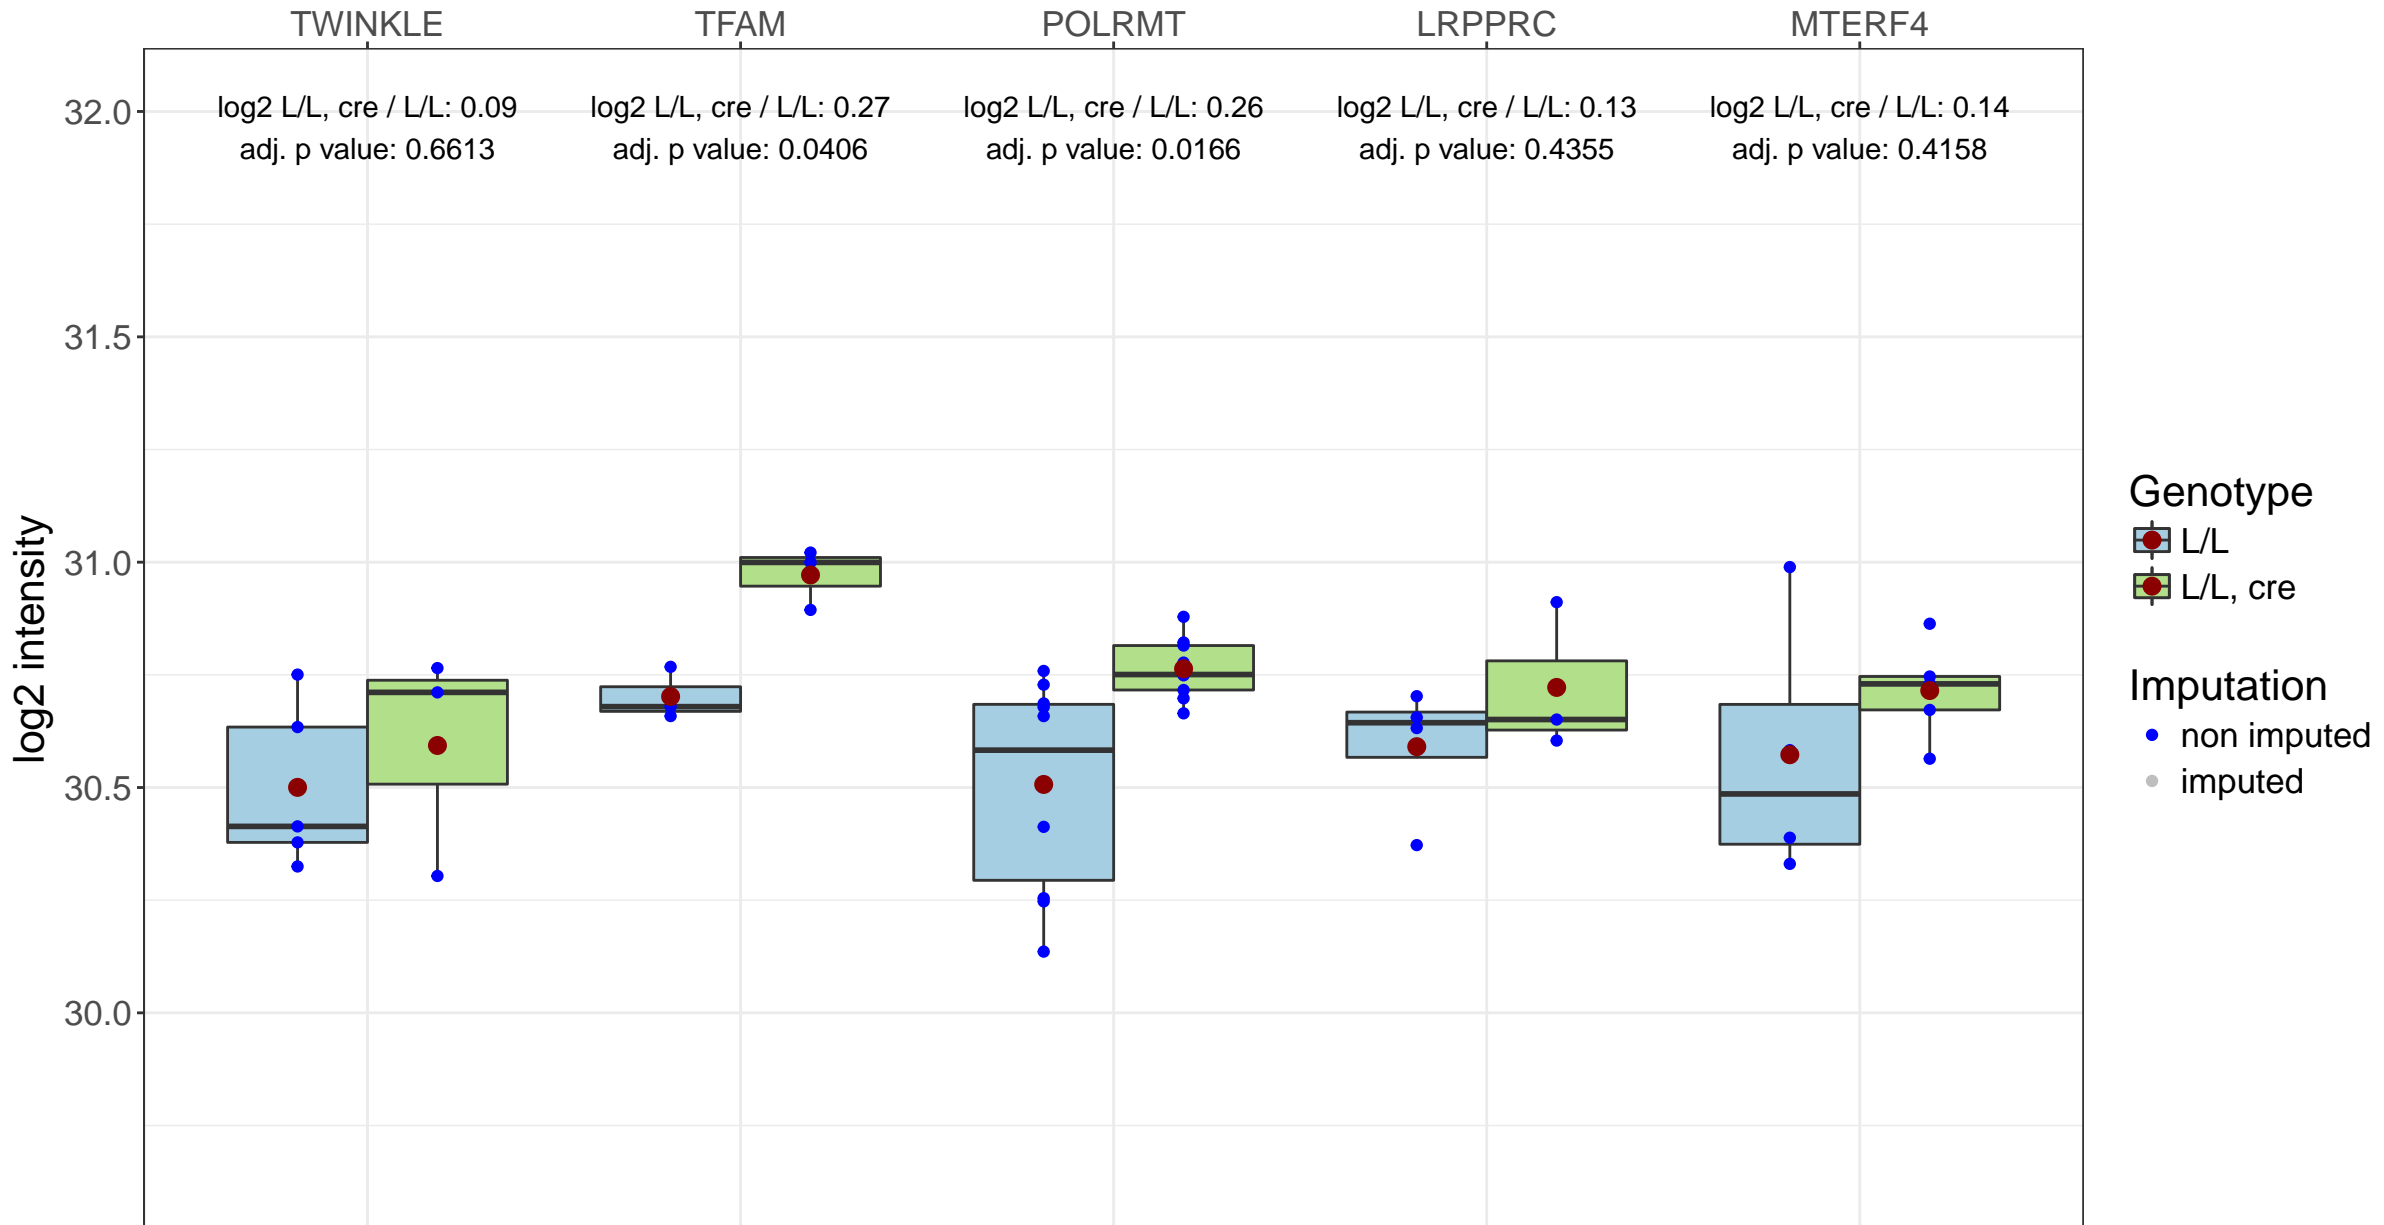

# OXSM / Q9D404

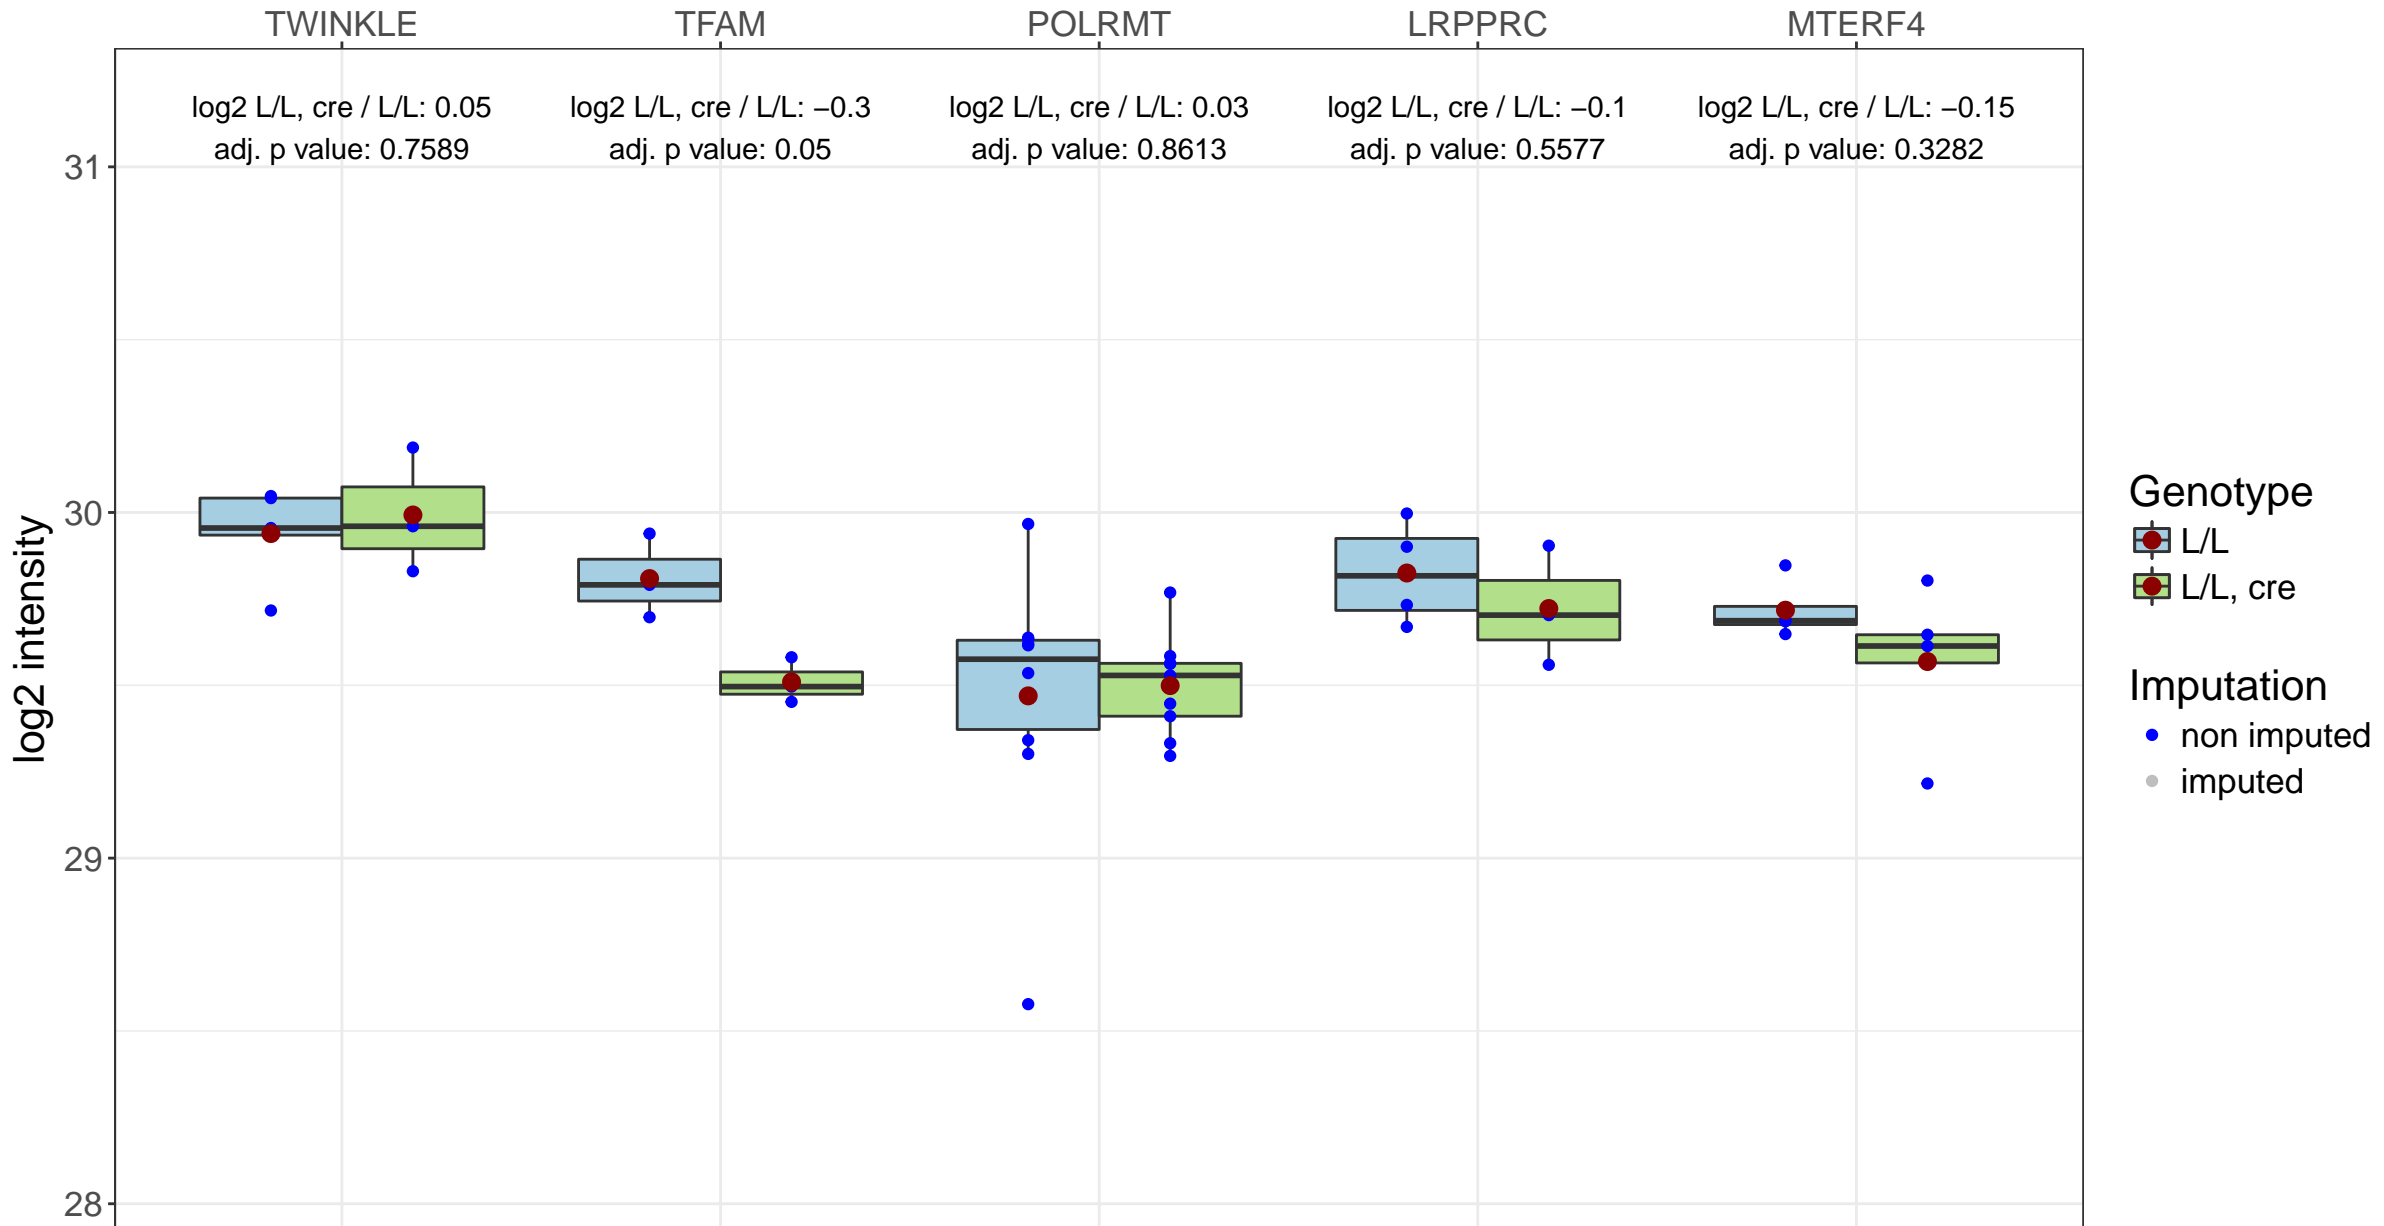

# P4HB / P09103

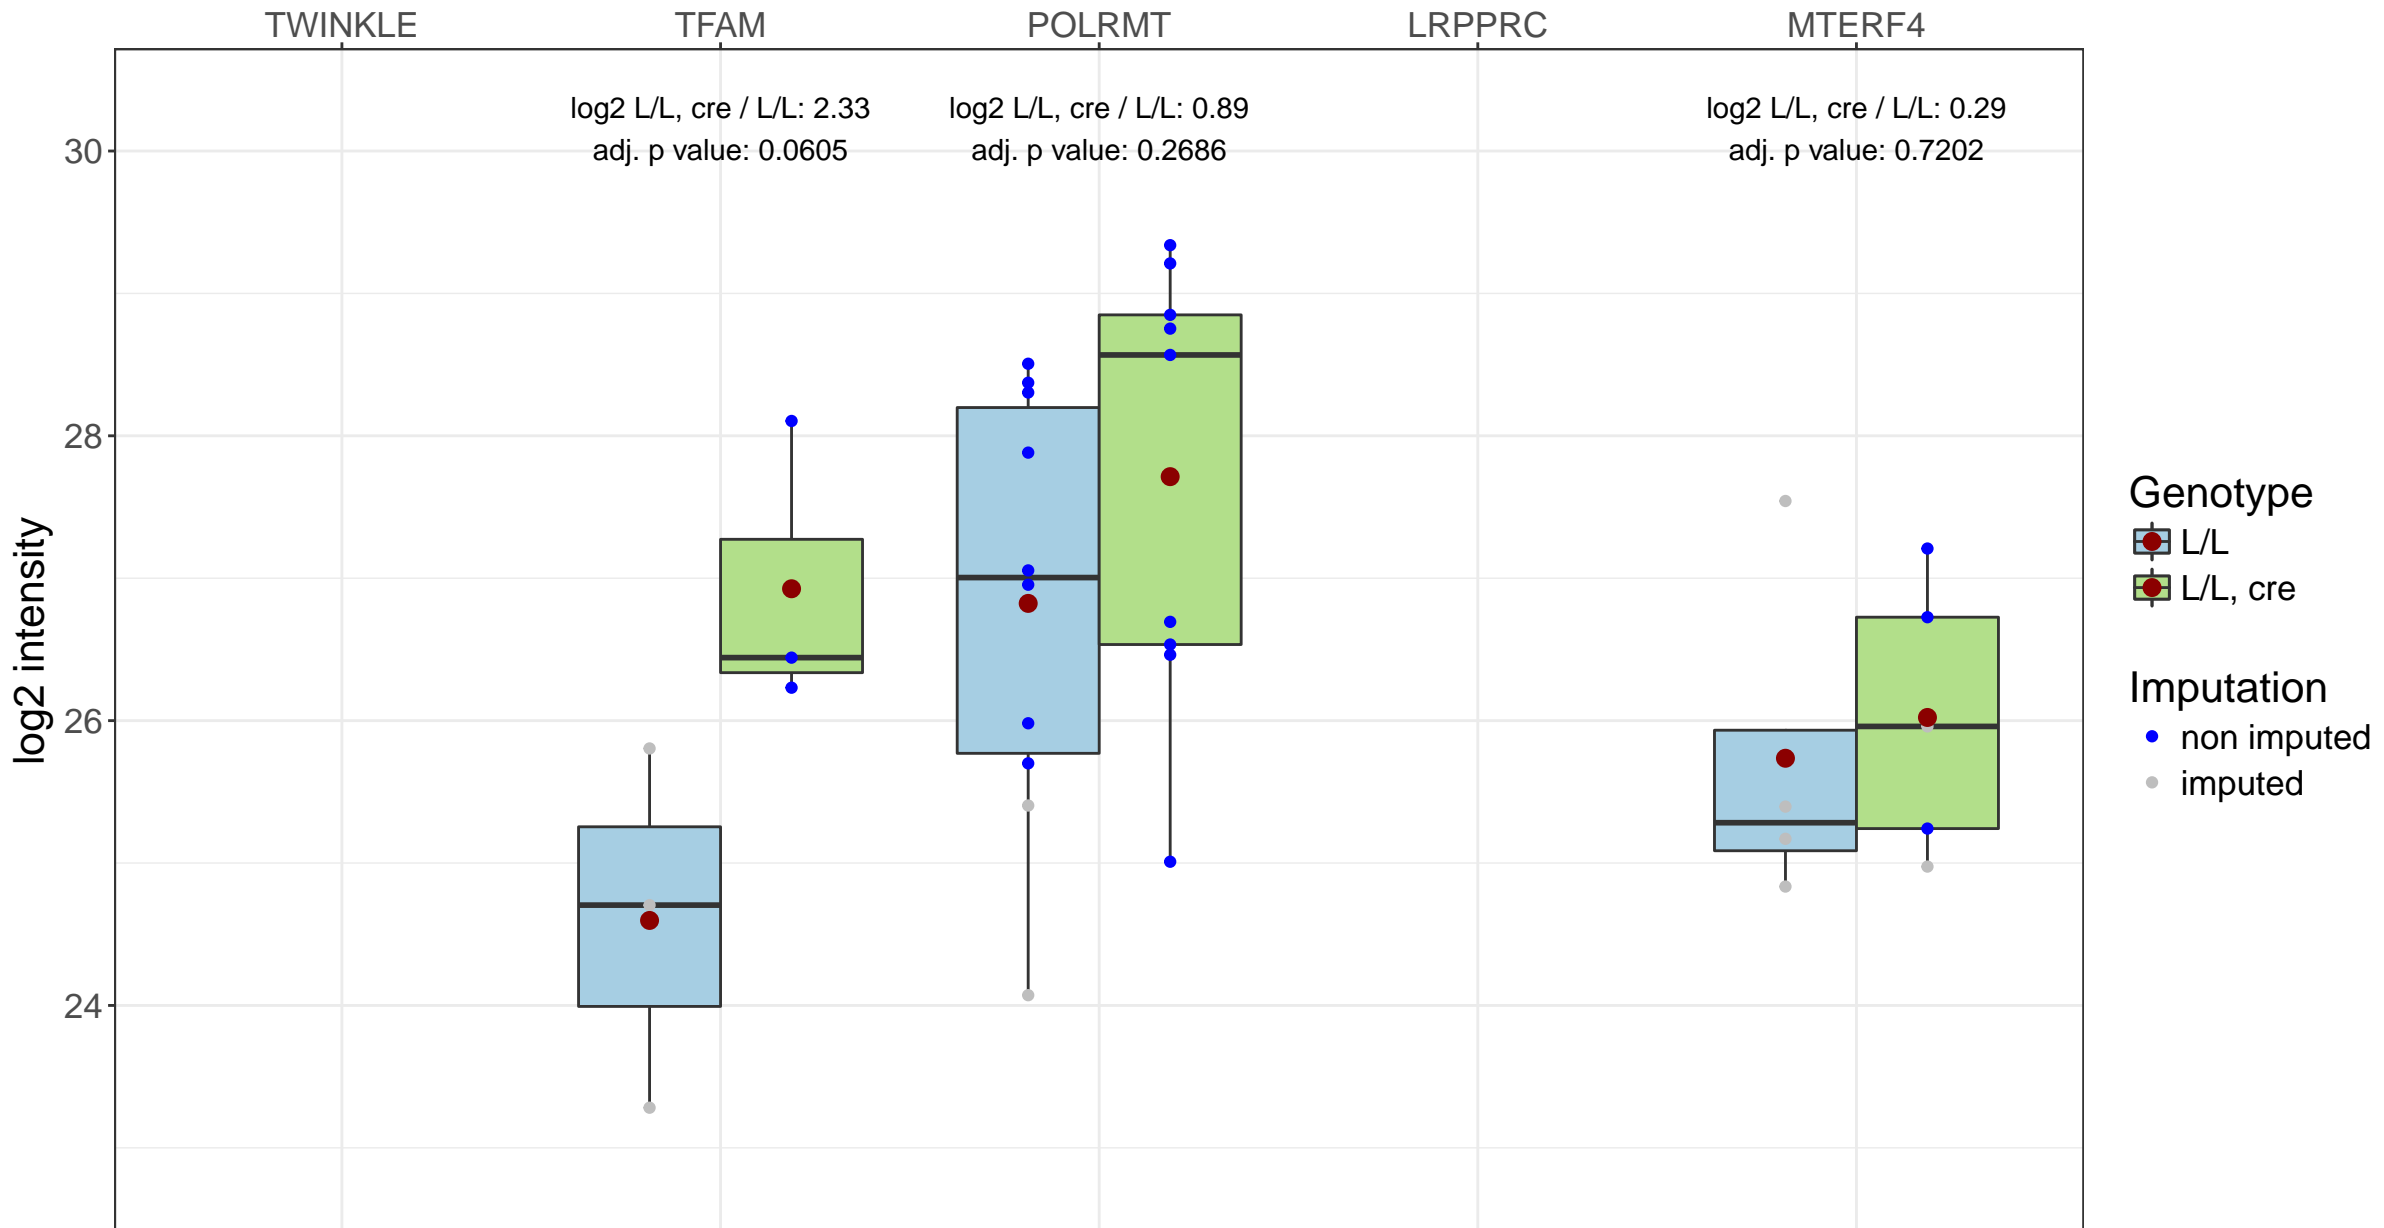

# PA2G4 / P50580

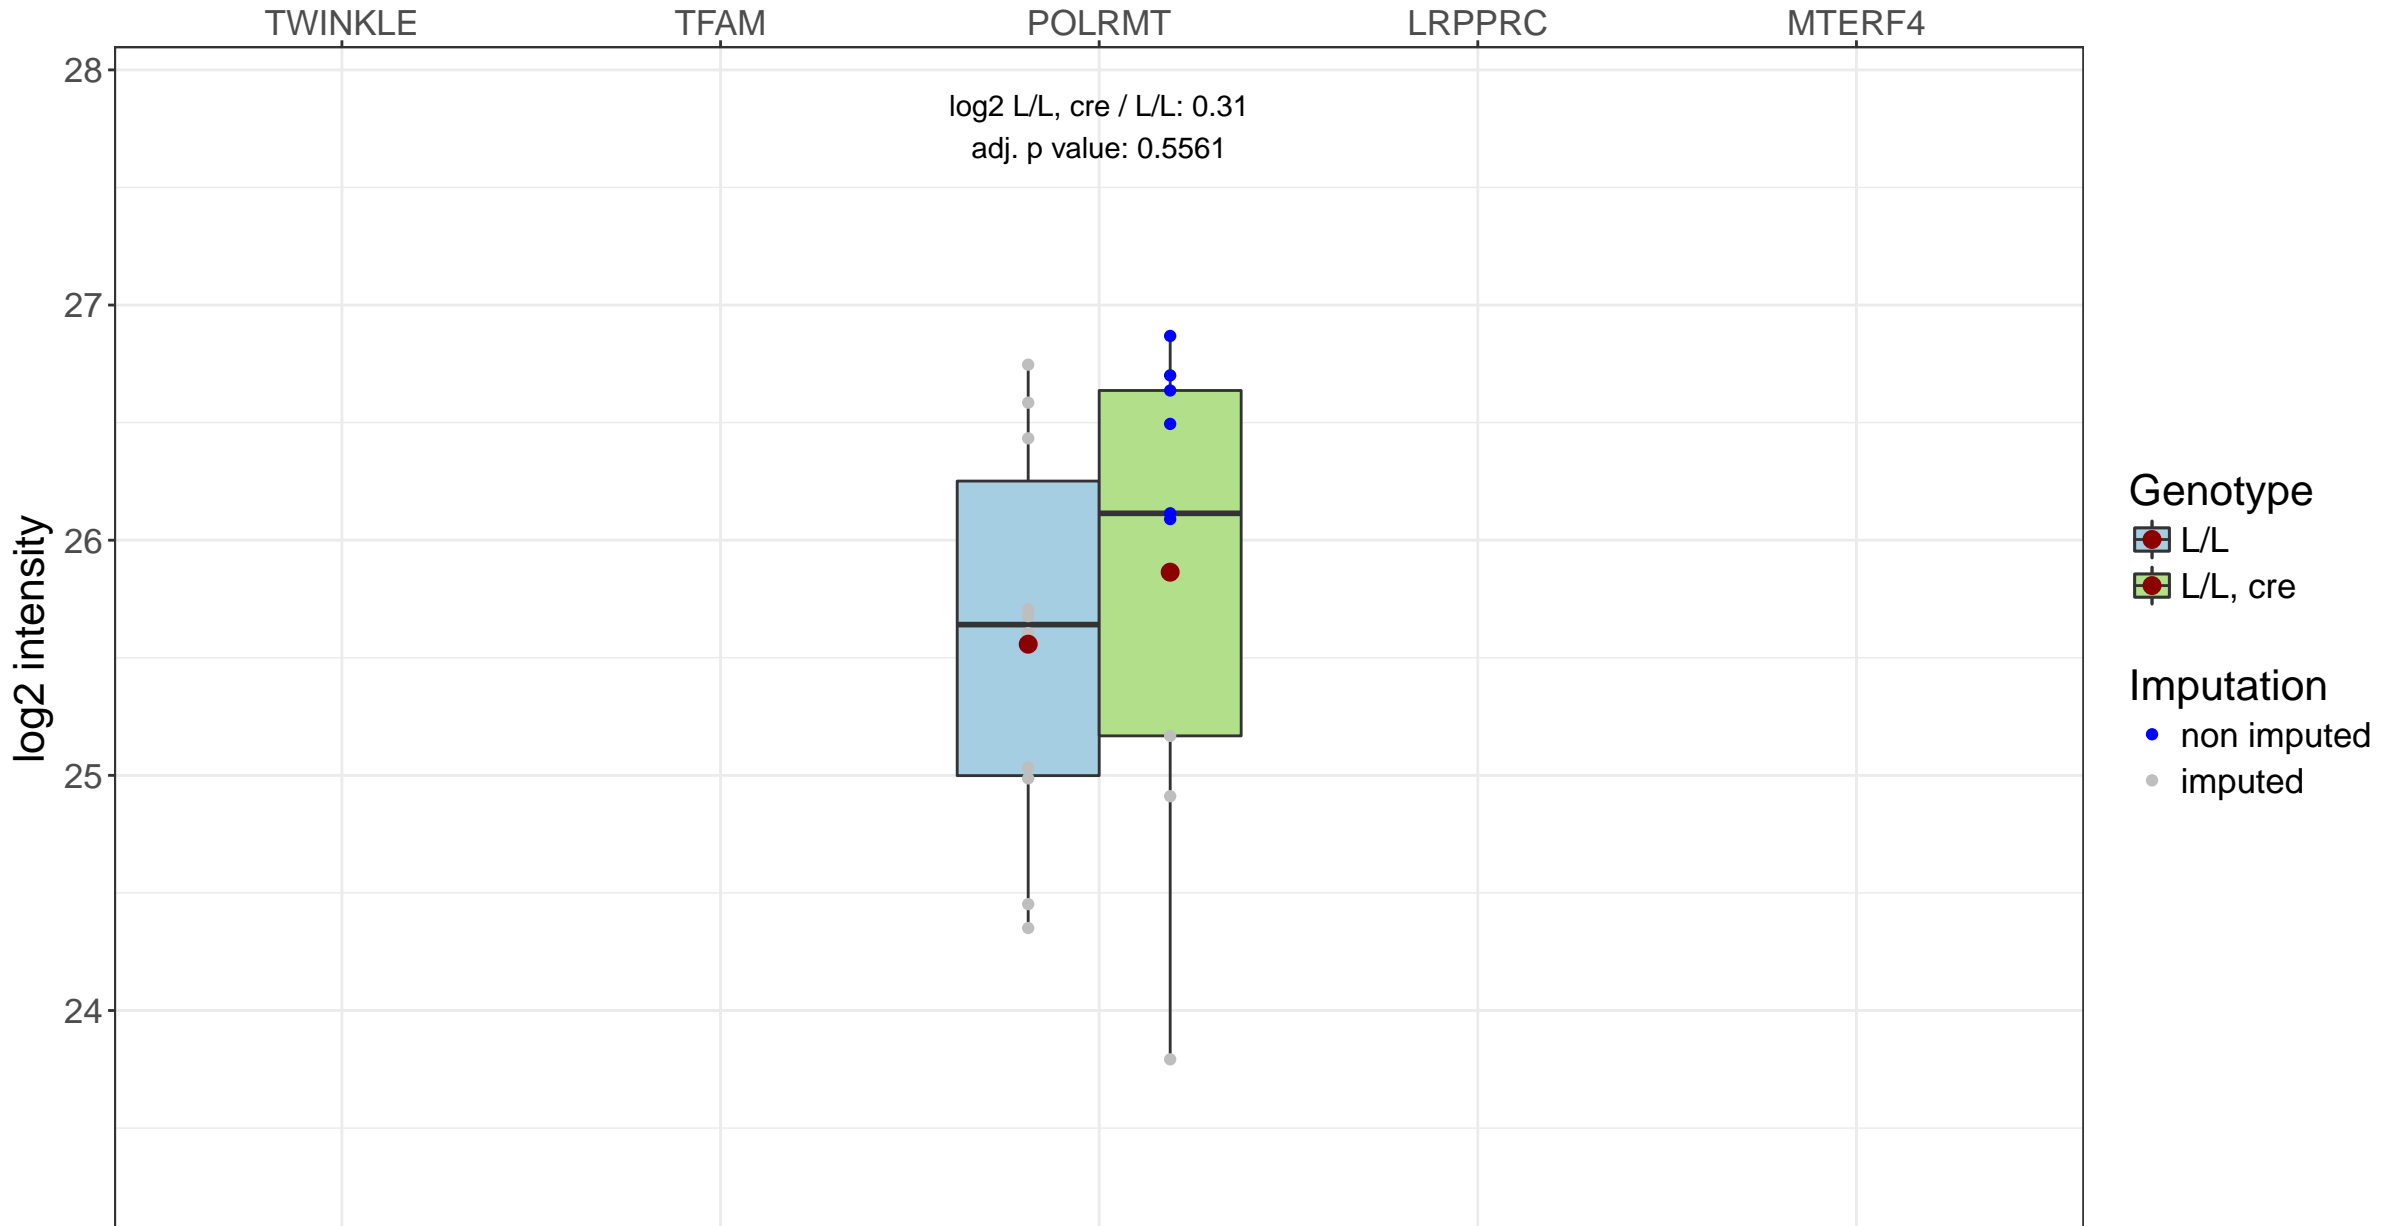



# PAM16 / Q9CQV1

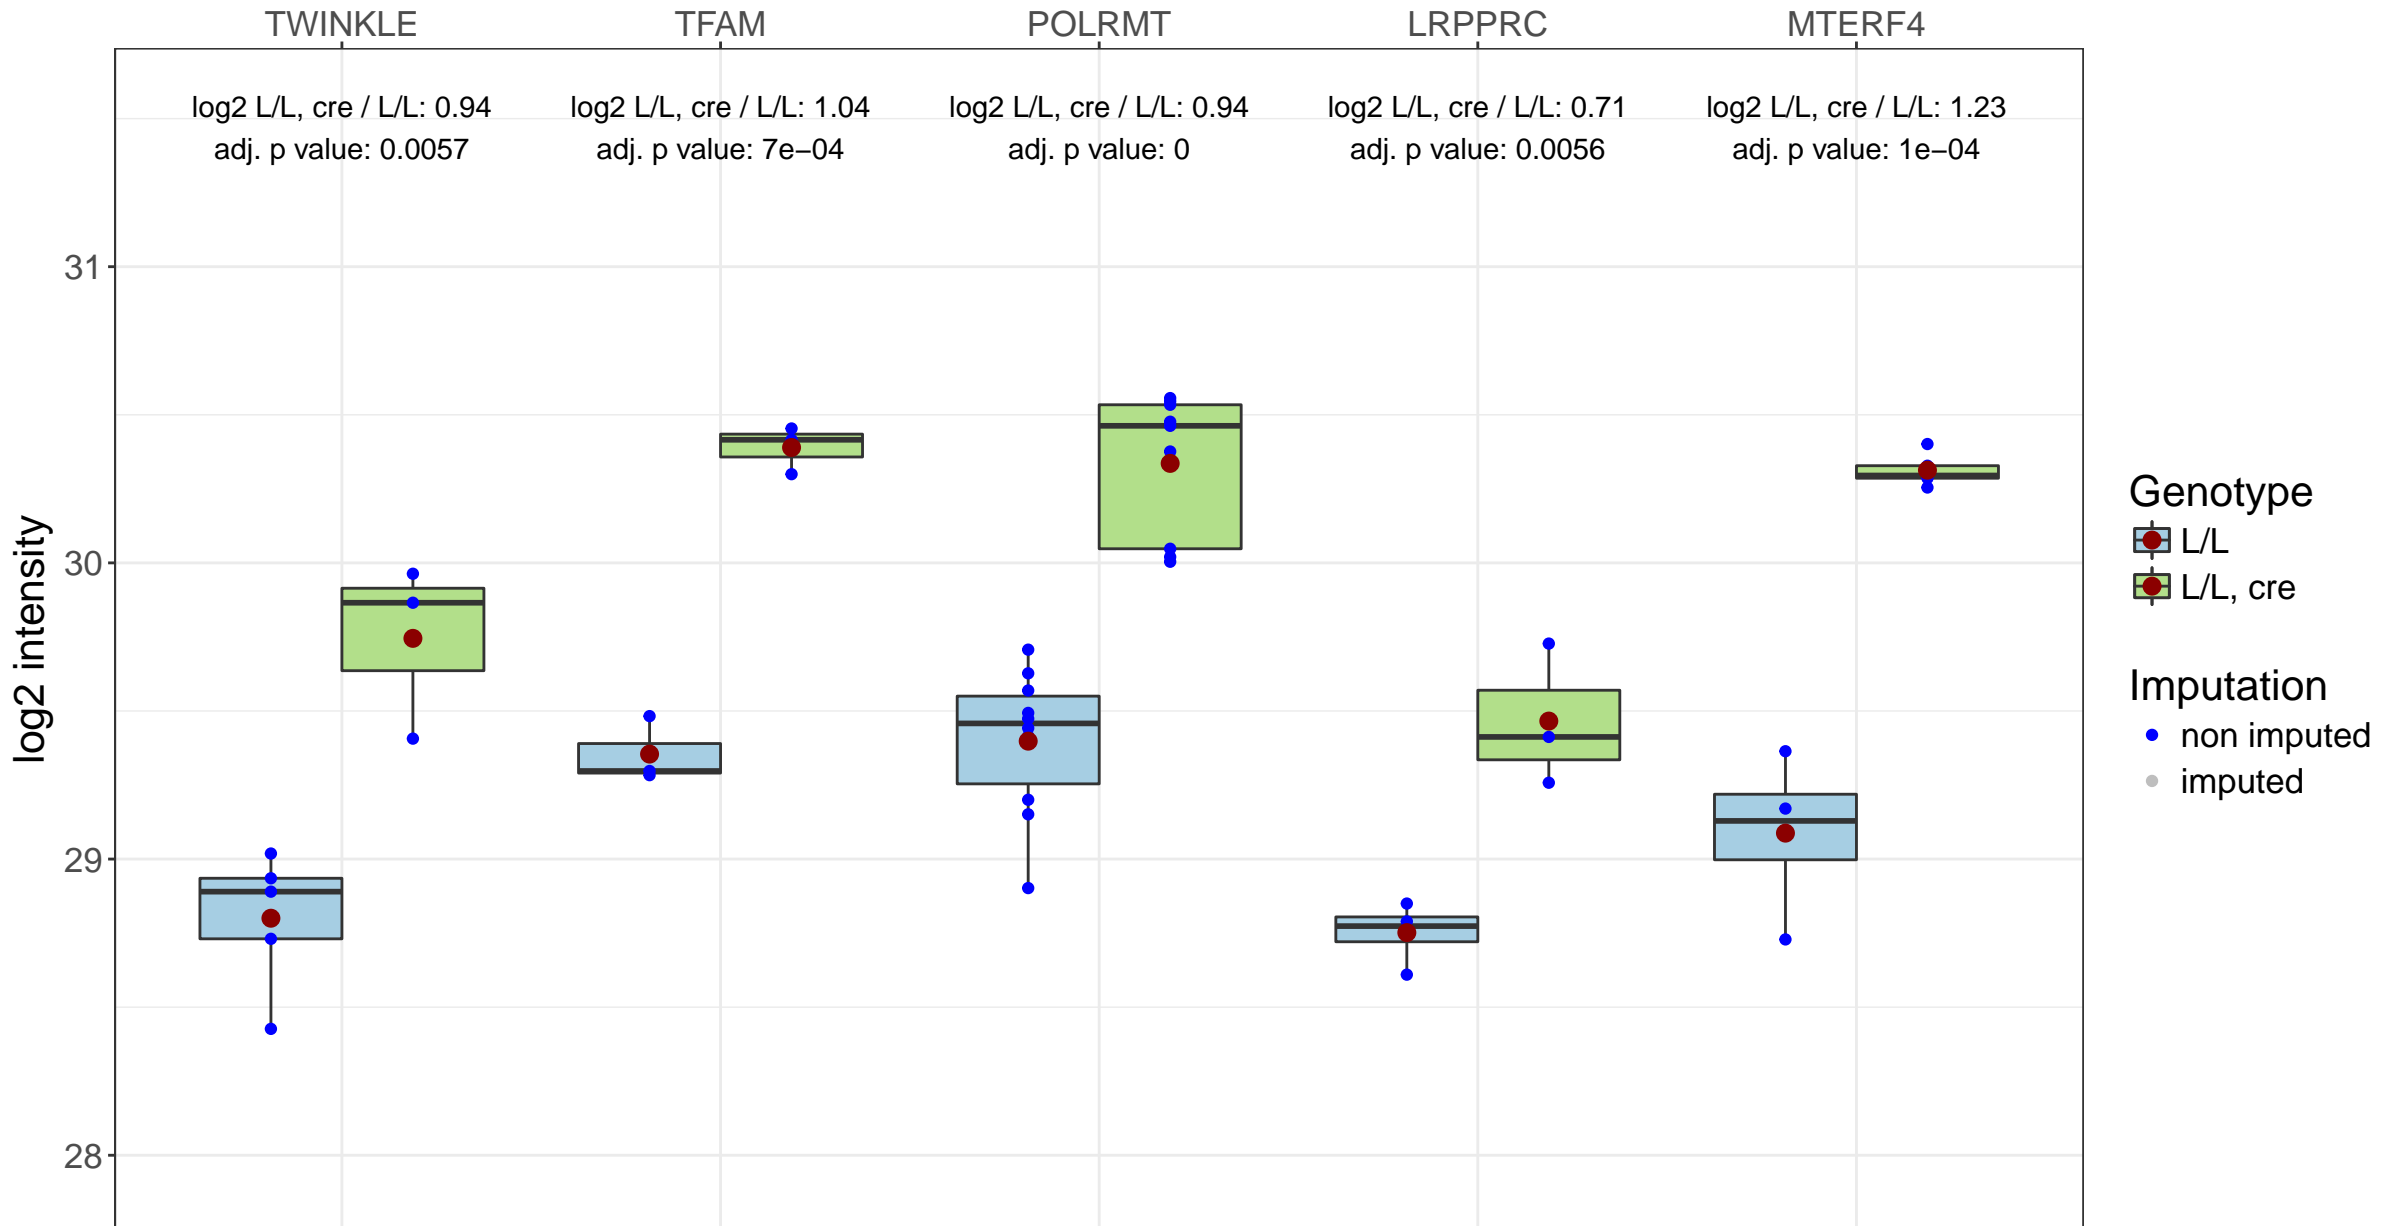

# PARK7 / Q99LX0

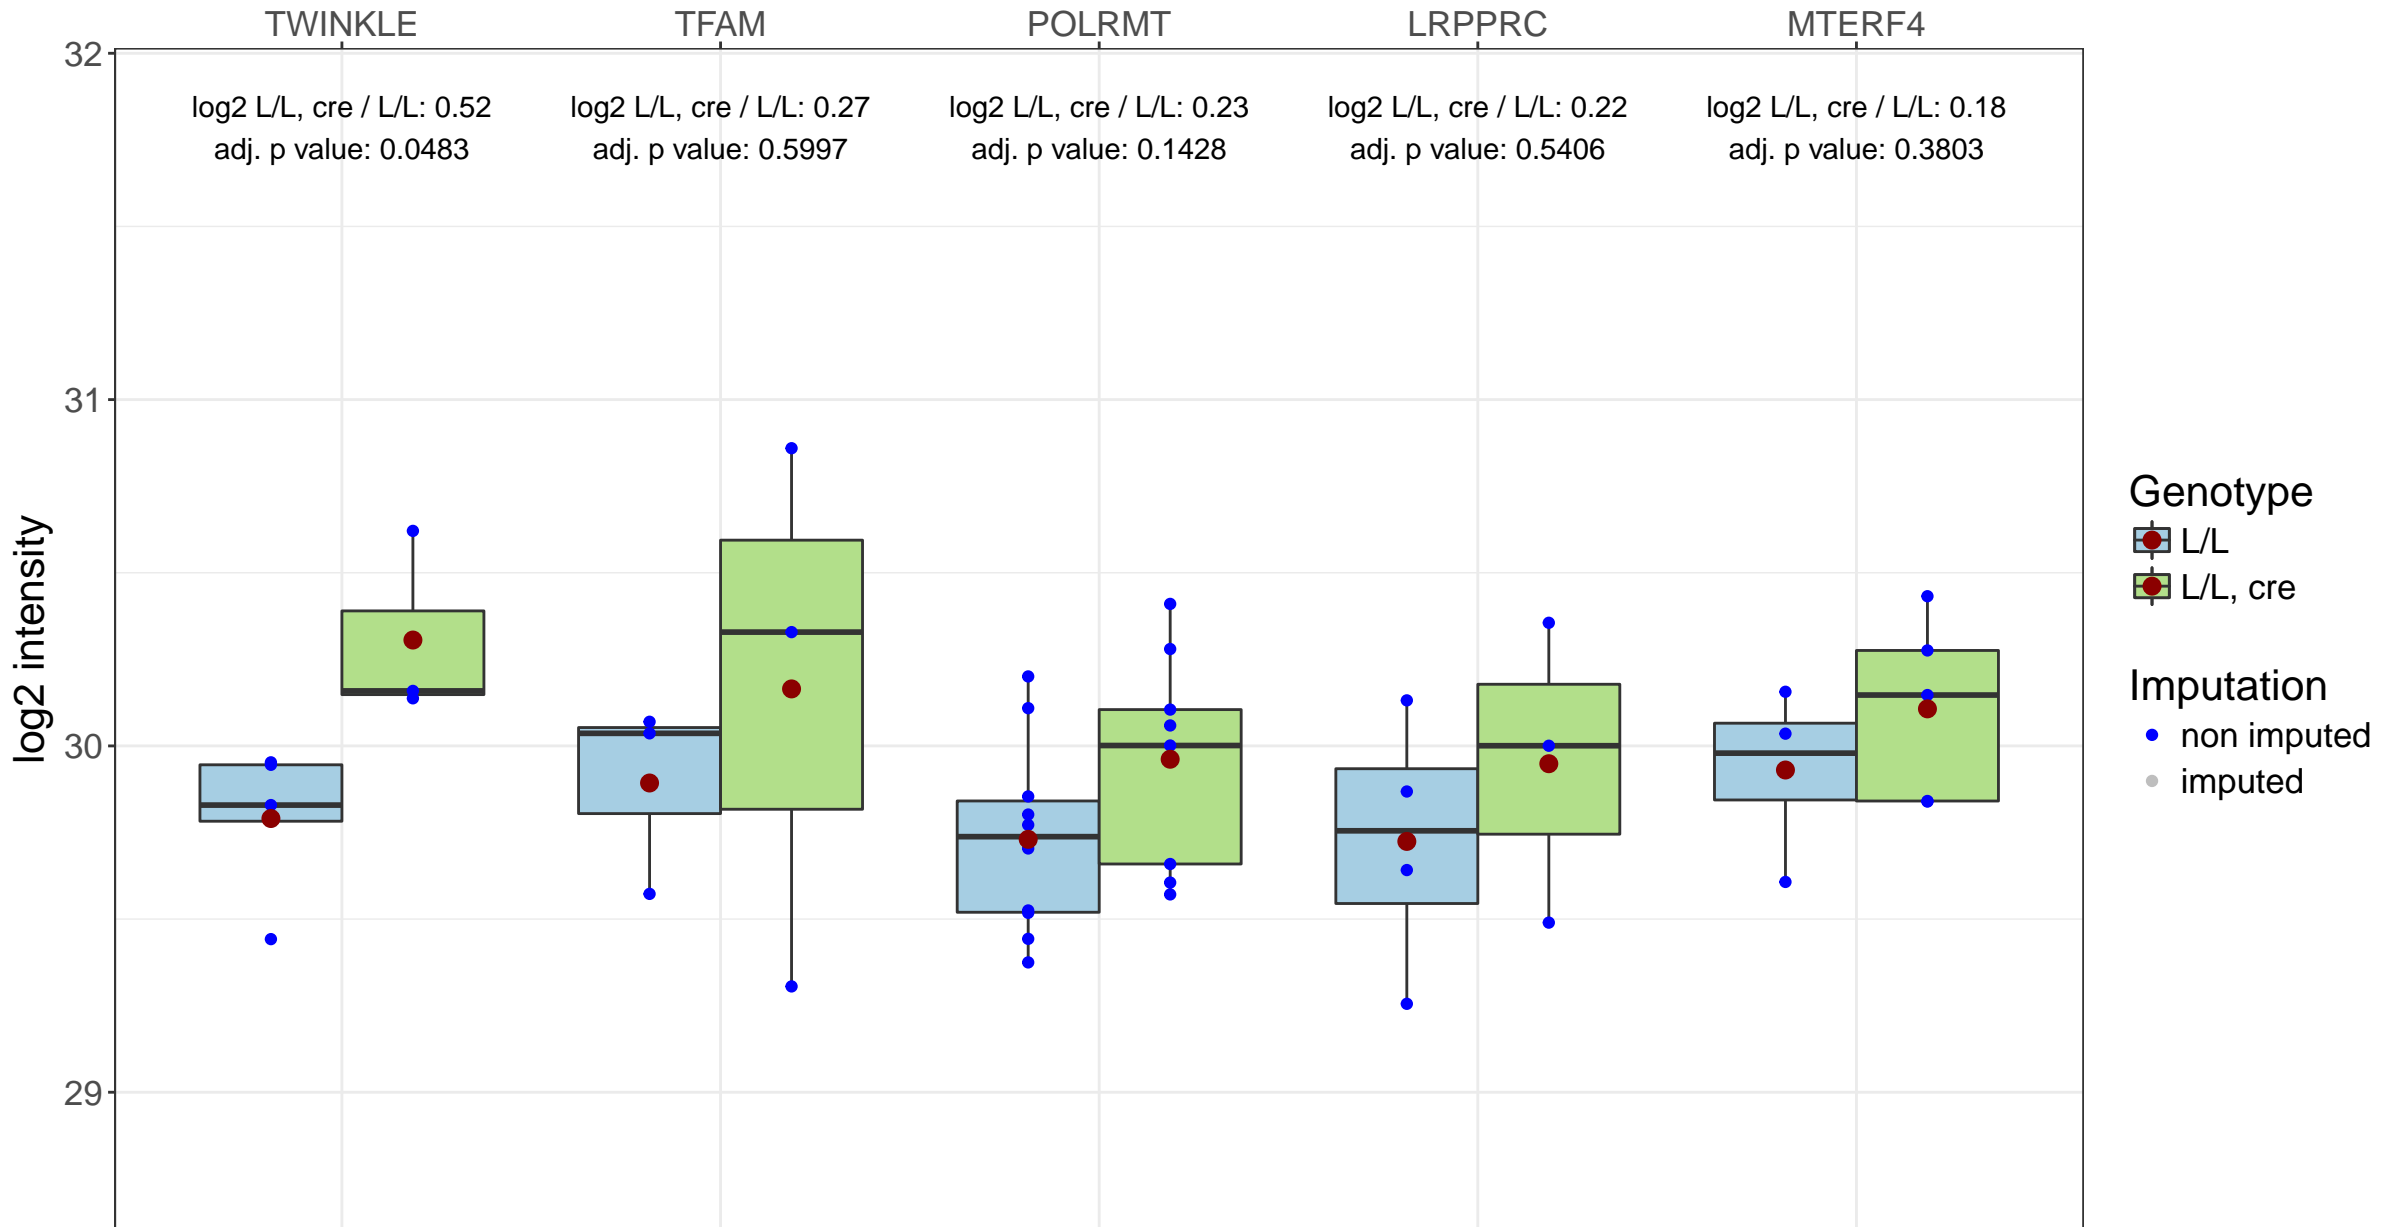

# PARL / Q5XJY4

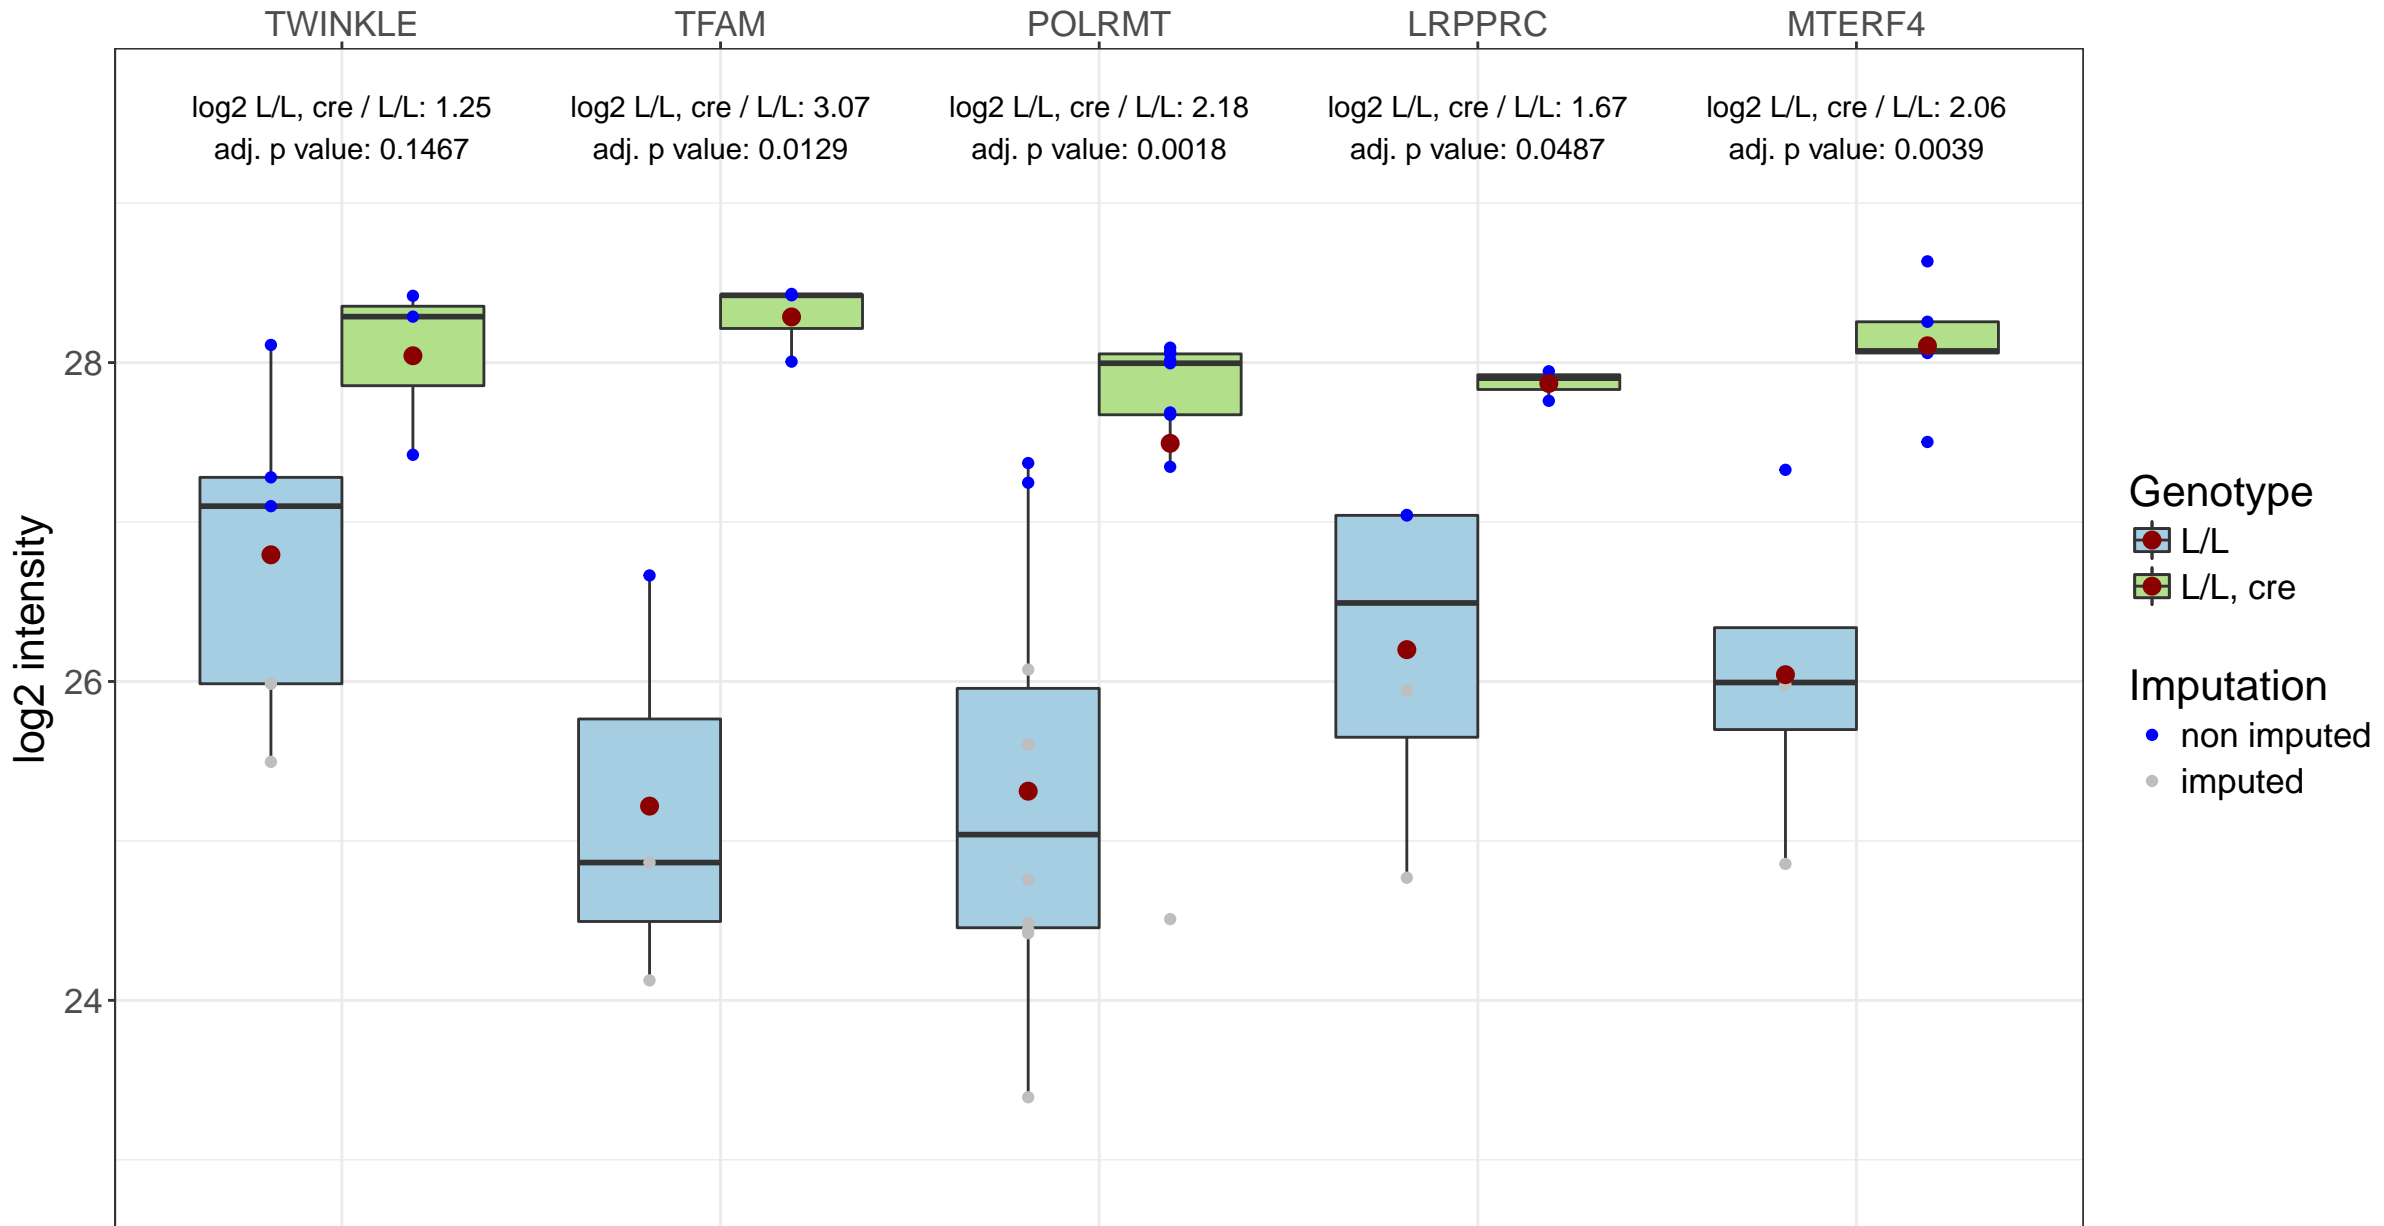

# PARS2 / A8Y5T6

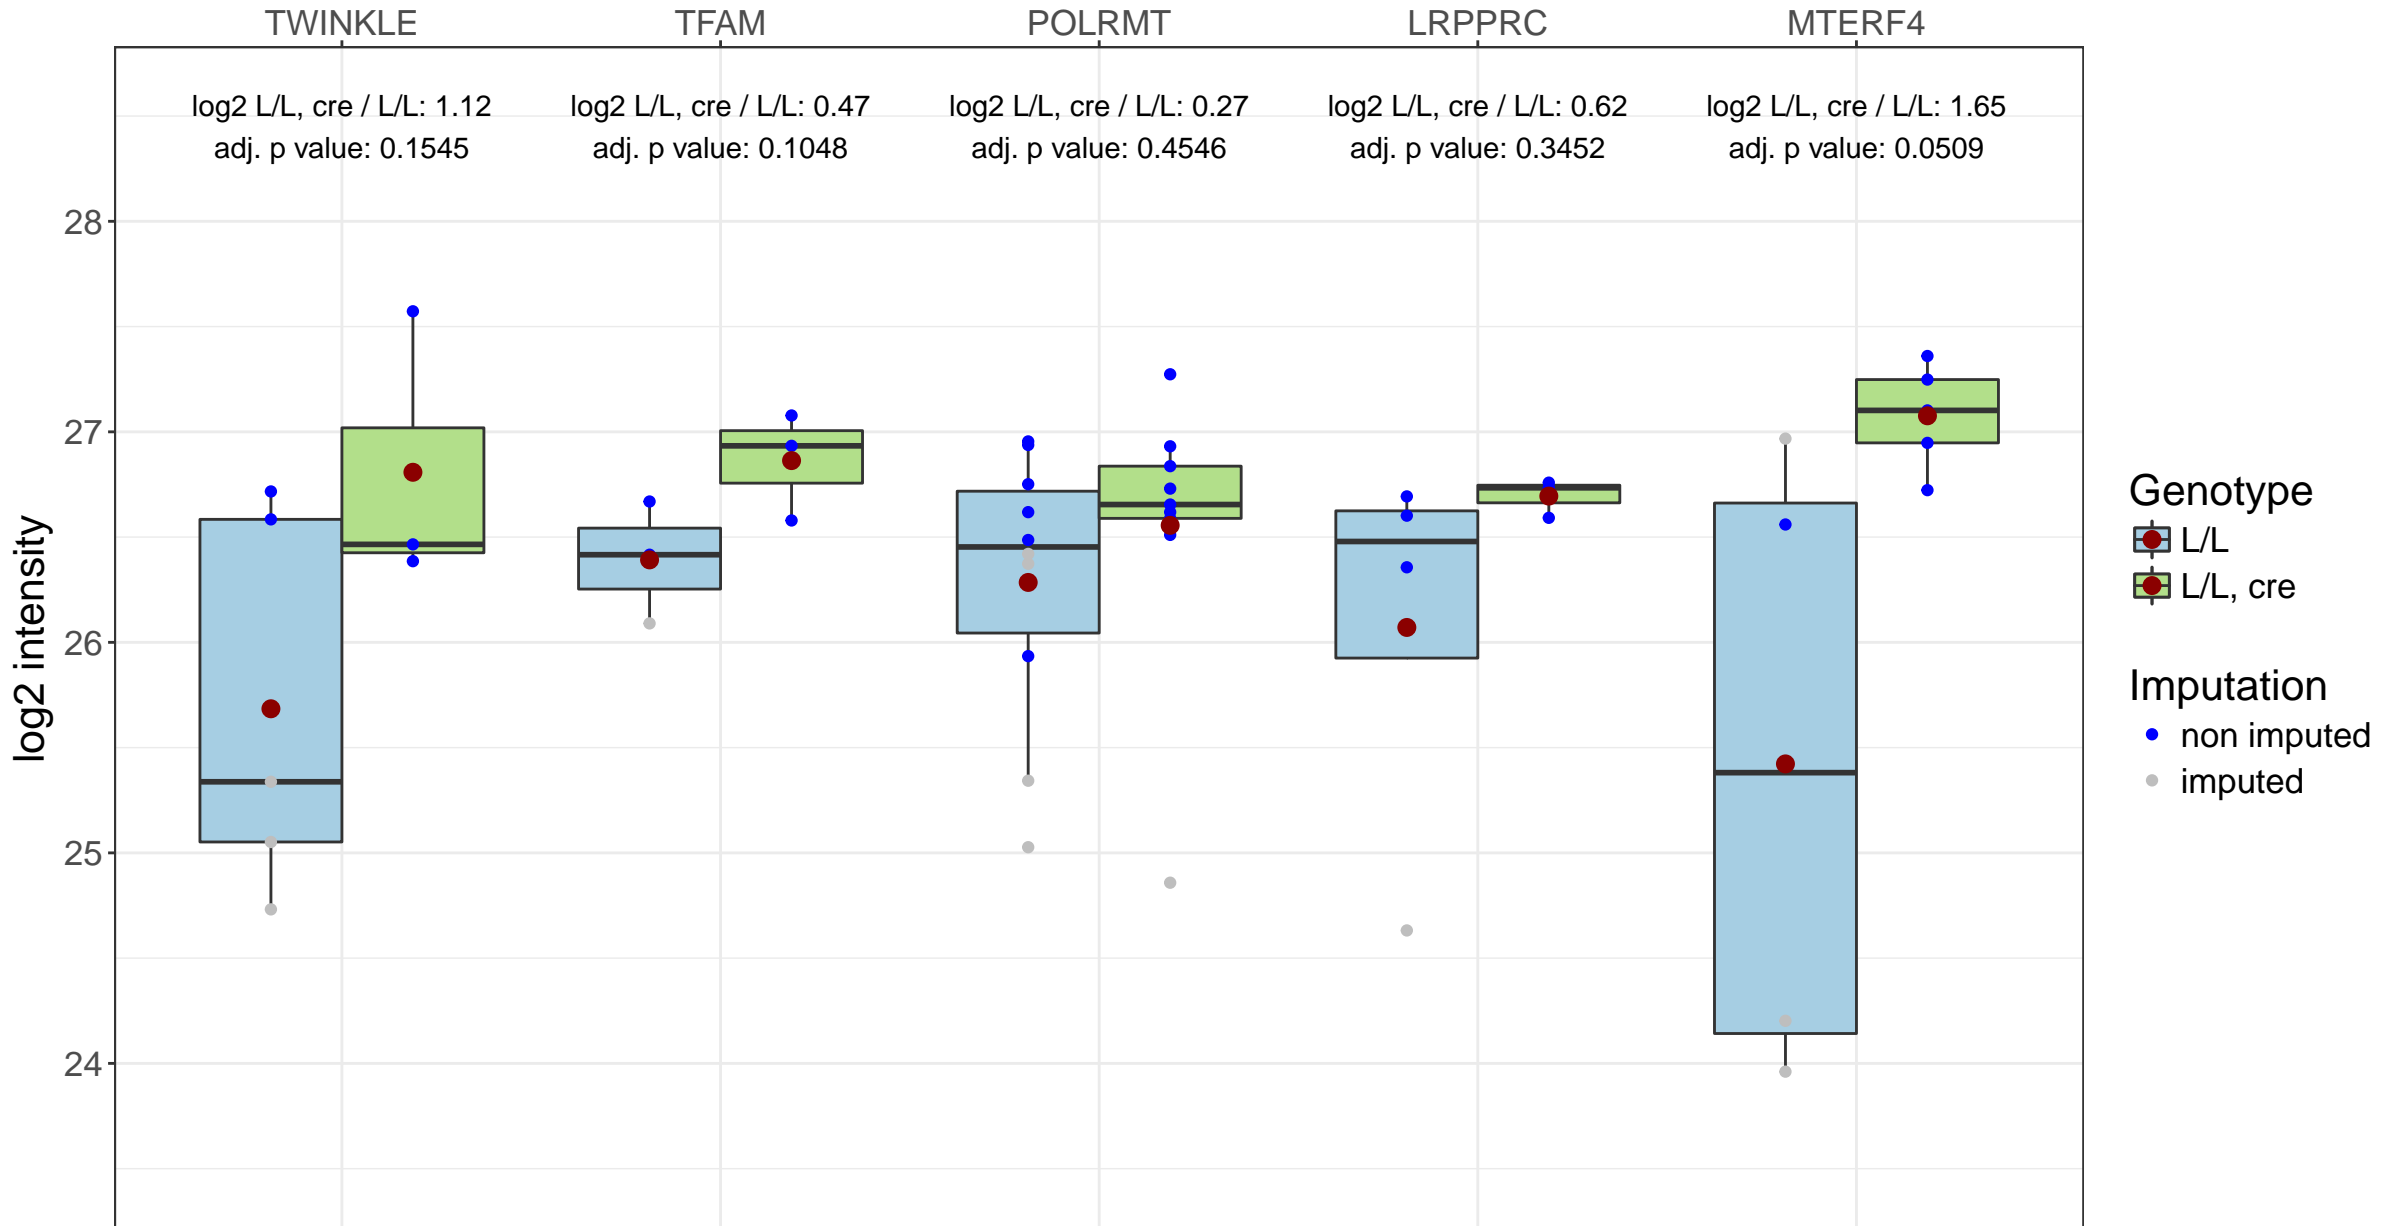

# PCBD2 / Q9CZL5

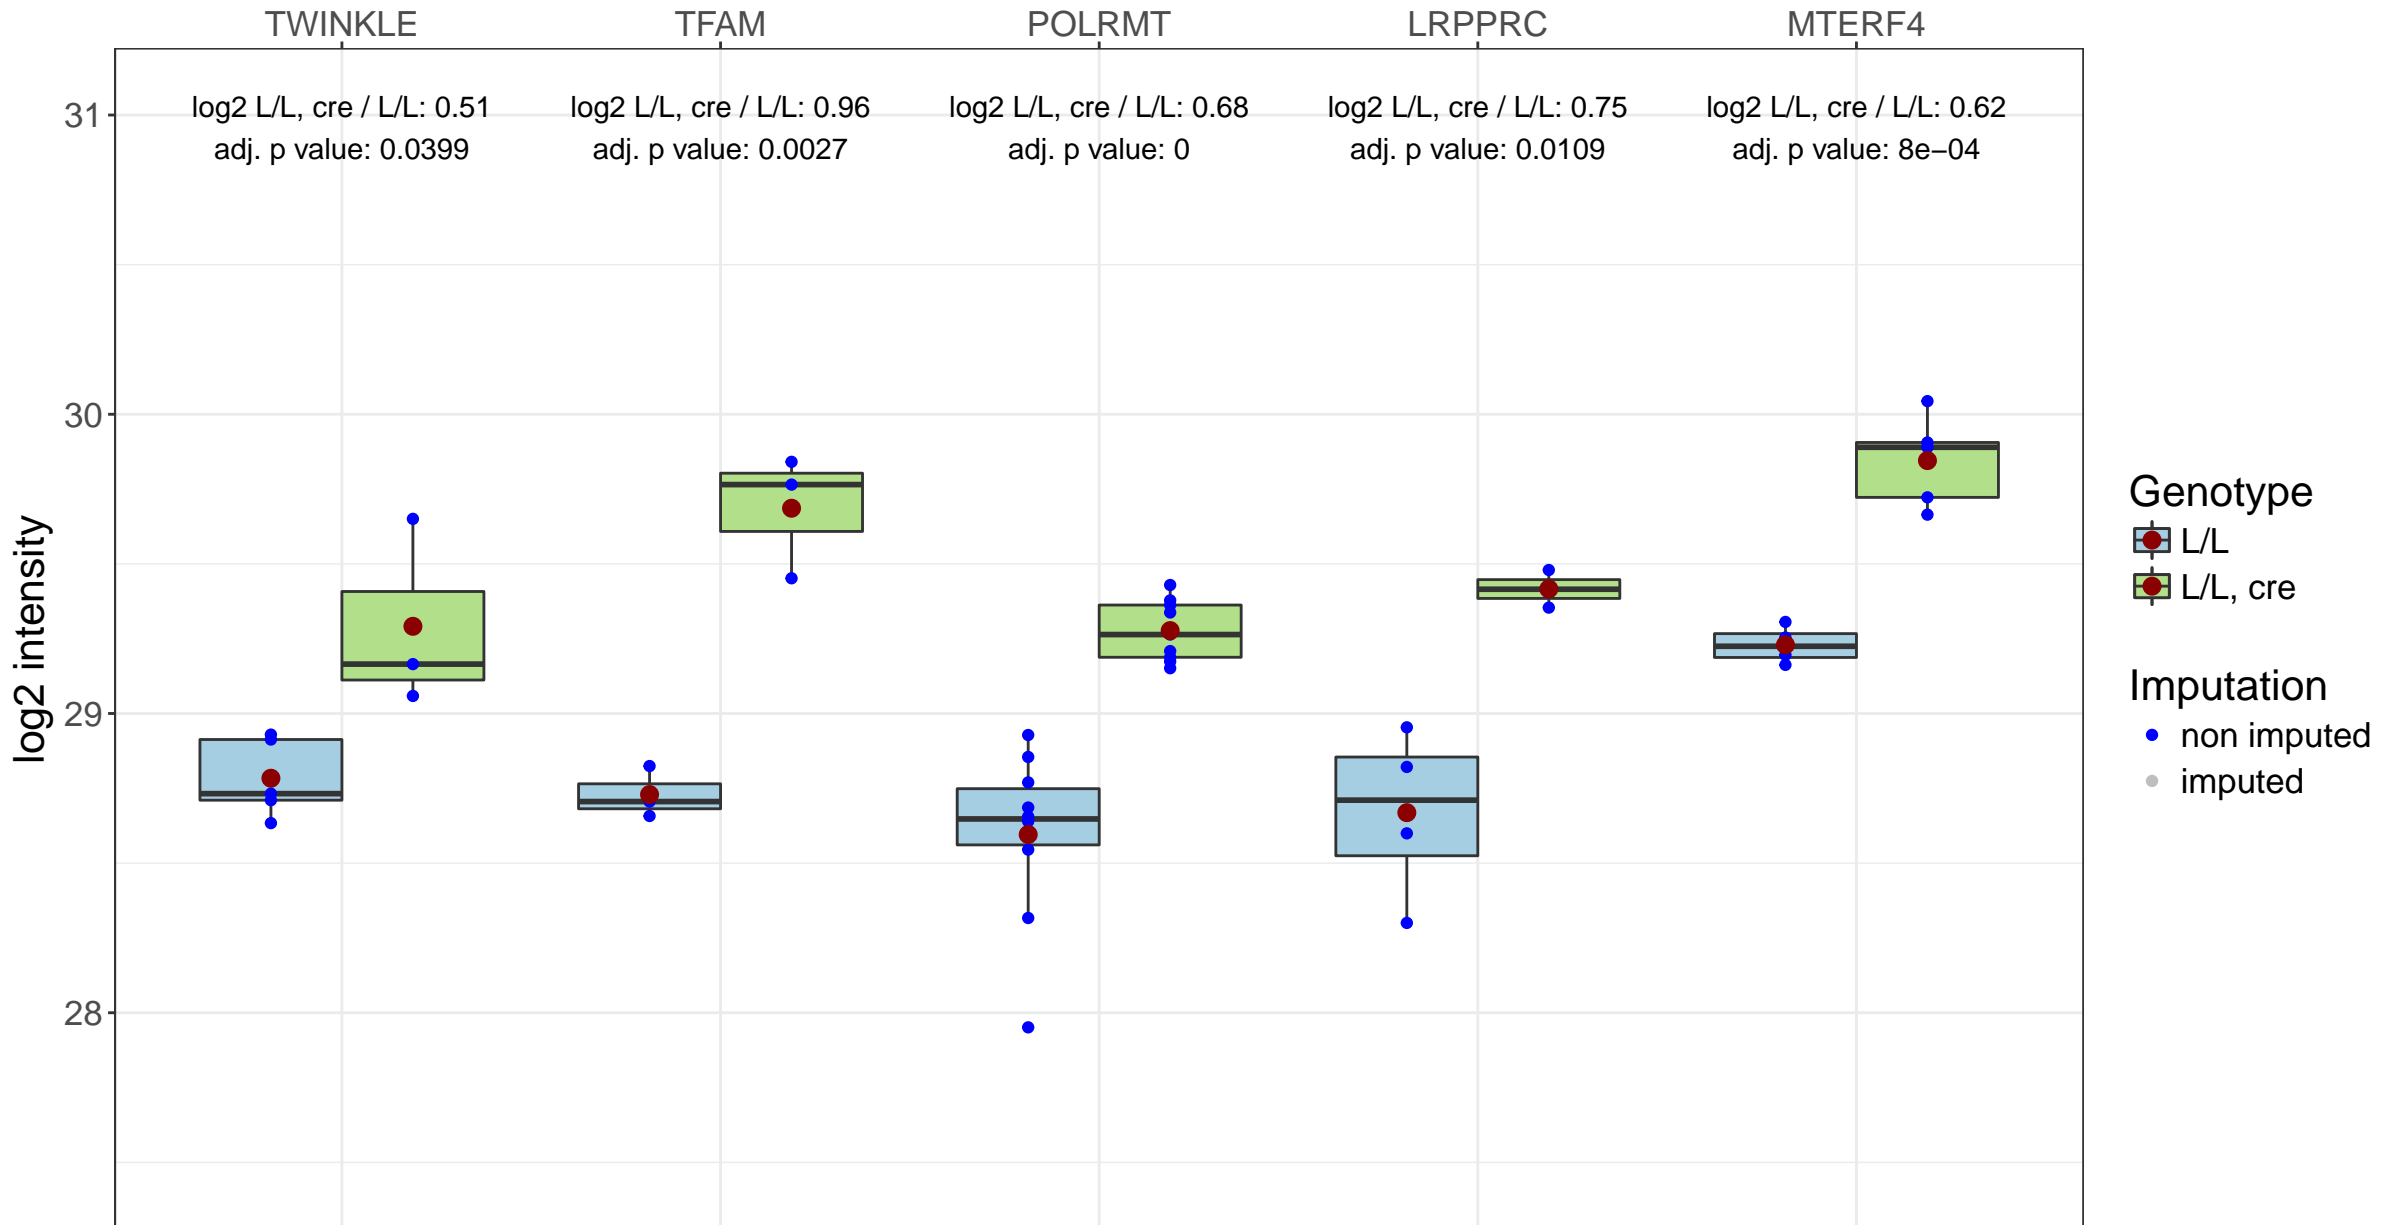

# PCBP1 / P60335

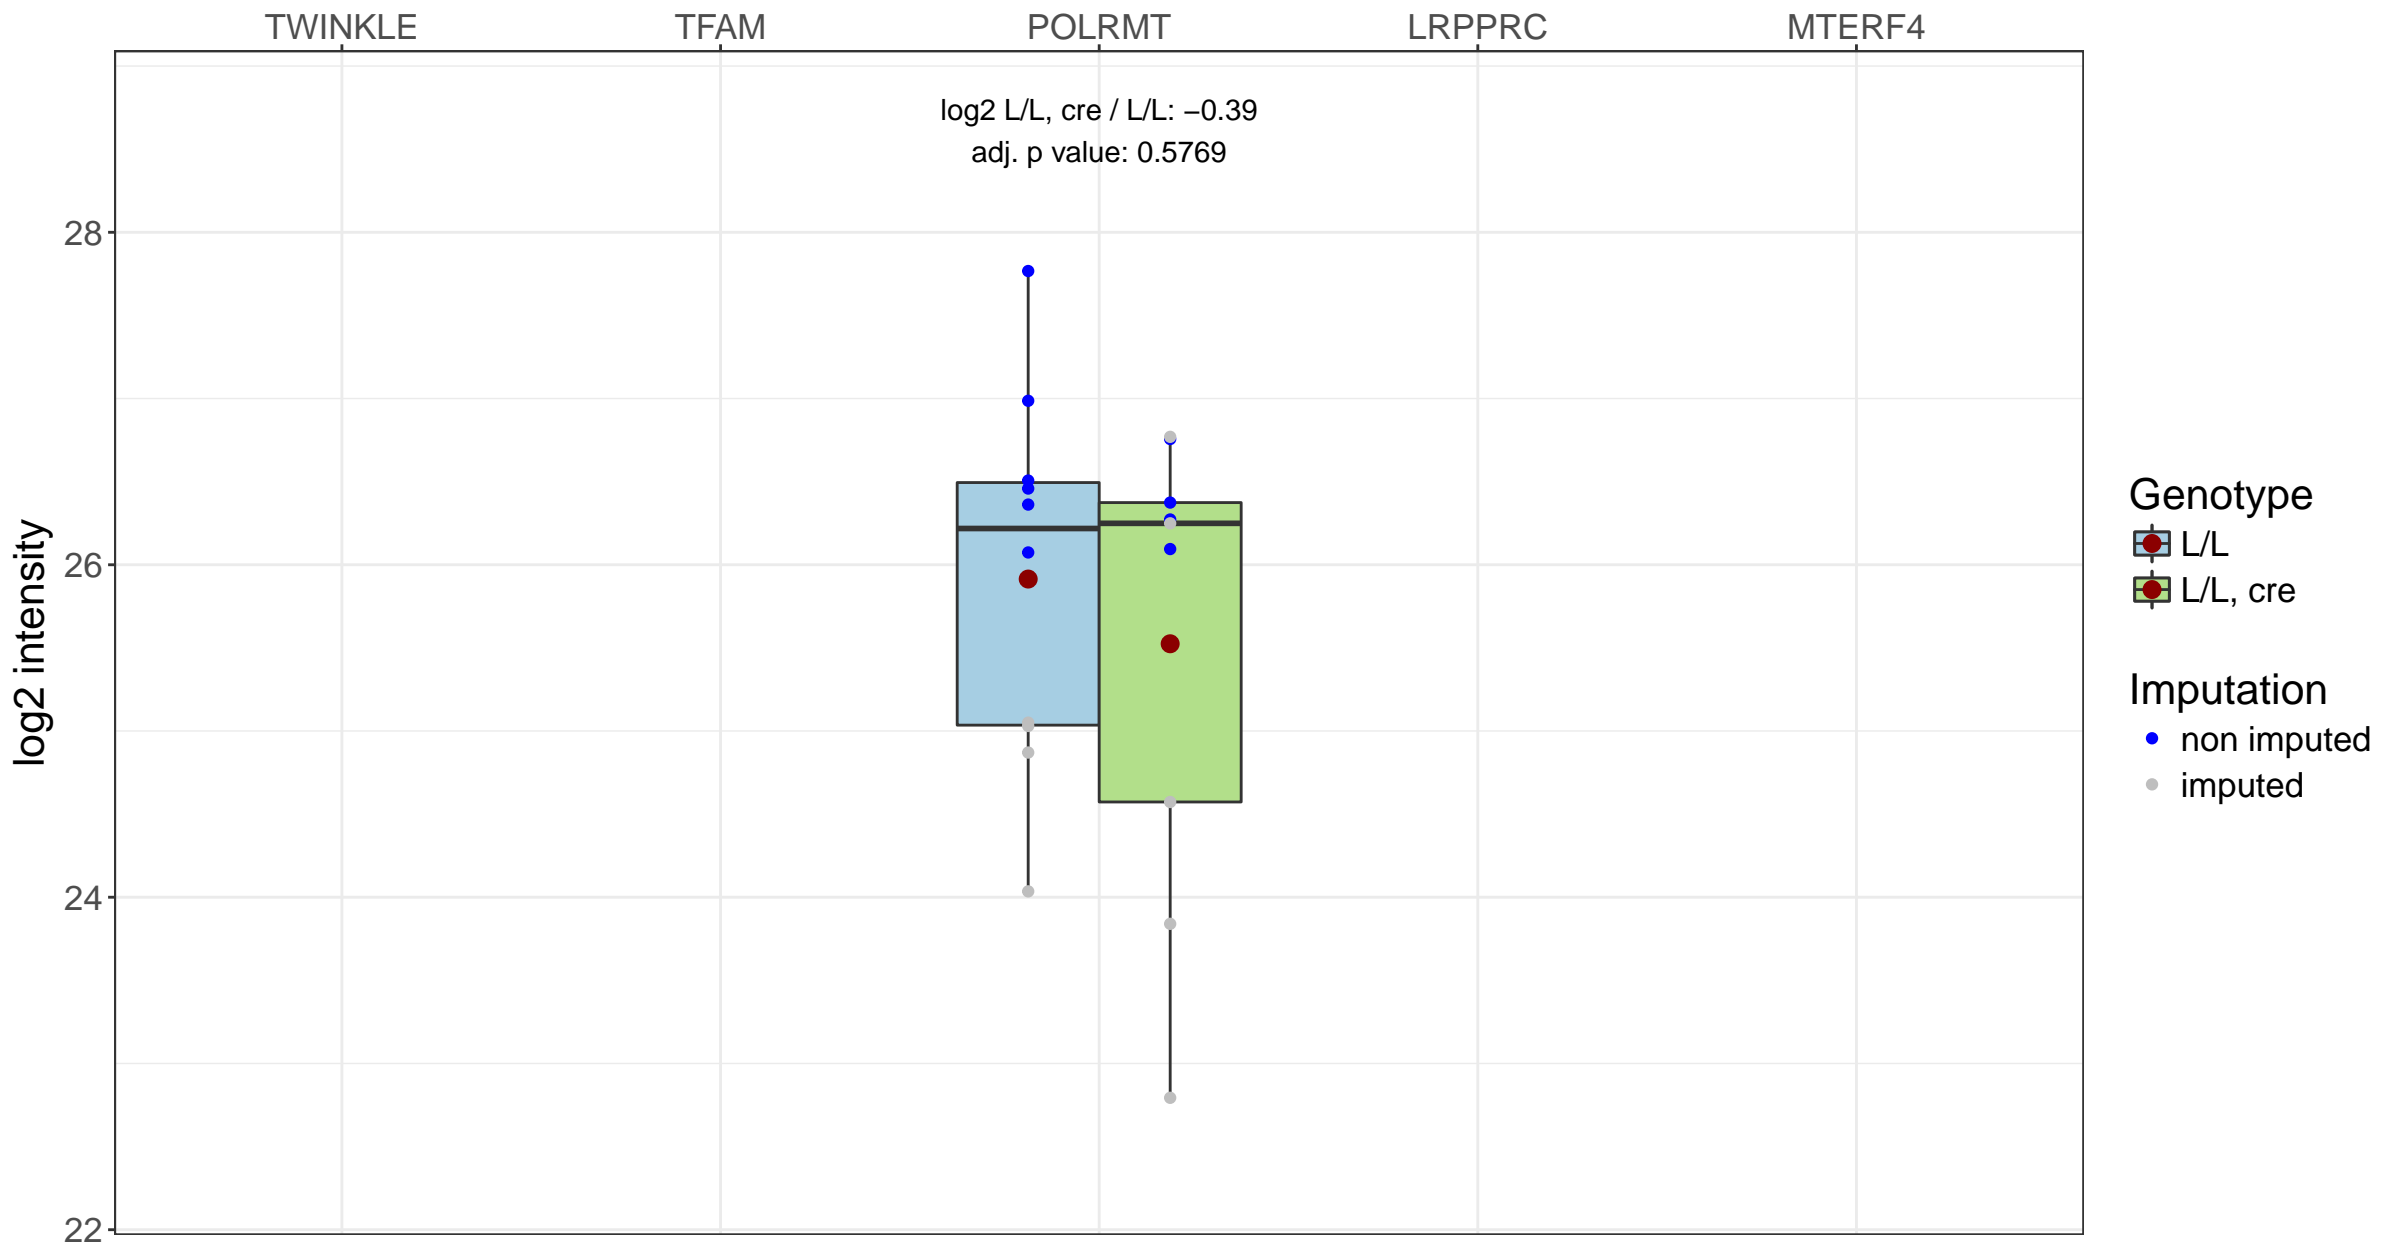

# PCCA / Q91ZA3

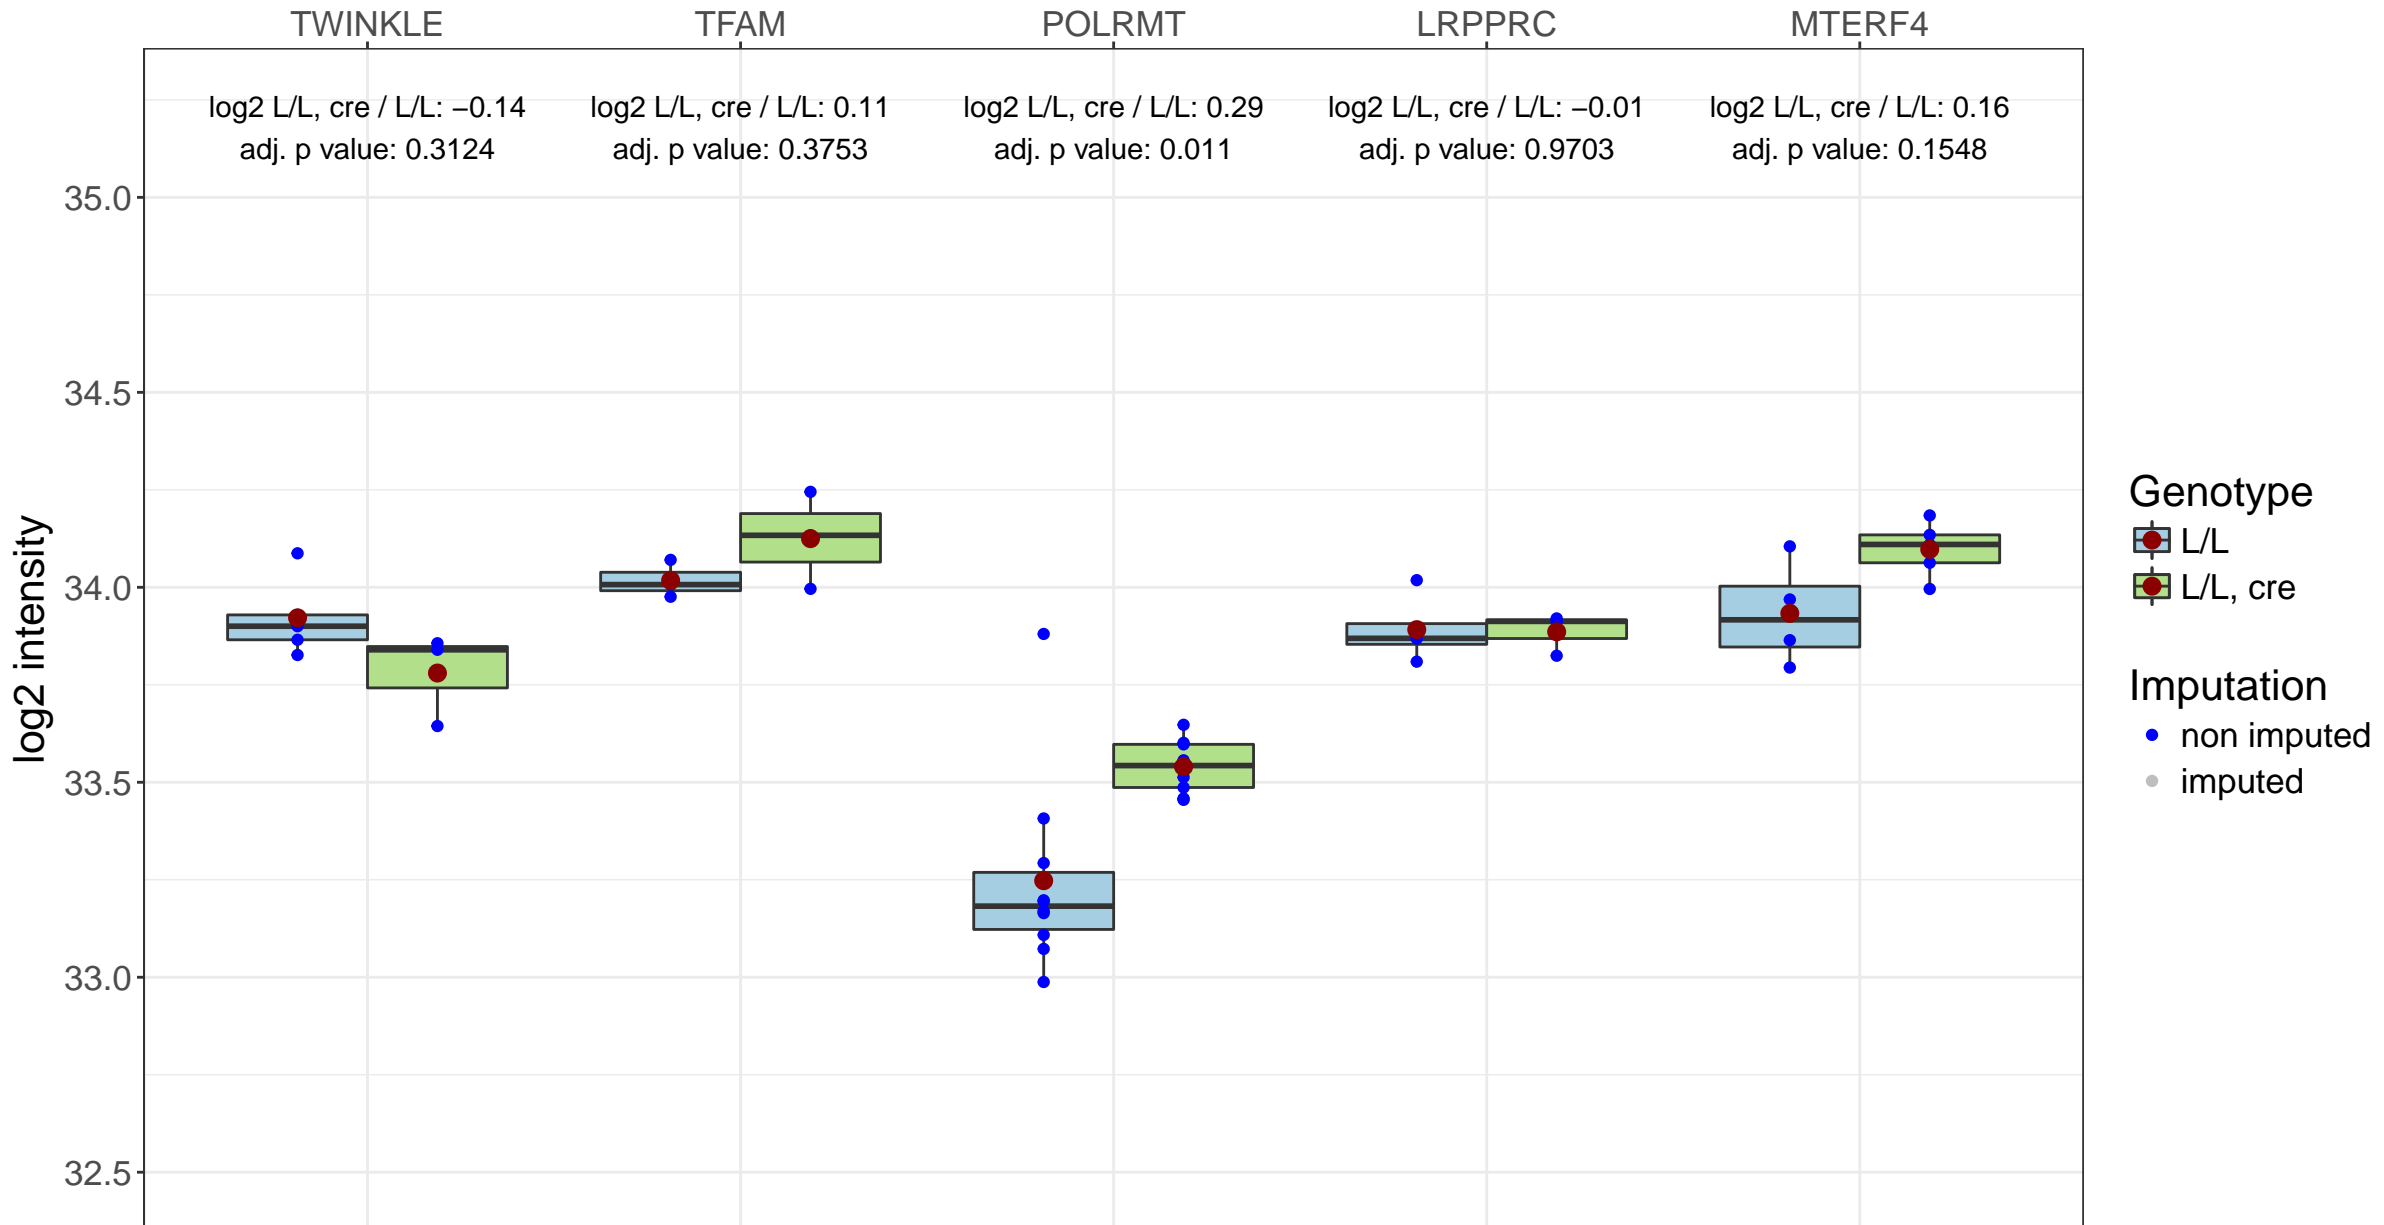

# PCCB / Q99MN9

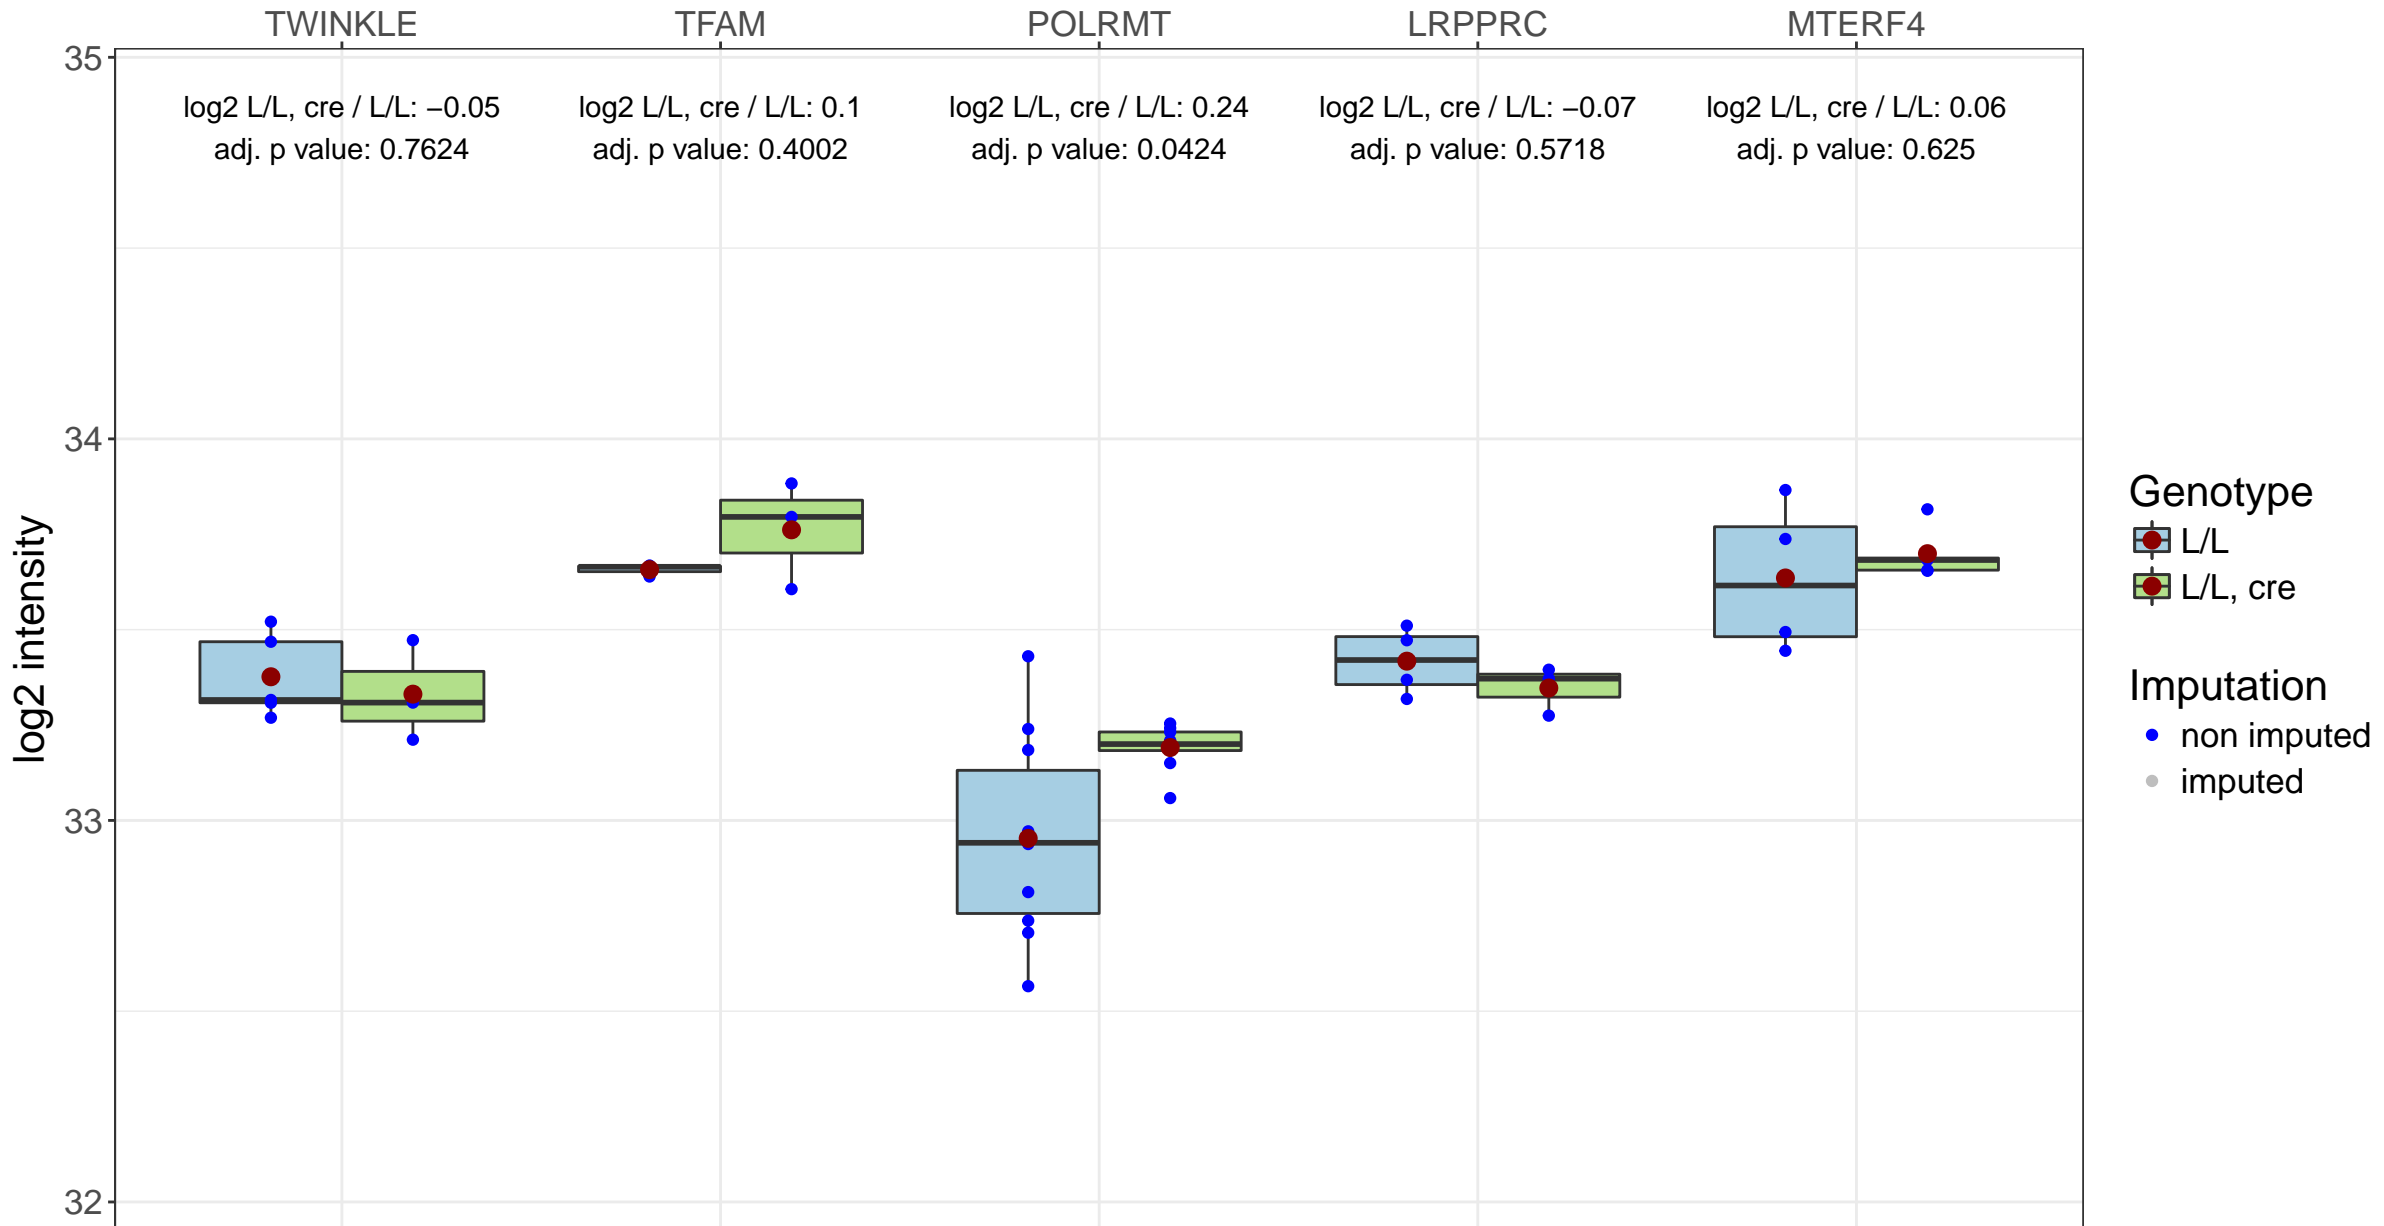



# PCK2 / Q8BH04

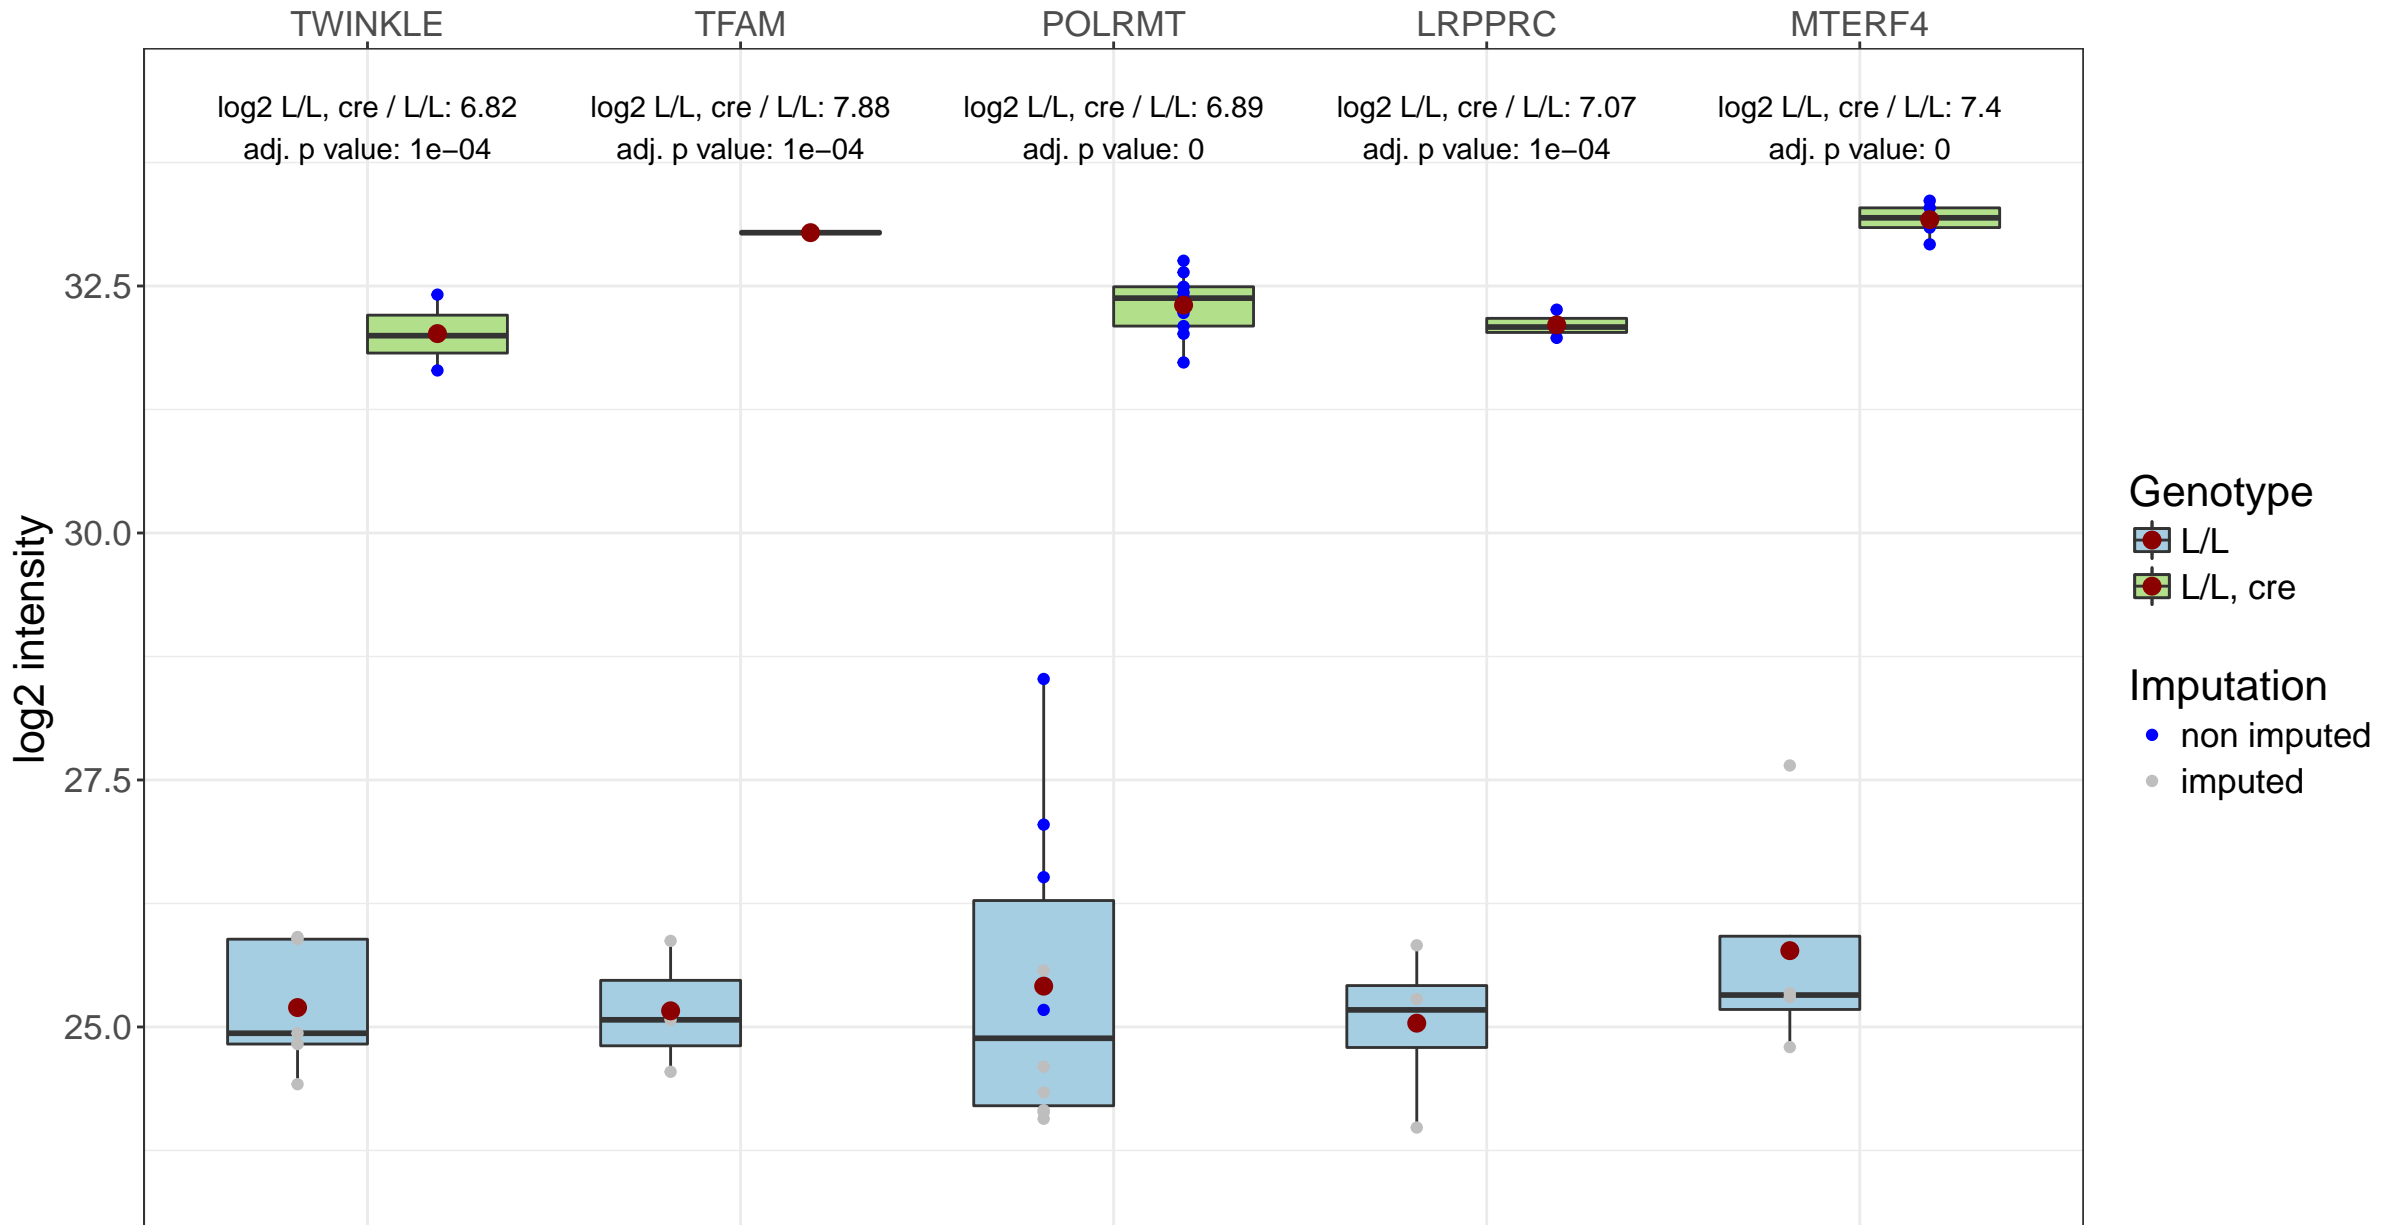

# PCMT1 / F7D432

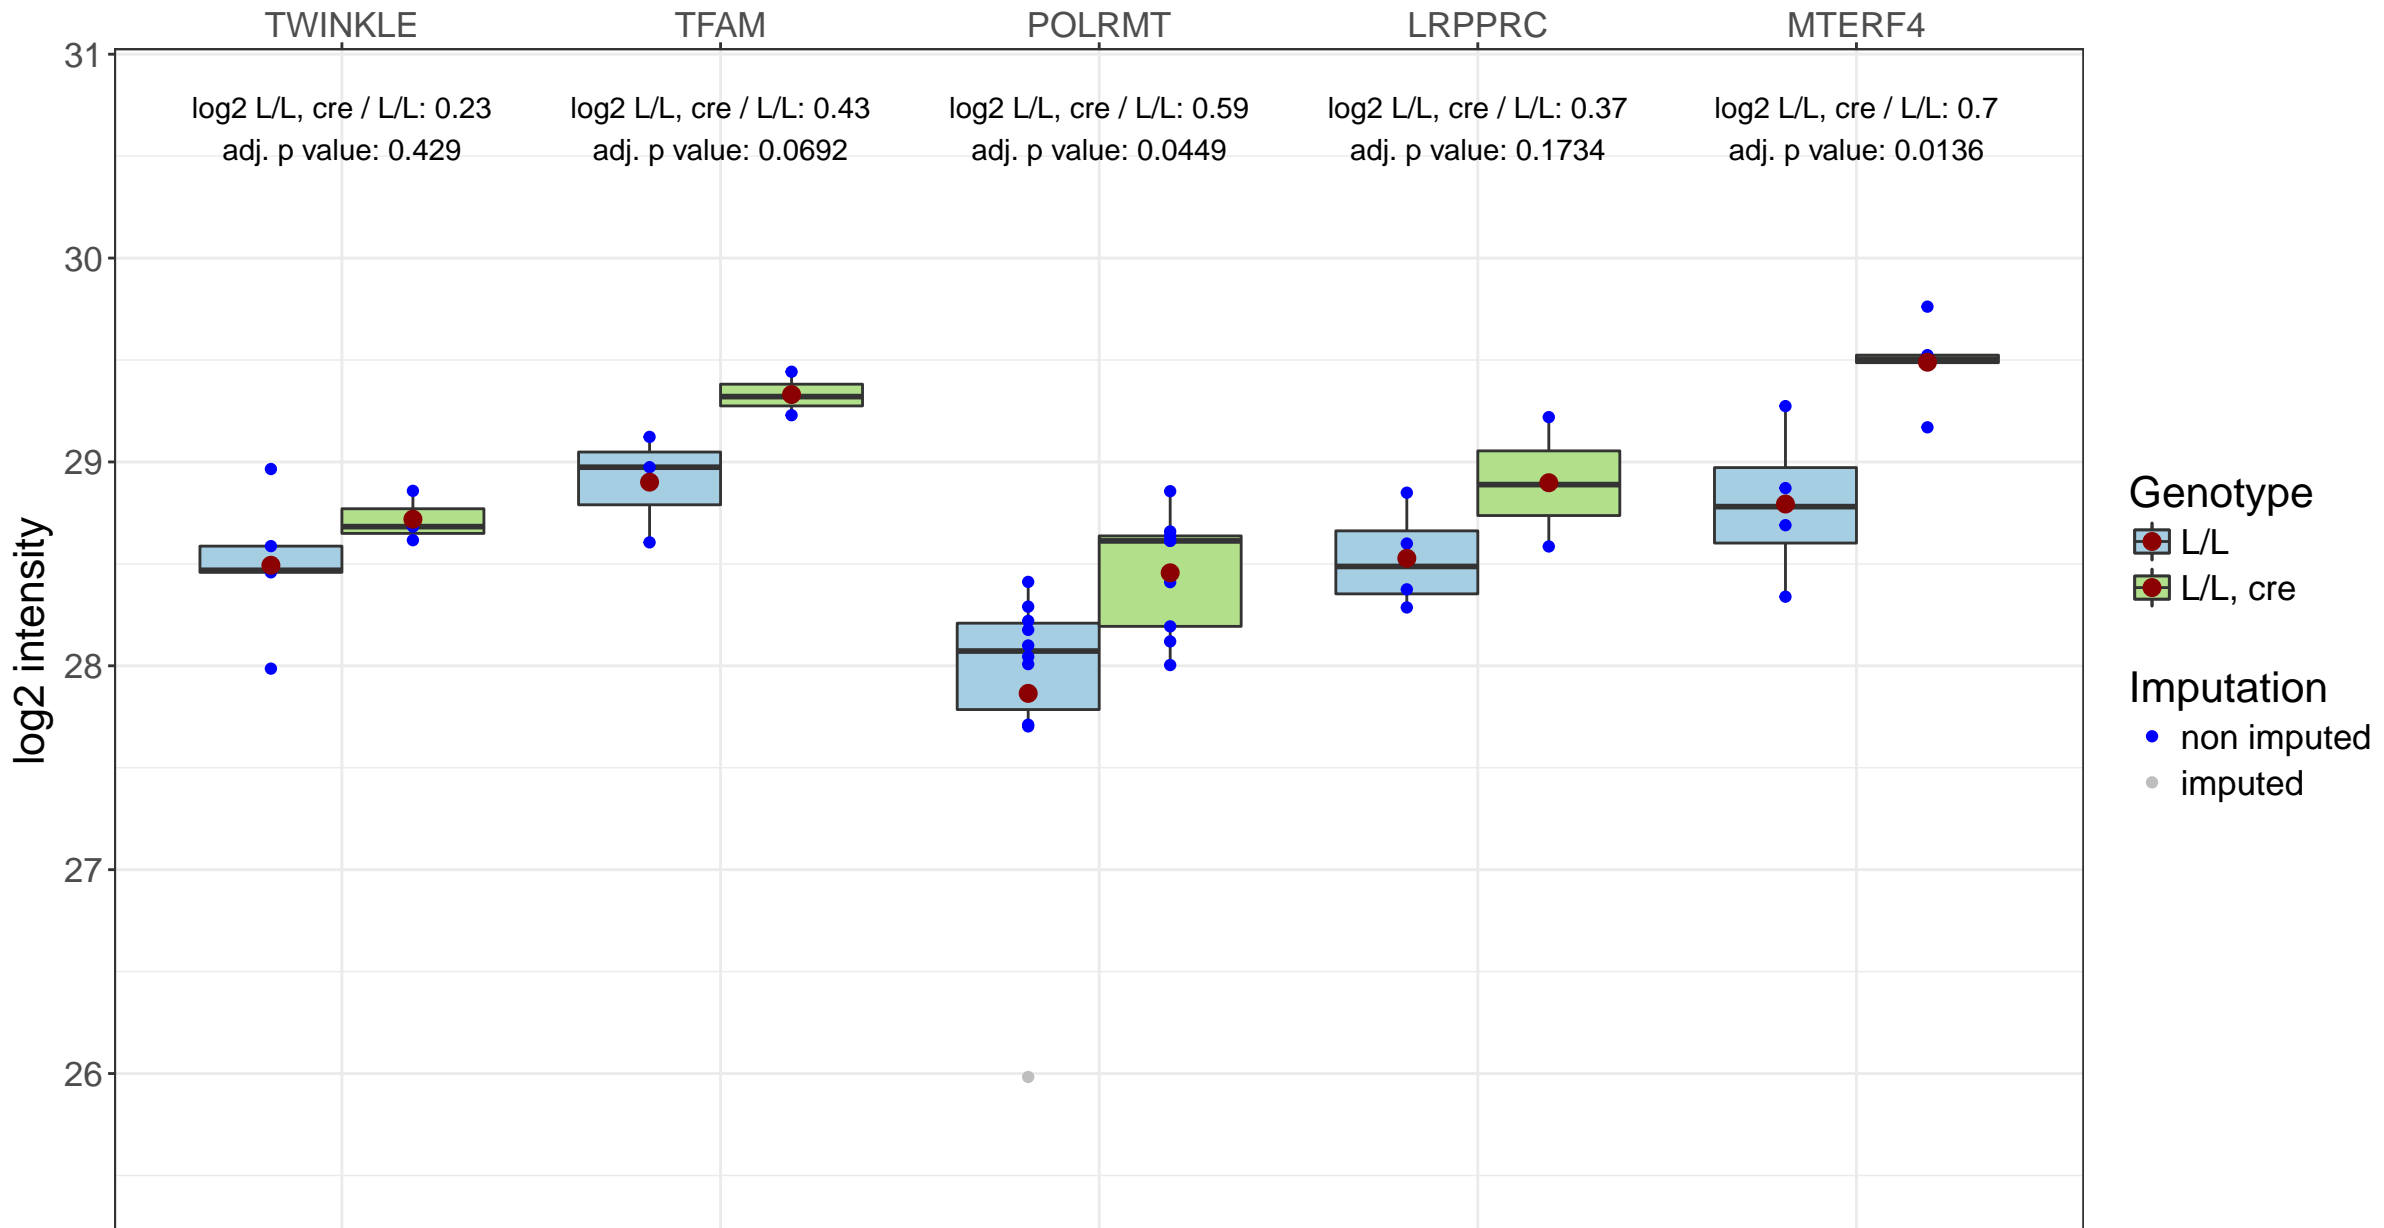

# PCX / G5E8R3

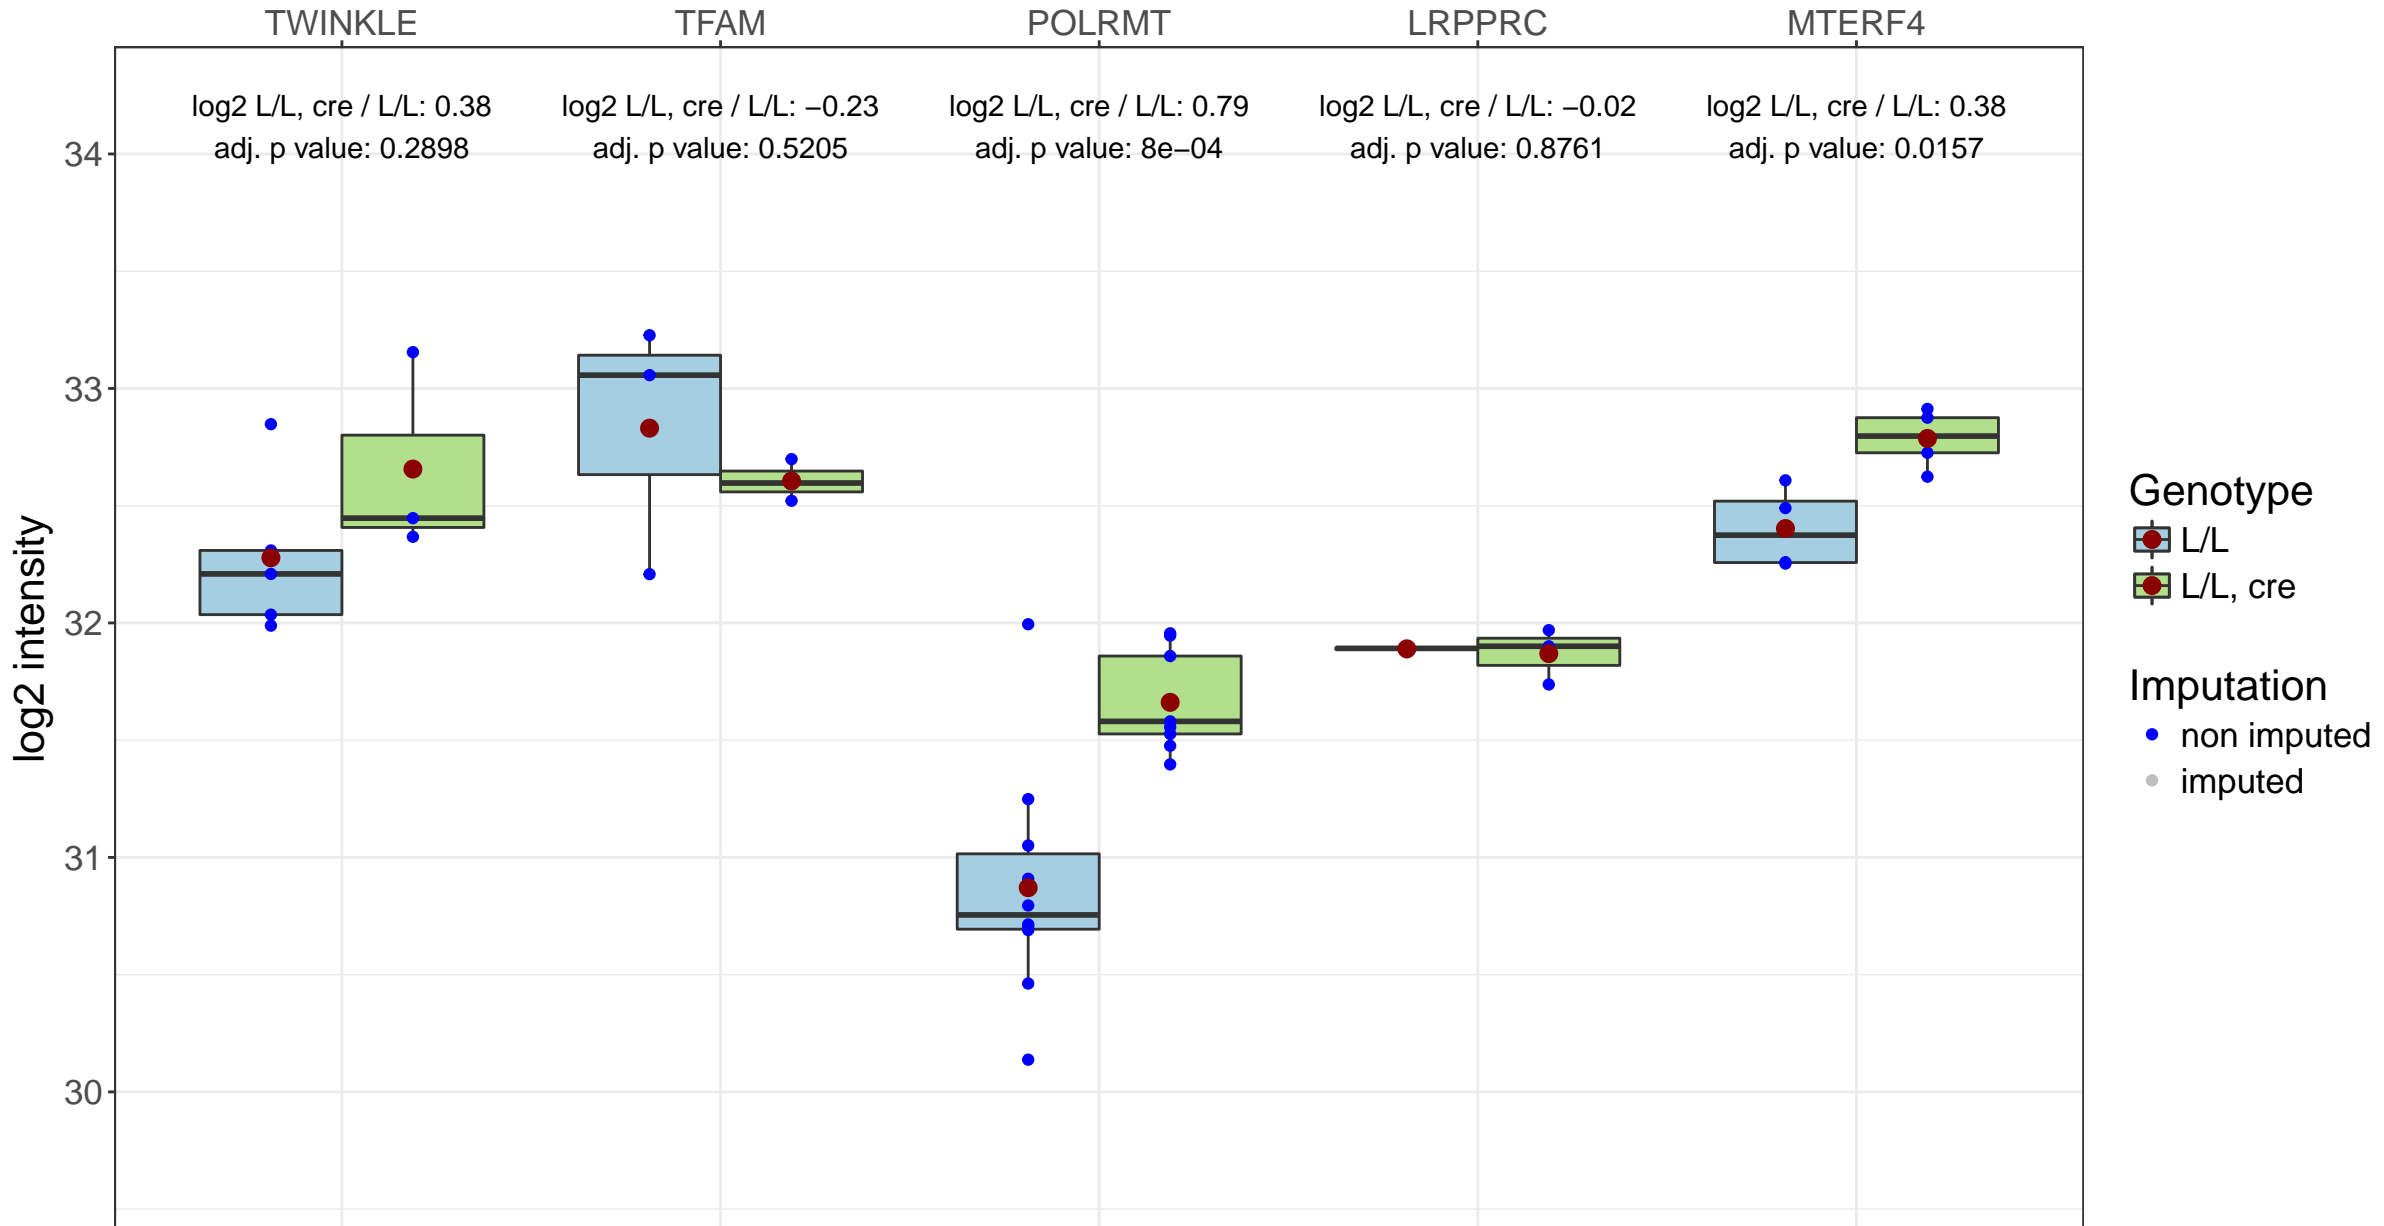

# PDF / S4R2K0

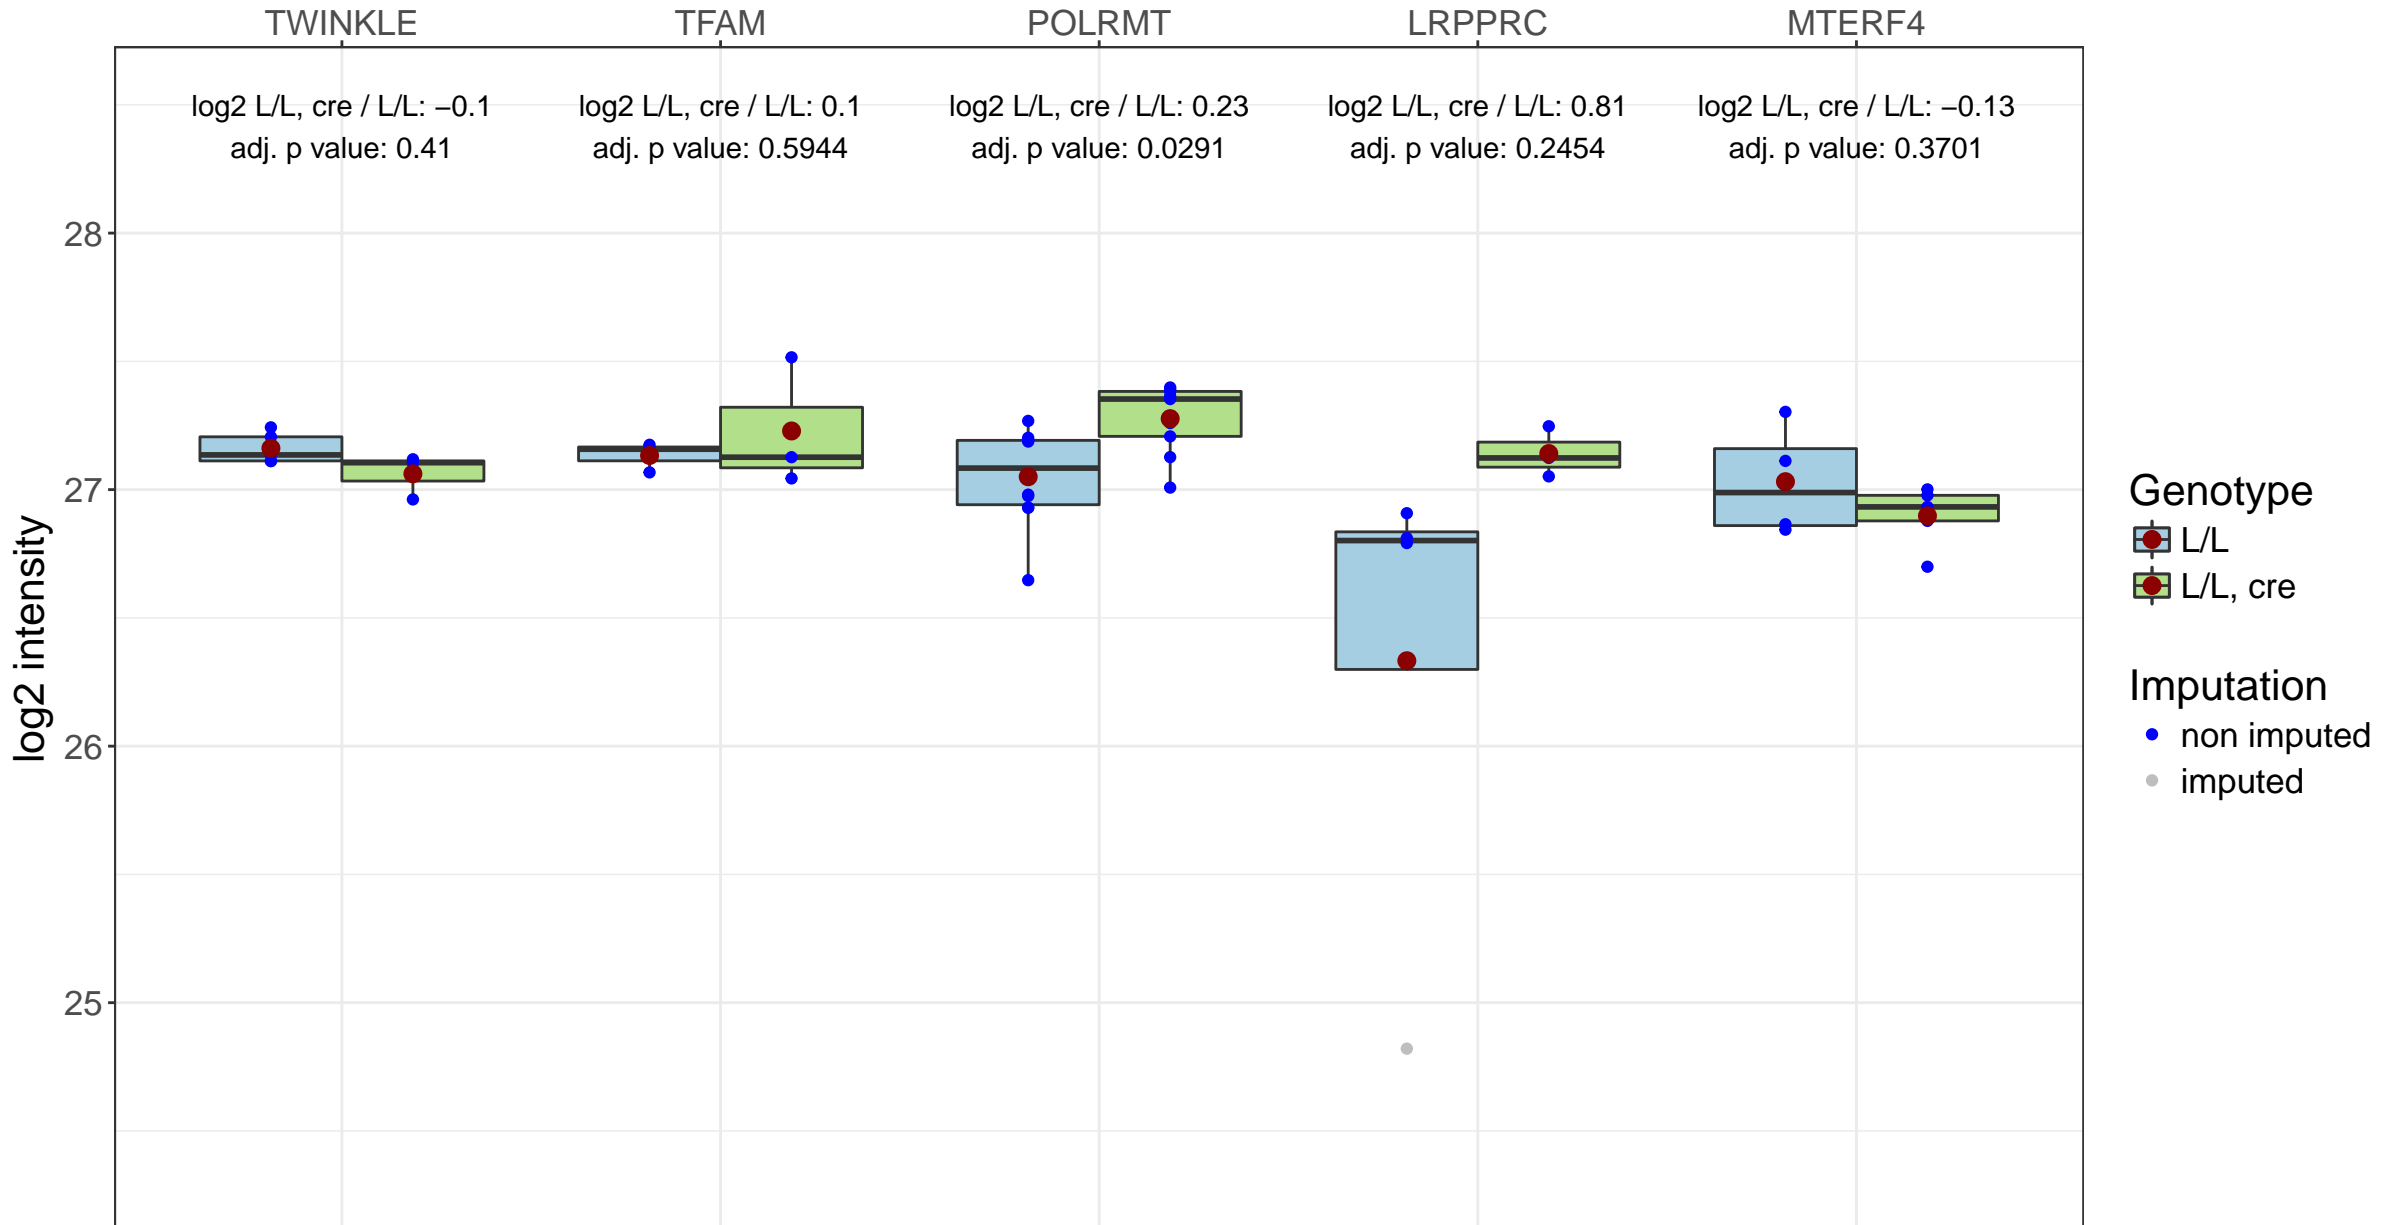

# PDHA1 / P35486

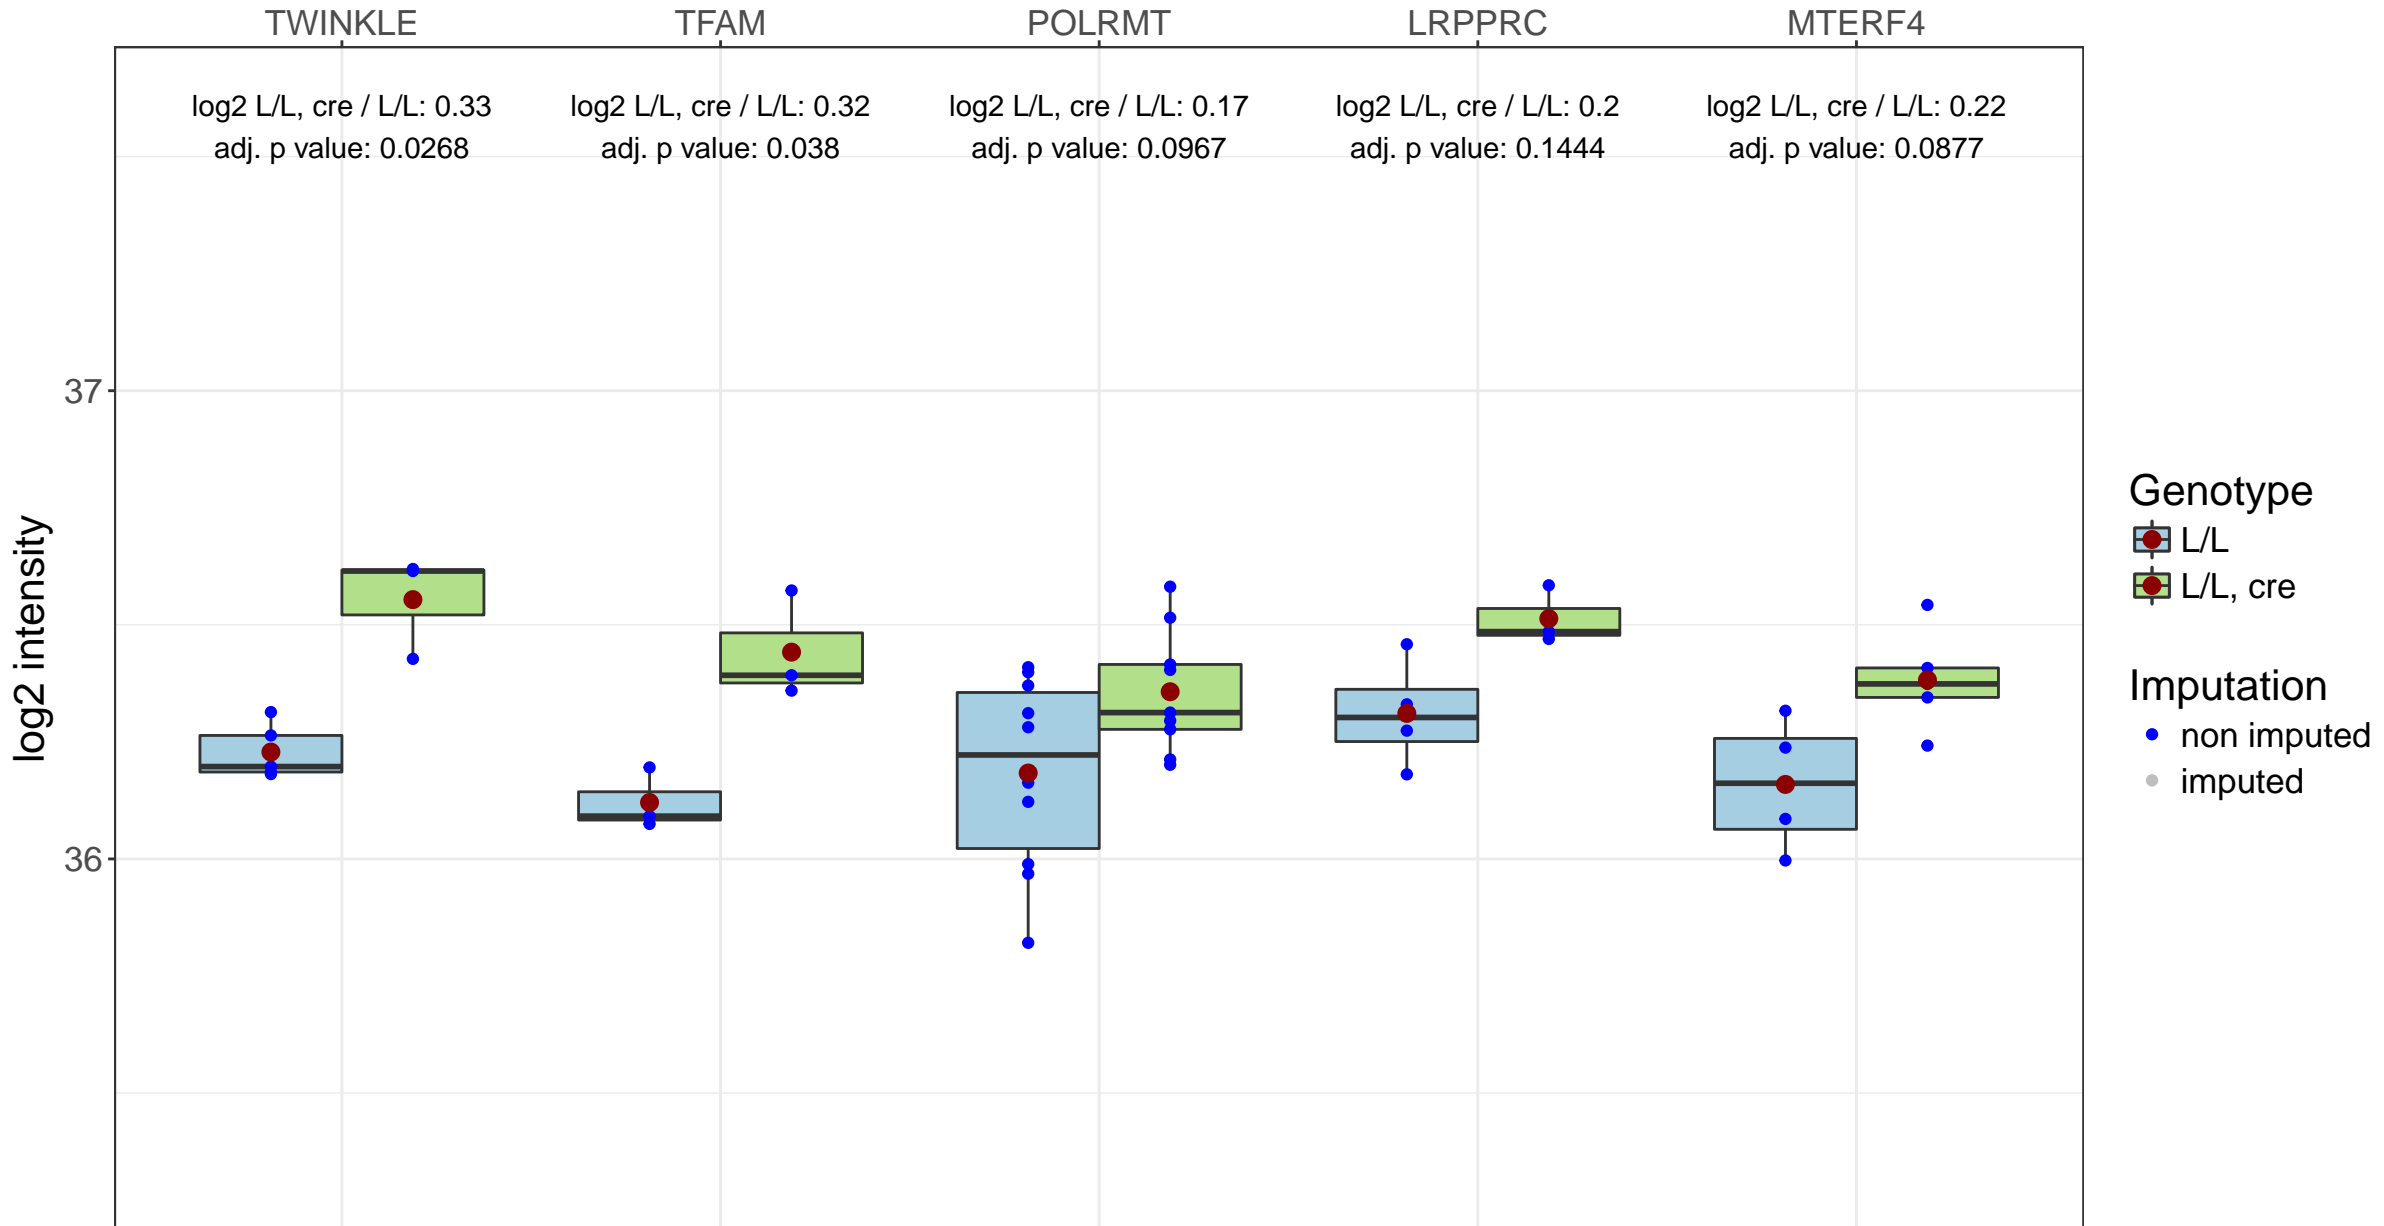

# PDHB / Q9D051

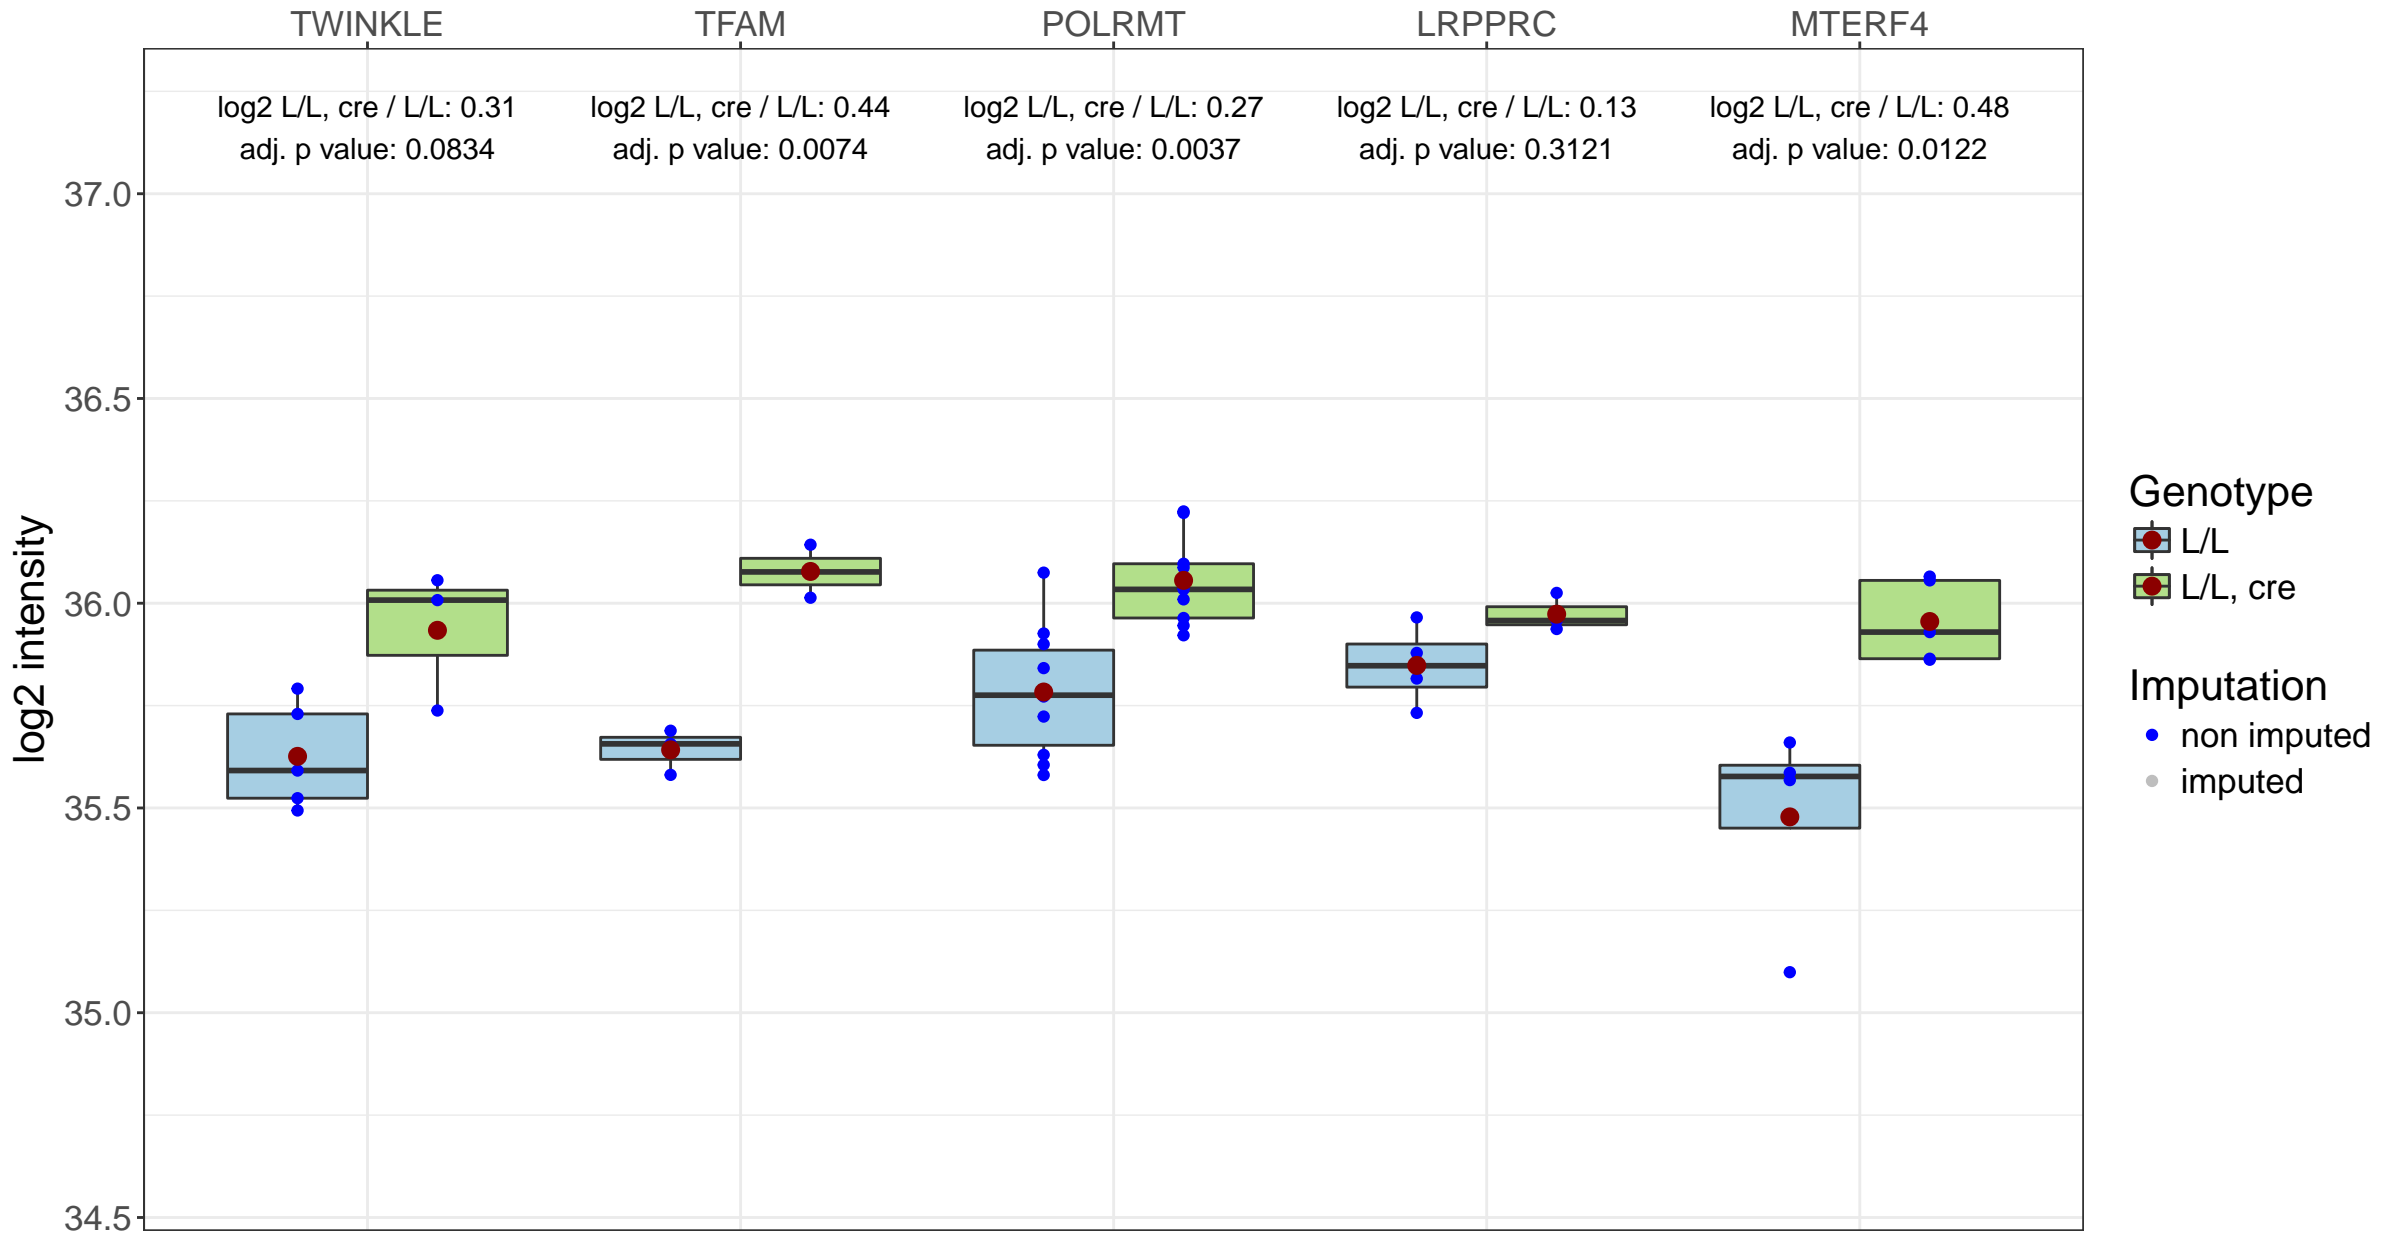

# PDHX / Q8BKZ9

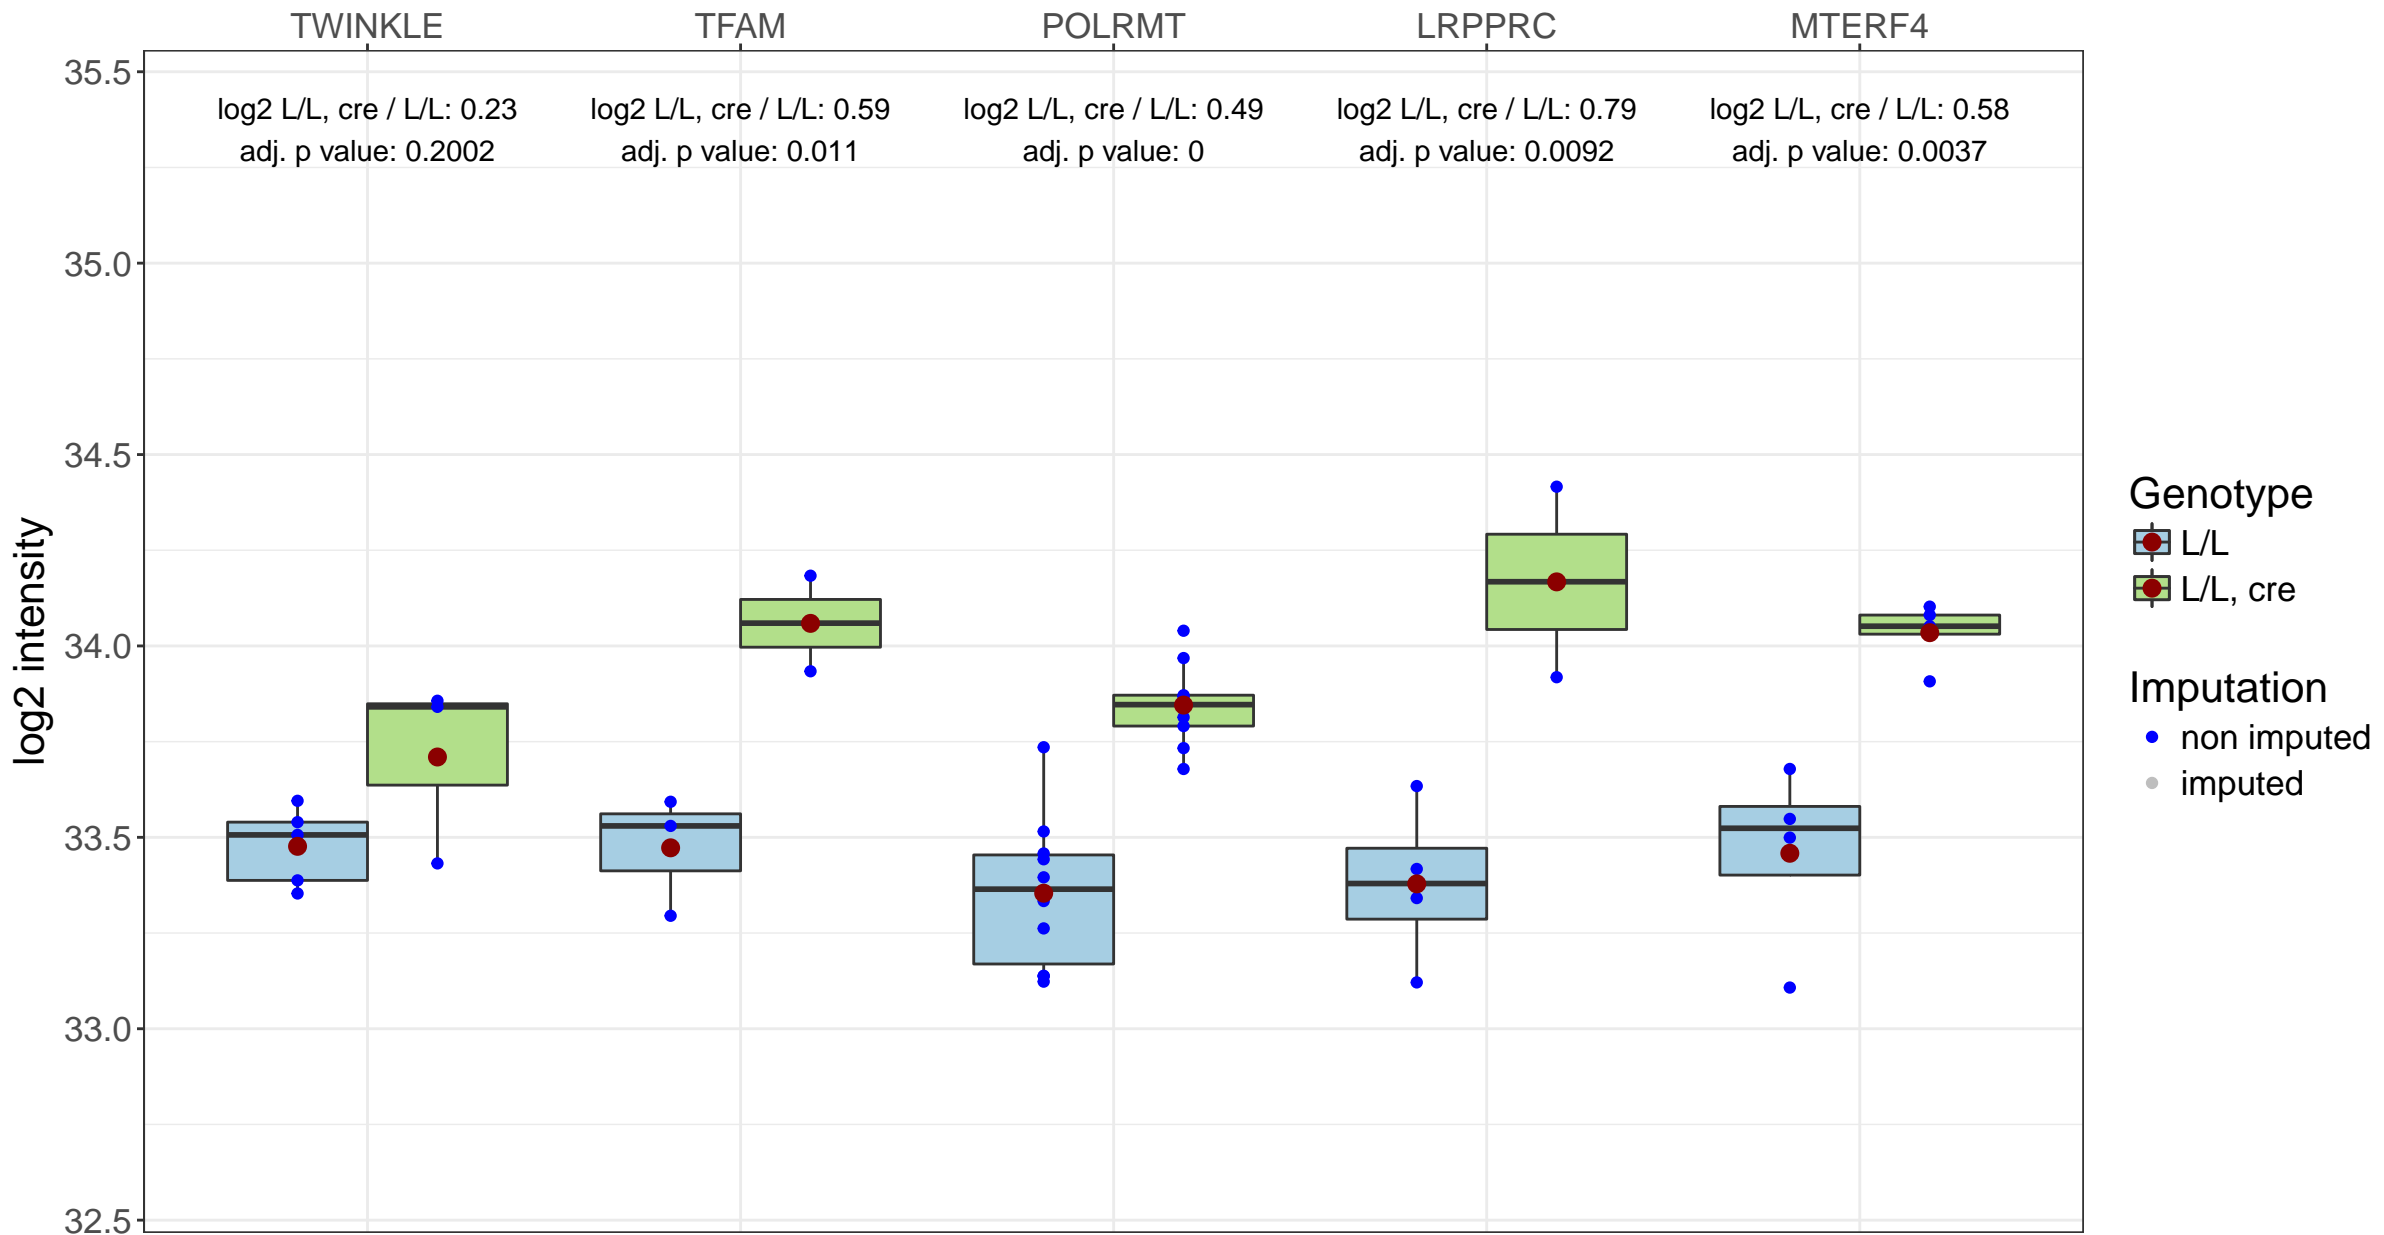

# PDIA3 / P27773

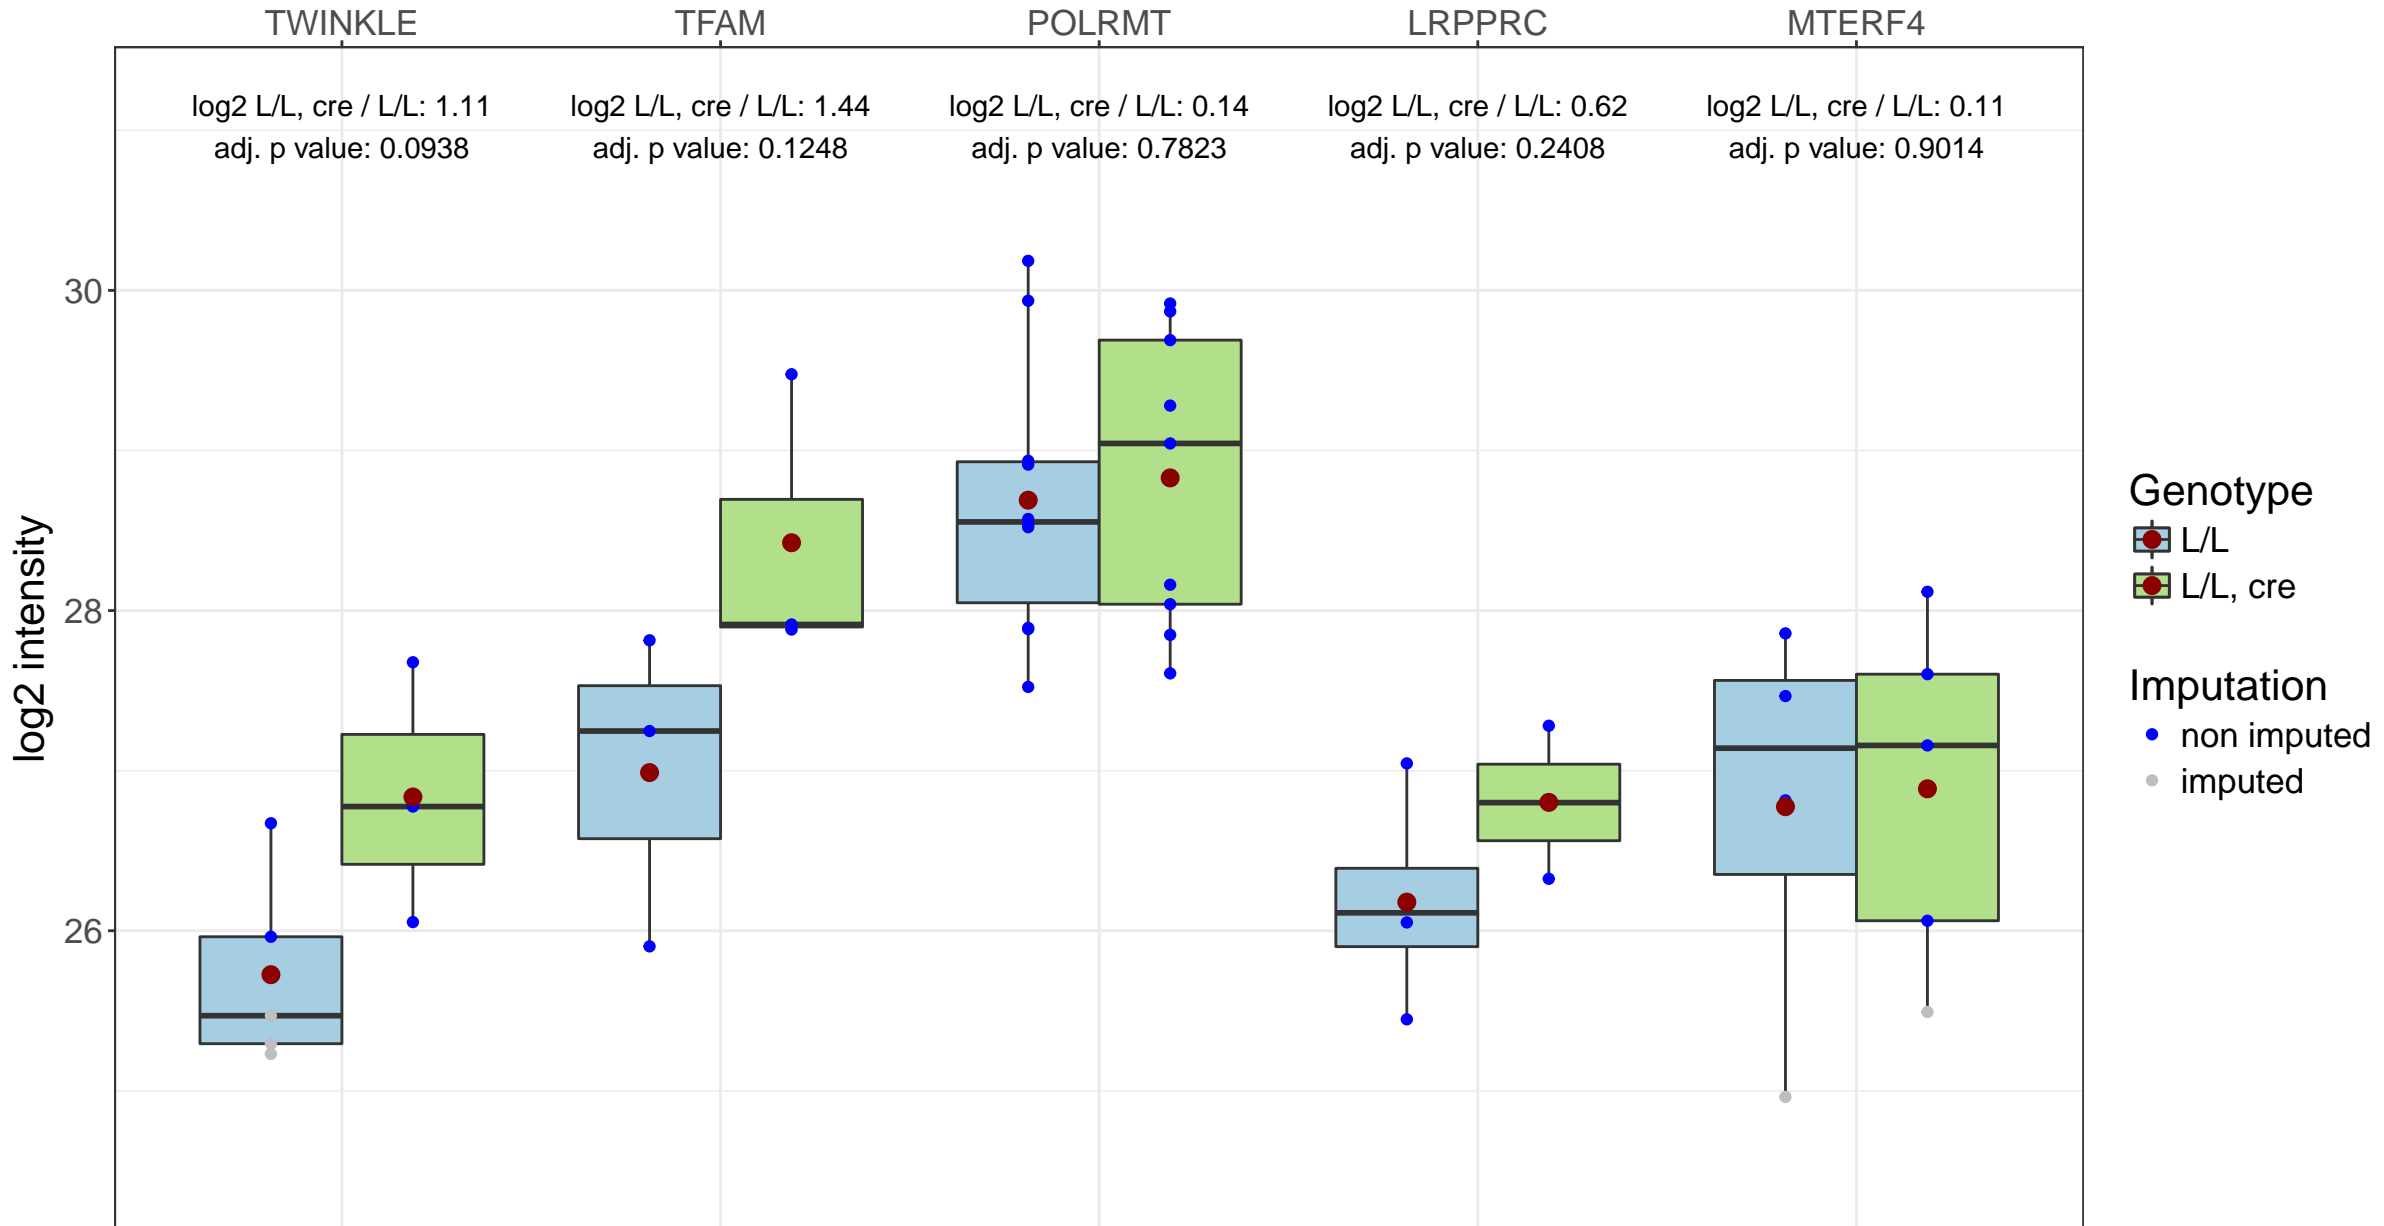



# PDK1 / Q8BFP9

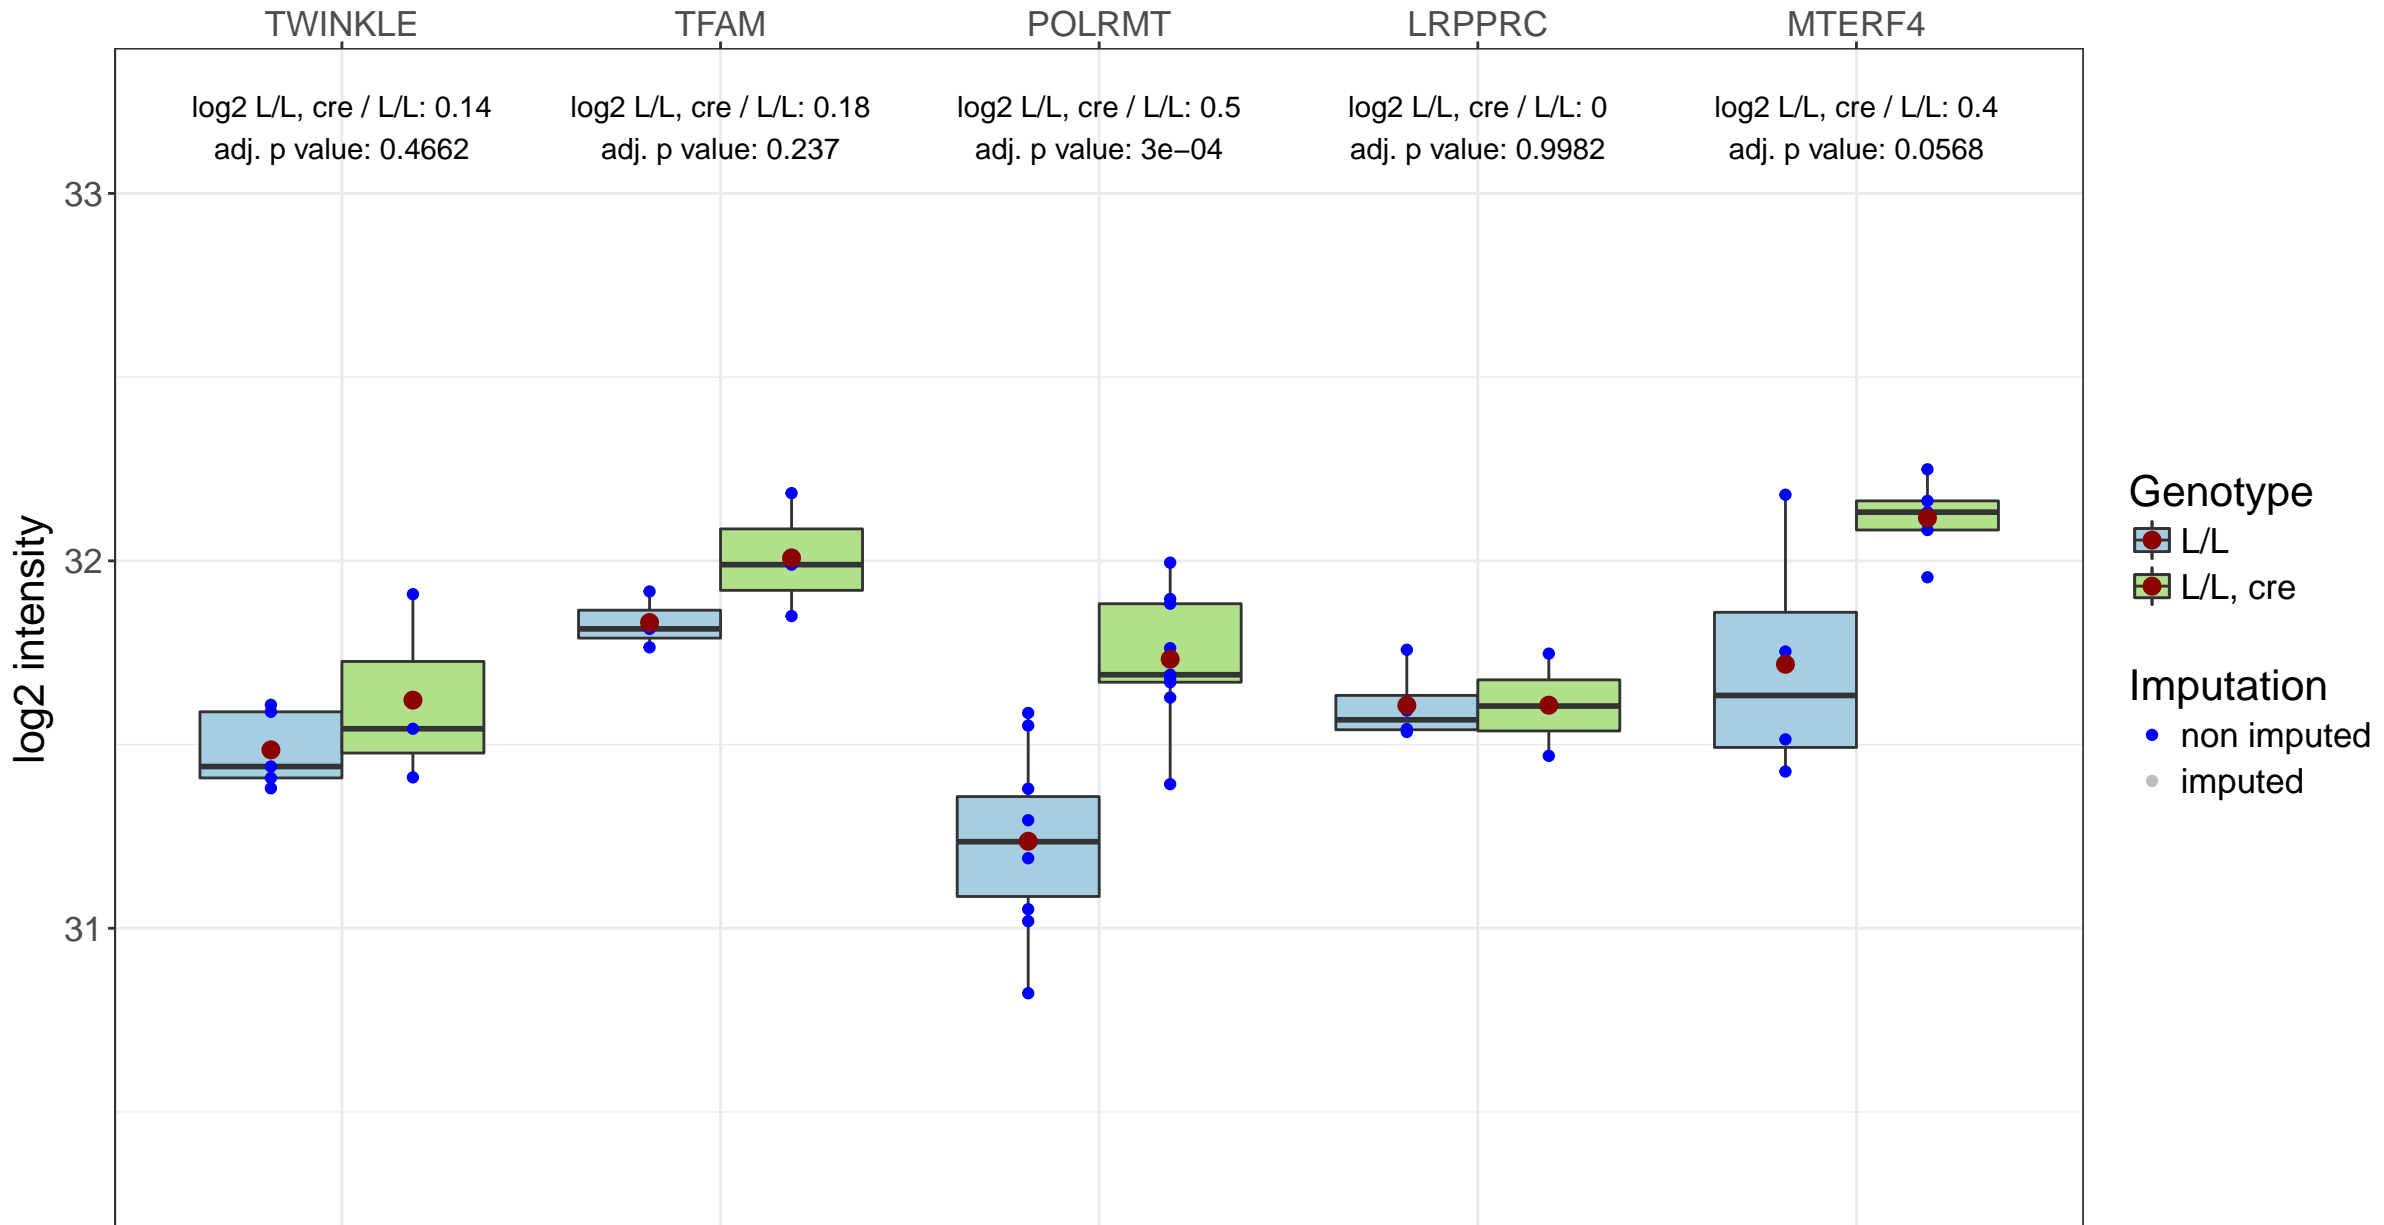

# PDK2 / Q9JK42

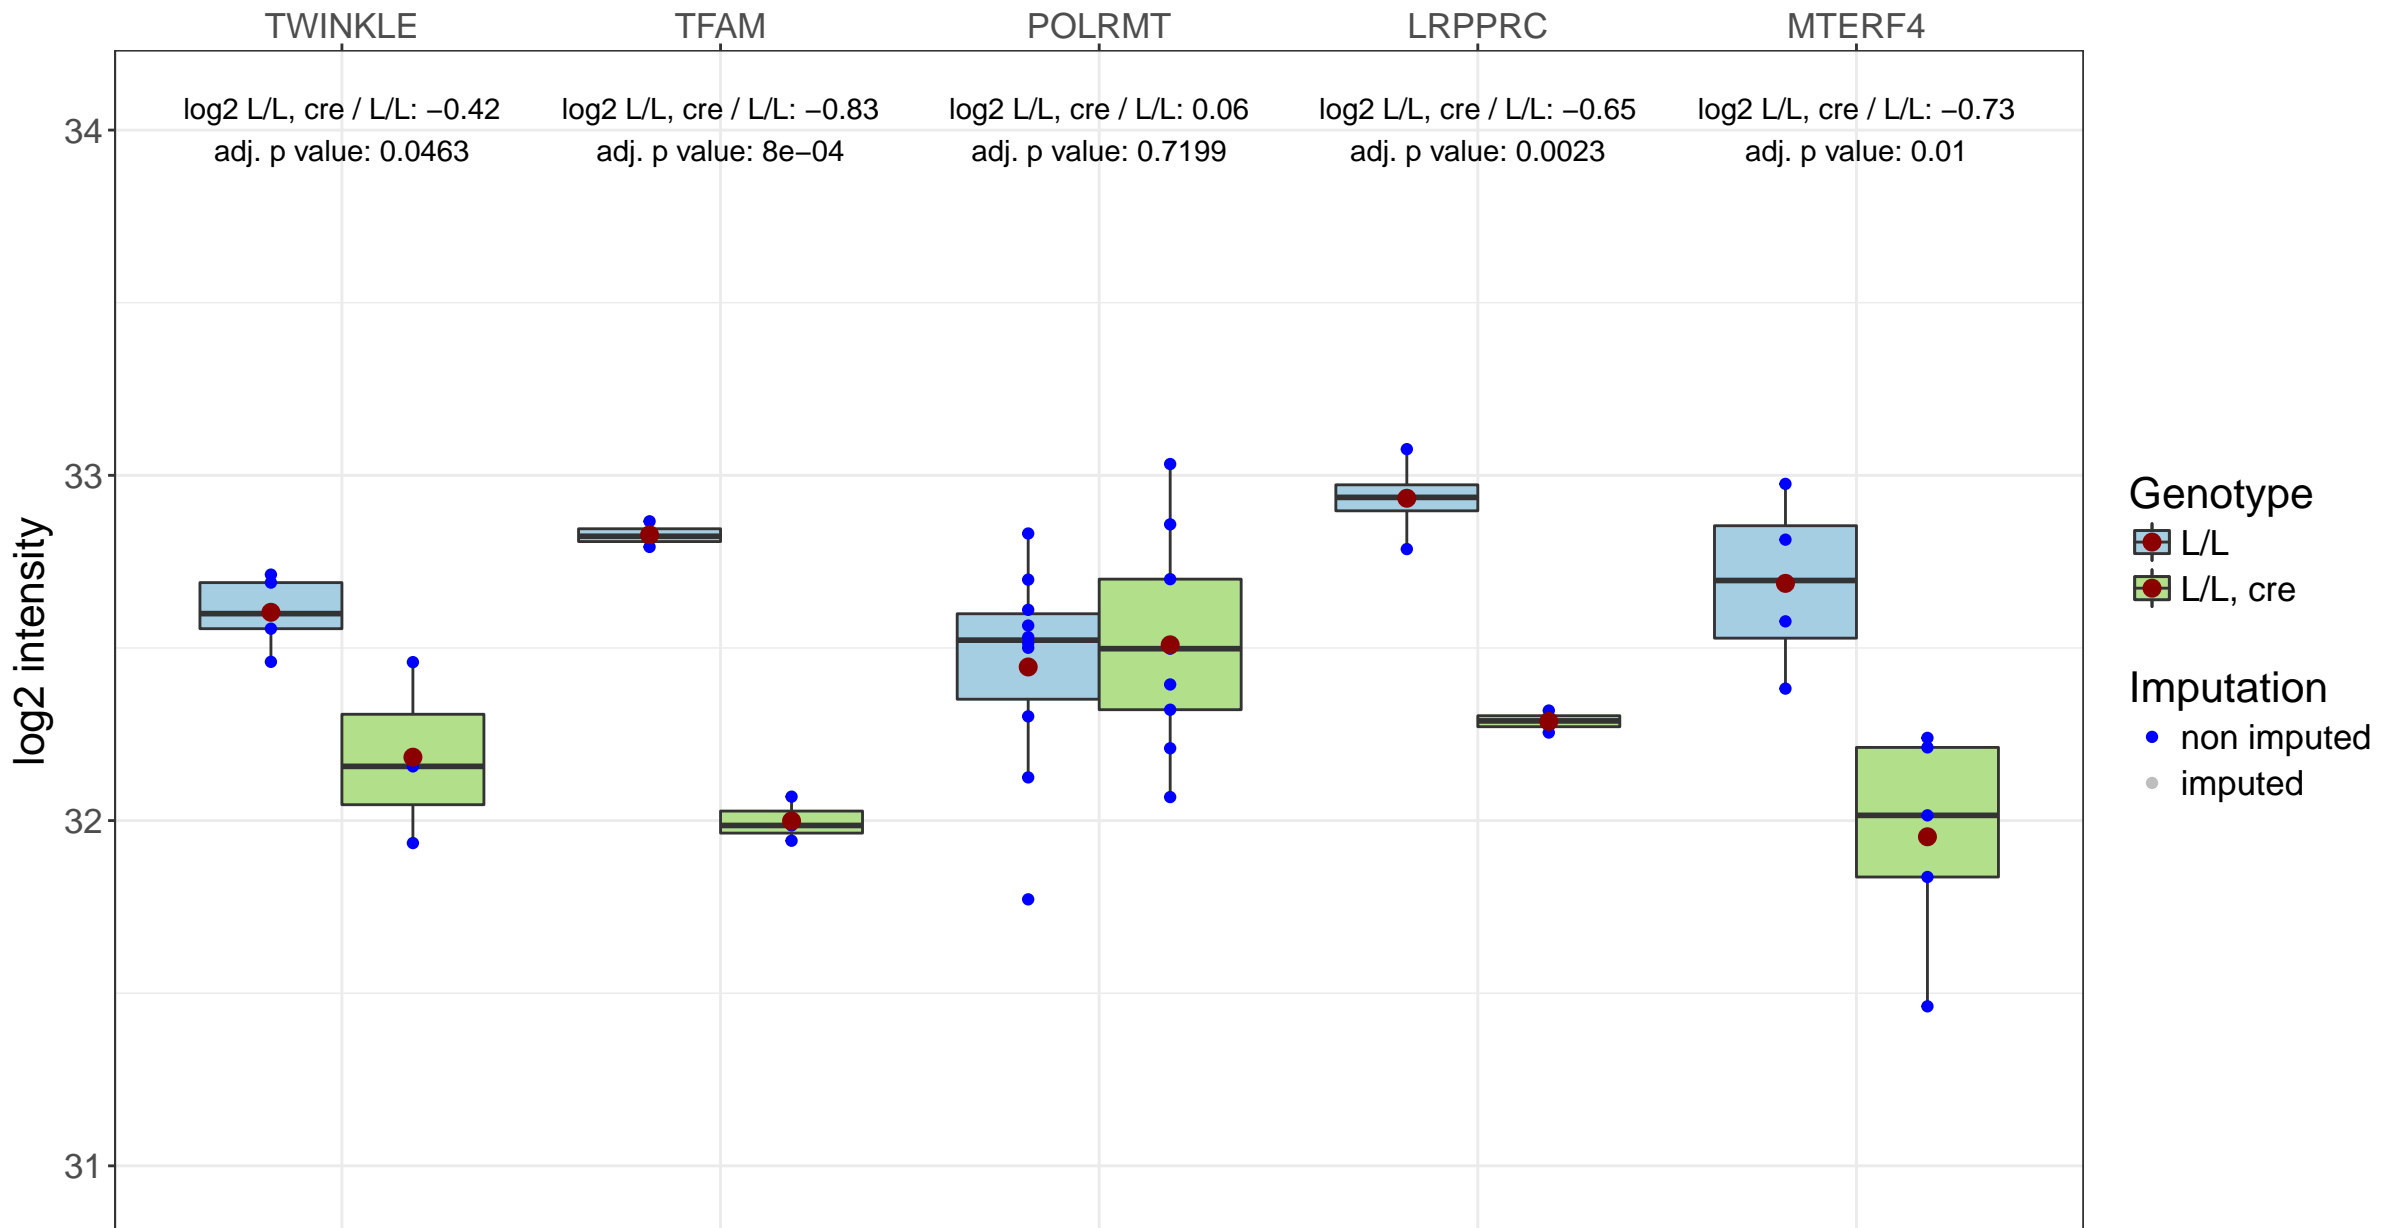

# PDK3 / Q922H2

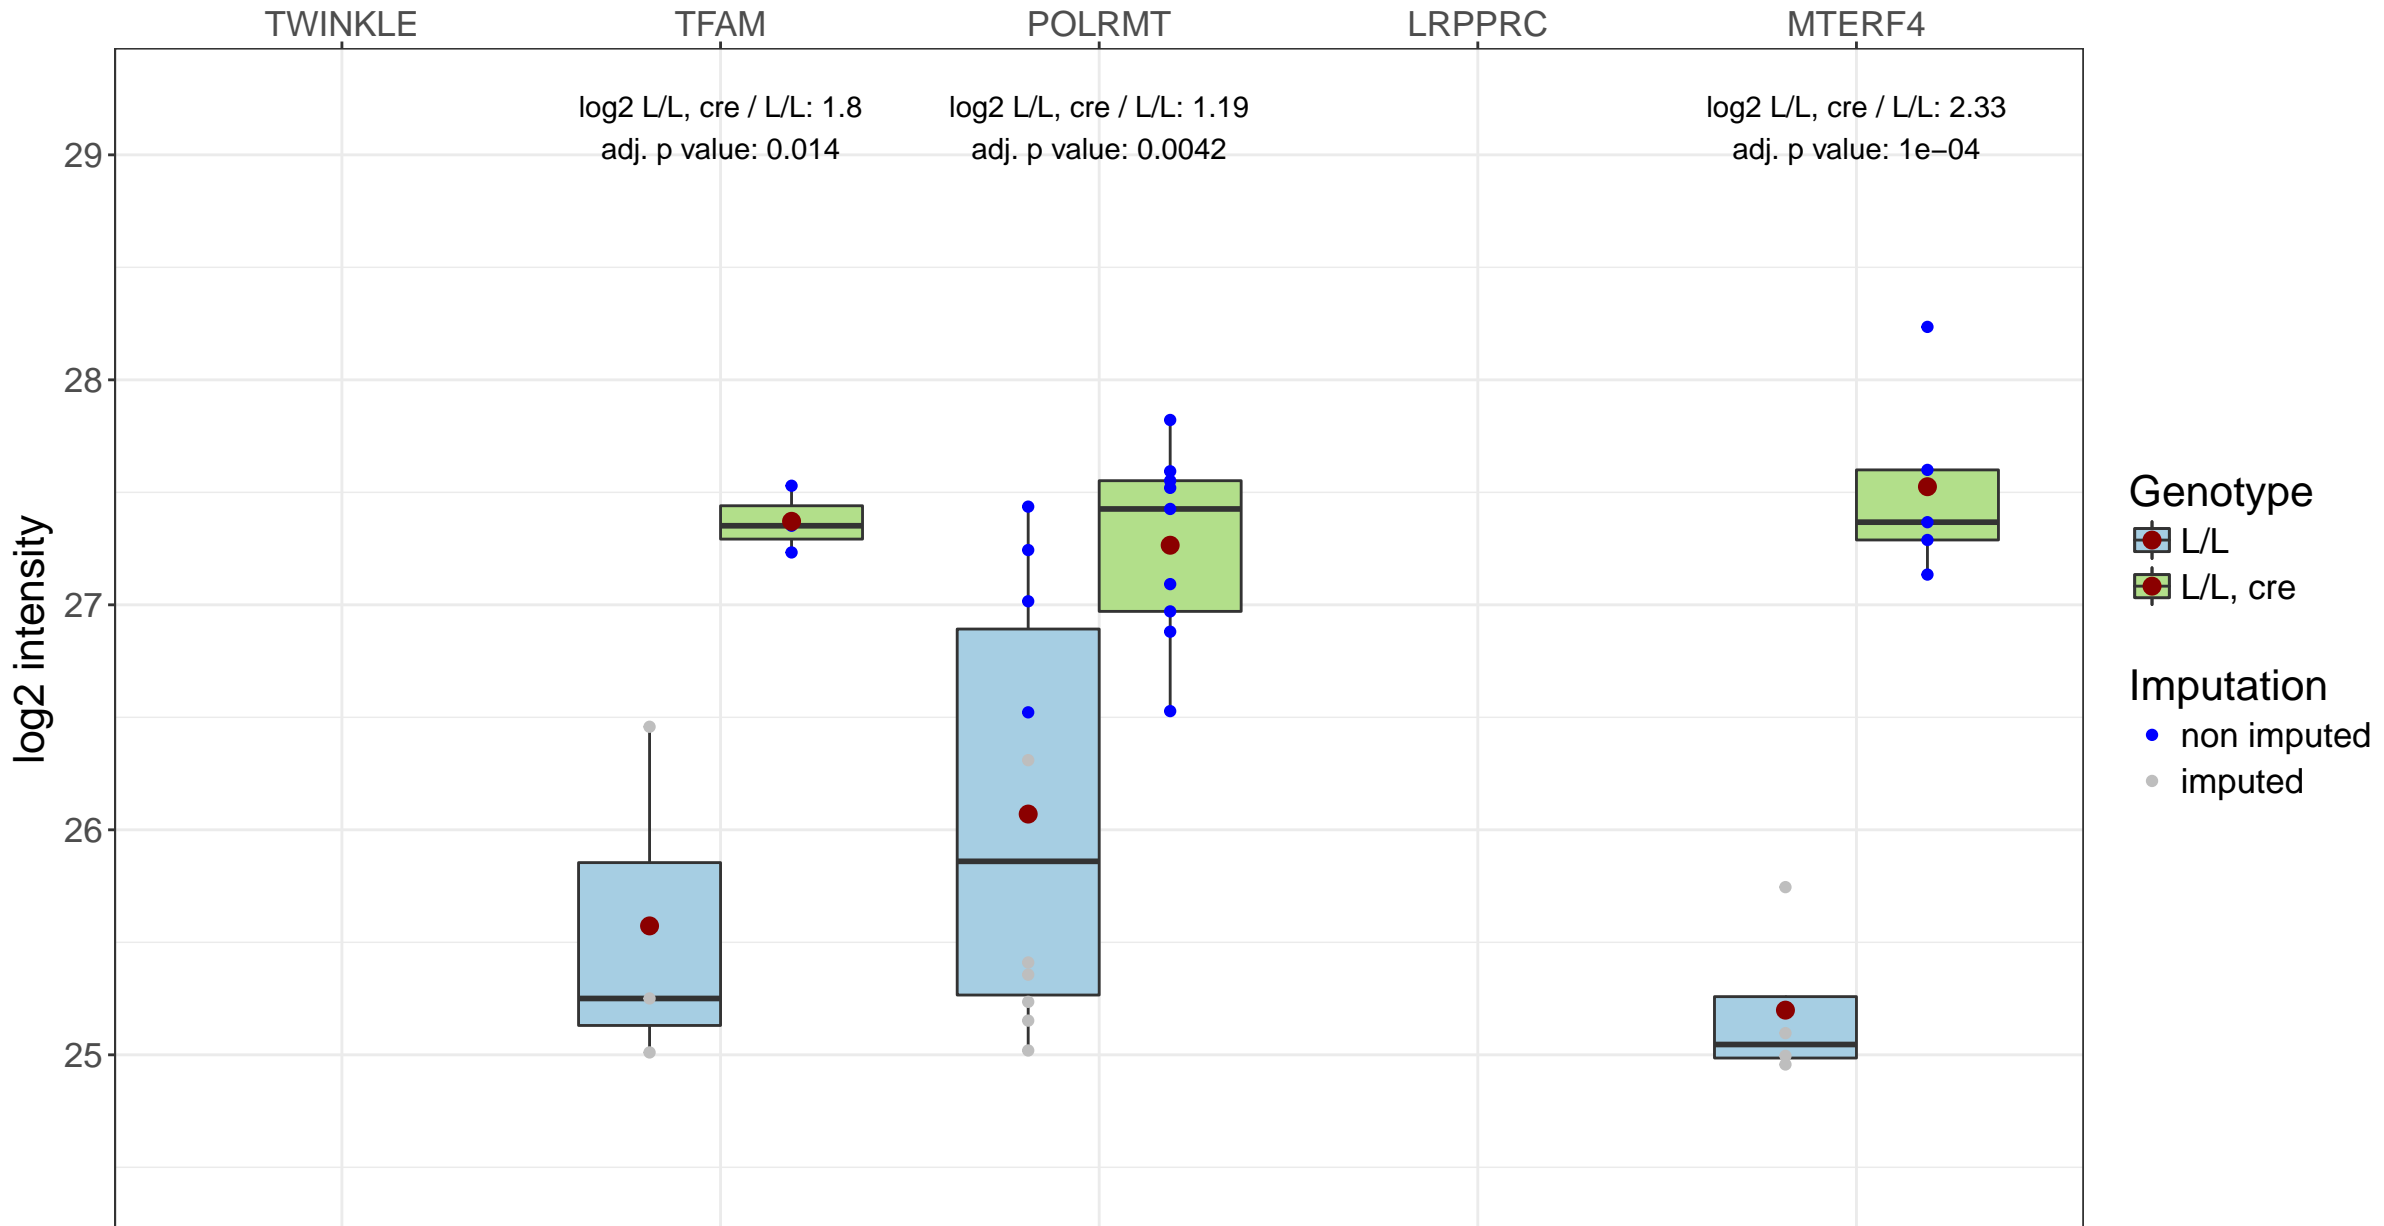

# PDK4 / O70571

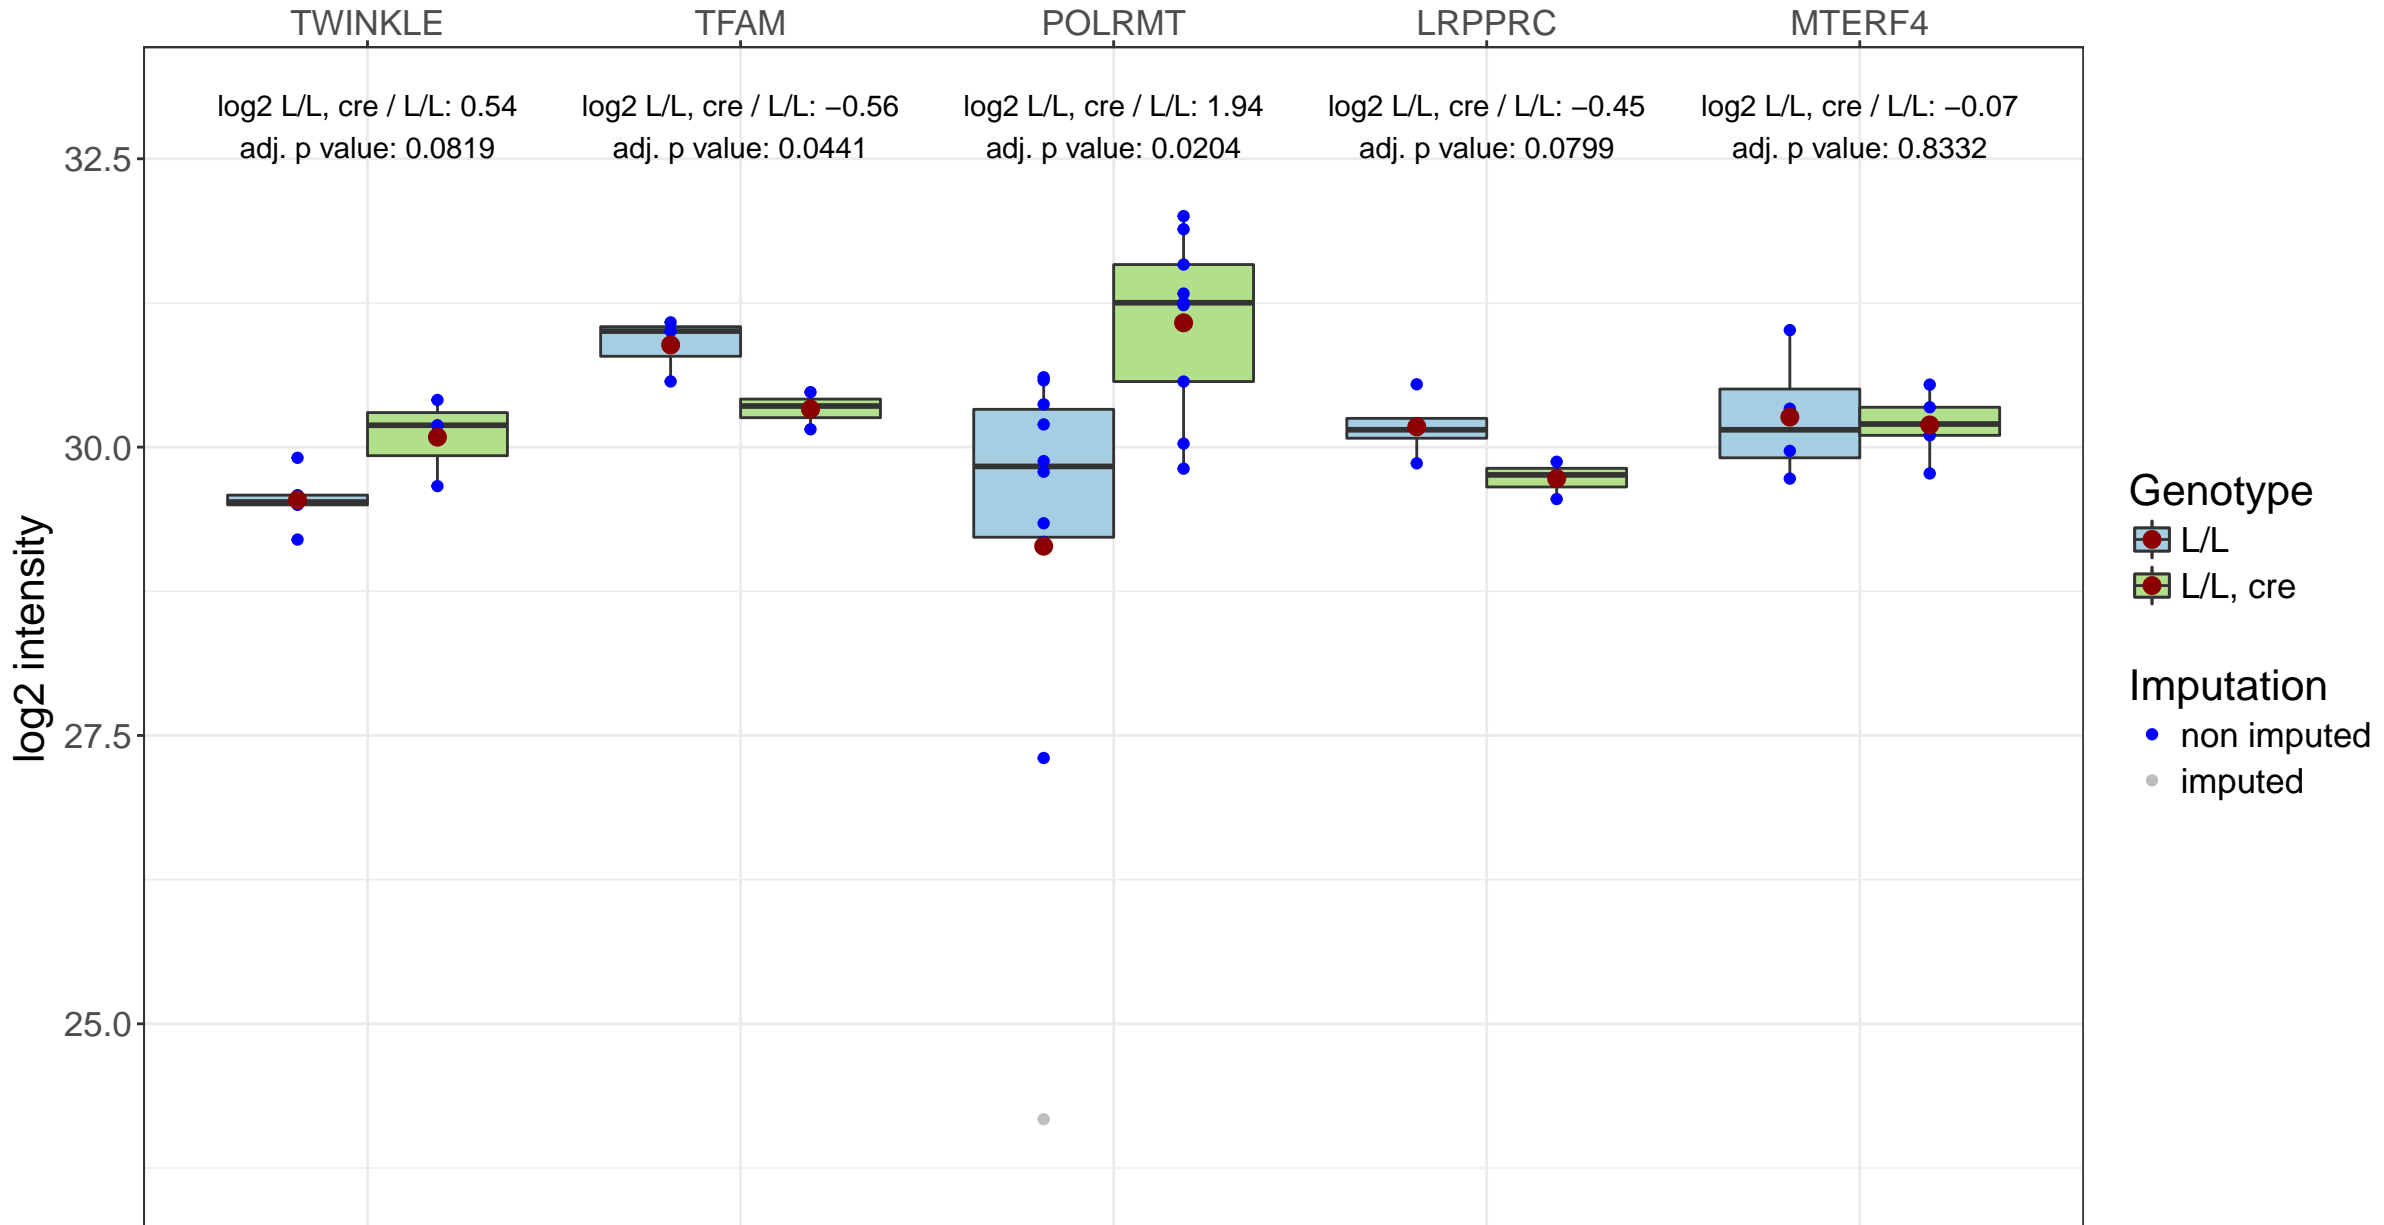

# PDP1 / A2AJP9

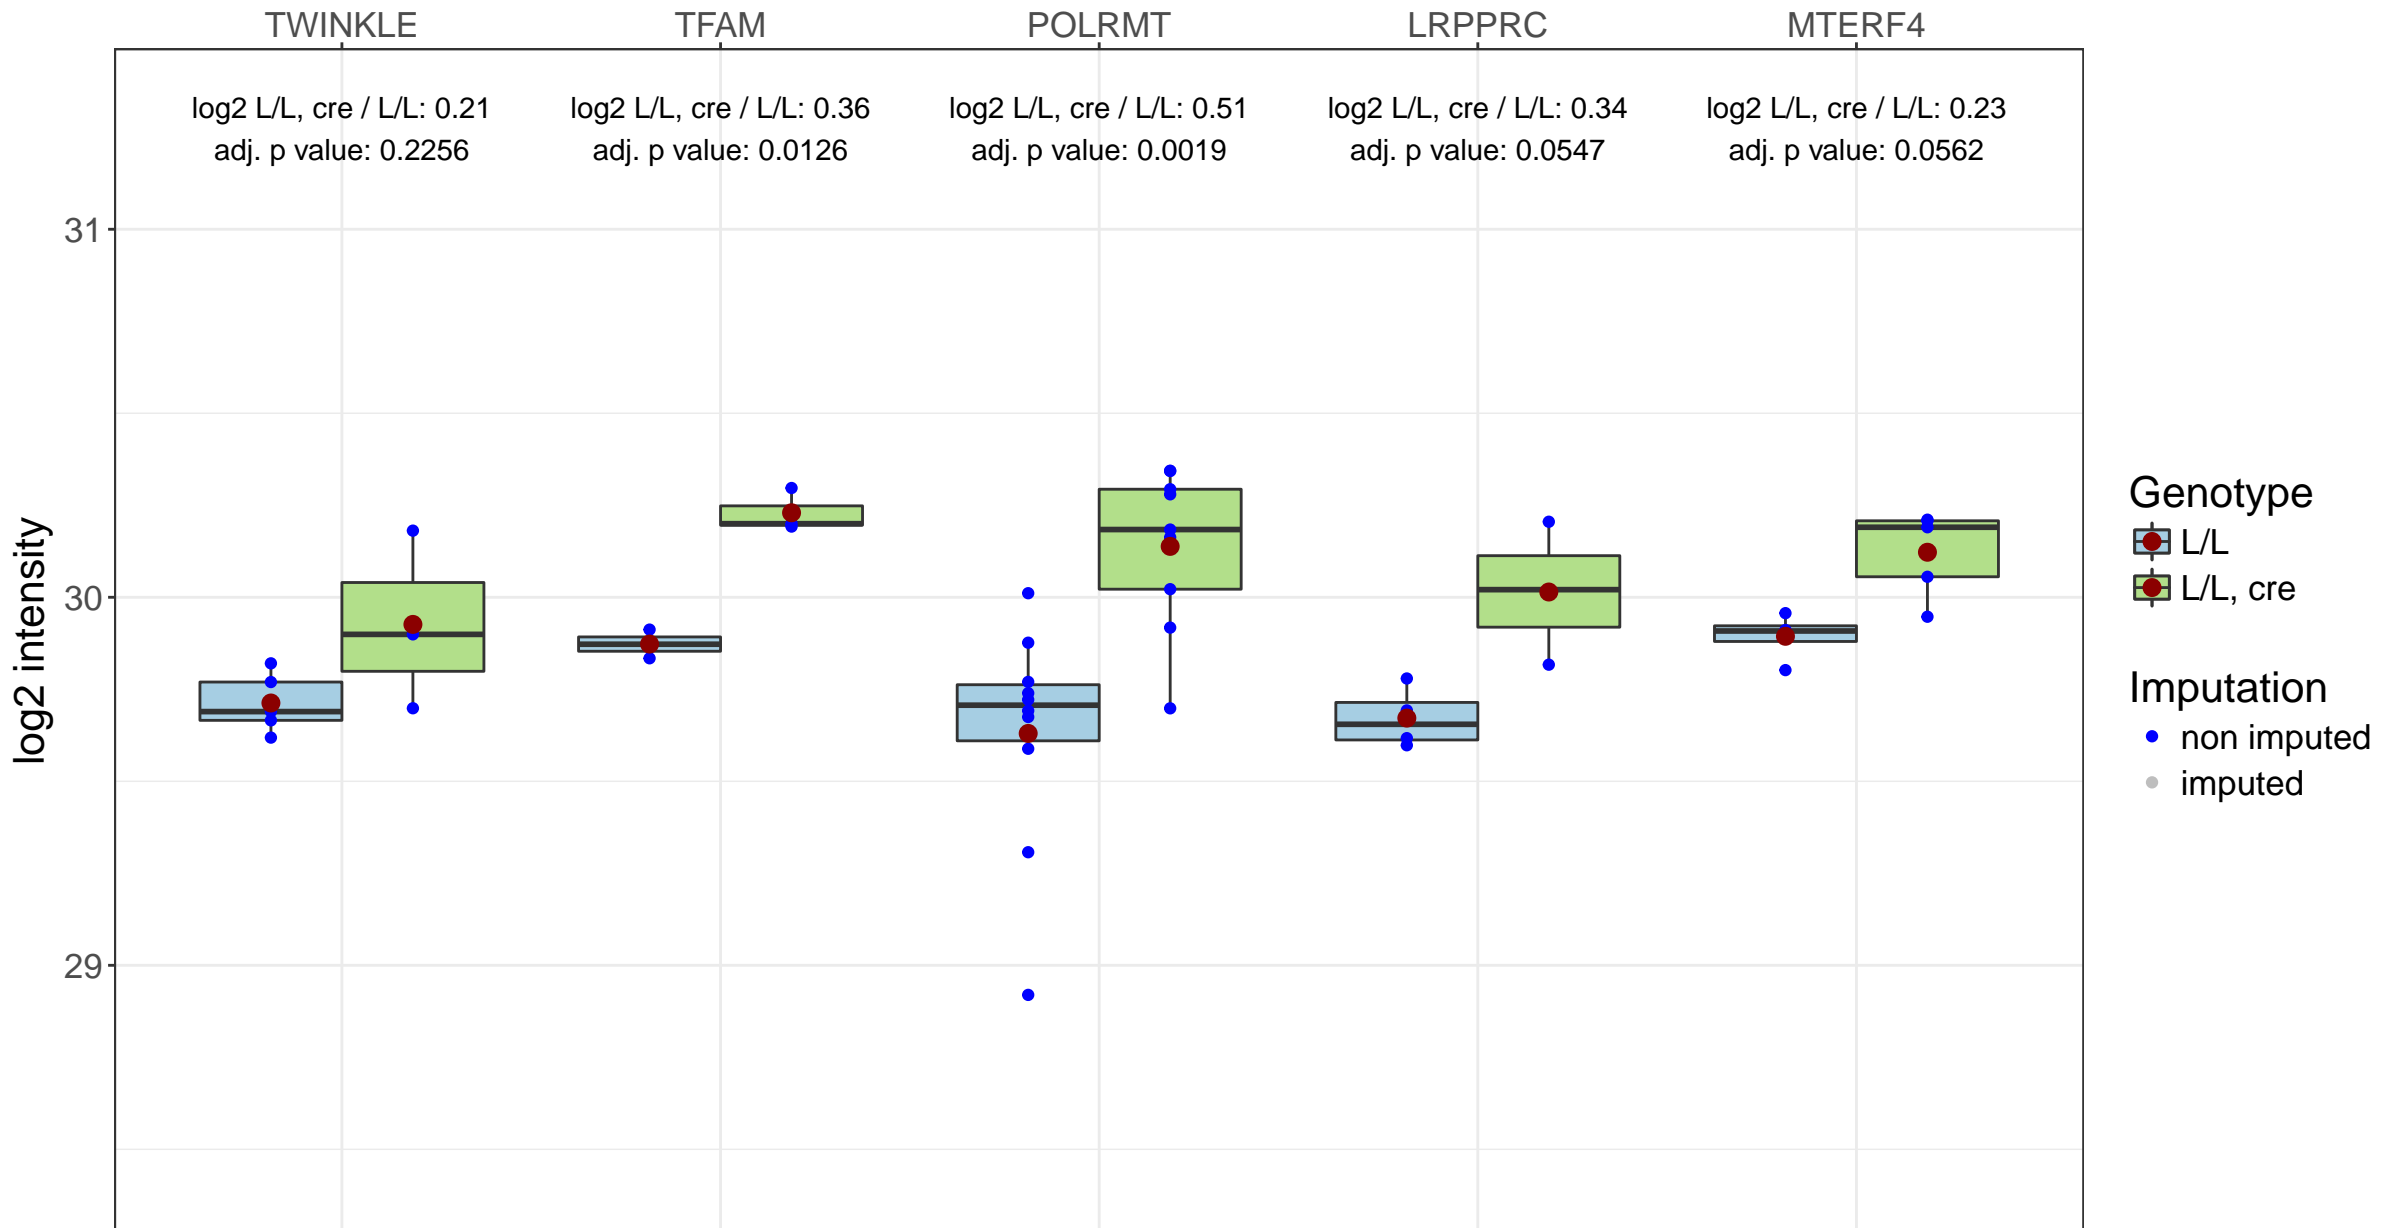

# PDP2 / Q504M2

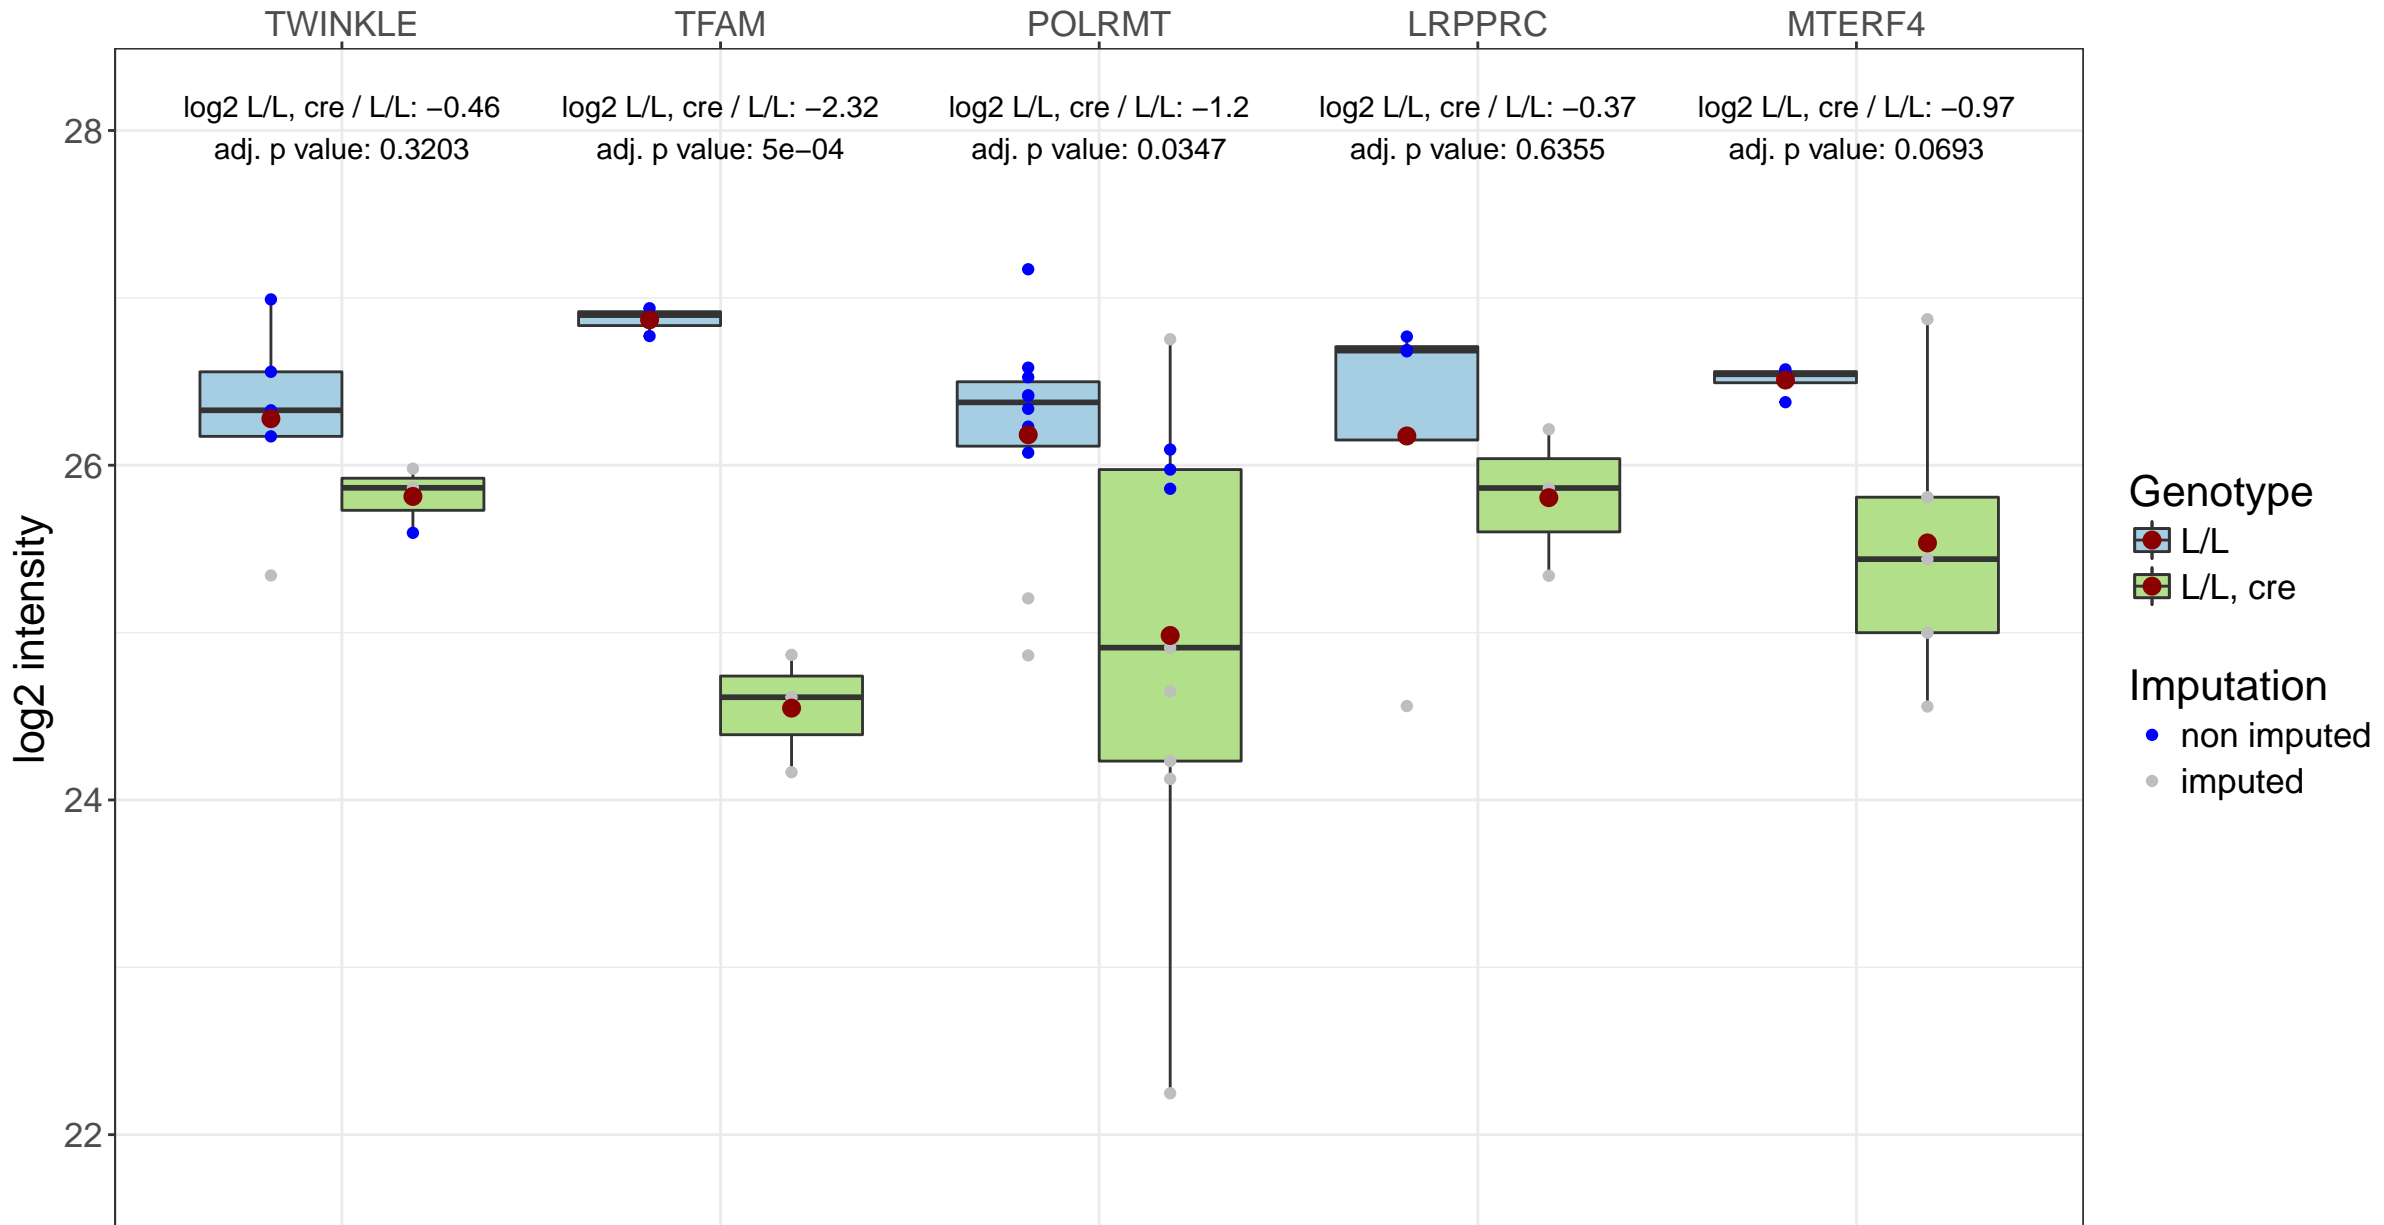

# PDPR / Q7TSQ8

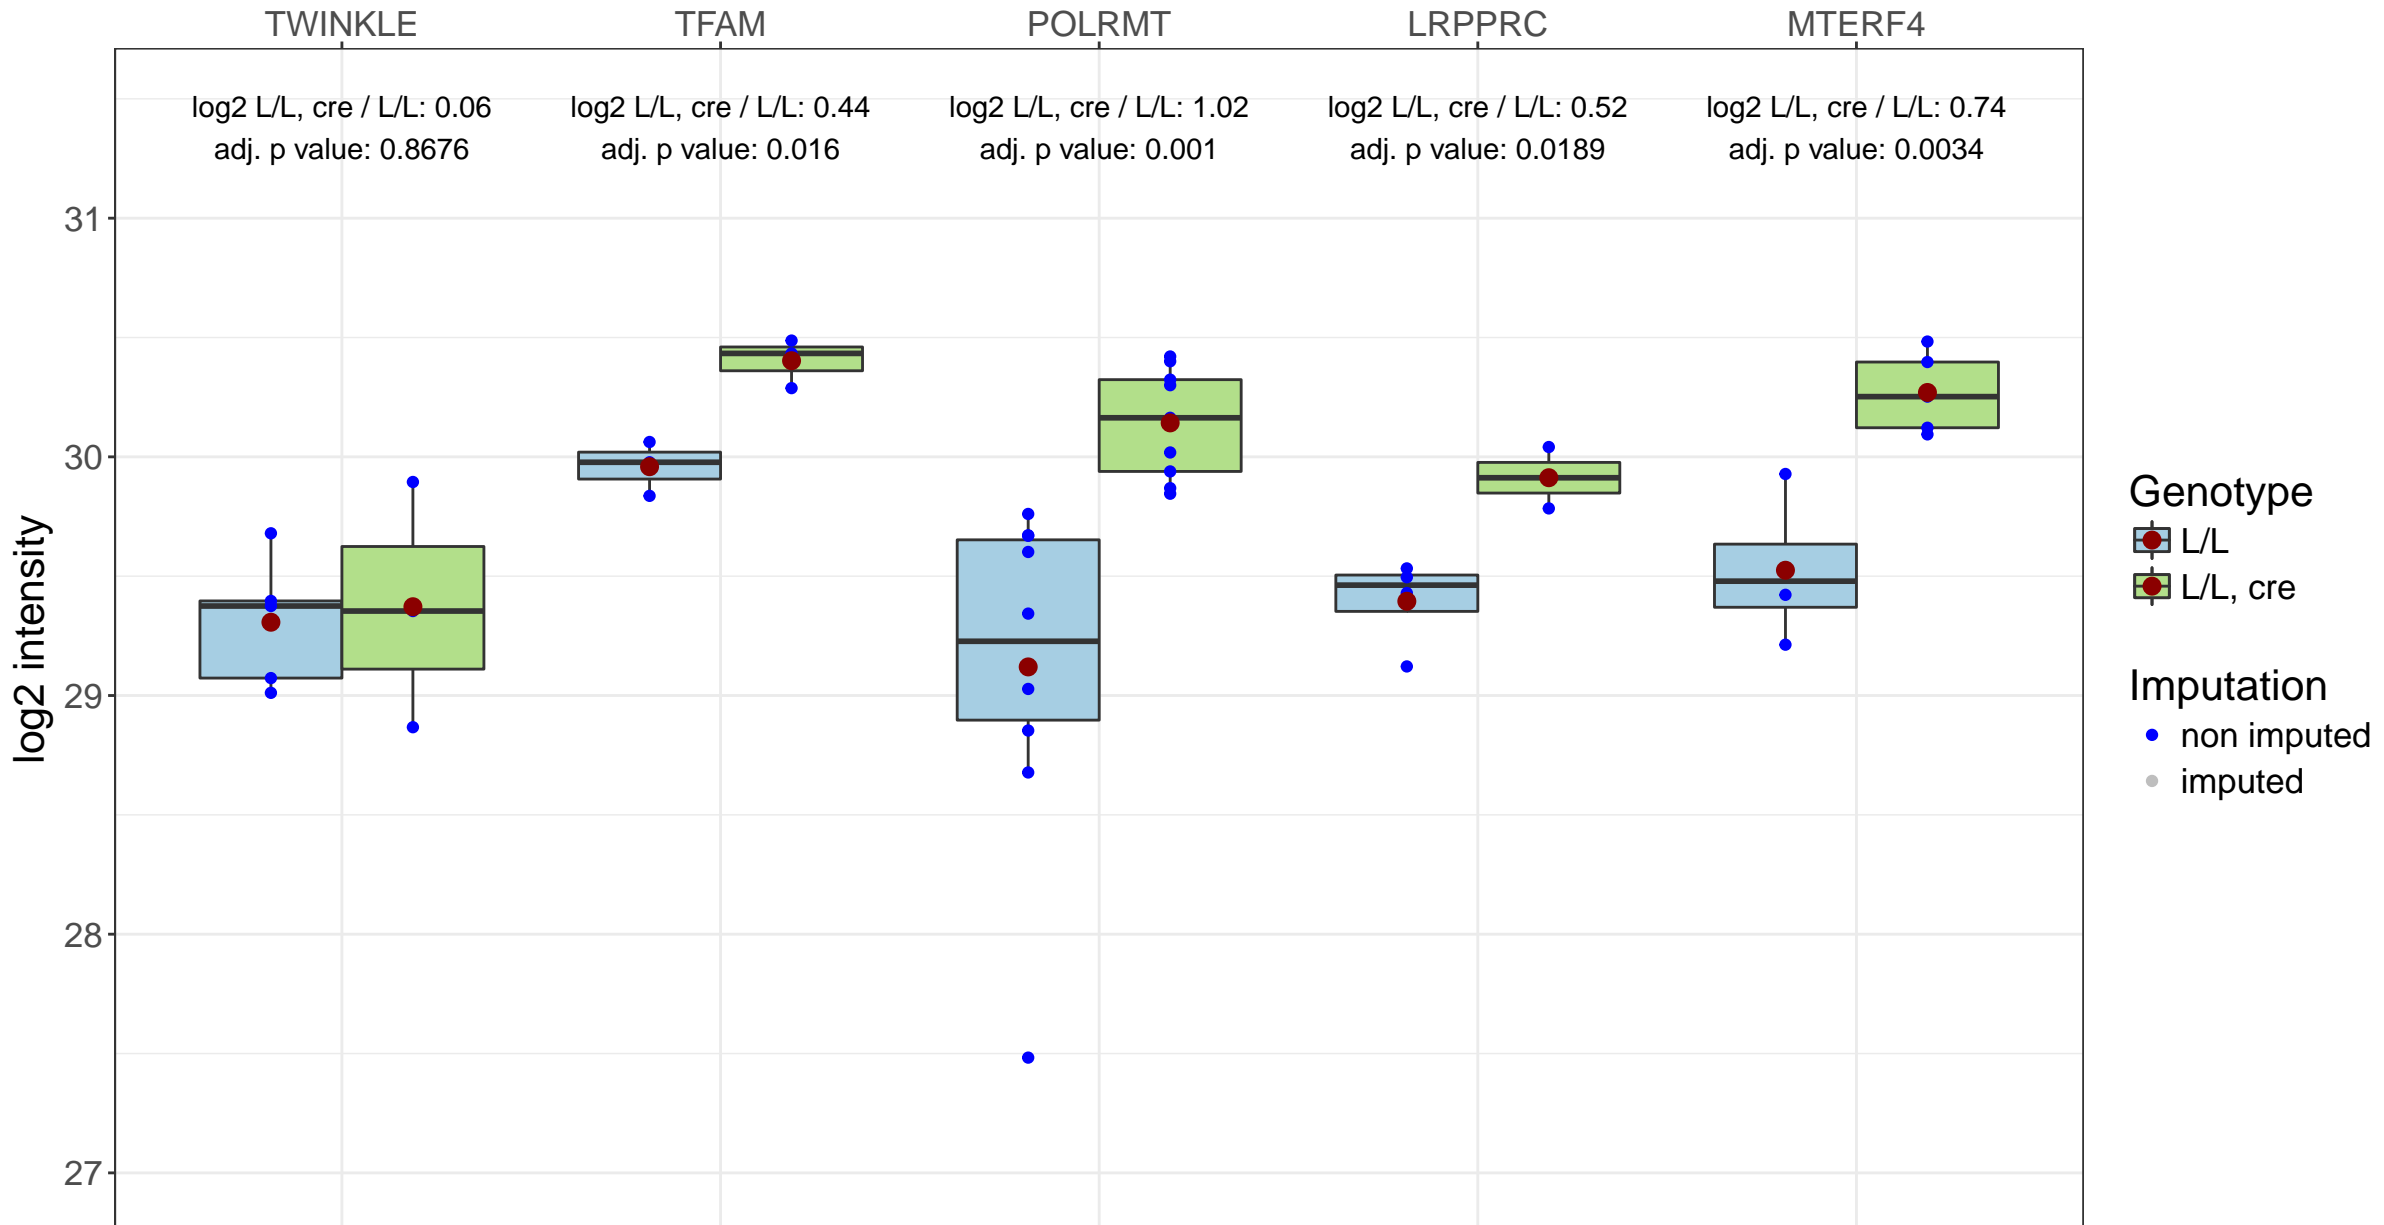

# PDSS2 / Q33DR3

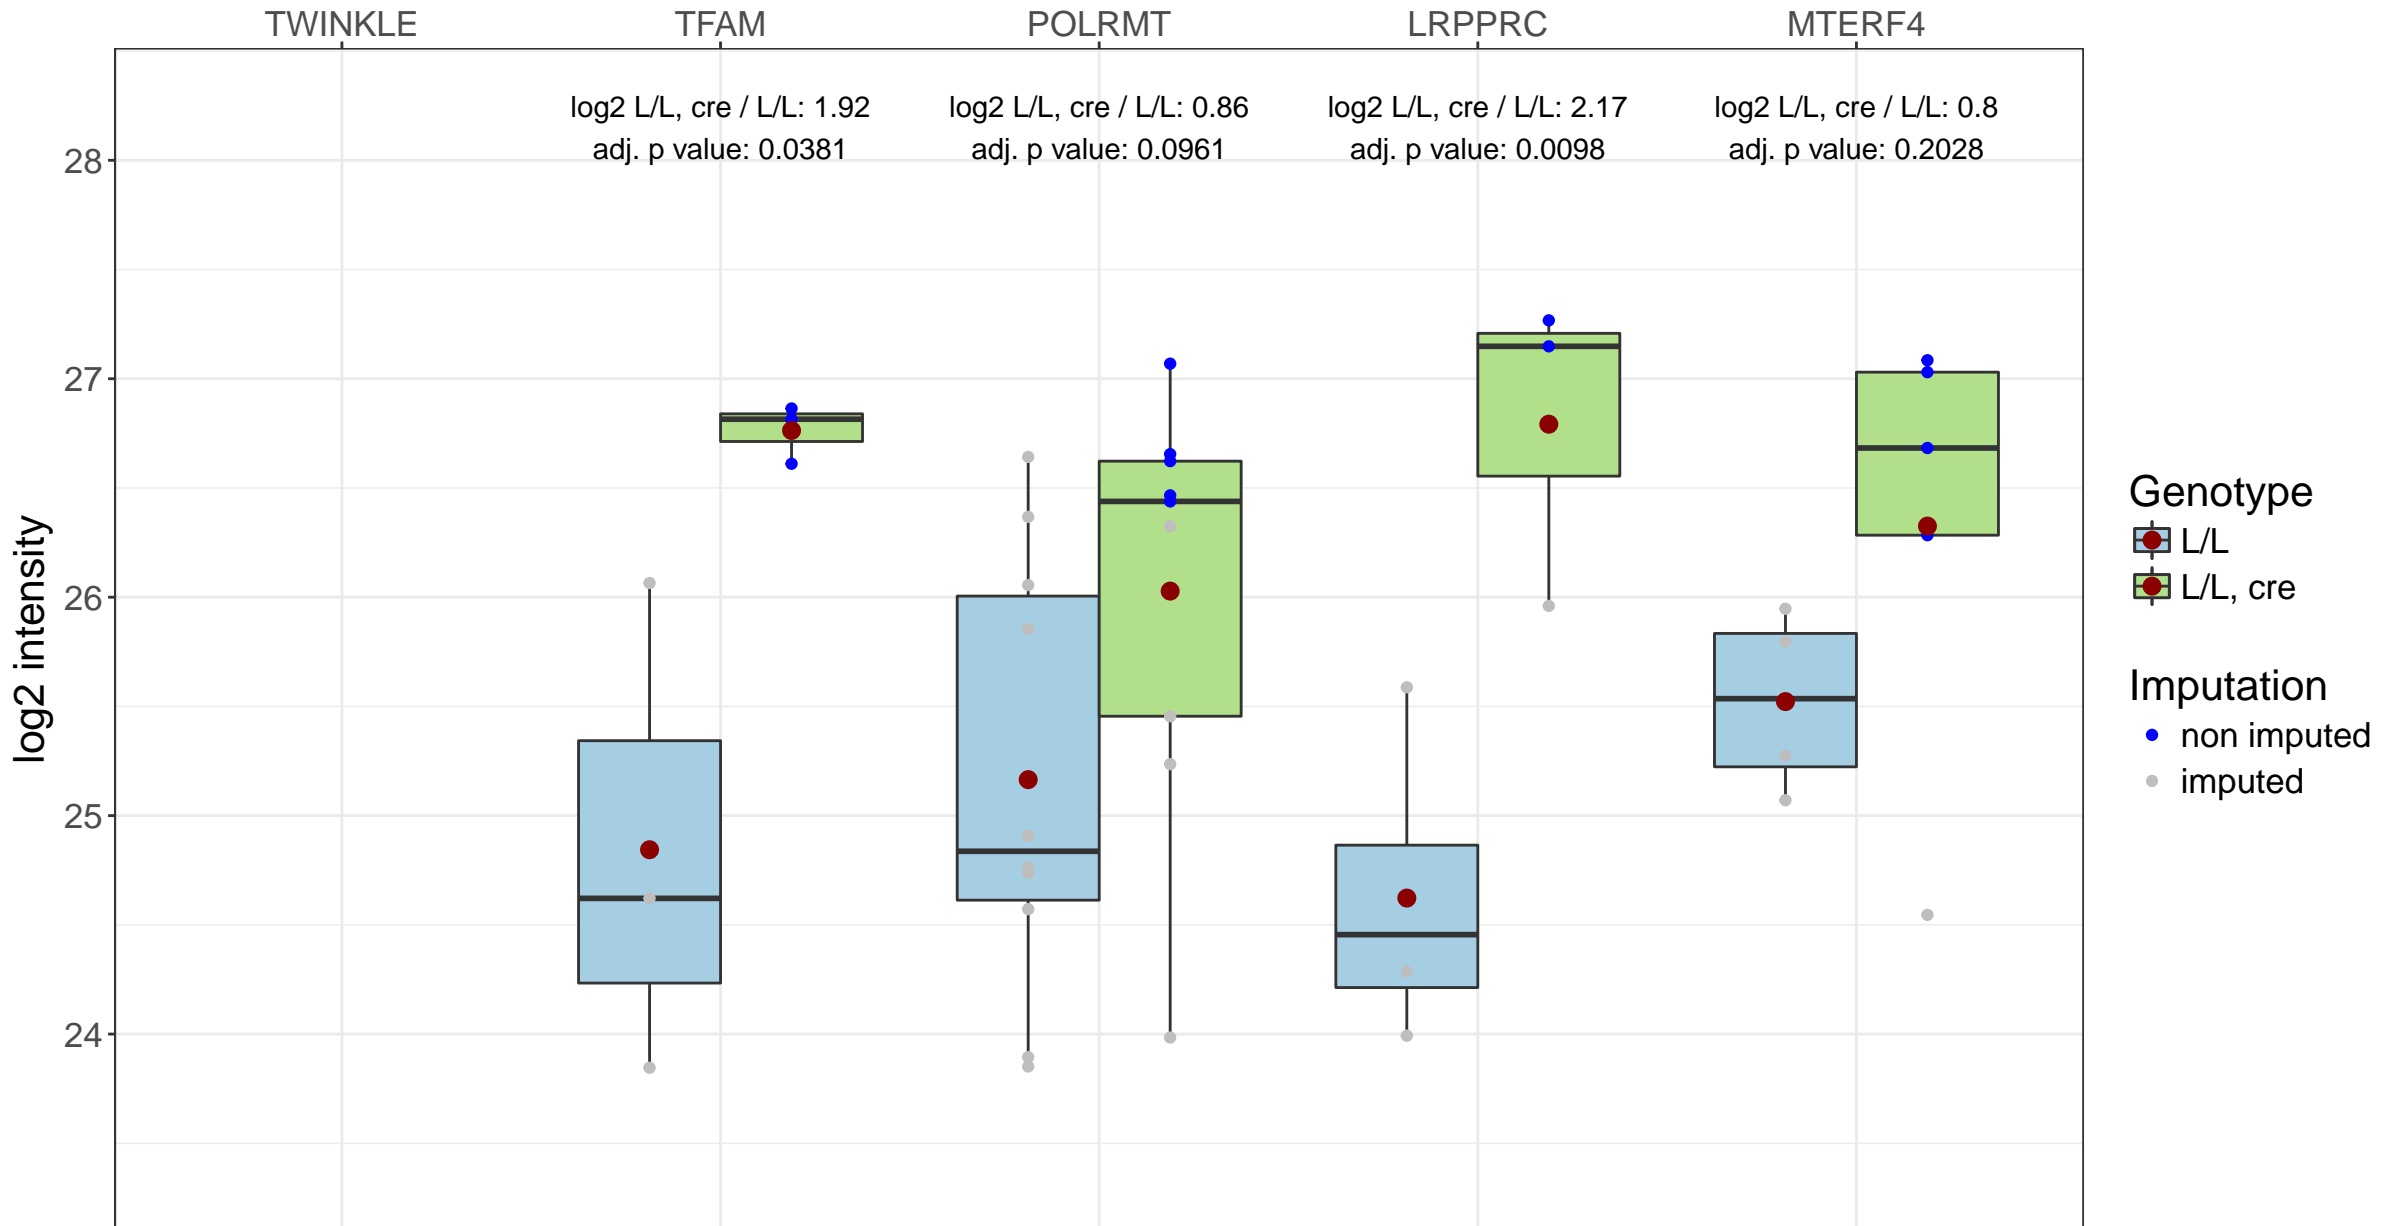



# PECR / Q3UXD9

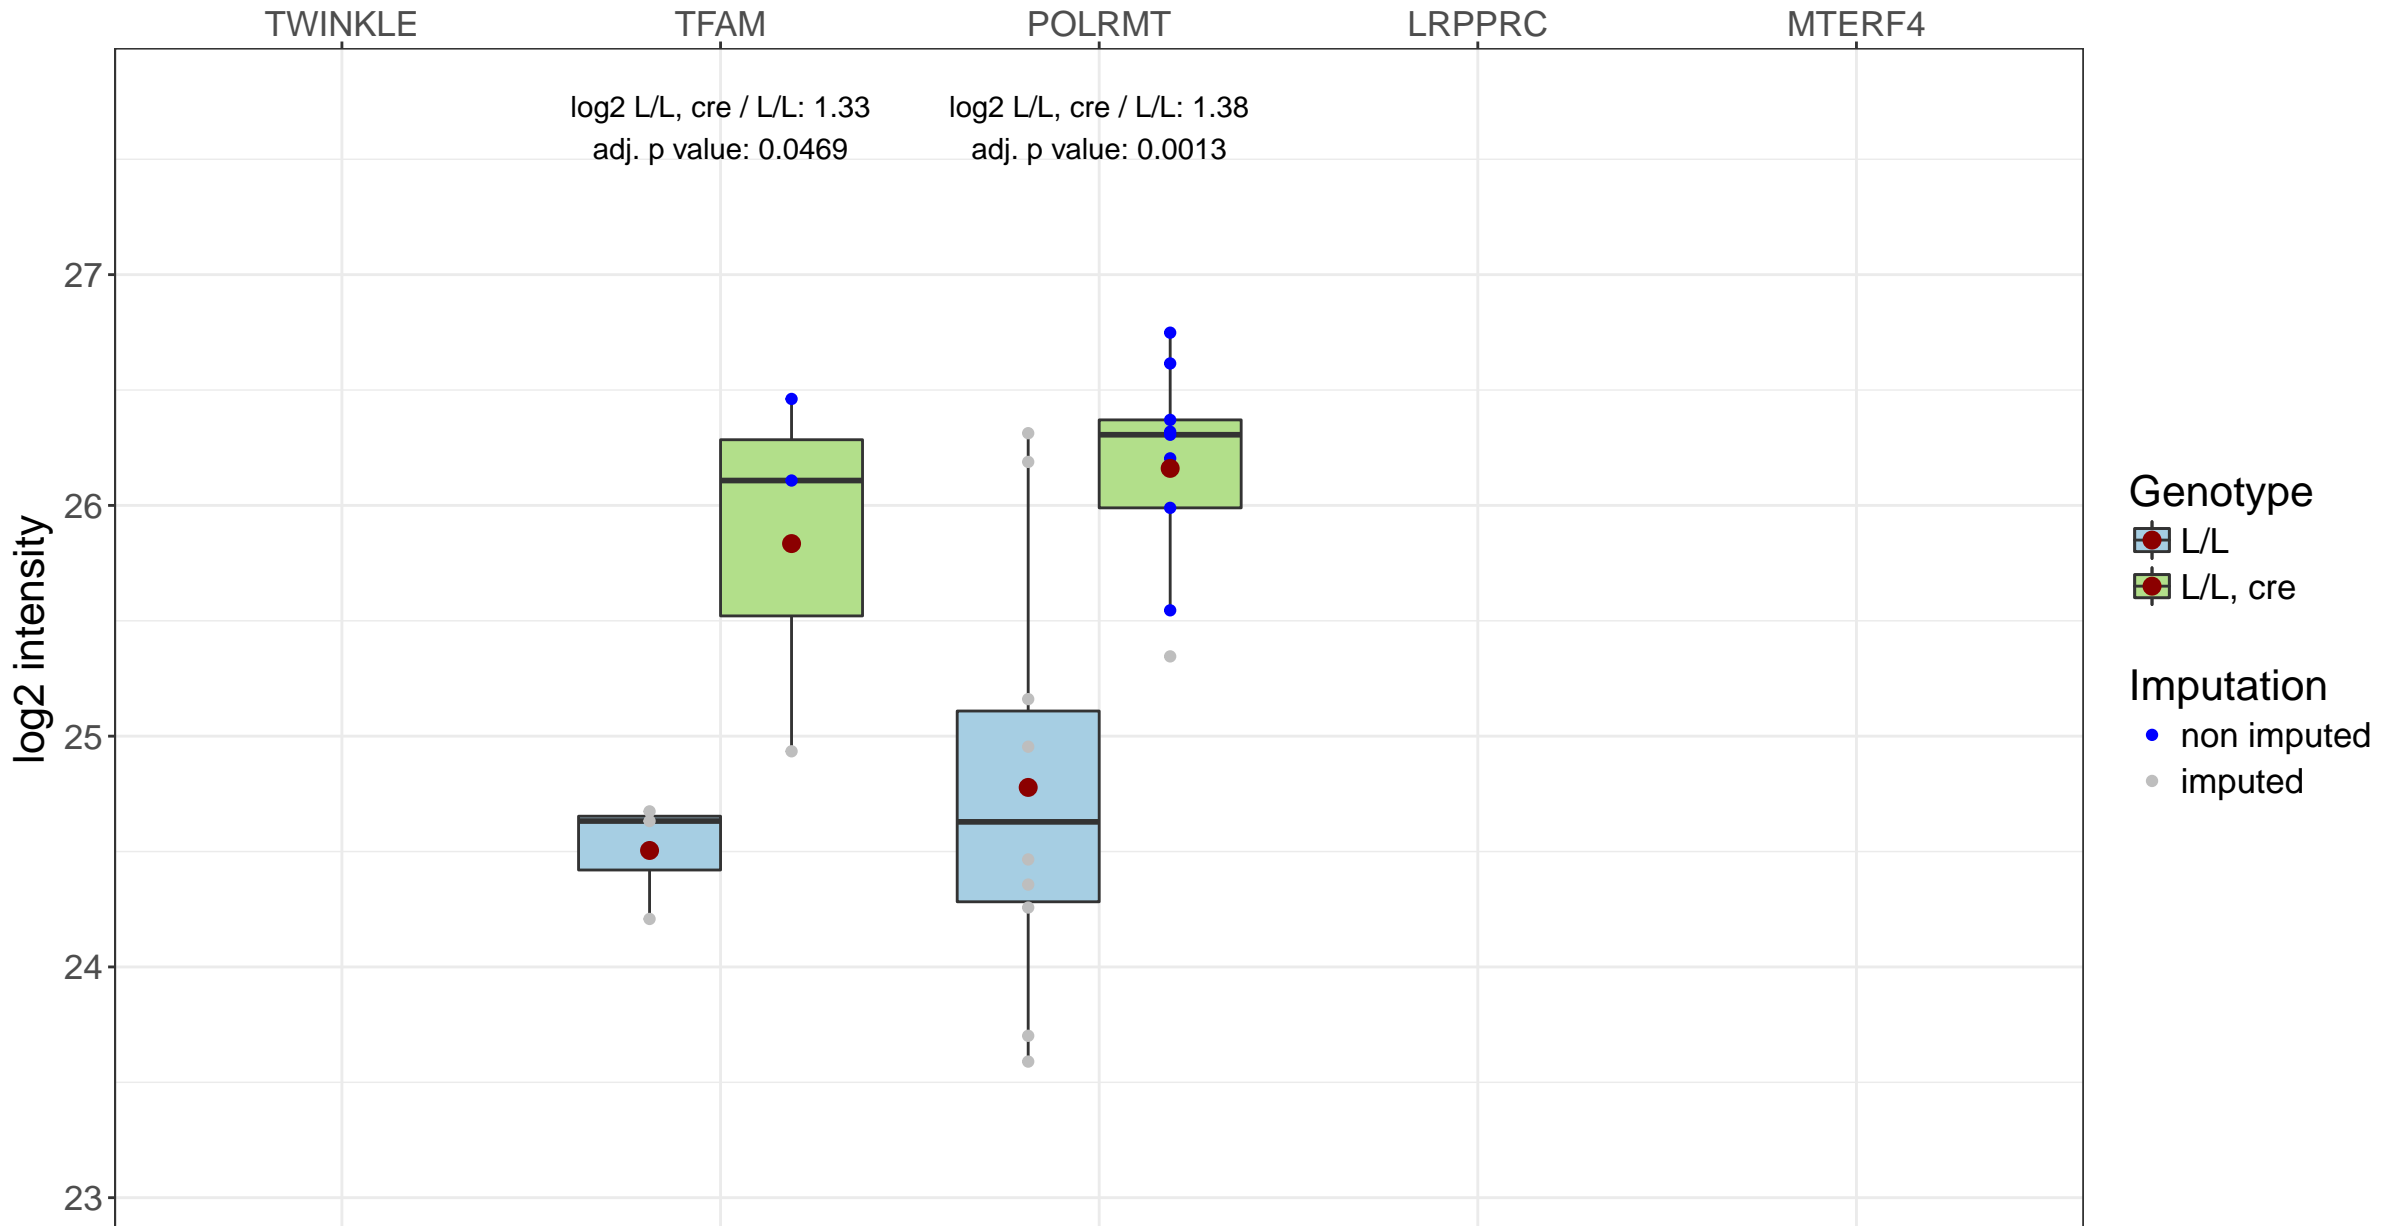

# PERM1 / Q149B8

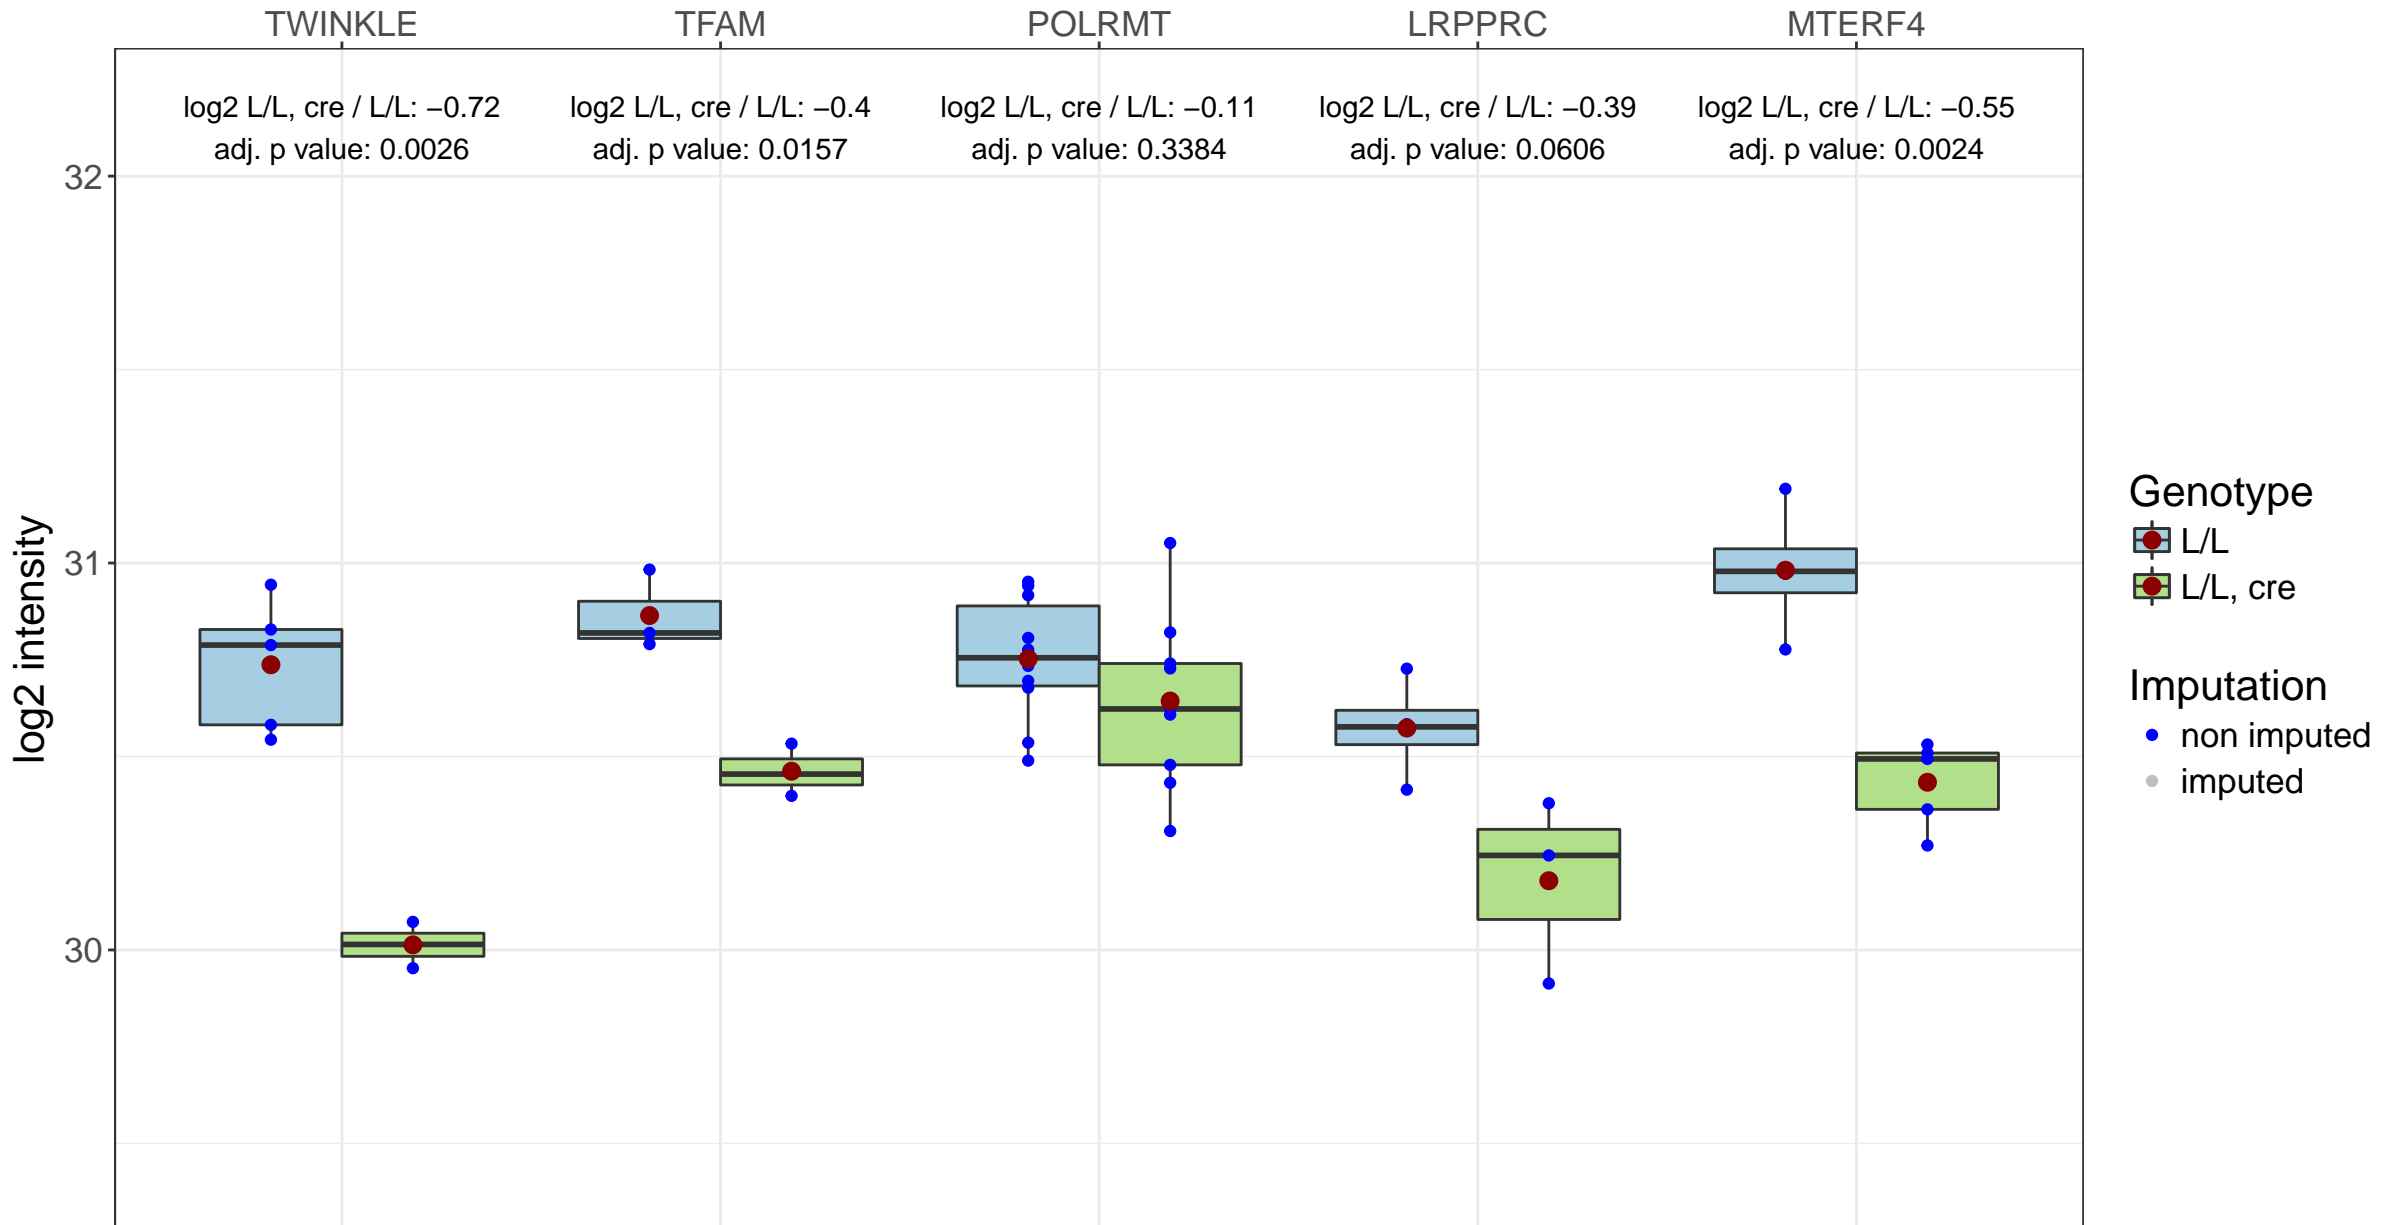

# PET112 / Q99JT1

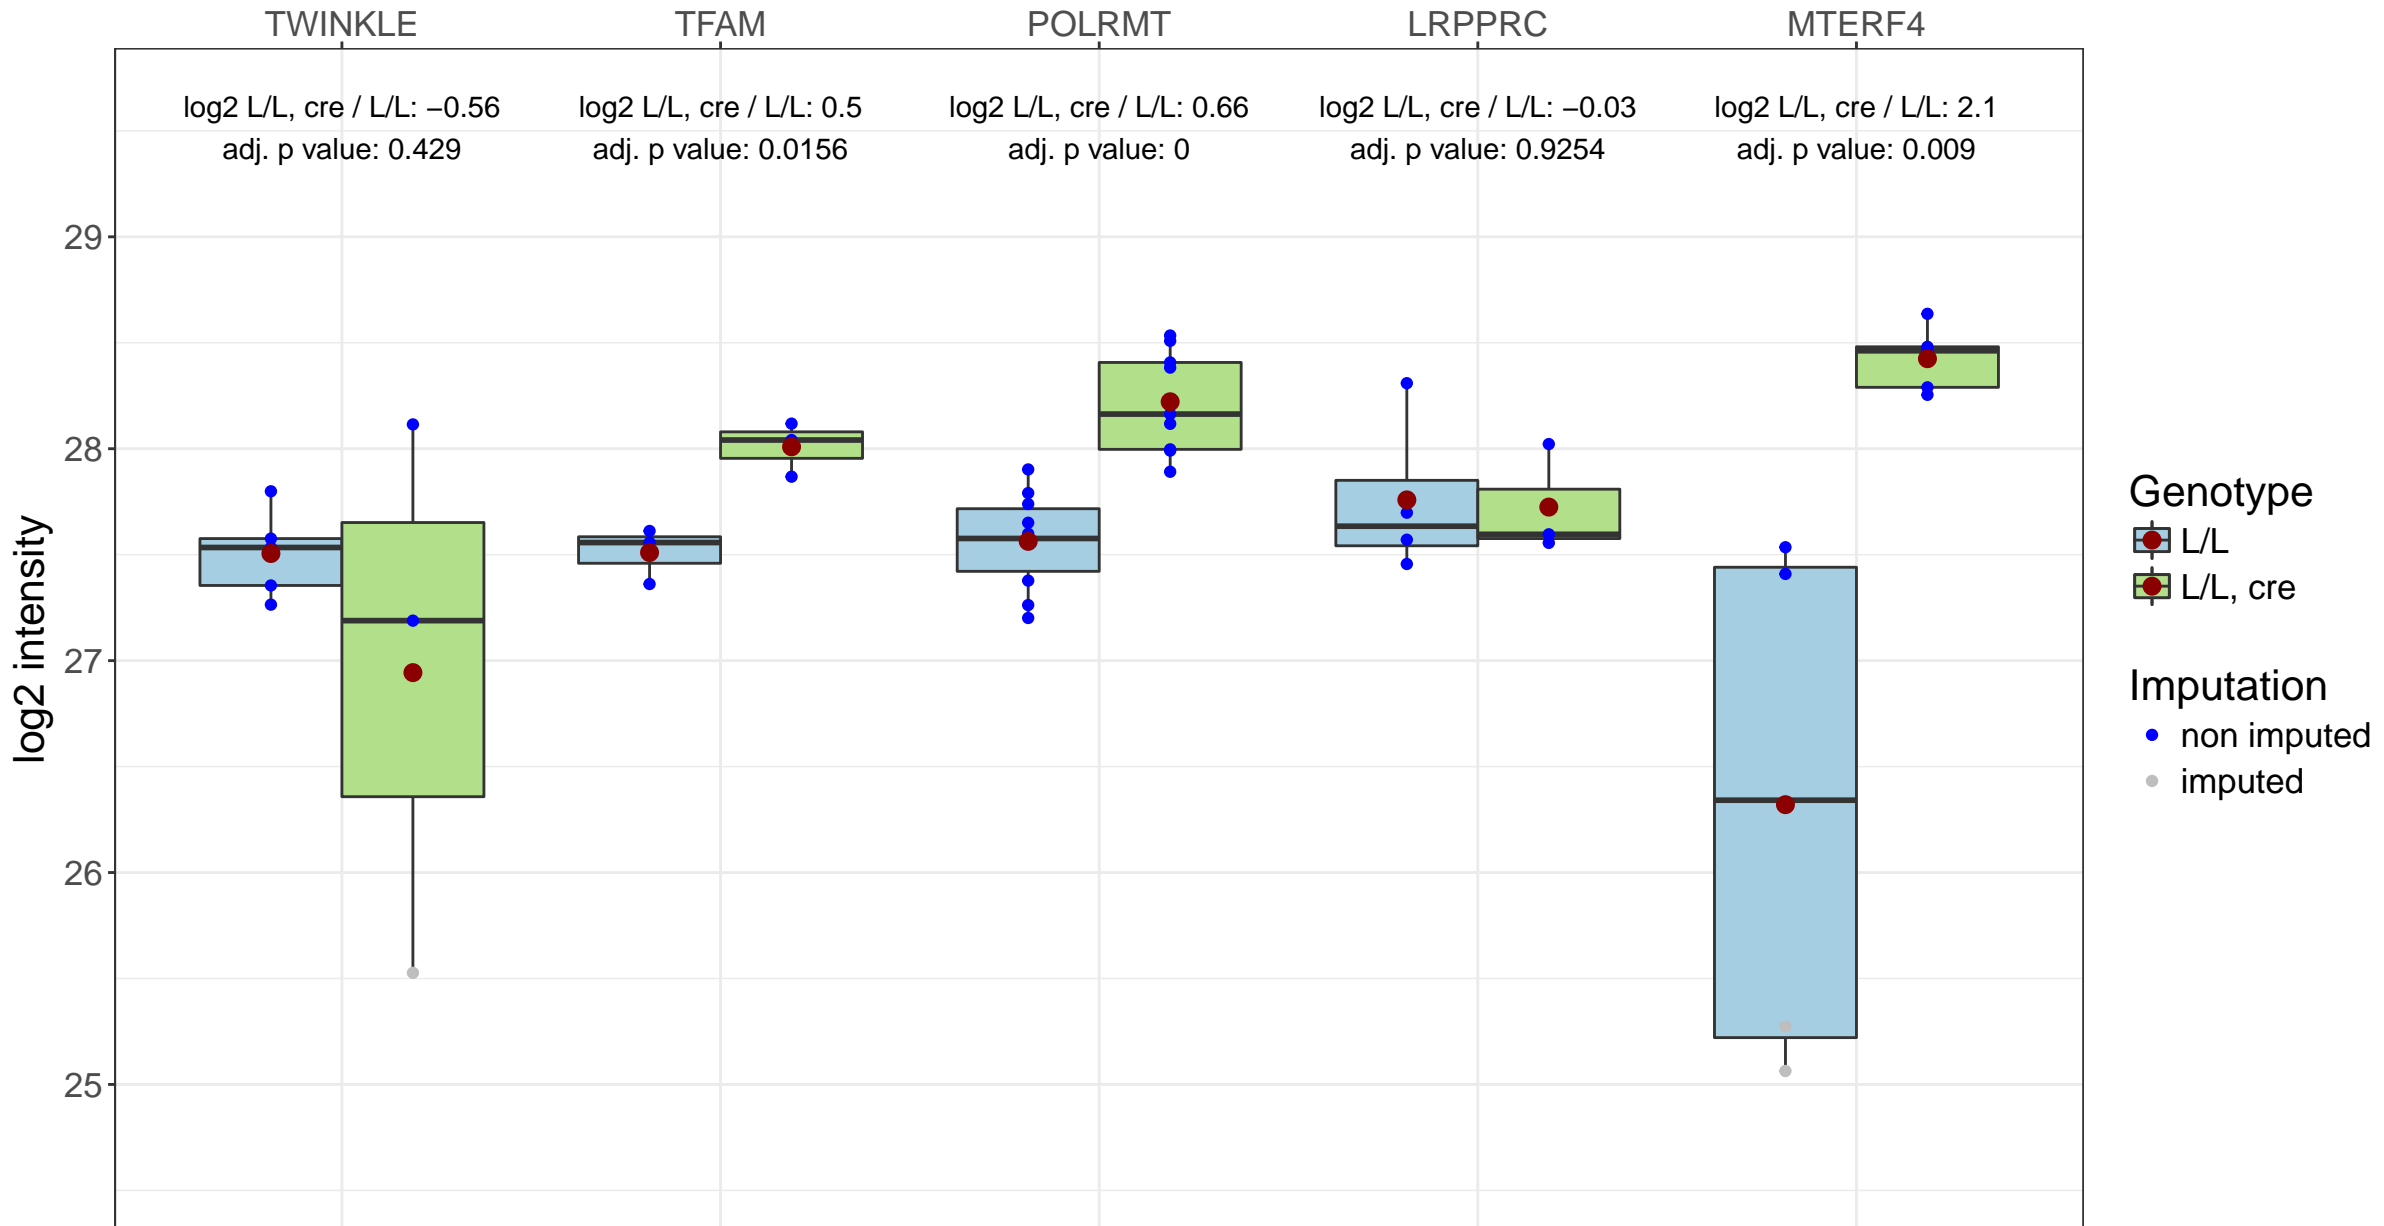

# PF4 / Q9Z126

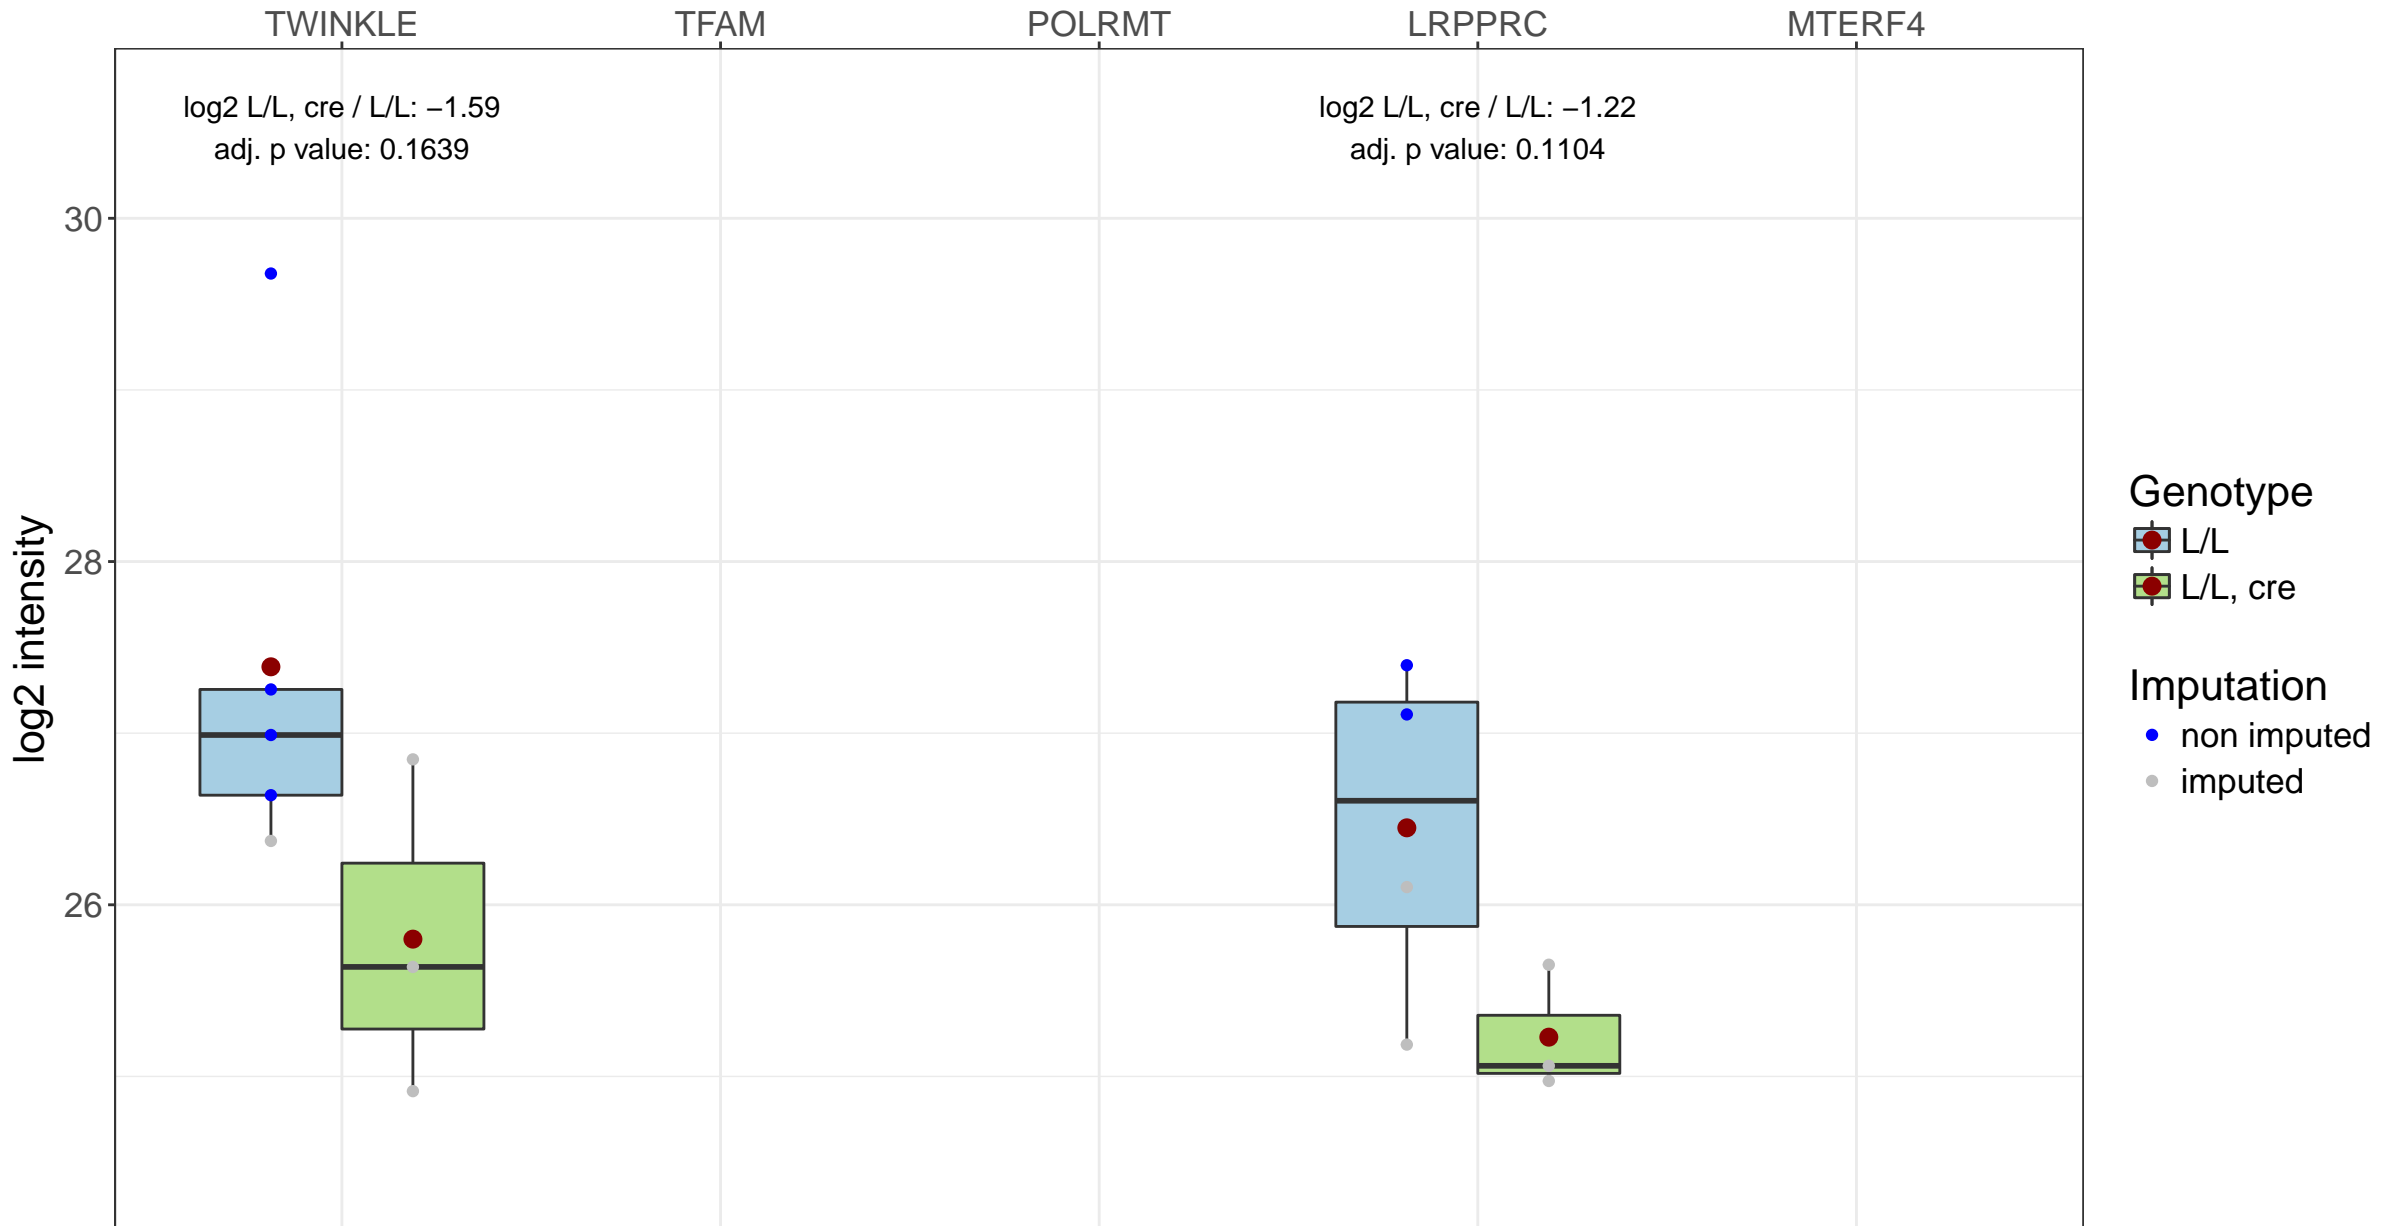

# PGAM2 / O70250

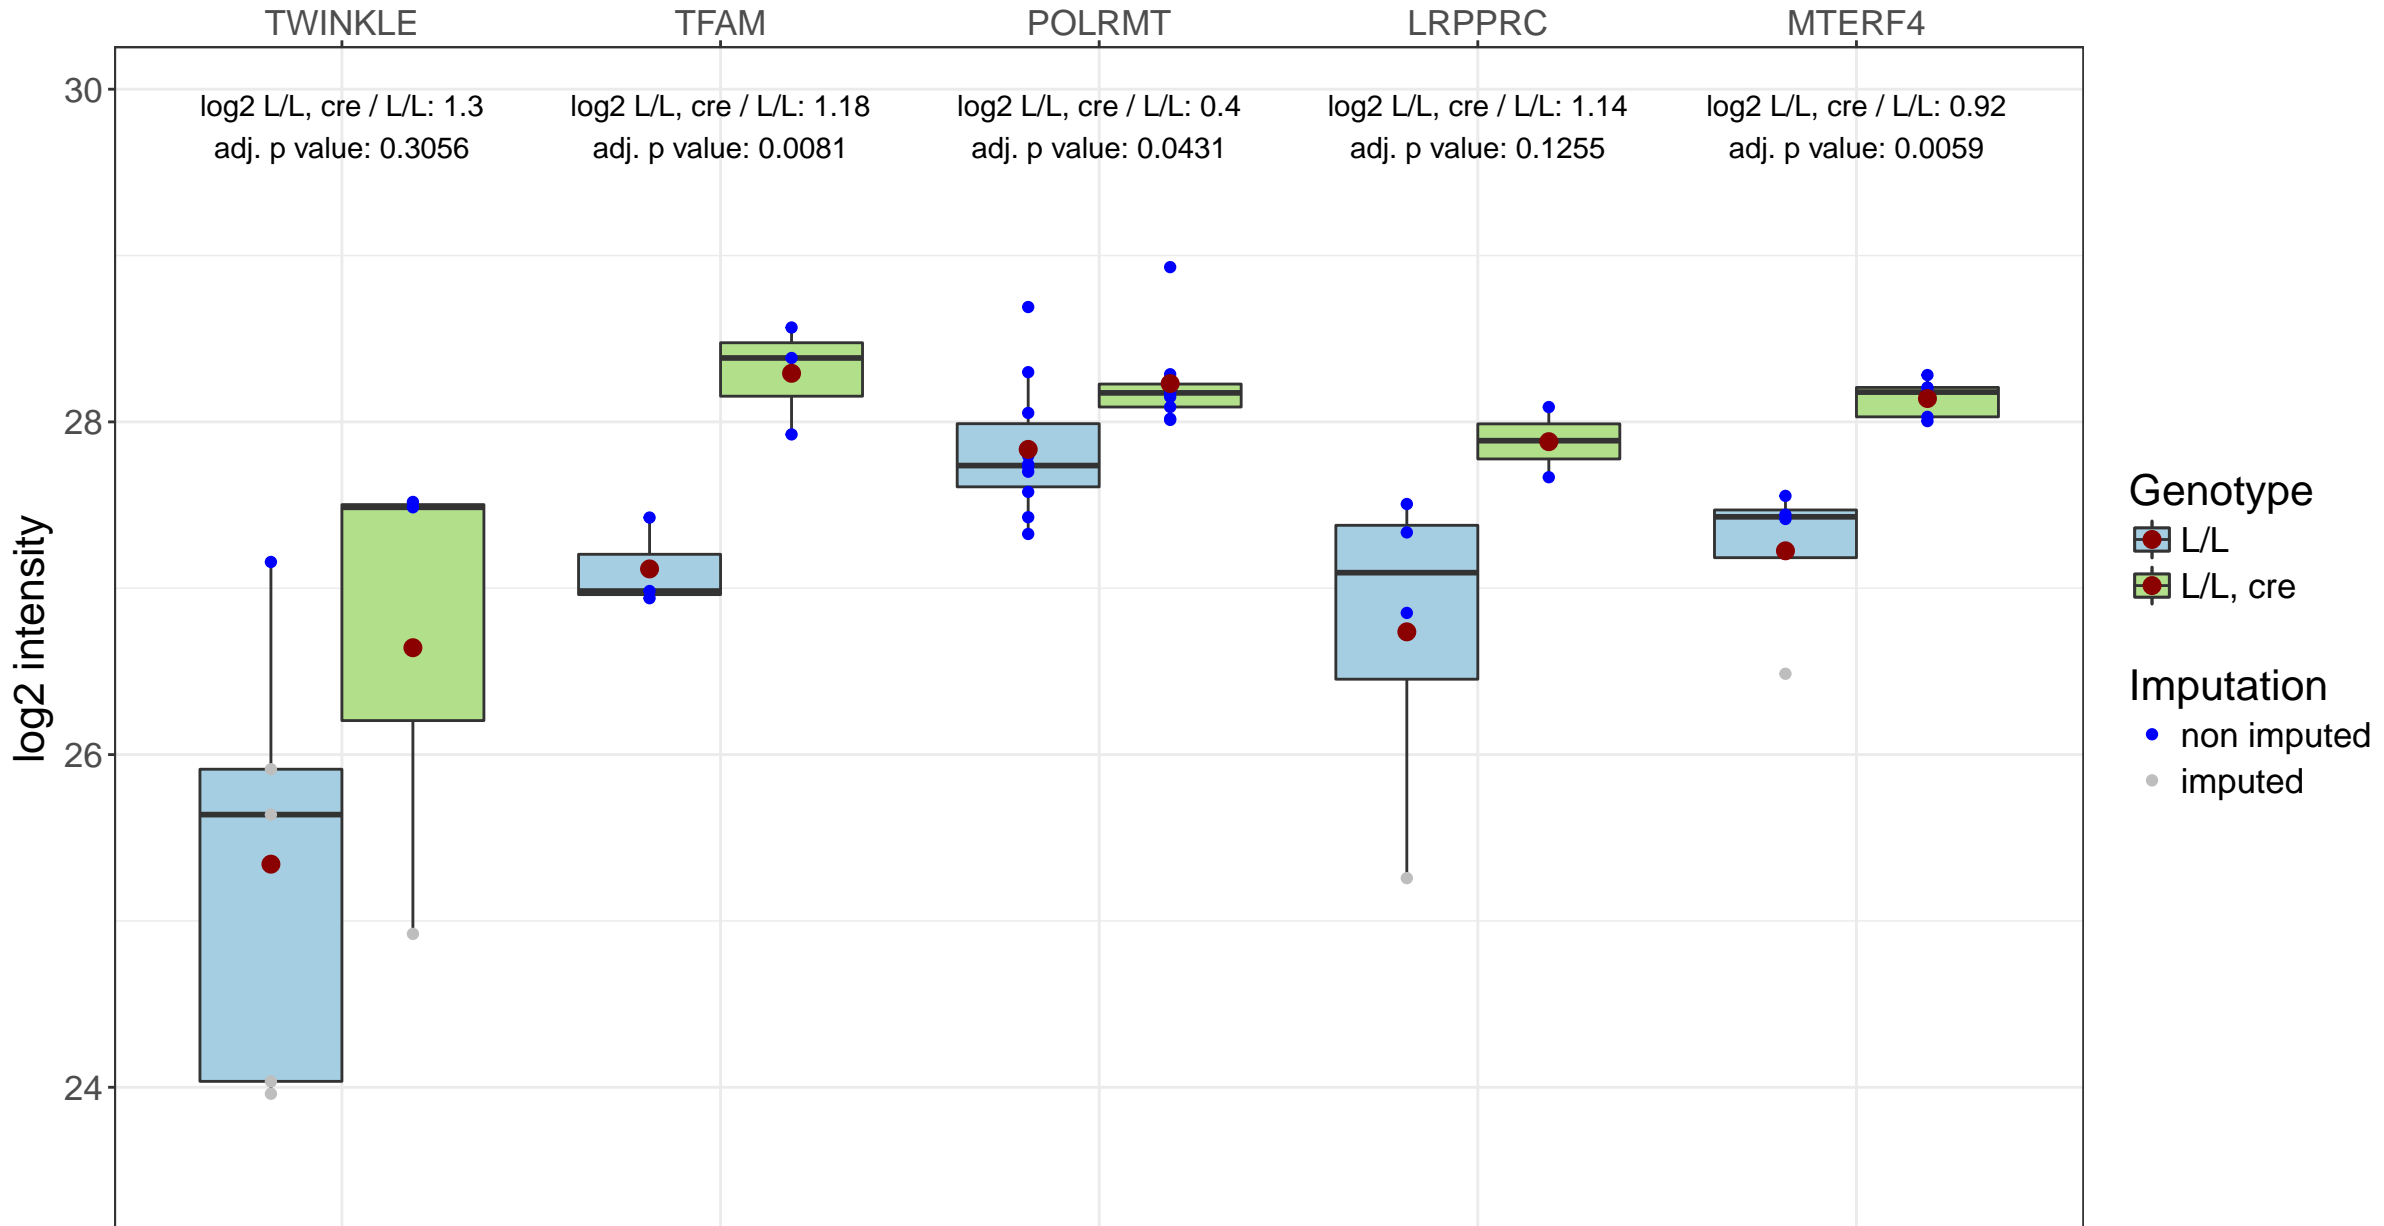

# PGAM5 / Q8BX10-2

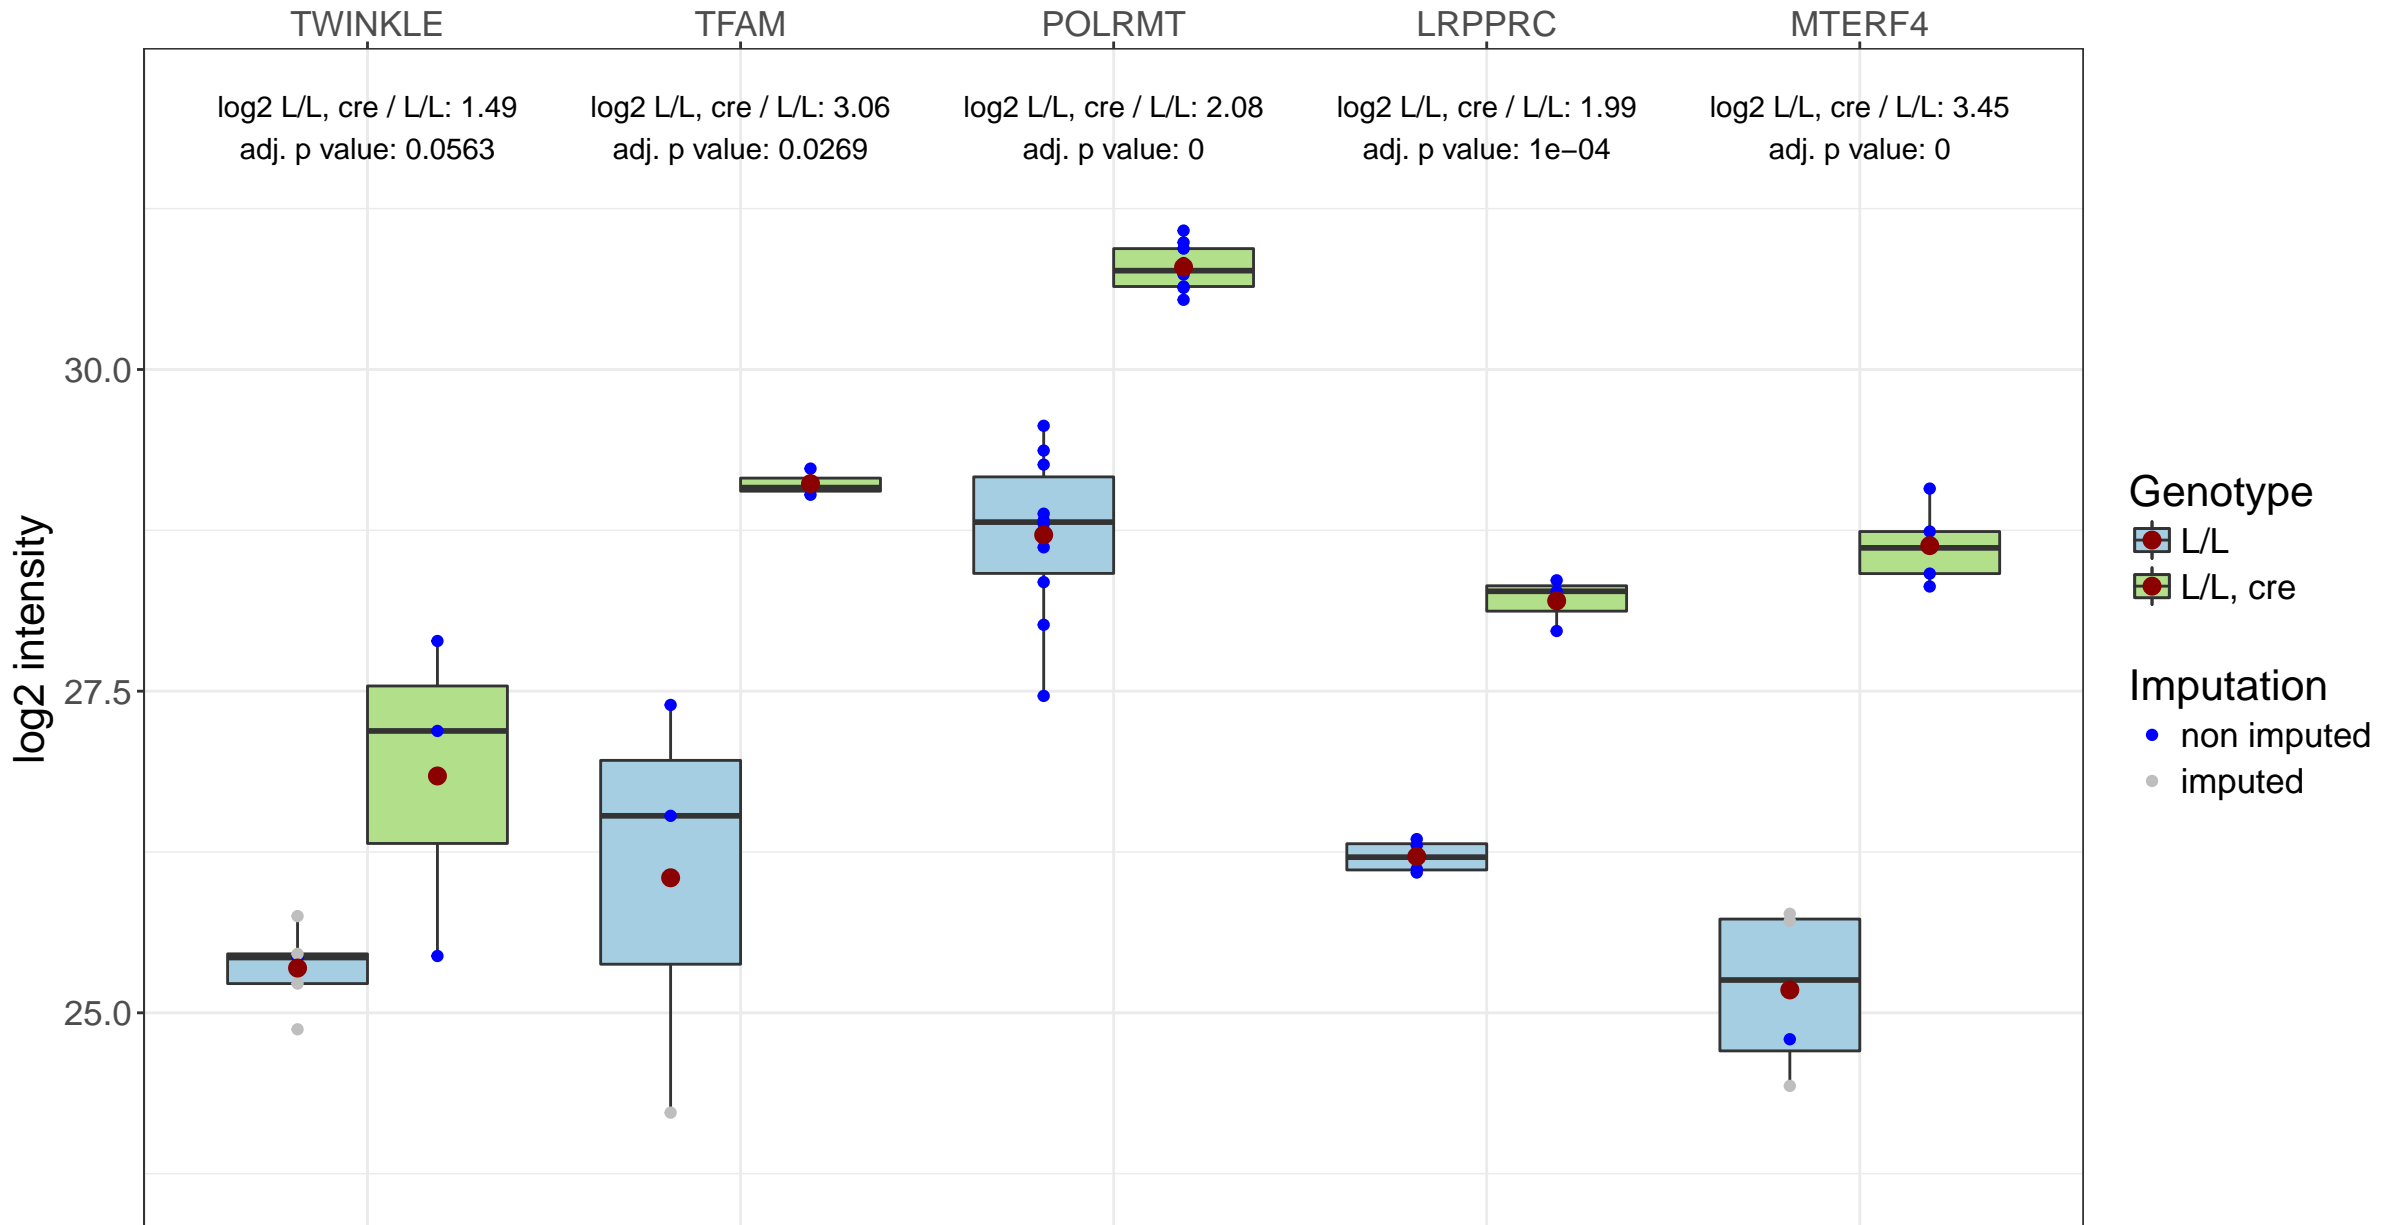

# PGS1 / Q8BHF7

TWINKLE

TFAM

POLRMT

LRPPRC

MTERF4

log2 intensity

27

26

25

log2 L/L, cre / L/L: 0.94

adj. p value: 0.079

Genotype

L/L

L/L, cre

Imputation

non imputed

imputed

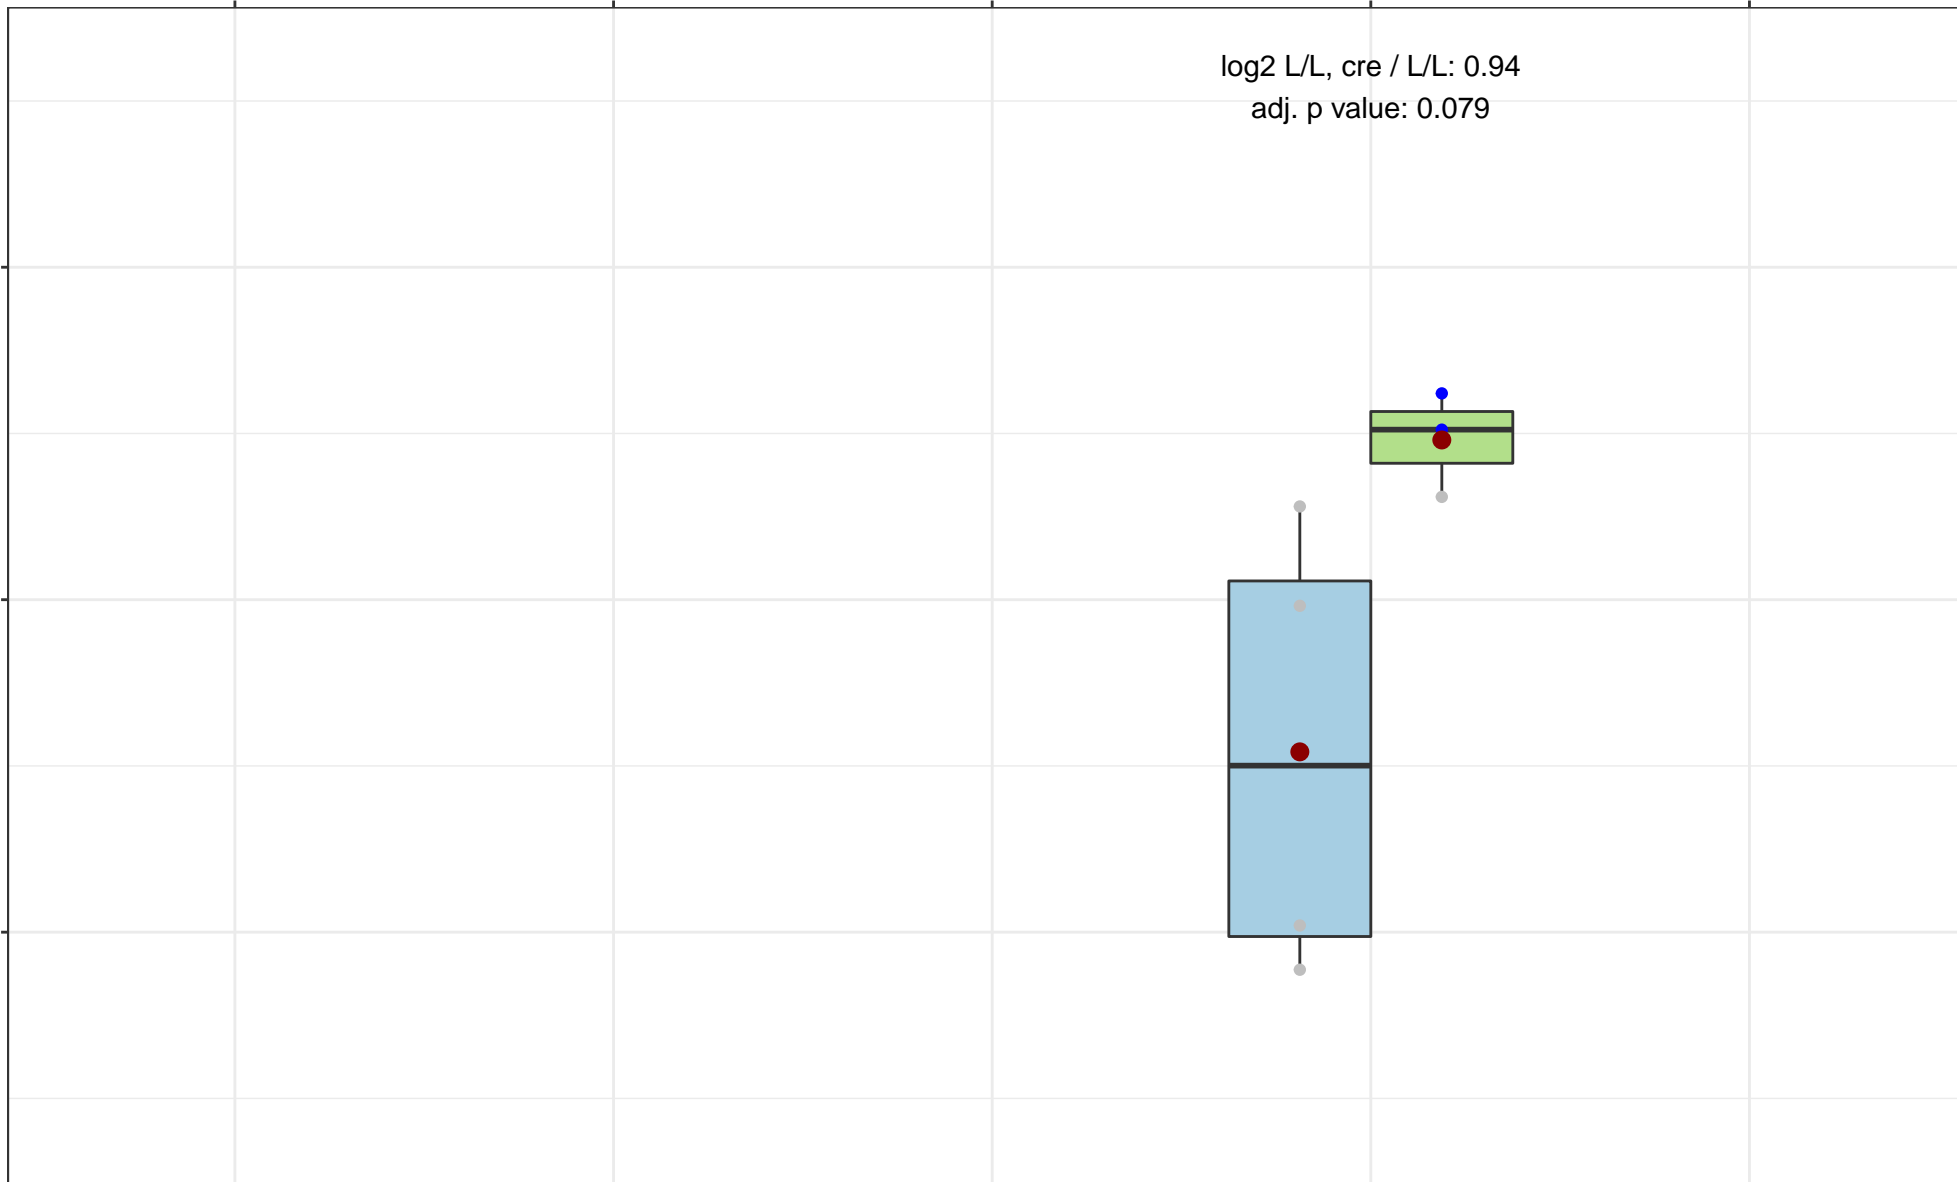

# PHB / P67778

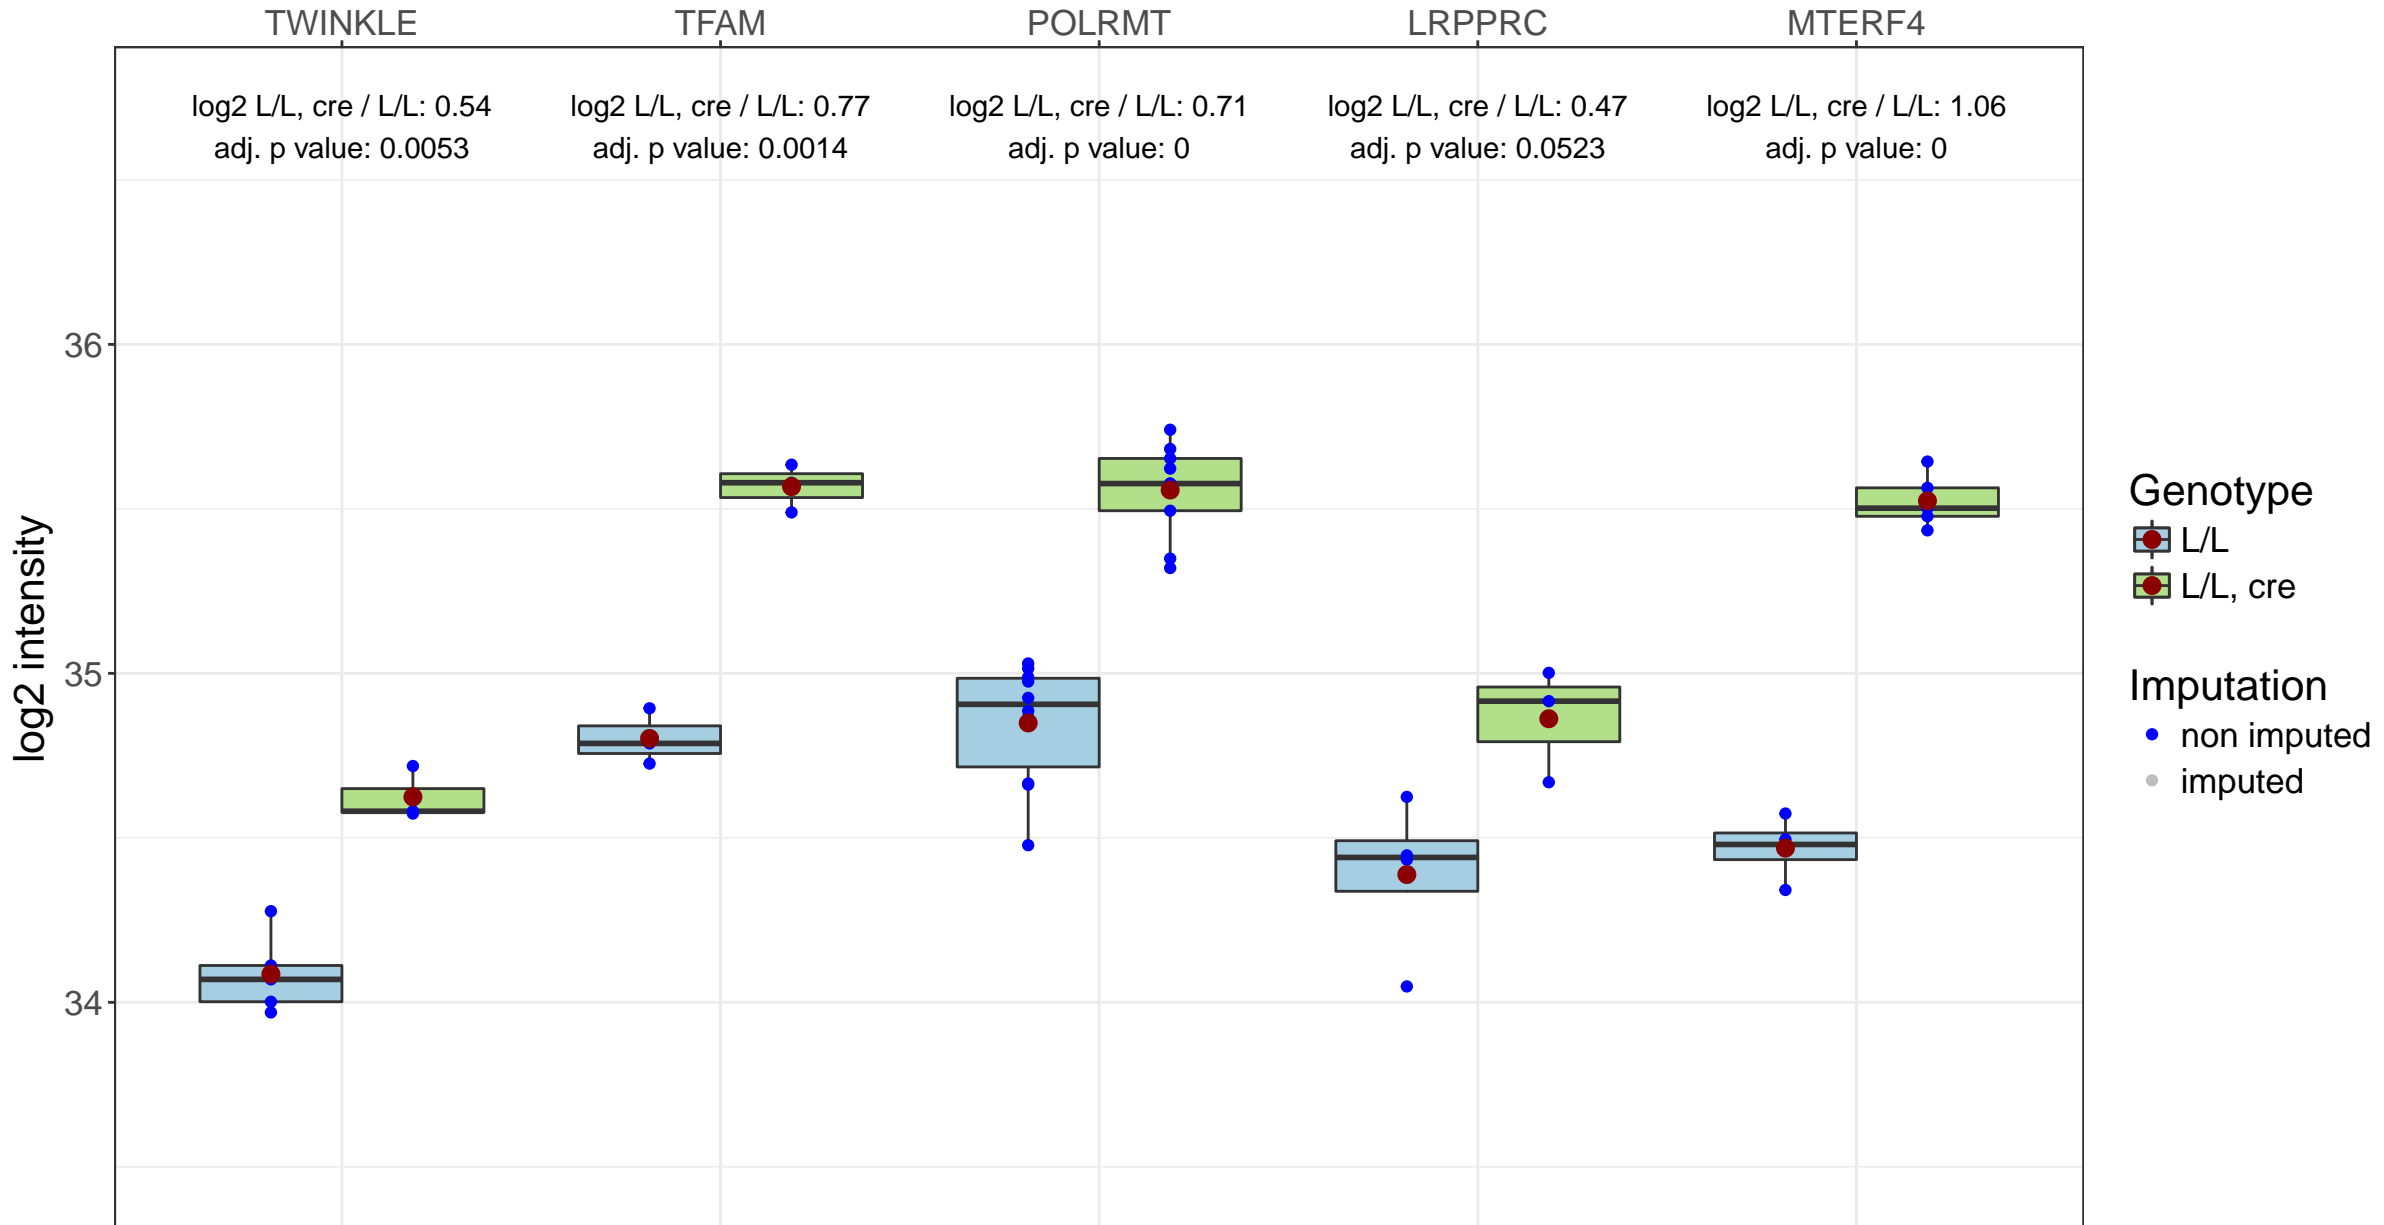



# PHB2 / O35129

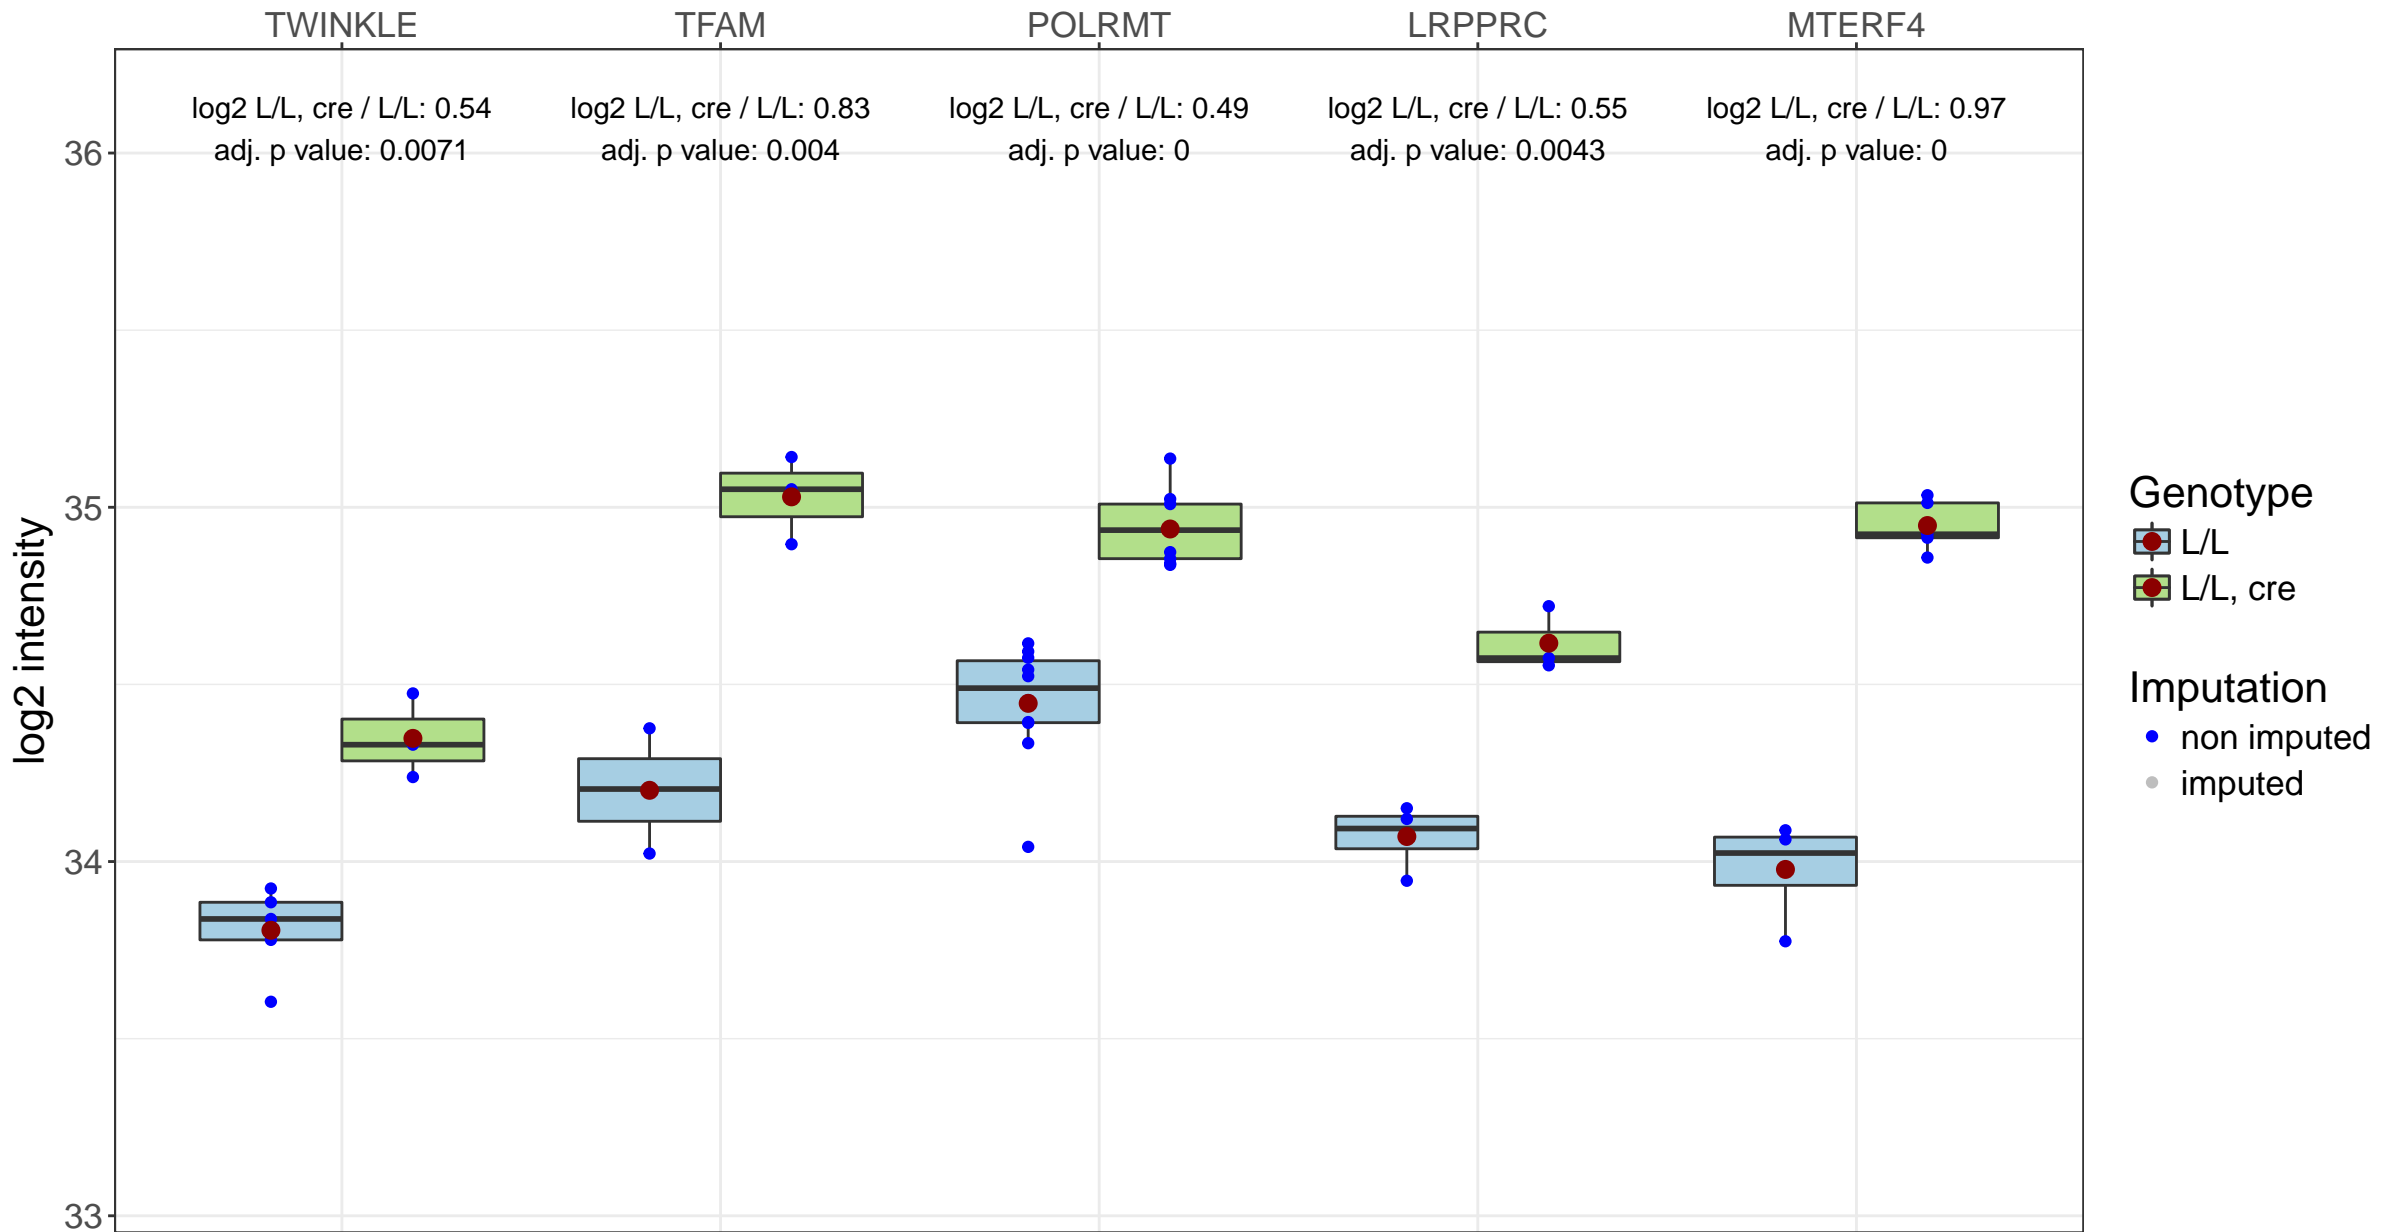

# PHYH / O35386

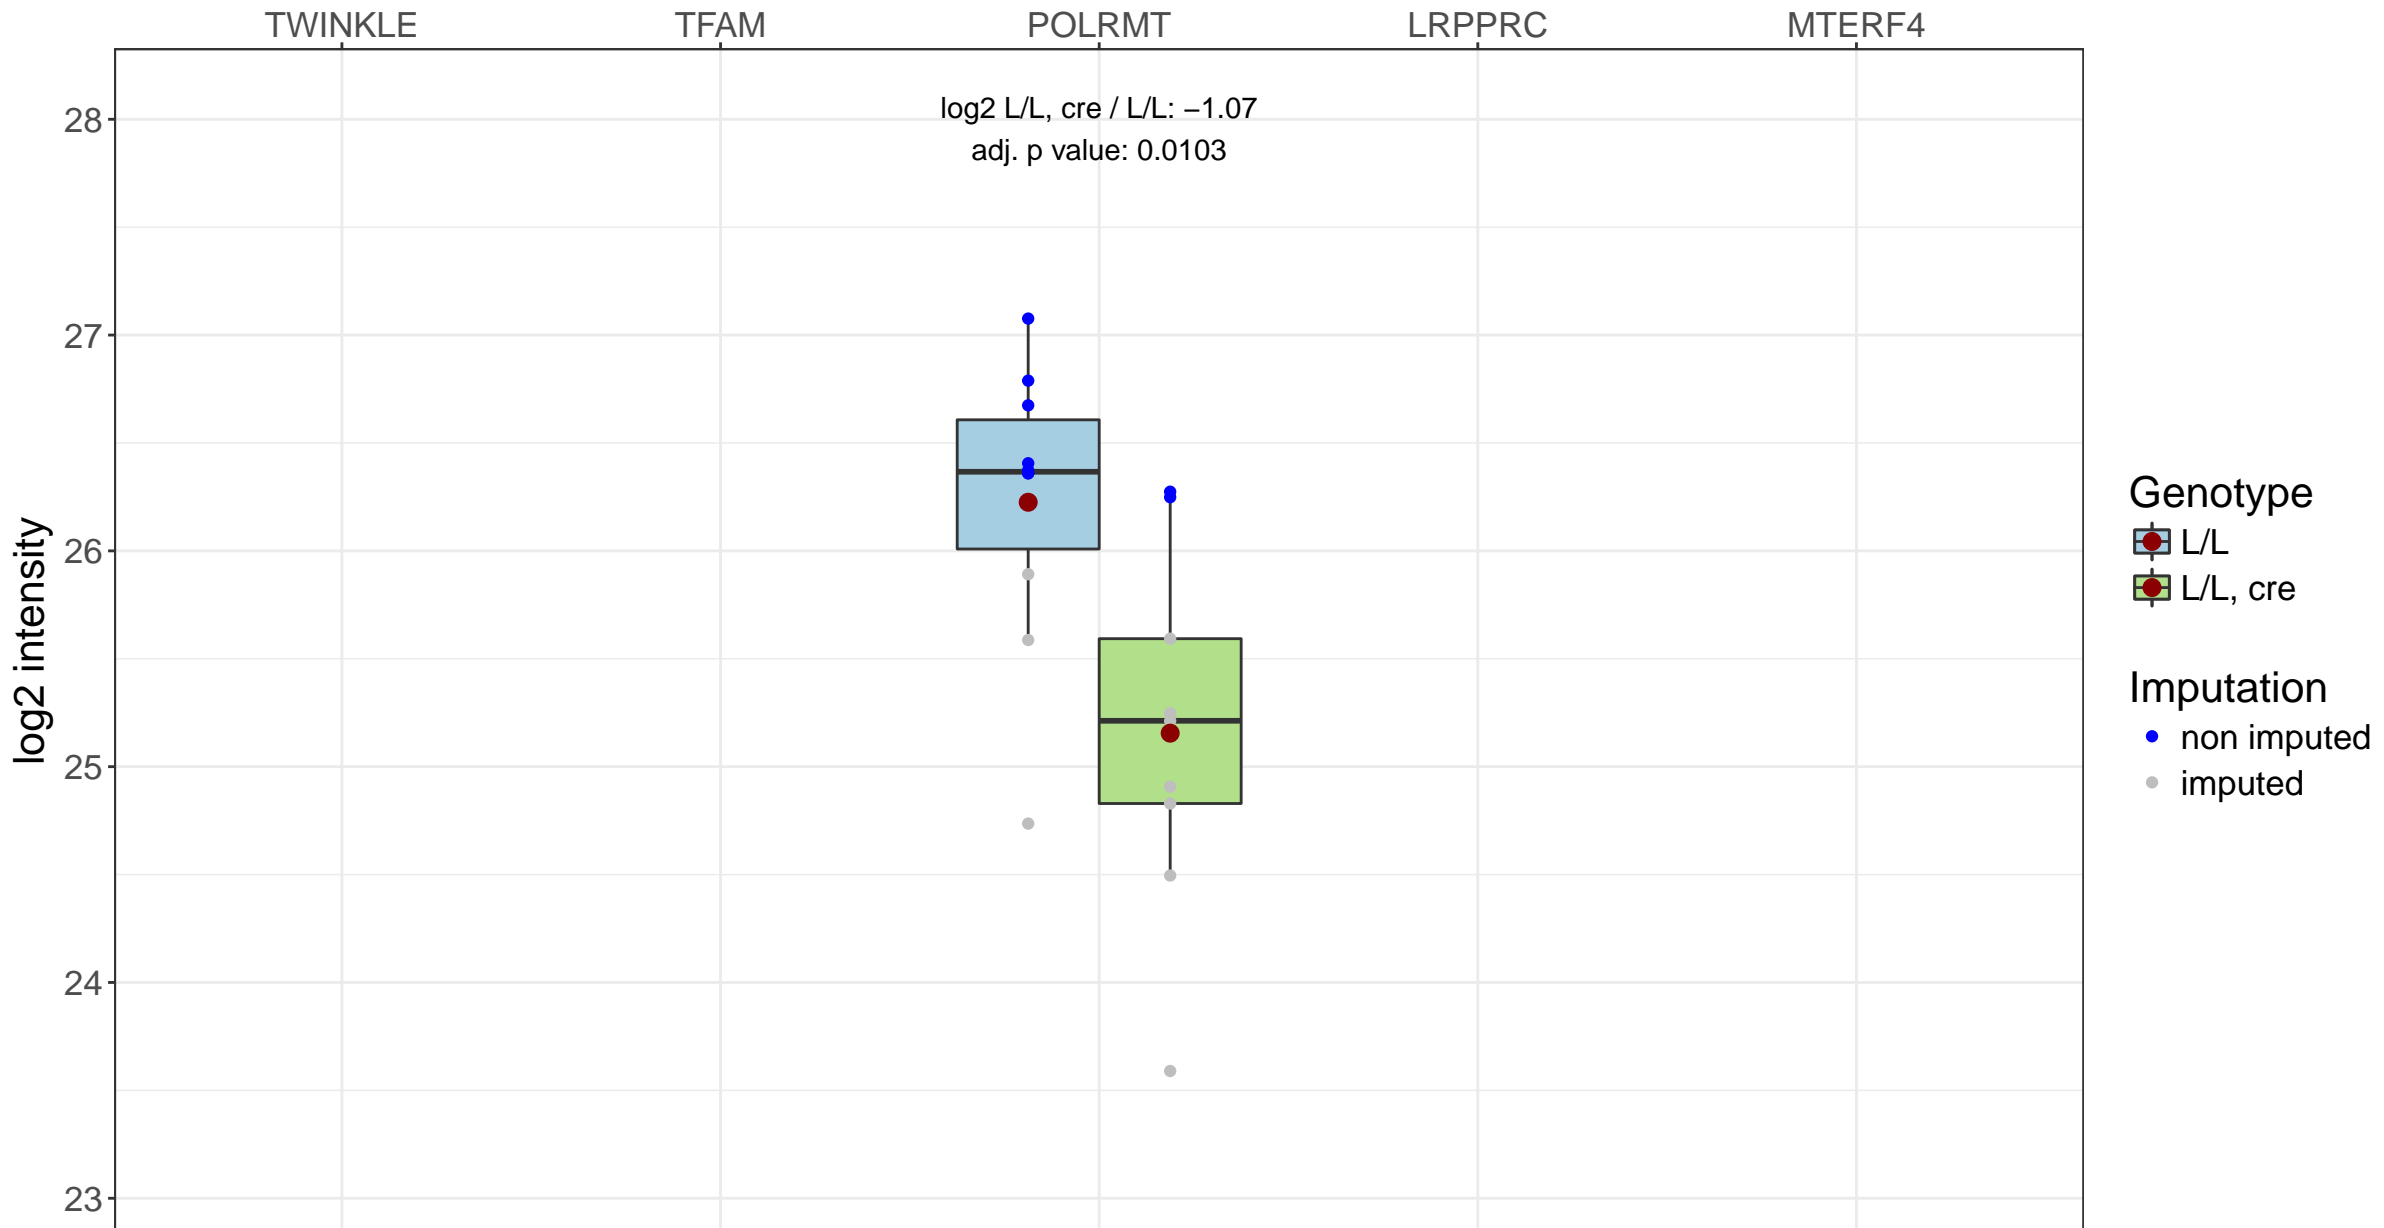

# PITRM1 / Q8K411-2

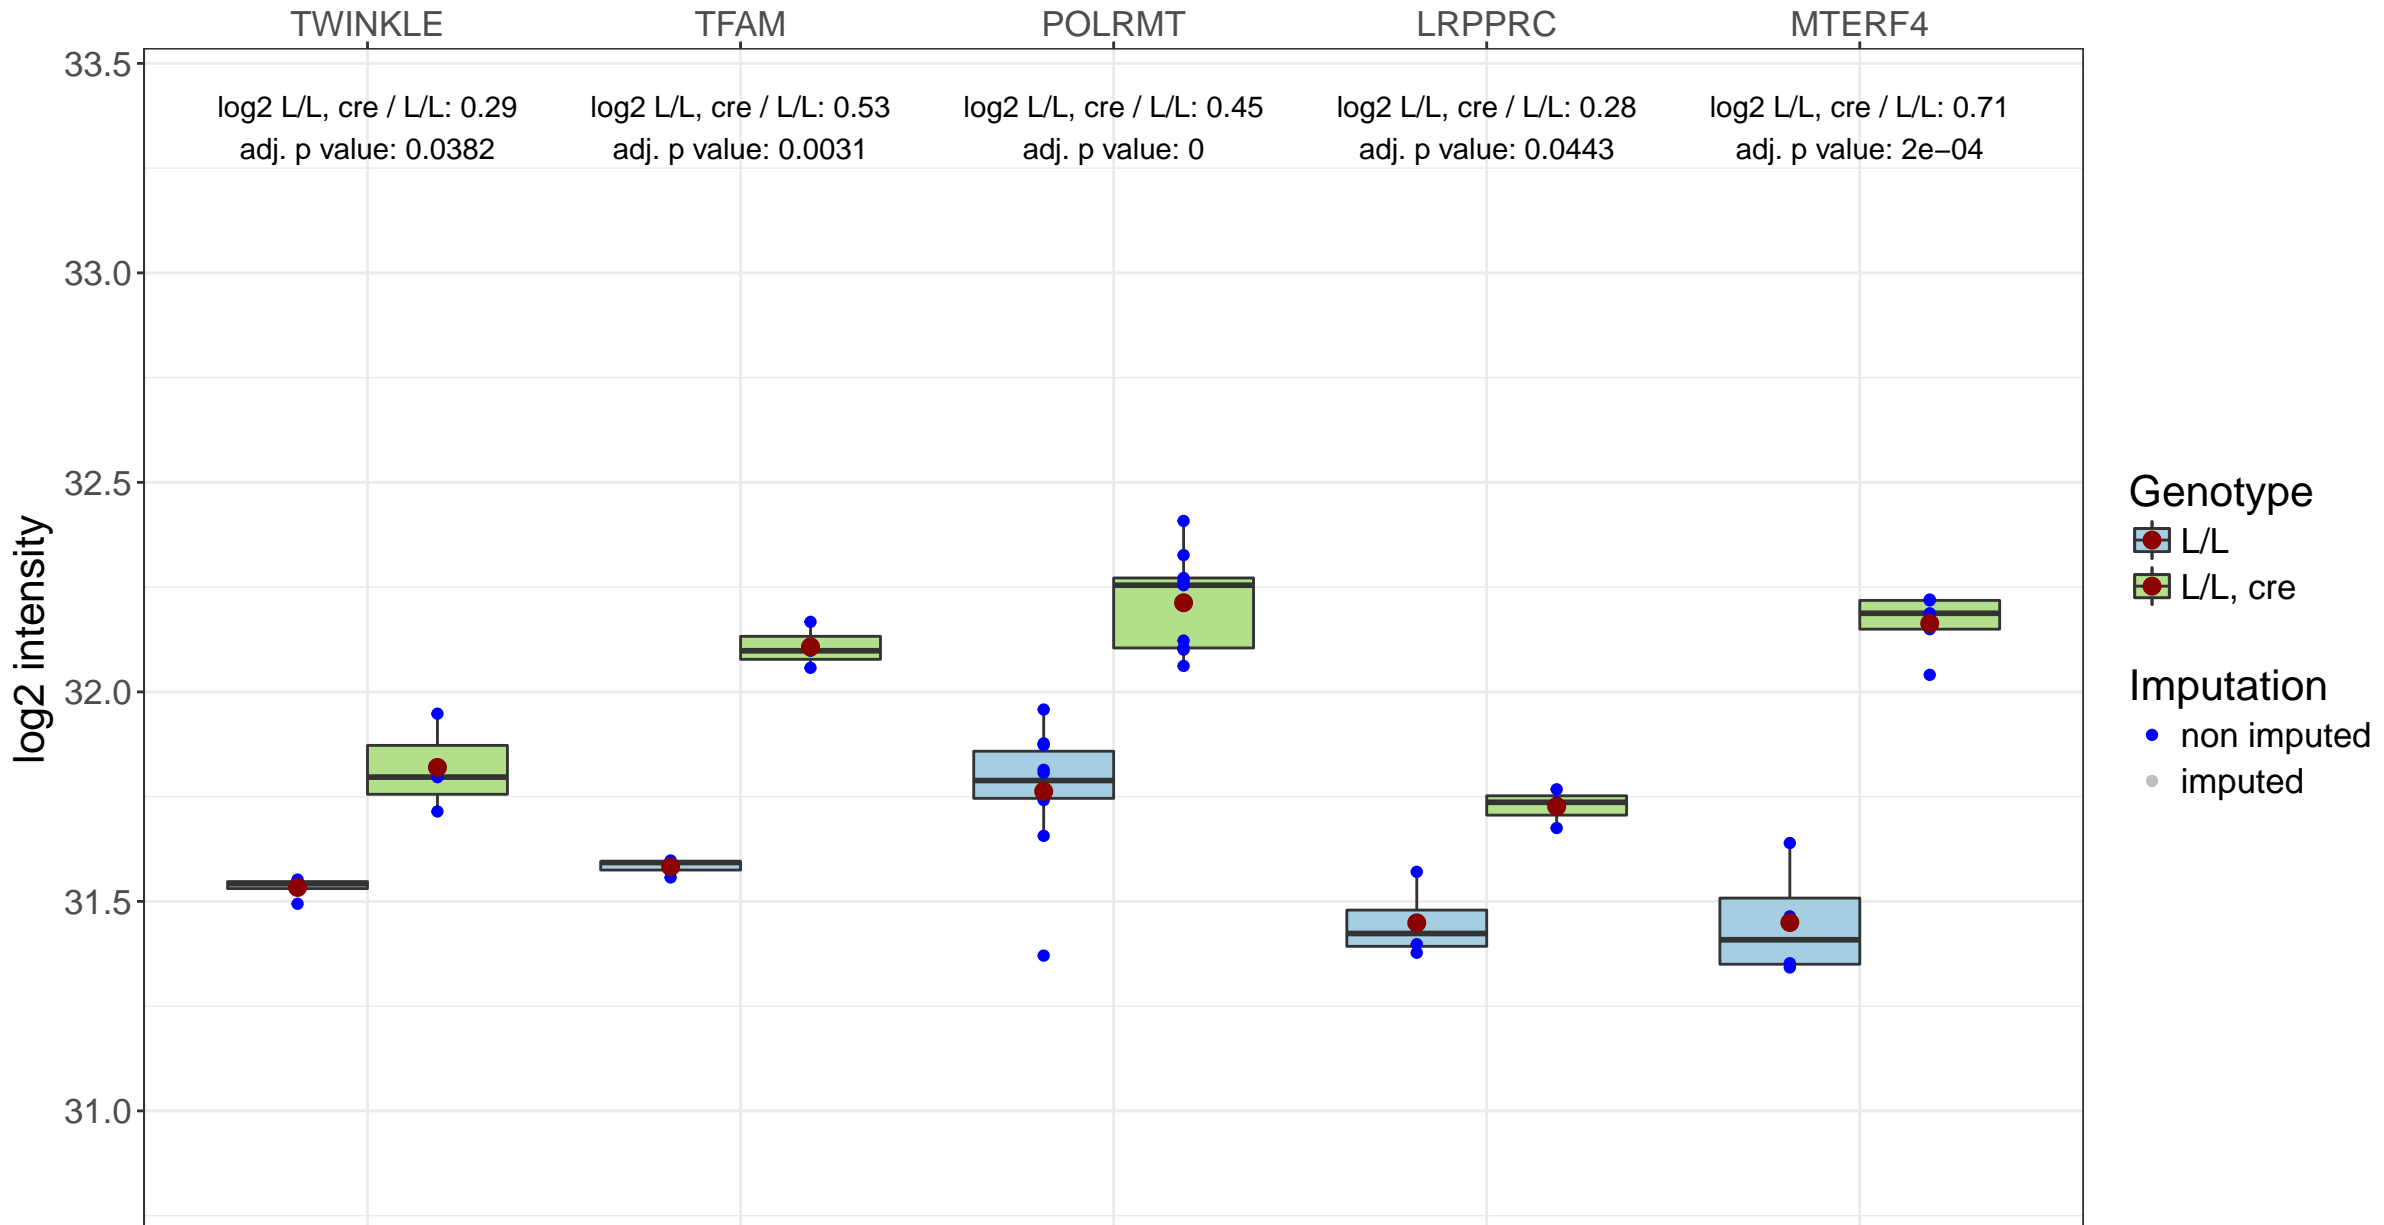

# PKM / P52480

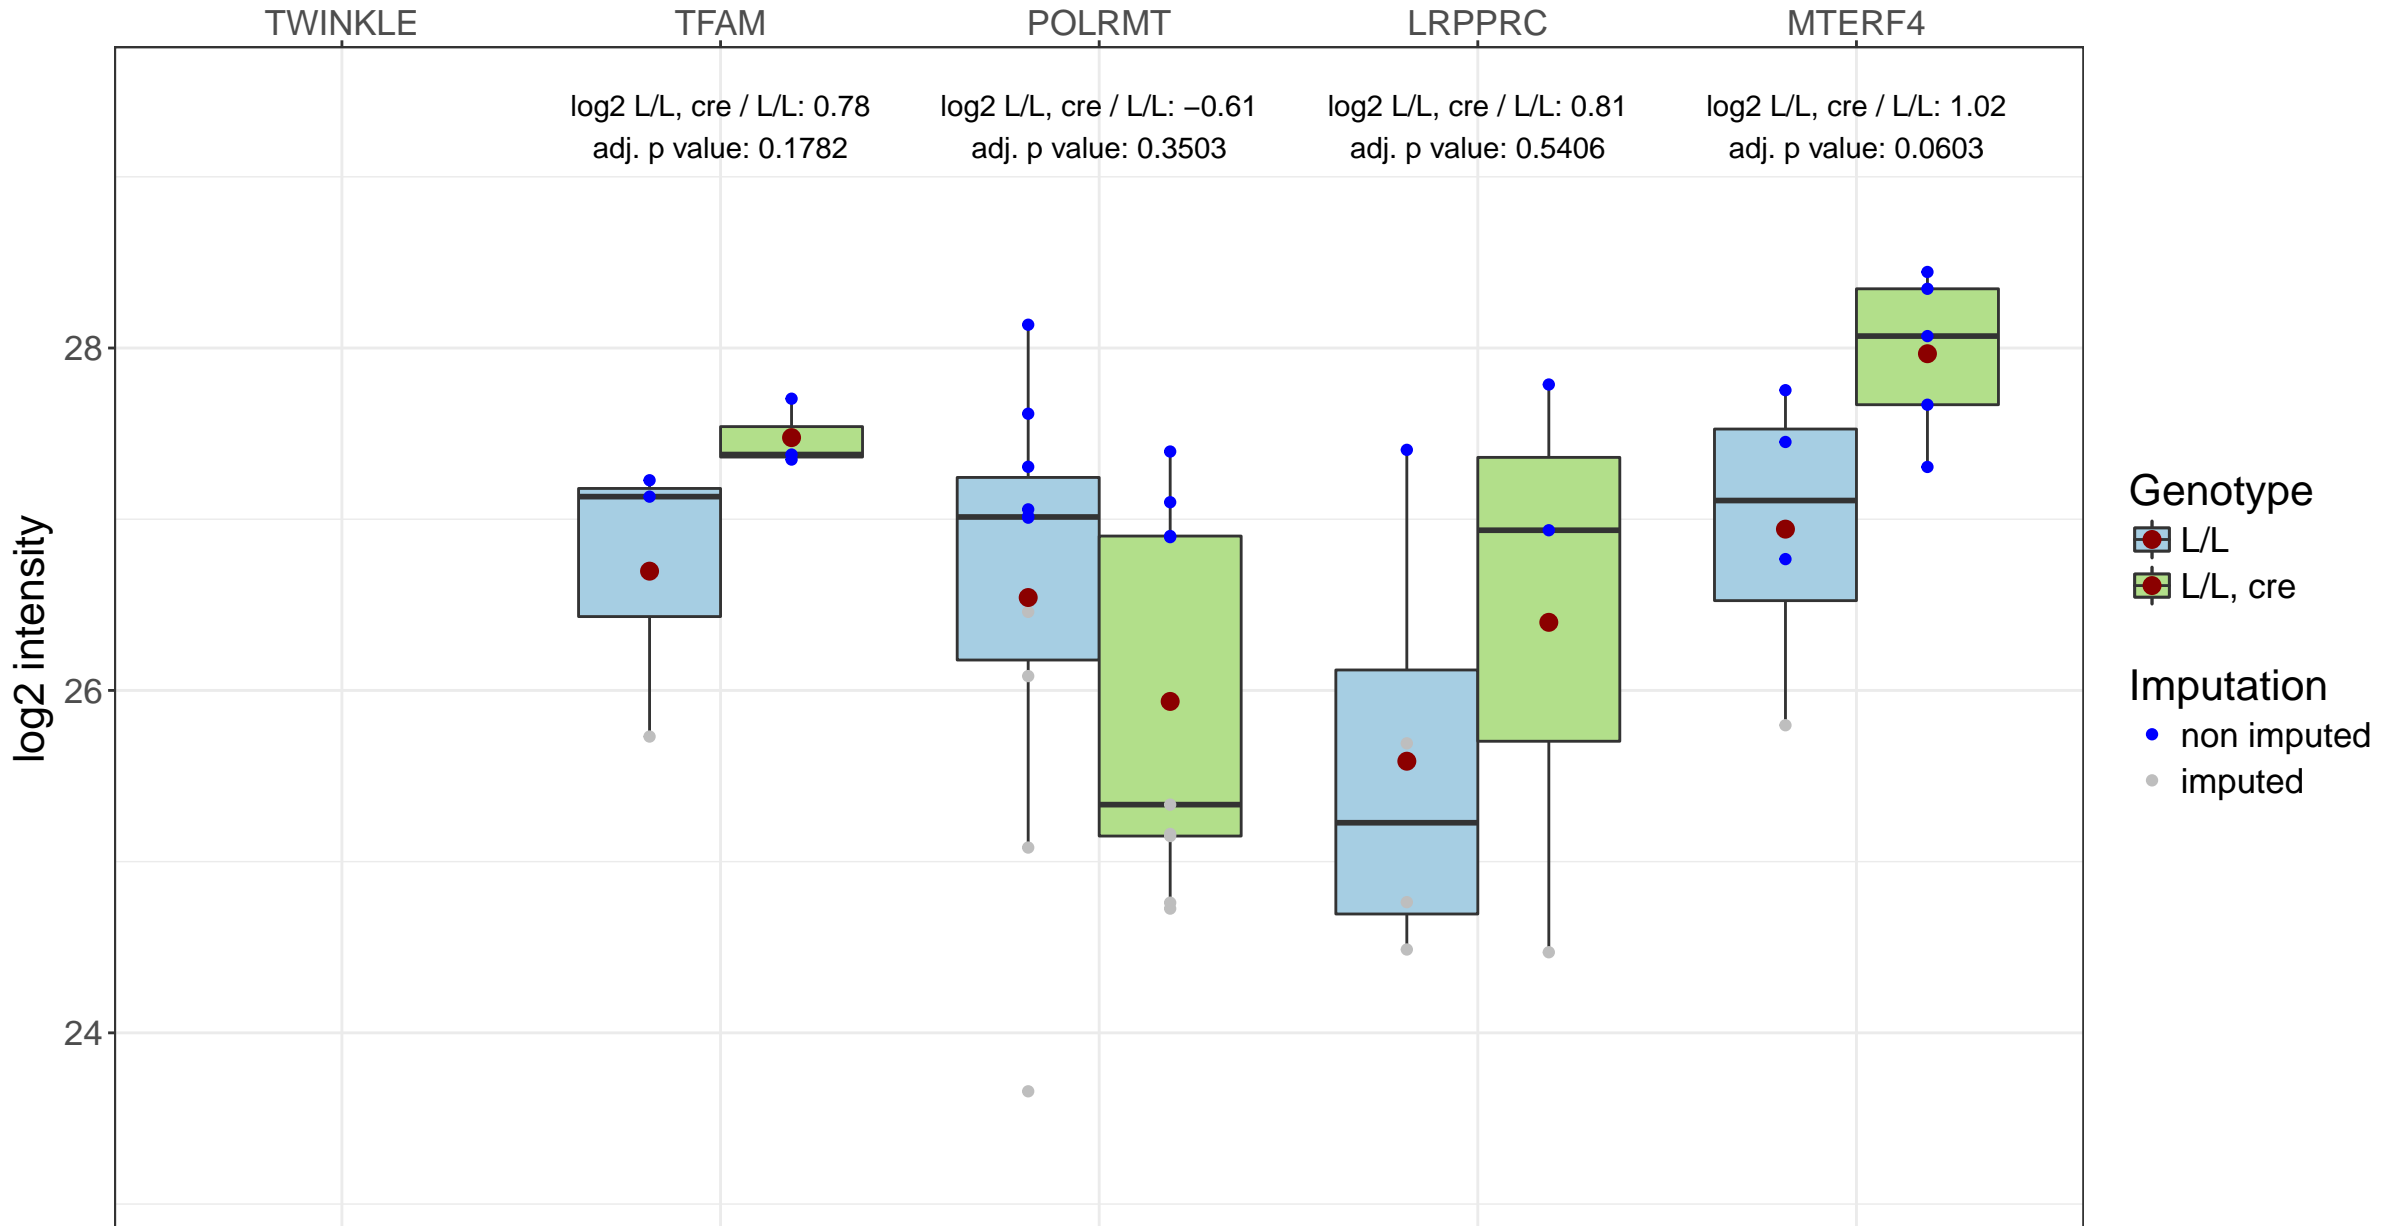

# PLIN4 / O88492

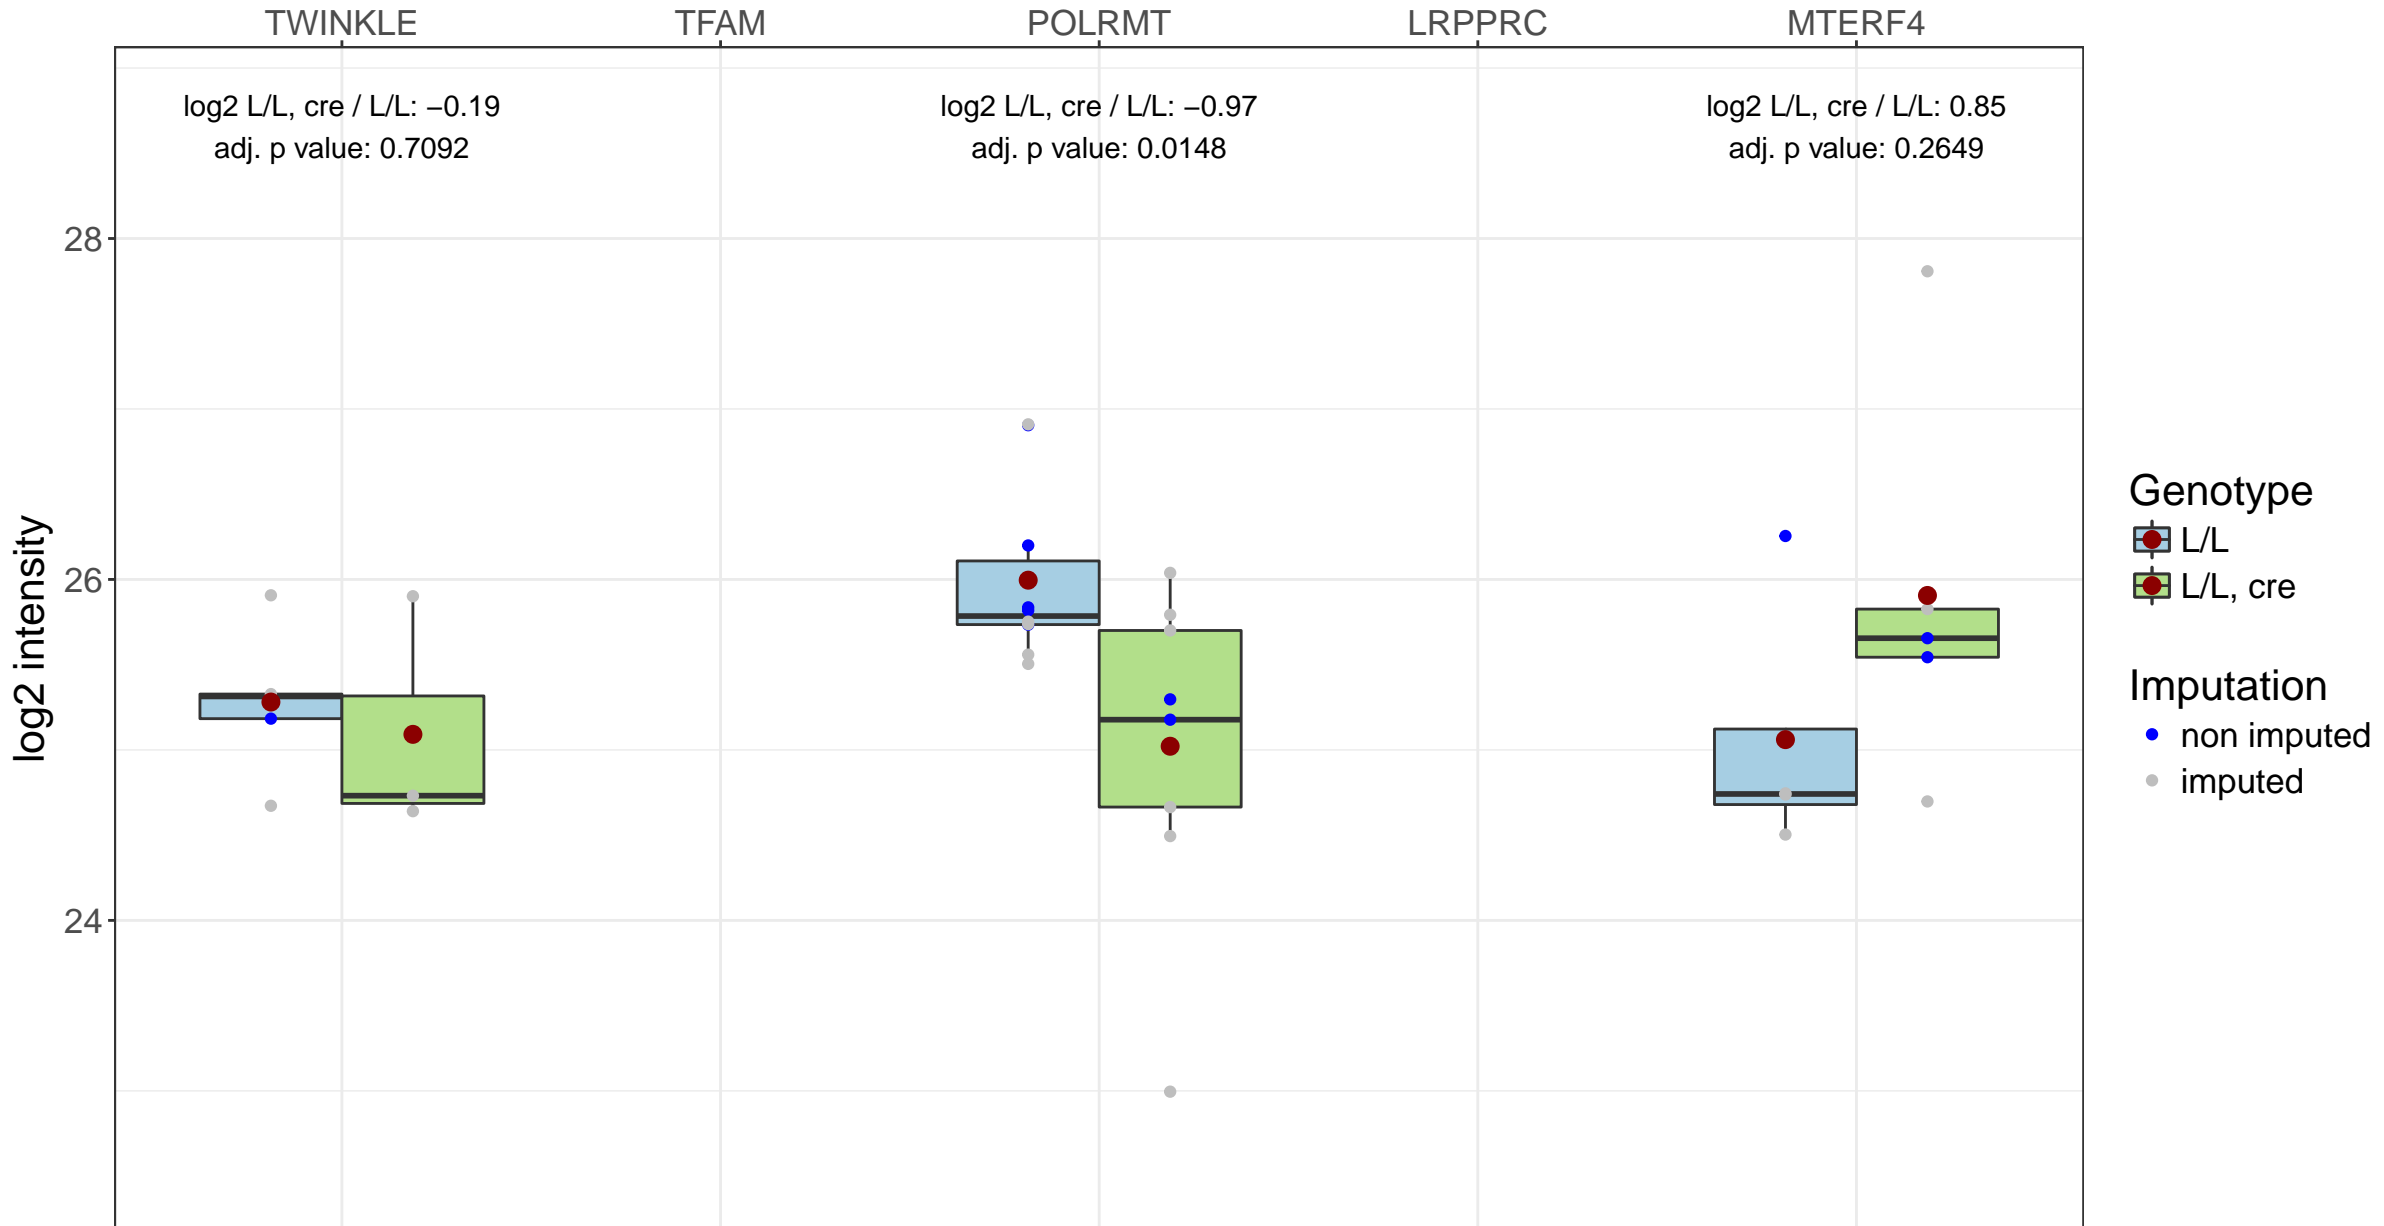

# PMPCA / Q9DC61

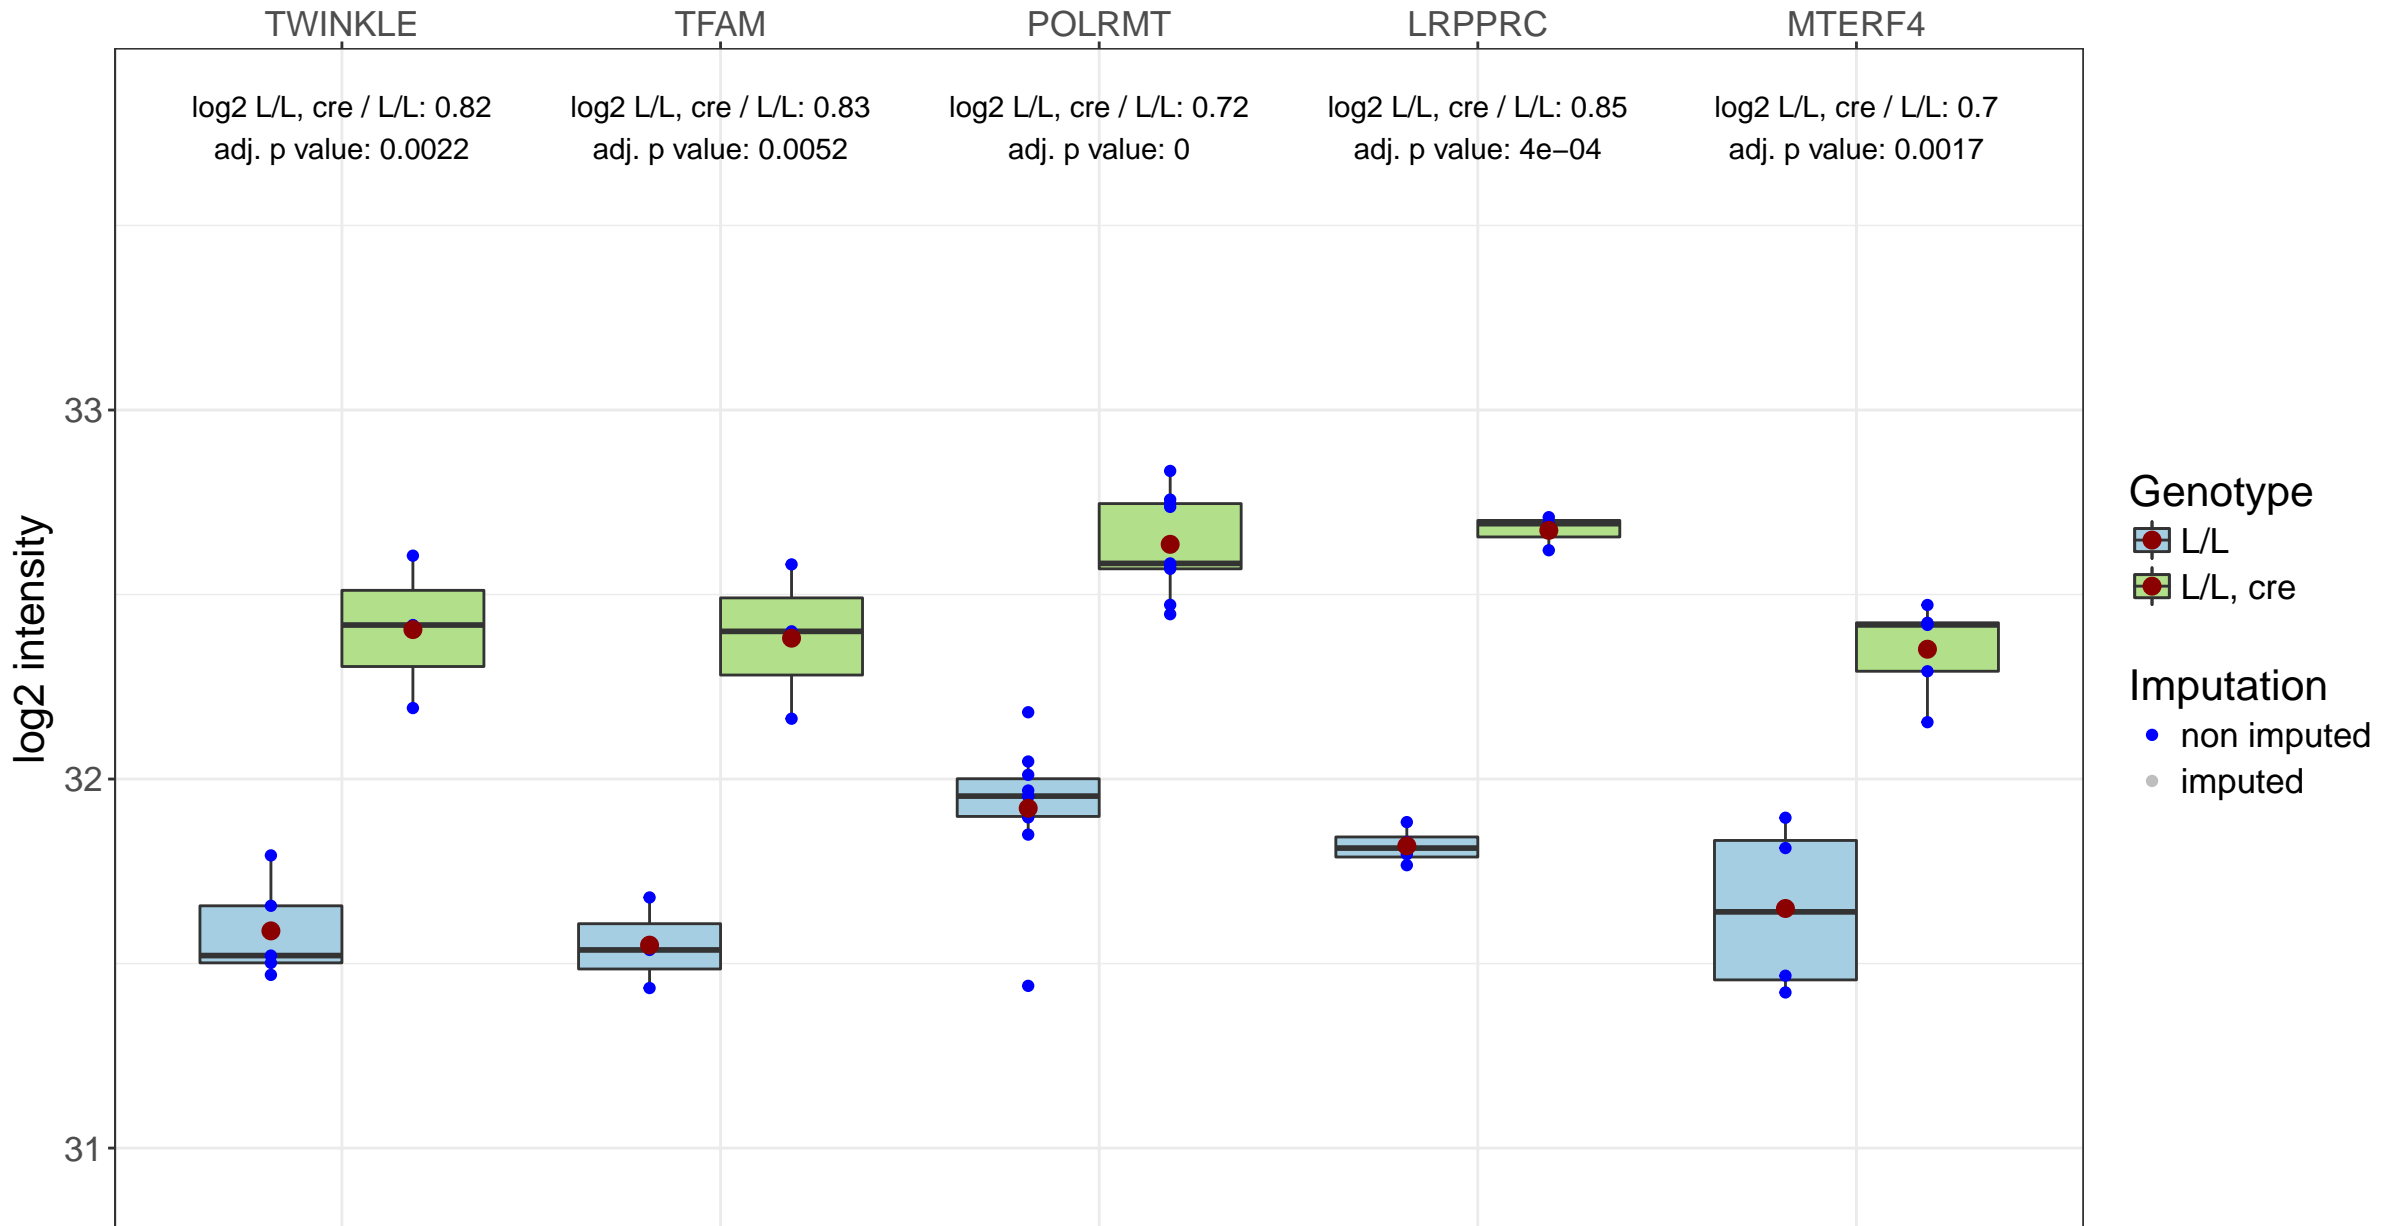

# PMPCB / Q9CXT8

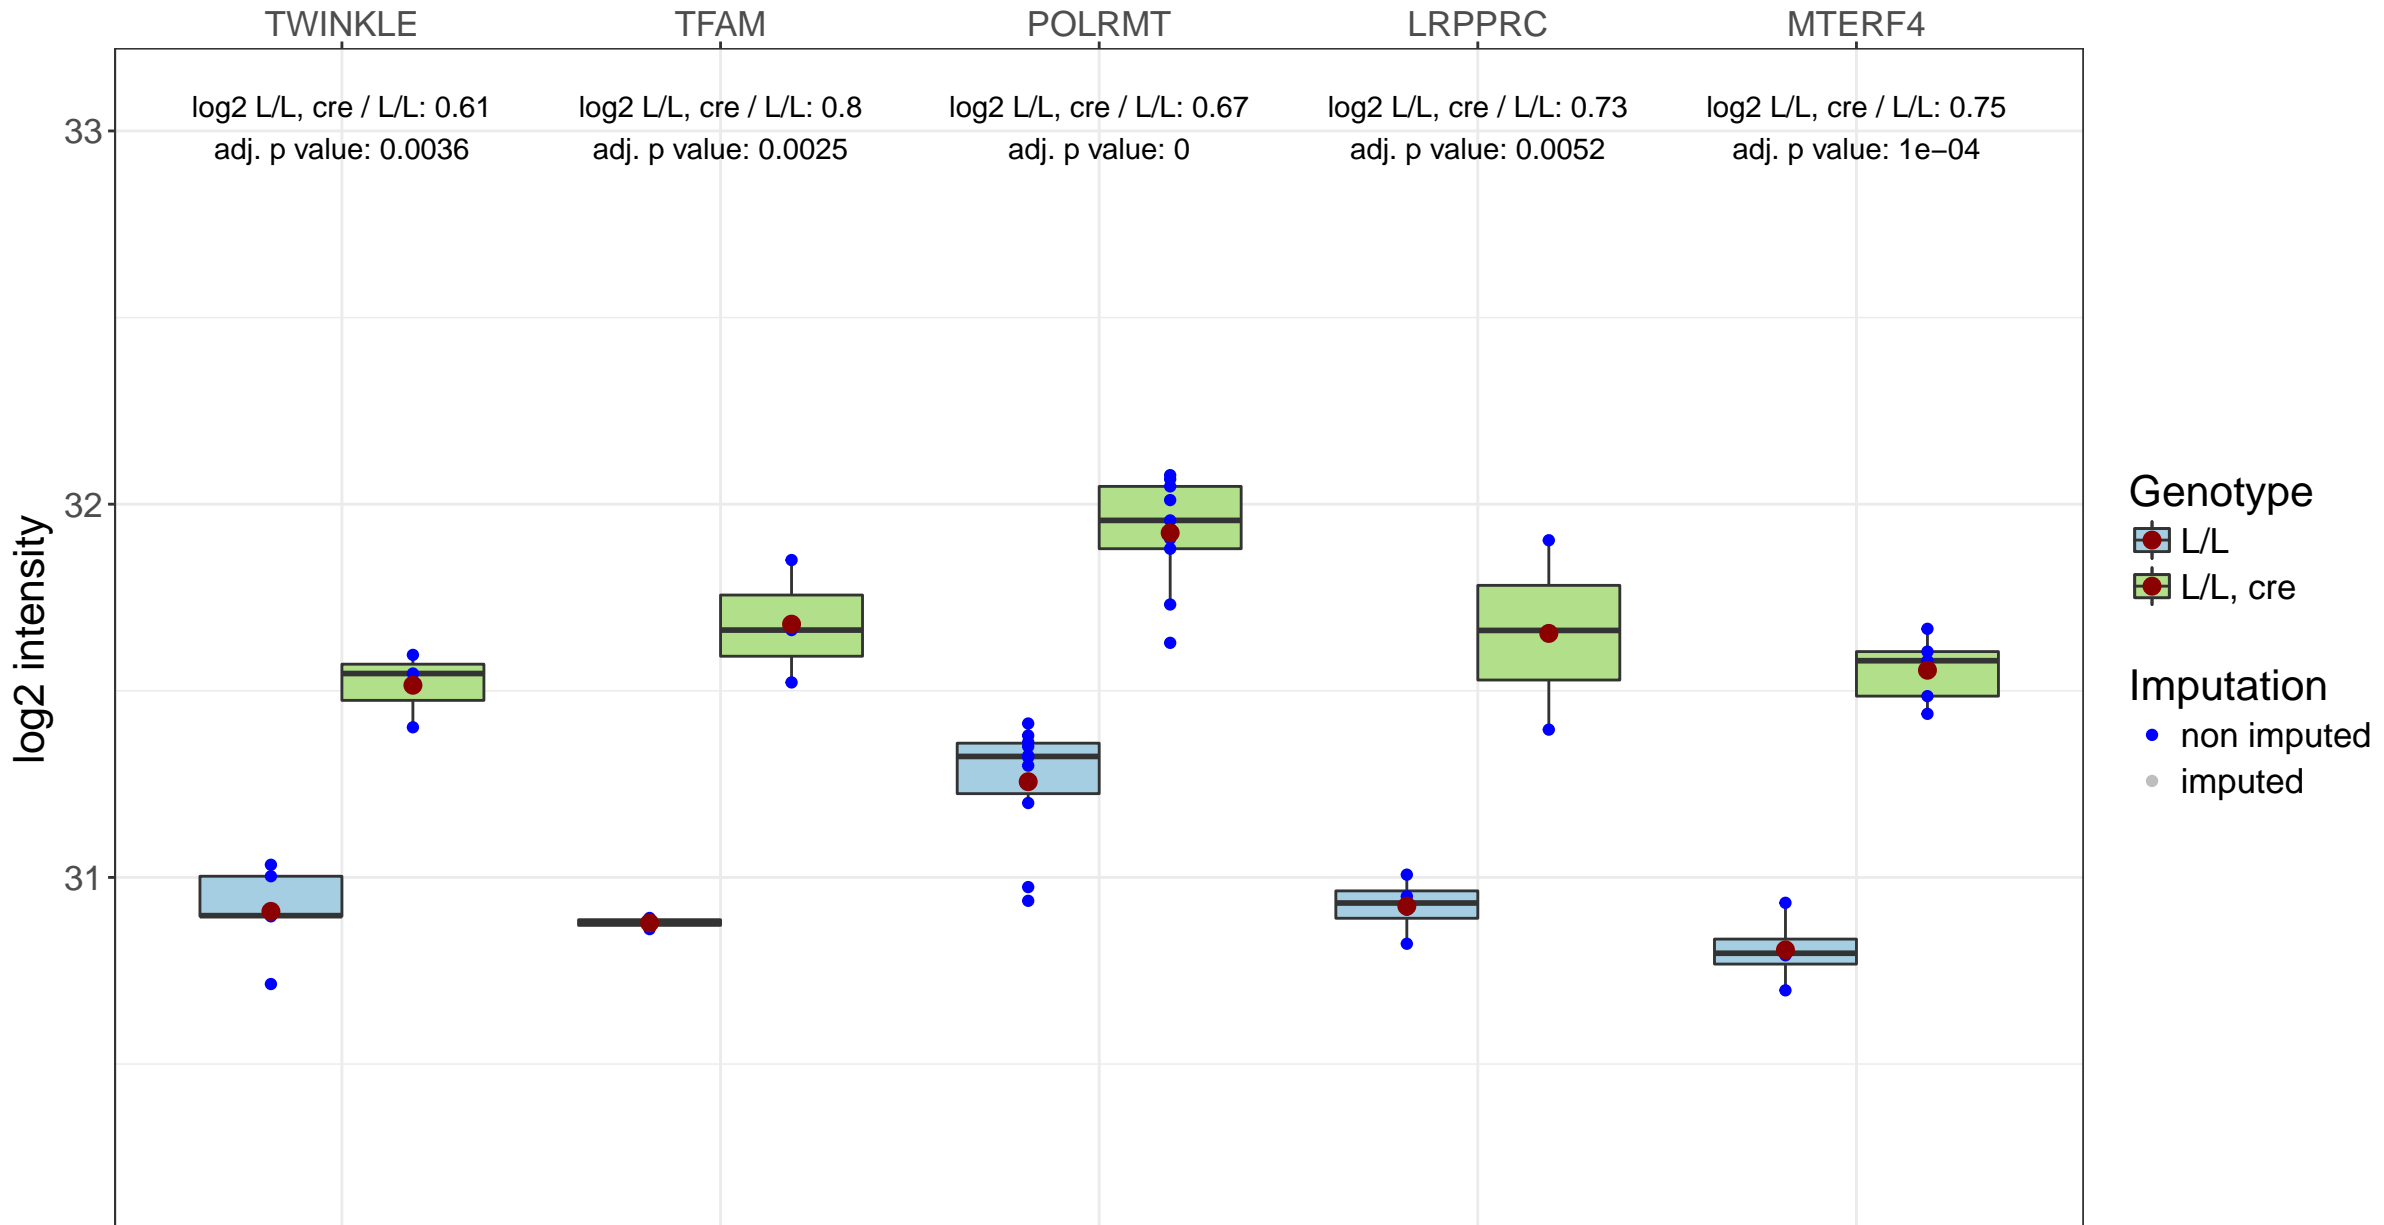

# PNKD / Q69ZP3-2

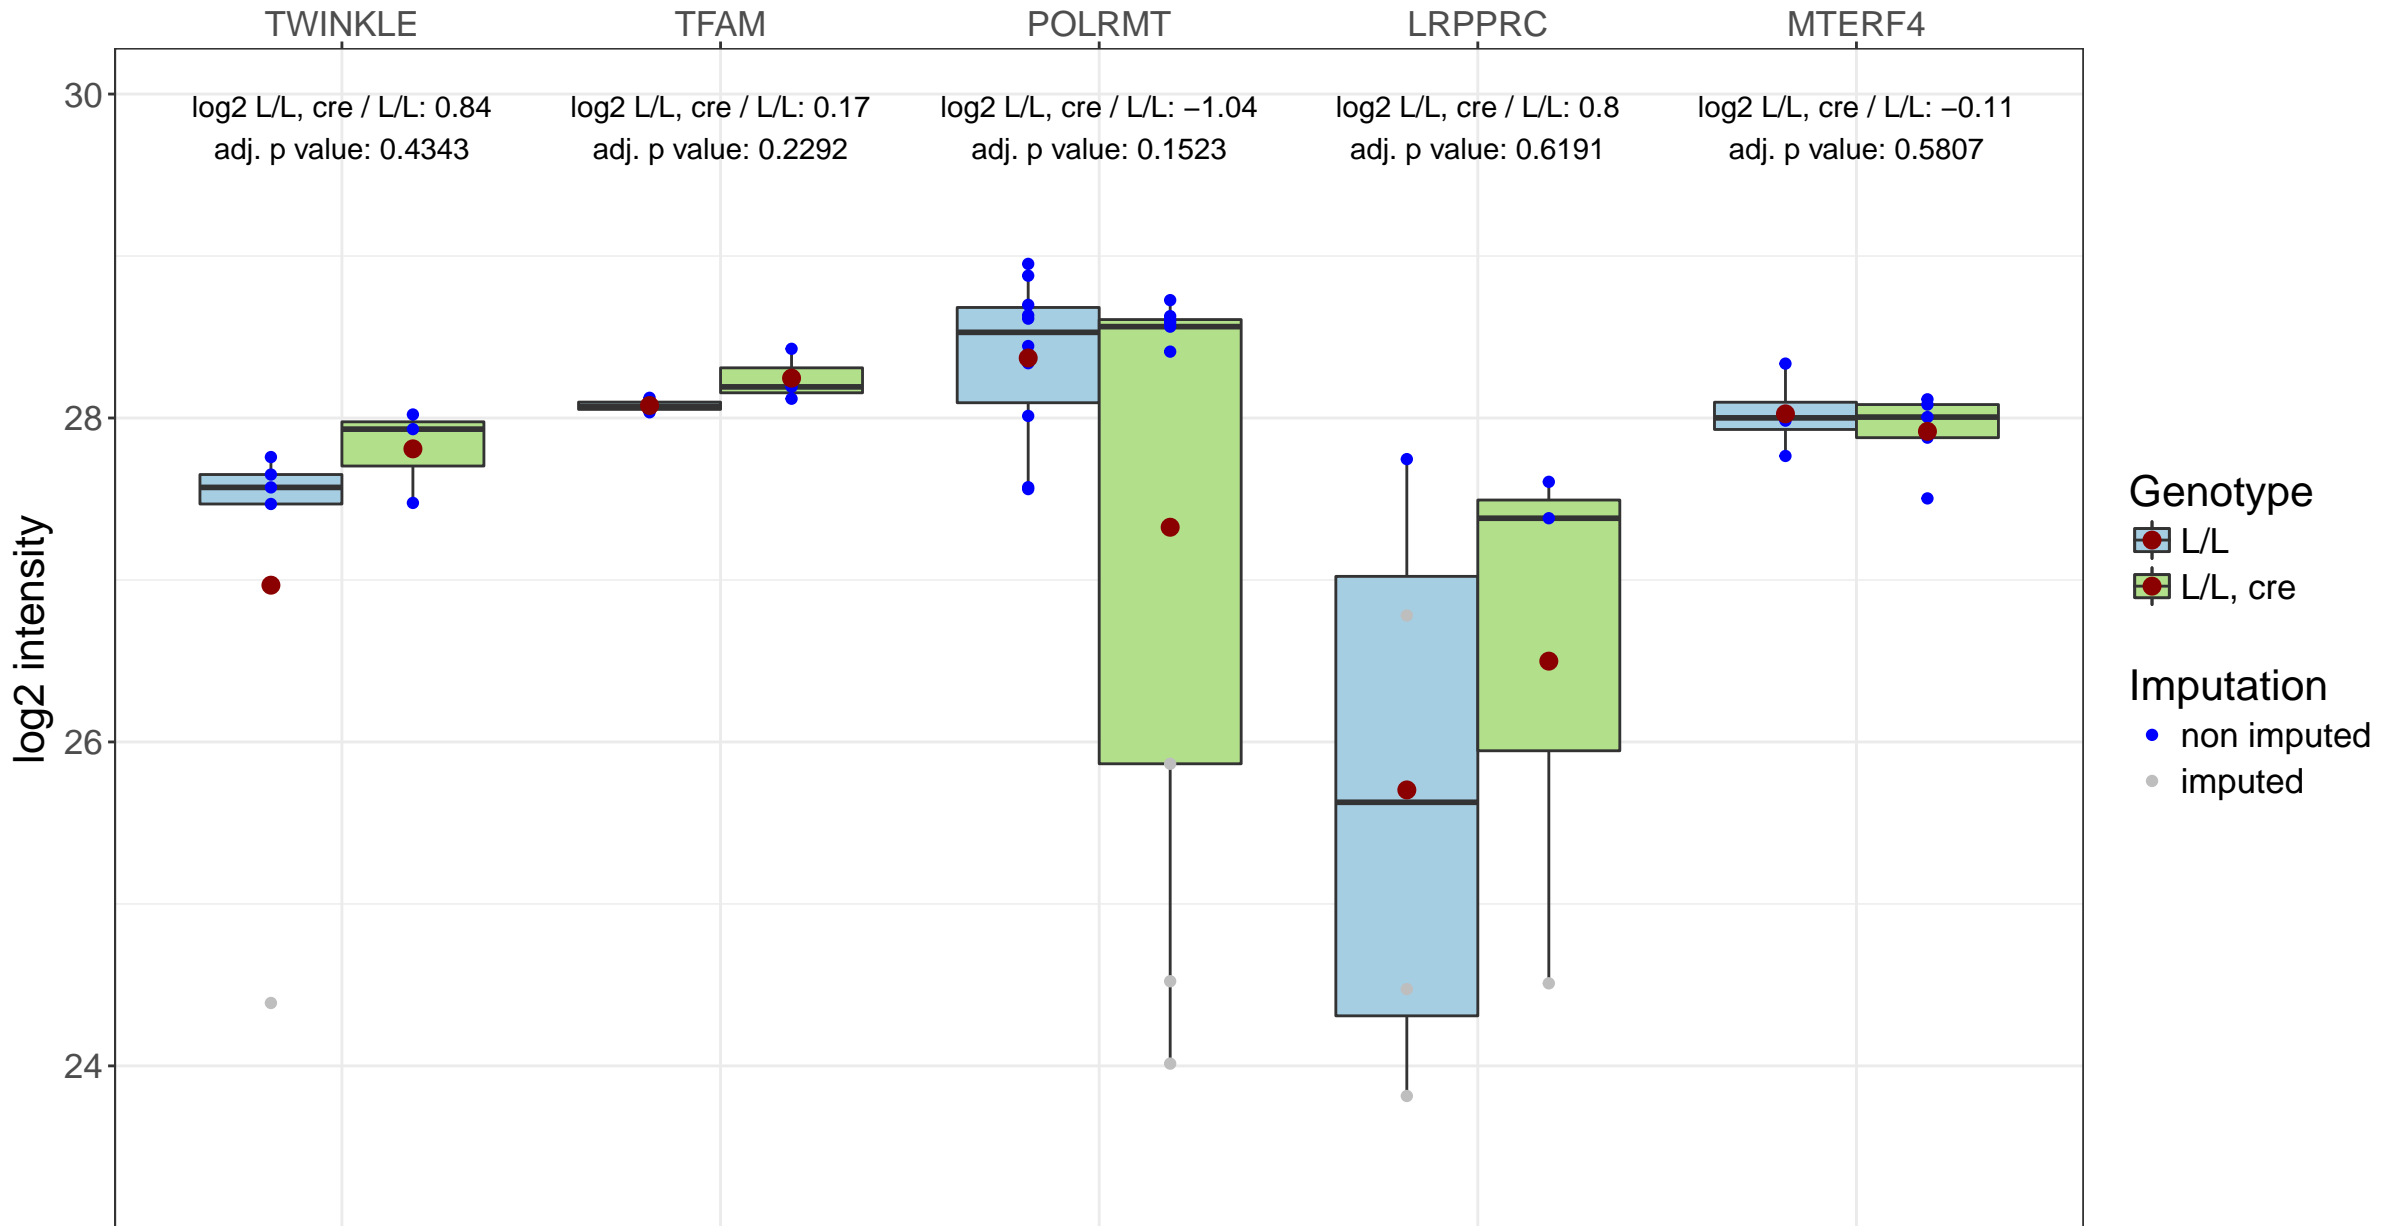



# PNPLA8 / Q8K1N1

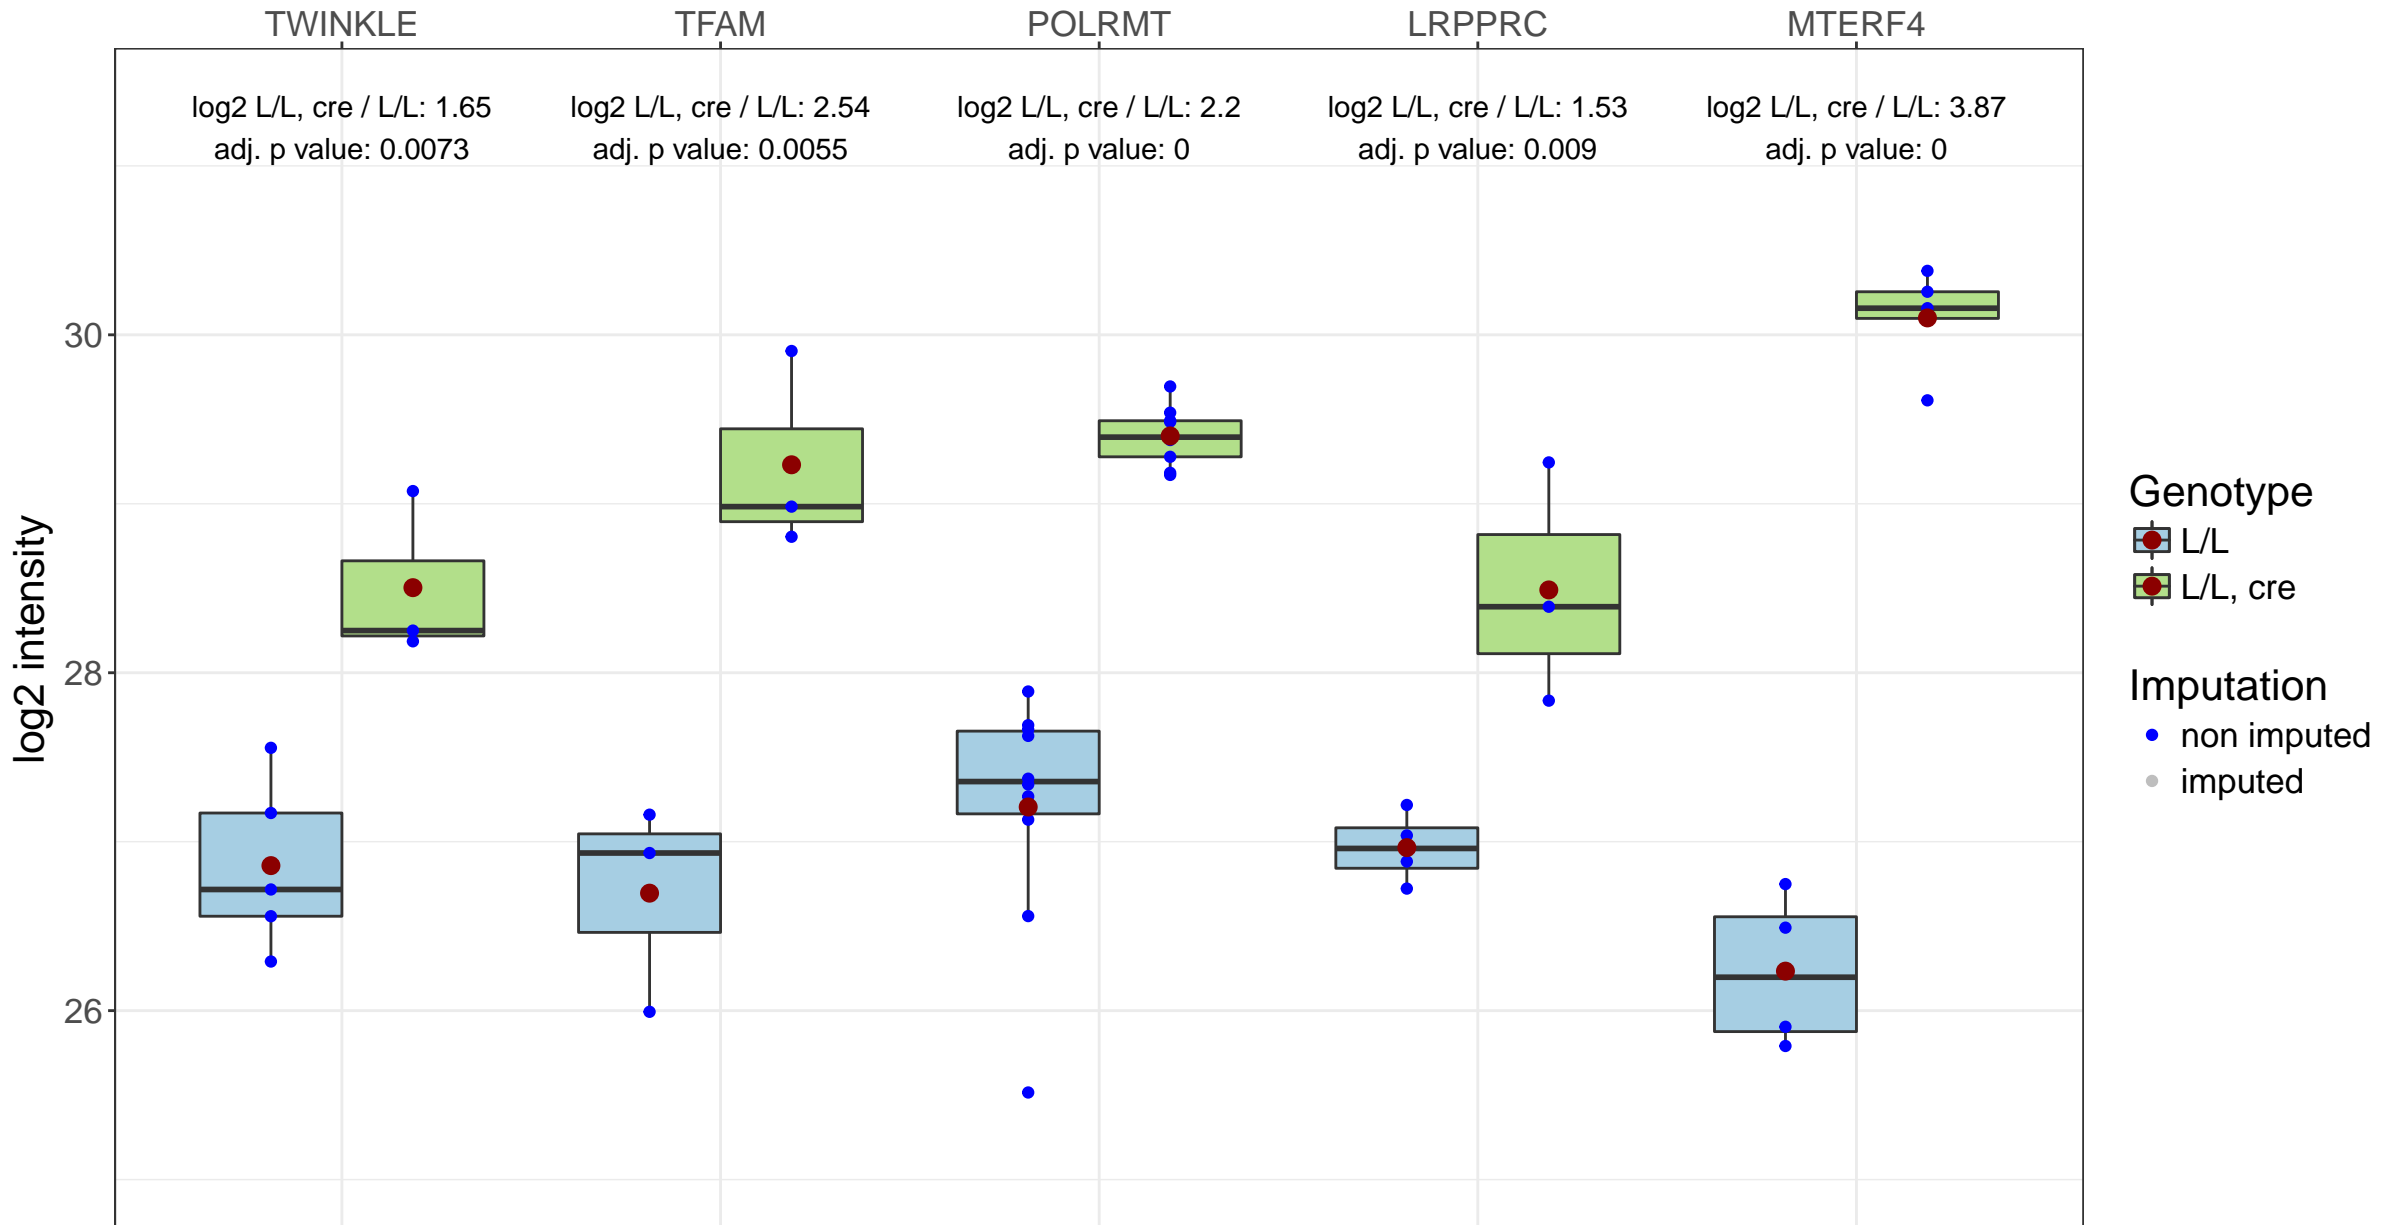

# PNPT1 / Q8K1R3

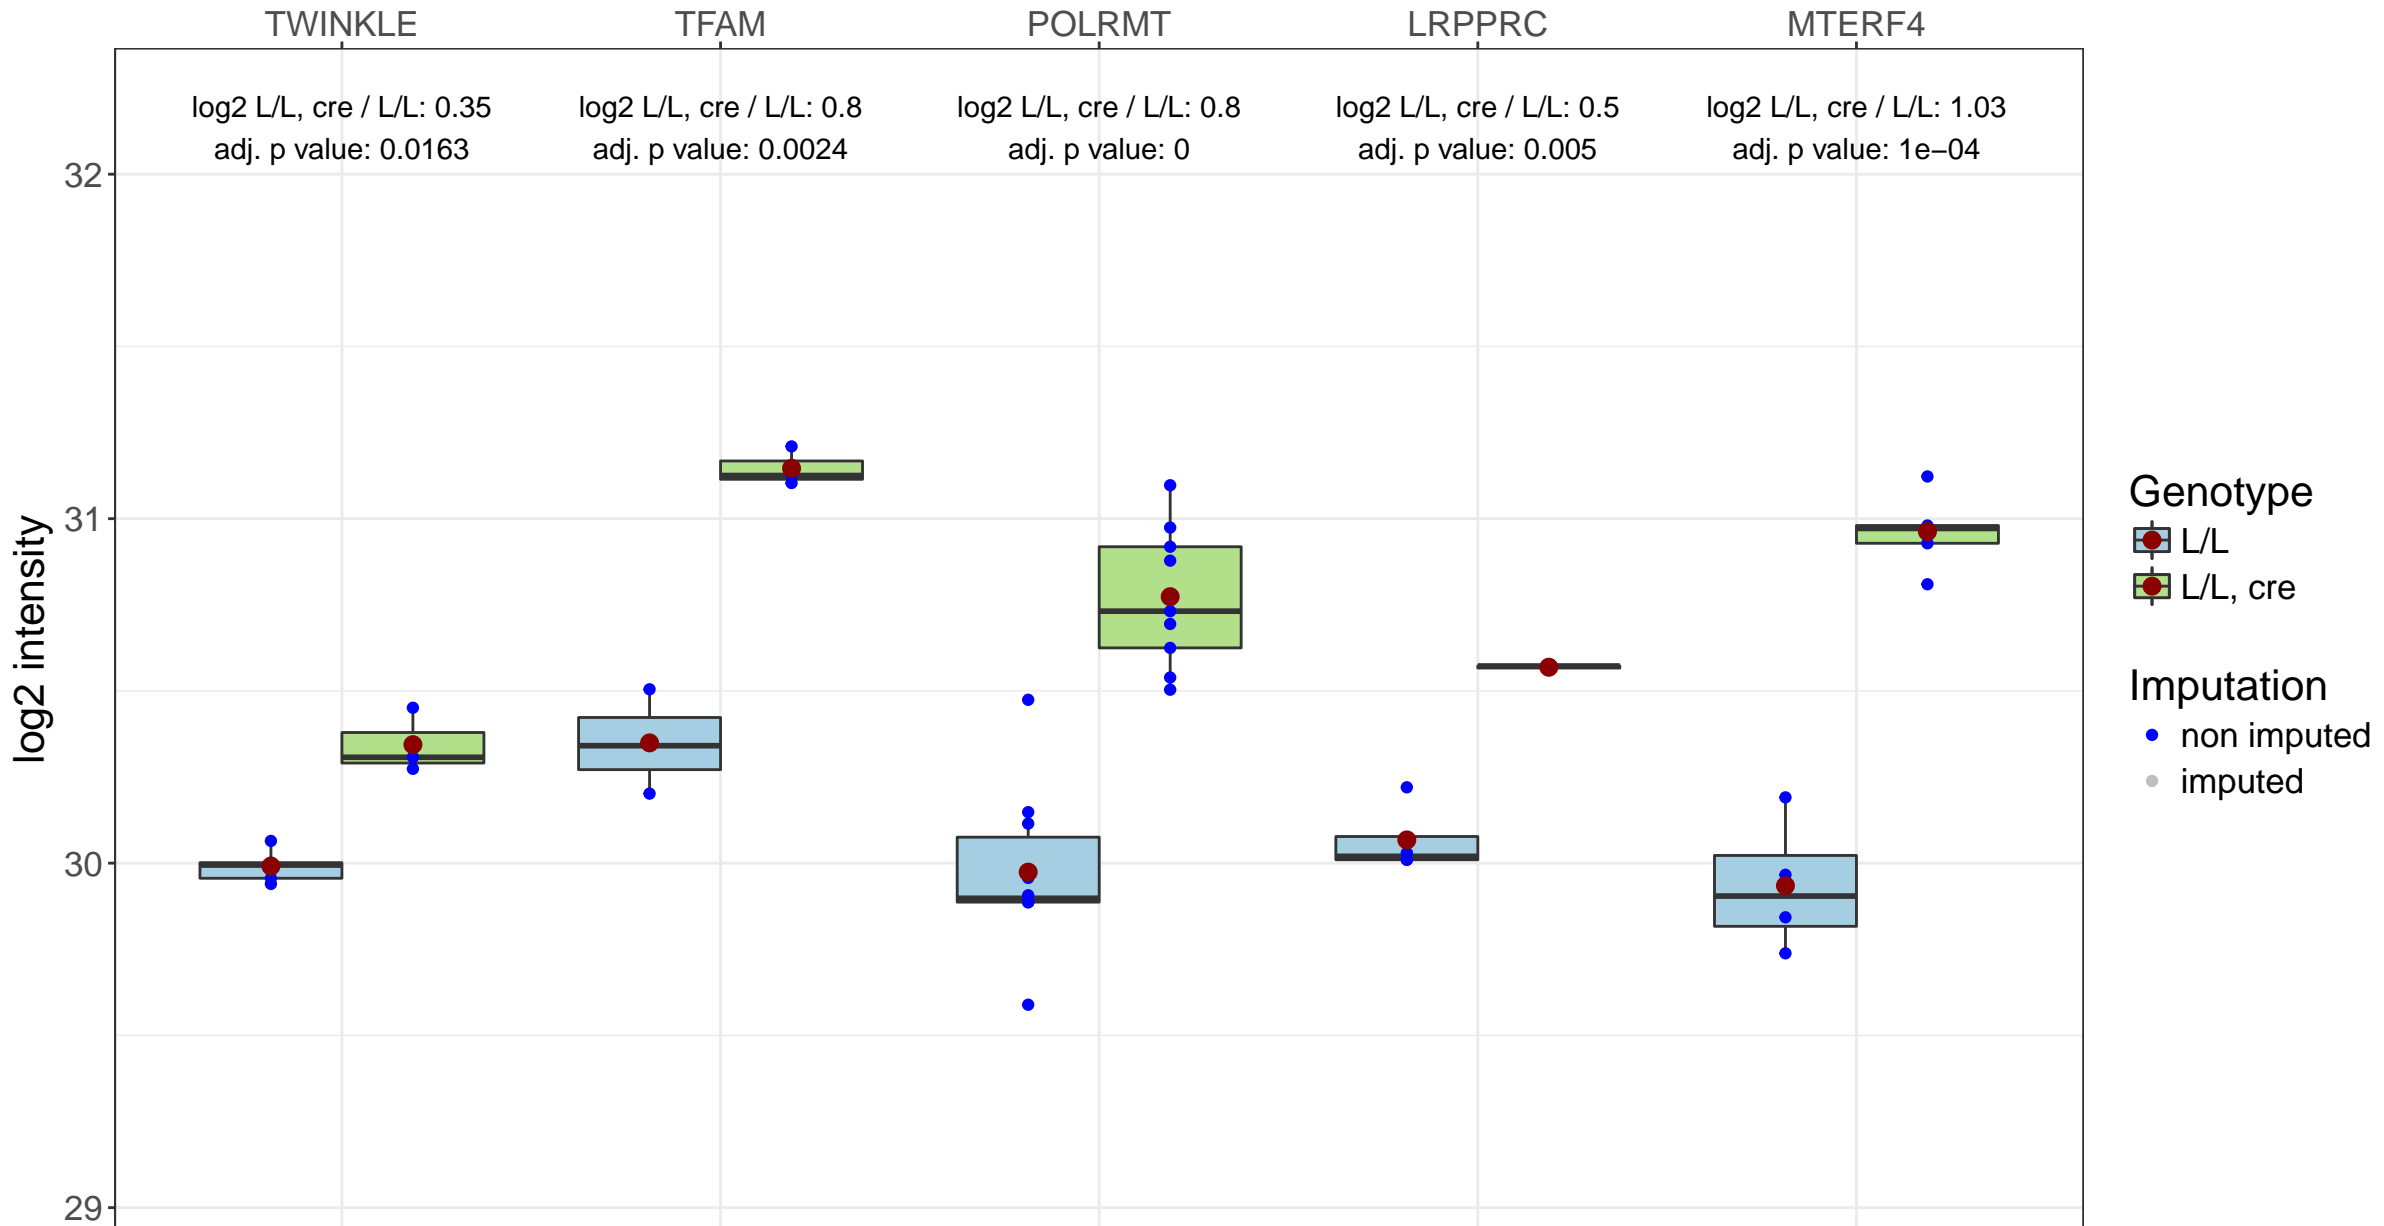

# POLDIP2 / Q91VA6

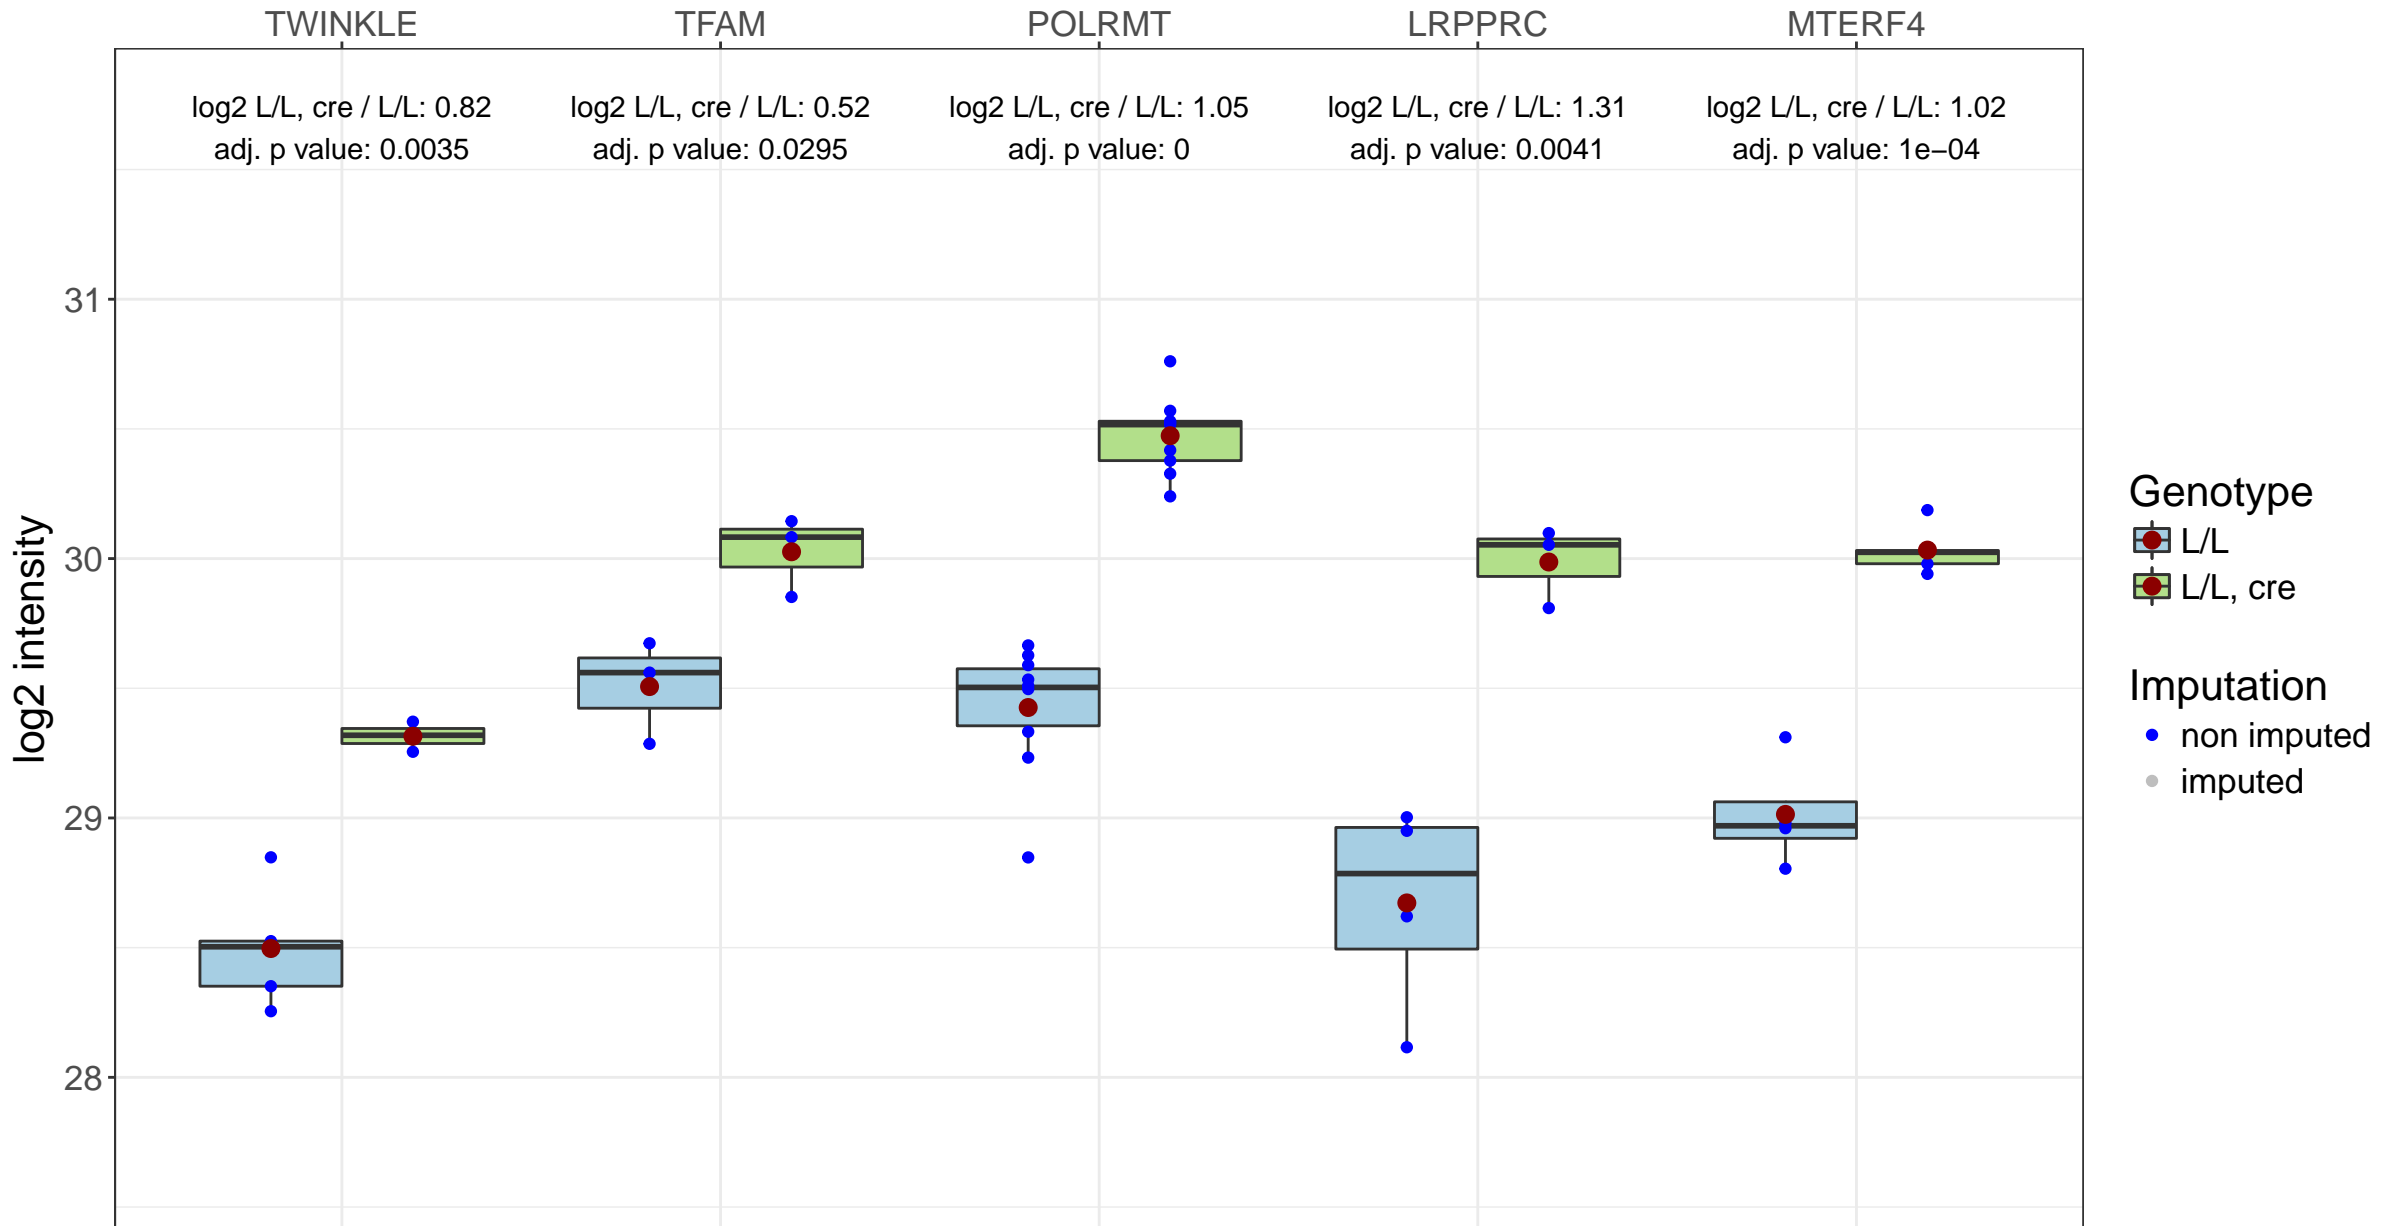

# POLG2 / D6RFU3

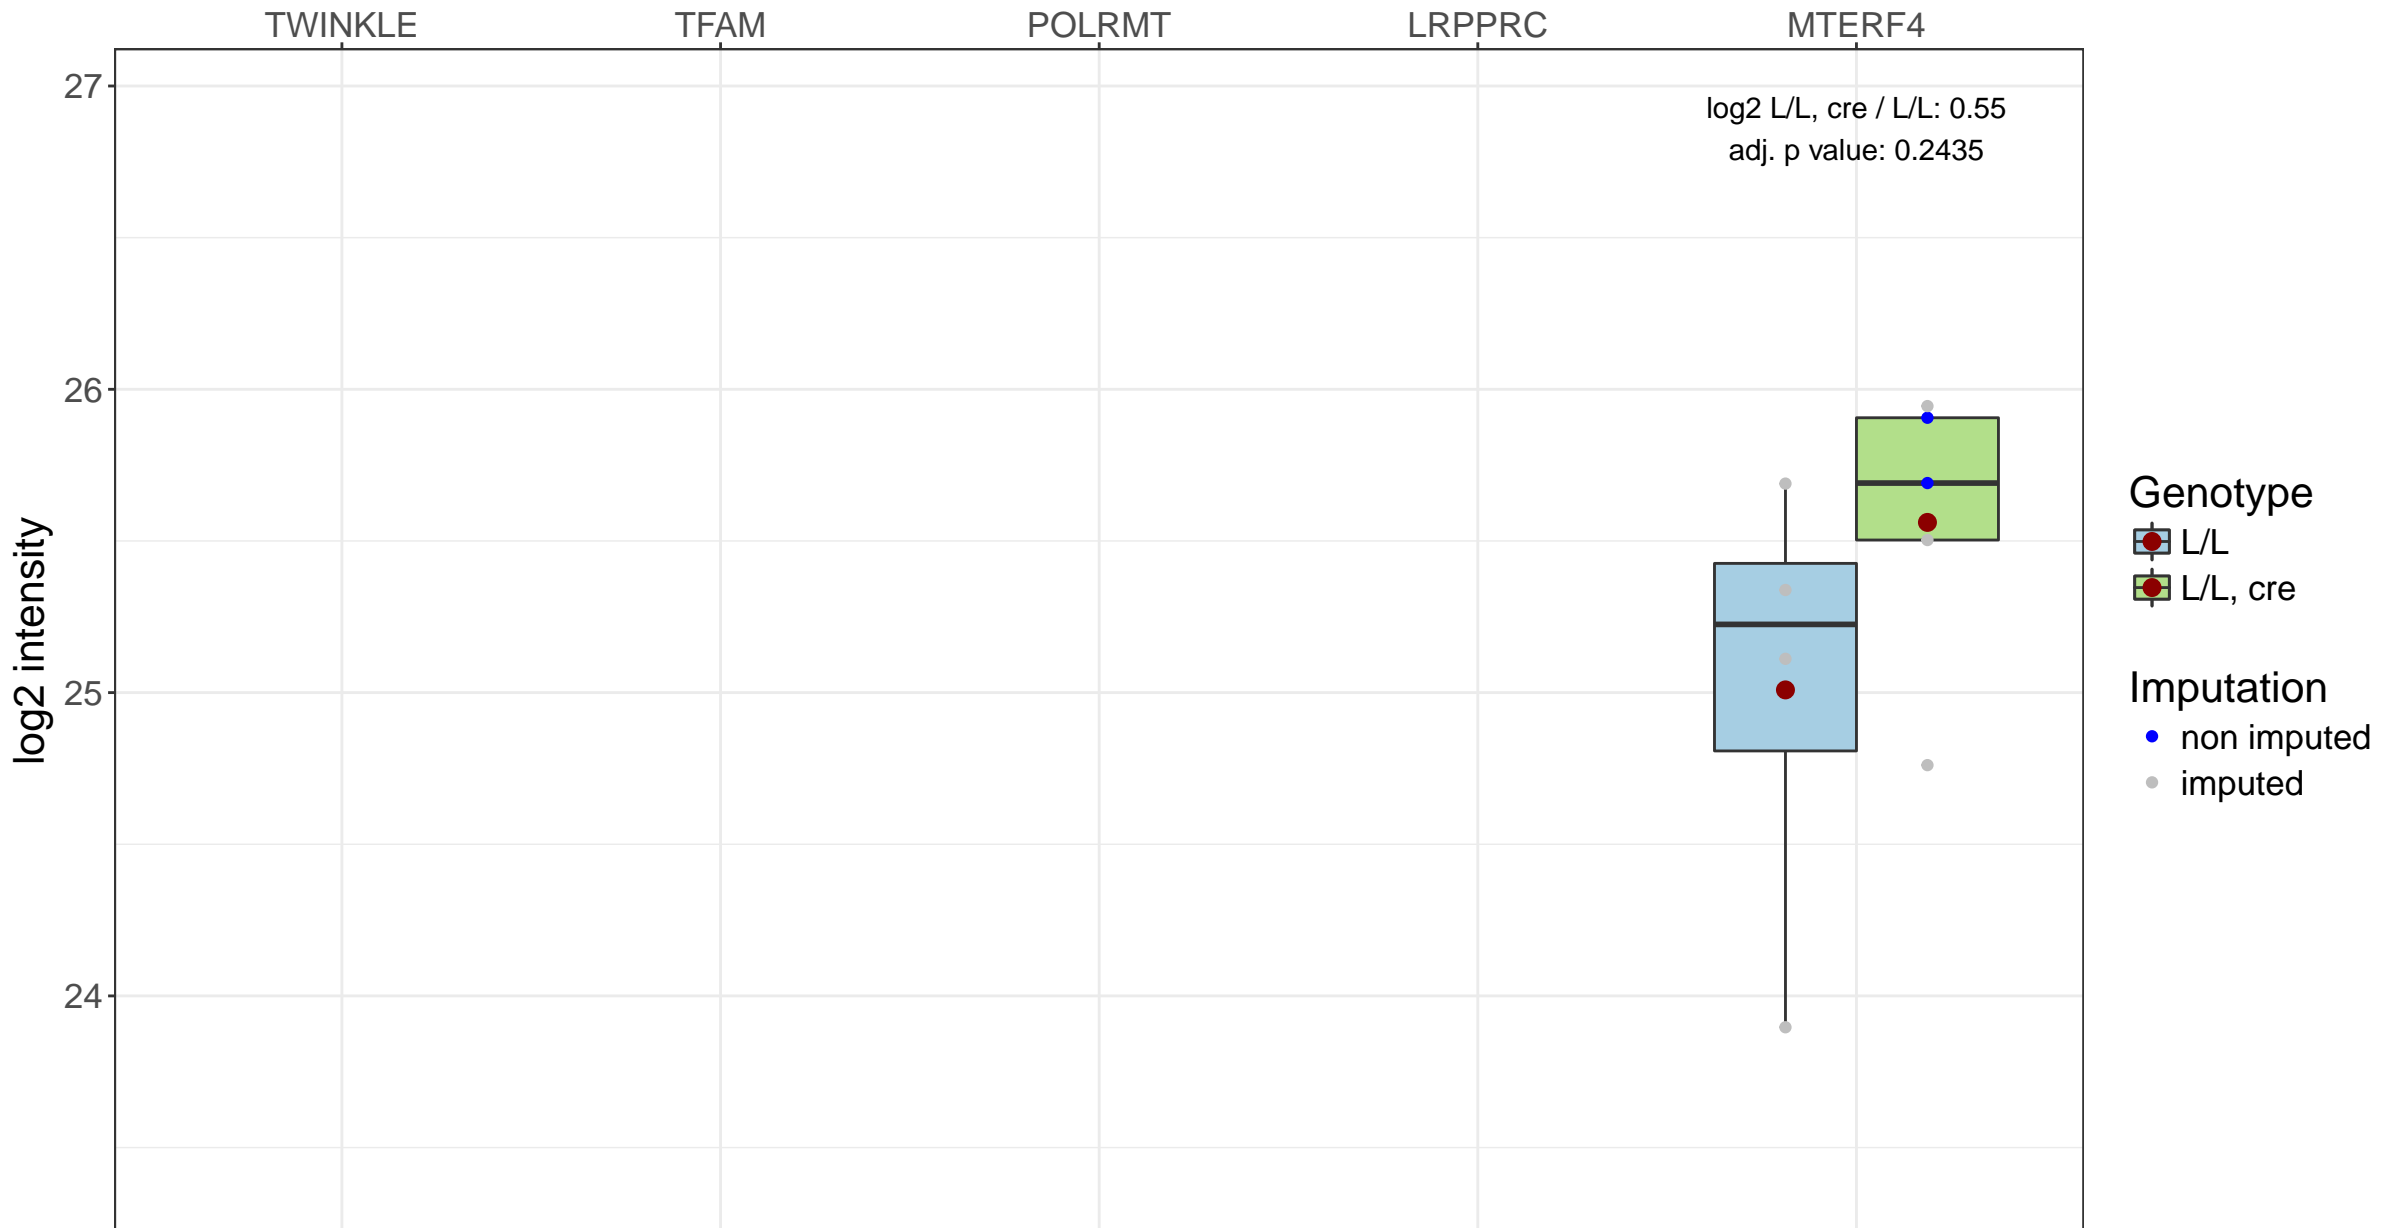

# POLRMT / Q8BKF1

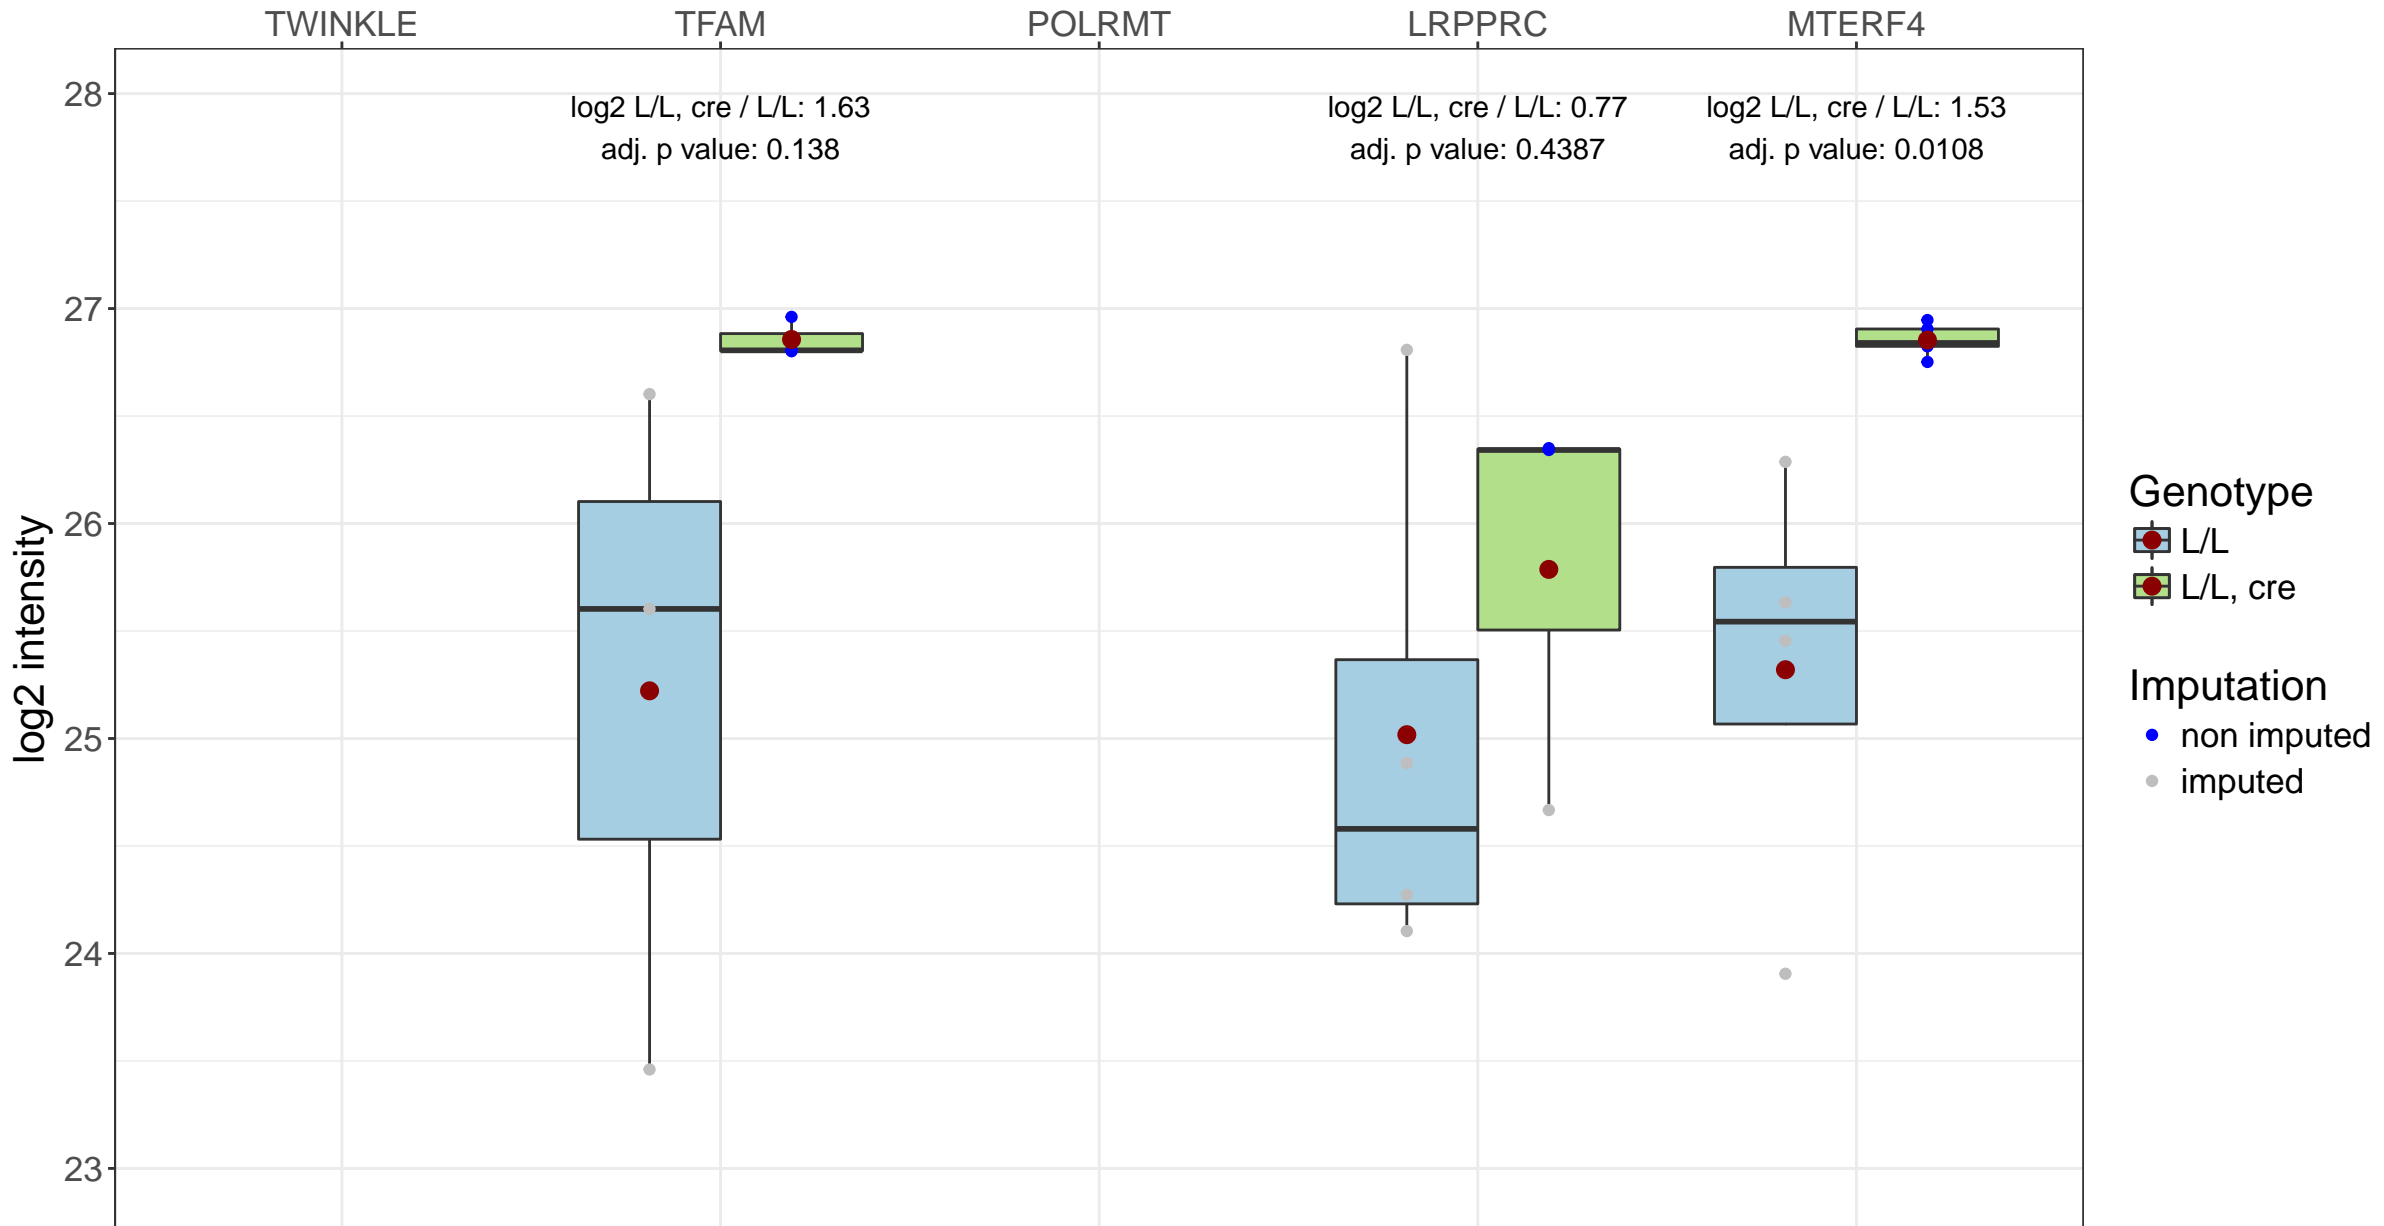

# PPA2 / Q91VM9

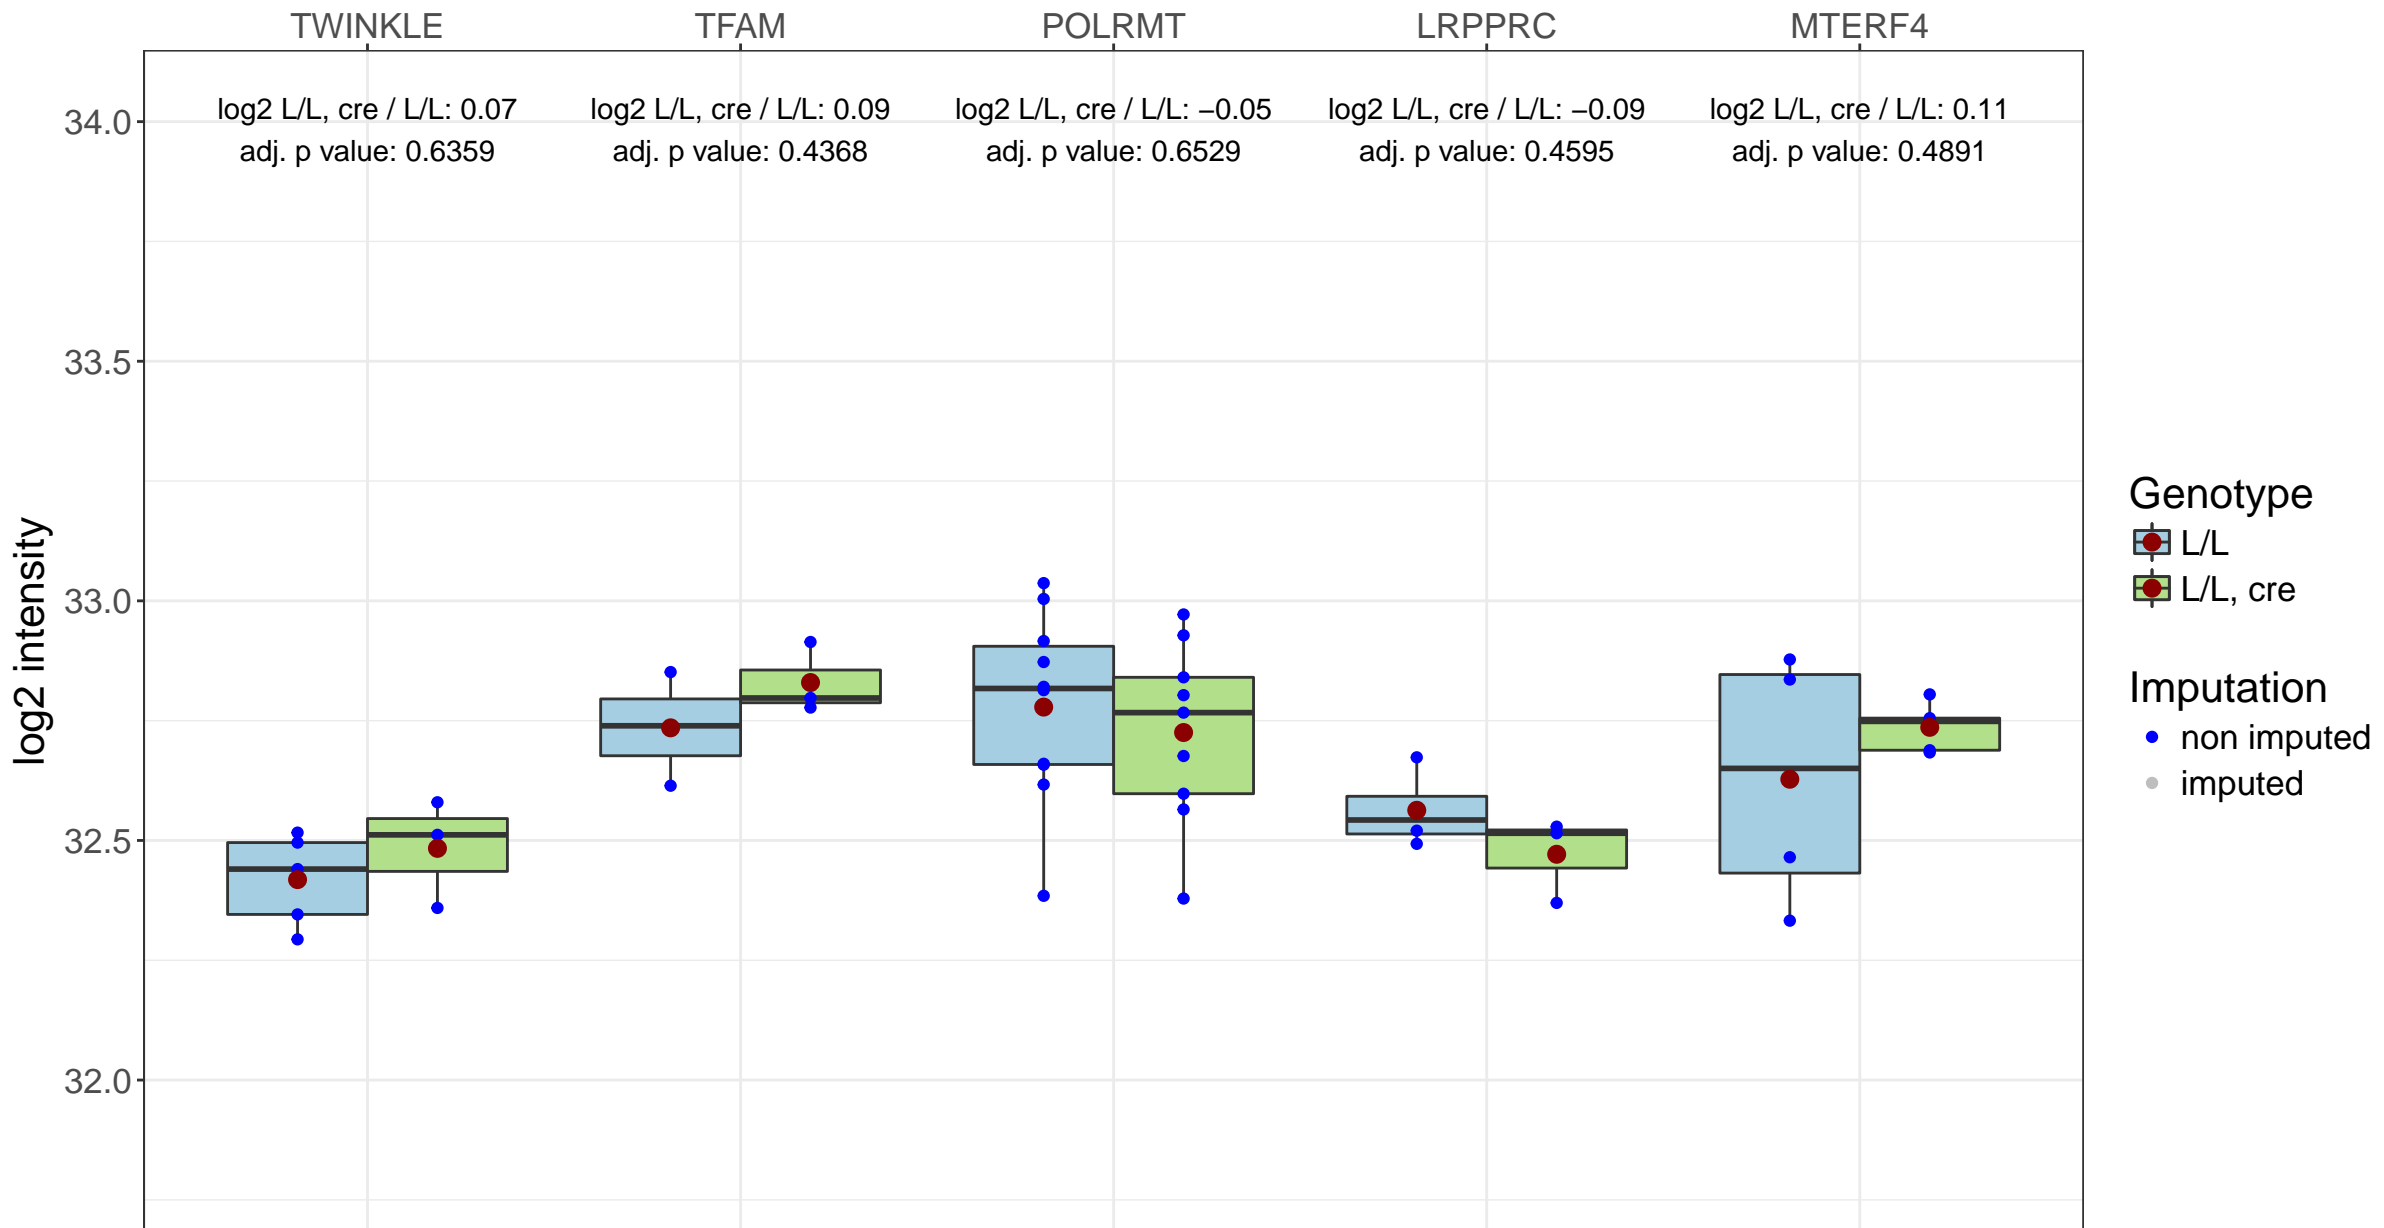

# PPIA / P17742

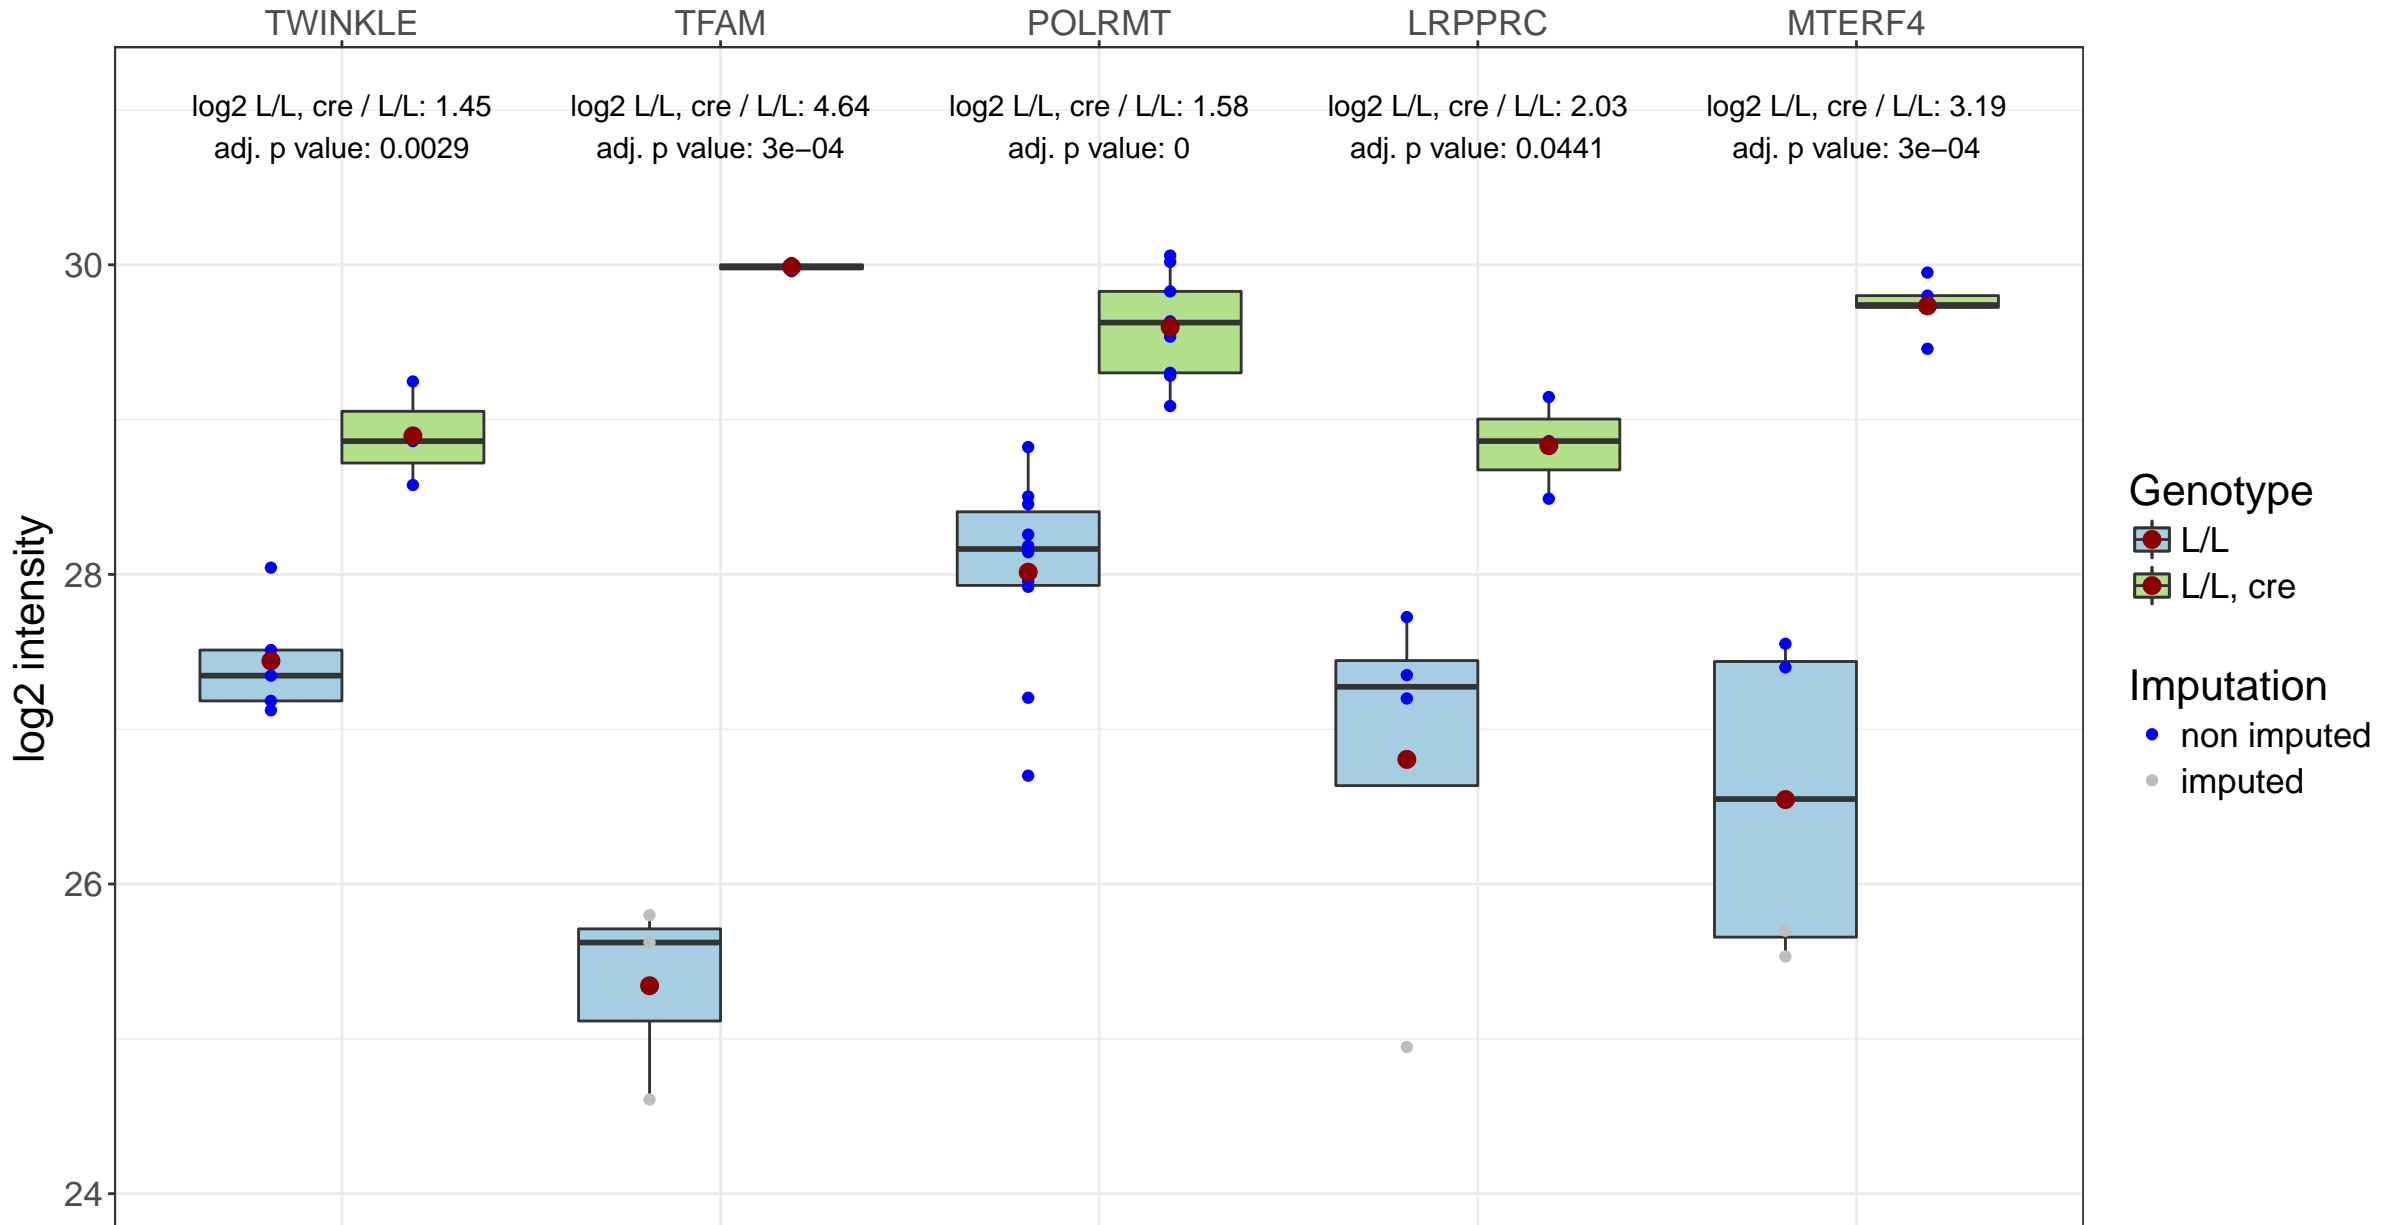

# PPIB / P24369

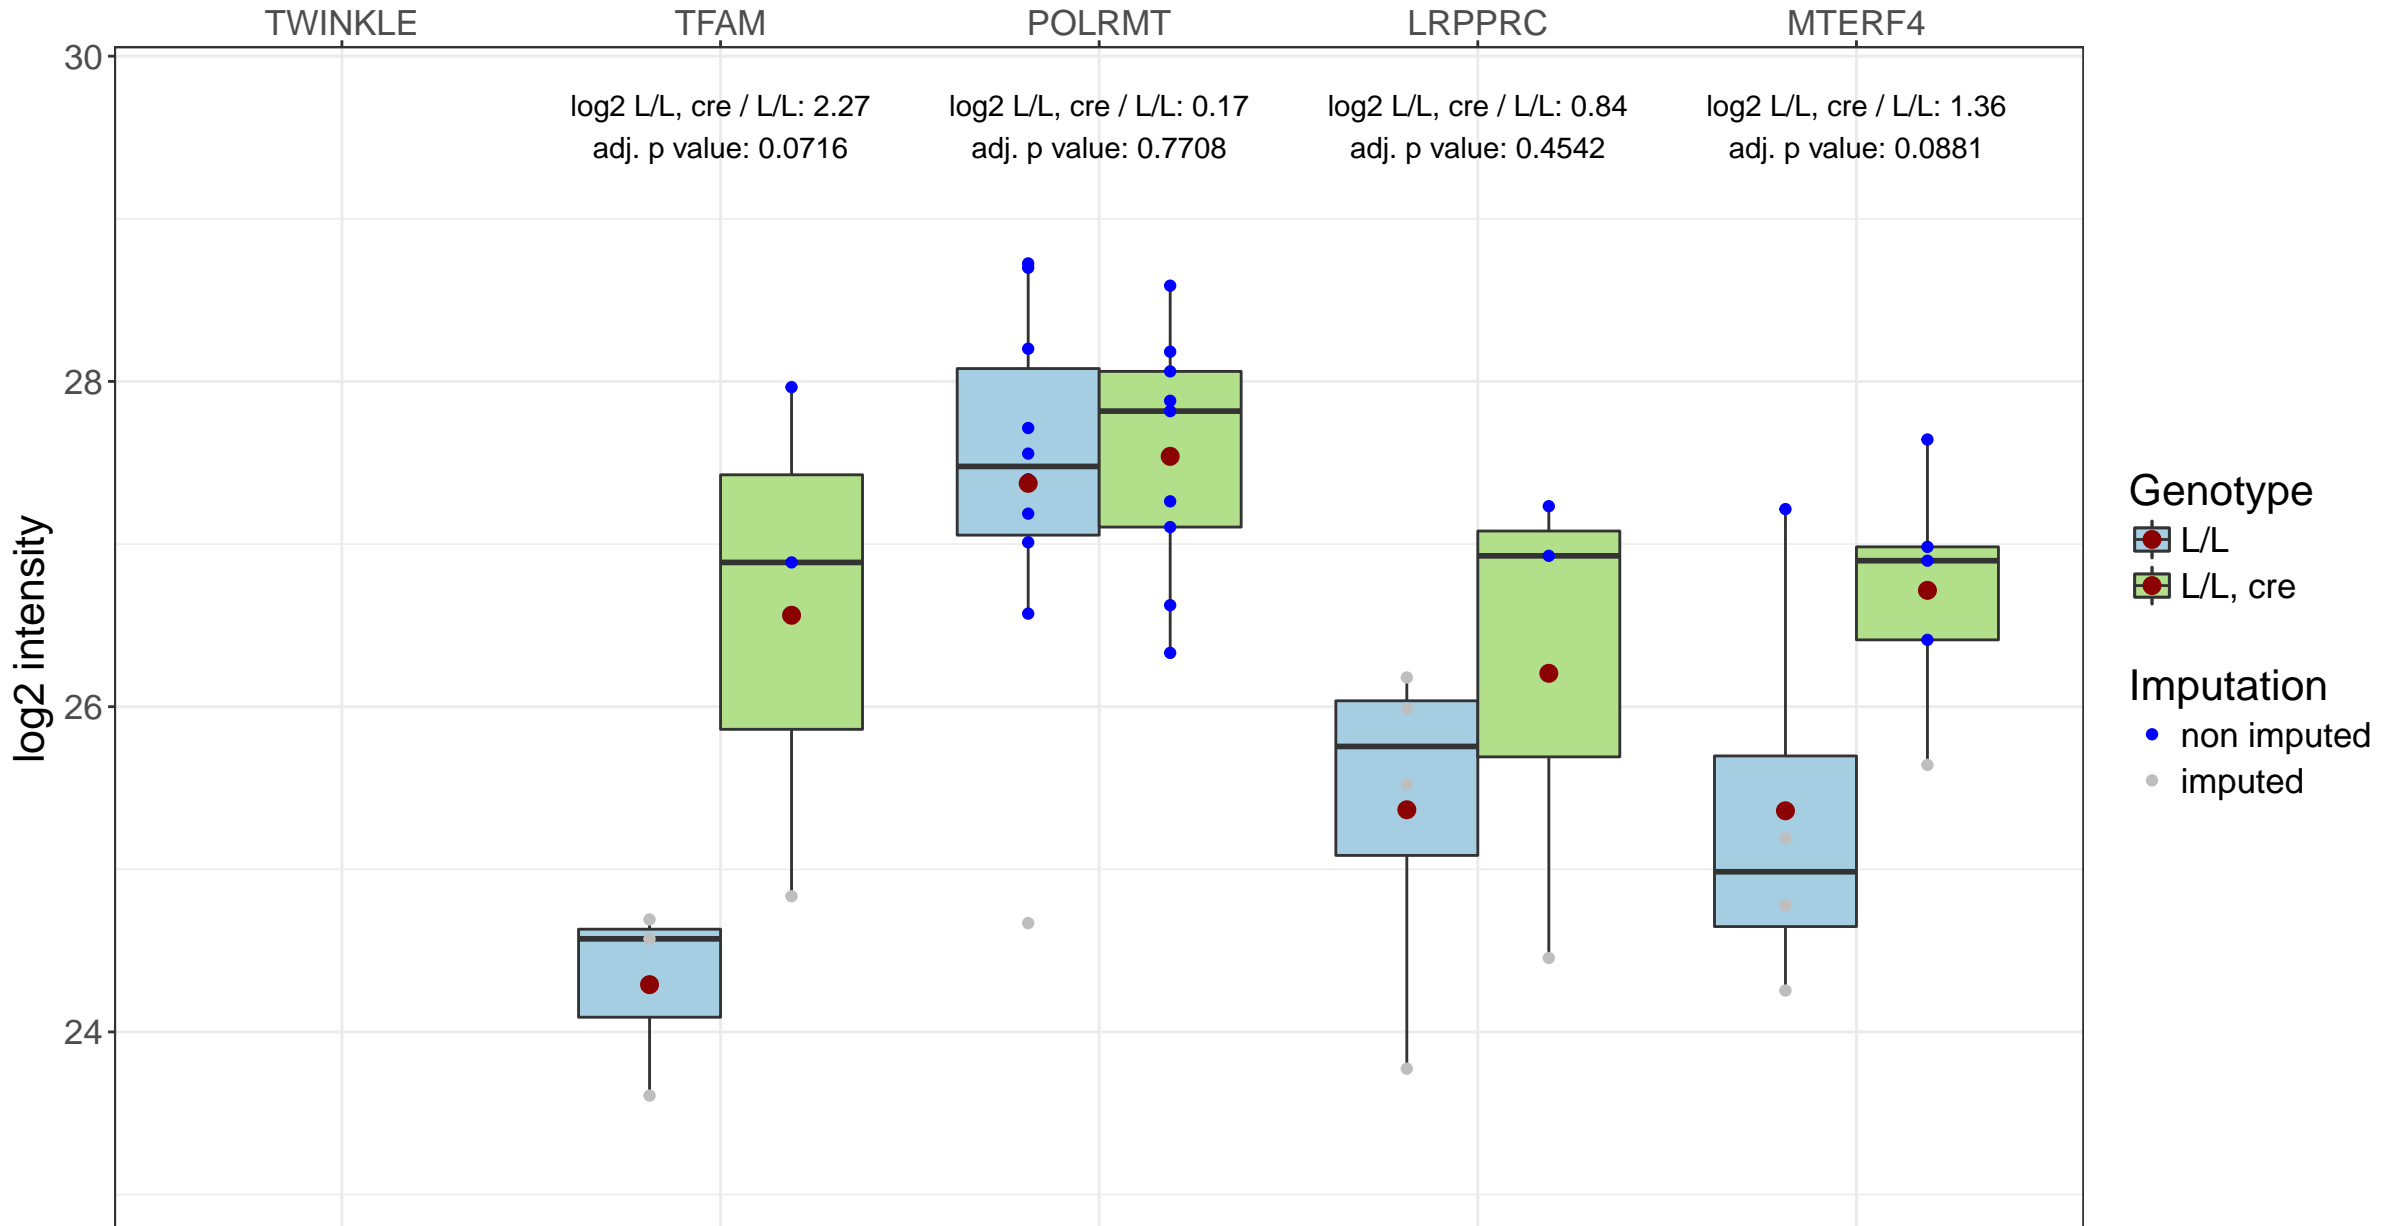



# PPIF / Q99KR7

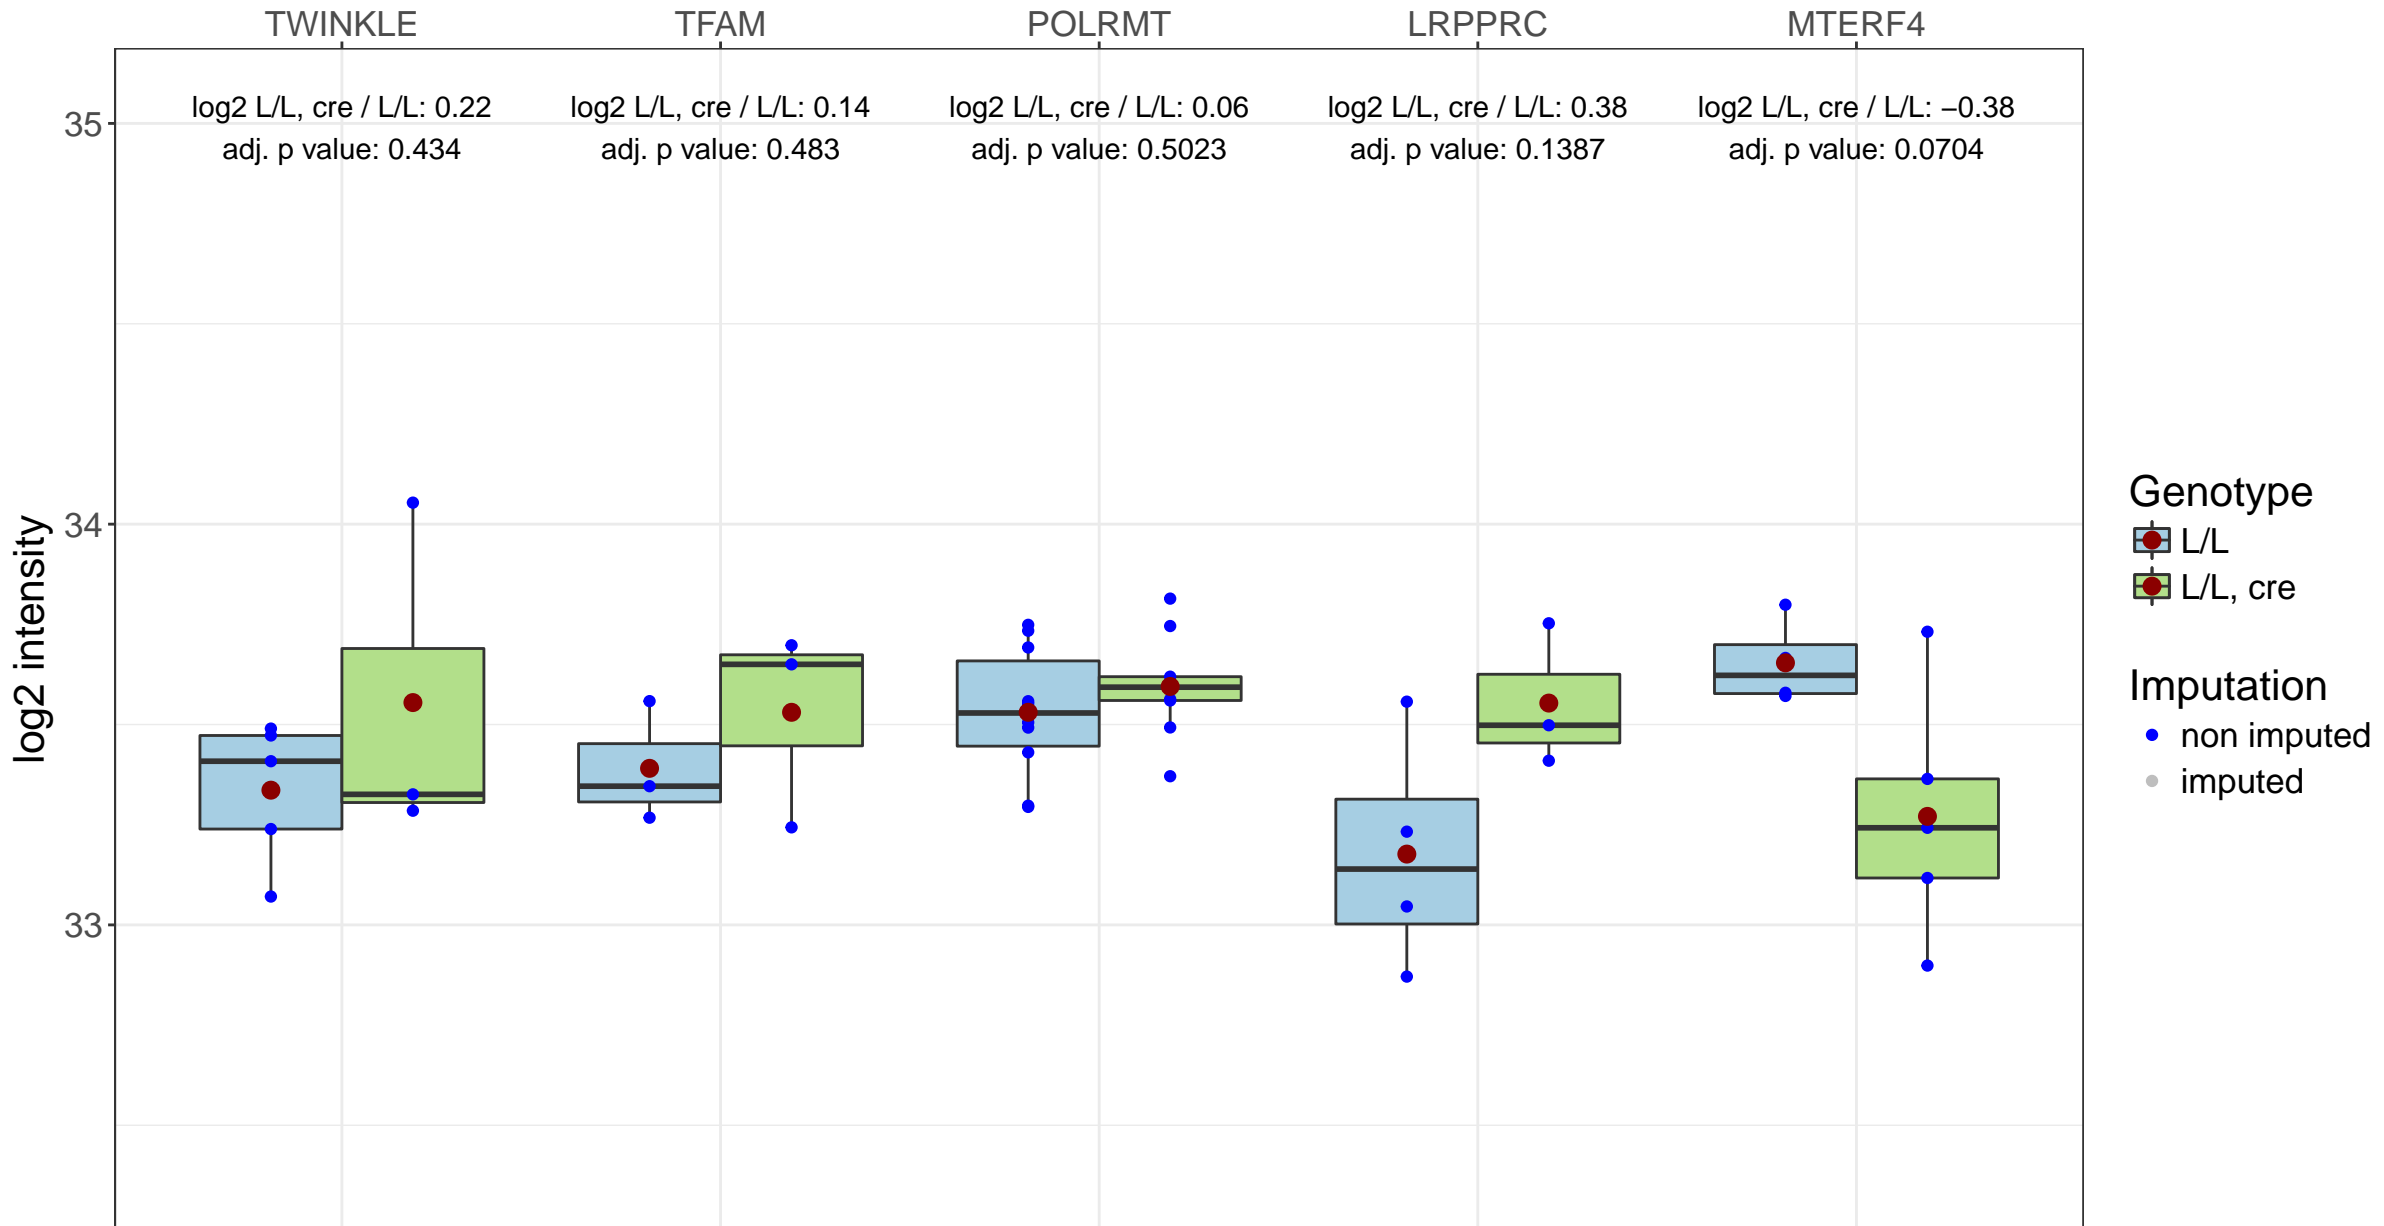

# PPM1K / Q8BXN7

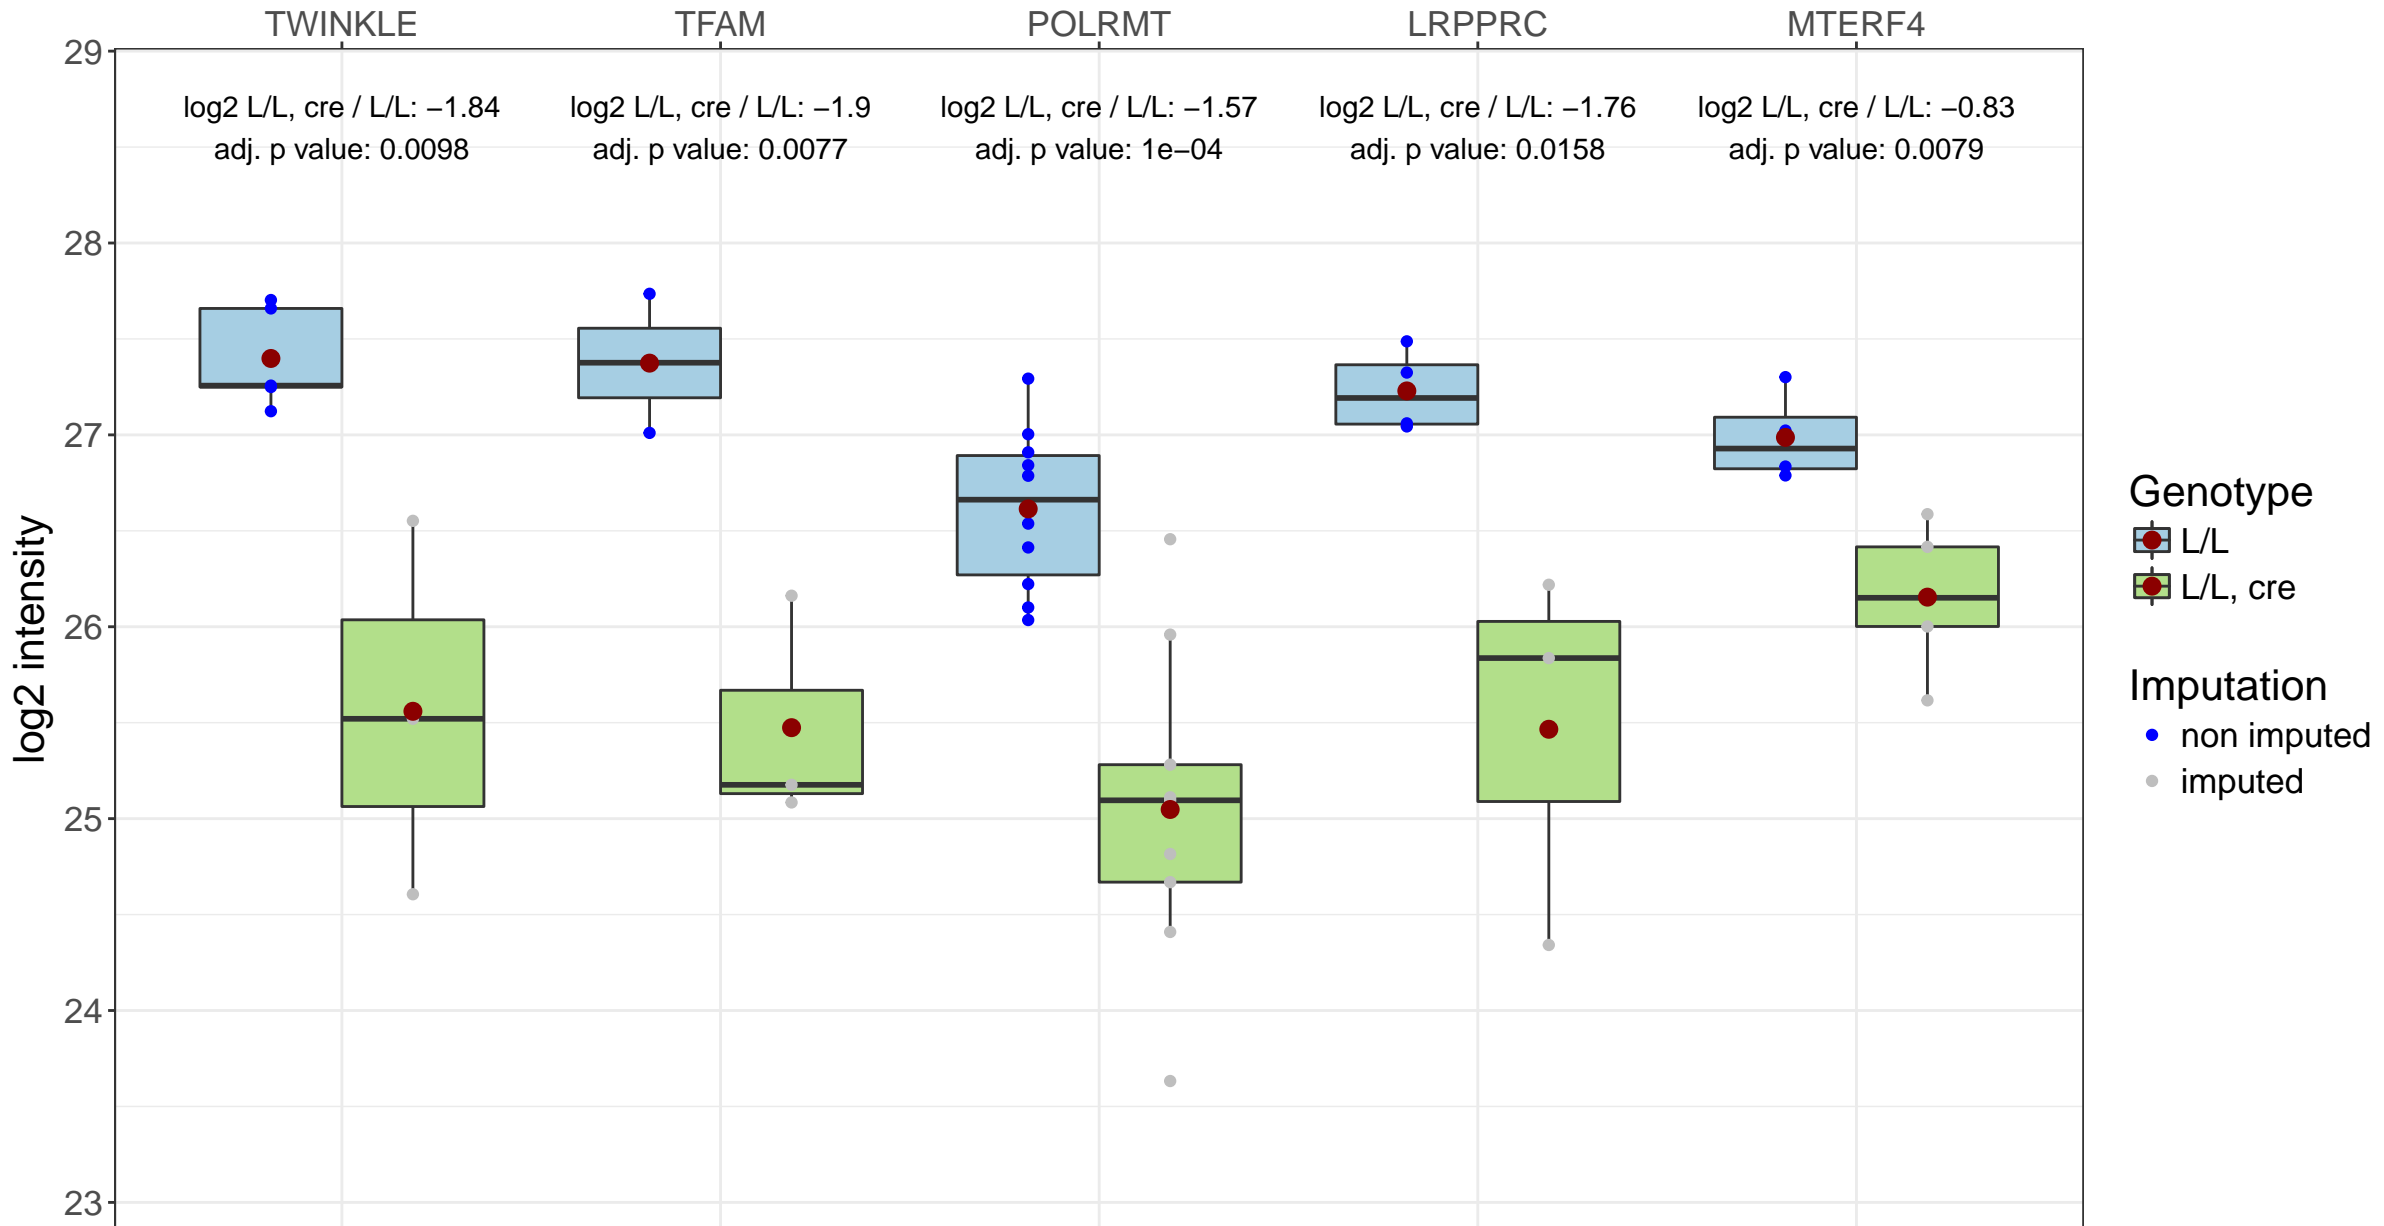

# PPOX / P51175

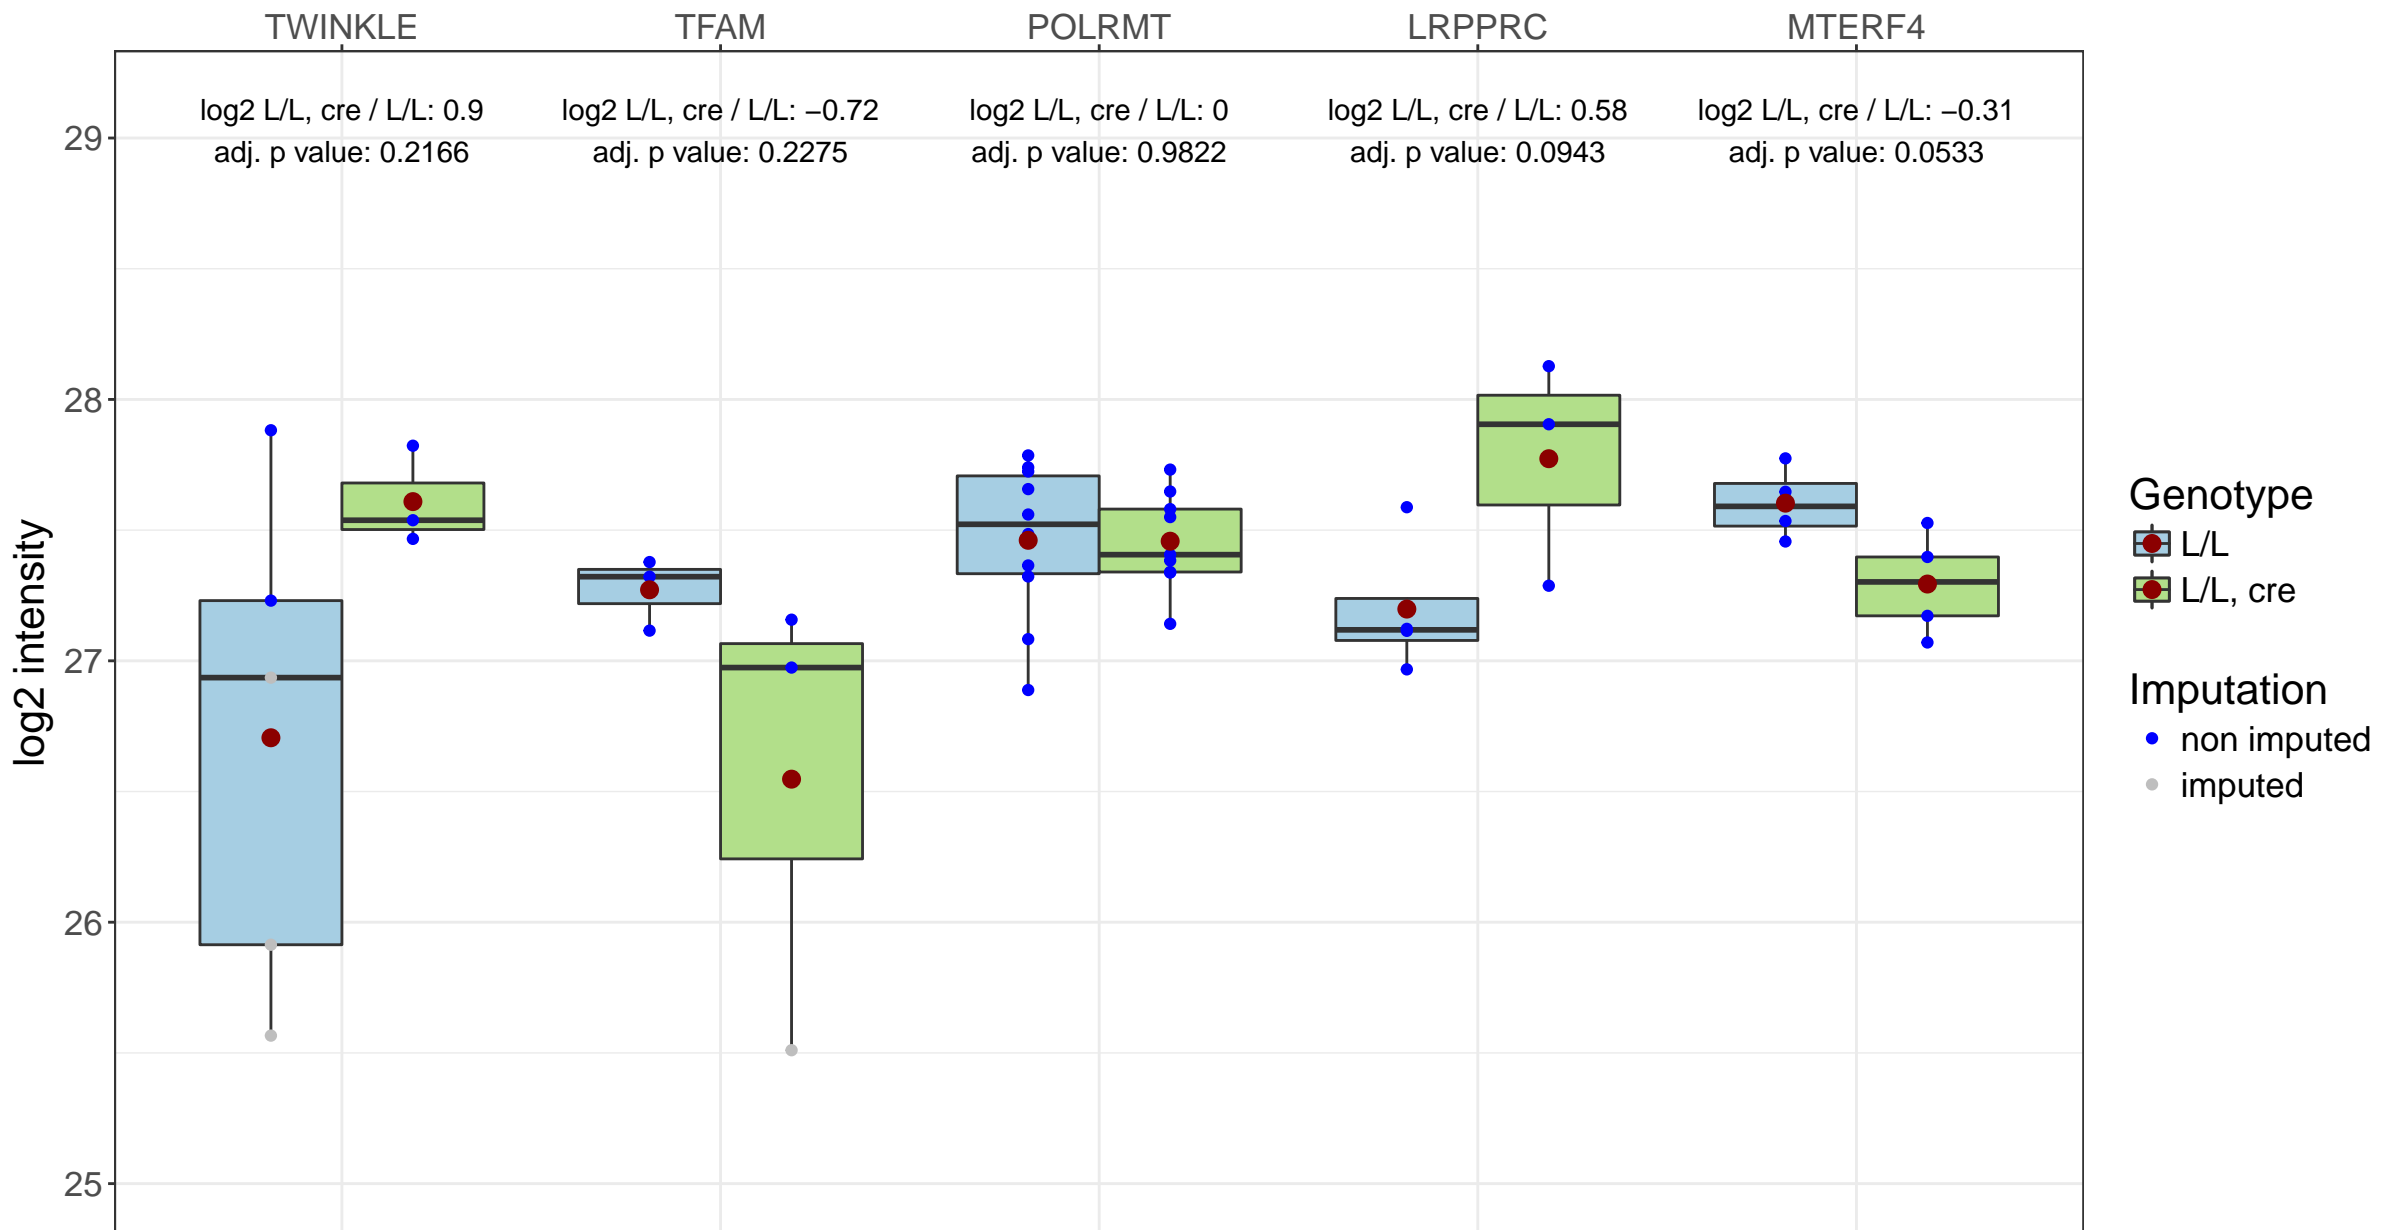

# PPTC7 / Q6NVE9

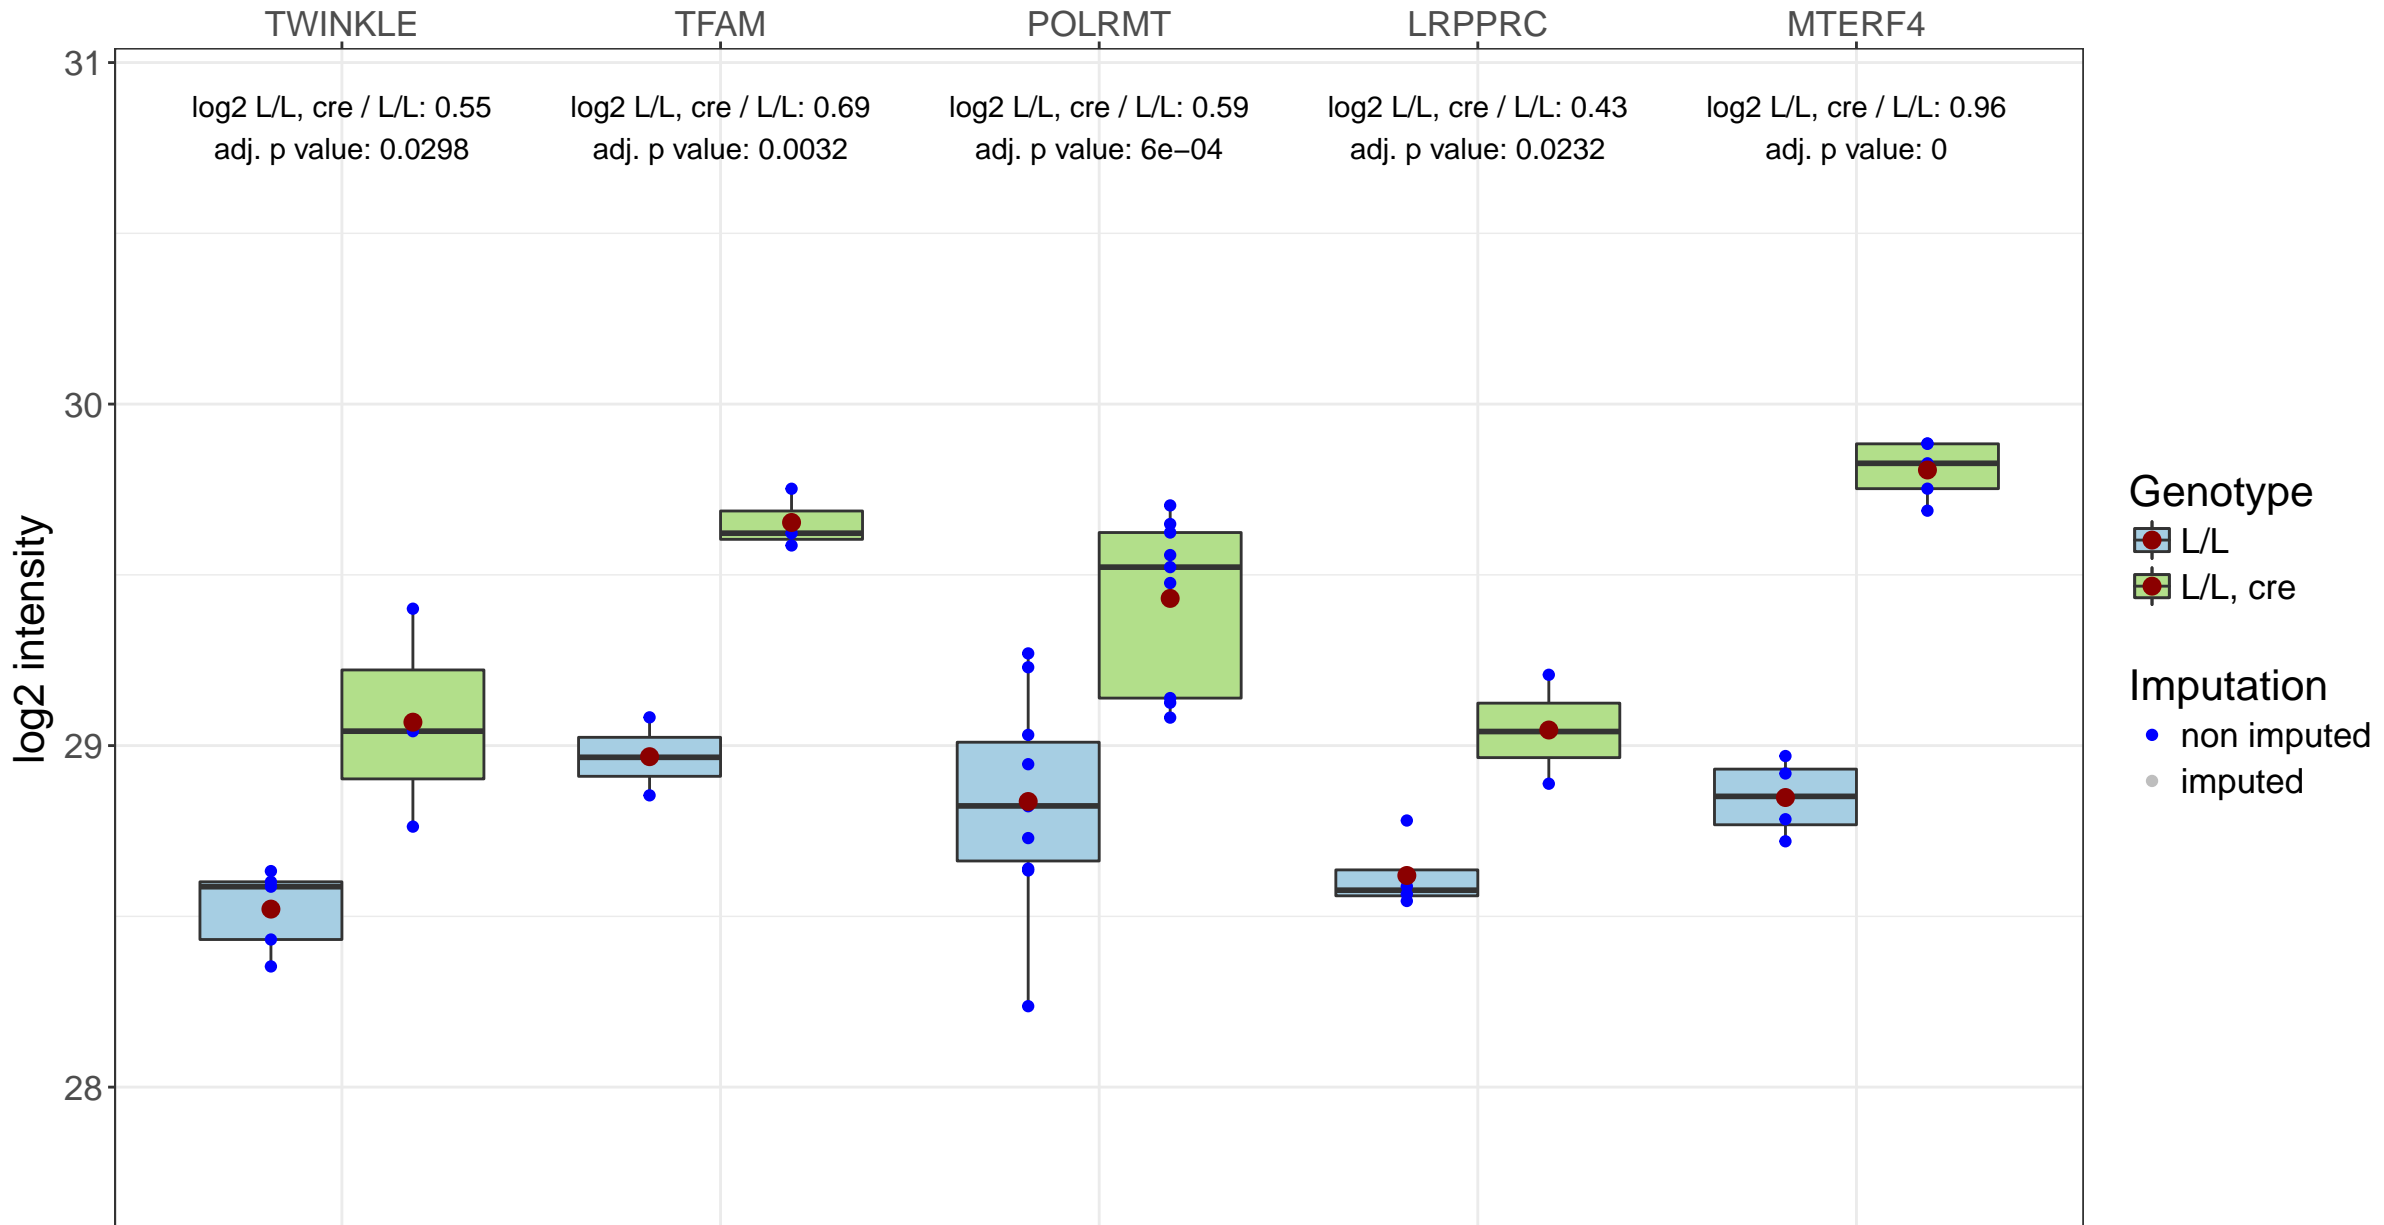

# PRDX1 / P35700

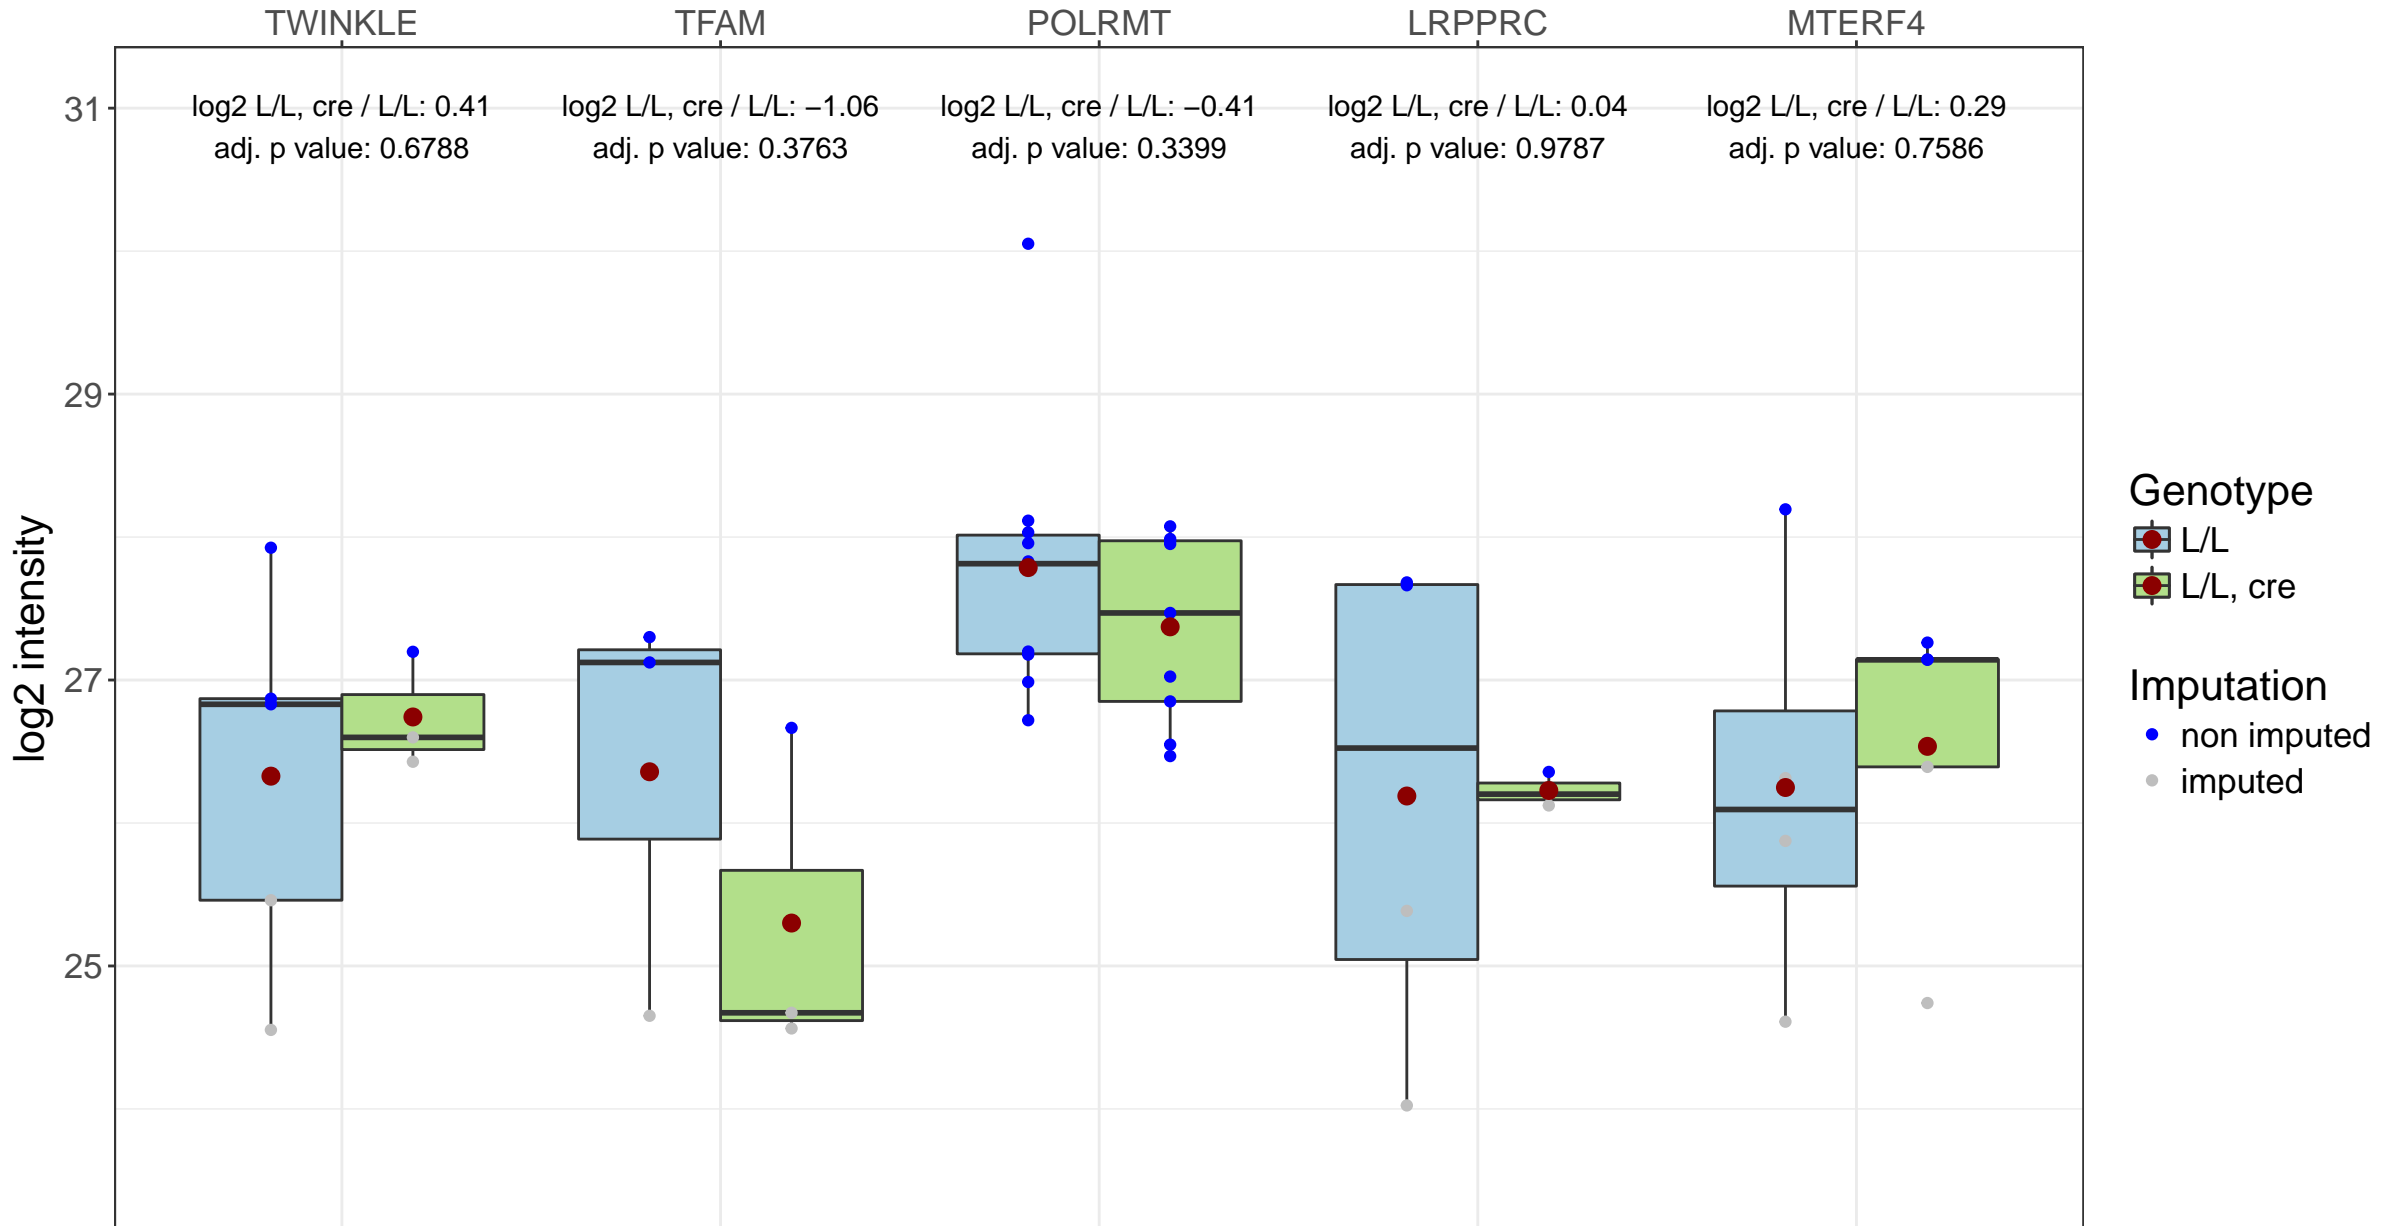

# PRDX3 / P20108

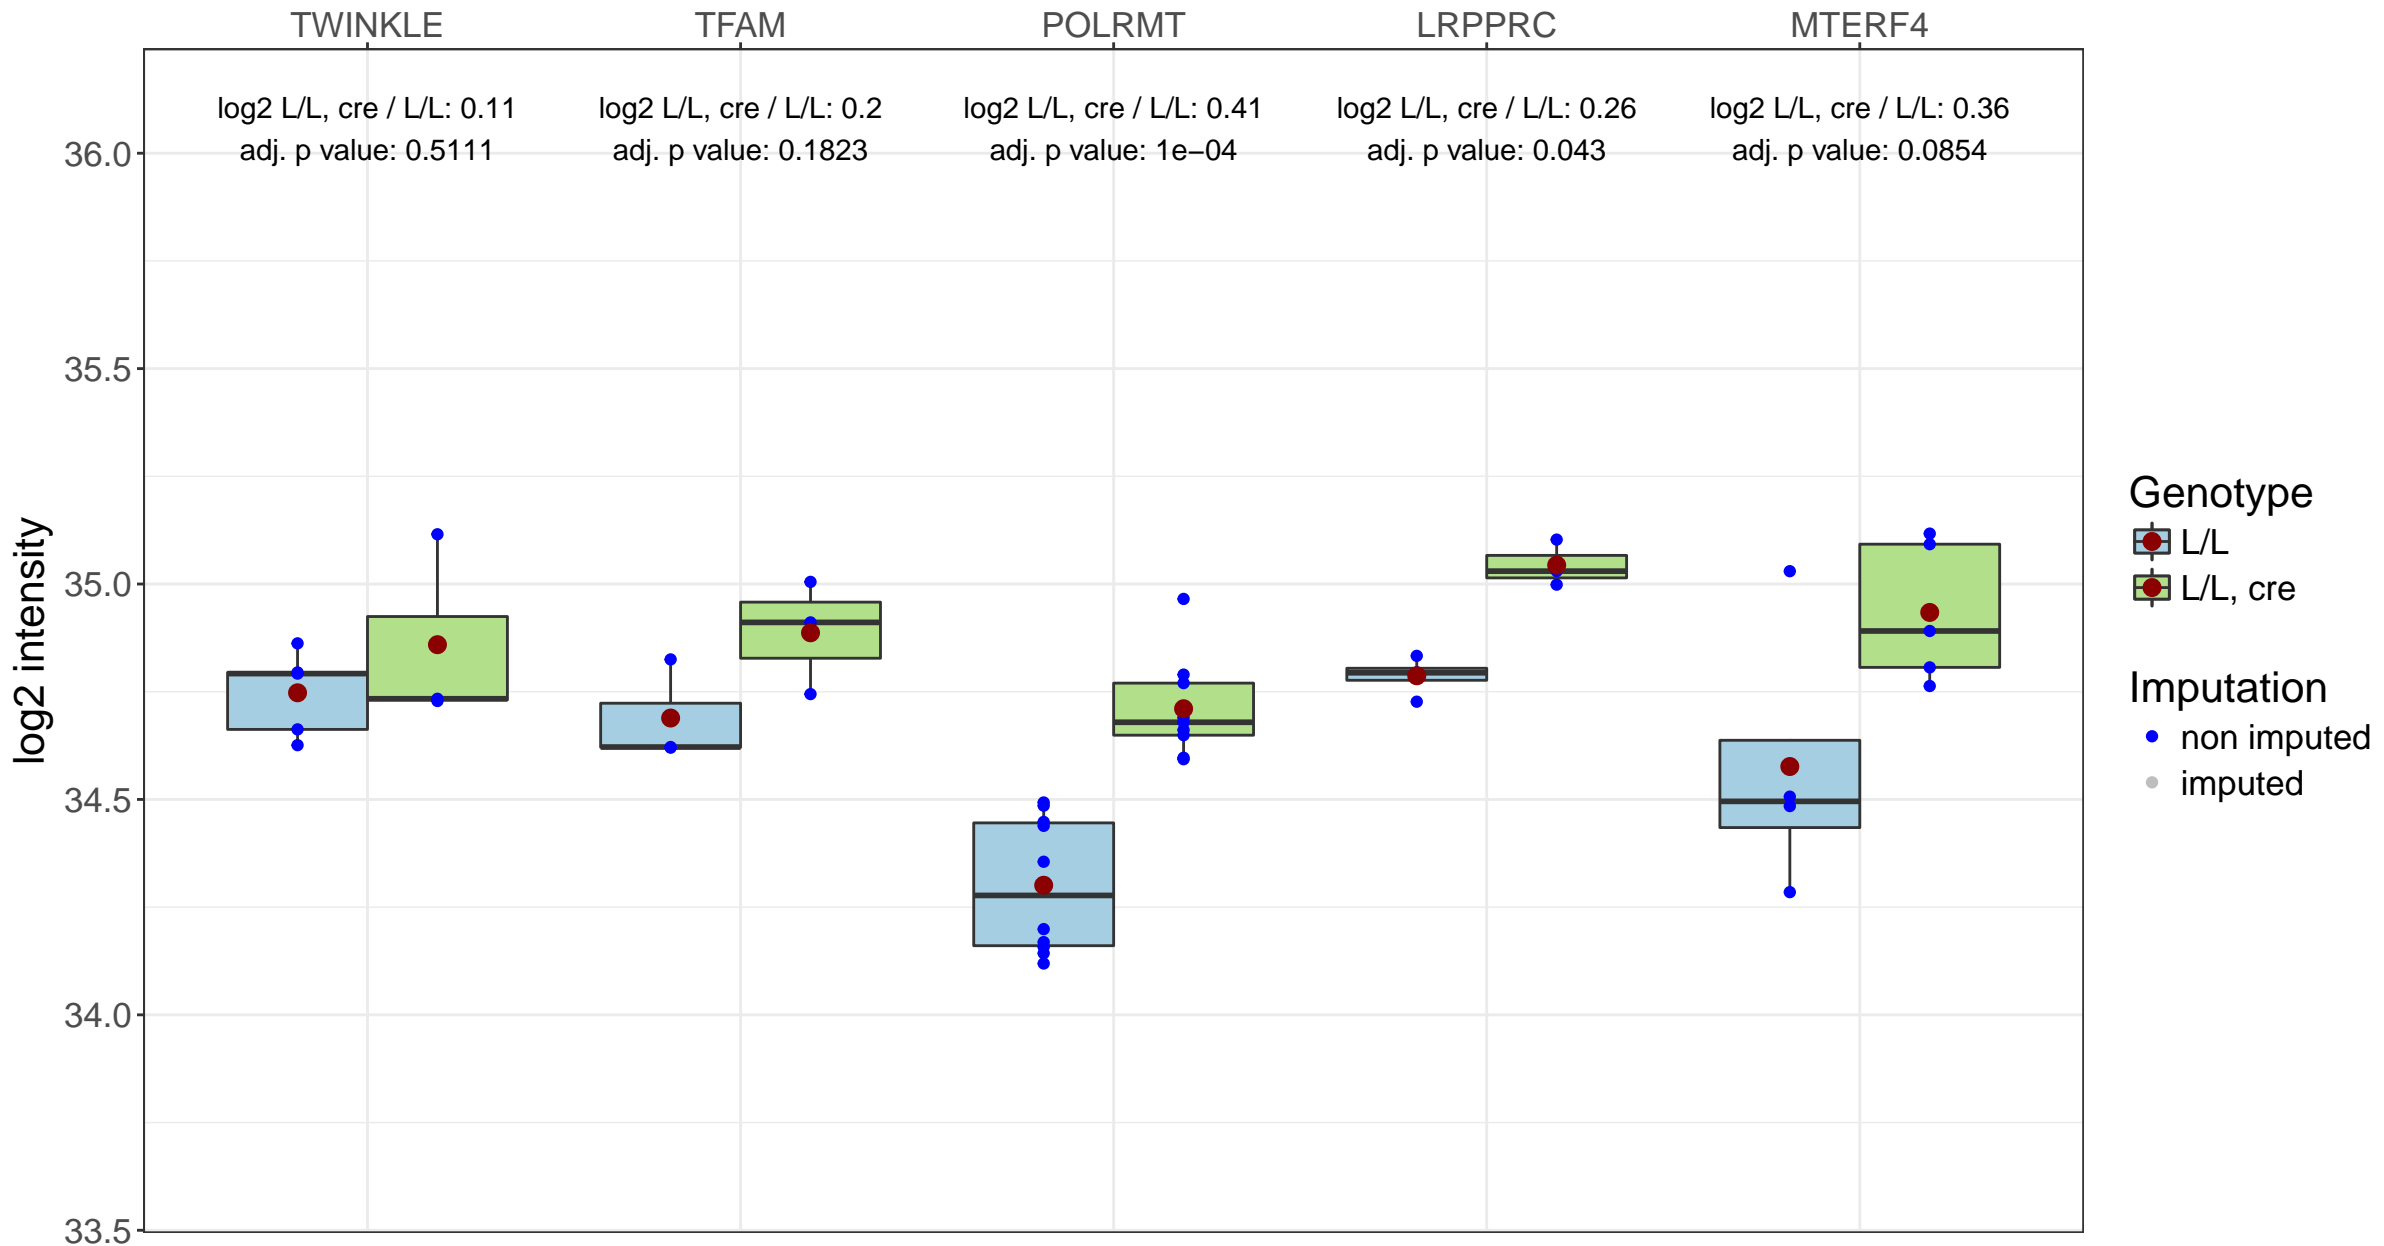

# PRDX5 / P99029-2

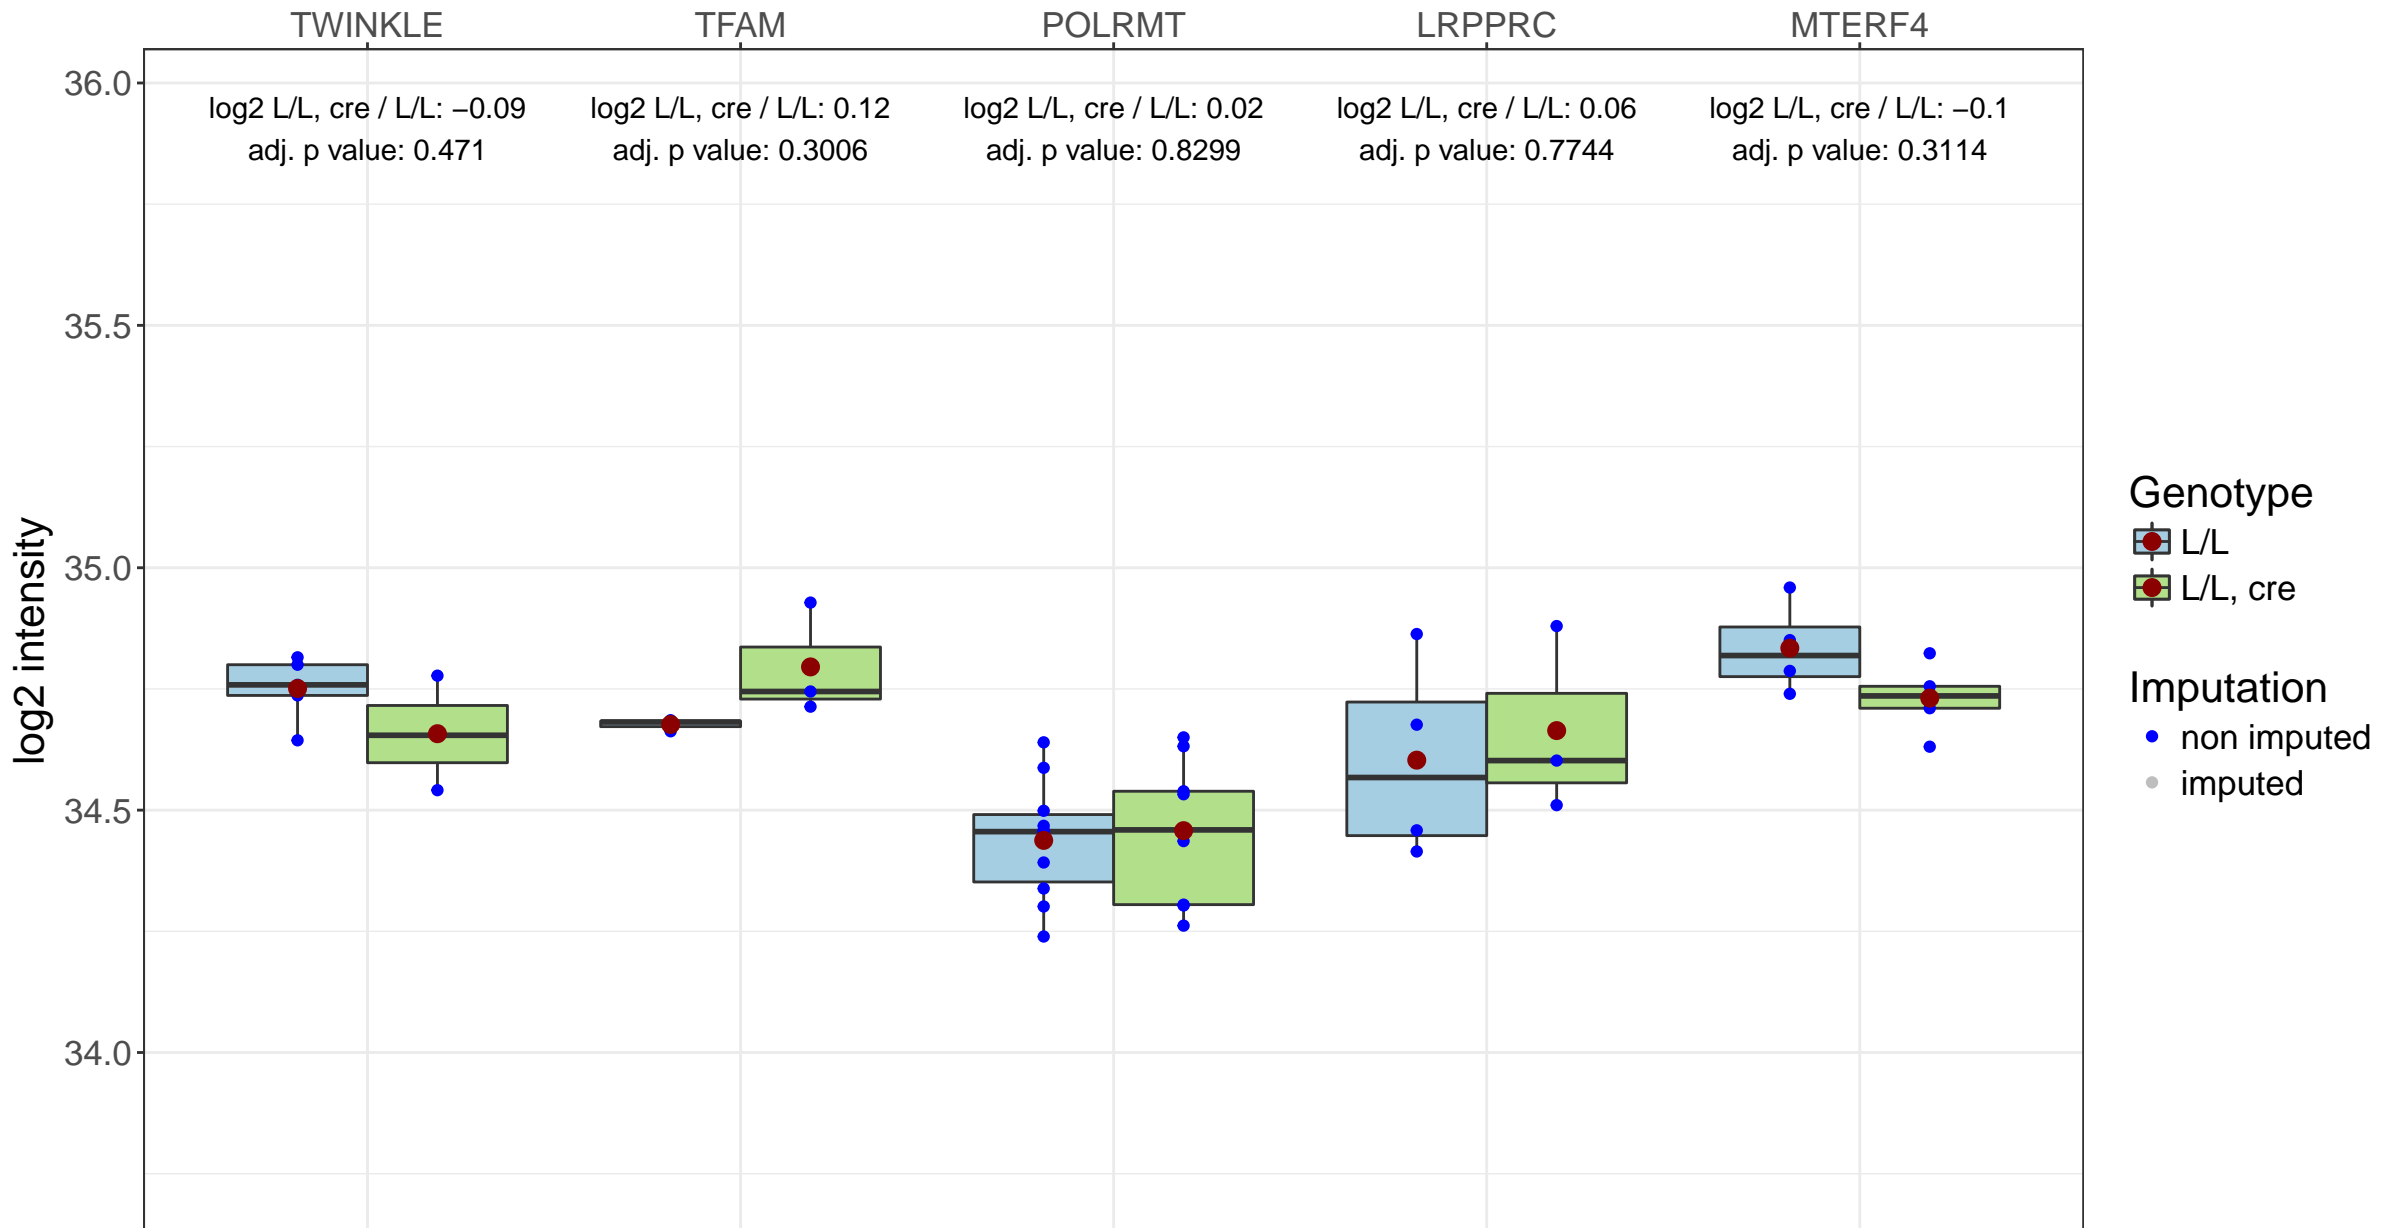

# PRODH / Q9WU79

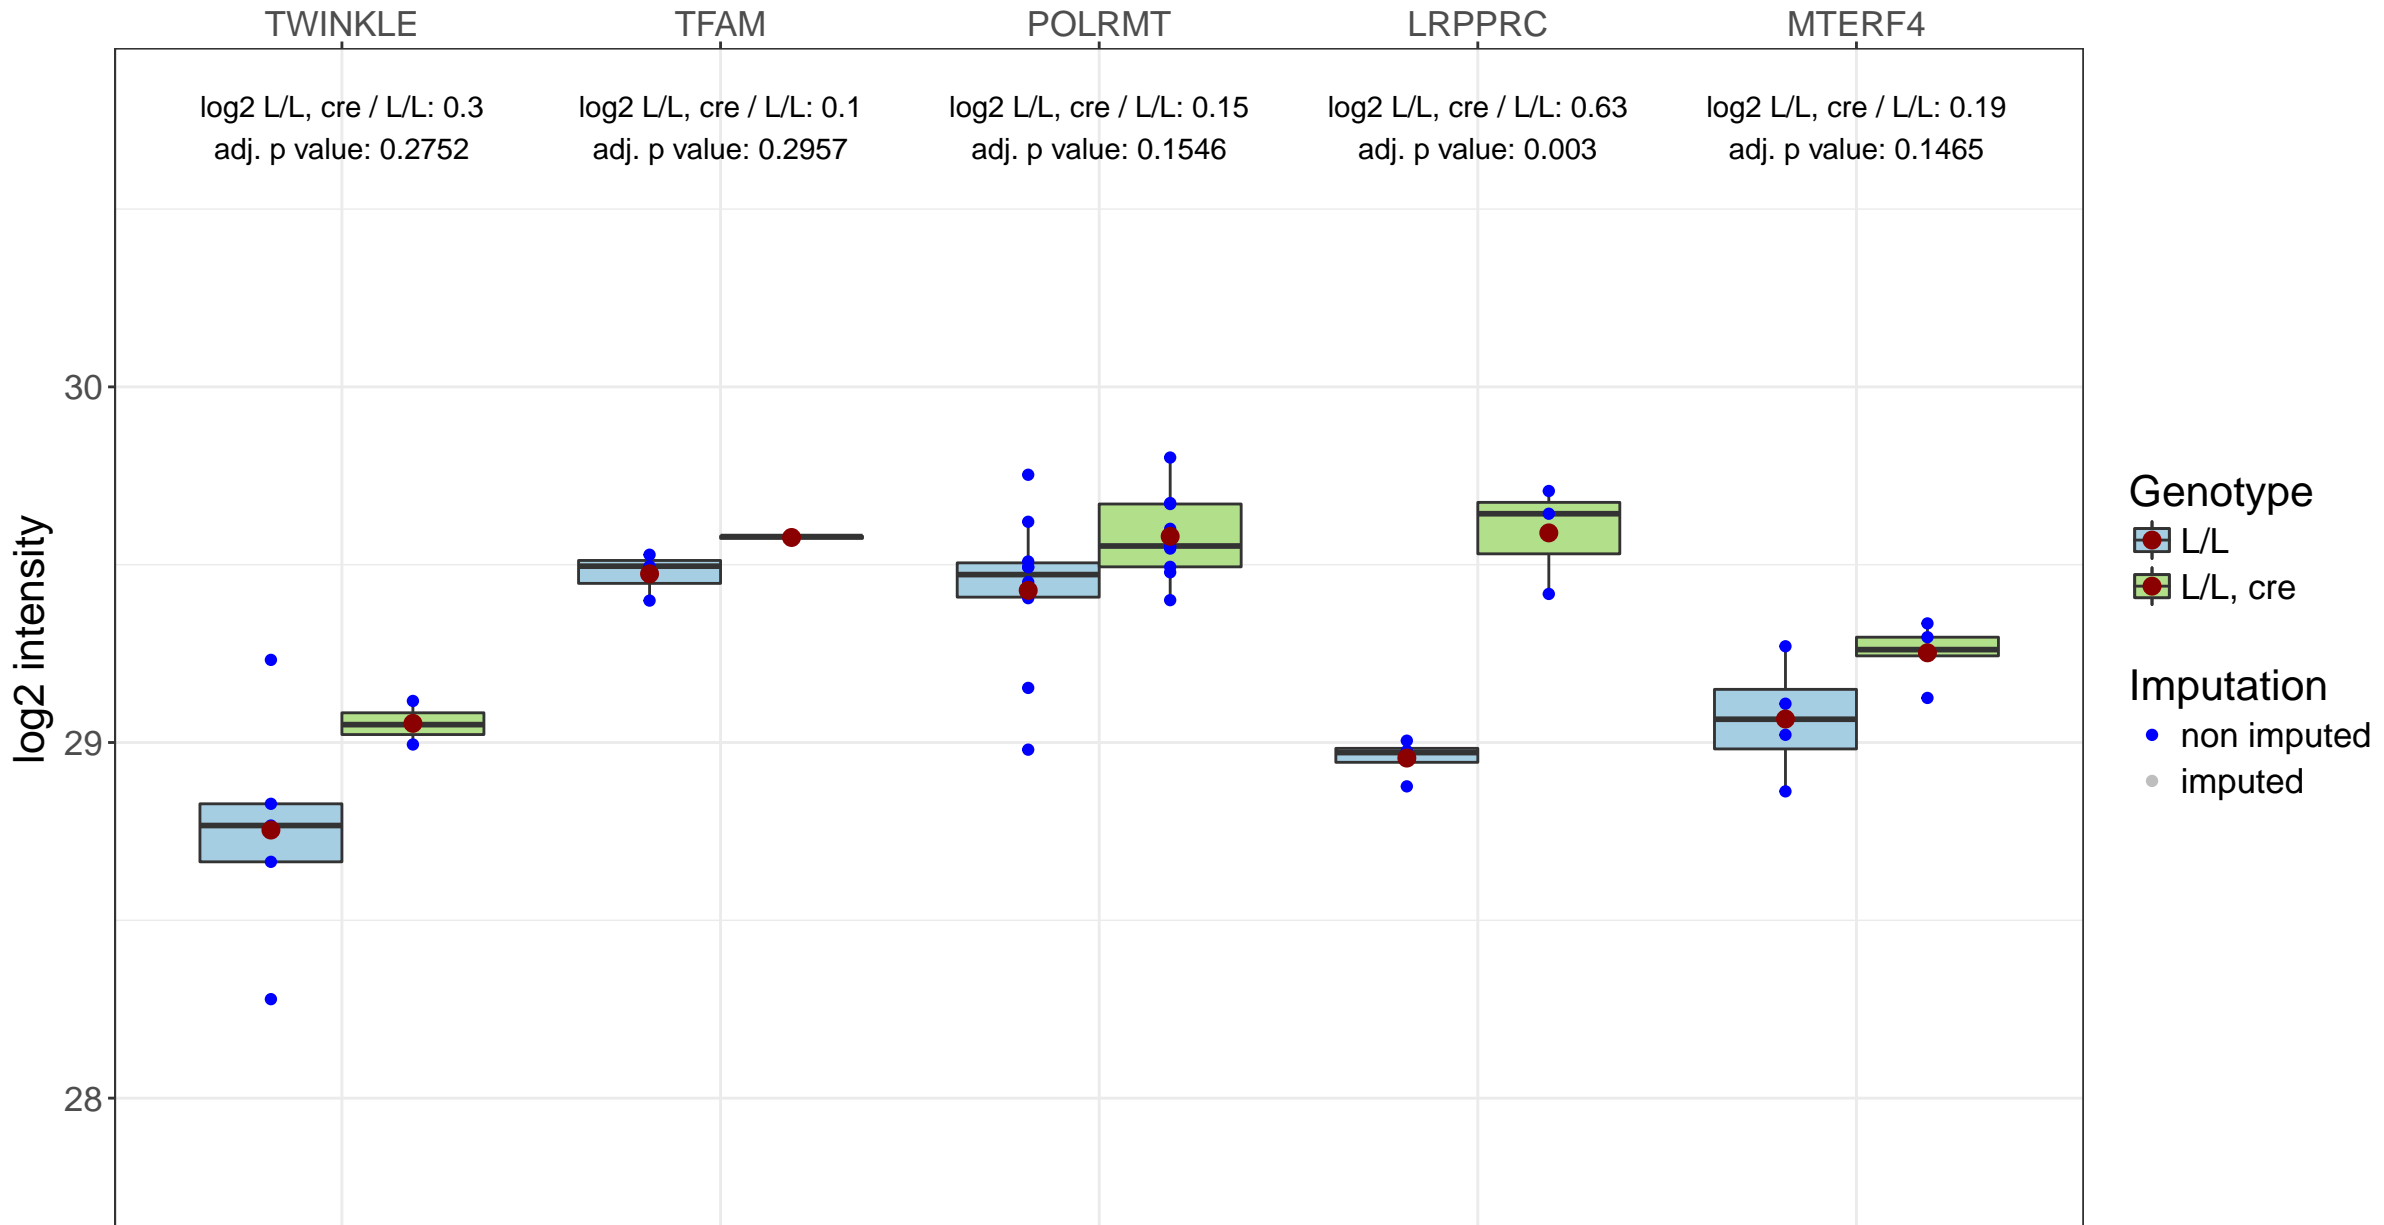



# PROSC / Q9Z2Y8

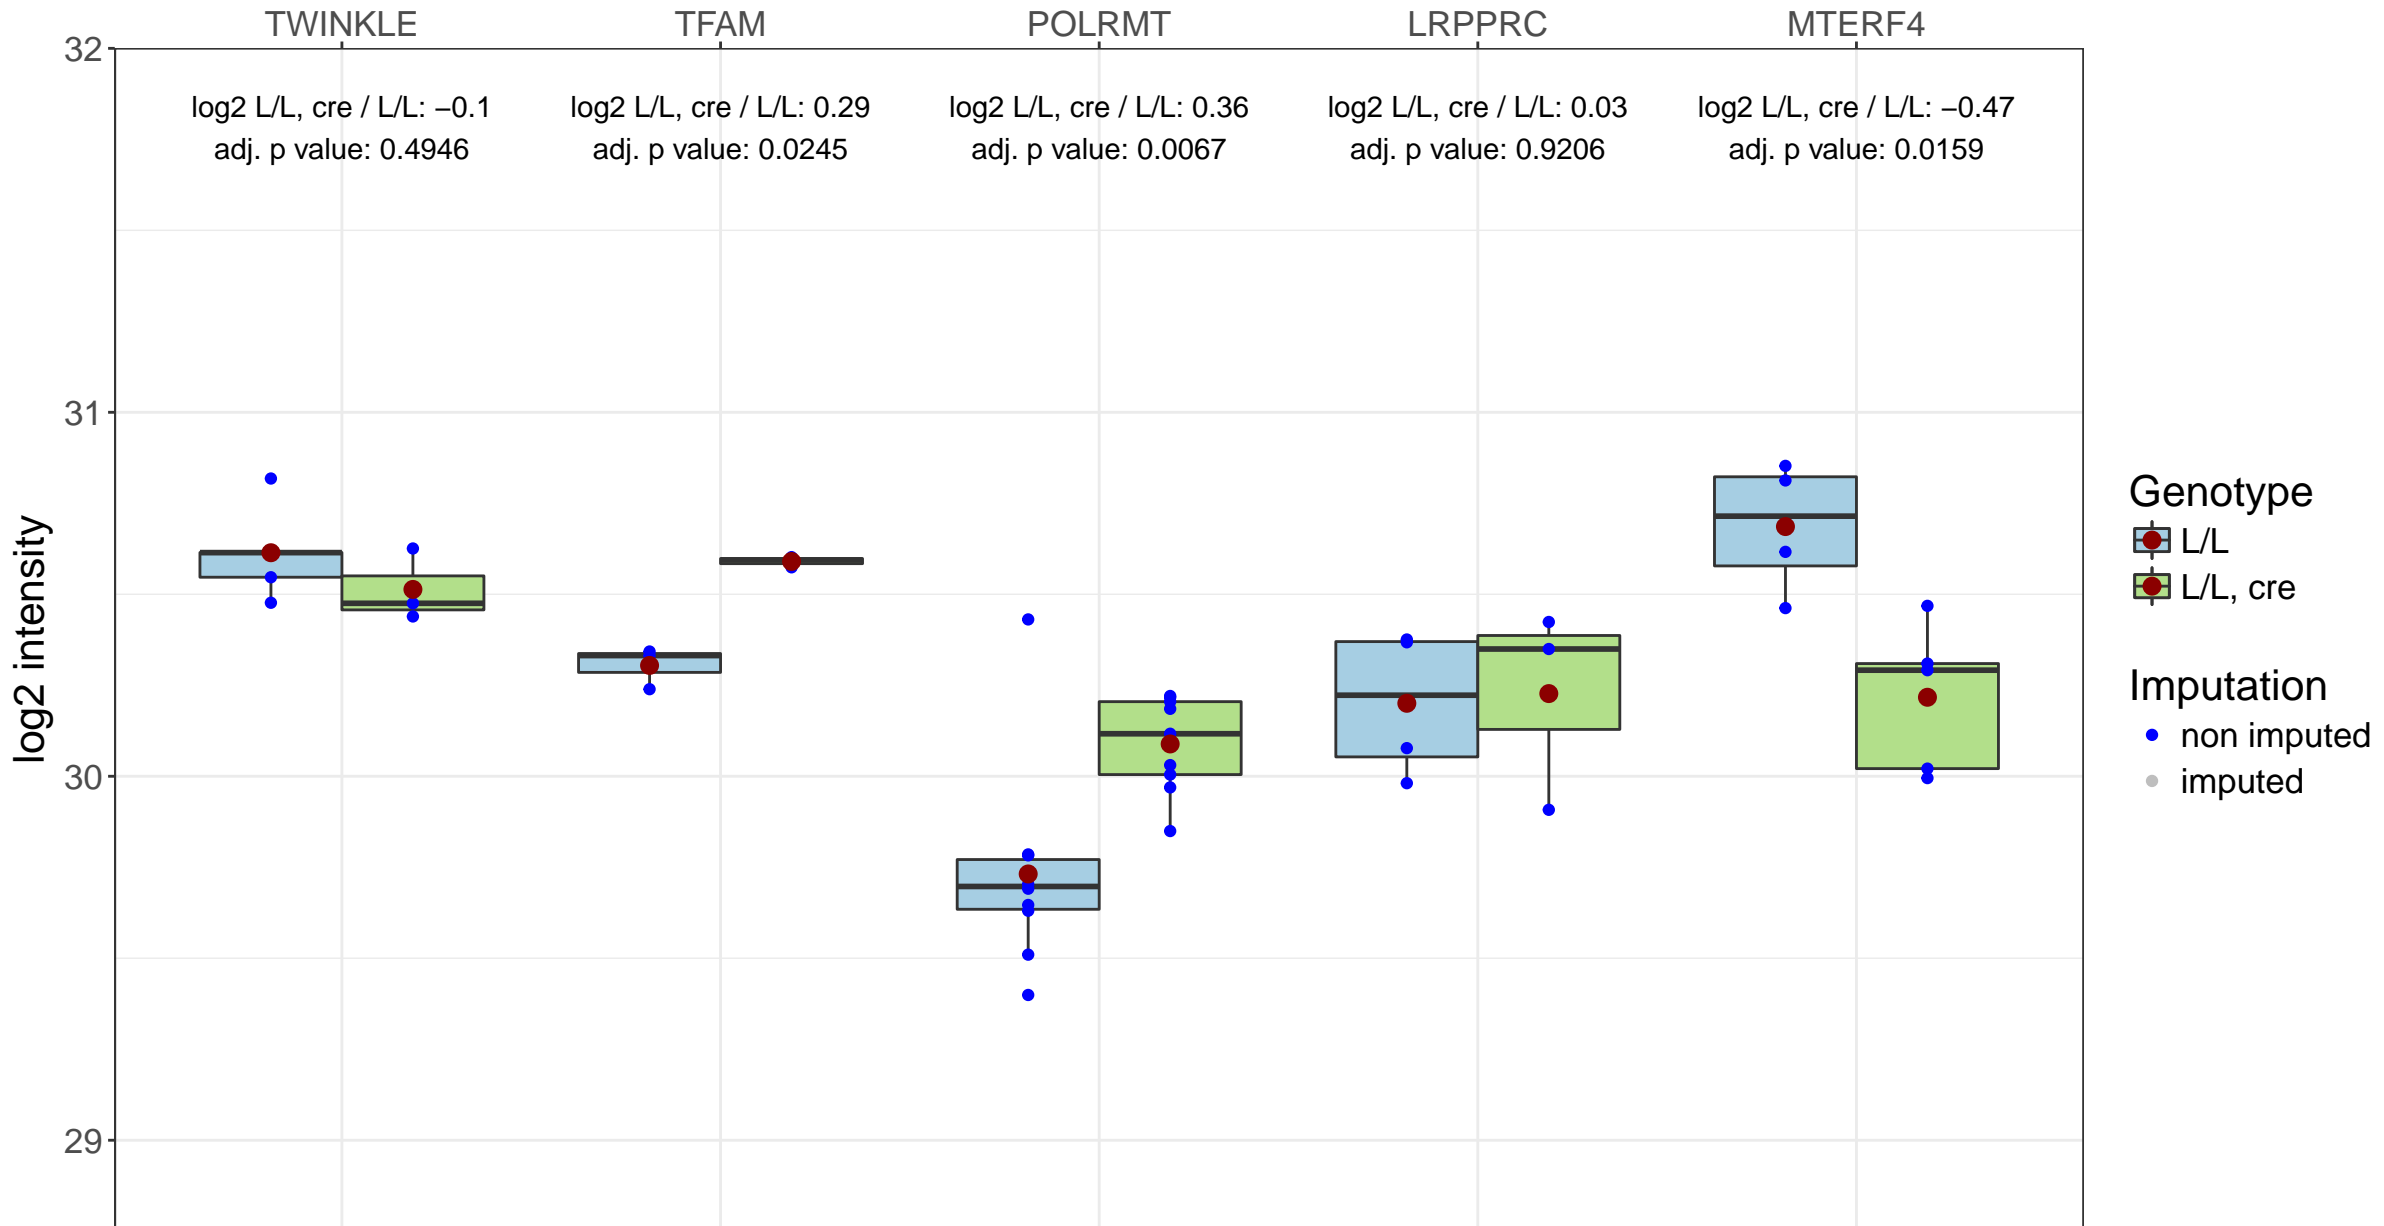

# PSAP / E9PZ00

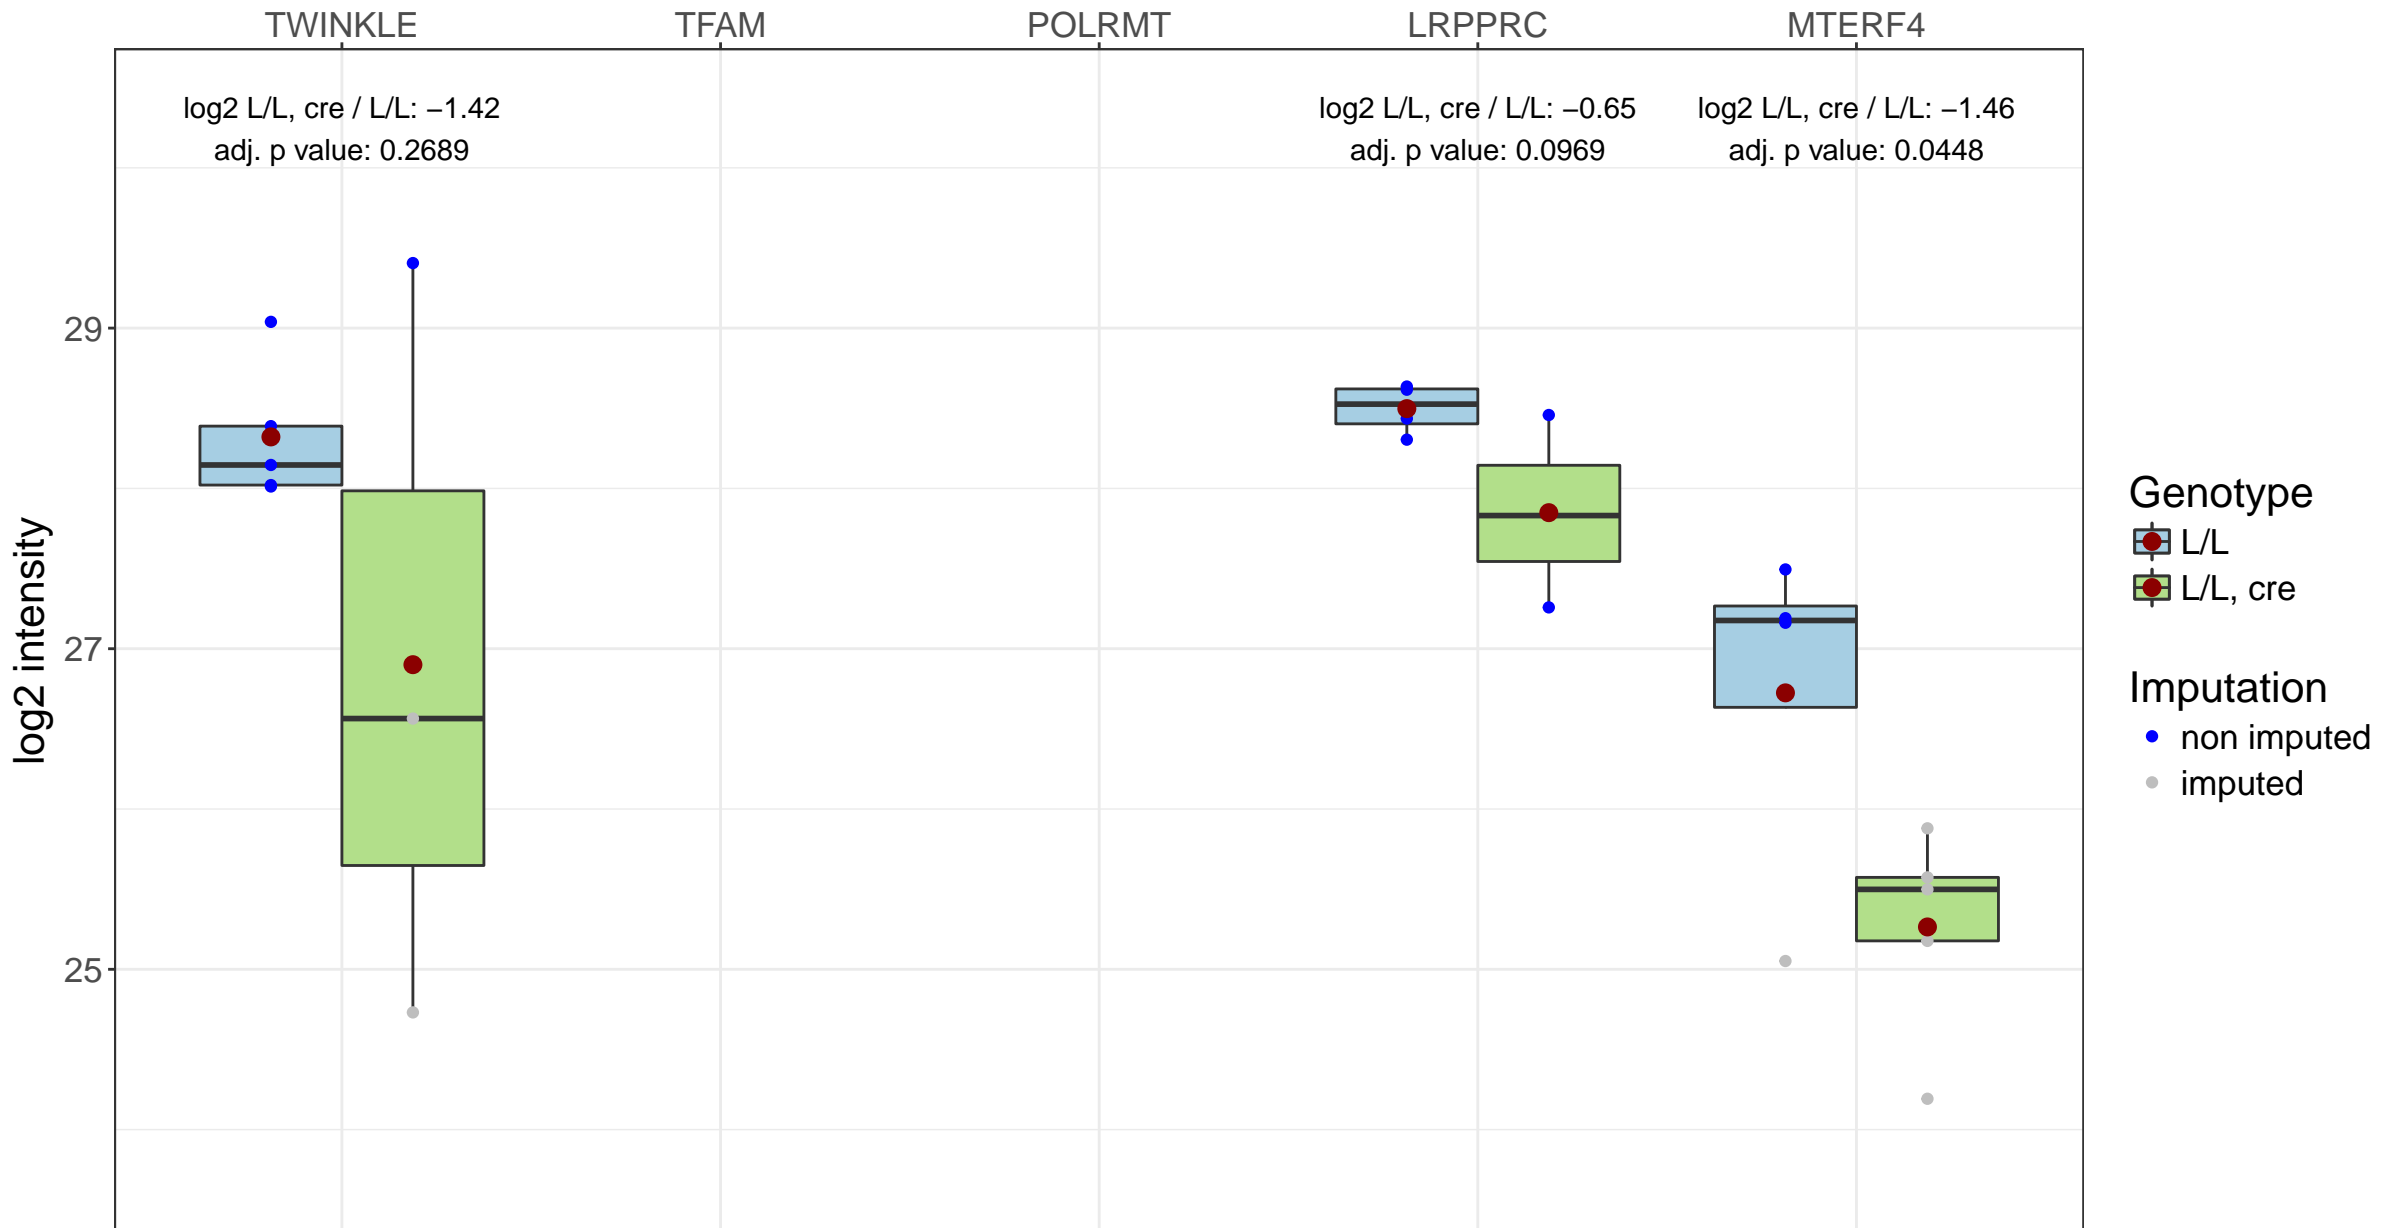

# PTCD1 / Q8C2E4

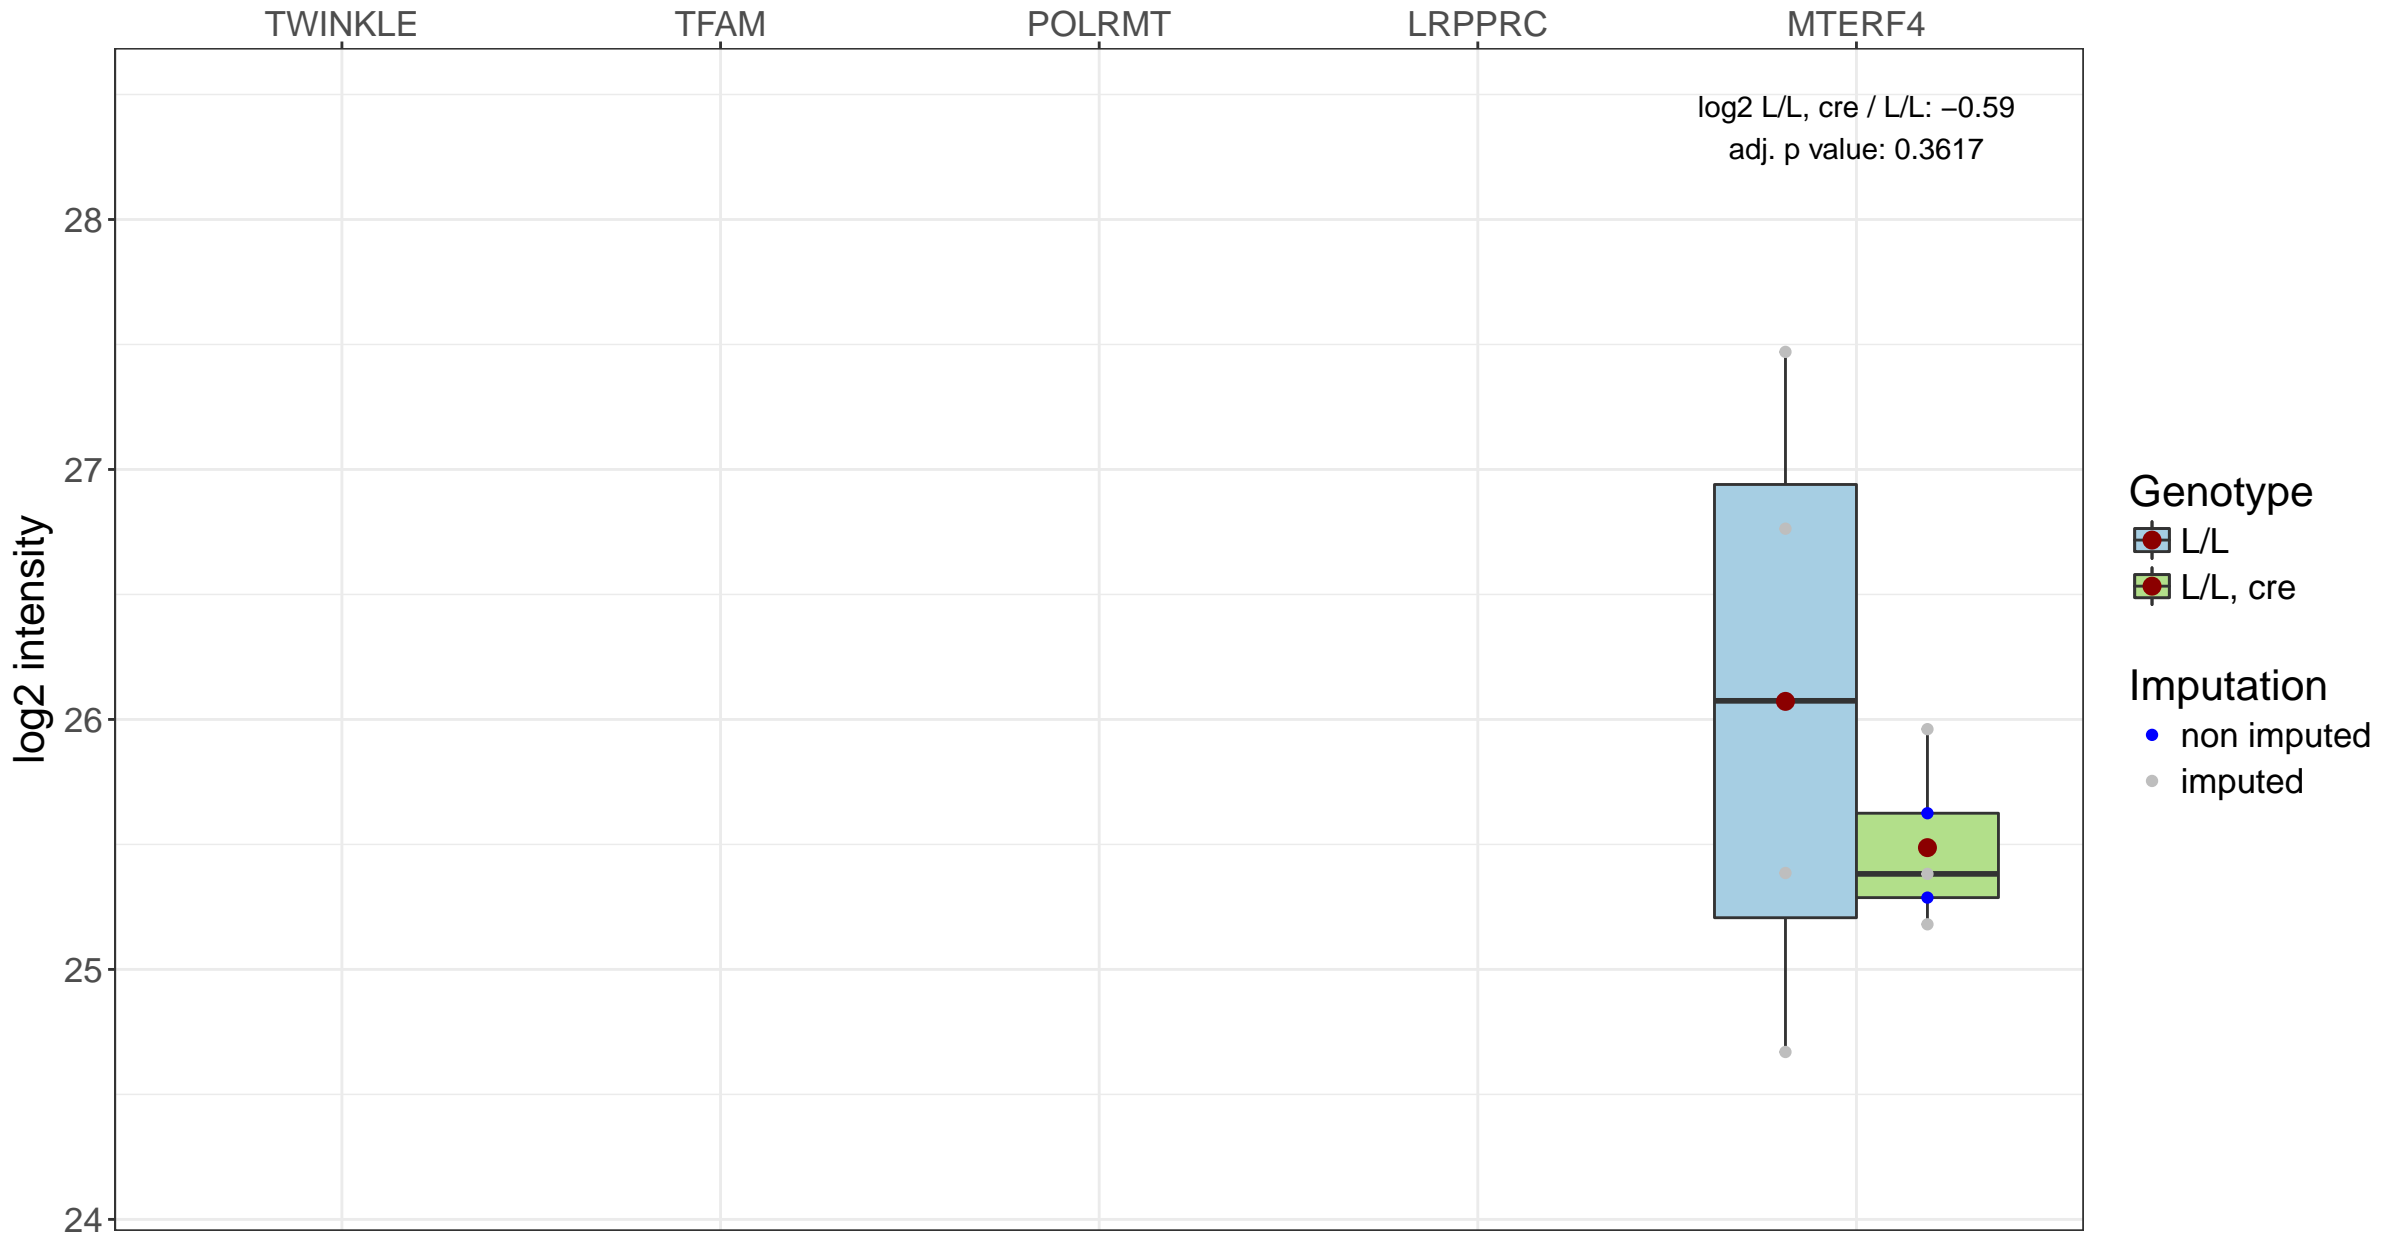

# PTCD2 / Q8R3K3

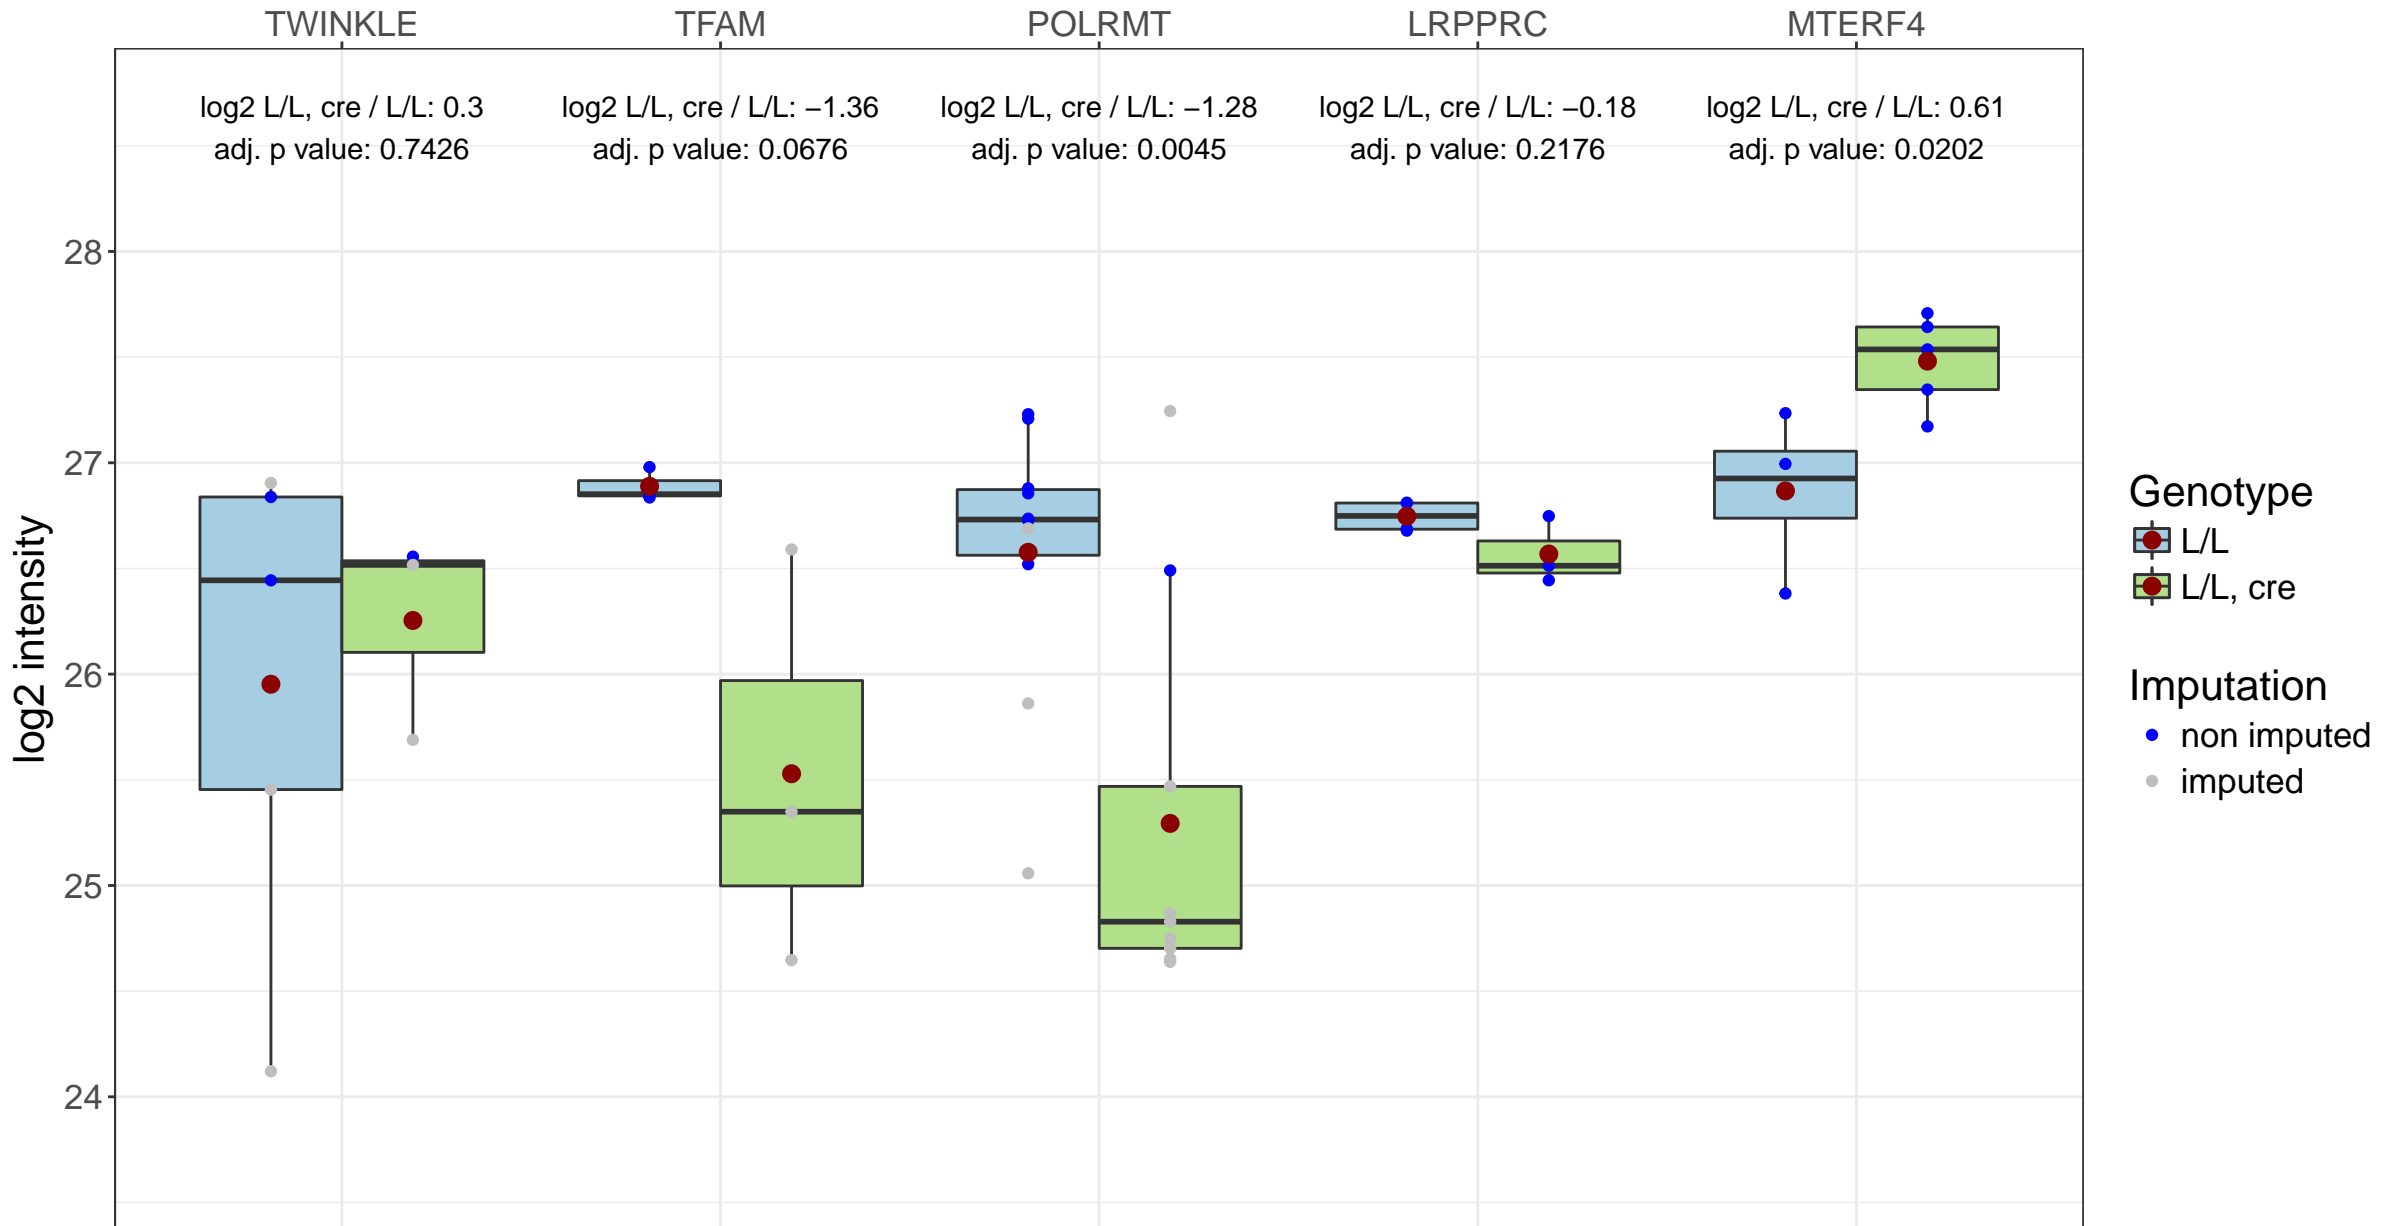

# PTGES2 / Q8BWM0

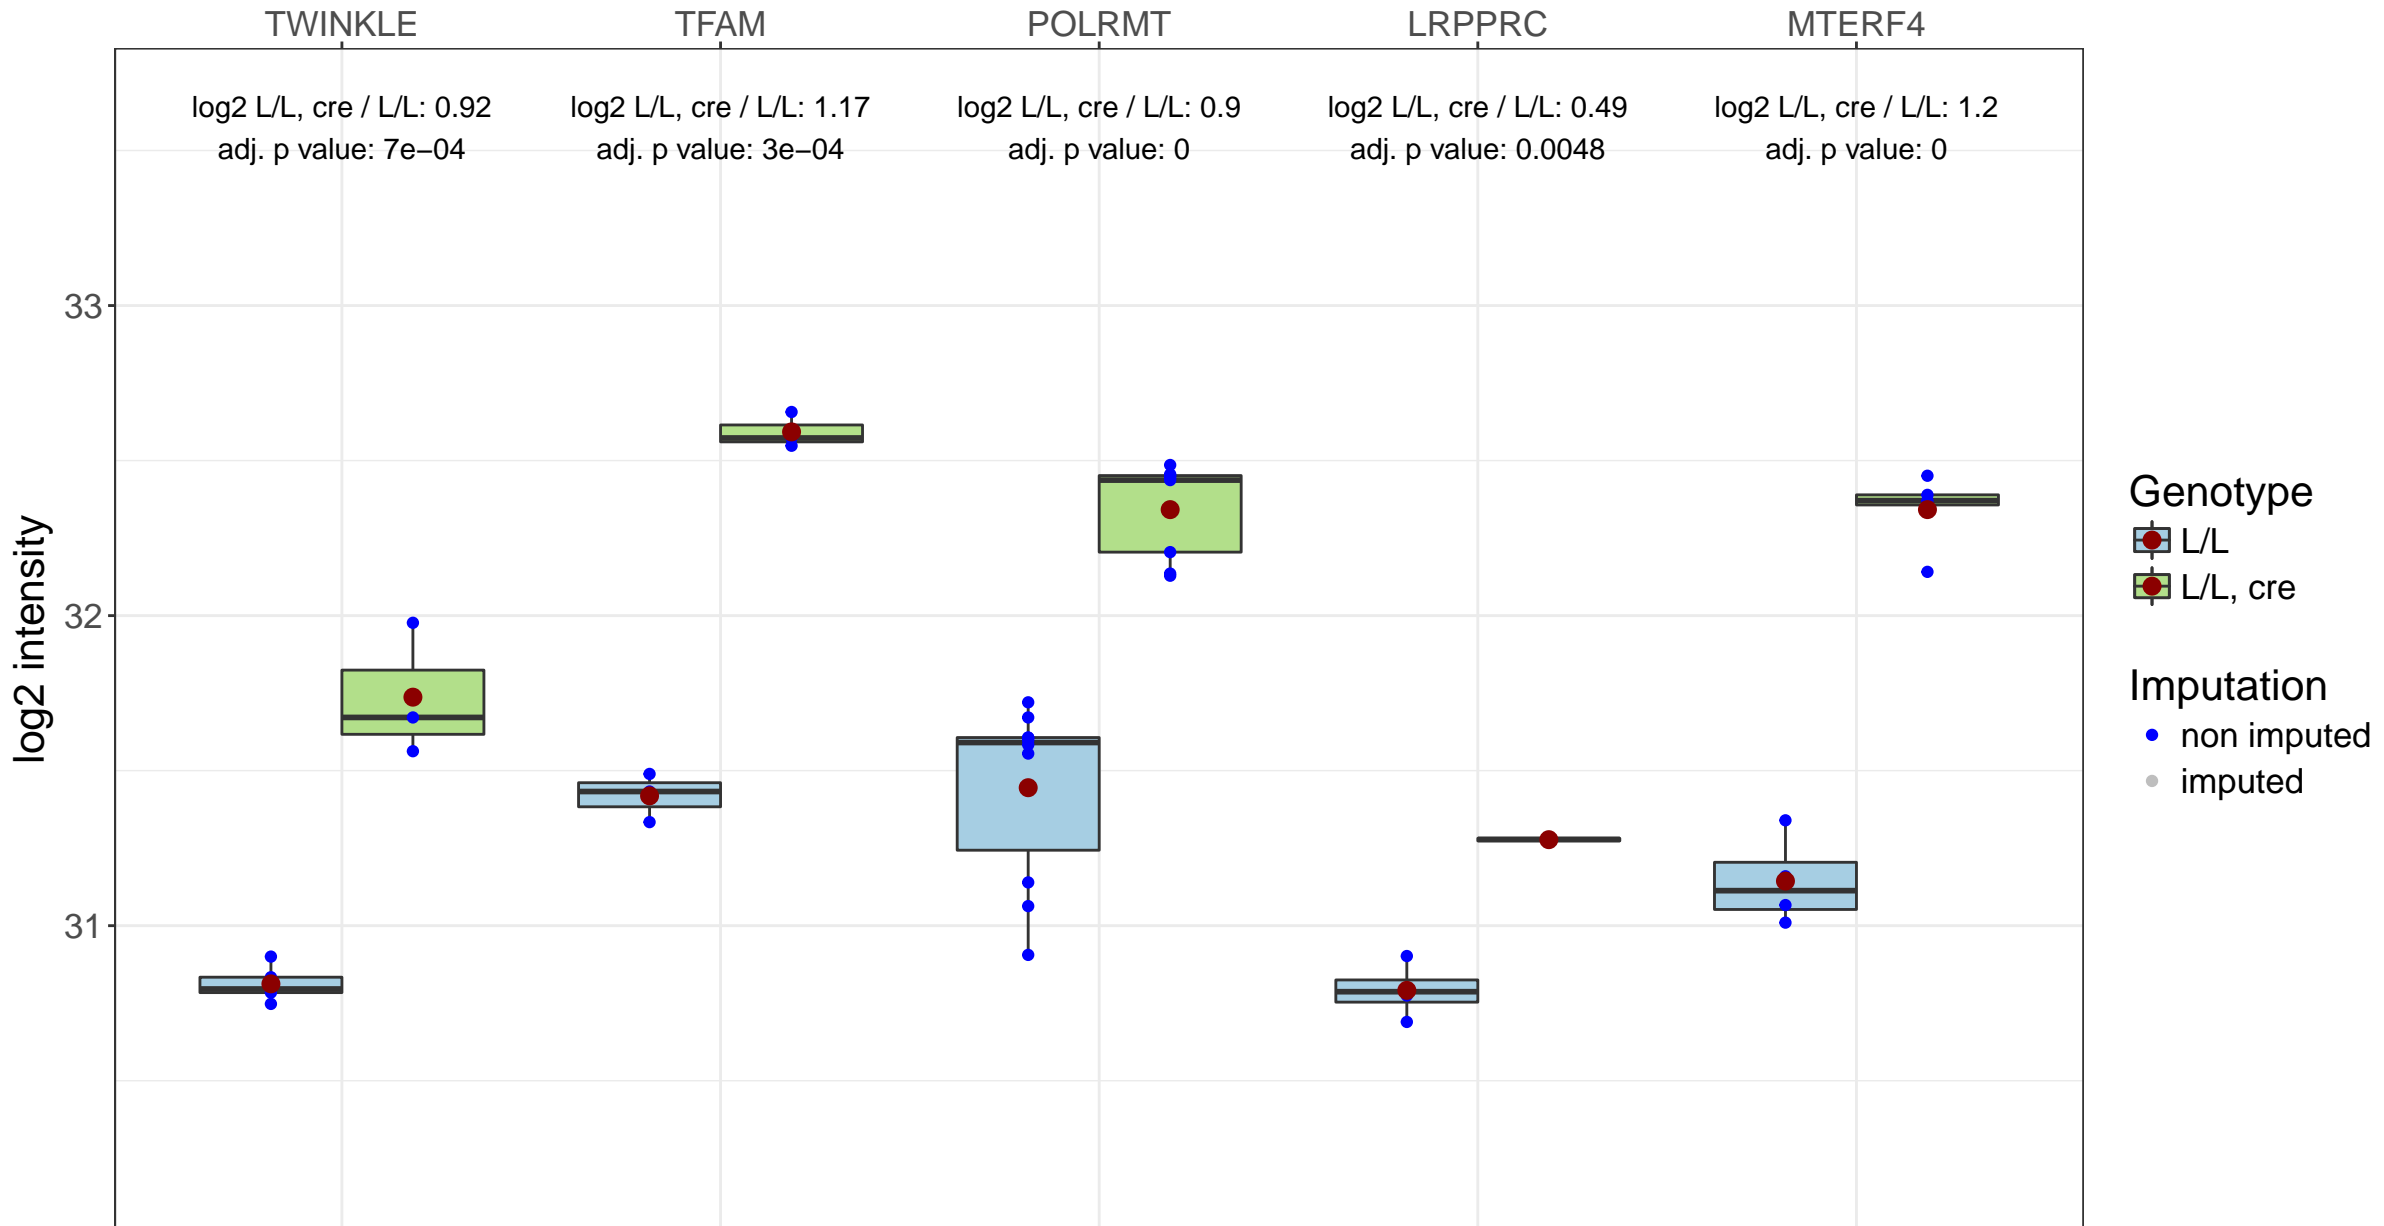

# PTGES3 / Q9R0Q7

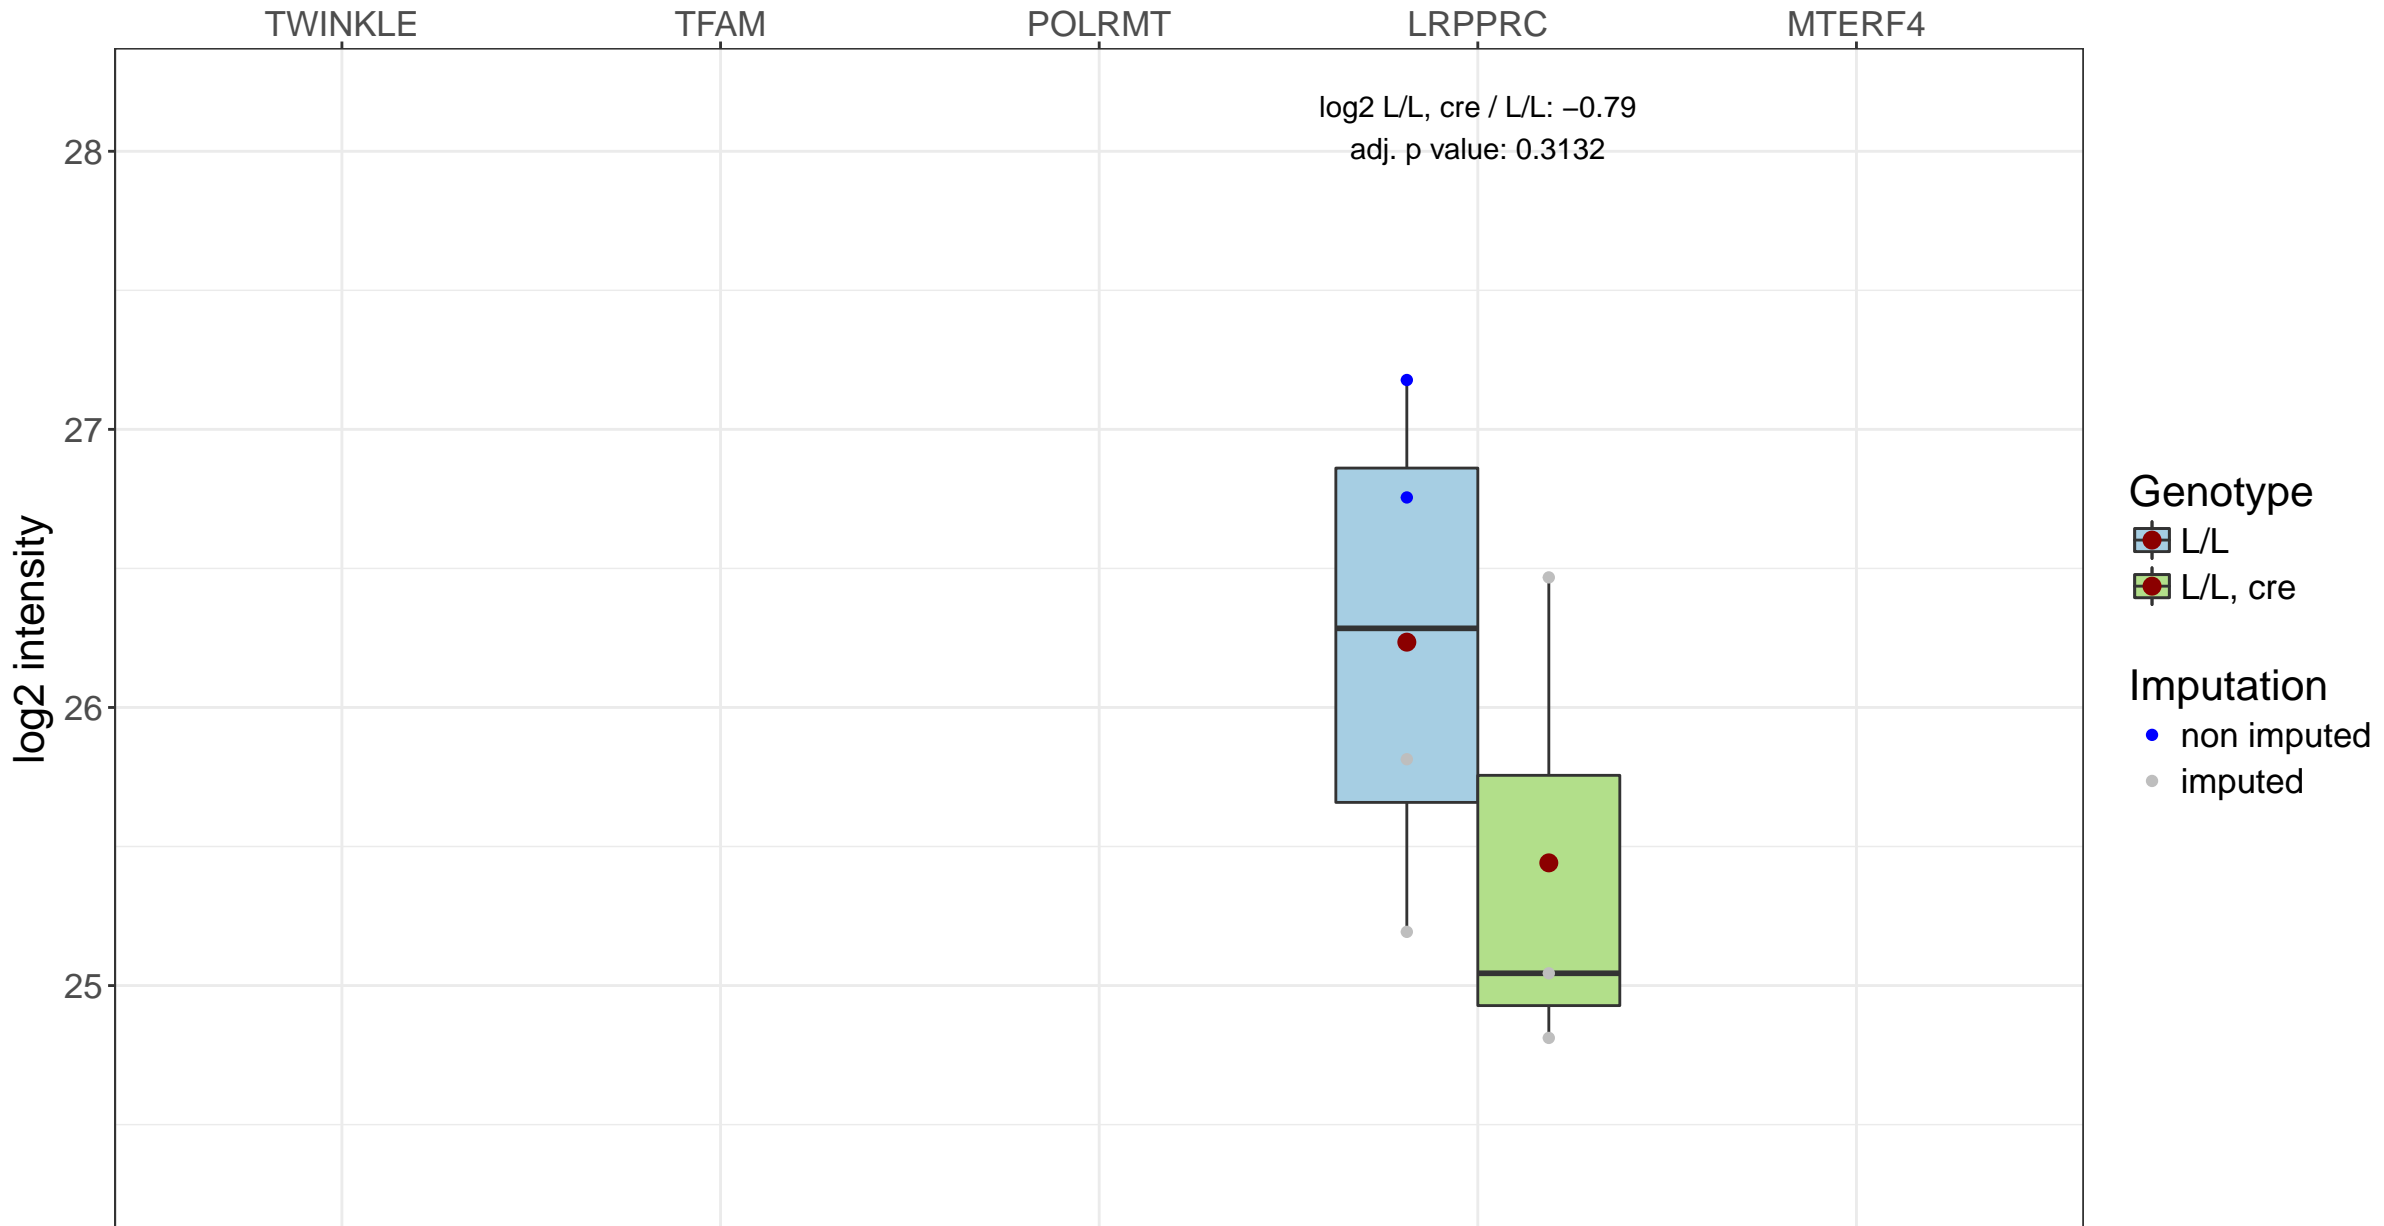

# PTMA / P26350

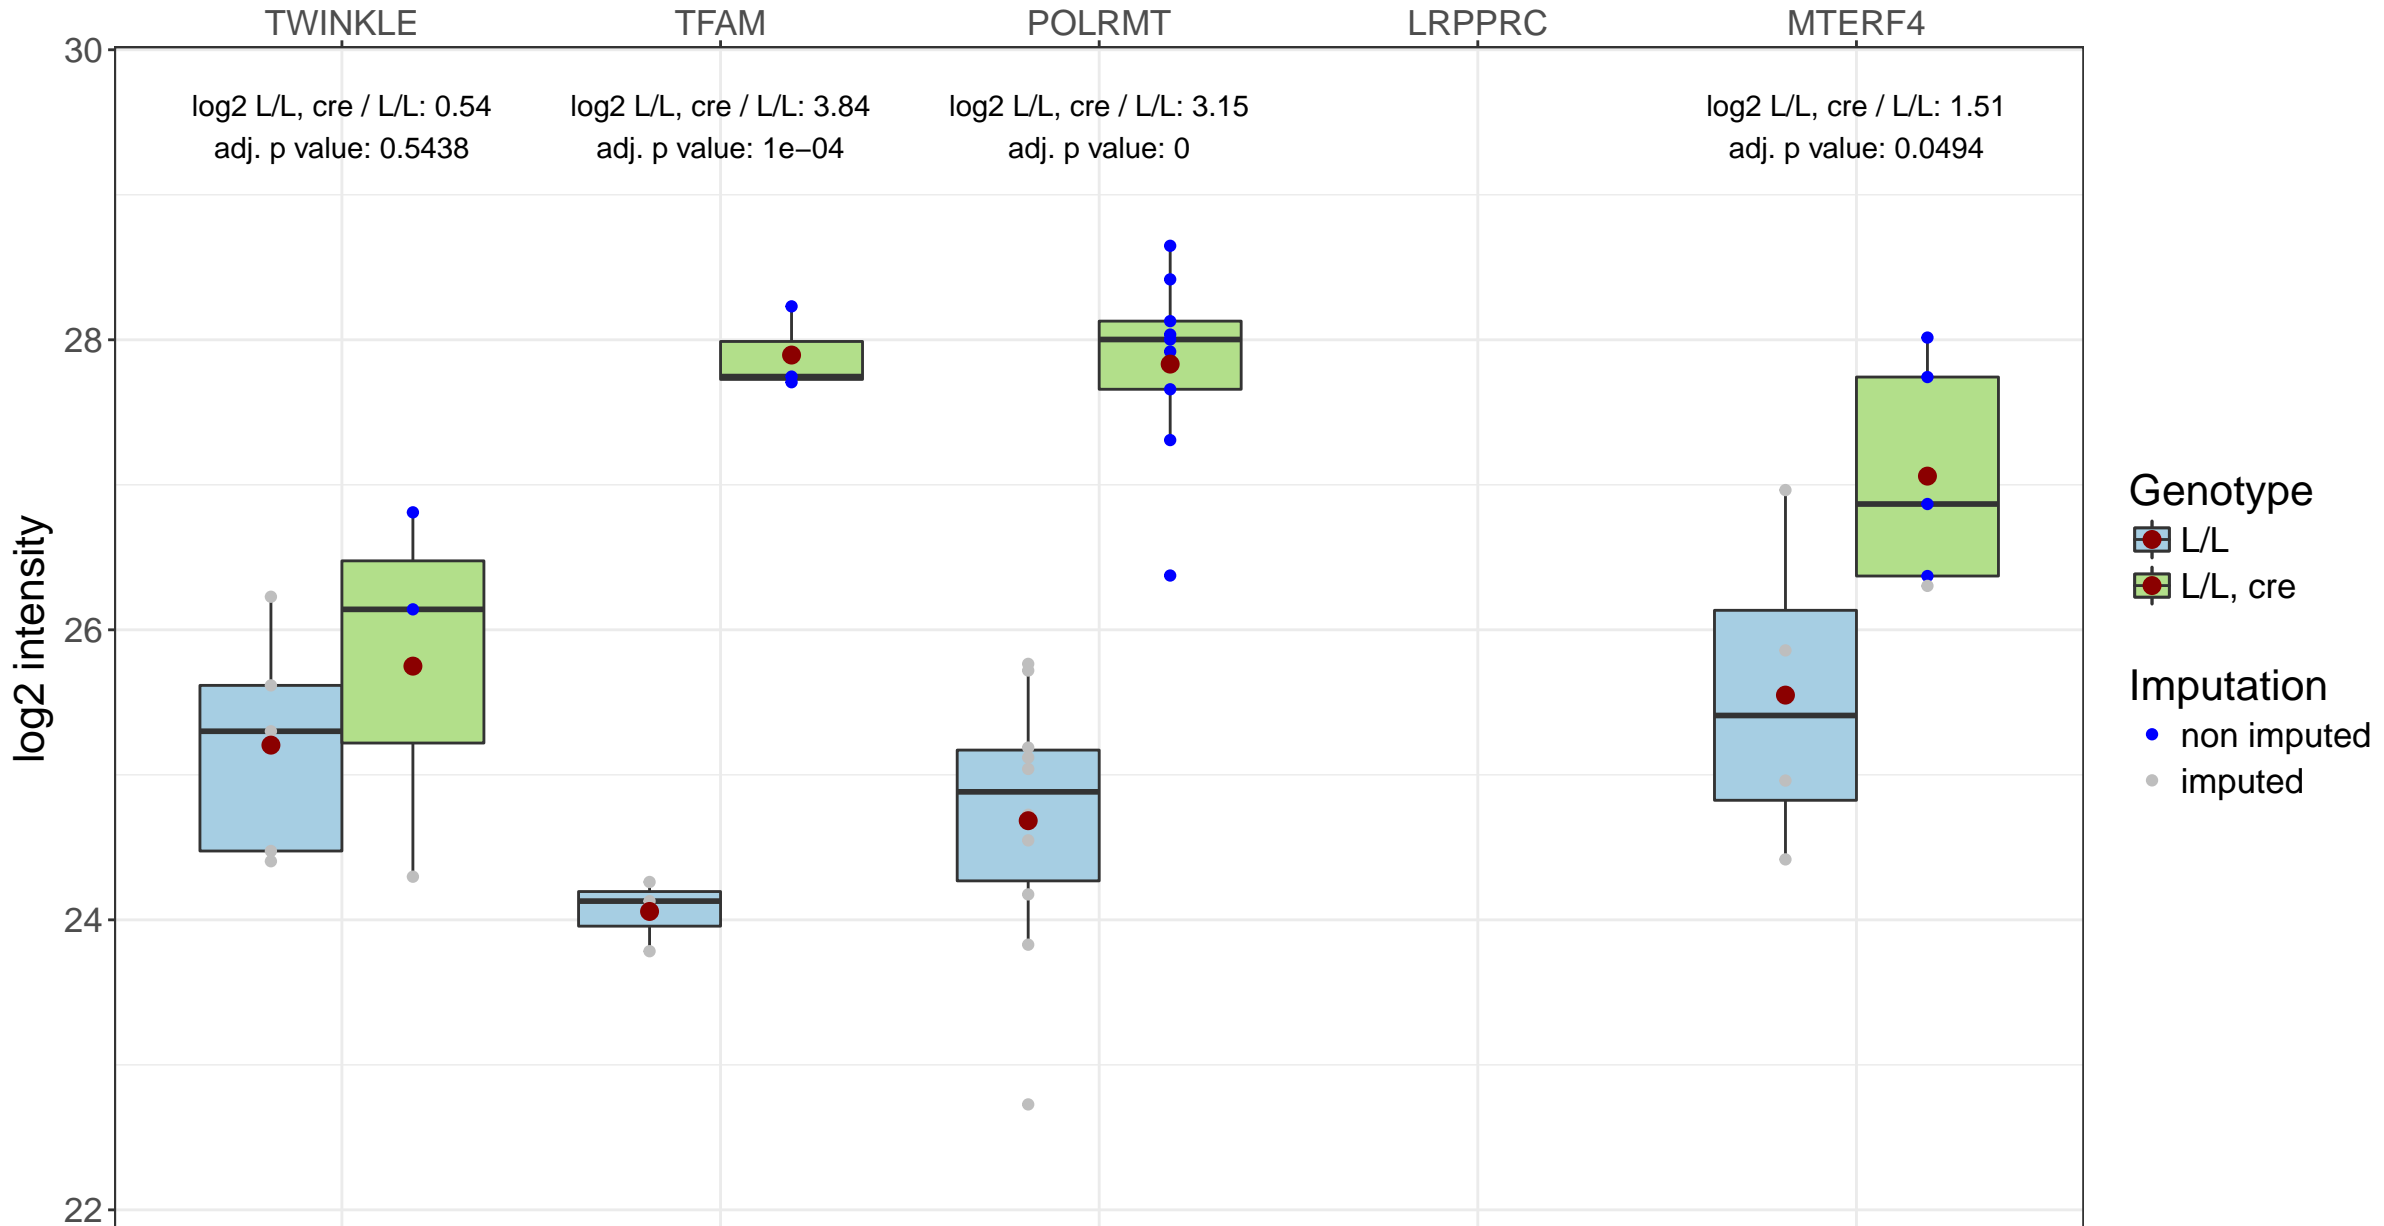

# PTMS / Q9D0J8

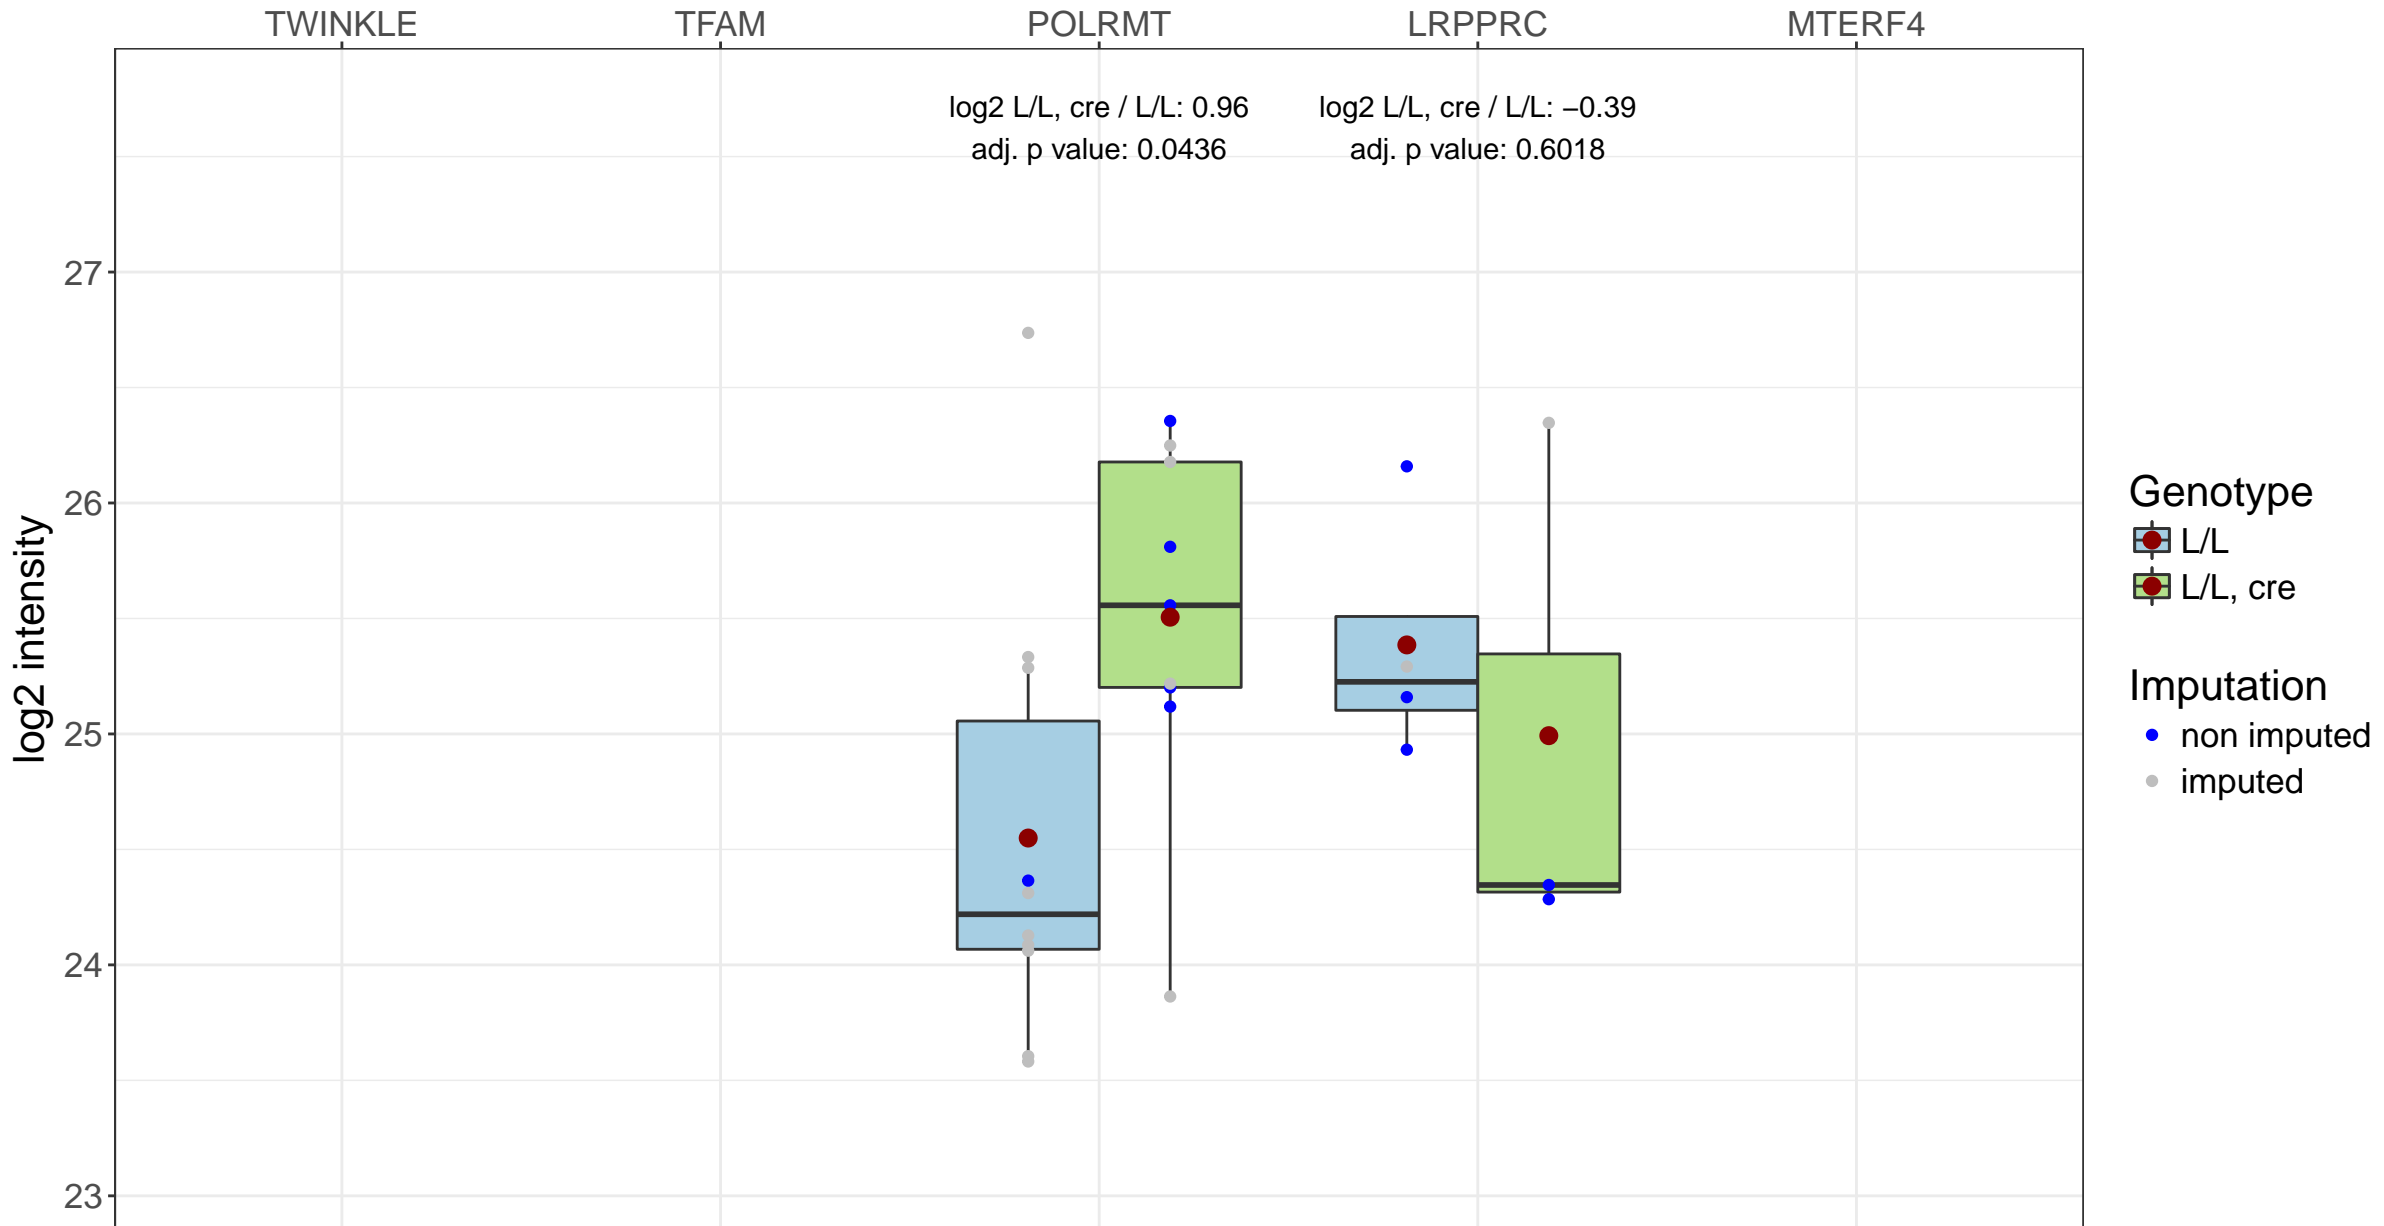



# PTPMT1 / Q66GT5

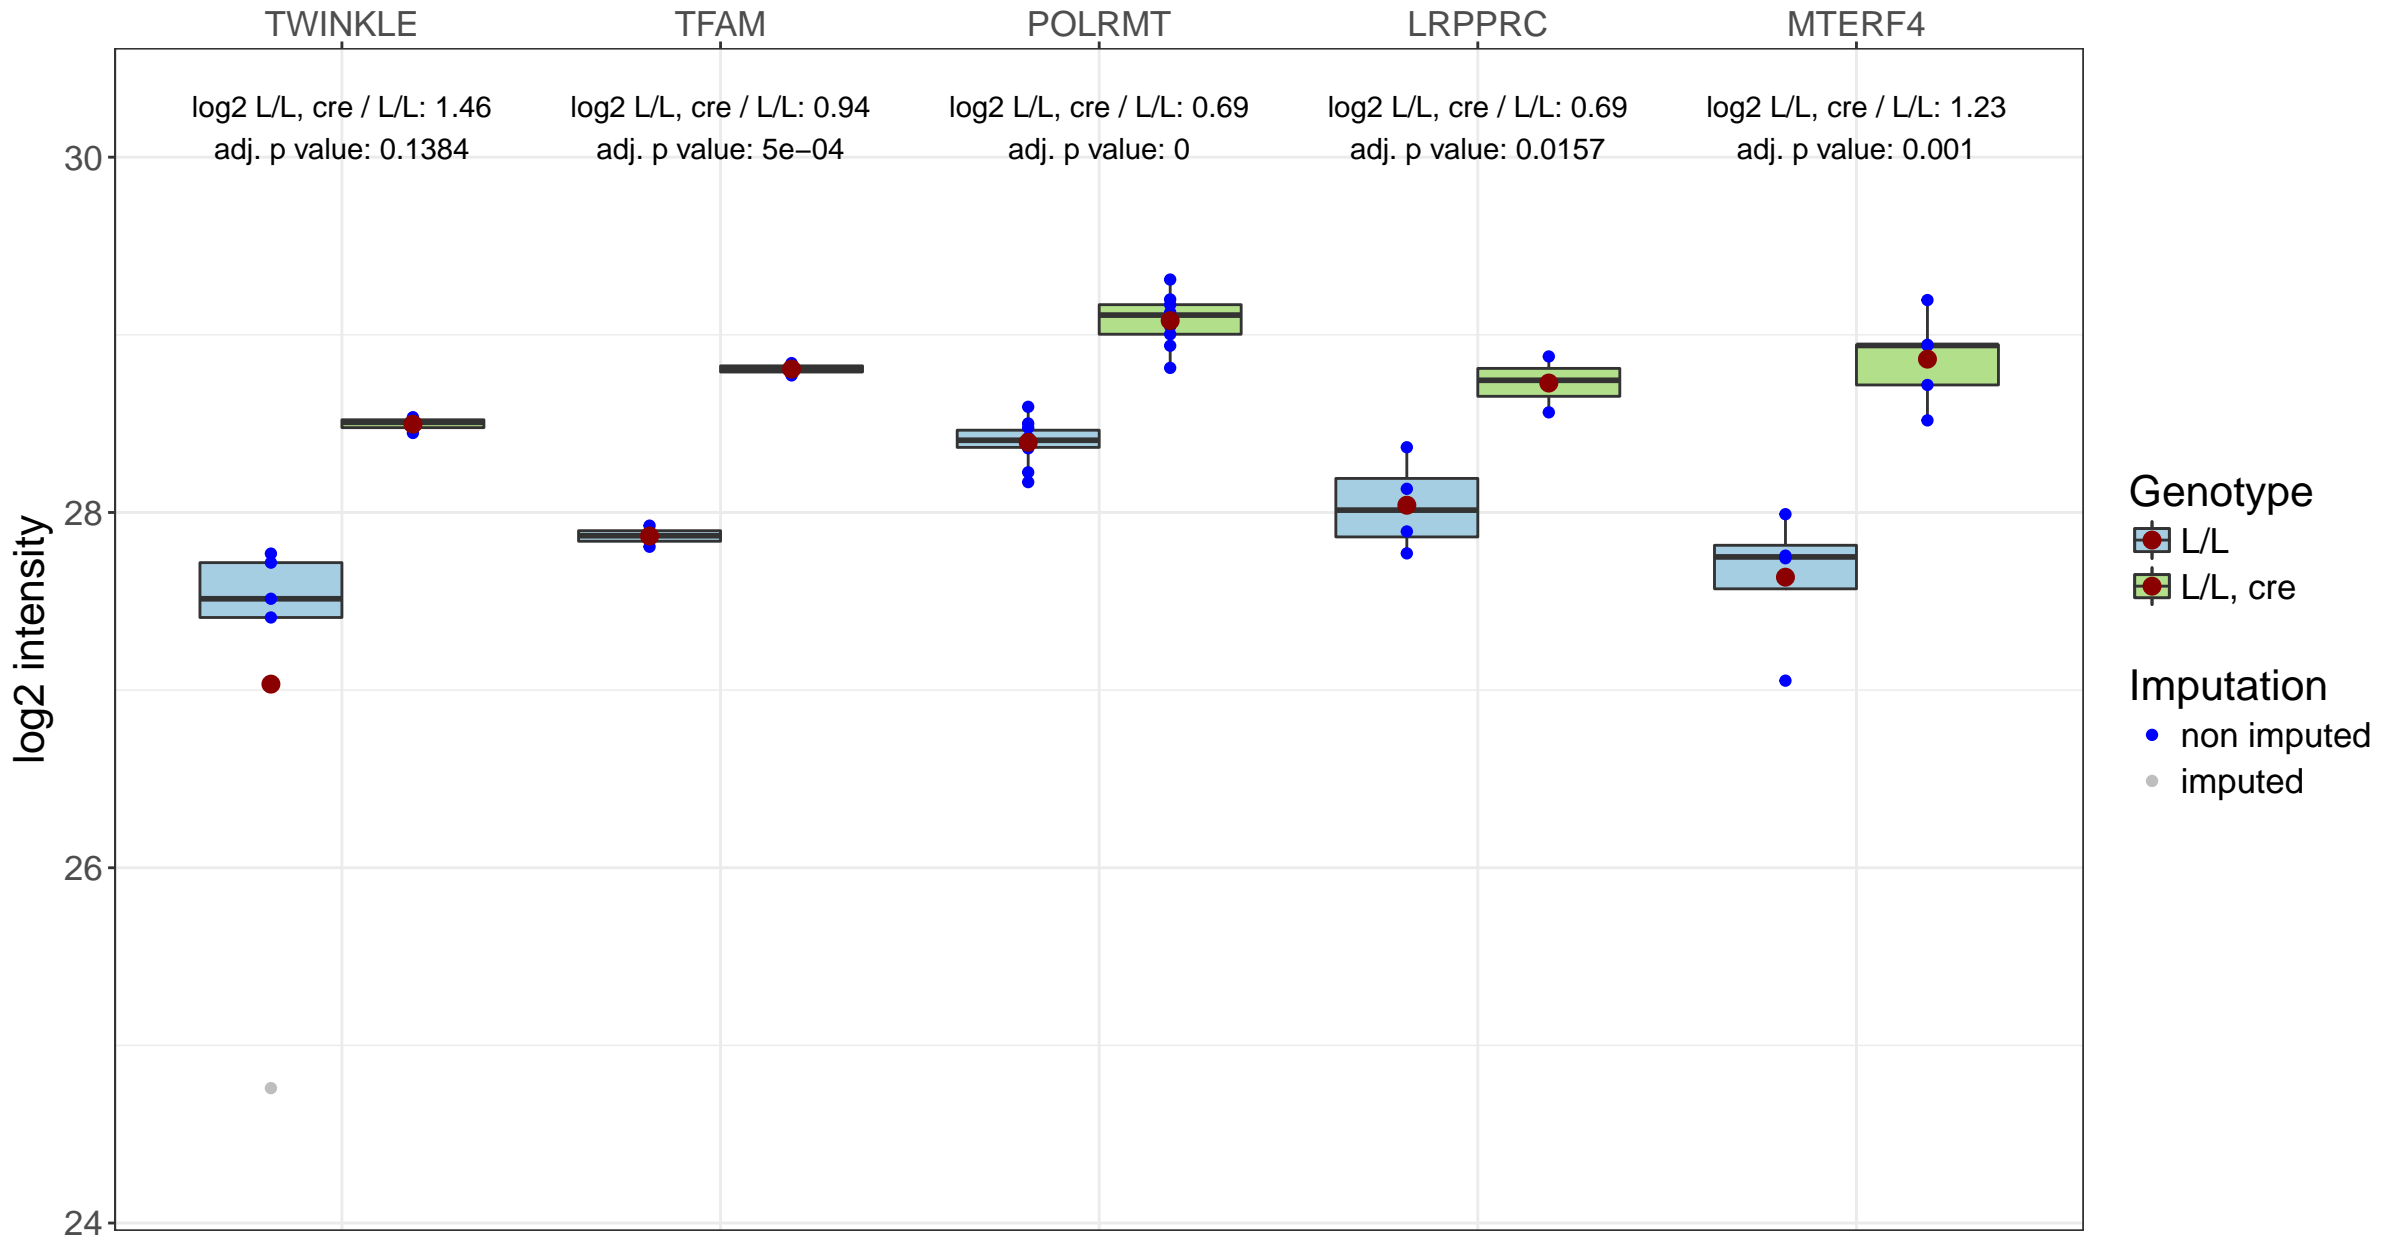

# PTRF / O54724

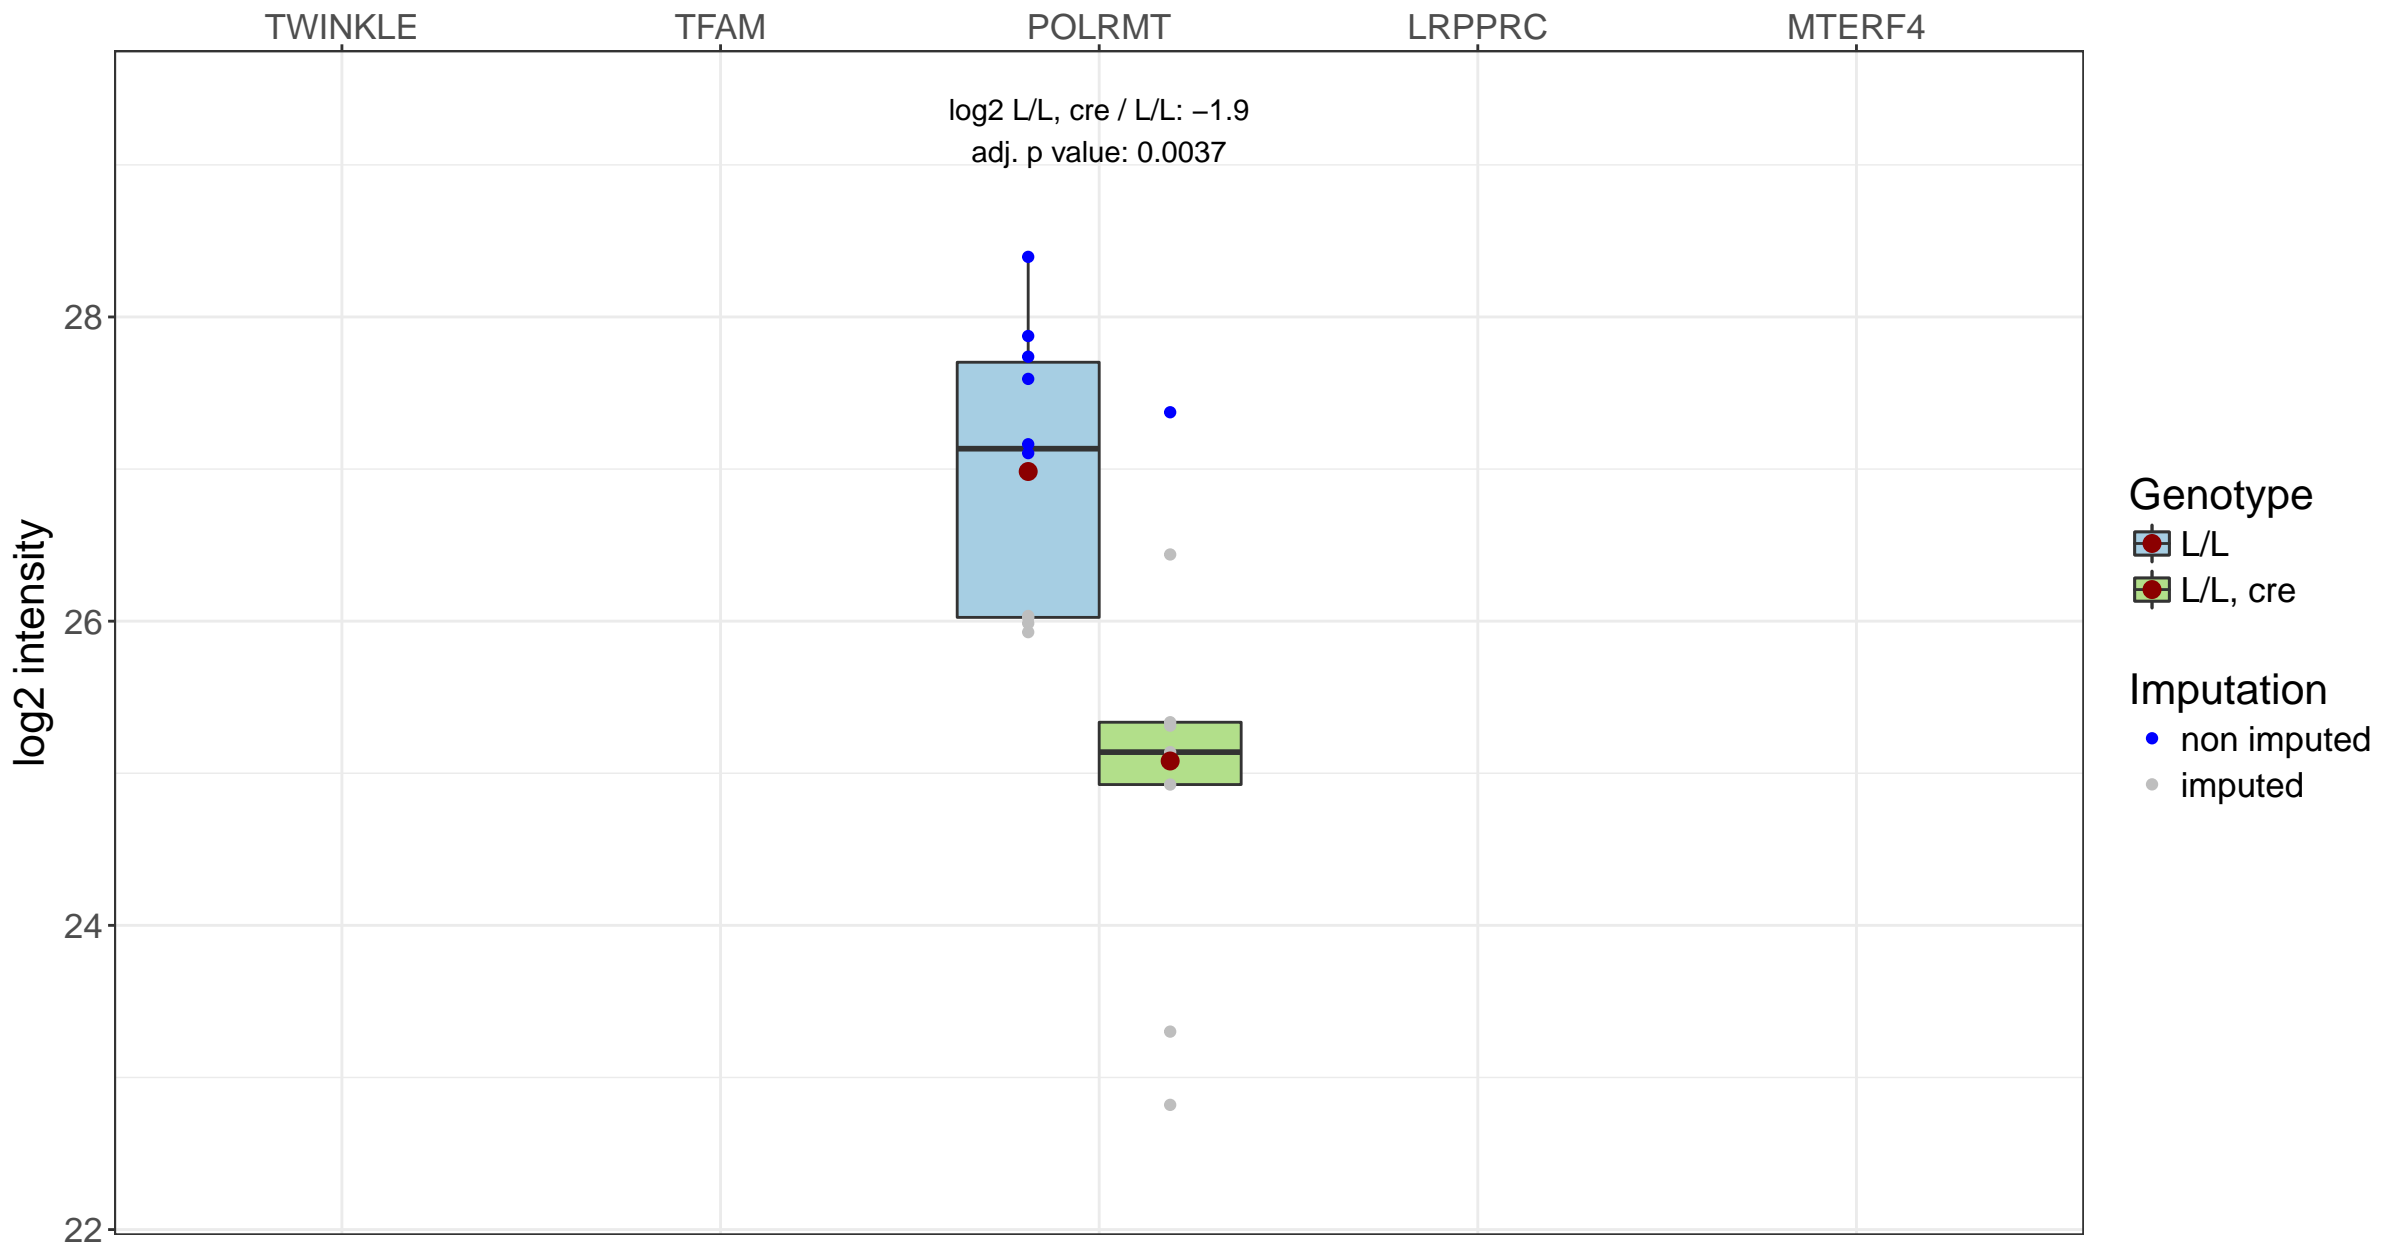

# PTRH1 / Q8BW00

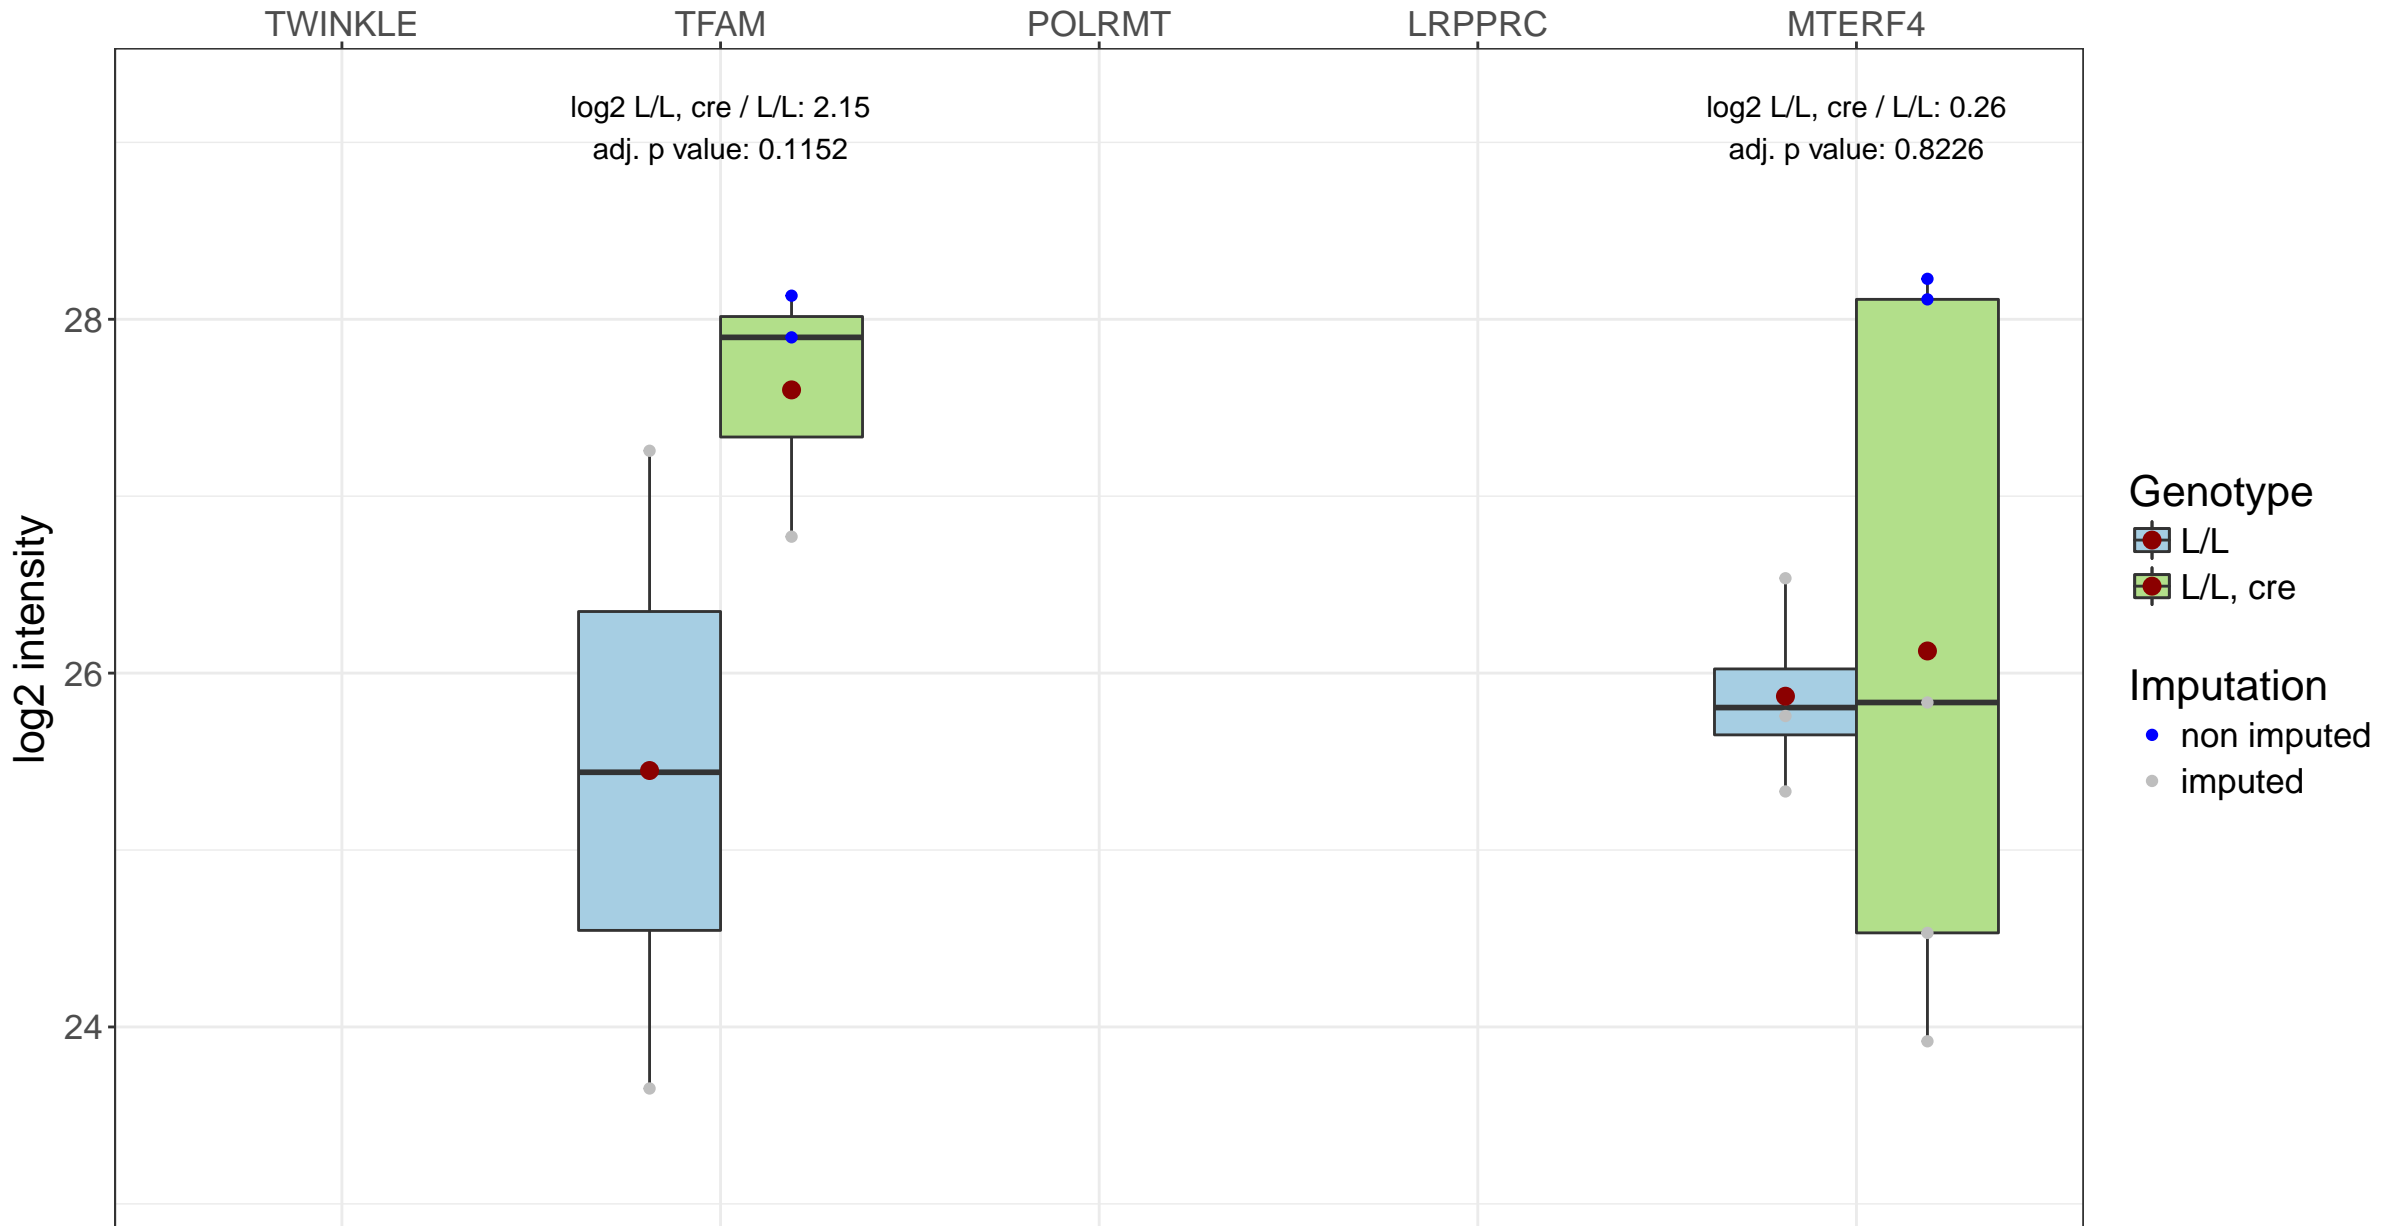

# PTRH2 / Q8R2Y8

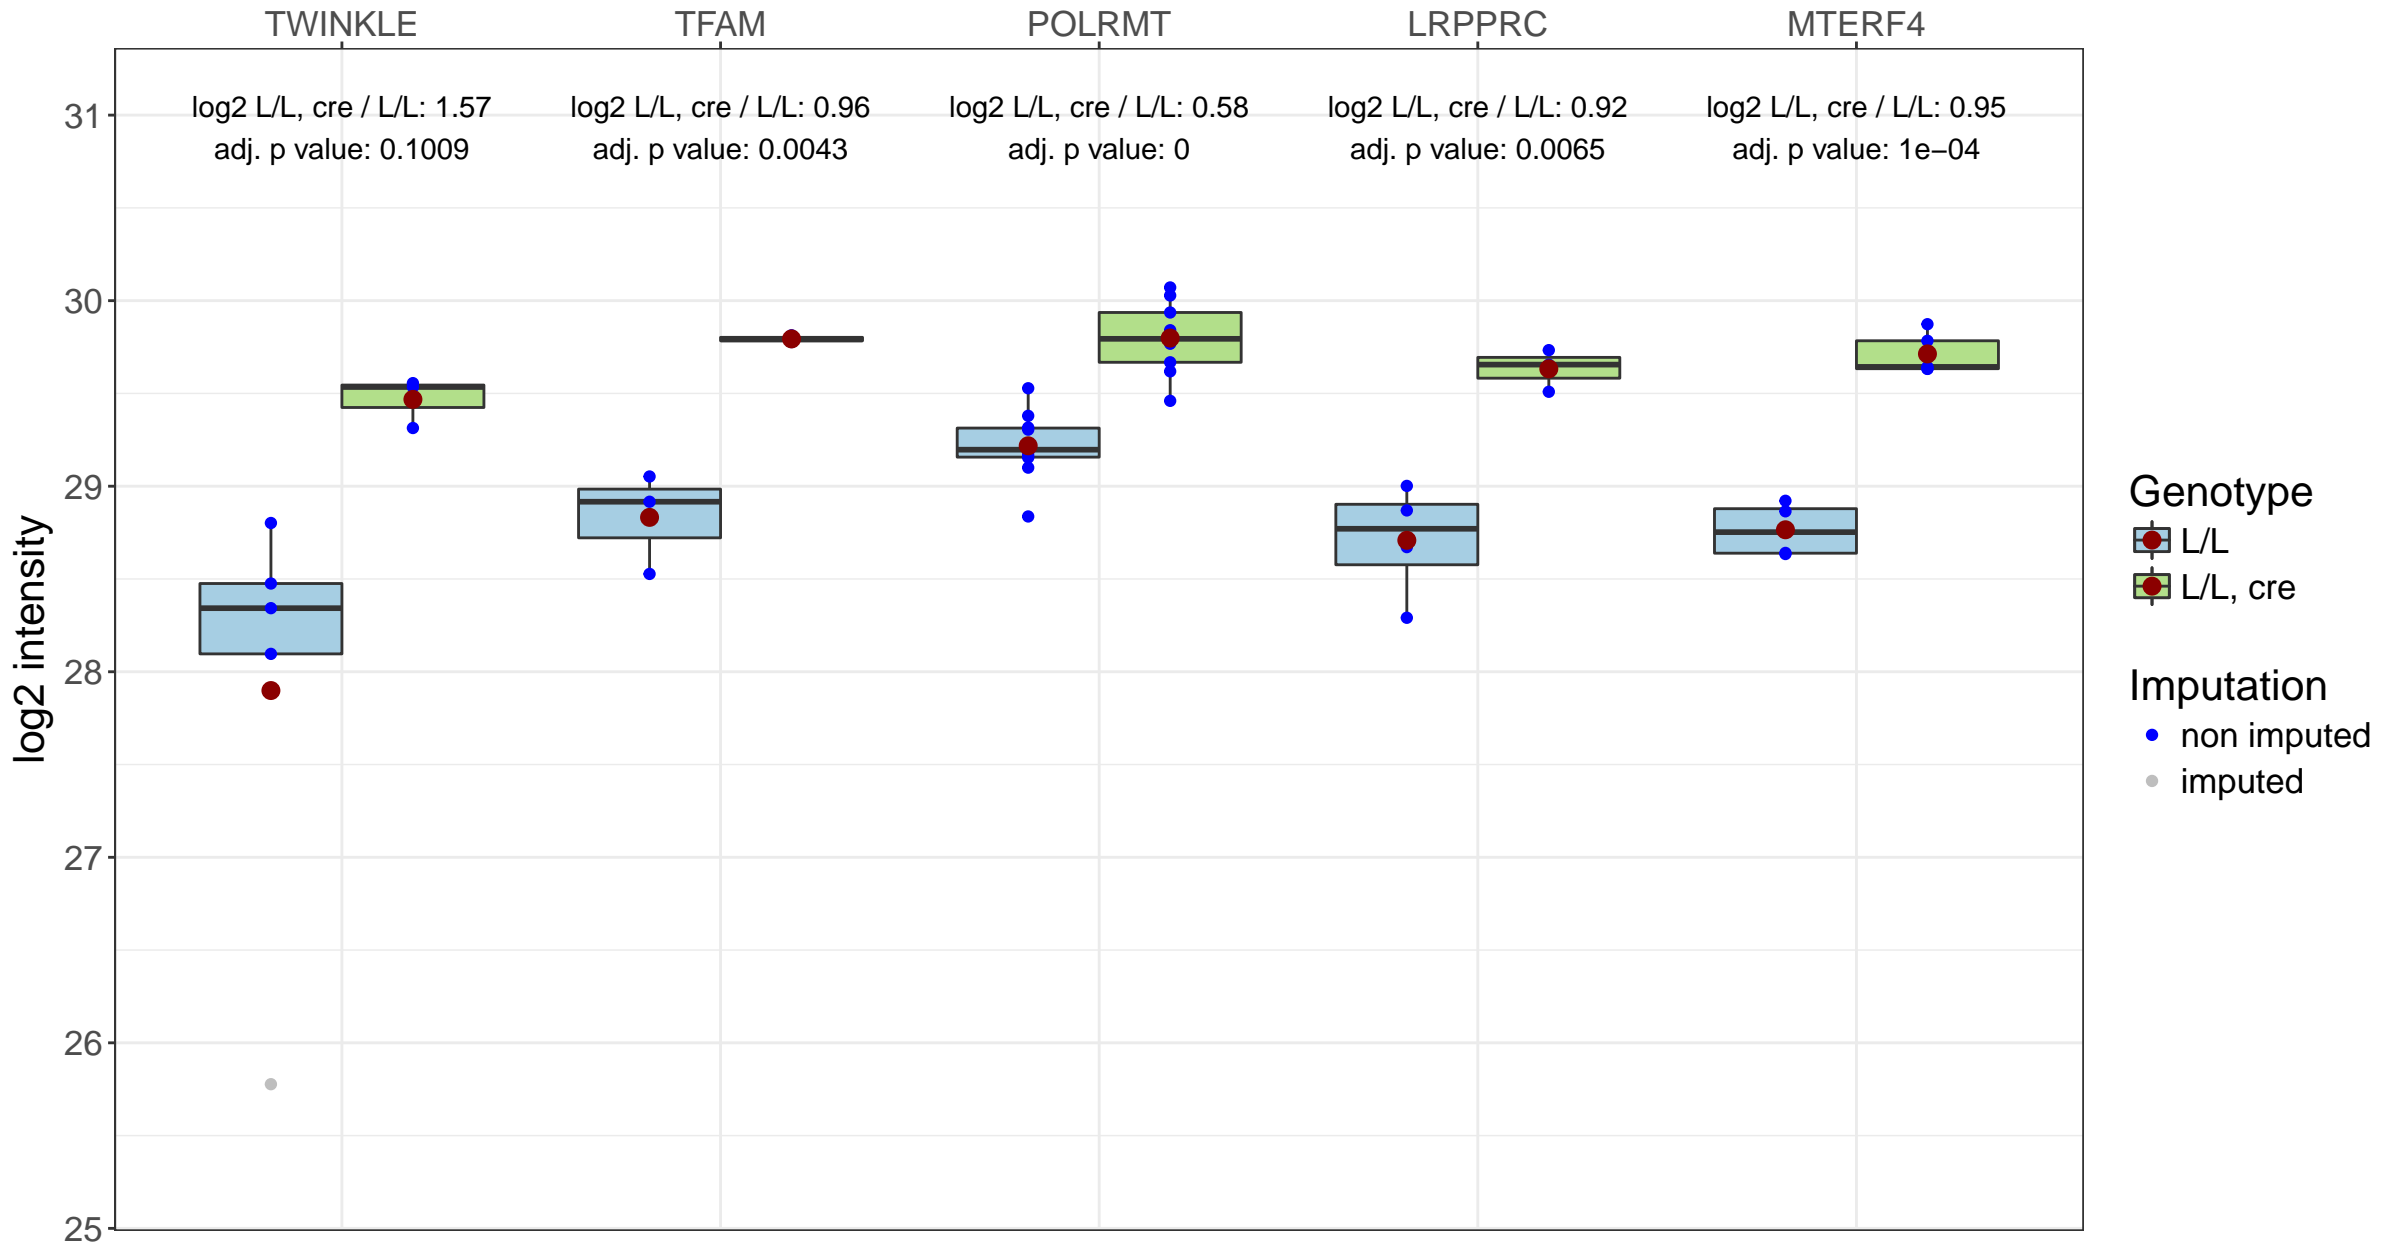

# PUS1 / Q9WU56

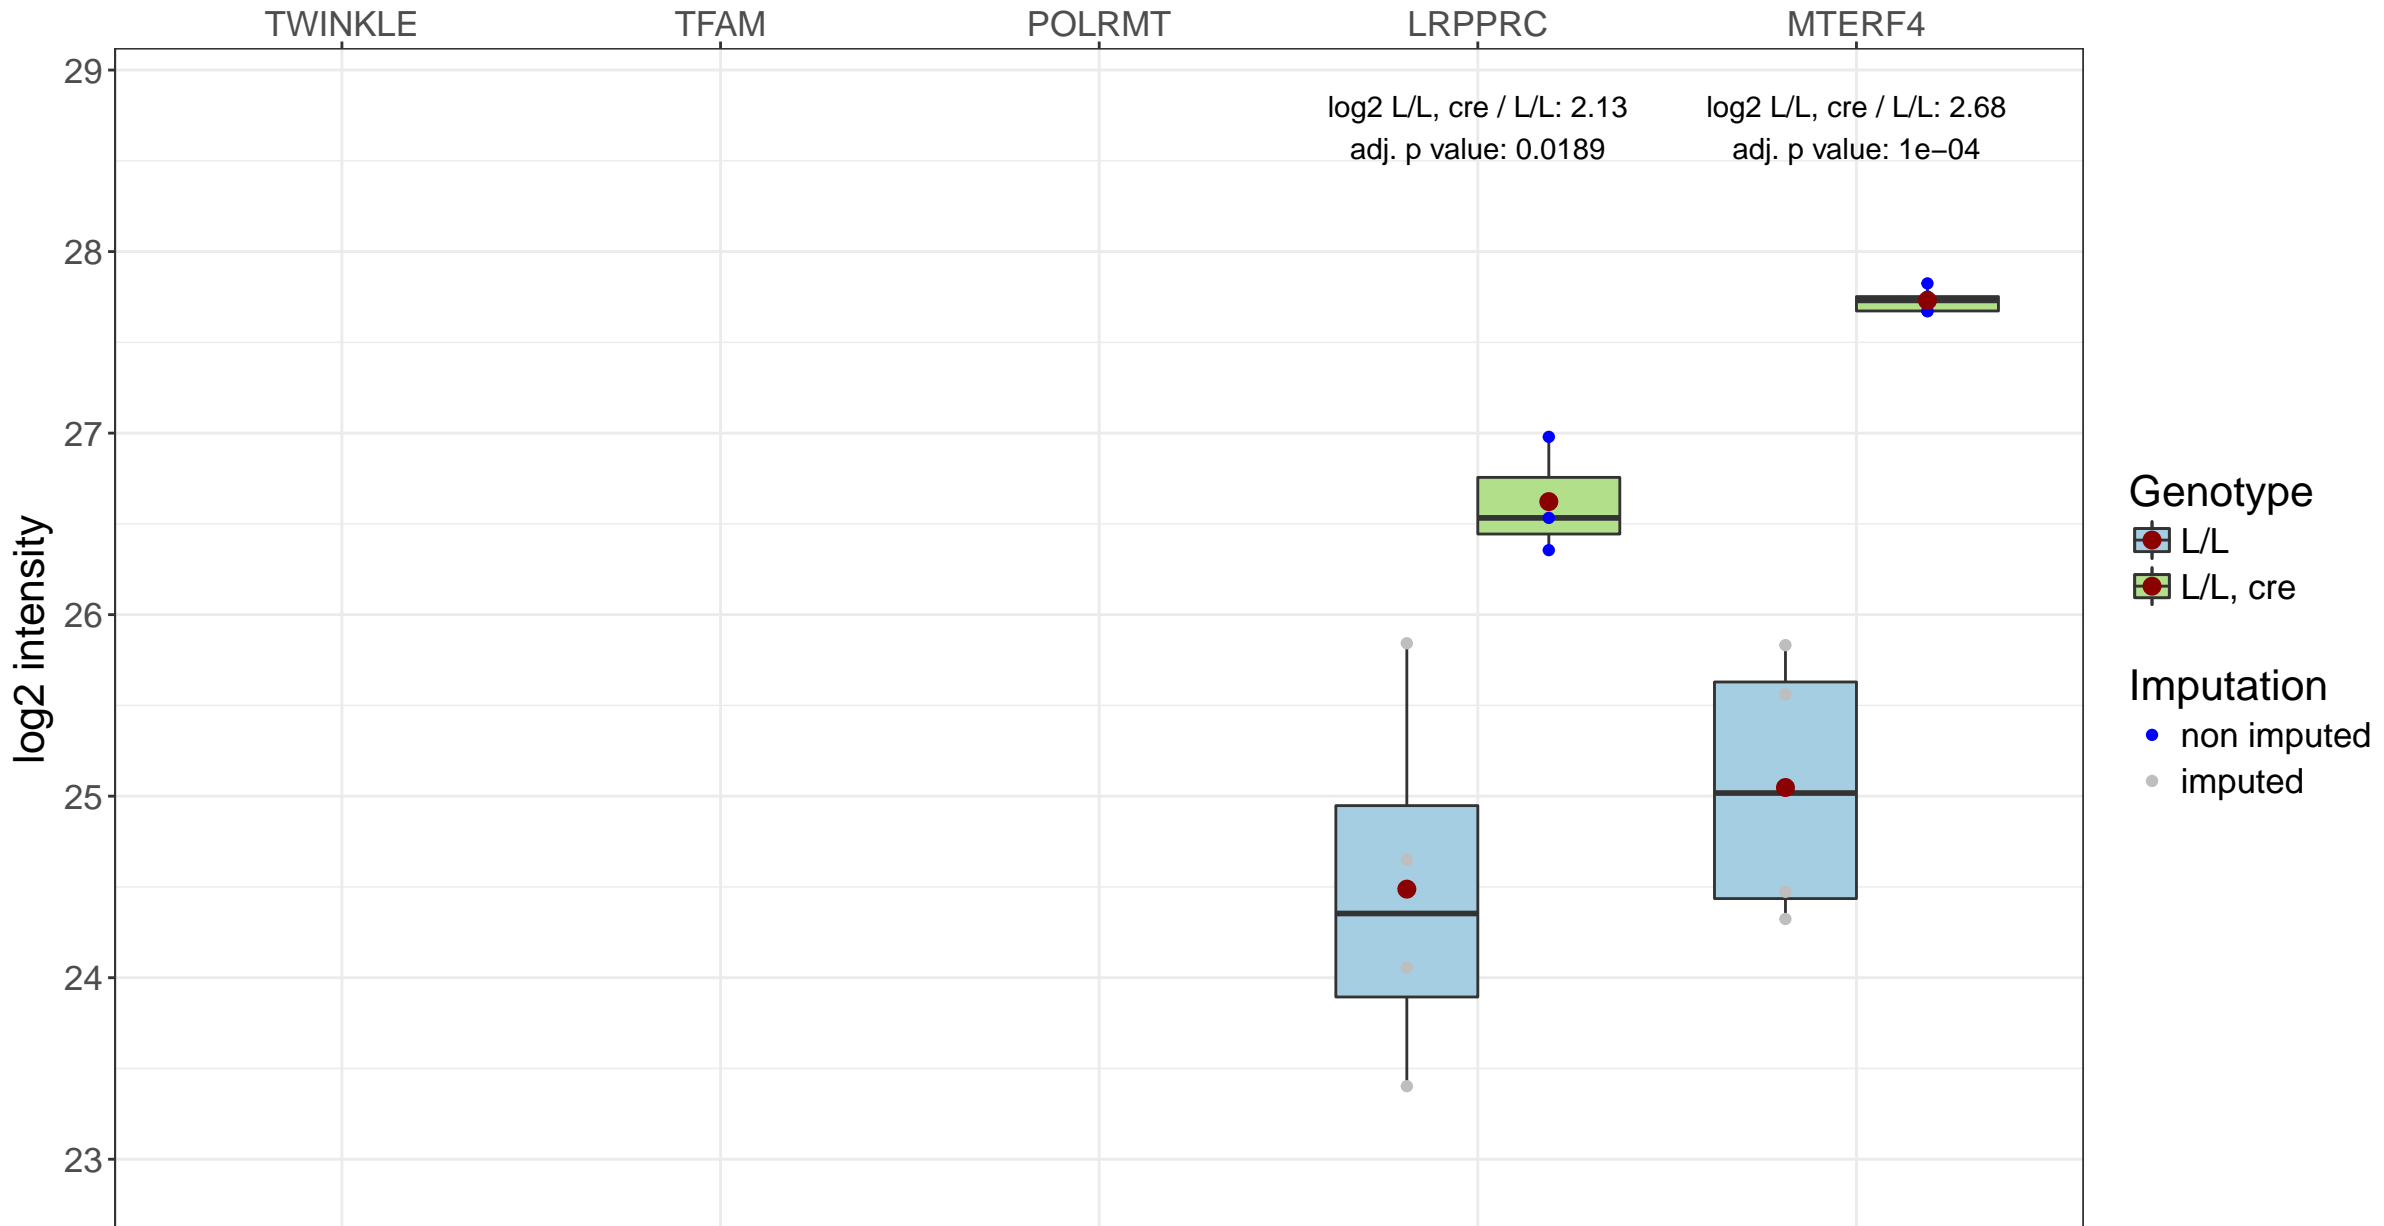

# PUSL1 / A2ADA5

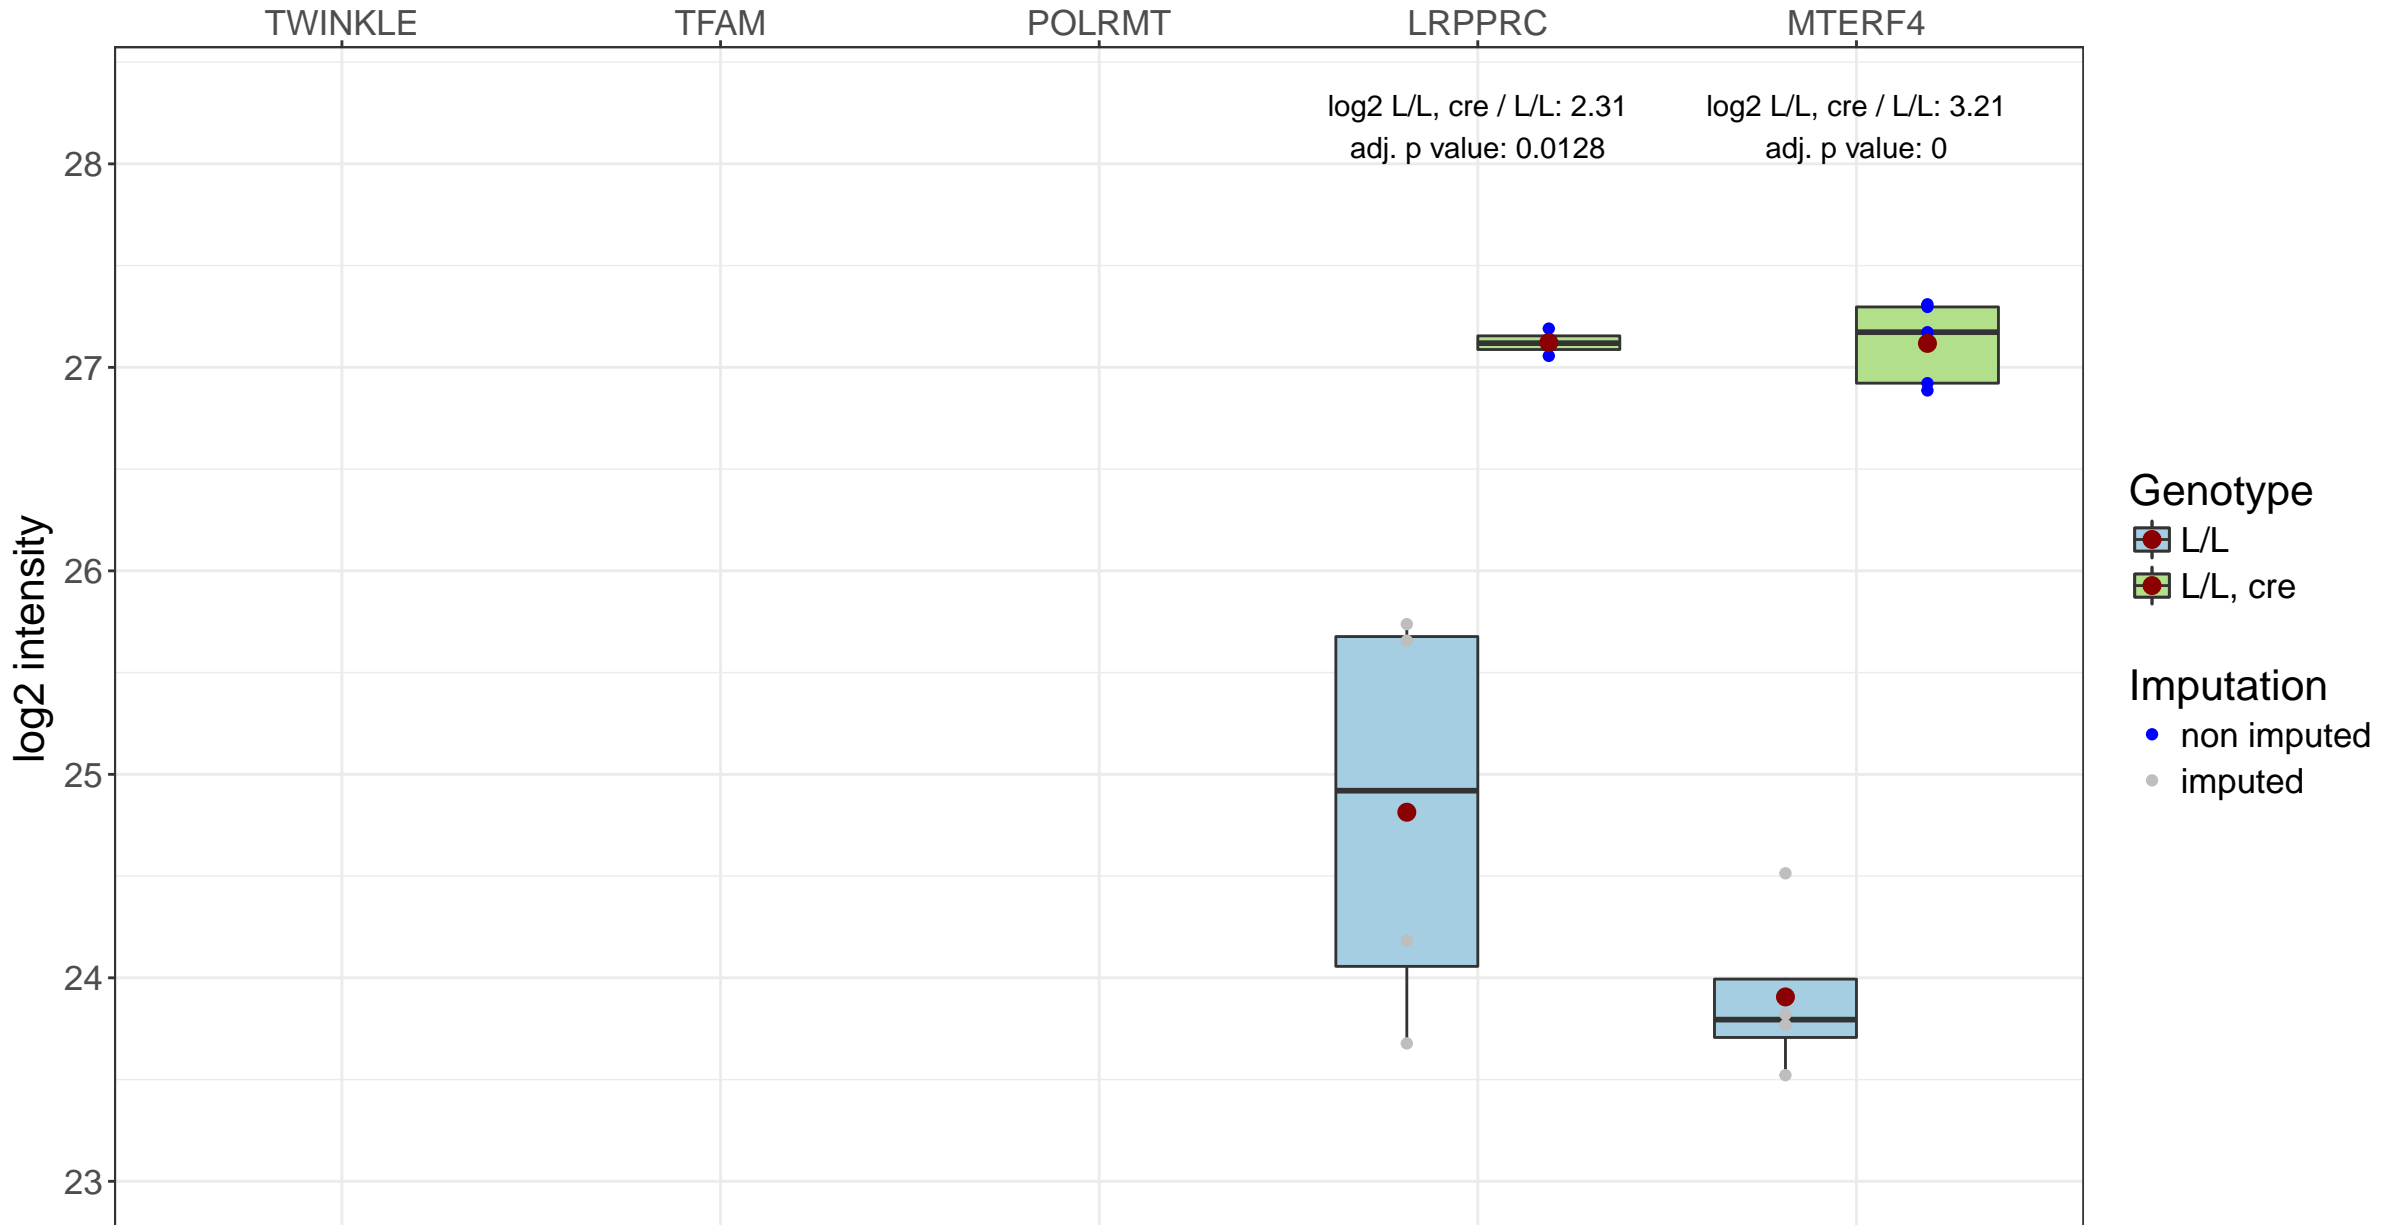

# PYCR1 / Q922W5

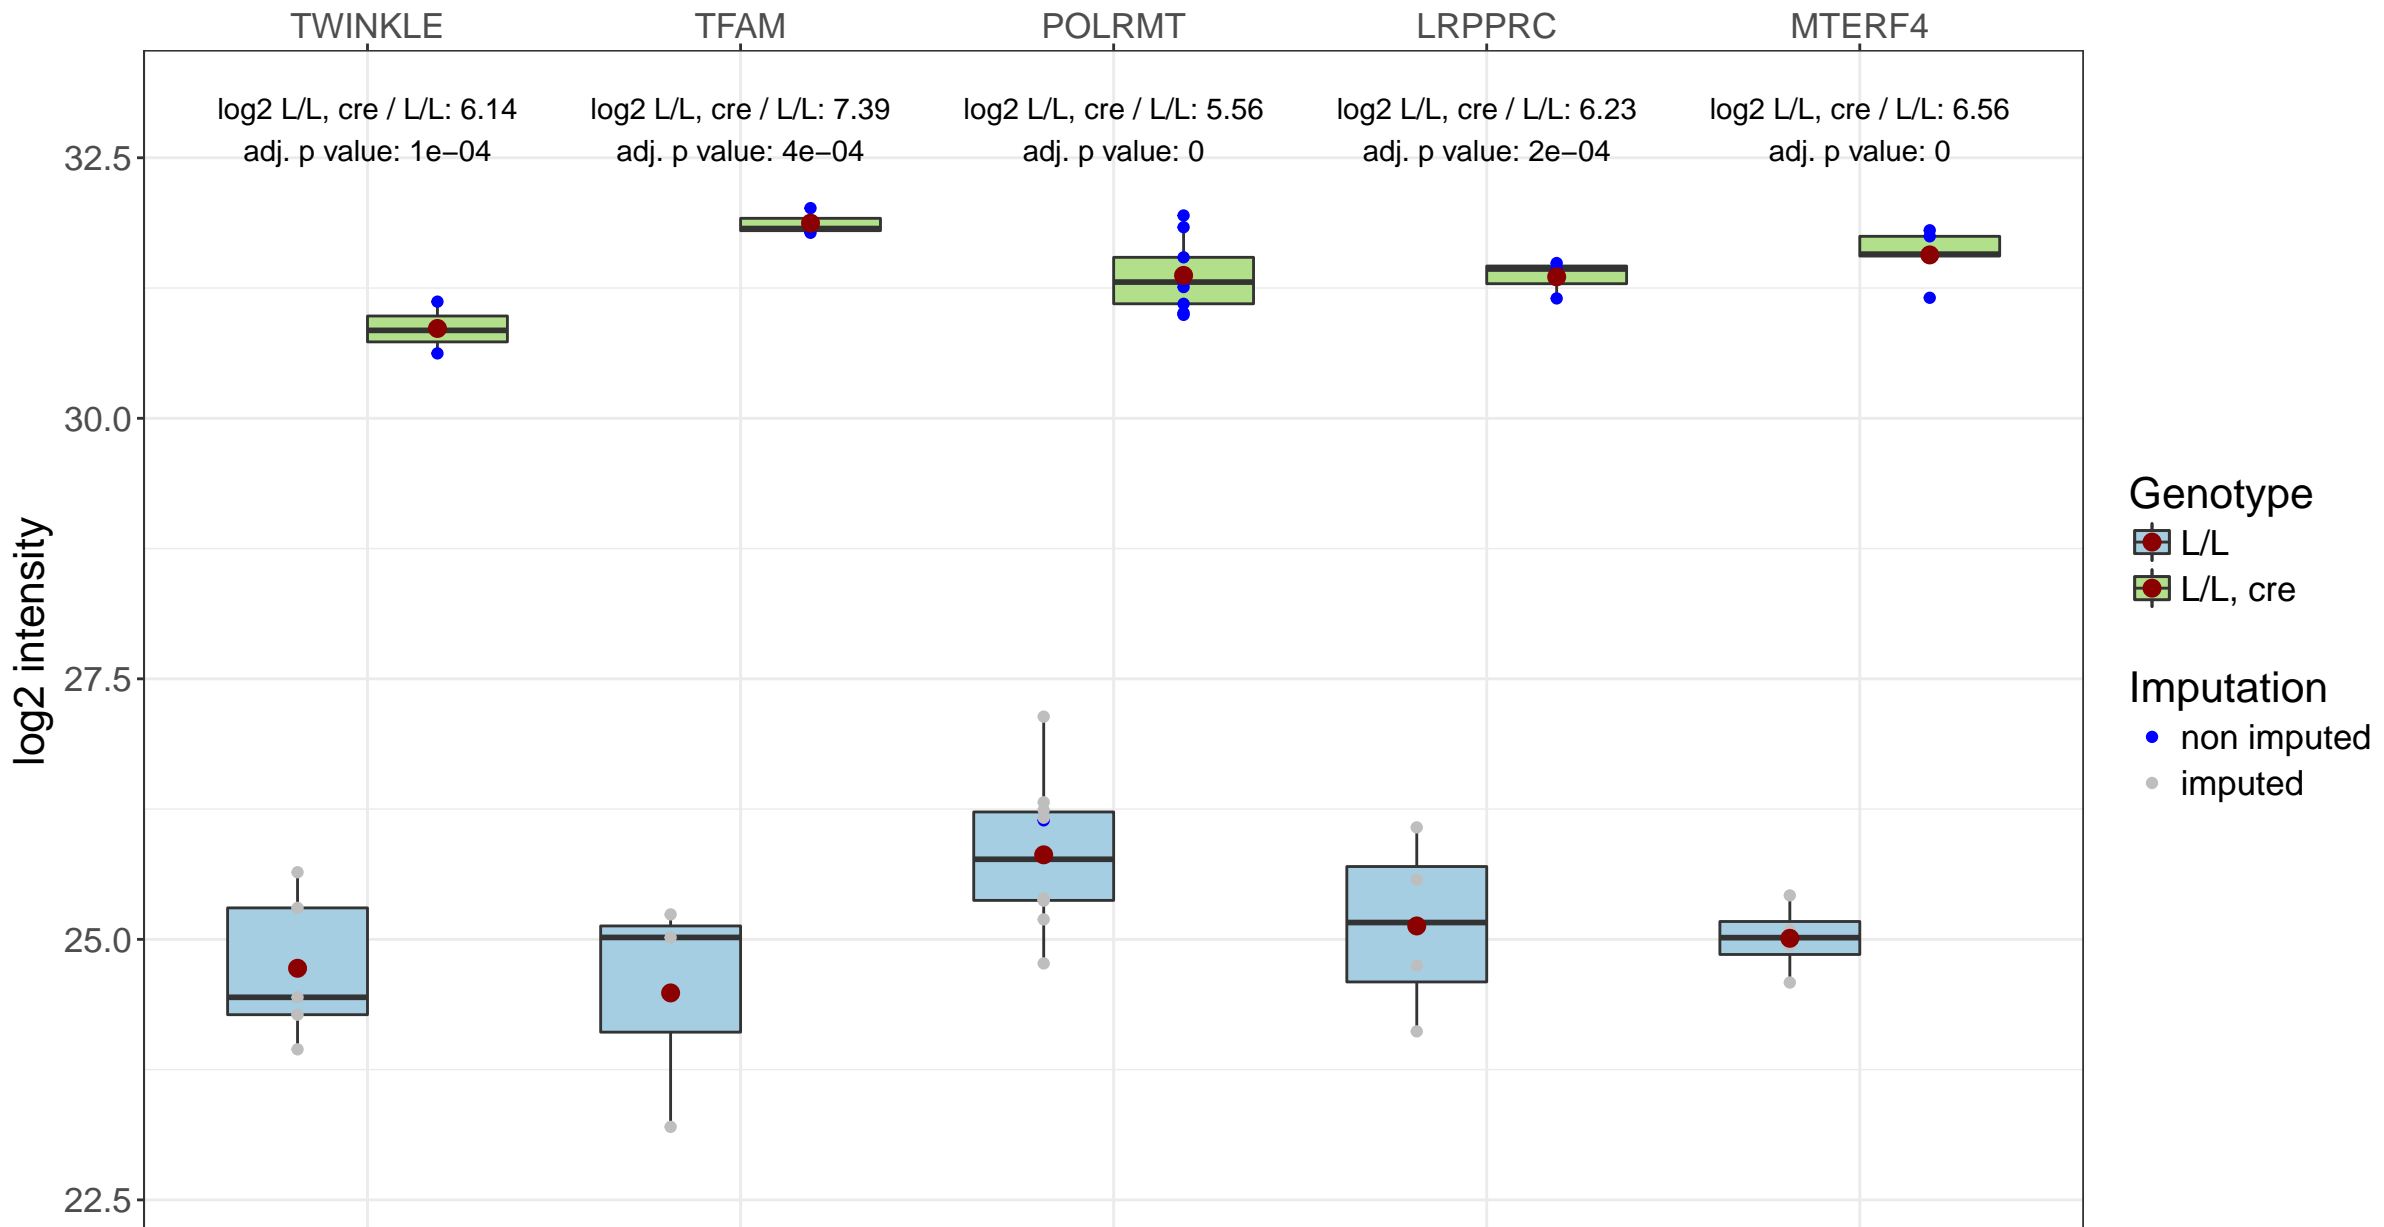

# PYCR2 / Q922Q4

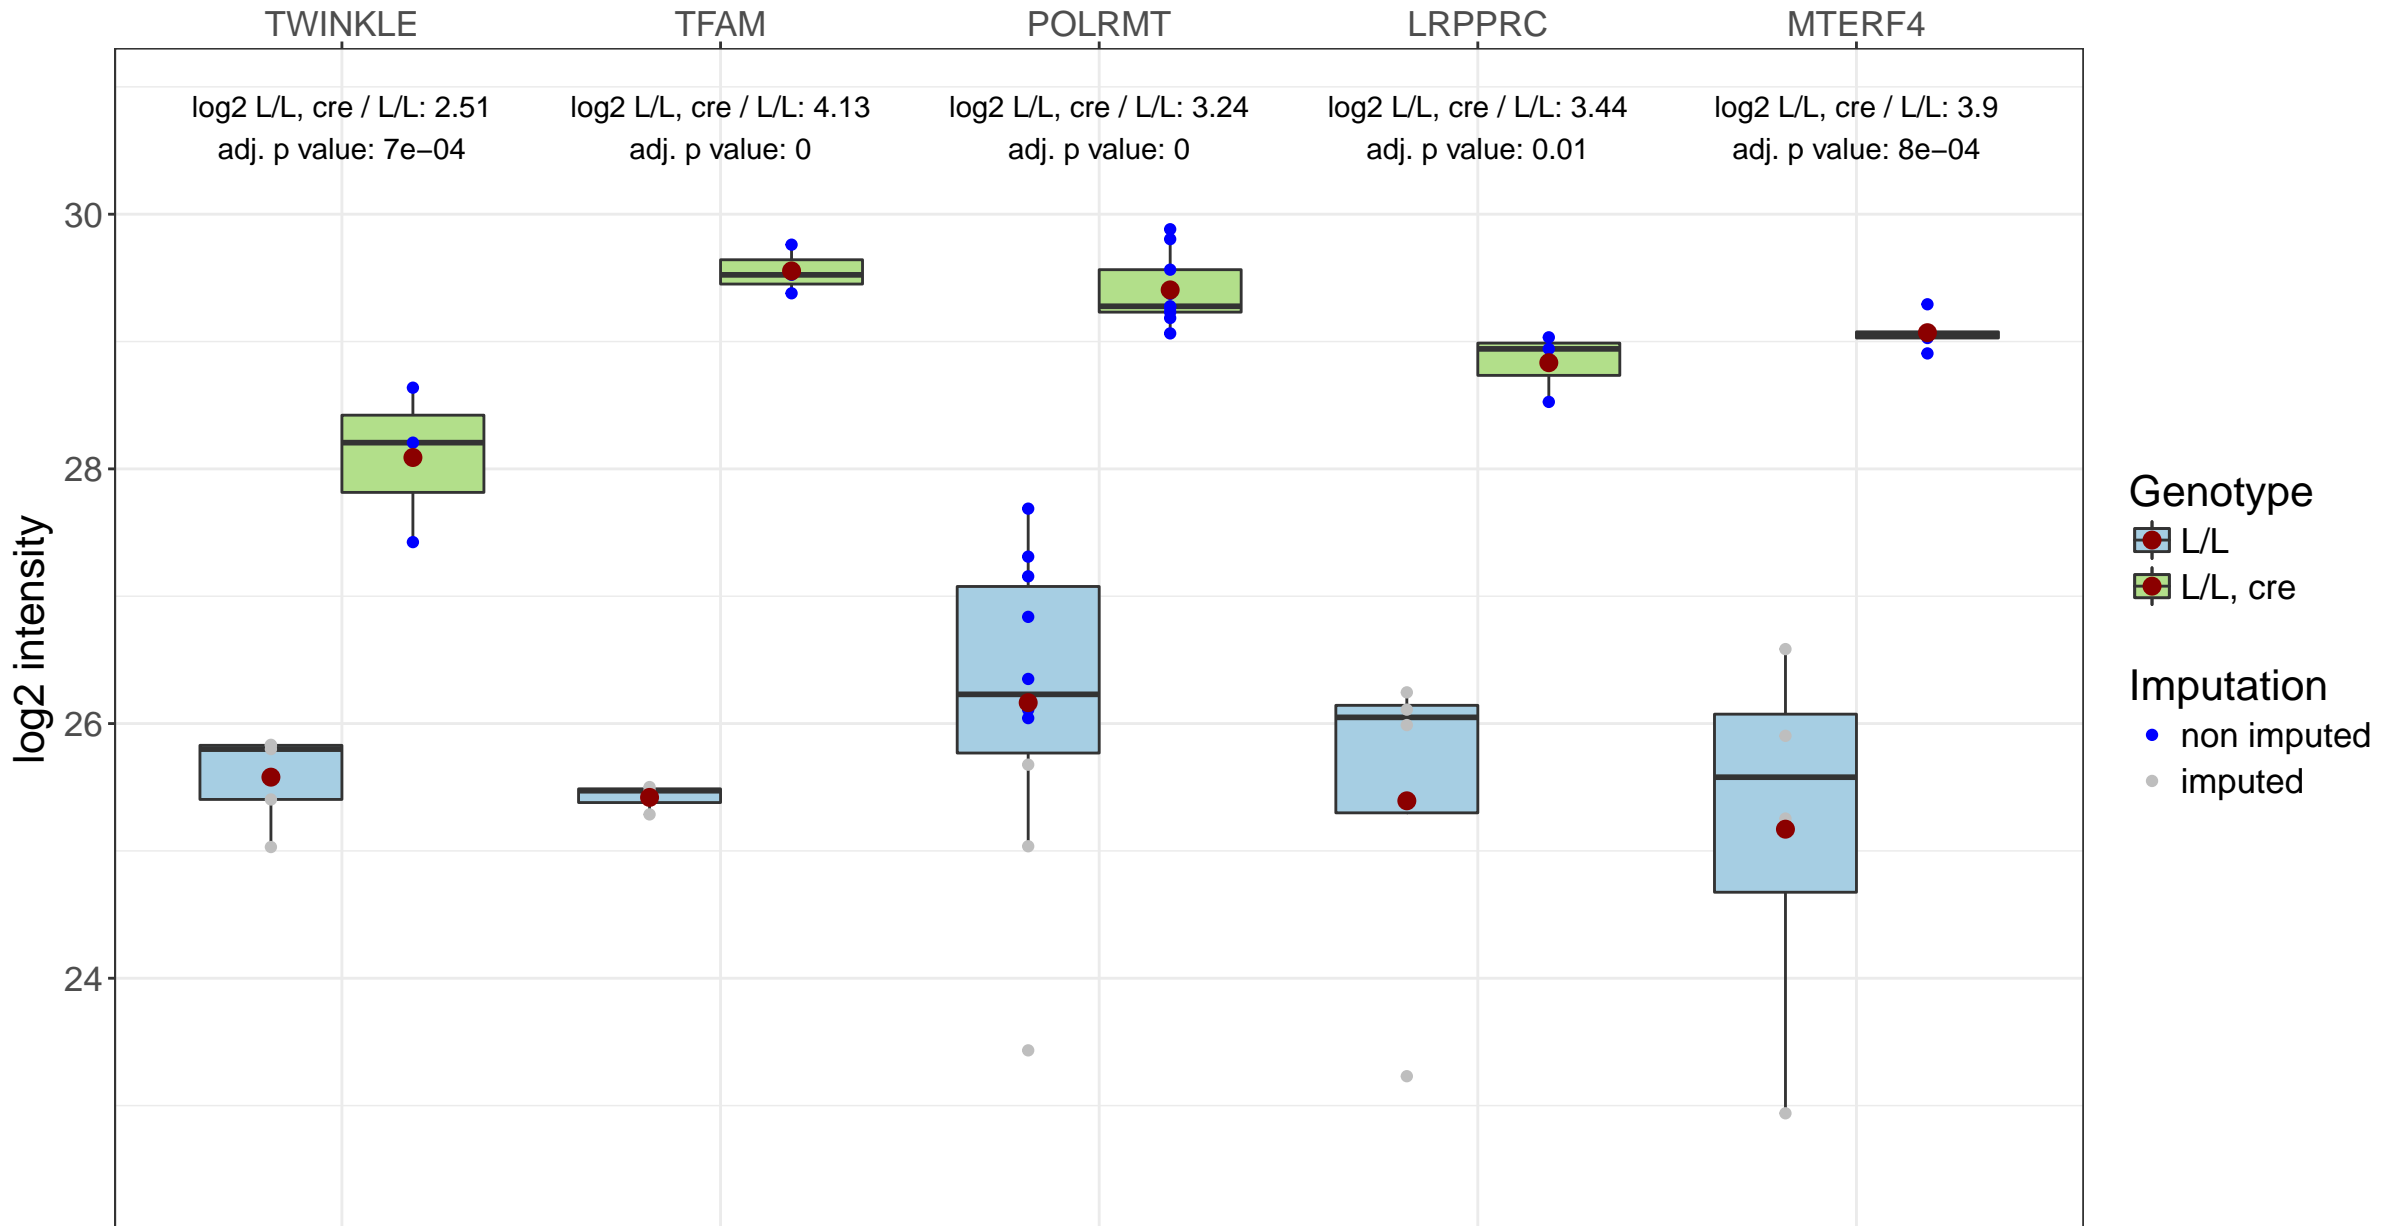



# PYURF / Q9D1C3

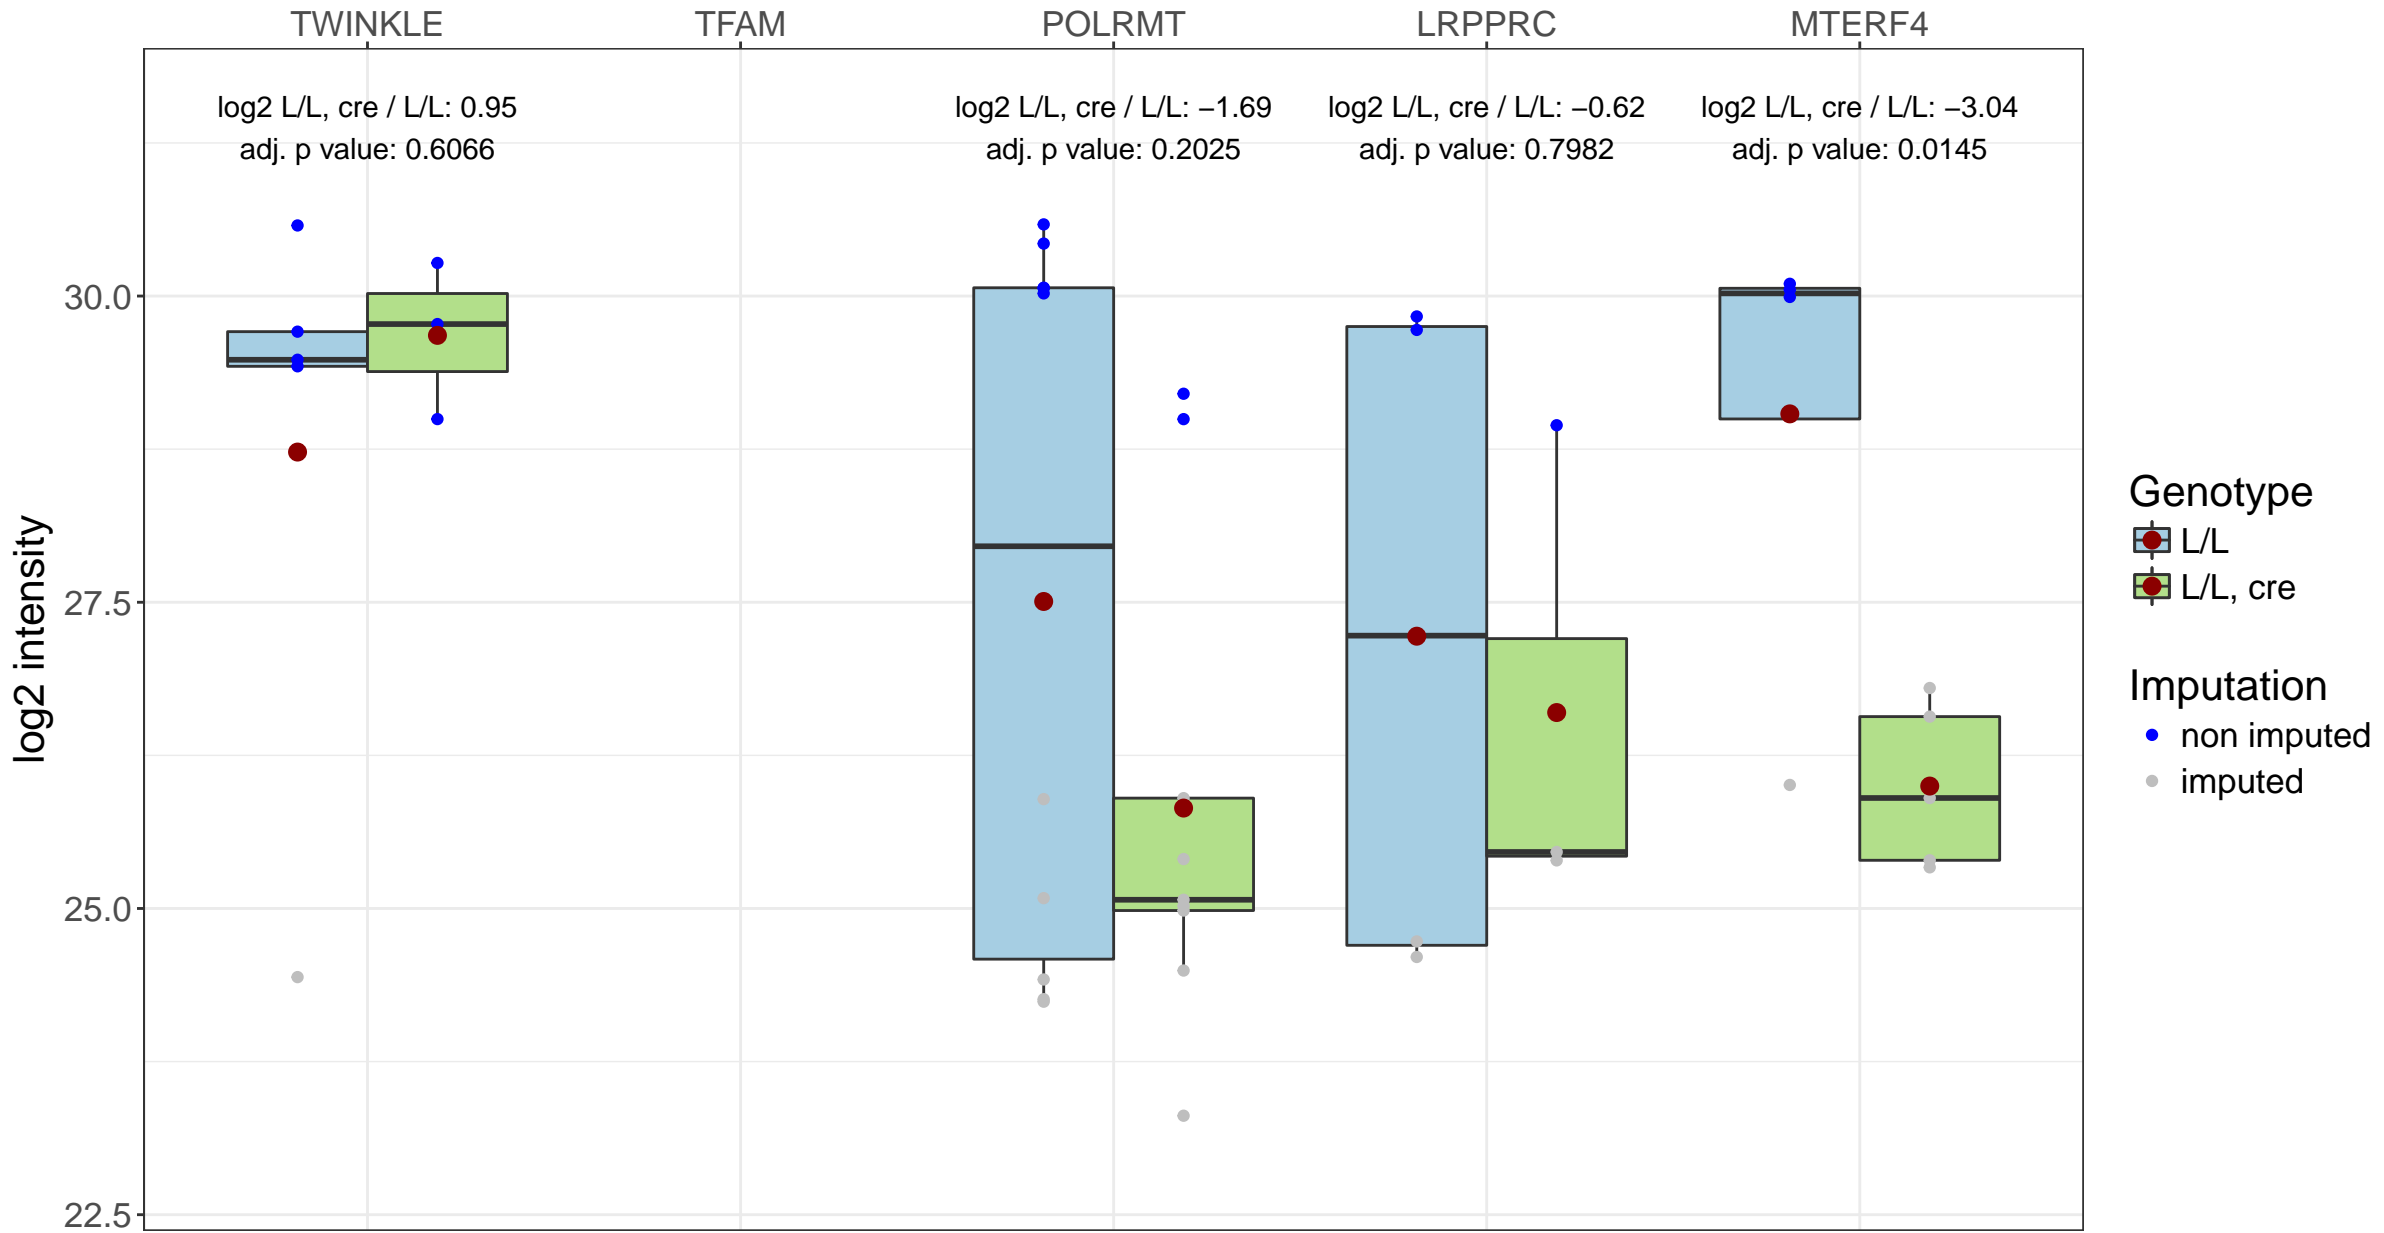

# QDPR / Q8BVI4

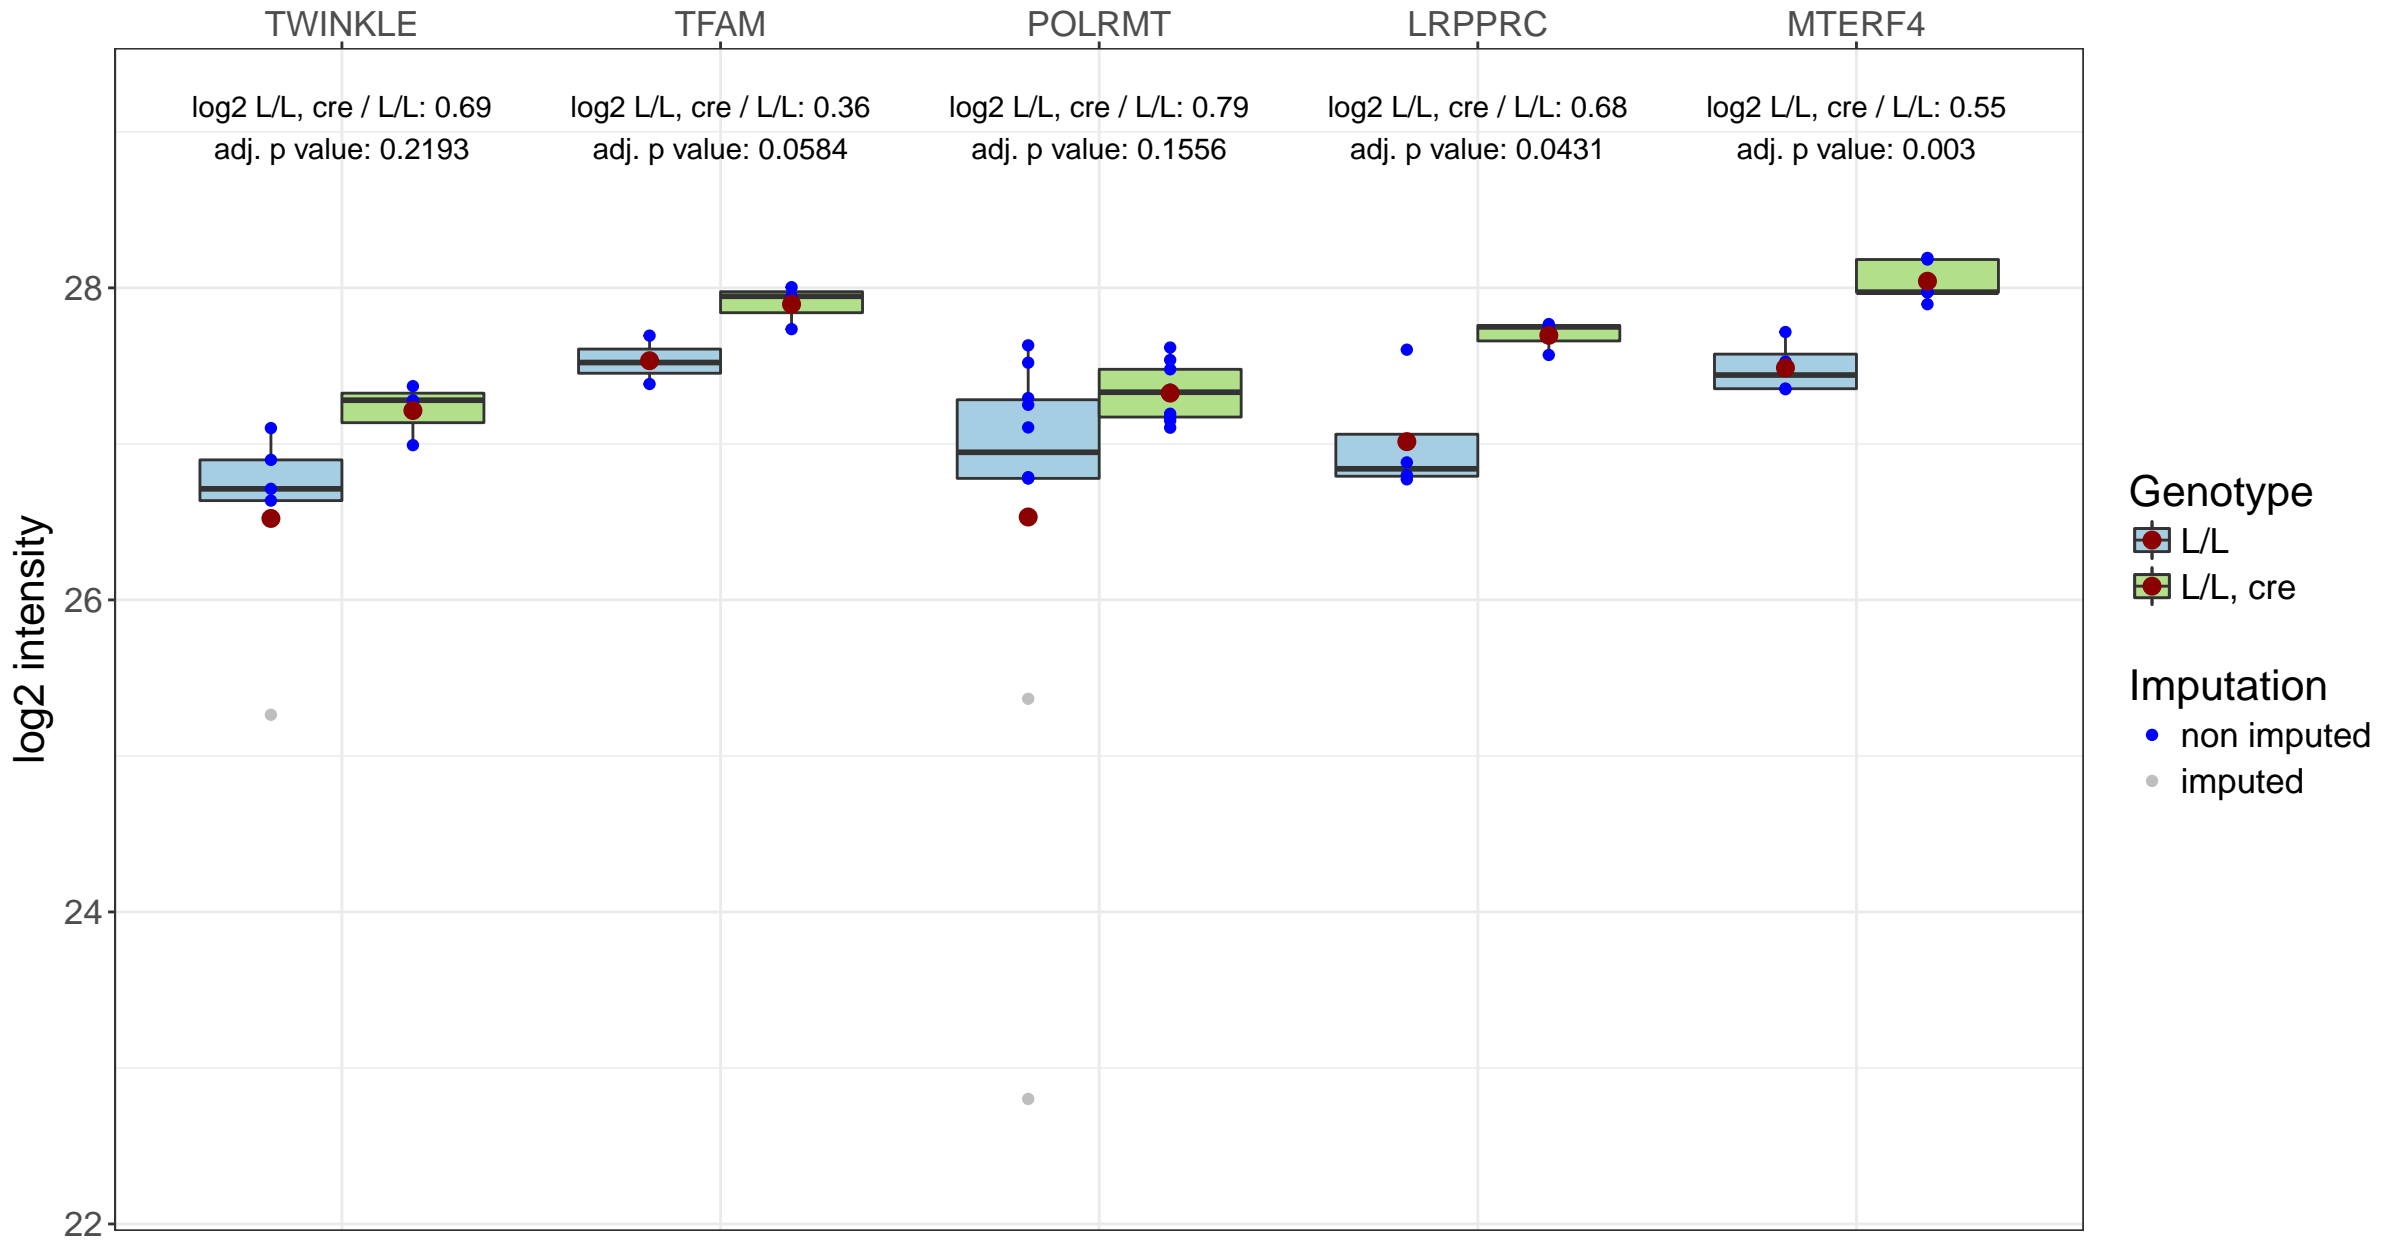

# QIL1 / Q8R404

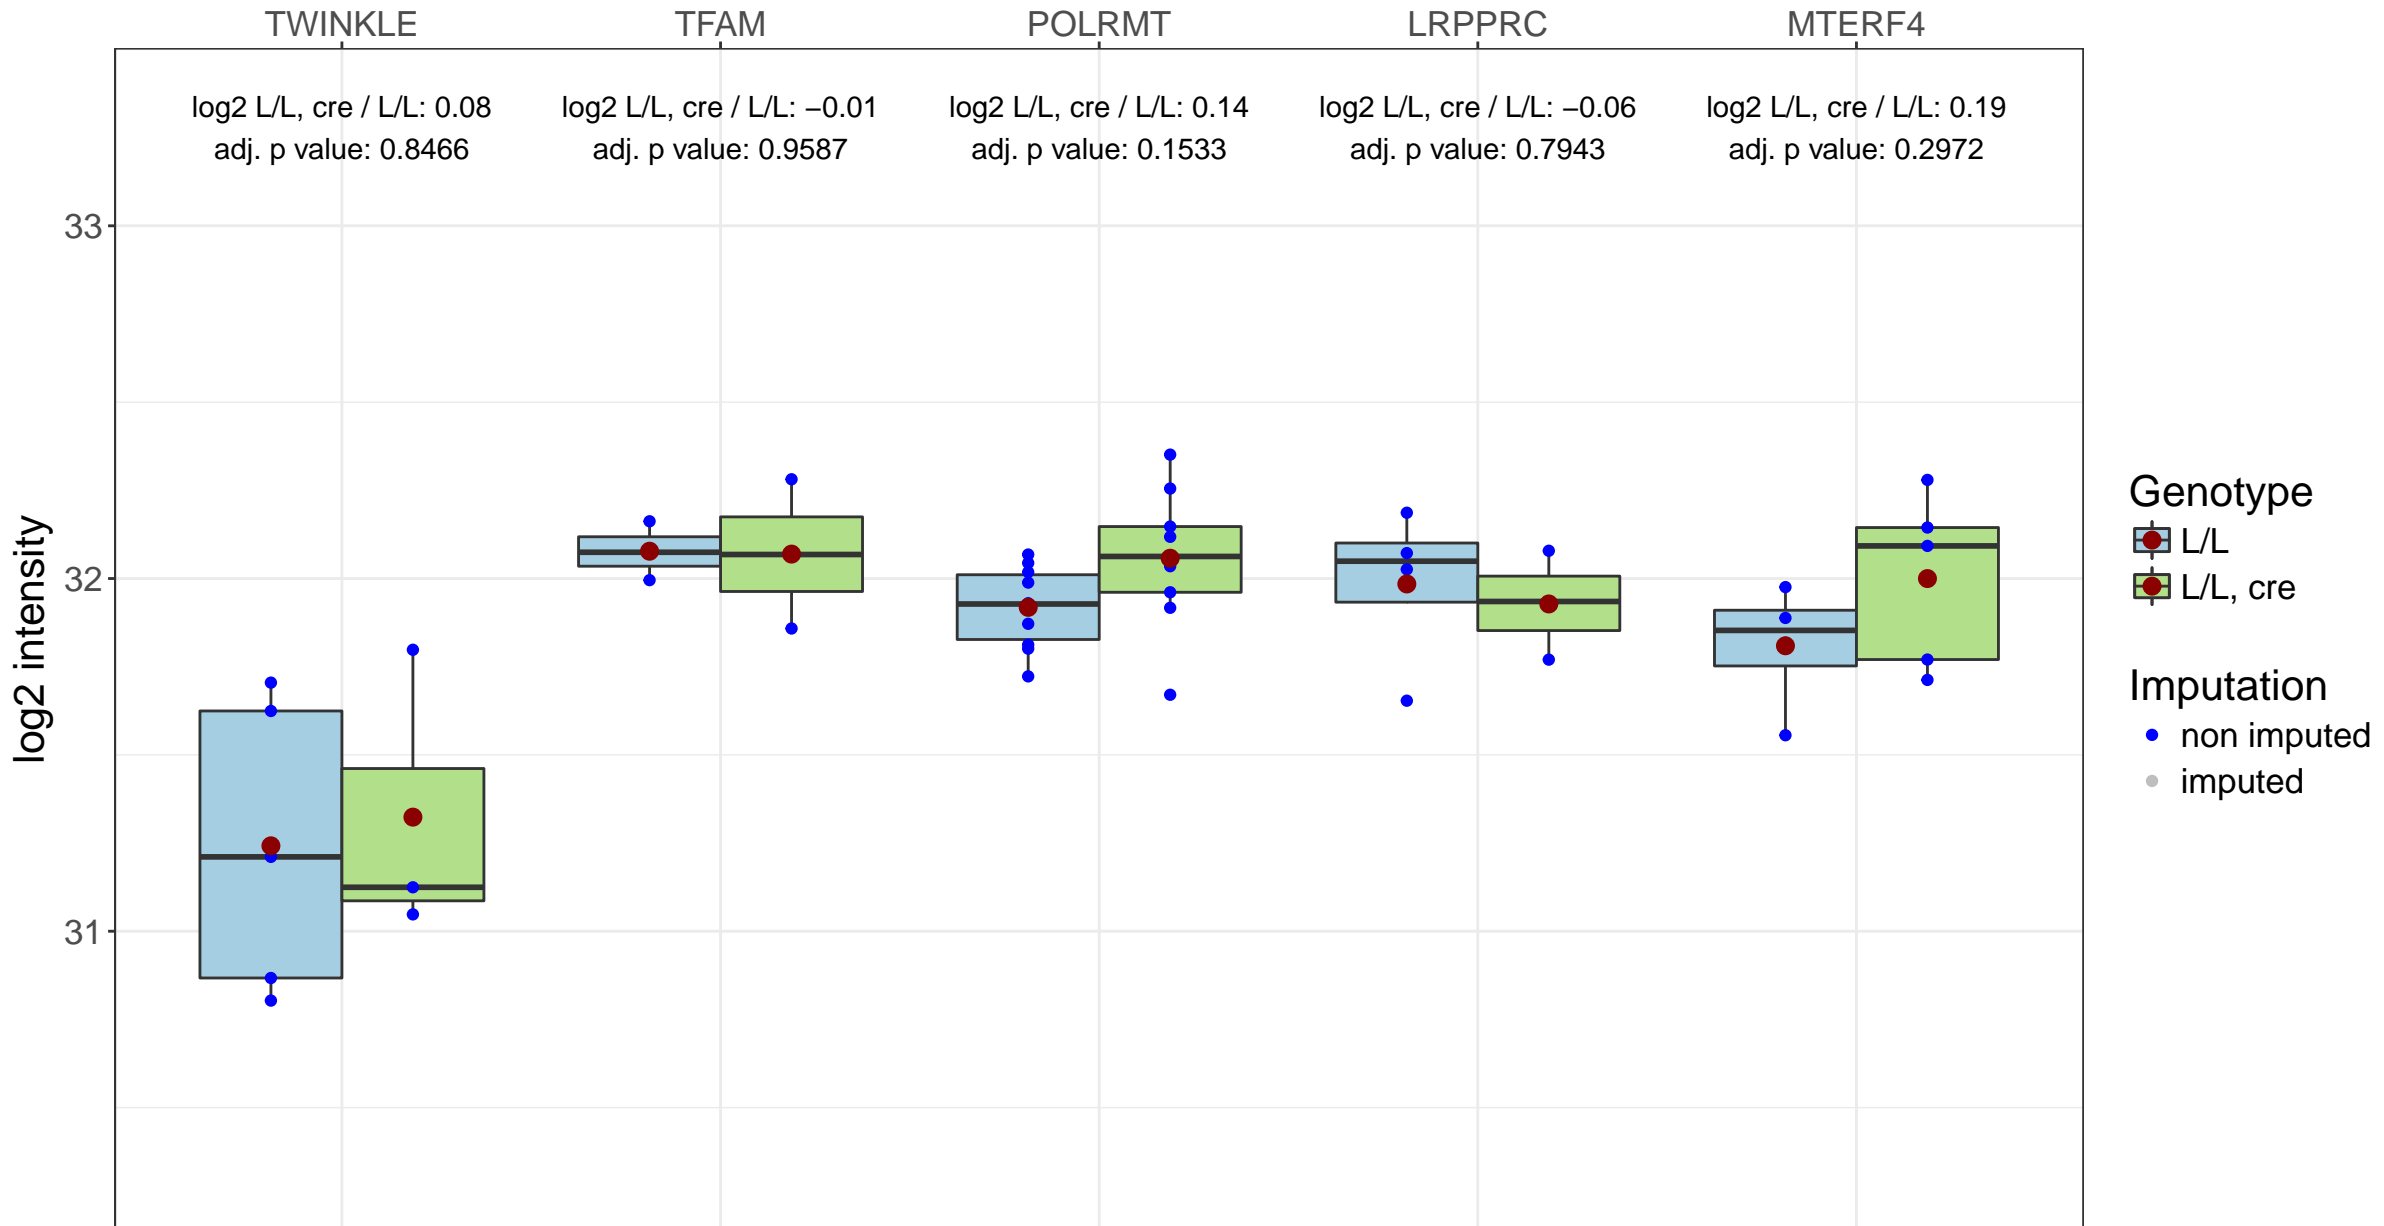

# QRSL1 / Q9CZN8

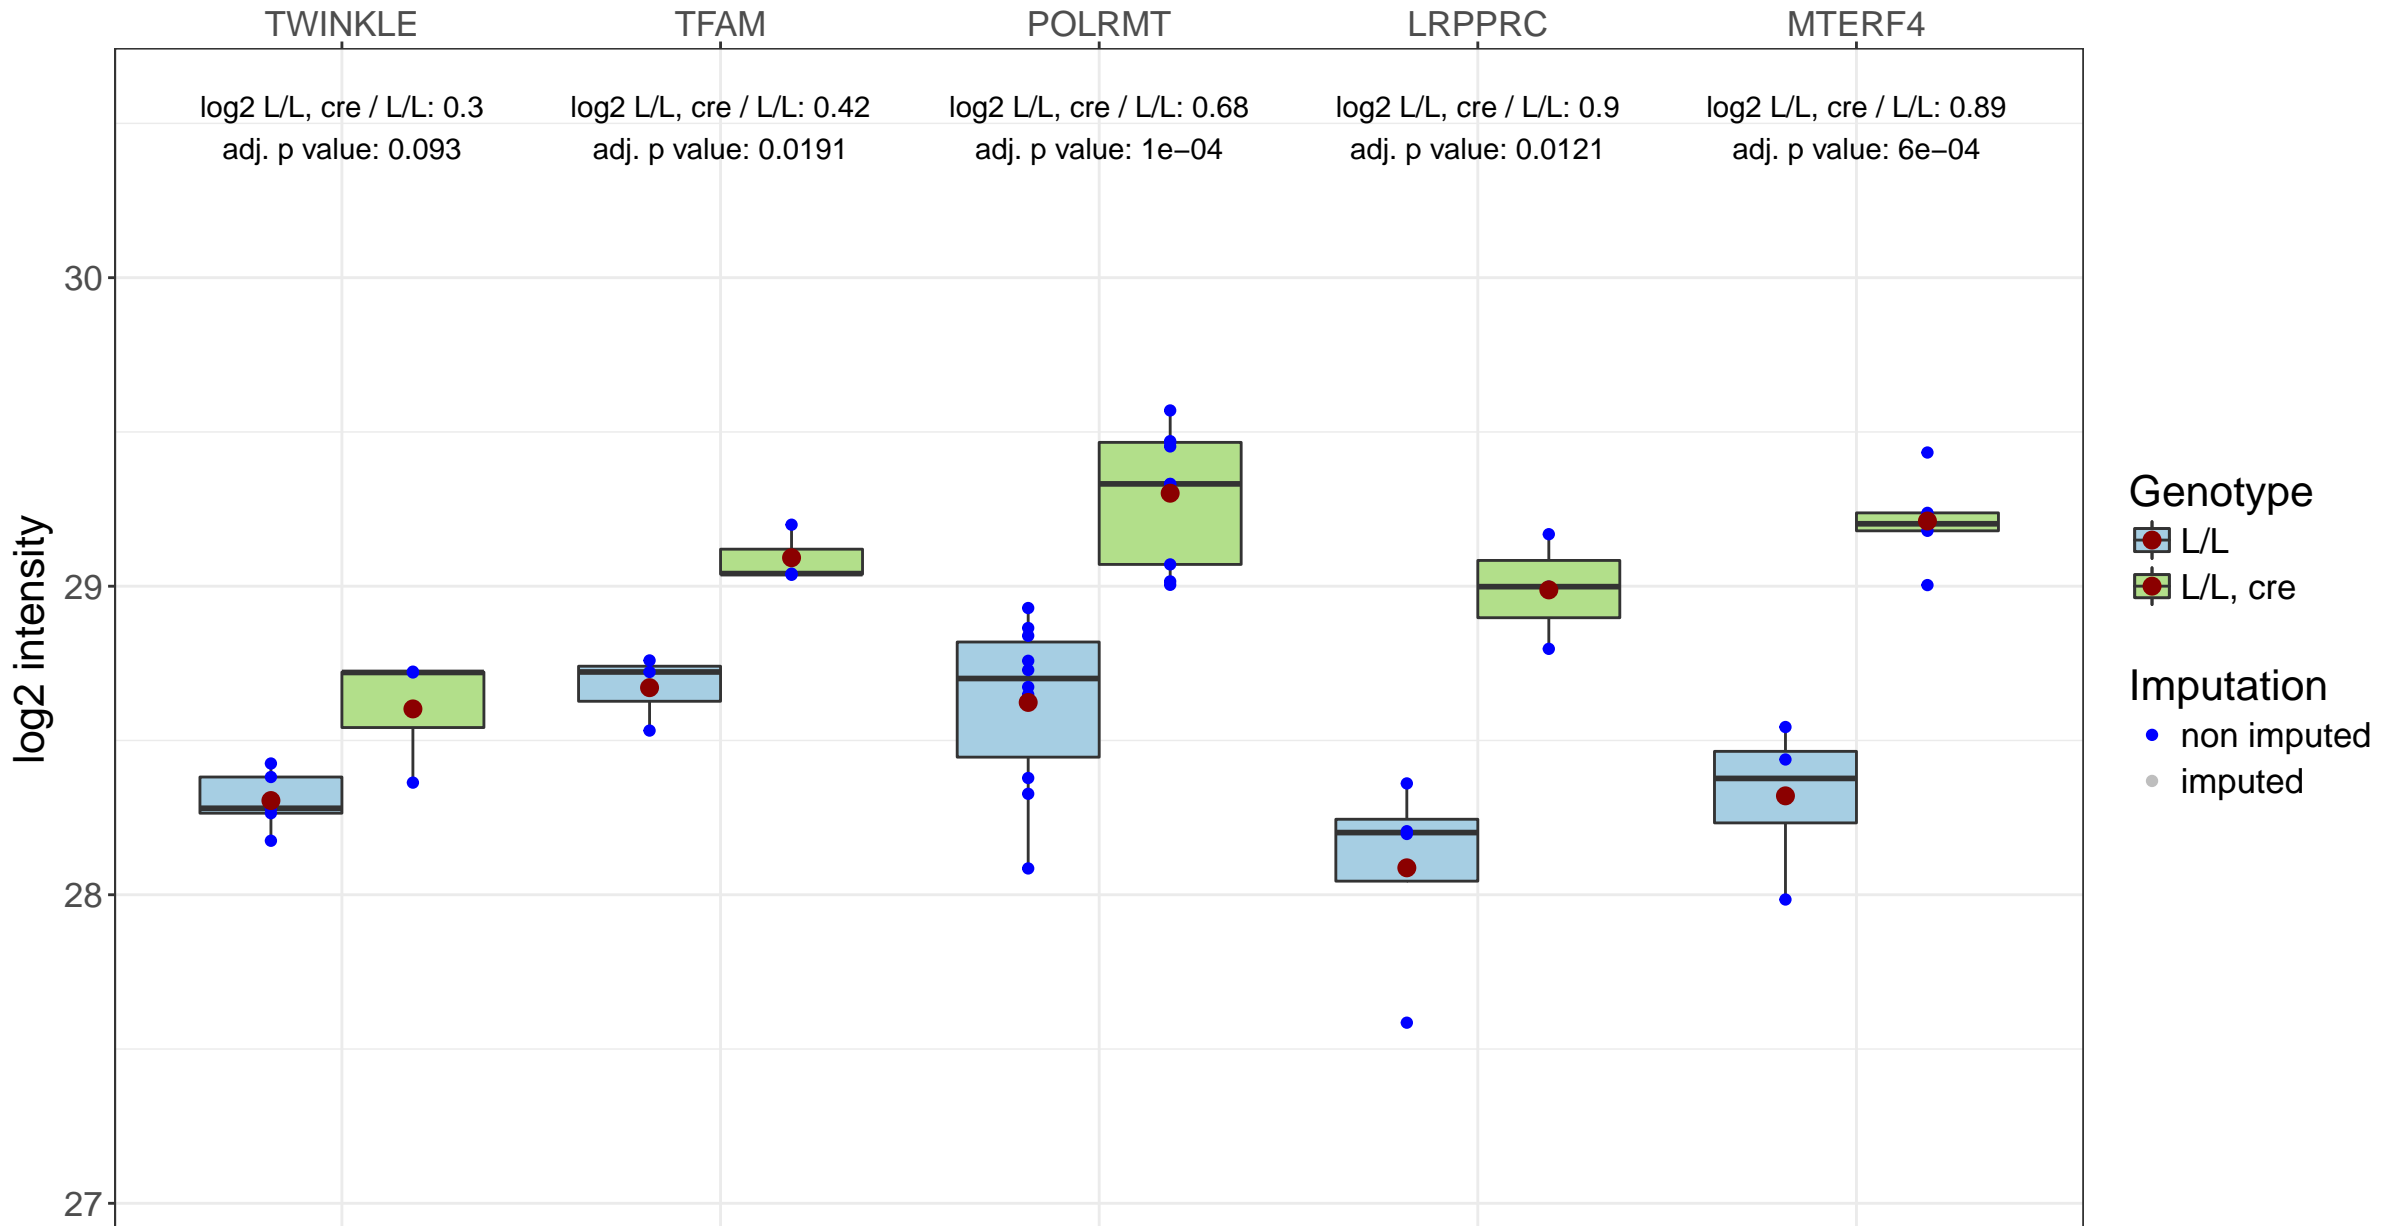

# RAB1 / Q5SW88

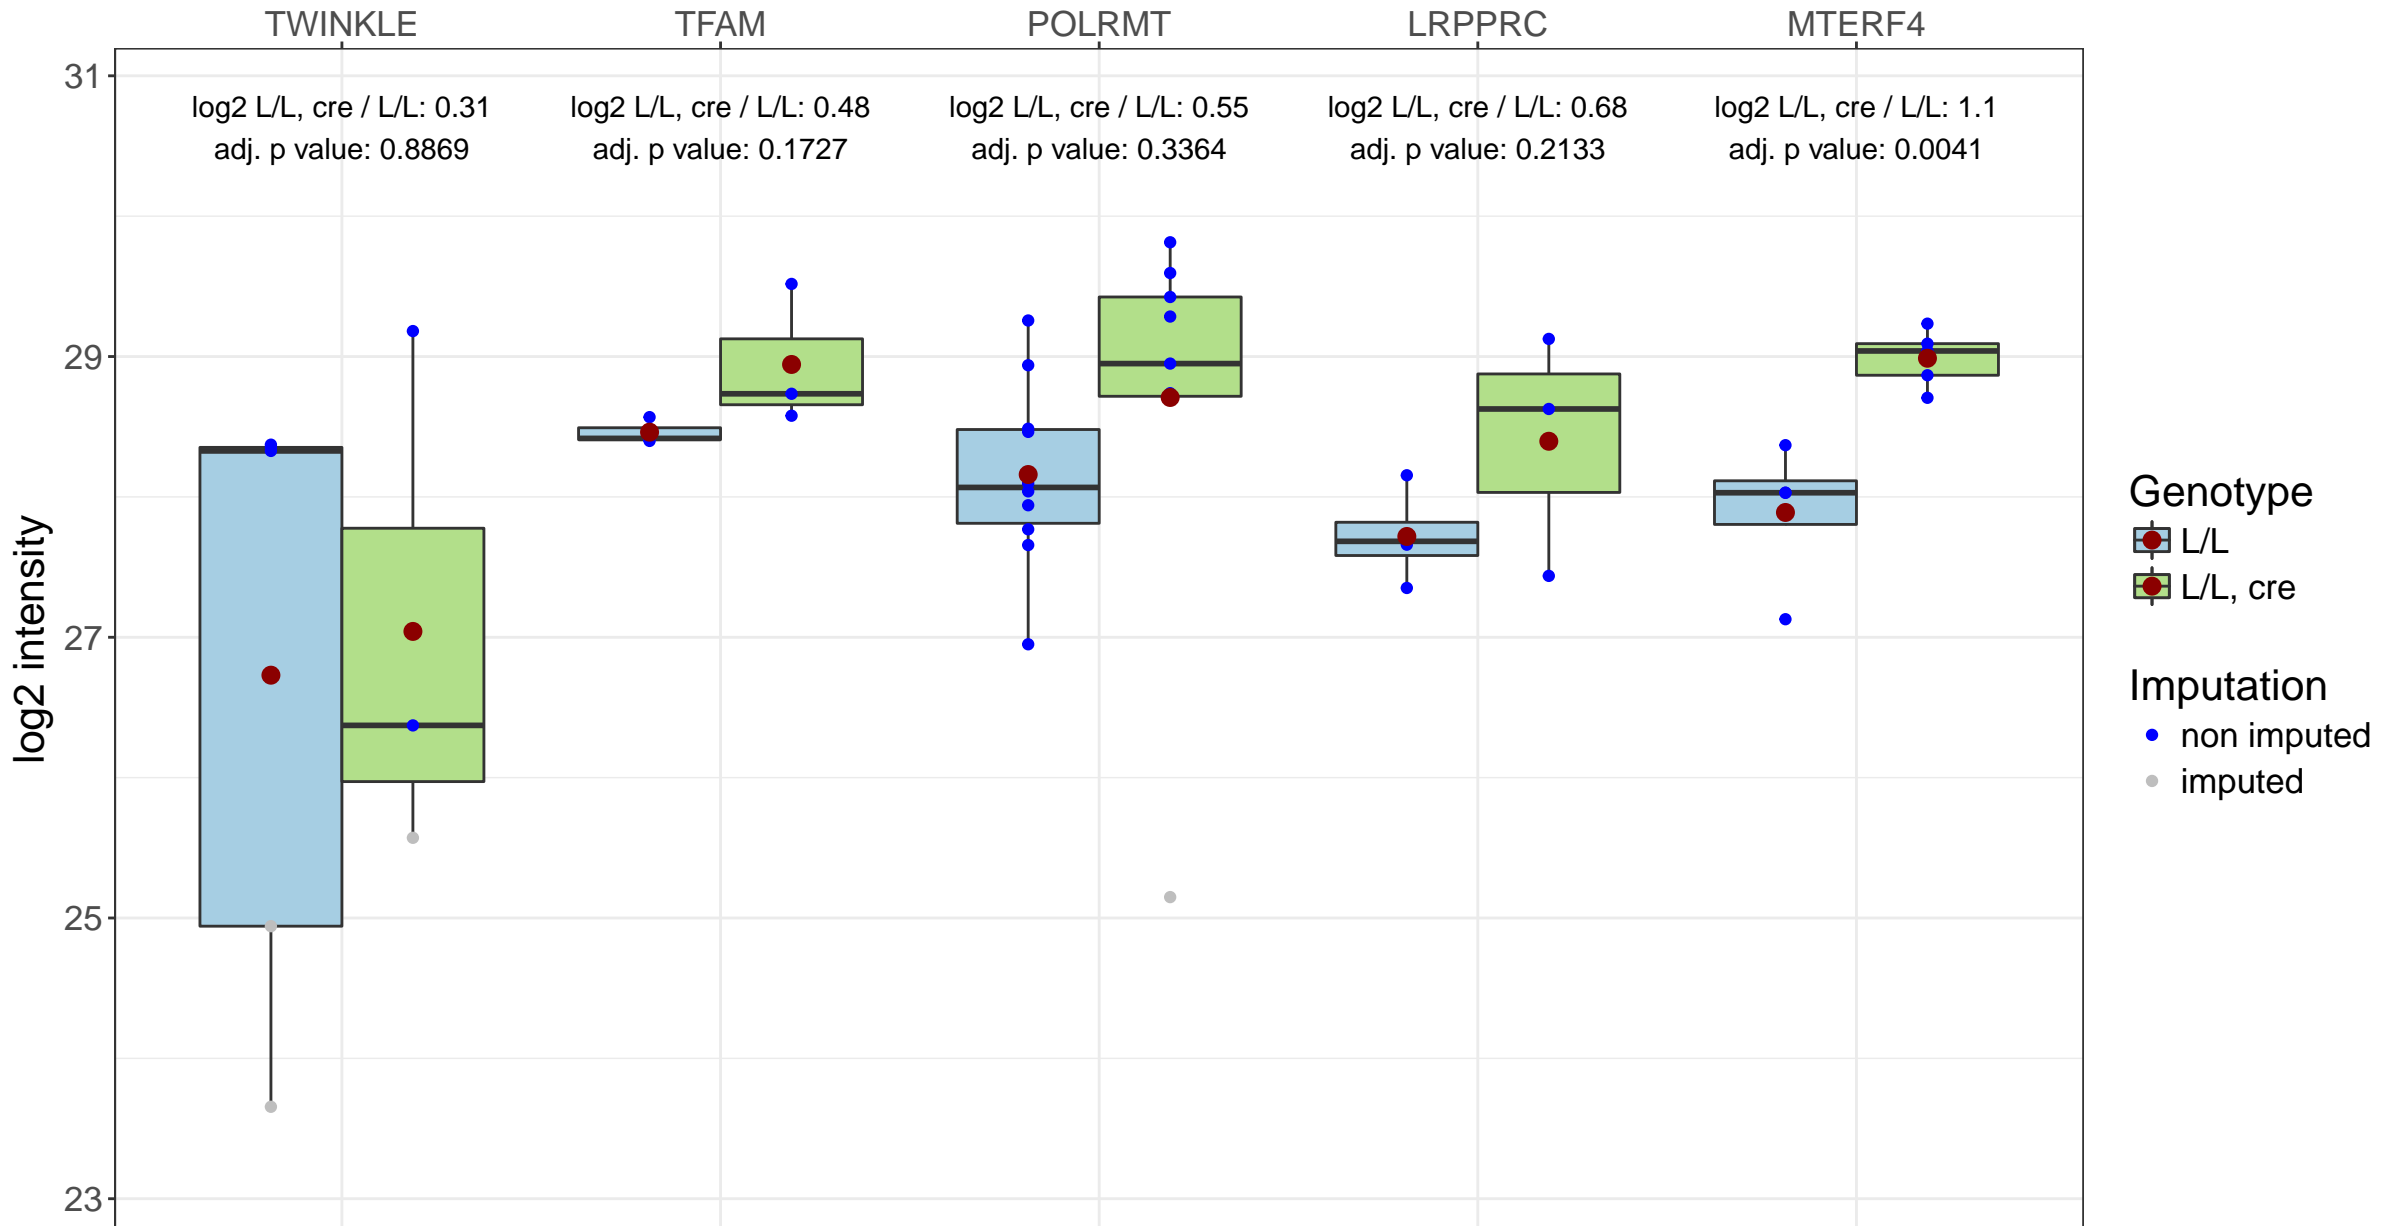

# RAB10 / P61027

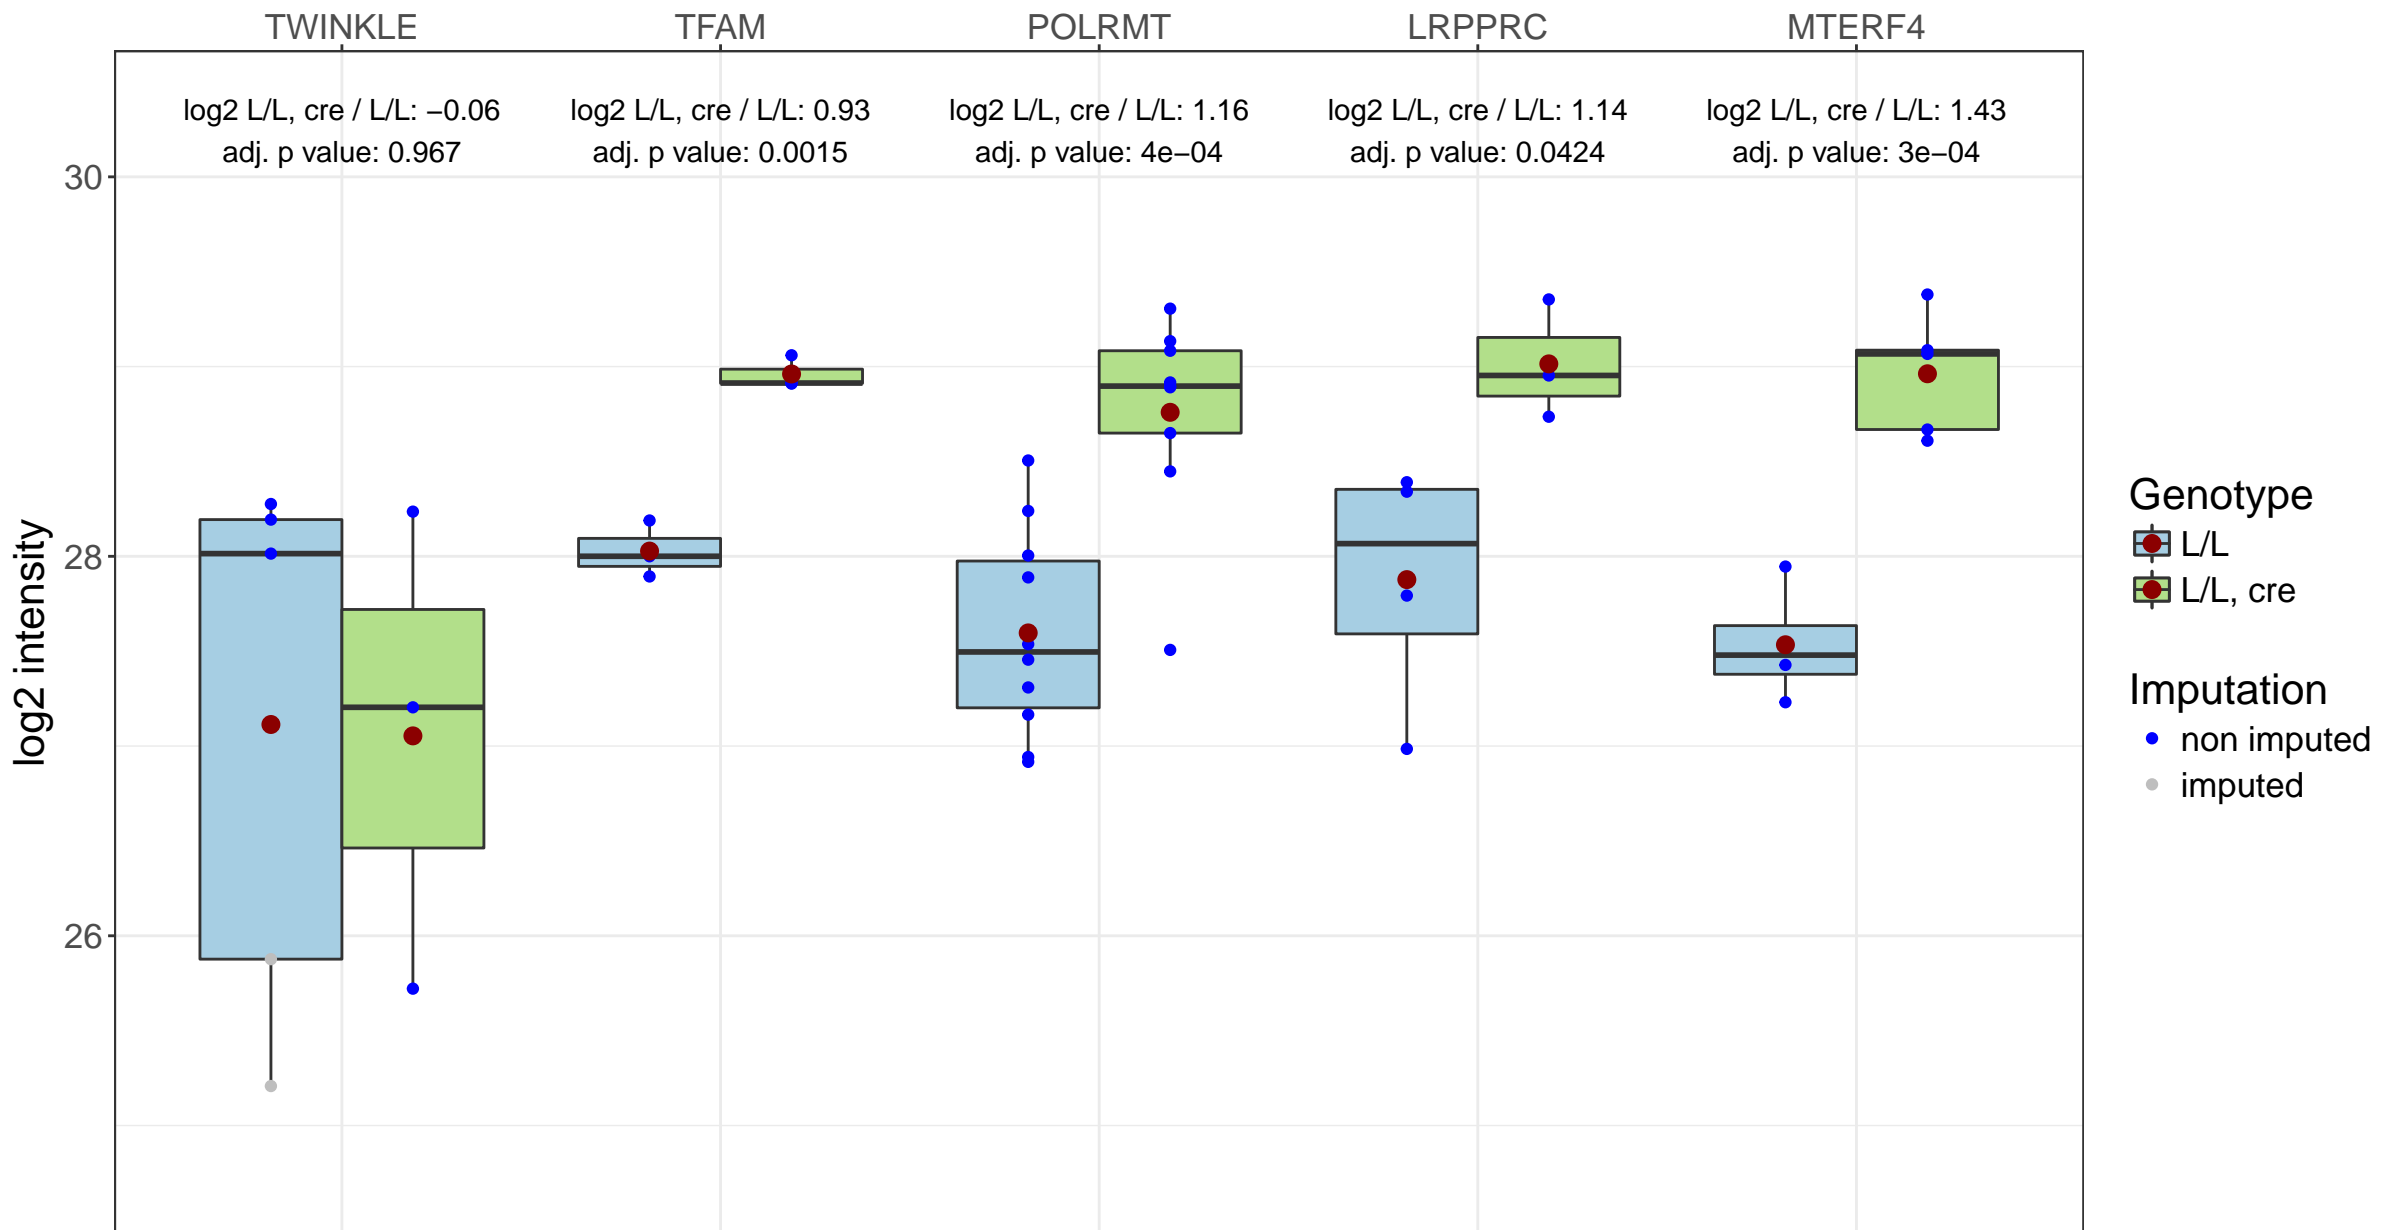

# RAB11B / P46638

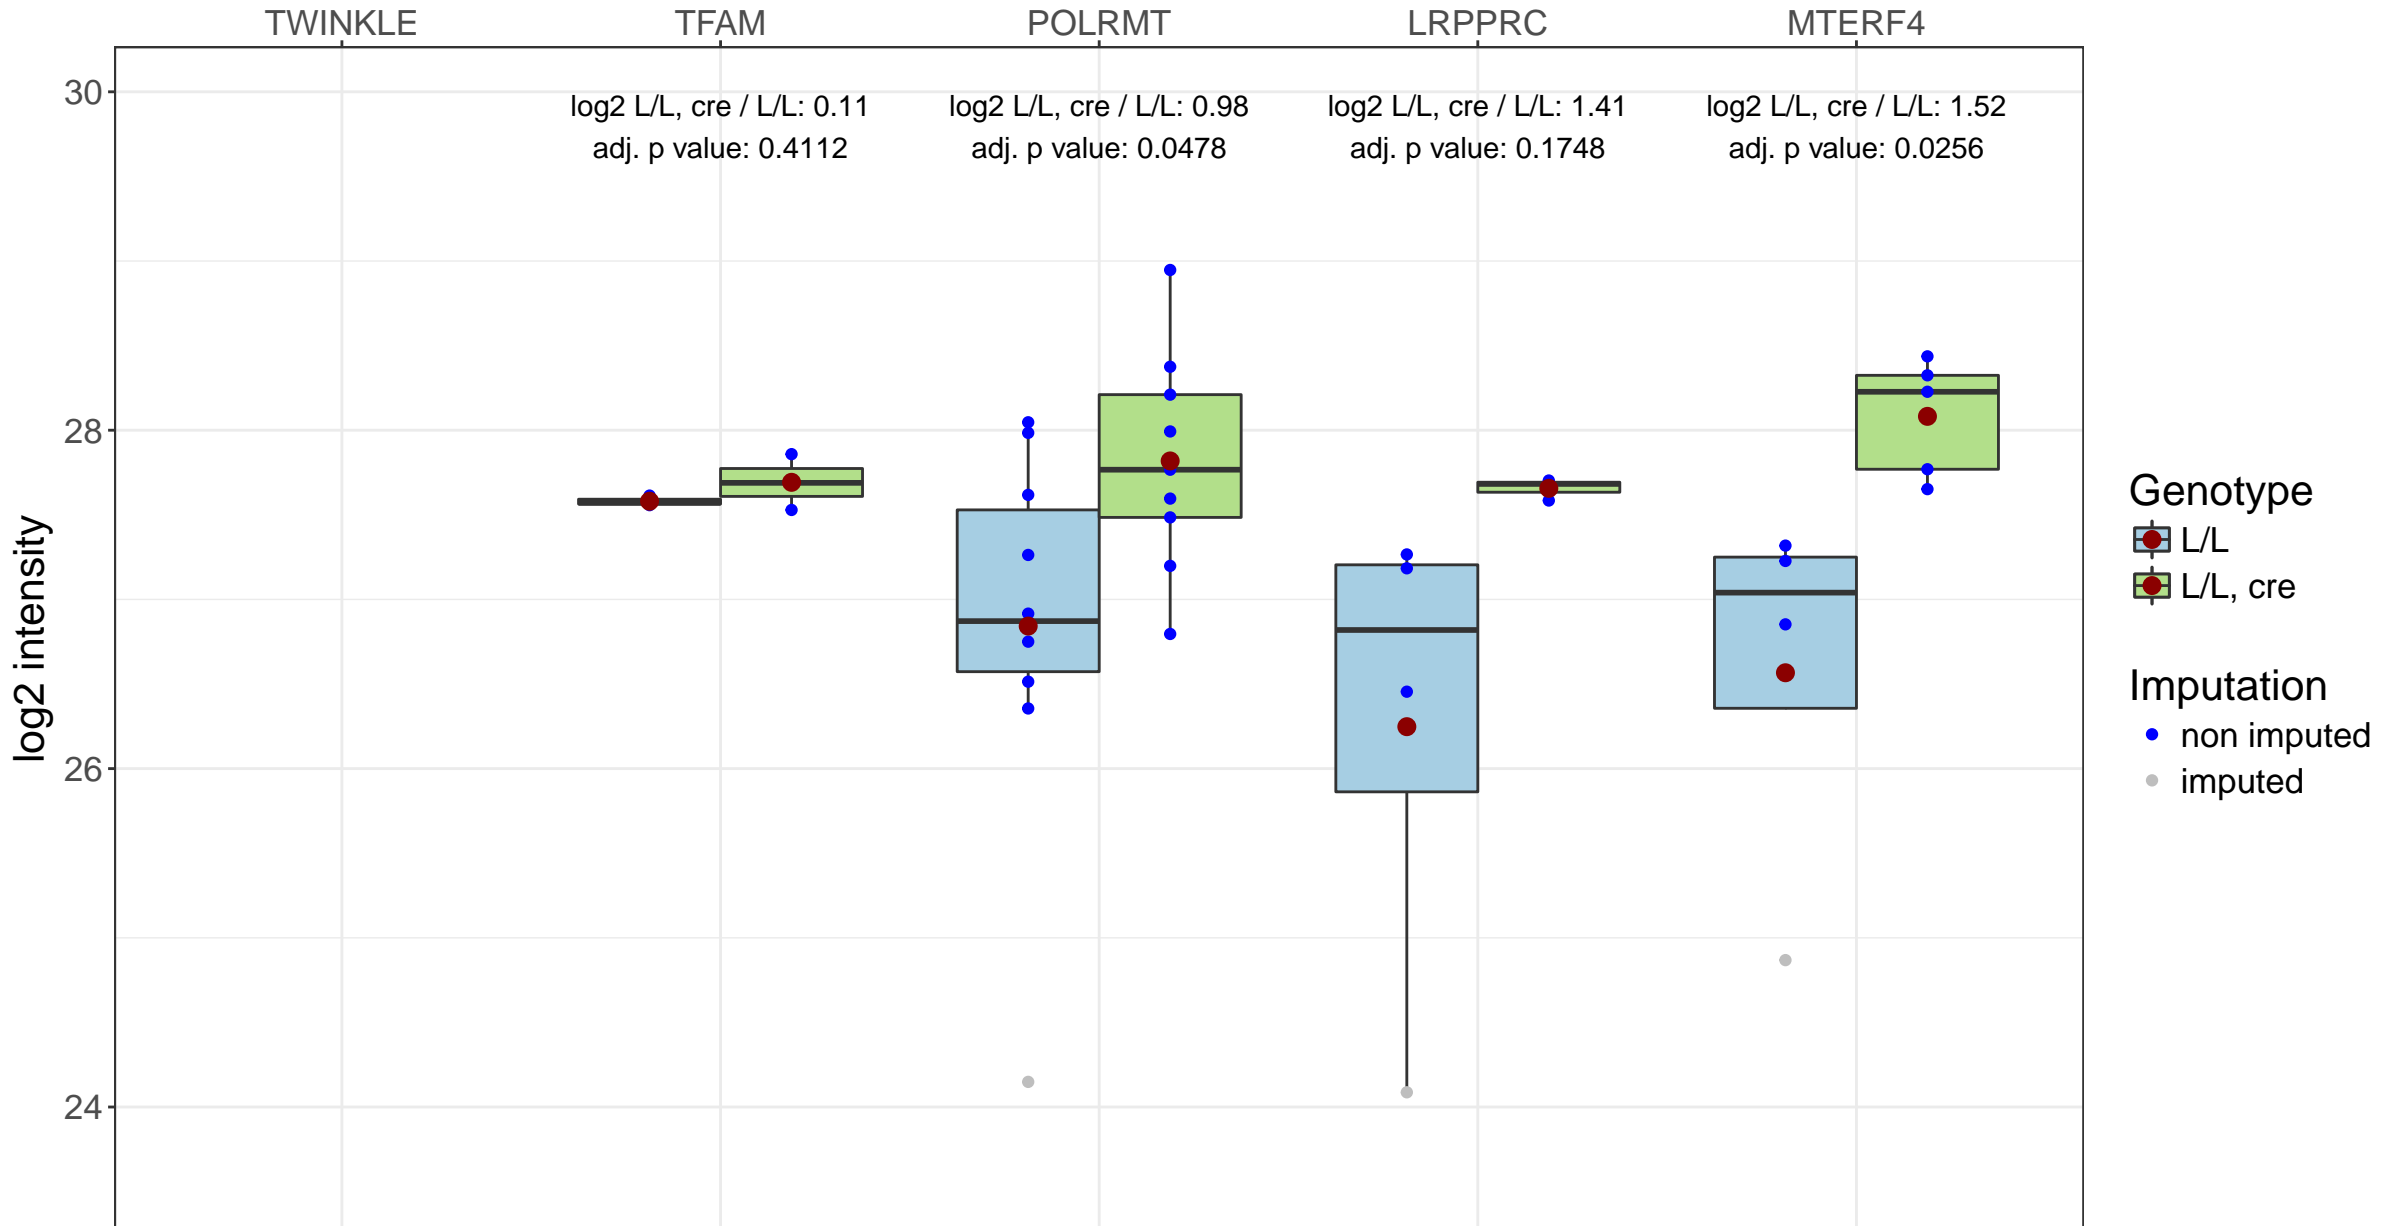

# RAB14 / Q91V41

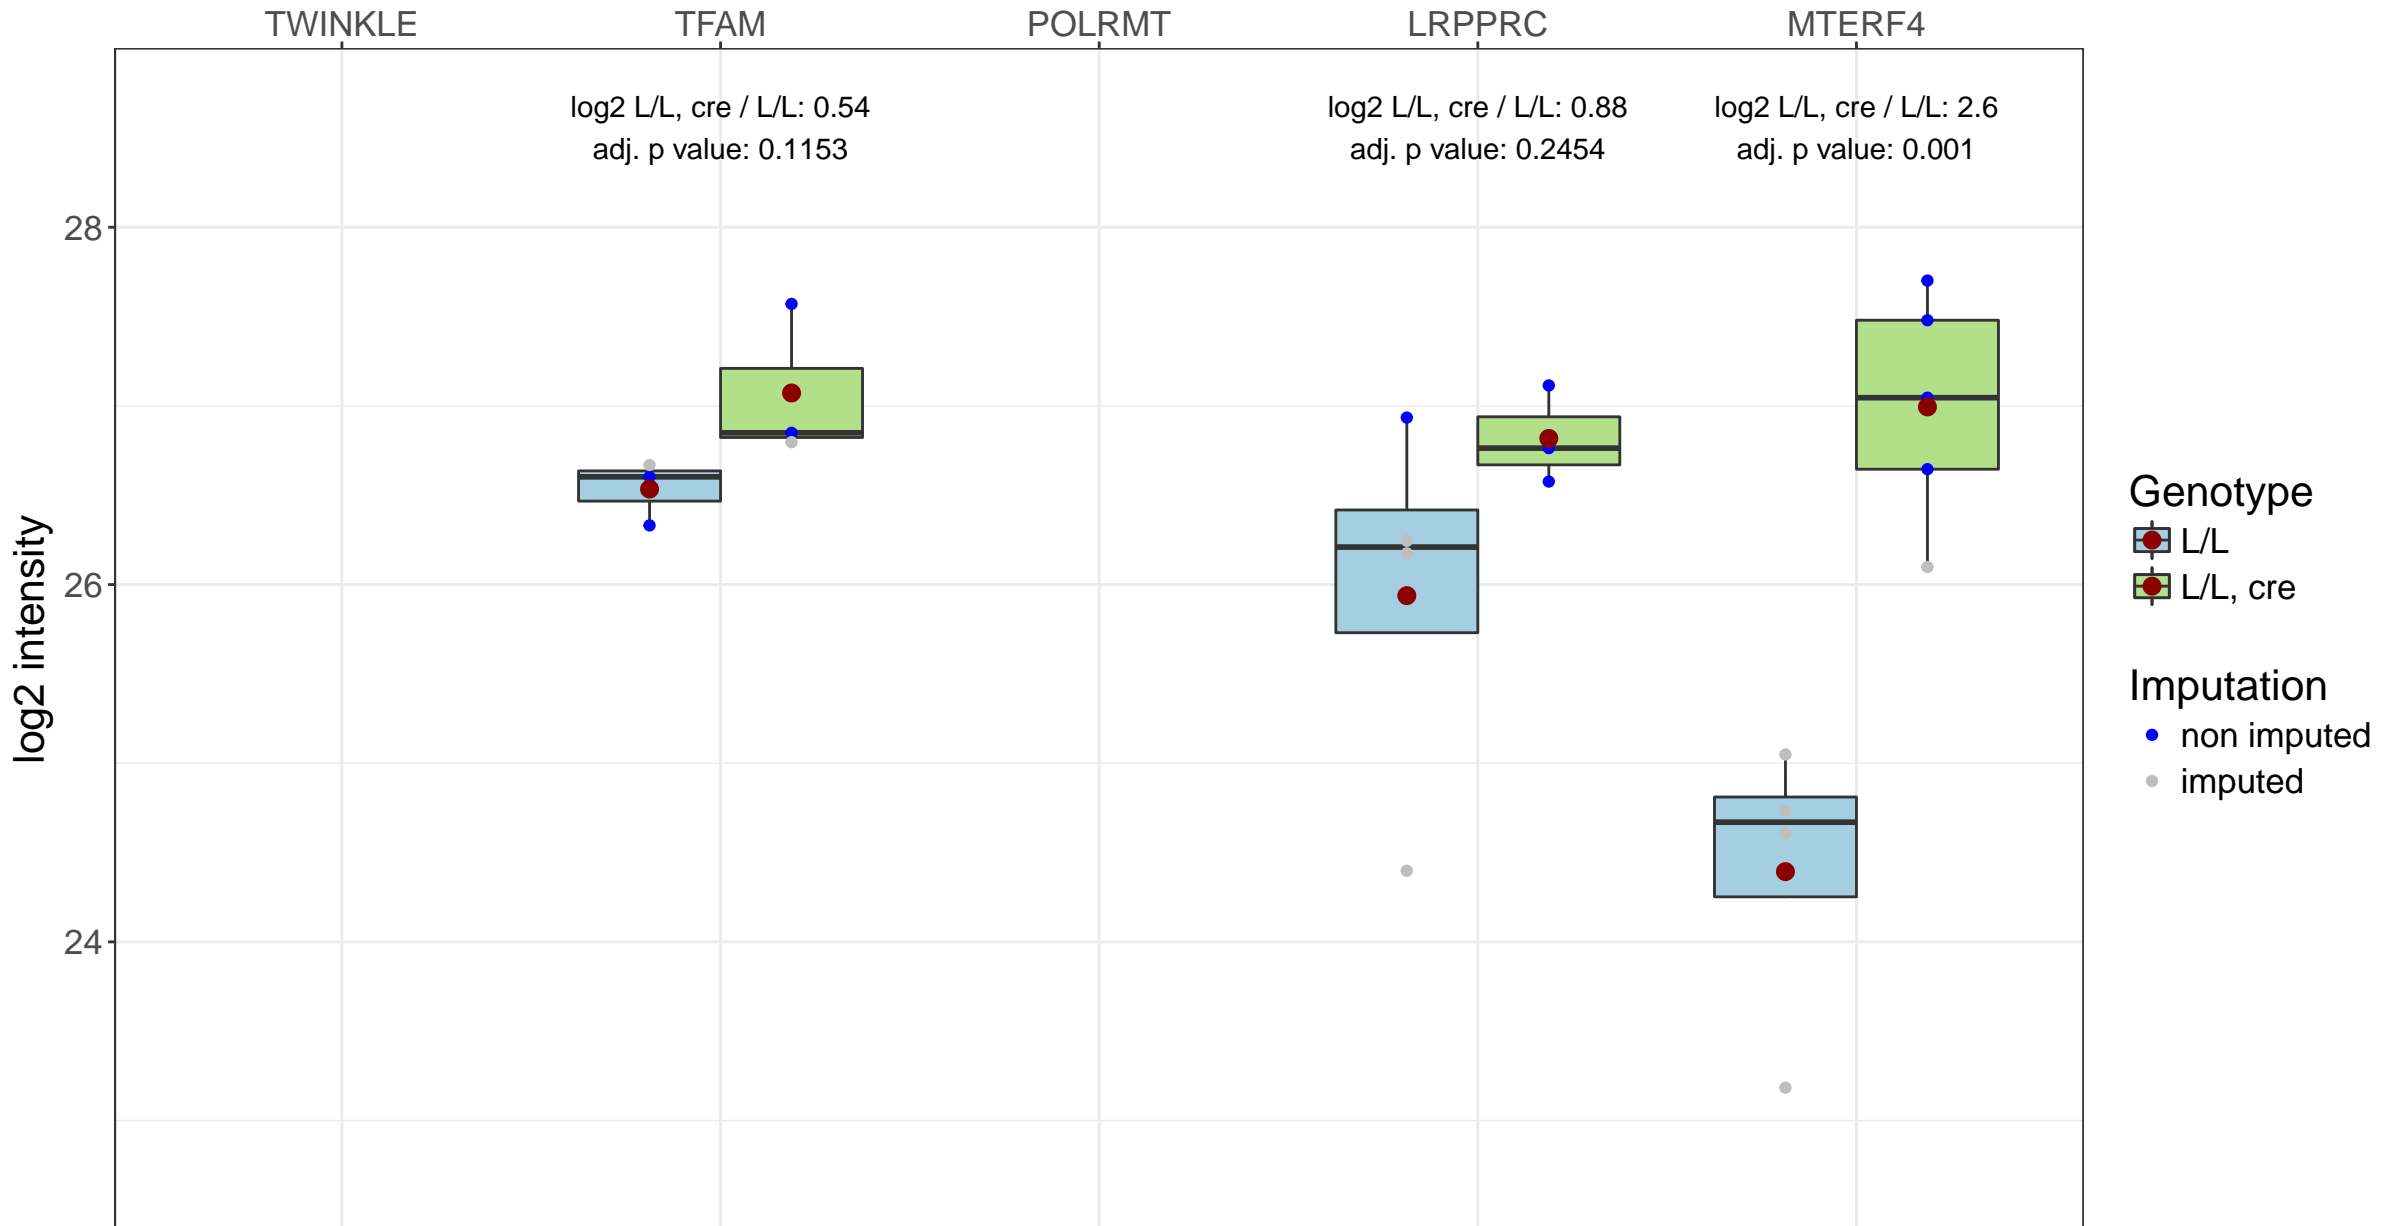



# RAB18 / P35293

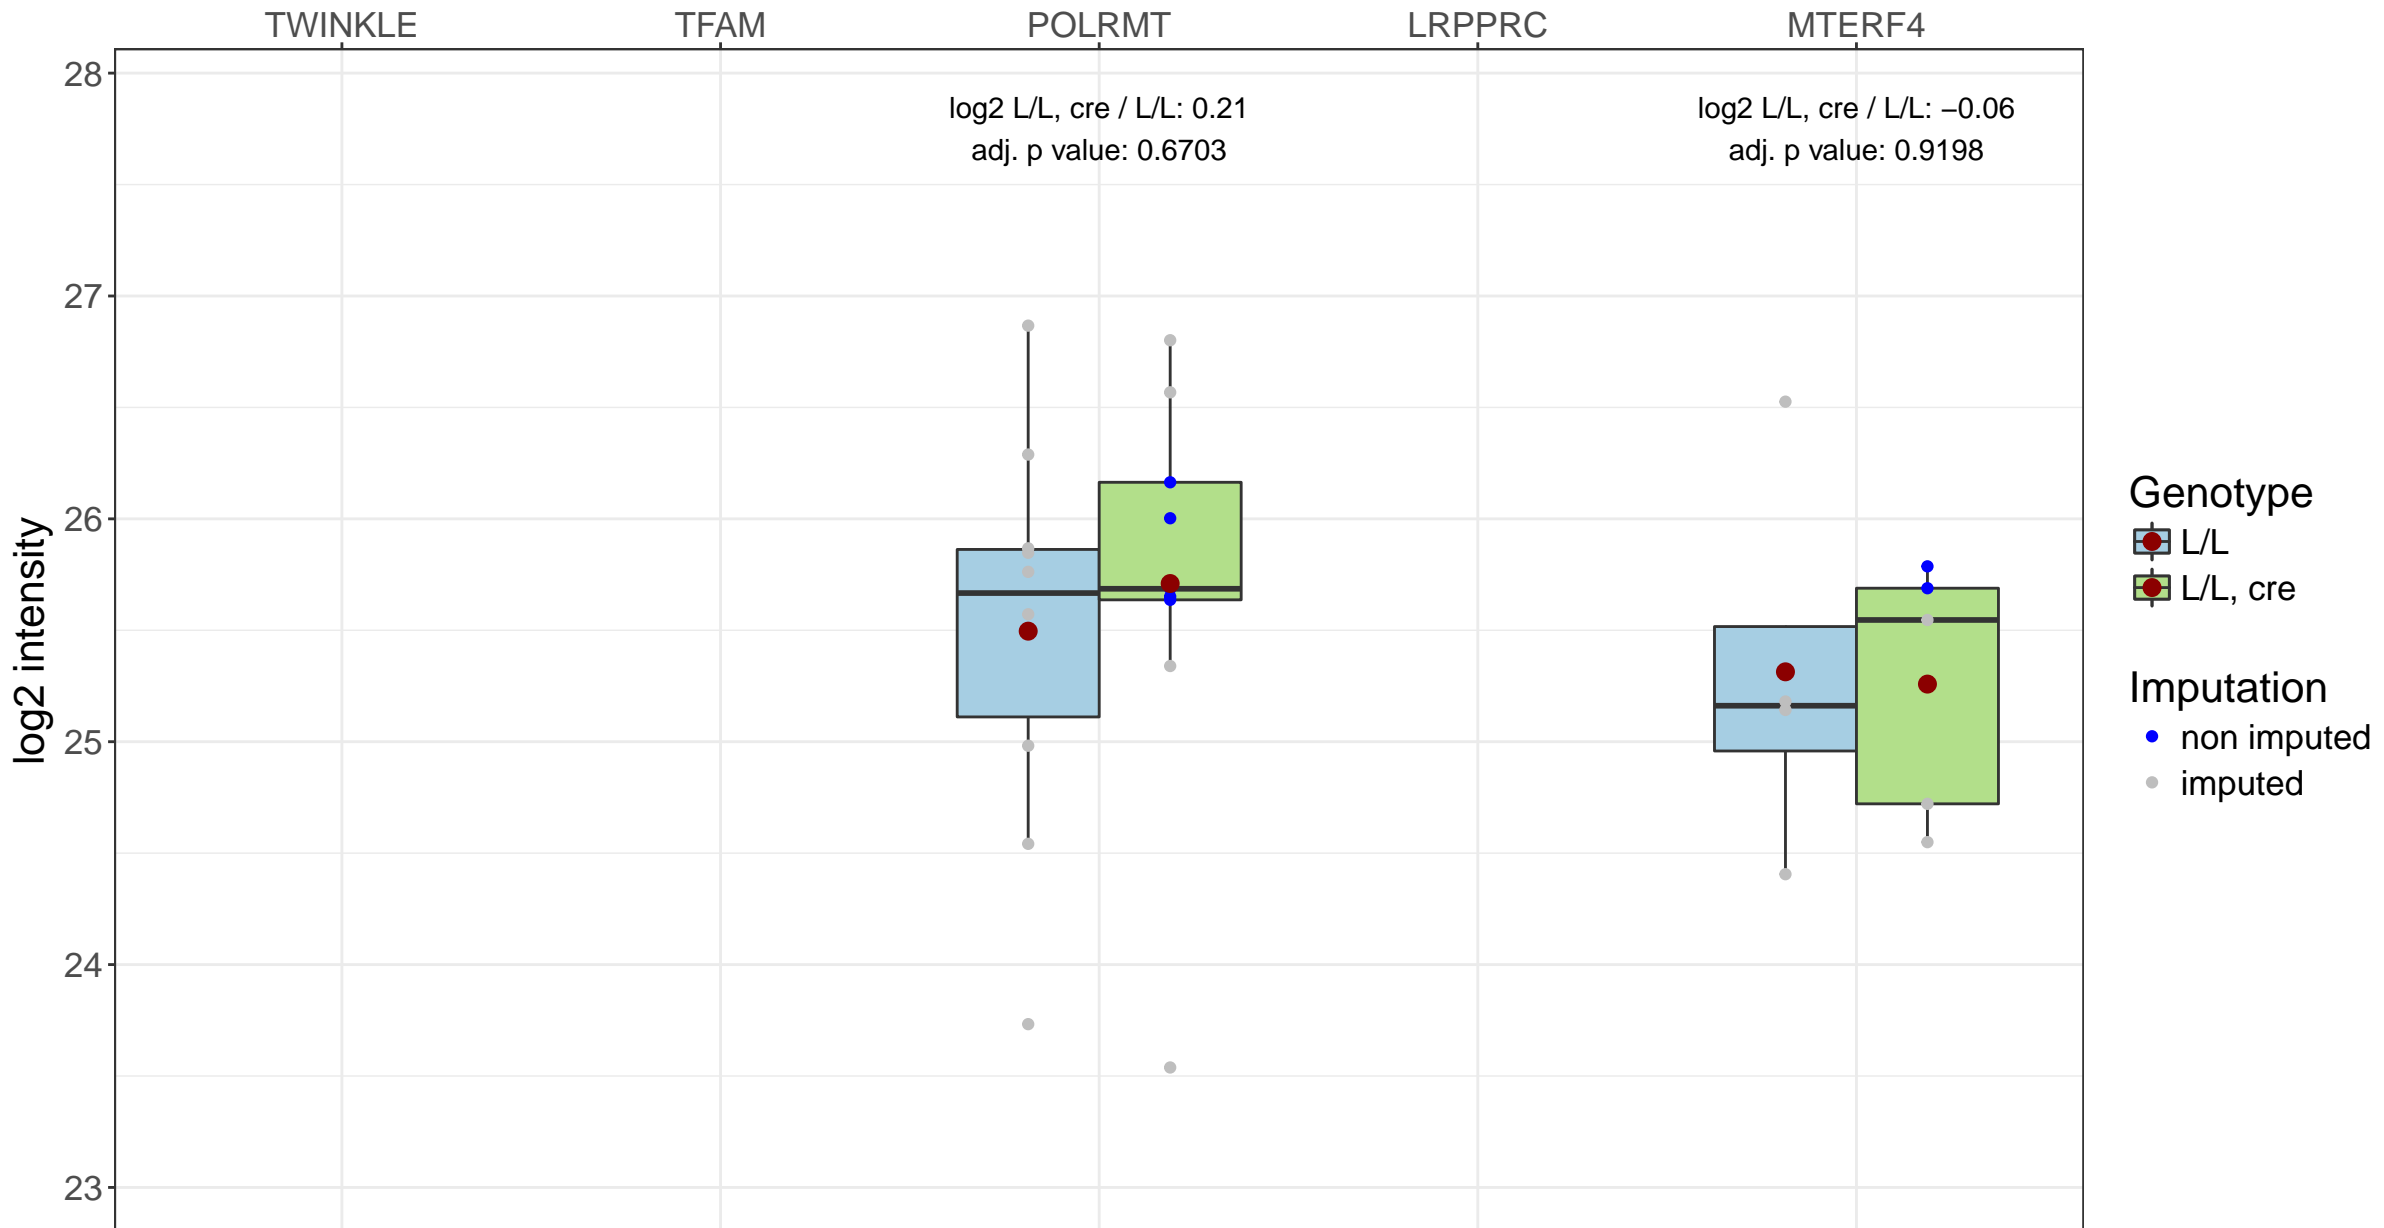

# RAB1B / Q9D1G1

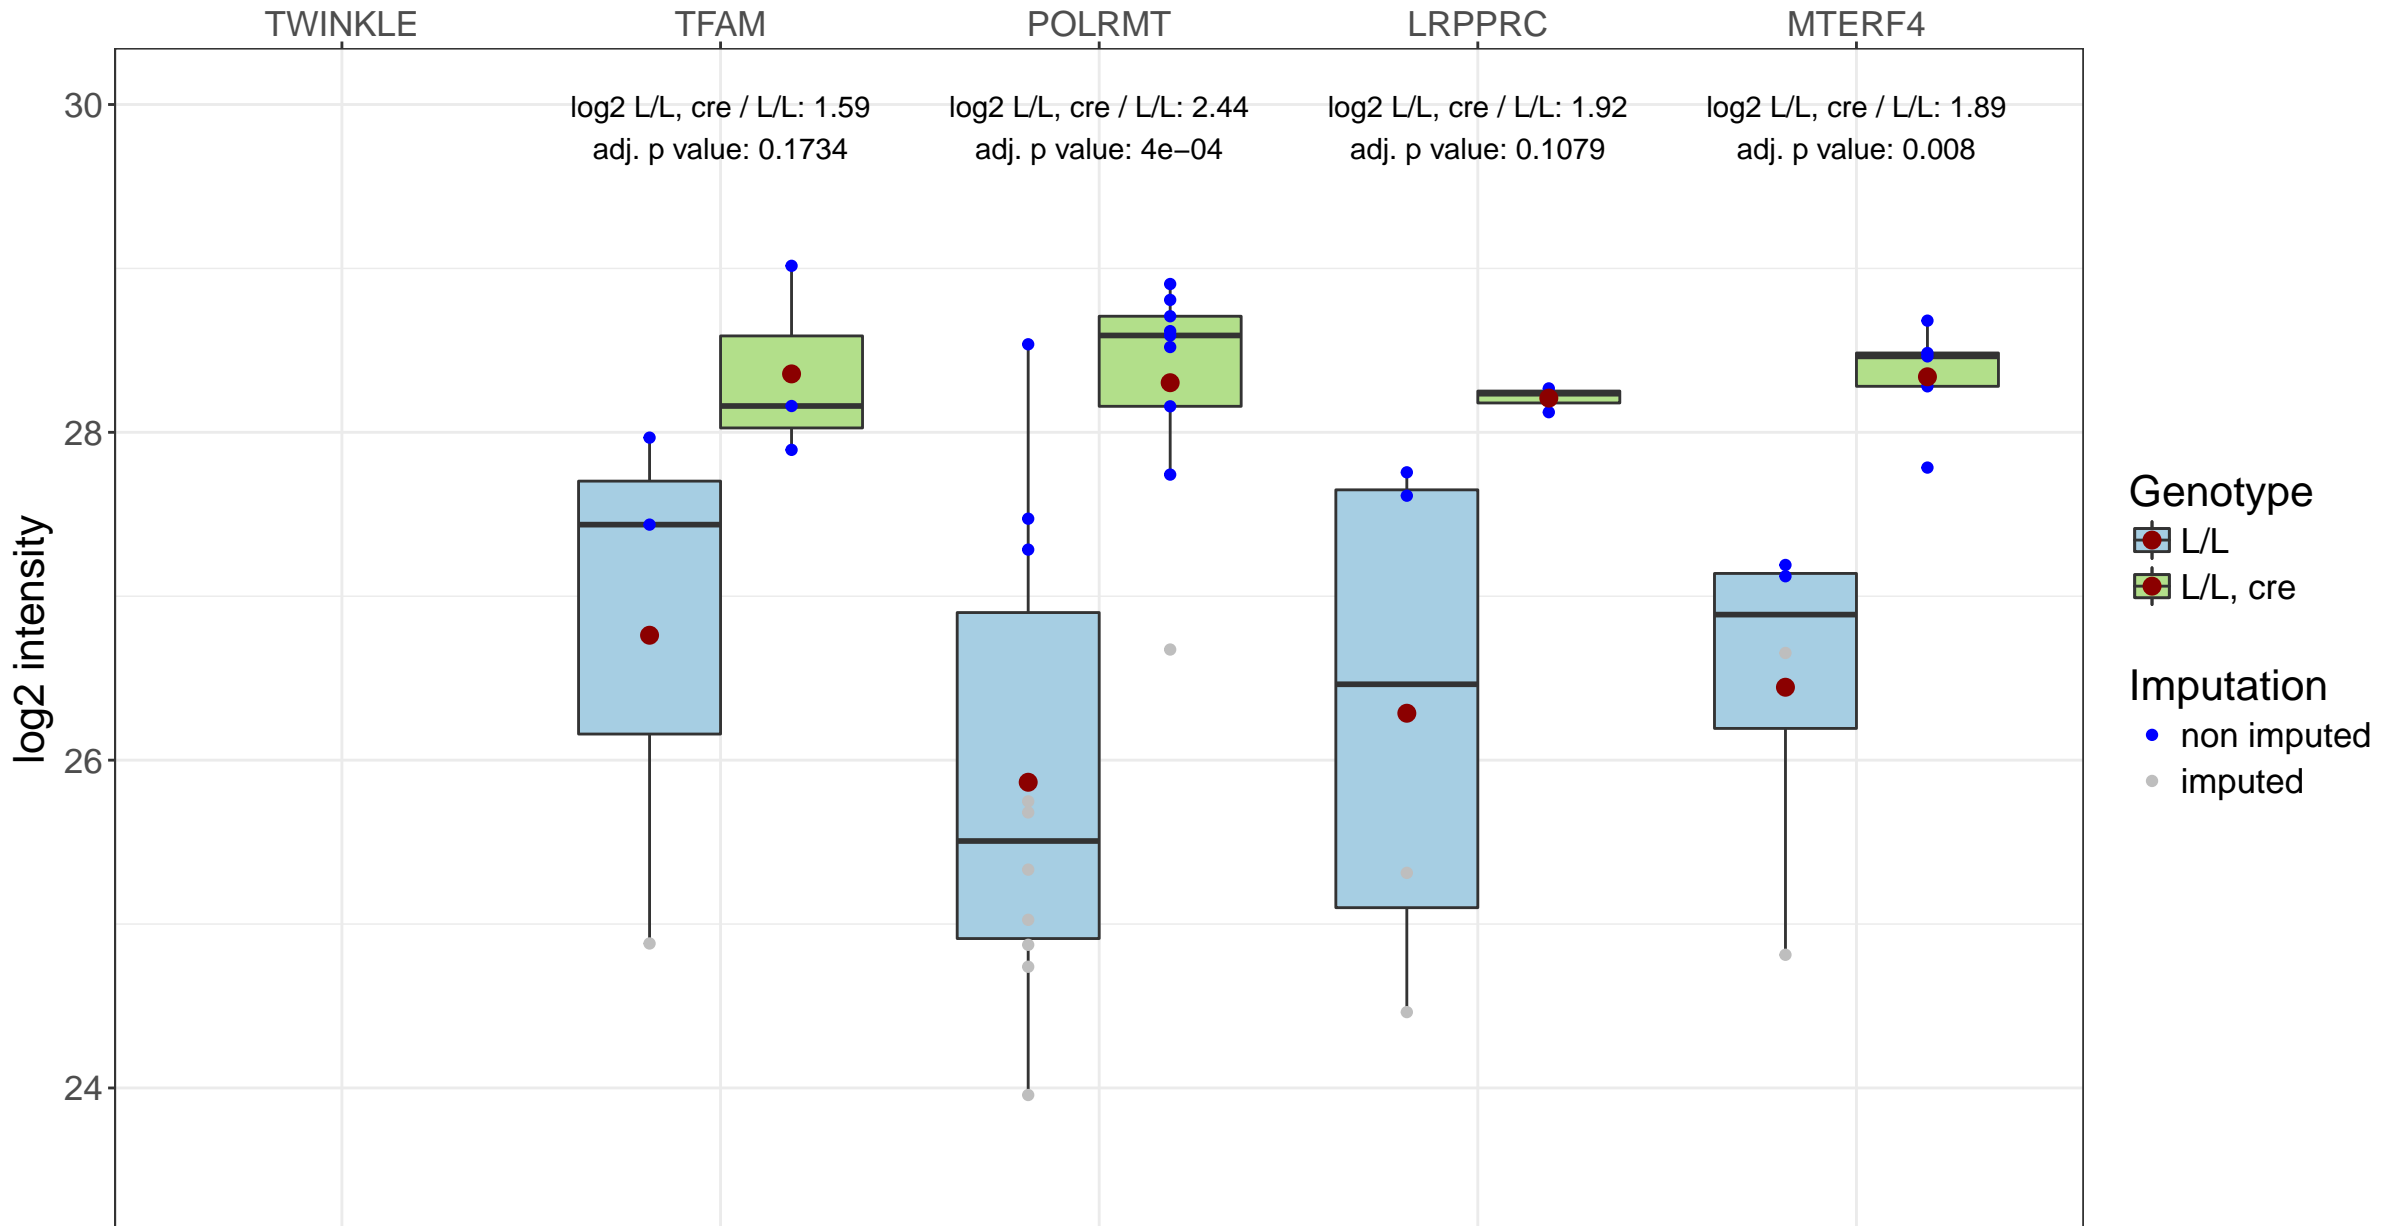

# RAB21 / P35282

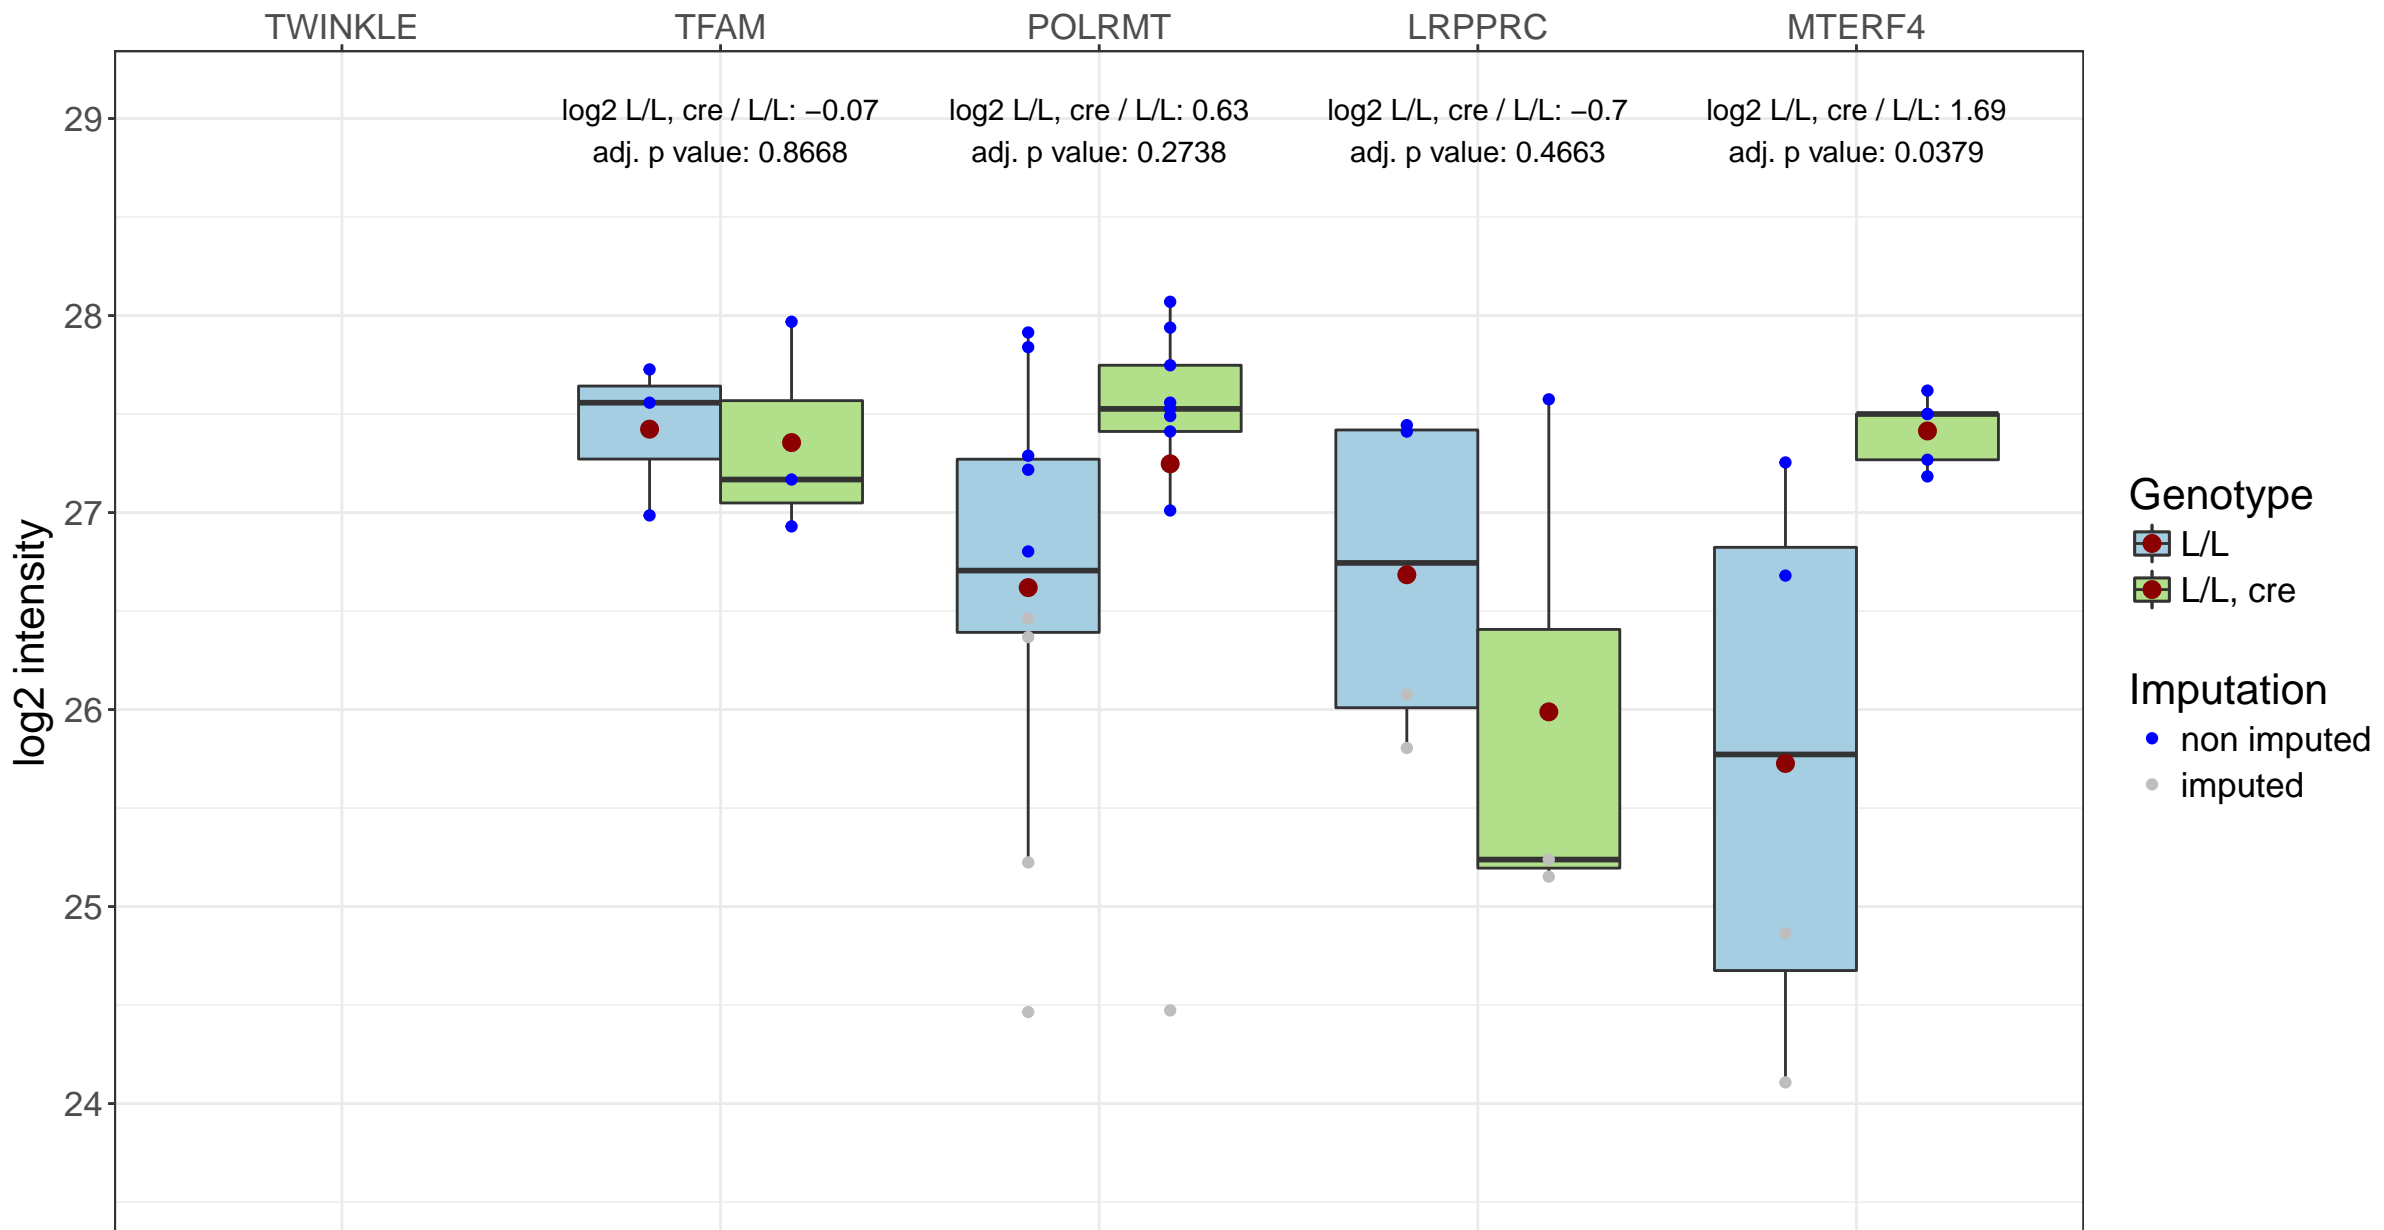

# RAB2A / P53994

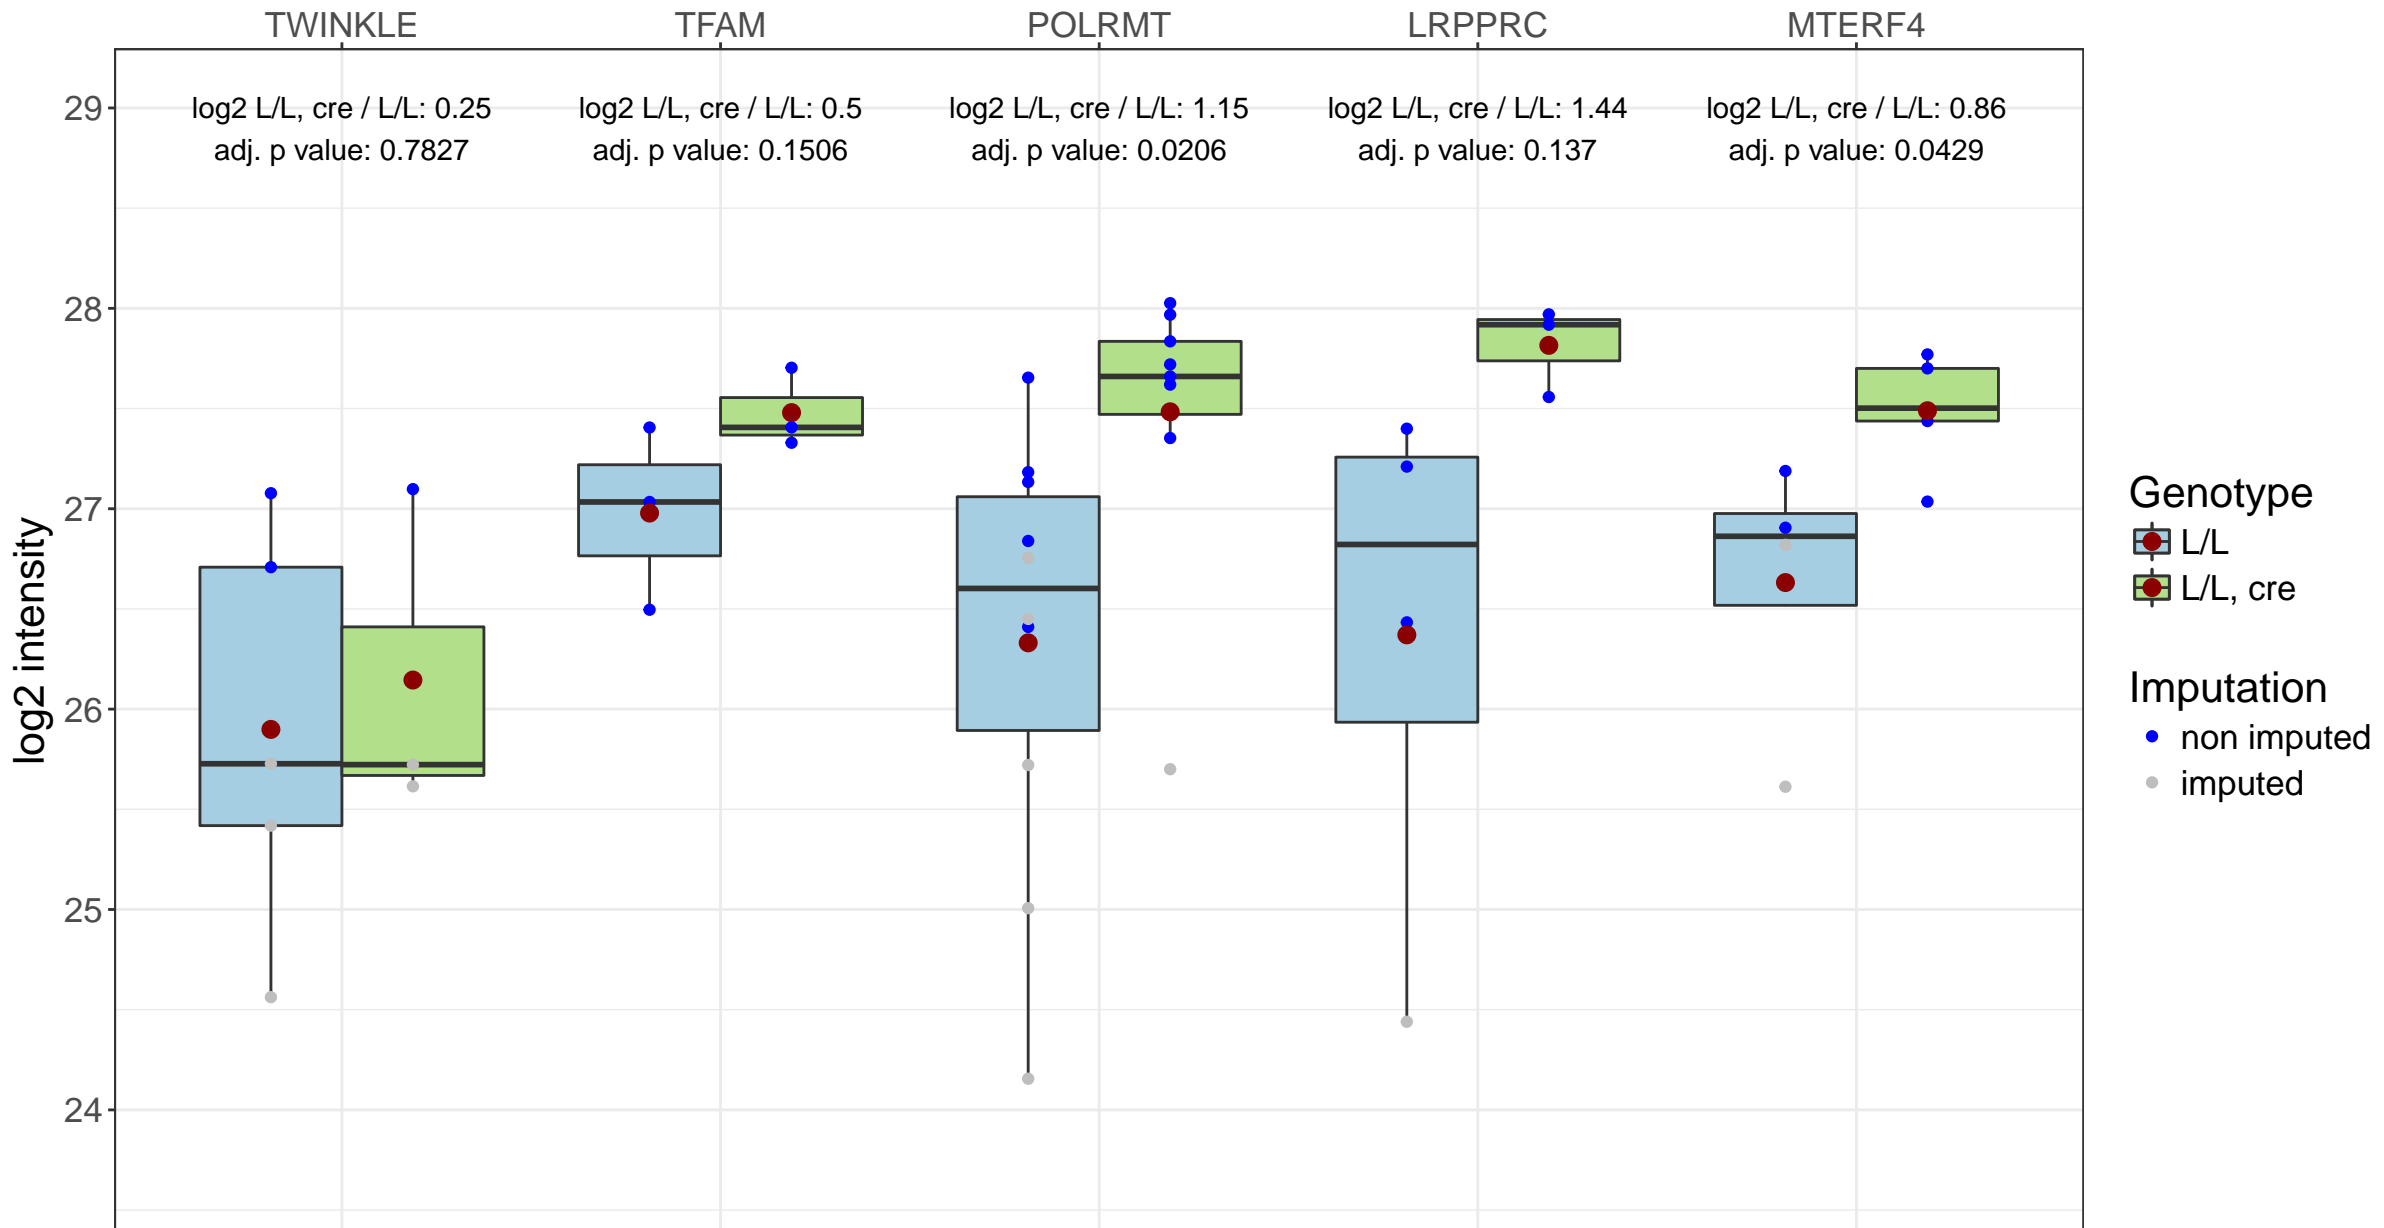

# RAB35 / Q6PHN9

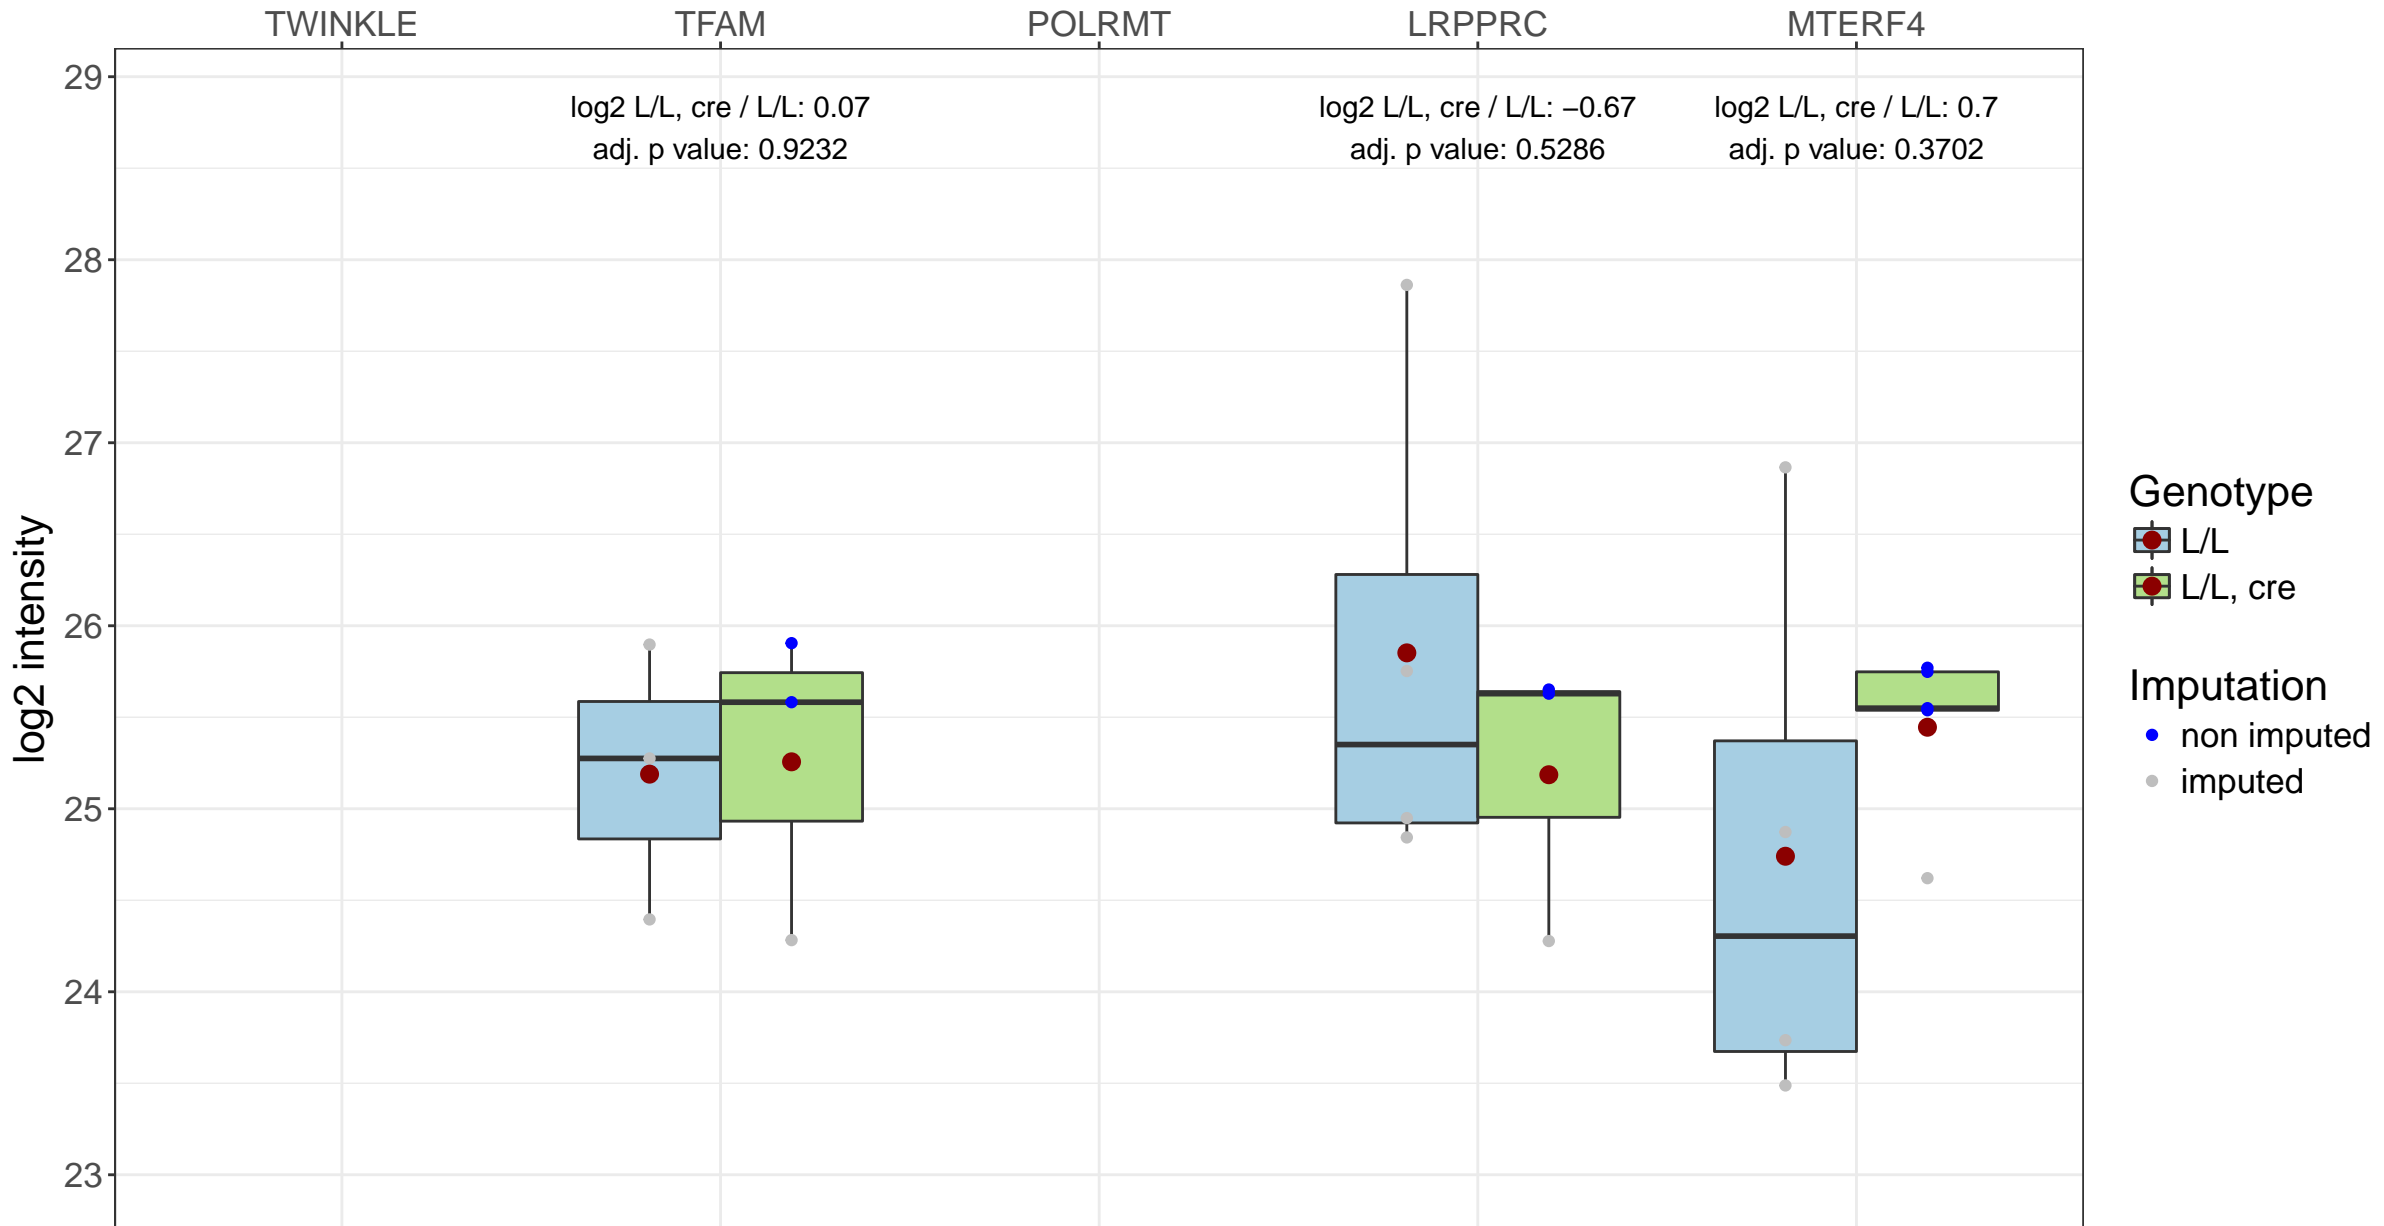

# RAB5A / Q9CQD1

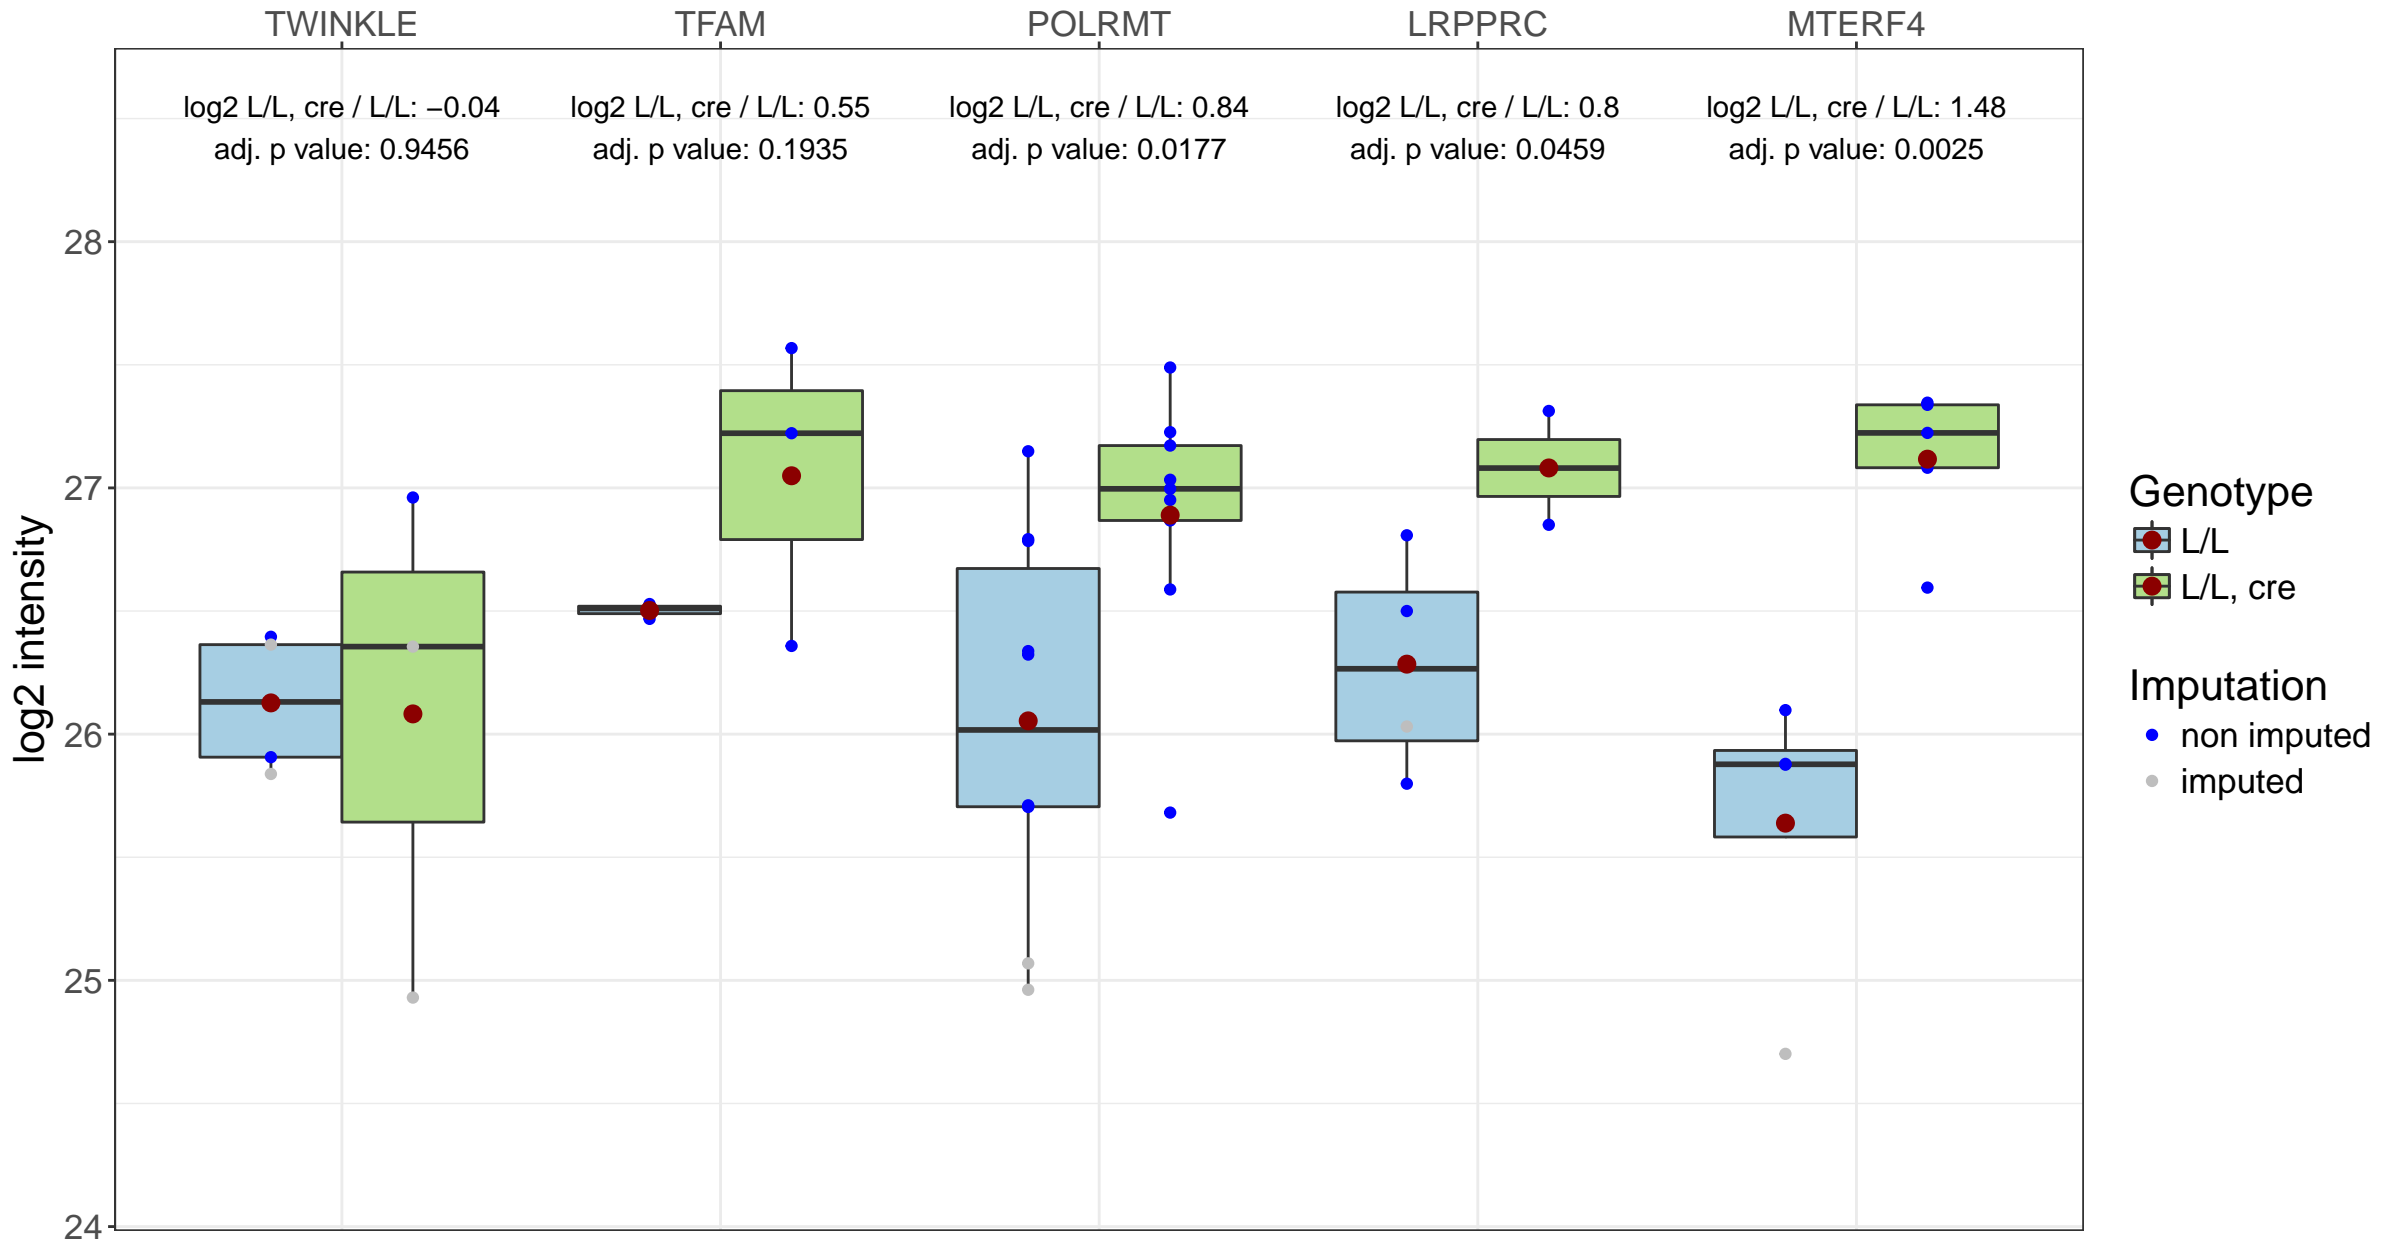

# RAB5B / P61021

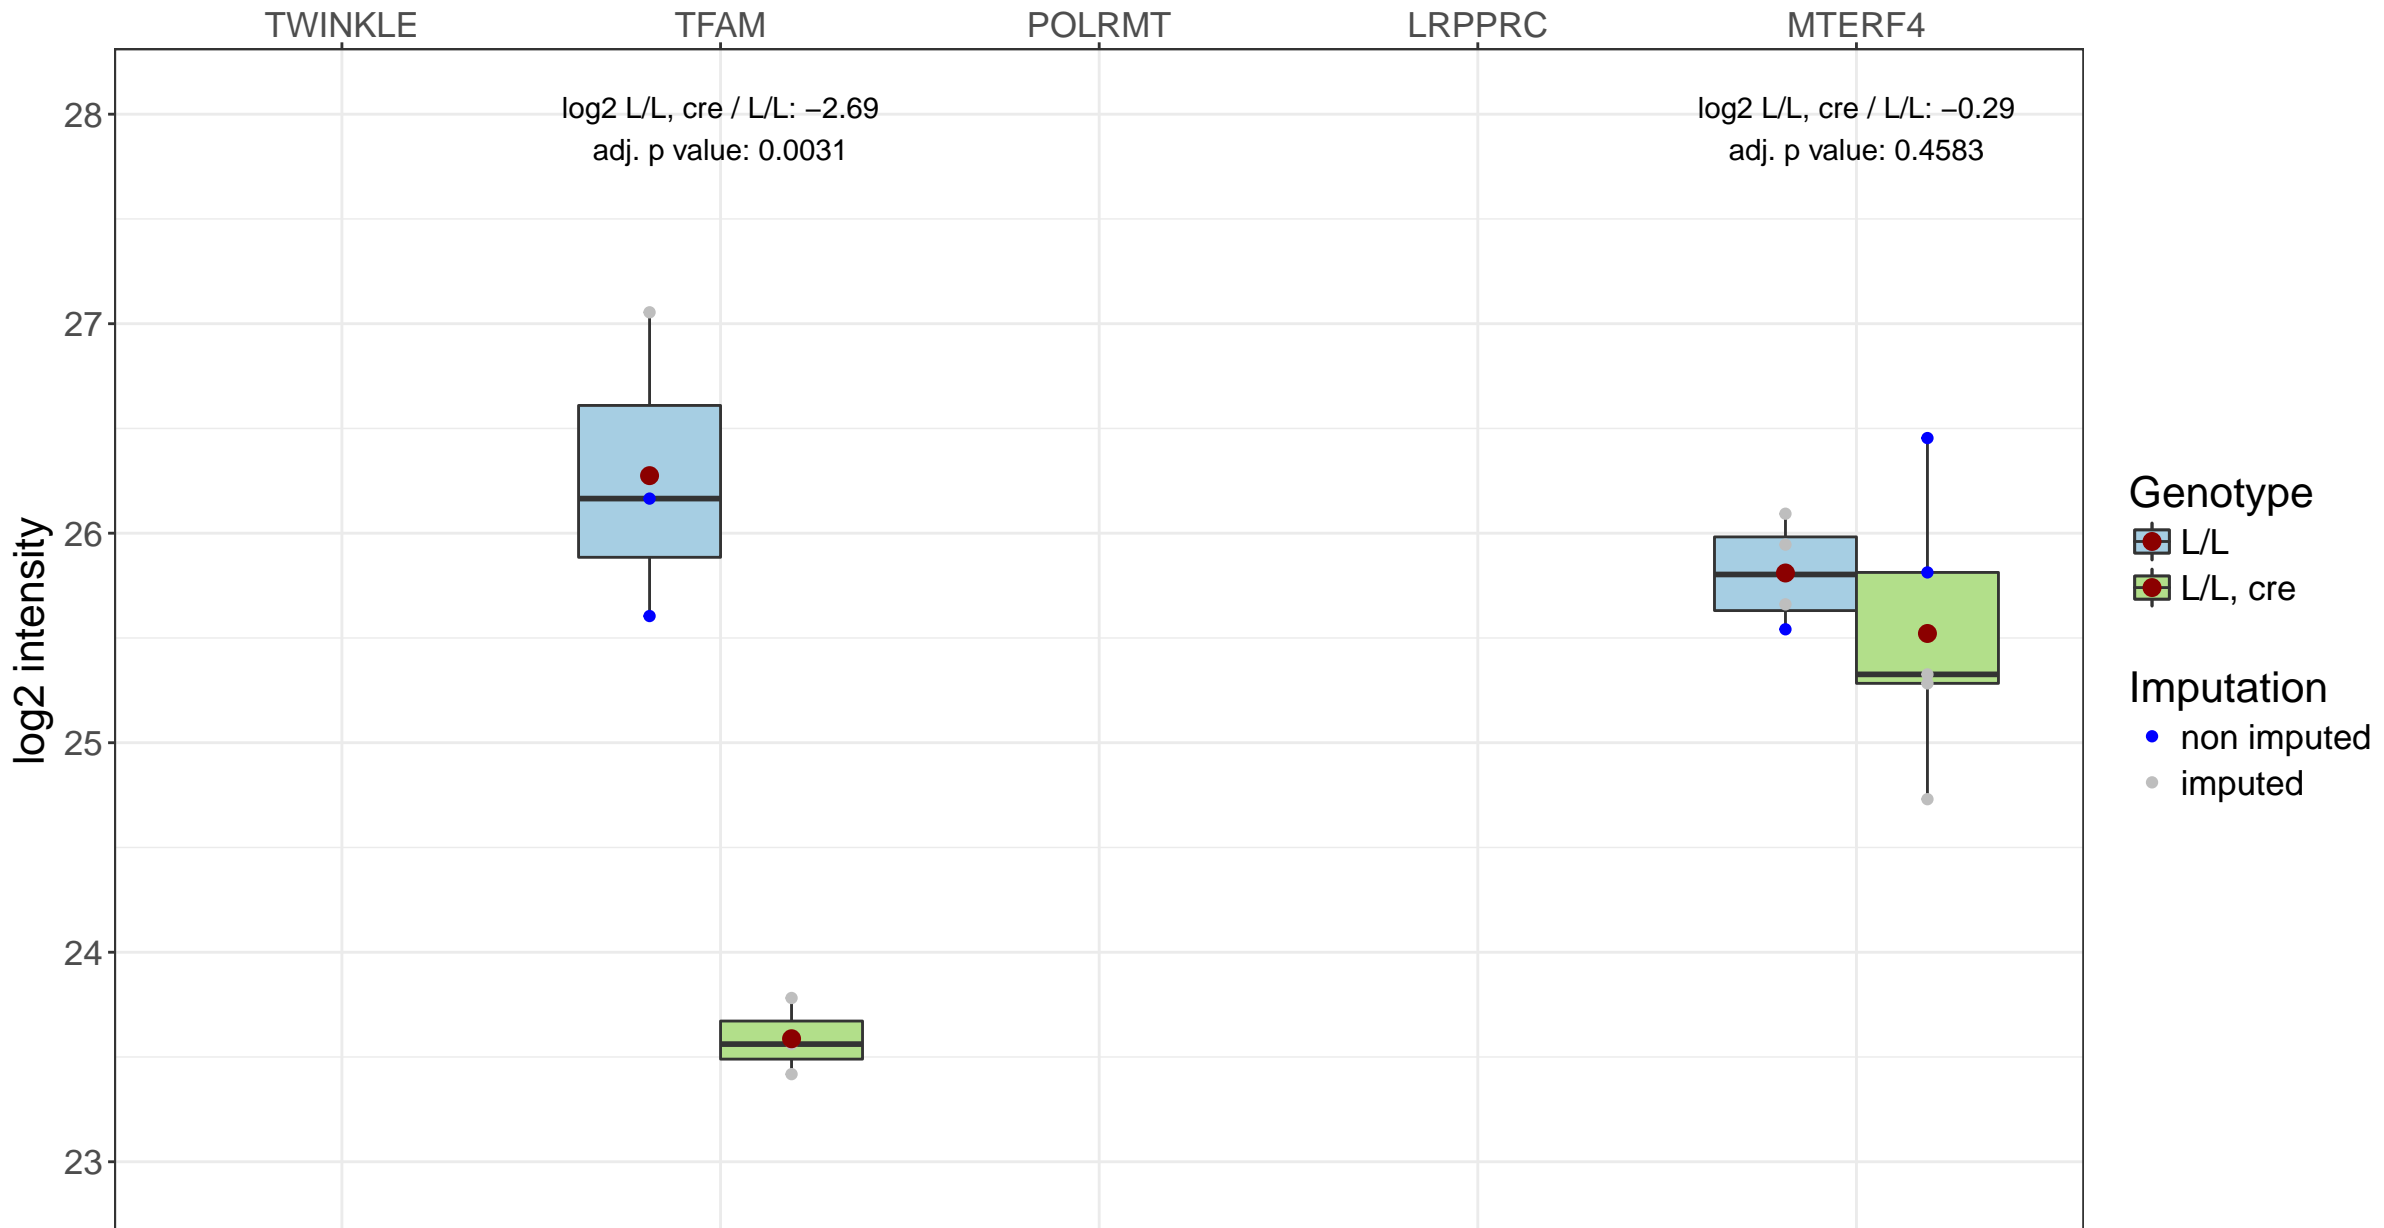

# RAB5C / Q8C266

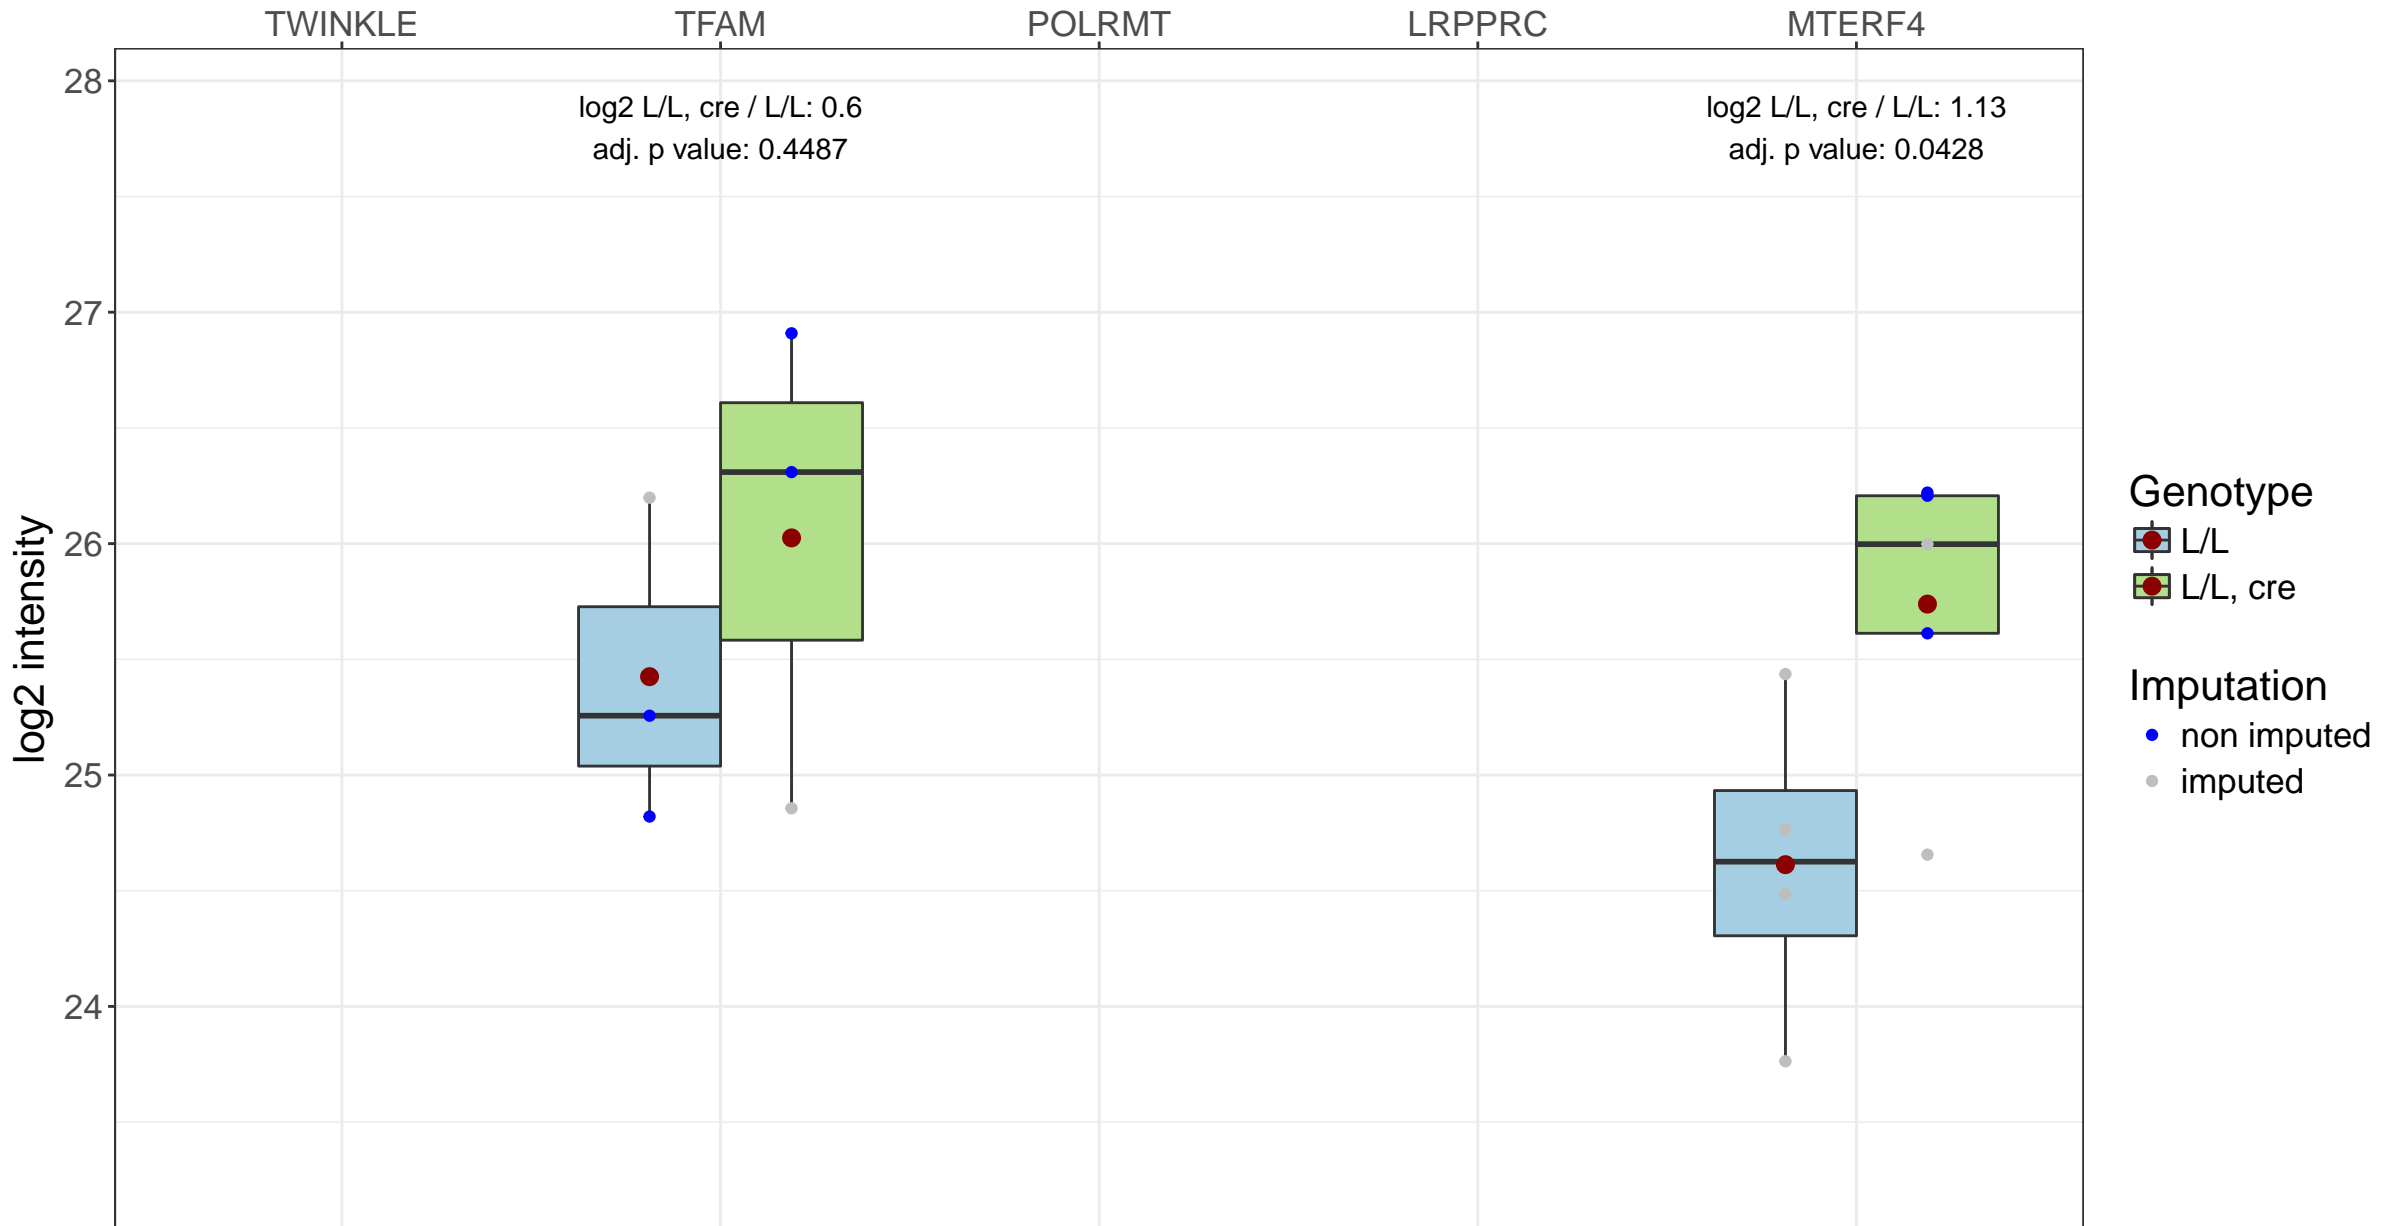



# RAB6A / P35279-2

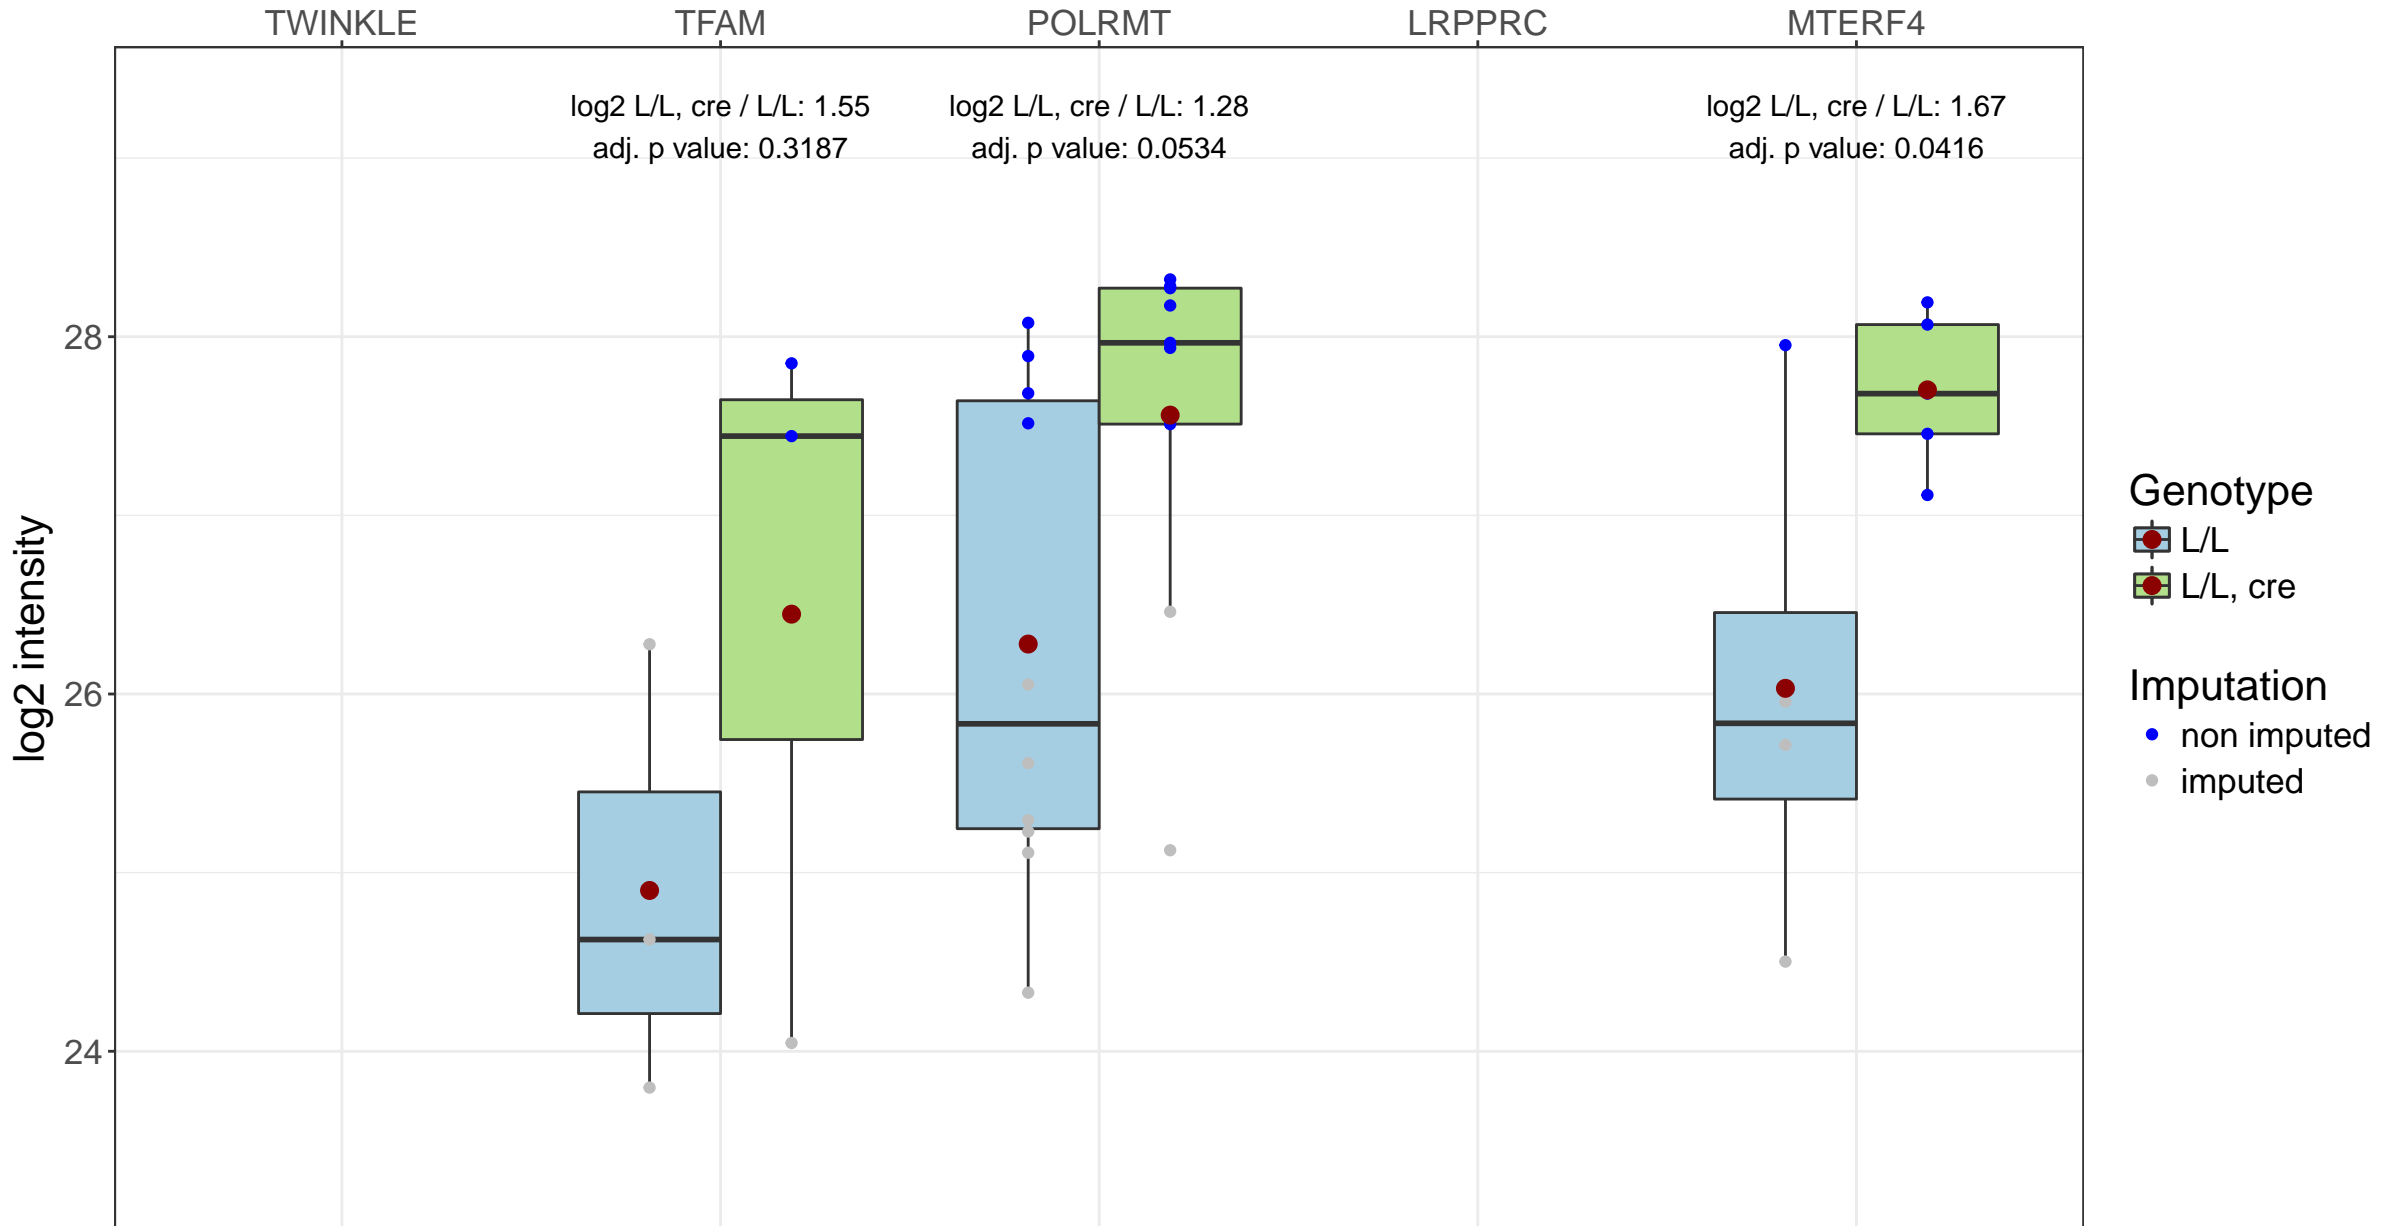

# RAB7A / P51150

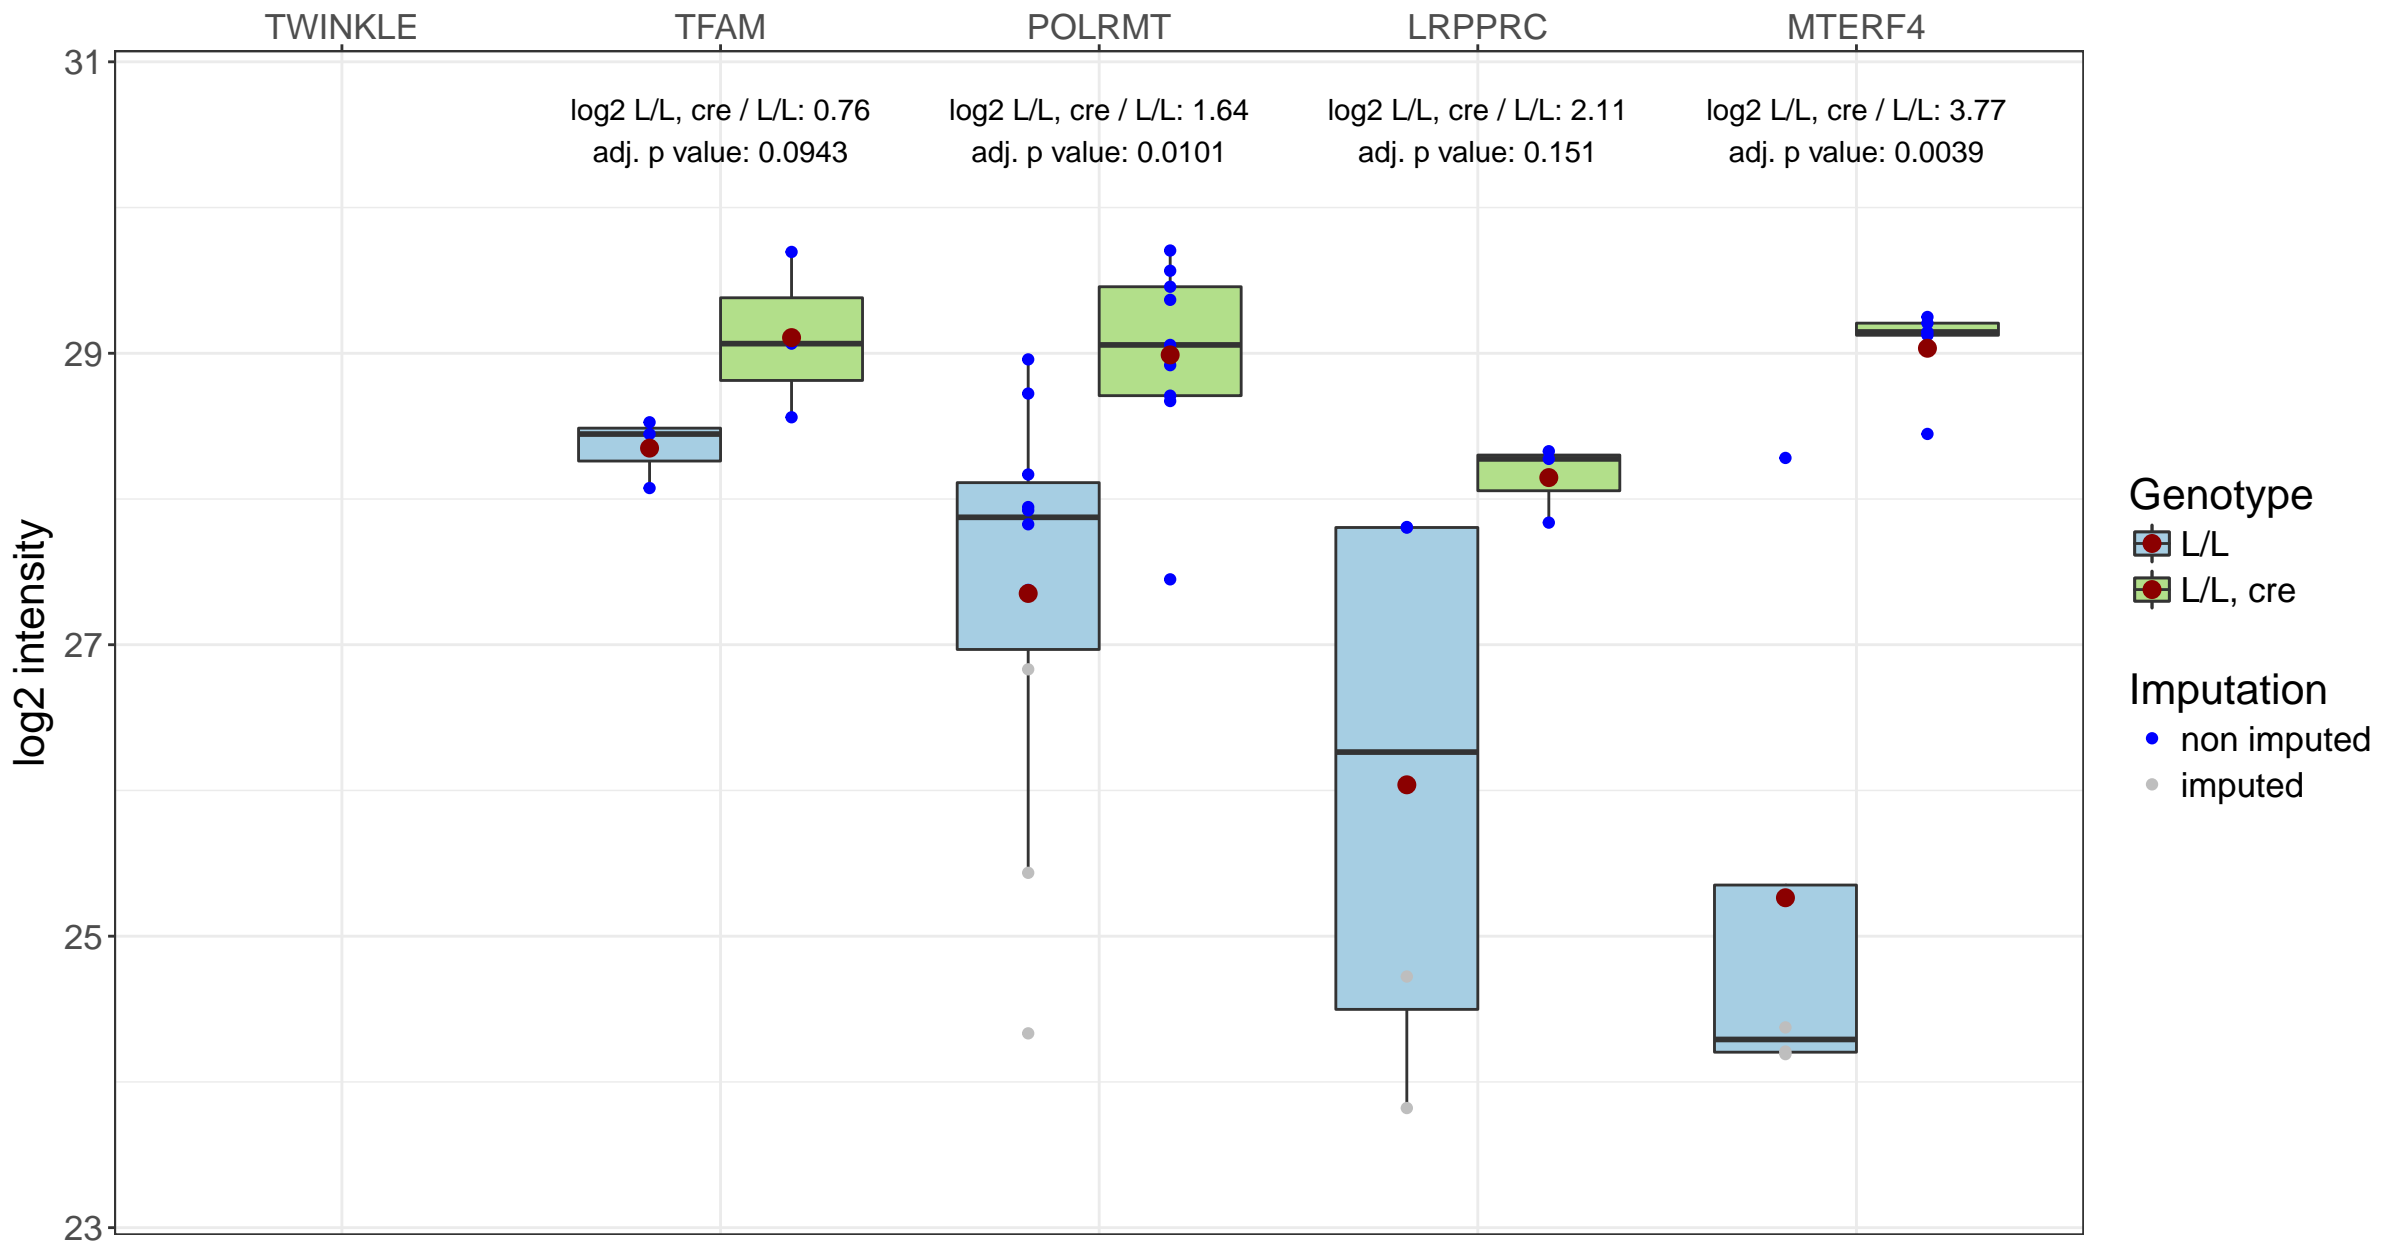

# RAB8A / P55258

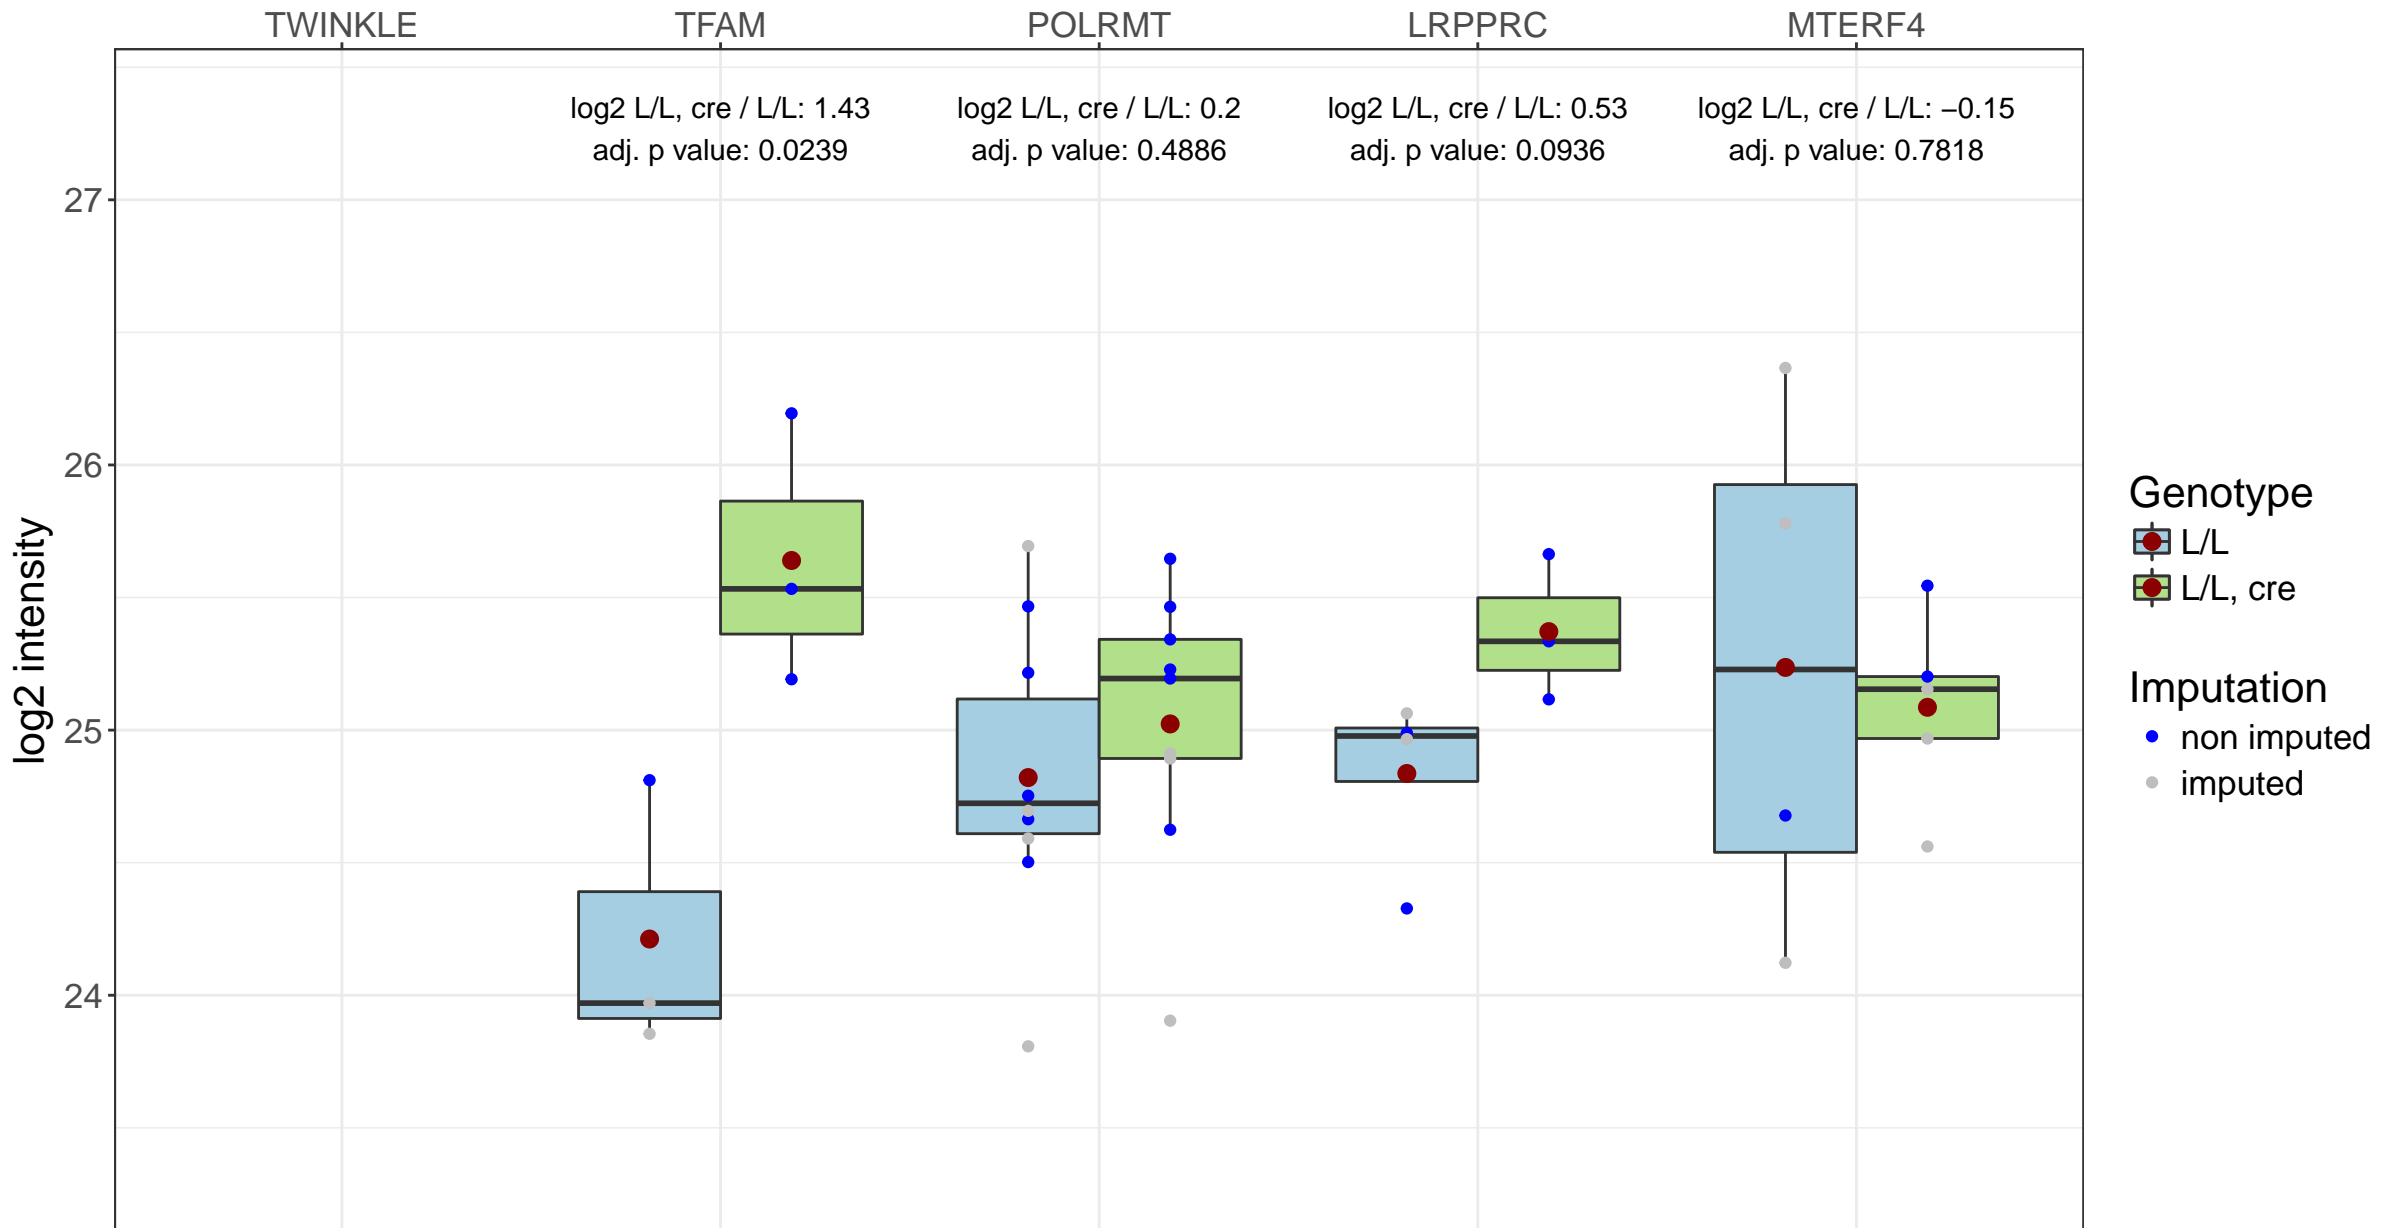

# RAC1 / Q3TLP8

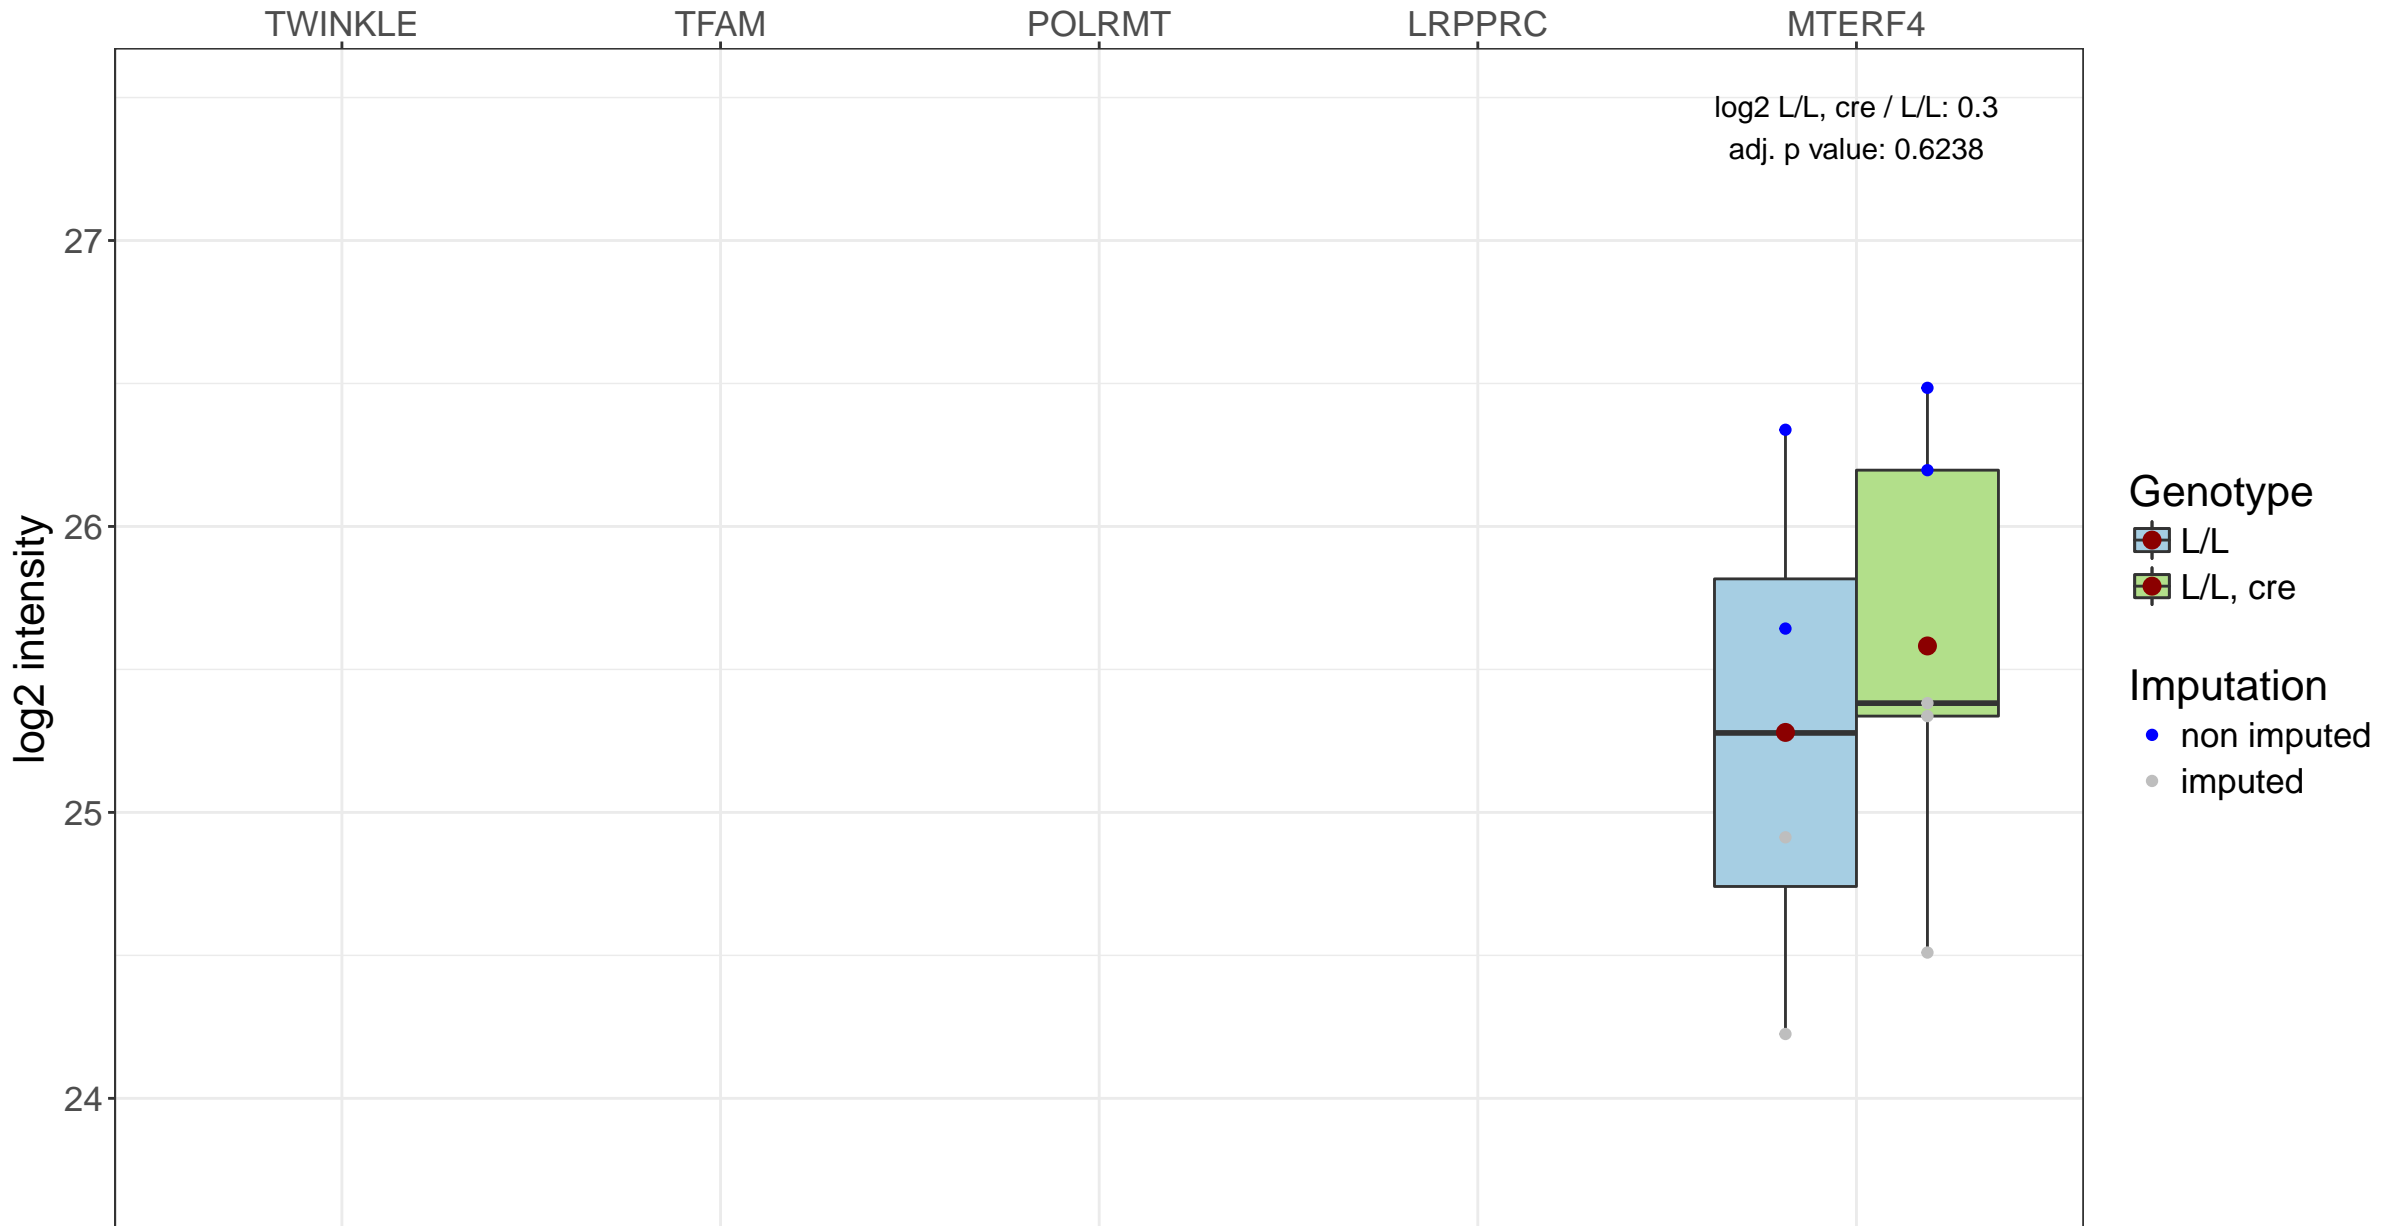

# RAP1A / P62835

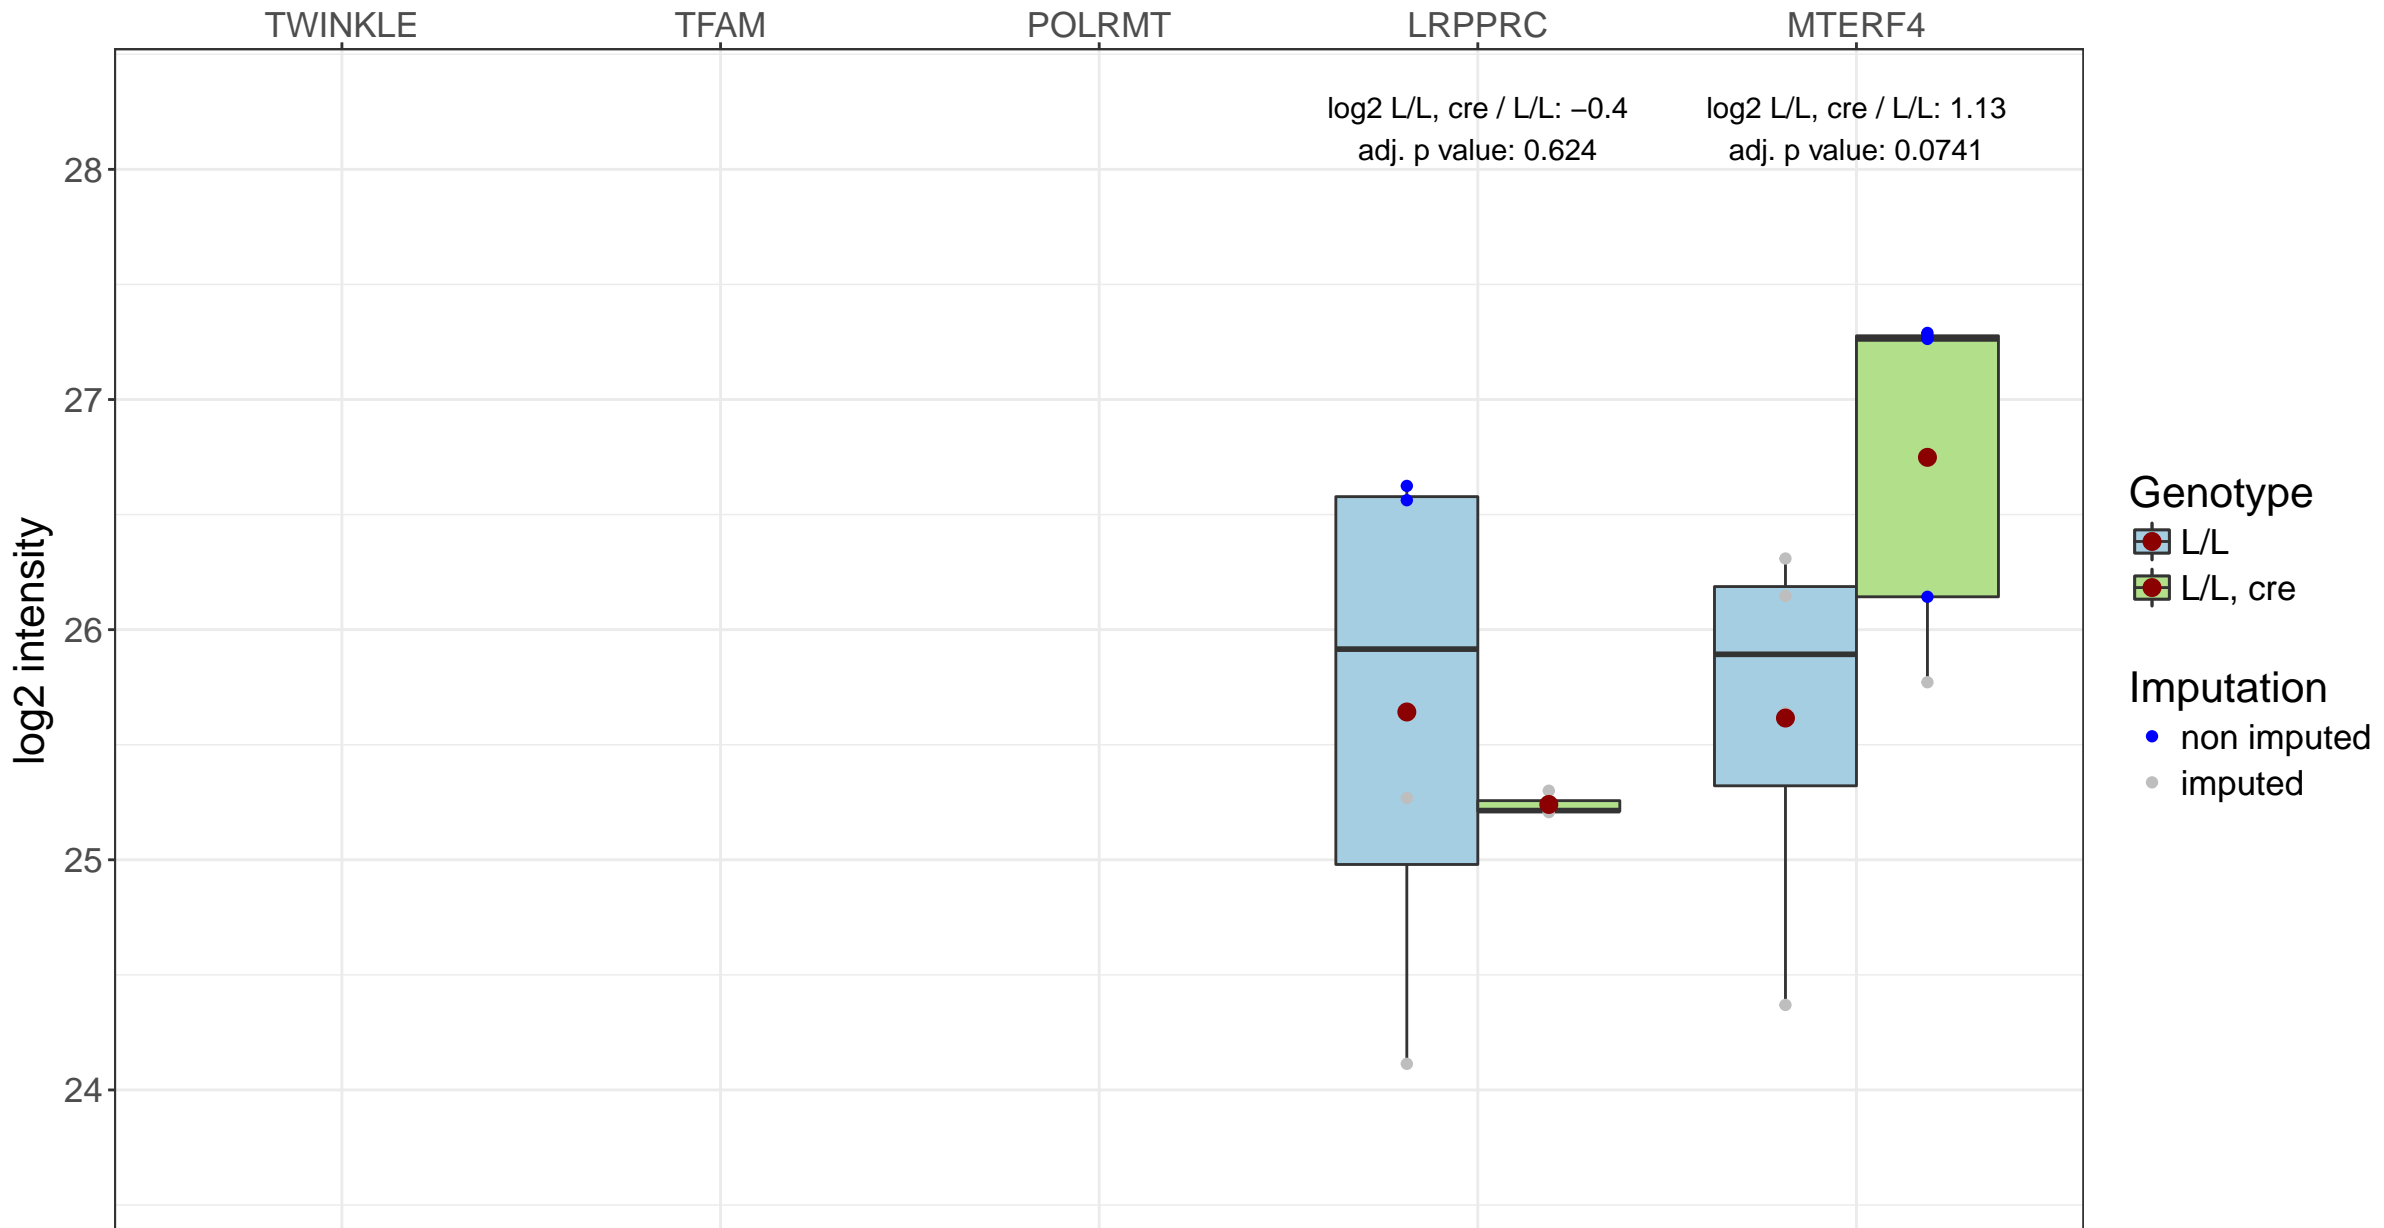

# RAP1B / Q99JI6

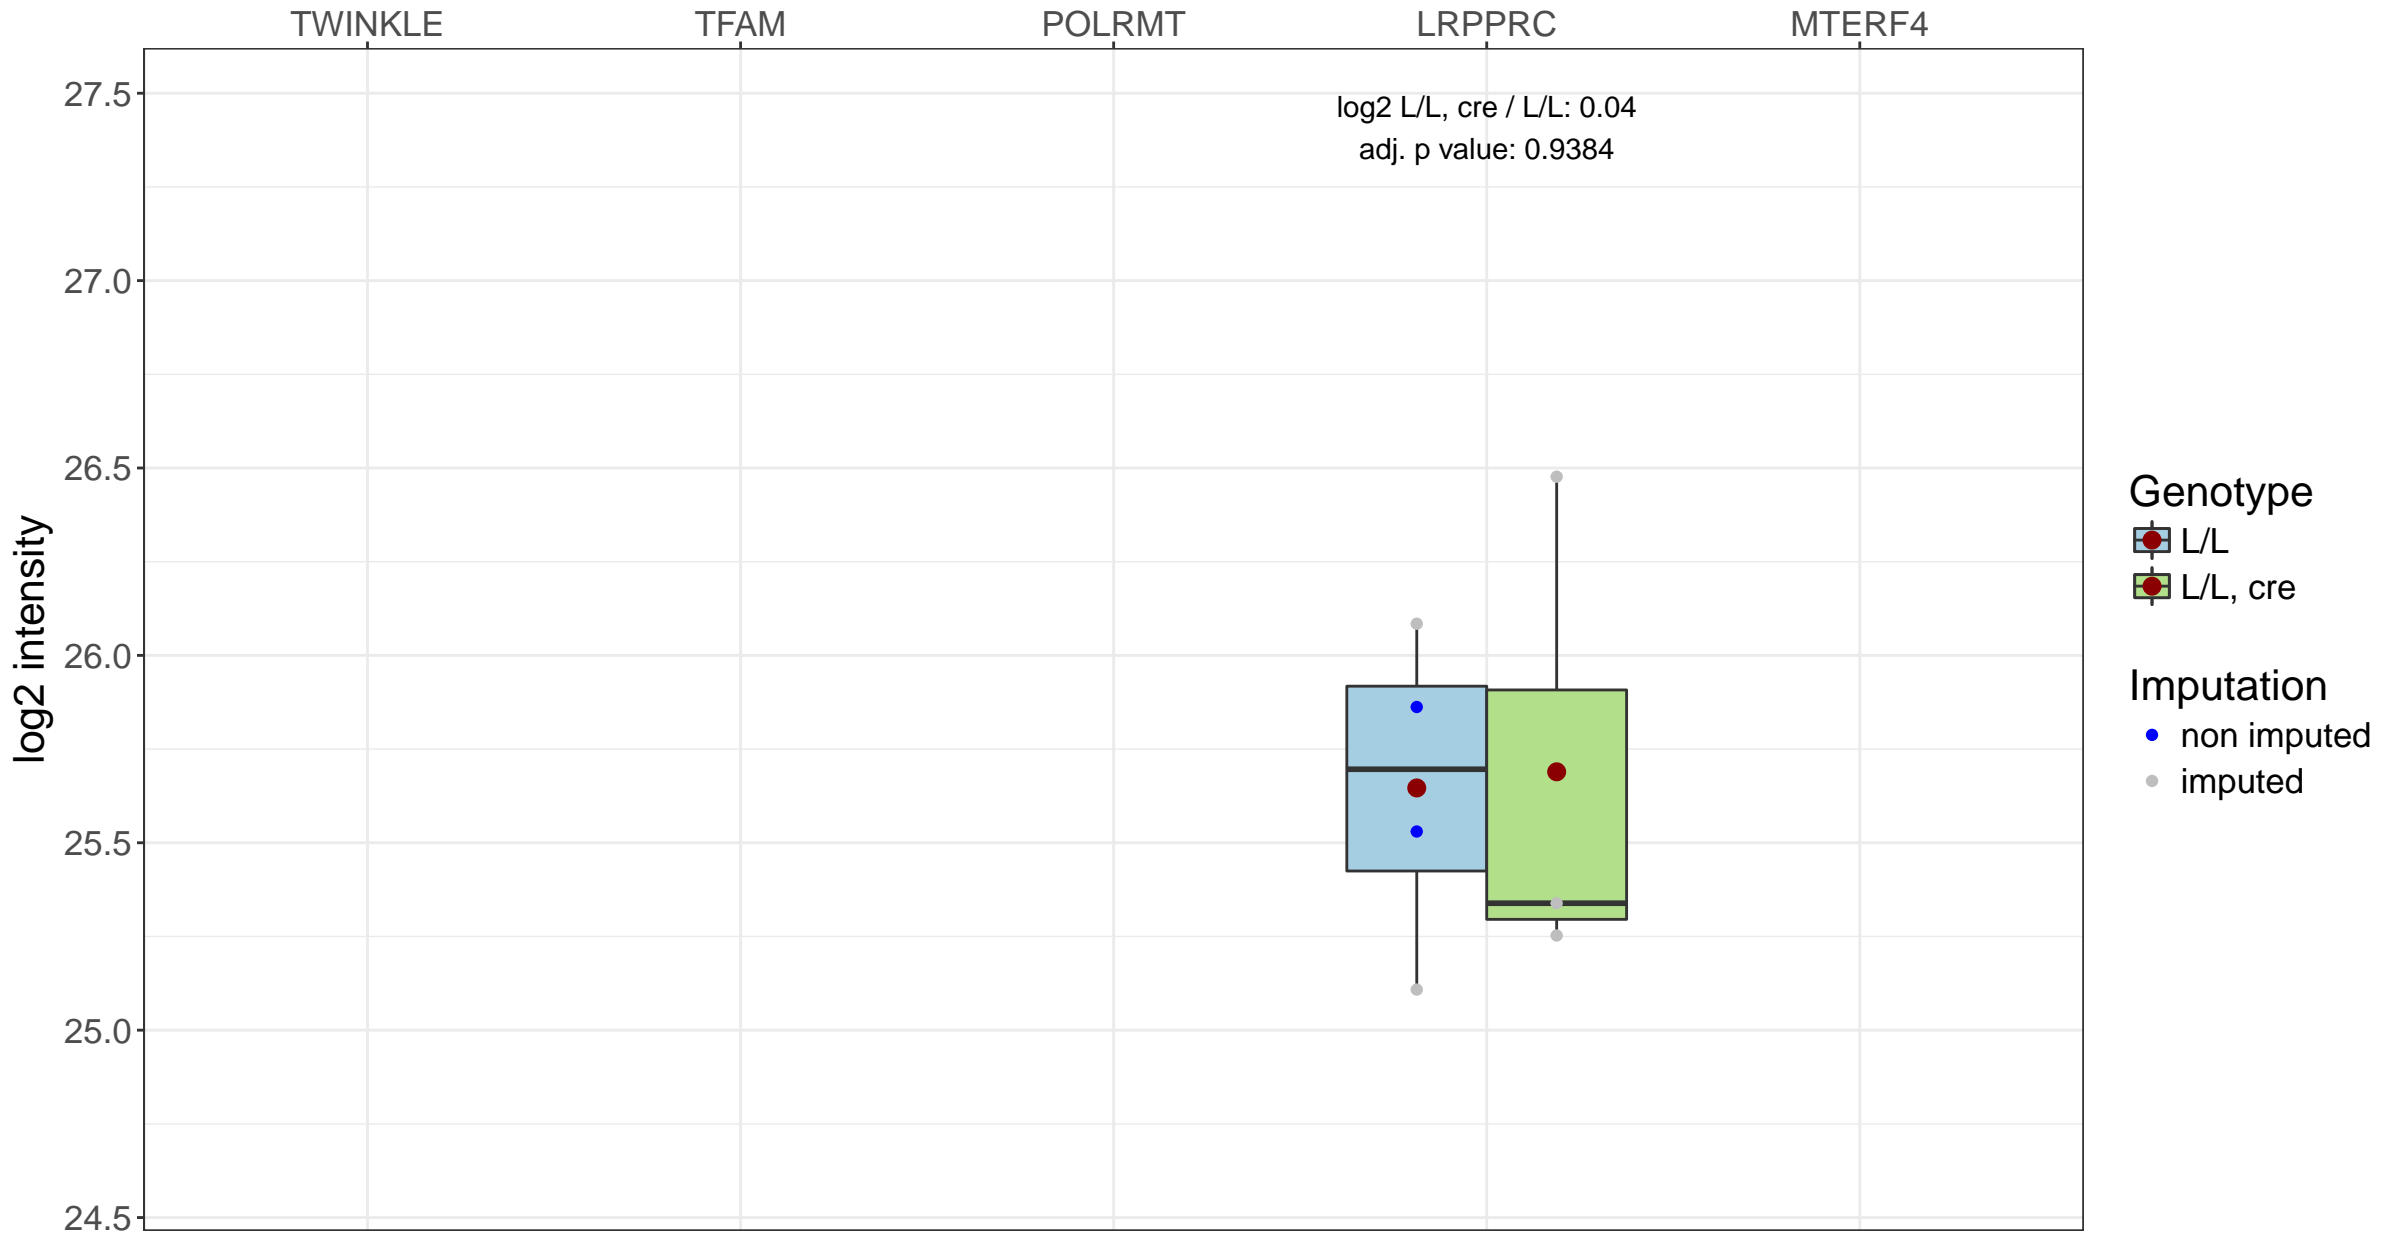

# RARS2 / Q3U186

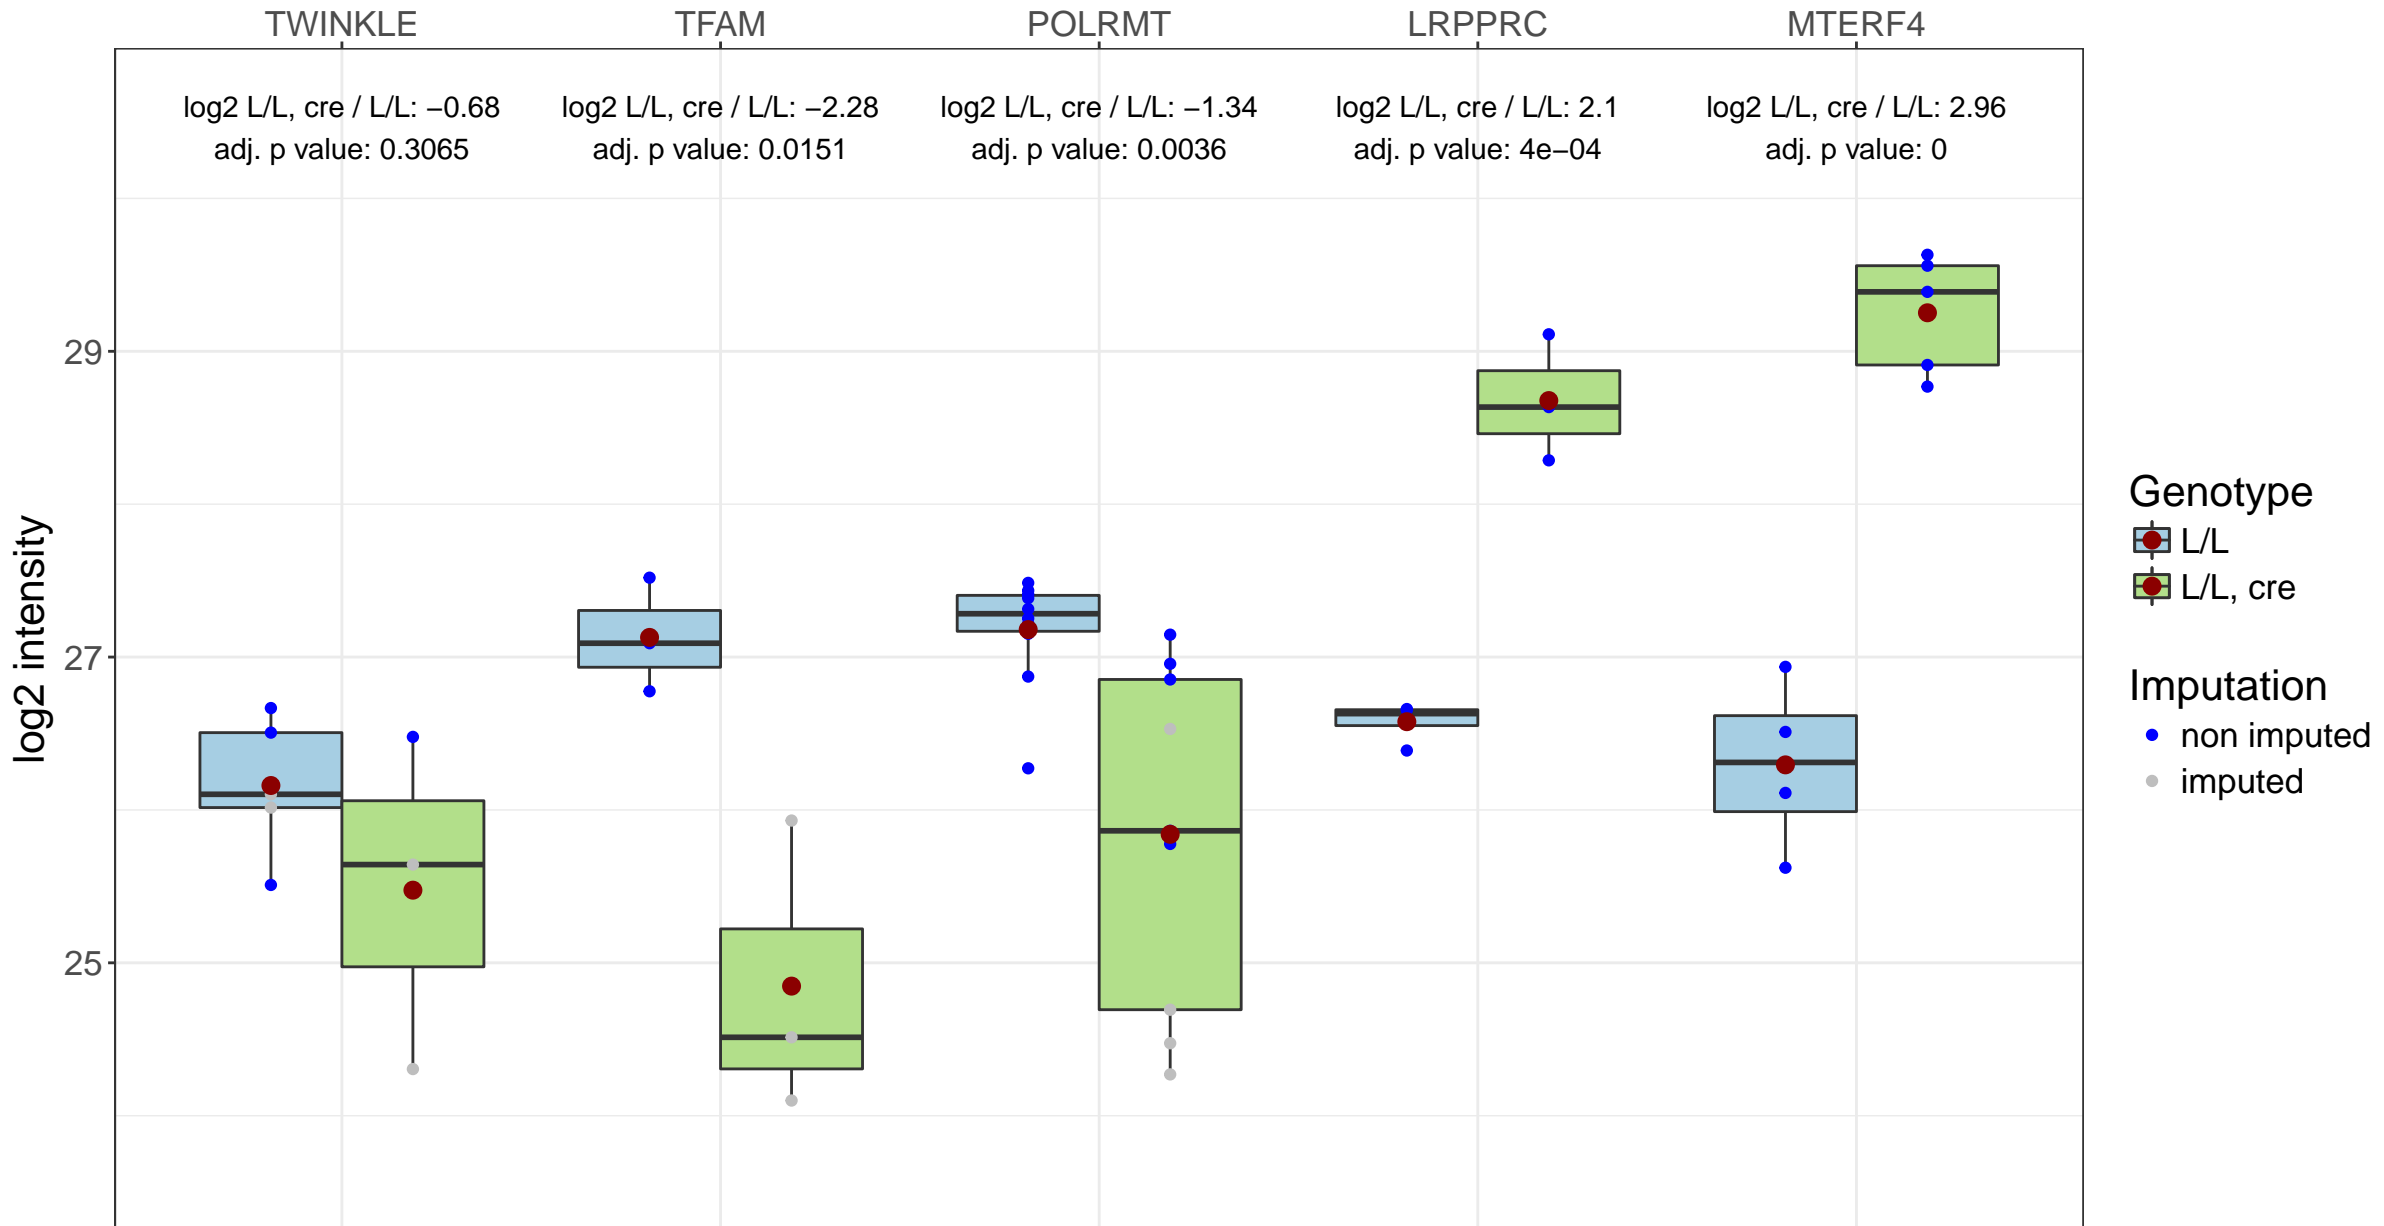

# RBFA / Q6P3B9

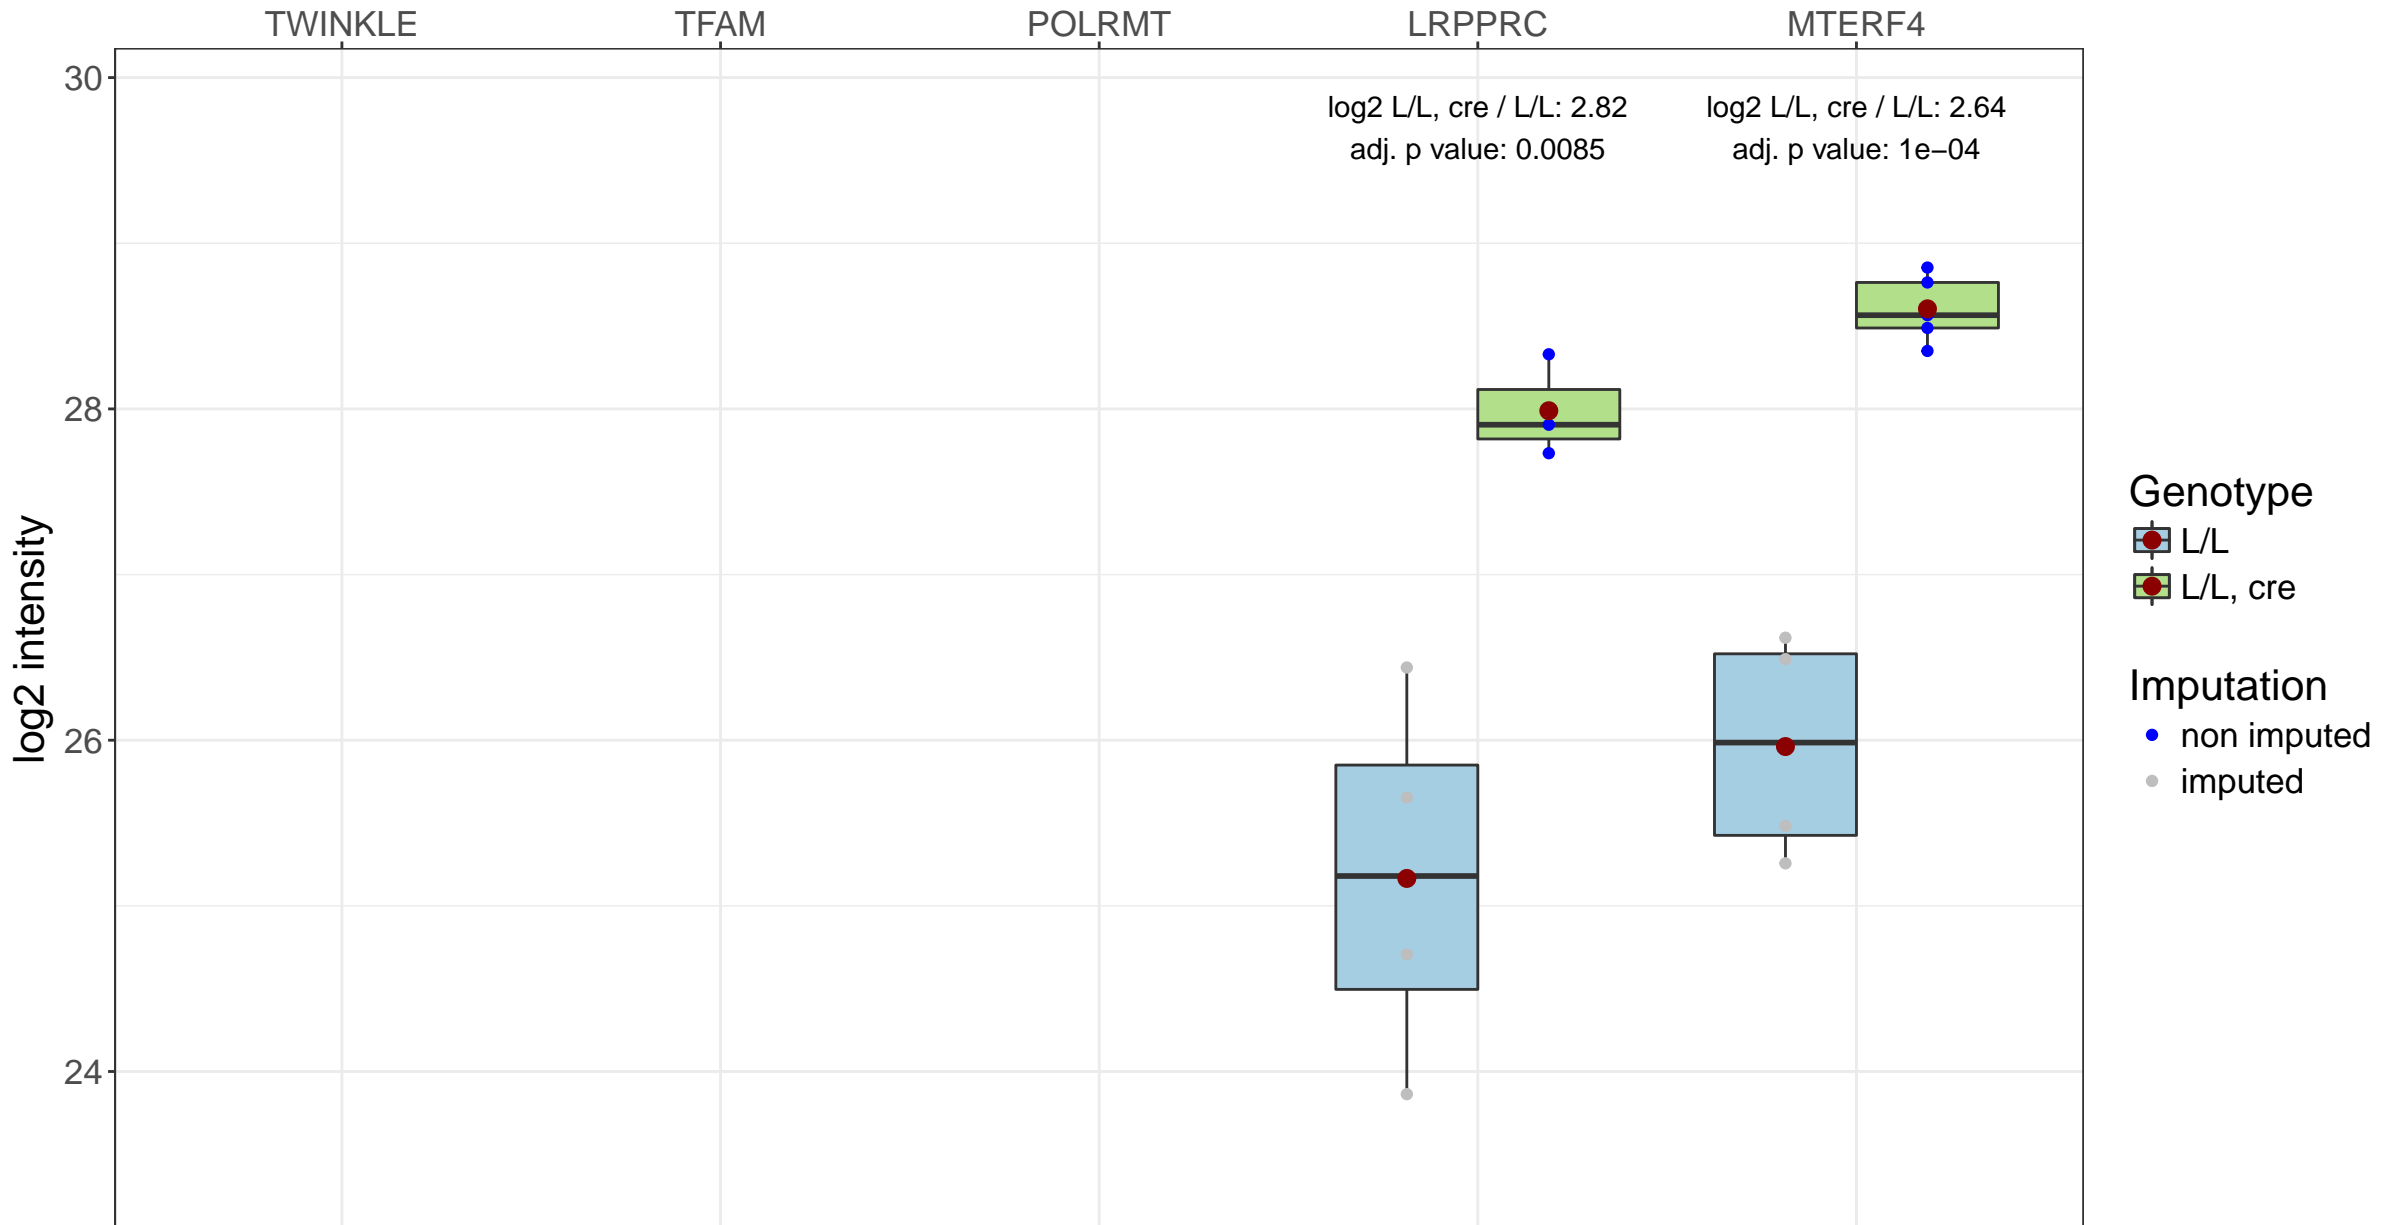



# RDH13 / Q8CEE7

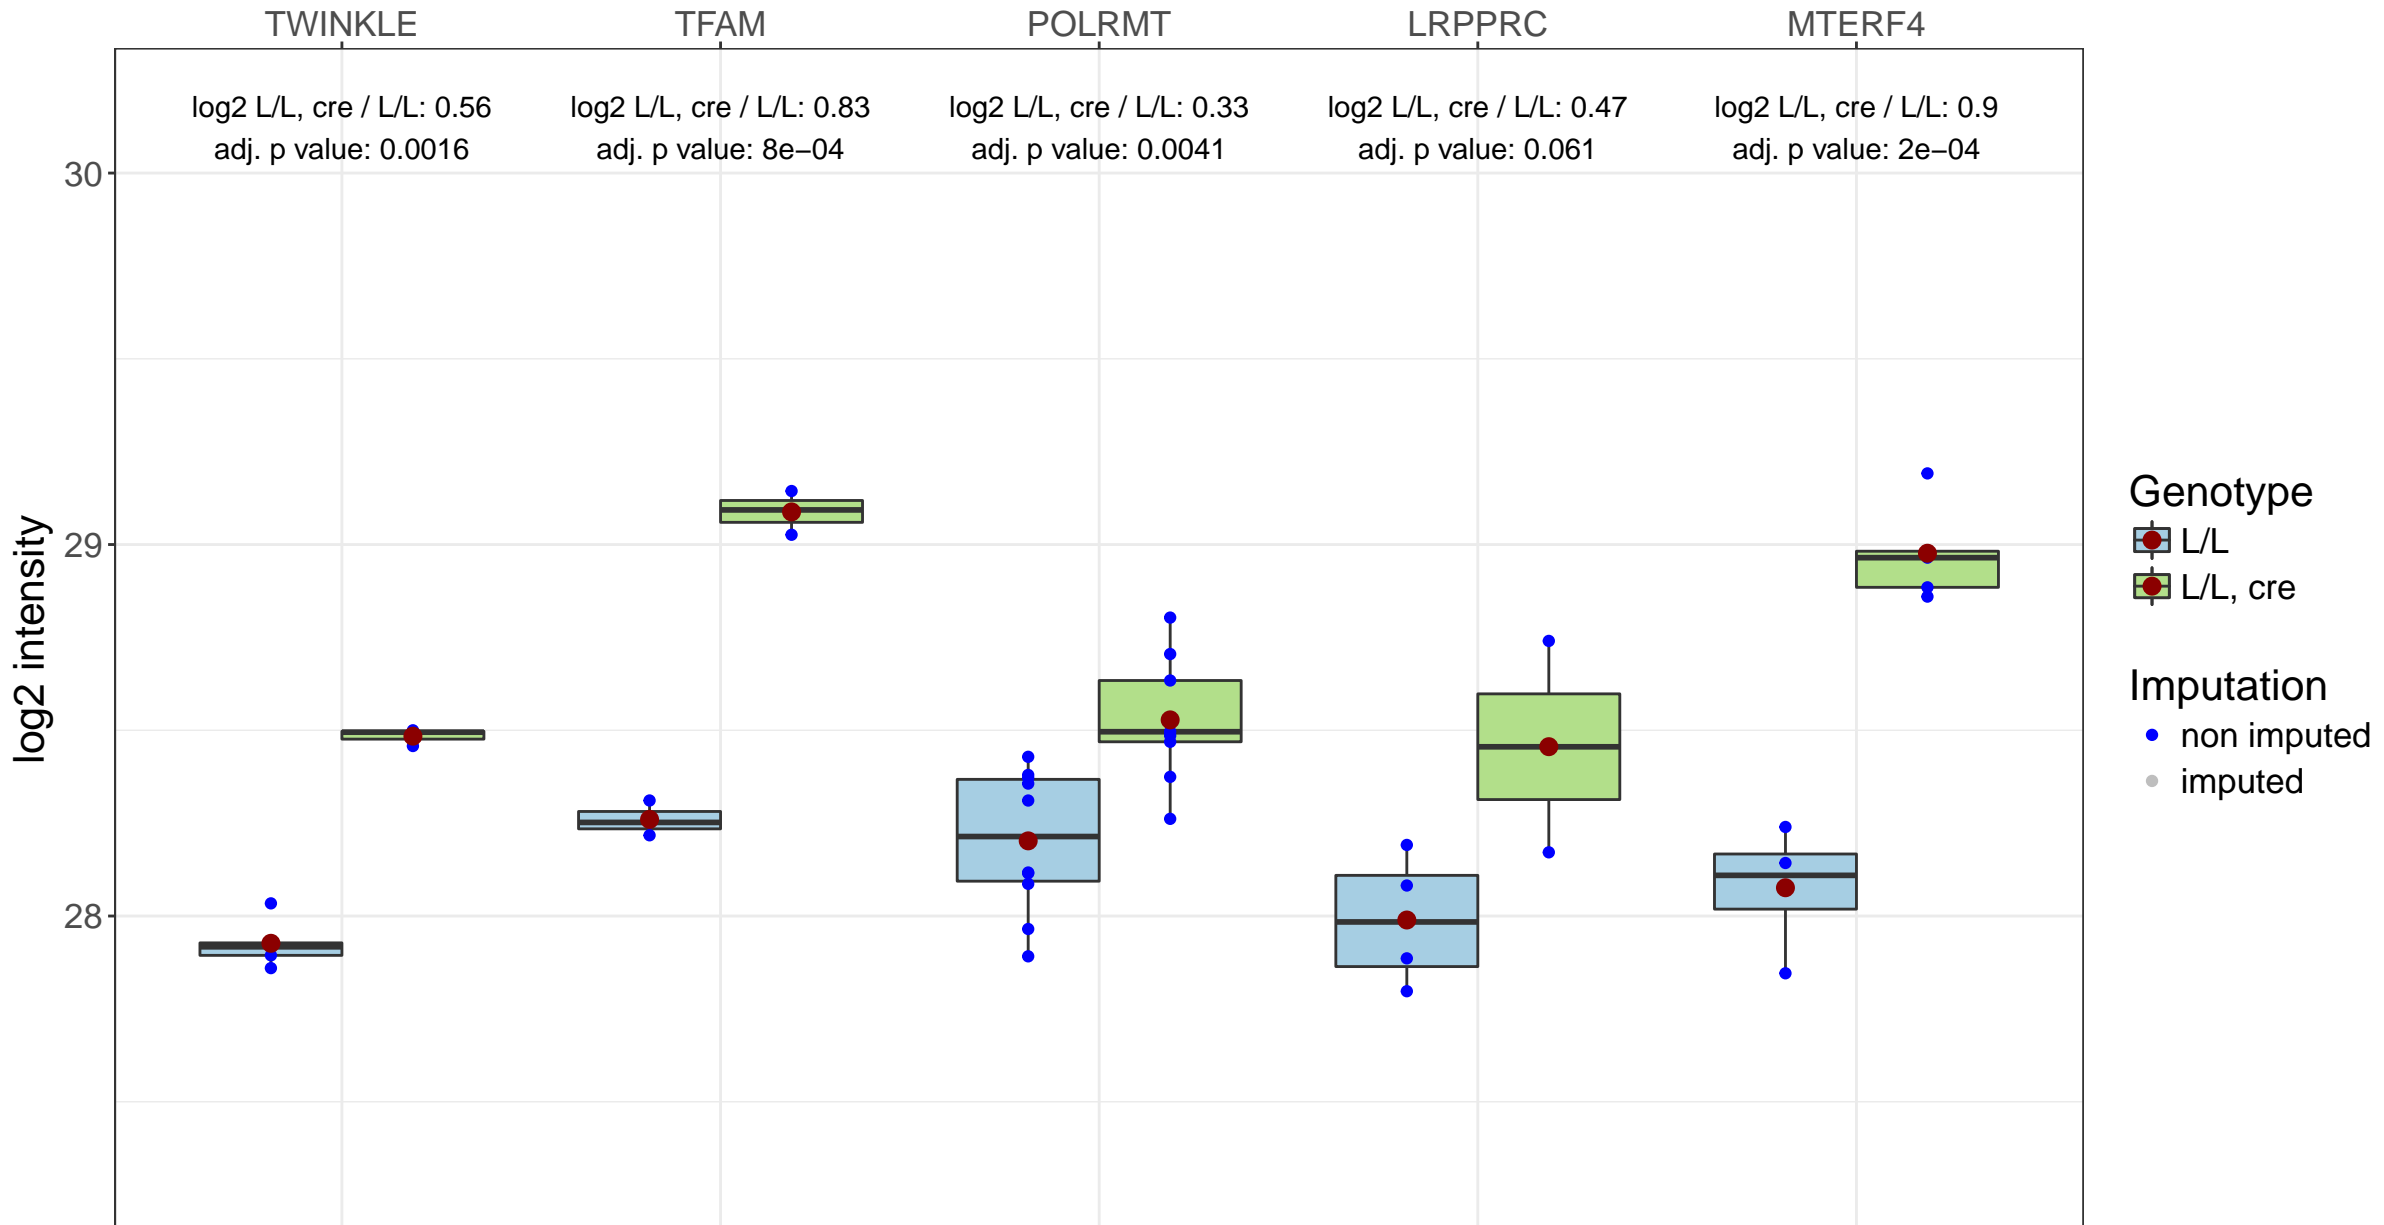

# RDH14 / Q9ERI6

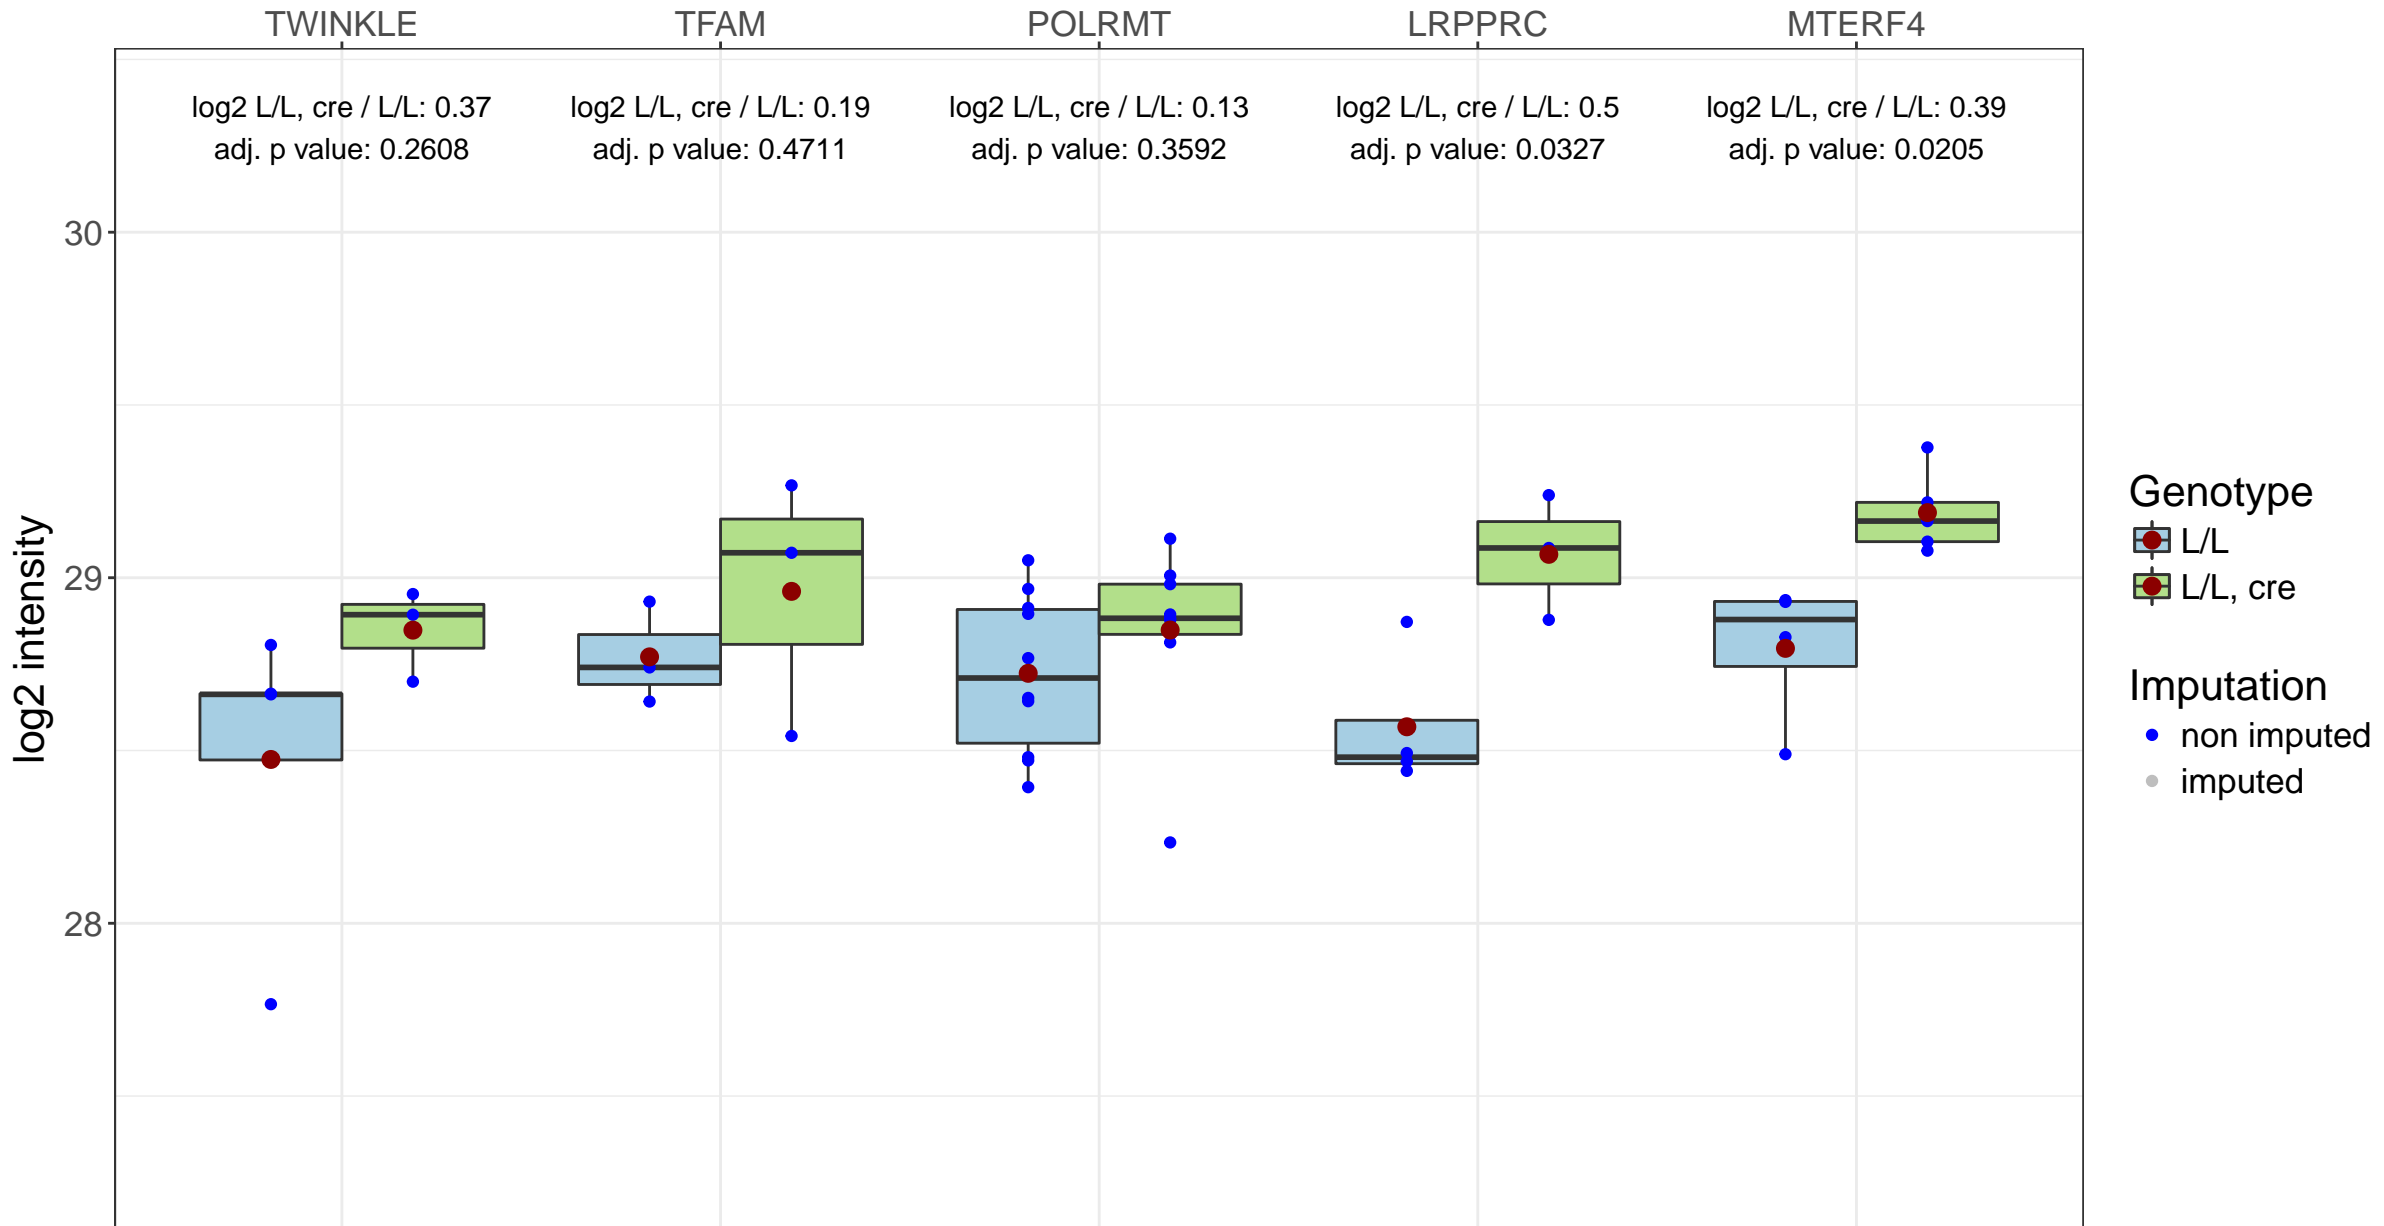

# REEP5 / G3X8R0

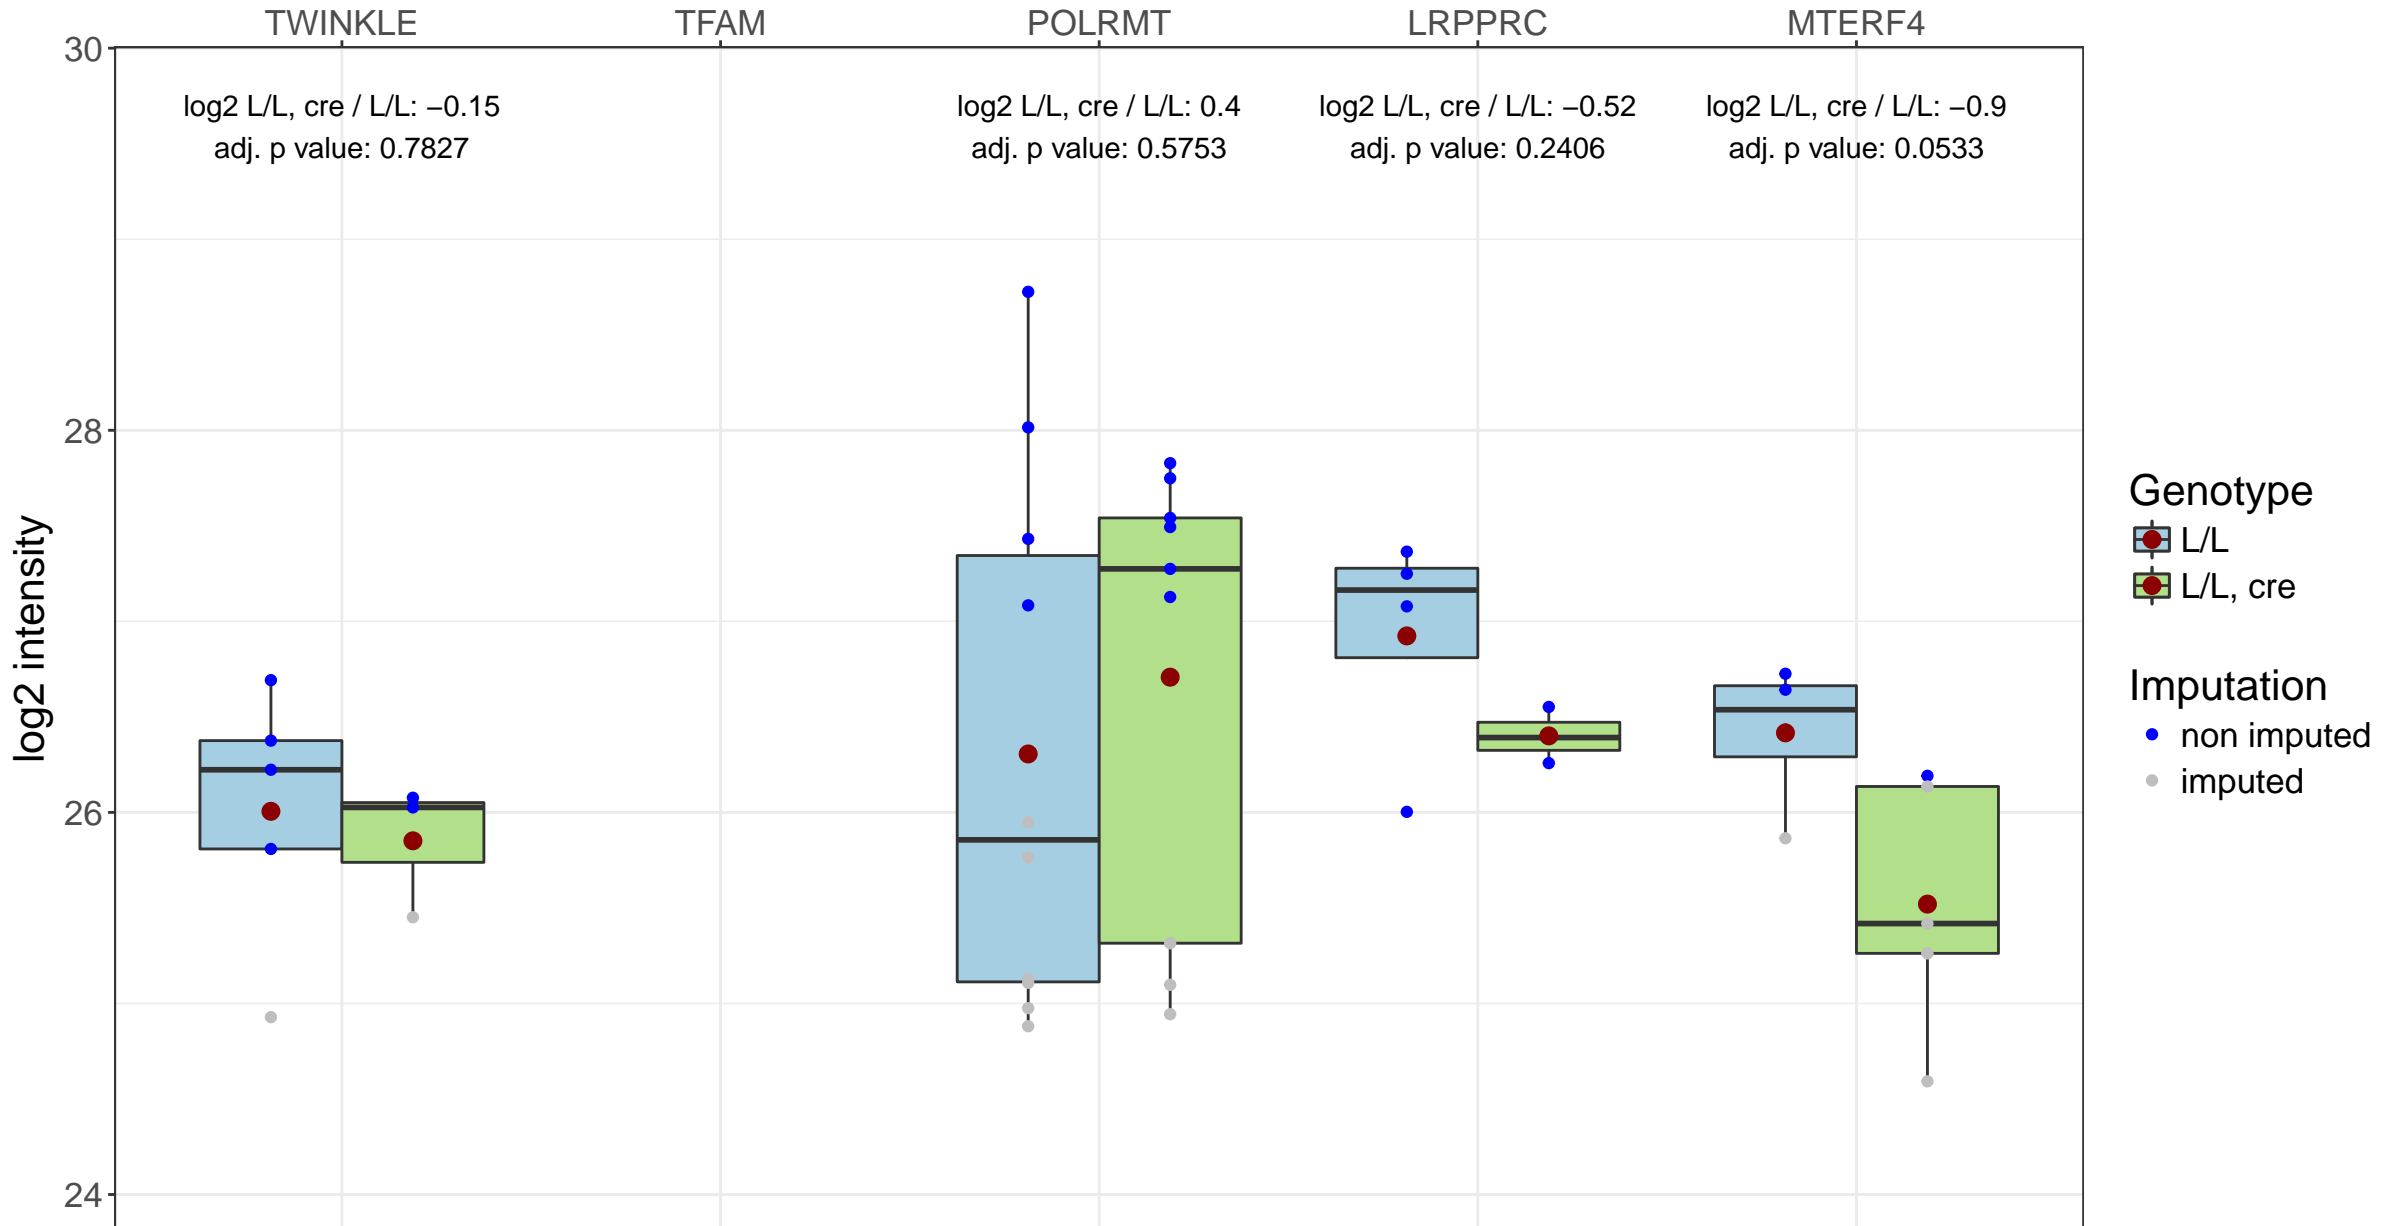

# REXO2 / Q9D8S4

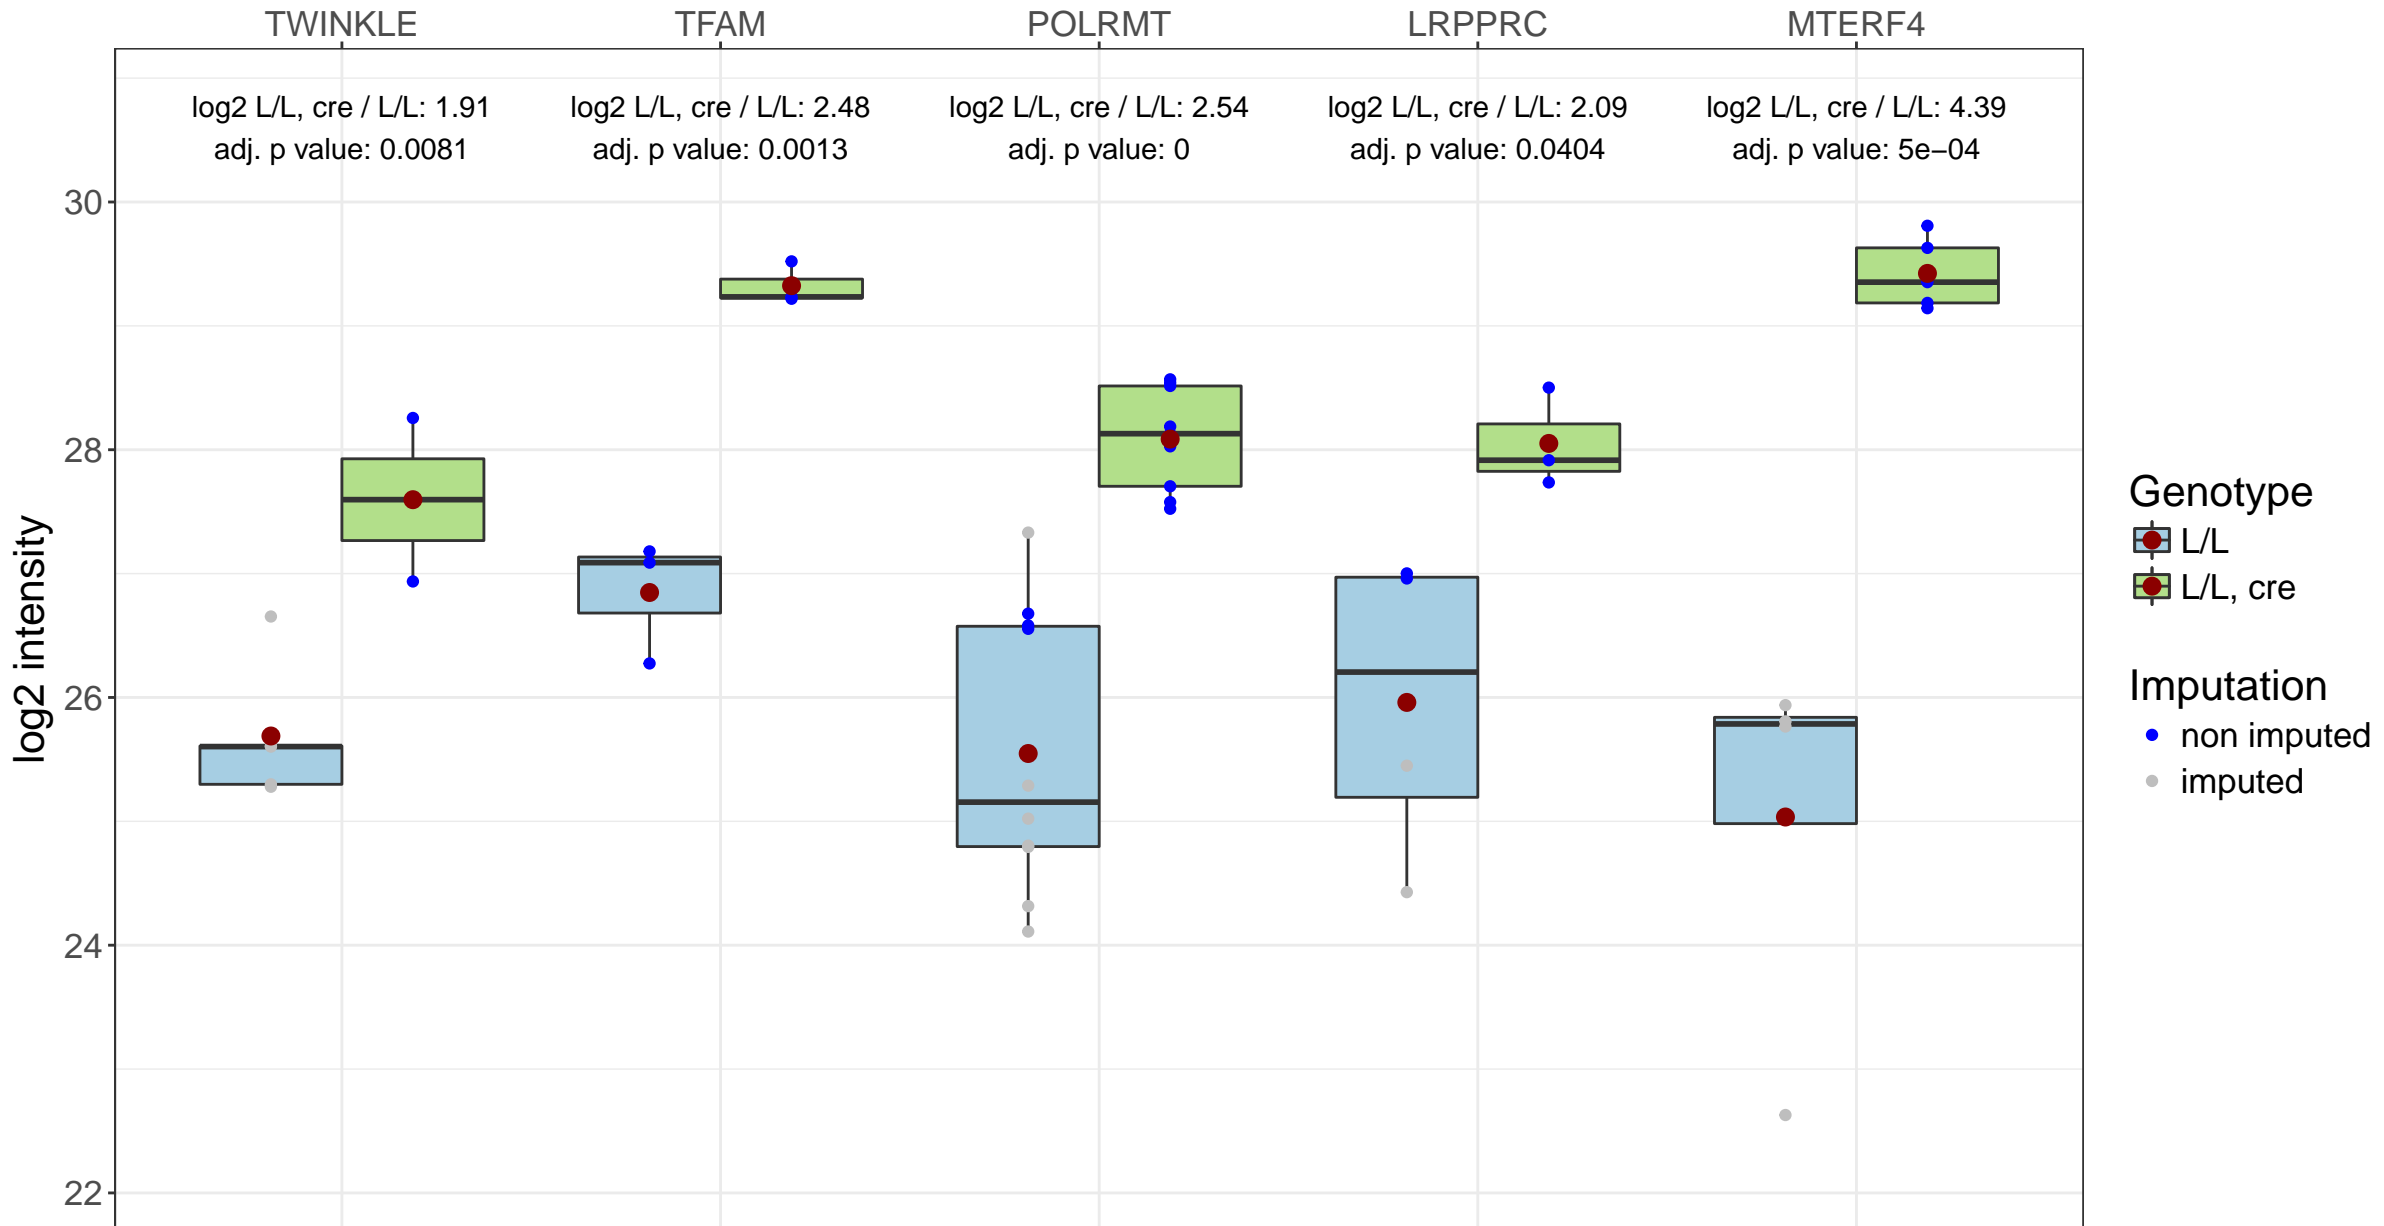

# RHOA / Q9QUI0

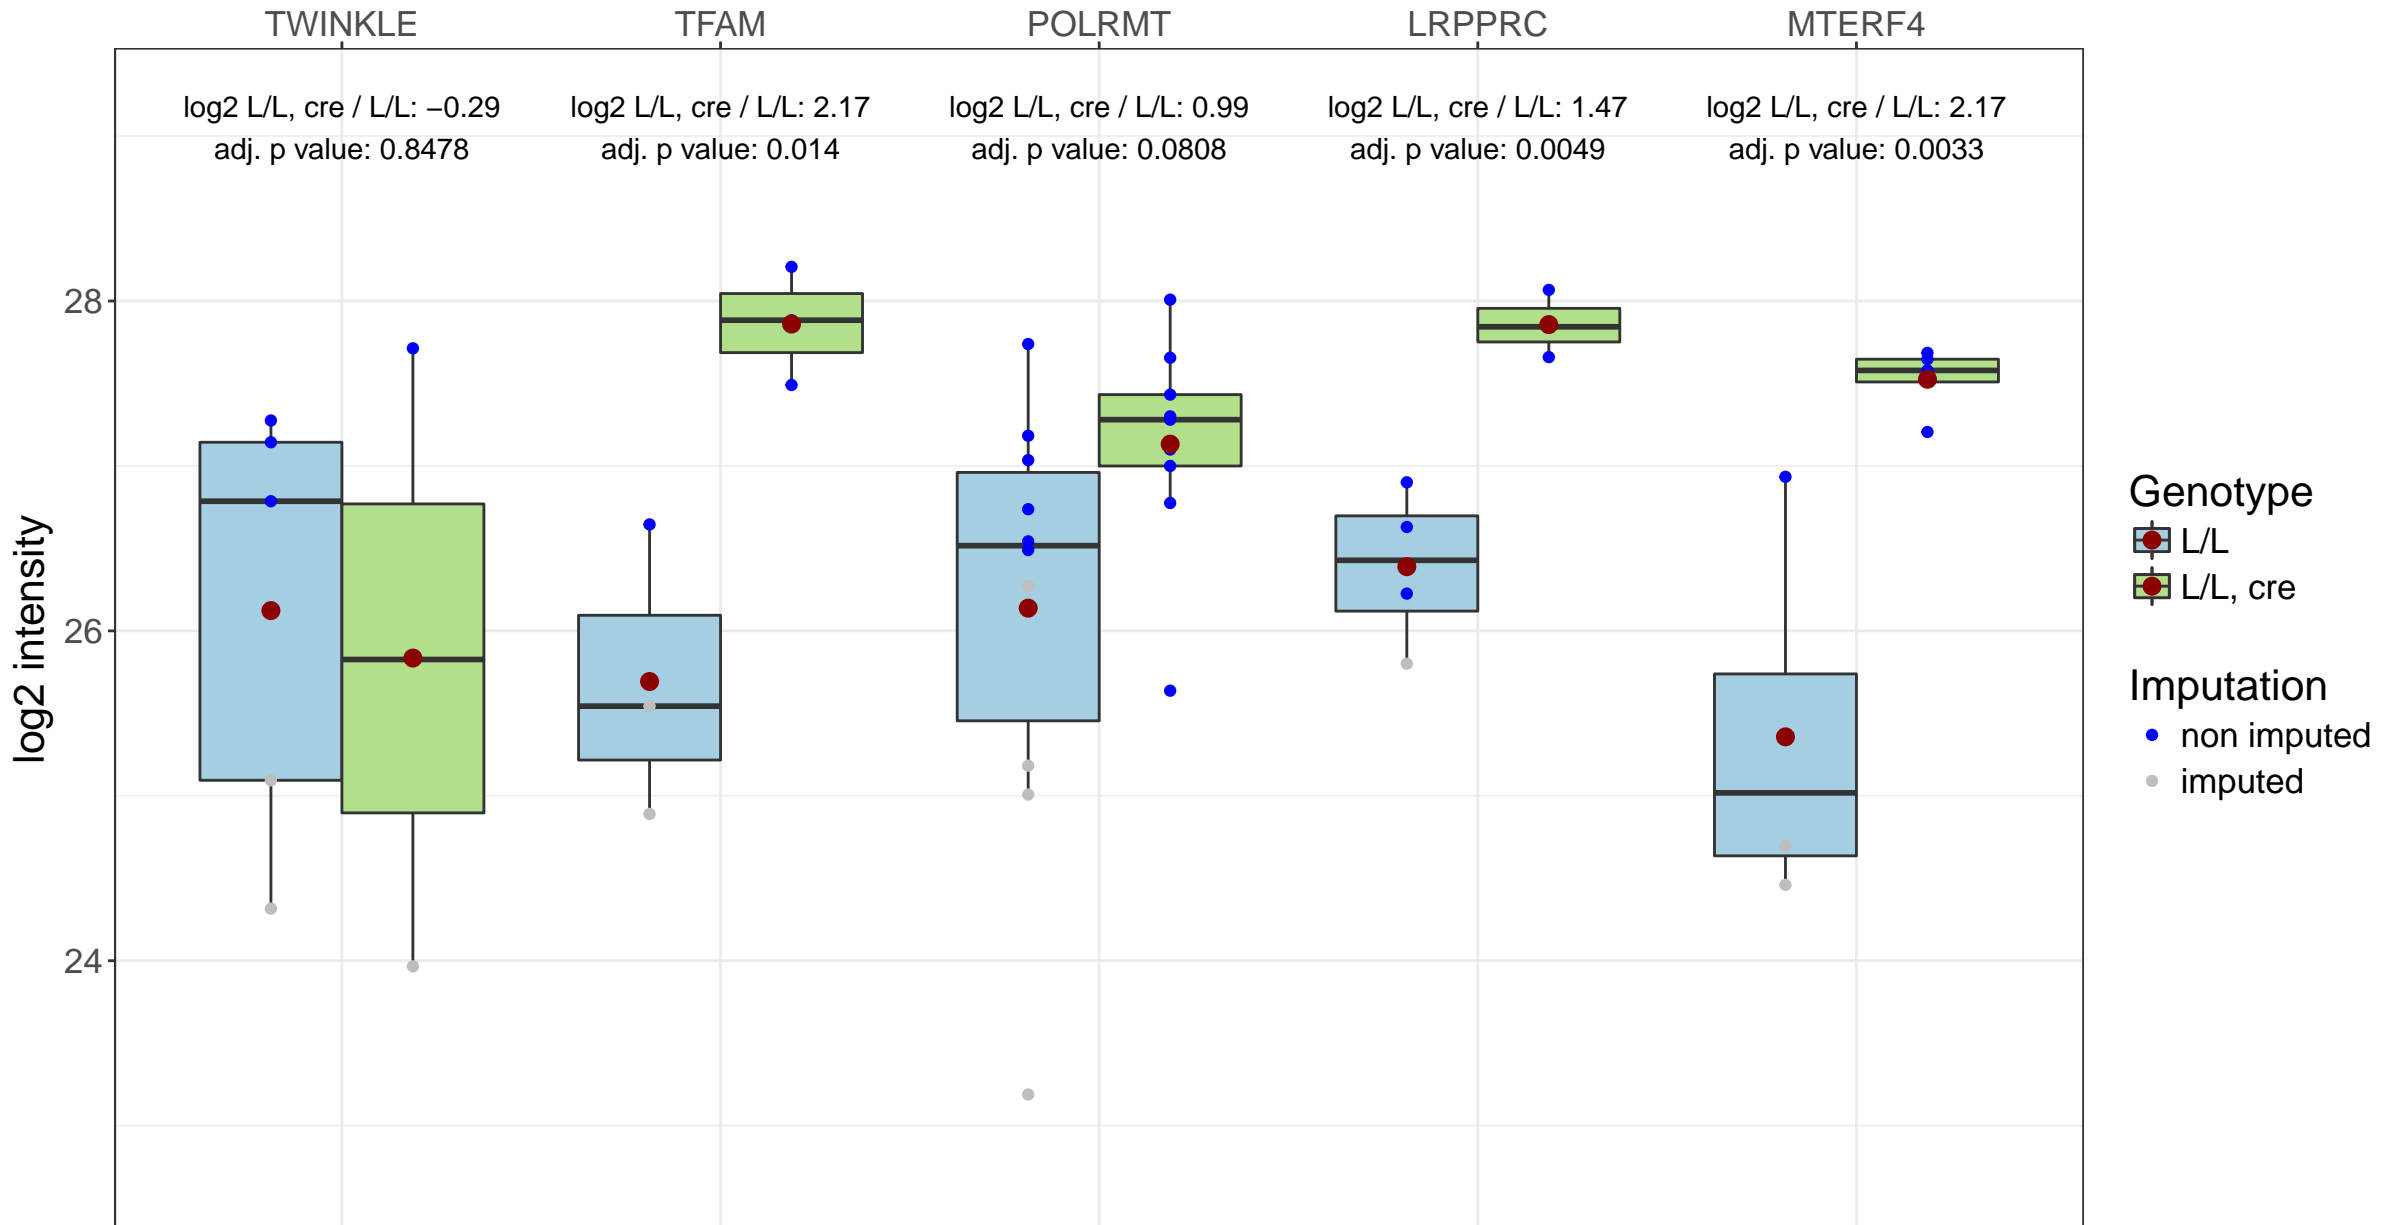

# RHOT1 / Q8BG51-3

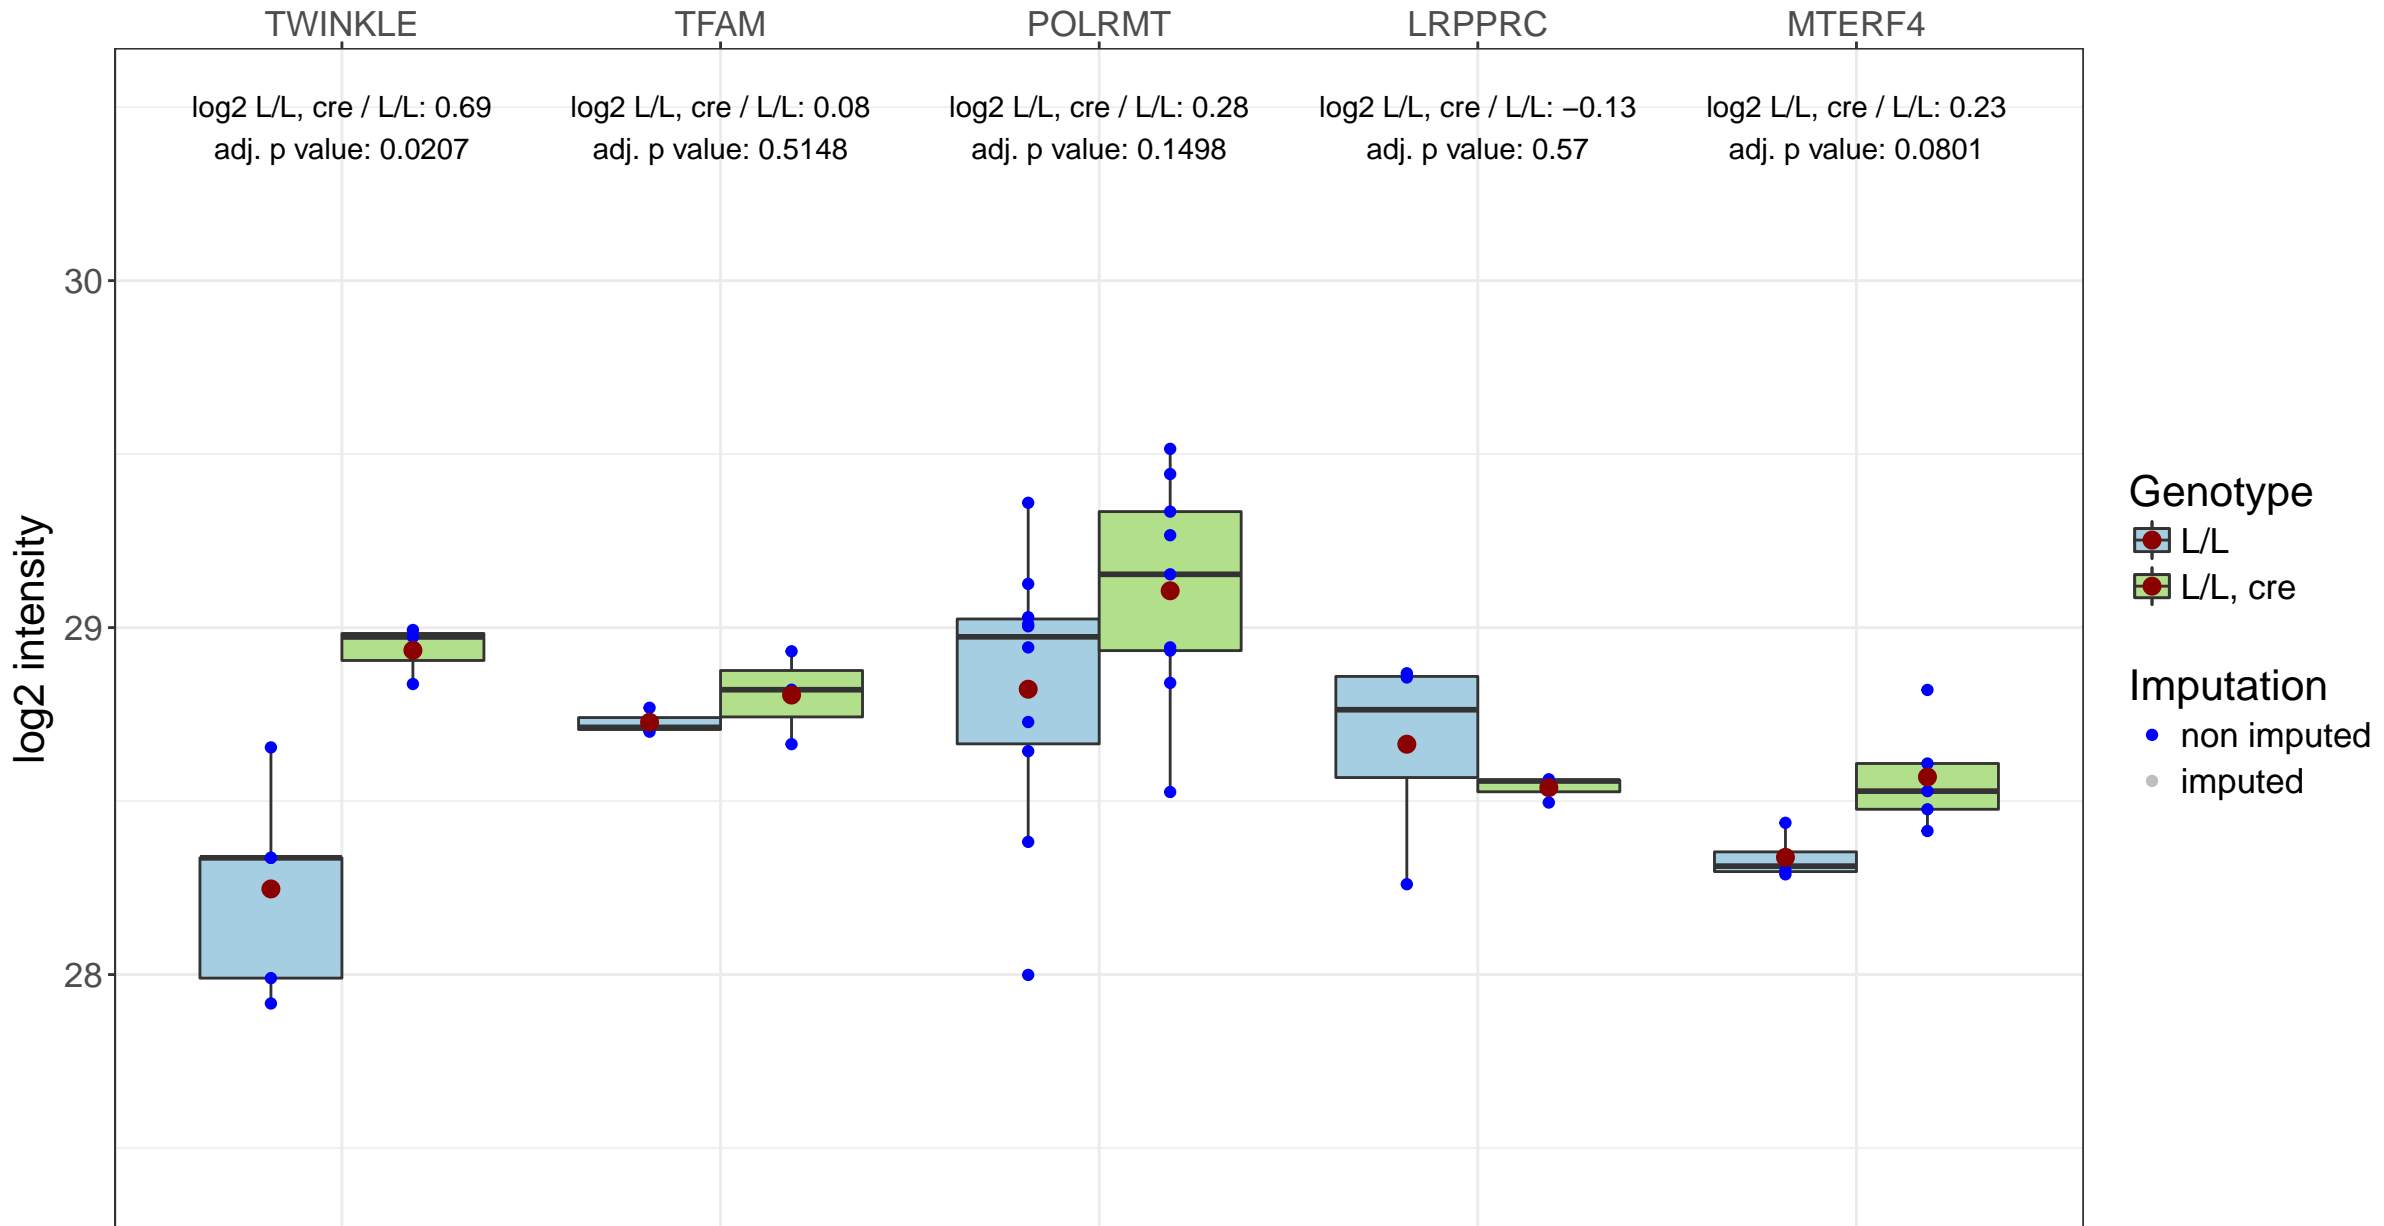

# RHOT2 / Q8JZN7

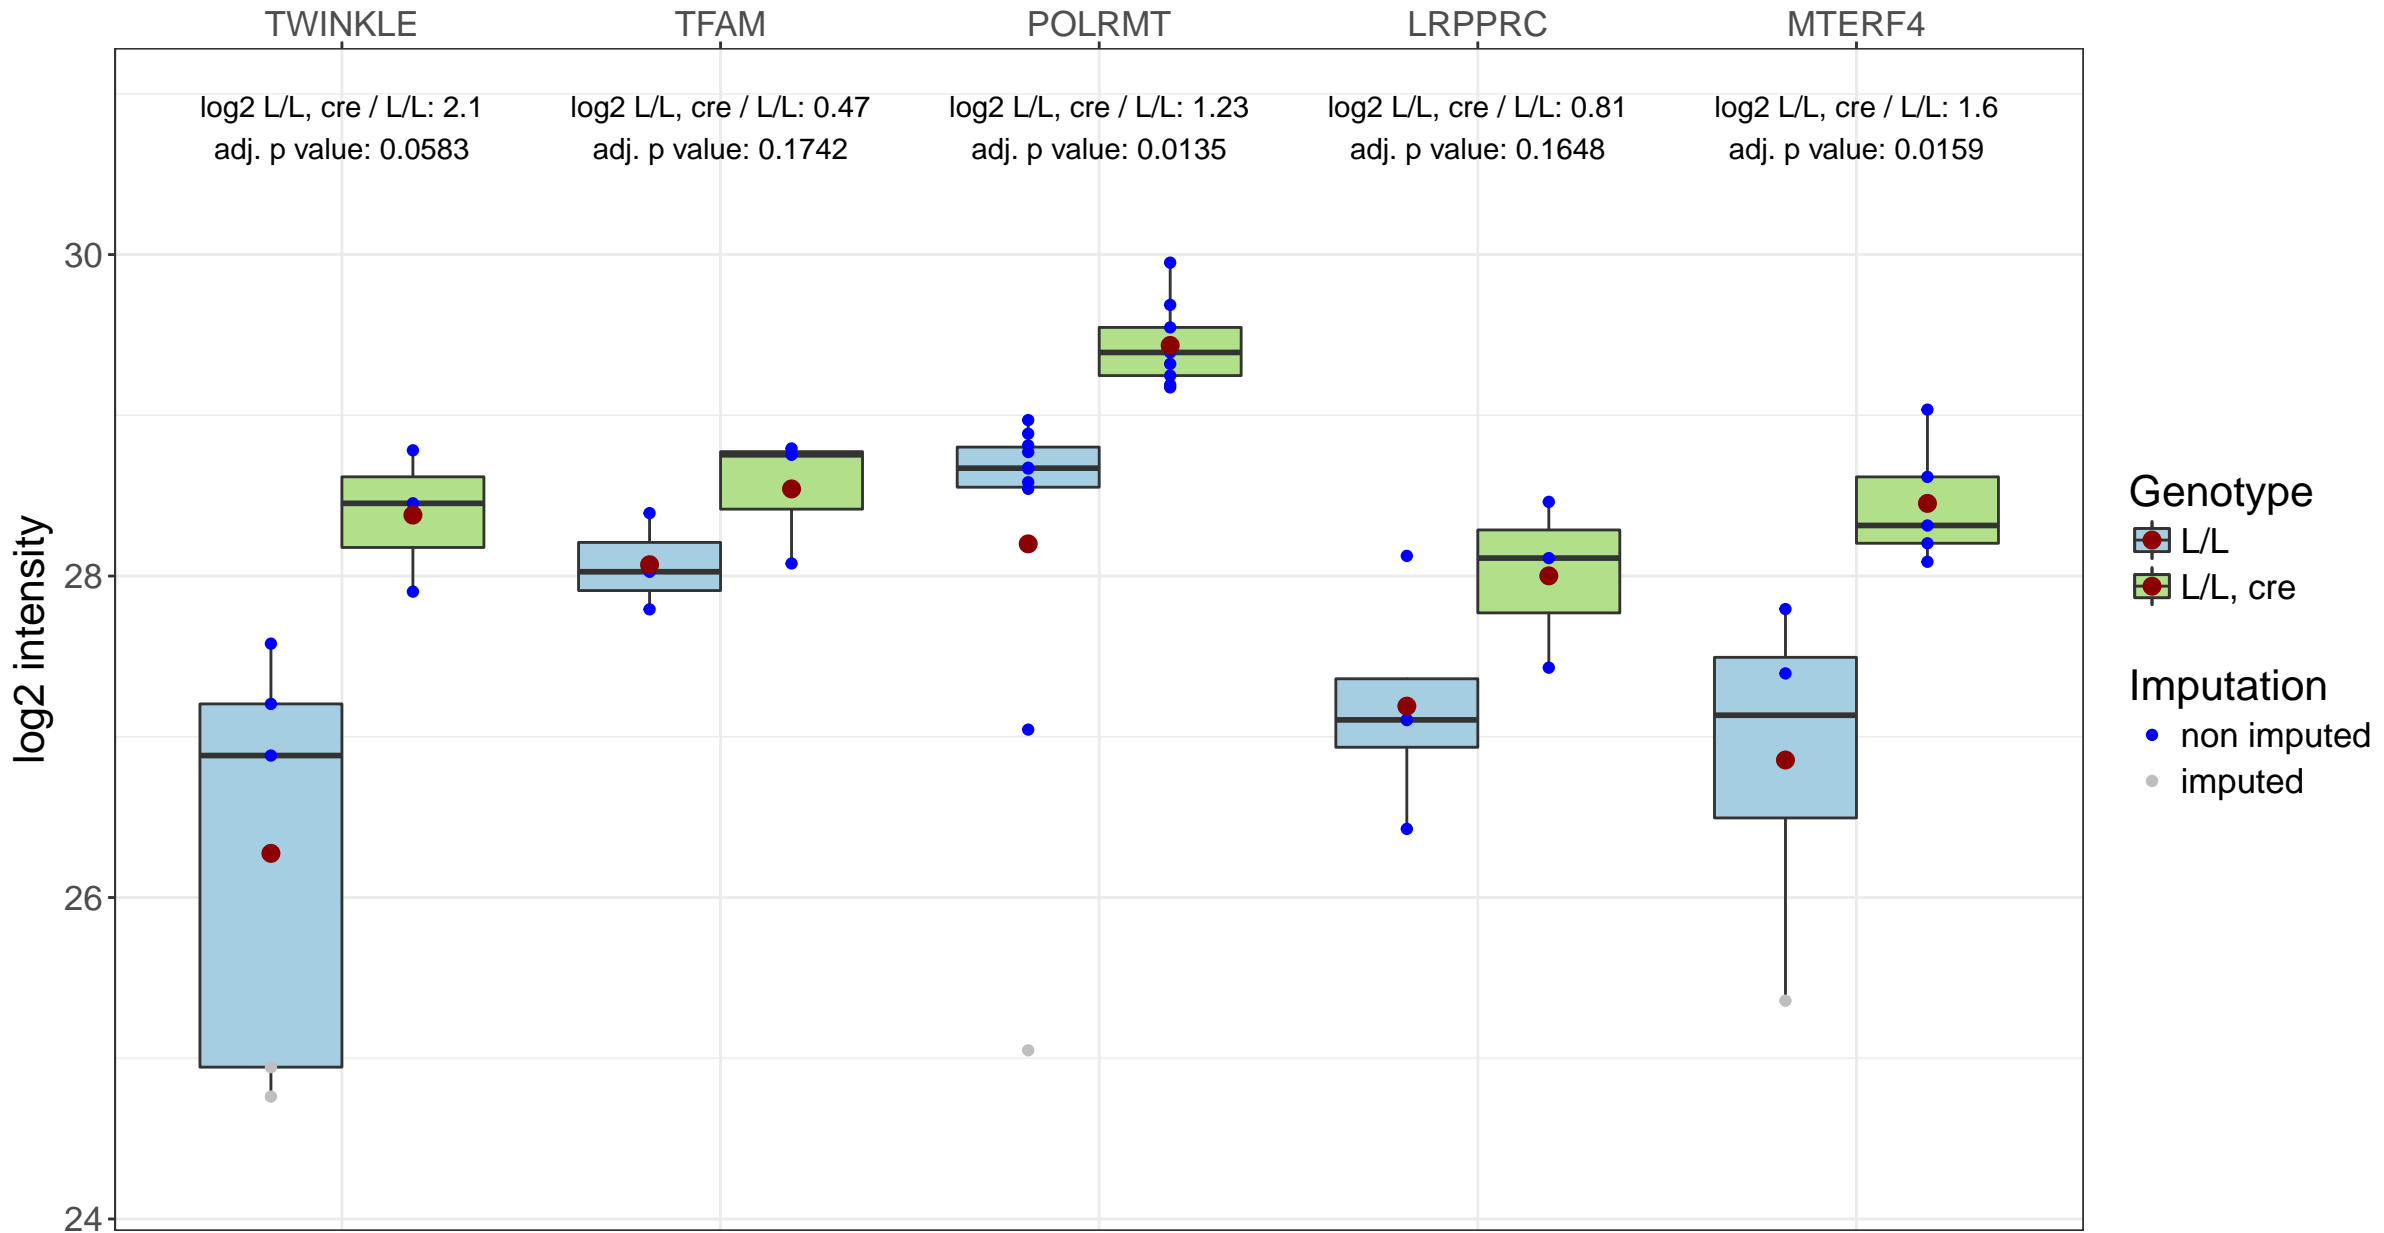

# RMDN1 / Q9DCV4

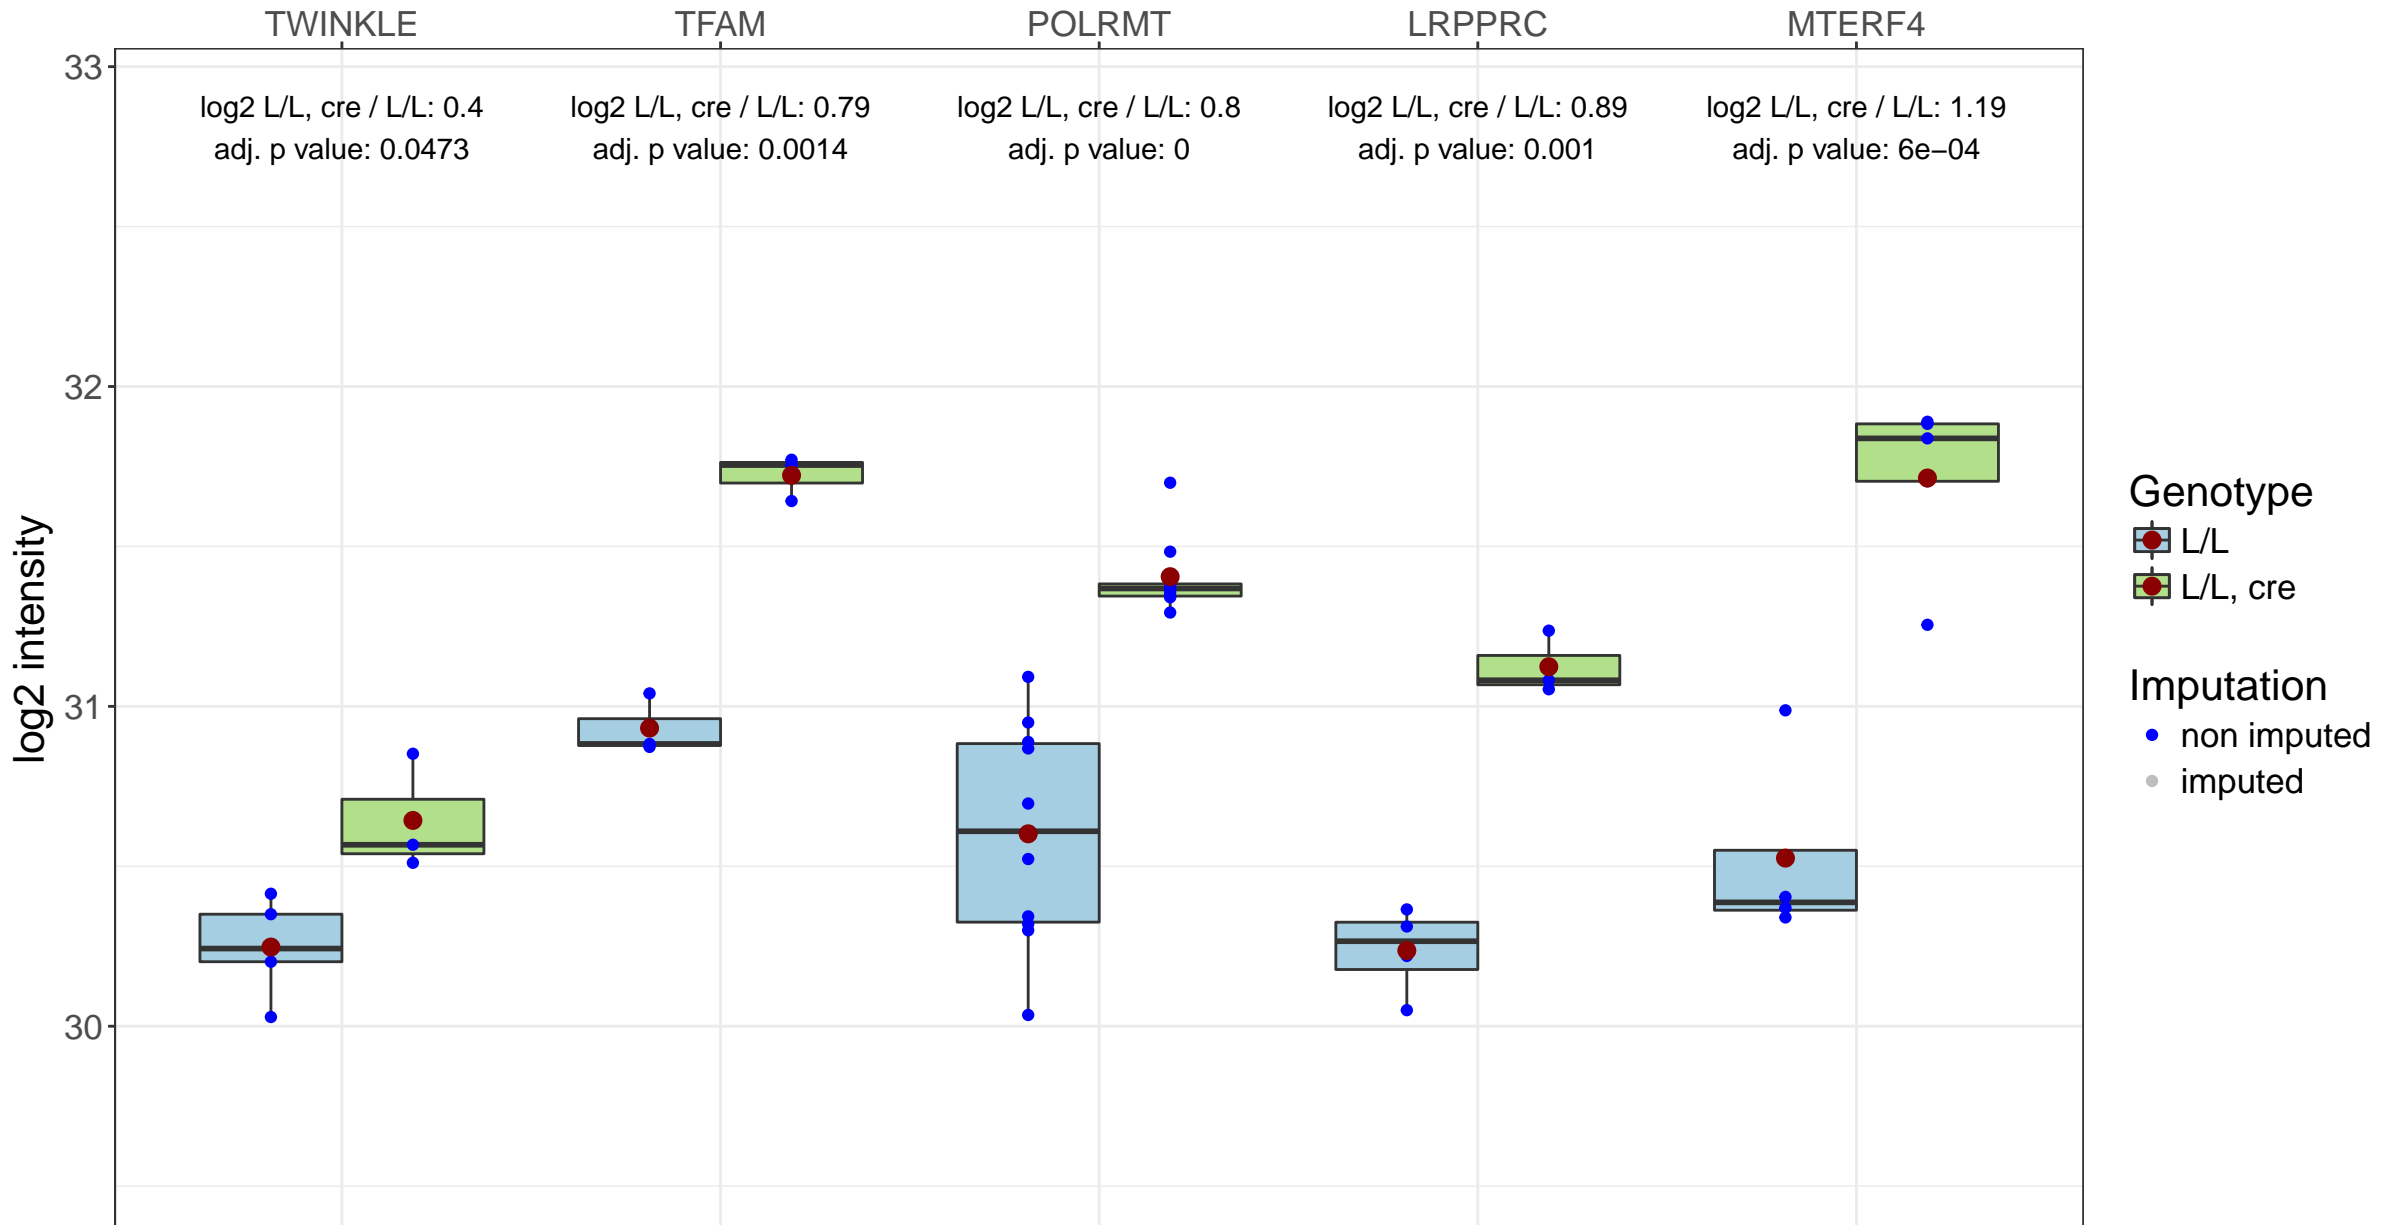



# RMND1 / Q8CI78

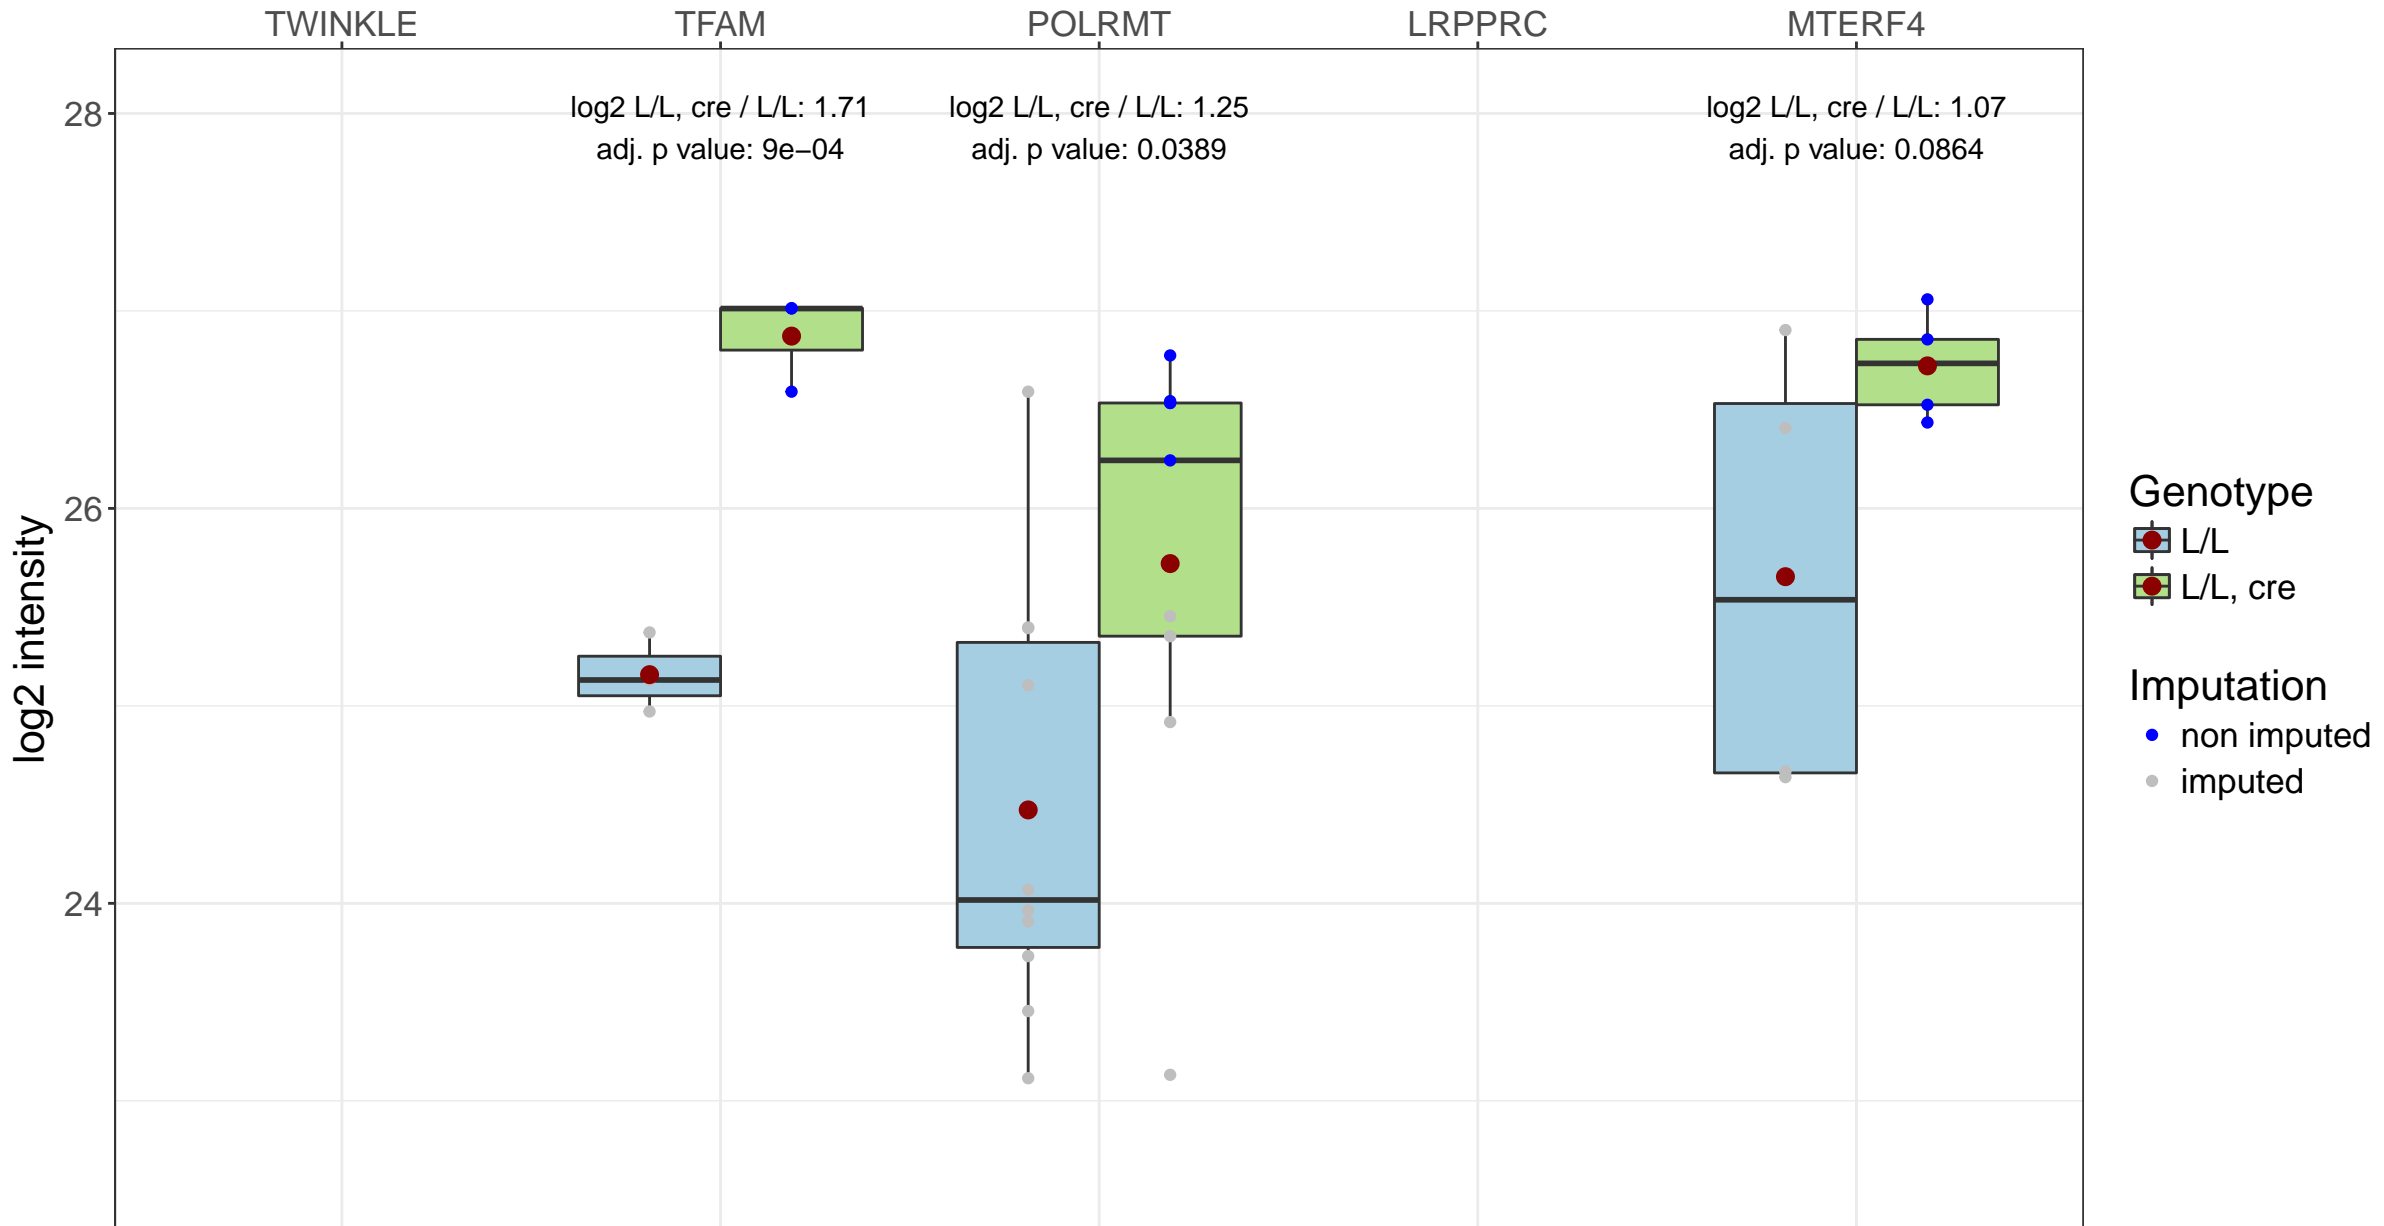

# RNF213 / F7A6H4

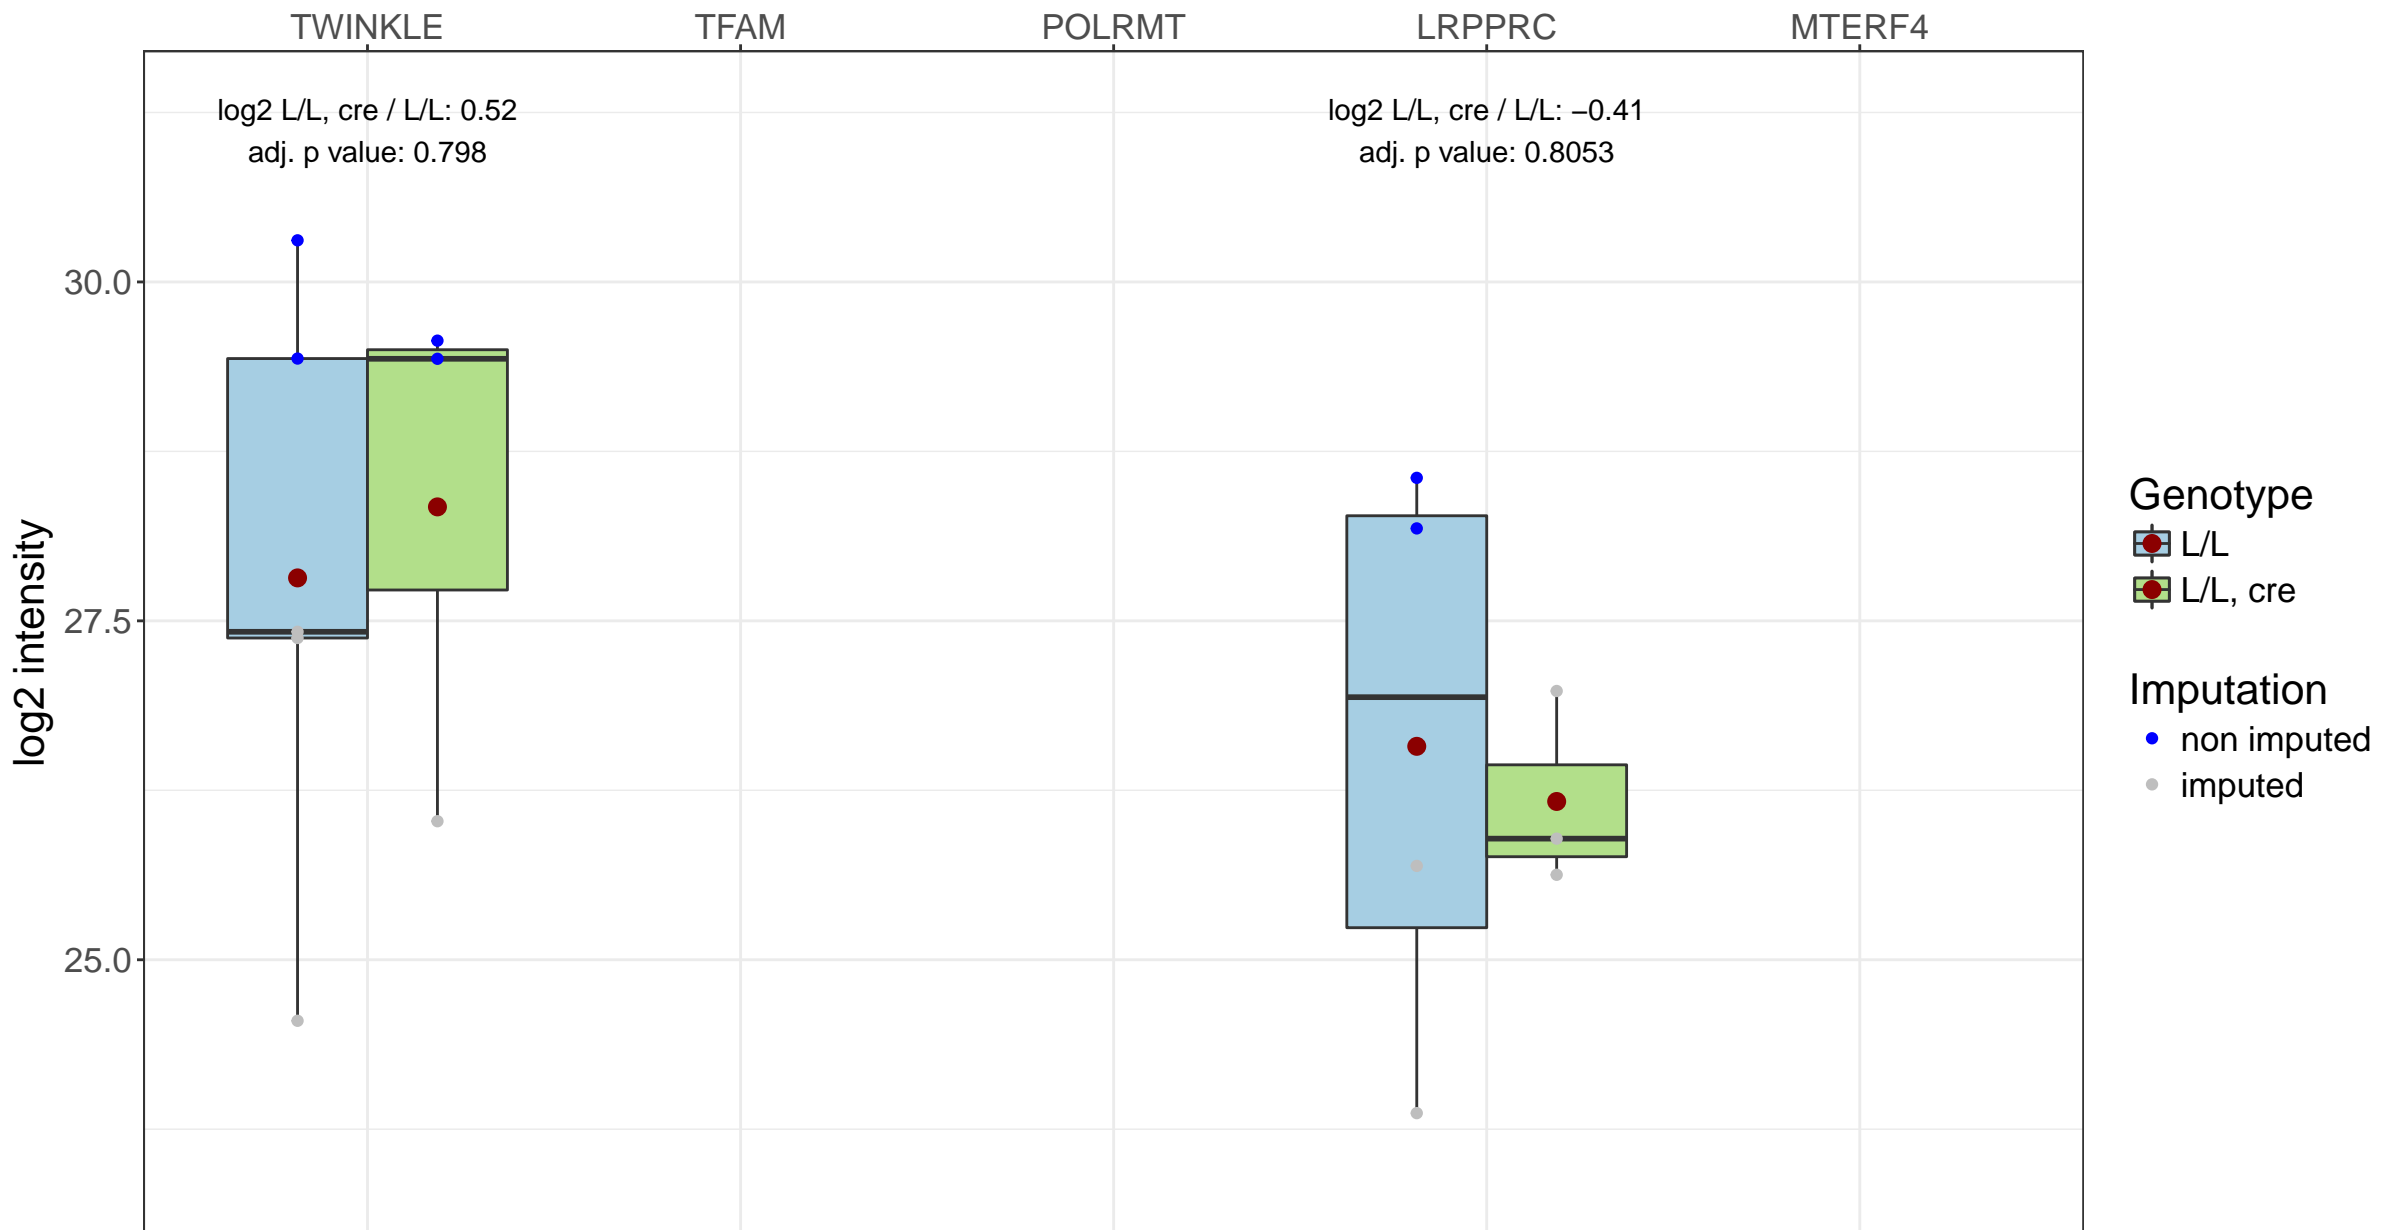

# RNMTL1 / Q5ND52

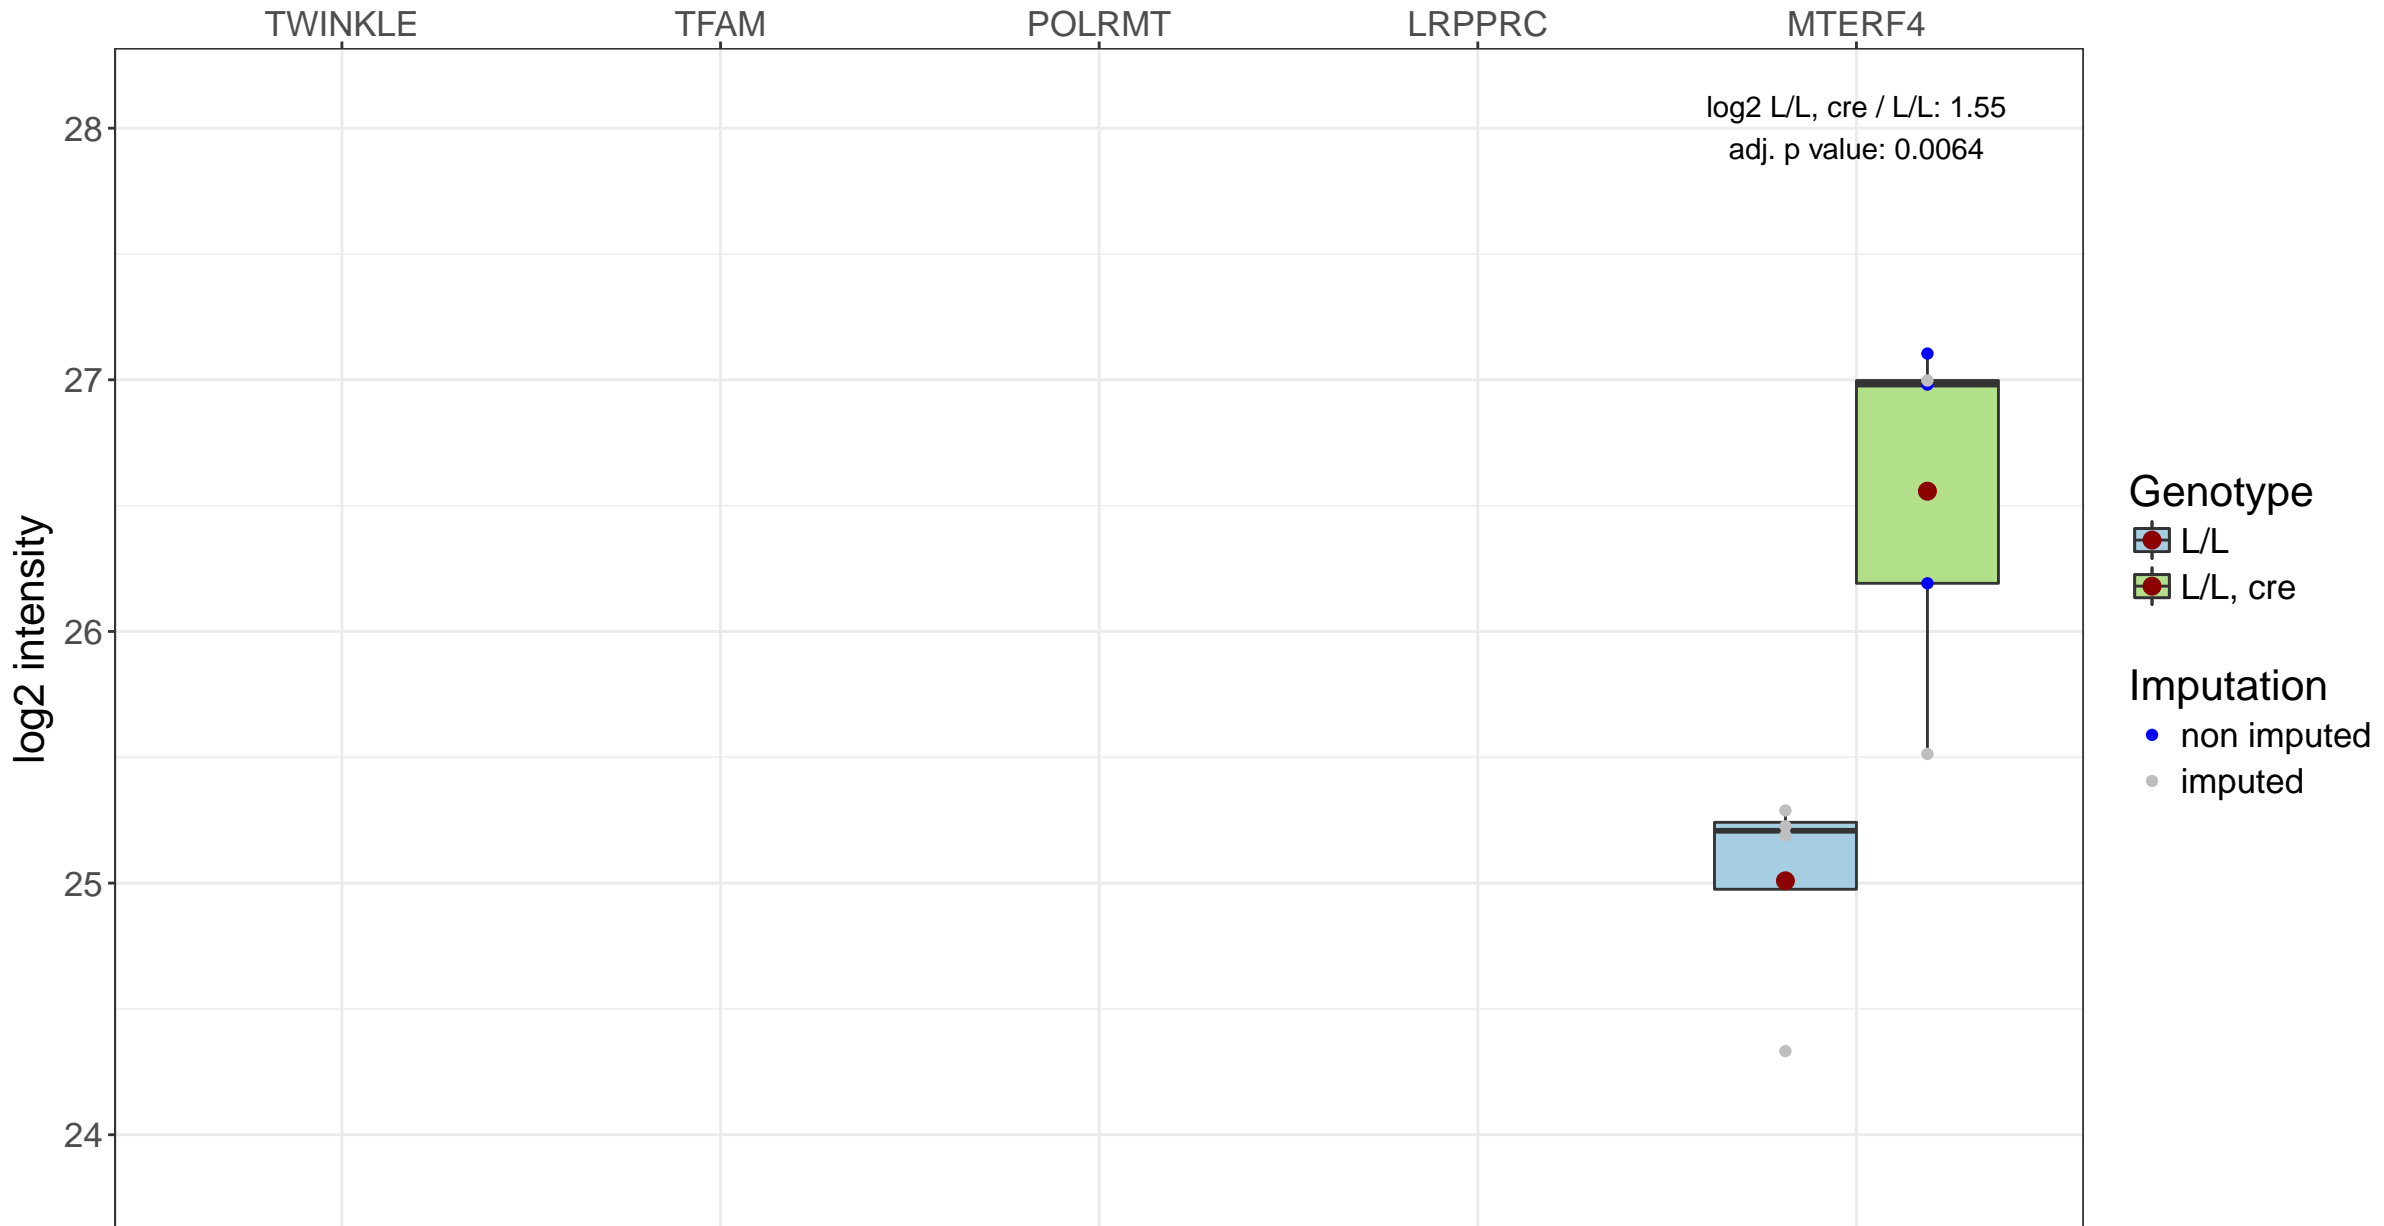

# ROMO1 / P60603

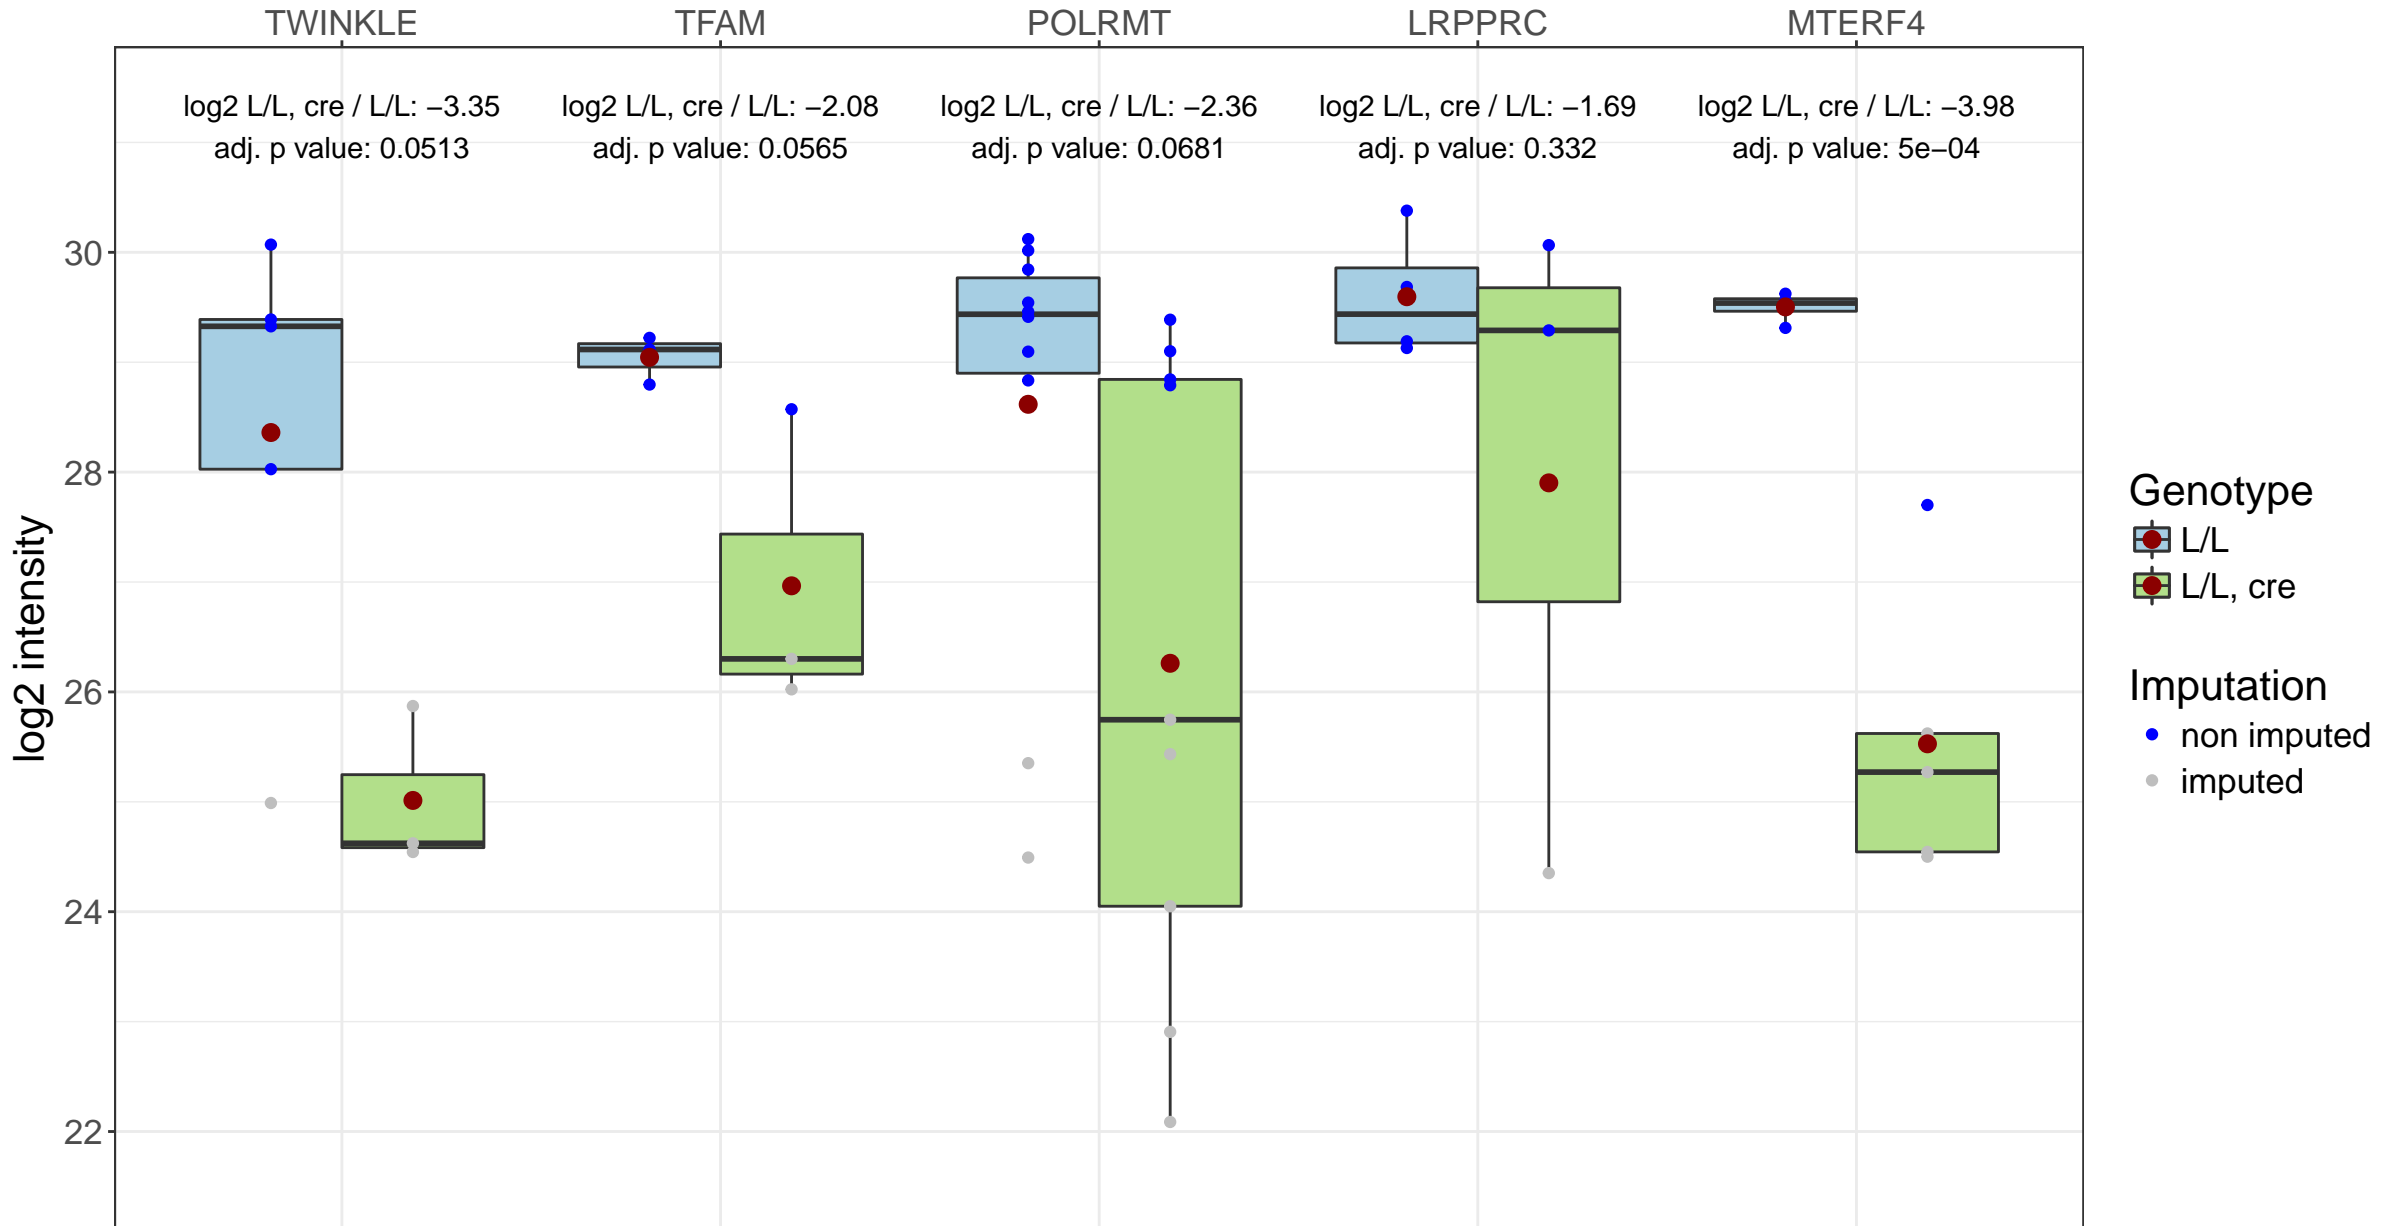

# RPIA / P47968

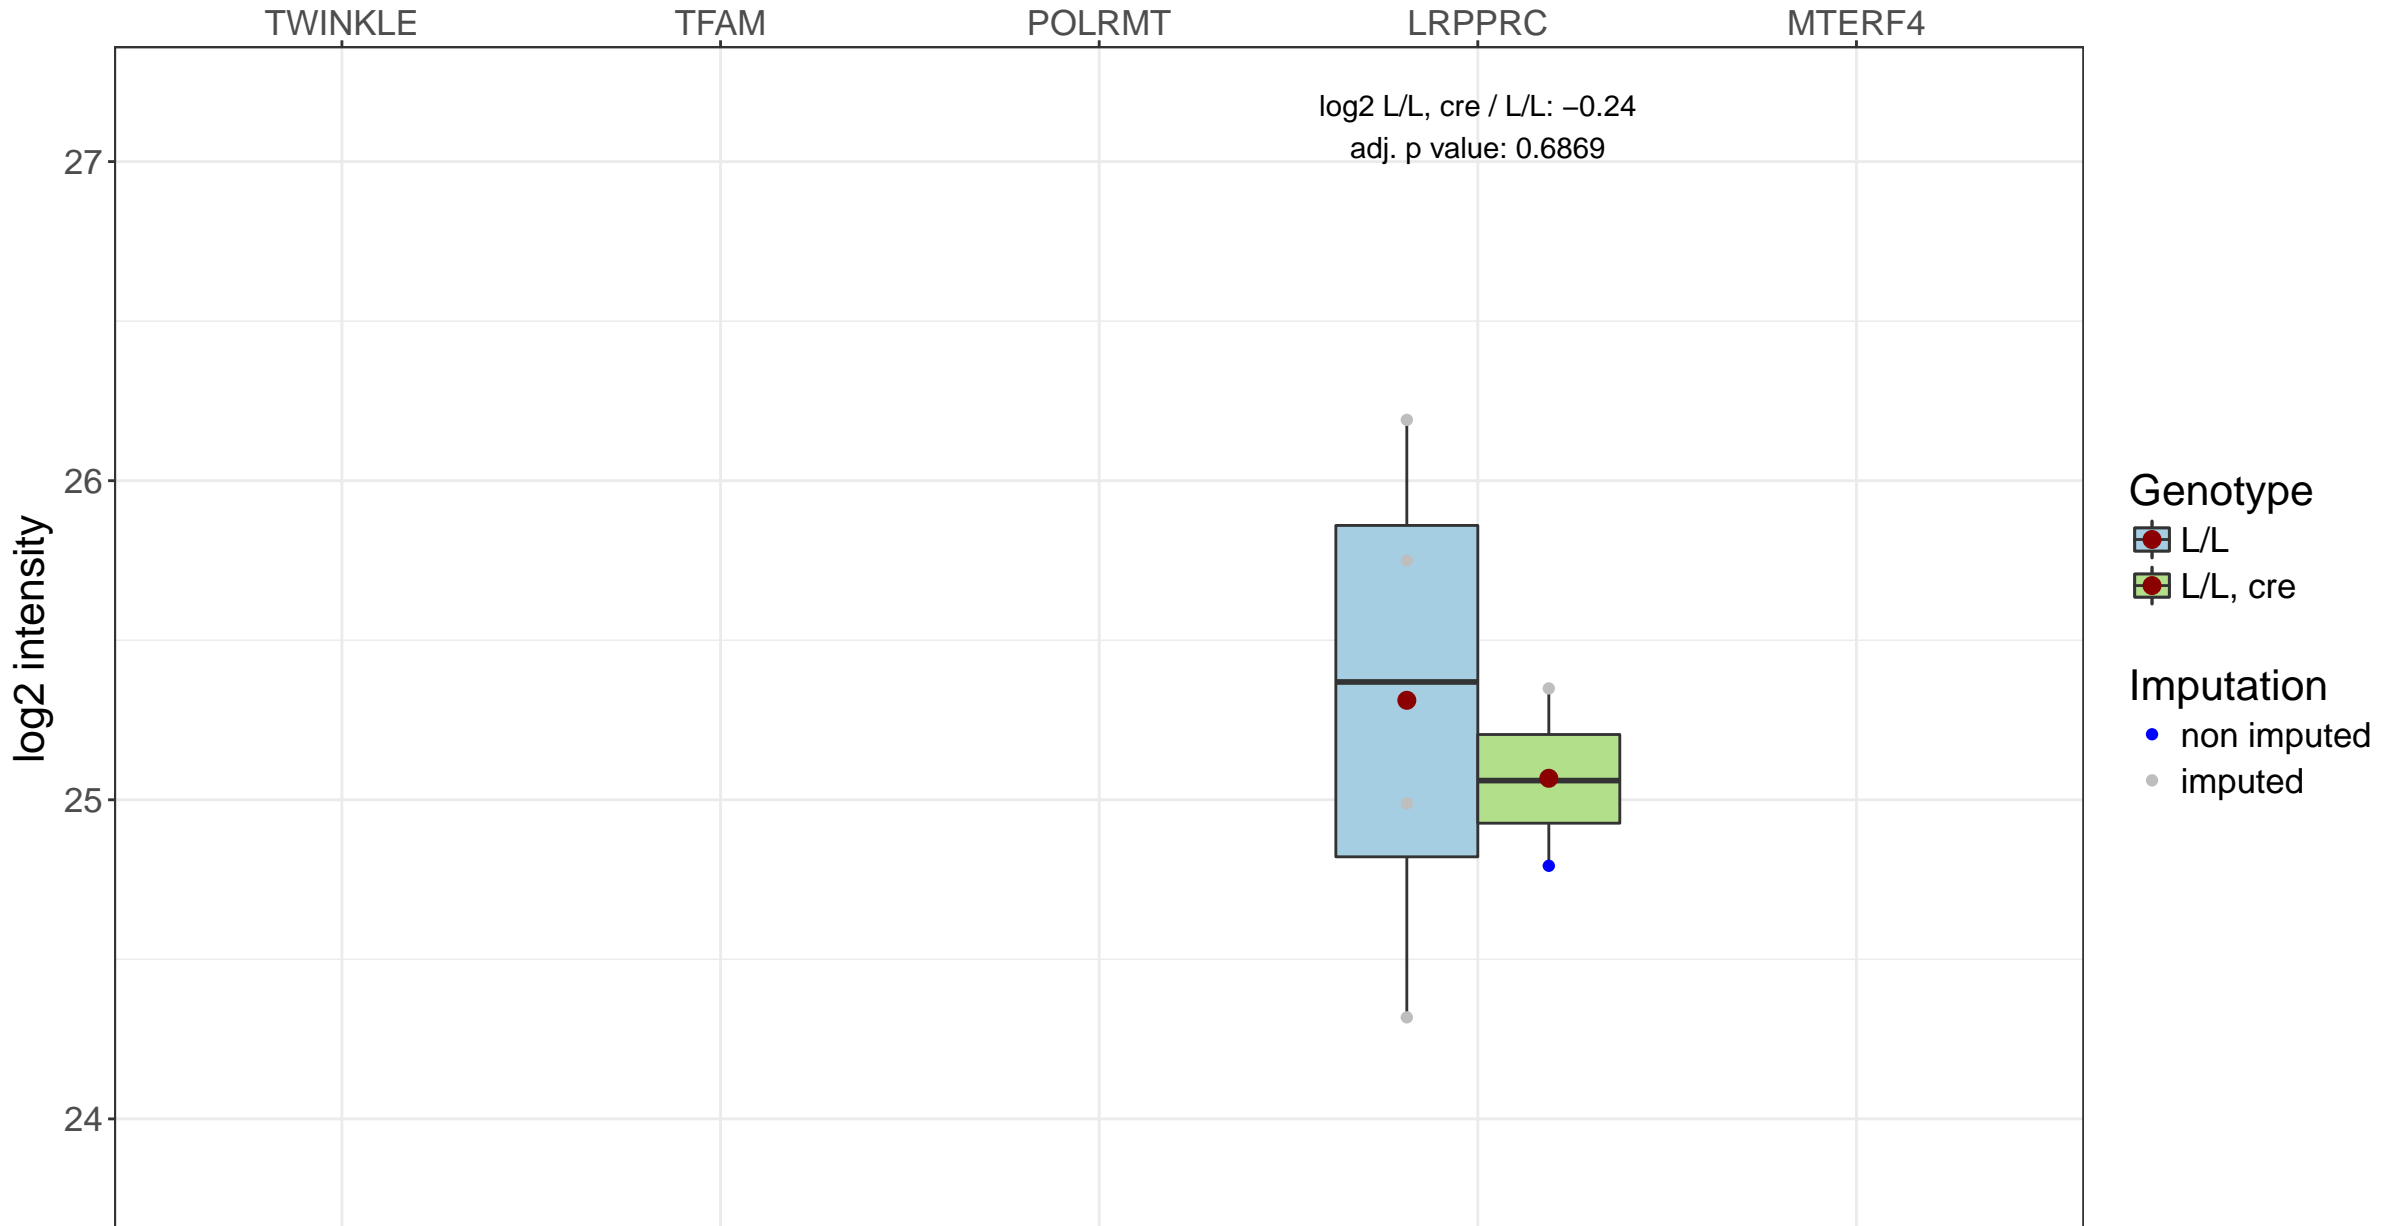

# RPL10 / Q6ZWV3

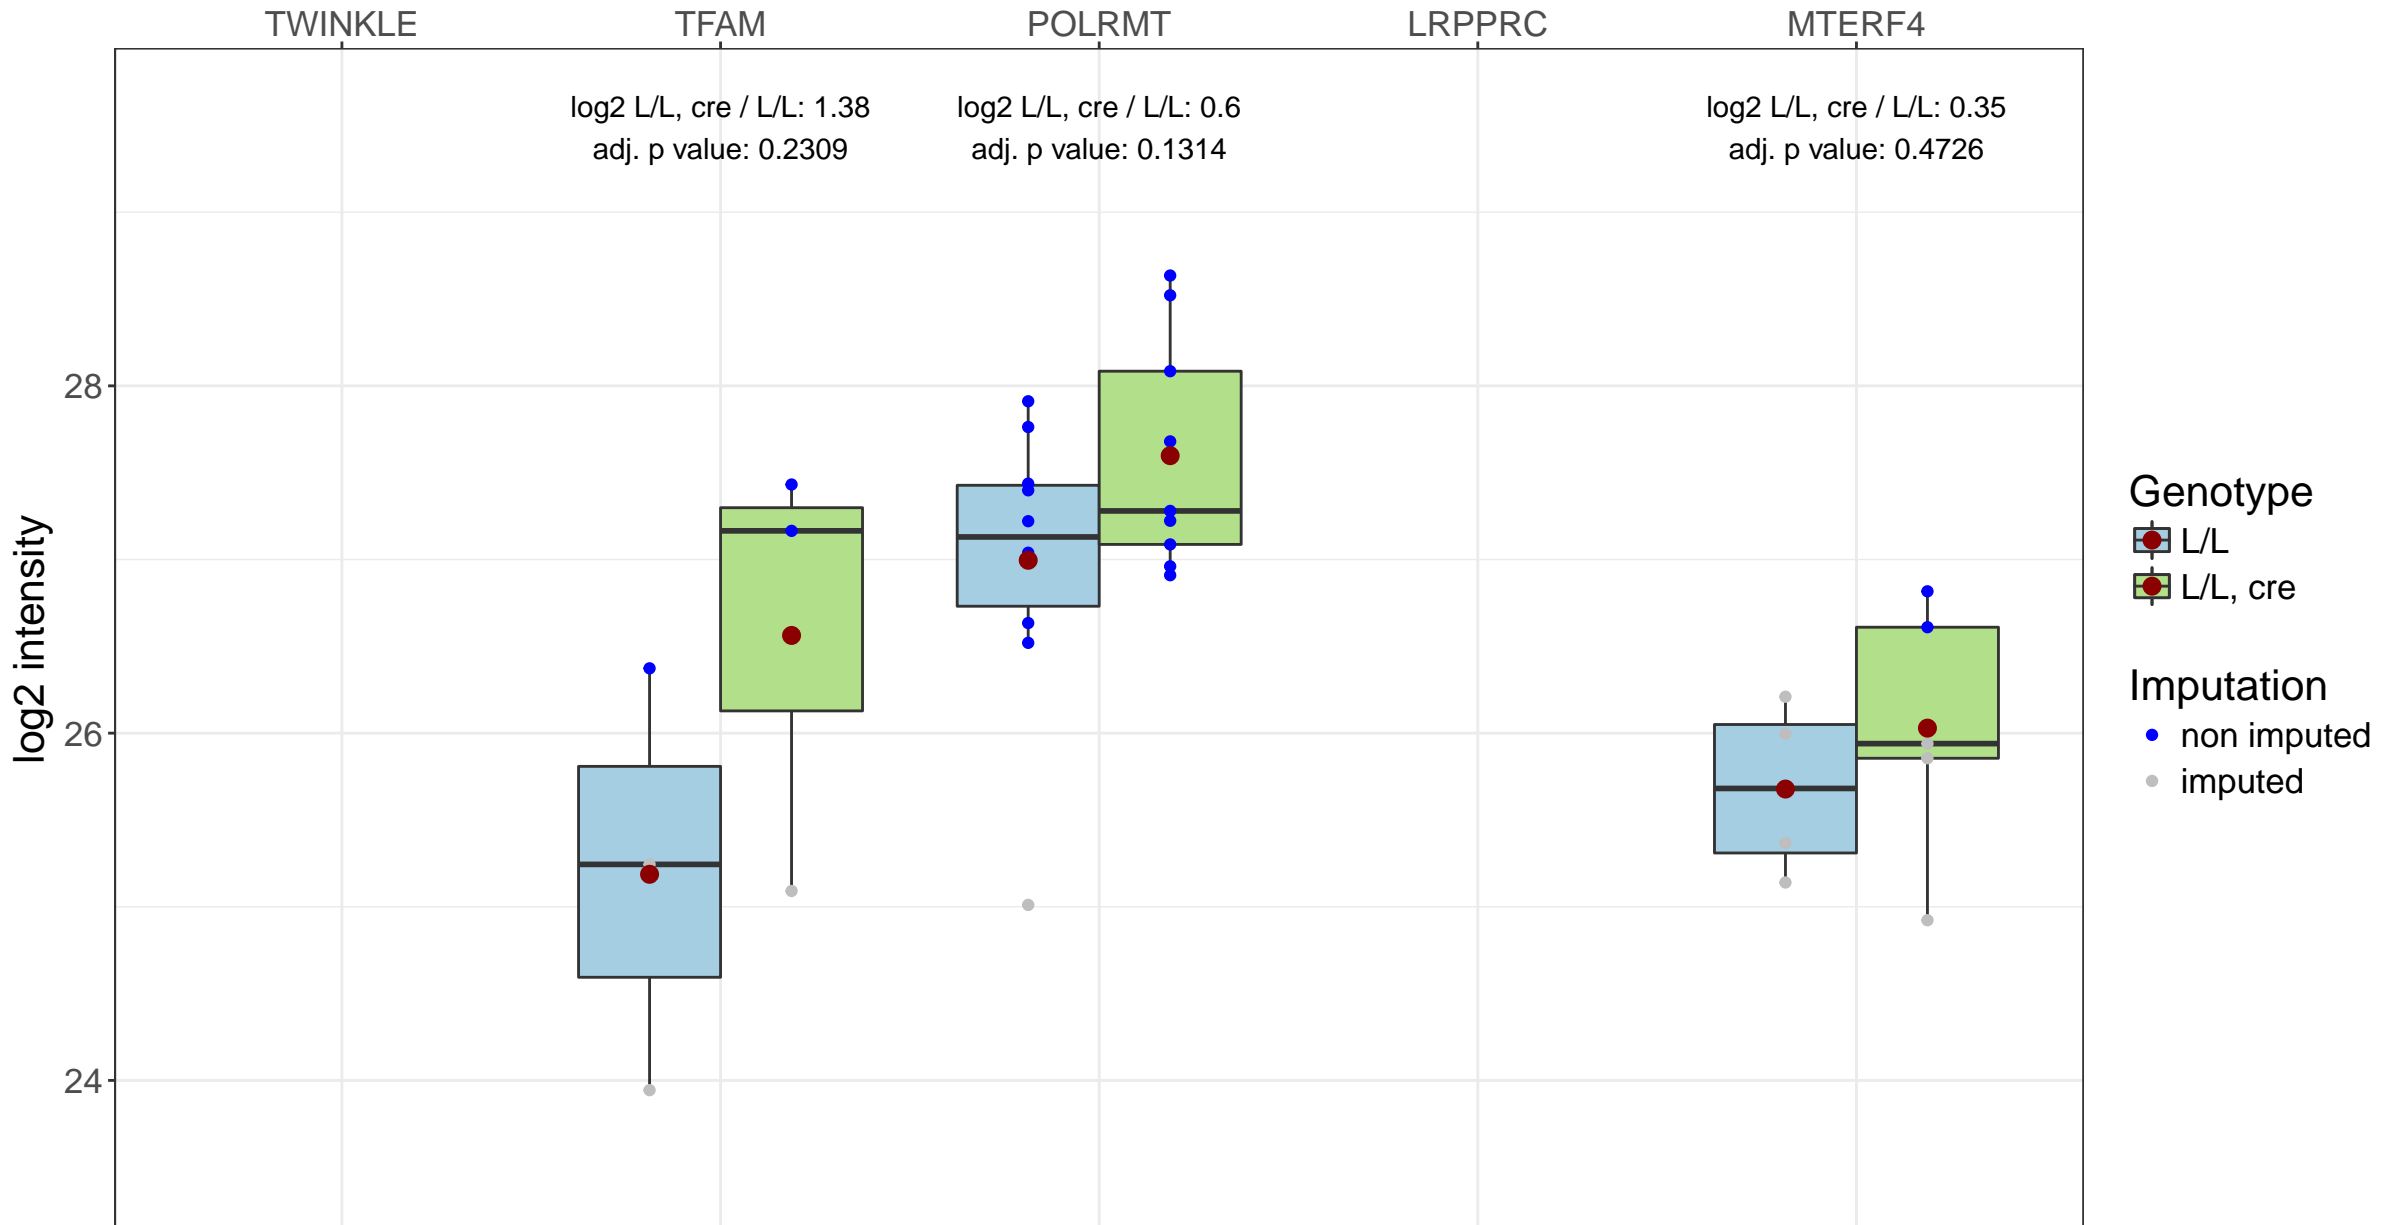

# RPL10A / Q5XJF6

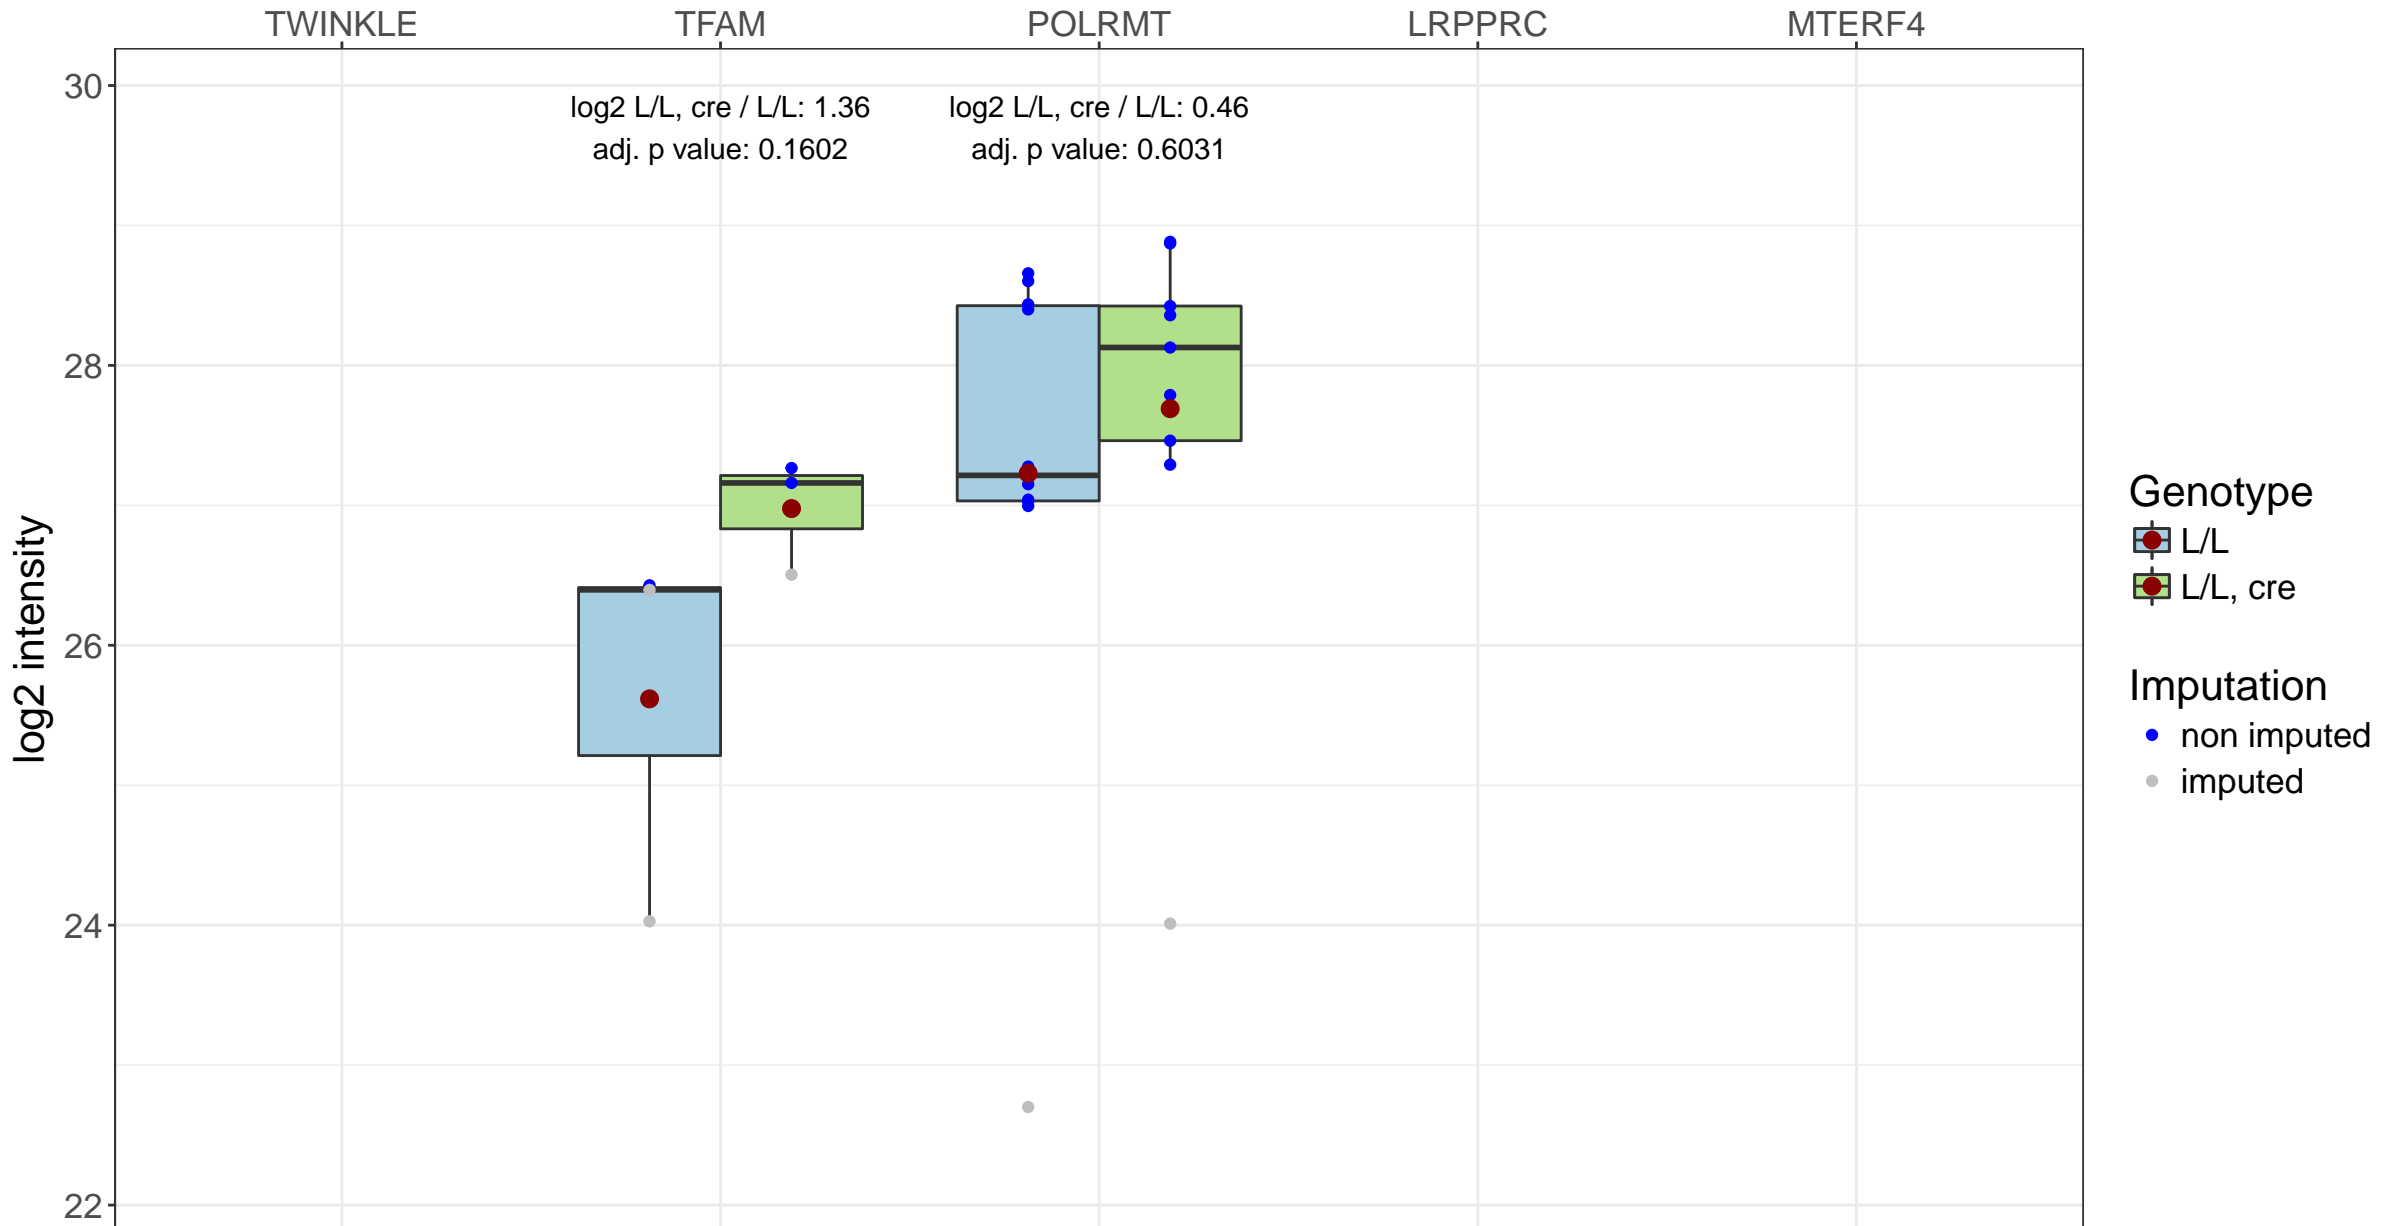

# RPL12 / P35979

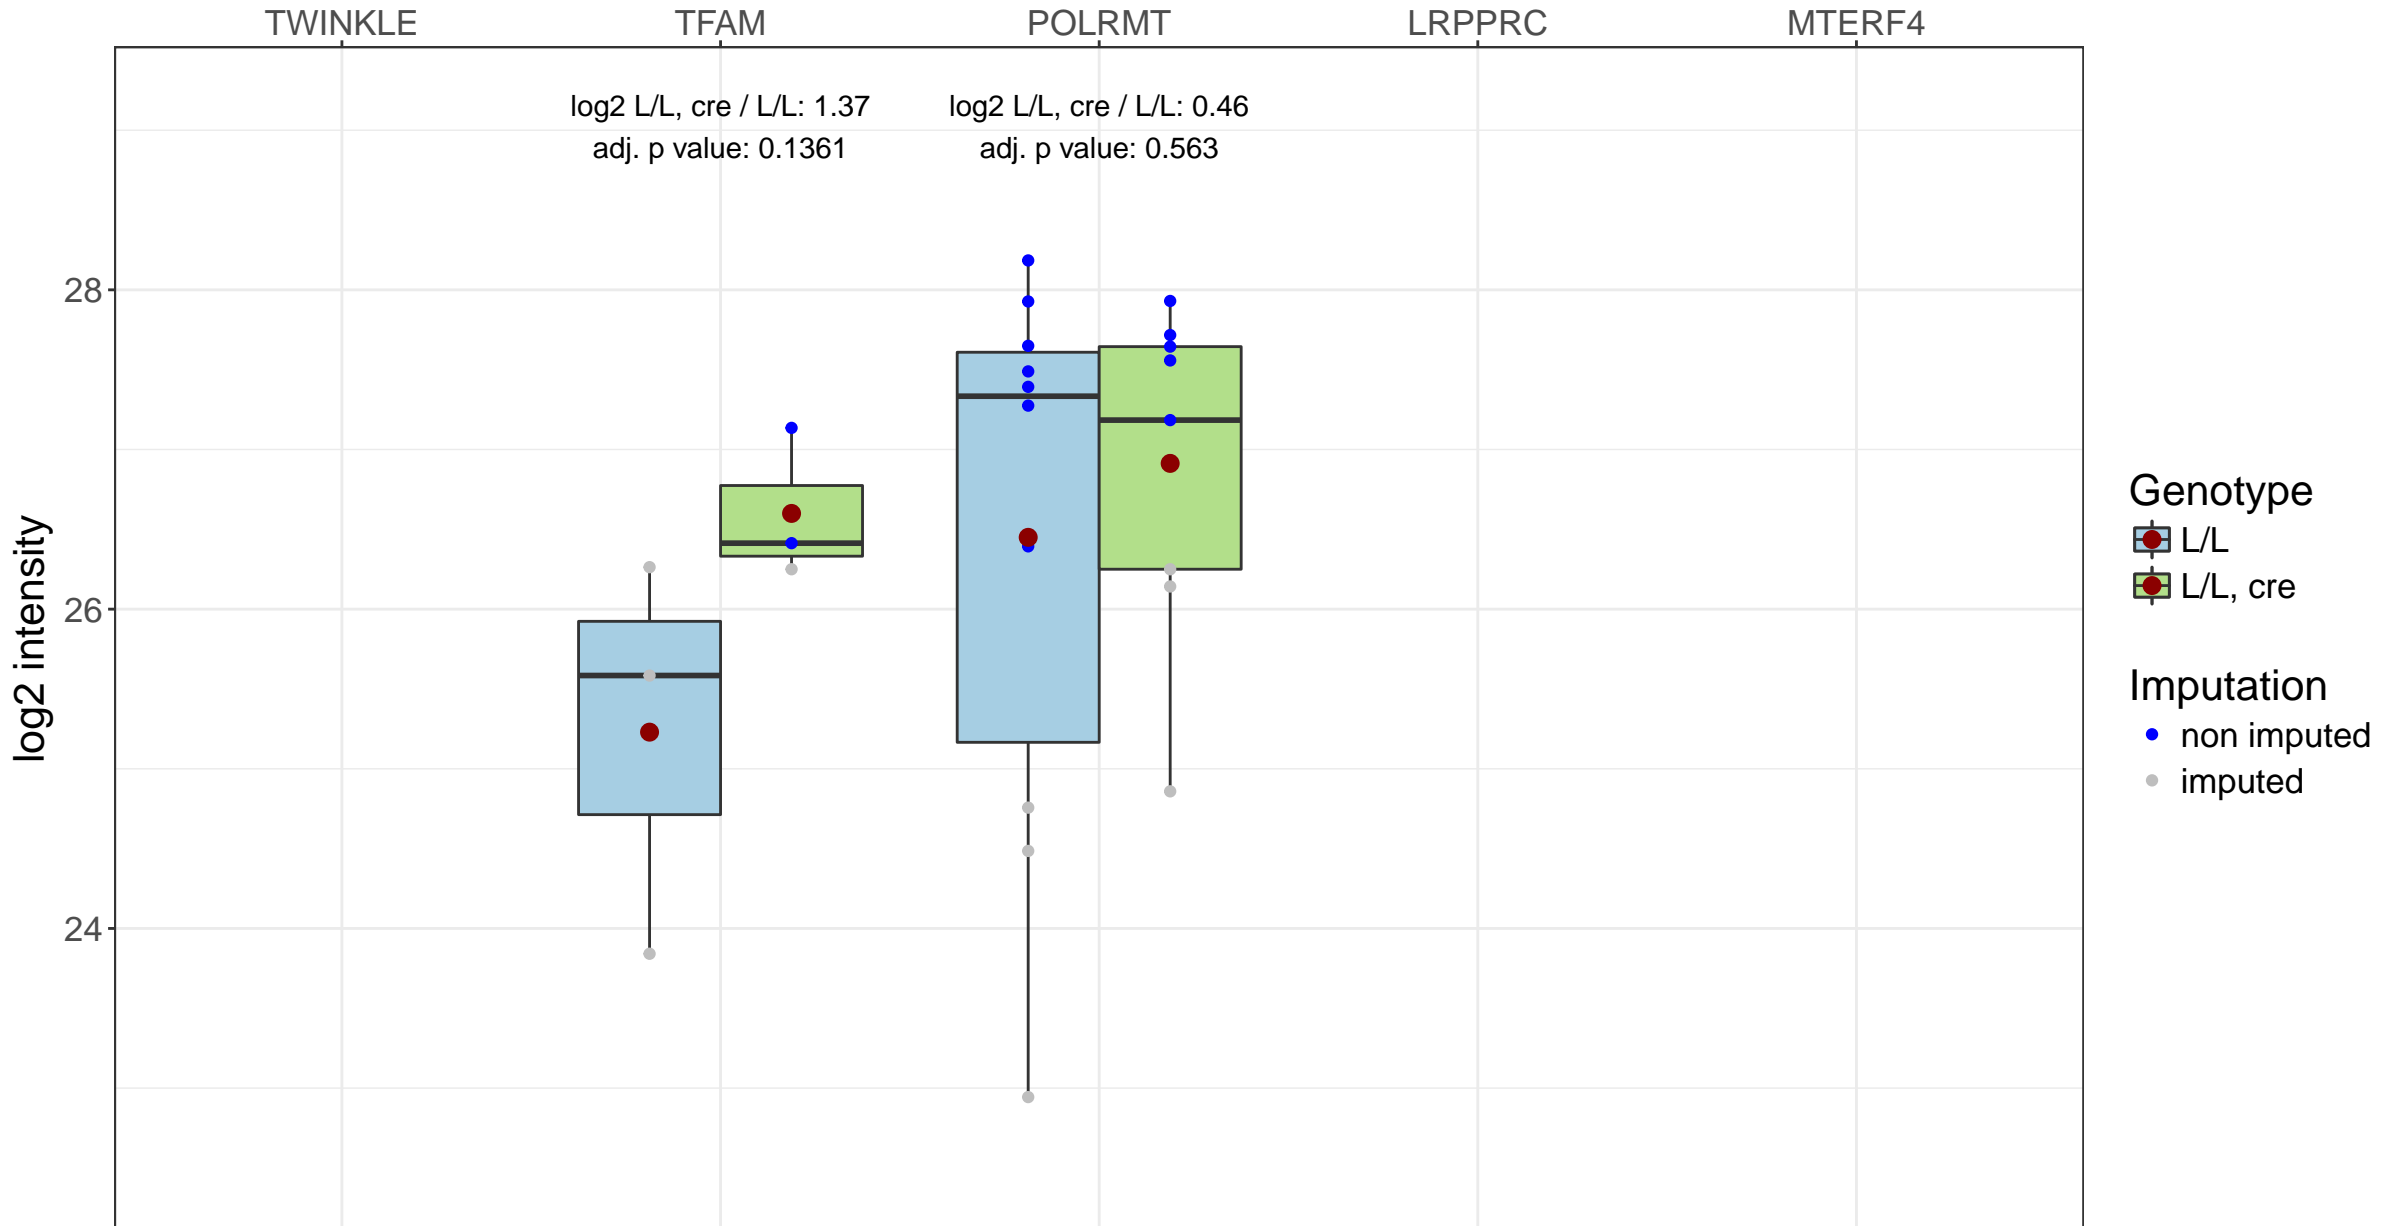



# RPL13 / P47963

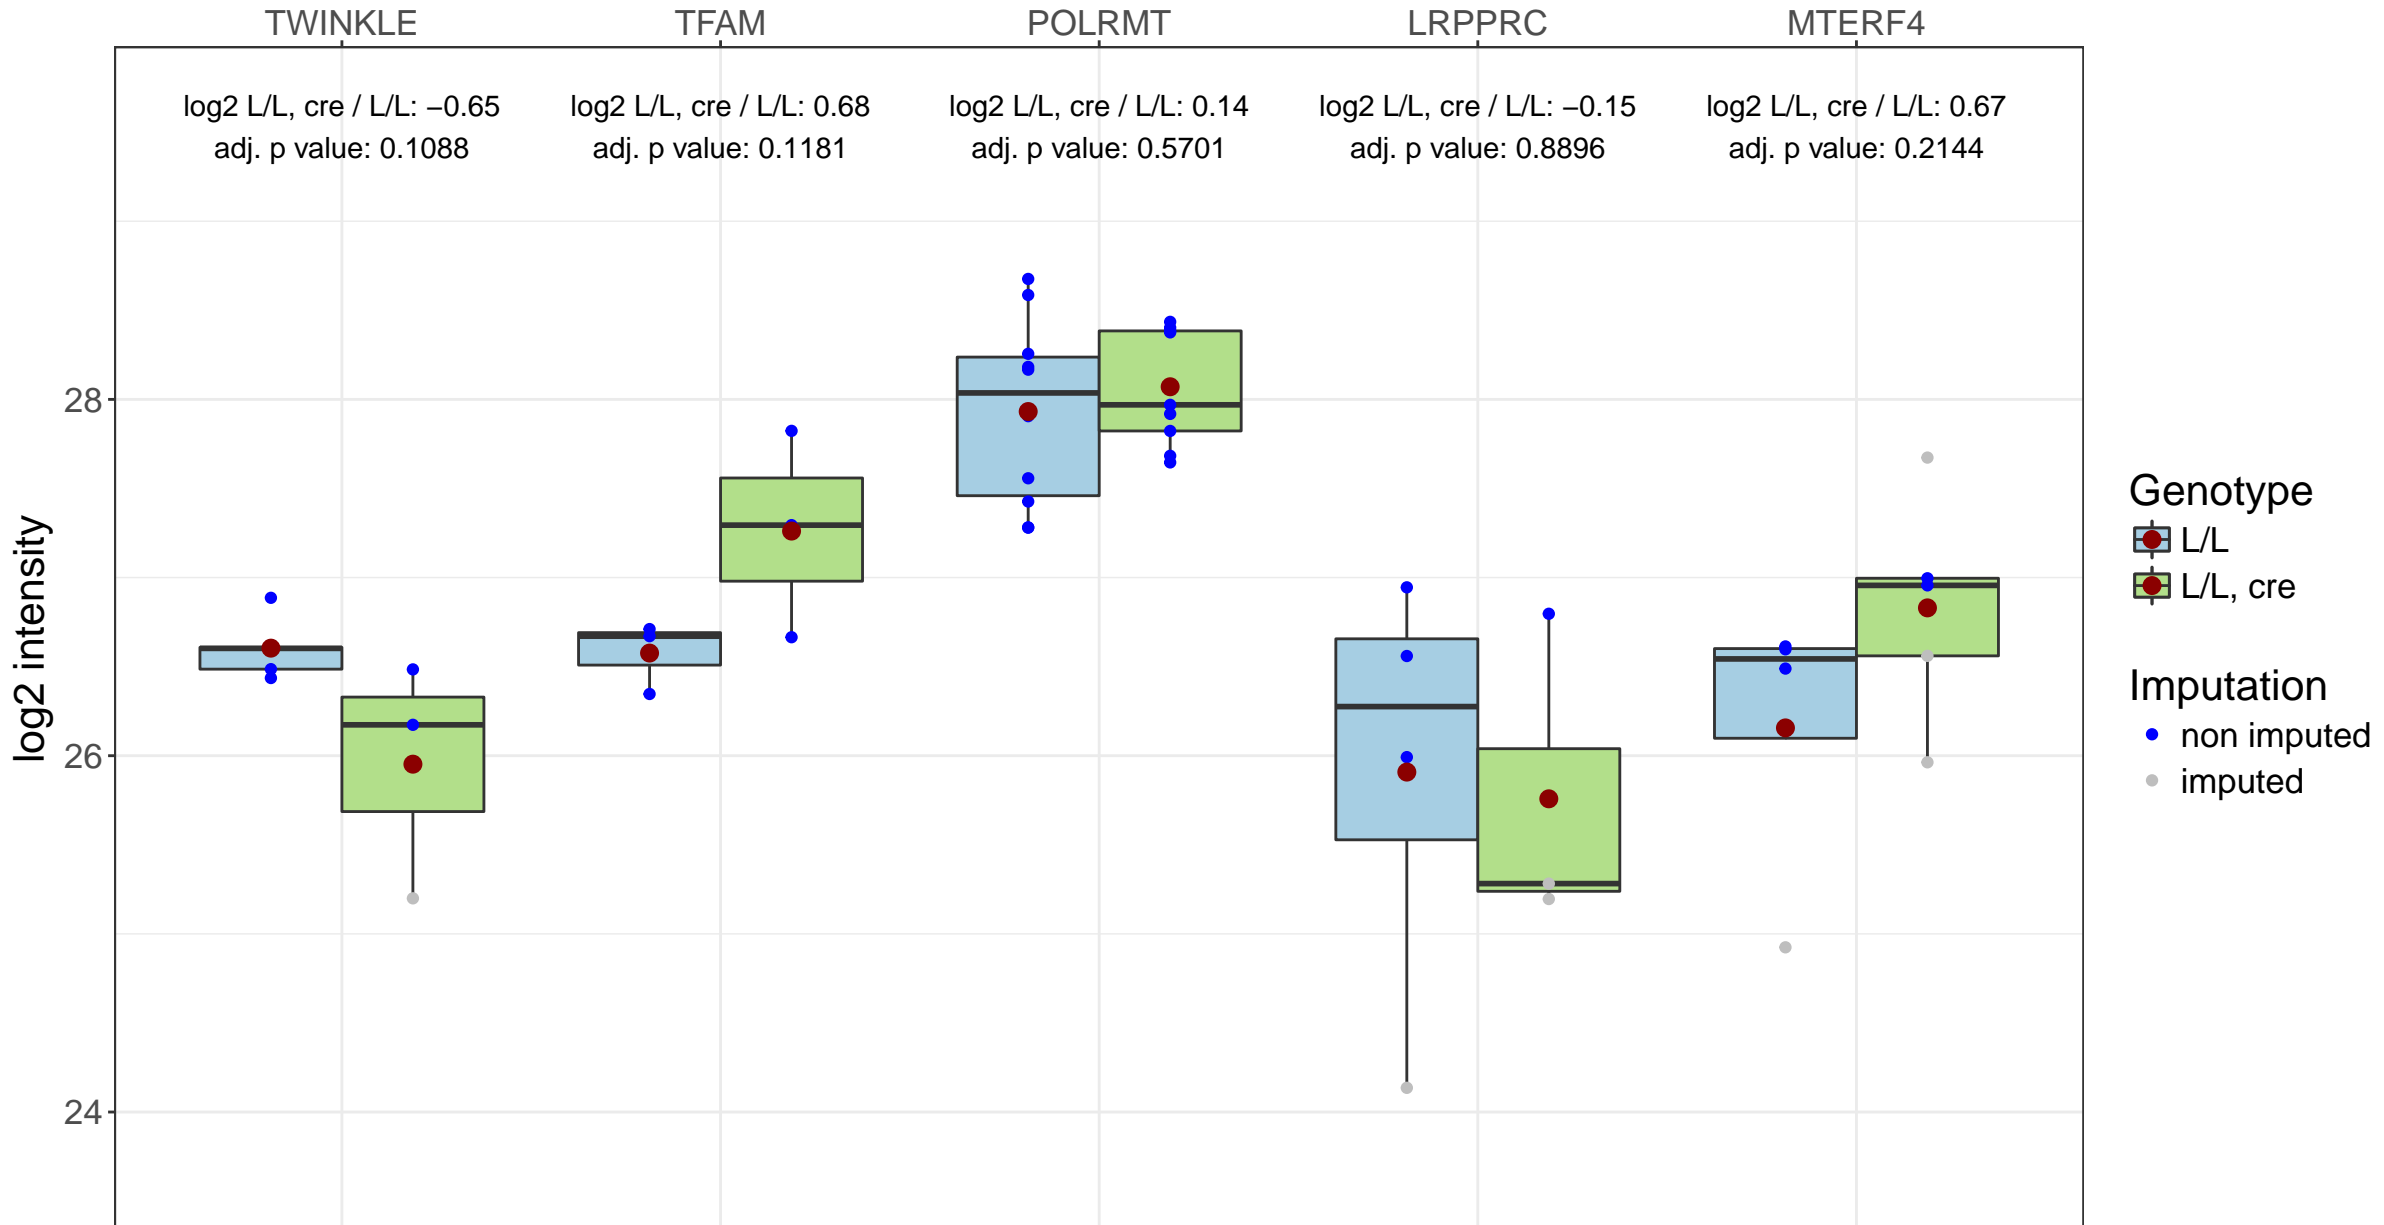

# RPL13A / P19253

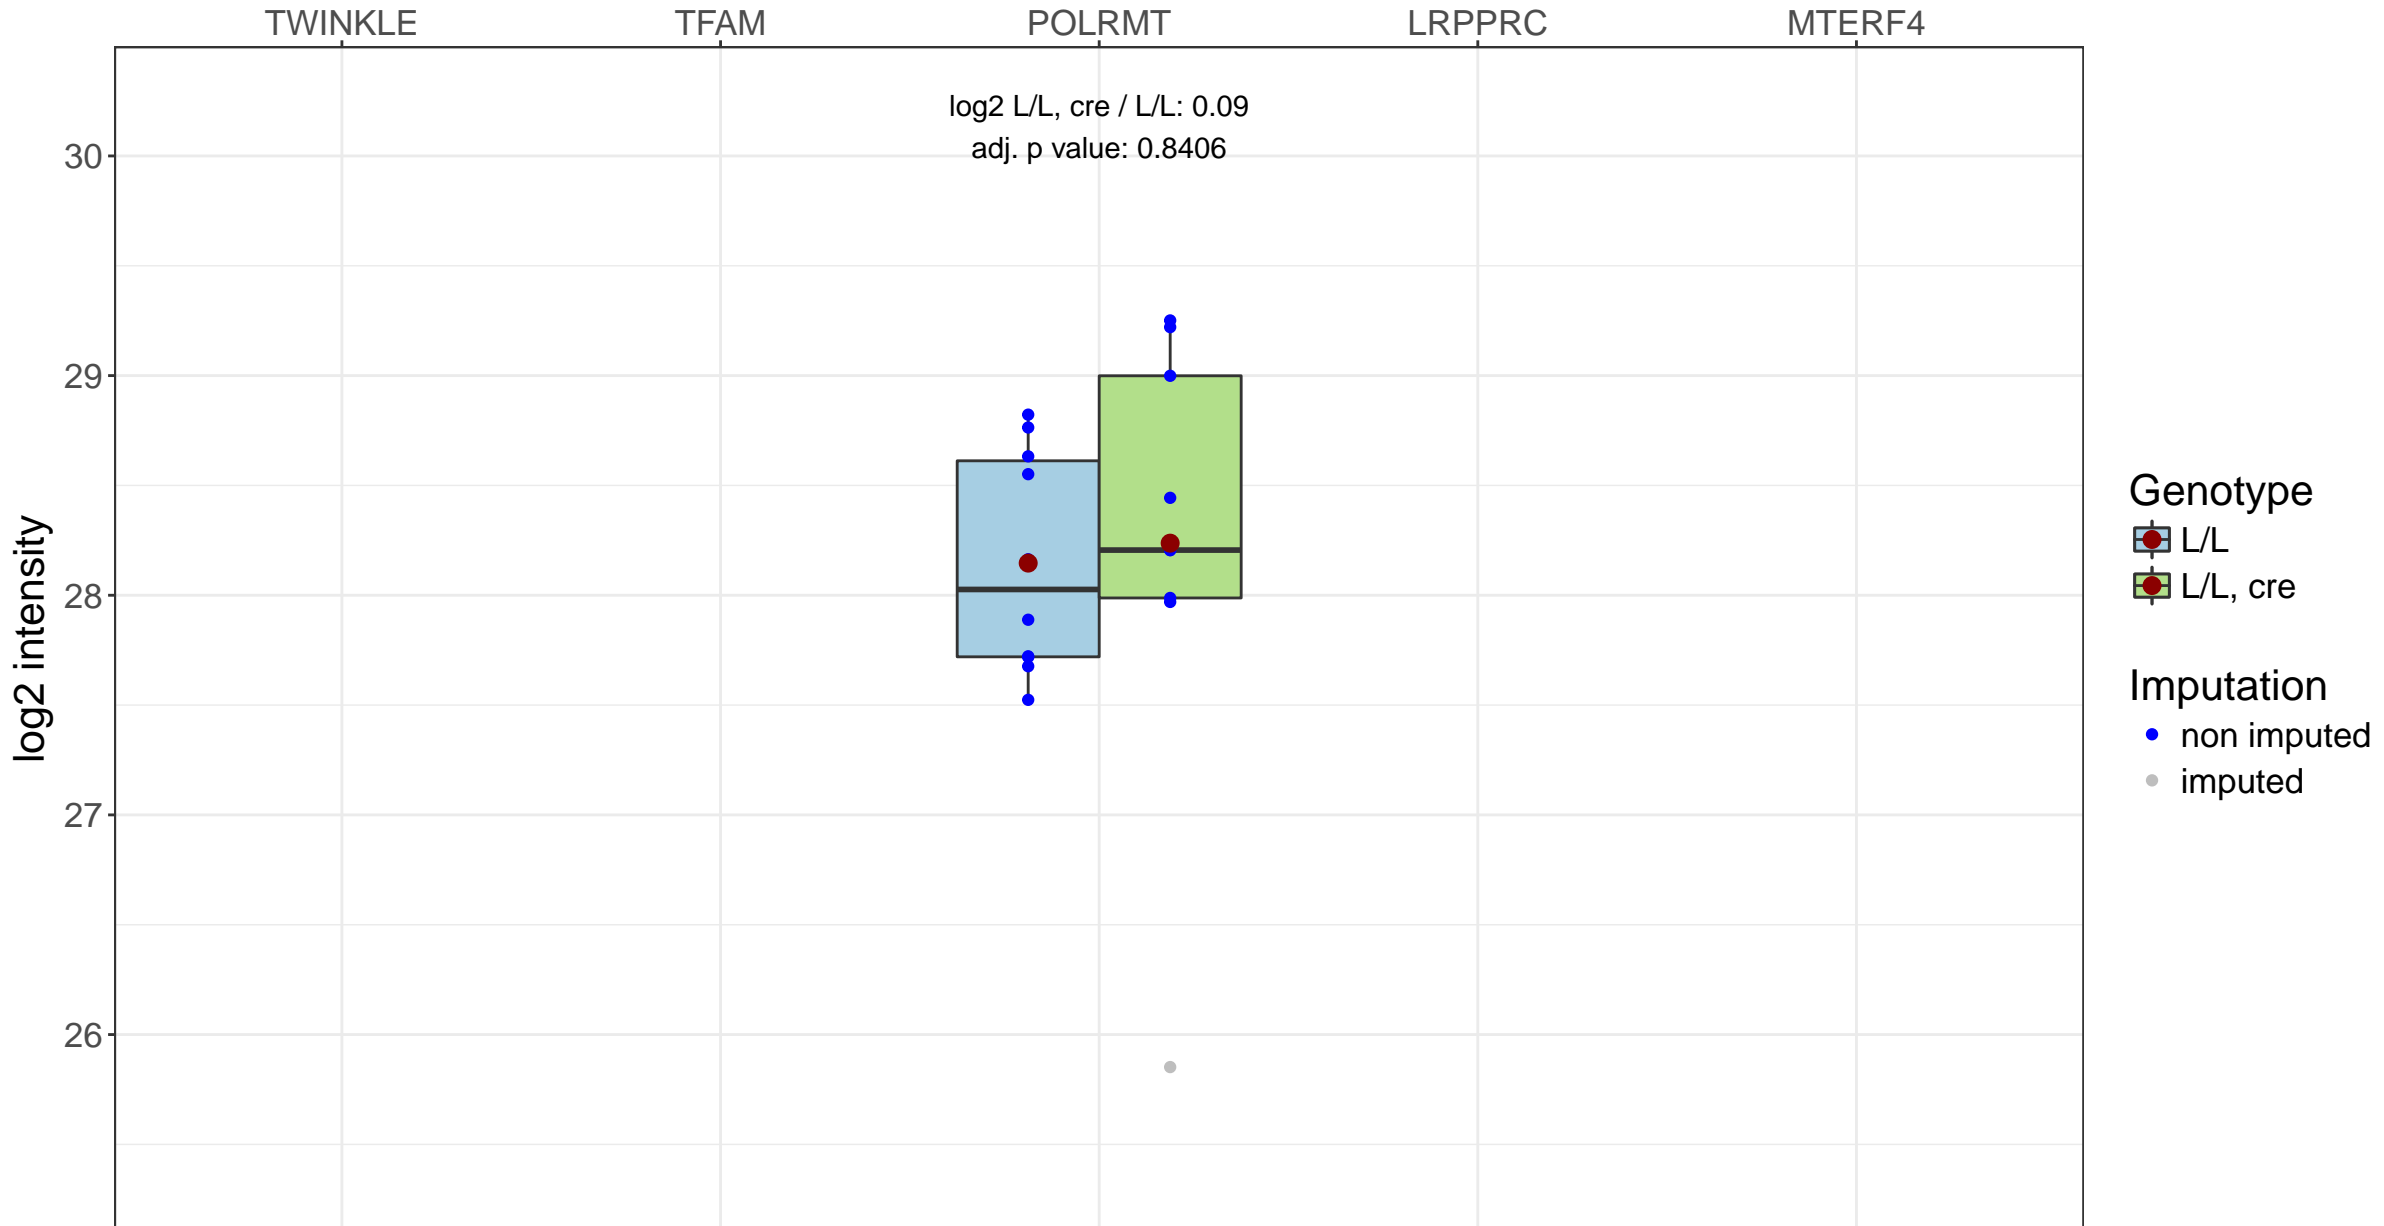

# RPL14 / Q9CR57

TWINKLE

TFAM

POLRMT

LRPPRC

MTERF4

log<sub>2</sub> intensity

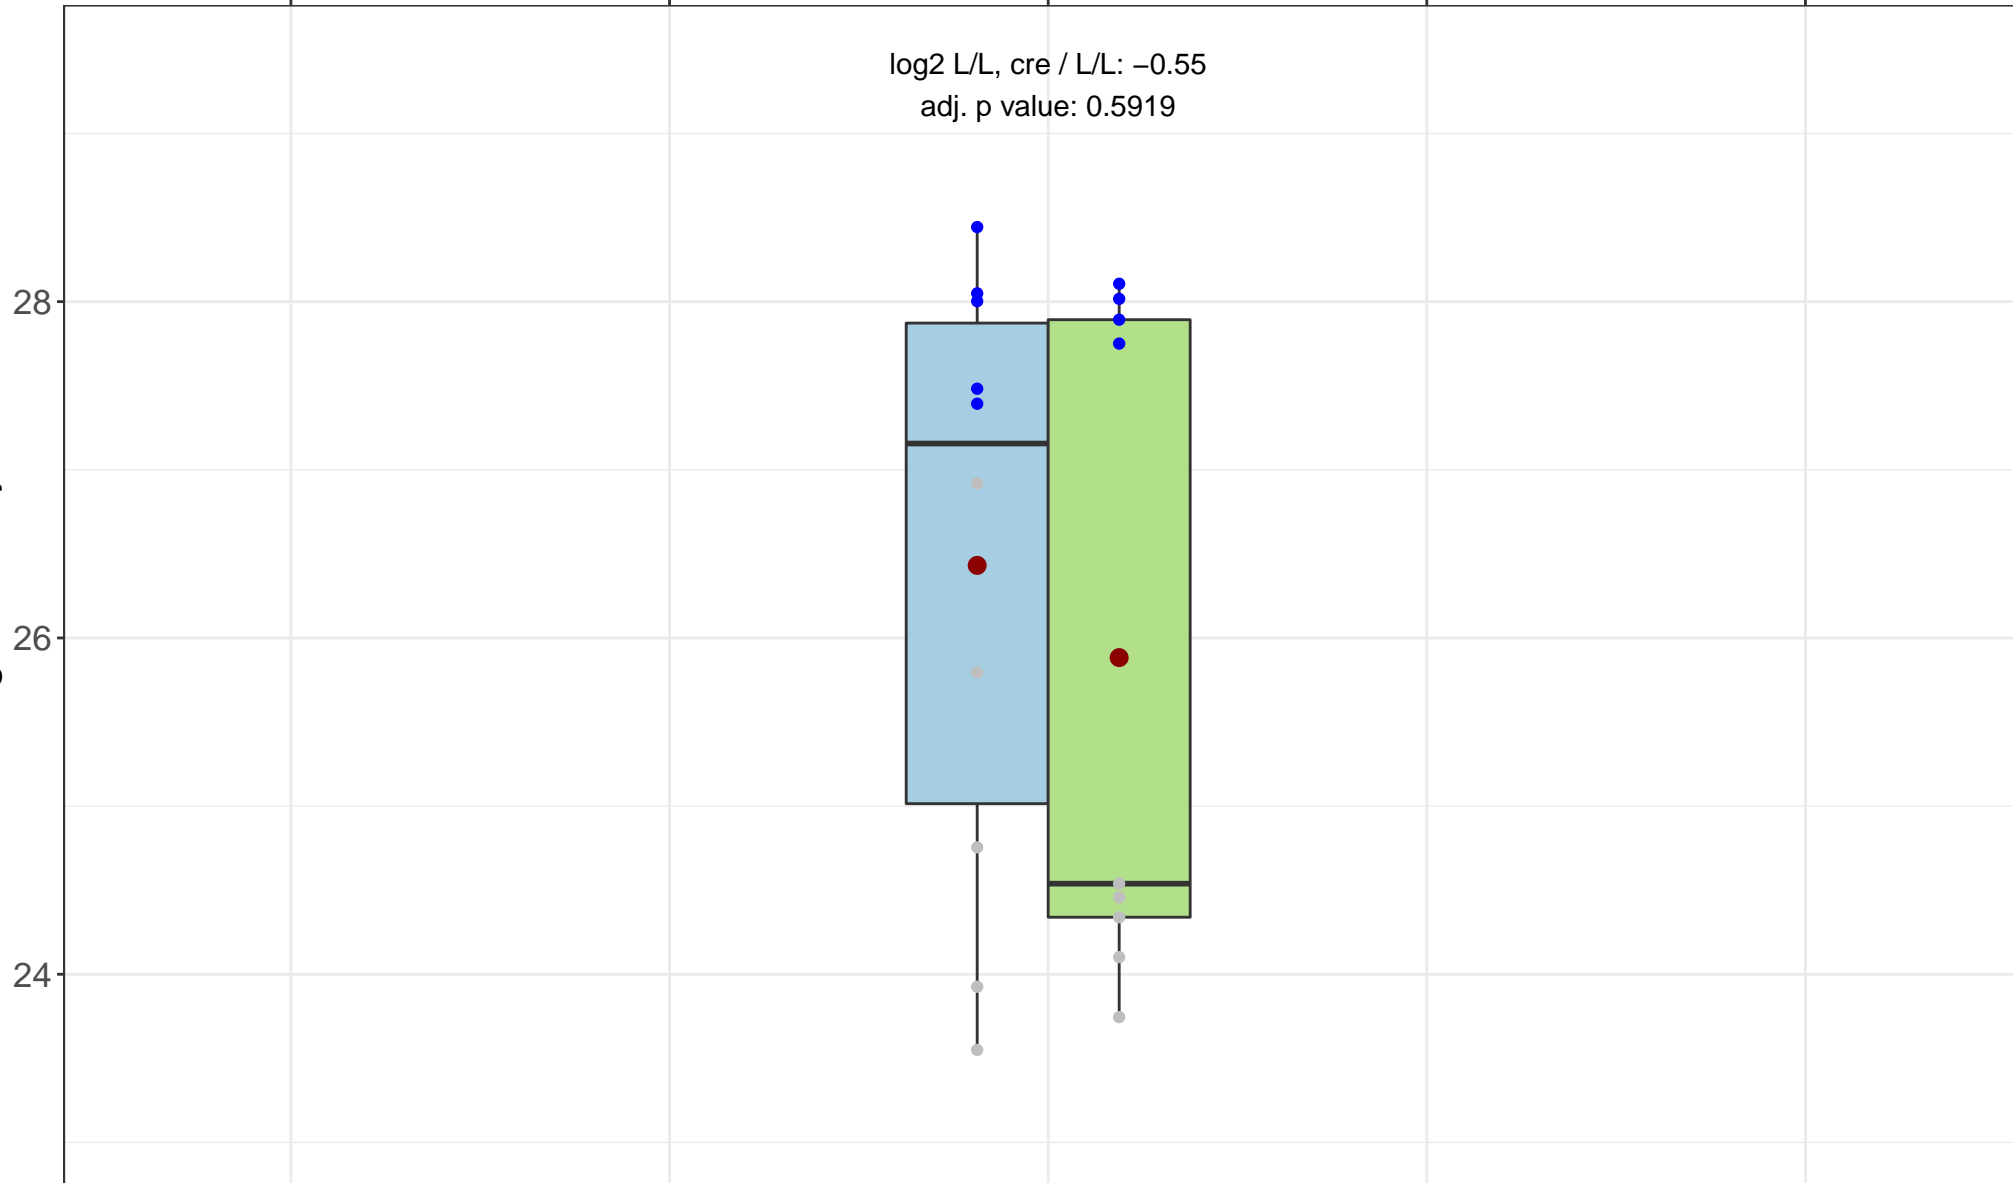

Genotype

L/L

L/L, cre

Imputation

non imputed

imputed

# RPL17 / Q6ZWZ7

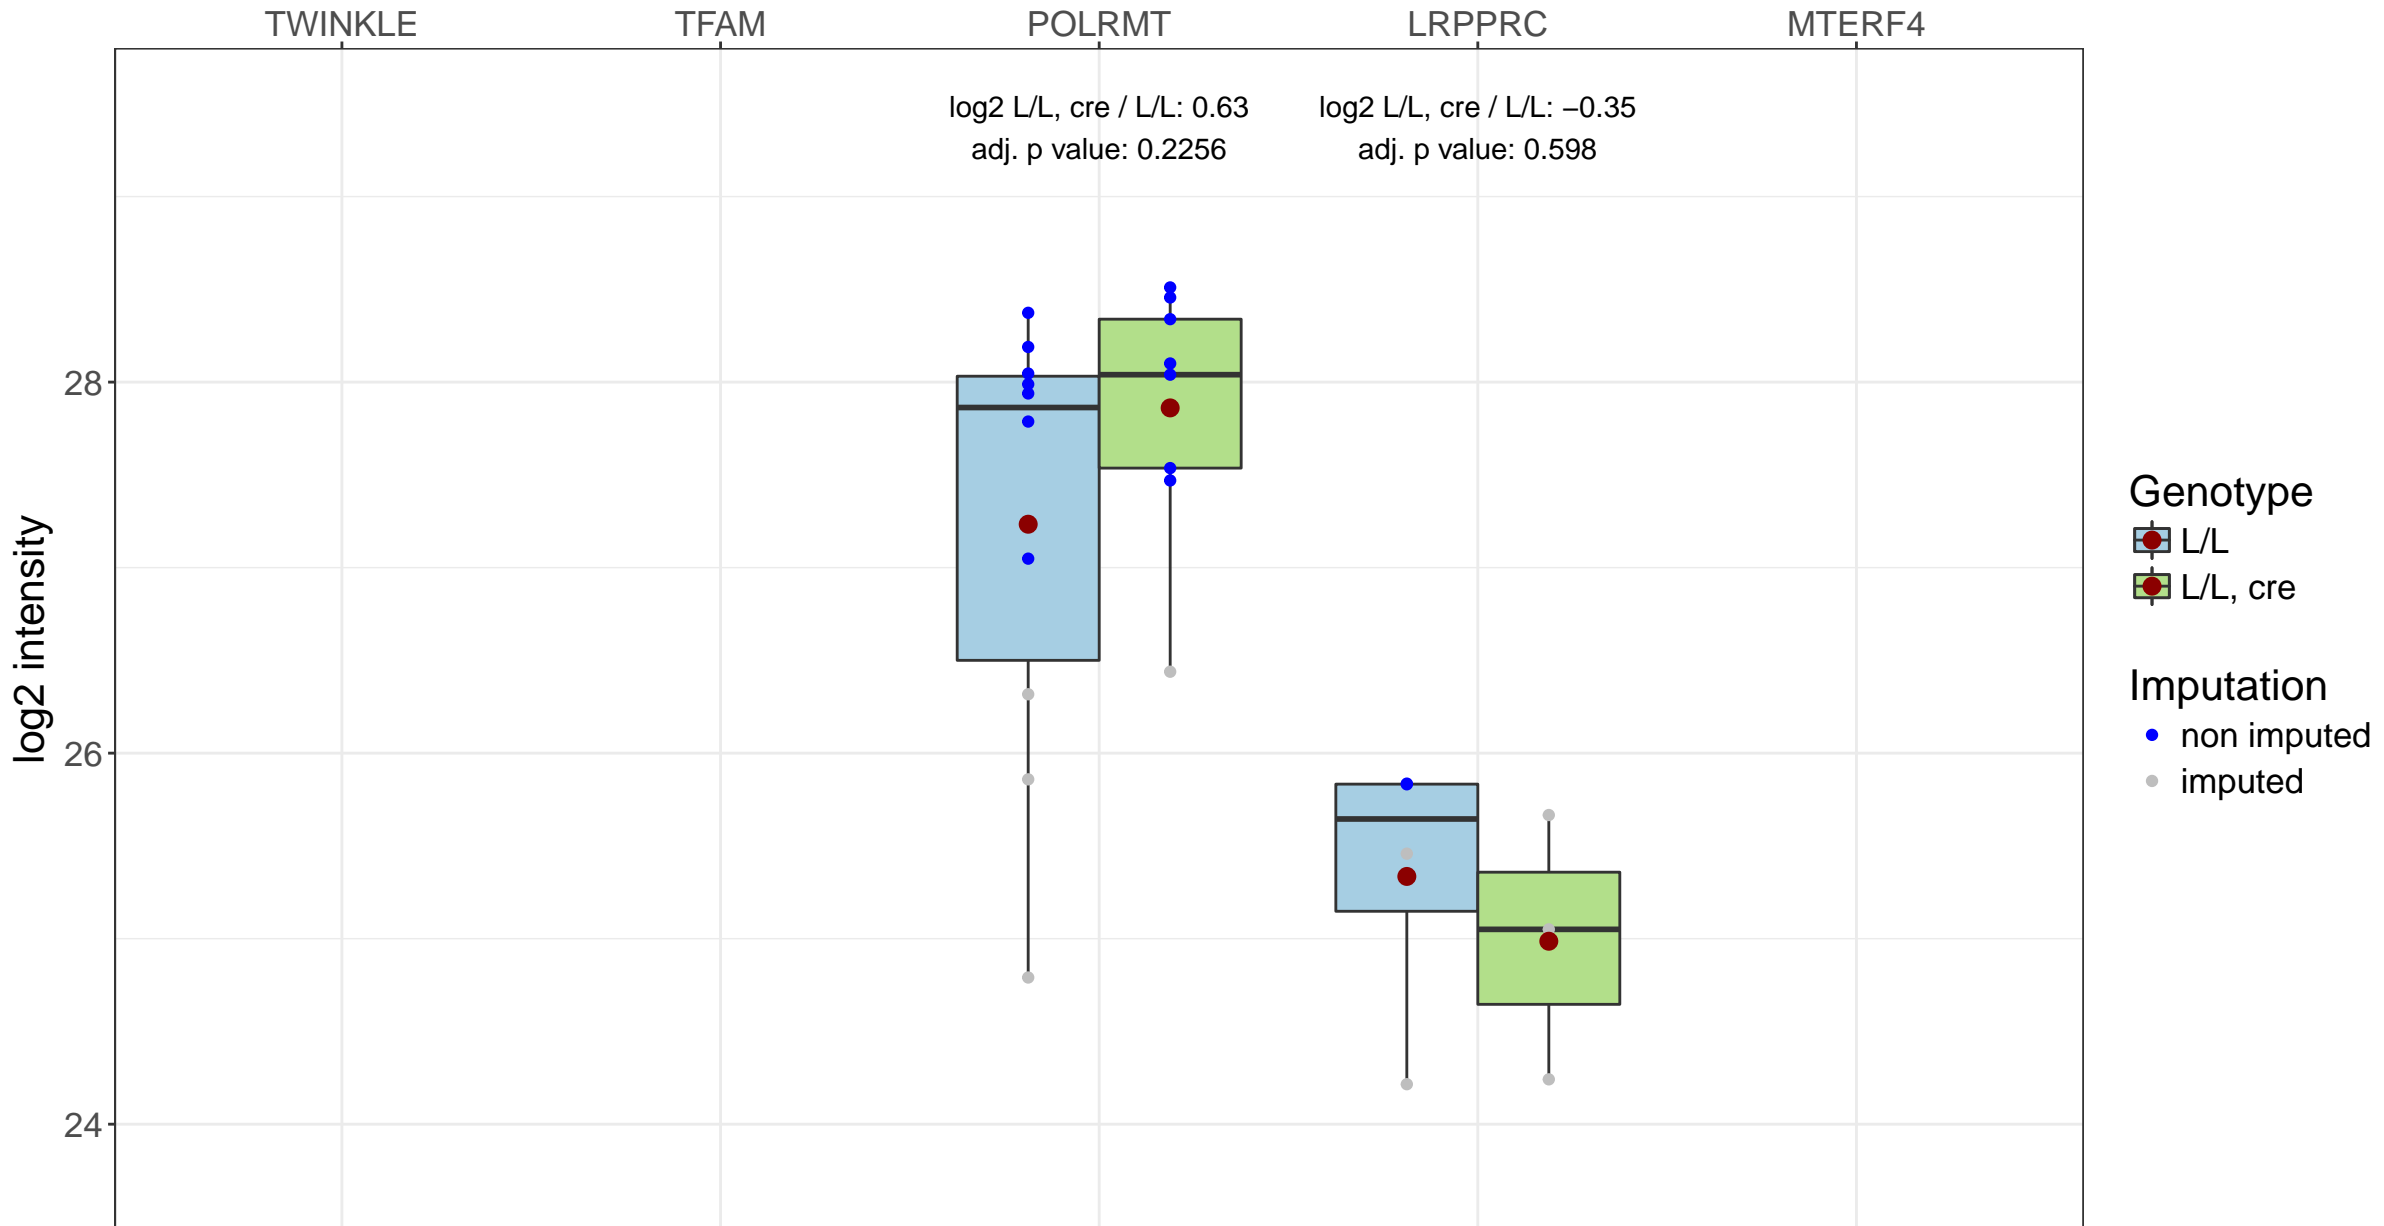

# RPL18 / P35980

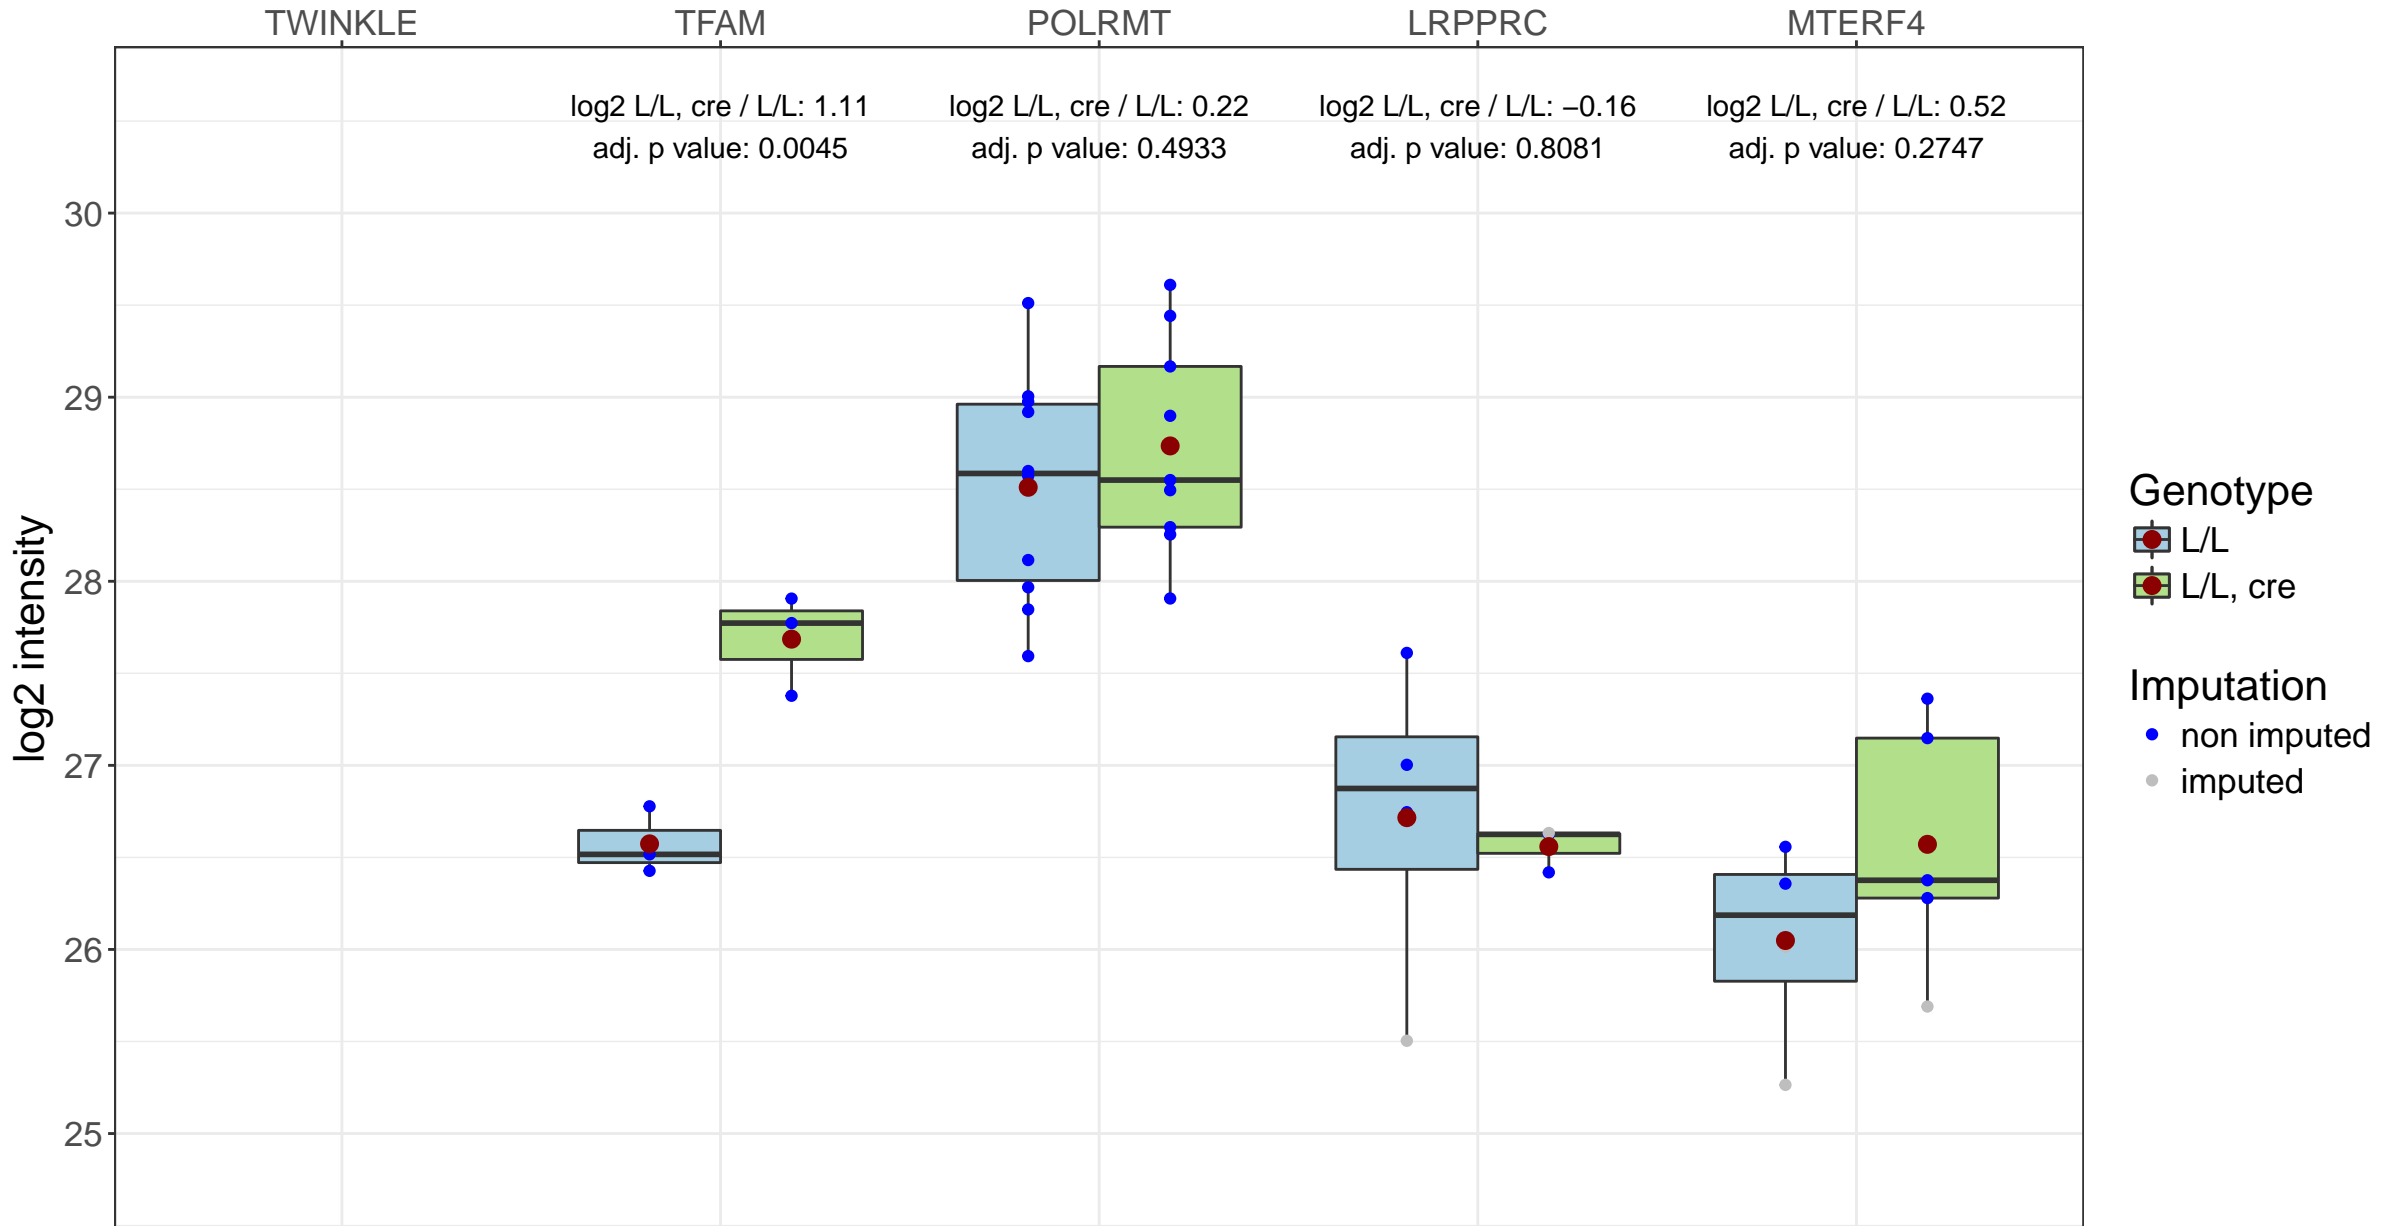

# RPL18A / P62717

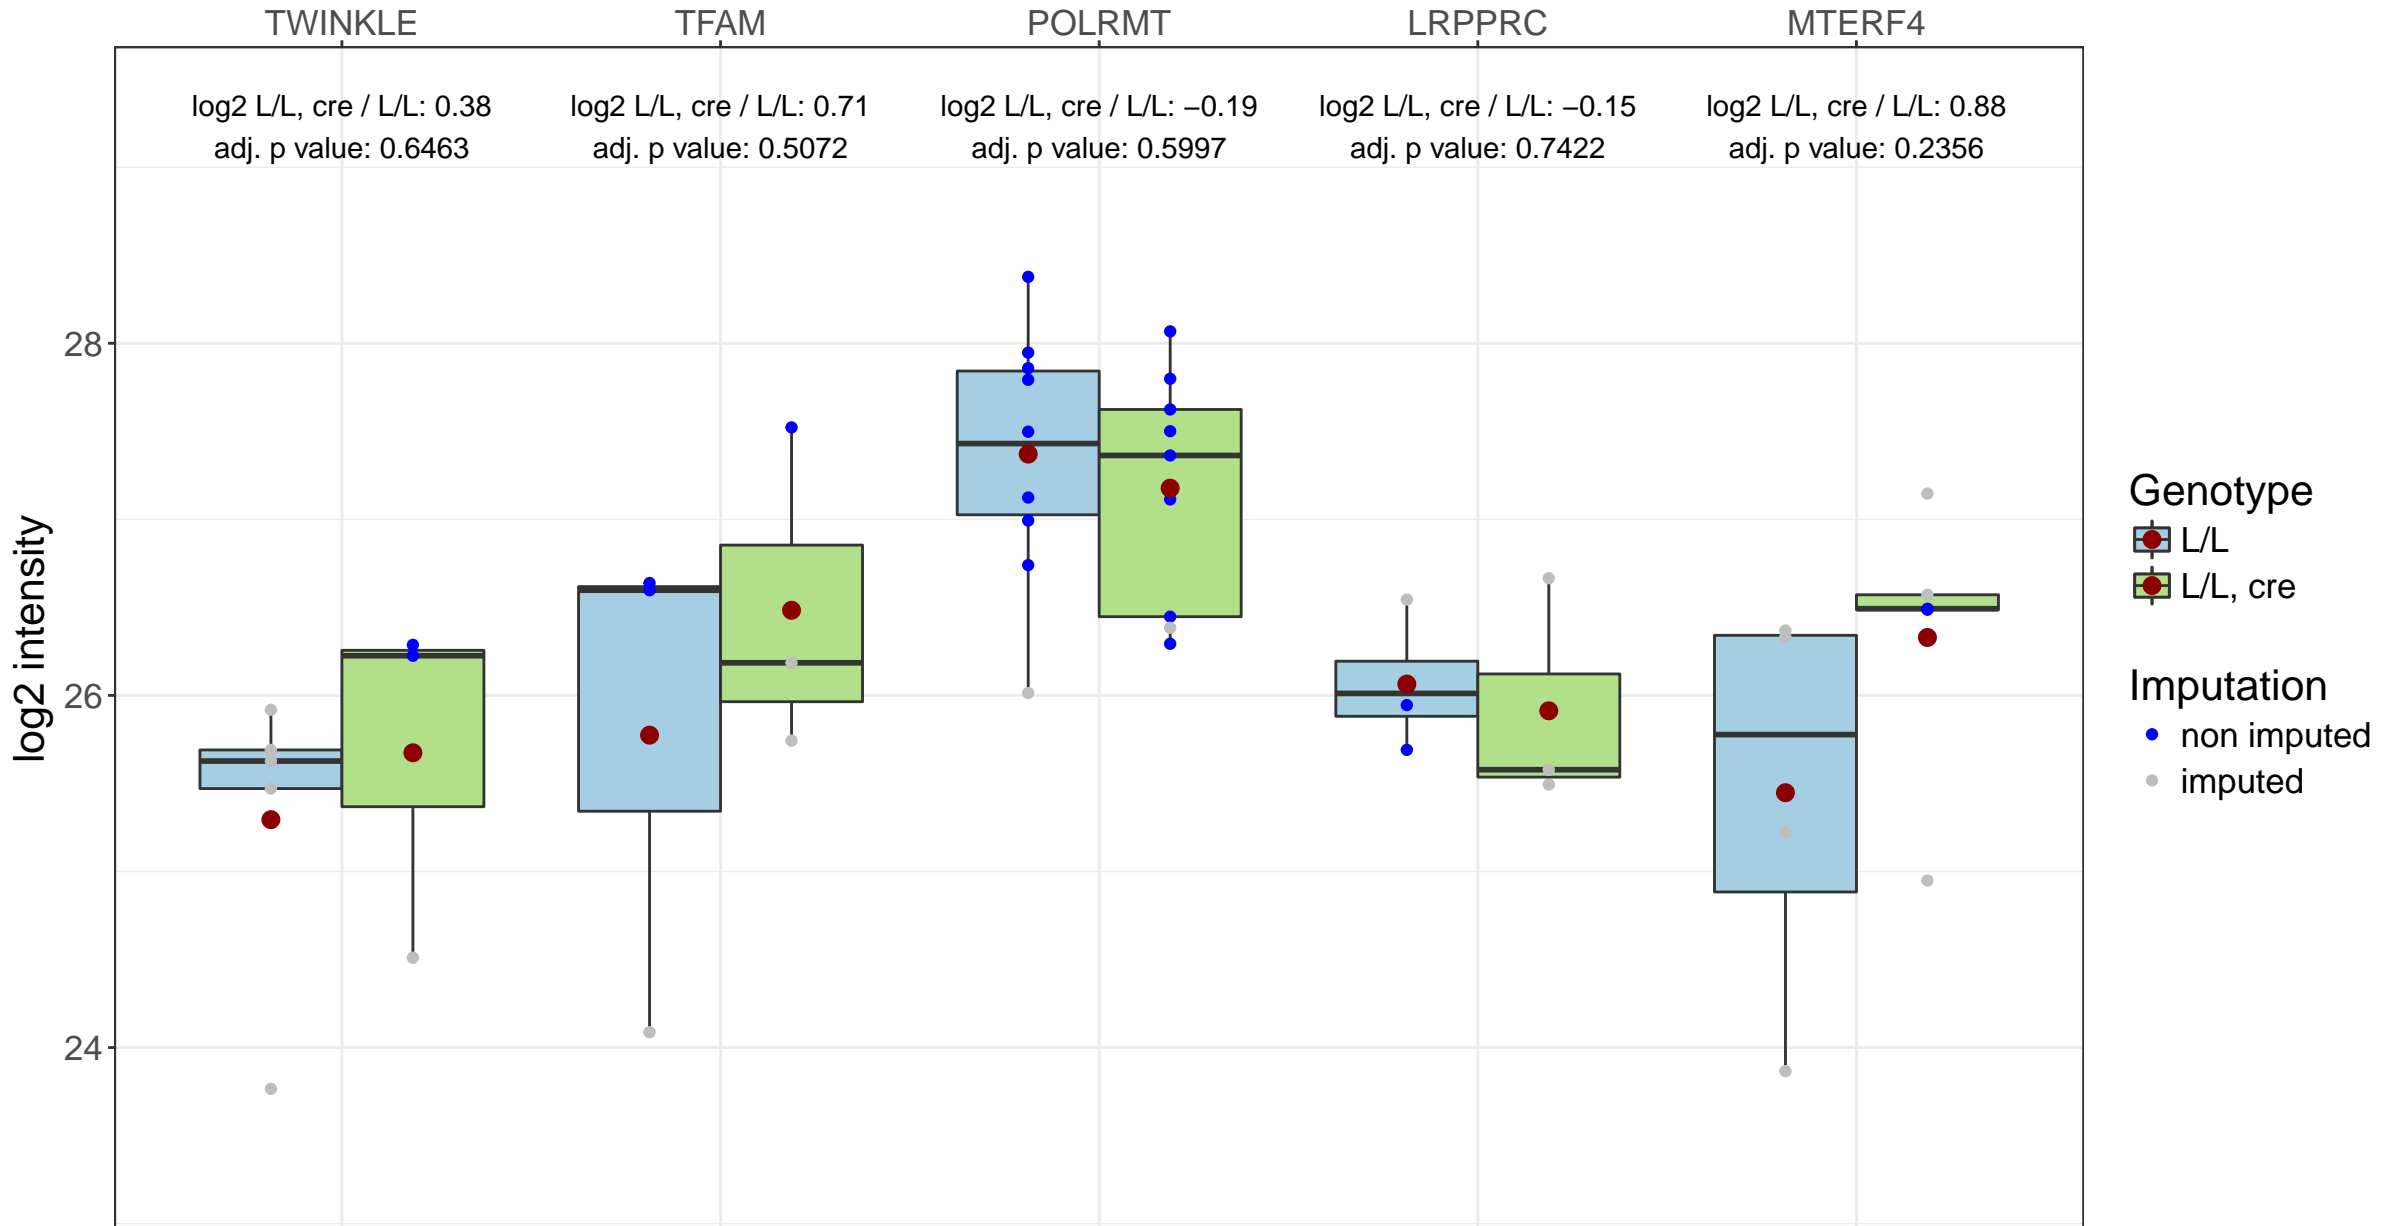

# RPL19 / A2A547

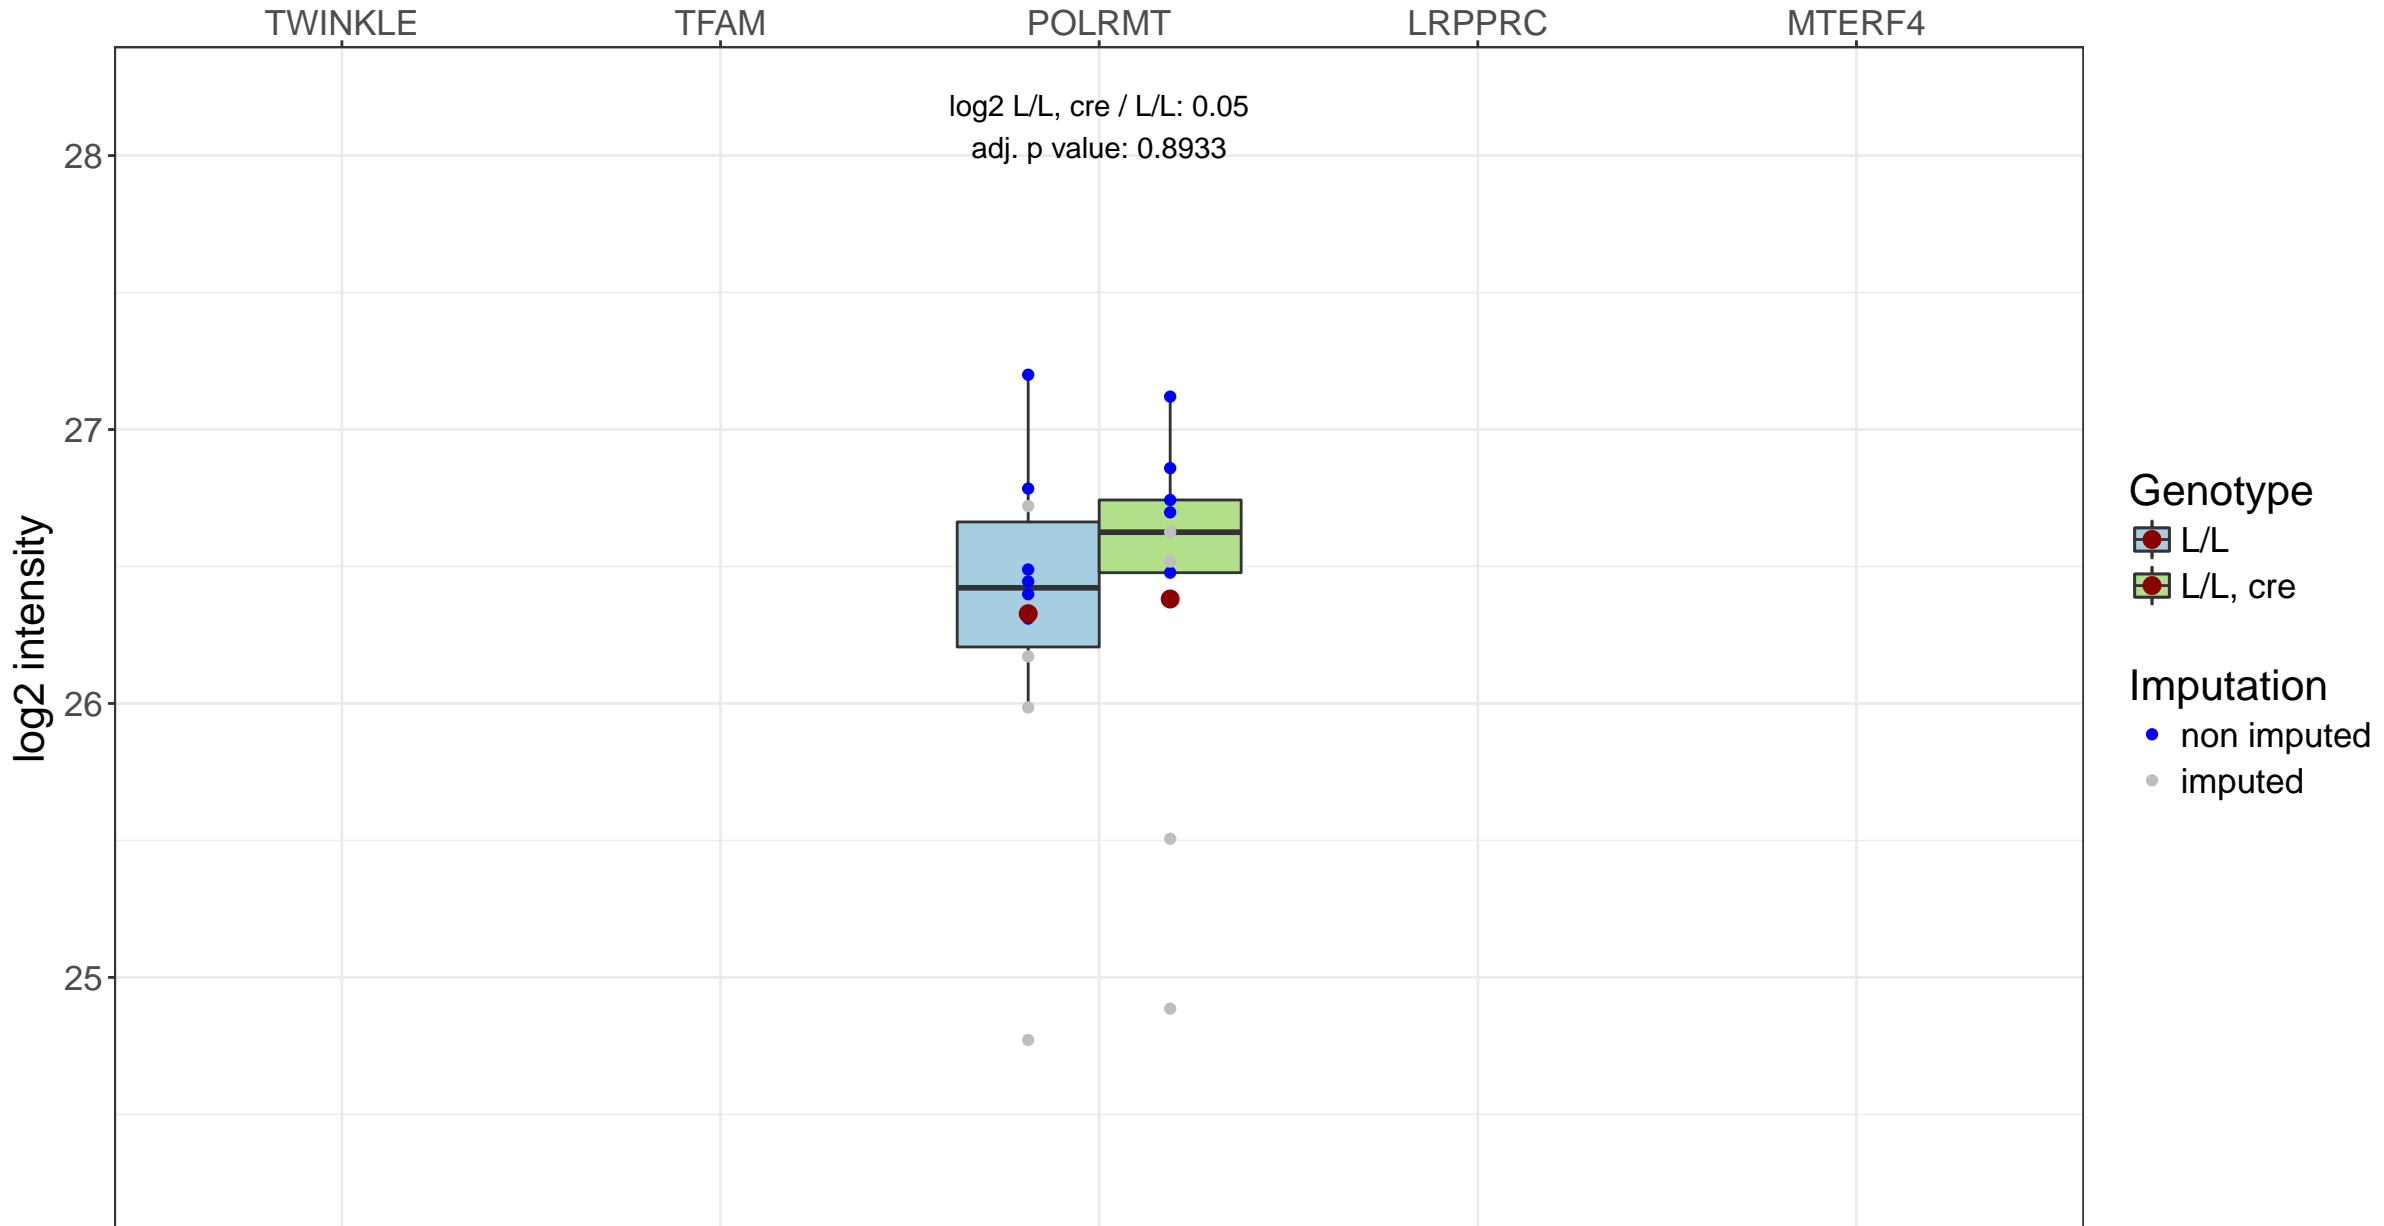

# RPL22 / P67984

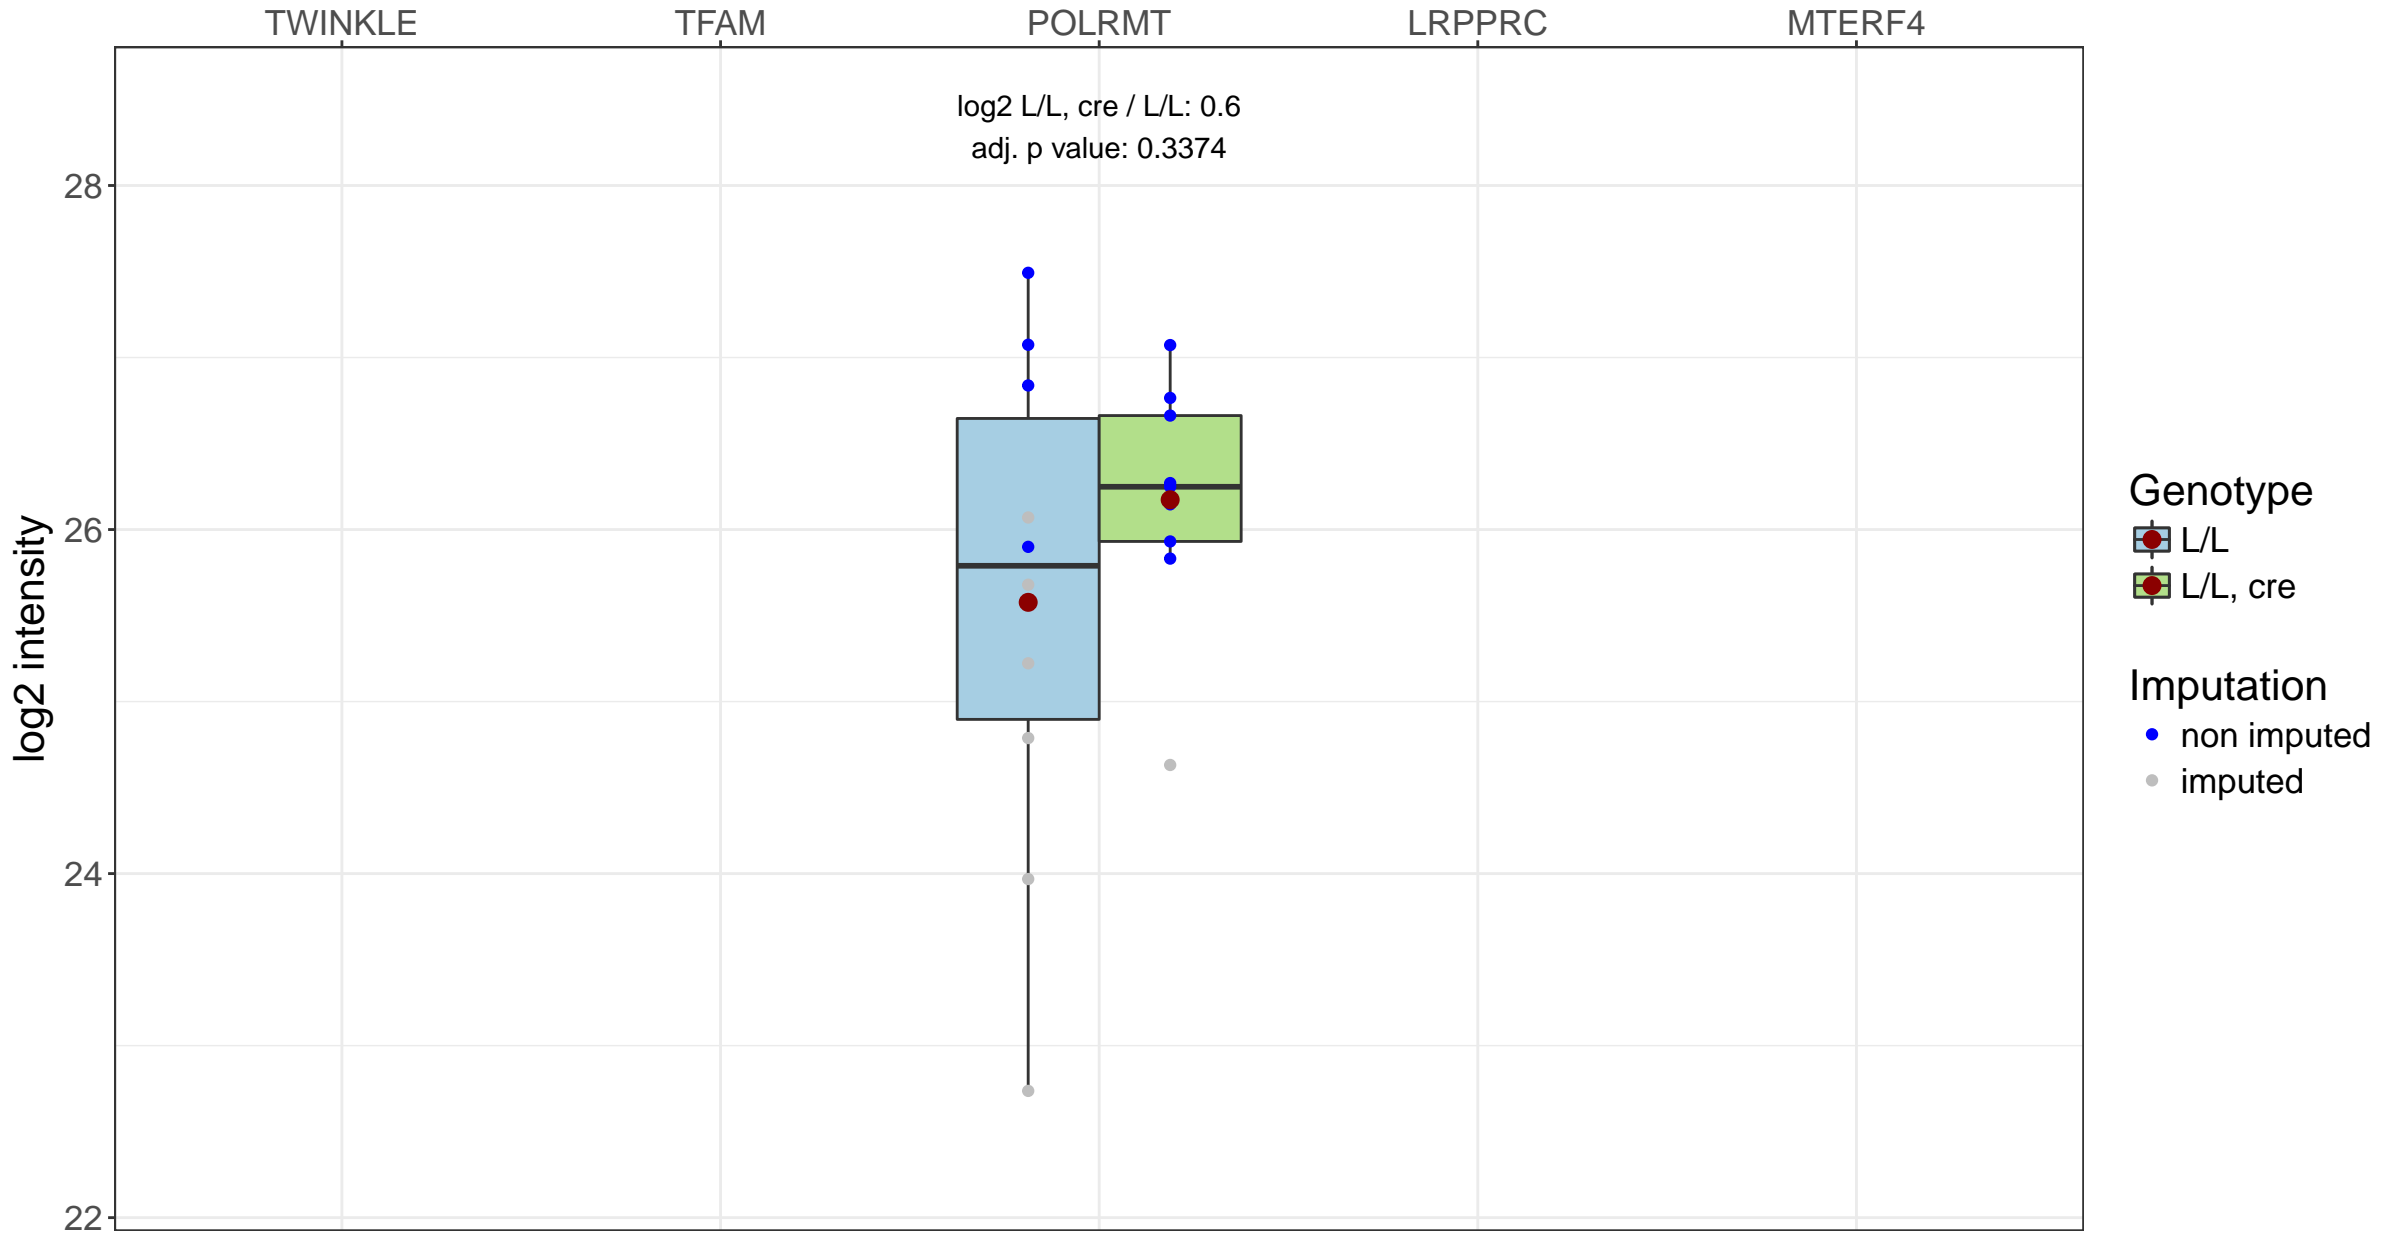



# RPL23 / P62830

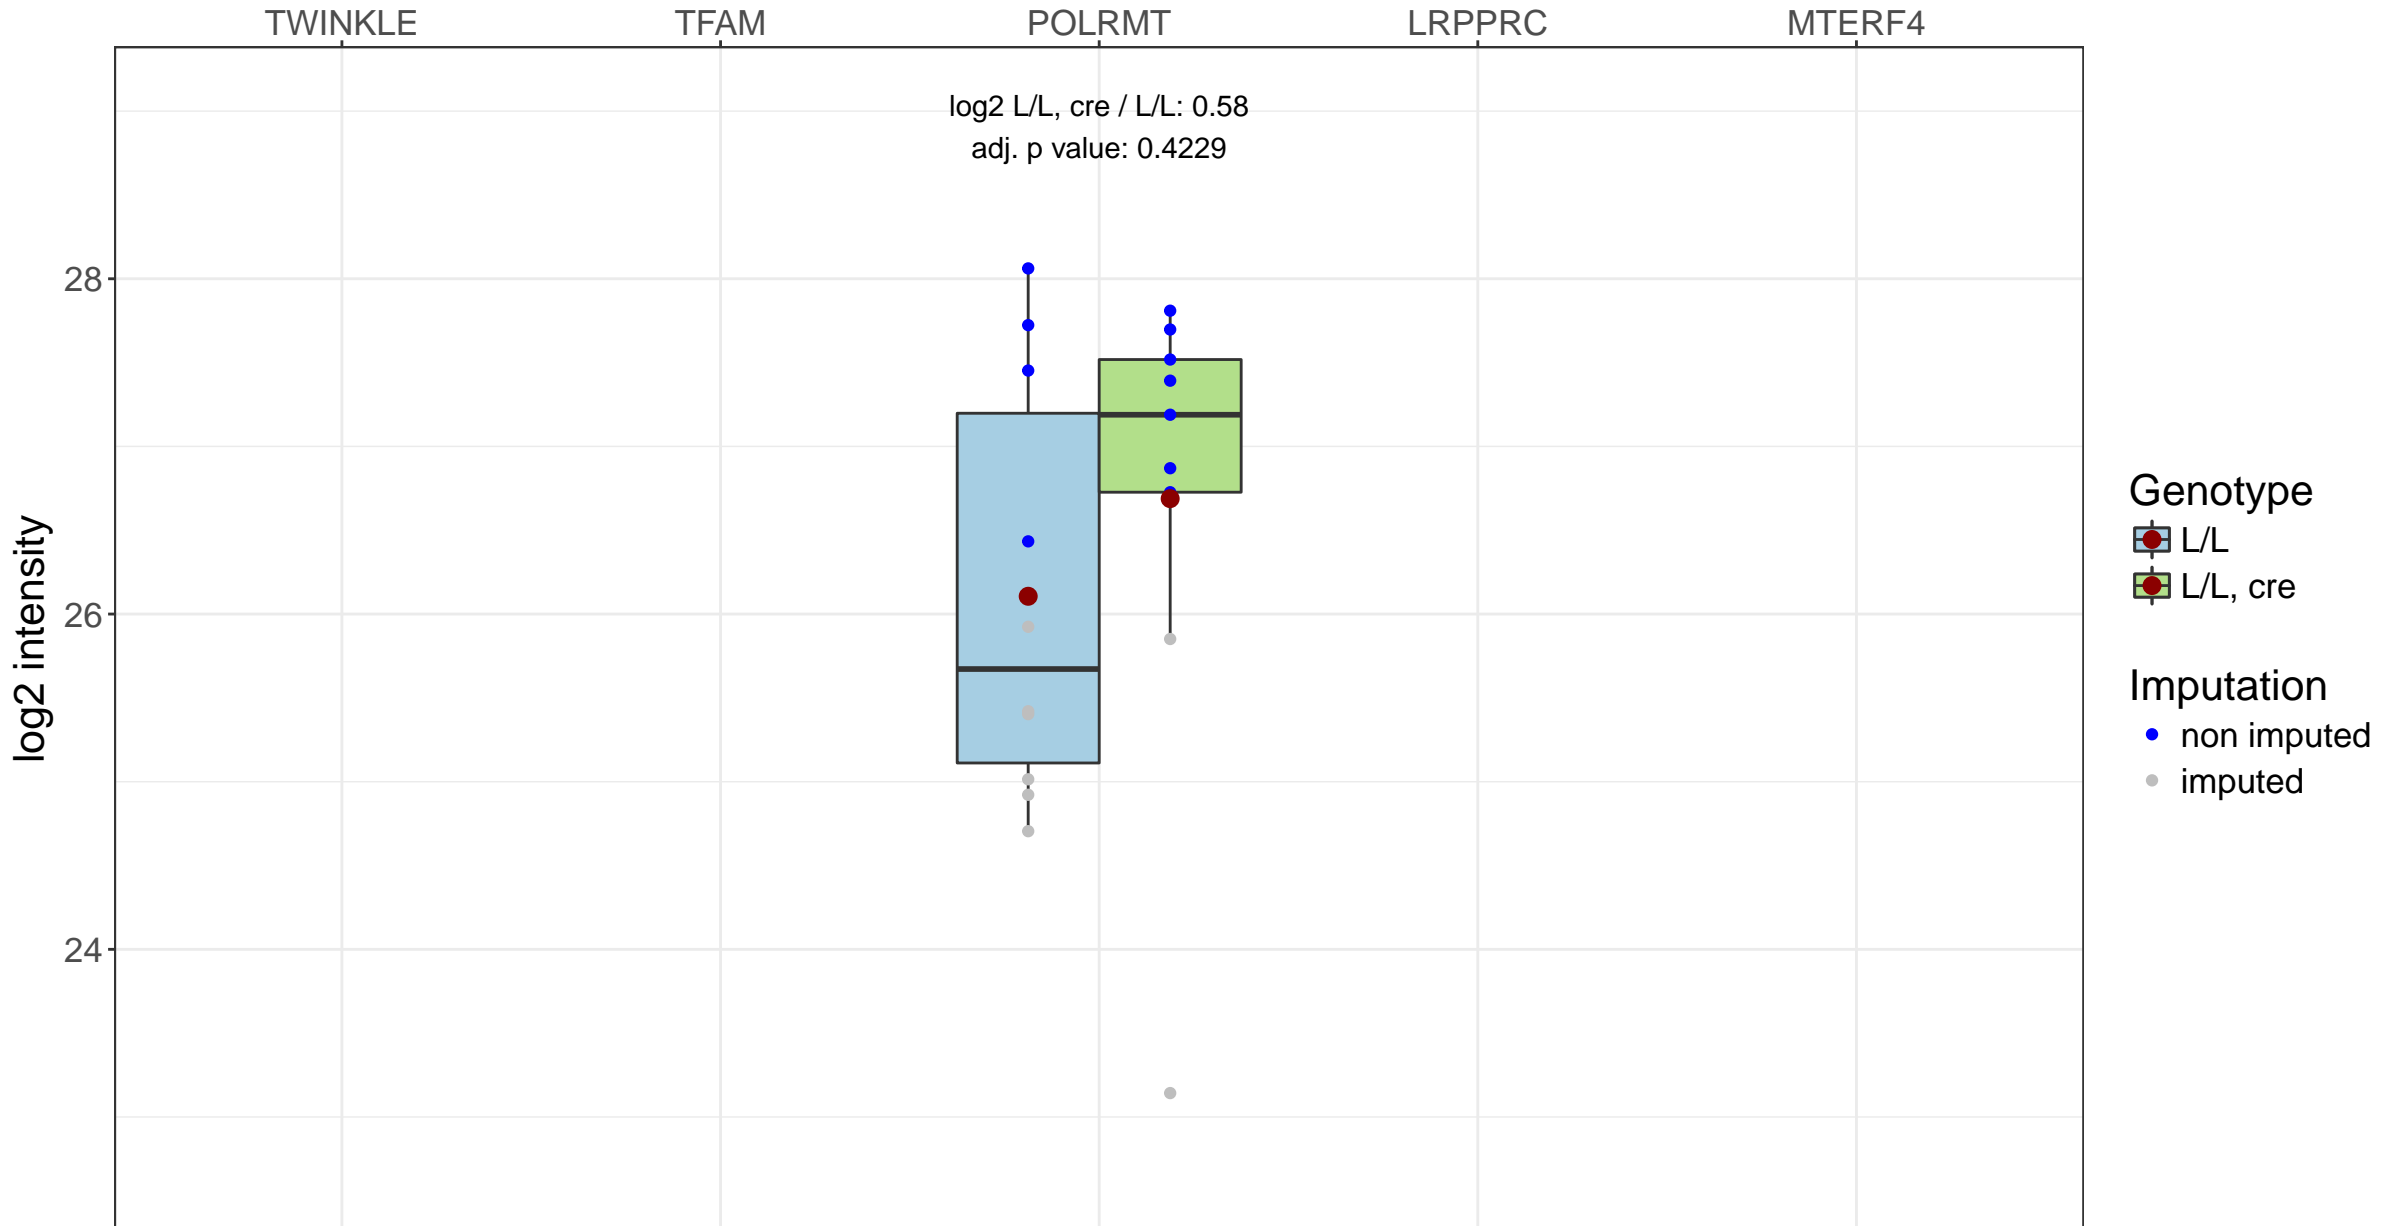

# RPL24 / Q8BP67

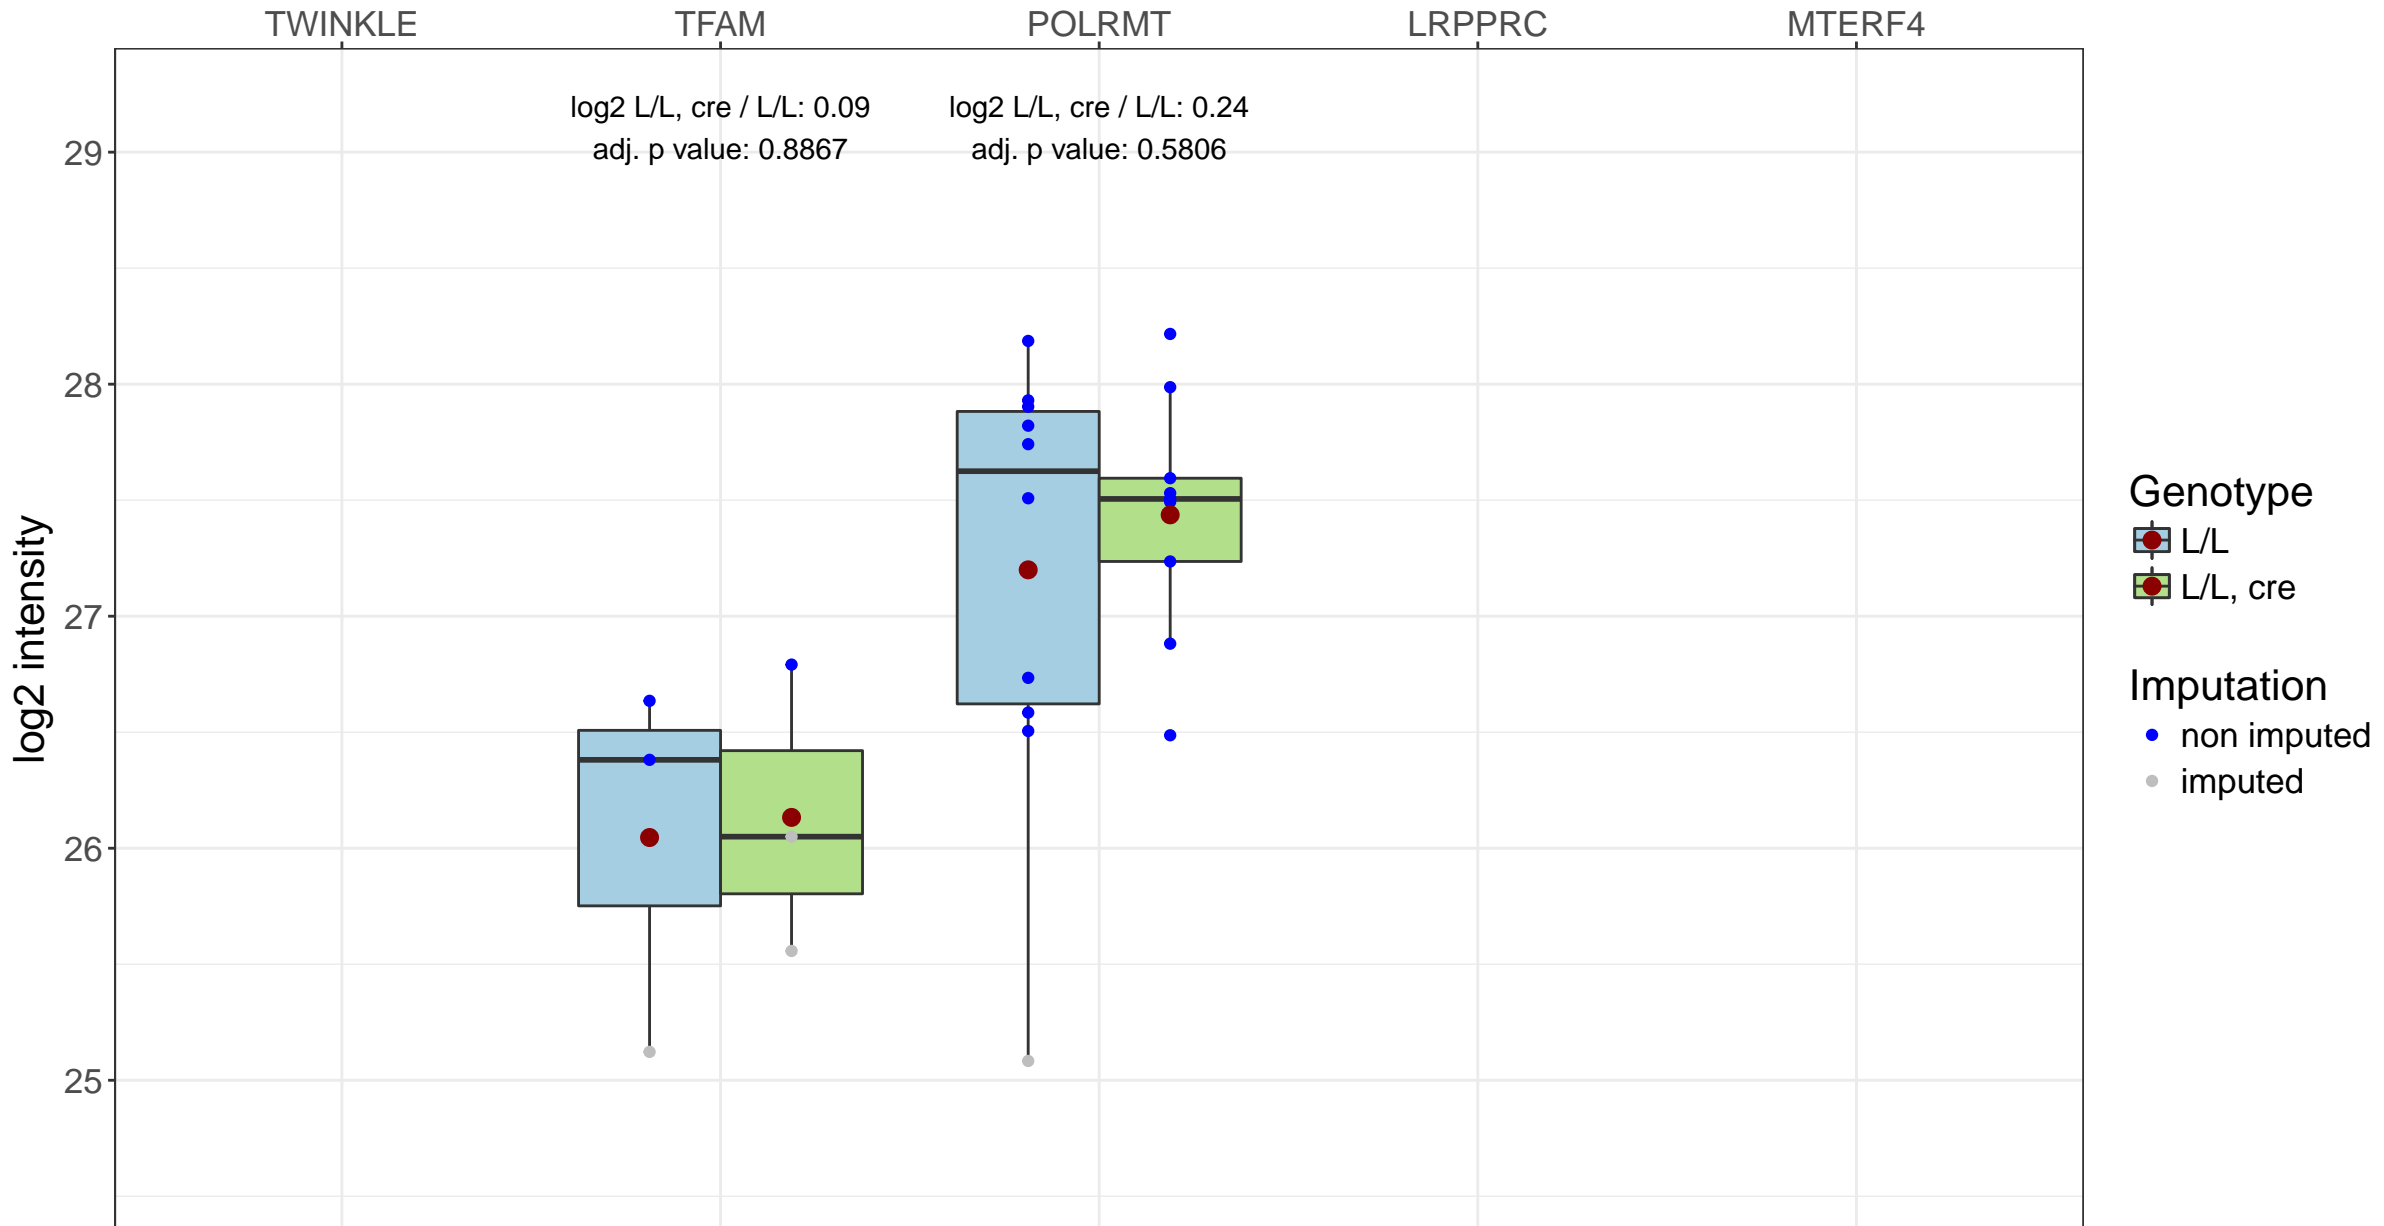

# RPL26 / P61255

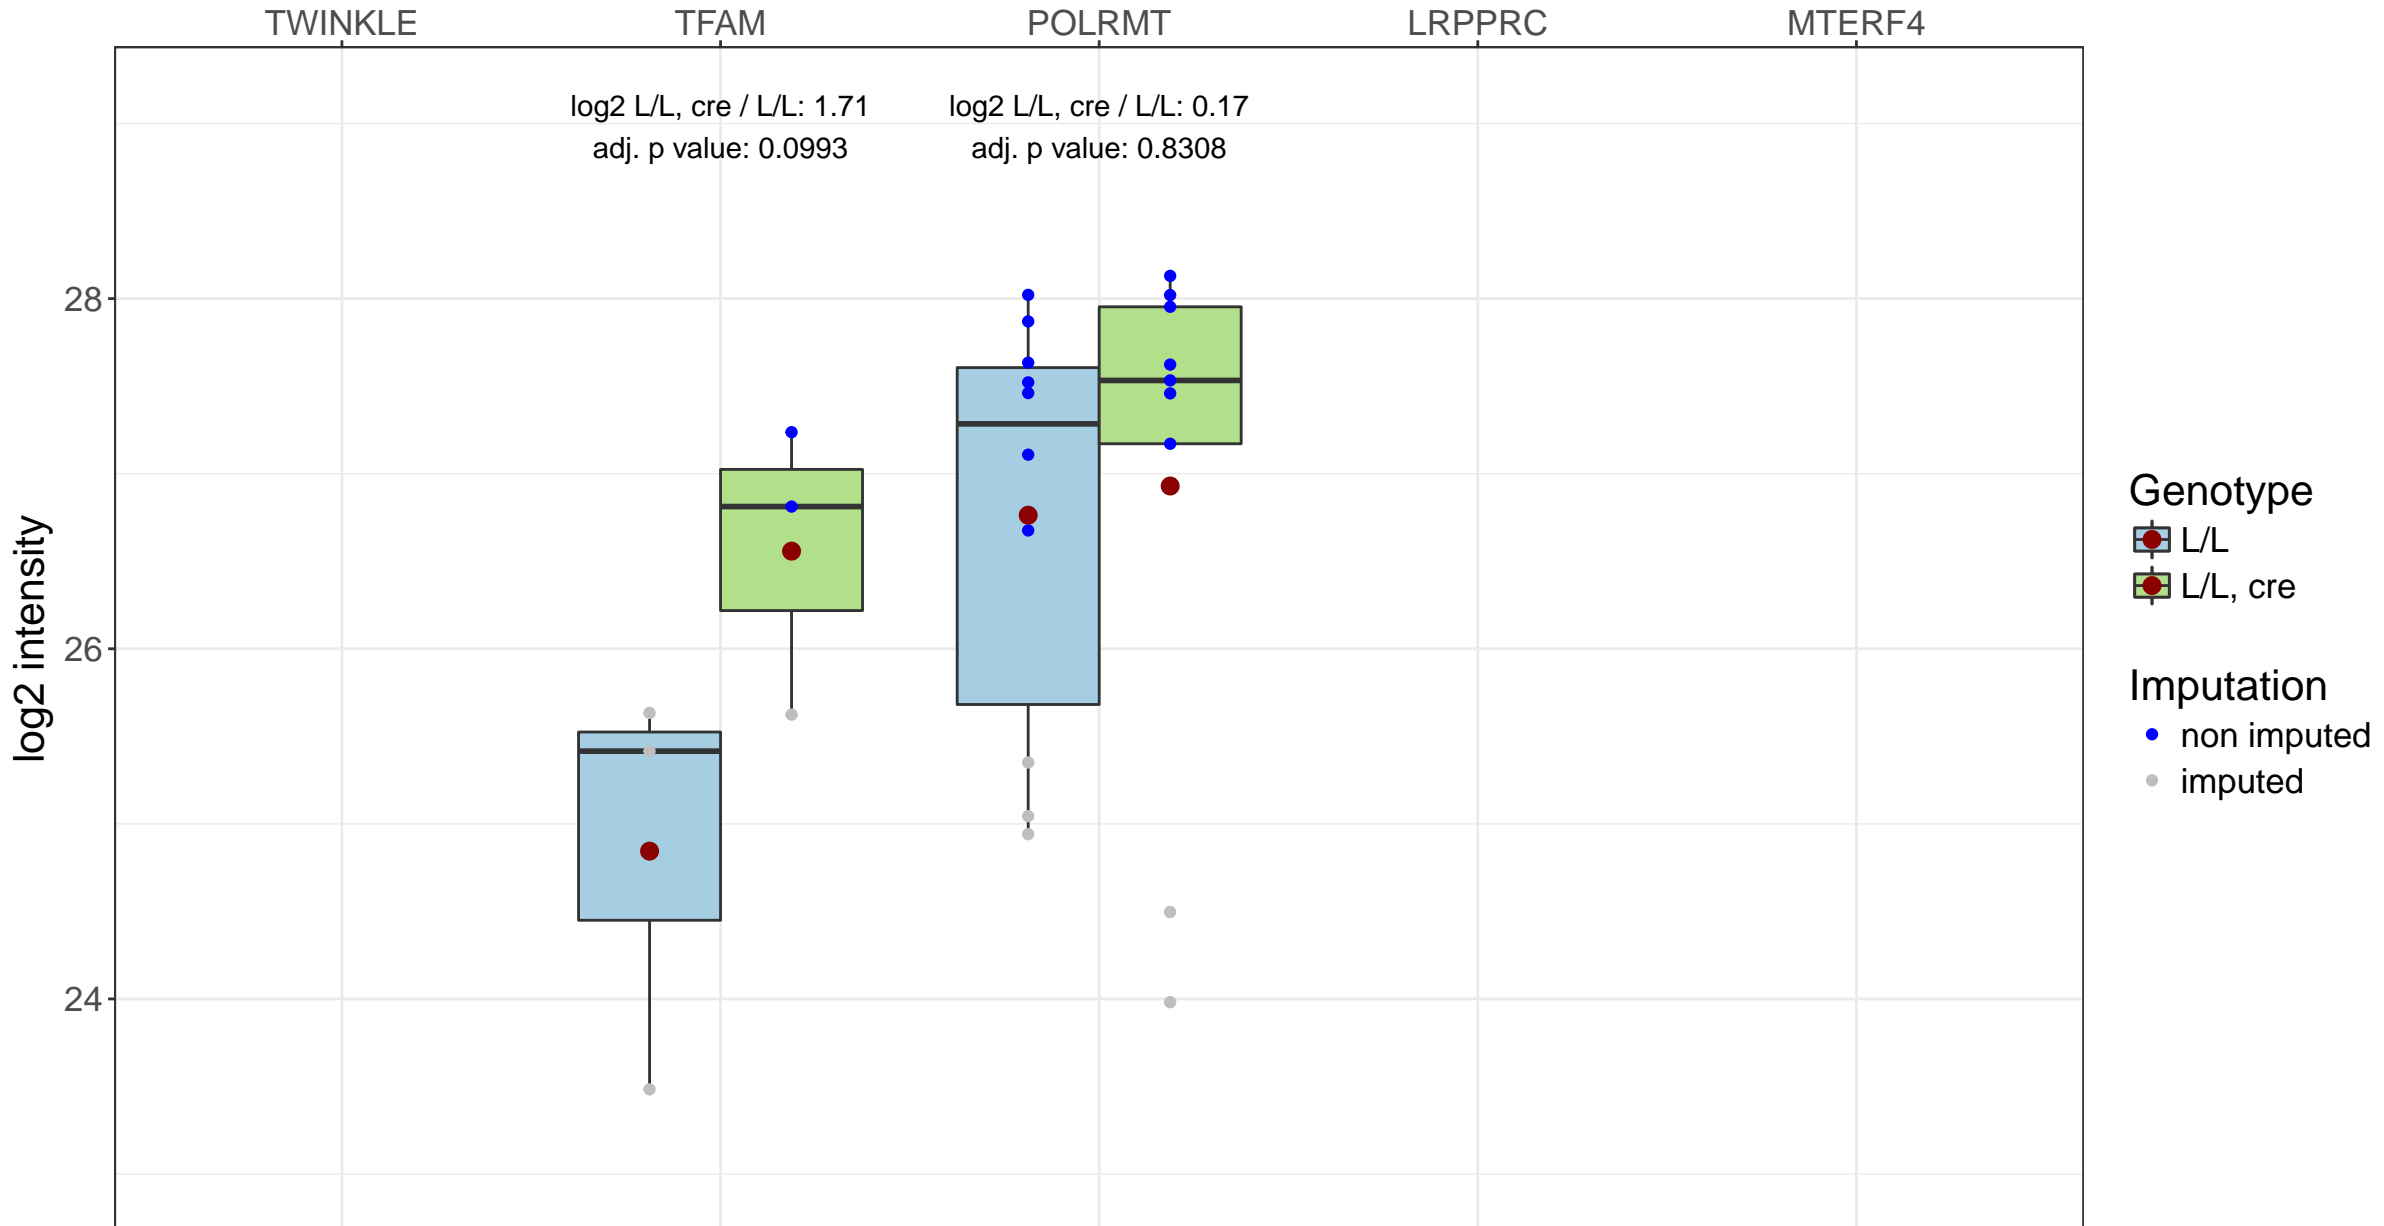

# RPL27A / P14115

TWINKLE

TFAM

POLRMT

LRPPRC

MTERF4

log2 L/L, cre / L/L: 1.37  
adj. p value: 0.0685

log2 intensity

28

26

24

Genotype

L/L

L/L, cre

Imputation

non imputed

imputed

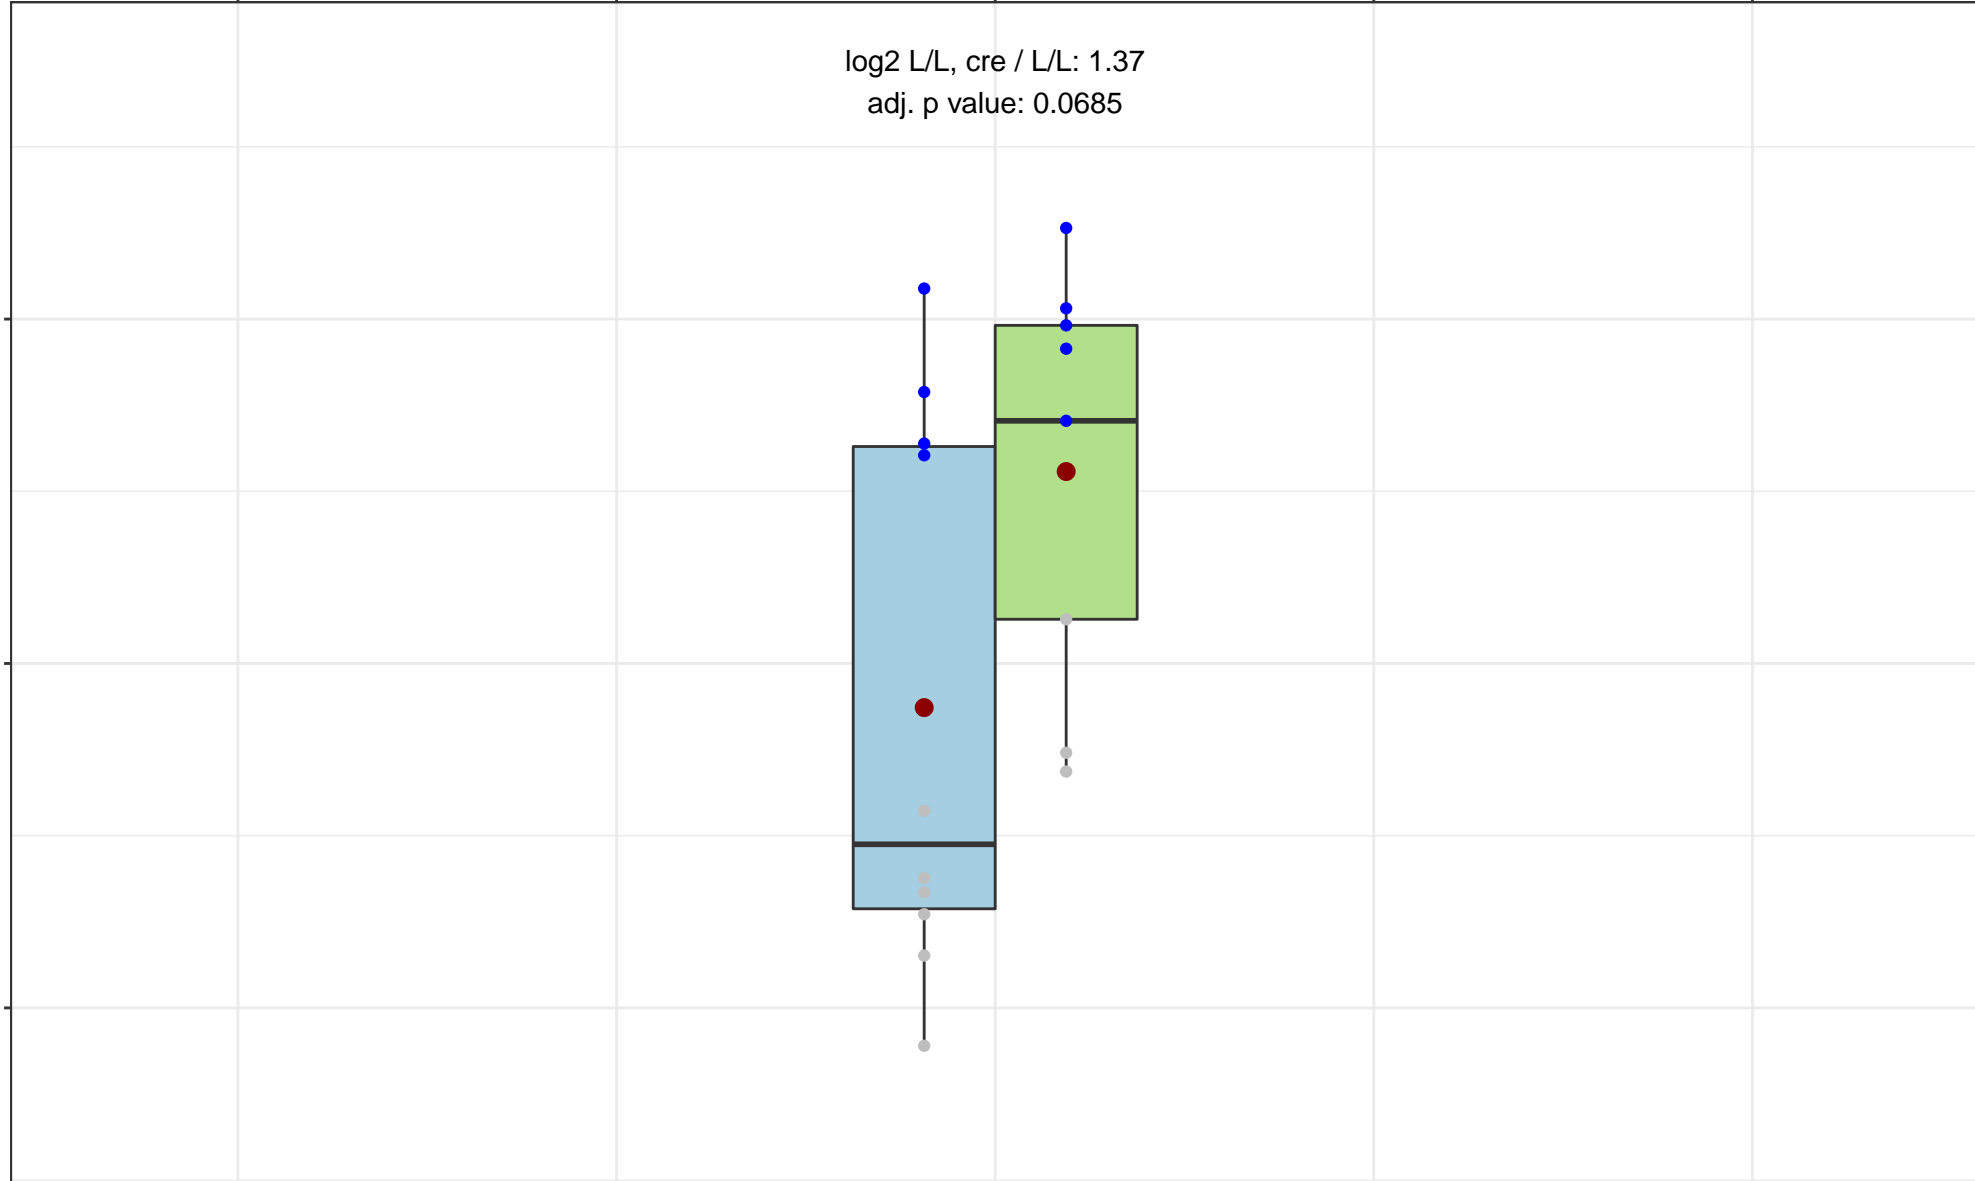

# RPL28 / P41105

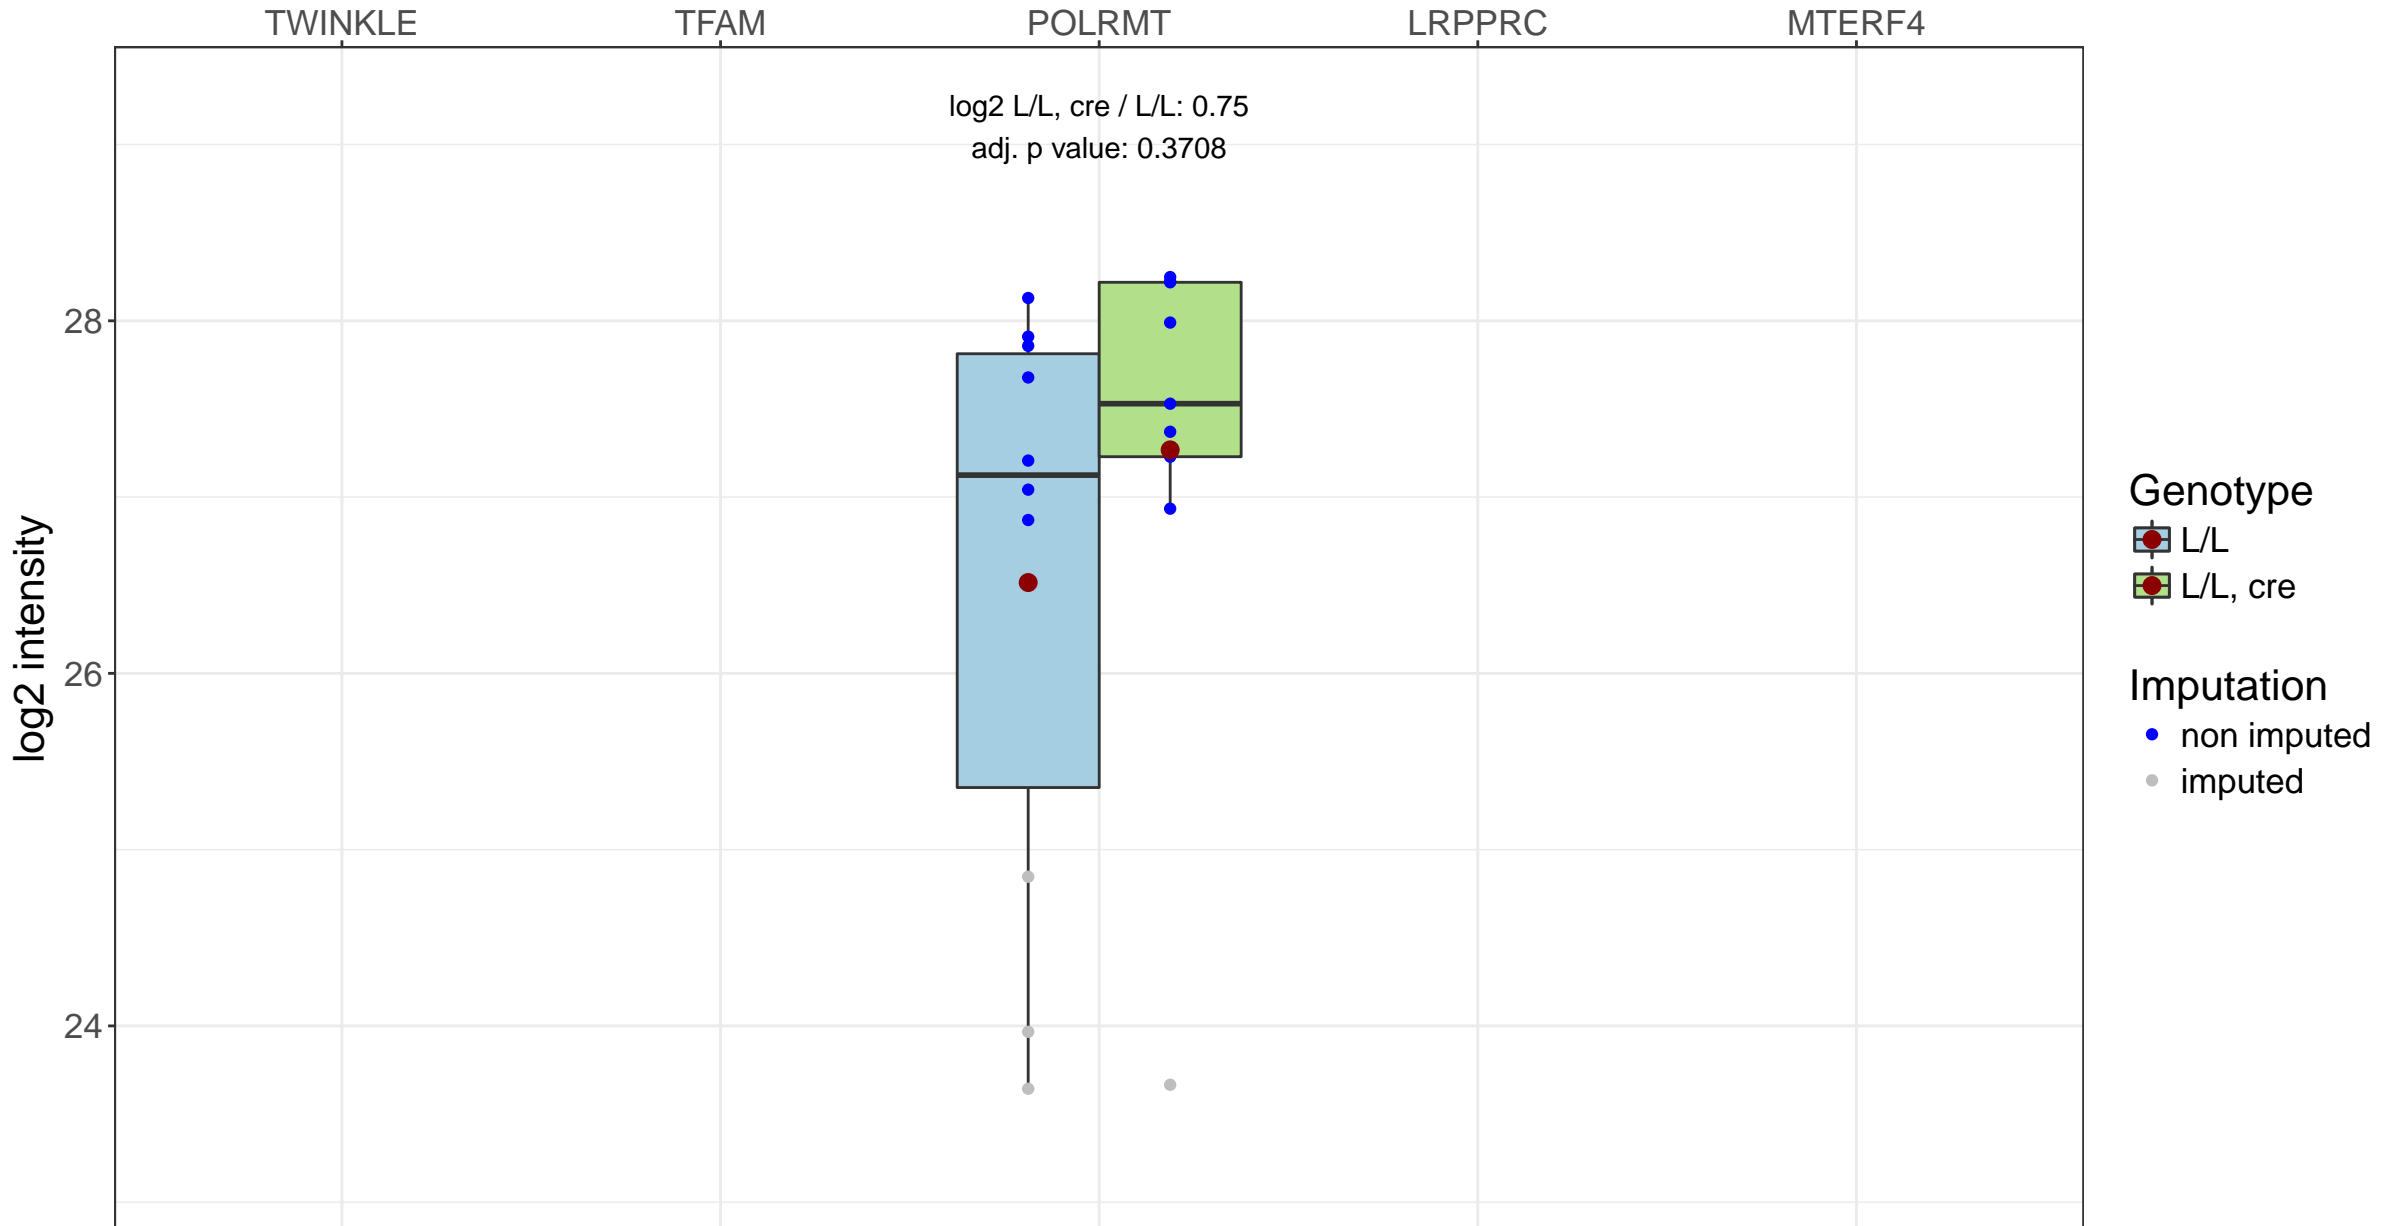

# RPL3 / P27659

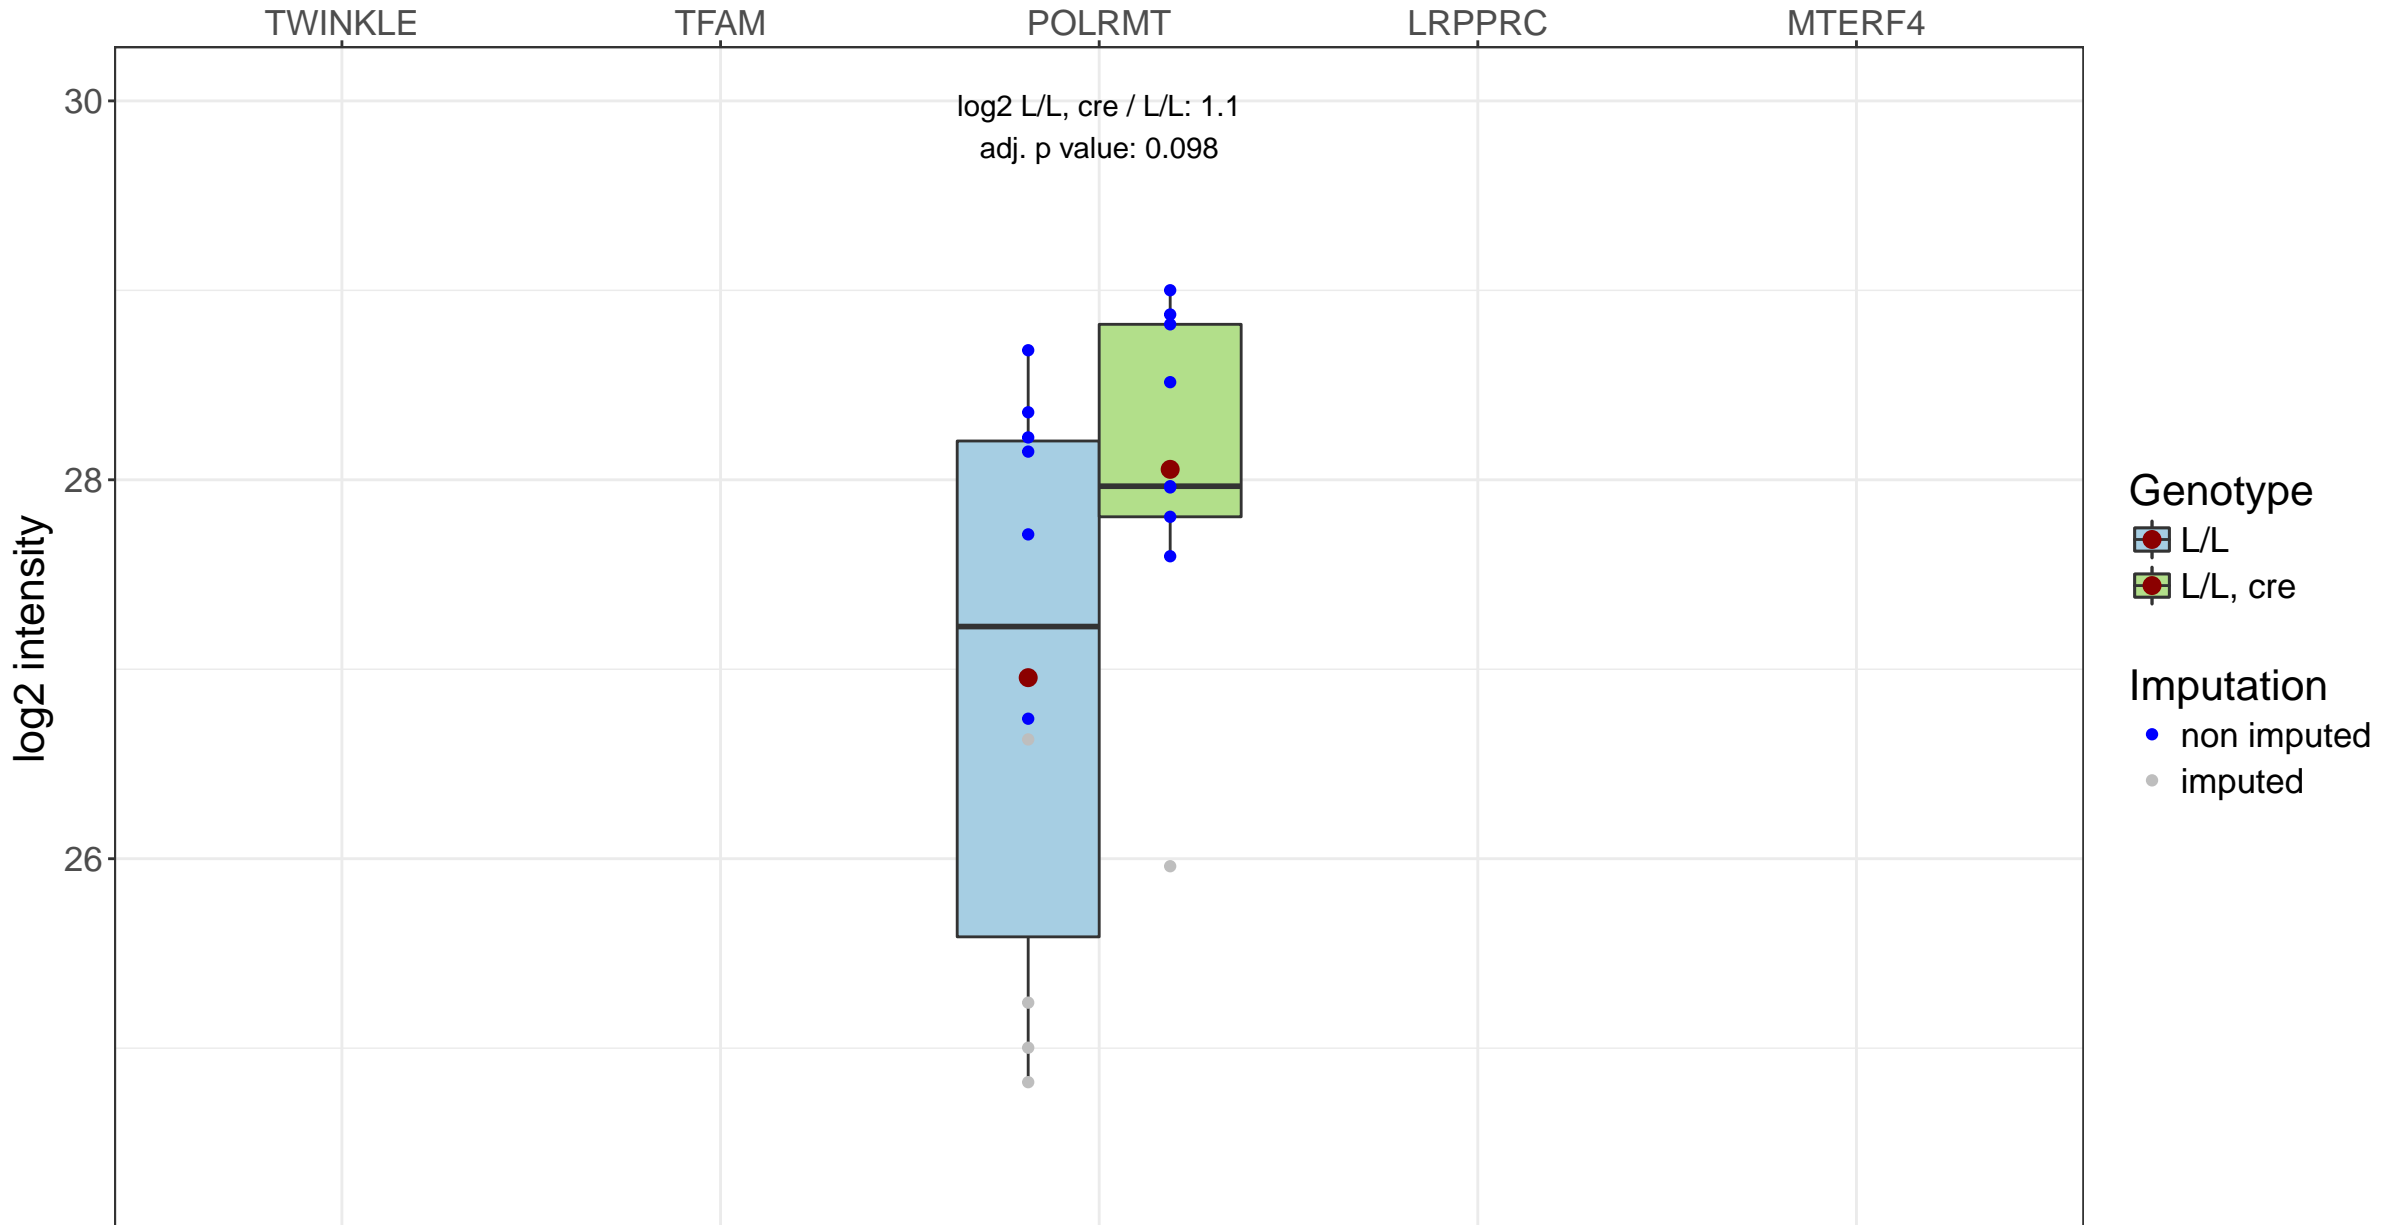

# RPL30 / P62889

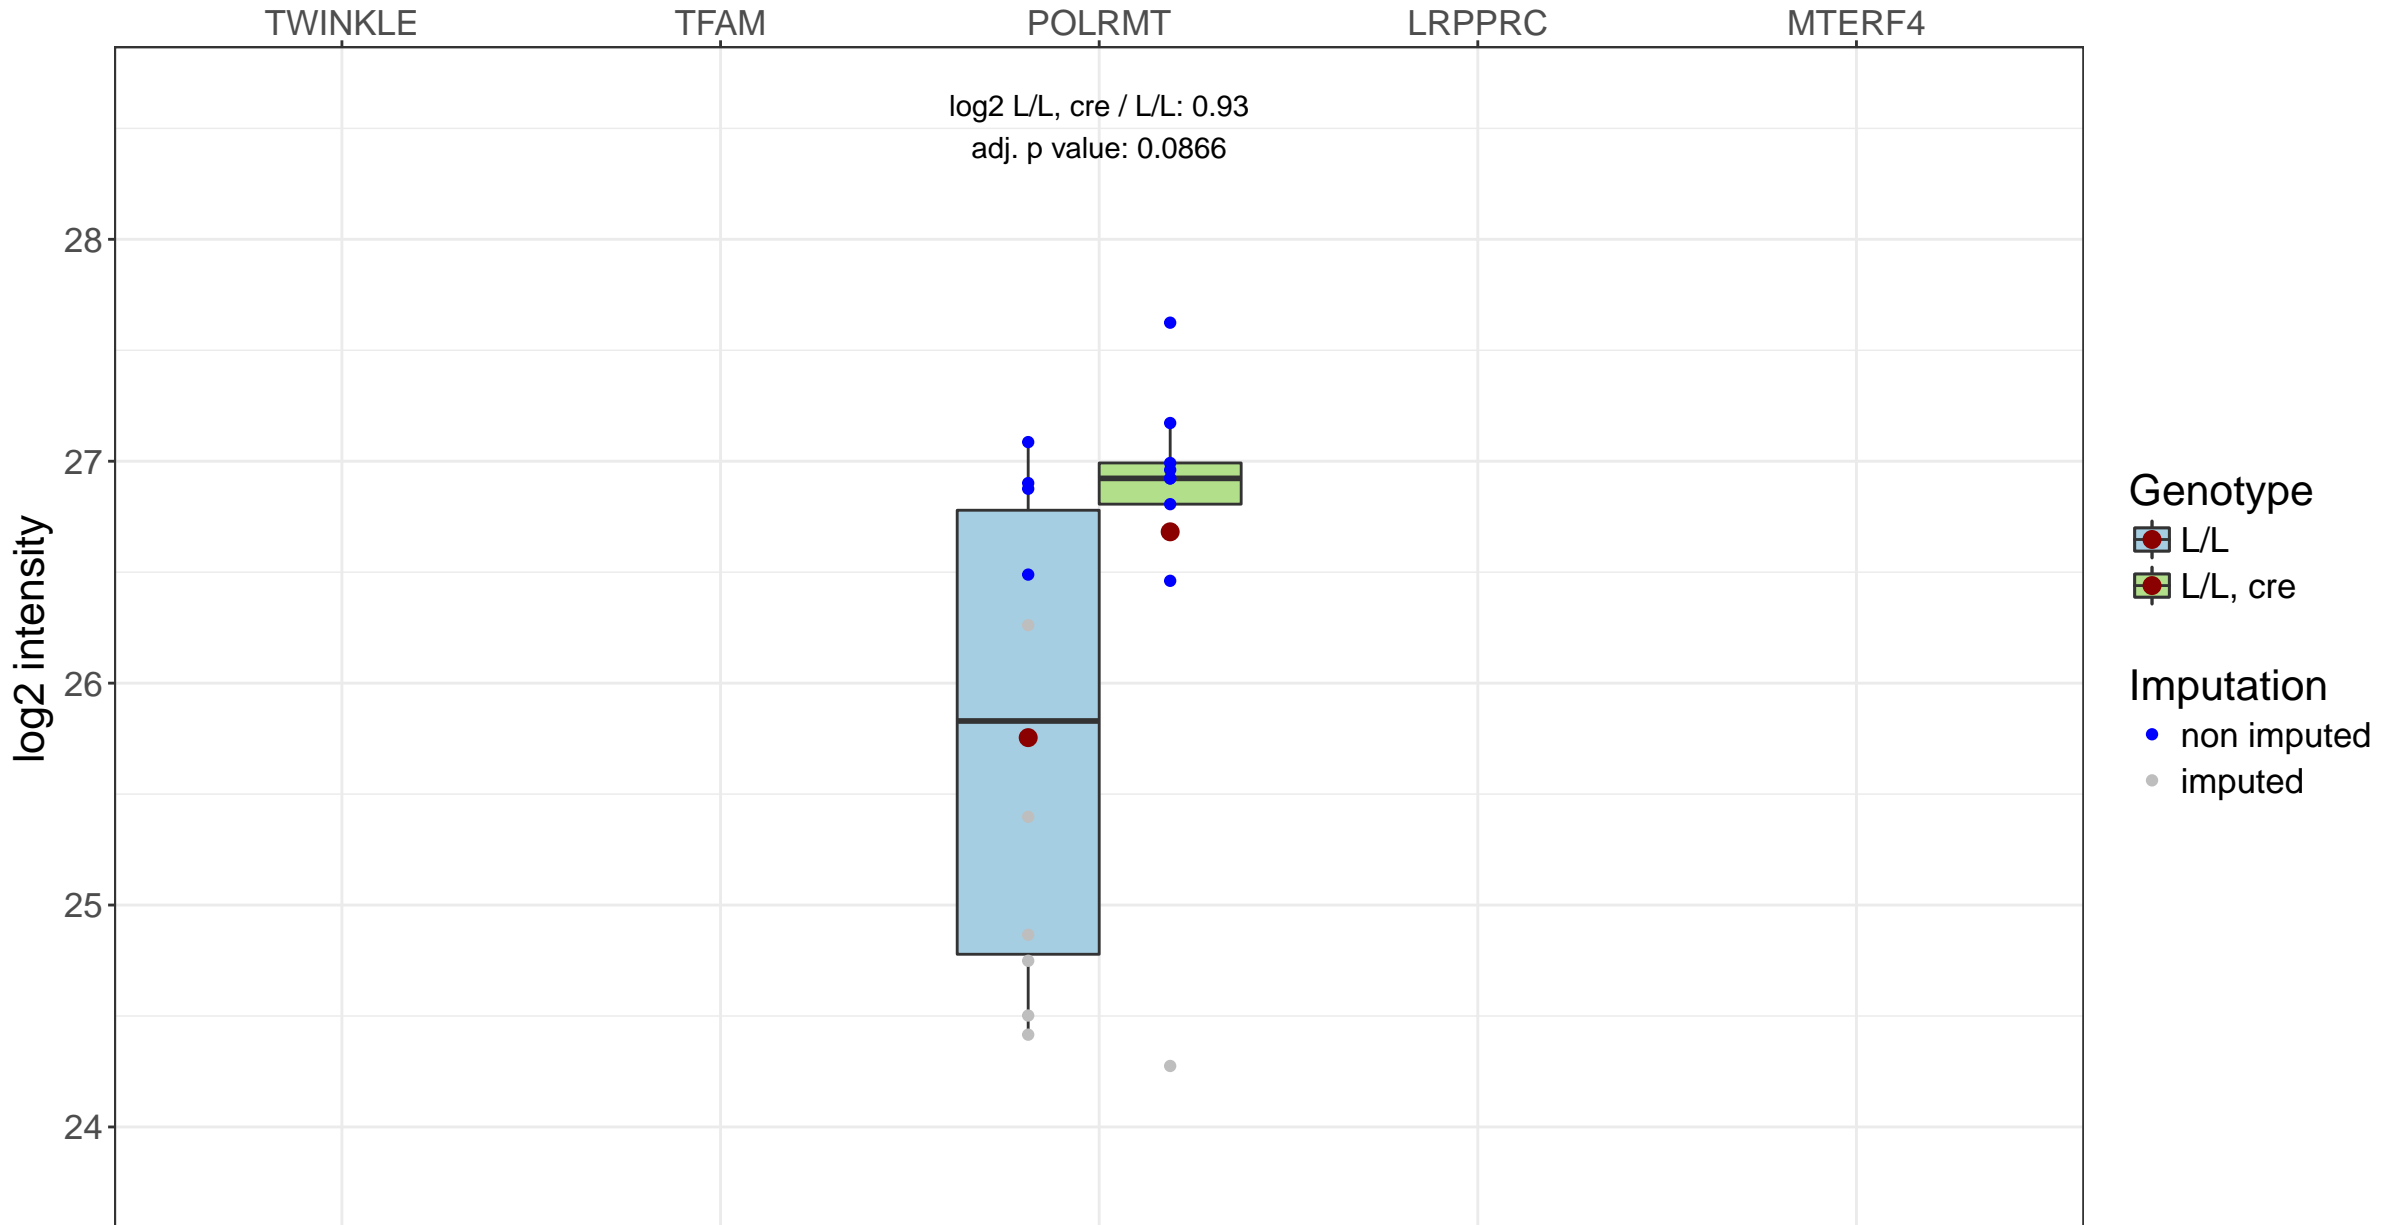

# RPL32 / P62911

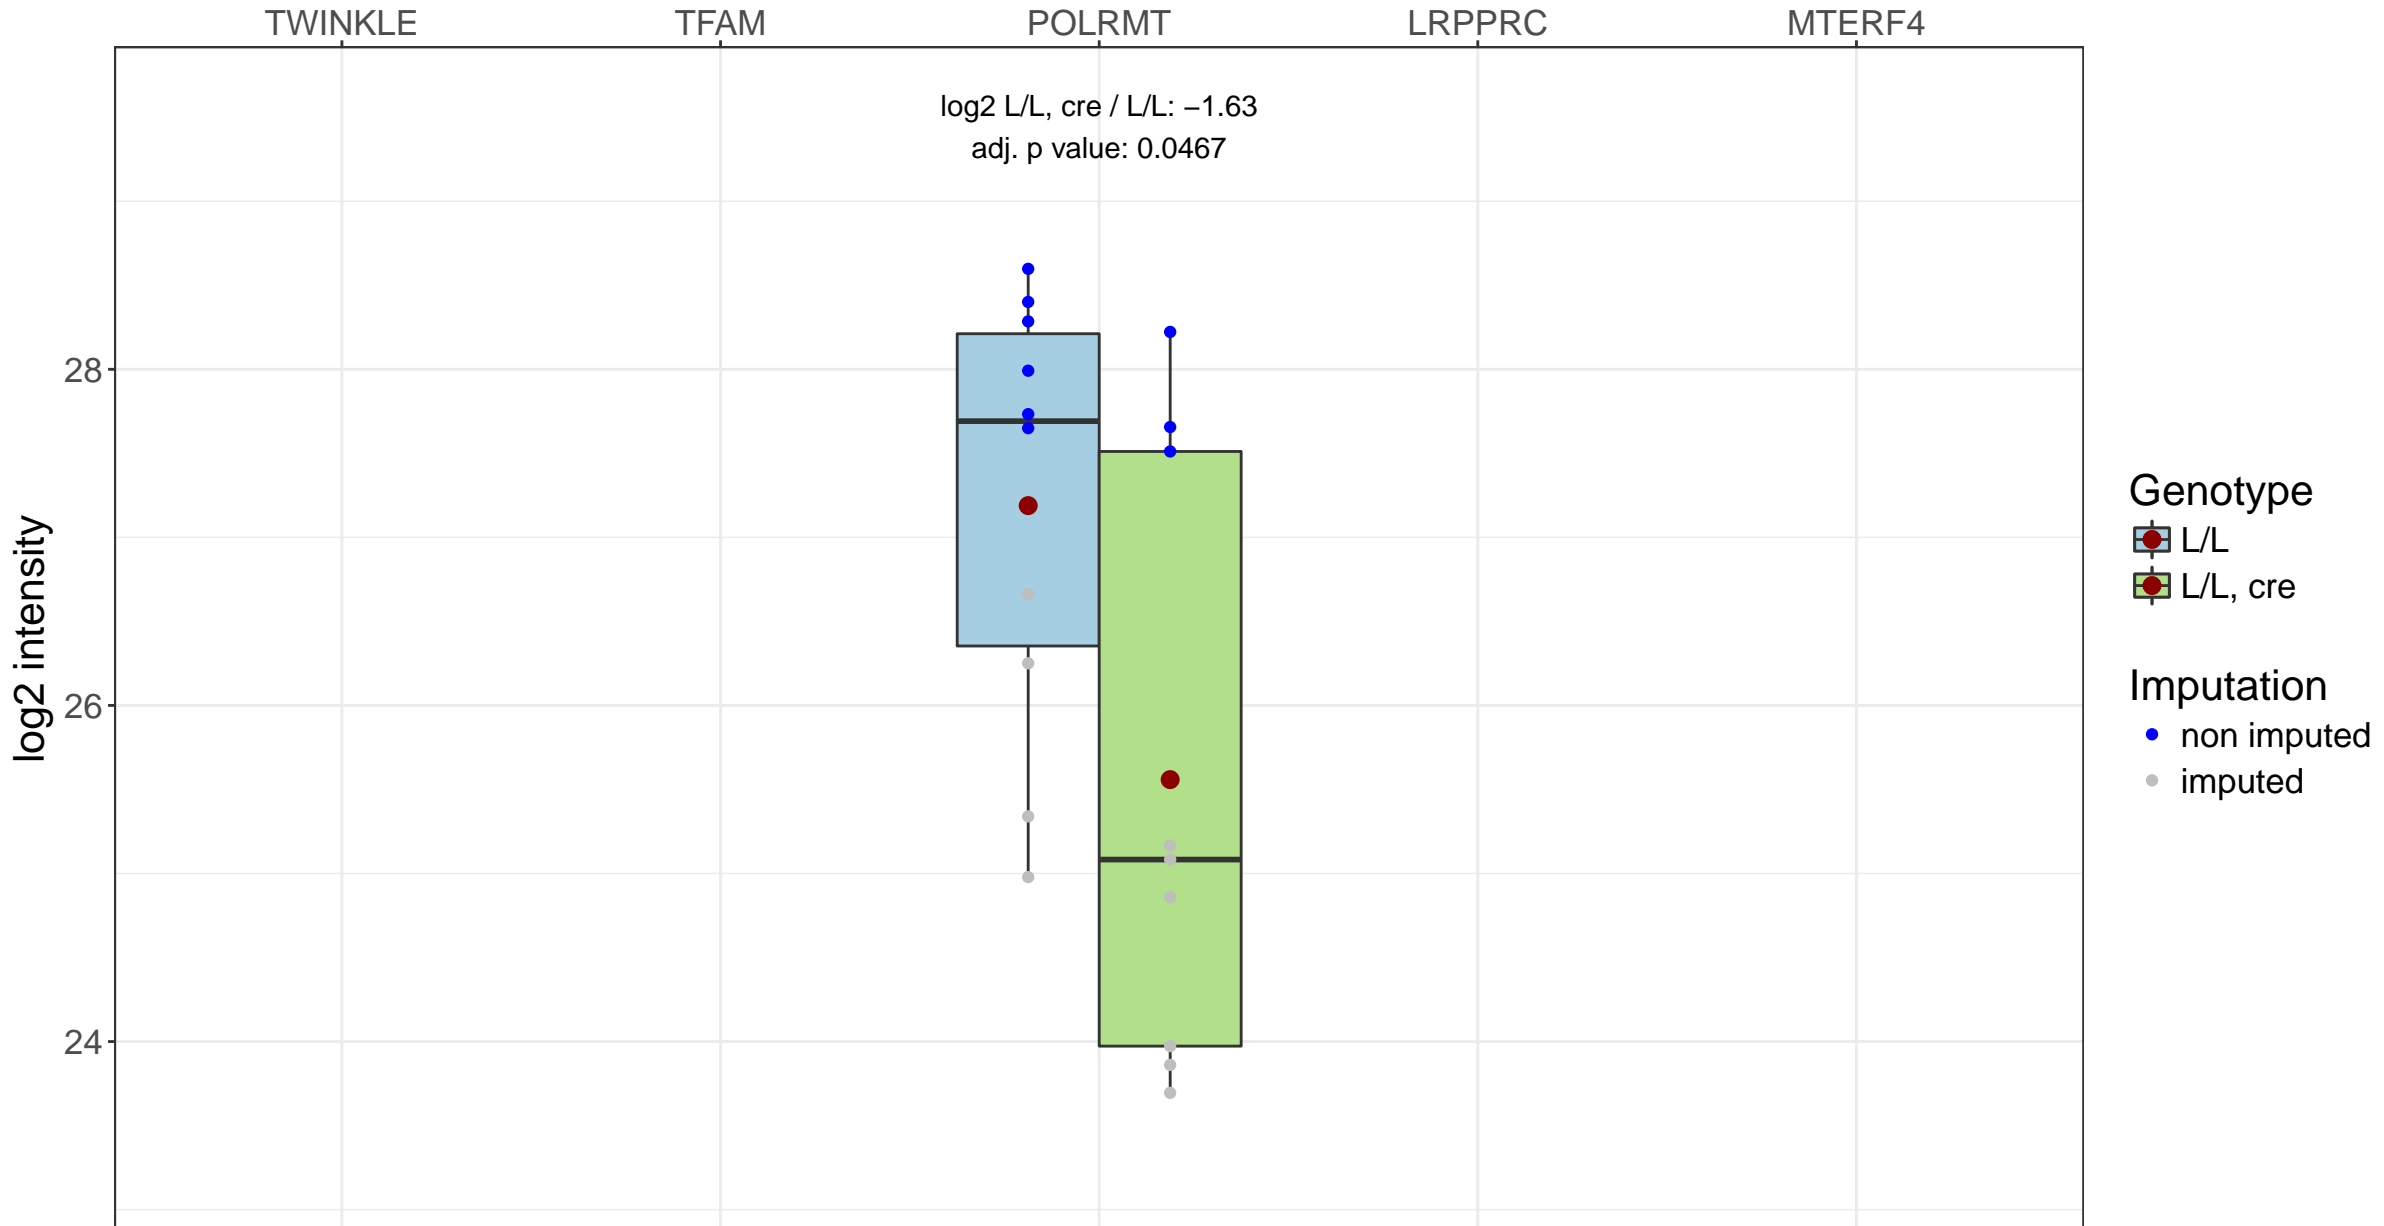



# RPL34 / Q9D1R9

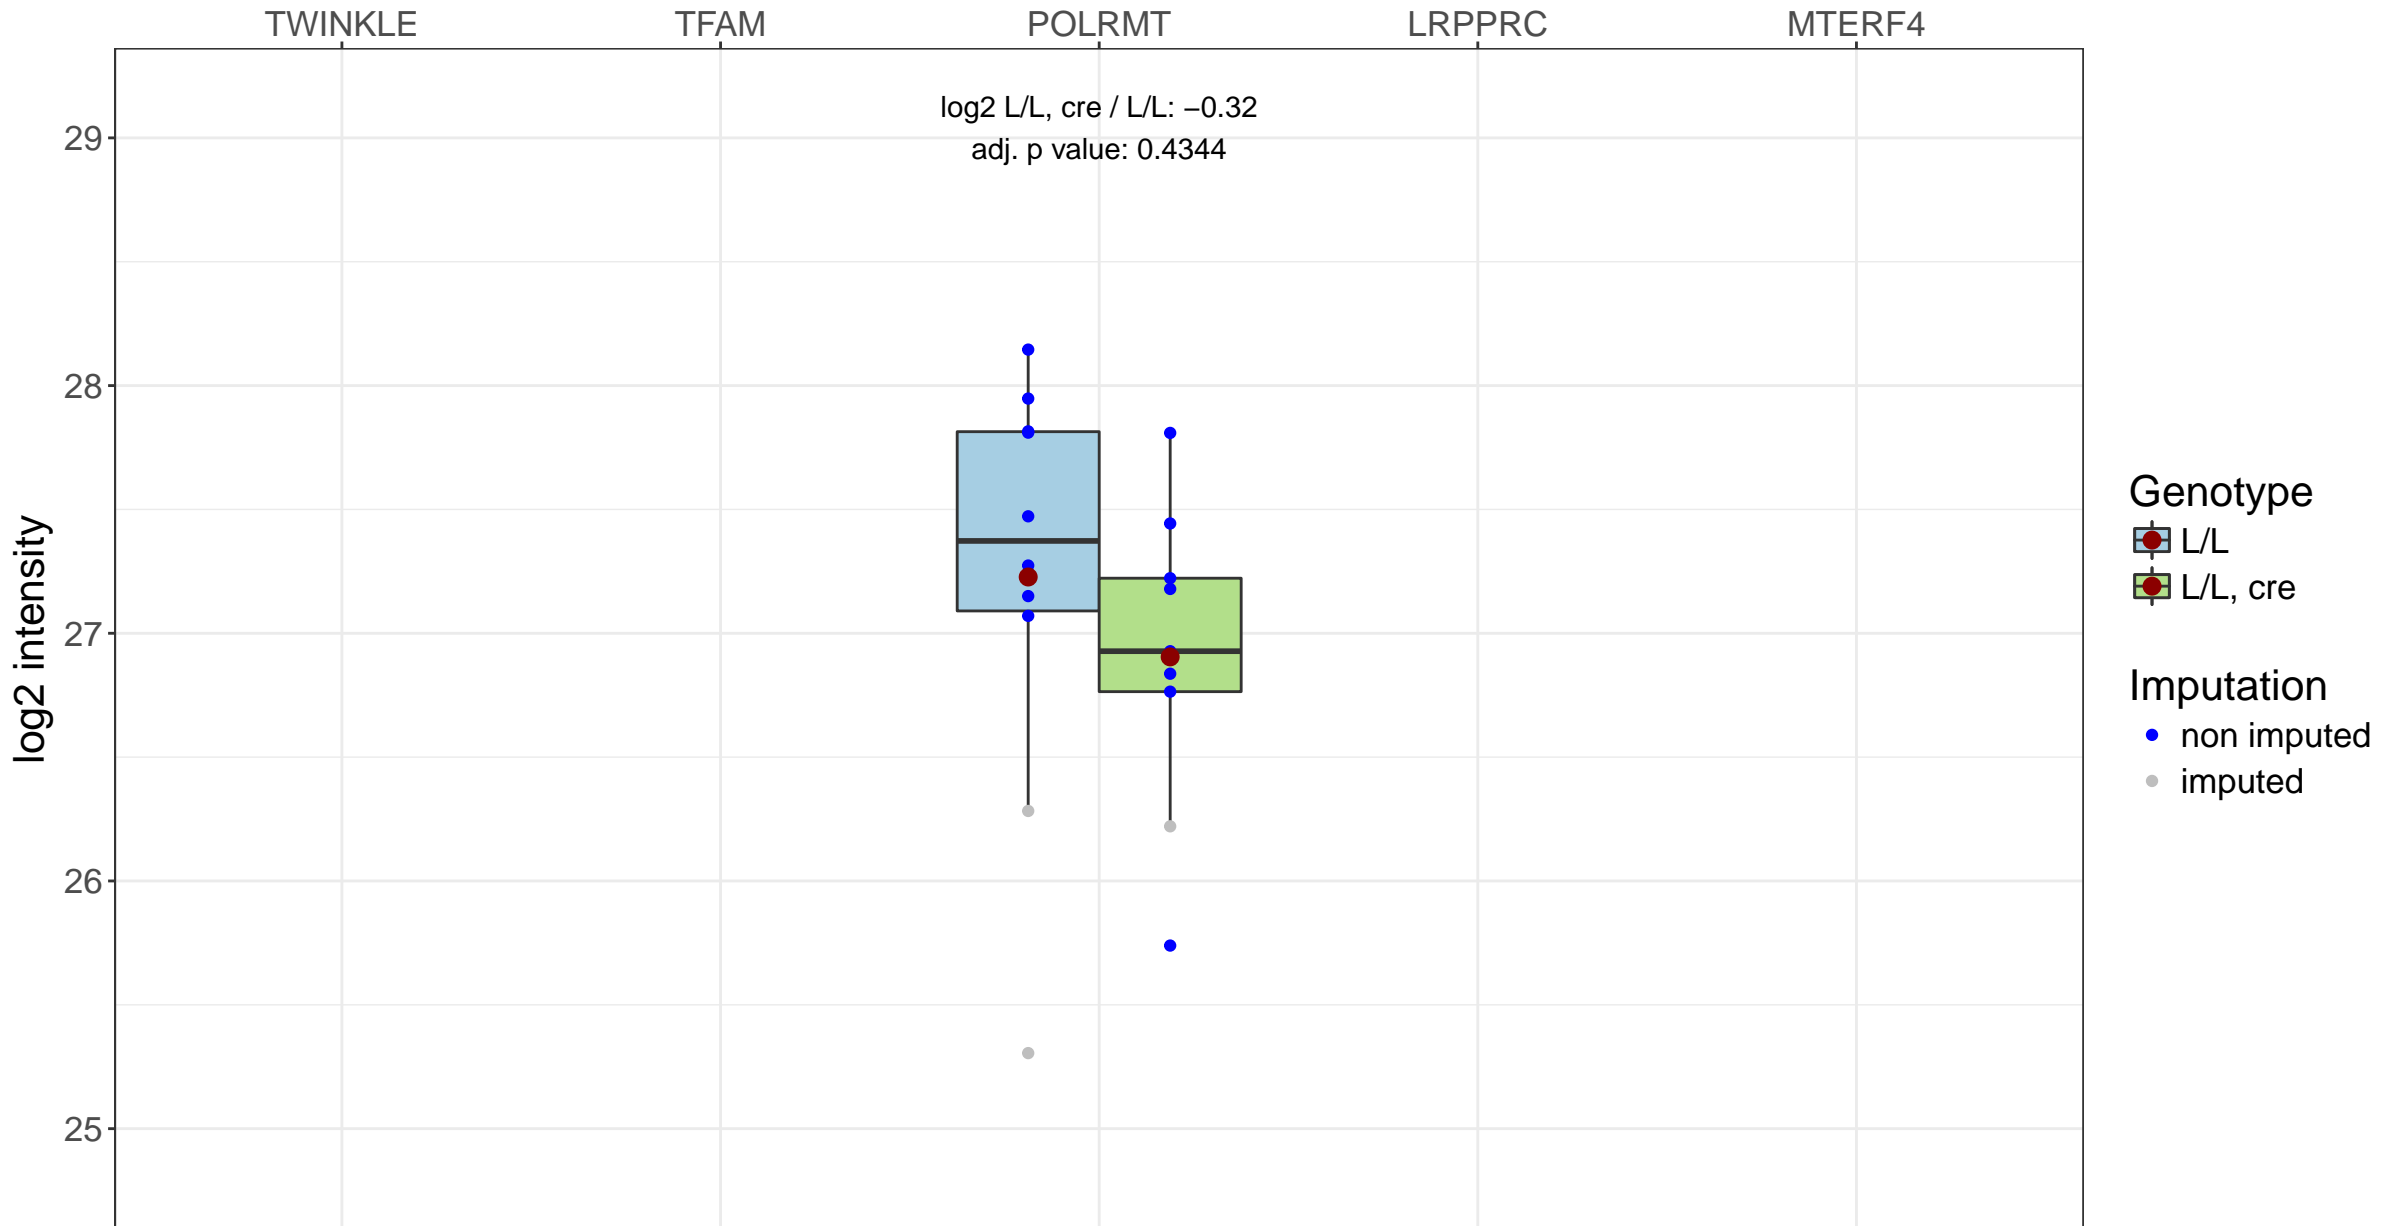

# RPL38 / Q9JJI8

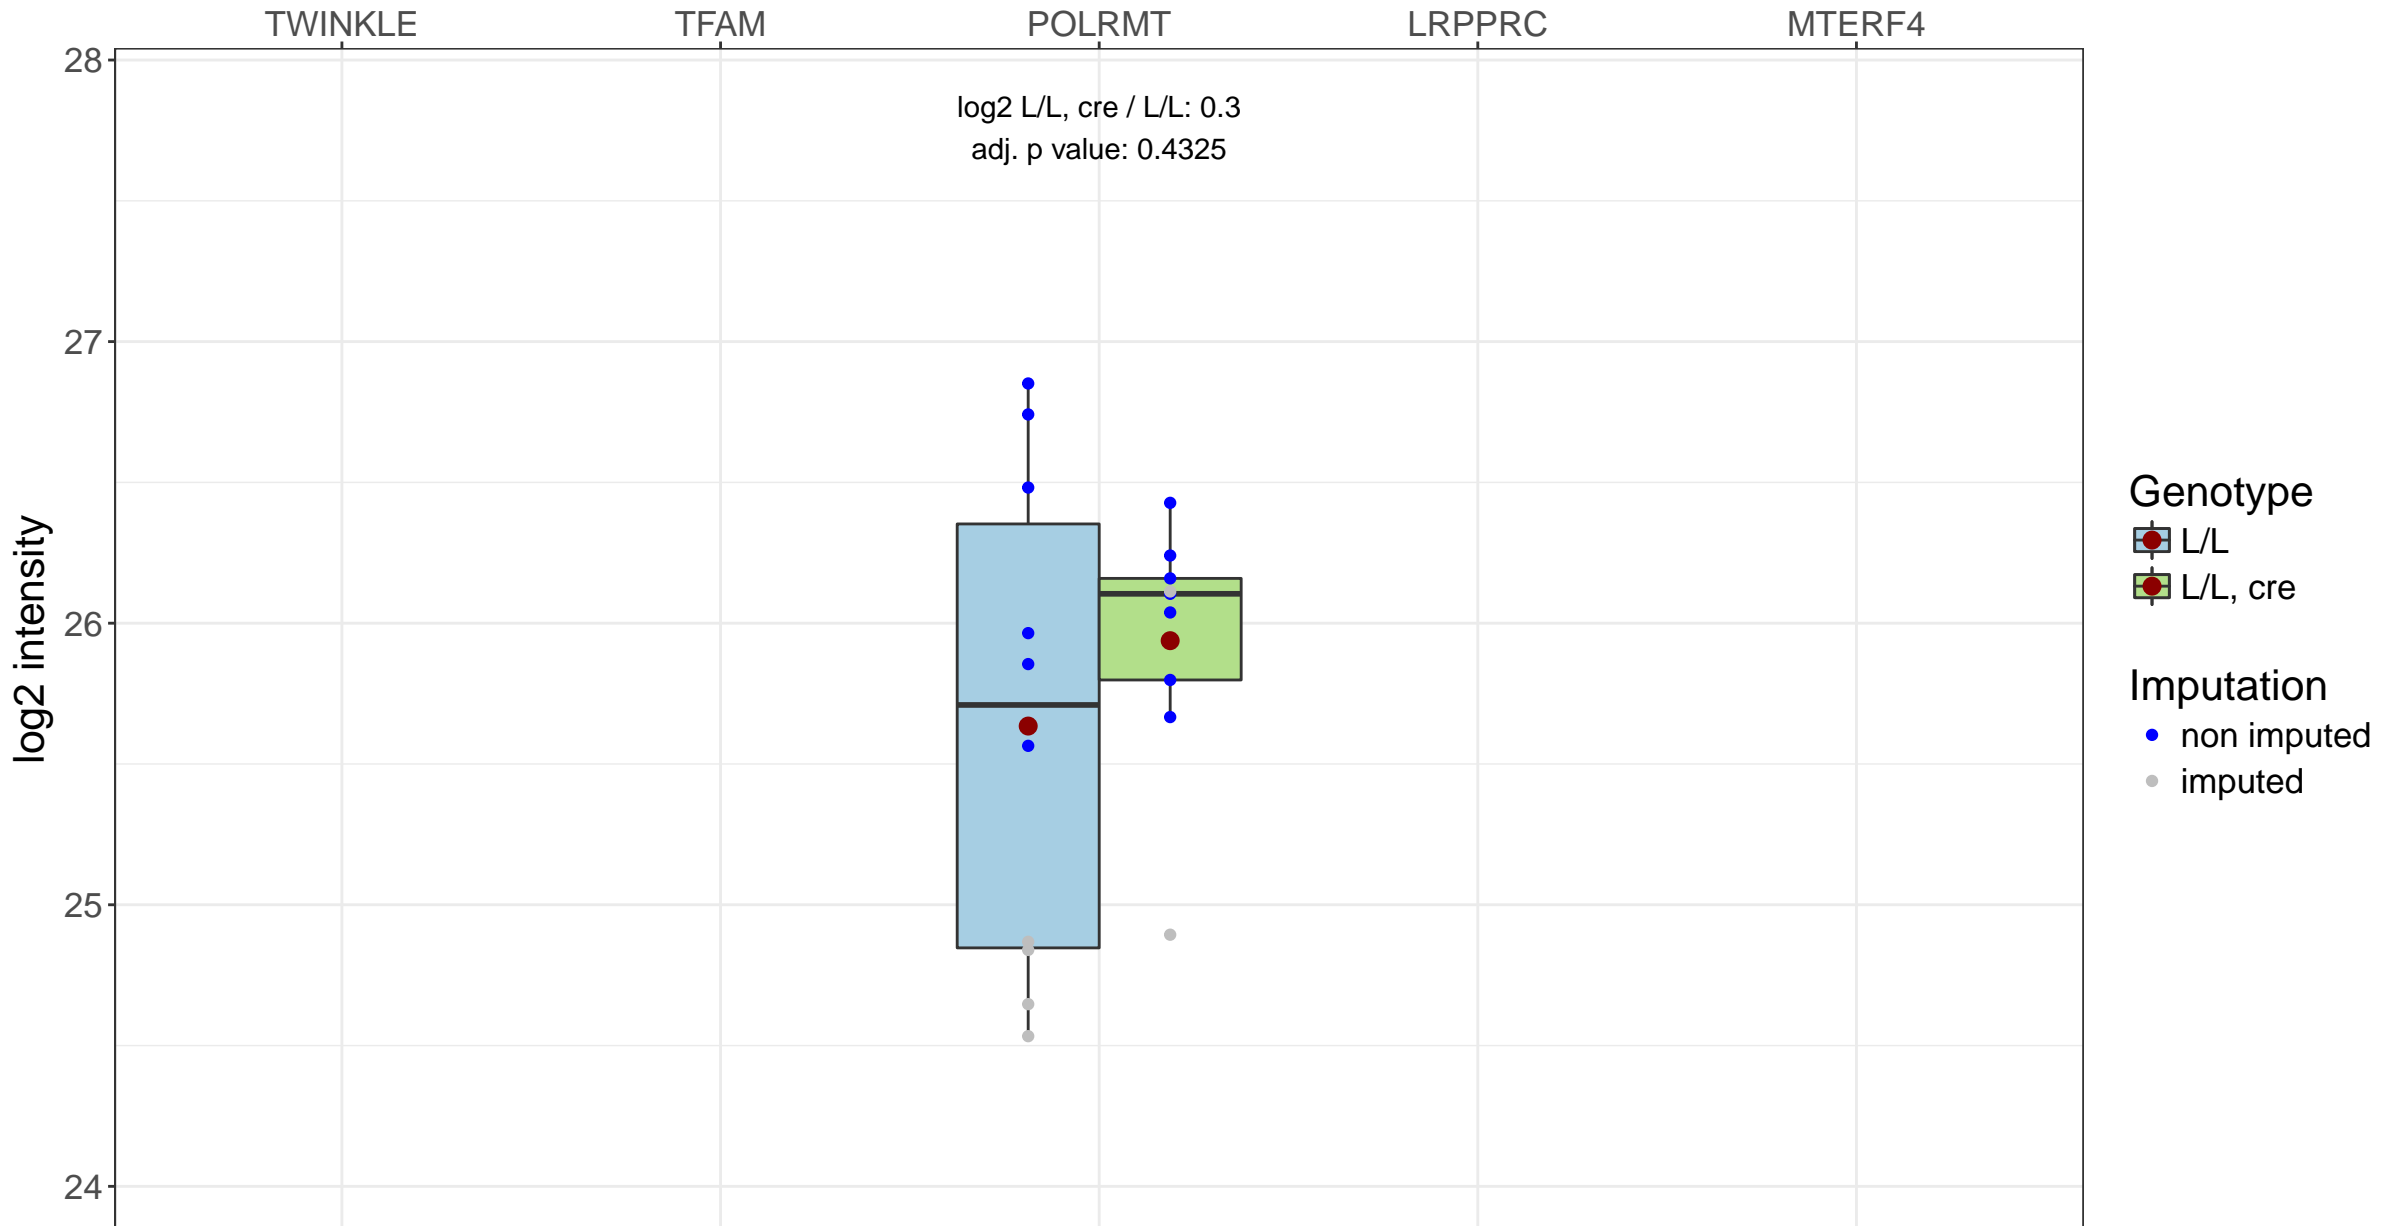

# RPL4 / Q9D8E6

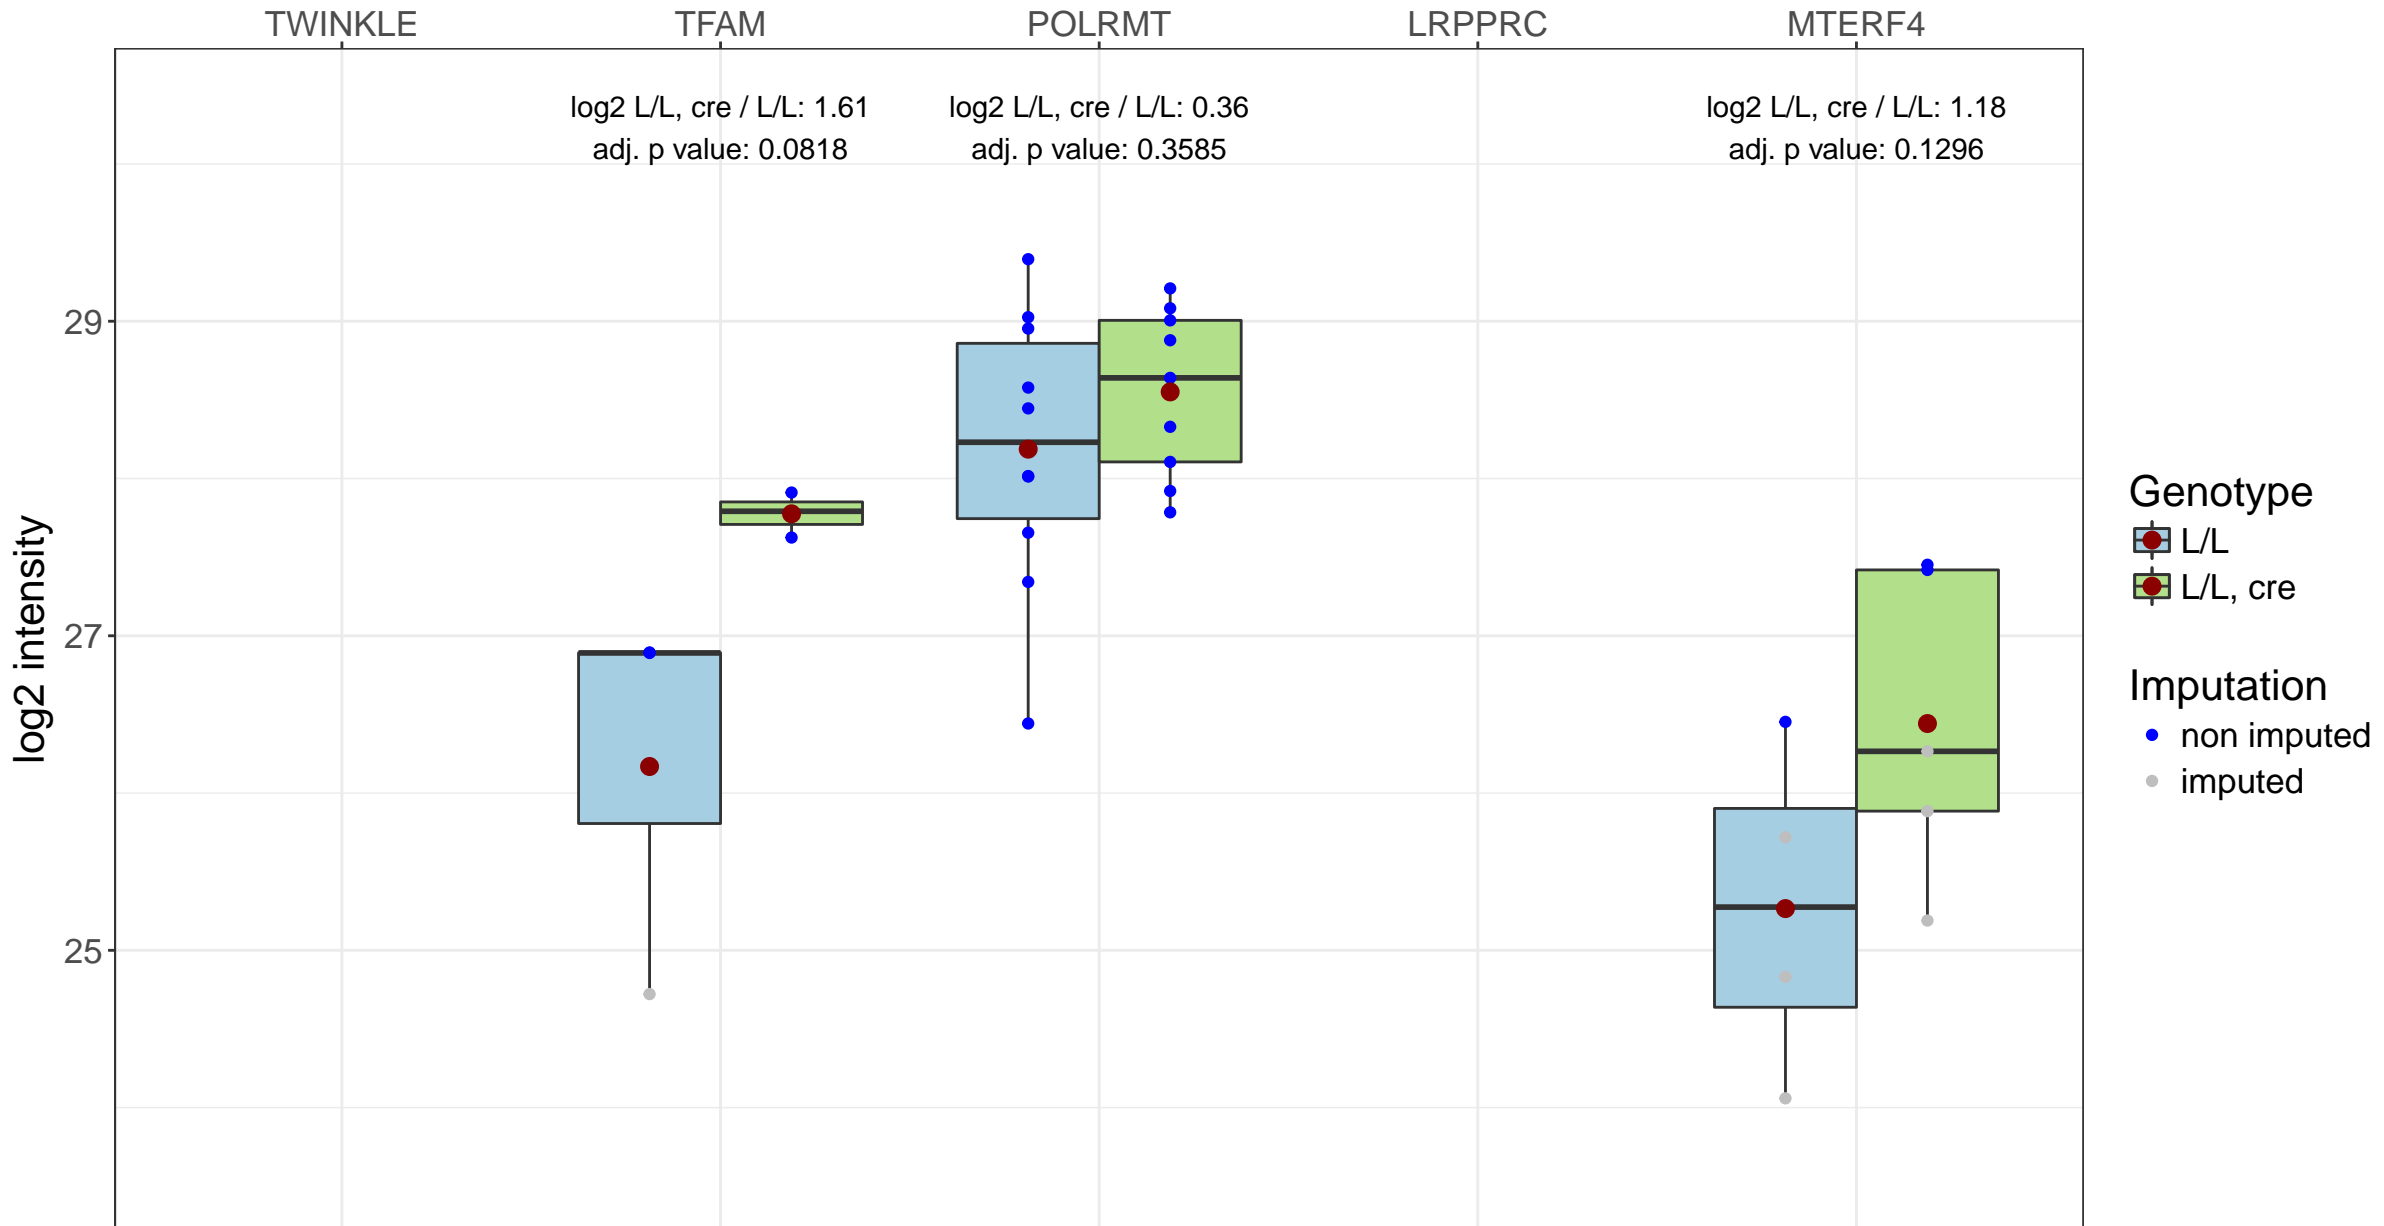

# RPL6 / P47911

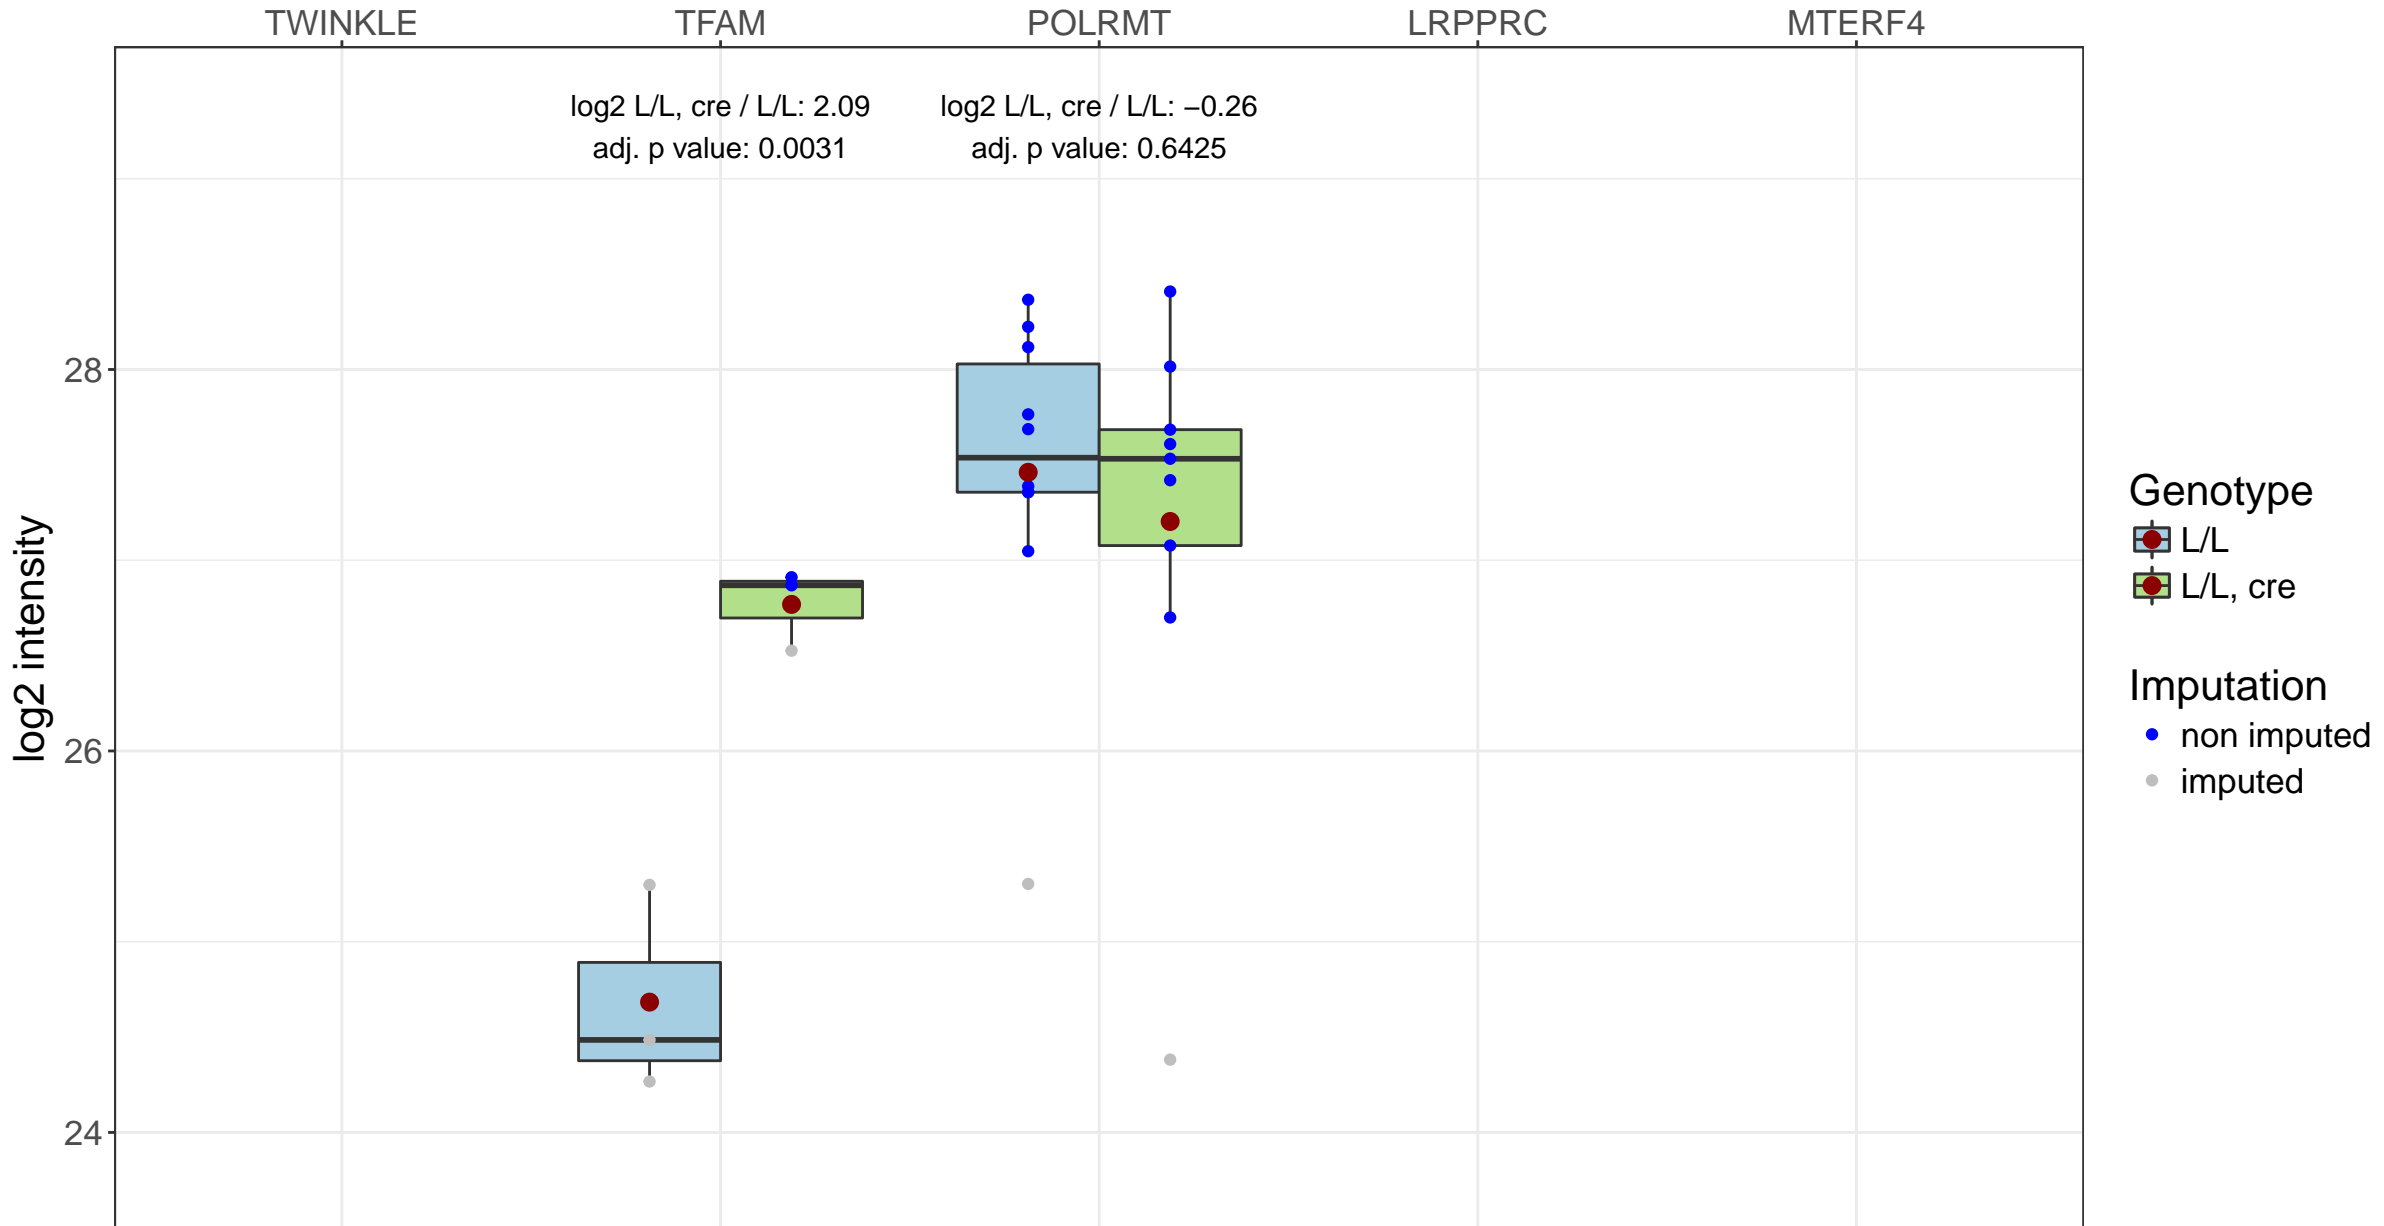

# RPL7 / P14148

TWINKLE

TFAM

POLRMT

LRPPRC

MTERF4

log2 intensity

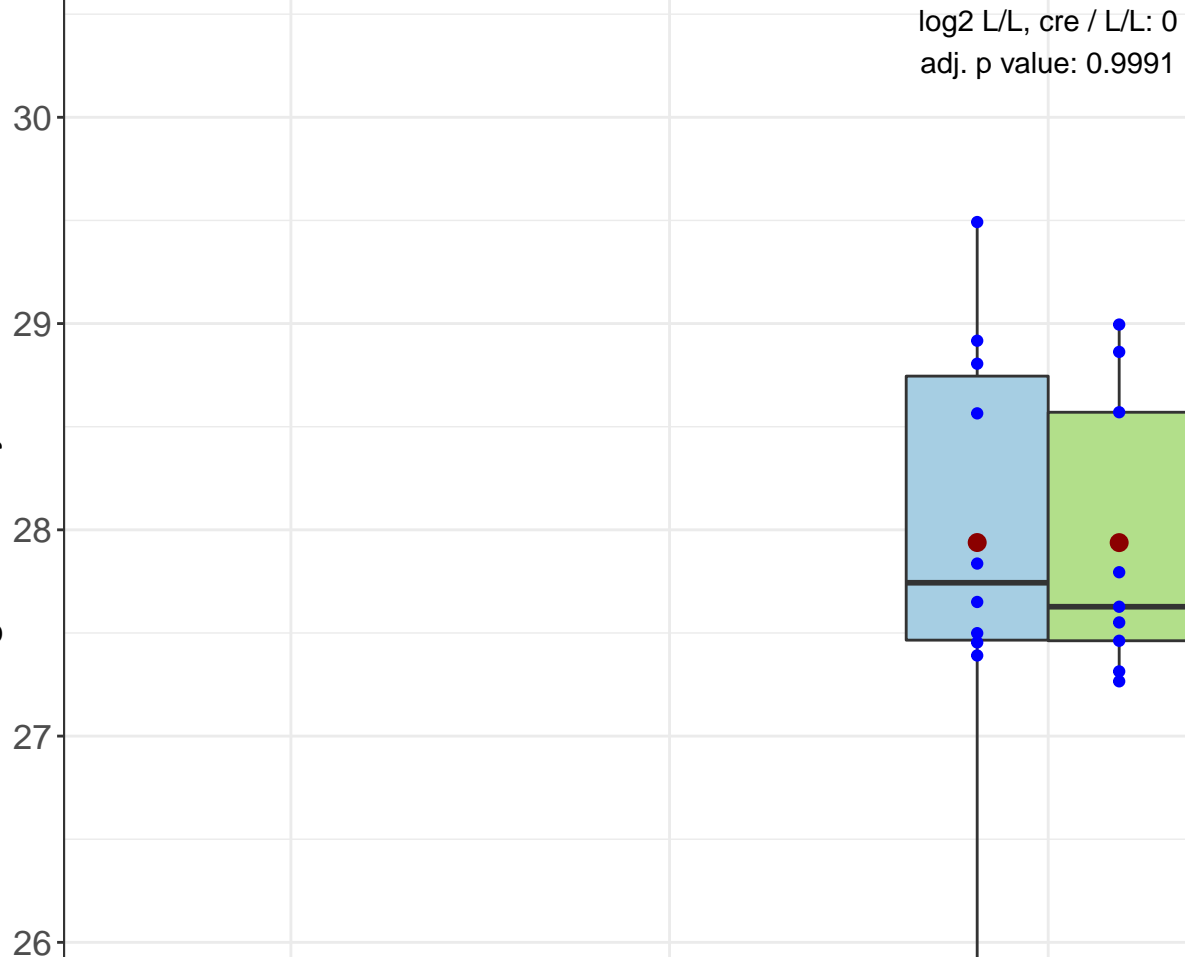

Genotype

L/L

L/L, cre

Imputation

non imputed

imputed

# RPL7A / P12970

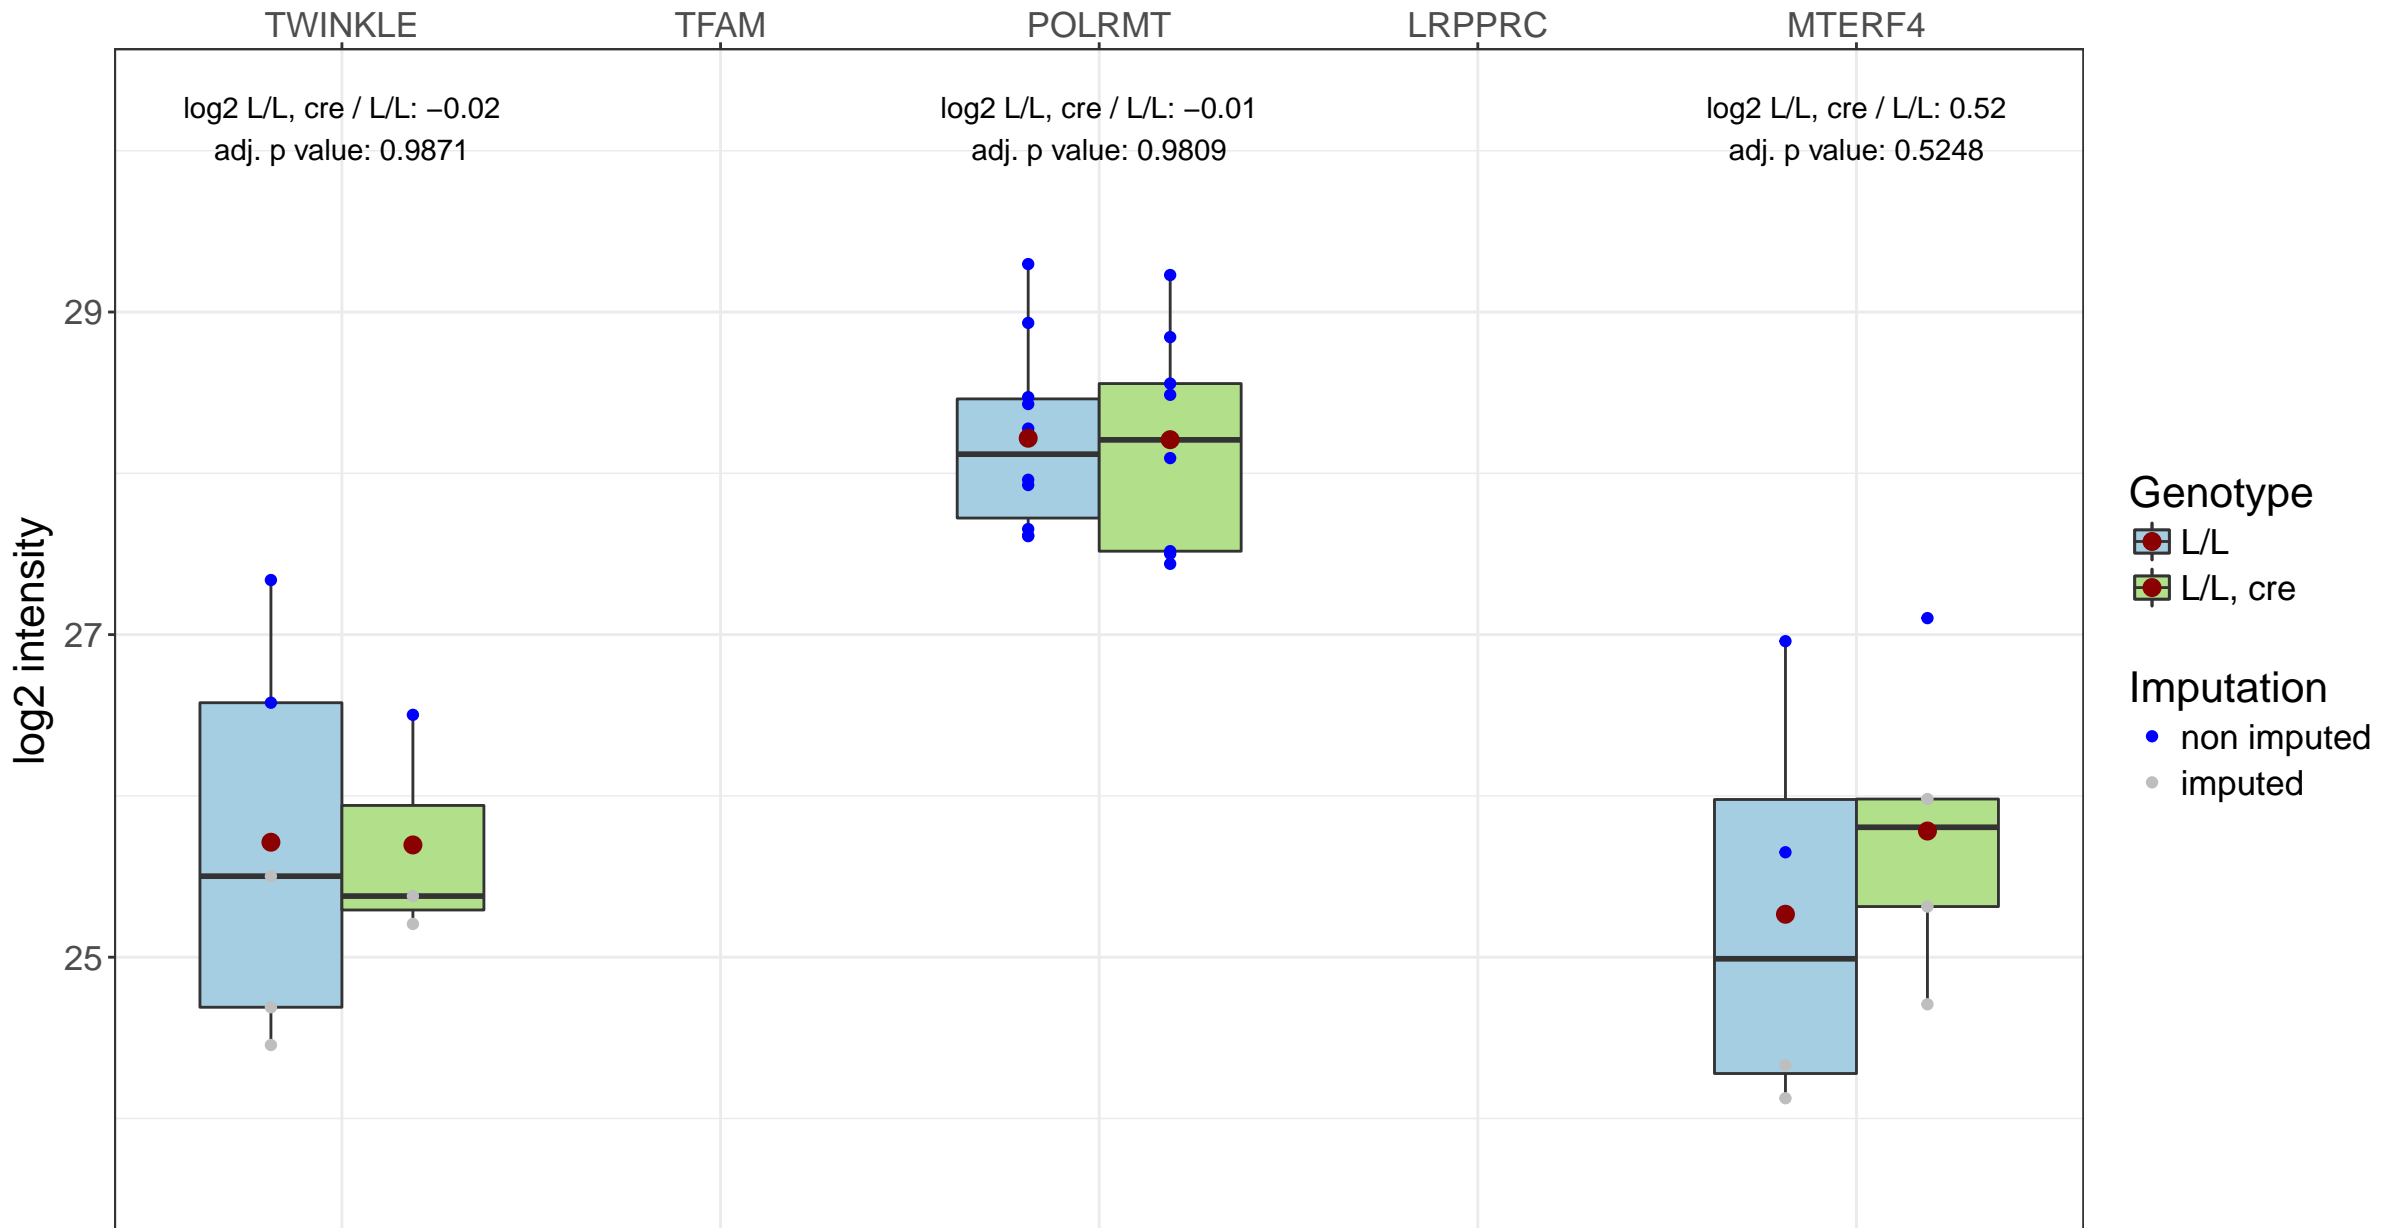

# RPL8 / P62918

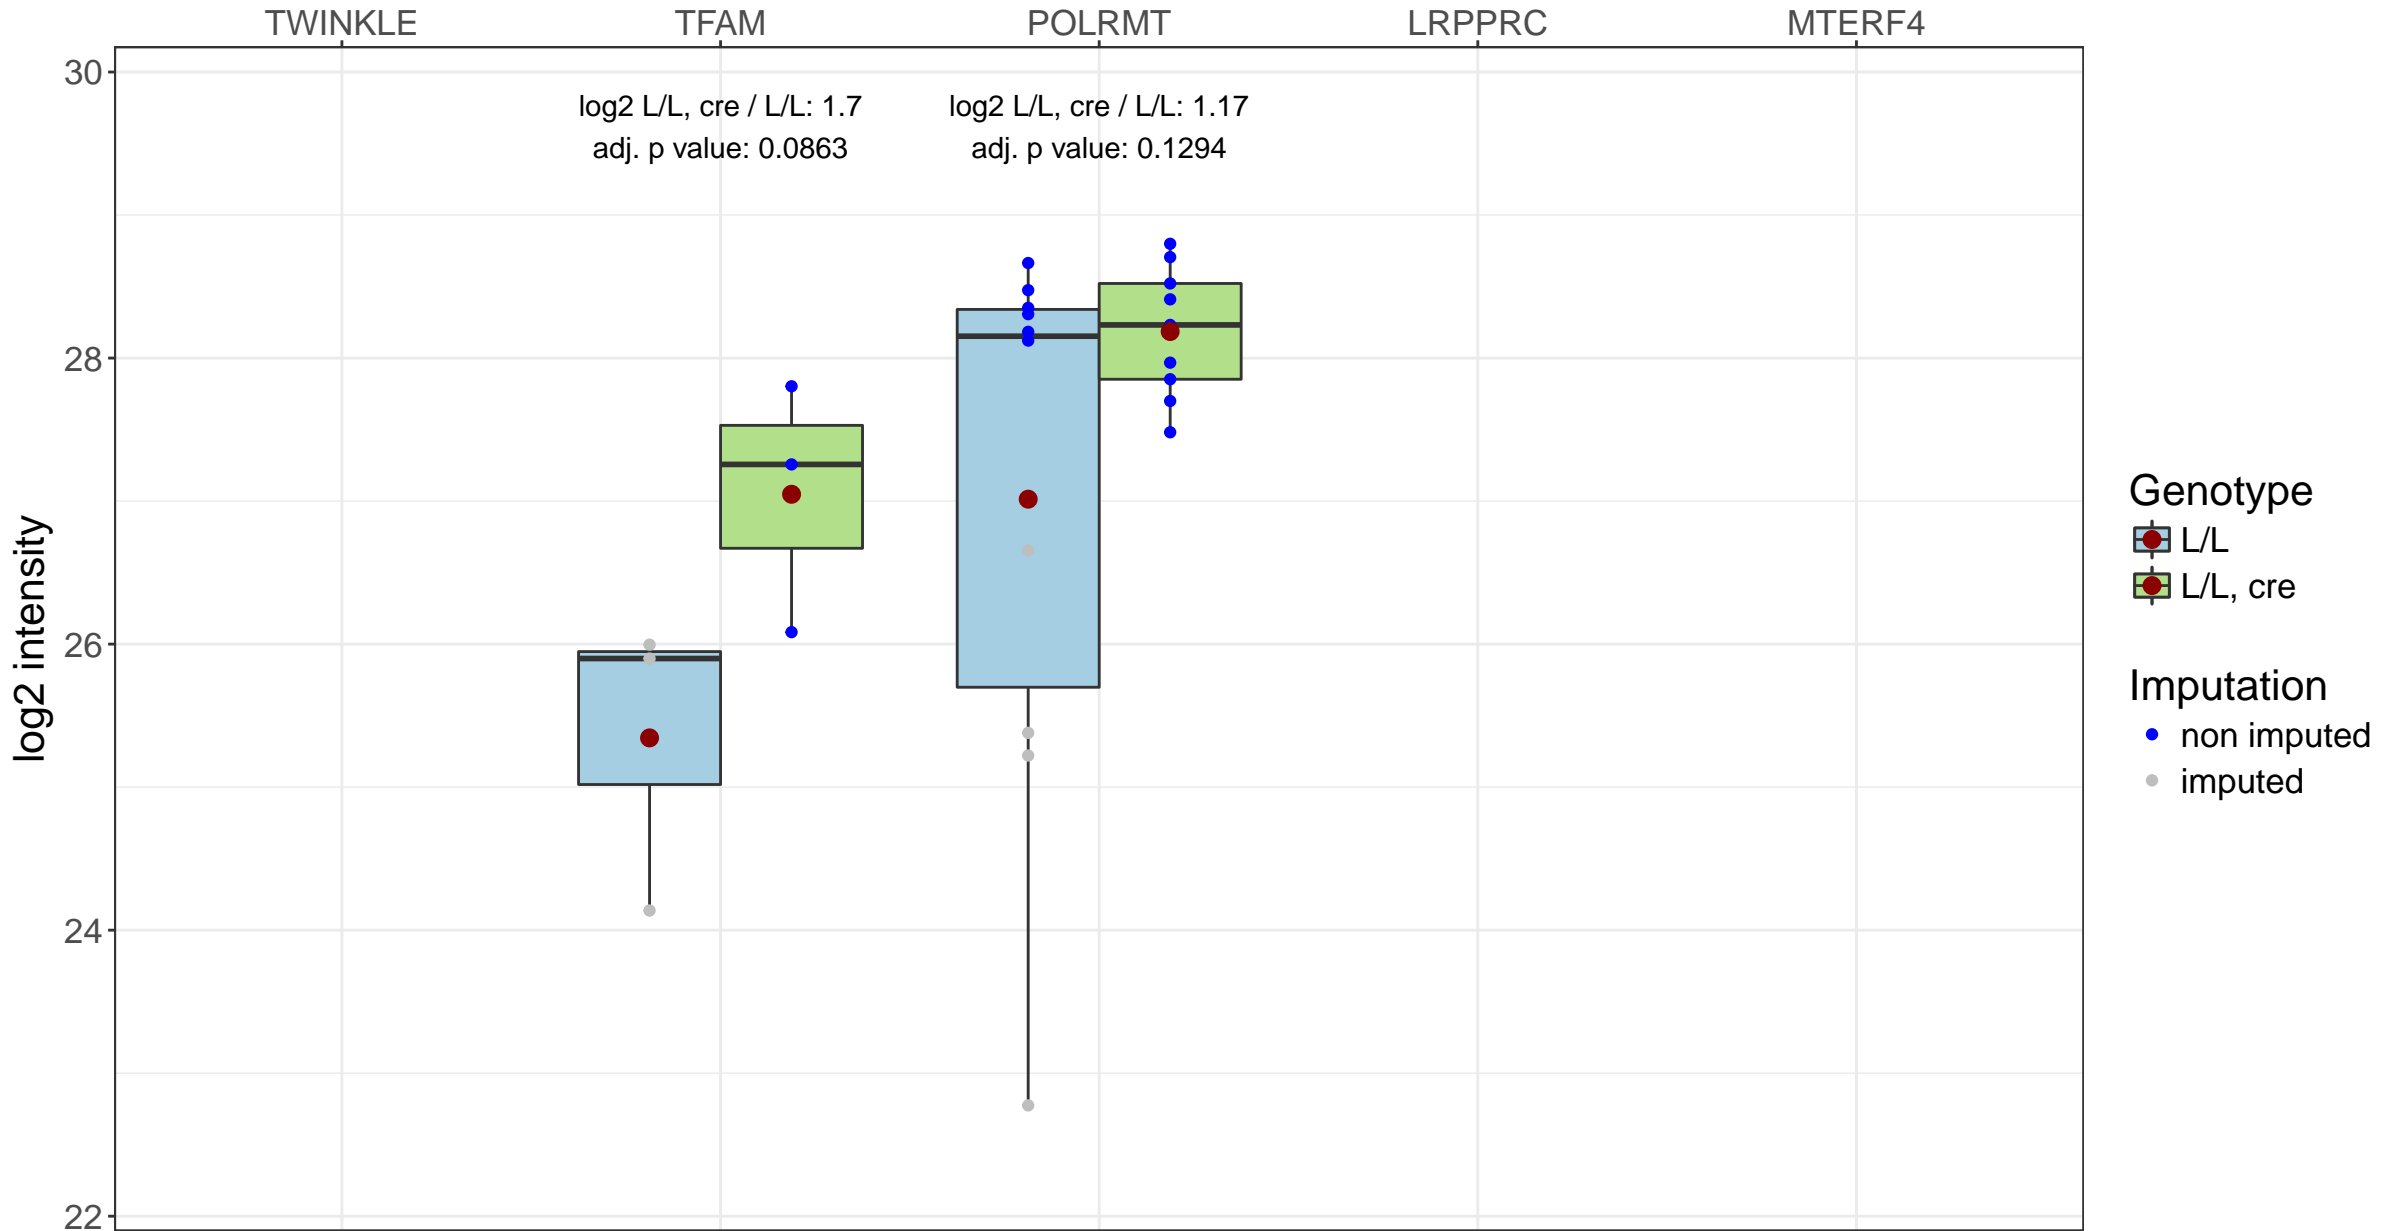

# RPL9 / P51410

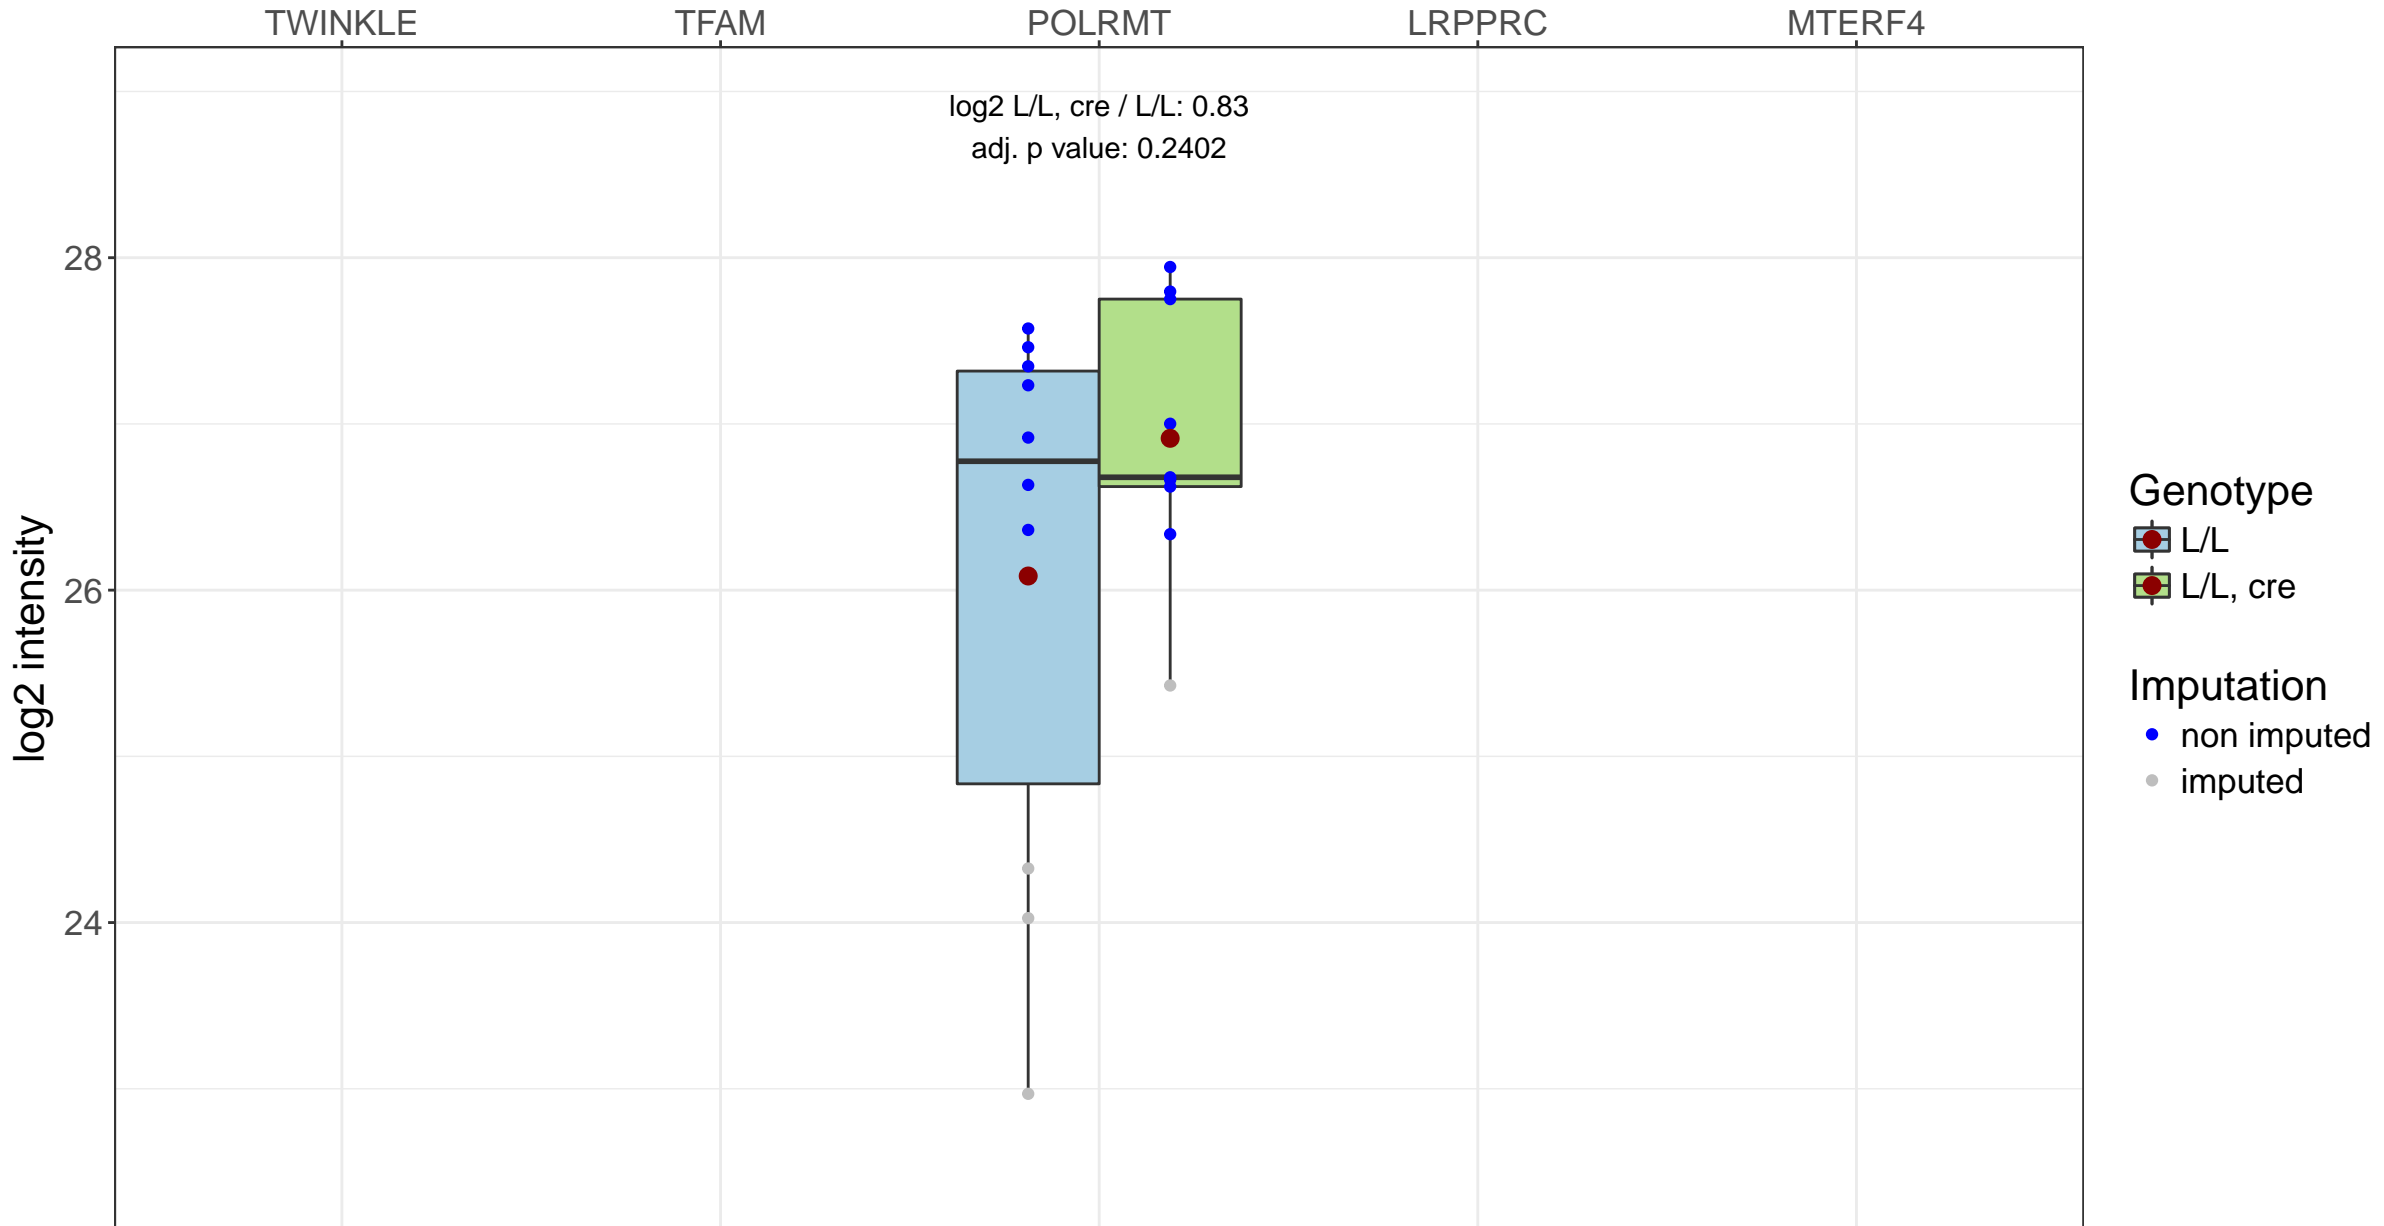



# RPLP0 / P14869

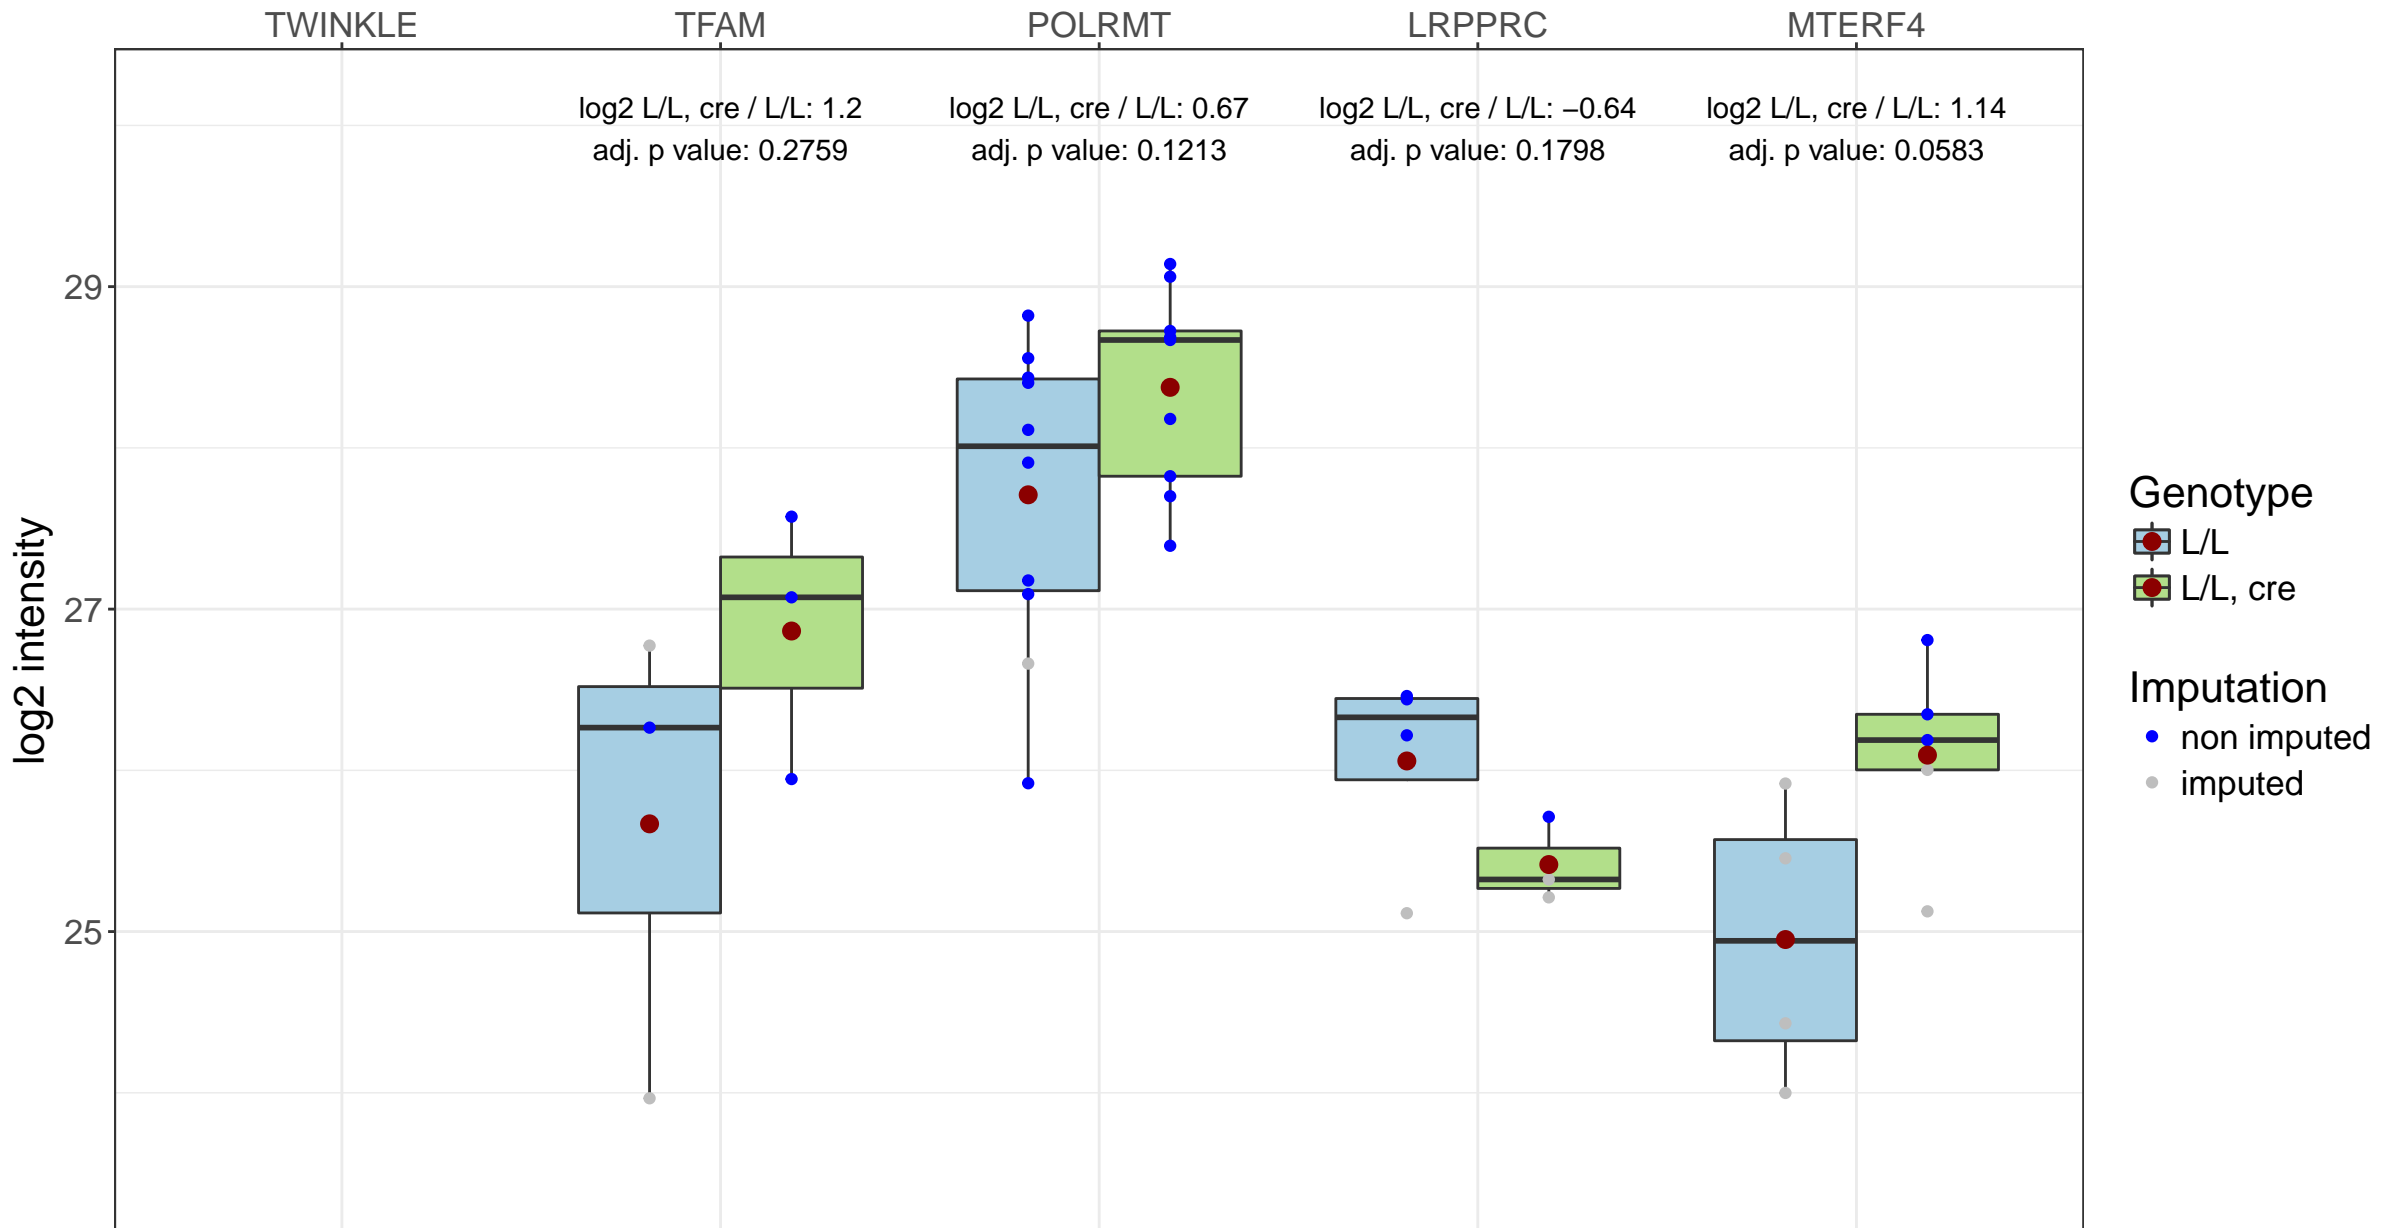

# RPLP2 / P99027

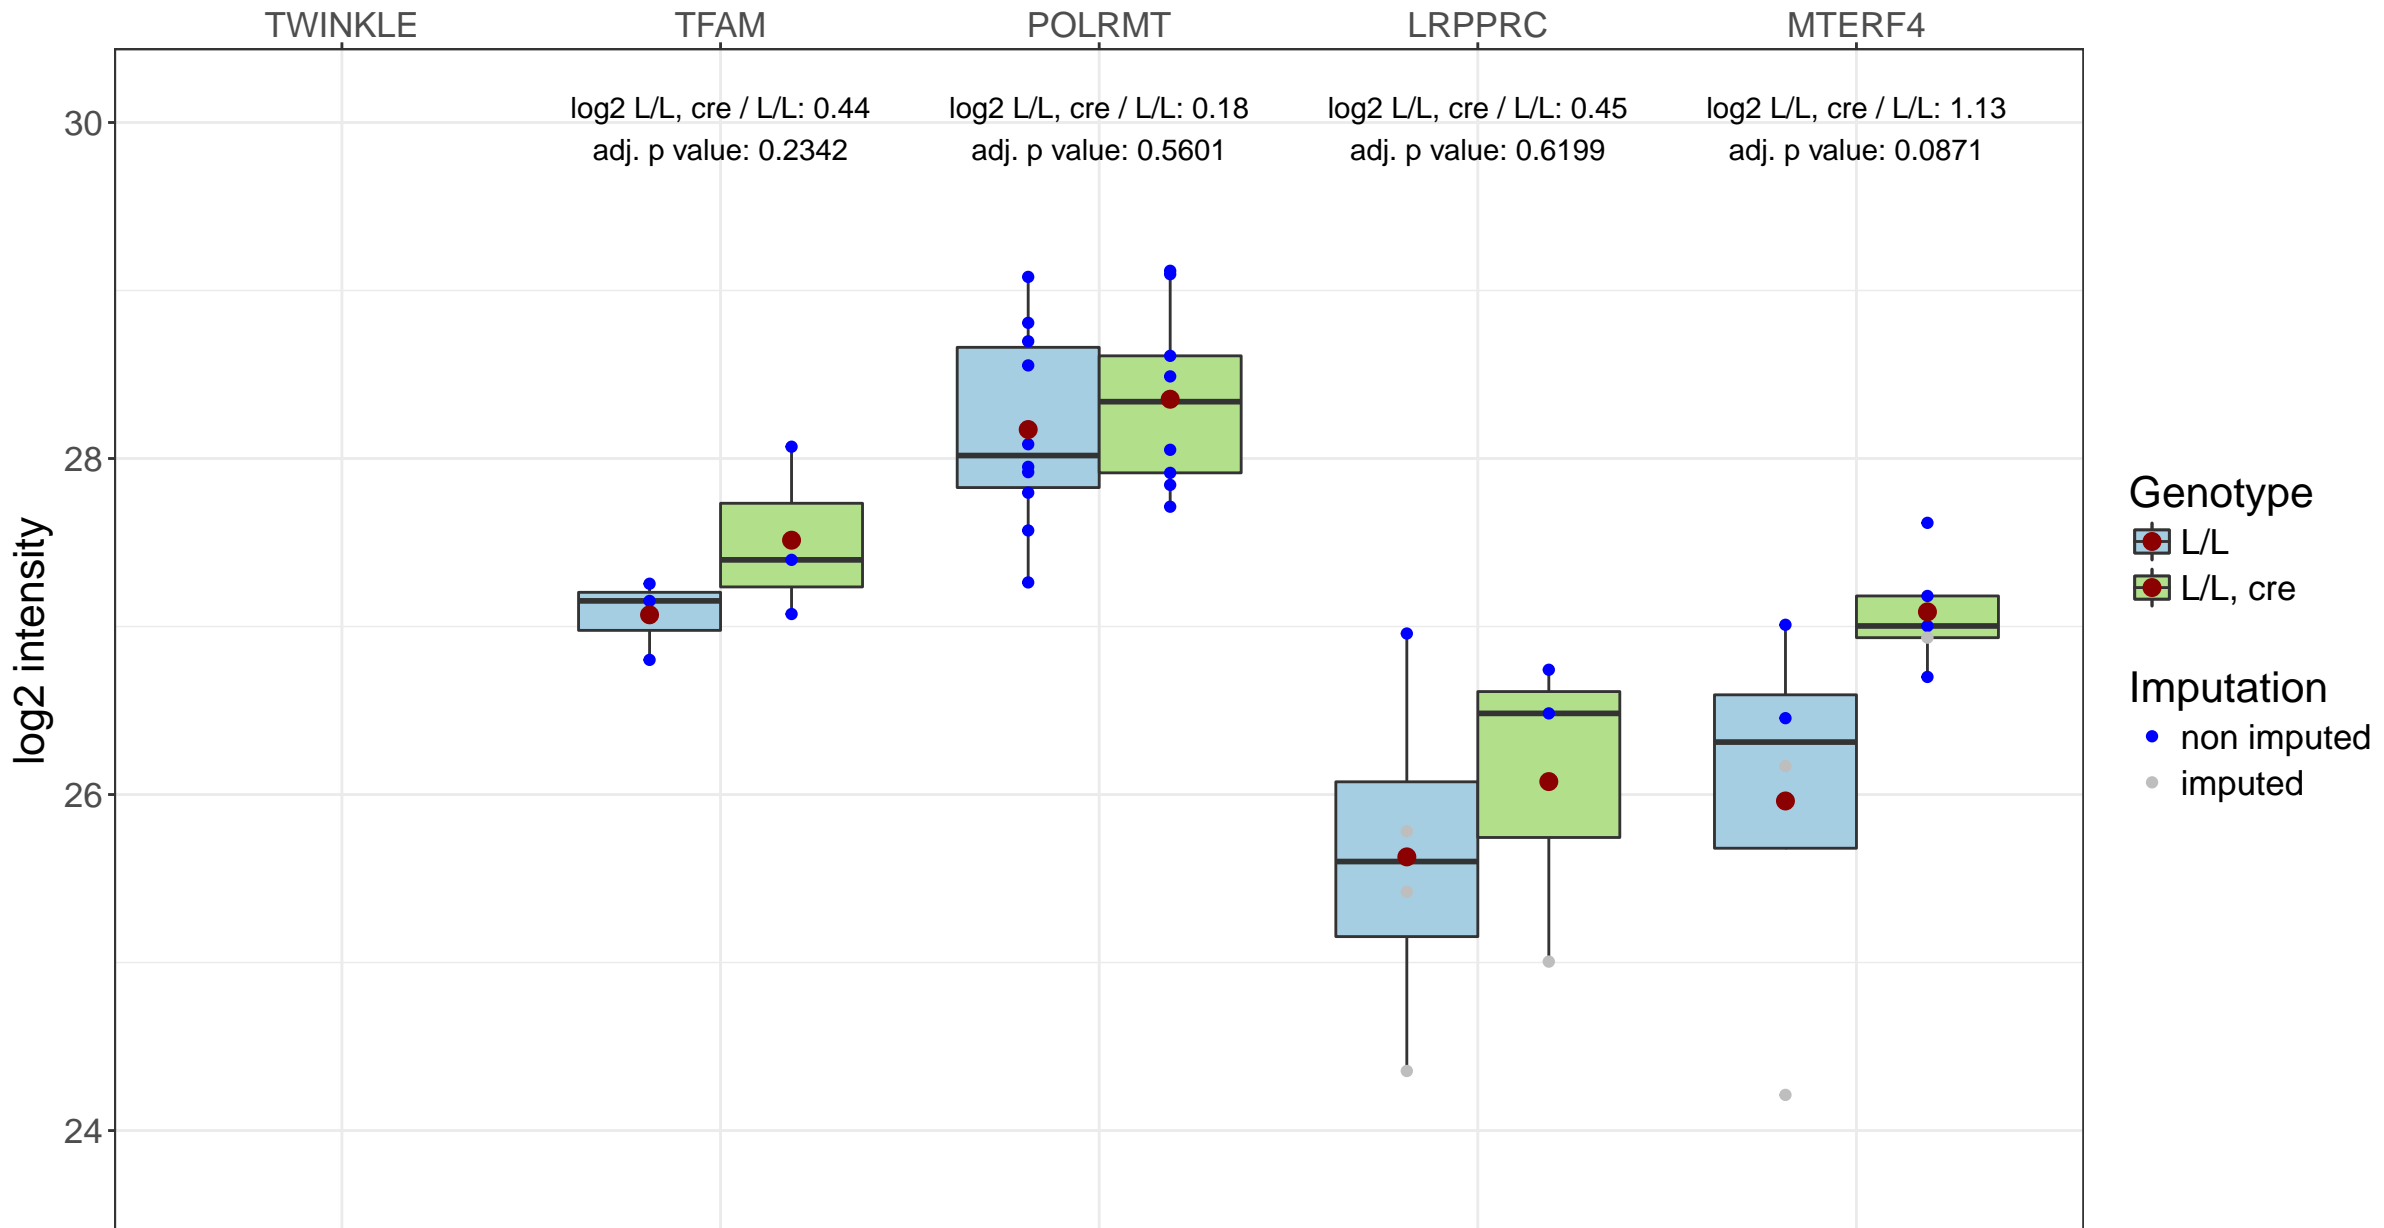

# RPN1 / Q91YQ5

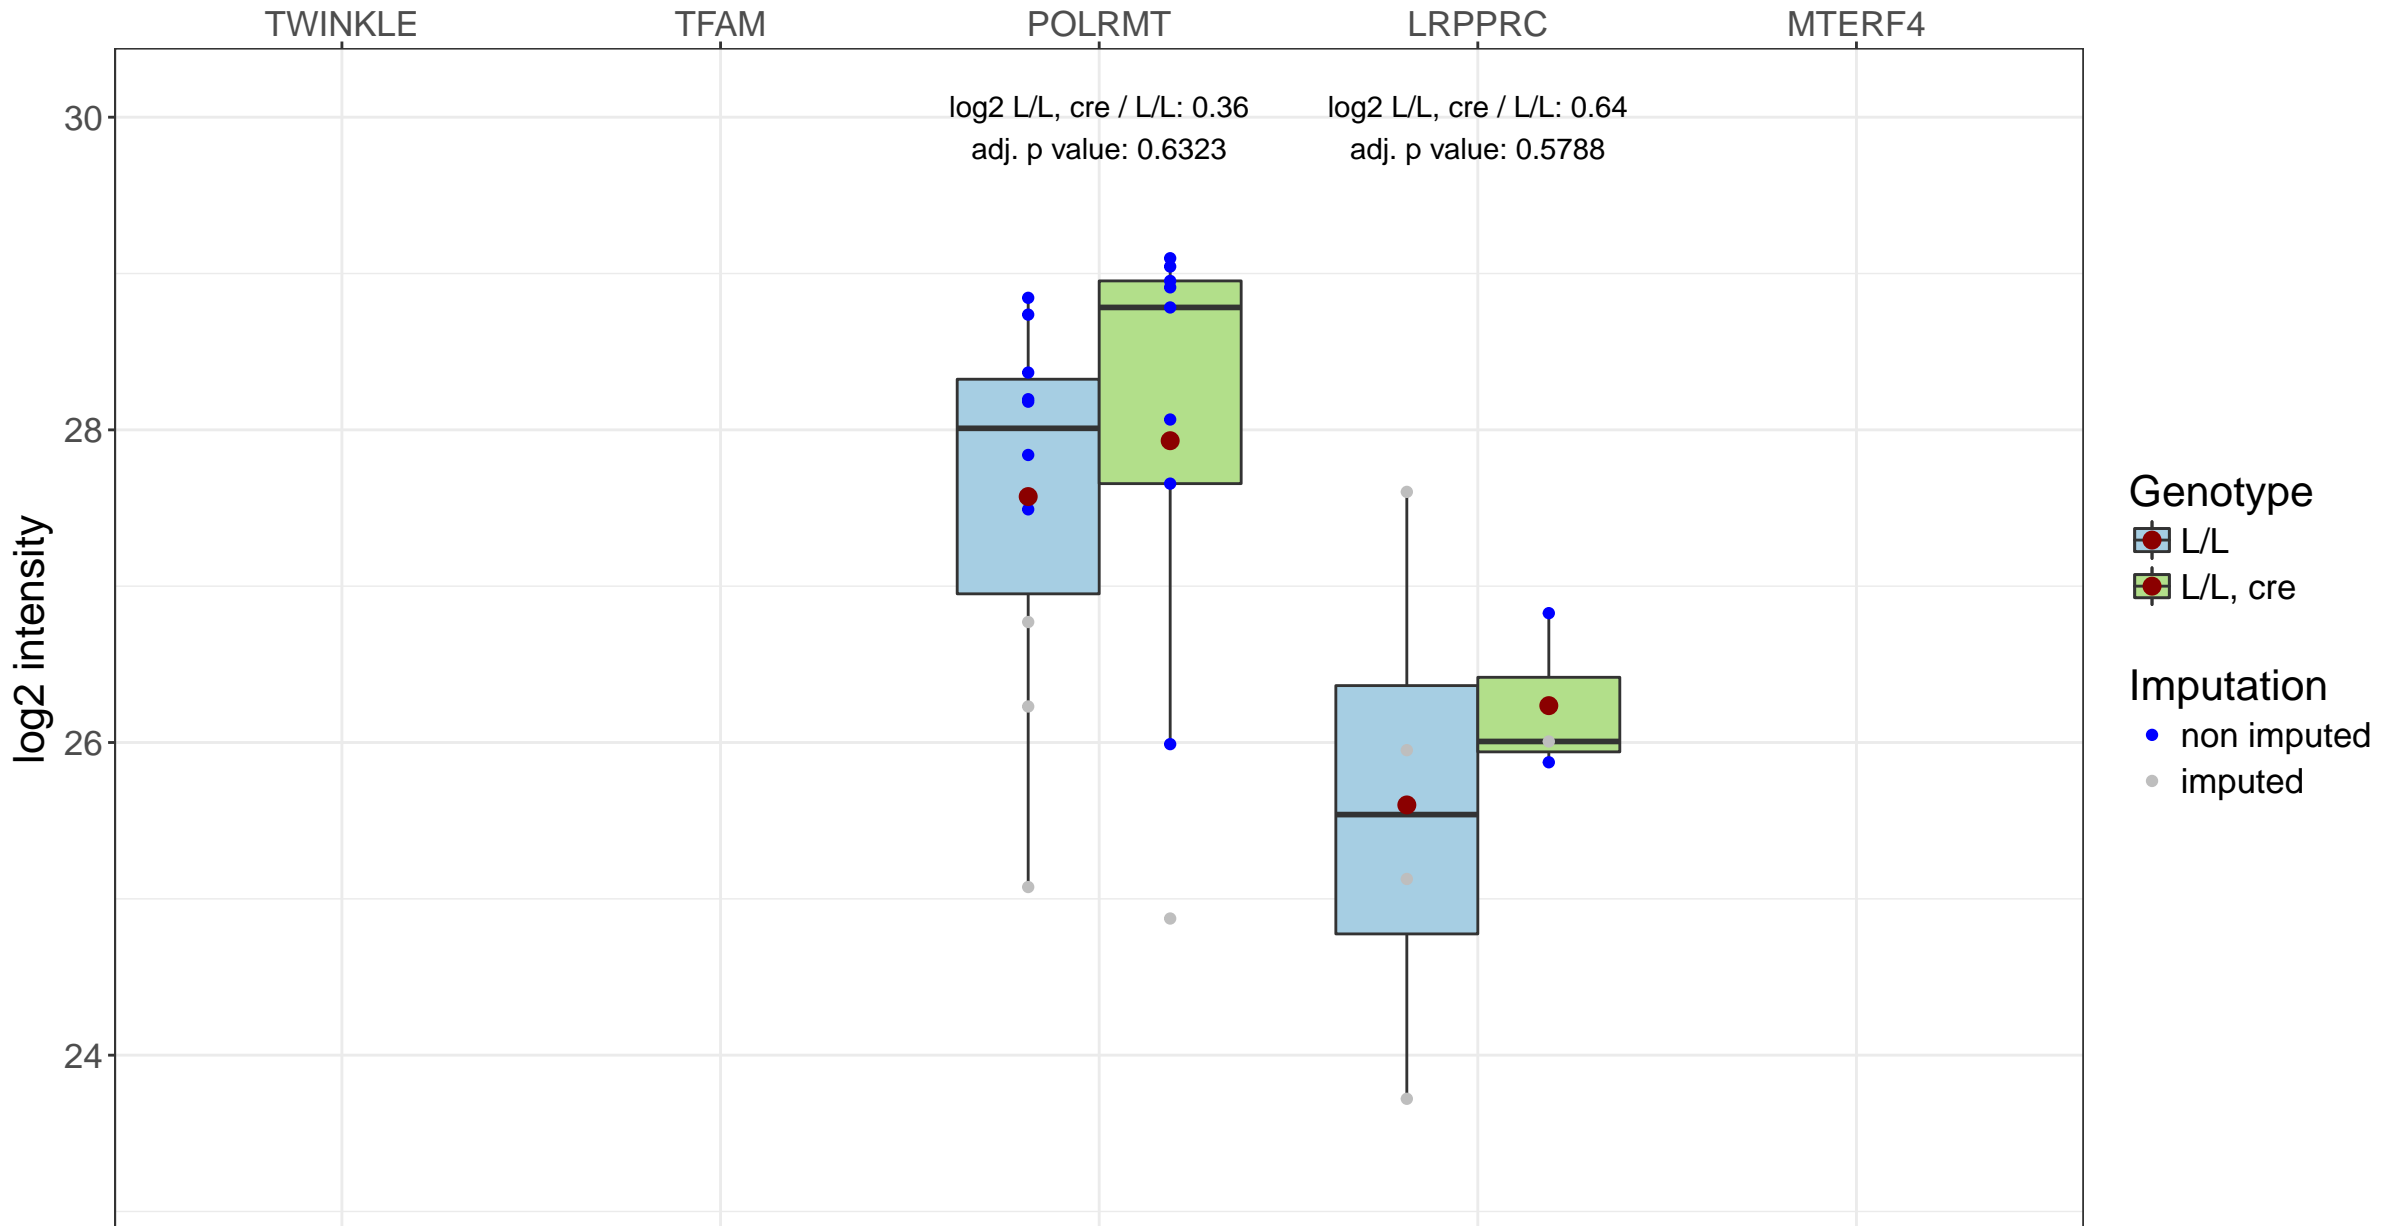

# RPP14 / J3QMX0

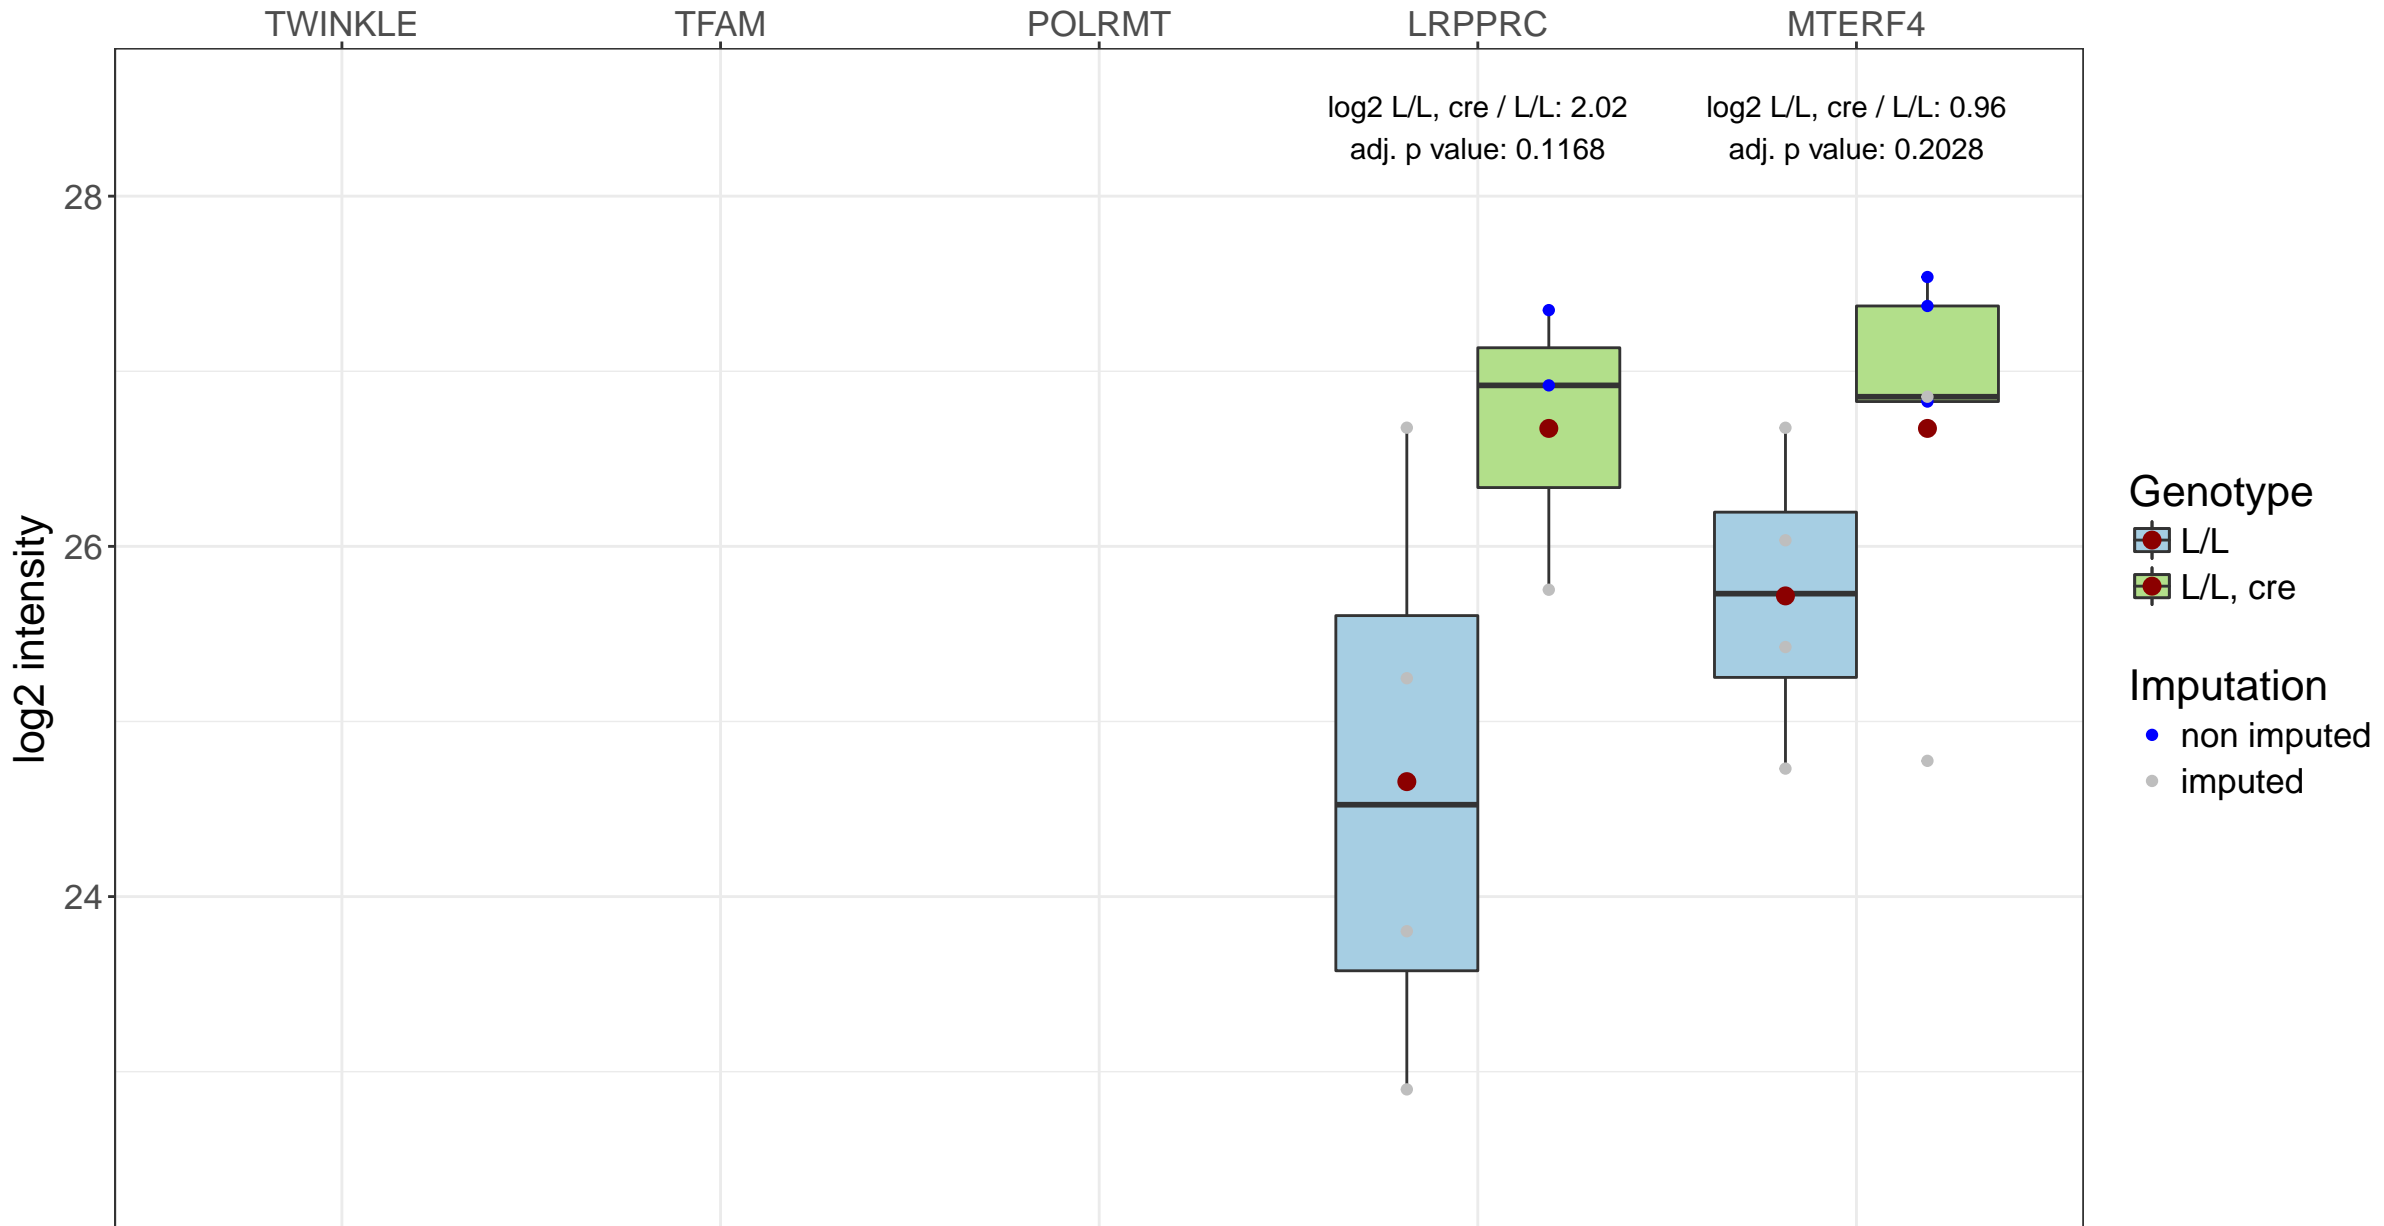

# RPS27A / P62983

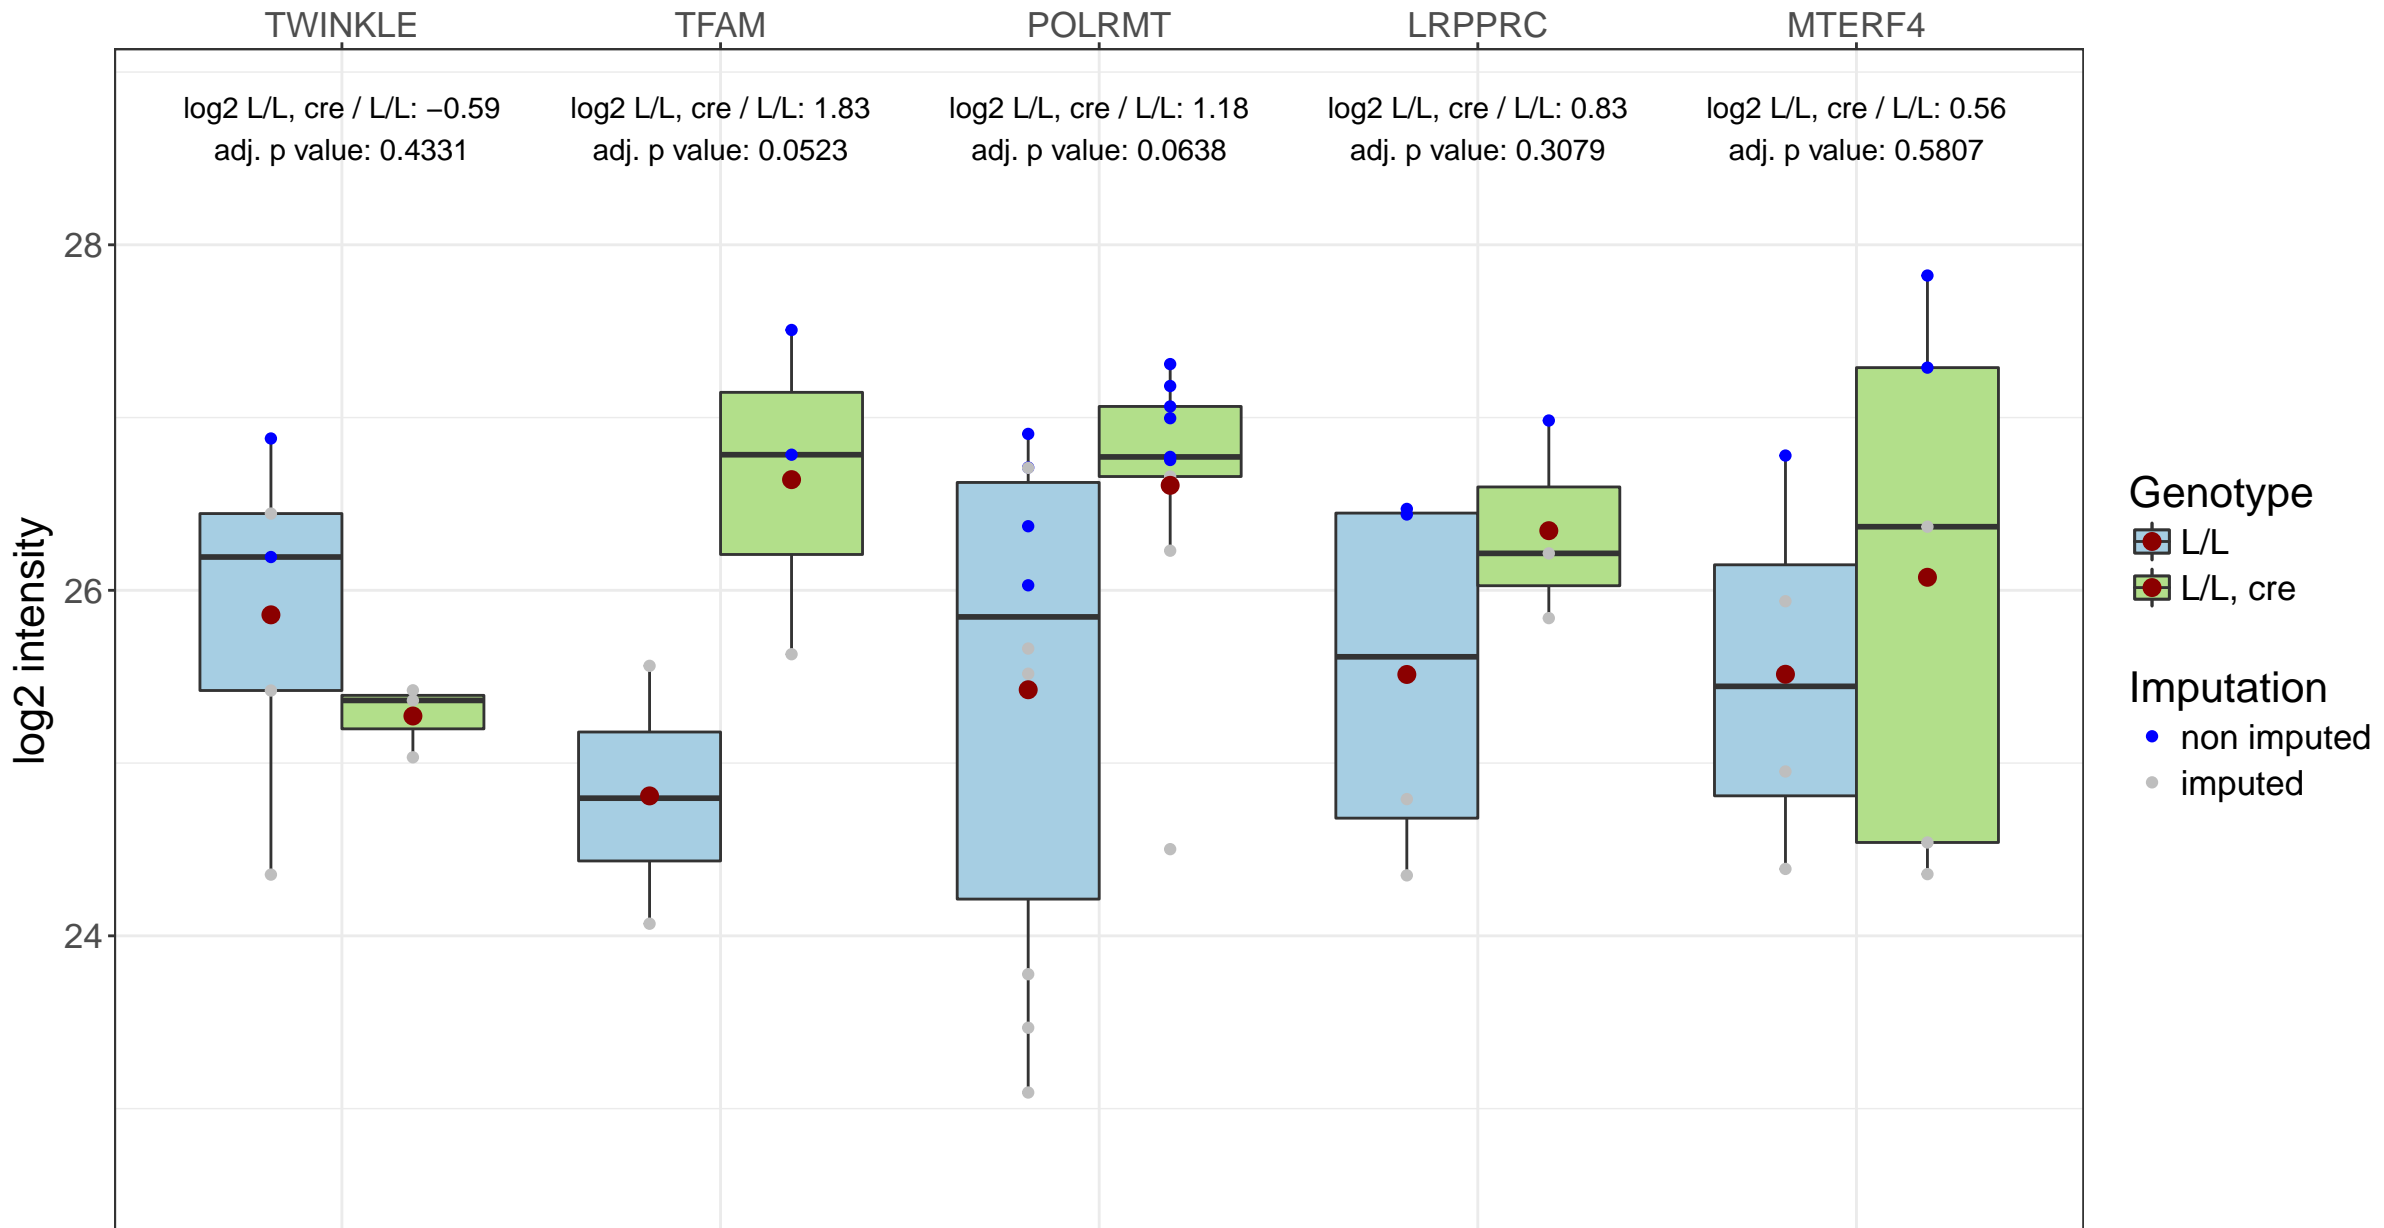

# RPS3A / D3Z6C3

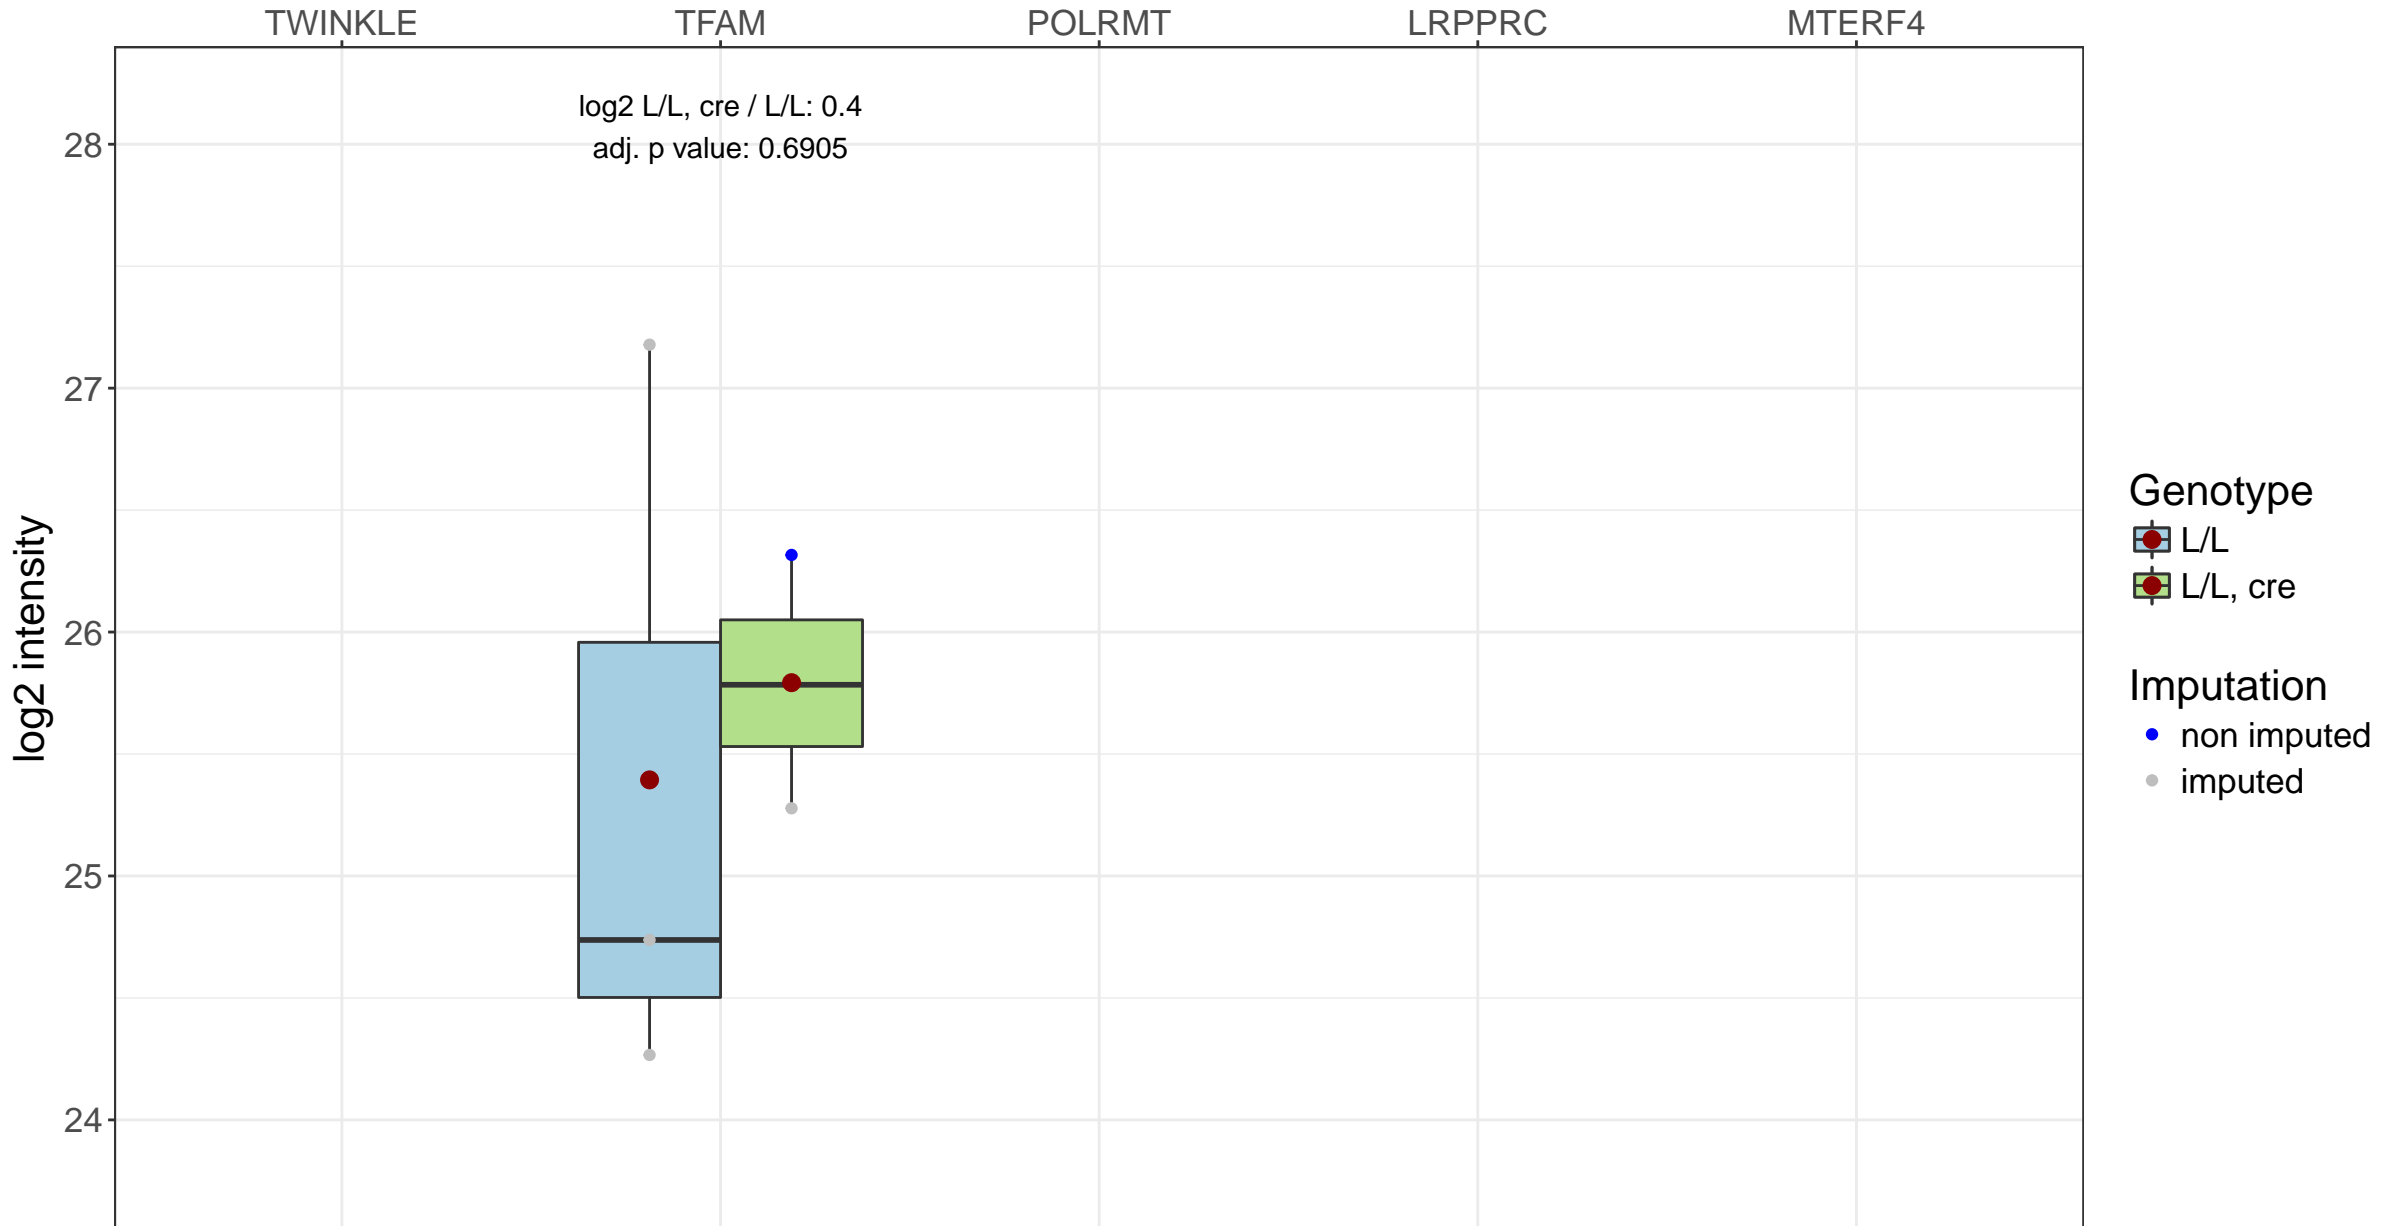

# RPUSD3 / Q14AI6

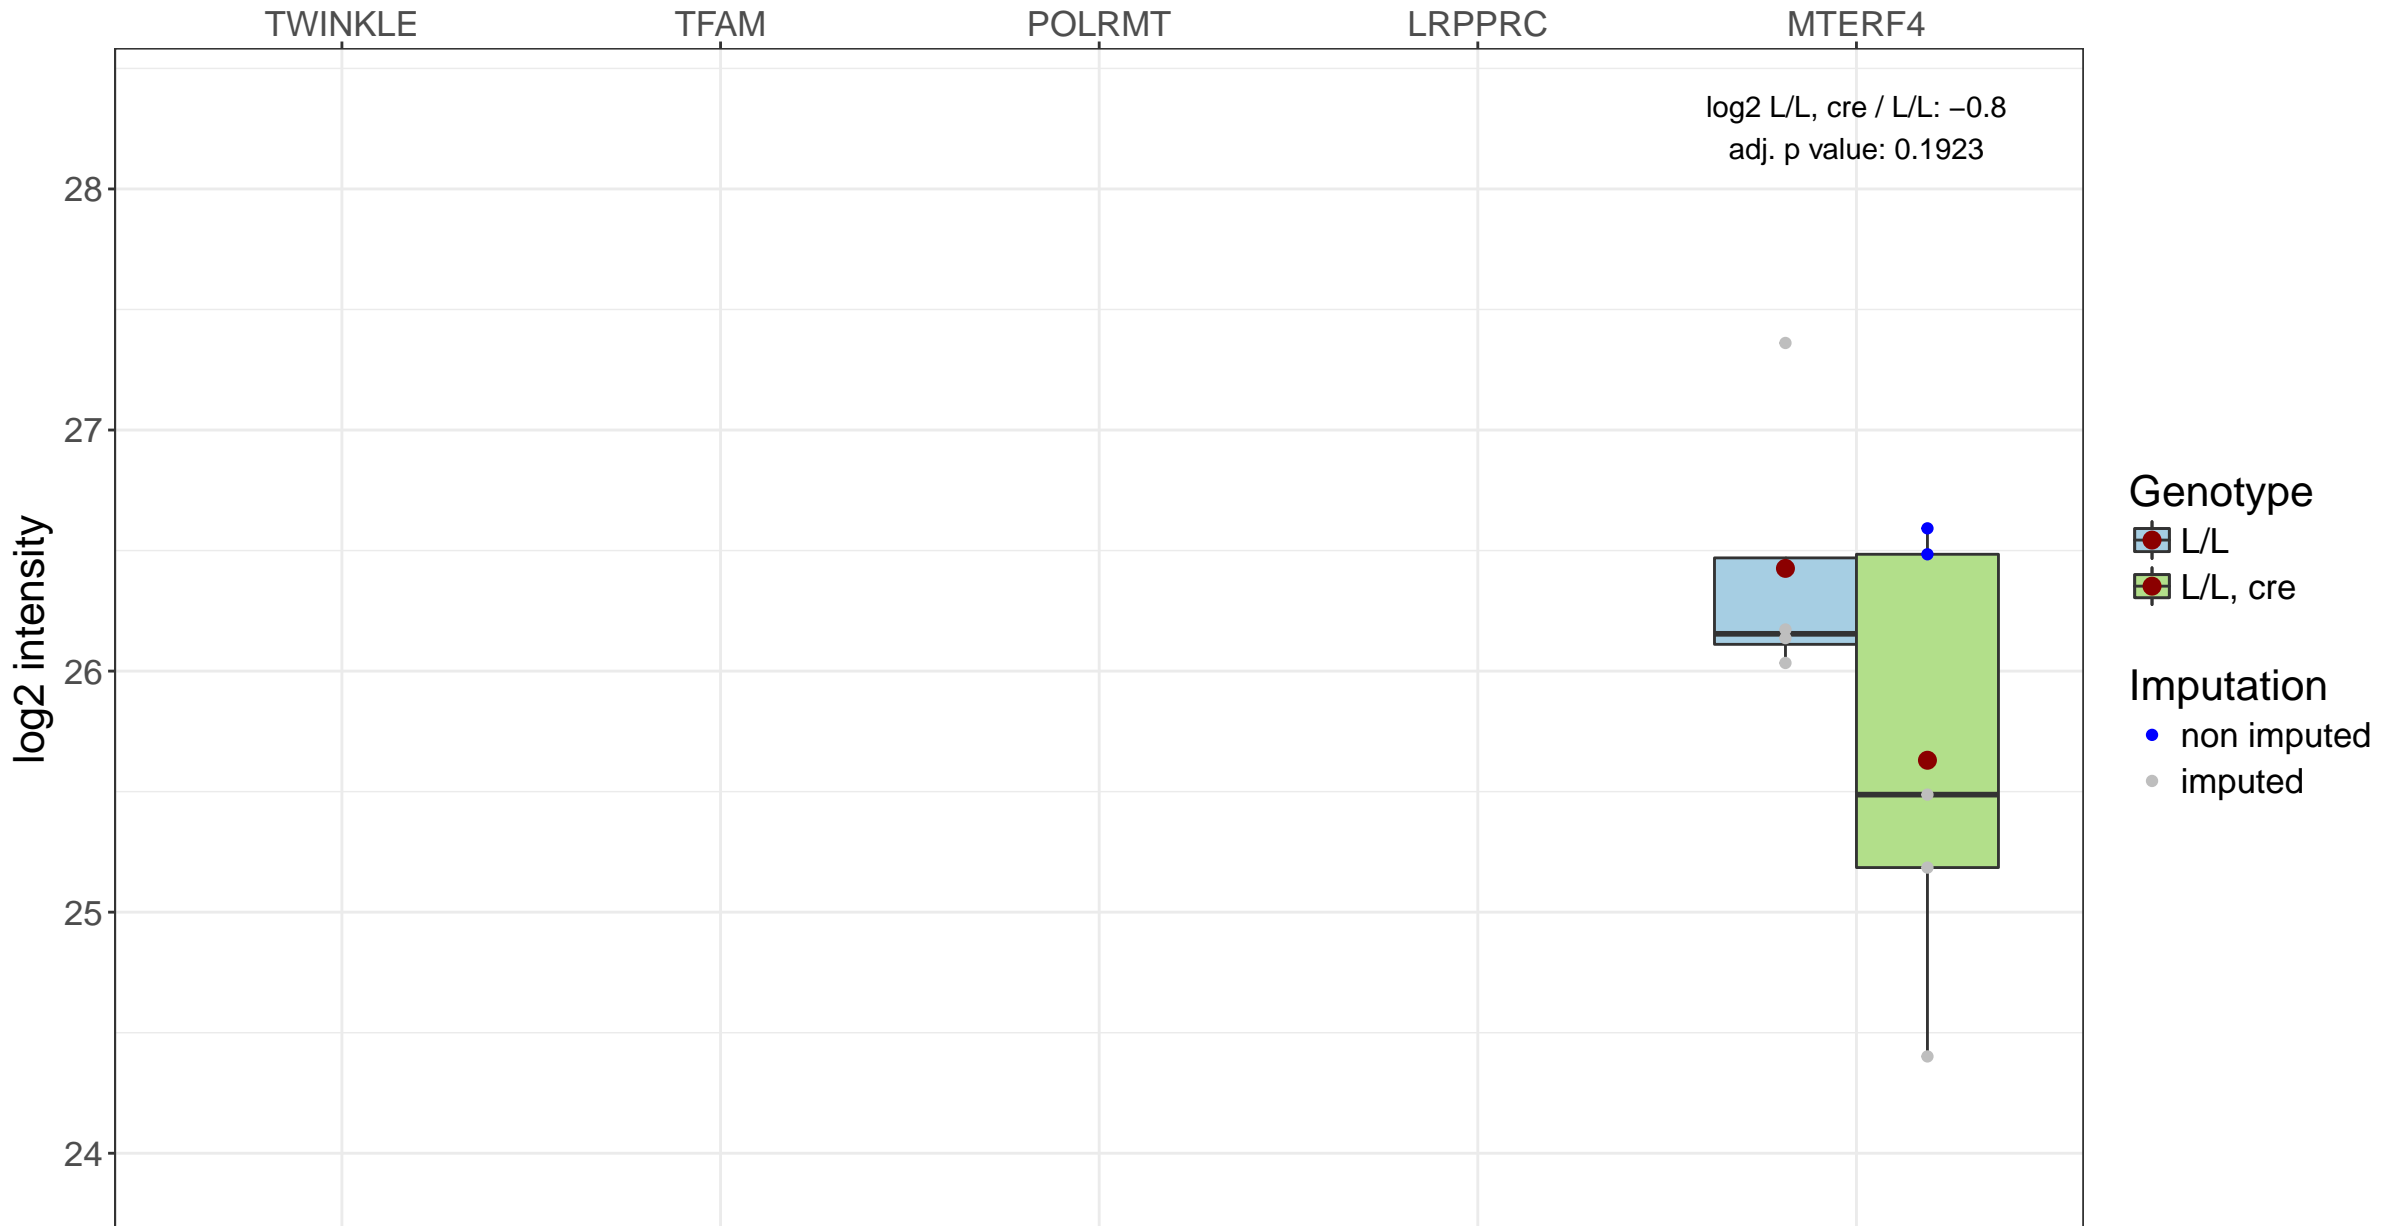

# RRBP1 / A2AVJ7

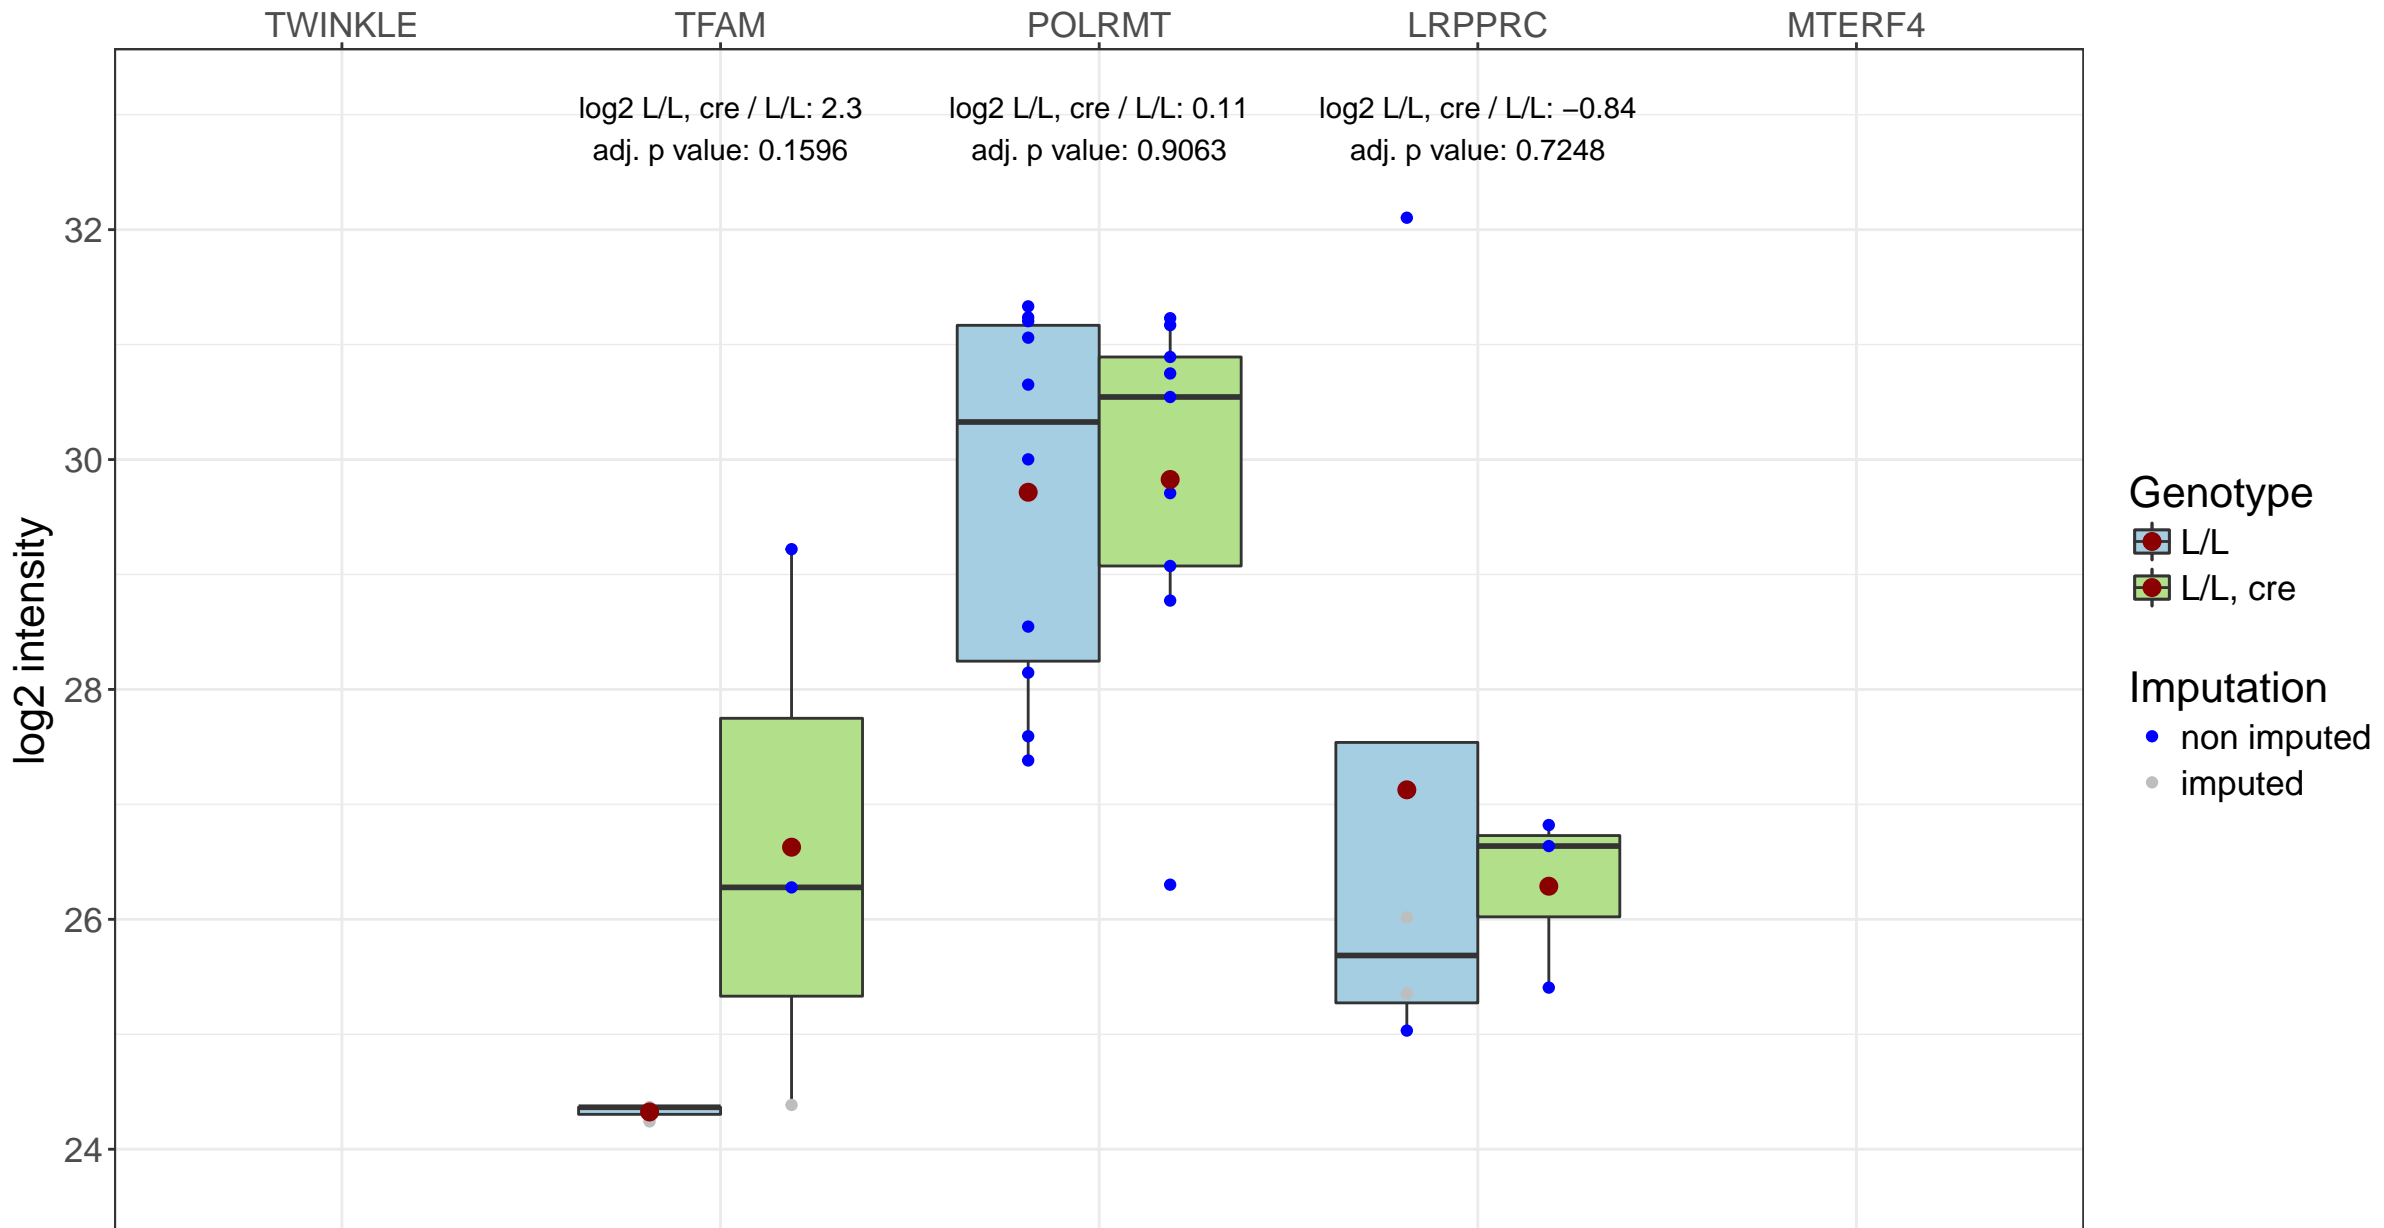



# RTN4IP1 / Q924D0

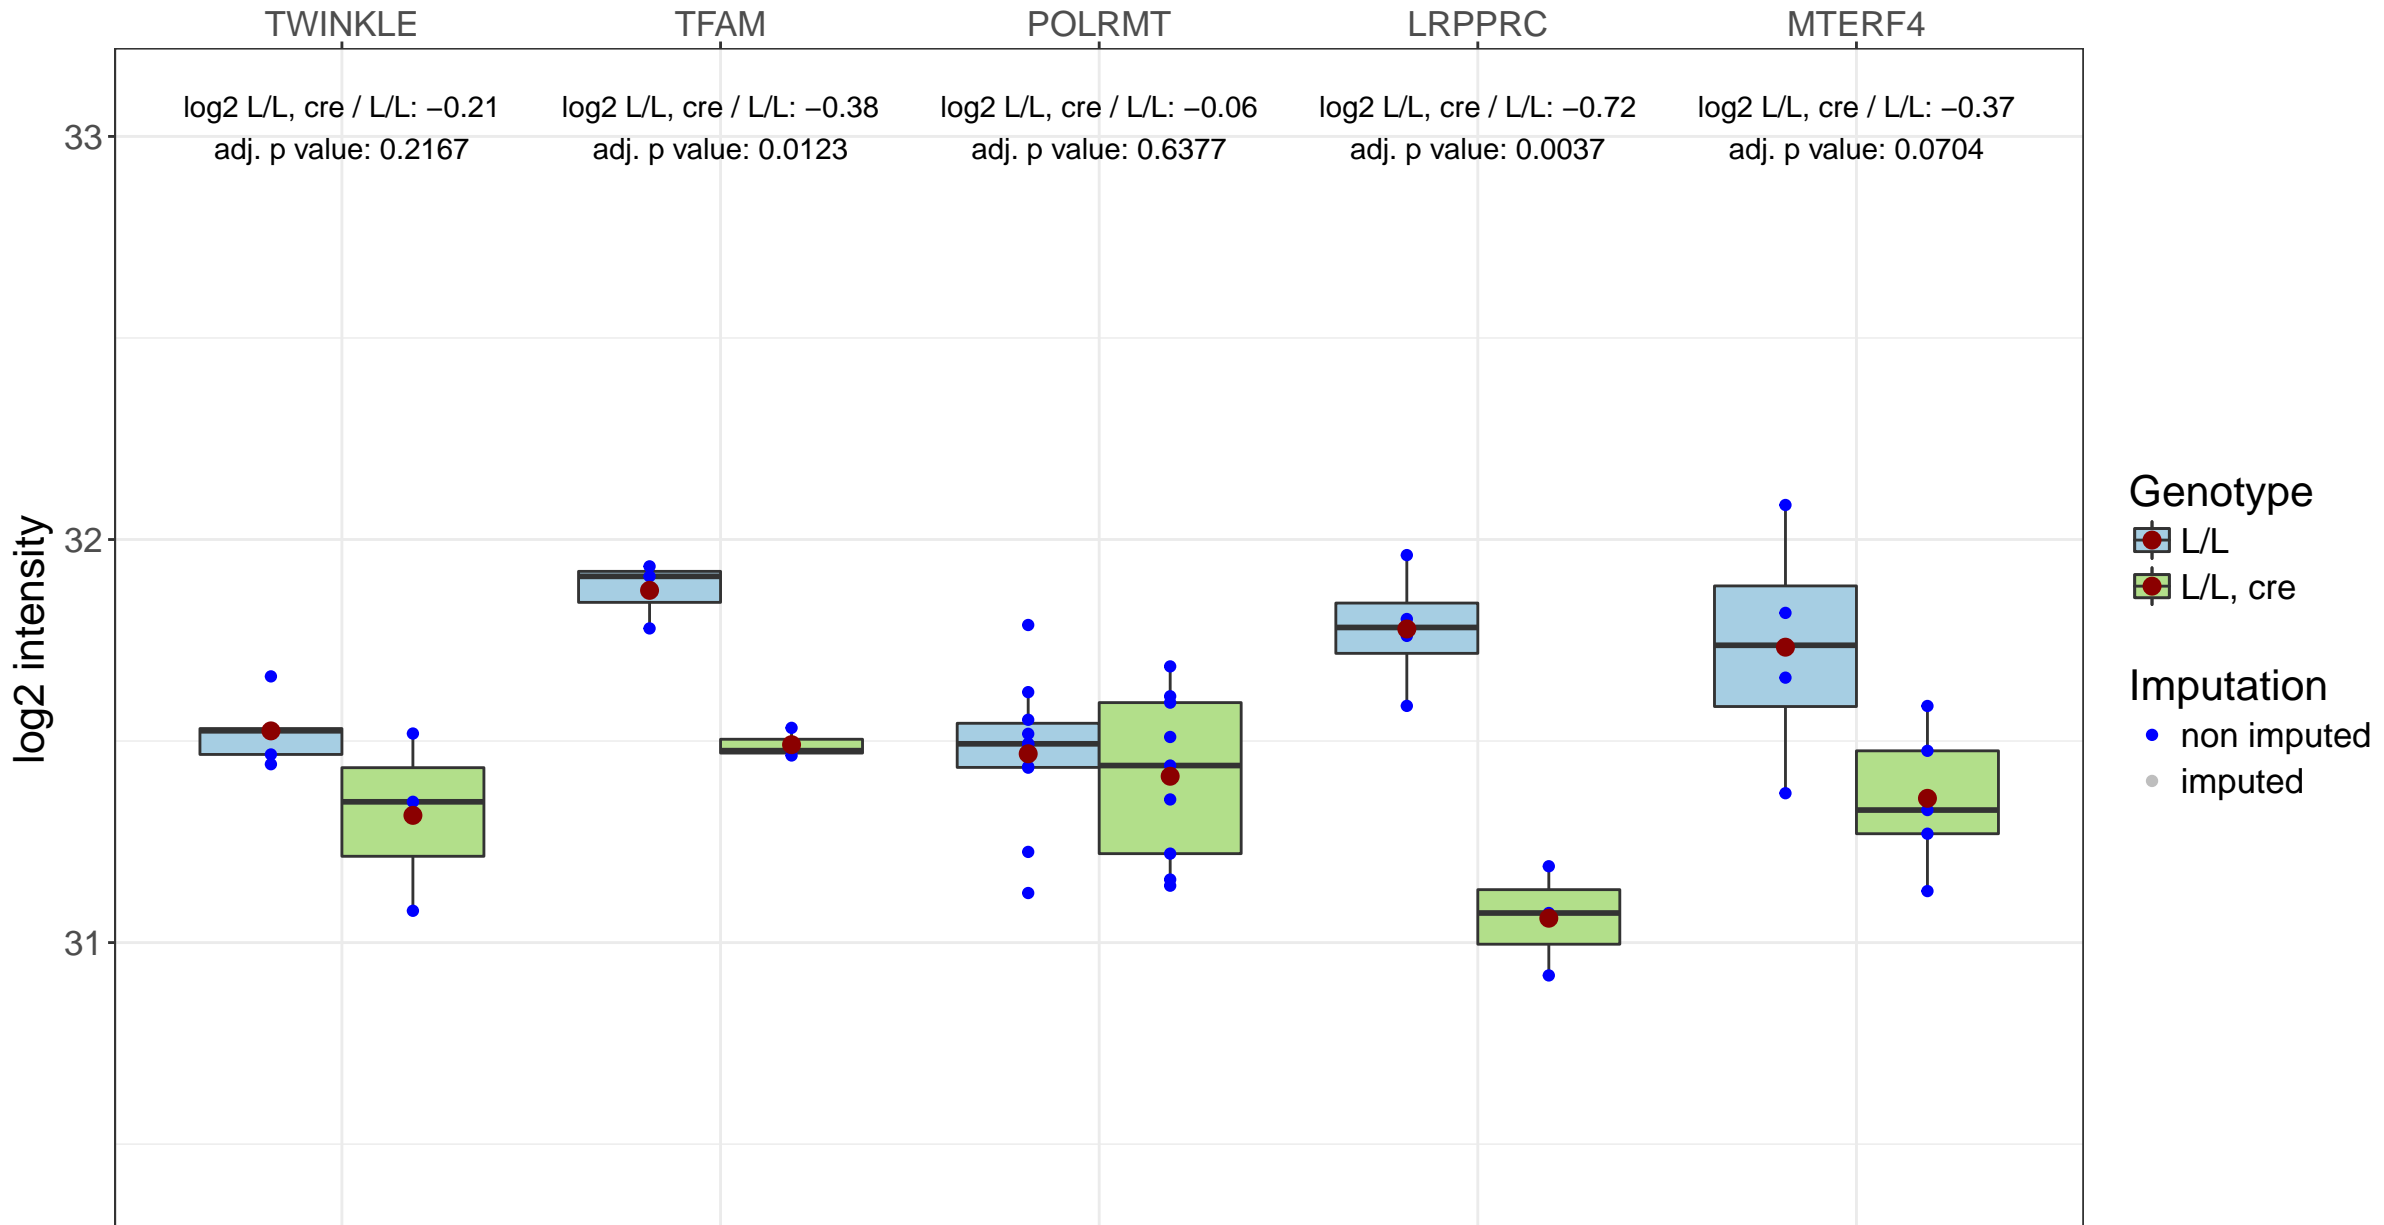

# RYR2 / E9Q401

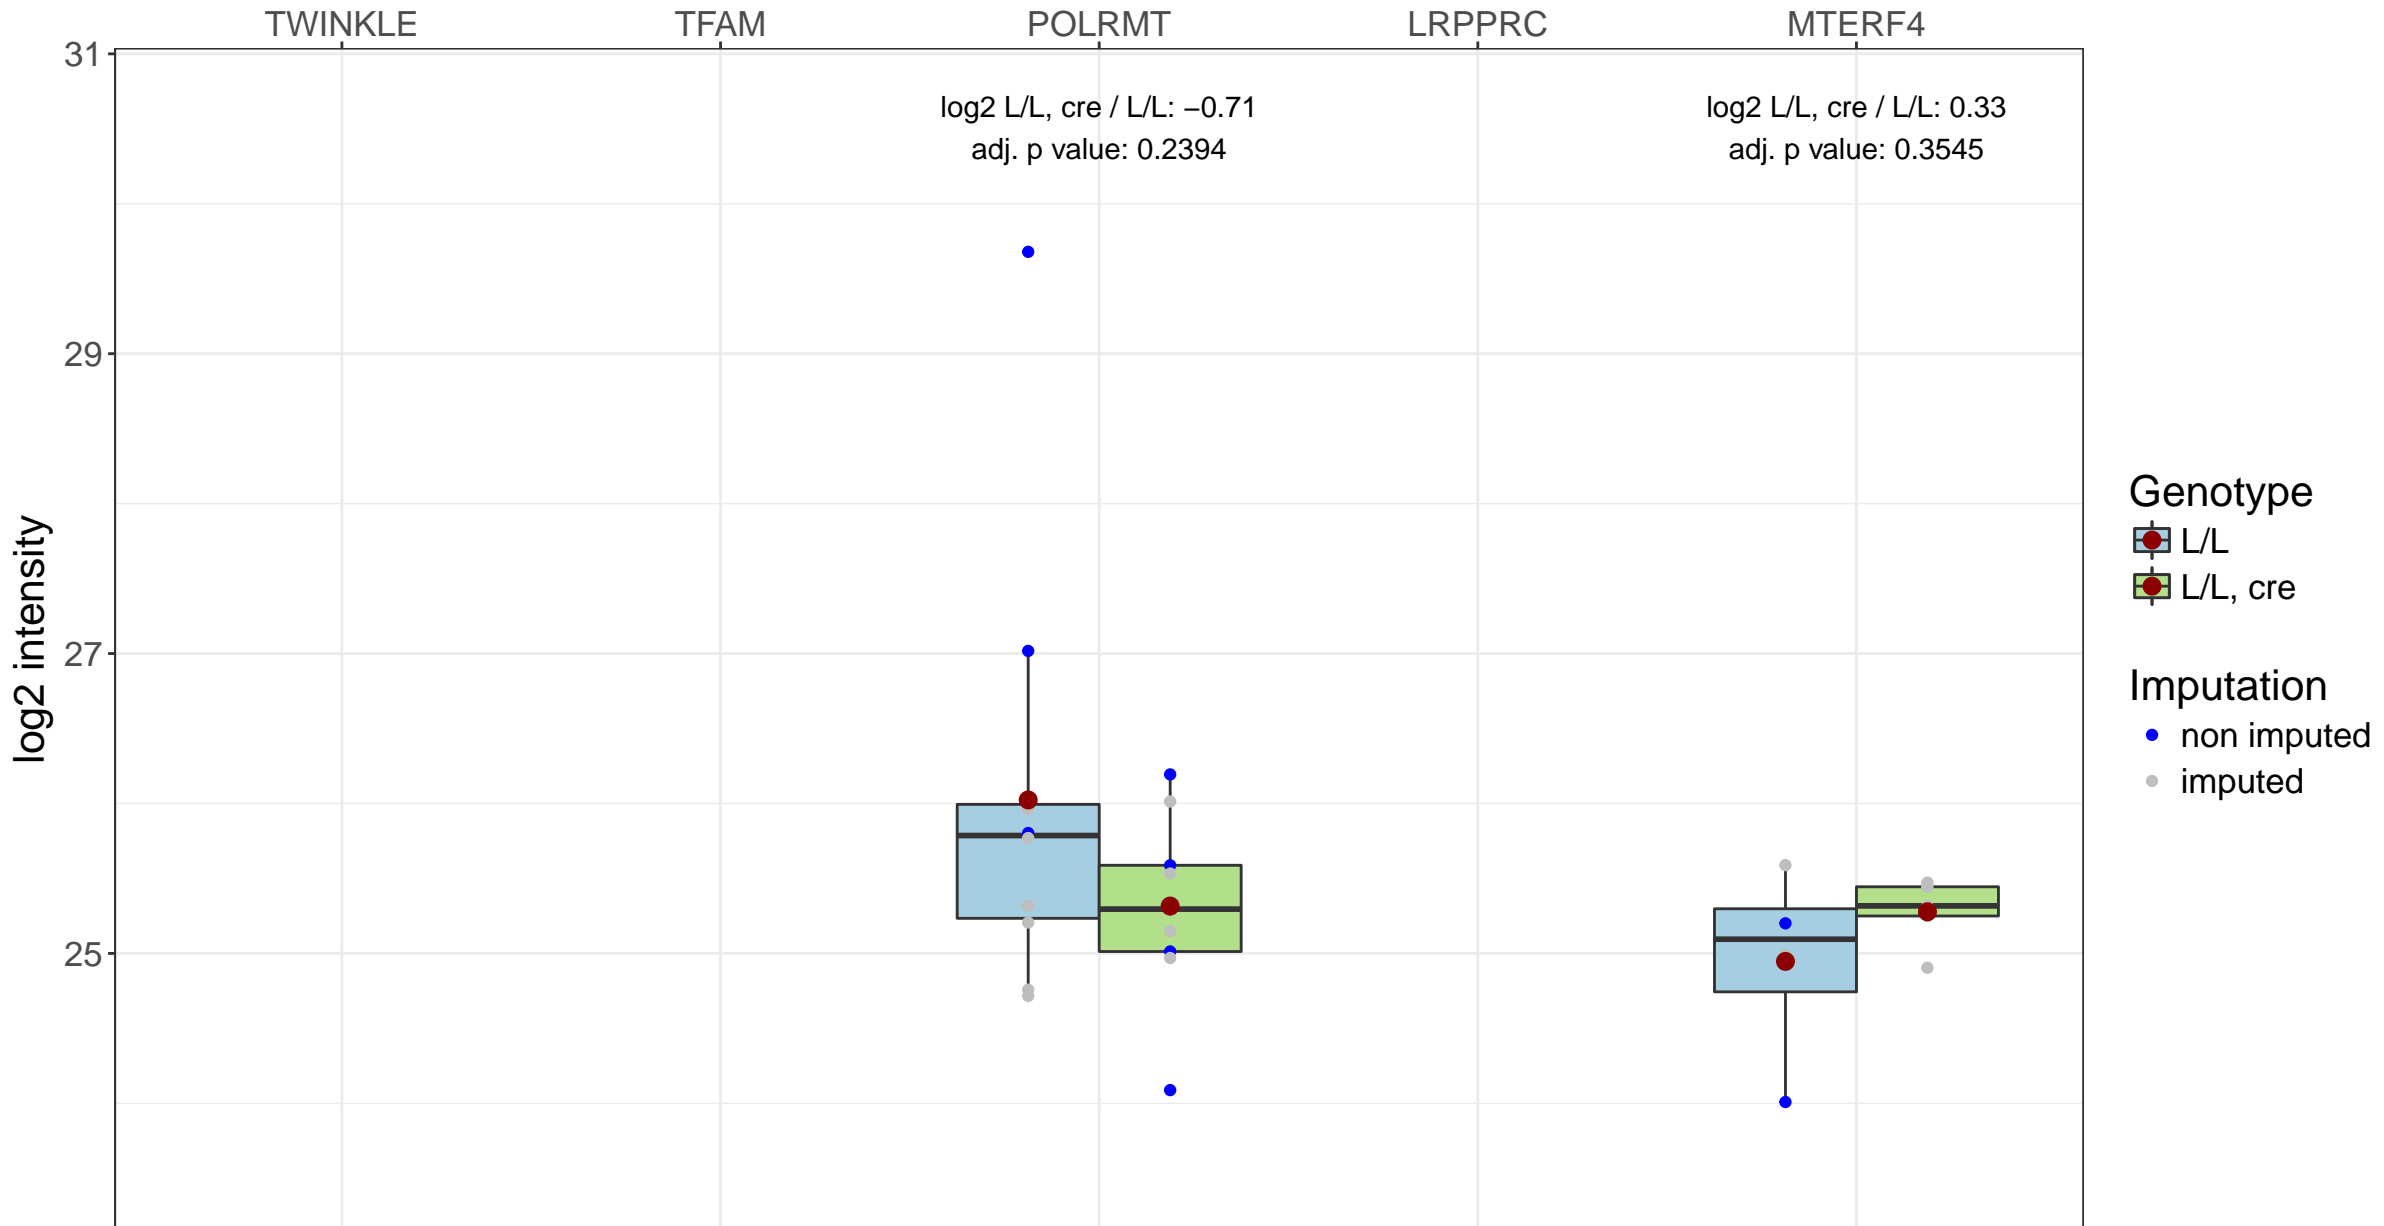

# SAMM50 / Q8BGH2

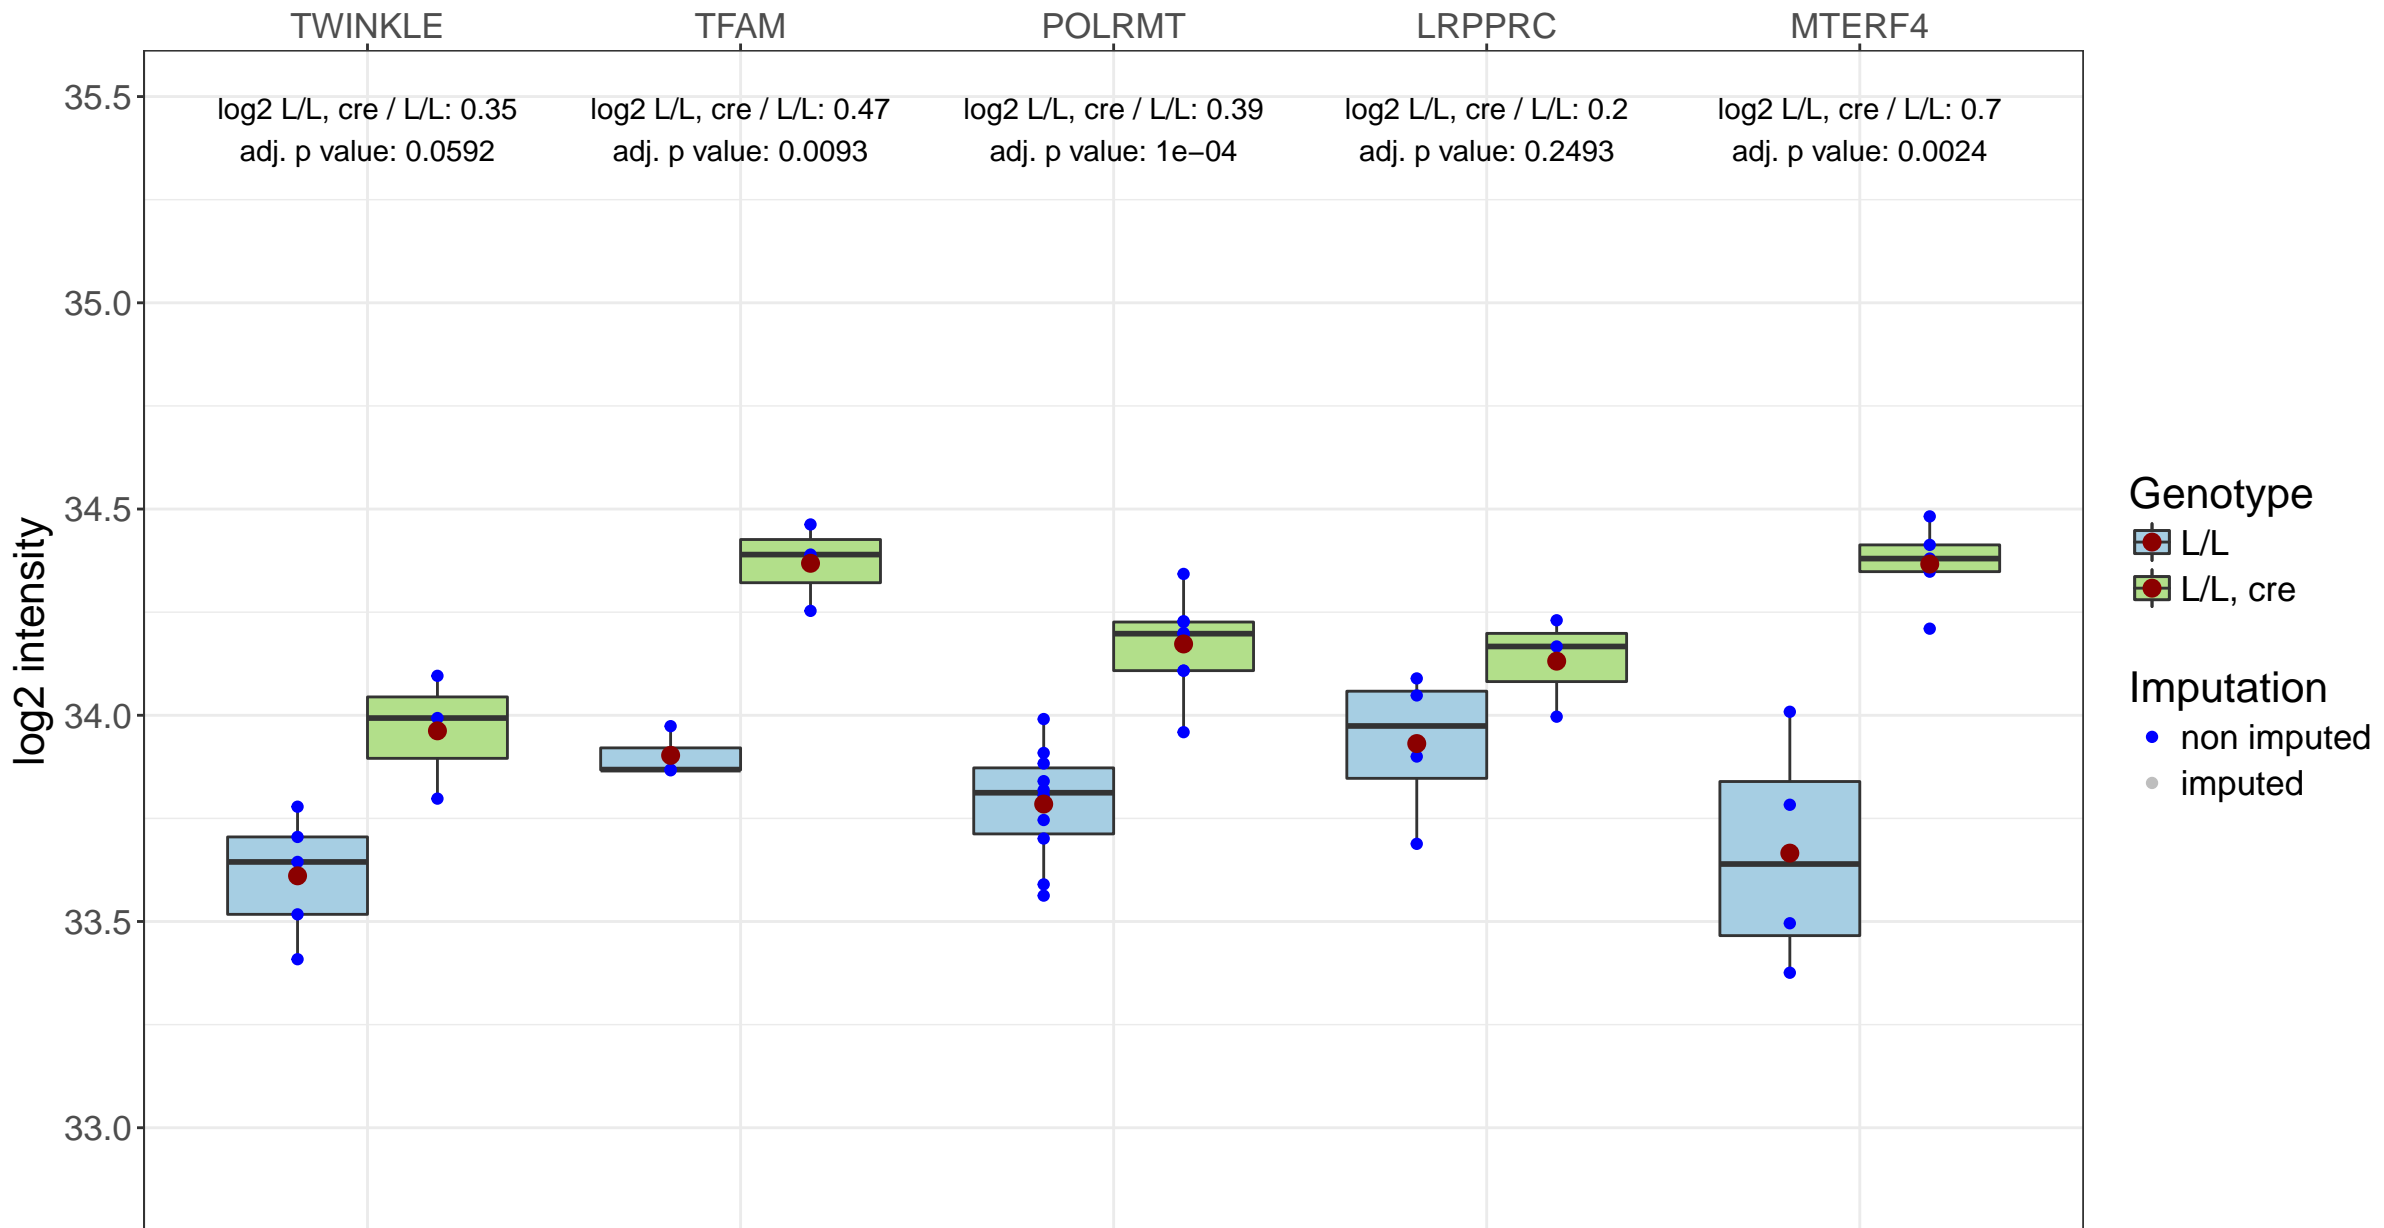

# SARDH / Q99LB7

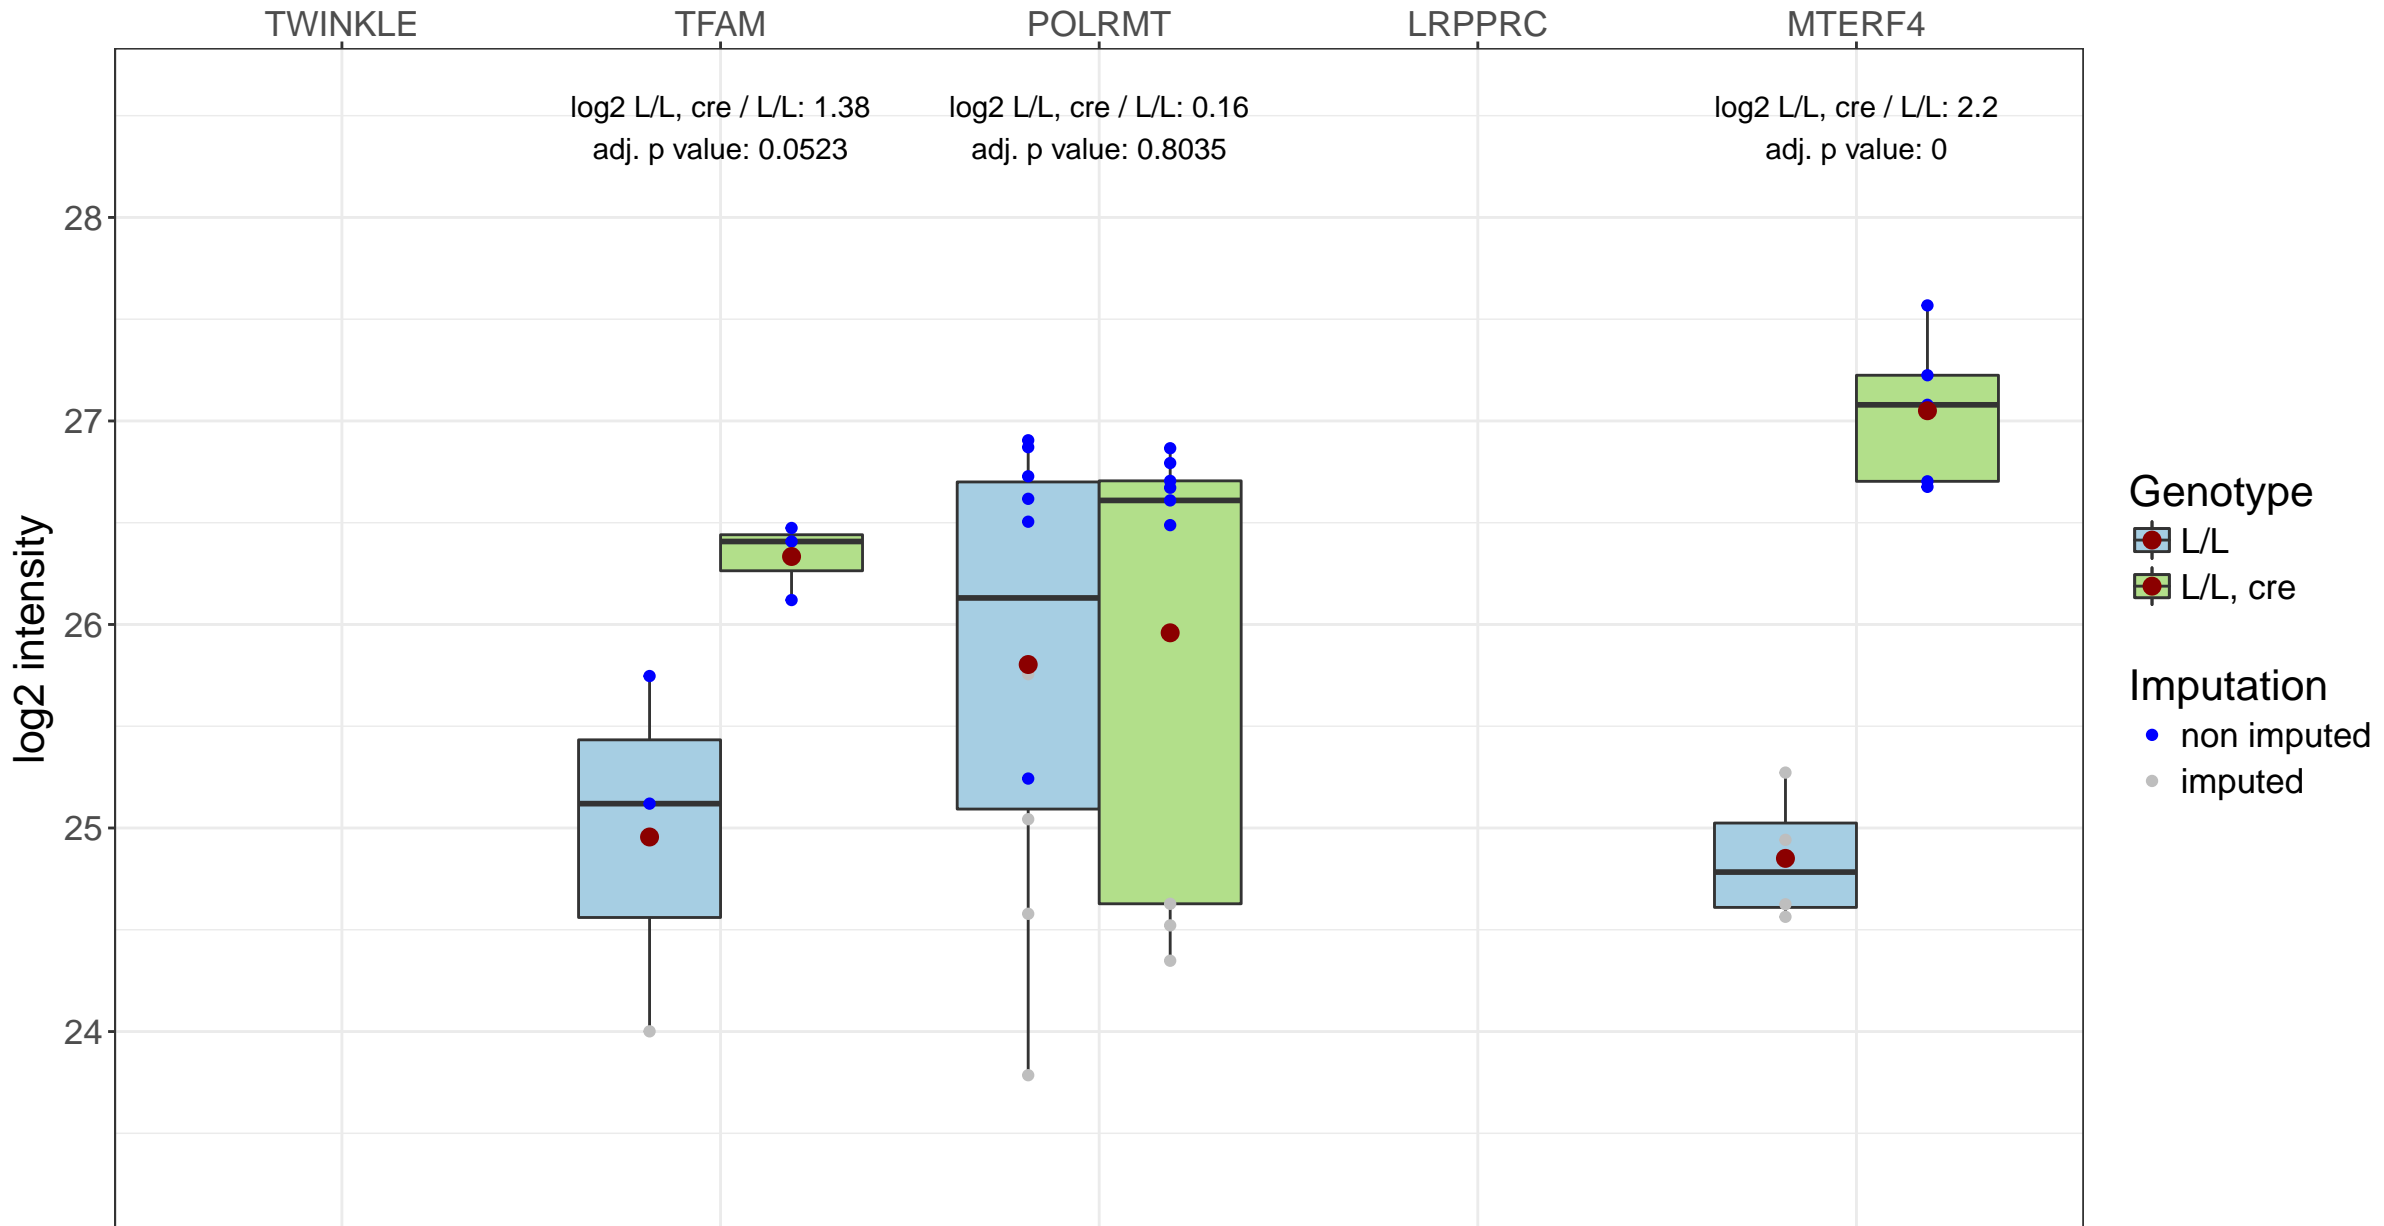

# SARS2 / Q9JL8

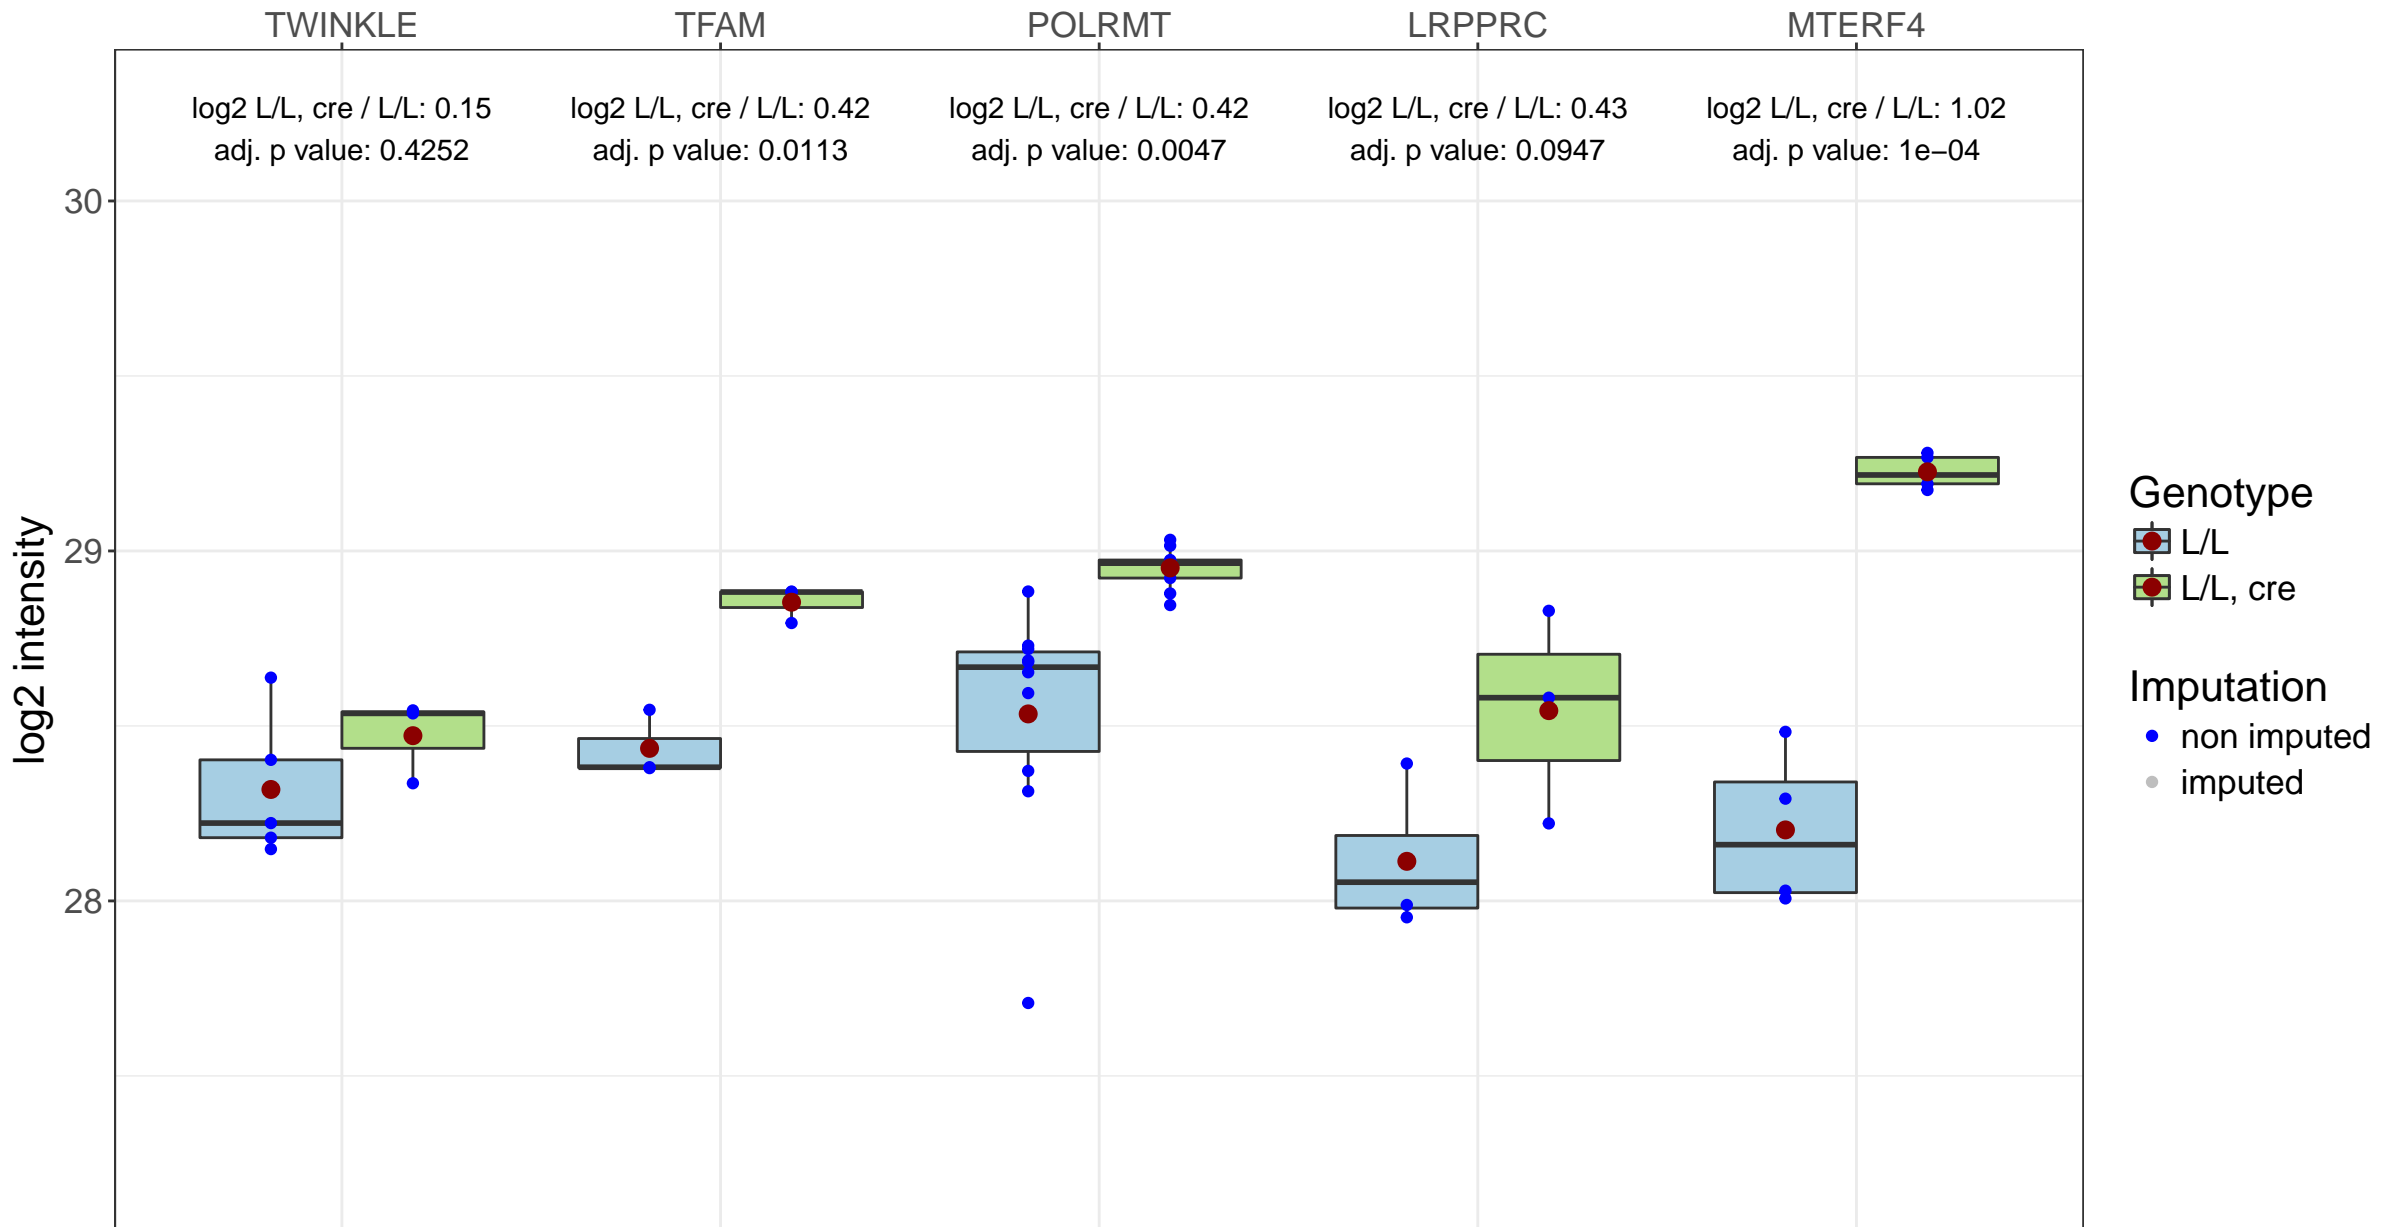

# SCCPDH / Q8R127

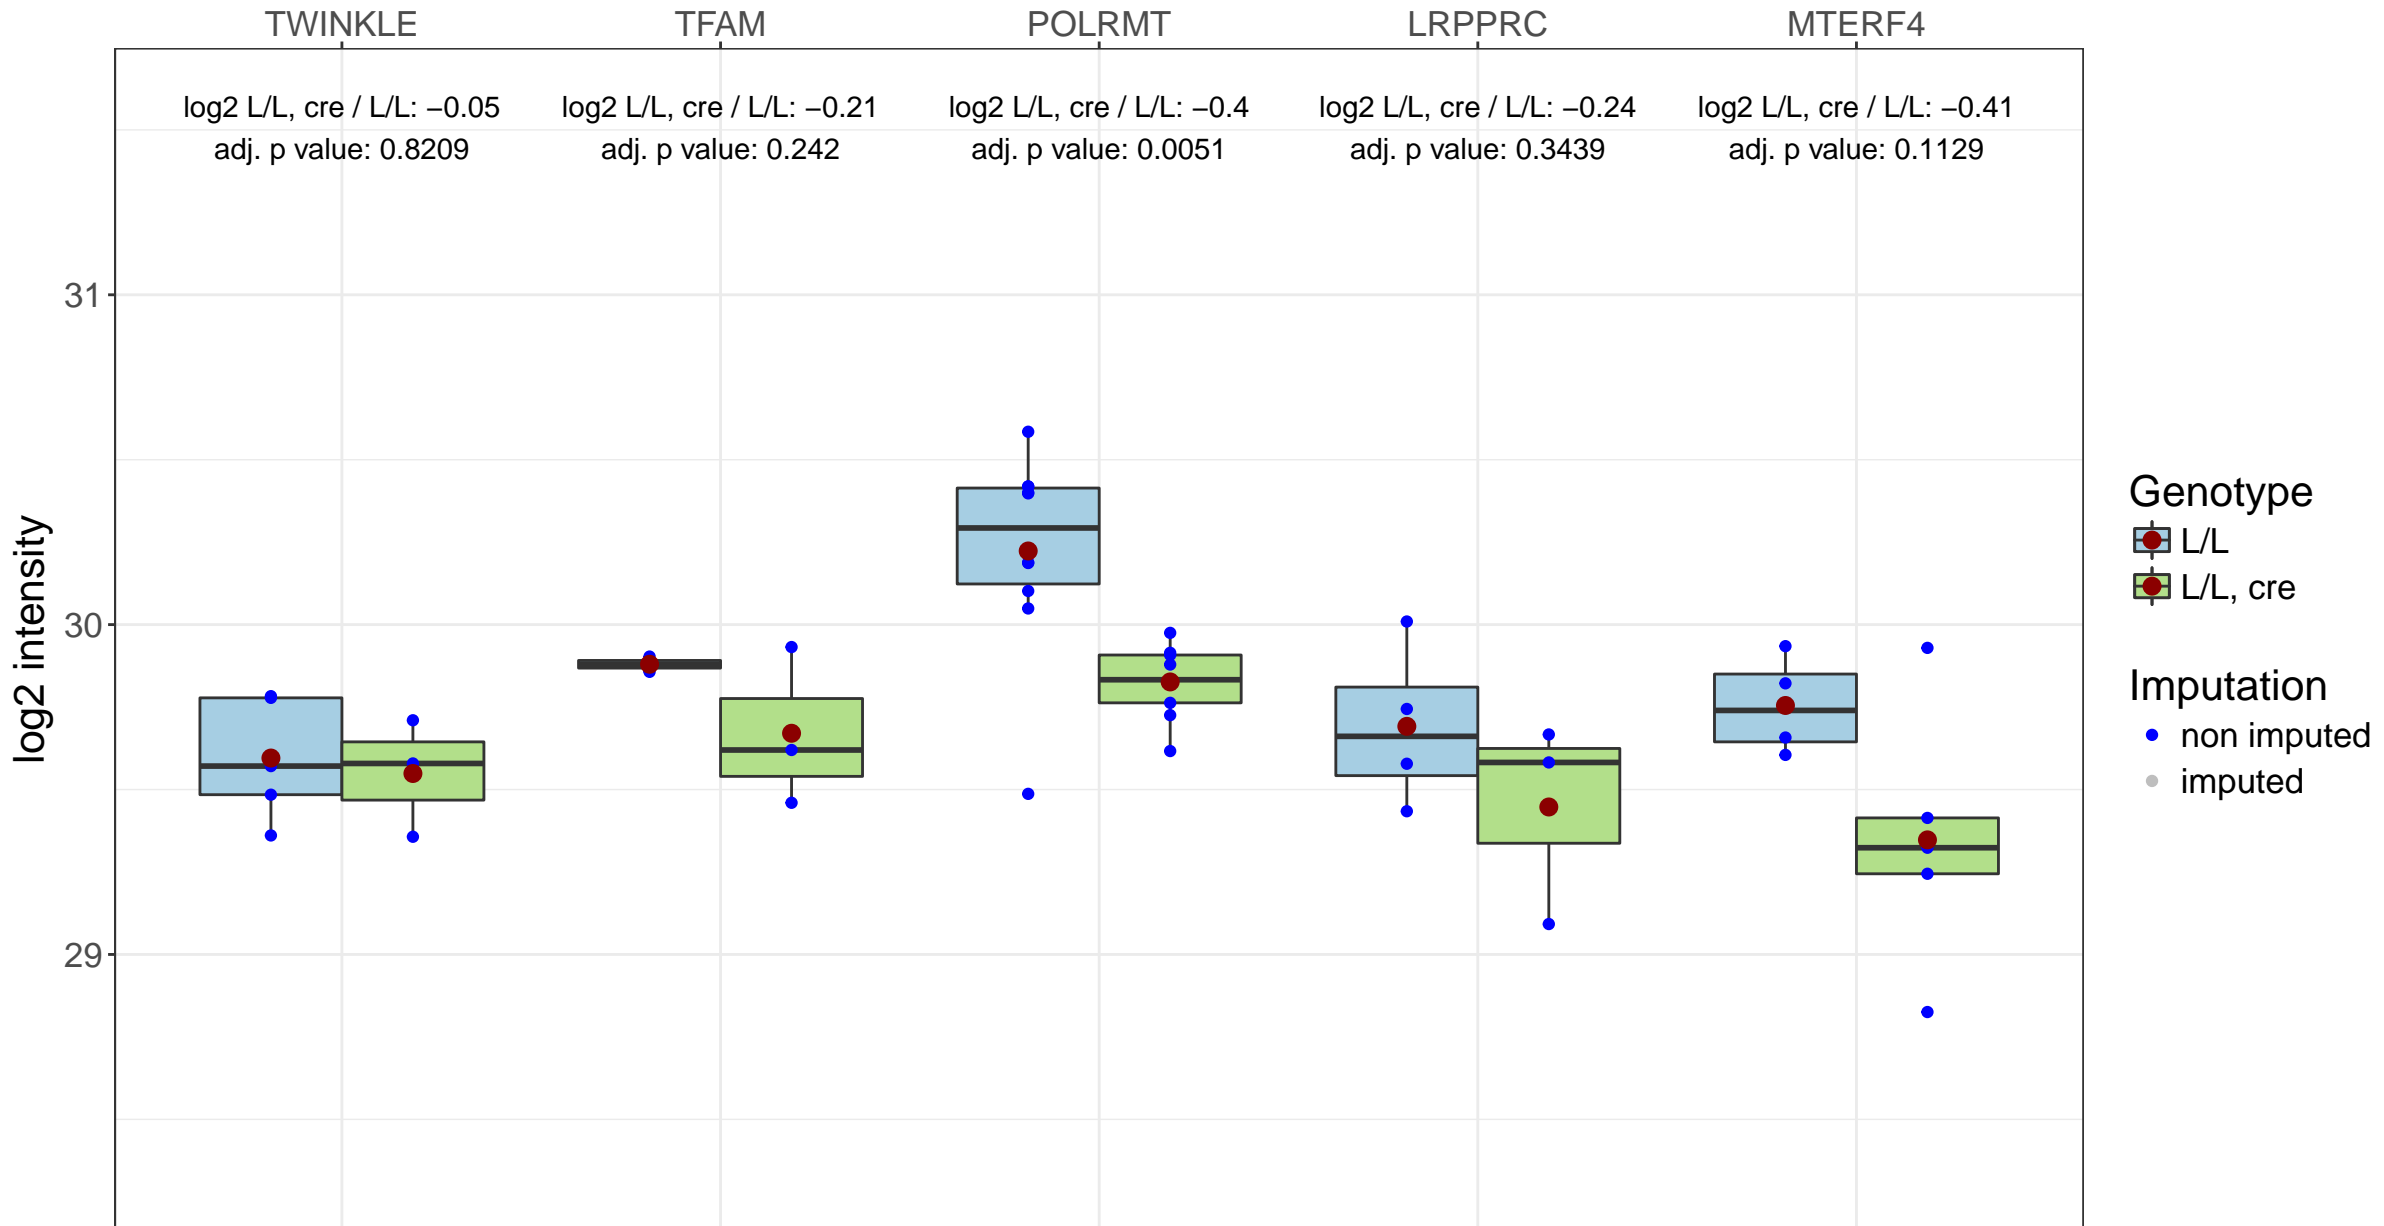

# SCO1 / Q5SUD5

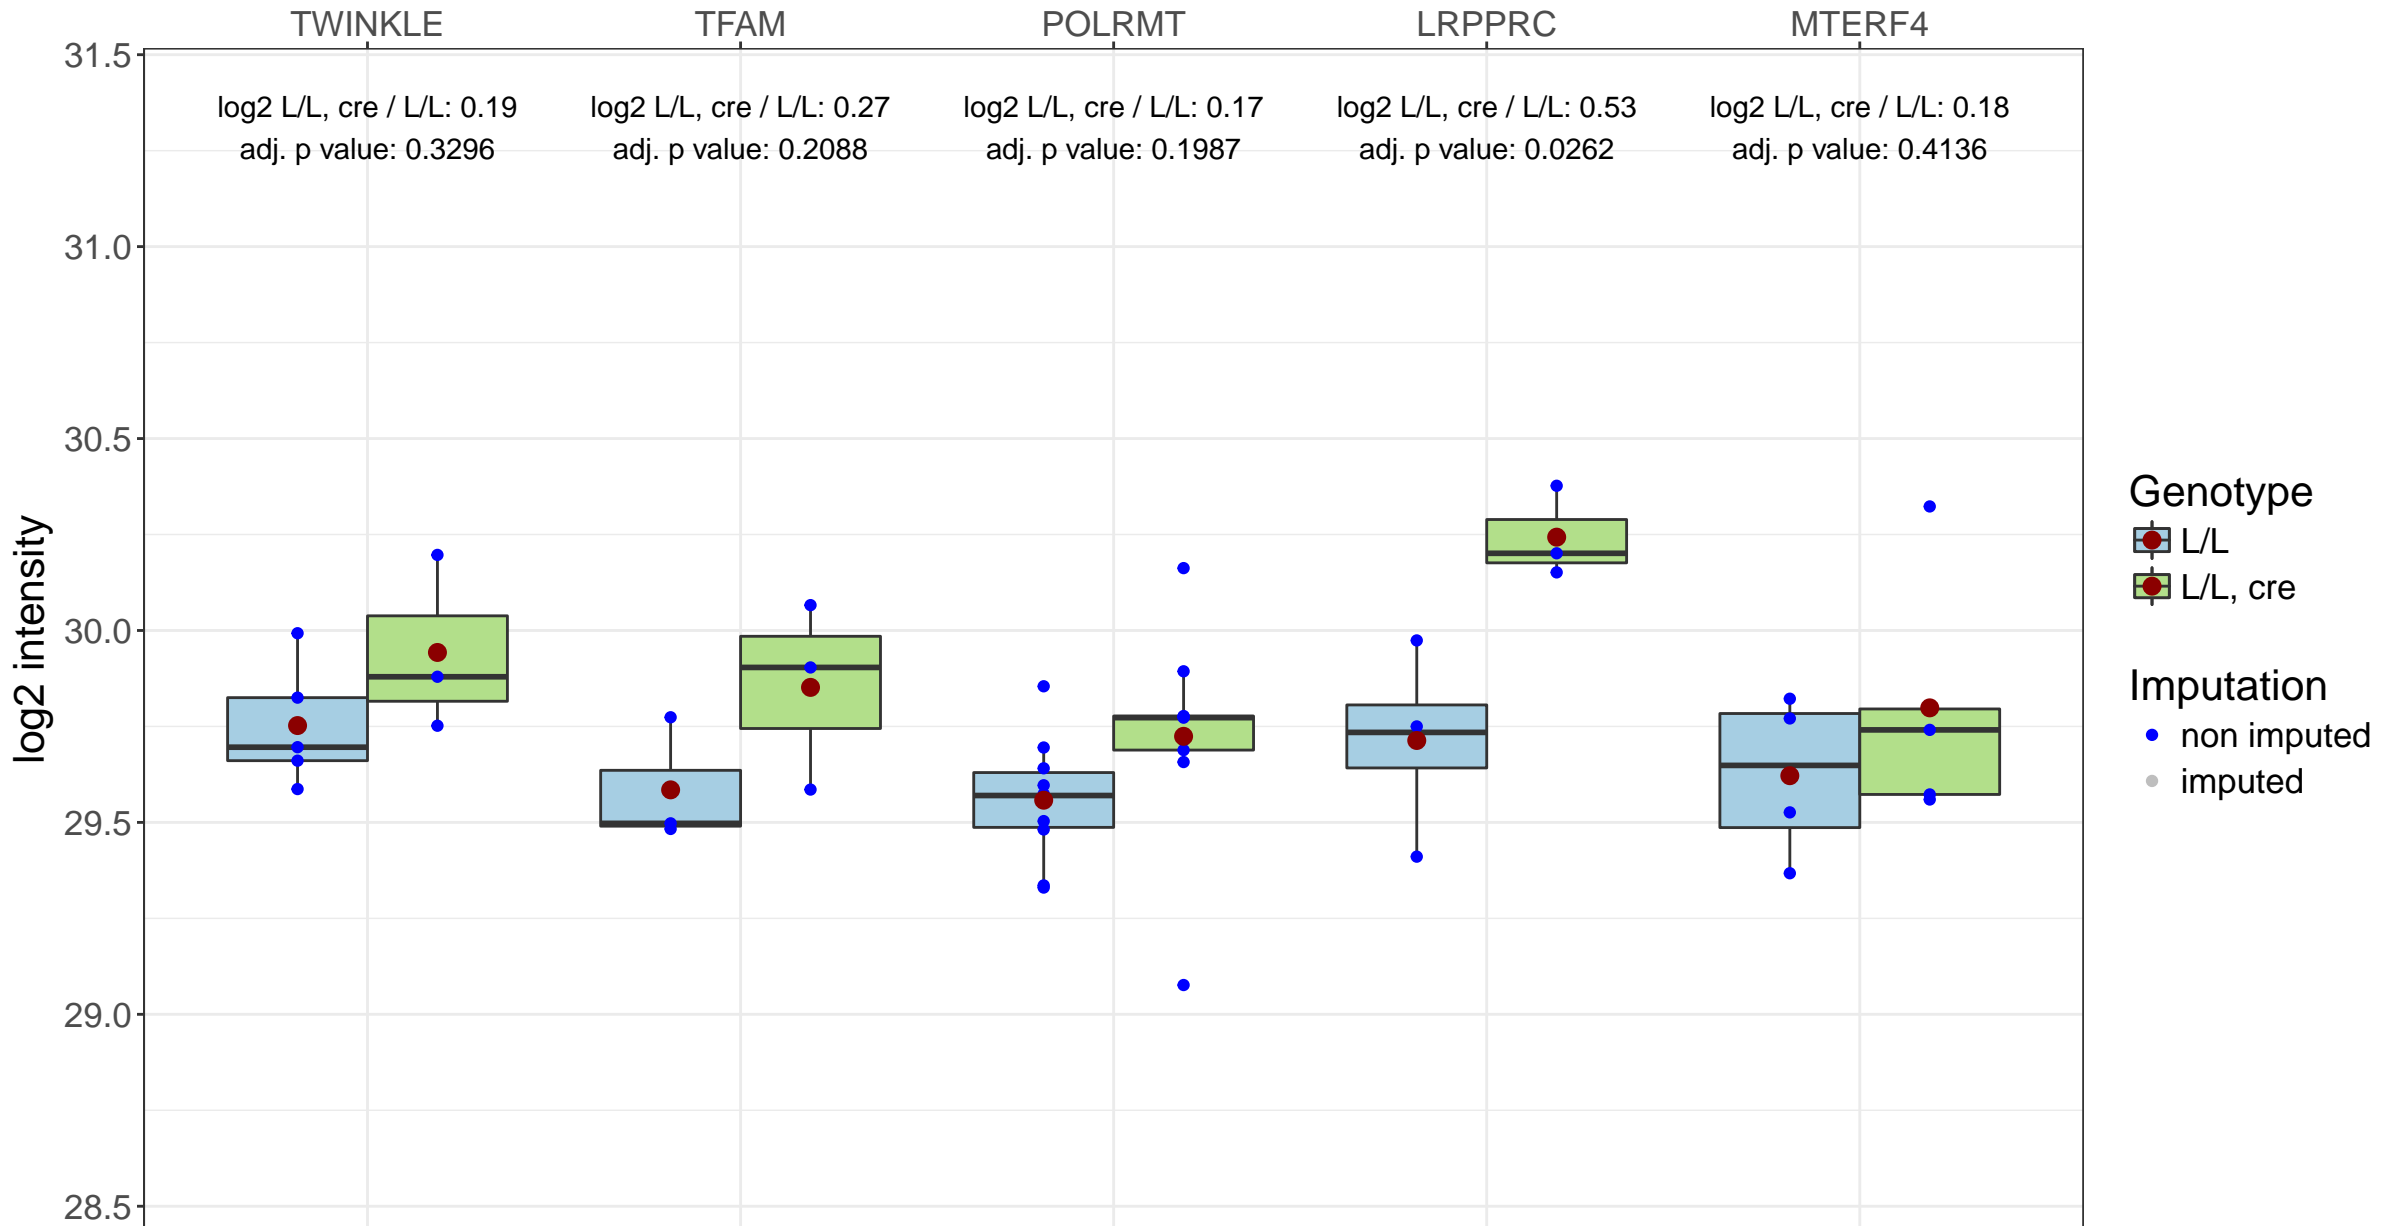

# SCO2 / Q8VCL2

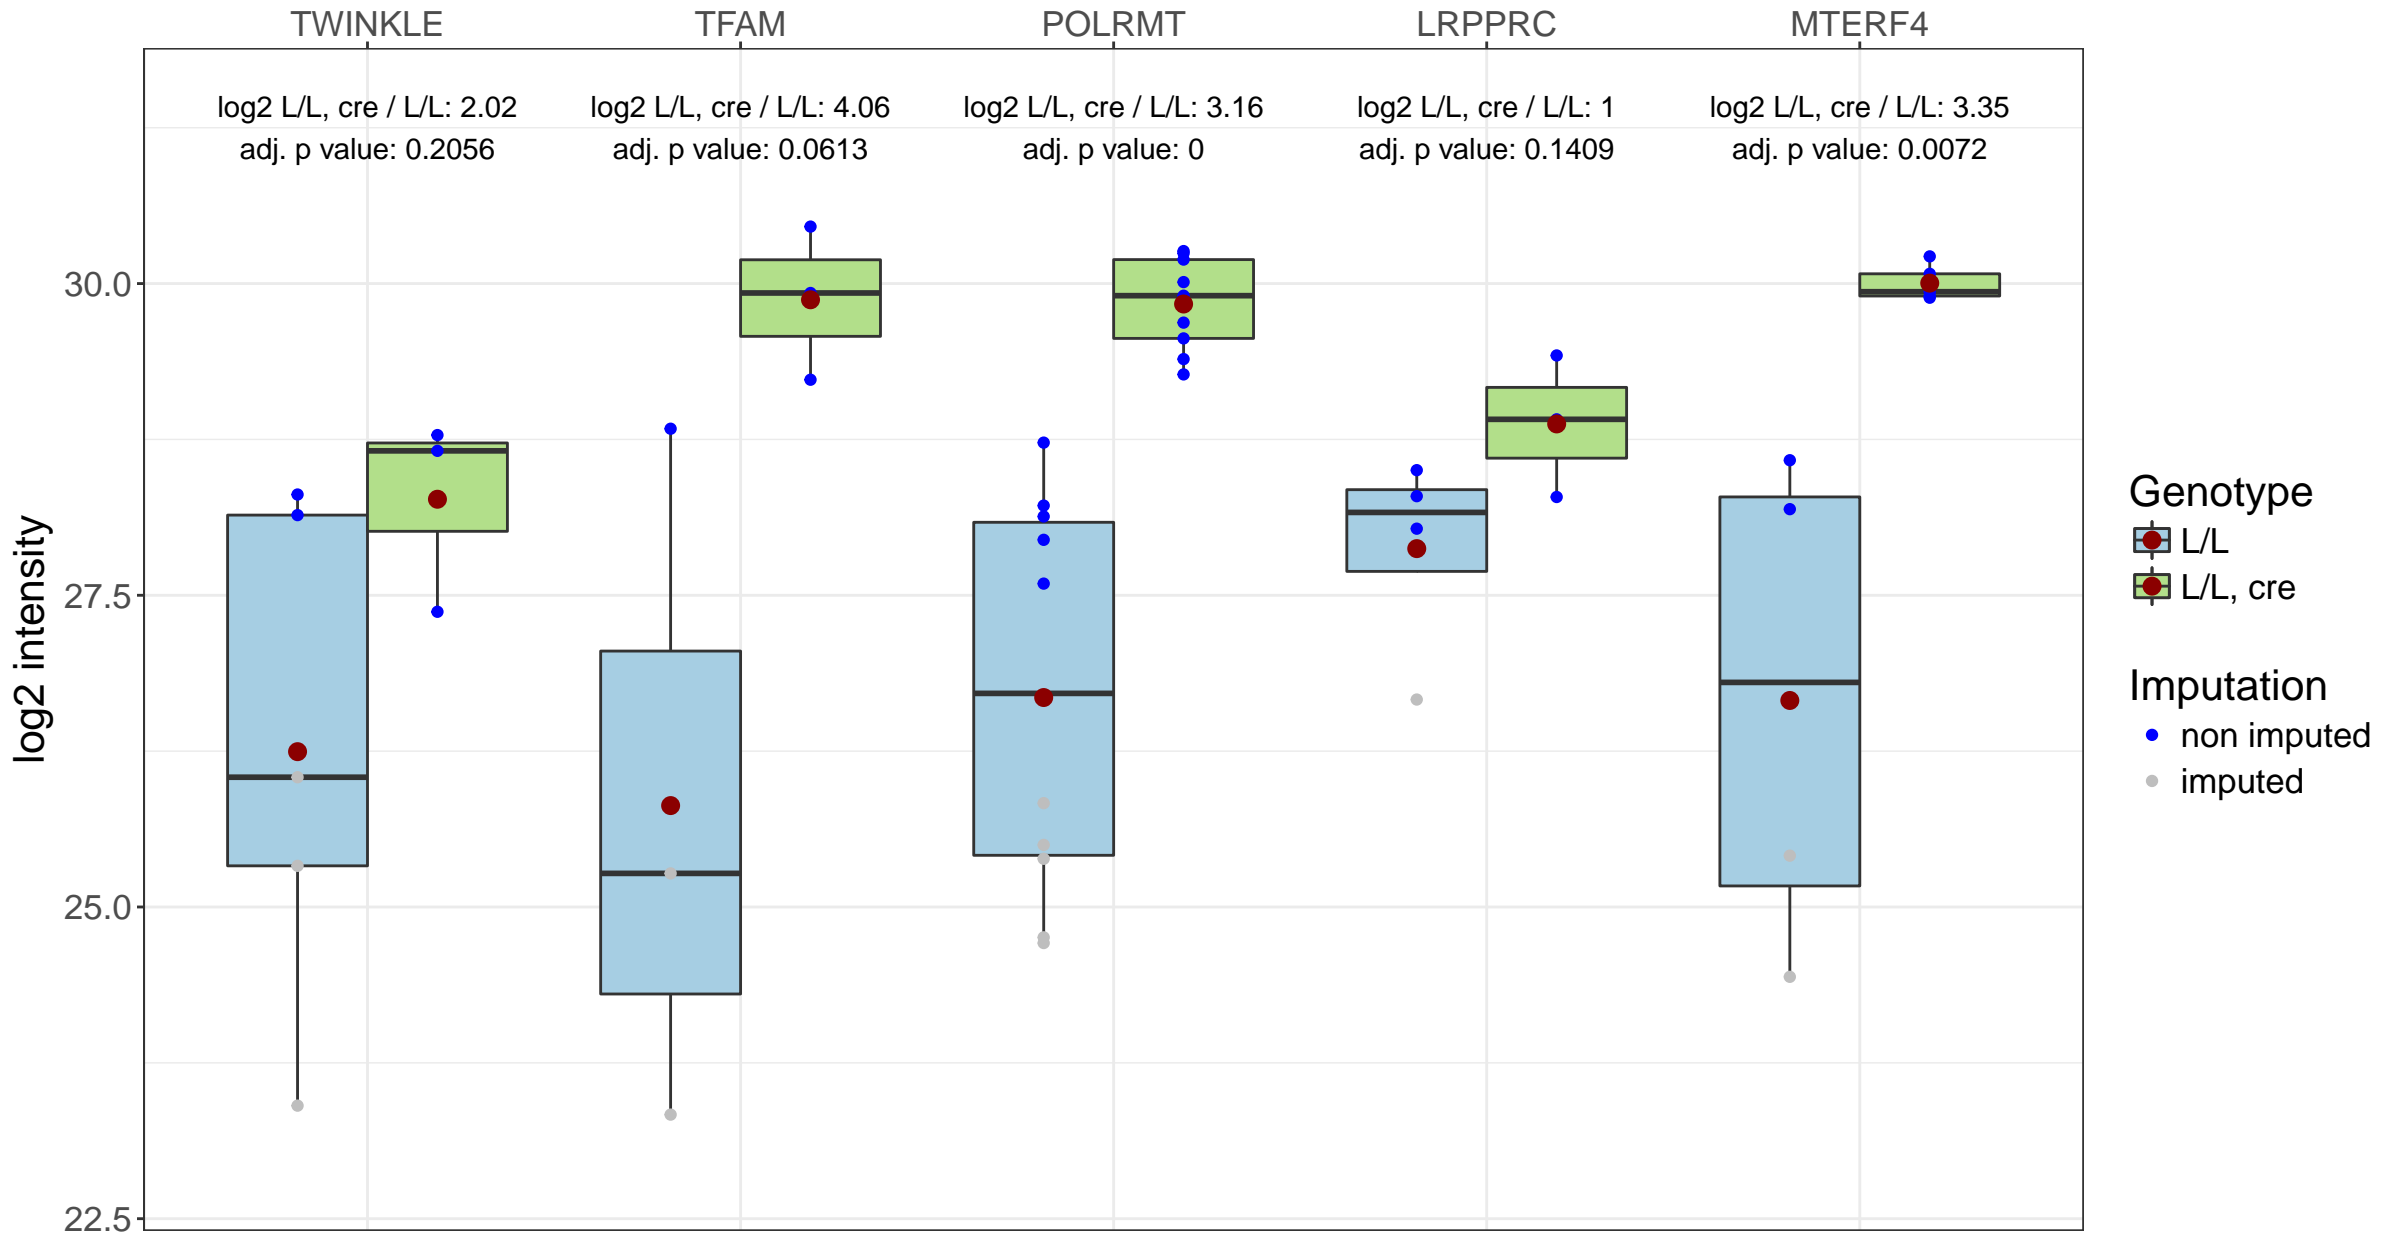



# SCP2 / P32020

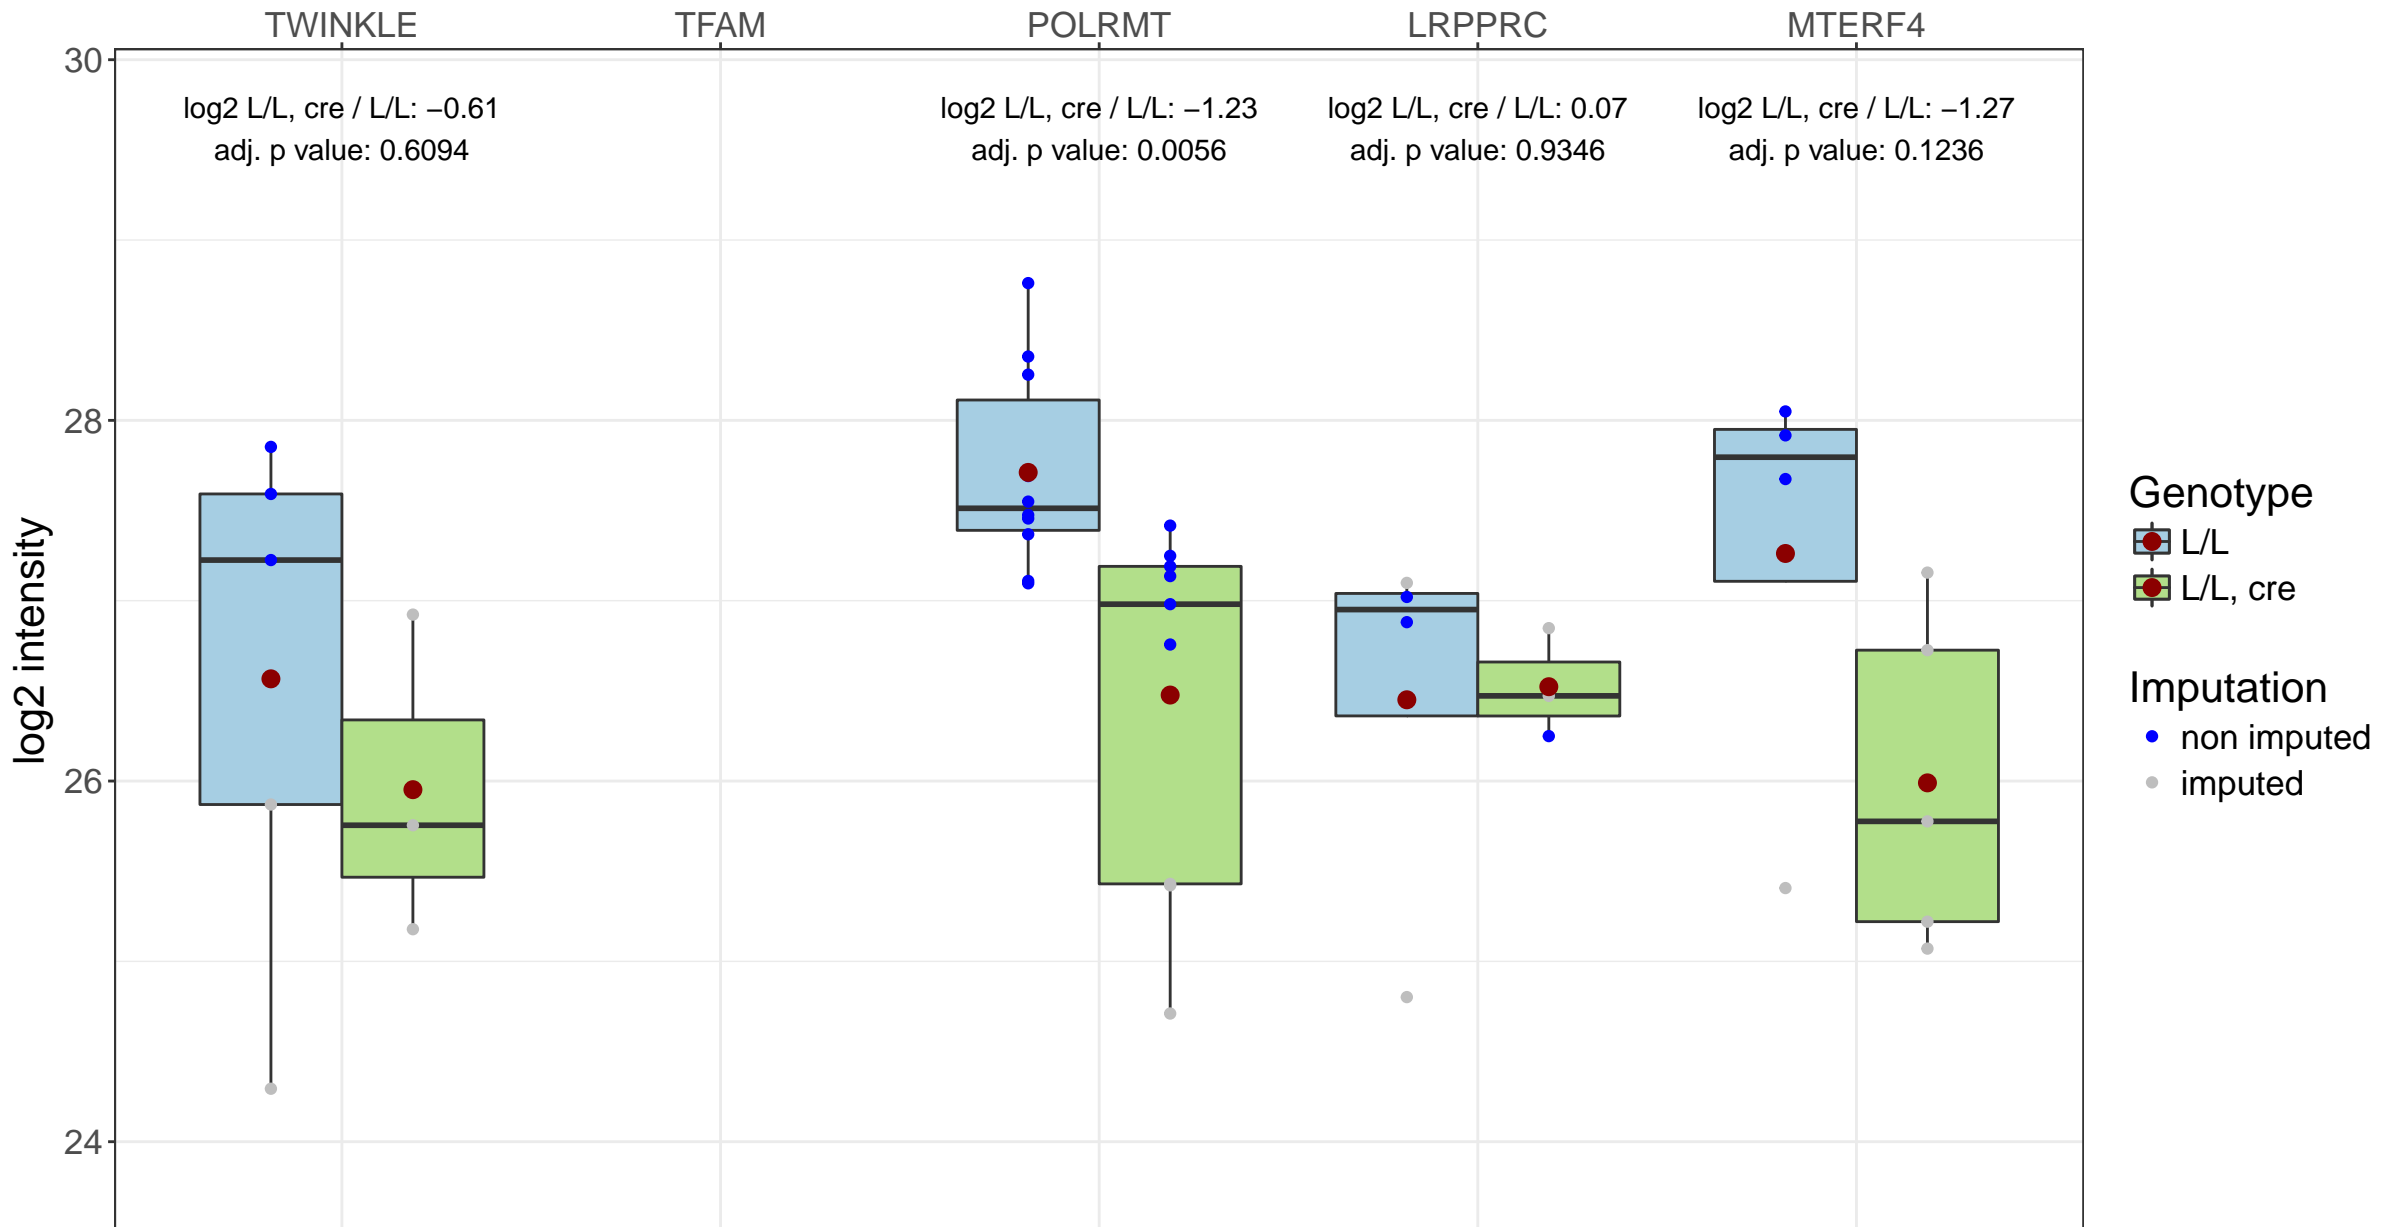

# SDHA / Q8K2B3

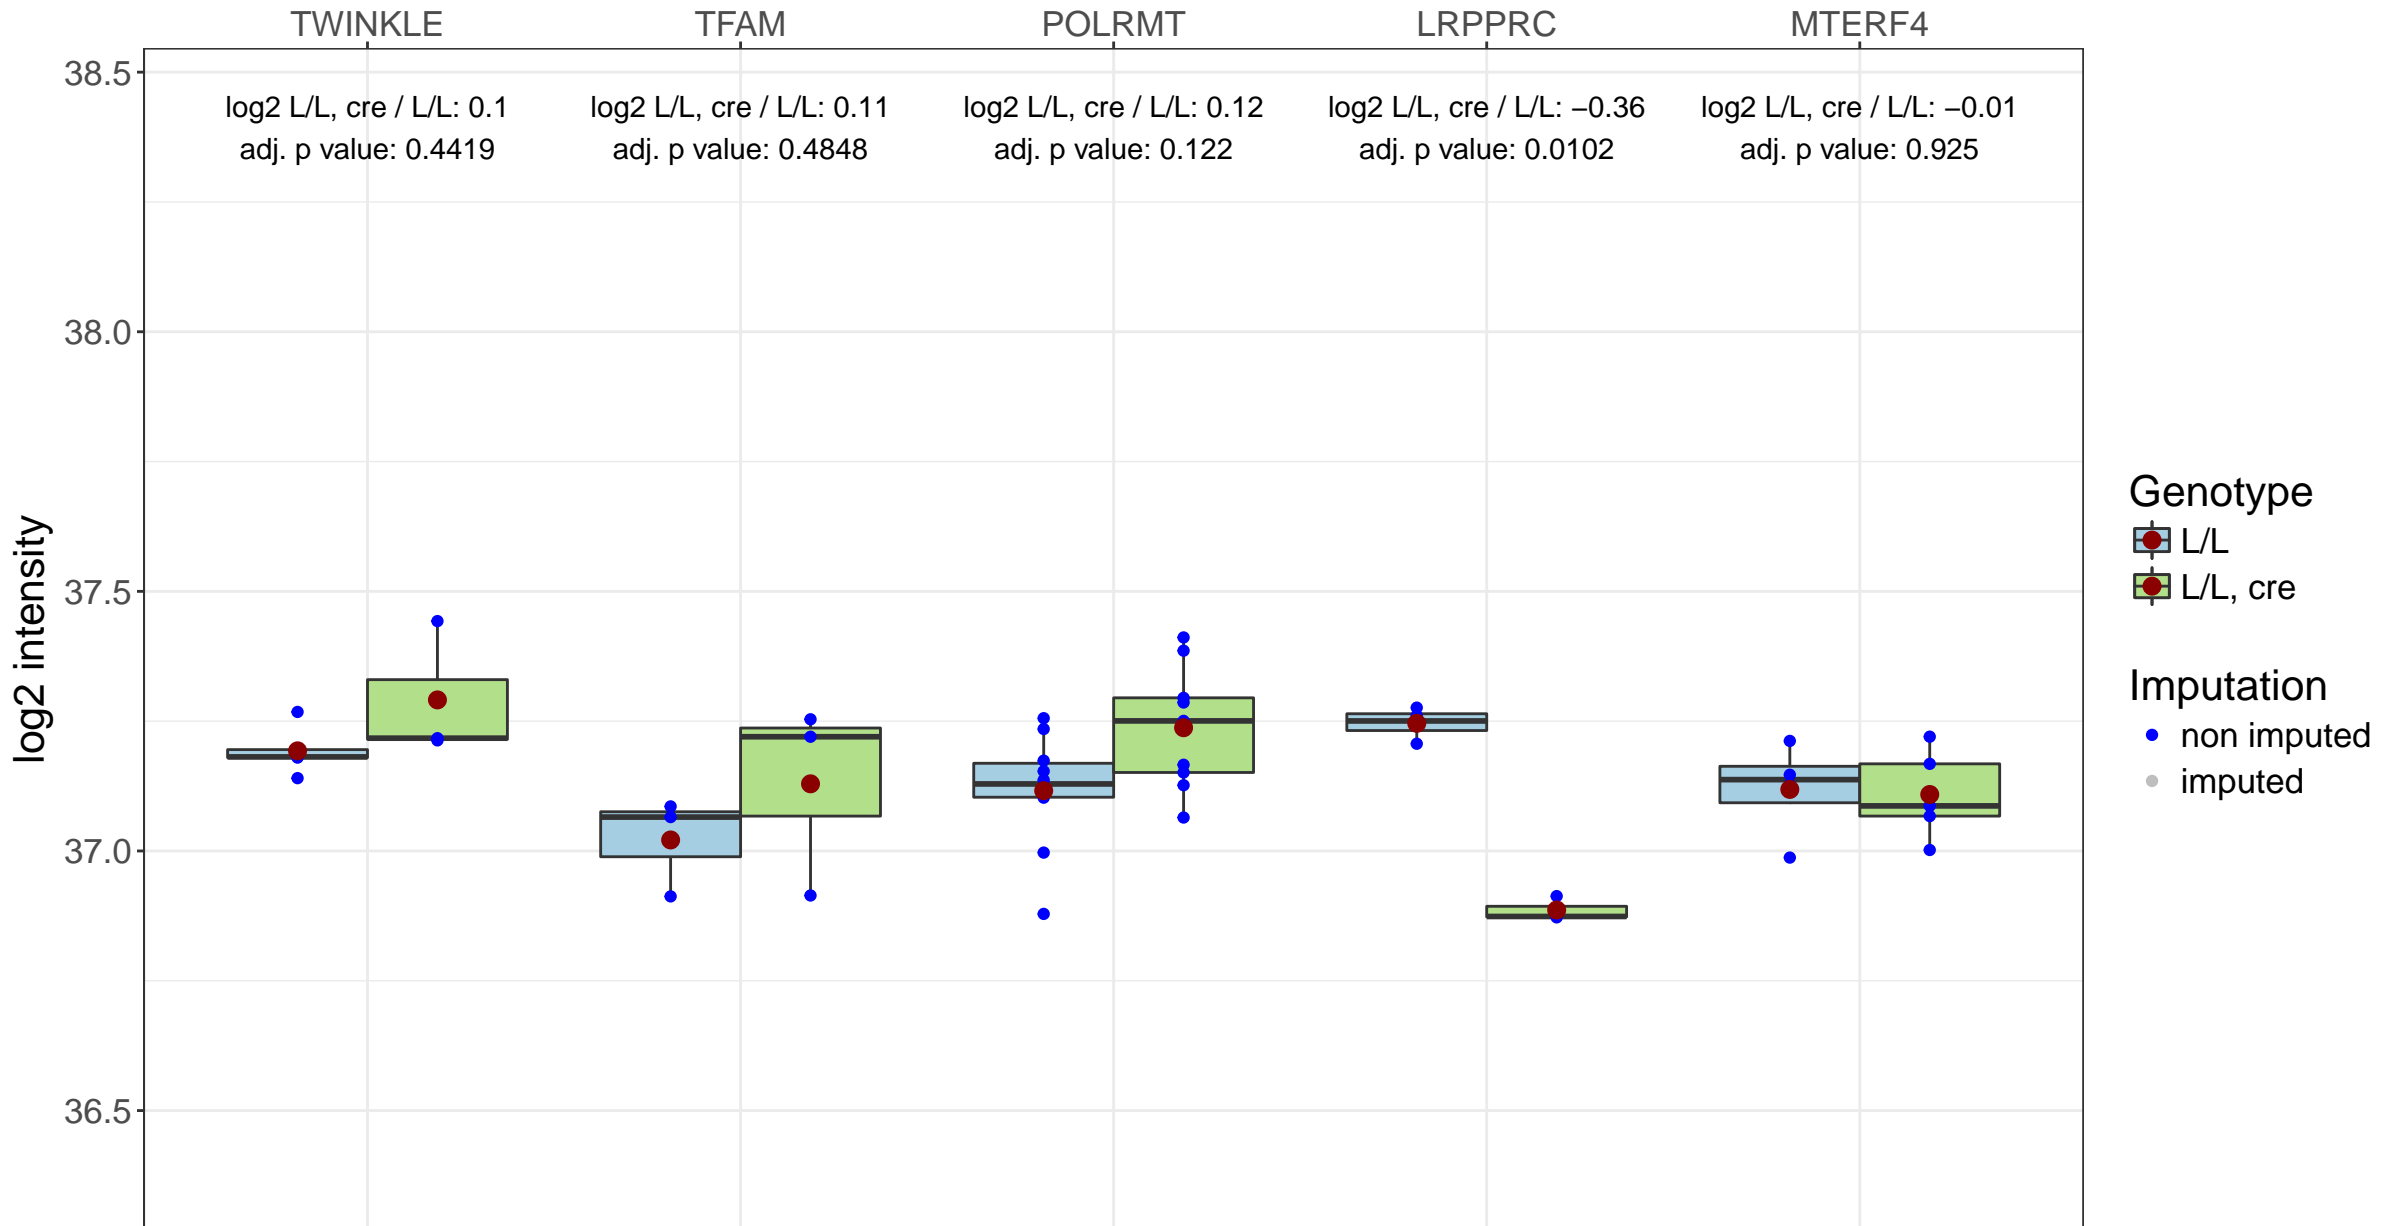

# SDHAF2 / Q8C6I2

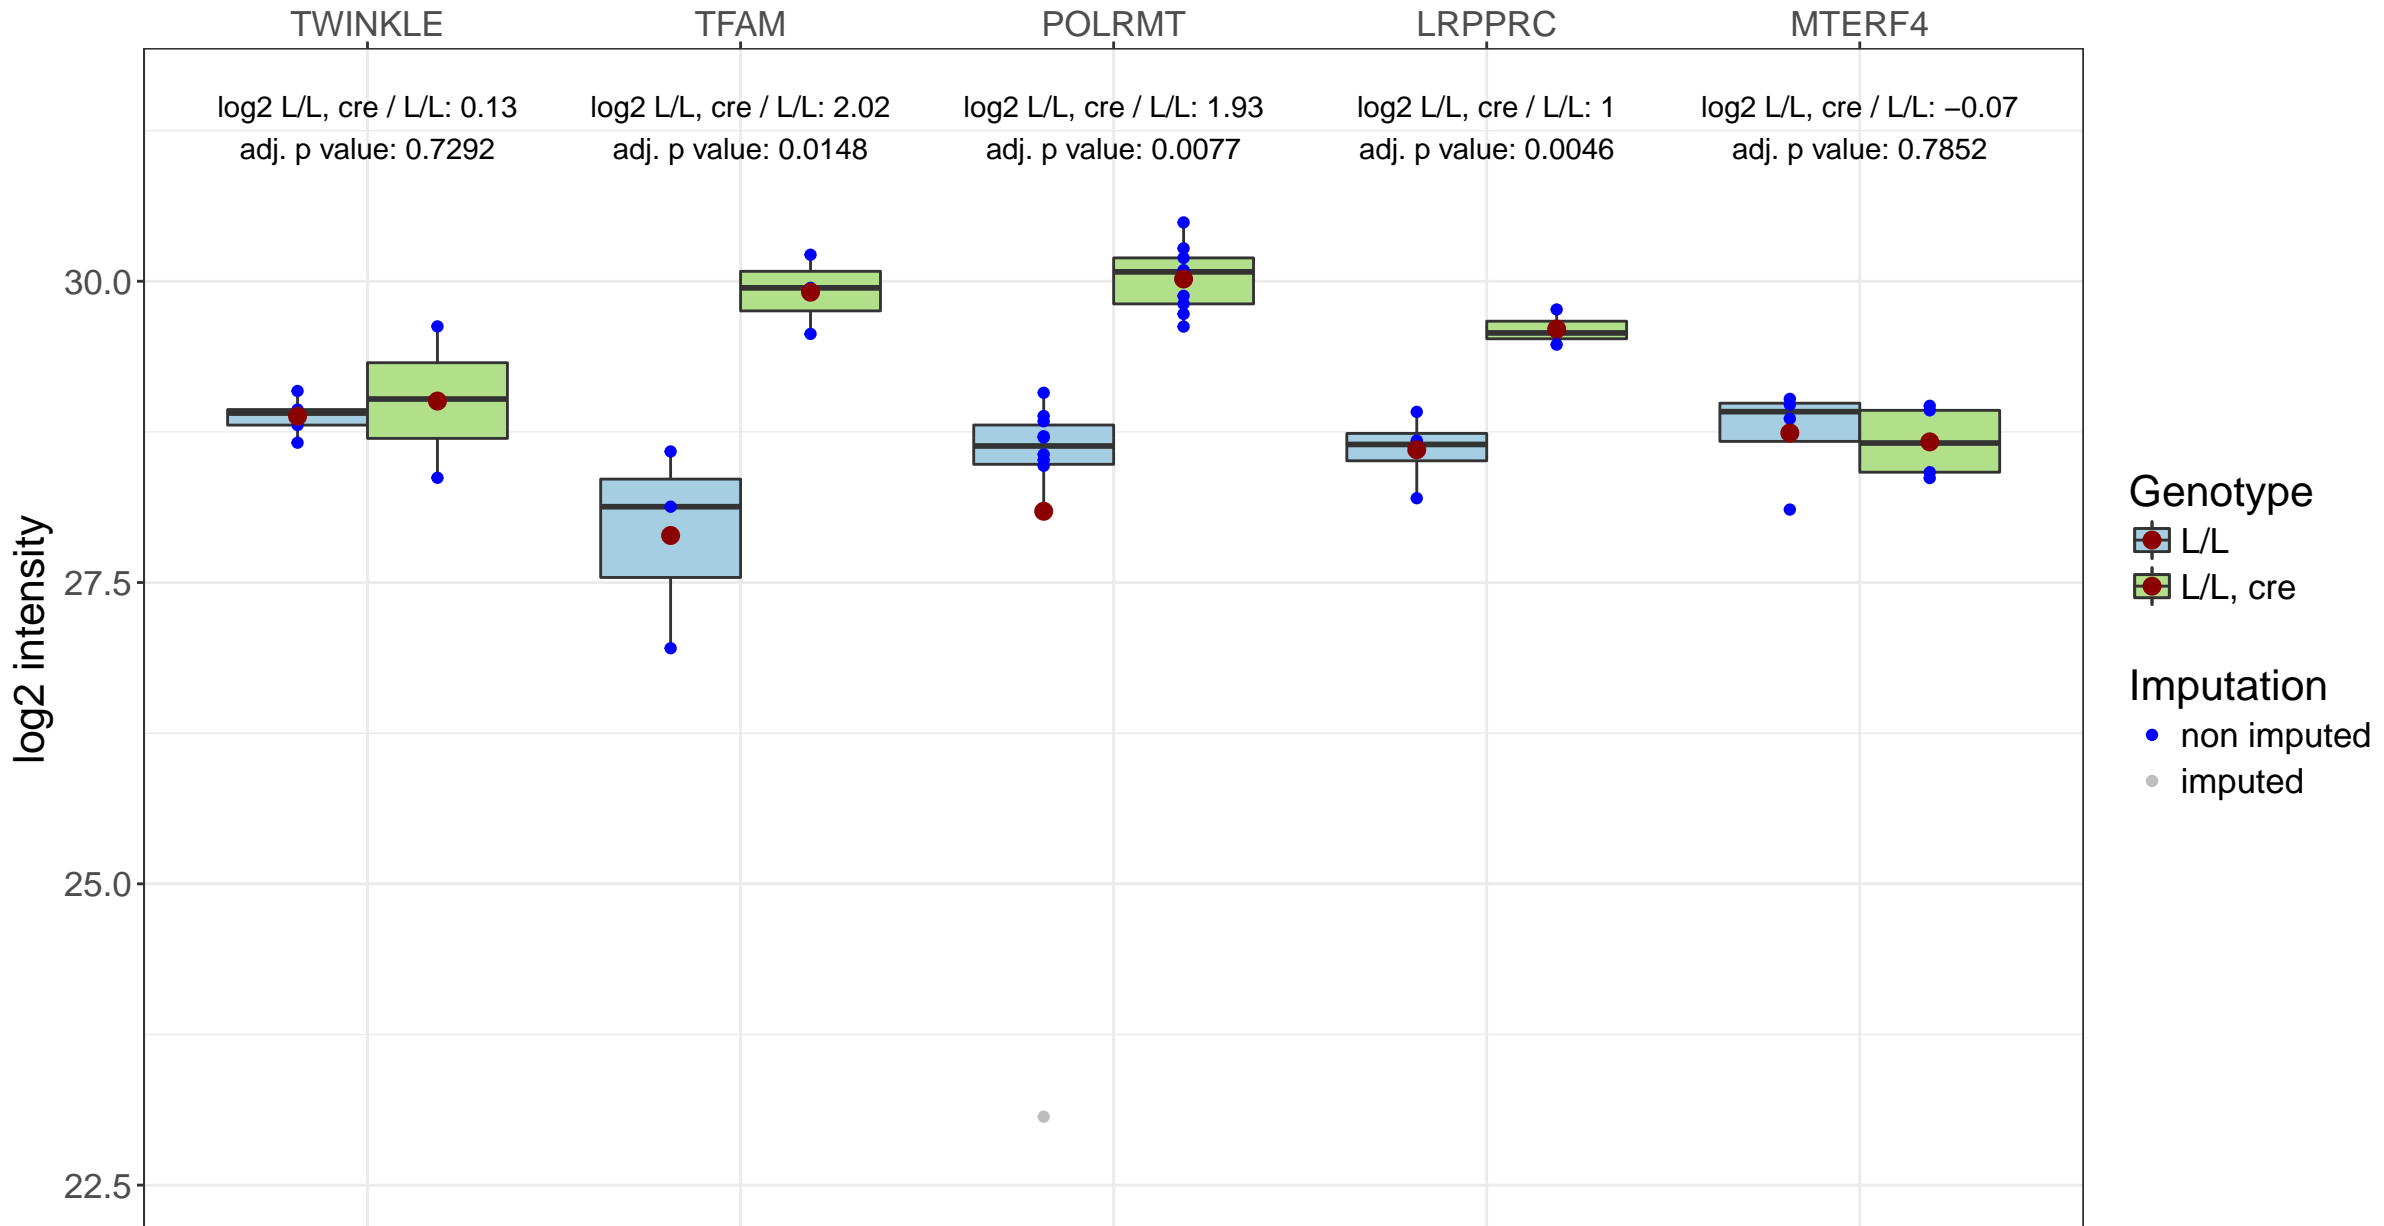

# SDHB / Q9CQA3

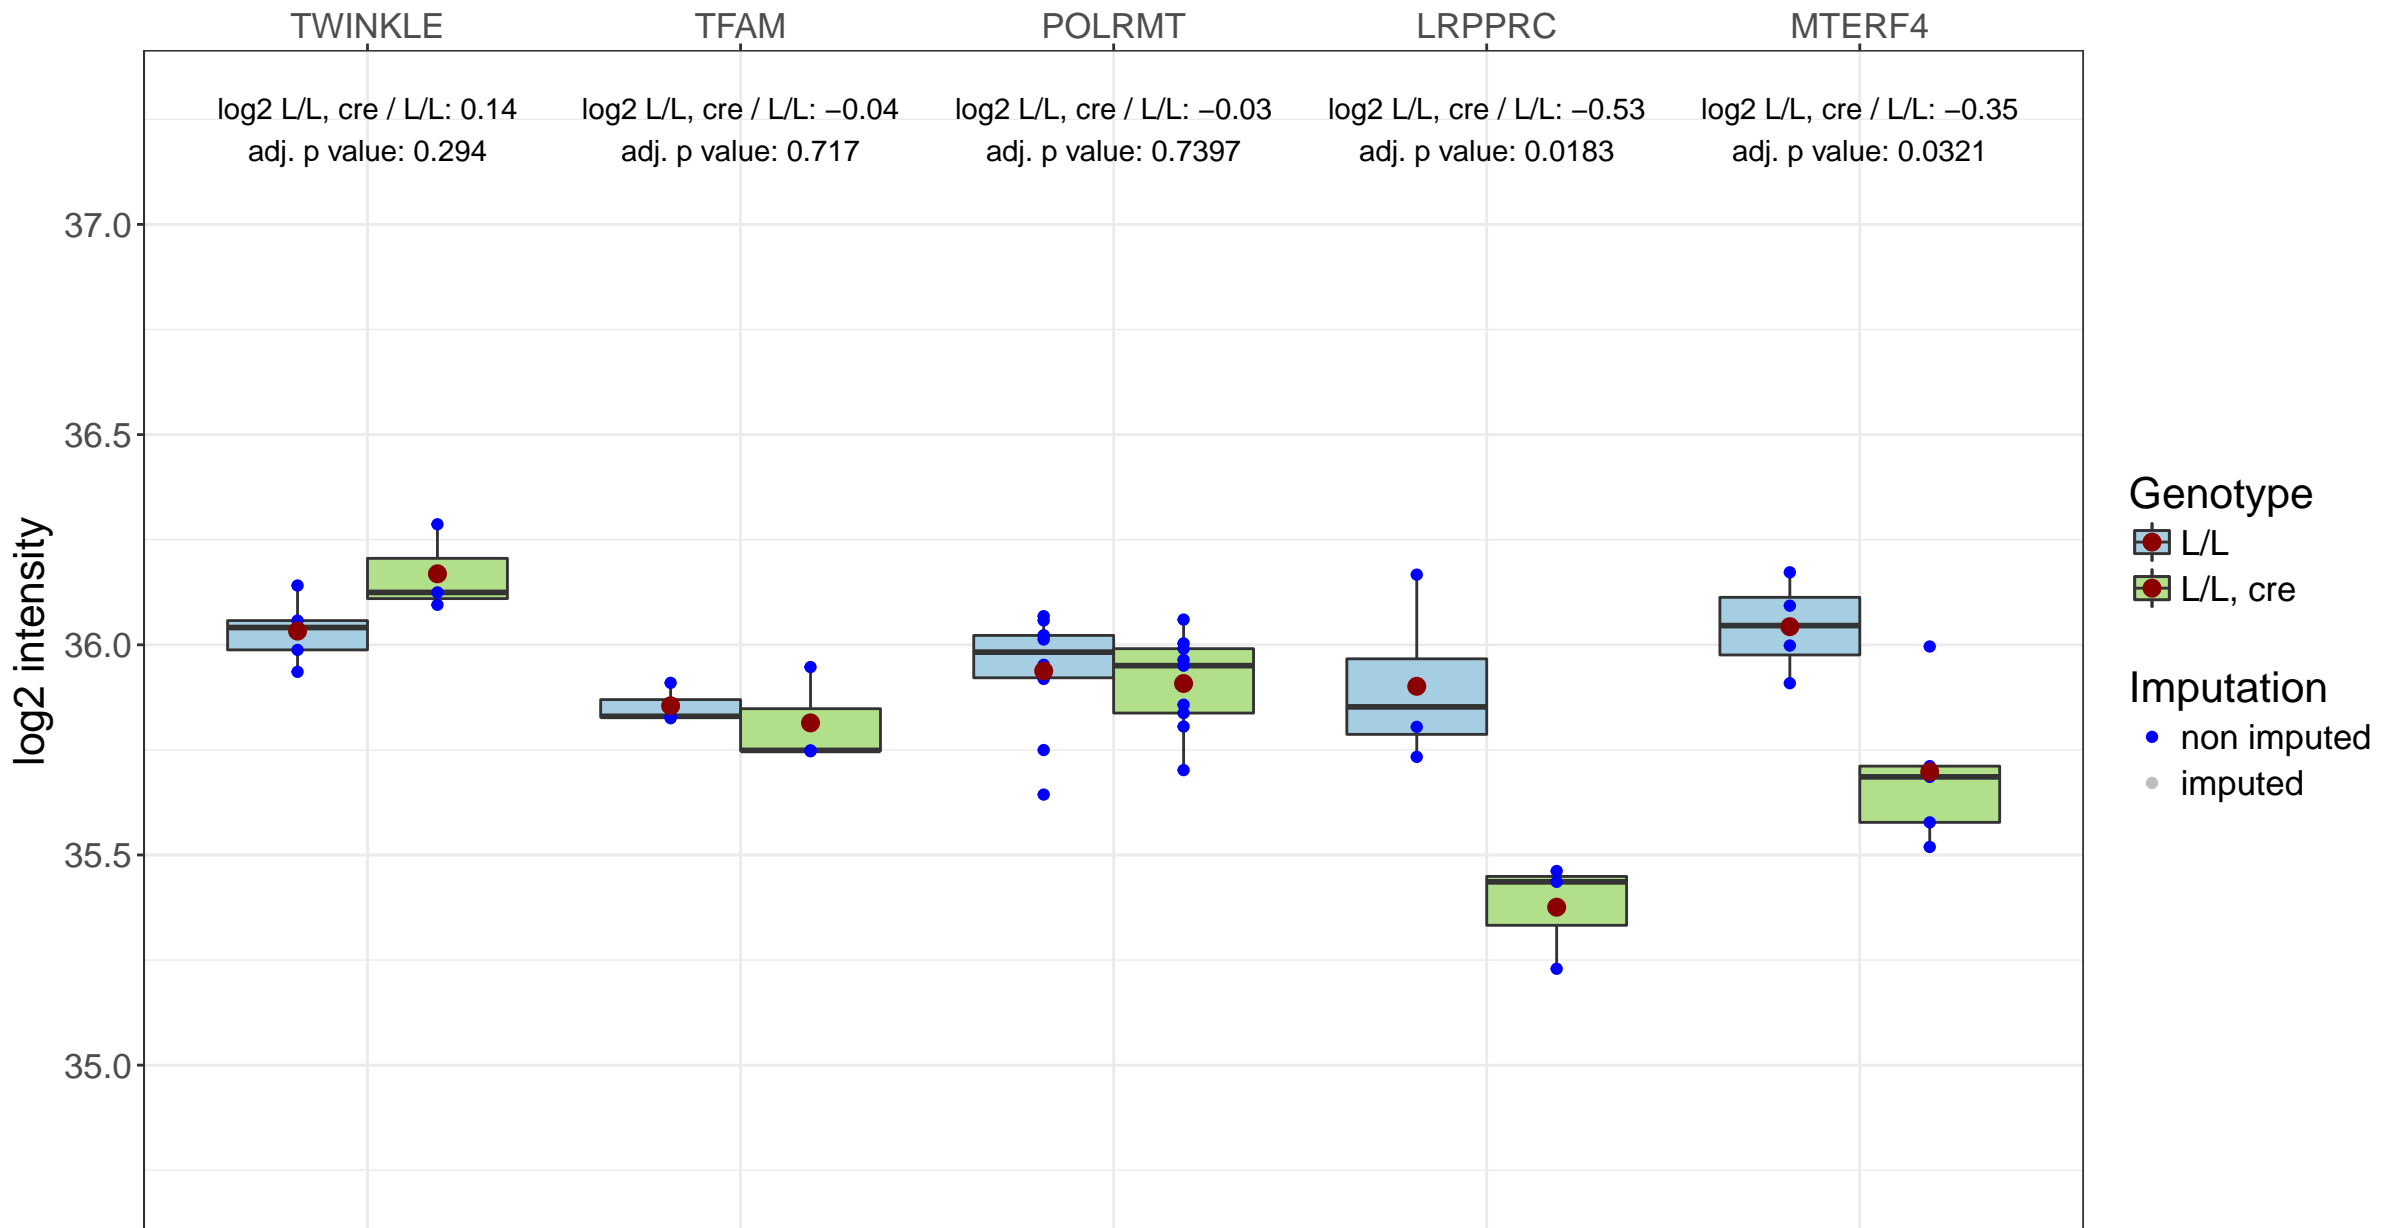

# SDHC / Q9CZB0

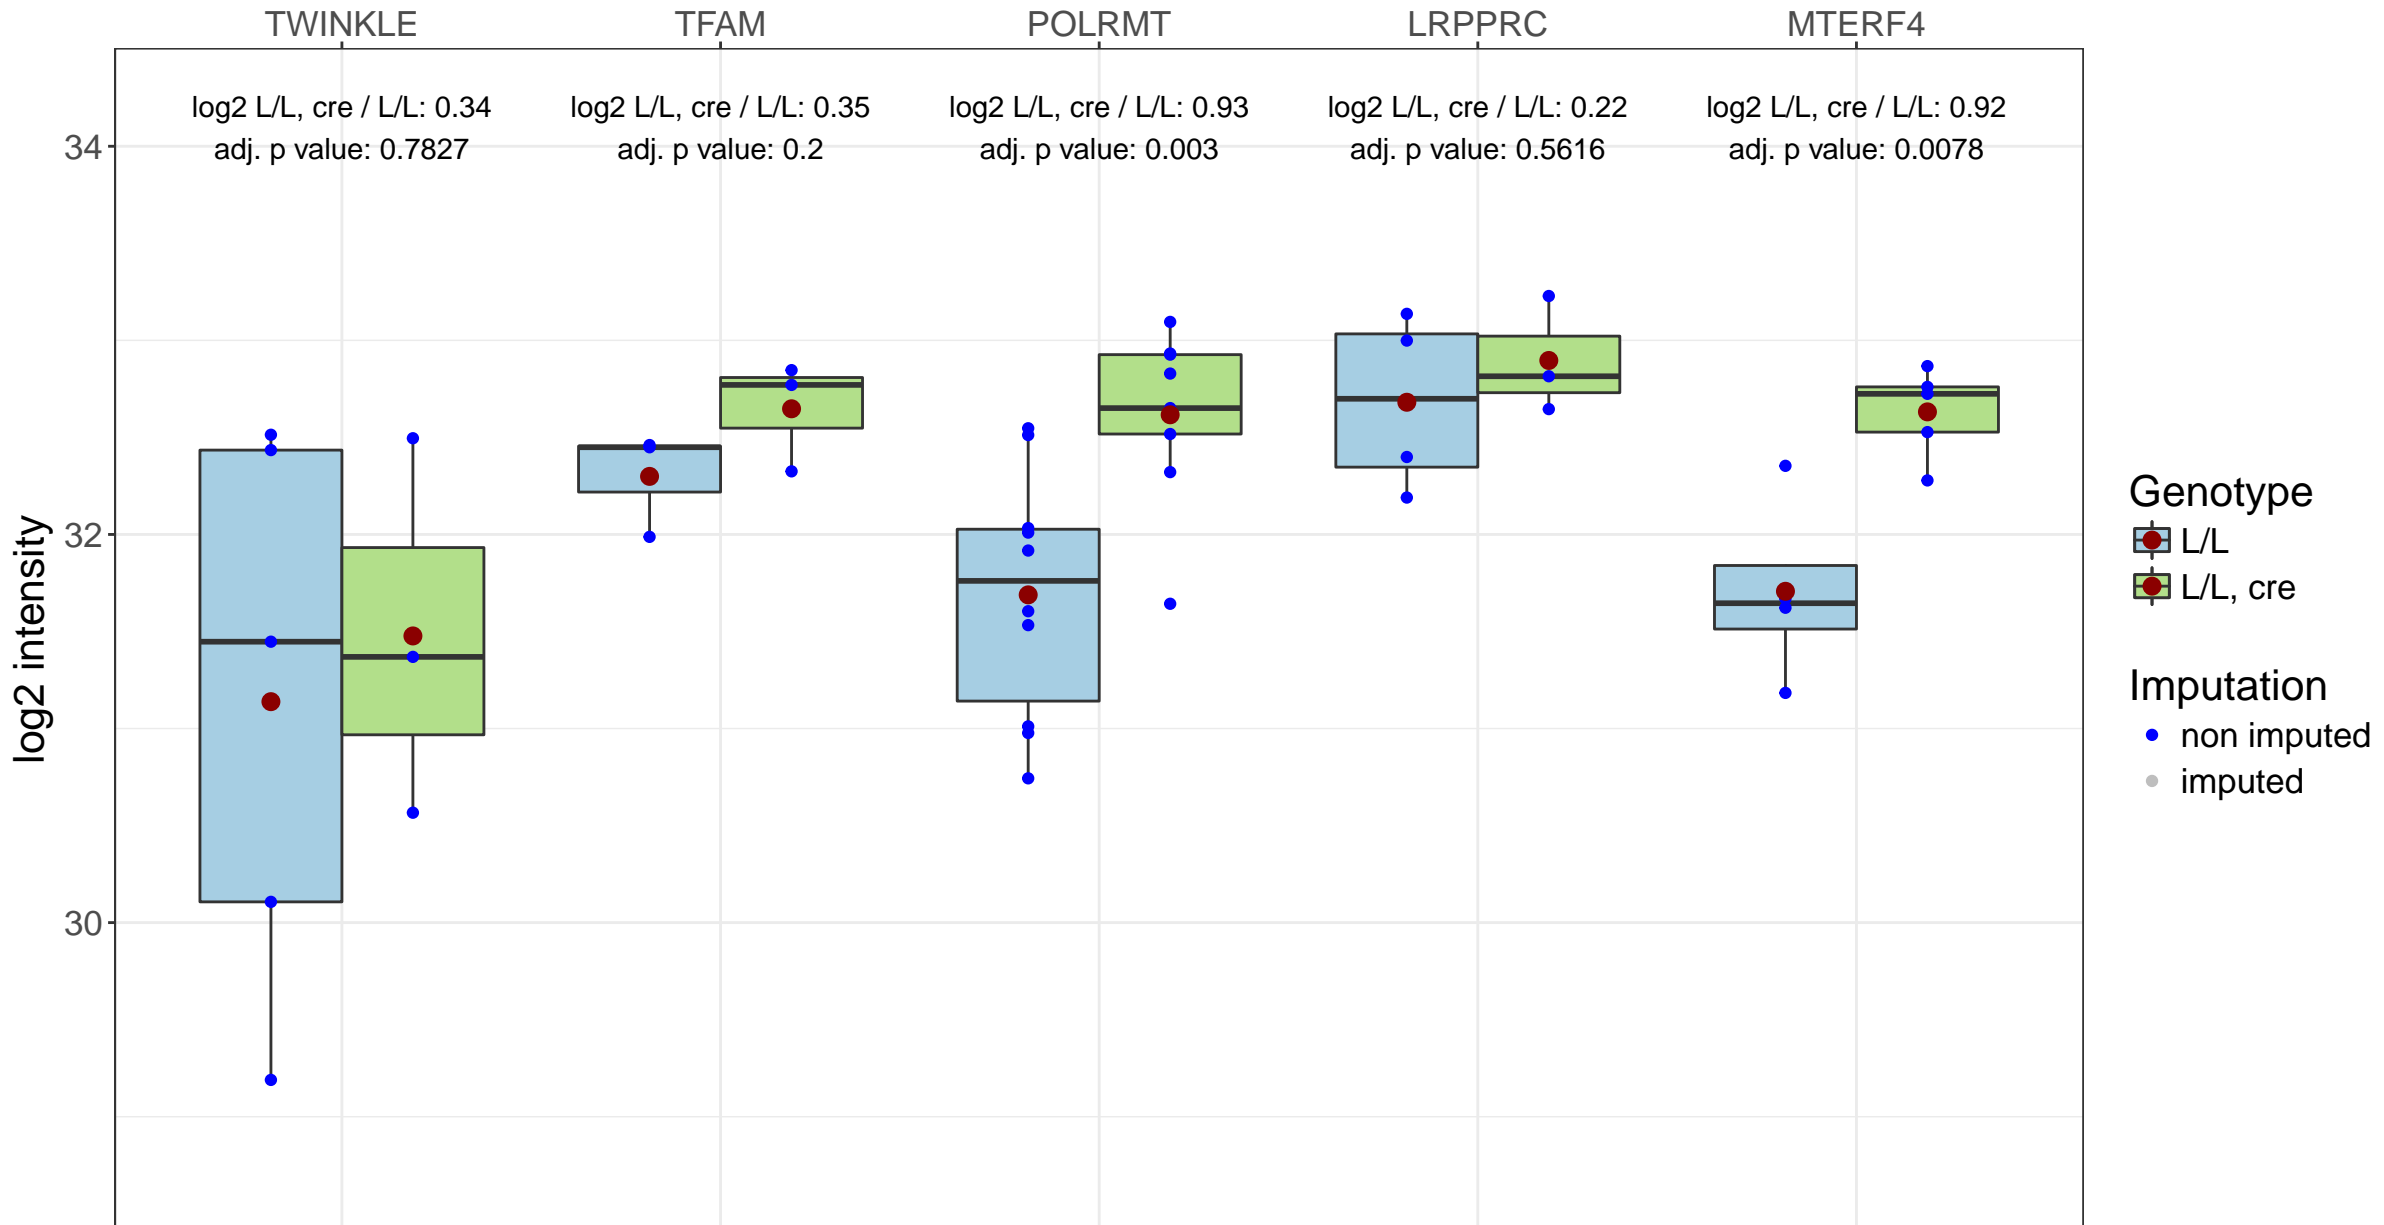

# SDHD / Q9CXV1

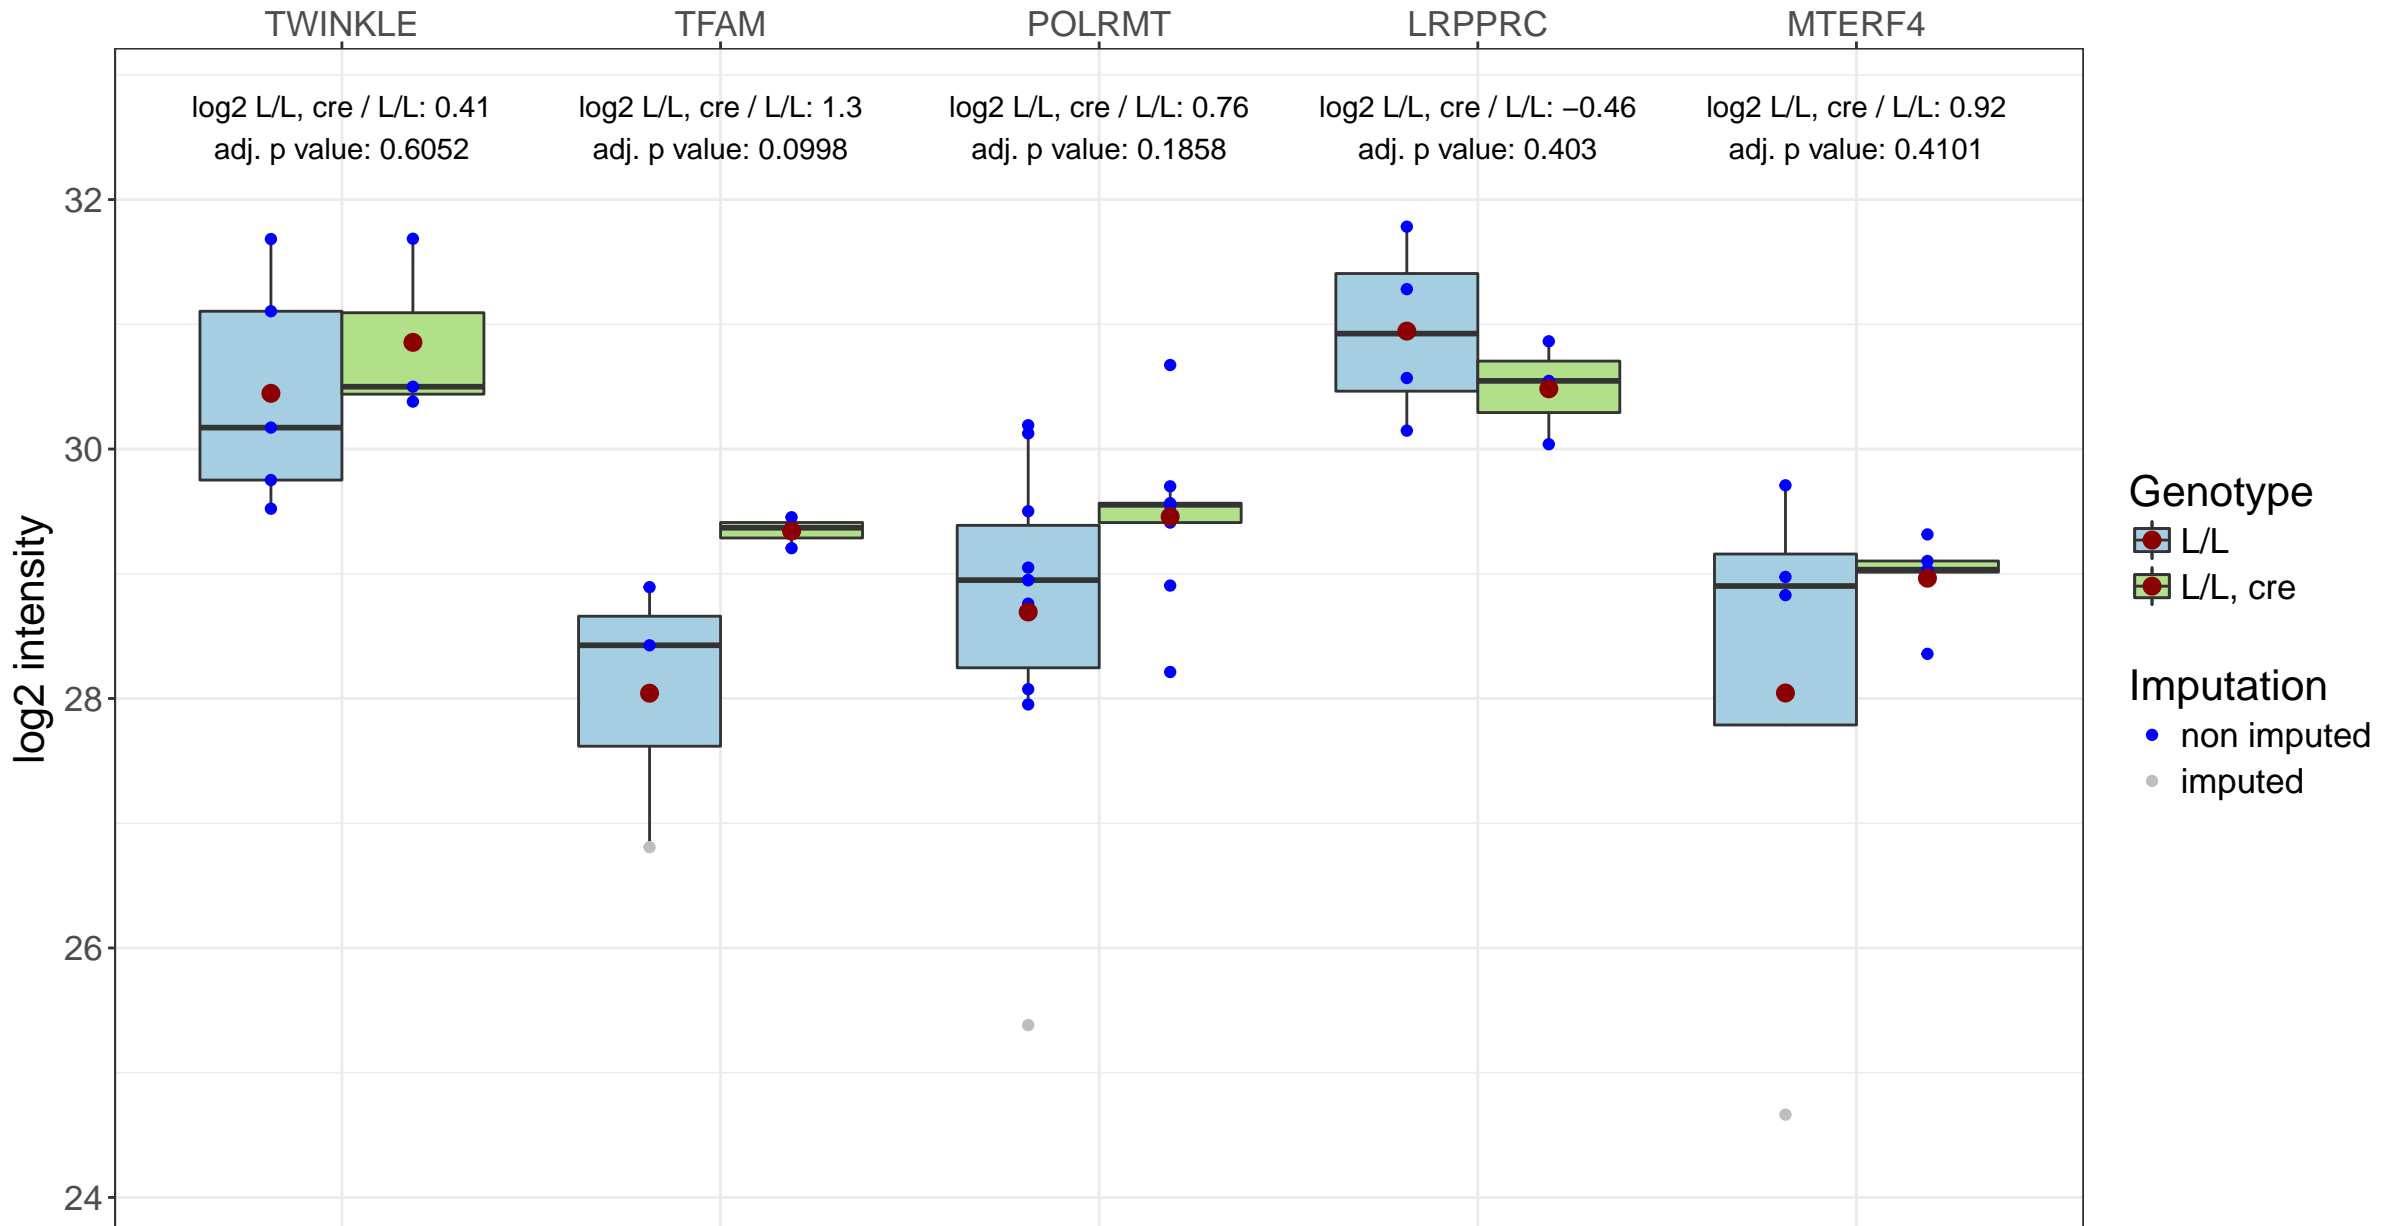

# SDPR / Q63918

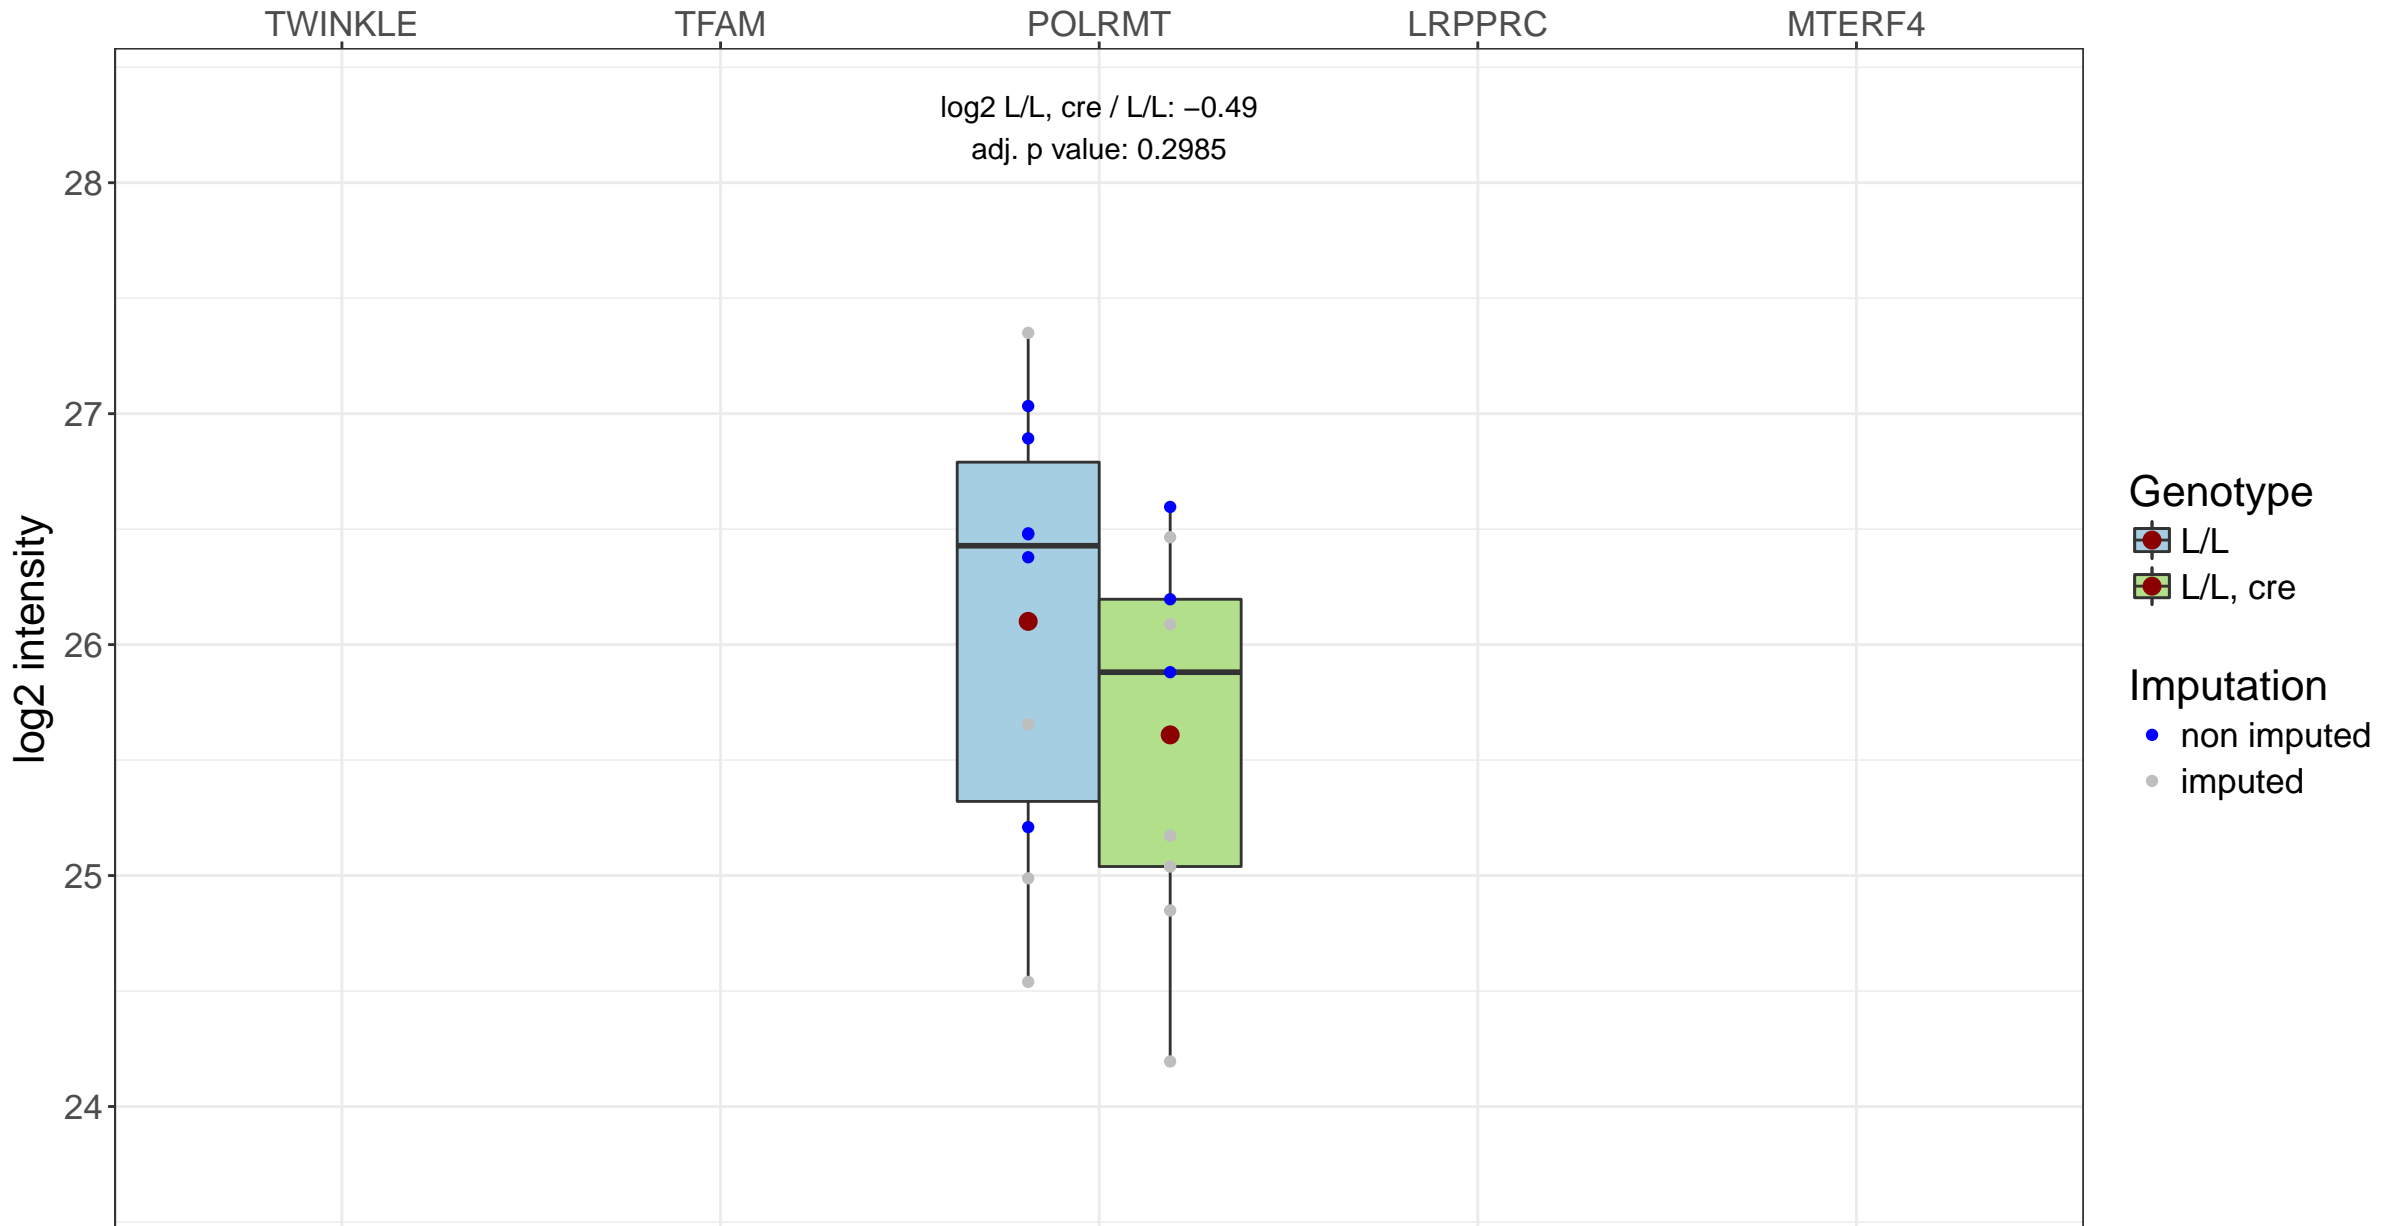

# SDR39U1 / Q5M8N4-2

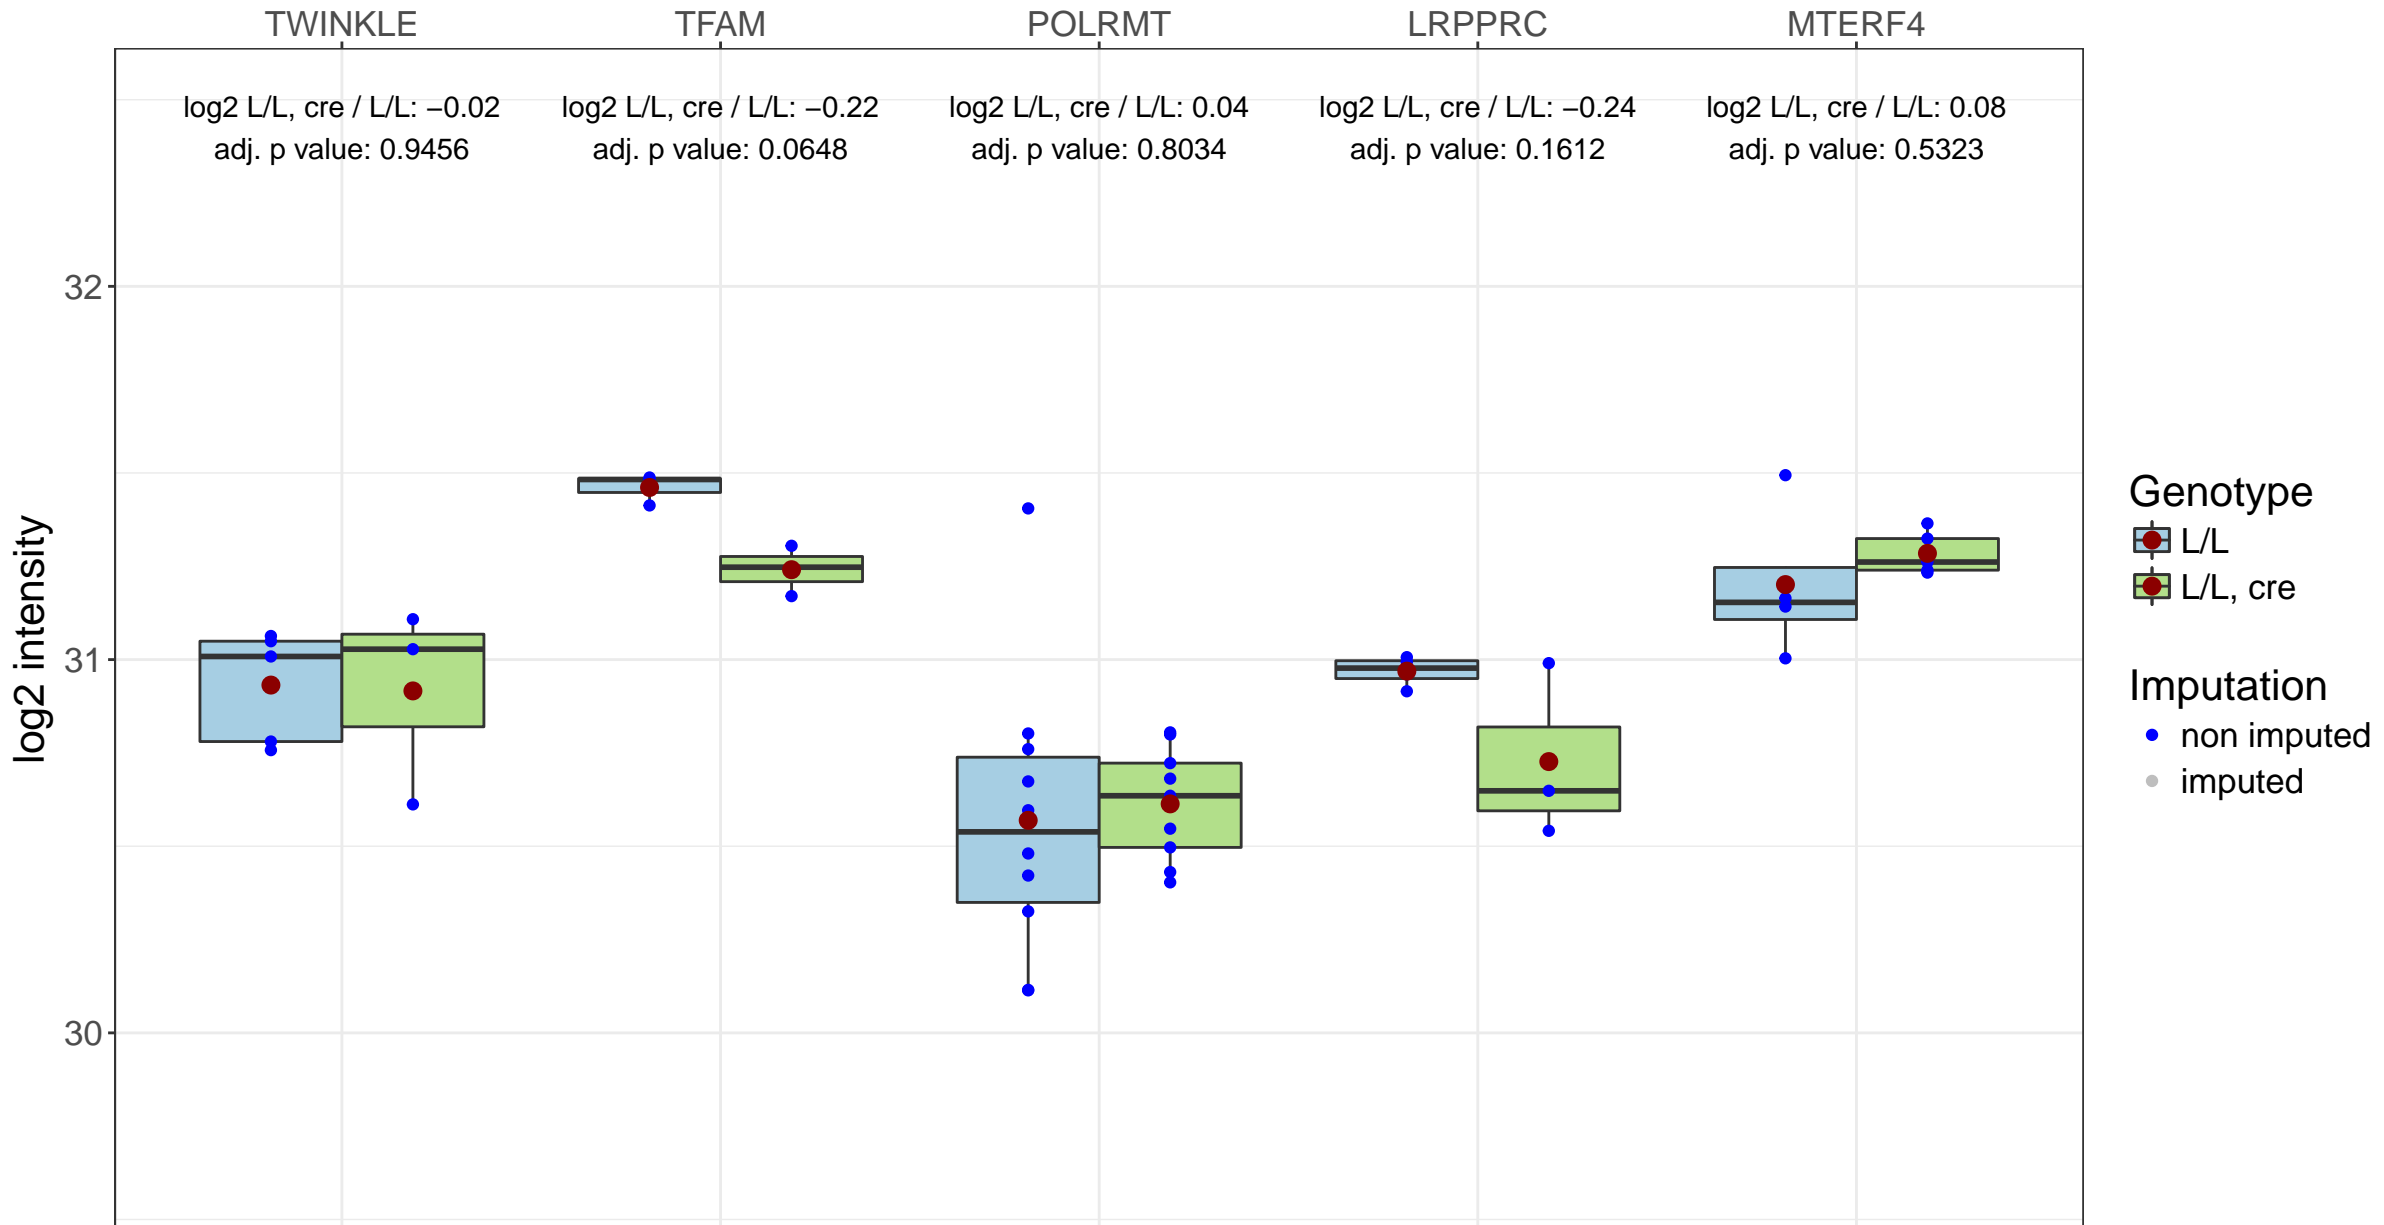



# SEPT7 / E9Q1G8

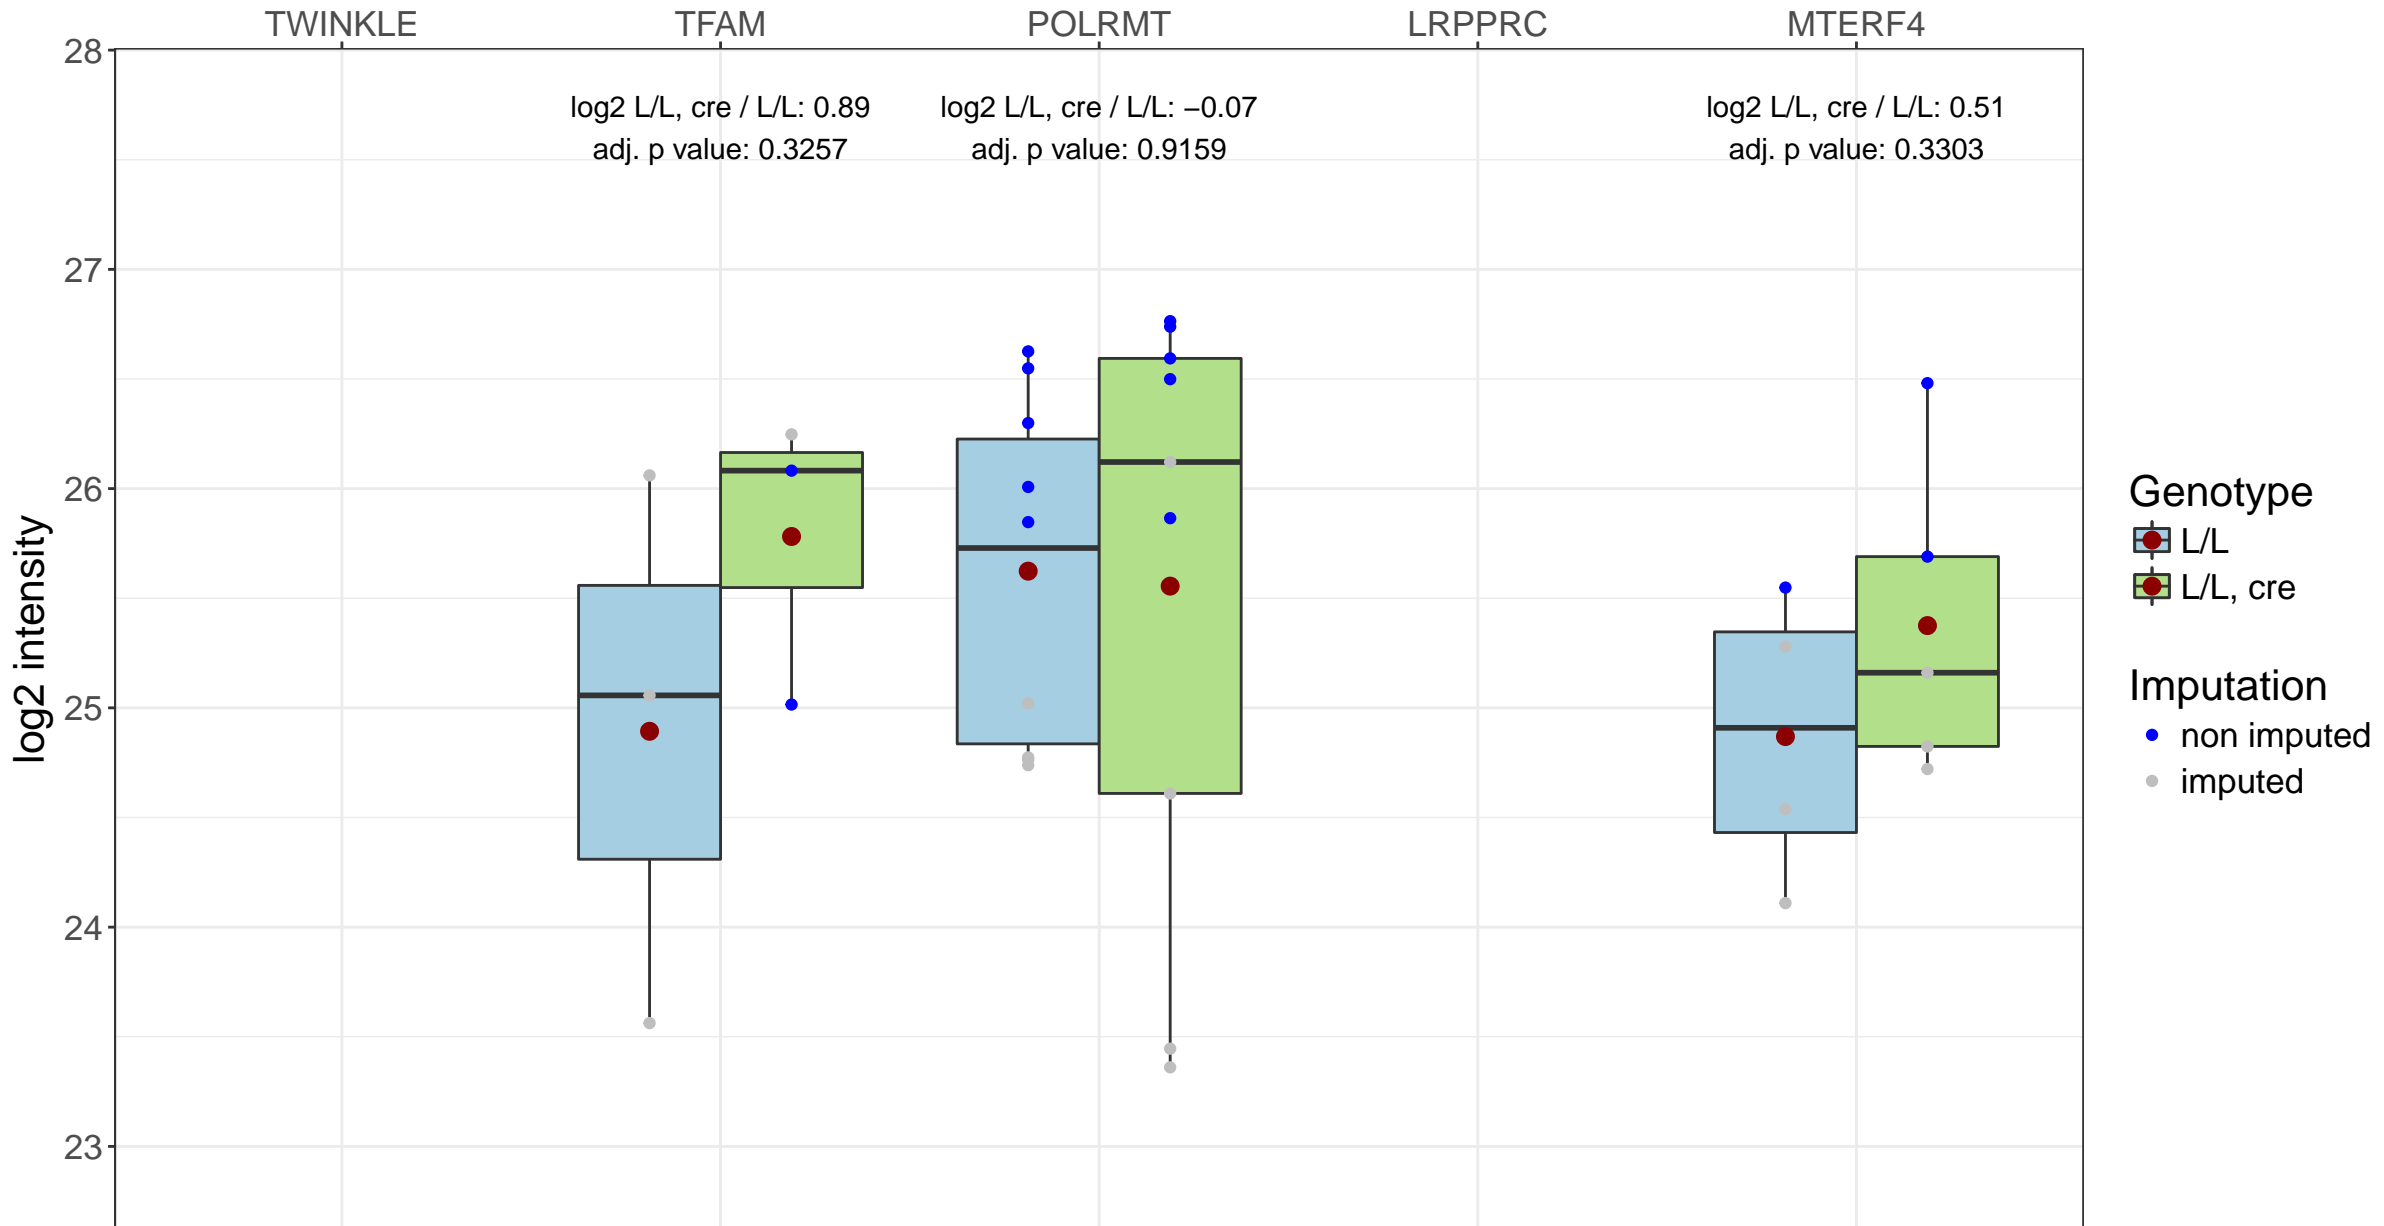

# SERBP1 / Q9CY58

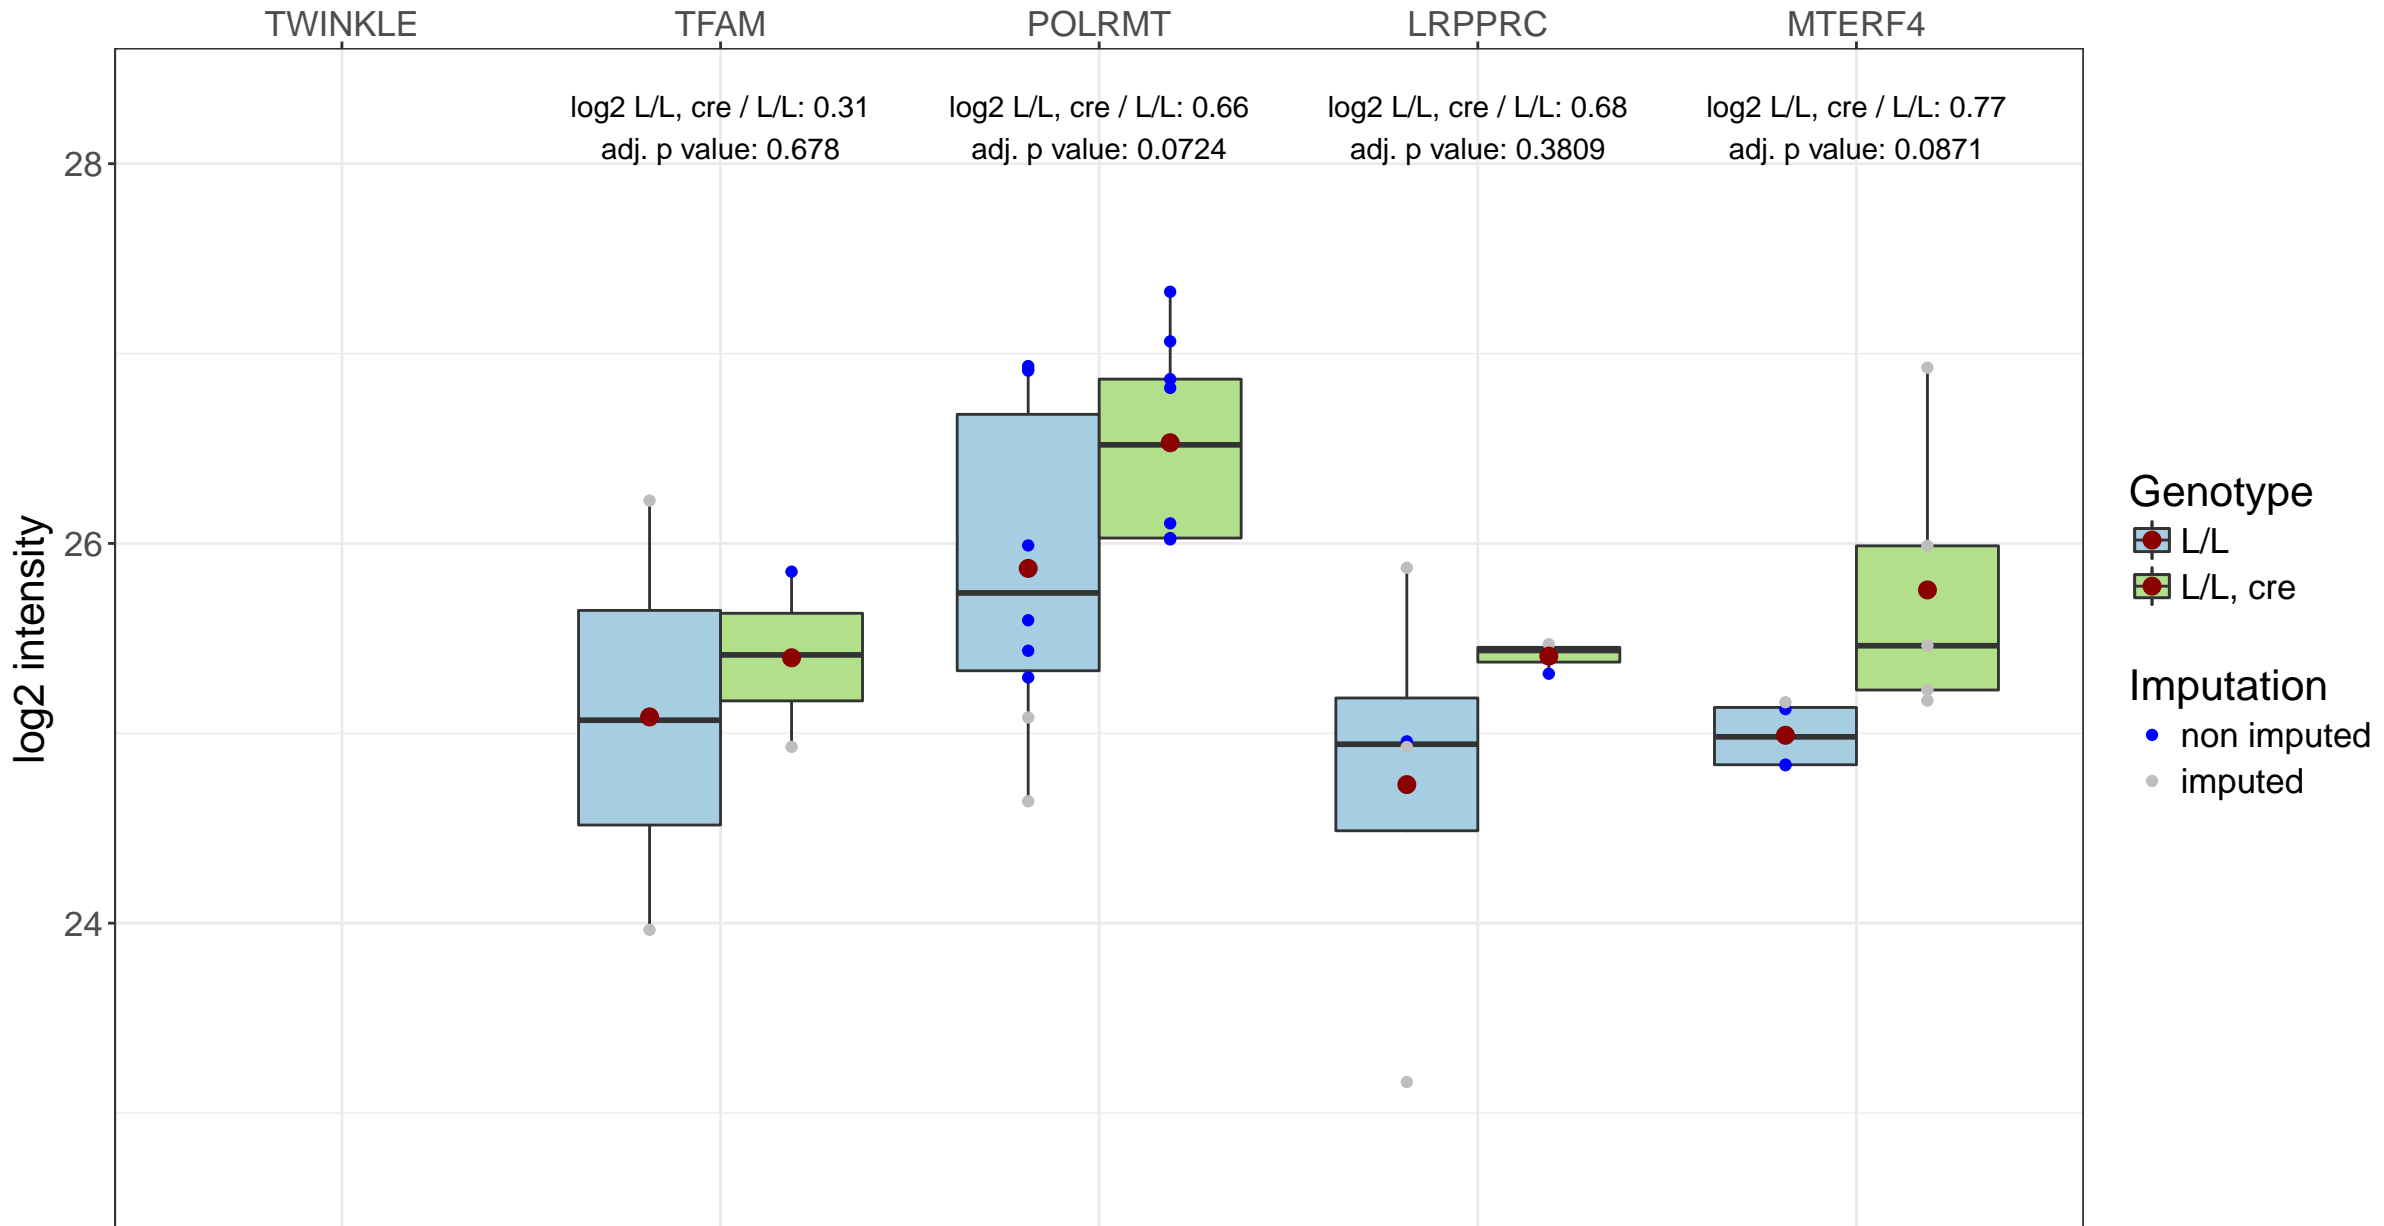

# SERHL / Q3U3G8

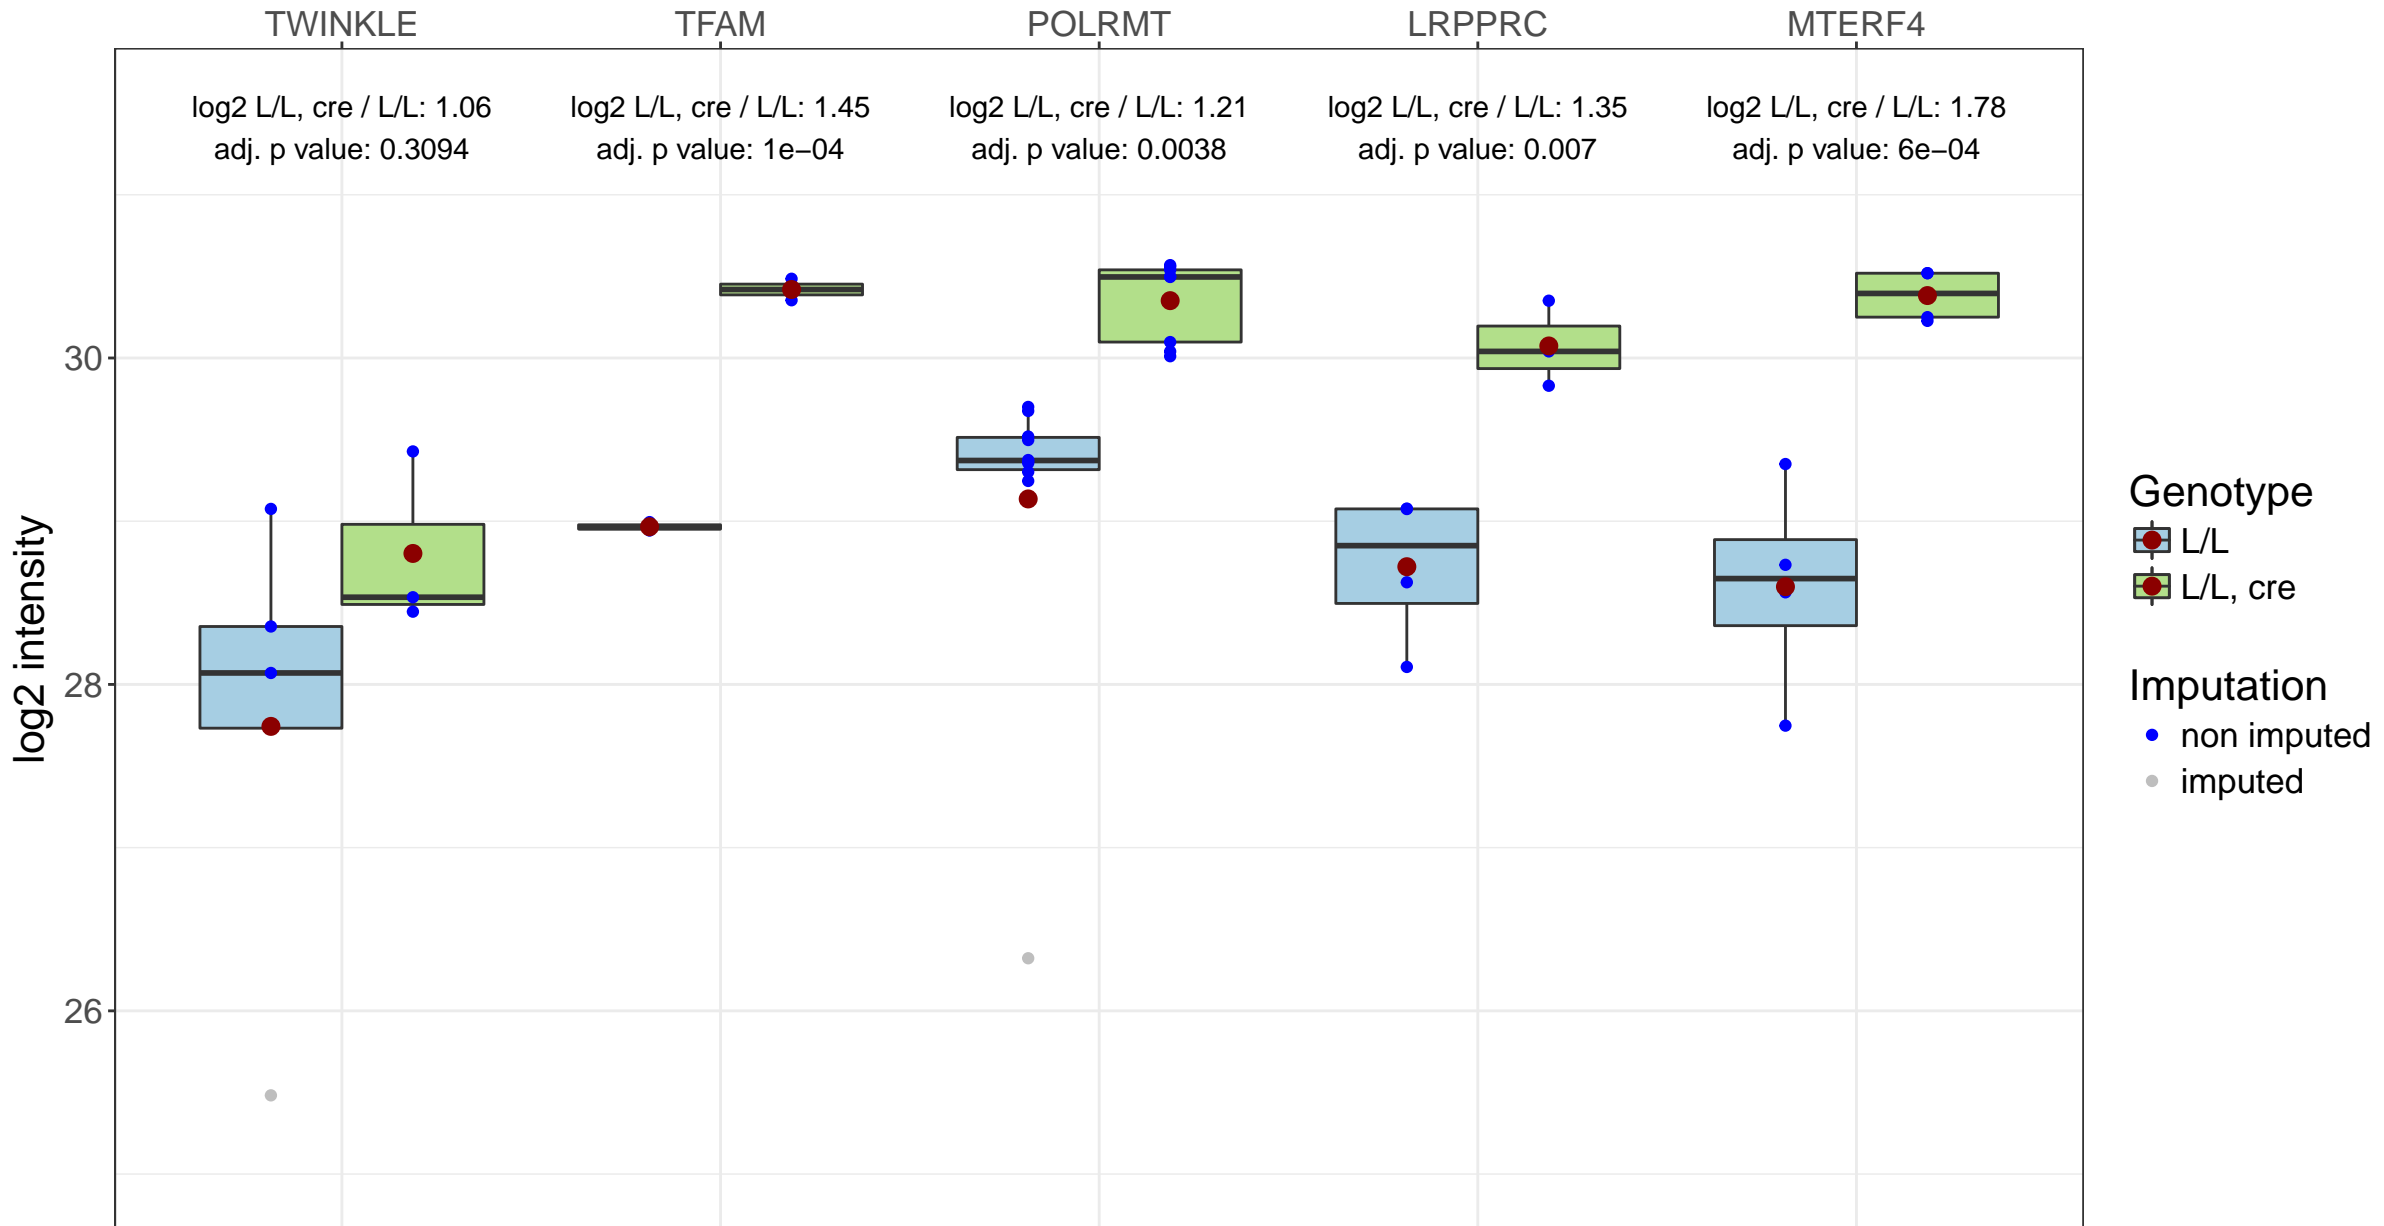

# SERPINH1 / P19324

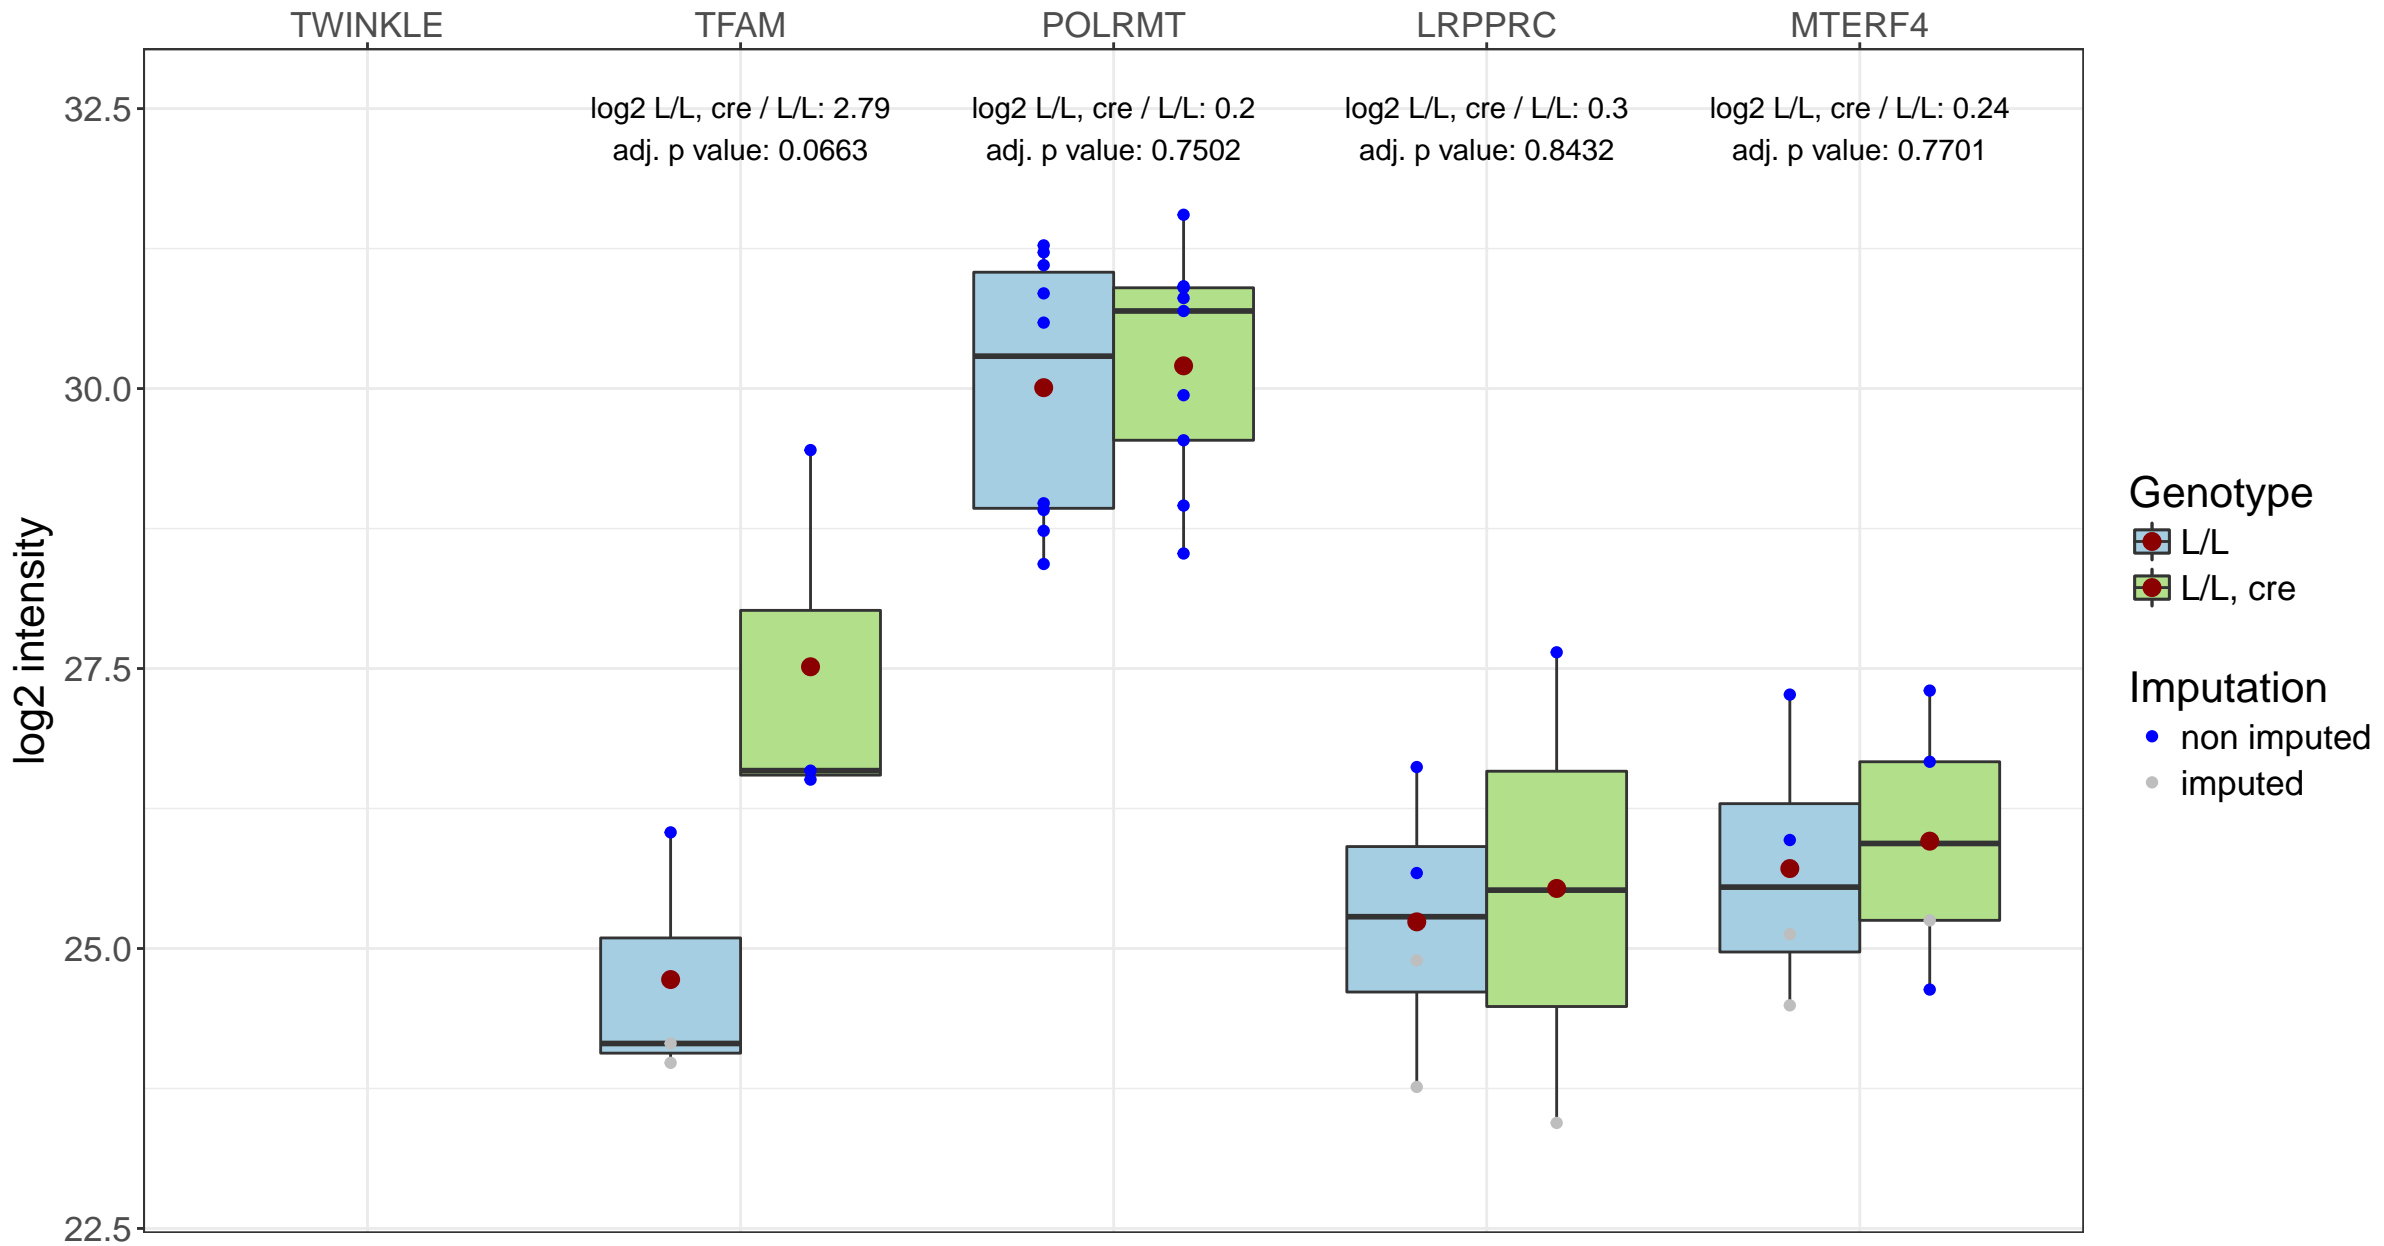

# SFXN3 / Q91V61

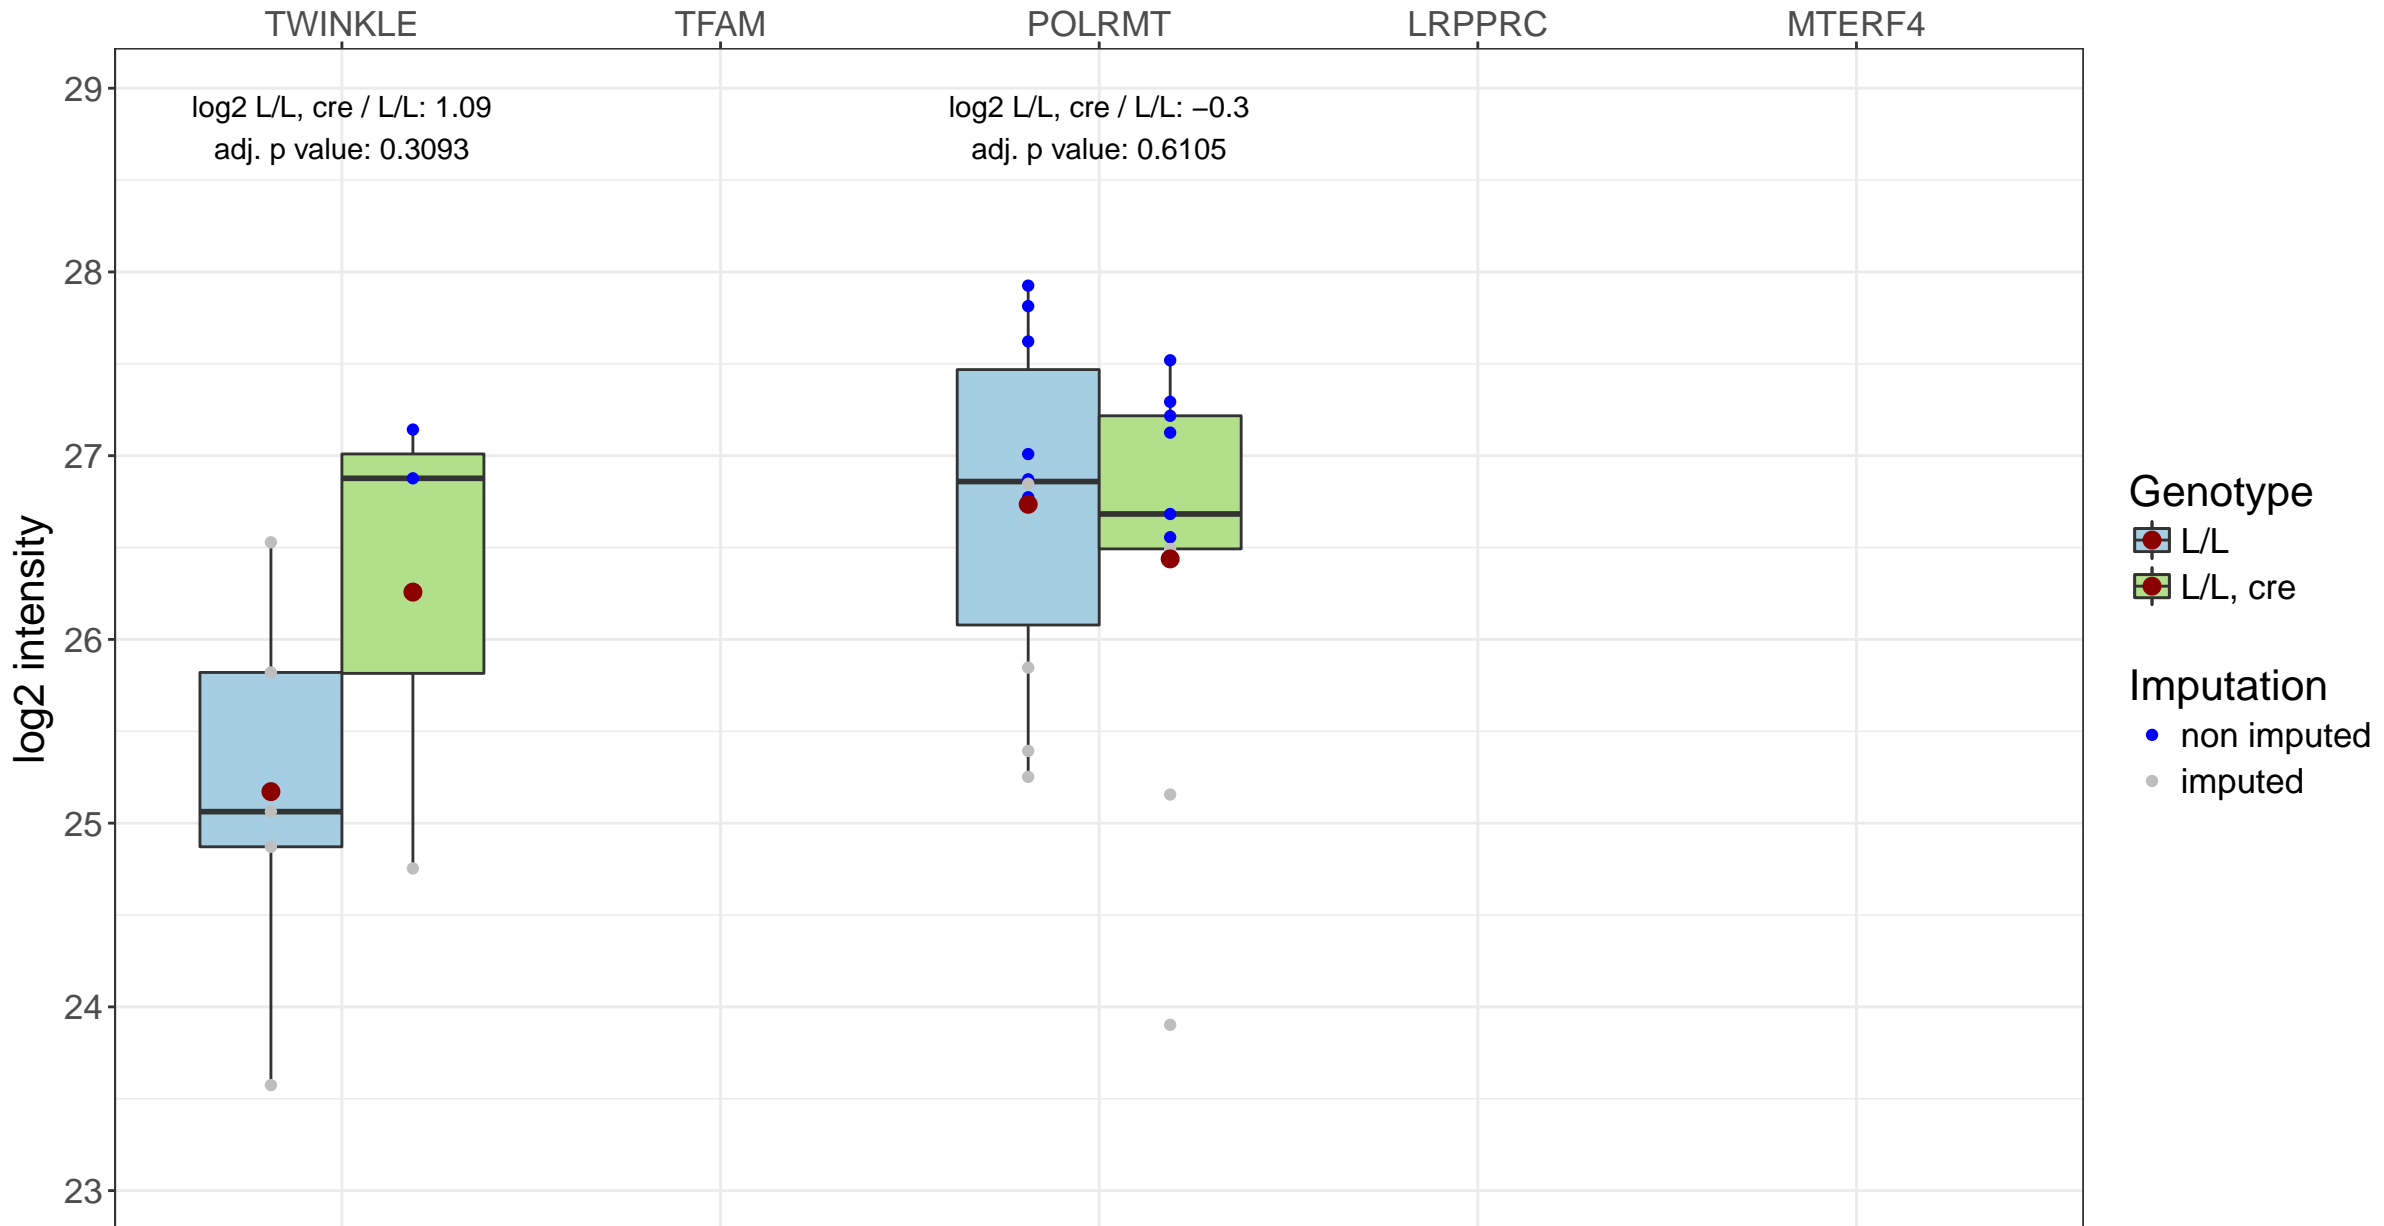

# SFXN4 / Q925N1

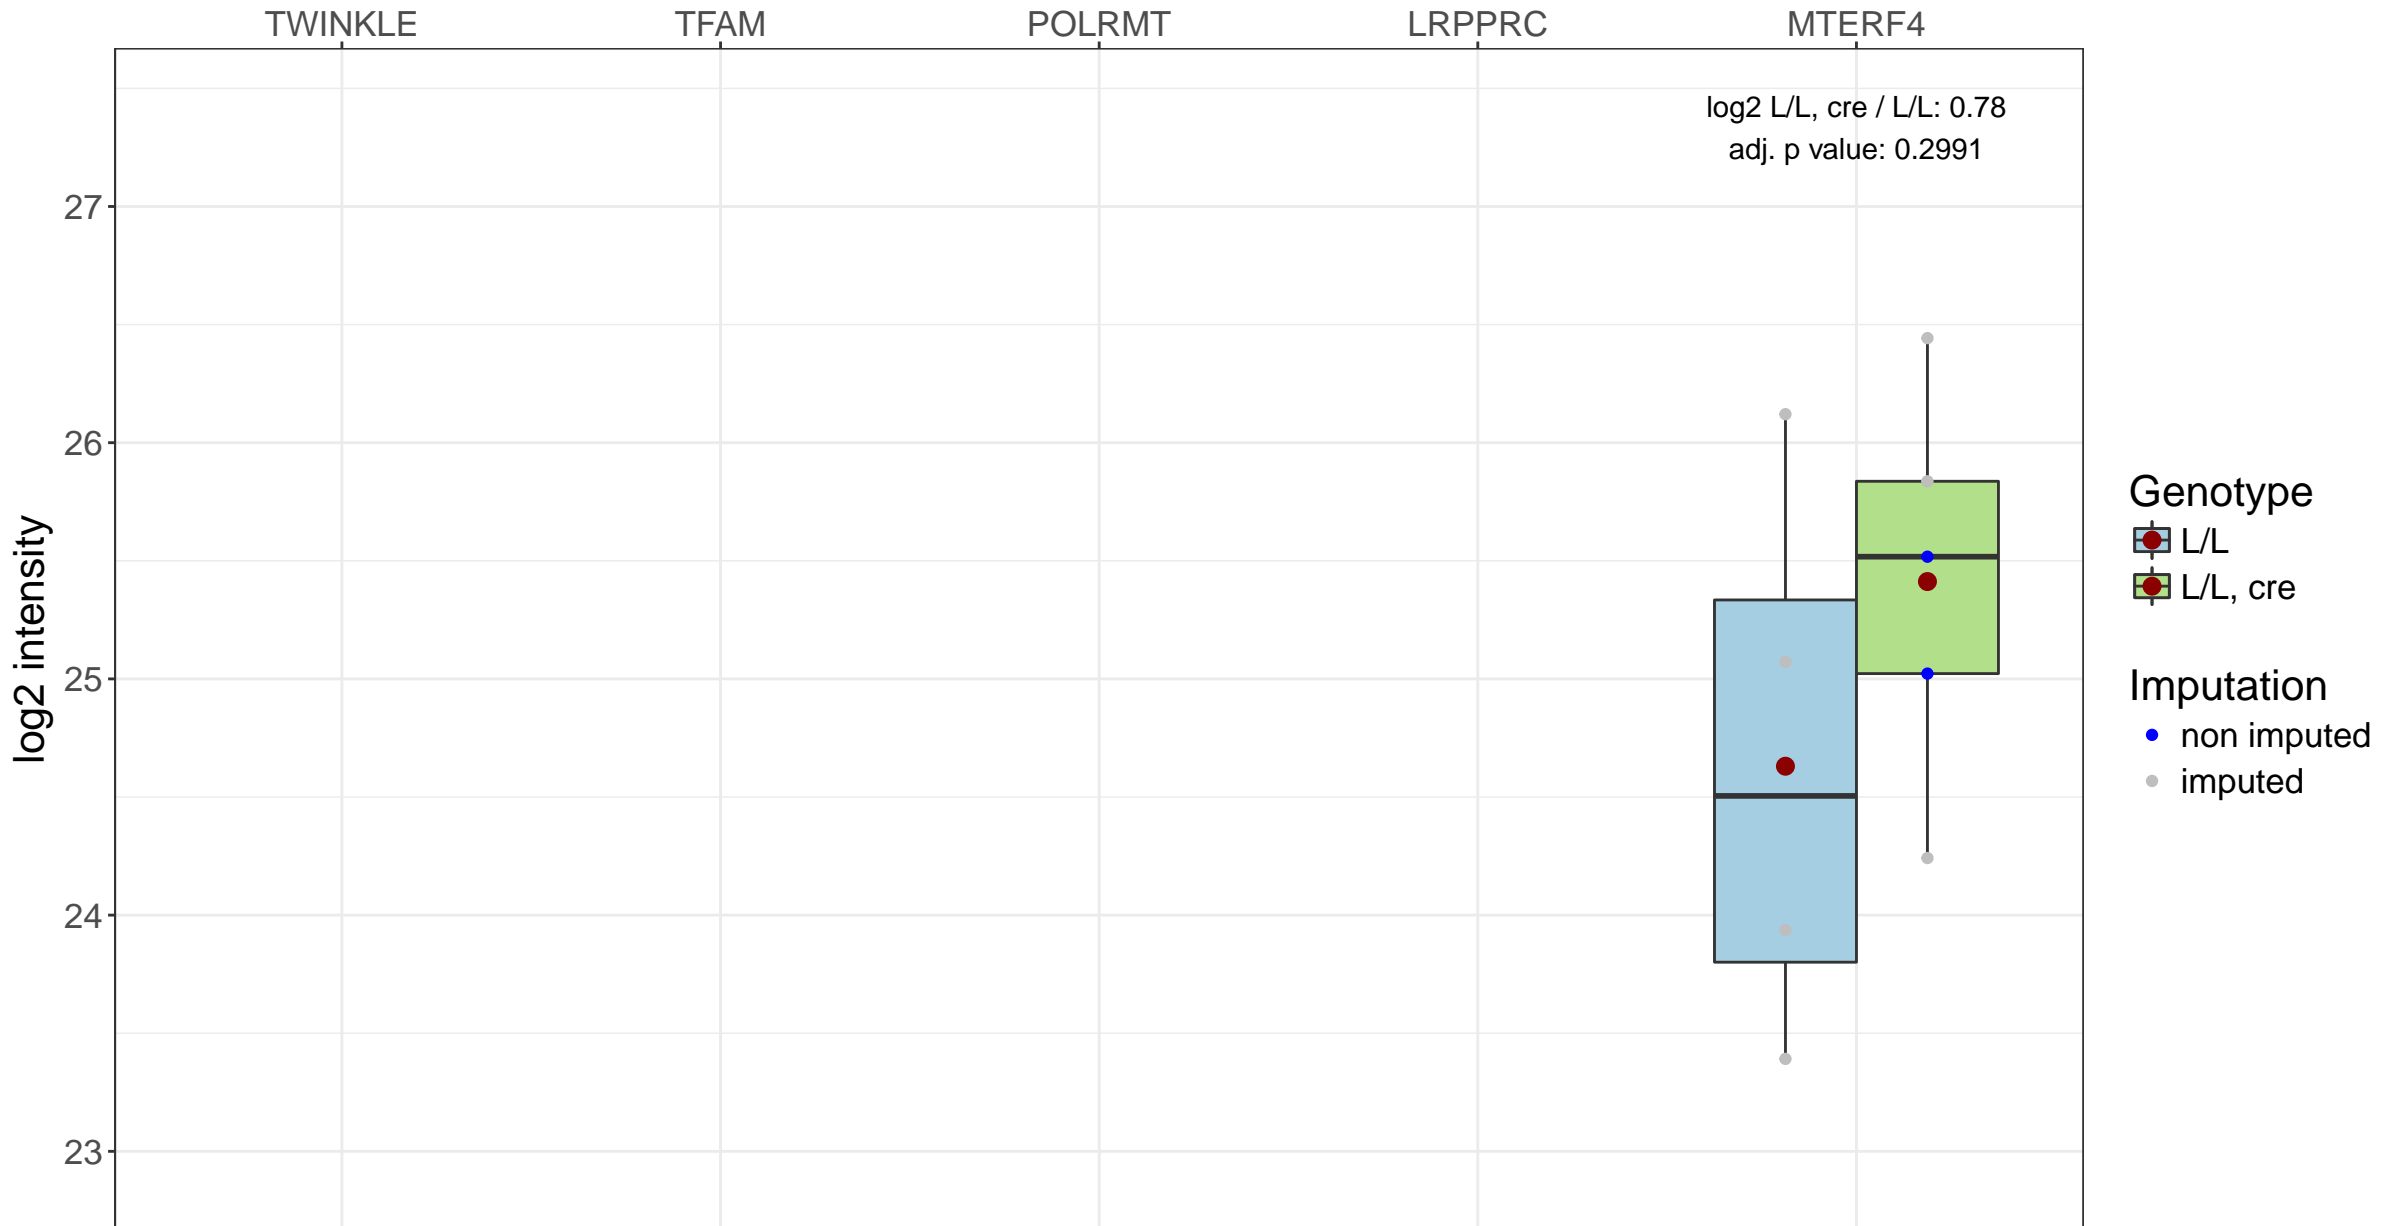

# SHMT2 / Q9CZN7

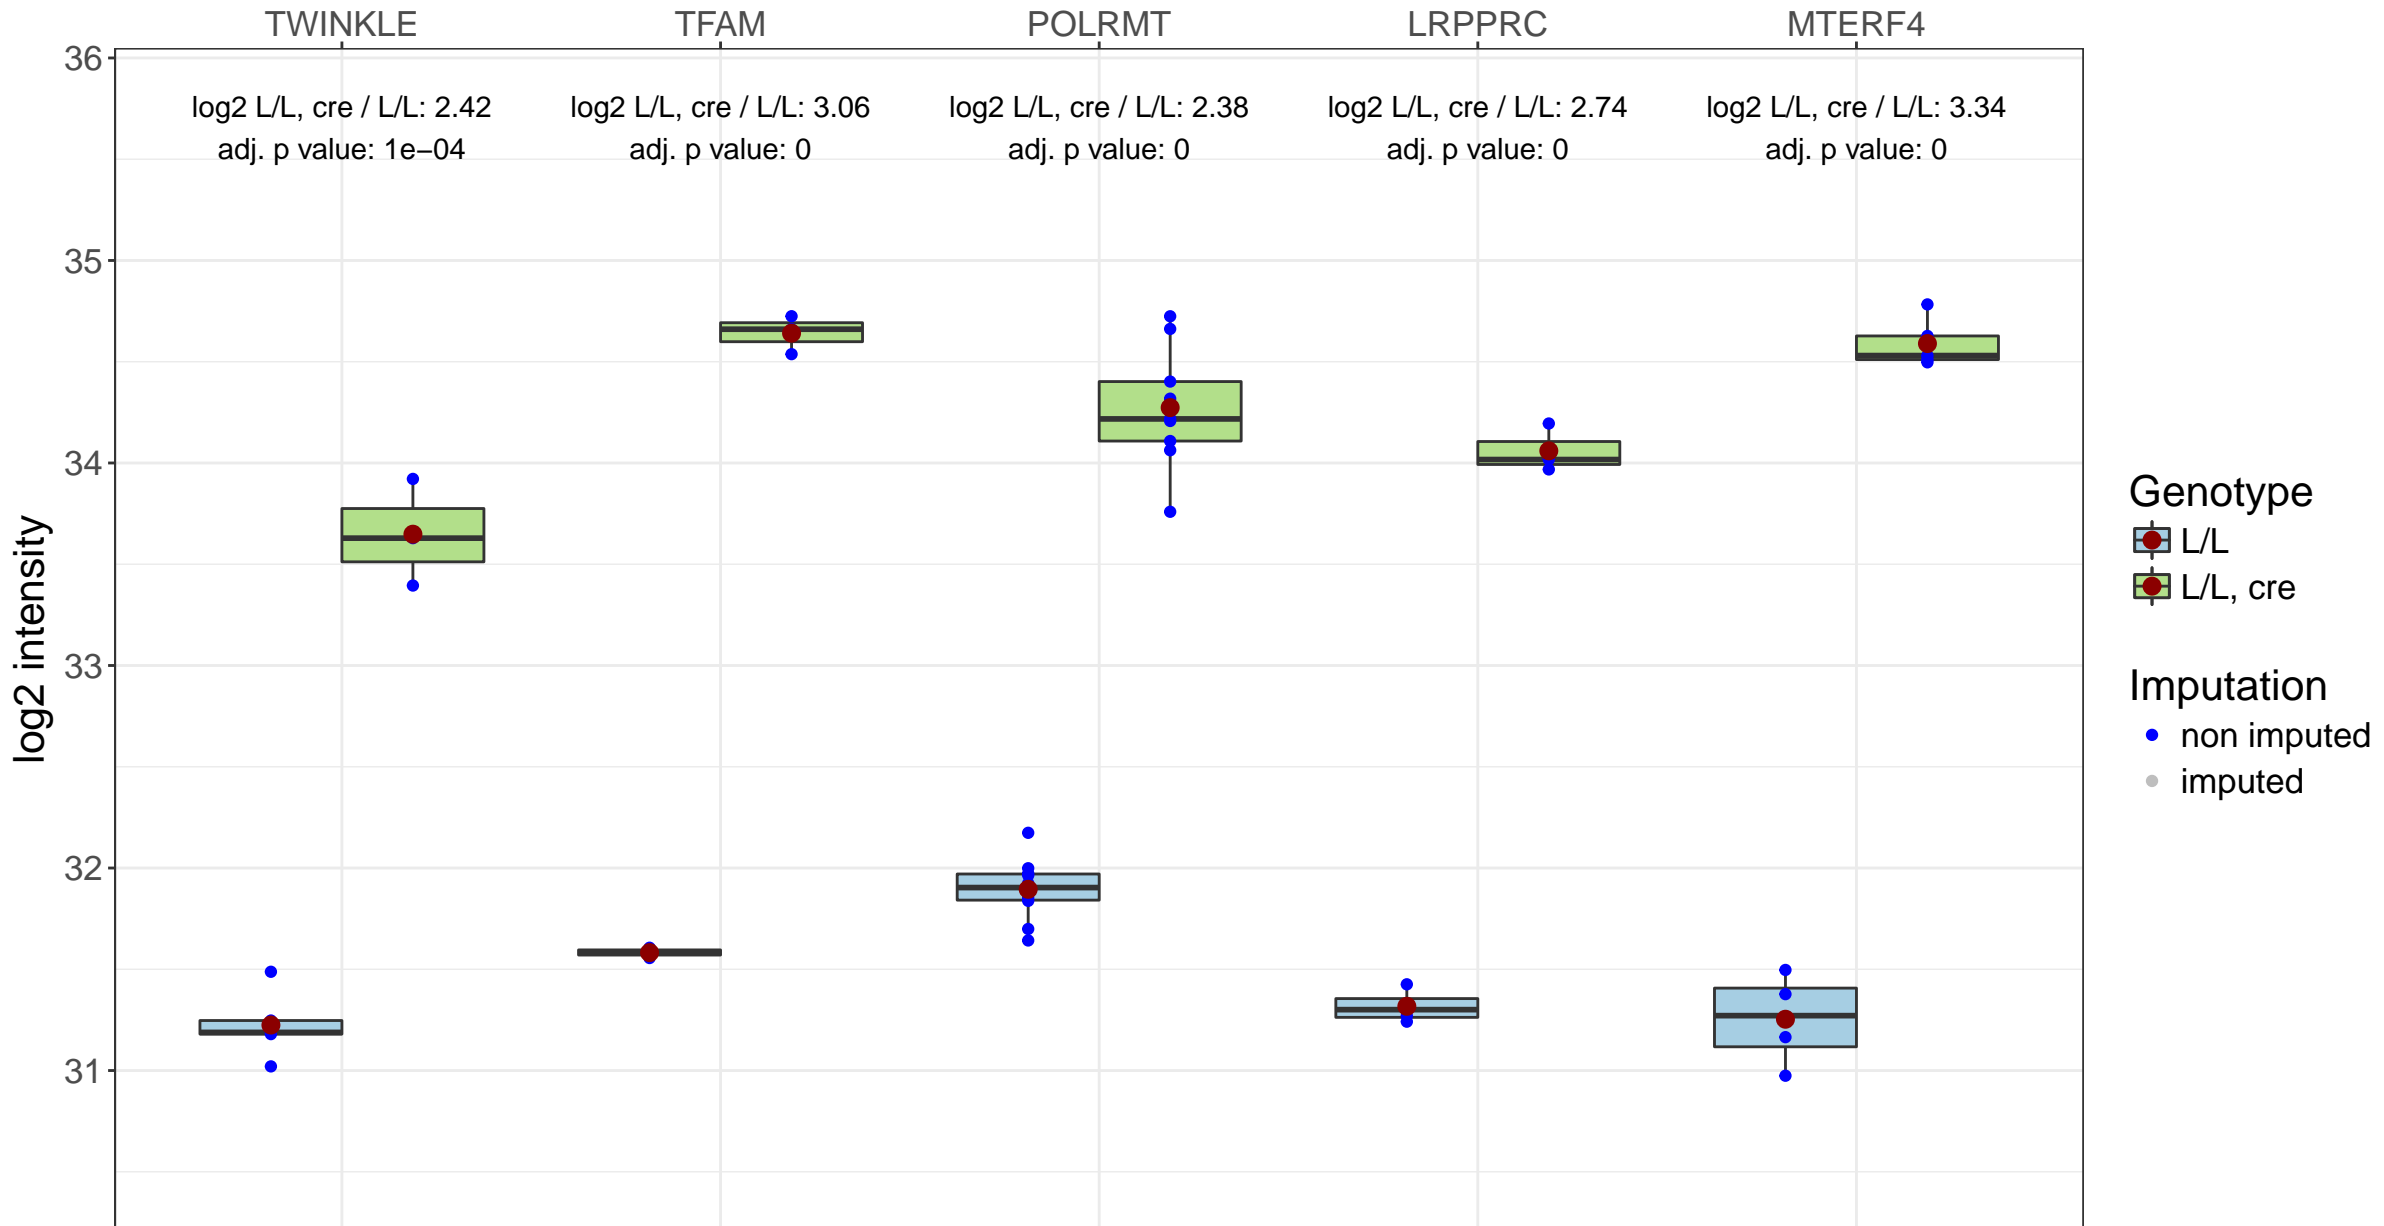

# SIRT3 / Q8R104

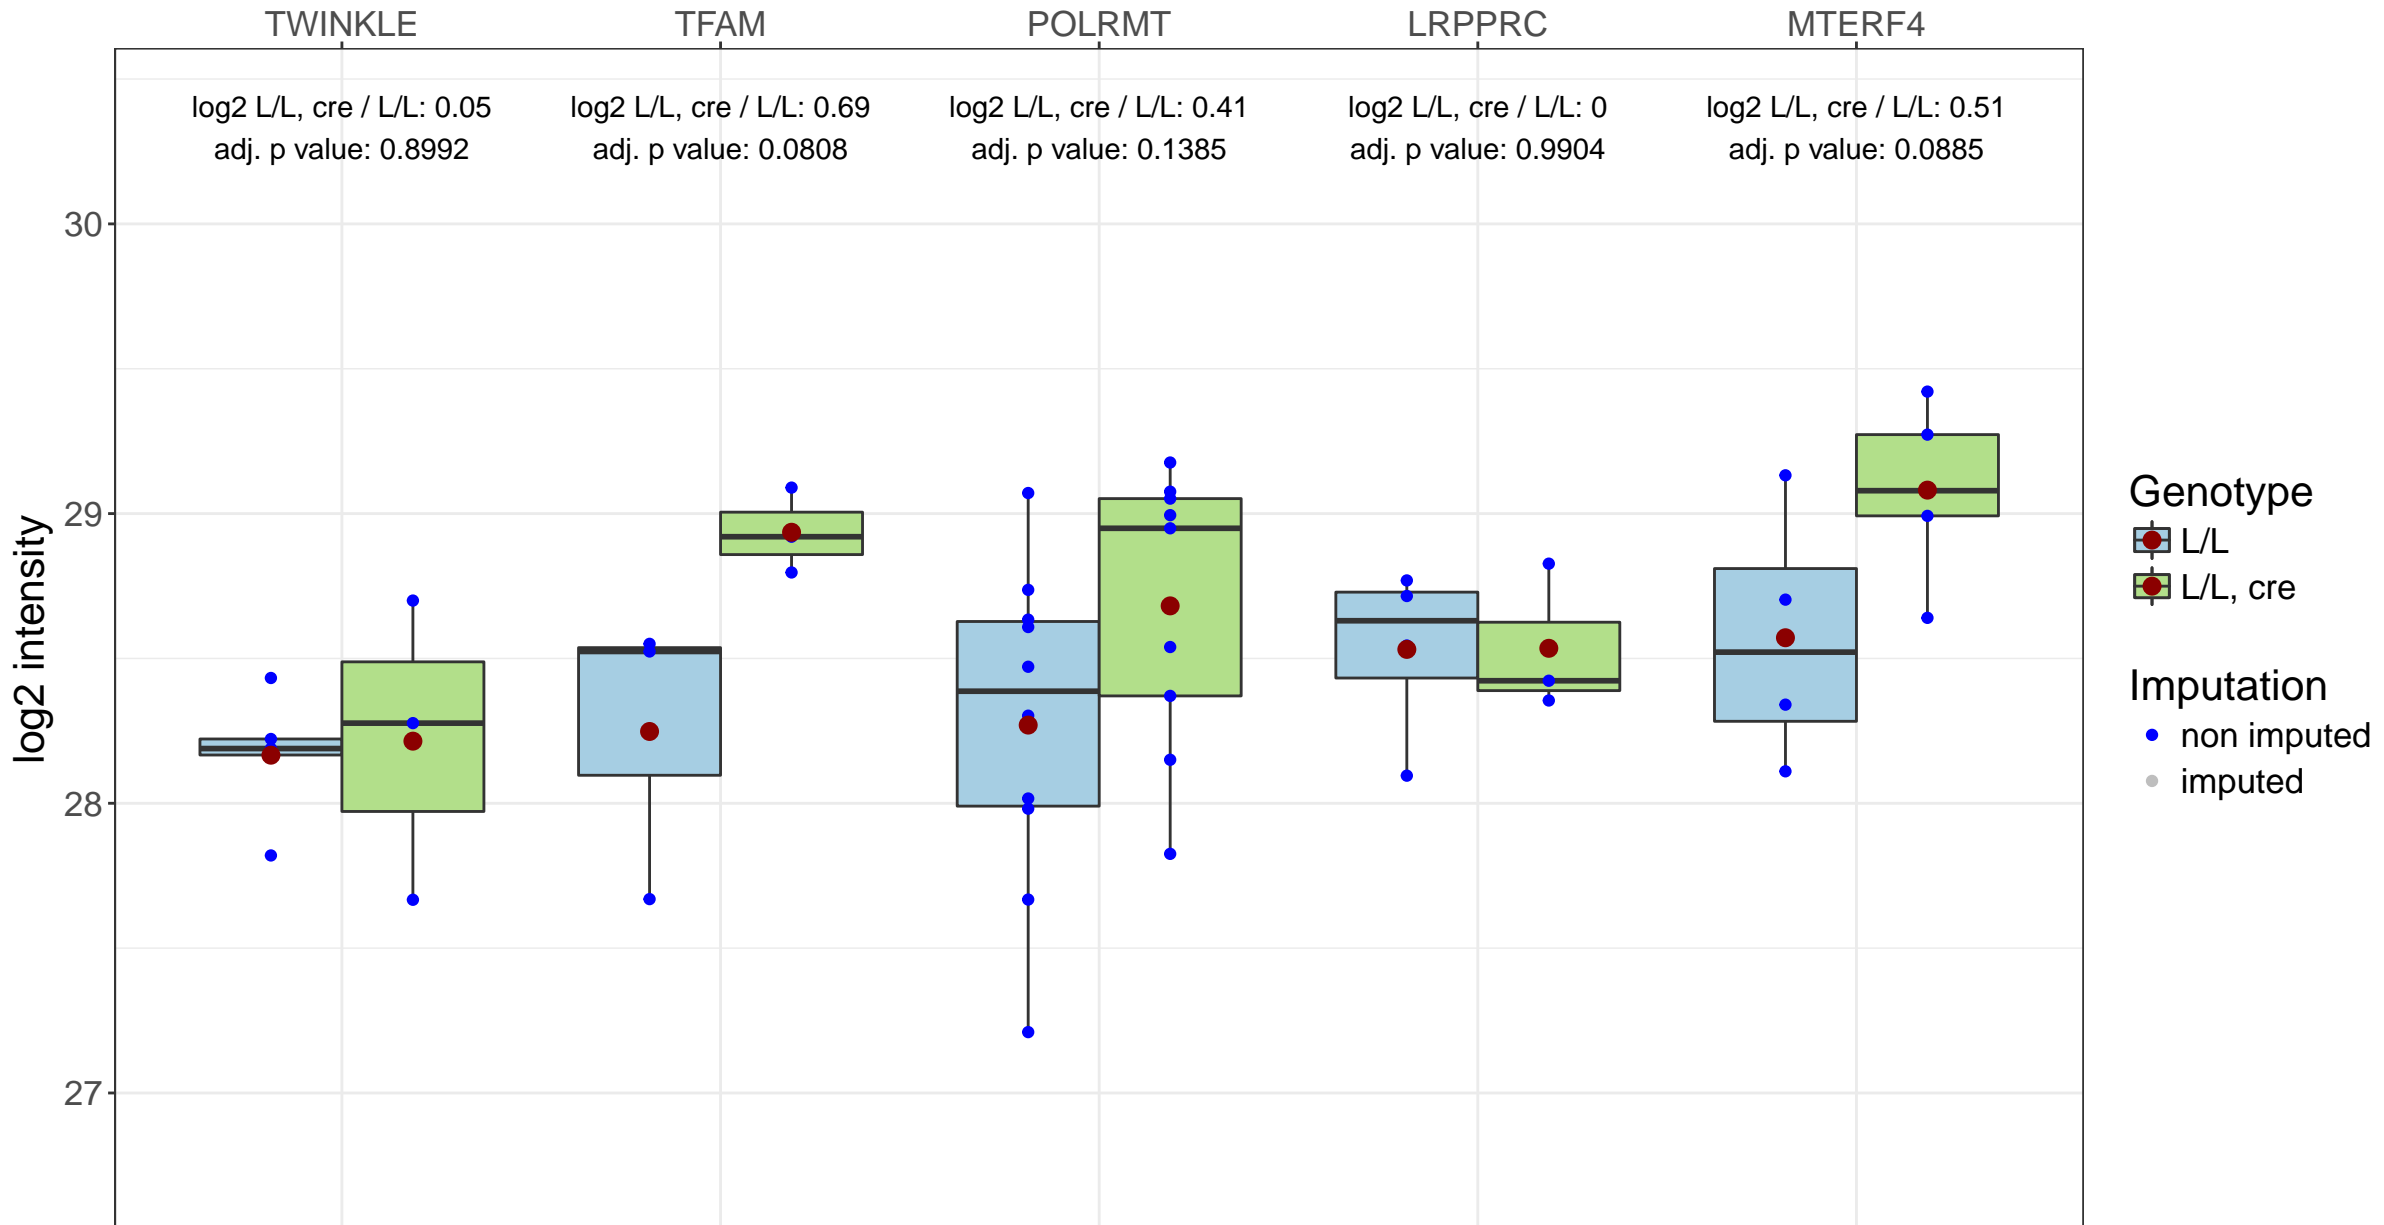



# SIRT4 / Q8R216

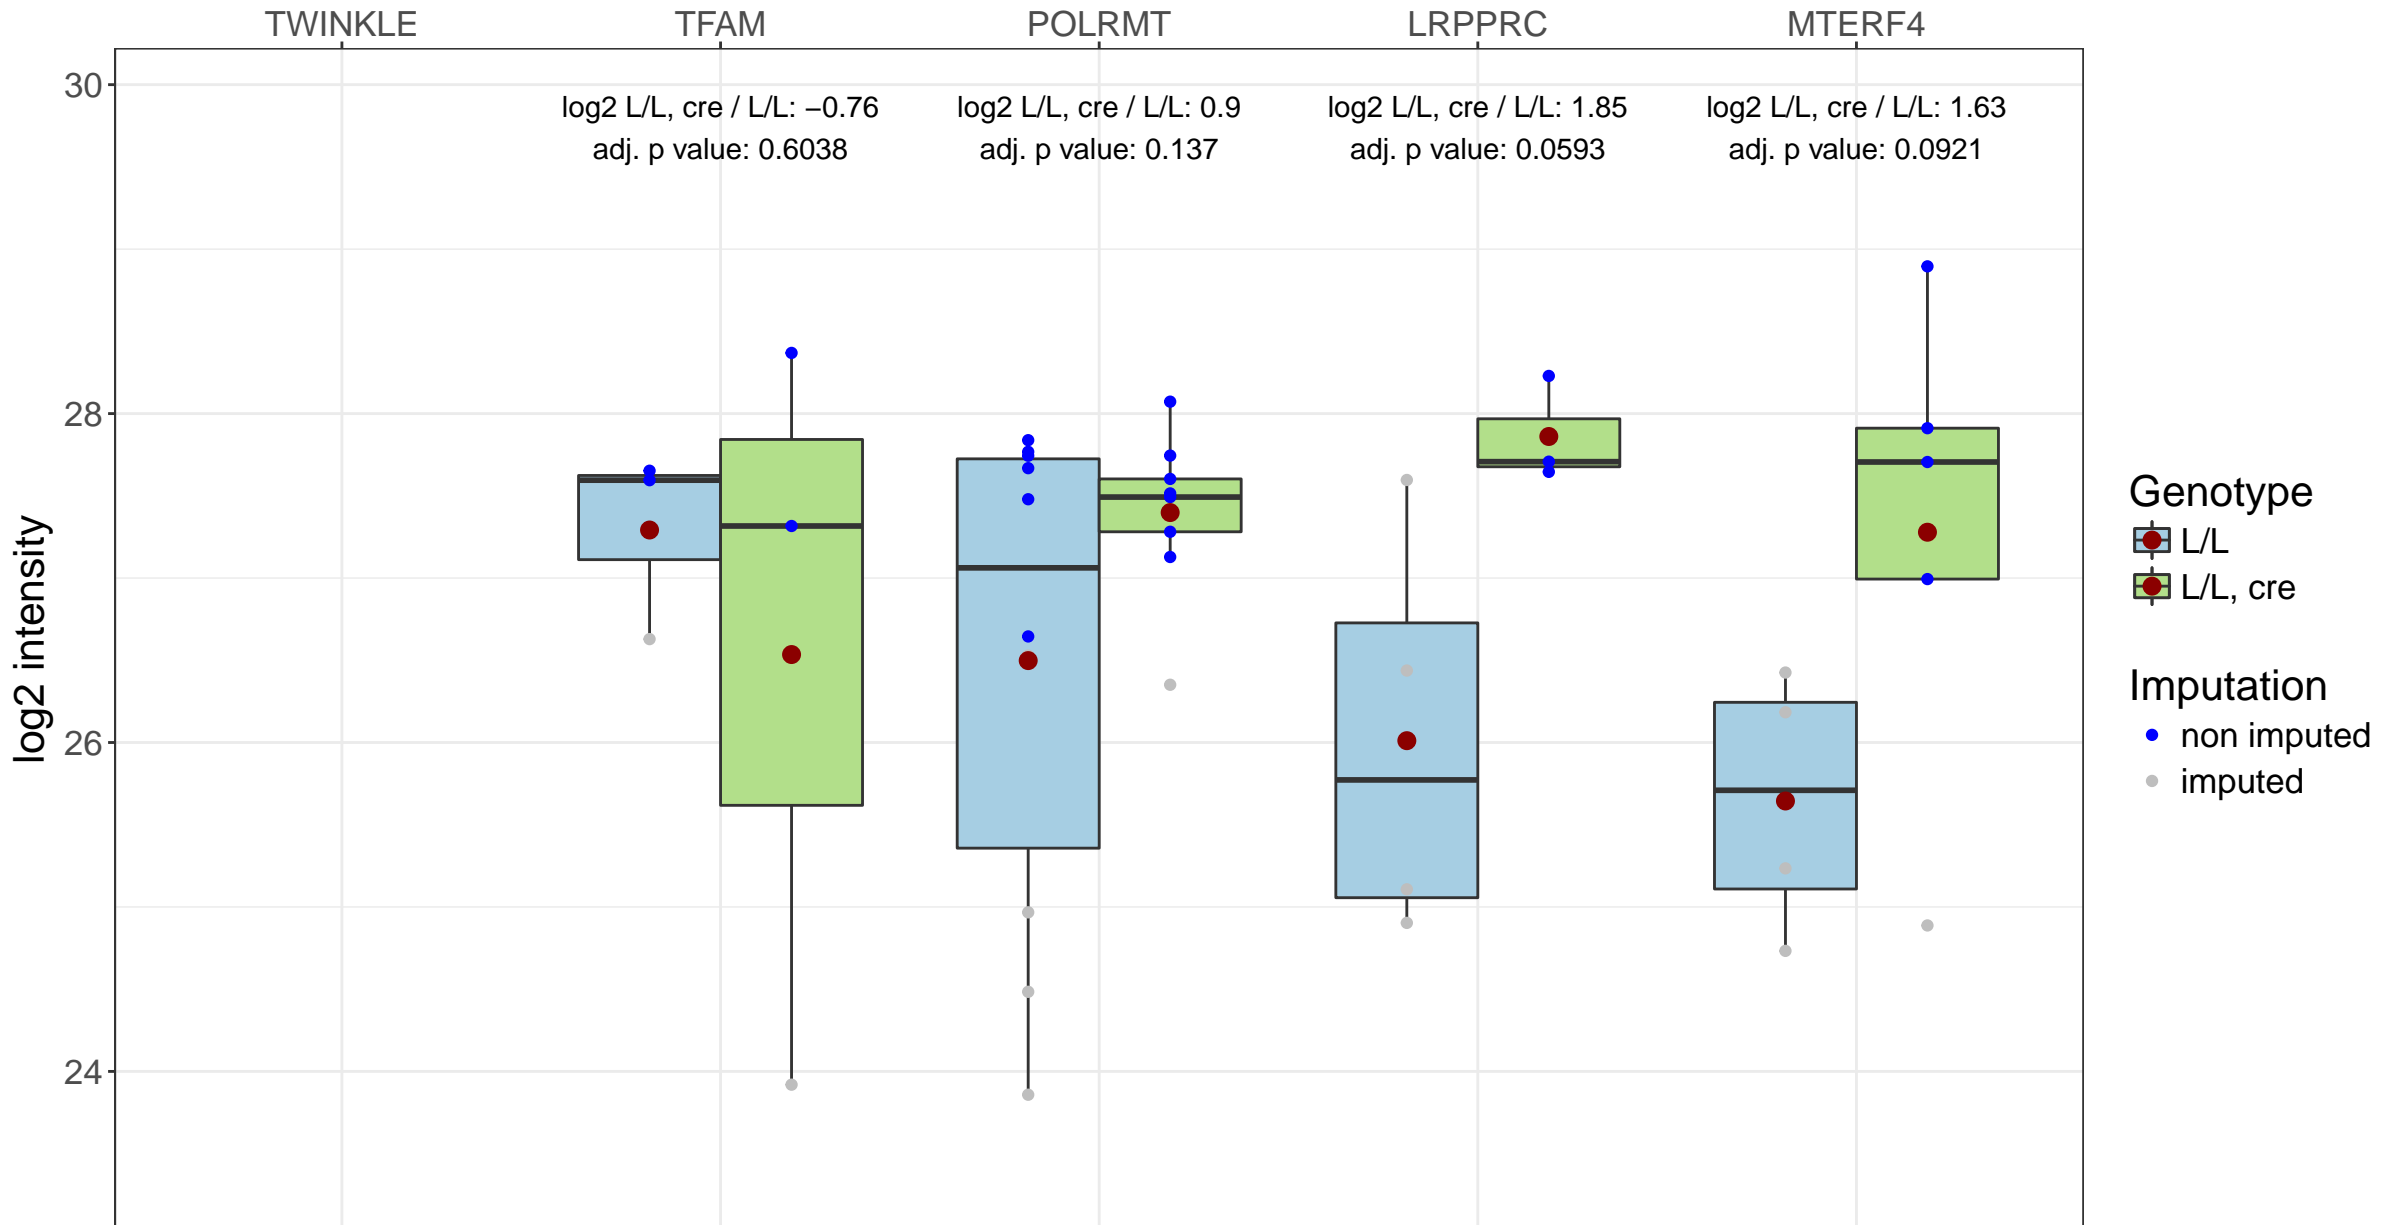

# SIRT5 / Q8K2C6

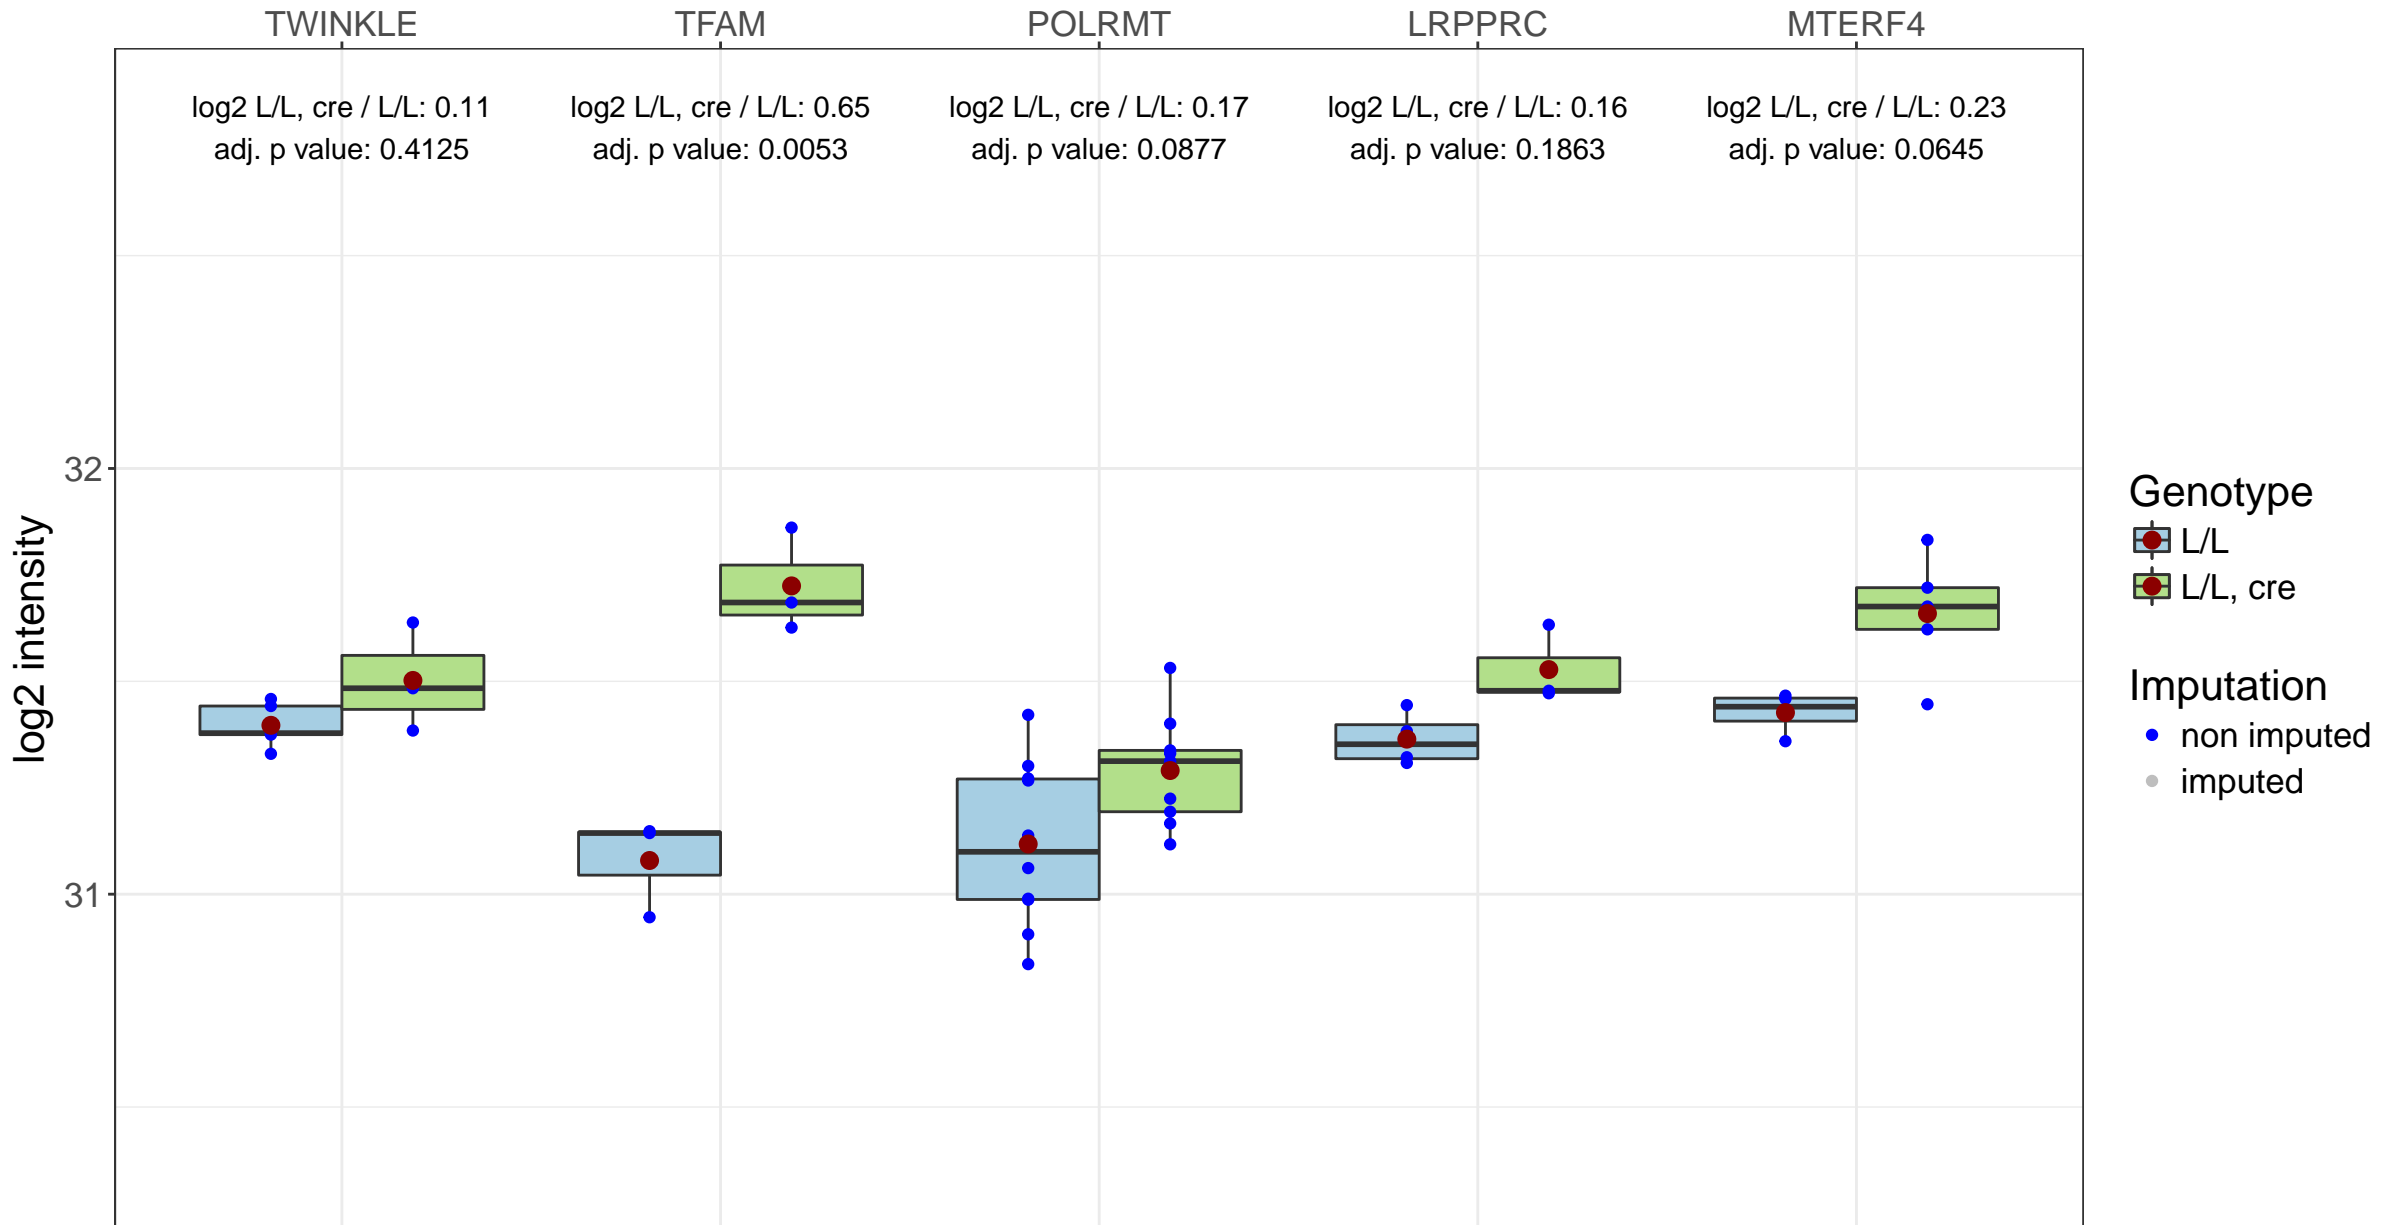

# SLC25A1 / Q8JZU2

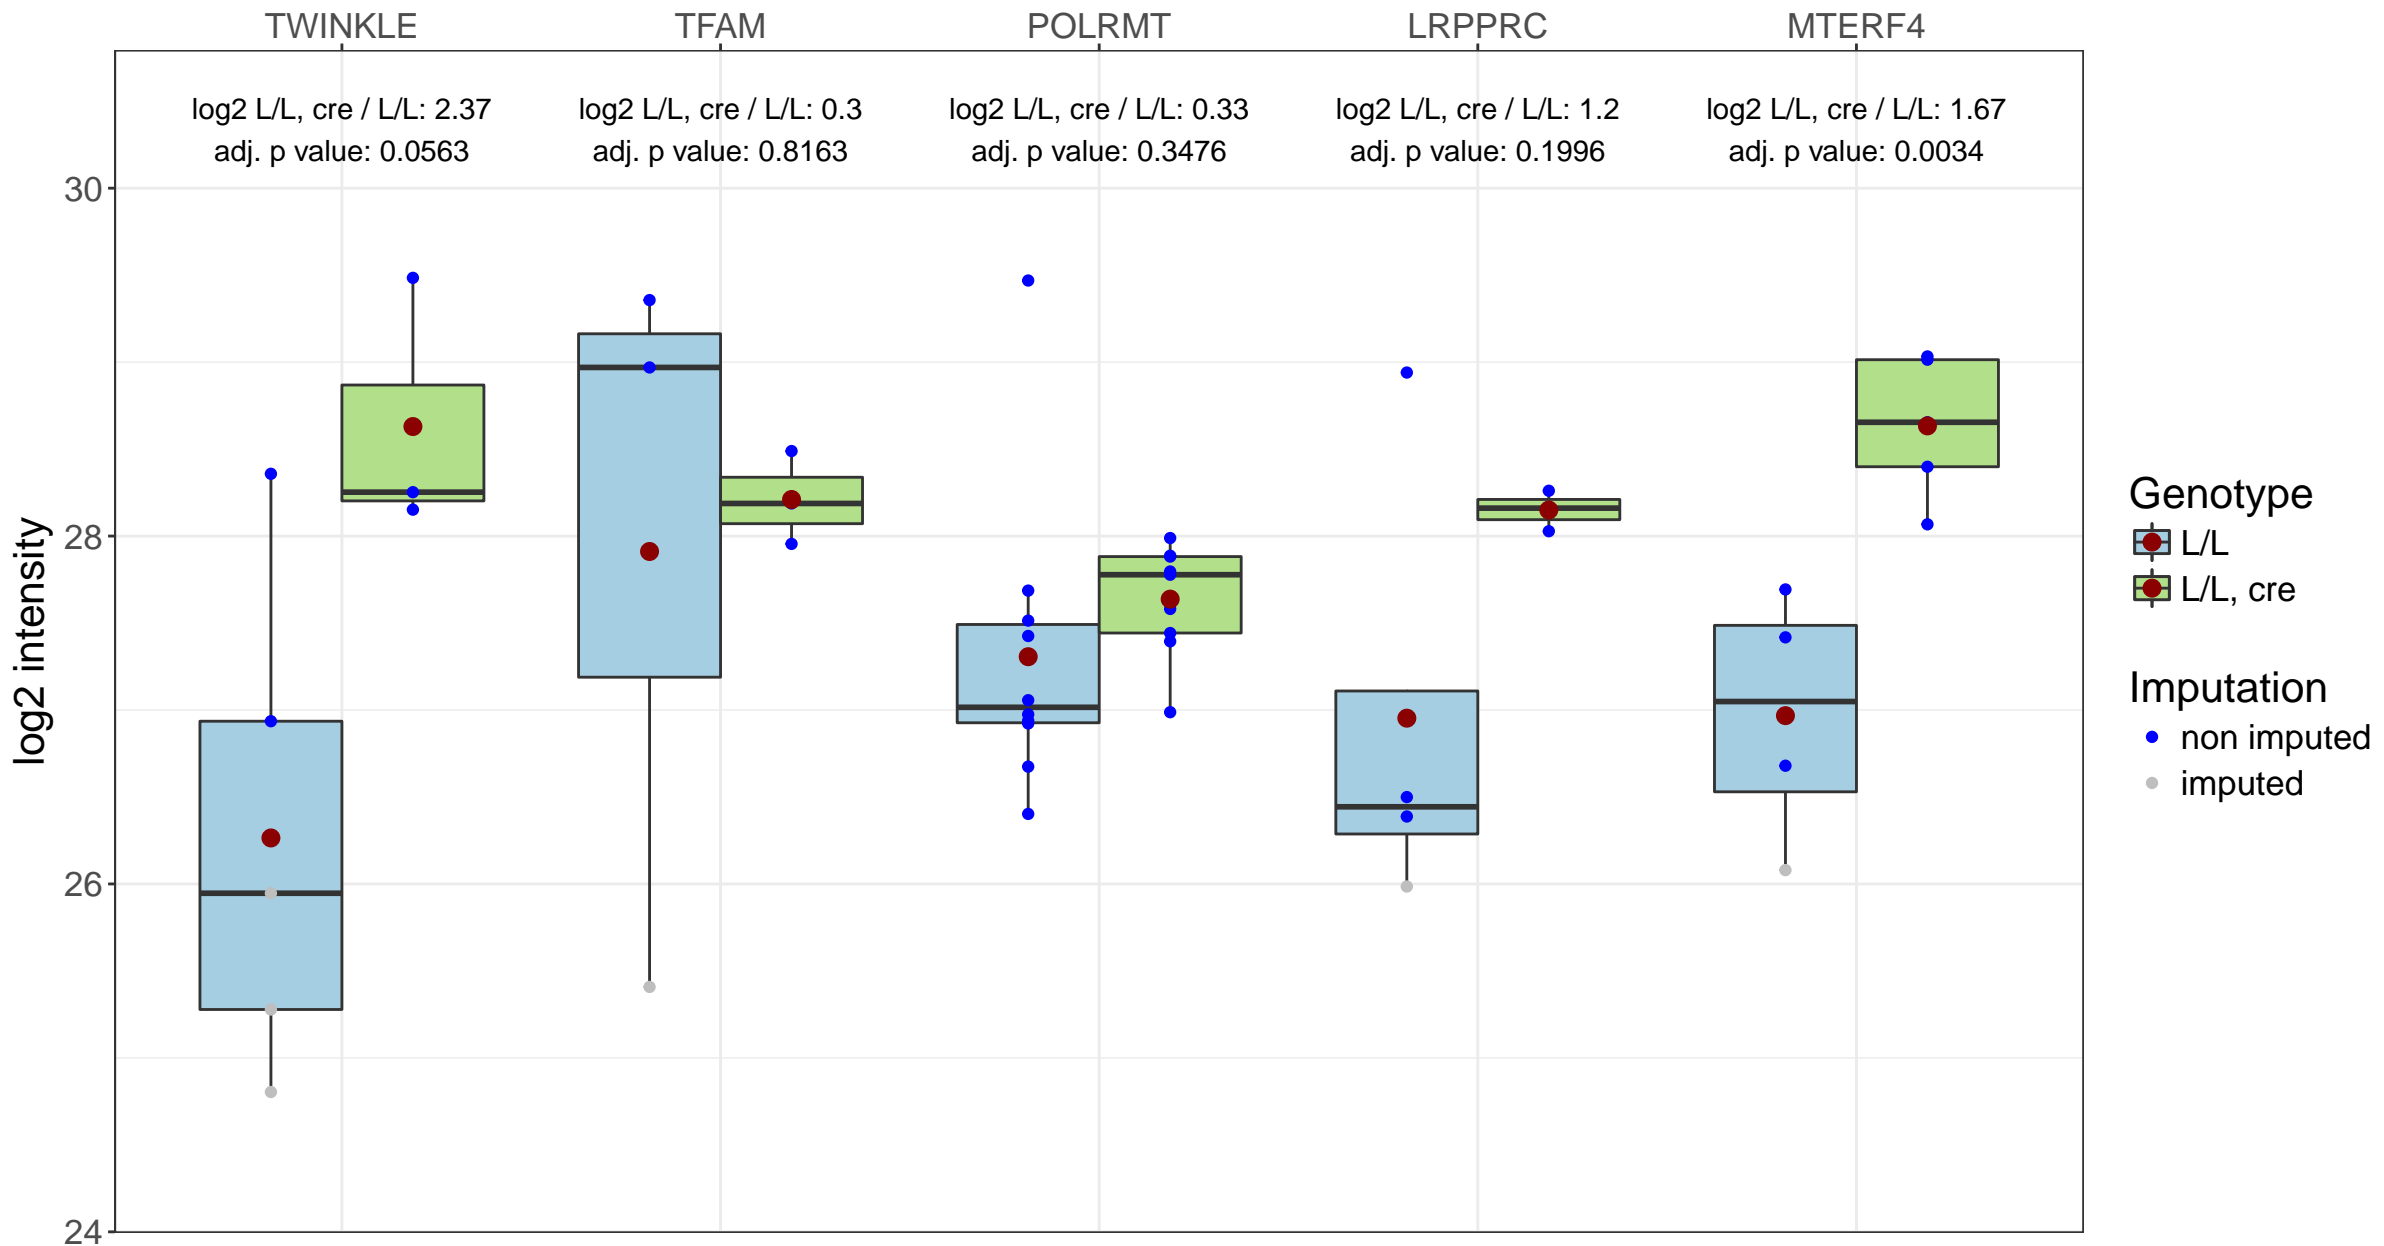

# SLC25A10 / Q9QZD8

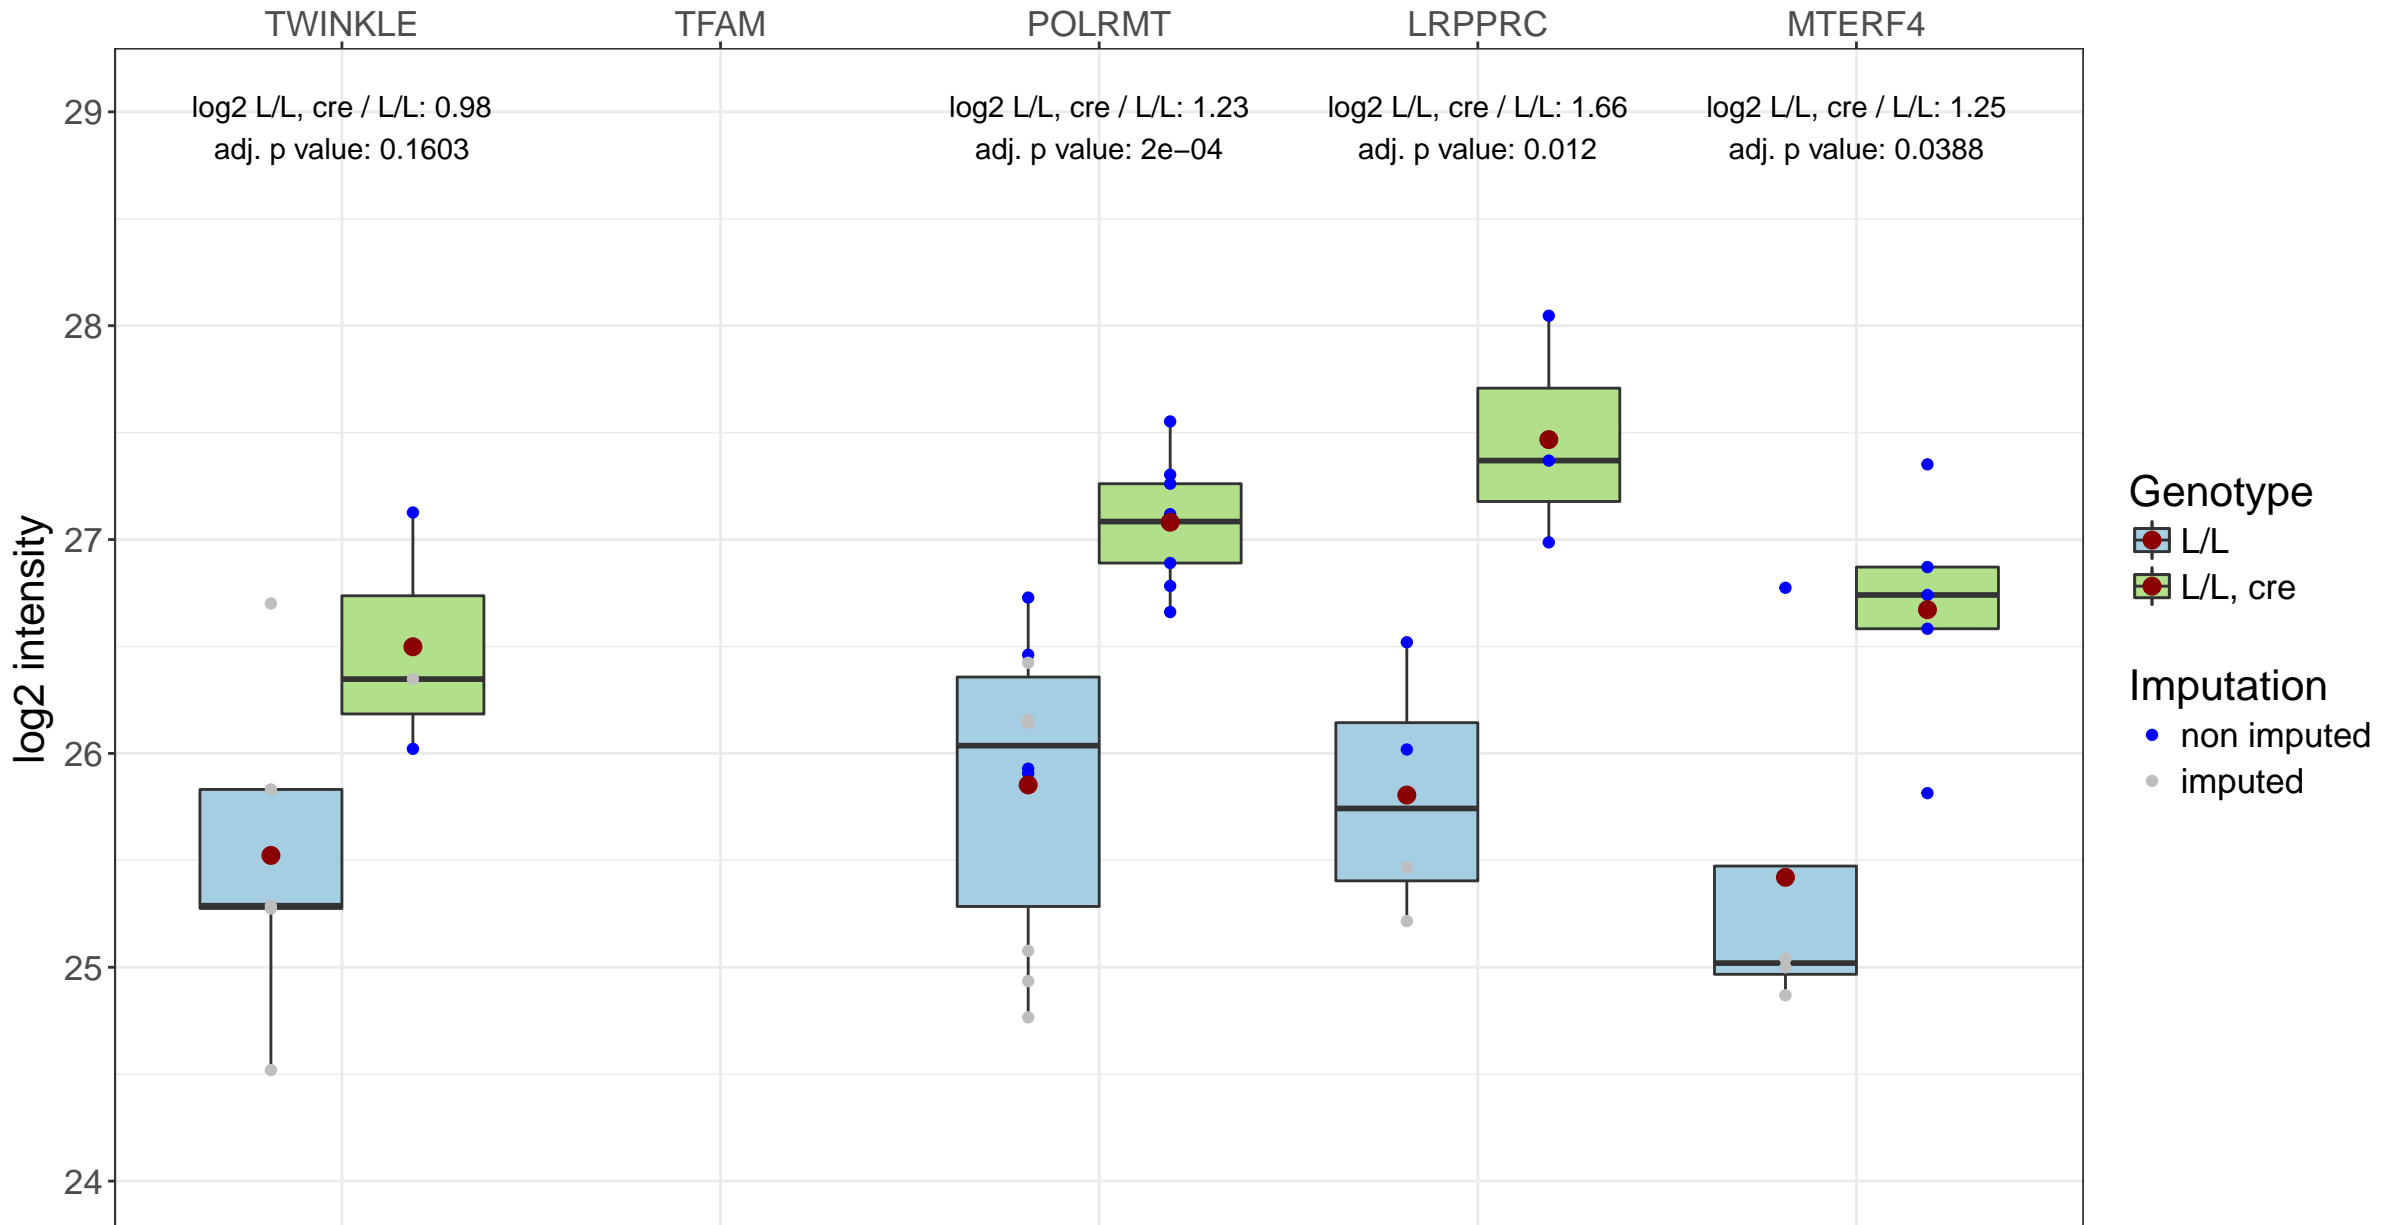

# SLC25A11 / Q9CR62

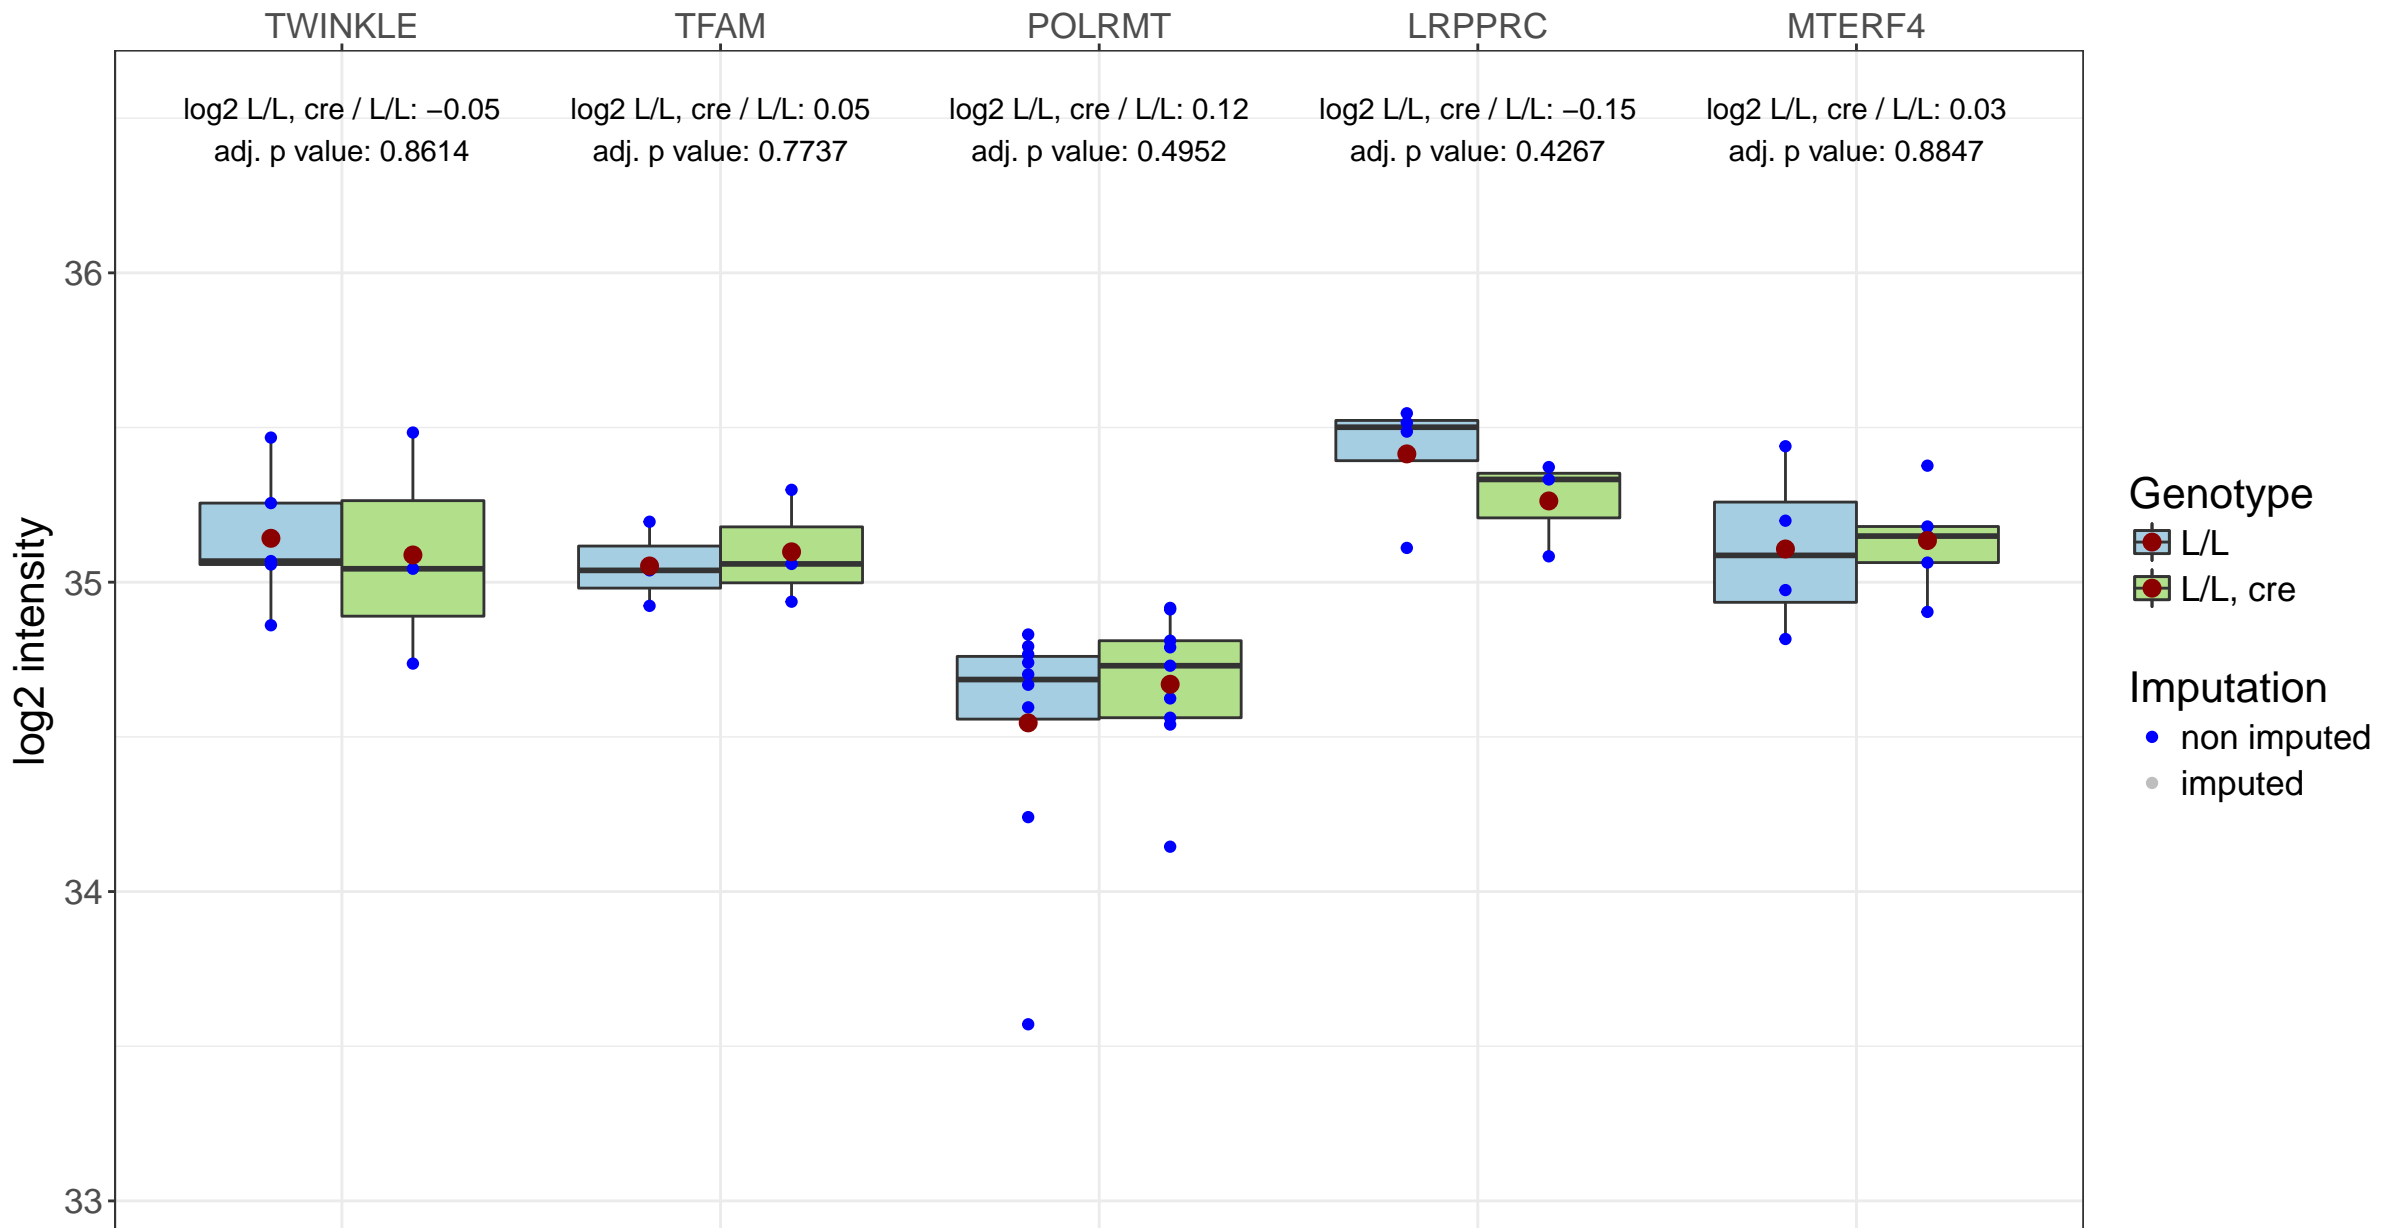

# SLC25A12 / Q8BH59

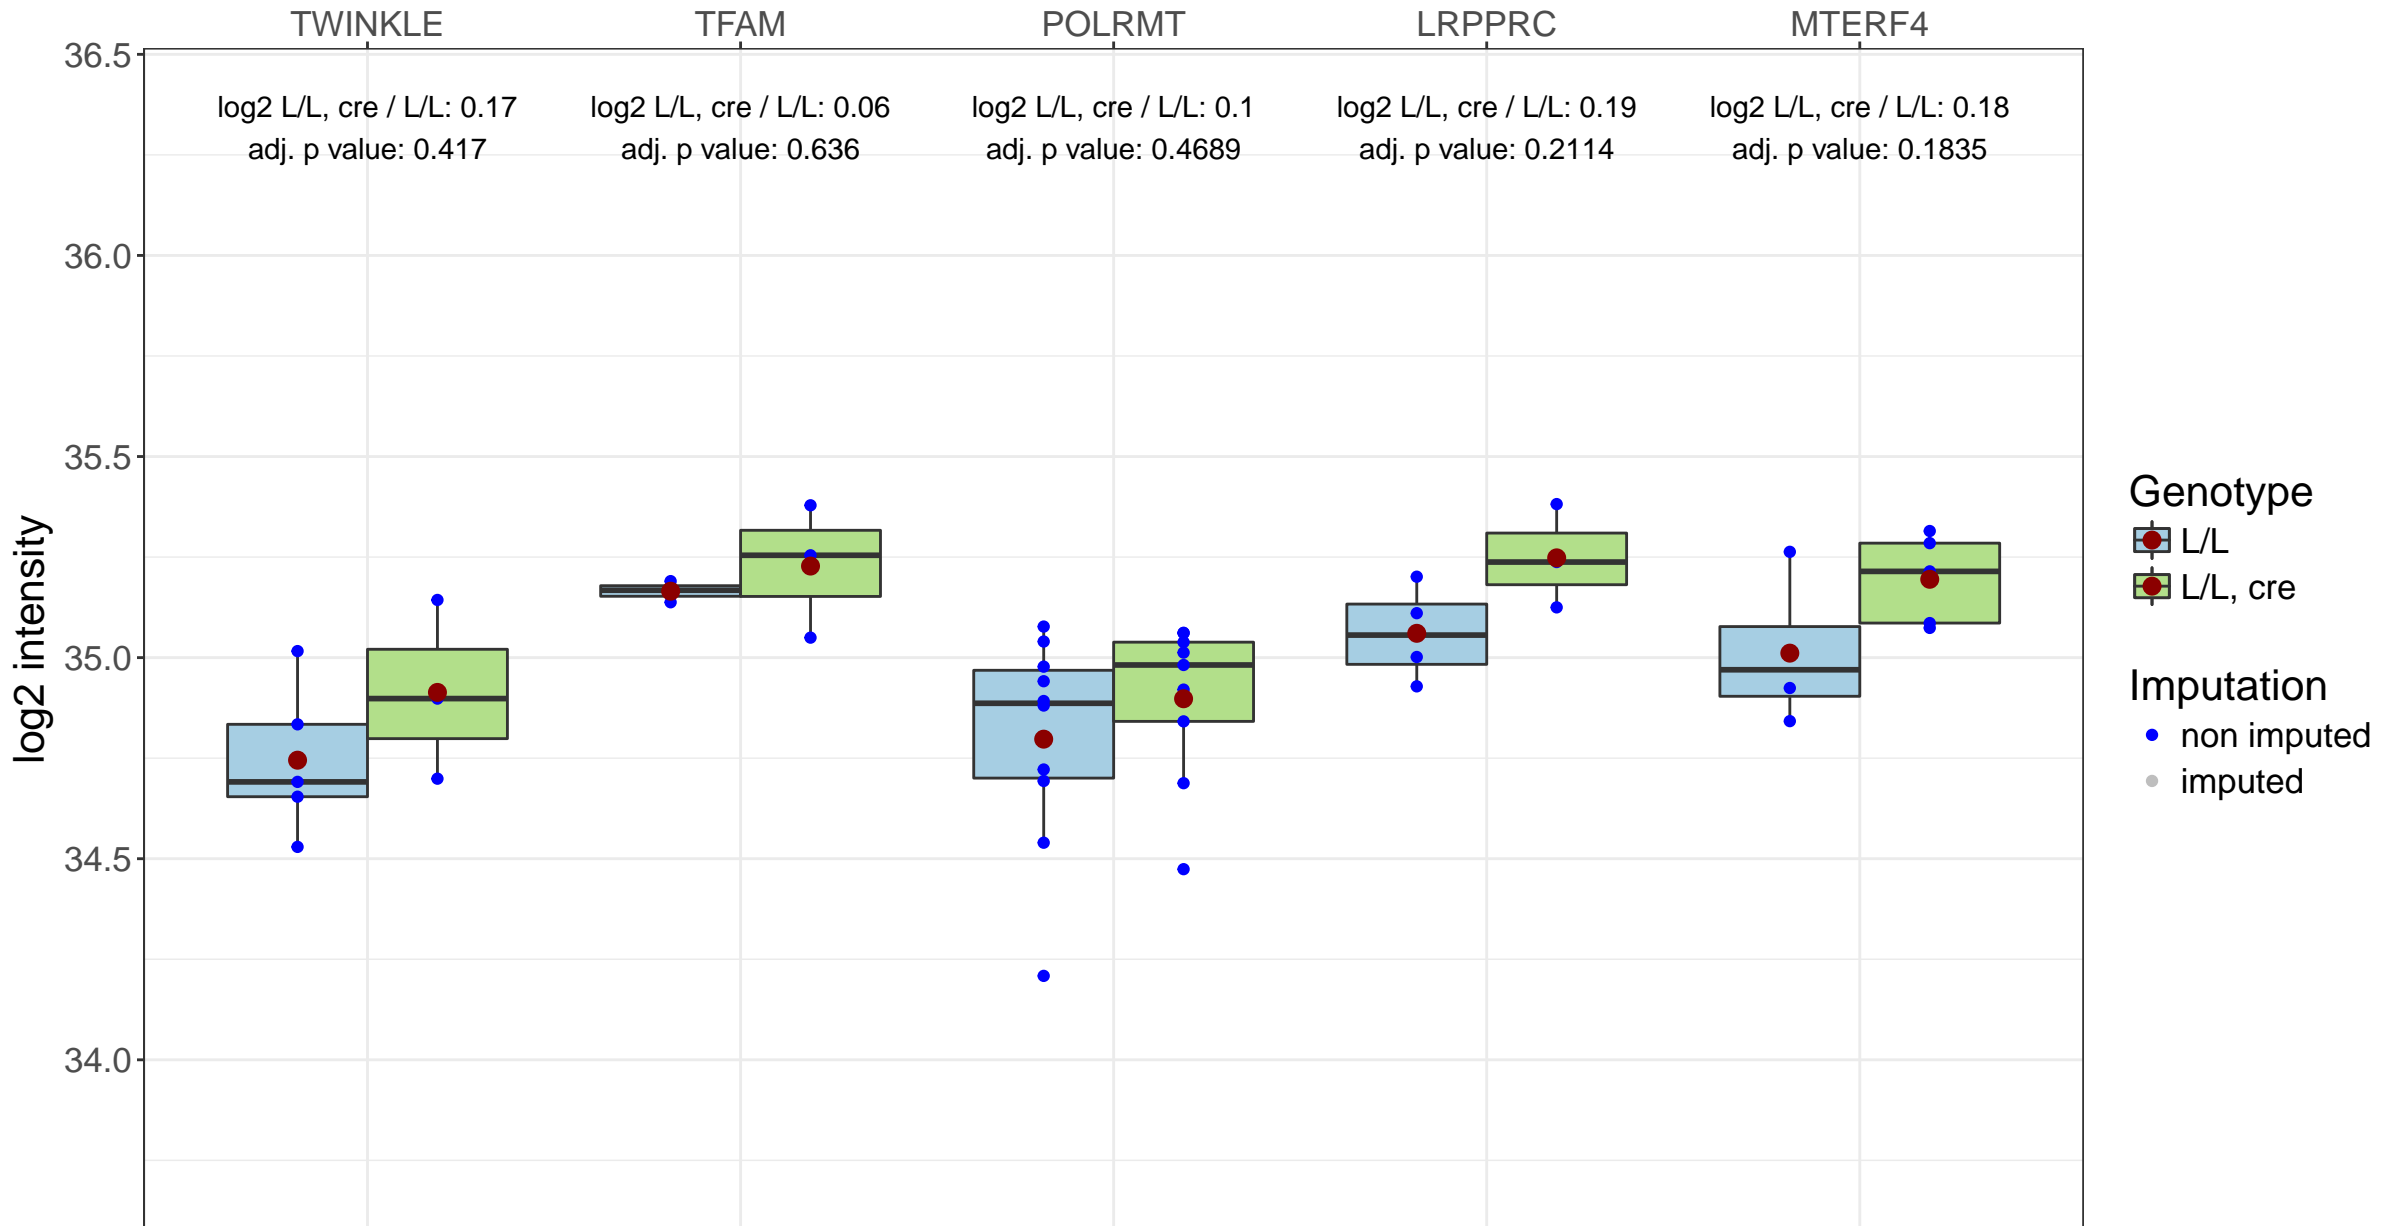

# SLC25A13 / Q9QXX4

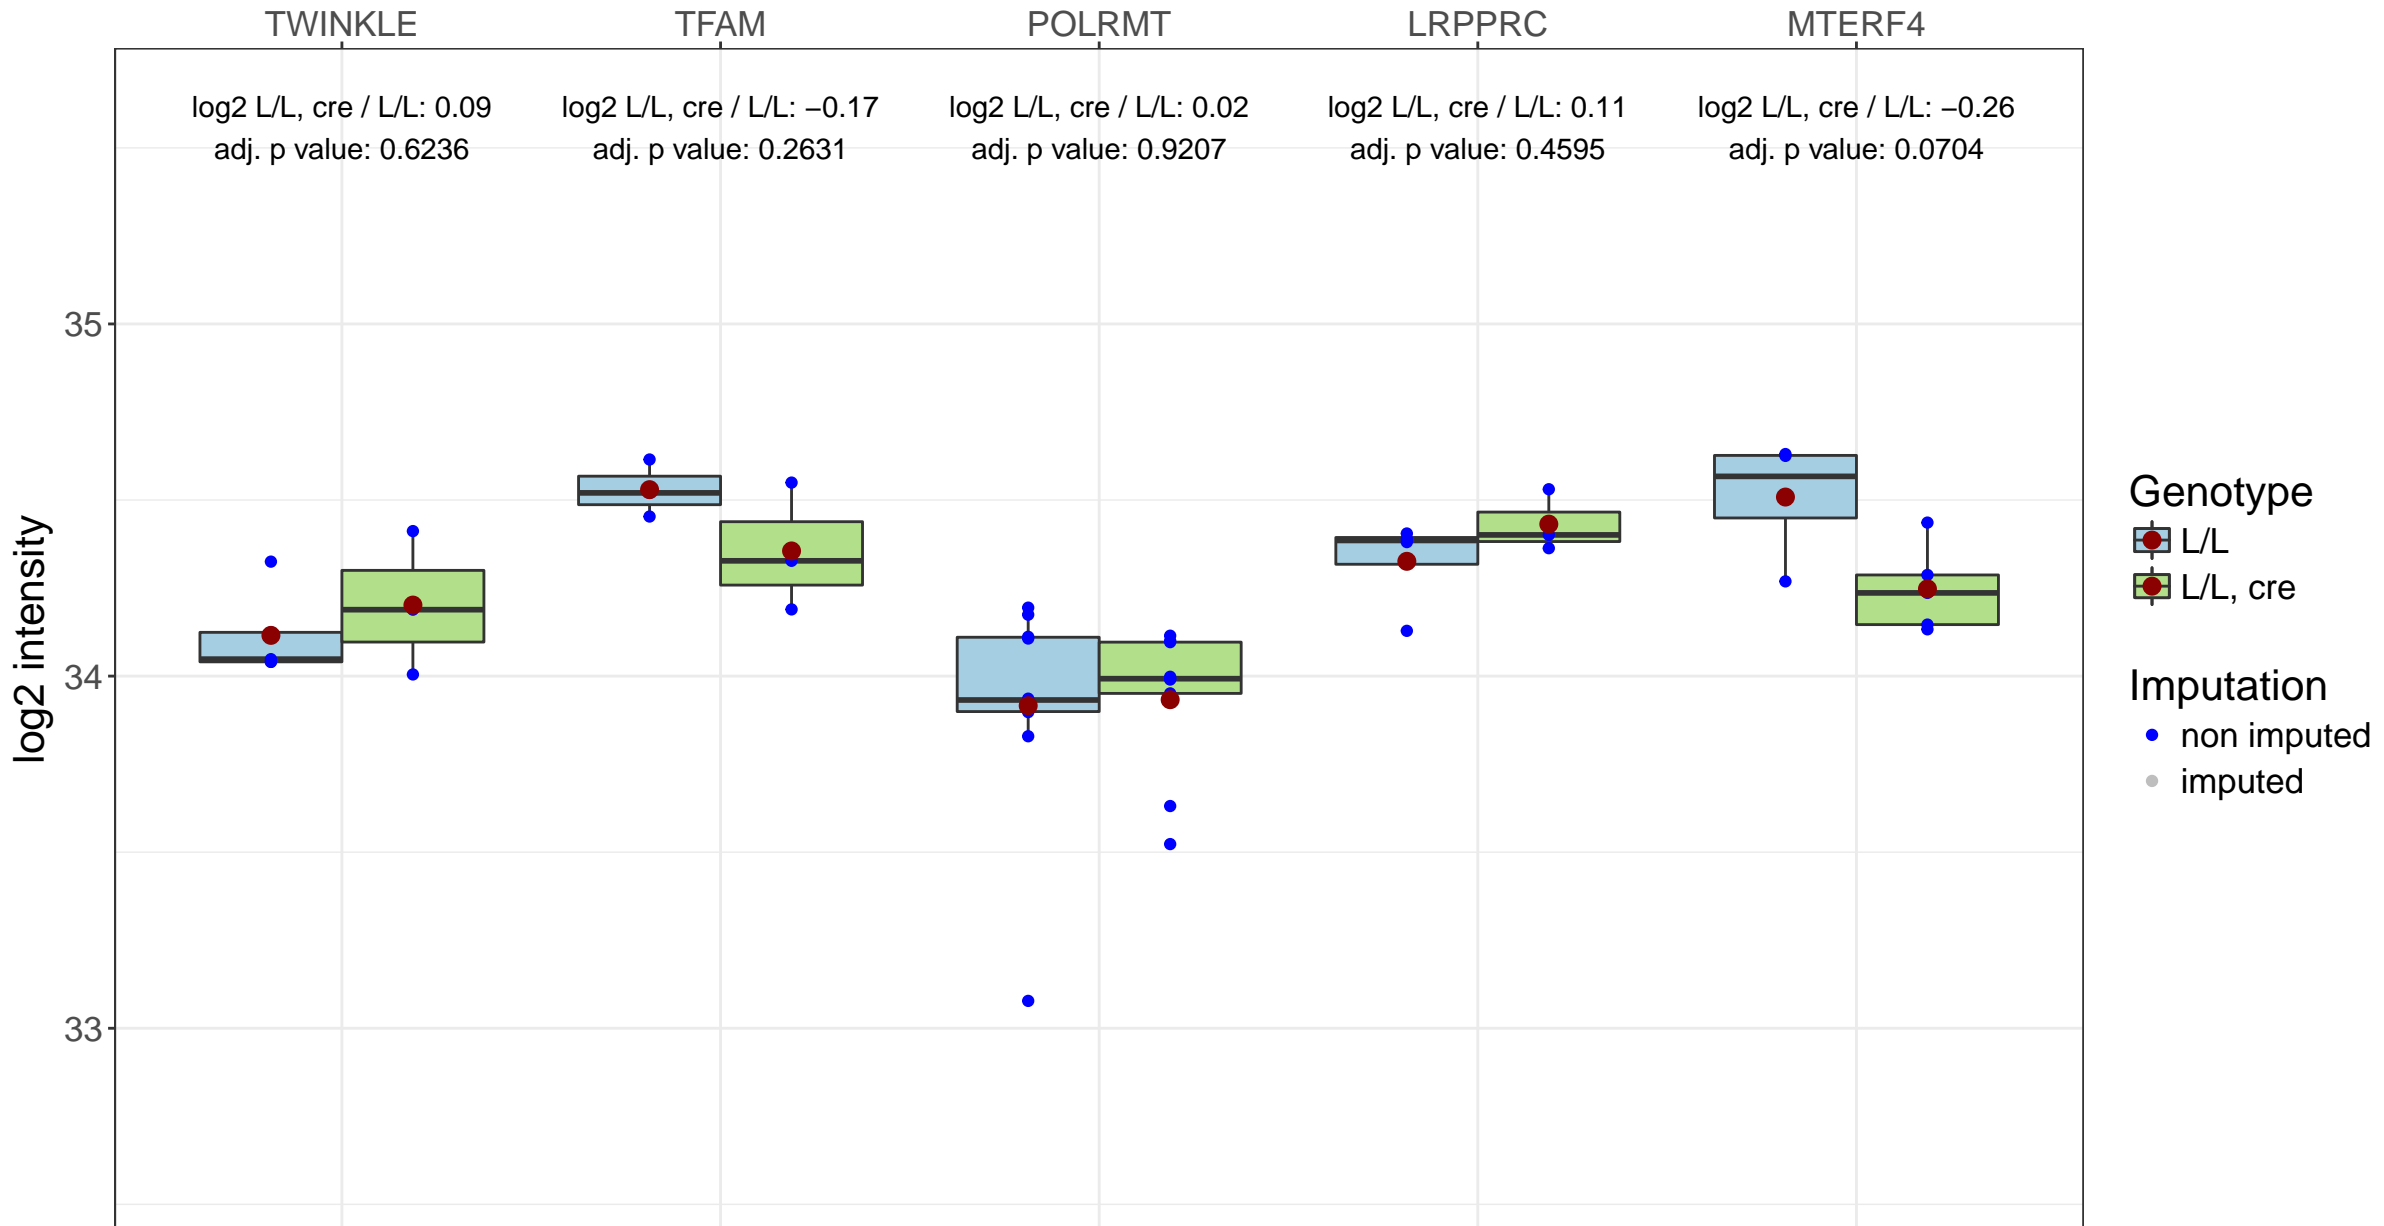

# SLC25A15 / Q9WVD5

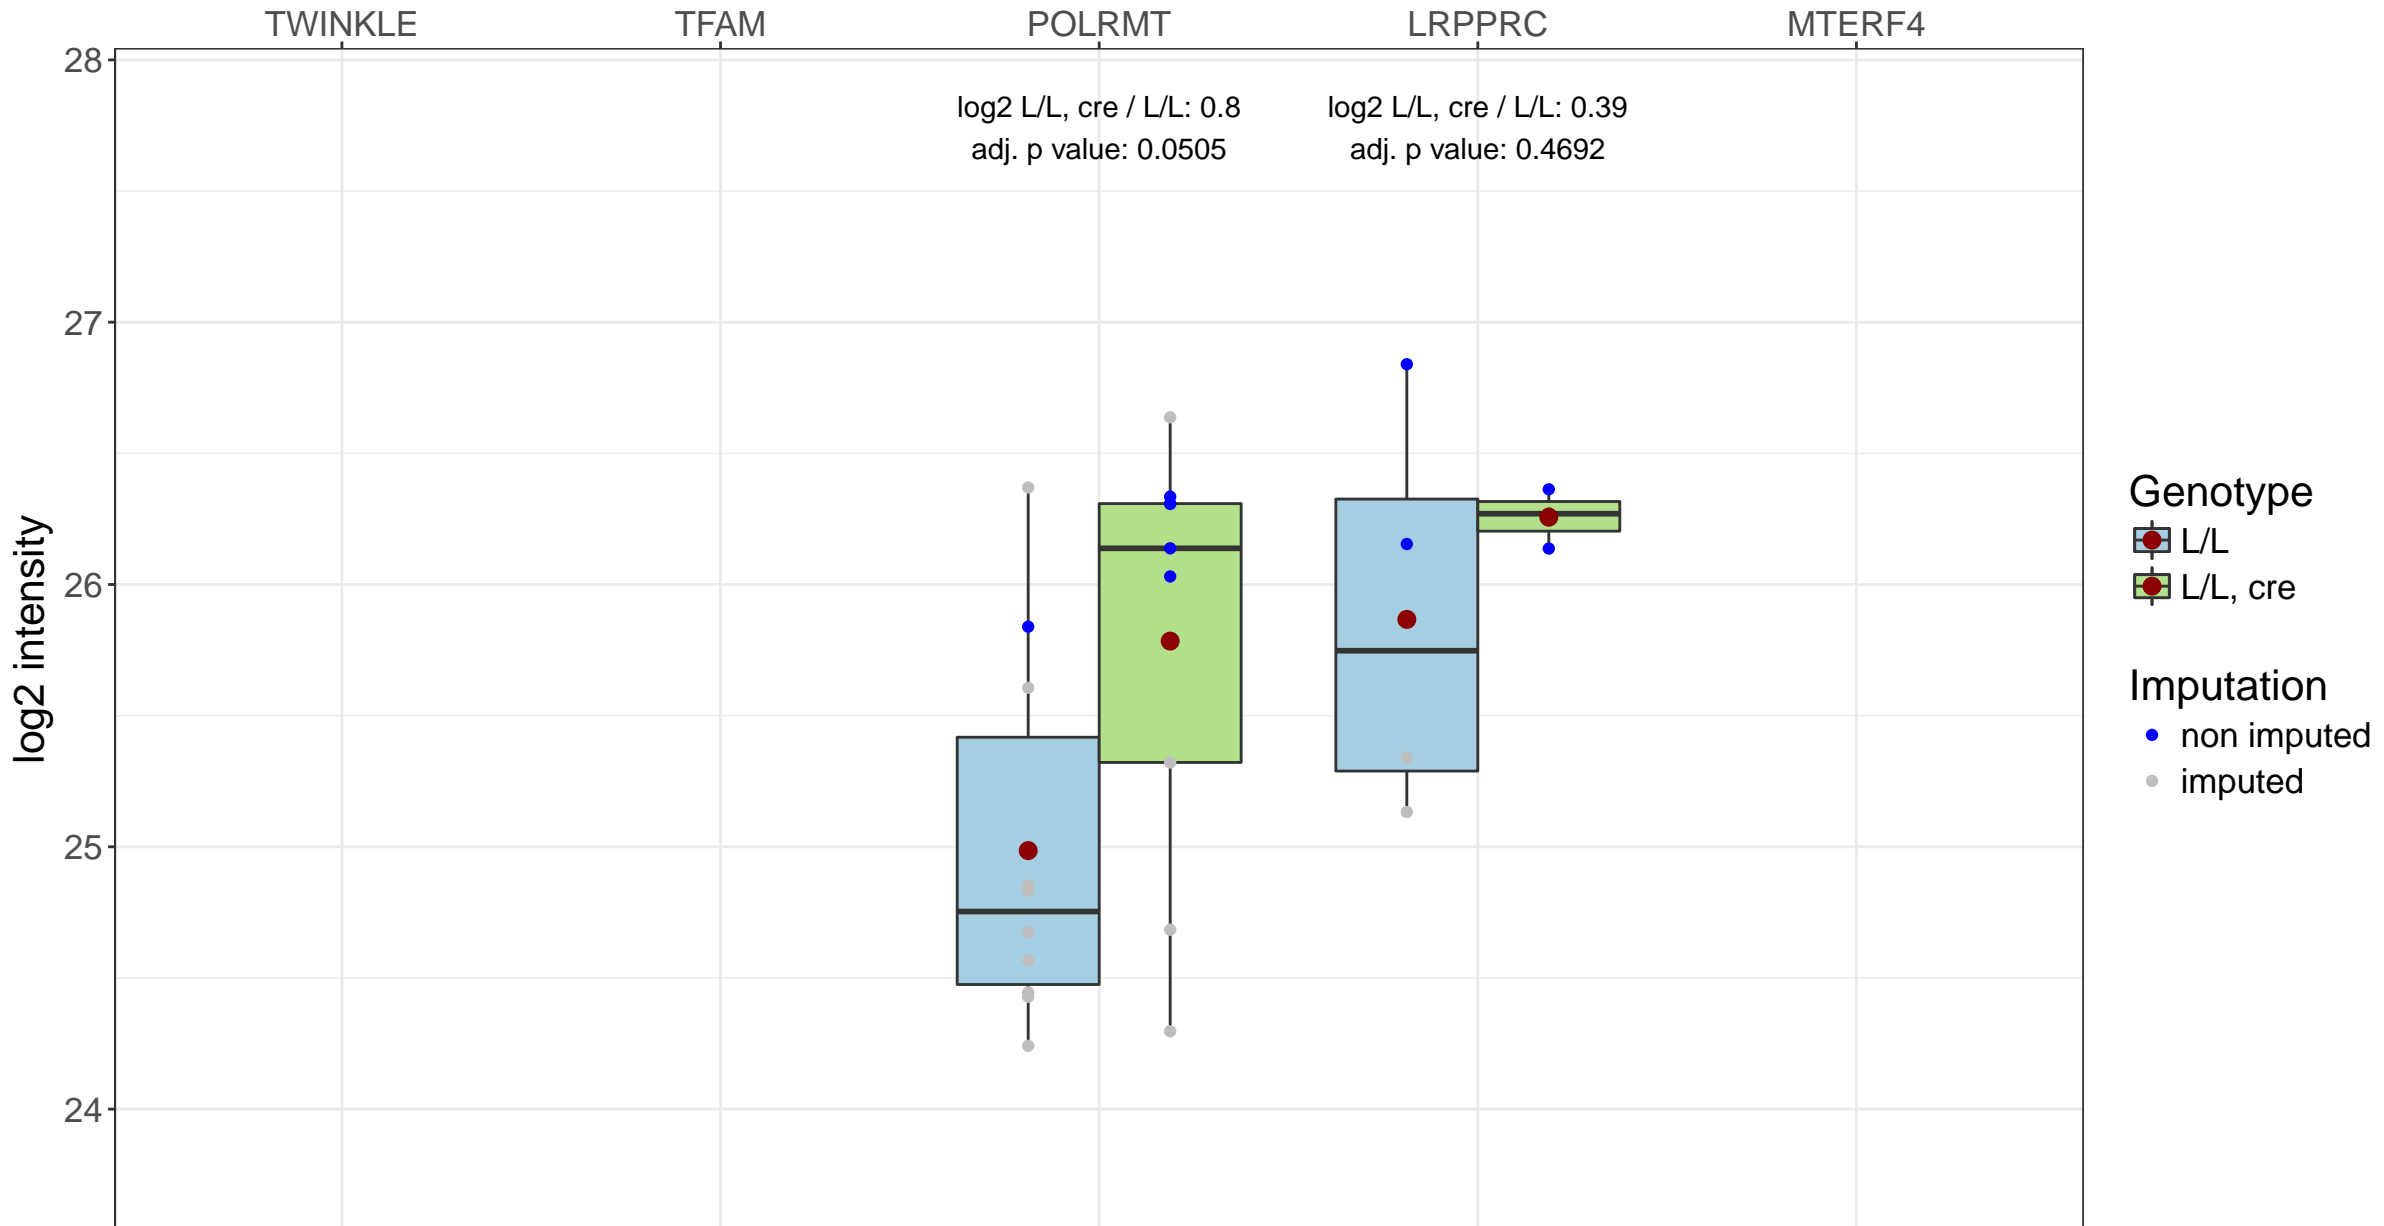



# SLC25A20 / Q9Z2Z6

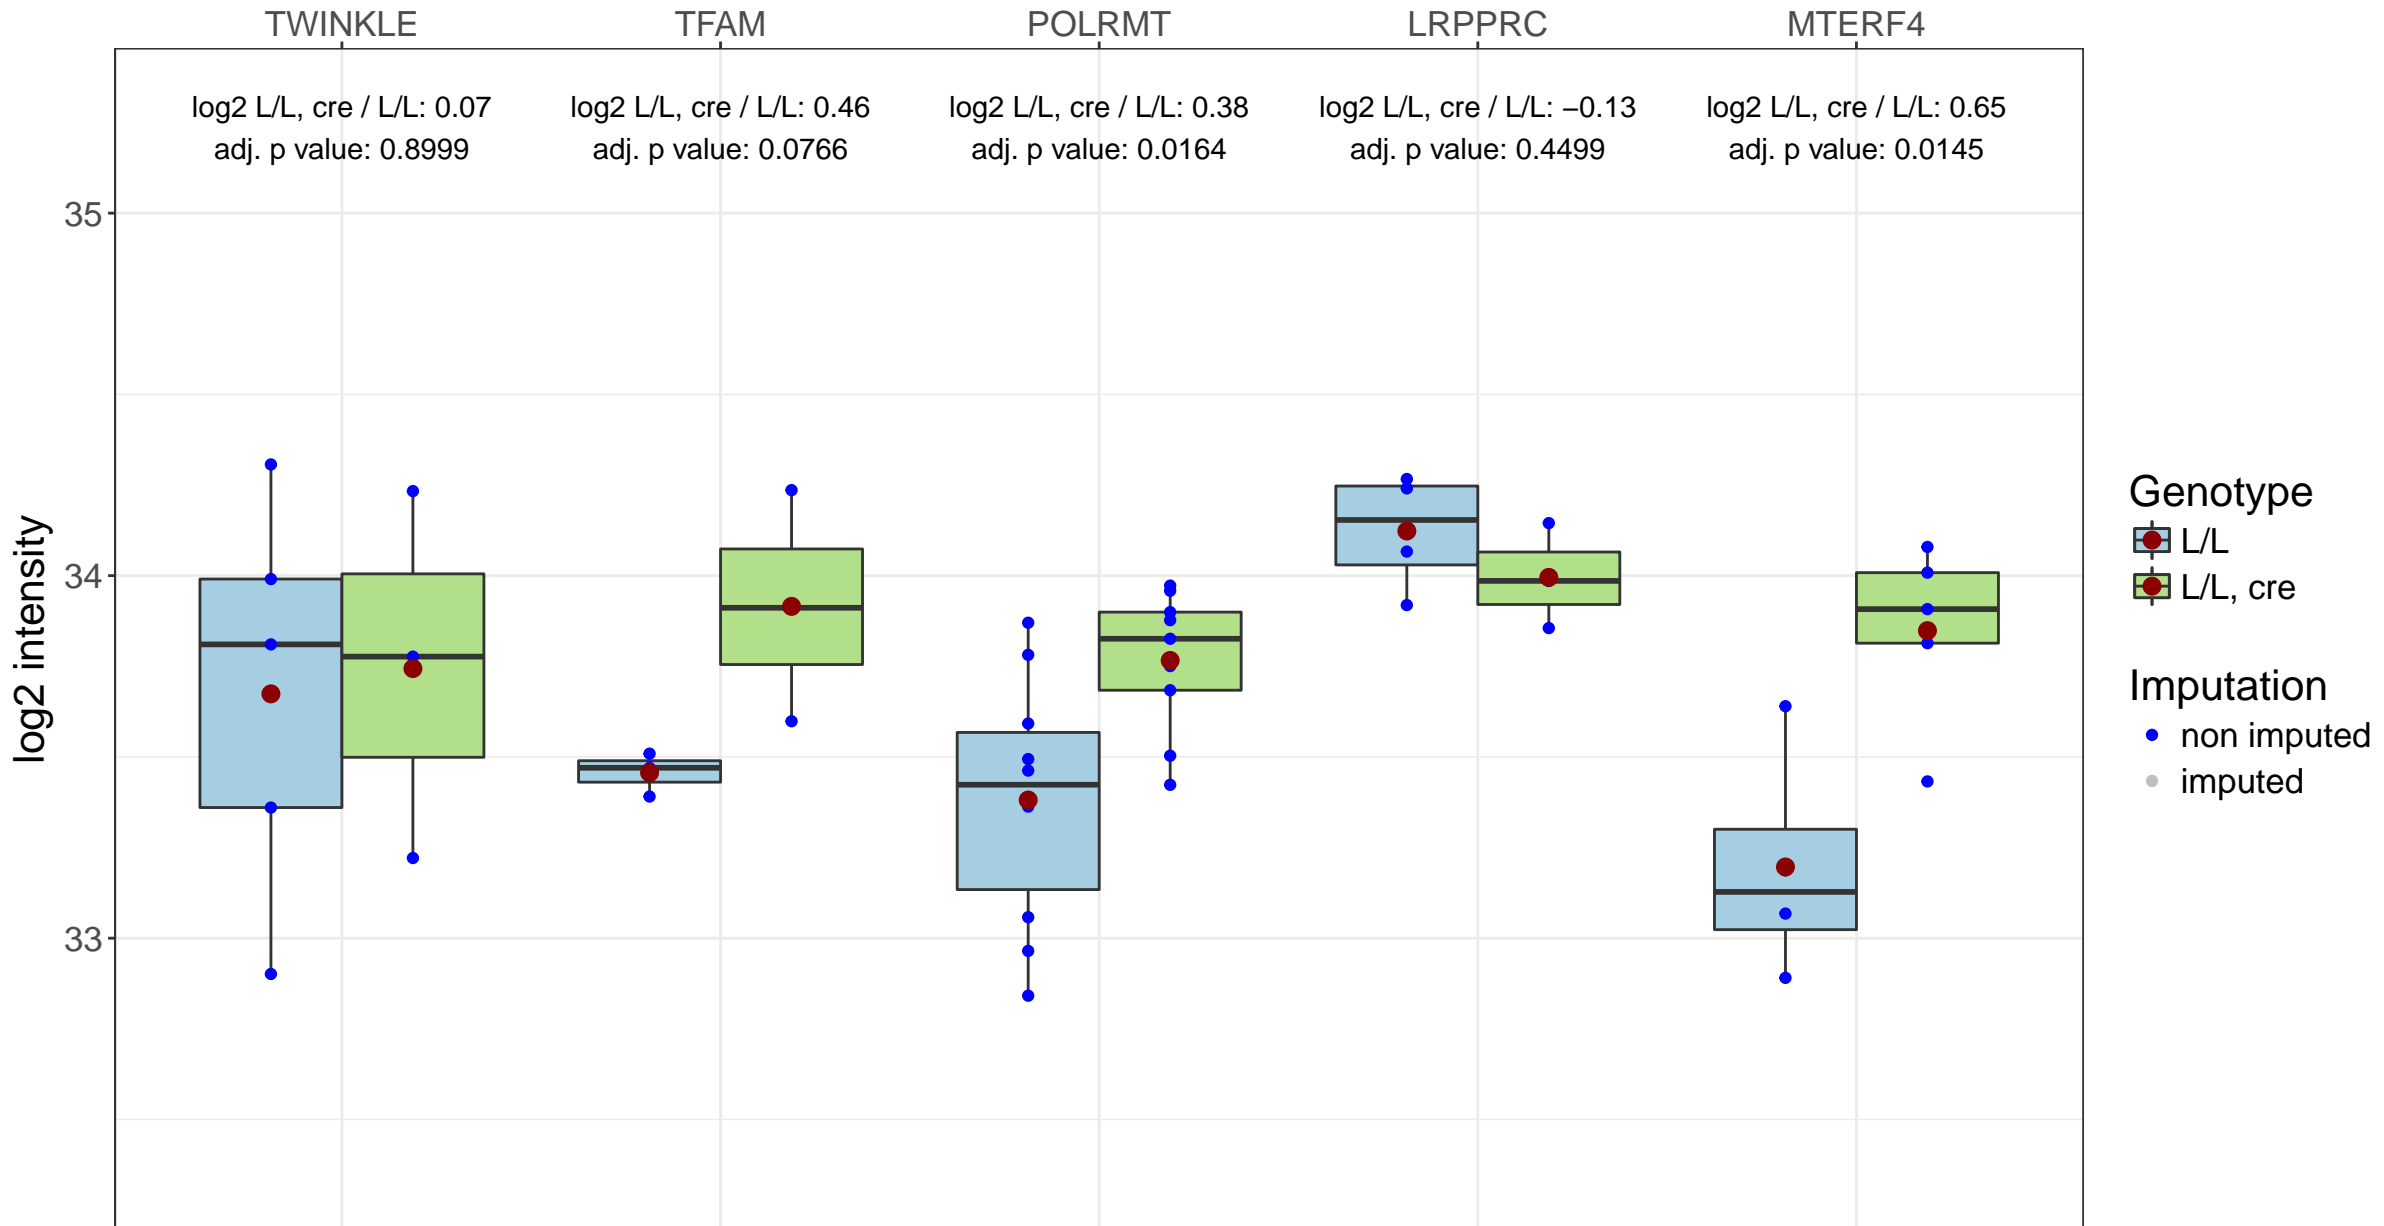

# SLC25A22 / Q9D6M3

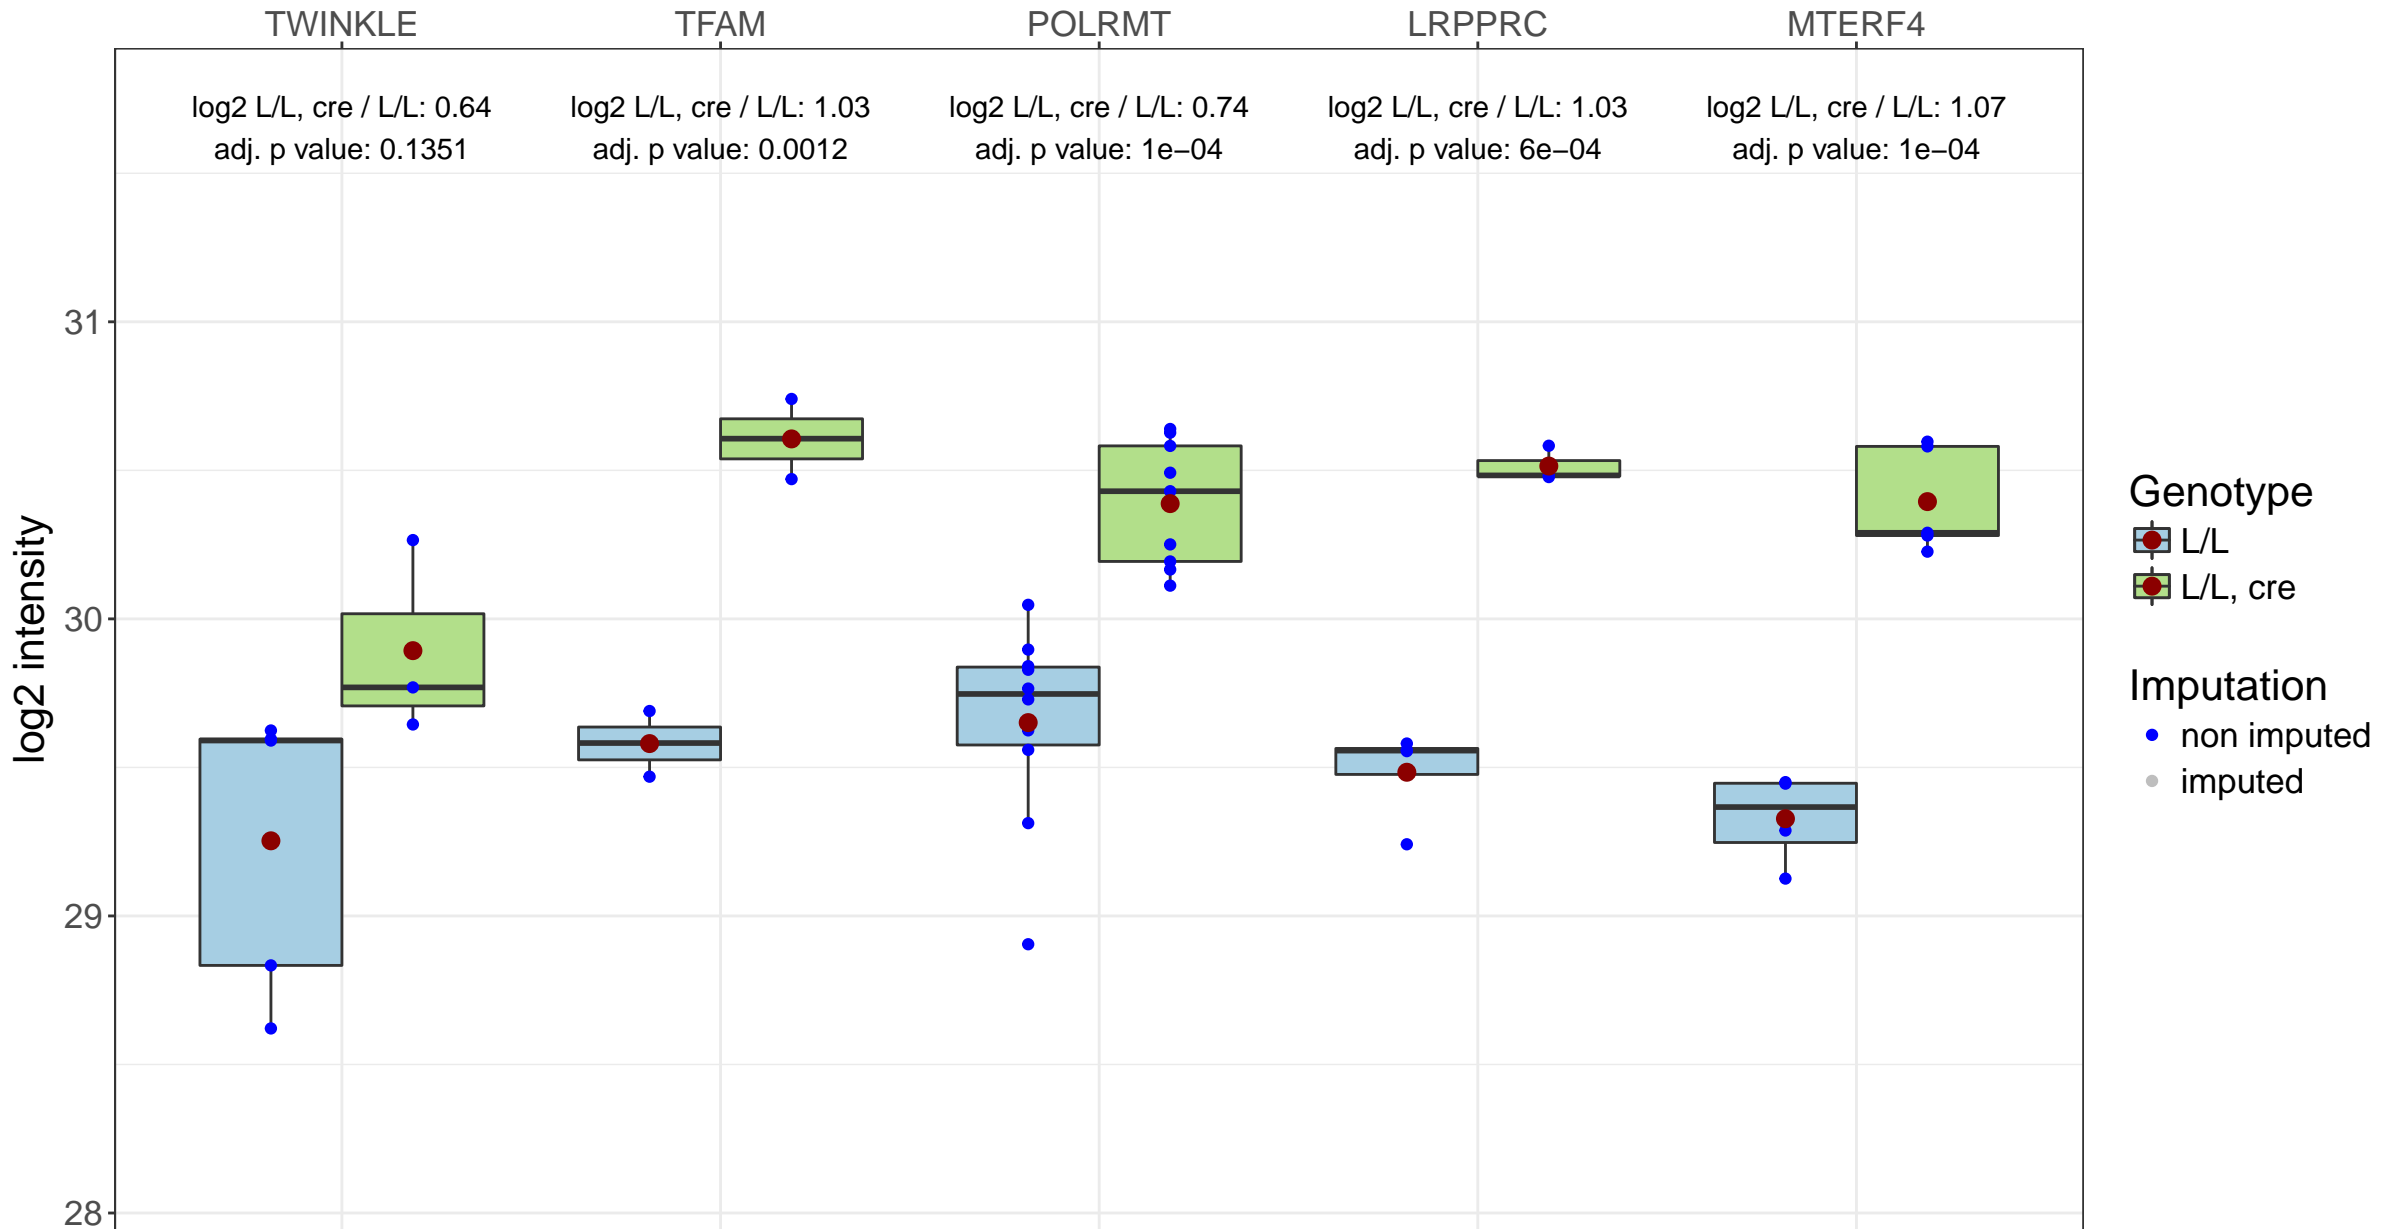

# SLC25A24 / Q8BMD8

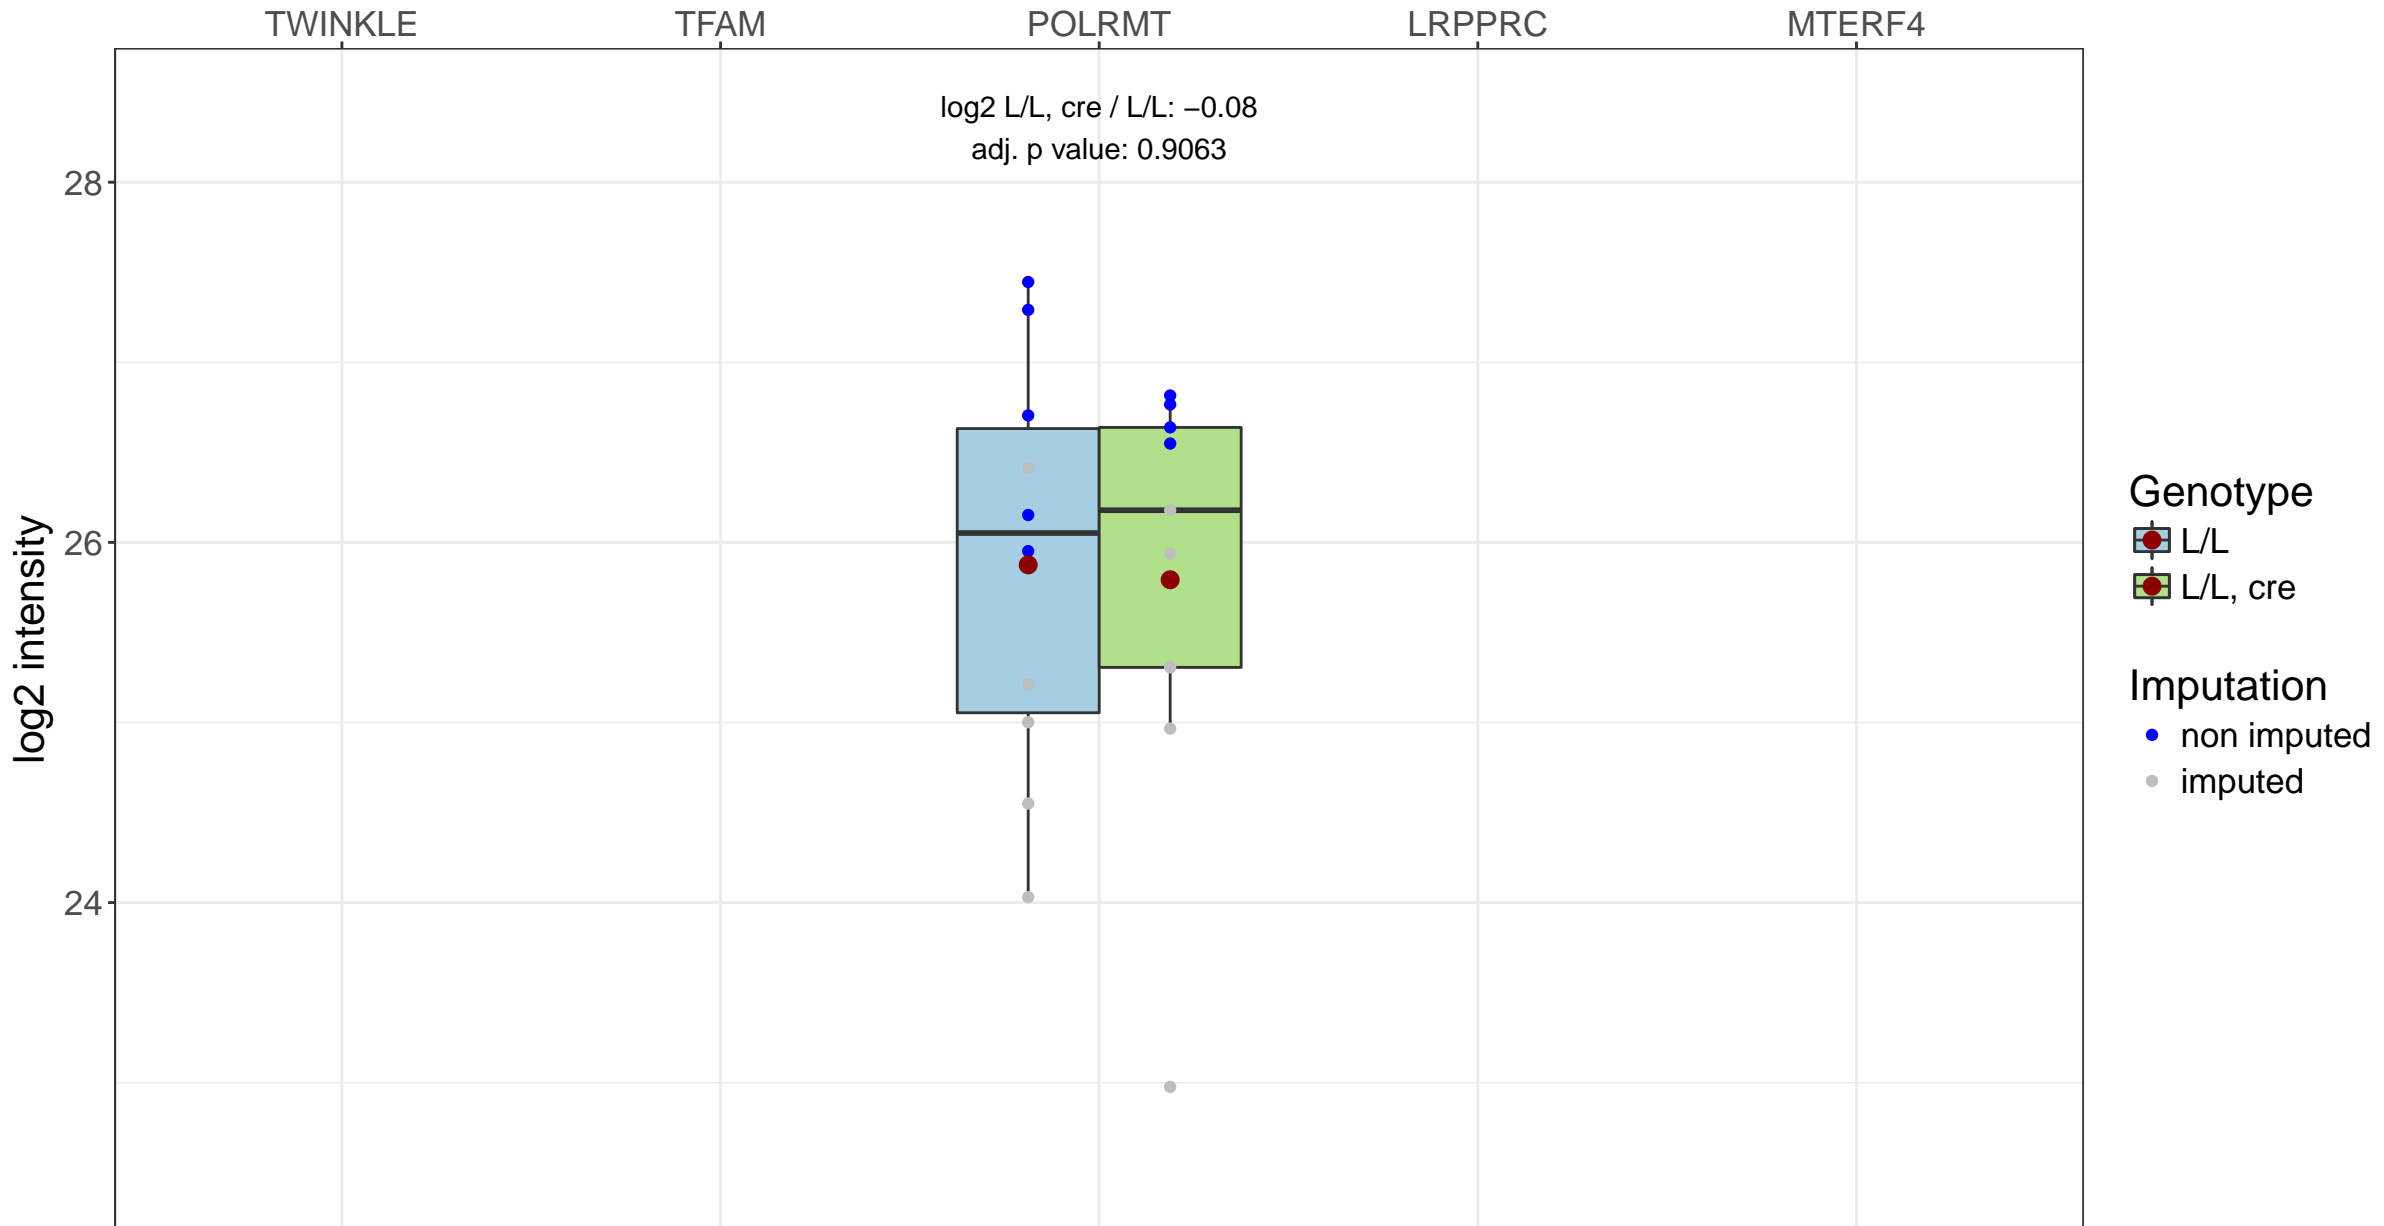

# SLC25A29 / Q8BL03

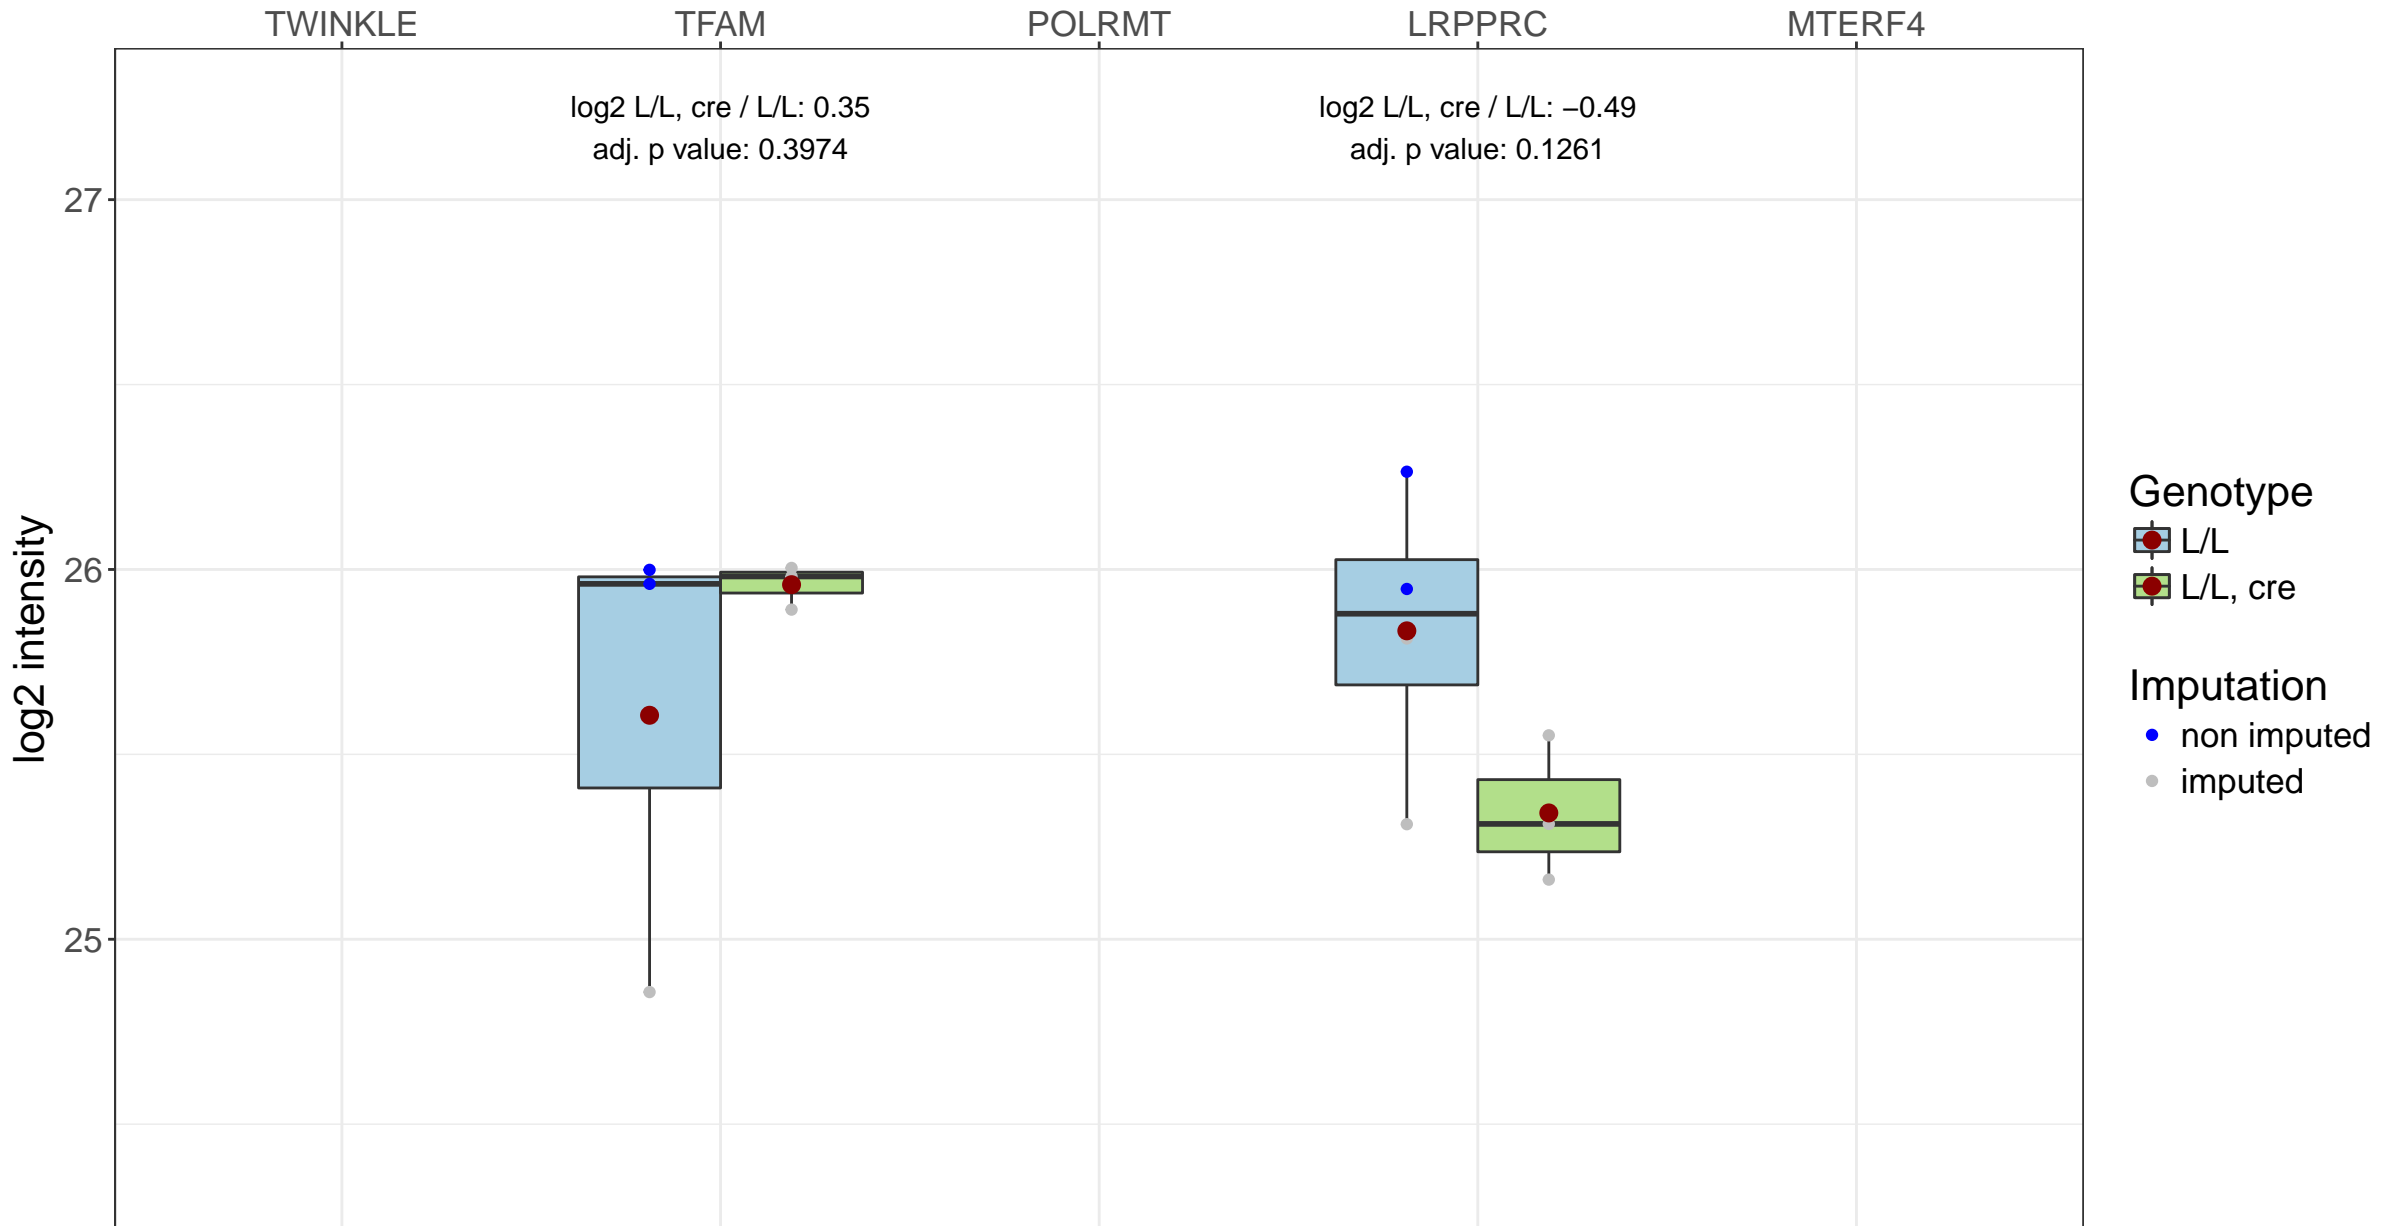

# SLC25A3 / G5E902

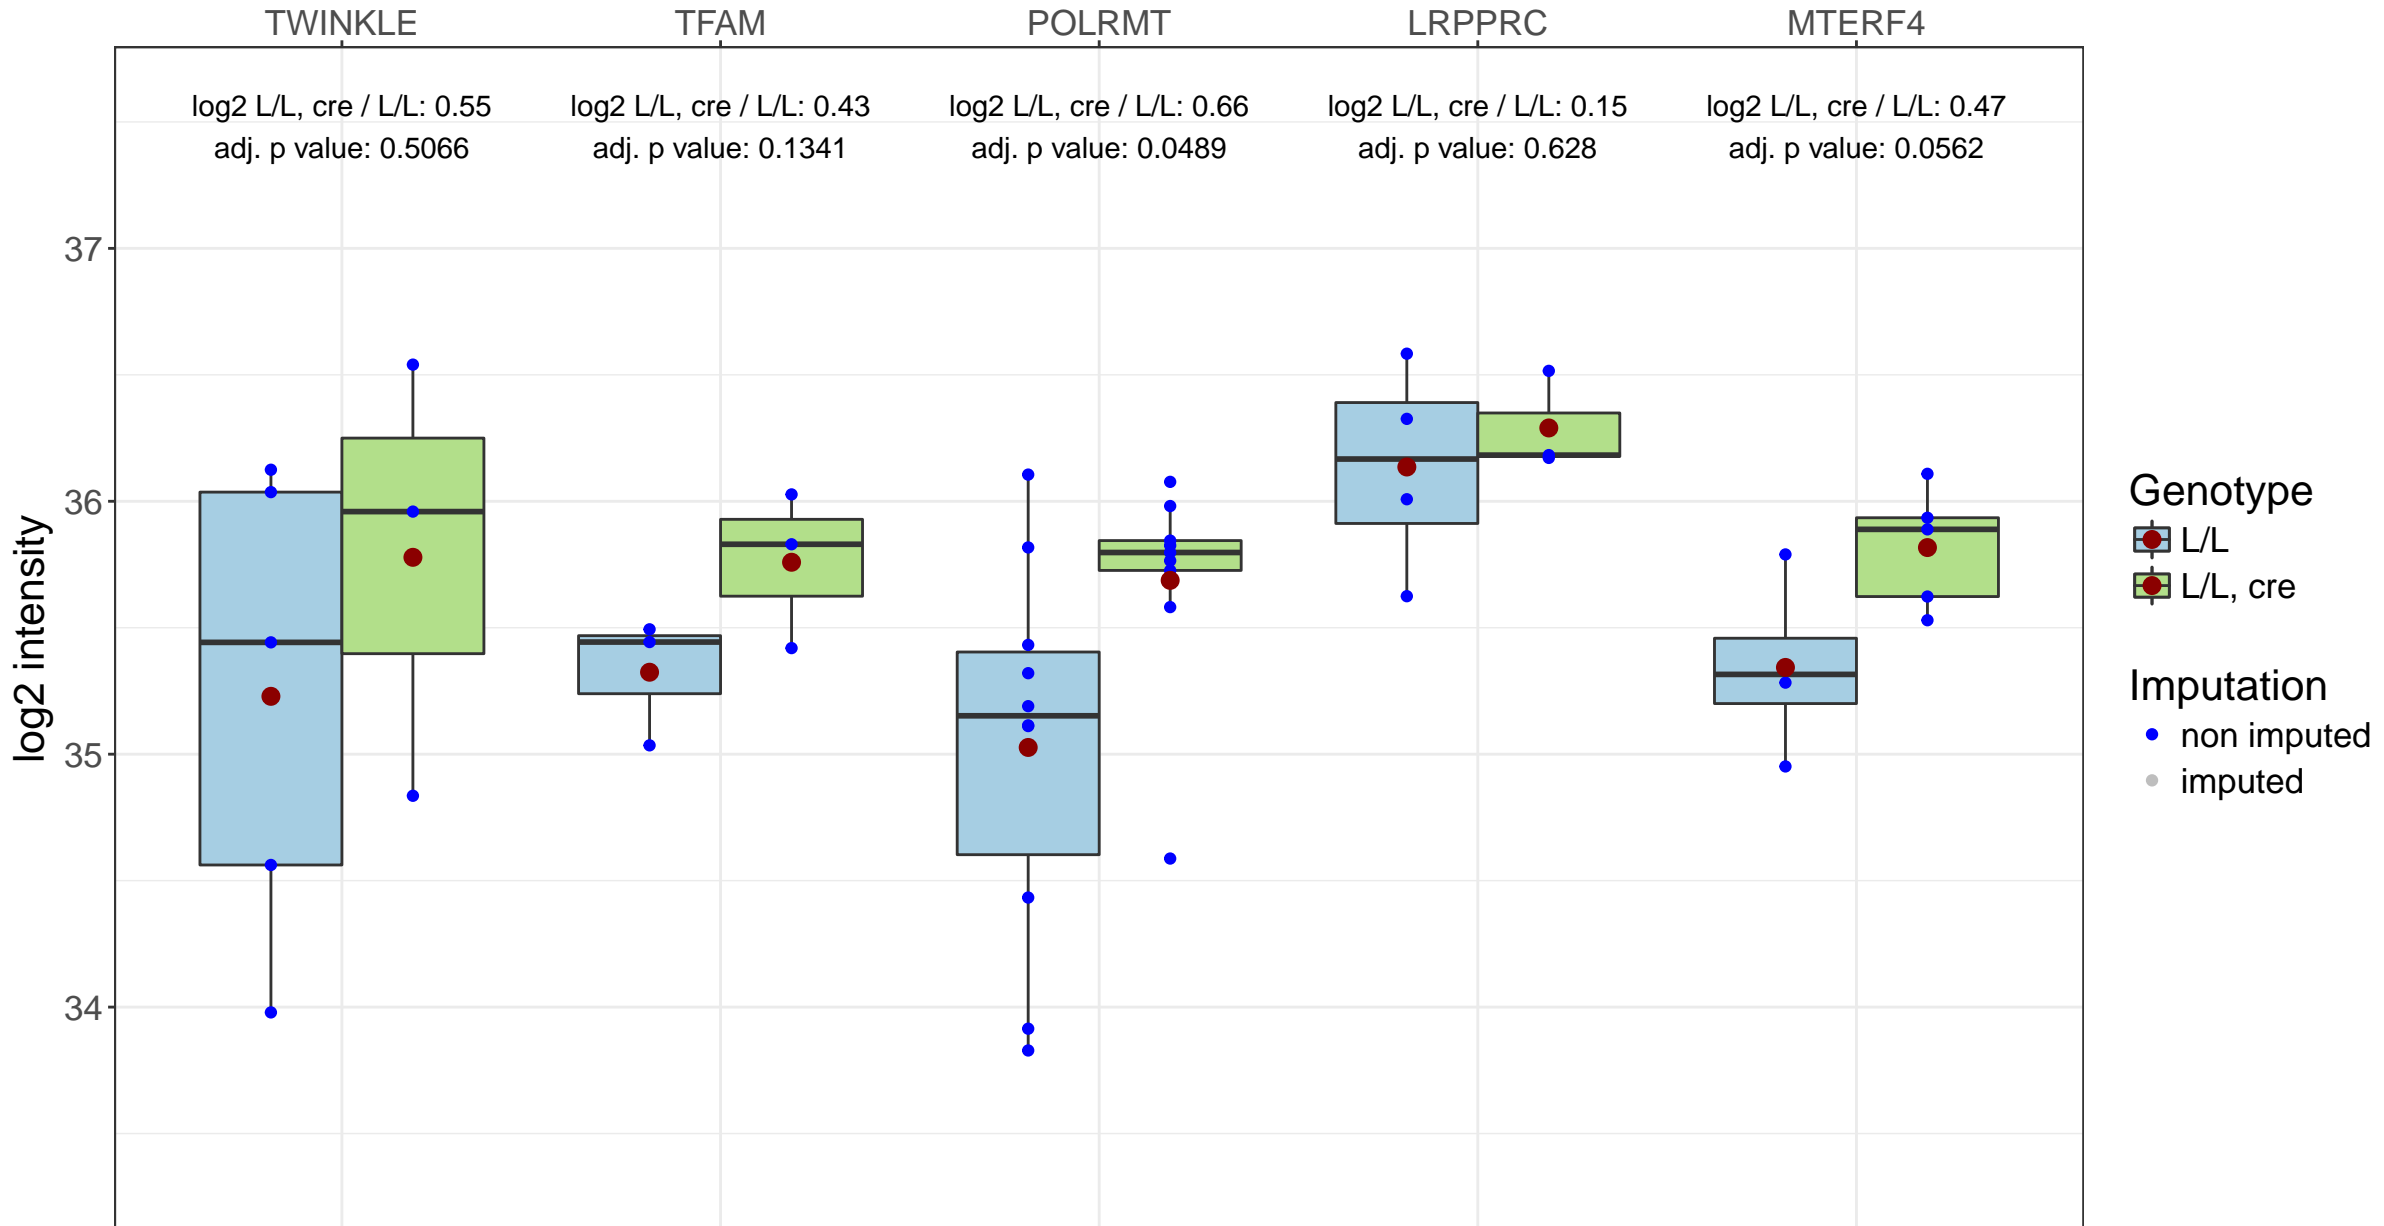

# SLC25A31 / Q3V132

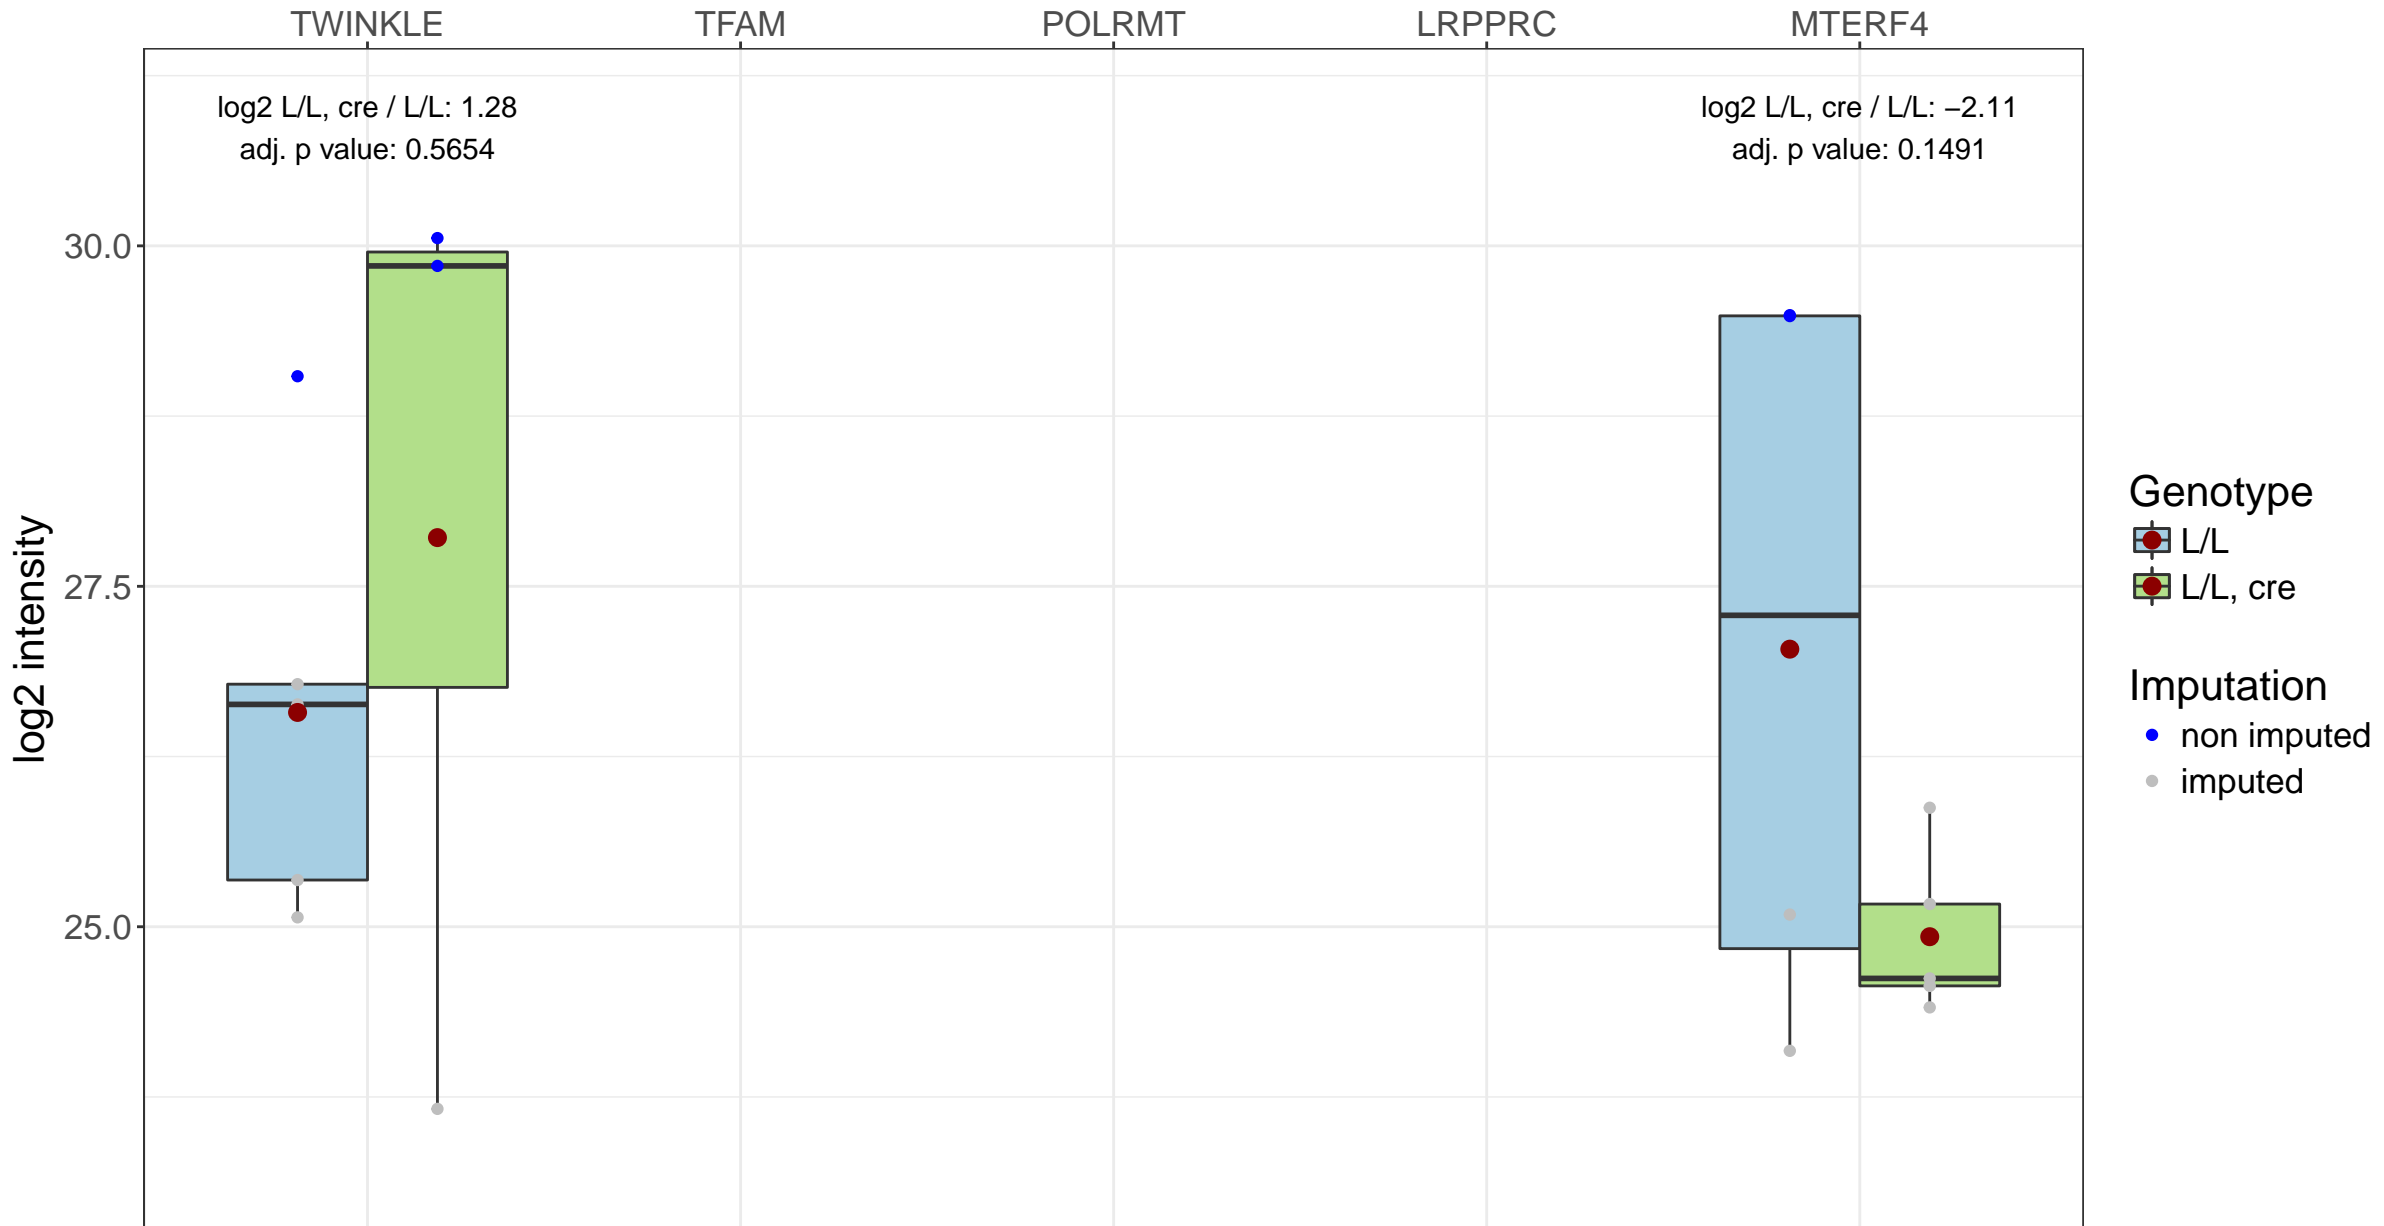

# SLC25A34 / A2ADF7

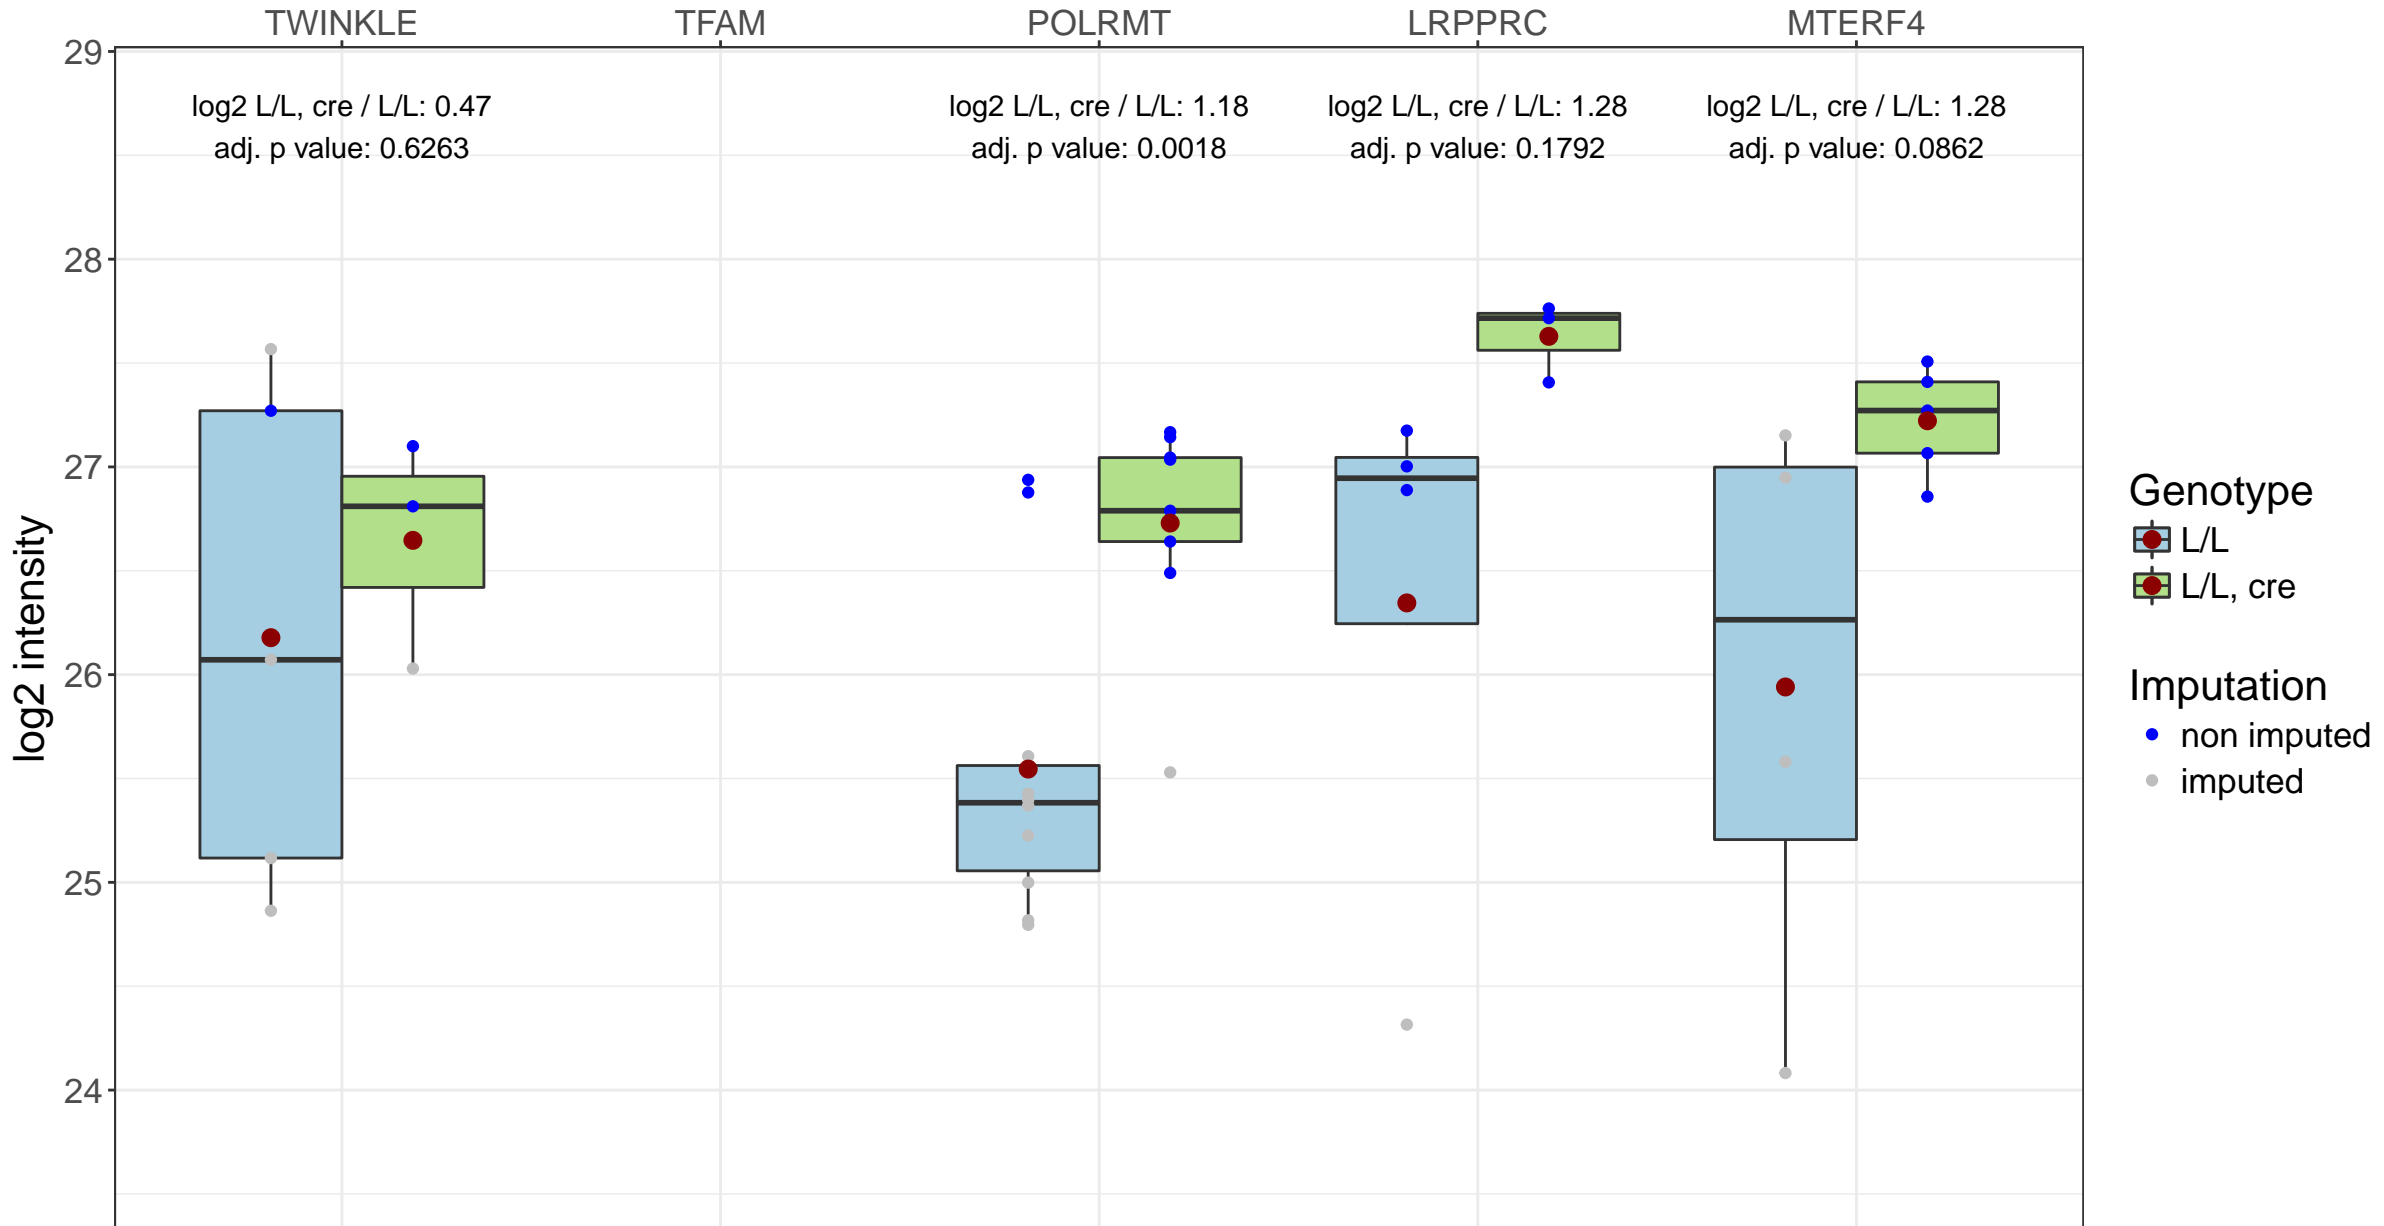

# SLC25A35 / Q5SWT3

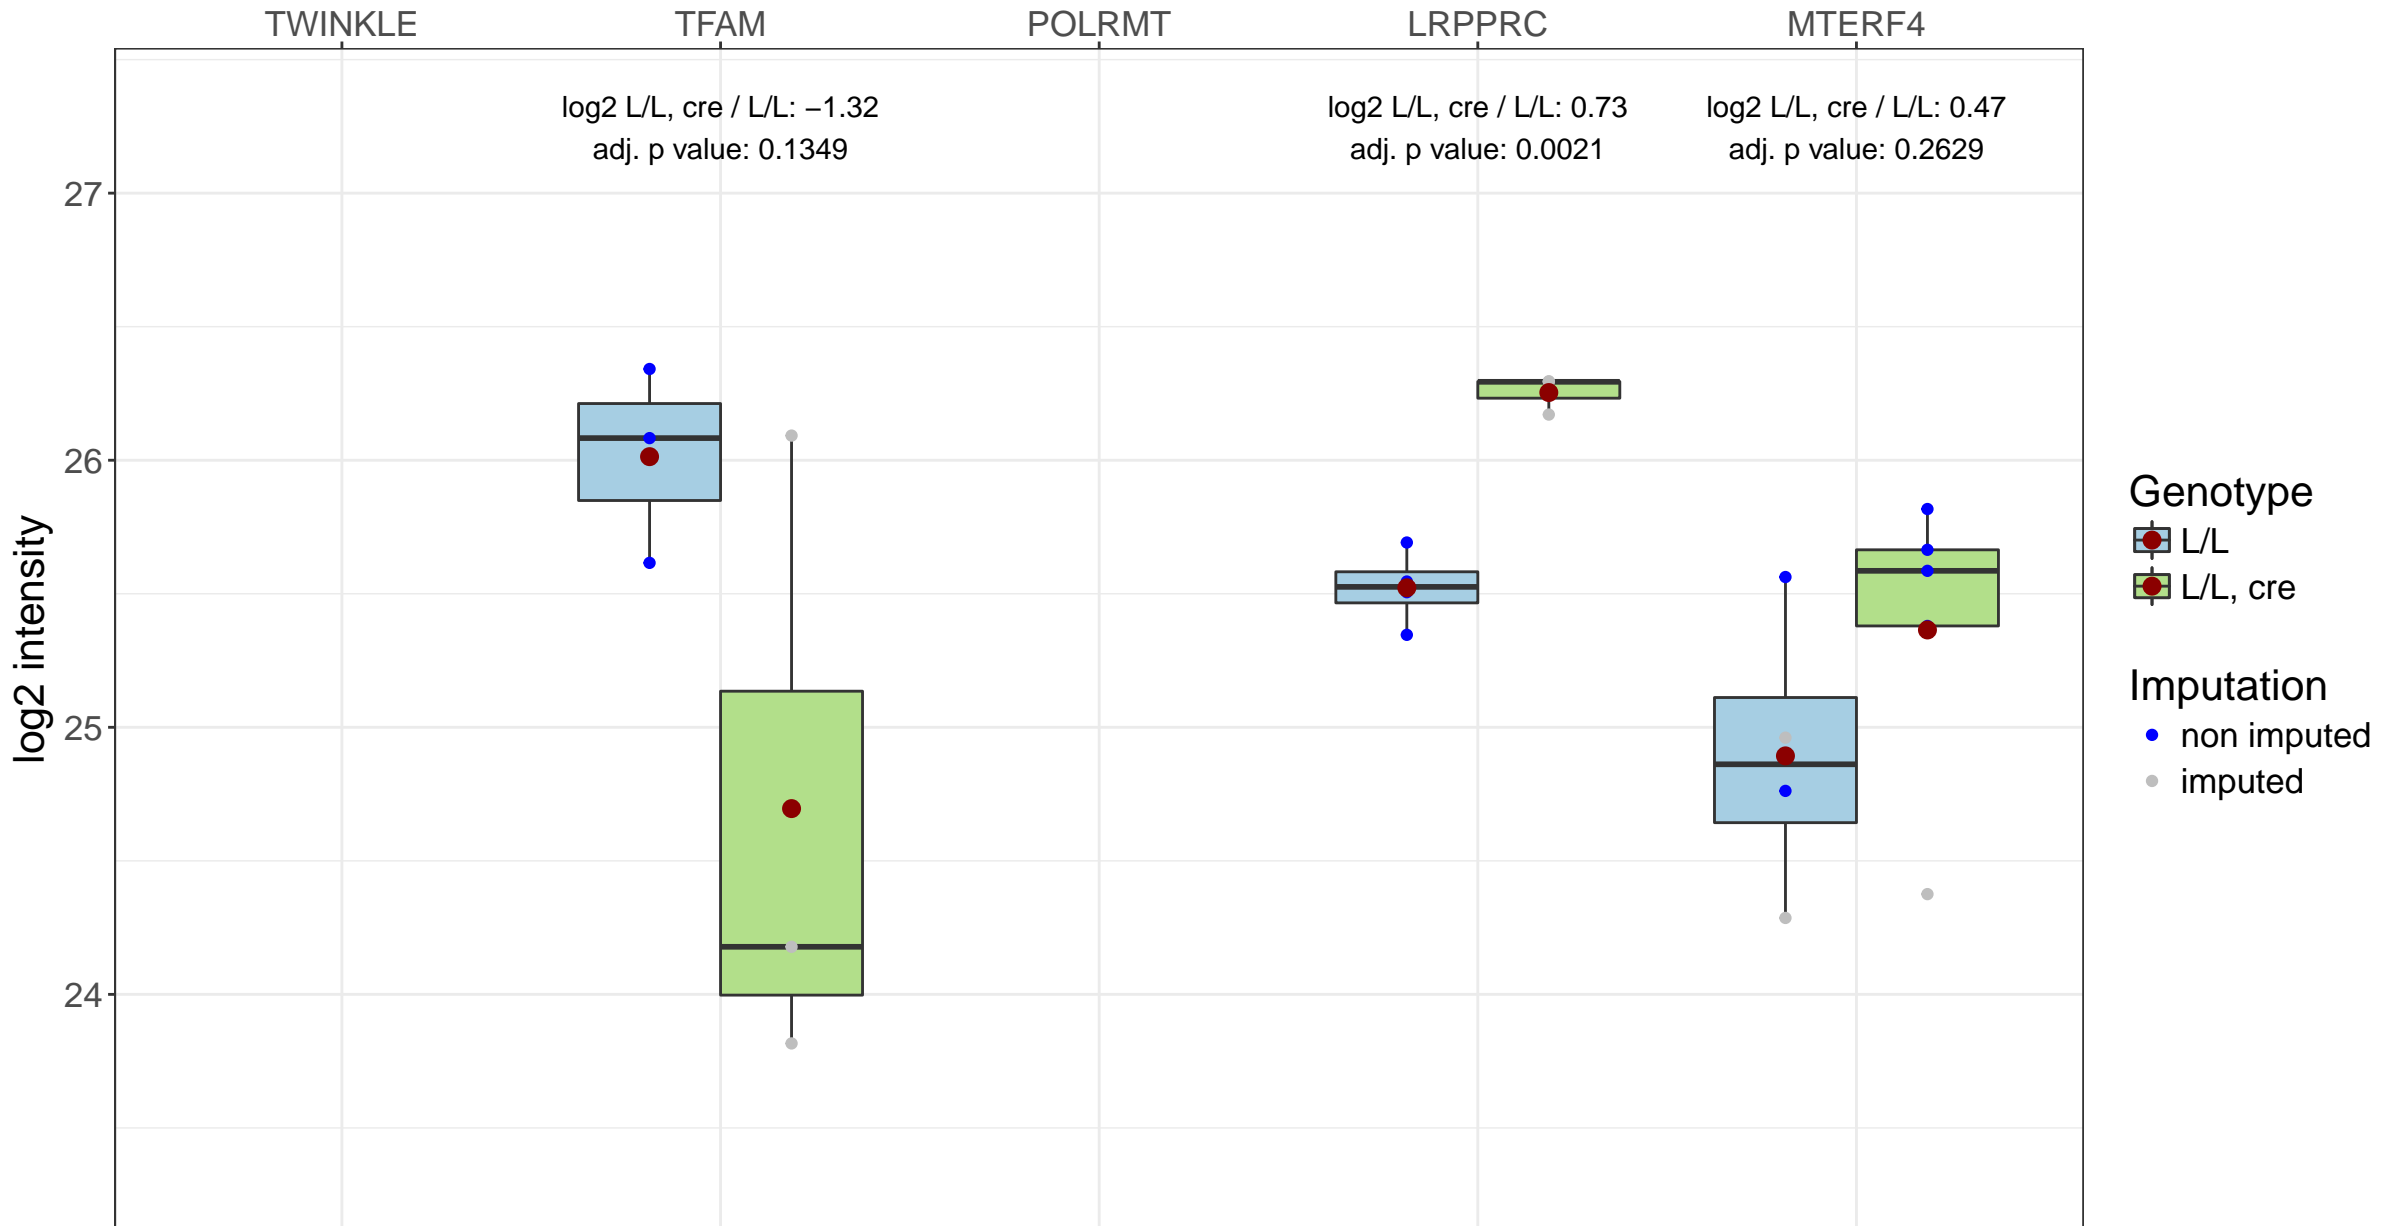



# SLC25A4 / P48962

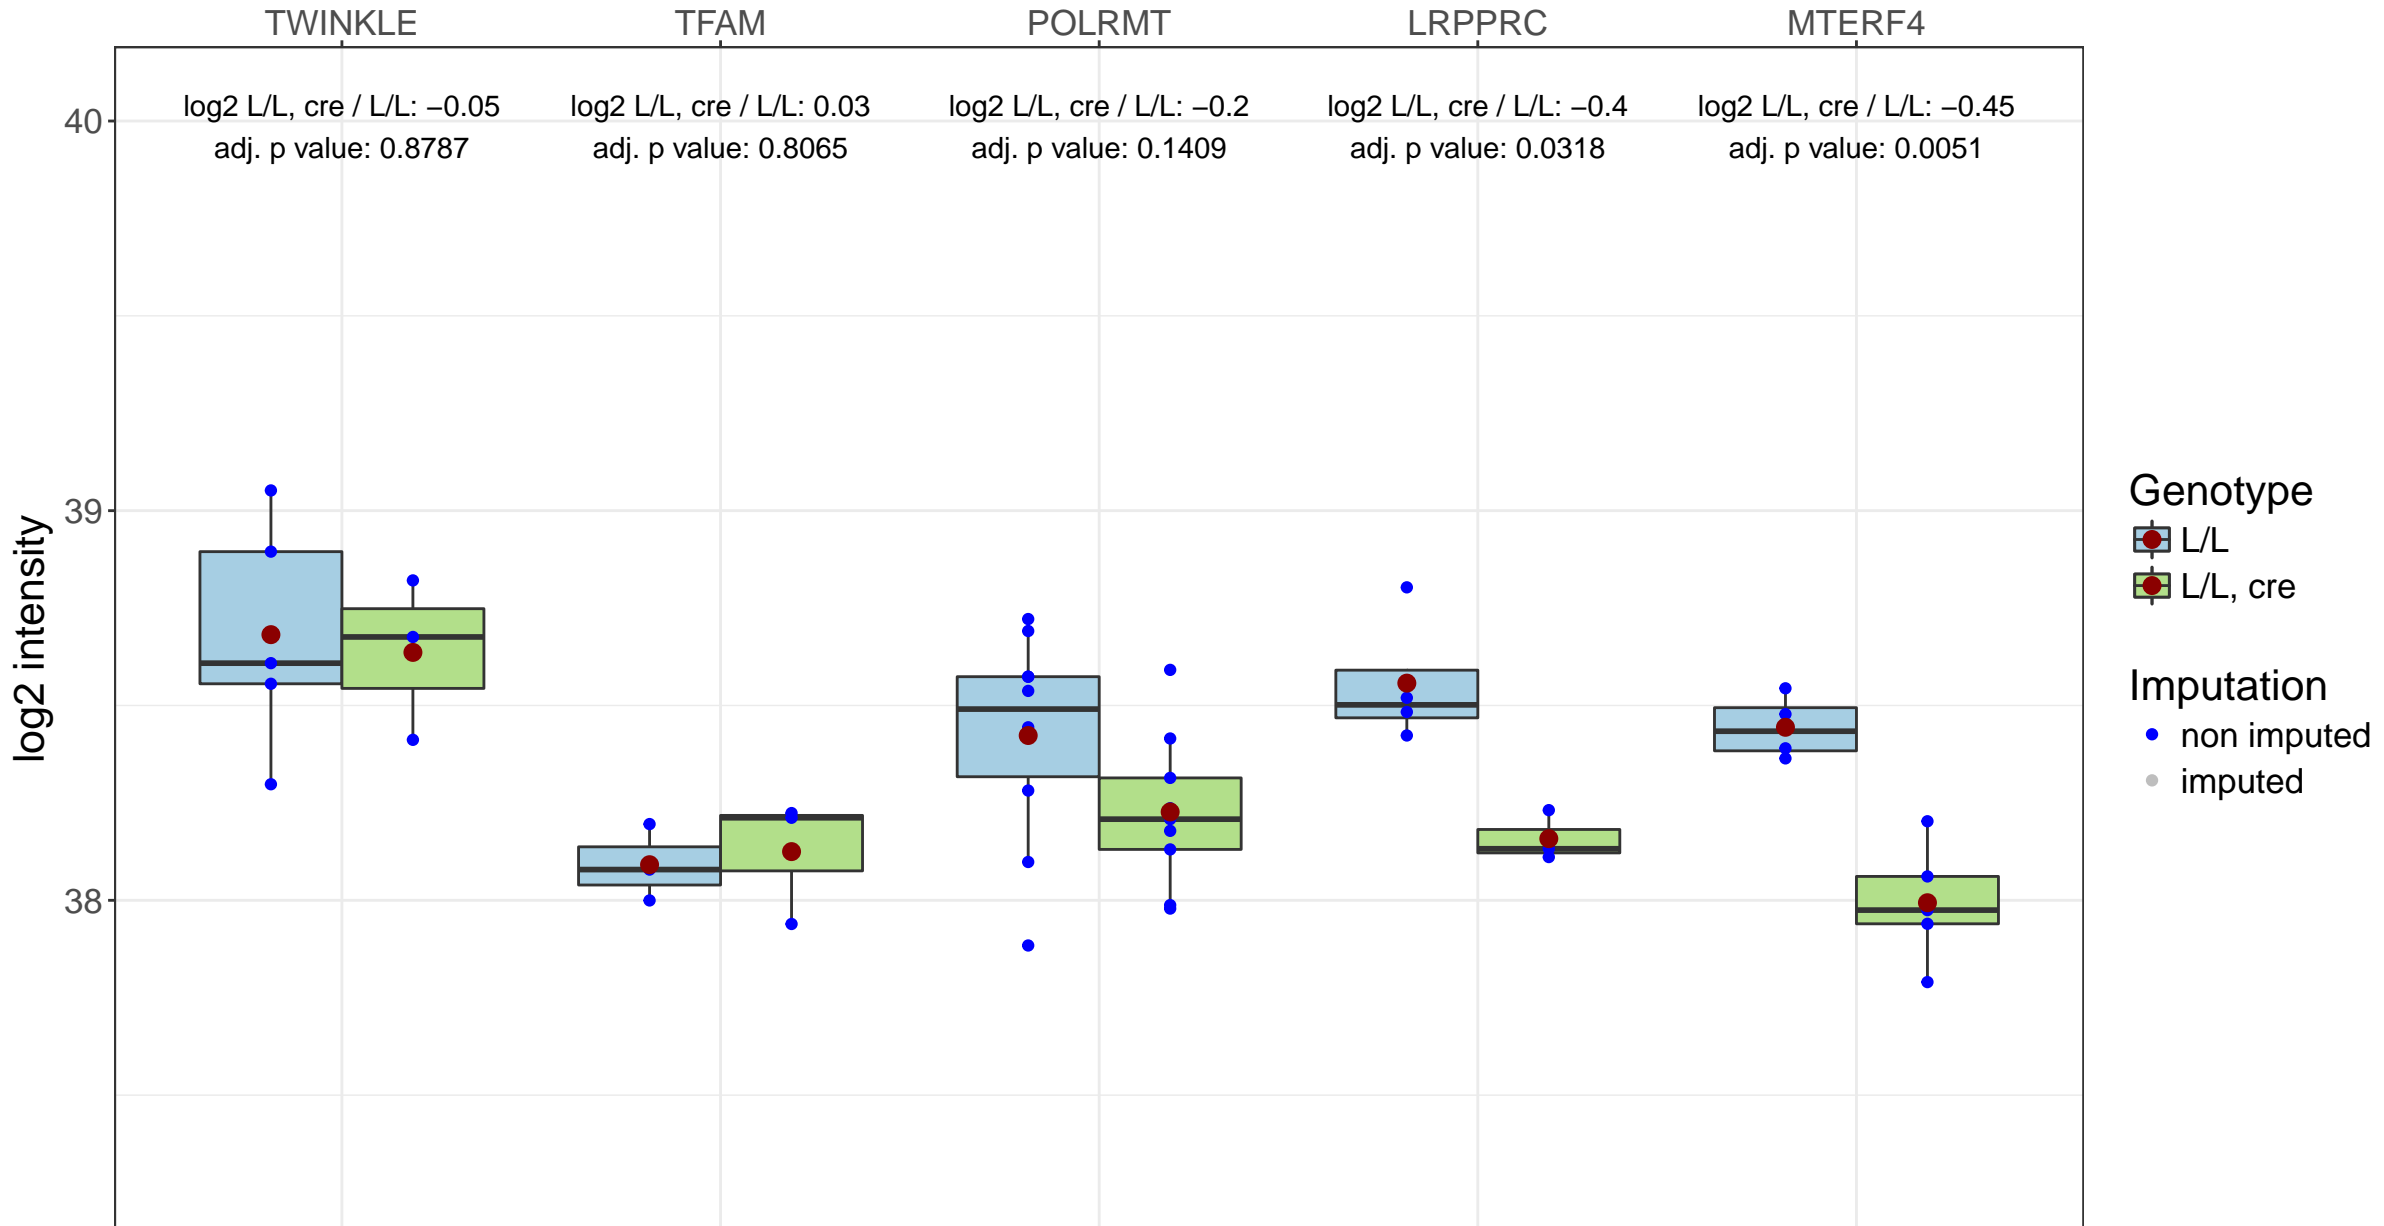

# SLC25A42 / Q8R0Y8

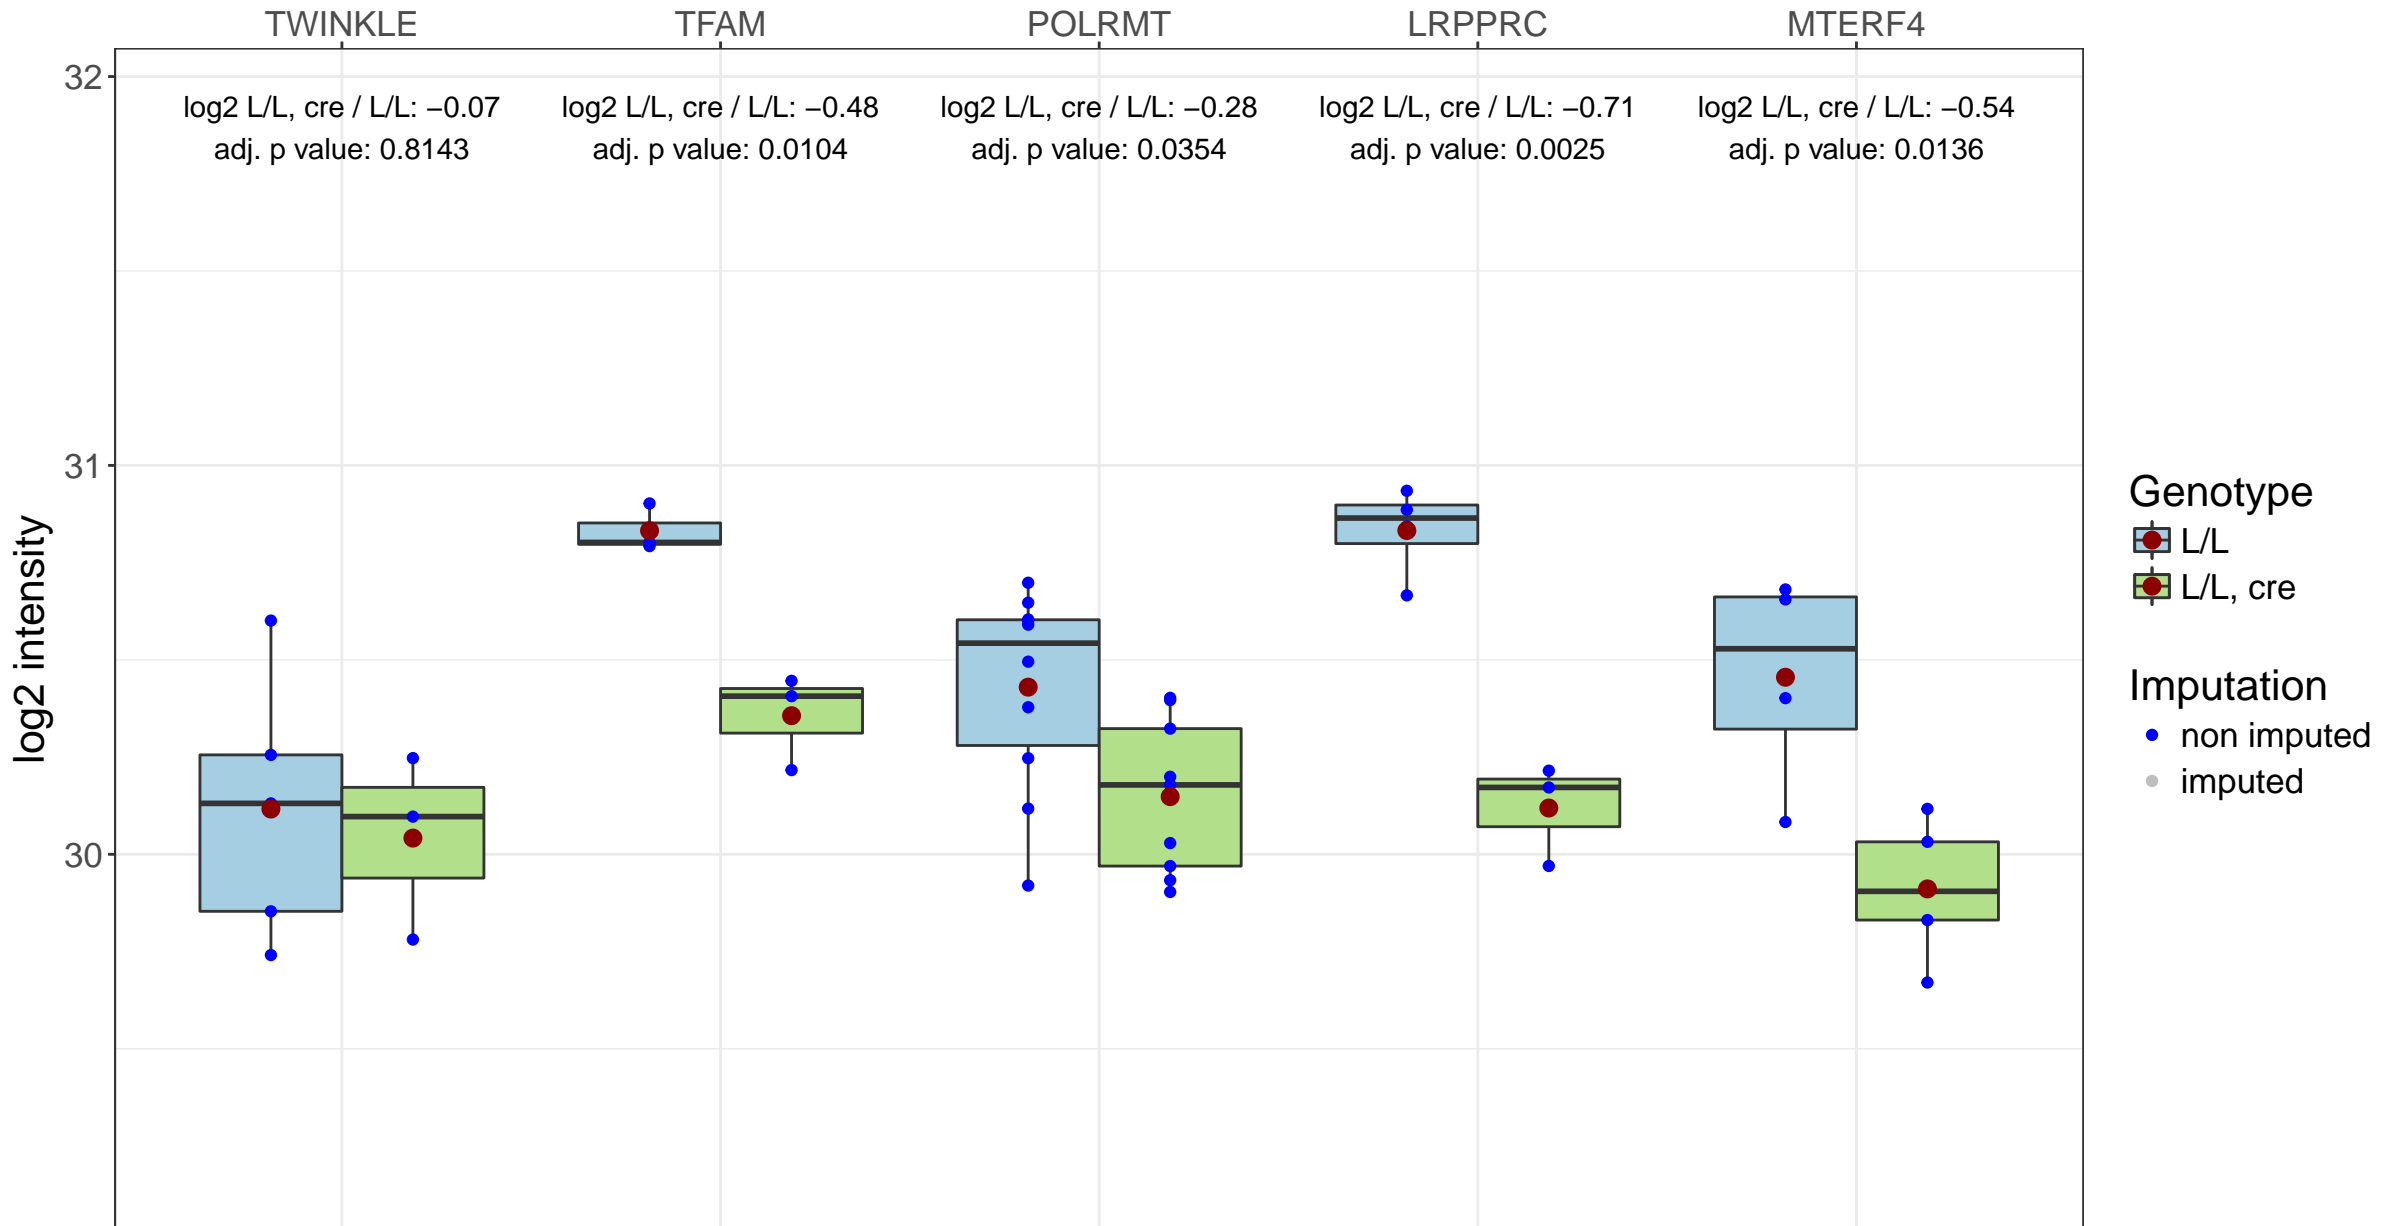

# SLC25A46 / Q9CQS4

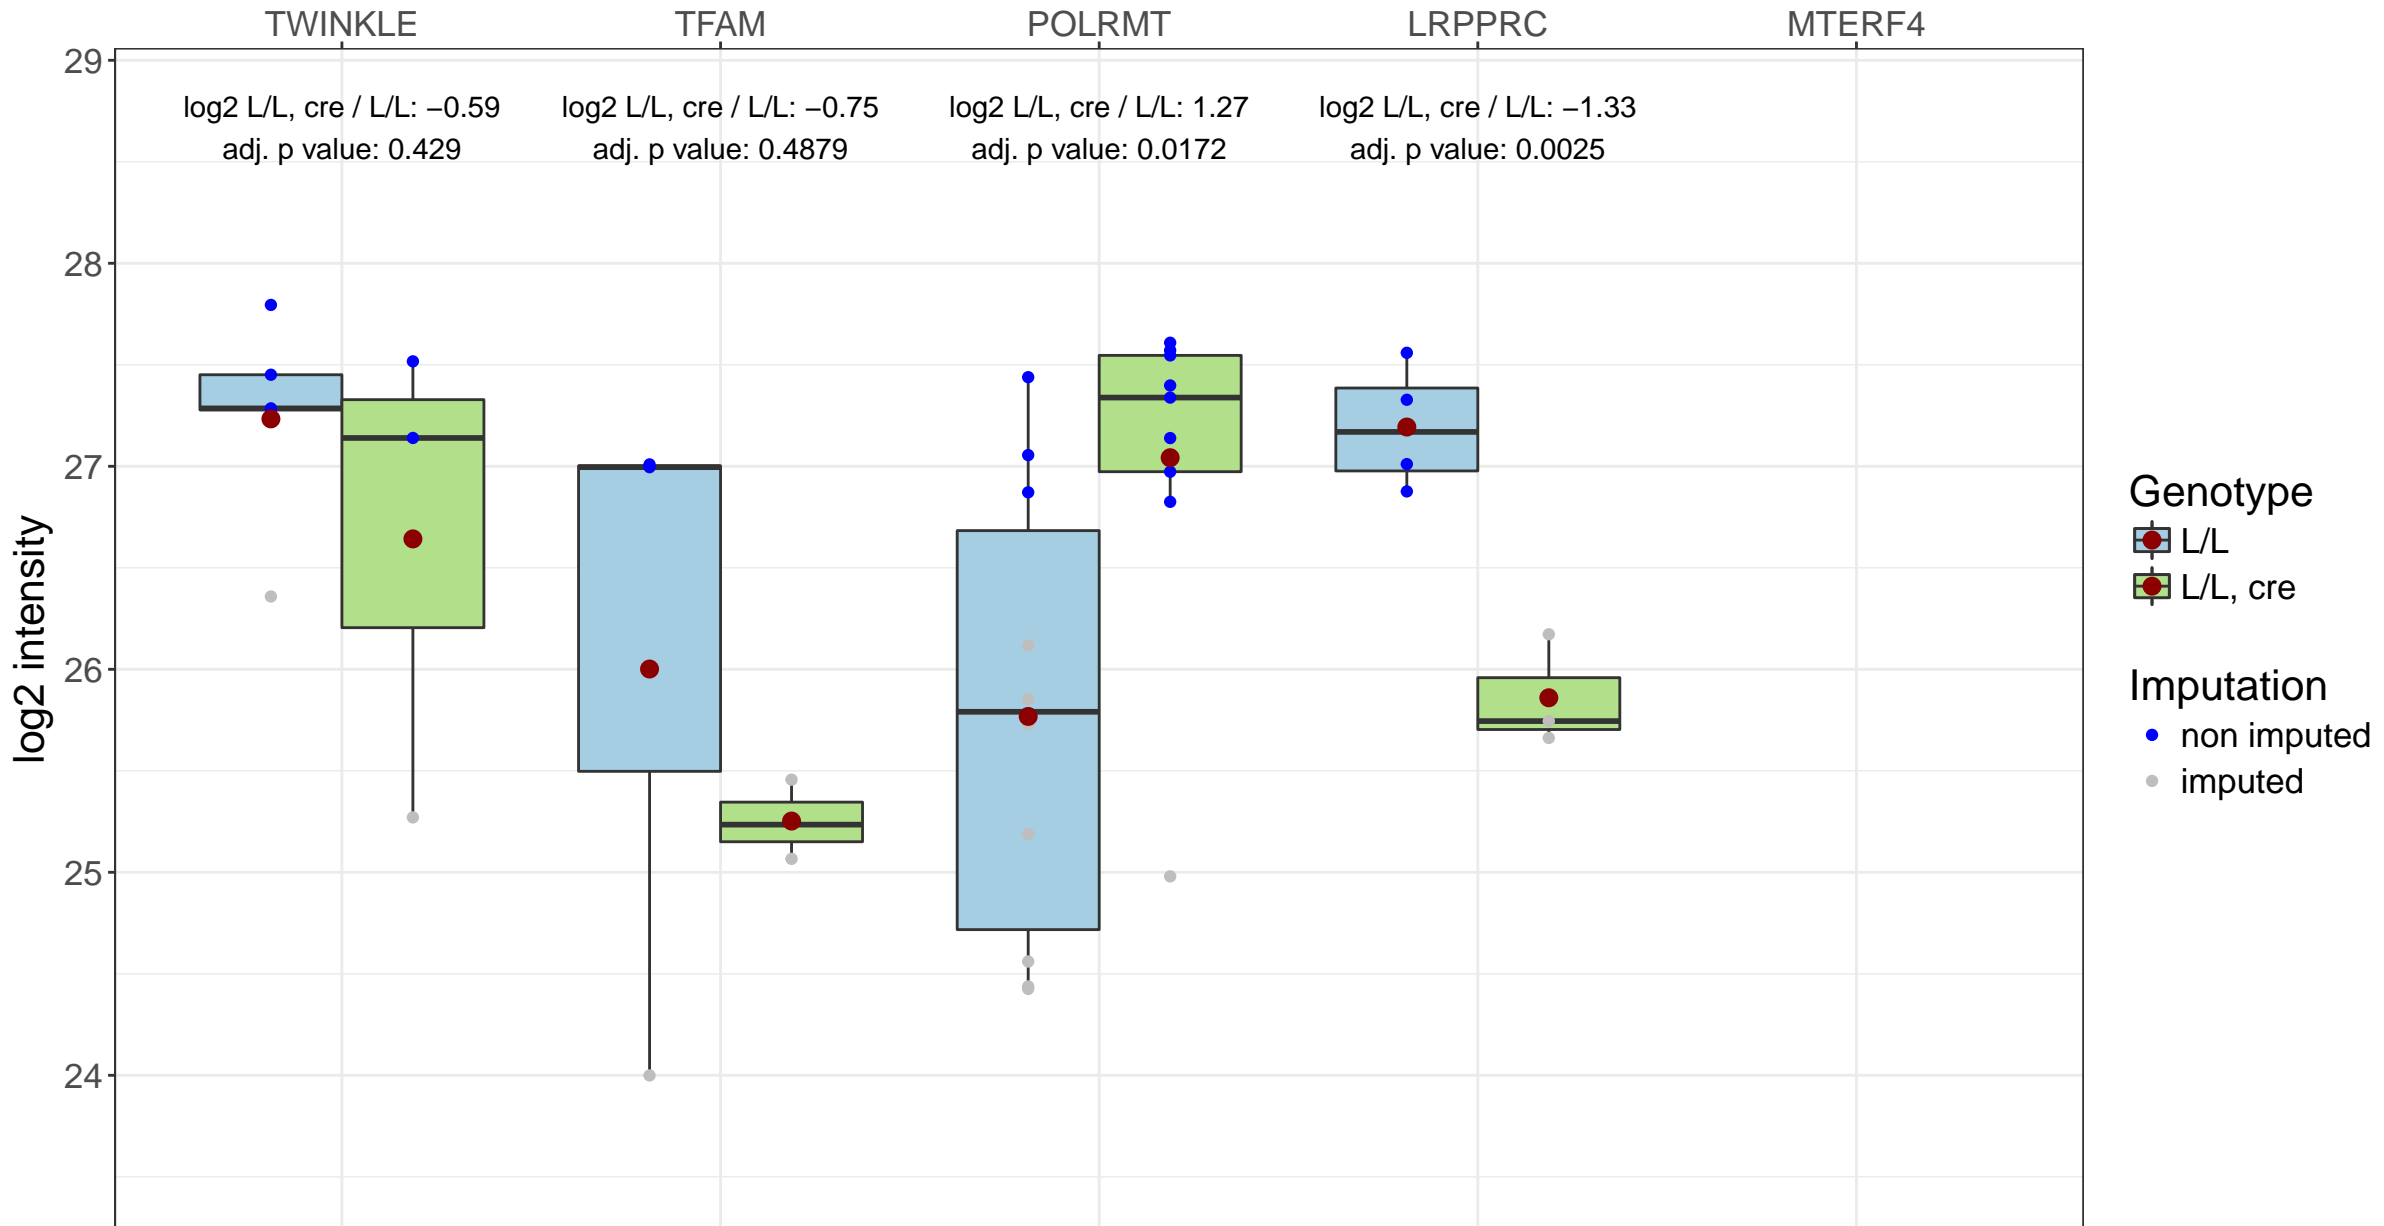

# SLC25A5 / P51881

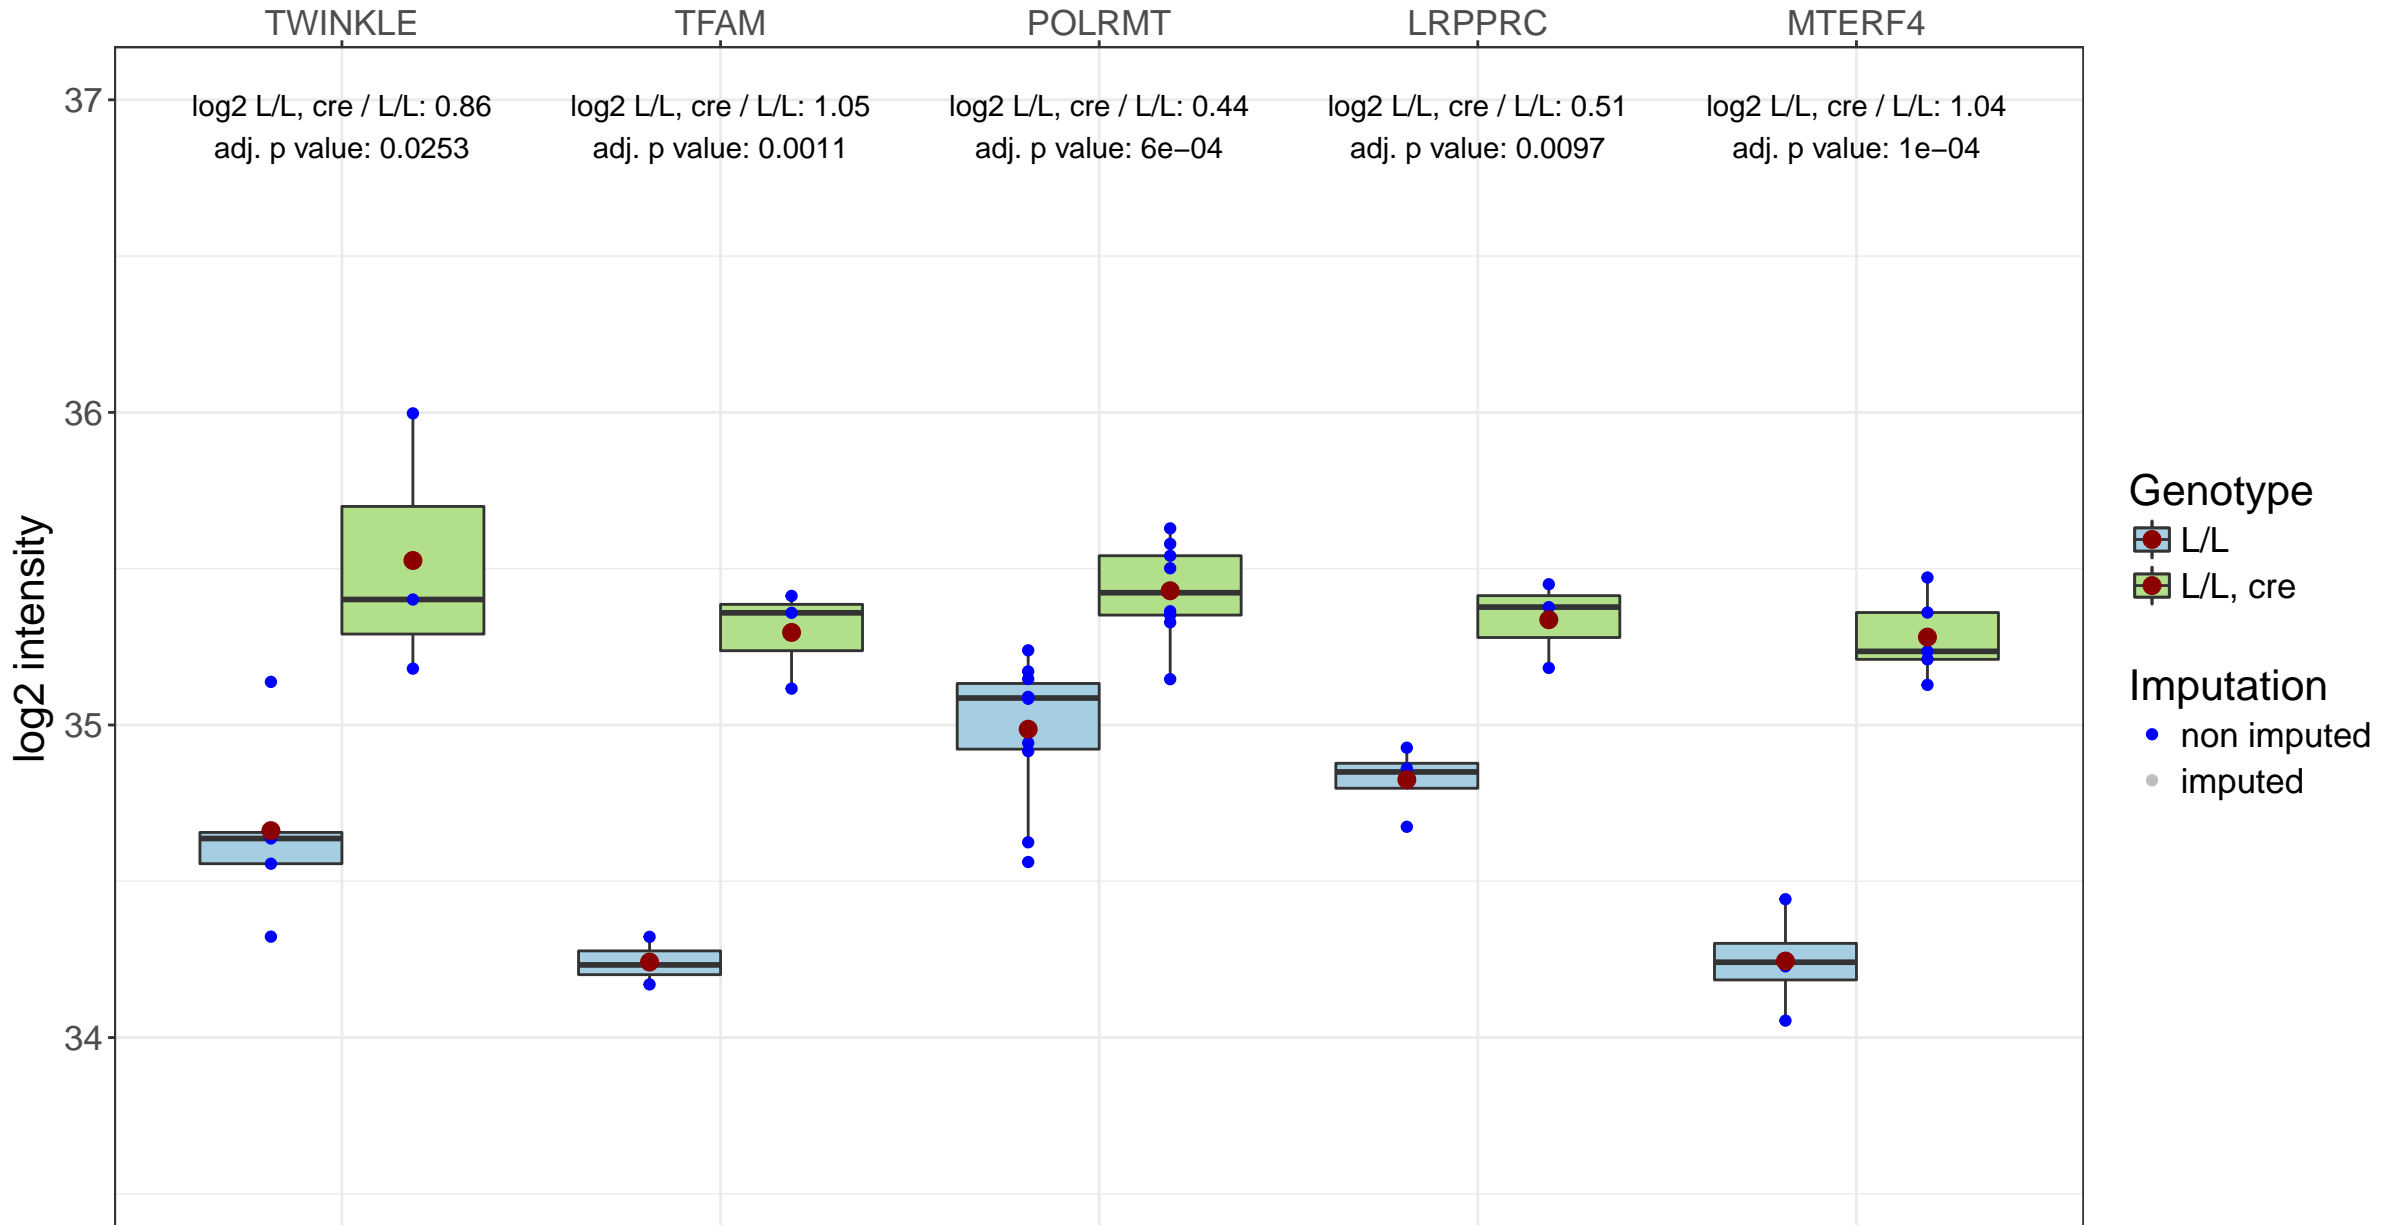

# SLC25A51 / Q5HZI9

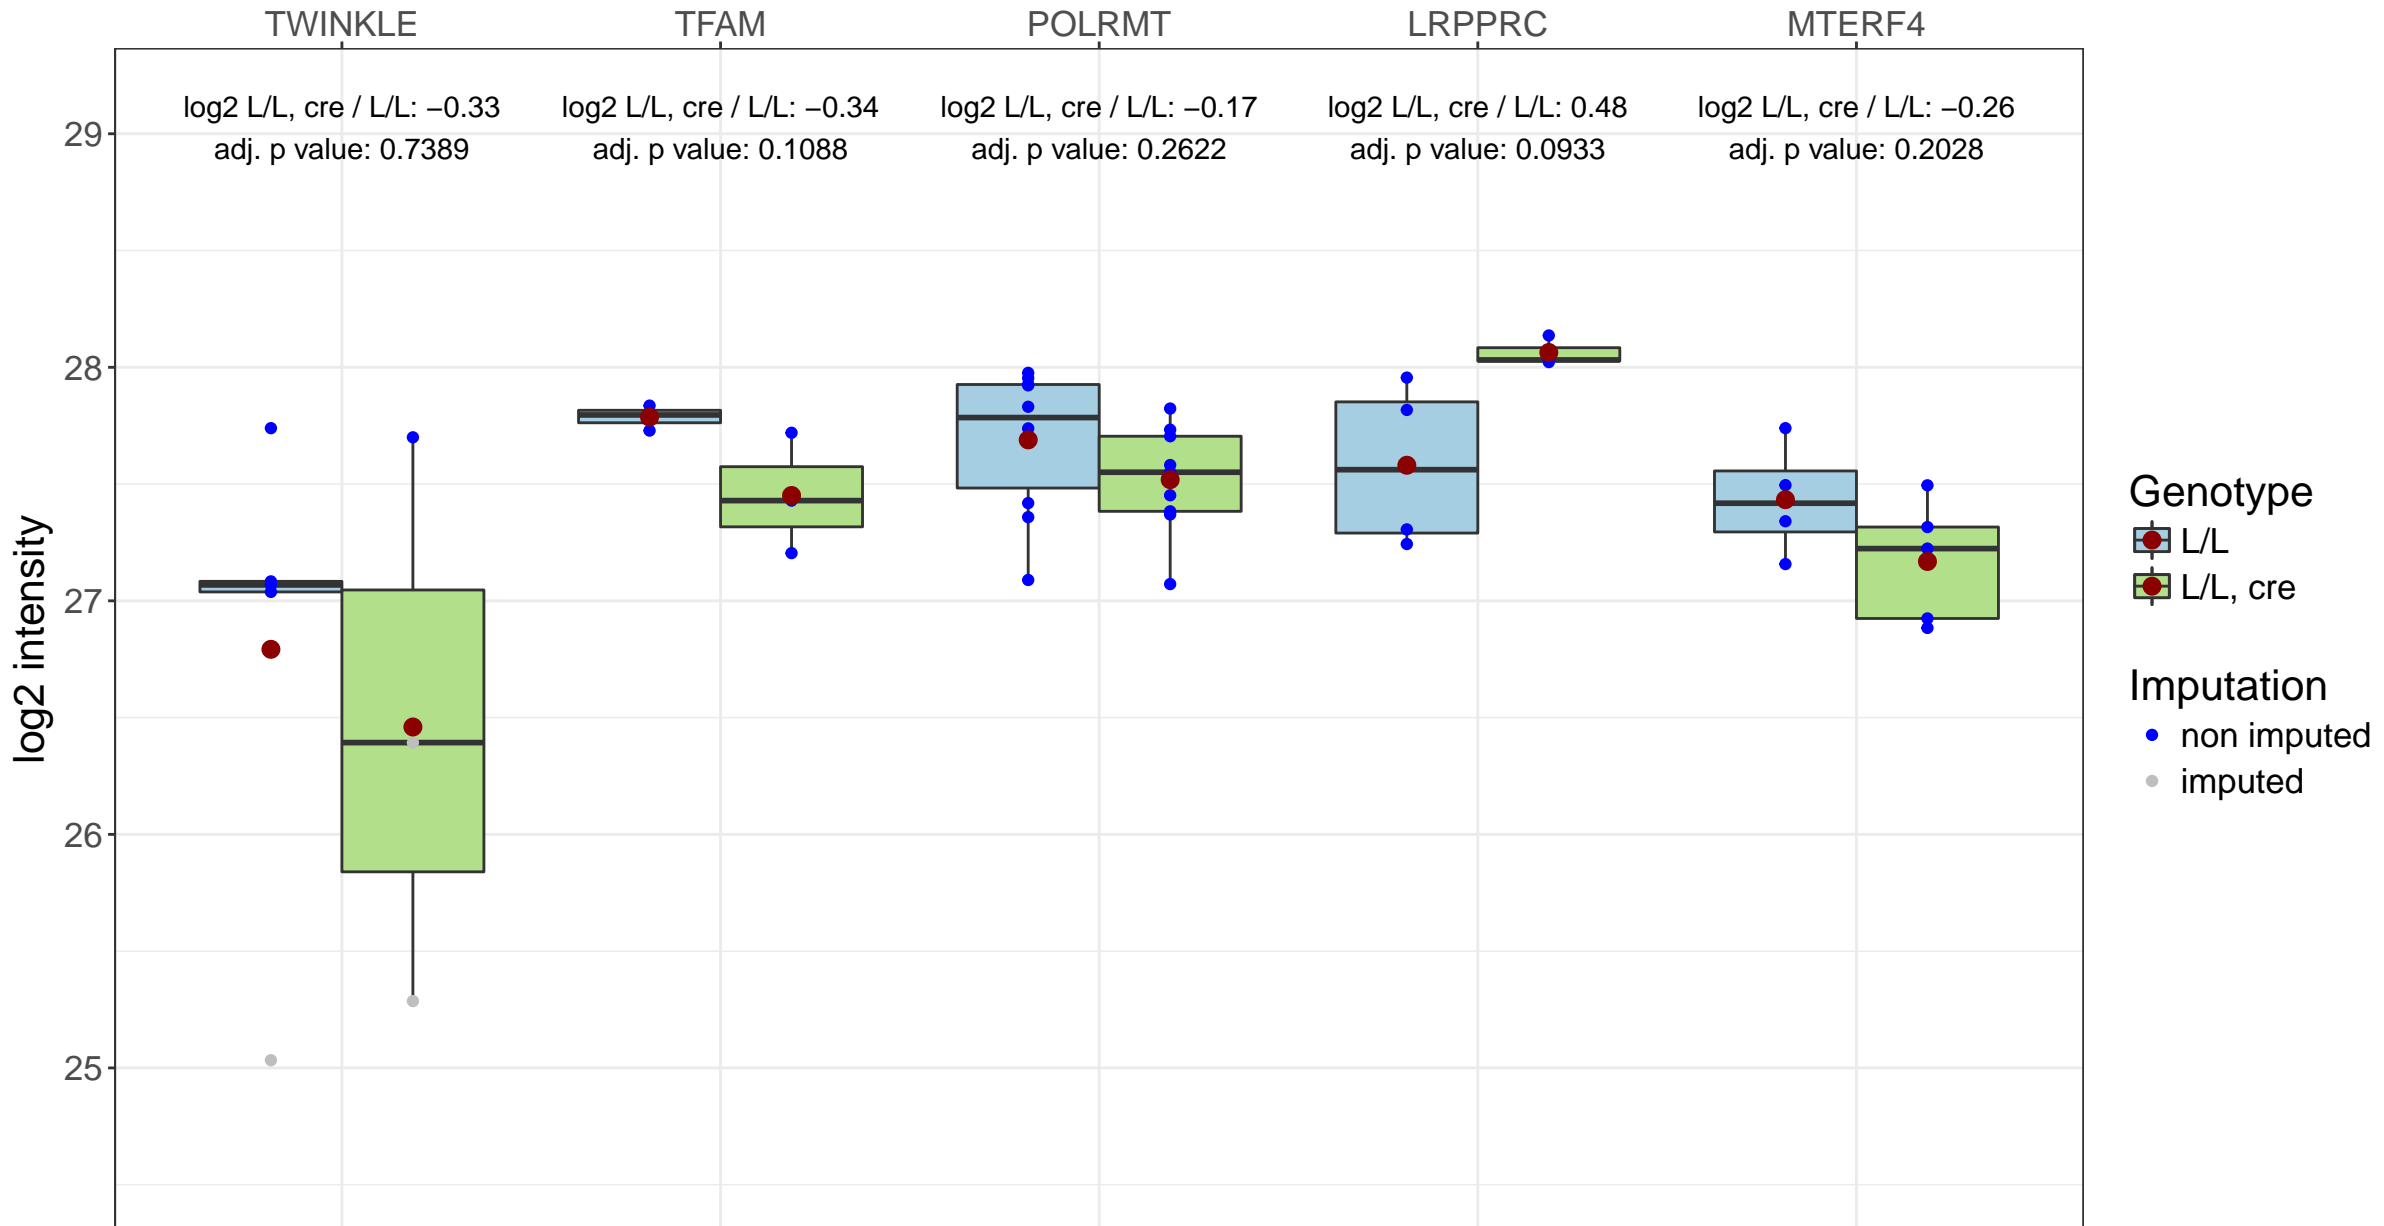

# SLC27A1 / Q60714

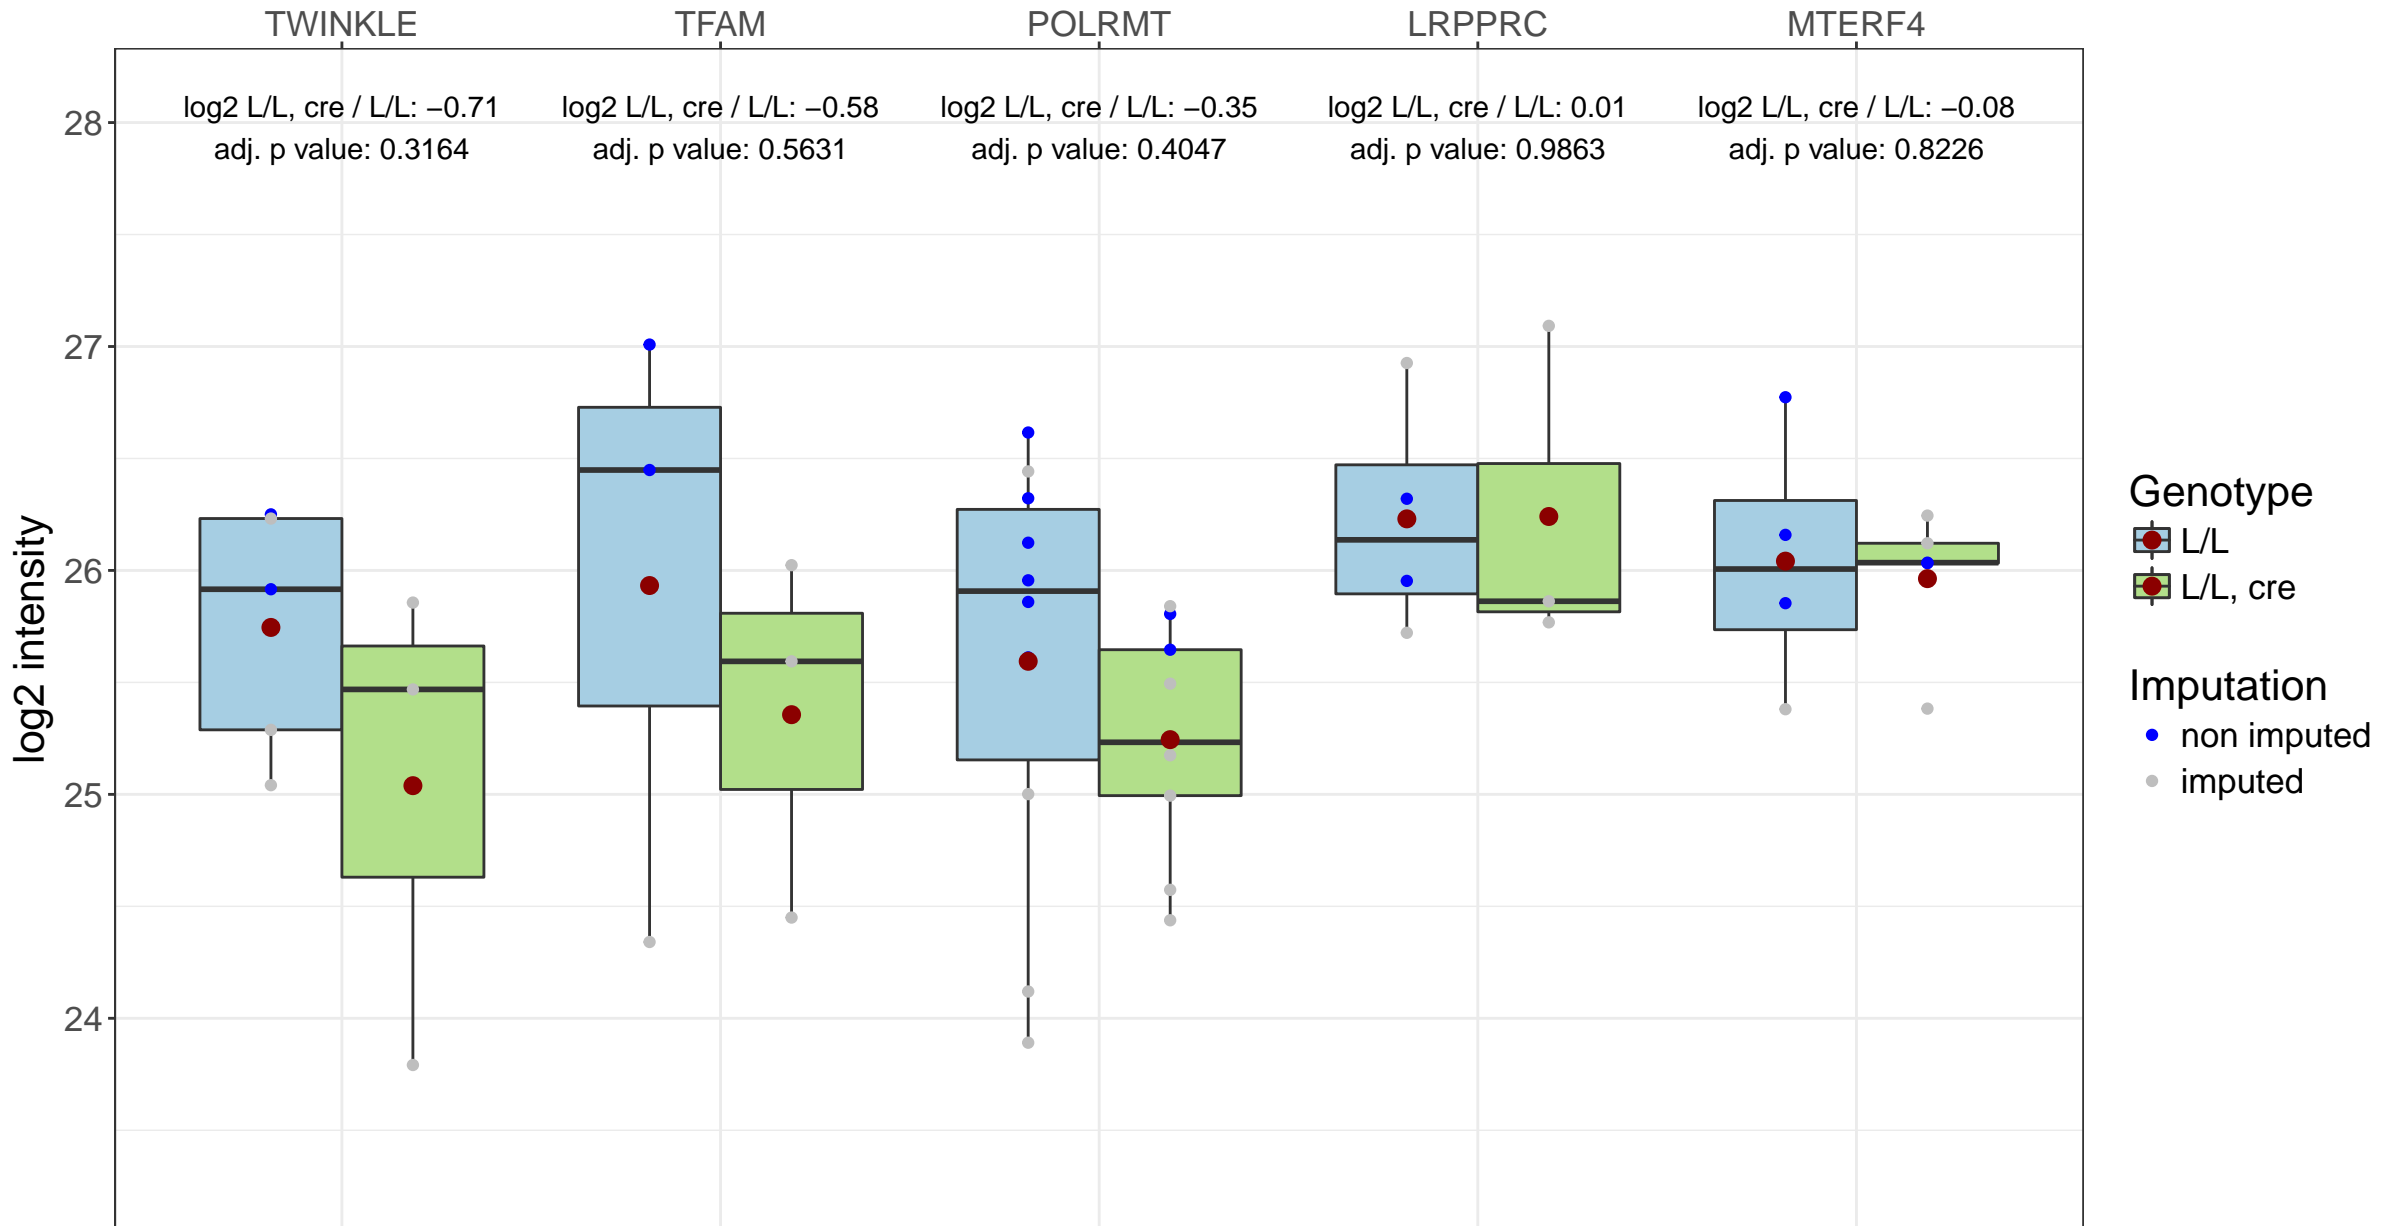

# SLC30A9 / Q5IRJ6

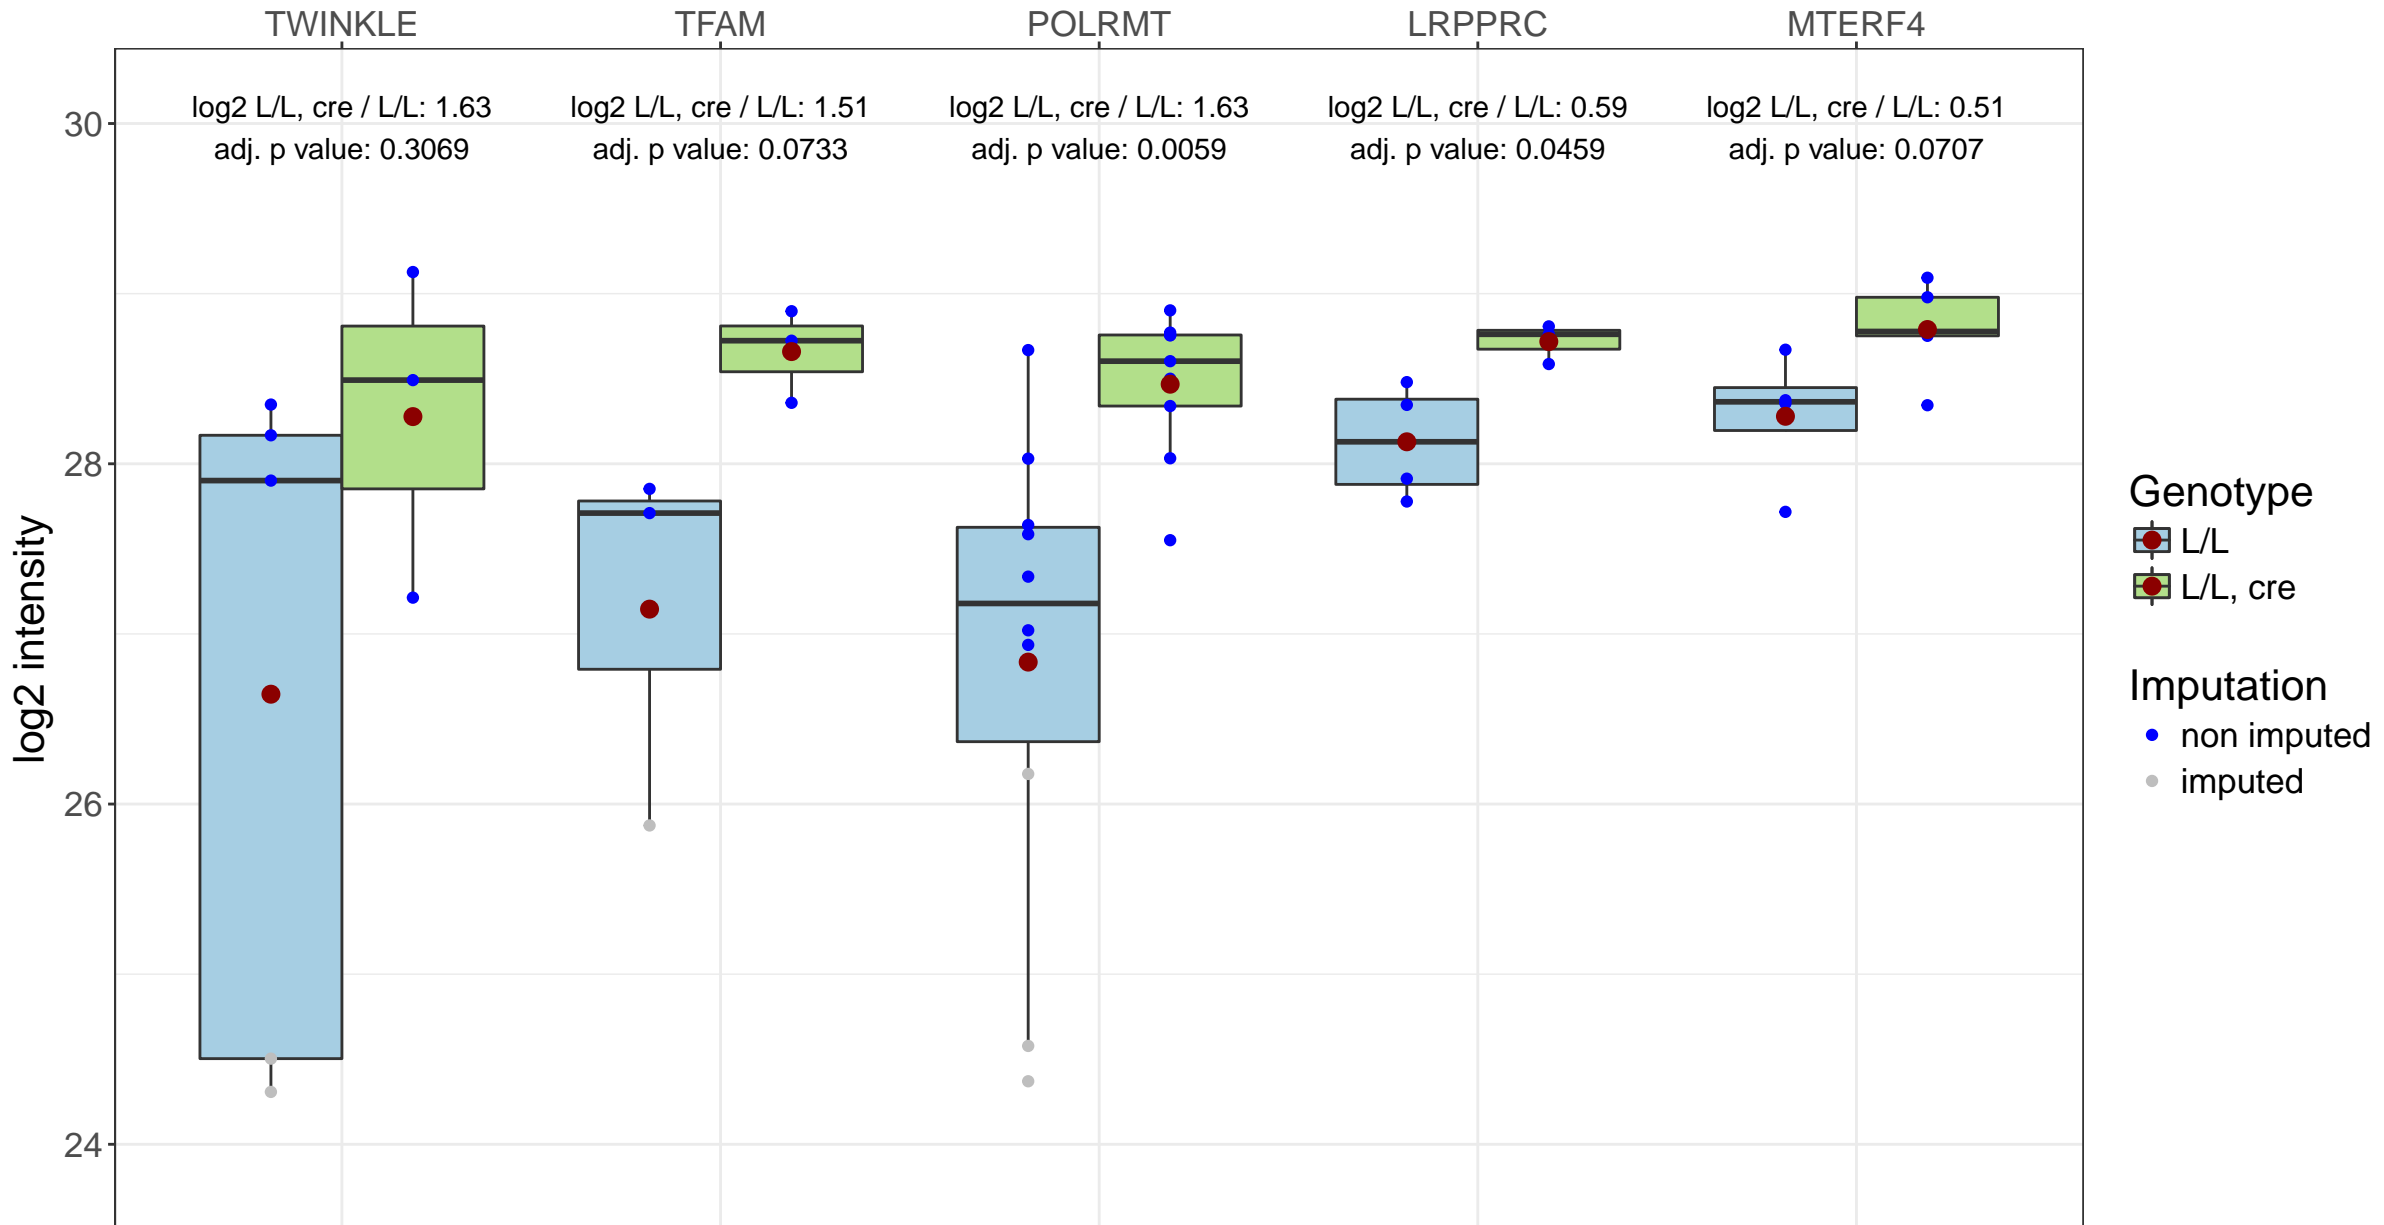

# SLIRP / Q9D8T7

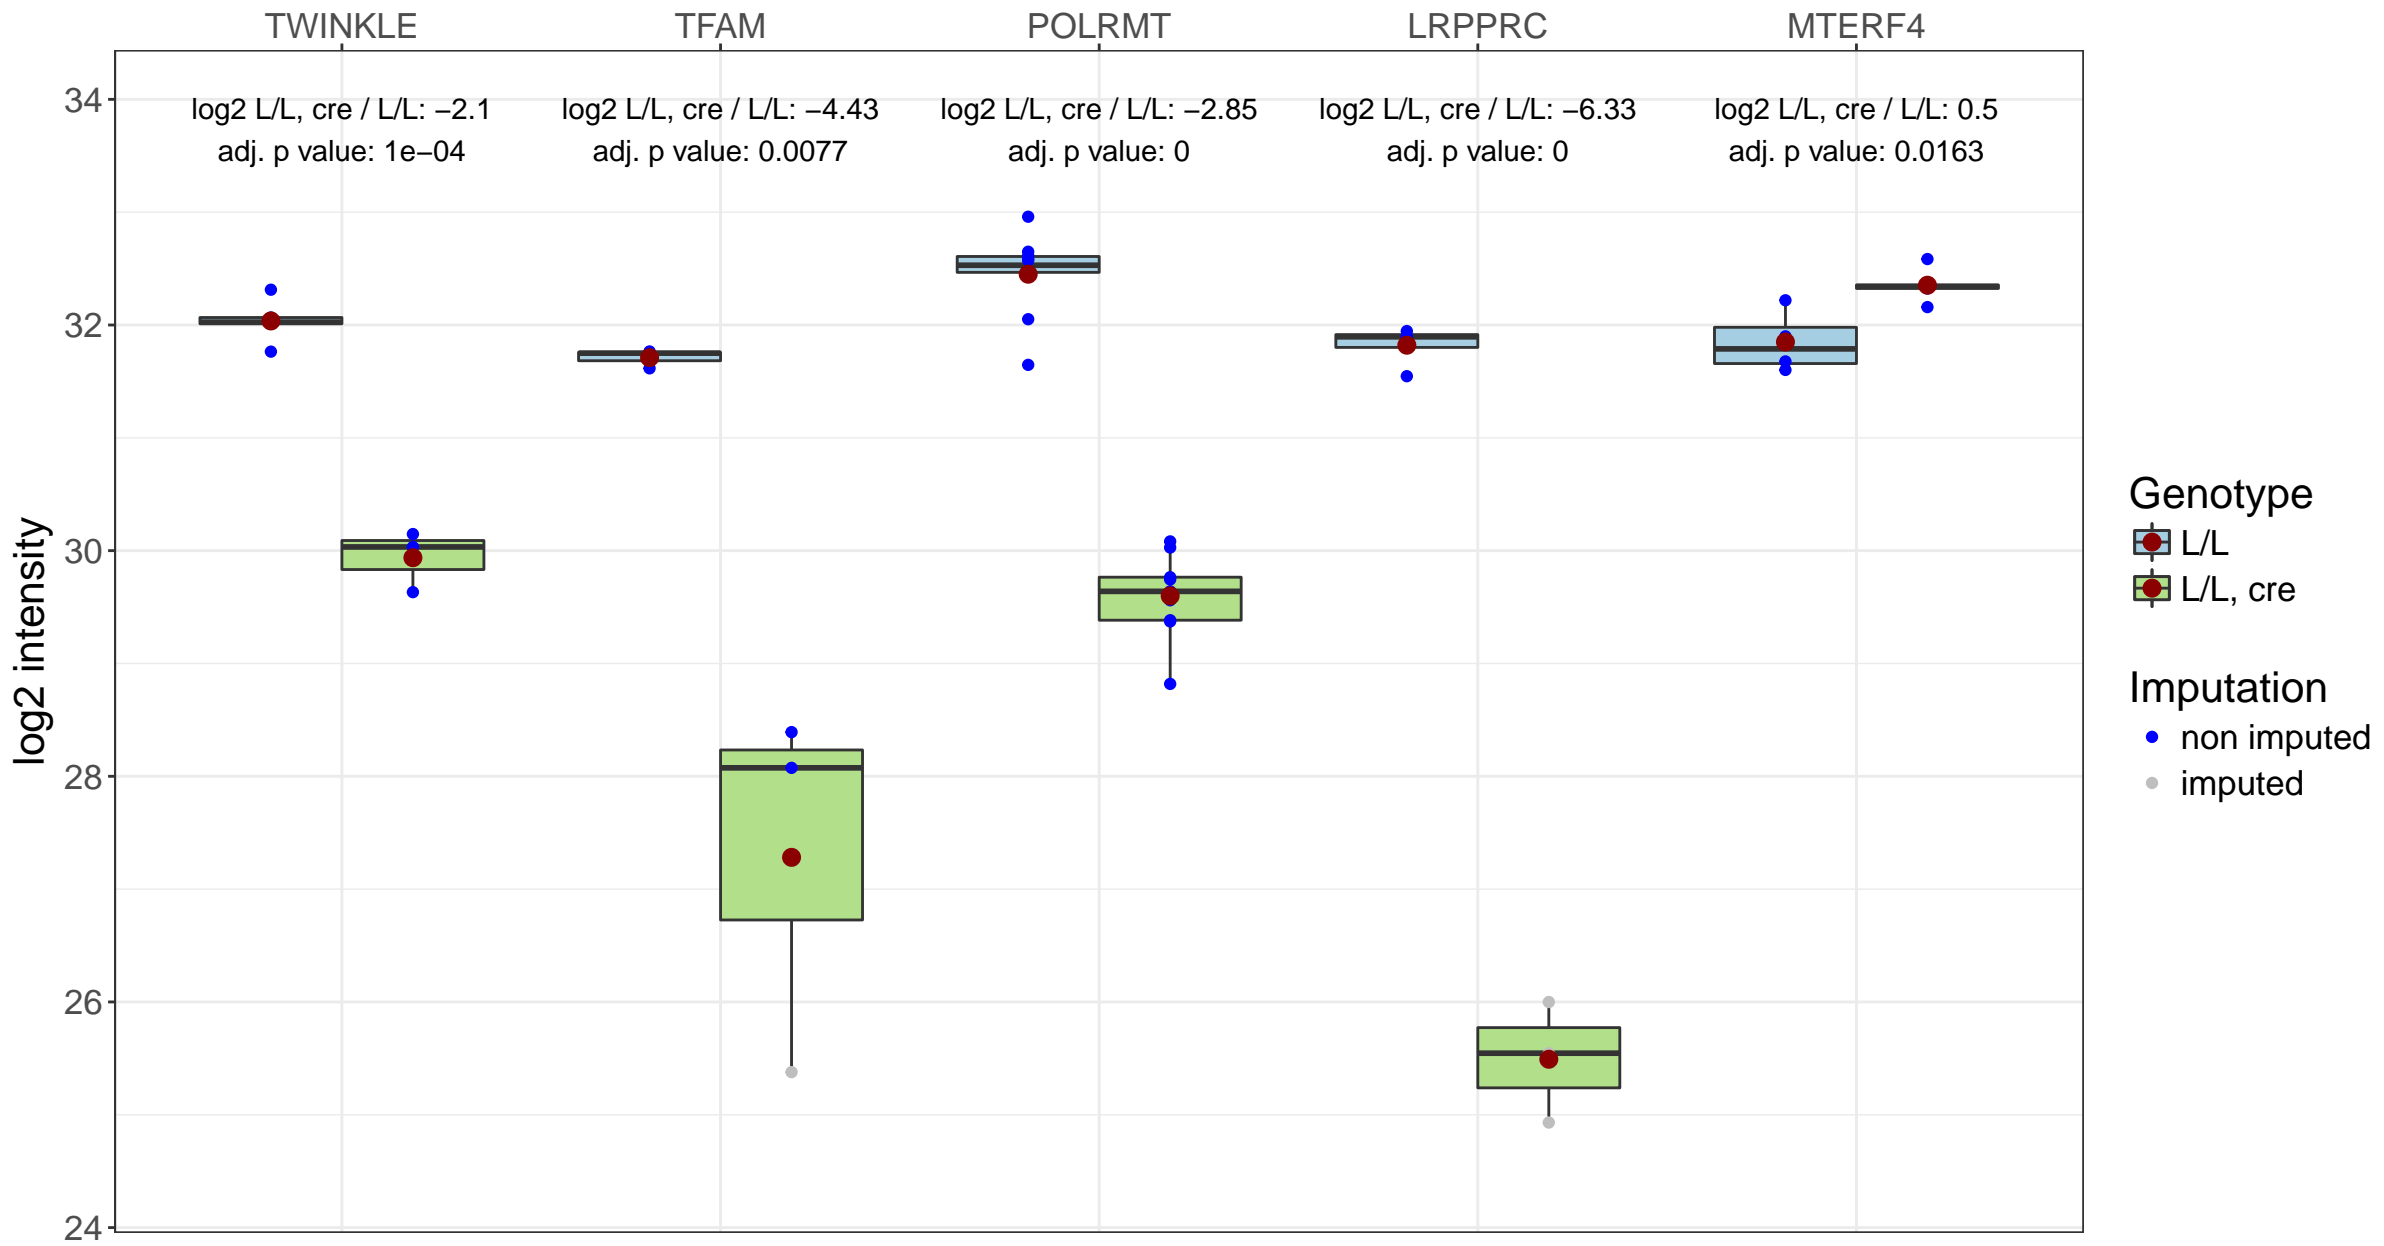



# SLMAP / Q3URD3-3

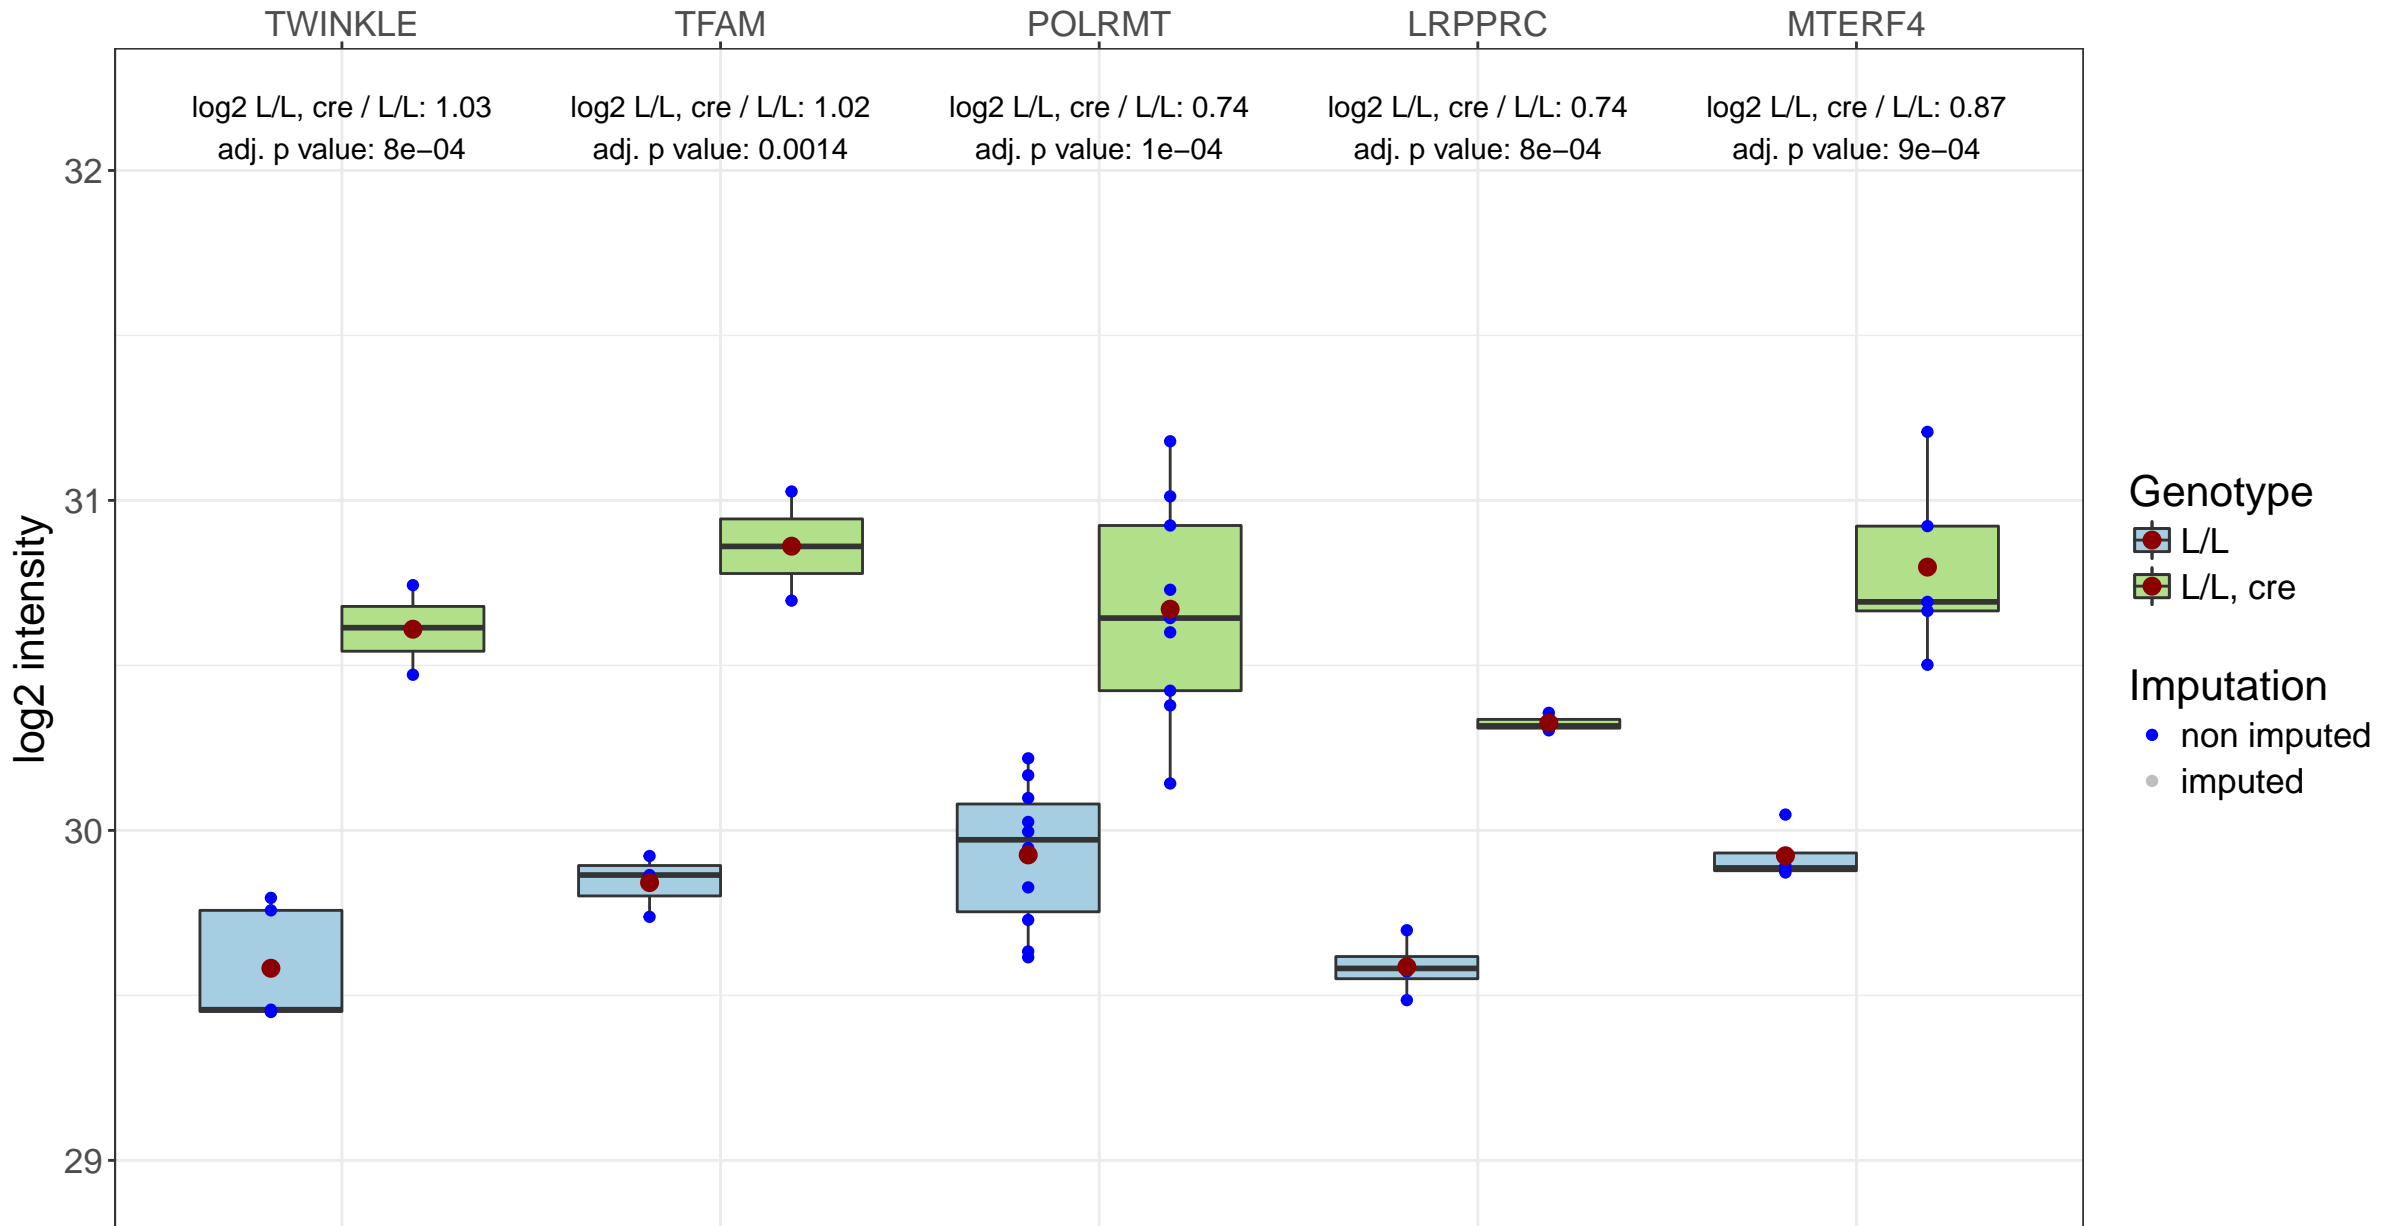

# SMIM20 / D3Z7Q2

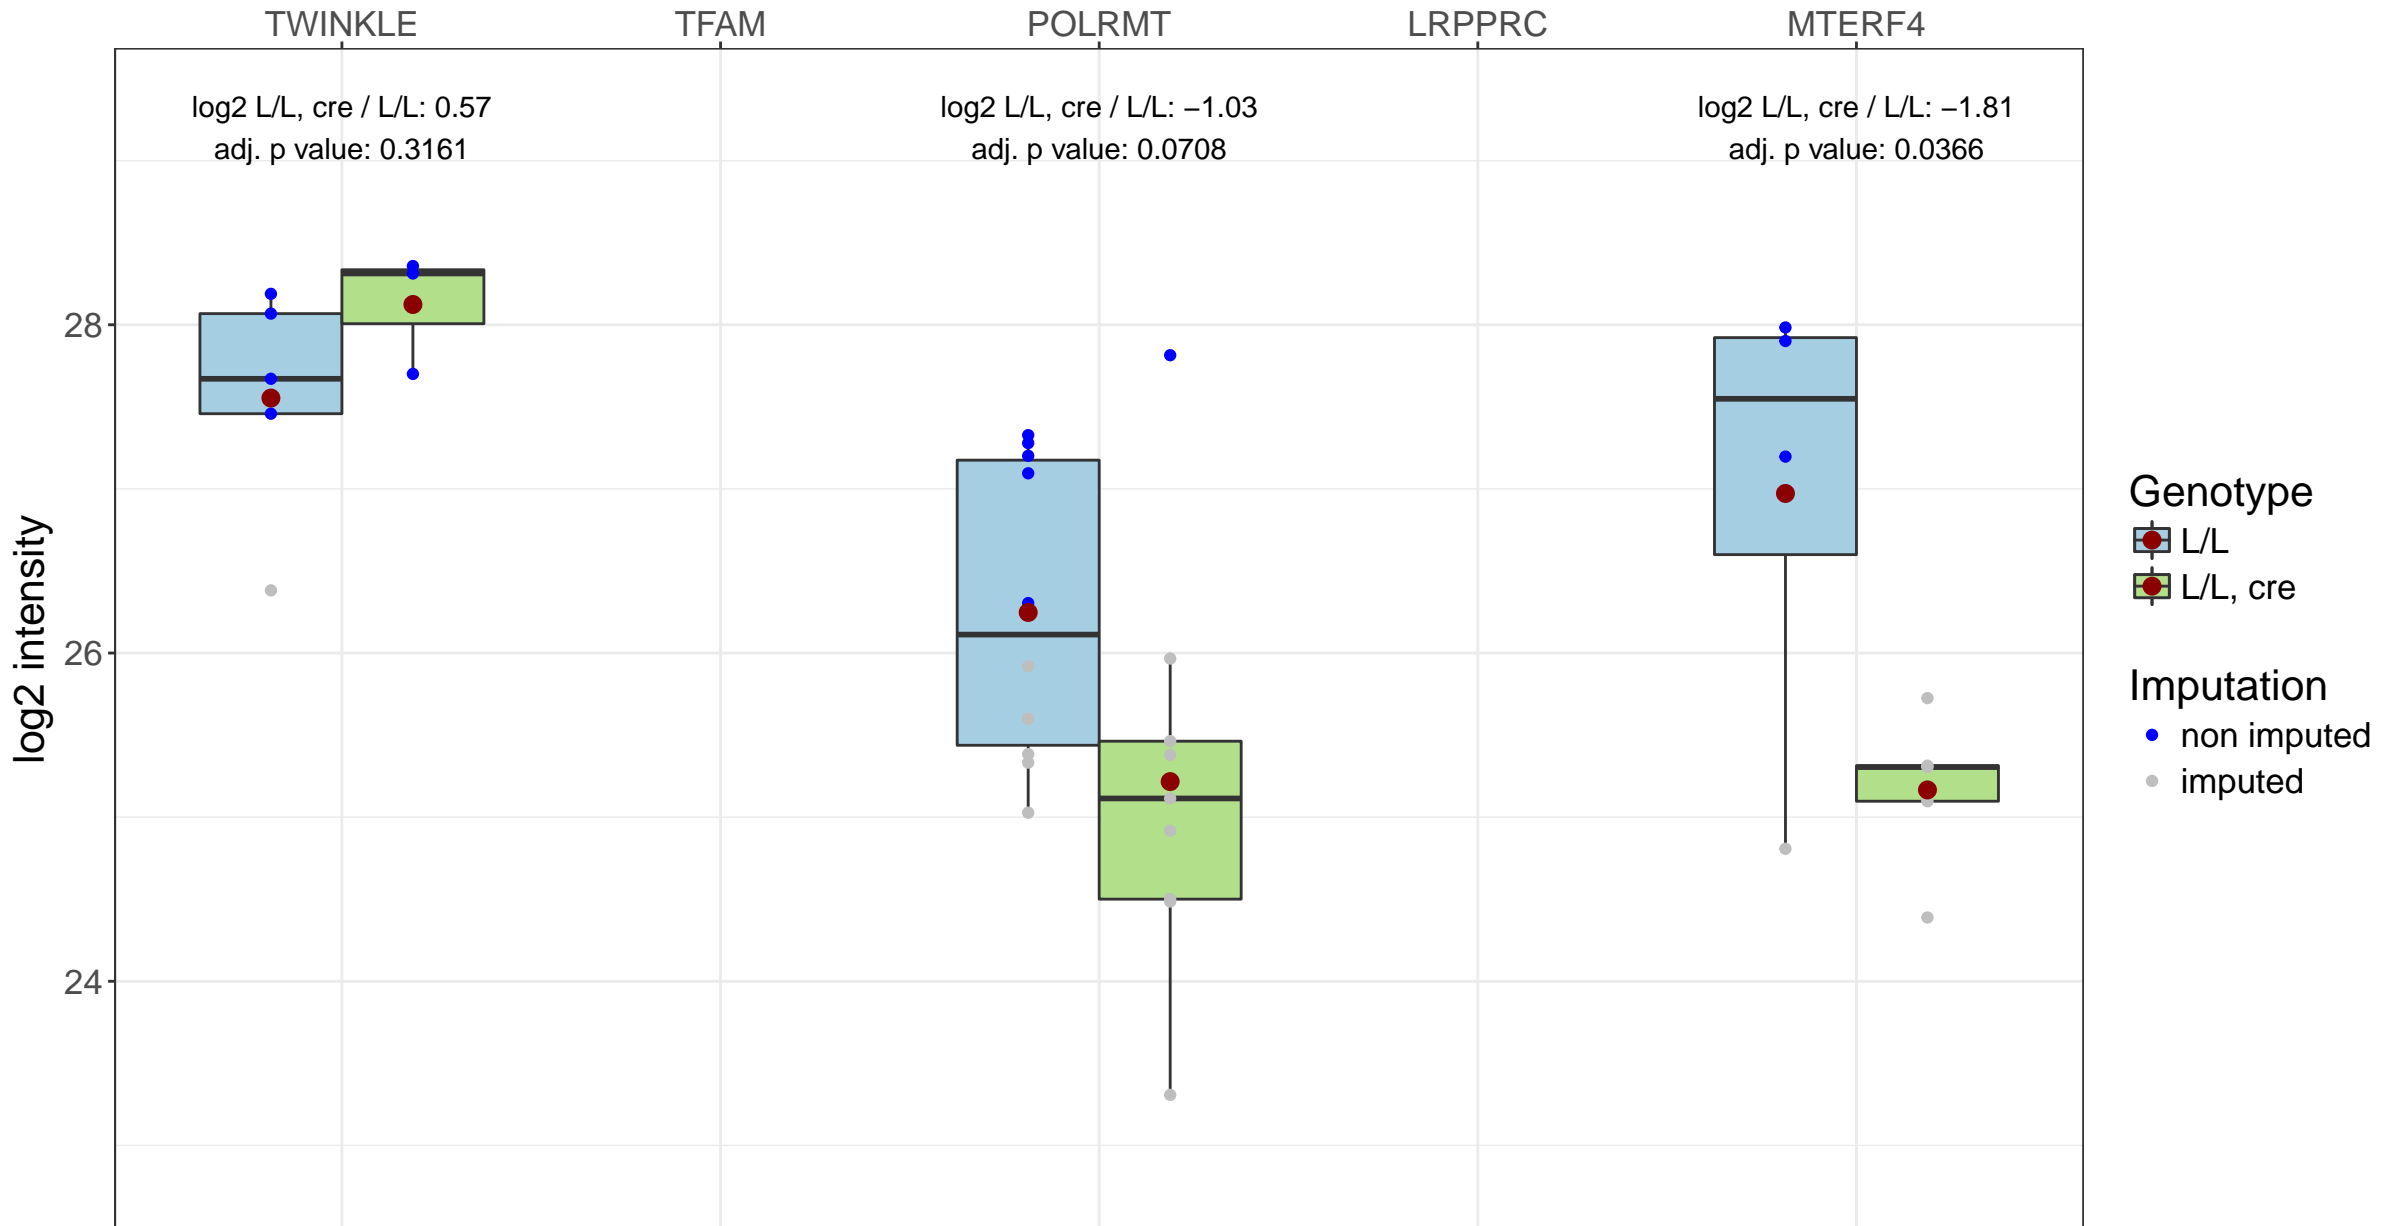

# SMIM4 / Q8C1Q6

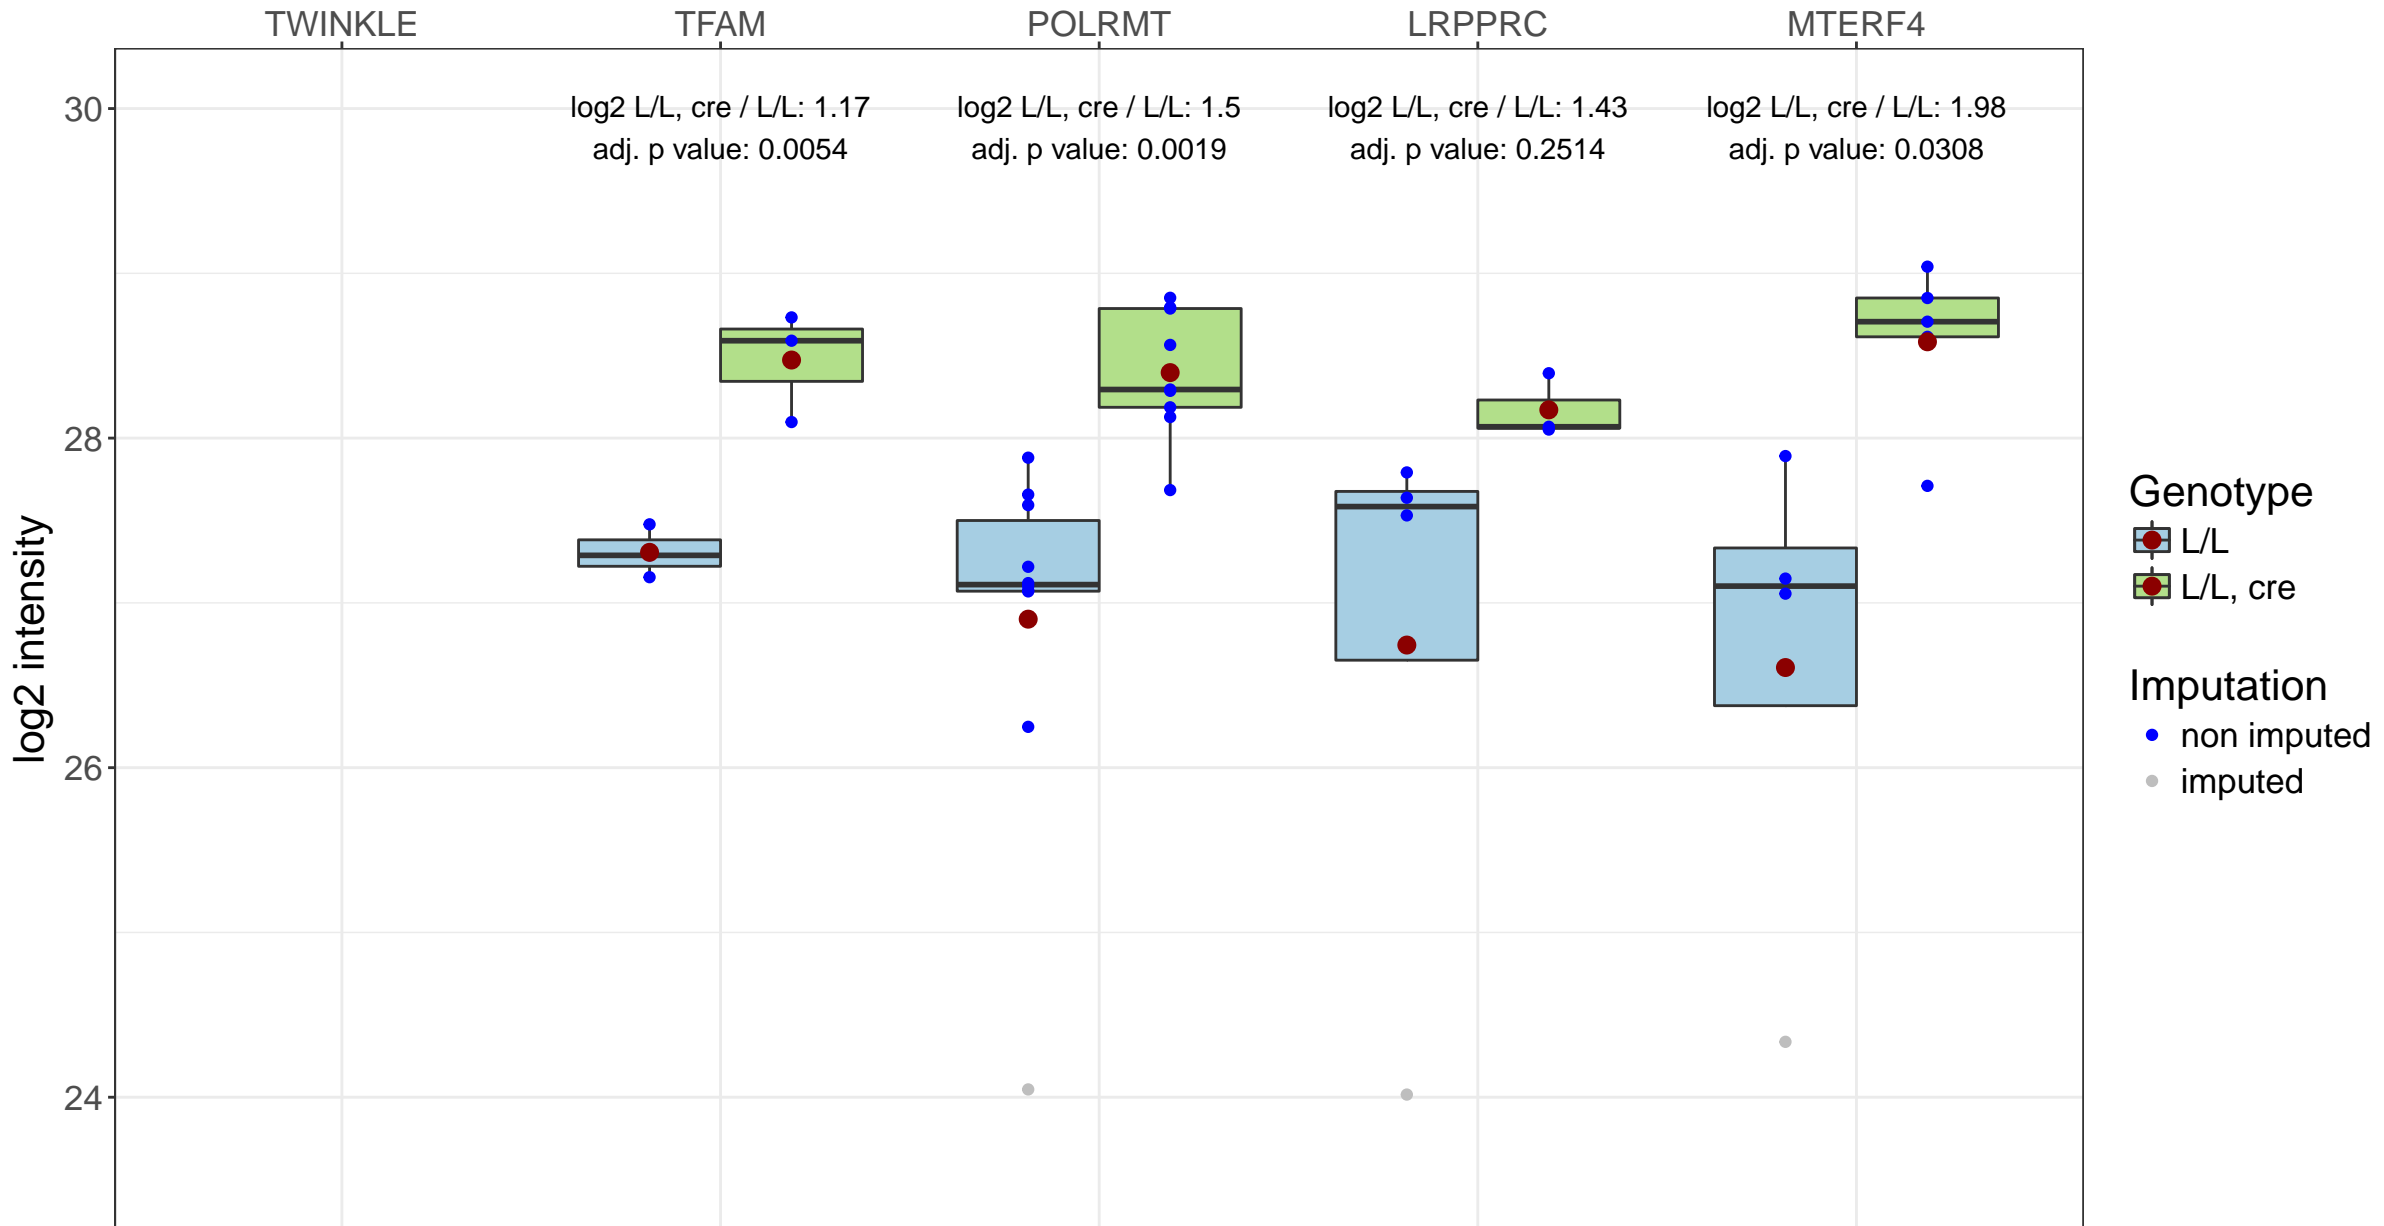

# SMIM8 / Q9CQQ0

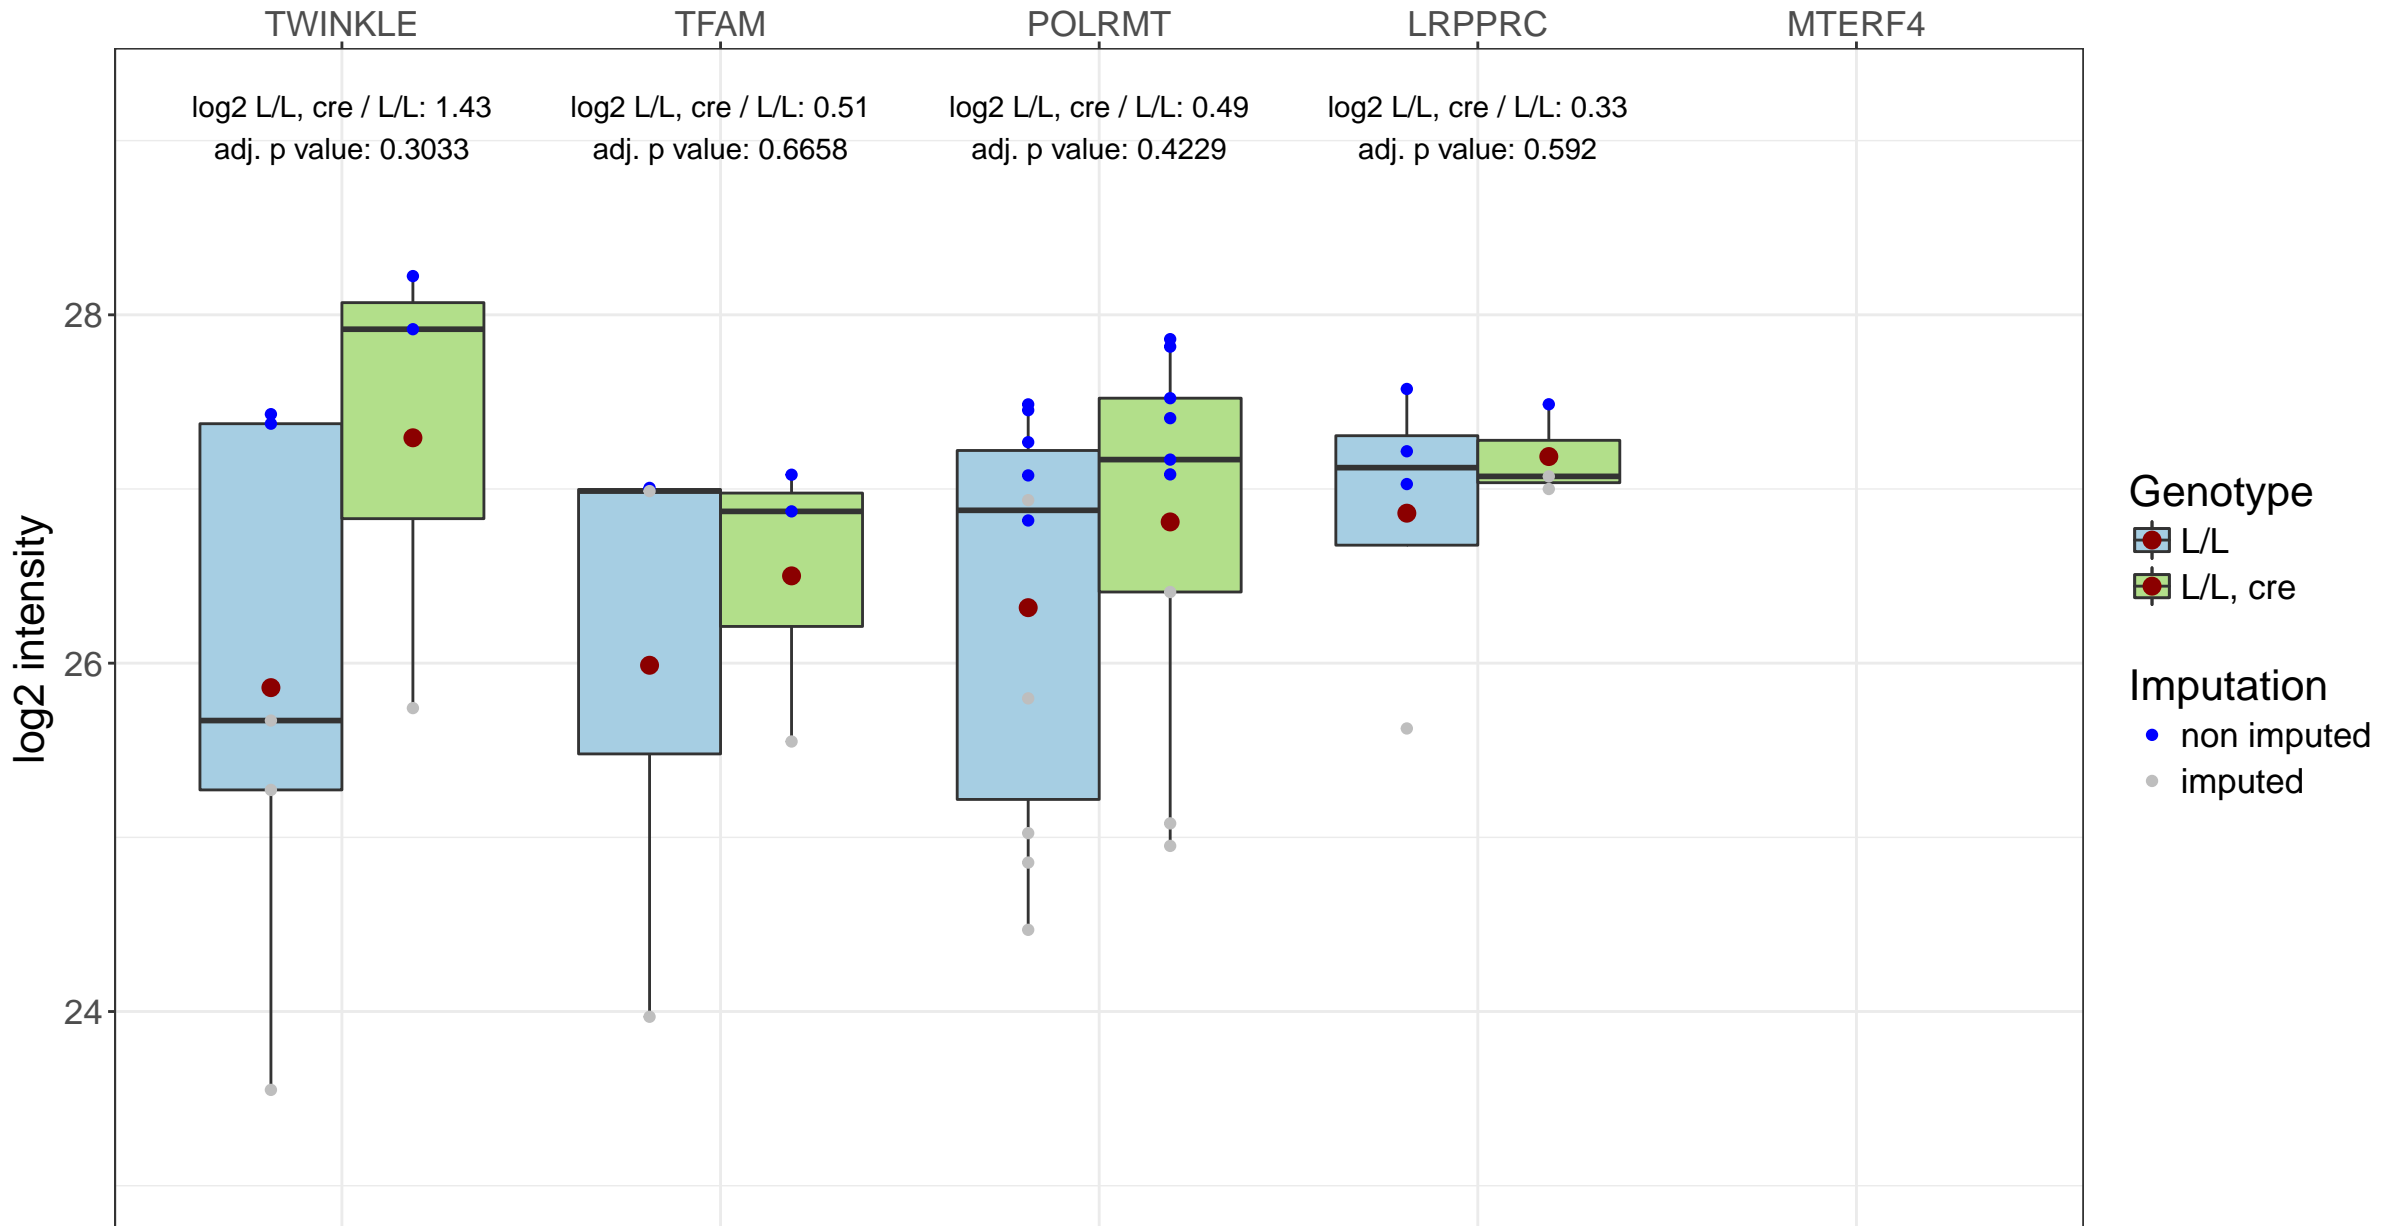

# SMPX / Q9DC77

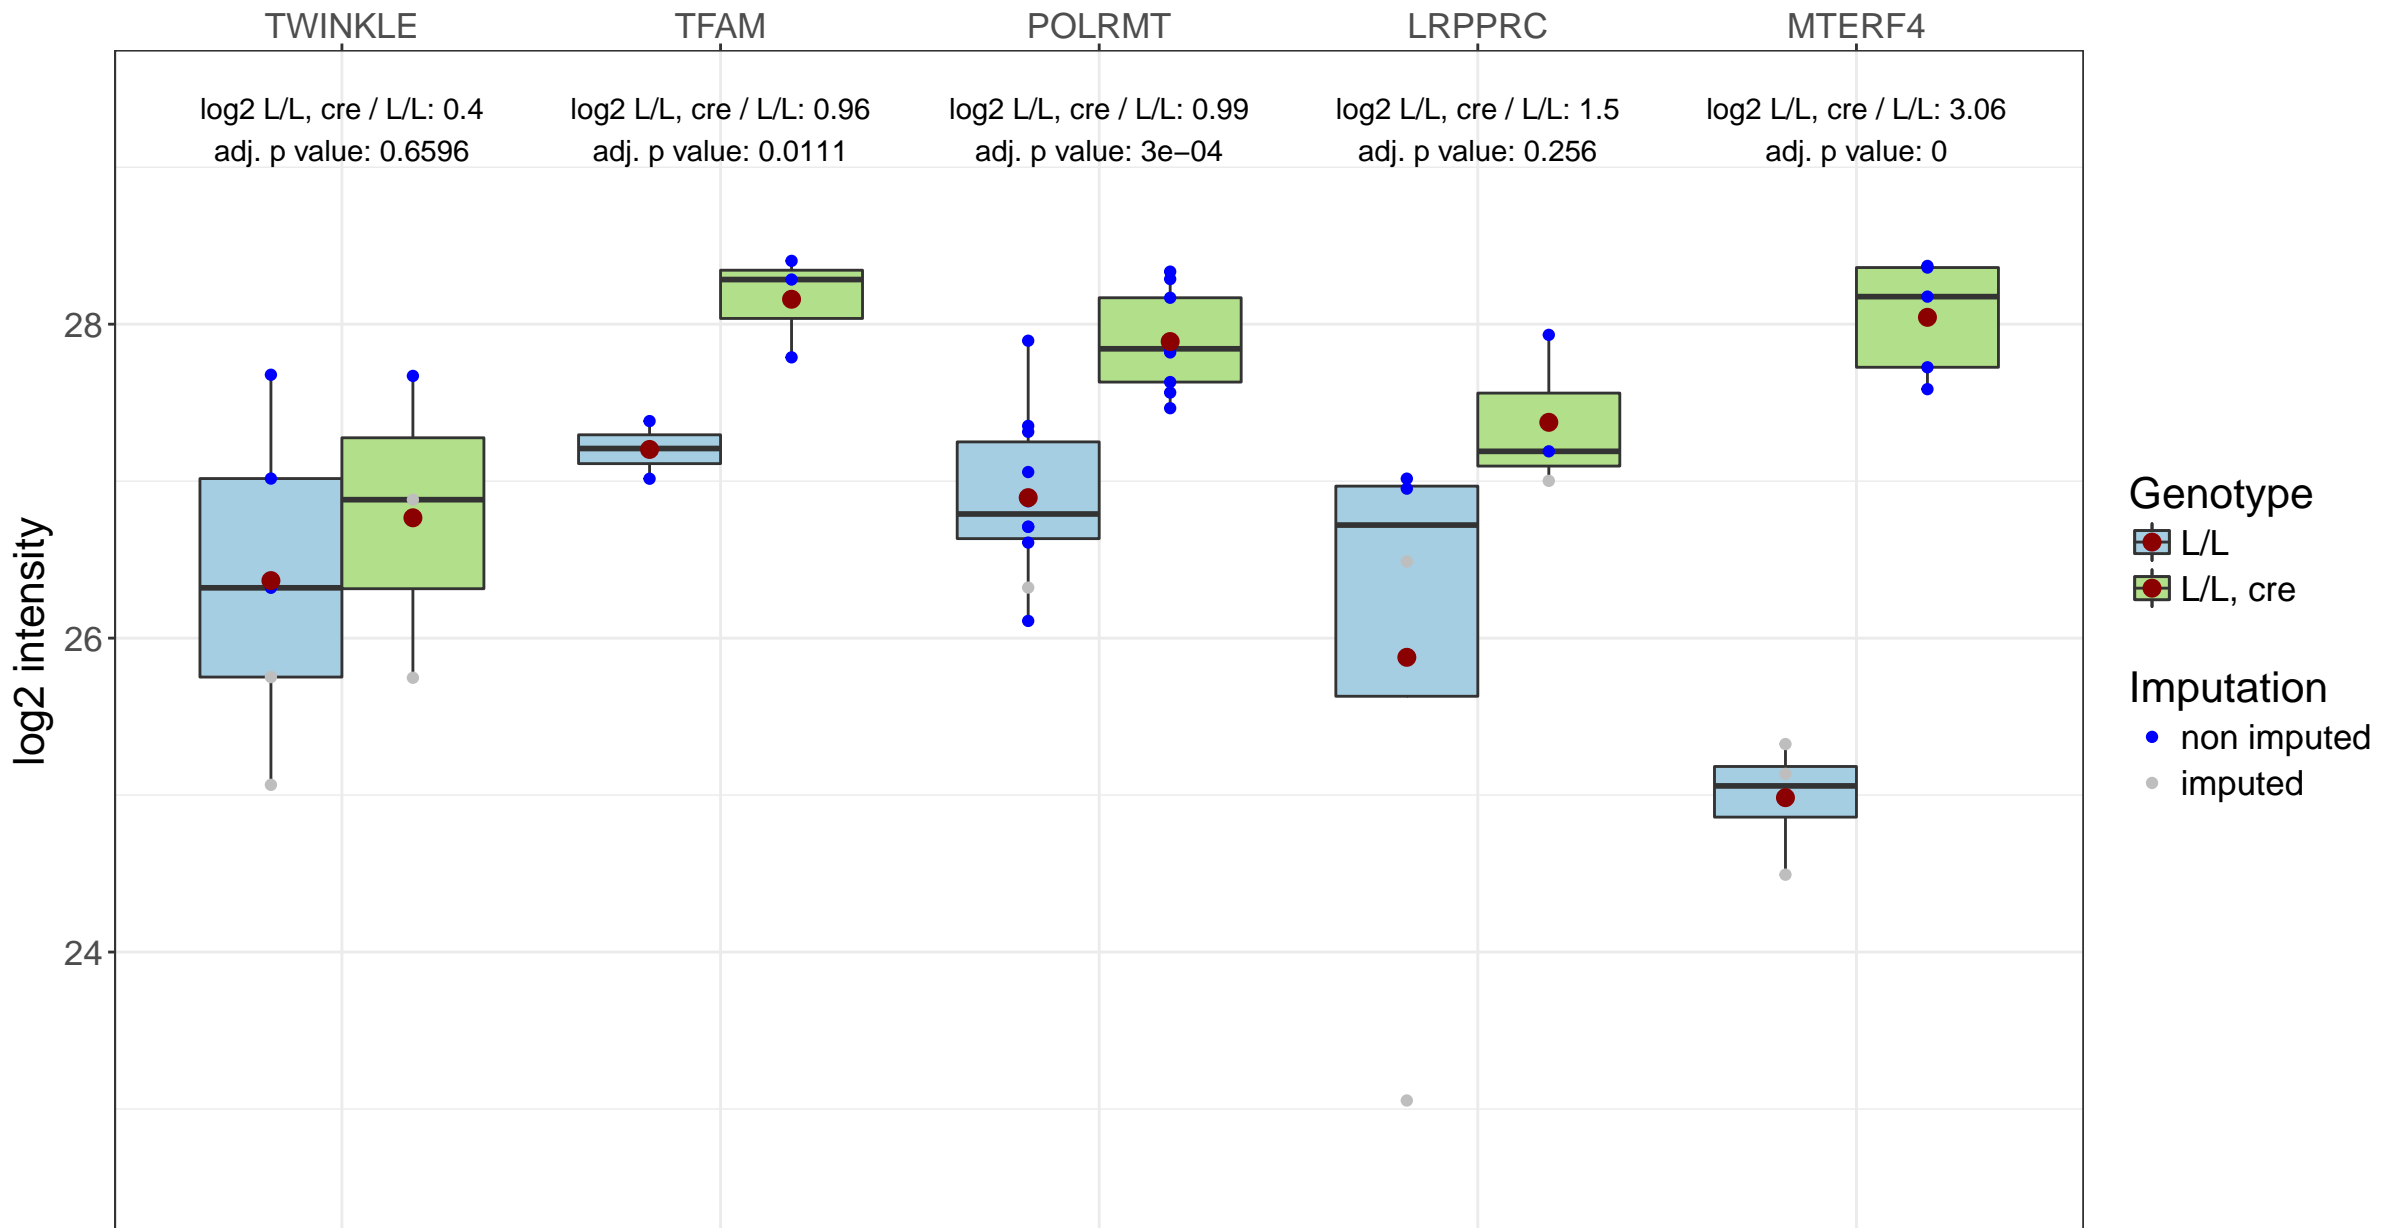

# SND1 / Q78PY7

TWINKLE

TFAM

POLRMT

LRPPRC

MTERF4

log2 L/L, cre / L/L: 0.11  
adj. p value: 0.7805

log2 intensity

27

26

25

24

Genotype

L/L

L/L, cre

Imputation

non imputed

imputed

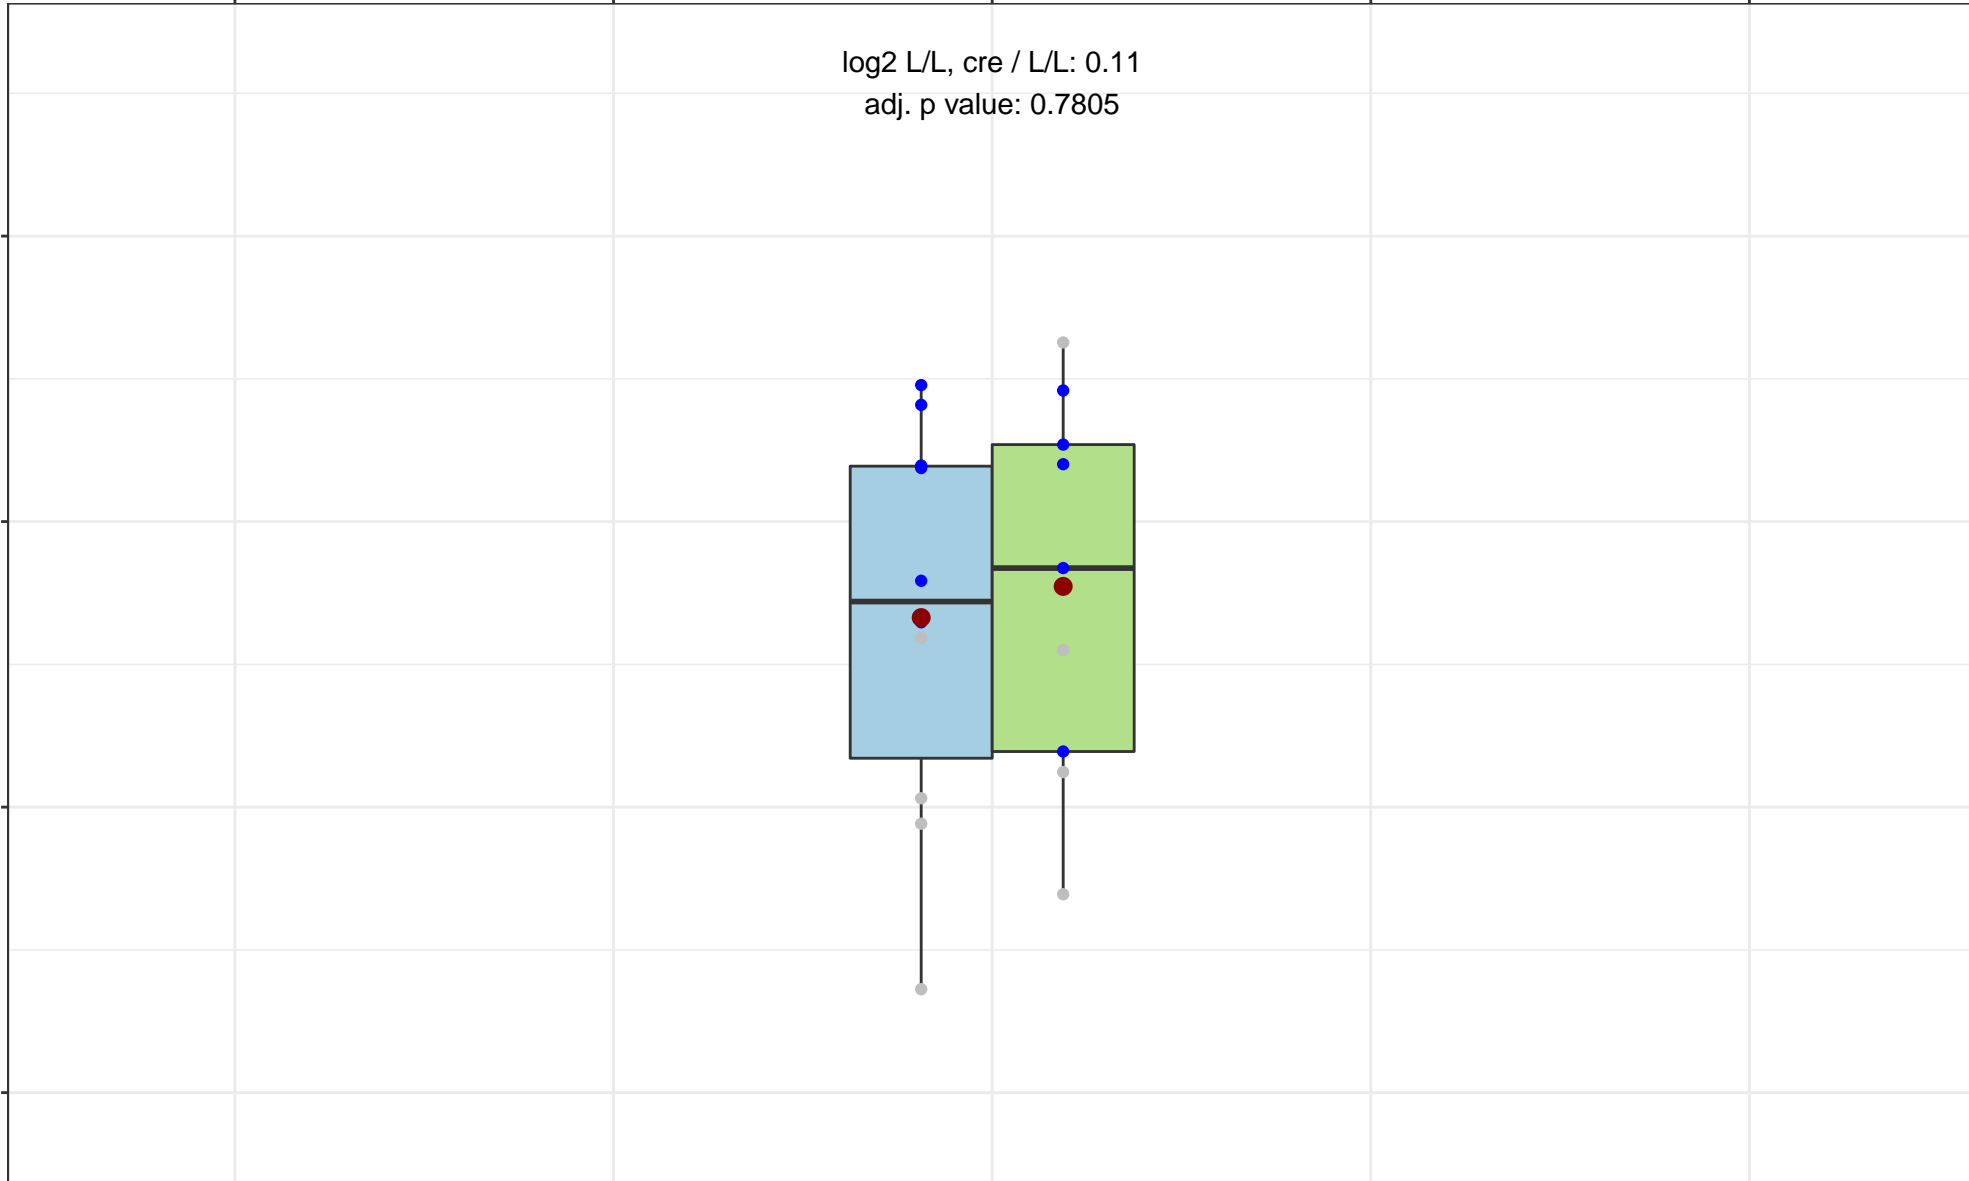

# SOD1 / P08228

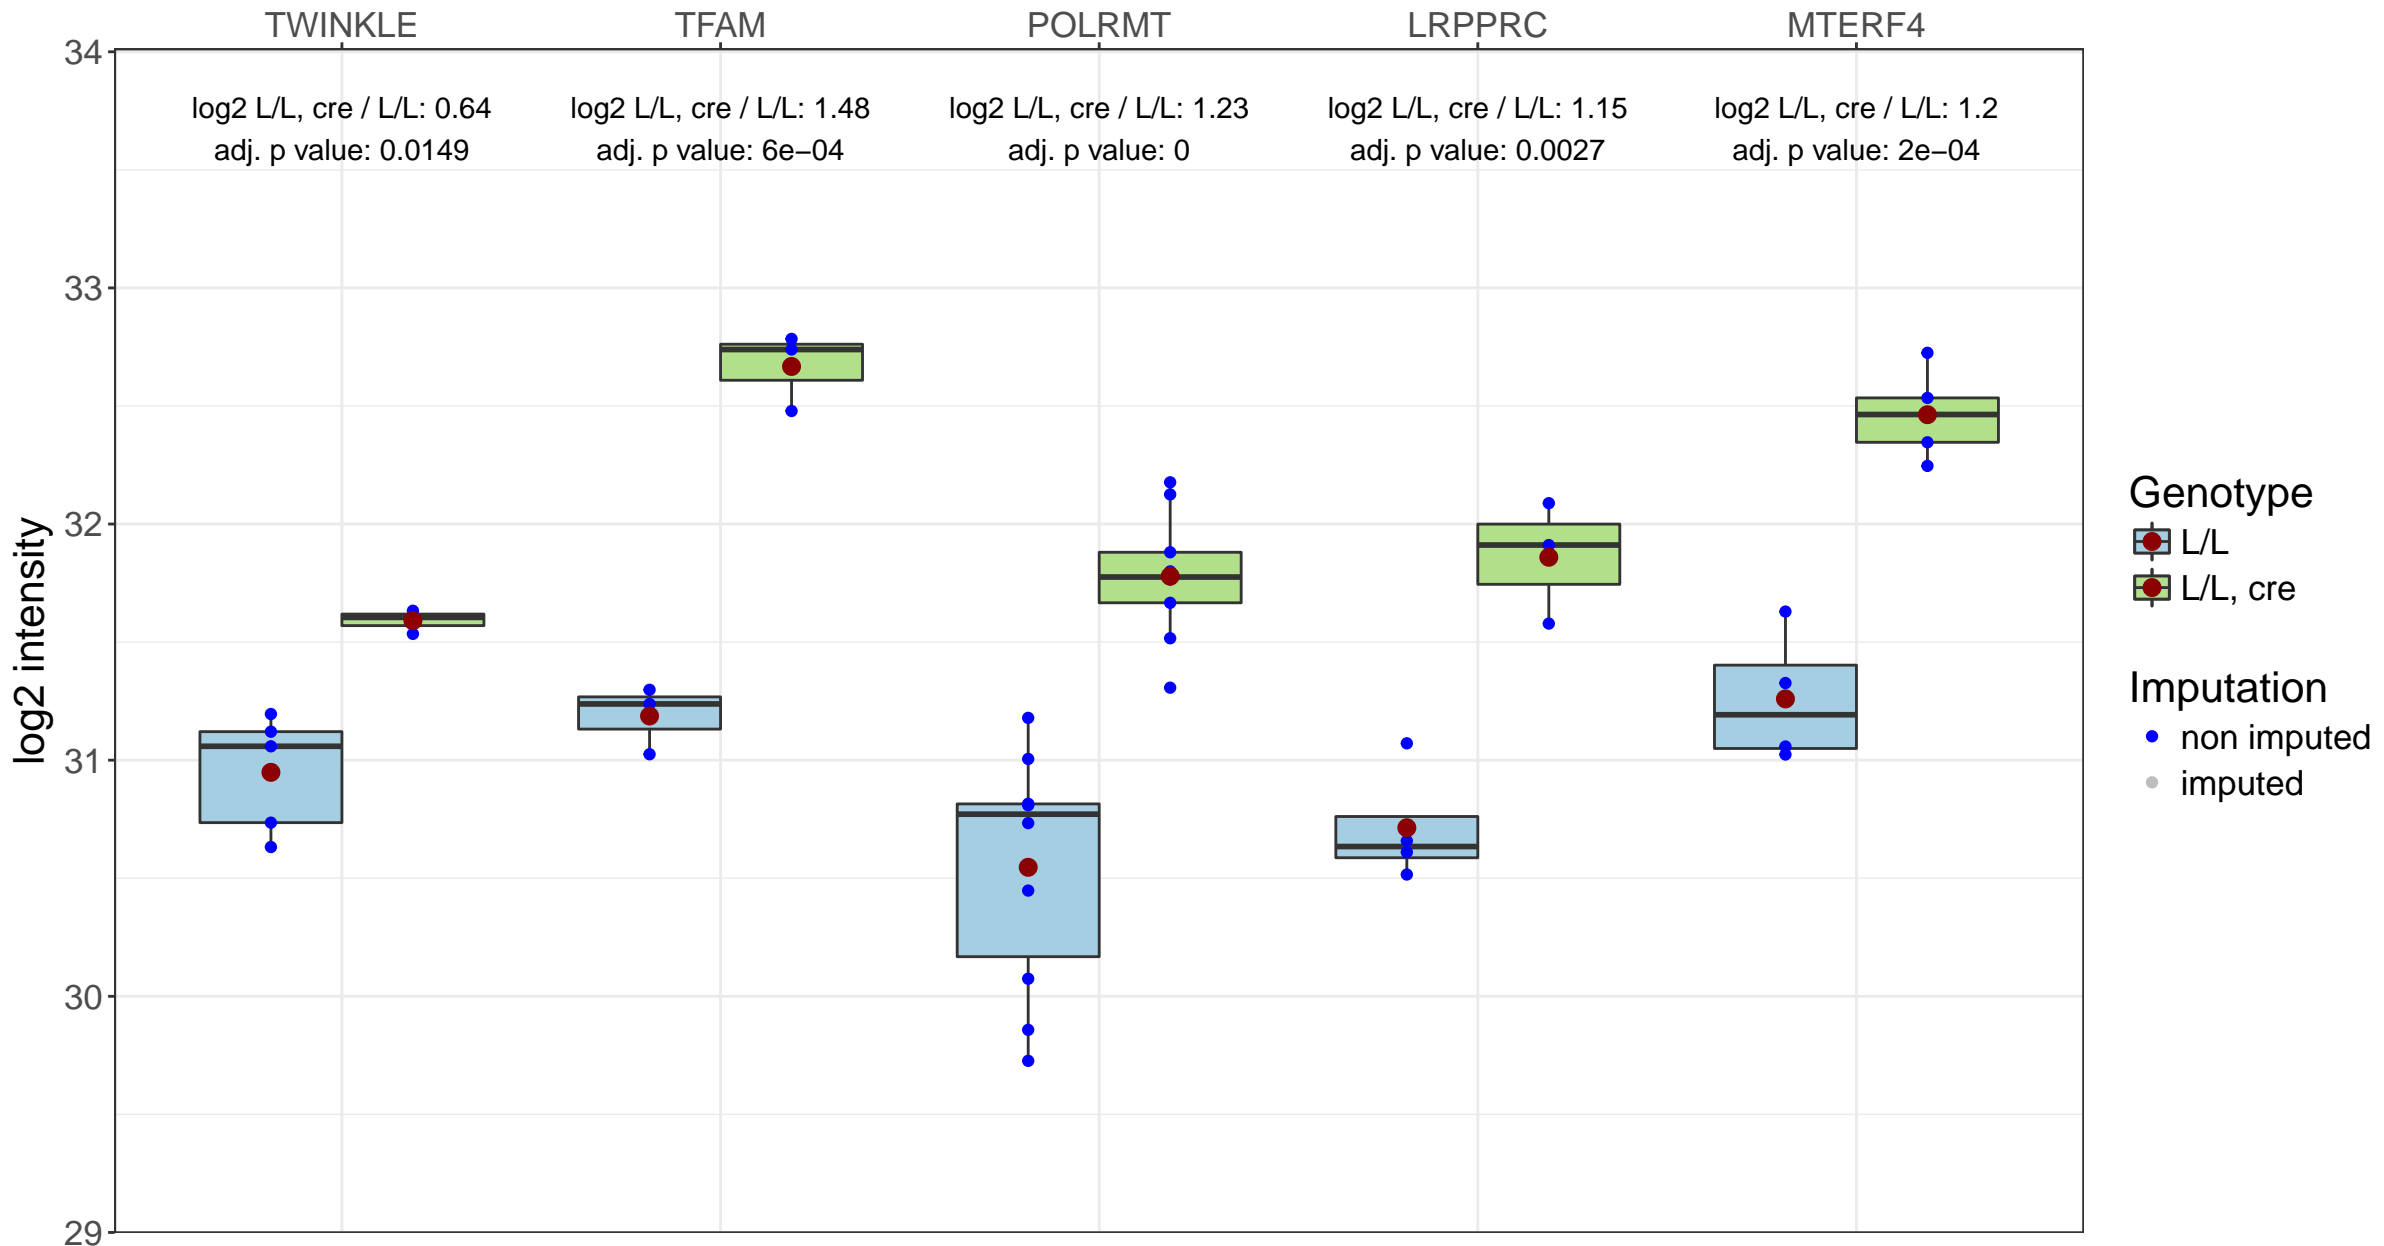

# SOD2 / P09671

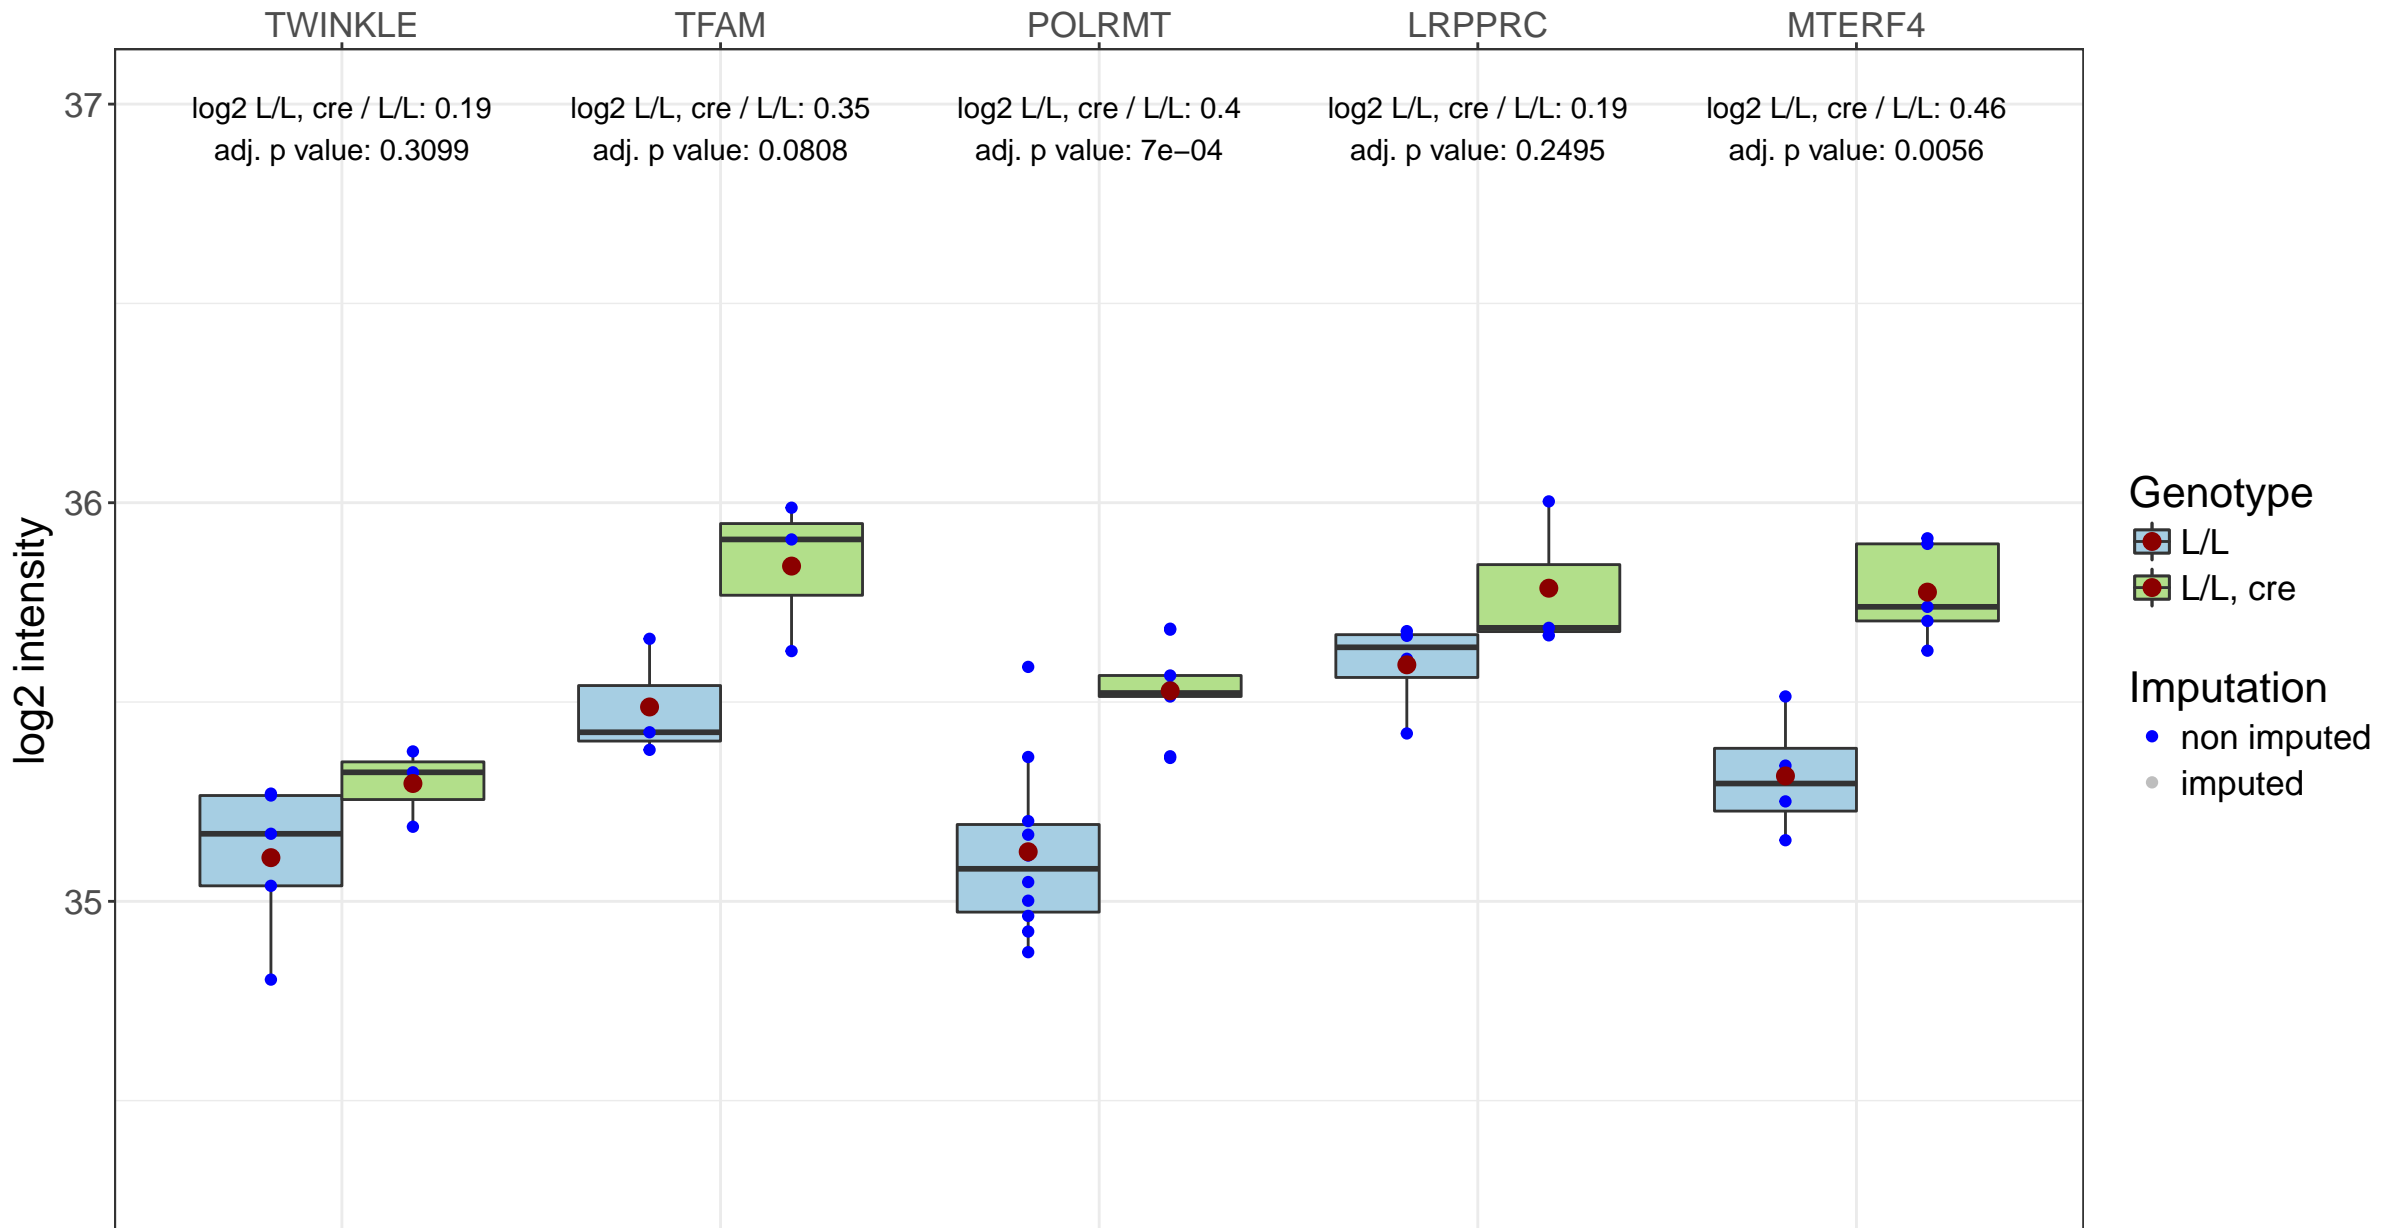



# SPG7 / D3YZN4

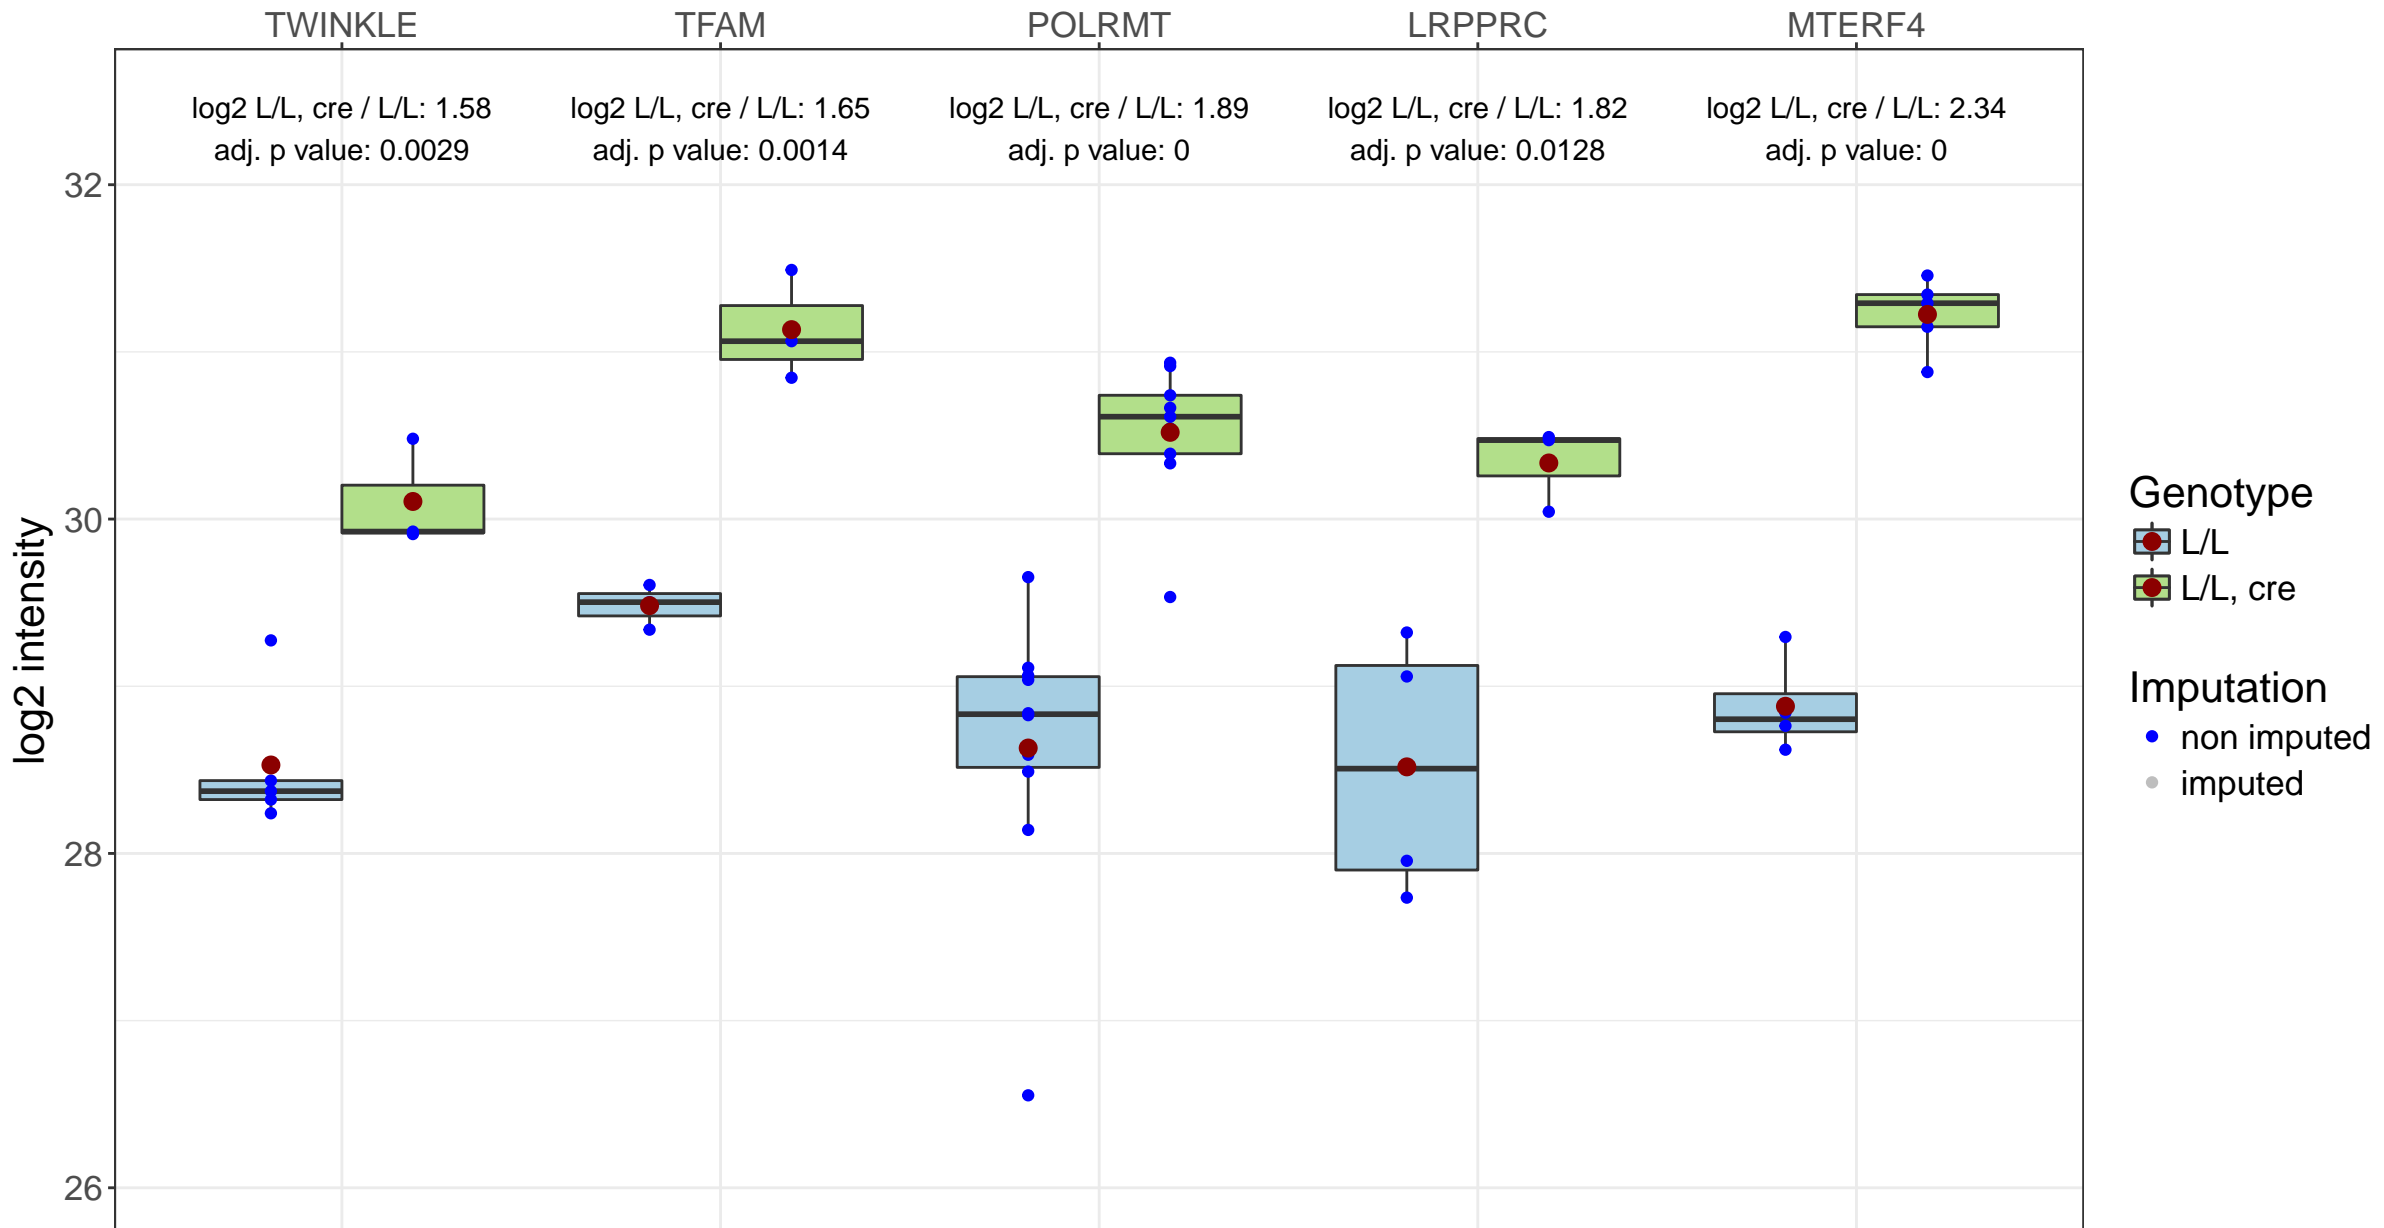

# SPR / Q91XH5

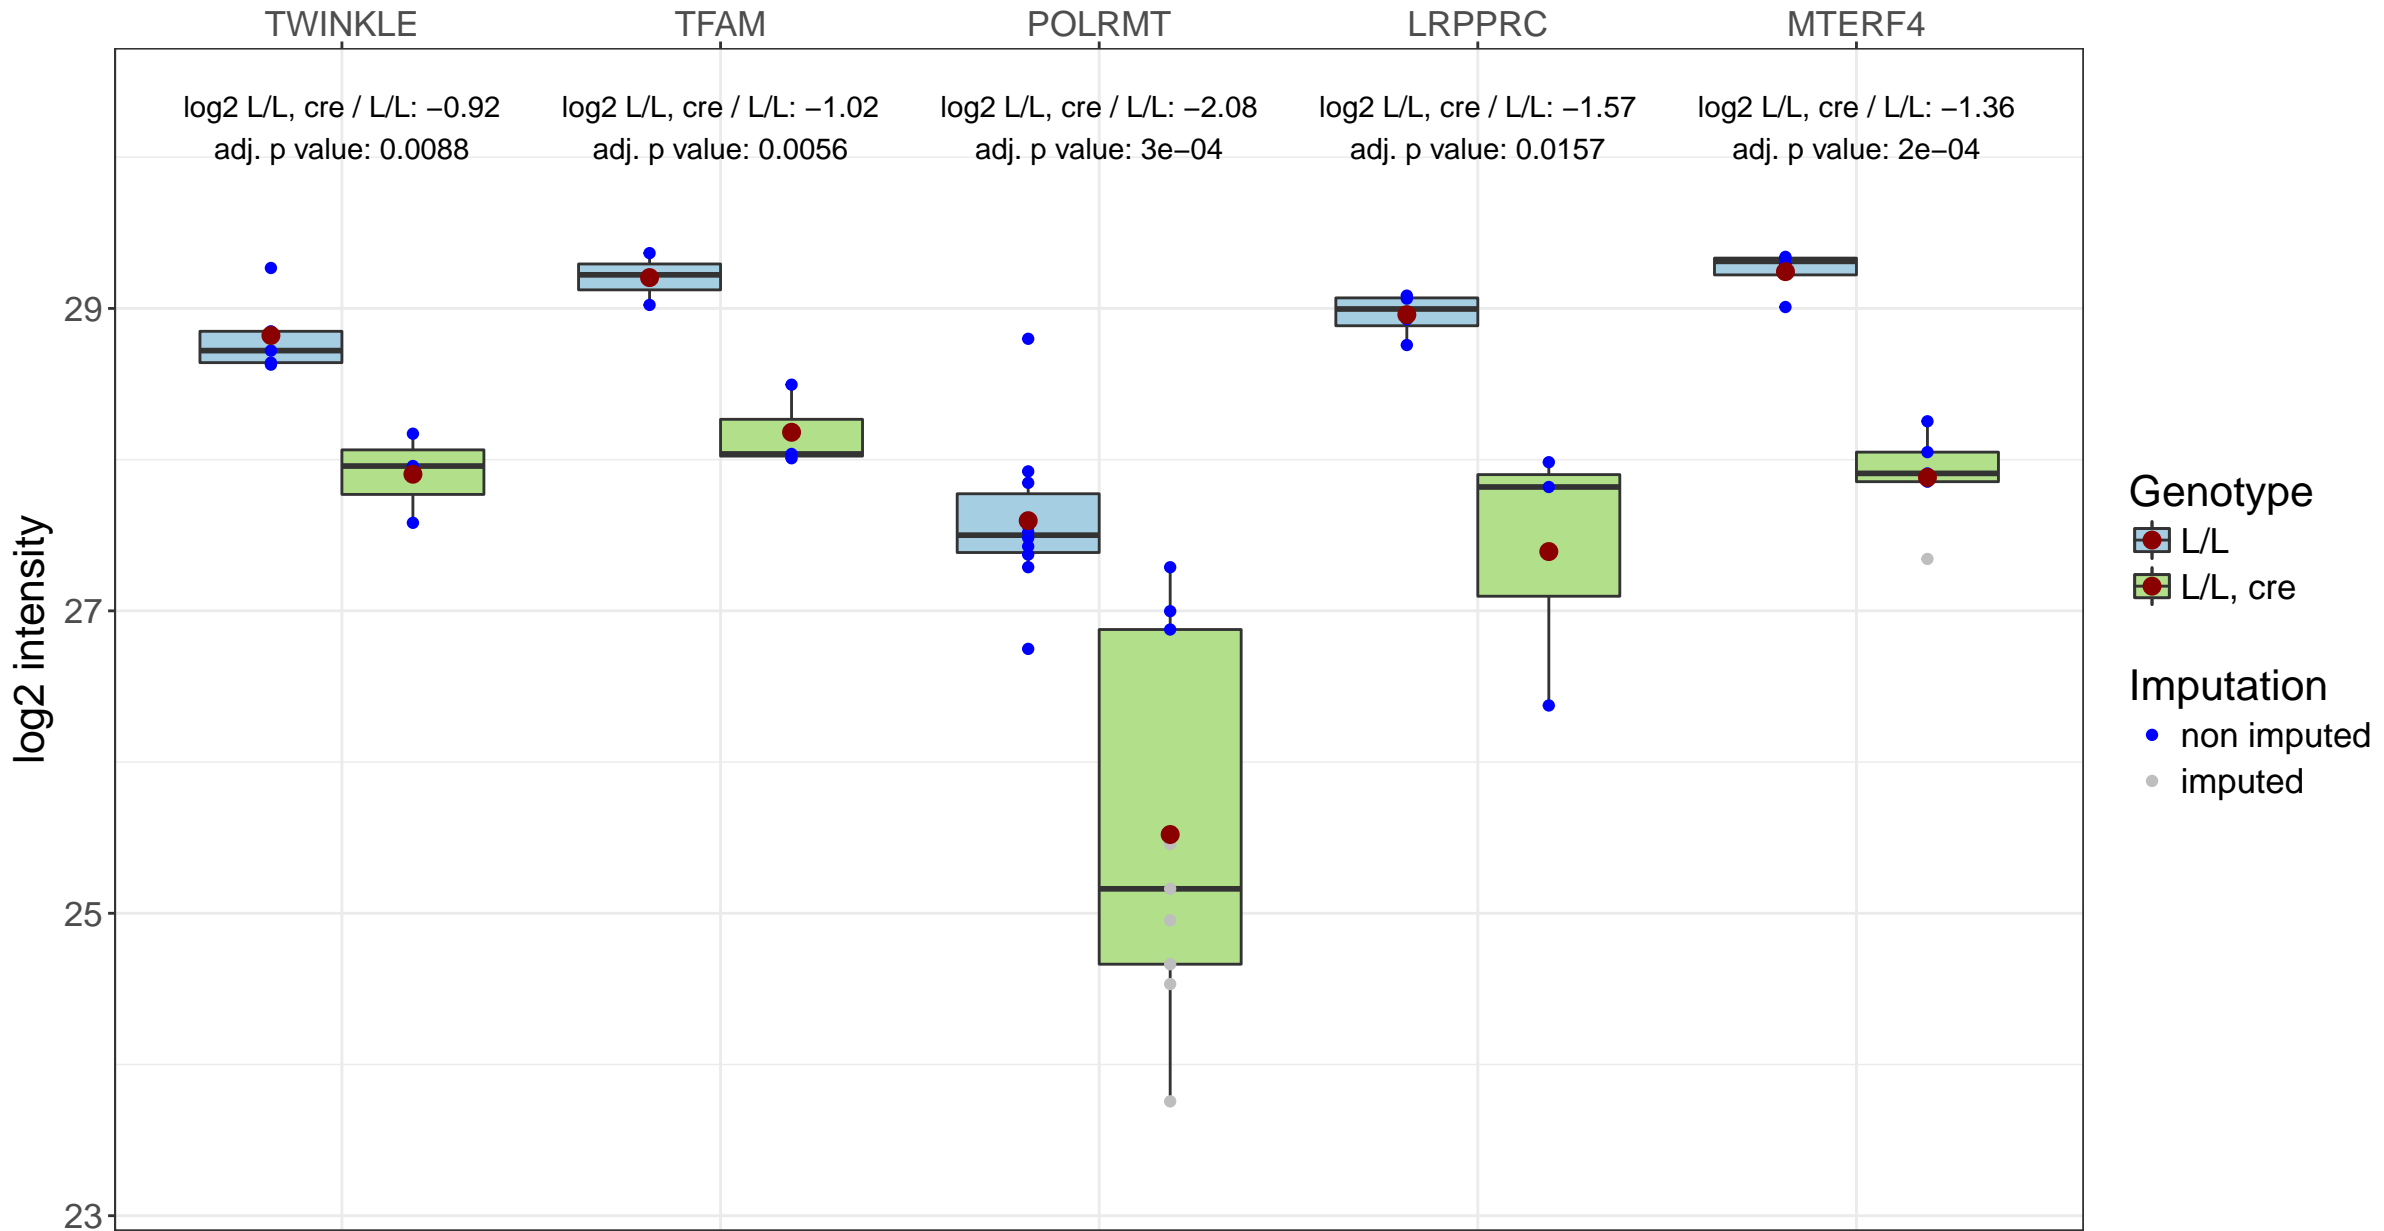

# SPRYD4 / Q91WK1

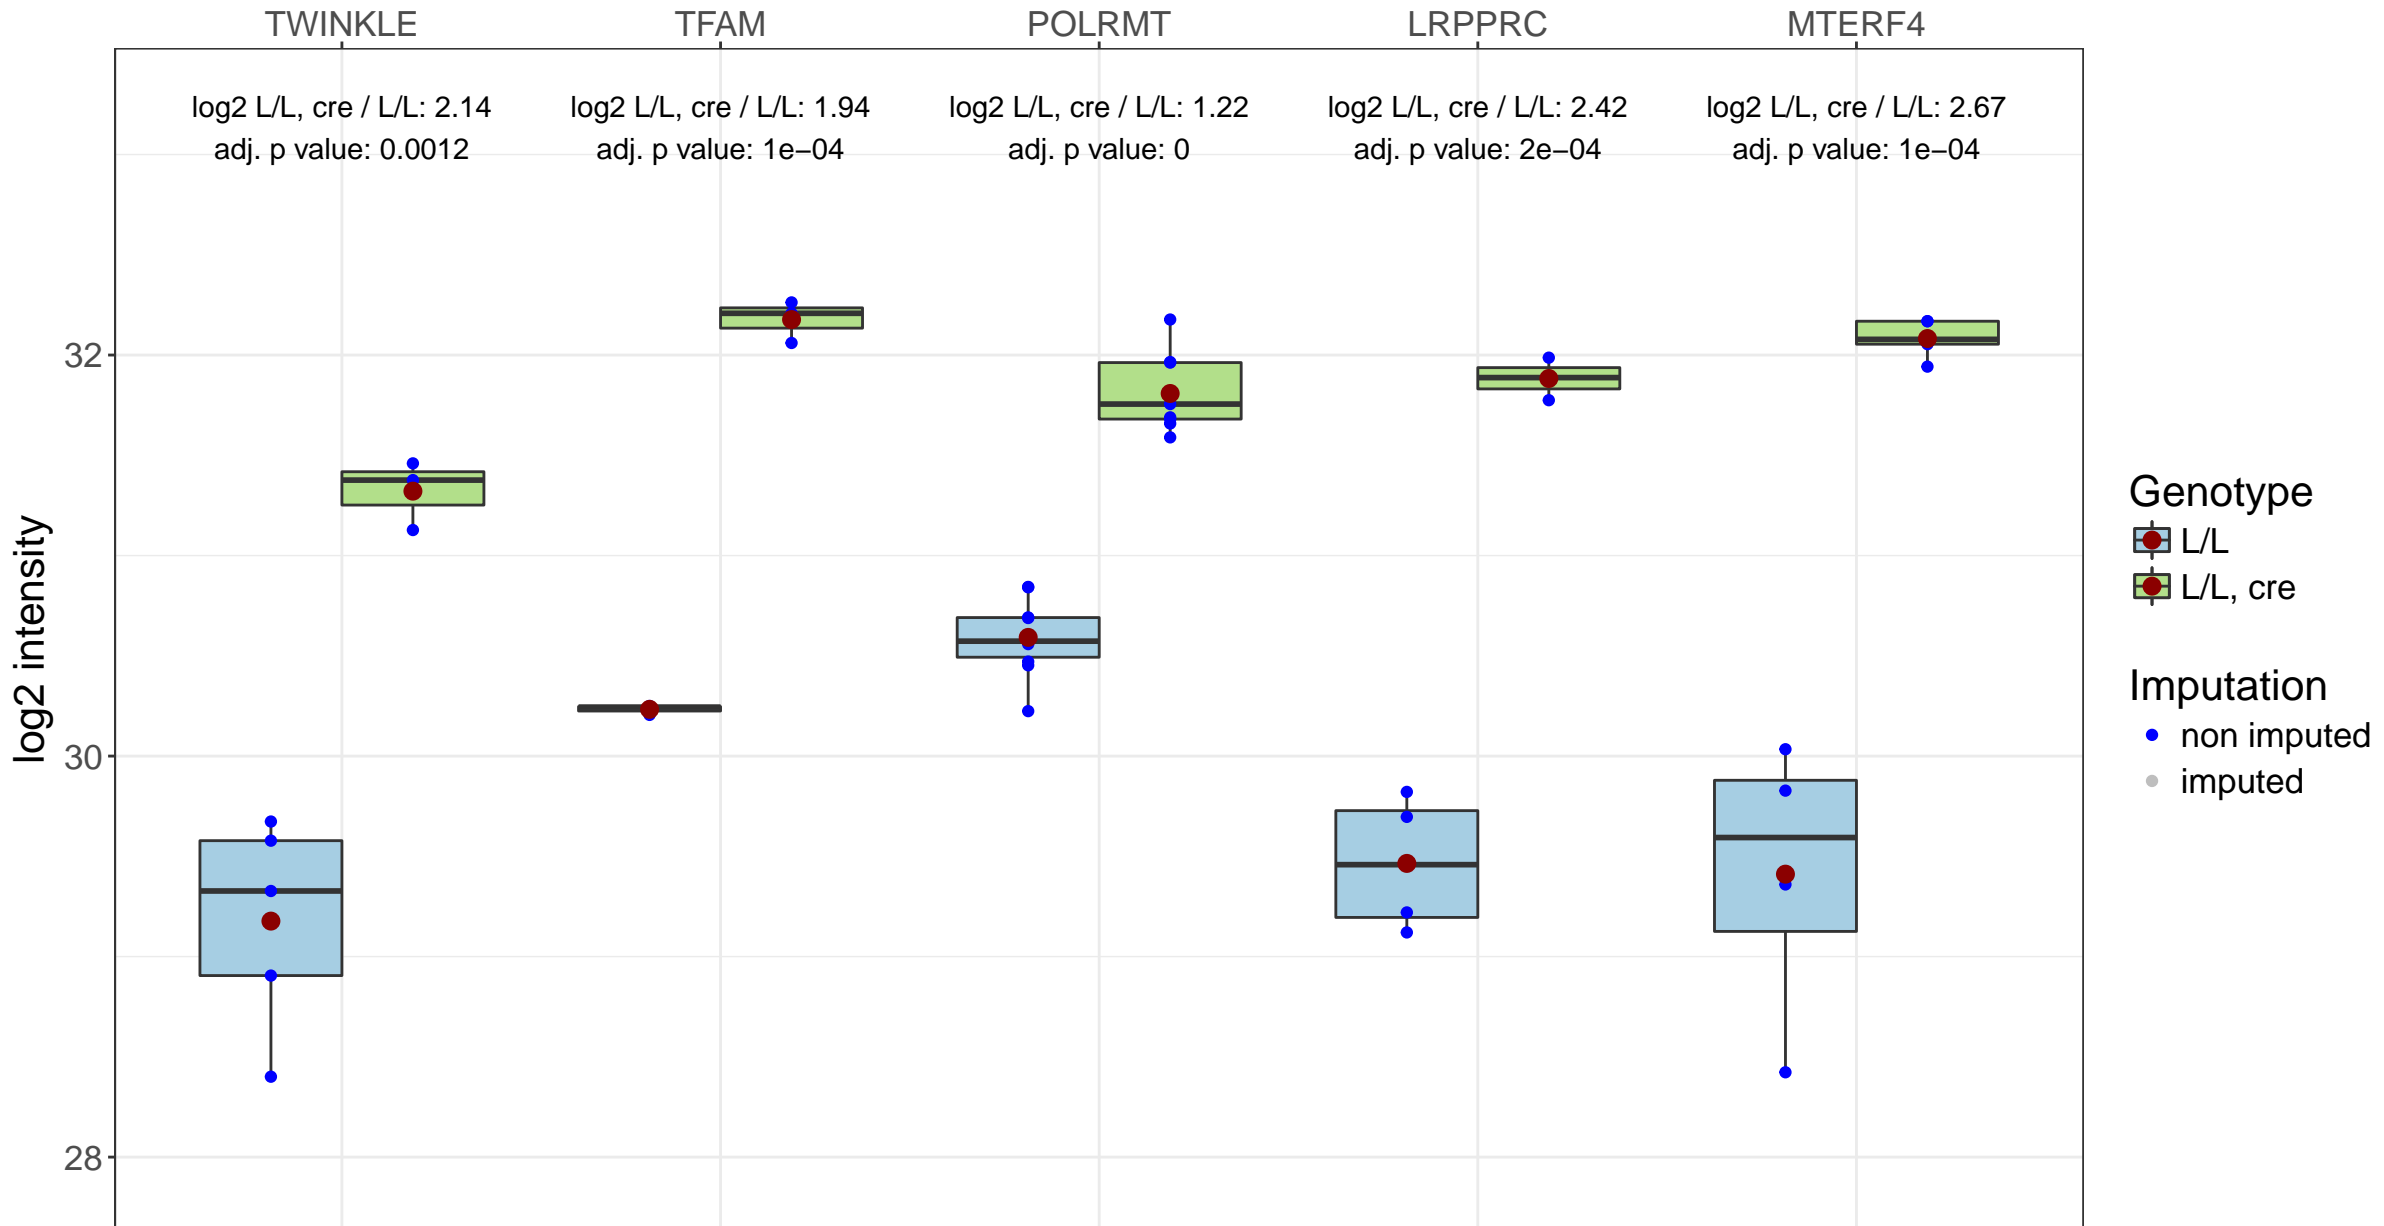

# SPTAN1 / A3KGU7

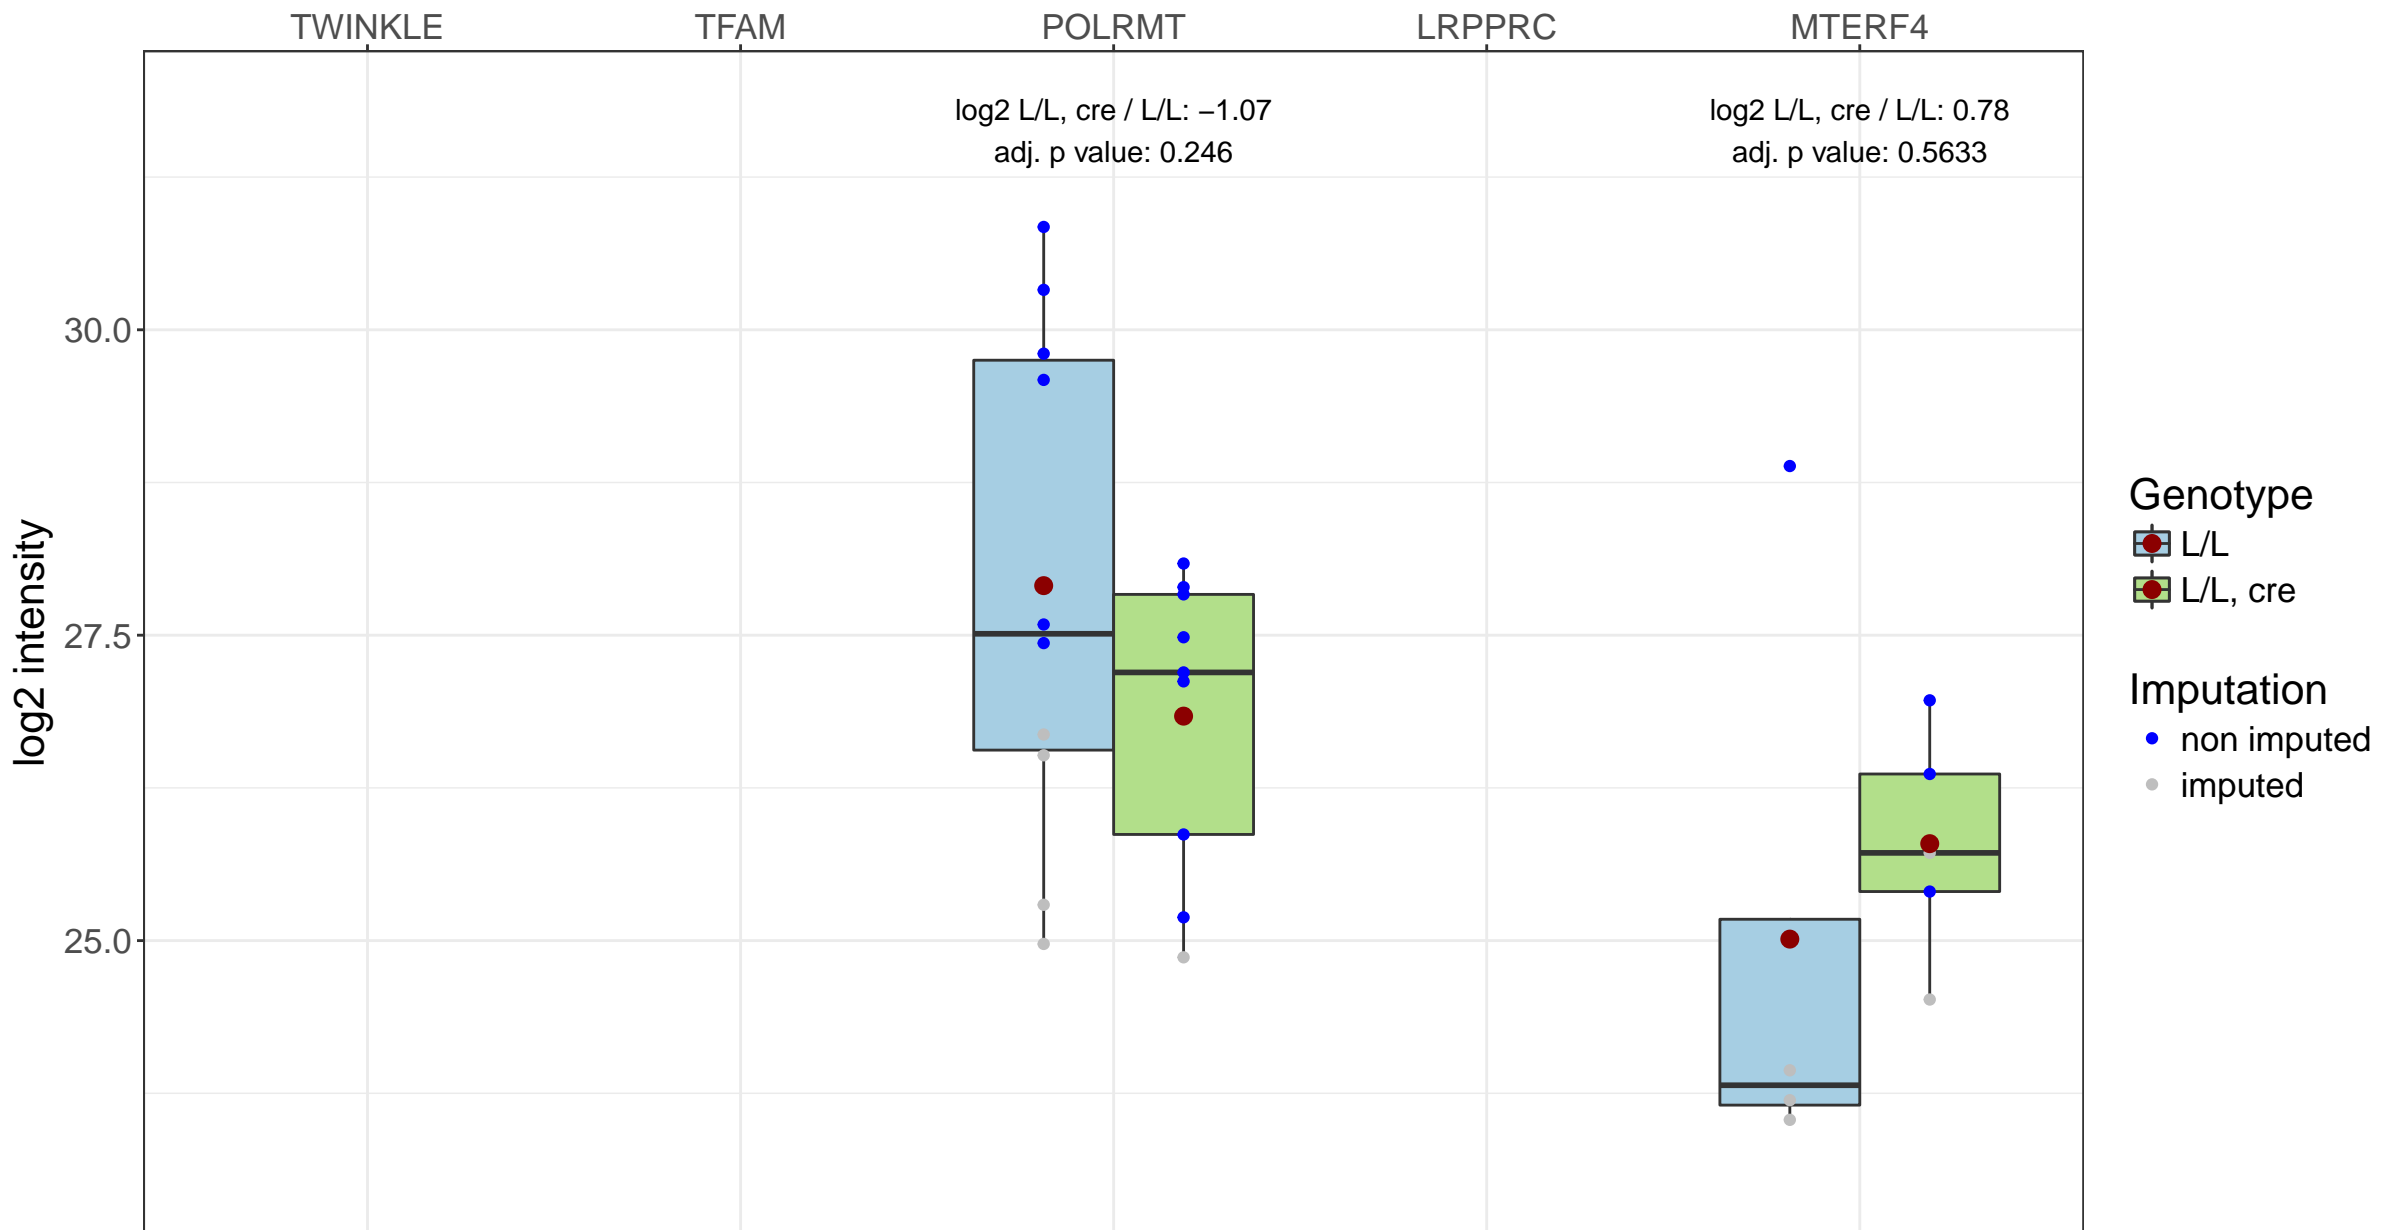

# SPTBN1 / Q62261

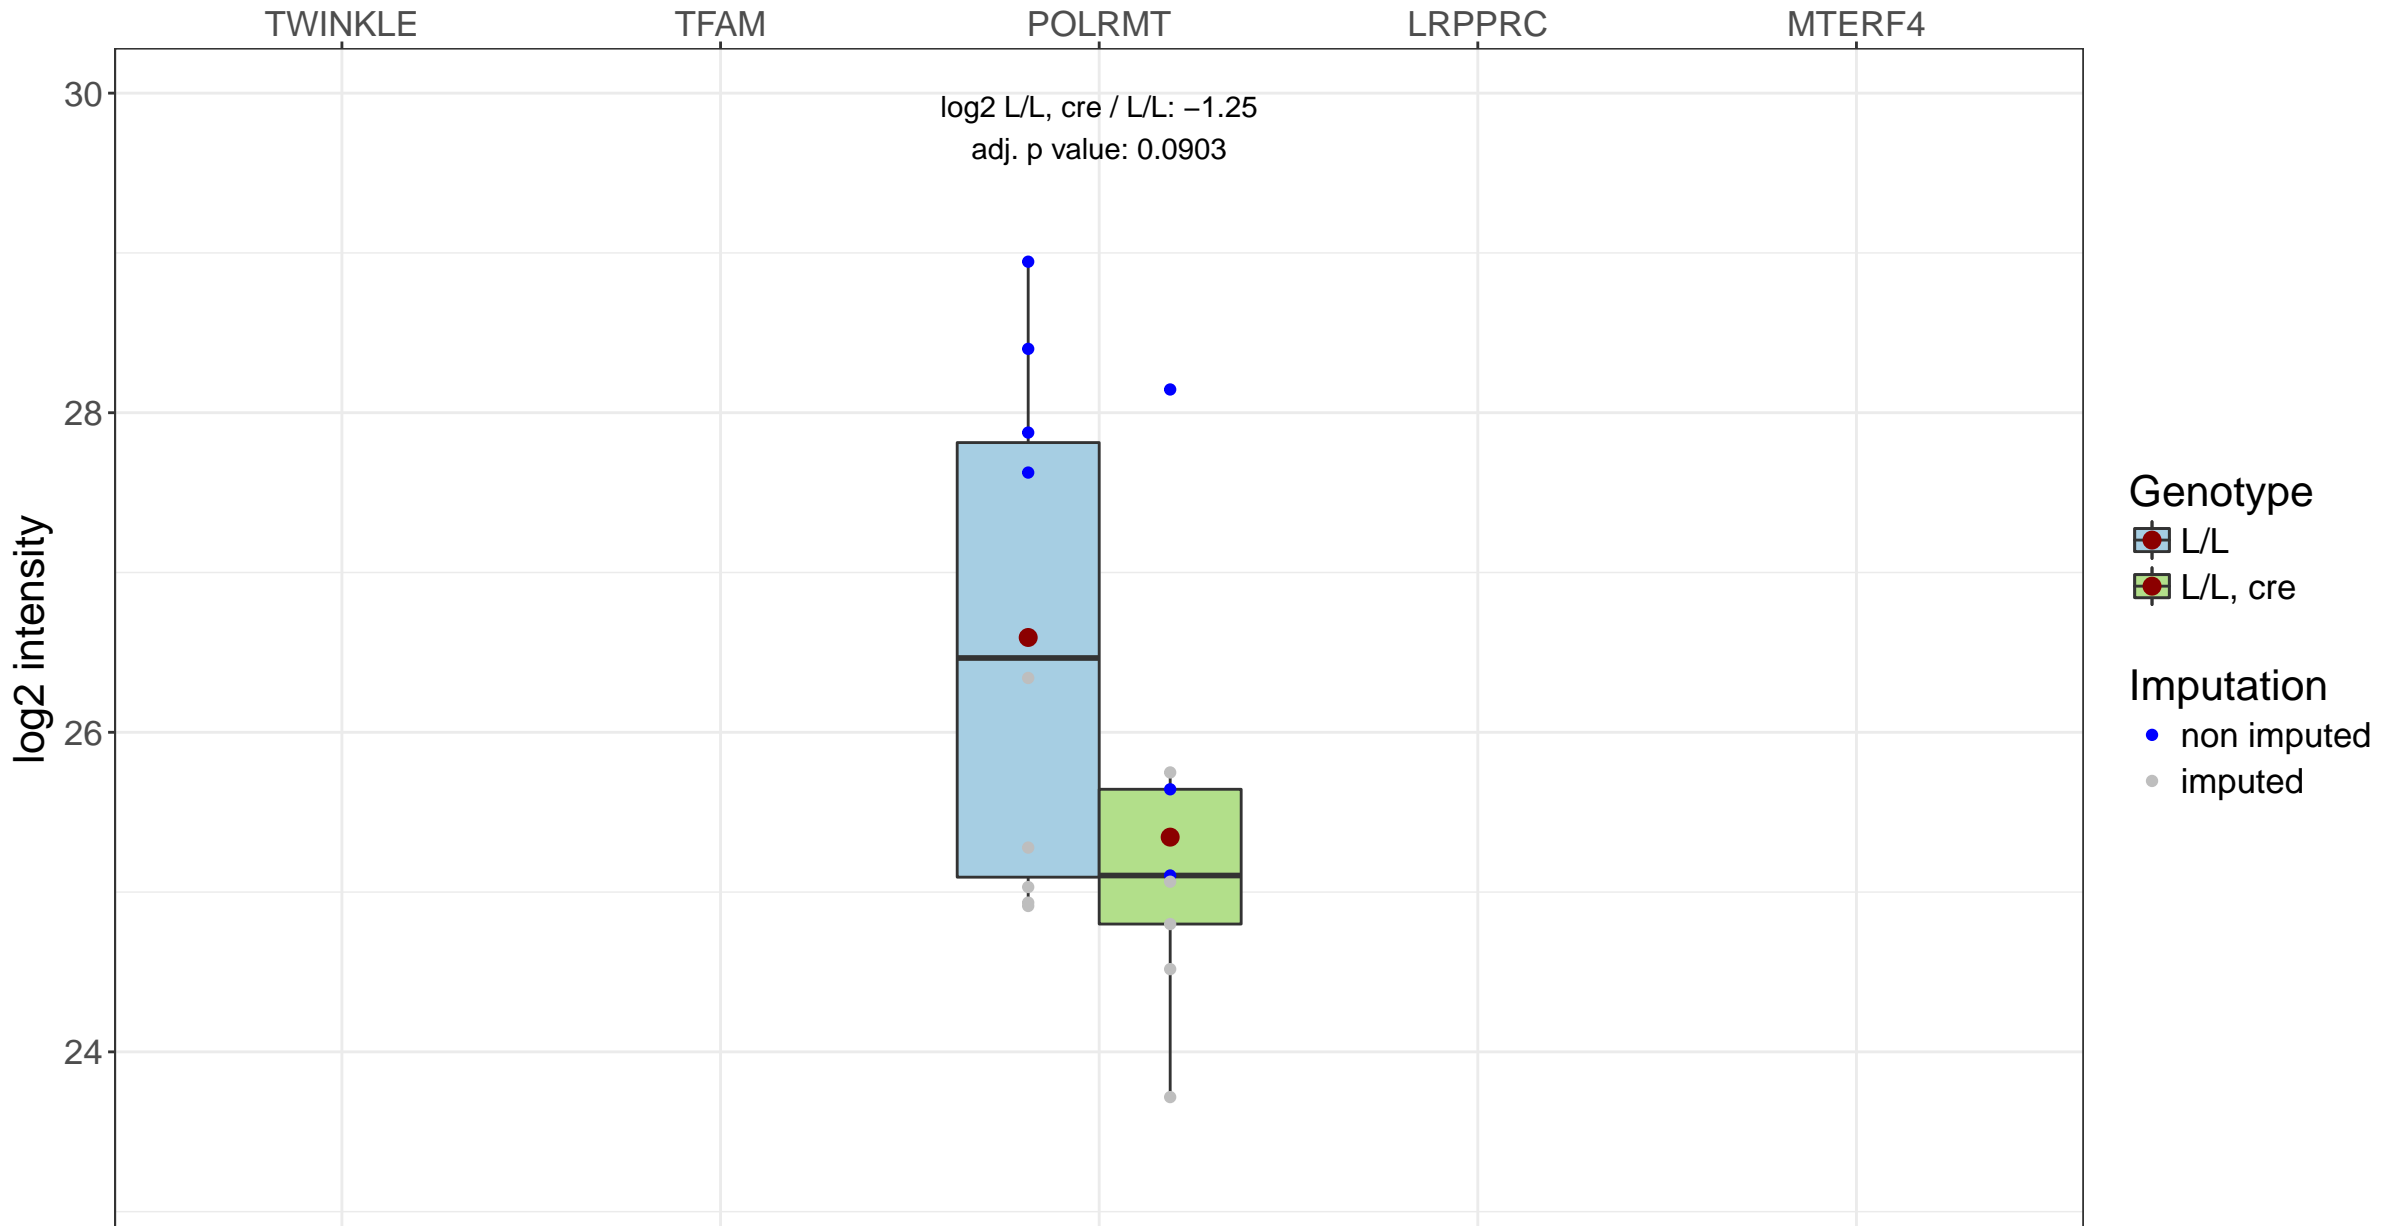

# SQRDL / Q9R112

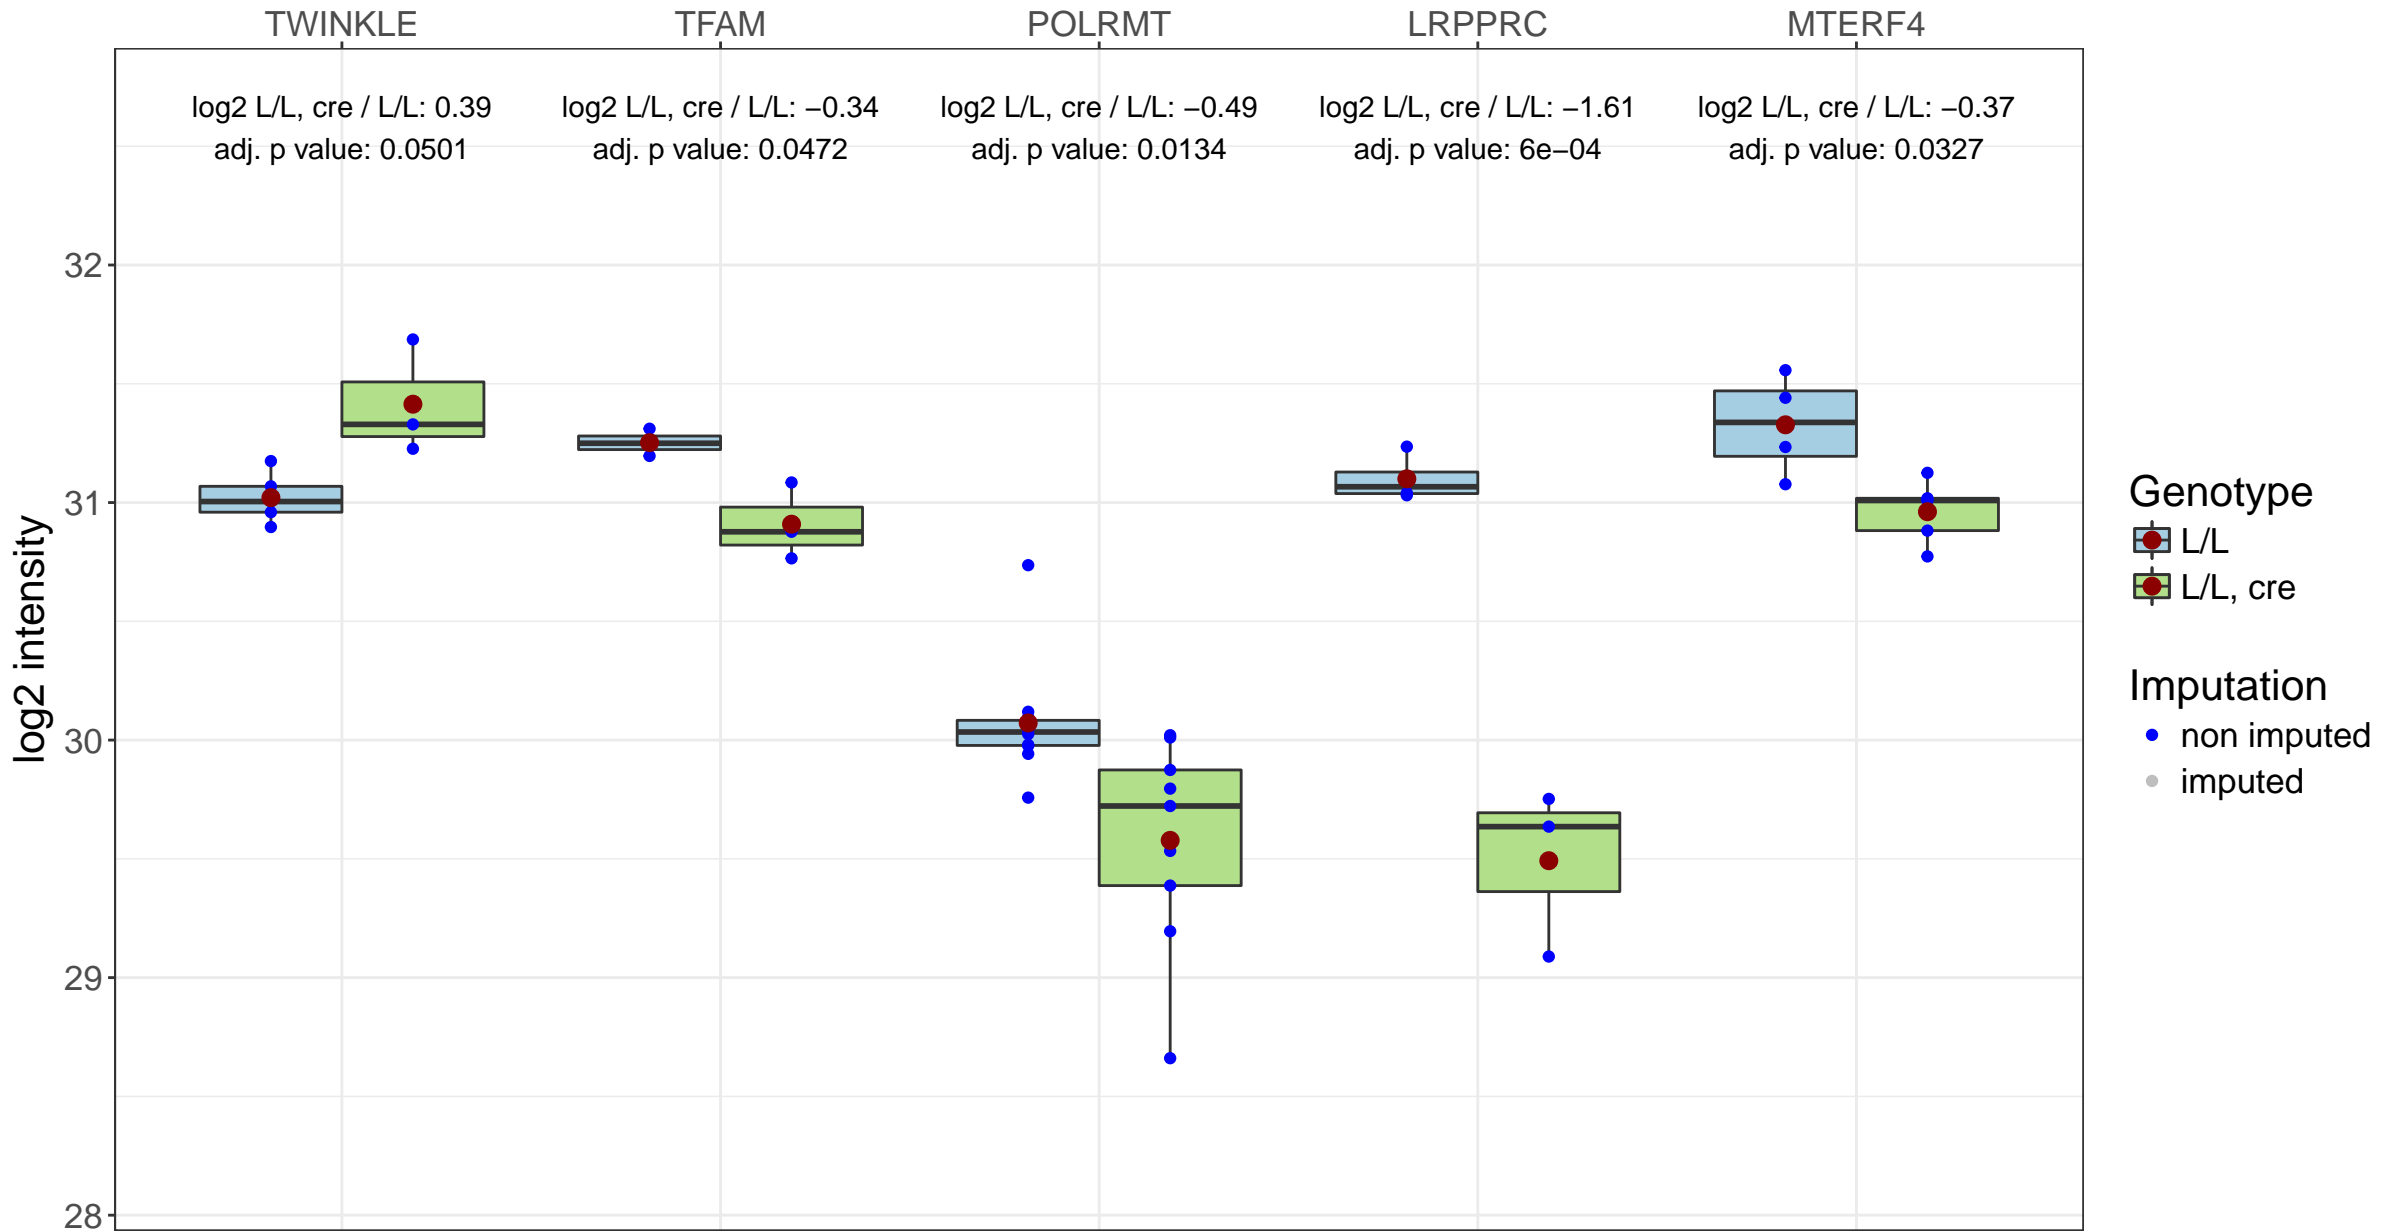

# SRL / Q7TQ48

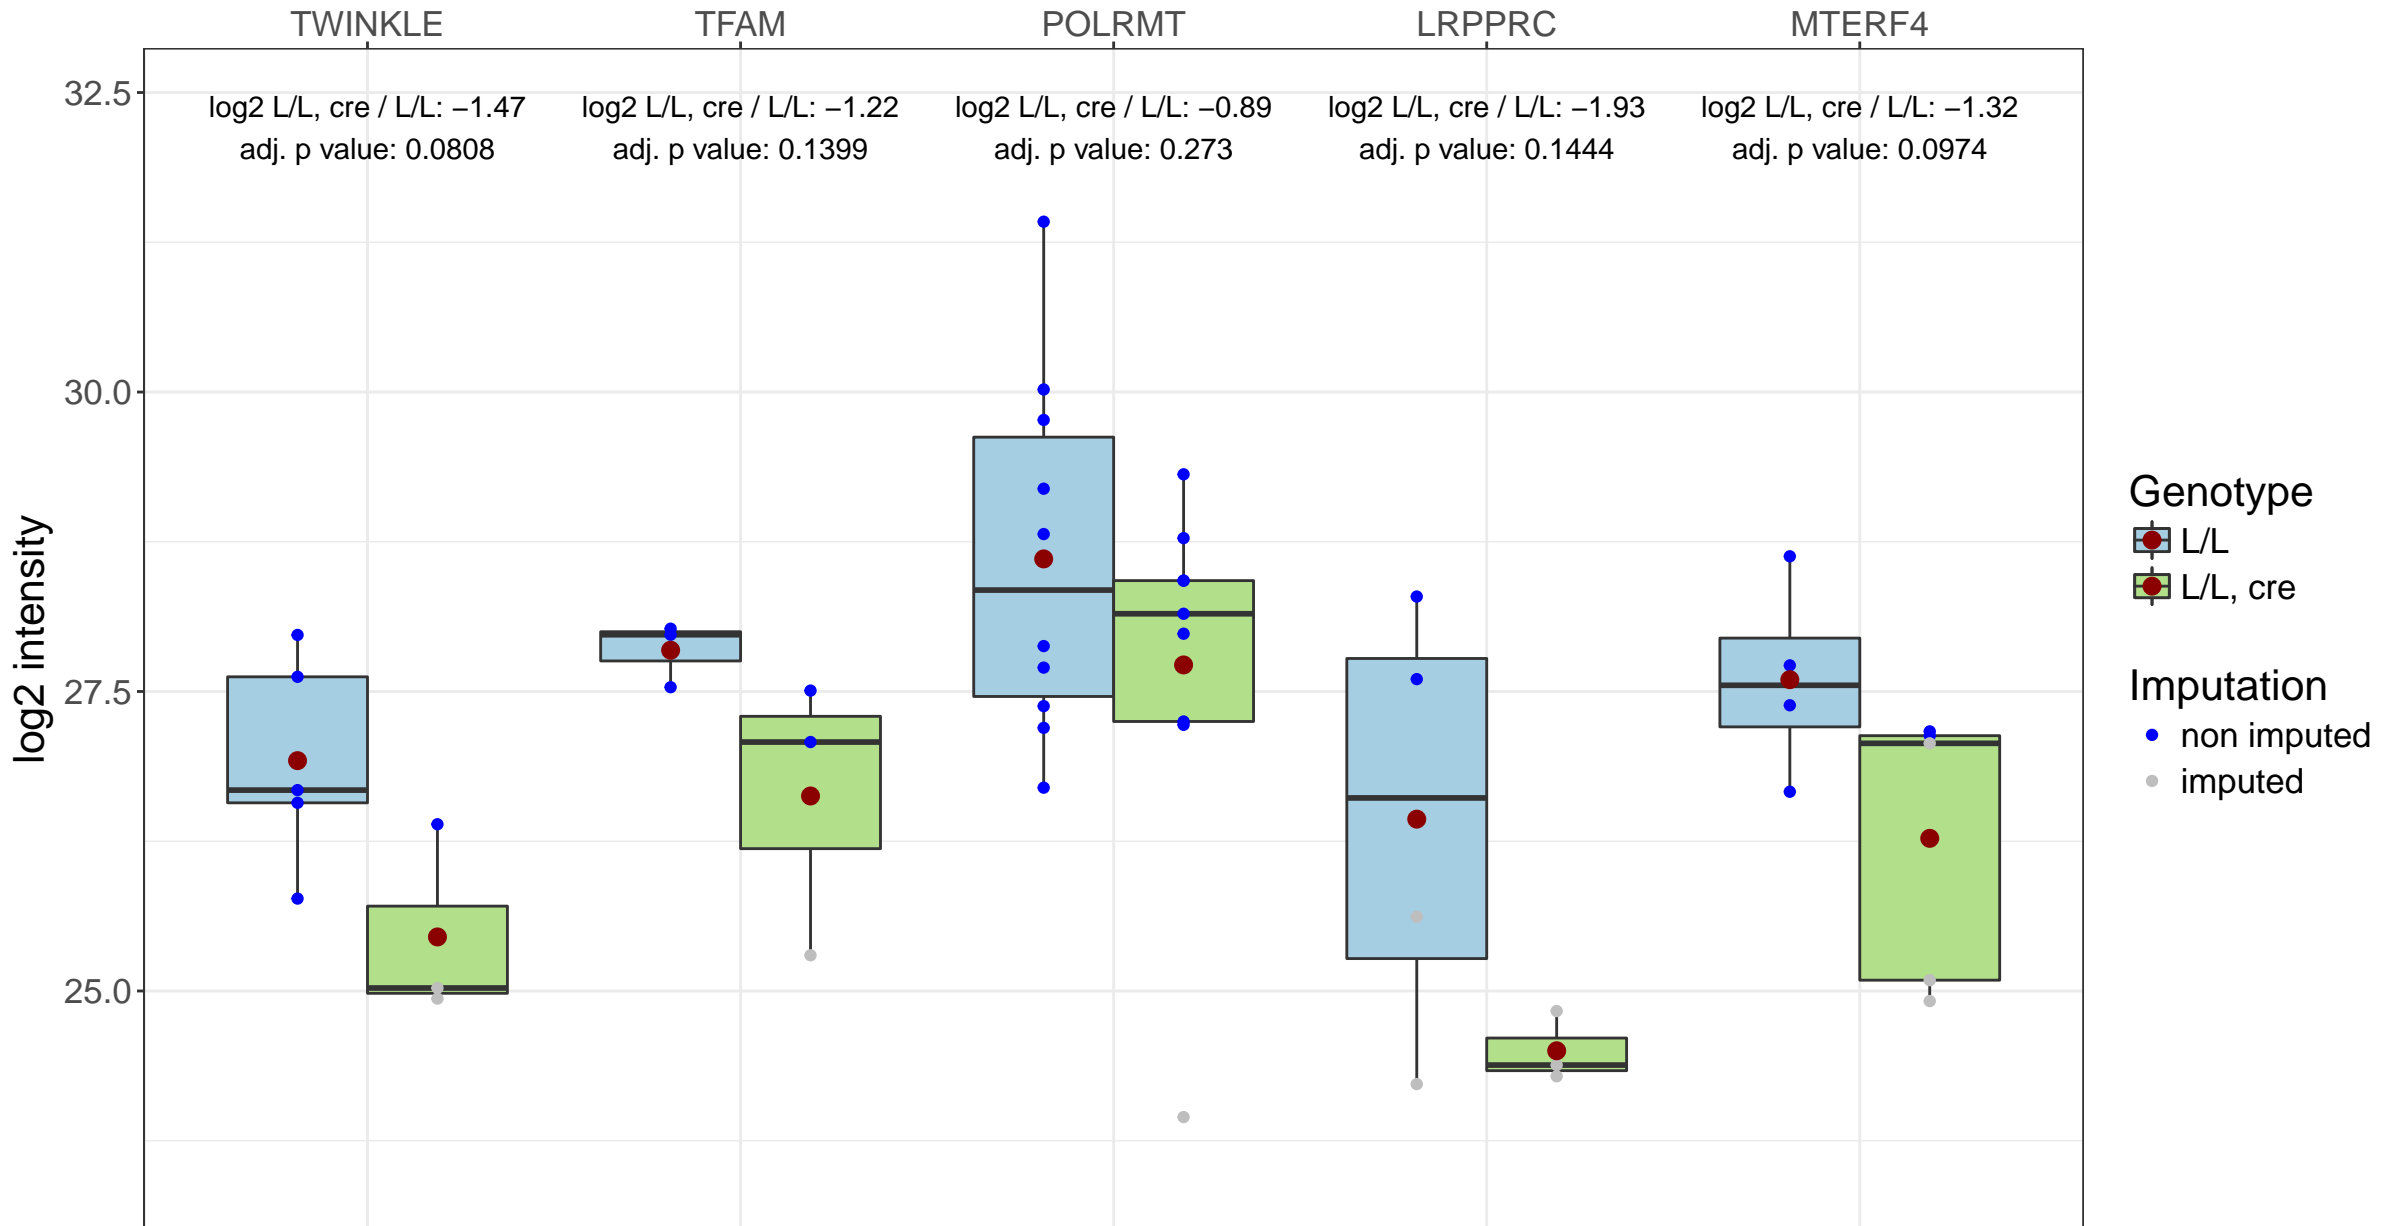

# SSBP1 / Q8R2K3

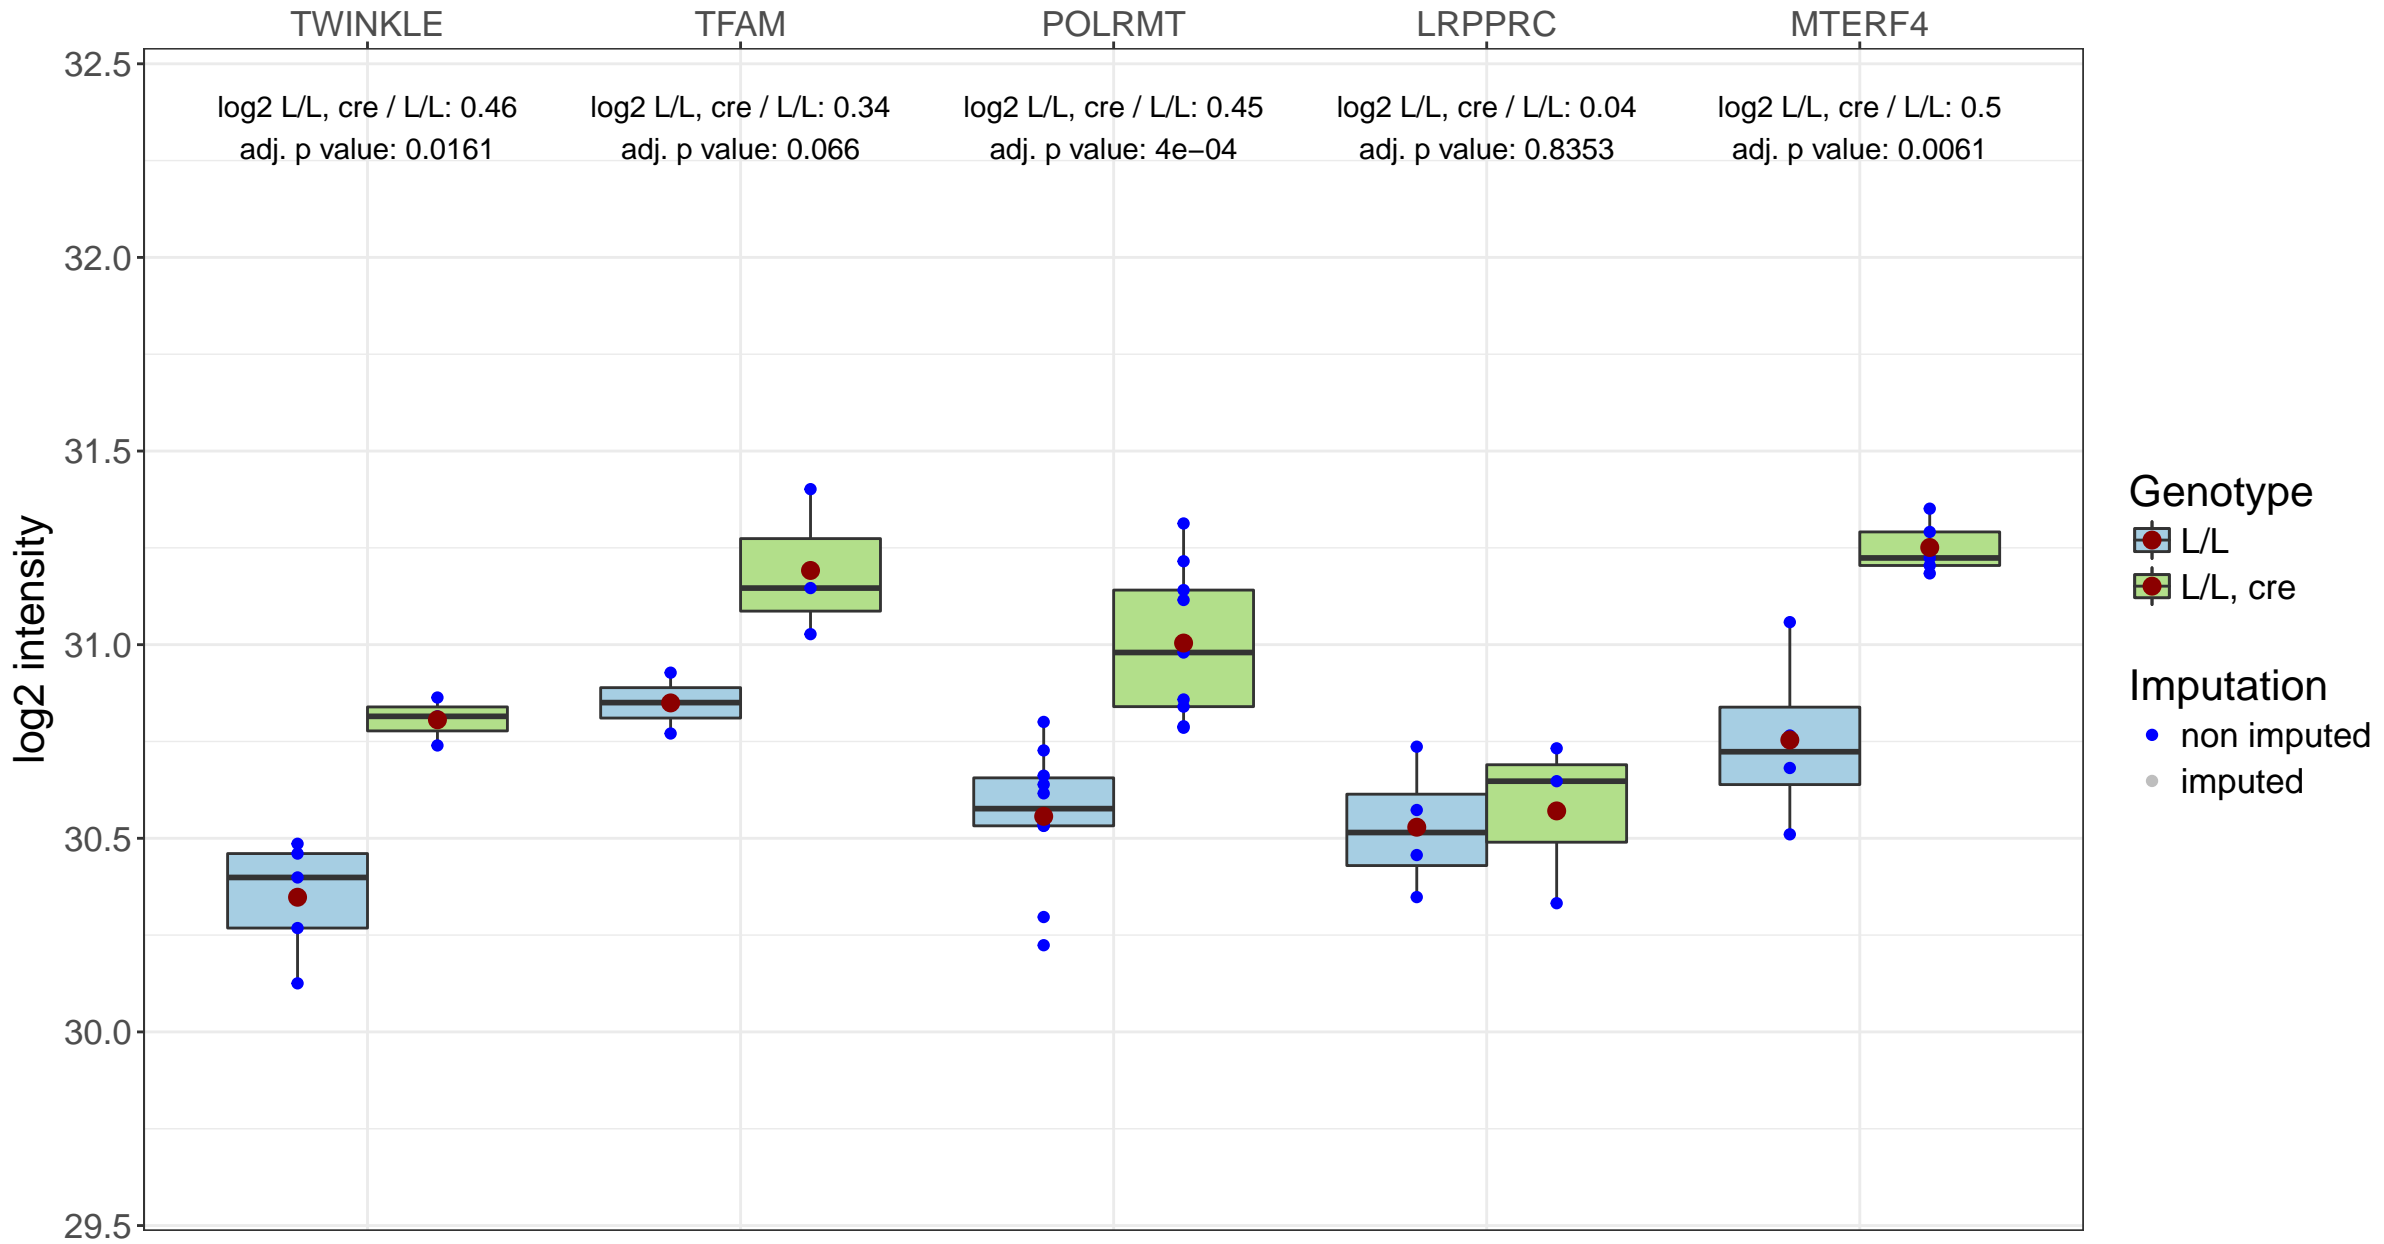



# STARD7 / Q8R1R3

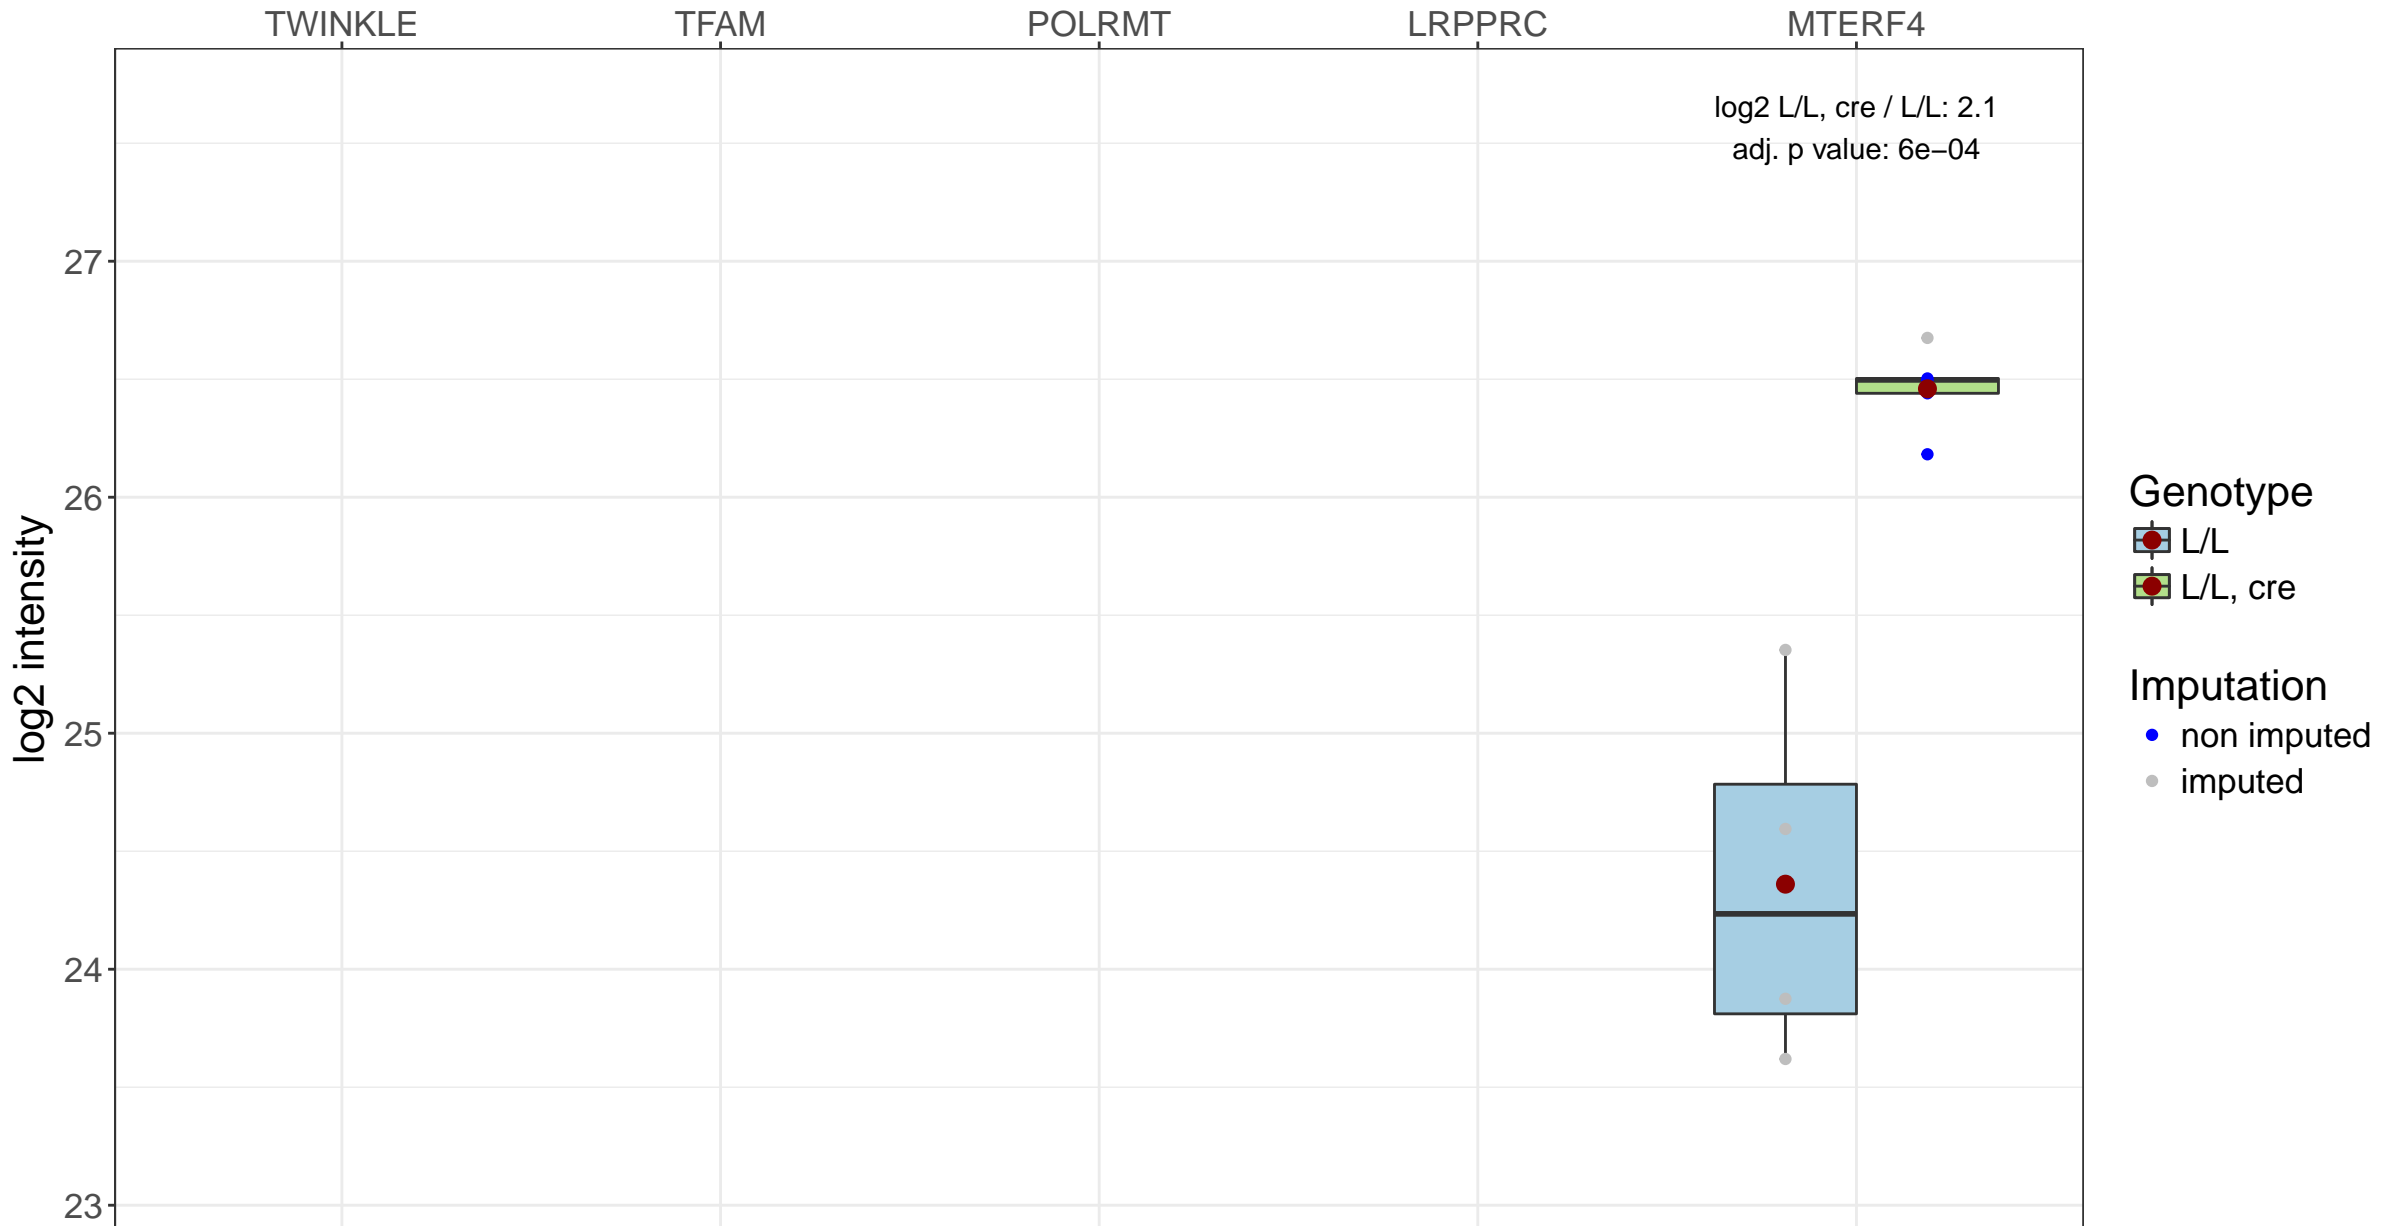

# STOML2 / Q99JB2

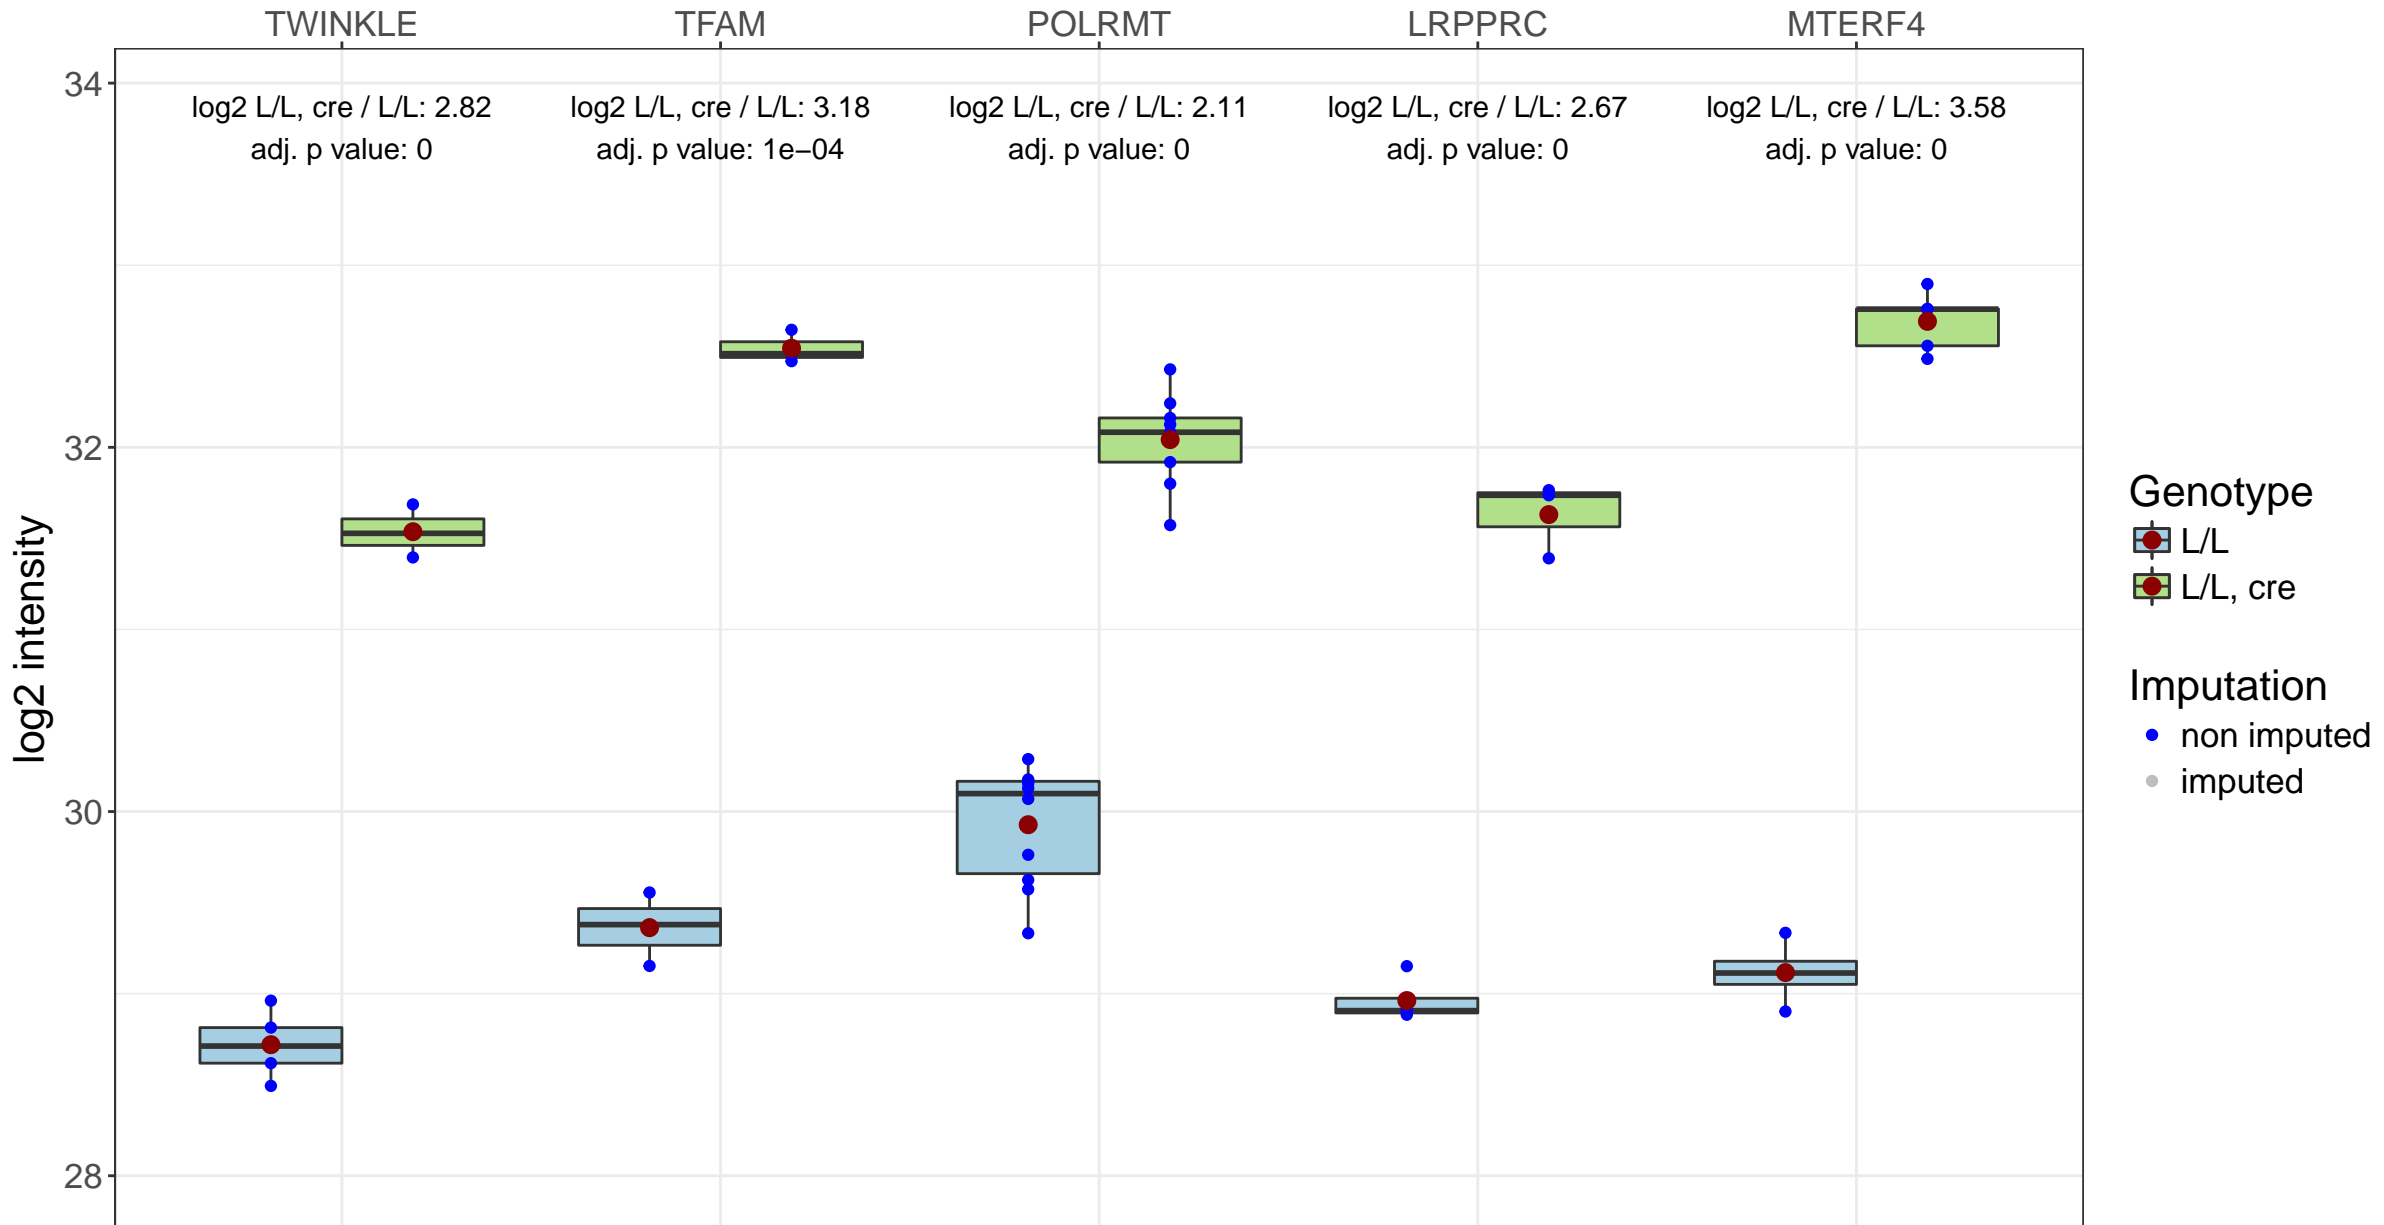

# SUCLA2 / Q9Z2I9

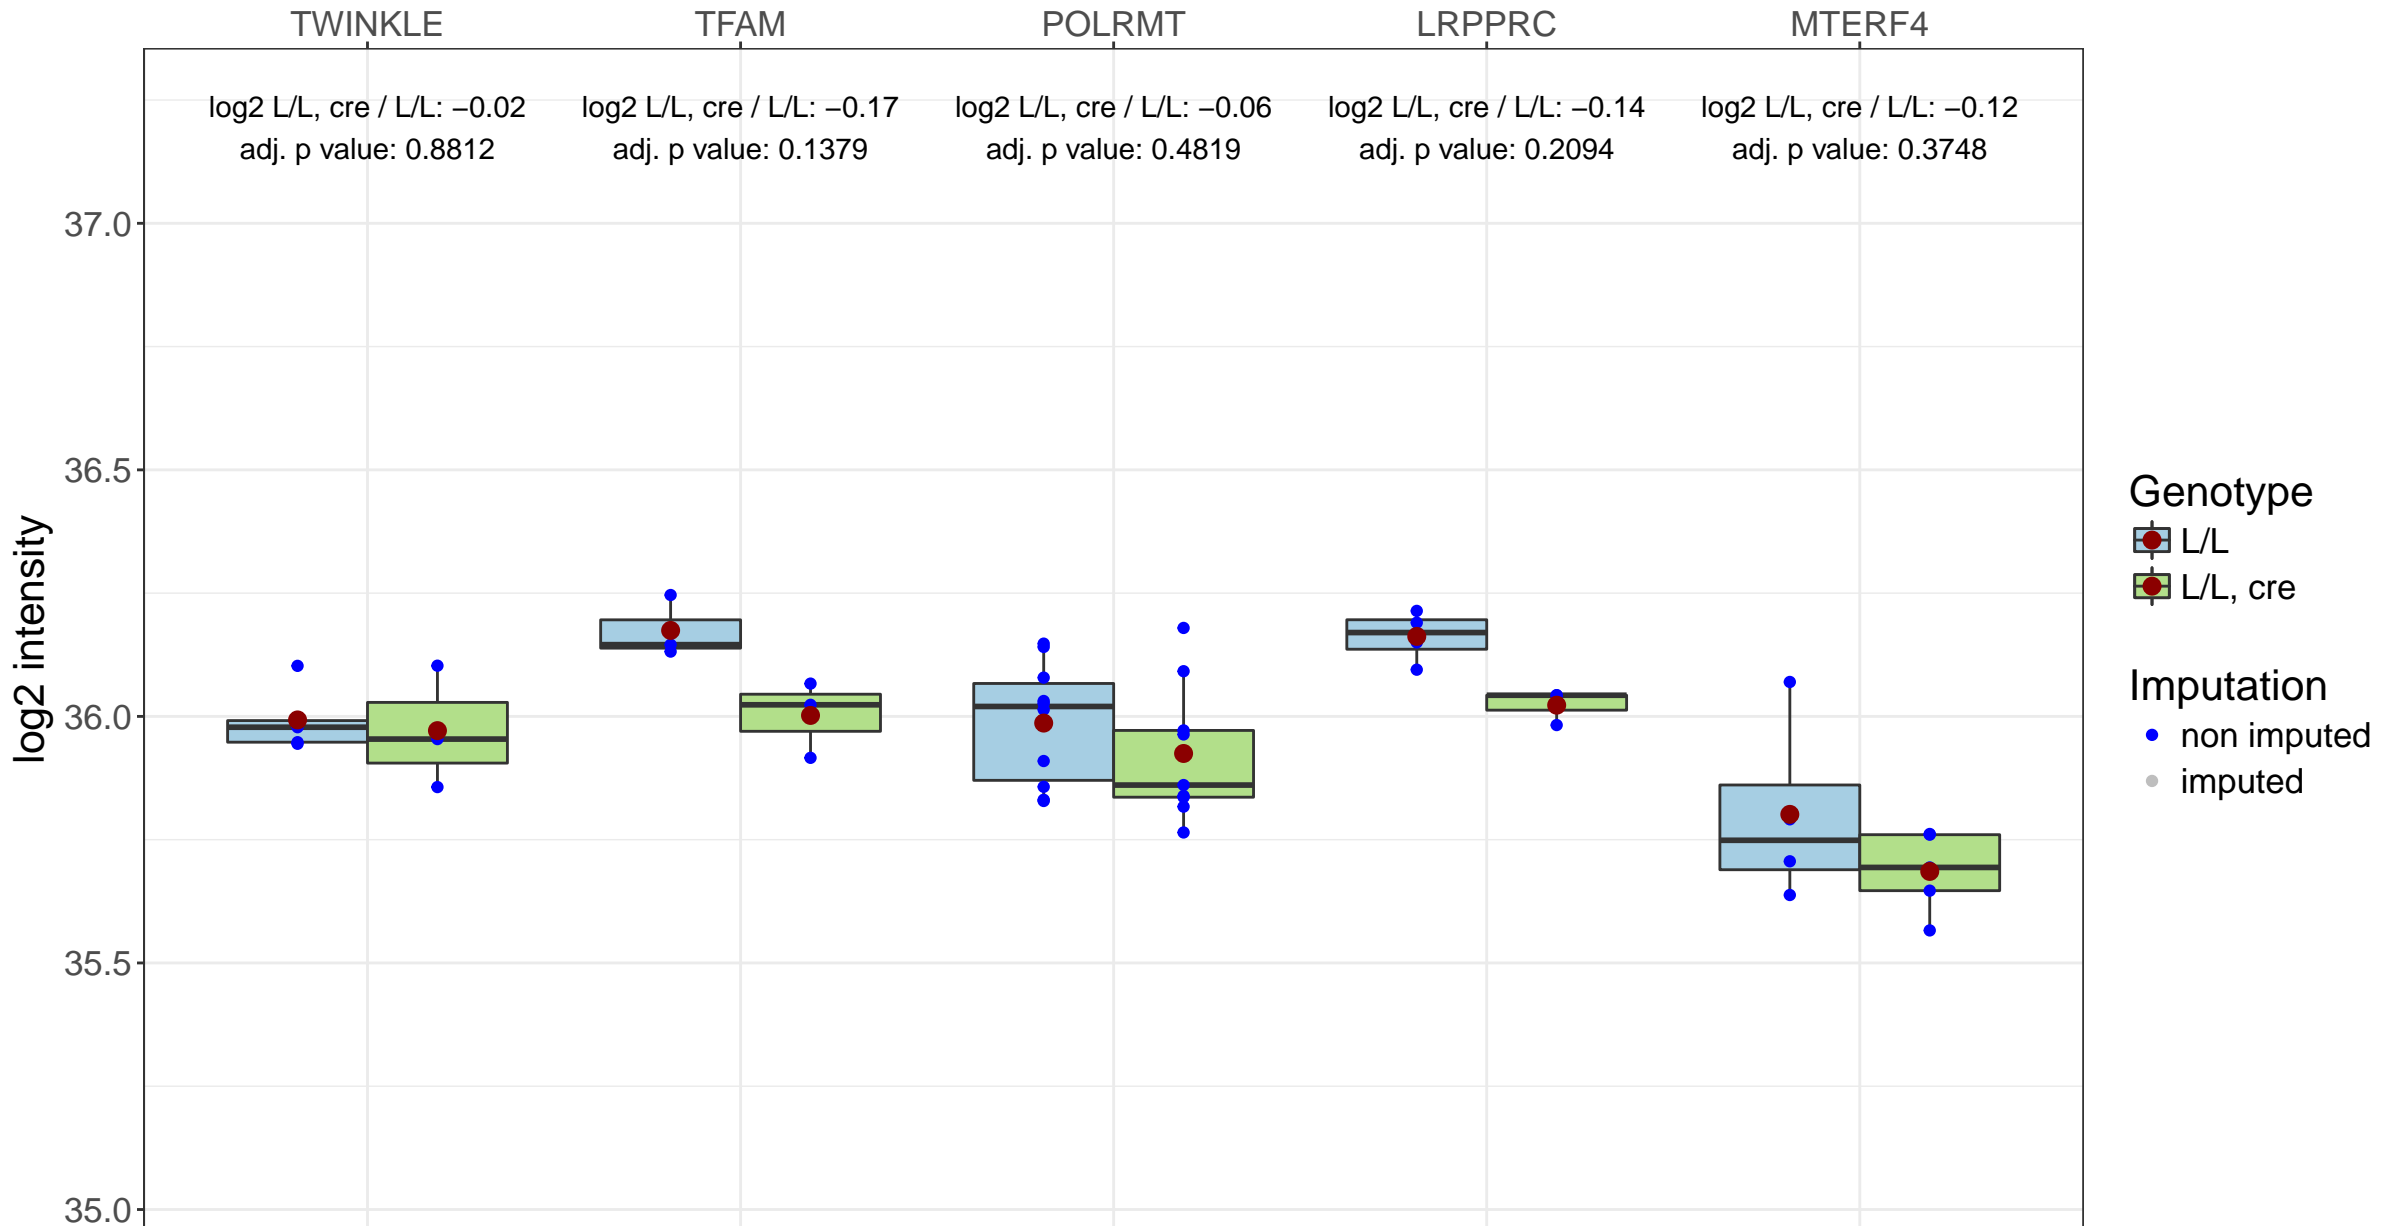

# SUCLG1 / Q9WUM5

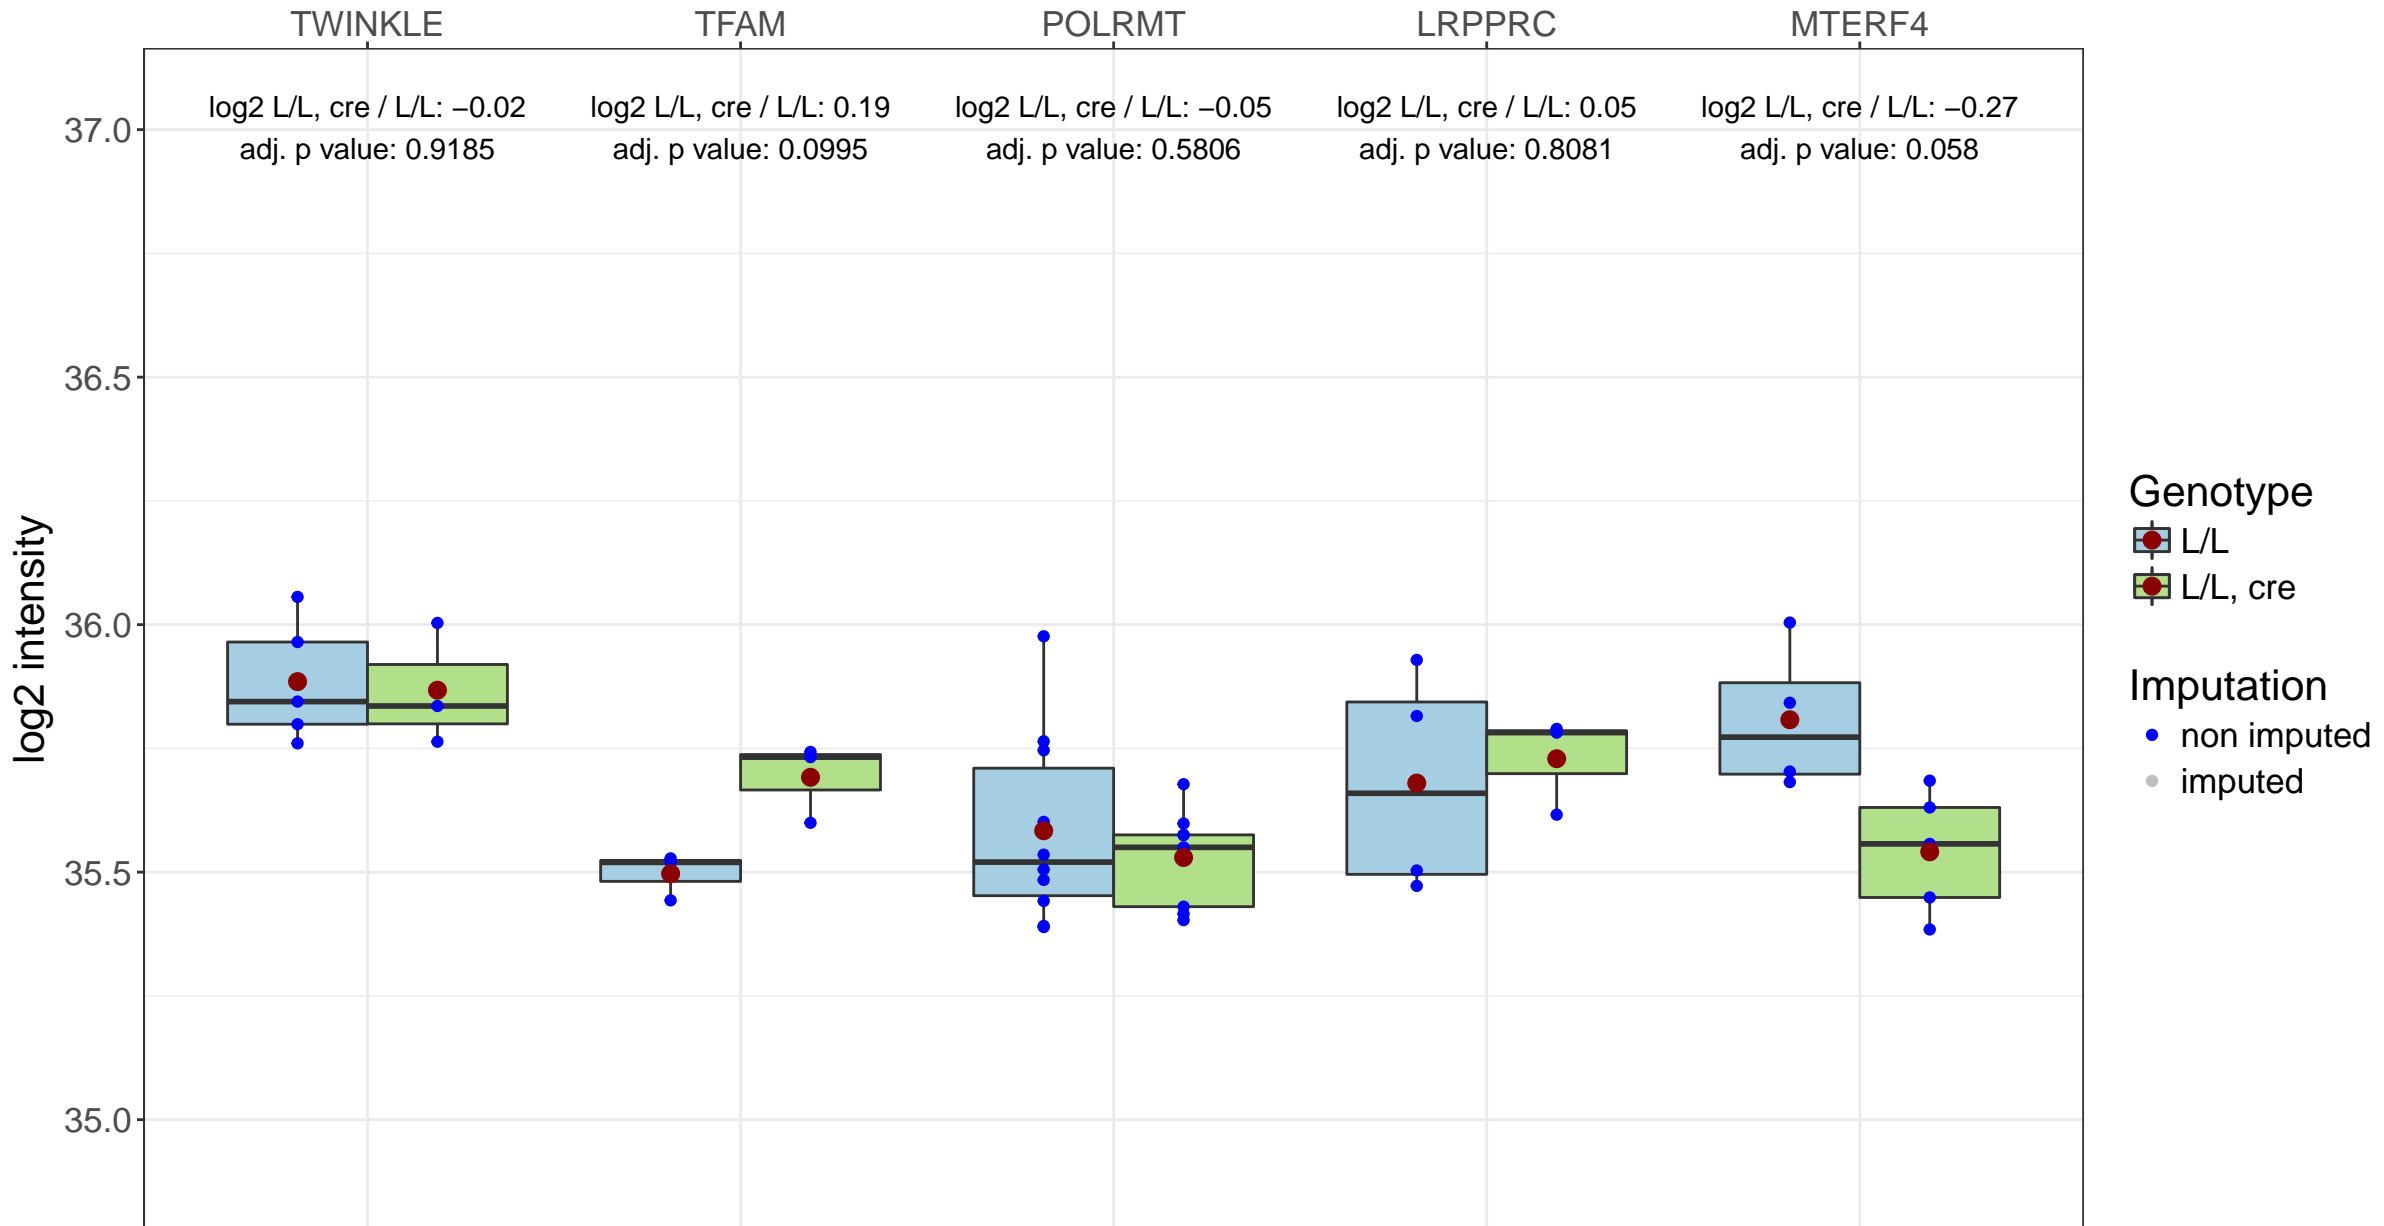

# SUCLG2 / Q9Z2I8

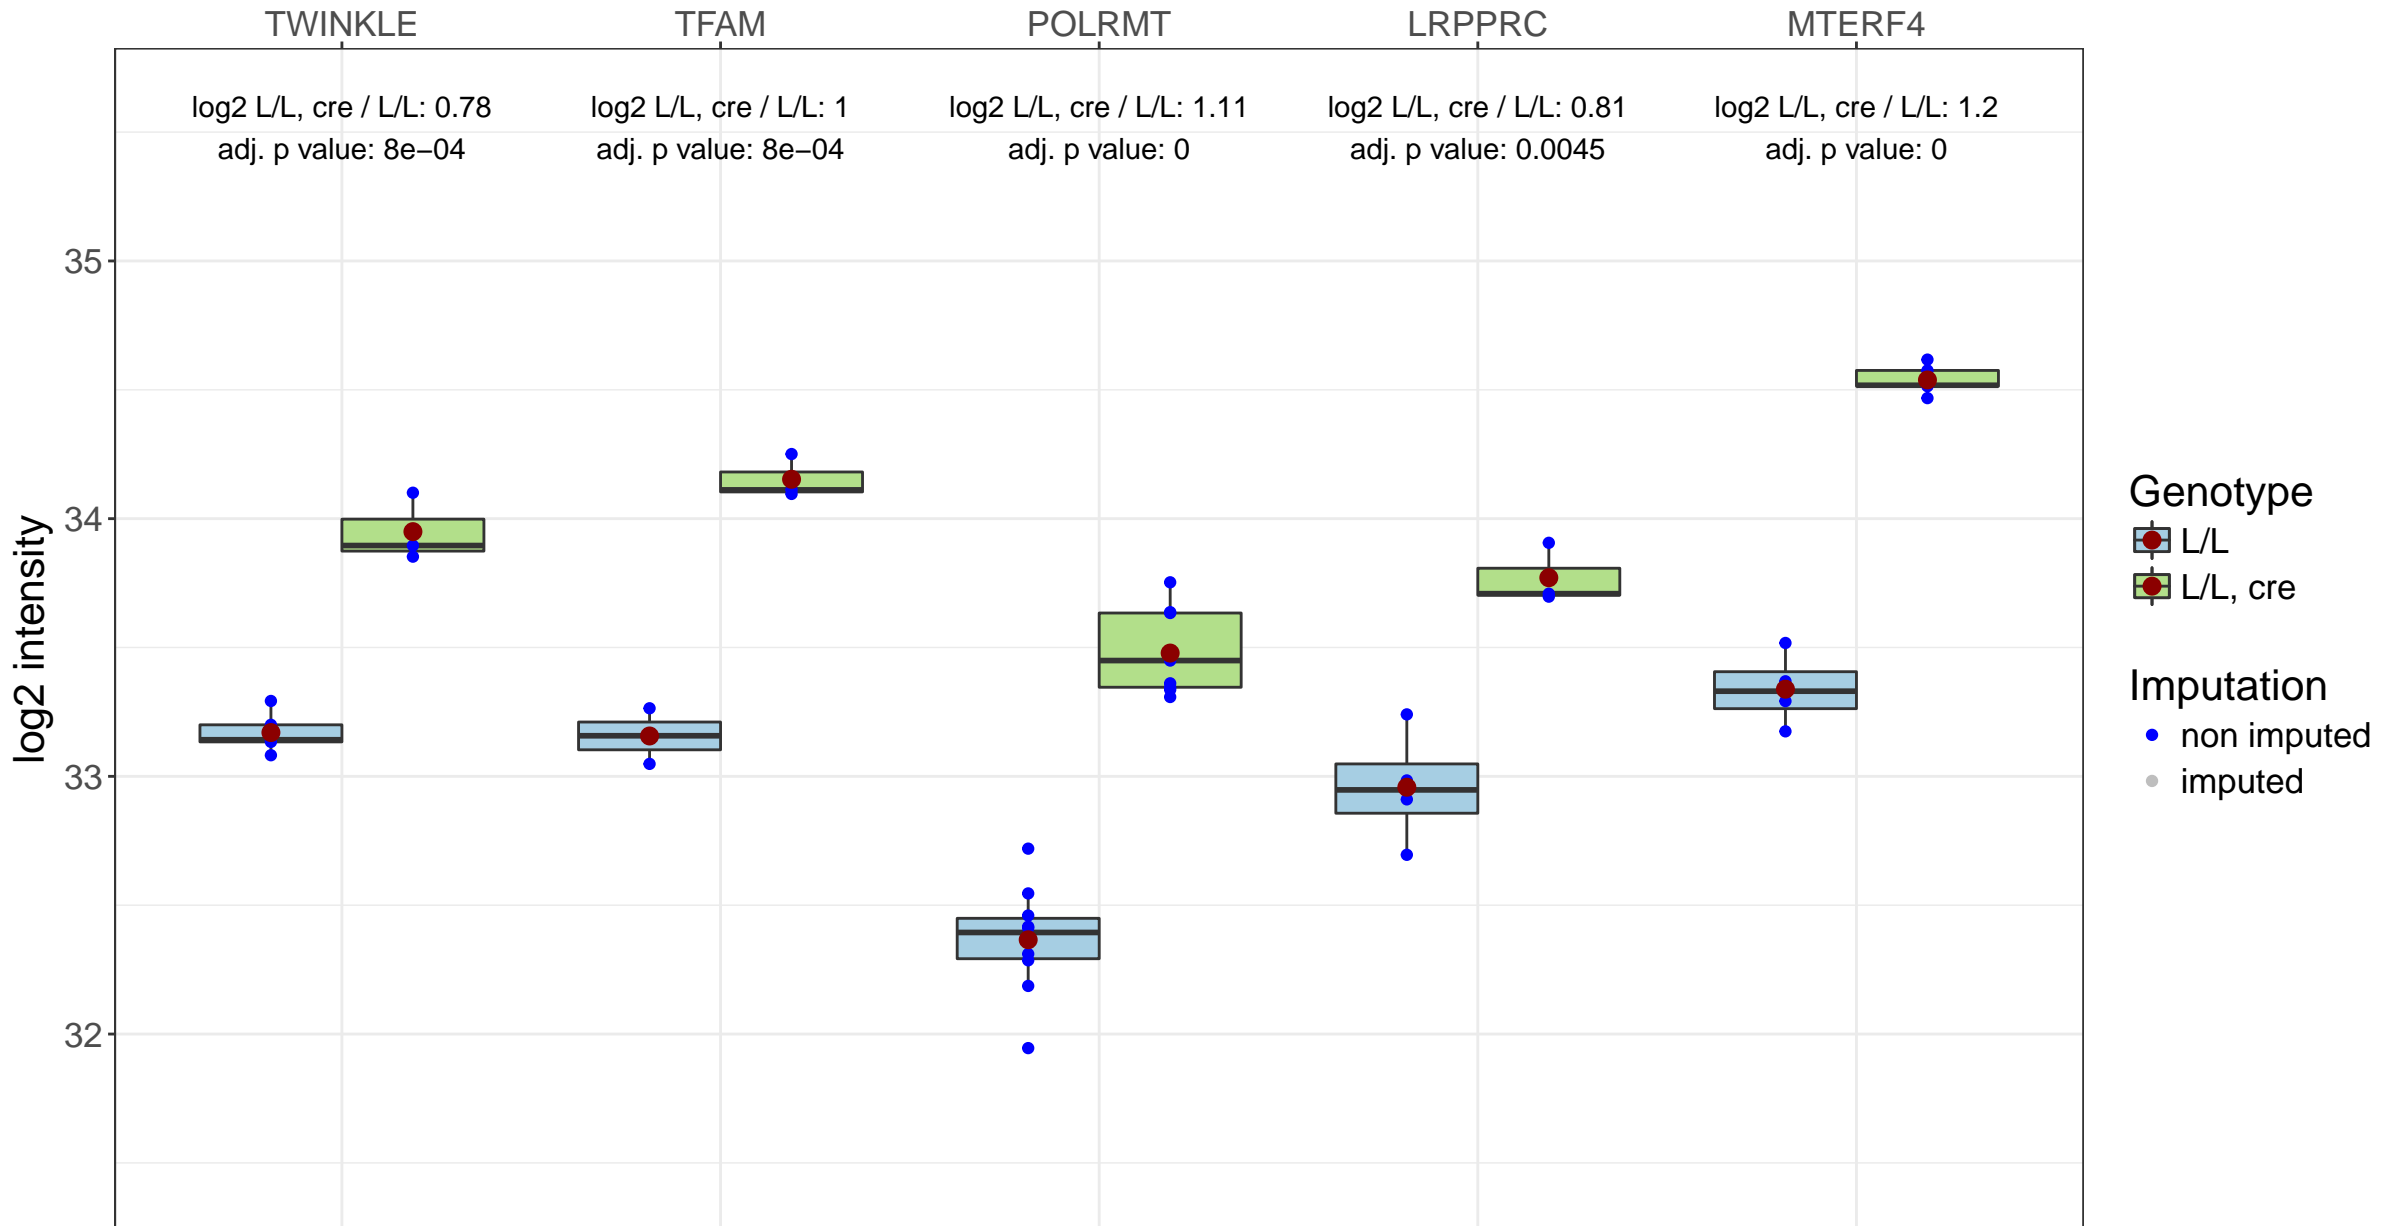

# SUOX / Q8R086

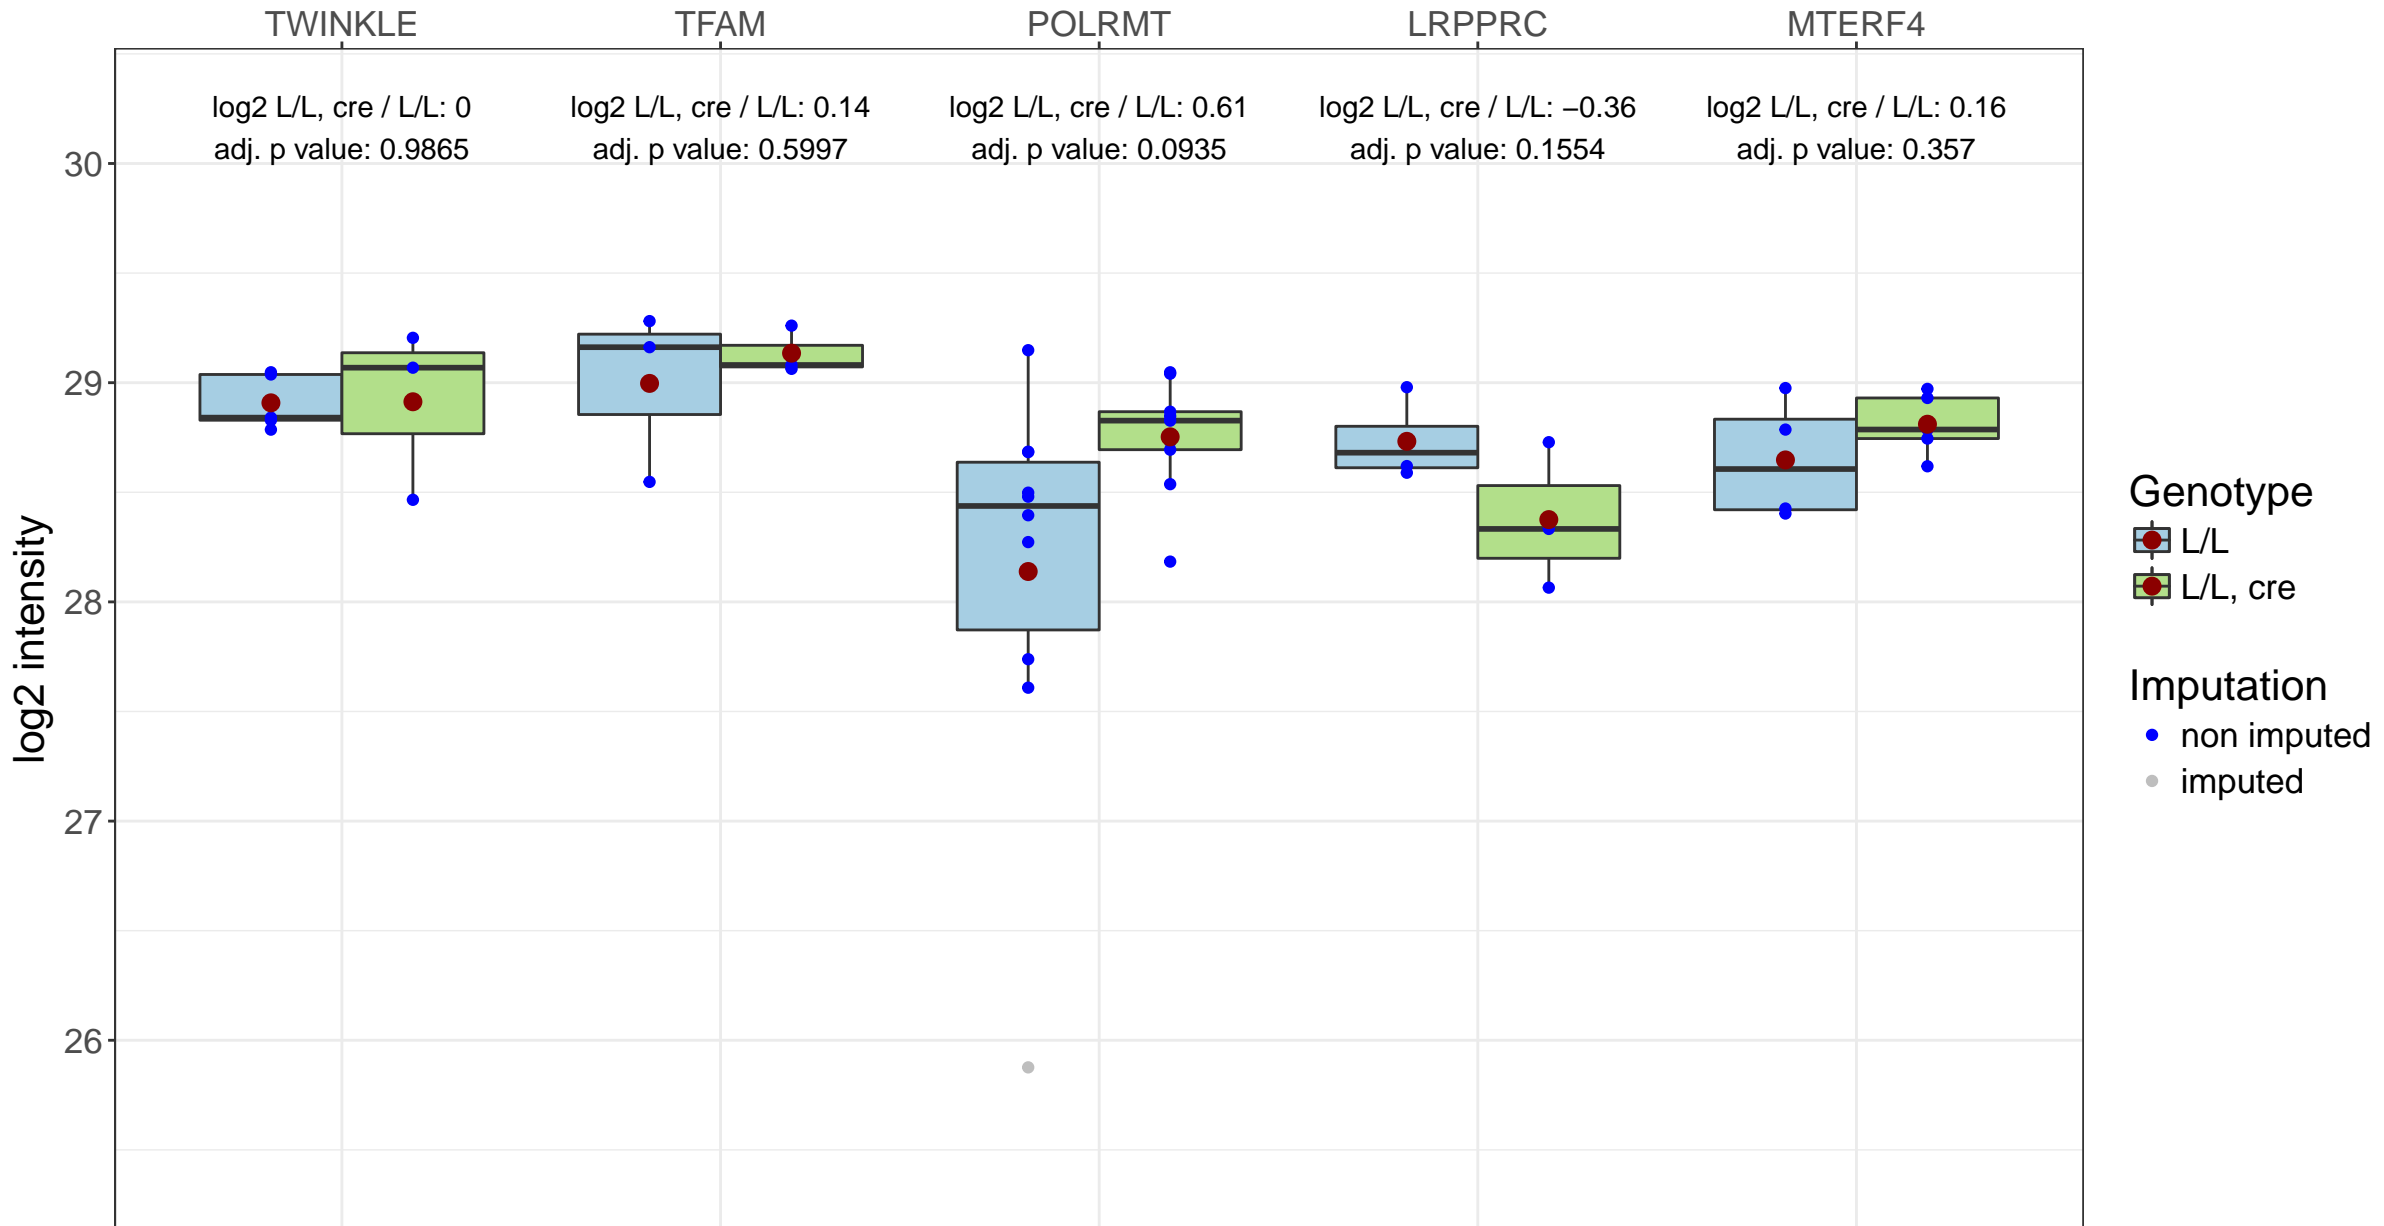

# SUPV3L1 / Q80YD1

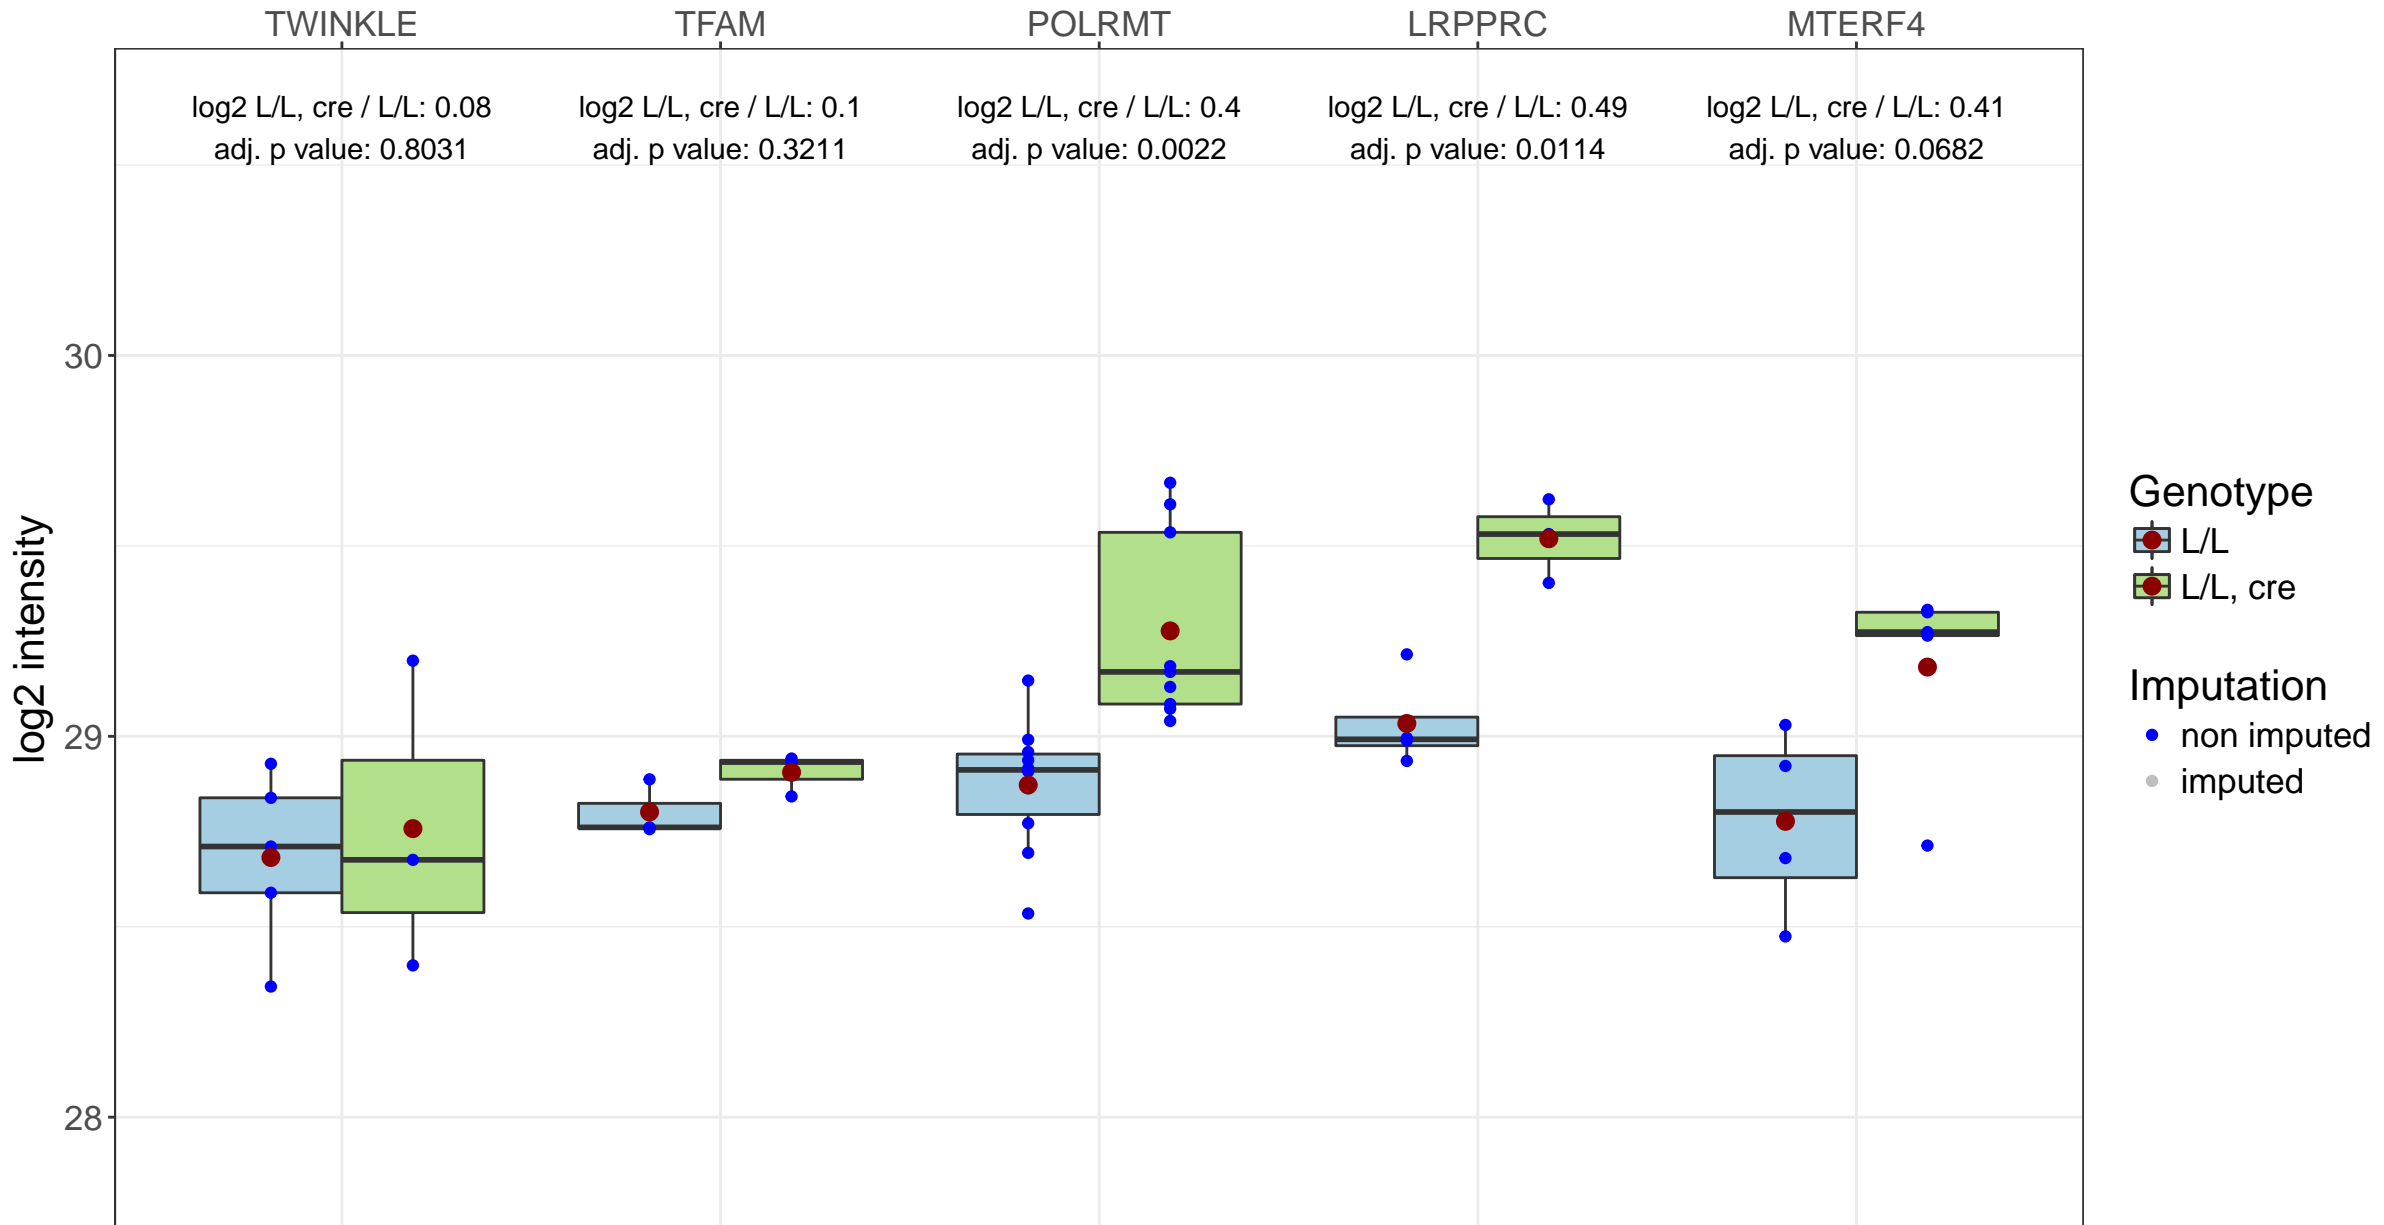

# SURF1 / A2ALA6

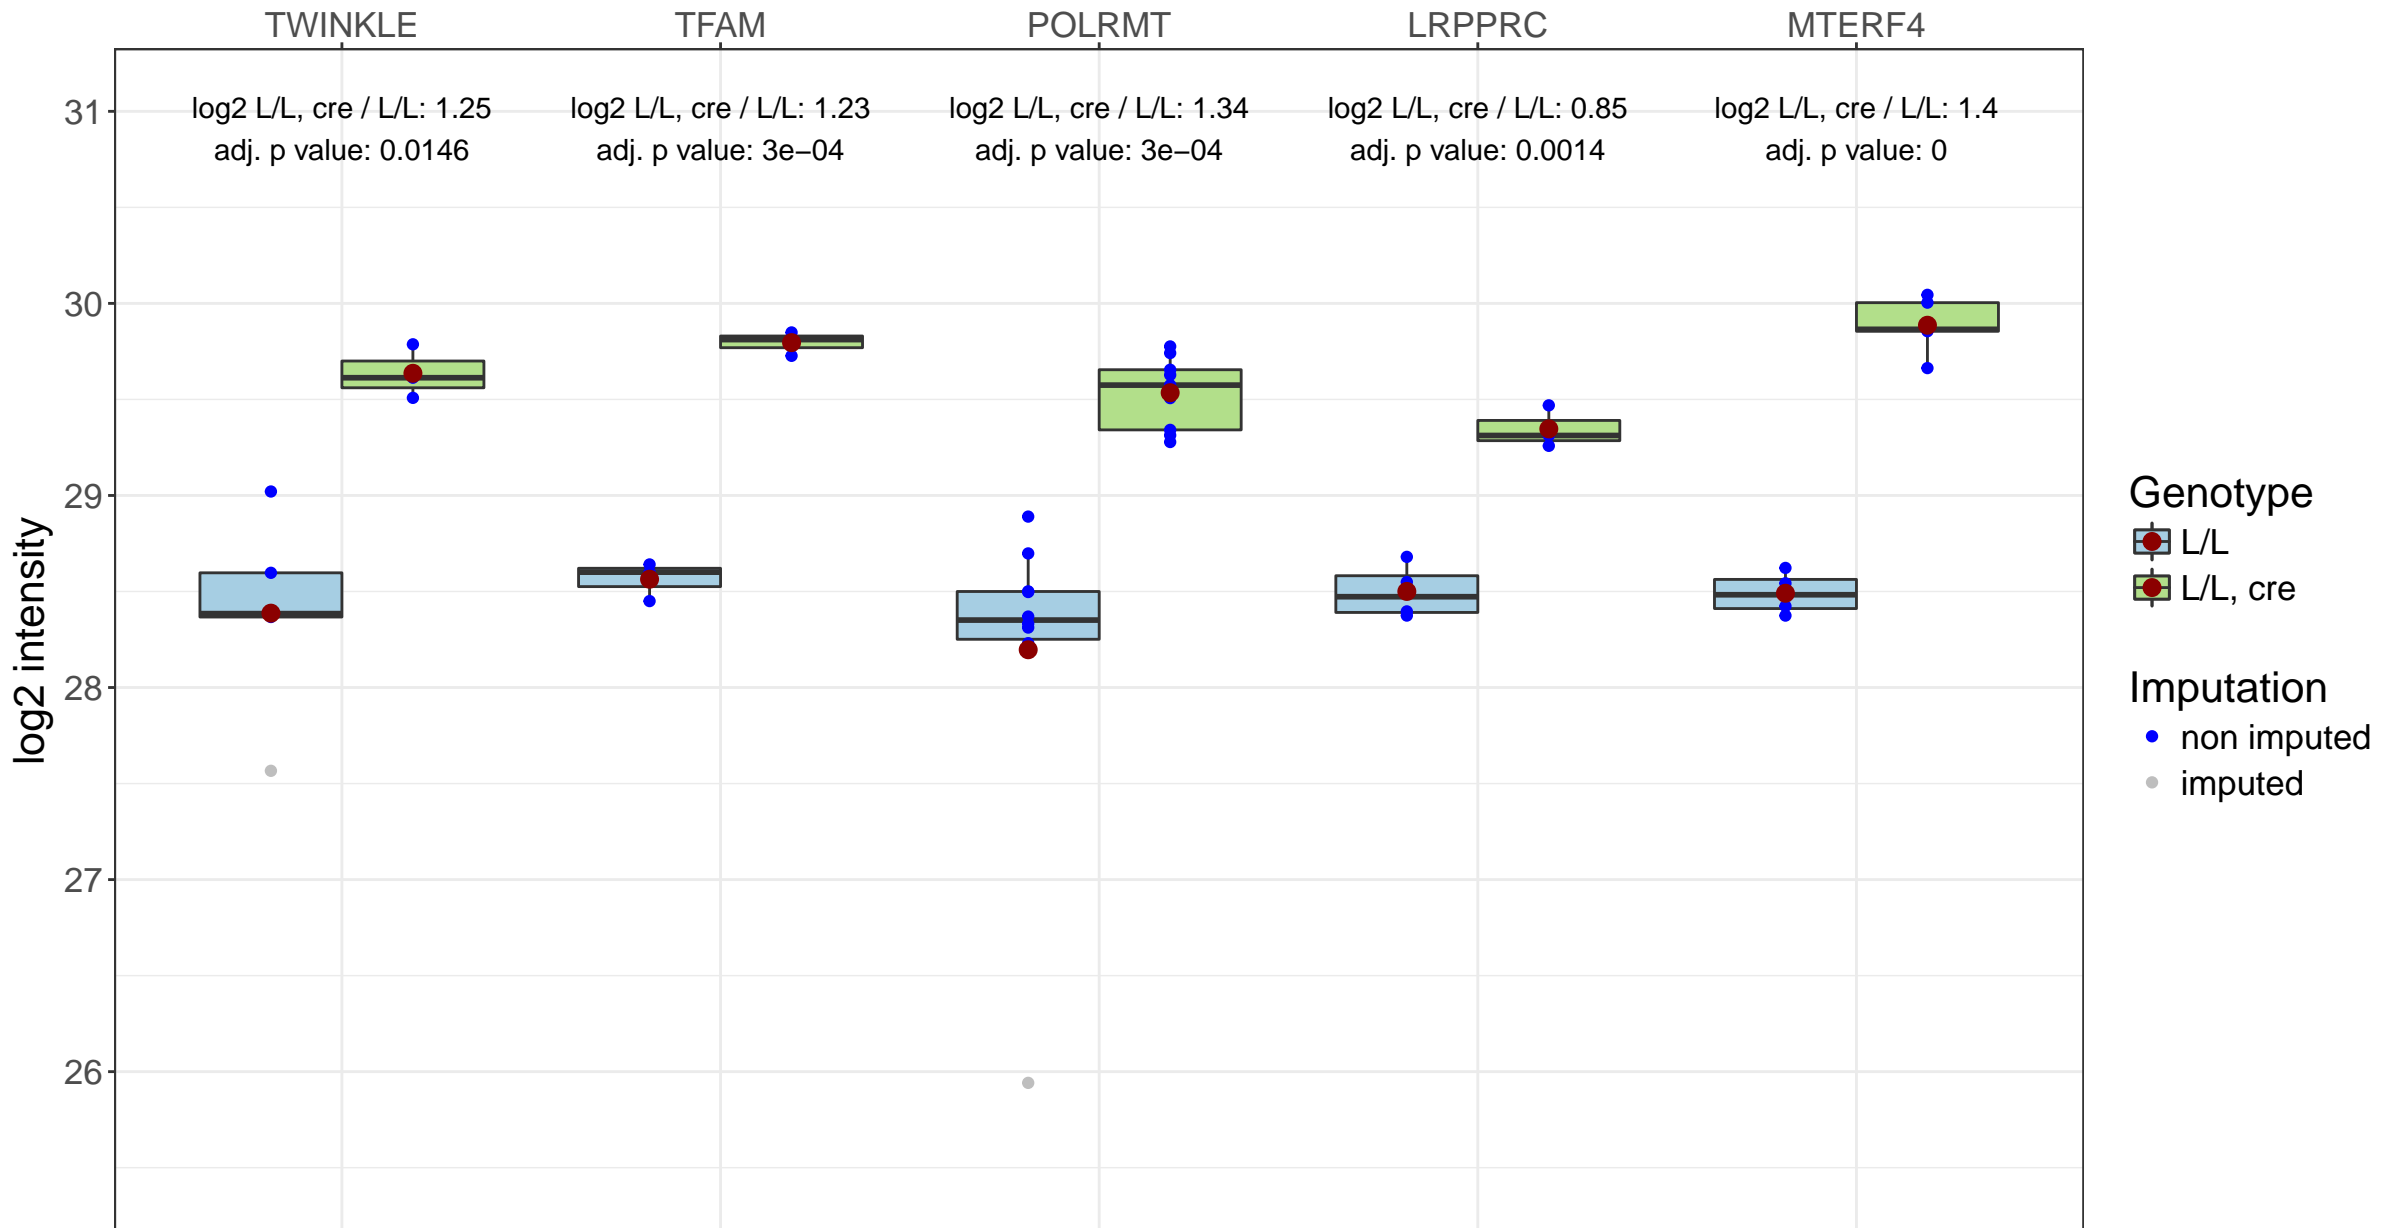



# SYNE1 / Q6ZWR6-4

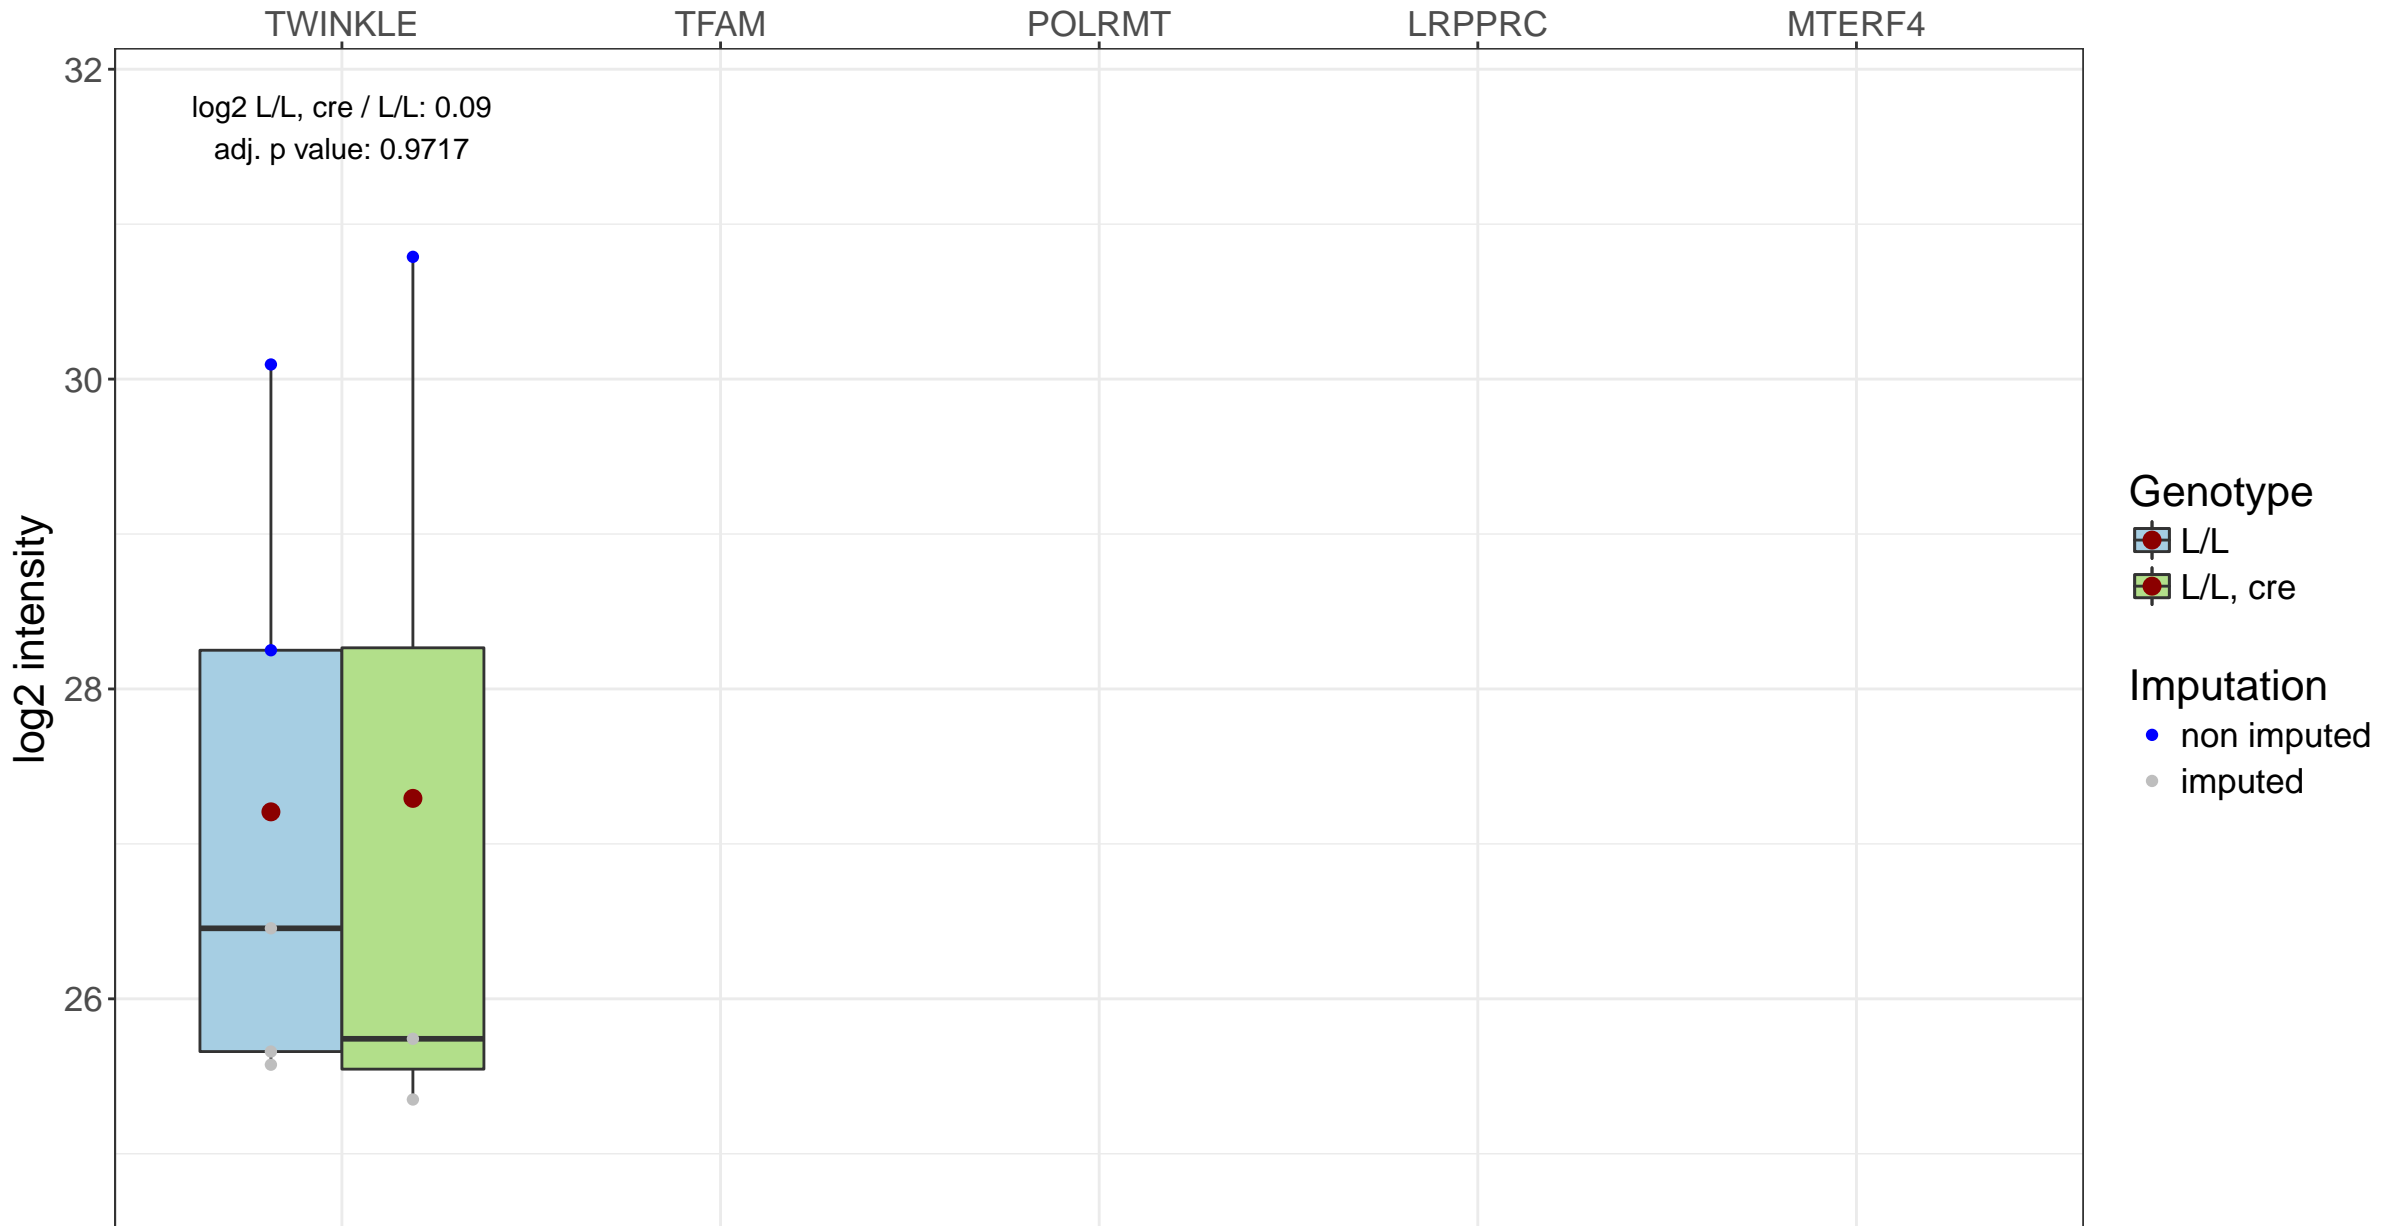

# SYNJ2BP / Q9D6K5

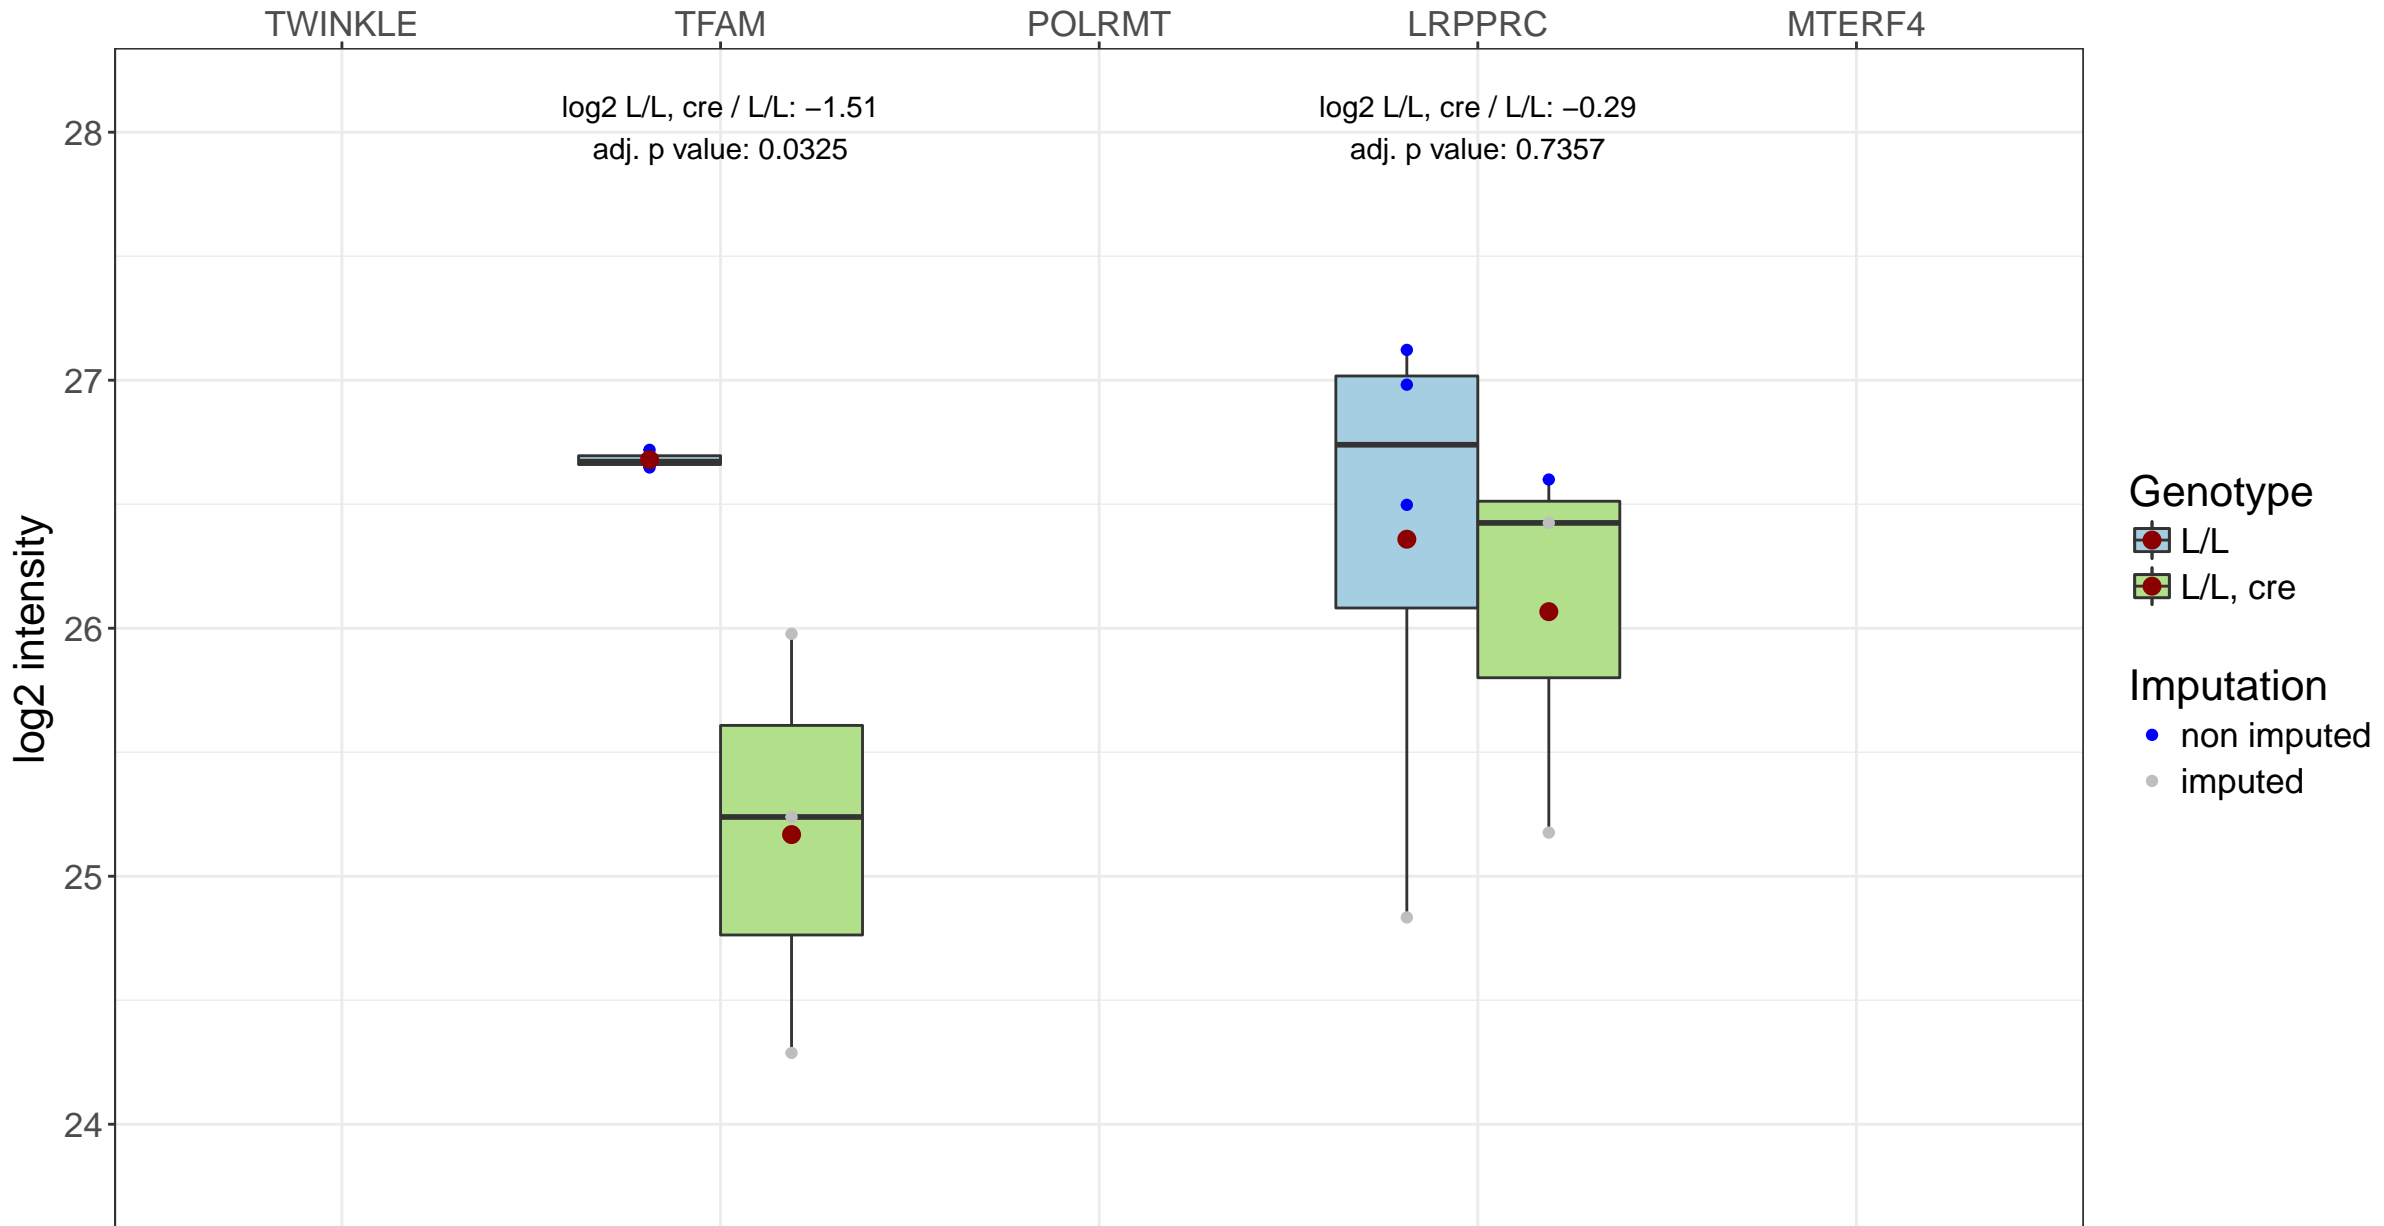

# TACO1 / Q8K0Z7

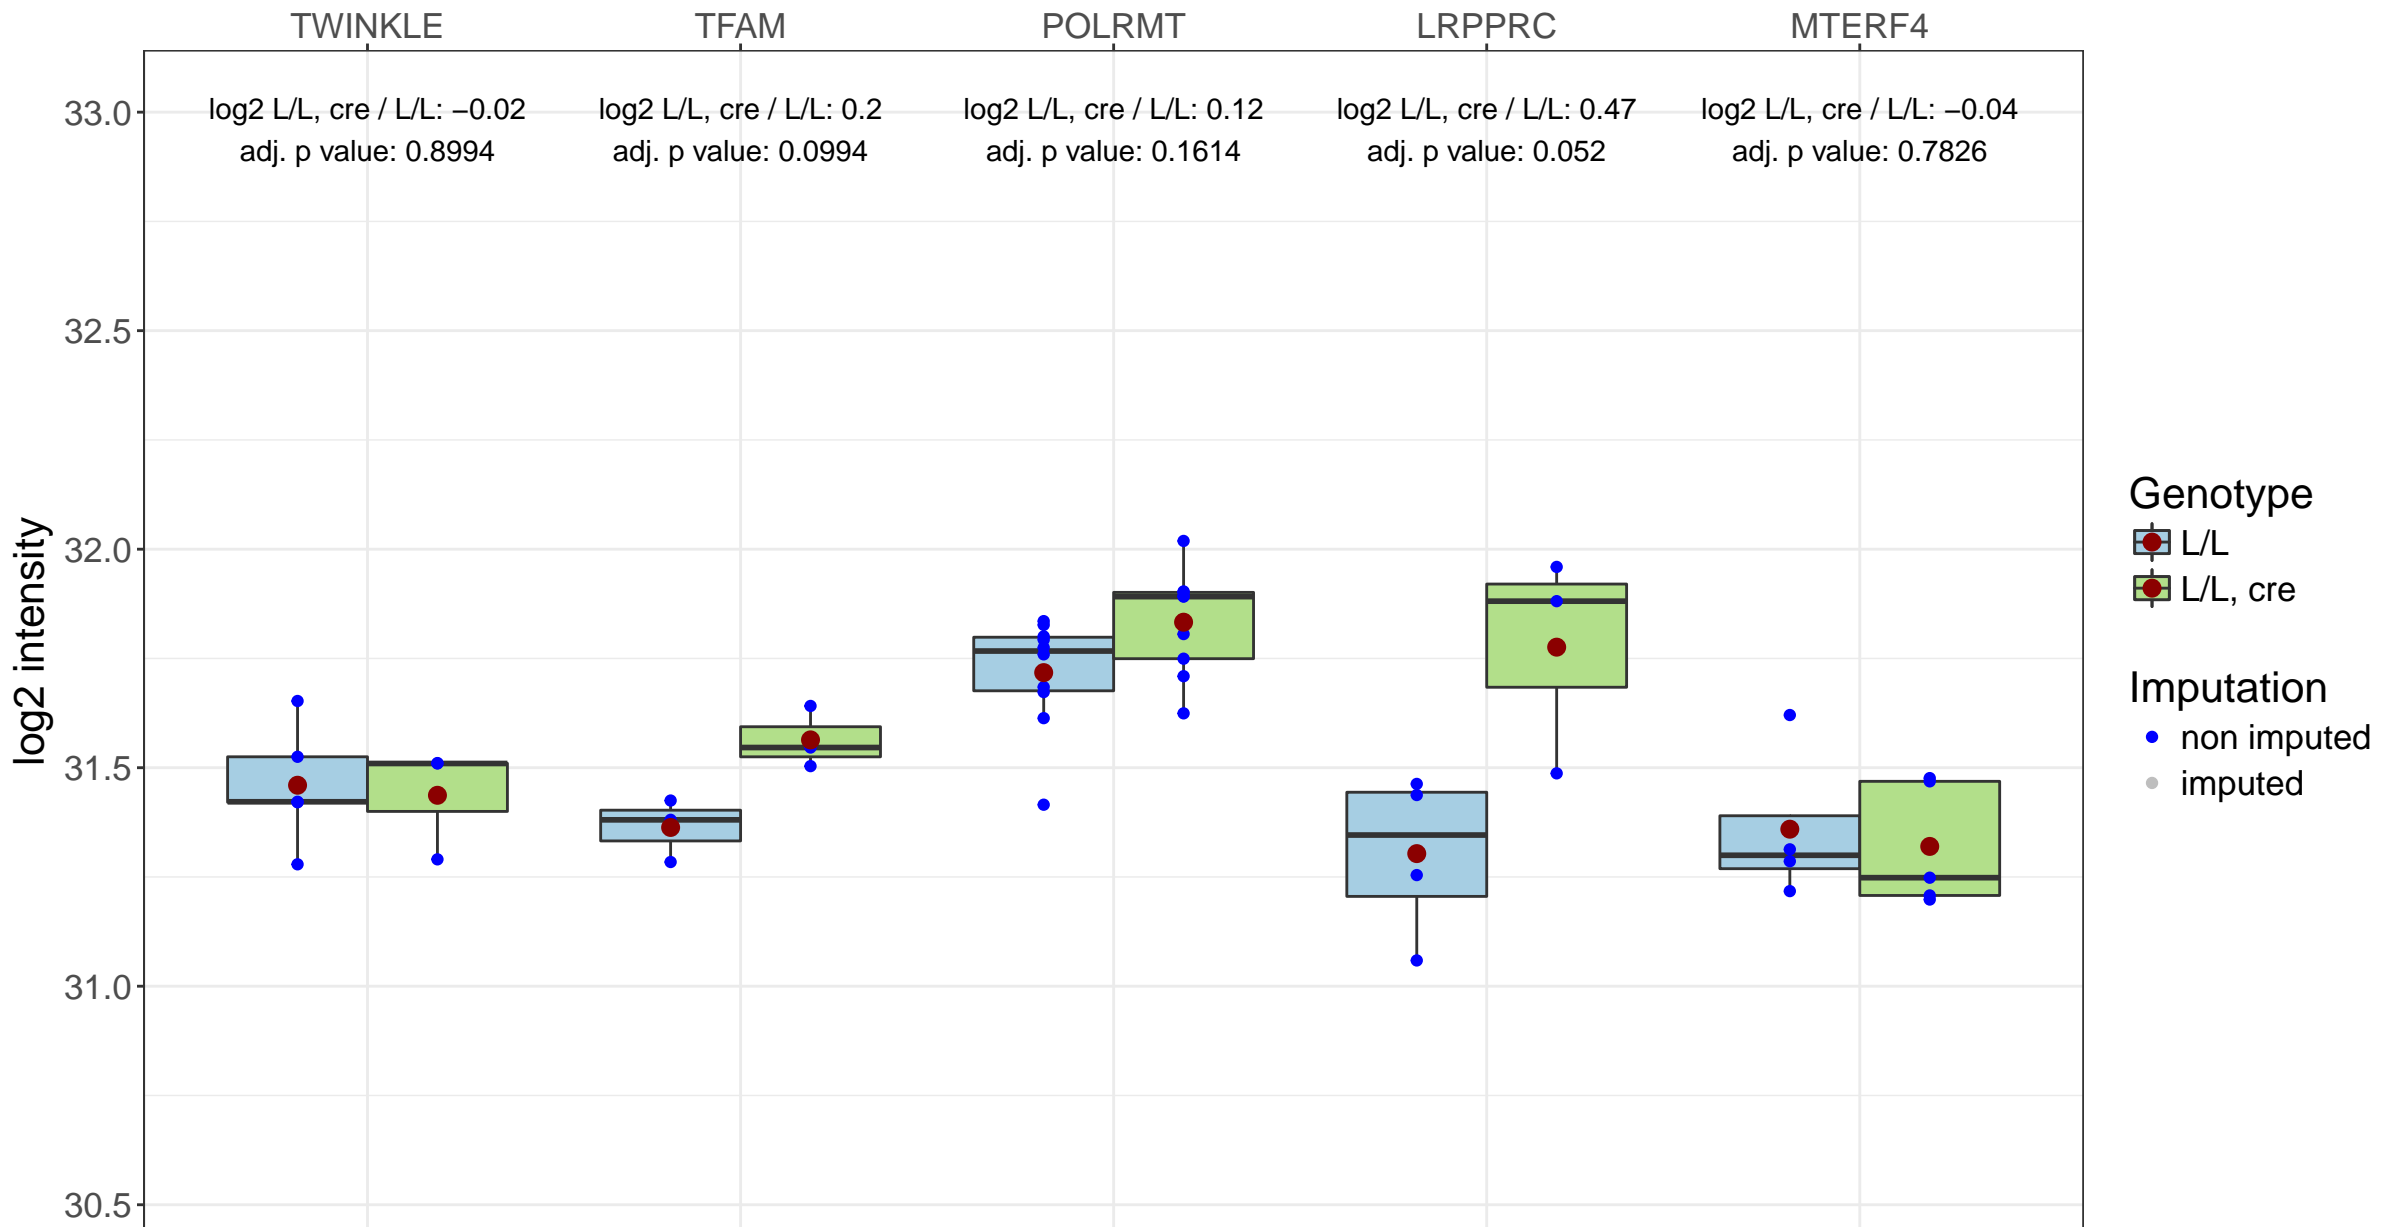

# TAGLN2 / Q9WVA4

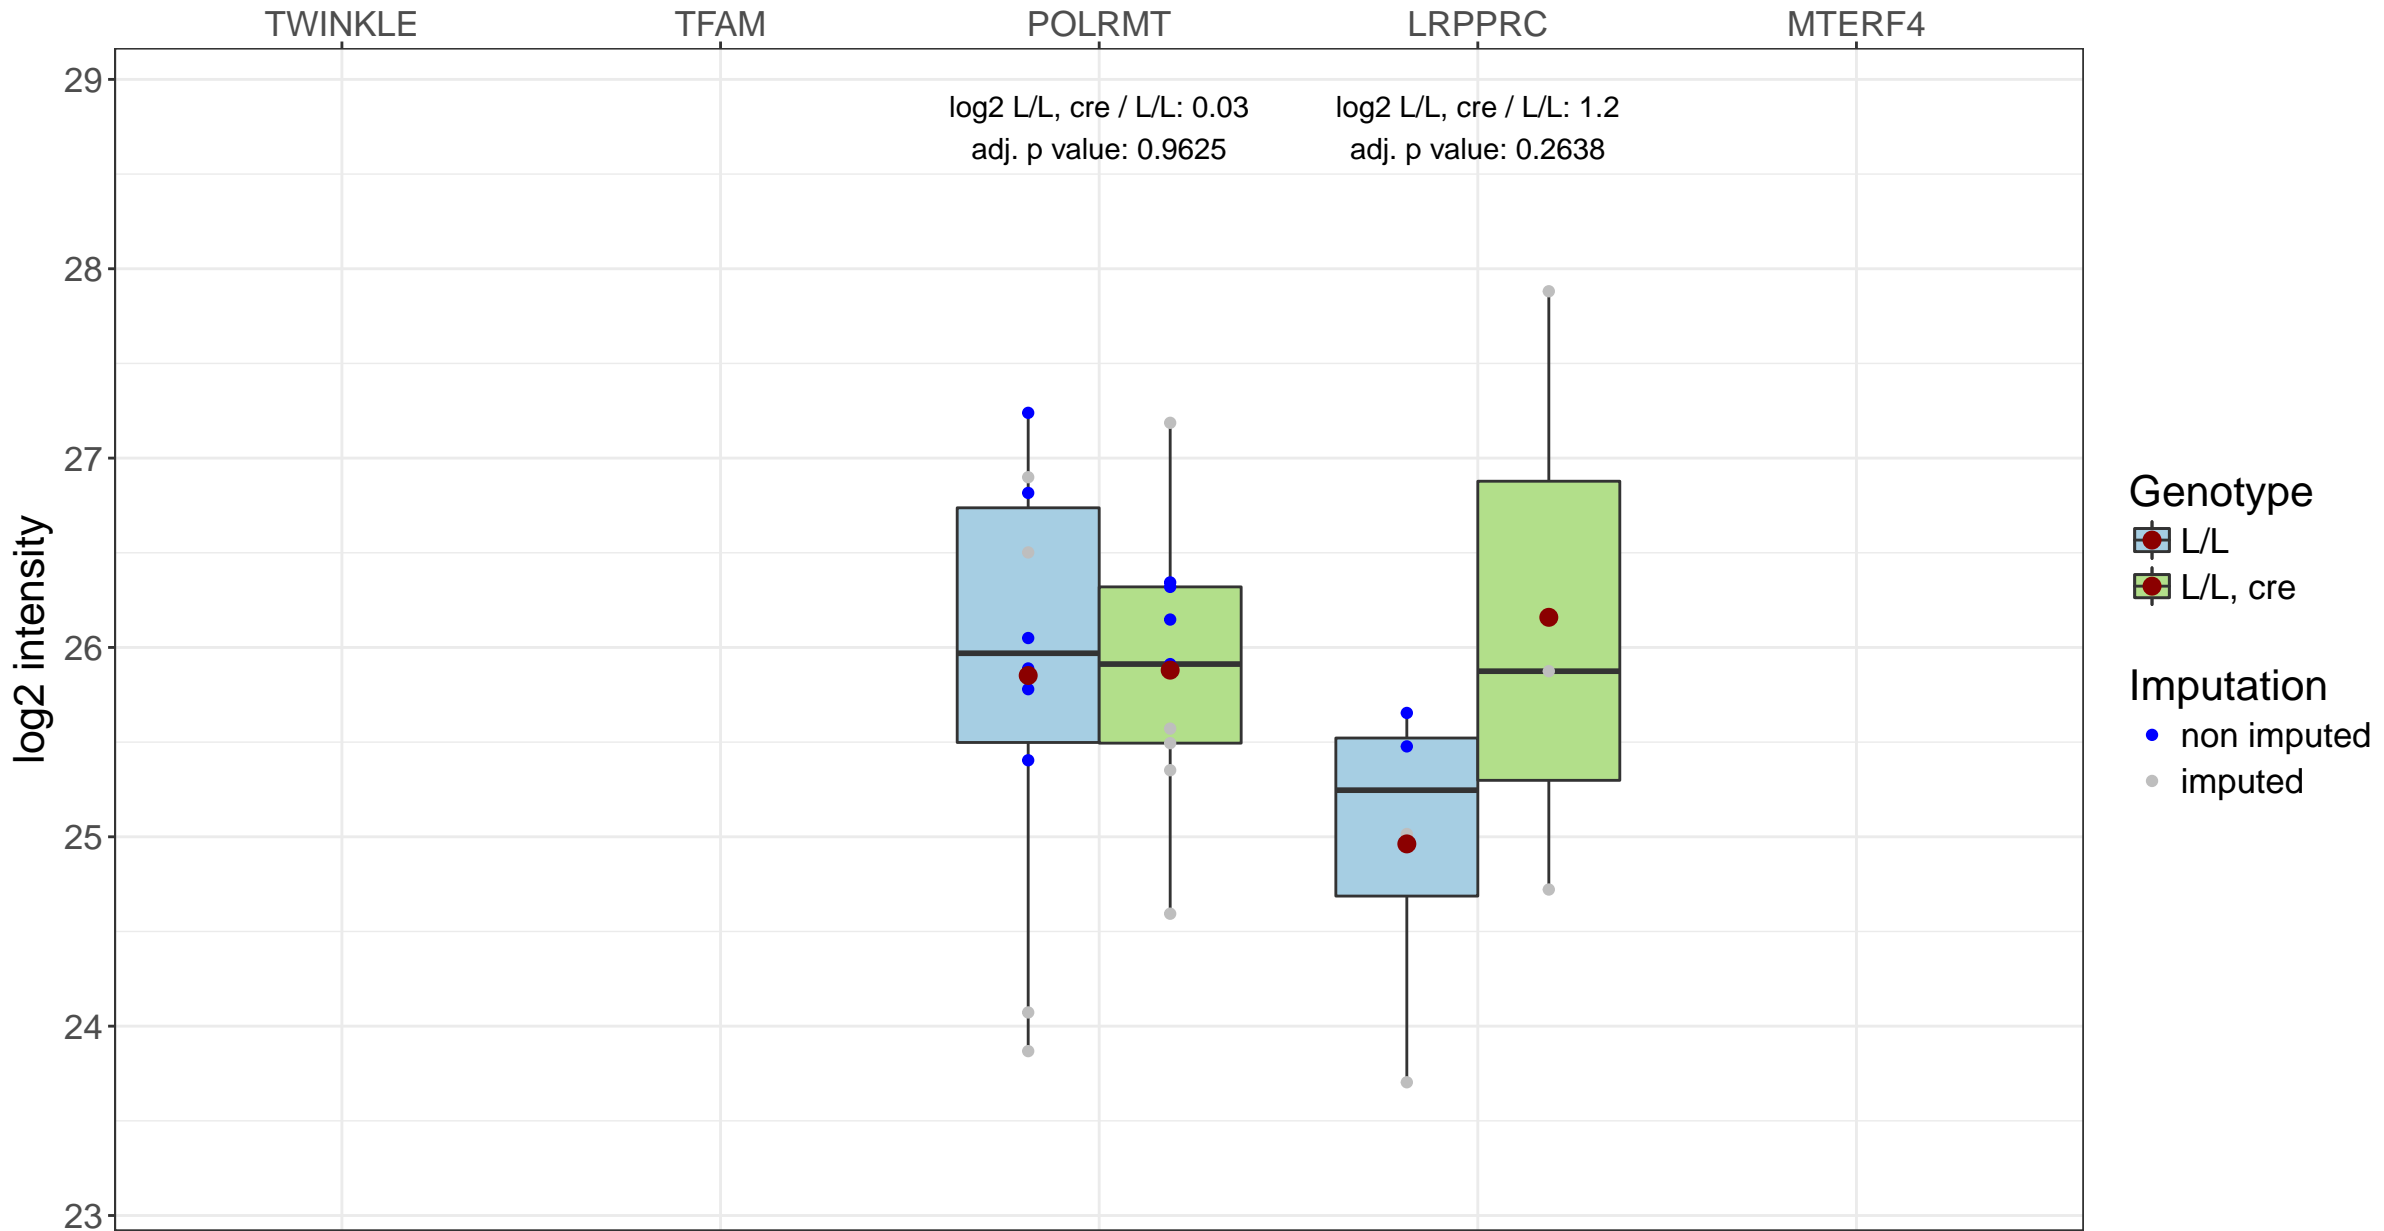

# TAMM41 / G5E881

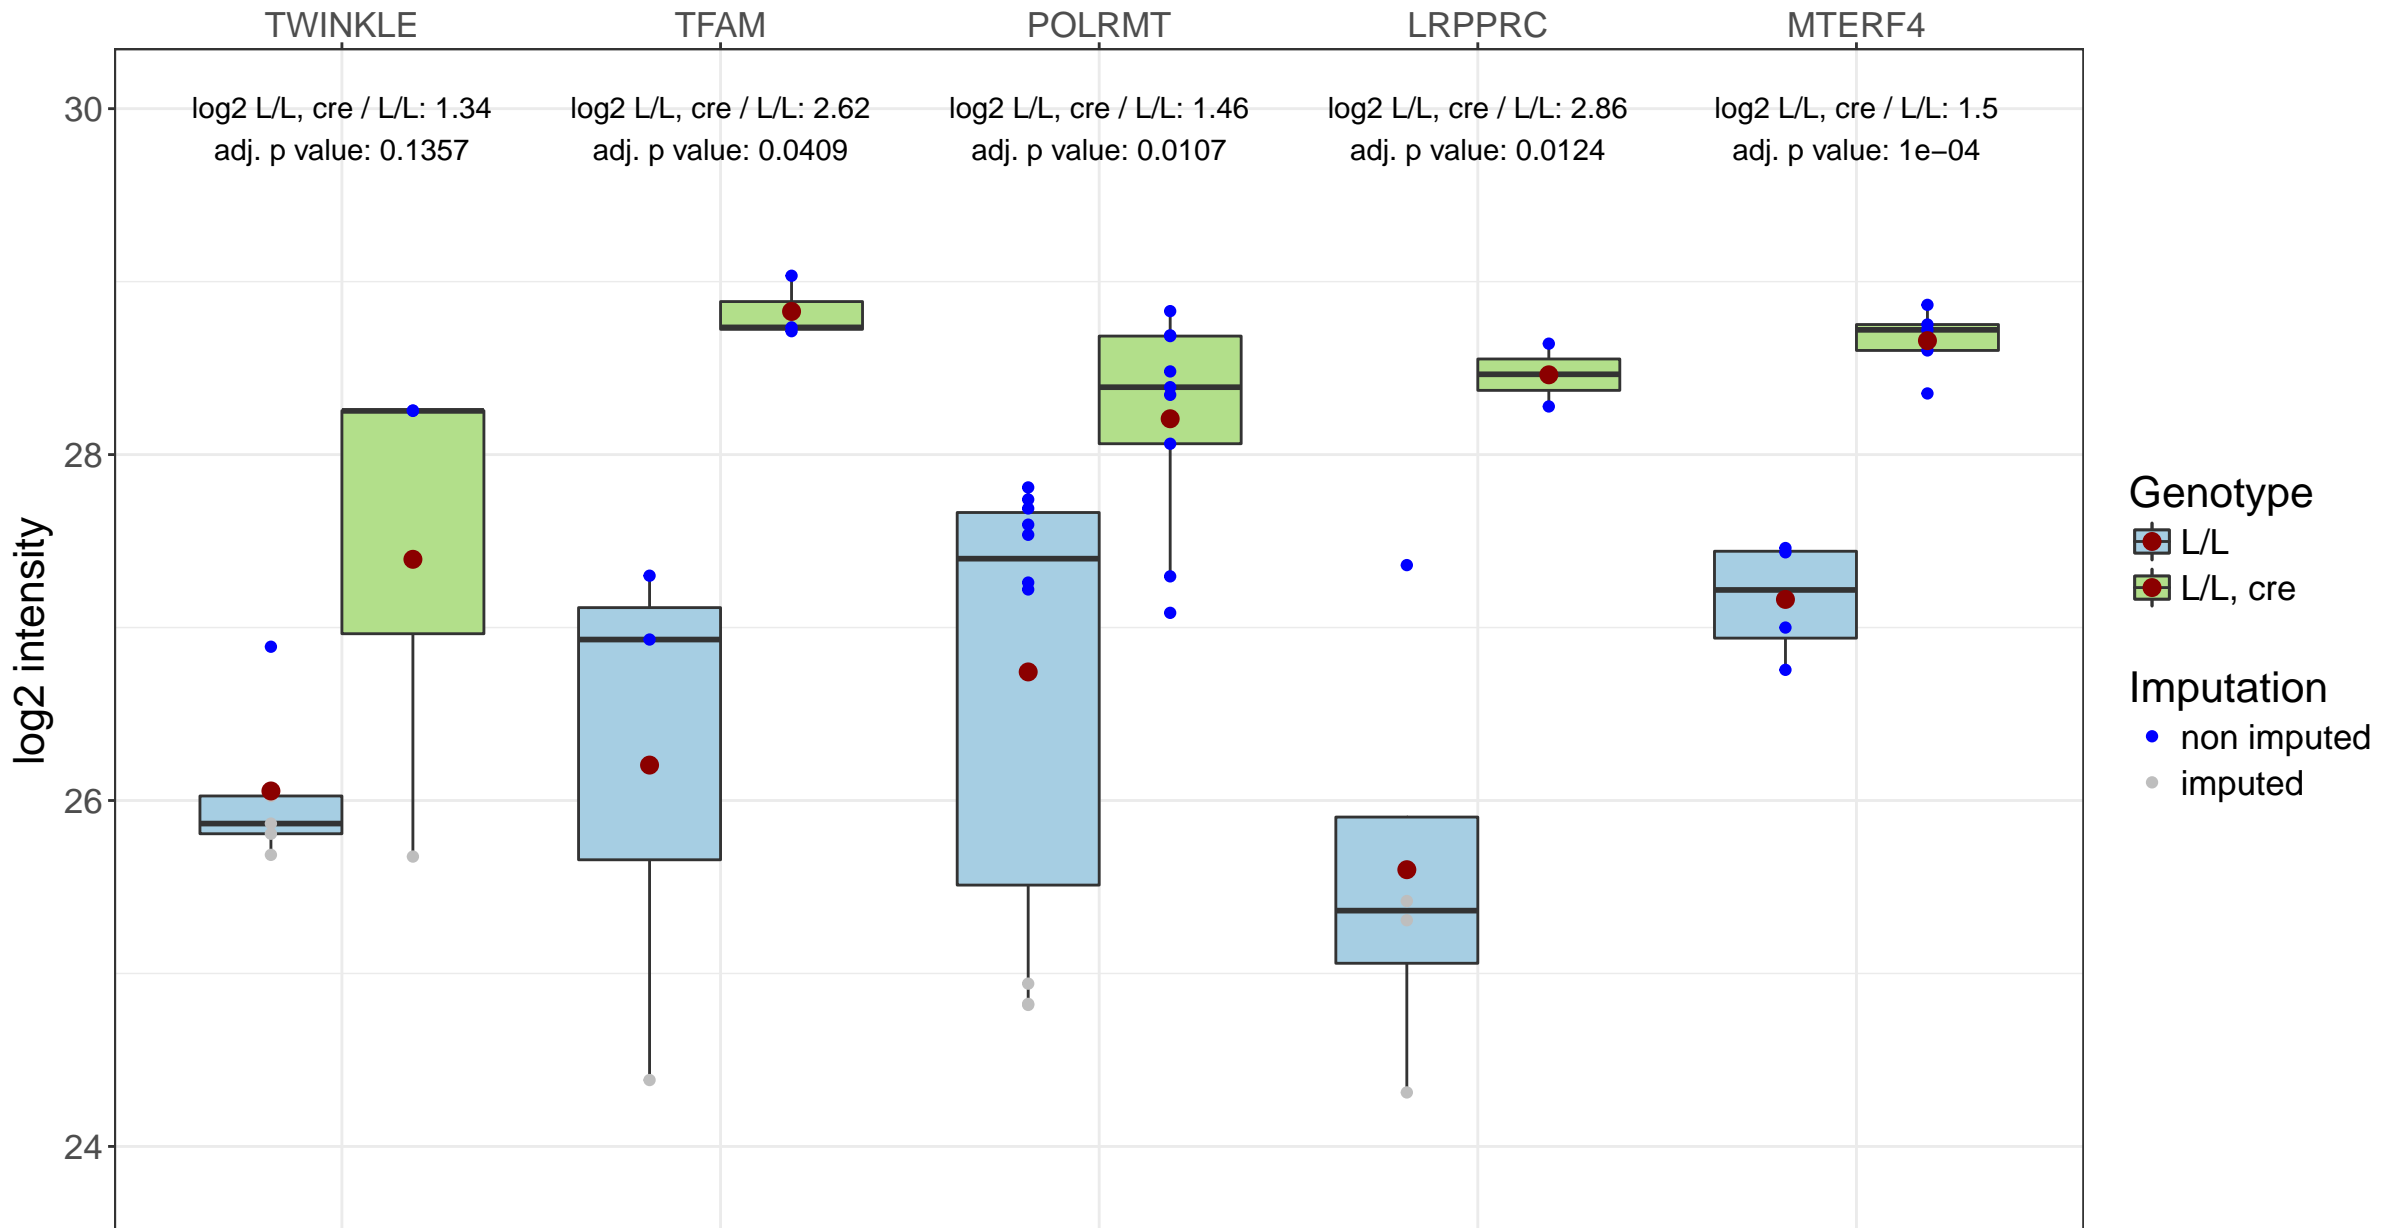

# TANGO2 / Q8BTN3

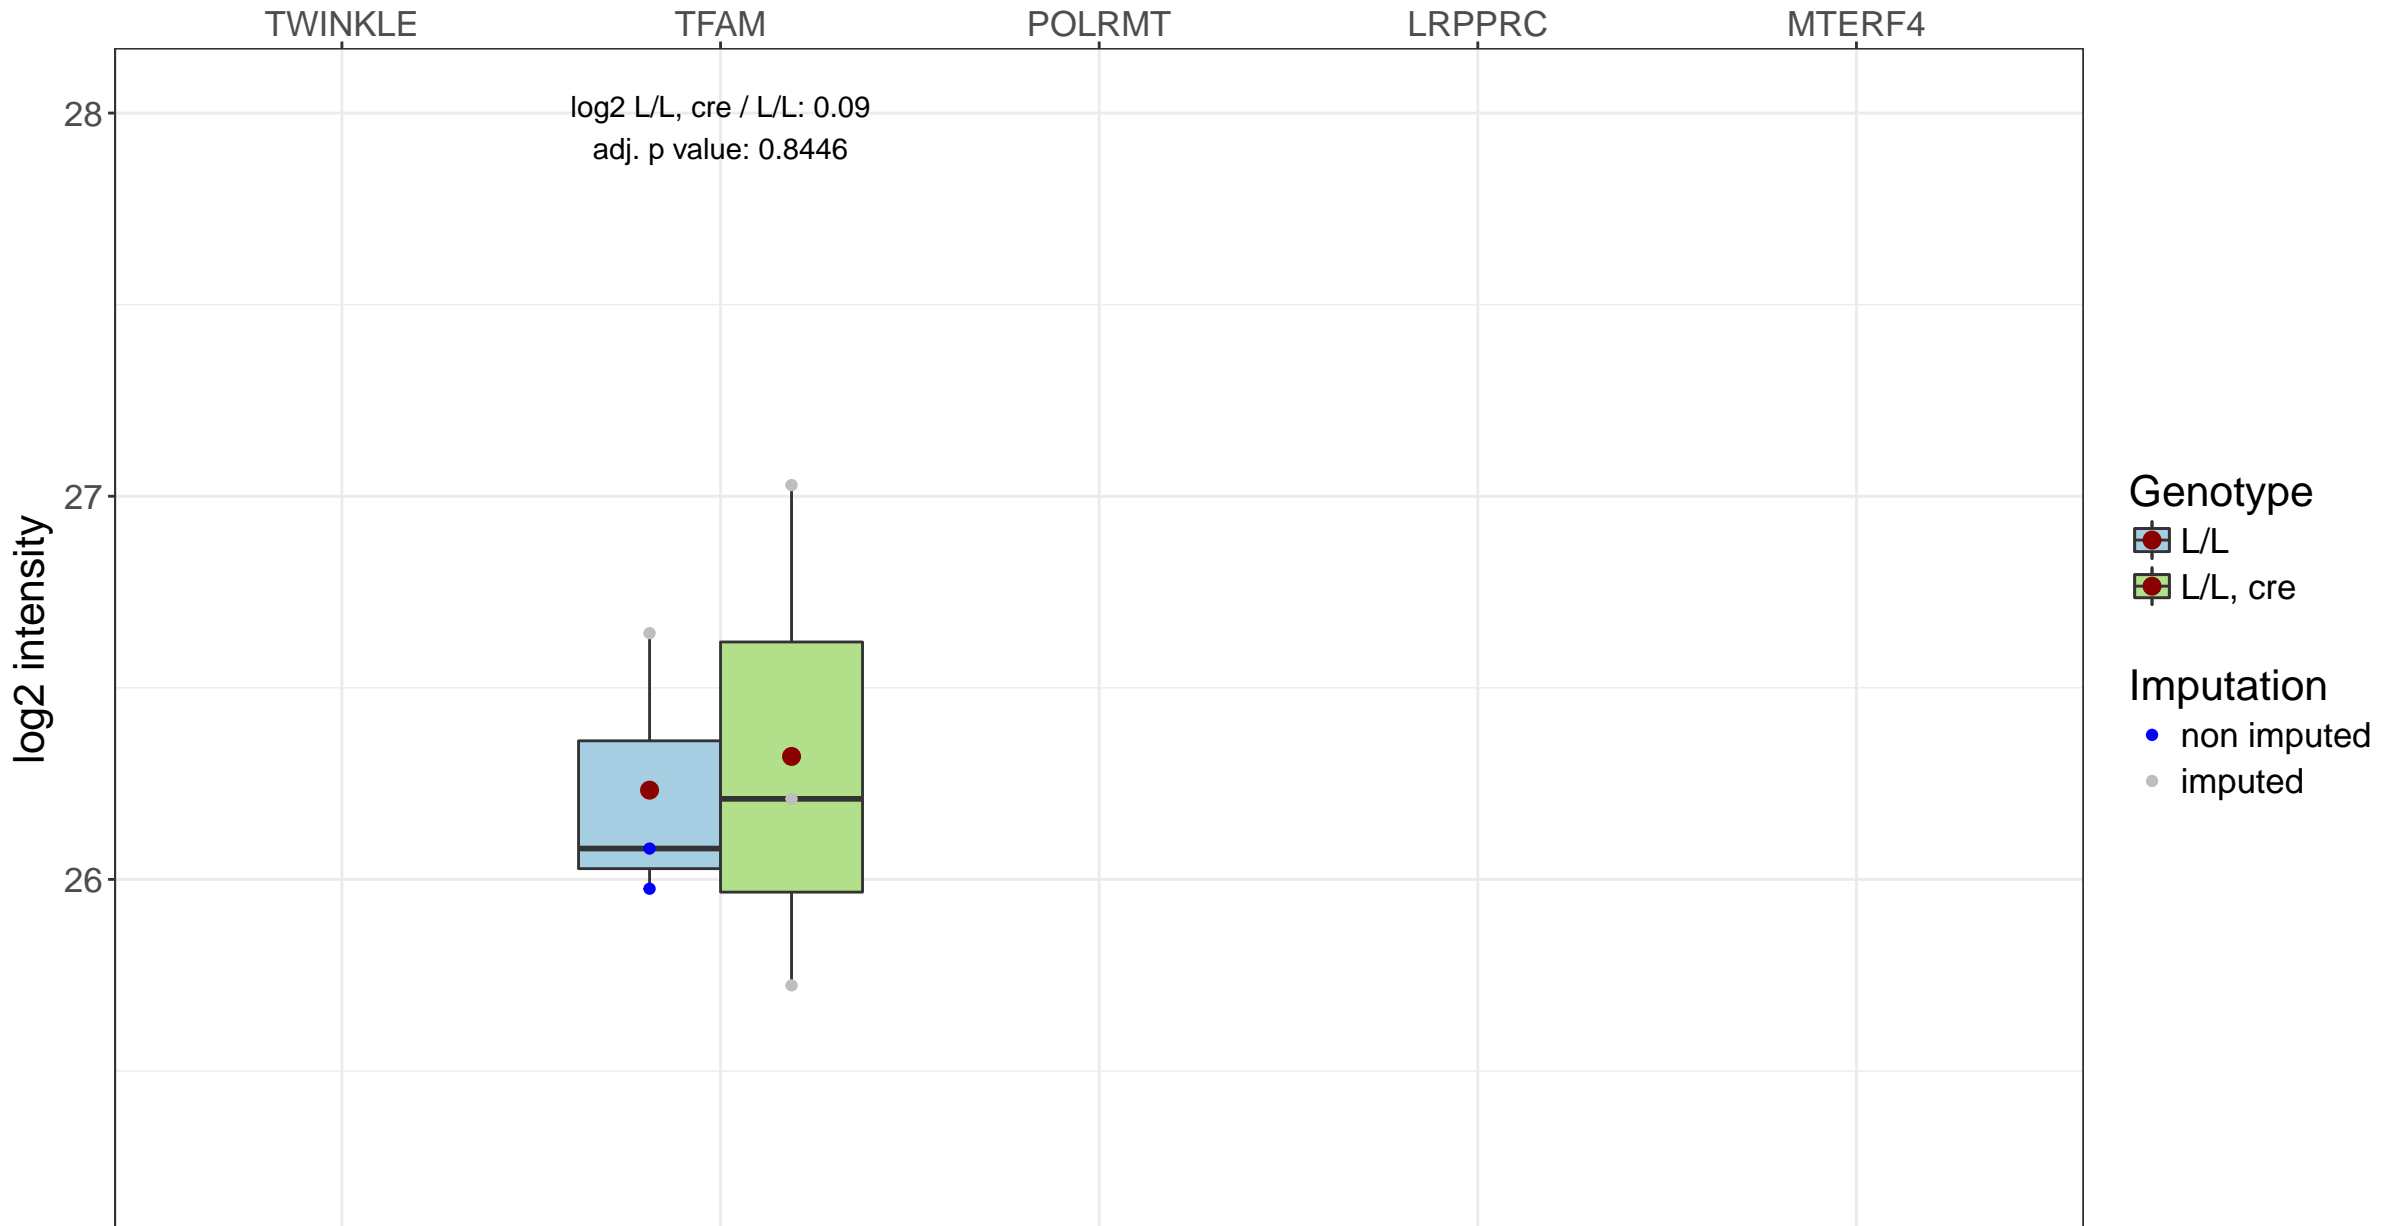

# TARS2 / Q3UQ84

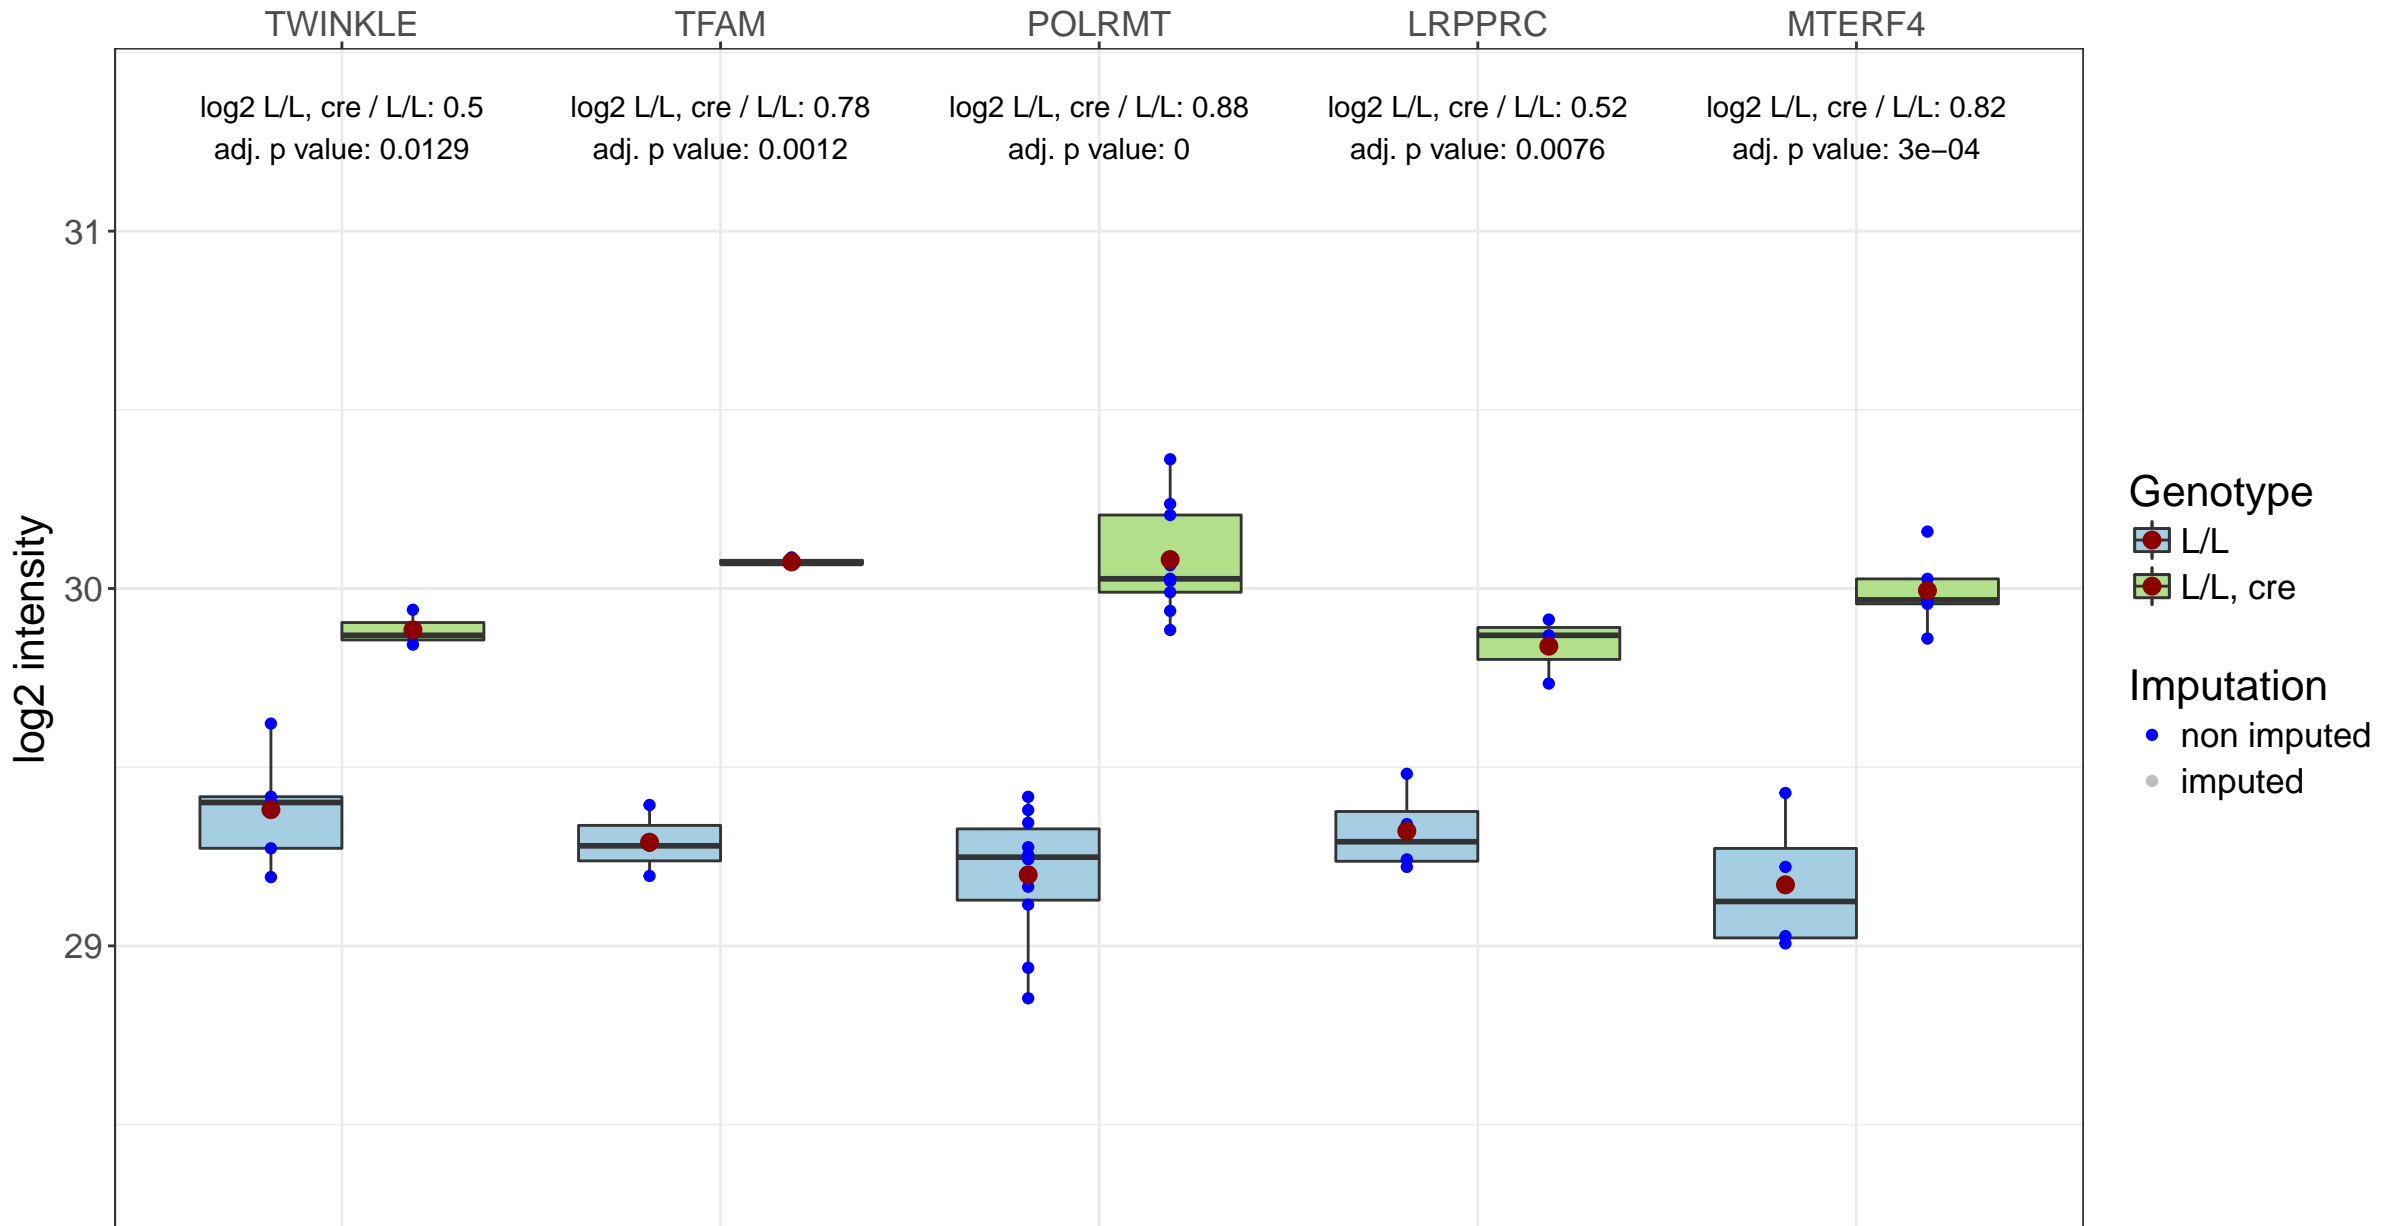

# TBRG4 / Q91YM4

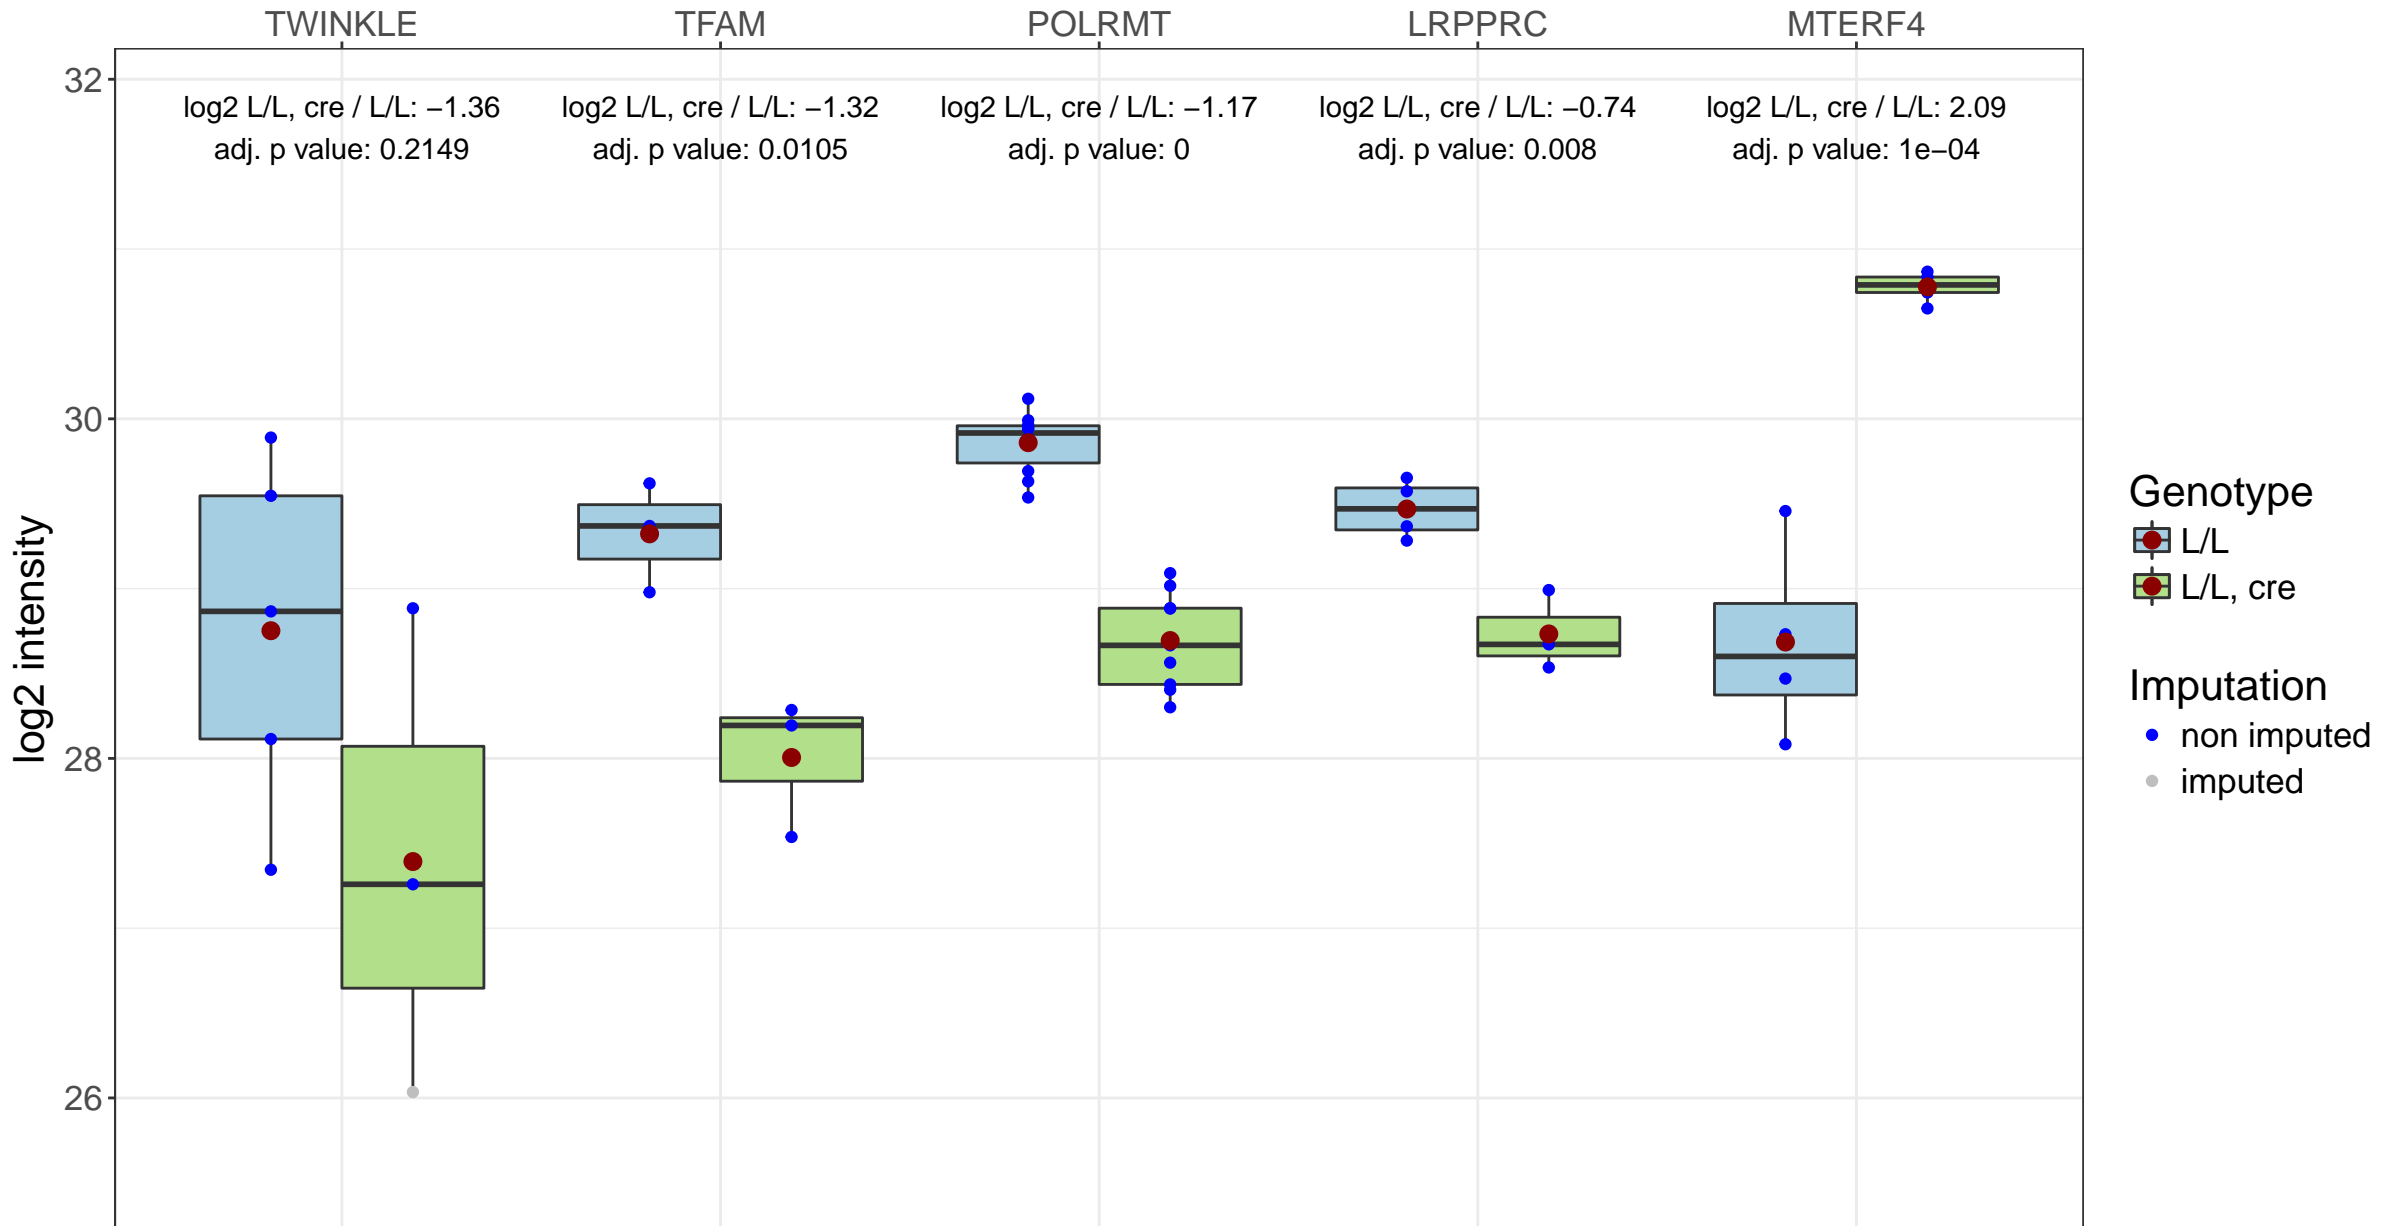



# TCAIM / G3X983

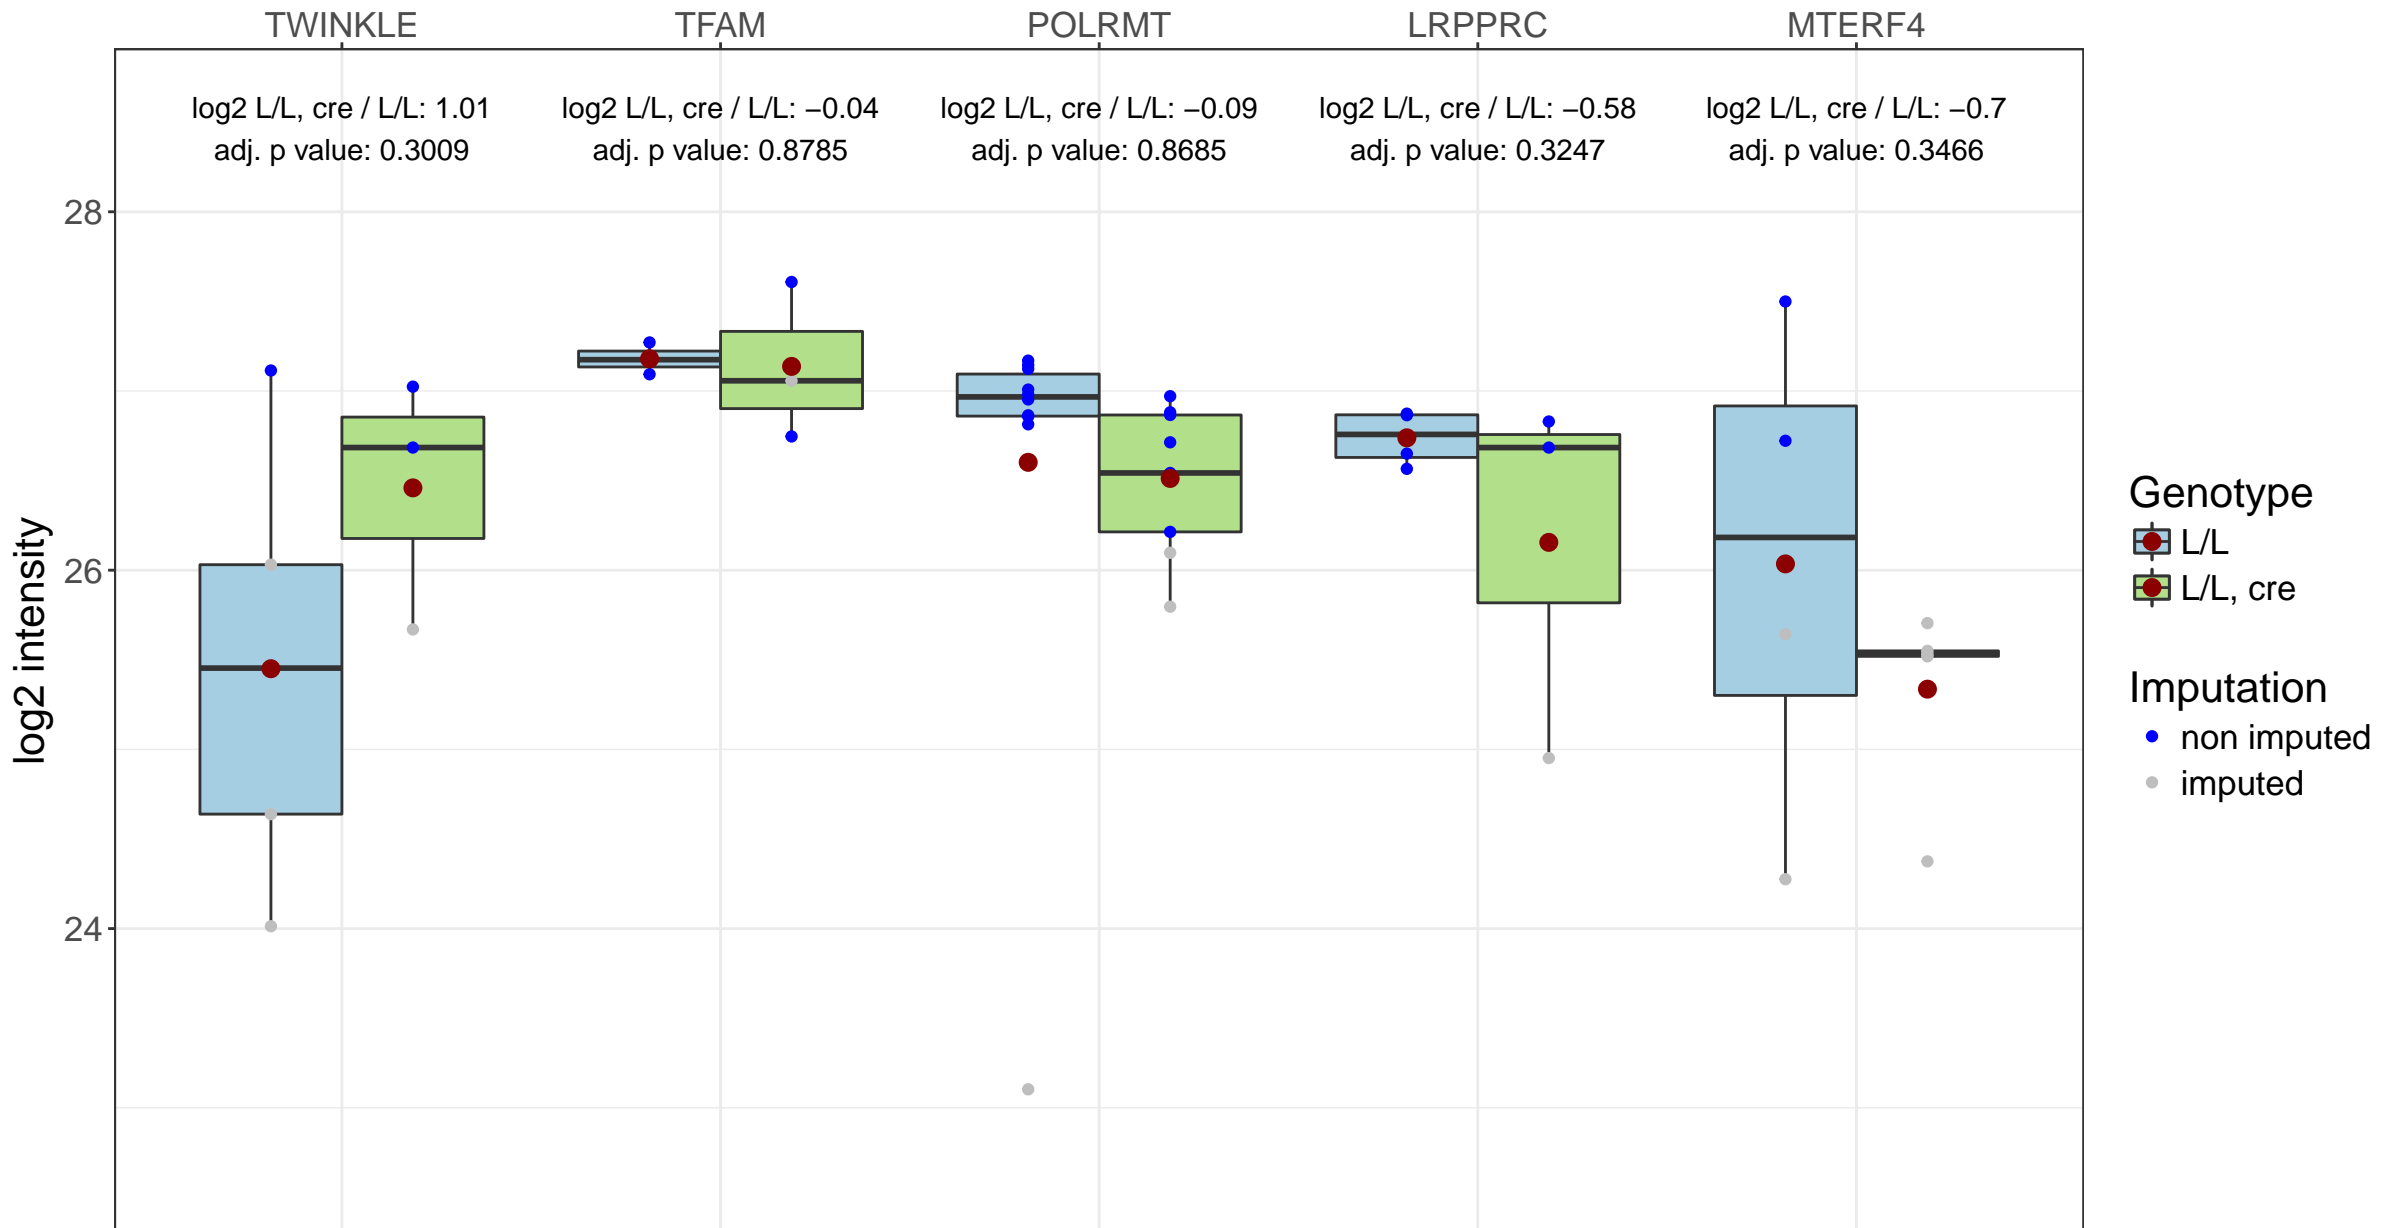

# TEFM / Q5SSK3

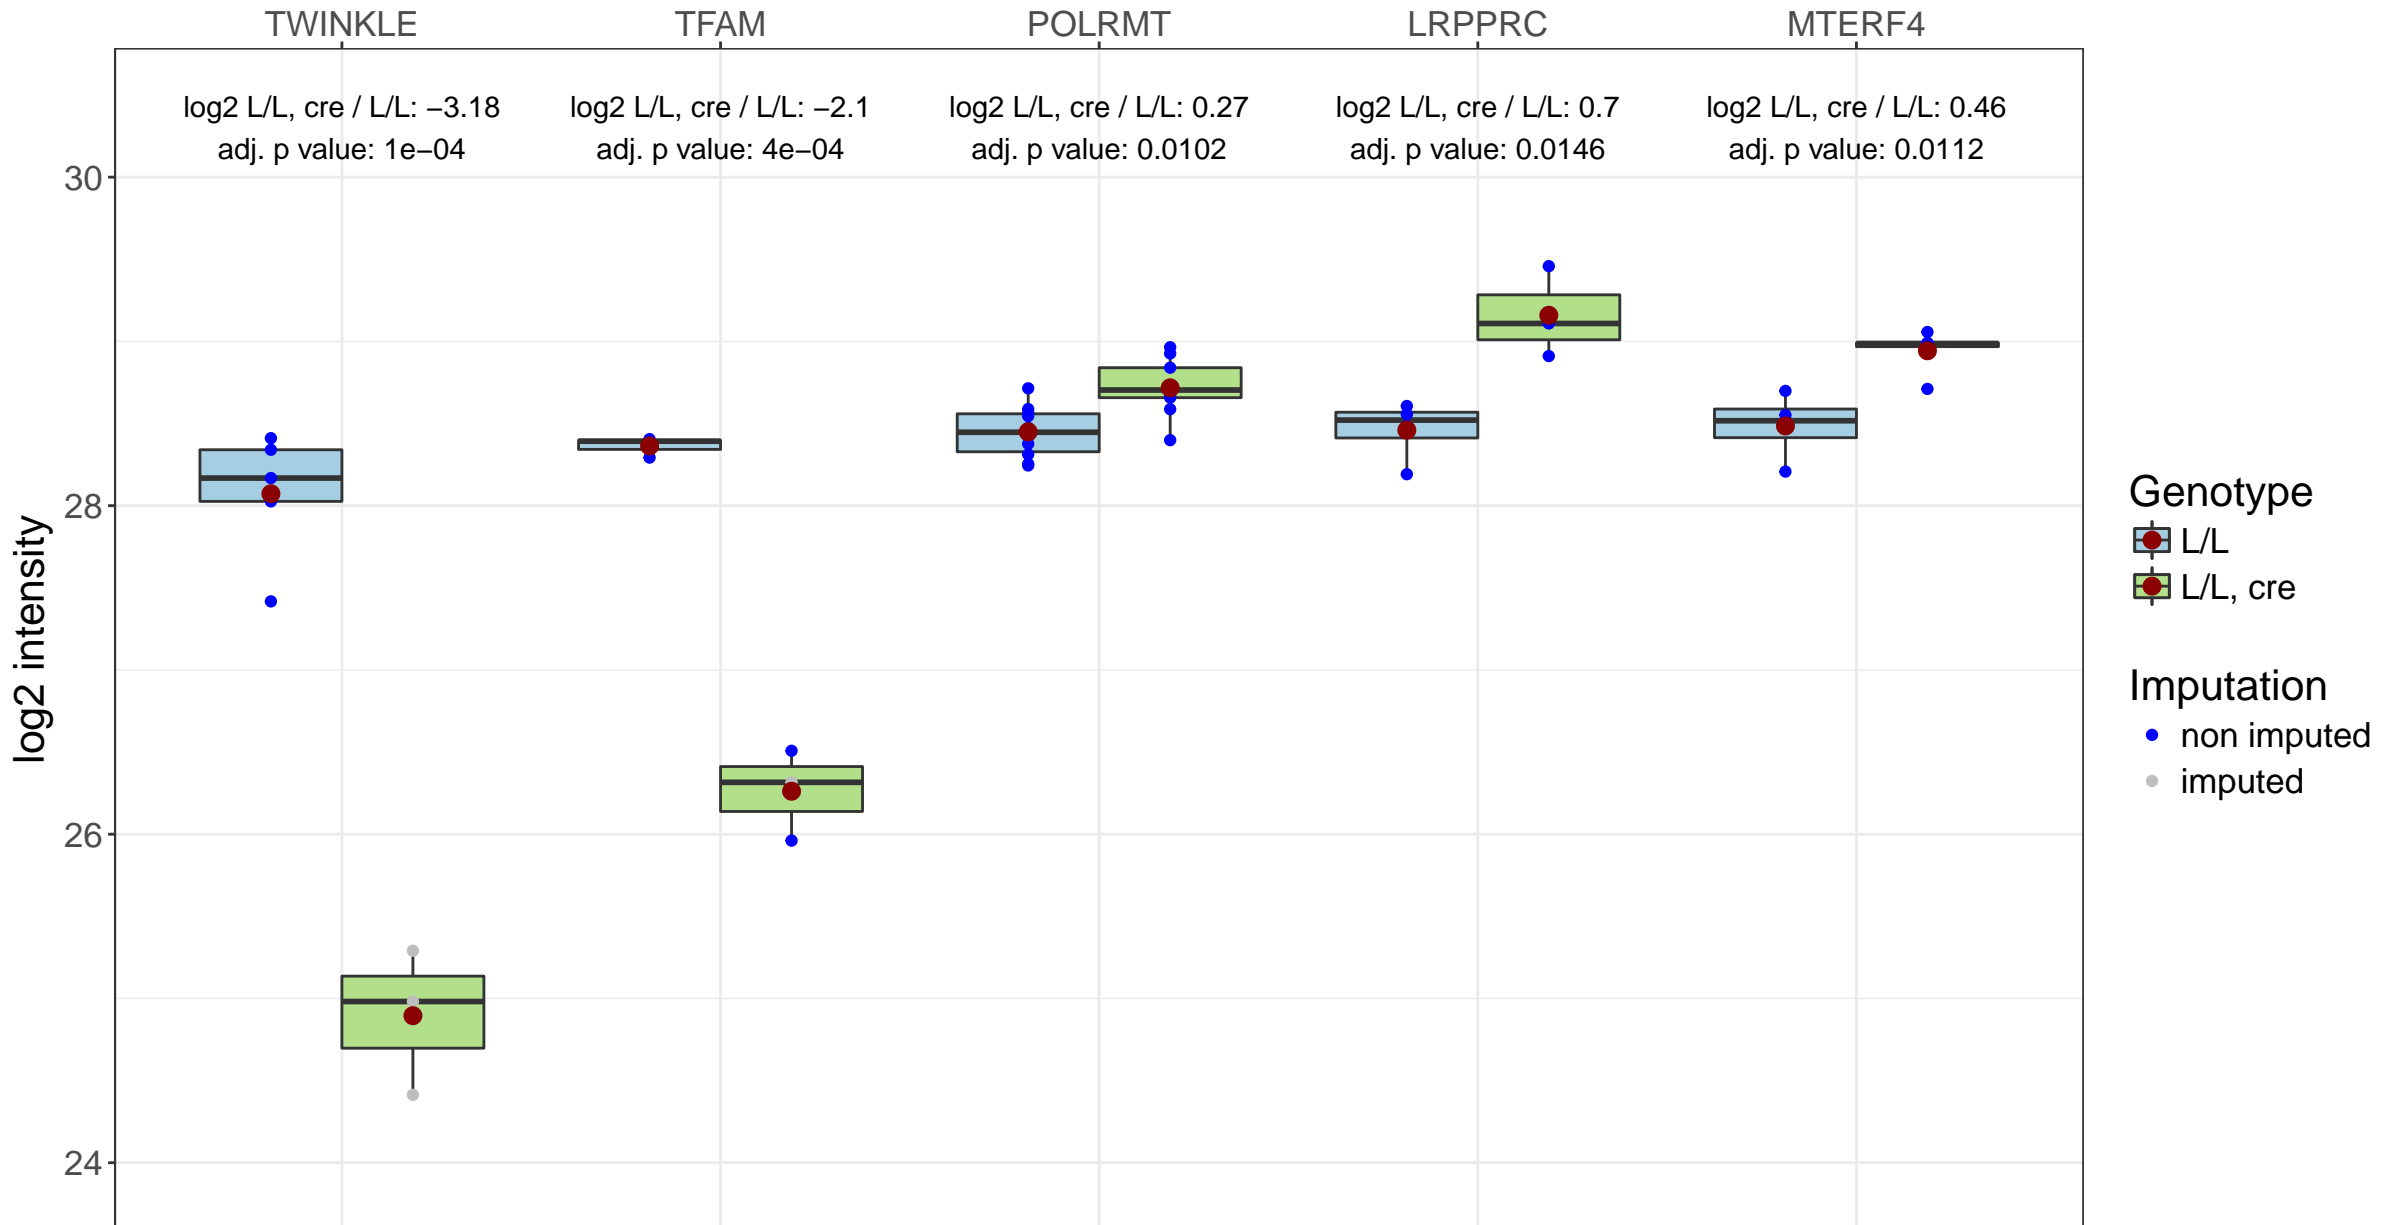

# TFAM / P40630-2

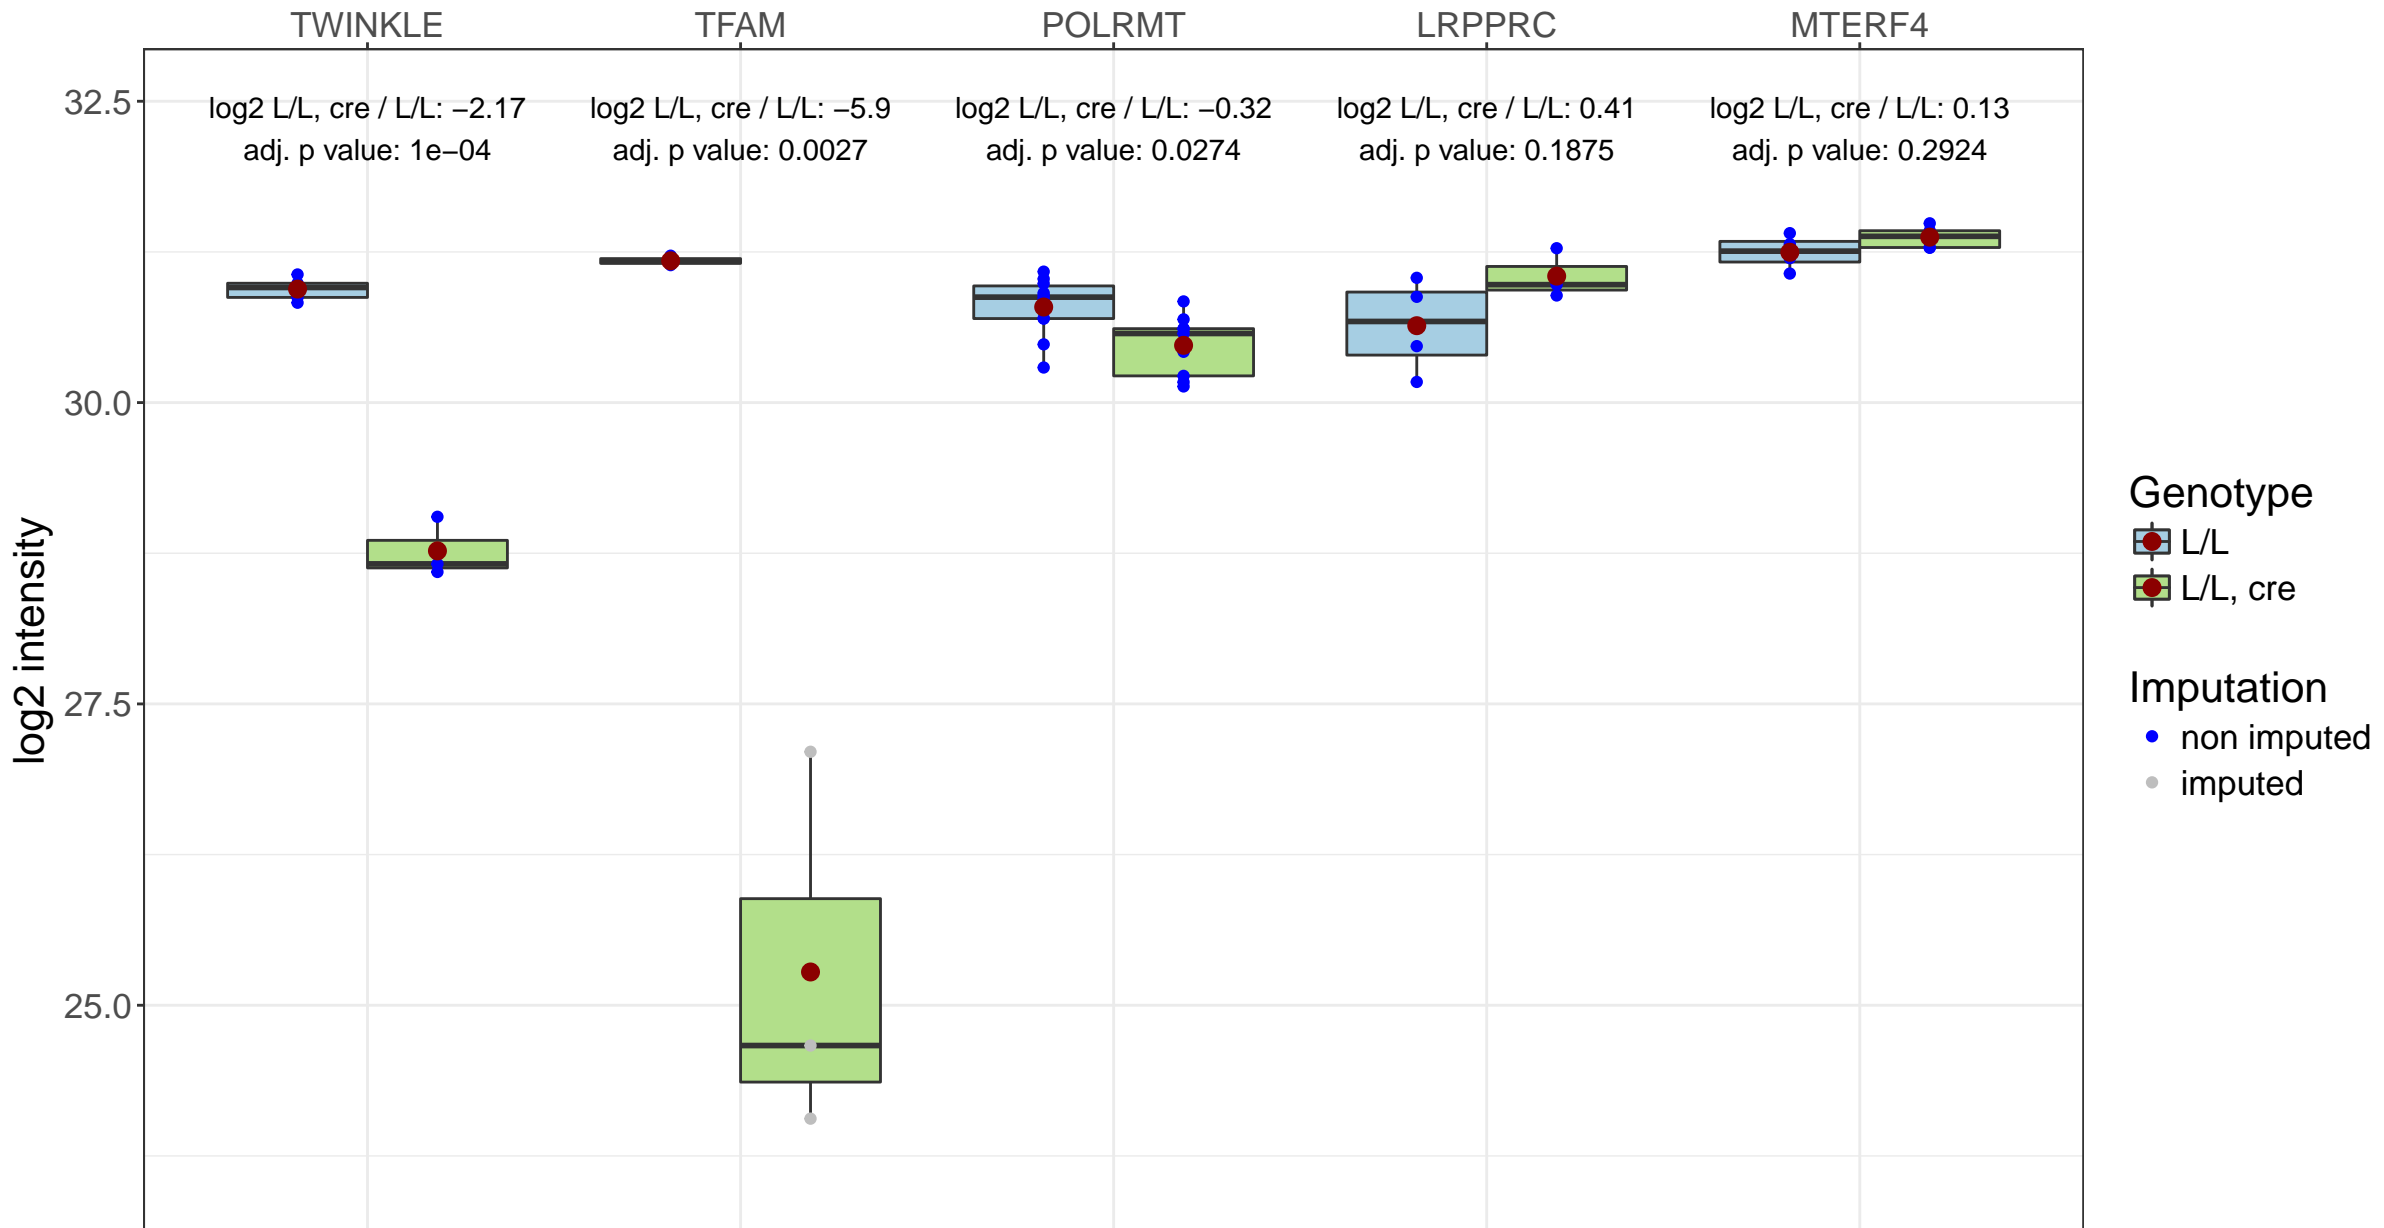

# TFB1M / Q8JZM0

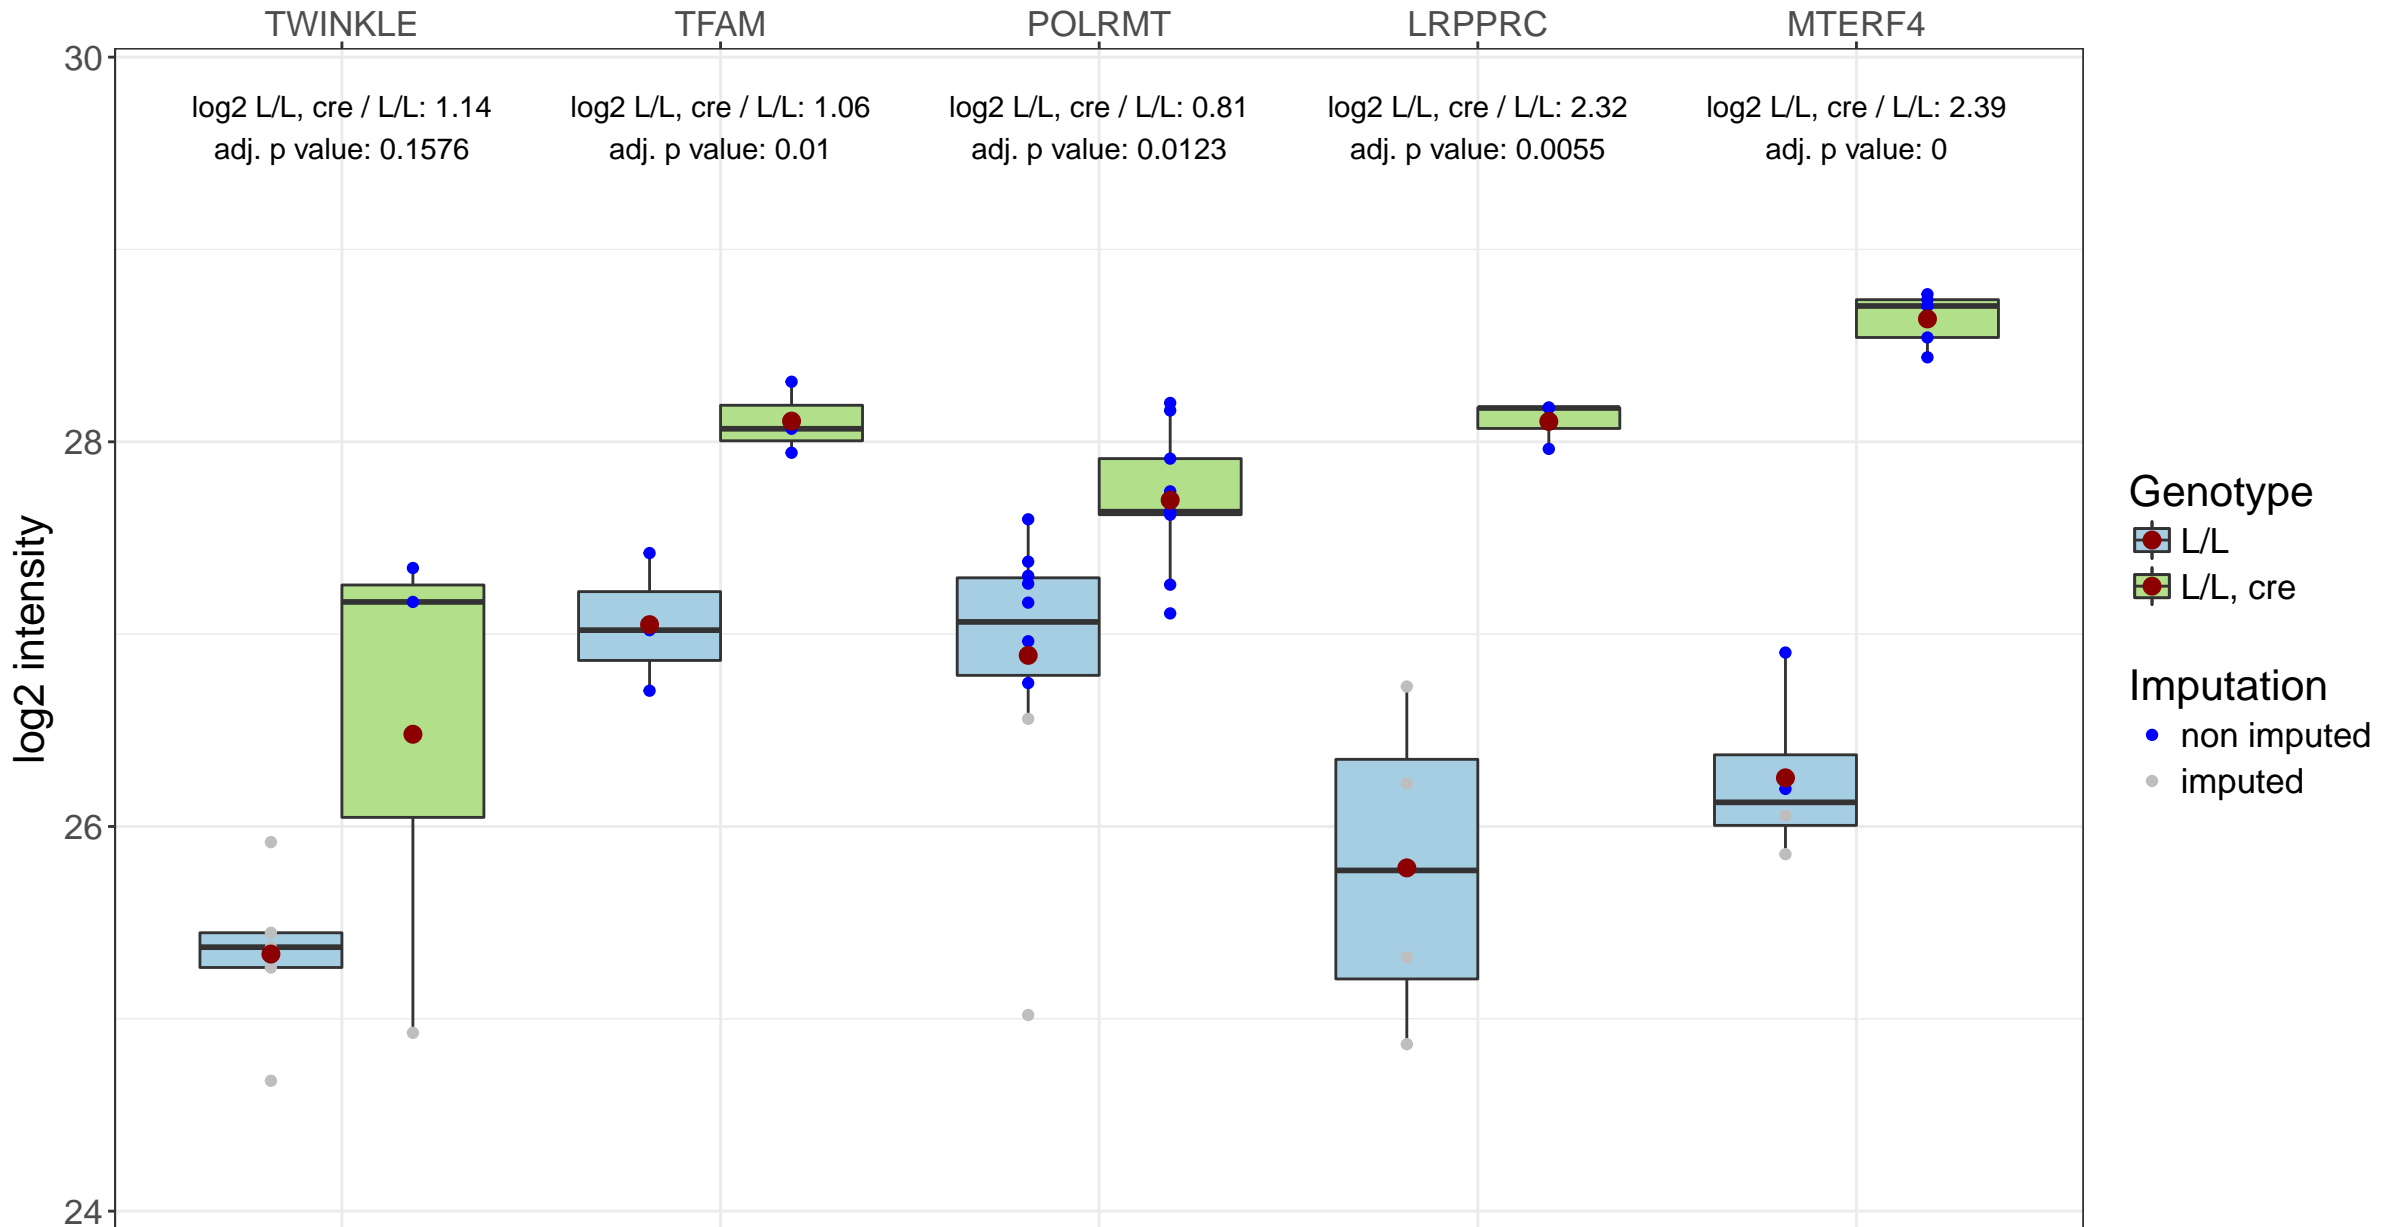

# THA1 / Q6XPS7

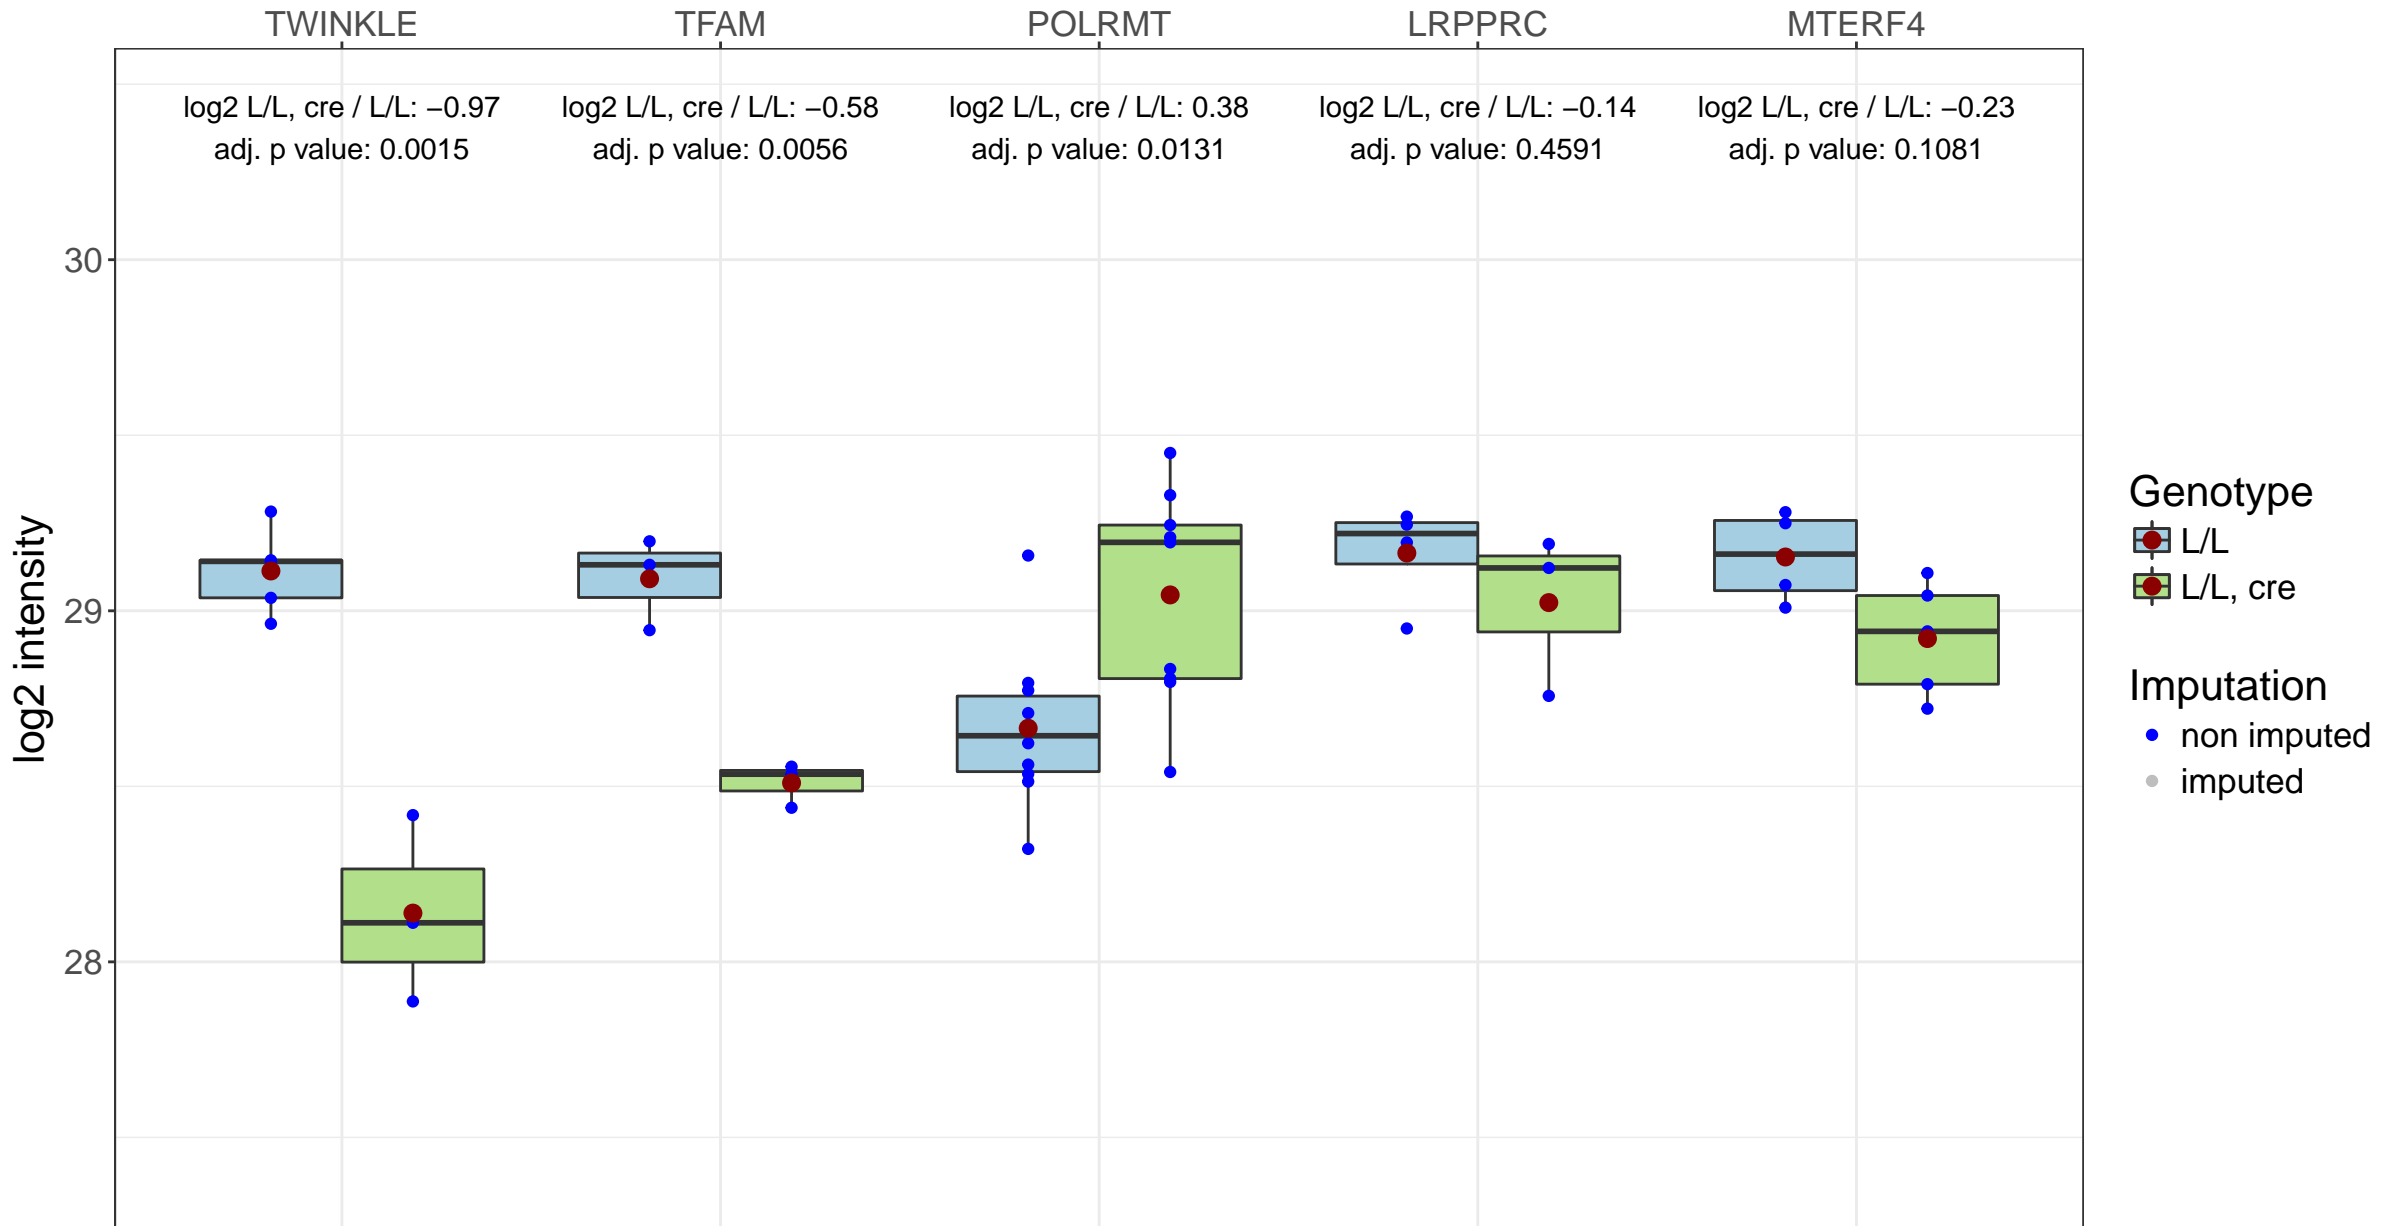

# THEM4 / Q3UUI3

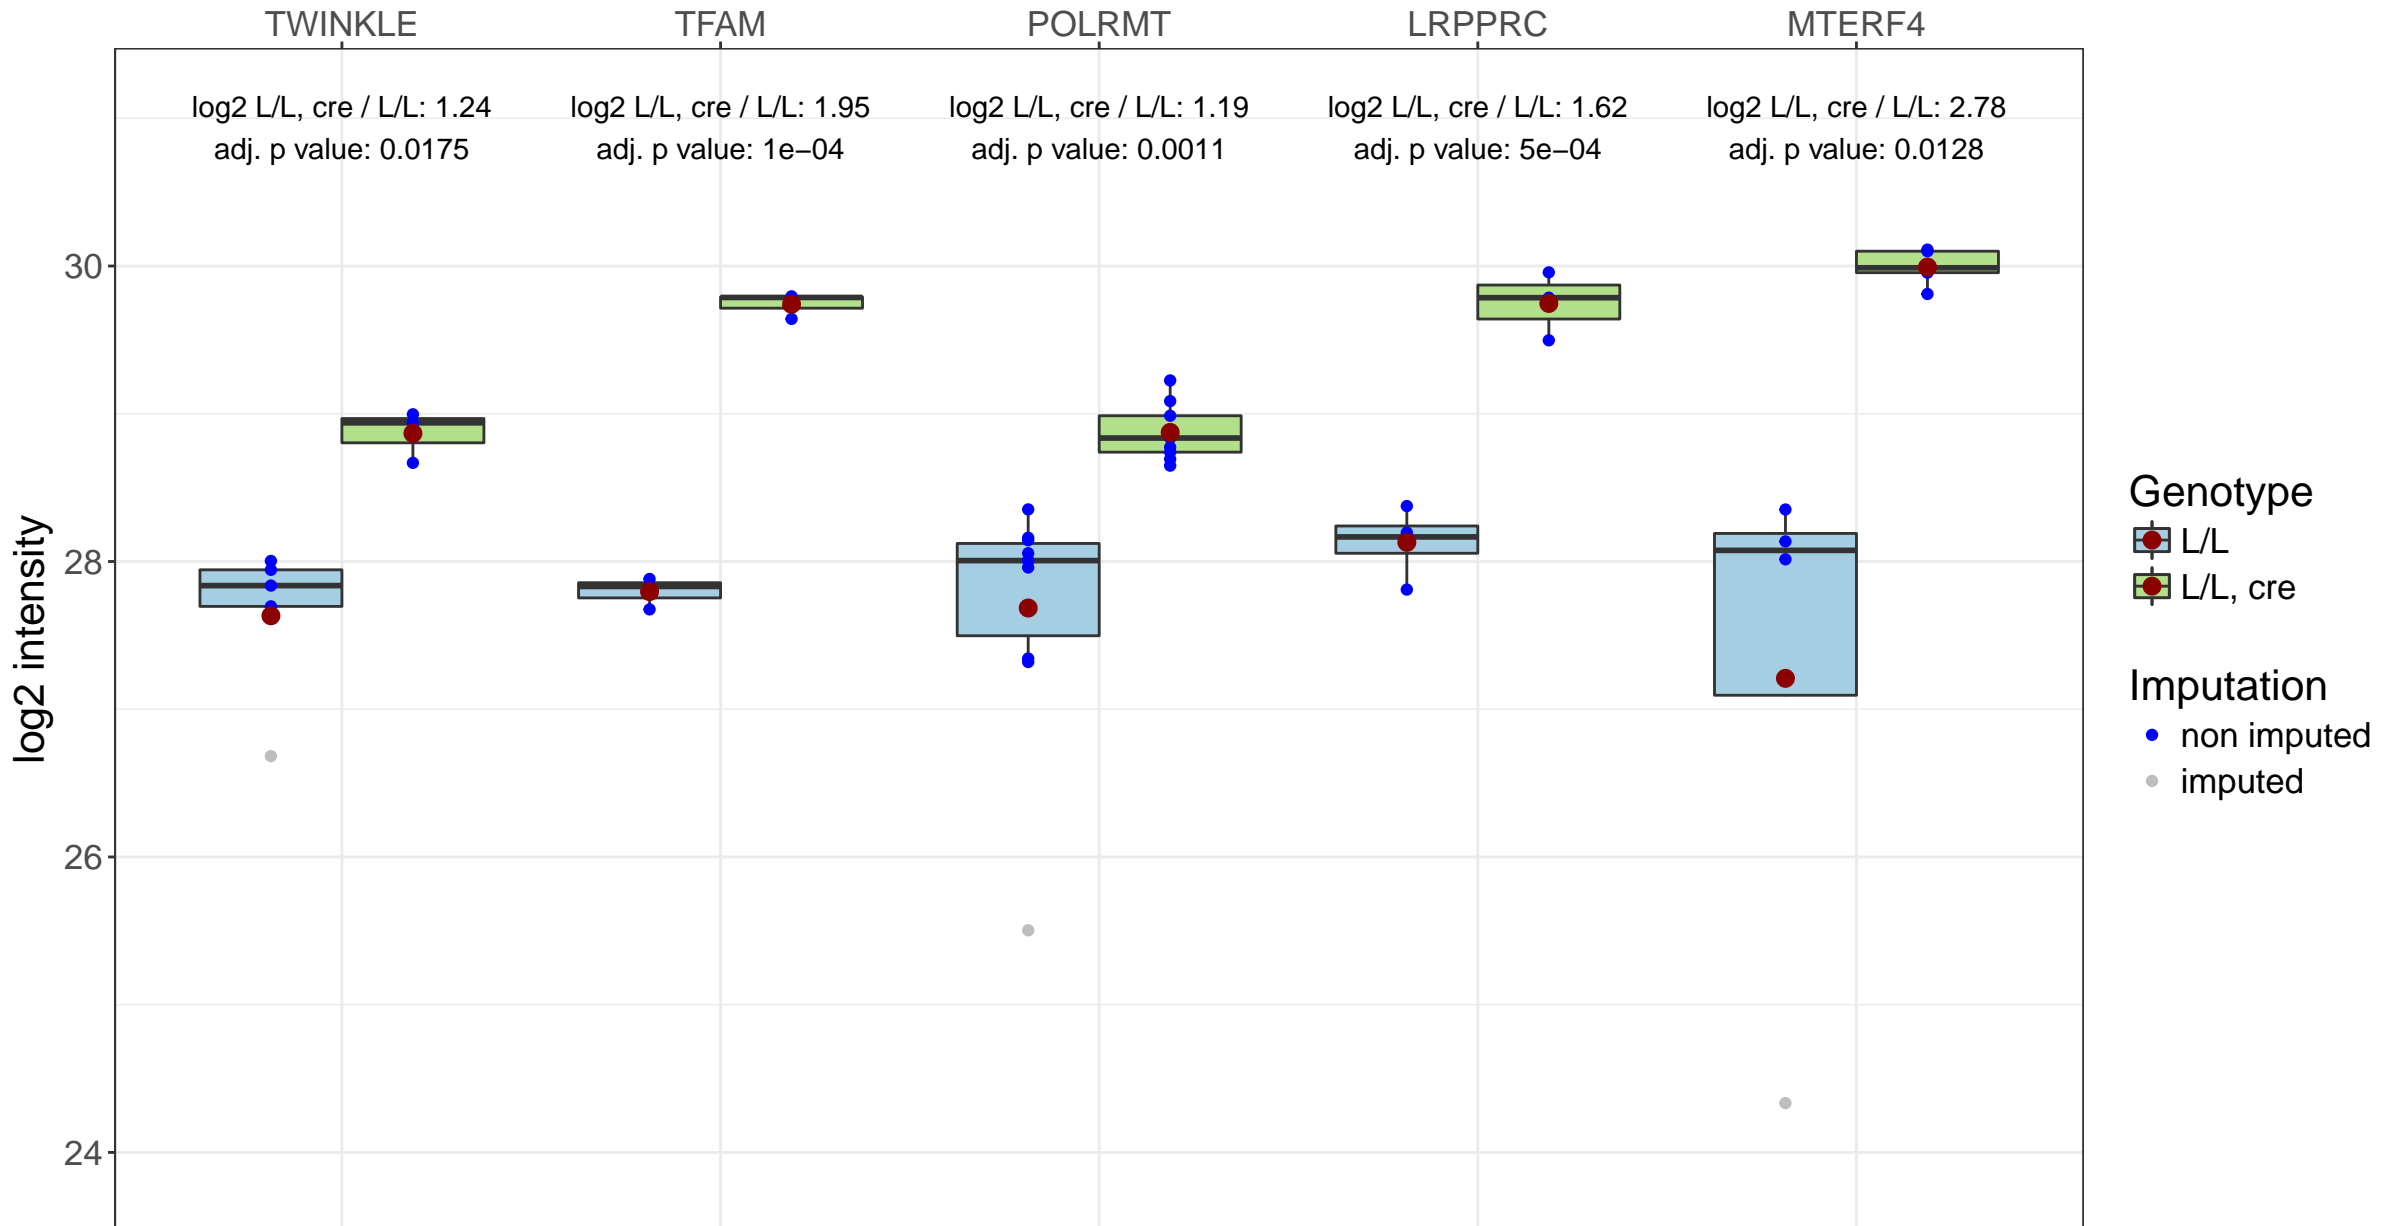

# THNSL1 / Q8BH55

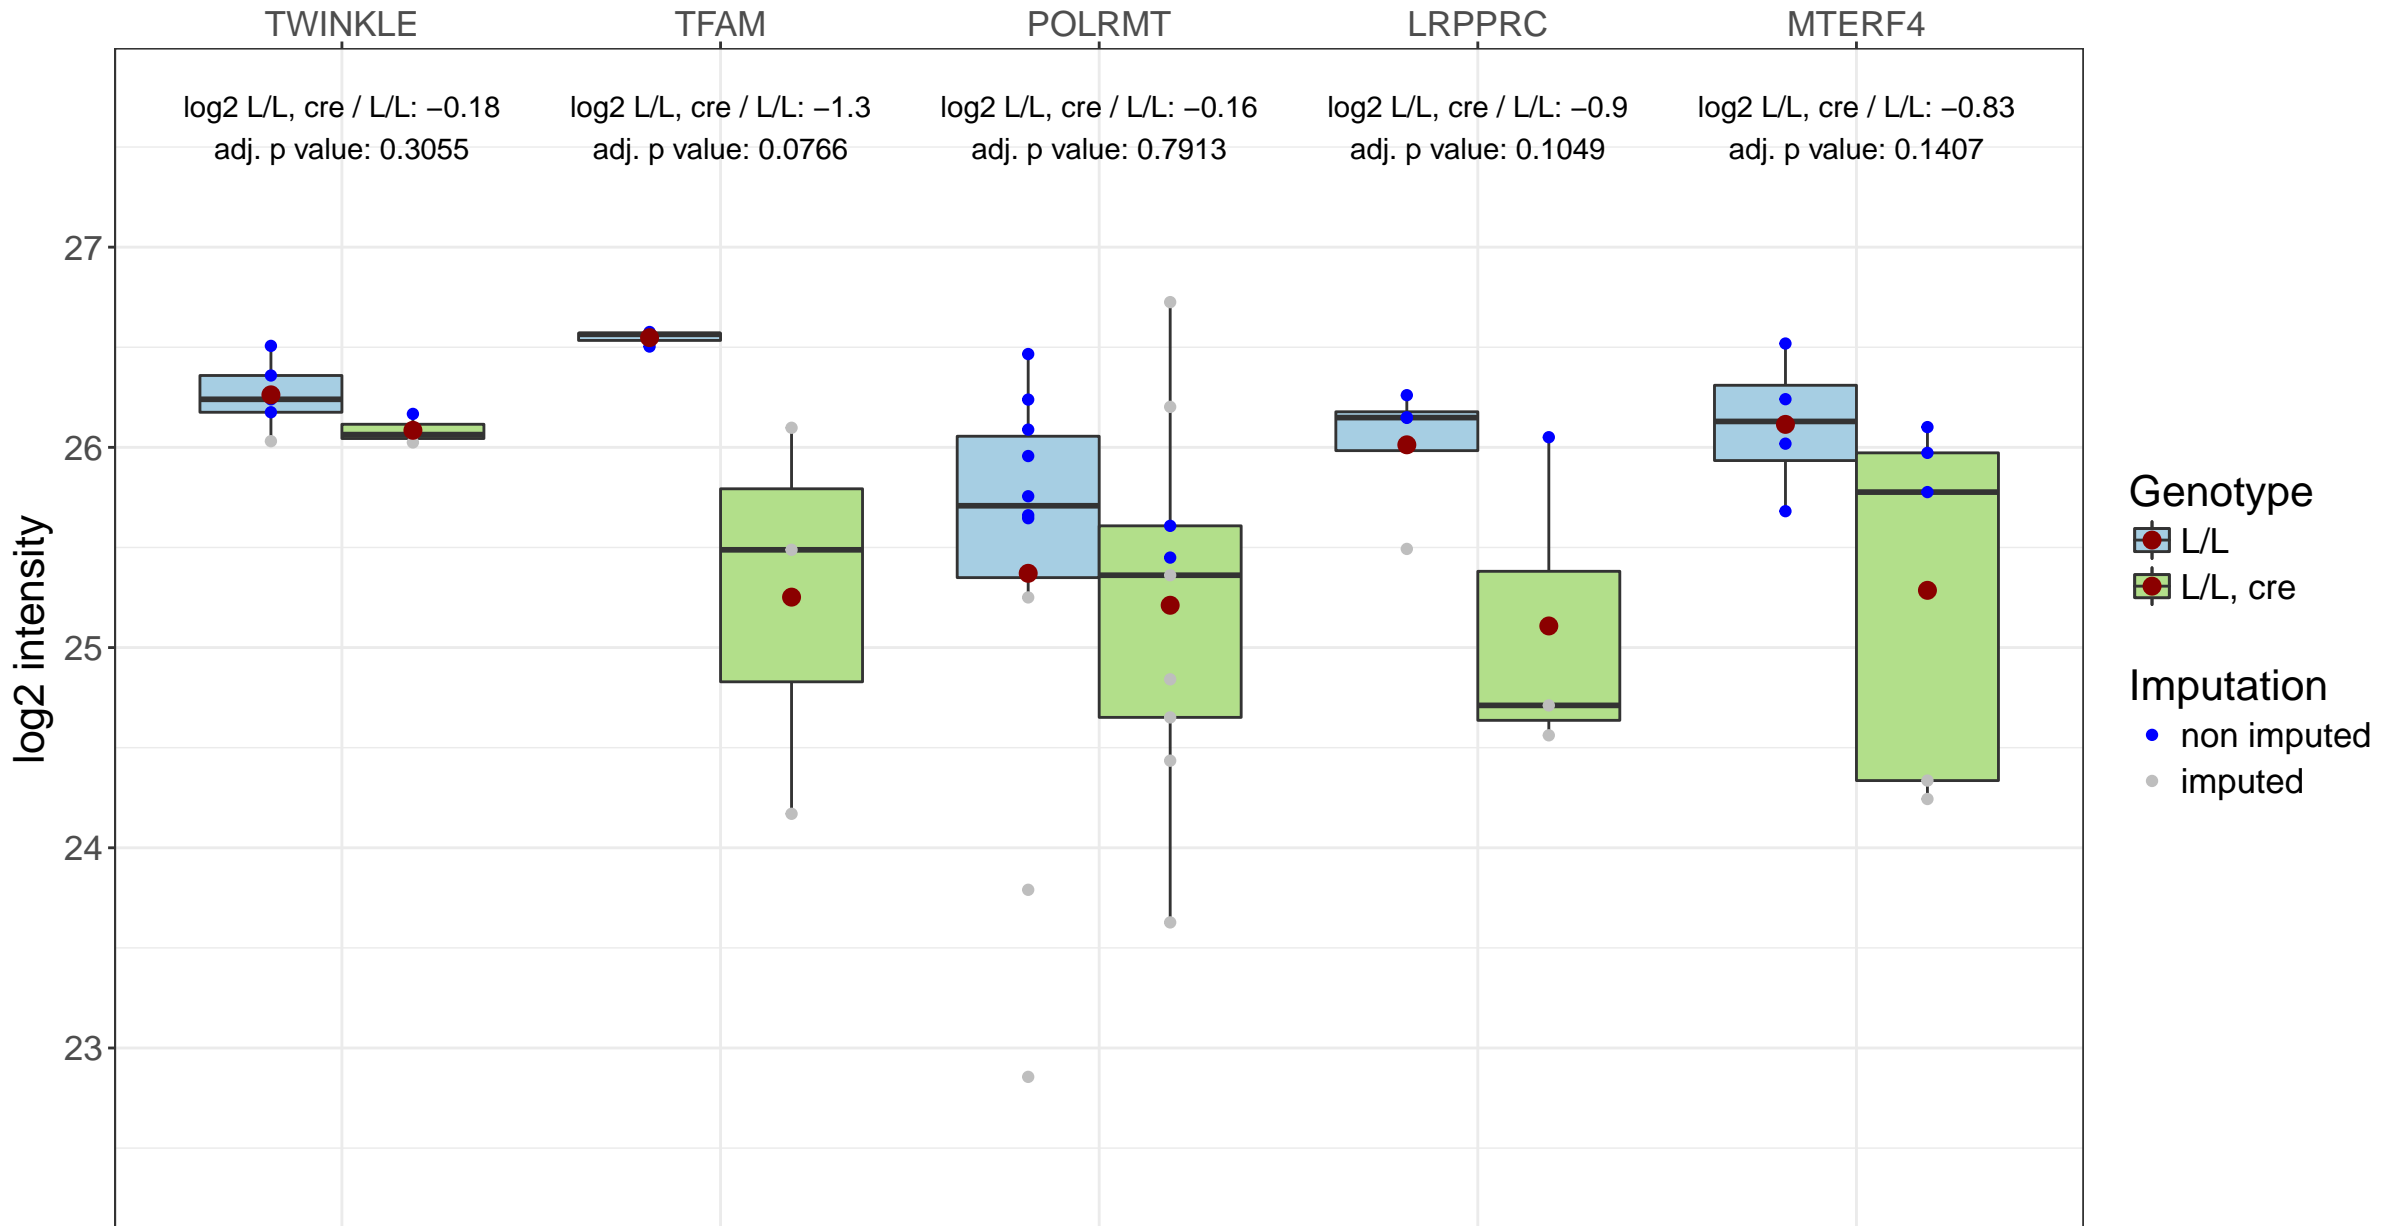

# TIMM10 / P62073

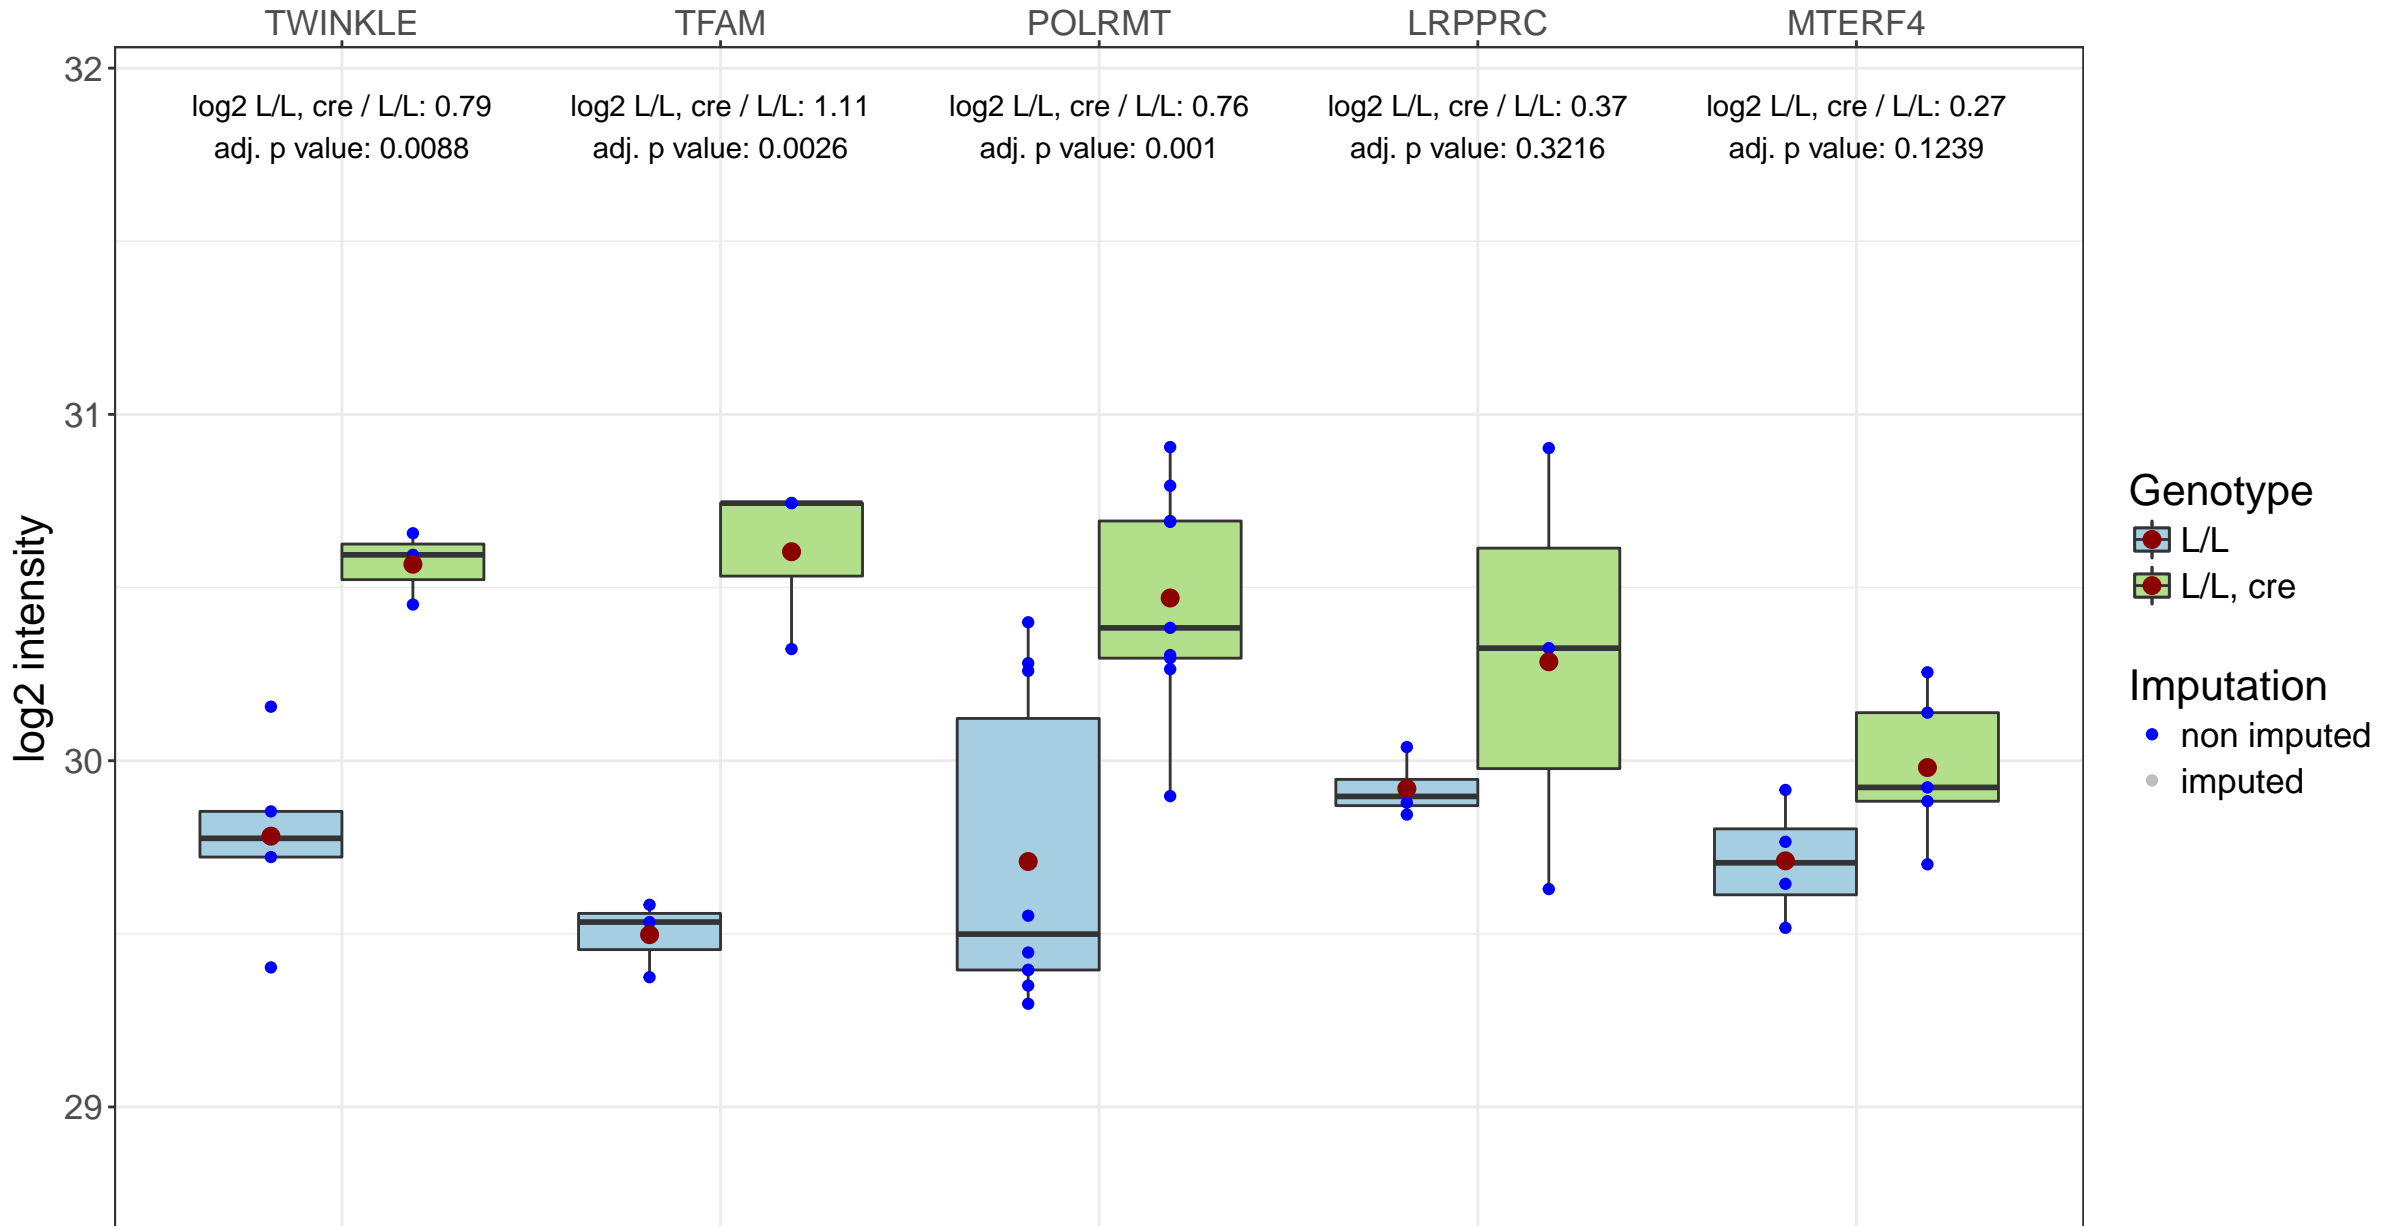



# TIMM10B / Q9WV96

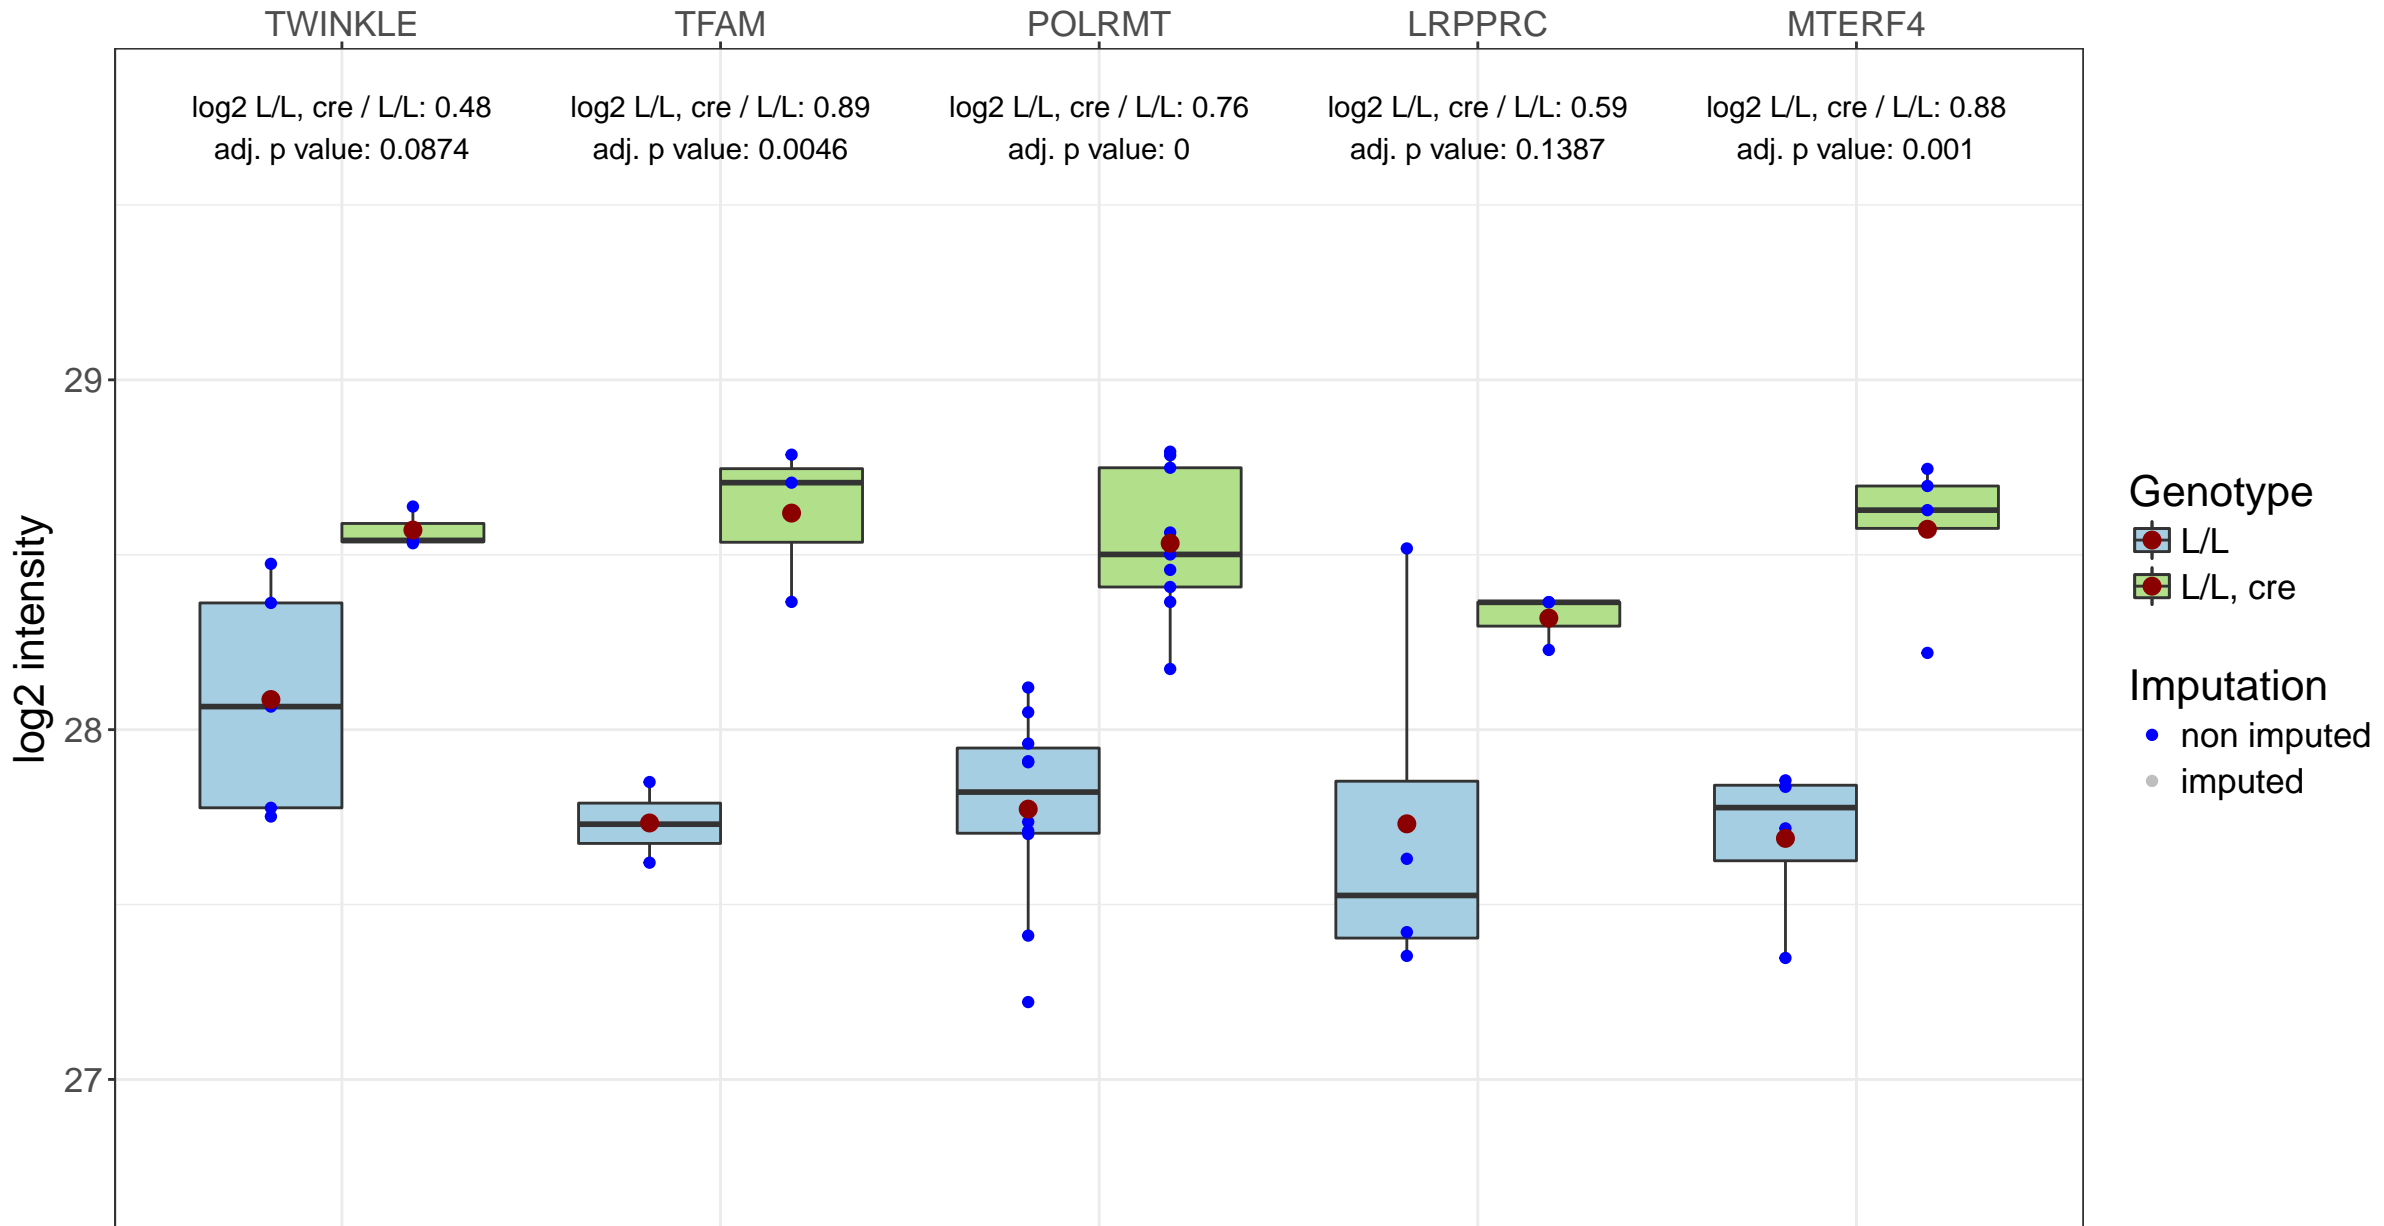

# TIMM13 / P62075

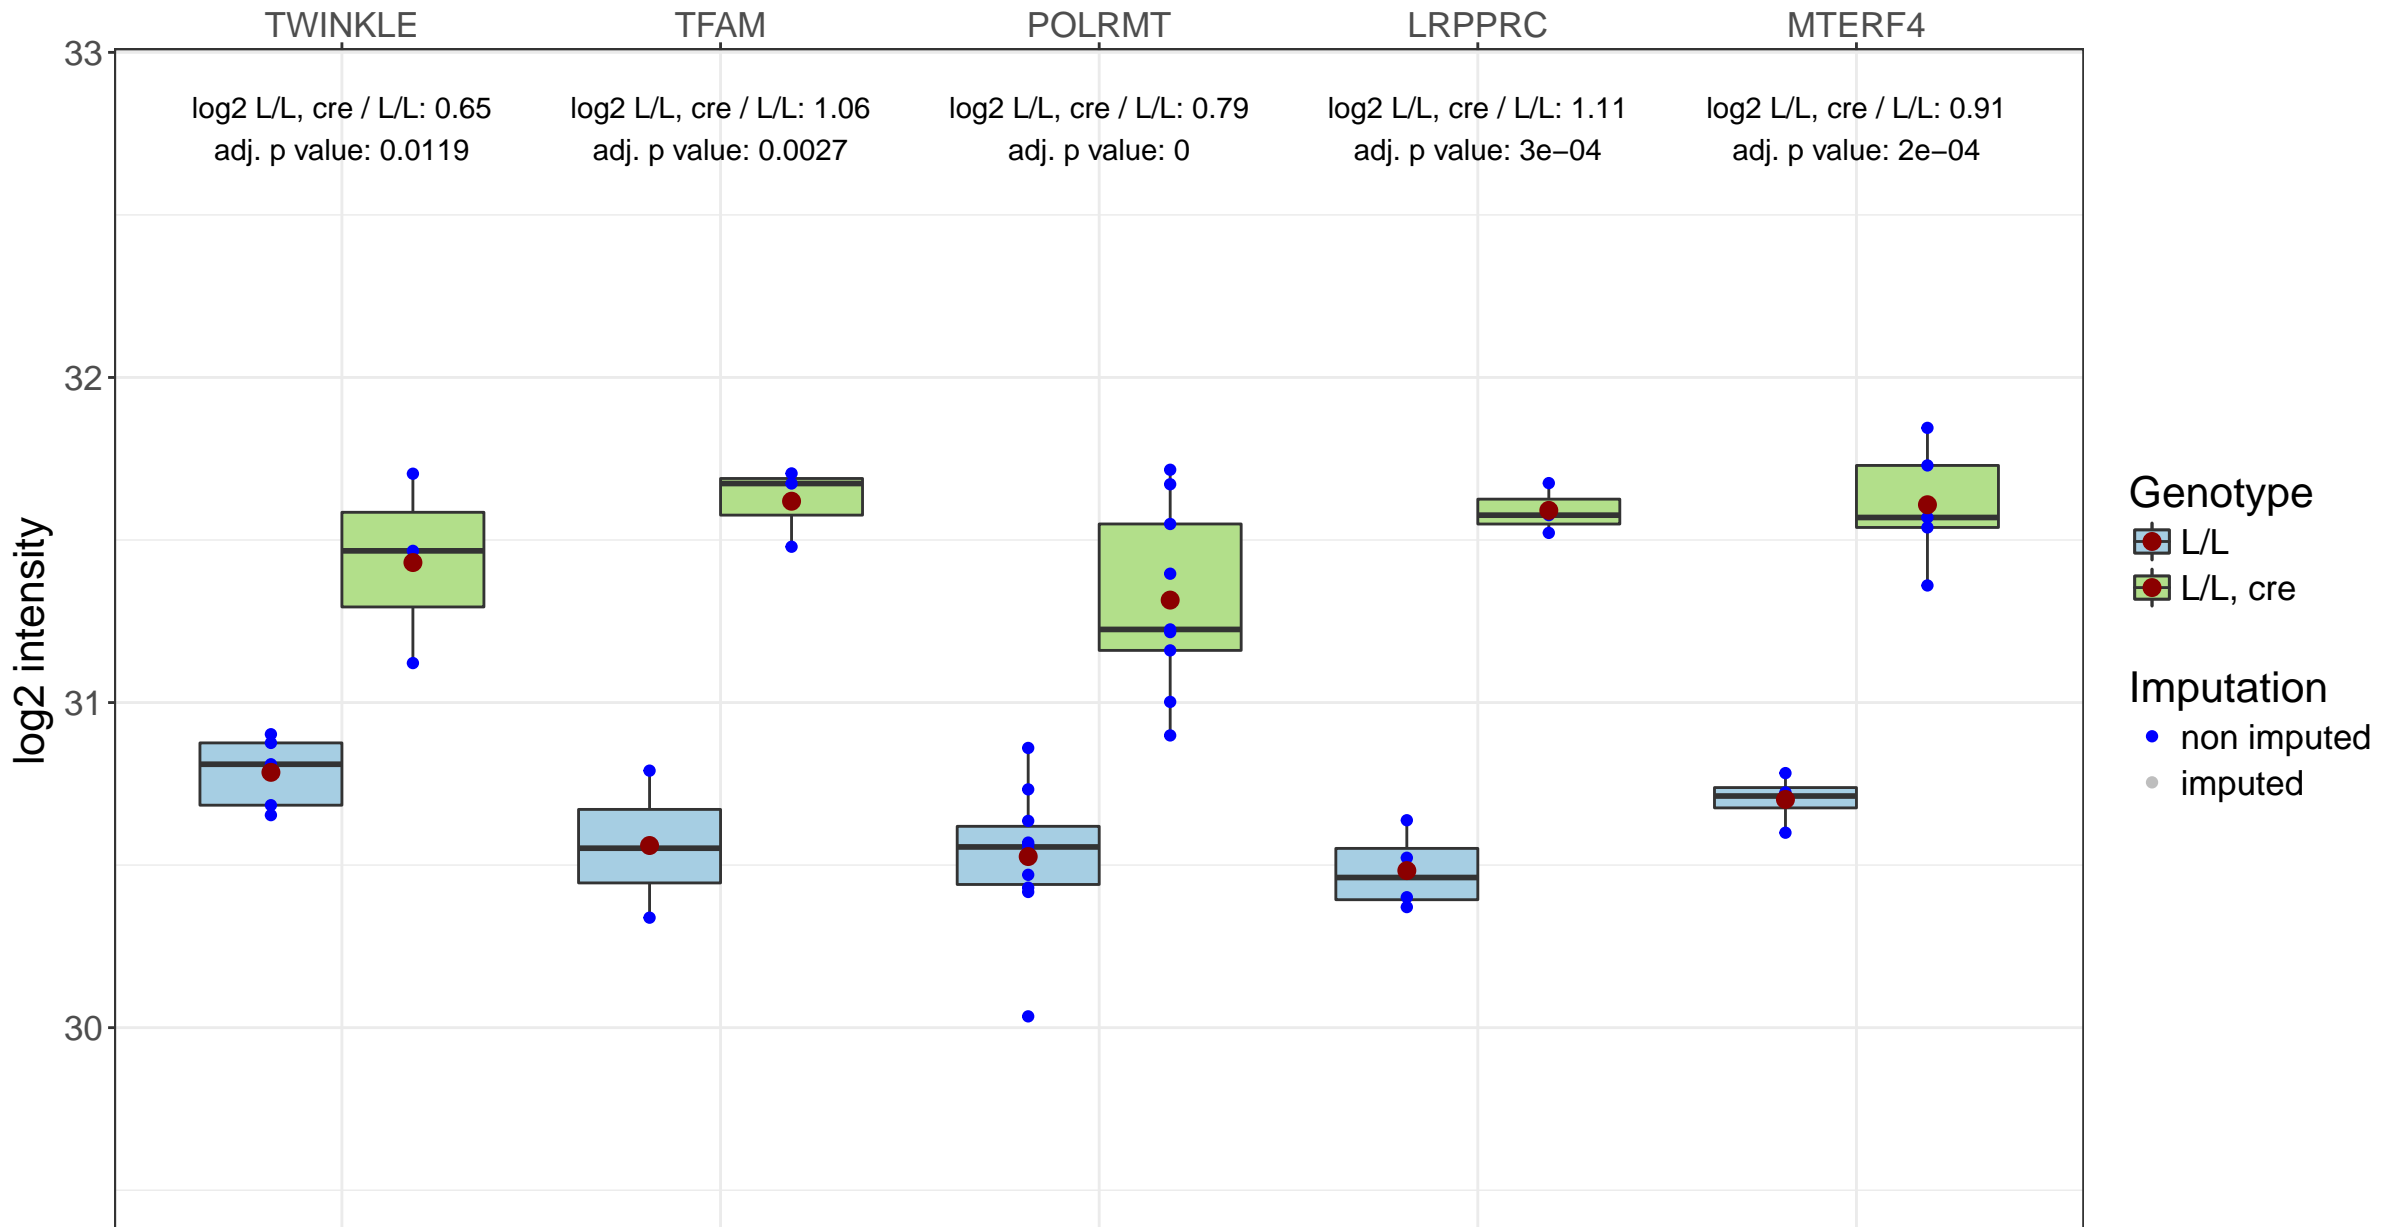

# TIMM17A / Q9Z0V8

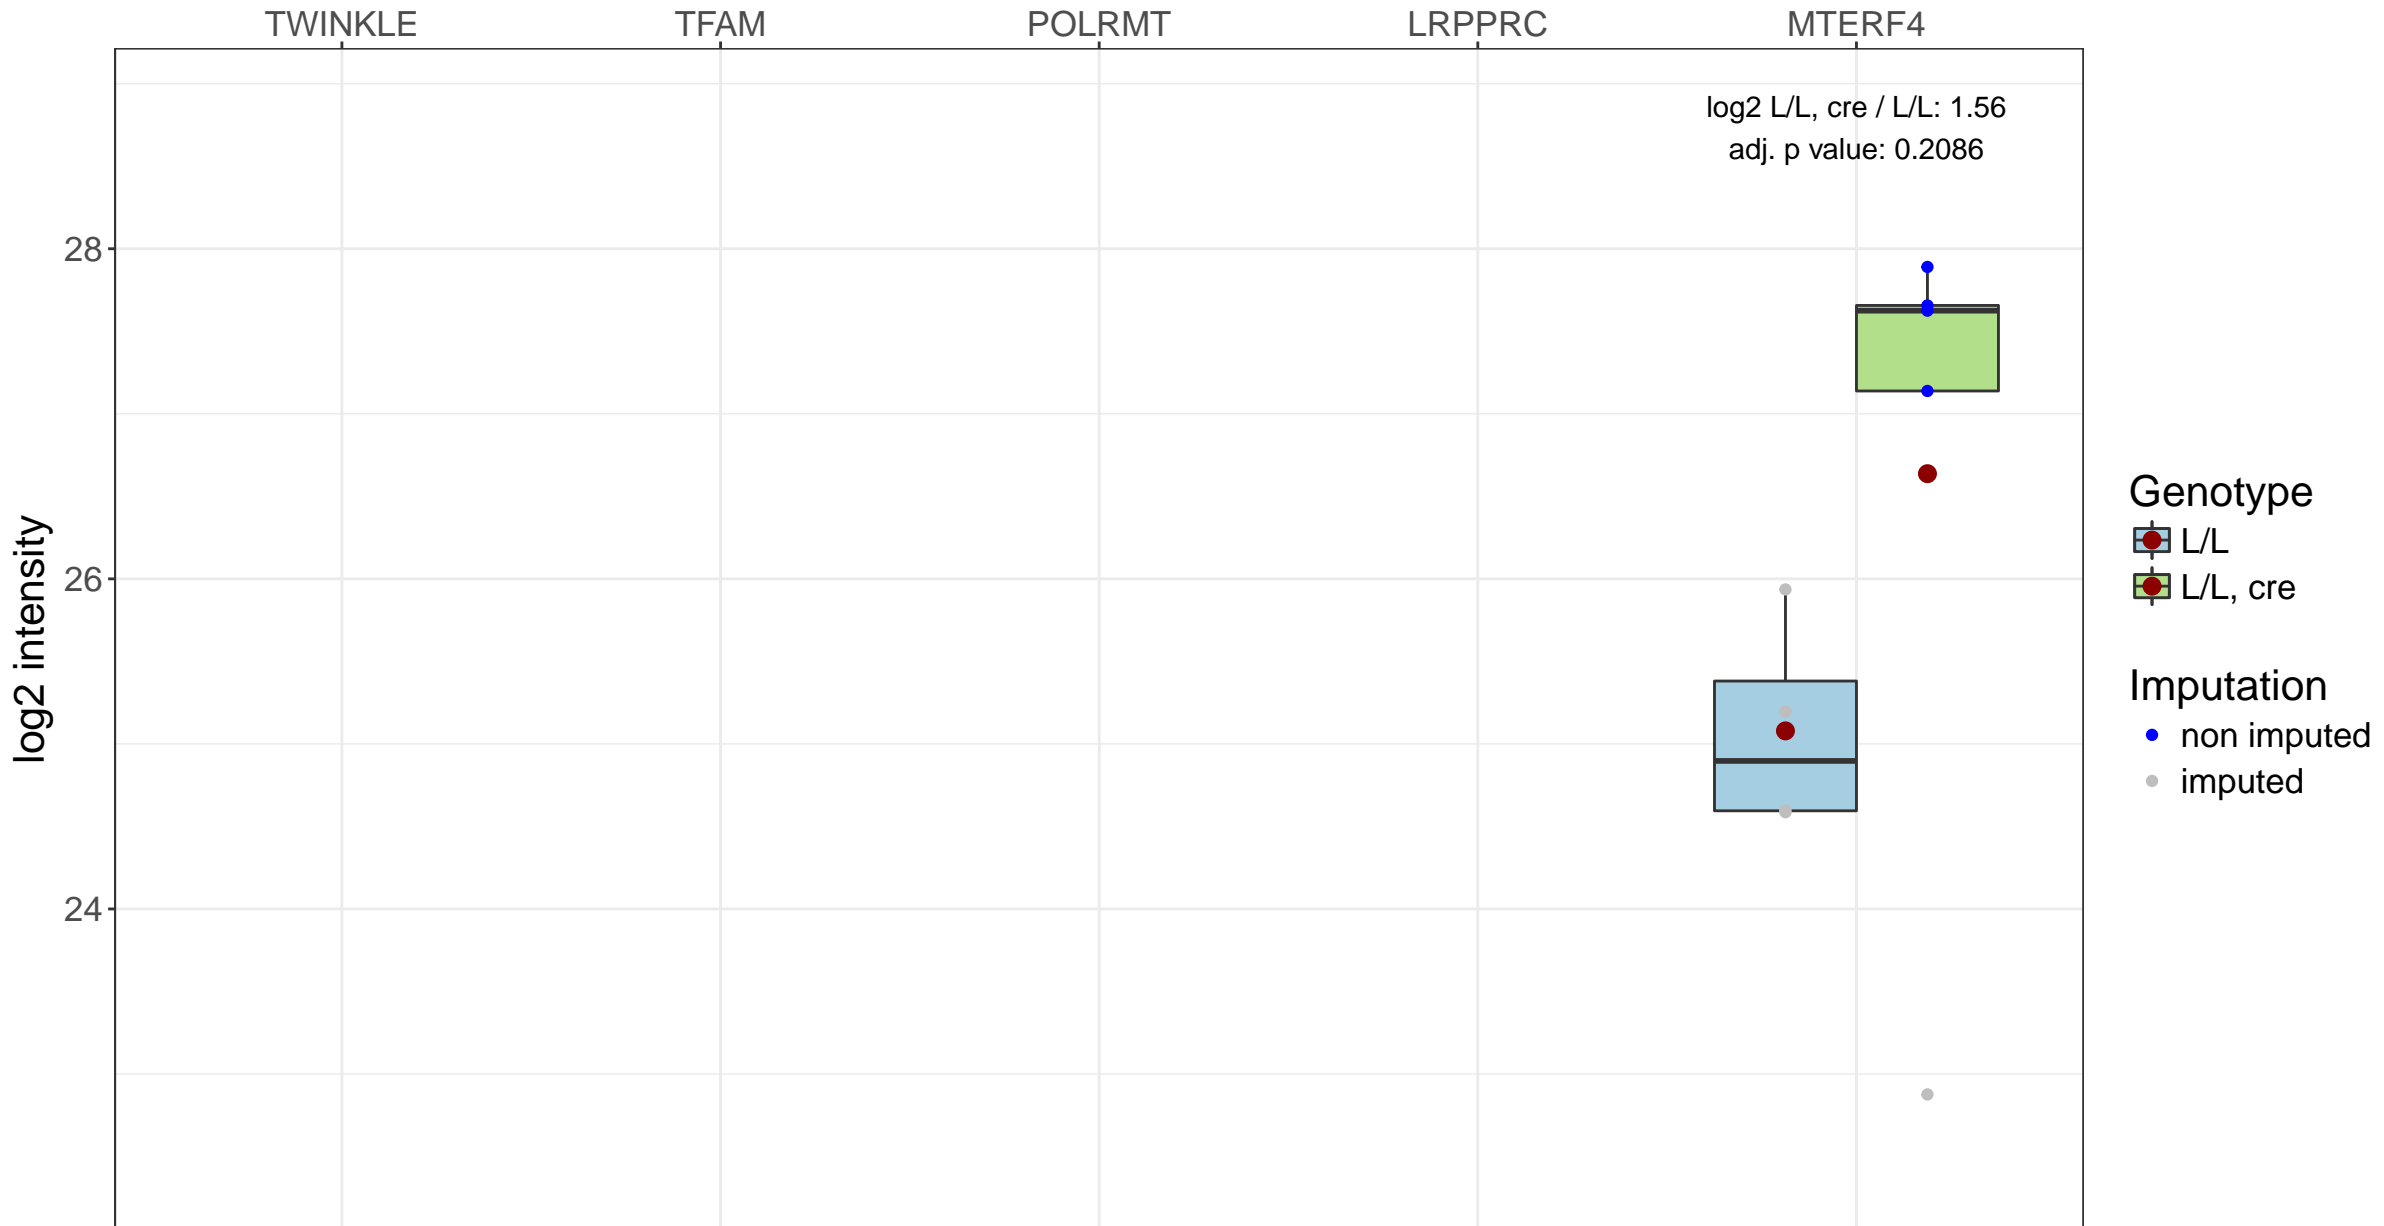

# TIMM17B / Q9Z0V7

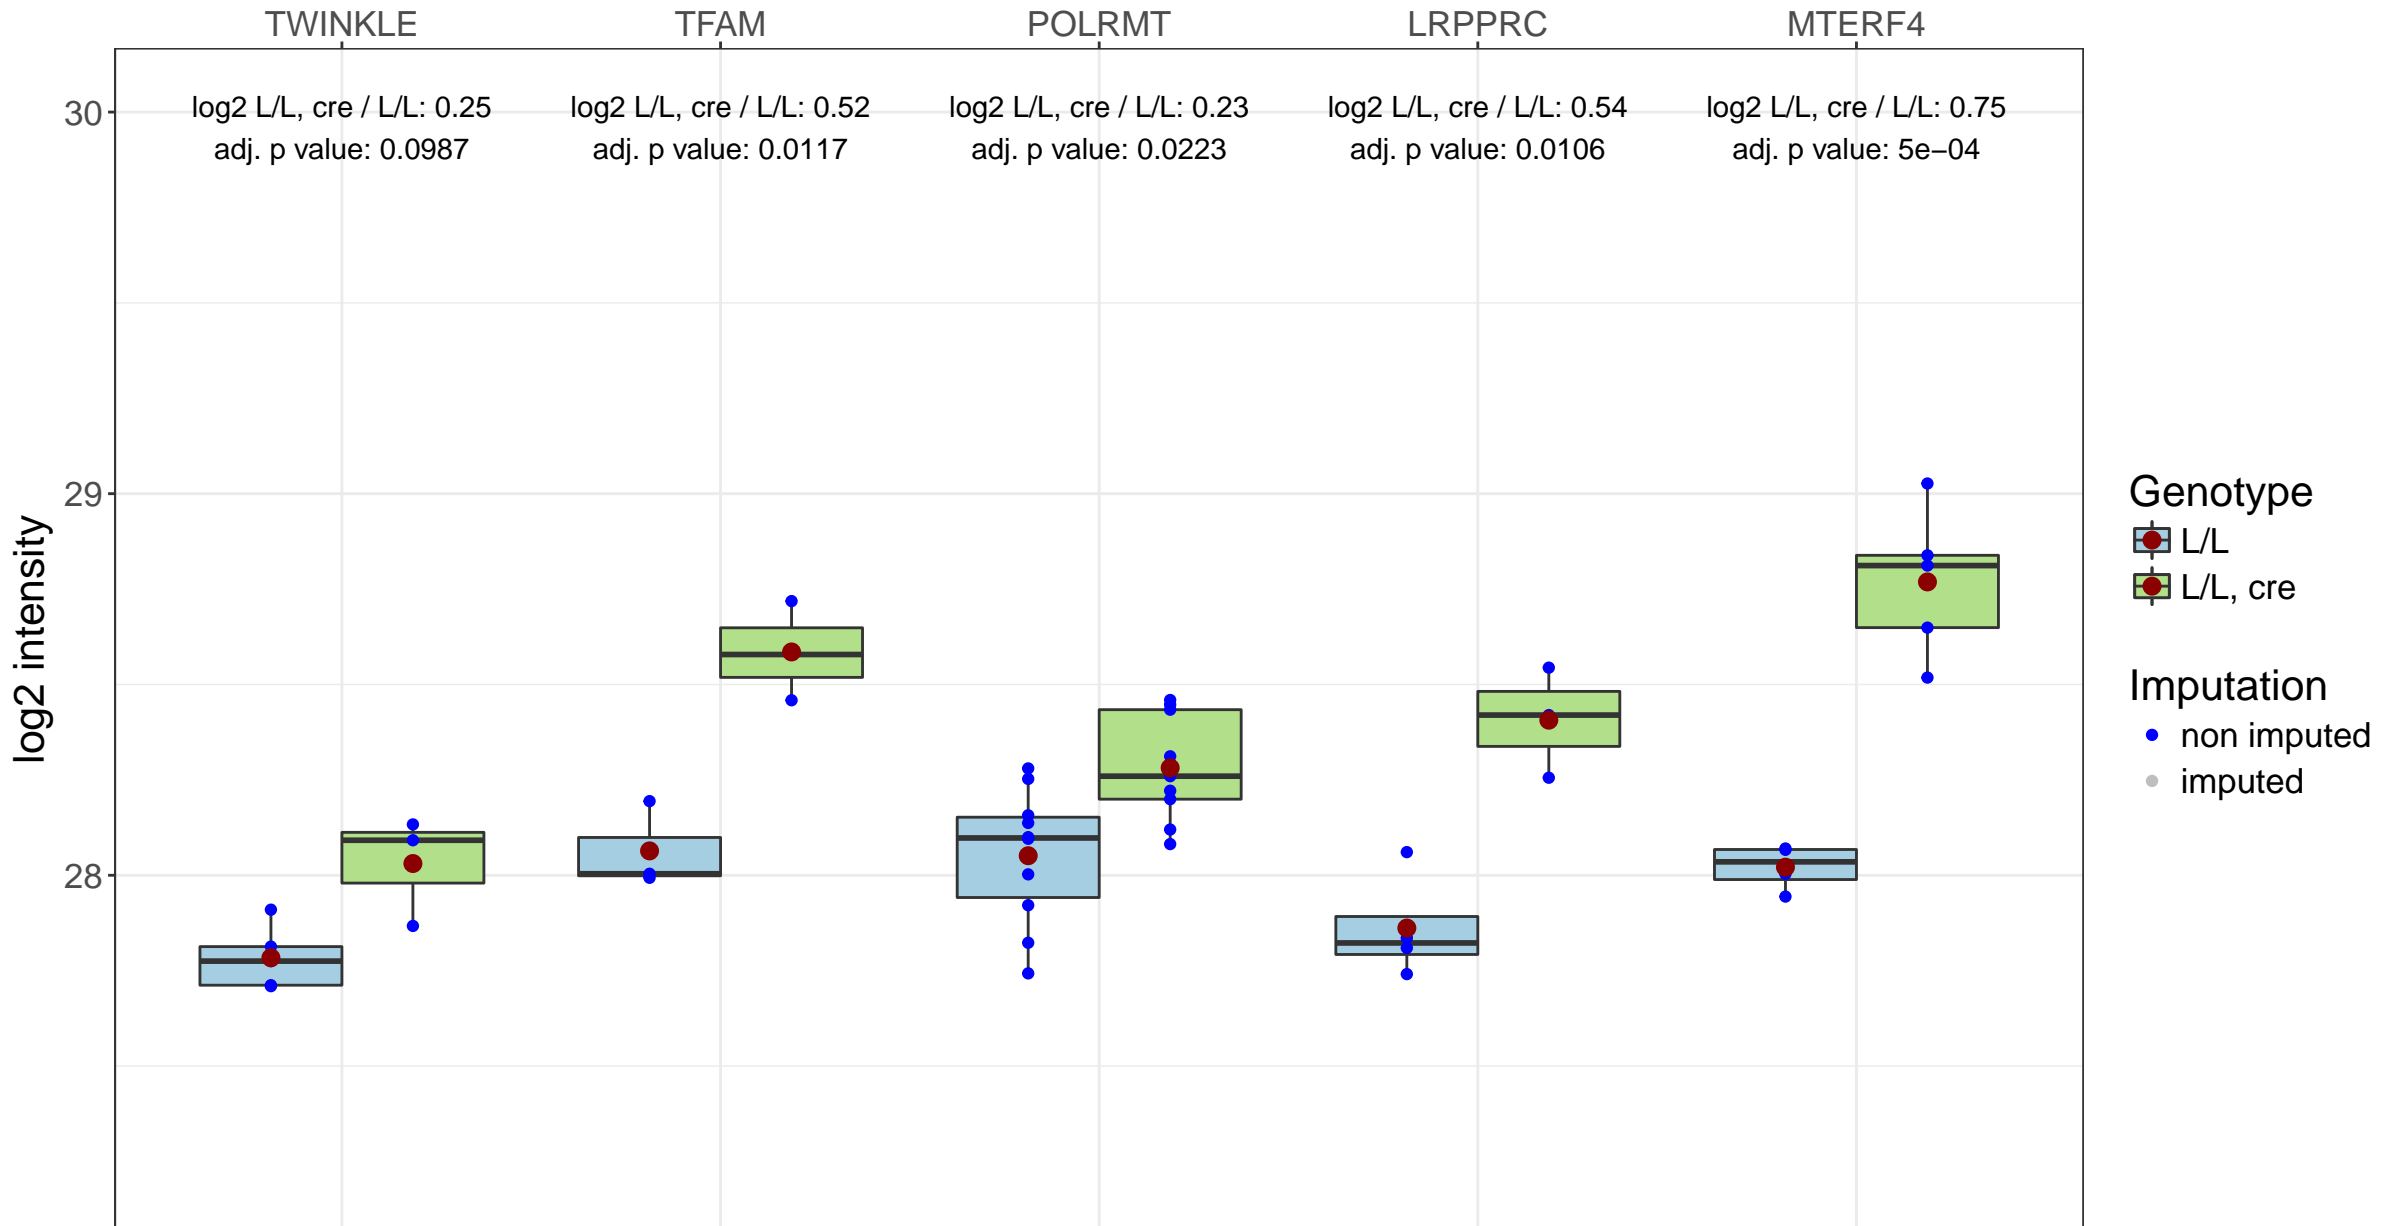

# TIMM21 / Q8CCM6-2

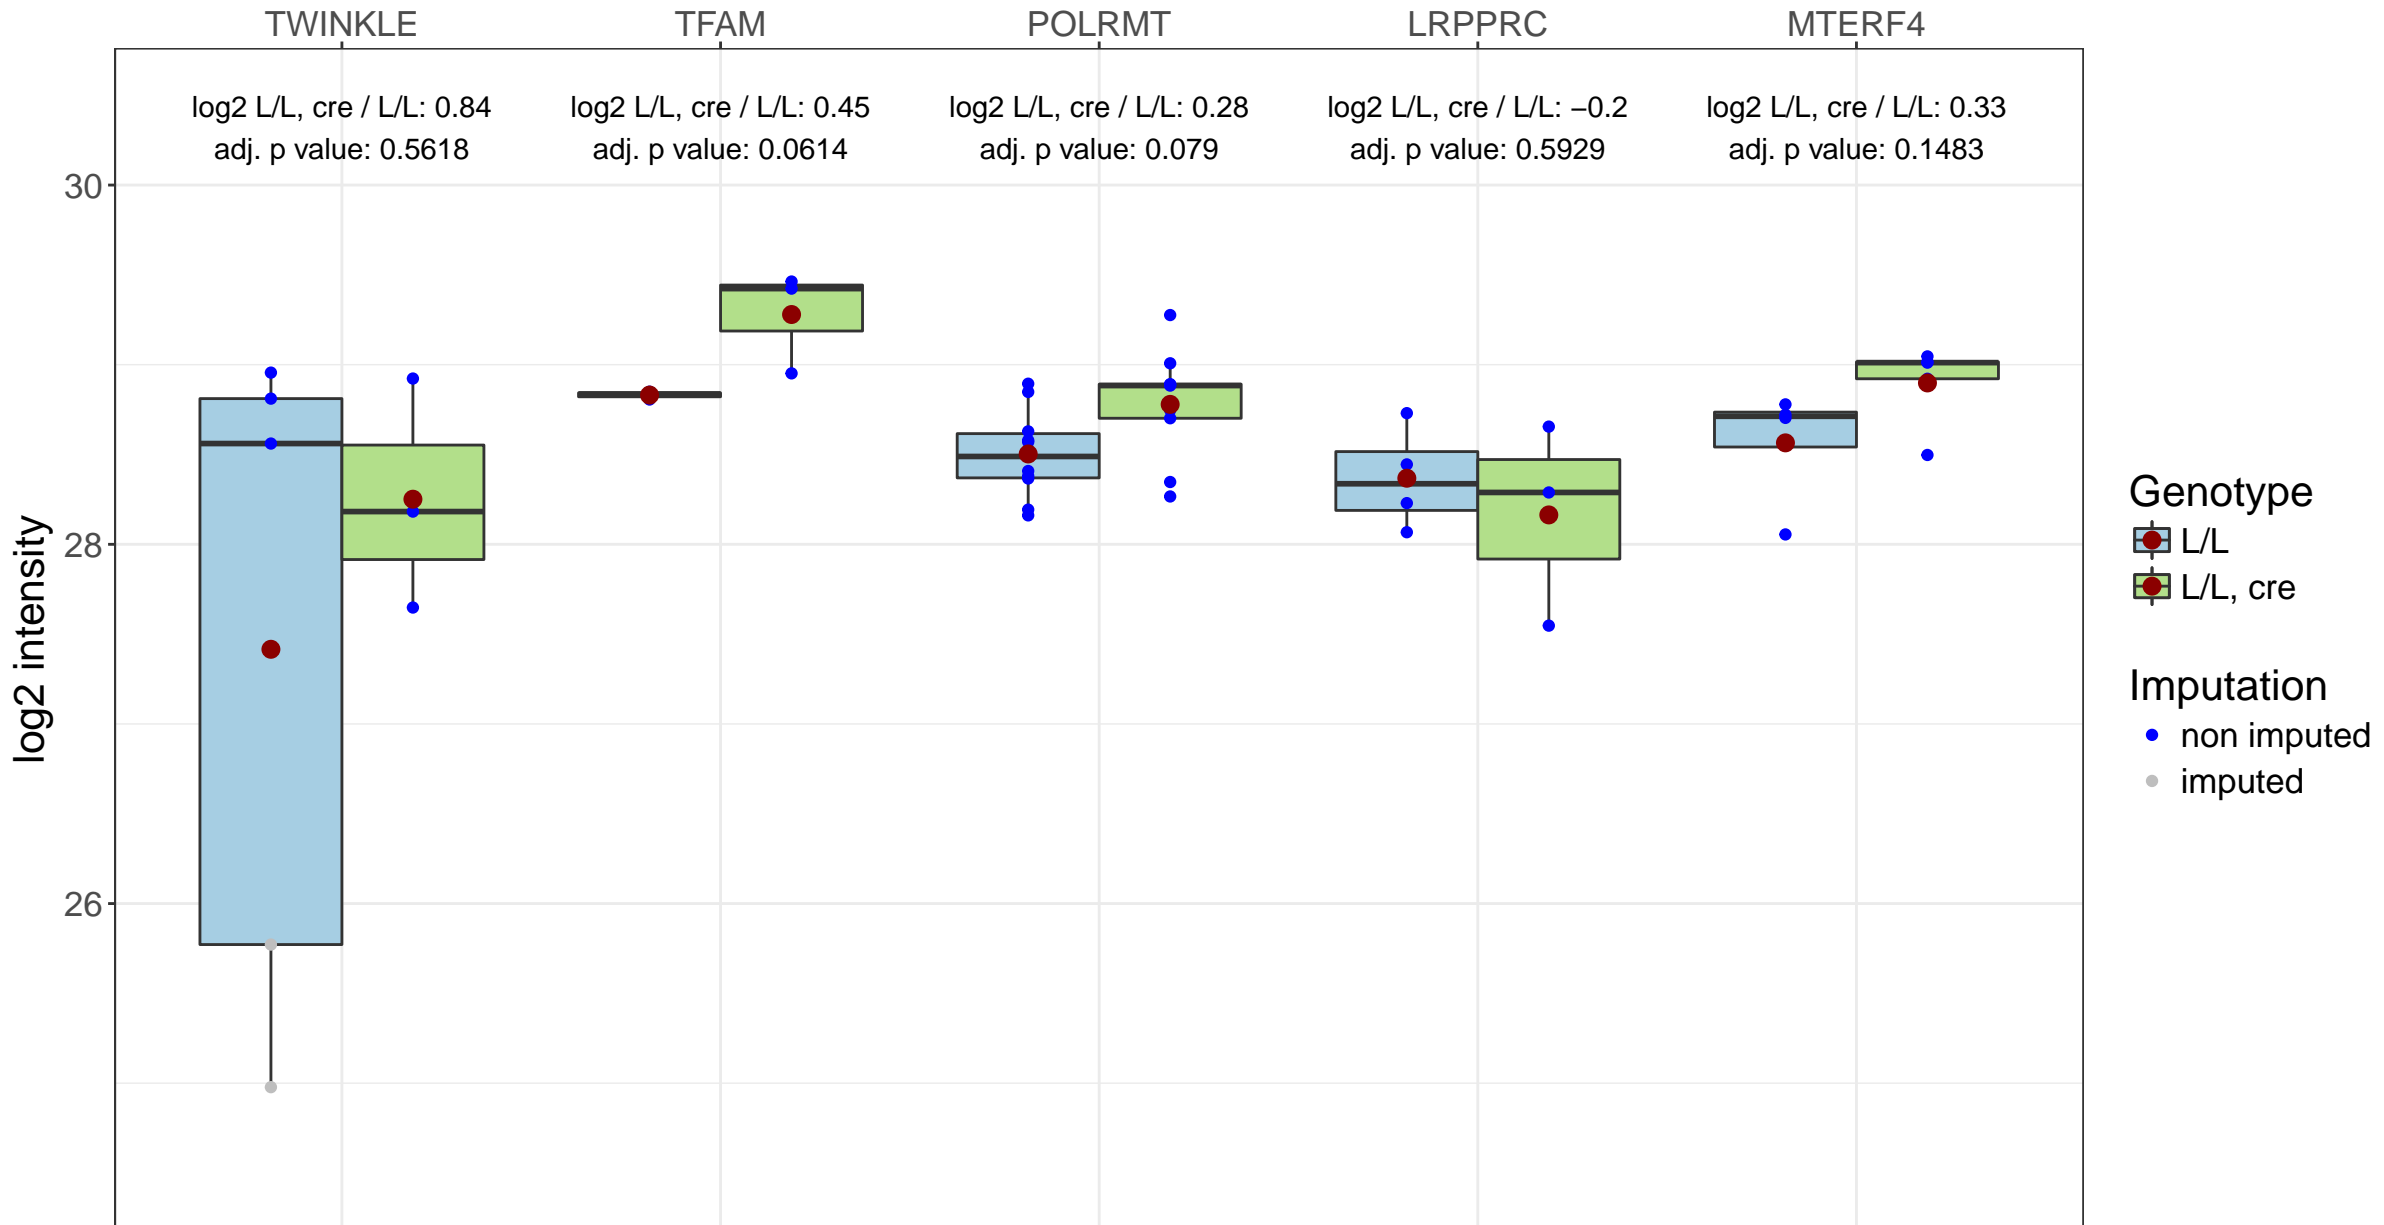

# TIMM22 / Q9CQ85

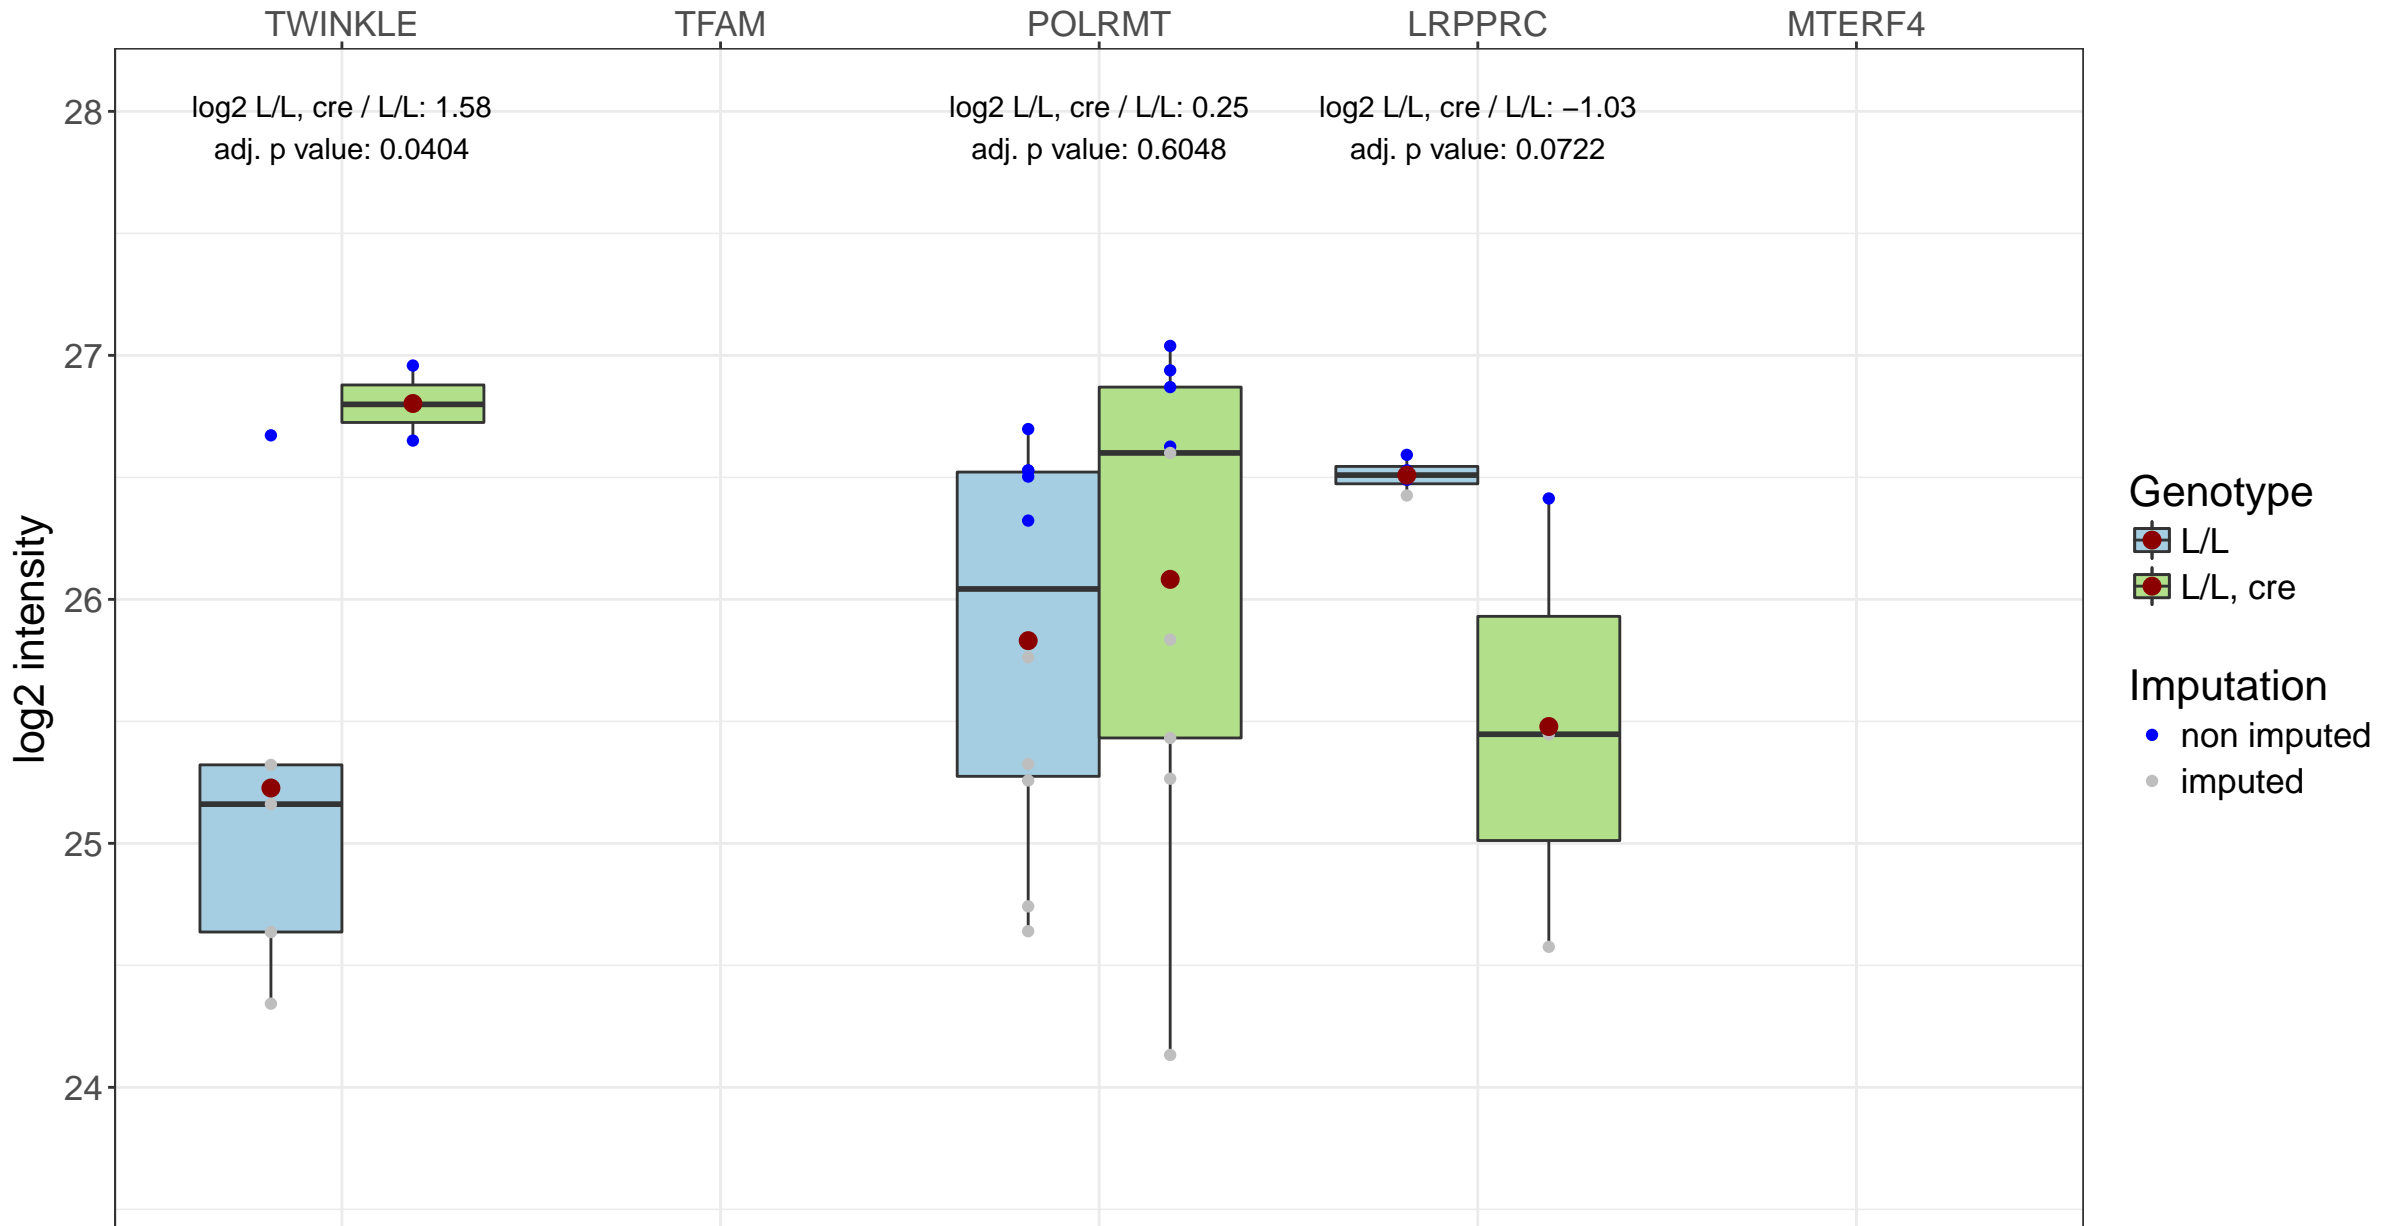

# TIMM23 / Q9CXU4

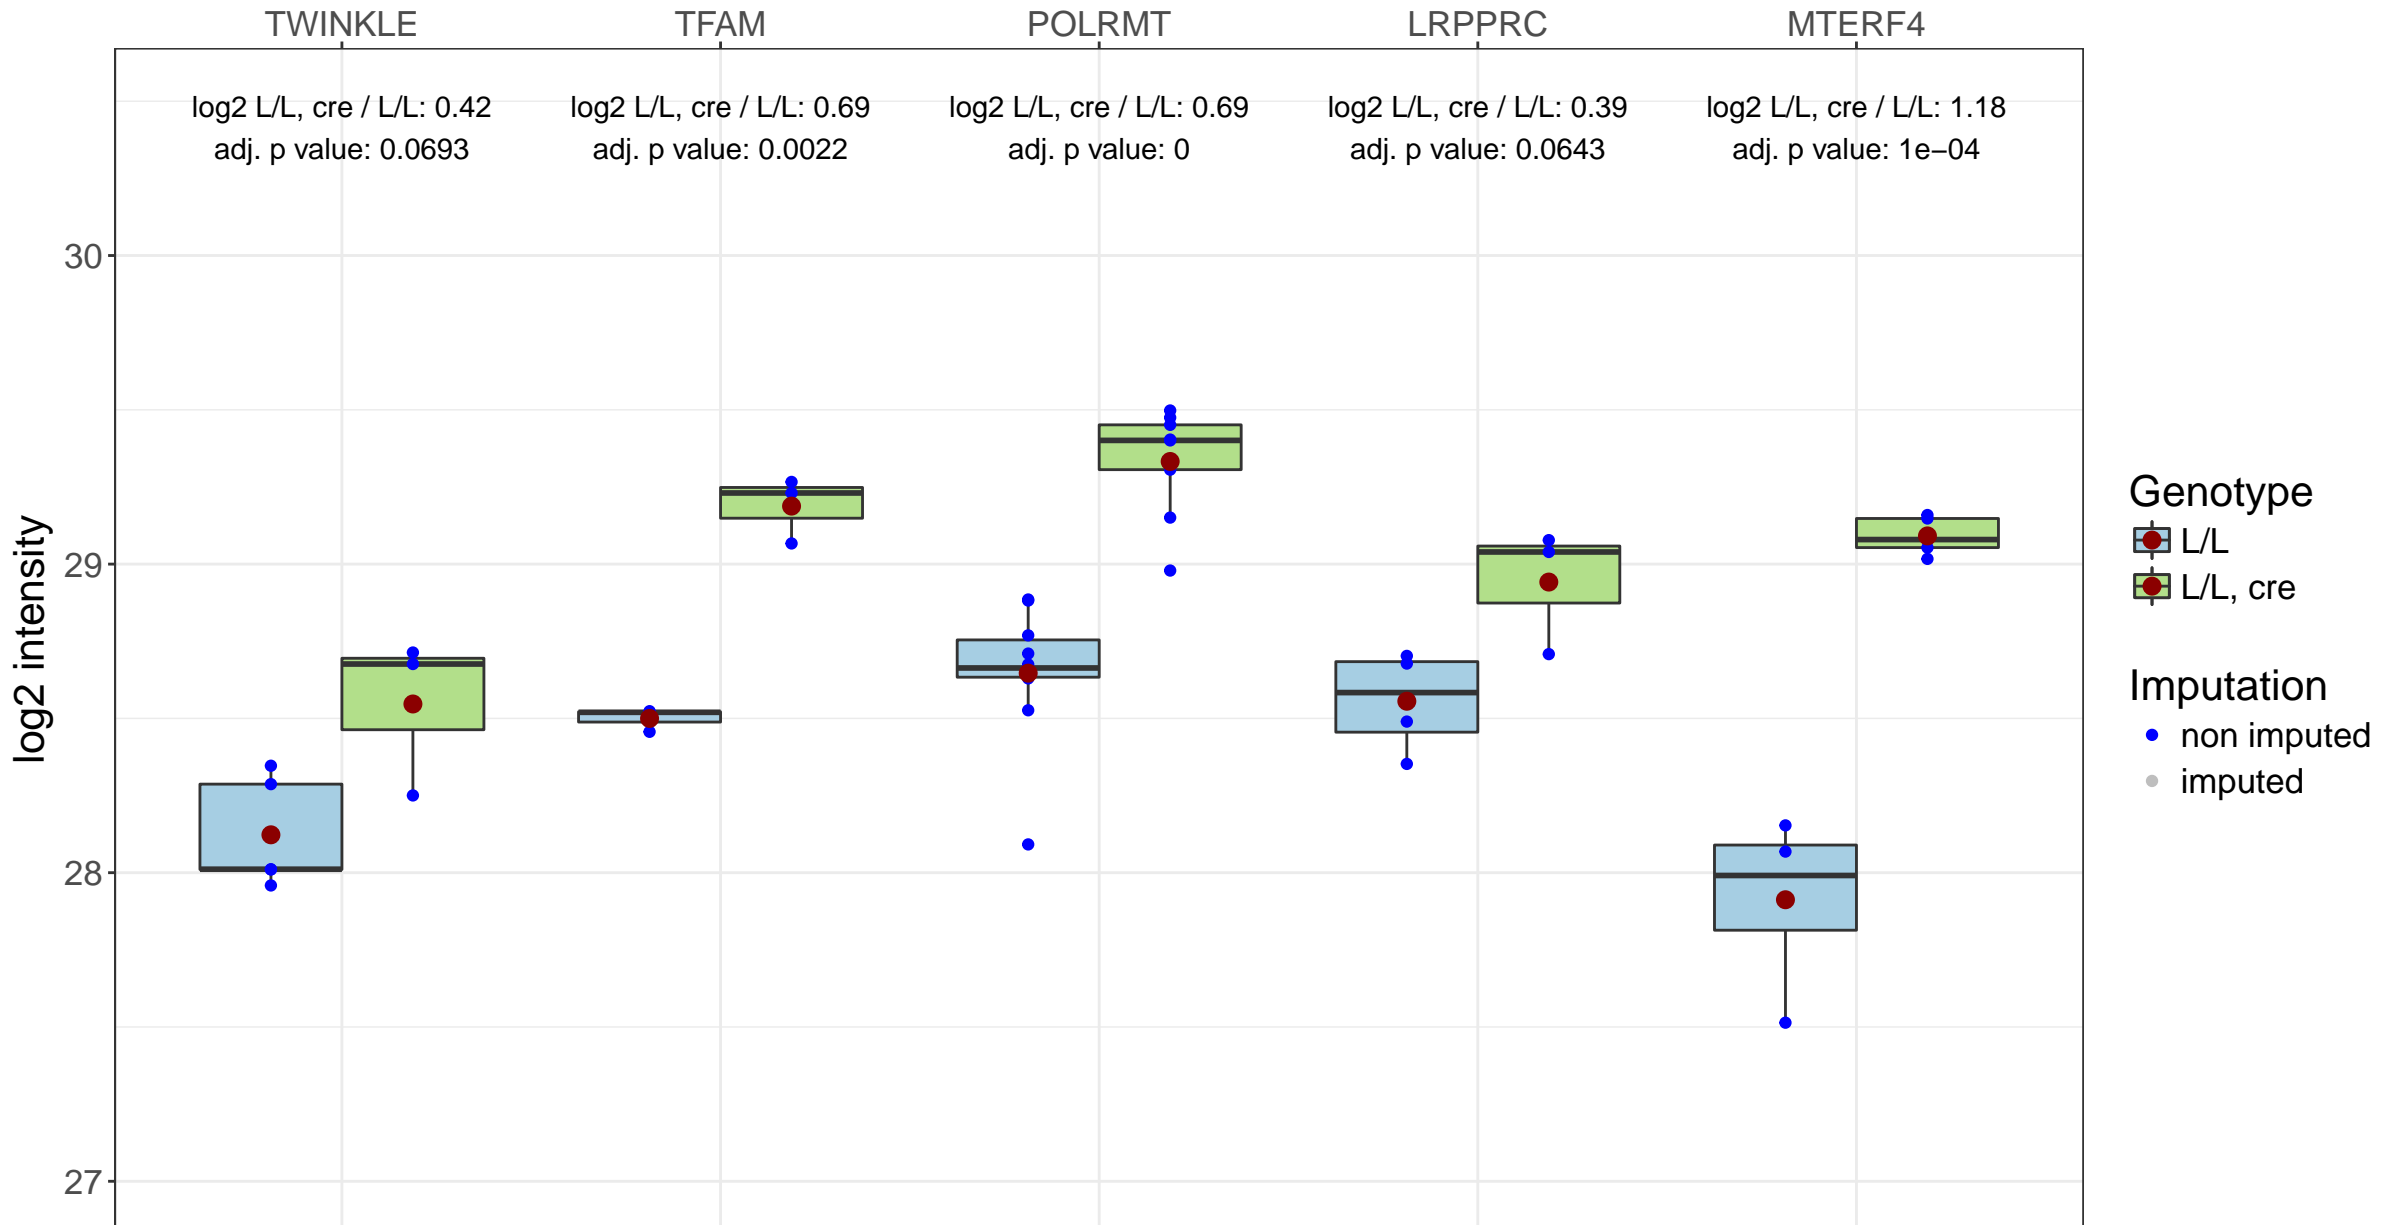

# TIMM44 / O35857

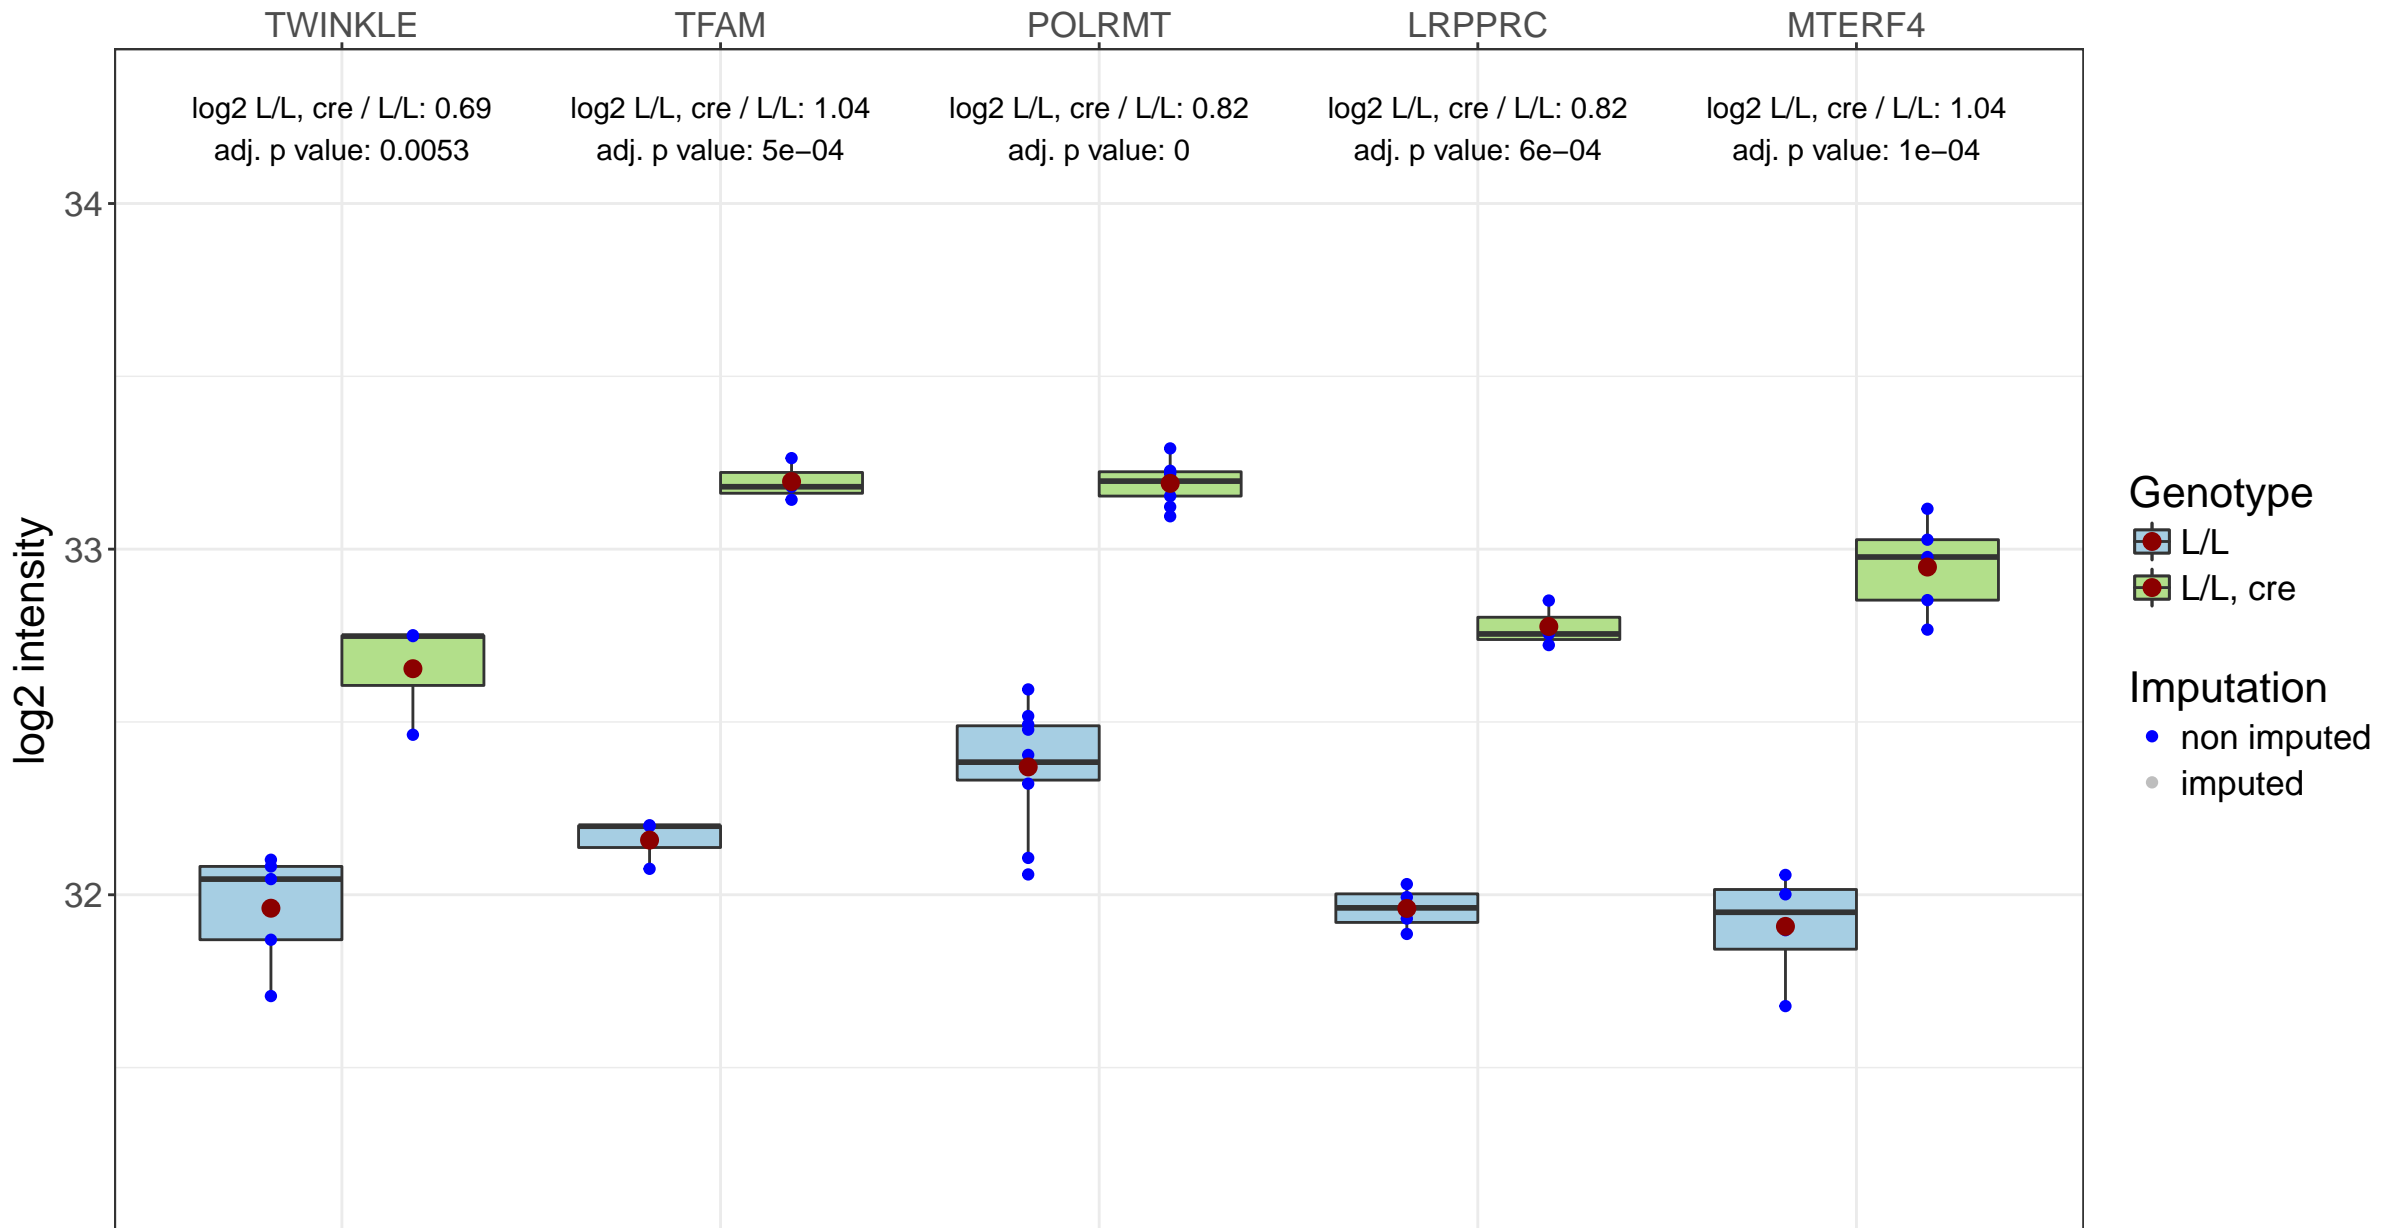



# TIMM50 / Q9D880

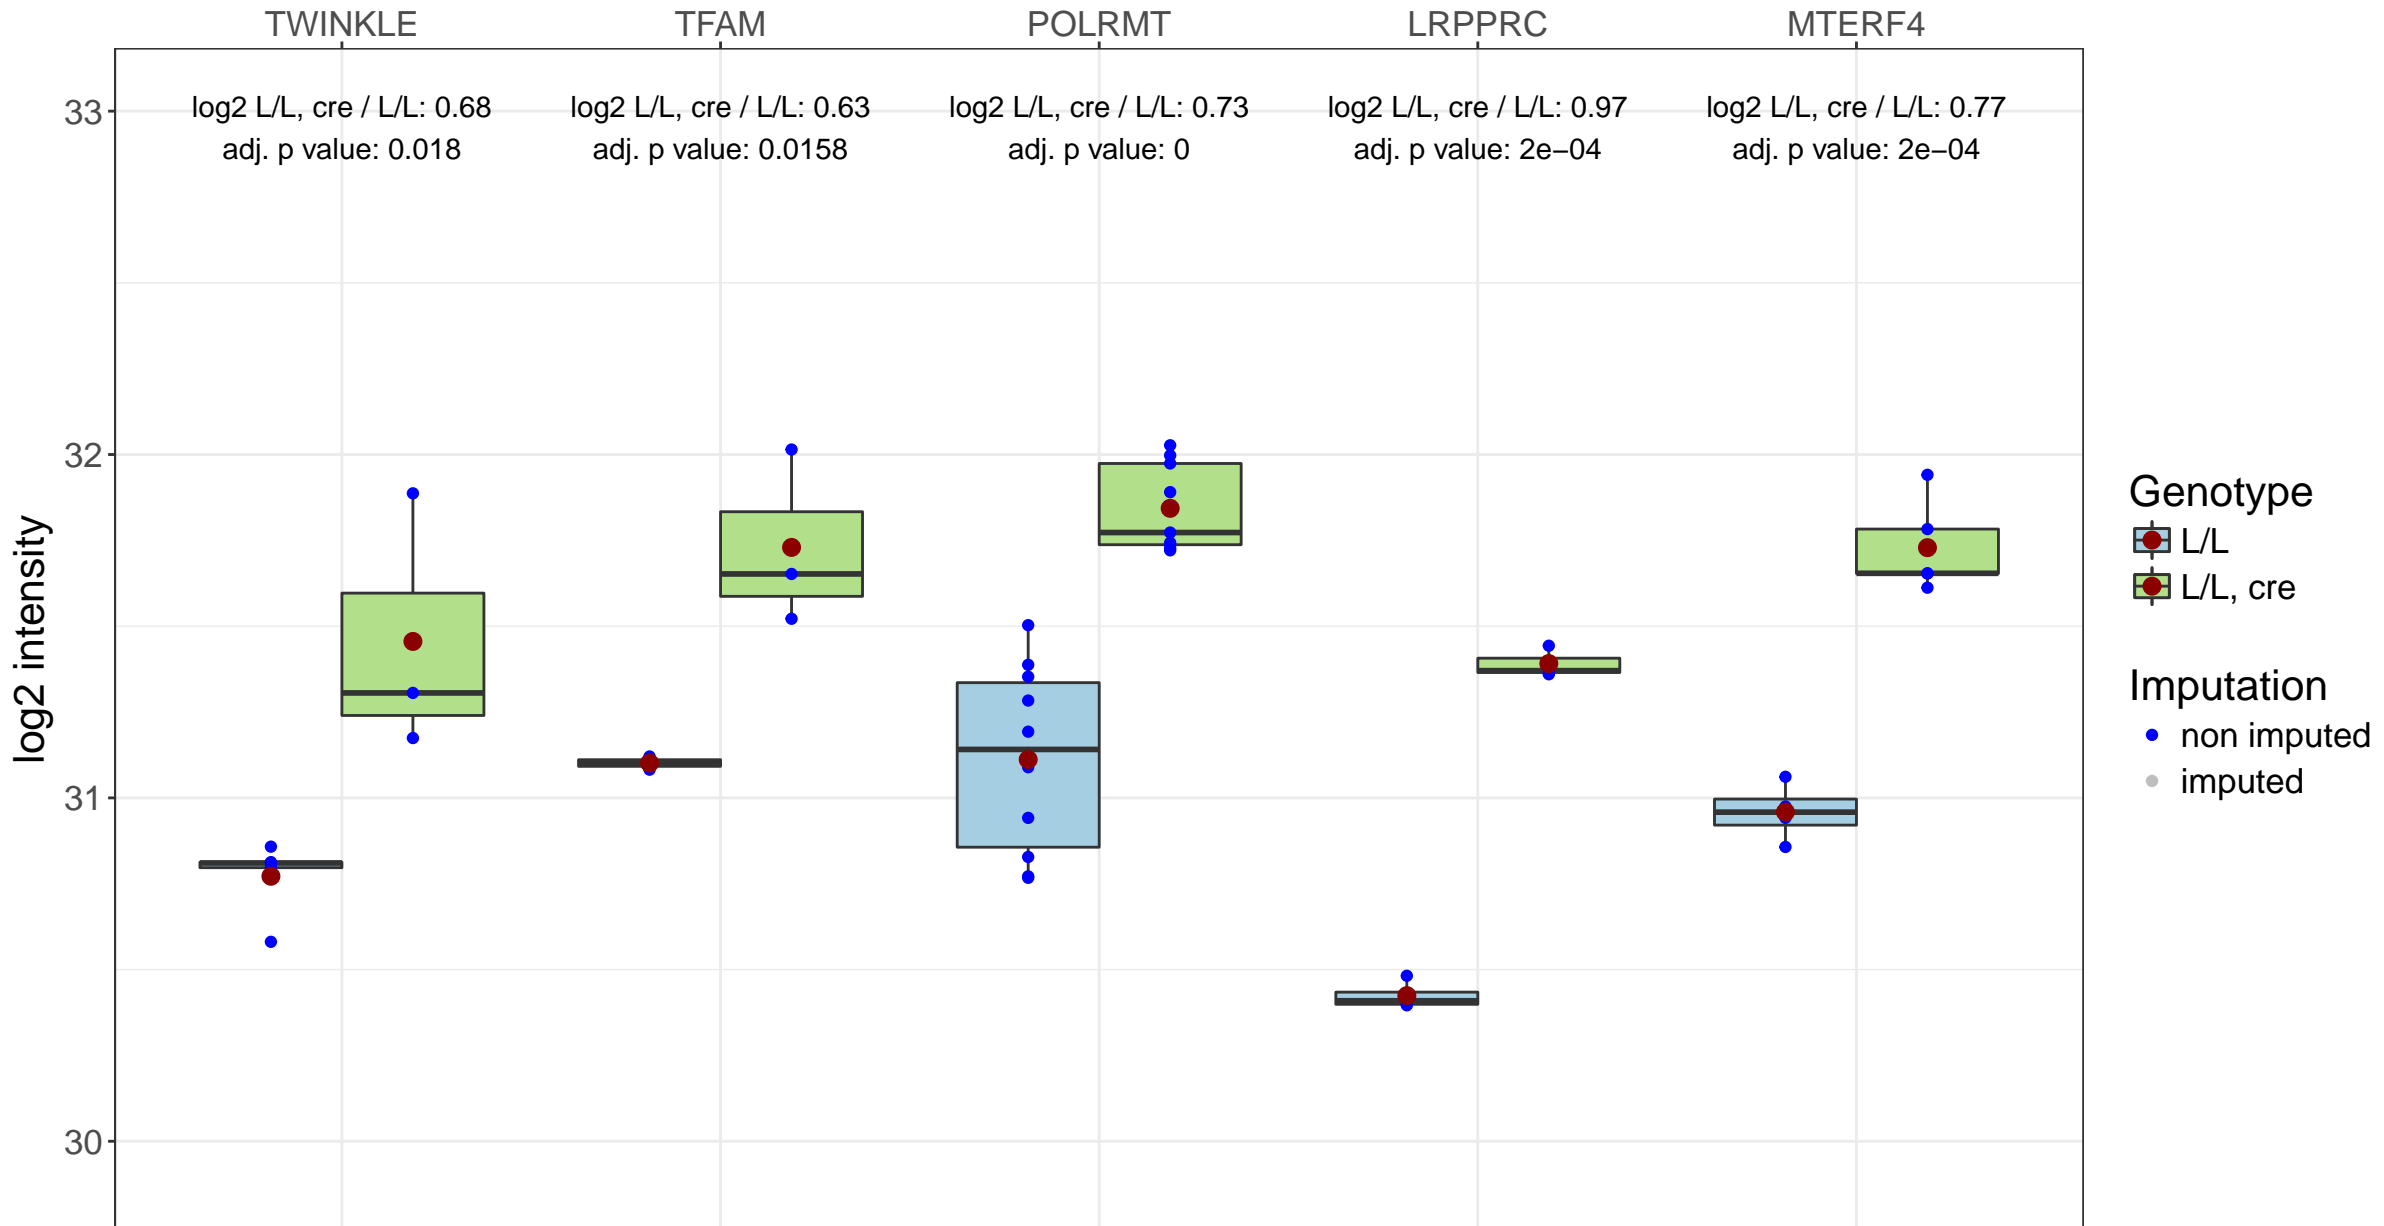

# TIMM8A1 / Q9WVA2

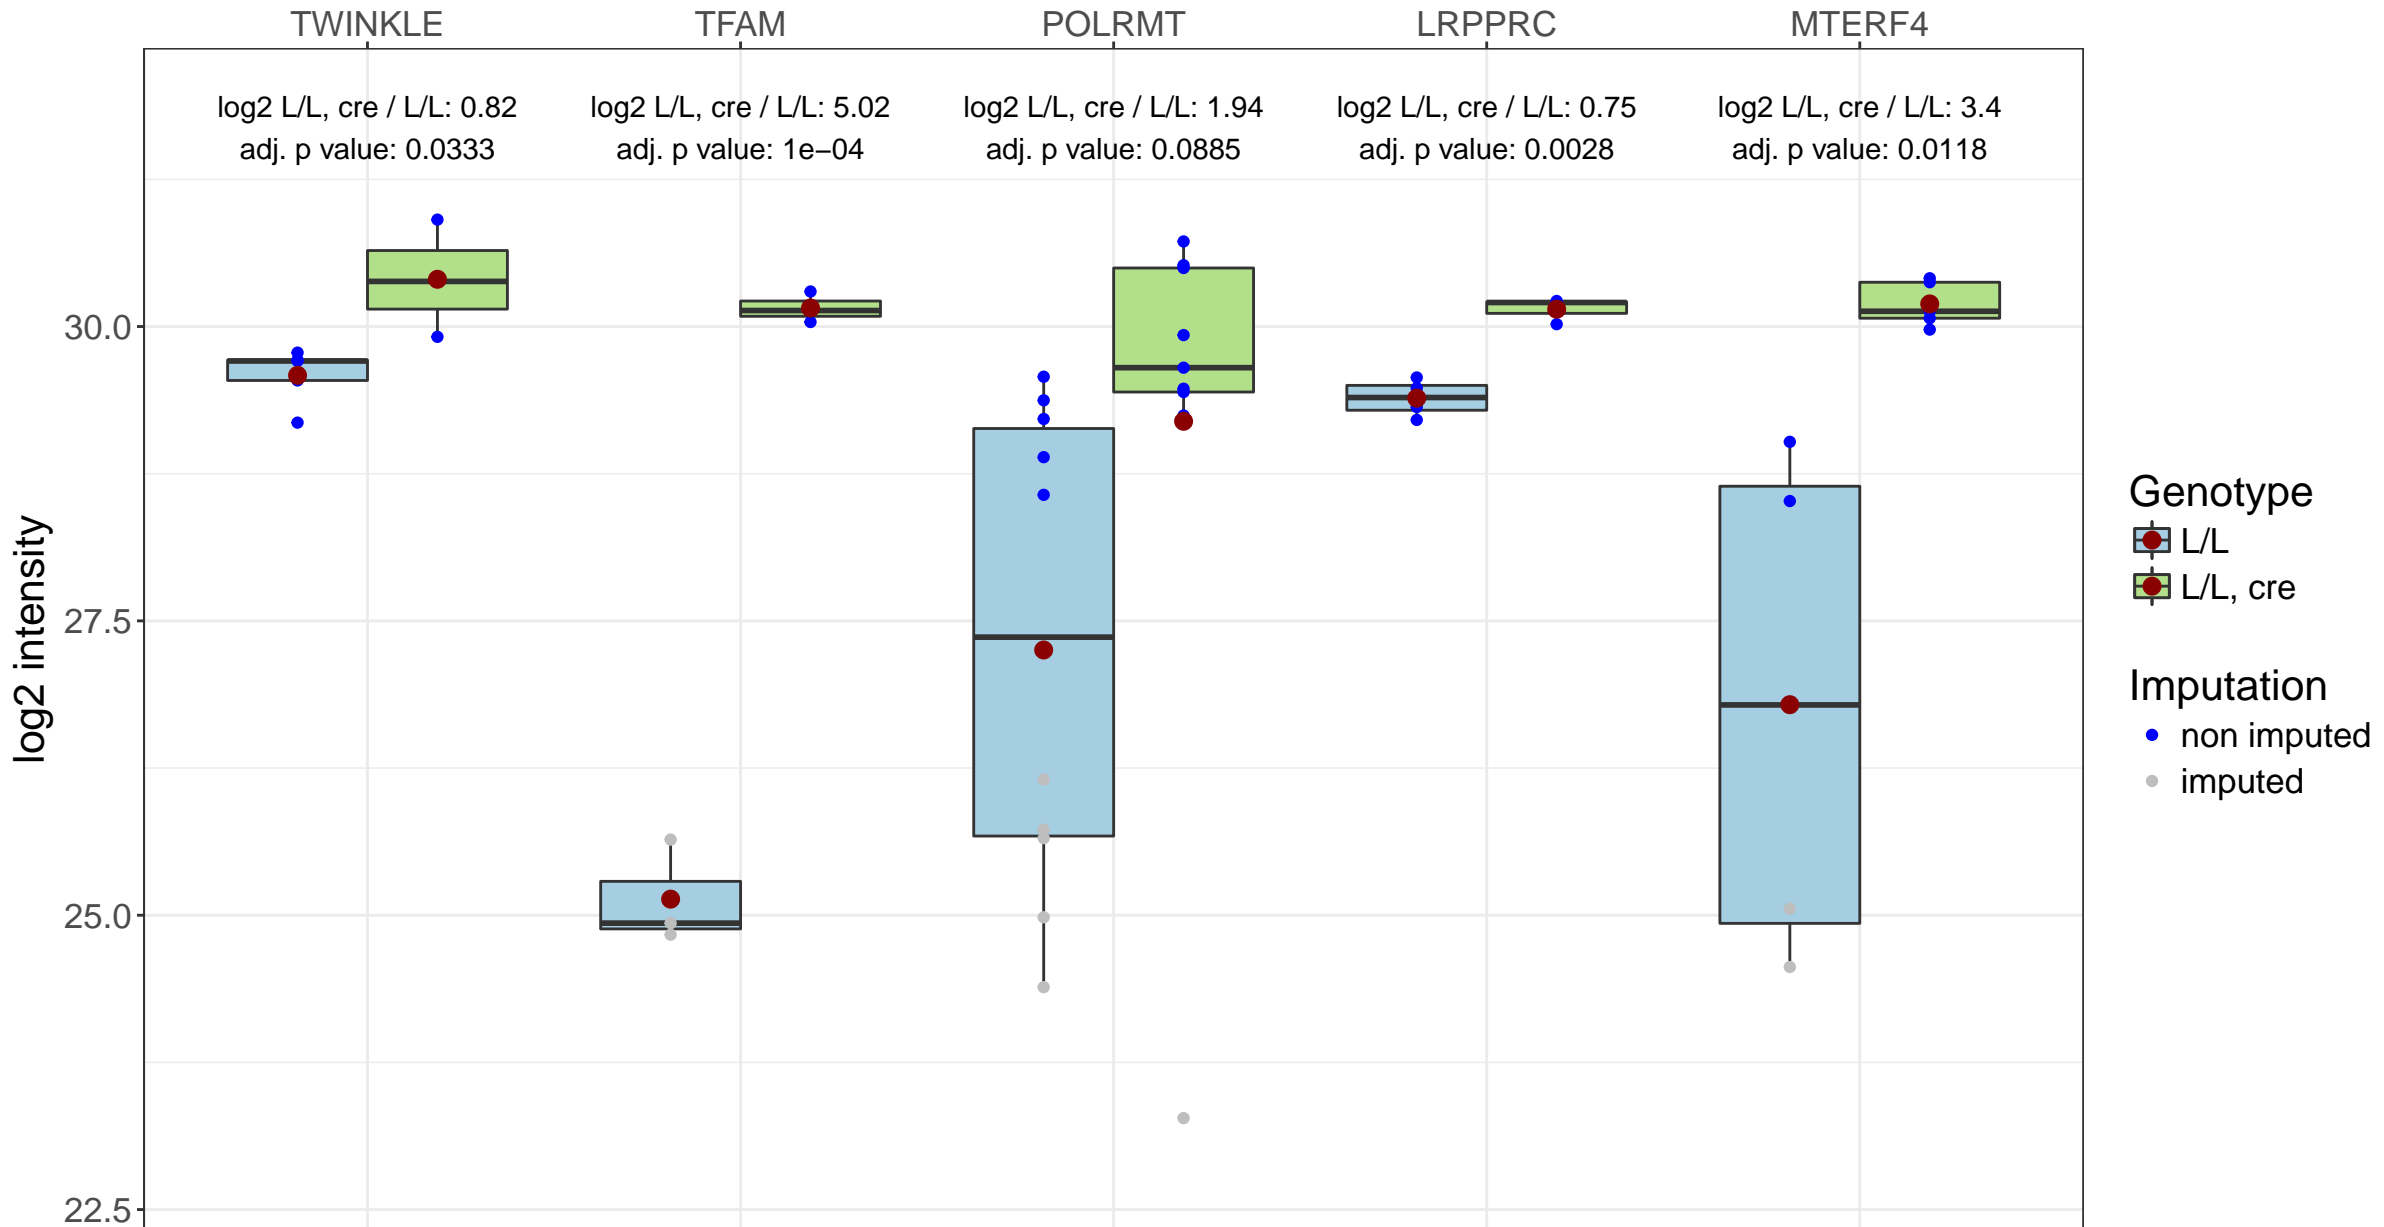

# TIMM8B / P62077

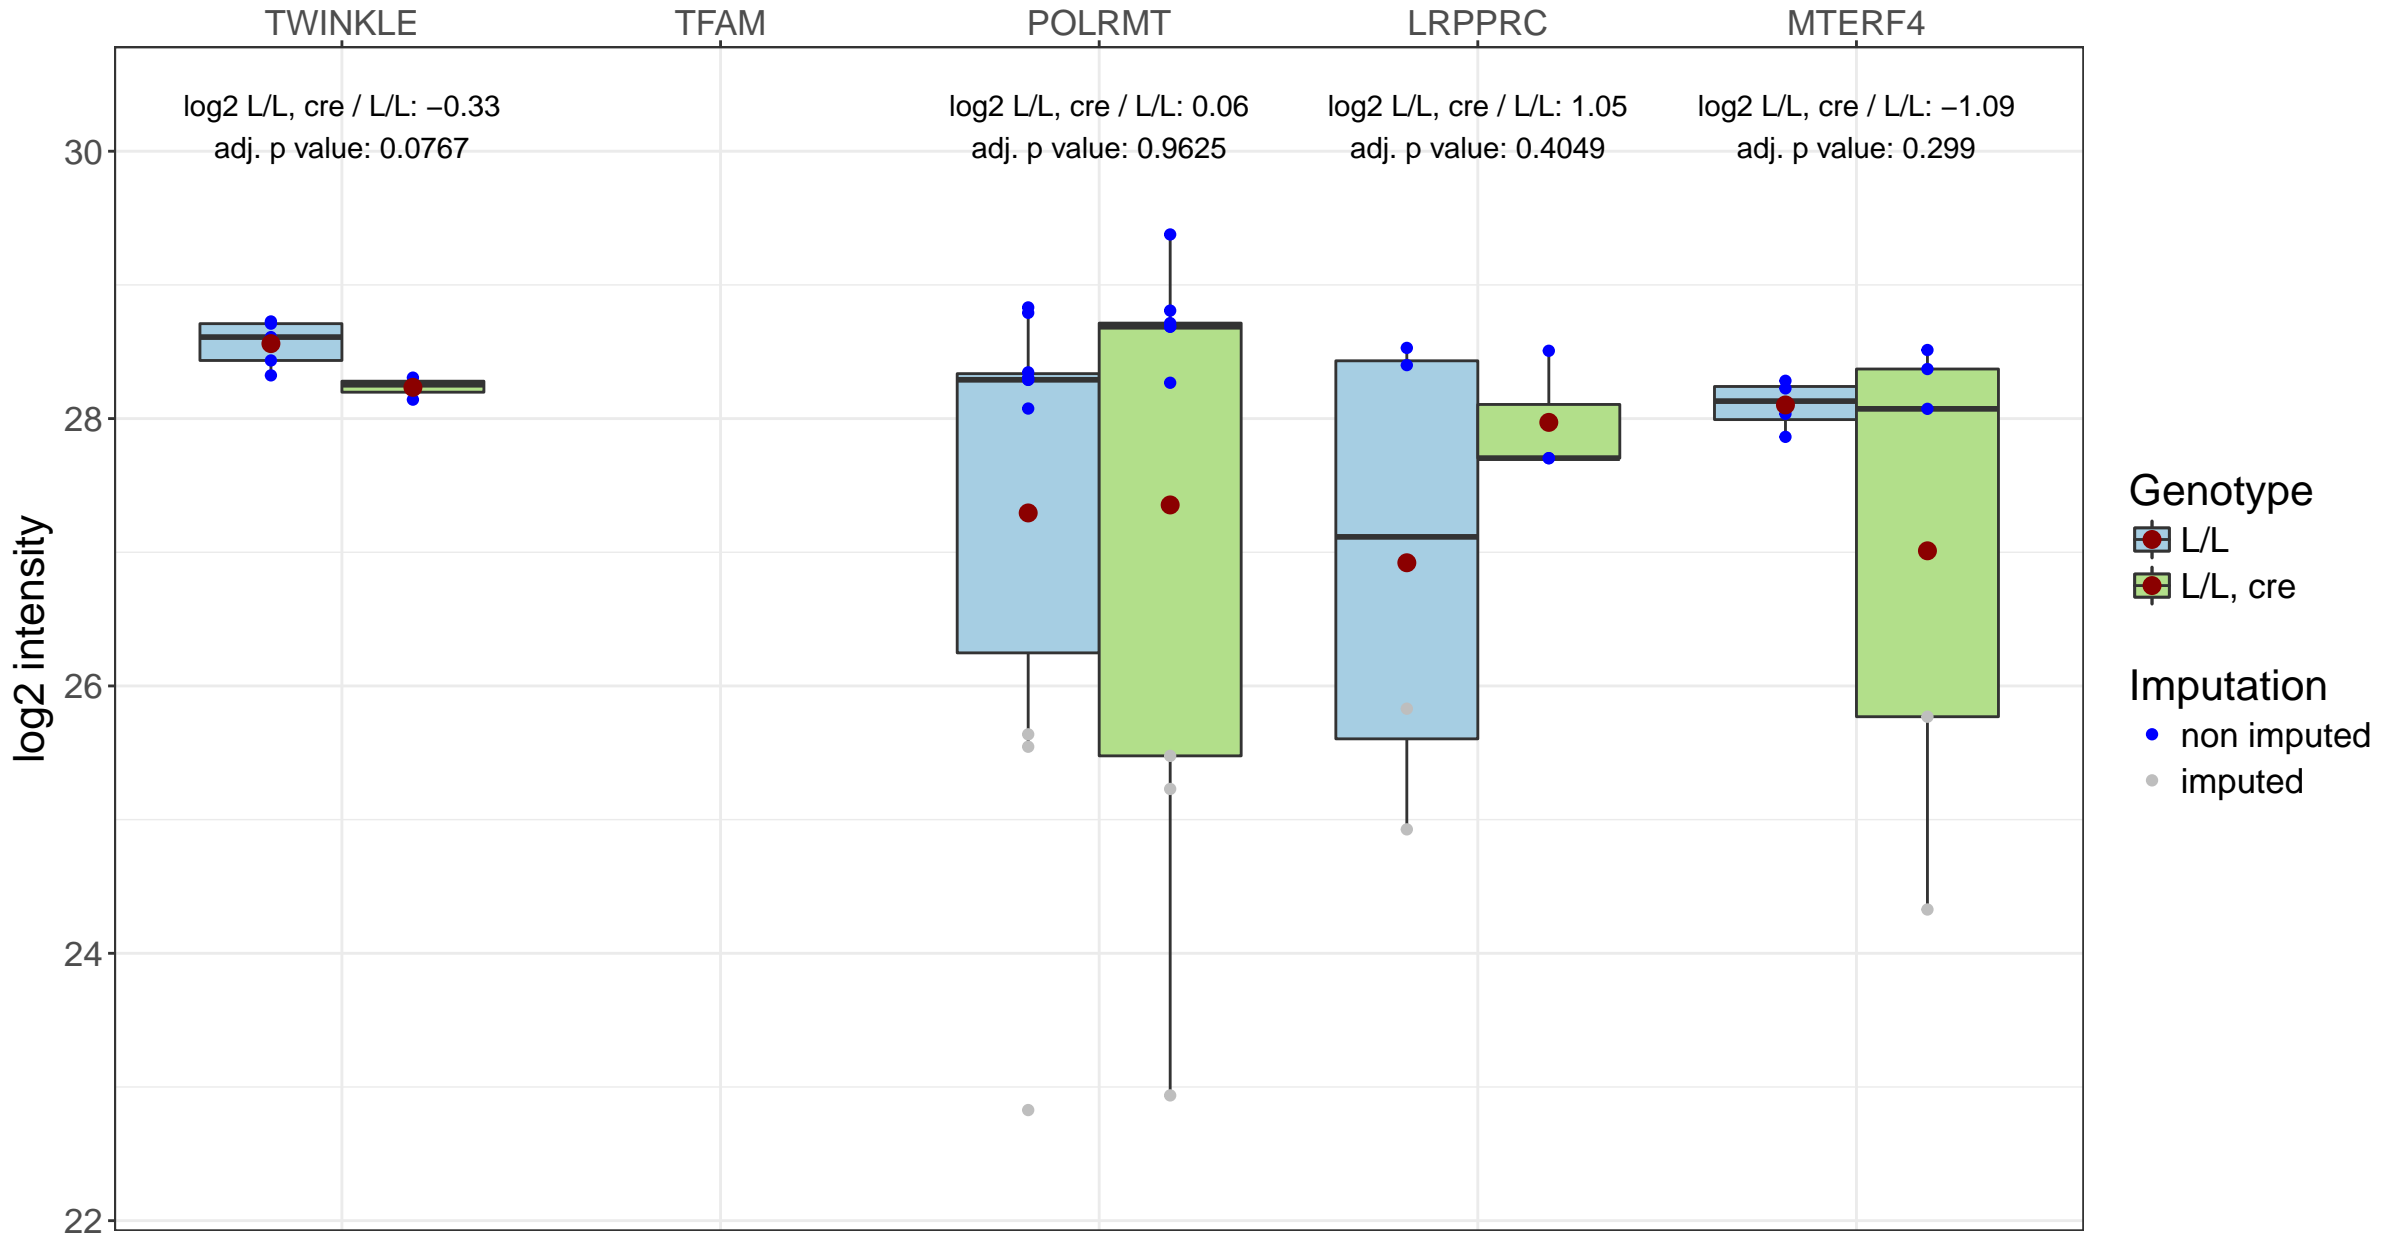

# TIMM9 / Q9WV98

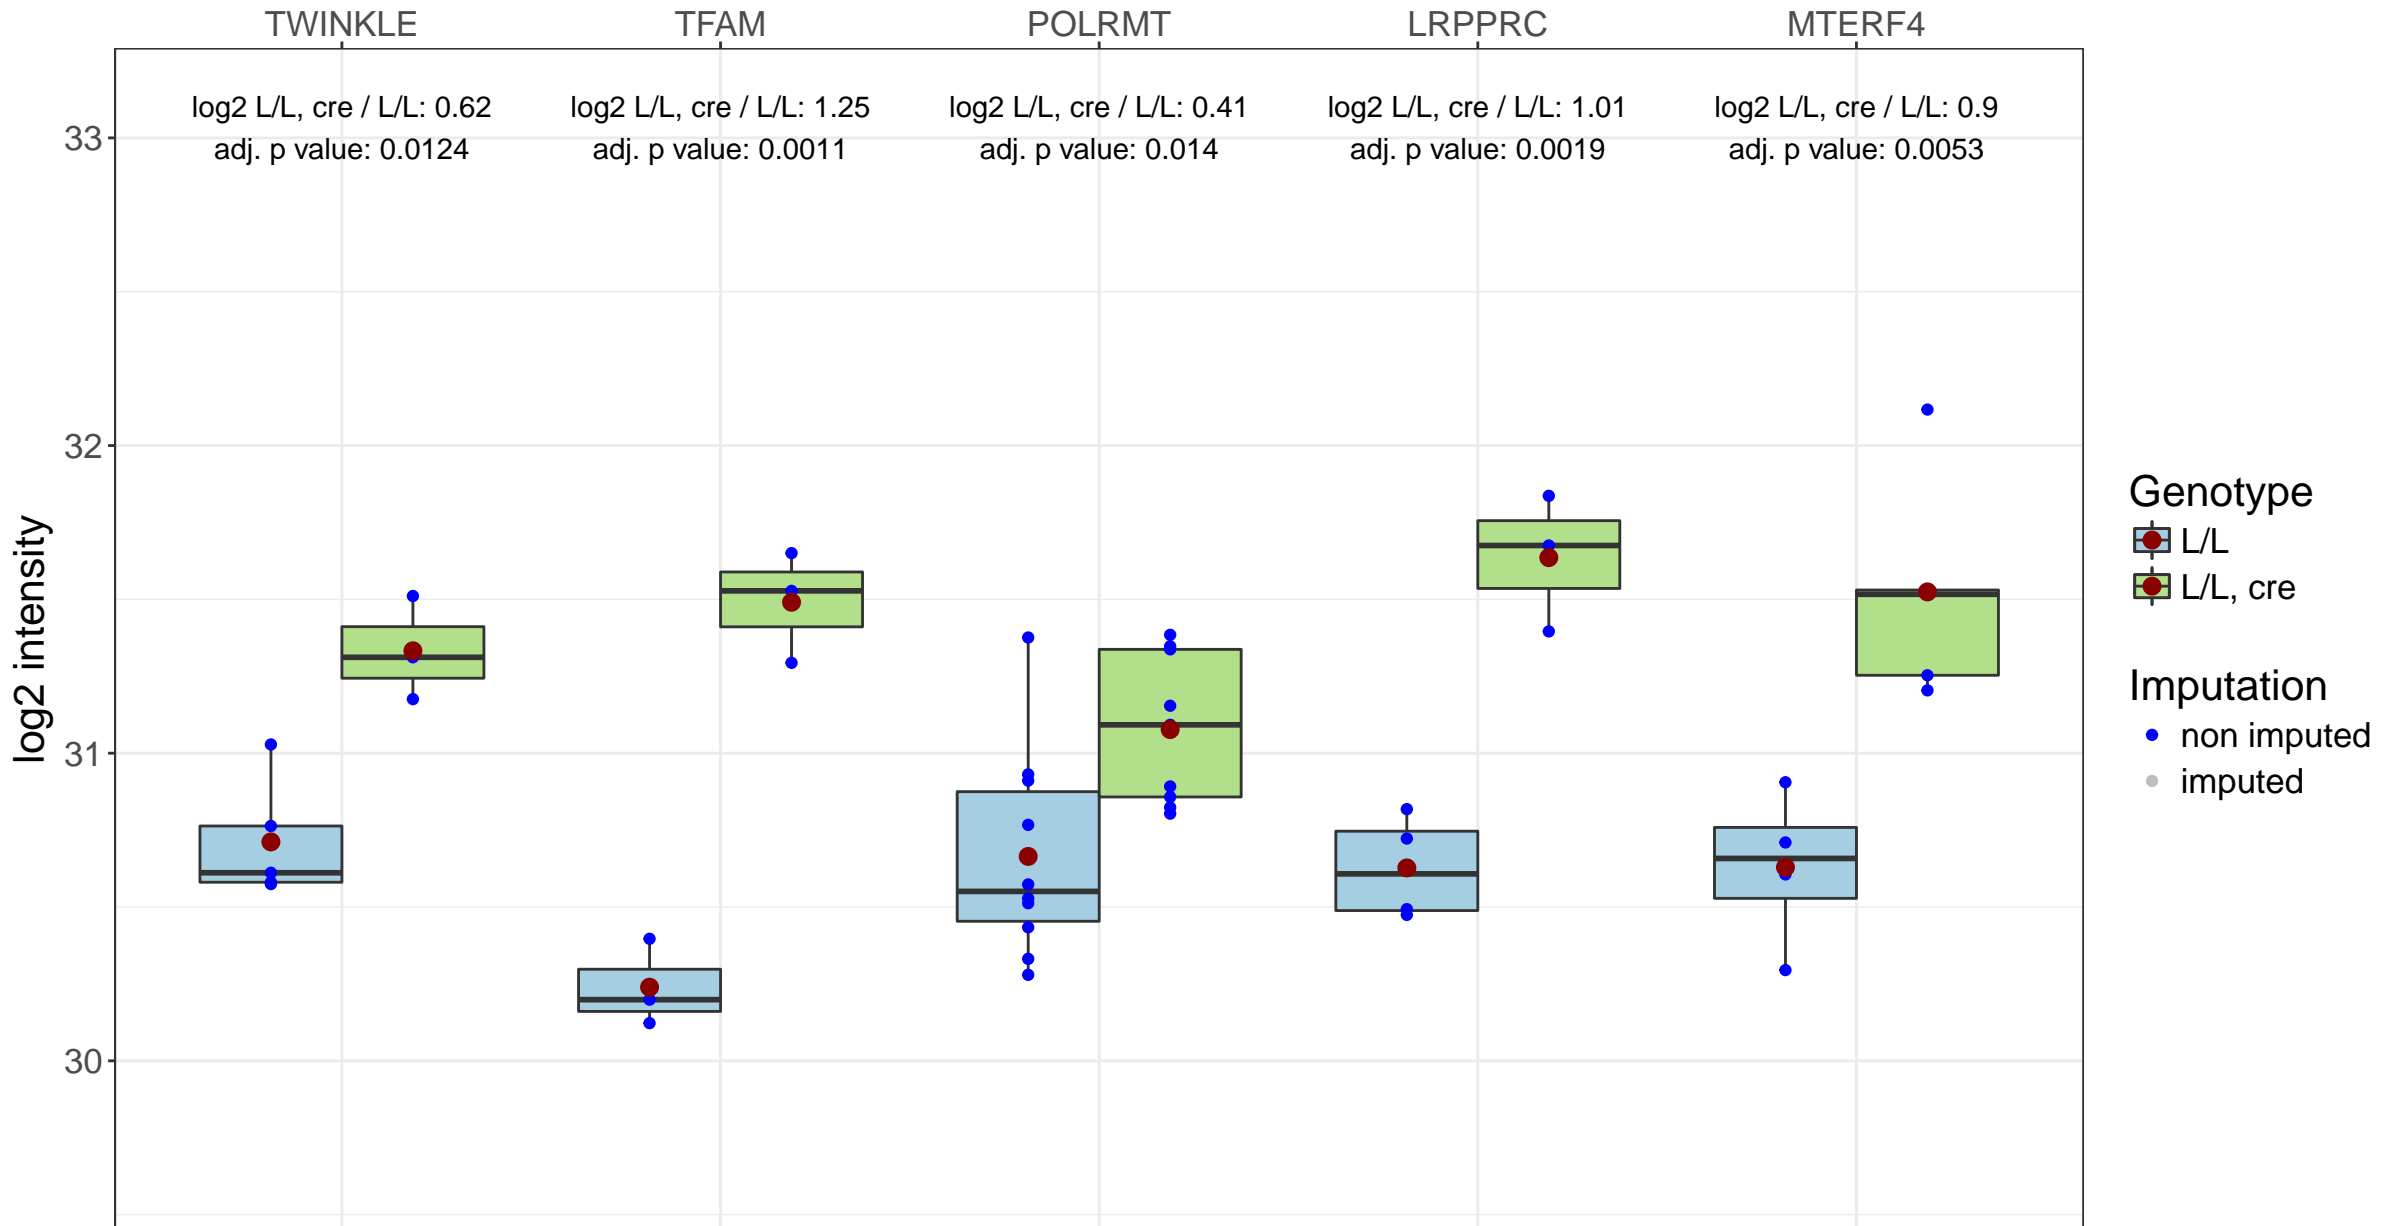

# TIMMDC1 / Q8BUY5

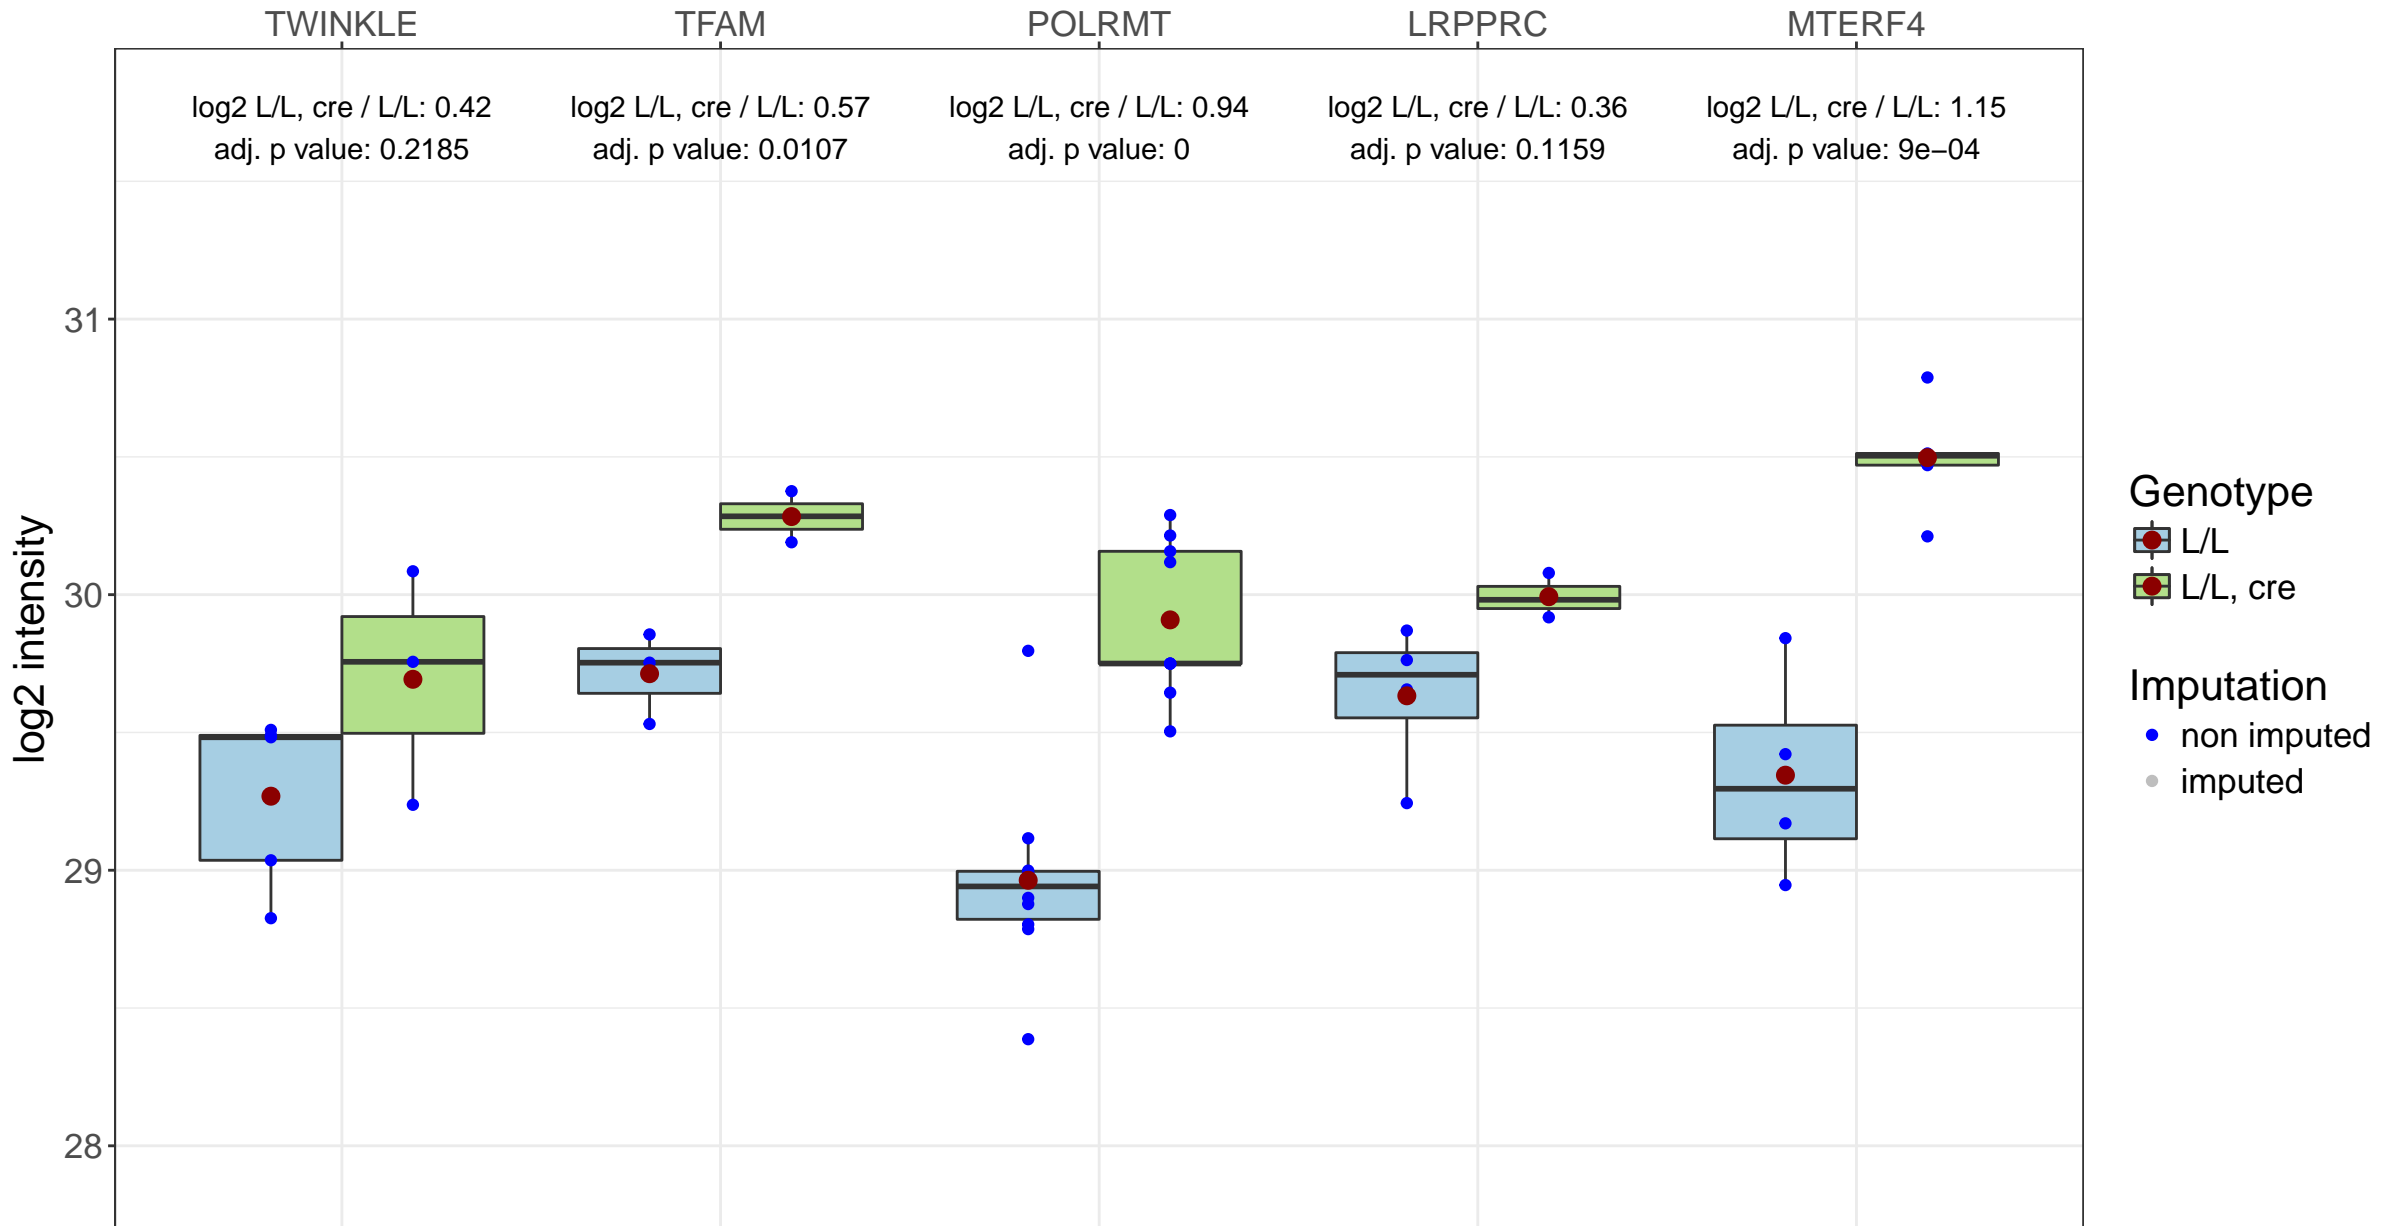

# TLN1 / P26039

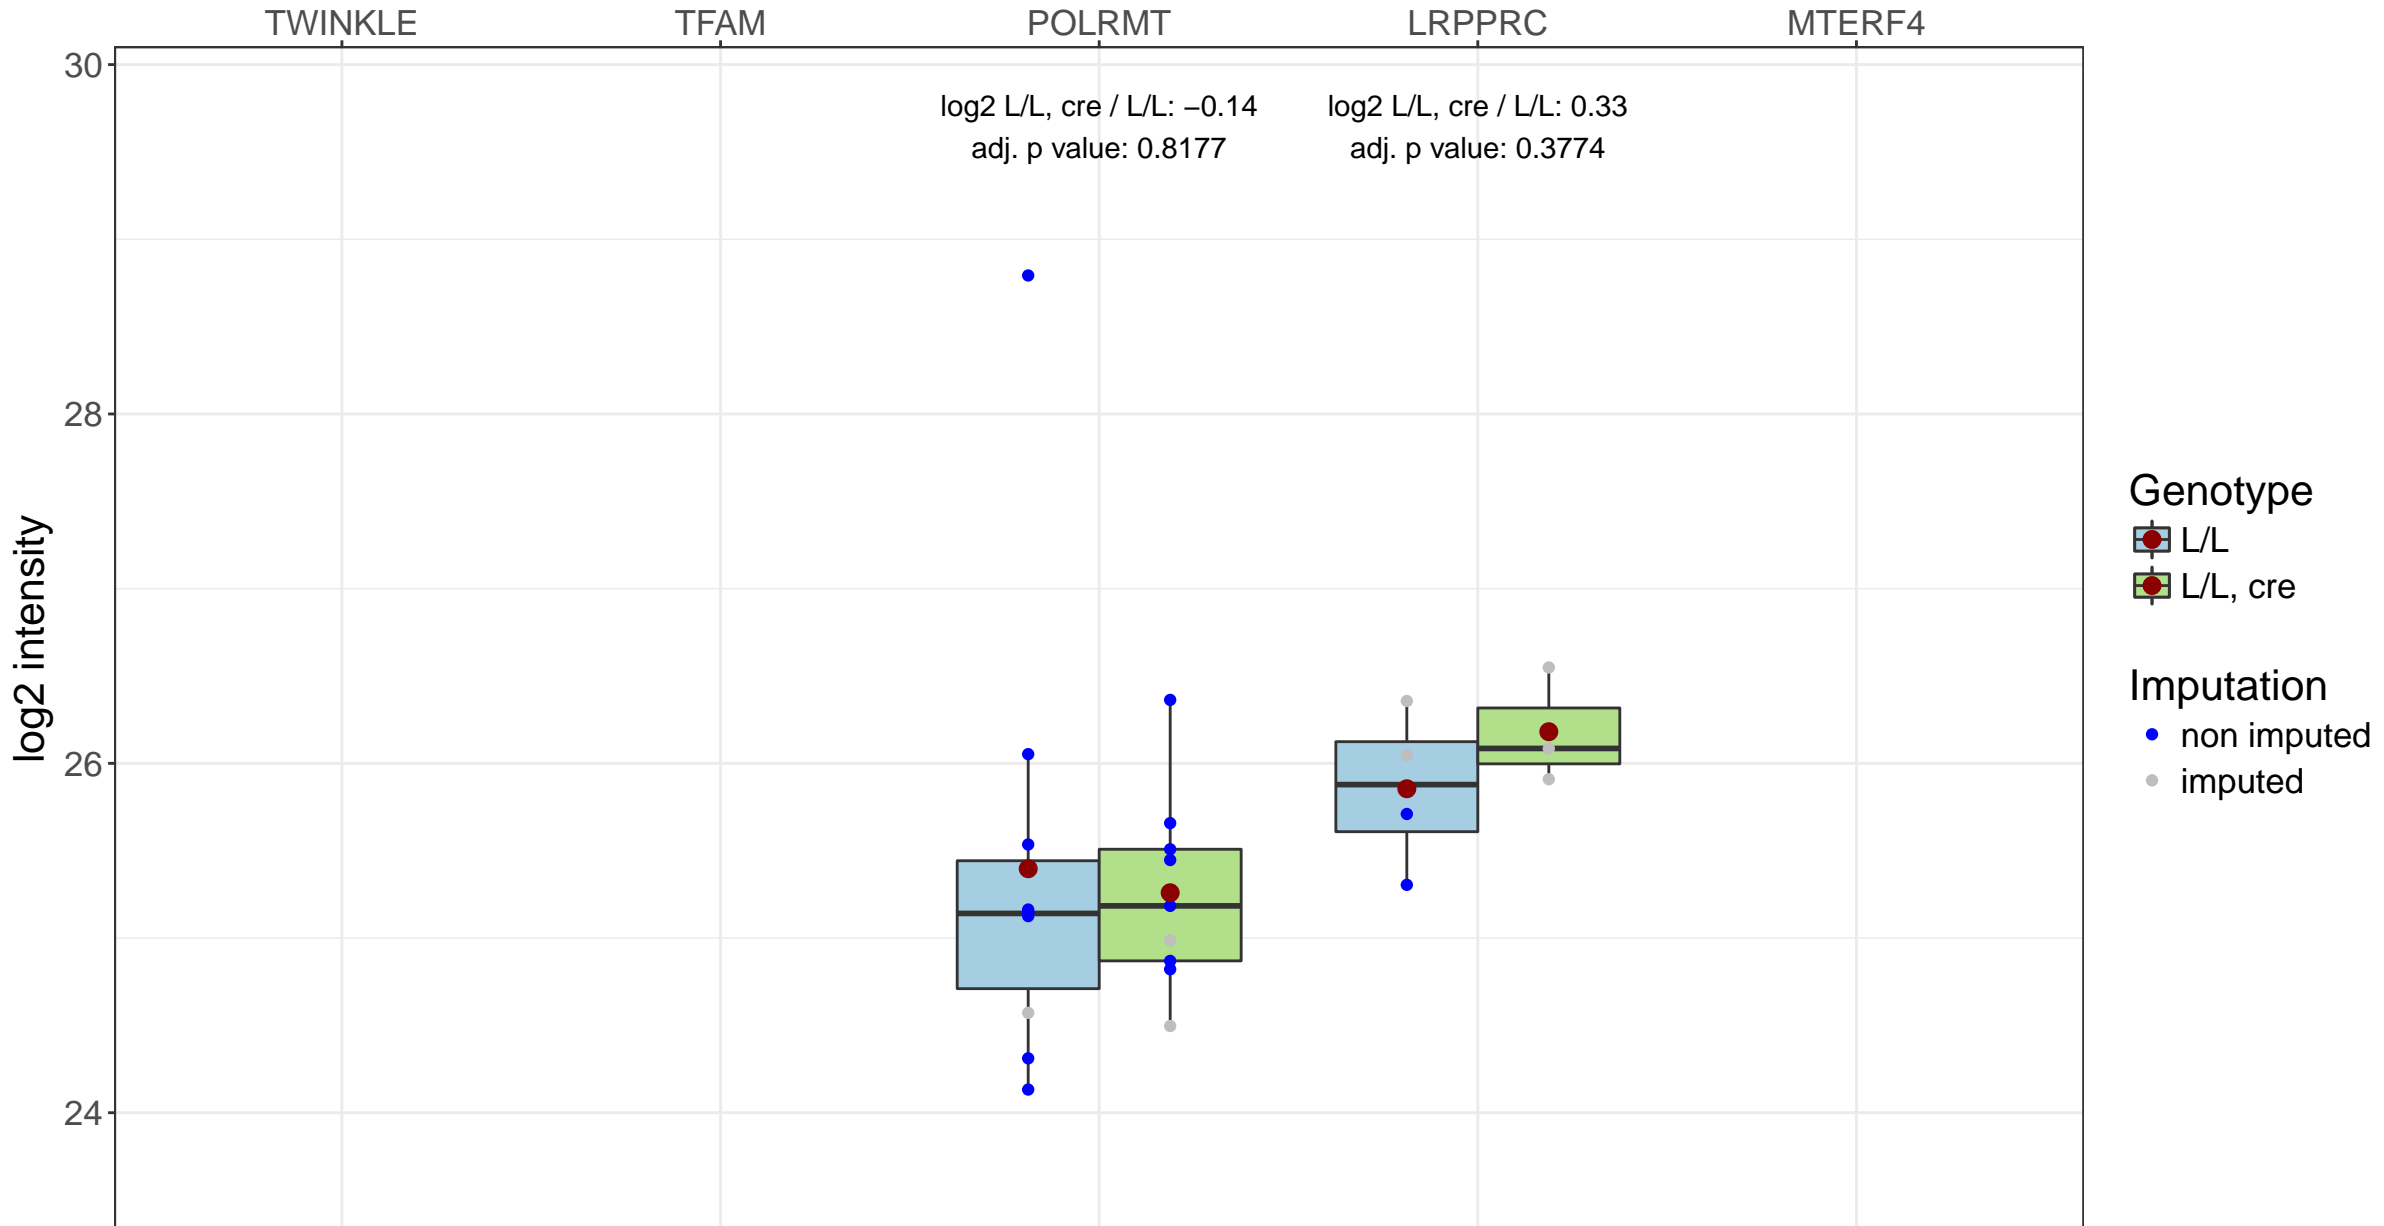

# TM9SF2 / P58021

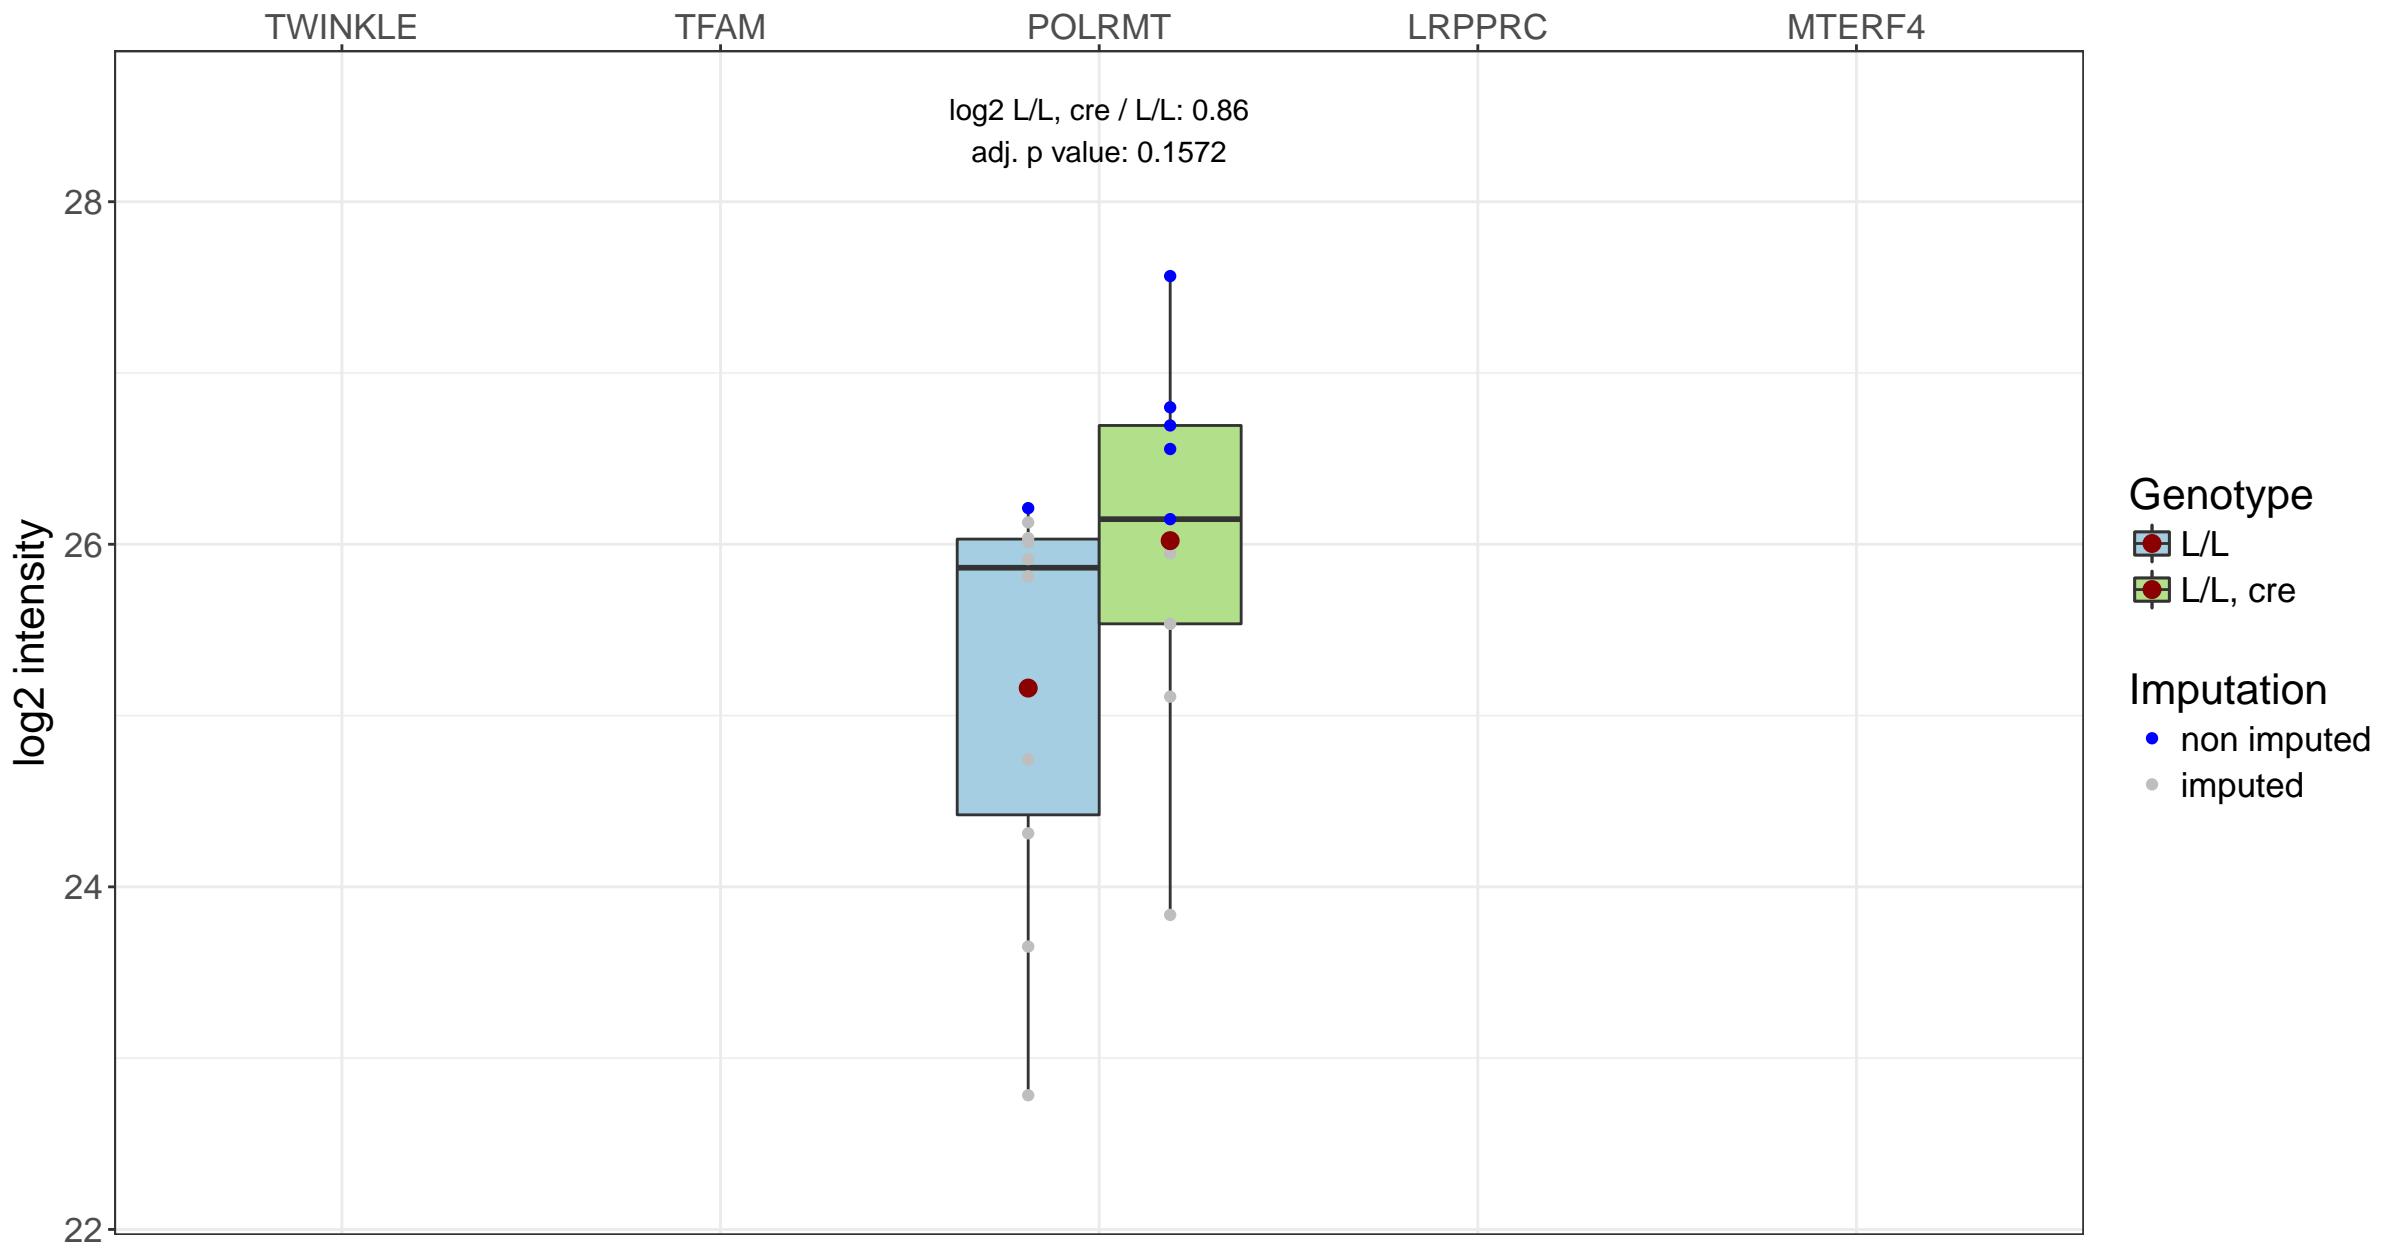

# TMED2 / F6V6T4

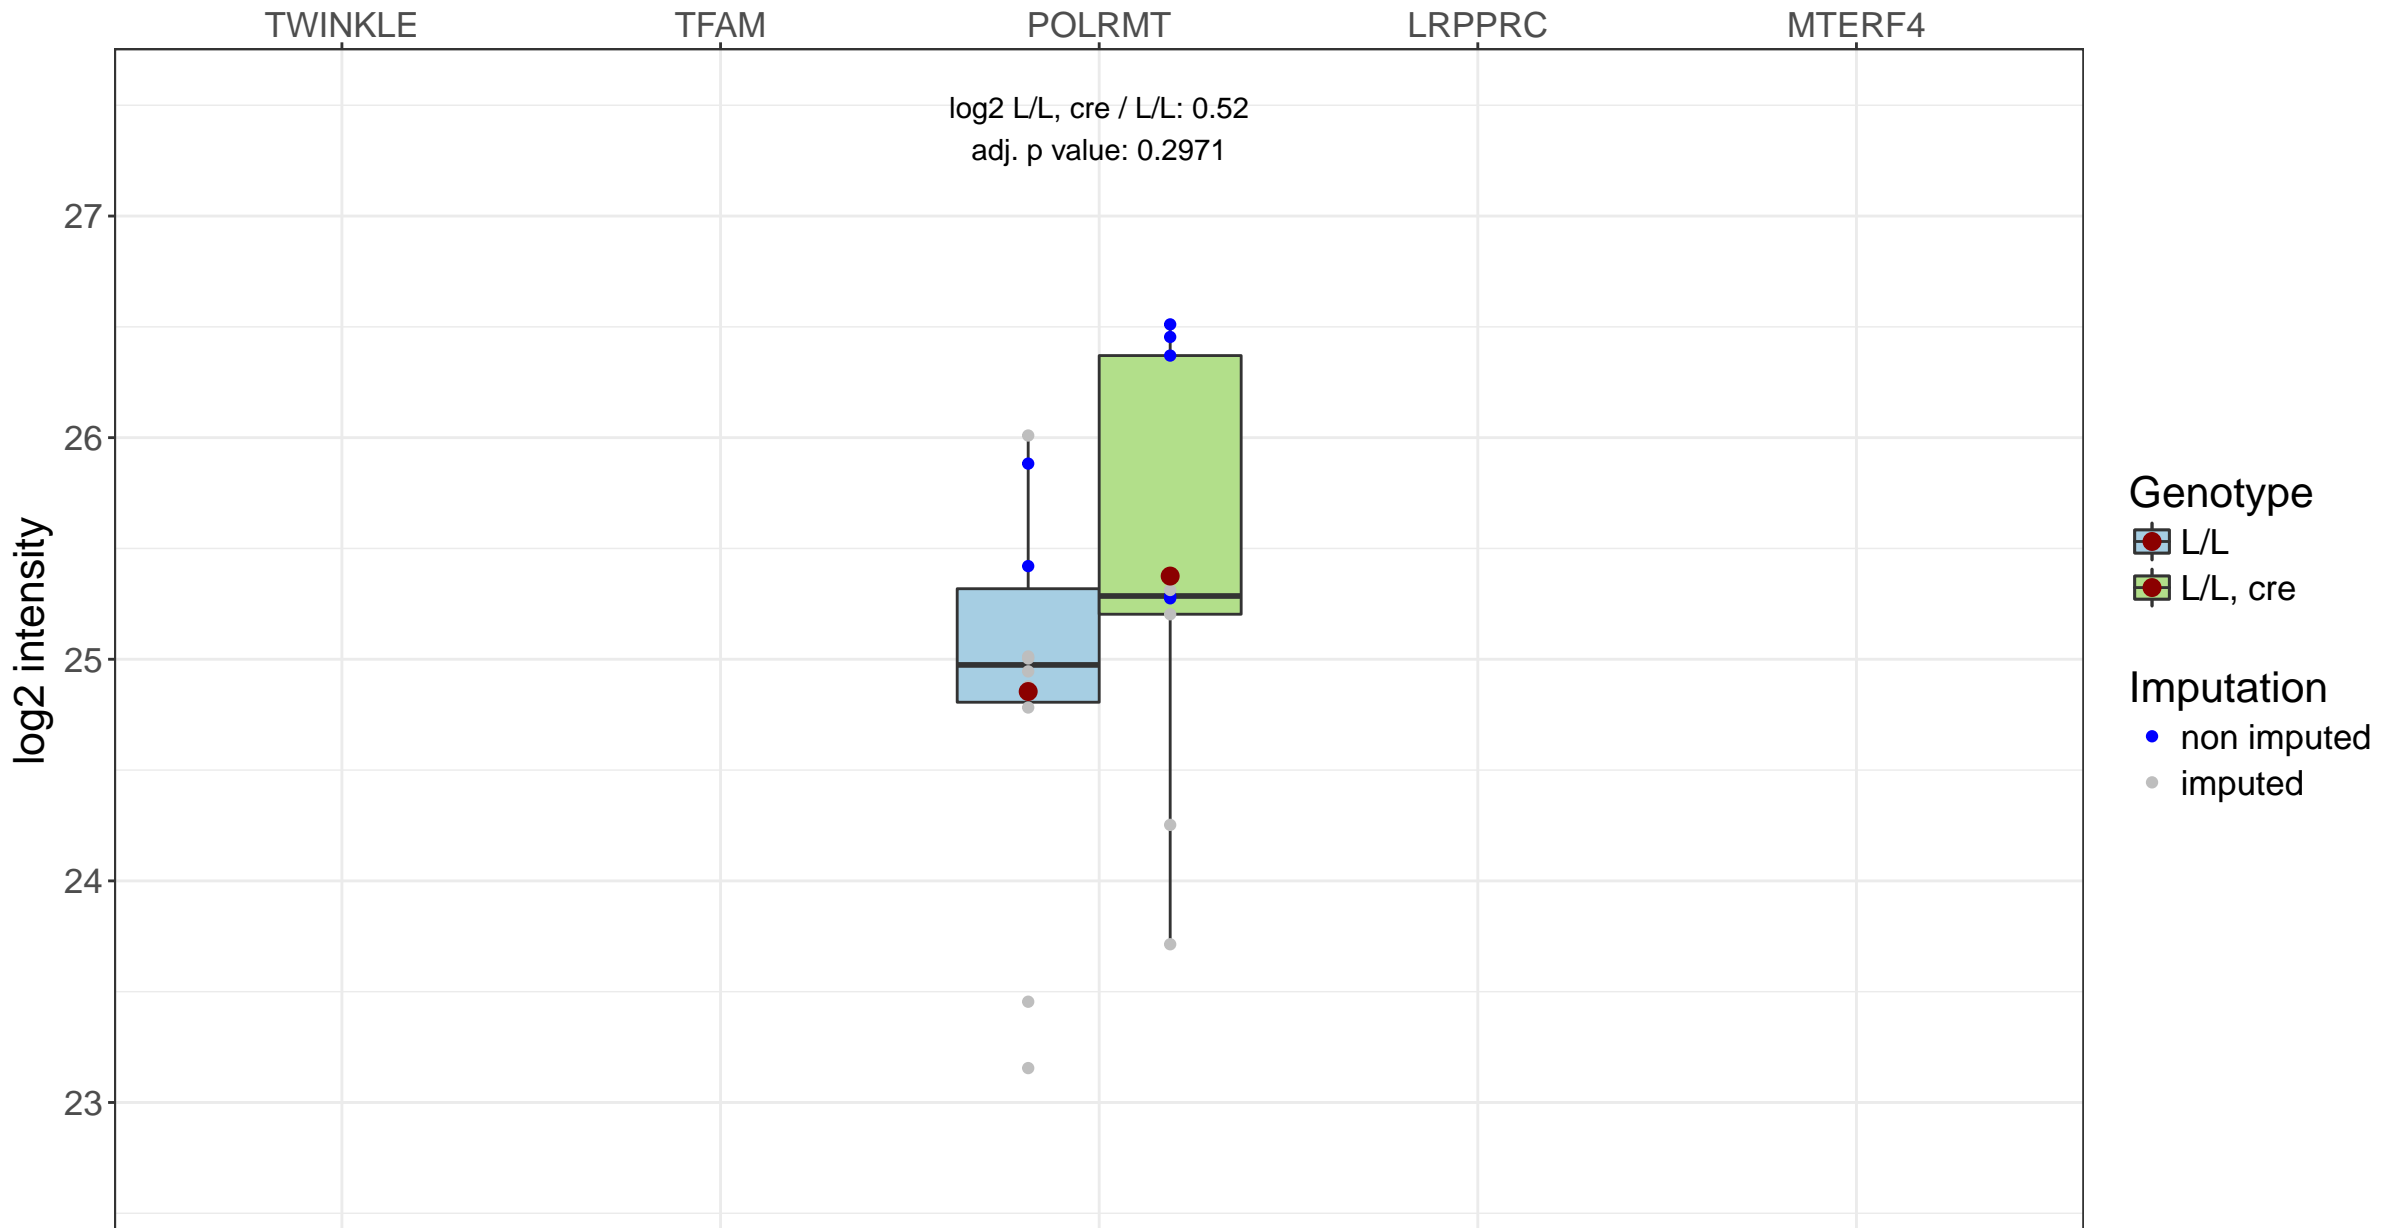





# TMEM126A / Q9D8Y1

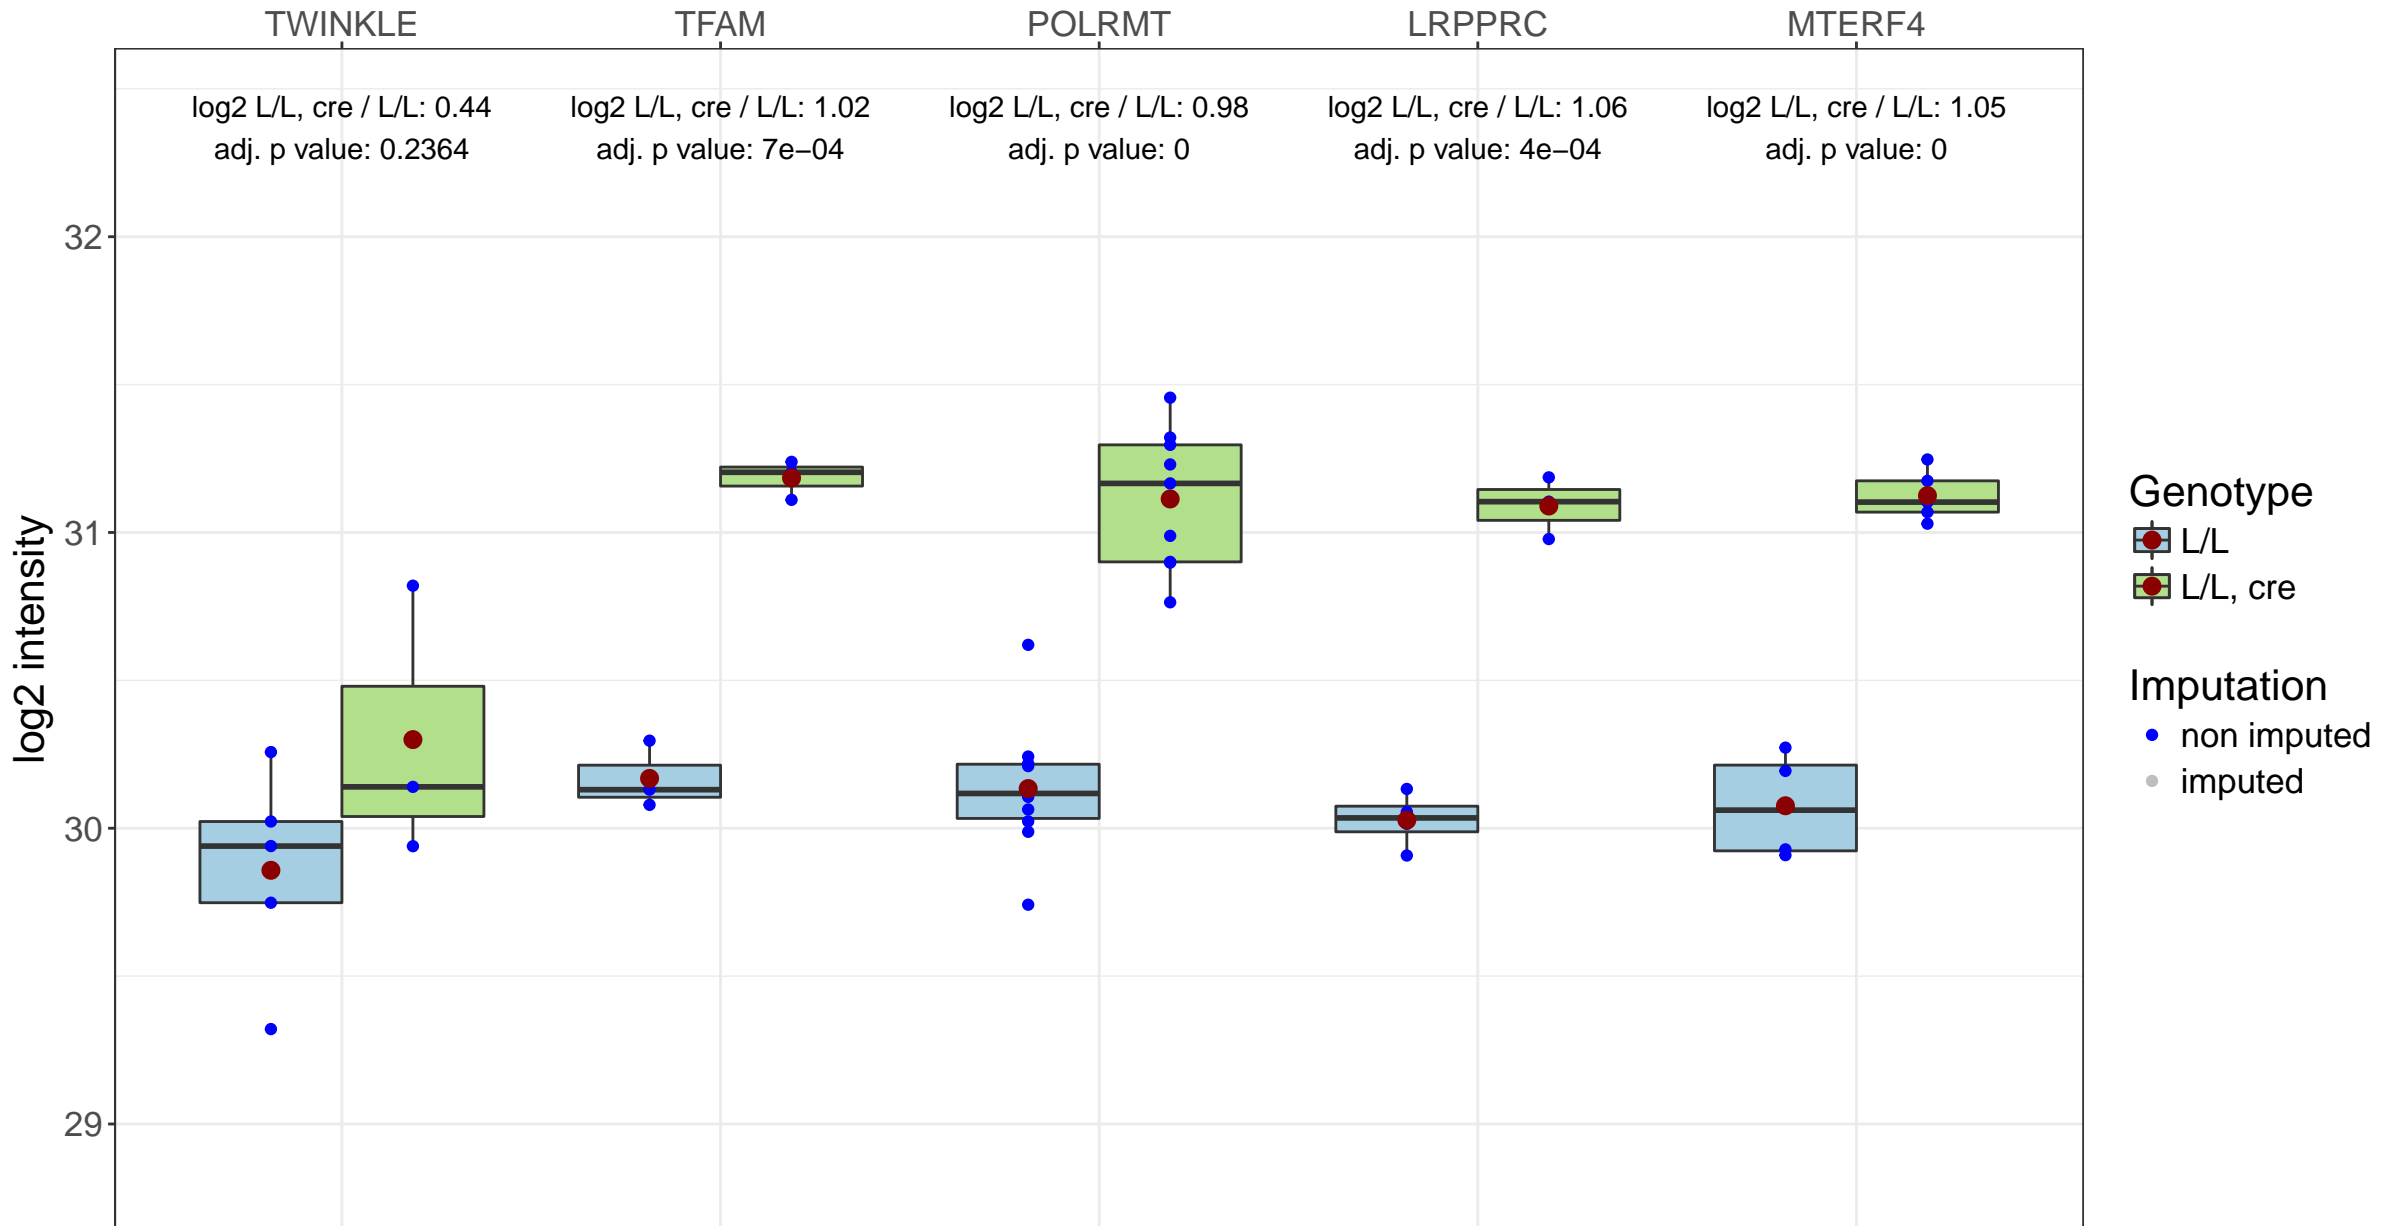

# TMEM141 / A2AJB2

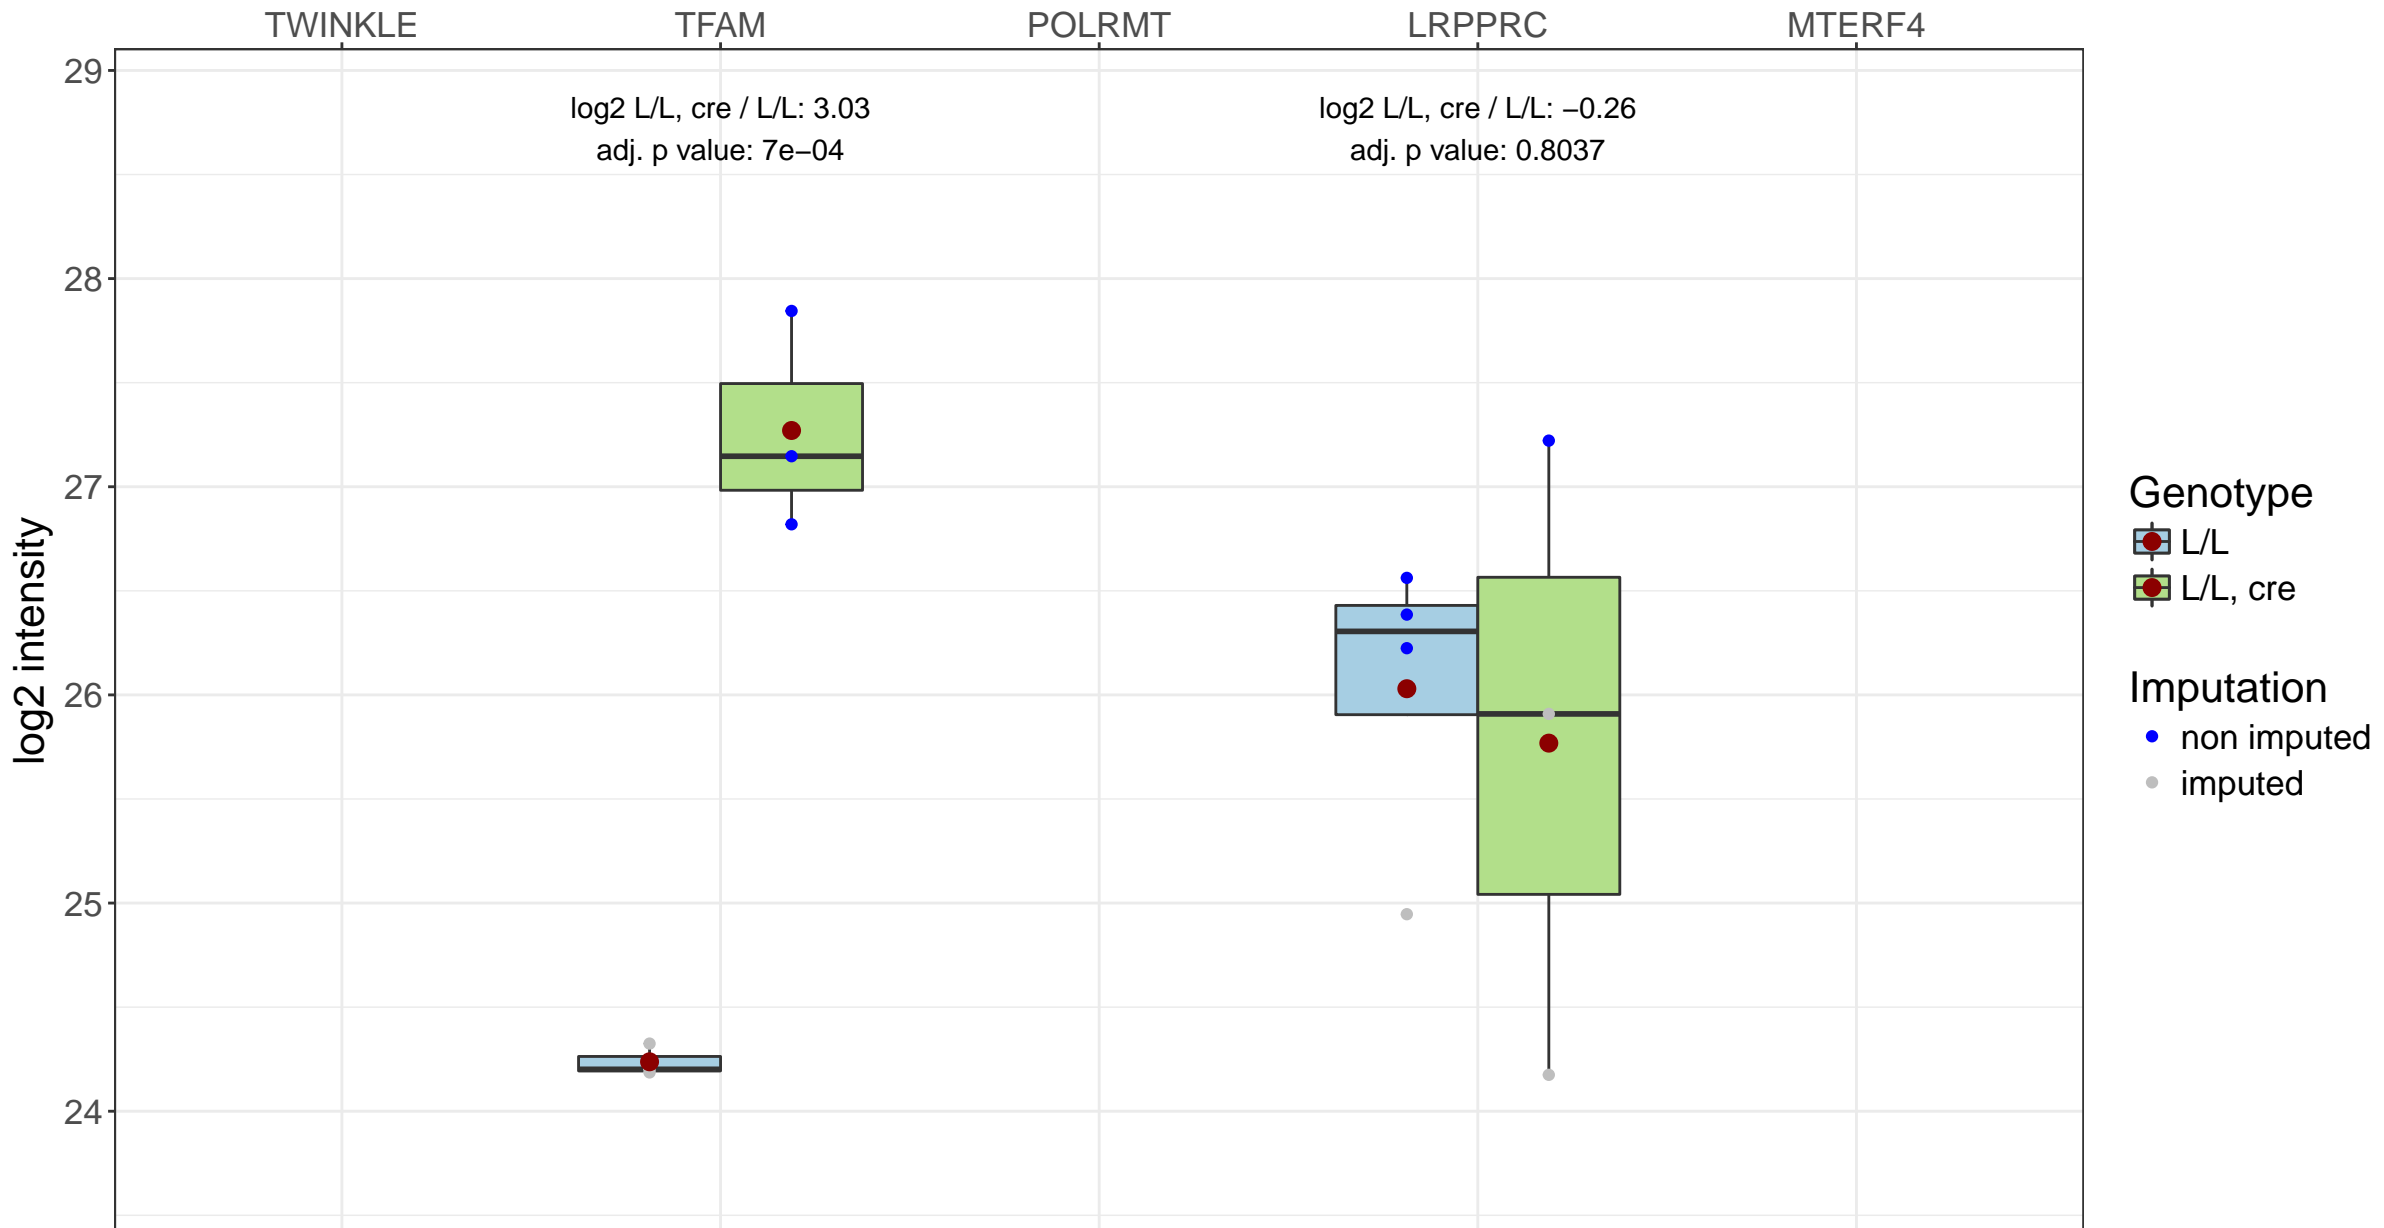

# TMEM143 / G3X9F4

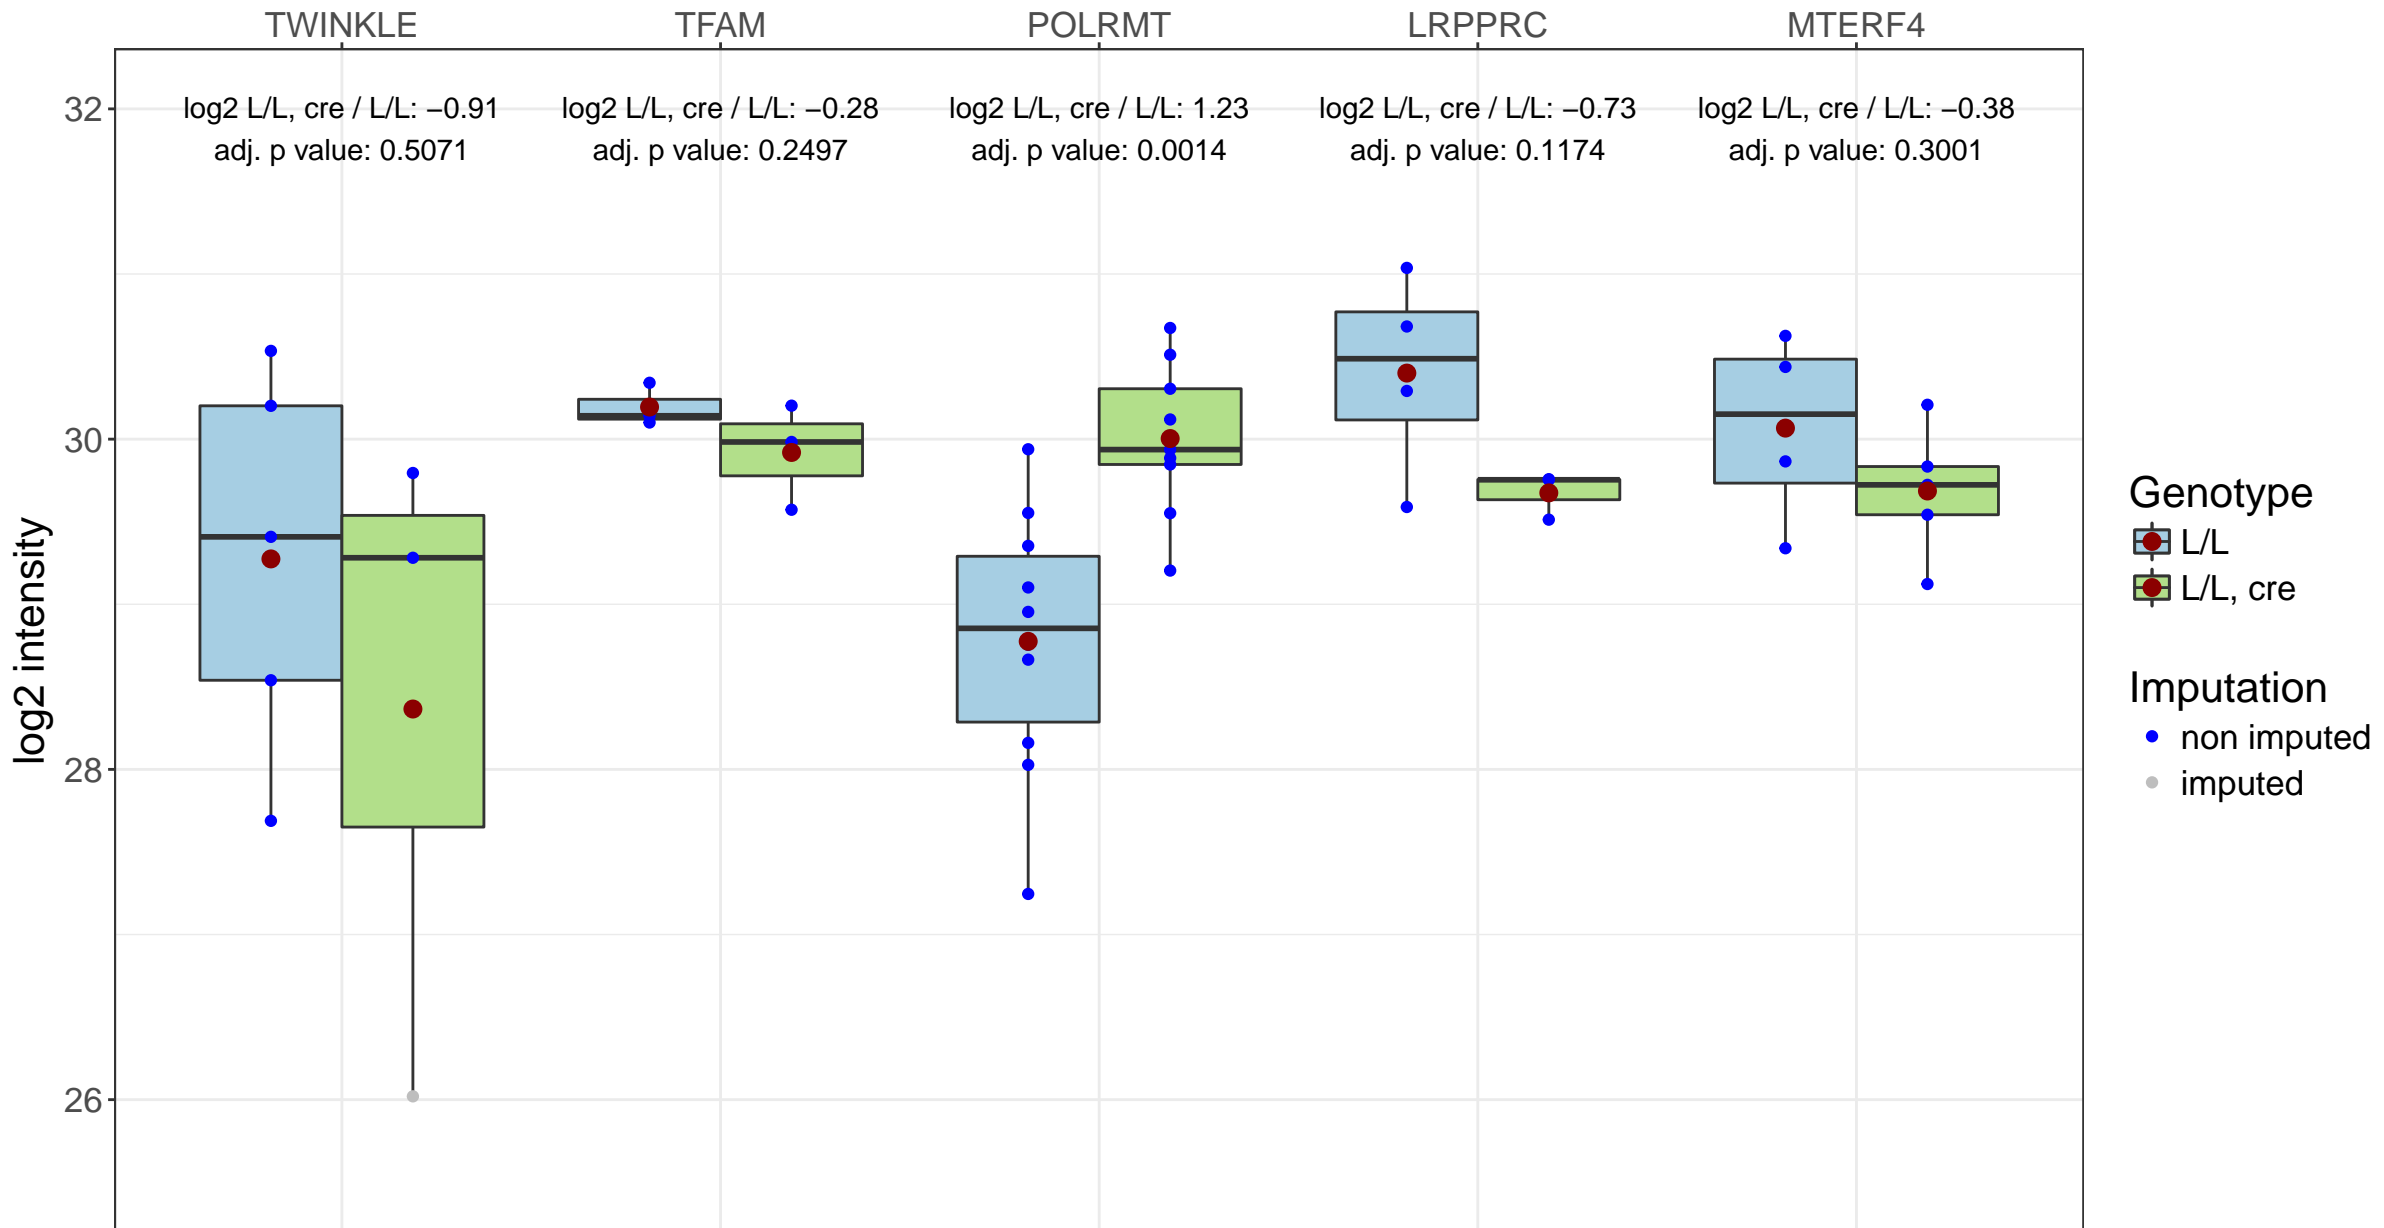

# TMEM160 / Q9D938

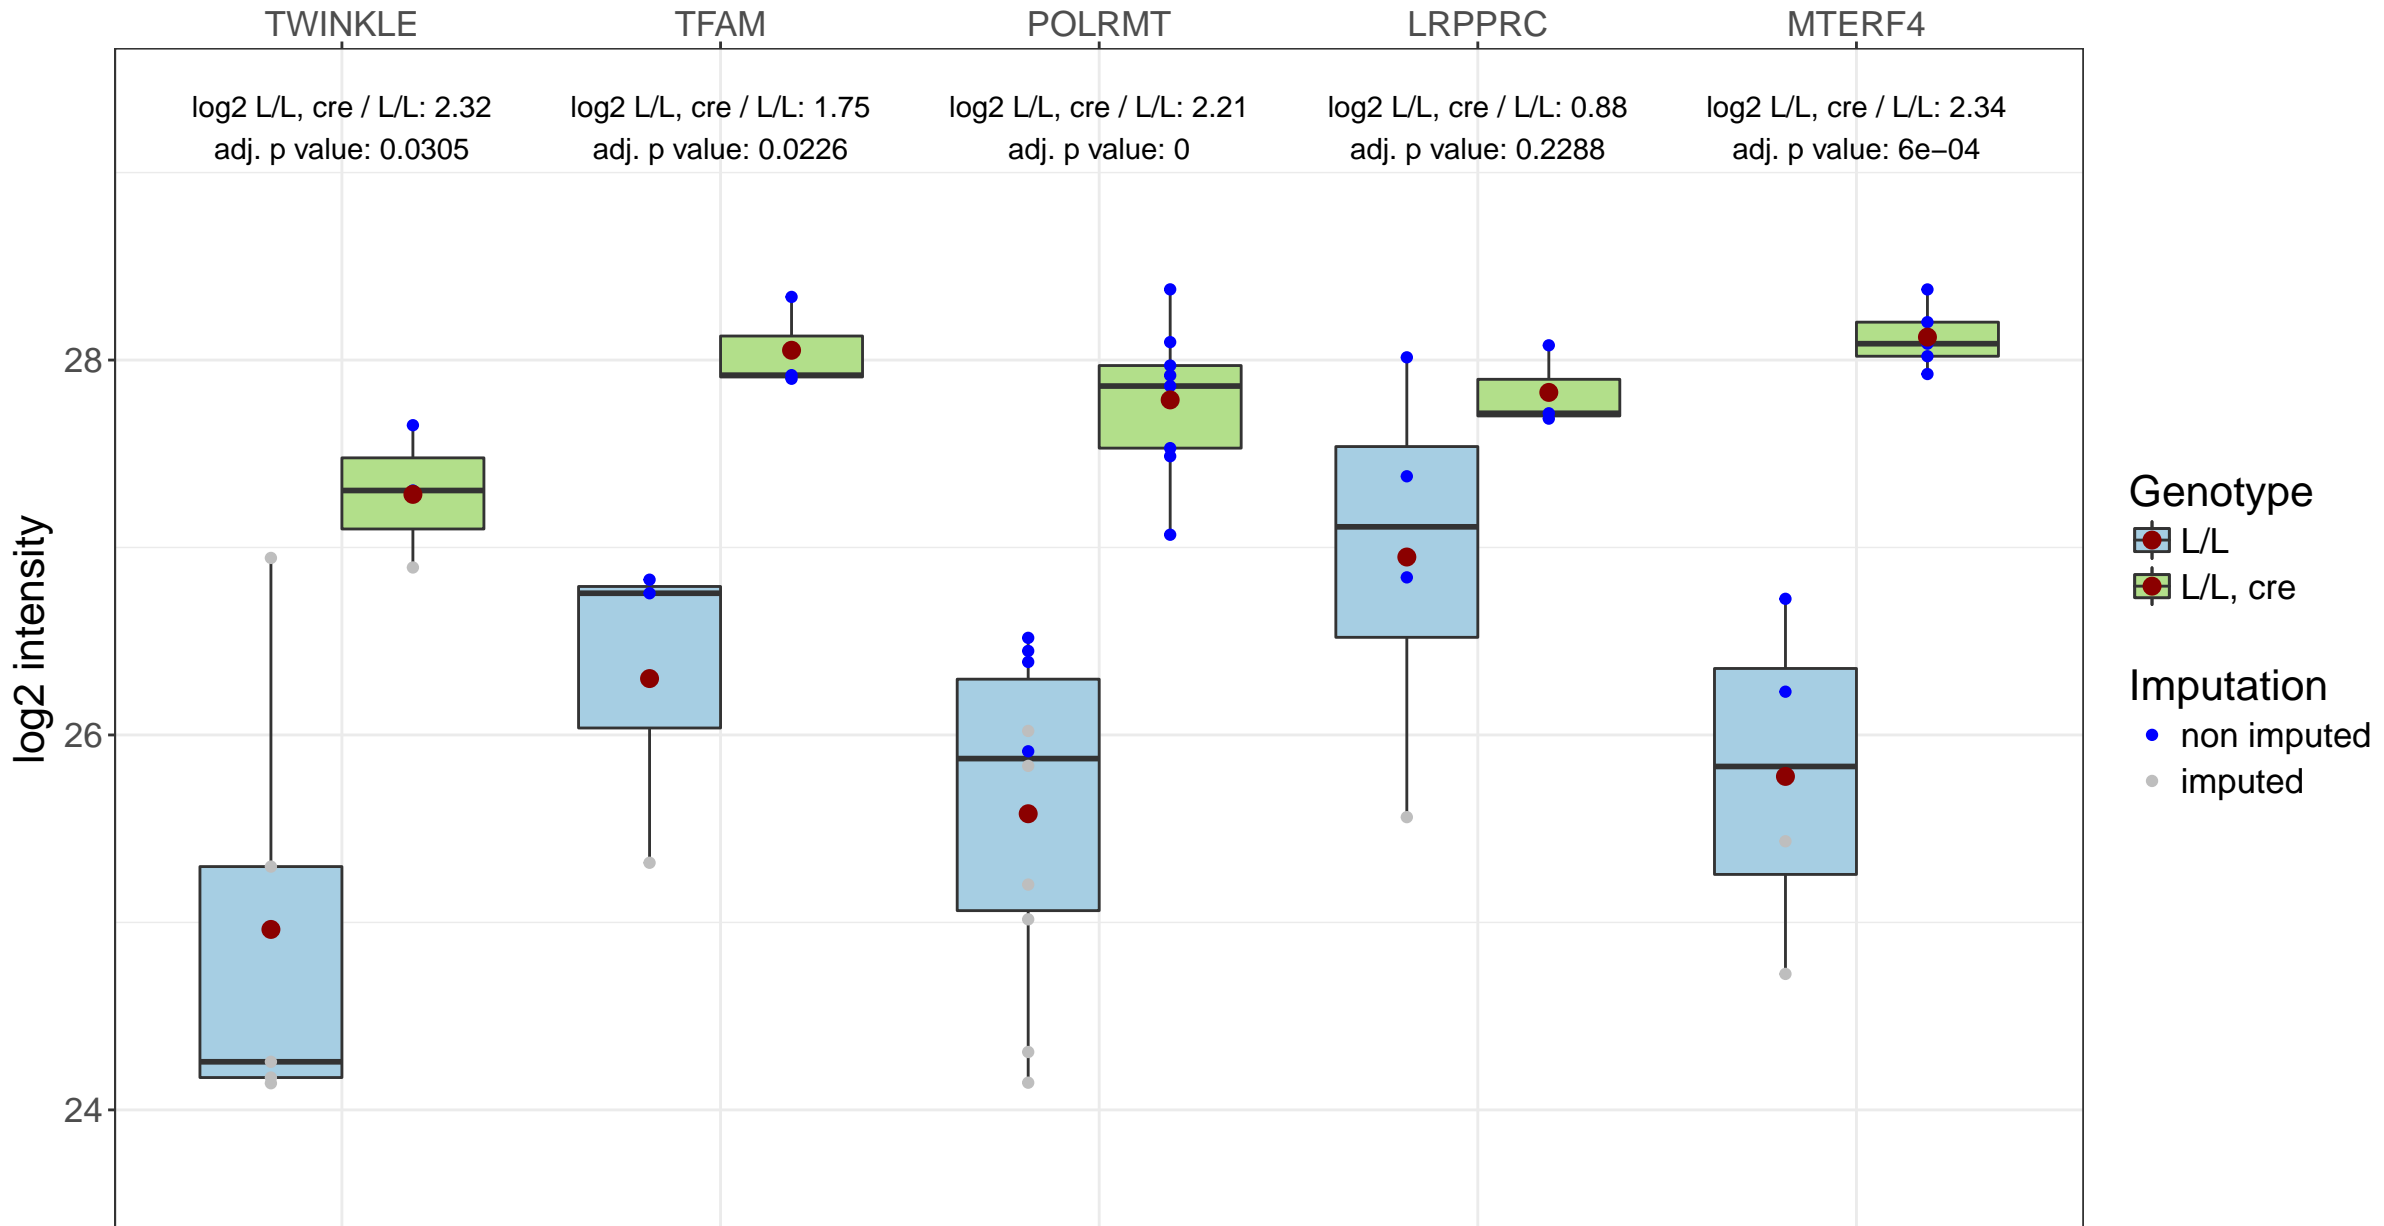

# TMEM177 / Q8BPE4

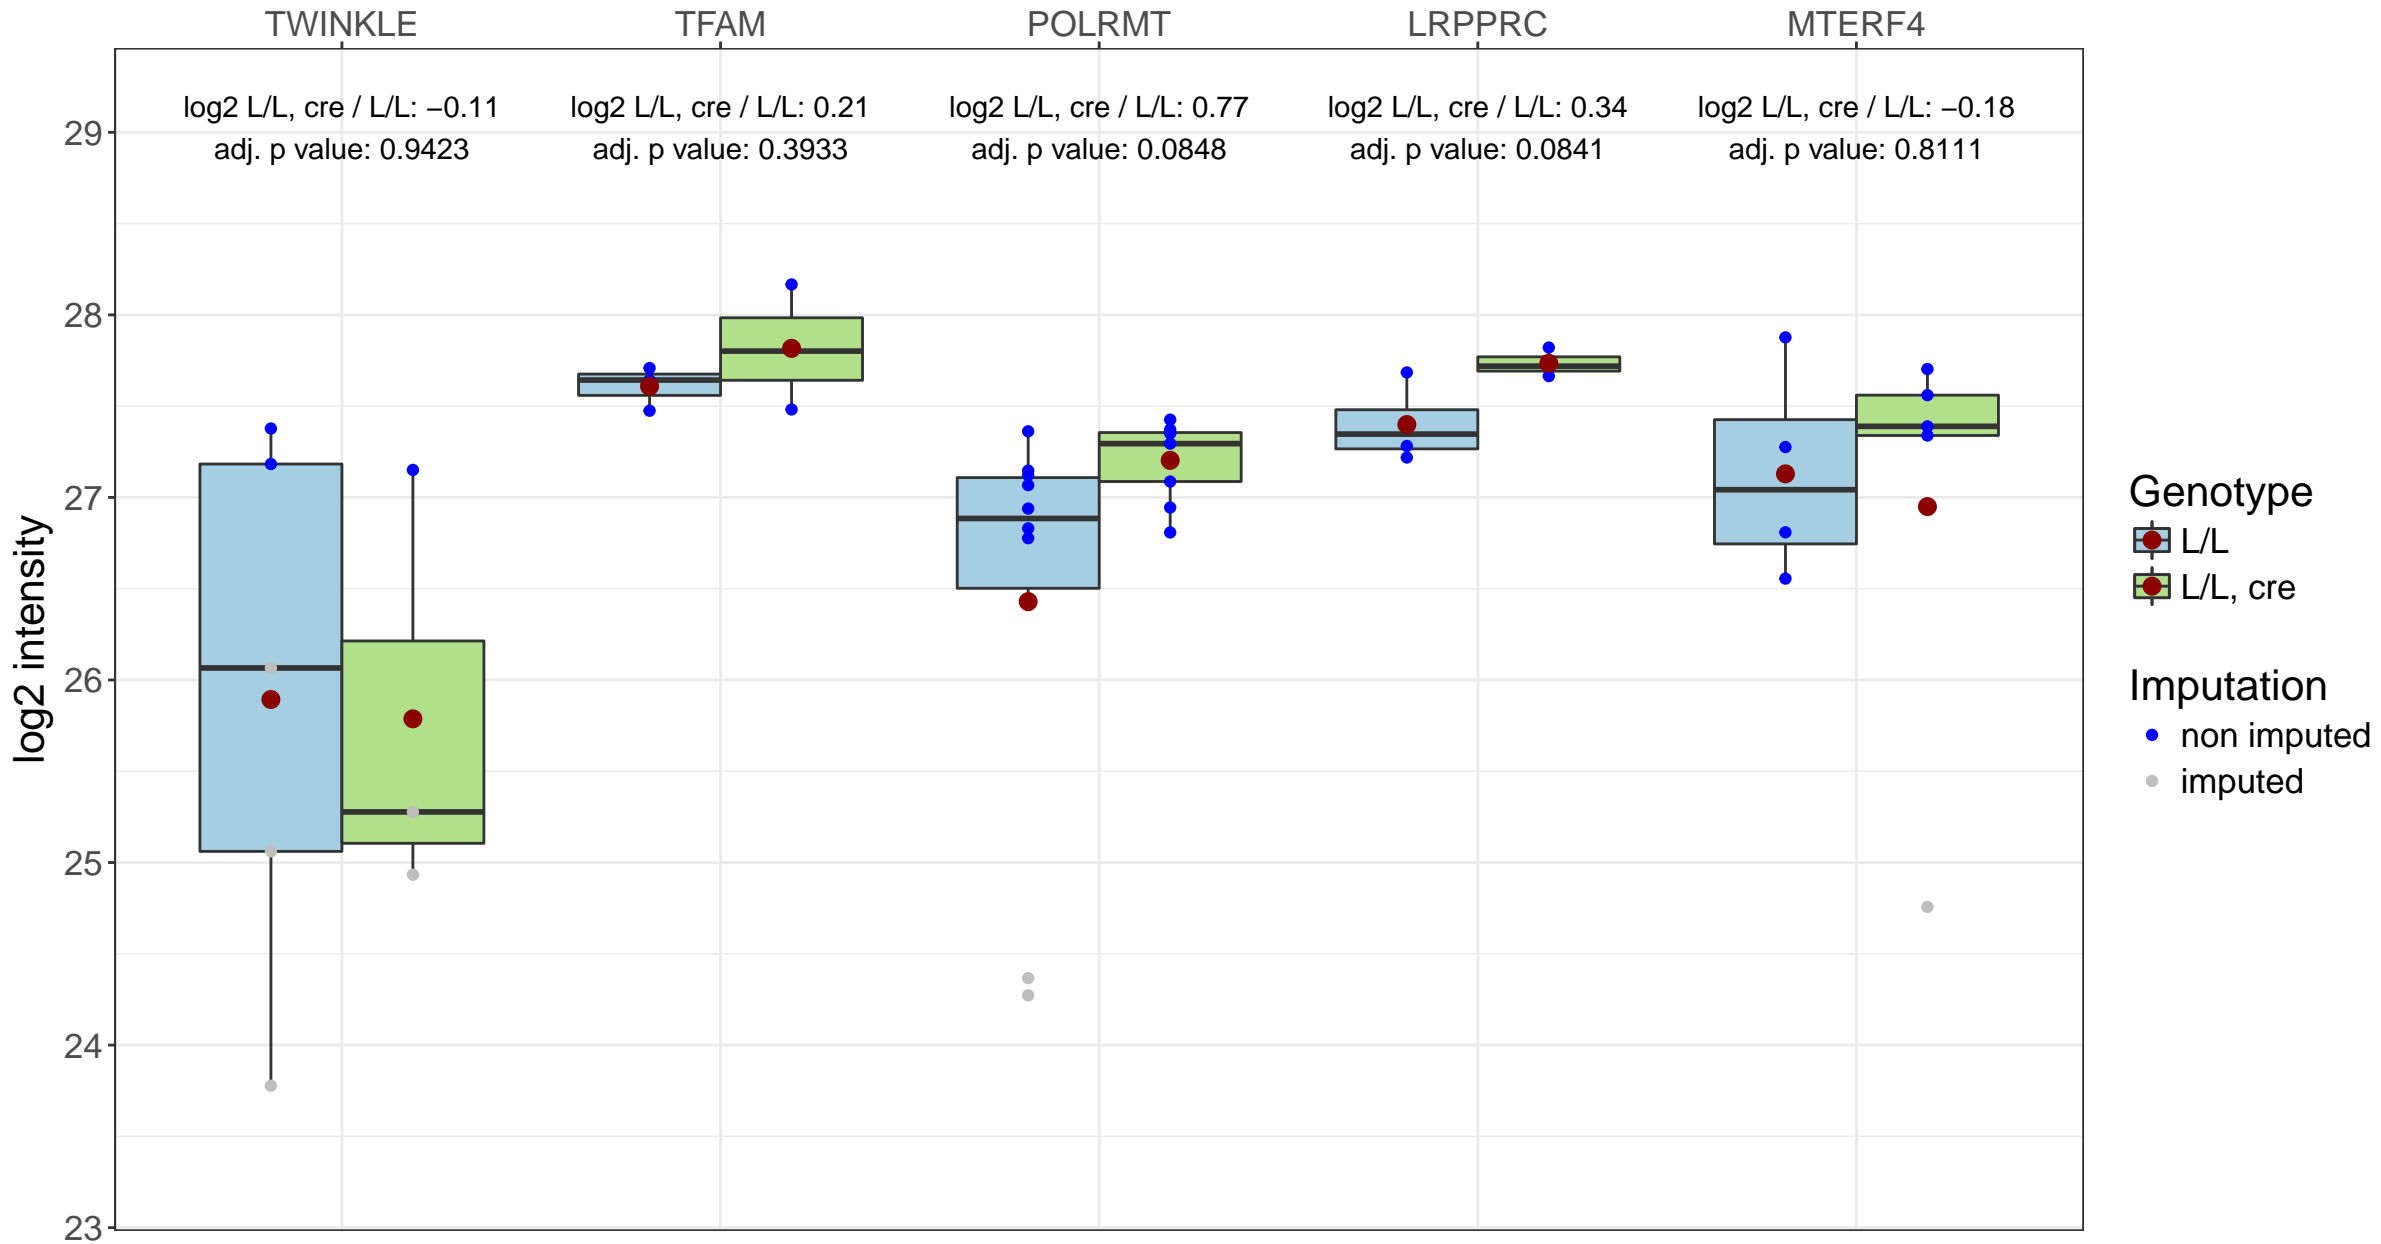

# TMEM186 / Q9CR76

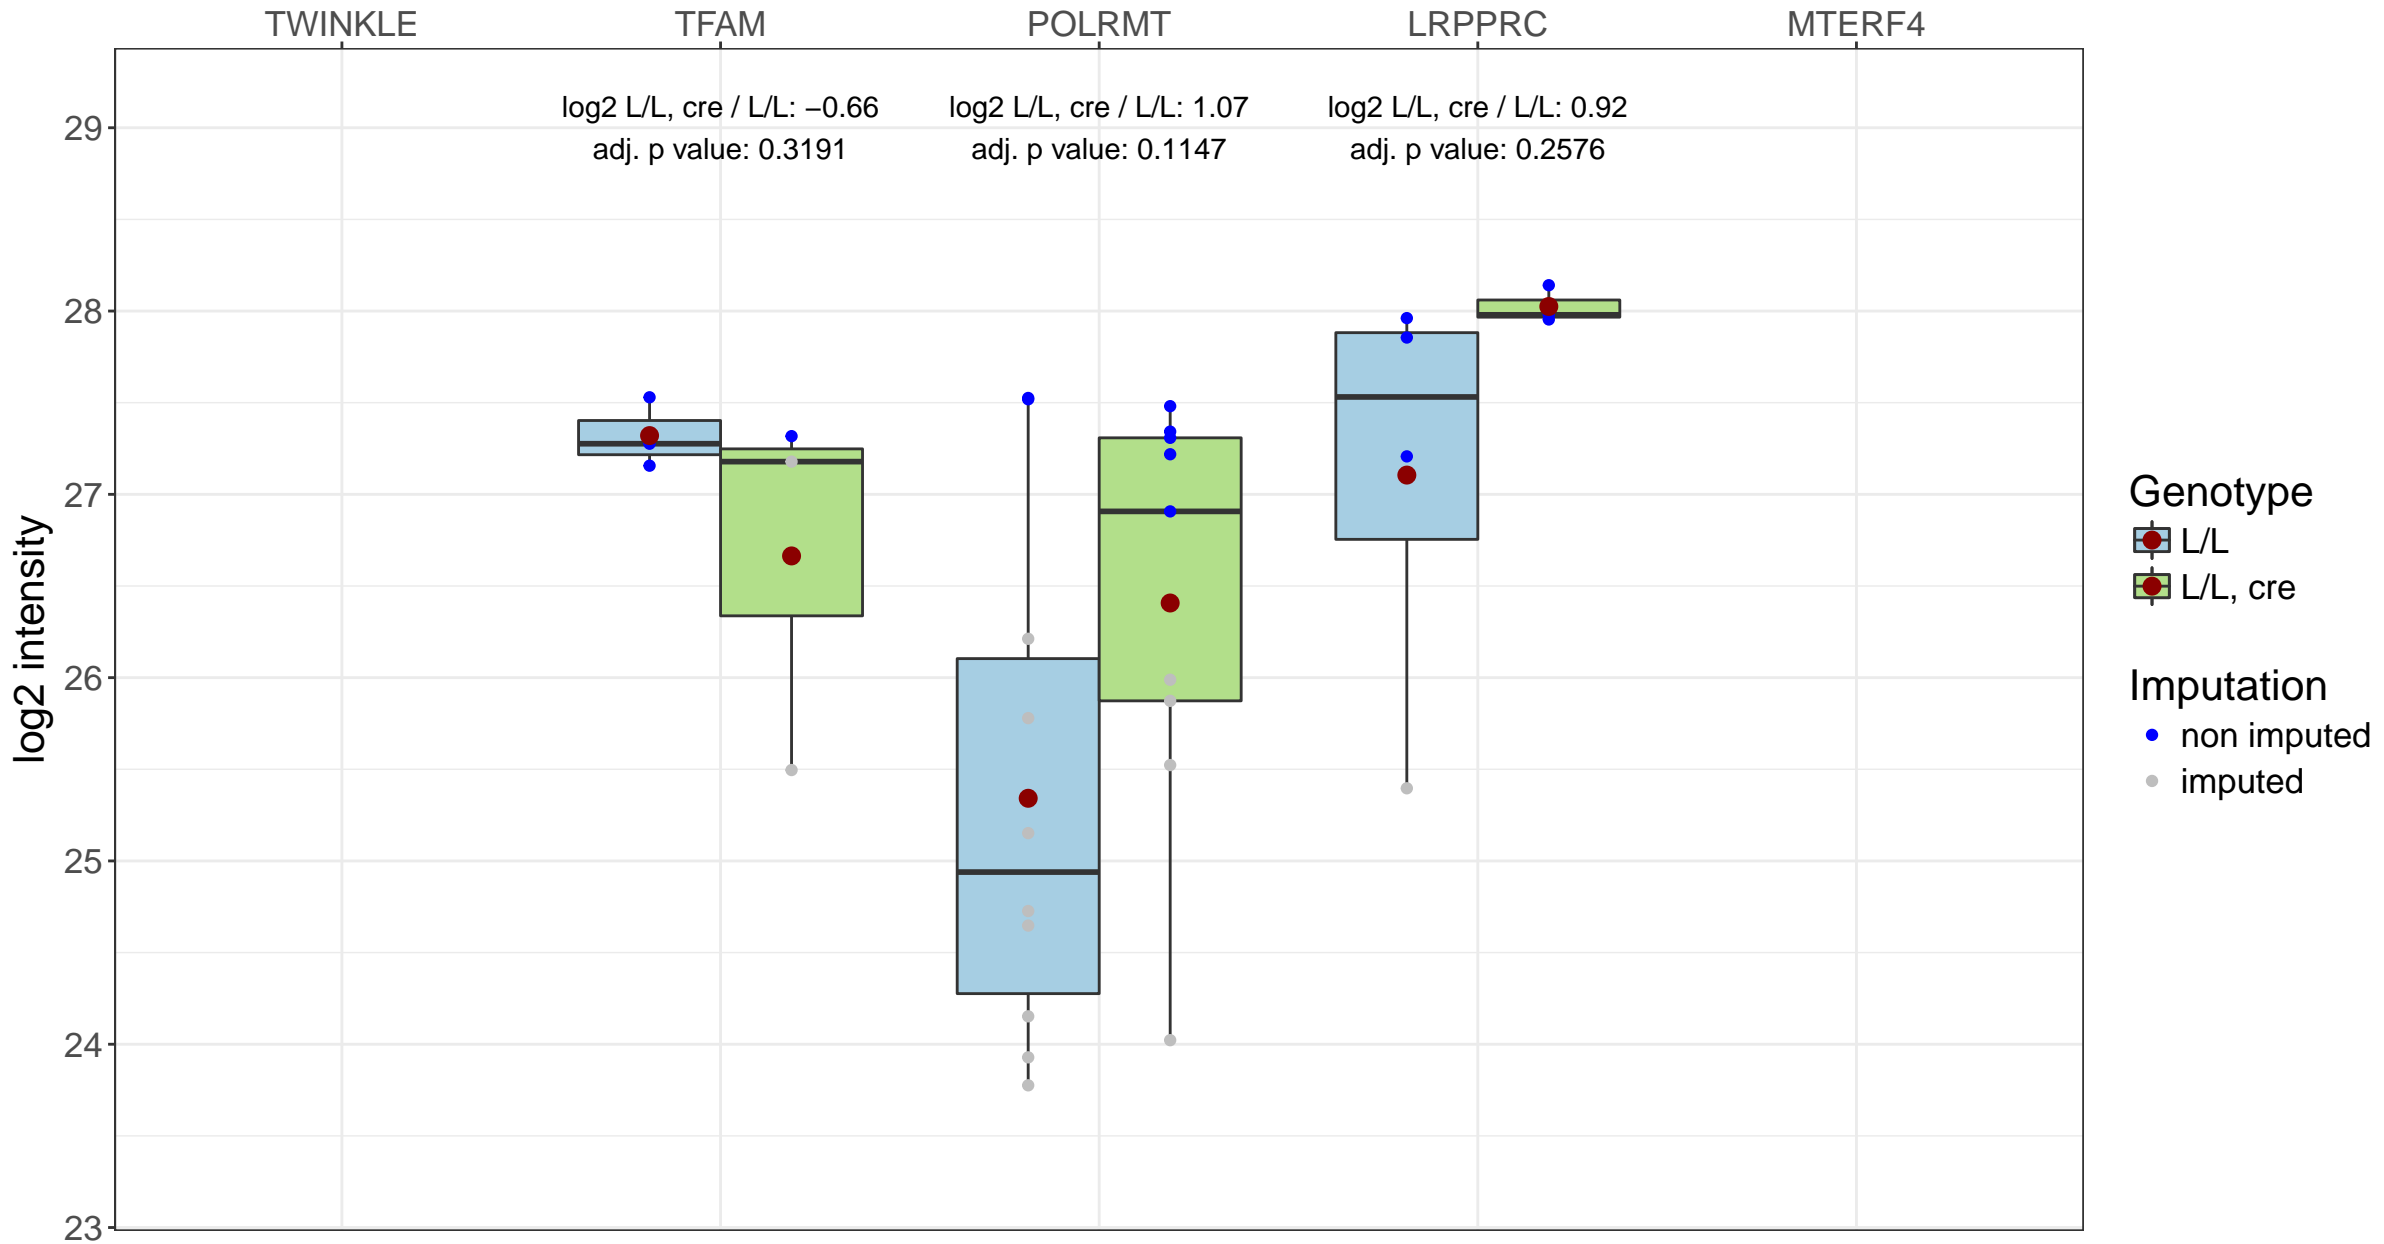

# TMEM223 / Q9CQE2

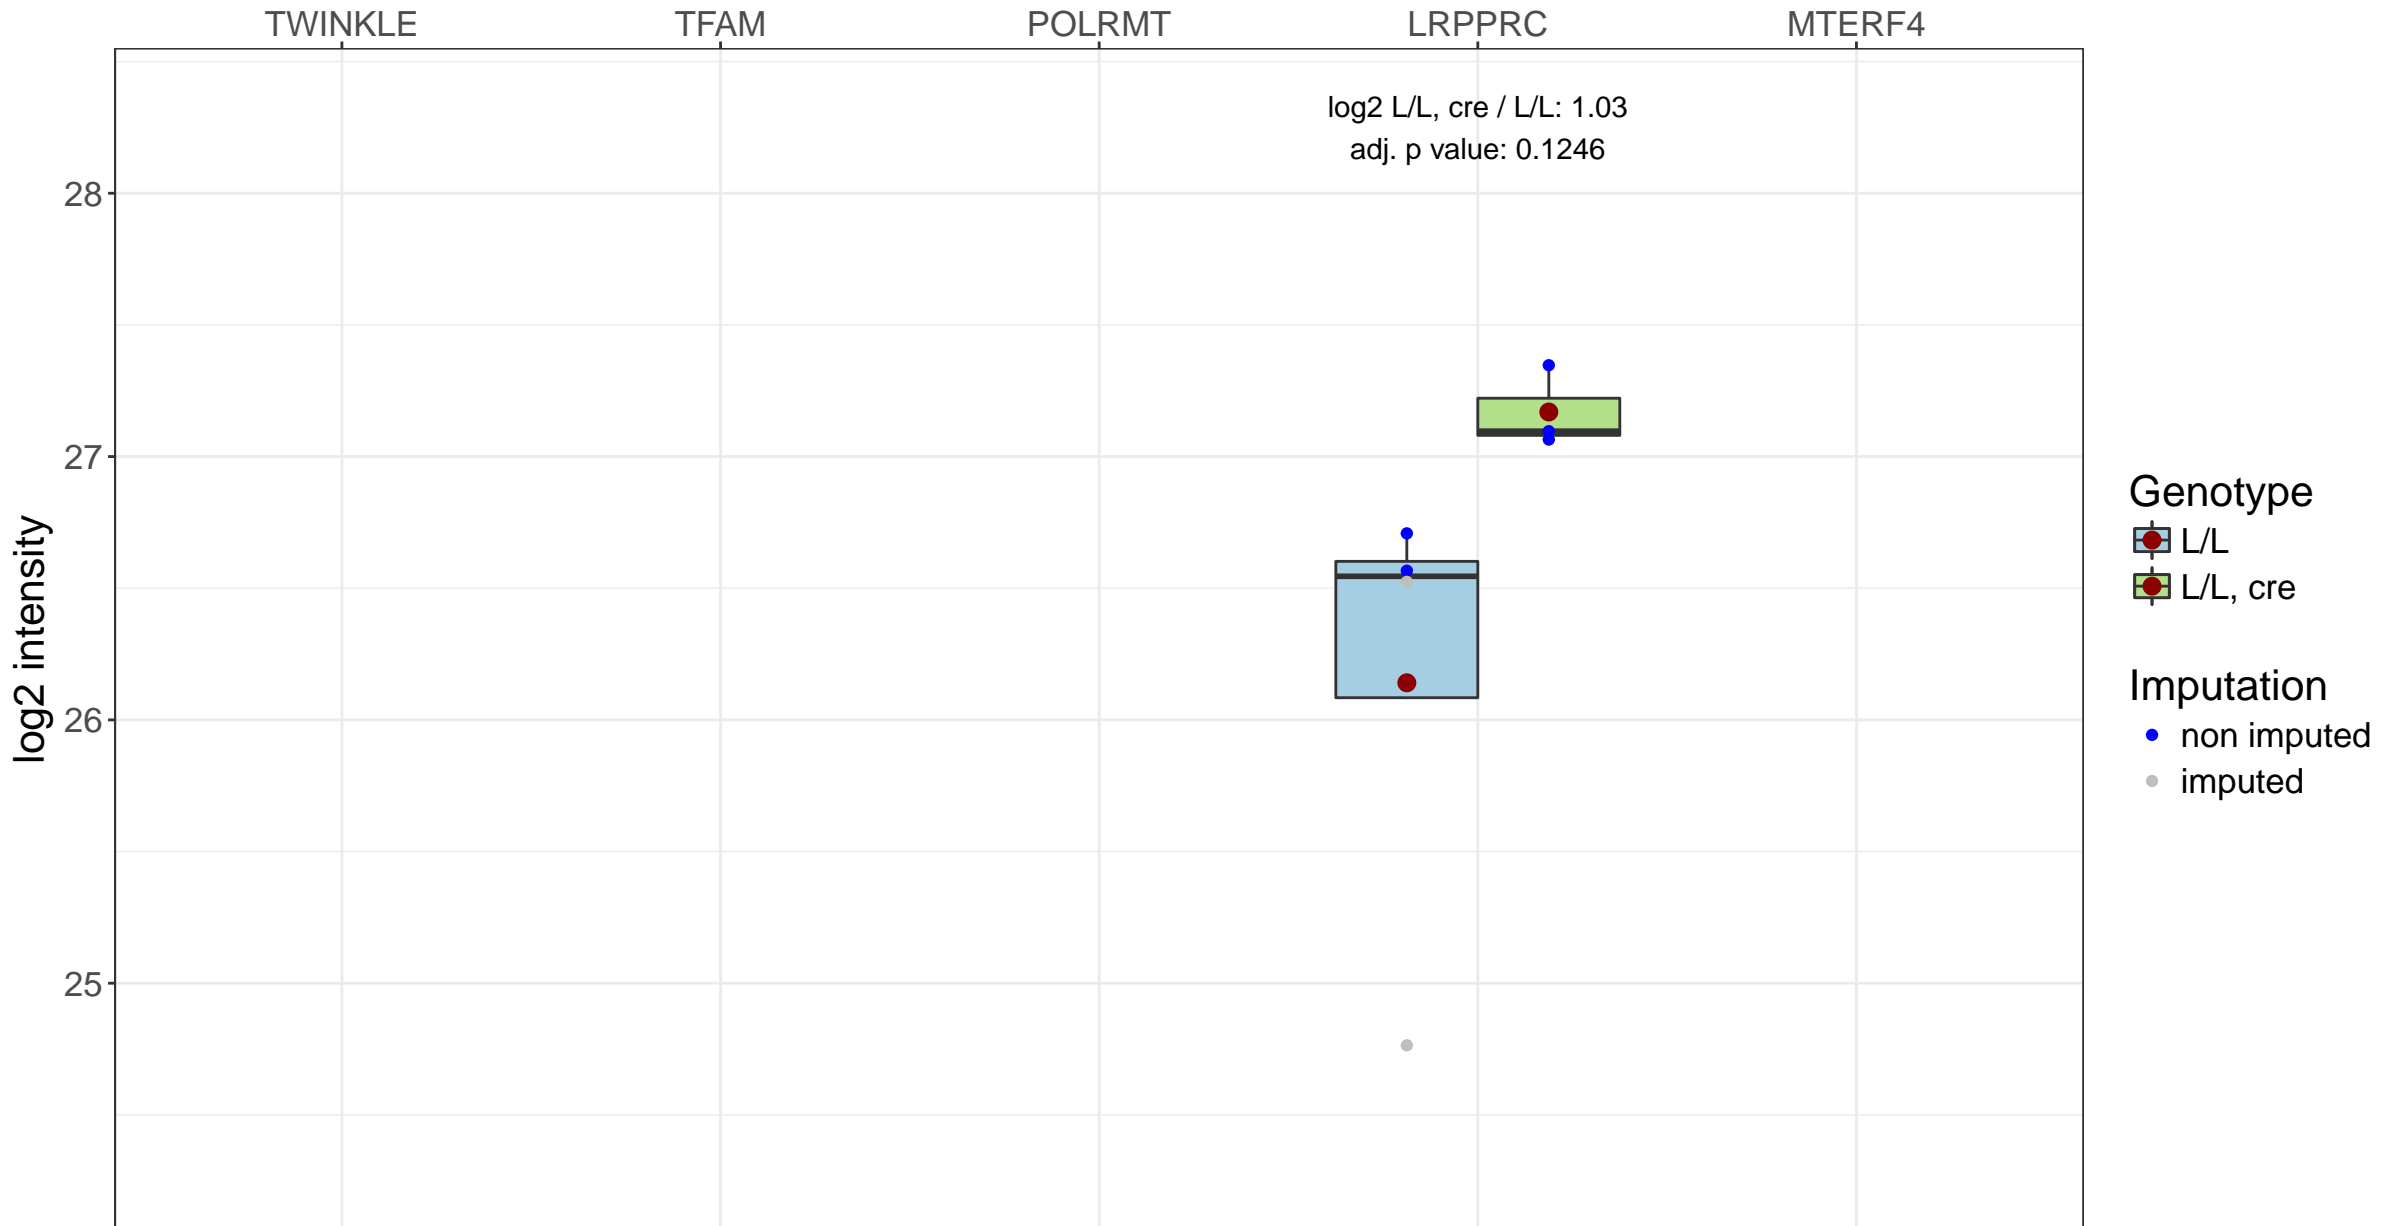



# TMEM242 / Q8VCR3

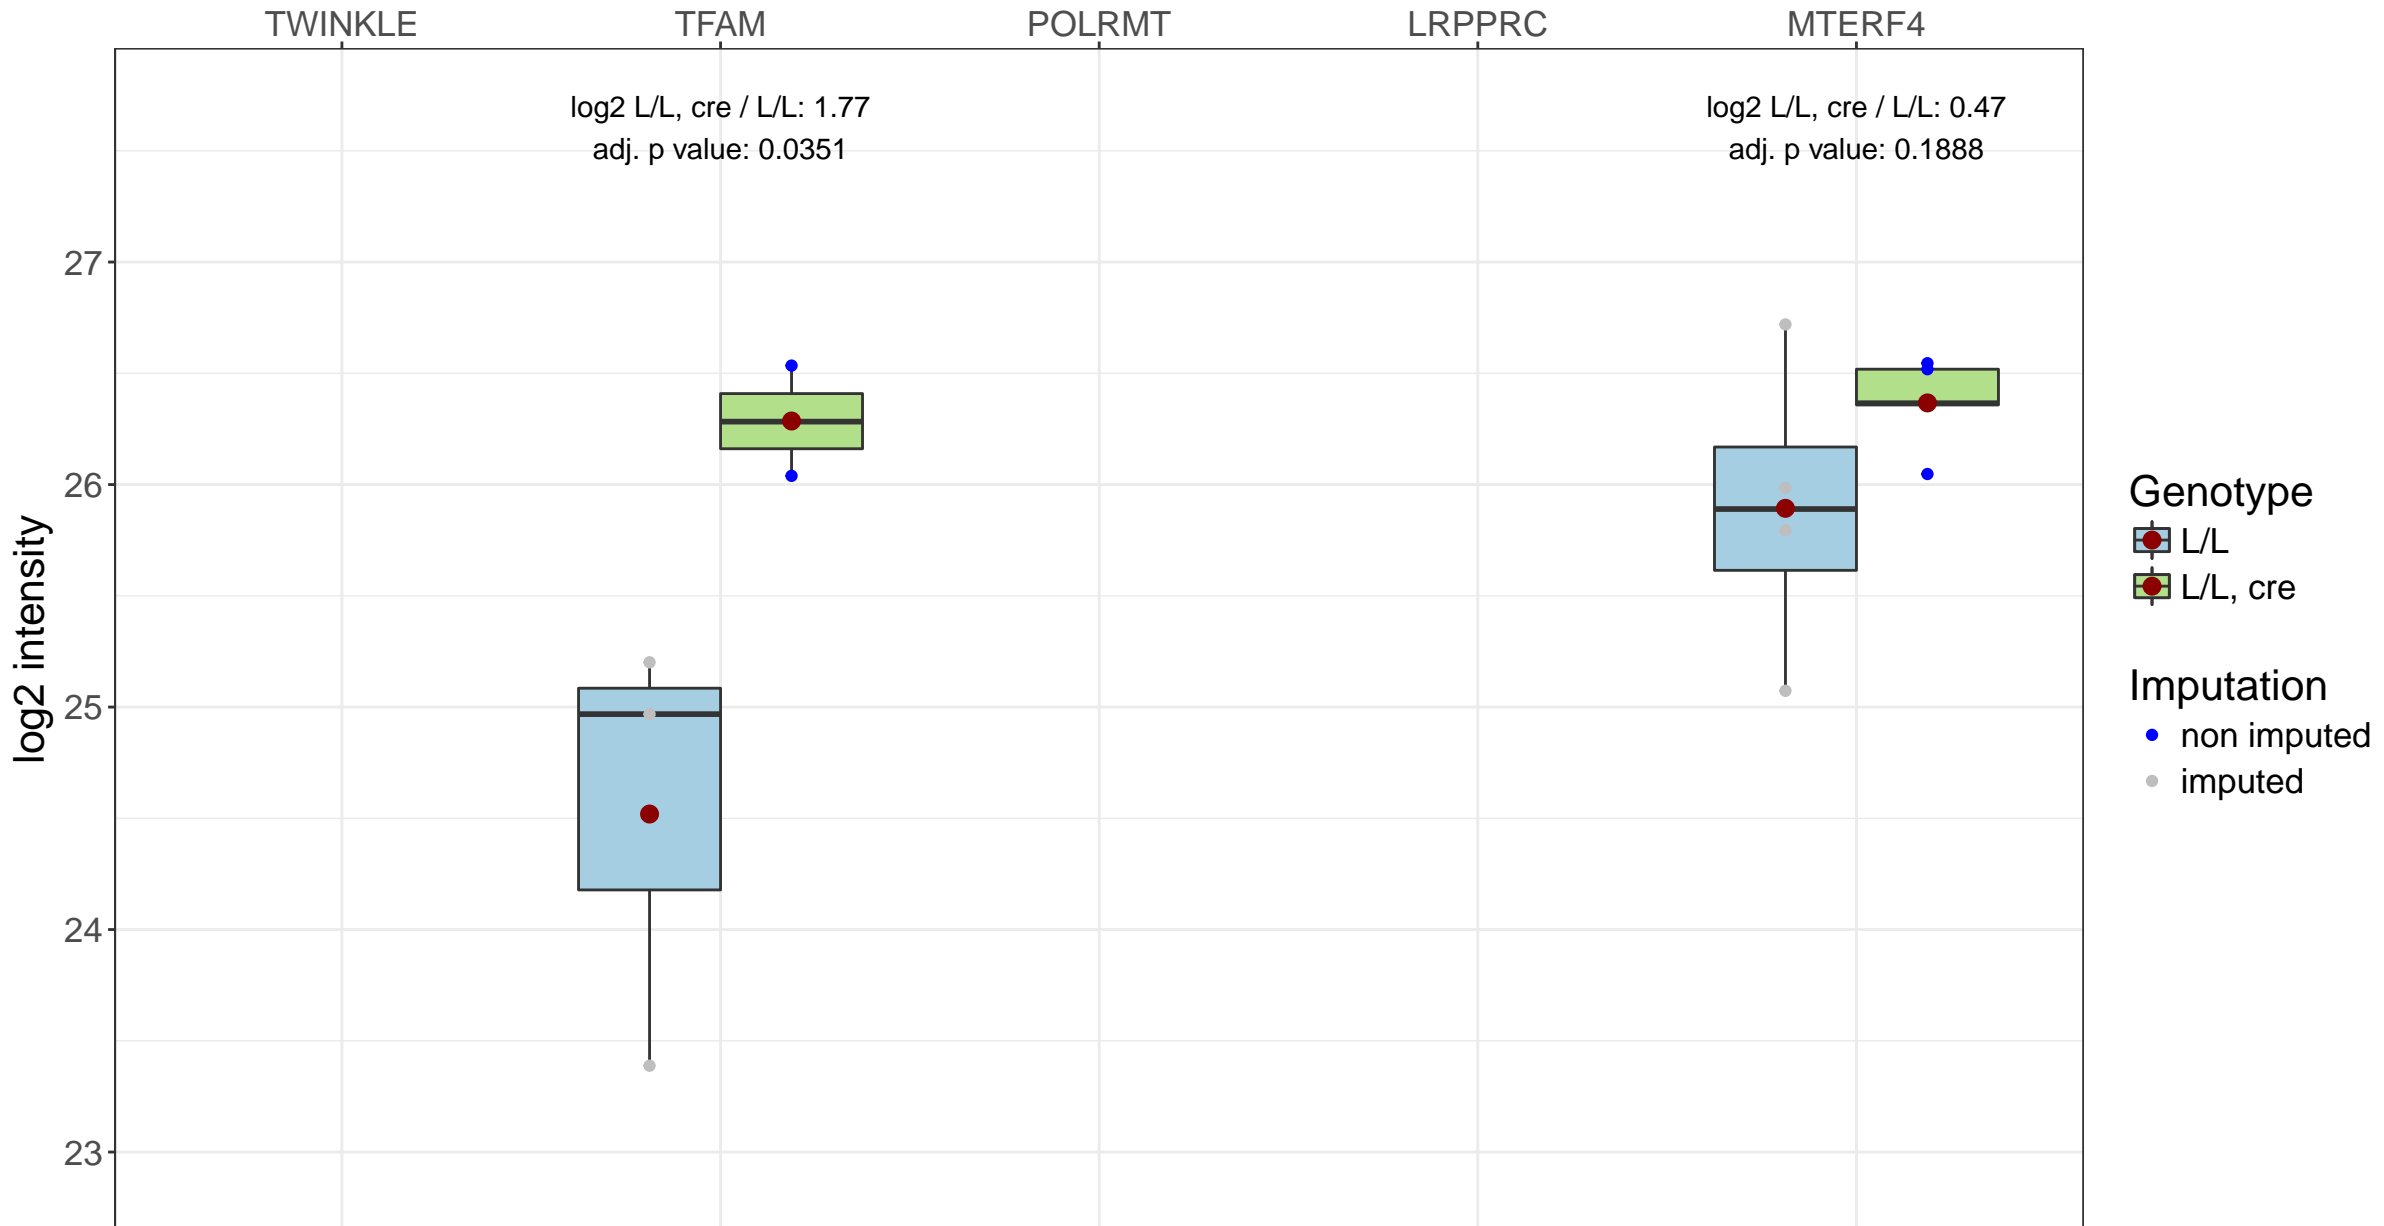

# TMEM256 / Q5F285

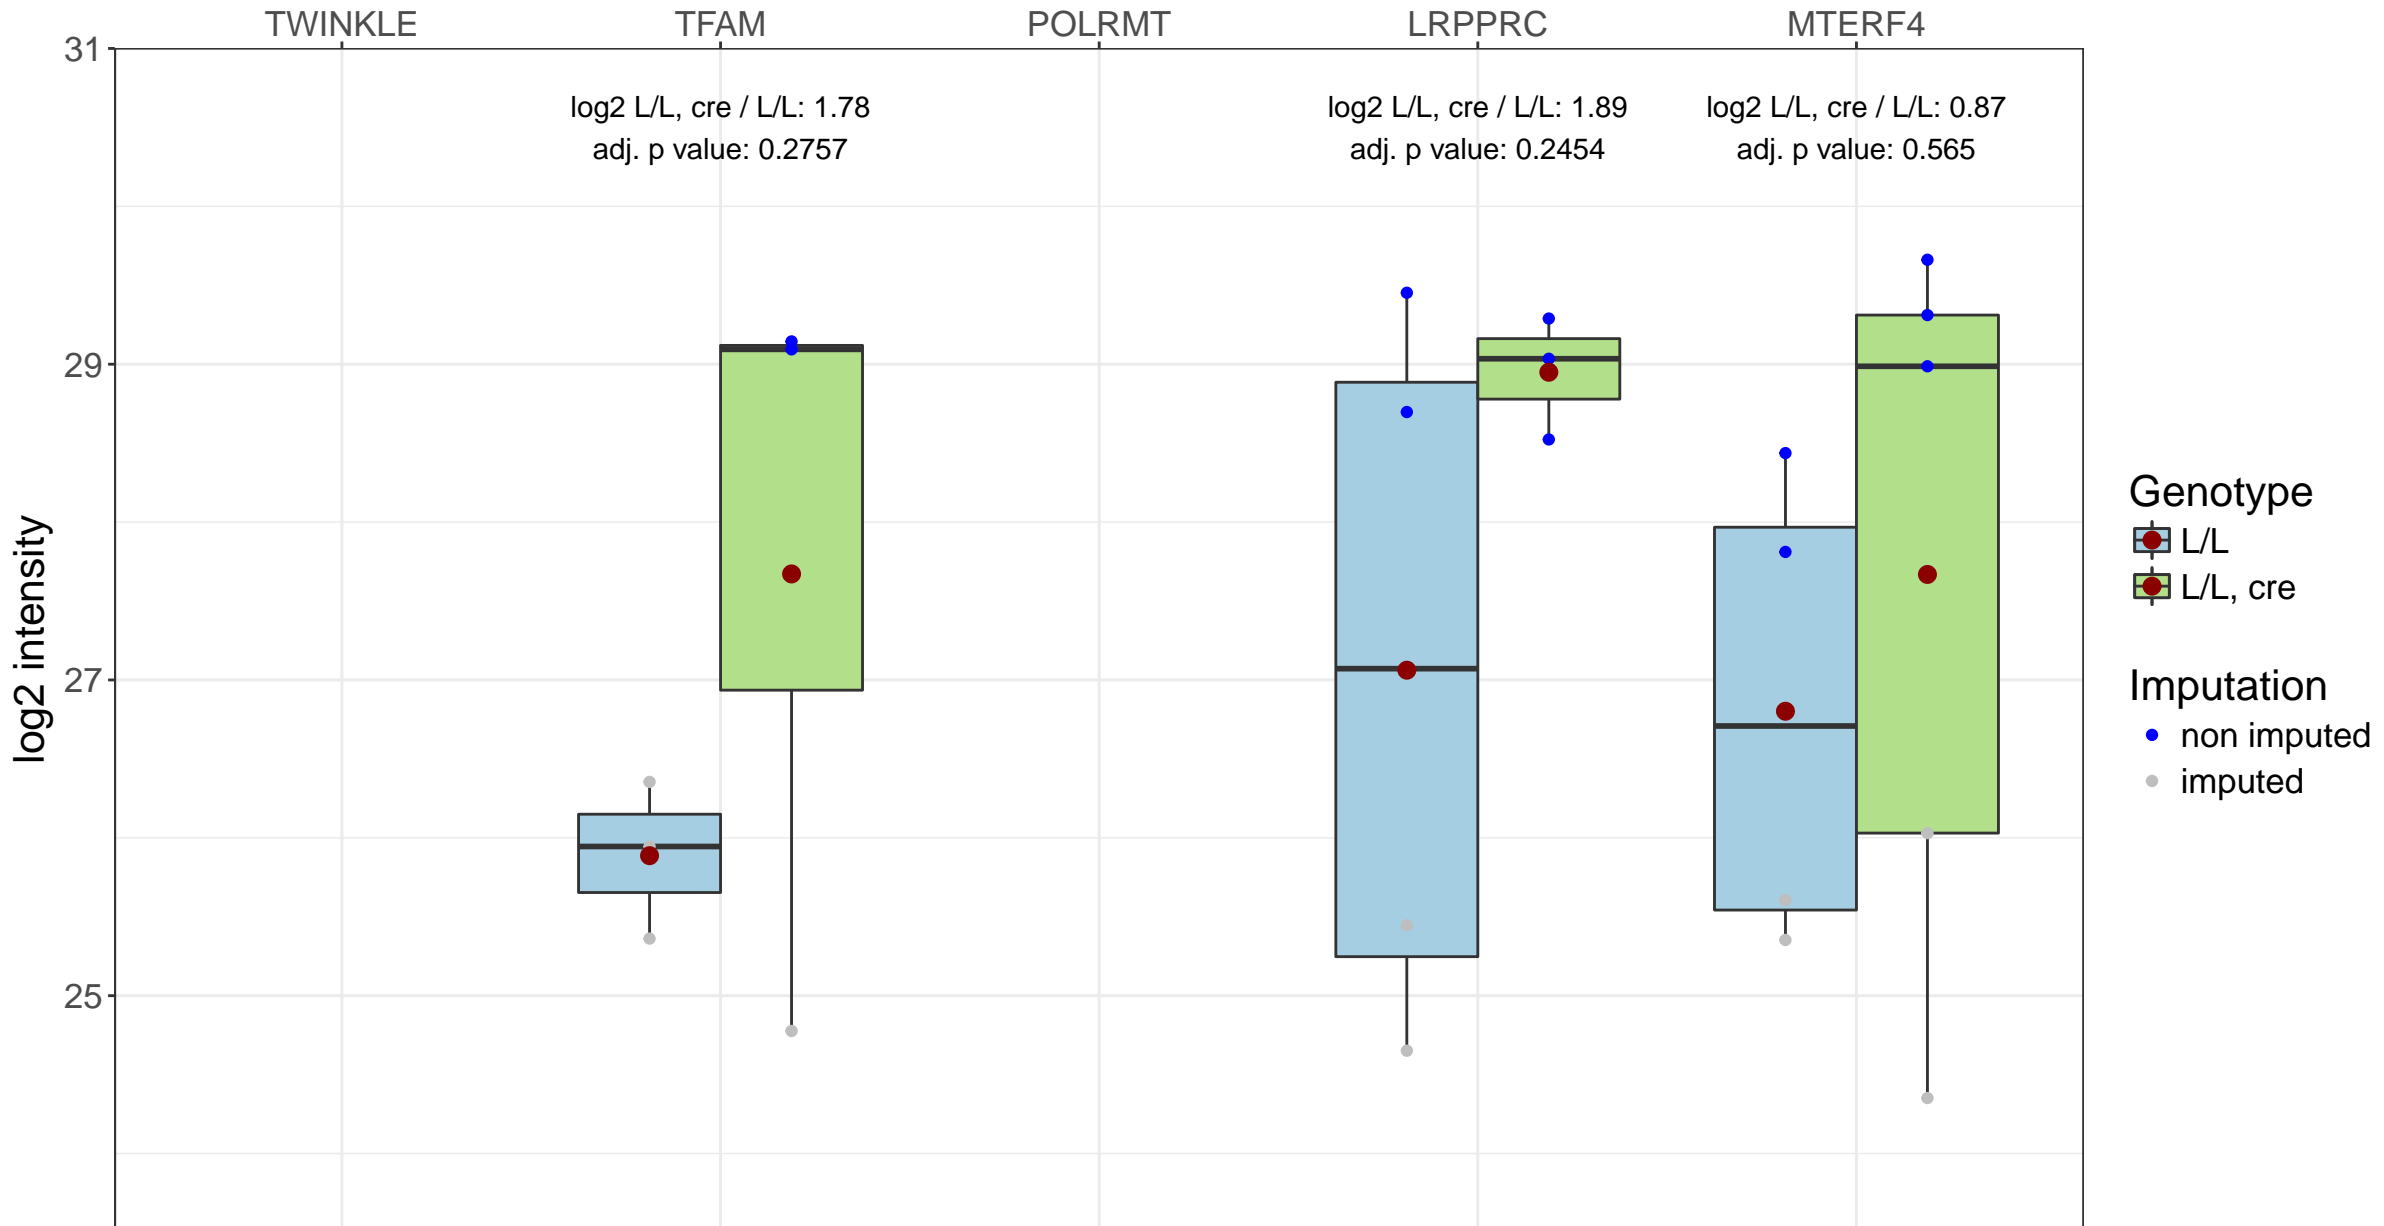

# TMEM261 / Q9CQ00

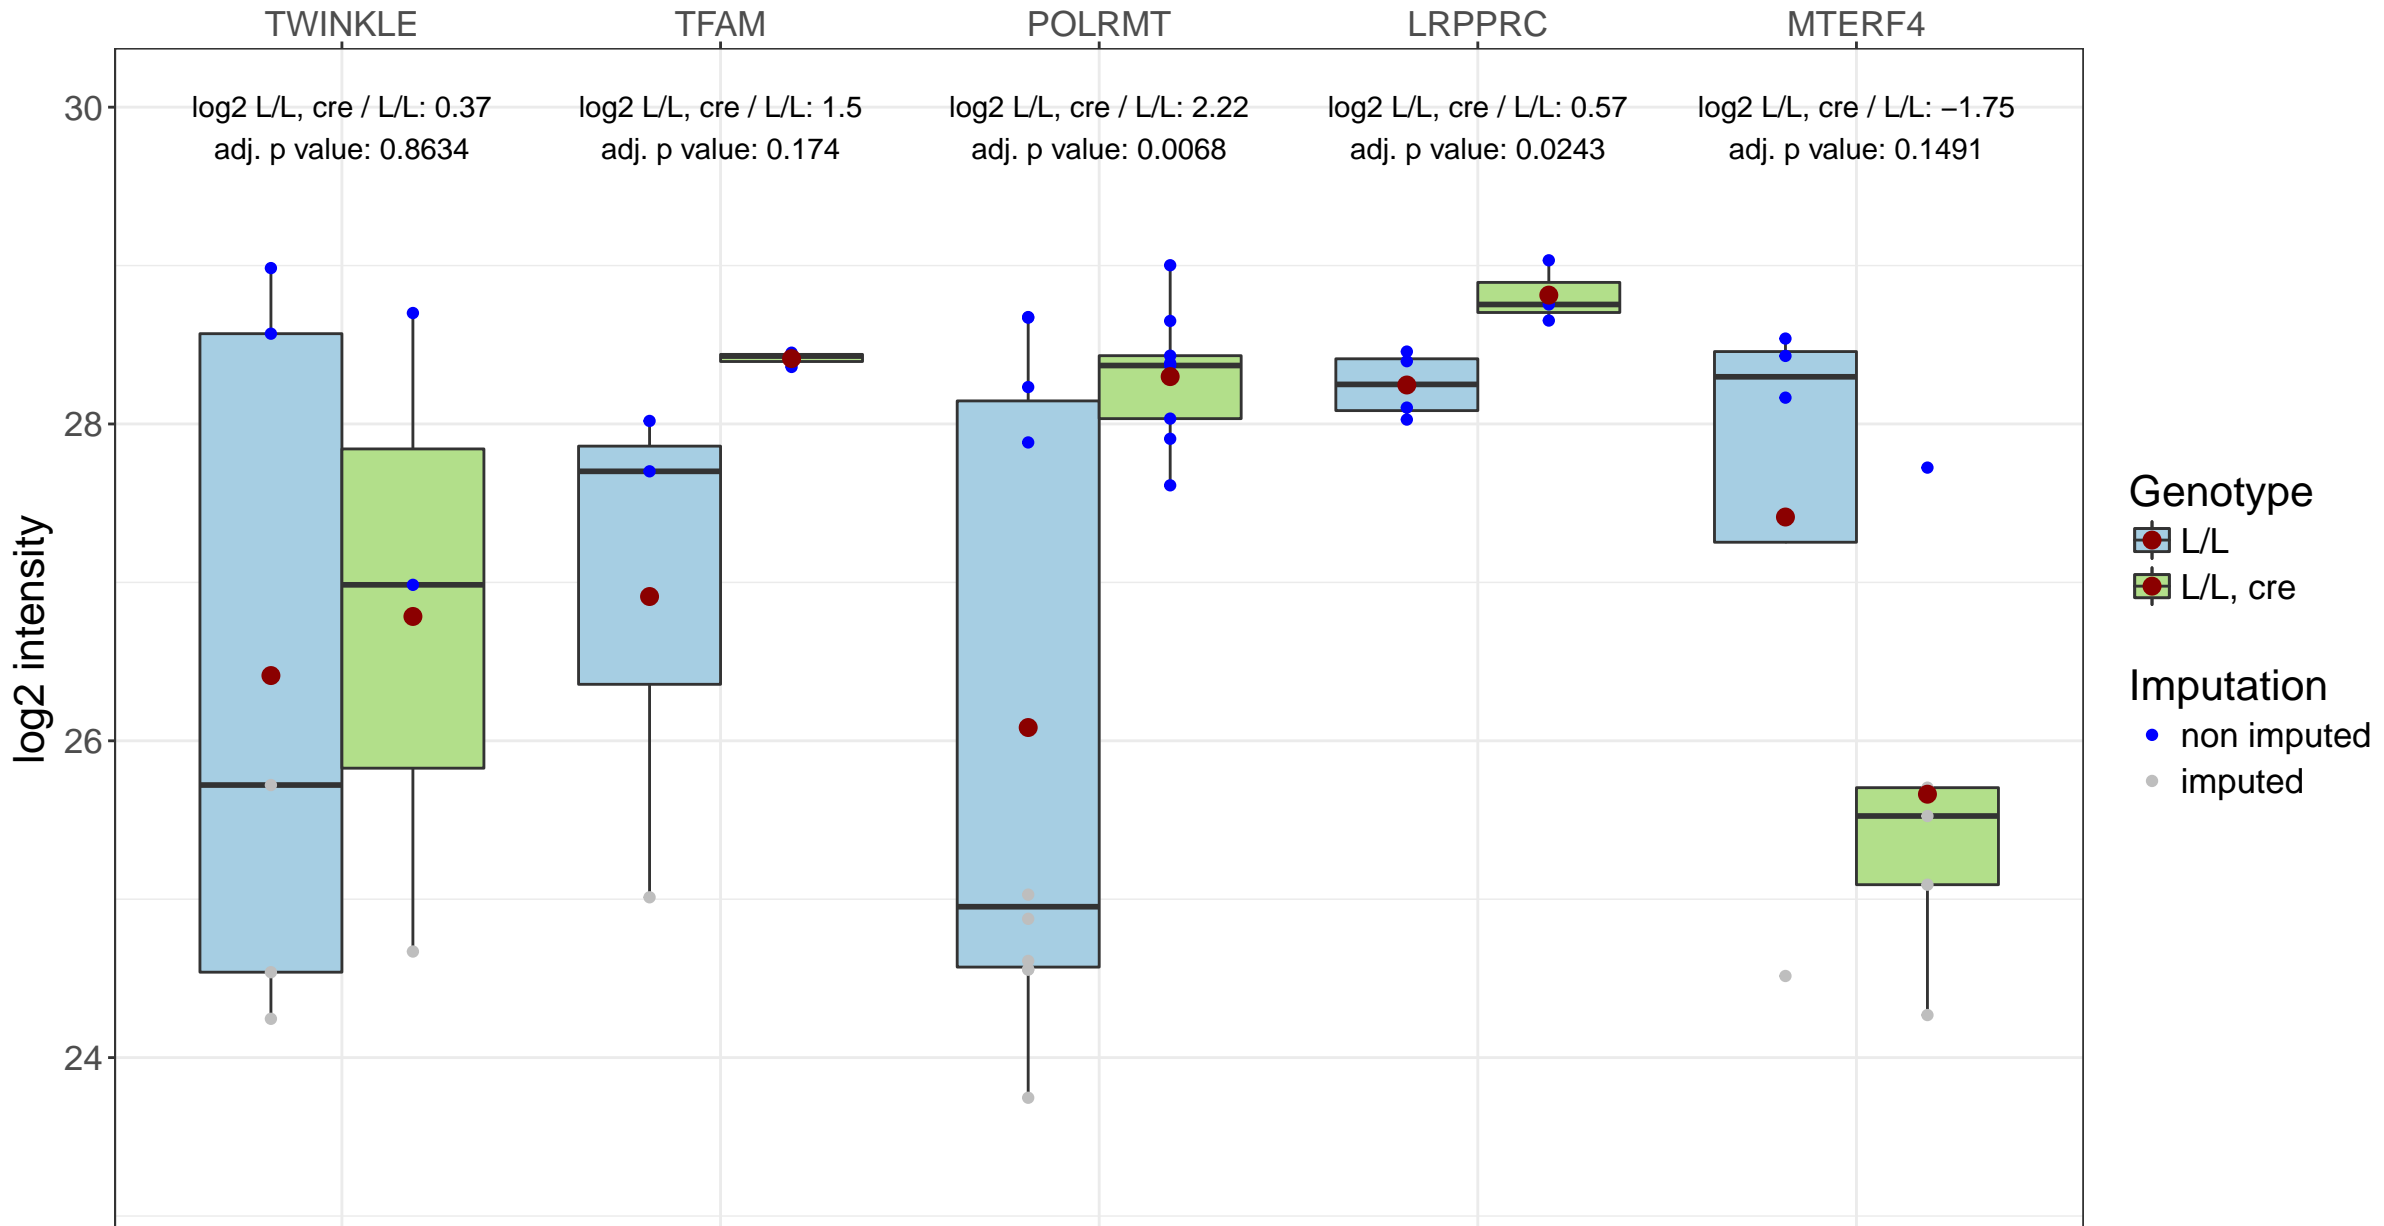

# TMEM65 / Q4VAE3

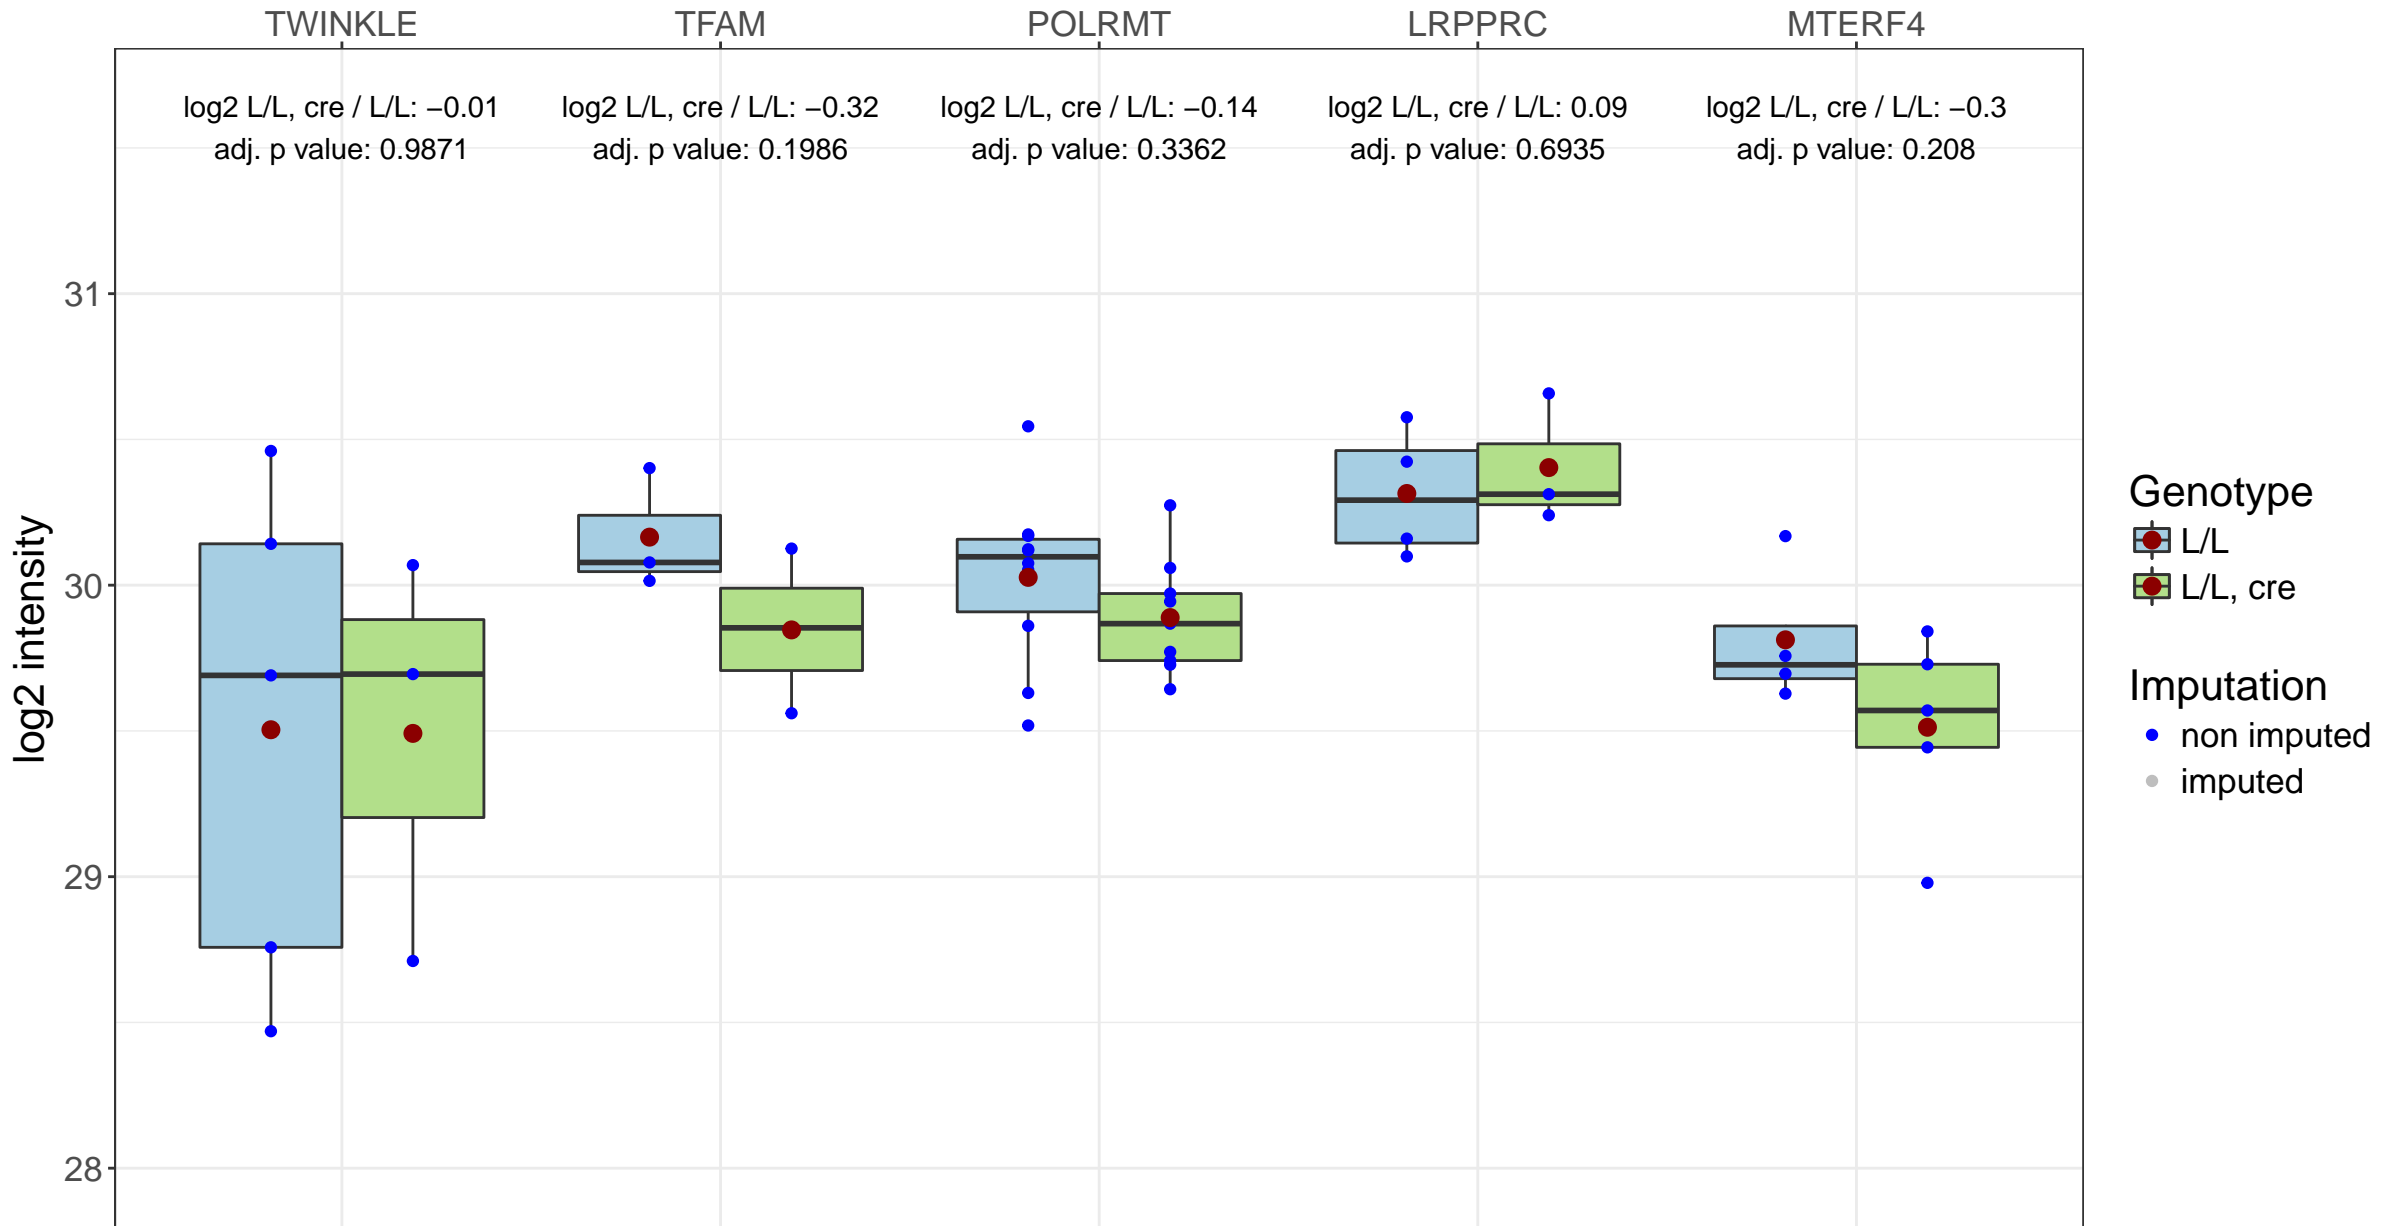

# TMEM70 / Q921N7

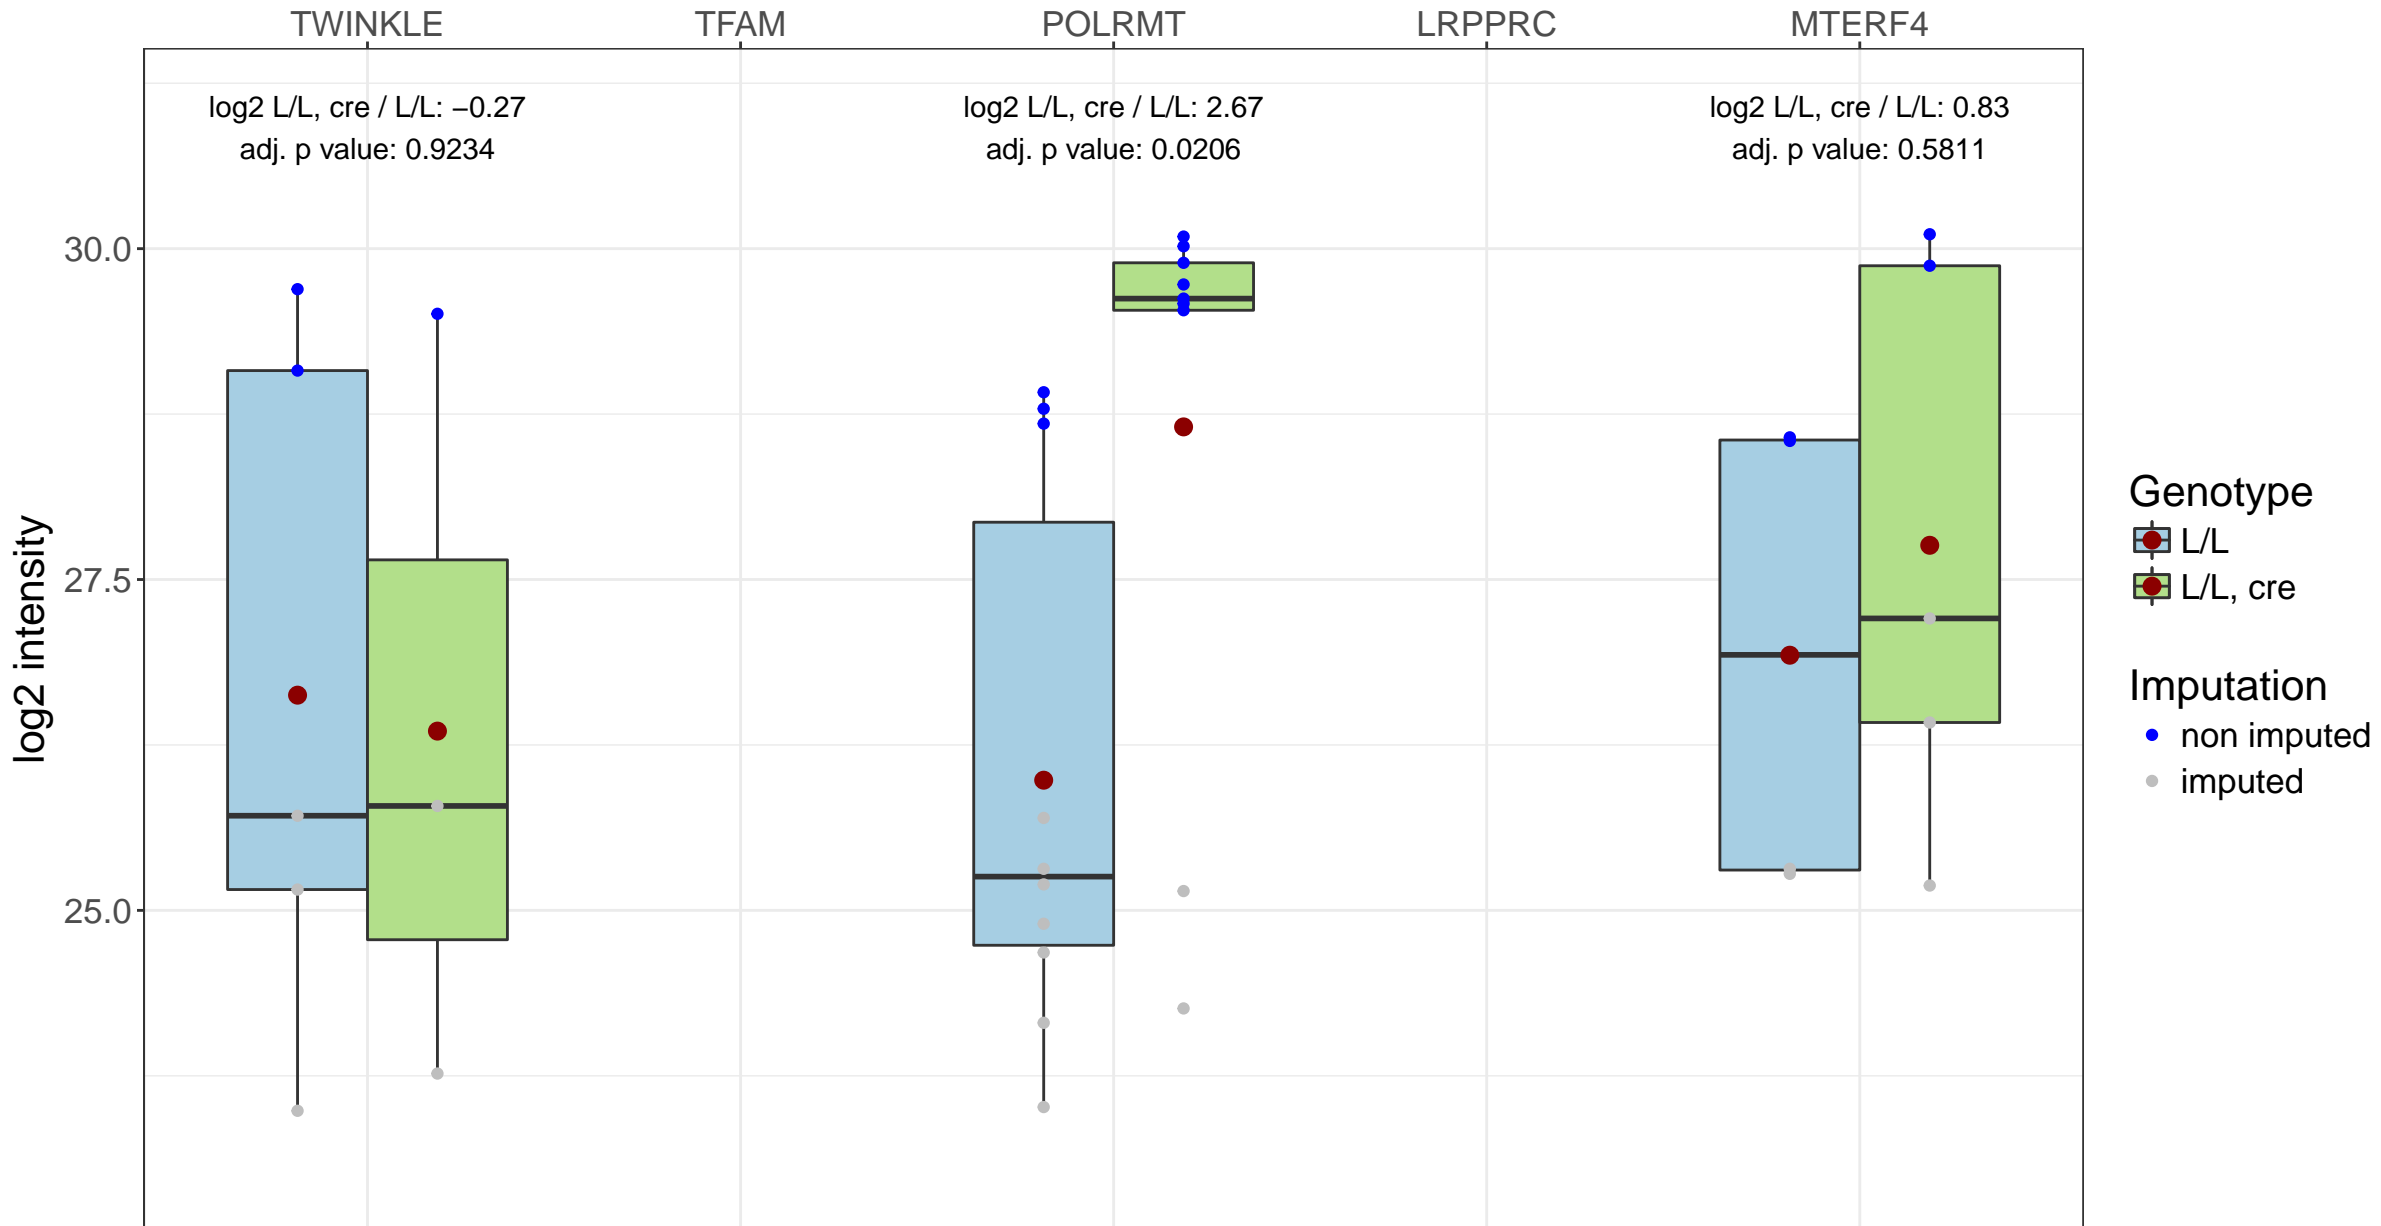

# TMLHE / Q91ZE0

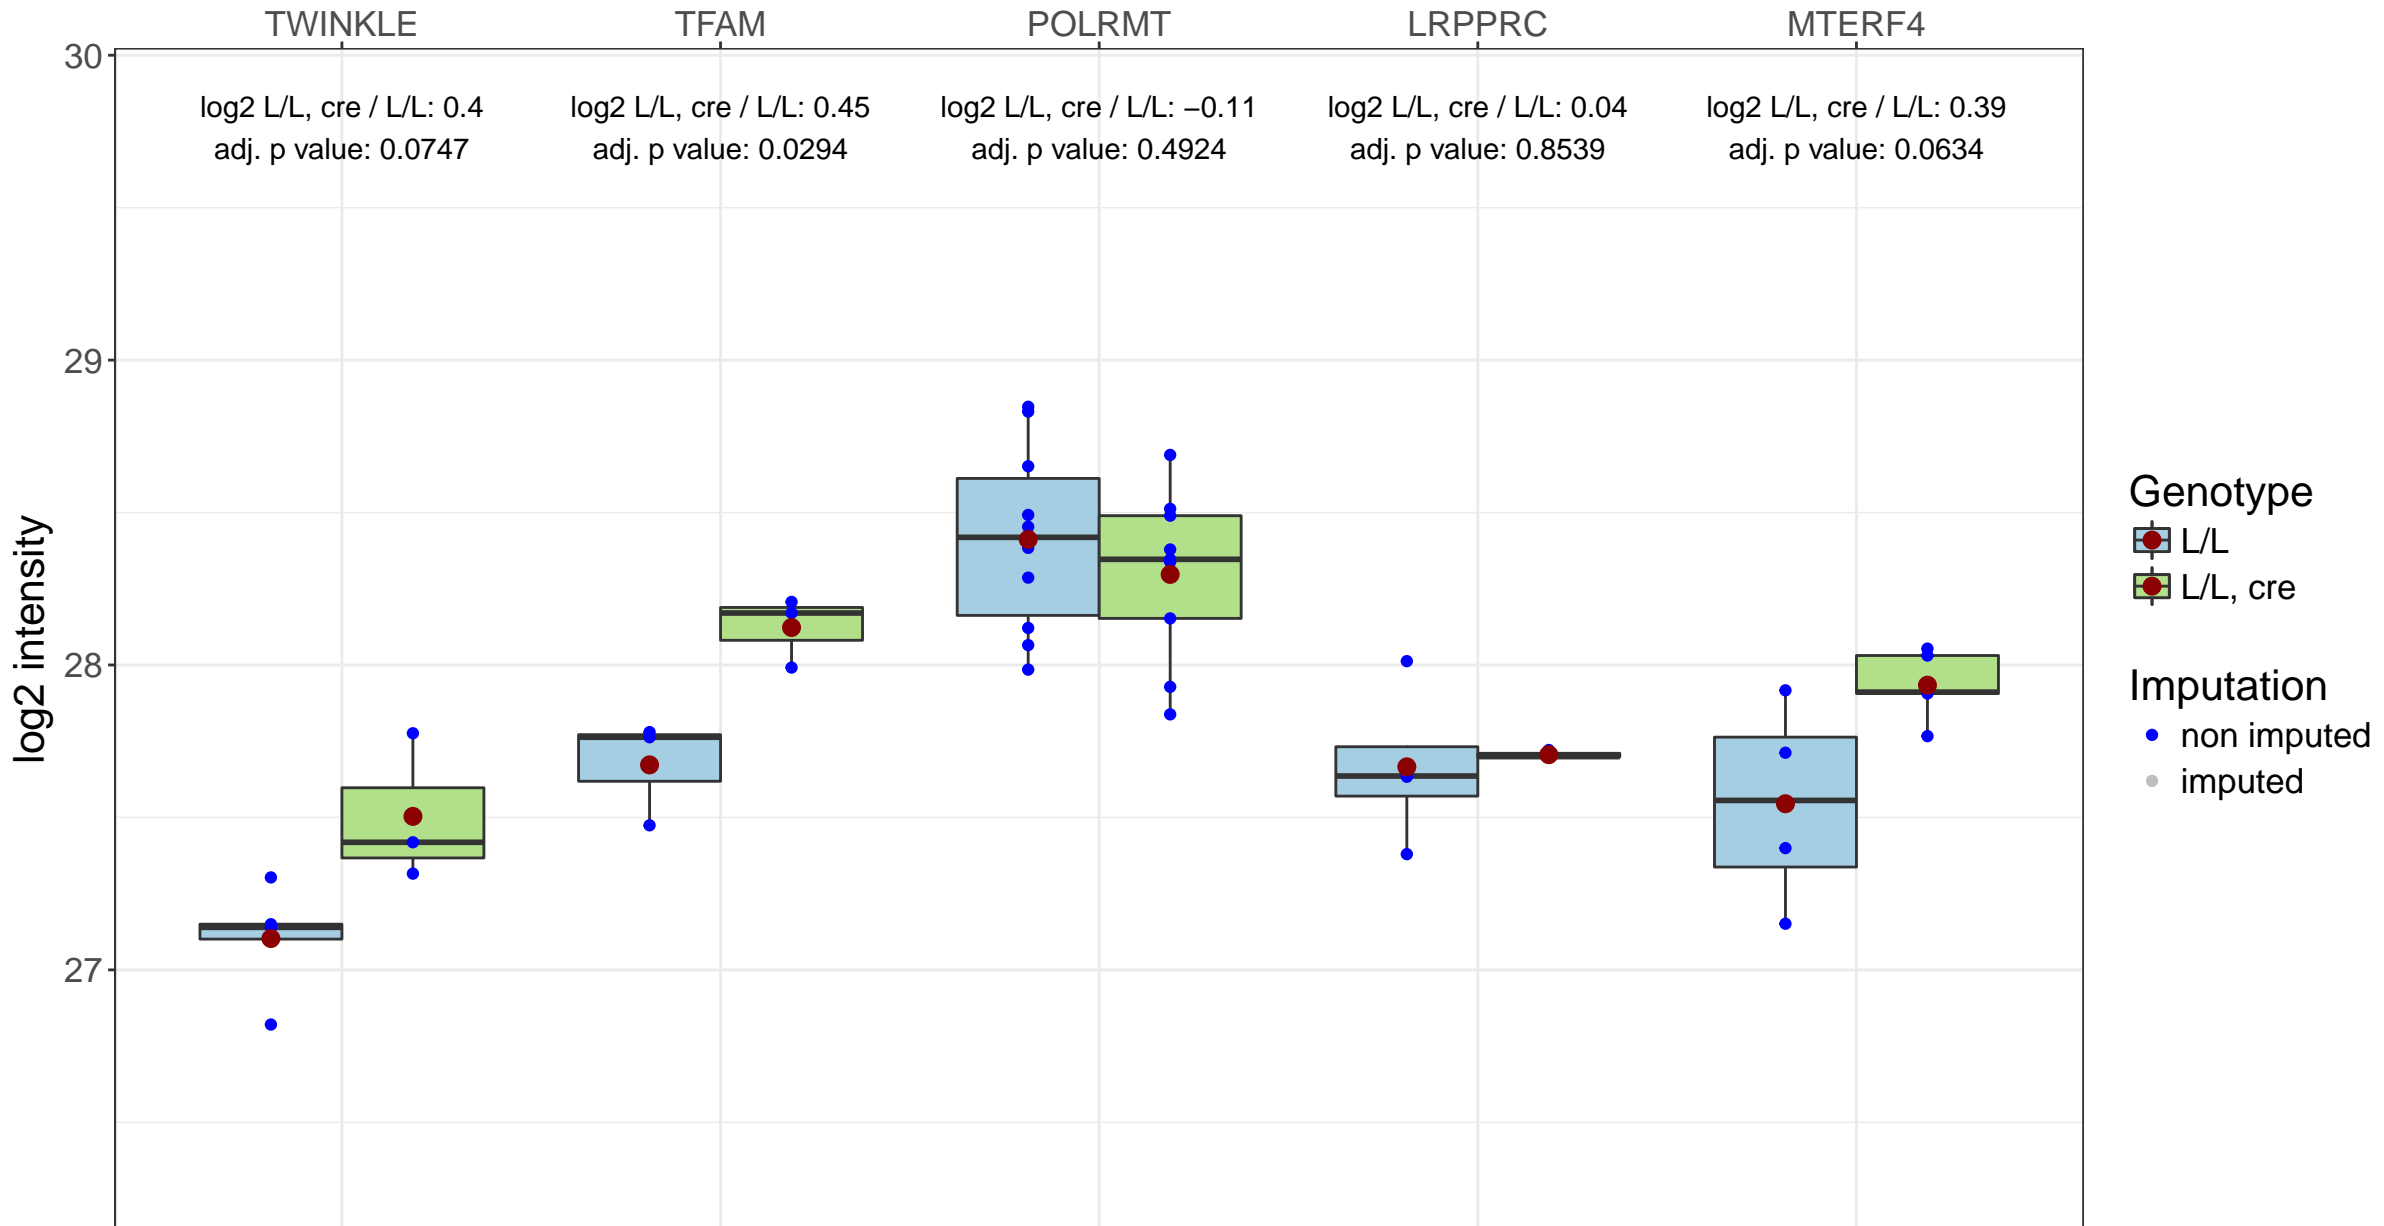

# TNNC1 / P19123

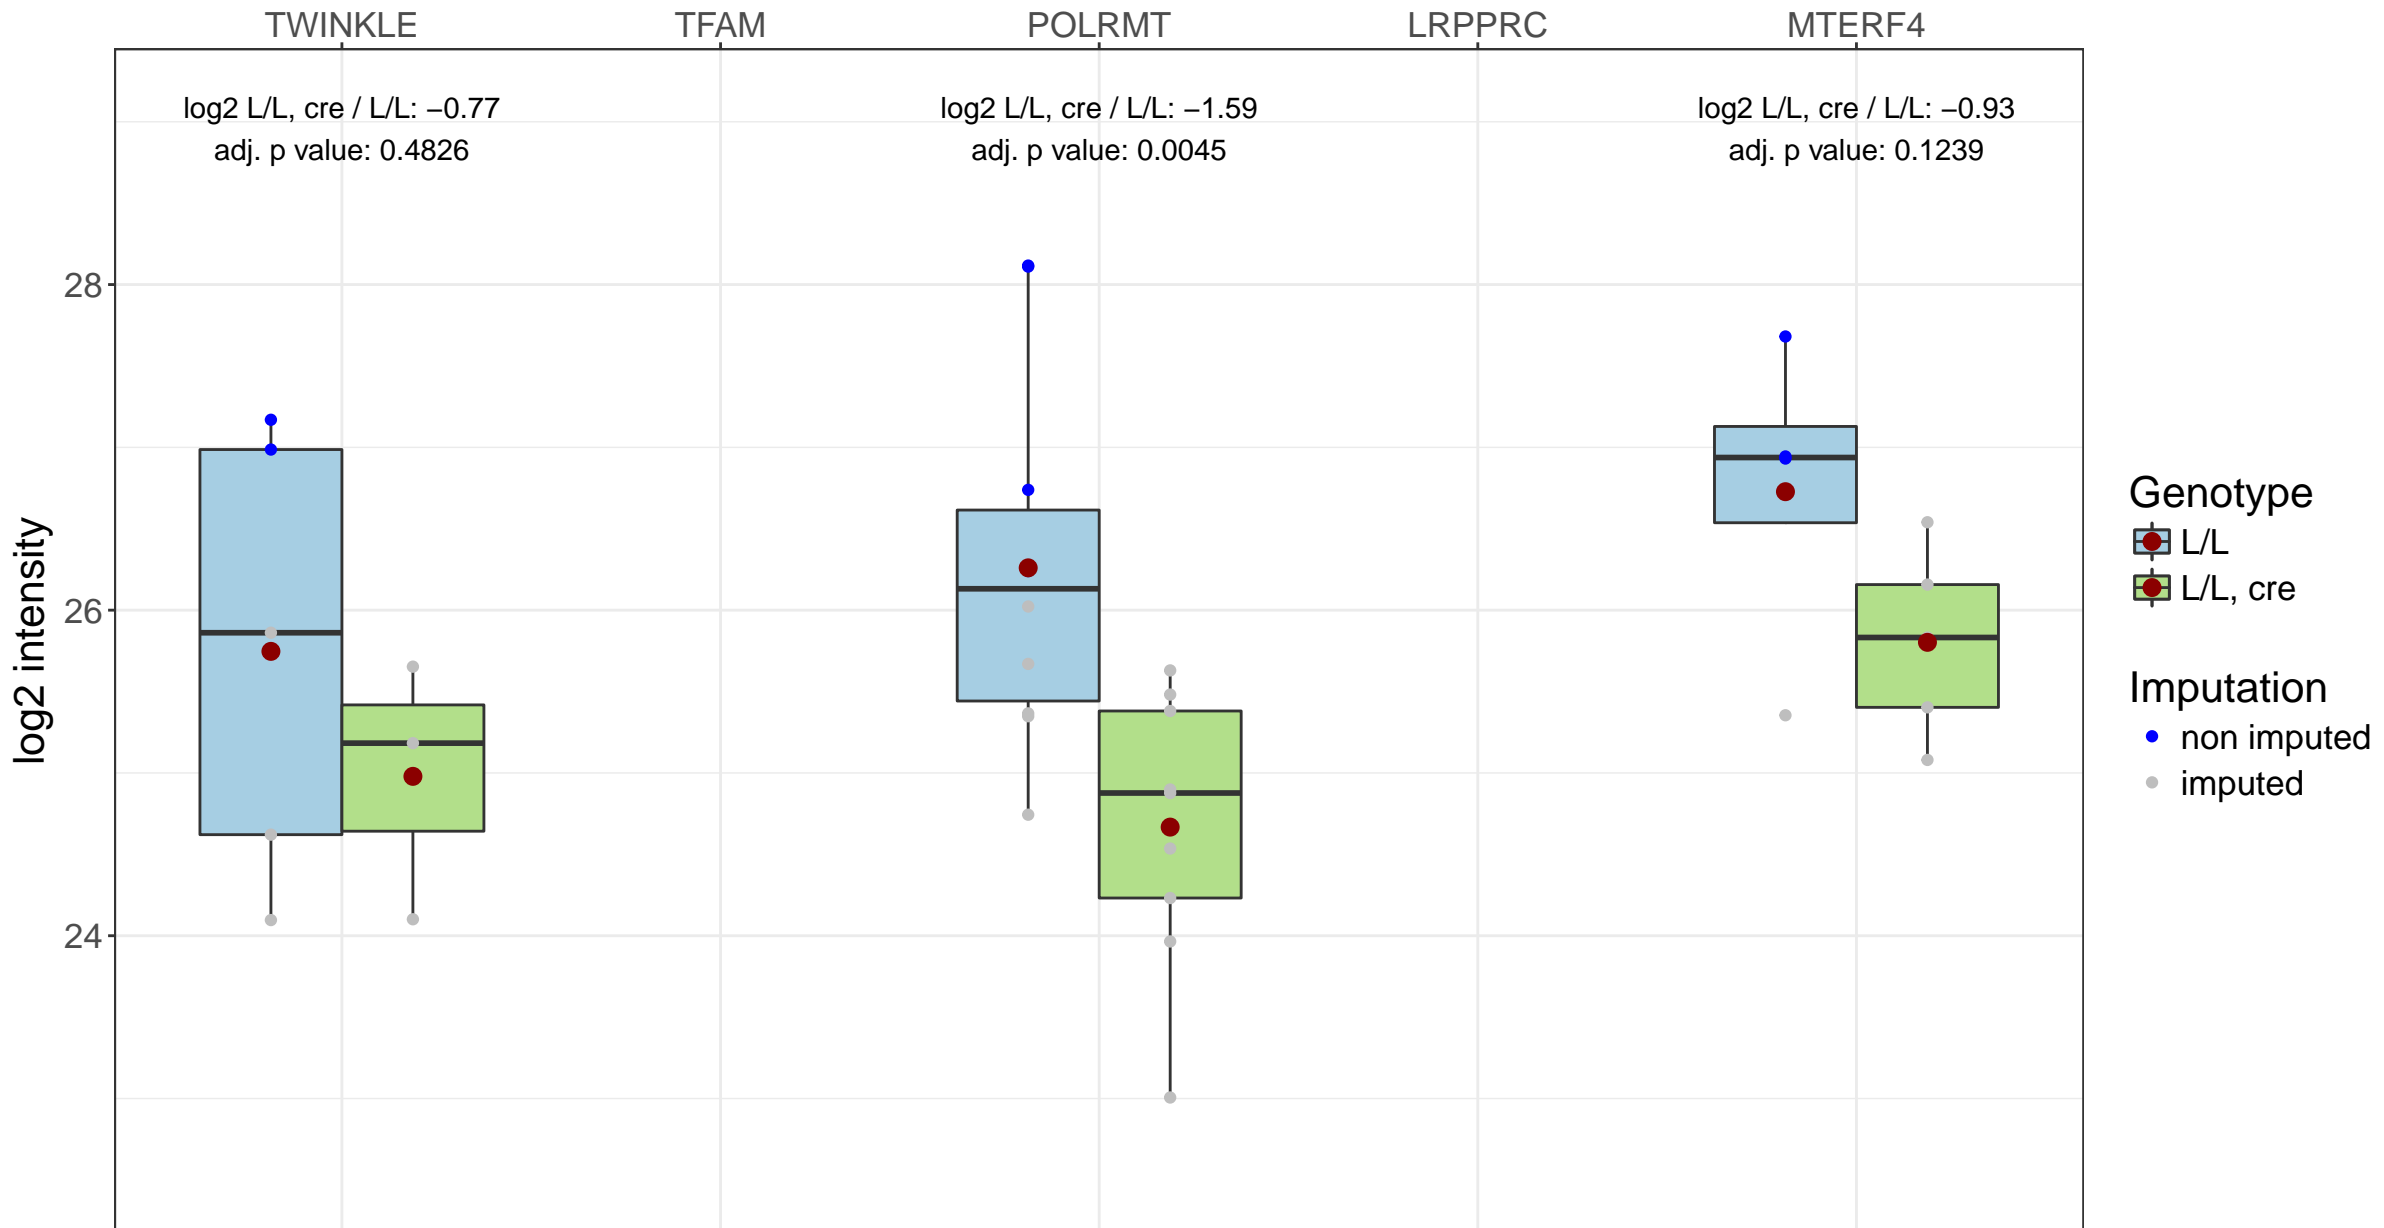

# TNNI3 / P48787

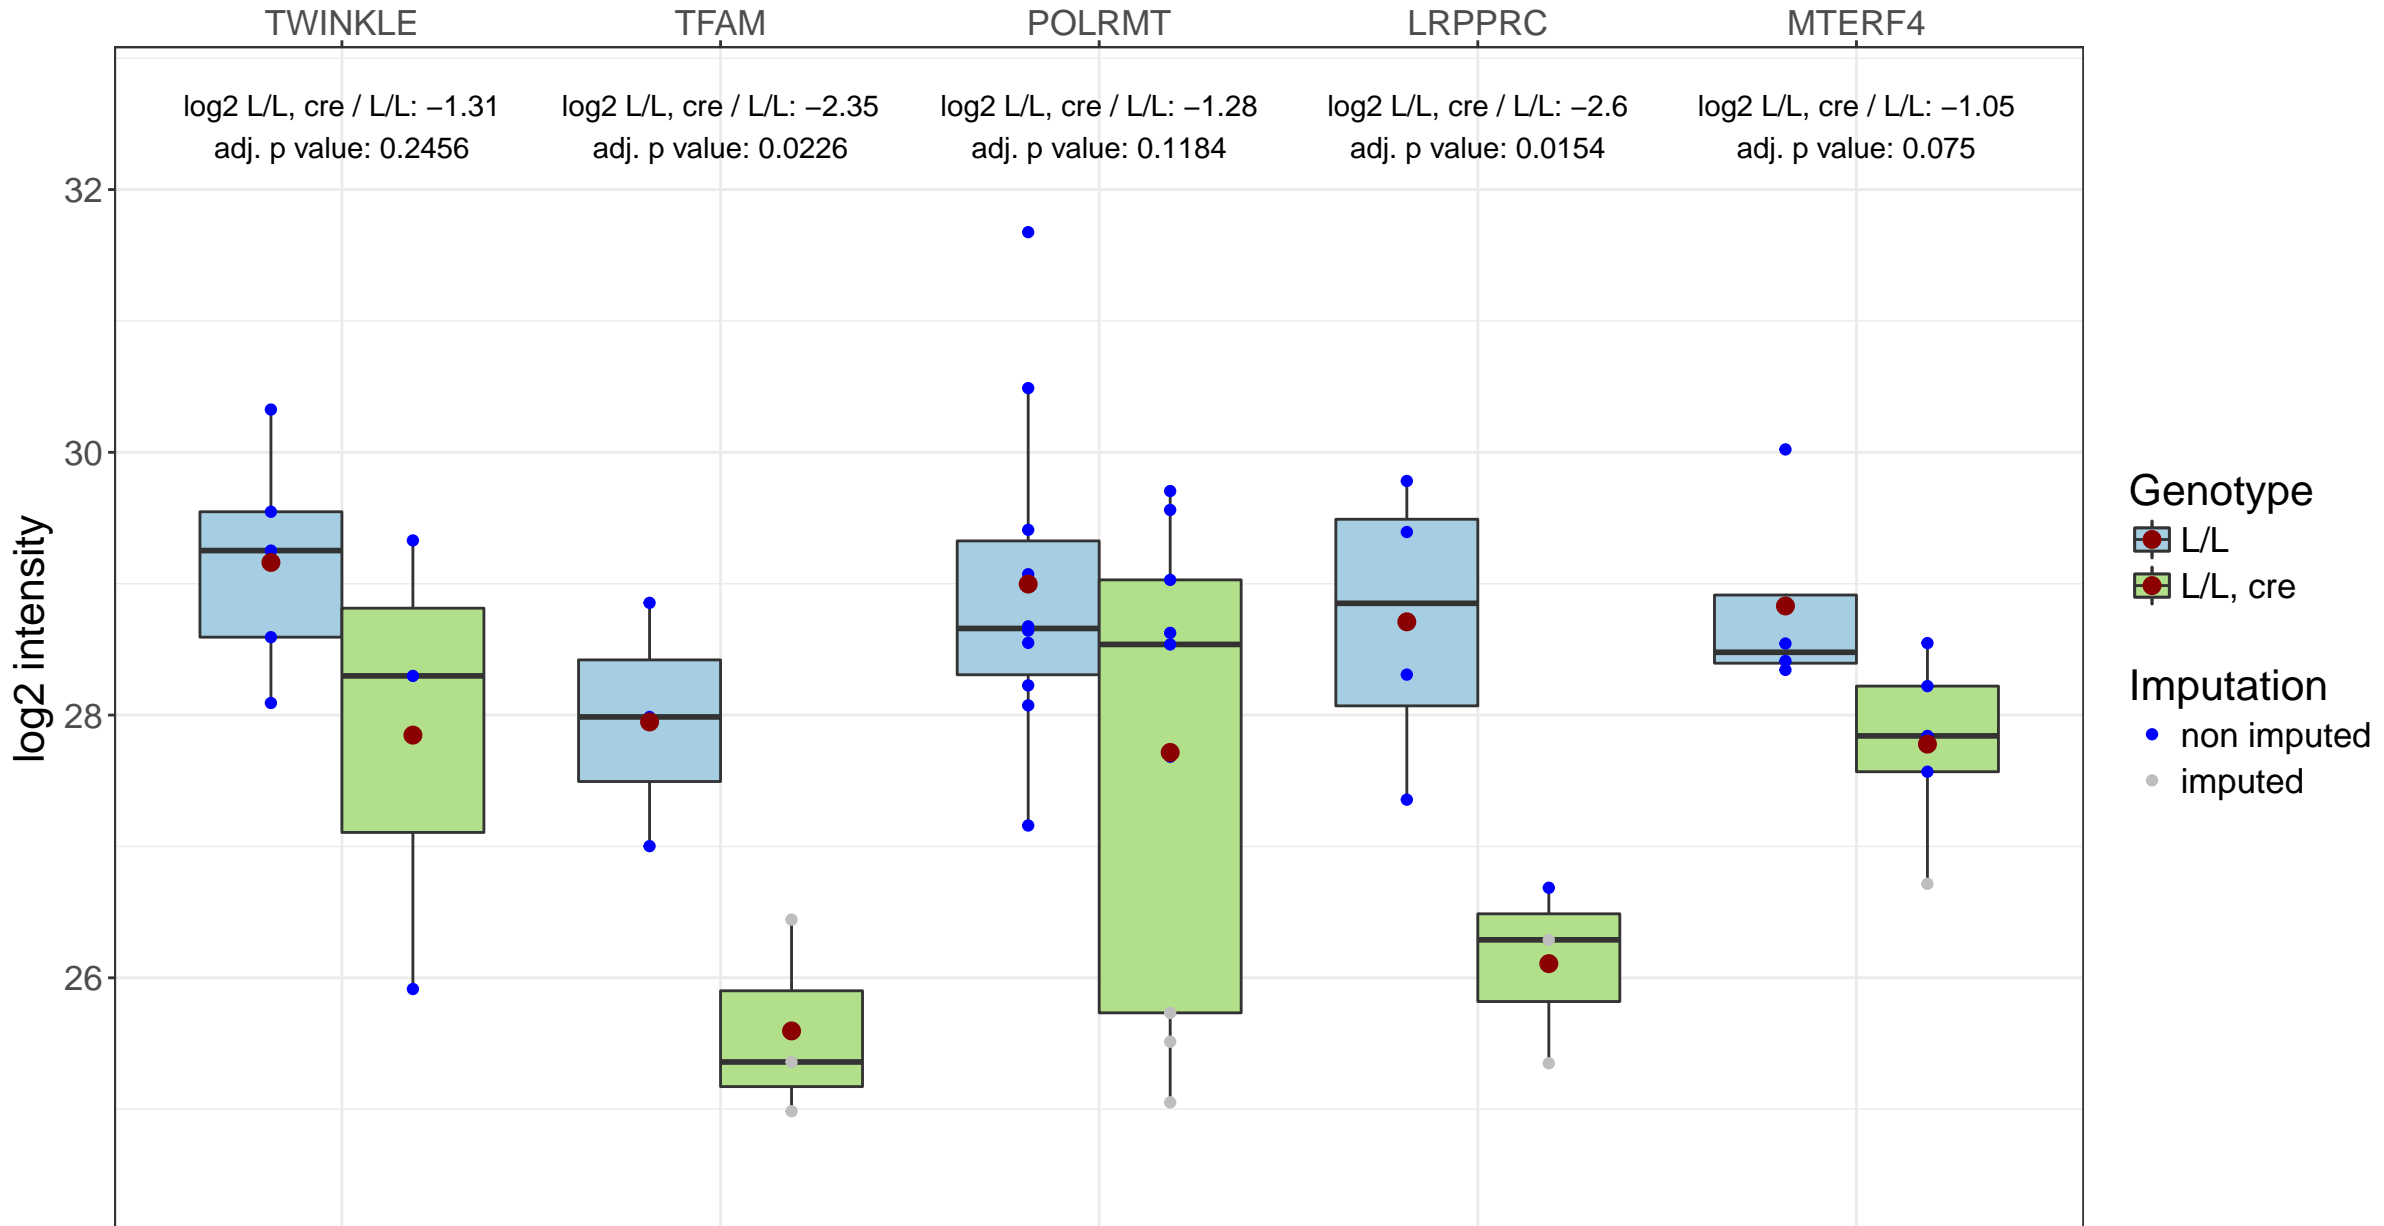



# TNNT2 / K3W4R6

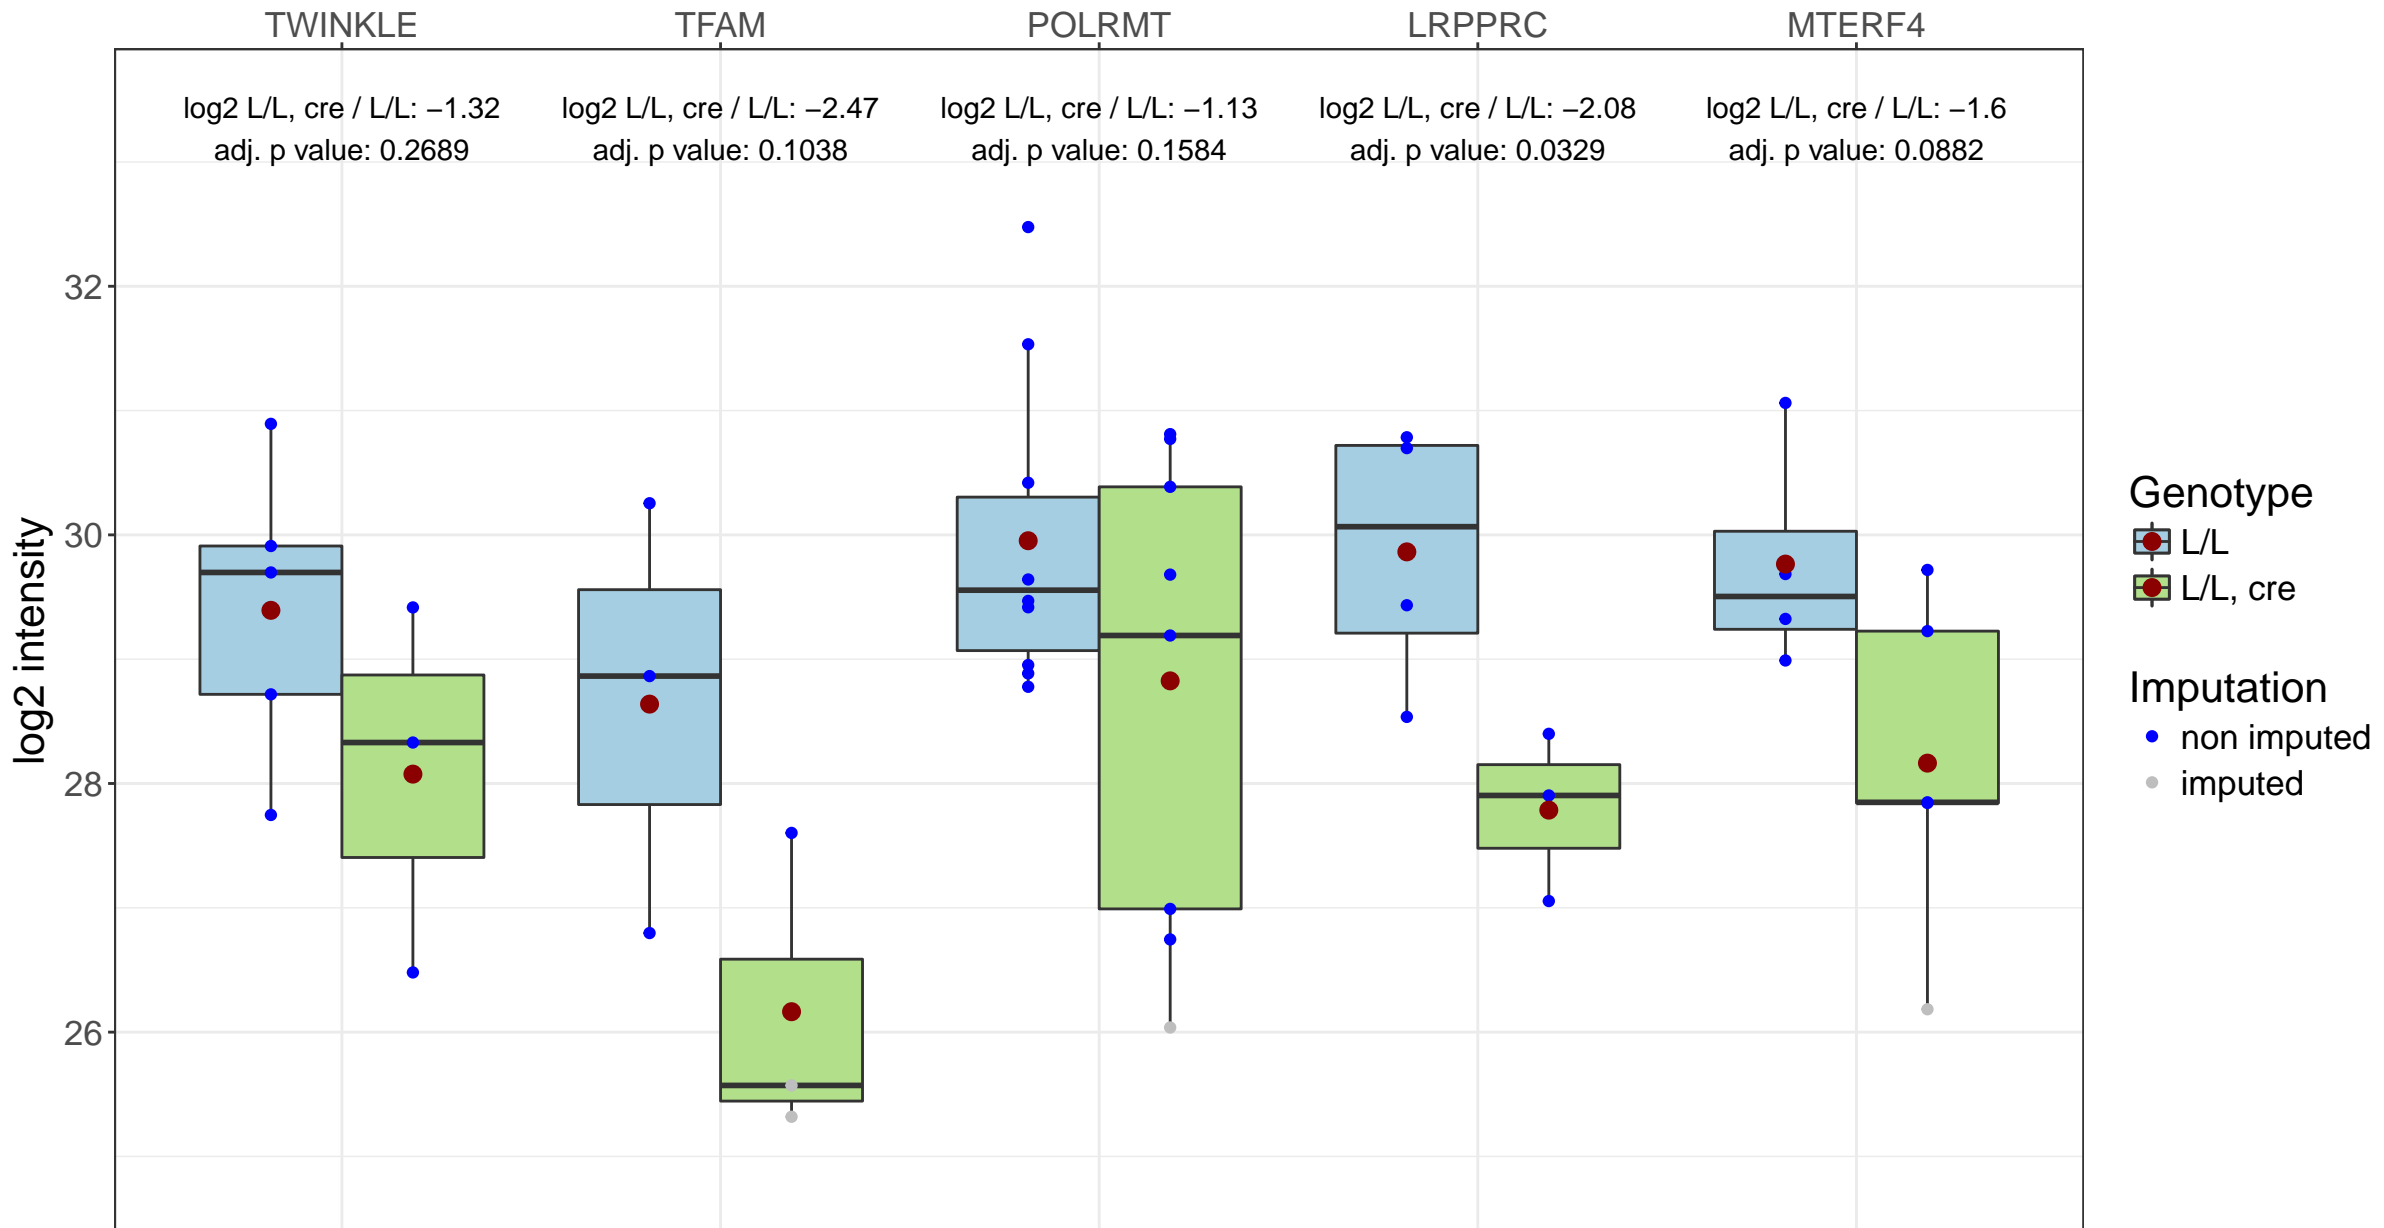

# TOMM20 / Q9DCC8

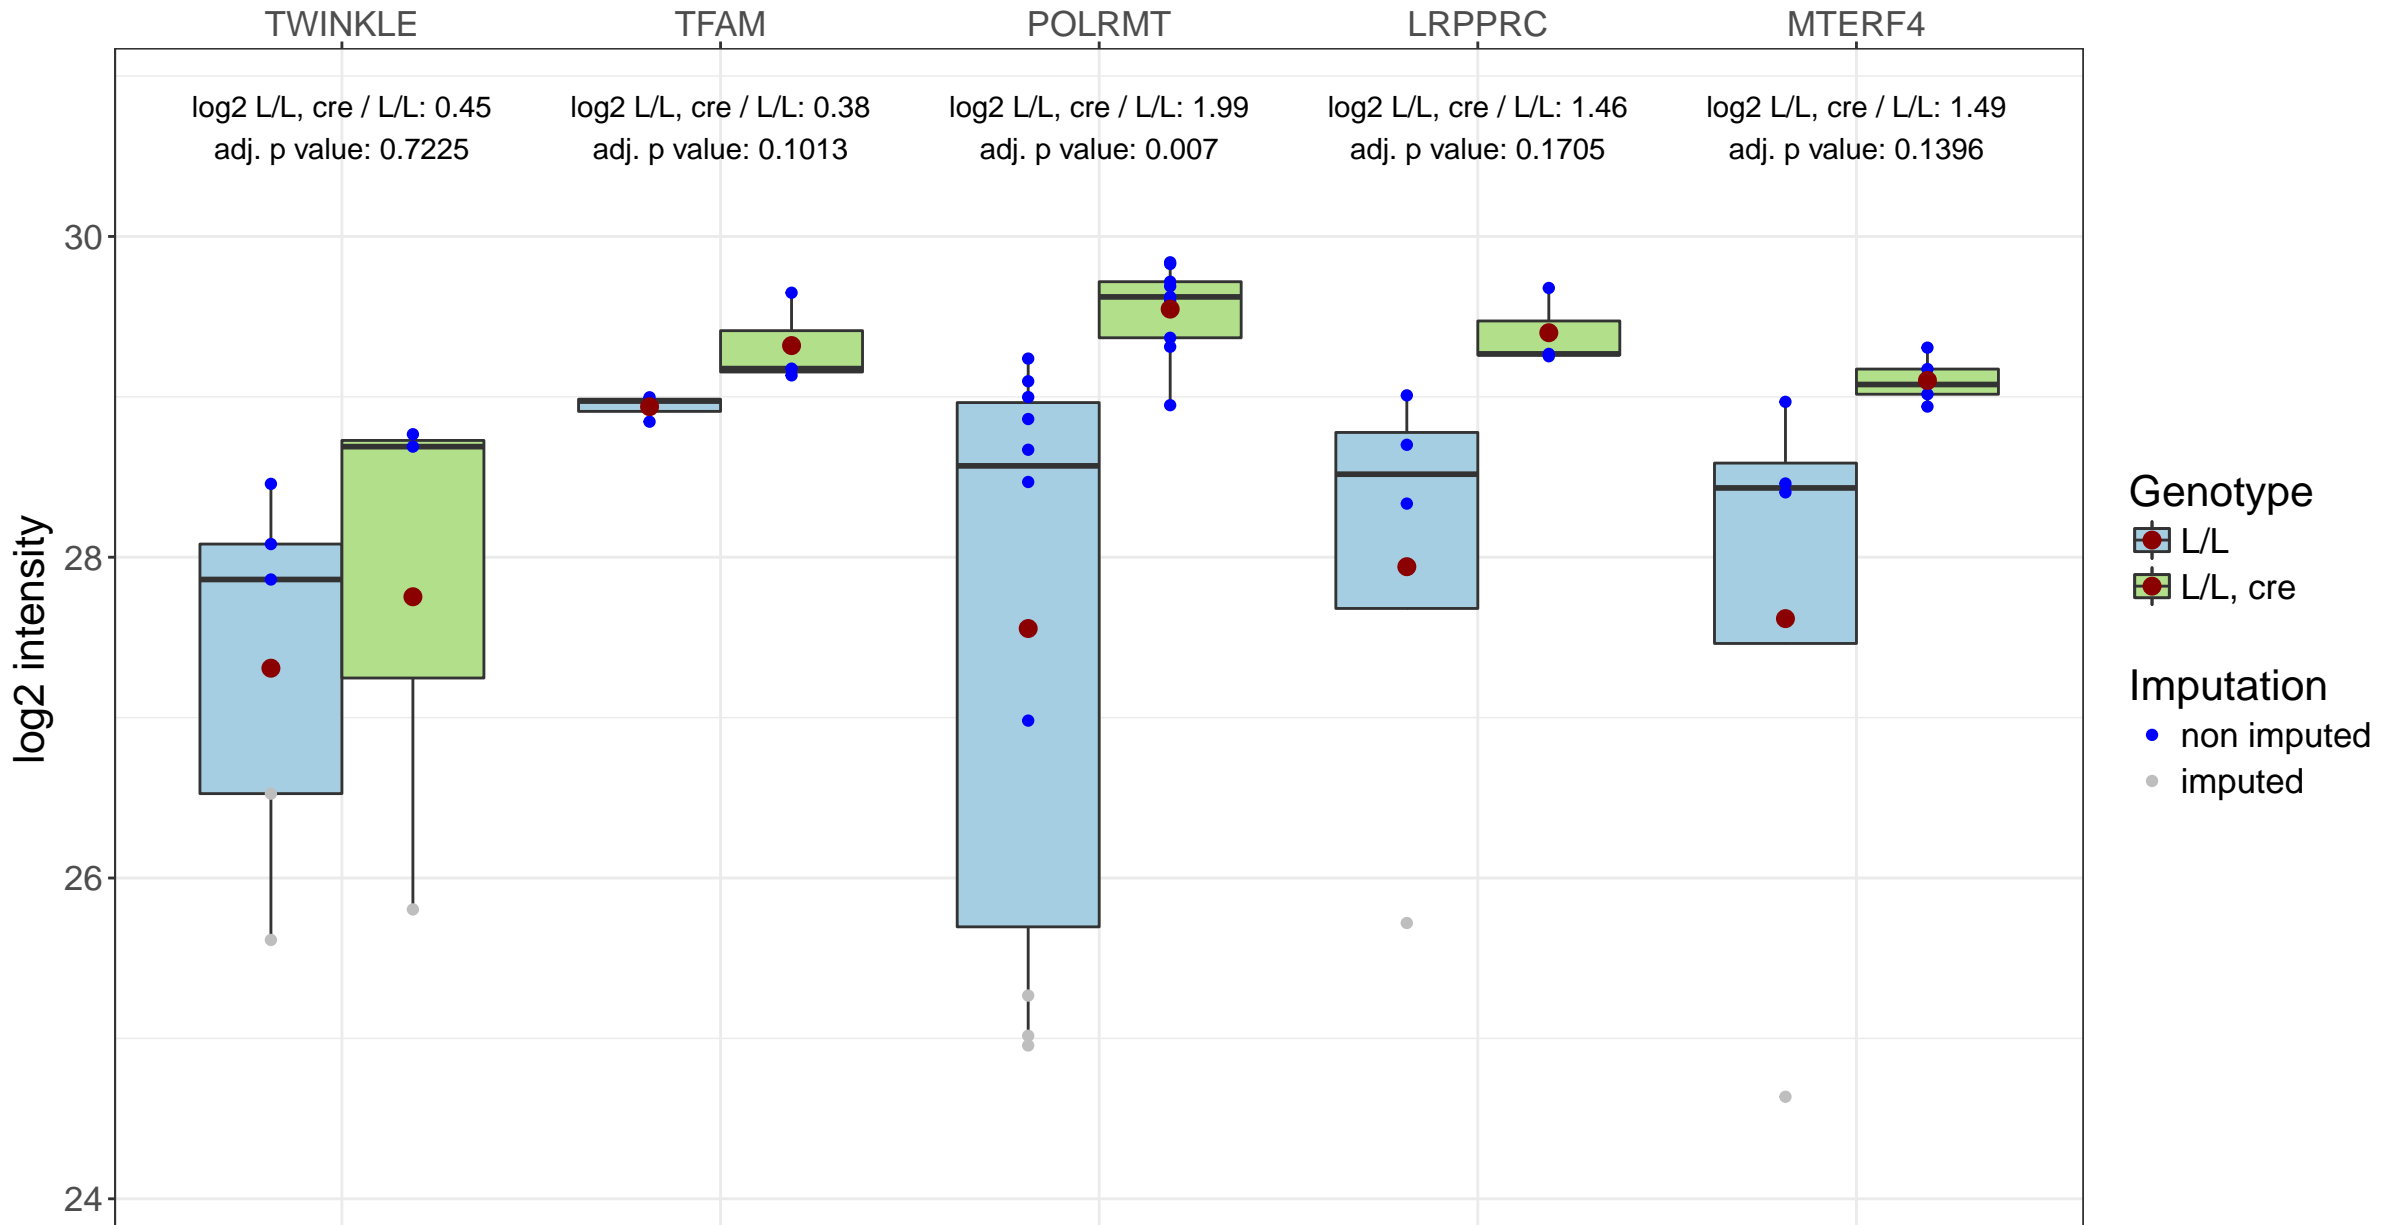

# TOMM22 / Q9CPQ3

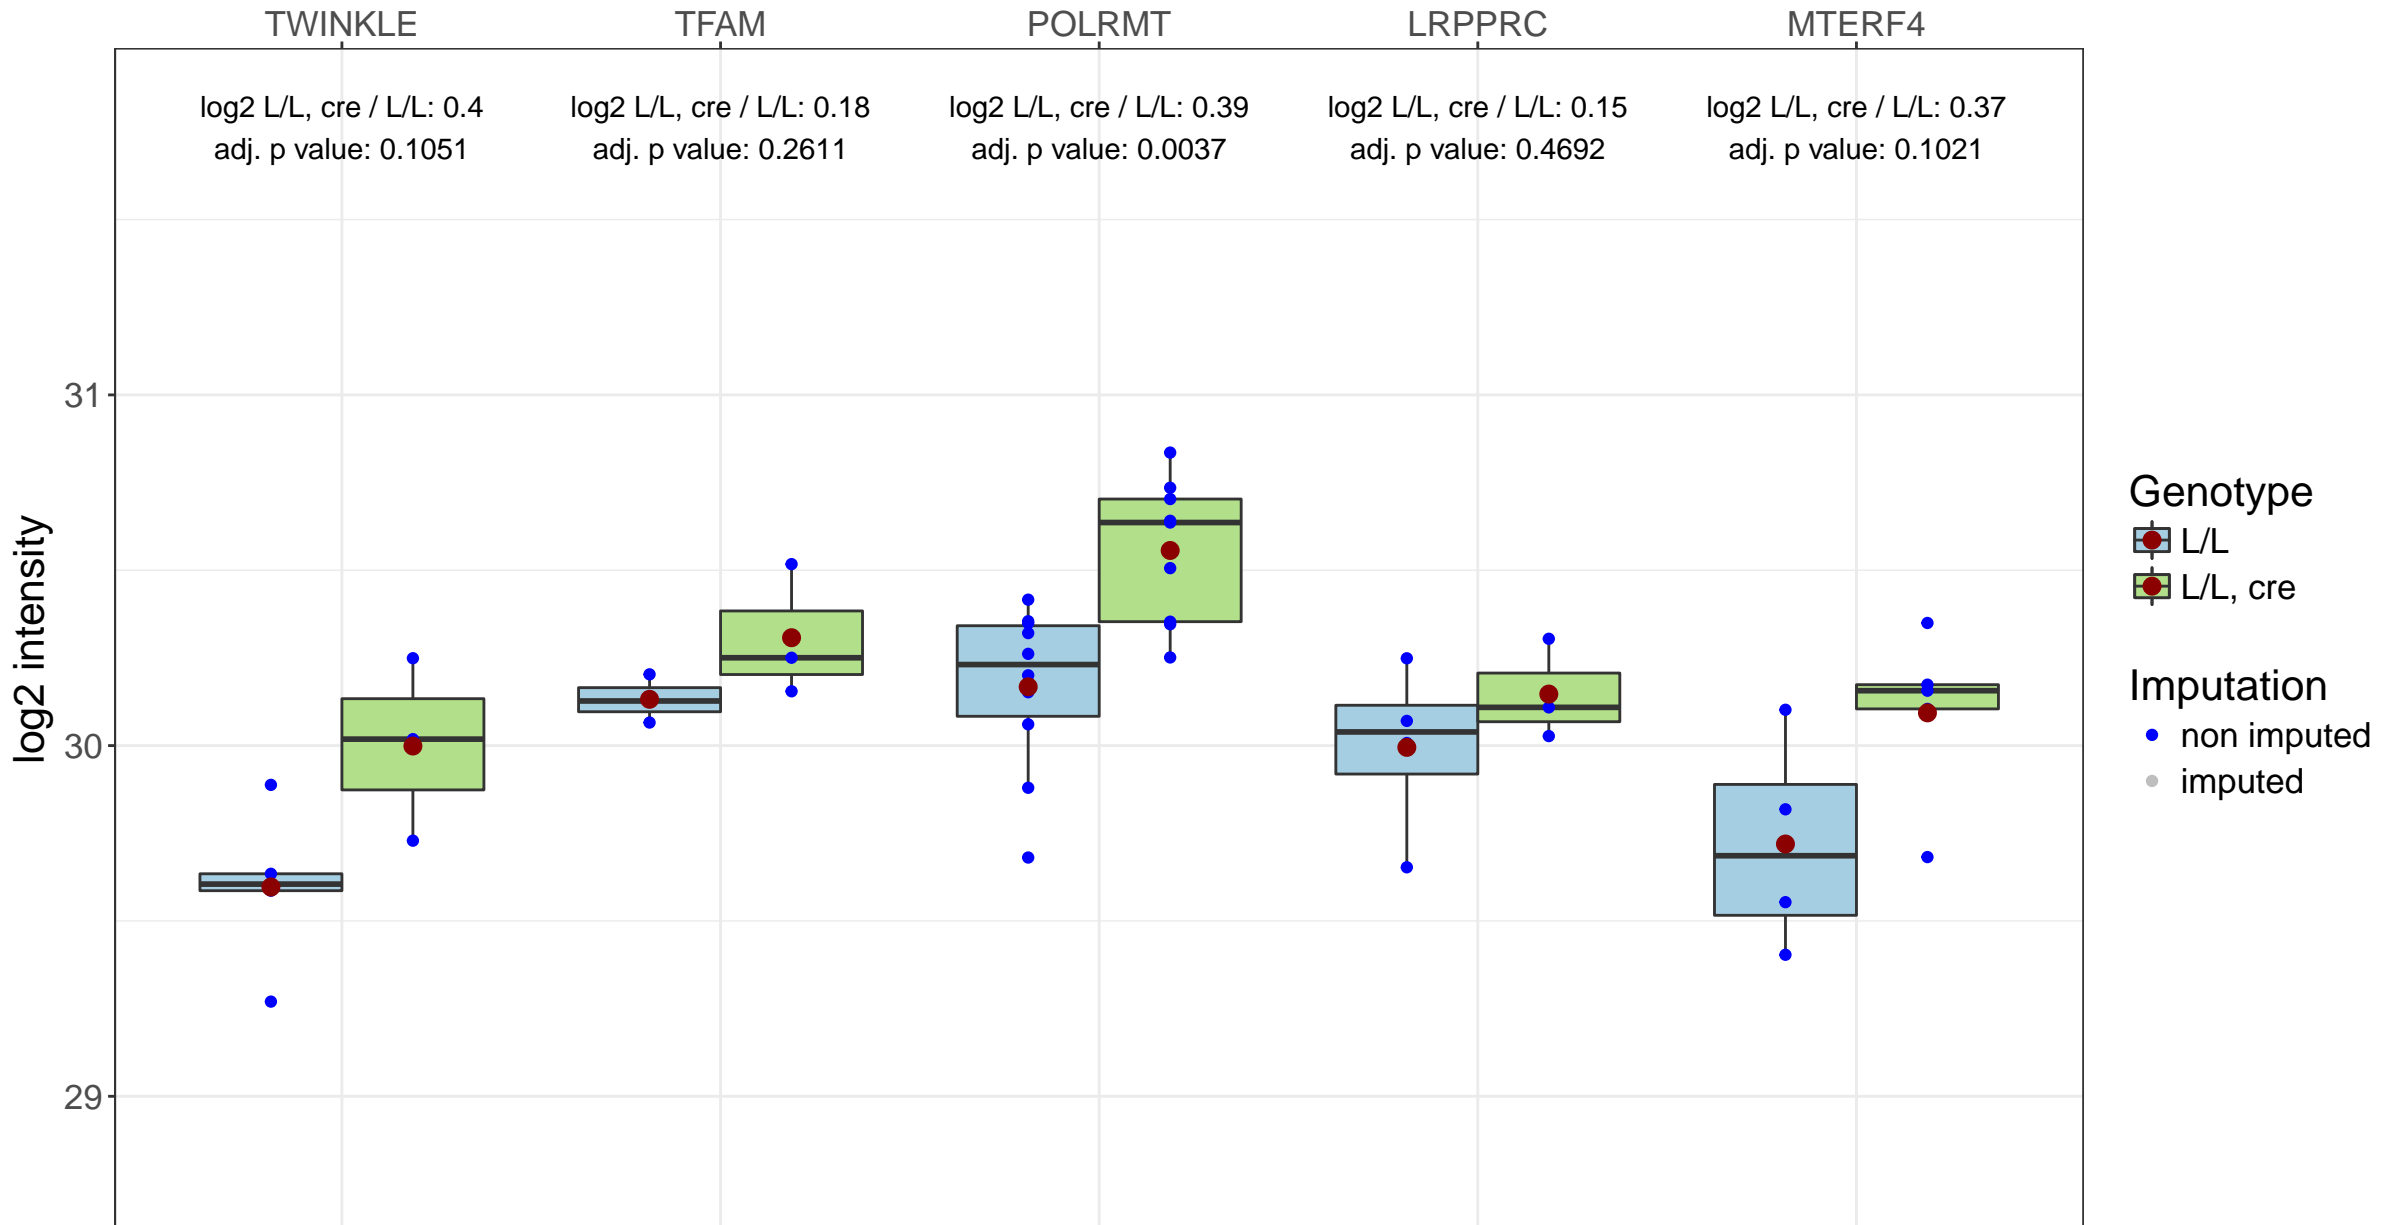

# TOMM40 / Q9QYA2

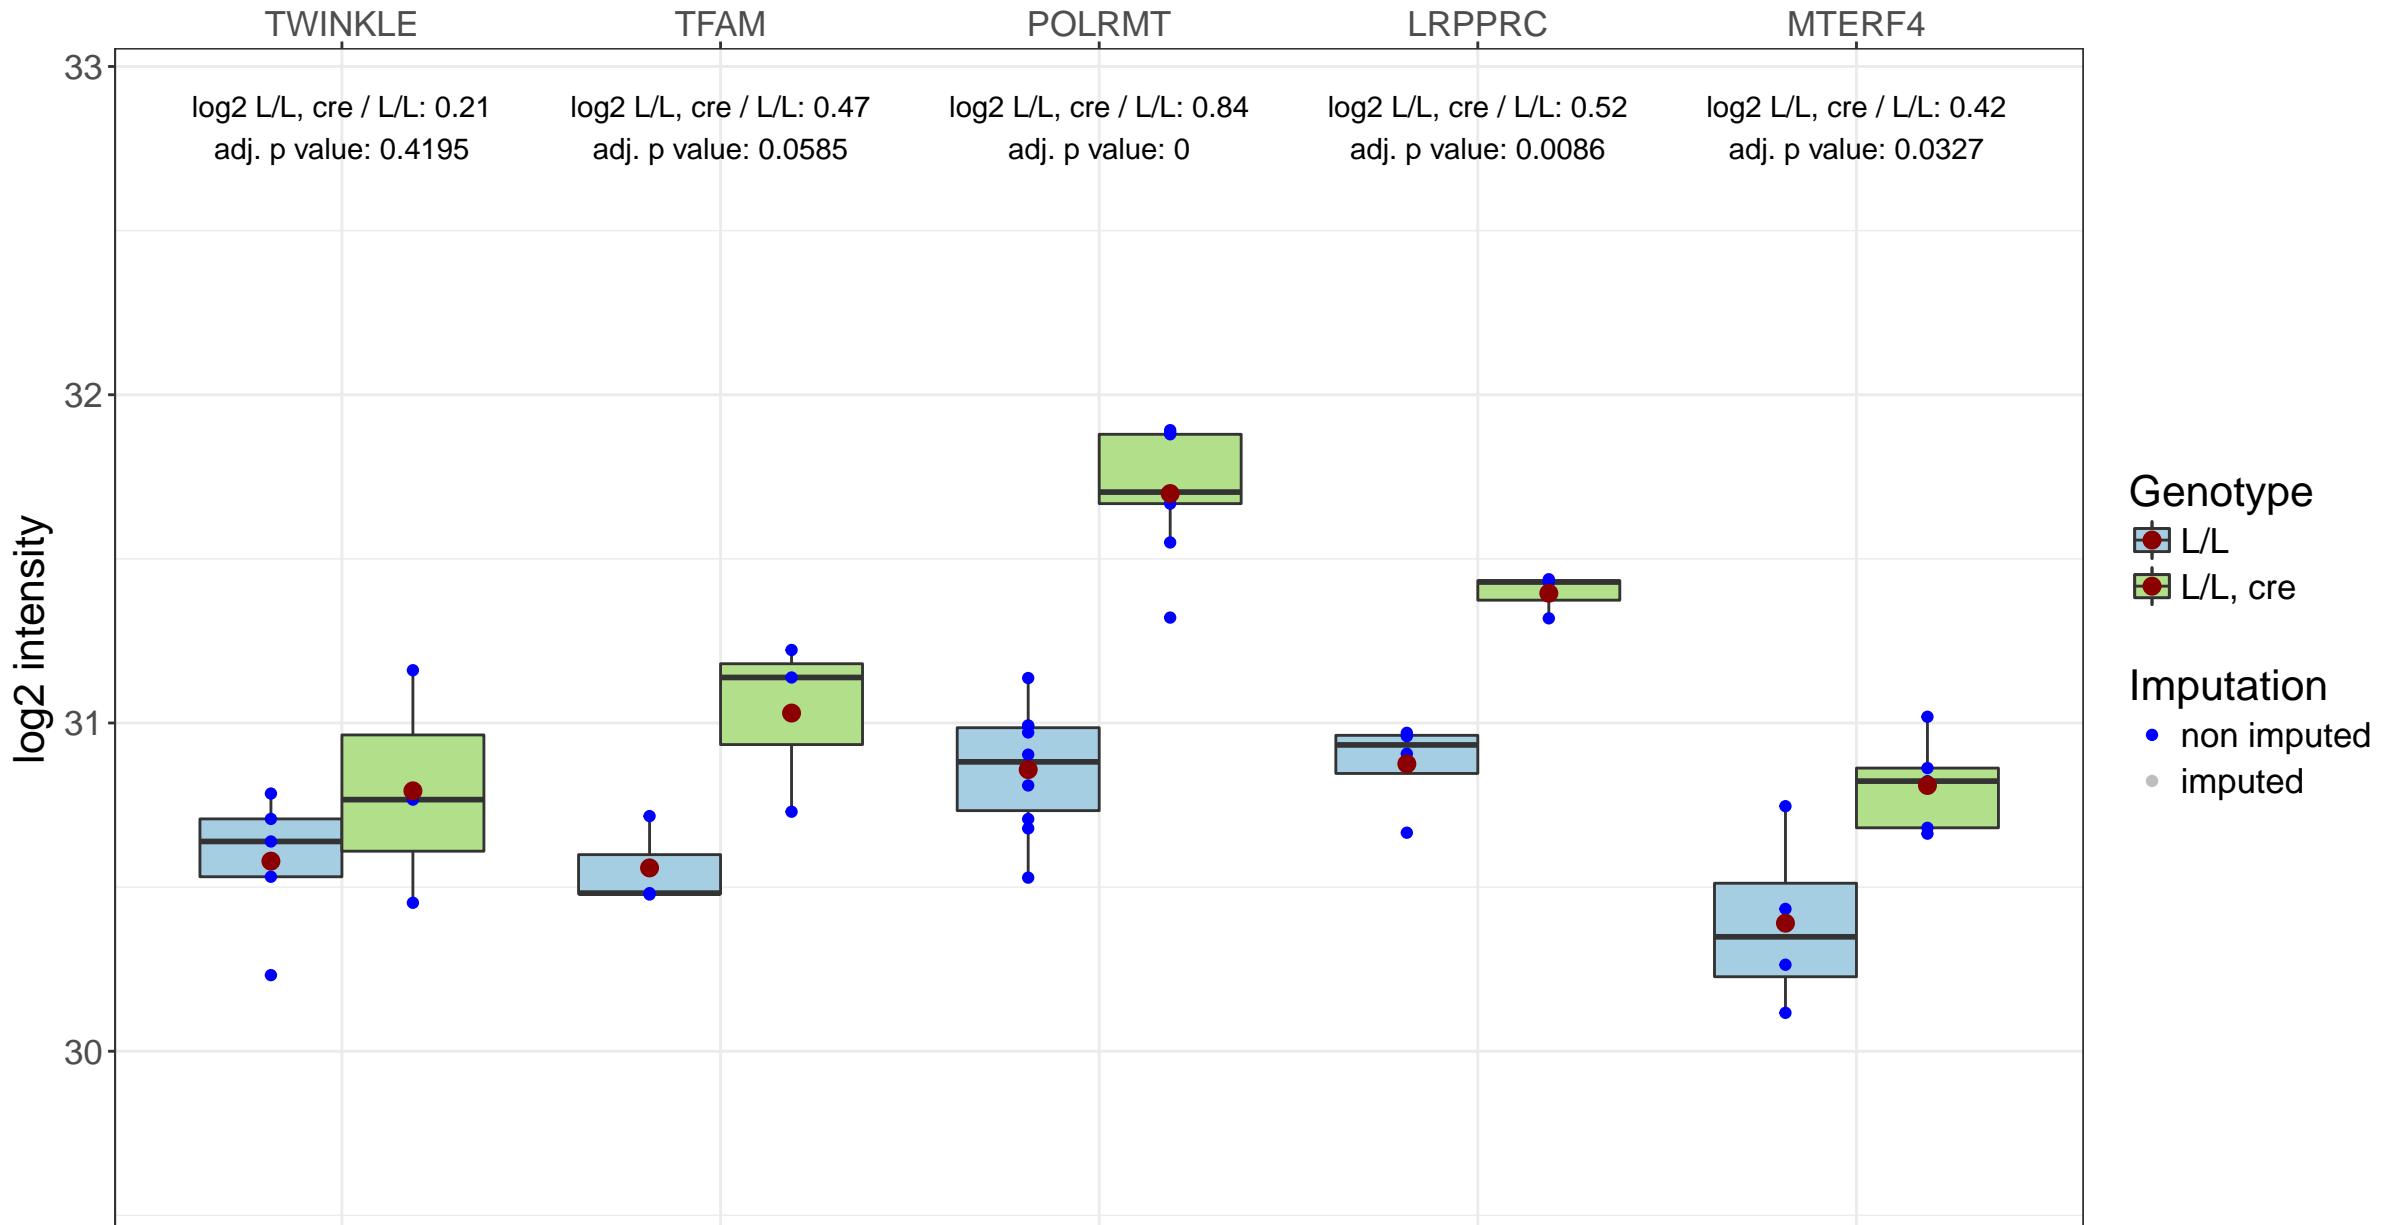

# TOMM40L / Q9CZR3

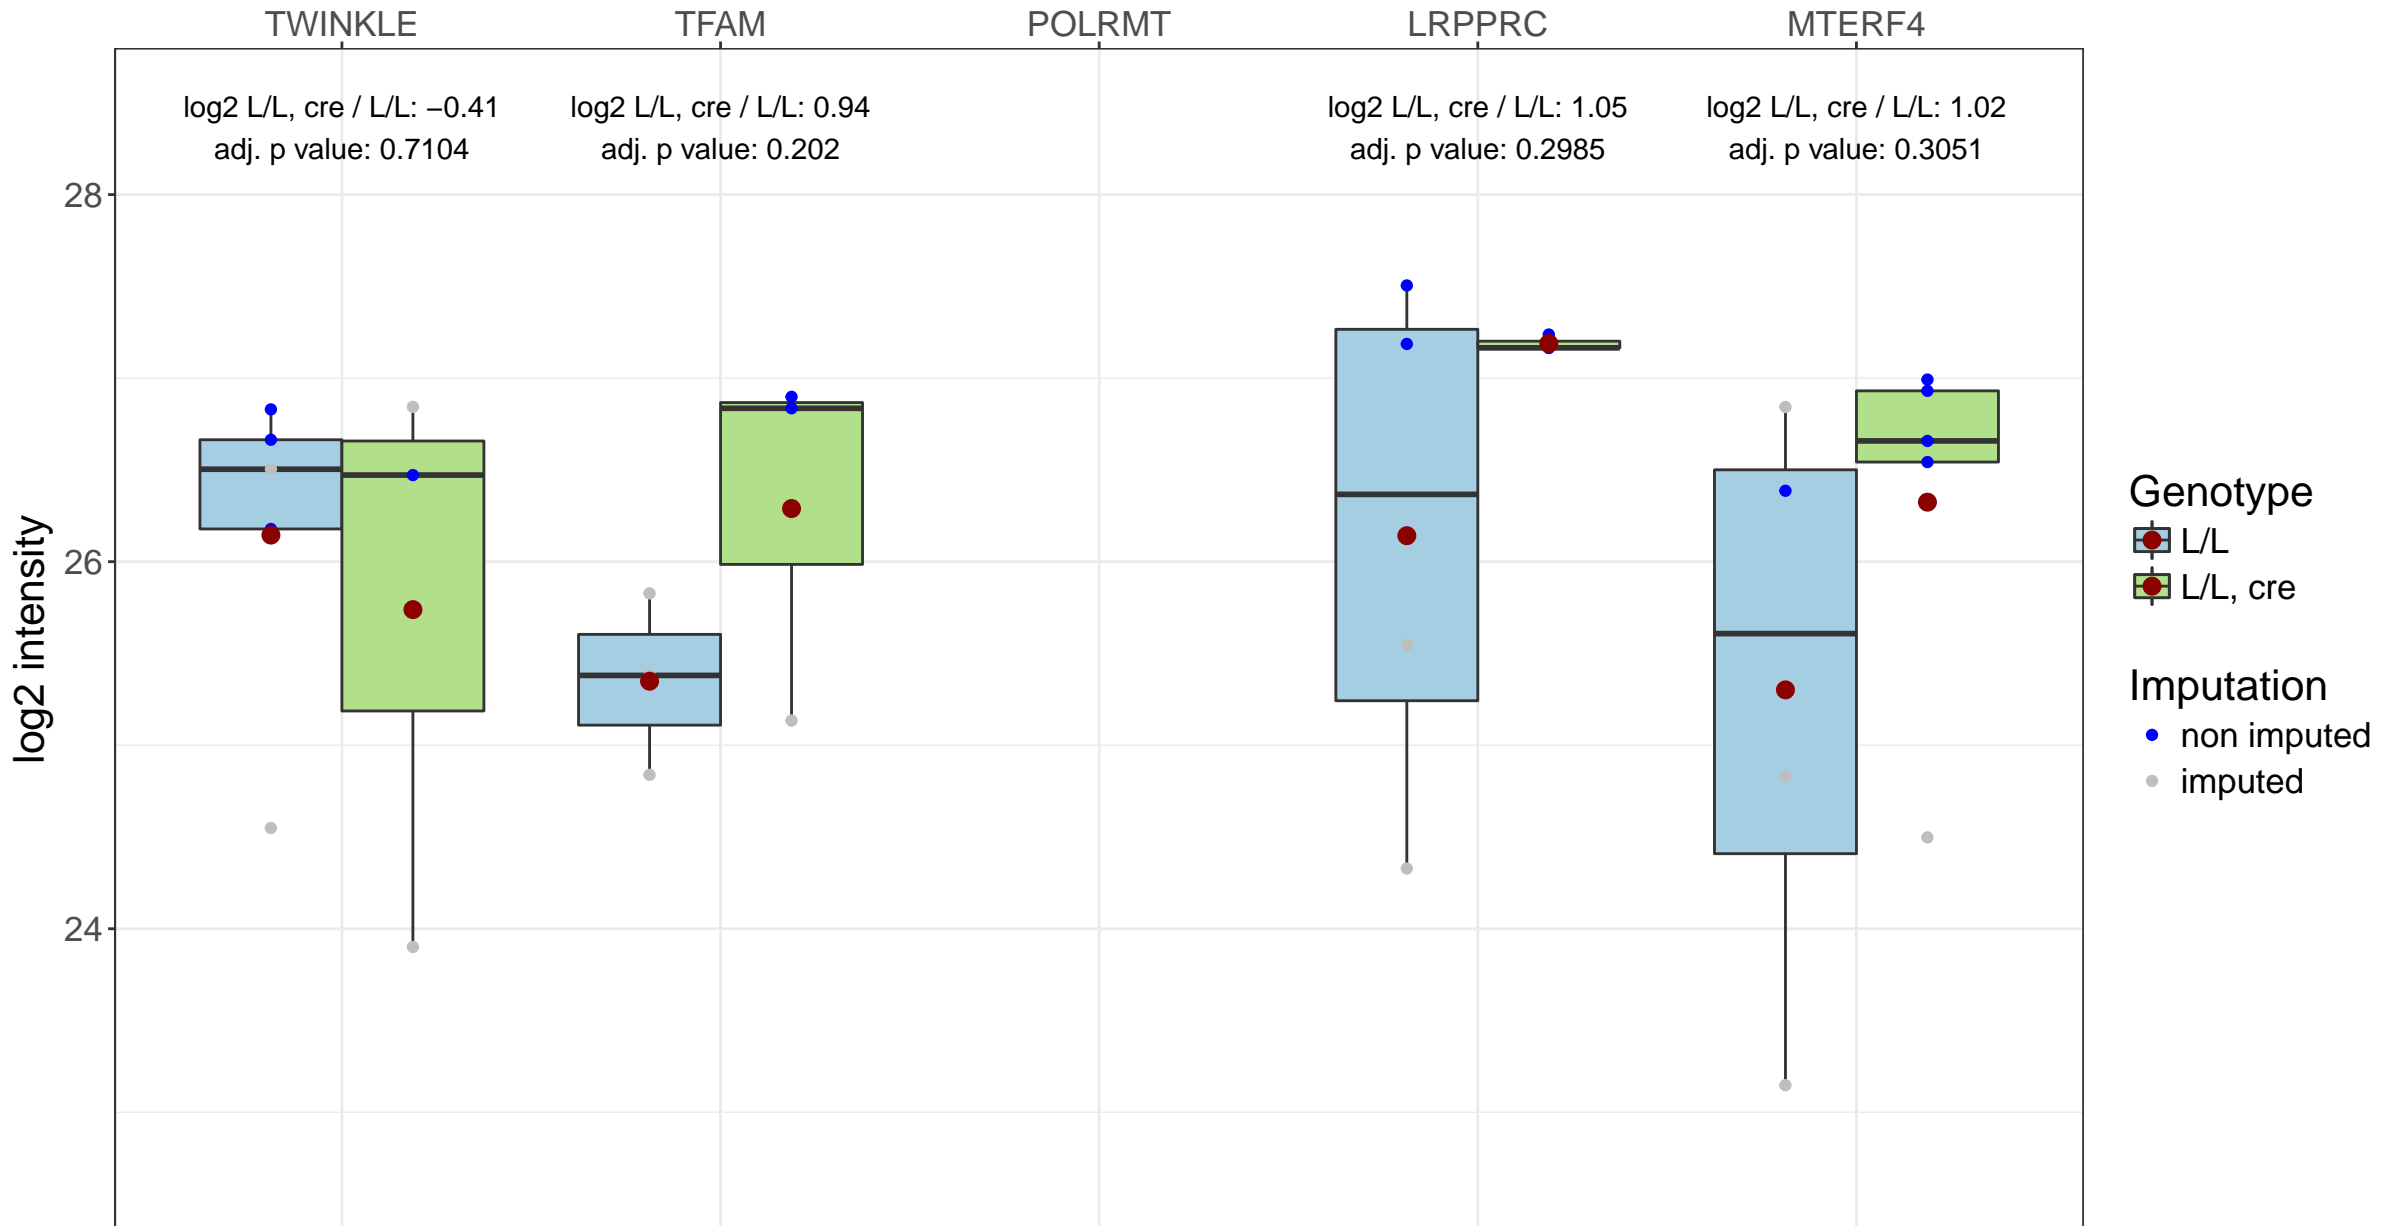

# TOMM5 / B1AXP6-2

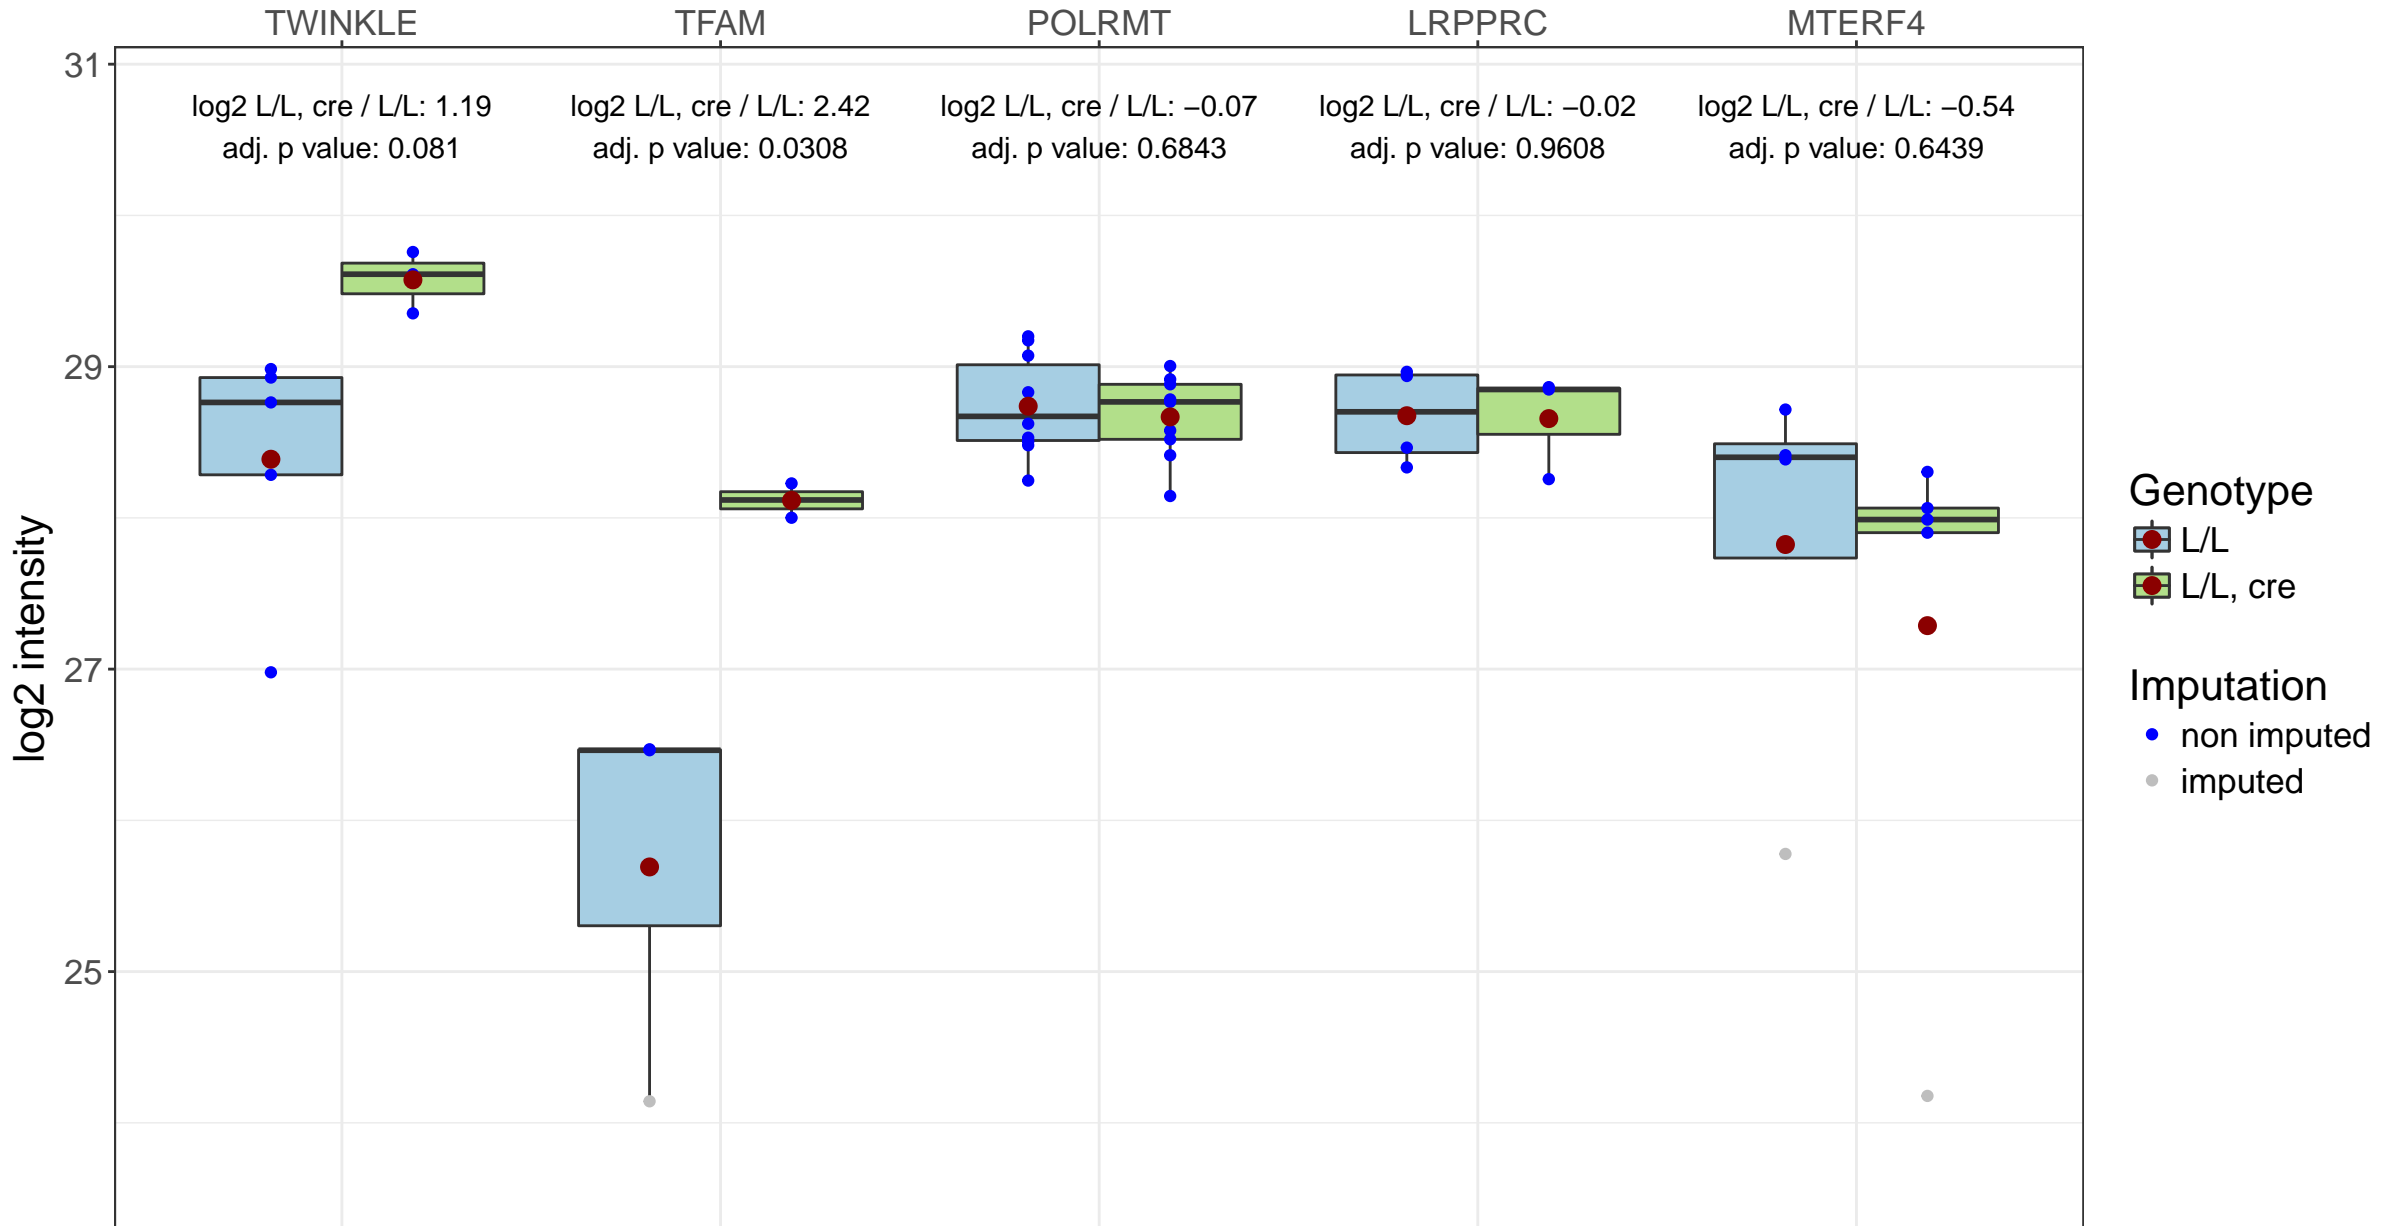

# TOMM6 / Q9CQN3

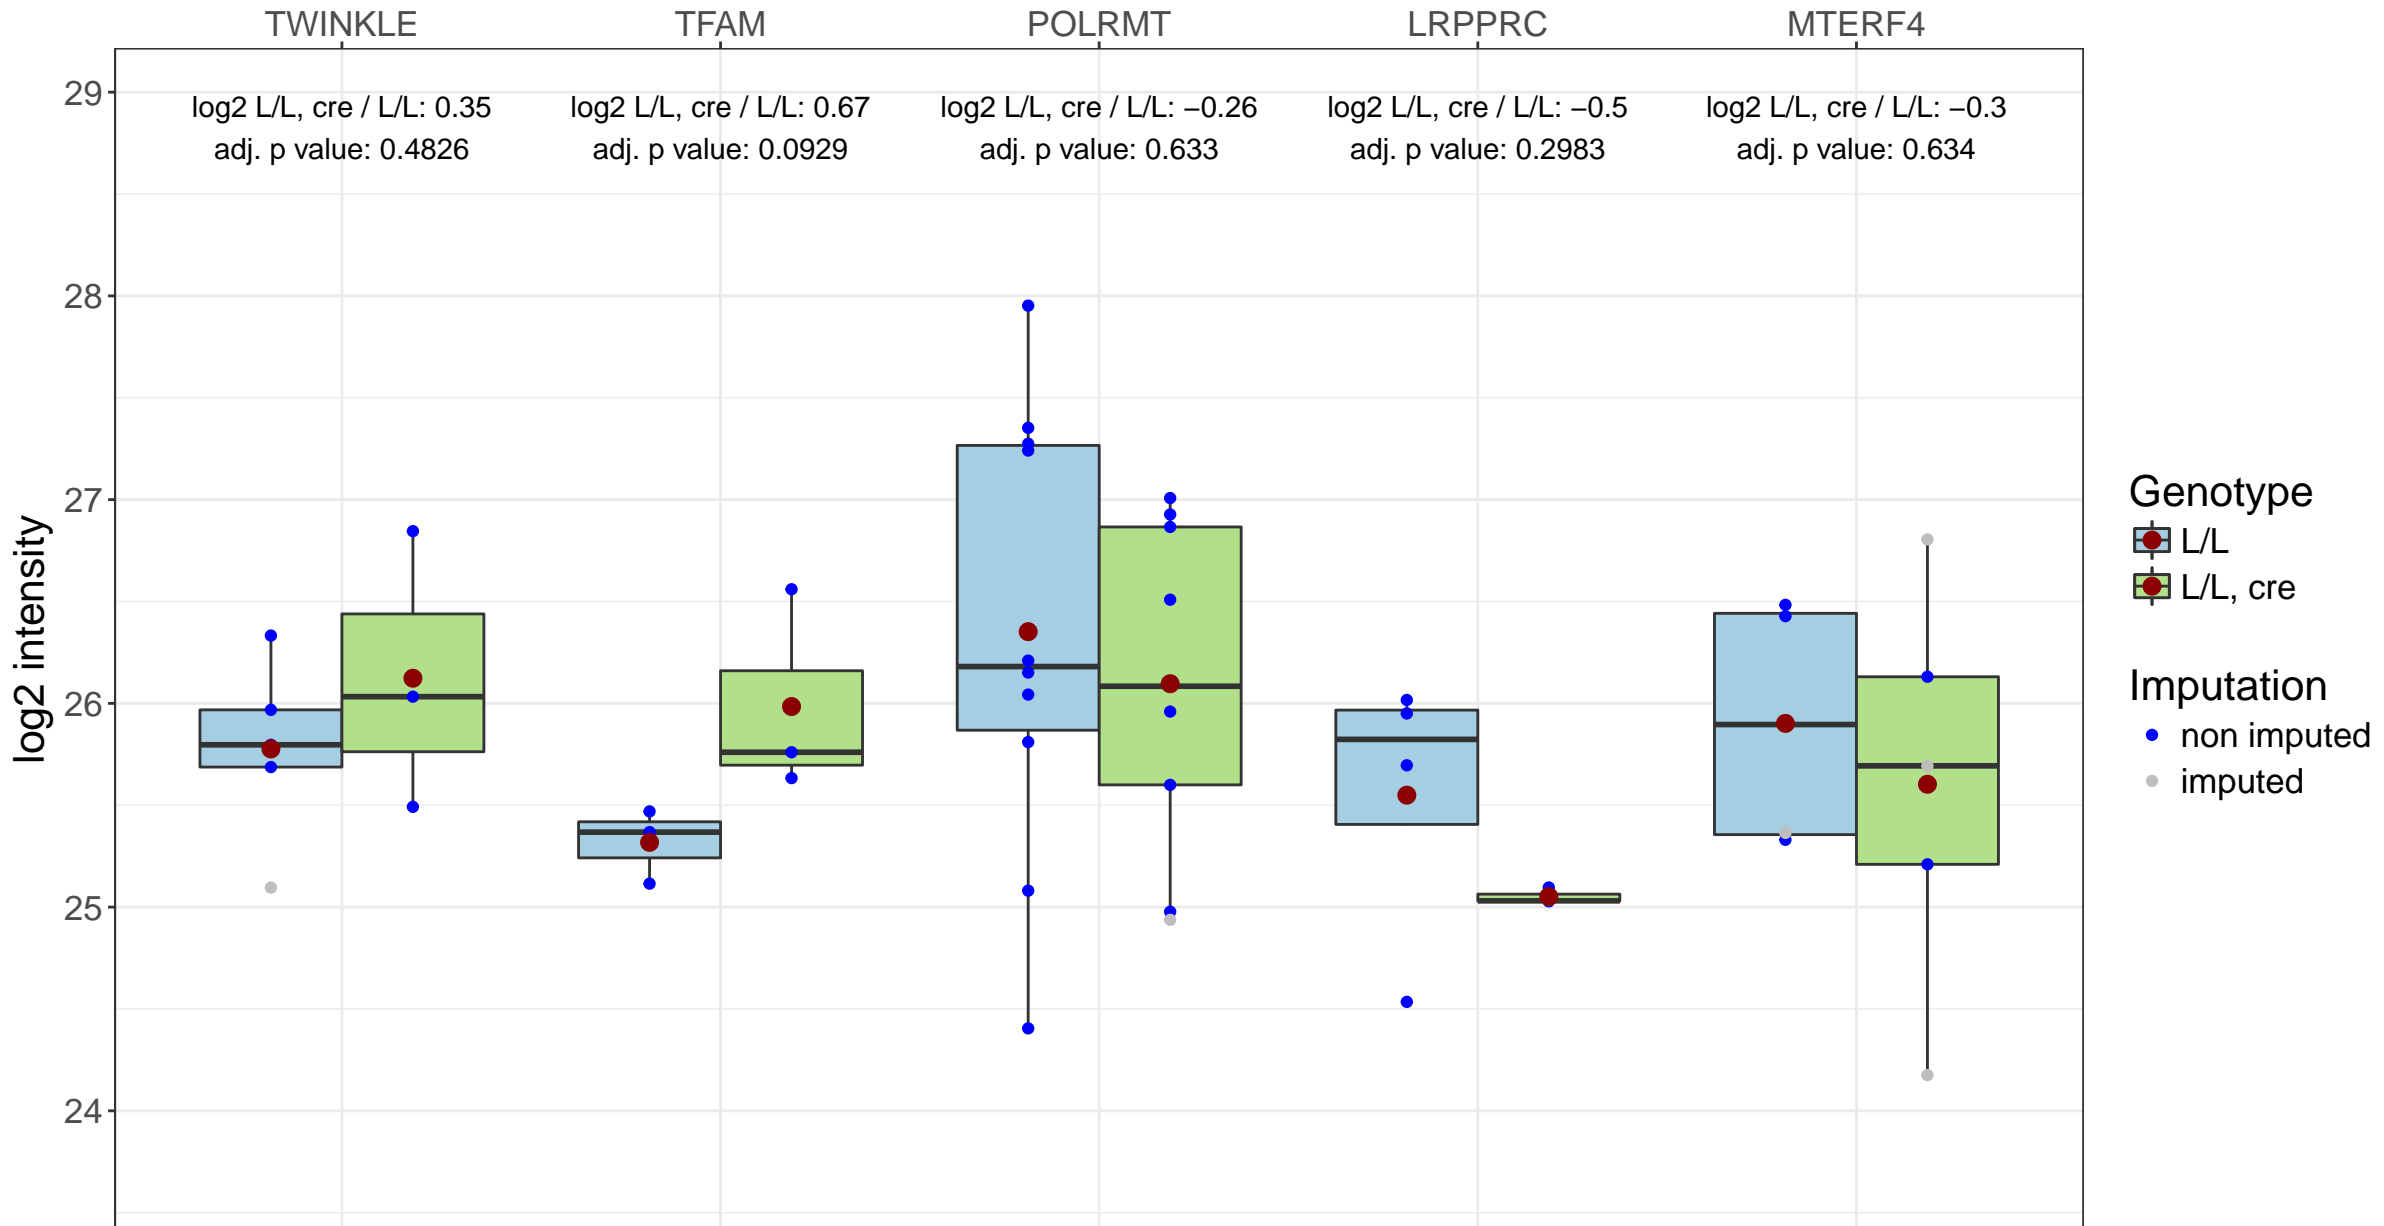

# TOMM7 / Q9D173

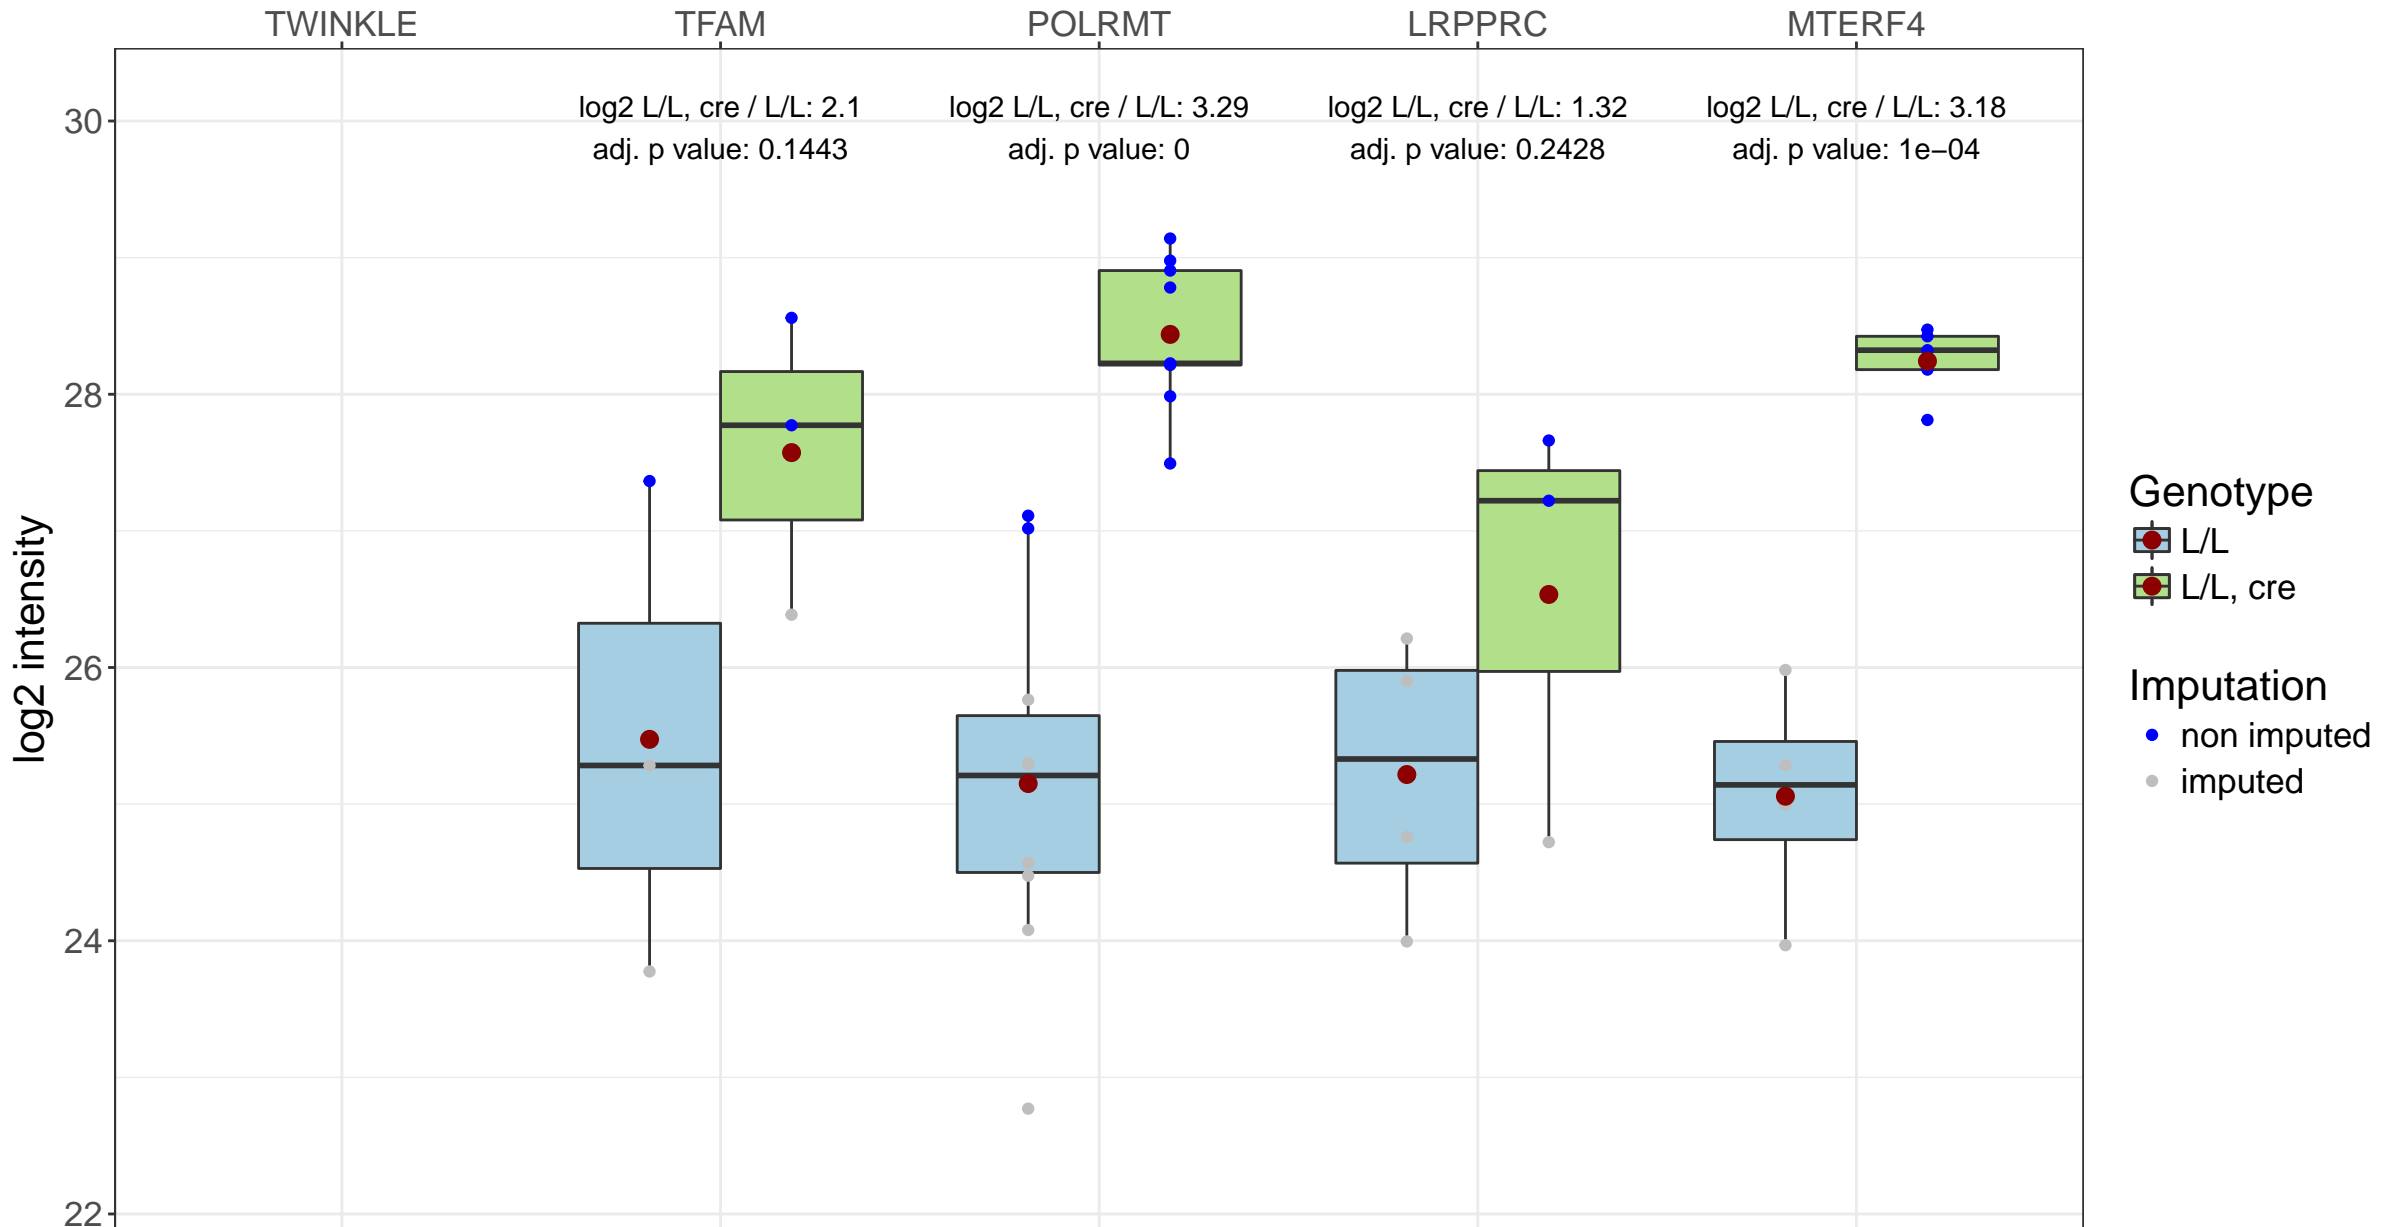



# TOMM70A / Q9CZW5

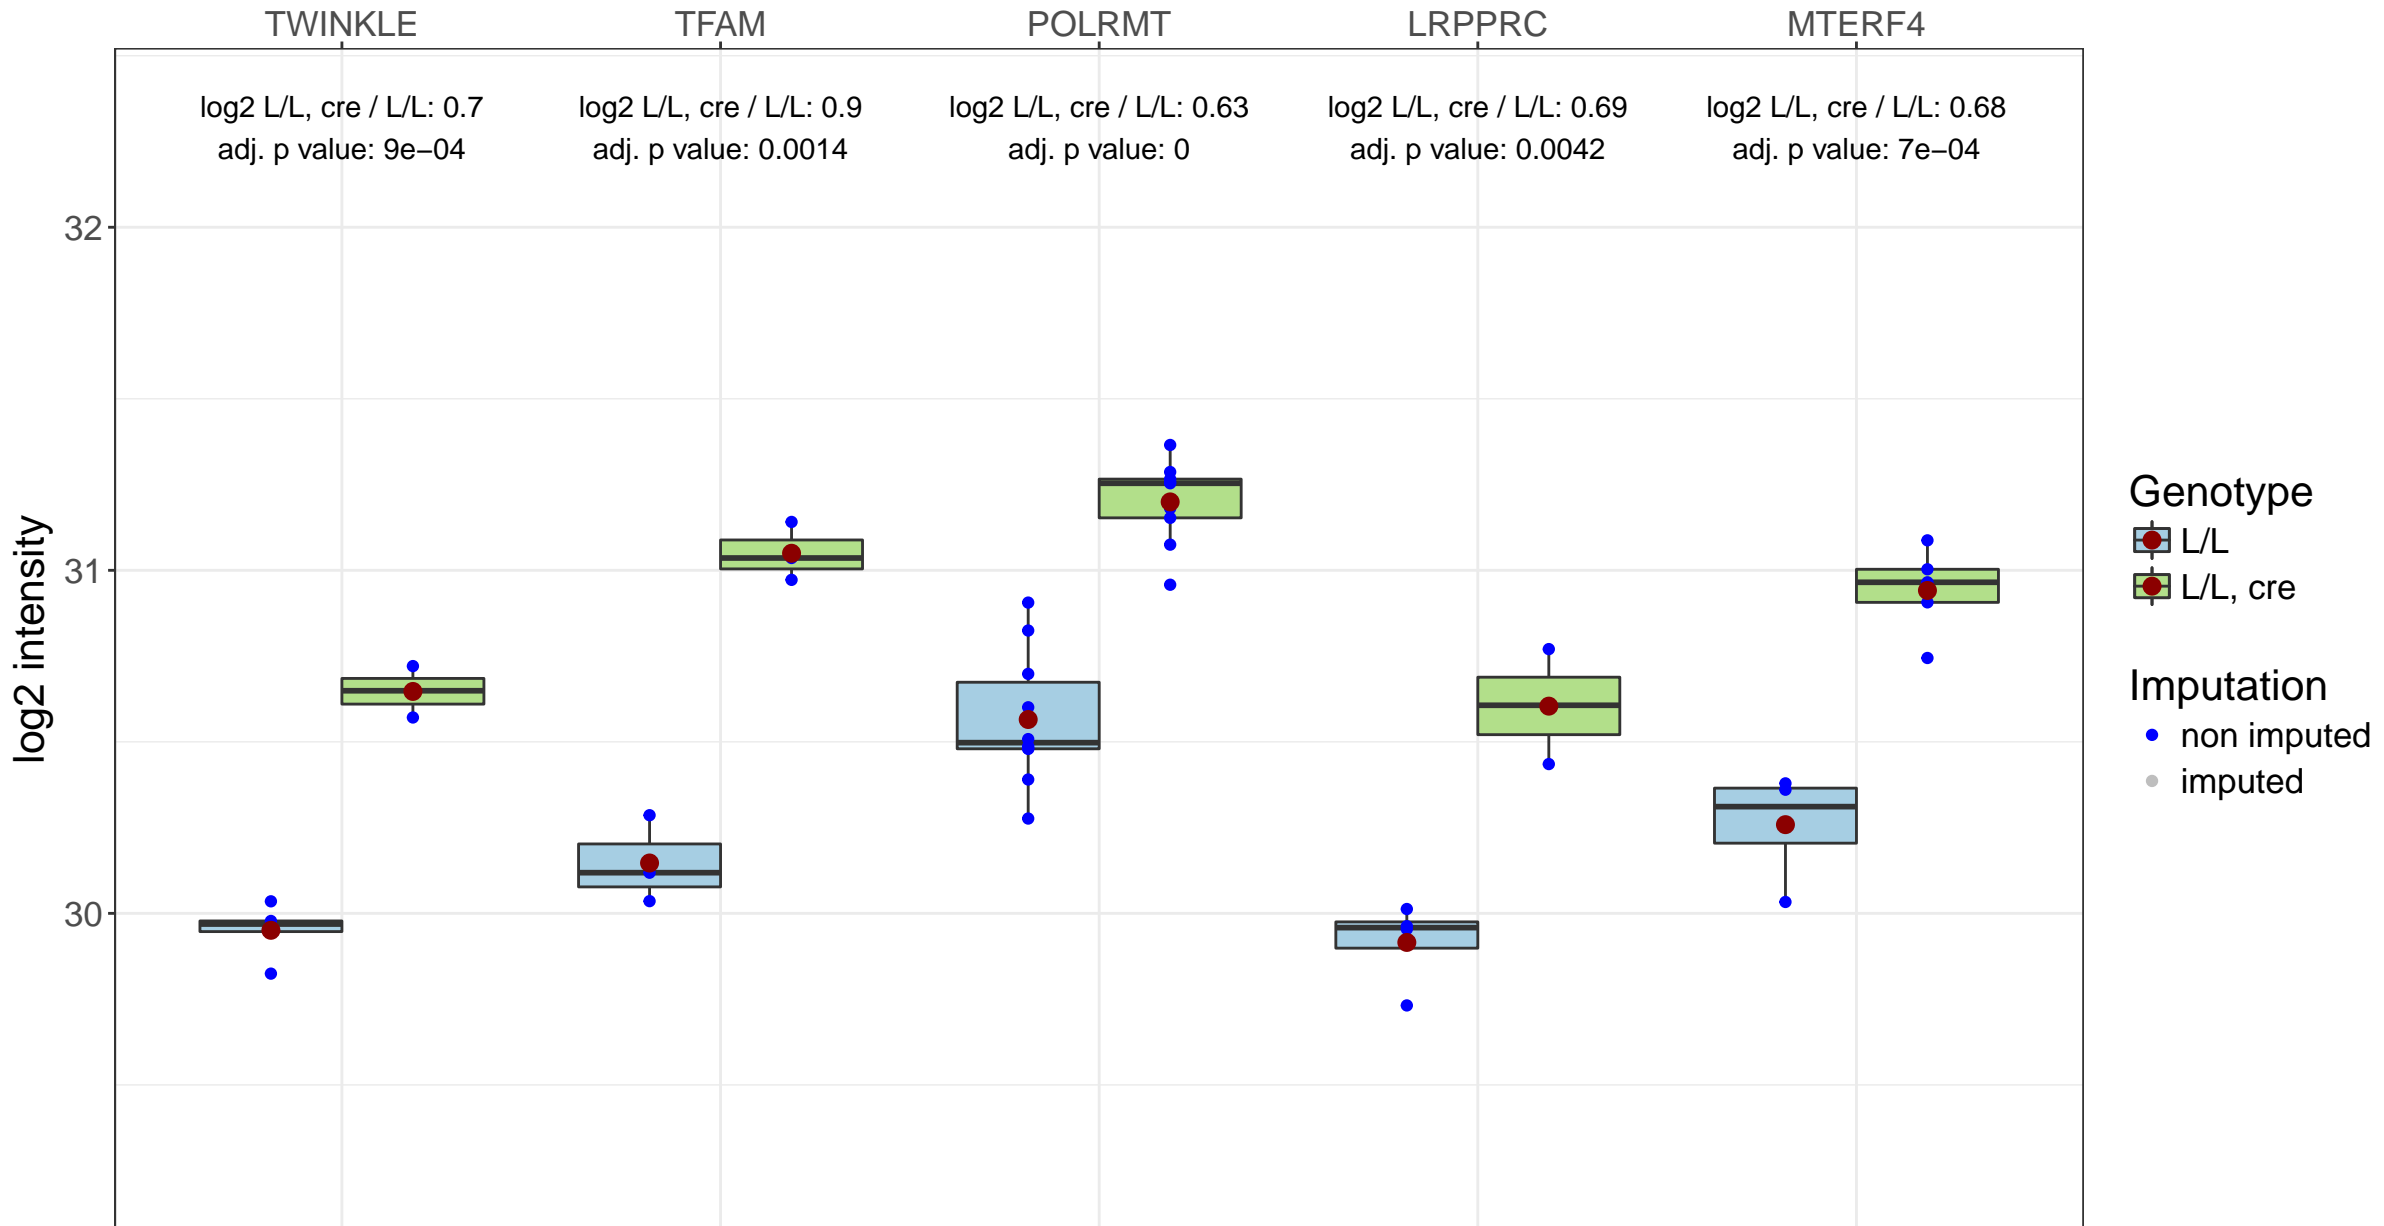

# TPI1 / P17751

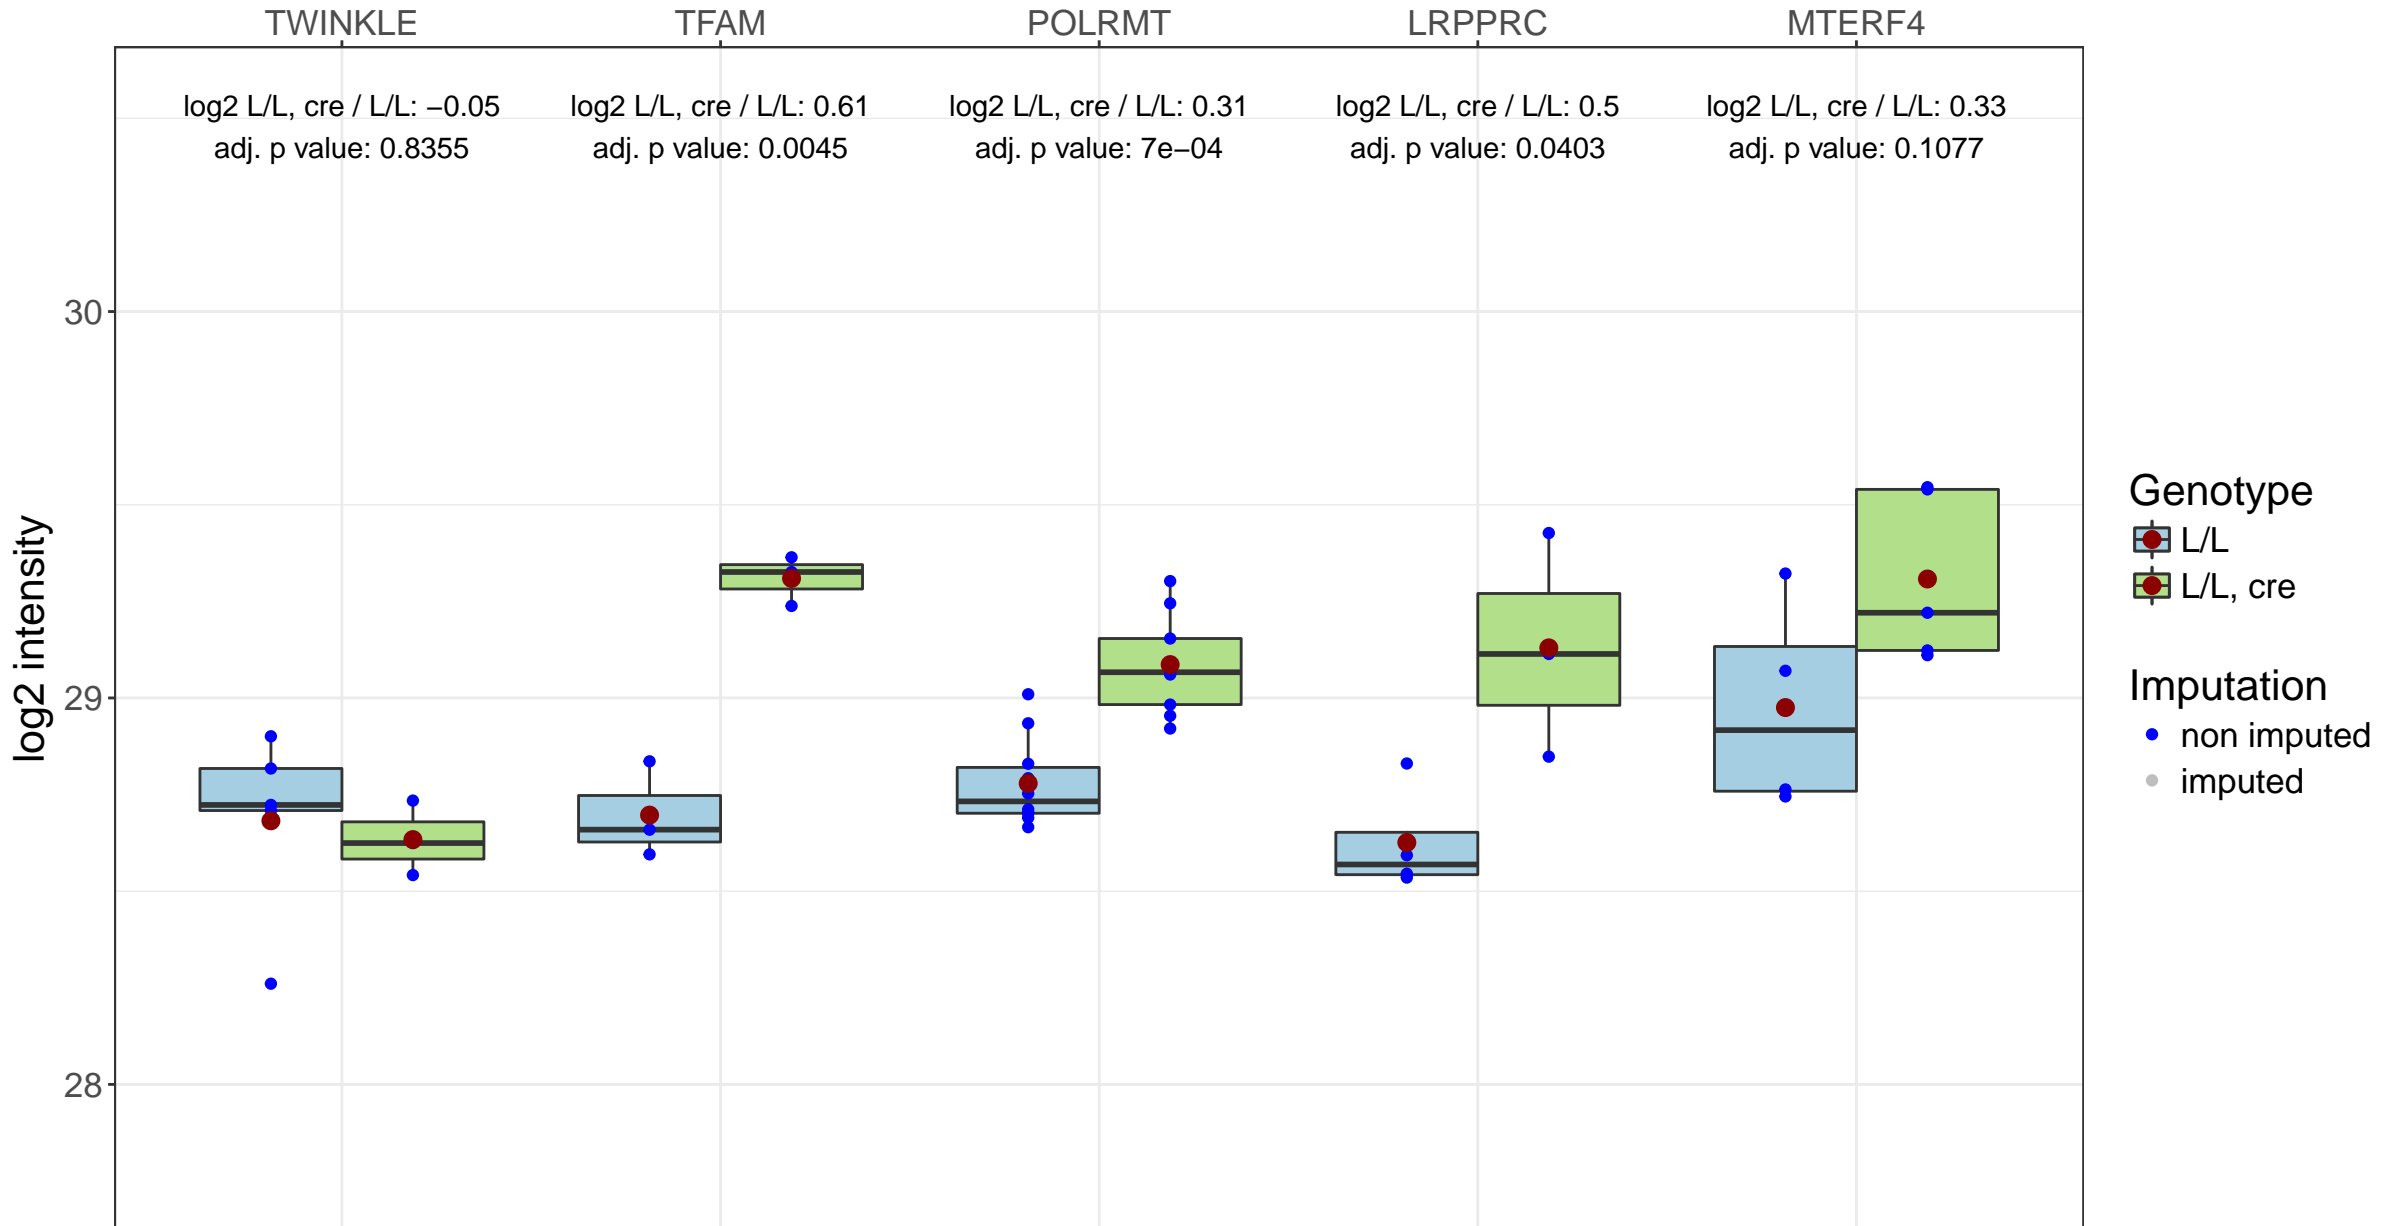

# TPM1 / F8WID5

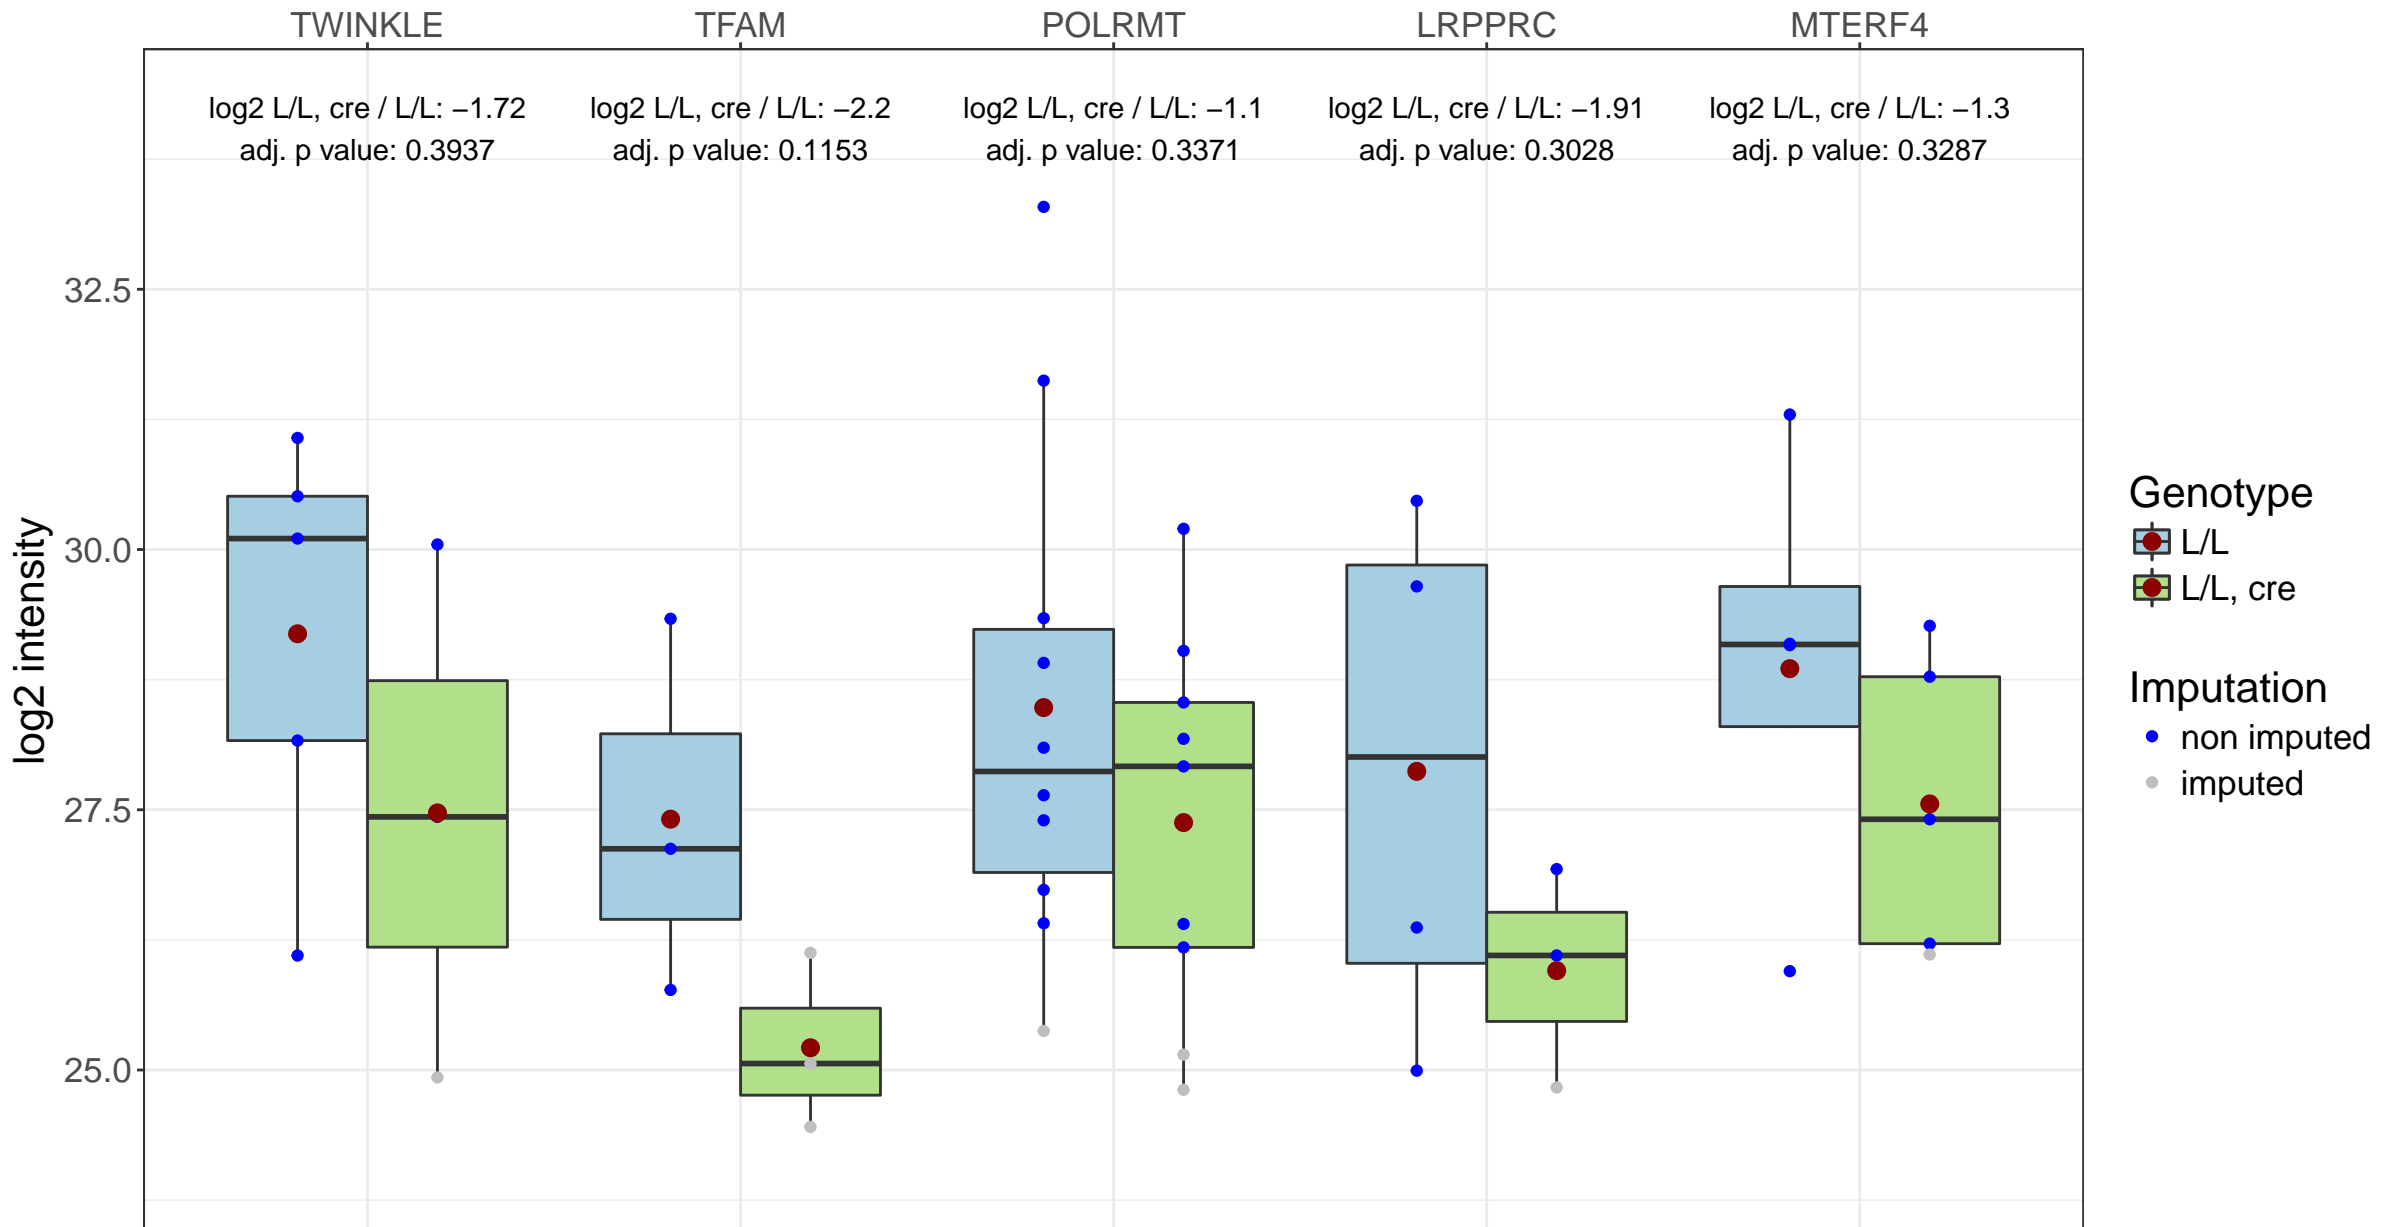

# TPM1 / P58771

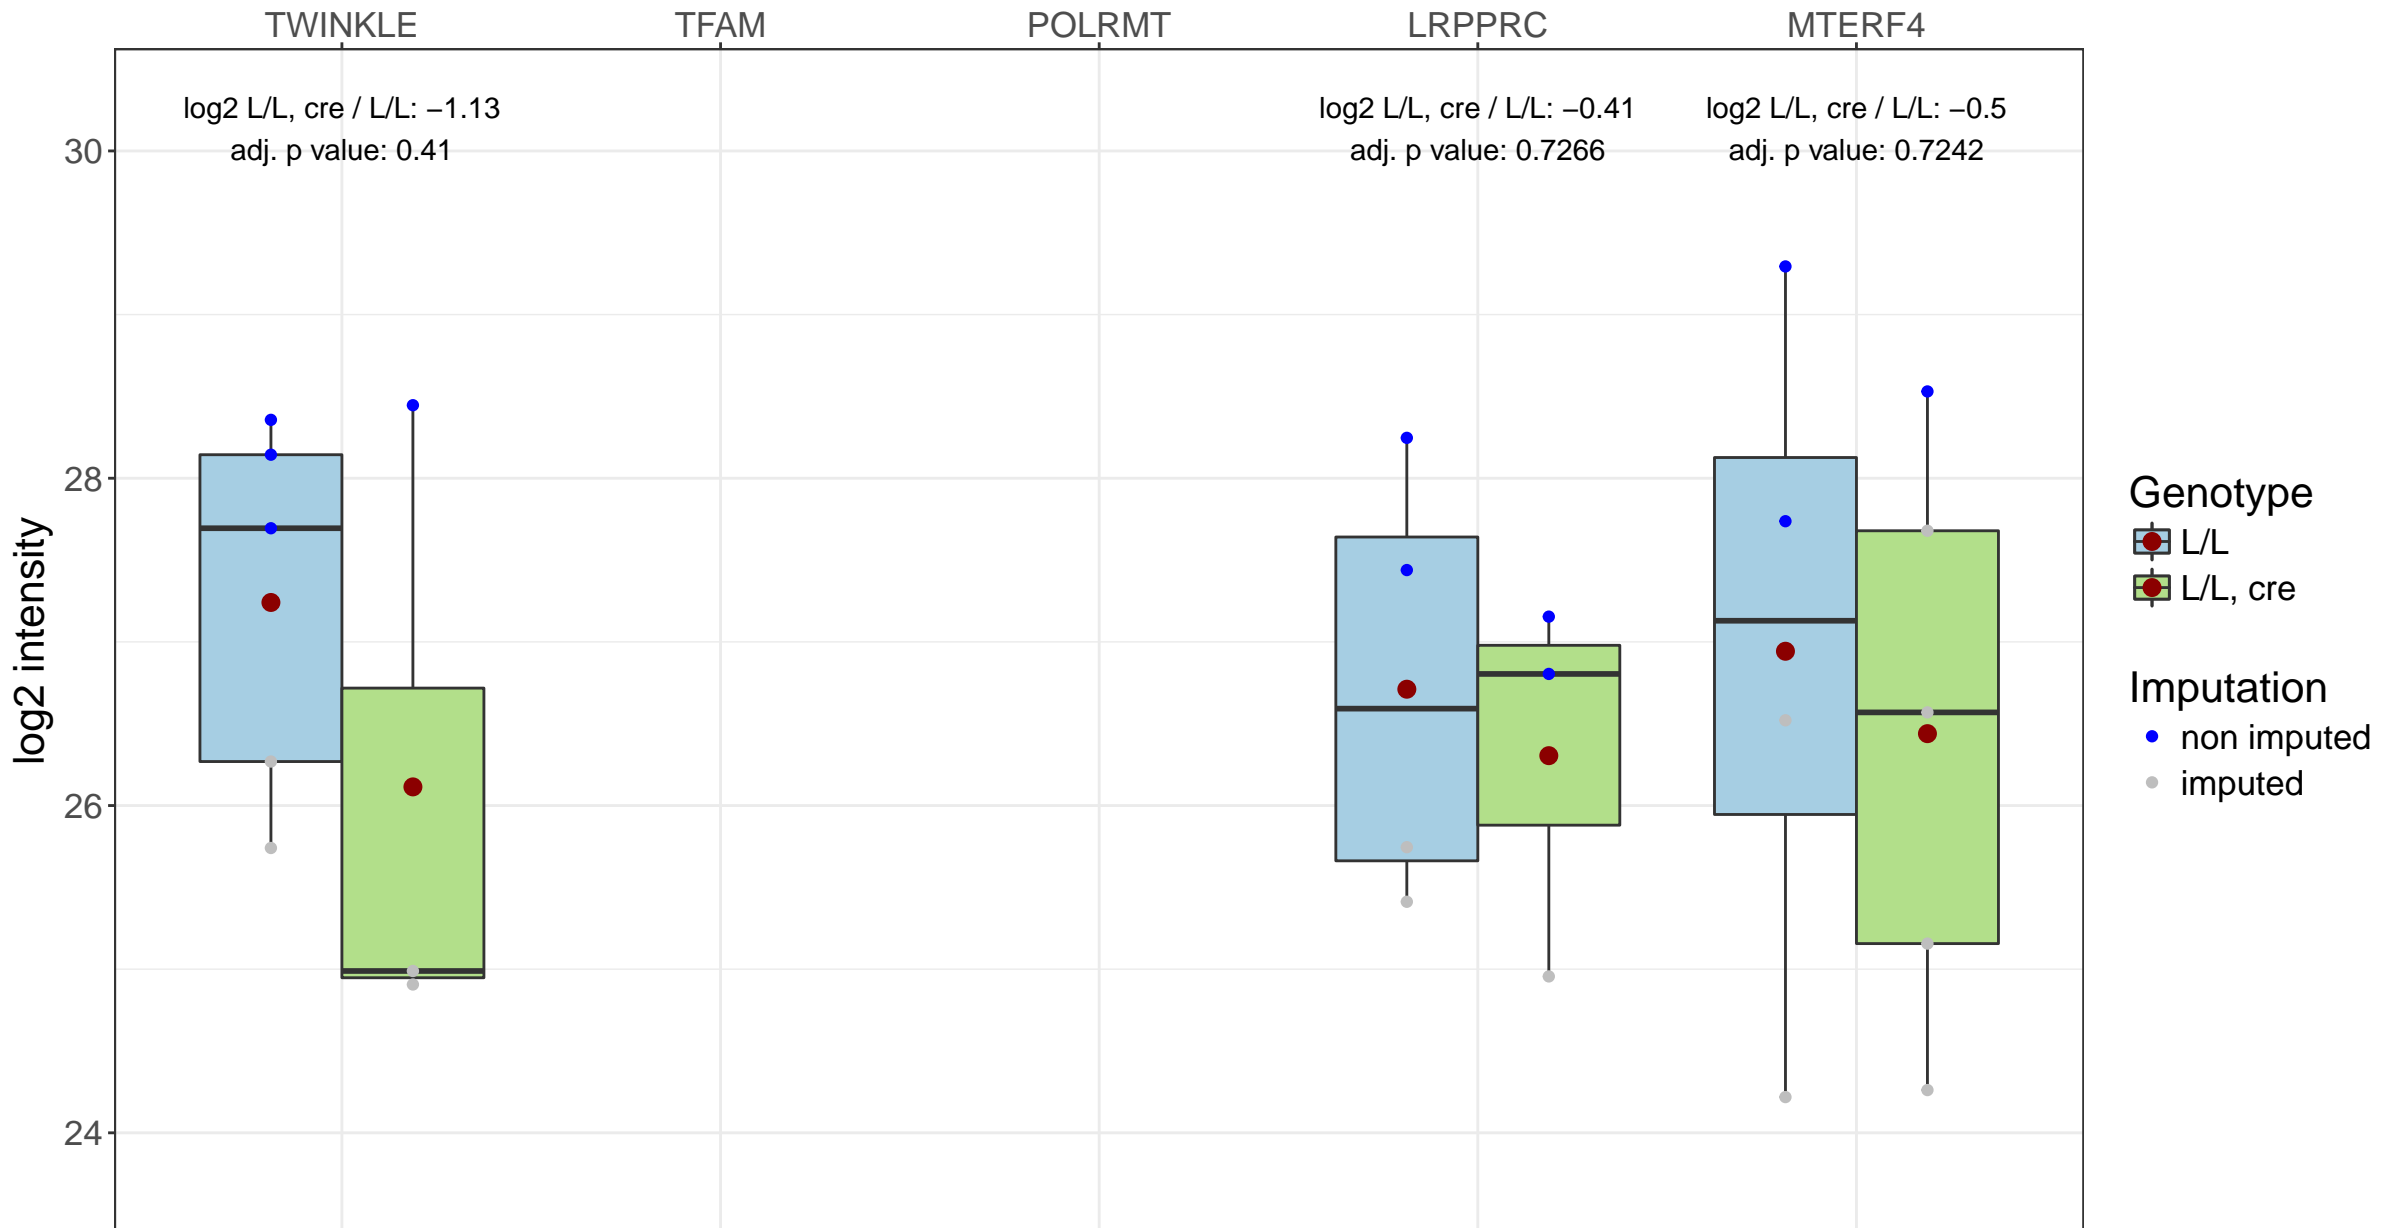

# TPP1 / O89023

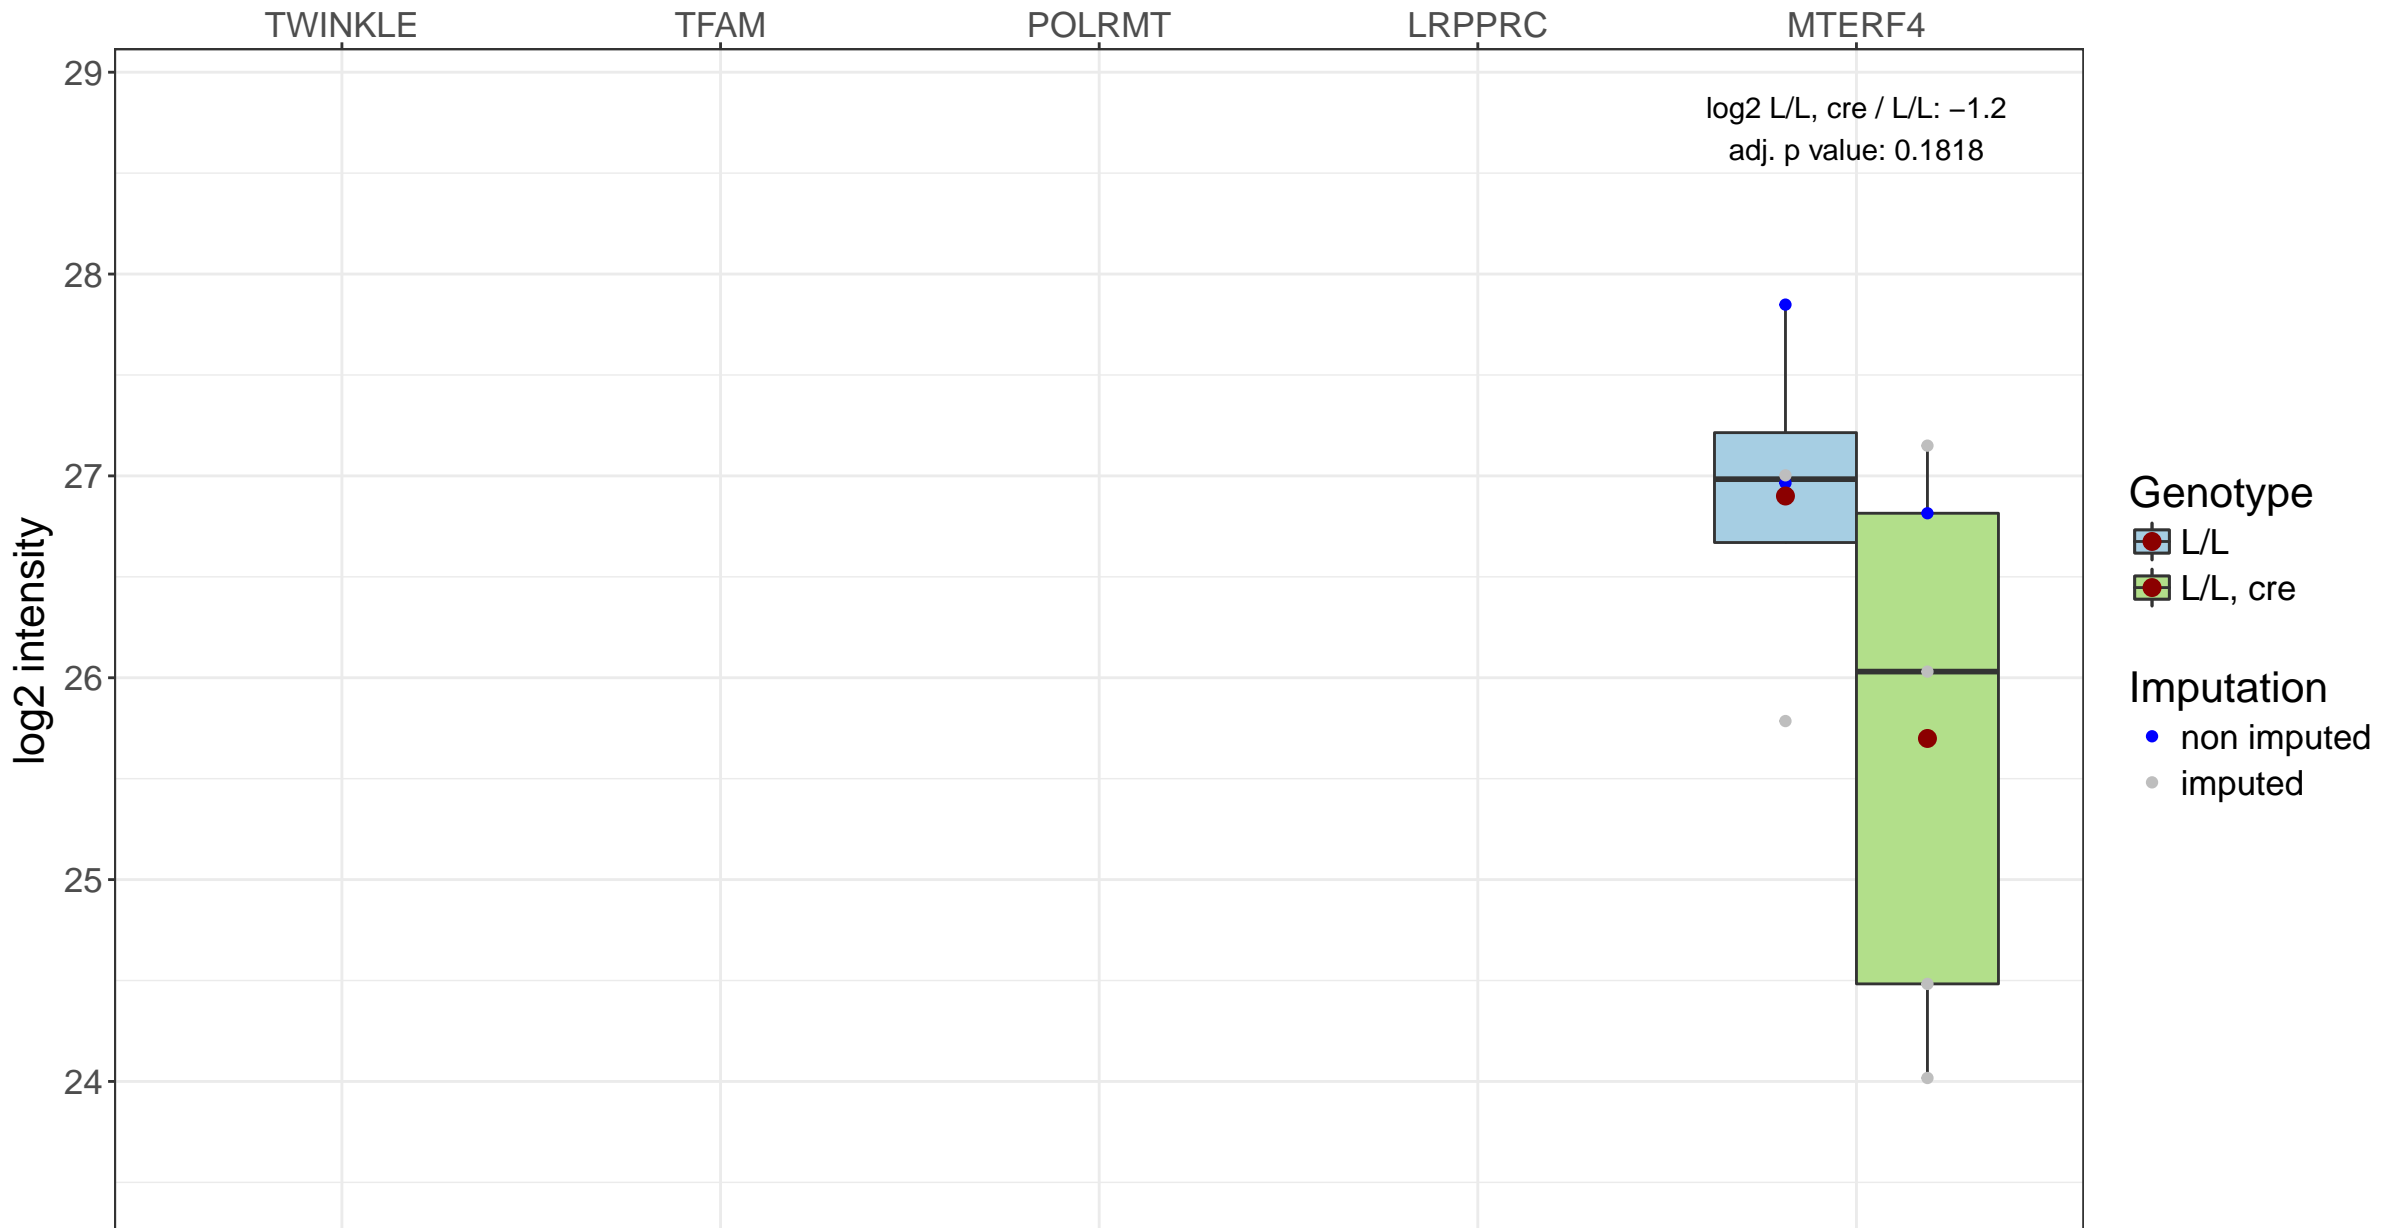

# TRABD / E9Q8R5

TWINKLE

TFAM

POLRMT

LRPPRC

MTERF4

log<sub>2</sub> intensity

27

26

25

24

log<sub>2</sub> L/L, cre / L/L: -0.07

adj. p value: 0.9254

Genotype

L/L

L/L, cre

Imputation

non imputed

imputed

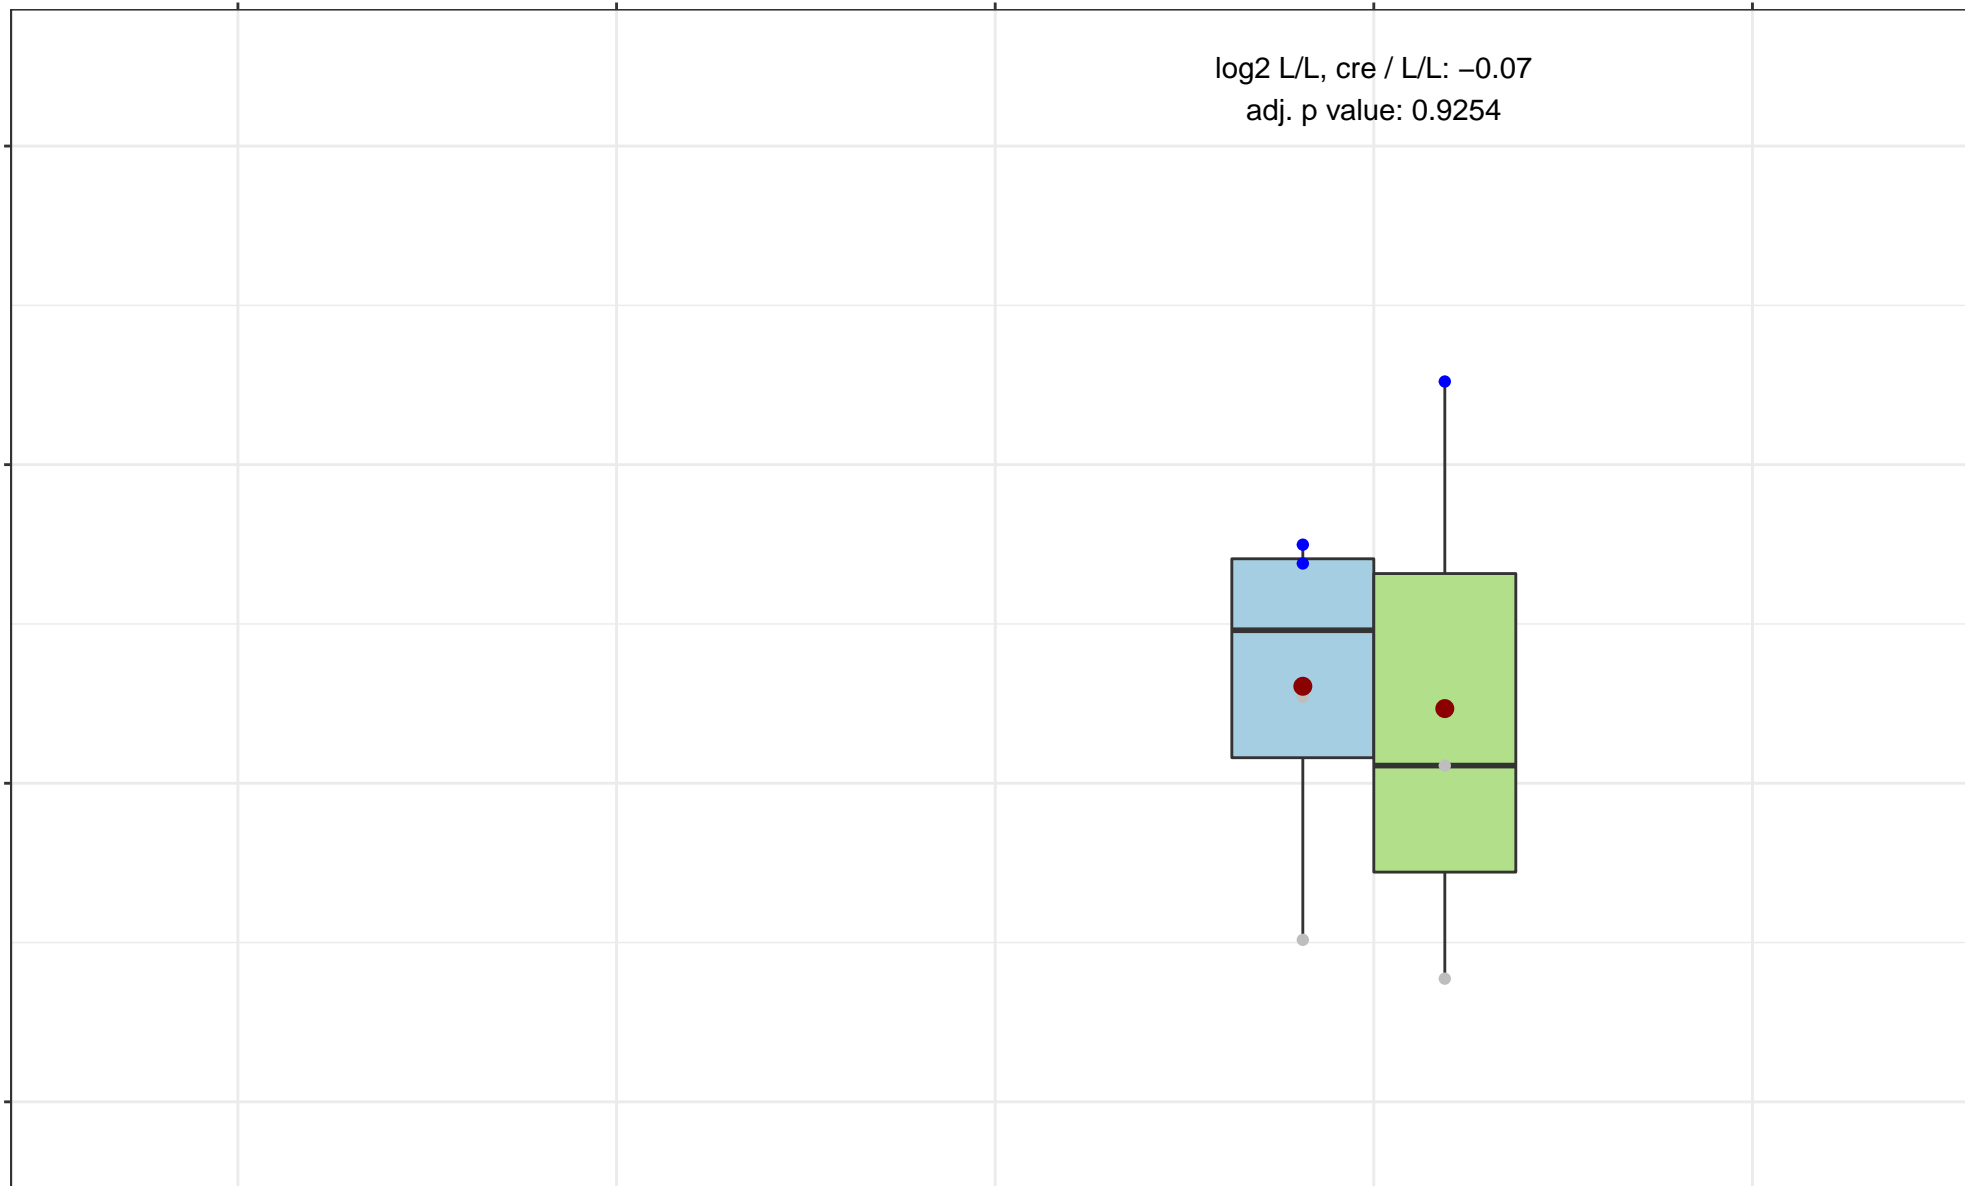

# TRAK1 / Q6PD31-2

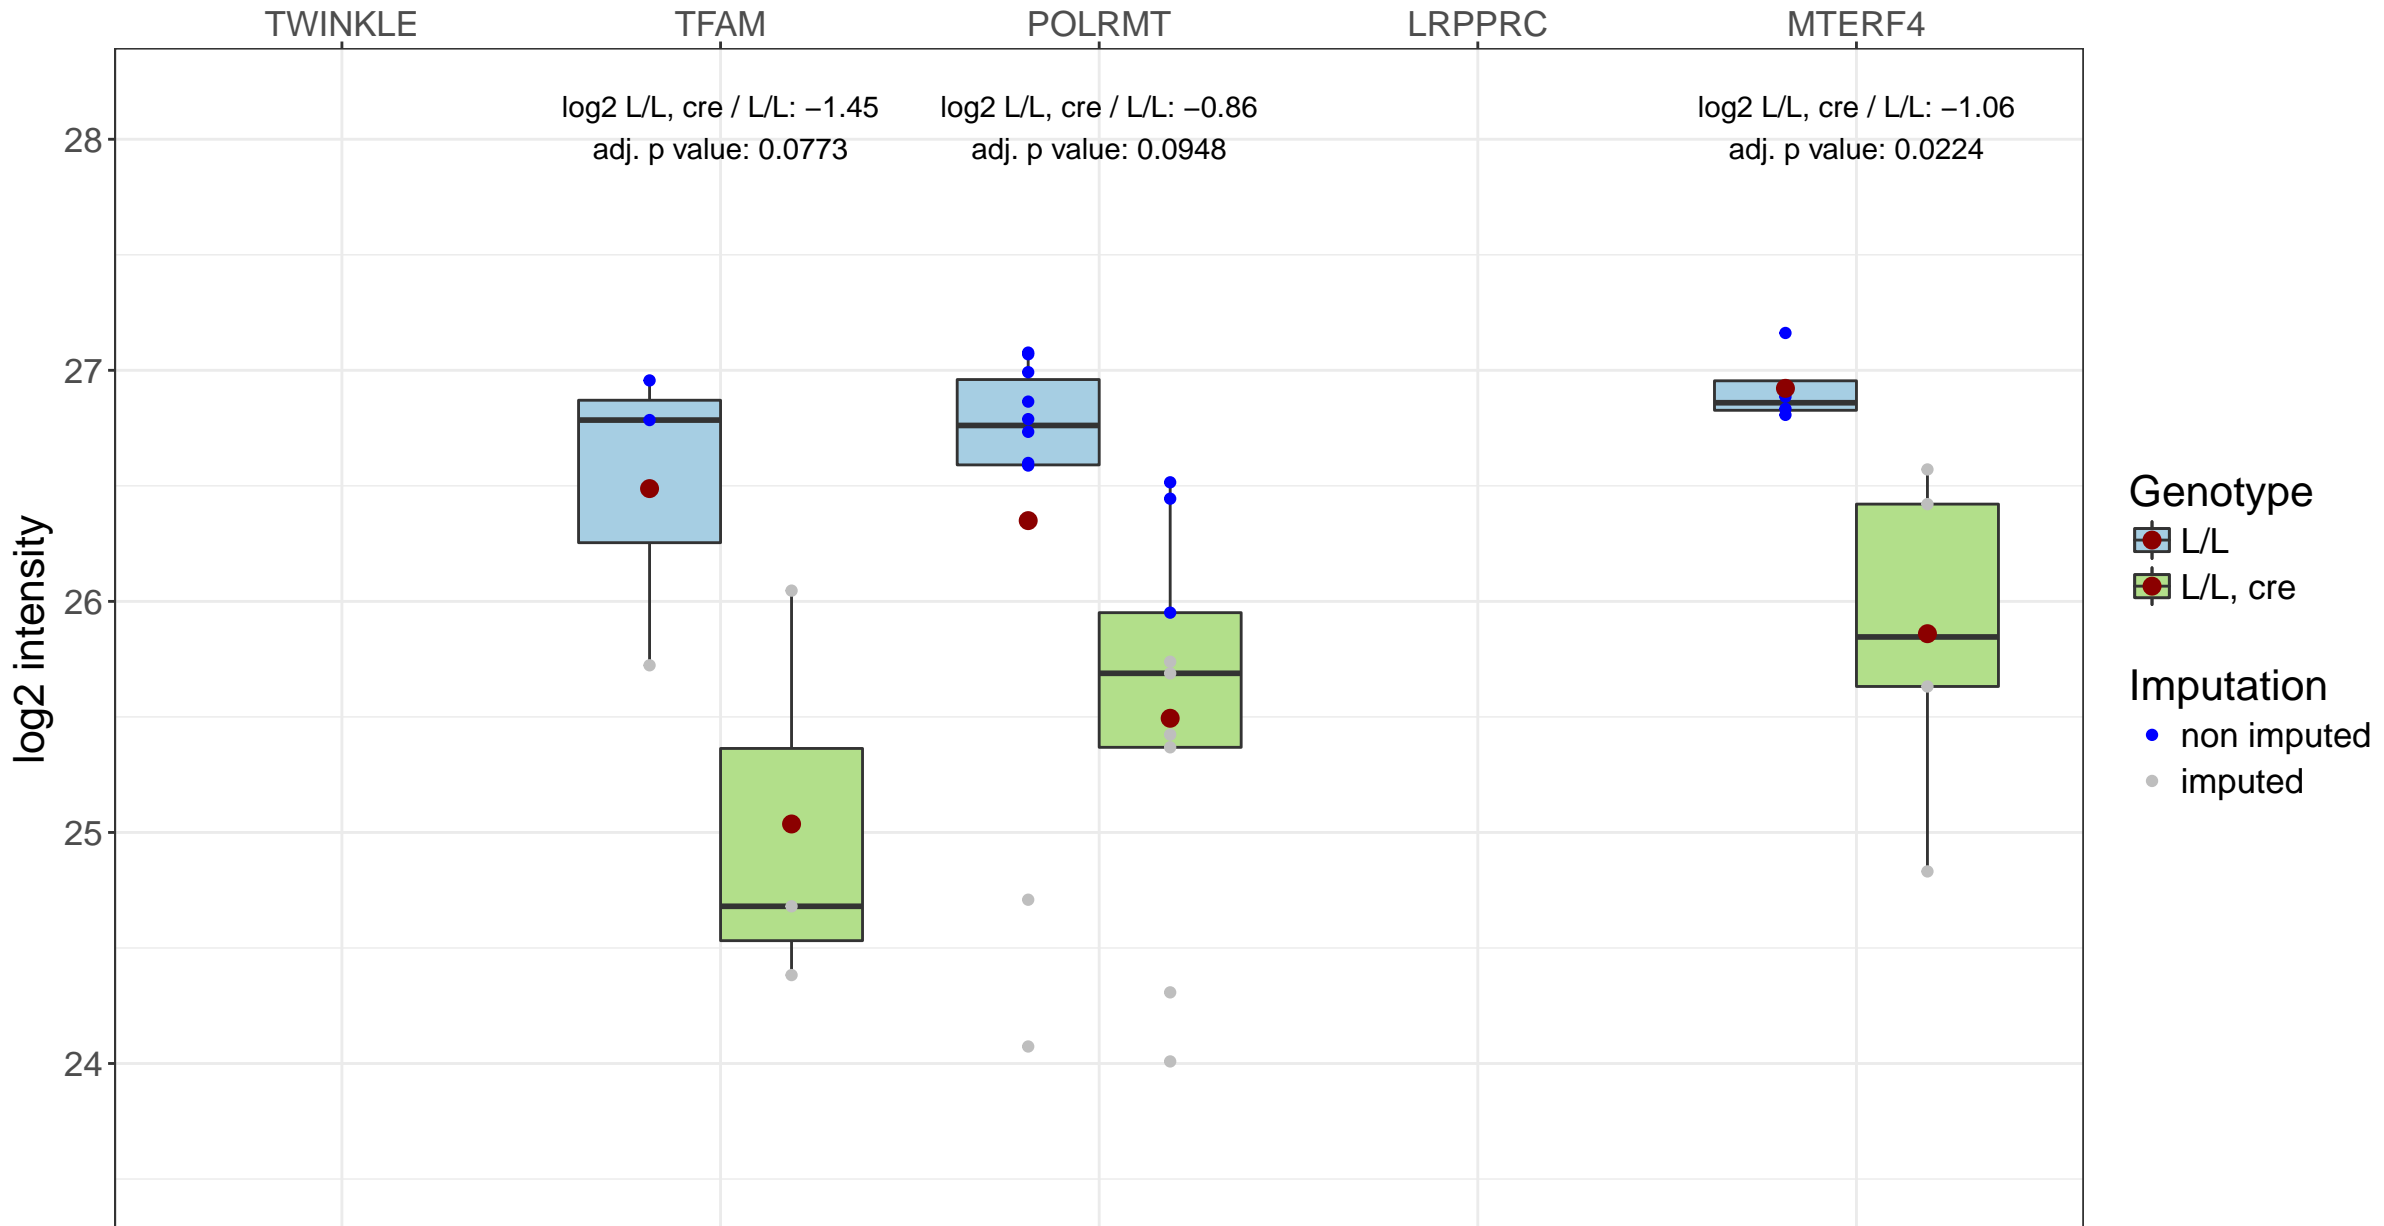

# TRAP1 / Q9CQN1

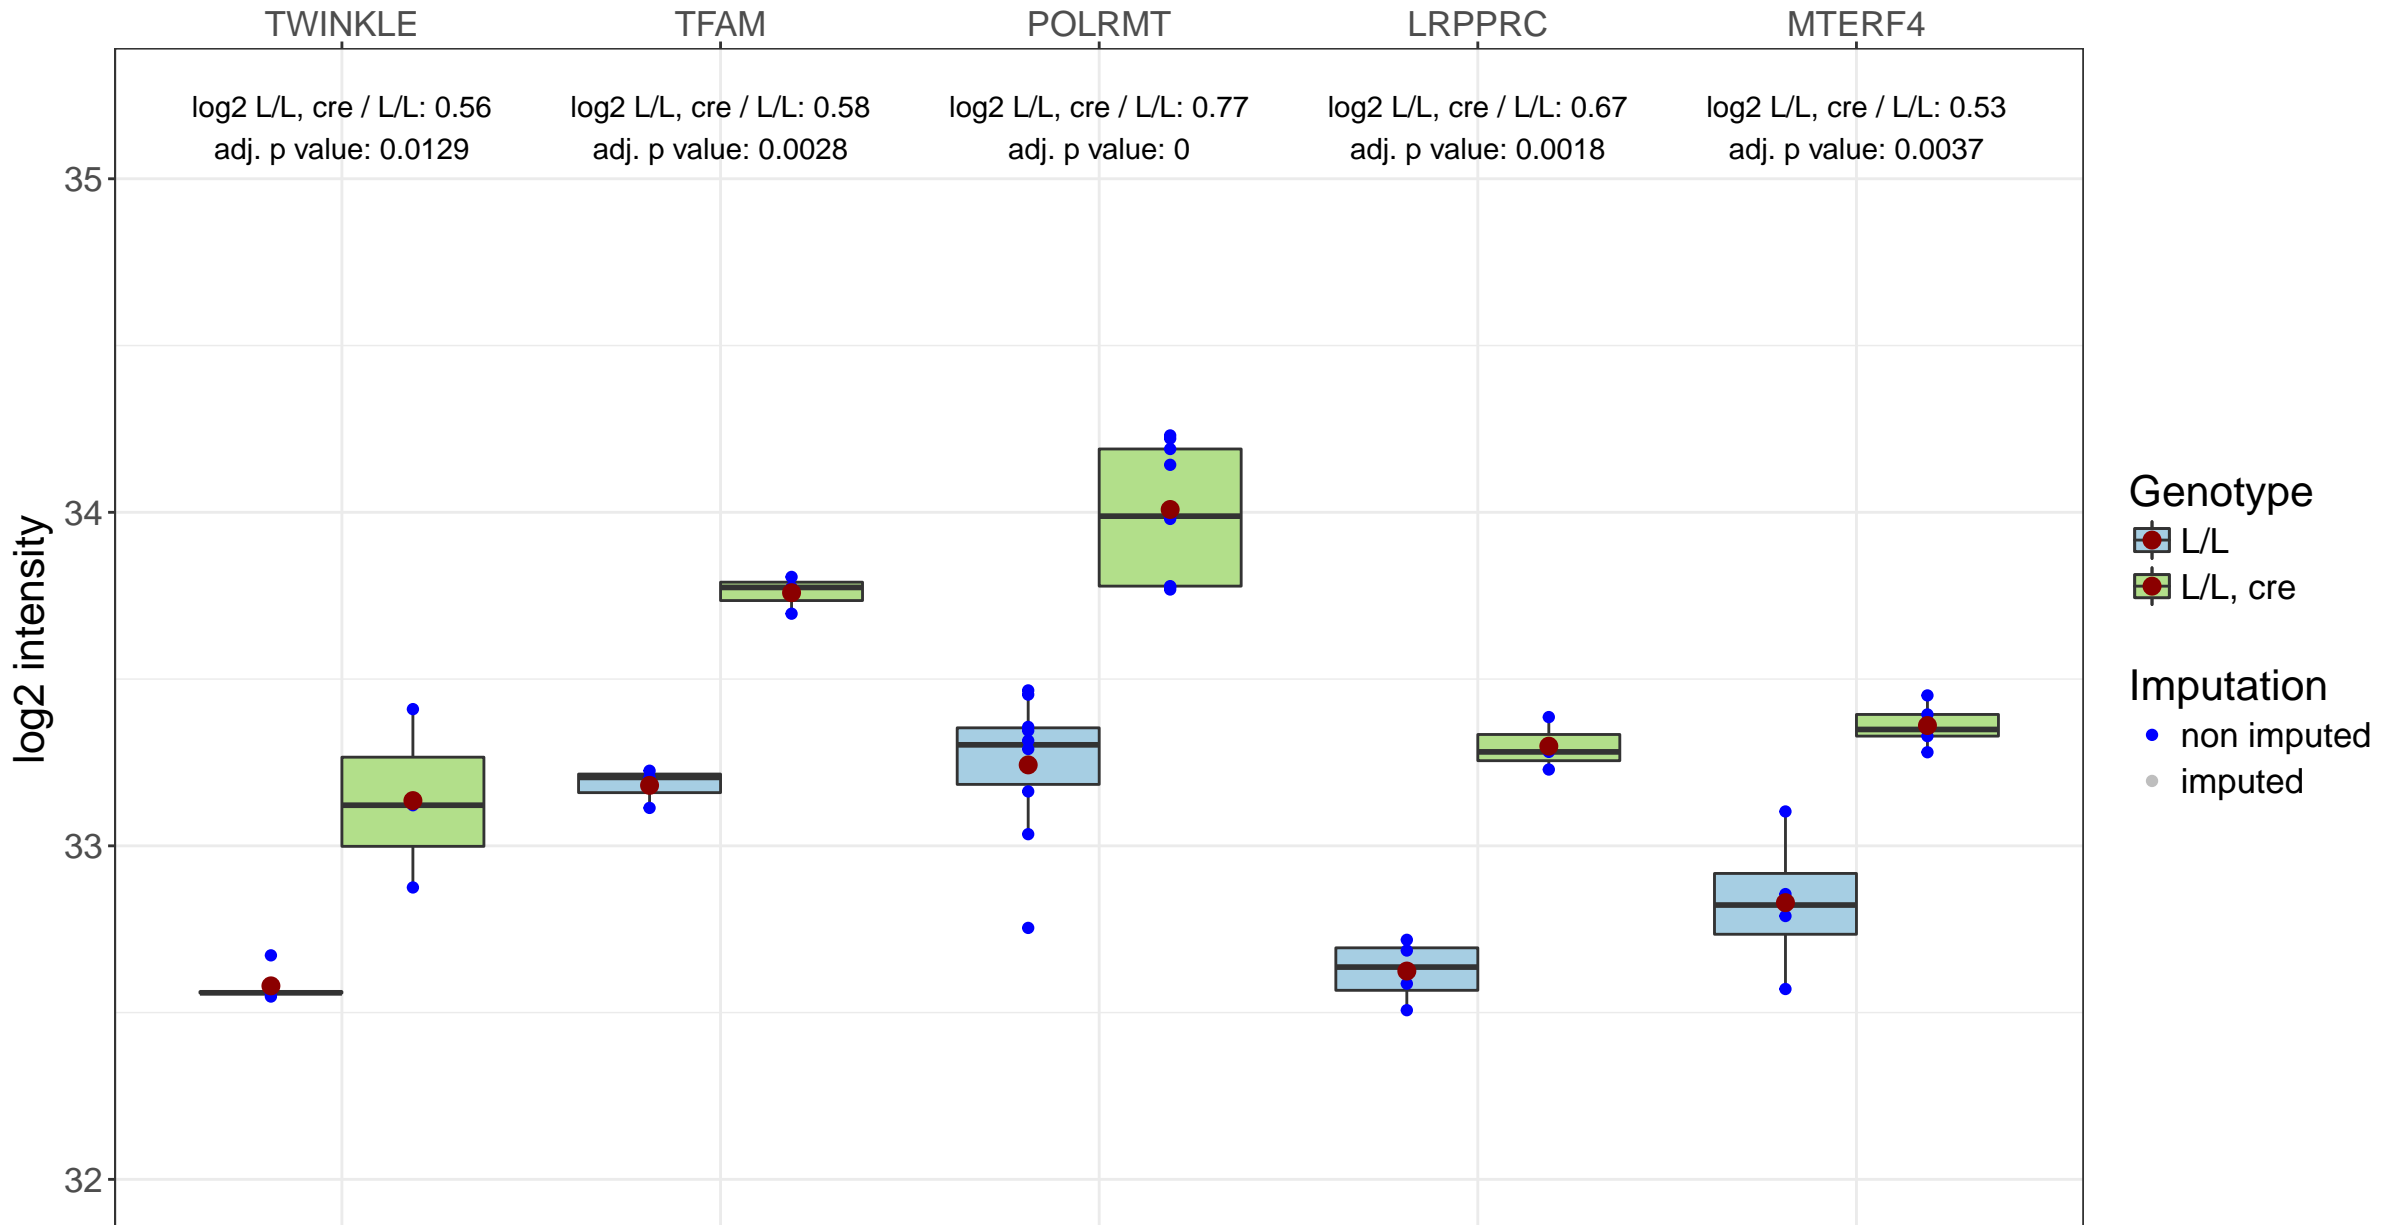



# TRIAP1 / Q9D8Z2

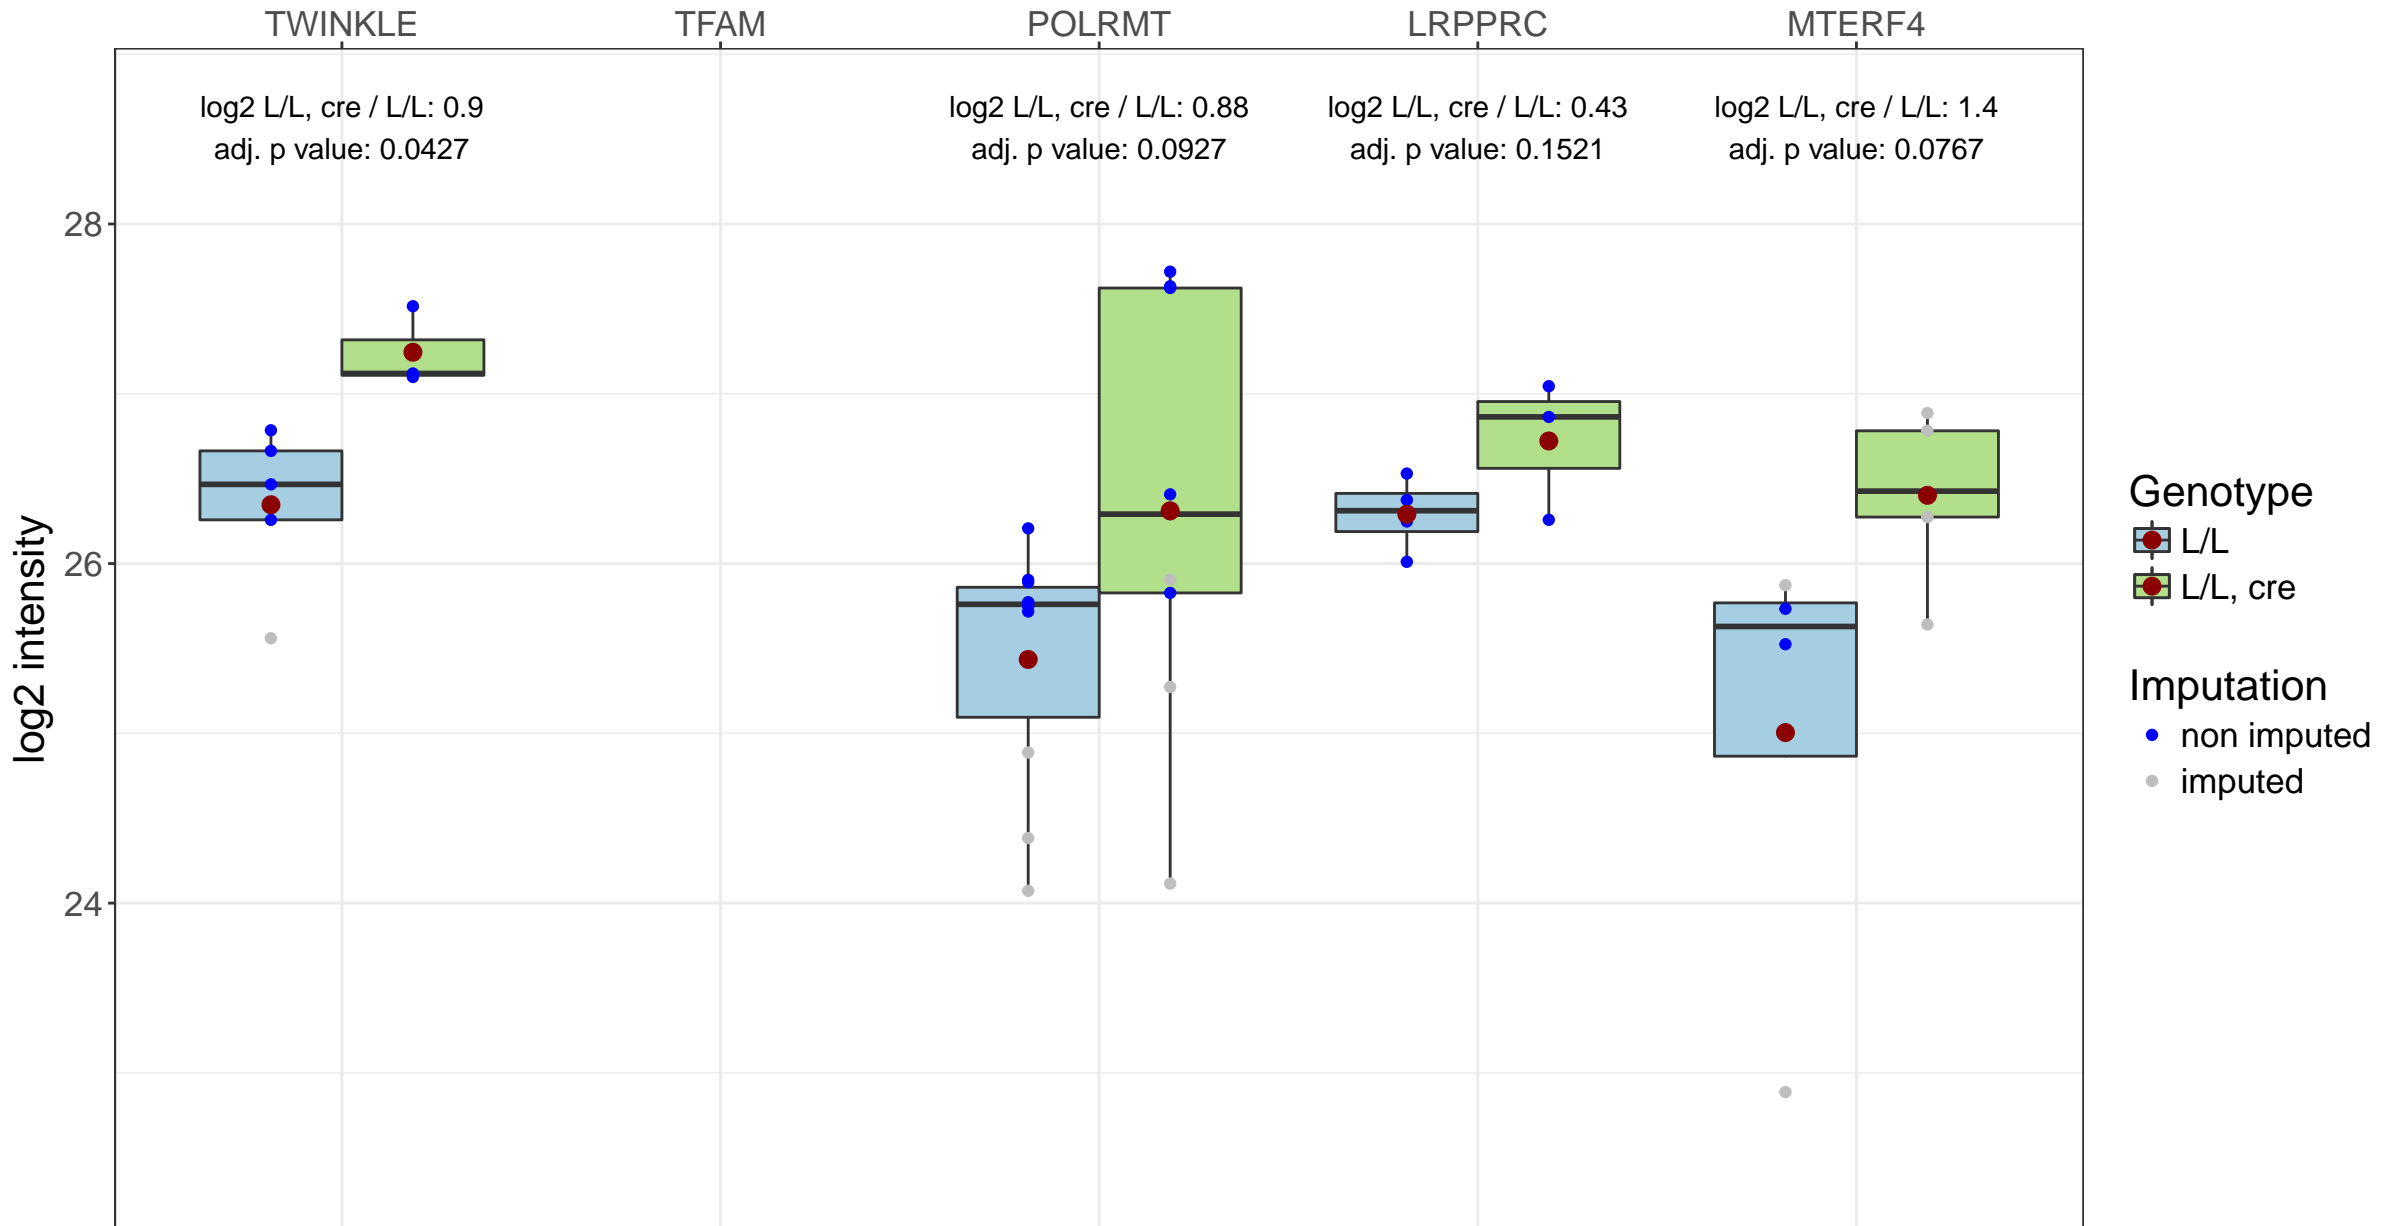

# TRIM72 / Q1XH17

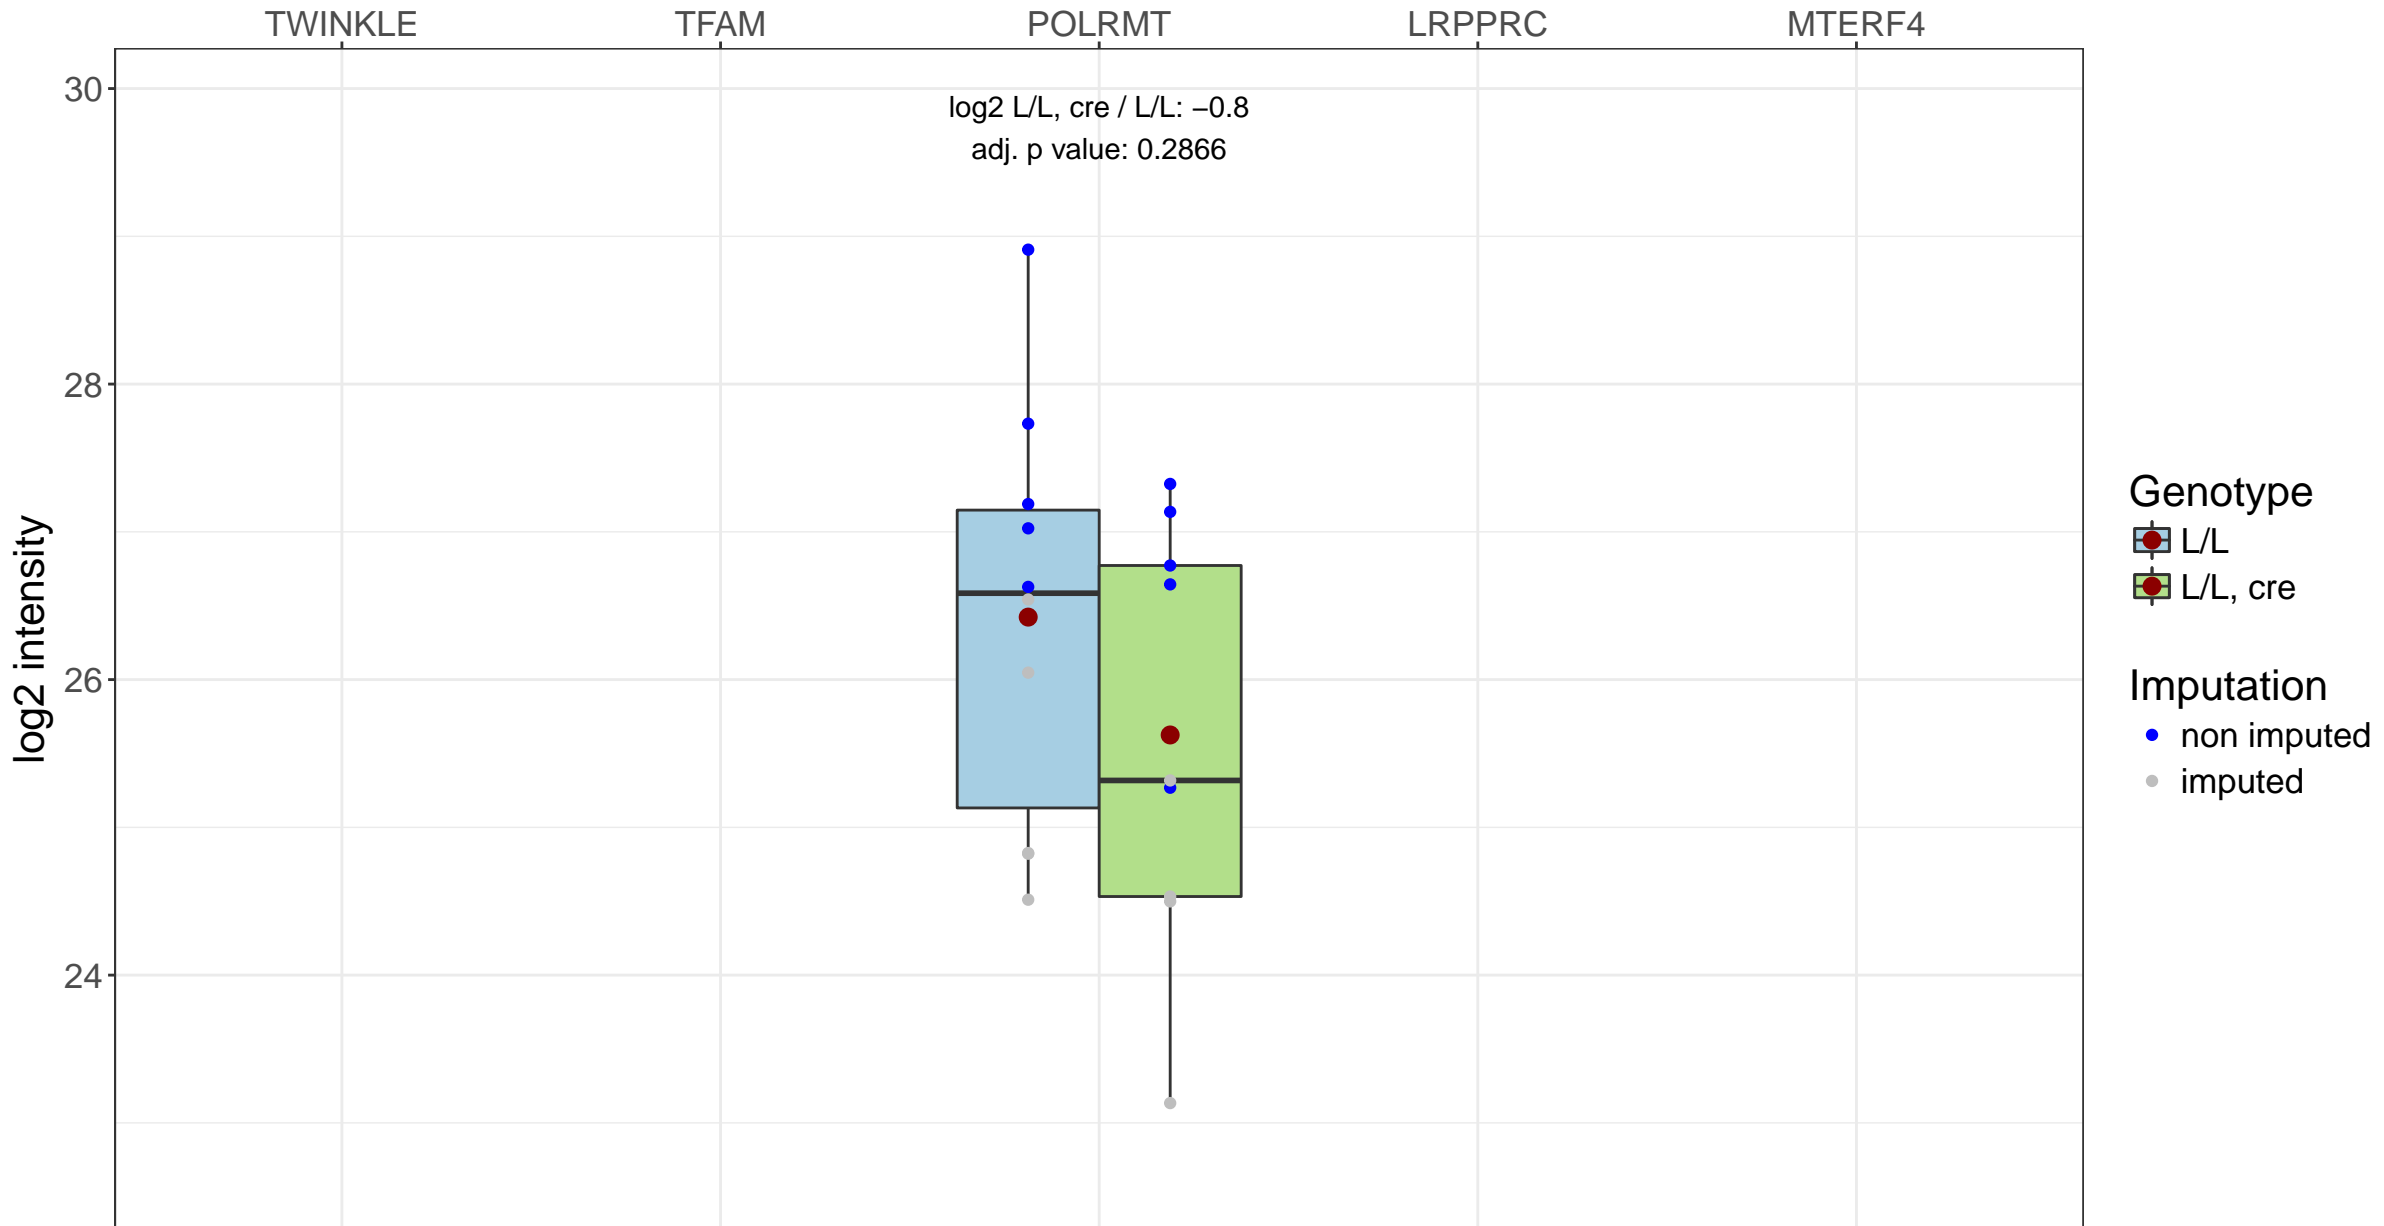

# TRMT10C / Q3UFY8

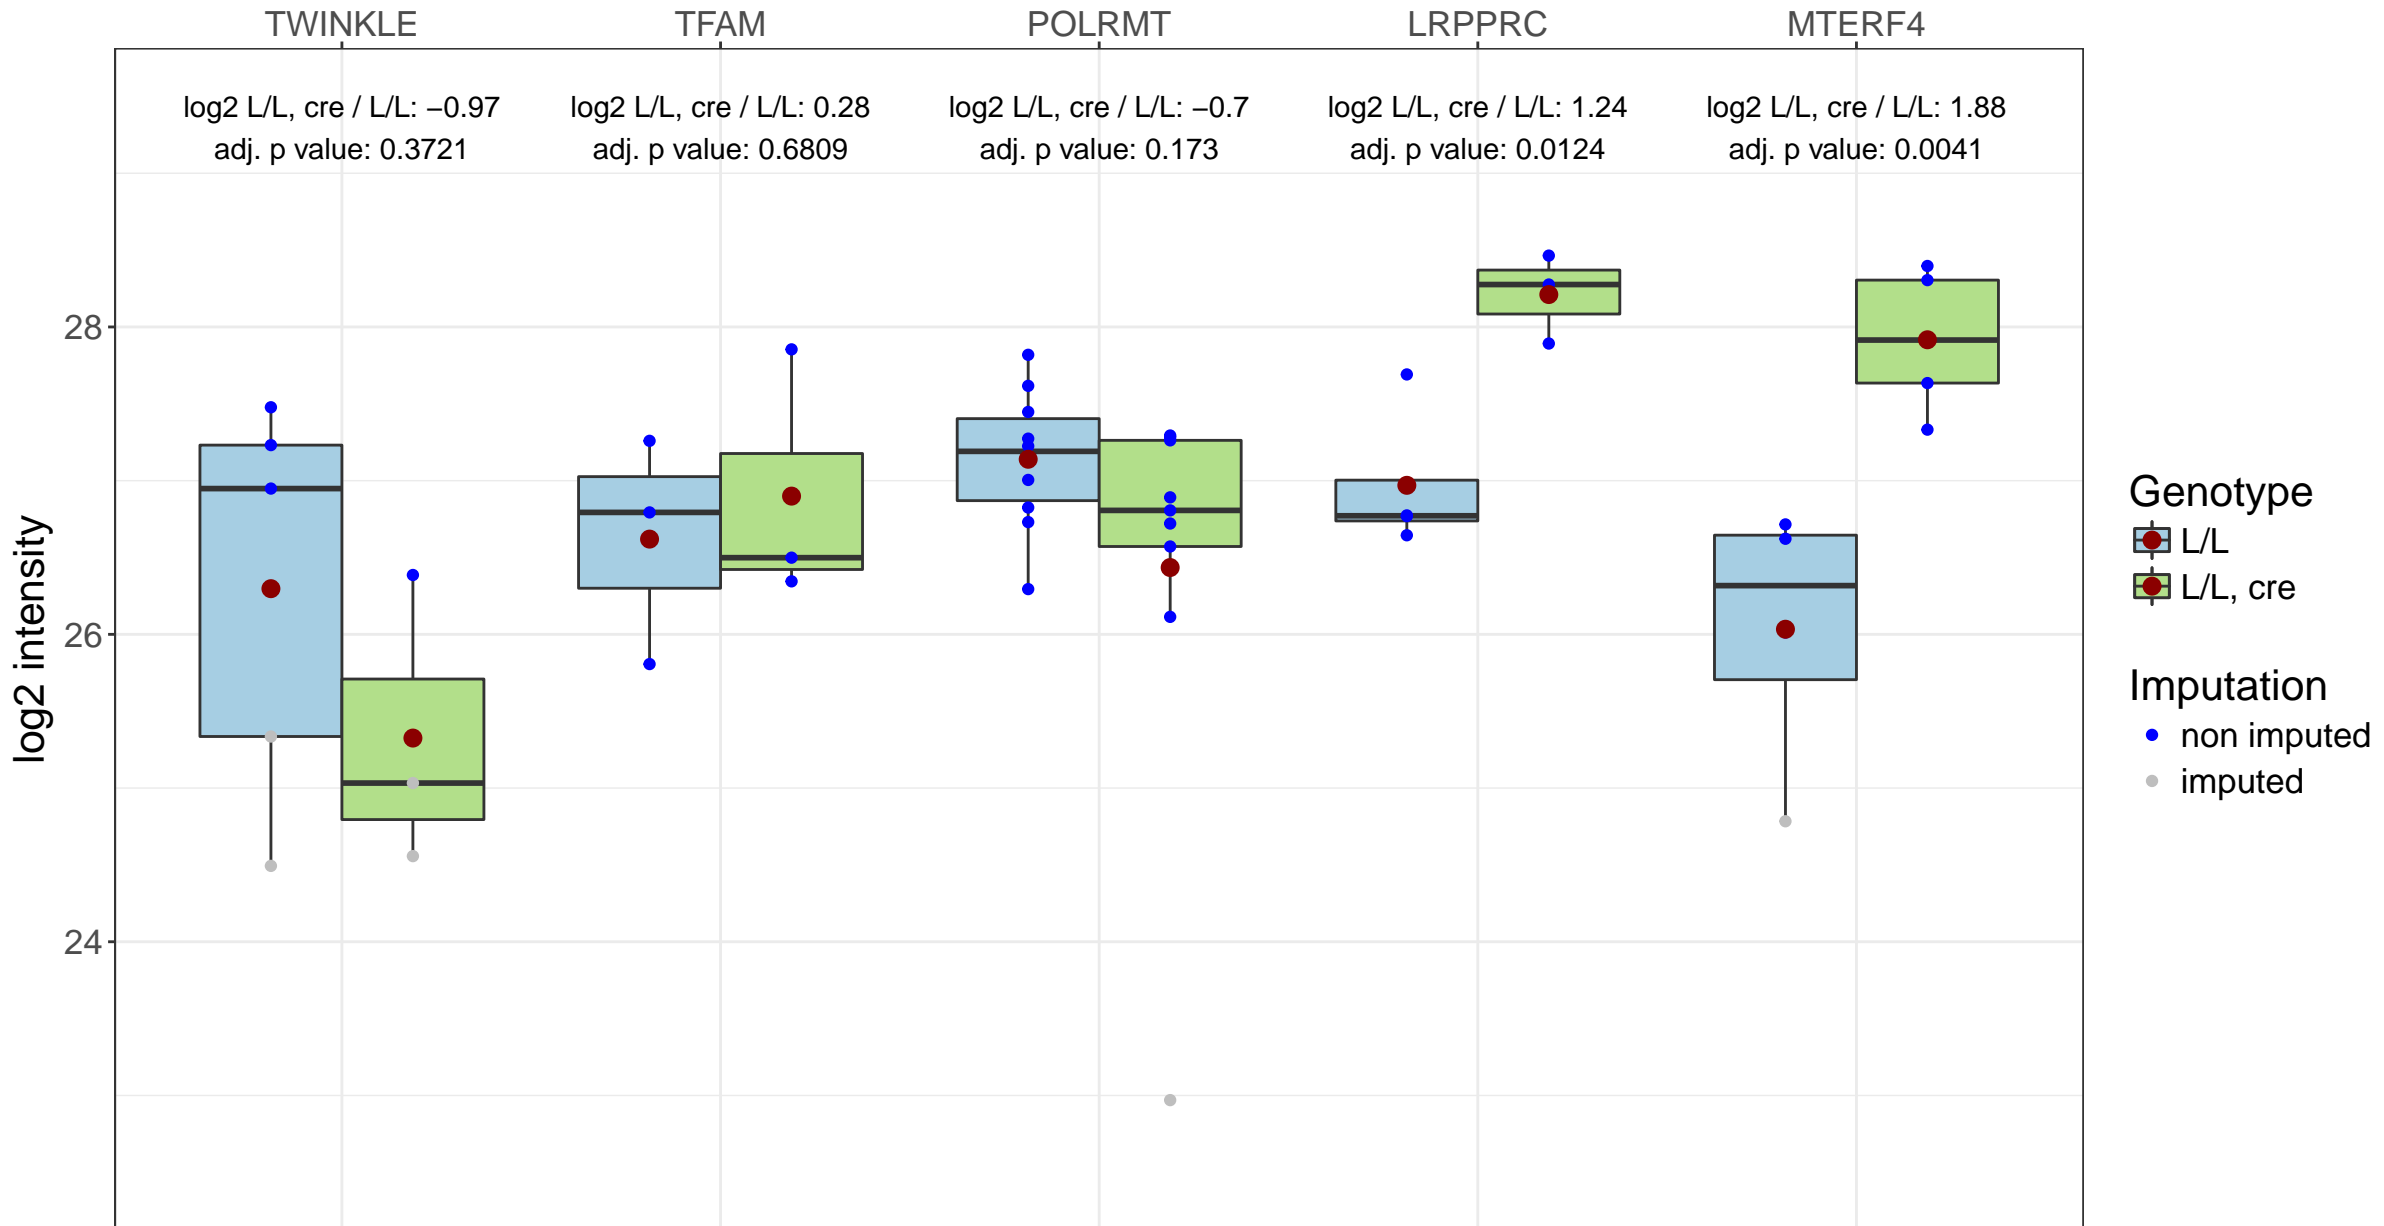

# TRMU / Q9DAT5

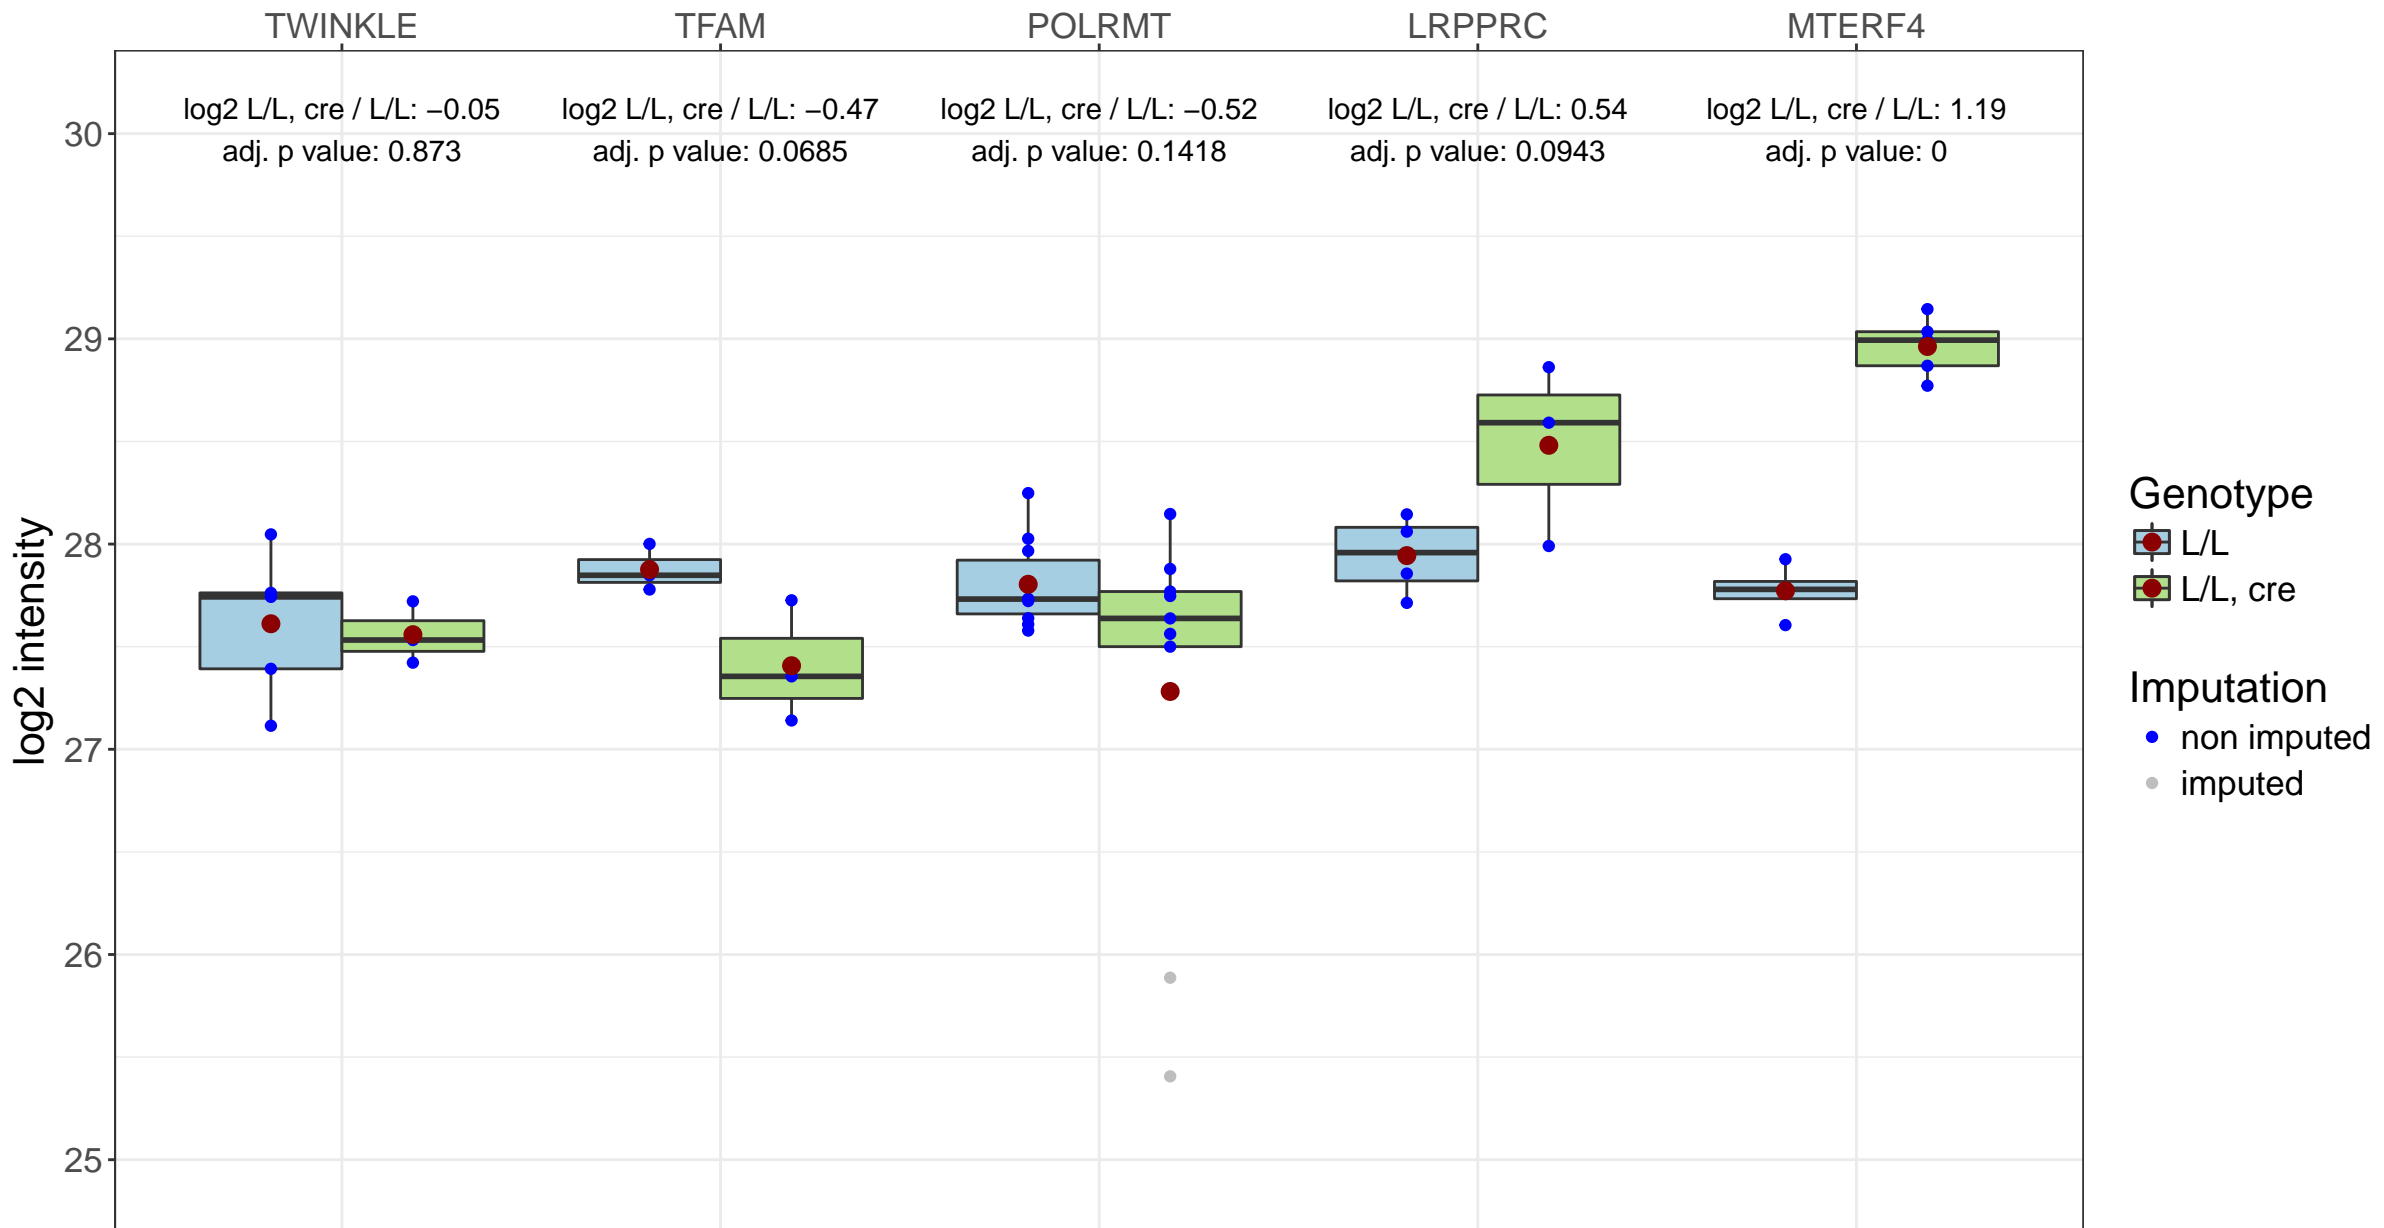

# TRNT1 / Q8K1J6

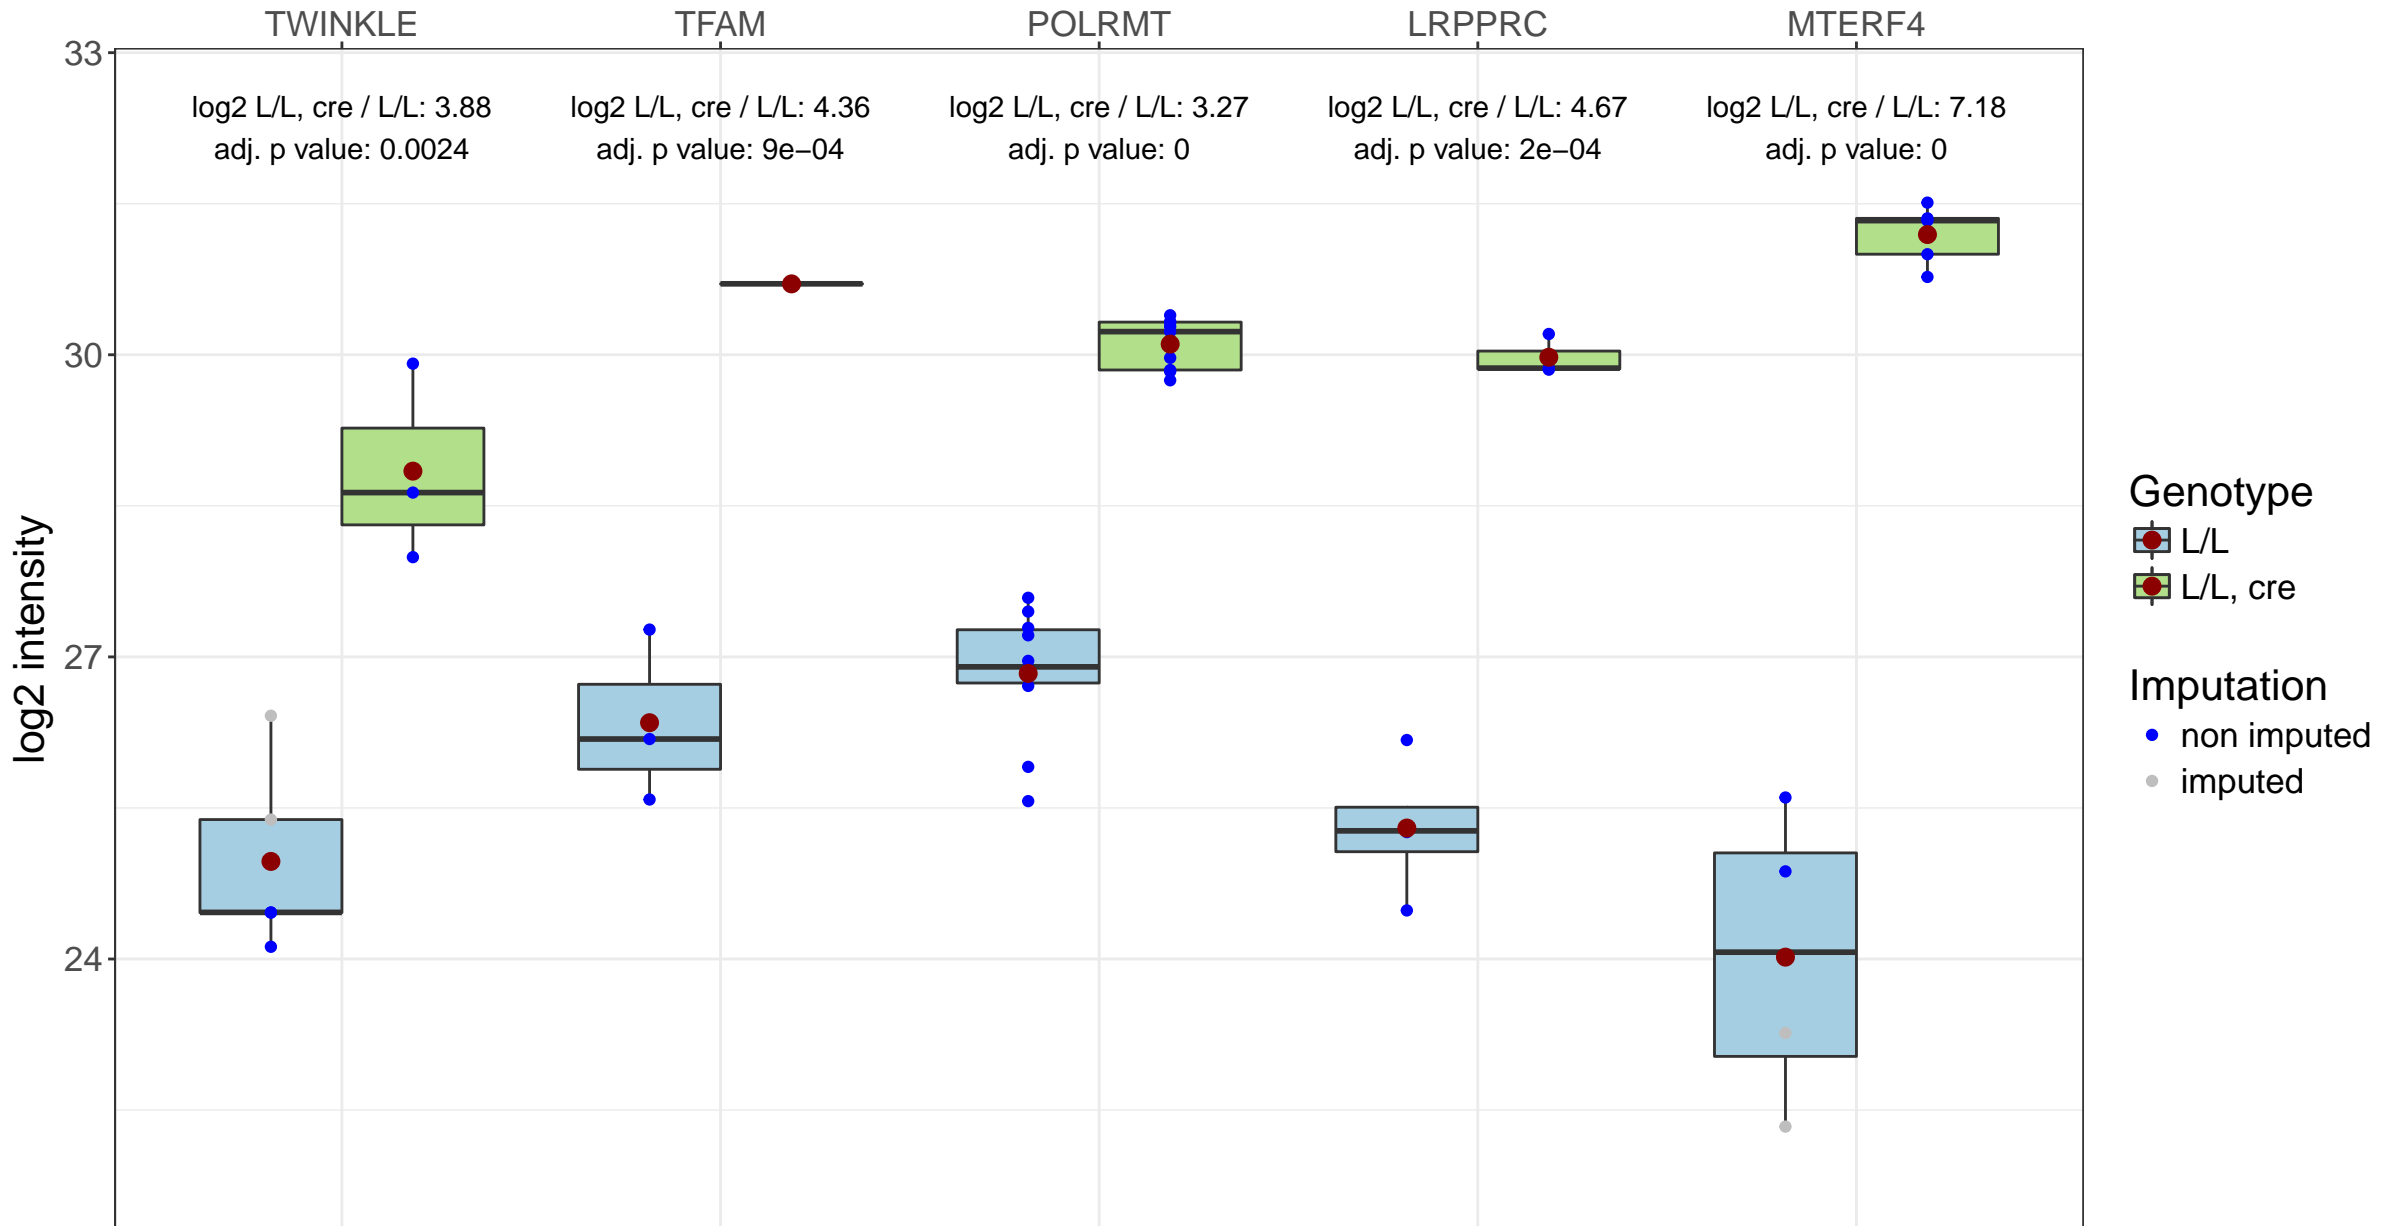

# TRY10 / Q792Z1

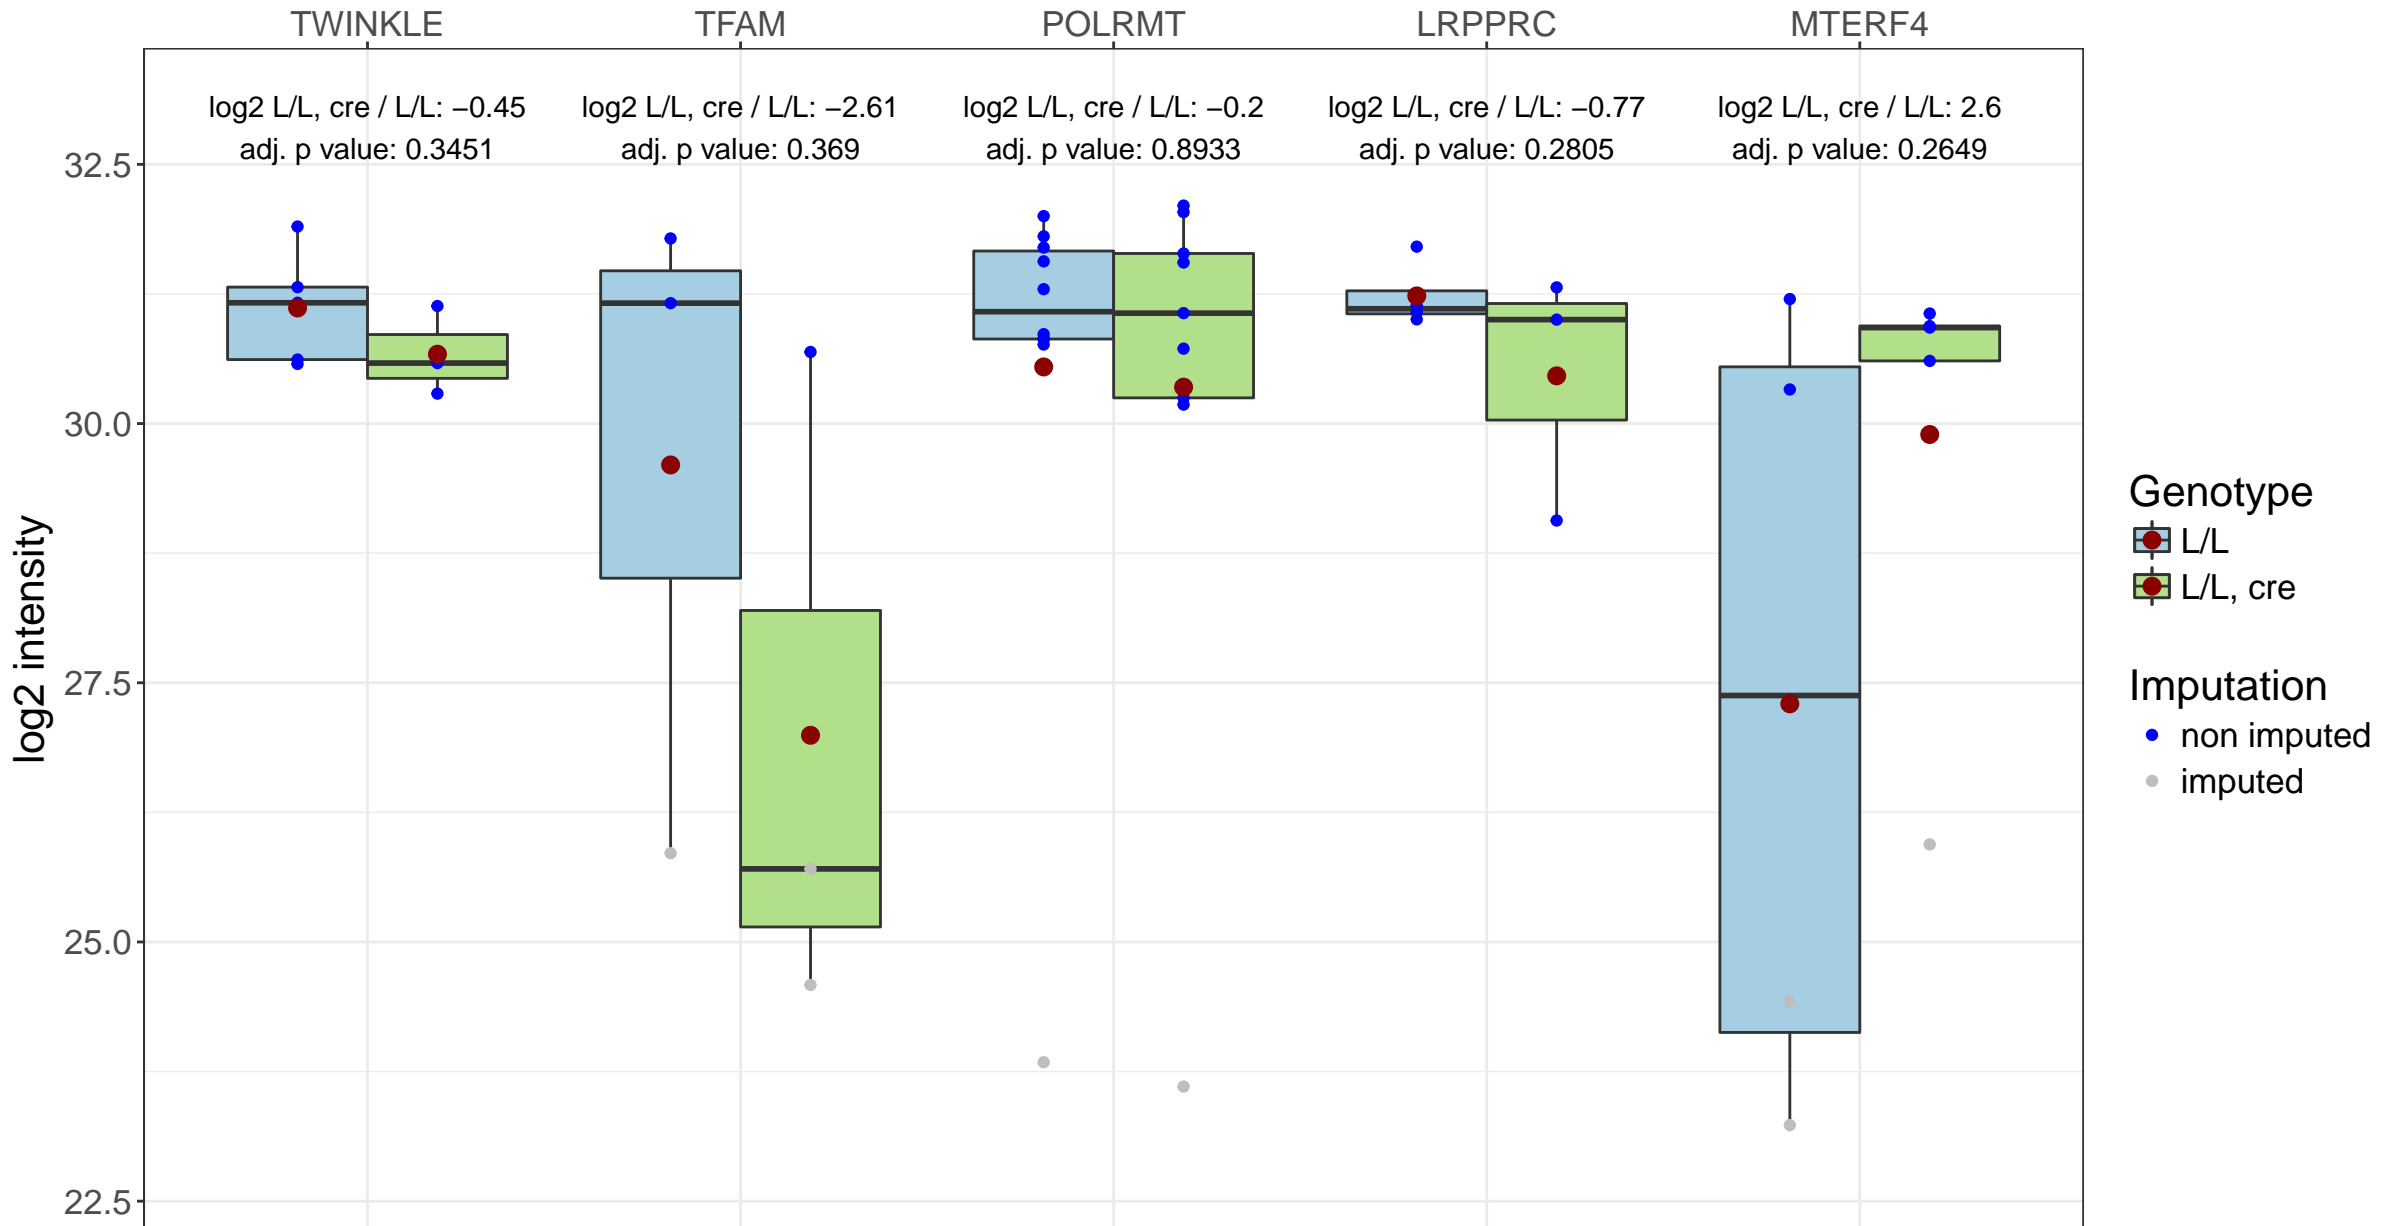

# TSFM / Q9CZR8

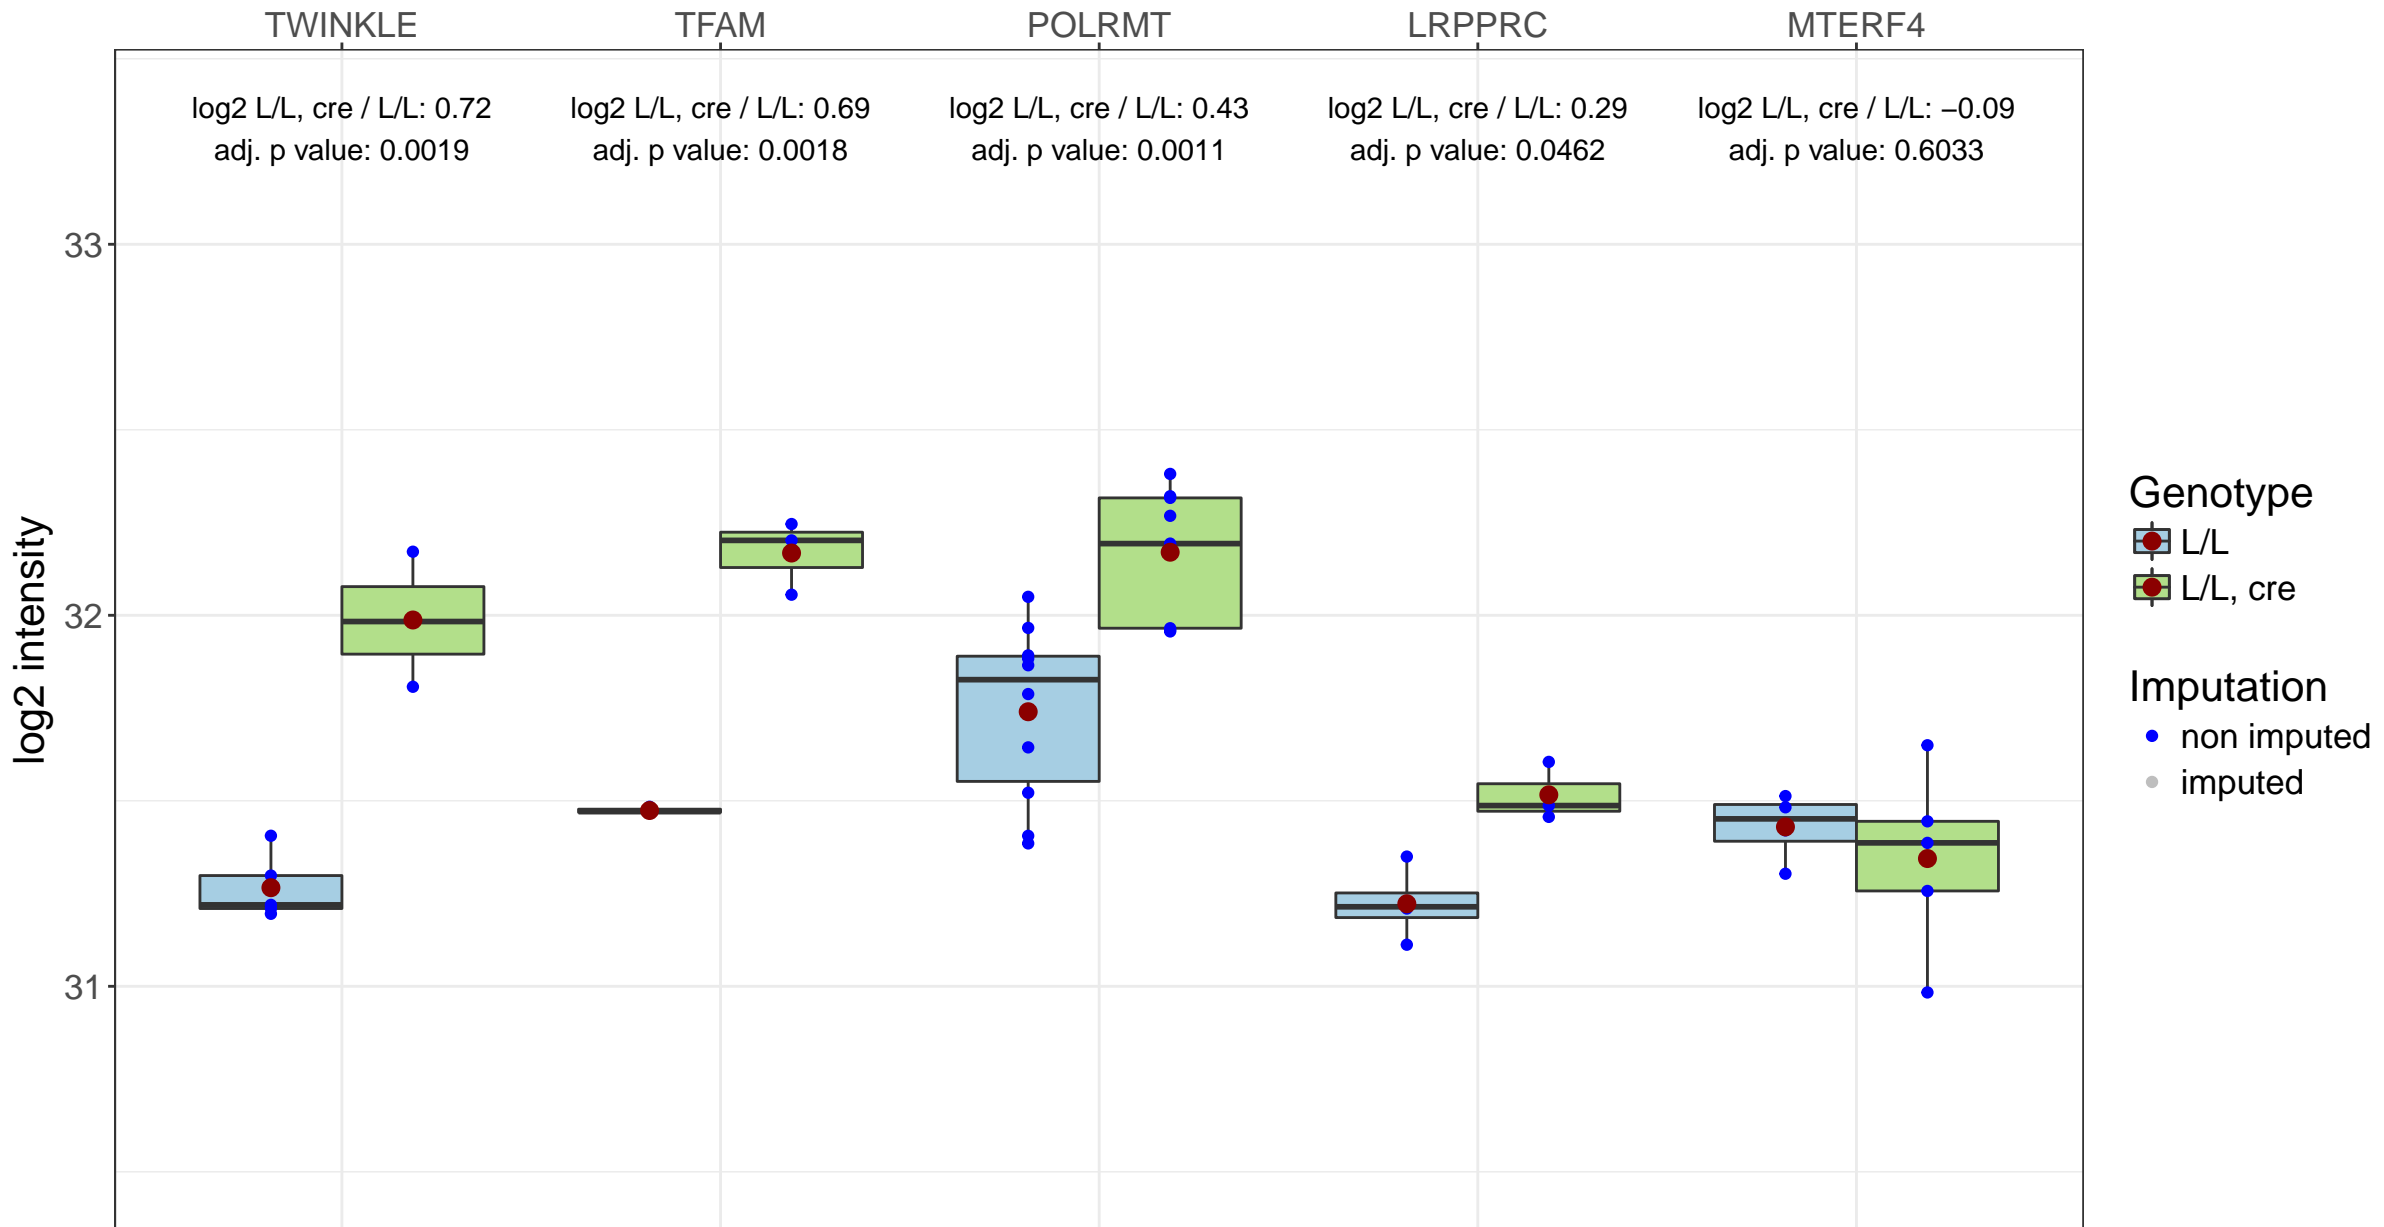

# TSPO / P50637

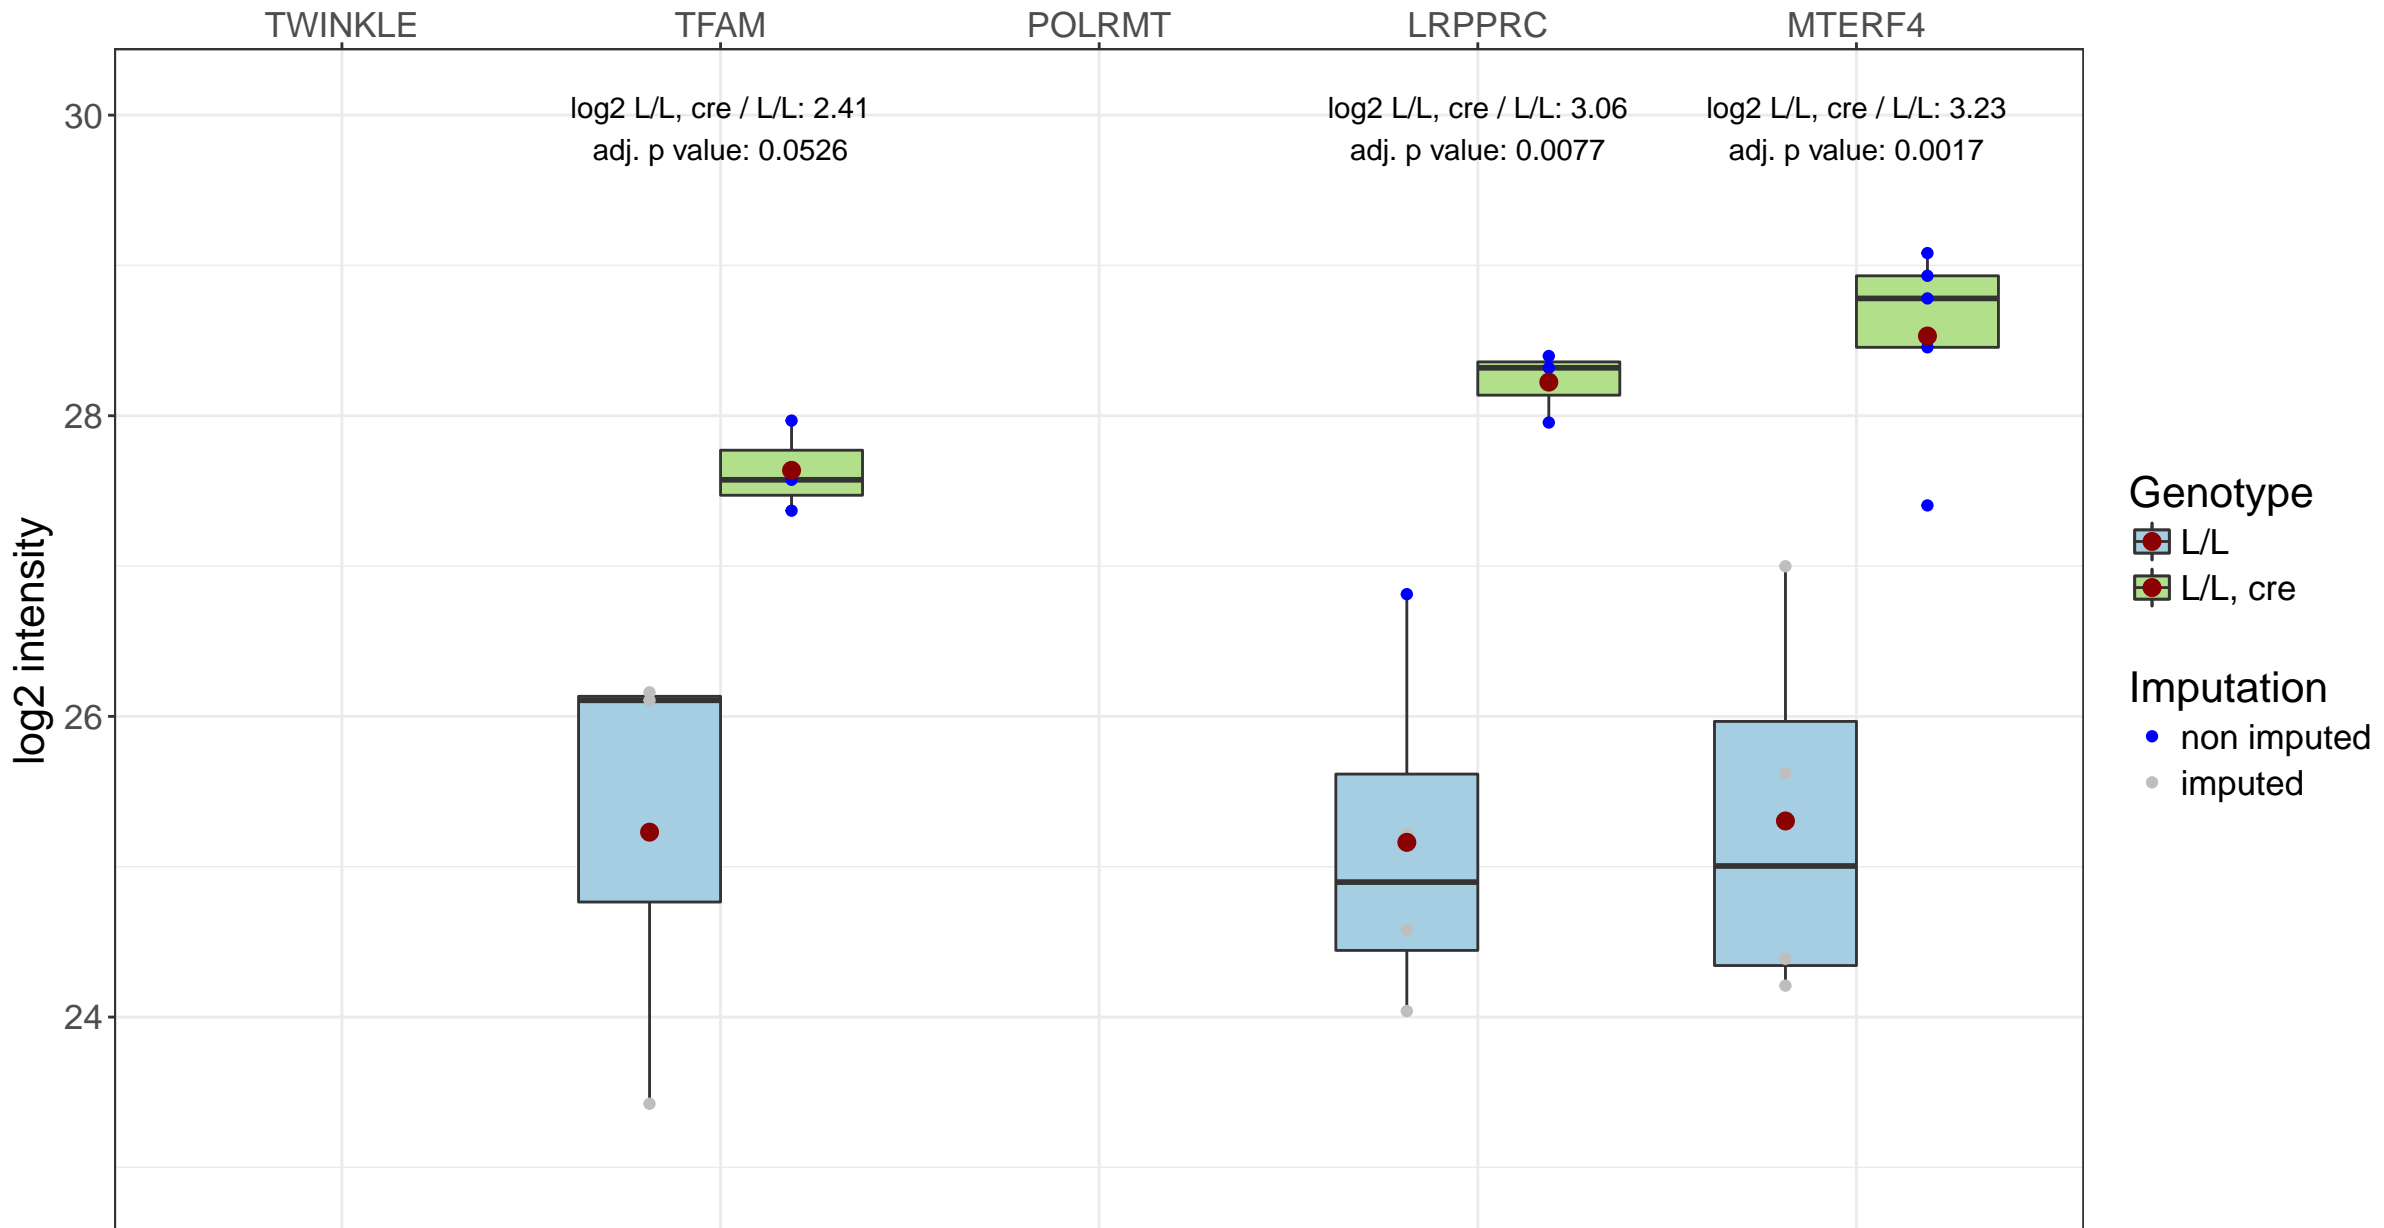



# TST / P52196

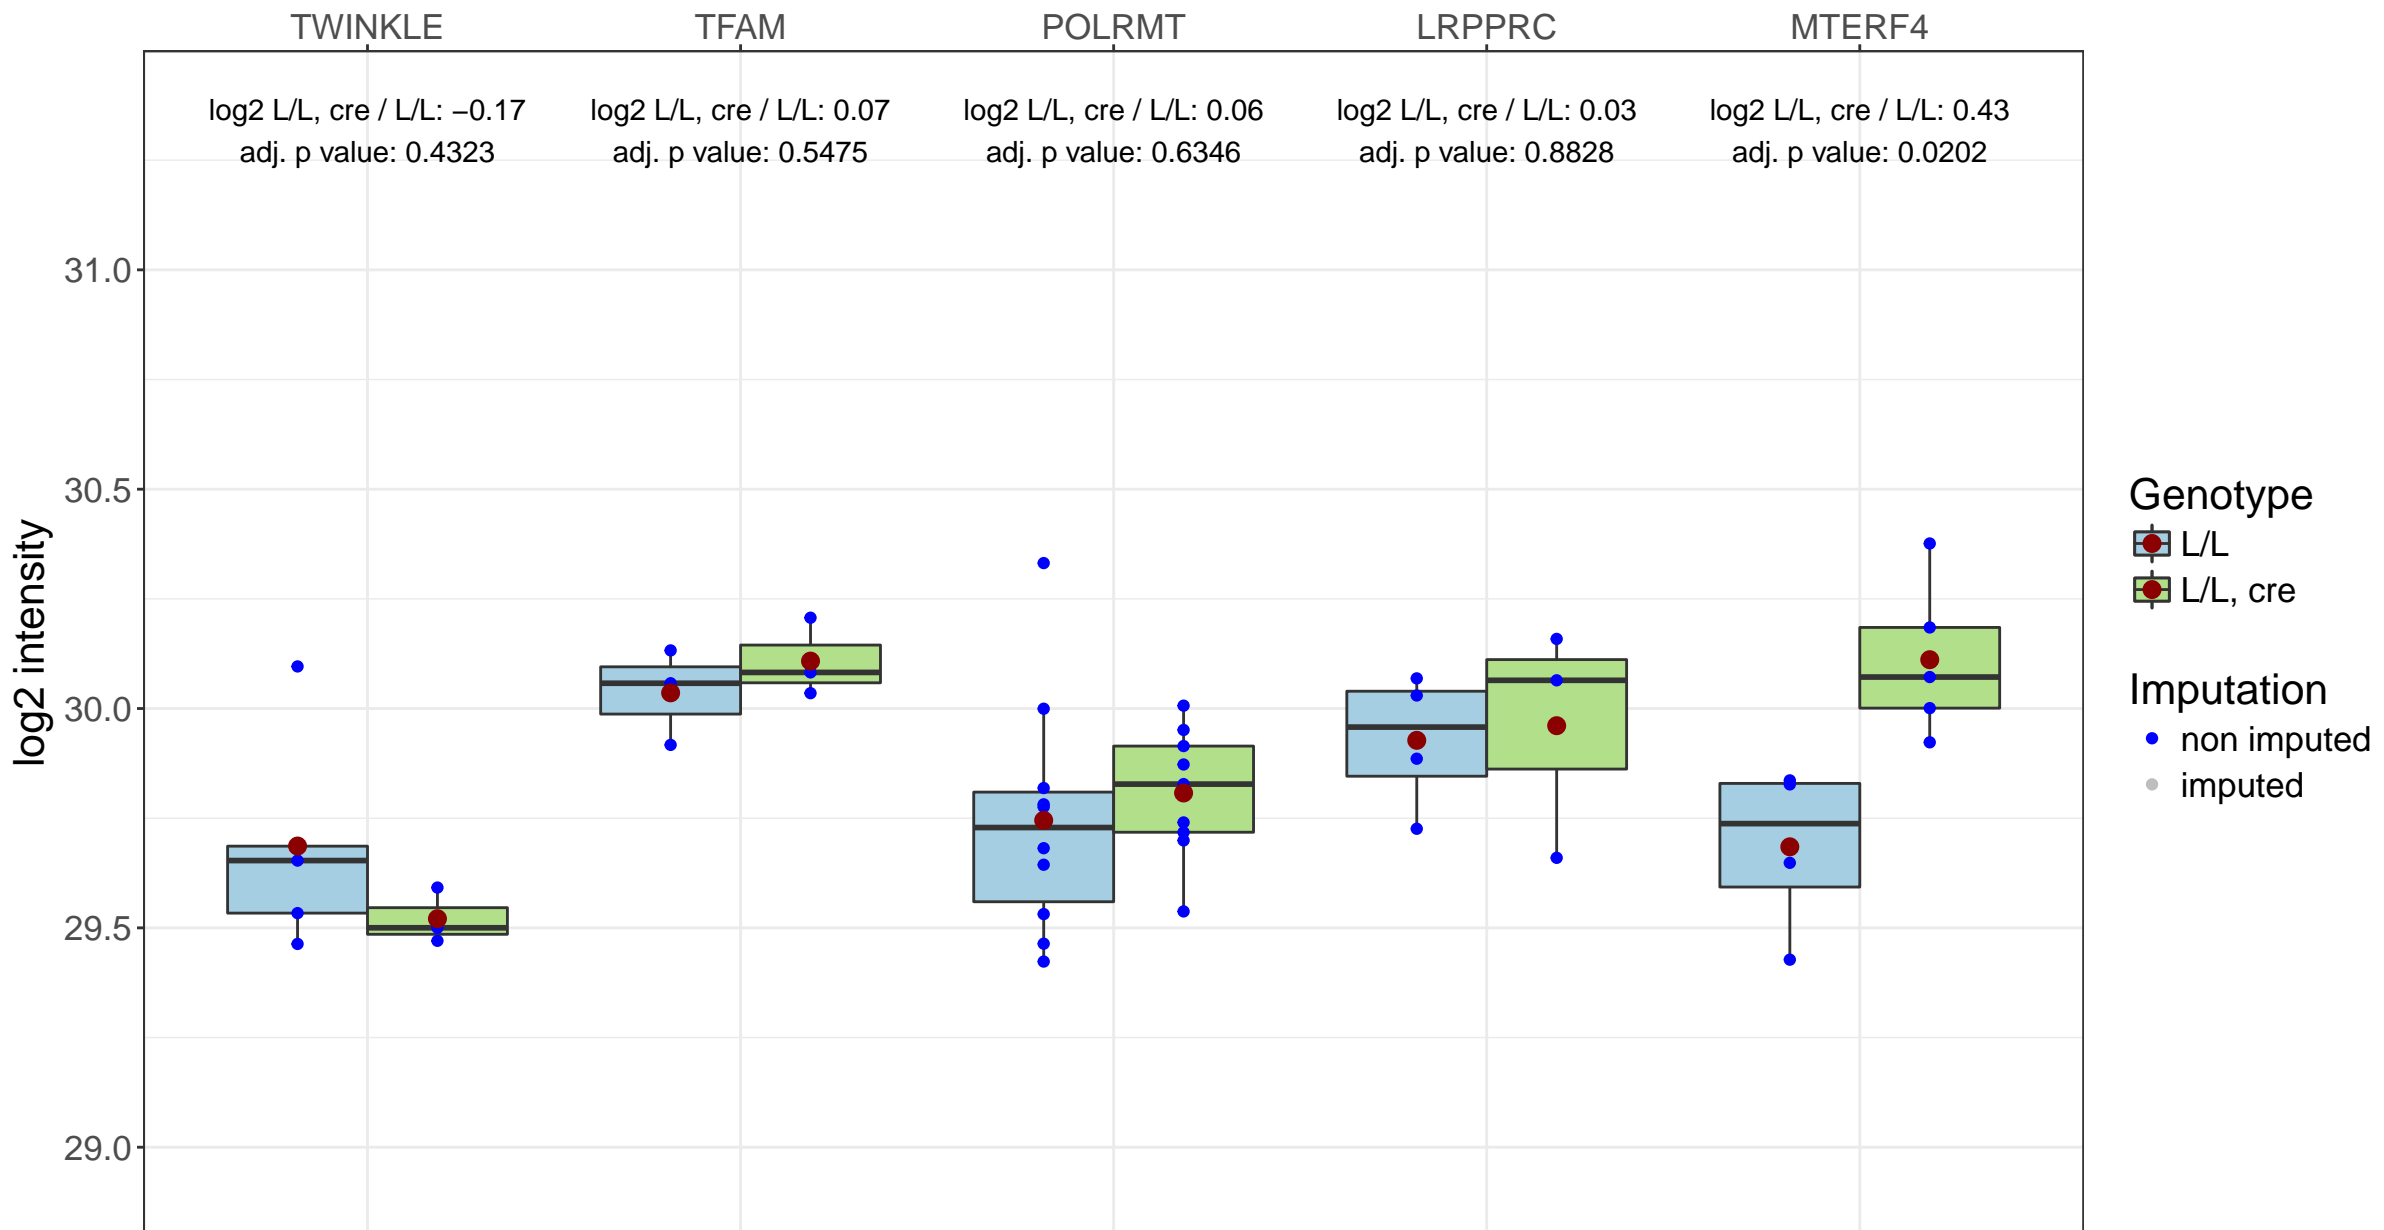

# TSTD3 / Q9D0B5

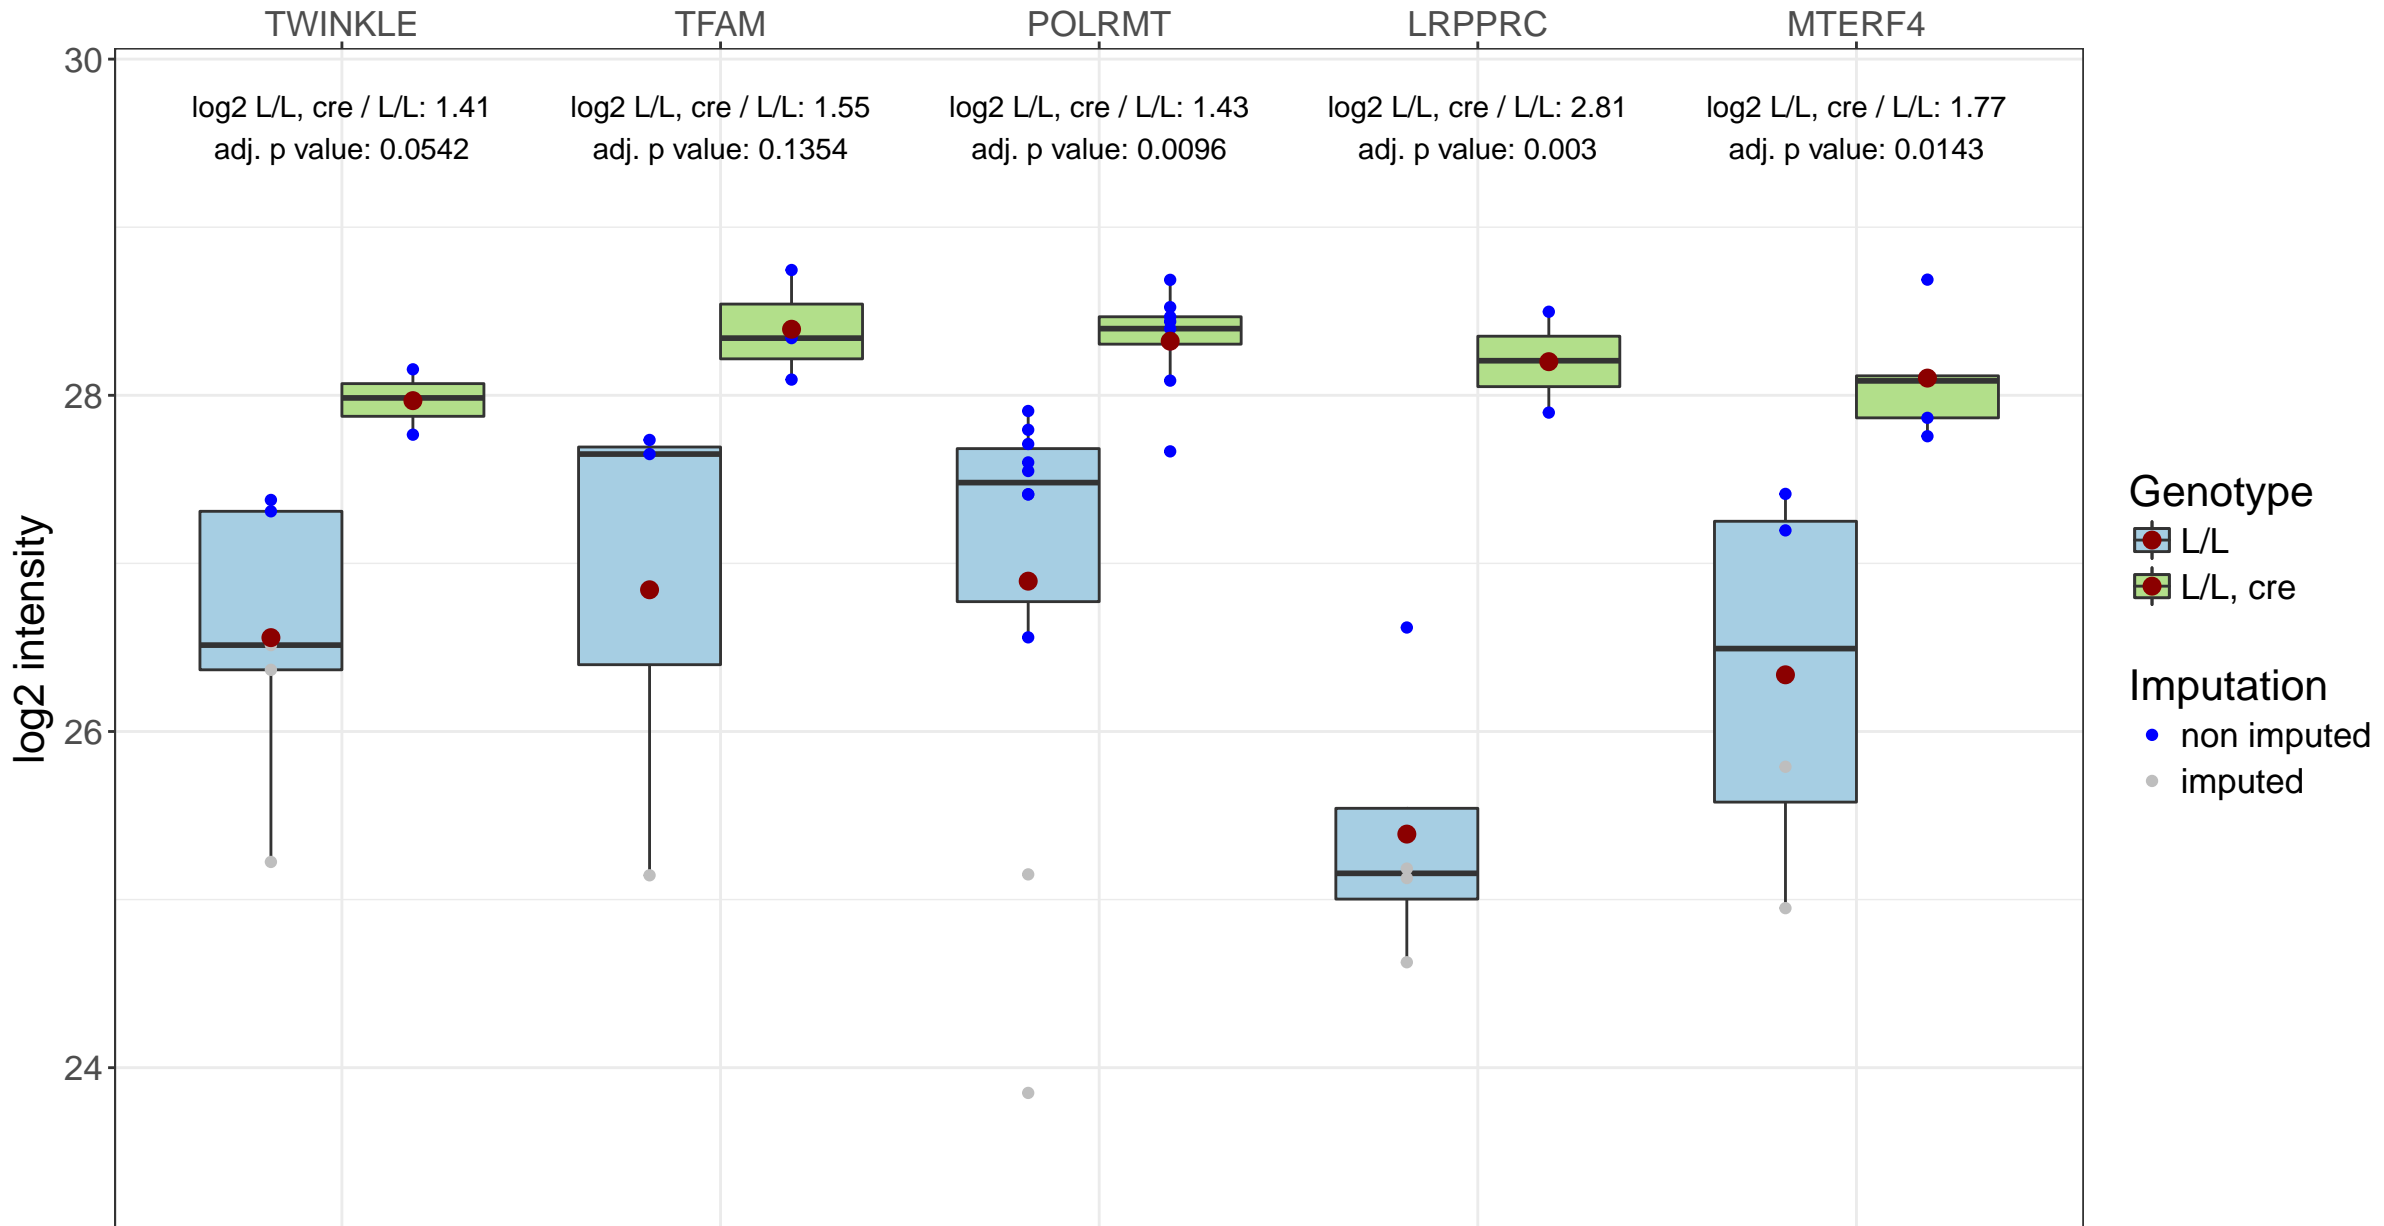

# TTC19 / Q8CC21

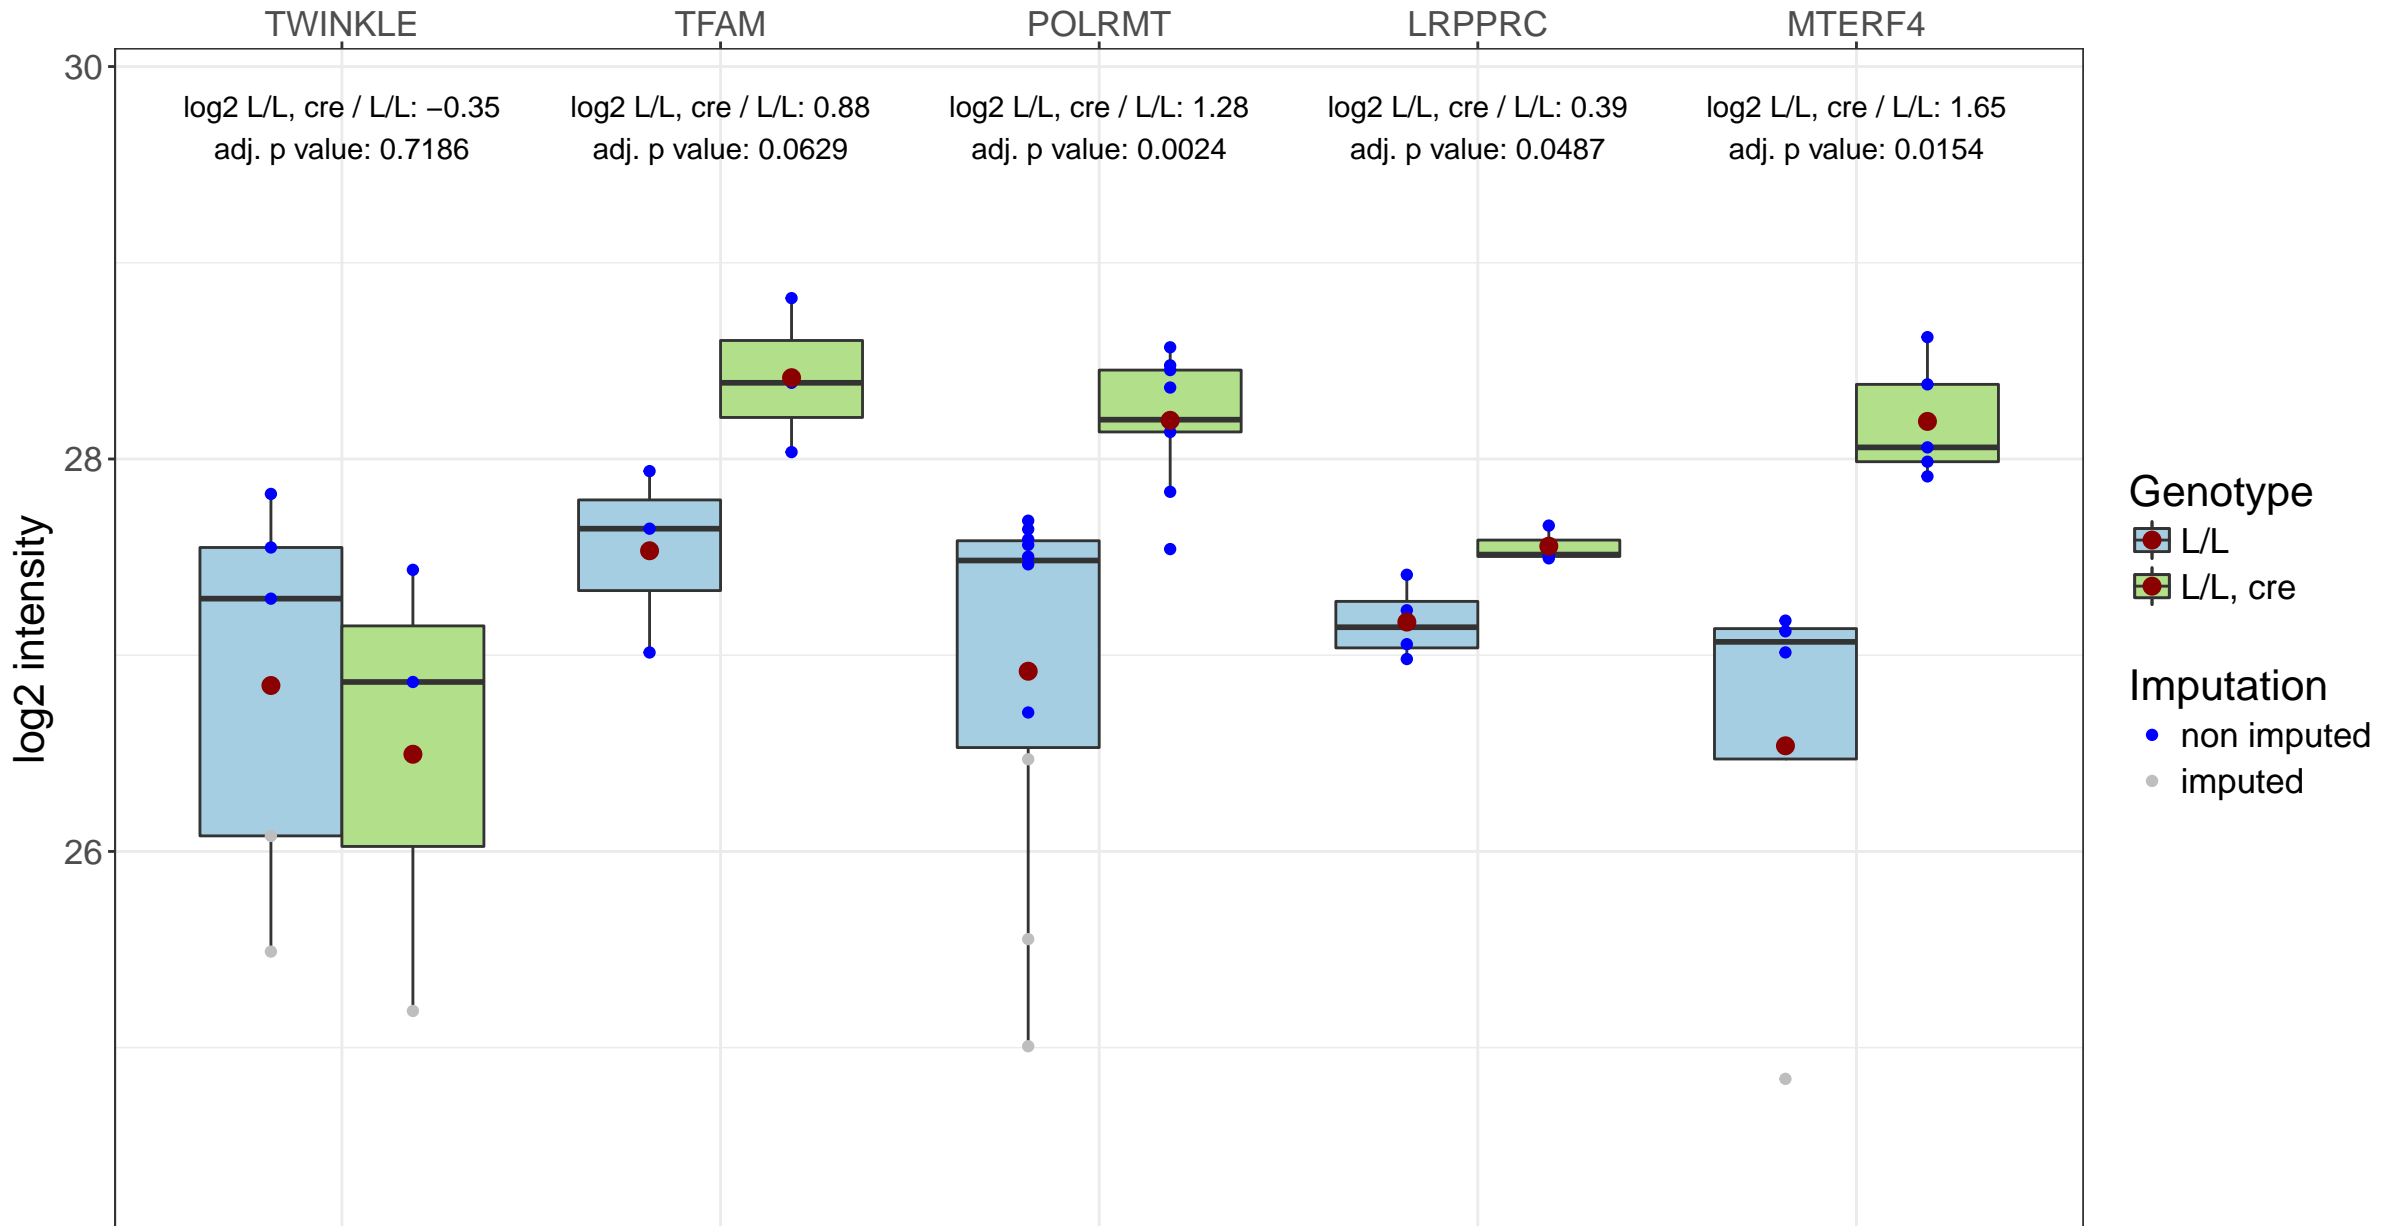

# TUBA1B / P05213

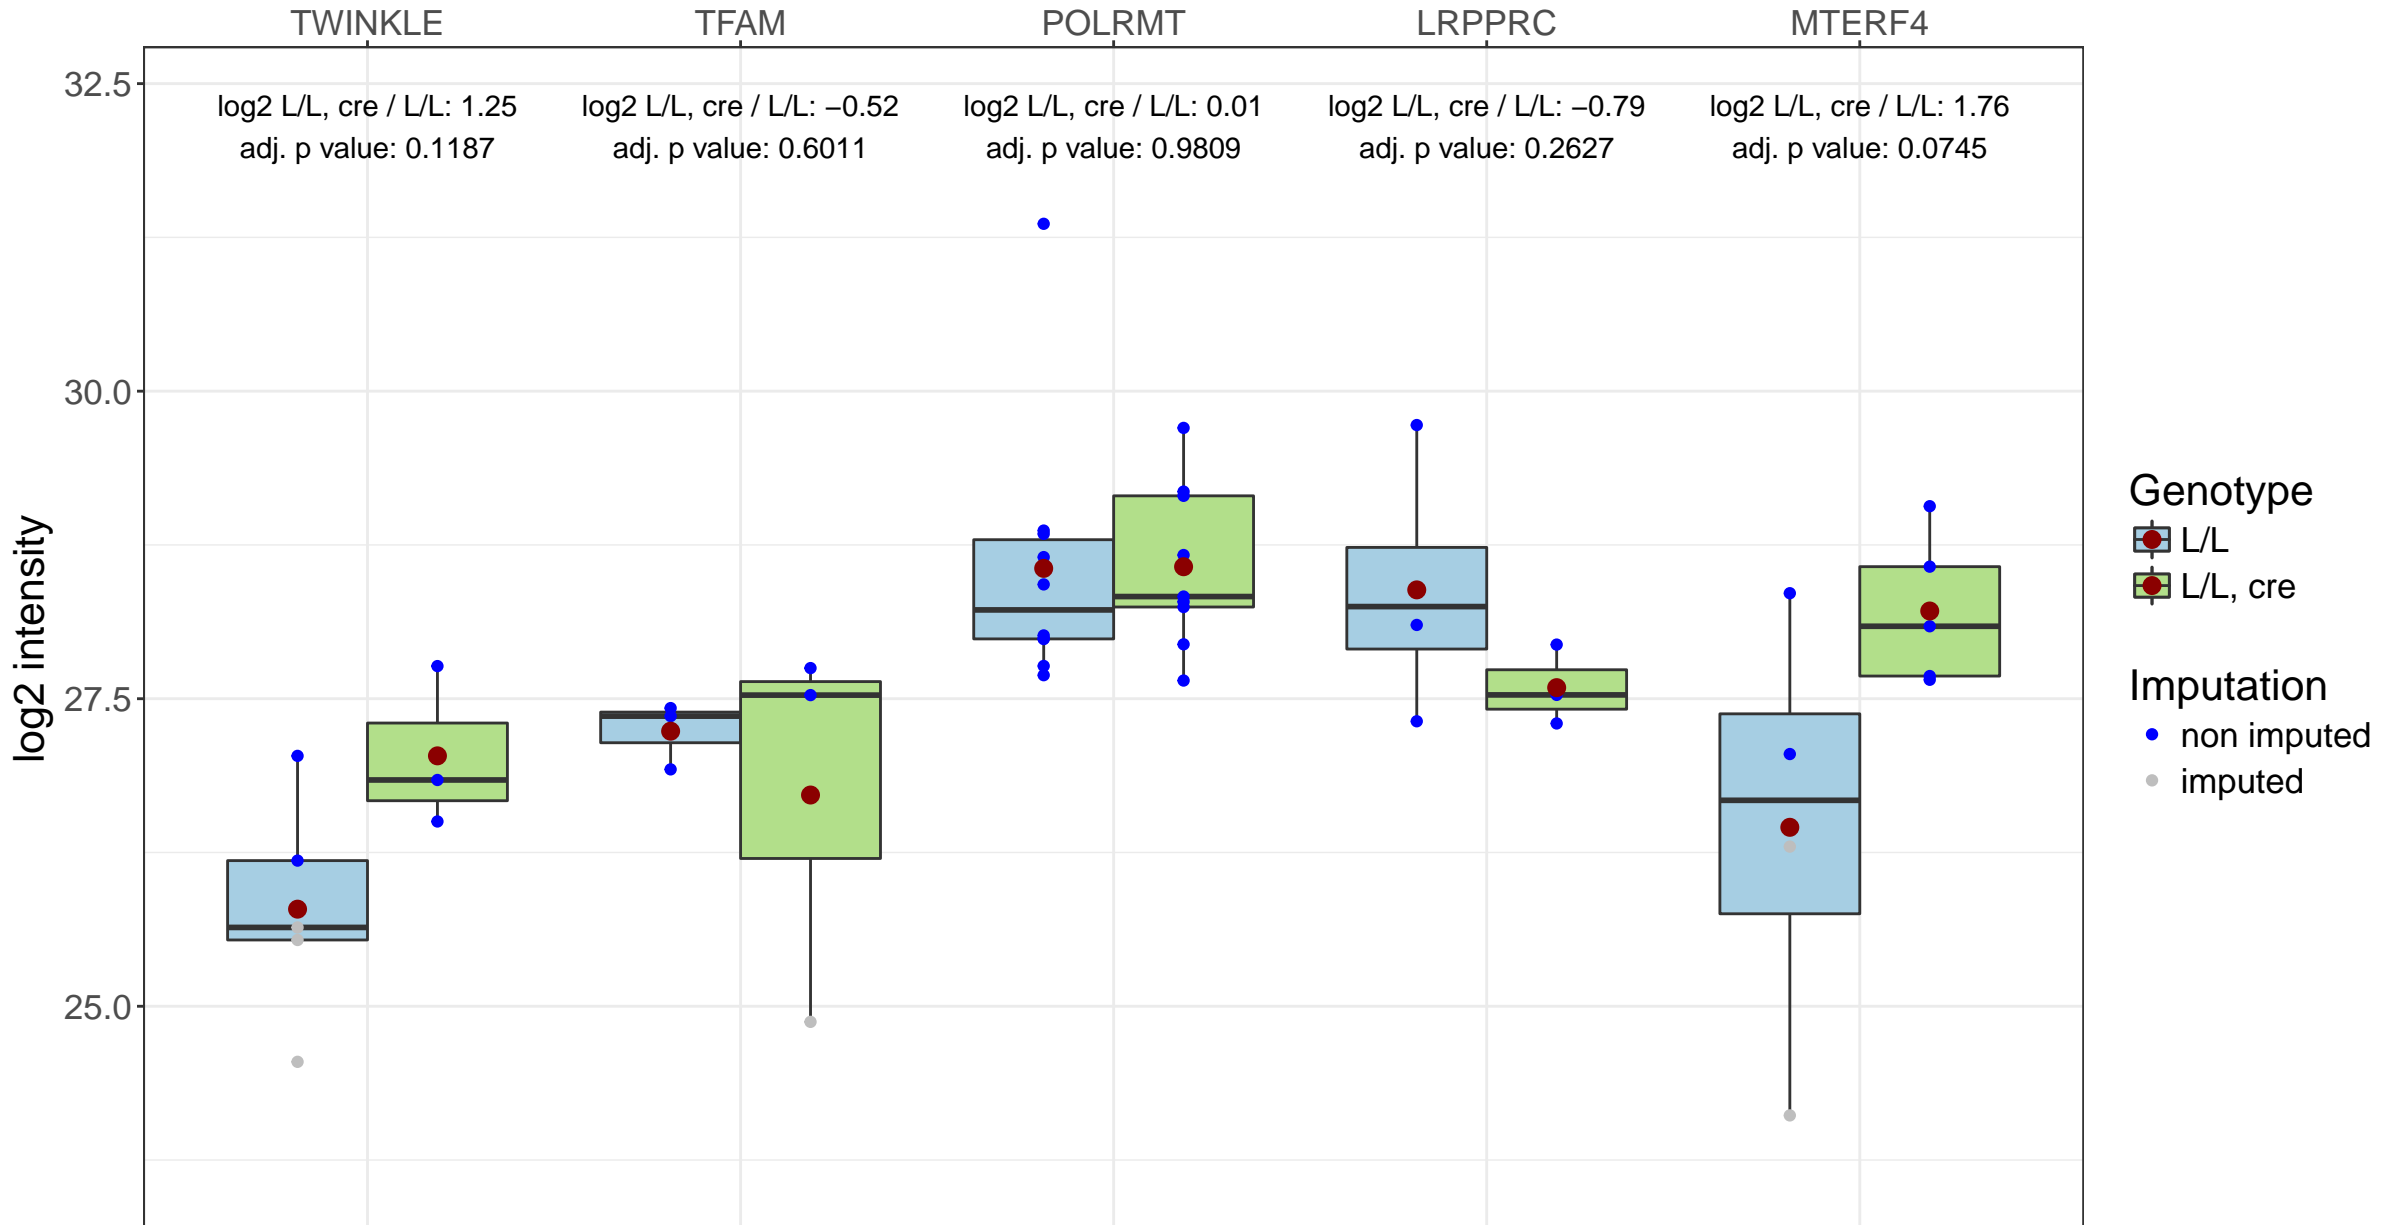

# TUBB4B / P68372

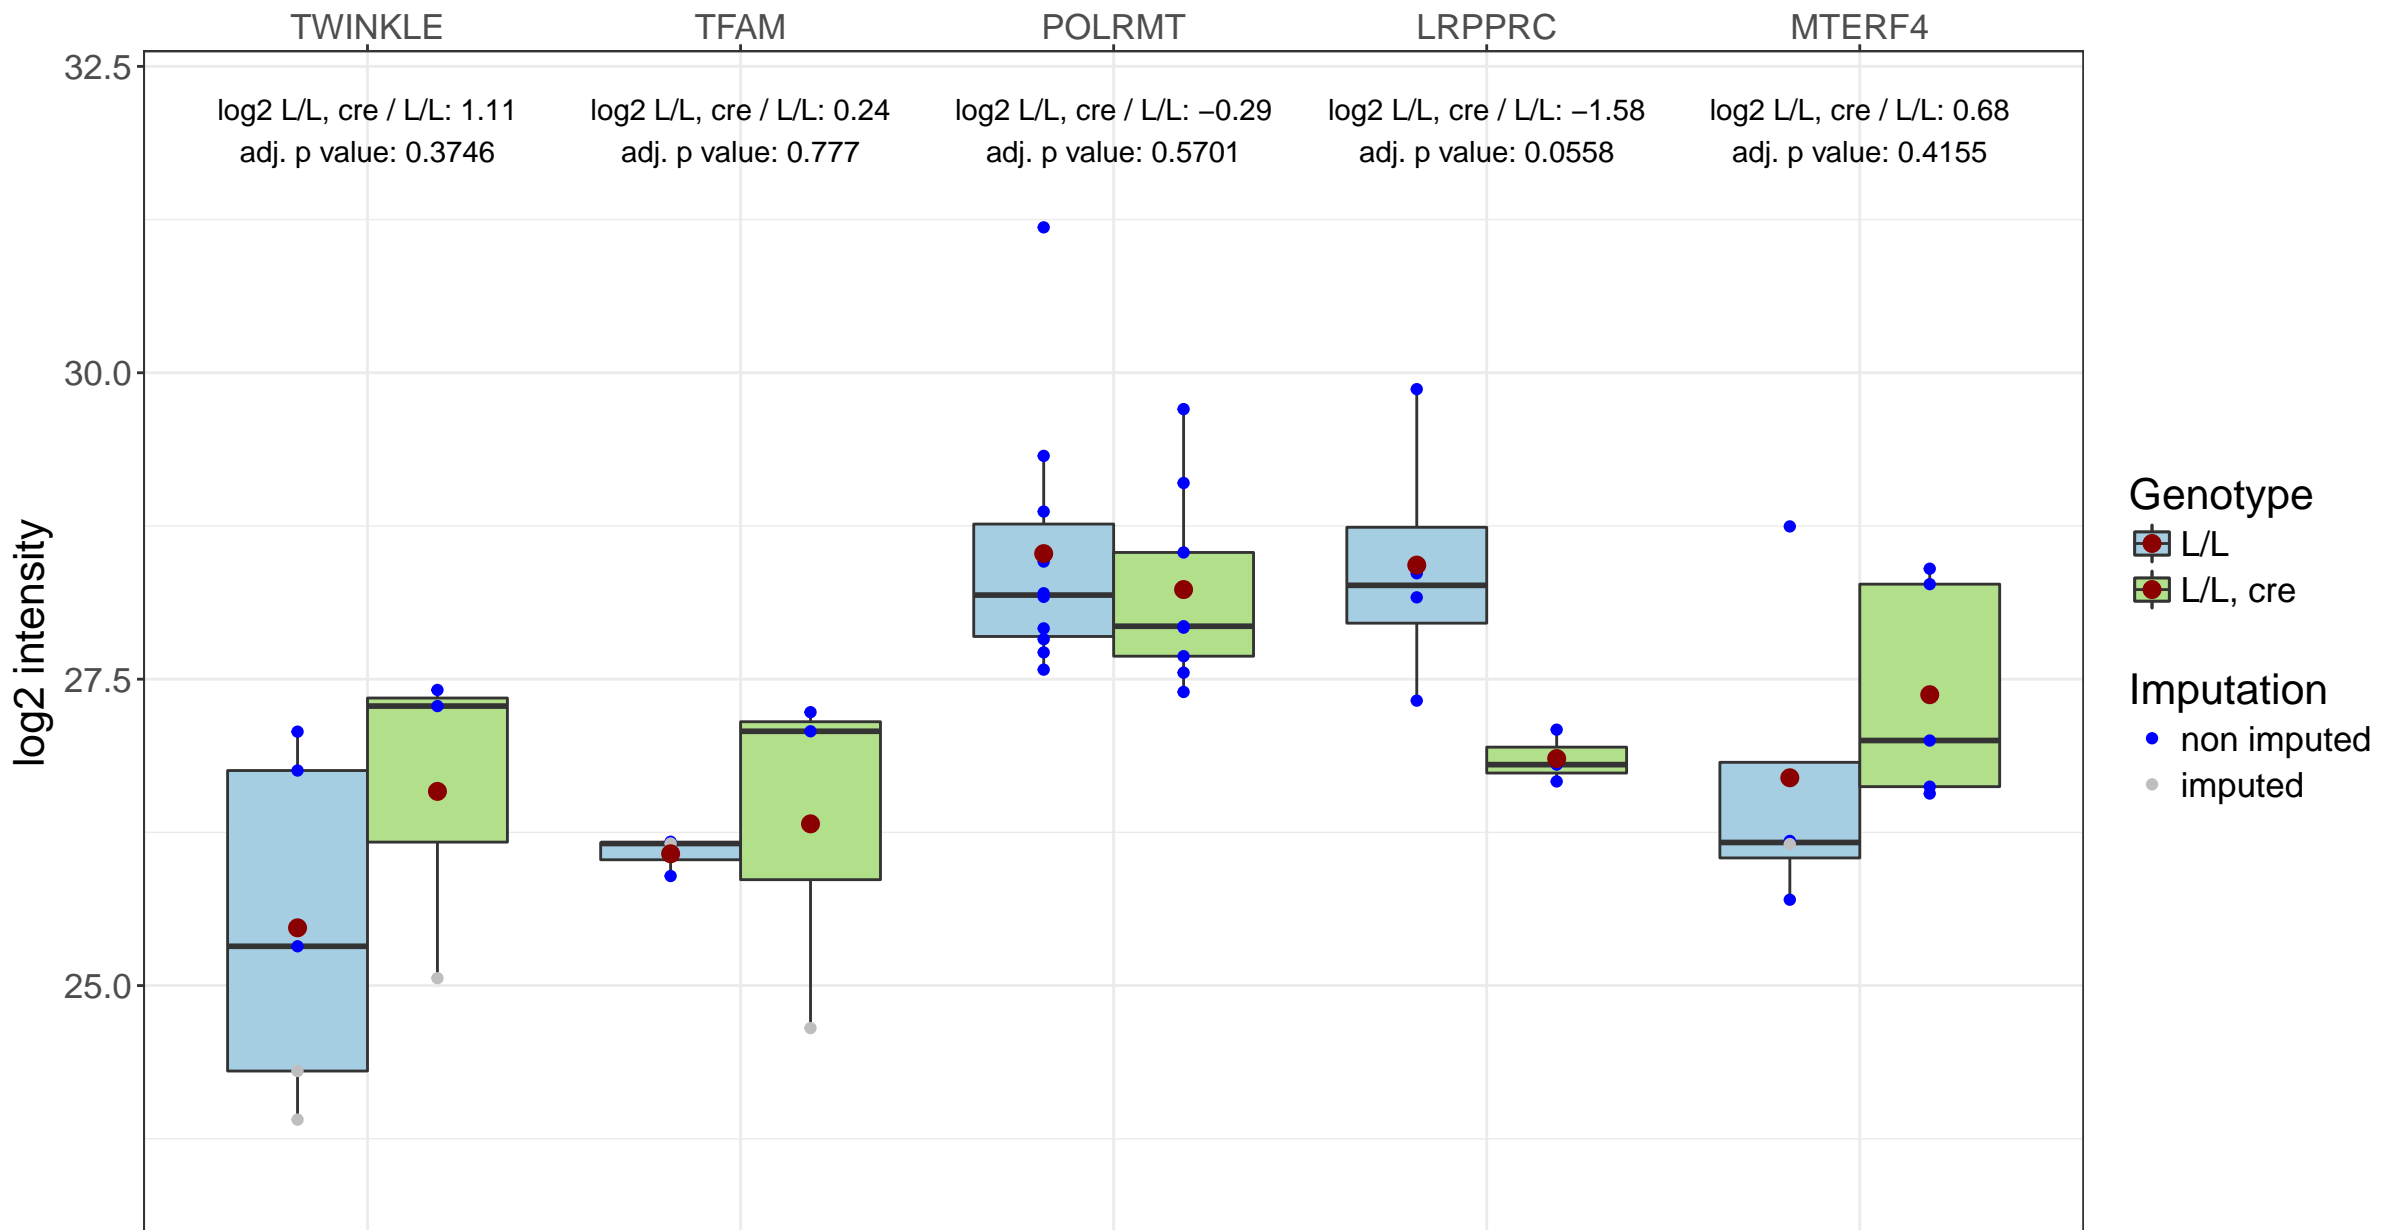

# TUFM / Q8BFR5

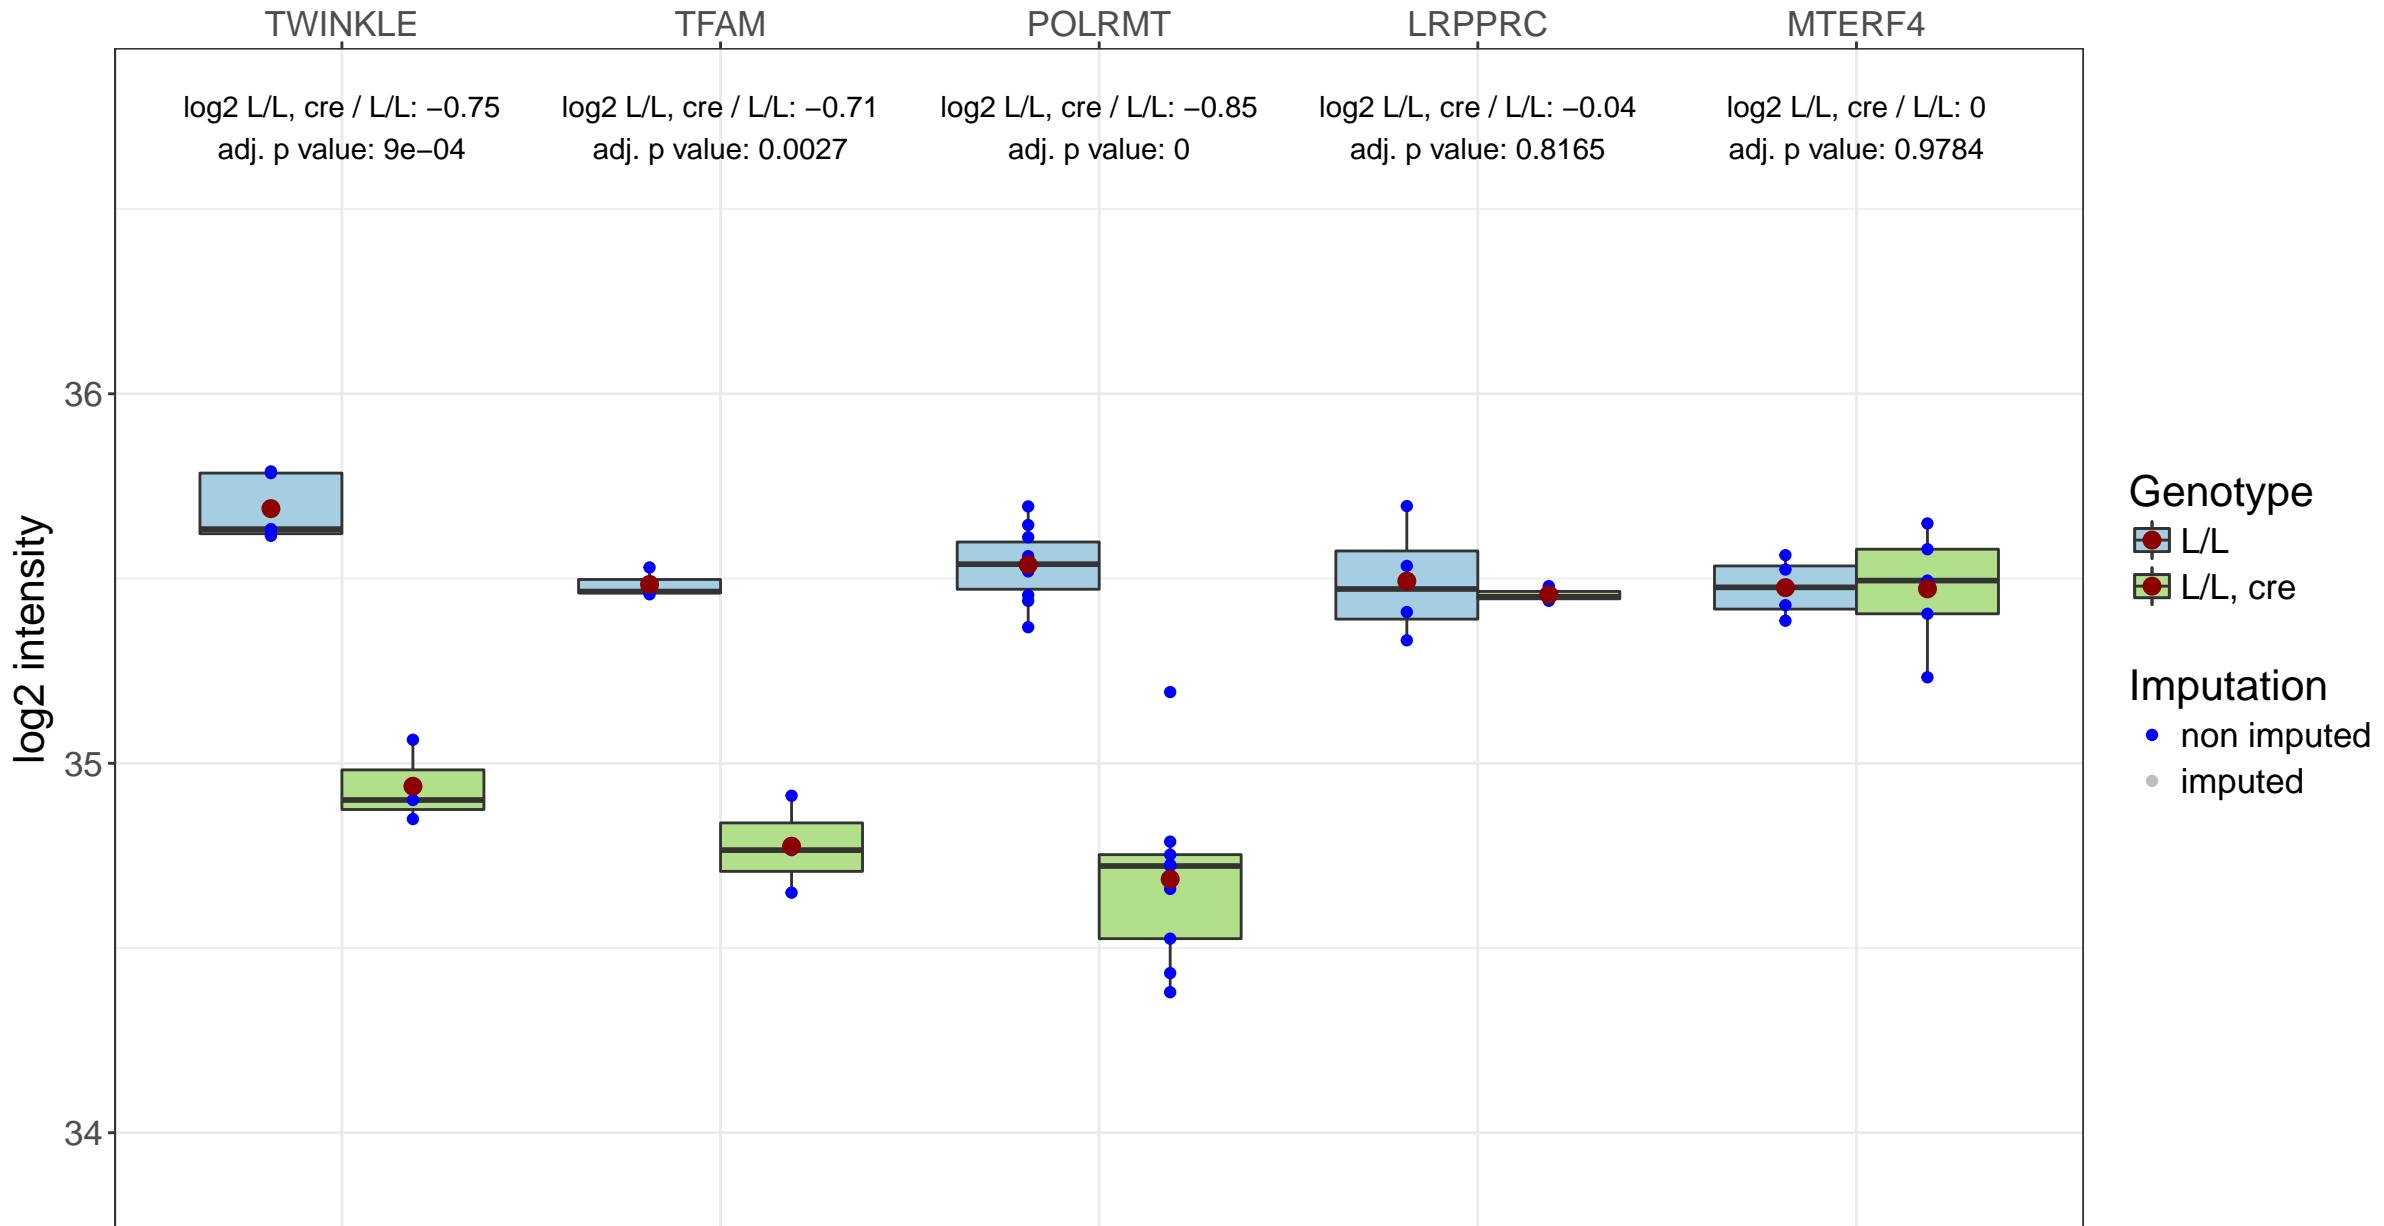

# TXN / P10639

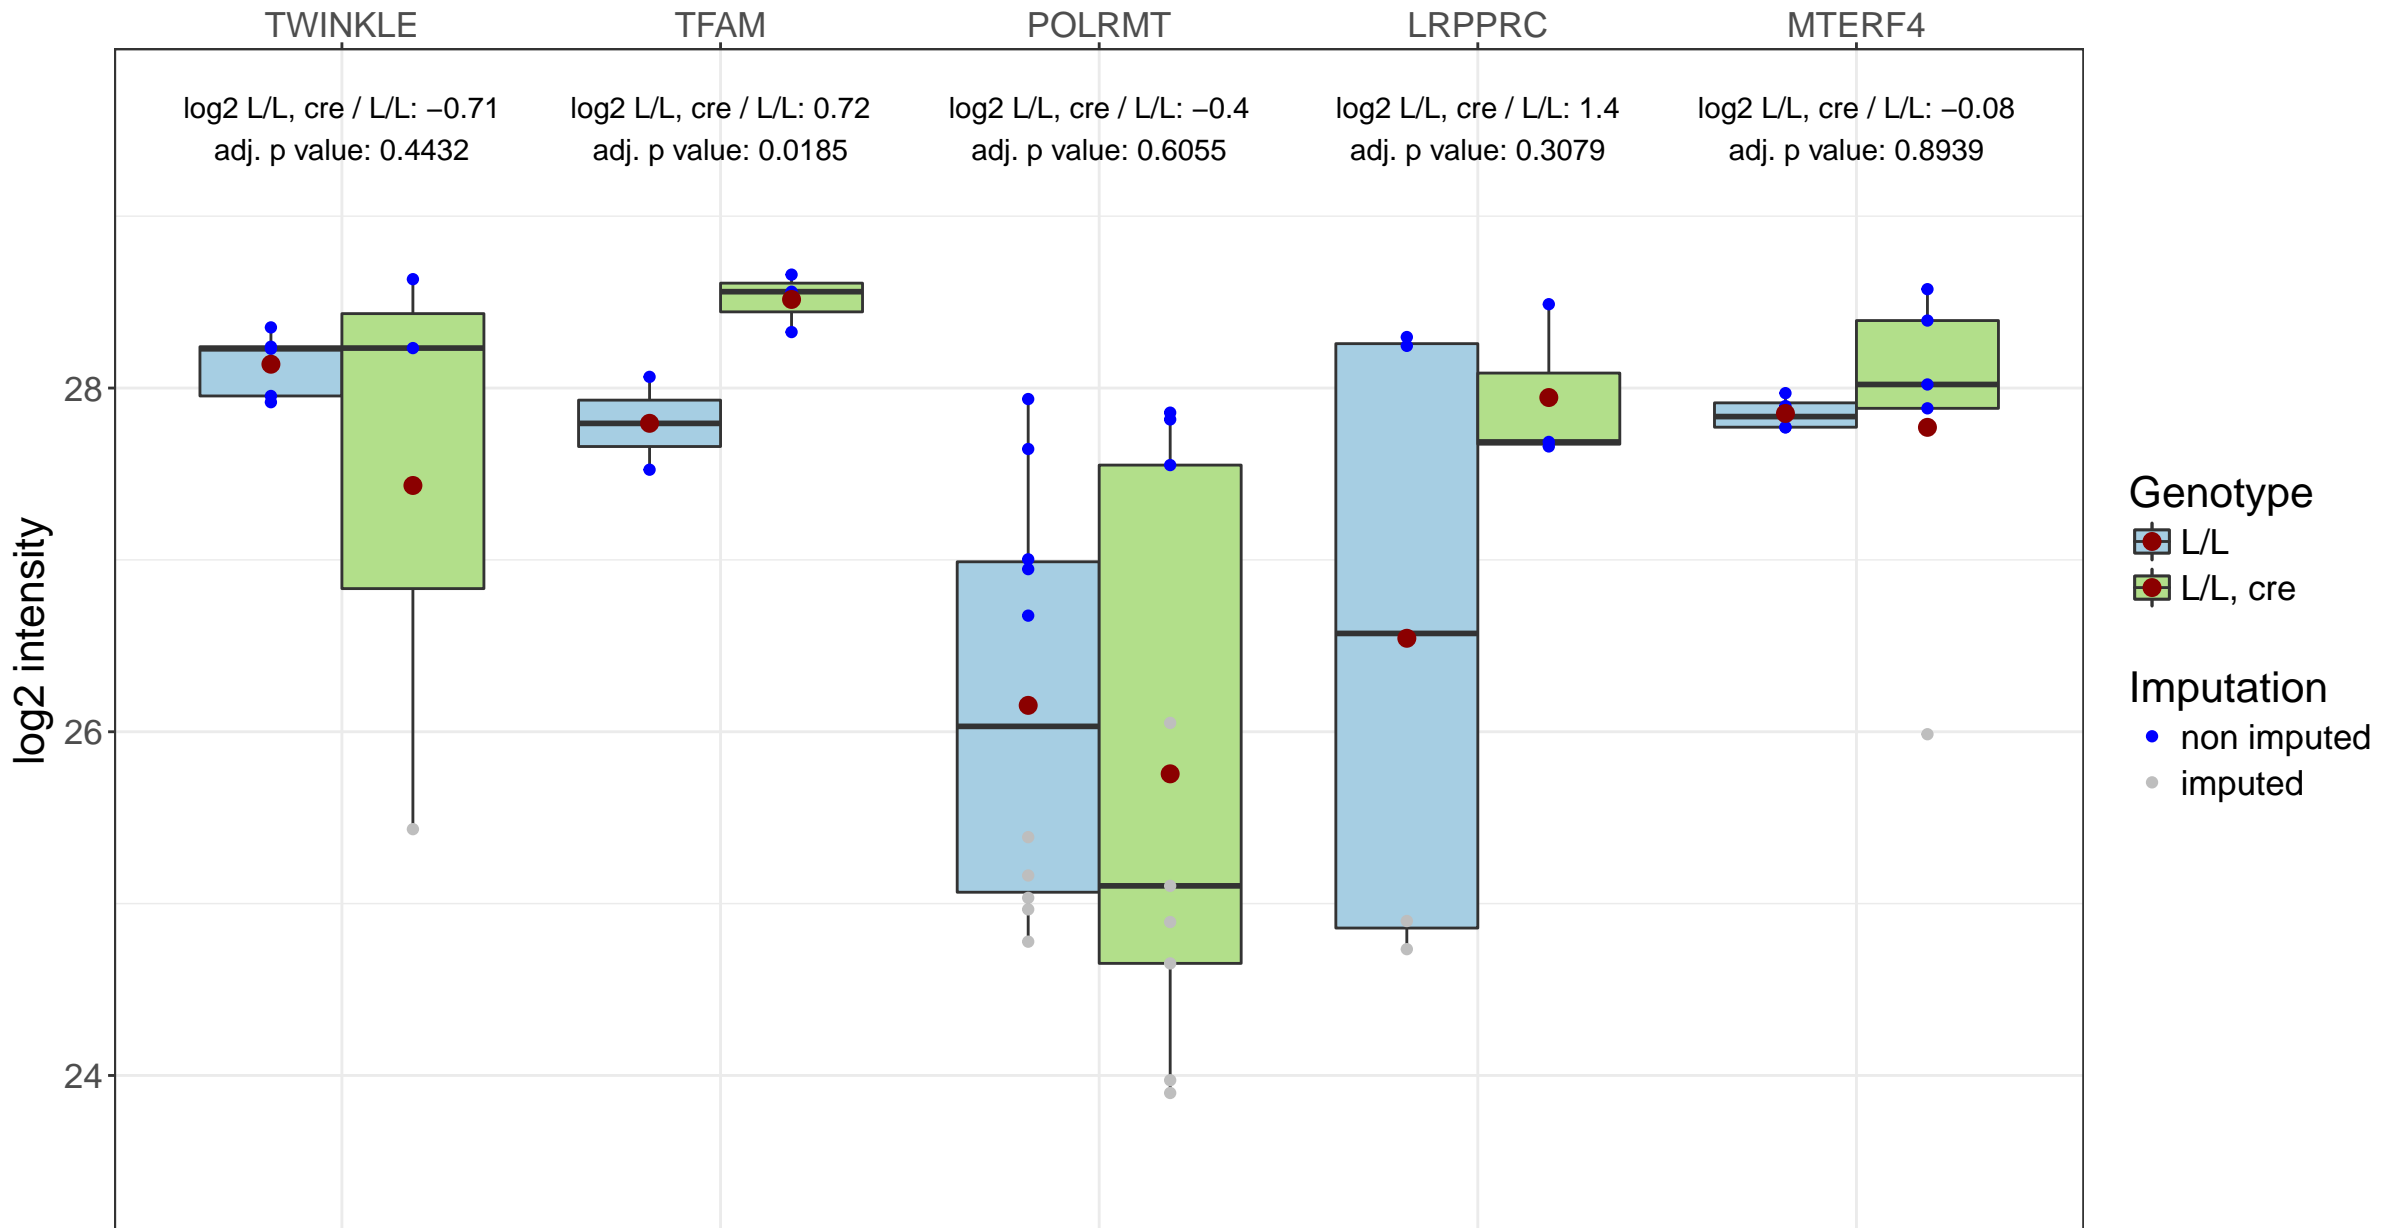

# TXN2 / G3UZY2

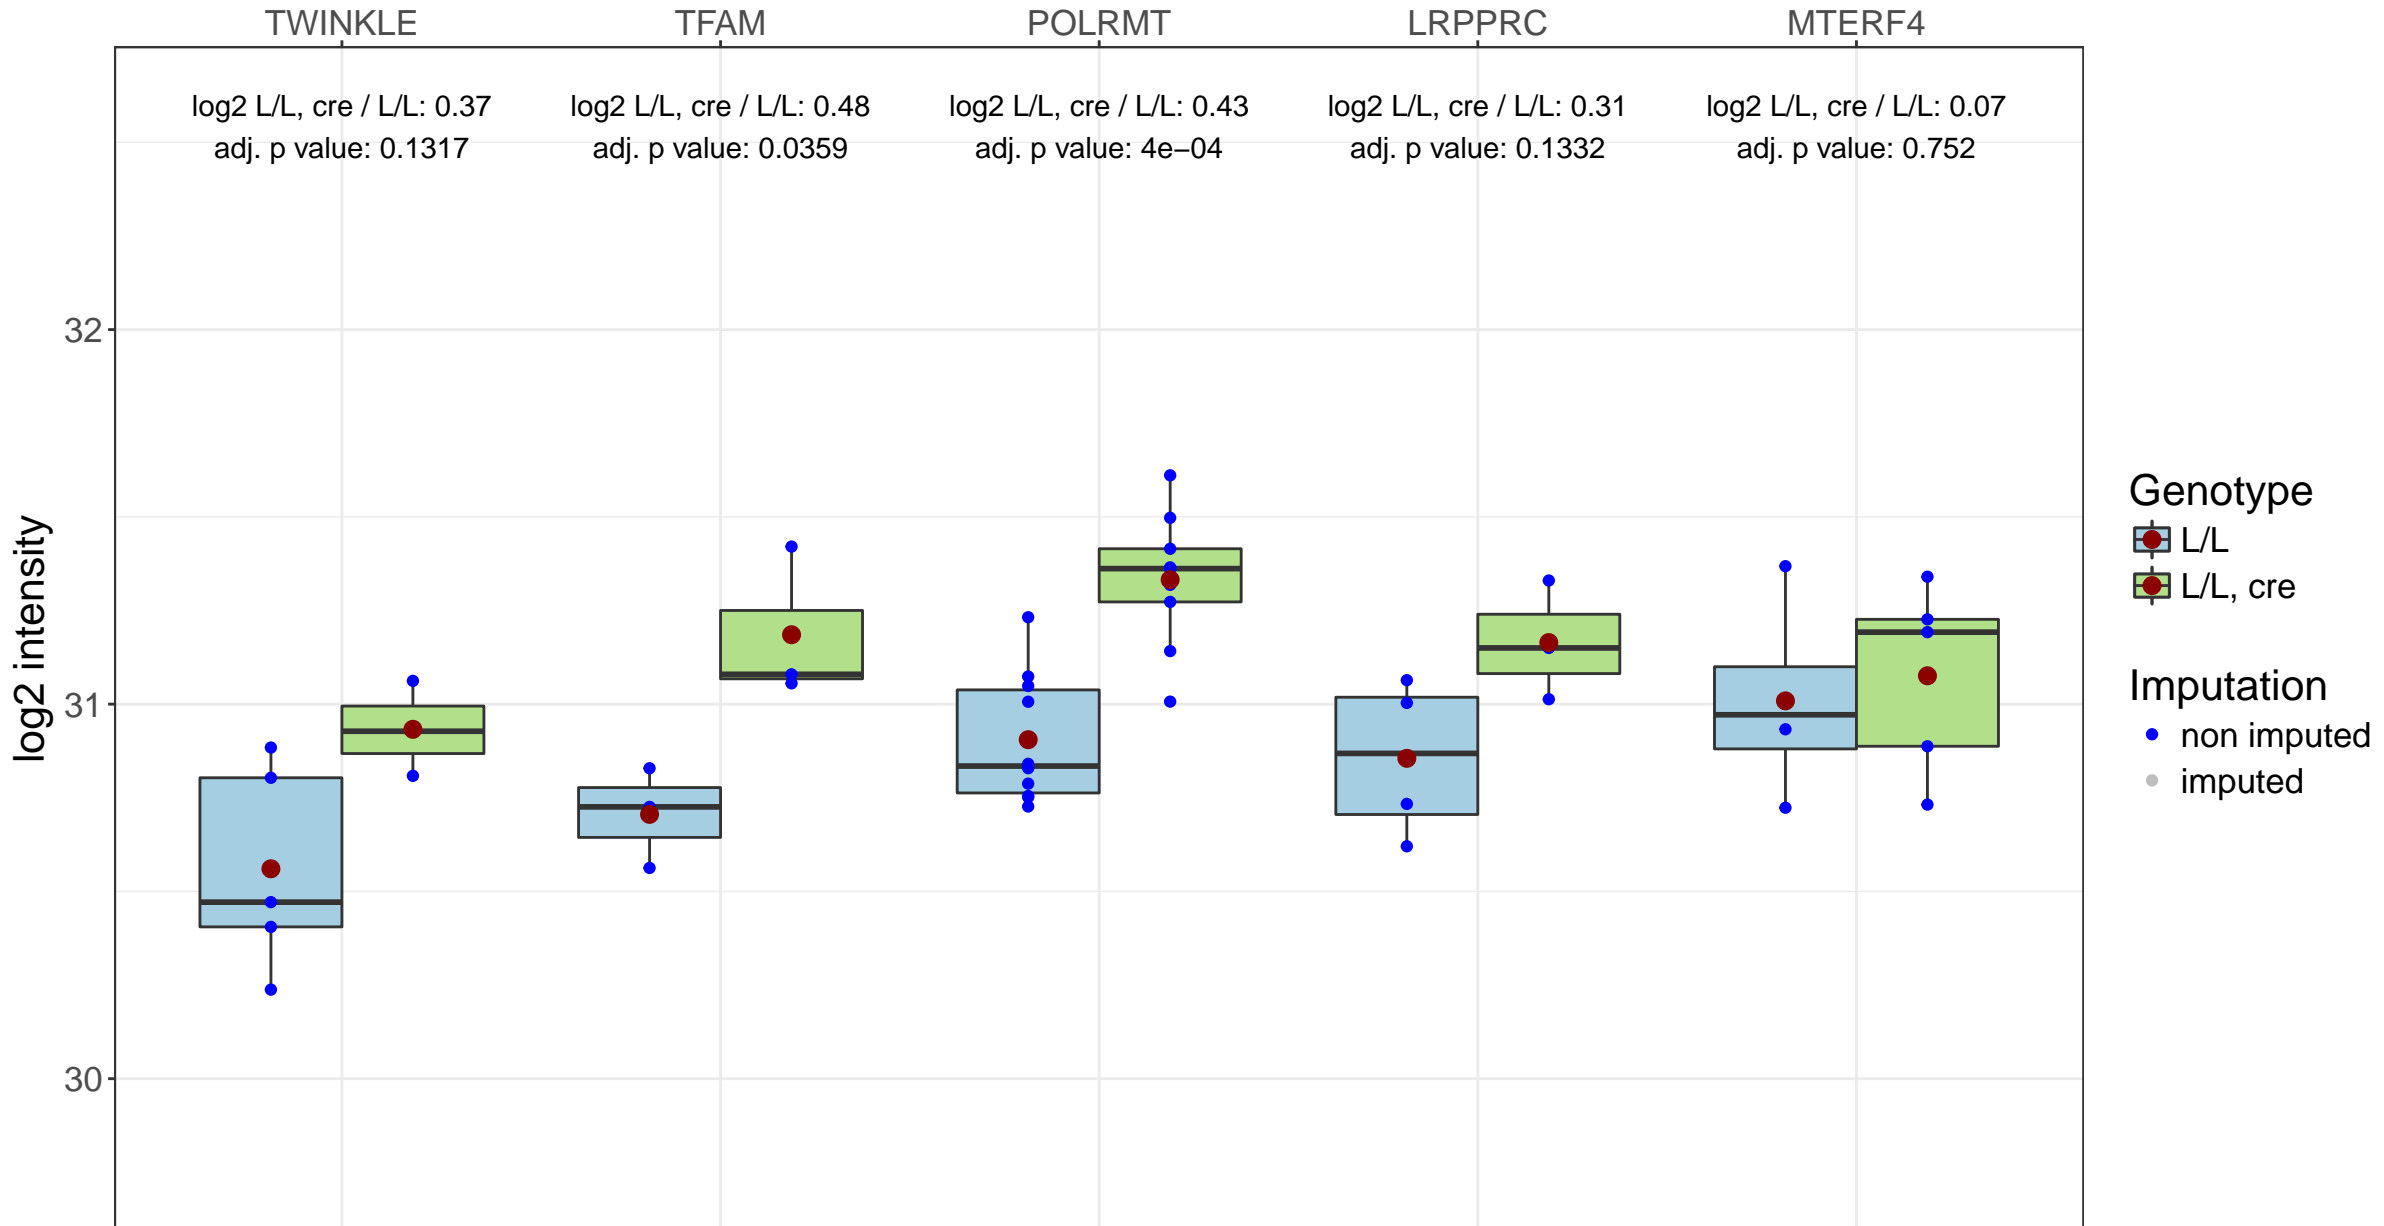



# TXNRD2 / J3QMN4

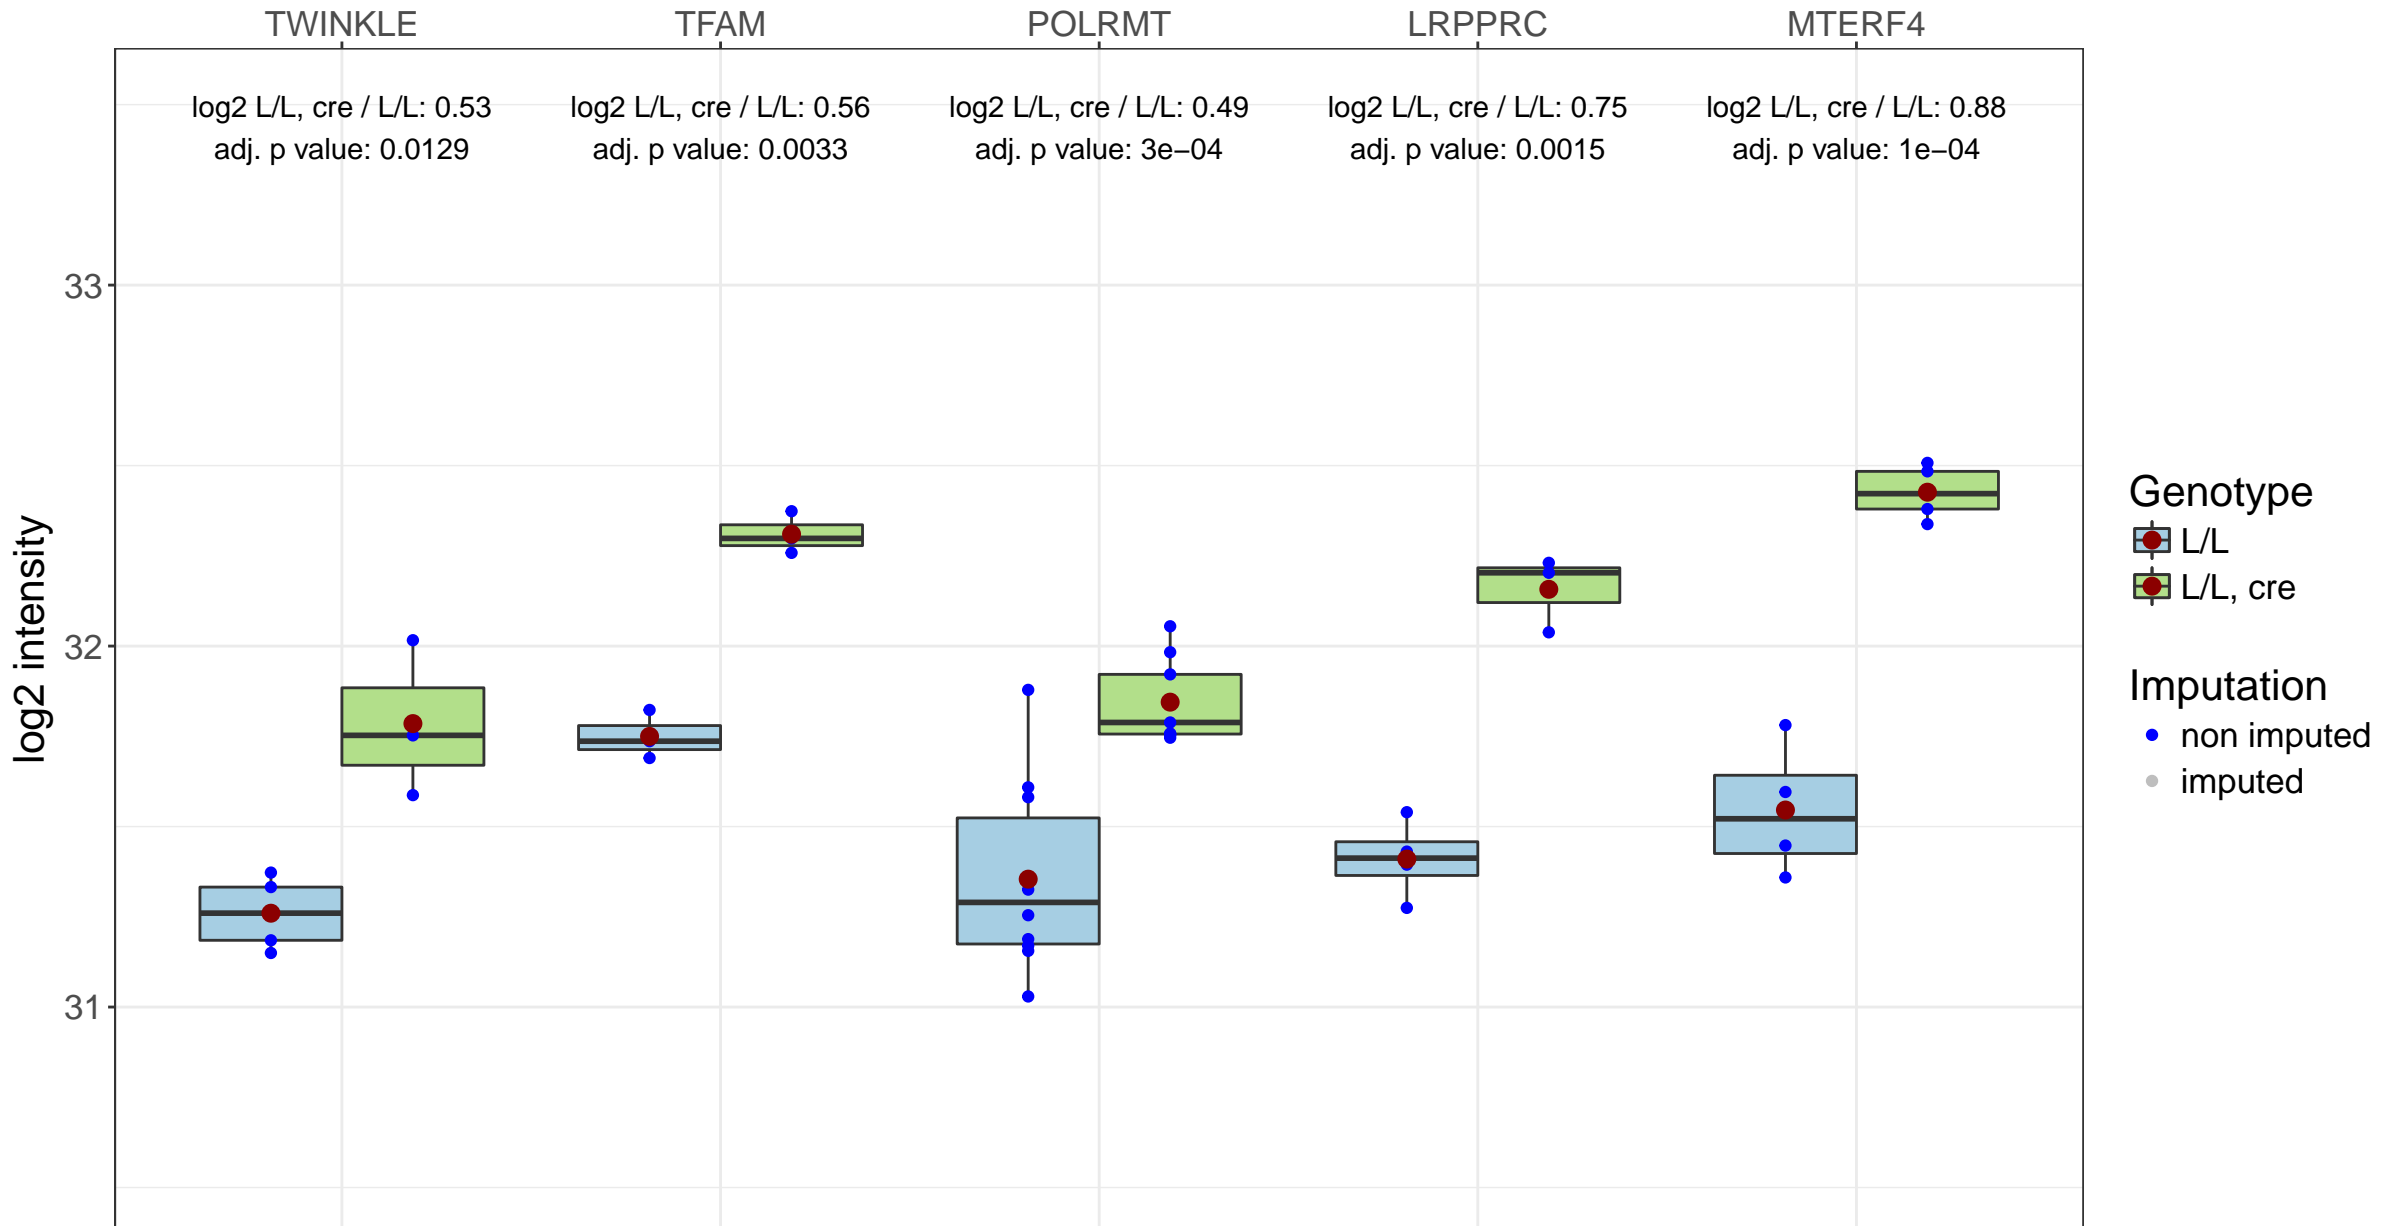

# UCP1 / P12242

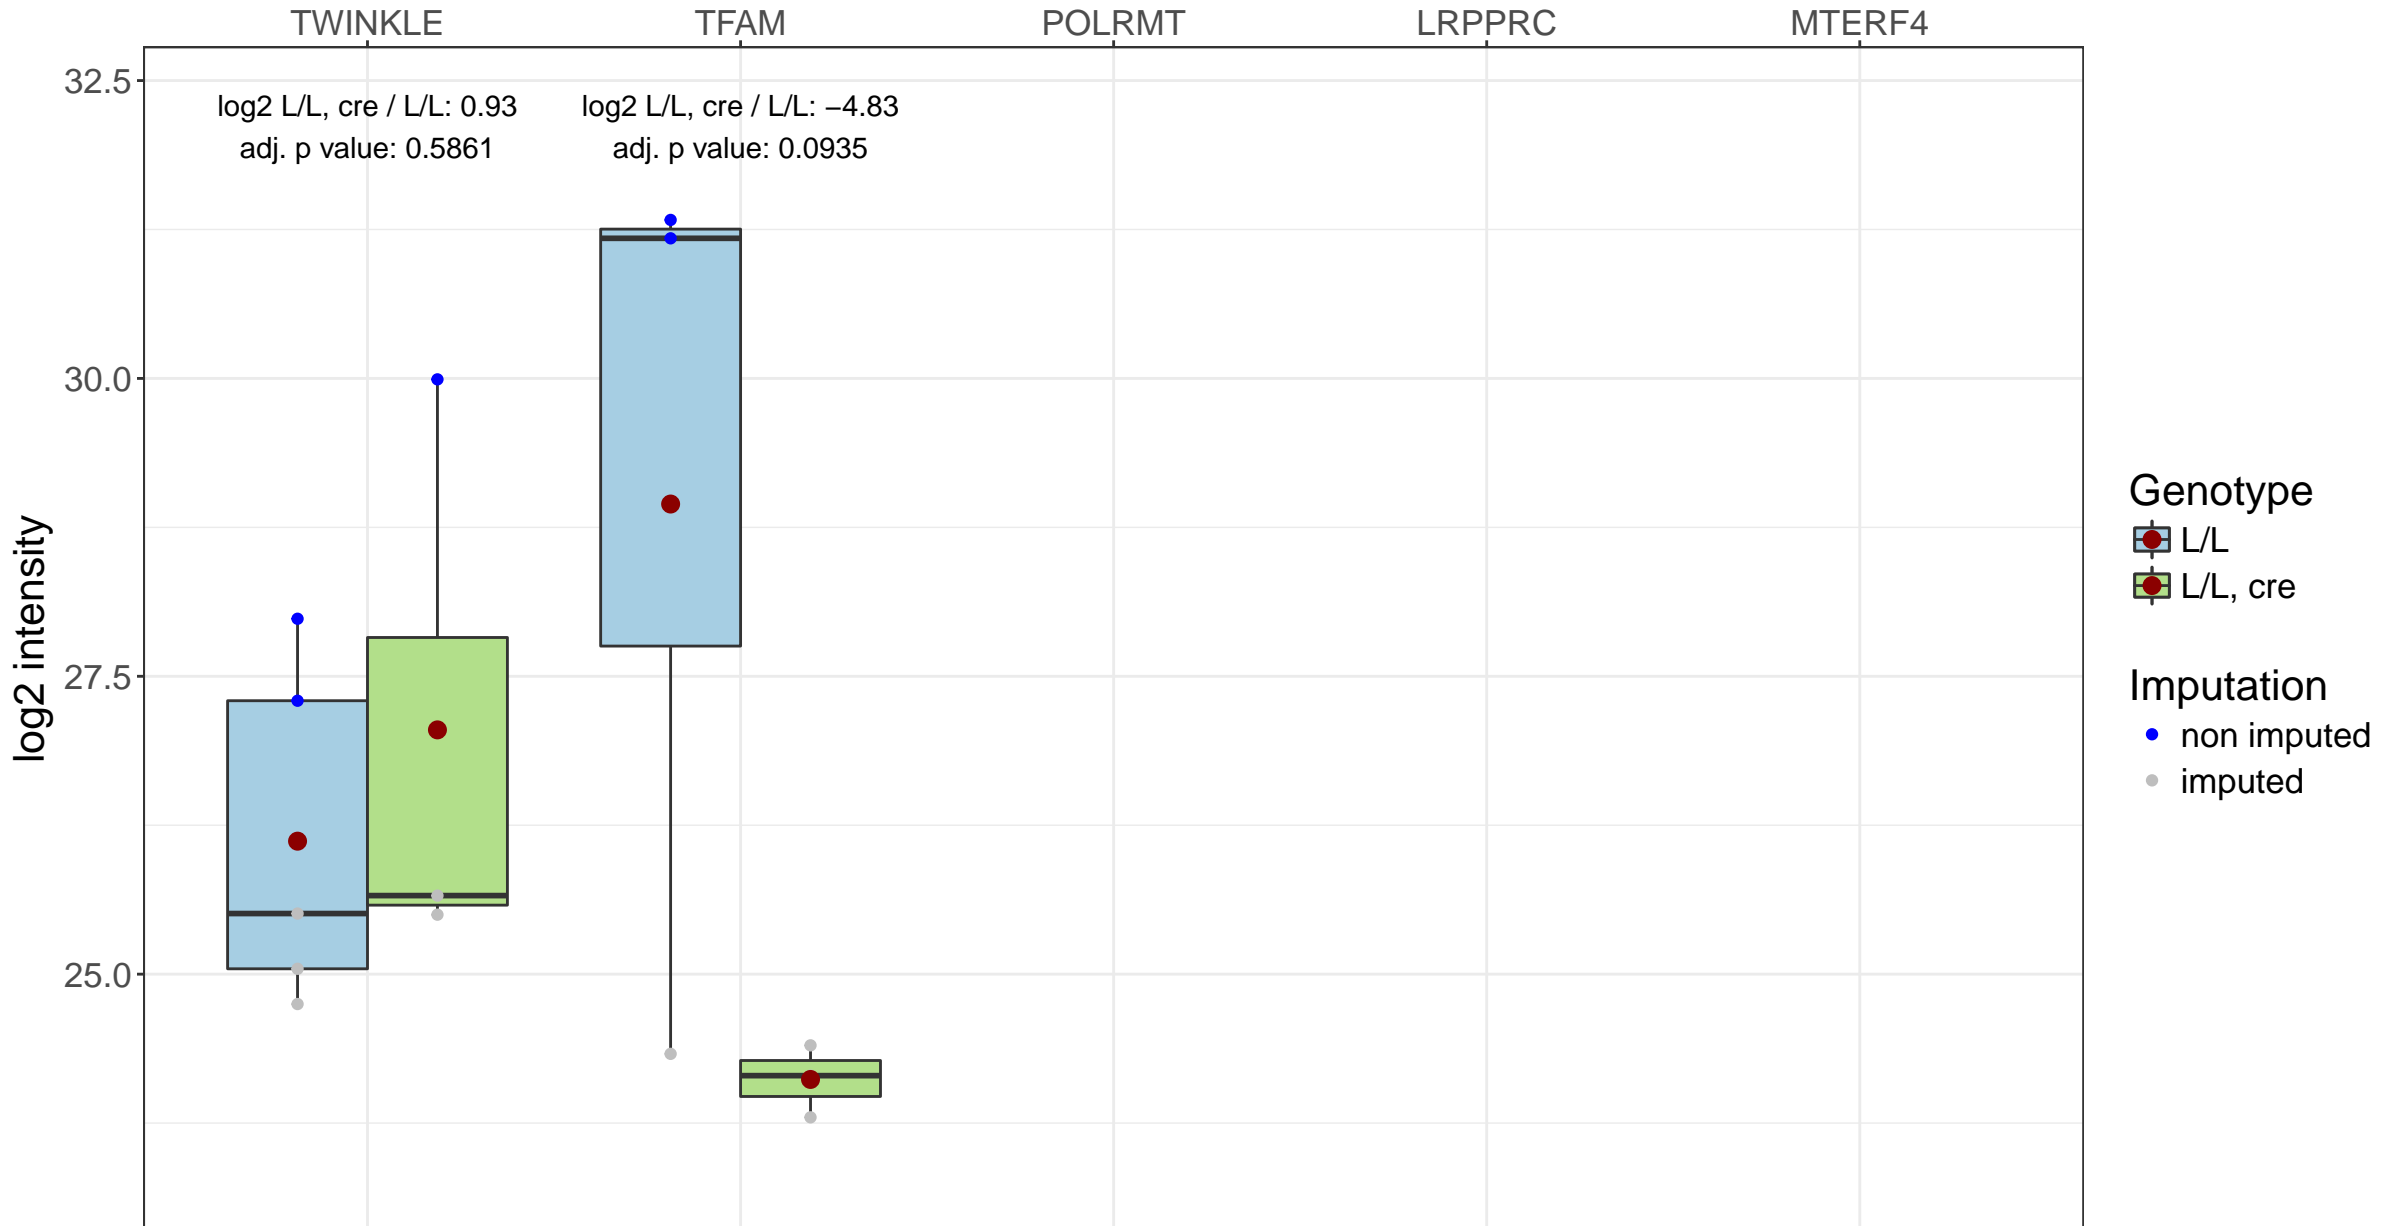

# UCP3 / P56501

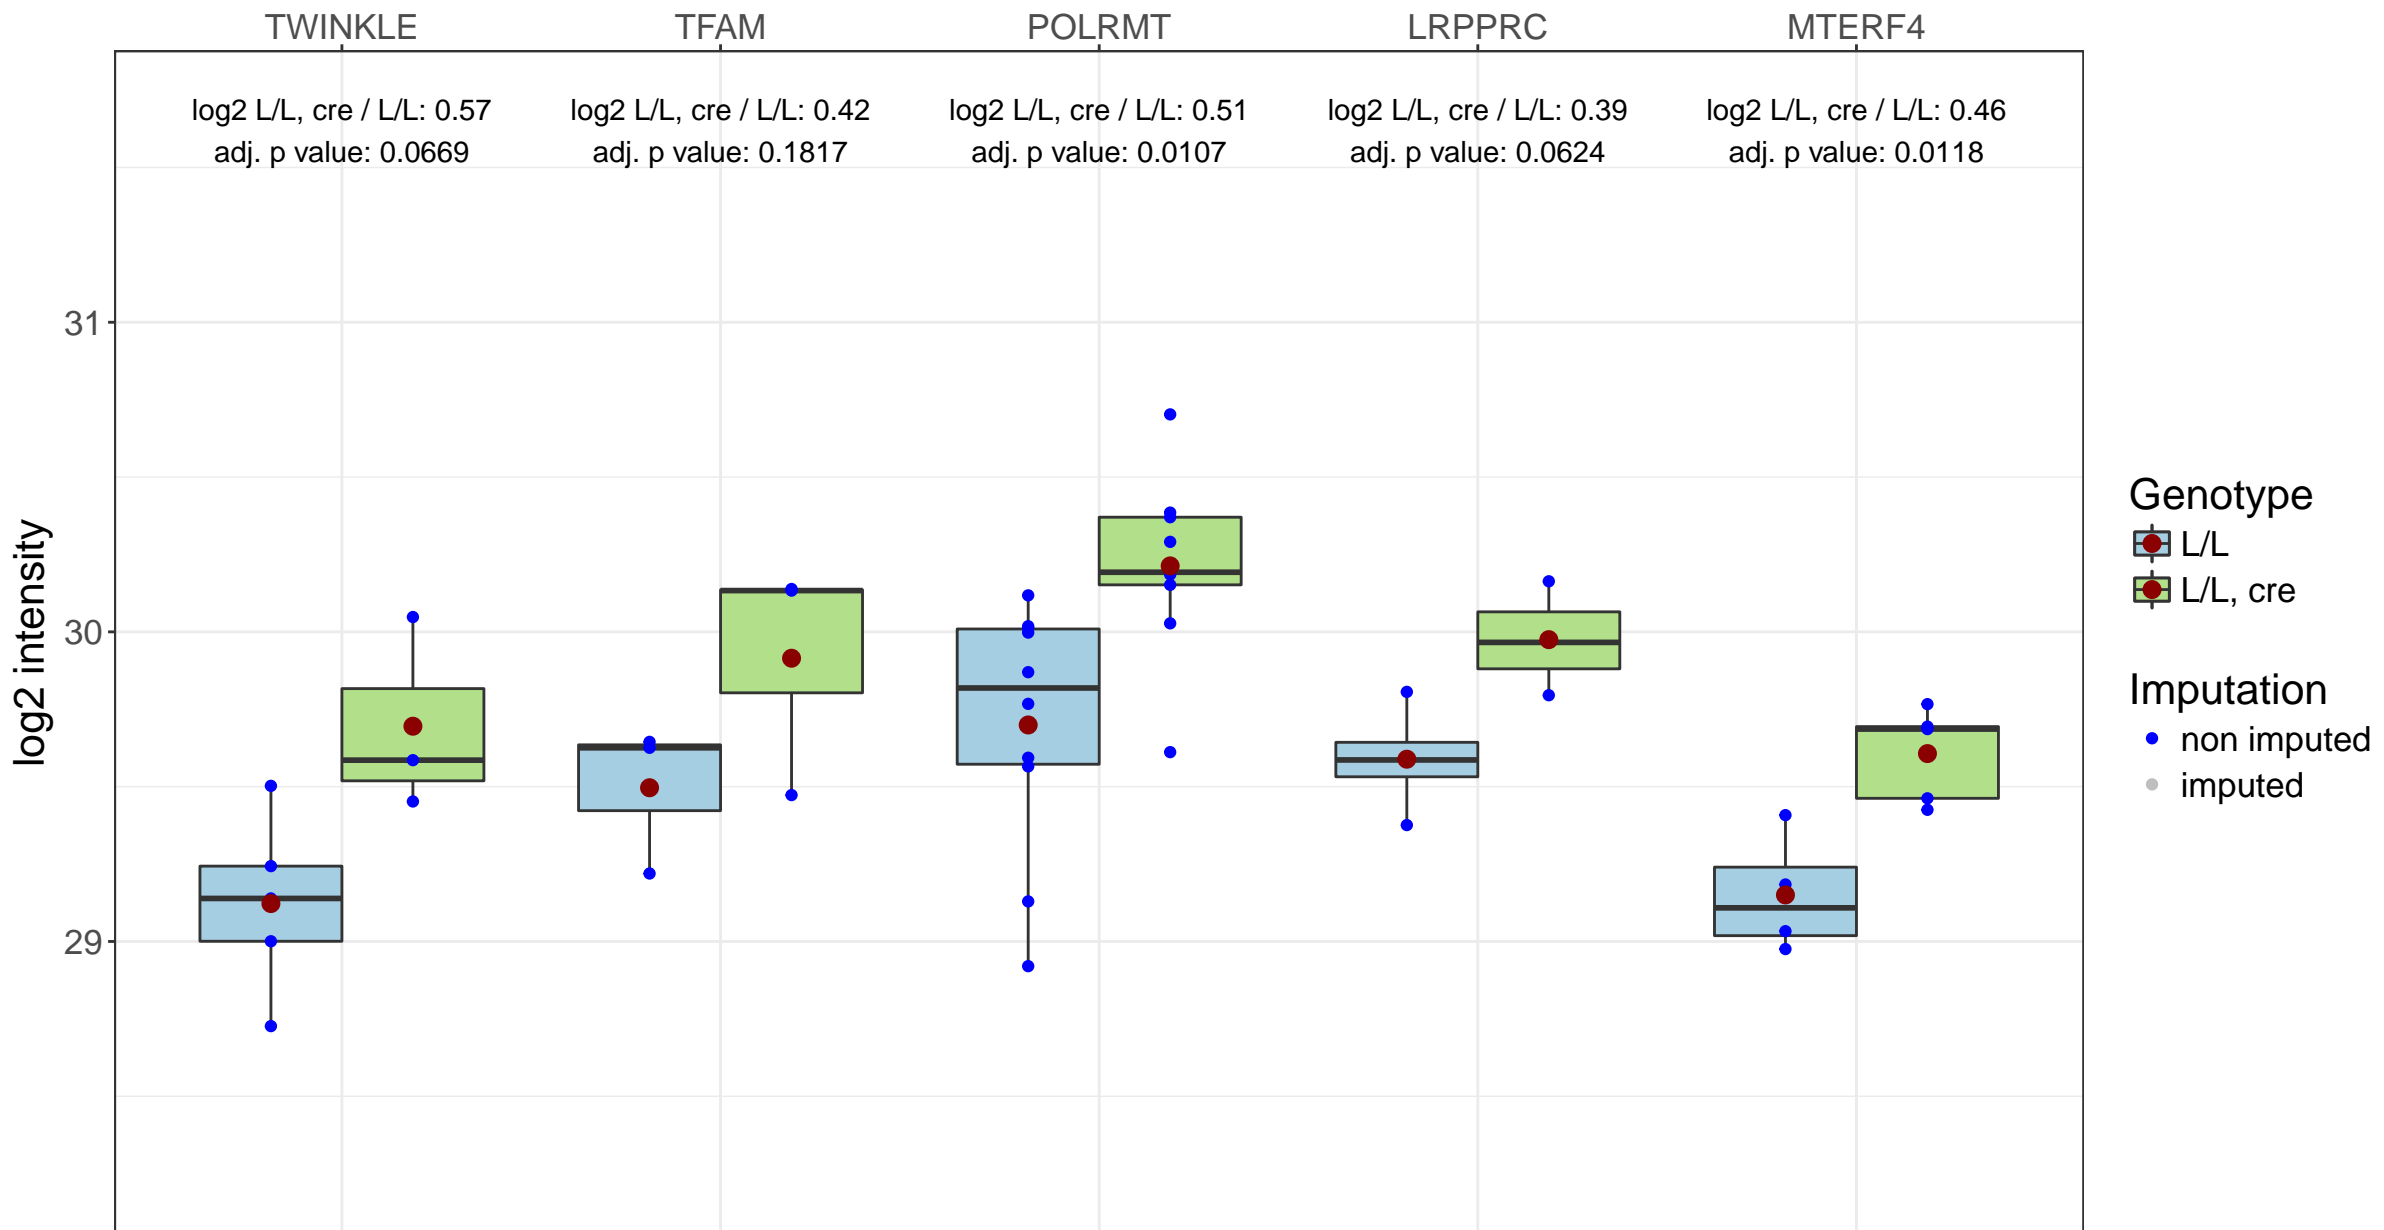

# UQCC1 / Q9CWU6

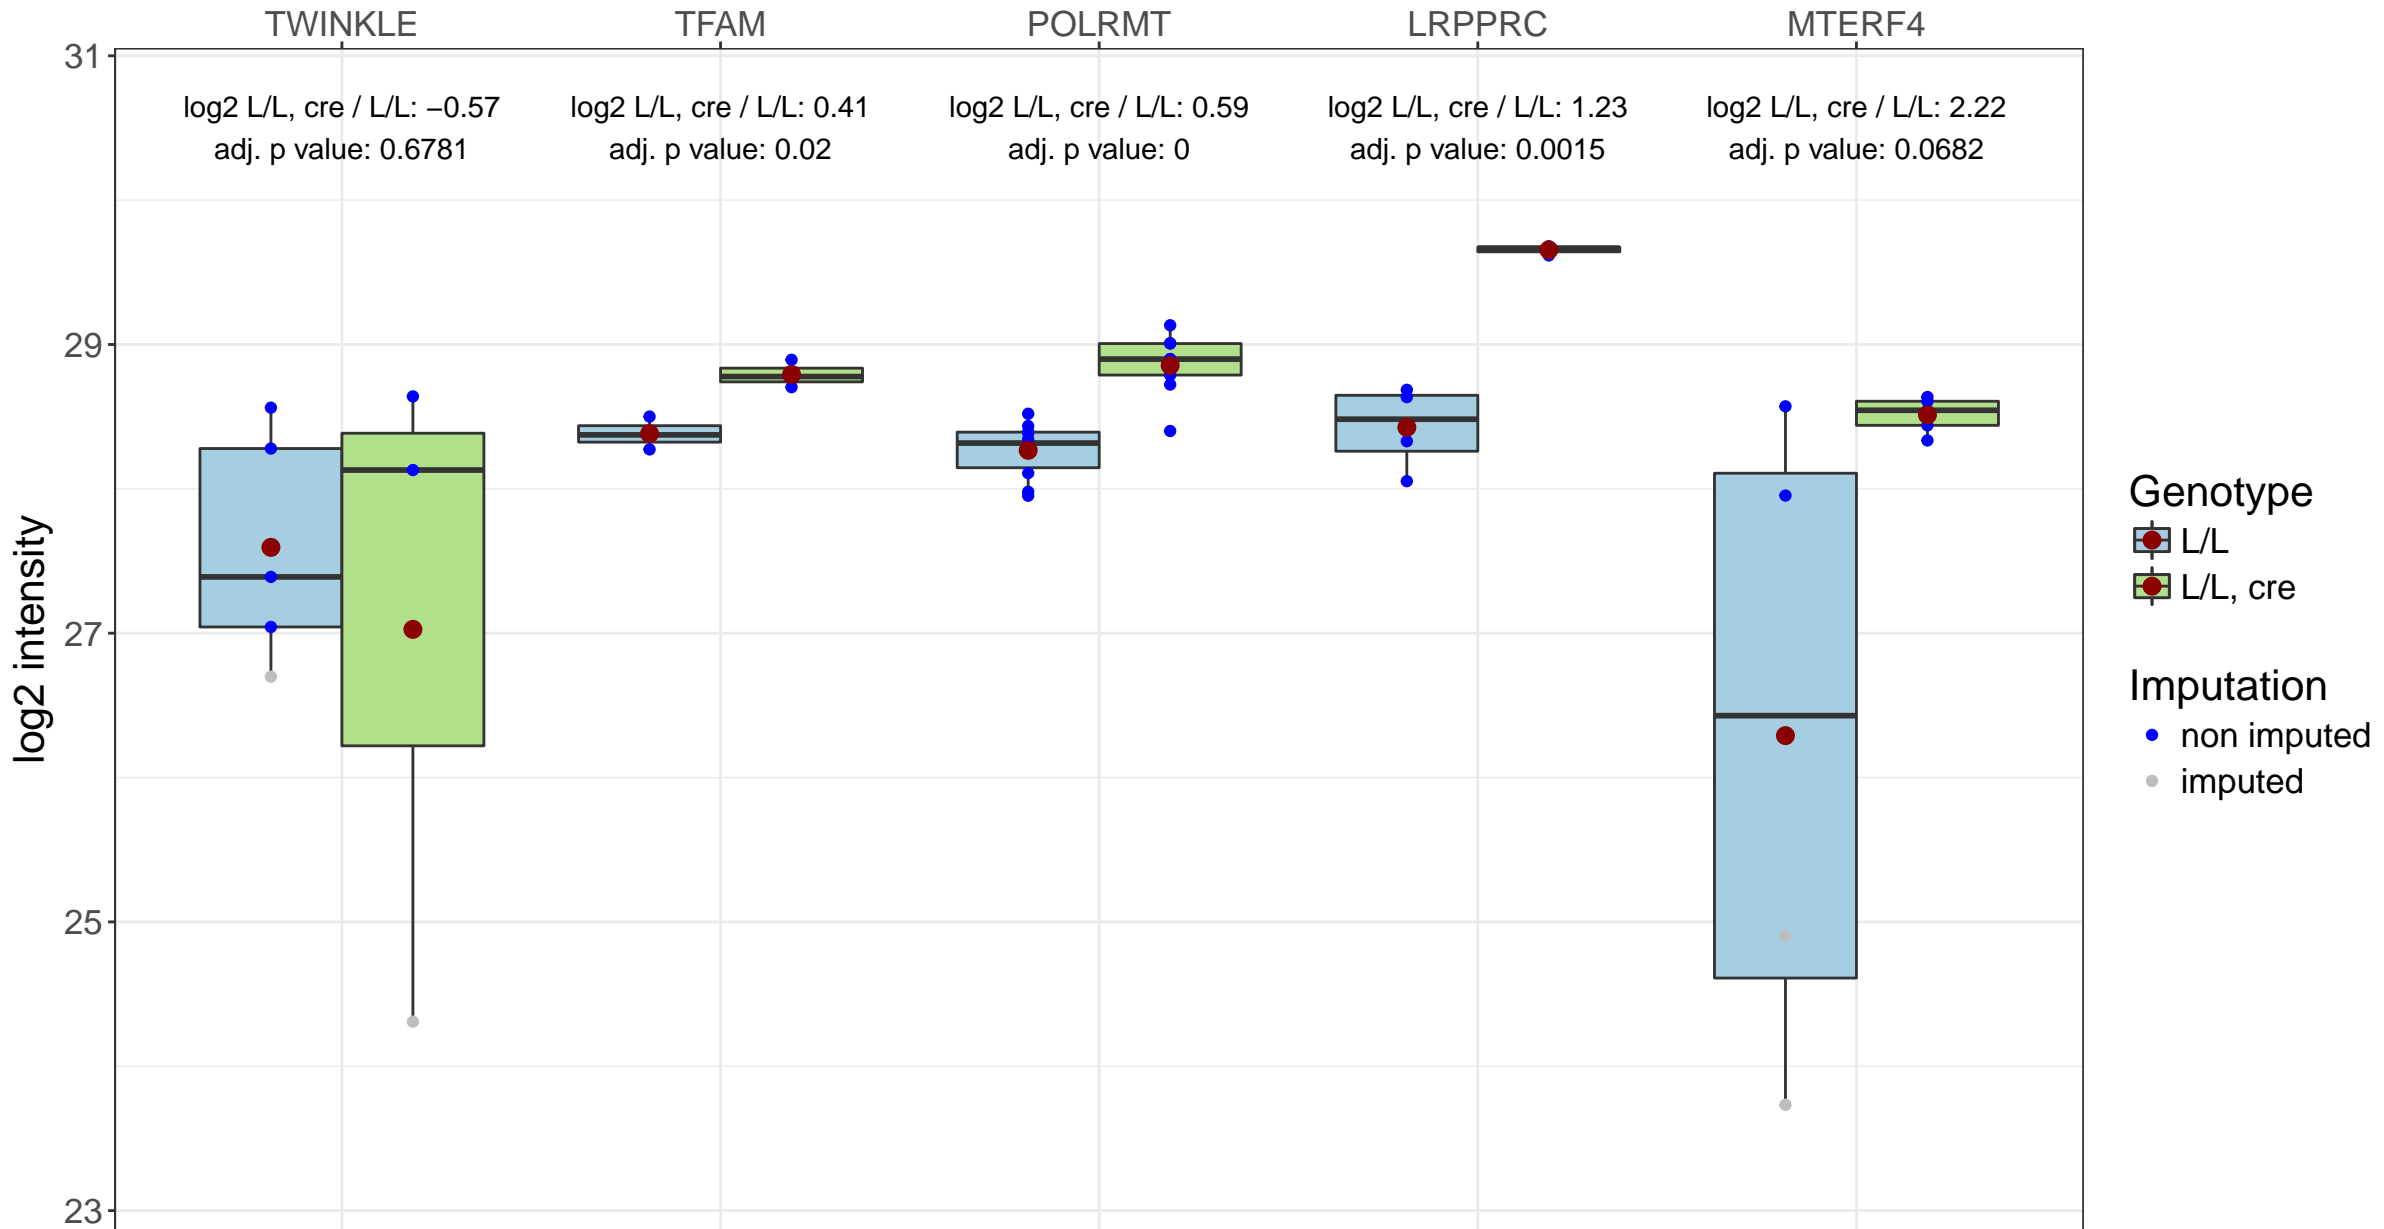

# UQCC2 / Q9CQY6

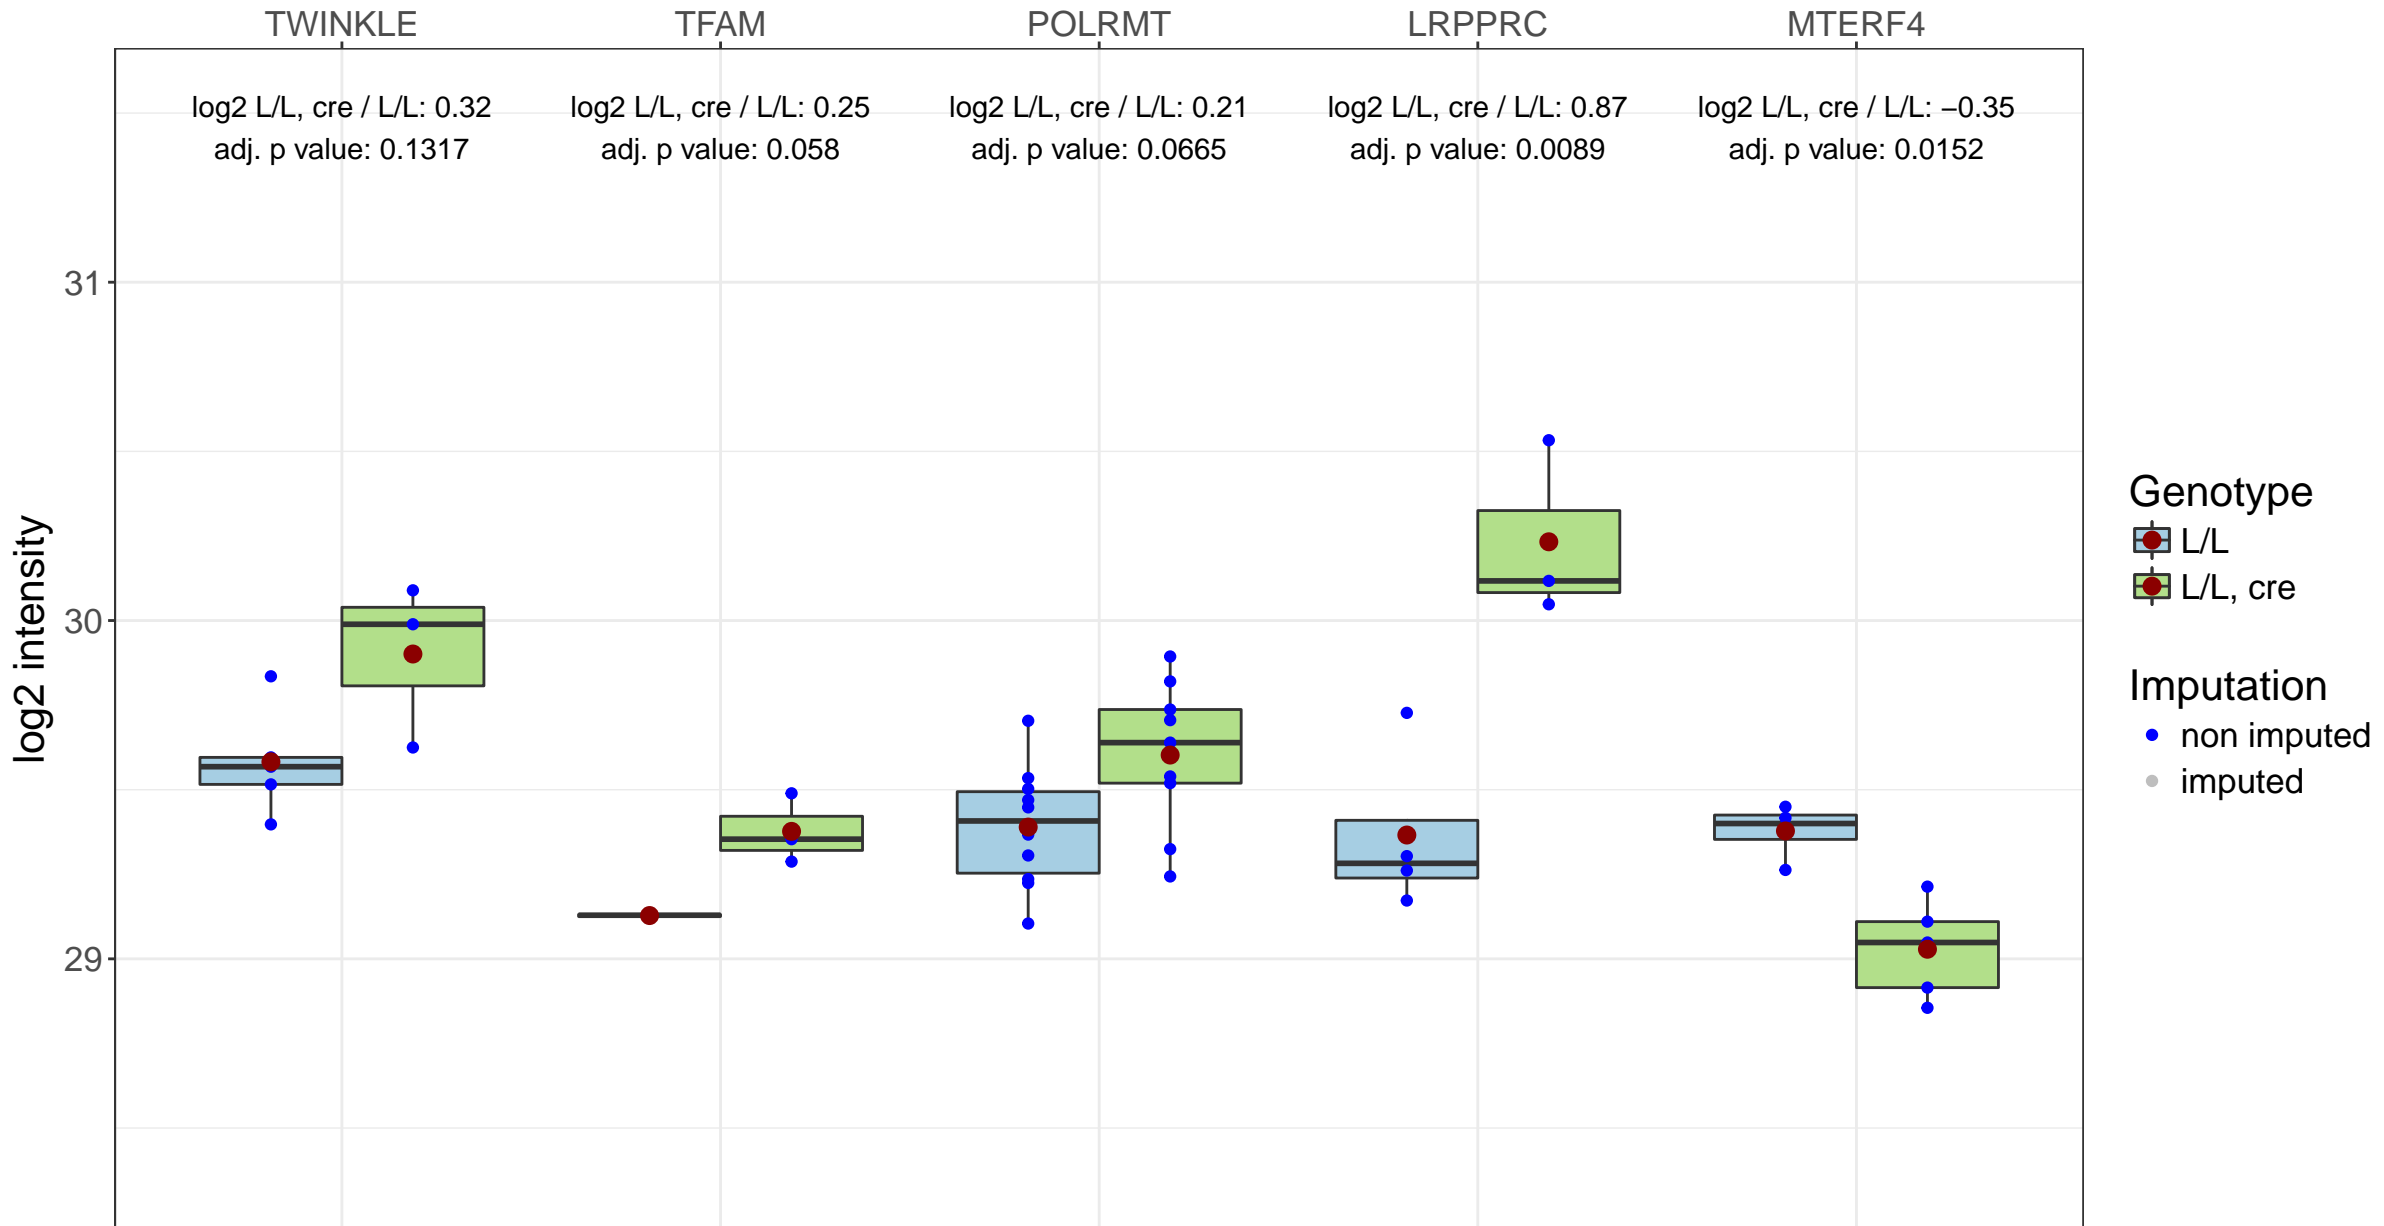

# UQCR10 / Q8R1I1

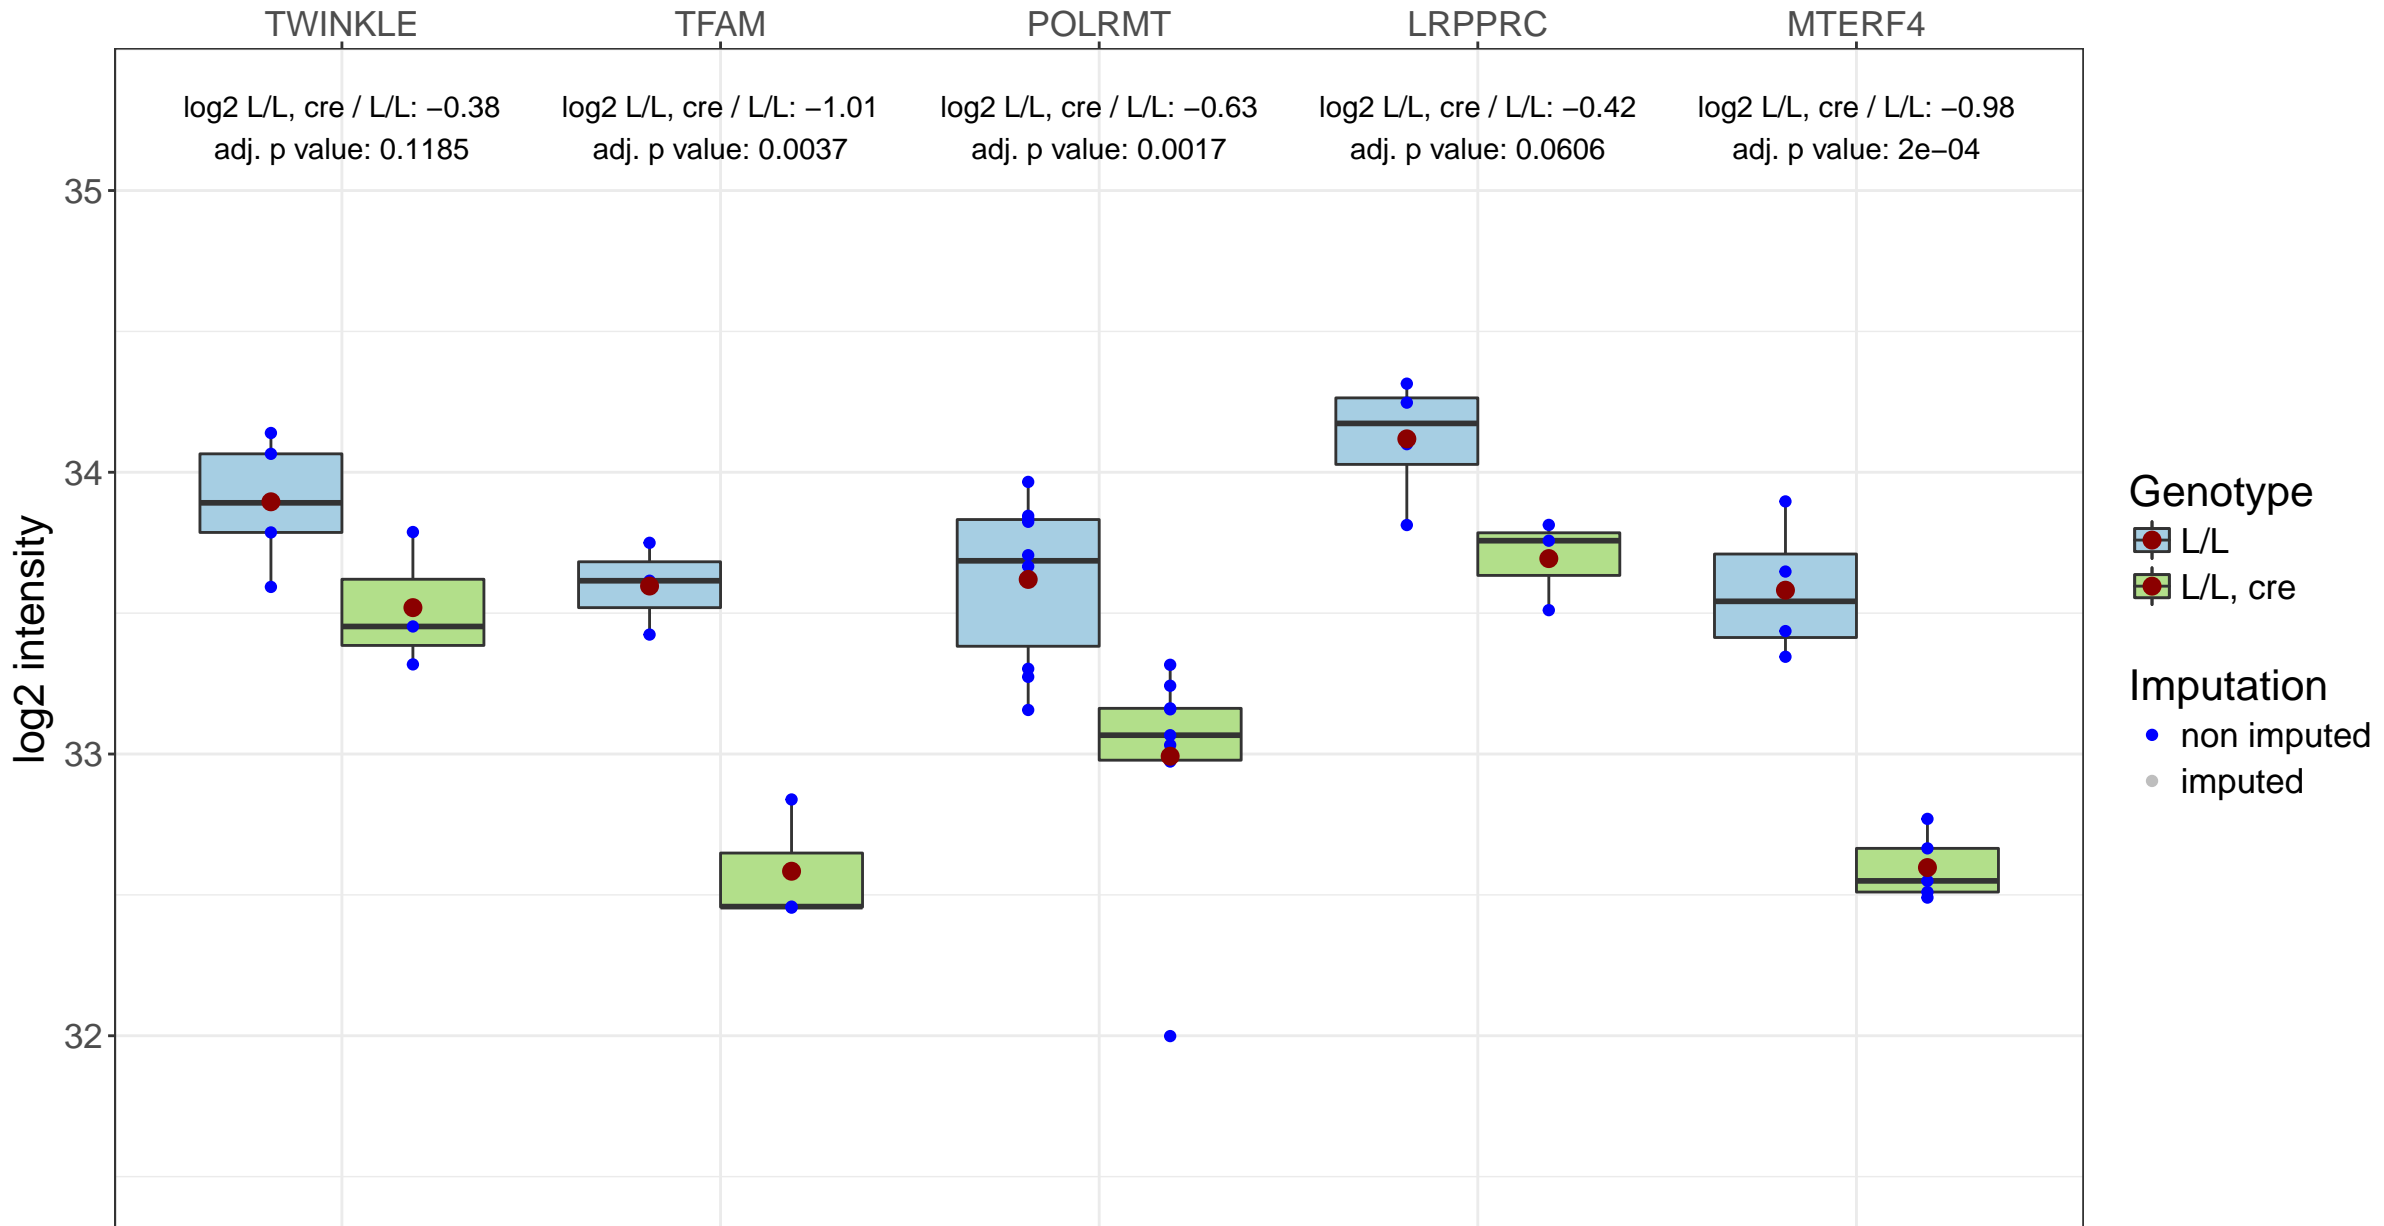

# UQCR11 / Q9CPX8

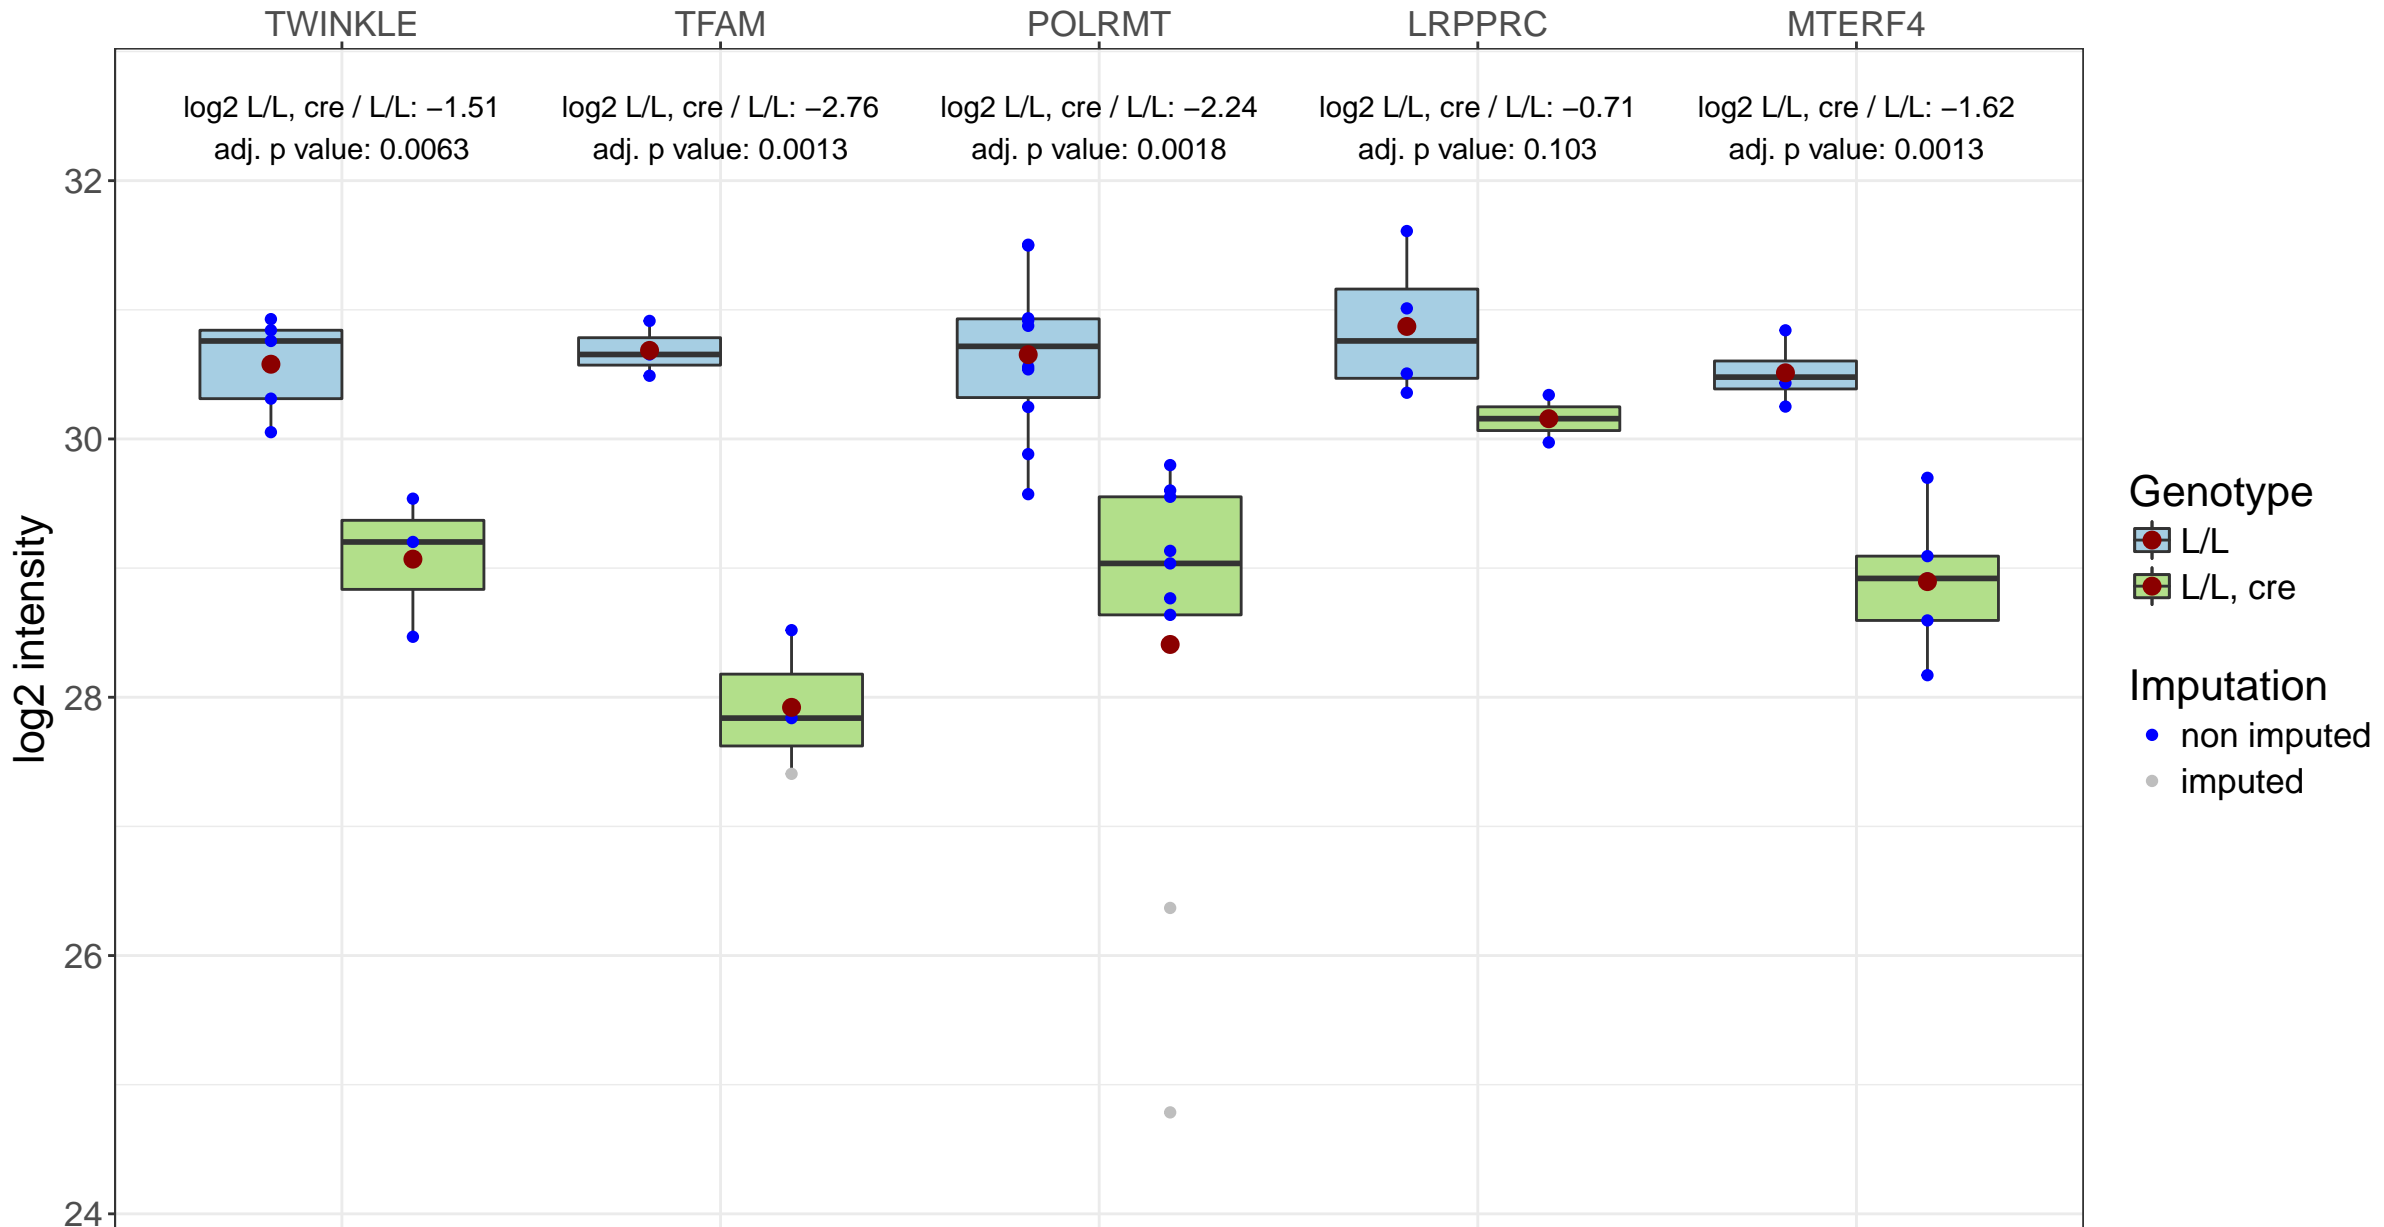

# UQCRB / Q9CQB4

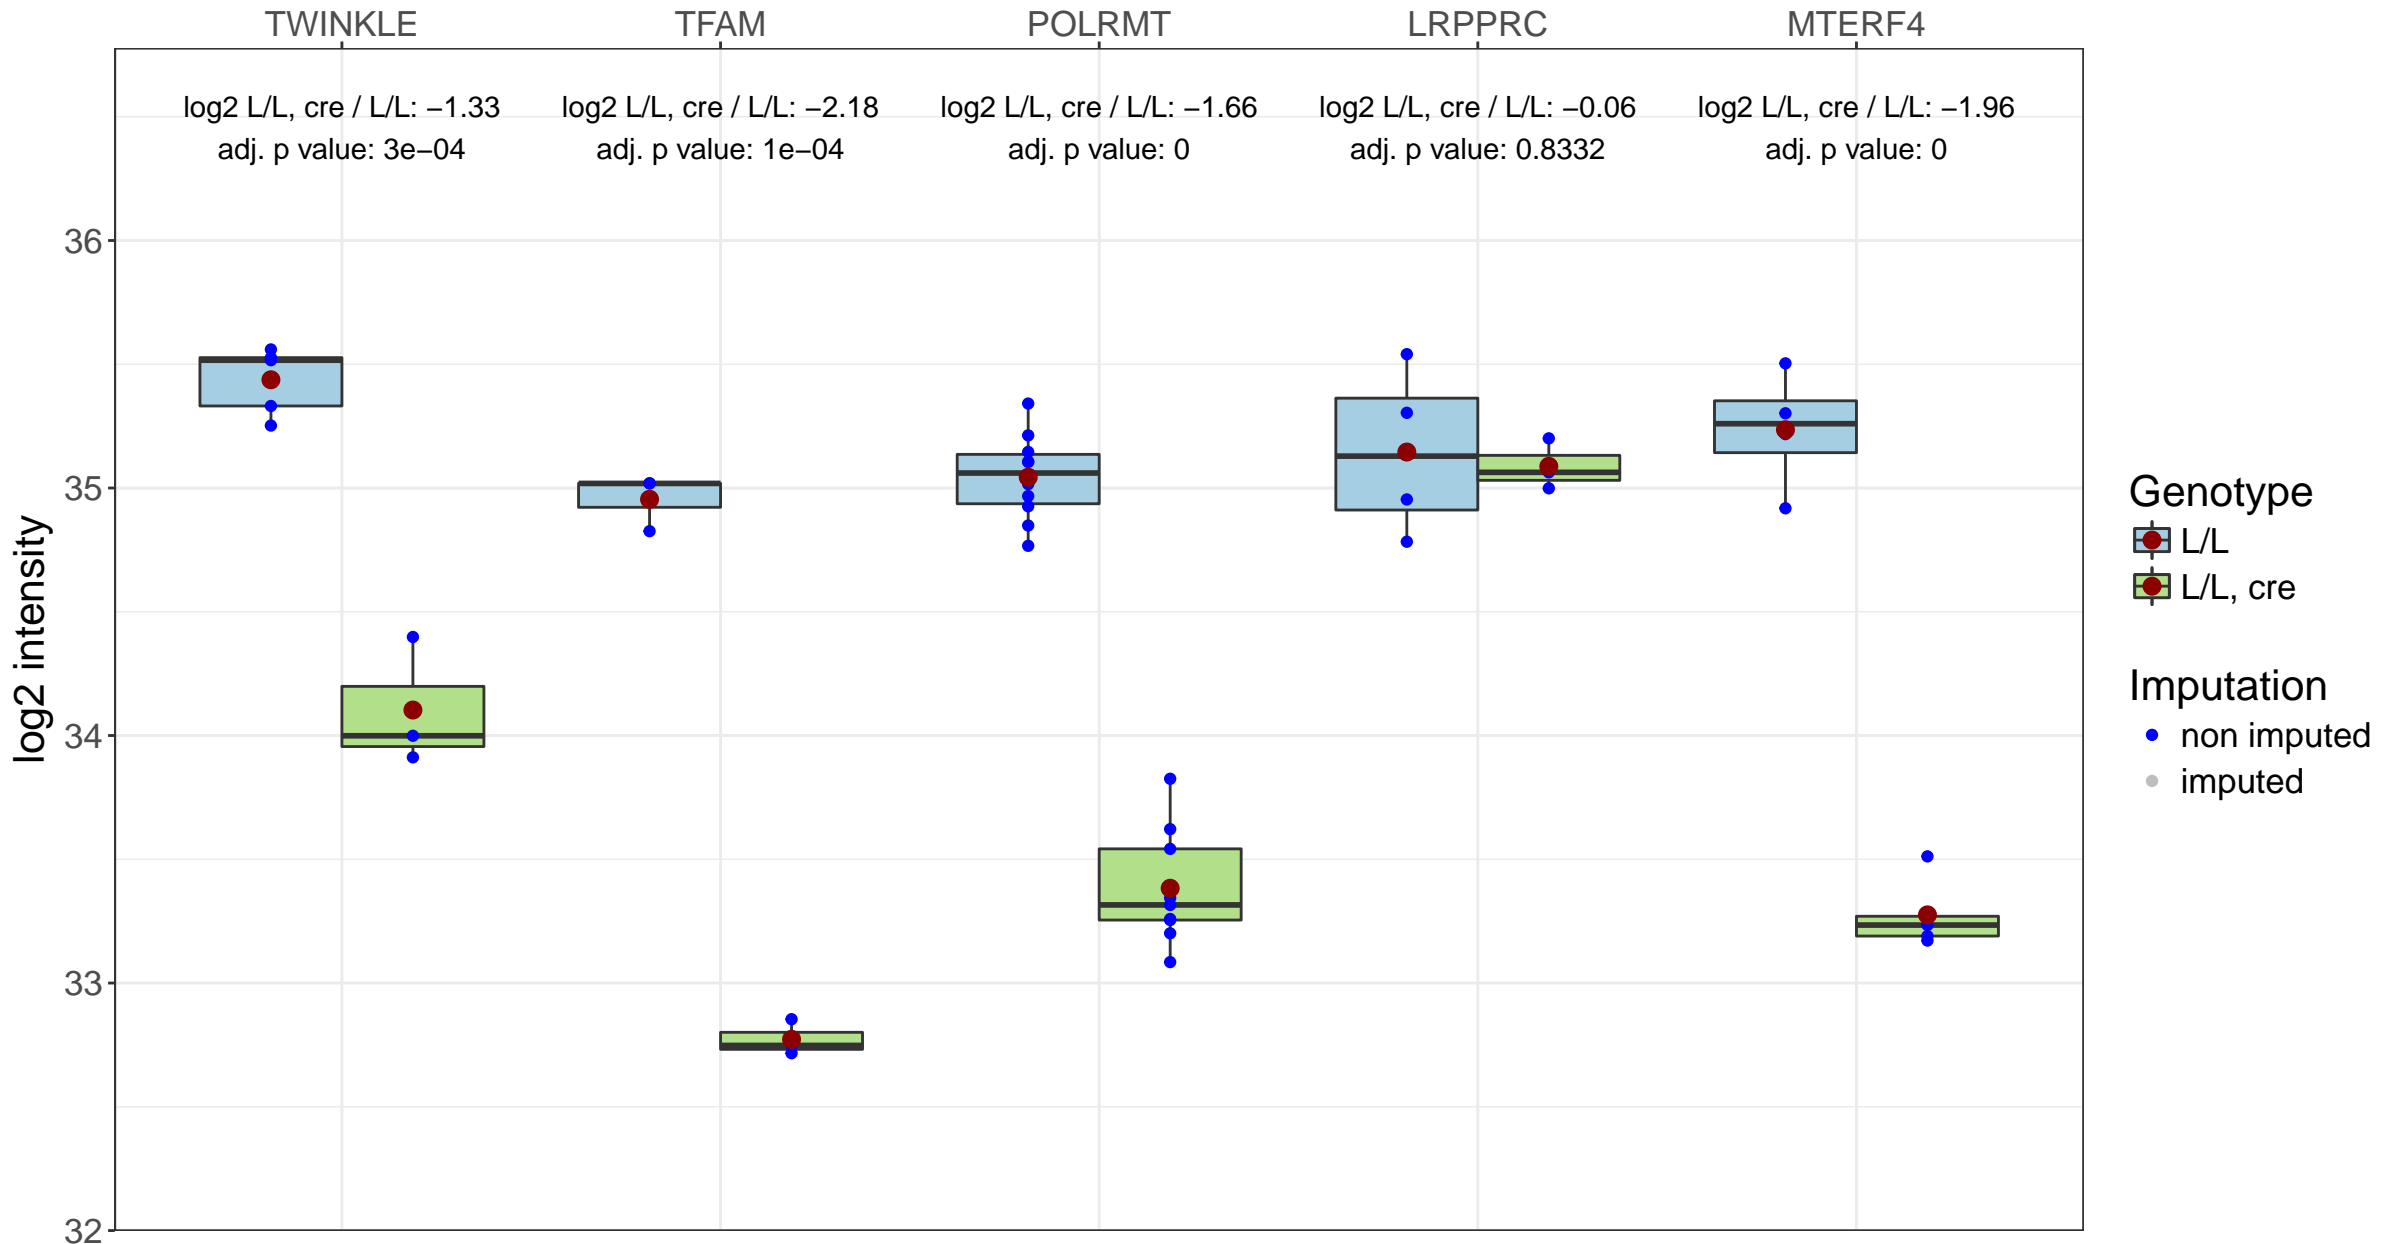



# UQCRC1 / Q9CZ13

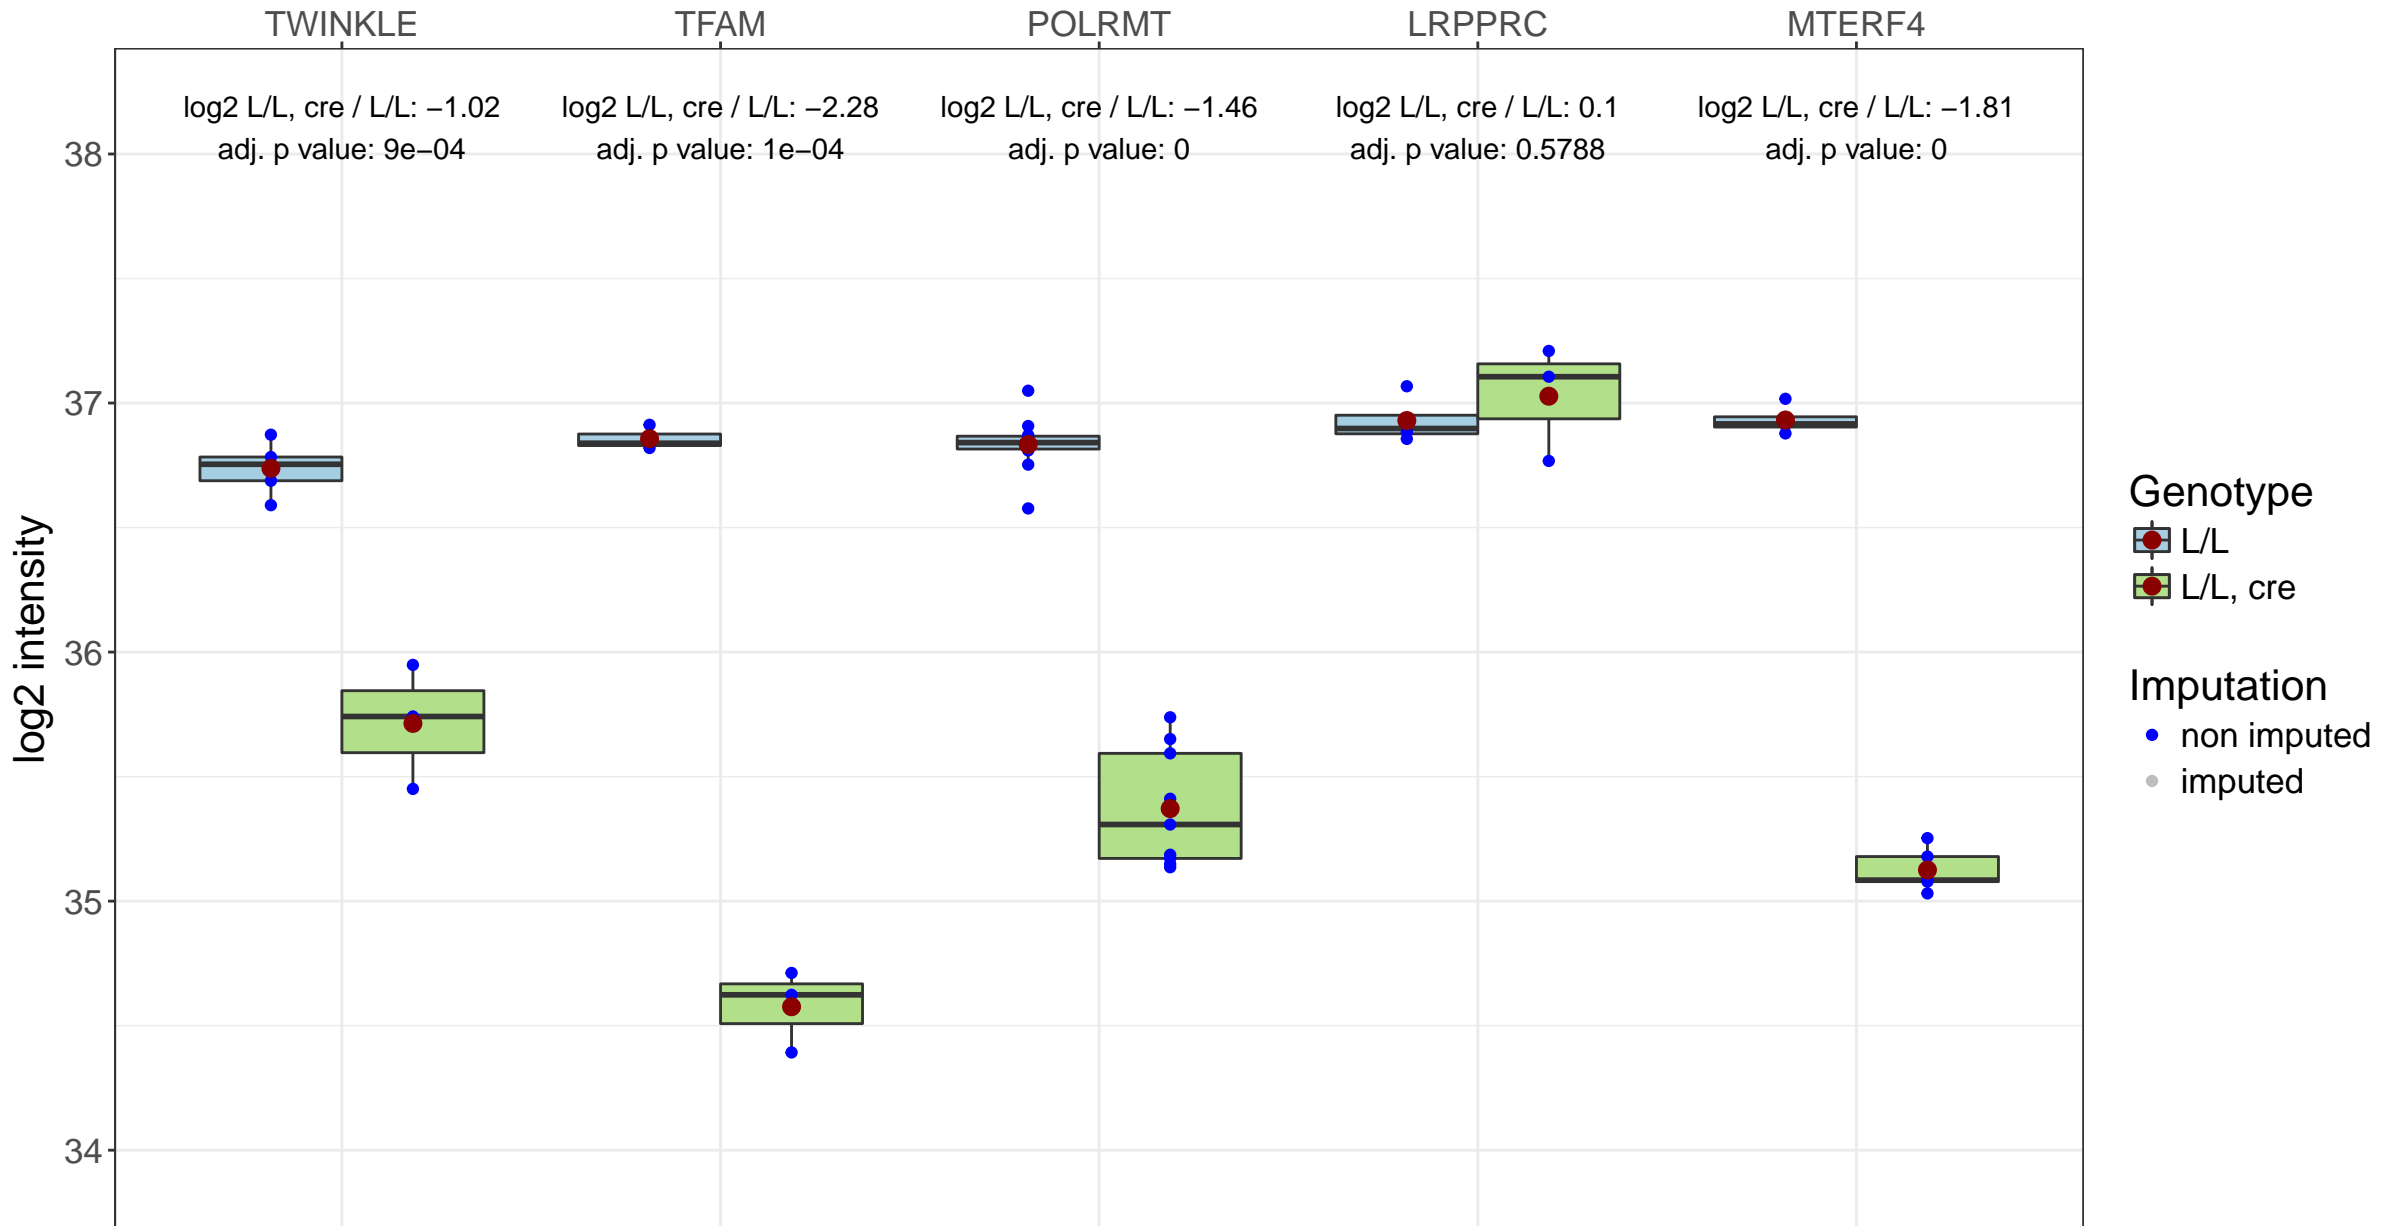

# UQCRC2 / Q9DB77

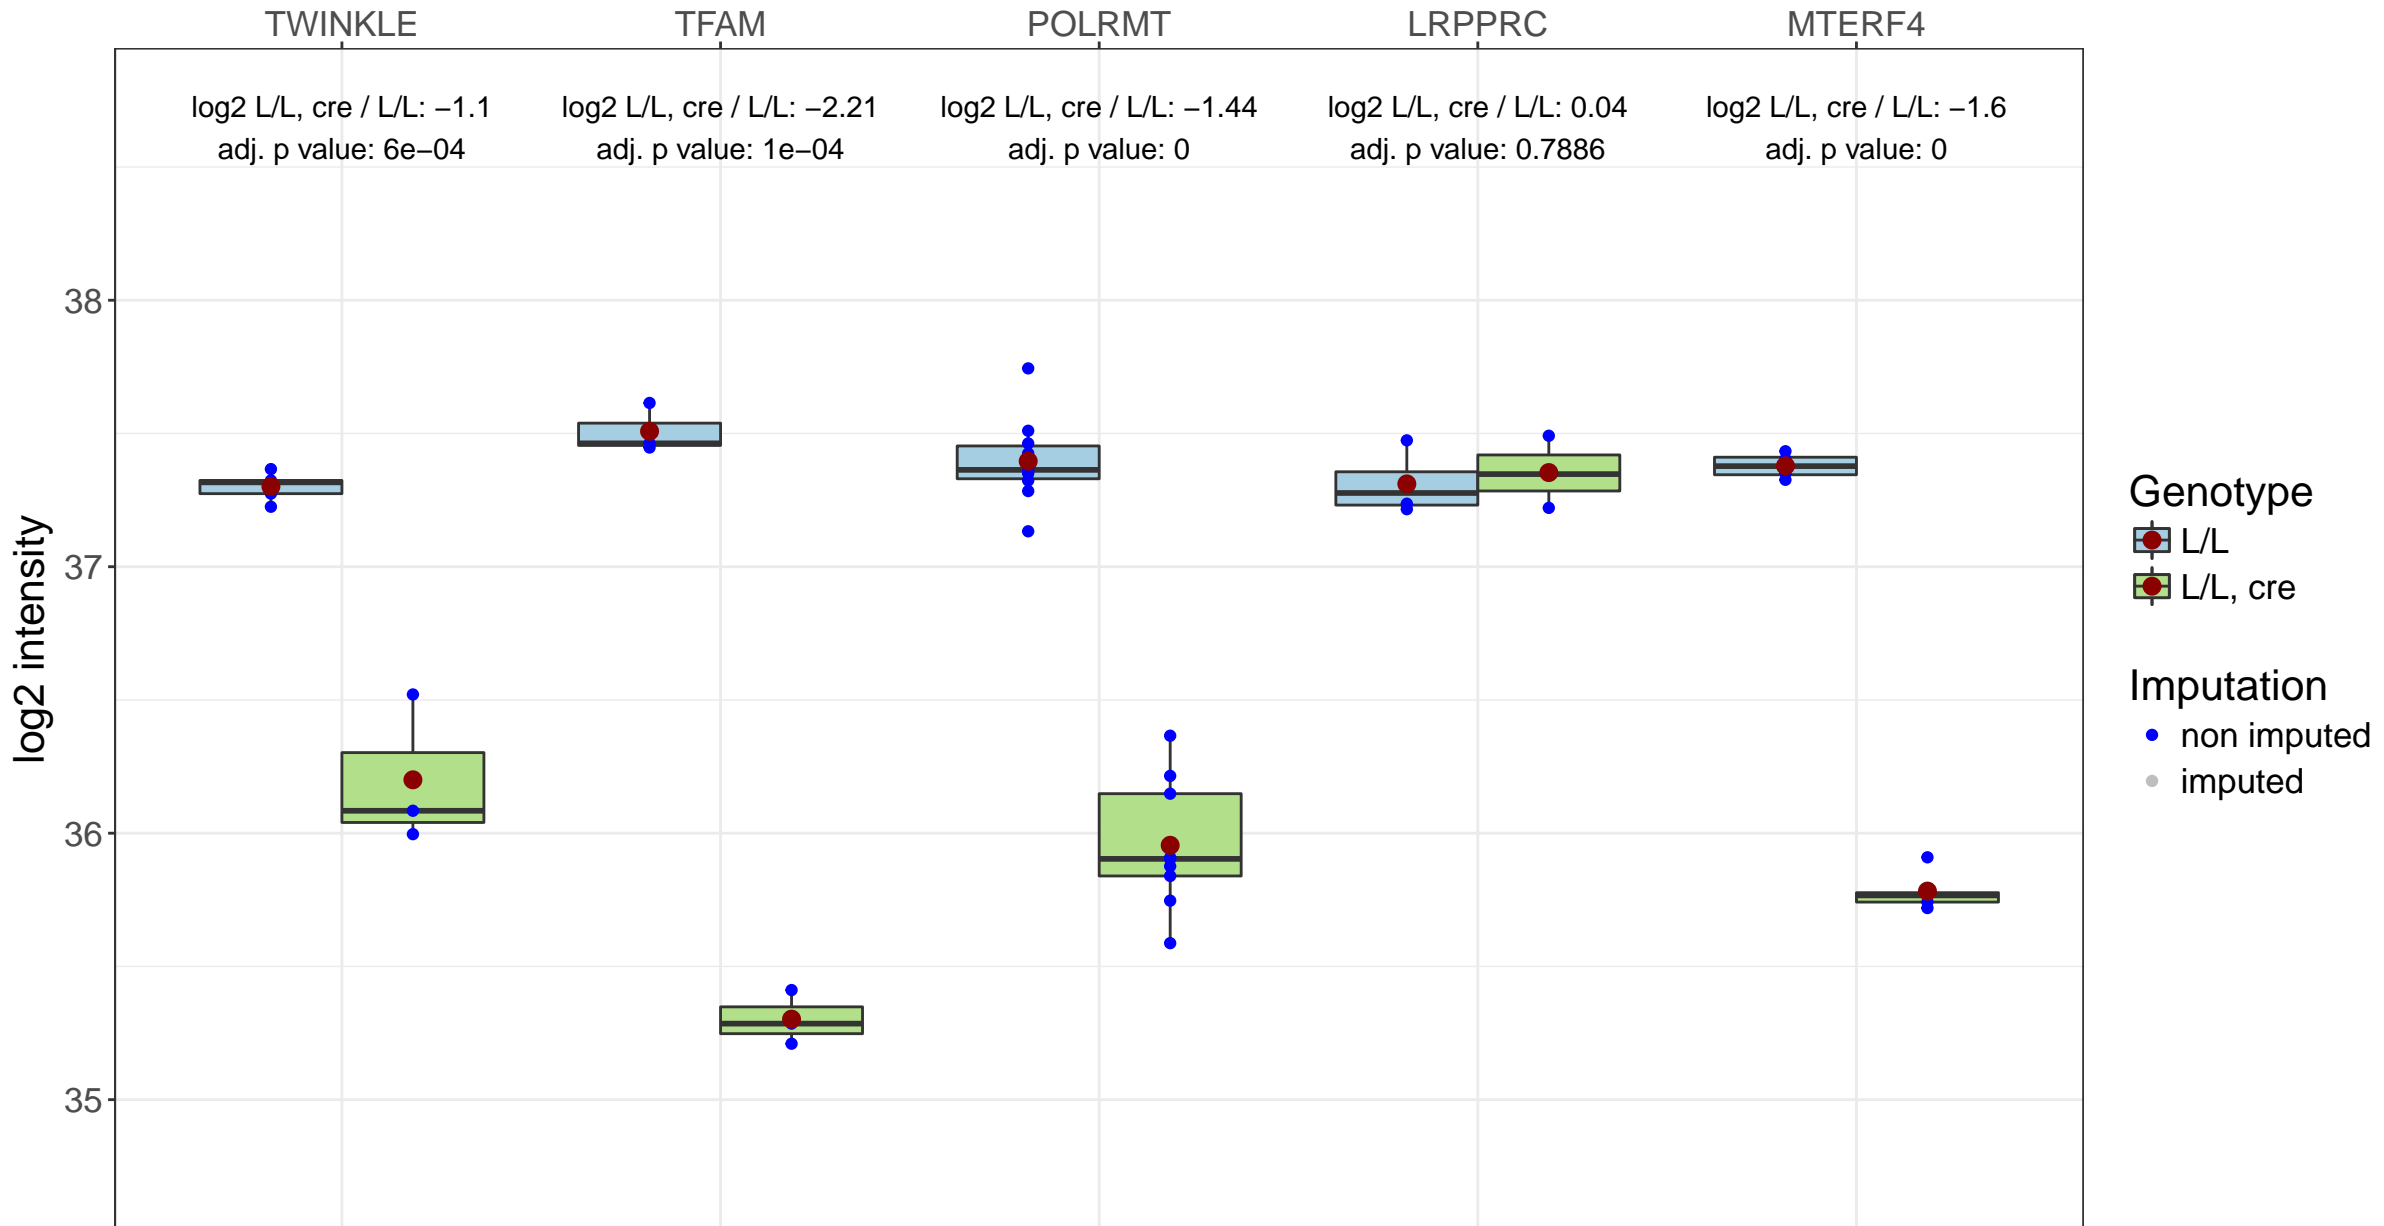

# UQCRFS1 / Q9CR68

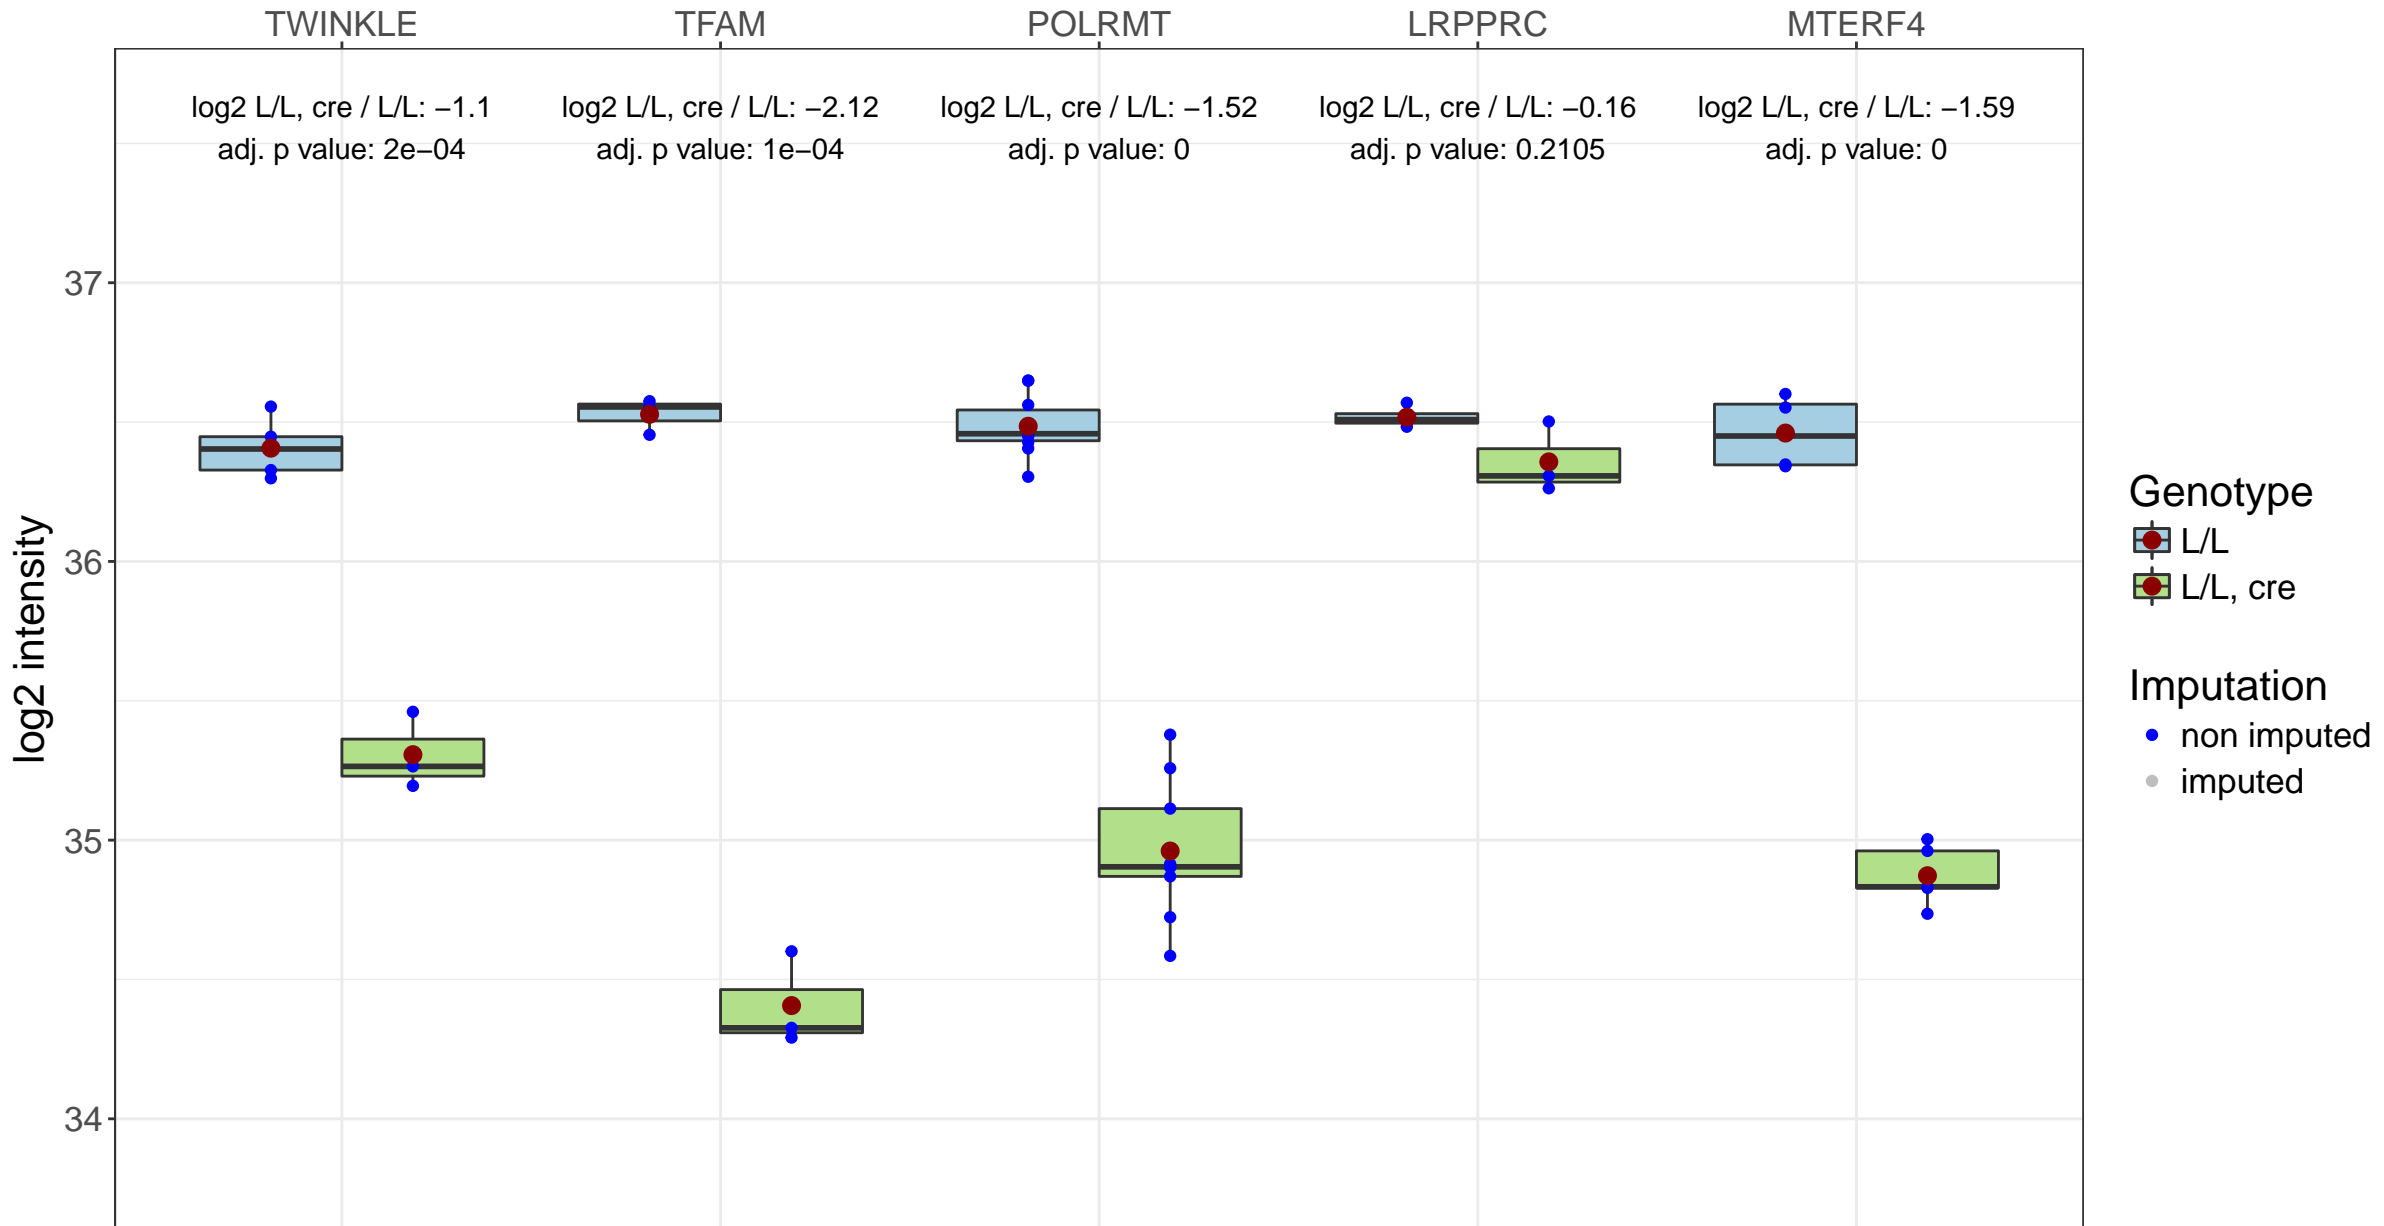

# UQCRH / P99028

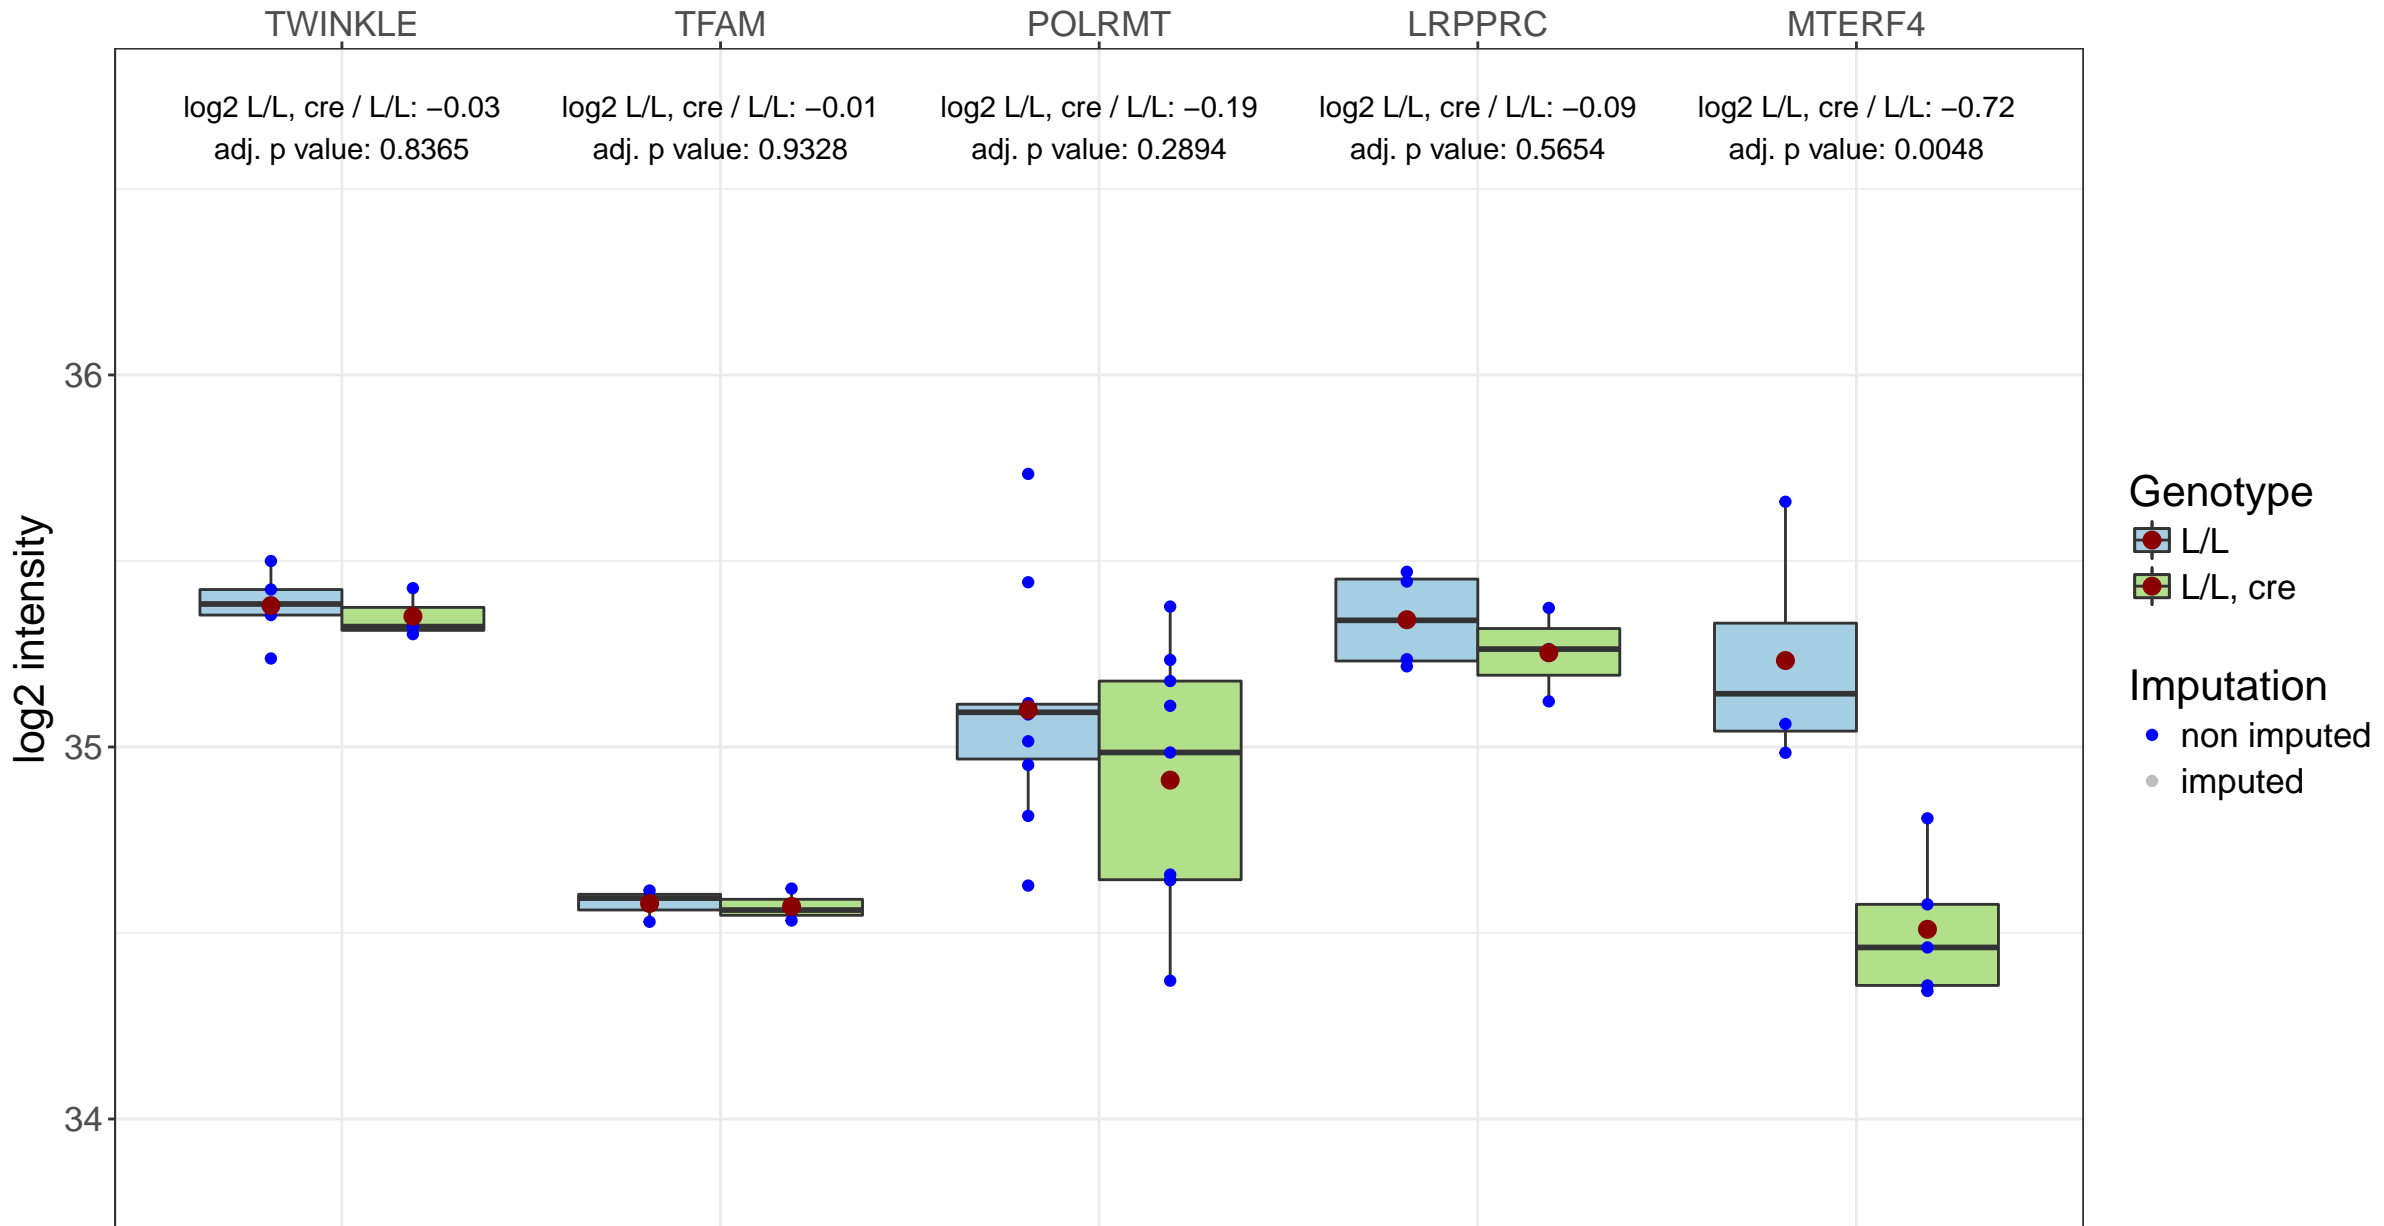

# UQCRQ / Q9CQ69

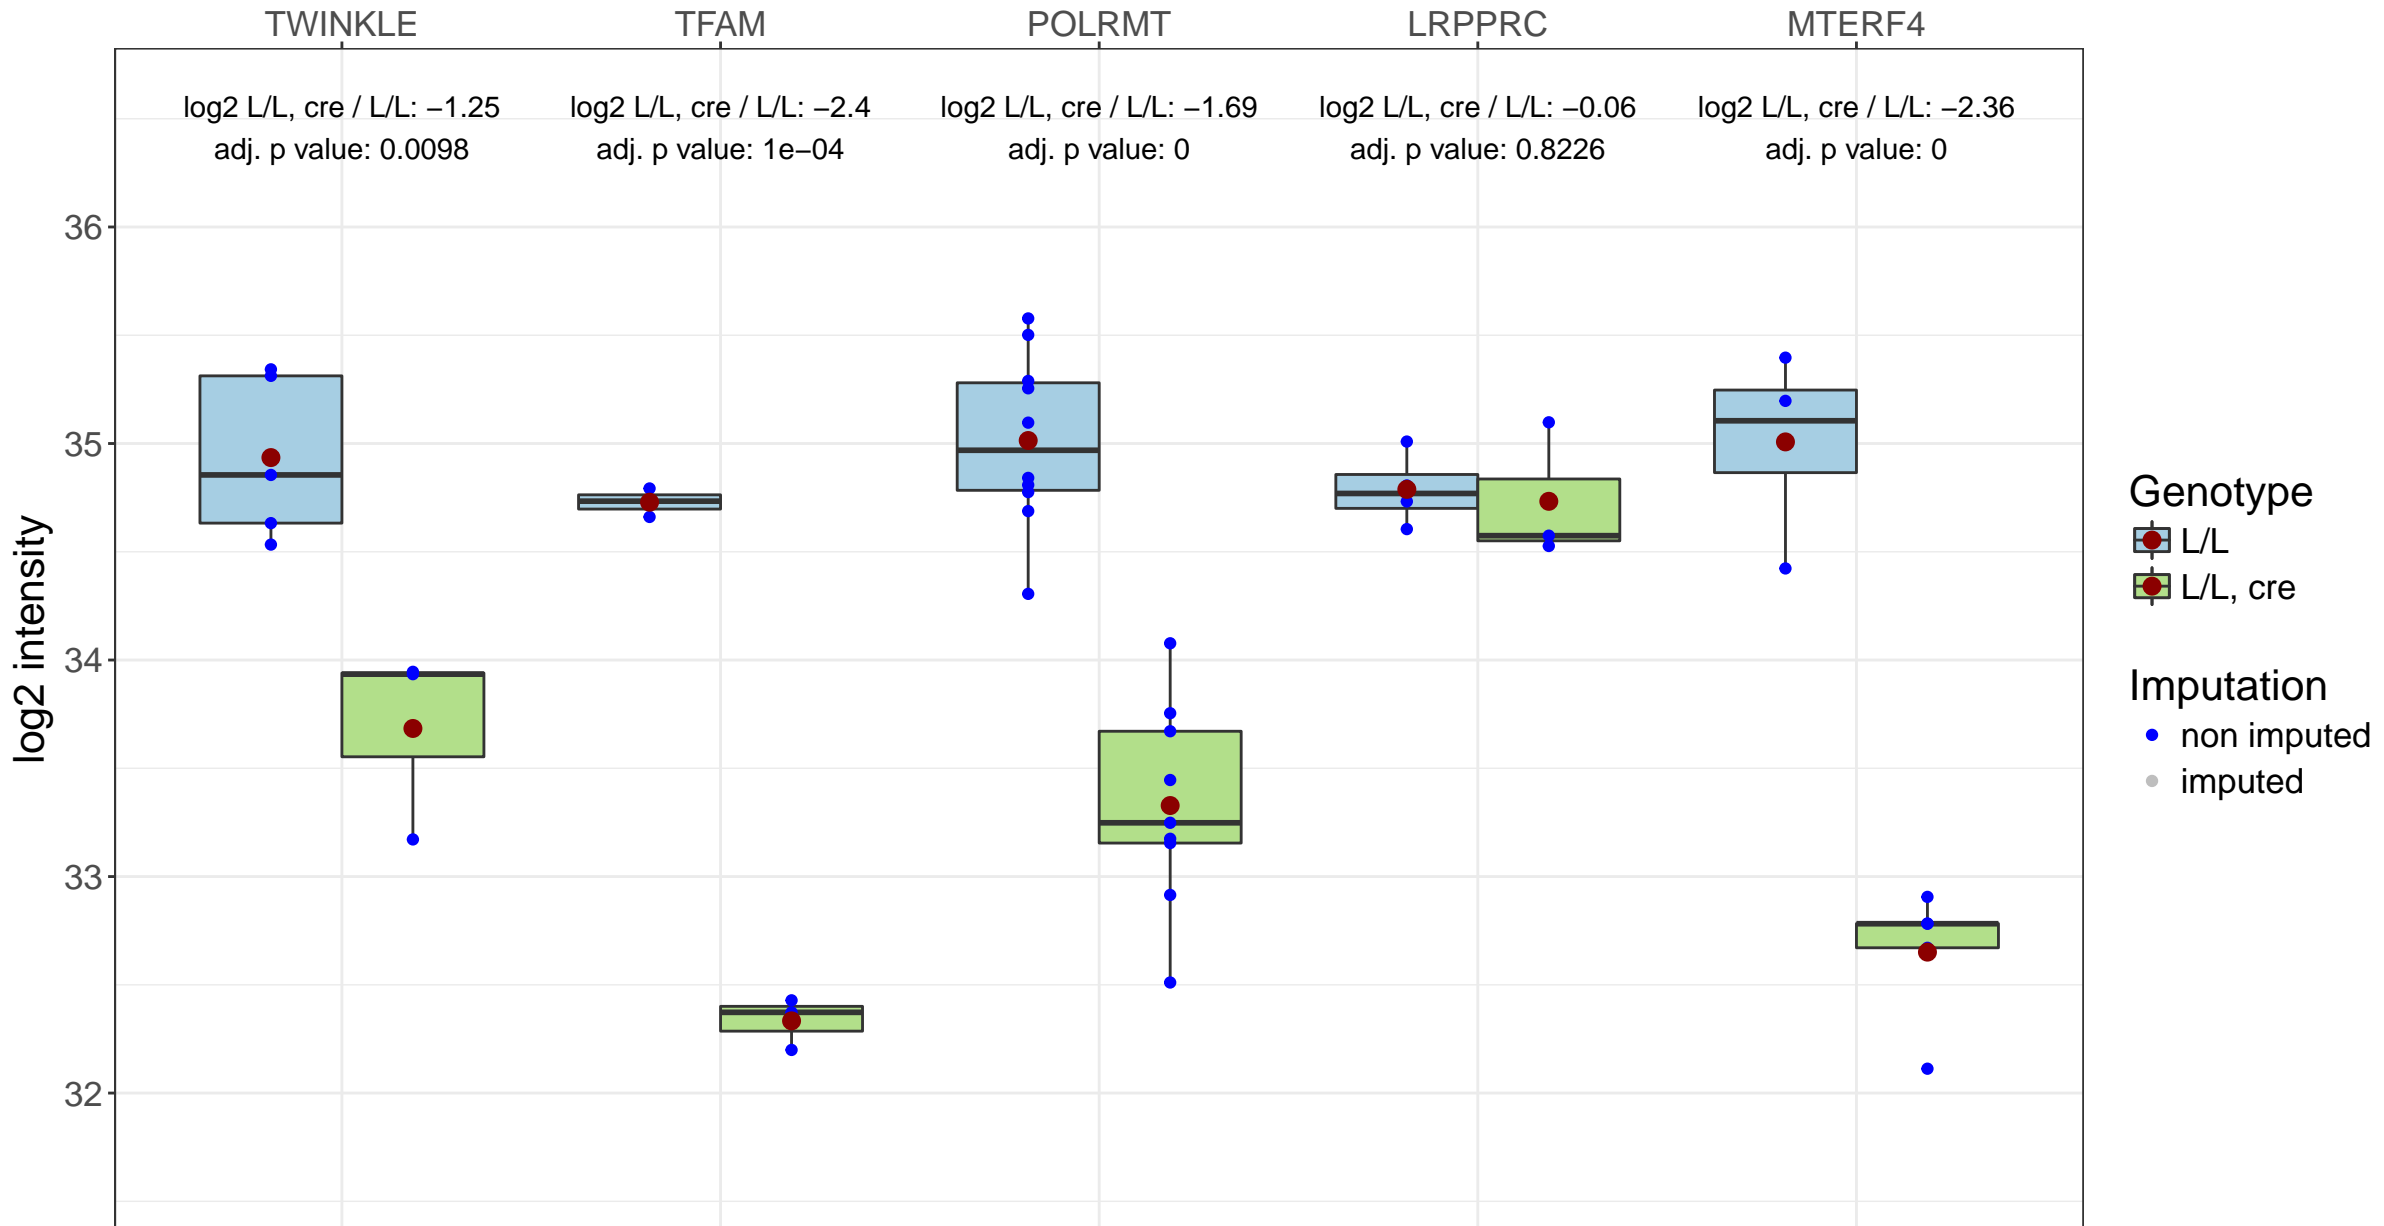

# USMG5 / Q78IK2

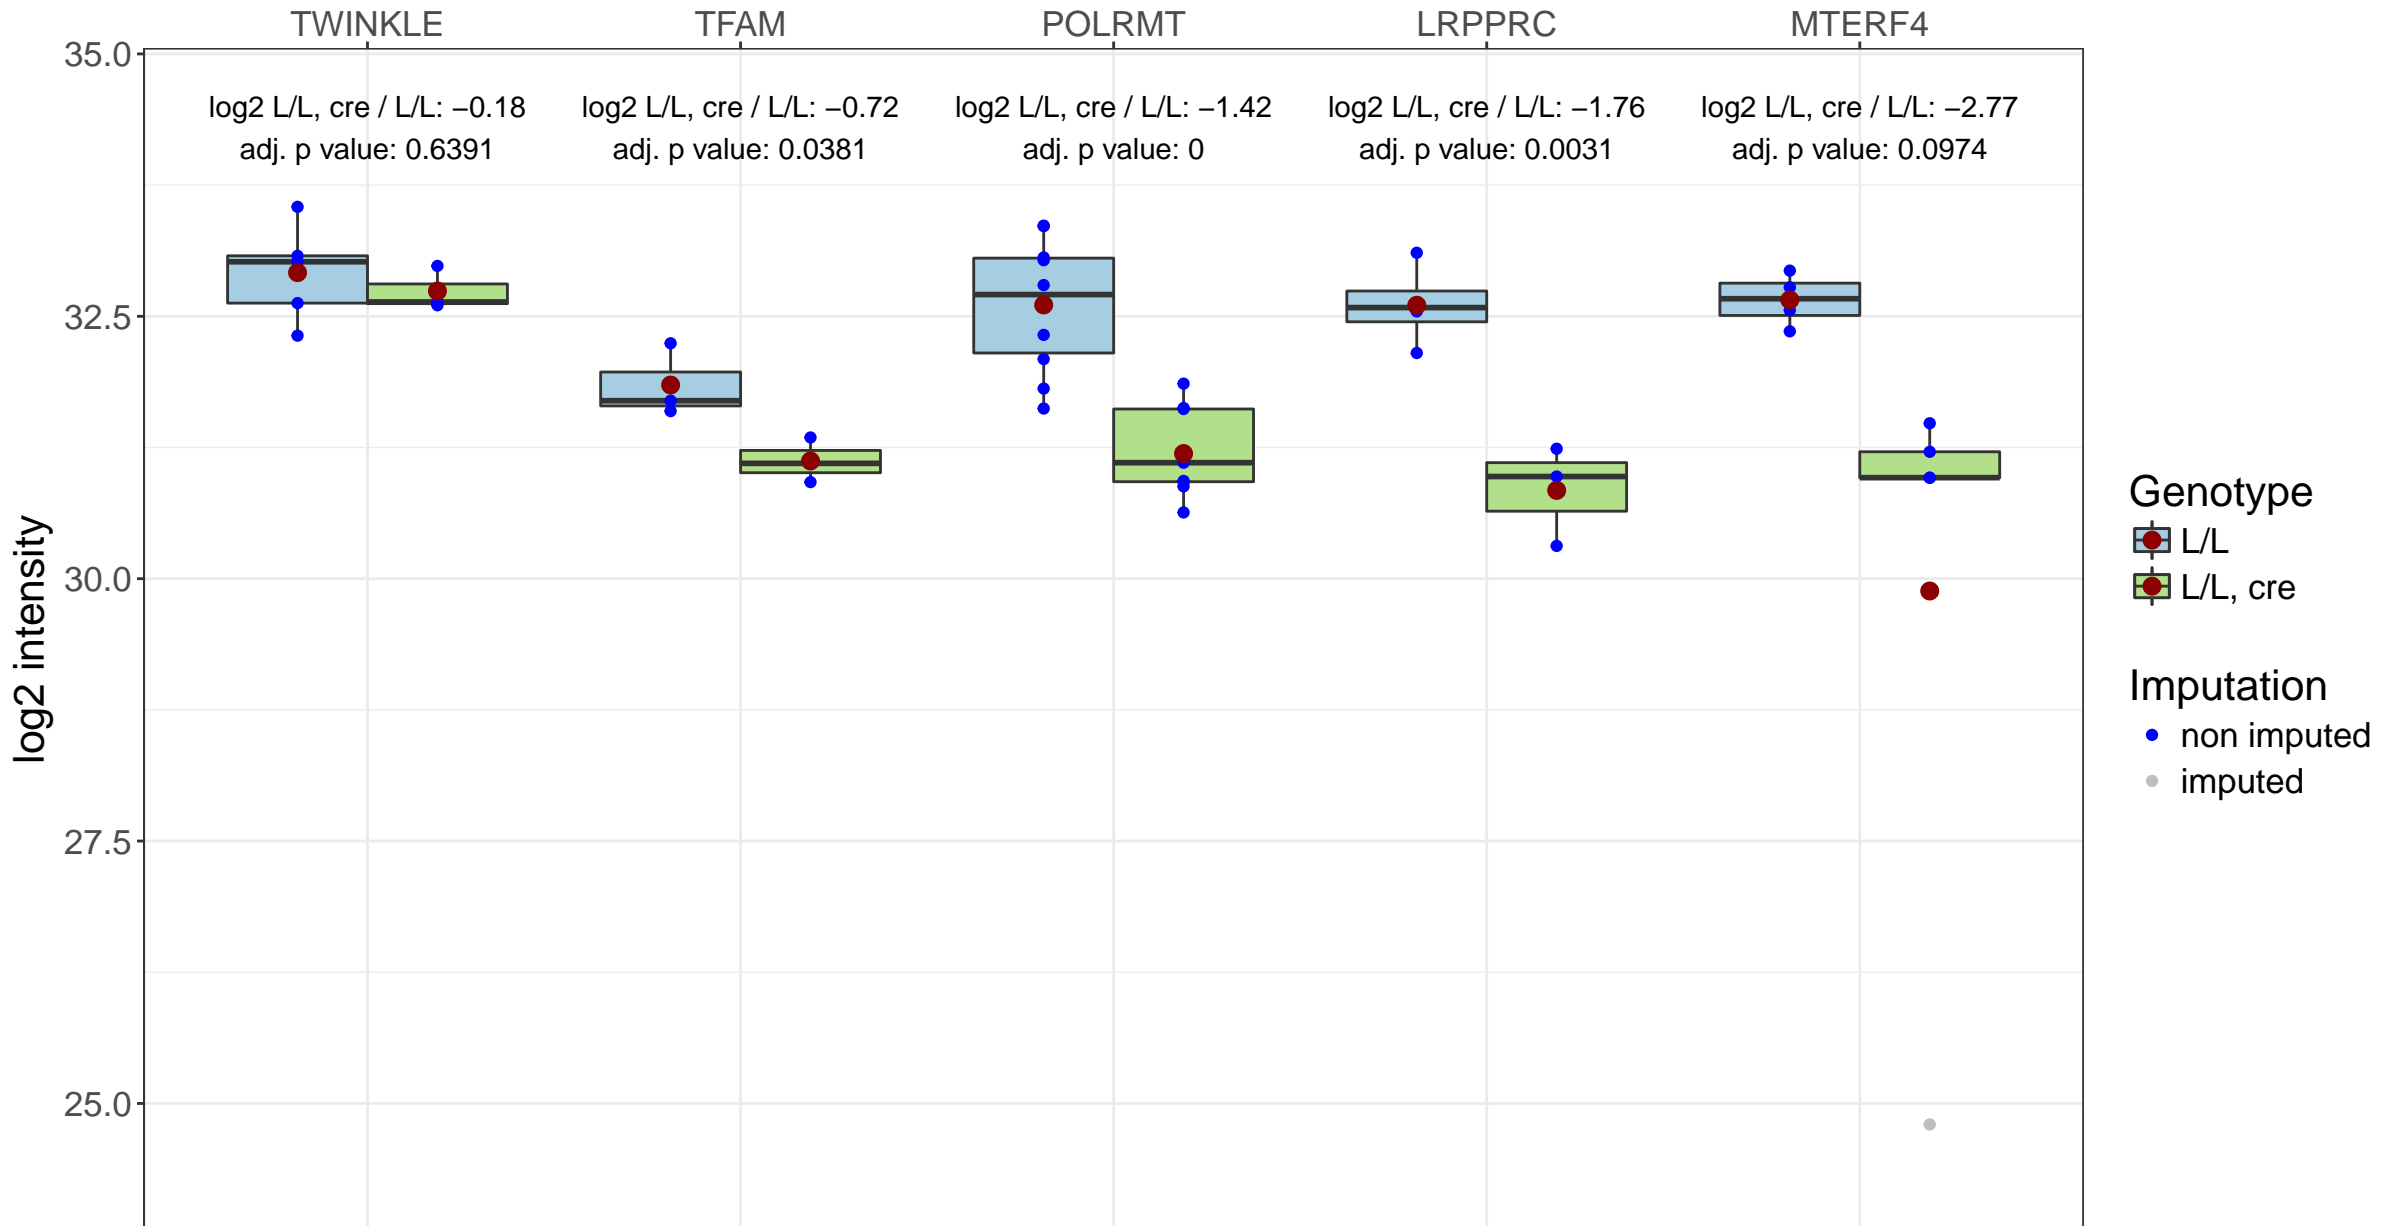

# VARS2 / Q3U2A8

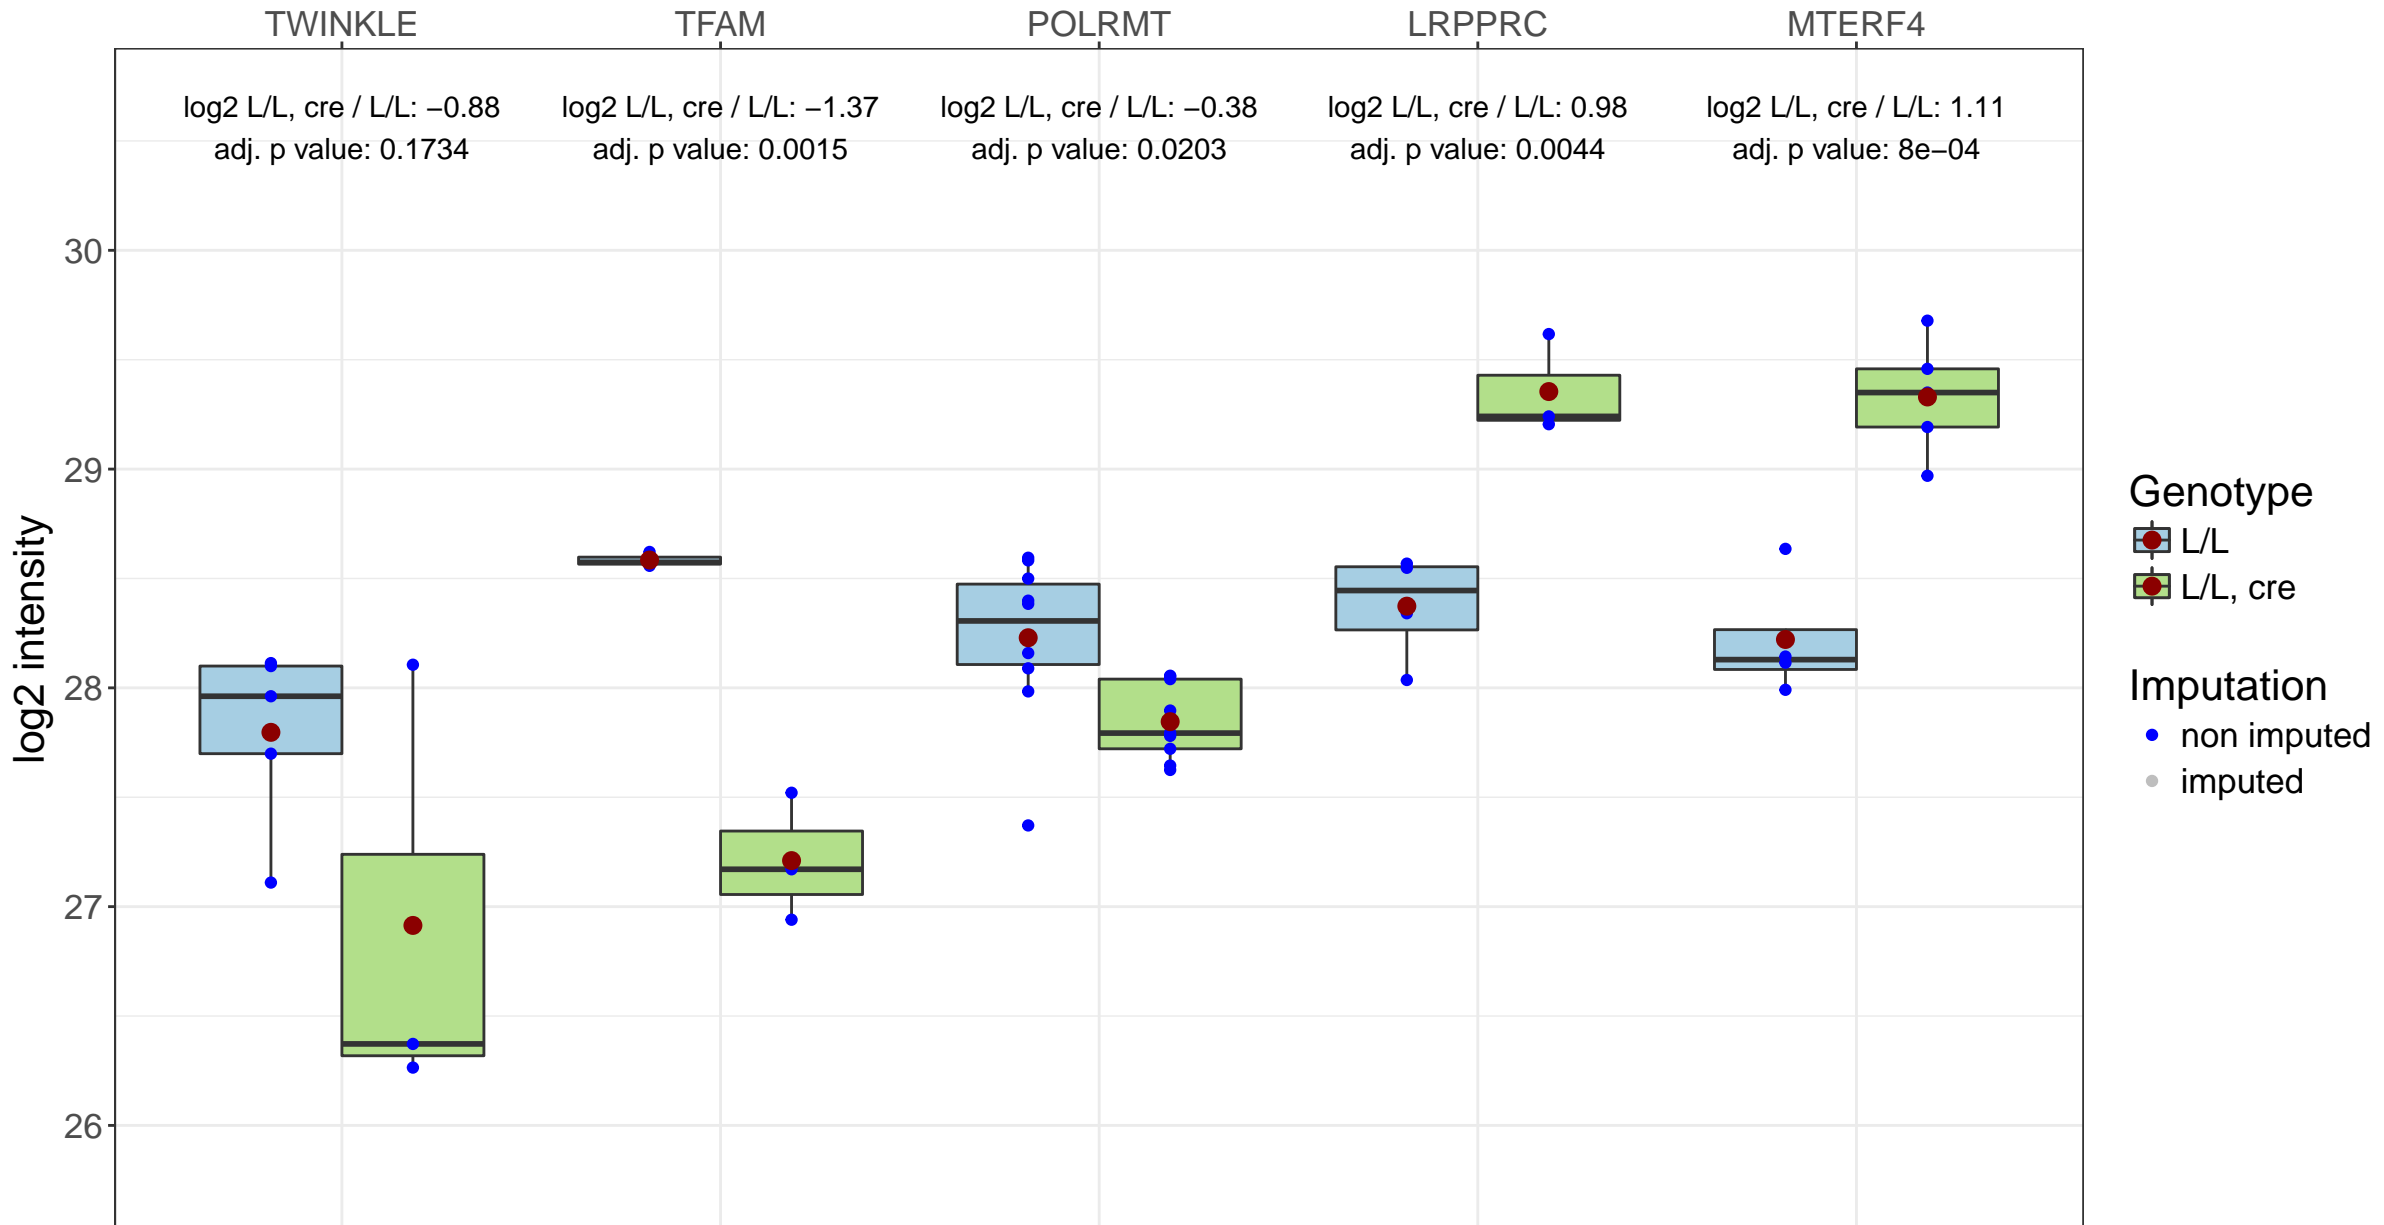

# VCP / Q01853

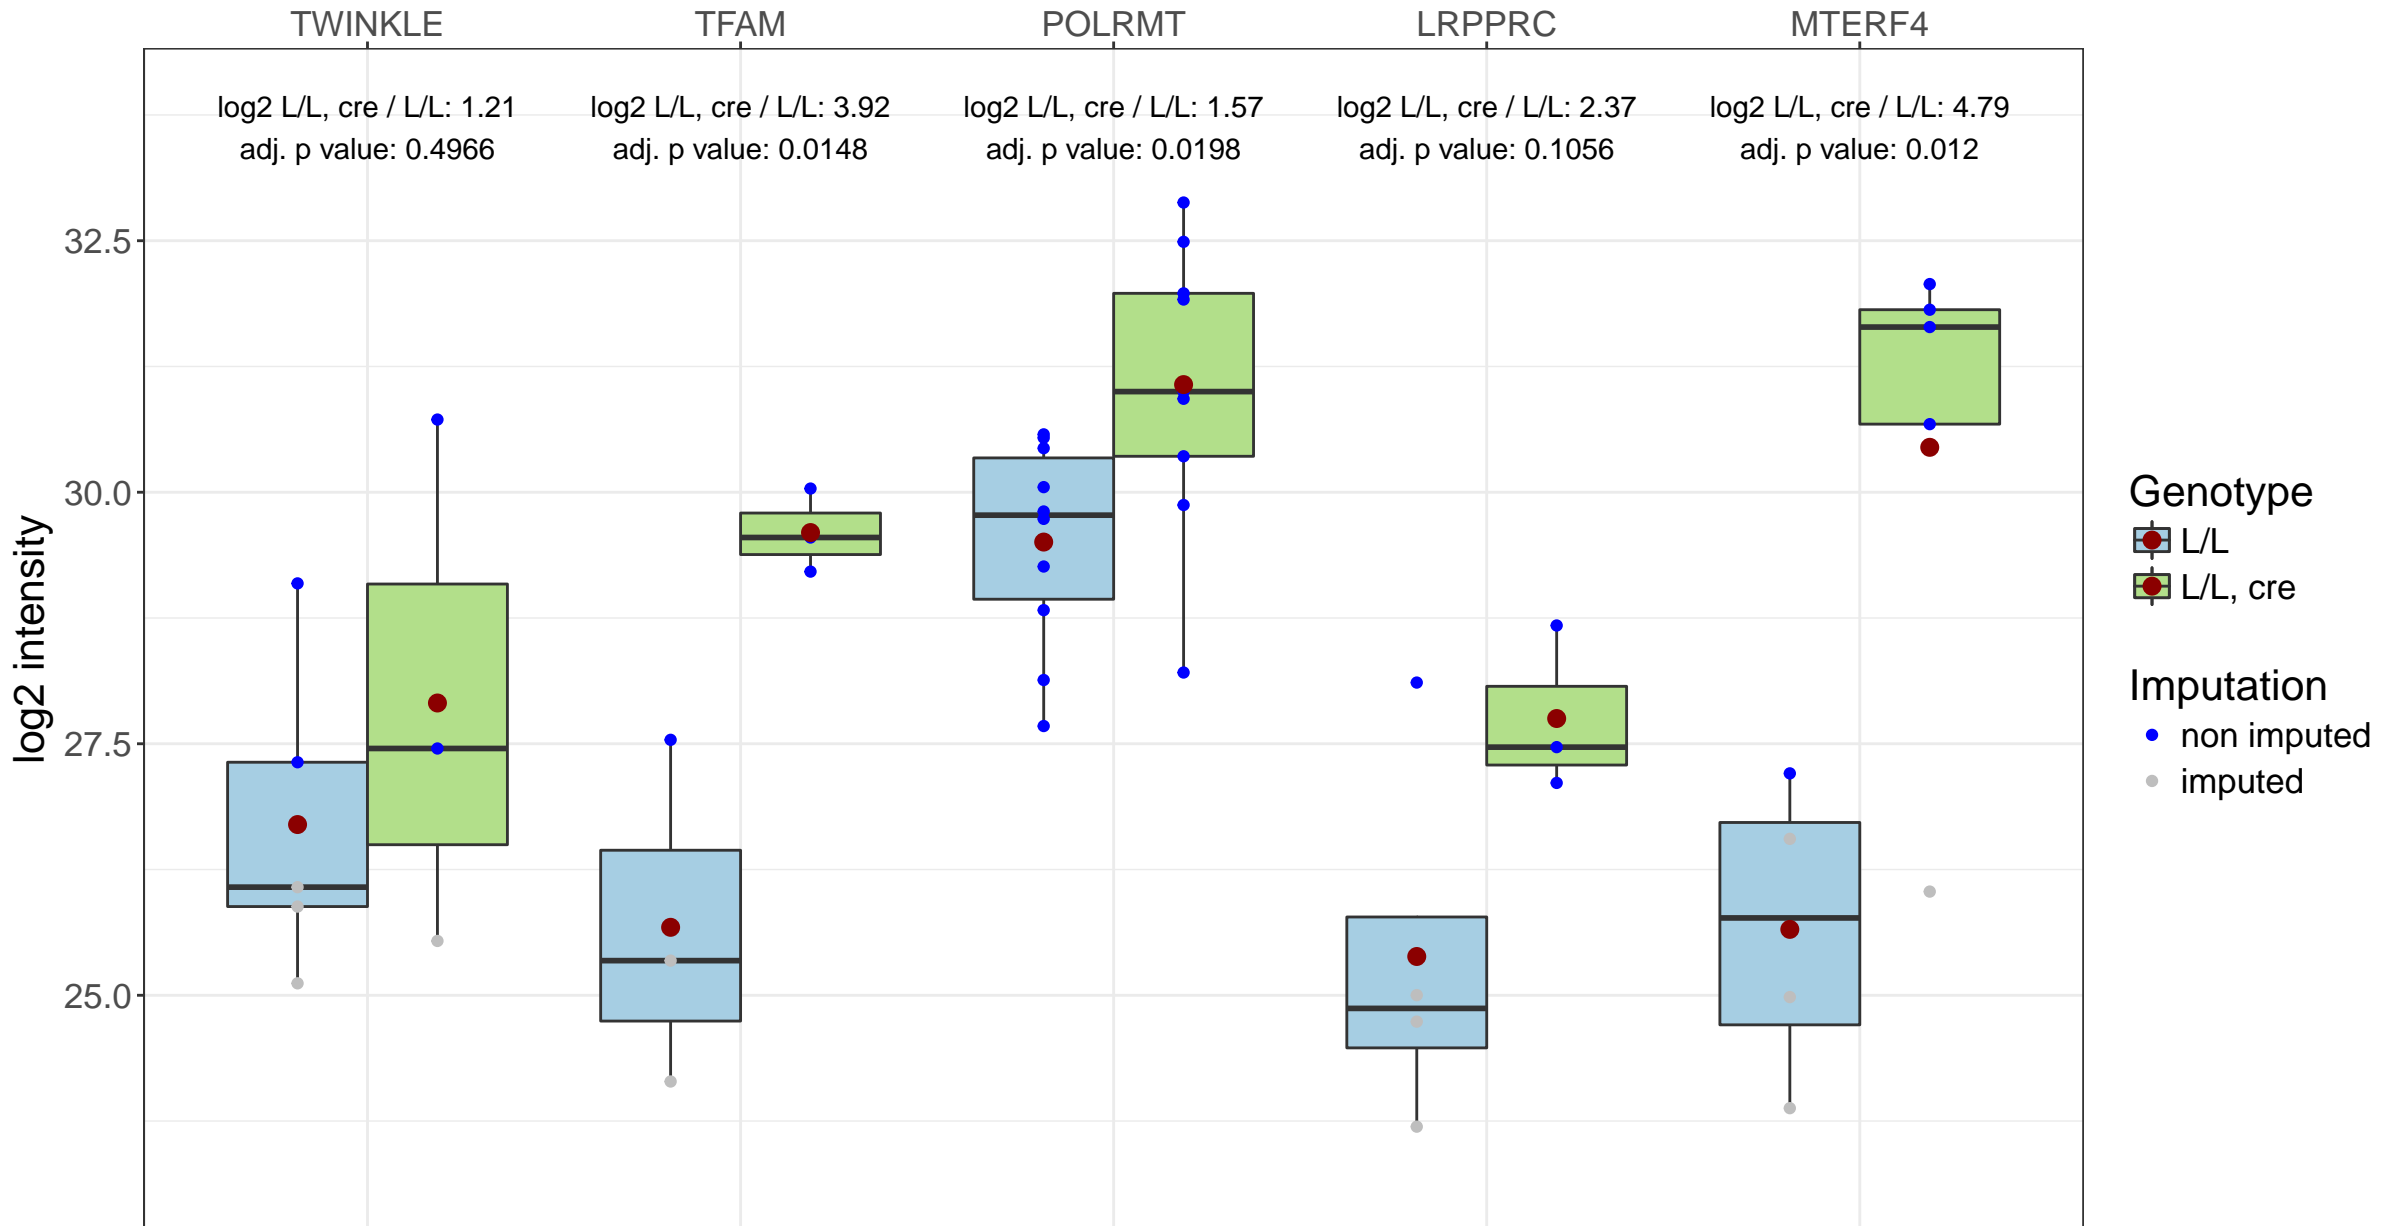



# VDAC1 / Q60932-2

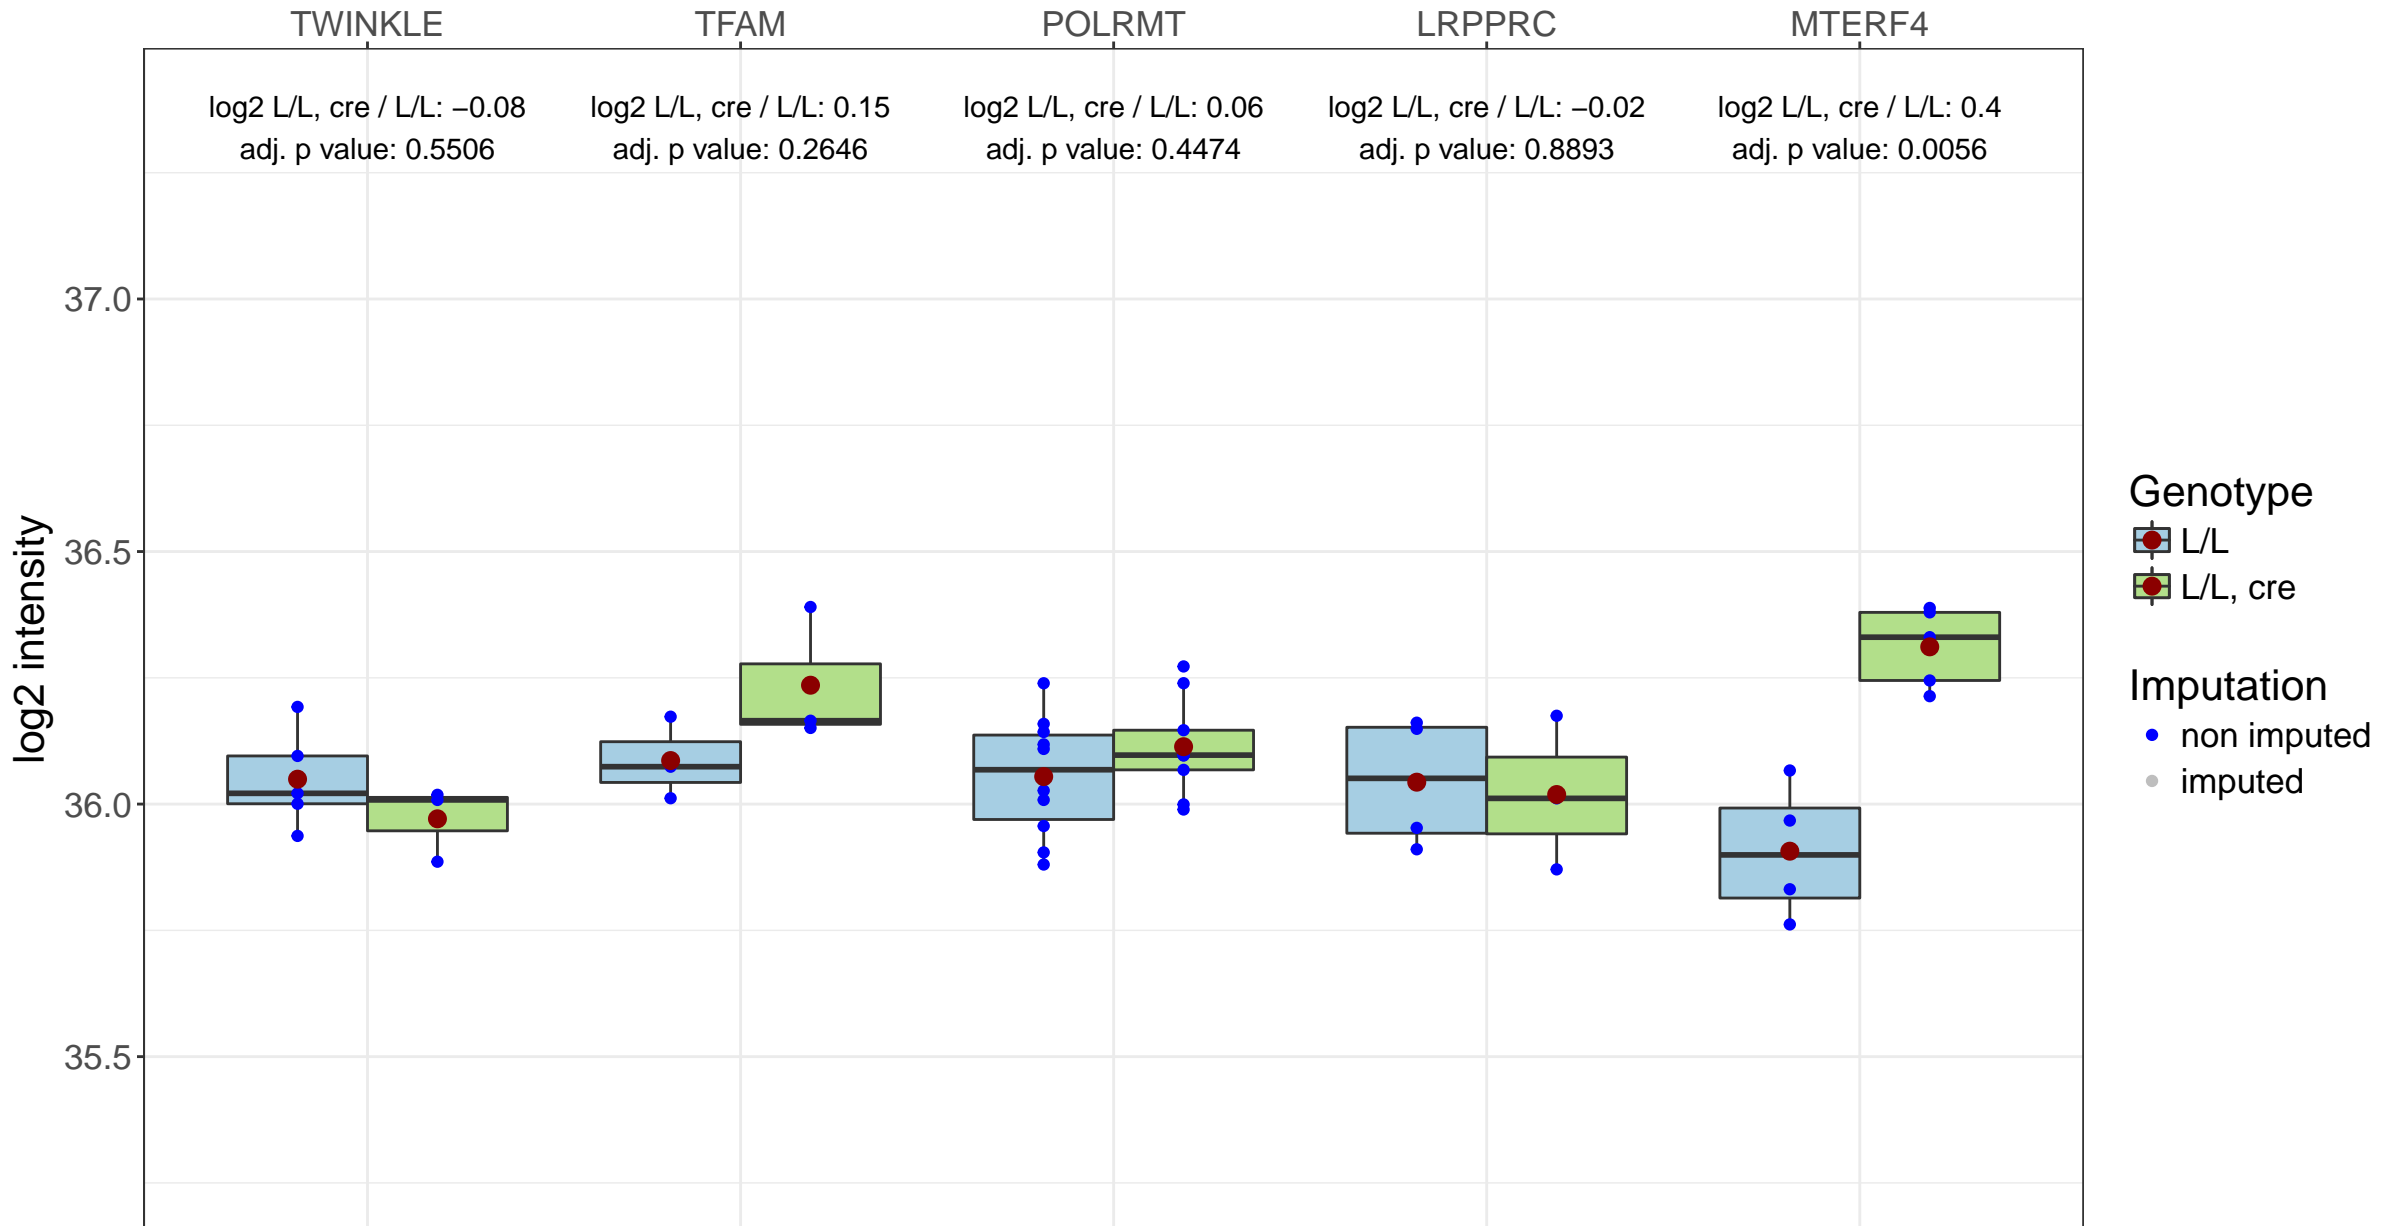

# VDAC2 / Q60930

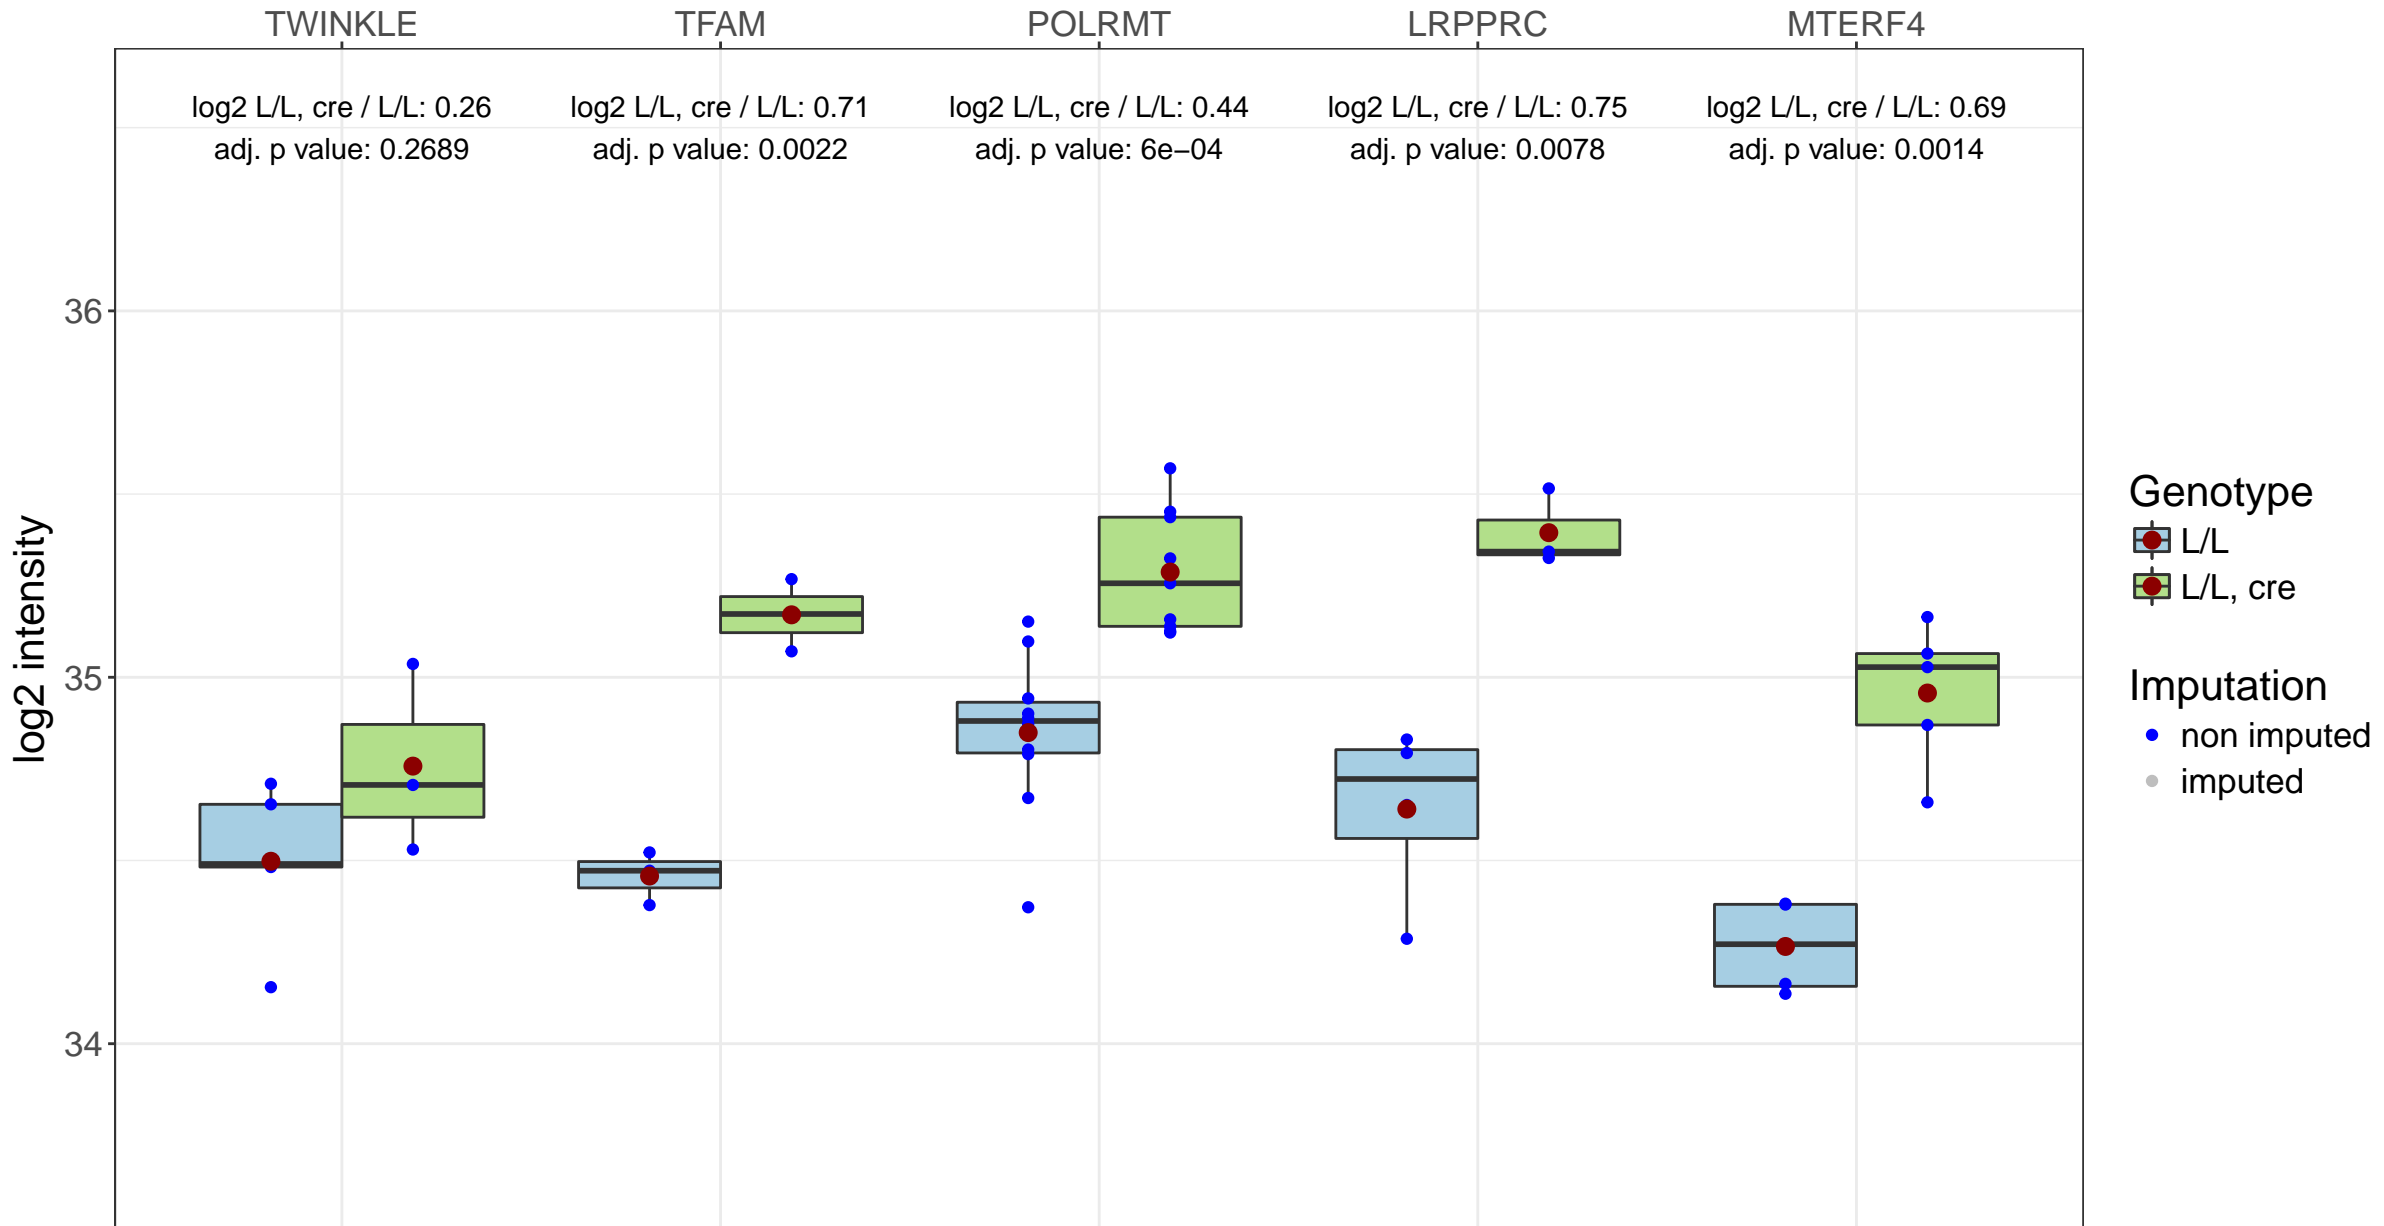

# VDAC3 / Q60931

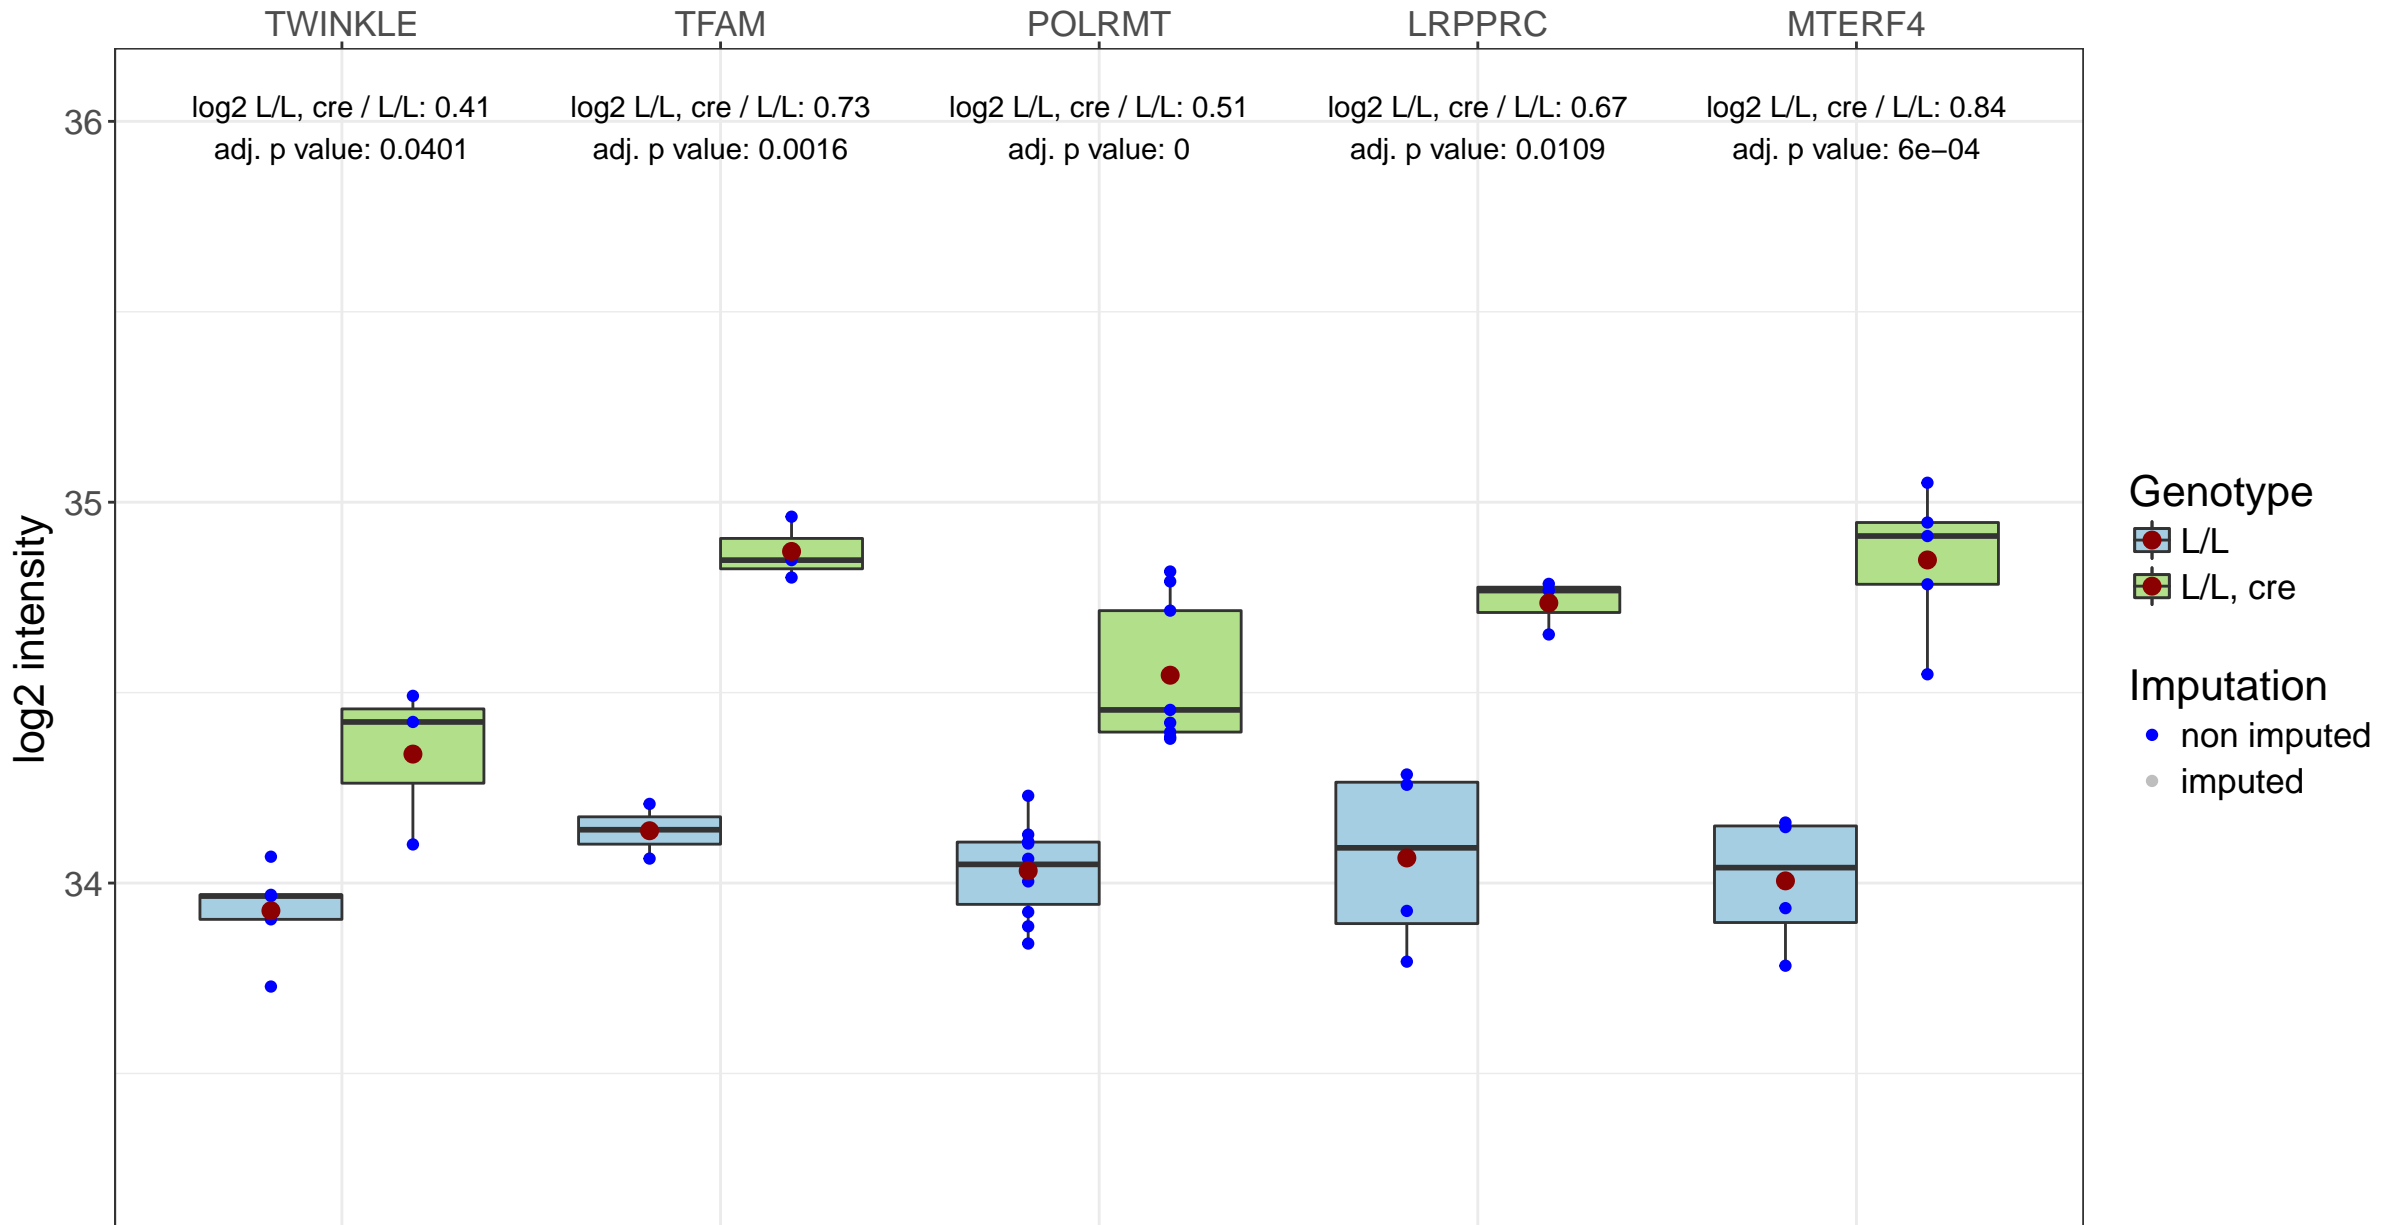

# VIM / P20152

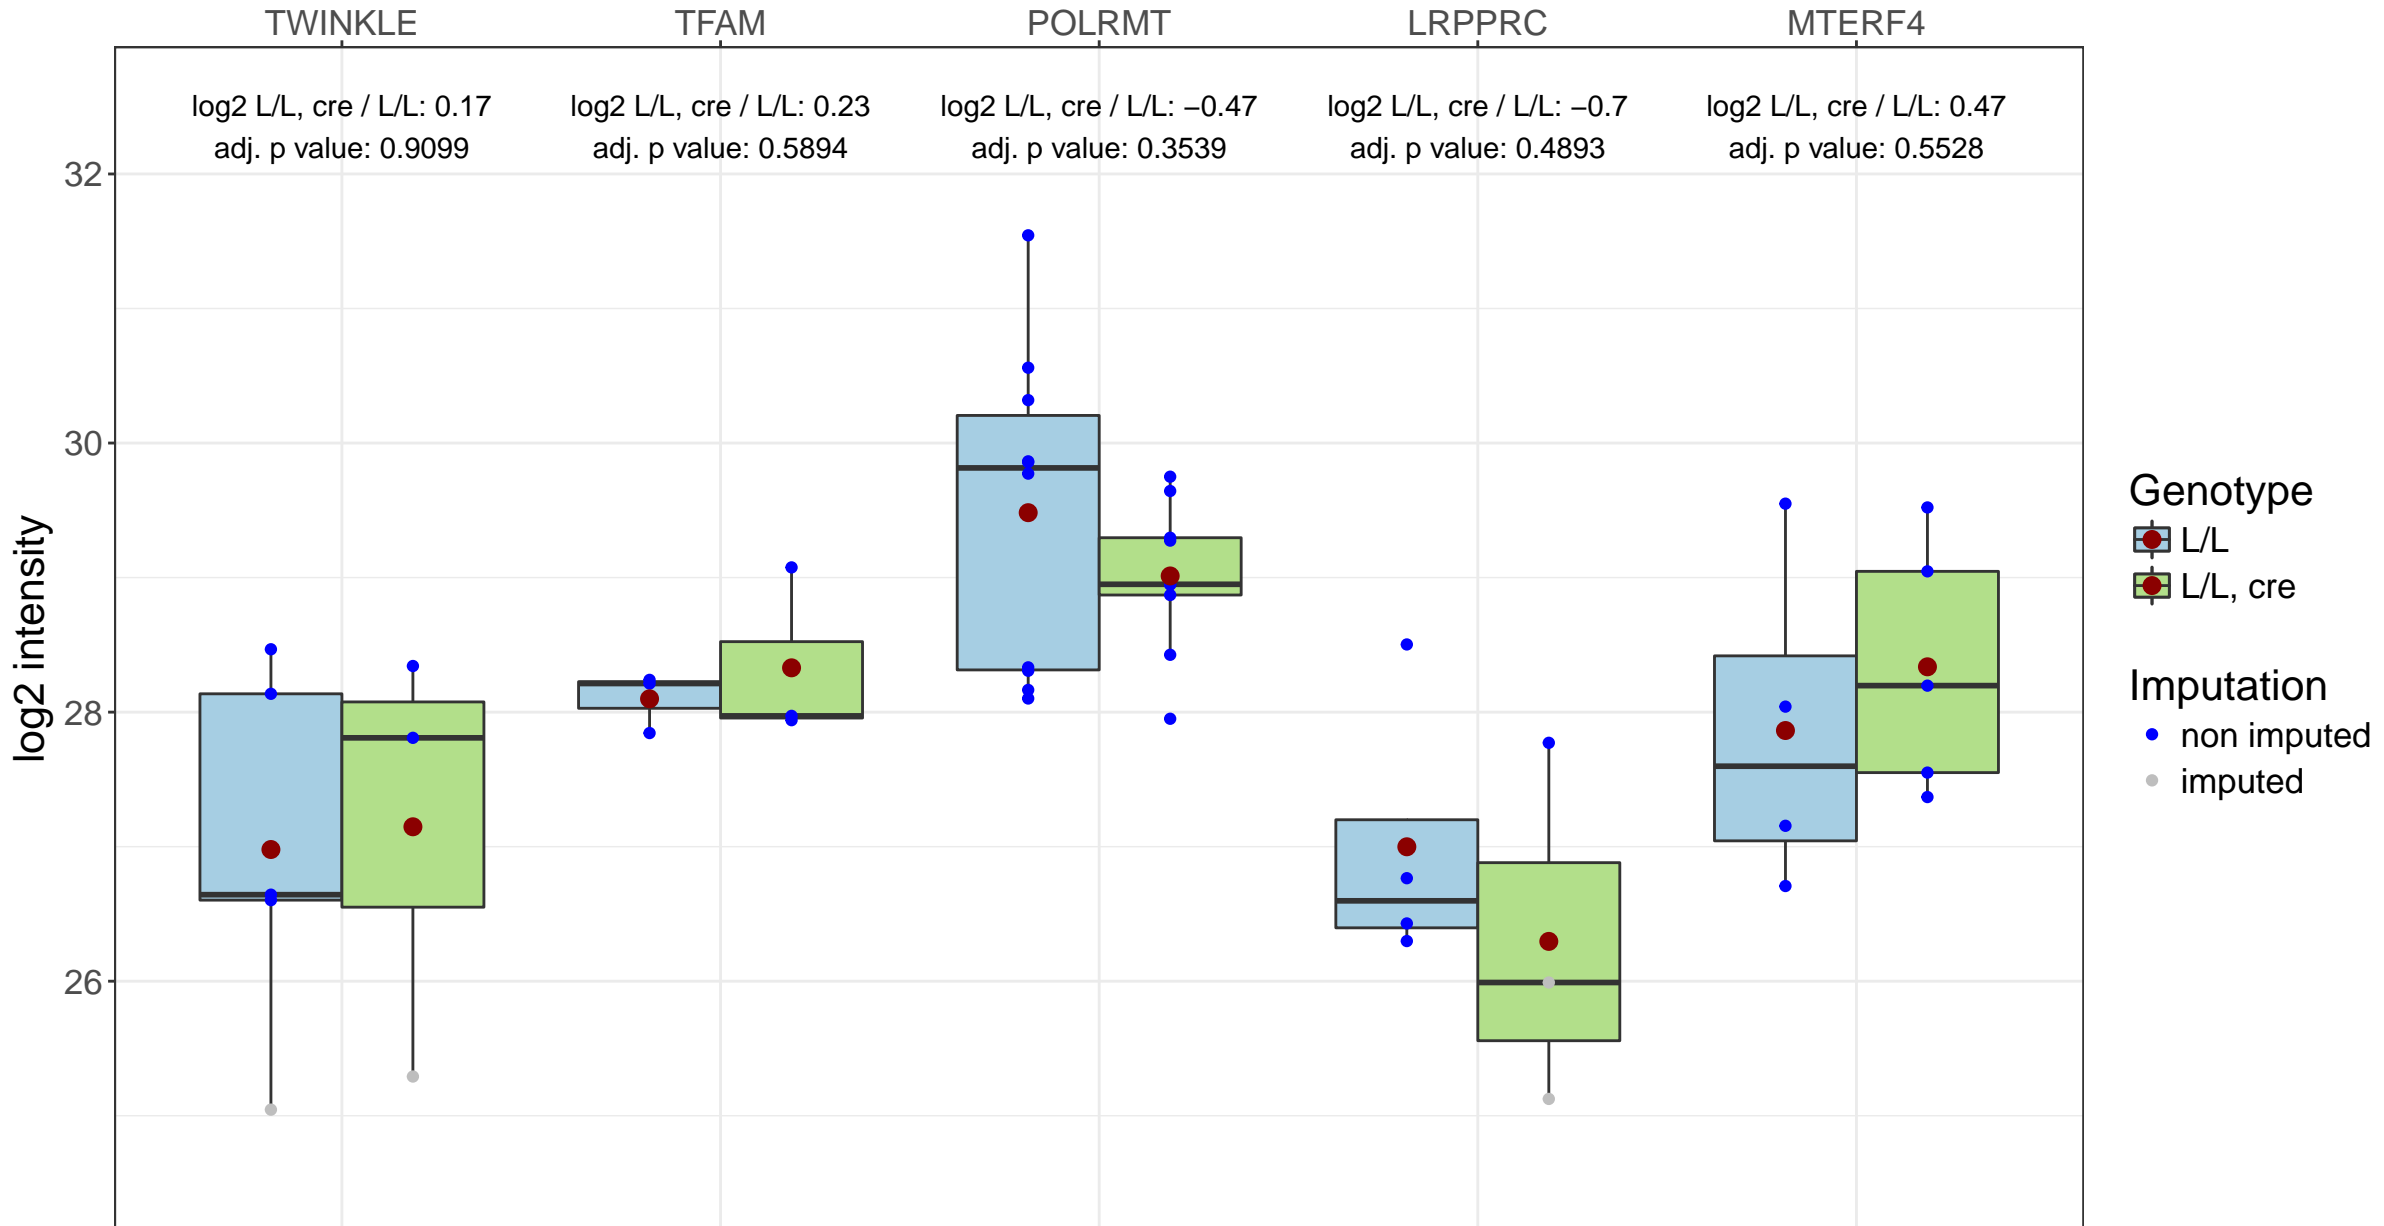

# VWA8 / Q8CC88

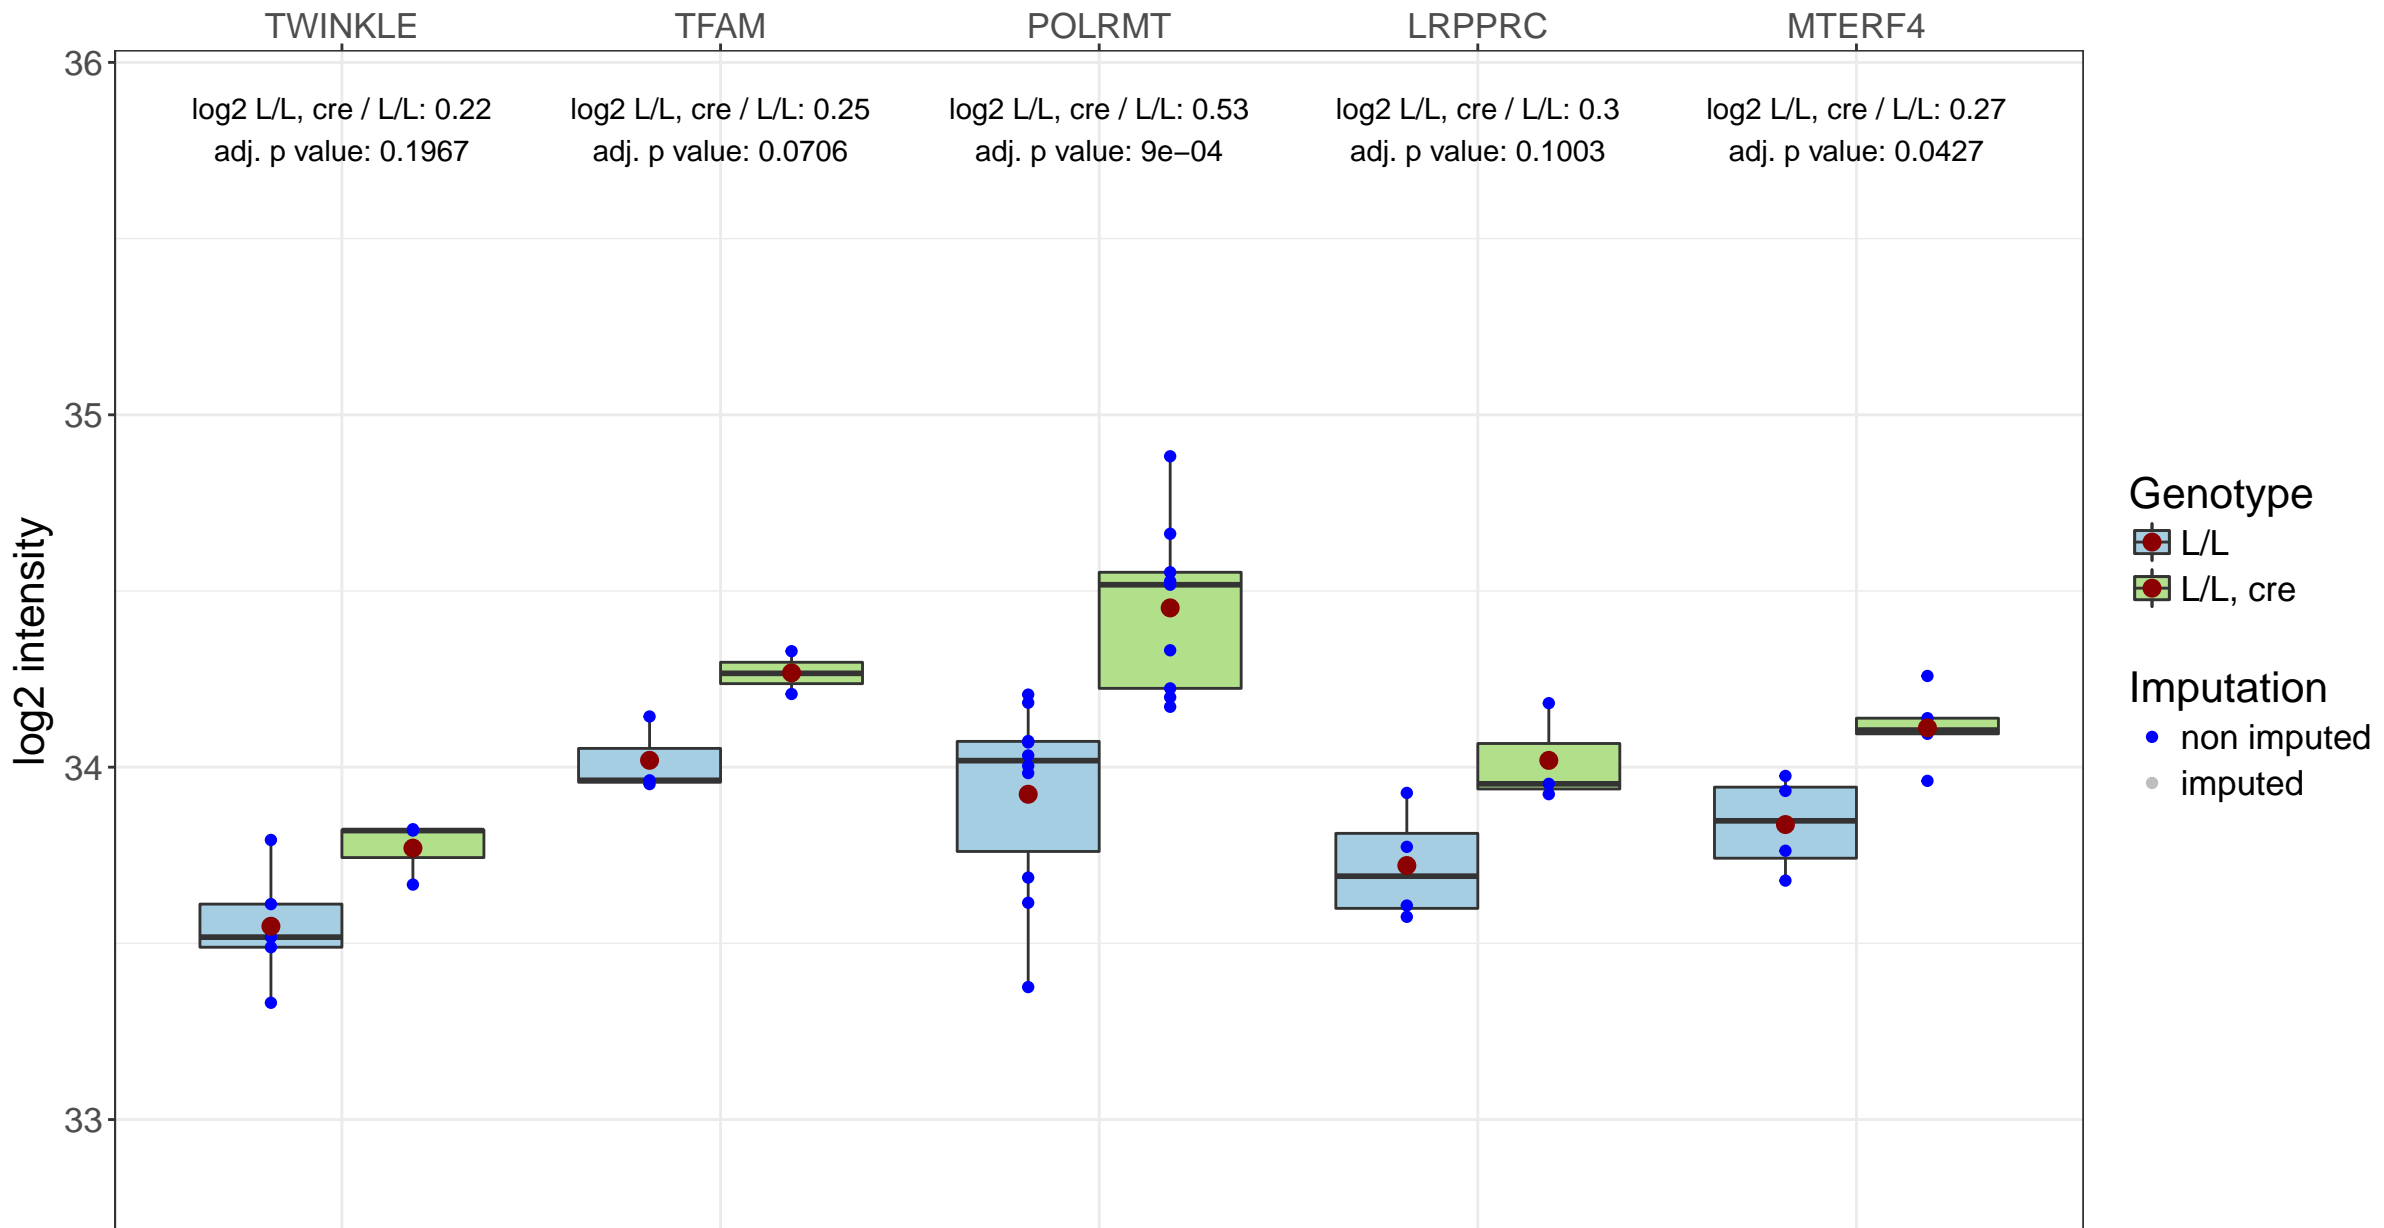

# WARS2 / Q9CYK1

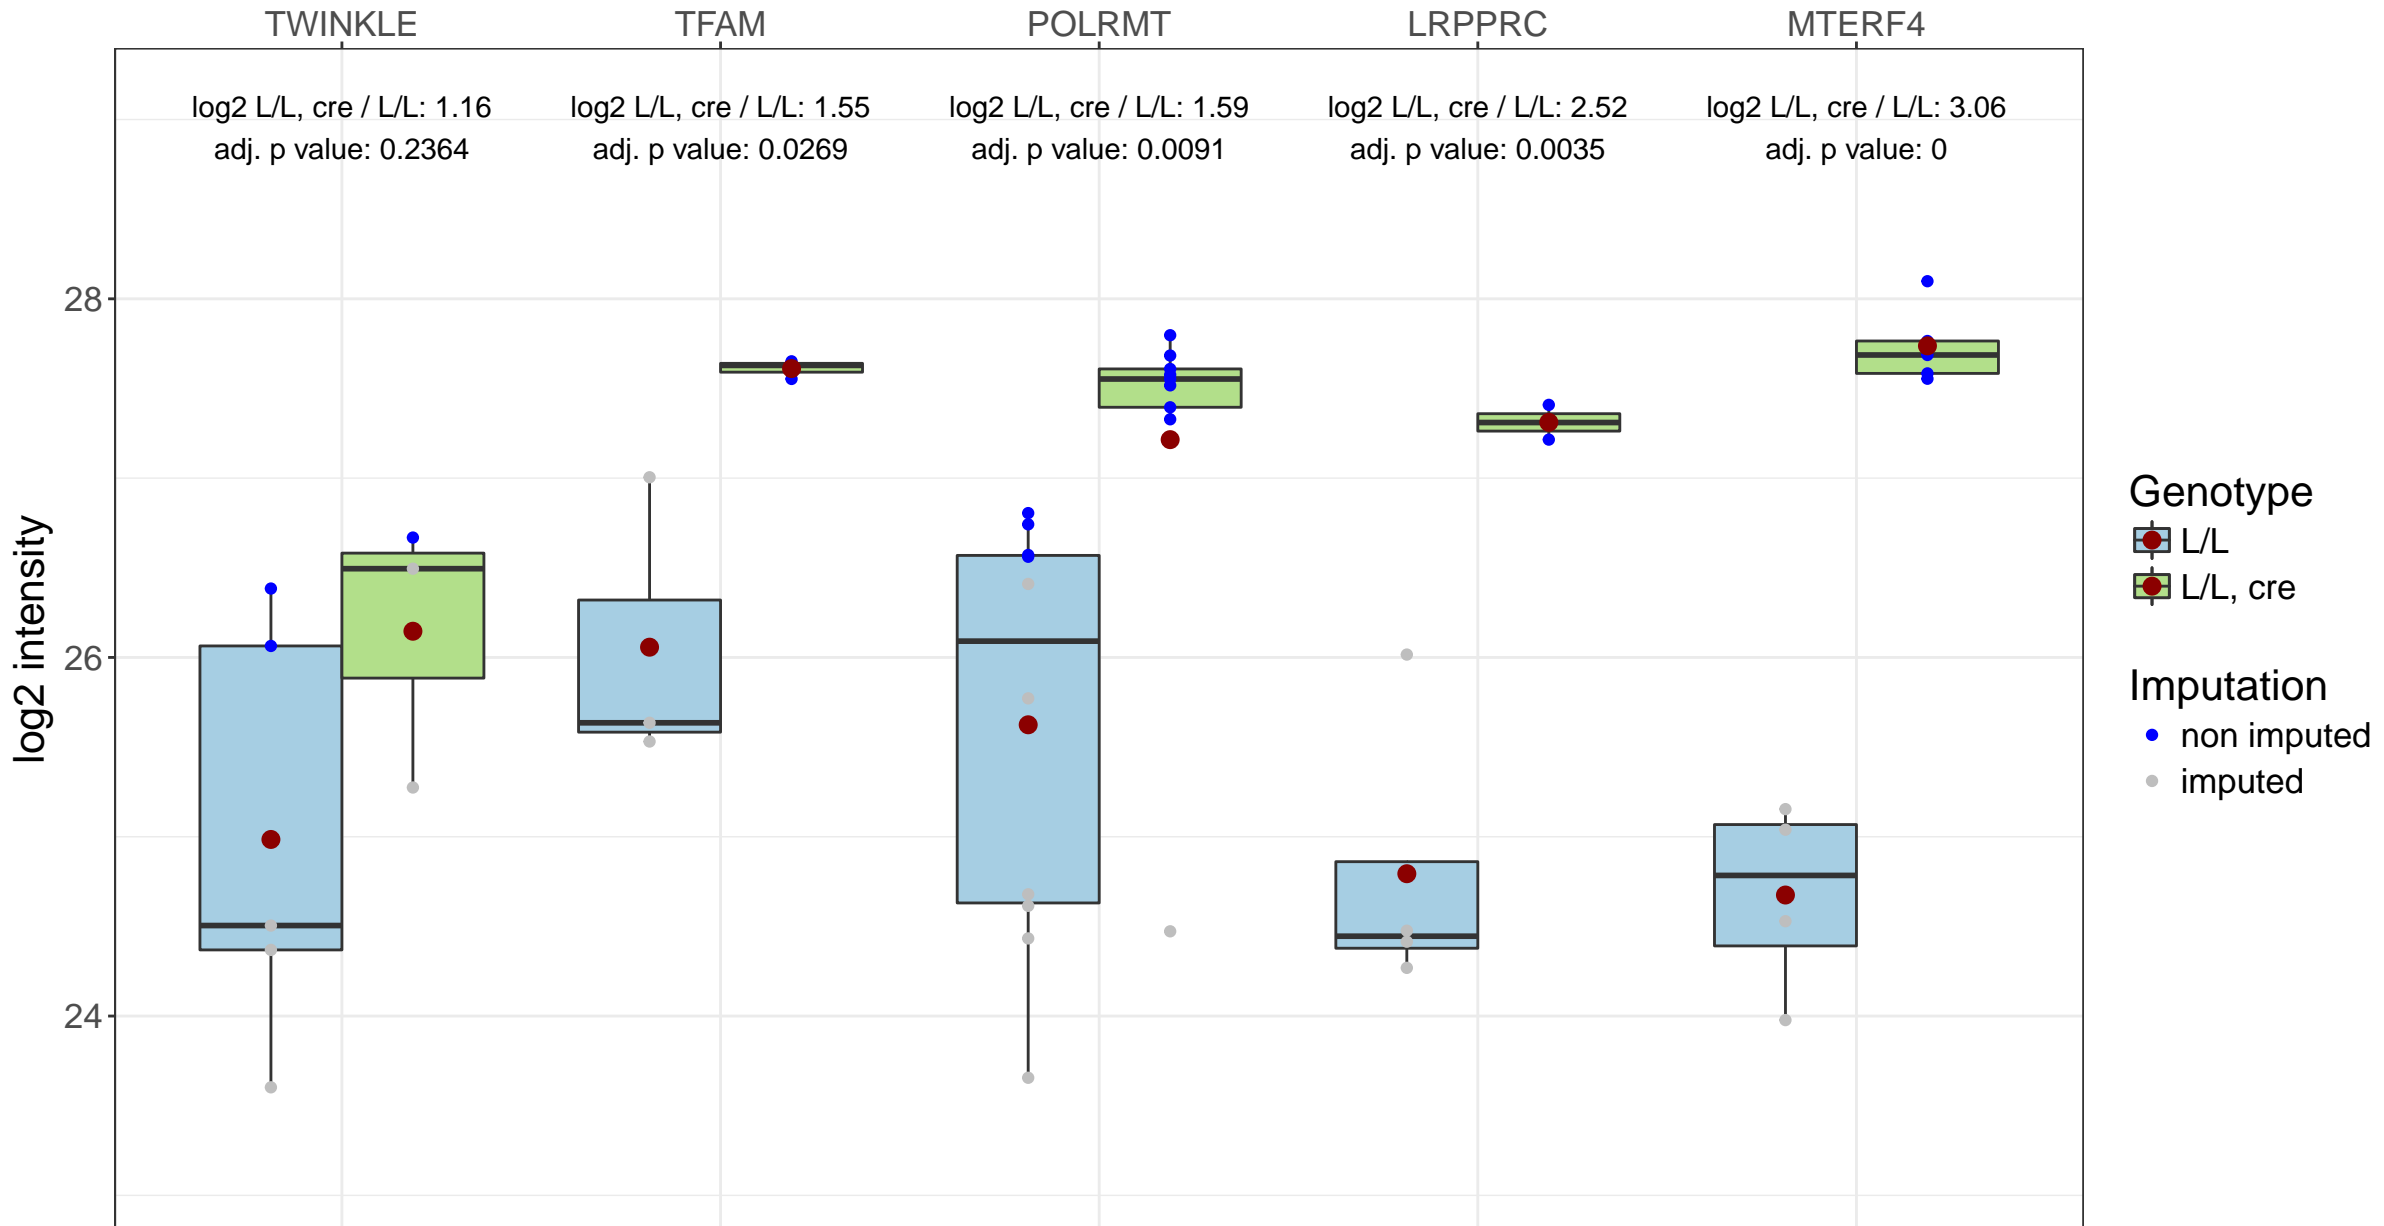

# WASL / Q91YD9

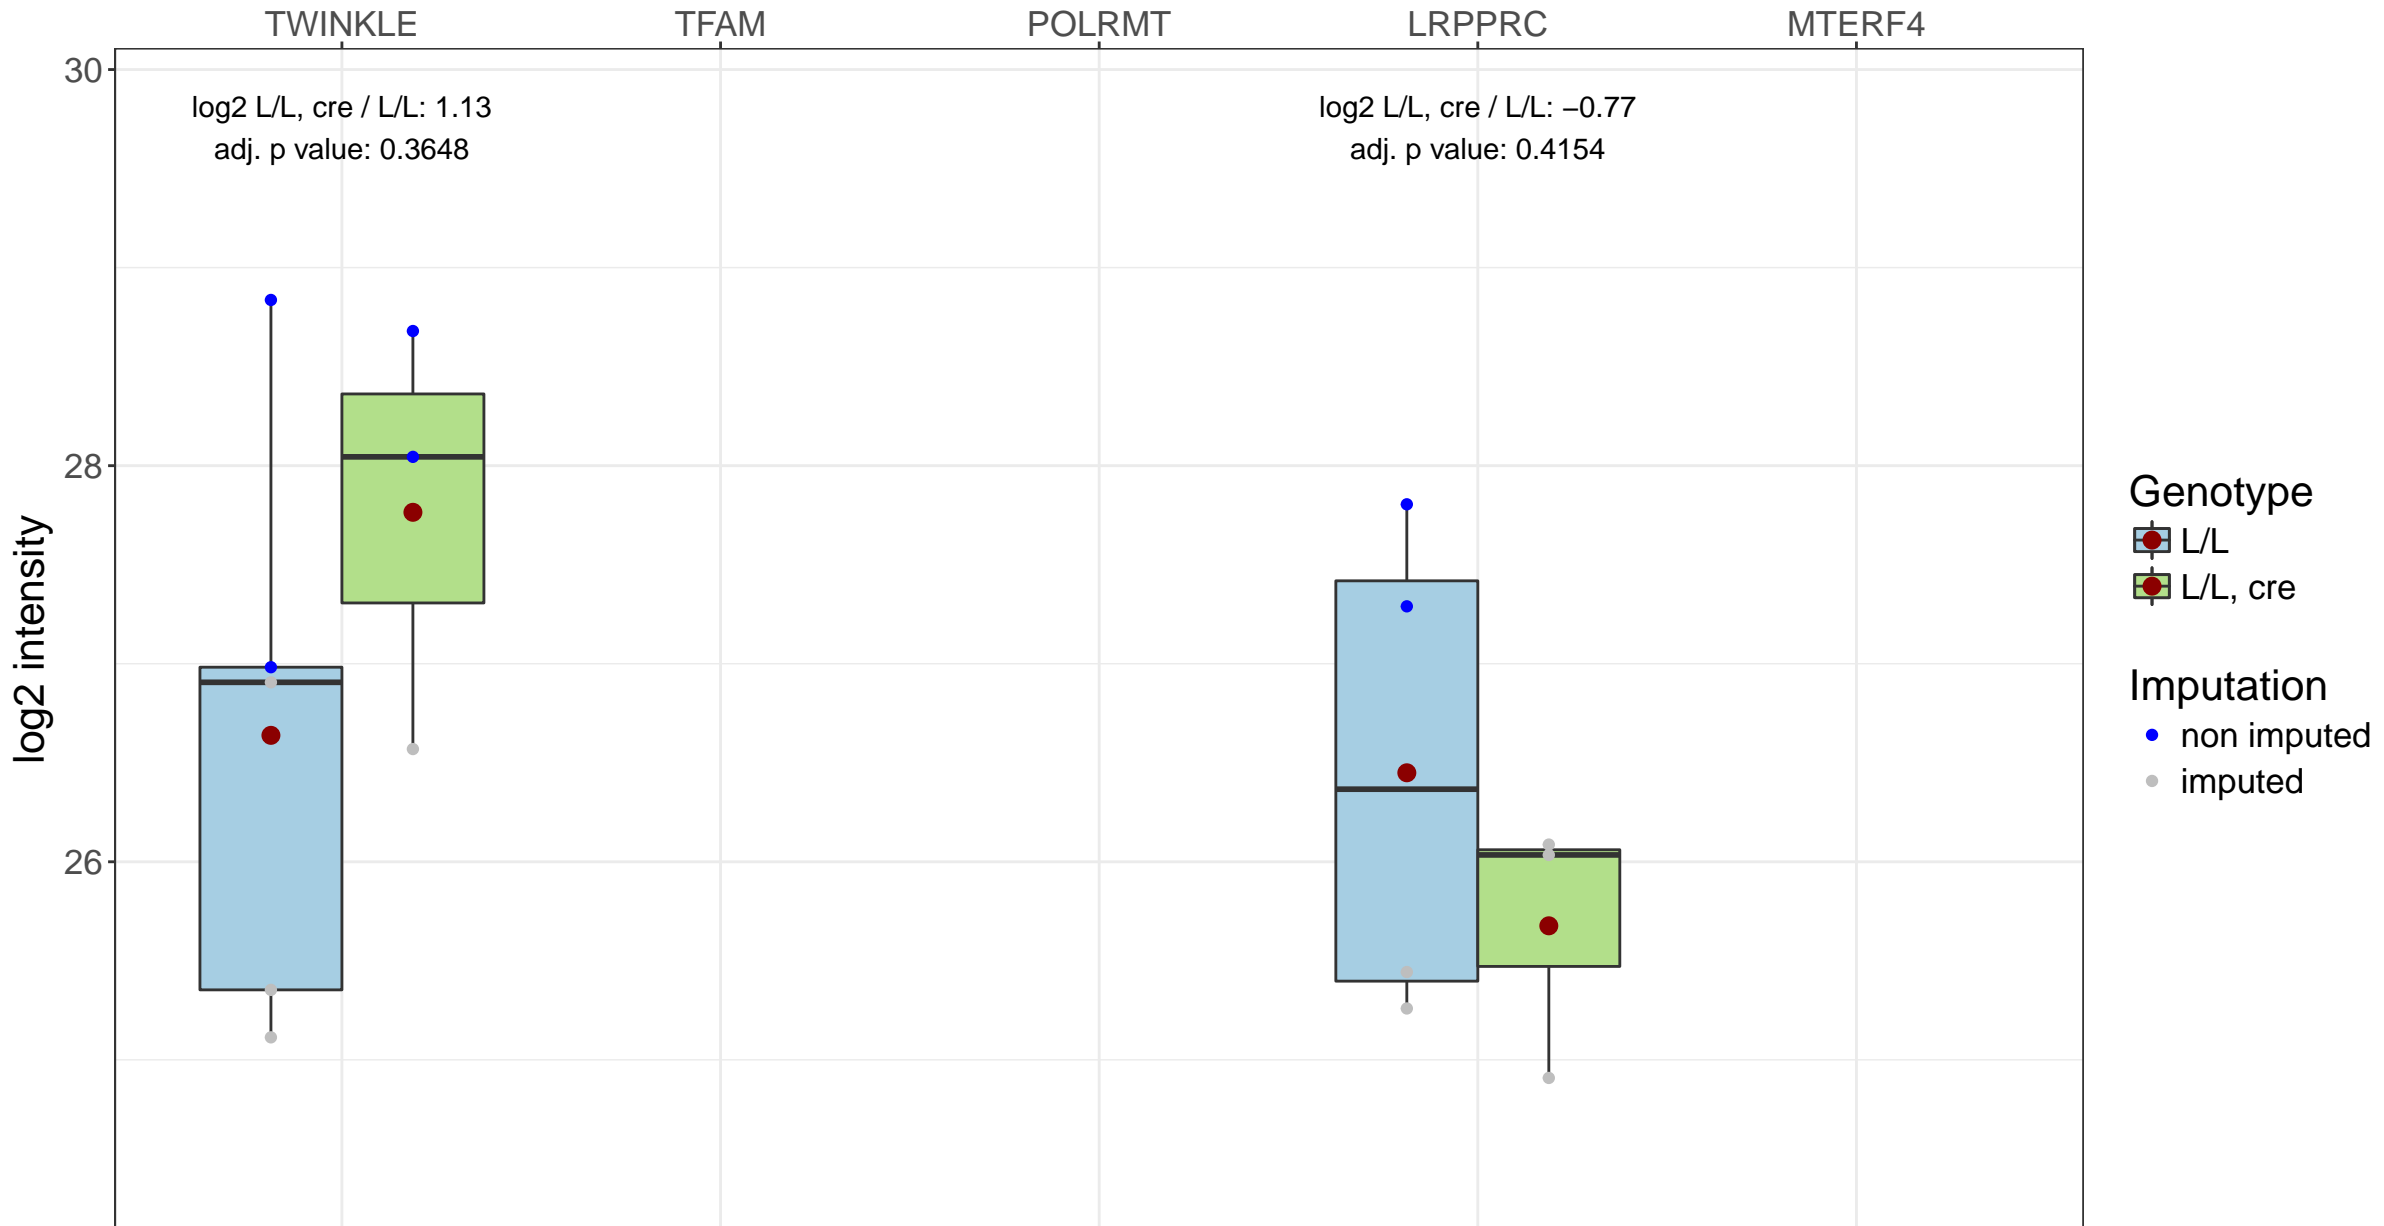

# XPNPEP3 / B7ZMP1

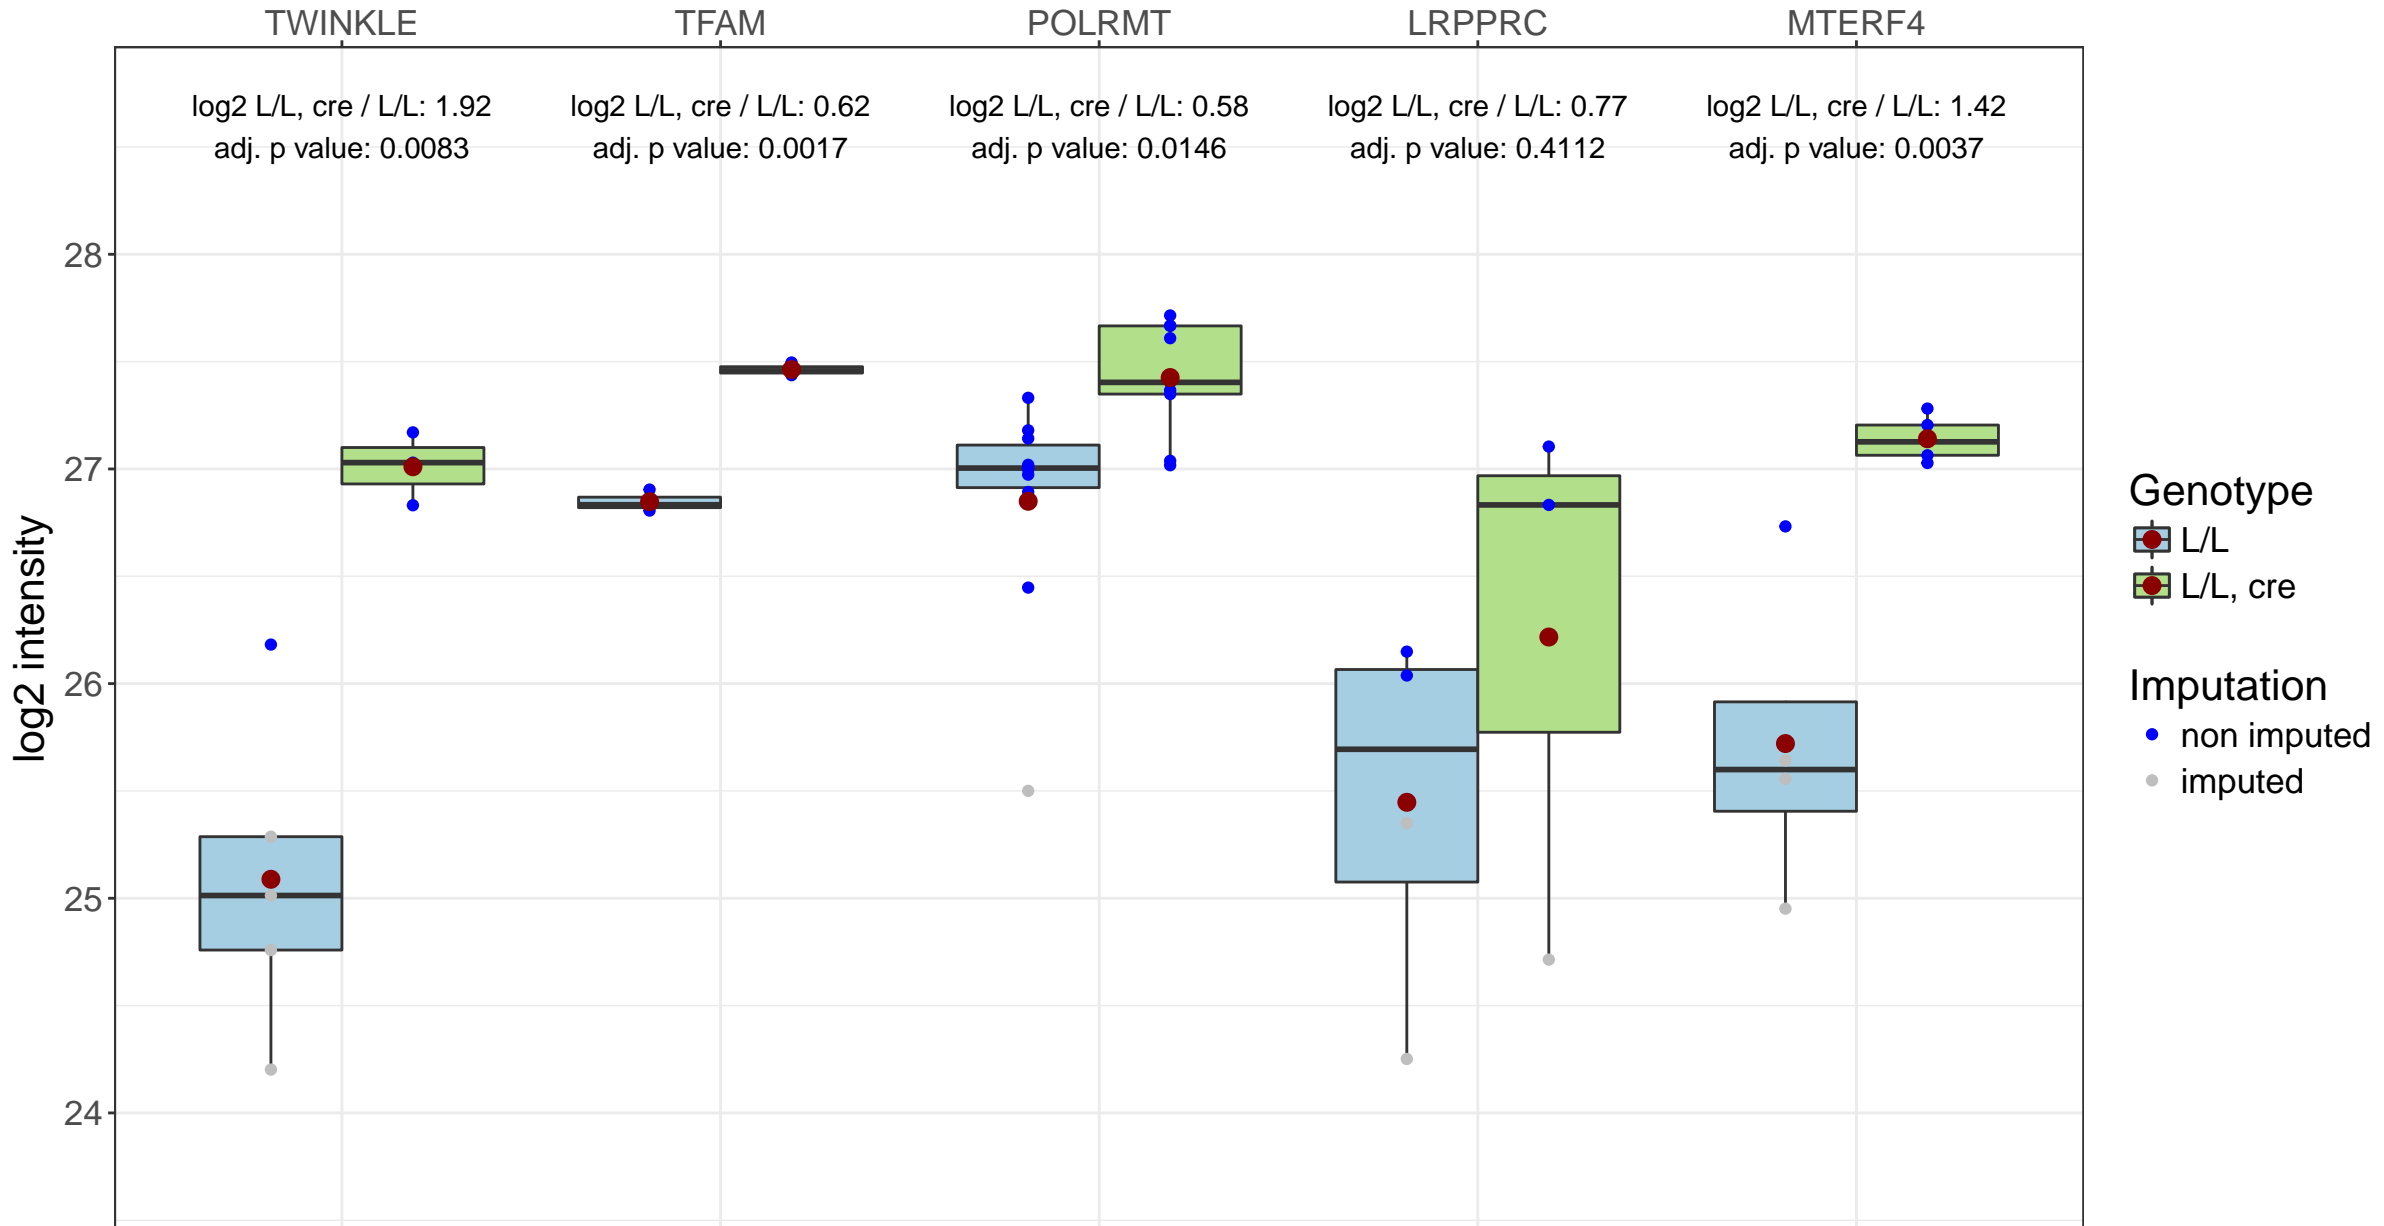



# YARS2 / Q8BYL4

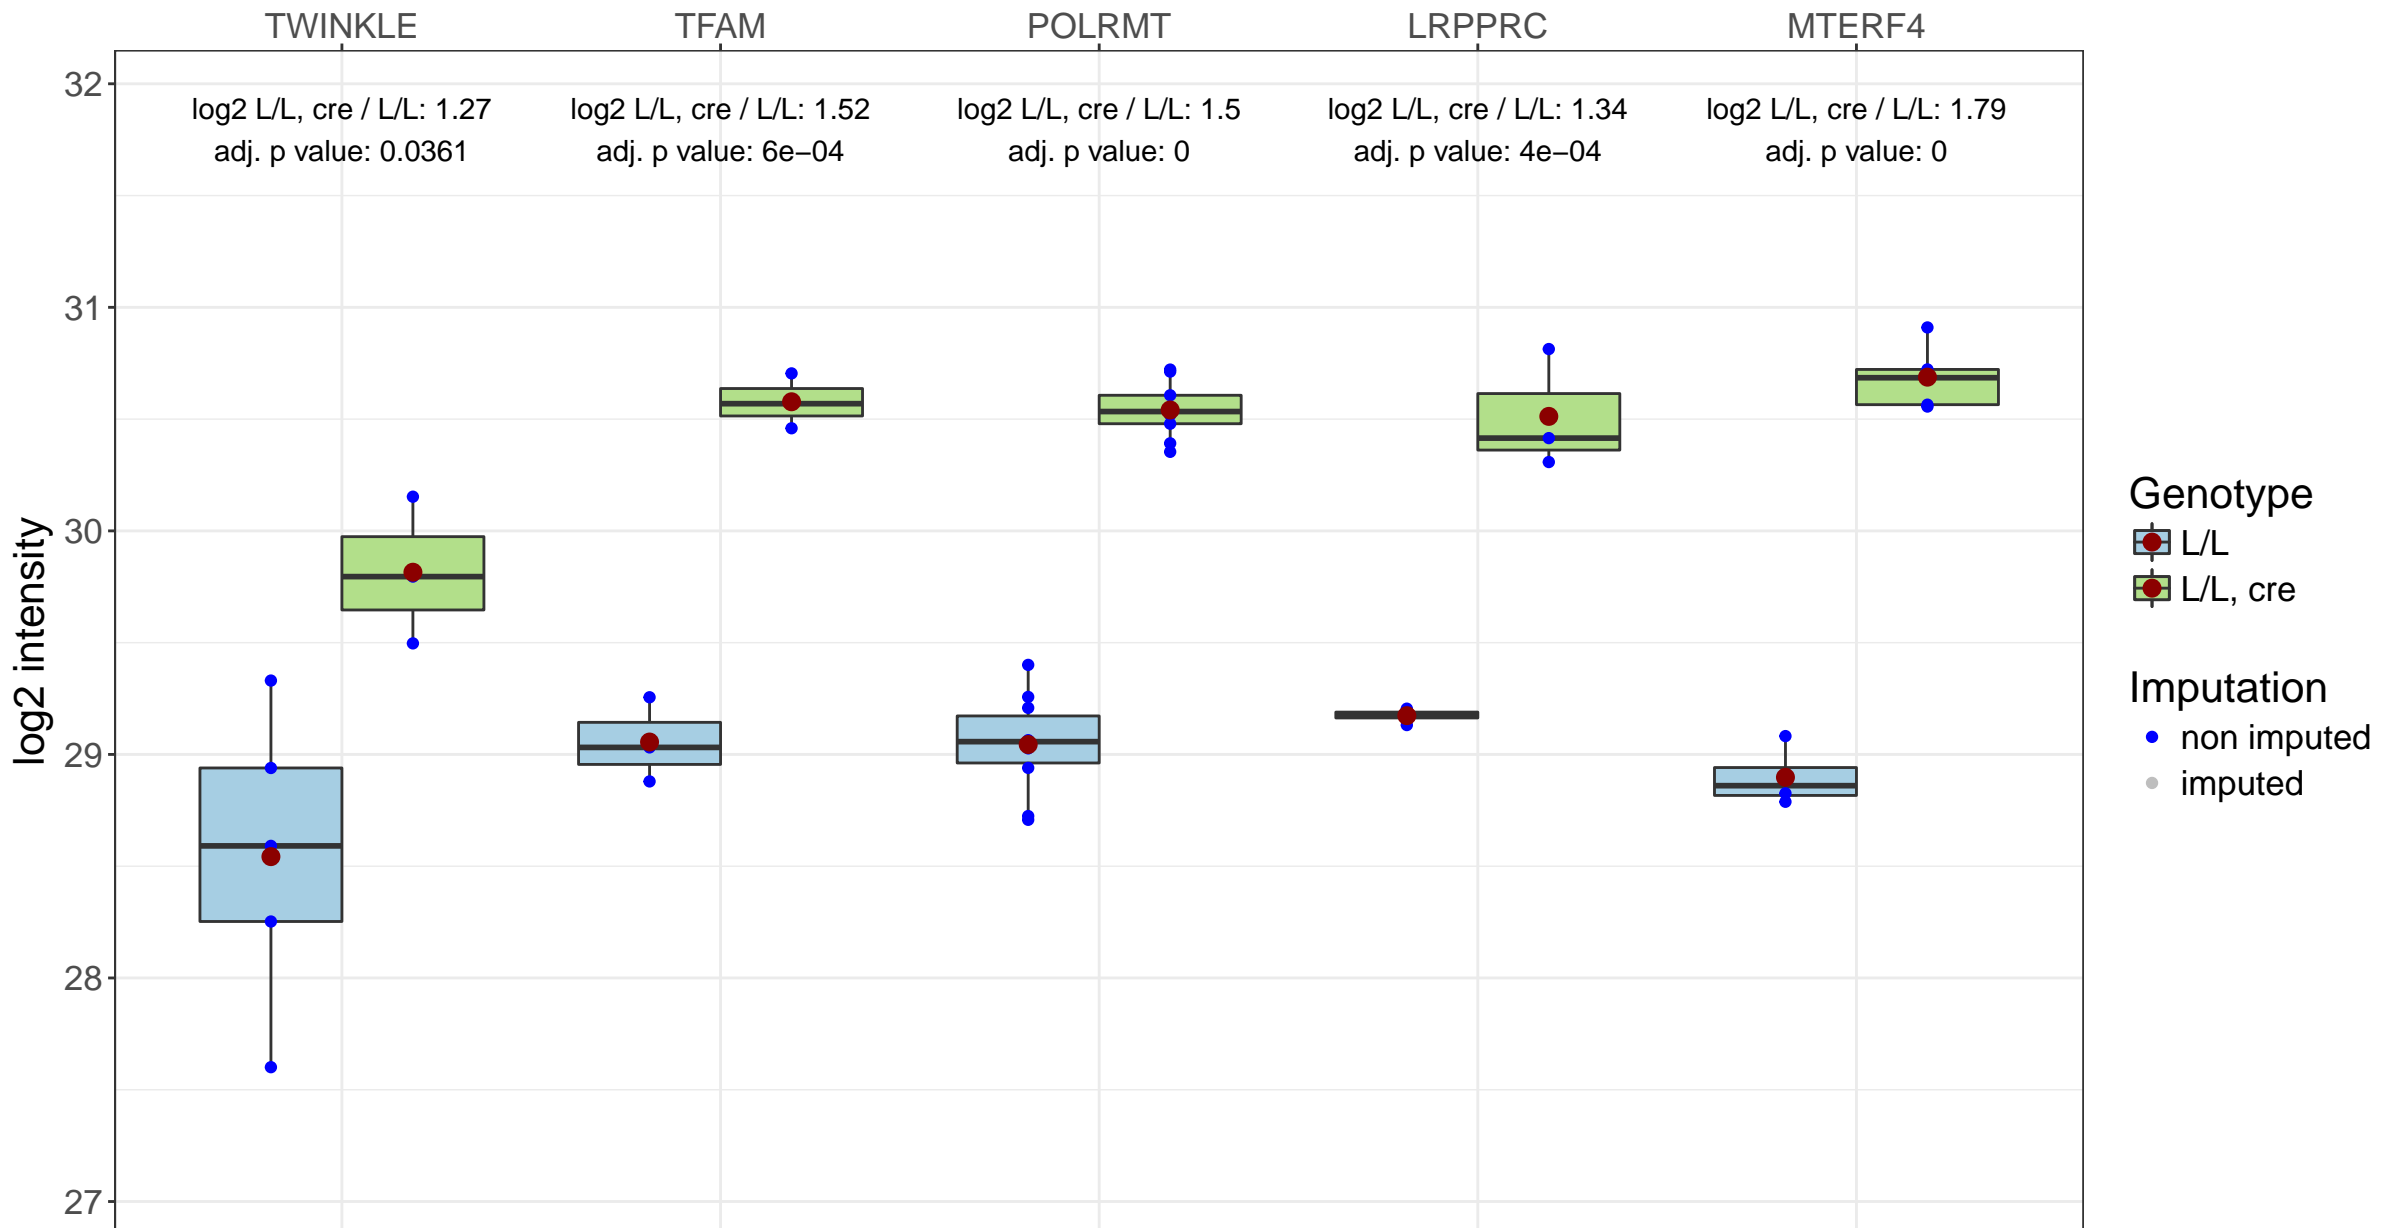

# YME1L1 / O88967

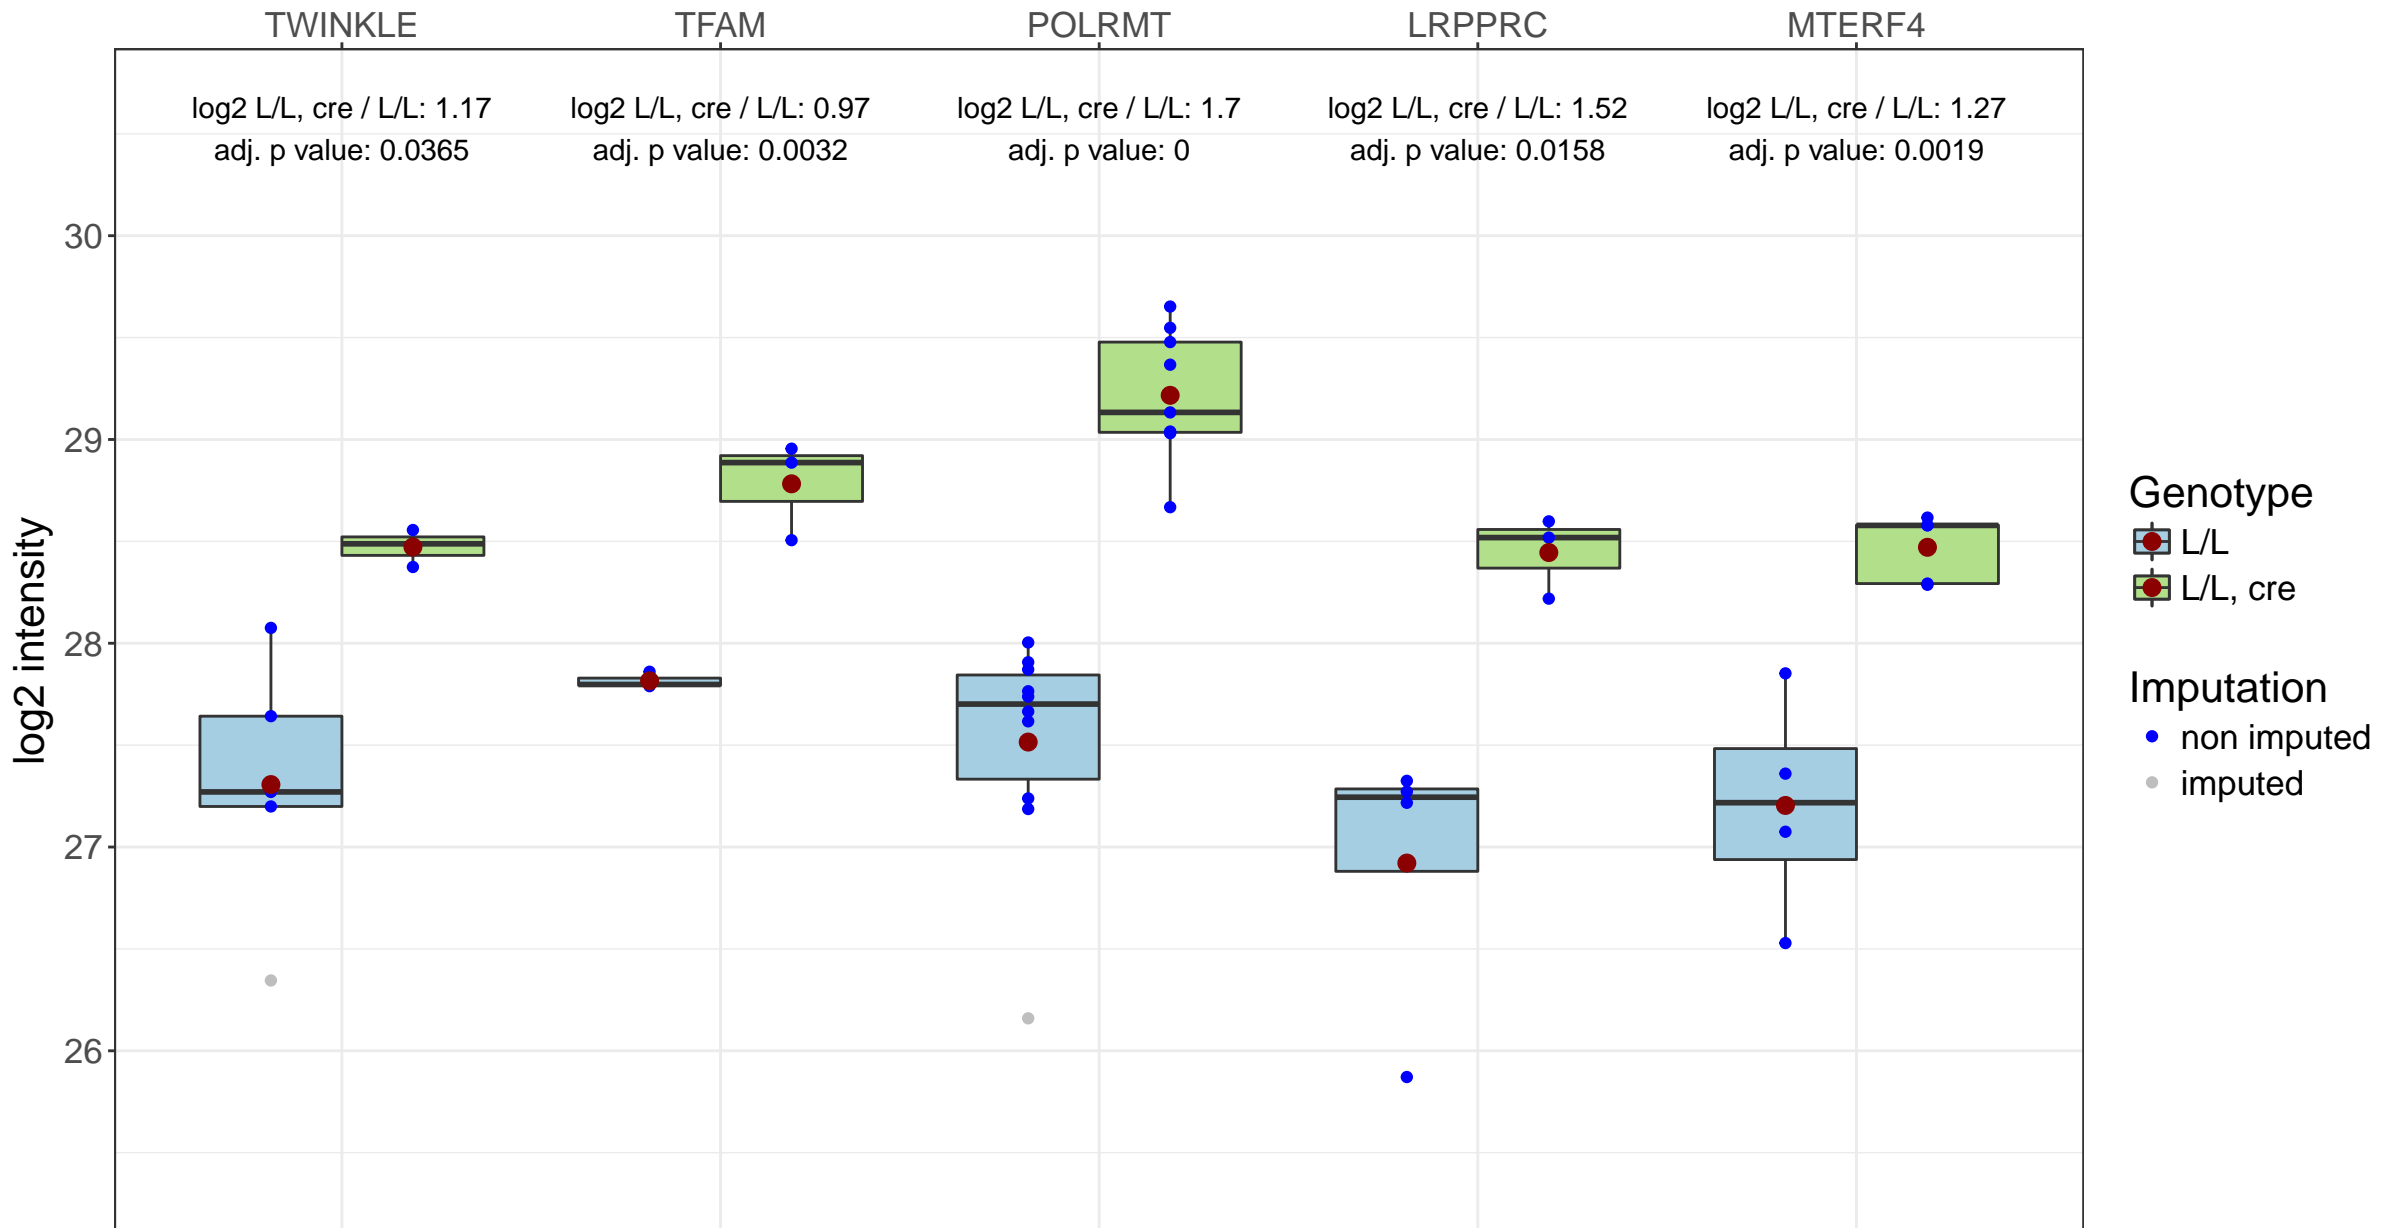

# YWHAE / P62259

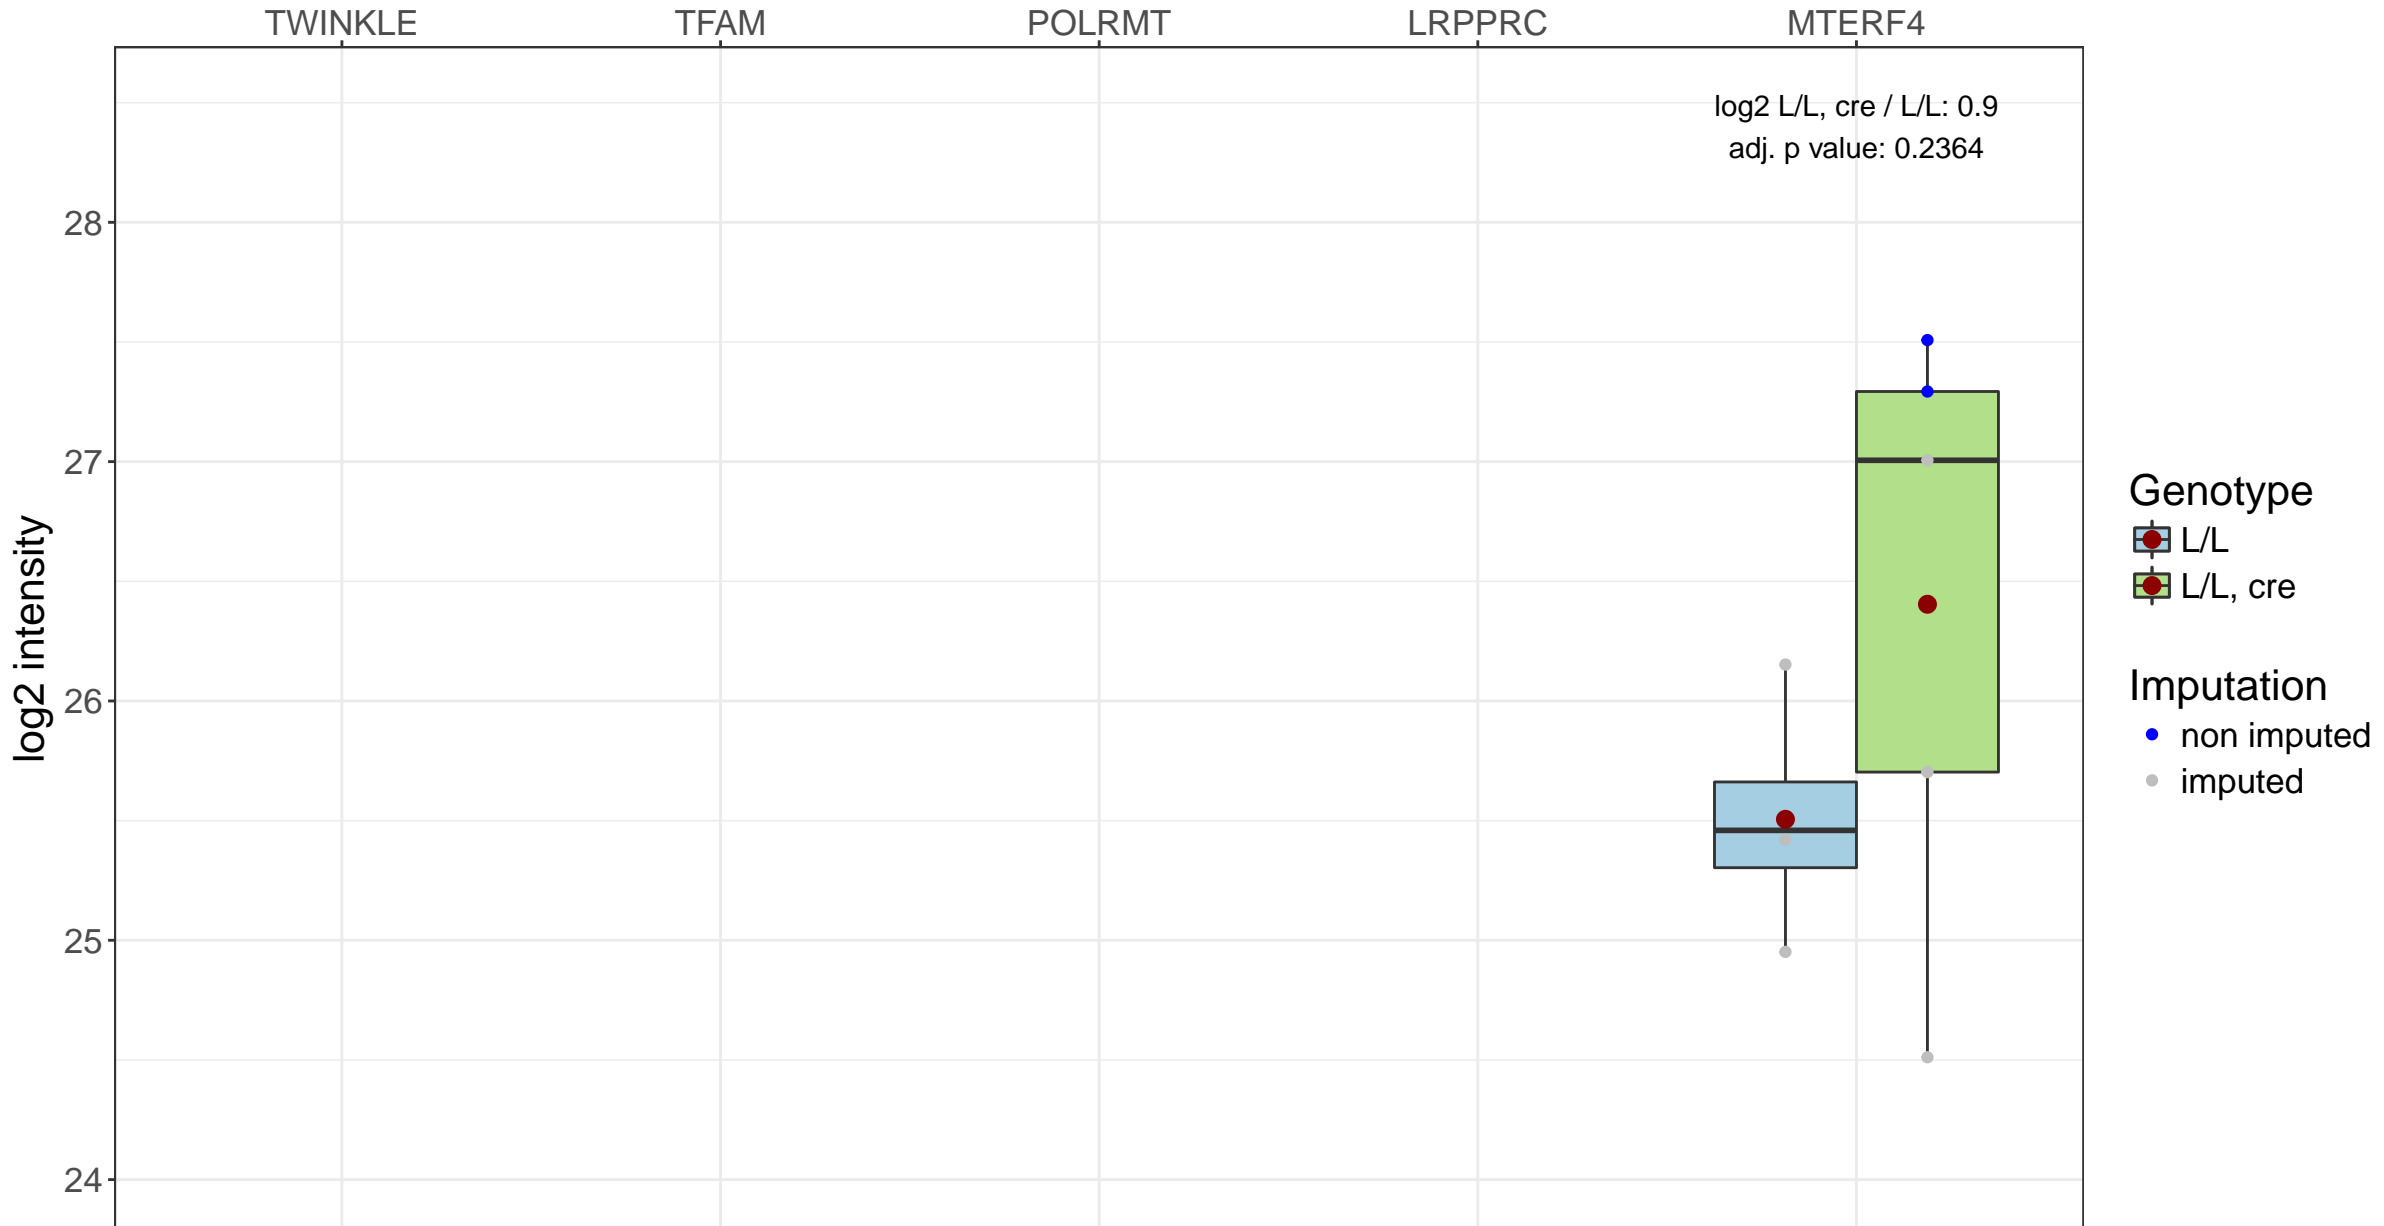

# YWHAG / P61982

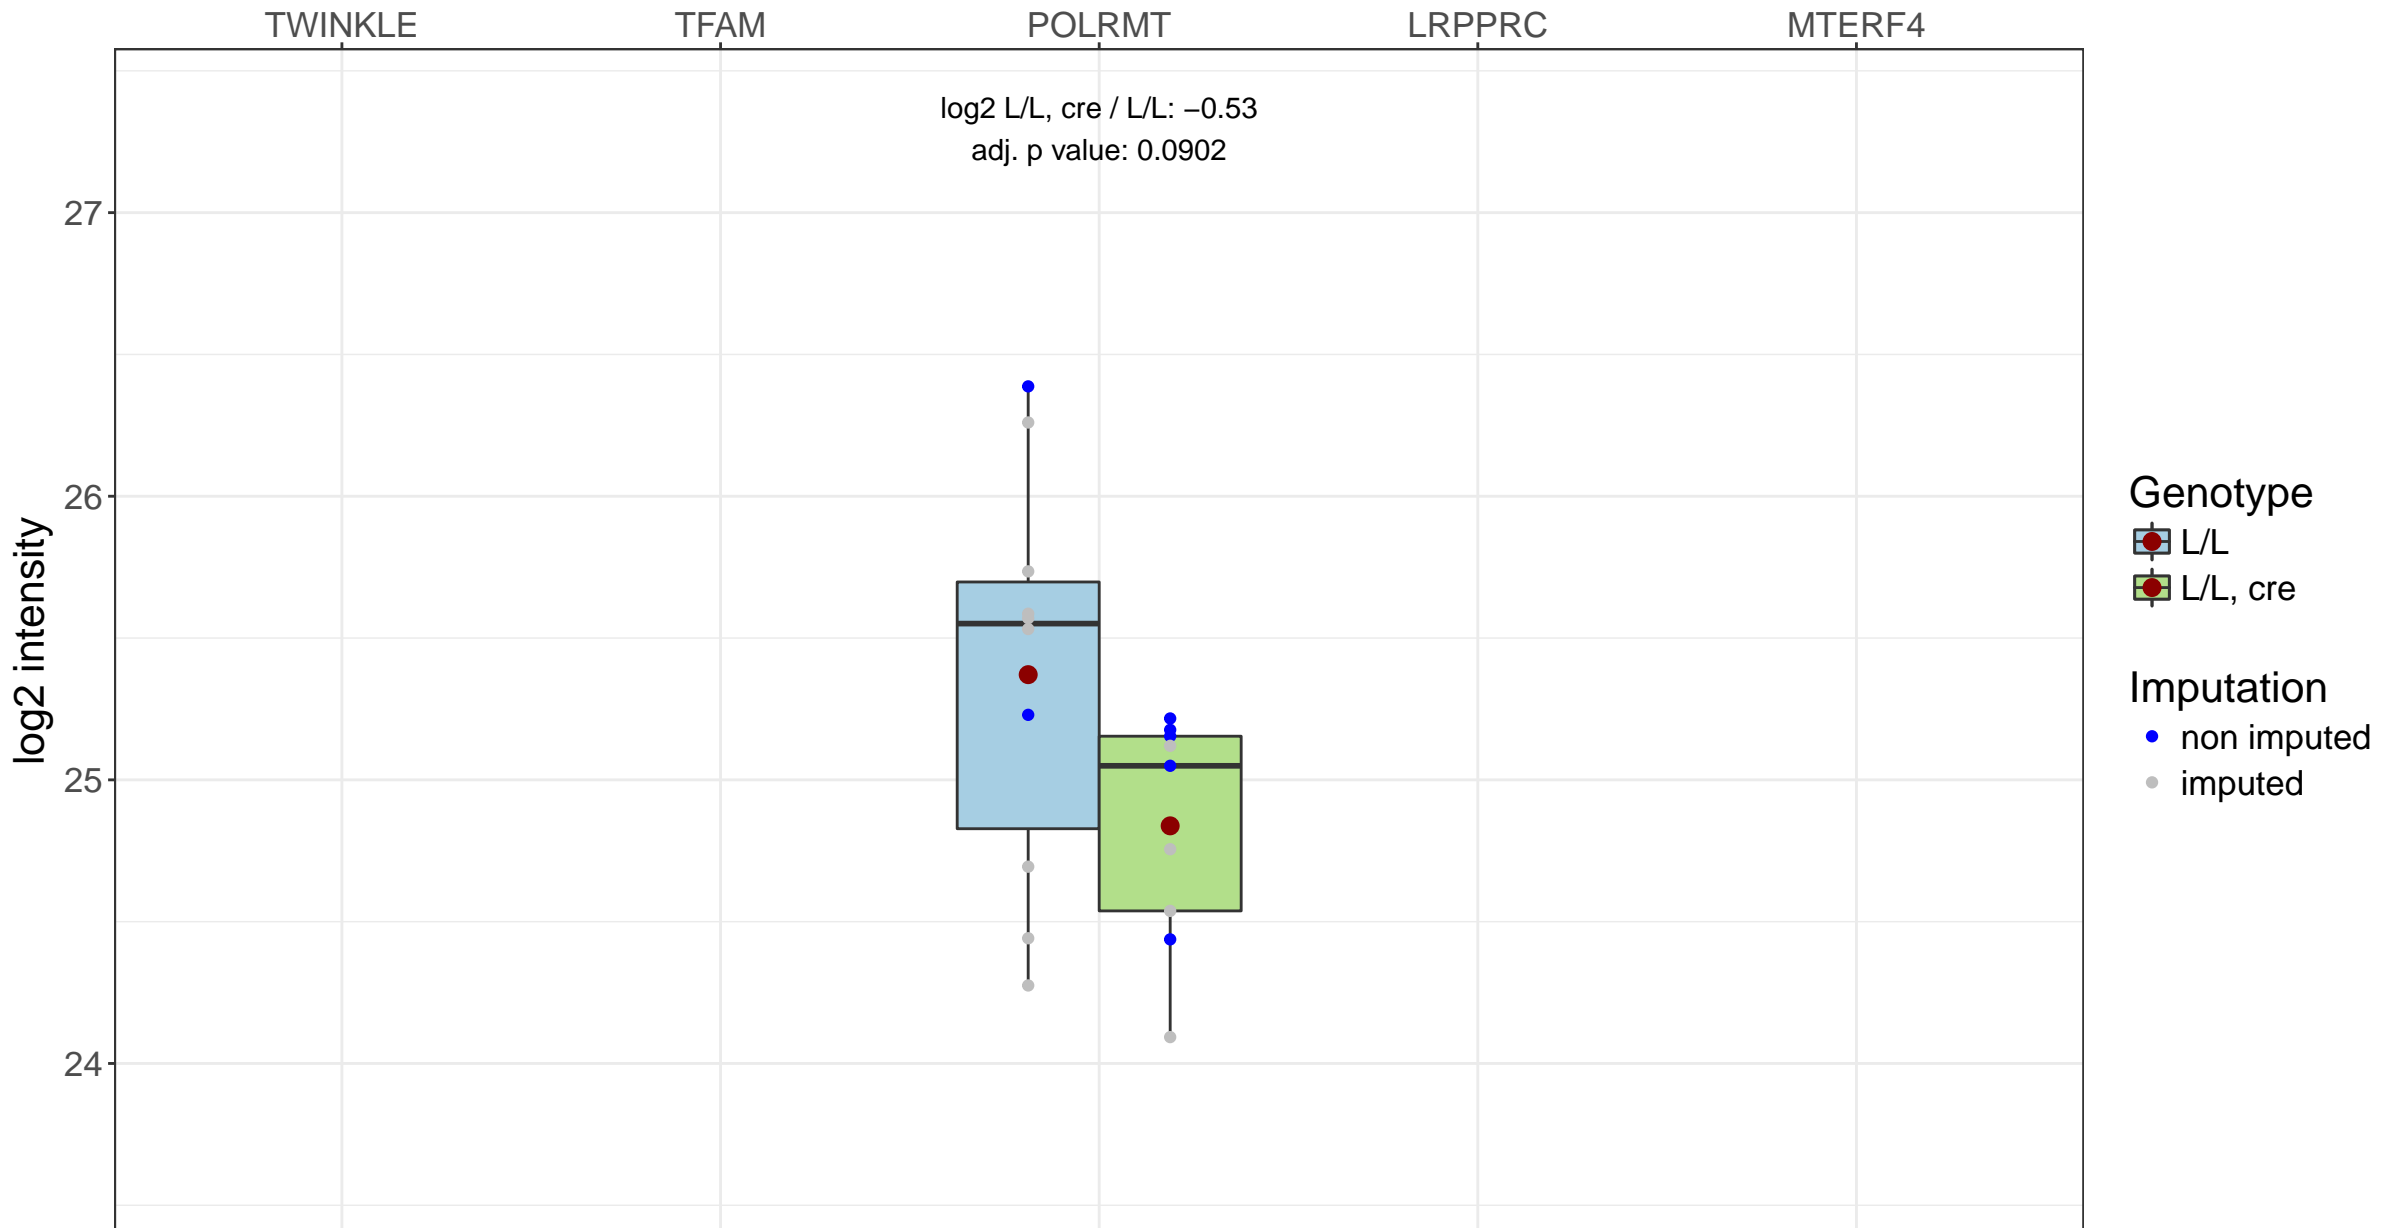

# YWHAZ / P63101

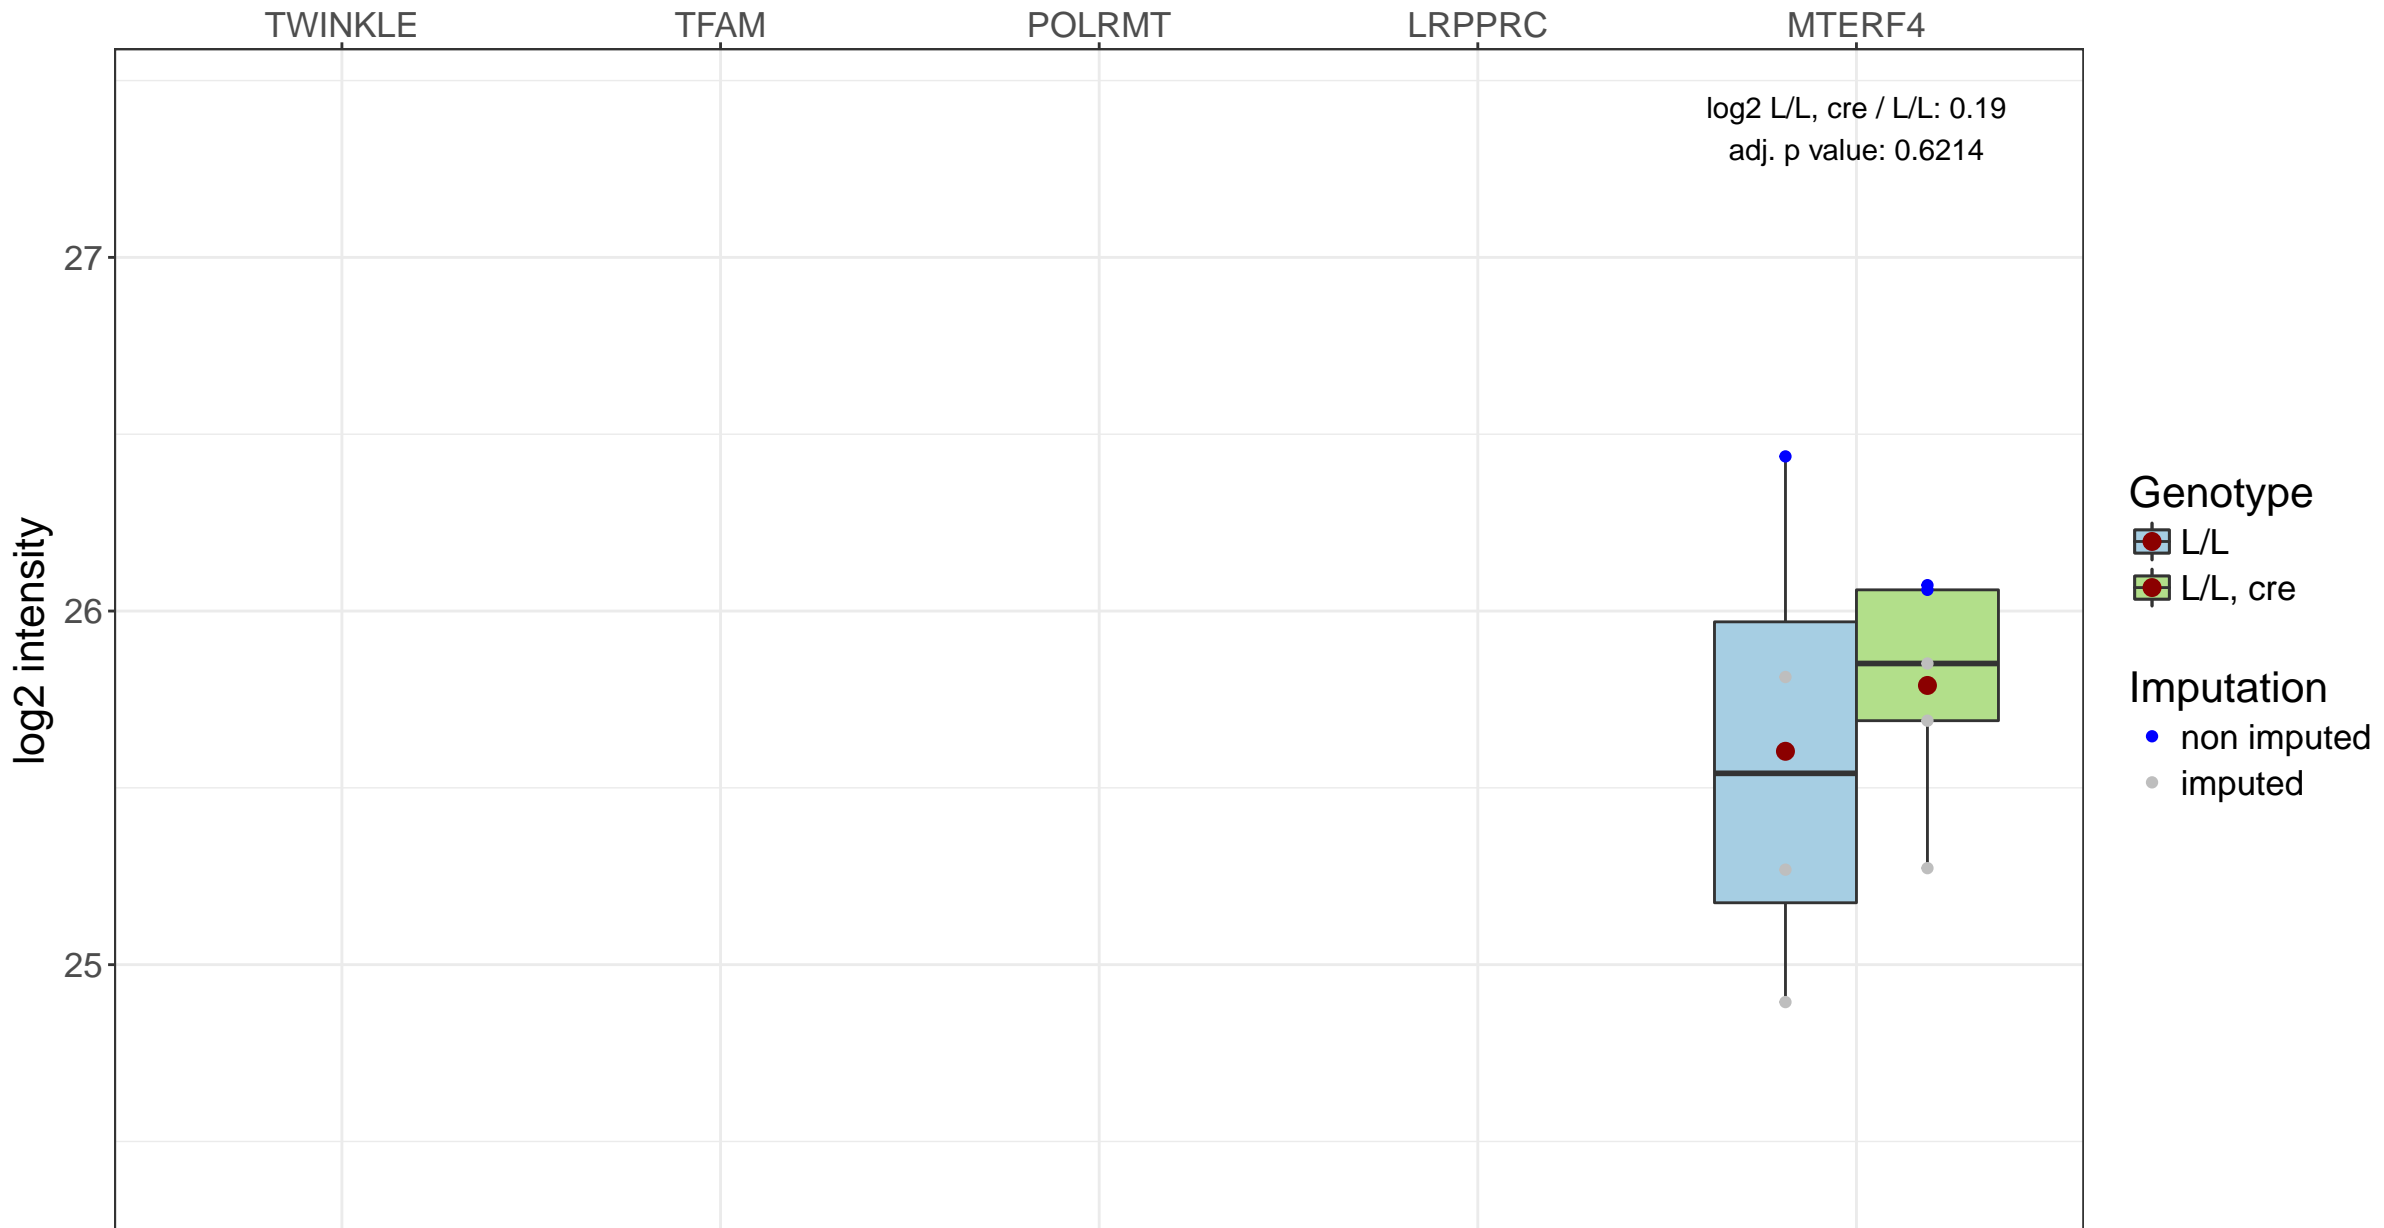

# ZADH2 / Q8BGC4

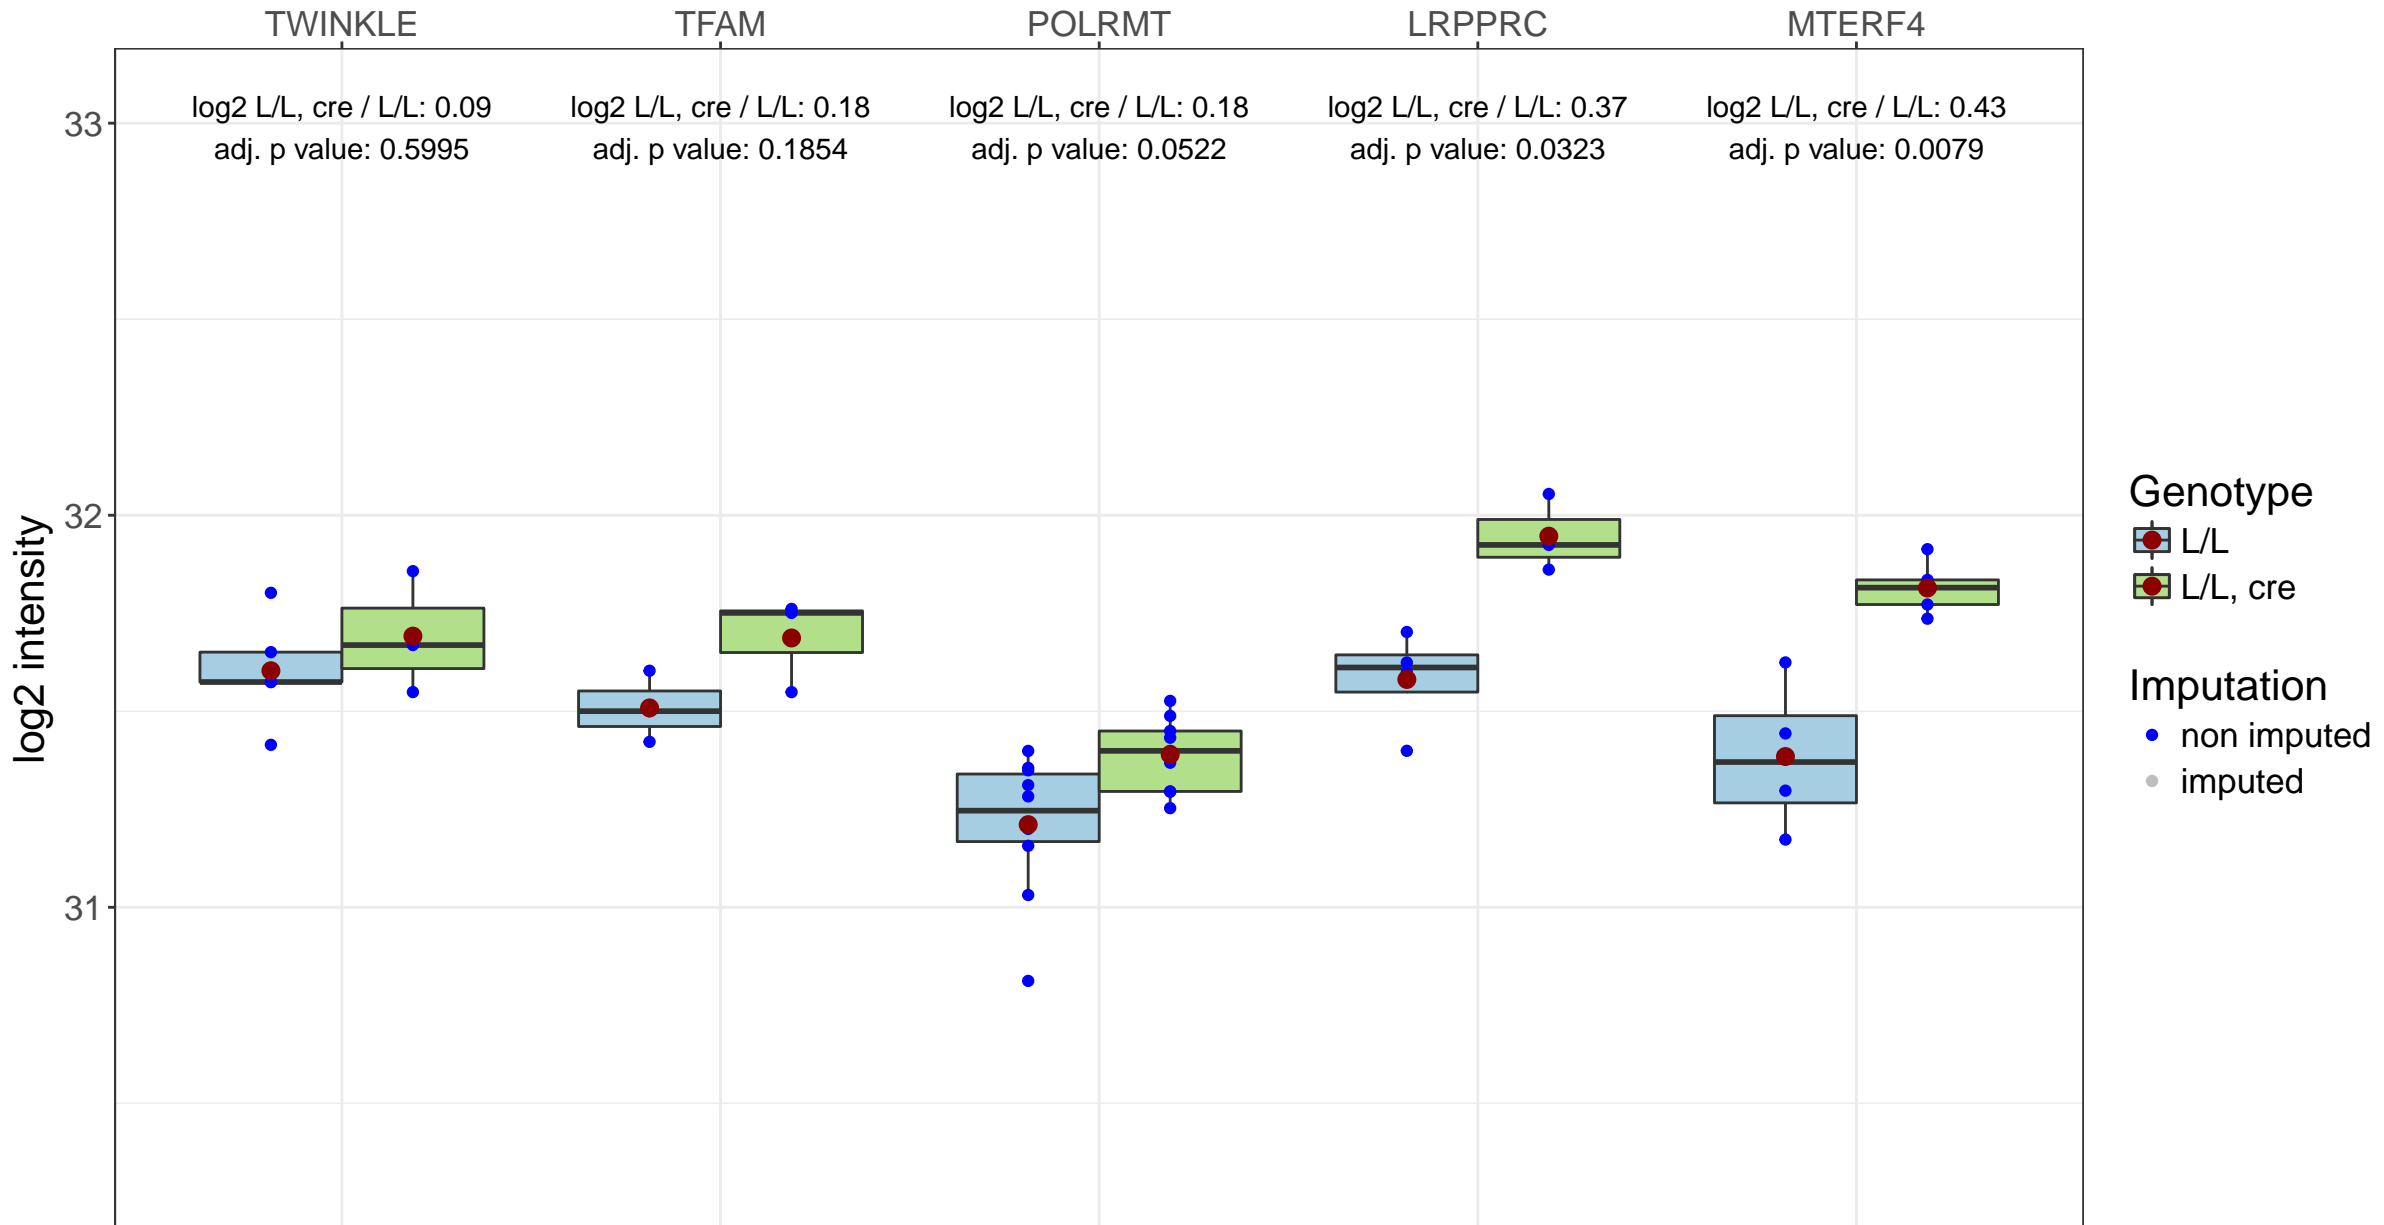

# ZFP11 / P10751

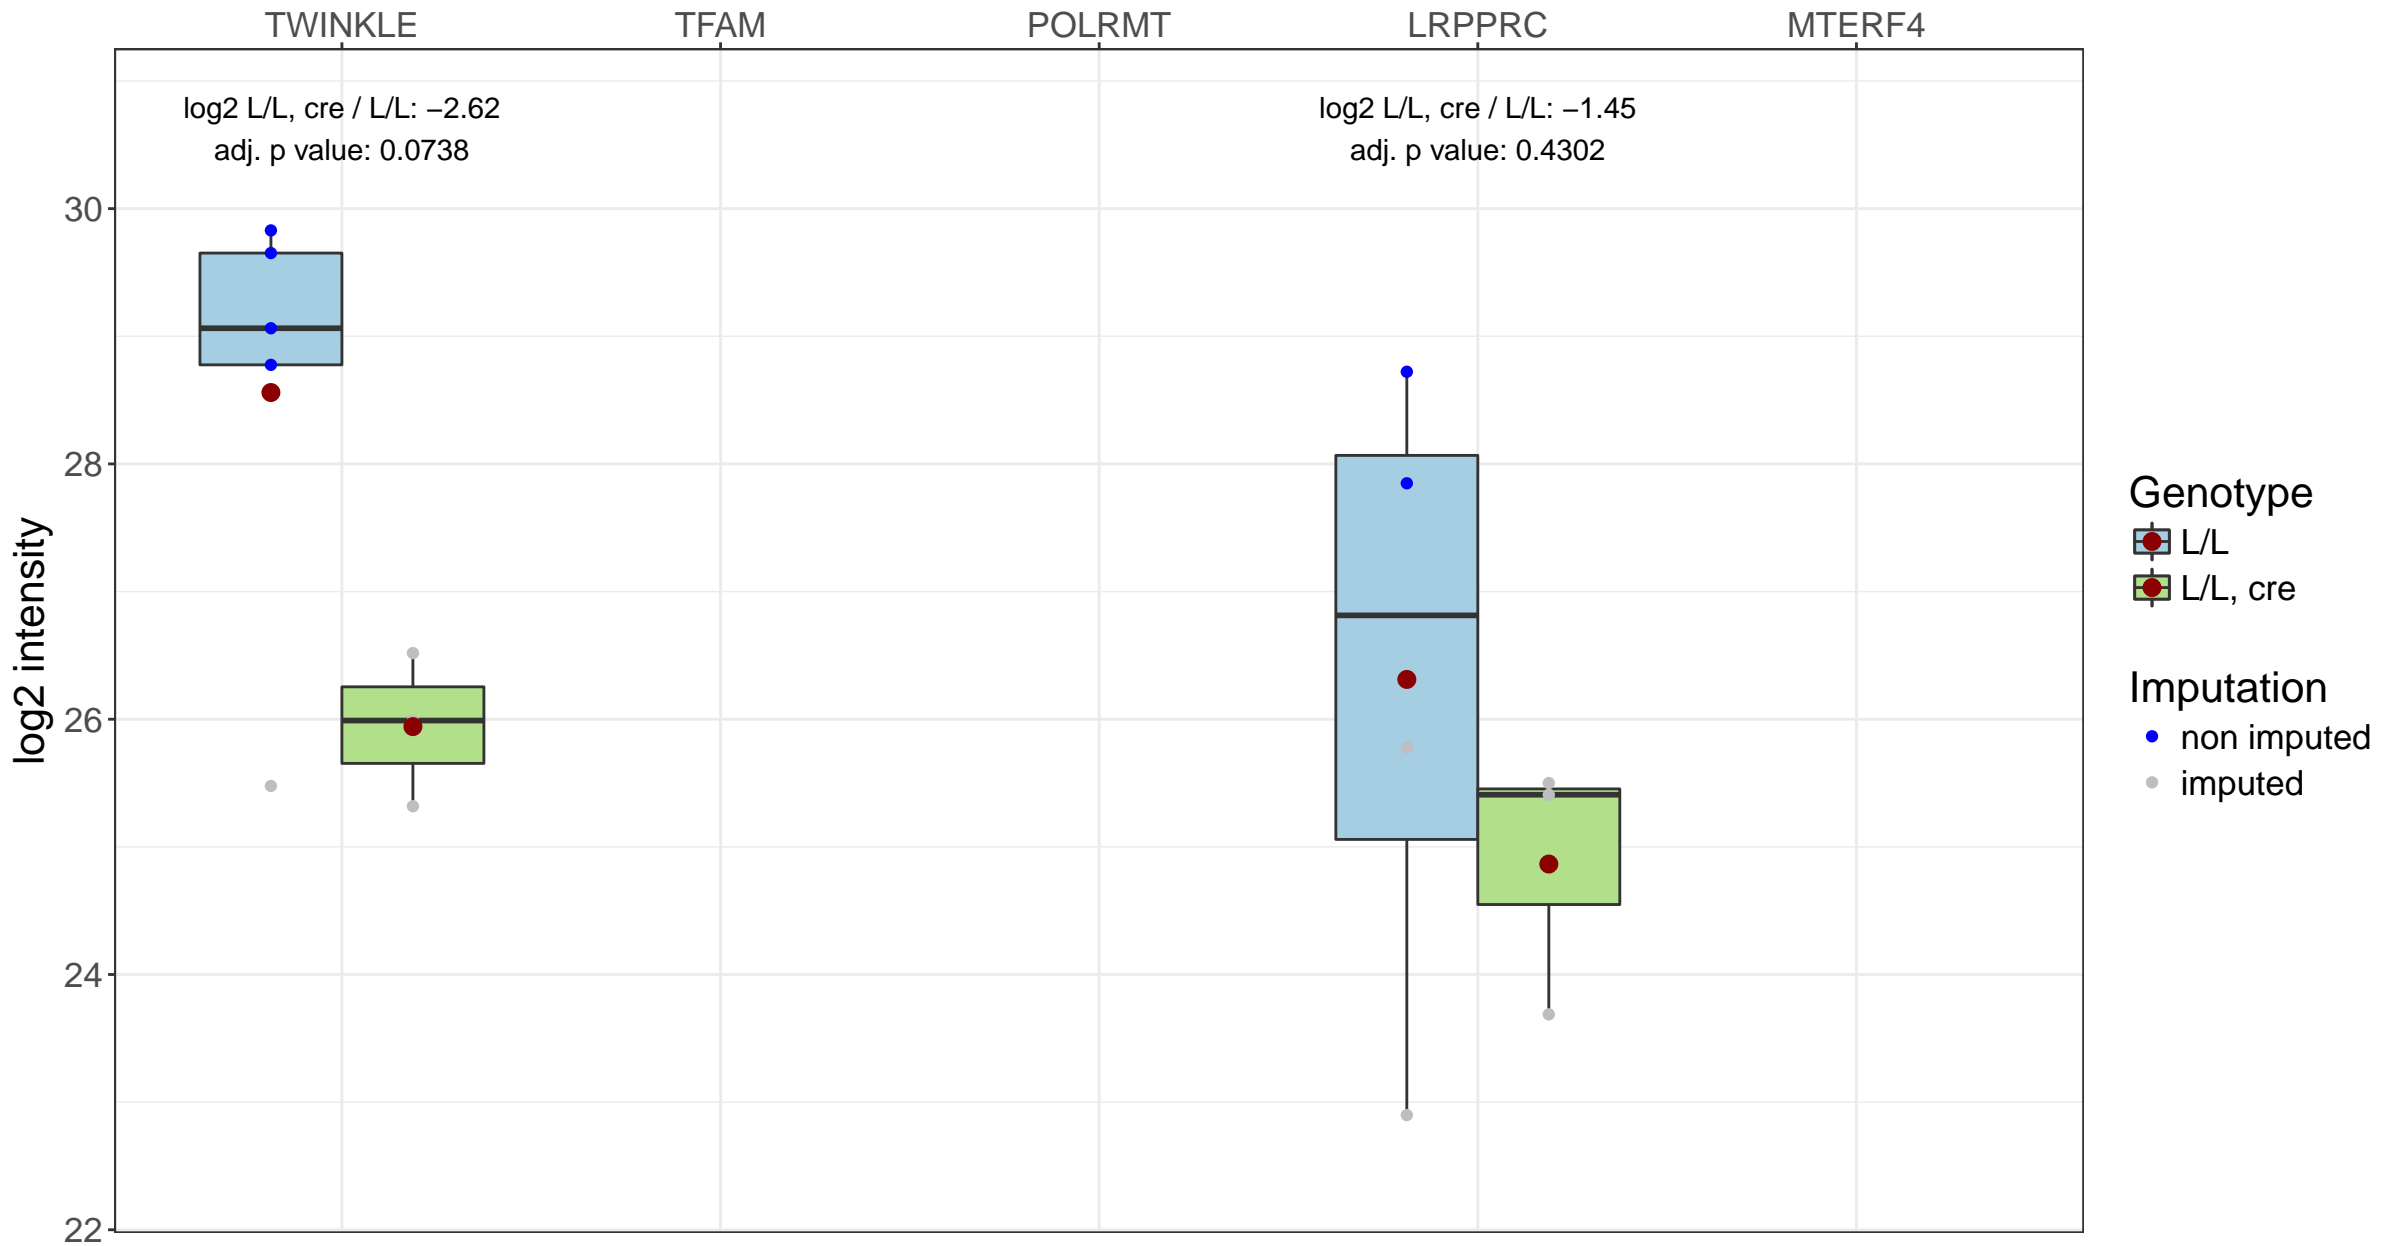

# ZFYVE26 / Q5DU37-3

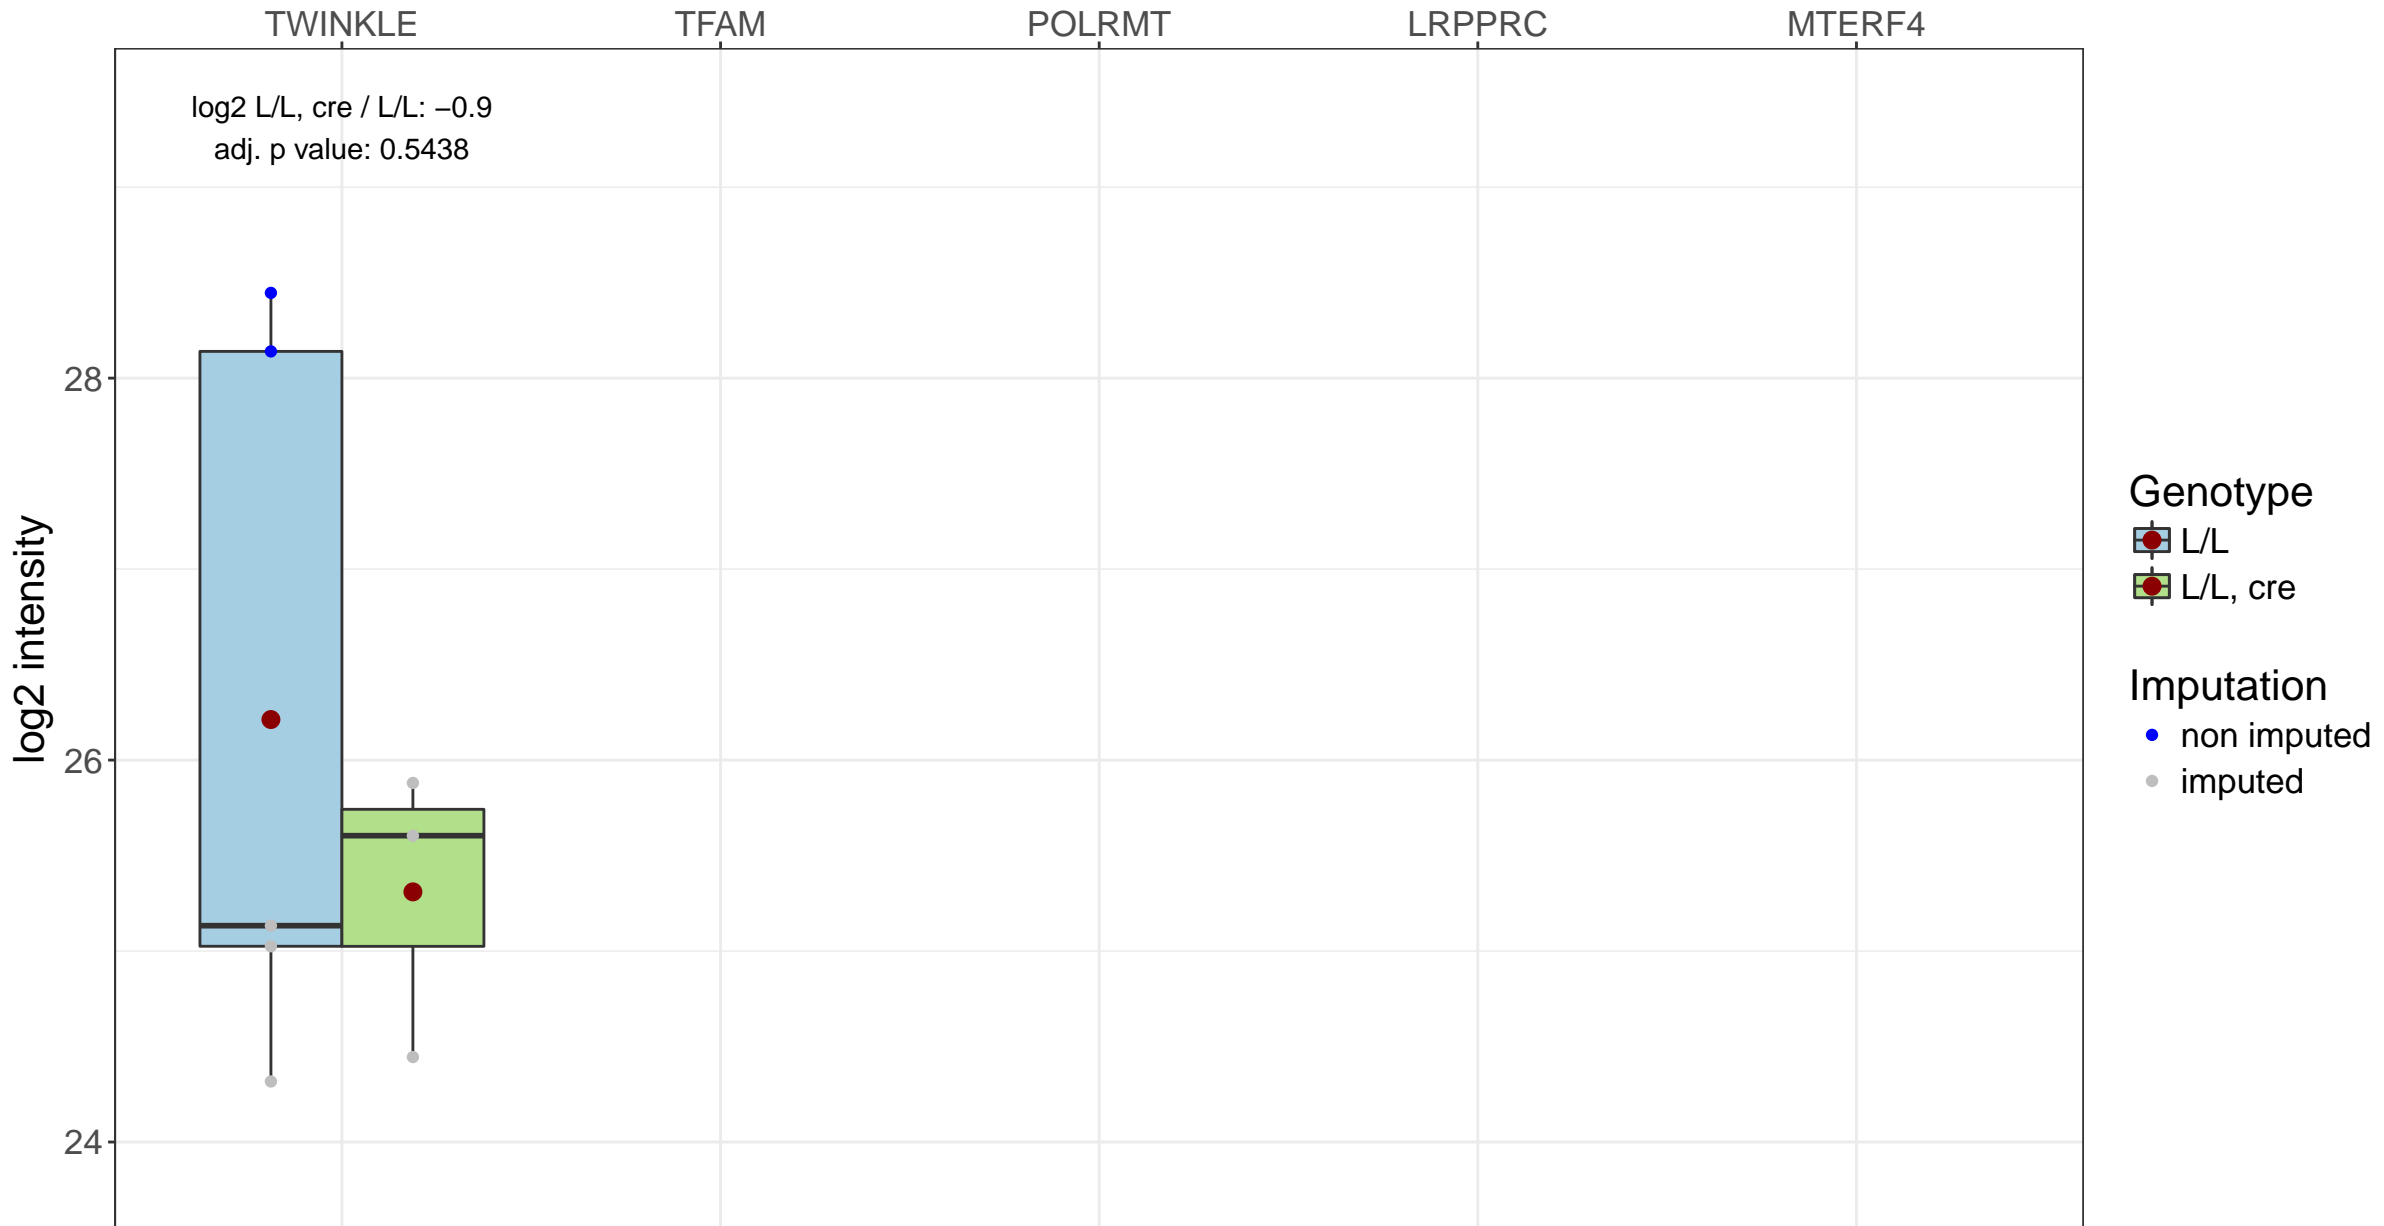

Supplement: supp [file elife-30952-supp-v1.zip]
