# Supplementary material for: Transcriptomic and proteomic landscape of mitochondrial dysfunction reveals secondary coenzyme Q deficiency in mammals
Source: eLife. 2017 Nov 14;6:e30952. doi: 10.7554/eLife.30952 (PMC5703644; doi:10.7554/eLife.30952)
Supplement: Figure 1—figure supplement 1—source data 1. [file elife-30952-fig1-figsupp1-data1.xlsx]

## Sheet: Summary - Figure data and graph
Kuehl et al_ Data for Figure 1 - figure supplement 1
mean	Twnk	Tfam	Polrmt	Lrpprc	Mterf4
L/L	100	100	100	100	100
L/L cre	97.8759	114.069	103.852	102.231	129.209
sem	Twnk	Tfam	Polrmt	Lrpprc	Mterf4
L/L	1.72657	3.92636	5.96417	4.99412	1.75476
L/L cre	1.90385	2.76871	1.73725	5.79759	4.27305

## Sheet: Twnk
Genotype	Enzyme activity (umole/ml/min)							Mean enzyme activity	Fold change enzyme activity (normalized to L/L) [%]
	Replicate 1	Replicate2	Replicate 3	Replicate 4	Replicate 5	Replicate 6	Replicate 7
L/L	4.26346	4.43681	5.04245	5.1245				4.71681	101.503
L/L	4.83021	6.99631	4.90232	4.34907	4.54559	3.9768	5.04937	4.94995	106.521
L/L	5.20425	5.08046	4.83003	4.20965	4.53982	3.96091	5.06021	4.6979	101.097
L/L	4.4567	4.67302	5.08472	4.15566	4.21542	3.88676	4.84672	4.47414	96.2814
L/L	4.69372	4.513	4.73981					4.64884	100.041
L/L	4.52419	4.27368	4.38424					4.39403	94.5574
L/L cre	4.79362	4.50057	4.66272	4.18416	4.08479	3.87761	4.44285	4.36376	93.906
L/L cre	5.24936	5.27689	4.66148	4.34063	4.61983	4.12324	4.73892	4.71576	101.481
L/L cre	4.11445	4.09651	4.43716	5.07531				4.43086	95.3499
L/L cre	4.9199	5.26623	5.0119	4.41896	4.53707	3.94146		4.68259	100.767

## Sheet: Tfam
Genotype	Enzyme activity (umole/ml/min)						Mean enzyme activity	Fold change enzyme activity (normalized to L/L) [%]
	Replicate 1	Replicate2	Replicate 3	Replicate 4	Replicate 5	Replicate 6
L/L	4.45173	3.76048	4.44533	3.89306	3.76892	3.94546	4.04416	90.7945
L/L	4.27057	5.09875	4.49915	3.85958	3.92361	4.08816	4.28997	96.3131
L/L	5	4.81511	5.59552	4.49249	4.42349	4.47748	4.80068	107.779
L/L	5.11882	5.14013	4.97407	4.22022	4.24277	4.39578	4.68196	105.114
L/L cre	5.27565	4.72062	5.60848	4.5249	4.3306	4.39676	4.8095	107.977
L/L cre	5.65626	5.03002	5.52607	4.38459	4.51558	4.49462	4.93452	110.784
L/L cre	6.06689	5.30282	6.45052	4.65038	4.51256	4.69114	5.27905	118.519
L/L cre	6.15534	5.31241	6.69899	4.57579	4.52312	4.53645	5.30035	118.997

## Sheet: Polrmt 
Genotype	Enzyme activity (umole/ml/min)						Mean enzyme activity	Fold change enzyme activity (normalized to L/L) [%]
	Replicate 1	Replicate2	Replicate 3	Replicate 4	Replicate 5	Replicate 6
L/L	3.76048	3.97805	3.94359	3.4018	3.33267	3.59752	3.66902	83.4039
L/L	5.31241	5.55307	5.79675	4.36532	4.22608	4.14544	4.89984	111.383
L/L	5.14013	5.10887	5.03694	4.14846	4.11205	4.07271	4.6032	104.64
L/L	4.72062	4.7771	4.91173	4.06952	4.08852	3.97849	4.42433	100.574
L/L cre	5.03002	4.87319	4.94867	3.95673	4.10042	3.96659	4.47927	101.822
L/L cre	5.30282	5.2657	5.46409	4.24934	4.22676	4.10806	4.76946	108.419
L/L cre	5.09875	5.11278	5.20638	4.1444	4.00673	4.03577	4.6008	104.585
L/L cre	4.81511	4.7462	4.82754	4.0585	4.08319	4.0173	4.42464	100.581

## Sheet: Lrpprc
Citrate Synthase Activity - Sigma Aldrich Citrate Synthase Assay Kit
Genotype	Enzyme activity (umole/ml/min)						Mean enzyme activity	Fold change enzyme activity (normalized to L/L) [%]
	Replicate 1	Replicate2	Replicate 3	Replicate 4	Replicate 5	Replicate 6
L/L	3.4875	3.79227	3.75337	2.97741	3.03113	3.27472	3.38607	103.427
L/L	3.06355	2.64351	3.33245	2.87839	2.78399	2.99606	2.94966	90.0966
L/L	3.01542	3.10866	3.18414	2.9965	2.95361	3.21807	3.0794	94.0595
L/L	3.92104	3.40899	4.14944	3.4843	3.48679	3.63189	3.68041	112.417
L/L cre	3.11097	2.93301	3.11967	3.21647	3.25226	3.31841	3.15846	96.4746
L/L cre	3.0893	2.98576	3.05875	2.86658	2.8617	3.09765	2.99329	91.4293
L/L cre	3.65711	3.26158	3.5612	3.24036	3.13637	3.35207	3.36811	102.878
L/L cre	4.10504	3.87859	4.09598	3.59477	3.72389	3.80843	3.86778	118.141

## Sheet: Mterf4
Citrate Synthase Activity - Sigma Aldrich Citrate Synthase Assay Kit
Genotype	Enzyme activity (umole/ml/min)						Mean enzyme activity	Fold change enzyme activity (normalized to L/L) [%]
	Replicate 1	Replicate2	Replicate 3	Replicate 4	Replicate 5	Replicate 6
L/L	3.91287	3.66528	4.0054	3.51218	3.43714	3.56351	3.68273	104.897
L/L	3.77433	3.50845	3.84733	3.33695	3.32152	3.30257	3.51519	100.125
L/L	3.54575	3.25305	3.75071	3.36299	3.23378	3.30216	3.40808	97.0738
L/L	3.54877	3.37454	3.71998	3.39026	3.27463	3.31522	3.43723	97.9043
L/L cre	4.90054	4.90516	4.98366	3.84502	3.82042	3.94448	4.39988	125.324
L/L cre	5.43869	5.56817	5.63921	4.09536	4.04554	4.18086	4.82797	137.517
L/L cre	5.40477	5.39304	5.41898	4.03932	4.02973	4.13283	4.73645	134.91
L/L cre	4.60962	4.47038	4.53254	3.86695	3.74449	3.86127	4.18088	119.086
