# Supplementary material for: Transcriptomic and proteomic landscape of mitochondrial dysfunction reveals secondary coenzyme Q deficiency in mammals
Source: eLife. 2017 Nov 14;6:e30952. doi: 10.7554/eLife.30952 (PMC5703644; doi:10.7554/eLife.30952)
Supplement: Figure 2—figure supplement 1—source data 1. [file elife-30952-fig2-figsupp1-data1.xlsx]

## Sheet: Summary data - Figure 2-S1
Kühl et al_ Figure 2 - figure supplement 1
mt-Co1 (normalised to 18S in %)
Timepoints:	2	3	4	5	6	8	15	25
Mean:	43.9861	51.2866	71.2088	70.5995	156.963	109.611	153.593	142.751
sem:	0.792004	1.24402	0.739792	2.25346	4.78142	1.34928	5.00643	4.19627
mt-Cytb (normalised to 18S in %)
Timepoints:	2	3	4	5	6	8	15	25
Mean:	44.4755	61.4621	84.8484	86.3765	127.86	127.568	130.203	137.206
sem:	1.12105	1.81023	2.61645	27.0614	0.994582	3.31544	4.7443	3.98463
mt-Nd1 (normalised to 18S in %)
Timepoints:	2	3	4	5	6	8	15	25
Mean:	44.4925	50.1368	68.6565	70.6144	154.621	111.224	152.314	147.941
sem:	0.678938	0.958128	1.60958	1.8255	1.62242	2.0206	6.10792	5.94594
mt-Nd5 (normalised to 18S in %)
Timepoints:	2	3	4	5	6	8	15	25
Mean:	44.1426	54.4446	75.4486	76.4819	151.825	109.784	144.334	143.54
sem:	0.948439	1.34744	0.483251	1.9333	1.94789	7.32929	4.22324	4.66935

## Sheet: Raw data
Gene	Timepoint (weeks)	Relative quantity				Mean quantity	Relative quantity (normalized to 18S)	Fold Change (normalized to mean) [%]
		Replicate 1	Replicate2	Replicate 3	Replicate 4
18S	2	3.78862	4.1591	3.98072	3.83164	3.94002
18S	3	17.1985	17.0548	18.3088	17.3679	17.4825
18S	4	16.1407	16.093	15.871	15.2056	15.8276
18S	5	18.9493	20.2559	19.0013	20.1571	19.5909
18S	6	5.38367	5.41075	5.20893	5.30119	5.32613
18S	8	13.5025	12.163	12.6008	12.8358	12.7755
18S	15	8.30889	7.77035	7.36758	7.78955	7.80909
18S	25	7.92357	8.52927	7.8479	7.82569	8.03161
mean						11.3479
mt-Co1	2	1.91519	1.98361	1.9374	1.95686	1.94827	0.494481	43.9861
mt-Co1	3	9.51277	10.2035	10.209	10.3929	10.0796	0.576551	51.2866
mt-Co1	4	12.6671	13.1609	12.807	12.0456	12.6701	0.800511	71.2088
mt-Co1	5	16.0126	15.7429	15.492	14.9466	15.5485	0.793662	70.5995
mt-Co1	6	9.04296	9.29845	9.8926	9.3587	9.39818	1.76454	156.963
mt-Co1	8	16.1026	15.1387	15.6981	16.0297	15.7423	1.23222	109.611
mt-Co1	15	13.6307	13.3316	13.7974	13.1748	13.4836	1.72666	153.593
mt-Co1	25	12.6348	13.0634	13.5453	12.3122	12.8889	1.60478	142.751
mean							1.12418	100
mt-Cytb	2	1.7758	1.95567	1.90407	1.97889	1.90361	0.483147	44.4755
mt-Cytb	3	11.193	11.4534	11.5907	12.4534	11.6726	0.667676	61.4621
mt-Cytb	4	14.4584	14.2518	14.4414	15.2031	14.5887	0.921726	84.8484
mt-Cytb	5	19.0714	17.6557		18.4208	18.3826	0.938325	86.3765
mt-Cytb	6	7.35802	7.65314	7.24919	7.33106	7.39785	1.38897	127.86
mt-Cytb	8	17.3984	17.2018	17.878	18.339	17.7043	1.3858	127.568
mt-Cytb	15	10.97	10.7752	11.393	11.0433	11.0454	1.41443	130.203
mt-Cytb	25	12.2065	11.7187	12.0468	11.9122	11.9711	1.49049	137.206
mean							1.08632	100
mt-Nd1	2	1.98764	2.0991	2.08011	2.06038	2.05681	0.52203	44.4925
mt-Nd1	3	10.2626	10.3742	10.3118	10.188	10.2842	0.588254	50.1368
mt-Nd1	4	12.524	12.6421	12.9536	12.8796	12.7498	0.805545	68.6565
mt-Nd1	5	16.6836	16.2328	15.7877	16.2215	16.2314	0.828517	70.6144
mt-Nd1	6	9.62875	9.69139	9.67872	9.65099	9.66246	1.81416	154.621
mt-Nd1	8	17.0583	16.4317	16.738	16.4598	16.672	1.30499	111.224
mt-Nd1	15	13.9625	13.786	14.4758	13.5982	13.9556	1.7871	152.314
mt-Nd1	25	13.4629	13.7478	13.718	14.8358	13.9411	1.73578	147.941
mean							1.1733	100
mt-Nd5	2	1.93877	1.94039	1.98423	1.88416	1.93689	0.491593	44.1426
mt-Nd5	3	10.2681	11.0327	10.803	10.2962	10.6	0.60632	54.4446
mt-Nd5	4	13.3989	13.6861	13.4291	12.6811	13.2988	0.84023	75.4486
mt-Nd5	5	17.1751	16.8163	16.233	16.5209	16.6863	0.851737	76.4819
mt-Nd5	6	9.17126	8.98807	9.06766	8.79451	9.00537	1.69079	151.825
mt-Nd5	8	16.3845	17.21	15.3133	13.5702	15.6195	1.22261	109.784
mt-Nd5	15	13.1623	12.2667	12.7679	12.0113	12.5521	1.60736	144.334
mt-Nd5	25	12.6565	12.5531	12.9751	13.1701	12.8387	1.59852	143.54
mean							1.11365	100
