# Supplementary material for: Transcriptomic and proteomic landscape of mitochondrial dysfunction reveals secondary coenzyme Q deficiency in mammals
Source: eLife. 2017 Nov 14;6:e30952. doi: 10.7554/eLife.30952 (PMC5703644; doi:10.7554/eLife.30952)
Supplement: Figure 2—figure supplement 1—source data 2. [file elife-30952-fig2-figsupp1-data2.xlsx]

## Sheet: Quantification Western wildtype
Kühl et al_Data for Figure 2 - figure supplement 1
Quantification of Western Blots on total proteins extracted from of wildtype mouse heart, all quantified signals were quantified from the same membrane
Antibody:	Tubulin	TWINKLE			TFAM					POLRMT			LRPPRC			VDAC
age (weeks)	Area	Area	TWINKLE/Tubulin	in%	Area (expo1)	Area (expo 2)	Area average	TFAM/Tubulin	in%	Area	POLRMT/Tubulin	in%	Area	LRPPRC/Tubulin	in%	Area	VDAC/Tubulin	in%
2	11914782	4145296	0.347912	63.5179	1250477	8645560	4.94802e+06	0.415284	19.2764	4174803	0.350389	128.465	40664487	3.41294	92.1088	33407626	2.80388	96.2835
3	11418903	4235832	0.370949	67.7237	5012811	18107836	1.15603e+07	1.01238	46.9922	4578903	0.400993	147.018	49343822	4.32124	116.622	25561362	2.23851	76.8691
4	12244317	7804681	0.637413	116.372	11406489	42422103	26914296	2.19811	102.03	3325217	0.271572	99.5679	50778165	4.14708	111.922	33189040	2.71057	93.0791
5	11896903	7521782	0.632247	115.429	9196539	34479475	21838007	1.8356	85.2038	3756146	0.315725	115.756	48796701	4.10163	110.695	27631090	2.32254	79.7547
6	10847539	6328418	0.583397	106.51	13536075	50986052	3.22611e+07	2.97404	138.047	1105083	0.101874	37.3506	28788889	2.65396	71.6252	14301593	1.31842	45.2736
8	9895539	6472075	0.65404	119.407	12104894	47454567	2.97797e+07	3.00941	139.689	1897033	0.191706	70.2861	36118032	3.64993	98.5047	30665525	3.09892	106.415
15	7959347	5164054	0.648804	118.451	9711439	41348739	25530089	3.20756	148.886	2447983	0.307561	112.763	29688647	3.73004	100.667	38745324	4.8679	167.161
25	7539468	3823640	0.50715	92.5897	6996660	31945555	1.94711e+07	2.58256	119.875	1825962	0.242187	88.7943	27337283	3.62589	97.8558	29676354	3.93613	135.164
Average			0.547739	100				2.15437	100		0.272751	100		3.70534	100		2.91211	100
