# Supplementary material for: Transcriptomic and proteomic landscape of mitochondrial dysfunction reveals secondary coenzyme Q deficiency in mammals
Source: eLife. 2017 Nov 14;6:e30952. doi: 10.7554/eLife.30952 (PMC5703644; doi:10.7554/eLife.30952)
Supplement: Figure 3—source data 1. [file elife-30952-fig3-data1.xlsx]

## Sheet: Summary data - Figure 3
Kühl et al_Data for Figure 3 - figure supplement 1
Knockout gene
mean	Twnk	Tfam	Polrmt	Lrpprc	Mterf4
L/L	100	100	100	100	100
L/L cre	3.84795	11.4178	8.75216	11.3294	17.5149
sem	Twnk	Tfam	Polrmt	Lrpprc	Mterf4
L/L	5.79484	7.31587	16.0703	10.2063	13.7348
L/L cre	1.00661	0.835178	1.75351	0.423002	3.79379
Pgc1a
mean	Twnk	Tfam	Polrmt	Lrpprc	Mterf4
L/L	100	100	100	100	100
L/L cre	43.8592	88.6479	84.3967	83.0846	100.162
sem	Twnk	Tfam	Polrmt	Lrpprc	Mterf4
L/L	15.138	15.82	20.7217	8.41745	11.4678
L/L cre	2.91009	8.6304	6.67429	11.4246	17.9887
Nrf1
mean	Twnk	Tfam	Polrmt	Lrpprc	Mterf4
L/L	100	100	100	100	100
L/L cre	63.961	128.185	101.626	101.561	176.752
sem	Twnk	Tfam	Polrmt	Lrpprc	Mterf4
L/L	15.4311	20.4512	11.8811	13.1254	21.1949
L/L cre	13.9501	9.15493	9.22526	5.39678	20.524
Gabpa
mean	Twnk	Tfam	Polrmt	Lrpprc	Mterf4
L/L	100	100	100	100	100
L/L cre	58.9157	100.85	90.134	94.1783	116.84
sem	Twnk	Tfam	Polrmt	Lrpprc	Mterf4
L/L	13.7983	14.5055	10.9246	8.39935	7.7043
L/L cre	4.36475	8.4496	10.0566	7.30854	16.0882
Myc
mean	Twnk	Tfam	Polrmt	Lrpprc	Mterf4
L/L	100	100	100	100	100
L/L cre	688.738	454.43	467.643	1151.73	839.946
sem	Twnk	Tfam	Polrmt	Lrpprc	Mterf4
L/L	15.2306	38.3685	10.6246	13.3109	16.4288
L/L cre	154.072	61.5004	137.887	101.79	159.886
Atf4
mean	Twnk	Tfam	Polrmt	Lrpprc	Mterf4
L/L	100	100	100	100	100
L/L cre	269.043	497.126	336.008	600.401	1062.3
sem	Twnk	Tfam	Polrmt	Lrpprc	Mterf4
L/L	5.76812	23.1363	18.9793	10.7429	15.271
L/L cre	84.6285	68.7384	66.5218	72.9587	267.707

## Sheet: Raw data Twnk
Mouse strain	Genotype	Gene	Relative quantity						Mean quantity	Relative quantity (normalized to B2m)	Fold Change (normalized to L/L) [%]
			Replicate 1	Replicate2	Replicate 3	Replicate 4	Replicate 5	Replicate 6
Twnk	L/L	B2m	5.4596	5.16983	4.95444	5.08391	5.32431	5.21522	5.20122
Twnk	L/L	B2m	12.166	12.3682	11.7914	12.3723	11.4081	13.9172	12.3372
Twnk	L/L	B2m	6.88602	7.16235	6.80853	7.41593	7.35667	7.08609	7.11927
Twnk	L/L	B2m	9.5108	10.2926	10.4127	10.8165	9.63012	10.594	10.2095
Twnk	L/L	B2m	12.5735	11.8738	12.6328	12.4612	13.0245	12.5301	12.516
Twnk	L/L cre	B2m	1.7628	1.90478	1.91154	2.0667	2.56678	2.14637	2.05983
Twnk	L/L cre	B2m	20.8361	21.4373	20.2354	19.1368	18.592	19.6013	19.9731
Twnk	L/L cre	B2m	36.9834	35.8159	36.8951	34.4278	35.2945	32.6621	35.3465
Twnk	L/L cre	B2m	19.58	18.553	18.726	19.0899	19.1216	20.7082	19.2965
Twnk	L/L	Twnk (Twinkle/Peo)	9.67	9.364	10.506				9.84667	1.89502	93.8226
Twnk	L/L	Twnk (Twinkle/Peo)	20.8668	18.8014	24.0905				21.2529	1.7188	85.0977
Twnk	L/L	Twnk (Twinkle/Peo)	14.8152	16.9375	15.2621				15.6716	2.20059	108.951
Twnk	L/L	Twnk (Twinkle/Peo)	19.2381	19.3087	20.0387				19.5285	1.91301	94.7132
Twnk	L/L	Twnk (Twinkle/Peo)	25.174	33.2022	30.6545				29.6769	2.37155	117.415
Twnk	L/L cre	Twnk (Twinkle/Peo)	0.0336076	0.0339999	0.0354				0.0343358	0.0167355	0.828576
Twnk	L/L cre	Twnk (Twinkle/Peo)	2.04813	2.05587	1.82257				1.97553	0.0988988	4.89649
Twnk	L/L cre	Twnk (Twinkle/Peo)	3.13346	3.41198	3.74968				3.43171	0.097179	4.81133
Twnk	L/L cre	Twnk (Twinkle/Peo)	1.59672	2.12304	1.95042				1.89006	0.0980688	4.85539
Twnk	L/L	Pgc1a	4.19043	3.99054	4.46551				4.21549	0.811205	56.813
Twnk	L/L	Pgc1a	18.1765	18.3776	19.1513				18.5685	1.50574	105.455
Twnk	L/L	Pgc1a	15.5706	14.0468	12.7911				14.1362	1.9845	138.985
Twnk	L/L	Pgc1a	16.0106	16.5771	13.6556				15.4144	1.51318	105.976
Twnk	L/L	Pgc1a	15.9337	15.9507	17.8614				16.5819	1.32462	92.7702
Twnk	L/L cre	Pgc1a	1.34866	1.31995	1.33049				1.33303	0.65016	45.5342
Twnk	L/L cre	Pgc1a	11.9235	12.2428	11.8589				12.0084	0.601215	42.1063
Twnk	L/L cre	Pgc1a	18.0283	18.9277	19.0155				18.6572	0.528007	36.9792
Twnk	L/L cre	Pgc1a	13.7583	14.2346	13.99				13.9943	0.72559	50.817
Twnk	L/L	Nrf1	3.4616	3.42357	3.30244				3.39587	0.652858	49.8925
Twnk	L/L	Nrf1	14.9361	15.4745	15.3751				15.2619	1.23838	94.6394
Twnk	L/L	Nrf1	11.5675	19.2747	10.3022				13.7148	1.91853	146.618
Twnk	L/L	Nrf1	13.4781	13.7097	13.7286				13.6388	1.33649	102.137
Twnk	L/L	Nrf1	17.2398	18.1845	16.9994				17.4746	1.39637	106.713
Twnk	L/L cre	Nrf1	0.625727	0.609463	0.626242				0.620477	0.30268	23.1314
Twnk	L/L cre	Nrf1	19.1997	23.0254	21.3004				21.1752	1.06015	81.0185
Twnk	L/L cre	Nrf1	31.7593	32.0603	31.8632				31.8943	0.902452	68.967
Twnk	L/L cre	Nrf1	21.0126	20.6771	20.961				20.8836	1.08251	82.7272
Twnk	L/L	Gabpa	5.17784	4.57125	5.41222				5.05377	0.97259	68.0202
Twnk	L/L	Gabpa	16.1258	17.3467	16.9096				16.794	1.36299	95.3237
Twnk	L/L	Gabpa	12.1583	22.5502	11.6554				15.4547	2.16141	151.163
Twnk	L/L	Gabpa	12.3391	15.2688	14.962				14.19	1.39045	97.244
Twnk	L/L	Gabpa	16.581	16.1231	14.667				15.7904	1.26184	88.2496
Twnk	L/L cre	Gabpa	2.09396	2.13062	2.04724				2.09061	1.01852	71.2326
Twnk	L/L cre	Gabpa	16.8627	17.9464	15.408				16.7391	0.837978	58.6058
Twnk	L/L cre	Gabpa	28.5945	28.8778	25.1312				27.5345	0.778548	54.4494
Twnk	L/L cre	Gabpa	14.3508	13.7678	14.4066				14.1751	0.734589	51.3751
Twnk	L/L	Myc	0.575886	0.629105	0.747961				0.650984	0.125411	55.1497
Twnk	L/L	Myc	3.12811	3.24763	3.31296				3.22957	0.261957	115.196
Twnk	L/L	Myc	2.20132	2.089	2.16204				2.15079	0.302267	132.922
Twnk	L/L	Myc	3.03857	2.86241	2.72227				2.87442	0.281832	123.936
Twnk	L/L	Myc	2.07762	2.02796	2.11033				2.07197	0.165537	72.7953
Twnk	L/L cre	Myc	2.15714	2.03392	2.02488				2.07198	1.01143	444.779
Twnk	L/L cre	Myc	24.5267	23.7913	24.1907				24.1696	1.21012	532.152
Twnk	L/L cre	Myc	52.0716	51.9881	51.092				51.7172	1.4632	643.446
Twnk	L/L cre	Myc	50.3724	47.1307	51.9126				49.8052	2.58004	1134.58
Twnk	L/L	Atf4	1.66	2.01	1.949				1.873	0.360457	78.9777
Twnk	L/L	Atf4	6.34	6.285	6.143				6.256	0.507773	111.255
Twnk	L/L	Atf4	3.249	3.652	3.206				3.369	0.47293	103.621
Twnk	L/L	Atf4	4.656	4.624	4.318				4.53267	0.444448	97.3806
Twnk	L/L	Atf4	6.121	6.284	6.234				6.213	0.496409	108.765
Twnk	L/L cre	Atf4	0.302129	0.34096	0.348067				0.330385	0.160614	35.1912
Twnk	L/L cre	Atf4	28.1083	29.0864	29.5432				28.9126	1.44761	317.179
Twnk	L/L cre	Atf4	47.634	42.8326	47.6255				46.0307	1.30272	285.431
Twnk	L/L cre	Atf4	38.4905	37.0167	40.3492				38.6188	2.00073	438.37

## Sheet: Raw data Tfam
Mouse strain	Genotype	Gene	Relative quantity			Mean quantity	Relative quantity (normalized to B2m)	Fold Change (normalized to L/L) [%]
			Replicate 1	Replicate2	Replicate 3
Tfam	L/L	B2m	14.4795	13.5533	13.5377	13.8568
Tfam	L/L	B2m	8.12675	8.20254	8.07744	8.13558
Tfam	L/L	B2m	9.1239	9.91997	9.18609	9.40999
Tfam	L/L	B2m	21.9036	22.1387	23.4141	22.4855
Tfam	L/L	B2m	10.1412	9.99038	9.95052	10.0274
Tfam	L/L	B2m	8.96696	8.48812	8.70728	8.72079
Tfam	L/L cre	B2m	15.0381	16.3989	15.4522	15.6297
Tfam	L/L cre	B2m	15.902	15.1736	15.7086	15.5947
Tfam	L/L cre	B2m	18.4048	18.5557		18.4802
Tfam	L/L cre	B2m	13.6056	12.8984	12.8426	13.1155
Tfam	L/L cre	B2m	28.1433	27.3906	28.4255	27.9865
Tfam	L/L cre	B2m	16.9797	18.3325	18.3203	17.8775
Tfam	L/L	Pgc1a	14.676	15.8269	16.1773	15.56	1.12292	96.3026
Tfam	L/L	Pgc1a	8.63847	8.62424	8.52859	8.5971	1.05673	90.6263
Tfam	L/L	Pgc1a	7.97287	7.52856	7.6501	7.71718	0.820105	70.3332
Tfam	L/L	Pgc1a	17.9198	16.4603	16.7309	17.037	0.757689	64.9803
Tfam	L/L	Pgc1a	12.981	11.2884	12.6091	12.2928	1.22593	105.137
Tfam	L/L	Pgc1a	18.0273	17.5051	17.1273	17.5532	2.01281	172.621
Tfam	L/L cre	Pgc1a	13.4483	12.4713	13.7957	13.2384	0.847003	72.64
Tfam	L/L cre	Pgc1a	15.7386	16.4543	16.9727	16.3885	1.0509	90.1266
Tfam	L/L cre	Pgc1a	20.6159	20.9566	20.6712	20.7479	1.12271	96.2847
Tfam	L/L cre	Pgc1a	17.5371	16.6338	17.2188	17.1299	1.30608	112.011
Tfam	L/L cre	Pgc1a	17.8861	18.6753	17.8218	18.1277	0.647732	55.5502
Tfam	L/L cre	Pgc1a	20.8928	22.5005	22.4427	21.9453	1.22754	105.275
Tfam	L/L	Nrf1	5.30262	5.02086	4.65046	4.99131	0.360206	38.7586
Tfam	L/L	Nrf1	8.87992	9.29677	10.1766	9.4511	1.1617	125
Tfam	L/L	Nrf1	10.3267	9.25994	9.4279	9.67152	1.02779	110.592
Tfam	L/L	Nrf1	14.4459	13.3605	13.3144	13.7069	0.609591	65.5926
Tfam	L/L	Nrf1	7.27615	7.47902	7.51728	7.42415	0.74039	79.6667
Tfam	L/L	Nrf1	14.528	14.091	15.2414	14.6202	1.67647	180.39
Tfam	L/L cre	Nrf1	17.2582	18.0386	15.9403	17.079	1.09273	117.579
Tfam	L/L cre	Nrf1	20.7333	20.8093	21.2868	20.9431	1.34296	144.504
Tfam	L/L cre	Nrf1	25.1595	26.5863	27.1897	26.3118	1.42378	153.201
Tfam	L/L cre	Nrf1	15.569	16.5821	16.4105	16.1872	1.2342	132.802
Tfam	L/L cre	Nrf1	22.8889	21.8828	25.2431	23.3383	0.833913	89.7299
Tfam	L/L cre	Nrf1	21.2083	22.5315	21.7039	21.8146	1.22022	131.297
Tfam	L/L	Gabpa	9.60903	10.222	9.75505	9.86204	0.71171	67.4681
Tfam	L/L	Gabpa	8.79654	8.08669	7.64394	8.17572	1.00493	95.265
Tfam	L/L	Gabpa	9.46635	10.1855	10.8273	10.1597	1.07967	102.35
Tfam	L/L	Gabpa	14.8624	16.0715	16.0558	15.6632	0.696594	66.0351
Tfam	L/L	Gabpa	11.0898	11.2683	11.0524	11.1368	1.11064	105.286
Tfam	L/L	Gabpa	15.0596	14.8553	15.2347	15.0499	1.72575	163.596
Tfam	L/L cre	Gabpa	12.6642	13.9805	13.5204	13.3884	0.856597	81.2029
Tfam	L/L cre	Gabpa	17.957	18.3043	18.5384	18.2666	1.17133	111.039
Tfam	L/L cre	Gabpa	22.0968	21.968	23.0367	22.3671	1.21033	114.736
Tfam	L/L cre	Gabpa	18.3499	16.9444	17.4005	17.5649	1.33925	126.957
Tfam	L/L cre	Gabpa	21.984	22.2139	20.5474	21.5818	0.771151	73.1029
Tfam	L/L cre	Gabpa	19.2082	19.2699	17.0028	18.4937	1.03447	98.0644
Tfam	L/L	Myc	1.11585	1.05631	1.21121	1.12779	0.0813888	26.0707
Tfam	L/L	Myc	1.90006	1.82636	1.78905	1.83849	0.225982	72.3871
Tfam	L/L	Myc	3.77166	4.00174	3.51627	3.76322	0.399918	128.103
Tfam	L/L	Myc	20.0547	18.3513	19.9707	19.4589	0.8654	277.207
Tfam	L/L	Myc	1.09192	1.09858	1.06811	1.08621	0.108324	34.6987
Tfam	L/L	Myc	1.68924	1.67887	1.65762	1.67524	0.192098	61.5333
Tfam	L/L cre	Myc	12.301	12.2942	12.9419	12.5124	0.80055	256.435
Tfam	L/L cre	Myc	31.821	34.3606	32.5002	32.8939	2.1093	675.656
Tfam	L/L cre	Myc	30.2373	28.597	30.5854	29.8065	1.61289	516.644
Tfam	L/L cre	Myc	18.3286	17.2822	17.3903	17.667	1.34703	431.486
Tfam	L/L cre	Myc	27.9484	27.505	29.9348	28.4627	1.01702	325.774
Tfam	L/L cre	Myc	27.7755	30.0711	29.3161	29.0542	1.62518	520.584
Tfam	L/L	Atf4	0.735399	0.735283	0.770326	0.747003	0.0539087	18.7388
Tfam	L/L	Atf4	2.10446	2.32779	2.30126	2.2445	0.275888	95.8995
Tfam	L/L	Atf4	4.70954	4.17506	4.37063	4.41841	0.469545	163.215
Tfam	L/L	Atf4	9.19882	9.14902	9.43625	9.26136	0.411882	143.172
Tfam	L/L	Atf4	1.3197	1.42983	1.44905	1.39952	0.139571	48.5153
Tfam	L/L	Atf4	3.17667	3.22011	3.42223	3.273	0.37531	130.459
Tfam	L/L cre	Atf4	18.801	19.521	20.5435	19.6218	1.25542	436.388
Tfam	L/L cre	Atf4	24.3002	25.6475	24.3728	24.7735	1.58858	552.196
Tfam	L/L cre	Atf4	42.8981	43.9304		43.4142	2.34923	816.599
Tfam	L/L cre	Atf4	14.4589	13.7137	15.1701	14.4476	1.10156	382.907
Tfam	L/L cre	Atf4	34.0274	31.8153	30.2848	32.0425	1.14493	397.981
Tfam	L/L cre	Atf4	20.5858	20.6246	19.9948	20.4017	1.1412	396.684
Mouse strain	Genotype	Gene	Relative quantity			Mean quantity	Relative quantity (normalized to B2m)	Fold Change (normalized to L/L) [%]
			Replicate 1	Replicate2	Replicate 3
Tfam	L/L	B2m	9.63089	9.24179	9.5823	9.48499
Tfam	L/L	B2m	9.98679	11.0342	9.95103	10.324
Tfam	L/L	B2m	9.75194	10.1114	9.0316	9.63166
Tfam	L/L cre	B2m	11.2051	11.764	11.1656	11.3782
Tfam	L/L cre	B2m	10.0397	9.7847	10.2119	10.0121
Tfam	L/L cre	B2m	9.57438	9.52276	10.3808	9.82597
Tfam	L/L cre	B2m	11.4554	11.5139	11.1818	11.3837
Tfam	L/L cre	B2m	12.0528	12.0489	12.0037	12.0352
Tfam	L/L	Tfam	26.3294	23.7618	24.1891	24.7601	2.61045	114.236
Tfam	L/L	Tfam	21.0161	19.6007	23.0485	21.2218	2.05558	89.9539
Tfam	L/L	Tfam	21.4961	20.492	21.2747	21.0876	2.18941	95.8104
Tfam	L/L cre	Tfam	2.44968	2.30801	2.20177	2.31982	0.203882	8.92208
Tfam	L/L cre	Tfam	2.30872	2.31559	2.32947	2.31793	0.231513	10.1312
Tfam	L/L cre	Tfam	2.66511	2.63279	2.61991	2.63927	0.268602	11.7543
Tfam	L/L cre	Tfam	3.35944	3.48581	3.33771	3.39432	0.298174	13.0484
Tfam	L/L cre	Tfam	3.40226	3.87452	3.64117	3.63932	0.302391	13.2329

## Sheet: Raw data Polrmt
Mouse strain	Genotype	Gene	Relative quantity			Mean quantity	Relative quantity (normalized to B2m)	Fold Change (normalized to L/L) [%]
			Replicate 1	Replicate2	Replicate 3
Polrmt	L/L	B2m	0.600336	0.567335	0.570115	0.579262
Polrmt	L/L	B2m	1.25849	1.37721	1.34922	1.32831
Polrmt	L/L	B2m	1.82354	1.91182	1.92956	1.88831
Polrmt	L/L	B2m	4.32276	4.63224	4.74624	4.56708
Polrmt	L/L	B2m	2.32671	2.04047	2.30367	2.22362
Polrmt	L/L cre	B2m	3.82412	3.88521	3.68534	3.79822
Polrmt	L/L cre	B2m	1.89021	1.93506	1.88305	1.90277
Polrmt	L/L cre	B2m	0.975269	0.970036	0.964593	0.969966
Polrmt	L/L cre	B2m	8.67685	8.56817	9.15983	8.80162
Polrmt	L/L cre	B2m	5.13559	5.55785	5.48346	5.3923
Polrmt	L/L cre	B2m	3.72821	3.64141	3.68655	3.68539
Polrmt	L/L	Polrmt	1.3776	1.18113	1.40183	1.32018	2.27908	76.1075
Polrmt	L/L	Polrmt	3.96883	4.36699	3.95519	4.097	3.08438	103
Polrmt	L/L	Polrmt	8.64901	8.84537	8.22347	8.57262	4.53985	151.604
Polrmt	L/L	Polrmt	7.83106	7.45939	8.38833	7.89293	1.72822	57.7122
Polrmt	L/L	Polrmt	7.60118	6.96922	7.71844	7.42961	3.34123	111.577
Polrmt	L/L cre	Polrmt	0.820296	0.97872	0.92271	0.907242	0.238859	7.97647
Polrmt	L/L cre	Polrmt	0.206052	0.174041	0.357865	0.245986	0.129277	4.31709
Polrmt	L/L cre	Polrmt	0.376311	0.51163	0.594708	0.494216	0.509519	17.0149
Polrmt	L/L cre	Polrmt	1.92859	2.41254	2.25558	2.1989	0.24983	8.34281
Polrmt	L/L cre	Polrmt	1.27862	1.30747	1.08221	1.22277	0.226762	7.57248
Polrmt	L/L cre	Polrmt	0.865083	0.818011	0.730243	0.804446	0.21828	7.28923
Polrmt	L/L	Pgc1a	0.320637	0.337737	0.299026	0.319133	0.550931	52.1997
Polrmt	L/L	Pgc1a	2.3203	2.18965	2.32138	2.27711	1.71429	162.426
Polrmt	L/L	Pgc1a	2.50598	2.6155	2.80998	2.64382	1.4001	132.657
Polrmt	L/L	Pgc1a	4.13844	4.33947	4.08593	4.18795	0.916986	86.8826
Polrmt	L/L	Pgc1a	1.5305	1.61117	1.49347	1.54505	0.694836	65.8344
Polrmt	L/L cre	Pgc1a	3.75363	4.08225	4.03654	3.95747	1.04193	98.7206
Polrmt	L/L cre	Pgc1a	1.68675	1.8901	1.44752	1.67479	0.880183	83.3957
Polrmt	L/L cre	Pgc1a	0.894039	0.859197	0.8251	0.859445	0.886057	83.9522
Polrmt	L/L cre	Pgc1a	9.59542	11.0237	8.90654	9.8419	1.11819	105.947
Polrmt	L/L cre	Pgc1a	3.64555	3.59207	3.20164	3.47975	0.645319	61.1428
Polrmt	L/L cre	Pgc1a	2.69842	2.98898	2.85692	2.84811	0.77281	73.2223
Polrmt	L/L	Nrf1	0.771962	0.73191	0.772233	0.758702	1.30977	121.864
Polrmt	L/L	Nrf1	1.44919	1.4943	1.41836	1.45395	1.09459	101.843
Polrmt	L/L	Nrf1	2.77325	2.67262	2.44105	2.62897	1.39224	129.537
Polrmt	L/L	Nrf1	3.06755	3.52204	3.46643	3.35201	0.733949	68.2884
Polrmt	L/L	Nrf1	1.65723	2.00598	1.96259	1.87527	0.843342	78.4666
Polrmt	L/L cre	Nrf1	4.75695	4.48041	4.77879	4.67205	1.23006	114.448
Polrmt	L/L cre	Nrf1	1.79987	1.81633	1.94872	1.85497	0.974879	90.7051
Polrmt	L/L cre	Nrf1	1.4319	1.452	1.52753	1.47048	1.51601	141.053
Polrmt	L/L cre	Nrf1	8.79794	8.53367	8.4034	8.57834	0.974632	90.6822
Polrmt	L/L cre	Nrf1	4.44147	4.53364	4.63181	4.53564	0.841133	78.2611
Polrmt	L/L cre	Nrf1	3.83308	3.97468	3.43395	3.74723	1.01678	94.6037
Polrmt	L/L	Gabpa	0.507229	0.538447	0.489704	0.511794	0.883527	81.8414
Polrmt	L/L	Gabpa	1.92302	1.94505	1.84383	1.90396	1.43338	132.774
Polrmt	L/L	Gabpa	2.1529	2.19986	2.19398	2.18225	1.15567	107.05
Polrmt	L/L	Gabpa	5.28925	5.44405	5.22026	5.31785	1.16439	107.858
Polrmt	L/L	Gabpa	1.68829	1.59313	1.79404	1.69182	0.760842	70.477
Polrmt	L/L cre	Gabpa	4.97132	5.38912	5.28017	5.21354	1.37262	127.147
Polrmt	L/L cre	Gabpa	2.1517	2.01632	1.96548	2.0445	1.07448	99.5299
Polrmt	L/L cre	Gabpa	1.12697	1.04316	1.11048	1.09354	1.1274	104.431
Polrmt	L/L cre	Gabpa	6.72546	6.88459	5.8876	6.49922	0.738412	68.3994
Polrmt	L/L cre	Gabpa	4.5991	4.56767	4.63059	4.59912	0.852906	79.005
Polrmt	L/L cre	Gabpa	2.72596	2.38043	2.32866	2.47835	0.672478	62.2919
Polrmt	L/L	Myc	0.100676	0.169317	0.154372	0.141455	0.244199	92.1375
Polrmt	L/L	Myc	0.338829	0.299094	0.22	0.285974	0.215292	81.2308
Polrmt	L/L	Myc	0.681116	0.613625	0.552699	0.615813	0.32612	123.047
Polrmt	L/L	Myc	0.906798	0.887482	0.974226	0.922835	0.202062	76.2391
Polrmt	L/L	Myc	0.691338	0.780716	0.779457	0.750504	0.337515	127.346
Polrmt	L/L cre	Myc	6.64031	7.14476	6.65438	6.81315	1.79377	676.799
Polrmt	L/L cre	Myc	0.805552	1.0359	1.10318	0.981544	0.515849	194.632
Polrmt	L/L cre	Myc	2.77386	2.74285	2.54668	2.6878	2.77102	1045.52
Polrmt	L/L cre	Myc	10.2698	10.132	9.65724	10.0197	1.13839	429.52
Polrmt	L/L cre	Myc	3.59348	3.99775	4.04251	3.87791	0.719158	271.342
Polrmt	L/L cre	Myc	1.9392	1.76154	1.80958	1.83678	0.498394	188.046
Polrmt	L/L	Atf4	0.145986	0.150627	0.146467	0.147693	0.254968	72.1816
Polrmt	L/L	Atf4	0.374139	0.386913	0.440872	0.400641	0.301618	85.3882
Polrmt	L/L	Atf4	1.04473	1.18671	1.1543	1.12858	0.597668	169.2
Polrmt	L/L	Atf4	0.932851	1.1023	1.03739	1.02418	0.224253	63.4861
Polrmt	L/L	Atf4	0.85752	0.872068	0.856364	0.861984	0.38765	109.744
Polrmt	L/L cre	Atf4	6.997	7.05014	7.31845	7.12186	1.87505	530.828
Polrmt	L/L cre	Atf4	0.967058	1.02364	0.995172	0.99529	0.523073	148.082
Polrmt	L/L cre	Atf4	1.62364	1.5507	2.0079	1.72741	1.7809	504.174
Polrmt	L/L cre	Atf4	12.5229	11.6914	12.5045	12.2396	1.39061	393.682
Polrmt	L/L cre	Atf4	3.893	3.99225	3.52593	3.80373	0.7054	199.699
Polrmt	L/L cre	Atf4	2.99105	3.27569	3.08998	3.11891	0.84629	239.585

## Sheet: Raw data Lrpprc 
Mouse strain	Genotype	Gene	Relative quantity			Mean quantity	Relative quantity (normalized to B2m)	Fold Change (normalized to L/L) [%]
			Replicate 1	Replicate2	Replicate 3
Lrpprc	L/L	B2m	10.221	9.752	9.739	9.904
Lrpprc	L/L	B2m	13.918	14.318	14.432	14.2227
Lrpprc	L/L	B2m	19.47	18.565	19.38	19.1383
Lrpprc	L/L	B2m	20.938	19.261	19.859	20.0193
Lrpprc	L/L cre	B2m	19.92	20.552	21.579	20.6837
Lrpprc	L/L cre	B2m	13.308	13.694	13.806	13.6027
Lrpprc	L/L cre	B2m	13.719	13.782	14.098	13.8663
Lrpprc	L/L cre	B2m	17.271	16.324	16.291	16.6287
Lrpprc	L/L	Lrpprc	20.162	19.899	20.312	20.1243	2.03295	113.217
Lrpprc	L/L	Lrpprc	30.012	30.759	31.924	30.8983	2.17224	120.974
Lrpprc	L/L	Lrpprc	29.596	30.411	30.609	30.2053	1.5792	87.9472
Lrpprc	L/L	Lrpprc	27.476	28.573	27.773	27.9407	1.39809	77.861
Lrpprc	L/L cre	Lrpprc	4.444	4.125	4.361	4.31	0.208634	11.6191
Lrpprc	L/L cre	Lrpprc	3.045	2.731	2.956	2.91067	0.214139	11.9257
Lrpprc	L/L cre	Lrpprc	2.833	3.212	2.686	2.91033	0.21004	11.6973
Lrpprc	L/L cre	Lrpprc	3.104	3.042	2.878	3.008	0.180917	10.0755
Lrpprc	L/L	Pgc1a	11.982	11.115	11.762	11.6197	1.17327	110.504
Lrpprc	L/L	Pgc1a	19.301	16.332	17.802	17.8117	1.25366	118.076
Lrpprc	L/L	Pgc1a	17.831	17.638	17.699	17.7227	0.9264	87.2531
Lrpprc	L/L	Pgc1a	19.122	17.281	17.286	17.8963	0.893632	84.1669
Lrpprc	L/L cre	Pgc1a	14.296	14.884	14.371	14.517	0.702627	66.177
Lrpprc	L/L cre	Pgc1a	13.608	13.576	13.816	13.6667	1.00486	94.6429
Lrpprc	L/L cre	Pgc1a	15.717	16.743	15.917	16.1257	1.16319	109.555
Lrpprc	L/L cre	Pgc1a	10.573	10.801	11.401	10.925	0.657888	61.9633
Lrpprc	L/L	Nrf1	12.873	12.678	13.289	12.9467	1.30801	121.809
Lrpprc	L/L	Nrf1	19.295	18.521	18.567	18.7943	1.32216	123.127
Lrpprc	L/L	Nrf1	16.76	17.401	16.589	16.9167	0.884717	82.3898
Lrpprc	L/L	Nrf1	15.849	15.861	15.107	15.6057	0.780389	72.6742
Lrpprc	L/L cre	Nrf1	20.841	21.281	21.405	21.1757	1.02456	95.4128
Lrpprc	L/L cre	Nrf1	14.243	15.341	15.298	14.9607	1.0995	102.391
Lrpprc	L/L cre	Nrf1	18.142	15.631	18.231	17.3347	1.24996	116.403
Lrpprc	L/L cre	Nrf1	16.636	16.514	16.129	16.4263	0.988297	92.0358
Lrpprc	L/L	Gabpa	10.942	11.947	11.064	11.3177	1.14393	108.128
Lrpprc	L/L	Gabpa	18.117	18.368	17.541	18.0087	1.26669	119.731
Lrpprc	L/L	Gabpa	17.495	17.959	17.545	17.6663	0.923763	87.3172
Lrpprc	L/L	Gabpa	19.086	16.788	18.051	17.975	0.897376	84.8231
Lrpprc	L/L cre	Gabpa	20.486	19.484	21.429	20.4663	0.989845	93.5636
Lrpprc	L/L cre	Gabpa	13.564	13.356	13.205	13.375	0.983646	92.9776
Lrpprc	L/L cre	Gabpa	17.259	16.263	16.162	16.5613	1.19483	112.94
Lrpprc	L/L cre	Gabpa	13.886	11.243	15.614	13.581	0.81707	77.2323
Lrpprc	L/L	Myc	1.725	1.696	1.856	1.759	0.177741	116.981
Lrpprc	L/L	Myc	2.364	2.633	2.658	2.55167	0.179319	118.019
Lrpprc	L/L	Myc	2.761	3.148	3.128	3.01233	0.157593	103.72
Lrpprc	L/L	Myc	2.243	2.032	1.325	1.86667	0.0931085	61.2797
Lrpprc	L/L cre	Myc	36.525	37.604	37.748	37.2923	1.80421	1187.45
Lrpprc	L/L cre	Myc	25.508	25.103	24.835	25.1487	1.84955	1217.29
Lrpprc	L/L cre	Myc	23.378	28.306	33.094	28.2593	2.03515	1339.44
Lrpprc	L/L cre	Myc	21.153	22.105	22.052	21.77	1.31082	862.722
Lrpprc	L/L	Atf4	3.373	3.502	3.513	3.46267	0.349917	119.003
Lrpprc	L/L	Atf4	4.961	4.591	4.716	4.756	0.334637	113.806
Lrpprc	L/L	Atf4	5.36	5.455	5.337	5.384	0.281513	95.7397
Lrpprc	L/L	Atf4	4.156	4.38	4.058	4.198	0.210095	71.451
Lrpprc	L/L cre	Atf4	36.545	36.097	34.737	35.793	1.7336	589.579
Lrpprc	L/L cre	Atf4	20.912	21.27	21.388	21.19	1.5579	529.825
Lrpprc	L/L cre	Atf4	33.823	32.705	32.223	32.917	2.37476	807.63
Lrpprc	L/L cre	Atf4	20.912	23.035	25.485	23.144	1.39543	474.569

## Sheet: Raw data Mterf4
Mouse strain	Genotype	Gene	Relative quantity			Mean quantity	Relative quantity (normalized to B2m)	Fold Change (normalized to L/L) [%]
			Replicate 1	Replicate2	Replicate 3
Mterf4	L/L	B2m	8.77755	8.22094	8.39335	8.46395
Mterf4	L/L	B2m	13.8949	13.7806	12.5762	13.4172
Mterf4	L/L	B2m	16.8602	17.5771	16.2584	16.8986
Mterf4	L/L	B2m	3.9268	3.58132	3.56038	3.6895
Mterf4	L/L	B2m	23.6475	25.1622	23.7371	24.1822
Mterf4	L/L	B2m	15.1664	13.7624	14.2096	14.3795
Mterf4	L/L cre	B2m	15.7415	12.284	12.0986	13.3747
Mterf4	L/L cre	B2m	9.38642	8.99555	9.6719	9.35129
Mterf4	L/L cre	B2m	3.88873	3.45239	3.62671	3.65594
Mterf4	L/L cre	B2m	11.9793	12.2831	12.462	12.2415
Mterf4	L/L cre	B2m	9.73273	9.7739	13.9758	11.1608
Mterf4	L/L cre	B2m	18.2921	18.0232	19.5514	18.6222
Mterf4	L/L	Mterf4	22.4974	21.2123	21.7952	21.835	2.57976	116.486
Mterf4	L/L	Mterf4	35.8628	34.8148	36.1998	35.6258	2.65522	119.893
Mterf4	L/L	Mterf4	30.3598	31.321	29.9579	30.5463	1.80762	81.6208
Mterf4	L/L	Mterf4	10.0166	13.9668	11.5191	11.8342	3.20753	144.832
Mterf4	L/L	Mterf4	45.5453	50.0568	44.0033	46.5351	1.92435	86.8915
Mterf4	L/L	Mterf4	16.986	16.2415	14.8058	16.0111	1.11347	50.2773
Mterf4	L/L cre	Mterf4	2.75536	3.21399	3.73134	3.23356	0.241767	10.9167
Mterf4	L/L cre	Mterf4	4.46955	4.25911	4.25636	4.32834	0.46286	20.8998
Mterf4	L/L cre	Mterf4	1.19917	1.18696	0.916331	1.10082	0.301105	13.596
Mterf4	L/L cre	Mterf4	5.06863	6.66071	5.88301	5.87078	0.479582	21.6549
Mterf4	L/L cre	Mterf4	7.2875	8.42671	8.04846	7.92089	0.709707	32.0459
Mterf4	L/L cre	Mterf4	2.48396	2.47121	2.43875	2.46464	0.132349	5.97606
Mterf4	L/L	Pgc1a	10.3629	10.5256	10.3666	10.4183	1.23091	98.4943
Mterf4	L/L	Pgc1a	16.5926	15.4933	16.2244	16.1034	1.2002	96.0375
Mterf4	L/L	Pgc1a	15.5142	16.3392	16.2865	16.0466	0.949584	75.9834
Mterf4	L/L	Pgc1a	6.30229	6.5464	6.34421	6.39764	1.73401	138.751
Mterf4	L/L	Pgc1a	35.5248	39.6191	38.5626	37.9022	1.56736	125.416
Mterf4	L/L	Pgc1a	11.4549	12.343	11.4154	11.7378	0.816287	65.3173
Mterf4	L/L cre	Pgc1a	16.6243	16.1961	16.0063	16.2756	1.21689	97.3728
Mterf4	L/L cre	Pgc1a	12.9301	13.1248	12.6652	12.9067	1.38021	110.441
Mterf4	L/L cre	Pgc1a	4.16155	4.89978	4.06277	4.3747	1.1966	95.749
Mterf4	L/L cre	Pgc1a	11.8396	13.4409	13.926	13.0688	1.06759	85.4256
Mterf4	L/L cre	Pgc1a	24.3447	30.6596	23.8814	26.2952	2.35604	188.524
Mterf4	L/L cre	Pgc1a	13.2023	13.7927	13.7107	13.5686	0.728621	58.3025
Mterf4	L/L	Nrf1	9.04125	8.81876	8.32011	8.72671	1.03104	101.123
Mterf4	L/L	Nrf1	11.7059	12.7879	12.5636	12.3524	0.92064	90.2945
Mterf4	L/L	Nrf1	10.3381	11.7656	10.7431	10.9489	0.64792	63.5467
Mterf4	L/L	Nrf1	7.77312	7.03313	7.41524	7.40716	2.00763	196.905
Mterf4	L/L	Nrf1	25.4753	24.7924	23.4973	24.5883	1.01679	99.725
Mterf4	L/L	Nrf1	6.94603	7.53319	6.81177	7.097	0.493551	48.4065
Mterf4	L/L cre	Nrf1	26.8	26.4135	26.576	26.5965	1.98857	195.035
Mterf4	L/L cre	Nrf1	14.6285	14.5617	13.4698	14.22	1.52065	149.142
Mterf4	L/L cre	Nrf1	6.84725	6.54711	6.84694	6.7471	1.84552	181.004
Mterf4	L/L cre	Nrf1	27.3213	29.2437	26.2519	27.6056	2.25509	221.175
Mterf4	L/L cre	Nrf1	22.4787	24.1768	29.5818	25.4124	2.27694	223.317
Mterf4	L/L cre	Nrf1	22.034	15.5647	14.146	17.2482	0.926217	90.8415
Mterf4	L/L	Gabpa	10.4591	10.7065	9.57654	10.2474	1.21071	98.9926
Mterf4	L/L	Gabpa	16.9902	15.9583	16.8778	16.6088	1.23787	101.214
Mterf4	L/L	Gabpa	17.4894	17.8617	18.2949	17.882	1.0582	86.5228
Mterf4	L/L	Gabpa	6.17317	6.4241	5.77766	6.12498	1.66011	135.738
Mterf4	L/L	Gabpa	28.4811	27.6622	27.7522	27.9652	1.15643	94.5549
Mterf4	L/L	Gabpa	14.0593	14.827	14.8927	14.593	1.01485	82.9784
Mterf4	L/L cre	Gabpa	20.0169	19.1129	18.7071	19.279	1.44145	117.859
Mterf4	L/L cre	Gabpa	13.8382	13.0105	13.0301	13.2929	1.42151	116.229
Mterf4	L/L cre	Gabpa	4.06151	4.46937	4.41322	4.3147	1.18019	96.4972
Mterf4	L/L cre	Gabpa	18.9567	17.2965	18.6855	18.3129	1.49597	122.317
Mterf4	L/L cre	Gabpa	25.4277	25.2808	24.6935	25.134	2.25199	184.132
Mterf4	L/L cre	Gabpa	13.988	14.3832	15.3619	14.5777	0.782814	64.0062
Mterf4	L/L	Myc	2.4567	2.17511	0.268579	1.63346	0.19299	120.733
Mterf4	L/L	Myc	1.70653	1.72541	1.9936	1.80852	0.13479	84.3233
Mterf4	L/L	Myc	0.916323	2.63213	1.84994	1.79946	0.106486	66.6165
Mterf4	L/L	Myc	0.94863	0.980906	0.771048	0.900194	0.243988	152.636
Mterf4	L/L	Myc	4.02197	5.65288	5.18051	4.95179	0.204769	128.101
Mterf4	L/L	Myc	1.0612	1.31762	0.902819	1.09388	0.0760722	47.5899
Mterf4	L/L cre	Myc	10.7888	7.92792	5.88855	8.20177	0.613231	383.63
Mterf4	L/L cre	Myc	16.9657	17.5278	18.0691	17.5209	1.87363	1172.12
Mterf4	L/L cre	Myc	4.86163	3.86827	7.44465	5.39152	1.47473	922.572
Mterf4	L/L cre	Myc	18.896	29.0219	20.4632	22.7937	1.86201	1164.85
Mterf4	L/L cre	Myc	11.8826	13.279	4.62586	9.92918	0.889648	556.553
Mterf4	L/L	Atf4	2.51081	2.42065	2.60233	2.51126	0.296701	125.91
Mterf4	L/L	Atf4	4.07468	3.75839	3.7658	3.86629	0.288158	122.285
Mterf4	L/L	Atf4	2.84506	2.93427	2.89201	2.89044	0.171047	72.5865
Mterf4	L/L	Atf4	1.32613	1.32277	1.10792	1.25227	0.339415	144.037
Mterf4	L/L	Atf4	5.21676	5.22235	5.00792	5.14901	0.212925	90.3584
Mterf4	L/L	Atf4	1.49952	1.52193	1.53503	1.51883	0.105625	44.8236
Mterf4	L/L cre	Atf4	23.2299	22.7121	22.1548	22.6989	1.69715	720.216
Mterf4	L/L cre	Atf4	23.675	24.1298	23.1554	23.6534	2.52943	1073.4
Mterf4	L/L cre	Atf4	15.6863	16.9694	16.9157	16.5238	4.51971	1918.01
Mterf4	L/L cre	Atf4	50.5291	53.818	47.7636	50.7036	4.14196	1757.71
Mterf4	L/L cre	Atf4	17.1874	16.0474	17.4812	16.9053	1.51471	642.792
Mterf4	L/L cre	Atf4	10.3814	12.4713	11.5932	11.482	0.616573	261.653
