# Supplementary material for: Transcriptomic and proteomic landscape of mitochondrial dysfunction reveals secondary coenzyme Q deficiency in mammals
Source: eLife. 2017 Nov 14;6:e30952. doi: 10.7554/eLife.30952 (PMC5703644; doi:10.7554/eLife.30952)
Supplement: Figure 4—source data 1. [file elife-30952-fig4-data1.xlsx]

## Sheet: correlation_matrix_RNA_Proteomi
Kuehl et al_ Data for Figure 4
Pearson correlation coefficient matrixes of L/L, cre versus L/L fold changes of significantly regulated mitochondrial transcripts and proteins
	Twnk Transcriptome	Tfam Transcriptome	Polrmt Transcriptome	Lrpprc Transcriptome	Mterf4 Transcriptome	Twnk Proteomics	Tfam Proteomics	Polrmt Proteomics	Lrpprc Proteomics	Mterf4 Proteomics
Twnk Transcriptome	1	0.830902	0.802525	0.818421	0.635916	0.45905	0.486334	0.341651	0.504274	0.55287
Tfam Transcriptome	0.830902	1	0.84747	0.850069	0.596997	0.466916	0.486346	0.343765	0.474271	0.547109
Polrmt Transcriptome	0.802525	0.84747	1	0.795674	0.541254	0.399345	0.43759	0.322628	0.447475	0.52081
Lrpprc Transcriptome	0.818421	0.850069	0.795674	1	0.720885	0.467909	0.474285	0.361722	0.560043	0.540223
Mterf4 Transcriptome	0.635916	0.596997	0.541254	0.720885	1	0.439368	0.420431	0.400339	0.527448	0.491439
Twnk Proteomics	0.45905	0.466916	0.399345	0.467909	0.439368	1	0.8969	0.877537	0.500722	0.582419
Tfam Proteomics	0.486334	0.486346	0.43759	0.474285	0.420431	0.8969	1	0.898418	0.540176	0.667433
Polrmt Proteomics	0.341651	0.343765	0.322628	0.361722	0.400339	0.877537	0.898418	1	0.4124	0.515411
Lrpprc Proteomics	0.504274	0.474271	0.447475	0.560043	0.527448	0.500722	0.540176	0.4124	1	0.791961
Mterf4 Proteomics	0.55287	0.547109	0.52081	0.540223	0.491439	0.582419	0.667433	0.515411	0.791961	1
Pearson correlation coefficient matrixes of L/L, cre versus L/L fold changes of significantly regulated mitochondrial transcripts and proteins excluding genes encoding mitoribosomal proteins
	Twnk Transcriptome	Tfam Transcriptome	Polrmt Transcriptome	Lrpprc Transcriptome	Mterf4 Transcriptome	Twnk Proteomics	Tfam Proteomics	Polrmt Proteomics	Lrpprc Proteomics	Mterf4 Proteomics
Twnk Transcriptome	1	0.833956	0.803611	0.82241	0.641168	0.610276	0.596735	0.514585	0.51214	0.570137
Tfam Transcriptome	0.833956	1	0.852696	0.854409	0.596171	0.600442	0.582691	0.48911	0.486115	0.568317
Polrmt Transcriptome	0.803611	0.852696	1	0.799228	0.543048	0.53659	0.539989	0.491182	0.453305	0.533431
Lrpprc Transcriptome	0.82241	0.854409	0.799228	1	0.727663	0.61305	0.576521	0.532695	0.574236	0.559065
Mterf4 Transcriptome	0.641168	0.596171	0.543048	0.727663	1	0.565086	0.503676	0.560415	0.552697	0.515656
Twnk Proteomics	0.610276	0.600442	0.53659	0.61305	0.565086	1	0.878841	0.837489	0.782693	0.825462
Tfam Proteomics	0.596735	0.582691	0.539989	0.576521	0.503676	0.878841	1	0.890831	0.79056	0.876086
Polrmt Proteomics	0.514585	0.48911	0.491182	0.532695	0.560415	0.837489	0.890831	1	0.815977	0.864264
Lrpprc Proteomics	0.51214	0.486115	0.453305	0.574236	0.552697	0.782693	0.79056	0.815977	1	0.795106
Mterf4 Proteomics	0.570137	0.568317	0.533431	0.559065	0.515656	0.825462	0.876086	0.864264	0.795106	1
