# Supplementary material for: Transcriptomic and proteomic landscape of mitochondrial dysfunction reveals secondary coenzyme Q deficiency in mammals
Source: eLife. 2017 Nov 14;6:e30952. doi: 10.7554/eLife.30952 (PMC5703644; doi:10.7554/eLife.30952)
Supplement: Figure 6—source data 1. [file elife-30952-fig6-data1.xlsx]

## Sheet: Figure Data Summary
Kuehl et al_ Data for Figure 6
Glycine
mean	Twnk	Tfam	Polrmt	Lrpprc	Mterf4
L/L	100	100	100	100	100
L/L cre	556.89	599.302	311.457	558.122	702.557
sem	Twnk	Tfam	Polrmt	Lrpprc	Mterf4
L/L	5.31277	12.9583	7.2229	15.0369	13.5416
L/L cre	34.1485	31.6519	25.4834	37.7179	82.3904
Serine
mean	Twnk	Tfam	Polrmt	Lrpprc	Mterf4
L/L	100	100	100	100	100
L/L cre	300.651	180.506	182.853	265.524	242.943
sem	Twnk	Tfam	Polrmt	Lrpprc	Mterf4
L/L	7.5453	7.5103	2.98536	16.371	12.3089
L/L cre	20.1231	10.6952	13.3251	21.4265	23.8762
Sarcosine
mean	Twnk	Tfam	Polrmt	Lrpprc	Mterf4
L/L	100	100	100	100	100
L/L cre	232.296	237.102	220.108	340.073	280.077
sem	Twnk	Tfam	Polrmt	Lrpprc	Mterf4
L/L	6.0601	6.93359	3.14447	7.7214	8.67985
L/L cre	16.0418	3.603	7.1472	20.6735	34.7603

## Sheet: Raw Data
Mouse strain	Genotype	Metabolite	ng_metabolite/mg_tissue		ng_metabolite/mg_tissue_average	average_mg_metabolite/mg_tissue	Fold Change (normalized to L/L) [%]
			Replicate 1	Replicate2
Twnk	L/L	Glycine	18961.3	16406.5	17683.9	17.6839	89.5367
Twnk	L/L	Glycine	21767.6	20432.5	21100.1	21.1001	106.833
Twnk	L/L	Glycine	18553.2	22381.5	20467.4	20.4674	103.63
Twnk	L/L cre	Glycine	118824	105392	112108	112.108	567.622
Twnk	L/L cre	Glycine	141383	127695	134539	134.539	681.194
Twnk	L/L cre	Glycine	101483	100252	100867	100.867	510.71
Twnk	L/L cre	Glycine	93660.3	97333.5	95496.9	95.4969	483.518
Twnk	L/L cre	Glycine	110531	103329	106930	106.93	541.408
Tfam	L/L	Glycine	42796.5	37239.6	40018.1	40.0181	125.89
Tfam	L/L	Glycine	28740.7	27247.7	27994.2	27.9942	88.0654
Tfam	L/L	Glycine	32906.1	21797.5	27351.8	27.3518	86.0442
Tfam	L/L cre	Glycine	154067	170262	162165	162.165	510.145
Tfam	L/L cre	Glycine	179147	202058	190603	190.603	599.606
Tfam	L/L cre	Glycine	213611	200683	207147	207.147	651.651
Tfam	L/L cre	Glycine	200000	204220	202110	202.11	635.806
Polrmt	L/L	Glycine	45286.5	40407	42846.7	42.8467	98.0041
Polrmt	L/L	Glycine	38596.1	32440	35518.1	35.5181	81.2411
Polrmt	L/L	Glycine	51321.9	49766.9	50544.4	50.5444	115.611
Polrmt	L/L	Glycine	48348.4	43587.9	45968.1	45.9681	105.144
Polrmt	L/L cre	Glycine	130497	145708	138102	138.102	315.884
Polrmt	L/L cre	Glycine	139839	129672	134755	134.755	308.228
Polrmt	L/L cre	Glycine	98805.3	92358	95581.6	95.5816	218.626
Polrmt	L/L cre	Glycine	150954	154073	152514	152.514	348.847
Polrmt	L/L cre	Glycine	167476	152288	159882	159.882	365.7
Lrpprc	L/L	Glycine	14570.1	14760.7	14665.4	14.6654	76.1625
Lrpprc	L/L	Glycine	25577.8	29852	27714.9	27.7149	143.933
Lrpprc	L/L	Glycine	17707.7	15949.1	16828.4	16.8284	87.3956
Lrpprc	L/L	Glycine	18261.1	17364.9	17813	17.813	92.509
Lrpprc	L/L cre	Glycine	99858.5	109926	104892	104.892	544.743
Lrpprc	L/L cre	Glycine	107721	93469.5	100595	100.595	522.426
Lrpprc	L/L cre	Glycine	139809	117271	128540	128.54	667.555
Lrpprc	L/L cre	Glycine	90384.3	101309	95846.8	95.8468	497.765
Mterf4	L/L	Glycine	19789.7	17078	18433.9	18.4339	77.0982
Mterf4	L/L	Glycine	23195.8	20427.1	21811.5	21.8115	91.2248
Mterf4	L/L	Glycine	18442.5	22285.6	20364.1	20.3641	85.1712
Mterf4	L/L	Glycine	20135.2	24598.7	22367	22.367	93.5482
Mterf4	L/L	Glycine	36586.4	36556.6	36571.5	36.5715	152.958
Mterf4	L/L cre	Glycine	94839.3	168187	131513	131.513	550.044
Mterf4	L/L cre	Glycine	222762		222762	222.762	931.684
Mterf4	L/L cre	Glycine	140621		140621	140.621	588.137
Mterf4	L/L cre	Glycine	88386.2	183934	136160	136.16	569.479
Mterf4	L/L cre	Glycine	205942	211732	208837	208.837	873.444
Twnk	L/L	Serine	17697.9	15061.2	16379.6	16.3796	114.678
Twnk	L/L	Serine	12813.7	12789.2	12801.5	12.8015	89.6269
Twnk	L/L	Serine	13162.9	14173.4	13668.1	13.6681	95.6948
Twnk	L/L cre	Serine	49245.2	49463.4	49354.3	49.3543	345.544
Twnk	L/L cre	Serine	52880.9	48145.5	50513.2	50.5132	353.658
Twnk	L/L cre	Serine	38263.9	40217.7	39240.8	39.2408	274.737
Twnk	L/L cre	Serine	39227.2	37045	38136.1	38.1361	267.002
Twnk	L/L cre	Serine	36921.8	38010.8	37466.3	37.4663	262.313
Tfam	L/L	Serine	29078.5	34351.6	31715.1	31.7151	113.75
Tfam	L/L	Serine	23217.3	25792	24504.6	24.5046	87.8889
Tfam	L/L	Serine	26827.9	28021	27424.4	27.4244	98.3611
Tfam	L/L cre	Serine	43678.8	40350.1	42014.5	42.0145	150.69
Tfam	L/L cre	Serine	49289.9	53908.2	51599	51.599	185.066
Tfam	L/L cre	Serine	51449.4	51515.9	51482.7	51.4827	184.649
Tfam	L/L cre	Serine	55606.7	56820.8	56213.8	56.2138	201.618
Polrmt	L/L	Serine	38170.4	43072.4	40621.4	40.6214	101.15
Polrmt	L/L	Serine	37710.5	35692.1	36701.3	36.7013	91.389
Polrmt	L/L	Serine	42840.9	41558.4	42199.7	42.1997	105.08
Polrmt	L/L	Serine	40720	41510.8	41115.4	41.1154	102.38
Polrmt	L/L cre	Serine	84576.5	83046.1	83811.3	83.8113	208.696
Polrmt	L/L cre	Serine	74519.8	75399.6	74959.7	74.9597	186.655
Polrmt	L/L cre	Serine	53444.6	56063.9	54754.2	54.7542	136.342
Polrmt	L/L cre	Serine	69784.5	70373.1	70078.8	70.0788	174.501
Polrmt	L/L cre	Serine	82071.6	85046.5	83559.1	83.5591	208.068
Lrpprc	L/L	Serine	15165	14649	14907	14.907	79.1088
Lrpprc	L/L	Serine	26559.5	28450.8	27505.2	27.5052	145.965
Lrpprc	L/L	Serine	18944.8	19021.3	18983.1	18.9831	100.74
Lrpprc	L/L	Serine	14528.5	13430.3	13979.4	13.9794	74.1863
Lrpprc	L/L cre	Serine	44504.5	46412.3	45458.4	45.4584	241.24
Lrpprc	L/L cre	Serine	40665.7	39276.9	39971.3	39.9713	212.121
Lrpprc	L/L cre	Serine	52876	56325.8	54600.9	54.6009	289.758
Lrpprc	L/L cre	Serine	60386.7	59828.1	60107.4	60.1074	318.979
Mterf4	L/L	Serine	11267.9	11187.1	11227.5	11.2275	73.8989
Mterf4	L/L	Serine	14893.9	14555.4	14724.6	14.7246	96.9167
Mterf4	L/L	Serine	12292.8	10596.6	11444.7	11.4447	75.3286
Mterf4	L/L	Serine	17658.9	17311.1	17485	17.485	115.086
Mterf4	L/L	Serine	20262.7	21904.3	21083.5	21.0835	138.77
Mterf4	L/L cre	Serine	36679.2	37744	37211.6	37.2116	244.924
Mterf4	L/L cre	Serine	37215.9	37346.3	37281.1	37.2811	245.382
Mterf4	L/L cre	Serine	51013	46710	48861.5	48.8615	321.604
Mterf4	L/L cre	Serine	33791.3	36402.7	35097	35.097	231.007
Mterf4	L/L cre	Serine	26104.4	26098.3	26101.4	26.1014	171.798
Twnk	L/L	Sarcosine	5838.68	5246.57	5542.62	5.54262	98.6511
Twnk	L/L	Sarcosine	6369.97	6114.77	6242.37	6.24237	111.106
Twnk	L/L	Sarcosine	5241.91	4898.55	5070.23	5.07023	90.2432
Twnk	L/L cre	Sarcosine	14376.3	13251	13813.6	13.8136	245.864
Twnk	L/L cre	Sarcosine	16374.1	15743.3	16058.7	16.0587	285.822
Twnk	L/L cre	Sarcosine	11376.5	11214.1	11295.3	11.2953	201.041
Twnk	L/L cre	Sarcosine	11609.5	10741.5	11175.5	11.1755	198.909
Twnk	L/L cre	Sarcosine	12575.4	13251.6	12913.5	12.9135	229.842
Tfam	L/L	Sarcosine	9731.34	9699.12	9715.23	9.71523	104.343
Tfam	L/L	Sarcosine	8661.91	7431.52	8046.72	8.04672	86.4233
Tfam	L/L	Sarcosine	10316	10025.1	10170.5	10.1705	109.233
Tfam	L/L cre	Sarcosine	23482.8	21990.1	22736.4	22.7364	244.194
Tfam	L/L cre	Sarcosine	21495.3	21621.6	21558.4	21.5584	231.542
Tfam	L/L cre	Sarcosine	21262.6	21619.1	21440.9	21.4409	230.279
Tfam	L/L cre	Sarcosine	23000.7	22137.3	22569	22.569	242.395
Polrmt	L/L	Sarcosine	9771.81	9577.66	9674.74	9.67474	100.518
Polrmt	L/L	Sarcosine	8509.42	8998.55	8753.98	8.75398	90.9515
Polrmt	L/L	Sarcosine	10194.6	9828.88	10011.8	10.0118	104.019
Polrmt	L/L	Sarcosine	10087.1	10031.1	10059.1	10.0591	104.511
Polrmt	L/L cre	Sarcosine	19873.2	20745.3	20309.3	20.3093	211.007
Polrmt	L/L cre	Sarcosine	22099.5	22585.4	22342.4	22.3424	232.132
Polrmt	L/L cre	Sarcosine	20024.2	20374.1	20199.2	20.1992	209.864
Polrmt	L/L cre	Sarcosine	20422	19149.3	19785.7	19.7857	205.568
Polrmt	L/L cre	Sarcosine	23124.1	23454.4	23289.2	23.2892	241.969
Lrpprc	L/L	Sarcosine	4064.76	4121.99	4093.37	4.09337	80.9659
Lrpprc	L/L	Sarcosine	6206.75	5746.12	5976.43	5.97643	118.212
Lrpprc	L/L	Sarcosine	4760.98	5063.36	4912.17	4.91217	97.1614
Lrpprc	L/L	Sarcosine	5492.35	4989.12	5240.74	5.24074	103.66
Lrpprc	L/L cre	Sarcosine	18619	19619.5	19119.2	19.1192	378.173
Lrpprc	L/L cre	Sarcosine	14382.4	14435.4	14408.9	14.4089	285.005
Lrpprc	L/L cre	Sarcosine	18576.5	18267.1	18421.8	18.4218	364.378
Lrpprc	L/L cre	Sarcosine	16725.6	16918.6	16822.1	16.8221	332.736
Mterf4	L/L	Sarcosine	7377.09	7170.77	7273.93	7.27393	88.5154
Mterf4	L/L	Sarcosine	6529.93	6213.92	6371.93	6.37193	77.5391
Mterf4	L/L	Sarcosine	7980.34	8002.65	7991.49	7.99149	97.2474
Mterf4	L/L	Sarcosine	9101.63	8749.85	8925.74	8.92574	108.616
Mterf4	L/L	Sarcosine	10620.4	10430.3	10525.4	10.5254	128.082
Mterf4	L/L cre	Sarcosine	31014.4	30319.8	30667.1	30.6671	373.184
Mterf4	L/L cre	Sarcosine	20523.9	21310.7	20917.3	20.9173	254.54
Mterf4	L/L cre	Sarcosine	24085.4	23430.1	23757.8	23.7578	289.105
Mterf4	L/L cre	Sarcosine	25342.9	27034.2	26188.5	26.1885	318.684
Mterf4	L/L cre	Sarcosine	13681.3	13415.8	13548.6	13.5486	164.871
Mterf4	L/L cre	Sarcosine	24085.4	23430.1	23757.8	23.7578	289.105
Mterf4	L/L cre	Sarcosine	25342.9	27034.2	26188.5	26.1885	318.684
Mterf4	L/L cre	Sarcosine	13681.3	13415.8	13548.6	13.5486	164.871
