# Supplementary material for: Transcriptomic and proteomic landscape of mitochondrial dysfunction reveals secondary coenzyme Q deficiency in mammals
Source: eLife. 2017 Nov 14;6:e30952. doi: 10.7554/eLife.30952 (PMC5703644; doi:10.7554/eLife.30952)
Supplement: Figure 7—source data 1. [file elife-30952-fig7-data1.xlsx]

## Sheet: Summary Data Figure
Kuehl et al _ Data for Figure 7
Glutamate
mean	Twnk	Tfam	Polrmt	Lrpprc	Mterf4
L/L	100	100	100	100	100
L/L cre	81.1954	51.2778	69.7035	75.5524	42.7756
sem	Twnk	Tfam	Polrmt	Lrpprc	Mterf4
L/L	8.25545	9.55514	7.49458	10.4613	12.4276
L/L cre	4.47905	5.54537	5.46391	7.05224	4.72702
Proline
mean	Twnk	Tfam	Polrmt	Lrpprc	Mterf4
L/L	100	100	100	100	100
L/L cre	406.596	370.126	353.254	751.075	721.76
sem	Twnk	Tfam	Polrmt	Lrpprc	Mterf4
L/L	11.0817	18.8653	6.59393	12.9908	16.7029
L/L cre	64.0519	24.2934	35.1255	159.972	141.028
Proline / glutamate ratio
mean	Twnk	Tfam	Polrmt	Lrpprc	Mterf4
L/L	100	100	100	100	100
L/L cre	490.121	719.431	510.354	994.246	1702.32
sem	Twnk	Tfam	Polrmt	Lrpprc	Mterf4
L/L	10.2106	24.8491	8.67012	6.64269	8.74746
L/L cre	54.4377	81.5267	59.8889	164.32	275.651

## Sheet: Raw data
Mouse strain	Genotype	Metabolite	ng_metabolite/mg_tissue				ng_metabolite/mg_tissue_average	average_mg_metabolite/mg_tissue	Fold Change (normalized to L/L) [%]
			Replicate 1	Replicate2	Replicate 3	Replicate 4
Twnk	L/L	Glutamate	242269	254211			248240	248.24	116.511
Twnk	L/L	Glutamate	193211	197794			195502	195.502	91.7587
Twnk	L/L	Glutamate	196608	194277			195442	195.442	91.7304
Twnk	L/L cre	Glutamate	188762	174308			181535	181.535	85.2033
Twnk	L/L cre	Glutamate	210357	192782			201570	201.57	94.6063
Twnk	L/L cre	Glutamate	160719	167266			163992	163.992	76.9695
Twnk	L/L cre	Glutamate	169226	178855			174041	174.041	81.6857
Twnk	L/L cre	Glutamate	143077	144609			143843	143.843	67.5124
Tfam	L/L	Glutamate	326348	364602			345475	345.475	109.414
Tfam	L/L	Glutamate	258919	251906			255412	255.412	80.8904
Tfam	L/L	Glutamate	345328	347403			346366	346.366	109.696
Tfam	L/L cre	Glutamate	120018	125255			122636	122.636	38.8395
Tfam	L/L cre	Glutamate	143293	149097	139797	142178	143591	143.591	45.4762
Tfam	L/L cre	Glutamate	189391	175140			182265	182.265	57.7244
Tfam	L/L cre	Glutamate	207567	190729			199148	199.148	63.0713
Polrmt	L/L	Glutamate	250447	253624			252036	252.036	92.4489
Polrmt	L/L	Glutamate	223767	233260			228513	228.513	83.8207
Polrmt	L/L	Glutamate	285492	291352			288422	288.422	105.796
Polrmt	L/L	Glutamate	322396	320634			321515	321.515	117.935
Polrmt	L/L cre	Glutamate	228069	206051			217060	217.06	79.6196
Polrmt	L/L cre	Glutamate	223829	221872			222851	222.851	81.7436
Polrmt	L/L cre	Glutamate	157533	142402			149967	149.967	55.0093
Polrmt	L/L cre	Glutamate	202704	198264			200484	200.484	73.5393
Polrmt	L/L cre	Glutamate	162217	157327			159772	159.772	58.6058
Lrpprc	L/L	Glutamate	178818	182421			180620	180.62	91.9962
Lrpprc	L/L	Glutamate	254245	259151			256698	256.698	130.746
Lrpprc	L/L	Glutamate	192121	174590			183356	183.356	93.3898
Lrpprc	L/L	Glutamate	161143	168181			164662	164.662	83.8684
Lrpprc	L/L cre	Glutamate	128736	109526			119131	119.131	60.6776
Lrpprc	L/L cre	Glutamate	124956	135619			130287	130.287	66.3601
Lrpprc	L/L cre	Glutamate	173843	166749			170296	170.296	86.738
Lrpprc	L/L cre	Glutamate	163975	183276			173626	173.626	88.4339
Mterf4	L/L	Glutamate	162256	151859			157058	157.058	68.4823
Mterf4	L/L	Glutamate	226918	238740			232829	232.829	101.521
Mterf4	L/L	Glutamate	177568	168652			173110	173.11	75.4819
Mterf4	L/L	Glutamate	292440	283196			287818	287.818	125.498
Mterf4	L/L	Glutamate	294073	297699			295886	295.886	129.016
Mterf4	L/L cre	Glutamate	61688.5	61385.8			61537.2	61.5372	26.8323
Mterf4	L/L cre	Glutamate	110979	99096			105037	105.037	45.7998
Mterf4	L/L cre	Glutamate	113462	116836			115149	115.149	50.2088
Mterf4	L/L cre	Glutamate	120436	122866			121651	121.651	53.0438
Mterf4	L/L cre	Glutamate	86086.1	88181.7			87133.9	87.1339	37.9933
Twnk	L/L	L-Proline	2509.33	2317.47			2413.4	2.4134	112.31
Twnk	L/L	L-Proline	1657.97	1689.28			1673.63	1.67363	77.8838
Twnk	L/L	L-Proline	2409.37	2309.82			2359.6	2.3596	109.806
Twnk	L/L cre	L-Proline	10638	10270.1			10454.1	10.4541	486.491
Twnk	L/L cre	L-Proline	13460.5	12564.6			13012.6	13.0126	605.552
Twnk	L/L cre	L-Proline	8488.22	8435.54			8461.88	8.46188	393.782
Twnk	L/L cre	L-Proline	6262.23	6197.04			6229.64	6.22964	289.902
Twnk	L/L cre	L-Proline	5447.49	5608.44			5527.96	5.52796	257.249
Tfam	L/L	L-Proline	4932.03	4968.71			4950.37	4.95037	119.761
Tfam	L/L	L-Proline	4909.53	4841.98			4875.75	4.87575	117.955
Tfam	L/L	L-Proline	2542.7	2606.38			2574.54	2.57454	62.2839
Tfam	L/L cre	L-Proline	13474.5	13773.2			13623.9	13.6239	329.592
Tfam	L/L cre	L-Proline	17629.3	18678.8			18154	18.154	439.187
Tfam	L/L cre	L-Proline	14165.8	14306.2			14236	14.236	344.401
Tfam	L/L cre	L-Proline	15065	15302.1			15183.5	15.1835	367.324
Polrmt	L/L	L-Proline	4433.85	4476.3			4455.07	4.45507	116.273
Polrmt	L/L	L-Proline	3258.94	3175.93			3217.44	3.21744	83.9718
Polrmt	L/L	L-Proline	3836.66	3824.71			3830.69	3.83069	99.9771
Polrmt	L/L	L-Proline	3822.44	3823.69			3823.07	3.82307	99.7782
Polrmt	L/L cre	L-Proline	13243	13246.1			13244.5	13.2445	345.669
Polrmt	L/L cre	L-Proline	17757.7	17631.6			17694.6	17.6946	461.812
Polrmt	L/L cre	L-Proline	15184.9	15372.4			15278.6	15.2786	398.757
Polrmt	L/L cre	L-Proline	10534.3	10601.1			10567.7	10.5677	275.806
Polrmt	L/L cre	L-Proline	10932.2	10848.4			10890.3	10.8903	284.227
Lrpprc	L/L	L-Proline	1395.83	1387.86			1391.85	1.39185	76.6065
Lrpprc	L/L	L-Proline	2436.04	2541.81			2488.93	2.48893	136.989
Lrpprc	L/L	L-Proline	1625.85	1654.21			1640.03	1.64003	90.2665
Lrpprc	L/L	L-Proline	1745.82	1747.59			1746.7	1.7467	96.1376
Lrpprc	L/L cre	L-Proline	11358.1	11445.9			11402	11.402	627.561
Lrpprc	L/L cre	L-Proline	10692.5	10688.1			10690.3	10.6903	588.389
Lrpprc	L/L cre	L-Proline	22067.4	22596.8			22332.1	22.3321	1229.15
Lrpprc	L/L cre	L-Proline	10126.1	10193.9			10160	10.16	559.203
Mterf4	L/L	L-Proline	2040.53	2090.67			2065.6	2.0656	79.872
Mterf4	L/L	L-Proline	2338.68	2338.66			2338.67	2.33867	90.4311
Mterf4	L/L	L-Proline	1645.75	1630.62			1638.19	1.63819	63.345
Mterf4	L/L	L-Proline	2718.06	2735.75			2726.91	2.72691	105.443
Mterf4	L/L	L-Proline	4162.01	4160.6			4161.31	4.16131	160.908
Mterf4	L/L cre	L-Proline	16269.9	16183.5			16226.7	16.2267	627.45
Mterf4	L/L cre	L-Proline	17514.6	17873.9			17694.3	17.6943	684.199
Mterf4	L/L cre	L-Proline	20437.3	20456.6			20447	20.447	790.638
Mterf4	L/L cre	L-Proline	30633.4	30894.5			30764	30.764	1189.57
Mterf4	L/L cre	L-Proline	8285.11	8107.82			8196.47	8.19647	316.939
Twnk	L/L	L-Proline / Glutamate						0.00972205	96.081
Twnk	L/L	L-Proline / Glutamate						0.00856064	84.6029
Twnk	L/L	L-Proline / Glutamate						0.0120731	119.316
Twnk	L/L cre	L-Proline / Glutamate						0.0575871	569.121
Twnk	L/L cre	L-Proline / Glutamate						0.0645562	637.995
Twnk	L/L cre	L-Proline / Glutamate						0.0515992	509.944
Twnk	L/L cre	L-Proline / Glutamate						0.0357941	353.746
Twnk	L/L cre	L-Proline / Glutamate						0.0384306	379.801
Tfam	L/L	L-Proline / Glutamate						0.0143292	105.228
Tfam	L/L	L-Proline / Glutamate						0.0190897	140.187
Tfam	L/L	L-Proline / Glutamate						0.00743301	54.585
Tfam	L/L cre	L-Proline / Glutamate						0.111092	815.813
Tfam	L/L cre	L-Proline / Glutamate						0.126429	928.44
Tfam	L/L cre	L-Proline / Glutamate						0.0781061	573.579
Tfam	L/L cre	L-Proline / Glutamate						0.0762424	559.893
Polrmt	L/L	L-Proline / Glutamate						0.0176764	124.2
Polrmt	L/L	L-Proline / Glutamate						0.0140799	98.9301
Polrmt	L/L	L-Proline / Glutamate						0.0132815	93.3207
Polrmt	L/L	L-Proline / Glutamate						0.0118908	83.5489
Polrmt	L/L cre	L-Proline / Glutamate						0.0610177	428.732
Polrmt	L/L cre	L-Proline / Glutamate						0.0794014	557.902
Polrmt	L/L cre	L-Proline / Glutamate						0.10188	715.844
Polrmt	L/L cre	L-Proline / Glutamate						0.0527108	370.365
Polrmt	L/L cre	L-Proline / Glutamate						0.0681617	478.928
Lrpprc	L/L	L-Proline / Glutamate						0.00770595	83.4108
Lrpprc	L/L	L-Proline / Glutamate						0.00969594	104.951
Lrpprc	L/L	L-Proline / Glutamate						0.00894452	96.8174
Lrpprc	L/L	L-Proline / Glutamate						0.0106078	114.821
Lrpprc	L/L cre	L-Proline / Glutamate						0.0957102	1035.99
Lrpprc	L/L cre	L-Proline / Glutamate						0.0820517	888.145
Lrpprc	L/L cre	L-Proline / Glutamate						0.131137	1419.45
Lrpprc	L/L cre	L-Proline / Glutamate						0.0585169	633.399
Mterf4	L/L	L-Proline / Glutamate						0.0131518	117.014
Mterf4	L/L	L-Proline / Glutamate						0.0100446	89.3678
Mterf4	L/L	L-Proline / Glutamate						0.00946324	84.1956
Mterf4	L/L	L-Proline / Glutamate						0.0094744	84.2949
Mterf4	L/L	L-Proline / Glutamate						0.0140639	125.128
Mterf4	L/L cre	L-Proline / Glutamate						0.263689	2346.08
Mterf4	L/L cre	L-Proline / Glutamate						0.168457	1498.78
Mterf4	L/L cre	L-Proline / Glutamate						0.177569	1579.86
Mterf4	L/L cre	L-Proline / Glutamate						0.252887	2249.97
Mterf4	L/L cre	L-Proline / Glutamate						0.0940675	836.929
