# Supplementary material for: Transcriptomic and proteomic landscape of mitochondrial dysfunction reveals secondary coenzyme Q deficiency in mammals
Source: eLife. 2017 Nov 14;6:e30952. doi: 10.7554/eLife.30952 (PMC5703644; doi:10.7554/eLife.30952)
Supplement: Figure 8—source data 1. [file elife-30952-fig8-data1.xlsx]

## Sheet: Summary data - Figure 3
Kuehl et al_Data for Figure 8
Coq2
mean	Twnk	Tfam	Polrmt	Lrpprc	Mterf4
L/L	100	100	100	100	100
L/L cre	44.8792	57.725	101.34	66.2853	63.4894
sem	Twnk	Tfam	Polrmt	Lrpprc	Mterf4
L/L	8.63492	9.02203	4.37881	9.66827	13.9769
L/L cre	6.54955	5.44492	7.14088	5.04379	10.2139
Coq4
mean	Twnk	Tfam	Polrmt	Lrpprc	Mterf4
L/L	100	100	100	100	100
L/L cre	78.2407	102.112	143.245	88.5574	104.187
sem	Twnk	Tfam	Polrmt	Lrpprc	Mterf4
L/L	8.54646	6.17241	5.15202	5.88001	14.4976
L/L cre	5.76763	7.05266	10.4289	3.04919	8.06191
Coq5
mean	Twnk	Tfam	Polrmt	Lrpprc	Mterf4
L/L	100	100	100	100	100
L/L cre	62.3816	90.9981	152.998	102.355	105.536
sem	Twnk	Tfam	Polrmt	Lrpprc	Mterf4
L/L	12.4793	7.26765	5.29267	9.72301	12.4983
L/L cre	3.95721	4.67409	12.5338	8.60884	10.9124
Coq7
mean	Twnk	Tfam	Polrmt	Lrpprc	Mterf4
L/L	100	100	100	100	100
L/L cre	44.4724	81.3325	134.022	98.1696	88.5025
sem	Twnk	Tfam	Polrmt	Lrpprc	Mterf4
L/L	8.11231	9.80049	4.42255	9.7882	16.4688
L/L cre	5.79366	7.24722	8.6972	12.1763	18.3382
Coq8a
mean	Twnk	Tfam	Polrmt	Lrpprc	Mterf4
L/L	100	100	100	100	100
L/L cre	32.6072	51.0926	89.2687	48.7405	38.7843
sem	Twnk	Tfam	Polrmt	Lrpprc	Mterf4
L/L
L/L cre	5.73262	10.3623	0.994032	10.4434	12.6785
	4.91708	10.2221	5.89192	3.52129	8.88333
Coq8b
mean	Twnk	Tfam	Polrmt	Lrpprc	Mterf4
L/L	100	100	100	100	100
L/L cre	219.208	467.876	421.556	334.966	489.389
sem	Twnk	Tfam	Polrmt	Lrpprc	Mterf4
L/L	8.18683	6.11329	4.68638	4.87867	12.5169
L/L cre	5.44108	46.1197	12.4867	43.9813	9.45355
Fdps
mean	Twnk	Tfam	Polrmt	Lrpprc	Mterf4
L/L	100	100	100	100	100
L/L cre	133.566	221.683	246.338	148.704	194.567
sem	Twnk	Tfam	Polrmt	Lrpprc	Mterf4
L/L	7.19329	8.07082	2.47141	7.46393	13.4742
L/L cre	10.5018	19.6752	19.3383	5.34232	26.6618
Hmgcr
mean	Twnk	Tfam	Polrmt	Lrpprc	Mterf4
L/L	100	100	100	100	100
L/L cre	96.597	119.729	163.258	118.341	156.22
sem	Twnk	Tfam	Polrmt	Lrpprc	Mterf4
L/L	8.73683	5.3984	3.25276	10.0625	8.84009
L/L cre	5.49485	8.36612	5.91666	4.60088	5.34074
Hmgcs1
mean	Twnk	Tfam	Polrmt	Lrpprc	Mterf4
L/L	100	100	100	100	100
L/L cre	76.6779	108.399	174.43	108.805	144.192
sem	Twnk	Tfam	Polrmt	Lrpprc	Mterf4
L/L	8.21481	7.20817	3.56865	9.39874	15.3663
L/L cre	0.988818	5.37708	12.0274	5.34232	7.97654
Pdss1
mean	Twnk	Tfam	Polrmt	Lrpprc	Mterf4
L/L	100	100	100	100	100
L/L cre	68.7961	96.5003	199.282	120.575	149.83
sem	Twnk	Tfam	Polrmt	Lrpprc	Mterf4
L/L	9.58206	9.03729	4.59514	9.14149	12.6526
L/L cre	5.64866	4.46718	12.4867	9.70821	12.0171
Pdss2
mean	Twnk	Tfam	Polrmt	Lrpprc	Mterf4
L/L	100	100	100	100	100
L/L cre	59.5839	85.6633	133.852	87.1394	104.308
sem	Twnk	Tfam	Polrmt	Lrpprc	Mterf4
L/L	6.63549	6.05149	3.98501	11.4831	15.1215
L/L cre	7.30255	6.64279	11.5526	2.89581	9.55825

## Sheet: Raw data Twnk 
Mouse strain	Genotype	Gene	Relative quantity			Mean quantity	Relative quantity (normalized to B2m)	Fold Change (normalized to L/L) [%]
			Replicate 1	Replicate2	Replicate 3
Twnk	L/L	B2m	13.0662	14.119	14.1577	13.781
Twnk	L/L	B2m	16.7724	17.4318	17.8635	17.3559
Twnk	L/L	B2m	5.62391	5.56638	5.97722	5.7225
Twnk	L/L	B2m	13.2805	12.335	14.314	13.3098
Twnk	L/L	B2m	8.18694	7.85835	8.90215	8.31581
Twnk	L/L	B2m	9.5089	10.0907	9.29666	9.63207
Twnk	L/L cre	B2m	2.26342	2.05936	2.06437	2.12905
Twnk	L/L cre	B2m	22.9143	19.4292	22.1737	21.5057
Twnk	L/L cre	B2m	36.6907	37.1077	37.85	37.2161
Twnk	L/L cre	B2m	20.4043	20.3293	17.3601	19.3646
Twnk	L/L	Coq2	26.2262	25.5782	29.4619	27.0887	1.96566	133.734
Twnk	L/L	Coq2	19.6735	20.9682	21.1484	20.5967	1.18673	80.7387
Twnk	L/L	Coq2	10.5024	9.75079	9.61884	9.95735	1.74003	118.383
Twnk	L/L	Coq2	17.6662	17.3603	17.5734	17.5333	1.31732	89.6237
Twnk	L/L	Coq2	10.6416	9.80982	10.6842	10.3786	1.24805	84.911
Twnk	L/L	Coq2	13.1082	12.4511	13.7746	13.1113	1.36121	92.6099
Twnk	L/L cre	Coq2	17.6368	18.4511	18.653	18.2469	0.848468	57.7254
Twnk	L/L cre	Coq2	19.3884	20.7875	19.2922	19.8227	0.532637	36.2379
Twnk	L/L cre	Coq2	11.8188	11.4865	11.4256	11.577	0.597844	40.6742
Twnk	L/L	Coq7	25.4297	23.753	25.8255	25.0027	1.81429	119.677
Twnk	L/L	Coq7	18.5186	17.6997	19.2681	18.4955	1.06566	70.2945
Twnk	L/L	Coq7	10.3229	9.09865	9.53904	9.65353	1.68694	111.277
Twnk	L/L	Coq7	17.9904	15.0952	18.2292	17.1049	1.28513	84.772
Twnk	L/L	Coq7	14.9962	14.0851	15.593	14.8915	1.79074	118.123
Twnk	L/L	Coq7	14.0533	14.1788	13.7592	13.9971	1.45317	95.8564
Twnk	L/L cre	Coq7	17.8015	19.0572	16.8869	17.9152	0.833042	54.9504
Twnk	L/L cre	Coq7	20.5926	20.2223	18.3385	19.7178	0.529819	34.9487
Twnk	L/L cre	Coq7	13.3152	13.0429	11.9681	12.7754	0.659731	43.5182
Twnk	L/L	Coq8a (Adck3)	24.9869	26.0054	26.3526	25.7817	1.87082	120.324
Twnk	L/L	Coq8a (Adck3)	22.8241	22.0068	22.8235	22.5515	1.29935	83.5698
Twnk	L/L	Coq8a (Adck3)	8.45658	8.5985	9.19322	8.74943	1.52895	98.3367
Twnk	L/L	Coq8a (Adck3)	22.2057	22.925	23.1455	22.7587	1.70992	109.976
Twnk	L/L	Coq8a (Adck3)	10.9432	11.749	10.6493	11.1138	1.33647	85.957
Twnk	L/L	Coq8a (Adck3)	15.3989	14.7452	15.6093	15.2511	1.58337	101.837
Twnk	L/L cre	Coq8a (Adck3)	15.7984	14.6945	11.8177	14.1035	0.655803	42.1789
Twnk	L/L cre	Coq8a (Adck3)	17.7874	16.7759	17.1255	17.2296	0.462961	29.776
Twnk	L/L cre	Coq8a (Adck3)	8.03803	7.87604	7.45009	7.78805	0.402181	25.8668
Twnk	L/L	Fdps	15.4143	15.5461	16.0283	15.6629	1.13656	130.655
Twnk	L/L	Fdps	13.5233	14.7108	15.0509	14.4283	0.831322	95.566
Twnk	L/L	Fdps	3.95471	3.85964	4.06261	3.95899	0.691828	79.5302
Twnk	L/L	Fdps	13.7271	11.5728	11.9759	12.4252	0.933538	107.316
Twnk	L/L	Fdps	6.31191	6.31781	6.74634	6.45869	0.776675	89.284
Twnk	L/L	Fdps	8.53262	8.06947	7.94336	8.18182	0.849435	97.6482
Twnk	L/L cre	Fdps	27.488	26.1214	26.7867	26.7987	1.24612	143.25
Twnk	L/L cre	Fdps	36.3775	33.8846	39.0811	36.4477	0.979352	112.583
Twnk	L/L cre	Fdps	24.5388	24.2606	24.4084	24.4026	1.26017	144.865
Twnk	L/L	Hmgcs1	16.5587	15.7304	19.2242	17.1711	1.246	108.01
Twnk	L/L	Hmgcs1	15.9619	16.854	16.5413	16.4524	0.947941	82.1725
Twnk	L/L	Hmgcs1	4.85556	4.78547	5.03939	4.89348	0.855129	74.127
Twnk	L/L	Hmgcs1	17.4291	15.1794	17.2597	16.6227	1.2489	108.262
Twnk	L/L	Hmgcs1	9.45988	9.27025	9.31703	9.34905	1.12425	97.4559
Twnk	L/L	Hmgcs1	14.0313	14.9567	14.3381	14.442	1.49937	129.973
Twnk	L/L cre	Hmgcs1	19.0625	18.4114	18.3671	18.6137	0.865521	75.0279
Twnk	L/L cre	Hmgcs1	32.6323	32.3188	33.6546	32.8686	0.88318	76.5587
Twnk	L/L cre	Hmgcs1	17.4566	17.2696	17.8464	17.5242	0.904964	78.4471
Twnk	L/L	Pdss2	23.797	24.6319	25.9203	24.7831	1.79836	132.122
Twnk	L/L	Pdss2	22.6917	19.6913	18.2812	20.2214	1.1651	85.5981
Twnk	L/L	Pdss2	7.28741	7.27871	7.8018	7.45597	1.30292	95.7236
Twnk	L/L	Pdss2	17.3314	16.9496	17.615	17.2987	1.29969	95.4863
Twnk	L/L	Pdss2	10.3279	10.7109	10.9796	10.6728	1.28343	94.2918
Twnk	L/L	Pdss2	12.5832	12.9469	12.534	12.688	1.31727	96.7777
Twnk	L/L cre	Pdss2	21.1574	21.5319	22.3443	21.6779	1.008	74.0564
Twnk	L/L cre	Pdss2	26.2586	25.4738	25.2354	25.6559	0.689376	50.6474
Twnk	L/L cre	Pdss2	15.721	13.0984	13.9178	14.2457	0.735661	54.0479
Mouse strain	Genotype	Gene	Relative quantity			Mean quantity	Relative quantity (normalized to B2m)	Fold Change (normalized to L/L) [%]
			Replicate 1	Replicate2	Replicate 3
Twnk	L/L	B2m	11.2291	10.6722	11.349	11.0834
Twnk	L/L	B2m	12.9518	14.8364	12.3146	13.3676
Twnk	L/L	B2m	7.36193	7.25696	7.15207	7.25699
Twnk	L/L	B2m	9.89563	10.0267	9.93233	9.95156
Twnk	L/L cre	B2m	19.1743	21.85	21.2621	20.7622
Twnk	L/L cre	B2m	14.0252	16.912	13.6824	14.8732
Twnk	L/L cre	B2m	25.1337	26.0977	24.489	25.2401
Twnk	L/L	Coq4	14.2505	14.5754	14.2728	14.3662	1.29748	115
Twnk	L/L	Coq4	12.9226	13.8673	11.9153	12.9017	0.966667	85.6792
Twnk	L/L	Coq4	8.971	9.73308	9.43358	9.37922	1.29292	114.597
Twnk	L/L	Coq4	9.81165	9.21454	9.5068	9.511	0.95589	84.7241
Twnk	L/L cre	Coq4	17.9469	15.564	16.2661	16.5923	0.804442	71.3007
Twnk	L/L cre	Coq4	16.6806	15.1515	13.0055	14.9459	1.01192	89.6903
Twnk	L/L cre	Coq4	21.0568	18.7842	22.9715	20.9375	0.831863	73.7311
Twnk	L/L	Coq5	18.865	17.952	20.086	18.9677	1.71065	133.985
Twnk	L/L	Coq5	13.063	14.745	14.88	14.2293	1.07026	83.8273
Twnk	L/L	Coq5	9.961	9.569	9.166	9.56533	1.31774	103.211
Twnk	L/L	Coq5	10.568	9.344	10.182	10.0313	1.00834	78.9772
Twnk	L/L cre	Coq5	15.271	16.152	14.751	15.3913	0.743136	58.2054
Twnk	L/L cre	Coq5	13.151	13.664	12.954	13.2563	0.897451	70.2919
Twnk	L/L cre	Coq5	18.686	18.664	19.291	18.8803	0.748781	58.6475
Twnk	L/L	Coq8b (Adck4)	6.63831	6.81269	7.03179	6.8276	0.616376	103.228
Twnk	L/L	Coq8b (Adck4)	5.97449	6.20766	6.10357	6.09524	0.458443	76.7782
Twnk	L/L	Coq8b (Adck4)	4.325	4.75148	4.53748	4.53799	0.625553	104.765
Twnk	L/L	Coq8b (Adck4)	6.13729	8.73175	5.69166	6.85357	0.688031	115.229
Twnk	L/L cre	Coq8b (Adck4)	26.4234	29.7436	29.3541	28.5071	1.3733	229.995
Twnk	L/L cre	Coq8b (Adck4)	18.5879	17.7792	19.5828	18.65	1.26928	212.574
Twnk	L/L cre	Coq8b (Adck4)	31.2675	33.0812	32.8307	32.3932	1.28409	215.054
Twnk	L/L	Hmgcr	13.28	12.434	13.645	13.1197	1.18335	117.141
Twnk	L/L	Hmgcr	10.35	10.55	9.747	10.2157	0.767234	75.9494
Twnk	L/L	Hmgcr	7.592	7.375	8.463	7.81	1.07694	106.607
Twnk	L/L	Hmgcr	10.076	9.728	10.442	10.082	1.01325	100.303
Twnk	L/L cre	Hmgcr	23.33	22.509	21.55	22.463	1.08681	107.585
Twnk	L/L cre	Hmgcr	12.648	13.592	14.52	13.5867	0.922237	91.2932
Twnk	L/L cre	Hmgcr	23.982	20.552	24.82	23.118	0.918398	90.9133
Twnk	L/L	Pdss1	17.5076	16.716	17.2079	17.1438	1.54723	123.346
Twnk	L/L	Pdss1	14.5675	13.055	12.6417	13.4214	1.01041	80.5507
Twnk	L/L	Pdss1	9.83279	9.7389	9.72702	9.76624	1.34589	107.295
Twnk	L/L	Pdss1	10.2489	10.5801	12.4263	11.0851	1.11399	88.8083
Twnk	L/L cre	Pdss1	16.4556	18.8493	17.32	17.5416	0.845158	67.3764
Twnk	L/L cre	Pdss1	14.7256	14.0867	15.0231	14.6118	0.993623	79.2122
Twnk	L/L cre	Pdss1	20.1814	15.5645	20.8402	18.862	0.750118	59.7998

## Sheet: Raw data Tfam
Mouse strain	Genotype	Gene	Relative quantity			Mean quantity	Relative quantity (normalized to B2m)	Fold Change (normalized to L/L) [%]
			Replicate 1	Replicate2	Replicate 3
Tfam	L/L	B2m	9.63089	9.24179	9.5823	9.48499
Tfam	L/L	B2m	9.98679	11.0342	9.95103	10.324
Tfam	L/L	B2m	9.75194	10.1114	9.0316	9.63166
Tfam	L/L cre	B2m	11.2051	11.764	11.1656	11.3782
Tfam	L/L cre	B2m	10.0397	9.7847	10.2119	10.0121
Tfam	L/L cre	B2m	9.57438	9.52276	10.3808	9.82597
Tfam	L/L cre	B2m	11.4554	11.5139	11.1818	11.3837
Tfam	L/L cre	B2m	12.0528	12.0489	12.0037	12.0352
Tfam	L/L	Coq2	15.194	16.361	14.67	15.4083	1.6245	118.021
Tfam	L/L	Coq2	13.013	13.265	12.847	13.0417	1.26324	91.7753
Tfam	L/L	Coq2	12.116	11.359	12.401	11.9587	1.2416	90.2035
Tfam	L/L cre	Coq2	6.353	6.364	6.307	6.34133	0.557322	40.49
Tfam	L/L cre	Coq2	9.871	9.186	9.756	9.60433	0.959273	69.6921
Tfam	L/L cre	Coq2	9.669	9.142	9.247	9.35267	0.951832	69.1515
Tfam	L/L cre	Coq2	8.554	8.797	8.927	8.75933	0.769463	55.9022
Tfam	L/L cre	Coq2	9.523	8.674	8.336	8.84433	0.734875	53.3894
Tfam	L/L	Coq7	12.6741	12.0373	12.2091	12.3068	1.2975	119.554
Tfam	L/L	Coq7	10.1139	10.0382	9.78183	9.97798	0.966482	89.0535
Tfam	L/L	Coq7	9.76925	9.48347	9.40713	9.55328	0.991863	91.3921
Tfam	L/L cre	Coq7	8.29877	8.50799	8.38467	8.39714	0.738001	68.0008
Tfam	L/L cre	Coq7	11.502	11.818	11.6526	11.6575	1.16435	107.285
Tfam	L/L cre	Coq7	9.09633	8.94652	9.57544	9.20609	0.936915	86.3291
Tfam	L/L cre	Coq7	9.15258	10.1566	8.7141	9.34108	0.820566	75.6085
Tfam	L/L cre	Coq7	9.24664	9.26275	8.70012	9.06984	0.753612	69.4392
Tfam	L/L	Coq8a (Adck3)	16.1102	15.7718	18.0626	16.6482	1.75521	120.594
Tfam	L/L	Coq8a (Adck3)	13.4147	14.0843	13.8459	13.7816	1.33491	91.7164
Tfam	L/L	Coq8a (Adck3)	11.5737	12.3917	12.9133	12.2929	1.2763	87.6898
Tfam	L/L cre	Coq8a (Adck3)	9.10928	9.58375	8.8746	9.18921	0.807614	55.488
Tfam	L/L cre	Coq8a (Adck3)	13.2125	12.2937		12.7531	1.27377	87.5154
Tfam	L/L cre	Coq8a (Adck3)	5.4781	5.02896	4.96023	5.15576	0.524708	36.0506
Tfam	L/L cre	Coq8a (Adck3)	8.52152	7.9228	7.33145	7.92526	0.696193	47.8327
Tfam	L/L cre	Coq8a (Adck3)	5.08571	4.90765	5.02353	5.00563	0.415917	28.576
Tfam	L/L	Fdps	6.01804	5.82346	6.18838	6.00996	0.633629	115.469
Tfam	L/L	Fdps	4.98573	5.08505	4.93178	5.00085	0.48439	88.2729
Tfam	L/L	Fdps	5.01155	4.94434	5.30664	5.08751	0.528207	96.2578
Tfam	L/L cre	Fdps	9.15531	9.86429	9.90138	9.64033	0.847261	154.401
Tfam	L/L cre	Fdps	12.4071	12.1444	11.8227	12.1247	1.21101	220.688
Tfam	L/L cre	Fdps	15.3486	14.7987	14.2979	14.8151	1.50775	274.764
Tfam	L/L cre	Fdps	13.3696	13.3026	14.0727	13.5816	1.19308	217.42
Tfam	L/L cre	Fdps	15.8618	16.34	15.5743	15.9253	1.32324	241.14
Tfam	L/L	Hmgcs1	10.3409	10.4504	10.1545	10.3153	1.08754	114.099
Tfam	L/L	Hmgcs1	9.19516	9.4364	9.57732	9.40296	0.910785	95.5552
Tfam	L/L	Hmgcs1	8.70772	7.78408	8.39054	8.29411	0.86113	90.3457
Tfam	L/L cre	Hmgcs1	9.67143	10.1086	10.1764	9.98547	0.877595	92.0731
Tfam	L/L cre	Hmgcs1	11.5264	10.4056	11.1949	11.0423	1.10289	115.71
Tfam	L/L cre	Hmgcs1	10.3801	9.99898	10.8007	10.3932	1.05773	110.972
Tfam	L/L cre	Hmgcs1	11.2083	11.029	10.5982	10.9452	0.961477	100.874
Tfam	L/L cre	Hmgcs1	14.3911	14.1492	13.5699	14.0367	1.16631	122.364
Tfam	L/L	Pdss2	11.9445	11.6606	11.6206	11.7419	1.23794	112.096
Tfam	L/L	Pdss2	10.8002	10.514	10.6988	10.671	1.03361	93.5932
Tfam	L/L	Pdss2	9.98569	10.1155	9.99385	10.0317	1.04153	94.3109
Tfam	L/L cre	Pdss2	9.2136	8.48024	8.88592	8.85992	0.778674	70.5089
Tfam	L/L cre	Pdss2	11.2378	11.1477	11.363	11.2495	1.12359	101.741
Tfam	L/L cre	Pdss2	11.0161	11.1754	10.8129	11.0015	1.11963	101.383
Tfam	L/L cre	Pdss2	9.9907	10.4361	9.53323	9.98666	0.877277	79.4374
Tfam	L/L cre	Pdss2	10.6317	9.18082	10.1907	10.0011	0.830989	75.2461
Mouse strain	Genotype	Gene	Relative quantity			Mean quantity	Relative quantity (normalized to B2m)	Fold Change (normalized to L/L) [%]
			Replicate 1	Replicate2	Replicate 3
Tfam	L/L	B2m	13.3045	13.3436	14.0703	13.5728
Tfam	L/L	B2m	13.5084	14.078	14.3543	13.9802
Tfam	L/L	B2m	17.4288	16.6525	16.9088	16.9967
Tfam	L/L cre	B2m	17.27	17.8177	17.0007	17.3628
Tfam	L/L cre	B2m	14.9743	14.2726	15.0818	14.7763
Tfam	L/L cre	B2m	15.4818	16.4647	15.4392	15.7952
Tfam	L/L cre	B2m	16.4181	16.4597	16.467	16.4482
Tfam	L/L cre	B2m	17.1401	18.0201	17.9018	17.6873
Tfam	L/L	Coq4	14.1798	14.2796	14.0171	14.1588	1.04318	112.248
Tfam	L/L	Coq4	12.7441	12.0577	12.3087	12.3701	0.884831	95.2099
Tfam	L/L	Coq4	14.5702	14.8236	14.4594	14.6177	0.860034	92.5417
Tfam	L/L cre	Coq4	13.8822	13.2927	13.6692	13.6147	0.784131	84.3743
Tfam	L/L cre	Coq4	15.9336	15.8717	16.8774	16.2276	1.09822	118.171
Tfam	L/L cre	Coq4	17.5511	17.3543	17.6284	17.5113	1.10864	119.293
Tfam	L/L cre	Coq4	14.0011	15.2091	14.9159	14.7087	0.894241	96.2225
Tfam	L/L cre	Coq4	15.3278	15.9791	14.307	15.2046	0.859634	92.4987
Tfam	L/L	Coq5	15.5935	15.3376	15.6273	15.5195	1.14342	110.851
Tfam	L/L	Coq5	15.1464	15.2225	14.1693	14.8461	1.06193	102.95
Tfam	L/L	Coq5	15.109	14.8618	15.3666	15.1124	0.889142	86.1989
Tfam	L/L cre	Coq5	14.3079	13.4749	14.6445	14.1424	0.814525	78.9651
Tfam	L/L cre	Coq5	15.9527	17.0606	15.5781	16.1972	1.09616	106.269
Tfam	L/L cre	Coq5	15.7893	15.4076	15.687	15.628	0.989409	95.9195
Tfam	L/L cre	Coq5	14.2824	15.0357	15.3573	14.8918	0.905373	87.7725
Tfam	L/L cre	Coq5	13.981	17.2342	15.891	15.7021	0.887757	86.0647
Tfam	L/L	Coq8b (Adck4)	4.68585	4.34641	4.16828	4.40018	0.324191	110.629
Tfam	L/L	Coq8b (Adck4)	3.67079	3.72671	3.59659	3.6647	0.262134	89.4522
Tfam	L/L	Coq8b (Adck4)	5.36047	4.64048	4.92928	4.97674	0.292807	99.9191
Tfam	L/L cre	Coq8b (Adck4)	17.1505	16.371	16.9241	16.8152	0.968463	330.484
Tfam	L/L cre	Coq8b (Adck4)	18.8397	18.9586	20.1374	19.3119	1.30695	445.992
Tfam	L/L cre	Coq8b (Adck4)	29.238	29.7053	27.1588	28.7007	1.81705	620.06
Tfam	L/L cre	Coq8b (Adck4)	22.8701	23.5942	21.7184	22.7276	1.38177	471.521
Tfam	L/L cre	Coq8b (Adck4)	23.9671	24.9049	24.4165	24.4295	1.38119	471.324
Tfam	L/L	Hmgcr	13.1476	12.0448	12.6151	12.6025	0.928511	106.451
Tfam	L/L	Hmgcr	13.04	12.7739	12.3318	12.7152	0.909515	104.273
Tfam	L/L	Hmgcr	13.2182	12.8586	13.6297	13.2355	0.778712	89.2767
Tfam	L/L cre	Hmgcr	15.0645	15.2596	14.9207	15.0816	0.868616	99.5838
Tfam	L/L cre	Hmgcr	14.1533	15.1446	14.6314	14.6431	0.990986	113.613
Tfam	L/L cre	Hmgcr	15.0665	14.3616	15.0339	14.8207	0.9383	107.573
Tfam	L/L cre	Hmgcr	19.4718	18.6786	19.085	19.0784	1.15991	132.98
Tfam	L/L cre	Hmgcr	23.2998	22.2095	21.5521	22.3538	1.26383	144.894
Tfam	L/L	Pdss1	16.5053	14.8467	15.2316	15.5279	1.14404	114.578
Tfam	L/L	Pdss1	13.9815	14.4002	14.3186	14.2334	1.01811	101.965
Tfam	L/L	Pdss1	14.2406	14.0856	14.1643	14.1635	0.833308	83.4571
Tfam	L/L cre	Pdss1	14.2768	13.7428	13.0372	13.6856	0.788214	78.9409
Tfam	L/L cre	Pdss1	15.2276	14.9355	15.2883	15.1505	1.02532	102.688
Tfam	L/L cre	Pdss1	16.1009	16.3257	15.4728	15.9665	1.01084	101.237
Tfam	L/L cre	Pdss1	16.2772	16.508	15.407	16.0641	0.976645	97.8125
Tfam	L/L cre	Pdss1	18.1509	17.7317	18.0651	17.9826	1.01669	101.823

## Sheet: Raw data Polrmt 
Mouse strain	Genotype	Gene	Relative quantity			Mean quantity	Relative quantity (normalized to B2m)	Fold Change (normalized to L/L) [%]
			Replicate 1	Replicate2	Replicate 3
Polrmt	L/L	B2m	13.7729	14.1358	13.9195	13.9427
Polrmt	L/L	B2m	14.1678	14.2903	14.0988	14.1856
Polrmt	L/L	B2m	13.4682	14.3136	13.2497	13.6772
Polrmt	L/L	B2m	14.385	14.7353	14.5682	14.5628
Polrmt	L/L cre	B2m	12.5364	12.7588	12.8358	12.7104
Polrmt	L/L cre	B2m	12.3554	13.2582	12.0917	12.5685
Polrmt	L/L cre	B2m	8.61903	8.79826	8.96121	8.79284
Polrmt	L/L cre	B2m	11.3643	11.1789	11.0739	11.2057
Polrmt	L/L	Coq2	12.8838	12.7746	12.9378	12.8654	0.922877	93.0495
Polrmt	L/L	Coq2	15.9244	15.2428	15.7064	15.6245	1.10155	111.065
Polrmt	L/L	Coq2	14.1196	14.3195	13.4555	13.9649	1.02144	102.987
Polrmt	L/L	Coq2	13.3457	13.8075	13.102	13.4184	0.921381	92.8988
Polrmt	L/L cre	Coq2	13.4561	12.7996	13.5271	13.2609	1.04347	105.209
Polrmt	L/L cre	Coq2	11.5072	11.766	11.385	11.5528	0.920118	92.7714
Polrmt	L/L cre	Coq2	10.3658	10.4319	10.5131	10.4369	1.18718	119.698
Polrmt	L/L cre	Coq2	10.2797	9.18527	9.77526	9.74673	0.869649	87.6828
Polrmt	L/L	Coq7	11.7094	11.7241	12.0857	11.8397	0.849275	96.9817
Polrmt	L/L	Coq7	13.8747	13.6974	13.7378	13.77	0.970739	110.852
Polrmt	L/L	Coq7	12.421	11.9615	12.3151	12.2325	0.895794	102.294
Polrmt	L/L	Coq7	11.3384	11.2398	11.8011	11.4598	0.787019	89.8724
Polrmt	L/L cre	Coq7	13.8117	14.5865	14.3593	14.2525	1.12122	128.036
Polrmt	L/L cre	Coq7	14.0344	12.497	14.3449	13.6254	1.08827	124.274
Polrmt	L/L cre	Coq7	12.6601	12.6262	11.6352	12.3072	1.40078	159.96
Polrmt	L/L cre	Coq7	12.3614	12.1182	11.9726	12.1507	1.0843	123.821
Polrmt	L/L	Coq8a (Adck3)	14.6983	14.8203	14.5739	14.6975	1.05421	101.504
Polrmt	L/L	Coq8a (Adck3)	14.5027	14.902	15.2588	14.8878	1.04957	101.057
Polrmt	L/L	Coq8a (Adck3)	14.2228	13.5816	14.8556	14.22	1.04203	100.331
Polrmt	L/L	Coq8a (Adck3)	14.7278	14.6574	14.6715	14.6856	1.00855	97.1073
Polrmt	L/L cre	Coq8a (Adck3)	12.6902	12.5048	12.1486	12.4479	0.979607	94.321
Polrmt	L/L cre	Coq8a (Adck3)	11.8274	11.5893	11.9263	11.781	0.939233	90.4336
Polrmt	L/L cre	Coq8a (Adck3)	9.38986	9.17066	8.75321	9.10458	1.03618	99.7683
Polrmt	L/L cre	Coq8a (Adck3)	8.40192	8.5792	8.34727	8.4428	0.753516	72.5519
Polrmt	L/L	Fdps	8.29872	8.64418	8.42645	8.45645	0.606474	98.5284
Polrmt	L/L	Fdps	9.74483	8.88199	9.36684	9.33122	0.657908	106.885
Polrmt	L/L	Fdps	8.14631	8.59198	8.35855	8.36561	0.61199	99.4246
Polrmt	L/L	Fdps	8.39335	8.23852	8.95484	8.5289	0.585755	95.1625
Polrmt	L/L cre	Fdps	16.9474	16.801	17.0572	16.9352	1.33251	216.482
Polrmt	L/L cre	Fdps	16.8931	16.9142	16.0602	16.6225	1.32373	215.055
Polrmt	L/L cre	Fdps	16.3396	15.6608	16.0843	16.0282	1.82354	296.255
Polrmt	L/L cre	Fdps	16.9572	17.5587	18.7509	17.7556	1.58536	257.56
Polrmt	L/L	Hmgcs1	11.0387	11.0387	11.0387	11.0387	0.791811	104.765
Polrmt	L/L	Hmgcs1	10.6492	10.6492	10.6492	10.6492	0.750726	99.3289
Polrmt	L/L	Hmgcs1	10.9185	10.9185	10.9185	10.9185	0.799185	105.741
Polrmt	L/L	Hmgcs1	9.92317	9.92317	9.92317	9.92317	0.68147	90.1657
Polrmt	L/L cre	Hmgcs1	15.6082	15.6082	15.6082	15.6082	1.22811	162.492
Polrmt	L/L cre	Hmgcs1	14.7079	14.7079	14.7079	14.7079	1.17204	155.073
Polrmt	L/L cre	Hmgcs1	13.8971	13.8971	13.8971	13.8971	1.5809	209.17
Polrmt	L/L cre	Hmgcs1	14.4796	14.4796	14.4796	14.4796	1.29231	170.987
Polrmt	L/L	Hmgcr	11.989	12.106	11.689	11.928	0.855548	106.289
Polrmt	L/L	Hmgcr	12.042	12.082	11.569	11.8977	0.838663	104.191
Polrmt	L/L	Hmgcr	10.941	9.874	11.289	10.7013	0.784737	97.4918
Polrmt	L/L	Hmgcr	10.66	10.526	11.172	10.786	0.740756	92.0278
Polrmt	L/L cre	Hmgcr	16.567	16.489	17.783	16.9463	1.3331	165.617
Polrmt	L/L cre	Hmgcr	16.032	15.257	15.805	15.698	1.2518	155.518
Polrmt	L/L cre	Hmgcr	12.481	12.562	12.961	12.668	1.44073	178.99
Polrmt	L/L cre	Hmgcr	14.482	13.391	13.512	13.795	1.23079	152.908
Polrmt	L/L	Pdss2	12.0678	12.0678	12.0678	12.0678	0.865624	100.154
Polrmt	L/L	Pdss2	13.3276	13.3276	13.3276	13.3276	0.939541	108.706
Polrmt	L/L	Pdss2	12.0104	12.0104	12.0104	12.0104	0.879102	101.713
Polrmt	L/L	Pdss2	11.2546	11.2546	11.2546	11.2546	0.772905	89.4263
Polrmt	L/L cre	Pdss2	14.7609	14.7609	14.7609	14.7609	1.16144	134.38
Polrmt	L/L cre	Pdss2	13.3734	13.3734	13.3734	13.3734	1.06569	123.302
Polrmt	L/L cre	Pdss2	12.5888	12.5888	12.5888	12.5888	1.43207	165.693
Polrmt	L/L cre	Pdss2	10.8491	10.8491	10.8491	10.8491	0.968285	112.032
Mouse strain	Genotype	Gene	Relative quantity			Mean quantity	Relative quantity (normalized to B2m)	Fold Change (normalized to L/L) [%]
			Replicate 1	Replicate2	Replicate 3
Polrmt	L/L	B2m	17.613	16.006	21.957	18.5253
Polrmt	L/L	B2m	16.767	16.836	17.309	16.9707
Polrmt	L/L	B2m	15.964	15.398	15.008	15.4567
Polrmt	L/L	B2m	18.597	19.221	18.417	18.745
Polrmt	L/L cre	B2m	16.427	16.823	16.49	16.58
Polrmt	L/L cre	B2m	15.299	15.973	15.953	15.7417
Polrmt	L/L cre	B2m	11.035	11.069	11.805	11.303
Polrmt	L/L cre	B2m	12.543	13.716	12.969	13.076
Polrmt	L/L	Coq4	16.2008	15.8931	14.9375	15.6771	0.864358	105.658
Polrmt	L/L	Coq4	14.139	14.0877	13.5902	13.939	0.821726	100.447
Polrmt	L/L	Coq4	12.939	14.03	14.1307	13.6999	0.887736	108.516
Polrmt	L/L	Coq4	13.5982	13.0137	12.6546	13.0888	0.698457	85.3787
Polrmt	L/L cre	Coq4	17.7563	18.4115	18.0712	18.0797	1.09041	133.291
Polrmt	L/L cre	Coq4	17.3813	17.2969	17.549	17.4091	1.10635	135.239
Polrmt	L/L cre	Coq4	16.1762	16.3619	15.763	16.1004	1.42645	174.368
Polrmt	L/L cre	Coq4	13.2893	14.3539	14.09	13.9111	1.06415	130.08
Polrmt	L/L	Coq5	15.5212	15.6106	15.3622	15.498	0.85206	107.799
Polrmt	L/L	Coq5	13.7485	14.1947	13.1504	13.6979	0.807611	102.175
Polrmt	L/L	Coq5	12.6655	13.7662	12.2281	12.8866	0.83406	105.521
Polrmt	L/L	Coq5	12.7378	12.3102	12.4945	12.5142	0.667939	84.5046
Polrmt	L/L cre	Coq5	18.9997	19.5695	18.6971	19.0887	1.15124	145.649
Polrmt	L/L cre	Coq5	18.6744	18.4693	18.4026	18.5154	1.17682	148.886
Polrmt	L/L cre	Coq5	16.6424	17.3545	16.3969	16.7979	1.48832	188.296
Polrmt	L/L cre	Coq5	13.8921	12.3982	13.6332	13.3078	1.0209	129.159
Polrmt	L/L	Coq8b (Adck4)	6.97003	7.0788	6.60177	6.88353	0.379553	95.5185
Polrmt	L/L	Coq8b (Adck4)	6.91532	6.88862	6.2	6.66798	0.393264	98.969
Polrmt	L/L	Coq8b (Adck4)	7.24943	6.84774	6.80117	6.96611	0.450666	113.415
Polrmt	L/L	Coq8b (Adck4)	6.90524	6.94539	6.72641	6.85901	0.365961	92.0978
Polrmt	L/L cre	Coq8b (Adck4)	21.112	20.8409	21.5068	21.1532	1.27609	321.141
Polrmt	L/L cre	Coq8b (Adck4)	22.3442	22.6178	19.9846	21.6489	1.37641	346.387
Polrmt	L/L cre	Coq8b (Adck4)	26.3311	26.9846	27.4446	26.9201	2.38294	599.692
Polrmt	L/L cre	Coq8b (Adck4)	22.0419	21.0514	22.083	21.7254	1.66496	419.004
Polrmt	L/L	Pdss1	12.0573	13.3425	13.4785	12.9594	0.710673	103.519
Polrmt	L/L	Pdss1	12.2577	12.4246	12.4718	12.3847	0.72986	106.314
Polrmt	L/L	Pdss1	11.8079	10.3997	10.8545	11.0207	0.712767	103.824
Polrmt	L/L	Pdss1	11.3781	10.6092	11.3171	11.1015	0.592758	86.3431
Polrmt	L/L cre	Pdss1	23.3608	21.7661	21.2885	22.1384	1.33564	194.554
Polrmt	L/L cre	Pdss1	22.6077	21.0694	21.2686	21.6486	1.37666	200.529
Polrmt	L/L cre	Pdss1	18.6004	17.6529	17.5262	17.9265	1.58834	231.363
Polrmt	L/L cre	Pdss1	15.4681	15.1844	15.2388	15.2971	1.17176	170.683

## Sheet: Raw data Lrpprc 
Mouse strain	Genotype	Gene	Relative quantity			Mean quantity	Relative quantity (normalized to B2m)	Fold Change (normalized to L/L) [%]
			Replicate 1	Replicate2	Replicate 3
Lrpprc	L/L	B2m	12.4201	11.203	12.0688	11.8973
Lrpprc	L/L	B2m	9.69657	10.6907	10.9715	10.4529
Lrpprc	L/L	B2m	13.1002	14.4328	13.0889	13.5406
Lrpprc	L/L	B2m	13.1051	12.5628	13.4249	13.0309
Lrpprc	L/L cre	B2m	13.6471	14.4076	13.876	13.9769
Lrpprc	L/L cre	B2m	13.059	13.2466	12.4874	12.931
Lrpprc	L/L cre	B2m	8.68237	9.39242	8.90618	8.99366
Lrpprc	L/L cre	B2m	13.9739	13.1197	14.5056	13.8664
Lrpprc	L/L	Coq2	16.345	14.8123	15.4147	15.524	1.30483	110.286
Lrpprc	L/L	Coq2	15.0778	14.5335	15.4189	15.01	1.43596	121.37
Lrpprc	L/L	Coq2	14.1816	14.6776	14.1869	14.3487	1.05967	89.5652
Lrpprc	L/L	Coq2	12.1652	12.0917	12.1797	12.1456	0.932056	78.7787
Lrpprc	L/L cre	Coq2	10.4302	11.952	10.3807	10.9209	0.781356	66.0413
Lrpprc	L/L cre	Coq2	9.49134	9.4828	8.90694	9.29369	0.718713	60.7466
Lrpprc	L/L cre	Coq2	8.18951	8.75342	8.76408	8.56901	0.952783	80.5306
Lrpprc	L/L cre	Coq2	9.89487	9.44038	9.12364	9.4863	0.684121	57.8228
Lrpprc	L/L	Coq3	11.8975	11.5954	11.6954	11.7294	1.17327	110.504
Lrpprc	L/L	Coq3	10.4417	11.0158	10.4767	10.6448	1.25366	118.076
Lrpprc	L/L	Coq3	10.7691	10.8781	10.5709	10.7394	0.9264	87.2531
Lrpprc	L/L	Coq3	8.73639	8.90984	8.87083	8.83902	0.893632	84.1669
Lrpprc	L/L cre	Coq3	13.9954	13.1851	14.4238	13.8681	0.702627	66.177
Lrpprc	L/L cre	Coq3	12.2798	13.3416	12.7601	12.7938	1.00486	94.6429
Lrpprc	L/L cre	Coq3	15.9304	14.5244	14.8502	15.1017	1.16319	109.555
Lrpprc	L/L cre	Coq3	11.6425	13.184	12.3804	12.4023	0.657888	61.9633
Lrpprc	L/L	Coq7	13.3701	12.9506	13.2039	13.1749	1.10738	111.762
Lrpprc	L/L	Coq7	13.0294	12.3136	12.3114	12.5515	1.20076	121.186
Lrpprc	L/L	Coq7	12.329	11.531	11.025	11.6283	0.858774	86.6711
Lrpprc	L/L	Coq7	10.5042	10.0435	10.5879	10.3786	0.796456	80.3817
Lrpprc	L/L cre	Coq7	12.1129	11.9985	12.0465	12.0526	0.862326	87.0295
Lrpprc	L/L cre	Coq7	10.61	10.6146	10.9547	10.7264	0.829512	83.7178
Lrpprc	L/L cre	Coq7	11.3027	11.6805	13.005	11.9961	1.33384	134.616
Lrpprc	L/L cre	Coq7	11.9137	11.6309	12.445	11.9965	0.865151	87.3146
Lrpprc	L/L	Fdps	10.6328	10.5886	11.1416	10.7877	0.906733	109.163
Lrpprc	L/L	Fdps	10.0701	9.92779	10.1839	10.0606	0.962466	115.873
Lrpprc	L/L	Fdps	10.5417	9.5627	10.4592	10.1879	0.752391	90.5816
Lrpprc	L/L	Fdps	9.33167	8.66613	9.40229	9.13337	0.700899	84.3825
Lrpprc	L/L cre	Fdps	16.7217	16.3065	15.2989	16.109	1.15255	138.757
Lrpprc	L/L cre	Fdps	15.5881	12.4781	12.7128	13.593	1.05119	126.555
Lrpprc	L/L cre	Fdps	14.5286	15.2264	14.9279	14.8943	1.65609	199.379
Lrpprc	L/L cre	Fdps	14.8489	14.4874	15.6256	14.9873	1.08084	130.124
Lrpprc	L/L	Hmgcs1	12.2088	12.6001	12.111	12.3066	1.0344	111.719
Lrpprc	L/L	Hmgcs1	11.6031	12.0121	11.1992	11.6048	1.11019	119.904
Lrpprc	L/L	Hmgcs1	11.0335	11.3235	10.6771	11.0114	0.813209	87.8291
Lrpprc	L/L	Hmgcs1	9.78927	9.46017	9.90558	9.71834	0.74579	80.5477
Lrpprc	L/L cre	Hmgcs1	16.1228	14.3239	15.8865	15.4444	1.10499	119.343
Lrpprc	L/L cre	Hmgcs1	12.1732	12.0334	12.1022	12.1029	0.935958	101.086
Lrpprc	L/L cre	Hmgcs1	9.40667	10.2376	9.47389	9.70605	1.07921	116.558
Lrpprc	L/L cre	Hmgcs1	13.2249	12.2535	12.358	12.6121	0.909545	98.2337
Lrpprc	L/L	Pdss2	13.9824	14.1311	14.4262	14.1799	1.19186	116.438
Lrpprc	L/L	Pdss2	12.8836	12.7737	13.7777	13.145	1.25754	122.854
Lrpprc	L/L	Pdss2	11.8323	11.5356	11.2879	11.5519	0.853131	83.346
Lrpprc	L/L	Pdss2	9.9077	10.8226	10.2265	10.3189	0.791881	77.3621
Lrpprc	L/L cre	Pdss2	12.3238	12.733	12.645	12.5673	0.899145	87.8412
Lrpprc	L/L cre	Pdss2	11.5767	10.5837	10.9307	11.0303	0.853014	83.3345
Lrpprc	L/L cre	Pdss2	8.95448	8.328	8.96788	8.75012	0.972921	95.0487
Lrpprc	L/L cre	Pdss2	11.5453	12.2312	11.2818	11.6861	0.842763	82.333
Mouse strain	Genotype	Gene	Relative quantity			Mean quantity	Relative quantity (normalized to B2m)	Fold Change (normalized to L/L) [%]
			Replicate 1	Replicate2	Replicate 3
Lrpprc	L/L	B2m	13.0001	13.6632	14.1329	13.5987
Lrpprc	L/L	B2m	9.82296	10.4828	11.5847	10.6302
Lrpprc	L/L	B2m	13.6065	14.914	14.4291	14.3165
Lrpprc	L/L	B2m	15.085	15.8214	16.2084	15.7049
Lrpprc	L/L cre	B2m	15.4081	16.7368	15.8804	16.0085
Lrpprc	L/L cre	B2m	14.5142	15.3483	15.5919	15.1515
Lrpprc	L/L cre	B2m	9.46411	9.72621	9.42116	9.53716
Lrpprc	L/L cre	B2m	15.9486	16.436	16.3831	16.2559
Lrpprc	L/L	Coq5	14.1071	14.3542	14.2095	14.2236	1.04595	106.848
Lrpprc	L/L	Coq5	12.6234	12.9006	13.0042	12.8427	1.20814	123.417
Lrpprc	L/L	Coq5	12.7296	12.734	12.8973	12.787	0.893163	91.2405
Lrpprc	L/L	Coq5	11.7214	12.0796	12.4018	12.0676	0.768393	78.4947
Lrpprc	L/L cre	Coq5	17.5349	17.9555	17.1921	17.5608	1.09697	112.061
Lrpprc	L/L cre	Coq5	13.144	13.664	13.8778	13.5619	0.895089	91.4372
Lrpprc	L/L cre	Coq5	10.8602	11.4996	11.6237	11.3278	1.18776	121.335
Lrpprc	L/L cre	Coq5	13.8154	12.617	13.9486	13.4603	0.828026	84.5864
Lrpprc	L/L	Hmgcr	12.4662	12.8796	12.8565	12.7341	0.936417	100.115
Lrpprc	L/L	Hmgcr	11.8819	13.4164	12.4005	12.5663	1.18213	126.385
Lrpprc	L/L	Hmgcr	12.7067	12.66	13.1626	12.8431	0.897082	95.9093
Lrpprc	L/L	Hmgcr	10.5737	12.3095	11.3102	11.3978	0.725745	77.5912
Lrpprc	L/L cre	Hmgcr	18.972	19.2411	20.6791	19.6307	1.22627	131.104
Lrpprc	L/L cre	Hmgcr	17.095	16.5573	16.4436	16.6986	1.10211	117.83
Lrpprc	L/L cre	Hmgcr	10.2249	10.0743	10.4833	10.2608	1.07588	115.025
Lrpprc	L/L cre	Hmgcr	15.9823	16.7401	17.1819	16.6348	1.0233	109.404
Lrpprc	L/L	Pdss1	12.121	12.7306	12.8656	12.5724	0.924529	102.676
Lrpprc	L/L	Pdss1	11.5714	12.143	11.5042	11.7395	1.10436	122.648
Lrpprc	L/L	Pdss1	12.2729	12.8345	12.1504	12.4192	0.867477	96.34
Lrpprc	L/L	Pdss1	10.8778	11.4786	10.8767	11.0777	0.705365	78.3362
Lrpprc	L/L cre	Pdss1	19.0379	19.3835	19.4977	19.3064	1.20601	133.937
Lrpprc	L/L cre	Pdss1	12.9546	14.4973	13.8953	13.7824	0.909641	101.023
Lrpprc	L/L cre	Pdss1	11.9526	12.5773	11.6072	12.0457	1.26303	140.269
Lrpprc	L/L cre	Pdss1	15.0287	16.4891	15.5002	15.6727	0.96412	107.073
Mouse strain	Genotype	Gene	Relative quantity			Mean quantity	Relative quantity (normalized to B2m)	Fold Change (normalized to L/L) [%]
			Replicate 1	Replicate2	Replicate 3
Lrpprc	L/L	B2m	13.4797	13.1362	13.0871	13.2343
Lrpprc	L/L	B2m	12.111	11.9248	11.1863	11.7407
Lrpprc	L/L	B2m	15.3005	15.445	13.9257	14.8904
Lrpprc	L/L	B2m	15.1389	16.6404	17.149	16.3094
Lrpprc	L/L cre	B2m	15.4865	14.0833	15.6693	15.0797
Lrpprc	L/L cre	B2m	14.3168	15.0887	15.0956	14.8337
Lrpprc	L/L cre	B2m	11.2906	12.5074	11.179	11.659
Lrpprc	L/L cre	B2m	17.0816	16.7448	16.9831	16.9365
Lrpprc	L/L	Coq4	14.9319	14.4193		14.6756	1.11925	105.923
Lrpprc	L/L	Coq4	13.9086	13.7619	14.2854	13.9853	1.19205	112.813
Lrpprc	L/L	Coq4	14.649	14.475	15.6031	14.909	1.00502	95.1128
Lrpprc	L/L	Coq4	14.9759	14.7211	14.6985	14.7985	0.910336	86.1519
Lrpprc	L/L cre	Coq4	14.0384	14.7176	13.9019	14.2193	0.946247	89.5505
Lrpprc	L/L cre	Coq4	13.6179	12.3853	13.0277	13.0103	0.878344	83.1243
Lrpprc	L/L cre	Coq4	11.8332	11.882	11.9474	11.8875	1.02226	96.7444
Lrpprc	L/L cre	Coq4	14.804	15.6482	15.0692	15.1738	0.896161	84.8104
Lrpprc	L/L	Coq8ab (Adck4)	21.2374	19.3017	21.8008	20.78	1.57023	112.081
Lrpprc	L/L	Coq8ab (Adck4)	19.4617	20.7846	20.1589	20.1351	1.71734	122.581
Lrpprc	L/L	Coq8ab (Adck4)	16.157	15.7846	16.4582	16.1333	1.08661	77.5605
Lrpprc	L/L	Coq8ab (Adck4)	19.7399	20.1218	20.1689	20.0102	1.22975	87.7774
Lrpprc	L/L cre	Coq8ab (Adck4)	11.6935	12.1549	11.8869	11.9118	0.792253	56.5498
Lrpprc	L/L cre	Coq8ab (Adck4)	8.55971	8.7435	8.68706	8.66343	0.584275	41.7047
Lrpprc	L/L cre	Coq8ab (Adck4)	8.80496	8.60232	8.3605	8.58926	0.7385	52.7131
Lrpprc	L/L cre	Coq8ab (Adck4)	10.3863	10.6033	10.3222	10.4373	0.616355	43.9945
Lrpprc	L/L	Coq8a (Adck3)	18.8834	20.5844	18.9093	19.459	0.472306	106.4
Lrpprc	L/L	Coq8a (Adck3)	17.8021	17.7662	17.3968	17.655	0.486283	109.548
Lrpprc	L/L	Coq8a (Adck3)	24.429	25.3039	22.2193	23.9841	0.424605	95.6537
Lrpprc	L/L	Coq8a (Adck3)	23.1279	23.347	24.7813	23.7521	0.392398	88.3983
Lrpprc	L/L cre	Coq8a (Adck3)	6.15306	6.27889	6.31405	6.24867	1.29591	291.939
Lrpprc	L/L cre	Coq8a (Adck3)	5.79849	5.929	5.40154	5.70967	1.19111	268.33
Lrpprc	L/L cre	Coq8a (Adck3)	6.43762	6.21831	6.27297	6.30963	2.05812	463.647
Lrpprc	L/L cre	Coq8a (Adck3)	6.44526	6.05634	6.64519	6.38226	1.40248	315.946

## Sheet: Raw data Mterf4 
Mouse strain	Genotype	Gene	Relative quantity			Mean quantity	Relative quantity (normalized to B2m)	Fold Change (normalized to L/L) [%]
			Replicate 1	Replicate2	Replicate 3
Mterf4	L/L	B2m	26.839	28.585	26.976	27.4667
Mterf4	L/L	B2m	12.537	12.188	13.259	12.6613
Mterf4	L/L	B2m	23.009	24.103	23.797	23.6363
Mterf4	L/L	B2m	4.641	4.236	4.572	4.483
Mterf4	L/L cre	B2m	13.191	13.194	13.121	13.1687
Mterf4	L/L cre	B2m	14.326	13.698	15.084	14.3693
Mterf4	L/L cre	B2m	15.432	14.407	15.427	15.0887
Mterf4	L/L	Coq4	18.854	18.06	19.415	18.7763	0.684669	69.4725
Mterf4	L/L	Coq4	12.851	14.097	14.29	13.746	1.08649	110.245
Mterf4	L/L	Coq4	19.464	18.616	17.238	18.4393	0.780899	79.2369
Mterf4	L/L	Coq4	6.216	6.518	5.909	6.21433	1.39004	141.045
Mterf4	L/L cre	Coq4	15.722	14.66	15.957	15.4463	1.17303	119.026
Mterf4	L/L cre	Coq4	12.668	12.393	13.734	12.9317	0.899832	91.3048
Mterf4	L/L cre	Coq4	15.159	14.125	16.349	15.211	1.0075	102.23
Mterf4	L/L	Coq5	18.763	19.073	18.721	18.8523	0.686768	68.4675
Mterf4	L/L	Coq5	14.187	13.934	13.289	13.8033	1.09237	108.904
Mterf4	L/L	Coq5	20.847	20.286	22	21.0443	0.890744	88.803
Mterf4	L/L	Coq5	6.307	5.977	5.748	6.01067	1.34235	133.826
Mterf4	L/L cre	Coq5	16.819	16.672	16.977	16.8227	1.27749	127.36
Mterf4	L/L cre	Coq5	13.013	13.383	14.429	13.6083	0.94733	94.4443
Mterf4	L/L cre	Coq5	13.97	14.044	15.007	14.3403	0.950938	94.804
Mterf4	L/L	Coq8b (Adck4)	7.772	8.09	7.339	7.73367	0.281544	70.7941
Mterf4	L/L	Coq8b (Adck4)	6.814	5.293	6.659	6.25533	0.493331	124.048
Mterf4	L/L	Coq8b (Adck4)	8.274	7.107	7.508	7.62967	0.32333	81.3012
Mterf4	L/L	Coq8b (Adck4)	2.434	2.201	1.983	2.206	0.492572	123.857
Mterf4	L/L cre	Coq8b (Adck4)	25.92	25.563	26.669	26.0507	1.97835	497.455
Mterf4	L/L cre	Coq8b (Adck4)	32.201	26.35	27.091	28.5473	1.98913	500.165
Mterf4	L/L cre	Coq8b (Adck4)	26.294	29.156	29.101	28.1837	1.87134	470.547
Mterf4	L/L	Hmgcr	18.878	18.517	18.91	18.7683	0.684047	82.215
Mterf4	L/L	Hmgcr	13.14	12.443	13.126	12.903	1.01968	122.555
Mterf4	L/L	Hmgcr	16.938	17.631	15.359	16.6427	0.704366	84.6572
Mterf4	L/L	Hmgcr	4.109	4.041	4.21	4.12	0.919993	110.573
Mterf4	L/L cre	Hmgcr	16.595	16.337	17.147	16.693	1.26769	152.363
Mterf4	L/L cre	Hmgcr	18.43	17.44	17.686	17.852	1.24405	149.522
Mterf4	L/L cre	Hmgcr	21.649	21.936	19.089	20.8913	1.3876	166.775
Mterf4	L/L	Pdss1	15.158	16.512	15.621	15.7637	0.57383	68.3454
Mterf4	L/L	Pdss1	11.873	11.106	11.171	11.3833	0.900259	107.225
Mterf4	L/L	Pdss1	17.379	16.24	19.527	17.7153	0.7499	89.3161
Mterf4	L/L	Pdss1	5.251	5.177	4.799	5.07567	1.13442	135.114
Mterf4	L/L cre	Pdss1	19.334	18.614	19.011	18.9863	1.4418	171.725
Mterf4	L/L cre	Pdss1	15.812	15.34	15.964	15.7053	1.09398	130.298
Mterf4	L/L cre	Pdss1	19.103	18.148	18.772	18.6743	1.23815	147.469
Mouse strain	Genotype	Gene	Relative quantity			Mean quantity	Relative quantity (normalized to B2m)	Fold Change (normalized to L/L) [%]
			Replicate 1	Replicate2	Replicate 3
Mterf4	L/L	B2m	25.4891	23.4523	24.5463	24.4959
Mterf4	L/L	B2m	13.7039	2.30294	13.1723	9.72637
Mterf4	L/L	B2m	23.2258	23.2392	23.2289	23.2313
Mterf4	L/L	B2m	4.91852	4.73222	4.76311	4.80462
Mterf4	L/L	B2m	19.5028	19.4425	18.7431	19.2295
Mterf4	L/L cre	B2m	12.6655	12.7661	12.5972	12.6763
Mterf4	L/L cre	B2m	16.8315	17.347	18.2303	17.4696
Mterf4	L/L cre	B2m	17.8697	17.5877	16.6116	17.3564
Mterf4	L/L cre	B2m	5.61878	5.54543	5.45162	5.53861
Mterf4	L/L	Coq8a (Adck3)	25.5386	24.2568	27.5556	25.7837	1.05257	70.9738
Mterf4	L/L	Coq8a (Adck3)	21.5751	21.0993	20.5237	21.066	2.16587	146.042
Mterf4	L/L	Coq8a (Adck3)	31.233	28.6884	33.8084	31.2433	1.34488	90.6837
Mterf4	L/L	Coq8a (Adck3)	7.49552	7.25146	7.5695	7.43883	1.54827	104.398
Mterf4	L/L	Coq8a (Adck3)	24.6034	24.7709	25.8299	25.0681	1.30363	87.9024
Mterf4	L/L cre	Coq8a (Adck3)	8.19508	8.21708	8.04056	8.15091	0.643005	43.3572
Mterf4	L/L cre	Coq8a (Adck3)	6.50182	6.4905	6.55207	6.5148	0.372922	25.1457
Mterf4	L/L cre	Coq8a (Adck3)	5.96741	6.3392	6.70727	6.33796	0.365167	24.6228
Mterf4	L/L cre	Coq8a (Adck3)	5.34101	4.88965	5.05015	5.0936	0.919654	62.0113
Mterf4	L/L	Coq2	23.2917	20.2868	22.0461	21.8749	0.893001	68.1219
Mterf4	L/L	Coq2	17.5631	17.7302	17.6778	17.657	1.81538	138.485
Mterf4	L/L	Coq2	25.8488	38.6096	26.6341	30.3642	1.30704	99.7064
Mterf4	L/L	Coq2	8.00849	7.75464	7.51619	7.75977	1.61507	123.204
Mterf4	L/L	Coq2	17.2357	17.7587	18.3068	17.7671	0.92395	70.4828
Mterf4	L/L cre	Coq2	8.90042	9.34912	9.84466	9.36474	0.738762	56.3559
Mterf4	L/L cre	Coq2	11.3731	11.232	10.4996	11.0349	0.631664	48.1861
Mterf4	L/L cre	Coq2	12.3266	12.3951	13.3647	12.6955	0.73146	55.7989
Mterf4	L/L cre	Coq2	6.98523	7.00968	6.39617	6.79703	1.22721	93.6167
Mterf4	L/L	Coq7	21.5151	19.6464	20.3148	20.4921	0.836551	65.3943
Mterf4	L/L	Coq7	18.1519	18.9014	18.1331	18.3955	1.8913	147.845
Mterf4	L/L	Coq7	27.3752	25.0046	25.0612	25.8137	1.11116	86.8607
Mterf4	L/L	Coq7	8.0392	8.19322	7.67477	7.96906	1.65863	129.657
Mterf4	L/L	Coq7	17.6148	17.3237	16.8989	17.2791	0.898575	70.2428
Mterf4	L/L cre	Coq7	15.5962	13.9919	16.0784	15.2222	1.20084	93.8713
Mterf4	L/L cre	Coq7	13.5222	14.514	13.0338	13.69	0.783646	61.2586
Mterf4	L/L cre	Coq7	13.4646	13.4414	13.4246	13.4435	0.77456	60.5483
Mterf4	L/L cre	Coq7	9.57358	10.1048	9.72503	9.80112	1.7696	138.332
Mterf4	L/L	Fdps	16.1314	14.5127	16.4505	15.6982	0.640849	73.5827
Mterf4	L/L	Fdps	12.8265	12.5538	12.7479	12.7094	1.30669	150.035
Mterf4	L/L	Fdps	21.2792	20.3683	18.7483	20.132	0.866587	99.5021
Mterf4	L/L	Fdps	4.25731	3.95263	4.02263	4.07753	0.848669	97.4446
Mterf4	L/L	Fdps	13.5746	12.8959	13.4396	13.3034	0.691823	79.4355
Mterf4	L/L cre	Fdps	17.6786	18.6039	18.3377	18.2068	1.43629	164.915
Mterf4	L/L cre	Fdps	26.7806	26.233	27.5899	26.8678	1.53798	176.591
Mterf4	L/L cre	Fdps	19.5912	26.9426	27.262	24.5986	1.41727	162.731
Mterf4	L/L cre	Fdps	13.1986	13.4403	13.0163	13.2184	2.38659	274.03
Mterf4	L/L	Hmgcs1	18.7462	17.2472	16.7259	17.5731	0.71739	77.6388
Mterf4	L/L	Hmgcs1	14.738	14.5189	14.1257	14.4609	1.48677	160.904
Mterf4	L/L	Hmgcs1	18.3283	20.1186	18.1134	18.8534	0.811551	87.8294
Mterf4	L/L	Hmgcs1	3.8424	3.6913	3.63697	3.72356	0.774996	83.8732
Mterf4	L/L	Hmgcs1	16.1493	16.0939	15.6002	15.9478	0.829342	89.7547
Mterf4	L/L cre	Hmgcs1	18.3481	18.0051	18.8327	18.3953	1.45116	157.05
Mterf4	L/L cre	Hmgcs1	21.8792	22.8504	22.2486	22.3261	1.278	138.31
Mterf4	L/L cre	Hmgcs1	23.5145	23.5056	28.5761	25.1987	1.45185	157.125
Mterf4	L/L cre	Hmgcs1	5.45734	6.82095	6.80329	6.36053	1.1484	124.284
Mterf4	L/L	Pdss2	18.9876	17.7514	18.6999	18.4796	0.754396	69.7897
Mterf4	L/L	Pdss2	15.3469	17.8659	16.3528	16.5219	1.69867	157.145
Mterf4	L/L	Pdss2	24.1436	23.3953	23.6261	23.7217	1.02111	94.4634
Mterf4	L/L	Pdss2	4.78411	5.28539	5.12604	5.06518	1.05423	97.5278
Mterf4	L/L	Pdss2	15.6616	17.9142	16.9808	16.8522	0.876375	81.0741
Mterf4	L/L cre	Pdss2	14.8598	14.501	14.7495	14.7034	1.15992	107.305
Mterf4	L/L cre	Pdss2	17.3219	16.9898	15.8007	16.7041	0.956183	88.4572
Mterf4	L/L cre	Pdss2	17.4718	17.2954	16.6349	17.1341	0.987193	91.3259
Mterf4	L/L cre	Pdss2	7.93403	7.48833	7.95297	7.79178	1.40681	130.145
