# Supplementary material for: Transcriptomic and proteomic landscape of mitochondrial dysfunction reveals secondary coenzyme Q deficiency in mammals
Source: eLife. 2017 Nov 14;6:e30952. doi: 10.7554/eLife.30952 (PMC5703644; doi:10.7554/eLife.30952)
Supplement: Figure 8—source data 2. [file elife-30952-fig8-data2.xlsx]

## Sheet: Summary Data Figure
Kuehl et al_Data for Figure 8
Coenzyme Q9
mean	Twnk	Tfam	Polrmt	Lrpprc	Mterf4
L/L	271.942	247.346	279.577	319.099	287.541
L/L cre	136.863	141.85	107.146	164.323	159.461
sem	Twnk	Tfam	Polrmt	Lrpprc	Mterf4
L/L	51.8063	41.2301	78.3479	30.4716	33.8582
L/L cre	21.0606	21.9272	13.5126	47.0824	19.701
Coenzyme Q10
mean	Twnk	Tfam	Polrmt	Lrpprc	Mterf4
L/L	35.9052	18.2117	23.957	35.5858	36.1559
L/L cre	26.8953	24.4396	23.1008	26.672	39.5835
sem	Twnk	Tfam	Polrmt	Lrpprc	Mterf4
L/L	13.5626	2.31131	5.42923	3.63603	4.31612
L/L cre	4.05826	4.65005	2.96234	7.88639	3.56318

## Sheet: Raw Data
Mouse strain	Genotype	Metabolite	ng_metabolite/mg_tissue			ng_metabolite/mg_tissue_average	average_mg_metabolite/mg_tissue
			Replicate 1	Replicate2	Replicate 3
Twnk	L/L	Q9	394857	400474	395355	396895	396.895
Twnk	L/L	Q9	153232	125883	150353	143156	143.156
Twnk	L/L	Q9	259800	282684	278235	273573	273.573
Twnk	L/L	Q9	283992	279962	258475	274143	274.143
Twnk	L/L cre	Q9	185261	195503	174871	185212	185.212
Twnk	L/L cre	Q9	83344.5	83940.6	93120.6	86801.9	86.8019
Twnk	L/L cre	Q9	156142	149576	153793	153170	153.17
Twnk	L/L cre	Q9	127402	118448	120957	122269	122.269
Tfam	L/L	Q9	174153	160120	172723	168999	168.999
Tfam	L/L	Q9	281630	286201	274973	280935	280.935
Tfam	L/L	Q9	198710	190786	186038	191844	191.844
Tfam	L/L	Q9	348837	341623	352360	347606	347.606
Tfam	L/L cre	Q9	142426	149163	151290	147626	147.626
Tfam	L/L cre	Q9	200922	205906	198258	201695	201.695
Tfam	L/L cre	Q9	109322	104323	110653	108099	108.099
Tfam	L/L cre	Q9	116907	107177	105853	109979	109.979
Polrmt	L/L	Q9	176509	188987	180518	182005	182.005
Polrmt	L/L	Q9	462175	423134	418330	434546	434.546
Polrmt	L/L	Q9	210660	235130	220747	222179	222.179
Polrmt	L/L cre	Q9	120582	113462	126594	120213	120.213
Polrmt	L/L cre	Q9	71656	74038.8	77305	74333.3	74.3333
Polrmt	L/L cre	Q9	99389.7	97383.3	96241	97671.3	97.6713
Polrmt	L/L cre	Q9	135020	139257	134826	136368	136.368
Lrpprc	L/L	Q9	254533	260857	258242	257877	257.877
Lrpprc	L/L	Q9	311958	294909	291098	299321	299.321
Lrpprc	L/L	Q9	320471	319572	309324	316455	316.455
Lrpprc	L/L	Q9	407959	395921	404343	402741	402.741
Lrpprc	L/L cre	Q9	169789	173196	170391	171125	171.125
Lrpprc	L/L cre	Q9	234945	226177	224514	228545	228.545
Lrpprc	L/L cre	Q9	29333.6	29498.7	28292.1	29041.5	29.0415
Lrpprc	L/L cre	Q9	237989	213676	234079	228582	228.582
Mterf4	L/L	Q9	352068	343361	341923	345784	345.784
Mterf4	L/L	Q9	341025	341282	343154	341820	341.82
Mterf4	L/L	Q9	211759	207388	204742	207963	207.963
Mterf4	L/L	Q9	257399	257700	248688	254595	254.595
Mterf4	L/L cre	Q9	120768	119138	127285	122397	122.397
Mterf4	L/L cre	Q9	144382	150774	148448	147868	147.868
Mterf4	L/L cre	Q9	148303	151997	157012	152437	152.437
Mterf4	L/L cre	Q9	215139			215139	215.139
Twnk	L/L		85494.3	69915	71670.2	75693.2	75.6932
Twnk	L/L	Q10	14492.7	14333	15820.2	14882	14.882
Twnk	L/L	Q10	24862	25901.8	23512	24758.6	24.7586
Twnk	L/L	Q10	26408.3	33757.9	24695.1	28287.1	28.2871
Twnk	L/L cre	Q10	36830.7	38179.2	39572	38194	38.194
Twnk	L/L cre	Q10	18081.1	18711.6	20882.1	19225	19.225
Twnk	L/L cre	Q10	28342.5	24710.1	26718.6	26590.4	26.5904
Twnk	L/L cre	Q10	22193.5	25325	23196.7	23571.8	23.5718
Tfam	L/L	Q10	14329.4	16563.4	14052.3	14981.7	14.9817
Tfam	L/L	Q10	27244.8	23333.5	23591.5	24723.3	24.7233
Tfam	L/L	Q10	14079.6	14297.1	16188.5	14855.1	14.8551
Tfam	L/L	Q10	12262.4	20600.9	21997	18286.8	18.2868
Tfam	L/L cre	Q10	35651.2	33237.1	29872.5	32920.2	32.9202
Tfam	L/L cre	Q10	28778	32461.7	33798.7	31679.4	31.6794
Tfam	L/L cre	Q10	14985.5	12865.5	14670.3	14173.8	14.1738
Tfam	L/L cre	Q10	21558.3	17974.8	17422.3	18985.1	18.9851
Polrmt	L/L	Q10	18174.1	14959.7	14306.1	15813.3	15.8133
Polrmt	L/L	Q10	32531.8	32554	37661	34249	34.249
Polrmt	L/L	Q10	22168.8	20505.9	22751.4	21808.7	21.8087
Polrmt	L/L cre	Q10	27163	25655.7	24960.6	25926.4	25.9264
Polrmt	L/L cre	Q10	19548.3	15400.4	17951.2	17633.3	17.6333
Polrmt	L/L cre	Q10	19678.3	19059.6	17564.8	18767.6	18.7676
Polrmt	L/L cre	Q10	27635.9	31146.4	31445.3	30075.8	30.0758
Lrpprc	L/L	Q10	28220.8	30644	27941.3	28935.4	28.9354
Lrpprc	L/L	Q10	33974.2	32436.5	27477.9	31296.2	31.2962
Lrpprc	L/L	Q10	35839.6	38806.3	35762.3	36802.7	36.8027
Lrpprc	L/L	Q10	45177.1	45901.2	44848.5	45308.9	45.3089
Lrpprc	L/L cre	Q10	31150.2	27772.4	28952.3	29291.7	29.2917
Lrpprc	L/L cre	Q10	40080.3	34395.9	33922.6	36132.9	36.1329
Lrpprc	L/L cre	Q10	4096.12	2874.65	3968.35	3646.37	3.64637
Lrpprc	L/L cre	Q10	37984.2	39211.6	35654.8	37616.9	37.6169
Mterf4	L/L	Q10	46052.7	48882.1	44151.5	46362.1	46.3621
Mterf4	L/L	Q10	37452.1	38188.4	42637.9	39426.1	39.4261
Mterf4	L/L	Q10	26375.5	24066.7	28840.9	26427.7	26.4277
Mterf4	L/L	Q10	32077.9	33167.6	31977.9	32407.8	32.4078
Mterf4	L/L cre	Q10	33043.9	31471.5	30792	31769.2	31.7692
Mterf4	L/L cre	Q10	41751	33824.4	34494	36689.8	36.6898
Mterf4	L/L cre	Q10	42212.5	40439.3	41430.2	41360.7	41.3607
Mterf4	L/L cre	Q10	48514.3			48514.3	48.5143
