# Supplementary material for: Transcriptomic and proteomic landscape of mitochondrial dysfunction reveals secondary coenzyme Q deficiency in mammals
Source: eLife journal article supplement (doi:10.7554/elife.30952), 2017-11-13
Supplement: supp [file elife-30952-supp-v1.zip]

**A**

**B**

**C**

$$\text{Transcriptome } \log_2 \left( \frac{L/L, \text{ cre}}{L/L} \right)$$
$$\text{Proteome } \log_2 \left( \frac{L/L, \text{ cre}}{L/L} \right)$$
$$\text{Transcriptome } \log_2\left(\frac{L/L, \text{ cre}}{L/L}\right)$$
