# Supplementary material for: Transcriptomic and proteomic landscape of mitochondrial dysfunction reveals secondary coenzyme Q deficiency in mammals
Source: eLife journal article supplement (doi:10.7554/elife.30952), 2017-11-13
Supplement: supp [file elife-30952-supp-v1.zip]

# Figure 4 - Supplement 3

**A**

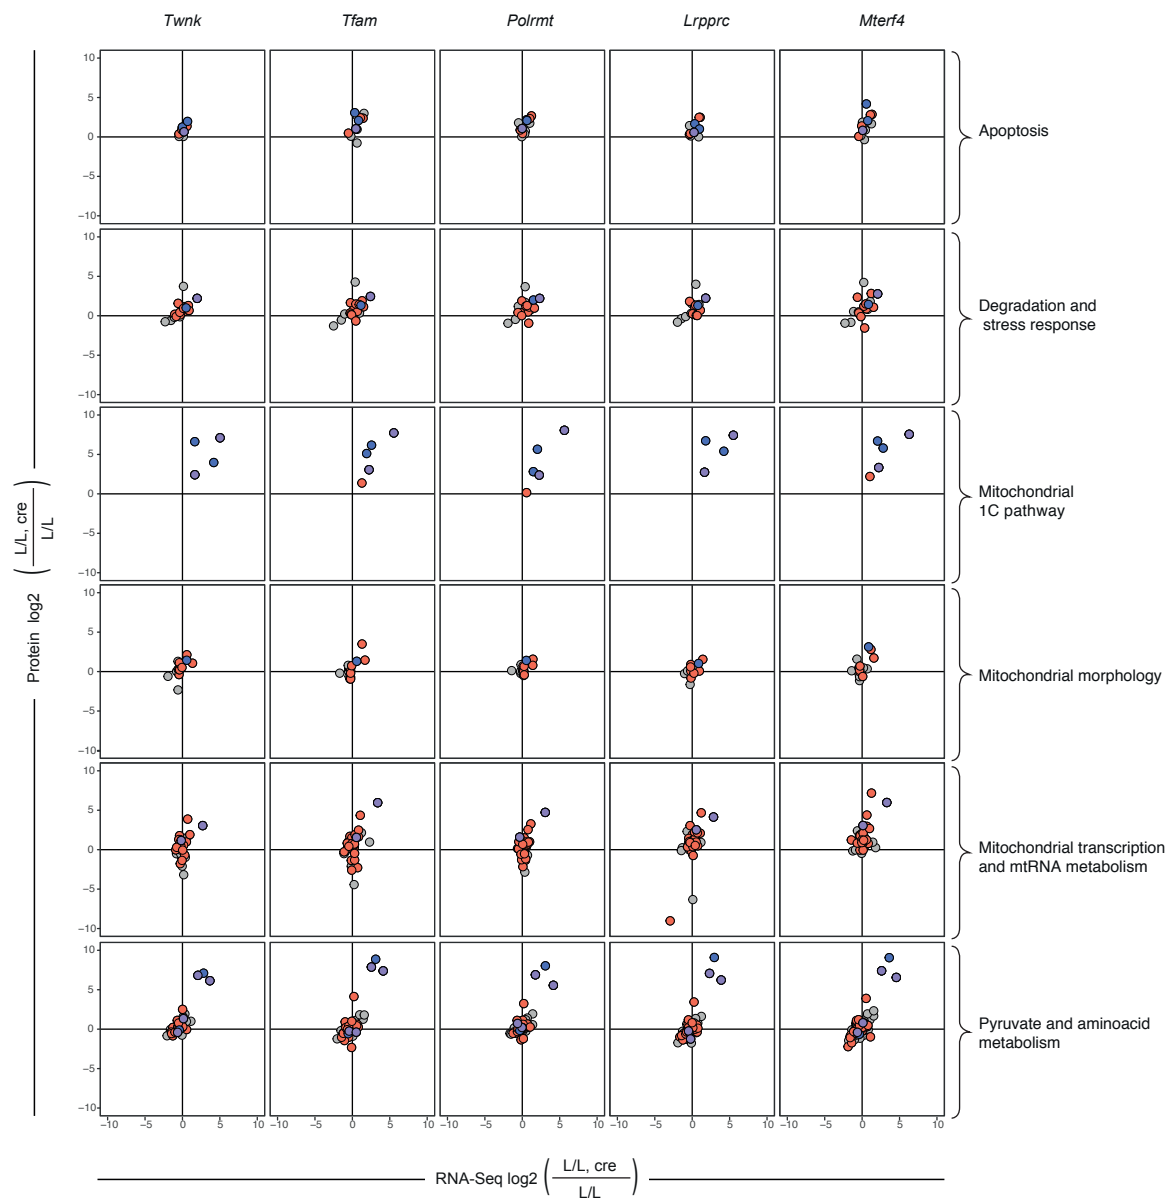

● Not a MYC nor ATF4 target gene

● ATF4 target gene

● MYC target gene

● ATF4 and MYC target gene
