# Supplementary material for: Transcriptomic and proteomic landscape of mitochondrial dysfunction reveals secondary coenzyme Q deficiency in mammals
Source: eLife journal article supplement (doi:10.7554/elife.30952), 2017-11-13

Figure 5 - Supplement 1

A Mitochondrial morphology

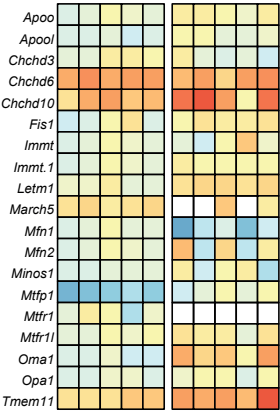

B Mitochondrial import and chaperones

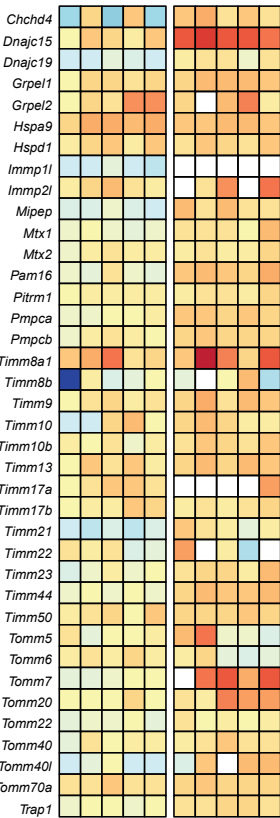

C Iron sulphur cluster and heme biogenesis

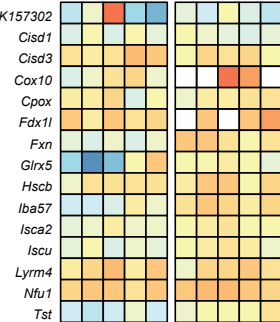

D Mitochondrial DNA replication and maintenance

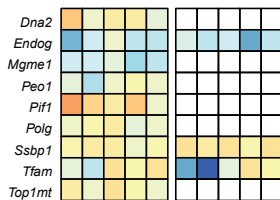

E Mitochondrial transcription and mt-RNA metabolism

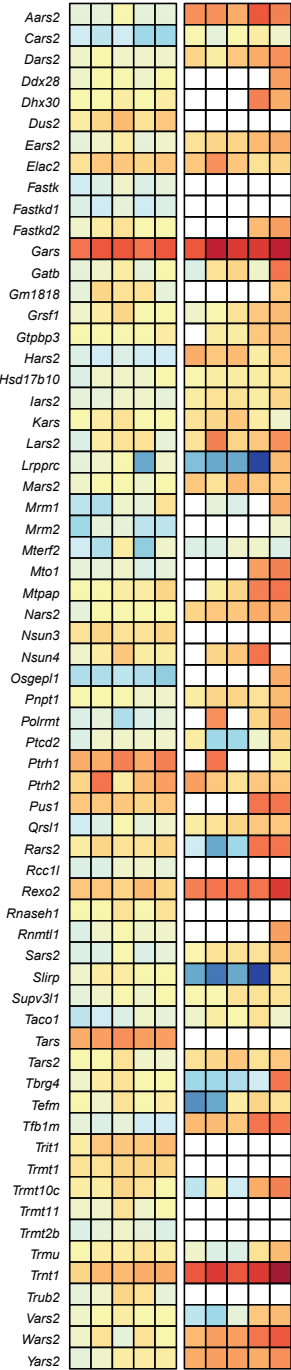

F Other mitochondrial protein synthesis factors

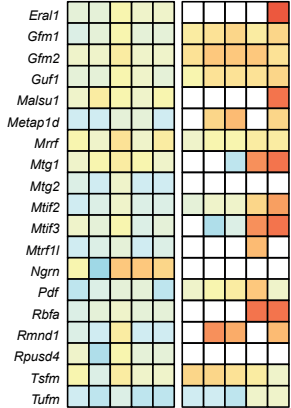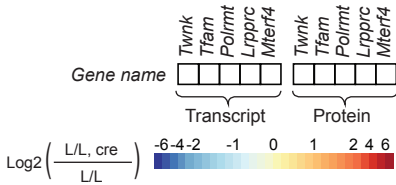

Supplement: supp [file elife-30952-supp-v1.zip]
