# Supplementary material for: Transcriptomic and proteomic landscape of mitochondrial dysfunction reveals secondary coenzyme Q deficiency in mammals
Source: eLife. 2017 Nov 14;6:e30952. doi: 10.7554/eLife.30952 (PMC5703644; doi:10.7554/eLife.30952)
Supplement: Supplementary file 1. [file elife-30952-supp1.xlsx]

## Sheet: Description tab content
Comparative analysis of mitoproteomic data from hearts of Tfam, Twnk, Polrmt, Lrpprc and Mterf4 conditional knockout mice and corresponding controls - Kühl et al.
This spreadsheet contains tabs with following datasets:
A_ Quantified proteins per line: Number of proteins per line that passed the filtering criteria as described in methods. Detailed n per mouse strain and genotype is presented
B_DE analysis of knockouts: Differential expression (DE) analysis of proteomic data from hearts of Twnk, Tfam, Polrmt, Lrpprc and Mterf4 conditional knockouts
C_Proteins per category: List of manually defined functional categories and number of DE proteins per category
D_Proportion total mass: Contribution of mitochondrial proteins to total protein mass
E_Correlation RNA Seq vs Prot Pearson correlation rho (r) of transcriptomic and proteomic fold changes per functional cateogy
Below are descriptions for the columns data set B
Protein IDs: Uniprot accession number
Gene names: Based on MaxQuant proteinGroups.txt file
Protein names: Based on MaxQuant proteinGroups.txt file
logFC: Log2 fold-change of L/L, cre / L/L per mouse strain
padj: Benjamini-Hochberg corrected p value of of two-sided moderated t-test
Manual category annotation: Manually assigned functional category

## Sheet: A_Quantified proteins per line 
	Number of proteins that fulfilled the filtering criteria
Twnk
		L/L, cre
	Number of replicates	0	1	2	3
L/L	0		73	10	11
	1	77	24	9	10
	2	9	13	8	11
	3	5	11	7	13
	4	7	5	11	21
	5	18	12	15	367
Tfam
		L/L, cre
	Number of replicates	0	1	2	3
L/L	0		67	32	39
	1	28	11	6	16
	2	12	4	11	18
	3	37	20	22	400
Polrmt
		L/L, cre
	Number of replicates	0	1	2	3	4	5	6	7	8	9
L/L	0		140	16	12	6	7	5	2	3	6
	1	173	16	3	9	4	4	0	0	2	3
	2	13	9	10	8	6	7	0	2	2	0
	3	4	5	4	6	2	1	4	4	3	1
	4	6	2	2	1	0	2	4	2	5	6
	5	5	3	3	4	7	6	2	0	5	5
	6	1	1	2	4	3	2	1	1	8	4
	7	1	2	2	2	2	0	5	2	6	7
	8	1	2	0	0	2	1	0	3	3	11
	9	0	2	0	3	2	1	2	5	3	34
	10	5	9	3	6	5	6	5	8	15	382
Lrpprc
		L/L, cre
	Number of replicates	0	1	2	3
L/L	0		75	24	22
	1	54	13	9	19
	2	16	10	5	21
	3	8	8	5	24
	4	8	10	11	442
Mterf4
		L/L, cre
	Number of replicates	0	1	2	3	4	5
L/L	0		80	28	15	16	35
	1	67	14	12	9	7	13
	2	9	3	4	5	6	19
	3	11	3	2	4	8	27
	4	7	4	6	8	15	395

## Sheet: B_DE analysis of knockouts
	Protein.IDs	Gene.names	Protein.names	logFC.Twnk	padj.Twnk	logFC.Tfam	padj.Tfam	logFC.Polrmt	padj.Polrmt	logFC.Lrpprc	padj.Lrpprc	logFC.Mterf4	padj.Mterf4	Manual Category Annotation
491	Q922Q1;F6UB20;F7DFG6;E0CZH6;D3YZZ3;Q9CW42	2002-03-01	Mitochondrial amidoxime reducing component 2	0.284227	0.137016	1.18454	0.38572	-0.456984	0.0866171	-0.0163233	0.925415	-0.616226	0.0064597	Other
573	Q9CQF4;D3Z316	1700021F05Rik	Uncharacterized protein C6orf203 homolog	0.705343	0.0209896	3.93712	0.0405299	0.786642	5.3767e-05	1.36325	0.000632902	1.18162	0.00313002	Unknown
17	B8JJ66;B8JJ69;F6X1P1;F6W3U3;B8JJ67	2310061I04Rik	2310061I04Rik protein	1.95273	0.131914	1.33249	0.000924882	1.39678	7.43497e-08	1.15693	0.000416211	2.52298	0.0162927	Unknown
47	E9QMK9;Q8BH86;Q8BH86-2;F7CUW7	9030617O03Rik	UPF0317 protein C14orf159 homolog, mitochondrial	-0.363942	0.0187478	-0.962697	0.00141549	-0.435054	0.0018855	-1.09244	0.000958295	-0.617612	0.0018173	Unknown
200	Q14CH7	Aars2	Alanine--tRNA ligase, mitochondrial	1.77566	0.000230032	1.68898	0.0139883	1.37761	0.000892576	3.05192	0.00777728	1.87376	0.000205529	Mitochondrial transcription and mtRNA metabolism
178	P61922;P61922-2;F7C9G3;Q3TUE8;F6RN86	Abat	4-aminobutyrate aminotransferase, mitochondrial	-2.55567	0.025208	-2.03804	0.0550744	NA	NA	-2.82262	0.000211804	-2.89964	0.000434862	Other
744	Q9JI39	Abcb10	ATP-binding cassette sub-family B member 10, mitochondrial	0.679539	0.268852	0.76969	0.0175977	1.78173	0.00431358	0.939976	0.105061	1.27507	0.000781224	Mitochondrial carriers or transport
258	Q61102	Abcb7	ATP-binding cassette sub-family B member 7, mitochondrial	0.973375	0.0819232	1.04109	0.00353925	1.58183	0.000840256	1.06937	0.0244353	1.26226	0.000546412	Mitochondrial carriers or transport
278	Q6PE15;Q6PE15-2;F6X5P5	Abhd10	Mycophenolic acid acyl-glucuronide esterase, mitochondrial	0.739687	0.0180667	0.41555	0.0286937	0.2444	0.238501	0.845823	0.0211014	2.14673	0.00556248	Other
415	Q8K4F5;D3YYK0	Abhd11	Alpha/beta hydrolase domain-containing protein 11	0.559785	0.0739148	0.523937	0.0523183	0.739753	0.00108074	0.466071	0.0418492	0.405229	0.0302089	Unknown
484	Q921H8;H3BKL5;H3BJZ9;Q8VCH0;H3BKA1;H3BJC1;H3BJG8	Acaa1a;Acaa1b	3-ketoacyl-CoA thiolase A, peroxisomal;3-ketoacyl-CoA thiolase B, peroxisomal	NA	NA	-1.95056	0.00145427	-1.77459	0.0193644	NA	NA	-1.68191	0.0280093	Lipid and acetyl CoA metabolism
365	Q8BWT1	Acaa2	3-ketoacyl-CoA thiolase, mitochondrial	-0.315509	0.0518225	-0.371507	0.00961959	-0.283207	0.0107491	-0.695029	0.00114301	-0.692095	0.000712675	Lipid and acetyl CoA metabolism
411	Q8K370	Acad10	Acyl-CoA dehydrogenase family member 10	NA	NA	NA	NA	NA	NA	NA	NA	-3.63209	0.0115806	Lipid and acetyl CoA metabolism
28	D3Z7X0;D3Z2B3;F6RGT6	Acad12	Acyl-Coenzyme A dehydrogenase family, member 12	-0.283605	0.0420071	-0.781243	0.00318599	-0.234229	0.119492	-0.752437	0.000970759	-0.542756	0.00210418	Lipid and acetyl CoA metabolism
689	Q9D7B6;D3YTT4	Acad8	Isobutyryl-CoA dehydrogenase, mitochondrial	-0.097806	0.557307	-0.577497	0.00424703	-0.164897	0.169812	-0.381465	0.0935436	-0.646169	0.0010434	Pyruvate and aminoacid metabolism
387	Q8JZN5;F6W0S5;F6TBZ5	Acad9	Acyl-CoA dehydrogenase family member 9, mitochondrial	0.369186	0.150032	0.53785	0.0110703	0.569139	1.26161e-05	0.674194	0.00837119	0.970588	4.6293e-05	OXPHOS assembly and biogenesis
196	Q07417;F6RAZ3	Acads	Short-chain specific acyl-CoA dehydrogenase, mitochondrial	-0.215777	0.234853	-0.296783	0.0428959	-0.0199819	0.891348	-0.412658	0.0212013	-0.414996	0.0101221	Lipid and acetyl CoA metabolism
712	Q9DBL1;E9Q5L3	Acadsb	Short/branched chain specific acyl-CoA dehydrogenase, mitochondrial	-0.440543	0.0137853	-0.633117	0.00360345	-0.0729286	0.563748	-0.464822	0.0212622	-0.338606	0.0246447	Lipid and acetyl CoA metabolism
147	P50544;B1AR28	Acadvl	Very long-chain specific acyl-CoA dehydrogenase, mitochondrial	-0.332559	0.0459809	-0.21307	0.0855141	0.370316	0.000166436	-0.330331	0.0588674	-0.433107	0.00315284	Lipid and acetyl CoA metabolism
418	Q8QZT1	Acat1	Acetyl-CoA acetyltransferase, mitochondrial	-0.328137	0.0483198	-0.389737	0.008446	-0.222245	0.00372597	-0.422739	0.0416719	-0.811305	8.65981e-05	Lipid and acetyl CoA metabolism
762	Q9QYR9	Acot2	Acyl-coenzyme A thioesterase 2, mitochondrial	1.41735	0.000174259	1.59663	0.0002879	1.55253	2.41e-09	1.46964	0.000102734	1.85721	3.93845e-07	Lipid and acetyl CoA metabolism
766	Q9R0X4;Q32MW3	Acot9;Acot10	Acyl-coenzyme A thioesterase 9, mitochondrial;Acyl-coenzyme A thioesterase 10, mitochondrial	1.26553	0.000419628	1.66787	0.000325717	0.94231	2.13081e-07	1.12354	0.000259534	2.19653	6.30771e-06	Lipid and acetyl CoA metabolism
349	Q8BP40;Q8BP40-2	Acp6	Lysophosphatidic acid phosphatase type 6	0.158805	0.352637	0.841553	0.00104057	0.407383	0.0019975	0.802372	0.00246534	0.89996	0.000394093	Lipid and acetyl CoA metabolism
450	Q8VCW8	Acsf2	Acyl-CoA synthetase family member 2, mitochondrial	0.865461	0.00311912	1.49237	0.00505894	1.48068	5.5117e-08	1.58336	0.00069014	1.61749	7.74594e-05	Lipid and acetyl CoA metabolism
223	Q3URE1;Q3URE1-2	Acsf3	Acyl-CoA synthetase family member 3, mitochondrial	0.374214	0.305554	0.622823	0.00240775	0.673176	8.65638e-07	0.958243	0.000720611	0.771332	0.000878901	Lipid and acetyl CoA metabolism
134	P41216;D3Z041;D3Z457;F6WNZ2;Q8JZR0	Acsl1	Long-chain-fatty-acid--CoA ligase 1	-0.836197	0.00975914	-0.931273	0.00561473	-0.502592	0.00143551	-0.825844	0.00290461	-0.893352	0.00186922	Lipid and acetyl CoA metabolism
162	P56375	Acyp2	Acylphosphatase-2	0.536049	0.301218	0.230653	0.755655	0.605916	0.00051689	0.4401	0.0223902	0.958484	0.00184568	Unknown
650	Q9D0L4;Q9D0L4-2	Adck1	Uncharacterized aarF domain-containing protein kinase 1	1.17703	0.433122	1.55072	0.000296407	1.60272	5.92168e-06	1.41636	0.000731907	1.74901	0.000481586	Other
30	E0CXW2;E9PUK2;Q80V03-2;Q80V03	Adck5	Uncharacterized aarF domain-containing protein kinase 5	NA	NA	-1.21374	0.324462	NA	NA	NA	NA	2.28644	0.000125098	Other
423	Q8R0N6;Q8R0N6-2	Adhfe1	Hydroxyacid-oxoacid transhydrogenase, mitochondrial	-0.629091	0.00980168	-0.441603	0.00465147	-0.0690871	0.556129	-0.060635	0.707692	0.124947	0.236675	Other
482	Q920A7;Q920A7-2	Afg3l1	AFG3-like protein 1	3.73088	0.00030145	4.27181	0.000861921	3.68542	2.42451e-09	3.99466	0.00061118	4.22299	0.000179318	Degradation and stress response
389	Q8JZQ2	Afg3l2	AFG3-like protein 2	1.1362	0.000535007	1.60029	0.00106167	1.28041	3.28983e-08	1.4259	0.000975686	1.82052	5.04509e-06	Degradation and stress response
740	Q9ESW4;Q9ESW4-2	Agk	Acylglycerol kinase, mitochondrial	0.593365	0.00420869	0.72415	0.00311878	0.381137	0.000272071	0.6762	0.00488007	0.523875	0.010626	Lipid and acetyl CoA metabolism
72	I3ITR1;Q9D924	AK157302;Isca1	cDNA sequence AK157302	-0.282731	0.12736	-0.723853	0.0042044	0.0144392	0.914857	-0.590032	0.0248985	-0.812114	0.0638876	Iron sulphur cluster and heme biogenesis
769	Q9WTP6-2;Q9WTP6	Ak2	Adenylate kinase 2, mitochondrial;Adenylate kinase 2, mitochondrial, N-terminally processed	0.621168	0.0152486	0.96506	0.00141767	0.889943	1.33238e-07	1.10266	0.000616705	1.07988	0.000250407	Mitochondrial nucleotide synthesis
775	Q9WUR9;F6TEU8;A2ARF6;A2ARF5	Ak4	Adenylate kinase 4, mitochondrial	-0.0347767	0.835904	0.13098	0.422594	-0.381879	0.00595983	-0.0874508	0.63381	0.294777	0.0281393	Mitochondrial nucleotide synthesis
68	G5E895;D3Z494;S4R2G9	Akr1b10	Aldo-keto reductase family 1 member B10	-0.312039	0.119928	0.11402	0.38572	-0.184714	0.241437	-0.597454	0.00409049	-0.308648	0.0640774	Other
443	Q8VC19;D6RGR8	Alas1	5-aminolevulinate synthase, nonspecific, mitochondrial	NA	NA	-1.12593	0.0622754	-0.987478	0.0034086	NA	NA	-0.900795	0.222161	Other
785	Q9Z110-2;Q9Z110;D3Z0B4;H3BKJ8;H3BLE8;H3BKK0	Aldh18a1	Delta-1-pyrroline-5-carboxylate synthase;Glutamate 5-kinase;Gamma-glutamyl phosphate reductase	7.09909	0.000100731	8.86513	0.000363119	8.03233	3.37135e-13	9.08931	3.6595e-05	9.06416	7.09687e-07	Pyruvate and aminoacid metabolism
639	Q9CZS1;G3UYH1;G3UWP3;Q9JHW9	Aldh1b1	Aldehyde dehydrogenase X, mitochondrial	1.47816	0.0138156	1.88957	7.04112e-05	0.376632	0.0574911	2.47223	0.000953615	2.71316	3.13435e-06	Other
393	Q8K009;D3Z6B9	Aldh1l2	Mitochondrial 10-formyltetrahydrofolate dehydrogenase	6.61692	0.00115928	5.11438	6.32282e-05	2.81528	6.12144e-10	6.72725	4.03863e-05	6.69926	2.18972e-06	Mitochondrial 1C pathway
139	P47738;D3YYF3	Aldh2	Aldehyde dehydrogenase, mitochondrial	-0.40437	0.016564	-0.77482	0.00215424	-0.351937	0.000838242	-0.808849	0.000444901	-0.622473	0.00159345	Other
13	B1AV77;B1ATI0;P47740	Aldh3a2	Aldehyde dehydrogenase;Fatty aldehyde dehydrogenase	NA	NA	1.26369	0.0613712	0.0885763	0.826741	NA	NA	1.71034	0.0321242	Lipid and acetyl CoA metabolism
384	Q8CHT0	Aldh4a1	Delta-1-pyrroline-5-carboxylate dehydrogenase, mitochondrial	-0.493059	0.00732388	-1.01352	0.00075498	-0.238458	0.095548	-1.00354	0.00069014	-0.936284	4.41925e-05	Pyruvate and aminoacid metabolism
735	Q9EQ20	Aldh6a1	Methylmalonate-semialdehyde dehydrogenase [acylating], mitochondrial	-0.494315	0.0171357	-1.01762	0.000385128	-0.397705	0.00432286	-1.10707	0.000226041	-0.901702	0.000273866	Pyruvate and aminoacid metabolism
710	Q9DBF1-2;Q9DBF1;G3UYR8;G3UY72;E9Q1H3;E9Q1G1	Aldh7a1	Alpha-aminoadipic semialdehyde dehydrogenase	-0.760973	0.069302	-0.889537	0.0748983	0.272395	0.541494	-1.76494	0.0257999	-0.248411	0.274719	Pyruvate and aminoacid metabolism
753	Q9JLJ2;Q3U367	Aldh9a1	NFU1 iron-sulfur cluster scaffold homolog	-0.68383	0.155638	-1.22508	0.0934857	-0.572174	0.0301099	-0.570811	0.437259	-0.593383	0.0017761	Other
400	Q8K1C0-2;Q8K1C0;Q8K1C0-3;Q8K1C0-5;Q8K1C0-4;F6SBQ6	Angel2	Protein angel homolog 2	0.00564733	0.993243	2.13093	0.0662905	1.39699	0.00143798	0.76815	0.0820402	1.33458	0.00920366	Unknown
416	Q8K4Z3	Apoa1bp	NAD(P)H-hydrate epimerase	0.520539	0.0471509	0.529643	0.0248576	0.61431	0.000405569	0.700102	0.00153214	0.528908	0.00777631	Other
659	Q9D186;B1ASQ2;Q9DCZ4	Apoo	Apolipoprotein O	0.278933	0.208133	0.337423	0.0716405	0.0436574	0.770931	-0.0194242	0.925415	0.34503	0.0265513	Mitochondrial morphology
286	Q78IK4;B1AV14	Apool	MICOS complex subunit Mic27	0.0948953	0.393416	0.01059	0.921508	-0.236247	0.0122097	-0.227597	0.0814769	-0.152031	0.177153	Mitochondrial morphology
499	Q925I1;Q925I1-2;H3BK90;H3BKI6;V9GWS5;V9GWS6	Atad3	ATPase family AAA domain-containing protein 3	0.953369	0.000535007	1.40995	0.000181133	0.915769	2.10093e-10	1.36459	0.000168254	1.78327	1.70114e-06	Other
194	Q03265;D3Z6F5;D6RJ16	Atp5a1	ATP synthase subunit alpha, mitochondrial;ATP synthase subunit alpha	0.0810287	0.653758	0.0378667	0.699383	-0.147805	0.024873	-0.236959	0.0607409	-0.131179	0.192534	OXPHOS
170	P56480	Atp5b	ATP synthase subunit beta, mitochondrial	0.017116	0.906182	-0.04952	0.666597	-0.0566223	0.523696	-0.295033	0.0297978	0.034763	0.76954	OXPHOS
370	Q8C2Q8;Q91VR2;A2AKV3;A2AKV2;A2AKV1;A2AKV0	Atp5c1	ATP synthase subunit gamma;ATP synthase subunit gamma, mitochondrial	0.0864767	0.598068	0.156263	0.345473	-0.020268	0.823053	-0.0236583	0.872404	0.249203	0.0321242	OXPHOS
675	Q9D3D9;D3Z7S4	Atp5d	ATP synthase subunit delta, mitochondrial	-0.191168	0.392013	0.29871	0.131523	0.553518	0.0031619	0.234577	0.418552	0.996157	0.000692203	OXPHOS
165	P56382	Atp5e	ATP synthase subunit epsilon, mitochondrial	0.0762693	0.89787	0.458343	0.22024	-0.820146	0.0278279	-0.0276883	0.964962	-1.30774	0.0917945	OXPHOS
733	Q9DCX2;G3X9L6;B1ASE2;D3Z1B2	Atp5h;Gm10250	ATP synthase subunit d, mitochondrial	-0.300264	0.0494143	-0.516497	0.00338582	-0.451721	1.95176e-05	-1.14777	0.00038456	-0.814234	4.70697e-05	OXPHOS
195	Q06185;Q8BTB6	Atp5i	ATP synthase subunit e, mitochondrial	-0.280206	0.140237	-0.50887	0.00465147	-0.624062	2.47569e-05	-0.874917	0.00541822	-1.00871	0.000145375	OXPHOS
187	P97450;E9QAD6	Atp5j	ATP synthase-coupling factor 6, mitochondrial	-0.147301	0.569703	-0.18586	0.233188	-0.356362	0.000194742	-0.920873	0.00274272	-0.736635	0.000688407	OXPHOS
160	P56135;F8WHP8	Atp5j2	ATP synthase subunit f, mitochondrial	-0.266367	0.160346	-0.715847	0.00215424	-0.414775	0.000166722	-1.06836	0.00180344	-0.943326	0.00108689	OXPHOS
540	Q9CPQ8;J3QNM7	Atp5l	ATP synthase subunit g, mitochondrial	-0.102488	0.630326	-0.36078	0.0198185	-0.386763	0.0416478	-1.00347	0.00469747	-0.747351	0.000982784	OXPHOS
707	Q9DB20;F7D3P8	Atp5o	ATP synthase subunit O, mitochondrial	-0.042968	0.709213	-0.168827	0.209197	-0.221261	0.0194058	-0.666473	0.00153214	-0.12898	0.26917	OXPHOS
605	Q9CRA7	Atp5s	ATP synthase subunit s, mitochondrial	0.356348	0.251869	0.51516	0.00630086	0.682292	0.000689829	0.416955	0.377417	1.1805	0.00132251	OXPHOS
795	V9GX21;H3BLL2;Q811I0;H3BJP9;H3BK16;H3BLD0;H3BKR0	Atpaf1	ATP synthase mitochondrial F1 complex assembly factor 1	0.575343	0.117636	1.08414	0.00257737	1.40539	1.27565e-05	1.16258	0.000958295	1.65467	0.000332472	OXPHOS assembly and biogenesis
478	Q91YY4;H3BLF0	Atpaf2	ATP synthase mitochondrial F1 complex assembly factor 2	0.102347	0.581286	0.275463	0.203772	0.420192	0.00264559	0.543418	0.0238446	0.634443	0.0164781	OXPHOS assembly and biogenesis
83	O35143	Atpif1	ATPase inhibitor, mitochondrial	0.947107	0.0247858	1.20126	0.00303072	0.350847	0.119492	1.45152	0.012622	0.687881	0.00669671	Other
33	E9PV44	Atpif1 (E9PV44)	ATPase inhibitor, mitochondrial	NA	NA	NA	NA	-1.62973	0.0350376	NA	NA	NA	NA	Other
755	Q9JLZ3;F6RT60;F6R307;Q9JLZ3-3;E9Q6L3;E9QMT1;Q9JLZ3-2	Auh	Methylglutaconyl-CoA hydratase, mitochondrial	-0.001848	0.989202	-0.06113	0.526678	0.0617953	0.629059	-0.359976	0.0319108	-0.306554	0.0338391	Pyruvate and aminoacid metabolism
46	E9QM21;O08734;Q91WX5;F7CUQ1	Bak1	Bcl-2 homologous antagonist/killer	NA	NA	2.98891	0.00201739	1.7427	0.000680594	NA	NA	1.66549	0.0199169	Apoptosis
197	Q07813	Bax	Apoptosis regulator BAX	NA	NA	2.37076	0.000528369	2.66818	4.92676e-06	2.48203	0.00995766	2.86266	2.57737e-05	Apoptosis
89	O35855;O88374;D3Z7C8;D3Z3D7	Bcat2	Branched-chain-amino-acid aminotransferase, mitochondrial;Branched-chain-amino-acid aminotransferase	-0.400523	0.0761446	-0.248727	0.0536853	0.208251	0.059162	-0.233277	0.377495	-0.404021	0.011406	Pyruvate and aminoacid metabolism
211	Q3U3J1;P50136	Bckdha	2-oxoisovalerate dehydrogenase subunit alpha, mitochondrial	-0.387777	0.0578632	-0.392697	0.00903816	0.0804698	0.63465	-0.537913	0.0212492	-0.24702	0.0552789	Pyruvate and aminoacid metabolism
273	Q6P3A8;Q6P3A8-2	Bckdhb	2-oxoisovalerate dehydrogenase subunit beta, mitochondrial	-0.387848	0.118667	-0.35405	0.0536853	0.165676	0.162437	-0.601727	0.0247918	-0.0292895	0.901447	Pyruvate and aminoacid metabolism
94	O55028;D3Z7R0	Bckdk	[3-methyl-2-oxobutanoate dehydrogenase [lipoamide]] kinase, mitochondrial	-0.109713	0.623578	-0.842313	0.00369059	-0.347843	0.0123926	-0.440896	0.106718	-1.14982	0.000688407	Pyruvate and aminoacid metabolism
636	Q9CZP5	Bcs1l	Mitochondrial chaperone BCS1	0.516739	0.485905	0.536627	0.00632306	0.656194	0.00185842	0.488853	0.0524607	1.38221	0.00436436	OXPHOS assembly and biogenesis
309	Q80XN0;D3Z2Y8	Bdh1	D-beta-hydroxybutyrate dehydrogenase, mitochondrial	0.011164	0.966993	1.03455	0.0190749	4.48021	0.00036643	0.586203	0.0845765	0.292219	0.245195	Lipid and acetyl CoA metabolism
700	Q9D8S9	Bola1	BolA-like protein 1	0.644732	0.0207504	1.21675	0.00030131	1.33905	8.59971e-09	0.865318	0.00153684	0.96211	0.00204331	Unknown
442	Q8R5L1;O35658	C1qbp	Complement component 1 Q subcomponent-binding protein, mitochondrial	0.847431	0.00114838	0.856547	0.00109555	0.842453	1.51713e-05	1.01266	0.000425945	1.17819	2.03959e-05	Other
73	J3QMM7;K3W4M4;Q9CZ42-3;Q9CZ42;Q9CZ42-2;J3QN06;J3QPU6	Carkd	ATP-dependent (S)-NAD(P)H-hydrate dehydratase	0.290917	0.0812048	0.73759	0.00146417	0.48536	0.0102547	0.548943	0.0145741	0.987051	7.02923e-05	Other
104	P08074;F6YNX9;A2AC16;Q91X52	Cbr2	Carbonyl reductase [NADPH] 2	2.02673	0.0250793	0.265467	0.649318	-0.129008	0.570052	0.696512	0.133213	-0.54213	0.067016	Other
466	Q91VT4;D3Z6C4	Cbr4	Carbonyl reductase family member 4	0.303859	0.0599166	0.331883	0.0163927	0.364409	0.00247587	0.323167	0.0624089	0.565156	0.00271961	Lipid and acetyl CoA metabolism
283	Q71RI9-2;Q71RI9;D6RJ70	Ccbl2	Kynurenine--oxoglutarate transaminase 3	-0.390393	0.0513008	-0.458903	0.0185744	0.264741	0.219353	0.02744	0.89708	-0.050788	0.796243	Pyruvate and aminoacid metabolism
224	Q3URS9-2;Q3URS9	Ccdc51	Coiled-coil domain-containing protein 51	0.537869	0.00861055	0.646063	0.0042044	0.594137	1.11776e-05	0.866848	0.00428445	0.977746	0.000320366	Other
58	F8WJI3;Q8R3Q6;E9Q4B5	Ccdc58	Coiled-coil domain-containing protein 58	0.439356	0.0811378	0.60728	0.0216866	0.552493	0.000164445	1.00108	0.00427187	0.811504	0.000142402	Other
371	Q8C3X2;Q8C3X2-2	Ccdc90b	Coiled-coil domain-containing protein 90B, mitochondrial	0.741374	0.0016447	0.878133	0.0016328	0.541052	0.00063842	0.786744	0.00250454	1.26217	8.19876e-05	Other
281	Q6RUT7	Ccsmst1	Protein CCSMST1	NA	NA	NA	NA	NA	NA	2.93542	0.00268759	NA	NA	Unknown
355	Q8BTE5	Cebpzos	Protein CEBPZOS	0.01503	0.967074	1.24017	0.0803067	1.44441	0.0250252	0.581489	0.693388	1.37088	0.0299335	Unknown
301	Q7TNL9	Chchd10	Coiled-coil-helix-coiled-coil-helix domain-containing protein 10, mitochondrial	2.1259	0.0340259	3.49503	0.0407854	1.56592	0.000632394	0.0677142	0.819405	2.80311	0.00376857	Mitochondrial morphology
666	Q9D1L0;D3Z5B1;B2RPU8	Chchd2;Zbed5	Coiled-coil-helix-coiled-coil-helix domain-containing protein 2, mitochondrial	0.768034	0.00628564	1.33615	0.00304765	0.0925736	0.775423	-0.68554	0.0020286	0.634935	0.0118353	Unknown
607	Q9CRB9;Q9D9P1;D3Z0L4;S4R238;F6QFL0	Chchd3	MICOS complex subunit Mic19	0.220111	0.186503	-0.204943	0.366198	-0.41882	0.00286415	-0.207003	0.366463	-0.623762	0.00214282	Mitochondrial morphology
457	Q8VEA4	Chchd4	Mitochondrial intermembrane space import and assembly protein 40	0.826337	0.0360578	1.26306	0.108057	0.596073	0.00355017	0.877912	0.0244353	0.405892	0.245195	Mitochondrial import and chaperones
465	Q91VN4;E9Q4M4	Chchd6	MICOS complex subunit Mic25	1.06161	0.00261883	1.45254	0.00109595	0.796239	1.44094e-05	1.55198	6.44822e-05	1.72248	2.25912e-05	Mitochondrial morphology
409	Q8K2Q5;B1AXC8;Q3TFT3;B1AXC7;B1AXC5	Chchd7	Coiled-coil-helix-coiled-coil-helix domain-containing protein 7	-1.29797	0.0281709	-0.29886	0.340317	-1.13043	0.0269965	-1.26858	0.000992386	-1.3312	0.0973999	Other
471	Q91WS0	Cisd1	CDGSH iron-sulfur domain-containing protein 1	0.143945	0.528041	-0.0285867	0.837481	-0.302459	0.00447321	-0.551427	0.00483036	-0.226549	0.140688	Iron sulphur cluster and heme biogenesis
797	Z4YKM2;B2RWE3;B1AR13	Cisd3	CDGSH iron-sulfur domain-containing protein 3, mitochondrial	0.0683567	0.641897	0.69199	0.0248576	0.583171	0.00715384	0.783341	0.00114301	0.19357	0.354524	Iron sulphur cluster and heme biogenesis
276	Q6P8J7	Ckmt2	Creatine kinase S-type, mitochondrial	-0.273968	0.132311	-0.0767133	0.466489	0.179309	0.121953	0.275633	0.0881944	-0.268642	0.0288361	Other
252	Q60649;E9PY58;D3YZF1;D3Z7V2	Clpb	Caseinolytic peptidase B protein homolog	1.41066	0.00319617	1.64816	0.000237132	1.7502	1.0144e-08	1.48857	0.00024208	1.95945	4.99836e-05	Other
742	Q9JHS4;Q6P8N8;F7BB92	Clpx	ATP-dependent Clp protease ATP-binding subunit clpX-like, mitochondrial	0.931108	0.000305847	1.43227	0.000181133	1.29224	5.29266e-09	1.33804	0.000570617	1.49881	3.13435e-06	Degradation and stress response
441	Q8R4N0	Clybl	Citrate lyase subunit beta-like protein, mitochondrial	0.156385	0.362787	0.38181	0.0132346	0.331104	0.00326473	0.259681	0.102966	0.386894	0.00329526	Other
399	Q8K199;F8WHQ0;D6RJ47;D6RD08;D3YZZ0	Cmc2	COX assembly mitochondrial protein 2 homolog	0.124473	0.479153	0.646723	0.0417558	-0.38339	0.133236	-0.111854	0.496593	-0.744963	0.068643	OXPHOS assembly and biogenesis
672	Q9D2R6;E9Q6W2	Coa3	Cytochrome c oxidase assembly factor 3 homolog, mitochondrial	0.773485	0.00147241	1.1786	0.000271015	0.641513	6.1738e-06	0.340533	0.146485	1.14463	1.58082e-05	OXPHOS assembly and biogenesis
320	Q8BGD8	Coa6	Cytochrome c oxidase assembly factor 6 homolog	0.775881	0.302267	NA	NA	1.24	0.0288408	0.549283	0.0660158	-0.476359	0.546233	OXPHOS assembly and biogenesis
485	Q921H9	Coa7	Cytochrome c oxidase assembly factor 7	-0.004964	0.984144	0.80711	0.139912	0.621005	0.000324877	1.16718	0.000507739	-0.698684	0.38432	OXPHOS assembly and biogenesis
713	Q9DBL7	Coasy	Bifunctional coenzyme A synthase;Phosphopantetheine adenylyltransferase;Dephospho-CoA kinase	NA	NA	NA	NA	1.41721	0.000848239	NA	NA	NA	NA	Lipid and acetyl CoA metabolism
332	Q8BIG7;H3BJ37	Comtd1	Catechol O-methyltransferase domain-containing protein 1	3.05929	0.00267938	4.92076	0.00126383	2.65956	3.87018e-06	4.61005	0.00029082	4.54081	0.000859507	Unknown
39	E9Q3H6	Coq10a	Coenzyme Q-binding protein COQ10 homolog A, mitochondrial	-0.50399	0.0542511	-2.04209	0.000105341	-1.0351	0.00023632	-1.91747	6.80775e-05	-2.2554	1.58082e-05	Ubiquinone biosynthesis
348	Q8BMS4	Coq3	Hexaprenyldihydroxybenzoate methyltransferase, mitochondrial	-0.667489	0.00192968	-1.26074	0.000467503	-0.986842	2.00855e-05	-1.83156	0.000195174	-1.41162	2.77283e-06	Ubiquinone biosynthesis
318	Q8BGB8;B7ZCV4;D6RJJ8	Coq4	Ubiquinone biosynthesis protein COQ4 homolog, mitochondrial	1.41992	0.15731	1.05744	0.191746	0.482185	0.404752	NA	NA	1.45168	0.0225435	Ubiquinone biosynthesis
616	Q9CXI0;F6X4L9	Coq5	2-methoxy-6-polyprenyl-1,4-benzoquinol methylase, mitochondrial	-0.0245433	0.899921	-0.594173	0.0160455	-0.385133	0.035404	-1.65855	0.000128317	-0.682457	0.00115639	Ubiquinone biosynthesis
431	Q8R1S0;D3YW66;D6RG57;F6ZE40	Coq6	Ubiquinone biosynthesis monooxygenase COQ6	-0.519065	0.021801	-1.2697	0.000363119	-0.900522	4.15142e-05	-1.95918	0.000335342	-1.34356	1.7756e-05	Ubiquinone biosynthesis
188	P97478;Q3TYT1	Coq7	Ubiquinone biosynthesis protein COQ7 homolog	-0.346726	0.0651667	-1.40821	0.000517012	-0.93634	0.000616407	-2.39994	0.000195174	-0.82835	0.000557378	Ubiquinone biosynthesis
257	Q60936;F7B1B6;E0CYD3;E0CYT4;E0CYG7;E0CZ05;E0CXT4;E0CXR6;E0CYC1;E0CXR1;E0CXI5;F6T0A8	Coq8a	Atypical kinase COQ8A, mitochondrial	-0.130221	0.410033	-0.41147	0.0158389	0.18741	0.0305563	-1.55028	0.000277985	-0.504544	0.0013129	Ubiquinone biosynthesis
45	E9QLB8;Q566J8	Coq8b	Atypical kinase COQ8B, mitochondrial	2.30783	0.00192968	3.3731	0.00675243	2.8108	1.82965e-06	NA	NA	2.38246	3.04675e-05	Ubiquinone biosynthesis
404	Q8K1Z0;F6SFF5	Coq9	Ubiquinone biosynthesis protein COQ9, mitochondrial	-0.654823	0.00529269	-0.71967	0.00369059	-0.428988	0.000186432	-0.830424	0.00270708	-1.2991	4.92554e-06	Ubiquinone biosynthesis
381	Q8CFY5	Cox10	Protoheme IX farnesyltransferase, mitochondrial	NA	NA	NA	NA	2.03977	0.00115572	1.41906	0.0524607	NA	NA	Iron sulphur cluster and heme biogenesis
275	Q6P8I6;Q5SRC5	Cox11	Cytochrome c oxidase assembly protein COX11, mitochondrial	NA	NA	0.318643	0.128832	0.676247	0.000428435	-0.0241292	0.983783	0.329846	0.546233	OXPHOS assembly and biogenesis
335	Q8BJ03-2;Q8BJ03	Cox15	Cytochrome c oxidase assembly protein COX15 homolog	NA	NA	3.2064	0.00369059	3.55655	8.22831e-06	3.06415	0.0535577	3.58495	0.000688407	OXPHOS assembly and biogenesis
169	P56394	Cox17	Cytochrome c oxidase copper chaperone	0.627189	0.0599166	1.05688	0.00175931	0.510822	0.153492	1.5063	0.00048011	0.121835	0.832885	Mitochondrial carriers or transport
395	Q8K0C8;S4R231	Cox19	Cytochrome c oxidase assembly protein COX19	2.65391	0.0187478	3.14574	0.00615793	2.96675	0.000306075	1.45972	0.217164	2.33341	0.000883919	OXPHOS assembly and biogenesis
690	Q9D7J4	Cox20	Cytochrome c oxidase protein 20 homolog	-0.310703	0.12325	-0.488027	0.0179292	0.0173786	0.915861	-0.00546833	0.978747	-0.449792	0.0567144	OXPHOS assembly and biogenesis
120	P19783;M0QWX7;D6RG40	Cox4i1	Cytochrome c oxidase subunit 4 isoform 1, mitochondrial	-1.20972	0.0260218	-1.46261	0.000181133	-1.1682	2.11224e-10	-2.28078	0.000118818	-1.93375	4.65015e-07	OXPHOS
112	P12787	Cox5a	Cytochrome c oxidase subunit 5A, mitochondrial	-1.23972	0.00022533	-2.12467	0.000181133	-1.57497	1.71776e-09	-2.90677	8.19683e-05	-2.67794	6.67943e-06	OXPHOS
696	Q9D881;P19536	Cox5b	Cytochrome c oxidase subunit 5B, mitochondrial	-1.69287	0.000174259	-2.60119	0.000237132	-2.11043	5.80687e-12	-3.34202	0.000195174	-3.5597	1.25721e-06	OXPHOS
732	Q9DCW5;P43024	Cox6a1	Cytochrome c oxidase subunit 6A, mitochondrial;Cytochrome c oxidase subunit 6A1, mitochondrial	0.192035	0.184889	-0.710913	0.00342802	-0.55241	0.000793898	-1.77387	0.000205502	-0.675747	0.00409838	OXPHOS
136	P43023	Cox6a2	Cytochrome c oxidase subunit 6A2, mitochondrial	-2.1325	0.000467601	-4.40962	5.5182e-05	-3.08771	1.66025e-09	-4.96078	1.27972e-05	-6.00971	2.21208e-07	OXPHOS
166	P56391	Cox6b1	Cytochrome c oxidase subunit 6B1	-1.74445	0.000149553	-3.12565	5.5182e-05	-2.41507	5.26936e-11	-3.80042	1.27972e-05	-4.70985	5.34163e-07	OXPHOS
538	Q9CPQ1;D3Z6E1	Cox6c	Cytochrome c oxidase subunit 6C	-1.33867	0.00663088	-2.55321	4.44787e-05	-2.15602	9.19678e-11	-3.77357	7.81368e-05	-3.63307	8.38942e-08	OXPHOS
167	P56392	Cox7a1	Cytochrome c oxidase subunit 7A1, mitochondrial	-1.50589	0.000964461	-7.80505	0.0244702	-2.90179	2.92625e-06	-4.27371	6.44822e-05	-9.094	4.10775e-05	OXPHOS
143	P48771	Cox7a2	Cytochrome c oxidase subunit 7A2, mitochondrial	-0.923709	0.00165576	-1.25388	0.0909981	-1.72946	6.23215e-05	-3.25733	0.00118921	-3.36363	0.0366655	OXPHOS
36	E9PZS8;Q61387;F7B257	Cox7a2l	Cytochrome c oxidase subunit 7A-related protein, mitochondrial	0.634309	0.0278459	-0.60319	0.0635856	-0.119057	0.528054	1.28598	0.00356688	-0.779295	0.511126	OXPHOS assembly and biogenesis
168	P56393	Cox7b	Cytochrome c oxidase subunit 7B, mitochondrial	-0.903075	0.272257	-1.2314	0.547453	-2.08661	0.000425961	-4.68289	6.44822e-05	-3.93553	0.00293483	OXPHOS
116	P17665;B8JJA9;J3QNB4	Cox7c	Cytochrome c oxidase subunit 7C, mitochondrial	-1.5535	0.00377896	-4.61417	0.00561473	-2.9909	2.94182e-07	-4.70377	3.33475e-05	-4.84892	2.34756e-06	OXPHOS
267	Q64445	Cox8a	Cytochrome c oxidase subunit 8A, mitochondrial	NA	NA	NA	NA	-2.22249	0.00166984	-0.859109	0.35505	NA	NA	OXPHOS
144	P48772	Cox8b	Cytochrome c oxidase subunit 8B, mitochondrial	-1.62639	0.0314917	-2.23026	0.0683858	-2.37152	0.00400879	-6.55254	3.31087e-05	-2.97788	0.0416752	OXPHOS
130	P36552	Cpox	Oxygen-dependent coproporphyrinogen-III oxidase, mitochondrial	-0.0338293	0.905634	0.27037	0.170494	0.209792	0.0855237	0.518267	0.0157974	0.505101	0.00969239	Iron sulphur cluster and heme biogenesis
189	P97742	Cpt1a	Carnitine O-palmitoyltransferase 1, liver isoform	0.432577	0.799268	1.21223	0.0409323	1.03233	0.0512593	0.601656	0.459633	1.77751	0.0527032	Lipid and acetyl CoA metabolism
498	Q924X2;F6QXT4;E9Q393	Cpt1b	Carnitine O-palmitoyltransferase 1, muscle isoform	-0.0515007	0.880718	0.158697	0.524651	0.645851	0.0237753	0.131637	0.650112	0.442364	0.06453	Lipid and acetyl CoA metabolism
307	Q80X68	Csl	Citrate synthase	0.639153	0.0179669	NA	NA	NA	NA	-0.142756	0.872131	NA	NA	Unknown
65	G5E850;P56395;E0CY88	Cyb5a	Cytochrome b5	0.0195853	0.986538	2.45659	0.0409323	NA	NA	0.5852	0.56304	0.6447	0.546233	Other
708	Q9DB73;G3UZG6;Q9DB73-2;G3UZ57;G3UXV8	Cyb5r1	NADH-cytochrome b5 reductase 1	3.97219	0.000100731	4.23856	0.000101117	3.22798	1.57373e-10	4.60441	8.40236e-05	4.52176	2.59831e-07	Other
725	Q9DCN2-2;Q9DCN2;F2Z456	Cyb5r3	NADH-cytochrome b5 reductase 3;NADH-cytochrome b5 reductase 3 membrane-bound form;NADH-cytochrome b5 reductase 3 soluble form	1.55674	0.373167	1.70745	0.00075498	0.800107	0.000534173	1.8533	0.00802663	2.55444	3.98991e-05	Other
652	Q9D0M3-2;Q9D0M3	Cyc1	Cytochrome c1, heme protein, mitochondrial	-0.055686	0.906182	0.17728	0.272139	0.0964281	0.213605	0.224968	0.0624089	0.397065	0.0374937	OXPHOS
711	Q9DBG1	Cyp27a1	Sterol 26-hydroxylase, mitochondrial	NA	NA	2.298	0.0158389	1.6884	1.27565e-05	1.93893	0.00181309	2.20523	0.000119523	Other
657	Q9D172	D10Jhu81e	ES1 protein homolog, mitochondrial	-0.346669	0.136003	-0.23474	0.0774756	-0.252384	0.0107248	-0.249414	0.0977866	-0.587452	0.00435005	Unknown
48	E9QN44;Q8CIM3	D2hgdh	D-2-hydroxyglutarate dehydrogenase, mitochondrial	NA	NA	NA	NA	NA	NA	NA	NA	-0.96269	0.00115639	Pyruvate and aminoacid metabolism
334	Q8BIP0	Dars2	Aspartate--tRNA ligase, mitochondrial	0.732959	0.076734	0.384643	0.0626423	0.838453	0.00127365	1.38806	0.00666484	1.71762	0.000119479	Mitochondrial transcription and mtRNA metabolism
126	P31786;F6WUQ1;Q4VWZ5;D3Z563;M0QWU8	Dbi	Acyl-CoA-binding protein	0.280455	0.754931	1.48187	0.147965	1.71732	0.0261193	-0.0365333	0.968513	3.23823	0.0102658	Lipid and acetyl CoA metabolism
156	P53395	Dbt	Lipoamide acyltransferase component of branched-chain alpha-keto acid dehydrogenase complex, mitochondrial	-0.386669	0.0378197	-0.759093	0.00138556	-0.229935	0.0462241	-0.643813	0.00299941	-0.761142	0.000718312	Pyruvate and aminoacid metabolism
329	Q8BHC4;B0QZX9	Dcakd	Dephospho-CoA kinase domain-containing protein	1.79855	0.184889	0.51695	0.31868	0.897206	0.00109322	1.46638	0.00269855	1.90692	0.0162927	Unknown
613	Q9CWT6	Ddx28	Probable ATP-dependent RNA helicase DDX28	NA	NA	NA	NA	NA	NA	NA	NA	1.56729	0.000426504	Mitochondrial transcription and mtRNA metabolism
85	O35435;E9Q1V3;F6TCT7;D3YZY5;F6ZQJ5	Dhodh	Dihydroorotate dehydrogenase (quinone), mitochondrial	0.184586	0.553283	0.347713	0.0328734	0.152962	0.220067	0.304858	0.106329	0.429087	0.015172	Mitochondrial nucleotide synthesis
511	Q99L04	Dhrs1	Dehydrogenase/reductase SDR family member 1	0.110099	0.720856	-0.318353	0.0821465	-0.186759	0.153266	-0.474708	0.0314027	0.620402	0.473706	Unknown
798	Z4YKT6;Q99J47-2;Q99J47	Dhrs7b	Dehydrogenase/reductase SDR family member 7B	NA	NA	1.20475	0.0499924	NA	NA	NA	NA	1.26541	0.0224261	Unknown
22	D3Z2J3;Q99PU8-2;Q99PU8;Q99PU8-3;D3Z1G8;D3YXL7	Dhx30	Putative ATP-dependent RNA helicase DHX30	NA	NA	NA	NA	NA	NA	1.92255	0.00208577	1.39092	0.0591695	Mitochondrial transcription and mtRNA metabolism
746	Q9JIQ3;D3Z3K5;D3Z2Q3	Diablo	Diablo homolog, mitochondrial	NA	NA	2.67941	0.0107329	1.79059	0.0089596	1.43281	0.0119406	1.86863	0.0117915	Apoptosis
346	Q8BMF4	Dlat	Dihydrolipoyllysine-residue acetyltransferase component of pyruvate dehydrogenase complex, mitochondrial	0.344183	0.0440681	0.310623	0.0618549	0.176103	0.0877814	0.204688	0.120083	0.253898	0.0876748	Pyruvate and aminoacid metabolism
671	Q9D2G2;Q9D2G2-2	Dlst	Dihydrolipoyllysine-residue succinyltransferase component of 2-oxoglutarate dehydrogenase complex, mitochondrial	0.171939	0.216373	0.383203	0.00913681	0.2104	0.00461421	0.178136	0.167736	0.469691	0.0025591	Pyruvate and aminoacid metabolism
523	Q99M87;Q99M87-3	Dnaja3	DnaJ homolog subfamily A member 3, mitochondrial	0.654069	0.00192968	1.02932	0.000721837	1.072	1.16526e-09	0.575346	0.00974418	0.835448	0.000150418	Apoptosis
247	Q5U458;E9Q8B3;A2A8D1	Dnajc11	DnaJ homolog subfamily C member 11	0.783948	0.0148252	0.77119	0.000845311	0.737302	3.64394e-06	0.795258	0.00424052	1.46247	0.00156044	Unknown
289	Q78YY6	Dnajc15	DnaJ homolog subfamily C member 15	3.07097	0.0105958	4.31972	0.000332395	3.86525	1.24322e-08	3.26545	0.00029082	2.81954	1.35352e-06	Mitochondrial import and chaperones
589	Q9CQV7;D3Z5K6;G3X8S1;Q9CQV7-3;Q9CQV7-2	Dnajc19	Mitochondrial import inner membrane translocase subunit TIM14	0.360443	0.1915	0.57787	0.0224656	0.405016	0.00138568	-0.0988775	0.56304	0.519087	0.00282742	Mitochondrial import and chaperones
38	E9Q1L7;Q8VCE1;D3Z032;D3Z0T8	Dnajc28	DnaJ homolog subfamily C member 28	0.432207	0.634636	-1.94313	0.128189	-0.994651	0.0151189	-1.34013	0.0157974	-1.85691	0.00280397	Other
446	Q8VCG1;Q9CQ43	Dut	Deoxyuridine 5'-triphosphate nucleotidohydrolase, mitochondrial	-0.665369	0.0124119	-0.492573	0.0158389	-0.403944	0.00333045	-0.838	0.0404445	-1.45974	0.00302726	Mitochondrial nucleotide synthesis
617	Q9CXJ1;Q497Y9	Ears2	Probable glutamate--tRNA ligase, mitochondrial	0.451719	0.0226535	0.776603	0.0033333	0.713571	3.44589e-07	1.03533	0.000341836	1.23238	0.000101462	Mitochondrial transcription and mtRNA metabolism
86	O35459;F7B227	Ech1	Delta(3,5)-Delta(2,4)-dienoyl-CoA isomerase, mitochondrial	-0.595579	0.0161496	-0.93856	0.000790419	0.0743732	0.570052	-0.624518	0.00526447	-0.786614	0.00048297	Lipid and acetyl CoA metabolism
207	Q3TLP5;Q3TLP5-2;F6YTG0;Q3TLP5-3;F6Z5N5;E0CXC8	Echdc2	Enoyl-CoA hydratase domain-containing protein 2, mitochondrial	-0.165805	0.421715	-0.33647	0.131523	-0.477378	0.00203668	-0.684952	0.0152968	-0.602935	0.00116502	Unknown
691	Q9D7J9;A2AR43	Echdc3	Enoyl-CoA hydratase domain-containing protein 3, mitochondrial	-0.41549	0.0250793	-0.918807	0.00589855	-0.474753	0.000377933	-0.902562	0.00966184	-1.09109	0.000313217	Unknown
135	P42125	Eci1	Enoyl-CoA delta isomerase 1, mitochondrial	-0.0735813	0.623524	0.04636	0.704434	0.309472	0.00117988	-0.0679083	0.64681	0.0707625	0.546233	Lipid and acetyl CoA metabolism
774	Q9WUR2-2;Q3TCD4;Q9WUR2;E9PVM6;E9PYC6;E9Q858;E9PYA9;E9Q7A8	Eci2	Enoyl-CoA delta isomerase 2, mitochondrial	-0.00374333	0.989202	0.230267	0.0535932	0.215261	0.0320343	-0.0122233	0.946361	0.209358	0.119088	Other
765	Q9QZH6;J3KMM6	Ecsit	Evolutionarily conserved signaling intermediate in Toll pathway, mitochondrial	-0.0312967	0.836536	-0.18715	0.149968	-0.452989	0.000183916	1.41305	0.00039324	0.10784	0.526997	OXPHOS assembly and biogenesis
12	B1ATP7;Q80Y81-2;Q80Y81;B1ATP9	Elac2	Zinc phosphodiesterase ELAC protein 2	0.991377	0.0812048	1.63121	0.00131826	0.999119	0.000211954	0.491942	0.499581	0.791441	0.151111	Mitochondrial transcription and mtRNA metabolism
76	O08600	Endog	Endonuclease G, mitochondrial	-0.461939	0.0369256	-0.92693	0.00128507	-0.733534	5.26793e-05	-2.07255	6.6307e-05	-0.917215	0.000196147	Mitochondrial DNA maintenance and replication
128	P34914;P34914-2	Ephx2	Bifunctional epoxide hydrolase 2;Cytosolic epoxide hydrolase 2	0.0871427	0.736572	0.56392	0.0117248	0.37092	0.000933525	0.349438	0.115785	0.487033	0.00528545	Other
640	Q9CZU4	Eral1	GTPase Era, mitochondrial	NA	NA	NA	NA	NA	NA	NA	NA	3.22264	0.000800055	Other mitochondrial protein synthesis factors
731	Q9DCW4	Etfb	Electron transfer flavoprotein subunit beta	-0.129544	0.253391	-0.0545233	0.579532	-0.195405	0.034678	-0.219405	0.252307	-0.251141	0.0480829	Other
483	Q921G7;Q6PF96	Etfdh	Electron transfer flavoprotein-ubiquinone oxidoreductase, mitochondrial	-0.0553847	0.713908	-0.21612	0.1341	-0.0751038	0.329377	-0.828152	0.000835257	-0.680696	0.00029527	Other
723	Q9DCM0	Ethe1	Persulfide dioxygenase ETHE1, mitochondrial	0.320123	0.0642867	0.849483	0.00176932	0.862323	4.78818e-07	0.519415	0.0110771	0.546473	0.00161385	Other
422	Q8R0F8	Fahd1	Acylpyruvase FAHD1, mitochondrial	0.610723	0.0174781	0.43535	0.0429212	0.168348	0.0889622	0.559645	0.00366366	0.517289	0.0011049	Other
604	Q9CR98	Fam136a	Protein FAM136A	0.565539	0.020794	1.2202	0.0120004	0.880893	8.11805e-06	1.05582	0.000756702	0.946264	0.000797118	Unknown
686	Q9D6U8	Fam162a	Protein FAM162A	0.392069	0.0500558	0.956047	0.00075498	0.395575	0.00447321	0.0646067	0.675782	0.865895	0.000439453	Unknown
303	Q7TPD2;Q7TPD2-2	Fam185a	Protein FAM185A	0.987687	0.303288	0.520623	0.0120601	0.948792	3.35774e-07	0.516001	0.557286	-0.6433	0.0973999	Unknown
324	Q8BGY7	Fam210a	Protein FAM210A	0.444303	0.0917029	1.00608	0.00128507	0.663272	0.00507906	0.156593	0.601754	1.22962	9.18297e-05	Unknown
489	Q922E6	Fastkd2	FAST kinase domain-containing protein 2	NA	NA	NA	NA	NA	NA	1.01346	0.179256	1.5754	0.015803	Mitochondrial transcription and mtRNA metabolism
138	P46656	Fdx1	Adrenodoxin, mitochondrial	0.446774	0.197317	0.0883767	0.603791	0.877734	0.0824235	0.480456	0.0172297	-0.184973	0.275417	Other
547	Q9CPW2;Q9CPW2-2	Fdx1l	Adrenodoxin-like protein, mitochondrial	NA	NA	0.850613	0.0377882	NA	NA	0.956145	0.300691	1.47538	0.034571	Iron sulphur cluster and heme biogenesis
260	Q61578	Fdxr	NADPH:adrenodoxin oxidoreductase, mitochondrial	0.942155	0.00165576	1.3246	0.000528311	1.43136	2.47569e-05	1.37307	0.000345091	1.23522	5.04475e-05	Other
235	Q544X6;P22315	Fech	Ferrochelatase;Ferrochelatase, mitochondrial	-0.119943	0.482622	-0.985603	0.00128507	0.100799	0.432541	-0.462113	0.0212031	-0.759786	0.00116384	Other
35	E9PZ91;O89106;E9PVU9;F6SV10;E9Q3M6	Fhit	Bis(5-adenosyl)-triphosphatase	0.873913	0.196707	2.34275	0.0189462	1.48319	0.000262446	NA	NA	1.02308	0.0662591	Other
564	Q9CQ92;G3X9U9;D3YZ32	Fis1	Mitochondrial fission 1 protein	0.0199613	0.944668	0.493383	0.0564747	0.282544	0.0445574	0.266204	0.169498	0.426144	0.102433	Mitochondrial morphology
87	O35465-2;O35465;F6WP10;D3Z597	Fkbp8	Peptidyl-prolyl cis-trans isomerase FKBP8	0.054636	0.925858	0.960603	0.124379	0.733928	0.000755039	NA	NA	0.880147	0.168249	Apoptosis
426	Q8R123;Q8R123-2;F8WGX4;E0CZ66	Flad1	FAD synthase;Molybdenum cofactor biosynthesis protein-like region;FAD synthase region	1.47958	0.108483	0.9457	0.0033333	0.664108	0.00114841	0.767513	0.00601288	1.2261	0.134757	Other
208	Q3TQB2;Q3TQB2-2;D6RG85;D3Z5V7;F6UAF9;D6RJ42	Foxred1	FAD-dependent oxidoreductase domain-containing protein 1	0.824911	0.251478	1.24859	0.0229861	1.05913	0.0243283	0.239889	0.259525	1.85955	0.00631777	OXPHOS assembly and biogenesis
681	Q9D6K8	Fundc2	FUN14 domain-containing protein 2	-0.43725	0.0331773	-1.7184	0.108056	-0.735095	0.221617	-0.465765	0.0337102	-0.485868	0.0681754	Other
91	O35943	Fxn	Frataxin, mitochondrial;Frataxin intermediate form;Frataxin mature form	0.956501	0.482622	0.968427	0.00684606	0.468119	0.0526708	0.118405	0.569654	0.407177	0.636845	Iron sulphur cluster and heme biogenesis
631	Q9CZD3	Gars	Glycine--tRNA ligase	3.0546	0.00457311	5.95961	7.43039e-05	4.72438	5.39019e-11	4.13967	0.00104393	5.97775	3.45825e-07	Mitochondrial transcription and mtRNA metabolism
100	O88986;E9PWY6	Gcat	2-amino-3-ketobutyrate coenzyme A ligase, mitochondrial	-0.685879	0.32121	NA	NA	NA	NA	-0.984121	0.125459	-2.2153	0.00742932	Pyruvate and aminoacid metabolism
253	Q60759;D3Z4I2	Gcdh	Glutaryl-CoA dehydrogenase, mitochondrial	-0.561371	0.0185198	-1.0362	0.00311878	-0.524166	0.000254603	-0.813512	0.00374025	-1.07619	0.000396584	Pyruvate and aminoacid metabolism
161	P56213	Gfer	FAD-linked sulfhydryl oxidase ALR	0.858552	0.0171135	1.53339	0.000351354	2.21458	0.000661288	1.48363	0.000259286	1.34502	4.6293e-05	Other
396	Q8K0D5;E0CXN8	Gfm1	Elongation factor G, mitochondrial	0.368171	0.0310732	0.405223	0.0576784	0.717327	2.99971e-07	0.321498	0.0328752	0.632947	0.00114052	Other mitochondrial protein synthesis factors
435	Q8R2Q4-2;Q8R2Q4;Q8R2Q4-3;E9Q7N5;Q8C1C2;E0CY79;E0CXH2	Gfm2	Ribosome-releasing factor 2, mitochondrial	0.568344	0.012378	0.8743	0.00190524	0.866992	2.91328e-07	0.801516	0.0055866	0.498796	0.00170695	Other mitochondrial protein synthesis factors
462	Q91VC9	Ghitm	Growth hormone-inducible transmembrane protein	1.96585	0.0990532	2.09144	0.00418568	2.08618	0.00278165	1.00498	0.023547	4.18238	0.00241376	Apoptosis
268	Q64516-1;Q64516-2;Q64516;B1ASZ3;Q9WU65;Q8C635	Gk;Gyk	Glycerol kinase	0.967838	0.0016596	1.82102	0.000307126	1.41104	7.01794e-07	1.34937	0.000507197	1.9353	3.97551e-05	Pyruvate and aminoacid metabolism
546	Q9CPV4;E9Q197;Q9CPV4-2;Q9CPV4-3;F6ZTG3;E9Q055;E9Q2R6;F7BB55	Glod4	Glyoxalase domain-containing protein 4	0.423685	0.021801	0.0916433	0.540008	0.0871903	0.52318	0.246625	0.0865773	0.292426	0.0271755	Other
494	Q923X4-2;Q923X4;B7ZC40	Glrx2	Glutaredoxin-2, mitochondrial	0.431367	0.218552	-0.654487	0.0139883	-0.944587	0.0297531	0.0323825	0.904882	-1.54835	0.00288401	Degradation and stress response
26	D3Z7P3;D3Z7P4;F7B327	Gls	Glutaminase kidney isoform, mitochondrial	1.56868	0.000793444	1.09859	0.000900871	1.04653	1.72799e-08	1.24205	0.00213731	0.793787	0.000215755	Pyruvate and aminoacid metabolism
124	P26443;F7CFA5	Glud1	Glutamate dehydrogenase 1, mitochondrial	0.305766	0.0708277	0.55981	0.0042044	0.48874	7.1573e-05	0.329203	0.0289801	0.615676	0.000690718	Pyruvate and aminoacid metabolism
52	F6TVX7;Q8BSF4;F7C386;E9PX91;D3YY63;D3Z0X7	Gm20671;Pisd	Phosphatidylserine decarboxylase proenzyme;Phosphatidylserine decarboxylase alpha chain;Phosphatidylserine decarboxylase beta chain	3.32711	0.0153198	5.09056	0.000181133	3.83139	4.85086e-07	3.92019	0.00161605	4.35329	3.09226e-06	Other
261	Q61586	Gpam	Glycerol-3-phosphate acyltransferase 1, mitochondrial	NA	NA	1.18753	0.00938525	NA	NA	NA	NA	-0.354729	0.546233	Lipid and acetyl CoA metabolism
270	Q64521;A2AQR0	Gpd2	Glycerol-3-phosphate dehydrogenase, mitochondrial	0.716889	0.160965	-0.0466533	0.94059	0.362815	0.0034159	0.00688583	0.976021	1.01444	0.0011247	Pyruvate and aminoacid metabolism
103	P06745;F6SAC3;CON__Q3ZBD7	Gpi;Gm1840	Glucose-6-phosphate isomerase	NA	NA	NA	NA	0.265623	0.509889	NA	NA	1.19075	0.0145554	Pyruvate and aminoacid metabolism
284	Q76LV0;O70325-2;O70325;S4R1E5;Q91XR9	Gpx4	Glutathione peroxidase;Phospholipid hydroperoxide glutathione peroxidase, mitochondrial;Phospholipid hydroperoxide glutathione peroxidase, nuclear	1.00121	0.00732775	1.32683	0.0111071	1.99446	0.00638136	1.30817	0.000187091	1.44286	7.89318e-06	Degradation and stress response
479	Q91Z53;B1AXQ0	Grhpr	Glyoxylate reductase/hydroxypyruvate reductase	-0.049068	0.913663	0.86462	0.00285707	0.44624	0.00651753	0.954004	0.0274764	0.655626	0.000797118	Other
517	Q99LP6	Grpel1	GrpE protein homolog 1, mitochondrial	0.748585	0.00143569	1.11551	0.0002879	1.05136	3.25547e-08	1.02186	0.000970759	0.839211	0.000800468	Mitochondrial import and chaperones
96	O88396	Grpel2	GrpE protein homolog 2, mitochondrial	0.666103	0.271253	NA	NA	1.10582	0.0396563	1.89035	0.0154333	0.36349	0.536722	Mitochondrial import and chaperones
37	E9Q179;Q8C5Q4;D3YUN1;D3YV30	Grsf1	G-rich sequence factor 1	-0.0718893	0.635851	0.197987	0.117308	0.56727	0.000116968	0.919556	0.00069014	1.08922	0.000273866	Mitochondrial transcription and mtRNA metabolism
140	P47791-2;P47791	Gsr	Glutathione reductase, mitochondrial	1.29208	0.0197223	1.8971	0.000382644	1.09892	2.55614e-05	1.09617	0.00515577	2.82659	0.000796595	Degradation and stress response
724	Q9DCM2	Gstk1	Glutathione S-transferase kappa 1	-0.757905	0.0072376	-1.28443	0.000307126	-0.948049	1.51055e-05	-0.813359	0.00268759	-0.939639	0.000770764	Degradation and stress response
80	O09131;D3Z1Q9;Q8K2Q2	Gsto1	Glutathione S-transferase omega-1	NA	NA	1.16969	0.134883	0.723261	0.0209345	1.1437	0.0122649	1.34357	0.0616444	Other
781	Q9WVL0	Gstz1	Maleylacetoacetate isomerase	0.103481	0.466194	0.423347	0.0164835	0.174203	0.066721	-0.000140833	0.999039	0.587646	0.00379593	Other
394	Q8K013;F8WHJ2;D3Z4U2;D6RCG6;F6WSS0	Gtpbp10	GTP-binding protein 10	NA	NA	NA	NA	NA	NA	0.956248	0.277788	4.05985	5.40519e-05	Other
34	E9PWV7;Q923K4;D6RDC6;Q923K4-2	Gtpbp3	tRNA modification GTPase GTPBP3, mitochondrial	NA	NA	0.395187	0.497949	0.215883	0.639879	0.959359	0.240619	1.15754	0.000169792	Mitochondrial transcription and mtRNA metabolism
213	Q3U6U5;D3YW02;D3YXC1	Gtpbp6	Putative GTP-binding protein 6	NA	NA	0.5098	0.62665	1.34393	0.000324877	1.15704	0.0279618	1.5742	8.21639e-05	Unknown
372	Q8C3X4;G3UWY0;Q8C3X4-2;F6ZM03	Guf1	Translation factor Guf1, mitochondrial	0.028722	0.930816	0.401973	0.0106053	0.409093	0.00495925	0.511651	0.0352814	0.665395	0.000367859	Other mitochondrial protein synthesis factors
259	Q61425	Hadh	Hydroxyacyl-coenzyme A dehydrogenase, mitochondrial	-0.0825647	0.661335	-0.213053	0.0685428	-0.0665682	0.532569	-0.242352	0.149702	-0.38124	0.0135408	Lipid and acetyl CoA metabolism
70	G5E8T9;Q99KB8;E9PYA3;Q99KB8-2;E9Q2H8;D3YWI0;D3YUX8;D3YV58	Hagh	Hydroxyacylglutathione hydrolase, mitochondrial	0.665458	0.00336734	0.764573	0.0178904	0.642547	6.1738e-06	0.623787	0.0439122	1.05615	0.00306346	Degradation and stress response
509	Q99KK9;G5E823	Hars2	Probable histidine--tRNA ligase, mitochondrial	1.29208	0.1729	0.82781	0.005755	1.00213	5.48828e-08	0.351933	0.180272	0.832986	0.055404	Mitochondrial transcription and mtRNA metabolism
157	P53702;G3UXK7	Hccs	Cytochrome c-type heme lyase	0.386661	0.0722888	0.119387	0.540008	0.344072	0.00578326	0.423984	0.0172713	0.528291	0.0222705	OXPHOS assembly and biogenesis
626	Q9CYW4	Hdhd3	Haloacid dehalogenase-like hydrolase domain-containing protein 3	1.78734	0.0483198	1.06861	0.00398548	0.365816	0.127587	0.867787	0.00356985	1.49538	0.00873058	Unknown
470	Q91WM2	Hdhd5	Haloacid dehalogenase-like hydrolase domain-containing 5	1.4489	0.104855	1.00415	0.00641792	0.985416	0.00147054	1.36219	0.00374574	0.963559	0.00371744	Unknown
768	Q9R257	Hebp1	Heme-binding protein 1	NA	NA	2.58361	0.00342202	3.37023	1.80019e-10	2.22067	0.0149878	4.04783	5.78776e-06	Other
512	Q99L13	Hibadh	3-hydroxyisobutyrate dehydrogenase, mitochondrial	1.11128	0.000153871	0.92013	0.00179919	0.616234	1.04222e-07	1.17639	0.000205502	1.09541	3.37099e-05	Pyruvate and aminoacid metabolism
417	Q8QZS1;E0CX19	Hibch	3-hydroxyisobutyryl-CoA hydrolase, mitochondrial	0.364545	0.0310717	0.703763	0.00141767	0.587052	5.35488e-05	0.569173	0.00269855	0.687089	0.00010083	Other
754	Q9JLR9;J3QPX3	Higd1a	HIG1 domain family member 1A, mitochondrial	-0.423874	0.1038	-1.26938	0.0551932	-0.462254	0.570052	-1.91615	0.00462985	-1.5154	0.000688407	OXPHOS
575	Q9CQJ1	Higd2a	HIG1 domain family member 2A	1.62925	0.143061	NA	NA	-1.08545	0.116466	-1.39454	0.0212013	0.188307	0.674898	OXPHOS
654	Q9D0S9	Hint2	Histidine triad nucleotide-binding protein 2, mitochondrial	0.261569	0.184889	0.24451	0.0777558	0.440996	8.64539e-05	0.244613	0.0935436	0.314341	0.0453175	Other
117	P17710-3;G3UVV4;P17710-4;P17710;P17710-2;D3YYR4;D3Z365;D3Z105;B4YB29;F6QD41	Hk1	Hexokinase-1	1.00422	0.00173469	1.26074	0.000655511	0.564155	5.58637e-06	1.61822	0.000118818	1.67303	4.10775e-05	Pyruvate and aminoacid metabolism
75	O08528;E9Q3Z4	Hk2	Hexokinase-2	0.508434	0.162139	0.589357	0.00689817	1.12563	1.23931e-05	0.592973	0.00238125	0.791896	0.00637737	Pyruvate and aminoacid metabolism
412	Q8K3A0;F6UL52;F6WN43	Hscb	Iron-sulfur cluster co-chaperone protein HscB, mitochondrial	0.313711	0.0986588	0.924577	0.00897761	0.865121	0.000158755	0.0916867	0.742205	0.761653	0.00648639	Iron sulphur cluster and heme biogenesis
527	Q99N15;A2AFQ2;O08756	Hsd17b10	3-hydroxyacyl-CoA dehydrogenase type-2	0.196072	0.21715	0.242687	0.071454	0.396348	0.00036017	0.22398	0.123632	0.579823	0.00407752	Mitochondrial transcription and mtRNA metabolism
151	P51660	Hsd17b4	Peroxisomal multifunctional enzyme type 2;(3R)-hydroxyacyl-CoA dehydrogenase	-1.26643	0.0868717	-0.905607	0.528573	-0.65828	0.0351483	-1.41868	0.169498	-1.86586	0.0297177	Lipid and acetyl CoA metabolism
146	P50171;P50171-2;G3UX44	Hsd17b8;H2-Ke6	Estradiol 17-beta-dehydrogenase 8	0.295258	0.0582924	0.54512	0.00502932	0.416371	6.23215e-05	0.441067	0.00487346	0.615653	0.000903019	Other
356	Q8BTX9	Hsdl1	Inactive hydroxysteroid dehydrogenase-like protein 1	NA	NA	NA	NA	NA	NA	0.936231	0.170827	1.37356	0.0152349	Unknown
201	Q2TPA8;B1AX78;B1AX77	Hsdl2	Hydroxysteroid dehydrogenase-like protein 2	0.060146	0.670593	0.233613	0.100457	0.239098	0.0110087	0.0183792	0.904882	0.075967	0.468166	Unknown
132	P38647	Hspa9	Stress-70 protein, mitochondrial	0.919828	0.000238843	0.992863	0.000526352	1.06836	7.61834e-10	1.04301	0.000810883	0.84402	0.000111453	Mitochondrial import and chaperones
183	P63038;P63038-2;D3Z2F2;D3Z7J9	Hspd1	60 kDa heat shock protein, mitochondrial	0.532155	0.00458853	0.901527	0.000596498	0.742696	5.81322e-08	0.515031	0.0260313	0.923203	1.7945e-05	Mitochondrial import and chaperones
266	Q64433	Hspe1	10 kDa heat shock protein, mitochondrial	0.67044	0.00361617	1.14056	0.000526352	0.974931	7.71977e-07	0.694583	0.00777728	1.07908	1.61281e-05	Degradation and stress response
788	Q9Z2G9;Q9Z2G9-2	Htatip2	Oxidoreductase HTATIP2	2.18912	0.00189389	3.69172	0.0179292	2.61769	1.45934e-07	2.591	0.0137685	3.7447	0.000215729	Unknown
747	Q9JIY5;D3YX27;F6TCV0;D3YX28;F6XUR8;S4R1B3;S4R1A8;A2RT60	Htra2	Serine protease HTRA2, mitochondrial	1.36108	0.0189527	2.4195	0.000226652	2.33309	2.24158e-07	2.48137	0.000369548	2.80528	0.000179175	Apoptosis
333	Q8BIJ6;E9PWN2;E9PWN3	Iars2	Isoleucine--tRNA ligase, mitochondrial	0.272748	0.137016	0.4706	0.0125308	0.448396	1.51055e-05	0.267188	0.107055	0.62917	0.00157231	Mitochondrial transcription and mtRNA metabolism
375	Q8CAK1;B2FDE8	Iba57	Putative transferase CAF17 homolog, mitochondrial	0.428542	0.034852	0.903497	0.00199702	0.663889	3.5005e-06	0.212157	0.419797	0.643227	0.00177955	Iron sulphur cluster and heme biogenesis
683	Q9D6R2	Idh3a	Isocitrate dehydrogenase [NAD] subunit alpha, mitochondrial	0.136462	0.264378	0.350117	0.0315442	0.0355263	0.69266	0.196209	0.208087	0.325229	0.029797	Pyruvate and aminoacid metabolism
461	Q91VA7;V9GXV0	Idh3b	Isocitrate dehydrogenase [NAD] subunit beta, mitochondrial	0.217449	0.0771352	0.350653	0.0431259	0.251737	0.00699385	0.393819	0.0260037	0.647247	0.000592728	Pyruvate and aminoacid metabolism
185	P70404	Idh3g	Isocitrate dehydrogenase [NAD] subunit gamma 1, mitochondrial	0.168875	0.241987	0.243573	0.150574	0.173793	0.0627132	0.577506	0.00211497	0.521882	0.000802975	Pyruvate and aminoacid metabolism
351	Q8BPT6;K3W4P5	Immp2l	Mitochondrial inner membrane protease subunit 2	NA	NA	0.577963	0.341946	1.69472	3.96099e-05	NA	NA	2.01192	0.000351491	Mitochondrial import and chaperones
42	E9Q800;E9QAY6	Immt	MICOS complex subunit Mic60	-0.379267	0.10617	-0.710623	0.200054	0.139577	0.895162	0.893009	0.00458426	-0.0131915	0.989402	Mitochondrial morphology
718	Q9DCB8	Isca2	Iron-sulfur cluster assembly 2 homolog, mitochondrial	0.192027	0.145113	0.20902	0.145408	0.479373	2.70663e-05	0.0384617	0.808052	0.165415	0.318066	Iron sulphur cluster and heme biogenesis
694	Q9D7P6;D3Z7W0;D3Z0K9	Iscu	Iron-sulfur cluster assembly enzyme ISCU, mitochondrial	0.0218293	0.899921	0.39757	0.0565166	0.576457	5.01571e-05	0.353123	0.161211	-0.0154365	0.934336	Iron sulphur cluster and heme biogenesis
186	P85094	Isoc2a	Isochorismatase domain-containing protein 2A, mitochondrial	-0.140919	0.55386	-0.196583	0.205751	0.275923	0.153266	-0.195225	0.549105	-0.447053	0.023474	Unknown
741	Q9JHI5	Ivd	Isovaleryl-CoA dehydrogenase, mitochondrial	-0.841529	0.0016447	-1.23123	0.000495662	-0.633652	0.000224355	-1.72513	0.000318444	-1.44163	4.41925e-05	Pyruvate and aminoacid metabolism
228	Q3V384;F6VT60;E9Q4K2;F6RBS7	Lace1	Lactation elevated protein 1	0.238985	0.0494143	-0.08575	0.436565	0.0568416	0.471898	-0.473977	0.0106293	-0.135698	0.273333	Unknown
554	Q9CPY7;Q9CPY7-2	Lap3	Cytosol aminopeptidase	0.878103	0.000928624	0.999253	0.000494898	1.07203	2.68491e-09	1.00275	0.000536957	0.890914	0.000115326	Other
452	Q8VDC0	Lars2	Probable leucine--tRNA ligase, mitochondrial	0.562317	0.0181166	1.89954	0.0407521	0.604629	1.24514e-06	0.970351	0.00055883	1.75904	9.27188e-05	Mitochondrial transcription and mtRNA metabolism
300	Q7TNG8	Ldhd	Probable D-lactate dehydrogenase, mitochondrial	-1.00227	0.167575	-0.267643	0.0797412	1.63207	0.00704258	-0.721402	0.00282829	-0.321008	0.0509564	Other
789	Q9Z2I0	Letm1	LETM1 and EF-hand domain-containing protein 1, mitochondrial	0.521339	0.0436469	0.738123	0.000994228	0.656888	2.56285e-07	0.584254	0.00922807	0.69924	0.000383786	Mitochondrial morphology
496	Q924L1;Q924L1-2;Q924L1-3	Letmd1	LETM1 domain-containing protein 1	1.77933	0.0722888	0.660027	0.420808	1.70472	0.00658089	3.24443	0.000275761	3.40589	1.21168e-05	Other
521	Q99M04;D3Z6I3	Lias	Lipoyl synthase, mitochondrial	0.629454	0.0360578	3.53813	0.00535437	0.543712	0.0183418	0.478011	0.116782	0.559477	0.6487	Other
448	Q8VCM4;D3Z093;D3Z7N1;D3Z2L3	Lipt1	Lipoyltransferase 1, mitochondrial	-0.202062	0.575758	0.7785	0.0042044	1.63036	0.000123928	1.39898	0.0607409	0.017343	0.971949	Other
643	Q9D009	Lipt2	Putative lipoyltransferase 2, mitochondrial	NA	NA	NA	NA	NA	NA	1.93858	0.0257825	NA	NA	Other
383	Q8CGK3	Lonp1	Lon protease homolog, mitochondrial	2.20493	9.31957e-05	2.45021	4.44787e-05	2.20368	4.41387e-14	2.22838	2.9359e-05	2.77803	9.46727e-08	Degradation and stress response
277	Q6PB66;F6V2A3	Lrpprc	Leucine-rich PPR motif-containing protein, mitochondrial	-1.7786	0.000118357	-2.59582	5.14112e-05	-2.15978	3.37135e-13	-9.024	1.27972e-05	1.06029	4.41925e-05	Mitochondrial transcription and mtRNA metabolism
419	Q8R033	Lyrm2	LYR motif-containing protein 2	1.66355	0.00114156	1.78802	0.000363119	1.8076	5.26793e-05	2.90328	0.0162881	1.13392	4.41925e-05	Other
405	Q8K215	Lyrm4	LYR motif-containing protein 4	-0.029086	0.913663	0.65905	0.0028092	0.61685	0.000898249	0.94076	0.000953615	0.461263	0.0799148	Iron sulphur cluster and heme biogenesis
704	Q9DA03;D6RD13	Lyrm7	Complex III assembly factor LYRM7	0.12385	0.517429	NA	NA	-0.364923	0.661703	-1.9764	0.040414	-0.383925	0.810363	OXPHOS assembly and biogenesis
488	Q922B1	Macrod1	O-acetyl-ADP-ribose deacetylase MACROD1	-0.425574	0.0427413	-0.806647	0.000887751	-0.402854	0.00313628	-0.681616	0.010913	-0.812488	0.000479898	Other
55	F7ASG0;Q9CWV0	Malsu1	Mitochondrial assembly of ribosomal large subunit protein 1	NA	NA	NA	NA	NA	NA	NA	NA	2.22395	0.0140447	Other mitochondrial protein synthesis factors
265	Q64133	Maoa	Amine oxidase [flavin-containing] A	7.01255	0.00012039	7.98914	0.000181133	7.30365	4.33024e-12	6.56954	1.27972e-05	8.02035	4.75867e-06	Other
362	Q8BW75;E9Q3X6;E9PVL9	Maob	Amine oxidase [flavin-containing] B	-0.418562	0.0379182	-1.16936	0.00141549	-0.861877	7.45614e-05	-1.12998	0.00269855	-0.469876	0.00812578	Other
231	Q499X9	Mars2	Methionine--tRNA ligase, mitochondrial	0.840817	0.0808371	0.546793	0.00484885	1.0335	4.16967e-07	0.956377	0.0095729	0.879584	0.0023943	Mitochondrial transcription and mtRNA metabolism
445	Q8VCF0	Mavs	Mitochondrial antiviral-signaling protein	-0.455917	0.347495	0.255393	0.424864	0.406335	0.0185553	-0.165882	0.724987	0.699098	0.0255136	Other
438	Q8R3F5	Mcat	Malonyl-CoA-acyl carrier protein transacylase, mitochondrial	0.282427	0.10281	0.572657	0.0153034	0.388648	1.06706e-05	0.805119	0.000782682	0.961689	6.1737e-05	Lipid and acetyl CoA metabolism
526	Q99MR8;D6RI29	Mccc1	Methylcrotonoyl-CoA carboxylase subunit alpha, mitochondrial	-0.376721	0.0151557	-0.53072	0.00551945	-0.306512	0.0154167	-0.6109	0.00266966	-0.511719	0.00244501	Pyruvate and aminoacid metabolism
218	Q3ULD5	Mccc2	Methylcrotonoyl-CoA carboxylase beta chain, mitochondrial	-0.361008	0.0360578	-0.55476	0.00910917	-0.305108	0.0222152	-0.576019	0.00178832	-0.715104	0.000799794	Pyruvate and aminoacid metabolism
664	Q9D1I5	Mcee	Methylmalonyl-CoA epimerase, mitochondrial	-0.425773	0.0808371	-0.933763	0.00141767	-0.414278	0.00865323	-1.30001	0.00131448	-1.33731	0.000100082	Pyruvate and aminoacid metabolism
220	Q3UMR5;Q3UMR5-2	Mcu	Calcium uniporter protein, mitochondrial	3.36019	0.00243676	3.4952	0.00561087	2.0786	0.00109472	2.72795	0.000565911	2.86153	0.000510743	Mitochondrial carriers or transport
615	Q9CXD6;Q9CXD6-3;Q9CXD6-2	Mcur1	Mitochondrial calcium uniporter regulator 1	0.440561	0.269836	0.626727	0.00209818	0.374123	0.0011673	0.600145	0.0396574	1.01956	0.000253195	Mitochondrial carriers or transport
345	Q8BMF3;E9PZP7	Me3	NADP-dependent malic enzyme, mitochondrial;Malic enzyme	-0.107913	0.623524	0.07638	0.598664	0.142312	0.245885	0.178796	0.182102	0.432934	0.0271195	Pyruvate and aminoacid metabolism
726	Q9DCS3;A2A845	Mecr	Trans-2-enoyl-CoA reductase, mitochondrial	0.462676	0.00407791	0.136163	0.462217	0.307397	0.00048268	0.416543	0.0231787	0.323665	0.0111844	Lipid and acetyl CoA metabolism
549	Q9CPW9;Q9CPW9-2	Metap1d	Methionine aminopeptidase 1D, mitochondrial	NA	NA	0.728067	0.0528314	1.04811	0.0440291	NA	NA	0.616268	0.256444	Other mitochondrial protein synthesis factors
722	Q9DCL4;A2AGM2	Mettl15	Probable methyltransferase-like protein 15	NA	NA	NA	NA	NA	NA	1.70594	0.0293302	3.12275	3.5423e-06	Unknown
313	Q811U4;F6XRI9;D3Z5P8;D3Z4L5	Mfn1	Mitofusin-1	-2.32477	0.00288188	-0.92887	0.0618549	-0.495469	0.0250252	-1.63286	0.00143406	-0.643942	0.021746	Mitochondrial morphology
305	Q80U63;Q80U63-2;A8Y5E5;A2A7Y8	Mfn2	Mitofusin-2	1.12185	0.0311212	-0.938183	0.293006	0.730395	0.130429	-0.823638	0.432023	0.224407	0.743263	Mitochondrial morphology
544	Q9CPU4	Mgst3	Microsomal glutathione S-transferase 3	-0.194183	0.931511	0.225123	0.436832	1.19606	0.000438984	-0.103418	0.808052	0.537394	0.159845	Degradation and stress response
451	Q8VCX5;Q8VCX5-3;Q8VCX5-2;E9Q9E0	Micu1	Calcium uptake protein 1, mitochondrial	0.37919	0.64161	1.37046	0.0503025	1.00743	0.00187804	1.04459	0.142305	1.34	0.0430009	Mitochondrial carriers or transport
10	A6H611	Mipep	Mitochondrial intermediate peptidase	1.10808	0.100907	0.555937	0.151901	1.06762	0.000186432	0.574297	0.163258	0.564143	0.00674555	Mitochondrial import and chaperones
502	Q99J39-2;Q99J39	Mlycd	Malonyl-CoA decarboxylase, mitochondrial	0.086408	0.711026	0.292297	0.0680533	0.420967	0.00036017	0.222486	0.113077	0.284228	0.0827727	Lipid and acetyl CoA metabolism
670	Q9D273;Q9D273-2;D3Z1G7	Mmab	Cob(I)yrinic acid a,c-diamide adenosyltransferase, mitochondrial	0.25028	0.184889	0.768233	0.0450752	1.2677	0.0151189	0.406395	0.0968514	0.270789	0.0917265	Other
163	P56379	Mp68	6.8 kDa mitochondrial proteolipid	-0.308912	0.521838	-4.59498	0.058851	-4.03899	0.00245836	-6.58303	0.000118818	-4.93697	0.0117915	OXPHOS
182	P63030;D3Z786;D3YWY6;D3Z5S0;E9Q0V4	Mpc1	Mitochondrial pyruvate carrier 1	0.426322	0.212922	0.685673	0.00561473	0.574156	0.00190924	0.248098	0.490866	0.579736	0.00759489	Mitochondrial carriers or transport
644	Q9D023;E9PY67;Q3V1C1;G5E869	Mpc2	Mitochondrial pyruvate carrier 2	0.483661	0.180552	0.09832	0.71741	0.465236	0.0102547	0.151293	0.580743	0.615082	0.0178251	Mitochondrial carriers or transport
226	Q3UW66;Q99J99	Mpst	Sulfurtransferase;3-mercaptopyruvate sulfurtransferase	-0.188228	0.36483	-0.609123	0.00656518	-0.921488	7.72287e-08	-0.23358	0.196538	-0.579788	0.00543594	Other
501	Q99J25	Mrm1	rRNA methyltransferase 1, mitochondrial	NA	NA	-0.272103	0.0636709	-0.579776	0.28248	NA	NA	1.25453	0.0450621	Mitochondrial transcription and mtRNA metabolism
535	Q99N96;Q9D3F3	Mrpl1	39S ribosomal protein L1, mitochondrial	-1.66178	0.00025095	-3.71769	0.00240775	-2.92053	3.86819e-09	1.22452	0.0036649	0.667763	0.000214799	Mitochondrial ribosome
204	Q3TBW2;A2A715	Mrpl10	39S ribosomal protein L10, mitochondrial	-0.263131	0.272226	-0.58276	0.00924266	-1.10056	2.91328e-07	1.41183	0.000226041	1.42093	1.32454e-05	Mitochondrial ribosome
572	Q9CQF0	Mrpl11	39S ribosomal protein L11, mitochondrial	-2.70739	0.000174259	-3.59971	0.000105341	-4.80818	3.15663e-09	1.13557	0.000764555	0.437036	0.0822626	Mitochondrial ribosome
706	Q9DB15	Mrpl12	39S ribosomal protein L12, mitochondrial	-0.077636	0.595754	-0.0398233	0.775783	-0.663603	1.51055e-05	1.1515	0.000833869	1.06037	1.76682e-05	Mitochondrial ribosome
668	Q9D1P0;F7CXG9;G5E909	Mrpl13	39S ribosomal protein L13, mitochondrial	-2.21223	0.0134354	-4.40965	0.000782341	-5.04372	3.44896e-11	1.52298	0.000336565	0.706624	0.0098693	Mitochondrial ribosome
665	Q9D1I6	Mrpl14	39S ribosomal protein L14, mitochondrial	-1.65747	0.000230862	-1.79571	0.00264213	-3.56117	3.81197e-11	1.6106	0.000330611	0.64454	0.00412845	Mitochondrial ribosome
541	Q9CPR5	Mrpl15	39S ribosomal protein L15, mitochondrial	-2.9939	0.00104413	-3.87219	0.00109595	-5.06802	2.75654e-09	1.55016	0.00069014	0.76204	0.000947314	Mitochondrial ribosome
532	Q99N93	Mrpl16	39S ribosomal protein L16, mitochondrial	-2.56057	0.000380483	-2.90112	0.00166522	-3.6558	5.33822e-07	1.64588	0.000202699	0.669658	0.02014	Mitochondrial ribosome
698	Q9D8P4;H3BJT9;H3BIZ3;Q9D8P4-2	Mrpl17	39S ribosomal protein L17, mitochondrial	-3.25839	0.0250793	-3.17161	0.000144499	-4.05904	4.30795e-12	1.32716	0.000336565	0.953229	7.15311e-05	Mitochondrial ribosome
577	Q9CQL5	Mrpl18	39S ribosomal protein L18, mitochondrial	-1.82717	0.0363573	-1.3891	0.264613	-3.15827	3.22678e-08	0.94274	0.0179832	0.740987	0.00217923	Mitochondrial ribosome
674	Q9D338	Mrpl19	39S ribosomal protein L19, mitochondrial	-2.28053	0.00165576	-3.57824	0.000181133	-2.84656	2.72787e-09	1.87425	0.000195174	0.944438	7.20199e-05	Mitochondrial ribosome
15	B1B1D8;Q9D773;B1B1D7	Mrpl2	39S ribosomal protein L2, mitochondrial	-2.91323	0.000107552	-3.21904	0.0028092	-4.17528	4.21182e-10	0.955599	0.00441993	0.174735	0.155527	Mitochondrial ribosome
796	V9GXI7;Q9CQL4;V9GX65	Mrpl20	39S ribosomal protein L20, mitochondrial	-0.0822813	0.955406	-2.4894	0.000721837	-1.12021	0.131512	4.40276	0.0151899	0.67059	0.00841954	Mitochondrial ribosome
667	Q9D1N9;Q9D1N9-2	Mrpl21	39S ribosomal protein L21, mitochondrial	-3.82037	0.000103313	-3.01723	0.0249087	-2.50965	7.01171e-06	1.48807	0.00142825	0.622244	0.000509491	Mitochondrial ribosome
357	Q8BU88	Mrpl22	39S ribosomal protein L22, mitochondrial	-1.60758	0.000708459	-3.08985	0.0105933	-3.84855	7.08428e-08	1.68914	0.000177545	0.48243	0.00532941	Mitochondrial ribosome
92	O35972	Mrpl23	39S ribosomal protein L23, mitochondrial	NA	NA	-1.30582	0.0073616	-2.11729	0.00280925	2.58745	0.0185967	2.5777	0.0113226	Mitochondrial ribosome
556	Q9CQ06	Mrpl24	39S ribosomal protein L24, mitochondrial	-1.078	0.000305847	-2.44623	0.00543641	-2.38381	2.50131e-07	1.58159	0.000396076	0.684486	0.00608227	Mitochondrial ribosome
531	Q99N92	Mrpl27	39S ribosomal protein L27, mitochondrial	-3.42419	0.000132299	-3.99646	0.00429597	-4.83359	2.88232e-11	1.798	0.000977162	-0.345823	0.648923	Mitochondrial ribosome
660	Q9D1B9;F6U4U1	Mrpl28	39S ribosomal protein L28, mitochondrial	-2.34162	0.000306717	-3.81381	0.0145661	-3.31939	3.11496e-08	1.39436	0.000677759	0.995914	0.00451532	Mitochondrial ribosome
534	Q99N95;D3Z456;F6W7C7	Mrpl3	39S ribosomal protein L3, mitochondrial	-4.37879	0.000149553	-3.82384	0.00103462	-5.03902	1.21091e-10	1.10283	0.000234688	0.559416	0.00773622	Mitochondrial ribosome
693	Q9D7N6	Mrpl30	39S ribosomal protein L30, mitochondrial	-2.47923	7.27893e-05	-2.866	0.0336755	-3.52175	4.89439e-09	1.3719	0.00266966	0.419609	0.245195	Mitochondrial ribosome
720	Q9DCI9	Mrpl32	39S ribosomal protein L32, mitochondrial	-1.91454	0.0189656	-2.8087	0.00785773	-3.3784	1.17185e-10	1.07906	0.000833869	0.552378	0.072066	Mitochondrial ribosome
582	Q9CQP0;Q8R0E2	Mrpl33	39S ribosomal protein L33, mitochondrial	-2.56789	0.00387811	-3.35851	0.00359827	-3.02335	9.21824e-07	1.59249	0.012622	-0.190475	0.601887	Mitochondrial ribosome
530	Q99N91	Mrpl34	39S ribosomal protein L34, mitochondrial	-0.916521	0.0857061	-1.75616	0.0417925	-2.02256	0.00264559	1.36986	0.0113919	1.96534	0.0107627	Mitochondrial ribosome
578	Q9CQL6	Mrpl35	39S ribosomal protein L35, mitochondrial	-0.87975	0.428995	NA	NA	-1.14952	0.0356716	1.38458	0.113479	1.98033	0.000575637	Mitochondrial ribosome
487	Q921S7	Mrpl37	39S ribosomal protein L37, mitochondrial	-4.63718	0.000362833	-5.06498	0.000652294	-5.20594	1.51774e-12	1.24116	0.000889992	0.631914	0.00820811	Mitochondrial ribosome
408	Q8K2M0;Q8K2M0-2	Mrpl38	39S ribosomal protein L38, mitochondrial	-3.29342	6.57095e-05	-3.07775	0.000592658	-4.60032	5.90966e-09	1.19896	0.000677759	0.537325	0.0203422	Mitochondrial ribosome
751	Q9JKF7	Mrpl39	39S ribosomal protein L39, mitochondrial	-3.01587	7.15218e-05	-3.93442	0.0095671	-3.89032	6.72298e-12	1.18289	0.000419855	0.734858	0.000341563	Mitochondrial ribosome
729	Q9DCU6	Mrpl4	39S ribosomal protein L4, mitochondrial	-3.28723	0.00475483	-3.03266	0.000593498	-3.85506	6.36432e-09	1.8462	0.000457124	1.06548	0.000125098	Mitochondrial ribosome
24	D3Z7C0;Q9Z2Q5	Mrpl40	39S ribosomal protein L40, mitochondrial	-1.7353	0.00192968	-2.43453	0.00203477	-2.87792	7.14551e-08	1.42997	0.00104393	0.724241	0.00726713	Mitochondrial ribosome
581	Q9CQN7;F7CXS7	Mrpl41;Gm6434	39S ribosomal protein L41, mitochondrial	1.00503	0.482622	1.1374	0.06198	-1.26817	0.0213009	1.44117	0.00069014	2.97806	0.00482646	Mitochondrial ribosome
545	Q9CPV3	Mrpl42	39S ribosomal protein L42, mitochondrial	-0.867628	0.272036	-1.54509	0.108708	-2.94954	6.82624e-08	1.17524	0.00848341	1.32375	0.097428	Mitochondrial ribosome
243	Q5RL20;Q99N89	Mrpl43	39S ribosomal protein L43, mitochondrial	-1.54136	0.000128169	-0.990667	0.00816338	-1.44677	4.14094e-09	1.17292	0.00153214	0.886902	0.000269012	Mitochondrial ribosome
624	Q9CY73;Q9CY73-2	Mrpl44	39S ribosomal protein L44, mitochondrial	-2.51385	0.00313807	-2.63363	0.00869187	-3.21706	5.32102e-07	1.57287	0.00069014	1.14496	0.00146357	Mitochondrial ribosome
653	Q9D0Q7;F6QAU7	Mrpl45	39S ribosomal protein L45, mitochondrial	-2.43859	0.00119184	-3.48856	0.00803453	-4.6533	4.07542e-16	1.37153	0.000633954	0.480594	0.0640774	Mitochondrial ribosome
737	Q9EQI8	Mrpl46	39S ribosomal protein L46, mitochondrial	-1.72497	0.00261883	-4.00776	0.0220453	-2.52019	2.73946e-06	1.23623	0.000384443	0.848872	0.000140297	Mitochondrial ribosome
410	Q8K2Y7	Mrpl47	39S ribosomal protein L47, mitochondrial	-0.961488	0.000827596	-1.72905	0.000181133	-1.9395	1.49422e-08	1.35528	0.000452154	0.763097	0.00397521	Mitochondrial ribosome
49	E9QPQ8;Q8JZS9;D3Z6C8	Mrpl48	39S ribosomal protein L48, mitochondrial	-2.02686	0.100907	-1.02357	0.299888	-3.24774	1.79676e-07	1.33835	0.00181309	1.52044	0.0321242	Mitochondrial ribosome
557	Q9CQ40	Mrpl49	39S ribosomal protein L49, mitochondrial	-2.63372	0.00286254	-3.43546	0.00311878	-4.08703	1.5871e-09	1.18013	0.000958295	0.556729	0.00716561	Mitochondrial ribosome
454	Q8VDT9	Mrpl50	39S ribosomal protein L50, mitochondrial	-3.57213	0.000168387	-3.75714	0.00104977	-3.4034	2.87374e-08	1.48716	0.00191248	0.482538	0.0471618	Mitochondrial ribosome
553	Q9CPY1	Mrpl51	39S ribosomal protein L51, mitochondrial	NA	NA	NA	NA	-3.08501	8.59804e-05	3.47755	0.0157974	3.01014	7.74594e-05	Mitochondrial ribosome
663	Q9D1H8	Mrpl53	39S ribosomal protein L53, mitochondrial	-1.21591	0.00261883	-1.43357	0.00196117	-1.80218	5.68158e-09	0.951168	0.0121621	0.69451	0.00174295	Mitochondrial ribosome
548	Q9CPW3	Mrpl54	39S ribosomal protein L54, mitochondrial	-2.3505	0.00147241	NA	NA	-2.83532	1.57628e-06	0.696763	0.0994318	2.36942	0.0550994	Mitochondrial ribosome
629	Q9CZ83;Q9CZ83-2	Mrpl55	39S ribosomal protein L55, mitochondrial	-2.22283	0.0310732	-2.30525	0.00803715	-2.56106	3.41506e-07	1.5258	0.0509645	0.557167	0.00876999	Mitochondrial ribosome
420	Q8R035;Q8R035-2;A2A6T4;D6RHR8	Mrpl58	Peptidyl-tRNA hydrolase ICT1, mitochondrial	-2.2395	0.00286254	-2.47482	0.00232766	-2.55485	1.29939e-06	1.03319	0.00269855	0.234377	0.187362	Mitochondrial ribosome
599	Q9CR59	Mrpl59	Growth arrest and DNA damage-inducible proteins-interacting protein 1	-1.9999	0.107798	-3.12394	0.000200101	-4.04125	2.72787e-09	1.98035	0.000192648	0.582568	0.311088	Mitochondrial ribosome
533	Q99N94;Q3UK02	Mrpl9	39S ribosomal protein L9, mitochondrial	-3.74298	7.37518e-05	-4.3373	0.00105308	-4.30786	4.87262e-09	0.851778	0.00181499	0.599643	0.013563	Mitochondrial ribosome
44	E9QJS0;G5E8U8;G5E8U5;Q80ZK0;D3Z6K5	Mrps10	28S ribosomal protein S10, mitochondrial	NA	NA	-3.26529	0.00353925	-3.28104	2.56934e-07	2.85532	0.0138434	3.09215	0.00230045	Mitochondrial ribosome
214	Q3U8Y1;Q9DCA2	Mrps11	28S ribosomal protein S11, mitochondrial	-2.53285	0.000380483	-3.46204	0.000181133	-3.59753	5.71354e-08	1.15876	0.00187571	1.95265	4.97298e-07	Mitochondrial ribosome
23	D3Z2K2;Q9CR88	Mrps14	28S ribosomal protein S14, mitochondrial	-2.41302	0.0363573	-3.26554	0.0175977	-3.36293	4.35803e-10	1.14242	0.00802663	2.38958	0.0243858	Mitochondrial ribosome
717	Q9DC71	Mrps15	28S ribosomal protein S15, mitochondrial	-1.85701	0.000293342	-3.57149	0.000679864	-3.85246	3.52681e-09	1.5384	0.00106038	1.88043	1.0598e-05	Mitochondrial ribosome
550	Q9CPX7	Mrps16	28S ribosomal protein S16, mitochondrial	-1.83729	0.0494143	-2.73349	0.000722752	-2.4716	2.28478e-05	1.55125	0.000835257	2.00331	6.36711e-05	Mitochondrial ribosome
571	Q9CQE3;D3Z198	Mrps17	28S ribosomal protein S17, mitochondrial	-1.77258	0.00861055	-3.01197	0.000300075	-2.94267	1.02868e-05	1.12429	0.00118921	1.67676	2.37489e-06	Mitochondrial ribosome
248	Q5U5I3;Q99N85;D3Z603	Mrps18a	28S ribosomal protein S18a, mitochondrial	-0.91027	0.443182	NA	NA	-3.23339	9.28971e-09	0.856247	0.0260313	-0.305206	0.710399	Mitochondrial ribosome
528	Q99N84;G3UYQ9;G3UYX8;G3UX79;Q99N84-2	Mrps18b	28S ribosomal protein S18b, mitochondrial	-2.94026	0.00359759	-2.63089	0.0111772	-3.53944	4.06611e-06	1.34636	0.00286997	1.72482	0.000471741	Mitochondrial ribosome
434	Q8R2L5;Q8BTZ9	Mrps18c	28S ribosomal protein S18c, mitochondrial	-0.463563	0.577508	NA	NA	-1.2242	0.0418035	NA	NA	0.986571	0.132525	Mitochondrial ribosome
497	Q924T2	Mrps2	28S ribosomal protein S2, mitochondrial	-1.19686	0.0196274	-2.59873	0.00668645	-3.07233	3.60629e-07	1.57355	0.00029082	2.05339	1.89265e-06	Mitochondrial ribosome
172	P58059;D3YVZ9;J3QPA0	Mrps21	28S ribosomal protein S21, mitochondrial	-2.80282	0.00171804	-2.5059	0.0669191	-3.43195	1.22768e-08	0.75495	0.0154612	1.92486	8.20285e-06	Mitochondrial ribosome
622	Q9CXW2	Mrps22	28S ribosomal protein S22, mitochondrial	-1.92316	0.00181579	-1.92381	0.0477852	-1.67499	9.21422e-11	1.51495	0.000205502	2.4216	1.49325e-07	Mitochondrial ribosome
455	Q8VE22;Q3TI14;F7ARZ1;A7M7Q8;Q5SXC9	Mrps23	28S ribosomal protein S23, mitochondrial	-1.27779	0.00512859	-2.13968	0.0042044	-3.15514	2.3302e-09	1.53514	0.000731907	2.22912	3.21658e-06	Mitochondrial ribosome
588	Q9CQV5	Mrps24	28S ribosomal protein S24, mitochondrial	-2.64145	0.00812115	-1.5778	0.0024777	-2.97099	1.51055e-05	1.3736	0.00441993	2.4798	0.00620466	Mitochondrial ribosome
656	Q9D125	Mrps25	28S ribosomal protein S25, mitochondrial	NA	NA	-2.46395	0.00165604	-3.36298	4.90889e-10	3.40089	0.00792885	3.36726	0.000175515	Mitochondrial ribosome
312	Q80ZS3	Mrps26	28S ribosomal protein S26, mitochondrial	-1.11092	0.0221899	-2.27258	0.0582758	-1.73137	8.12532e-06	1.57292	0.000632902	1.85681	1.74135e-06	Mitochondrial ribosome
339	Q8BK72	Mrps27	28S ribosomal protein S27, mitochondrial	-1.03875	0.117382	-0.866677	0.0120245	-0.735711	1.92317e-05	1.2494	0.000396076	1.8313	1.41074e-05	Mitochondrial ribosome
623	Q9CY16	Mrps28	28S ribosomal protein S28, mitochondrial	-0.912708	0.002506	-1.05251	0.00507322	-1.83605	4.38006e-05	1.11509	0.000810883	2.18286	1.13865e-05	Mitochondrial ribosome
63	G3X9M0;Q9ER88;Q9ER88-2;G3UWZ6;G3UWM7;G3UWJ4;G3UZC0;G3UWR5;G3UYM6;G3UYP3	Mrps29	28S ribosomal protein S29, mitochondrial	-1.75163	9.46742e-05	-3.44699	0.00632306	-3.50586	1.69796e-09	1.59051	0.000396076	2.33941	8.30055e-06	Mitochondrial ribosome
648	Q9D0G0	Mrps30	28S ribosomal protein S30, mitochondrial	-2.87703	0.000309625	-2.51091	0.00505894	-2.69984	1.03369e-07	1.48876	0.000238942	0.82831	0.000660782	Mitochondrial ribosome
262	Q61733	Mrps31	28S ribosomal protein S31, mitochondrial	-1.42095	0.00143569	-4.23203	0.00645786	-2.58278	4.89439e-09	1.87751	0.000312022	2.28443	0.00010947	Mitochondrial ribosome
673	Q9D2R8;Q8R2K5	Mrps33	28S ribosomal protein S33, mitochondrial	NA	NA	-2.76619	0.000652294	-3.24078	1.71776e-09	1.62974	0.000427895	2.06631	8.63435e-06	Mitochondrial ribosome
745	Q9JIK9	Mrps34	28S ribosomal protein S34, mitochondrial	-0.217609	0.364483	-0.38829	0.0556756	-0.396667	0.00131317	1.79304	0.000195174	2.01707	1.48756e-05	Mitochondrial ribosome
337	Q8BJZ4	Mrps35	28S ribosomal protein S35, mitochondrial	-2.86798	0.000162438	-4.26852	0.000883204	-3.61806	3.81197e-11	1.93725	0.000118818	2.70318	2.25391e-06	Mitochondrial ribosome
685	Q9D6T9;J3QPR8	Mrps36 (Q9D6T9)	28S ribosomal protein S36, mitochondrial	0.0193487	0.948517	-2.08649	0.0840414	-1.85817	0.00564152	-1.37457	0.031815	-1.04154	0.00569458	Other
566	Q9CQA6	Mrps37	Coiled-coil-helix-coiled-coil-helix domain containing 10	NA	NA	NA	NA	-1.91965	0.0109236	1.99006	0.159538	NA	NA	Mitochondrial ribosome
199	Q14C51	Mrps39	Pentatricopeptide repeat domain-containing protein 3, mitochondrial	-2.81216	0.00512859	-2.35726	0.00961959	-2.91028	2.23049e-05	1.71622	0.00069014	3.14668	2.60805e-06	Mitochondrial ribosome
529	Q99N87;B2FDG7	Mrps5	28S ribosomal protein S5, mitochondrial	-3.91631	0.00148471	-4.16161	0.00126383	-5.08145	1.58212e-08	1.49628	0.000224716	2.09921	3.68713e-07	Mitochondrial ribosome
173	P58064	Mrps6	28S ribosomal protein S6, mitochondrial	-0.836597	0.002506	-1.80441	0.0106194	-1.55848	2.69156e-08	1.62346	0.000396076	1.8247	4.519e-06	Mitochondrial ribosome
308	Q80X85	Mrps7	28S ribosomal protein S7, mitochondrial	-2.66092	0.000572433	-3.92716	0.00671654	-4.51552	5.95122e-11	1.21154	0.000396076	1.97363	5.34163e-07	Mitochondrial ribosome
692	Q9D7N3	Mrps9	28S ribosomal protein S9, mitochondrial	-2.9264	0.000244398	-3.79663	0.00132575	-4.40068	3.81197e-11	1.74721	0.000205502	2.52033	3.03973e-06	Mitochondrial ribosome
684	Q9D6S7	Mrrf	Ribosome-recycling factor, mitochondrial	-0.0727653	0.769462	0.0523267	0.798649	0.00767533	0.951497	0.208843	0.459851	0.335567	0.00947214	Other mitochondrial protein synthesis factors
240	Q5NCE8	Mrs2	Magnesium transporter MRS2 homolog, mitochondrial	NA	NA	1.88748	0.0200673	1.99181	1.01153e-05	1.51328	0.0942541	1.14485	0.188811	Mitochondrial carriers or transport
687	Q9D6Y7-2;Q9D6Y7;Q9D6Y7-3;Q9D6Y7-4	Msra	Mitochondrial peptide methionine sulfoxide reductase	-0.132211	0.291443	0.30962	0.0382214	0.184525	0.152447	0.302599	0.122651	0.160685	0.34248	Degradation and stress response
287	Q78J03	Msrb2	Methionine-R-sulfoxide reductase B2, mitochondrial	-0.59469	0.0141589	-0.540367	0.00507685	-0.460725	0.000322542	-0.362914	0.145042	-0.836456	0.00109523	Degradation and stress response
294	Q7JCY9;P00848	mt-Atp6;Mtatp6	ATP synthase subunit a	-1.11361	0.327135	-0.963783	0.482953	0.111152	0.760529	-2.50888	0.0238652	0.785419	0.535679	OXPHOS
295	Q7JCZ0;P03930	mt-Atp8;Mtatp8	ATP synthase protein 8	-0.406911	0.595754	-1.66605	0.00446378	-2.71474	0.0914102	-1.97121	0.00213731	-7.57106	0.000271945	OXPHOS
757	Q9MD68;P00397	mt-Co1;Mtco1	Cytochrome c oxidase subunit 1	-1.24844	0.624278	-4.61705	0.0324735	-0.777426	0.348652	-3.65639	0.0095184	-2.86032	0.0162927	OXPHOS
296	Q7JCZ1;P00405	mt-Co2;Mtco2	Cytochrome c oxidase subunit 2	-1.79801	0.0660307	-2.61461	0.00104634	-1.50345	6.5394e-05	-3.59136	0.00023111	-3.15666	2.18972e-06	OXPHOS
292	Q7JCX7;P00416	mt-Co3	Cytochrome c oxidase subunit 3	-2.86676	0.219304	-2.8505	0.153716	0.0320326	0.980864	-2.28105	0.00541822	-2.57414	0.0808301	OXPHOS
101	P03888	Mt-Nd1	NADH-ubiquinone oxidoreductase chain 1	-1.95807	0.241141	-4.59604	0.0399187	0.0596274	0.949657	0.503966	0.578705	-0.702068	0.583619	OXPHOS
756	Q9MD59;P03893	mt-Nd2;Mtnd2	NADH-ubiquinone oxidoreductase chain 2	-1.29162	0.313342	-3.18406	0.00938525	NA	NA	0.151073	0.934599	-2.41825	0.00726713	OXPHOS
293	Q7JCY6;P03911	mt-Nd4;Mtnd4	NADH-ubiquinone oxidoreductase chain 4	-1.58779	0.509847	-3.14433	0.0683858	-0.081339	0.911554	0.772548	0.145766	-3.35545	0.00695321	OXPHOS
758	Q9MD82;P03921	mt-Nd5;Mtnd5	NADH-ubiquinone oxidoreductase chain 5	-2.91187	0.184889	-3.22207	0.00411186	-0.106986	0.843318	-0.149052	0.874888	-5.15267	0.000243491	OXPHOS
290	Q791T5-2;Q791T5;D3YXC2	Mtch1	Mitochondrial carrier homolog 1	-0.810309	0.680639	0.139247	0.782093	0.486856	0.517275	0.038325	0.983783	-0.81107	0.0198932	Mitochondrial carriers or transport
291	Q791V5;A2AFW6;Q9D050;D6RCZ1	Mtch2	Mitochondrial carrier homolog 2	-0.030604	0.976859	0.340497	0.115306	0.723557	0.00442422	0.56164	0.106718	0.486705	0.0671427	Mitochondrial carriers or transport
341	Q8BKY8	Mterf2	Transcription termination factor 2, mitochondrial	-0.5123	0.0588983	-0.50308	0.0313611	-0.169683	0.100643	-0.116545	0.426129	-0.465912	0.00876999	Mitochondrial transcription and mtRNA metabolism
606	Q9CRB8	Mtfp1	Mitochondrial fission process protein 1	-0.601272	0.025208	-0.200703	0.512041	0.121831	0.469995	-0.252012	0.312729	0.101163	0.821347	Mitochondrial morphology
611	Q9CWE0;D3YW54;D6RCX5;D3Z0X8;Q9CWE0-2	Mtfr1l	Mitochondrial fission regulator 1-like	0.480719	0.0090647	0.25571	0.120127	0.233035	0.0753158	-0.337412	0.580738	0.469891	0.0366016	Mitochondrial morphology
436	Q8R2R6	Mtg1	Mitochondrial ribosome-associated GTPase 1	NA	NA	NA	NA	-0.817266	0.148465	1.68045	0.0593574	2.52857	0.0188111	Other mitochondrial protein synthesis factors
229	Q3V3R1	Mthfd1l	Monofunctional C1-tetrahydrofolate synthase, mitochondrial	3.97299	0.00373256	6.17519	6.37977e-05	5.65619	6.809e-13	5.40398	0.000205502	5.80485	1.13207e-06	Mitochondrial 1C pathway
119	P18155	Mthfd2	Bifunctional methylenetetrahydrofolate dehydrogenase/cyclohydrolase, mitochondrial;NAD-dependent methylenetetrahydrofolate dehydrogenase;Methenyltetrahydrofolate cyclohydrolase	7.1084	2.74334e-05	7.72593	0.000105341	8.05898	1.90605e-14	7.4316	0.000425945	7.5545	8.08984e-06	Mitochondrial 1C pathway
474	Q91YJ5;Q5M6W7;F6RR02;Q5M6W8	Mtif2	Translation initiation factor IF-2, mitochondrial	-0.35526	0.347575	-0.08294	0.493786	-0.153167	0.160488	0.711752	0.0101384	1.41478	4.6293e-05	Other mitochondrial protein synthesis factors
632	Q9CZD5;D3YWL2;D3Z0H9	Mtif3	Translation initiation factor IF-3, mitochondrial	NA	NA	-1.14876	0.329401	-0.589217	0.262372	1.63691	0.037504	2.29244	0.011406	Other mitochondrial protein synthesis factors
67	G5E889;Q923Z3;F6WQ99;D6RCK0	Mto1	Protein MTO1 homolog, mitochondrial	NA	NA	NA	NA	NA	NA	1.43802	0.0286476	1.8459	0.000286458	Mitochondrial transcription and mtRNA metabolism
647	Q9D0D3	Mtpap	Poly(A) RNA polymerase, mitochondrial	NA	NA	0.36421	0.235242	0.669351	0.10944	1.99233	0.112385	2.84308	0.00414998	Mitochondrial transcription and mtRNA metabolism
56	F7C846;P47802;D3Z3F4;D3YVW0;G3XA75;G3UYJ5;G3UXX9;G3UXB5	Mtx1	Metaxin-1	0.502901	0.0747191	0.568537	0.0323048	0.559623	0.000103679	0.102728	0.616789	1.03574	0.000409822	Mitochondrial import and chaperones
97	O88441	Mtx2	Metaxin-2	0.215363	0.410033	0.426303	0.0545574	0.23267	0.0103302	0.367006	0.0589142	0.641632	0.000722883	Mitochondrial import and chaperones
449	Q8VCM5;Q8VCM5-3;Q8VCM5-2	Mul1	Mitochondrial ubiquitin ligase activator of NFKB 1	NA	NA	-0.336093	0.806471	NA	NA	1.17664	0.0131958	1.05684	0.235383	Other
114	P16332	Mut	Methylmalonyl-CoA mutase, mitochondrial	-0.841397	0.00115928	-1.44155	0.000577661	-0.502646	0.00223247	-1.36126	0.00029082	-1.73034	9.09962e-07	Pyruvate and aminoacid metabolism
373	Q8C5H8-2;Q8C5H8-3;Q8C5H8;Q8C5H8-4;Z4YK42	Nadk2	NAD kinase 2, mitochondrial	0.233956	0.179336	0.308607	0.0534259	-0.00363678	0.980864	0.473628	0.00483242	0.571184	0.0104379	Other
323	Q8BGV0;D3YV21	Nars2	Probable asparagine--tRNA ligase, mitochondrial	0.644274	0.0483198	0.86491	0.00235496	0.925852	0.0168603	1.30071	0.000205502	1.29671	0.000127774	Mitochondrial transcription and mtRNA metabolism
88	O35683	Ndufa1	NADH dehydrogenase [ubiquinone] 1 alpha subcomplex subunit 1	-3.3916	0.0440681	-5.3166	0.00278026	-3.60021	0.000239514	-1.34872	0.0163474	-5.0789	3.92418e-07	OXPHOS
515	Q99LC3	Ndufa10	NADH dehydrogenase [ubiquinone] 1 alpha subcomplex subunit 10, mitochondrial	-1.53981	0.000100731	-2.71809	3.25676e-05	-1.82336	3.03565e-11	-0.74471	0.00204846	-3.0179	4.16628e-07	OXPHOS
64	G5E814;Q9D8B4	Ndufa11	NADH dehydrogenase [ubiquinone] 1 alpha subcomplex subunit 11	-1.20662	0.00171804	-2.71891	0.00502932	-1.76509	1.93406e-07	-0.709923	0.00597528	-3.00657	2.61858e-05	OXPHOS
298	Q7TMF3;F6RBR6	Ndufa12	NADH dehydrogenase [ubiquinone] 1 alpha subcomplex subunit 12	-1.80757	0.000138109	-3.01034	3.25676e-05	-2.05252	3.03565e-11	-0.924797	0.000833869	-3.38026	1.43104e-07	OXPHOS
739	Q9ERS2	Ndufa13	NADH dehydrogenase [ubiquinone] 1 alpha subcomplex subunit 13	-1.49504	0.00012039	-2.71879	0.000124568	-1.68617	3.03565e-11	-0.793543	0.00187706	-2.69552	2.35696e-07	OXPHOS
561	Q9CQ75	Ndufa2	NADH dehydrogenase [ubiquinone] 1 alpha subcomplex subunit 2	-1.87034	0.000181576	-2.82793	0.00235453	-2.46581	1.58652e-12	-0.618505	0.0314027	-3.57737	1.42011e-07	OXPHOS
563	Q9CQ91;D3Z670	Ndufa3	NADH dehydrogenase [ubiquinone] 1 alpha subcomplex subunit 3	-1.94387	0.00876843	-5.77384	0.0185744	-1.50038	1.44435e-07	-0.414407	0.0686203	-2.15672	0.000125098	OXPHOS
264	Q62425	Ndufa4	Cytochrome c oxidase subunit NDUFA4	-1.30123	0.000293342	-2.08612	5.61729e-05	-1.43158	2.7766e-08	-2.67431	1.27972e-05	-2.77062	2.30603e-07	OXPHOS
537	Q9CPP6;D3YTQ8	Ndufa5	NADH dehydrogenase [ubiquinone] 1 alpha subcomplex subunit 5	-1.4558	0.000116643	-2.34947	5.14112e-05	-1.68235	3.03565e-11	-0.270668	0.122834	-2.69797	2.73174e-07	OXPHOS
594	Q9CQZ5	Ndufa6	NADH dehydrogenase [ubiquinone] 1 alpha subcomplex subunit 6	-1.61271	0.00204771	-2.59393	6.91624e-05	-1.91667	4.46103e-11	-0.363707	0.0624089	-3.11427	9.73305e-08	OXPHOS
787	Q9Z1P6	Ndufa7	NADH dehydrogenase [ubiquinone] 1 alpha subcomplex subunit 7	-1.76592	0.0016486	-3.30582	0.000853535	-2.28074	3.00179e-11	-0.488474	0.04872	-3.85782	2.30603e-07	OXPHOS
721	Q9DCJ5	Ndufa8	NADH dehydrogenase [ubiquinone] 1 alpha subcomplex subunit 8	-1.44301	0.000107552	-2.38504	5.5182e-05	-1.70573	2.91079e-12	-0.767187	0.00107898	-2.67128	4.16628e-07	OXPHOS
715	Q9DC69	Ndufa9	NADH dehydrogenase [ubiquinone] 1 alpha subcomplex subunit 9, mitochondrial	-1.31968	0.00530973	-2.03301	5.61729e-05	-1.29879	3.26239e-10	-0.665212	0.00403101	-2.00433	2.18972e-06	OXPHOS
54	F6ZFT1;F8WJ64;Q9CR21	Ndufab1	Acyl carrier protein;Acyl carrier protein, mitochondrial	-0.626615	0.125148	-0.505187	0.117344	-0.403167	0.0129315	0.0118567	0.971082	-0.17769	0.583619	OXPHOS
9	A2AQ17;Q9CWX2	Ndufaf1	Complex I intermediate-associated protein 30, mitochondrial	-0.0529307	0.760064	-0.150003	0.180586	-0.292432	0.0511427	0.990247	0.000316716	0.514067	0.0129942	OXPHOS assembly and biogenesis
236	Q59J78	Ndufaf2	Mimitin, mitochondrial	0.368256	0.0595192	0.929197	0.000994204	0.537518	6.41277e-06	0.48681	0.00394151	0.565329	0.00613901	OXPHOS assembly and biogenesis
752	Q9JKL4	Ndufaf3	NADH dehydrogenase [ubiquinone] 1 alpha subcomplex assembly factor 3	0.48036	0.17461	0.63898	0.00502011	0.417197	0.00323525	0.157696	0.326935	0.826175	0.00210208	OXPHOS assembly and biogenesis
662	Q9D1H6;A2AJX3	Ndufaf4	NADH dehydrogenase [ubiquinone] 1 alpha subcomplex assembly factor 4	0.342878	0.0759833	0.21902	0.196152	0.14609	0.187507	-0.123377	0.460597	0.476815	0.0283199	OXPHOS assembly and biogenesis
8	A2APY7;A2APY7-2	Ndufaf5	NADH dehydrogenase [ubiquinone] 1 alpha subcomplex assembly factor 5	1.27687	0.195642	0.534407	0.00432938	0.529518	0.00108843	0.0136008	0.959643	0.686857	0.000482915	OXPHOS assembly and biogenesis
3	A2AIL4	Ndufaf6	NADH dehydrogenase (ubiquinone) complex I, assembly factor 6	0.743746	0.00146159	0.654163	0.0176128	0.276968	0.0449045	0.370173	0.199828	1.0076	0.00131993	OXPHOS assembly and biogenesis
612	Q9CWG8;Q9CWG8-2	Ndufaf7	NADH dehydrogenase [ubiquinone] complex I, assembly factor 7	0.282518	0.376625	0.589737	0.00477689	0.44019	0.00538232	0.573498	0.0324475	0.696379	0.00456901	OXPHOS assembly and biogenesis
727	Q9DCS9;D3YUK4	Ndufb10	NADH dehydrogenase [ubiquinone] 1 beta subcomplex subunit 10	-1.32172	0.000247432	-2.06298	6.84478e-05	-1.26119	5.29266e-09	-0.925337	0.000756702	-2.0913	1.74135e-06	OXPHOS
79	O09111	Ndufb11	NADH dehydrogenase [ubiquinone] 1 beta subcomplex subunit 11, mitochondrial	-2.17437	0.0584735	-1.53165	0.000352522	-0.432557	0.00508994	-0.387278	0.170827	-1.4272	1.40347e-05	OXPHOS
543	Q9CPU2	Ndufb2	NADH dehydrogenase [ubiquinone] 1 beta subcomplex subunit 2, mitochondrial	-4.58047	0.0138156	-4.64335	0.0123194	-3.5332	1.33588e-05	-4.61093	0.0410093	-5.82598	2.34756e-06	OXPHOS
595	Q9CQZ6	Ndufb3	NADH dehydrogenase [ubiquinone] 1 beta subcomplex subunit 3	-1.4452	0.000820631	-5.20416	0.00619937	-2.39658	4.46441e-06	-0.993912	0.0478469	-5.20076	0.0020564	OXPHOS
569	Q9CQC7	Ndufb4	NADH dehydrogenase [ubiquinone] 1 beta subcomplex subunit 4	-1.54292	0.000630599	-2.77296	8.02745e-05	-1.98431	4.05592e-09	-0.939469	0.0114481	-3.57309	5.71225e-07	OXPHOS
574	Q9CQH3;D3Z568;D3YX99;F6Y6V5;D3Z6W9	Ndufb5	NADH dehydrogenase [ubiquinone] 1 beta subcomplex subunit 5, mitochondrial	-1.22866	0.0459809	-1.72456	0.000228878	-0.757082	6.18298e-08	-0.239141	0.298575	-1.41288	4.6293e-05	OXPHOS
217	Q3UIU2;A2AP32	Ndufb6	NADH dehydrogenase [ubiquinone] 1 beta subcomplex subunit 6	-1.87016	0.000230862	-6.09498	0.000126833	-2.41534	5.33244e-10	-1.59041	0.000396076	-7.19727	8.20285e-06	OXPHOS
600	Q9CR61	Ndufb7	NADH dehydrogenase [ubiquinone] 1 beta subcomplex subunit 7	-1.38165	0.00013703	-3.26107	0.00030131	-2.06517	9.38954e-09	-1.03055	0.00181309	-4.27779	4.519e-06	OXPHOS
678	Q9D6J5;Q3V406;F6VCY0;E9Q9J5;F6Z9R1	Ndufb8	NADH dehydrogenase [ubiquinone] 1 beta subcomplex subunit 8, mitochondrial	-1.68687	0.0483198	-2.92079	4.44787e-05	-1.5347	2.84811e-09	-0.690302	0.0286476	-3.02916	1.5254e-06	OXPHOS
576	Q9CQJ8	Ndufb9	NADH dehydrogenase [ubiquinone] 1 beta subcomplex subunit 9	-1.64331	0.000352047	-3.4597	5.14112e-05	-2.19491	1.37614e-11	-1.00267	0.00114788	-3.96361	7.44749e-07	OXPHOS
593	Q9CQY9	Ndufc1	NADH dehydrogenase [ubiquinone] 1 subunit C1, mitochondrial	-1.60633	0.0197205	NA	NA	NA	NA	-2.3136	0.0770028	NA	NA	OXPHOS
558	Q9CQ54	Ndufc2	NADH dehydrogenase [ubiquinone] 1 subunit C2	-1.91232	0.00030145	-2.41949	6.91624e-05	-1.73198	2.82125e-11	-0.877297	0.00483036	-2.7223	2.58703e-07	OXPHOS
463	Q91VD9	Ndufs1	NADH-ubiquinone oxidoreductase 75 kDa subunit, mitochondrial	-1.60443	0.00013703	-2.81156	3.25676e-05	-1.90435	1.30669e-11	-0.932034	0.000596722	-3.00383	8.38942e-08	OXPHOS
467	Q91WD5;D3YXT0;F6RJ83	Ndufs2	NADH dehydrogenase [ubiquinone] iron-sulfur protein 2, mitochondrial	-1.43288	0.00022533	-2.36618	4.44787e-05	-1.672	4.04823e-11	-0.615769	0.00632047	-2.24716	7.44749e-07	OXPHOS
728	Q9DCT2	Ndufs3	NADH dehydrogenase [ubiquinone] iron-sulfur protein 3, mitochondrial	-1.57628	0.000138109	-2.43734	5.14112e-05	-1.69731	7.54386e-11	-0.58812	0.0162881	-2.58938	2.59831e-07	OXPHOS
50	E9QPX3;Q9CXZ1	Ndufs4	NADH dehydrogenase [ubiquinone] iron-sulfur protein 4, mitochondrial	-1.45743	0.00104413	-2.8142	4.44787e-05	-1.89569	2.26578e-10	-0.867981	0.0154488	-3.52404	1.43104e-07	OXPHOS
519	Q99LY9;B1ARW4	Ndufs5	NADH dehydrogenase [ubiquinone] iron-sulfur protein 5;NADH dehydrogenase [ubiquinone] iron-sulfur protein 5, N-terminally processed	-1.89476	0.00012039	-3.063	5.61729e-05	-2.48411	1.05996e-08	-1.10905	0.00271003	-4.54308	4.98162e-07	OXPHOS
154	P52503;D6RJ54	Ndufs6	NADH dehydrogenase [ubiquinone] iron-sulfur protein 6, mitochondrial	-1.34726	0.00693071	-2.81641	5.14112e-05	-1.7909	1.88082e-10	-0.364897	0.118475	-3.54476	2.35696e-07	OXPHOS
716	Q9DC70	Ndufs7	NADH dehydrogenase [ubiquinone] iron-sulfur protein 7, mitochondrial	-1.28286	0.00142478	-2.30756	4.44787e-05	-1.60329	2.82125e-11	-0.649642	0.0180126	-2.44855	9.09962e-07	OXPHOS
413	Q8K3J1	Ndufs8	NADH dehydrogenase [ubiquinone] iron-sulfur protein 8, mitochondrial	-1.34462	7.27893e-05	-2.35722	5.14112e-05	-1.89758	7.97484e-11	-1.03276	0.000958295	-2.5419	1.49714e-07	OXPHOS
18	D3YUM1;Q91YT0;D3Z1U9;D6RG60;D3Z0K1;D3YXX5	Ndufv1	NADH dehydrogenase [ubiquinone] flavoprotein 1, mitochondrial	-1.6507	0.000107552	-2.83039	3.25676e-05	-1.99349	3.69404e-11	-0.919086	0.000889992	-3.35631	1.43104e-07	OXPHOS
679	Q9D6J6;Q9D6J6-2;M0QWP9;D6RGN4	Ndufv2	NADH dehydrogenase [ubiquinone] flavoprotein 2, mitochondrial	-1.71515	0.000107552	-2.57565	5.90756e-05	-1.79996	4.30795e-12	-0.855838	0.00322325	-3.02405	1.43104e-07	OXPHOS
338	Q8BK30	Ndufv3	NADH dehydrogenase [ubiquinone] flavoprotein 3, mitochondrial	-1.77103	0.000827596	-3.44253	3.25676e-05	-2.6731	5.81227e-10	-1.37614	0.00508056	-4.05177	2.35696e-07	OXPHOS
212	Q3U422	Ndufv3 (Q3U422)	NADH dehydrogenase [ubiquinone] flavoprotein 3, mitochondrial	0.0160607	0.924139	0.1933	0.225496	-0.0325308	0.799643	0.664825	0.0195754	0.246421	0.234101	Other
786	Q9Z1J3-2;Q9Z1J3;V9GXS4;F7CZD1;F6TXD3;A6QRH3	Nfs1	Cysteine desulfurase, mitochondrial	-0.103027	0.441939	-0.18141	0.229593	0.285171	0.0089596	-0.327918	0.031832	-0.525397	0.00412845	Pyruvate and aminoacid metabolism
763	Q9QZ23	Nfu1	NFU1 iron-sulfur cluster scaffold homolog, mitochondrial	0.828409	0.00173469	1.1954	0.00140977	1.10727	3.55916e-06	0.874465	0.00462985	0.790807	0.000166103	Iron sulphur cluster and heme biogenesis
736	Q9EQ80;D3Z0G0;E9PWJ6;D3YYF0	Nif3l1	Putative GTP cyclohydrolase 1 type 2 Nif3l1	NA	NA	1.31133	0.00317366	NA	NA	2.17032	0.0252386	3.053	0.00472358	Other
570	Q9CQE1;B1AWZ5;G3X8S9;B1AWZ3	Nipsnap3b	Protein NipSnap homolog 3B	3.05728	0.0100778	3.62398	0.00619937	1.85242	0.000104878	3.07221	0.000396076	3.29237	0.000441595	Unknown
743	Q9JHW2	Nit2	Omega-amidase NIT2	-0.374221	0.0260218	-0.409277	0.046081	-0.157788	0.194567	-0.248096	0.0740432	-0.551233	0.00357533	Other
477	Q91YP2	Nln	Neurolysin, mitochondrial	0.997929	0.346356	3.5394	0.0383546	2.63474	0.000316062	3.26639	0.00131448	3.52389	3.79957e-05	Other
776	Q9WV85	Nme3	Nucleoside diphosphate kinase 3	NA	NA	0.38786	0.0997678	1.39893	0.0156644	1.66856	0.000416211	0.987126	0.00226037	Mitochondrial nucleotide synthesis
504	Q99JR6;Q3V3C7;D3Z3B0;Q3V3F1	Nmnat3	Nicotinamide mononucleotide adenylyltransferase 3	0.113773	0.482622	0.53033	0.00360002	0.748184	2.93872e-05	0.352373	0.105905	0.765006	0.0016978	Other
263	Q61941;Q8C9V5;Q8BGK0;E9Q8F4	Nnt	NAD(P) transhydrogenase, mitochondrial	-0.073322	0.545624	0.12952	0.40019	0.800736	0.00120947	0.225725	0.278526	0.473393	0.0371296	Other
748	Q9JJG9	Noa1	Nitric oxide-associated protein 1	NA	NA	NA	NA	NA	NA	NA	NA	2.00122	0.0107531	Other
628	Q9CZ57;Q9CZ57-2	Nsun4	5-methylcytosine rRNA methyltransferase NSUN4	NA	NA	0.71863	0.228388	0.957873	0.0514468	2.23957	0.0319108	NA	NA	Mitochondrial transcription and mtRNA metabolism
216	Q3UHB1	Nt5dc3	5-nucleotidase domain-containing protein 3	0.225839	0.302839	0.251123	0.0390867	0.815831	1.04362e-05	0.555478	0.00704618	0.671734	0.0710383	Unknown
444	Q8VCE6	Nt5m	5(3)-deoxyribonucleotidase, mitochondrial	NA	NA	NA	NA	NA	NA	1.3898	0.0461833	NA	NA	Mitochondrial nucleotide synthesis
610	Q9CWD8;F7D3P0	Nubpl	Iron-sulfur protein NUBPL	1.69471	0.132205	0.624403	0.0138564	1.06232	0.0229055	1.42374	0.186255	0.569112	0.000850502	OXPHOS assembly and biogenesis
390	Q8JZU0	Nudt13	Nucleoside diphosphate-linked moiety X motif 13	1.71662	0.150032	2.72579	0.128854	1.5928	0.0327282	2.56156	0.0389138	1.21852	0.0221321	Other
110	P11930	Nudt19	Nucleoside diphosphate-linked moiety X motif 19, mitochondrial	NA	NA	NA	NA	0.957595	0.0388906	NA	NA	NA	NA	Lipid and acetyl CoA metabolism
164	P56380	Nudt2	Bis(5-nucleosyl)-tetraphosphatase [asymmetrical]	0.211649	0.370606	0.432457	0.0111208	0.33081	0.0151189	0.236216	0.199828	0.489722	0.0293424	Other
598	Q9CR24;D3Z5H8	Nudt8	Nucleoside diphosphate-linked moiety X motif 8, mitochondrial	0.984421	0.00165576	1.0426	0.00307546	1.00054	2.59763e-06	0.90756	0.00112512	0.96873	0.000130675	Unknown
608	Q9CRD0;Q9CRD0-2	Ociad1	OCIA domain-containing protein 1	0.425744	0.039337	0.76639	0.00507322	0.491221	1.17703e-05	0.450309	0.0356334	0.752365	0.000222753	Other
251	Q60597;Q60597-3;Z4YJV4;Q60597-2;Q60597-4;Q5SVY1	Ogdh	2-oxoglutarate dehydrogenase, mitochondrial	0.325243	0.0483198	0.631727	0.00615793	0.501502	6.02735e-06	0.599388	0.00254642	0.583538	0.000800468	Pyruvate and aminoacid metabolism
41	E9Q7L0	Ogdhl	2-oxoglutarate dehydrogenase-like, mitochondrial	-0.047616	0.877599	-0.187583	0.373202	-0.531181	0.00262841	-0.267078	0.400889	-0.084751	0.631741	Pyruvate and aminoacid metabolism
697	Q9D8H7;Q9D8H7-2	Oma1	Metalloendopeptidase OMA1, mitochondrial	1.29877	0.291179	0.79435	0.0809567	0.88553	0.0736689	0.08488	0.812263	1.57932	0.015457	Mitochondrial morphology
174	P58281-2;P58281;H7BX01;E0CXD1;F6U775;P58682	Opa1	Dynamin-like 120 kDa protein, mitochondrial;Dynamin-like 120 kDa protein, form S1	-0.0523413	0.707141	0.173733	0.100457	0.186973	0.102238	-0.494043	0.00521959	0.104595	0.299051	Mitochondrial morphology
234	Q505D7	Opa3	Optic atrophy 3 protein homolog	0.114327	0.54922	0.75784	0.0420221	0.170293	0.254257	0.470533	0.0606169	0.234145	0.136527	Unknown
317	Q8BGA9	Oxa1l	Mitochondrial inner membrane protein OXA1L	2.22907	0.136457	1.96767	0.116008	2.14011	0.00271708	2.87482	0.0624089	4.37135	2.65094e-06	OXPHOS assembly and biogenesis
649	Q9D0K2;Q3UJQ9	Oxct1	Succinyl-CoA:3-ketoacid coenzyme A transferase 1, mitochondrial;Succinyl-CoA:3-ketoacid-coenzyme A transferase	0.126879	0.647839	0.5555	0.011775	0.622834	9.23901e-05	0.811175	0.00178832	1.20009	3.40855e-05	Lipid and acetyl CoA metabolism
596	Q9CR10;H3BK04	Oxld1	Oxidoreductase-like domain-containing protein 1	-0.324154	0.0330825	-0.29134	0.151358	0.217223	0.760529	1.58623	0.337168	-0.447679	0.0402492	Other
456	Q8VE38-2;Q8VE38;E9Q690;E9Q8U8;F6XLU3;E9PZL5;F6SAD4;E9Q2B7	Oxnad1	Oxidoreductase NAD-binding domain-containing protein 1	0.0929873	0.661335	0.26972	0.040571	0.256668	0.0165696	0.131492	0.435541	0.142348	0.415834	Unknown
676	Q9D404;D3Z6F9	Oxsm	3-oxoacyl-[acyl-carrier-protein] synthase, mitochondrial	0.0536913	0.758903	-0.298997	0.0499924	0.0297439	0.861269	-0.102746	0.557671	-0.148514	0.32822	Lipid and acetyl CoA metabolism
587	Q9CQV1;D6RI93	Pam16	Mitochondrial import inner membrane translocase subunit TIM16	0.944897	0.00573273	1.03516	0.000746004	0.937781	8.43431e-07	0.714155	0.0055866	1.22533	5.37891e-05	Mitochondrial import and chaperones
518	Q99LX0;A2A813;A2A815;A2A817;A2A816	Park7	Protein DJ-1	0.515377	0.0483198	0.271667	0.599718	0.231313	0.142801	0.224427	0.540632	0.176554	0.38035	Other
250	Q5XJY4;D6RJ50;D6RCZ6	Parl	Presenilins-associated rhomboid-like protein, mitochondrial;P-beta	1.24853	0.146722	3.06807	0.0128835	2.18171	0.00181431	1.66974	0.04872	2.06282	0.00391666	Apoptosis
633	Q9CZL5;P61458	Pcbd2	Pterin-4-alpha-carbinolamine dehydratase 2	0.507659	0.0398969	0.956793	0.0026792	0.68157	1.42362e-05	0.747552	0.0109427	0.615703	0.000781224	Other
480	Q91ZA3;H3BL62;D3YWM4;D3YZC0;H3BK61;H3BJR0;H3BKW6	Pcca	Propionyl-CoA carboxylase alpha chain, mitochondrial	-0.141536	0.312376	0.107083	0.375296	0.29219	0.0110087	-0.00565417	0.97033	0.164347	0.154839	Other
525	Q99MN9;E9Q1J7;D3YZC1	Pccb	Propionyl-CoA carboxylase beta chain, mitochondrial	-0.0455587	0.762371	0.104257	0.40019	0.238206	0.0423742	-0.070335	0.571765	0.0636655	0.62501	Other
325	Q8BH04	Pck2	Phosphoenolpyruvate carboxykinase [GTP], mitochondrial	6.82193	6.57095e-05	7.87671	5.94288e-05	6.89389	4.36384e-10	7.06822	6.80775e-05	7.39926	4.35679e-06	Pyruvate and aminoacid metabolism
69	G5E8R3;E9QPD7;Q05920	Pcx;Pc	Pyruvate carboxylase;Pyruvate carboxylase, mitochondrial	0.378403	0.289783	-0.225157	0.520497	0.790632	0.000755039	-0.0205025	0.876083	0.384334	0.0156942	Pyruvate and aminoacid metabolism
794	S4R2K0	Pdf	Peptide deformylase	-0.0996113	0.410033	0.0955033	0.594371	0.226358	0.0290733	0.807698	0.245413	-0.133251	0.37012	Other mitochondrial protein synthesis factors
129	P35486;P35487	Pdha1	Pyruvate dehydrogenase E1 component subunit alpha, somatic form, mitochondrial	0.325538	0.0267509	0.32113	0.0380432	0.173692	0.0966645	0.20238	0.144434	0.223126	0.0876559	Pyruvate and aminoacid metabolism
645	Q9D051	Pdhb	Pyruvate dehydrogenase E1 component subunit beta, mitochondrial	0.307829	0.0834197	0.435563	0.00738096	0.272638	0.00370958	0.125227	0.312089	0.477135	0.0121947	Pyruvate and aminoacid metabolism
342	Q8BKZ9;A2AWH7;A2AWH8	Pdhx	Pyruvate dehydrogenase protein X component, mitochondrial	0.233391	0.200235	0.586337	0.0109676	0.491399	4.27173e-05	0.788908	0.00916801	0.576255	0.00371744	Pyruvate and aminoacid metabolism
314	Q8BFP9	Pdk1	[Pyruvate dehydrogenase (acetyl-transferring)] kinase isozyme 1, mitochondrial	0.135468	0.466194	0.17588	0.23704	0.495792	0.00034742	0.000423333	0.998237	0.398334	0.0568335	Pyruvate and aminoacid metabolism
750	Q9JK42	Pdk2	[Pyruvate dehydrogenase (acetyl-transferring)] kinase isozyme 2, mitochondrial	-0.419753	0.0463005	-0.828733	0.00075498	0.0641078	0.719938	-0.646105	0.00226111	-0.734004	0.00995534	Pyruvate and aminoacid metabolism
490	Q922H2	Pdk3	[Pyruvate dehydrogenase (acetyl-transferring)] kinase isozyme 3, mitochondrial	NA	NA	1.79818	0.0139883	1.19481	0.00424537	NA	NA	2.32647	7.35254e-05	Pyruvate and aminoacid metabolism
95	O70571	Pdk4	[Pyruvate dehydrogenase (acetyl-transferring)] kinase isozyme 4, mitochondrial	0.544231	0.0818943	-0.556687	0.0440992	1.93657	0.0203716	-0.448836	0.0798563	-0.0683395	0.833248	Pyruvate and aminoacid metabolism
4	A2AJP9;A8Y5Q0;A2AJQ0;Q3UV70	Pdp1	[Pyruvate dehydrogenase [acetyl-transferring]]-phosphatase 1, mitochondrial	0.213469	0.225645	0.356717	0.0126158	0.508248	0.00190924	0.342548	0.0547114	0.228397	0.0562224	Pyruvate and aminoacid metabolism
233	Q504M2	Pdp2	[Pyruvate dehydrogenase [acetyl-transferring]]-phosphatase 2, mitochondrial	-0.464607	0.320337	-2.32028	0.000522564	-1.19952	0.034678	-0.368668	0.635513	-0.973462	0.0692872	Pyruvate and aminoacid metabolism
304	Q7TSQ8;D6RD07;D3Z443	Pdpr	Pyruvate dehydrogenase phosphatase regulatory subunit, mitochondrial	0.064906	0.867566	0.444103	0.016043	1.02234	0.000960886	0.517697	0.0188938	0.744834	0.00341011	Pyruvate and aminoacid metabolism
202	Q33DR3;E0CYM9;Q33DR3-2;F6T4Z4;Q33DR3-3	Pdss2	Decaprenyl-diphosphate synthase subunit 2	NA	NA	1.91916	0.0380692	0.863061	0.0960802	2.1693	0.00978962	0.803297	0.202814	Ubiquinone biosynthesis
505	Q99JT1;Q8BW84;Q3TLZ6	Pet112	Glutamyl-tRNA(Gln) amidotransferase subunit B, mitochondrial	-0.562137	0.428995	0.498933	0.0156417	0.658587	4.35925e-05	-0.0338358	0.925415	2.10449	0.00899541	Mitochondrial transcription and mtRNA metabolism
366	Q8BX10-2;Q8BX10;F6YJC6	Pgam5	Serine/threonine-protein phosphatase PGAM5, mitochondrial	1.493	0.0563111	3.06322	0.0268605	2.08119	9.01581e-08	1.98683	0.000118818	3.45309	1.95863e-05	Other
184	P67778;Q5SQG5	Phb	Prohibitin	0.538413	0.00530136	0.765507	0.00144308	0.708142	6.30036e-07	0.473601	0.0523413	1.05566	1.2039e-05	Other
82	O35129;F6QPR1;F6Q8V7	Phb2	Prohibitin-2	0.541675	0.00705342	0.82841	0.00399702	0.492157	1.49413e-05	0.545689	0.00431898	0.970715	3.54612e-05	Other
84	O35386	Phyh	Phytanoyl-CoA dioxygenase, peroxisomal	NA	NA	NA	NA	-1.07007	0.0103493	NA	NA	NA	NA	Lipid and acetyl CoA metabolism
414	Q8K411-2;Q8K411;Q8K411-3	Pitrm1	Presequence protease, mitochondrial	0.286487	0.0382129	0.52516	0.00307966	0.450076	4.22141e-05	0.277718	0.0443231	0.71377	0.000212735	Mitochondrial import and chaperones
714	Q9DC61;A2AIW9	Pmpca	Mitochondrial-processing peptidase subunit alpha	0.816513	0.00217835	0.83186	0.0052135	0.715243	5.97147e-07	0.854952	0.000394719	0.702539	0.00167581	Mitochondrial import and chaperones
619	Q9CXT8;D3Z1T9	Pmpcb	Mitochondrial-processing peptidase subunit beta	0.606025	0.00358172	0.80037	0.00248285	0.666644	1.06812e-06	0.730566	0.00515577	0.749382	0.000111453	Mitochondrial import and chaperones
402	Q8K1N1;E9QAC9;E9PXB0;F7B2N8	Pnpla8	Calcium-independent phospholipase A2-gamma	1.64517	0.00732775	2.53548	0.00551945	2.19621	1.2871e-07	1.52527	0.00904852	3.8664	2.08375e-06	Lipid and acetyl CoA metabolism
403	Q8K1R3;Q8K1R3-2	Pnpt1	Polyribonucleotide nucleotidyltransferase 1, mitochondrial	0.352827	0.0162948	0.79696	0.00240775	0.799436	2.25848e-06	0.501379	0.0049931	1.0279	8.21639e-05	Mitochondrial transcription and mtRNA metabolism
460	Q91VA6;F6SQH7	Poldip2	Polymerase delta-interacting protein 2	0.818435	0.0034514	0.519753	0.0295028	1.0479	2.66135e-08	1.3144	0.0040949	1.01891	9.27564e-05	Unknown
340	Q8BKF1;E9PWD9;E0CY15;F6TLB0	Polrmt	DNA-directed RNA polymerase, mitochondrial;DNA-directed RNA polymerase	NA	NA	1.63443	0.138047	NA	NA	0.768826	0.438725	1.53358	0.0107884	Mitochondrial transcription and mtRNA metabolism
367	Q8BXN7	Ppm1k	Protein phosphatase 1K, mitochondrial	-1.83886	0.00982782	-1.89983	0.00765836	-1.56655	0.000104677	-1.76333	0.0157974	-0.832359	0.00786239	Other
272	Q6NVE9;Q6NVE9-2	Pptc7	Protein phosphatase PTC7 homolog	0.547375	0.0298254	0.68576	0.00322106	0.594693	0.000629179	0.425993	0.0231787	0.95904	3.01908e-05	Unknown
121	P20108	Prdx3	Thioredoxin-dependent peroxide reductase, mitochondrial	0.111675	0.511095	0.197883	0.1823	0.409702	9.71907e-05	0.256795	0.0429829	0.357632	0.0853601	Degradation and stress response
772	Q9WU79;F6PYI8;F6YFQ5;F6XMC0;E9PUR5	Prodh	Proline dehydrogenase 1, mitochondrial	0.29997	0.275163	0.102253	0.295697	0.151963	0.15463	0.633164	0.00295766	0.186237	0.146544	Pyruvate and aminoacid metabolism
792	Q9Z2Y8;Q80ZV3	Prosc	Proline synthase co-transcribed bacterial homolog protein	-0.100813	0.494564	0.285593	0.0244702	0.357157	0.00665198	0.0266108	0.920615	-0.469003	0.0158781	Other
439	Q8R3K3	Ptcd2	Pentatricopeptide repeat-containing protein 2, mitochondrial	0.301663	0.742619	-1.36029	0.0675616	-1.28277	0.00447321	-0.178677	0.217587	0.614141	0.0201753	Mitochondrial transcription and mtRNA metabolism
364	Q8BWM0	Ptges2	Prostaglandin E synthase 2;Prostaglandin E synthase 2 truncated form	0.924662	0.00071371	1.17376	0.00030131	0.896821	1.0323e-06	0.485965	0.00478273	1.19803	1.69456e-05	Lipid and acetyl CoA metabolism
271	Q66GT5	Ptpmt1	Phosphatidylglycerophosphatase and protein-tyrosine phosphatase 1	1.46334	0.138413	0.940037	0.000478325	0.68538	1.35789e-07	0.687773	0.0157206	1.22741	0.00102285	Lipid and acetyl CoA metabolism
437	Q8R2Y8	Ptrh2	Peptidyl-tRNA hydrolase 2, mitochondrial	1.56929	0.100907	0.96187	0.00432938	0.580612	2.64316e-05	0.924073	0.0065139	0.947872	7.06789e-05	Mitochondrial transcription and mtRNA metabolism
771	Q9WU56;H7BX59;Q9WU56-2;Q9WU56-4;Q9WU56-3;D3YWU8;D3Z092	Pus1	tRNA pseudouridine synthase A, mitochondrial;tRNA pseudouridine synthase	NA	NA	NA	NA	NA	NA	2.13458	0.0188938	2.68283	0.000100082	Mitochondrial transcription and mtRNA metabolism
1	A2ADA5;A2ADA5-2;A2ADA5-3	Pusl1	tRNA pseudouridine synthase-like 1	NA	NA	NA	NA	NA	NA	2.30825	0.0128243	3.21168	2.43358e-06	Unknown
493	Q922W5;A2ABZ2;A2ABZ3;A2ABZ0	Pycr1	Pyrroline-5-carboxylate reductase 1, mitochondrial	6.13952	7.27893e-05	7.38642	0.000365364	5.55998	1.18476e-12	6.22886	0.000177545	6.55777	8.38942e-08	Pyruvate and aminoacid metabolism
492	Q922Q4	Pycr2	Pyrroline-5-carboxylate reductase 2	2.51026	0.000708459	4.13429	4.44787e-05	3.24128	1.36662e-06	3.44059	0.00995766	3.89919	0.000778358	Pyruvate and aminoacid metabolism
661	Q9D1C3	Pyurf	Protein preY, mitochondrial	0.952585	0.606576	NA	NA	-1.68652	0.20248	-0.623329	0.798158	-3.03859	0.0144906	Unknown
359	Q8BVI4;D3Z1A1;D3Z099	Qdpr	Dihydropteridine reductase	0.691793	0.219304	0.36227	0.0584335	0.794142	0.155626	0.68163	0.0430795	0.554909	0.00302726	Other
635	Q9CZN8	Qrsl1	Glutamyl-tRNA(Gln) amidotransferase subunit A, mitochondrial	0.296973	0.0930107	0.421187	0.0190829	0.67808	5.42798e-05	0.900783	0.0120886	0.89074	0.000564605	Mitochondrial transcription and mtRNA metabolism
209	Q3U186;A2AT41	Rars2	Probable arginine--tRNA ligase, mitochondrial	-0.684664	0.306489	-2.28099	0.0151487	-1.33927	0.00358737	2.10051	0.000361997	2.95698	4.02118e-05	Mitochondrial transcription and mtRNA metabolism
274	Q6P3B9	Rbfa	Putative ribosome-binding factor A, mitochondrial	NA	NA	NA	NA	NA	NA	2.82337	0.00846239	2.64248	8.62257e-05	Other mitochondrial protein synthesis factors
380	Q8CEE7;D3YVJ8	Rdh13	Retinol dehydrogenase 13	0.557575	0.0016447	0.827787	0.00075498	0.325694	0.00414223	0.466599	0.0610088	0.900492	0.000155813	Unknown
738	Q9ERI6	Rdh14	Retinol dehydrogenase 14	0.374177	0.260782	0.18956	0.471128	0.125302	0.359178	0.499098	0.032666	0.392775	0.0205195	Other
699	Q9D8S4	Rexo2	Oligoribonuclease, mitochondrial	1.90794	0.0081023	2.47697	0.00125962	2.53823	1.30803e-05	2.0909	0.0404445	4.38876	0.000471741	Mitochondrial transcription and mtRNA metabolism
316	Q8BG51-3;Q8BG51-4;Q8BG51;Q8BG51-2;F7ASU3	Rhot1	Mitochondrial Rho GTPase 1	0.687745	0.0207	0.0784367	0.514808	0.283608	0.14978	-0.125017	0.570037	0.231661	0.0801374	Other
388	Q8JZN7;H3BKJ1;H3BKL2;H3BL14	Rhot2;Gm20683	Mitochondrial Rho GTPase 2	2.10453	0.0582924	0.471663	0.174179	1.23438	0.0134674	0.810516	0.164832	1.59663	0.0159333	Other
730	Q9DCV4;A2AGJ2	Rmdn1	Regulator of microtubule dynamics protein 1	0.395893	0.0473472	0.79037	0.0014133	0.803925	1.58759e-05	0.887269	0.000977162	1.1884	0.000621465	Unknown
385	Q8CI78;F6QWS3	Rmnd1	Required for meiotic nuclear division protein 1 homolog	NA	NA	1.71446	0.000922608	1.24759	0.0388674	NA	NA	1.06748	0.0863706	Other mitochondrial protein synthesis factors
241	Q5ND52	Rnmtl1	RNA methyltransferase-like protein 1	NA	NA	NA	NA	NA	NA	NA	NA	1.54831	0.00637737	Mitochondrial transcription and mtRNA metabolism
177	P60603	Romo1	Reactive oxygen species modulator 1	-3.34773	0.0513008	-2.07938	0.0564747	-2.35645	0.0681125	-1.69376	0.332004	-3.97552	0.000525564	Other
495	Q924D0;D3Z792	Rtn4ip1	Reticulon-4-interacting protein 1, mitochondrial	-0.20963	0.216739	-0.382807	0.0123194	-0.0557716	0.637686	-0.717626	0.00374025	-0.374963	0.0703787	Unknown
321	Q8BGH2	Samm50	Sorting and assembly machinery component 50 homolog	0.351519	0.0591525	0.465633	0.0093466	0.388182	7.29073e-05	0.199774	0.249285	0.700895	0.00244501	OXPHOS assembly and biogenesis
514	Q99LB7;A2AH52;A2AH53	Sardh	Sarcosine dehydrogenase, mitochondrial	NA	NA	1.37828	0.0523183	0.155841	0.803524	NA	NA	2.19957	4.70697e-05	Mitochondrial 1C pathway
749	Q9JJL8	Sars2	Serine--tRNA ligase, mitochondrial	0.153728	0.425245	0.417673	0.011331	0.417282	0.00471938	0.430532	0.0946757	1.02324	8.32308e-05	Mitochondrial transcription and mtRNA metabolism
427	Q8R127;J3QNN5;F6S0R8	Sccpdh	Saccharopine dehydrogenase-like oxidoreductase	-0.0468253	0.820907	-0.20927	0.242023	-0.397047	0.00513335	-0.244442	0.343934	-0.40744	0.112936	Unknown
245	Q5SUD5;Q5SUC9	Sco1	Protein SCO1 homolog, mitochondrial	0.190419	0.329649	0.266957	0.208814	0.166347	0.198698	0.529713	0.026227	0.176772	0.41364	Other
447	Q8VCL2	Sco2	Protein SCO2 homolog, mitochondrial	2.02453	0.205551	4.0568	0.0613236	3.15607	3.24552e-05	1.00023	0.14085	3.34716	0.00715023	OXPHOS assembly and biogenesis
127	P32020;P32020-2;A2APS4	Scp2	Non-specific lipid-transfer protein	-0.61464	0.609427	NA	NA	-1.23461	0.00564361	0.0725075	0.934599	-1.27203	0.123641	Mitochondrial carriers or transport
406	Q8K2B3	Sdha	Succinate dehydrogenase [ubiquinone] flavoprotein subunit, mitochondrial	0.0981207	0.441939	0.108103	0.484761	0.121309	0.121985	-0.359498	0.0102065	-0.009757	0.924997	OXPHOS
374	Q8C6I2;Q8C6I2-3;Q8C6I2-2	Sdhaf2	Succinate dehydrogenase assembly factor 2, mitochondrial	0.126286	0.729177	2.01882	0.0148247	1.92728	0.00768472	1.00187	0.00458426	-0.0741775	0.785215	OXPHOS assembly and biogenesis
565	Q9CQA3	Sdhb	Succinate dehydrogenase [ubiquinone] iron-sulfur subunit, mitochondrial	0.136194	0.294048	-0.0406533	0.716974	-0.0298709	0.739711	-0.525499	0.0183023	-0.345128	0.0320869	OXPHOS
630	Q9CZB0;F8WGB3;D3Z1A8	Sdhc	Succinate dehydrogenase cytochrome b560 subunit, mitochondrial	0.338629	0.782739	0.34824	0.20002	0.927768	0.00302226	0.215293	0.56158	0.924414	0.0077764	OXPHOS
634	Q9CZN7	Shmt2	Serine hydroxymethyltransferase	2.42382	7.27893e-05	3.05867	3.25676e-05	2.3788	1.58652e-12	2.74301	1.27972e-05	3.33655	1.49714e-07	Mitochondrial 1C pathway
407	Q8K2C6	Sirt5	NAD-dependent protein deacylase sirtuin-5, mitochondrial	0.105439	0.412476	0.645013	0.00525739	0.172674	0.0877366	0.163364	0.186255	0.232576	0.06453	Other
391	Q8JZU2;F6VVY4	Slc25a1	Tricarboxylate transport protein, mitochondrial	2.36517	0.0562613	0.29905	0.816281	0.331062	0.347603	1.19658	0.199581	1.66582	0.00341523	Mitochondrial carriers or transport
764	Q9QZD8	Slc25a10	Mitochondrial dicarboxylate carrier	0.975599	0.160346	NA	NA	1.22843	0.00020725	1.66235	0.0120061	1.2516	0.0387875	Mitochondrial carriers or transport
793	Q9Z2Z6	Slc25a20	Mitochondrial carnitine/acylcarnitine carrier protein	0.0697927	0.899921	0.458627	0.0766179	0.38492	0.0164178	-0.127873	0.449851	0.651868	0.0145418	Mitochondrial carriers or transport
682	Q9D6M3;E9PV90;E9PY45;E9Q6M6;Q80X52;E9Q579;V9GWS2;Q9DB41-2;Q9DB41;G3UX09;V9GWV4;G3UY41	Slc25a22	Mitochondrial glutamate carrier 1	0.640071	0.135117	1.02554	0.00119111	0.737122	7.22315e-05	1.03068	0.000642722	1.06741	9.5356e-05	Mitochondrial carriers or transport
71	G5E902;E9PX16	Slc25a3	Phosphate carrier protein, mitochondrial	0.549575	0.50658	0.434853	0.1341	0.660645	0.0489237	0.154337	0.627981	0.473976	0.0562224	Mitochondrial carriers or transport
2	A2ADF7;A2ADF7-2	Slc25a34	Solute carrier family 25 member 34	0.468593	0.626331	NA	NA	1.18444	0.00178542	1.28329	0.179218	1.28163	0.0861749	Mitochondrial carriers or transport
246	Q5SWT3	Slc25a35	Solute carrier family 25 member 35	NA	NA	-1.31778	0.134883	NA	NA	0.731028	0.00210896	0.471531	0.26295	Mitochondrial carriers or transport
145	P48962	Slc25a4	ADP/ATP translocase 1	-0.045542	0.878708	0.0336	0.806471	-0.196225	0.140944	-0.399126	0.031815	-0.450306	0.00505304	Mitochondrial carriers or transport
424	Q8R0Y8	Slc25a42	Mitochondrial coenzyme A transporter SLC25A42	-0.0747087	0.814269	-0.475817	0.0104179	-0.281473	0.0354363	-0.713517	0.00252625	-0.544319	0.0136185	Mitochondrial carriers or transport
586	Q9CQS4	Slc25a46	Solute carrier family 25 member 46	-0.591234	0.428995	-0.748853	0.487895	1.27447	0.017226	-1.33366	0.00254642	NA	NA	Mitochondrial carriers or transport
152	P51881	Slc25a5	ADP/ATP translocase 2;ADP/ATP translocase 2, N-terminally processed	0.864215	0.0253041	1.05445	0.00109555	0.442978	0.000580225	0.511372	0.00966626	1.0363	6.48333e-05	Mitochondrial carriers or transport
238	Q5IRJ6;Q5IRJ6-2;F8WHL1	Slc30a9	Zinc transporter 9	1.63174	0.306891	1.51395	0.0732948	1.63343	0.00586627	0.589187	0.0459093	0.510155	0.0707022	Mitochondrial carriers or transport
701	Q9D8T7;Q9D8T7-2;F8WHU8;F7DE82	Slirp	SRA stem-loop-interacting RNA-binding protein, mitochondrial	-2.0986	0.000107552	-4.42918	0.00770988	-2.85093	3.44896e-11	-6.32888	1.86938e-05	0.503145	0.0162927	Mitochondrial transcription and mtRNA metabolism
27	D3Z7Q2;D6RCX0	Smim20	Small integral membrane protein 20	0.570181	0.316123	NA	NA	-1.03059	0.070759	NA	NA	-1.80634	0.0366016	OXPHOS assembly and biogenesis
230	Q3V460	Smim26	Gene model 561, (NCBI)	0.853771	0.394305	NA	NA	-1.31374	0.006231	0.520157	0.590913	0.124396	0.807614	Unknown
105	P08228	Sod1	Superoxide dismutase [Cu-Zn]	0.642221	0.014939	1.48017	0.000584735	1.23298	1.09026e-05	1.14533	0.00269855	1.20359	0.00019203	Degradation and stress response
108	P09671	Sod2	Superoxide dismutase [Mn], mitochondrial	0.186067	0.309922	0.35347	0.080819	0.403702	0.0006553	0.192168	0.249492	0.461093	0.00558688	Degradation and stress response
19	D3YZN4;D3Z1Z1;Q3ULF4;D3YXB7;D3Z342;F6W695;G3UX97;F6VTG4	Spg7	Paraplegin	1.57639	0.0029449	1.65079	0.00141767	1.88837	2.07575e-05	1.81777	0.0127935	2.34399	5.04509e-06	Degradation and stress response
473	Q91XH5;Q64105;G3UXX3;G3UZ79	Spr	Sepiapterin reductase	-0.917559	0.00883793	-1.02287	0.00558672	-2.07543	0.000264406	-1.56674	0.0157253	-1.36124	0.000224681	Other
468	Q91WK1	Spryd4	SPRY domain-containing protein 4	2.14423	0.00122439	1.94389	6.3243e-05	1.21654	1.17642e-09	2.41843	0.000224716	2.67137	7.74594e-05	Other
767	Q9R112;F6ZKZ3;H3BLH2	Sqrdl	Sulfide:quinone oxidoreductase, mitochondrial	0.393342	0.0500558	-0.34335	0.0472035	-0.494222	0.0133612	-1.60752	0.00055883	-0.365965	0.0326574	Other
433	Q8R2K3;Q9CYR0;D3Z3Y3	Ssbp1	Single-stranded DNA-binding protein;Single-stranded DNA-binding protein, mitochondrial	0.45826	0.0161496	0.342073	0.0660385	0.44751	0.000384729	0.0421125	0.835307	0.497085	0.00613901	Mitochondrial DNA maintenance and replication
430	Q8R1R3;F7BBA2;Q8BXP7	Stard7	StAR-related lipid transfer protein 7, mitochondrial	NA	NA	NA	NA	NA	NA	NA	NA	2.0991	0.000605393	Unknown
503	Q99JB2;A2AG39;F6WI02;A2AG41	Stoml2	Stomatin-like protein 2, mitochondrial	2.81681	3.14292e-05	3.18198	5.5182e-05	2.11484	9.19678e-11	2.66853	4.03863e-05	3.57621	1.42011e-07	Other
790	Q9Z2I8	Suclg2	Succinyl-CoA ligase [GDP-forming] subunit beta, mitochondrial	0.779538	0.000827596	0.996063	0.000845311	1.11246	3.84097e-09	0.813081	0.0045079	1.19999	8.18305e-06	Pyruvate and aminoacid metabolism
311	Q80YD1;M0QWM4	Supv3l1	ATP-dependent RNA helicase SUPV3L1, mitochondrial	0.075774	0.803056	0.104057	0.321107	0.404624	0.00220367	0.485011	0.0114481	0.405038	0.0681754	Mitochondrial transcription and mtRNA metabolism
6	A2ALA6;P09925;V9GXE6	Surf1	Surfeit locus protein 1	1.24882	0.0146384	1.2319	0.000325717	1.33823	0.000313835	0.846448	0.00139354	1.39542	7.75671e-06	OXPHOS assembly and biogenesis
680	Q9D6K5;E9Q2H0;Q9D6K5-2;Q9D6K5-4;Q9D6K5-3;E9PVQ9	Synj2bp	Synaptojanin-2-binding protein	NA	NA	-1.51186	0.0324735	NA	NA	-0.292176	0.735674	NA	NA	Other
66	G5E881;Q3TUH1;G3UWL8;G3UYJ1;Q3TUH1-2;D6RGT1	Tamm41	Phosphatidate cytidylyltransferase, mitochondrial	1.33947	0.135684	2.62285	0.0409323	1.46364	0.0106673	2.86135	0.0123507	1.49635	0.000111453	OXPHOS assembly and biogenesis
222	Q3UQ84;Q922A3;E9Q7H6;Q3TP97	Tars2	Threonine--tRNA ligase, mitochondrial	0.502939	0.0129187	0.784417	0.00119734	0.882149	4.01122e-08	0.51731	0.00759601	0.82351	0.000313217	Mitochondrial transcription and mtRNA metabolism
475	Q91YM4;Q91YM4-2;E9PUT1;Q5SWP1;Q5SWP0	Tbrg4	Protein TBRG4	-1.35965	0.214893	-1.31707	0.010474	-1.16549	3.14995e-08	-0.735911	0.00802663	2.09164	0.00010083	Mitochondrial transcription and mtRNA metabolism
244	Q5SSK3;B7ZCA9;F7CPB7	Tefm	Transcription elongation factor, mitochondrial	-3.17749	0.000149553	-2.10189	0.000350291	0.267927	0.0102235	0.699267	0.0146096	0.45787	0.0112036	Mitochondrial transcription and mtRNA metabolism
133	P40630-2;P40630;D3Z0F3	Tfam	Transcription factor A, mitochondrial	-2.17209	6.63265e-05	-5.90044	0.0026792	-0.317834	0.027365	0.411138	0.18751	0.125521	0.292369	Mitochondrial DNA maintenance and replication
386	Q8JZM0	Tfb1m	Dimethyladenosine transferase 1, mitochondrial	1.1429	0.157646	1.05833	0.0100438	0.807151	0.0123453	2.32118	0.00547795	2.38604	1.58057e-05	Mitochondrial transcription and mtRNA metabolism
282	Q6XPS7	Tha1		-0.974595	0.00147241	-0.581363	0.00561087	0.379793	0.0130625	-0.141095	0.459086	-0.232291	0.108088	Unknown
225	Q3UUI3;Q3UUI3-2	Them4	Acyl-coenzyme A thioesterase THEM4	1.23503	0.0174566	1.94512	8.45547e-05	1.1887	0.00111622	1.61718	0.000536957	2.78394	0.0127795	Lipid and acetyl CoA metabolism
179	P62073	Timm10	Mitochondrial import inner membrane translocase subunit Tim10	0.785433	0.00883793	1.10595	0.00258522	0.760902	0.000963024	0.366259	0.321636	0.269337	0.123925	Mitochondrial import and chaperones
777	Q9WV96;D3YVK5;D3YVK4;D6RG99;D3YVK6;D6RJ48	Timm10b	Mitochondrial import inner membrane translocase subunit Tim10 B	0.484482	0.0873835	0.885893	0.00460824	0.760048	1.68325e-05	0.588084	0.138694	0.8837	0.000958777	Mitochondrial import and chaperones
180	P62075	Timm13	Mitochondrial import inner membrane translocase subunit Tim13	0.645327	0.0118666	1.05901	0.00270738	0.788862	1.26101e-05	1.10799	0.000345091	0.906535	0.000155813	Mitochondrial import and chaperones
782	Q9Z0V7;A2AES1	Timm17b	Mitochondrial import inner membrane translocase subunit Tim17-B	0.246926	0.0986588	0.521363	0.0117136	0.230373	0.0223387	0.544746	0.0106045	0.747588	0.000541554	Mitochondrial import and chaperones
562	Q9CQ85;E9PXB9;Z4YN86;B0QZS8	Timm22	Mitochondrial import inner membrane translocase subunit Tim22	1.57592	0.0403793	NA	NA	0.251275	0.604777	-1.03031	0.0722248	NA	NA	Mitochondrial import and chaperones
620	Q9CXU4;Q9WTQ8;E9Q3T4;E9PVF9	Timm23	Mitochondrial import inner membrane translocase subunit Tim23	0.423971	0.069302	0.68798	0.00215424	0.685943	6.17314e-06	0.386147	0.0642713	1.17906	9.13009e-05	Mitochondrial import and chaperones
90	O35857;F7C189	Timm44	Mitochondrial import inner membrane translocase subunit TIM44	0.693002	0.00530136	1.03738	0.000450047	0.820453	7.8584e-09	0.815658	0.00055883	1.03971	7.4496e-05	Mitochondrial import and chaperones
695	Q9D880	Timm50	Mitochondrial import inner membrane translocase subunit TIM50	0.683882	0.0180359	0.62797	0.0158478	0.731556	6.14897e-06	0.967183	0.000238942	0.769861	0.000173276	Mitochondrial import and chaperones
779	Q9WVA2;Q4FZG7	Timm8a1	Mitochondrial import inner membrane translocase subunit Tim8 A	0.815803	0.0333332	5.02074	7.3848e-05	1.94231	0.0884544	0.754965	0.00278443	3.40389	0.0117915	Mitochondrial import and chaperones
778	Q9WV98	Timm9	Mitochondrial import inner membrane translocase subunit Tim9	0.621164	0.0124119	1.25123	0.00113458	0.412623	0.0140252	1.0088	0.00193023	0.895236	0.00533119	Mitochondrial import and chaperones
358	Q8BUY5	Timmdc1	Complex I assembly factor TIMMDC1, mitochondrial	0.42424	0.218526	0.570133	0.0106835	0.944908	1.83598e-05	0.359647	0.115927	1.15236	0.000850502	OXPHOS assembly and biogenesis
43	E9Q933;Q8BK08;Z4YN74	Tmem11	Transmembrane protein 11, mitochondrial	1.44101	0.0930107	1.30427	0.00423933	1.41231	0.0229451	1.02642	0.0078402	3.1308	0.0101221	Mitochondrial morphology
702	Q9D8Y1;D6RG44	Tmem126a	Transmembrane protein 126A	0.441946	0.236447	1.01569	0.000743951	0.979083	2.47472e-07	1.06184	0.000356514	1.04855	4.70697e-05	Unknown
62	G3X9F4;Q8VD26-2;Q8VD26;S4R1U1;Q8VD26-3;F6ZAS5	Tmem143	Transmembrane protein 143	-0.909021	0.507128	-0.275083	0.249652	1.2282	0.00136486	-0.725499	0.117411	-0.380797	0.300122	Unknown
486	Q921N7	Tmem70	Transmembrane protein 70, mitochondrial	-0.271473	0.923378	NA	NA	2.66954	0.0206285	NA	NA	0.830586	0.58109	Other
481	Q91ZE0	Tmlhe	Trimethyllysine dioxygenase, mitochondrial	0.400559	0.0747191	0.45064	0.0294384	-0.114655	0.492367	0.0399117	0.853918	0.38885	0.0634196	Other
719	Q9DCC8	Tomm20	Mitochondrial import receptor subunit TOM20 homolog	0.44539	0.722501	0.381047	0.101323	1.99141	0.00702213	1.45881	0.170452	1.4852	0.139573	Mitochondrial import and chaperones
539	Q9CPQ3	Tomm22	Mitochondrial import receptor subunit TOM22 homolog	0.402036	0.105113	0.175563	0.261117	0.388833	0.00373539	0.151969	0.469206	0.37396	0.102148	Mitochondrial import and chaperones
761	Q9QYA2;G3UY77	Tomm40	Mitochondrial import receptor subunit TOM40 homolog	0.214118	0.419519	0.471757	0.0584702	0.84102	1.47432e-07	0.519873	0.00861733	0.419427	0.0326574	Mitochondrial import and chaperones
14	B1AXP6-2;B1AXP6;B1AXP6-3;B1AXP6-4	Tomm5	Mitochondrial import receptor subunit TOM5 homolog	1.18616	0.0810456	2.42378	0.0307897	-0.0706291	0.684262	-0.0190192	0.960752	-0.536341	0.643896	Mitochondrial import and chaperones
658	Q9D173	Tomm7	Mitochondrial import receptor subunit TOM7 homolog	NA	NA	2.09883	0.144312	3.28737	3.76228e-06	1.31789	0.242788	3.1847	8.65981e-05	Mitochondrial import and chaperones
642	Q9CZW5	Tomm70a	Mitochondrial import receptor subunit TOM70	0.696295	0.000861119	0.90293	0.00140977	0.634331	2.38954e-06	0.688735	0.0042217	0.682678	0.000712675	Mitochondrial import and chaperones
118	P17751;H7BXC3	Tpi1	Triosephosphate isomerase	-0.048656	0.835503	0.612537	0.00446378	0.307283	0.000709066	0.503669	0.0402868	0.332728	0.107731	Pyruvate and aminoacid metabolism
579	Q9CQN1	Trap1	Heat shock protein 75 kDa, mitochondrial	0.555512	0.0129187	0.577637	0.00278026	0.765788	2.05543e-06	0.674292	0.00178832	0.531023	0.00372321	Mitochondrial import and chaperones
703	Q9D8Z2	Triap1	TP53-regulated inhibitor of apoptosis 1	0.898227	0.042713	NA	NA	0.875293	0.0926526	0.431421	0.15207	1.3973	0.0767499	Apoptosis
215	Q3UFY8	Trmt10c	Mitochondrial ribonuclease P protein 1	-0.971963	0.372061	0.27965	0.680894	-0.704388	0.17301	1.24108	0.0123507	1.88325	0.00412845	Mitochondrial transcription and mtRNA metabolism
705	Q9DAT5;E0CZ49;F7CCK8;F7CNH0	Trmu	Mitochondrial tRNA-specific 2-thiouridylase 1	-0.0533007	0.872951	-0.468567	0.0685428	-0.522317	0.141788	0.537593	0.0942541	1.19047	2.32807e-05	Mitochondrial transcription and mtRNA metabolism
401	Q8K1J6;Q8K1J6-2	Trnt1	CCA tRNA nucleotidyltransferase 1, mitochondrial	3.87569	0.00239466	4.35735	0.000887751	3.2704	2.35673e-10	4.67481	0.000205502	7.17504	1.53326e-05	Mitochondrial transcription and mtRNA metabolism
638	Q9CZR8;Q9CX33;D3Z4M7	Tsfm	Elongation factor Ts, mitochondrial	0.721526	0.00192968	0.694007	0.00176932	0.430004	0.00114841	0.293612	0.0461833	-0.0854045	0.603278	Other mitochondrial protein synthesis factors
148	P50637	Tspo	Translocator protein	NA	NA	2.40665	0.0525581	NA	NA	3.06168	0.00773701	3.22609	0.00169297	Other
153	P52196	Tst	Thiosulfate sulfurtransferase	-0.165655	0.432263	0.0723633	0.547488	0.0623712	0.63465	0.0334142	0.882788	0.42657	0.0201753	Iron sulphur cluster and heme biogenesis
646	Q9D0B5	Tstd3	Thiosulfate sulfurtransferase/rhodanese-like domain-containing protein 3	1.40982	0.0541688	1.5499	0.13541	1.42762	0.00959593	2.81044	0.00299941	1.76516	0.0142558	Unknown
377	Q8CC21;Q8CC21-2;F7BCD5	Ttc19	Tetratricopeptide repeat protein 19, mitochondrial	-0.350289	0.718625	0.88211	0.0628766	1.27859	0.00241455	0.386801	0.04872	1.65323	0.0154179	OXPHOS assembly and biogenesis
315	Q8BFR5;D3YVN7;Q8BFR5-2	Tufm;Gm9755	Elongation factor Tu, mitochondrial	-0.751448	0.000920308	-0.708403	0.00268193	-0.850702	1.06764e-07	-0.0364817	0.816503	-0.0032665	0.978406	Other mitochondrial protein synthesis factors
59	G3UZY2;P97493;G3UX99;A2A439	Txn2	Thioredoxin, mitochondrial	0.372394	0.131717	0.479547	0.0358741	0.427122	0.00036643	0.309053	0.133213	0.0668895	0.751957	Apoptosis
74	J3QMN4;D3Z0K8;J3QMQ8;Q9JLT4-2;Q9JLT4-4;Q9JLT4;Q9JLT4-3	Txnrd2	Thioredoxin reductase 2, mitochondrial	0.525361	0.0129187	0.56022	0.00332631	0.490373	0.00031259	0.747352	0.00153684	0.880468	0.000118158	Degradation and stress response
171	P56501;D3YXM5;D3YZG5;P70406	Ucp3	Mitochondrial uncoupling protein 3	0.572787	0.0668972	0.418323	0.181696	0.513777	0.0107299	0.38619	0.0624277	0.456635	0.0118195	Mitochondrial carriers or transport
614	Q9CWU6;A6PWX7;A6PWX9;F6V305;A6PWX8;A6PWX5;Q9CWU6-2;D6RJ23;D6RJ83	Uqcc1	Ubiquinol-cytochrome-c reductase complex assembly factor 1	-0.568172	0.678071	0.409453	0.0200024	0.587721	3.96099e-05	1.22896	0.00145437	2.22188	0.0681754	OXPHOS assembly and biogenesis
592	Q9CQY6;D3Z4C9;D3Z4D6	Uqcc2	Ubiquinol-cytochrome-c reductase complex assembly factor 2	0.318663	0.131717	0.248803	0.0579852	0.212939	0.0665462	0.866663	0.00891115	-0.349684	0.0152349	OXPHOS assembly and biogenesis
429	Q8R1I1	Uqcr10	Cytochrome b-c1 complex subunit 9	-0.375636	0.118473	-1.01226	0.00369059	-0.627626	0.001695	-0.424892	0.0606169	-0.984368	0.000224681	OXPHOS
551	Q9CPX8	Uqcr11	Cytochrome b-c1 complex subunit 10	-1.50918	0.00628564	-2.76413	0.00129359	-2.24418	0.00175045	-0.714509	0.103018	-1.61691	0.00125572	OXPHOS
567	Q9CQB4;Q9D855	Uqcrb	Cytochrome b-c1 complex subunit 7	-1.33433	0.00033411	-2.1817	6.11544e-05	-1.66057	3.81197e-11	-0.0577633	0.833213	-1.95992	3.66289e-06	OXPHOS
627	Q9CZ13	Uqcrc1	Cytochrome b-c1 complex subunit 1, mitochondrial	-1.02411	0.000892767	-2.28098	7.43039e-05	-1.46209	5.95122e-11	0.09769	0.578831	-1.80678	3.68713e-07	OXPHOS
709	Q9DB77	Uqcrc2	Cytochrome b-c1 complex subunit 2, mitochondrial	-1.10077	0.000630599	-2.20615	6.11544e-05	-1.44142	2.35673e-10	0.0424108	0.788557	-1.59595	5.06756e-07	OXPHOS
602	Q9CR68	Uqcrfs1	Cytochrome b-c1 complex subunit Rieske, mitochondrial;Cytochrome b-c1 complex subunit 11	-1.09999	0.000225024	-2.12165	0.000105341	-1.52417	4.62854e-11	-0.160367	0.21046	-1.58838	2.34756e-06	OXPHOS
192	P99028;Q9D2Q7	Uqcrh	Cytochrome b-c1 complex subunit 6, mitochondrial	-0.0287147	0.836536	-0.00776	0.932756	-0.188725	0.289435	-0.0889283	0.565415	-0.722545	0.00476582	OXPHOS
560	Q9CQ69;I7HPX6	Uqcrq	Cytochrome b-c1 complex subunit 8	-1.25113	0.00980168	-2.39555	5.5182e-05	-1.68586	4.03802e-07	-0.05507	0.822646	-2.35644	3.63864e-05	OXPHOS
285	Q78IK2	Usmg5	Up-regulated during skeletal muscle growth protein 5	-0.175543	0.639077	-0.72354	0.0380692	-1.41587	4.4151e-05	-1.7641	0.00314237	-2.77409	0.0973999	OXPHOS
210	Q3U2A8;F6YJY2;F7A8L1;F6Z939	Vars2	Valine--tRNA ligase, mitochondrial	-0.88256	0.173418	-1.37383	0.00154581	-0.38357	0.02028	0.980993	0.00441993	1.10848	0.000762065	Mitochondrial transcription and mtRNA metabolism
256	Q60932-2;Q60932;F2Z471	Vdac1	Voltage-dependent anion-selective channel protein 1	-0.0785007	0.550602	0.149113	0.264613	0.0591708	0.447405	-0.0244225	0.889305	0.404553	0.00556486	Mitochondrial carriers or transport
254	Q60930;D3YZT5;D3YUN8	Vdac2	Voltage-dependent anion-selective channel protein 2	0.259621	0.268852	0.713	0.00215424	0.43822	0.000647977	0.754372	0.00777728	0.691728	0.00138748	Mitochondrial carriers or transport
255	Q60931;J3QMG3	Vdac3	Voltage-dependent anion-selective channel protein 3	0.411223	0.0401082	0.733343	0.0016328	0.513407	1.51055e-05	0.669543	0.010913	0.842585	0.000637519	Mitochondrial carriers or transport
378	Q8CC88;Q8CC88-3	Vwa8	von Willebrand factor A domain-containing protein 8	0.221691	0.196707	0.248203	0.0705733	0.528864	0.000921498	0.298383	0.10028	0.274584	0.0426568	Unknown
625	Q9CYK1	Wars2	Tryptophan--tRNA ligase, mitochondrial	1.16116	0.236447	1.55399	0.0268605	1.59021	0.00905453	2.51732	0.00354302	3.0627	1.0598e-05	Mitochondrial transcription and mtRNA metabolism
16	B7ZMP1;B7ZMP1-2;E9Q1R1	Xpnpep3	Probable Xaa-Pro aminopeptidase 3	1.92174	0.00828007	0.615383	0.00171961	0.576378	0.0145551	0.769913	0.41122	1.41997	0.00373742	Pyruvate and aminoacid metabolism
368	Q8BYL4;E9PX65;F7BWC1	Yars2	Tyrosine--tRNA ligase, mitochondrial	1.27223	0.0360578	1.52206	0.000577661	1.49661	3.81197e-11	1.33861	0.000433838	1.78993	1.89265e-06	Mitochondrial transcription and mtRNA metabolism
99	O88967	Yme1l1	ATP-dependent zinc metalloprotease YME1L1	1.16624	0.0364867	0.966597	0.00322106	1.70171	6.06797e-07	1.52388	0.0157974	1.26693	0.00191262	Degradation and stress response
319	Q8BGC4	Zadh2	Zinc-binding alcohol dehydrogenase domain-containing protein 2	0.088386	0.599482	0.178393	0.18542	0.178876	0.0521644	0.365471	0.0323276	0.429861	0.00792857	Other
221	Q3UNZ8;Q3UNZ8-2		CDNA sequence BC026585	NA	NA	3.21739	0.0869776	0.301979	0.47606	0.627794	0.0162881	2.90901	2.37337e-05	Unknown
330	Q8BHE8		m-AAA protease-interacting protein 1, mitochondria	1.32132	0.245236	1.0408	0.00126383	0.883145	6.05529e-05	0.977243	0.000731907	1.62035	2.55863e-05	Degradation and stress response
354	Q8BTE0		Succinate dehydrogenase assembly factor 4, mitochondrial	-0.0489113	0.955406	-0.32695	0.152074	0.904165	0.0171701	0.418809	0.218301	0.233949	0.678111	OXPHOS assembly and biogenesis
597	Q9CR13		UPF0562 protein C7orf55 homolog	0.342593	0.0692766	0.555493	0.0517001	0.73435	0.152399	0.943247	0.00234087	1.03055	0.146577	Unknown

## Sheet: C_Proteins per category
Manually defined functional category	Number of proteins per category	DE proteins per mouse strain
		Twnk	Tfam	Polrmt	Lrpprc	Mterf4
Apoptosis	10	6	9	9	8	7
Degradation and stress response	20	14	17	19	15	17
Iron sulphur cluster and heme biogenesis	14	4	9	10	6	7
Lipid and acetyl CoA metabolism	38	21	29	30	27	31
Mitochondrial 1C pathway	5	5	4	4	5	5
Mitochondrial DNA maintenance and replication	3	3	2	3	1	2
Mitochondrial carriers or transport	28	5	15	23	14	20
Mitochondrial import and chaperones	32	20	24	29	20	26
Mitochondrial morphology	15	7	4	8	6	9
Mitochondrial nucleotide synthesis	6	4	4	5	4	6
Mitochondrial ribosome	77	64	69	76	73	64
Mitochondrial transcription and mtRNA metabolism	45	24	33	38	32	41
OXPHOS	87	53	66	72	59	76
OXPHOS assembly and biogenesis	37	7	24	29	18	26
Other	105	53	66	77	70	79
Other mitochondrial protein synthesis factors	15	11	9	11	11	10
Pyruvate and aminoacid metabolism	55	25	42	39	36	42
Ubiquinone biosynthesis	10	5	9	8	10	9
Unknown	54	27	36	44	35	41

## Sheet: D_Proportion total mass
Mouse strain	Genotype	Mean	Standard deviation
Twnk	L/L	0.992955	0.00174965
	L/L, cre	0.993252	0.00236392
Tfam	L/L	0.994087	0.000833437
	L/L, cre	0.993459	0.00114289
Polrmt	L/L	0.985794	0.0121039
	L/L, cre	0.988372	0.0042411
Lrpprc	L/L	0.992526	0.00223495
	L/L, cre	0.992928	0.00044944
Mterf4	L/L	0.992182	0.00387848
	L/L, cre	0.991975	0.00229449

## Sheet: E_Correlation RNA-Seq vs Prot
Category	Mouse strain
	Twnk	Tfam	Polrmt	Lrpprc	Mterf4
Apoptosis	0.770481	0.564453	0.628276	0.502589	0.617162
Degradation and stress response	0.656188	0.614948	0.481707	0.53723	0.54976
Iron sulphur cluster and heme biogenesis	0.311703	0.275502	0.143807	0.636526	0.54413
Lipid and acetyl CoA metabolism	0.57439	0.555703	0.662371	0.621589	0.544756
Mitochondrial 1C pathway	0.373393	0.815629	0.880422	0.587275	0.74195
Mitochondrial DNA maintenance and replication	-0.0282685	0.790219	0.530226	0.988952	0.840147
Mitochondrial carriers or transport	0.116853	0.310268	0.206991	0.270146	0.412554
Mitochondrial import and chaperones	0.360125	0.325511	0.283225	0.399659	0.14617
Mitochondrial morphology	0.568126	0.685257	0.519015	0.5363	0.609562
Mitochondrial nucleotide synthesis	0.578326	0.91342	0.633718	0.638402	0.771005
Mitochondrial ribosome	-0.0684102	-0.0640733	-0.0185172	0.193629	-0.0290897
Mitochondrial transcription and mtRNA metabolism	0.393091	0.494342	0.504079	0.629957	0.530496
OXPHOS	0.208657	0.231195	-0.193664	0.0386664	0.061305
OXPHOS assembly and biogenesis	0.465025	0.585305	0.115647	-0.00417122	0.0506921
Other	0.717516	0.571773	0.635558	0.717071	0.668725
Other mitochondrial protein synthesis factors	0.621058	0.140091	0.0890451	0.252032	0.409167
Pyruvate and aminoacid metabolism	0.867596	0.816739	0.746886	0.819188	0.835314
Ubiquinone biosynthesis	0.723305	0.68494	0.519709	-0.132952	0.609994
Unknown	0.641841	0.723621	0.598523	0.71461	0.672373
