# Supplementary material for: Transcriptomic and proteomic landscape of mitochondrial dysfunction reveals secondary coenzyme Q deficiency in mammals
Source: eLife. 2017 Nov 14;6:e30952. doi: 10.7554/eLife.30952 (PMC5703644; doi:10.7554/eLife.30952)
Supplement: Supplementary file 2. [file elife-30952-supp2.xlsx]

## Sheet: Description tab content
Analysis of mitoproteomic data from hearts at different ages of Lrpprc conditional knockout mice and controls - Kühl et al.
This spreadsheet contains tabs with following datasets:
A_N biological replicates: Number of biological replicates per genotype and timepoint
B_DE analysis of timecourse: Differential expression (DE) analysis of proteomic data of hearts from Lrpprc knockout mice at time different time points
Below are descriptions for the columns data set B
Protein IDs: Uniprot accession number
Gene names: based on MaxQuant proteinGroups.txt file
Protein names: based on MaxQuant proteinGroups.txt file
logFC: log2 fold-change of L/L, cre / L/L per time point
padj: Benjamini-Hochberg corrected p value of moderated F-test

## Sheet: A_N biological replicates
Age [weeks]	L/L	L/L, cre
2	5	5
3-4	5	6
5	5	4
7	4	4
10	5	3

## Sheet: A_DE analysis timecourse
Protein.IDs	Gene.names	Protein.names	logFC.2weeks	logFC.3.4weeks	logFC.5weeks	logFC.7weeks	logFC.10weeks	padj
Q922Q1;E0CZH6;D3YZZ3;Q9CW42;A0A087WPC2	2017-03-02	Mitochondrial amidoxime reducing component 2	0.195952	-0.15175	0.210427	0.107972	-0.166163	0.103488
Q3KNM2	2017-03-05	E3 ubiquitin-protein ligase MARCH5	-0.259952	0.510549	0.177821	0.618857	0.795872	0.653695
E9Q9F5;E9Q1G8;O55131;S4R2P6;Q8C650-2;Q9DA97;Q8C650	2017-09-07	Septin-7	-0.3229	-0.70076	0.454024	1.05639	2.29121	0.00864107
Q9CQF4;D3Z316	1700021F05Rik	Uncharacterized protein C6orf203 homolog	-0.092738	0.48137	0.223416	0.575955	0.437247	0.00033217
B8JJ66;B8JJ69;F6X1P1;F6W3U3;B8JJ67	2310061I04Rik		-0.584562	0.859886	0.753231	0.946785	0.832269	0.00104927
E9QMK9;Q8BH86;Q8BH86-2;F7CUW7	9030617O03Rik	UPF0317 protein C14orf159 homolog, mitochondrial	-0.052166	0.0677407	-0.341208	-0.470515	-0.741257	8.70532e-05
Q14CH7	Aars2	Alanine--tRNA ligase, mitochondrial	-0.115106	0.477745	0.479073	0.706402	0.585909	0.000117104
P61922;P61922-2;F7C9G3;Q3TUE8;F6RN86	Abat	4-aminobutyrate aminotransferase, mitochondrial	-0.565802	-0.0301467	0.720699	-0.512908	-1.54939	0.195738
Q9JI39	Abcb10	ATP-binding cassette sub-family B member 10, mitochondrial	0.005684	0.570869	0.410826	0.445717	0.262787	0.0246708
Q61102	Abcb7	ATP-binding cassette sub-family B member 7, mitochondrial	-0.204836	0.76917	0.453876	0.721702	0.590417	0.00102254
Q9CXJ4;D3Z492;F6ZFC5;D3Z1J6;A0A0G2JFJ3	Abcb8	ATP-binding cassette sub-family B member 8, mitochondrial	-0.126298	0.246374	-0.106381	-0.190765	-0.724296	0.0617135
A0A0G2JDI9;P55096	Abcd3	ATP-binding cassette sub-family D member 3	-0.970828	0.2964	-0.185063	-0.135975	1.2612	0.0466217
Q6PE15;Q6PE15-2;F6X5P5	Abhd10	Mycophenolic acid acyl-glucuronide esterase, mitochondrial	0.072376	-0.415428	0.310434	0.402602	-0.248654	0.0176287
Q8K4F5;D3YYK0	Abhd11	Alpha/beta hydrolase domain-containing protein 11	-0.107888	0.168513	0.0874115	0.114965	0.053186	0.694585
Q921H8;H3BKL5;H3BJZ9;Q8VCH0;H3BKA1;H3BJC1;H3BJG8	Acaa1a;Acaa1b	3-ketoacyl-CoA thiolase A, peroxisomal;3-ketoacyl-CoA thiolase B, peroxisomal	0.228434	-0.056613	-0.576766	-0.8561	1.09671	0.0388352
Q8BWT1	Acaa2	3-ketoacyl-CoA thiolase, mitochondrial	0.01381	-0.133421	-0.0885525	-0.241245	-0.627993	0.000117104
Q8K370	Acad10	Acyl-CoA dehydrogenase family member 10	0.36373	-0.205117	-3.11284	-0.224373	-1.298	0.0220479
D3Z7X0;D3Z2B3;F6RGT6	Acad12		0.077748	0.107223	-0.182898	-0.217498	-0.509289	0.038533
Q9D7B6;D3YTT4	Acad8	Isobutyryl-CoA dehydrogenase, mitochondrial	0.192402	0.083441	-0.244251	-0.217927	-0.69306	0.000338775
Q8JZN5;A0A0G2JF25;A0A0G2JDY4	Acad9	Acyl-CoA dehydrogenase family member 9, mitochondrial	-0.210874	0.507733	0.195067	0.44098	0.278417	0.180013
P51174	Acadl	Long-chain specific acyl-CoA dehydrogenase, mitochondrial	-0.067012	0.108392	0.0979665	0.01192	-0.185049	0.33875
P45952;D6RFD7;D3Z2A5	Acadm	Medium-chain specific acyl-CoA dehydrogenase, mitochondrial	-0.17616	0.06485	-0.0640445	-0.184507	-0.534355	0.000313913
Q07417;F6RAZ3	Acads	Short-chain specific acyl-CoA dehydrogenase, mitochondrial	-0.01447	0.268139	0.022759	-0.179403	-0.524248	0.114198
Q9DBL1;E9Q5L3	Acadsb	Short/branched chain specific acyl-CoA dehydrogenase, mitochondrial	0.02954	0.01764	-0.094115	-0.323095	-0.634638	0.0345397
P50544;B1AR28	Acadvl	Very long-chain specific acyl-CoA dehydrogenase, mitochondrial	-0.059512	0.165105	-0.003428	-0.217465	-0.610598	0.000433493
Q8QZT1	Acat1	Acetyl-CoA acetyltransferase, mitochondrial	-0.09678	-0.116105	-0.190804	-0.428173	-0.749262	7.75741e-07
Q8BQU3	Acn9	Protein ACN9 homolog, mitochondrial	0.954926	0.465966	0.451432	1.97779	0.781573	0.0736685
Q99KI0	Aco2	Aconitate hydratase, mitochondrial	-0.002392	-0.180176	-0.135974	-0.08782	-0.217865	0.0960791
Q9CQR4	Acot13	Acyl-coenzyme A thioesterase 13;Acyl-coenzyme A thioesterase 13, N-terminally processed	-0.243912	-0.0864287	-0.121025	-0.0152175	-0.299468	0.117041
Q9QYR9;O55137;Q9QYR7-2;Q6Q2Z6;Q9QYR7;Q91YQ6;Q8BWN8;Q32Q92-2;Q32Q92	Acot2;Acot1	Acyl-coenzyme A thioesterase 2, mitochondrial;Acyl-coenzyme A thioesterase 1	-0.228078	0.500718	0.575692	1.17655	1.32114	2.73194e-09
E9PYH2;Q91V12;Q91V12-2;Q91V12-4	Acot7	Cytosolic acyl coenzyme A thioester hydrolase	-0.055262	0.278793	0.187801	0.19572	0.254973	0.271973
Q9R0X4;Q32MW3	Acot9;Acot10	Acyl-coenzyme A thioesterase 9, mitochondrial;Acyl-coenzyme A thioesterase 10, mitochondrial	-0.11533	0.162654	0.203768	0.588062	1.19487	1.81688e-10
Q9R0H0-2;Q9R0H0;A2A848	Acox1	Peroxisomal acyl-coenzyme A oxidase 1	-0.280828	0.430032	0.745591	0.384533	-0.712039	0.710878
Q8BP40;Q8BP40-2	Acp6	Lysophosphatidic acid phosphatase type 6	0.006874	-0.0948283	0.0741825	0.091325	0.326373	0.454514
Q8VCW8	Acsf2	Acyl-CoA synthetase family member 2, mitochondrial	-0.234204	0.344258	0.719268	0.977225	0.87795	2.12319e-08
Q3URE1;Q3URE1-2	Acsf3	Acyl-CoA synthetase family member 3, mitochondrial	-0.050782	0.553152	0.0244235	0.215795	0.0515633	0.214512
P41216;D3Z041;D3Z457;F6WNZ2;Q8JZR0	Acsl1	Long-chain-fatty-acid--CoA ligase 1	-0.146752	0.221279	-0.213846	-0.568885	-0.945444	0.0043742
Q99NB1	Acss1	Acetyl-coenzyme A synthetase 2-like, mitochondrial	-0.149856	0.173374	0.03659	0.117345	-0.146459	0.799412
P60710;P63260;E9Q1F2;E9Q5F4;B1ATY1;G3UZ07;E9Q606;Q8BFZ3;G3UYG0;F8WGM8;E9Q2D1	Actb;Actg1	Actin, cytoplasmic 1;Actin, cytoplasmic 1, N-terminally processed;Actin, cytoplasmic 2;Actin, cytoplasmic 2, N-terminally processed	-0.019726	0.056844	0.408307	0.37392	1.25246	0.0354408
P68033	Actc1	Actin, alpha cardiac muscle 1	0.067766	-0.423582	-0.576224	-0.83159	1.1128	0.0141921
Q9JI91;O88990;D3YY95	Actn2	Alpha-actinin-2	0.20057	-0.0246803	-1.73821	-2.45804	2.00944	0.0898326
P56375	Acyp2	Acylphosphatase-2	0.146172	-0.162054	0.047944	0.1082	-0.285478	0.741045
Q9D0L4;Q9D0L4-2	Adck1	Uncharacterized aarF domain-containing protein kinase 1	-0.354644	0.606197	0.471394	0.516805	0.66331	0.0434772
Q60936;F7B1B6;A0A0A6YXD9;E0CYD3;E0CYT4;E0CYG7;E0CZ05;E0CXT4;E0CXR6;E0CYC1;E0CXR1;F6T0A8;E0CXI5	Adck3	Chaperone activity of bc1 complex-like, mitochondrial	0.019966	-0.13381	-0.304054	-1.13499	-1.82014	2.16462e-15
E9QLB8;Q566J8	Adck4	AarF domain-containing protein kinase 4	-0.133256	-0.273368	-0.834512	1.276	1.47529	0.018228
A0A087WRE7;Q8R0N6;Q8R0N6-2	Adhfe1	Hydroxyacid-oxoacid transhydrogenase, mitochondrial	-0.017882	0.0441473	0.0743575	-0.0256375	-0.299849	0.351117
Q6PDY2	Ado	2-aminoethanethiol dioxygenase	-0.566412	-0.382482	-0.199191	0.0980825	-0.00101933	0.725855
P28650;J3QN31;P28650-2	Adssl1	Adenylosuccinate synthetase isozyme 1	0.518632	-0.327427	-0.0787565	0.263845	1.0446	0.482762
Q920A7;Q920A7-2	Afg3l1	AFG3-like protein 1	-0.45193	0.650306	1.15862	1.70741	1.99883	3.88625e-10
Q8JZQ2	Afg3l2	AFG3-like protein 2	0.076516	0.334201	0.430125	0.655632	0.669225	8.75805e-07
Q9ESW4;Q9ESW4-2	Agk	Acylglycerol kinase, mitochondrial	-0.06333	0.250892	0.288983	0.452067	0.375005	0.116813
E9Q616;G5E8K8	Ahnak		-0.01382	-0.621494	0.489312	1.26525	3.28915	0.00137544
Q9Z0X1;B1AU25	Aifm1	Apoptosis-inducing factor 1, mitochondrial	-0.100266	-0.036271	-0.047461	0.10681	-0.14146	0.281483
Q3UZG4;P31230;A0A0G2JDH0;A0A0G2JEU9;A0A0G2JDV0;A0A0G2JDW6	Aimp1	Aminoacyl tRNA synthase complex-interacting multifunctional protein 1;Endothelial monocyte-activating polypeptide 2	-0.049484	0.187767	0.867665	0.497048	-0.79223	0.291303
Q9R0Y5;Q9R0Y5-2;Z4YN97;A0A0A6YXW8	Ak1	Adenylate kinase isoenzyme 1	0.078592	0.287951	0.136462	0.78879	0.977305	0.748323
I3ITR1;Q9D924	AK157302;Isca1	Iron-sulfur cluster assembly 1 homolog, mitochondrial	-0.238914	-0.0895277	-0.255451	-0.210905	-0.594457	0.0233969
Q9WTP6-2;Q9WTP6;F7BP55	Ak2	Adenylate kinase 2, mitochondrial;Adenylate kinase 2, mitochondrial, N-terminally processed	-0.141682	0.0116867	-0.155439	0.51736	0.665773	0.000349673
Q9WTP7;F6RP11	Ak3	GTP:AMP phosphotransferase AK3, mitochondrial	0.060468	0.148787	0.11225	-0.071625	-0.275576	0.158512
Q9WUR9;F6TEU8;A2ARF6;A2ARF5	Ak4	Adenylate kinase 4, mitochondrial	0.084644	-0.022301	-0.312336	-0.507547	-0.630015	1.00314e-05
O08715;O08715-4;O08715-6;O08715-2;O08715-5;O08715-3	Akap1	A-kinase anchor protein 1, mitochondrial	0.033304	-0.210428	0.147283	0.0778075	0.45154	0.482149
G5E895;D3Z494;S4R2G9;P45377	Akr1b10		-0.111922	0.139425	-0.002931	-0.496053	-0.790825	0.0849143
P21300	Akr1b7	Aldose reductase-related protein 1	0.021592	1.72803	-1.33234	0.153407	-0.171263	0.034008
Q8CG76	Akr7a2	Aflatoxin B1 aldehyde reductase member 2	0.093942	0.172336	-0.244807	-0.1924	-0.689345	0.0112894
Q8VC19;D6RGR8	Alas1	5-aminolevulinate synthase, nonspecific, mitochondrial	-0.17036	-0.742934	-1.03001	-1.20556	-0.985319	5.97737e-07
P07724	Alb	Serum albumin	0.088132	-0.640886	0.503486	0.678198	1.7458	0.000123587
Q9Z110-2;Q9Z110;D3Z0B4;H3BKJ8;H3BLE8;H3BKK0	Aldh18a1	Delta-1-pyrroline-5-carboxylate synthase;Glutamate 5-kinase;Gamma-glutamyl phosphate reductase	-0.191984	4.12928	5.63375	9.25708	9.99956	1.05482e-10
Q9CZS1;G3UYH1;G3UWP3;Q9JHW9;P24549;O35945	Aldh1b1	Aldehyde dehydrogenase X, mitochondrial	-0.025952	-0.0362127	0.461664	0.726588	1.03331	4.31241e-09
Q8K009;D3Z6B9;Q8R0Y6	Aldh1l2	Mitochondrial 10-formyltetrahydrofolate dehydrogenase	-0.14361	0.538718	1.09197	1.9791	2.79922	4.54421e-17
P47738;A0A0G2JEU1;A0A0G2JFQ0;A0A0G2JF60;D3YYF3	Aldh2	Aldehyde dehydrogenase, mitochondrial	0.055396	-0.029553	-0.123774	-0.103923	-0.496594	0.0824354
B1AV77;B1ATI0;P47740;P47739	Aldh3a2	Aldehyde dehydrogenase;Fatty aldehyde dehydrogenase	0.462948	0.298301	-0.132059	1.76292	2.05553	0.0253068
Q8CHT0	Aldh4a1	Delta-1-pyrroline-5-carboxylate dehydrogenase, mitochondrial	-0.148988	0.18943	-0.411465	-0.423472	-0.978797	1.35826e-07
Q8BWF0	Aldh5a1	Succinate-semialdehyde dehydrogenase, mitochondrial	-0.181782	0.210253	0.0205685	0.032985	-0.454725	0.0105242
Q9EQ20	Aldh6a1	Methylmalonate-semialdehyde dehydrogenase [acylating], mitochondrial	-0.074698	0.00221767	-0.292785	-0.251868	-0.898389	0.0005983
Q9DBF1-2;Q9DBF1;G3UYR8;G3UY72;E9Q1H3;E9Q1G1	Aldh7a1	Alpha-aminoadipic semialdehyde dehydrogenase	-0.353412	-0.0342403	-0.148922	-0.475052	-0.632895	0.00366899
Q9JLJ2;Q3U367	Aldh9a1	4-trimethylaminobutyraldehyde dehydrogenase	-0.100314	-0.109773	-0.281815	-0.469985	-1.0309	4.00652e-05
P05064;A6ZI44;D3YWI1;Q9CPQ9;A6ZI46;D3Z510;D3YV98;A6ZI47;P05063;Q91Y97	Aldoa;Aldoart1	Fructose-bisphosphate aldolase A	0.146564	-0.513878	-0.176329	0.170518	1.11432	0.126973
Q9D6Z0;Q9D6Z0-2	Alkbh7	Alpha-ketoglutarate-dependent dioxygenase alkB homolog 7, mitochondrial	0.030762	-0.345982	-0.129184	-0.283437	-0.36445	0.149508
O09174	Amacr	Alpha-methylacyl-CoA racemase	0.005026	0.108284	-0.063798	-0.23078	-0.128317	0.246332
Q8K1C0-2;Q8K1C0;Q8K1C0-3;Q8K1C0-5;Q8K1C0-4;F6SBQ6	Angel2	Protein angel homolog 2	-0.142514	0.514845	0.701637	-0.184655	0.160908	0.314808
Q8C8R3-4;S4R291;Q8C8R3;S4R285;S4R245;S4R249;Q8C8R3-5;S4R2H6;S4R2D0;S4R2F3;S4R1V6;Q8C8R3-3;S4R1I1;S4R2D6;S4R2B2;Q8C8R3-8;Q8C8R3-7;Q8C8R3-6;S4R1U2;S4R1M4;S4R2R5;S4R1B7;S4R2Q9;S4R229;W4VSQ0;Q3UVY0;S4R1S2;G5E8K2;G5E8K3;S4R2S8;S4R2K9;G5E8K5-2;G5E8K5-3;G5E8K5	Ank2	Ankyrin-2	0.467906	-0.761604	-2.12312	-0.598612	-1.35219	0.224405
Q9D2J7;Q8BLU6	Ankef1	Ankyrin repeat and EF-hand domain-containing protein 1	0.616714	-0.101134	-0.708723	-0.96187	-1.75459	5.65454e-06
P07356;B0V2N7;B0V2N8;B0V2N5	Anxa2	Annexin A2;Annexin	-0.089886	0.50403	-0.613504	-0.581012	2.52446	0.0716926
F8WIT2;P14824	Anxa6	Annexin;Annexin A6	0.226374	-0.318068	0.789472	0.764685	1.45838	0.26513
Q00623;CON__P15497	Apoa1	Apolipoprotein A-I;Proapolipoprotein A-I;Truncated apolipoprotein A-I	0.111662	-0.510372	-0.101871	-0.146853	3.13797	0.0587706
Q8K4Z3	Apoa1bp	NAD(P)H-hydrate epimerase	-0.027238	-0.0649883	0.0013575	0.37228	0.226694	0.175626
P09813	Apoa2	Apolipoprotein A-II;Proapolipoprotein A-II	-0.364048	-0.18682	0.134531	-0.954855	0.583529	0.181142
Q01339;I7HJR3;I7HPW5;CON__P17690	Apoh	Beta-2-glycoprotein 1	0.194088	-1.83683	-0.727128	-1.45266	0.567898	0.199334
Q9DCZ4;Q9DCZ4-3;Q9DCZ4-2	Apoo	Apolipoprotein O	-0.371698	0.0672713	0.321784	0.194945	-0.00353867	0.587316
Q78IK4;B1AV14	Apool	MICOS complex subunit Mic27	0.22143	0.013409	-0.132185	0.0170475	-0.297787	0.00483097
Q9D7A8	Armc1	Armadillo repeat-containing protein 1	-0.03141	-0.147592	-0.108917	0.613185	0.394605	0.0767803
Q9D0L7-2;Q9D0L7;D3Z5T2	Armc10	Armadillo repeat-containing protein 10	-0.64426	0.222236	0.397887	0.441435	0.208259	0.136728
A2AL85;Q8BSY0;Q8CBM2;A2AL83;A2AL79;Q6P8S1;Q3TU40;A2AL81	Asph	Aspartyl/asparaginyl beta-hydroxylase	0.002424	-0.361105	1.50751	1.01176	0.765985	0.0784566
Q9D5T0	Atad1	ATPase family AAA domain-containing protein 1	-0.199948	-0.180925	0.04103	0.155533	-0.066186	0.159829
Q925I1;Q925I1-2;H3BKI6;H3BK90;V9GWS5;V9GWS6	Atad3	ATPase family AAA domain-containing protein 3	0.089502	0.0431733	0.428432	0.685342	0.763965	2.35183e-06
O08997	Atox1	Copper transport protein ATOX1	-0.536268	0.248042	-0.432525	0.71431	1.76479	0.0884194
Q8VDN2;Q91WH7;E9QNX7;Q64436	Atp1a1	Sodium/potassium-transporting ATPase subunit alpha-1	0.37408	0.164395	-0.200204	0.189365	2.16379	0.0440107
P14094;A0A0A6YX05	Atp1b1	Sodium/potassium-transporting ATPase subunit beta-1	0.131788	-0.0887297	0.45725	-0.518493	2.4952	0.0638599
J3KMM5;O55143	Atp2a2	Calcium-transporting ATPase;Sarcoplasmic/endoplasmic reticulum calcium ATPase 2	0.238458	-0.084799	0.088206	-0.251638	0.295355	0.729411
Q03265;D3Z6F5;D6RJ16	Atp5a1	ATP synthase subunit alpha, mitochondrial;ATP synthase subunit alpha	0.054534	-0.186356	-0.116435	-0.18282	-0.368441	0.0215544
P56480	Atp5b	ATP synthase subunit beta, mitochondrial	0.00795	0.0971803	-0.107471	-0.145122	-0.369764	0.0287526
A2AKU9	Atp5c1	ATP synthase subunit gamma	0.332524	1.0609	0.146335	0.134597	-0.481947	0.351459
Q8C2Q8;Q91VR2;A2AKV2;A2AKV1;A2AKV0	Atp5c1	ATP synthase subunit gamma;ATP synthase subunit gamma, mitochondrial	0.163572	-0.300219	0.007578	0.116185	0.321447	0.361245
Q9D3D9;D3Z7S4	Atp5d	ATP synthase subunit delta, mitochondrial	0.040134	-0.286605	0.181463	0.0515825	-0.0473773	0.565536
P56382	Atp5e	ATP synthase subunit epsilon, mitochondrial	-0.319454	-0.193419	-0.433791	-0.277245	-0.432414	0.306975
Q9CQQ7;A0A0G2JGX3	Atp5f1	ATP synthase F(0) complex subunit B1, mitochondrial	0.074832	-0.0810117	-0.140466	-0.412615	-0.611965	0.00203731
A0A087WQS5;Q9CR84;P56384;P56383	Atp5g1;Atp5g3;Atp5g2	ATP synthase F(0) complex subunit C1, mitochondrial;ATP synthase F(0) complex subunit C3, mitochondrial;ATP synthase F(0) complex subunit C2, mitochondrial	0.04909	1.63193	1.6002	-0.383043	1.79637	0.595065
Q9DCX2;G3X9L6;B1ASE2	Atp5h;Gm10250	ATP synthase subunit d, mitochondrial	0.047562	-0.422198	-0.449459	-0.968035	-1.24922	4.46802e-12
Q06185;Q8BTB6	Atp5i;Atp5k	ATP synthase subunit e, mitochondrial	0.27202	-0.467803	-0.444288	-0.597003	-0.965112	0.000312005
P97450;E9QAD6	Atp5j	ATP synthase-coupling factor 6, mitochondrial	-0.042954	-0.529984	-0.544329	-0.906958	-0.923155	2.34863e-06
P56135;F8WHP8	Atp5j2	ATP synthase subunit f, mitochondrial	0.012086	-0.194423	-0.176899	-0.740548	-1.15764	2.24077e-08
Q9CPQ8;J3QNM7	Atp5l	ATP synthase subunit g, mitochondrial	0.038442	0.19081	-0.257336	-0.882488	-1.04424	7.37472e-06
Q9DB20;F7D3P8;F6XVM5	Atp5o	ATP synthase subunit O, mitochondrial	-0.083886	-0.154468	-0.118937	-0.39428	-0.652799	8.52528e-05
Q9CRA7	Atp5s	ATP synthase subunit s, mitochondrial	0.071006	0.000814667	0.286586	0.417447	0.403907	0.030238
A2ANX3	Atp8b4		0.245508	0.717134	-0.164165	0.655517	-0.183721	0.272196
H3BLL2;Q811I0;V9GX21;H3BJP9;H3BK16;H3BLD0;H3BKR0	Atpaf1	ATP synthase mitochondrial F1 complex assembly factor 1	-0.369246	0.093615	0.413613	0.66073	0.434323	0.000642139
Q91YY4;H3BLF0	Atpaf2	ATP synthase mitochondrial F1 complex assembly factor 2	-0.009922	0.331324	0.644905	0.298638	0.347244	0.301853
O35143	Atpif1	ATPase inhibitor, mitochondrial	0.649244	-0.771989	0.038323	0.743697	0.281253	0.351459
Q9JLZ3;F6RT60;F6R307;Q9JLZ3-3;E9Q6L3;E9QMT1;Q9JLZ3-2	Auh	Methylglutaconyl-CoA hydratase, mitochondrial	0.01925	0.143179	-0.157046	-0.229805	-0.501937	0.00554181
O08734;Q91WX5;F7CUQ1	Bak1	Bcl-2 homologous antagonist/killer	-0.232504	1.0714	1.95832	1.30333	1.49964	0.00921309
Q07813	Bax	Apoptosis regulator BAX	-0.178248	-0.653562	1.74252	2.14042	2.01847	0.00559493
O35855;O88374;D3Z7C8;D3Z3D7	Bcat2	Branched-chain-amino-acid aminotransferase, mitochondrial;Branched-chain-amino-acid aminotransferase	-0.031198	0.238436	-0.1796	-0.08595	-0.618507	0.224691
Q3U3J1;P50136	Bckdha	2-oxoisovalerate dehydrogenase subunit alpha, mitochondrial	0.033922	0.236031	-0.01758	-0.10001	-0.454697	0.0587706
Q6P3A8;Q6P3A8-2	Bckdhb	2-oxoisovalerate dehydrogenase subunit beta, mitochondrial	0.47958	-0.257713	-0.047961	-0.136373	-0.489272	0.0577372
O55028;D3Z7R0	Bckdk	[3-methyl-2-oxobutanoate dehydrogenase [lipoamide]] kinase, mitochondrial	-0.026622	0.155549	0.073184	-0.120593	-0.354974	0.394686
Q9D1I2	Bcl10-interacting CARD protein	Bcl10-interacting CARD protein	0.029714	-0.0917347	0.873989	-0.0262925	2.75179	0.000633766
P59017	Bcl2l13	Bcl-2-like protein 13	-0.077406	0.136117	-0.0425535	0.13328	-0.249658	0.587263
Q9CZP5	Bcs1l	Mitochondrial chaperone BCS1	0.027998	2.18545	0.453633	0.542443	0.695587	0.256541
Q80XN0;D3Z2Y8	Bdh1	D-beta-hydroxybutyrate dehydrogenase, mitochondrial	0.54737	2.18181	0.233332	0.914117	0.468705	0.261632
O55003	Bnip3	BCL2/adenovirus E1B 19 kDa protein-interacting protein 3	0.096336	-0.0459207	-0.254283	-0.229033	-0.796855	0.0221704
Q9D8S9	Bola1	BolA-like protein 1	0.13476	0.157261	0.348881	0.755555	0.471639	0.00636885
E9Q705;E9PX89;Q8CEI1	Bola3	BolA-like protein 3	0.08247	-0.0564277	-0.063483	-0.13645	-0.0510567	0.965993
Q8R164	Bphl	Valacyclovir hydrolase	-0.183962	0.0512217	0.010414	-0.14065	-0.242451	0.26875
Q9Z0S1;D3Z0E6;D3Z5X0	Bpnt1	3(2),5-bisphosphate nucleotidase 1	-0.058838	0.384996	-0.250053	0.240067	0.192546	0.671034
J3QP71;K3W4Q8;P18572-2;P18572	Bsg	Basigin	-0.029042	-0.400243	0.0149225	-0.41759	1.50571	0.339404
Q8R5L1;O35658	C1qbp	Complement component 1 Q subcomponent-binding protein, mitochondrial	-0.243658	0.317281	0.363348	0.588458	0.466275	0.000176878
P62204;Q3UKW2;Q9D6P8;P20801	Calm1;Calml3	Calmodulin;Calmodulin-like protein 3	-0.26083	0.436819	1.50273	1.64101	0.370513	0.0464507
P14211	Calr	Calreticulin	-0.432046	-0.521279	0.533753	0.88511	2.82285	0.000204237
P35564;Q3V063	Canx	Calnexin	0.182426	0.313817	0.82248	1.00362	2.18446	0.0322601
J3QMM7;K3W4M4;Q9CZ42-3;Q9CZ42;Q9CZ42-2;J3QN06;J3QPU6	Carkd	ATP-dependent (S)-NAD(P)H-hydrate dehydratase	-0.07668	0.316366	0.186017	0.233825	0.151263	0.201724
Q8BYM8	Cars2	Probable cysteine--tRNA ligase, mitochondrial	0.083494	0.0975557	-0.026359	0.07281	-0.226808	0.399662
F6QYE1;O09161;E9PZ67	Casq2	Calsequestrin;Calsequestrin-2	0.012414	0.539047	-0.383465	-0.885005	0.308196	0.291402
P24270;A2AL20	Cat	Catalase	0.040884	0.536044	1.52986	0.91552	2.65139	0.0497853
P49817;H3BKG0;H3BLK5;D3Z148;P49817-2;D3Z0J2	Cav1	Caveolin-1;Caveolin	0.370324	-0.263695	-0.078068	0.332235	1.77436	0.203635
P48758;Q8K354	Cbr1	Carbonyl reductase [NADPH] 1	0.649328	-0.317795	-0.363931	-0.426445	-0.601514	0.00121629
P08074;F6YNX9;A2AC16;Q91X52	Cbr2	Carbonyl reductase [NADPH] 2	0.22701	0.309263	0.807451	1.79448	1.88207	5.51594e-07
Q91VT4;D3Z6C4	Cbr4	Carbonyl reductase family member 4	-0.175304	0.287662	0.018701	0.18438	0.07652	0.151032
Q71RI9-2;Q71RI9;A0A0G2JGE1;D6RJ70	Ccbl2	Kynurenine--oxoglutarate transaminase 3	0.172074	0.0168697	-0.0494965	-0.04094	-0.293284	0.832282
Q3TC33;E0CYX9;E0CYP1;Q3TC33-2;E0CXT2	Ccdc127	Coiled-coil domain-containing protein 127	0.26589	-0.206669	-0.308323	-0.253993	-0.476363	0.193349
Q3URS9-2;Q3URS9	Ccdc51	Coiled-coil domain-containing protein 51	0.208054	0.160771	0.16397	0.467085	0.274858	1.28388e-05
F8WJI3;Q8R3Q6;E9Q4B5	Ccdc58	Coiled-coil domain-containing protein 58	-0.074208	-0.352494	-0.174022	-0.15732	-0.033174	0.28791
Q8C3X2;Q8C3X2-2	Ccdc90b	Coiled-coil domain-containing protein 90B, mitochondrial	-0.185854	0.368649	0.186372	0.295397	0.510866	0.00123899
Q6RUT7	Ccsmst1	Protein CCSMST1	0.994376	0.54773	0.156888	1.5373	0.922636	0.107409
Q08857;A0A0G2JFB7	Cd36	Platelet glycoprotein 4	0.44668	-0.325377	0.248303	1.37782	1.24723	0.598076
Q9WTR5	Cdh13	Cadherin-13	0.603226	0.361866	0.114752	-0.134173	0.216199	0.579455
Q8BTE5;A0A0A6YXB8	Cebpzos		-0.087806	0.407946	-0.0153585	0.290633	0.120801	0.379936
Q91WM2	Cecr5	Cat eye syndrome critical region protein 5 homolog	-0.105834	0.347636	0.221308	0.197787	0.272923	0.335454
Q7TNL9	Chchd10		-0.294016	-1.54414	-1.99823	-0.144595	-1.0361	0.284405
Q9D1L0;D3Z5B1	Chchd2;Zbed5	Coiled-coil-helix-coiled-coil-helix domain-containing protein 2, mitochondrial	0.043428	-1.21133	-0.824094	-1.71274	-1.26117	6.28261e-06
Q9CRB9;Q9D9P1;D3Z0L4;S4R238;F6QFL0;A2AI52;Q80U87	Chchd3	MICOS complex subunit Mic19	0.16457	-0.165235	-0.0216055	0.0530425	-0.305812	0.545543
Q8VEA4	Chchd4	Mitochondrial intermembrane space import and assembly protein 40	0.037696	0.327498	-0.008697	0.64596	1.16946	0.385753
Q91VN4;E9Q4M4	Chchd6	MICOS complex subunit Mic25	-0.219636	0.103309	0.247973	0.938573	1.16349	1.64494e-06
Q8K2Q5;B1AXC8;Q3TFT3;B1AXC7;B1AXC5	Chchd7	Coiled-coil-helix-coiled-coil-helix domain-containing protein 7	-0.42241	-0.231823	-1.0701	-1.14359	-1.40249	0.0119786
Q91WS0	Cisd1	CDGSH iron-sulfur domain-containing protein 1	-0.347888	-0.084475	-0.219788	0.0436625	0.085492	0.191018
Z4YKM2;B2RWE3;B1AR13	Cisd3	CDGSH iron-sulfur domain-containing protein 3, mitochondrial	-0.10662	-0.374007	0.352639	0.616455	0.466184	0.00258241
Q8BMK4	Ckap4	Cytoskeleton-associated protein 4	-0.014322	-0.0917173	1.21231	1.90784	3.11223	0.00959783
P07310	Ckm	Creatine kinase M-type	-0.00288	-0.302938	-0.206789	-0.279855	0.818759	0.231106
Q6P8J7;P30275;B0R0F0;A2ARP5;B0R0E9	Ckmt2	Creatine kinase S-type, mitochondrial	0.015858	-0.155565	-0.114839	-0.017365	-0.252824	0.119893
Q60649;E9PY58;D3YZF1;D3Z7V2;D6RIQ2	Clpb	Caseinolytic peptidase B protein homolog	-0.124404	0.270187	0.324002	0.586817	0.700355	1.28541e-05
O88696	Clpp	ATP-dependent Clp protease proteolytic subunit, mitochondrial	-0.08161	0.089902	-0.144116	0.01061	-0.0911587	0.612007
Q9JHS4;Q6P8N8;F7BB92	Clpx	ATP-dependent Clp protease ATP-binding subunit clpX-like, mitochondrial	-0.068298	0.0220307	0.448736	0.922268	1.05644	8.70801e-08
Q8R4N0	Clybl	Citrate lyase subunit beta-like protein, mitochondrial	0.01228	-0.101187	-0.036184	0.16318	0.0934587	0.302855
A4QPC5;P21844	Cma1	Chymase	0.265886	-0.908751	-0.365553	-0.884902	-2.43201	0.00783177
Q9CPZ8	Cmc1	COX assembly mitochondrial protein homolog	0.00872	-0.96096	0.0683005	0.145747	1.47736	0.592698
Q8K199;F8WHQ0;D6RJ47;D6RD08;D3YZZ0	Cmc2	COX assembly mitochondrial protein 2 homolog	0.141142	-1.79595	0.81096	-0.0823825	1.46545	0.182162
Q9D2R6;E9Q6W2	Coa3	Cytochrome c oxidase assembly factor 3 homolog, mitochondrial	-0.0549	0.131662	0.446459	0.506533	0.299169	0.00513832
Q8BGD8	Coa6	Cytochrome c oxidase assembly factor 6 homolog	-0.008614	-0.292165	0.880245	0.858692	-0.486465	0.521913
Q921H9	Coa7	Cytochrome c oxidase assembly factor 7	0.092832	-0.0448377	0.229338	0.397348	0.229447	0.534488
Q9DBL7;REV__F6QNN0;REV__J3QNE4	Coasy	Bifunctional coenzyme A synthase;Phosphopantetheine adenylyltransferase;Dephospho-CoA kinase	-0.097156	0.116392	0.395146	0.799648	0.890457	6.47431e-05
P11087-2;P11087	Col1a1	Collagen alpha-1(I) chain	-0.021916	-0.788554	0.988149	-1.10646	0.806947	0.443154
Q01149;E0CXI2	Col1a2	Collagen alpha-2(I) chain	0.3921	-1.09532	-0.302584	-0.013145	1.12312	0.353144
Q04857	Col6a1	Collagen alpha-1(VI) chain	-0.054268	-1.72185	0.727246	-0.819118	1.37369	0.0390851
Q02788;D3Z7D5	Col6a2	Collagen alpha-2(VI) chain	0.357816	-1.8251	0.103143	-0.212083	2.30987	0.0648272
J3QQ16;A0A087WS16;E9PWQ3;D3YWD1	Col6a3		0.100516	-1.04469	-0.293556	-1.78118	2.3981	0.0459792
Q8BIG7;H3BJ37	Comtd1	Catechol O-methyltransferase domain-containing protein 1	-0.462914	-0.406912	1.20959	2.72718	3.95811	1.00168e-11
E9Q3H6	Coq10a		-0.330572	0.573041	0.105909	-0.459998	-1.52359	5.95409e-07
Q3THF9;G5E8J7;Q3THF9-2	Coq10b	Coenzyme Q-binding protein COQ10 homolog B, mitochondrial	-0.475674	0.226099	-0.235266	-0.323937	-0.239633	0.706544
Q8BMS4	Coq3	Hexaprenyldihydroxybenzoate methyltransferase, mitochondrial	0.06773	-0.264454	-0.67215	-1.20954	-1.86014	3.32134e-12
Q8BGB8;B7ZCV4;D6RJJ8	Coq4	Ubiquinone biosynthesis protein COQ4 homolog, mitochondrial	-0.009594	0.849153	-0.129055	-0.06166	-0.291595	0.244533
Q9CXI0;F6X4L9	Coq5	2-methoxy-6-polyprenyl-1,4-benzoquinol methylase, mitochondrial	0.226472	-0.077377	-0.321183	-0.882312	-1.29821	1.89075e-08
Q8R1S0;D3YW66;D6RG57;F6ZE40	Coq6	Ubiquinone biosynthesis monooxygenase COQ6	0.086276	-0.0619603	-0.3866	-1.14726	-2.04958	9.14518e-14
P97478;Q3TYT1	Coq7	Ubiquinone biosynthesis protein COQ7 homolog	0.071438	-0.167652	-0.329535	-1.09696	-1.99004	1.72522e-15
Q8K1Z0;F6SFF5	Coq9	Ubiquinone biosynthesis protein COQ9, mitochondrial	-0.12105	-0.0195283	-0.256618	-0.437635	-0.931013	7.5972e-09
Q8CFY5	Cox10	Protoheme IX farnesyltransferase, mitochondrial	0.161246	1.64049	0.687361	1.29187	0.807137	0.0520461
Q6P8I6;Q5SRC5	Cox11	Cytochrome c oxidase assembly protein COX11, mitochondrial	-0.41655	1.21539	0.714742	0.285865	1.12986	0.0212552
Q8BJ03-2;Q8BJ03	Cox15	Cytochrome c oxidase assembly protein COX15 homolog	0.006712	1.72417	1.08632	1.54722	1.5039	0.0366061
Q9CR63;E9Q5H8;E9Q3U7;G3UWC6;Q9CR63-2	Cox16	Cytochrome c oxidase assembly protein COX16 homolog, mitochondrial	-0.503184	1.21156	-0.335178	1.2119	1.11337	0.0710462
P56394	Cox17	Cytochrome c oxidase copper chaperone	-0.56958	-1.8475	-0.283661	1.41174	0.940762	0.00367352
Q8K0C8;A0A0G2JFK4;S4R231	Cox19	Cytochrome c oxidase assembly protein COX19	-0.180514	-0.0464723	-0.816285	0.781915	0.114319	0.574272
Q9D7J4	Cox20	Cytochrome c oxidase protein 20 homolog	-0.202562	0.084856	-0.134081	-0.192257	-0.400211	0.111072
P19783;D6RG40	Cox4i1	Cytochrome c oxidase subunit 4 isoform 1, mitochondrial	-0.010998	-0.51634	-0.602376	-1.27757	-2.03851	2.25094e-13
P12787	Cox5a	Cytochrome c oxidase subunit 5A, mitochondrial	0.176592	-0.502577	-0.620512	-1.28781	-2.41171	1.88189e-12
Q9D881;P19536;A0A0A6YVR0;F7C106	Cox5b	Cytochrome c oxidase subunit 5B, mitochondrial	-0.006064	-0.565813	-0.679302	-1.66327	-2.7265	1.16535e-14
Q9DCW5;P43024	Cox6a1	Cytochrome c oxidase subunit 6A, mitochondrial;Cytochrome c oxidase subunit 6A1, mitochondrial	-0.660702	0.0331353	-0.202929	-0.237382	-0.592637	0.0124225
P43023	Cox6a2	Cytochrome c oxidase subunit 6A2, mitochondrial	-0.251008	-0.621719	-0.666679	-1.53592	-3.09444	1.051e-13
P56391	Cox6b1	Cytochrome c oxidase subunit 6B1	0.300084	-1.47545	-0.829149	-1.52787	-2.98197	2.16989e-11
Q9CPQ1;D3Z6E1;A0A0G2JDA6	Cox6c	Cytochrome c oxidase subunit 6C	0.09056	-0.442243	-0.710621	-1.61577	-2.75085	1.24446e-14
P56392	Cox7a1	Cytochrome c oxidase subunit 7A1, mitochondrial	0.478702	-0.649071	-0.593165	-0.991207	-2.63875	3.88625e-10
P48771	Cox7a2	Cytochrome c oxidase subunit 7A2, mitochondrial	0.39999	-0.220328	-0.4501	-1.11029	-1.55065	3.67109e-08
E9PZS8;Q61387;F7B257	Cox7a2l	Cytochrome c oxidase subunit 7A-related protein, mitochondrial	0.210028	0.673315	0.85015	0.912735	0.944301	1.65521e-07
P56393	Cox7b	Cytochrome c oxidase subunit 7B, mitochondrial	-0.410418	0.017597	-0.765594	-1.6975	-2.61507	1.26449e-06
P17665;B8JJA9	Cox7c	Cytochrome c oxidase subunit 7C, mitochondrial	0.02538	-0.664242	-0.803669	-1.4872	-3.11152	1.42936e-10
P48772	Cox8b	Cytochrome c oxidase subunit 8B, mitochondrial	1.0866	0.367276	-0.048216	-2.39266	-3.30209	0.000266835
P15089	Cpa3	Mast cell carboxypeptidase A	0.361254	0.450299	-0.499713	-0.31391	-0.981121	0.172314
P36552	Cpox	Oxygen-dependent coproporphyrinogen-III oxidase, mitochondrial	0.091446	-0.03861	0.125692	-0.0981775	-0.172646	0.784458
P97742	Cpt1a	Carnitine O-palmitoyltransferase 1, liver isoform	-0.18913	0.191541	0.442927	0.258125	0.179071	0.694585
Q924X2;F6QXT4;E9Q393	Cpt1b	Carnitine O-palmitoyltransferase 1, muscle isoform	-0.270652	0.442835	0.238393	0.288948	0.231139	0.675621
P52825;A2A8E8;A2A8E7;A2A8E9	Cpt2	Carnitine O-palmitoyltransferase 2, mitochondrial	-0.196594	0.277951	-0.123976	-0.273413	-0.620655	0.0450146
H7BX88;P47934;B7ZDD7;F7BF80;A2AWJ5;B7ZDD8;A2AWE5	Crat	Carnitine O-acetyltransferase	-0.27385	0.385227	0.092863	-0.046655	-0.457489	0.022796
P23927	Cryab	Alpha-crystallin B chain	-0.083506	0.0383933	-0.125303	-0.264737	0.786474	0.0652841
P47199;A0A0A6YXR4;A0A0A6YVS7;V9GXY8;D3YUG9;D3YWU6;D3Z4Q4;D3Z2X0;A0A0G2JFU5	Cryz	Quinone oxidoreductase	0.18241	1.02815	-0.075171	0.20225	-0.156217	0.173318
Q9CZU6	Cs	Citrate synthase, mitochondrial	-0.156364	0.391389	0.0281535	0.047335	-0.12452	0.403765
Q80X68	Csl	Citrate synthase	0.083464	0.274032	-1.0286	-0.728028	-0.47608	0.520839
P50462	Csrp3	Cysteine and glycine-rich protein 3	0.062922	-1.29147	-0.378219	-2.31465	0.375097	0.0497717
P18242;F6Y6L6;F8WIR1	Ctsd	Cathepsin D	0.374504	-0.214895	1.07054	-0.0880925	1.12099	0.387979
G5E850;P56395;E0CY88	Cyb5a	Cytochrome b5	0.057102	0.0453783	-0.174574	-0.0127525	-0.203259	0.575281
Q9CQX2	Cyb5b	Cytochrome b5 type B	-0.168546	0.095576	0.445288	0.21088	0.465327	0.396697
Q9DB73;G3UZG6;Q9DB73-2;G3UZ57;G3UXV8	Cyb5r1	NADH-cytochrome b5 reductase 1	-0.246588	0.37366	1.42292	2.8068	3.20515	4.93216e-14
Q9DCN2-2;Q9DCN2;F2Z456;A0A0A0MQM3	Cyb5r3	NADH-cytochrome b5 reductase 3;NADH-cytochrome b5 reductase 3 membrane-bound form;NADH-cytochrome b5 reductase 3 soluble form	-0.068098	0.29152	0.367107	0.730397	1.18091	0.000180963
Q9D0M3-2;Q9D0M3	Cyc1	Cytochrome c1, heme protein, mitochondrial	-0.26449	0.431504	0.202755	0.64799	0.243225	3.3285e-07
Q9DBG1	Cyp27a1	Sterol 26-hydroxylase, mitochondrial	-0.585152	0.255138	1.87286	2.47276	2.19929	0.000176313
Q9D172	D10Jhu81e	ES1 protein homolog, mitochondrial	0.037	-0.166598	-0.16178	0.057595	-0.403681	0.065969
E9QN44;Q8CIM3;A0A087WR78	D2hgdh	D-2-hydroxyglutarate dehydrogenase, mitochondrial	0.084554	0.697773	0.74547	0.72424	-0.793265	0.0408891
Q8BIP0	Dars2	Aspartate--tRNA ligase, mitochondrial	-0.17547	0.497376	-0.00596	0.53446	0.529093	0.198458
P31786;Q4VWZ5;D3Z563;M0QWU8	Dbi	Acyl-CoA-binding protein	-0.444782	-0.263923	-0.205617	-0.487245	-1.07391	0.000352633
P53395	Dbt	Lipoamide acyltransferase component of branched-chain alpha-keto acid dehydrogenase complex, mitochondrial	-0.012914	0.0115357	-0.133112	-0.143178	-0.520973	0.00440397
Q8BHC4;B0QZX9	Dcakd	Dephospho-CoA kinase domain-containing protein	-0.275144	-0.209376	0.334127	0.671135	0.393677	0.000738181
P28654	Dcn	Decorin	0.053112	-0.267719	-0.359602	-0.24245	0.835395	0.533025
O54734	Ddost	Dolichyl-diphosphooligosaccharide--protein glycosyltransferase 48 kDa subunit	0.22856	0.300892	0.768829	1.13218	1.2651	0.384683
Q62167;P16381;Q3V086;Q61496	Ddx3x;D1Pas1	ATP-dependent RNA helicase DDX3X;Putative ATP-dependent RNA helicase Pl10	0.194906	-0.007499	0.293064	-0.694595	1.01003	0.42224
Q9CQ62	Decr1	2,4-dienoyl-CoA reductase, mitochondrial	-0.035472	-0.086552	-0.0086	-0.160725	-0.399849	0.0134295
P31001;CON__Q9H552;D3YZ35;P46660;P08553	Des	Desmin	0.109522	-0.0922403	-0.398212	-0.713135	1.64661	0.131725
Q9QX60-2;Q9QX60;Q504N4	Dguok	Deoxyguanosine kinase, mitochondrial	0.05971	0.452371	-0.0972985	-0.141482	-0.103416	0.578033
O35435;E9Q1V3;F6TCT7;D3YZY5;F6ZQJ5	Dhodh	Dihydroorotate dehydrogenase (quinone), mitochondrial	-0.066572	0.1959	0.047833	0.09626	-0.0114647	0.451419
Q99L04	Dhrs1	Dehydrogenase/reductase SDR family member 1	0.06326	-0.370818	-0.020239	-0.145975	-0.166307	0.0563058
Q99LB2	Dhrs4	Dehydrogenase/reductase SDR family member 4	-0.109708	-0.158632	-0.155281	-0.38704	-0.779563	1.09464e-06
Z4YKT6;Q99J47-2;Q99J47	Dhrs7b	Dehydrogenase/reductase SDR family member 7B	0.115968	-0.24448	-0.135965	0.82453	0.00568533	0.34841
A0A0G2JGL8;Q99PU8-2;Q99PU8;Q99PU8-3;A0A0G2JE53;A0A0G2JGL1;A0A0G2JGD9;A0A0G2JGY7;A0A0G2JFR1;A0A0G2JEY7	Dhx30	Putative ATP-dependent RNA helicase DHX30	0.161018	0.254941	2.32329	2.71779	4.19549	1.79459e-06
Q9JIQ3;A0A0G2JGS0;Q8R1D8;D3Z3K5;D3Z2Q3	Diablo	Diablo homolog, mitochondrial	-0.534846	0.074428	0.531714	1.26132	1.90824	4.31241e-09
Q8BMF4	Dlat	Dihydrolipoyllysine-residue acetyltransferase component of pyruvate dehydrogenase complex, mitochondrial	-0.034258	0.255084	0.0049365	-0.064145	-0.0393073	0.401806
O08749	Dld	Dihydrolipoyl dehydrogenase, mitochondrial	-0.132976	0.0716627	-0.160998	-0.0382375	-0.272894	0.0403855
Q9D2G2;Q9D2G2-2	Dlst	Dihydrolipoyllysine-residue succinyltransferase component of 2-oxoglutarate dehydrogenase complex, mitochondrial	-0.055222	0.233551	-0.157955	-0.13634	-0.204318	0.0873051
Q99M87;Q99M87-3	Dnaja3	DnaJ homolog subfamily A member 3, mitochondrial	-0.007562	0.073876	0.327189	0.66145	0.569758	1.22292e-07
Q5U458;E9Q8B3;A2A8D1	Dnajc11	DnaJ homolog subfamily C member 11	-0.035748	0.0762097	0.218029	0.493365	0.648861	0.000176313
Q78YY6	Dnajc15	DnaJ homolog subfamily C member 15	0.087358	1.23309	0.565779	1.55825	3.20683	0.00111137
Q9CQV7;D3Z5K6;G3X8S1;Q9CQV7-3;Q9CQV7-2	Dnajc19	Mitochondrial import inner membrane translocase subunit TIM14	0.118	0.340007	0.071404	-0.210285	-0.131327	0.128317
E9Q1L7;Q8VCE1;D3Z032;D3Z0T8	Dnajc28	DnaJ homolog subfamily C member 28	-0.146264	0.138048	-0.190127	-0.217242	-0.769698	3.30155e-05
P59041	Dnajc30	DnaJ homolog subfamily C member 30	-0.171716	0.68995	0.324188	0.0916375	-0.0117967	0.191018
Q6GTN1;Q9D844	Dnajc4	DnaJ homolog subfamily C member 4	-0.245226	1.5556	-0.5766	1.34661	0.913706	0.126681
E9PUD2;Q8K1M6-3;Q8K1M6-2;Q8K1M6;Q8K1M6-4;Q8K1M6-5	Dnm1l	Dynamin-1-like protein	0.3278	0.712138	-0.406842	0.663815	1.70558	0.112903
Q3TVK3;Q9Z2W0;Q8BPW9;A0A087WS31;A0A087WSE6;A0A087WRC1;A0A087WNX3;A0A087WSD3;A0A087WSU0	Dnpep	Aspartyl aminopeptidase	-0.165556	0.142993	0.296084	0.354078	0.754217	0.00530465
O08553	Dpysl2	Dihydropyrimidinase-related protein 2	0.023942	0.348886	0.372729	0.54197	1.73593	0.312652
E9PWE8;Q3TT92;Q62188;D3YUS0;D3Z567	Dpysl3	Dihydropyrimidinase-related protein 3	0.660796	-0.57365	0.13978	1.12462	2.65179	0.0426597
E9PZW0;E9Q557	Dsp	Desmoplakin	1.76782	-0.177079	0.746819	-1.20749	-2.12067	0.0188064
P97930;D3Z3R3;P97930-2	Dtymk	Thymidylate kinase	-0.17934	0.294549	-0.251649	0.0099525	-0.0842687	0.166864
Q8VCG1;Q9CQ43	Dut		-0.096844	-0.0822773	-0.192278	-0.406658	-1.09623	4.70693e-05
Q9JHU4;F6ZX84	Dync1h1	Cytoplasmic dynein 1 heavy chain 1	-0.228364	0.134135	0.940085	0.939512	3.28517	0.00344885
Q9CXJ1	Ears2	Probable glutamate--tRNA ligase, mitochondrial	0.018518	0.207956	0.362259	0.660415	0.571037	9.91389e-07
O35459;F7B227	Ech1	Delta(3,5)-Delta(2,4)-dienoyl-CoA isomerase, mitochondrial	-0.075706	-0.047094	-0.212333	-0.529925	-0.880359	0.000204237
Q9D9V3-2;Q9D9V3;E0CXS3	Echdc1	Ethylmalonyl-CoA decarboxylase	0.0674	-0.152125	0.072971	0.04364	-0.203336	0.824478
Q3TLP5;Q3TLP5-2;F6YTG0;Q3TLP5-3;F6Z5N5;E0CXC8	Echdc2	Enoyl-CoA hydratase domain-containing protein 2, mitochondrial	0.088542	0.0749107	-0.0141275	-0.304195	-0.705481	0.00194609
Q9D7J9	Echdc3	Enoyl-CoA hydratase domain-containing protein 3, mitochondrial	-0.108986	0.267505	-0.233566	-0.517907	-1.03225	1.81269e-05
Q8BH95;F6T930	Echs1	Enoyl-CoA hydratase, mitochondrial	-0.001468	0.0295237	-0.218095	-0.114035	-0.3501	0.0964998
P42125	Eci1	Enoyl-CoA delta isomerase 1, mitochondrial	0.032628	-0.0321027	0.0857535	-0.07206	-0.325059	0.146647
Q9WUR2-2;Q3TCD4;Q9WUR2;E9PYA9;E9PVM6;E9PYC6;E9Q858;E9Q7A8;E9PY42;Q78JN3	Eci2	Enoyl-CoA delta isomerase 2, mitochondrial	-0.294026	0.052212	0.0530695	0.210622	-0.0391873	0.16901
Q9QZH6	Ecsit	Evolutionarily conserved signaling intermediate in Toll pathway, mitochondrial	0.244802	-0.0568133	0.341405	0.684133	0.764376	0.000525214
Q8BL66	Eea1	Early endosome antigen 1	0.736586	1.2408	-0.058384	1.40372	0.567705	0.675621
P10126;D3YZ68;D3Z3I8	Eef1a1	Elongation factor 1-alpha 1	0.100056	-0.040616	0.471433	0.310072	1.00646	0.0348863
P62631	Eef1a2	Elongation factor 1-alpha 2	-0.266916	0.235808	0.545607	0.109672	0.218042	0.22348
Q80T06;E9QN08;P57776;Q91VK2;P57776-3;D3YUQ9;D3YZT9;D3YY68	Eef1d	Elongation factor 1-delta	-0.210812	0.11559	0.069071	-0.256578	1.46476	0.590752
Q9D8N0	Eef1g	Elongation factor 1-gamma	0.033252	-0.112752	-0.093072	0.413815	2.2289	0.0253068
P58252;G3UXK8;G3UZ34;A2AH85;O08810	Eef2	Elongation factor 2	0.1871	0.261711	-0.316346	0.454193	1.00079	0.193349
Q9WVK4	Ehd1	EH domain-containing protein 1	0.286964	-0.5149	0.176479	-0.961885	1.28583	0.159747
Q8BH64;D3Z7U7	Ehd2	EH domain-containing protein 2	0.396438	0.374972	-0.0804765	-0.21151	1.19621	0.347706
Q9EQP2	Ehd4	EH domain-containing protein 4	-0.0169	-0.307693	0.280361	-0.0334875	1.06194	0.159435
P63242;A0A0A0MQM0;Q8BGY2;J3QPS8	Eif5a;Eif5a2	Eukaryotic translation initiation factor 5A-1;Eukaryotic translation initiation factor 5A-2	0.32492	-0.0797173	0.41025	1.37623	2.22858	0.0700542
Q80Y81-2;Q80Y81;B1ATP7;B1ATP9	Elac2	Zinc phosphodiesterase ELAC protein 2	0.602638	0.748553	1.10792	1.45037	2.04782	0.00104927
O08600	Endog	Endonuclease G, mitochondrial	0.197546	-0.428264	-0.335534	-1.25458	-1.4746	1.17594e-11
P17182;Q6PHC1;B0QZL1	Eno1	Alpha-enolase;Enolase	0.126058	-0.698589	-0.783262	1.94416	1.80135	0.206924
P21550;Q5SX59;J3QPZ9;Q5SX60;Q5SX61	Eno3	Beta-enolase;Enolase	-0.143908	0.128861	-0.244278	-0.27854	-0.684776	8.64759e-05
P34914;P34914-2	Ephx2	Bifunctional epoxide hydrolase 2;Cytosolic epoxide hydrolase 2;Lipid-phosphate phosphatase	-0.208722	0.407776	0.215797	0.176312	0.180799	0.394686
Q9CZU4	Eral1	GTPase Era, mitochondrial	-0.417962	1.57435	1.08817	0.906815	0.93103	0.000352573
Q99LC5	Etfa	Electron transfer flavoprotein subunit alpha, mitochondrial	-0.146348	0.0617577	-0.118939	-0.1607	-0.442244	0.00077056
Q9DCW4	Etfb	Electron transfer flavoprotein subunit beta	-0.009748	-0.378731	-0.176625	-0.126433	-0.396699	0.076095
Q921G7;Q6PF96	Etfdh	Electron transfer flavoprotein-ubiquinone oxidoreductase, mitochondrial	-0.056868	-0.027189	-0.120866	-0.17918	-0.639219	4.48285e-06
Q9DCM0	Ethe1	Persulfide dioxygenase ETHE1, mitochondrial	-0.2249	-0.23832	-0.0495695	0.208523	0.0271907	0.134536
Q8C163;E9PZS5	Exog	Nuclease EXOG, mitochondrial	-0.207552	0.781865	0.947307	0.11108	0.105264	0.37035
P11404	Fabp3	Fatty acid-binding protein, heart	0.136462	-0.124047	-0.282836	-0.244157	0.530268	0.335372
P04117;A0A0A6YW05;A0A0A6YXB9;A0A0A6YXI2;O08716	Fabp4	Fatty acid-binding protein, adipocyte	-0.473106	-0.0227647	-0.366641	0.436598	1.71232	0.00124229
Q8R0F8	Fahd1	Acylpyruvase FAHD1, mitochondrial	-0.030688	0.0453893	0.129075	0.332395	0.398954	0.0166994
Q3TC72	Fahd2	Fumarylacetoacetate hydrolase domain-containing protein 2A	-0.012622	0.133163	-0.124503	-0.041985	-0.262658	0.532022
Q9CR98	Fam136a	Protein FAM136A	-0.178126	-0.2665	-0.13094	0.09794	0.530487	0.224405
Q9D6U8	Fam162a	Protein FAM162A	-0.18132	0.121525	-0.0567525	0.024035	-0.0848627	0.650845
Q501J2	Fam173a	Protein FAM173A	0.30355	0.101525	0.888893	2.07493	2.13773	0.00482833
Q9D1Z3	Fam173b	Protein FAM173B	-1.73167	0.121456	0.411785	1.94305	1.21824	0.0201199
Q7TPD2;Q7TPD2-2	Fam185a	Protein FAM185A	0.100868	0.313335	0.380102	0.467607	0.0617353	0.076095
Q8BGY7	Fam210a	Protein FAM210A	-0.190958	0.683519	0.366017	0.253437	-0.0210753	0.0126535
Q9DB60;B1AS14	Fam213b	Prostamide/prostaglandin F synthase	0.21927	-0.00444	-0.005629	0.246057	0.293905	0.219902
Q99M01;G3X9Q4	Fars2	Phenylalanine--tRNA ligase, mitochondrial	-0.219652	0.152126	-0.198606	0.0160875	-0.406164	0.390139
Q922E6	Fastkd2	FAST kinase domain-containing protein 2	0.138146	0.270138	0.334068	0.555182	0.480078	0.0163619
P46656	Fdx1	Adrenodoxin, mitochondrial	-0.062274	-0.0548457	-0.124161	0.30908	-0.364626	0.844412
Q9CPW2;Q9CPW2-2	Fdx1l	Adrenodoxin-like protein, mitochondrial	-0.114718	0.658529	0.639427	1.42438	-0.363629	0.194285
Q61578	Fdxr	NADPH:adrenodoxin oxidoreductase, mitochondrial	-0.095178	0.064628	0.0949375	0.430842	0.766956	3.19564e-07
Q544X6;P22315	Fech	Ferrochelatase;Ferrochelatase, mitochondrial	-0.042394	0.25397	-0.109479	0.0147875	-0.523881	0.00944893
E9PV24-2;E9PV24	Fga		-0.041178	0.128	-1.0407	0.318197	1.60286	0.165966
Q8K0E8;CON__P02676	Fgb	Fibrinogen beta chain;Fibrinopeptide B;Fibrinogen beta chain	0.369592	-0.801274	-0.531541	0.145108	1.84108	0.0710462
Q3UER8;Q8VCM7	Fgg	Fibrinogen gamma chain	0.33222	-0.181751	-1.96596	0.30121	1.77564	0.0750522
P97807-2;P97807;H3BKG7	Fh	Fumarate hydratase, mitochondrial	-0.030826	0.161656	-0.0762305	-0.121015	-0.284826	0.227116
E9PZ91;O89106;E9PVU9;F6SV10;E9Q3M6	Fhit	Bis(5-adenosyl)-triphosphatase	-0.065798	-1.03322	0.125311	0.77486	1.85702	0.0441047
Q9CQ92;G3X9U9;D3YZ32	Fis1	Mitochondrial fission 1 protein	0.052626	0.144067	0.109631	-0.194362	0.134449	0.50185
Q62446	Fkbp3	Peptidyl-prolyl cis-trans isomerase FKBP3	-0.117682	0.025991	0.909241	-0.0815575	0.967395	0.52685
O35465-2;O35465;F6WP10;D3Z597	Fkbp8	Peptidyl-prolyl cis-trans isomerase FKBP8	-0.030826	-0.219038	-0.0856825	0.2611	0.390428	0.177993
Q8R123;Q8R123-2;F8WGX4;E0CZ66	Flad1	FAD synthase;Molybdenum cofactor biosynthesis protein-like region;FAD synthase region	-0.503326	1.10204	1.11439	0.62516	0.994681	0.010566
B7FAU9;Q8BTM8;B7FAV1;F6XC15;J3JS91;Q8BTM8-2;F6Z2C0	Flna	Filamin-A	0.395616	-2.13793	-0.423939	-0.173023	1.52501	0.0888739
Q9ER35;Q6P264;Q7TQJ3	Fn3k	Fructosamine-3-kinase	0.2148	-0.0995363	0.489938	0.821075	0.132278	0.748323
Q3TQB2;Q3TQB2-2;F6UAF9;D6RG85;D3Z5V7;D6RJ42	Foxred1	FAD-dependent oxidoreductase domain-containing protein 1	-0.215264	0.597803	0.664491	0.438965	0.462045	0.543407
Q9CPY0	Ftsj2	Putative ribosomal RNA methyltransferase 2	-0.910408	-0.630835	0.605601	0.311942	-0.0925847	0.216833
Q9DB70;H3BJZ1;H3BJ77	Fundc1	FUN14 domain-containing protein 1	-0.331278	-0.0759927	0.860911	0.111538	-0.00819933	0.685771
Q9D6K8;Q9D9Q3	Fundc2	FUN14 domain-containing protein 2	-0.345558	-0.0231093	0.071795	0.257383	-0.272115	0.513082
O35943	Fxn	Frataxin, mitochondrial;Frataxin intermediate form;Frataxin mature form	0.721662	0.402695	0.681182	-0.329005	0.0414633	0.233136
E9Q7N6;Q3V1B8	Gal3st4		1.37841	-0.851438	-0.0360575	-0.644655	-1.86616	0.0587706
P16858;A0A0A0MQF6;S4R1W1;S4R257;D3YYI5;V9GX06;S4R1W8;S4R1N5;S4R2G5;Q64467;V9GXA7;V9GXK0	Gapdh;Gm3839;Gm7293	Glyceraldehyde-3-phosphate dehydrogenase	0.057828	-0.381725	0.046945	0.0749375	1.05222	0.0246708
Q9CZD3	Gars	Glycine--tRNA ligase	-1.4457	1.34217	2.80816	4.6825	4.91606	1.08429e-09
Q8CBY0	Gatc	Glutamyl-tRNA(Gln) amidotransferase subunit C, mitochondrial	-0.035794	-0.0923173	-0.267741	0.340707	1.79934	0.210401
Q7TMG8;O55126;A0A0G2JEV1	Gbas	Protein NipSnap homolog 2	-0.002136	0.177344	-0.012764	-0.08782	-0.405659	0.264675
O88986;E9PWY6	Gcat	2-amino-3-ketobutyrate coenzyme A ligase, mitochondrial	0.211138	0.839802	-0.314746	-0.269153	-0.847401	0.0358441
A0A0A0MQ68;Q60759;D3Z4I2	Gcdh	Glutaryl-CoA dehydrogenase, mitochondrial	0.060586	-0.133506	-0.077795	-0.245268	-0.851915	0.000147909
Q91WK5	Gcsh	Glycine cleavage system H protein, mitochondrial	-0.195428	-0.0474843	-0.149053	0.0823	-0.013422	0.823482
P56213	Gfer	FAD-linked sulfhydryl oxidase ALR	-0.373236	-0.805063	0.226255	0.571525	1.62037	0.210433
Q8K0D5	Gfm1	Elongation factor G, mitochondrial	-0.02797	0.189212	0.171664	0.276152	0.0322093	0.212863
Q8R2Q4-2;Q8R2Q4;E9Q7N5;Q8R2Q4-3;Q8C1C2;E0CXH2	Gfm2	Ribosome-releasing factor 2, mitochondrial	-0.052468	0.133297	0.276153	0.453545	0.549119	7.03727e-06
Q91VC9	Ghitm	Growth hormone-inducible transmembrane protein	0.14682	0.778647	0.421736	0.680485	0.963965	0.0710462
P23242	Gja1	Gap junction alpha-1 protein	0.101664	0.314954	-0.865742	1.08972	0.300889	0.312885
Q64516-1;Q64516-2;Q64516;B1ASZ3;Q9WU65;Q8C635	Gk;Gyk	Glycerol kinase	-0.097976	0.298504	0.394076	0.53526	0.867288	0.000597936
F8WHM5;Q61543;F6RSH1;E9PWD8	Glg1	Golgi apparatus protein 1	0.183134	-1.65353	0.682167	0.350903	-0.171011	0.131487
Q9CPV4;E9Q197;Q9CPV4-3;Q9CPV4-2;F6ZTG3;F7BB55;E9Q055;E9Q2R6	Glod4	Glyoxalase domain-containing protein 4	0.0219	0.116938	-0.021202	-0.0262775	-0.154918	0.81934
Q923X4-2;Q923X4;B7ZC40	Glrx2	Glutaredoxin-2, mitochondrial	0.366692	-0.607479	0.04063	0.08817	-0.532646	0.0320583
Q80Y14	Glrx5	Glutaredoxin-related protein 5, mitochondrial	-0.005574	-0.0260507	-0.0449425	-0.03091	0.151107	0.97755
D3Z7P3;D3Z7P4;F7B327	Gls	Glutaminase kidney isoform, mitochondrial	-0.287524	0.525012	0.457671	1.21516	1.16031	5.24257e-09
D3Z7P3-2;F6RDM4;Q571F8	Gls	Glutaminase kidney isoform, mitochondrial	-0.355178	0.244224	0.527716	0.728385	0.748211	2.14356e-06
P26443;F7CFA5	Glud1	Glutamate dehydrogenase 1, mitochondrial	-0.035006	0.246019	0.111956	0.48298	0.355186	0.000590653
Q9CWB7	Glutaredoxin-like protein C5orf63 homolog	Glutaredoxin-like protein C5orf63 homolog	0.53224	-0.893867	2.41369	0.086895	0.646412	0.00921309
E9QAZ2;Q9CZM2;B8JKK2	Gm10020;Rpl15	Ribosomal protein L15;60S ribosomal protein L15	-0.038282	-0.0610323	0.17509	0.938797	0.707497	0.0396165
F6YVP7;P62270;S4R1N6	Gm10260;Rps18	40S ribosomal protein S18	0.355288	-0.210521	0.156114	-0.917162	1.32034	0.0351565
F6QL70;P47915;W4VSN7;D3Z1N9;F6YH22;F6VZG1	Gm17669;Rpl29;Gm3550;Gm10709	60S ribosomal protein L29	0.332556	-0.632434	0.630202	1.38376	2.33629	0.023453
E9Q4A5;Q3TL26	Gm1818;Tfb2m	Dimethyladenosine transferase 2, mitochondrial	-1.92735	4.32363	-1.31767	1.09015	2.88414	0.00258241
E9PZF0;Q01768	Gm20390;Nme2	Nucleoside diphosphate kinase;Nucleoside diphosphate kinase B	-0.014896	-0.082148	0.0609505	0.399383	0.745364	0.000239665
E9PVN6;Q9D6K5-4	Gm20498;Synj2bp	Synaptojanin-2-binding protein	-0.115836	0.331587	0.0650405	0.262458	-0.192704	0.023453
F6TVX7;Q8BSF4;F7C386;E9PX91;D3YY63;D3Z0X7;A0A0G2JEL6	Gm20671;Pisd	Phosphatidylserine decarboxylase proenzyme;Phosphatidylserine decarboxylase alpha chain;Phosphatidylserine decarboxylase beta chain	-0.249738	1.1346	0.745835	1.58052	1.87715	0.00422333
Q3V460	Gm561		-0.620784	1.67853	2.08799	-0.002825	-0.0561253	0.0132969
P62880;E9QKR0;D3Z1M1;D3YZX3;D3Z1T4;E9PWM7;A0A0A6YVN9;V9GWY1;Q61011	Gnb2	Guanine nucleotide-binding protein G(I)/G(S)/G(T) subunit beta-2	0.086114	-0.00891133	0.60834	1.26481	1.30521	0.130716
P05201;F7ALS6	Got1	Aspartate aminotransferase, cytoplasmic	0.50546	-0.542706	0.329834	2.49974	2.56012	0.00425526
P05202	Got2	Aspartate aminotransferase, mitochondrial	-0.128882	0.0303313	-0.0192325	-0.0723375	-0.217227	0.55466
Q61586	Gpam	Glycerol-3-phosphate acyltransferase 1, mitochondrial	0.46683	0.697498	0.849904	0.928812	-0.204308	0.348477
Q3ULJ0;Q3ULJ0-2;D3Z0L6;E0CXN5;P13707	Gpd1l	Glycerol-3-phosphate dehydrogenase 1-like protein	0.377518	0.386909	-0.025956	0.197355	0.0873367	0.096672
Q64521;A2AQR0	Gpd2	Glycerol-3-phosphate dehydrogenase, mitochondrial	-0.163736	-0.179636	-0.0793245	0.523333	0.0988987	0.375931
P06745;F6SAC3;CON__Q3ZBD7	Gpi;Gm1840	Glucose-6-phosphate isomerase	-0.142658	1.05819	1.05823	0.384577	1.35521	0.0391468
Q8BGT5;D6RFQ8;Q8QZR5	Gpt2	Alanine aminotransferase 2	0.097434	0.307964	0.319443	0.869698	0.211621	1.92758e-05
P11352;A0A0A6YVV2;A0A0A6YY34	Gpx1	Glutathione peroxidase 1	-0.166652	-0.356815	-0.22473	0.26279	0.0380347	0.0194813
Q76LV0;O70325-2;O70325;S4R1E5;Q91XR9	Gpx4	Glutathione peroxidase;Phospholipid hydroperoxide glutathione peroxidase, mitochondrial;Phospholipid hydroperoxide glutathione peroxidase, nuclear	0.046308	0.432223	0.209142	0.52429	0.641075	0.0203995
Q91Z53;D6REG4;B1AXQ0	Grhpr	Glyoxylate reductase/hydroxypyruvate reductase	-0.142598	0.119843	0.177023	0.19396	0.100578	0.335454
Q99LP6	Grpel1	GrpE protein homolog 1, mitochondrial	0.047272	0.26671	0.329031	0.494925	0.35547	0.00202733
E9Q179;Q8C5Q4;D3YUN1;D3YV30	Grsf1	G-rich sequence factor 1	-0.300442	0.711962	0.595383	0.800715	0.504662	3.07855e-07
P47791-2;P47791	Gsr	Glutathione reductase, mitochondrial	-0.012852	0.325533	0.636695	0.580487	0.804437	0.008935
Q9DCM2	Gstk1	Glutathione S-transferase kappa 1	0.00024	0.313568	-0.491847	-0.485937	-0.895483	0.0220479
P10649;A2AE89;F6WHQ7	Gstm1	Glutathione S-transferase Mu 1	0.652654	0.334158	-0.235682	0.62743	0.108635	0.335454
Q9WVL0	Gstz1	Maleylacetoacetate isomerase	0.099468	0.156217	0.181318	0.199392	0.442705	0.224691
Q8K013;F8WHJ2;D3Z4U2;D6RCG6;F6WSS0;F6TIN5	Gtpbp10	GTP-binding protein 10	0.05841	-0.776745	0.551231	0.443447	0.480785	0.300396
Q8C3X4;G3UWY0;Q8C3X4-2;F6ZM03	Guf1	Translation factor Guf1, mitochondrial	-0.25028	0.273271	0.128632	0.219838	0.112546	0.36938
Q564G0;E9Q7K1;Q64520;G3UYV3	Guk1	Guanylate kinase	0.180348	1.00908	0.378803	0.191672	0.0720153	0.384372
P10922	H1f0	Histone H1.0;Histone H1.0, N-terminally processed	-0.07729	0.601895	-0.956478	-0.36821	2.87758	0.0432344
Q61425	Hadh	Hydroxyacyl-coenzyme A dehydrogenase, mitochondrial	0.04394	-0.028221	-0.075629	-0.06189	-0.410626	0.0274004
Q8BMS1	Hadha	Trifunctional enzyme subunit alpha, mitochondrial;Long-chain enoyl-CoA hydratase;Long chain 3-hydroxyacyl-CoA dehydrogenase	-0.072614	-0.0147173	-0.0261125	-0.101042	-0.393655	0.00520955
Q99JY0;D3YXU1	Hadhb	Trifunctional enzyme subunit beta, mitochondrial;3-ketoacyl-CoA thiolase	0.034956	0.0977207	-0.021925	-0.01745	-0.213521	0.177
G5E8T9;E9Q2H8;Q99KB8-2;Q99KB8;E9PYA3;D3YWI0;D3YUX8	Hagh	Hydroxyacylglutathione hydrolase, mitochondrial	-0.044472	0.05875	-0.0910375	0.47635	0.598026	0.00729546
Q99KK9;G5E823	Hars2	Probable histidine--tRNA ligase, mitochondrial	0.01326	0.430964	0.40627	0.473185	0.164737	0.00636885
A0A0G2JDP0;O35387;A0A0G2JFF9;A0A0G2JE46;A0A0G2JEE6;A0A0G2JFE1;A0A0G2JGG5;A0A0G2JGR0	Hax1	HCLS1-associated protein X-1	0.148946	0.552741	0.58046	1.6075	1.78717	7.08251e-08
Q91VB8;P01942;A7M7S6;P06467	Hba-a2;Hba	Hemoglobin subunit alpha	0.09656	-0.421665	-0.163437	-0.755098	0.38253	0.150705
A8DUK4;P02088;E9Q223;P02089;CON__Q3SX09;CON__P02070;P02104	Hbbt1;Hbb-b1;Hbb-bs	Hemoglobin subunit beta-1	-0.237086	-0.107582	-0.195184	-0.580897	0.770776	0.155257
P53702;G3UXK7	Hccs	Cytochrome c-type heme lyase	-0.01813	-0.204523	0.258351	0.309138	0.129675	0.132879
Q3UGR5;Q3UGR5-2;D3YZI3;D3YUN7	Hdhd2	Haloacid dehalogenase-like hydrolase domain-containing protein 2	-0.139288	0.0483517	0.0648885	0.249508	0.037572	0.640246
Q9CYW4	Hdhd3	Haloacid dehalogenase-like hydrolase domain-containing protein 3	0.03029	0.18174	0.486289	0.43347	0.456707	0.131725
Q9R257	Hebp1	Heme-binding protein 1	0.779172	0.31646	0.636899	1.12336	2.70003	0.0104691
Q99L13	Hibadh	3-hydroxyisobutyrate dehydrogenase, mitochondrial	-0.08058	0.284072	0.250733	0.669523	0.656634	2.43214e-06
Q8QZS1;E0CX19	Hibch	3-hydroxyisobutyryl-CoA hydrolase, mitochondrial	-0.05212	0.226701	0.057443	0.29157	0.539357	0.0443767
Q9JLR9	Higd1a	HIG1 domain family member 1A, mitochondrial	-0.798356	0.579754	0.550443	-0.16389	-0.370182	0.290803
Q9CQJ1	Higd2a	HIG1 domain family member 2A	-0.150128	0.0308497	-0.066583	-0.918887	0.435309	0.818093
Q9D0S9	Hint2	Histidine triad nucleotide-binding protein 2, mitochondrial	0.15424	-0.212608	0.0861645	0.23005	0.0795067	0.154668
P15864	Hist1h1c	Histone H1.2	-0.375972	-1.05383	-0.730814	-0.998432	2.72277	0.0194813
F8WIX8;Q64523;Q6GSS7	Hist1h2al;Hist2h2ac;Hist2h2aa1	Histone H2A;Histone H2A type 2-C;Histone H2A type 2-A	0.354058	-0.274516	-0.247806	-1.22431	1.94931	0.0307899
Q6ZWY9;Q64478;Q64525;P10854;G3X9D5;Q64524	Hist1h2bc;Hist1h2bh;Hist2h2bb;Hist1h2bm	Histone H2B type 1-C/E/G;Histone H2B type 1-H;Histone H2B type 2-B;Histone H2B type 1-M	0.02065	-0.434195	-0.40144	-0.519562	1.94456	0.0706385
P84228	Hist1h3b	Histone H3.2	-0.117556	-1.18176	-0.809387	-1.3074	0.818228	0.0360435
P62806	Hist1h4a	Histone H4	0.22527	-0.687702	-0.383088	-0.358573	2.71074	0.0154006
P17710-3;G3UVV4;P17710-4;P17710;D3YYR4;D3Z365;D3Z105;B4YB29;F6QD41	Hk1	Hexokinase-1	0.012682	0.148333	0.198784	0.827392	1.11965	6.19514e-08
O08528	Hk2	Hexokinase-2	0.158144	0.177231	0.401152	1.2874	1.33093	1.75549e-08
P63158;D3YZ18;D3YVC6	Hmgb1	High mobility group protein B1	0.312948	0.520835	0.391797	0.584715	1.4172	0.689678
P38060;V9GXD2;V9GWZ9;D3YVU9;Q8JZS7	Hmgcl	Hydroxymethylglutaryl-CoA lyase, mitochondrial	-0.189152	-0.107126	-0.072214	-0.333258	-0.253376	0.0402089
P54869;Q8JZK9	Hmgcs2	Hydroxymethylglutaryl-CoA synthase, mitochondrial	-0.287718	0.0632767	1.52341	0.363875	-0.907907	0.748323
O88569;O88569-3;O88569-2	Hnrnpa2b1	Heterogeneous nuclear ribonucleoproteins A2/B1	-0.124498	0.253163	-0.0991405	-1.41973	0.937951	0.111072
B2M1R6;P61979-3;P61979;P61979-2;H3BK96;H3BKD0;H3BLL4;D3Z5X4;D3YWG1;H3BKI8;Q8BT23;H3BLP7;H3BJ43;H3BJS9	Hnrnpk;Gm7964	Heterogeneous nuclear ribonucleoprotein K	-0.136654	-0.693443	0.467185	-0.35614	1.57393	0.416075
G5E8J6	Hrc		0.129124	-0.12466	-0.307774	-0.609055	0.0309133	0.670128
Q8K3A0;F6UL52;F6WN43	Hscb	Iron-sulfur cluster co-chaperone protein HscB, mitochondrial	-0.176826	0.129882	0.0090745	0.174652	-0.0242773	0.573417
Q99N15;A2AFQ2;O08756	Hsd17b10	3-hydroxyacyl-CoA dehydrogenase type-2	-0.098938	0.492459	0.153067	0.14808	0.0603213	0.322114
P51660	Hsd17b4	Peroxisomal multifunctional enzyme type 2;(3R)-hydroxyacyl-CoA dehydrogenase;Enoyl-CoA hydratase 2	-0.23246	0.03811	1.00711	0.382672	1.06729	0.220135
P50171;P50171-2;G3UX44	Hsd17b8;H2-Ke6	Estradiol 17-beta-dehydrogenase 8	0.046942	0.023418	0.076779	0.136995	0.101381	0.671067
Q8BTX9	Hsdl1	Inactive hydroxysteroid dehydrogenase-like protein 1	-0.24196	0.62112	0.435083	0.149225	0.452982	0.823482
Q2TPA8;B1AX78;B1AX77	Hsdl2	Hydroxysteroid dehydrogenase-like protein 2	-0.161802	0.15851	0.250469	0.161612	-0.199301	0.0712089
P11499;E9Q3D6;D3Z1R1;E9PX27;E9Q0C3;REV__Q8BL66	Hsp90ab1	Heat shock protein HSP 90-beta	-0.100332	-0.424588	0.434088	0.695235	1.52564	0.000180963
P08113;F7C312	Hsp90b1	Endoplasmin	-0.256722	0.109861	-0.242046	0.32317	1.7181	0.160731
P20029	Hspa5	78 kDa glucose-regulated protein	-0.004984	-0.57822	0.028243	0.50046	1.08825	0.0588161
P63017;Q504P4;P17156;D3Z5E2;D3YW43;Q61696;P16627;P17879	Hspa8	Heat shock cognate 71 kDa protein	-0.097928	-0.0452877	-0.040587	0.242453	0.662355	0.0253068
P38647	Hspa9	Stress-70 protein, mitochondrial	-0.132842	0.379063	0.428085	1.02931	0.837222	4.14255e-09
P14602;P14602-2;P14602-3;D3YZ06	Hspb1	Heat shock protein beta-1	0.404602	-1.20112	1.06447	0.95133	3.60637	0.00381816
P63038;P63038-2;D3Z2F2;D3Z7J9	Hspd1	60 kDa heat shock protein, mitochondrial	-0.065438	0.0774697	0.17634	0.43718	0.325121	0.000123745
Q64433	Hspe1	10 kDa heat shock protein, mitochondrial	-0.189198	-0.0288437	0.193635	0.406342	0.30046	0.0674508
E9PZ16;B1B0C7;Q05793	Hspg2	Basement membrane-specific heparan sulfate proteoglycan core protein;Endorepellin;LG3 peptide	0.39822	-0.91907	0.382701	-1.67737	0.601249	0.475801
Q9Z2G9;Q9Z2G9-2	Htatip2	Oxidoreductase HTATIP2	0.278314	1.39461	-0.0557065	2.40388	2.4905	0.000360213
Q9JIY5;D3YX27;F6TCV0;D3YX28;F6XUR8;S4R1B3;S4R1A8;A2RT60	Htra2	Serine protease HTRA2, mitochondrial	0.146608	-0.224162	0.186222	0.294035	0.565359	0.00570748
Q8BIJ6;E9PWN2;E9PWN3	Iars2	Isoleucine--tRNA ligase, mitochondrial	-0.099852	0.273564	0.265436	0.144528	0.0657947	0.609897
Q8CAK1;B2FDE8	Iba57	Putative transferase CAF17 homolog, mitochondrial	0.103562	-0.196703	0.040336	-0.0344525	-0.157171	0.405279
P54071;D6RIL6	Idh2	Isocitrate dehydrogenase [NADP], mitochondrial	0.016636	-0.12748	-0.0903715	-0.03144	-0.365897	0.0253068
Q9D6R2;Q9D6R2-2	Idh3a	Isocitrate dehydrogenase [NAD] subunit alpha, mitochondrial	0.018708	-0.0246437	-0.144029	-0.0538	-0.162611	0.575281
Q91VA7;V9GXV0	Idh3b		0.104722	0.031292	0.076615	0.228685	0.0696147	0.594977
P70404	Idh3g	Isocitrate dehydrogenase [NAD] subunit gamma 1, mitochondrial	0.060934	0.060085	0.027036	0.04661	0.0721687	0.96007
F8WH23;E9Q5D9;Q61581	Igfbp7	Insulin-like growth factor-binding protein 7	1.20795	1.88098	-2.29356	-1.93803	0.823368	0.026675
Q8CAQ8-2;Q8CAQ8;Q8CAQ8-5	Immt	MICOS complex subunit Mic60	-0.003066	-0.0786733	-0.0481295	0.155255	-0.105965	0.460637
E9Q800;E9QAY6	Immt		-0.18072	-0.131447	-0.166438	0.210958	0.119348	0.670299
Q60766-2;Q60766;Q5NCB5	Irgm1	Immunity-related GTPase family M protein 1	-0.297958	1.72352	0.462284	-0.7616	-0.0136867	0.365584
Q9DCB8	Isca2	Iron-sulfur cluster assembly 2 homolog, mitochondrial	-0.053756	-0.152822	0.230614	0.35725	-0.077672	0.0624349
Q9D7P6;D3Z7W0;D3Z0K9	Iscu	Iron-sulfur cluster assembly enzyme ISCU, mitochondrial	0.243244	-0.304121	0.0836115	-0.28725	-1.10831	0.00024998
P85094	Isoc2a	Isochorismatase domain-containing protein 2A, mitochondrial	0.113296	0.200928	-0.0052015	0.555837	-0.253428	0.671034
D3Z6P4;Q6NZJ5;E9Q3I8;E9Q3I9;E9Q3I4;E9Q3I5;E9Q0N0;Q9Z0R4-2;Q9Z0R4	Itsn1	Intersectin-1	-0.555402	1.66487	0.407464	-0.54939	0.021656	0.260794
Q9JHI5	Ivd	Isovaleryl-CoA dehydrogenase, mitochondrial	-0.067262	0.183039	-0.240831	-0.61638	-1.45918	1.27678e-07
Q9ET78;Q9ET77	Jph2	Junctophilin-2	0.450858	-0.236725	0.344539	0.217872	1.0516	0.55014
Q02257;F7CRC6	Jup	Junction plakoglobin	-0.357736	0.305322	0.268256	-1.88791	1.14609	0.532022
Q8R2P8;Q99MN1	Kars	Lysine--tRNA ligase	0.164324	-0.0319467	0.071721	0.20141	0.536368	0.123536
Q8JZY4;V9GXP4;V9GXF2;V9GWT5	Kiaa0391;1110008L16Rik	Mitochondrial ribonuclease P protein 3	-0.406894	0.0121053	-0.107339	0.615063	0.375251	0.532022
Q61768;E9QAK5;P28738;P33175;A2ARD4	Kif5b	Kinesin-1 heavy chain	0.10707	-0.146426	-0.058136	-0.29488	-0.47013	0.0141921
A0A087WNW3;A0A087WQI3;A0A087WQ25;A0A087WRS1;A0A087WQQ5;F8VQC7;A0A087WQF8;A0A087WP48;A0A087WS04;A0A087WS29;A0A087WQG4;A0A087WQD0;A0A087WPW5;A0A087WS23;A0A087WP85;A0A087WP14;A0A087WPX0;Q61595-6;Q61595-9;Q61595-5;Q61595-15;Q61595;Q61595-2;Q61595-12;Q61595-16;Q61595-3;Q61595-14;Q61595-4;Q61595-8;Q61595-13;Q61595-10;Q61595-7;Q61595-11;A0A087WR91;A0A087WPY8	Ktn1	Kinectin	0.032292	-0.201757	0.430127	0.02701	0.219671	0.987367
E9QNP0;P62984;A0A0A6YW67;E9Q9J0;J3QK04;E9Q4P0;E9Q5F6;Q5SX22;P62983;P0CG49;P0CG50;D3YYZ2	Kxd1;Uba52;Gm7808;Ubc;Ubb;Rps27a;Gm5239	Ubiquitin-60S ribosomal protein L40;Ubiquitin;60S ribosomal protein L40;Ubiquitin-40S ribosomal protein S27a;Ubiquitin;40S ribosomal protein S27a;Polyubiquitin-B;Ubiquitin;Polyubiquitin-C;Ubiquitin;Ubiquitin-related 1;Ubiquitin-related 2	0.531676	-0.595681	-0.394763	-0.035355	2.17433	0.0297853
Q91YP0	L2hgdh	L-2-hydroxyglutarate dehydrogenase, mitochondrial	-0.03661	0.178728	0.185509	0.267278	0.0992133	0.162404
Q3V384;F6VT60;E9Q4K2;F6RBS7	Lace1	Lactation elevated protein 1	-0.172202	-0.114399	-0.014215	-0.121927	-0.581489	0.00185386
Q9EP89	Lactb	Serine beta-lactamase-like protein LACTB, mitochondrial	-0.18985	0.0970113	0.422522	-0.2411	-0.30075	0.0599496
Q9CPY7;Q9CPY7-2;A0A0G2JEM7	Lap3	Cytosol aminopeptidase	-0.04844	0.121171	0.182844	0.69847	0.838732	3.85841e-09
Q8VDC0	Lars2	Probable leucine--tRNA ligase, mitochondrial	-0.163408	0.0777157	0.245132	0.334162	0.53395	5.33849e-05
Q9JKS4-3;Q9JKS4;E9PYJ9;Q9JKS4-4;Q9JKS4-2	Ldb3	LIM domain-binding protein 3	-0.219952	0.135674	-0.328931	-0.73435	0.762173	0.292181
P06151;G5E8N5;D3Z736;D3YZQ9;D3YVR7;D3YZE4;P00342	Ldha	L-lactate dehydrogenase A chain;L-lactate dehydrogenase	-0.546304	0.302216	0.326493	0.241698	1.24878	0.124844
P16125;D3Z7F0	Ldhb	L-lactate dehydrogenase B chain;L-lactate dehydrogenase	-0.216274	-0.352279	0.399253	0.67689	0.949743	0.33679
Q7TNG8	Ldhd	Probable D-lactate dehydrogenase, mitochondrial	0.989318	-0.211575	-0.349821	-0.424383	-0.607278	0.0406775
Q9Z2I0	Letm1	LETM1 and EF-hand domain-containing protein 1, mitochondrial	-0.087216	0.190095	0.204462	0.327428	0.333491	0.000120228
Q924L1-2;Q924L1;Q924L1-3	Letmd1	LETM1 domain-containing protein 1	-0.336658	-0.21426	0.989181	1.71882	1.31383	0.012376
P16045	Lgals1	Galectin-1	-0.344078	-0.574879	0.181597	0.572008	1.48698	0.145082
Q99M04;D3Z6I3;A0A0G2JFF7	Lias	Lipoyl synthase, mitochondrial	-0.157846	-0.378874	0.127078	0.25048	0.168668	0.116505
Q8VCM4;D3Z093;D3Z7N1;D3Z2L3	Lipt1	Lipoyltransferase 1, mitochondrial	0.19108	-1.15413	1.20636	0.247665	1.2536	0.0758446
Q9D009	Lipt2	Putative lipoyltransferase 2, mitochondrial	-0.210598	0.807681	-0.034714	0.021555	2.59421	0.000946496
P48678;P48678-2;P48678-3;D3YUF7	Lmna	Prelamin-A/C;Lamin-A/C	-0.629814	0.683255	-0.054214	0.44067	1.89396	0.519919
Q8CGK3;A4UUI3	Lonp1	Lon protease homolog, mitochondrial	-0.091234	0.45947	0.807403	1.83758	2.1699	1.84028e-15
Q6PB66;F6V2A3	Lrpprc	Leucine-rich PPR motif-containing protein, mitochondrial	0.493032	-3.90584	-6.01008	-9.03232	-10.555	1.98428e-12
Q922Q8	Lrrc59	Leucine-rich repeat-containing protein 59	0.18267	-0.361412	1.82902	0.498985	1.35064	0.00203141
P97823;J3QP56;P97823-2;D3Z111;D3Z269;D3YUG4;J3QQ63	Lypla1	Acyl-protein thioesterase 1	-0.107618	0.158909	-0.156296	0.06484	-0.056736	0.875165
Q8R033	Lyrm2	LYR motif-containing protein 2	0.784494	1.36278	0.952289	1.2529	1.08158	0.00458556
Q8K215	Lyrm4	LYR motif-containing protein 4	0.233042	0.150216	0.182372	0.33929	-0.0196727	0.0208707
Q91V16	Lyrm5	LYR motif-containing protein 5	-0.272866	0.258586	-0.071263	0.16882	-0.818007	0.0265751
Q9DA03;D6RD13	Lyrm7	Complex III assembly factor LYRM7	-0.03528	-0.302678	0.228702	0.267038	0.175871	0.683204
E9PX24;Q3UN90	Lyrm9	LYR motif-containing protein 9	-0.049358	0.34887	0.495328	0.57241	0.349754	0.00528895
Q922B1	Macrod1	O-acetyl-ADP-ribose deacetylase MACROD1	-0.056886	-0.0785347	-0.077643	-0.0212725	-0.518107	0.0124125
F7ASG0;Q9CWV0;D3Z186	Malsu1	Mitochondrial assembly of ribosomal large subunit protein 1	0.253544	1.47657	0.396156	1.25631	1.33351	0.0388448
Q64133	Maoa	Amine oxidase [flavin-containing] A	0.48605	-0.40216	2.46933	6.29667	8.15786	2.13861e-06
Q8BW75;E9Q3X6;E9PVL9	Maob	Amine oxidase [flavin-containing] B	0.000604	0.202166	-0.213866	-0.393765	-0.913238	0.0278238
A0A0B4J1F2;A0A0B4J1M9;P27546-2;P27546;P27546-3;A0A0G2JFH2;E9PZ43;A0A0G2JDN7;P27546-4;A0A0G2JG35;A0A0G2JFT4;A0A0G2JDY5;A0A0G2JFK3;A0A0G2JE57;A0A0G2JDU1	Map4	Microtubule-associated protein 4	0.056858	-0.265967	0.581515	-0.0770275	1.79593	0.103752
A2AJI1;A8Y5P4;A2AJI0-2;A2AJI0;F6WF36	Map7d1	MAP7 domain-containing protein 1	0.128844	-0.225876	0.193279	0.21087	-0.226179	0.962879
Q499X9	Mars2	Methionine--tRNA ligase, mitochondrial	-0.117014	0.27242	0.102572	0.204107	0.0287513	0.465906
Q8VCF0;S4R1W6	Mavs	Mitochondrial antiviral-signaling protein	-0.21586	-0.0767787	-0.225536	0.23289	-0.262389	0.159829
P04247	Mb	Myoglobin	-0.187646	0.009283	-0.142714	0.100883	-0.0399887	0.834188
Q8R3F5	Mcat	Malonyl-CoA-acyl carrier protein transacylase, mitochondrial	0.060988	-0.009929	0.121088	0.38974	0.218245	0.00760855
Q99MR8;A0A0G2JFQ5;A0A0G2JF64	Mccc1	Methylcrotonoyl-CoA carboxylase subunit alpha, mitochondrial	-0.106794	0.187691	-0.114642	-0.231805	-0.594951	0.0510881
Q3ULD5	Mccc2	Methylcrotonoyl-CoA carboxylase beta chain, mitochondrial	0.05147	0.00149133	-0.1736	-0.2578	-0.723979	0.000263945
Q9D1I5	Mcee	Methylmalonyl-CoA epimerase, mitochondrial	-0.36115	-0.185131	-0.465845	-0.6394	-1.30048	1.65521e-07
Q3UN88;P21812;P11034	Mcpt4	Mast cell protease 4	0.528428	-0.592125	-0.008907	-0.179248	-0.696089	0.159881
Q3UMR5;Q3UMR5-2	Mcu	Calcium uniporter protein, mitochondrial	0.594372	0.342528	1.09409	1.77822	1.62411	1.06894e-09
Q9CXD6;Q9CXD6-3;Q9CXD6-2	Mcur1	Mitochondrial calcium uniporter regulator 1	-0.332182	0.380484	0.207939	0.406	0.545101	1.22105e-05
P14152;B1ATQ3	Mdh1	Malate dehydrogenase, cytoplasmic	0.159016	-0.141144	-0.0062615	0.684653	1.61558	0.108424
P08249;A0A0G2JF23;A0A0G2JGY4	Mdh2	Malate dehydrogenase, mitochondrial	-0.059228	-0.10222	-0.115248	-0.146635	-0.234882	0.210433
Q8BMF3;E9PZP7	Me3	NADP-dependent malic enzyme, mitochondrial;Malic enzyme	-0.05606	0.478699	0.09524	-0.15213	-0.376267	0.366703
Q9DCS3;A2A845	Mecr	Trans-2-enoyl-CoA reductase, mitochondrial	-0.226994	0.113382	0.0889455	0.47287	0.170288	0.00285573
Q9CPW9;Q9CPW9-2	Metap1d	Methionine aminopeptidase 1D, mitochondrial	0.576978	0.33802	0.0038285	0.470143	1.00369	0.365872
Q9DCL4;A2AGM2	Mettl15	Probable methyltransferase-like protein 15	-0.370284	0.962087	2.12254	3.87227	3.06129	2.35658e-08
E9Q7K9;Q3U2U7;F7AGB5;E9Q0X9	Mettl17	Methyltransferase-like protein 17, mitochondrial	-0.346492	1.27071	0.673858	1.35573	1.32538	0.0521298
Q6PCP5;E0CYB9;F7CTF8;E0CYI3;Q6PCP5-4;F7BC60	Mff	Mitochondrial fission factor	0.090392	-0.365613	-0.268964	-0.126315	-0.594254	0.00737118
Q811U4;F6XRI9;D3Z5P8;D3Z4L5	Mfn1	Mitofusin-1	0.09669	-0.304383	-0.555721	-0.720783	-0.913113	3.5627e-05
Q80U63;Q80U63-2;A8Y5E5;A2A7Y8	Mfn2	Mitofusin-2	-0.062654	-0.209026	0.224463	0.10341	-0.0806353	0.820913
Q9CPU4	Mgst3	Microsomal glutathione S-transferase 3	-0.281072	1.64143	-0.0197	0.442568	0.038494	0.72678
P34884	Mif	Macrophage migration inhibitory factor	-1.06985	0.509195	0.606796	1.61343	2.33257	2.29956e-06
Q7TNS2	Minos1	MICOS complex subunit Mic10	-0.305774	-0.56357	0.306251	0.0388975	-0.37201	0.235985
A6H611	Mipep	Mitochondrial intermediate peptidase	-0.096154	0.155595	0.0808345	0.161922	0.136627	0.65579
Q99J39-2;Q99J39	Mlycd	Malonyl-CoA decarboxylase, mitochondrial	-0.427962	0.296192	0.257054	0.189912	-0.0521853	0.510341
Q8C7H1	Mmaa	Methylmalonic aciduria type A homolog, mitochondrial	0.157306	-0.0548243	-0.293298	-0.546585	-0.780029	5.48441e-07
Q9D273;Q9D273-2;D3Z1G7	Mmab	Cob(I)yrinic acid a,c-diamide adenosyltransferase, mitochondrial	0.192024	0.117685	0.070855	0.434007	0.0262007	0.218773
Q5RKZ7;Q5RKZ7-3;G3UYX9;Q5RKZ7-2	Mocs1	Molybdenum cofactor biosynthesis protein 1;Cyclic pyranopterin monophosphate synthase;Cyclic pyranopterin monophosphate synthase accessory protein	-0.457394	0.341138	0.0296	0.606633	0.00633	0.570827
P56379	Mp68	6.8 kDa mitochondrial proteolipid	0.028858	-1.73018	-1.19283	-1.83648	-2.08331	0.00372519
P63030;D3Z786;D3YWY6;D3Z5S0;E9Q0V4	Mpc1	Mitochondrial pyruvate carrier 1	-0.594506	0.892387	0.337347	0.52075	0.0892113	0.0343561
Q9D023;A0A0A6YY89;E9PY67;Q3V1C1;G5E869	Mpc2	Mitochondrial pyruvate carrier 2	0.151952	0.106095	0.371982	0.279153	0.22953	0.448825
Q3UW66;Q99J99	Mpst	Sulfurtransferase;3-mercaptopyruvate sulfurtransferase	-0.12126	-0.189778	-0.096025	-0.31916	-0.768935	8.64759e-05
D3YWI4;E9Q1I6;F8WHT5;G3UVW1;D6RI47;P19258;Q3UU56	Mpv17	Protein Mpv17	-0.172728	-0.120884	0.0312205	-0.42186	-0.792498	0.295104
Q99J25	Mrm1	rRNA methyltransferase 1, mitochondrial	0.0608	-0.272613	0.202618	0.32434	0.649943	0.111072
Q99N96;Q9D3F3	Mrpl1	39S ribosomal protein L1, mitochondrial	0.009308	0.197032	0.363117	0.715067	0.549054	0.000224892
Q3TBW2;A2A715	Mrpl10	39S ribosomal protein L10, mitochondrial	0.086408	0.668288	0.988244	0.901477	1.01291	0.00241825
Q9CQF0	Mrpl11	39S ribosomal protein L11, mitochondrial	0.223356	-0.031565	0.35711	0.72309	0.813777	0.0194137
Q9DB15	Mrpl12	39S ribosomal protein L12, mitochondrial	-0.030936	0.226673	0.514634	0.85577	0.727431	3.02195e-06
Q9D1P0;F7CXG9;G5E909	Mrpl13	39S ribosomal protein L13, mitochondrial	0.211634	0.196001	0.577551	0.844008	0.838877	2.16989e-11
Q9D1I6	Mrpl14	39S ribosomal protein L14, mitochondrial	-0.132812	0.270722	0.356758	0.68264	0.65304	1.20875e-06
Q9CPR5;Q9CPR5-2;A0A0A6YVP4;F8WHN1	Mrpl15	39S ribosomal protein L15, mitochondrial	-0.08149	0.199769	0.483	0.695125	0.860285	5.31571e-09
Q99N93	Mrpl16	39S ribosomal protein L16, mitochondrial	0.17327	0.281901	0.620562	0.813552	0.745099	7.98592e-08
Q9D8P4;H3BJT9;H3BIZ3;Q9D8P4-2	Mrpl17	39S ribosomal protein L17, mitochondrial	-0.248876	0.186413	0.439921	0.67181	0.806263	2.09022e-05
Q9CQL5	Mrpl18	39S ribosomal protein L18, mitochondrial	-0.068636	0.426304	0.730332	0.745142	1.02365	0.000315779
Q9D338	Mrpl19	39S ribosomal protein L19, mitochondrial	-0.17641	0.23439	0.551634	0.627812	0.870958	7.1221e-10
B1B1D8;Q9D773;B1B1D7	Mrpl2	39S ribosomal protein L2, mitochondrial	0.045608	0.0408867	0.372956	0.7182	0.789649	0.00522242
V9GXI7;Q9CQL4;V9GX65	Mrpl20	39S ribosomal protein L20, mitochondrial	-0.209516	0.0585497	0.42167	0.519245	0.810245	0.00424034
Q9D1N9;Q9D1N9-2	Mrpl21	39S ribosomal protein L21, mitochondrial	-0.299148	0.421659	0.603283	0.58866	0.37764	0.0040605
Q8BU88	Mrpl22	39S ribosomal protein L22, mitochondrial	0.027414	0.319257	0.560116	0.623975	0.70892	1.08429e-09
O35972	Mrpl23	39S ribosomal protein L23, mitochondrial	0.176914	0.239119	0.453637	0.513653	0.768461	5.64336e-08
Q9CQ06;A0A0A6YXP0	Mrpl24	39S ribosomal protein L24, mitochondrial	-0.134122	0.197526	0.287574	0.81255	0.657202	5.94153e-07
Q99N92	Mrpl27	39S ribosomal protein L27, mitochondrial	0.003058	-0.139016	0.203838	1.13861	1.3054	0.00122953
Q9D1B9;F6U4U1	Mrpl28	39S ribosomal protein L28, mitochondrial	-0.334552	0.163714	0.542	0.789133	0.799525	8.70201e-07
Q99N95;D3Z456;F6W7C7	Mrpl3	39S ribosomal protein L3, mitochondrial	-0.141304	0.183986	0.417378	0.755358	0.819751	5.6162e-08
Q9D7N6;A0A0A6YXW4	Mrpl30	39S ribosomal protein L30, mitochondrial	-0.083818	0.551332	0.376554	0.6491	0.568129	2.30513e-05
Q9DCI9	Mrpl32	39S ribosomal protein L32, mitochondrial	0.020984	-0.0215153	0.286515	0.652625	0.656455	0.00758528
Q9CQP0;Q8R0E2	Mrpl33	39S ribosomal protein L33, mitochondrial	-0.25135	-0.0403057	0.0397785	0.765315	1.03735	0.00161851
Q99N91	Mrpl34	39S ribosomal protein L34, mitochondrial	0.192632	-0.035381	0.450019	0.0802975	0.874719	0.220518
Q9CQL6	Mrpl35	39S ribosomal protein L35, mitochondrial	0.435076	-0.487678	0.935932	0.544617	1.29984	0.000858075
Q921S7	Mrpl37	39S ribosomal protein L37, mitochondrial	-0.131244	0.289166	0.538254	0.761163	0.840633	2.52685e-05
Q8K2M0;Q8K2M0-2	Mrpl38	39S ribosomal protein L38, mitochondrial	-0.169898	0.366329	0.299578	0.78751	0.68659	0.00032234
Q9JKF7	Mrpl39	39S ribosomal protein L39, mitochondrial	-0.093922	0.270957	0.529373	0.761685	0.854543	3.26516e-09
Q9DCU6	Mrpl4	39S ribosomal protein L4, mitochondrial	-0.19597	0.167446	0.768971	0.769203	0.776949	0.000319428
D3Z7C0;Q9Z2Q5	Mrpl40	39S ribosomal protein L40, mitochondrial	0.067236	0.205639	0.381486	0.876308	0.946891	0.000522761
Q9CQN7;F7CXS7;A0A0A6YXF9	Mrpl41;Gm6434	39S ribosomal protein L41, mitochondrial	-0.210124	0.029521	0.177018	0.399053	0.749335	0.0307899
Q9CPV3	Mrpl42	39S ribosomal protein L42, mitochondrial	-0.117494	-0.22295	0.377864	0.565775	0.239149	0.0663214
Q5RL20;Q99N89	Mrpl43	39S ribosomal protein L43, mitochondrial	-0.157244	0.118554	0.531911	1.01858	0.560728	0.00125148
Q9CY73;Q9CY73-2	Mrpl44	39S ribosomal protein L44, mitochondrial	-0.375772	-0.0309337	0.489715	0.75325	0.623914	9.41203e-09
Q9D0Q7;F6QAU7	Mrpl45	39S ribosomal protein L45, mitochondrial	0.111606	0.273691	0.348165	0.609262	0.654559	1.42333e-05
Q9EQI8;REV__Q9ERK0	Mrpl46	39S ribosomal protein L46, mitochondrial	-0.021864	0.495045	0.495936	0.86775	1.02539	9.28623e-09
Q8K2Y7	Mrpl47	39S ribosomal protein L47, mitochondrial	0.172802	0.001837	0.427524	0.747138	0.90741	2.98944e-08
E9QPQ8;Q8JZS9;D3Z6C8	Mrpl48	39S ribosomal protein L48, mitochondrial	0.241216	0.712857	0.138098	0.42826	1.1961	0.000123745
Q9CQ40	Mrpl49	39S ribosomal protein L49, mitochondrial	-0.037166	0.34865	0.065664	0.425405	0.470969	0.0409458
Q8VDT9	Mrpl50	39S ribosomal protein L50, mitochondrial	-0.255906	-0.119918	0.467661	0.62199	0.745323	0.00026515
Q9CPY1	Mrpl51	39S ribosomal protein L51, mitochondrial	0.224672	0.30128	0.624436	0.698205	0.710119	0.130109
Q9D0Y8;Q9D0Y8-2	Mrpl52	39S ribosomal protein L52, mitochondrial	-0.179352	0.515016	0.245835	1.33231	0.856005	0.0303788
Q9D1H8	Mrpl53	39S ribosomal protein L53, mitochondrial	-0.100226	-0.0566653	0.412722	0.92446	0.608635	0.000176313
Q9CPW3	Mrpl54	39S ribosomal protein L54, mitochondrial	-0.510462	0.321691	0.407166	0.911993	0.866636	2.93784e-05
Q9CZ83;Q9CZ83-2	Mrpl55	39S ribosomal protein L55, mitochondrial	0.318582	0.0148097	0.593751	0.920625	1.32307	0.000160761
Q9CQF8	Mrpl57	Ribosomal protein 63, mitochondrial	0.016504	-0.0552417	0.751168	1.38607	1.59754	0.000420013
Q8R035;Q8R035-2;A2A6T4;D6RHR8	Mrpl58	Peptidyl-tRNA hydrolase ICT1, mitochondrial	-0.055832	-0.0573467	0.378629	0.59007	0.86919	0.0211035
Q9CR59	Mrpl59	Growth arrest and DNA damage-inducible proteins-interacting protein 1	-0.10329	0.133896	0.282022	0.663658	0.604909	0.00139207
Q99N94;Q3UK02	Mrpl9	39S ribosomal protein L9, mitochondrial	-0.059738	0.120006	0.598325	0.756552	0.472755	3.56896e-05
E9QJS0;G5E8U8;G5E8U5;Q80ZK0;D3Z6K5	Mrps10	28S ribosomal protein S10, mitochondrial	-0.911734	0.415334	0.510604	1.04395	0.917868	3.02195e-06
Q3U8Y1;Q9DCA2	Mrps11	28S ribosomal protein S11, mitochondrial	-0.15376	0.116298	0.547992	0.748827	0.753517	0.000204237
O35680;E9PUY1	Mrps12	28S ribosomal protein S12, mitochondrial	0.157088	-0.551175	0.363707	1.82896	1.95105	0.0189471
D3Z2K2;Q9CR88	Mrps14	28S ribosomal protein S14, mitochondrial	-0.151764	0.455457	0.822982	1.09712	0.673622	1.09505e-06
Q9DC71	Mrps15	28S ribosomal protein S15, mitochondrial	-0.1157	0.550334	0.65881	1.04639	0.747731	1.08999e-07
Q9CPX7	Mrps16	28S ribosomal protein S16, mitochondrial	-0.151612	0.27278	0.21785	0.896267	0.989556	0.000224857
Q9CQE3;D3Z198;D3YWF8;D3YX95	Mrps17	28S ribosomal protein S17, mitochondrial	-0.274286	0.474447	0.810807	0.826817	0.751045	9.51225e-09
Q5U5I3;Q99N85;D3Z603	Mrps18a	28S ribosomal protein S18a, mitochondrial	-0.113364	-0.385514	0.363826	0.53434	1.10506	0.0733304
Q99N84;G3UYQ9;G3UYX8;G3UX79;Q99N84-2	Mrps18b	28S ribosomal protein S18b, mitochondrial	-0.103366	0.380137	0.504256	1.11452	0.886161	1.19689e-06
Q8R2L5;Q8BTZ9	Mrps18c	28S ribosomal protein S18c, mitochondrial	-0.068372	-0.850687	1.53994	2.21161	1.43743	0.0092233
Q924T2	Mrps2	28S ribosomal protein S2, mitochondrial	-0.479916	0.190421	0.864418	1.13511	1.18862	2.64807e-08
P58059;D3YVZ9	Mrps21	28S ribosomal protein S21, mitochondrial	0.036802	0.458496	0.68806	0.993777	0.80093	9.54757e-06
Q9CXW2	Mrps22	28S ribosomal protein S22, mitochondrial	-0.126454	0.435923	0.671024	1.00406	1.12272	3.36283e-12
Q8VE22;Q3TI14;A7M7Q8;F7ARZ1;Q5SXC9	Mrps23	28S ribosomal protein S23, mitochondrial	-0.10687	0.204289	0.591908	1.15745	1.08148	2.37929e-08
Q9CQV5	Mrps24	28S ribosomal protein S24, mitochondrial	-0.041578	0.130869	0.781531	1.6277	0.959409	4.50627e-07
Q9D125	Mrps25	28S ribosomal protein S25, mitochondrial	-0.195336	0.400027	0.68831	0.873252	0.785953	5.13698e-10
Q80ZS3	Mrps26	28S ribosomal protein S26, mitochondrial	-0.059442	0.161976	0.721927	1.02836	1.25362	1.25732e-08
Q8BK72	Mrps27	28S ribosomal protein S27, mitochondrial	-0.204528	0.406552	0.55872	0.983518	0.798505	2.53385e-13
Q9CY16	Mrps28	28S ribosomal protein S28, mitochondrial	0.314792	0.429581	0.67802	1.06475	0.728307	2.16923e-08
G3X9M0;Q9ER88;Q9ER88-2;G3UWZ6;G3UWM7;G3UWJ4;G3UZC0;G3UWR5;G3UYM6;G3UYP3	Mrps29	28S ribosomal protein S29, mitochondrial	-0.028824	0.295263	0.827309	0.998003	0.90179	1.28793e-08
Q9D0G0	Mrps30	28S ribosomal protein S30, mitochondrial	-0.170904	-0.014125	0.453843	0.628115	0.69499	1.37132e-06
Q61733	Mrps31	28S ribosomal protein S31, mitochondrial	-0.085436	0.342492	0.701905	0.94657	0.706057	1.25626e-10
Q9D2R8;Q8R2K5	Mrps33	28S ribosomal protein S33, mitochondrial	-0.291788	0.266398	0.867503	1.4168	1.4958	6.28261e-06
Q9JIK9	Mrps34	28S ribosomal protein S34, mitochondrial	-0.11399	0.137394	0.724498	1.03028	1.09438	2.66028e-10
Q8BJZ4	Mrps35	28S ribosomal protein S35, mitochondrial	-0.188018	0.311876	0.66341	0.945457	0.969749	1.04037e-08
Q9CQX8	Mrps36	28S ribosomal protein S36, mitochondrial	-0.319932	0.030614	-0.07138	-0.41955	-0.623967	0.00758502
Q9D6T9	Mrps36		-0.051334	0.0475397	-0.253923	-0.257102	-1.04883	0.550696
Q9CQA6	Mrps37	Coiled-coil-helix-coiled-coil-helix domain-containing protein 1	0.263136	0.130887	0.26718	0.638512	0.780177	0.0214098
Q14C51	Mrps39	Pentatricopeptide repeat domain-containing protein 3, mitochondrial	-0.180156	0.688729	0.932621	1.14607	1.04957	2.38734e-08
Q99N87;B2FDG7	Mrps5	28S ribosomal protein S5, mitochondrial	-0.045016	0.5255	0.807126	1.1065	1.13104	6.83381e-11
P58064	Mrps6	28S ribosomal protein S6, mitochondrial	0.177864	0.554027	0.607279	1.0654	1.09983	1.46227e-09
Q80X85	Mrps7	28S ribosomal protein S7, mitochondrial	-0.056664	0.180487	0.638525	0.990732	1.12024	2.63646e-06
Q9D7N3	Mrps9	28S ribosomal protein S9, mitochondrial	-0.00839	0.119373	0.79394	1.09008	1.1448	4.47133e-09
Q9D6S7	Mrrf	Ribosome-recycling factor, mitochondrial	-0.089288	0.244261	0.169111	0.317533	0.423945	0.00870177
Q5NCE8	Mrs2	Magnesium transporter MRS2 homolog, mitochondrial	-2.02863	1.52291	1.20233	3.52585	2.9155	8.60536e-06
P26041	Msn	Moesin	0.029896	-0.0695623	-0.0633565	0.022695	1.74116	0.0217983
Q9D6Y7-2;Q9D6Y7;Q9D6Y7-3;Q9D6Y7-4	Msra	Mitochondrial peptide methionine sulfoxide reductase	0.261952	-0.169257	-0.172392	-0.31019	-0.2387	0.165763
Q78J03	Msrb2	Methionine-R-sulfoxide reductase B2, mitochondrial	-4.4e-05	-0.216227	-0.36729	-0.242515	-0.964147	1.57117e-06
P00416	mt-Co3	Cytochrome c oxidase subunit 3	0.332132	1.24195	-0.003926	-1.19671	-2.53657	0.0592843
P00158	Mt-Cyb	Cytochrome b	-0.413012	0.287748	0.820981	1.03496	0.766091	0.744973
P00848	Mtatp6	ATP synthase subunit a	-0.850164	1.84907	0.185623	-1.30208	-0.619688	0.155427
P03930	Mtatp8	ATP synthase protein 8	0.151146	-0.167648	-0.562177	-0.678155	-1.07478	2.97487e-05
Q791T5-2;Q791T5;D3YXC2	Mtch1	Mitochondrial carrier homolog 1	-0.447796	0.359035	-0.219077	-0.079815	-0.350381	0.288207
Q791V5;A2AFW6;Q9D050;D6RCZ1	Mtch2	Mitochondrial carrier homolog 2	0.118046	0.473495	0.213987	0.1766	0.112397	0.711185
P00397	Mtco1	Cytochrome c oxidase subunit 1	-0.109354	0.646059	-0.493853	-1.34521	-2.14388	0.317812
P00405	Mtco2	Cytochrome c oxidase subunit 2	0.054074	0.327544	-0.441956	-1.15036	-2.19676	9.13859e-07
Q8BKY8	Mterf2	Transcription termination factor 2, mitochondrial	0.090752	0.167201	-0.036535	-0.36986	-0.580872	0.0392963
Q9D799	Mtfmt	Methionyl-tRNA formyltransferase, mitochondrial	-0.142382	-0.503888	0.161167	-0.12205	0.834734	0.363285
Q9CRB8	Mtfp1	Mitochondrial fission process protein 1	-0.575262	0.420838	-0.0517555	-0.130423	-0.512958	0.00176234
Q9CWE0;D3YW54;D6RCX5;D3Z0X8;Q9CWE0-2	Mtfr1l	Mitochondrial fission regulator 1-like	0.138428	-0.184619	-0.096137	0.473105	0.191799	0.281483
Q8R2R6	Mtg1	Mitochondrial ribosome-associated GTPase 1	-0.23239	-0.14754	0.168791	0.56242	1.59176	0.0287526
Q3V3R1	Mthfd1l	Monofunctional C1-tetrahydrofolate synthase, mitochondrial	0.20812	1.6522	2.34172	4.38467	6.29266	9.57442e-10
P18155	Mthfd2	Bifunctional methylenetetrahydrofolate dehydrogenase/cyclohydrolase, mitochondrial;NAD-dependent methylenetetrahydrofolate dehydrogenase;Methenyltetrahydrofolate cyclohydrolase	-0.807282	3.90747	5.06764	8.66906	8.89807	2.37321e-11
D3YZG8	Mthfd2l	Probable bifunctional methylenetetrahydrofolate dehydrogenase/cyclohydrolase 2;NAD-dependent methylenetetrahydrofolate dehydrogenase;Methenyltetrahydrofolate cyclohydrolase	-1.03159	-0.123864	3.06189	0.694537	0.122255	0.00454435
L7N466;Q9D110;B2KF83;A0A087WPE2;F6Q785	Mthfsl;Mthfs	5-formyltetrahydrofolate cyclo-ligase	0.424646	-0.205091	-0.533433	0.07472	1.14473	0.357742
Q91YJ5;Q5M6W7;F6RR02;Q5M6W8;Q5M6W9	Mtif2	Translation initiation factor IF-2, mitochondrial	0.04017	0.22901	0.332371	0.59762	0.571605	2.14092e-06
Q9CZD5;D3YWL2;D3Z0H9	Mtif3	Translation initiation factor IF-3, mitochondrial	-0.499492	0.797116	0.501864	0.80368	0.676124	0.0388448
P03888	Mtnd1	NADH-ubiquinone oxidoreductase chain 1	-0.49474	1.6932	0.673261	-0.18975	-0.554939	0.532022
P03893	Mtnd2	NADH-ubiquinone oxidoreductase chain 2	0.116716	1.5864	0.637106	-0.51015	-1.39455	0.668593
P03911	Mtnd4	NADH-ubiquinone oxidoreductase chain 4	0.113818	0.683869	0.412899	-0.147785	-0.118455	0.985738
P03921	Mtnd5	NADH-ubiquinone oxidoreductase chain 5	-0.33432	2.20377	0.224365	-0.541992	-0.712919	0.456888
G5E889;Q923Z3;F6WQ99;D6RCK0	Mto1	Protein MTO1 homolog, mitochondrial	-0.198728	0.44048	0.366974	0.74473	0.536783	0.0515805
Q9D0D3	Mtpap	Poly(A) RNA polymerase, mitochondrial	0.022588	-0.426845	-0.178811	0.324678	0.289633	0.137306
Q8K126	Mtrf1	Peptide chain release factor 1, mitochondrial	0.38599	-0.267529	0.891837	1.17477	1.26718	0.0204725
Q8BJU9	Mtrf1l	Peptide chain release factor 1-like, mitochondrial	-0.060838	1.2375	0.0975485	-0.575637	-0.926181	0.0422477
F7C846;D3Z3F4;D3YVW0;G3XA75;G3UXX9;G3UYJ5;G3UXB5	Mtx1		-0.177858	0.292343	0.0841425	0.0394775	0.079668	0.611272
O88441	Mtx2	Metaxin-2	-0.010816	0.301385	0.152708	0.2166	0.100609	0.820913
Q8VCM5;Q8VCM5-3;Q8VCM5-2	Mul1	Mitochondrial ubiquitin ligase activator of NFKB 1	-0.095666	-0.819178	-0.556815	-0.259173	-0.152289	0.571327
A2AMM0	Murc	Muscle-related coiled-coil protein	-0.127128	0.31443	0.295394	-1.66457	1.59861	0.038533
P16332;A6PWC3;A2A9Q2;Q8BHG1	Mut	Methylmalonyl-CoA mutase, mitochondrial	-0.20016	-0.0570413	-0.340119	-0.656212	-1.13388	2.62094e-09
E9Q9T8;Q3UIK0;Q3TF37	Mybpc3		0.317924	-0.322115	-0.249777	-0.513127	1.15156	0.0823411
O70468	Mybpc3	Myosin-binding protein C, cardiac-type	0.924988	0.175441	0.636443	-1.05832	0.169939	0.532948
P13541;A2AQP0	Myh3	Myosin-3	1.51404	3.06188	-0.877838	-0.11855	1.52383	0.065969
Q02566;B8JJH5;Q1WNP4;B8JJH3	Myh6	Myosin-6	0.235718	-0.338585	-0.866414	-1.18668	0.974946	0.0809822
Q8VDD5;F2Z494	Myh9	Myosin-9	-0.227588	-0.898051	-0.751262	1.50527	2.55139	0.0391982
P51667;E9Q8Y0;D3YUI7;D3Z0I3;D3YW14;F6RBQ5;A0A0G2JE15;D3Z1V1;A0A0G2JDZ4;Q62082-2;F6XCE3	Myl2	Myosin regulatory light chain 2, ventricular/cardiac muscle isoform	0.036114	-0.458376	-0.448968	-1.02994	0.817483	0.185342
P09542;A0A0G2JDW2;A0A0G2JDM3;E0CZ30	Myl3	Myosin light chain 3	0.263682	-0.48078	-0.777265	-0.989838	1.04878	0.0804363
A2A6Q8;Q9CZ19;P09541;D6RFU4	Myl4	Myosin light chain 4	0.389114	-0.841441	-1.00898	-1.94436	1.21179	0.0397209
Q60605-2;Q60605;Q8CI43	Myl6	Myosin light polypeptide 6	-0.326906	0.168739	0.221961	0.604587	2.69605	0.000865244
Q9QVP4	Myl7	Myosin regulatory light chain 2, atrial isoform	1.07093	-1.53186	-1.73628	-1.28326	1.04275	0.0227446
Z4YJF5;Q62234-2;Q62234	Myom1	Myomesin-1	-0.018896	0.403231	-0.574896	-2.40607	1.11293	0.0588161
Q14BI5	Myom2		0.045622	0.508367	-0.337707	-2.27527	2.20532	0.104825
Q9JJW5;D6RGM5	Myoz2	Myozenin-2	1.03294	-0.497074	-0.447145	-1.43721	0.851387	0.110366
P70670;Q60817	Naca	Nascent polypeptide-associated complex subunit alpha, muscle-specific form	0.139824	-0.195693	0.086403	0.521693	0.998195	0.0199222
Q8C5H8	Nadk2	NAD kinase 2, mitochondrial	-0.00788	-0.000509333	0.083157	-0.198667	-0.092466	0.928447
Q8BGV0;D3YV21	Nars2	Probable asparagine--tRNA ligase, mitochondrial	-0.13295	-0.330049	0.785163	0.79693	0.870763	0.0540172
Q8BLF1;Q8BYQ0	Nceh1	Neutral cholesterol ester hydrolase 1	-0.1664	0.308181	1.76919	1.63355	0.814251	0.00304857
Q9QYG0-2;Q9QYG0	Ndrg2	Protein NDRG2	-0.019432	0.757707	-0.455078	-0.360535	2.19293	0.0341017
O35683	Ndufa1	NADH dehydrogenase [ubiquinone] 1 alpha subcomplex subunit 1	-0.772466	-0.213091	-0.373032	-0.988273	-1.13502	0.00441351
Q99LC3;A0A087WR38	Ndufa10	NADH dehydrogenase [ubiquinone] 1 alpha subcomplex subunit 10, mitochondrial	0.023622	-0.265219	-0.301326	-0.63697	-0.834801	0.0052153
G5E814;Q9D8B4	Ndufa11	NADH dehydrogenase [ubiquinone] 1 alpha subcomplex subunit 11	-0.036638	-0.81195	-0.253387	-0.527925	-0.362999	0.0453319
Q7TMF3;F6RBR6	Ndufa12	NADH dehydrogenase [ubiquinone] 1 alpha subcomplex subunit 12	0.199492	-0.447148	-0.724798	-0.779848	-1.05769	3.73007e-08
Q9ERS2	Ndufa13	NADH dehydrogenase [ubiquinone] 1 alpha subcomplex subunit 13	0.149642	-0.518981	-0.580229	-0.761285	-0.977473	3.15444e-08
Q9CQ75	Ndufa2	NADH dehydrogenase [ubiquinone] 1 alpha subcomplex subunit 2	0.198432	-0.592031	-0.593647	-0.739367	-1.12933	2.19206e-06
Q9CQ91;D3Z670	Ndufa3	NADH dehydrogenase [ubiquinone] 1 alpha subcomplex subunit 3	-0.09795	-0.074477	-0.55621	-0.36015	-0.768481	0.135473
Q62425	Ndufa4	Cytochrome c oxidase subunit NDUFA4	0.01543	0.00276267	-0.428986	-1.20628	-2.12558	1.24209e-12
Q9CPP6;D3YTQ8	Ndufa5	NADH dehydrogenase [ubiquinone] 1 alpha subcomplex subunit 5	0.201448	-0.485933	-0.560423	-0.541077	-0.59218	0.000195253
Q9CQZ5	Ndufa6	NADH dehydrogenase [ubiquinone] 1 alpha subcomplex subunit 6	0.276066	-0.544513	-0.464666	-0.758663	-0.978186	8.70887e-06
Q9Z1P6;G3UXZ4	Ndufa7	NADH dehydrogenase [ubiquinone] 1 alpha subcomplex subunit 7	0.370034	-0.586769	-1.02091	-1.05916	-1.19898	0.00114459
Q9DCJ5	Ndufa8	NADH dehydrogenase [ubiquinone] 1 alpha subcomplex subunit 8	-0.067008	-0.560492	-0.421318	-0.746588	-0.864997	1.16666e-06
Q9DC69	Ndufa9	NADH dehydrogenase [ubiquinone] 1 alpha subcomplex subunit 9, mitochondrial	0.023034	0.17236	-0.353286	-0.57244	-0.769079	0.245957
F6ZFT1;F8WJ64;Q9CR21	Ndufab1	Acyl carrier protein;Acyl carrier protein, mitochondrial	0.360268	-0.049075	-0.032434	-0.585193	-0.715797	0.0663713
A2AQ17;Q9CWX2	Ndufaf1	Complex I intermediate-associated protein 30, mitochondrial	0.117124	0.145202	0.342592	0.523352	0.727713	0.00364947
Q59J78	Ndufaf2	Mimitin, mitochondrial	0.103796	-0.0442343	0.088561	0.50295	0.230075	0.0252542
Q9JKL4;A0A0A6YVW1	Ndufaf3	NADH dehydrogenase [ubiquinone] 1 alpha subcomplex assembly factor 3	0.086436	0.410976	0.427864	0.321443	0.122599	0.134794
Q9D1H6;A2AJX3	Ndufaf4	NADH dehydrogenase [ubiquinone] 1 alpha subcomplex assembly factor 4	-0.077582	0.380589	0.073904	0.148602	-0.115163	0.042506
A2APY7;A2APY7-2	Ndufaf5	NADH dehydrogenase [ubiquinone] 1 alpha subcomplex assembly factor 5	0.209434	-0.0488733	-0.073479	0.21568	0.130841	0.532022
A2AIL4	Ndufaf6	NADH dehydrogenase (ubiquinone) complex I, assembly factor 6	0.406318	-0.179127	0.066144	0.307432	0.863947	0.00783177
Q9CWG8;Q9CWG8-2	Ndufaf7	NADH dehydrogenase [ubiquinone] complex I, assembly factor 7	-0.248568	-0.0947503	0.0769125	0.001435	0.0524773	0.519919
Q9DCS9;D3YUK4	Ndufb10	NADH dehydrogenase [ubiquinone] 1 beta subcomplex subunit 10	0.367898	-0.336806	-0.523137	-0.8264	-0.903336	2.72064e-07
O09111	Ndufb11	NADH dehydrogenase [ubiquinone] 1 beta subcomplex subunit 11, mitochondrial	-0.517132	-0.00960333	-0.552813	-0.691063	-0.803875	0.000282882
Q9CPU2	Ndufb2	NADH dehydrogenase [ubiquinone] 1 beta subcomplex subunit 2, mitochondrial	0.257082	-0.599157	-0.290088	-0.29704	-1.57342	0.000647891
Q9CQZ6	Ndufb3	NADH dehydrogenase [ubiquinone] 1 beta subcomplex subunit 3	-0.01582	-0.450541	-0.720514	-1.12824	-1.01943	2.77055e-07
Q9CQC7	Ndufb4	NADH dehydrogenase [ubiquinone] 1 beta subcomplex subunit 4	-0.094176	-0.457874	-0.480336	-1.0089	-1.16536	4.66166e-08
Q9CQH3;D3Z568;D3YX99;F6Y6V5;D3Z6W9	Ndufb5	NADH dehydrogenase [ubiquinone] 1 beta subcomplex subunit 5, mitochondrial	0.020558	-0.074053	-0.428542	-0.28526	-0.659945	0.00522242
Q3UIU2;A2AP32	Ndufb6	NADH dehydrogenase [ubiquinone] 1 beta subcomplex subunit 6	0.238006	0.000878	-0.394703	-0.671157	-0.995831	0.00424034
Q9CR61	Ndufb7	NADH dehydrogenase [ubiquinone] 1 beta subcomplex subunit 7	0.002314	-0.480345	-0.382533	-0.892112	-1.09048	1.65521e-07
Q9D6J5;Q3V406;F6VCY0;E9Q9J5;F6Z9R1	Ndufb8	NADH dehydrogenase [ubiquinone] 1 beta subcomplex subunit 8, mitochondrial	0.184902	0.395118	-0.461936	-0.587847	-0.881525	0.00147945
Q9CQJ8	Ndufb9	NADH dehydrogenase [ubiquinone] 1 beta subcomplex subunit 9	0.255346	-0.668236	-0.562285	-0.821705	-0.629596	2.35074e-06
Q9CQY9	Ndufc1	NADH dehydrogenase [ubiquinone] 1 subunit C1, mitochondrial	0.43785	1.08748	-0.228221	-1.85496	-0.400501	0.147704
Q9CQ54	Ndufc2	NADH dehydrogenase [ubiquinone] 1 subunit C2	0.13314	-0.180778	-0.42948	-0.5596	-0.763807	0.000287512
Q91VD9;A0A087WQR0;A0A087WP77;A0A087WQ77;A0A087WR47	Ndufs1	NADH-ubiquinone oxidoreductase 75 kDa subunit, mitochondrial	0.025726	-0.2518	-0.374043	-0.721395	-0.860507	2.43158e-06
Q91WD5;D3YXT0;A0A0A6YW30	Ndufs2	NADH dehydrogenase [ubiquinone] iron-sulfur protein 2, mitochondrial	-0.08076	-0.0263147	-0.3385	-0.766278	-0.993781	0.00771192
Q9DCT2	Ndufs3	NADH dehydrogenase [ubiquinone] iron-sulfur protein 3, mitochondrial	0.047128	-0.110318	-0.439516	-0.596375	-0.991399	7.45568e-05
E9QPX3;Q9CXZ1	Ndufs4	NADH dehydrogenase [ubiquinone] iron-sulfur protein 4, mitochondrial	0.034898	-0.4186	-0.654459	-0.805908	-1.12947	9.30816e-09
Q99LY9;B1ARW4	Ndufs5	NADH dehydrogenase [ubiquinone] iron-sulfur protein 5;NADH dehydrogenase [ubiquinone] iron-sulfur protein 5, N-terminally processed	0.401278	-1.04925	-0.875718	-0.8628	-1.19191	6.74829e-05
P52503;D6RJ54	Ndufs6	NADH dehydrogenase [ubiquinone] iron-sulfur protein 6, mitochondrial	-0.057018	-0.602926	-0.536592	-0.841773	-0.906299	0.000185764
Q9DC70	Ndufs7	NADH dehydrogenase [ubiquinone] iron-sulfur protein 7, mitochondrial	-0.174928	-0.0478443	-0.378793	-0.629232	-0.781342	0.000666155
Q8K3J1	Ndufs8	NADH dehydrogenase [ubiquinone] iron-sulfur protein 8, mitochondrial	0.22806	-0.188099	-0.444169	-0.665723	-0.992017	1.07588e-06
D3YUM1;Q91YT0;D3Z1U9;D3Z0K1;D6RG60;D3YXX5	Ndufv1	NADH dehydrogenase [ubiquinone] flavoprotein 1, mitochondrial	-0.01063	-0.344142	-0.449056	-0.6969	-0.972204	2.93901e-07
Q9D6J6;Q9D6J6-2;M0QWP9;D6RGN4	Ndufv2	NADH dehydrogenase [ubiquinone] flavoprotein 2, mitochondrial	-0.028034	-0.498324	-0.501554	-0.792718	-1.0263	1.07588e-06
Q8BK30	Ndufv3	NADH dehydrogenase [ubiquinone] flavoprotein 3, mitochondrial	-0.59769	-0.239102	-0.875024	-1.85209	-2.67405	8.20934e-09
Q3U422;A0A087WQ40	Ndufv3		-0.25138	-0.107431	-0.151468	0.0883825	0.0793233	0.172314
B7ZCI2;B7ZCI3;Q0II04;Q8BWC6;Q3TR73	Nebl	Nebulette	0.10712	-0.277801	-0.600534	-1.30713	1.24273	0.271803
Q9Z1J3-2;Q9Z1J3;V9GXS4;F7CZD1;F6TXD3;A6QRH3	Nfs1	Cysteine desulfurase, mitochondrial	0.040512	0.16003	0.0265945	-0.108505	-0.337591	0.0811681
Q9QZ23	Nfu1	NFU1 iron-sulfur cluster scaffold homolog, mitochondrial	-0.117836	0.221921	0.497525	0.967893	0.933952	5.51594e-07
D3Z285	Nfu1		-0.52015	1.40965	0.489052	1.14611	0.937806	7.55069e-05
Q9EQ80;D3Z0G0;E9PWJ6	Nif3l1	Putative GTP cyclohydrolase 1 type 2 Nif3l1	0.139658	1.12187	0.790614	2.61857	2.50458	5.91957e-05
Q9CQE1;B1AWZ5;G3X8S9;B1AWZ3	Nipsnap3b	Protein NipSnap homolog 3B	0.186556	1.56459	0.484065	1.55594	4.2784	4.70748e-06
Q8VDK1-2;Q8VDK1;D3YY53;D3Z3I3;D3Z2Y2	Nit1	Nitrilase homolog 1	0.332642	-0.125133	0.132158	0.122397	-0.0822007	0.260282
Q9JHW2	Nit2	Omega-amidase NIT2	-0.067646	-0.0143727	-0.211427	-0.12067	-0.406514	0.330013
Q91YP2	Nln	Neurolysin, mitochondrial	-0.108446	0.870186	0.953071	1.15168	1.27452	0.00300723
Q3TL44	Nlrx1	NLR family member X1	0.297538	0.203785	0.0162295	-0.17891	-0.388089	0.492098
Q9WV85	Nme3	Nucleoside diphosphate kinase 3	0.146662	0.688368	0.25167	0.34496	0.490818	0.603074
Q99JR6;Q3V3C7;Q3V3F1;A0A087WSM7	Nmnat3	Nicotinamide mononucleotide adenylyltransferase 3	-0.135724	-0.0494777	0.0680965	0.12831	0.0772087	0.762144
Q61941;Q8C9V5;Q8BGK0;E9Q8F4	Nnt	NAD(P) transhydrogenase, mitochondrial	0.033032	0.368962	0.023827	0.136032	-0.0915907	0.014537
Q11011;E9Q039;F6QYF8;E9Q6F4;F6V7K3;F7ANF4;F2Z3V5	Npepps	Puromycin-sensitive aminopeptidase	0.01832	0.283627	0.633576	-0.0932525	-0.343829	0.510278
P05125	Nppa	Natriuretic peptides A;Atrial natriuretic factor;Auriculin-B;Auriculin-A;Atriopeptin-1;Atriopeptin-2	0.841442	-0.230639	0.22614	-1.71822	-1.20979	0.0342615
Q9CZ57;Q9CZ57-2;A0A0A0MQ81	Nsun4	5-methylcytosine rRNA methyltransferase NSUN4	0.165418	0.700223	-0.053463	2.54709	1.37126	0.00393113
Q9D020	Nt5c3a	Cytosolic 5-nucleotidase 3A	0.251508	-0.127993	-0.272487	1.30581	0.569732	0.120258
Q91X76	Nt5dc2		-0.354246	0.956319	0.393629	0.361287	-1.20815	0.369525
Q3UHB1	Nt5dc3	5-nucleotidase domain-containing protein 3	-0.201522	0.472107	0.414595	0.203808	-0.076848	0.388104
Q8VCE6	Nt5m	5(3)-deoxyribonucleotidase, mitochondrial	-0.043482	0.205064	0.557647	0.47754	0.534219	0.13804
Q9CWD8;F7D3P0	Nubpl	Iron-sulfur protein NUBPL	0.560772	-0.010604	-0.126445	0.06777	0.02322	0.0758069
Q8JZU0	Nudt13	Nucleoside diphosphate-linked moiety X motif 13	0.254496	0.176421	0.237141	0.884977	0.723413	0.0023291
P11930	Nudt19	Nucleoside diphosphate-linked moiety X motif 19, mitochondrial	-0.33486	0.534746	0.78535	1.12105	1.61689	0.0209905
P56380	Nudt2	Bis(5-nucleosyl)-tetraphosphatase [asymmetrical]	0.180784	0.27757	0.285251	0.240377	0.34275	0.215622
Q3ULU4;Q8CH40;A2ACU7;Q8CH41;A2ACT8;A0A0G2JDN4;A0A0G2JE11;A2ACU1;F6WJF1	Nudt6	Nucleoside diphosphate-linked moiety X motif 6	-0.031598	0.127141	0.012496	0.03011	0.191119	0.860286
Q9CR24;D3Z5H8	Nudt8	Nucleoside diphosphate-linked moiety X motif 8, mitochondrial	0.156206	0.00886	0.228399	0.774302	1.02512	7.26897e-05
Q8BVU5;A2AH27;A2AH28;A2AH29;A2AH30	Nudt9	ADP-ribose pyrophosphatase, mitochondrial	-0.585238	0.224289	0.427972	0.591993	-0.0406853	0.0253068
P29758	Oat	Ornithine aminotransferase, mitochondrial	0.093682	-0.0304883	0.0023975	0.082925	-0.235343	0.609897
E9QQ96;Z4YJE4;A2AAJ9-2;A2AAJ9;H7BX05	Obscn	Obscurin	0.576352	0.446677	1.10565	-0.128332	3.30568	0.22466
Q9CRD0;Q9CRD0-2	Ociad1	OCIA domain-containing protein 1	-0.151578	0.11733	0.119084	0.444532	0.129873	0.013618
Q9D8W7	Ociad2	OCIA domain-containing protein 2	0.073788	-0.128294	-0.046945	-0.380317	-1.56898	0.194201
Q60597;Q60597-3;Z4YJV4;Q60597-2;Q60597-4;Q5SVY1	Ogdh	2-oxoglutarate dehydrogenase, mitochondrial	-0.079744	0.230797	0.0637775	0.182525	0.16874	0.441108
E9Q7L0	Ogdhl		-0.100624	0.288567	-0.066108	-0.429758	-0.888976	0.0247188
Q9D8H7;Q9D8H7-2	Oma1	Metalloendopeptidase OMA1, mitochondrial	-0.125558	0.226428	0.018473	0.0024575	-0.117068	0.883486
P58281-2;P58281;H7BX01;E0CXD1;F6U775;P58682	Opa1	Dynamin-like 120 kDa protein, mitochondrial;Dynamin-like 120 kDa protein, form S1	-0.009742	-0.0757587	-0.178303	-0.384675	-0.636001	1.68864e-05
Q505D7	Opa3	Optic atrophy 3 protein homolog	0.105702	-0.0866677	0.200605	0.0449325	0.133168	0.545543
Q8BGA9	Oxa1l	Mitochondrial inner membrane protein OXA1L	0.158442	0.650811	0.413901	0.436555	0.248767	0.00016336
Q9D0K2;Q3UJQ9	Oxct1	Succinyl-CoA:3-ketoacid coenzyme A transferase 1, mitochondrial;Succinyl-CoA:3-ketoacid-coenzyme A transferase	-0.017126	0.592995	0.0103245	0.270938	0.282771	0.00997696
Q9CR10;H3BK04	Oxld1	Oxidoreductase-like domain-containing protein 1	0.234372	0.215523	-0.146969	0.61949	0.985483	0.441108
Q8VE38-2;Q8VE38;E9Q690;E9Q8U8;F6XLU3;E9PZL5;F6SAD4;E9Q2B7	Oxnad1	Oxidoreductase NAD-binding domain-containing protein 1	0.10988	0.197217	0.14796	0.071345	-0.0993353	0.830303
Q9D404;D3Z6F9	Oxsm	3-oxoacyl-[acyl-carrier-protein] synthase, mitochondrial	0.017888	-0.0308187	-0.129831	-0.0702575	-0.280017	0.39438
P09103;E9Q8G8	P4hb	Protein disulfide-isomerase	-0.201452	0.010397	0.1954	0.67569	2.94709	0.000182592
Q9CQV1;D6RI93	Pam16	Mitochondrial import inner membrane translocase subunit TIM16	-0.18753	0.020436	0.147455	0.203987	0.141861	0.609897
Q99LX0;A2A813;A2A815;A2A817;A2A816	Park7	Protein DJ-1	0.238186	-0.077191	0.0269095	0.0703325	-0.0120133	0.75435
Q5XJY4;D6RJ50;D6RCZ6	Parl	Presenilins-associated rhomboid-like protein, mitochondrial;P-beta	-0.40774	1.34545	0.133817	0.786747	0.959698	0.010566
A8Y5T6;Q8CFI5;A2AVQ7	Pars2	Probable proline--tRNA ligase, mitochondrial	0.043306	0.216152	0.086773	0.445702	0.285562	0.226189
Q9CZL5	Pcbd2	Pterin-4-alpha-carbinolamine dehydratase 2	-0.314622	-0.0575467	0.173438	0.49215	0.416887	0.0348863
P60335	Pcbp1	Poly(rC)-binding protein 1	0.065274	-0.181176	0.0917625	1.71521	2.76014	0.000446199
Q91ZA3;H3BL62;H3BK61;D3YWM4;D3YZC0;H3BJR0;H3BKW6	Pcca	Propionyl-CoA carboxylase alpha chain, mitochondrial	-0.006078	0.150864	-0.055382	0.052325	-0.261462	0.570827
Q99MN9;E9Q1J7;D3YZC1;A0A087WQV1	Pccb	Propionyl-CoA carboxylase beta chain, mitochondrial	-0.029658	0.168465	-0.0098455	0.004305	-0.260967	0.683707
Q8BH04;Q9Z2V4	Pck2	Phosphoenolpyruvate carboxykinase [GTP], mitochondrial	-0.159416	0.968074	2.92577	6.11659	6.68897	6.69517e-12
F7D432;E9PWE0;E0CYV0;P23506;P23506-2;F6V9F1;F6TXE3	Pcmt1	Protein-L-isoaspartate O-methyltransferase;Protein-L-isoaspartate(D-aspartate) O-methyltransferase	-0.06465	-0.0856533	-0.0477375	0.07474	-0.156736	0.81252
G5E8R3;E9QPD7;Q05920	Pcx;Pc	Pyruvate carboxylase;Pyruvate carboxylase, mitochondrial	0.20514	0.000762	-0.401243	0.249178	-0.0151807	0.361575
S4R2K0;S4R2R8	Pdf		-0.001522	0.144108	0.181094	-0.27638	-0.041078	0.349846
P35486	Pdha1	Pyruvate dehydrogenase E1 component subunit alpha, somatic form, mitochondrial	-0.053358	0.07195	-0.043336	-0.0993175	-0.283431	0.0785341
Q9D051	Pdhb	Pyruvate dehydrogenase E1 component subunit beta, mitochondrial	0.000914	-0.011966	0.013081	0.0807075	-0.135277	0.830303
Q8BKZ9;A2AWH7;A2AWH8	Pdhx	Pyruvate dehydrogenase protein X component, mitochondrial	-0.067994	-0.119373	0.0994205	0.12159	-0.0232013	0.737043
P27773;F6Q404	Pdia3	Protein disulfide-isomerase A3	0.086248	-0.264226	0.167327	0.04574	2.33094	0.0166994
Q3TML0;Q922R8	Pdia6	Protein disulfide-isomerase A6	0.227394	-0.0158703	0.109239	0.10956	2.28478	0.087298
Q8BFP9	Pdk1	[Pyruvate dehydrogenase (acetyl-transferring)] kinase isozyme 1, mitochondrial	-0.083594	0.145067	0.0591125	0.105112	-0.194707	0.884586
Q9JK42	Pdk2	[Pyruvate dehydrogenase (acetyl-transferring)] kinase isozyme 2, mitochondrial	-0.450898	0.154304	0.09542	-0.38812	-0.897955	0.103926
Q922H2	Pdk3	[Pyruvate dehydrogenase (acetyl-transferring)] kinase isozyme 3, mitochondrial	-0.41986	0.219836	0.648204	1.03482	0.768087	0.156143
O70571	Pdk4	[Pyruvate dehydrogenase (acetyl-transferring)] kinase isozyme 4, mitochondrial	-0.23879	0.813421	-0.017888	0.261075	-0.220369	0.457863
F8WJI6;E9Q8P5;Q8CI51-3;Q9CRA2;Q8CI51-2	Pdlim5	PDZ and LIM domain protein 5	0.04726	-0.325766	-0.68865	-0.833483	0.0657127	0.542841
A2AJP9;A8Y5Q0;A2AJQ0;Q3UV70	Pdp1	[Pyruvate dehydrogenase [acetyl-transferring]]-phosphatase 1, mitochondrial	-0.143904	0.101687	0.157997	0.115888	0.0601893	0.382822
Q504M2	Pdp2		0.189908	0.606694	-1.11916	-0.207325	-2.27294	0.100036
Q7TSQ8;D6RD07;D3Z443	Pdpr	Pyruvate dehydrogenase phosphatase regulatory subunit, mitochondrial	-0.204024	0.529118	0.0348625	0.156955	0.046128	0.566426
Q33DR3;E0CYM9;Q33DR3-2;F6T4Z4;Q33DR3-3	Pdss2	Decaprenyl-diphosphate synthase subunit 2	-0.181058	-0.0235637	0.484429	1.84	1.65049	0.000865244
Q3UXD9;Q99MZ7;D6RHN4;D6RIP0	Pecr	Peroxisomal trans-2-enoyl-CoA reductase	-0.642402	-0.539626	0.182383	1.4996	1.67321	0.302855
Q149B8	Perm1	PGC-1 and ERR-induced regulator in muscle protein 1	-0.260544	0.0404377	-0.35145	-0.30729	-0.598655	0.000284889
P0DJE0	Pet100	Protein PET100 homolog, mitochondrial	0.363482	-0.547159	-1.40237	-1.46776	0.309263	0.246332
Q99JT1;Q8BW84;Q3TLZ6	Pet112	Glutamyl-tRNA(Gln) amidotransferase subunit B, mitochondrial	0.099724	0.080163	0.267208	0.197497	0.45487	0.0363171
Q9Z126	Pf4	Platelet factor 4	-0.20388	0.505808	-2.34115	-2.18423	-1.2902	0.00137544
P47857;P47857-2;P47857-3	Pfkm	ATP-dependent 6-phosphofructokinase, muscle type	-0.346982	-0.685186	0.936074	-0.107708	0.768256	0.586186
O70250	Pgam2	Phosphoglycerate mutase 2	0.14336	-0.147853	0.123297	0.27596	0.234585	0.733991
Q8BX10;A0A0G2JG95	Pgam5	Serine/threonine-protein phosphatase PGAM5, mitochondrial	-0.076428	0.658371	0.802101	0.959978	2.45621	0.00230191
P09411;S4R2M7	Pgk1	Phosphoglycerate kinase 1;Phosphoglycerate kinase	0.081744	-0.0403937	-0.572941	2.70157	2.05331	0.00170727
Q8BHF7;F8WI04;F2Z427	Pgs1	CDP-diacylglycerol--glycerol-3-phosphate 3-phosphatidyltransferase, mitochondrial	-0.256898	0.0978637	-0.117986	-0.045745	0.830469	0.635232
P67778;Q5SQG5	Phb	Prohibitin	0.040634	0.271824	0.210909	0.196768	0.107589	0.0115824
O35129;F6QPR1;F6Q8V7	Phb2	Prohibitin-2	-0.017074	0.189989	0.291182	0.29718	0.153515	0.038533
O35386	Phyh	Phytanoyl-CoA dioxygenase, peroxisomal	-0.104444	-0.472612	-0.308824	-0.00764	0.05221	0.868649
Q8K411-2;Q8K411;Q8K411-3	Pitrm1	Presequence protease, mitochondrial	-0.090596	0.020221	0.0844665	0.187665	0.155065	0.159881
P52480-2;P52480;E9Q509;G3X925;P53657	Pkm	Pyruvate kinase PKM	-0.141046	-0.440727	0.125164	0.57476	1.36442	0.000349673
Q9QXS1-15;Q9QXS1-10;Q9QXS1-9;Q9QXS1-12;Q9QXS1-11;Q9QXS1-13;Q9QXS1-5;Q9QXS1-3;Q9QXS1-16;Q9QXS1-4;Q9QXS1-14;Q9QXS1-6;Q9QXS1-7;Q9QXS1-8;Q9QXS1-2;Q9QXS1;E9Q3W4;F6R059;E9Q9J6;E9PW24	Plec	Plectin	0.296484	-1.35146	-2.73535	-1.2739	-0.798598	0.118162
O88492;O88492-2	Plin4	Perilipin-4	-0.03973	0.0633773	-0.36073	-0.35654	0.745804	0.740318
Q8BVZ1;Q8BVZ1-2	Plin5	Perilipin-5	0.147354	-0.649219	-0.789601	-1.85882	-1.28224	0.00728082
Q9DC61;A2AIW9	Pmpca	Mitochondrial-processing peptidase subunit alpha	-0.042904	0.218786	0.39117	0.661567	0.769703	5.50843e-06
Q9CXT8;D3Z1T9	Pmpcb	Mitochondrial-processing peptidase subunit beta	0.057802	-0.152036	0.375006	0.588905	0.627043	1.09505e-06
Q69ZP3-2;Q69ZP3-3;Q69ZP3	Pnkd	Probable hydrolase PNKD	-0.325576	-0.125654	-0.089228	0.0721525	-0.511279	0.0546227
Q8K1N1;E9QAC9;E9PXB0;F7B2N8	Pnpla8	Calcium-independent phospholipase A2-gamma	-0.188714	0.731436	0.187907	0.551453	0.806025	1.00037e-08
Q8K1R3;Q8K1R3-2	Pnpt1	Polyribonucleotide nucleotidyltransferase 1, mitochondrial	-0.11466	0.171246	0.172134	0.391665	0.343629	0.000608517
Q91VA6;F6SQH7	Poldip2	Polymerase delta-interacting protein 2	-0.01477	0.153418	0.38869	0.33311	0.455139	0.0872602
E9PWD9;Q8BKF1;E0CY15;F6TLB0	Polrmt	DNA-directed RNA polymerase;DNA-directed RNA polymerase, mitochondrial	2.4e-05	1.08653	1.16512	2.39426	3.40817	3.72723e-07
Q91VM9;Q91VM9-2	Ppa2	Inorganic pyrophosphatase 2, mitochondrial	-0.068242	0.0754417	0.0855	0.03975	-0.17608	0.790495
P17742;F8VPN3;V9GXC1;V9GX31	Ppia	Peptidyl-prolyl cis-trans isomerase A;Peptidyl-prolyl cis-trans isomerase A, N-terminally processed	-0.026438	-0.196265	0.417392	0.899415	1.37671	3.84479e-07
P24369	Ppib	Peptidyl-prolyl cis-trans isomerase B	0.193602	0.0952013	1.19129	1.1331	2.13898	0.0188064
Q99KR7;Q9QZH3;Q9ERU9	Ppif	Peptidyl-prolyl cis-trans isomerase F, mitochondrial	-0.239062	0.091405	-0.171578	-0.031025	-0.216206	0.396697
Q8BXN7	Ppm1k	Protein phosphatase 1K, mitochondrial	-0.05142	0.24489	-0.748066	-1.06968	-2.83526	1.17671e-06
P51175;A0A0A6YX50	Ppox	Protoporphyrinogen oxidase	0.004738	-0.120441	0.494414	0.31187	-0.122993	0.172204
Q6NVE9;Q6NVE9-2	Pptc7	Protein phosphatase PTC7 homolog	-0.000512	0.226513	0.0535905	0.44043	0.342063	0.0599496
P35700;B1AXW5;B1AXW6;B1AXW4	Prdx1	Peroxiredoxin-1	0.282974	-0.234894	0.004957	0.180338	1.36845	0.0113656
Q61171;D3Z4A4	Prdx2	Peroxiredoxin-2	-0.16557	-0.293305	0.0762575	-0.210512	1.70893	0.0687808
P20108	Prdx3	Thioredoxin-dependent peroxide reductase, mitochondrial	-0.452626	0.683522	0.0452795	0.284035	0.0491447	0.165966
P99029-2;P99029;G3UZJ4;H3BJQ7	Prdx5	Peroxiredoxin-5, mitochondrial	-0.089242	0.005524	-0.003236	-0.21165	-0.339463	0.0253068
Q80VP5;Q80VP5-2	Probable peptide chain release factor C12orf65 homolog, mitochondrial	Probable peptide chain release factor C12orf65 homolog, mitochondrial	-0.873006	0.604333	0.506894	0.816155	-0.576648	0.102655
Q9WU79;F6PYI8;F6YFQ5;F6XMC0;E9PUR5	Prodh	Proline dehydrogenase 1, mitochondrial	0.15078	0.229065	0.092152	0.428585	0.196905	0.0278529
Q9Z2Y8;Q80ZV3	Prosc	Proline synthase co-transcribed bacterial homolog protein	0.042988	0.155102	-0.0859945	-0.037875	-0.207972	0.42224
E9PZ00;Q8BFQ1;K3W4L3;J3QPG5;Q61207	Psap	Sulfated glycoprotein 1	0.235554	-1.42711	0.437172	0.160045	1.97833	0.0336155
Q8C2E4	Ptcd1	Pentatricopeptide repeat-containing protein 1, mitochondrial	-0.204756	0.0479323	0.417627	0.15539	0.493455	0.593022
Q8R3K3	Ptcd2	Pentatricopeptide repeat-containing protein 2, mitochondrial	-0.064386	-0.327964	-0.5171	-0.33898	-0.626583	0.000414617
Q8BWM0	Ptges2	Prostaglandin E synthase 2;Prostaglandin E synthase 2 truncated form	-0.038976	0.589958	0.197342	-0.02587	0.022834	0.365584
P26350;A0A087WP98;A0A087WPN6;A0A087WQN2;J3QPK6	Ptma	Prothymosin alpha;Prothymosin alpha, N-terminally processed;Thymosin alpha	-0.224136	0.897814	1.55768	1.79761	2.57747	2.19206e-06
Q66GT5	Ptpmt1	Phosphatidylglycerophosphatase and protein-tyrosine phosphatase 1	-0.185248	0.352119	0.240834	0.388185	0.317679	0.0371959
O54724	Ptrf	Polymerase I and transcript release factor	-0.078768	-0.708258	-0.142718	-0.240792	1.73307	0.253802
Q8R2Y8	Ptrh2	Peptidyl-tRNA hydrolase 2, mitochondrial	0.01585	-0.0780337	0.314755	0.667158	0.588527	0.000412513
Q922Q4	Pycr2	Pyrroline-5-carboxylate reductase 2	-0.144724	0.542241	2.64561	5.80706	5.22921	6.01989e-15
Q8CI94	Pygb	Glycogen phosphorylase, brain form	-0.01134	0.473233	0.66684	0.855185	1.71459	0.154668
Q9WUB3;E9PUM3	Pygm	Glycogen phosphorylase, muscle form;Phosphorylase	-0.264556	0.179622	0.50408	0.41168	1.29082	0.609897
Q9D1C3	Pyurf	Protein preY, mitochondrial	0.254452	-0.049336	-0.518144	-0.315365	0.0347227	0.590752
Q8BVI4;D3YWR7;A0A0G2JGJ1;A0A0G2JGY0;D3Z1A1	Qdpr	Dihydropteridine reductase	-0.771702	0.291932	0.224956	0.114733	0.0730427	0.162402
Q8R404	Qil1	Protein QIL1	-0.241994	0.782958	0.139386	0.153547	-0.108487	0.132906
Q9CZN8	Qrsl1	Glutamyl-tRNA(Gln) amidotransferase subunit A, mitochondrial	-0.385056	0.219117	0.33206	0.381435	0.267044	0.00903015
Q3UNZ8;A0A0A6YWV6;Q3UNZ8-2;A0A0A6YXW5;A0A0A6YWZ0	Quinone oxidoreductase-like protein 2	Quinone oxidoreductase-like protein 2	0.192644	0.154488	1.14692	-0.949782	0.973068	0.365584
P61027;D3YUS4	Rab10	Ras-related protein Rab-10	0.10007	0.408584	0.500193	0.157493	0.334678	0.00195138
P46638;G3UY29;E9Q3P9;F8WGS1;P62492;G3UZD3;G3UZL4;E9Q6B3;E9PZB2;F6R2Z5;D3YYB3;Q9WTL2	Rab11b;Rab11a	Ras-related protein Rab-11B;Ras-related protein Rab-11A	-0.173382	0.860645	0.424063	0.553378	0.770597	0.0741215
A2CG35;P35283	Rab12	Ras-related protein Rab-12	0.40566	0.173548	-0.373493	-0.0511	-0.0494467	0.671034
Q91V41;A2AL34	Rab14	Ras-related protein Rab-14	0.18293	0.625583	1.24028	1.25354	0.568822	0.118162
P35293	Rab18	Ras-related protein Rab-18	0.263802	1.00946	0.449304	0.0885075	-0.391801	0.0666845
P62821	Rab1A	Ras-related protein Rab-1A	0.391392	0.625027	0.498667	0.525843	0.314265	0.0118994
Q9D1G1	Rab1b	Ras-related protein Rab-1B	0.038044	0.403114	0.098892	0.979355	0.397833	0.177993
P35282	Rab21	Ras-related protein Rab-21	0.581682	-0.095803	0.642395	0.128605	-1.20773	0.0312525
P53994;Q3TEG7;P59279;G3UXQ7;G3V022;S4R232	Rab2a;Rab2b	Ras-related protein Rab-2A;Ras-related protein Rab-2B	0.274844	0.39972	0.201001	0.206857	0.418987	0.351459
Q6PHN9;S4R1W7;Q923S9	Rab35	Ras-related protein Rab-35	0.153656	0.548754	1.45393	1.24672	1.31728	0.0121057
Q9CQD1	Rab5a	Ras-related protein Rab-5A	0.218122	0.423635	1.33543	2.4546	0.536157	0.00127447
P61021	Rab5b	Ras-related protein Rab-5B	-0.312448	-0.100551	0.019268	0.370485	0.674606	0.668633
P35279-2;P35279;D3YV69;P61294;Q8BHD0	Rab6a;Rab6b	Ras-related protein Rab-6A;Ras-related protein Rab-6B	-0.103454	0.517135	-0.060988	0.775023	2.95885	0.0733901
P51150	Rab7a	Ras-related protein Rab-7a	0.163296	0.544618	0.605345	0.537517	0.723254	0.0102937
P55258;Q3TYH2;A2A7Z6;Q8K386;Q9CZT8	Rab8a	Ras-related protein Rab-8A	0.451558	0.869207	1.29563	0.708447	0.0629073	0.0010024
Q3TLP8;P63001;P60764;Q05144;A2AC13	Rac1;Rac3;Rac2	Ras-related C3 botulinum toxin substrate 1;Ras-related C3 botulinum toxin substrate 3;Ras-related C3 botulinum toxin substrate 2	0.01718	-0.497551	0.491403	0.380557	1.99054	0.0343001
Q99JI6	Rap1b	Ras-related protein Rap-1b	0.972264	0.458604	-1.09392	1.34029	1.63405	0.161027
Q3U186;A2AT41	Rars2	Probable arginine--tRNA ligase, mitochondrial	-0.423406	0.392649	0.0581045	0.704977	0.744177	0.166727
Q6P3B9	Rbfa	Putative ribosome-binding factor A, mitochondrial	-0.50713	1.54813	1.95294	3.31272	3.4087	2.89305e-05
Q8CEE7;D3YVJ8	Rdh13	Retinol dehydrogenase 13	-0.242542	0.161478	-0.136876	0.18524	0.494797	0.00376961
Q9ERI6	Rdh14	Retinol dehydrogenase 14	-0.087566	0.217972	0.272661	0.36431	0.14923	0.112054
G3X8R0;Q60870	Reep5		0.006586	0.355323	0.377456	-0.0648025	0.499083	0.474181
Q9D8S4	Rexo2	Oligoribonuclease, mitochondrial	0.563576	0.161035	0.396153	0.965055	1.76234	0.0356302
Q9QUI0;A0A0A6YXF6;Q62159;H3BL56;A0A0G2JEP8;Q9CR99;A0A0A6YWJ1;P62746	Rhoa;Rhoc	Transforming protein RhoA;Rho-related GTP-binding protein RhoC	0.491076	0.239878	0.475986	0.570895	0.344067	0.137306
Q8BG51-3;Q8BG51-4;Q8BG51;Q8BG51-2;F7ASU3	Rhot1	Mitochondrial Rho GTPase 1	-0.191108	-0.0871063	0.0466625	0.134378	0.0113193	0.569248
Q8JZN7;H3BKJ1;H3BL14;H3BKL2	Rhot2	Mitochondrial Rho GTPase 2	-0.10635	-0.136581	0.507484	0.442275	0.293621	0.278608
Q9DCV4;A2AGJ2	Rmdn1	Regulator of microtubule dynamics protein 1	0.052618	-0.0553077	0.148114	0.163365	0.374465	0.302382
Q8CI78;F6QWS3	Rmnd1	Required for meiotic nuclear division protein 1 homolog	0.022282	0.592463	1.00999	0.656707	0.451737	0.0391468
F7A6H4;E9Q555;Q3U0U2	Rnf213	E3 ubiquitin-protein ligase RNF213	1.86201	-0.292261	0.170347	-1.89444	-2.65494	0.228045
Q5ND52	Rnmtl1	RNA methyltransferase-like protein 1	-0.31532	-0.126149	-0.370347	1.70361	1.67704	0.0781405
P60603	Romo1	Reactive oxygen species modulator 1	-0.04012	0.0288643	0.44719	0.418138	0.00569067	0.62084
P47968	Rpia	Ribose-5-phosphate isomerase	-0.079512	-0.340761	-0.398912	0.13179	0.326203	0.930349
Q6ZWV3;I7HLV2;P86048;B7FAU6	Rpl10;Rpl10l	60S ribosomal protein L10;60S ribosomal protein L10-like	0.20597	-0.286834	0.540368	1.12741	2.56922	0.0020522
Q5XJF6;P53026;D6RE43	Rpl10a	Ribosomal protein;60S ribosomal protein L10a	-0.234212	-0.259107	0.28843	0.668995	1.69832	0.0358441
Q9CXW4;A2BH06;E9PYL9;E9PZB3	Rpl11;Gm10036;Gm5093	60S ribosomal protein L11	0.277098	-0.270522	0.836318	1.49168	2.13317	0.00535941
P35979;F8VQK7	Rpl12	60S ribosomal protein L12	0.137756	-0.423274	0.190383	1.34746	2.00422	0.00241905
P47963	Rpl13	60S ribosomal protein L13	0.198854	-0.293124	0.470029	0.488183	0.846567	0.0520869
P19253;E9Q5A0;S4R281	Rpl13a	60S ribosomal protein L13a	0.16587	-0.169963	0.586538	0.623542	2.72242	0.000104364
Q9CR57	Rpl14	60S ribosomal protein L14	-0.167836	-0.415359	0.240142	0.455207	1.15731	0.0599496
Q6ZWZ7;Q9CPR4;B2RY53	Rpl17	60S ribosomal protein L17	-0.053638	-0.212001	0.41566	0.422673	1.17142	0.0253068
P35980;G3UZK4;G3UZJ6;G3UX28;G3UYV6	Rpl18	60S ribosomal protein L18	0.413986	-0.368327	0.619727	0.88975	0.948317	0.00346166
P62717;F6YJW4	Rpl18a	60S ribosomal protein L18a	-0.004232	0.0188897	0.490484	1.09818	0.688434	0.172204
A2A547;P84099	Rpl19	Ribosomal protein L19;60S ribosomal protein L19	0.037256	0.137527	0.446637	1.45627	2.21876	0.0450146
Q9CQM8;O09167	Rpl21	60S ribosomal protein L21	-1.02426	-0.00195267	0.221439	0.668387	1.90877	0.0625102
P67984	Rpl22	60S ribosomal protein L22	-0.163006	0.630288	0.80507	0.909635	2.21502	0.00152999
P62830;A2A6F8	Rpl23	60S ribosomal protein L23	0.007512	-0.364568	0.525317	1.33469	1.24352	0.00806321
P62751;D3YTY6	Rpl23a	60S ribosomal protein L23a	-0.381386	-0.125932	0.338818	0.351532	1.22238	0.162978
Q8BP67;F6RSK3	Rpl24	60S ribosomal protein L24	0.038648	-0.38356	0.265894	0.582945	0.683425	0.059069
P61255;B1ARA3;B1ARA5	Rpl26	60S ribosomal protein L26	0.082102	-0.25689	1.11469	2.11677	0.896433	0.0066478
P61358;A2A4Q0	Rpl27	60S ribosomal protein L27	-0.11898	-0.288156	0.340667	0.760872	2.00798	0.0087048
P14115	Rpl27a	60S ribosomal protein L27a	-0.32145	0.341671	-0.163295	2.27203	1.31017	0.0229652
P41105;F6Z0X0	Rpl28	60S ribosomal protein L28	-0.05899	-0.367553	0.0821395	0.822113	1.6706	0.0638599
P27659;A0A087WNS0;A0A087WQK0	Rpl3	60S ribosomal protein L3	0.181062	-0.0645663	1.58167	1.89662	3.97041	2.66898e-06
P62889	Rpl30	60S ribosomal protein L30	0.067798	0.139822	-0.662555	0.224945	0.230468	0.89214
P62900;A0A0A6YX26;A0A0A6YXL3	Rpl31	60S ribosomal protein L31	0.120662	0.364115	0.937666	0.27291	2.24076	0.034008
P62911;P17932	Rpl32	60S ribosomal protein L32	0.118498	-0.407004	2.74413	2.50308	2.61909	0.000323566
Q9D1R9;A0A0G2JEY6;A0A0G2JGY8;D3YWC0	Rpl34	60S ribosomal protein L34	0.266146	-0.451579	0.17491	0.88634	1.66327	0.150705
O55142	Rpl35a	60S ribosomal protein L35a	0.122946	-0.228108	0.990141	1.57391	2.20586	0.0614215
Q6ZWZ4;P47964;D3YX71	Rpl36	60S ribosomal protein L36	0.087406	-1.04366	1.0702	1.20743	0.314008	0.111072
Q9JJI8	Rpl38	60S ribosomal protein L38	-0.243746	-0.463066	-0.029162	-0.497715	0.608125	0.598076
Q9D8E6	Rpl4	60S ribosomal protein L4	0.386024	-0.562407	0.815686	1.4856	2.58159	0.000263945
P47911;E9PUX4	Rpl6;Gm5428	60S ribosomal protein L6	0.184954	-0.309644	0.343334	0.807313	1.43564	0.0354408
P14148;F6XI62	Rpl7	60S ribosomal protein L7	-0.050046	-0.166838	0.614244	1.15621	2.44623	6.4258e-05
P12970;F6VBB8;V9GX35;F6SSI5	Rpl7a	60S ribosomal protein L7a	-0.212164	-0.112324	0.313163	0.96627	2.25193	0.000797402
P62918	Rpl8	60S ribosomal protein L8	0.029076	-0.213321	0.0423565	0.49294	1.21947	0.478572
A0A0G2JES3;P51410;D3Z629;A0A0G2JDK9;A0A0G2JFQ3;D3YZT0;S4R1R7	Rpl9	60S ribosomal protein L9	-0.097464	-0.332989	0.163388	0.795265	2.17748	0.0487354
P14869;E9Q070;S4R1N1;D3YVM5	Rplp0;Gm8730	60S acidic ribosomal protein P0	0.31984	-0.011159	0.779156	0.663068	1.26468	0.00378693
P99027	Rplp2	60S acidic ribosomal protein P2	-0.080612	-0.203899	0.257784	0.363655	0.581956	0.16901
Q91YQ5	Rpn1	Dolichyl-diphosphooligosaccharide--protein glycosyltransferase subunit 1	0.013678	-0.180195	1.24532	1.82019	2.21782	0.00713766
A2ACG7;Q9DBG6	Rpn2	Dolichyl-diphosphooligosaccharide--protein glycosyltransferase subunit 2	-0.277242	0.503389	1.42161	1.987	2.23167	0.00415041
J3QMX0	Rpp14		-0.243244	-0.559056	1.43754	2.96463	1.93439	0.000176313
P63325;Q3UW83	Rps10	40S ribosomal protein S10	0.72028	-0.134734	-0.234583	0.779593	1.03205	0.153113
P62301	Rps13	40S ribosomal protein S13	0.161672	-0.52584	0.30453	-1.95139	2.40445	0.0028562
D3YTQ9;P62843	Rps15	40S ribosomal protein S15	1.29233	-1.35323	-0.18767	-0.460823	0.954535	0.0336155
P14131	Rps16	40S ribosomal protein S16	-0.24408	0.08019	0.624234	-0.726208	0.723203	0.806742
Q9CZX8;D3YUT3;D3YUG3;D3Z5R8;D3Z722;S4R223	Rps19	40S ribosomal protein S19	-0.469932	-0.431031	0.305728	1.79166	1.5923	0.0393506
P25444;D3YVC1;D3YWJ3;J3QMG5;F6YTZ4;D3Z536;E9Q1N8	Rps2;Gm5786;Gm6576;Gm8225	40S ribosomal protein S2	0.053878	0.313589	-0.289514	1.14924	2.59516	0.065969
P60867	Rps20	40S ribosomal protein S20	0.435766	-0.610545	-1.18944	-0.22688	2.16403	0.219902
P62908;D3YV43	Rps3	40S ribosomal protein S3	0.27027	-0.00616833	1.07758	-0.898997	2.61589	0.0449201
P97351	Rps3a	40S ribosomal protein S3a	0.075796	0.212918	-0.053343	0.963213	1.77426	0.0395225
P62702;Q3V1Z5;V9GWY0	Rps4x;Rps4l;Gm15013	40S ribosomal protein S4, X isoform;40S ribosomal protein S4	-0.138982	-0.287278	0.0218805	0.173703	2.17349	0.0446048
D3YYM6;Q91V55;P97461	Rps5	40S ribosomal protein S5;40S ribosomal protein S5, N-terminally processed	0.535284	-0.122878	0.427319	1.55509	-0.337448	0.331723
P62242	Rps8	40S ribosomal protein S8	0.165358	-0.320408	0.0212345	0.80208	1.66125	0.178816
Q6ZWN5;F7CJS8;D3YWH9;Q9CXW7;D3Z673;D3YUV6	Rps9	40S ribosomal protein S9	0.491964	0.0884887	-0.315771	0.475285	1.1228	0.224405
Q9CWX4;F6W6X9	Rpusd4	RNA pseudouridylate synthase domain-containing protein 4	0.429612	-0.349176	0.618803	1.04291	1.62313	0.0977186
A2AVJ7;Q99PL5;Q99PL5-4;Q99PL5-3;Q99PL5-2;Q99PL5-8;Q99PL5-7;Q99PL5-6;Q99PL5-5;Q99PL5-10;Q99PL5-9;Q99PL5-11;Q99PL5-12	Rrbp1	Ribosome-binding protein 1	-0.158424	0.153528	0.562268	1.76991	2.02614	0.0195618
Q924D0;D3Z792	Rtn4ip1	Reticulon-4-interacting protein 1, mitochondrial	-0.186462	-0.022175	-0.206562	-0.75831	-1.0134	4.09281e-07
F6U7V1;E9Q401;E9PW34;A2AGL3-2;A2AGL3;K3W4M2;E9PZQ0	Ryr2	Ryanodine receptor 2	0.323998	1.0206	0.791176	-1.59167	0.538778	0.322114
Q8BGH2	Samm50	Sorting and assembly machinery component 50 homolog	-0.03438	0.264102	0.141835	0.130448	0.162061	0.873383
Q99LB7;A2AH52;A2AH53	Sardh	Sarcosine dehydrogenase, mitochondrial	-0.065982	-0.0481973	-0.22381	2.23125	2.54988	0.00191442
Q9JJL8	Sars2	Serine--tRNA ligase, mitochondrial	-0.11465	0.063846	0.144869	0.316558	0.102881	0.0432469
Q8R127;J3QNN5;F6S0R8;F6SP57	Sccpdh	Saccharopine dehydrogenase-like oxidoreductase	0.003726	0.0399473	0.160814	-0.0334275	-0.322797	0.635232
Q5SUD5;Q5SUC9	Sco1	Protein SCO1 homolog, mitochondrial	0.362776	-0.444097	-0.131814	0.437235	0.165776	0.172314
Q8VCL2	Sco2	Protein SCO2 homolog, mitochondrial	-0.017296	0.552255	0.208523	0.61099	0.870461	0.022796
P32020;P32020-2;A2APS4	Scp2	Non-specific lipid-transfer protein	-0.01567	-0.394828	-0.0498235	0.732625	0.588783	0.461388
Q8K2B3	Sdha	Succinate dehydrogenase [ubiquinone] flavoprotein subunit, mitochondrial	0.014434	0.0734587	0.039982	-0.0454575	-0.292208	0.109102
Q3U276	Sdhaf1	Succinate dehydrogenase assembly factor 1, mitochondrial	-0.096278	0.827028	-0.595461	-2.40592	0.03937	0.065969
Q8C6I2;Q8C6I2-3;Q8C6I2-2	Sdhaf2	Succinate dehydrogenase assembly factor 2, mitochondrial	0.110038	-0.433256	0.329684	0.286727	0.157685	0.126973
Q9CQA3	Sdhb	Succinate dehydrogenase [ubiquinone] iron-sulfur subunit, mitochondrial	-0.097396	-0.0474657	0.000241	-0.088605	-0.484151	0.0175901
Q9CZB0;D3Z1A8	Sdhc	Succinate dehydrogenase cytochrome b560 subunit, mitochondrial	-0.19528	0.235696	0.201637	0.163595	-0.00437267	0.964267
Q9CXV1	Sdhd	Succinate dehydrogenase [ubiquinone] cytochrome b small subunit, mitochondrial	-0.810016	0.671149	0.432163	0.480853	0.466309	0.441214
Q63918	Sdpr	Serum deprivation-response protein	-0.002768	0.555325	-1.3679	0.359665	2.98673	0.0356214
Q5M8N4-2;Q5M8N4	Sdr39u1	Epimerase family protein SDR39U1	0.384638	-0.00529333	0.007603	-0.171003	-0.38873	0.286032
Q9CY58-3;Q9CY58-2;Q9CY58;Q9CY58-4	Serbp1	Plasminogen activator inhibitor 1 RNA-binding protein	0.121186	0.23706	0.318198	-0.42413	0.461308	0.593022
Q9EPB5;Q3U3G8;F6TMN2;E9Q8E7	Serhl	Serine hydrolase-like protein	0.059716	0.292884	0.389676	0.4679	0.524265	0.0746704
P19324	Serpinh1	Serpin H1	0.053252	-0.181688	0.637603	0.854195	3.06403	0.000193233
Q91V61-2;Q91V61;Q3U4F0	Sfxn3	Sideroflexin-3	-0.289862	-0.287923	0.779095	2.05498	2.36389	1.67169e-05
Q9CZN7	Shmt2	Serine hydroxymethyltransferase	-0.124662	0.51856	0.917202	1.75266	2.05211	2.76628e-14
Q8R104;Q8R104-2;D3YTK6;D3YVQ5;D3YWD6	Sirt3	NAD-dependent protein deacetylase sirtuin-3	0.157364	0.353683	0.446546	-0.0349775	-0.161017	0.42224
Q8R216	Sirt4	NAD-dependent protein deacetylase sirtuin-4	-0.29325	-0.413845	0.109175	0.385695	0.497049	0.24454
Q8K2C6	Sirt5	NAD-dependent protein deacylase sirtuin-5, mitochondrial	-0.083034	-0.0170517	0.061069	-0.026625	-0.099086	0.930349
Q8JZU2;F6VVY4	Slc25a1		-0.056558	-0.0363033	-0.195941	1.4149	0.801872	0.154668
Q9QZD8	Slc25a10	Mitochondrial dicarboxylate carrier	-0.402712	0.953666	0.763118	0.530375	0.684345	0.0360349
Q9CR62	Slc25a11	Mitochondrial 2-oxoglutarate/malate carrier protein	-0.199044	0.627705	0.141643	-0.031115	-0.510461	0.441108
Q8BH59;V9GXX9	Slc25a12	Calcium-binding mitochondrial carrier protein Aralar1	-0.241748	0.280525	0.0512785	0.14008	-0.108962	0.807897
Q9QXX4;A0A0G2JGT3;A0A0G2JES2	Slc25a13	Calcium-binding mitochondrial carrier protein Aralar2	-0.33143	0.395693	0.0433735	0.06121	-0.219029	0.178816
Q9WVD5	Slc25a15	Mitochondrial ornithine transporter 1	-0.330636	0.563411	0.622413	0.738912	1.23722	0.0858391
D3YVC9;Q8C0K5;Q8C0K5-2	Slc25a16	Graves disease carrier protein homolog	-0.329382	0.4421	0.514468	0.622548	0.759907	0.434146
Q9DAM5;A2A9V7;A2A9V5;A2A9V4	Slc25a19	Mitochondrial thiamine pyrophosphate carrier	-0.024954	0.242249	-0.218098	0.350353	-0.588545	0.875079
Q9Z2Z6	Slc25a20	Mitochondrial carnitine/acylcarnitine carrier protein	-0.171738	0.522739	0.351605	0.198888	-0.216751	0.481233
Q9D6M3;E9PV90;E9PY45;E9Q6M6;Q80X52;E9Q579;V9GWS2;G3UX09;Q9DB41-2;Q9DB41;G3UY41;V9GWV4	Slc25a22	Mitochondrial glutamate carrier 1	-0.03614	0.188142	0.358437	0.651303	0.425195	2.89305e-05
Q8BMD8;A0A0G2JFB9	Slc25a24	Calcium-binding mitochondrial carrier protein SCaMC-1	-0.334556	0.309167	1.02363	1.33561	2.13957	0.00401145
Q8BL03	Slc25a29	Mitochondrial basic amino acids transporter	-0.439956	0.700763	0.093751	0.0321475	-0.193598	0.532022
G5E902;E9PX16	Slc25a3		-0.148006	0.514741	0.152203	0.225013	-0.114639	0.645244
Q3V132	Slc25a31	ADP/ATP translocase 4	0.020114	0.494191	0.271301	0.34372	-0.157548	0.598852
Q8BMG8	Slc25a32	Mitochondrial folate transporter/carrier	0.291314	0.17132	1.00792	0.275717	0.145411	0.612007
A2ADF7;A2ADF7-2	Slc25a34	Solute carrier family 25 member 34	0.011674	0.586714	0.297645	0.353742	0.266411	0.0403642
Q5SWT3;A0A0A0MQ70	Slc25a35	Solute carrier family 25 member 35	-0.343452	1.4502	0.0929075	-0.002515	-0.492906	0.0840881
P48962	Slc25a4	ADP/ATP translocase 1	-0.030118	0.019256	-0.165281	-0.286133	-0.467444	0.0692452
Q8BGP6-2;Q8BGP6;A0A0G2JF69	Slc25a40	Solute carrier family 25 member 40	-0.301168	0.0354033	-0.0201385	0.345487	-0.503348	0.671034
Q8R0Y8	Slc25a42	Mitochondrial coenzyme A transporter SLC25A42	-0.112784	0.352341	0.002022	-0.434987	-1.02358	0.00122335
Q9CQS4	Slc25a46	Solute carrier family 25 member 46	-0.052026	-0.266419	-0.356569	-0.23783	-0.519865	0.0245564
P51881	Slc25a5	ADP/ATP translocase 2;ADP/ATP translocase 2, N-terminally processed	-0.108182	-0.0787853	0.18493	0.478662	0.330705	0.0192682
Q5HZI9;A2AKW0;A2AKV9;G3UYJ3;Q3V0T4	Slc25a51	Solute carrier family 25 member 51	-0.034758	0.623799	0.323885	0.337292	-0.228095	0.382822
Q60714	Slc27a1	Long-chain fatty acid transport protein 1	-0.311752	-0.266214	0.185925	-0.409373	-0.798261	0.294414
F6TRQ3;Q60738	Slc30a1	Zinc transporter 1	0.923384	-1.53095	-0.587937	-2.2637	-0.101467	0.356891
Q5IRJ6;Q5IRJ6-2;F8WHL1	Slc30a9	Zinc transporter 9	-0.108698	0.641936	0.13977	0.3962	0.502725	0.000751366
Q9D8T7;Q9D8T7-2;F8WHU8;F7DE82	Slirp	SRA stem-loop-interacting RNA-binding protein, mitochondrial	0.568708	-3.51749	-4.22891	-6.20985	-6.8571	1.17594e-11
D3Z7V3;H7BX64;Q3URD3;F8WIH0;Q3URD3-2;F6YCM8;Q3URD3-5;F6UV57;D3Z0N1	Slmap	Sarcolemmal membrane-associated protein	0.16329	-0.249562	-0.0407975	0.2695	0.351045	0.111072
Q78RX3	Smim12	Small integral membrane protein 12	0.256628	0.639288	1.06027	1.29834	0.905569	0.193349
D3Z7Q2;D6RCX0	Smim20		-0.160394	0.175099	0.434384	0.391168	-0.0864373	0.422412
Q8C1Q6	Smim4	Small integral membrane protein 4	-0.308786	0.369385	0.301417	0.596273	0.455293	0.00215732
Q9CQQ0	Smim8	Small integral membrane protein 8	0.274548	0.933688	0.518618	0.496017	-0.263137	0.33222
Q9DC77;B1AW13;D6RJ22	Smpx	Small muscular protein	-0.016056	0.473664	0.263356	1.0285	1.10028	0.287822
G5E8R7;P97443-3;P97443-2;P97443;G3UZ94	Smyd1	Histone-lysine N-methyltransferase Smyd1	0.543724	0.483494	-0.656222	0.0830775	1.62091	0.351258
Q78PY7;Q3TJ56	Snd1	Staphylococcal nuclease domain-containing protein 1	0.254142	-0.158363	-0.632084	-0.66871	1.19694	0.44767
P08228	Sod1	Superoxide dismutase [Cu-Zn]	0.00124	-0.110903	0.141137	0.51159	0.472193	0.00775482
P09671	Sod2	Superoxide dismutase [Mn], mitochondrial	-0.182224	0.161144	0.072599	0.245885	-0.216874	0.234214
D3YZN4;D3Z1Z1;Q3ULF4;D3YXB7;D3Z342;F6W695;G3UX97;F6VTG4	Spg7	Paraplegin	-0.051778	0.327892	0.5454	0.466885	0.380827	0.00469399
Q91XH5;G3UXX3;Q64105;G3UZ79	Spr	Sepiapterin reductase	0.030426	-0.177218	-0.487552	-0.81106	-1.05148	1.00908e-08
Q91WK1	Spryd4	SPRY domain-containing protein 4	0.075386	0.771536	0.968514	1.372	1.34924	2.54523e-09
P16546-2;P16546	Sptan1	Spectrin alpha chain, non-erythrocytic 1	0.226432	-1.81816	0.212732	-2.31829	1.43557	0.0283685
Q62261;A0A0A0MQG2;Q62261-2;Q68FG2	Sptbn1	Spectrin beta chain, non-erythrocytic 1	-0.015094	-0.994721	-0.604962	-0.696167	0.184135	0.694585
Q9R112;F6ZKZ3;H3BLH2	Sqrdl	Sulfide:quinone oxidoreductase, mitochondrial	-0.185814	0.0578917	0.234709	-0.142795	-0.960234	0.00144385
Q7TQ48;Q7TQ48-2	Srl	Sarcalumenin	0.16319	-0.0564353	-0.412036	-0.48796	0.887733	0.173396
Q8R2K3;Q9CYR0;D3Z3Y3	Ssbp1	Single-stranded DNA-binding protein;Single-stranded DNA-binding protein, mitochondrial	-0.074866	-0.125758	-0.0974395	0.3006	-0.00611533	0.115948
Q9D8L3;Q62186	Ssr4	Translocon-associated protein subunit delta	0.38537	0.0721957	1.11909	0.53776	0.0365667	0.245965
Q8R1R3;F7BBA2;Q8BXP7	Stard7	StAR-related lipid transfer protein 7, mitochondrial	-0.751276	0.553266	0.741768	-1.33648	-1.51556	0.0563498
Q99JB2;A2AG39;F6WI02;A2AG41	Stoml2	Stomatin-like protein 2, mitochondrial	-0.261464	0.578262	1.03167	1.65102	1.78188	8.13327e-14
Q9Z2I9	Sucla2	Succinyl-CoA ligase [ADP-forming] subunit beta, mitochondrial	-0.025282	0.170893	0.004793	0.0065775	-0.223035	0.473627
Q9WUM5	Suclg1	Succinyl-CoA ligase [ADP/GDP-forming] subunit alpha, mitochondrial	-0.177736	-0.0217703	-0.043307	-0.122677	-0.346791	0.0747537
Q9Z2I8	Suclg2	Succinyl-CoA ligase [GDP-forming] subunit beta, mitochondrial	-0.082356	0.0488827	0.242671	0.719585	0.760397	1.28793e-08
Q8R086	Suox	Sulfite oxidase, mitochondrial	0.056216	-0.318098	-0.20322	-0.281867	-0.352232	0.00673505
Q80YD1;M0QWM4	Supv3l1	ATP-dependent RNA helicase SUPV3L1, mitochondrial	-0.094516	-0.00537267	0.0818095	0.14837	-0.228933	0.670347
A0A0A6YVR9;P09925;V9GXE6;A0A0A6YVY3	Surf1	Surfeit locus protein 1	-0.082284	0.337802	0.480526	0.847422	0.659993	5.27696e-07
Q8K0Z7	Taco1	Translational activator of cytochrome c oxidase 1	-0.017436	-0.171517	0.09075	0.234615	-0.016578	0.41244
P37804	Tagln	Transgelin	0.130462	-0.526586	-0.267647	-0.495873	2.25004	0.17834
Q9WVA4;A0A0A6YXG6	Tagln2	Transgelin-2	-0.098386	-0.380438	-0.0875425	-1.11184	2.11104	0.00593156
G5E881;Q3TUH1;G3UWL8;G3UYJ1;Q3TUH1-2;D6RGT1	Tamm41	Phosphatidate cytidylyltransferase, mitochondrial	-0.084052	0.527404	0.424947	0.66216	0.582713	0.00165821
Q3UQ84;Q922A3;E9Q7H6;Q3TP97;A0A0G2JGW2;A0A0G2JF63;A0A0G2JFR0;A0A0G2JFW1;A0A0G2JFT3;A0A0G2JGZ2;A0A0G2JF59	Tars2	Threonine--tRNA ligase, mitochondrial	-0.077452	0.107463	0.181636	0.51958	0.631003	0.000677709
Q91WF0;I7HJS2;J3JS92;H3BJJ8;B7FAU2;H3BKZ8;Q810E8;F6TQ32;H3BK99	Taz		0.226934	0.167968	-0.445588	0.01511	-0.321265	0.81934
Q91YM4;Q91YM4-2;E9PUT1;Q5SWP1;Q5SWP0	Tbrg4	Protein TBRG4	-0.238842	-0.57158	-0.609394	-0.76056	-0.768991	0.143149
G3X983;Q66JZ4;D6RHM0	Tcaim;TCAIM	T-cell activation inhibitor, mitochondrial	0.220858	0.309713	0.227072	0.179193	-0.193001	0.245965
Q5SSK3;B7ZCA9;F7CPB7	Tefm	Transcription elongation factor, mitochondrial	-0.067696	0.247082	0.159313	0.395967	0.274025	0.0670069
Q921I1;D3YYR8	Tf	Serotransferrin	-0.049888	-1.60378	0.256411	0.0491475	1.97537	0.257209
P40630-2;P40630;D3Z0F3	Tfam	Transcription factor A, mitochondrial	-0.016564	-0.0887007	-0.243124	-0.193785	-0.272235	0.237453
Q8JZM0	Tfb1m	Dimethyladenosine transferase 1, mitochondrial	-0.021944	0.575042	1.01922	1.78405	2.24083	6.11024e-12
Q6XPS7	Tha1		-0.101794	0.073331	-0.104948	-0.218362	-0.409359	0.0599496
Q3UUI3	Them4	Acyl-coenzyme A thioesterase THEM4	-0.08399	-0.167196	-0.0018905	0.421492	0.638837	0.120506
Q8BH55;A2AUG7;A2AUG6	Thnsl1	Threonine synthase-like 1	0.019038	0.113781	-0.236659	-0.0239925	-0.385222	0.161027
P62073	Timm10	Mitochondrial import inner membrane translocase subunit Tim10	-0.029758	-0.103662	-0.078637	0.3466	0.631548	0.0656682
Q9WV96;D3YVK5;D3YVK4;D6RG99;D3YVK6;D6RJ48	Timm10b	Mitochondrial import inner membrane translocase subunit Tim10 B	-0.389648	0.292663	0.0368565	0.663522	0.196619	0.00909824
P62075	Timm13	Mitochondrial import inner membrane translocase subunit Tim13	-0.078202	-0.185485	0.123488	0.260037	0.366058	0.164026
Q9Z0V8;D3Z1K5;D3Z1Z0	Timm17a	Mitochondrial import inner membrane translocase subunit Tim17-A	0.185116	-0.642349	1.98009	2.02616	1.65543	0.0246708
Q9Z0V7;A2AES1	Timm17b	Mitochondrial import inner membrane translocase subunit Tim17-B	0.147704	0.173188	0.0992725	0.104818	0.385221	0.361245
Q8CCM6-2;Q8CCM6-3;Q8CCM6	Timm21	Mitochondrial import inner membrane translocase subunit Tim21	0.032846	0.0295493	0.14194	0.229058	0.0513447	0.888314
Q9CXU4;Q9WTQ8;E9Q3T4;E9PVF9	Timm23	Mitochondrial import inner membrane translocase subunit Tim23	0.08921	0.303412	0.350479	0.20059	0.35117	0.482149
O35857;F7C189	Timm44	Mitochondrial import inner membrane translocase subunit TIM44	-0.110414	0.322053	0.359592	0.434292	0.449889	1.44774e-05
Q9D880	Timm50	Mitochondrial import inner membrane translocase subunit TIM50	-0.23379	0.121709	0.105475	0.50599	0.356481	0.0177977
Q9WVA2;Q4FZG7	Timm8a1	Mitochondrial import inner membrane translocase subunit Tim8 A	-0.073688	-0.204297	0.161542	0.24915	1.56634	0.358841
P62077	Timm8b	Mitochondrial import inner membrane translocase subunit Tim8 B	-0.16606	-0.076937	0.0758595	0.10764	-0.079384	0.799412
Q9WV98	Timm9	Mitochondrial import inner membrane translocase subunit Tim9	-0.221172	-0.154522	0.28169	0.552792	0.033478	0.138947
Q8BUY5	Timmdc1	Complex I assembly factor TIMMDC1, mitochondrial	-0.432138	1.25332	0.312006	0.45267	0.0159153	0.0118994
P26039;A2AIM2;F6SX70;F6S1V7	Tln1	Talin-1	-0.286	0.768857	-0.882358	-0.236715	2.65204	0.0632044
Q9D1D4;Q9D1D4-2	Tmed10	Transmembrane emp24 domain-containing protein 10	0.147814	-0.100368	0.0410285	0.909913	1.11712	0.453882
Q99KF1	Tmed9	Transmembrane emp24 domain-containing protein 9	-0.292624	0.287967	0.428044	0.17199	0.534774	0.651487
E9Q933;Q8BK08;Z4YN74	Tmem11	Transmembrane protein 11, mitochondrial	0.053724	0.697543	0.494996	0.52157	1.1126	0.167854
Q9D8Y1;D6RG44	Tmem126a	Transmembrane protein 126A	-0.19574	0.713703	0.36503	0.76496	0.391798	0.00191442
Q9D1R1	Tmem126b	Complex I assembly factor TMEM126B, mitochondrial	-0.213396	0.654496	1.65428	1.97079	1.68568	0.00774712
F8WGV9;A2AJB2	Tmem141	Transmembrane protein 141	-0.233046	-0.094865	1.51464	-1.34599	-2.05108	0.224405
G3X9F4;Q8VD26-2;Q8VD26;F6ZAS5;S4R1U1;Q8VD26-3	Tmem143	Transmembrane protein 143	-0.08942	0.701866	0.117503	0.121313	-0.641885	0.192972
Q9CQN6	Tmem14c	Transmembrane protein 14C	-1.62158	1.37072	1.10661	2.08897	-0.130028	0.00660851
Q9D938	Tmem160	Transmembrane protein 160	0.024288	1.17289	0.186189	0.458995	0.207827	0.00274568
Q8BPE4	Tmem177	Transmembrane protein 177	0.245408	0.503881	-0.03361	0.20001	-0.11341	0.0436692
Q9CR76	Tmem186	Transmembrane protein 186	0.11726	1.0054	0.779355	0.259227	0.115793	0.677481
Q9CQE2	Tmem223	Transmembrane protein 223	-0.367824	-0.369892	0.59309	0.299445	0.346087	0.860286
Q5F285	Tmem256	Transmembrane protein 256	-1.90798	0.187491	0.227341	0.439063	0.075964	0.292181
Q9CQ00	Tmem261	Transmembrane protein 261	0.757154	2.6699	-0.508612	-0.0974925	-1.74408	0.00730281
Q3TMP8	Tmem38a	Trimeric intracellular cation channel type A	0.15356	-0.561631	0.094661	-0.45794	0.233589	0.827084
Q4VAE3	Tmem65	Transmembrane protein 65	0.273198	0.552494	0.004069	-0.31659	-0.437554	0.0134229
Q921N7	Tmem70	Transmembrane protein 70, mitochondrial	-1.01407	1.34393	2.13845	0.665112	-0.19025	0.335432
Q91ZE0	Tmlhe	Trimethyllysine dioxygenase, mitochondrial	0.038182	-0.152692	0.18623	-0.157825	-0.334927	0.455394
G5E8C4;Q8BRH0;Q8BRH0-2	Tmtc3	Transmembrane and TPR repeat-containing protein 3	1.0273	0.331302	0.09311	-3.24405	-1.64742	0.361232
P19123;E9Q8P0	Tnnc1	Troponin C, slow skeletal and cardiac muscles	0.280912	-0.67676	-1.92159	-1.43975	0.299521	0.118162
P48787;D3YXP5;D3Z160	Tnni3	Troponin I, cardiac muscle	0.346686	-0.237548	-1.09007	-1.16394	1.1724	0.0432133
K3W4R6;K3W4R7;Q6P3Z7;J3QQ13;P50752-2;P50752-3;P50752-4;P50752;A0A087WRX3;A0A087WQP1;E9PVN9;E9PZB4;E9Q0G9;E9QA86;E9Q688;J3QPC8;O88346-3;O88346-2;O88346	Tnnt2	Troponin T, cardiac muscle	0.300662	0.0381787	-0.810696	-0.97076	0.996962	0.0587706
Q9DCC8	Tomm20	Mitochondrial import receptor subunit TOM20 homolog	0.017656	-0.833201	0.574318	0.722468	0.305386	0.00881094
Q9CPQ3	Tomm22	Mitochondrial import receptor subunit TOM22 homolog	0.06356	1.01699	0.440161	0.451992	0.167514	0.0819041
Q9QYA2;G3UY77	Tomm40	Mitochondrial import receptor subunit TOM40 homolog	-0.012086	0.243458	0.431901	0.595297	0.499547	0.0449126
Q9CZR3;D3YXS8;M0QWR6;D3Z346;D3YY29	Tomm40l	Mitochondrial import receptor subunit TOM40B	0.105852	0.355459	1.50827	0.395455	0.216638	0.319154
B1AXP6;B1AXP6-2;B1AXP6-3;B1AXP6-4	Tomm5	Mitochondrial import receptor subunit TOM5 homolog	-0.00397	0.11563	-0.00747	0.237602	-0.052958	0.819062
Q9CQN3	Tomm6	Mitochondrial import receptor subunit TOM6 homolog	1.03688	0.168146	0.0127075	0.24508	-1.05419	0.241543
Q9D173	Tomm7	Mitochondrial import receptor subunit TOM7 homolog	-2.2676	0.391049	0.219139	0.686377	2.45951	0.17537
Q9CZW5	Tomm70a	Mitochondrial import receptor subunit TOM70	-0.02078	-0.0215187	0.364909	0.597117	0.512418	1.38686e-06
P17751;H7BXC3	Tpi1	Triosephosphate isomerase	0.04916	-0.177278	0.037619	0.13042	0.230065	0.509828
P58771;Q8BSH3;E9Q452;E9Q454;P58771-2;Q8BP43;E9Q450;S4R2U0;E9Q456	Tpm1	Tropomyosin alpha-1 chain	0.220916	0.0544957	-1.05796	-1.21456	1.20943	0.0894392
P63028;D3YU75	Tpt1	Translationally-controlled tumor protein	-0.49911	0.215805	0.005904	-0.2415	0.957312	0.52552
E9Q8R5;Q99JY4;E9Q7A5	Trabd	TraB domain-containing protein	0.112066	0.415968	-0.270532	0.948178	0.512187	0.302382
Q6PD31;Q6PD31-2;G3UYW9;Q6P9N8	Trak1	Trafficking kinesin-binding protein 1	-0.030394	-0.291311	-0.130005	-1.30554	-0.902823	0.00249585
Q9CQN1	Trap1	Heat shock protein 75 kDa, mitochondrial	-0.028772	0.312438	0.413175	0.74561	0.689086	1.08999e-07
Q9D8Z2	Triap1	TP53-regulated inhibitor of apoptosis 1	-0.34679	-0.041978	-0.781569	1.52212	-0.0625793	0.126681
Q1XH17	Trim72	Tripartite motif-containing protein 72	0.345406	-0.187016	0.233417	0.00946	1.50406	0.0239823
Q3UFY8	Trmt10c	Mitochondrial ribonuclease P protein 1	-0.134194	0.510269	0.317282	0.495247	0.247544	0.0096945
Q9DAT5;E0CZ49;F7CCK8;F7CNH0	Trmu	Mitochondrial tRNA-specific 2-thiouridylase 1	-0.119138	0.271503	0.352737	0.590575	0.277077	0.388104
Q8K1J6;Q8K1J6-2	Trnt1	CCA tRNA nucleotidyltransferase 1, mitochondrial	-0.212346	0.463655	0.661262	1.46032	1.92452	6.11024e-12
Q91WG3;H3BKT7;A2ARC1;H3BLS1	Trub2	Probable tRNA pseudouridine synthase 2	0.396668	-0.13485	2.62117	-0.932647	0.801747	0.593523
Q792Z1	Try10		0.182978	0.170617	-1.11336	0.57842	-0.665923	0.475801
Q9CZR8;Q9CX33;D3Z4M7	Tsfm	Elongation factor Ts, mitochondrial	0.035184	0.224774	0.093567	0.129078	0.06741	0.159402
P50637	Tspo	Translocator protein	-0.664202	0.761143	0.576472	1.48727	2.83159	0.0360435
P52196	Tst	Thiosulfate sulfurtransferase	-0.377362	0.236412	-0.0669355	-0.252488	-0.413431	0.0238046
Q9D0B5	Tstd3	Thiosulfate sulfurtransferase/rhodanese-like domain-containing protein 3	-0.029082	-0.26382	0.349568	0.844223	0.477098	0.0110673
Q8CC21;Q8CC21-2;F7BCD5	Ttc19	Tetratricopeptide repeat protein 19, mitochondrial	-0.01125	0.533803	0.29469	0.15666	0.191097	0.795793
A2ASS6;A2ASS6-2;E9Q8K5;E9Q8N1;F7CR78;Q8BUJ6;A2AT64;A2AT67;A2AT66;A2AT65;A2AT68;F6RSJ3	Ttn	Titin	0.380144	-0.613803	-0.855845	-2.6536	2.52823	0.359589
P05213	Tuba1b	Tubulin alpha-1B chain	-0.202132	0.414877	0.246578	0.39378	2.72033	0.0124951
A0A0A0MQA5;P68368;A0A087WQS4;A0A087WRB4;A0A087WSB0;A0A087WSL5;A0A087WS35	Tuba4a	Tubulin alpha-4A chain	0.032338	0.663546	0.154475	-0.42332	1.13422	0.172204
Q7TMM9;Q9CWF2;G3UZR1	Tubb2a;Tubb2b	Tubulin beta-2A chain;Tubulin beta-2B chain	0.187224	0.397043	-0.172833	0.21832	1.21029	0.529162
P68372;Q9D6F9	Tubb4b;Tubb4a	Tubulin beta-4B chain;Tubulin beta-4A chain	0.020394	-0.123591	-0.0037895	-0.0185	1.90857	0.000176878
P99024	Tubb5	Tubulin beta-5 chain	-0.075036	-0.412878	0.457676	-1.18686	0.958685	0.206924
Q8BFR5;D3YVN7;Q8BFR5-2	Tufm;Gm9755	Elongation factor Tu, mitochondrial;Elongation factor Tu	0.036044	-0.0955013	-0.135034	-0.0842325	-0.165439	0.206175
P10639	Txn	Thioredoxin	0.153466	0.144738	-0.197254	0.576	2.39443	0.125365
G3UZY2;P97493;G3UX99;A2A439;G3UX46	Txn2	Thioredoxin, mitochondrial	0.097762	-0.306974	-0.117678	-0.0489675	-0.320876	0.178646
J3QMN4;D3Z0K8;J3QMQ8;Q9JLT4-2;Q9JLT4-4;Q9JLT4;Q9JLT4-3;Q9JMH6-2;Q9JMH6	Txnrd2	Thioredoxin reductase 2, mitochondrial	-0.143568	0.261804	-0.016461	0.287385	0.347215	0.00216023
P12242	Ucp1	Mitochondrial brown fat uncoupling protein 1	0.750486	-0.547173	-1.946	1.14419	-1.07843	0.71644
P56501;D3YXM5	Ucp3	Mitochondrial uncoupling protein 3	-0.1196	0.442913	0.396515	0.387675	0.269031	0.423699
Q91ZJ5-2;Q91ZJ5	Ugp2	UTP--glucose-1-phosphate uridylyltransferase	-0.441414	-0.0477153	0.32263	-0.422233	2.38826	0.0211701
Q8BTC1;V9GX89	Uncharacterized protein C12orf73 homolog	Uncharacterized protein C12orf73 homolog	-0.661642	0.916912	0.52768	0.286777	0.502777	0.235985
Q8BGX2	Uncharacterized protein C19orf52 homolog	Uncharacterized protein C19orf52 homolog	0.129846	-0.0033	-0.079824	0.765968	0.68407	5.8463e-06
Q8BHE8	Uncharacterized protein C2orf47 homolog, mitochondrial	Uncharacterized protein C2orf47 homolog, mitochondrial	0.162368	-0.178971	0.362407	0.57192	0.482481	0.00465908
Q8C1A9;Q8C1A9-3;Q8C1A9-2;E0CXW1;E9PWH0;E0CXU9	Uncharacterized protein C4orf29 homolog	Uncharacterized protein C4orf29 homolog	-0.415962	0.032305	0.935877	1.12837	-0.967296	0.249473
Q8BTE0	UPF0369 protein C6orf57 homolog	UPF0369 protein C6orf57 homolog	-0.729578	0.820746	0.0823955	0.093705	-0.0504793	0.378698
Q9CR13	UPF0562 protein C7orf55 homolog	UPF0562 protein C7orf55 homolog	0.052002	0.0387987	0.308579	0.176288	0.378351	0.344319
Q8VE95	UPF0598 protein C8orf82 homolog	UPF0598 protein C8orf82 homolog	0.014598	-0.15739	0.0795795	0.535612	0.48304	0.000289151
Q8K2T4	UPF0723 protein C11orf83 homolog	UPF0723 protein C11orf83 homolog	-0.44996	0.378701	0.202942	1.01004	0.258387	0.820913
Q9CWU6;A6PWX7;F6V305;A6PWX8;A6PWX9;A6PWX5;Q9CWU6-2;D6RJ23;D6RJ83	Uqcc1	Ubiquinol-cytochrome-c reductase complex assembly factor 1	-0.345888	1.04255	0.758344	0.738597	0.804917	0.0227123
Q9CQY6;D3Z4C9;D3Z4D6	Uqcc2	Ubiquinol-cytochrome-c reductase complex assembly factor 2	-0.145952	0.285977	0.430293	0.598515	0.460429	0.000440013
Q8R1I1	Uqcr10	Cytochrome b-c1 complex subunit 9	-0.034112	0.0707567	0.206778	0.0765725	0.0572	0.908814
Q9CPX8	Uqcr11	Cytochrome b-c1 complex subunit 10	-0.190046	0.165347	-0.39696	0.381992	-0.273479	0.697613
Q9CQB4;Q9D855	Uqcrb	Cytochrome b-c1 complex subunit 7	0.14597	-0.178982	-0.191383	-0.347007	-0.561835	0.063766
Q9CZ13;A0A0A6YW82;A0A0A6YWX6;A0A0A6YVZ0	Uqcrc1	Cytochrome b-c1 complex subunit 1, mitochondrial	0.076914	-0.054644	-0.024667	-0.0204525	-0.168502	0.55014
Q9DB77	Uqcrc2	Cytochrome b-c1 complex subunit 2, mitochondrial	-0.075164	0.0616183	0.000493	-0.05101	-0.183833	0.380875
Q9CR68	Uqcrfs1	Cytochrome b-c1 complex subunit Rieske, mitochondrial;Cytochrome b-c1 complex subunit 11	-0.08397	0.086946	-0.0139365	-0.071175	-0.259453	0.116952
P99028;Q9D2Q7	Uqcrh	Cytochrome b-c1 complex subunit 6, mitochondrial	-0.189168	-0.40589	-0.0535595	-0.248453	-0.274653	0.042506
Q9CQ69;I7HPX6	Uqcrq	Cytochrome b-c1 complex subunit 8	0.261432	0.121152	0.034966	-0.308405	-0.763827	0.000784852
Q78IK2	Usmg5	Up-regulated during skeletal muscle growth protein 5	-0.195652	-0.366869	-0.456633	-0.85185	-1.75088	0.000619473
A0A0G2JDF7;Q3UN04	Usp30	Ubiquitin carboxyl-terminal hydrolase 30	0.077582	-0.158125	-0.963705	1.37162	-0.00981533	0.110366
Q9WV55	Vapa	Vesicle-associated membrane protein-associated protein A	-0.294412	0.452453	0.656632	1.18198	2.75281	0.0189471
Q8BH80;Q9QY76	Vapb	Vesicle-associated membrane protein-associated protein B	0.32676	-0.220337	0.87792	1.3256	1.75147	0.0886344
Q3U2A8;F6YJY2;F7A8L1;F6Z939	Vars2	Valine--tRNA ligase, mitochondrial	-0.175802	0.330755	0.149389	0.242293	0.117295	0.124842
Q64727	Vcl	Vinculin	0.144372	-0.320628	0.137412	-0.99406	2.69381	0.228212
Q01853	Vcp	Transitional endoplasmic reticulum ATPase	-0.10726	0.961295	2.04128	3.96457	3.10718	4.8554e-07
Q60932-2;Q60932;F2Z471	Vdac1	Voltage-dependent anion-selective channel protein 1	-0.083366	-0.0994463	0.107837	0.09844	-0.0242647	0.398867
Q60930;D3YZT5;D3YUN8	Vdac2	Voltage-dependent anion-selective channel protein 2	-0.193426	0.170005	0.226129	0.223895	0.472653	0.245014
Q60931;J3QMG3	Vdac3	Voltage-dependent anion-selective channel protein 3	-0.07577	0.24755	0.420106	0.452672	0.486299	0.086895
P20152;A0A0A6YWC8;A2AKJ2;G5E846;G3X981;P15331-3;P15331;P15331-2;P03995-2;P03995	Vim	Vimentin	0.063606	-0.571949	-0.284236	-0.645487	1.62768	0.0387728
Q8CC88;Q8CC88-3	Vwa8	von Willebrand factor A domain-containing protein 8	-0.051792	0.230849	0.128651	0.162572	-0.0151153	0.287822
Q9CYK1;A0A0G2JDR5;Q8BZQ9;A0A0G2JDG7	Wars2	Tryptophan--tRNA ligase, mitochondrial	-0.231398	0.468745	0.515876	0.491335	0.584404	0.0599496
B7ZMP1;B7ZMP1-2;E9Q1R1	Xpnpep3	Probable Xaa-Pro aminopeptidase 3	-0.249682	-0.0325623	0.0156845	0.29526	0.336498	0.026675
Q8BYL4;E9PX65;F7BWC1	Yars2	Tyrosine--tRNA ligase, mitochondrial	-0.091468	0.346161	0.576937	1.2602	0.952281	1.85315e-10
O88967	Yme1l1	ATP-dependent zinc metalloprotease YME1L1	-0.15955	0.673764	0.59814	0.751313	0.485139	2.3492e-07
P61982;O70456	Ywhag	14-3-3 protein gamma;14-3-3 protein gamma, N-terminally processed	-0.1888	-0.262057	0.863462	0.398342	2.84239	0.46129
P63101;D3YXN6;D3YXF4;D3YW45	Ywhaz	14-3-3 protein zeta/delta	0.047158	-0.310721	0.17203	0.590317	2.17219	0.0215544
Q8BGC4	Zadh2	Zinc-binding alcohol dehydrogenase domain-containing protein 2	-0.16105	0.089663	0.079255	0.0536625	0.0220847	0.869461
P10751	Zfp11	Zinc finger protein 11	0.546744	-1.395	-0.254327	-1.59645	-1.32285	0.00666712
A0A0A6YXD3			0.618198	-2.05065	-1.46	-0.120875	-1.79507	0.0670069
A0A087WQH8			0.825466	-0.045997	-0.0105535	0.391933	1.26361	0.111072
