# Supplementary material for: Transcriptomic and proteomic landscape of mitochondrial dysfunction reveals secondary coenzyme Q deficiency in mammals
Source: eLife. 2017 Nov 14;6:e30952. doi: 10.7554/eLife.30952 (PMC5703644; doi:10.7554/eLife.30952)
Supplement: Supplementary file 3. [file elife-30952-supp3.xlsx]

## Sheet: Description tab content
Analysis of mitoproteomic data from hearts at different ages of control mouse strains (L/L) - Kühl et al.
This spreadsheet contains tabs with following datasets:
A_ N biological replicates: number of biological replicates per time point
B_ DE analysis of controls: Differential expression (DE) analysis of proteomics data from control mice at different ages (compared to 3 week old controls)
C_Z-score and clustering: Z-score normalized DE analysis and clustering analysis of control mice at different ages (compared to 3 week old controls)
Below are descriptions for the columns presented in this spreadsheet
Protein IDs: Uniprot accession number
Gene names: Based on MaxQuant proteinGroups.txt file
Protein names: Based on MaxQuant proteinGroups.txt file
logFC: Log2 fold-change of L/L, cre / L/L per mouse strain
padj: Benjamini-Hochberg corrected p value of anova F-test
Cluster: Based on hierarchical clustering analysis presented in Figure 2
Manual category.annotation: Manually assigned functional category

## Sheet: A_N biological replicates
Age [weeks]	L/L
3	6
4	4
8	1
9	2
12	5
14	4
18	1
19	1
23	2

## Sheet: B_DE analysis controls
Protein IDs	Gene names	Protein names	logFC_4weeks	logFC_8weeks	logFC_9weeks	logFC_12weeks	logFC_14weeks	logFC_18weeks	logFC_19weeks	logFC_23weeks	padj	Cluster	Manual category.annotation
A0A087WQY7;A2AMZ4		Uncharacterized protein C17orf89 homolog	1.53	-1.06	-0.35	1.85	1.88	1.1	-0.29	-0.08	6.43657e-05	2	OXPHOS assembly and biogenesis
A0A087WRE7;Q8R0N6;Q8R0N6-2	Adhfe1	Hydroxyacid-oxoacid transhydrogenase, mitochondrial	-0.25	-0.24	-0.23	-0.72	-0.8	-0.92	-0.89	-0.67	1.28286e-05	4	Other
A0A0A0MQ68;Q60759;D3Z4I2	Gcdh	Glutaryl-CoA dehydrogenase, mitochondrial	-0.36	0.27	0.29	0.14	-0.01	-0.09	0.15	0.4	0.0196801	1	Pyruvate and aminoacid metabolism
A0A0A0MQ70;Q5SWT3	Slc25a35	Solute carrier family 25 member 35	-0.98	1.68	1.31	0.81	0.22	0.04	0.02	0.18	0.0042672	1	Mitochondrial carriers or transport
A0A0G2JGJ1;Q8BVI4;D3YWR7;A0A0G2JGY0;D3Z1A1;D3Z099	Qdpr	Dihydropteridine reductase	-0.44	0.31	0.29	-0.09	-0.28	0.24	0.02	0.22	0.0325501	1	Other
A2ADF7;A2ADF7-2	Slc25a34	Solute carrier family 25 member 34	1.42	1.01	0.41	1.86	1.68	1.35	-0.89	0.15	0.00339599	4	Mitochondrial carriers or transport
A2AIL4	Ndufaf6	NADH dehydrogenase (ubiquinone) complex I, assembly factor 6	-0.44	-0.6	-0.54	-0.65	-0.73	-0.99	-0.88	-0.51	0.000516772	3	OXPHOS assembly and biogenesis
A2AKU9	Atp5c1	ATP synthase subunit gamma	-0.03	-0.21	-0.12	0.25	0.39	-0.03	-0.14	-0.14	0.0231006	2	Other
A2AQ17;Q9CWX2	Ndufaf1	Complex I intermediate-associated protein 30, mitochondrial	-0.16	-0.38	-0.31	-0.52	-0.62	-0.91	-0.53	-0.52	0.00042136	4	OXPHOS assembly and biogenesis
B1AWZ5;Q9CQE1	Nipsnap3b	Protein NipSnap homolog 3B	0.3	-0.8	-1.02	-1.09	-0.5	-1.94	-0.55	-1.25	0.000133412	4	Unknown
B1AXP6-2;B1AXP6;B1AXP6-3;B1AXP6-4	Tomm5	Mitochondrial import receptor subunit TOM5 homolog	0.07	-1.59	-1.23	0.19	-0.01	-0.51	-0.75	-1.27	0.000120557	2	Mitochondrial import and chaperones
B1B1D8;Q9D773;B1B1D7	Mrpl2	39S ribosomal protein L2, mitochondrial	-0.26	-0.66	-0.66	-0.97	-0.84	-0.59	-0.69	-0.76	0.000395593	4	Mitochondrial ribosome
B7ZMP1;B7ZMP1-2;E9Q1R1	Xpnpep3	Probable Xaa-Pro aminopeptidase 3	-0.39	-0.14	-0.16	-0.85	-1.21	-0.79	-0.74	-0.39	0.000781378	3	Pyruvate and aminoacid metabolism
D3Z7C0;Q9Z2Q5	Mrpl40	39S ribosomal protein L40, mitochondrial	0.13	-0.92	-0.79	-0.81	-0.86	-0.76	-0.7	-1.02	3.28785e-05	4	Mitochondrial ribosome
D3Z7P3-2;F6U529;F6RDM4;Q571F8	Gls	Glutaminase kidney isoform, mitochondrial	-0.44	-1.86	-0.74	-0.41	-0.97	-0.35	-0.31	-0.54	0.00626083	2	Pyruvate and aminoacid metabolism
D3Z7P3;D3Z7P4;F7B327	Gls	Glutaminase kidney isoform, mitochondrial	-0.11	-0.18	-0.26	-0.5	-0.67	-0.61	-0.59	-0.62	0.000263982	4	Pyruvate and aminoacid metabolism
D3Z7X0;D3Z2B3;F6RGT6	Acad12		-0.31	1.24	1.19	1.05	1	1.18	1.15	1.45	1.4733e-06	1	Lipid and acetyl CoA metabolism
E0CYB9;Q6PCP5;Q6PCP5-3;F7CTF8;E0CYI3;Q6PCP5-4;F7BC60	Mff	Mitochondrial fission factor	0.18	-0.45	-0.44	-0.56	-0.14	-0.32	-0.24	-0.23	0.017843	4	Mitochondrial morphology
E9PV44;O35143	Atpif1	ATPase inhibitor, mitochondrial	0.6	-0.73	-0.78	0.13	0.69	0.01	-0.13	-0.27	0.0110121	2	Other
E9PZS8;Q61387;F7B257	Cox7a2l	Cytochrome c oxidase subunit 7A-related protein, mitochondrial	-0.39	-0.2	-0.02	-0.88	-1.36	-0.77	-0.57	-0.4	1.91051e-05	3	OXPHOS assembly and biogenesis
E9Q179;Q8C5Q4;D3YUN1;D3YV30	Grsf1	G-rich sequence factor 1	-0.15	-0.1	-0.05	-0.59	-0.57	-0.36	-0.78	-0.36	0.000455817	3	Mitochondrial transcription and mtRNA metabolism
E9Q3H6	Coq10a		-0.51	0.69	0.7	0.58	0.43	0.53	0.76	1.02	3.965e-06	1	Ubiquinone biosynthesis
E9Q4A5;Q3TL26	Gm1818;Tfb2m	Dimethyladenosine transferase 2, mitochondrial	-3.28	0.32	-0.15	-4.2	-3.37	0.13	-0.36	0.04	0.0106191	1	Mitochondrial transcription and mtRNA metabolism
E9QJS0;G5E8U8;G5E8U5;Q80ZK0;D3Z6K5	Mrps10	28S ribosomal protein S10, mitochondrial	0.24	-0.3	-0.17	-1.12	-0.91	-1.29	-0.49	-0.95	0.00550007	4	Mitochondrial ribosome
E9QMK9;Q8BH86;Q8BH86-2;F7CUW7	9030617O03Rik	UPF0317 protein C14orf159 homolog, mitochondrial	-0.22	0.89	0.92	0.61	0.65	0.5	0.69	0.79	1.63523e-05	1	Unknown
E9QN44;Q8CIM3;A0A087WR78	D2hgdh	D-2-hydroxyglutarate dehydrogenase, mitochondrial	0.57	-1.27	0.52	0.56	0.79	7.07	5.39	7.77	2.36855e-05	5	Pyruvate and aminoacid metabolism
E9QPQ8;Q8JZS9;D3Z6C8	Mrpl48	39S ribosomal protein L48, mitochondrial	0.11	-1.49	-0.86	-0.39	-0.61	-1.95	-1.43	-0.98	6.43657e-05	4	Mitochondrial ribosome
G3X9M0;Q9ER88;Q9ER88-2;G3UWZ6;G3UWJ4;G3UZC0;G3UWM7;G3UWR5;G3UYM6	Dap3	28S ribosomal protein S29, mitochondrial	-0.18	-0.66	-0.57	-0.74	-0.97	-0.94	-0.8	-0.75	1.91051e-05	4	Mitochondrial ribosome
G5E895;D3Z494;S4R2G9;P45377	Akr1b10		-0.46	0.32	0.31	-0.08	-0.27	-0.42	-0.16	0.22	0.0305605	1	Other
G5E8R3;E9QPD7;Q05920	Pcx;Pc	Pyruvate carboxylase;Pyruvate carboxylase, mitochondrial	-0.31	2.02	1.68	0.97	1.22	1.11	1.1	1.48	4.7249e-05	1	Pyruvate and aminoacid metabolism
G5E8T9;Q99KB8;E9PYA3;Q99KB8-2;E9Q2H8;D3YWI0;D3YUX8;D3YV58	Hagh	Hydroxyacylglutathione hydrolase, mitochondrial	-0.12	-0.79	-0.62	-0.78	-0.78	-1.08	-1.4	-1.13	0.000130976	4	Degradation and stress response
H7BX88;P47934;B7ZDD7;F7BF80;A2AWJ5;B7ZDD8;A2AWE5	Crat	Carnitine O-acetyltransferase	-0.26	0.3	0.41	0.11	-0.03	-0.33	-0.12	0.27	0.0113796	1	Lipid and acetyl CoA metabolism
J3QMM7;K3W4M4;Q9CZ42-3;Q9CZ42;Q9CZ42-2;J3QN06;J3QPU6	Carkd	ATP-dependent (S)-NAD(P)H-hydrate dehydratase	-0.51	0.08	0.1	-0.4	-0.56	-0.01	-0.26	-0.03	0.004769	1	Other
J3QMN4;D3Z0K8;J3QMQ8;Q9JLT4-2;Q9JLT4-4;Q9JLT4;Q9JLT4-3	Txnrd2	Thioredoxin reductase 2, mitochondrial	-0.29	0.31	0.48	-0.02	-0.06	-0.02	-0.07	0.29	0.0248437	1	Degradation and stress response
O08600	Endog	Endonuclease G, mitochondrial	-0.41	-0.39	-0.24	-0.87	-0.99	-0.83	-0.7	-0.53	6.75374e-05	3	Mitochondrial DNA maintenance and replication
O08749	Dld	Dihydrolipoyl dehydrogenase, mitochondrial	-0.04	0.16	0.14	0.2	0.29	0.29	0.18	0.19	0.0336041	1	Pyruvate and aminoacid metabolism
O09174	Amacr	Alpha-methylacyl-CoA racemase	-0.32	0.2	0.26	-0.31	-0.38	0.05	-0.34	-0.02	0.0129639	1	Lipid and acetyl CoA metabolism
O35129;F6QPR1;F6Q8V7	Phb2	Prohibitin-2	-0.18	-0.35	-0.17	-0.47	-0.68	-0.62	-0.64	-0.43	0.000865143	4	Other
O35435;E9Q1V3;F6TCT7;D3YZY5;F6ZQJ5	Dhodh	Dihydroorotate dehydrogenase (quinone), mitochondrial	-0.31	-0.22	-0.12	-0.54	-0.63	-0.54	-0.4	-0.14	0.00124232	3	Mitochondrial nucleotide synthesis
O35855;O88374;D3Z7C8;D3Z3D7	Bcat2	Branched-chain-amino-acid aminotransferase, mitochondrial;Branched-chain-amino-acid aminotransferase	-0.35	0.63	0.77	0.64	0.52	0.56	0.58	0.87	2.58801e-06	1	Pyruvate and aminoacid metabolism
O35857;F7C189	Timm44	Mitochondrial import inner membrane translocase subunit TIM44	-0.17	-0.24	-0.24	-0.41	-0.47	-0.56	-0.78	-0.4	0.000237613	4	Mitochondrial import and chaperones
O35972	Mrpl23	39S ribosomal protein L23, mitochondrial	-0.5	-0.73	-0.69	-1.05	-1.45	-0.74	-1.07	-1.3	6.50766e-05	5	Mitochondrial ribosome
O55003	Bnip3	BCL2/adenovirus E1B 19 kDa protein-interacting protein 3	0.05	0.54	0.66	0.1	0.07	0.46	0.18	0.41	0.0388633	1	Apoptosis
O55028;D3Z7R0	Bckdk	[3-methyl-2-oxobutanoate dehydrogenase [lipoamide]] kinase, mitochondrial	-0.41	0.16	0.09	-0.1	-0.26	0.08	0.26	0.09	0.0338369	1	Pyruvate and aminoacid metabolism
O70571	Pdk4	[Pyruvate dehydrogenase (acetyl-transferring)] kinase isozyme 4, mitochondrial	-1.27	0.37	0.79	-0.1	-0.57	-0.59	0.67	-0.15	0.000613069	1	Pyruvate and aminoacid metabolism
O88696	Clpp	ATP-dependent Clp protease proteolytic subunit, mitochondrial	-0.39	0.08	0.13	-0.26	-0.39	0.05	-0.38	-0.15	0.0485008	1	Degradation and stress response
O88986;E9PWY6	Gcat	2-amino-3-ketobutyrate coenzyme A ligase, mitochondrial	-0.57	1.76	2.02	2.11	2.11	2.28	2.59	2.66	6.43657e-05	1	Pyruvate and aminoacid metabolism
P08228	Sod1	Superoxide dismutase [Cu-Zn]	-0.54	0.27	0.55	0.09	0.22	0.25	0.27	0.68	0.0129881	1	Degradation and stress response
P08249;A0A0G2JF23;A0A0G2JGY4	Mdh2	Malate dehydrogenase, mitochondrial	0.15	-0.16	-0.04	0.29	0.36	0.1	0.09	0.09	0.0234476	2	Pyruvate and aminoacid metabolism
P09103;E9Q8G8	P4hb	Protein disulfide-isomerase	0.69	-1.57	-1.24	-2.78	-1.71	-2.15	-0.89	-2.16	0.00563252	4	Other
P11352;A0A0A6YY34;A0A0A6YVV2	Gpx1	Glutathione peroxidase 1	-0.2	0.08	0.46	-0.51	-0.52	-0.81	-0.32	-0.22	0.00229222	3	Degradation and stress response
P12787	Cox5a	Cytochrome c oxidase subunit 5A, mitochondrial	-0.23	0.18	0.03	-0.21	-0.11	0.42	0.2	0.08	0.0222974	1	OXPHOS
P14152;B1ATQ3	Mdh1	Malate dehydrogenase, cytoplasmic	0.41	-0.85	-1.16	-1.5	-1.47	-0.46	0.95	-1.1	0.000463121	5	Pyruvate and aminoacid metabolism
P16332	Mut	Methylmalonyl-CoA mutase, mitochondrial	-0.39	0.32	0.38	0.08	0.21	0.32	0.26	0.45	0.00153986	1	Pyruvate and aminoacid metabolism
P16858;S4R1W1;A0A0A0MQF6;S4R257;D3YYI5;S4R1N5;V9GX06;S4R1W8;S4R2G5;Q64467;V9GXA7;V9GXK0	Gapdh;Gm3839;Gm7293	Glyceraldehyde-3-phosphate dehydrogenase	0.83	-1.18	-0.78	-0.48	-0.58	-1.19	0.11	-0.75	0.00197559	4	Pyruvate and aminoacid metabolism
P17665;B8JJA9	Cox7c	Cytochrome c oxidase subunit 7C, mitochondrial	-1.06	-1.27	-1.1	0.1	-0.05	0.31	0.1	0.03	0.0329188	2	OXPHOS
P17710-3;G3UVV4;P17710-4;P17710;P17710-2;D3YYR4;D3Z365;D3Z105;B4YB29;F6QD41	Hk1	Hexokinase-1	0.01	-0.66	-0.46	-1.01	-0.99	-1.28	-1.12	-0.95	1.71944e-06	4	Pyruvate and aminoacid metabolism
P17751;H7BXC3	Tpi1	Triosephosphate isomerase	0.04	0.11	0	0.1	0.1	0.35	0.6	0.09	0.0211213	5	Pyruvate and aminoacid metabolism
P20108	Prdx3	Thioredoxin-dependent peroxide reductase, mitochondrial	0.02	0.37	0.49	0.62	0.44	0.15	-0.04	0.48	0.00390987	1	Degradation and stress response
P24270;A2AL20	Cat	Catalase	0.14	-0.28	-0.64	-1.8	-1.53	-0.11	0.1	-1.35	0.0205865	5	Degradation and stress response
P26443;F7CFA5	Glud1	Glutamate dehydrogenase 1, mitochondrial	-0.17	0.19	0.29	0.05	0	0.11	0.15	0.36	0.0460947	1	Pyruvate and aminoacid metabolism
P34914;P34914-2	Ephx2	Bifunctional epoxide hydrolase 2;Cytosolic epoxide hydrolase 2;Lipid-phosphate phosphatase	-0.03	-0.16	-0.11	-0.26	-0.54	-0.41	-0.76	-0.44	0.0201226	4	Other
P36552	Cpox	Oxygen-dependent coproporphyrinogen-III oxidase, mitochondrial	-0.3	-0.38	-0.13	-0.59	-0.73	-0.72	-0.63	-0.2	0.000393303	3	Iron sulphur cluster and heme biogenesis
P38060;V9GXD2;V9GWZ9;D3YVU9;Q8JZS7	Hmgcl	Hydroxymethylglutaryl-CoA lyase, mitochondrial	-0.27	-0.29	-0.29	-0.55	-0.47	-0.49	-0.64	-0.24	0.00441788	3	Lipid and acetyl CoA metabolism
P40630-2;P40630;D3Z0F3	Tfam	Transcription factor A, mitochondrial	-0.1	0.43	0.37	0.02	0.24	0.64	0.42	0.46	0.0129085	1	Mitochondrial DNA maintenance and replication
P42125	Eci1	Enoyl-CoA delta isomerase 1, mitochondrial	-0.1	0.25	0.38	0.46	0.31	0.32	-0.04	0.32	0.00537501	1	Lipid and acetyl CoA metabolism
P43023	Cox6a2	Cytochrome c oxidase subunit 6A2, mitochondrial	-0.33	-0.28	-0.23	0.2	0.26	0.12	0.29	0.03	0.0437078	2	OXPHOS
P45952;D6RFD7	Acadm	Medium-chain specific acyl-CoA dehydrogenase, mitochondrial	-0.21	0.1	0.15	0.12	0.16	0.11	0	0.29	0.0174774	1	Lipid and acetyl CoA metabolism
P47738;A0A0G2JEU1;A0A0G2JF60;A0A0G2JFQ0;D3YYF3	Aldh2	Aldehyde dehydrogenase, mitochondrial	-0.2	0.63	0.56	0.32	0.36	0.27	0.56	0.55	0.000592247	1	Other
P48771	Cox7a2	Cytochrome c oxidase subunit 7A2, mitochondrial	-0.66	-1.08	-1	-0.97	-1.33	-1.02	-0.78	-0.66	0.020906	5	OXPHOS
P50171;P50171-2;G3UX44	Hsd17b8;H2-Ke6	Estradiol 17-beta-dehydrogenase 8	-0.08	0.44	0.4	0.43	0.59	0.47	0.23	0.6	4.57807e-05	1	Other
P51660	Hsd17b4	Peroxisomal multifunctional enzyme type 2;(3R)-hydroxyacyl-CoA dehydrogenase;Enoyl-CoA hydratase 2	0.13	-0.85	-0.98	-0.76	-0.99	-0.27	0.54	-0.39	0.0260315	5	Lipid and acetyl CoA metabolism
P51881	Slc25a5	ADP/ATP translocase 2;ADP/ATP translocase 2, N-terminally processed	-0.06	-0.67	-0.81	-0.06	-0.42	-0.34	-0.84	-0.71	0.000472116	2	Mitochondrial carriers or transport
P53395;A0A0G2JGU0	Dbt	Lipoamide acyltransferase component of branched-chain alpha-keto acid dehydrogenase complex, mitochondrial	-0.21	0.67	0.76	0.6	0.49	0.54	0.44	0.81	0.000218453	1	Pyruvate and aminoacid metabolism
P53702;G3UXK7	Hccs	Cytochrome c-type heme lyase	-0.28	-0.51	-0.55	-0.85	-0.93	-0.93	-0.68	-0.83	3.11769e-05	4	OXPHOS assembly and biogenesis
P53986	Slc16a1	Monocarboxylate transporter 1	1.42	-0.12	0.26	1.15	0.5	1.27	0.42	1.91	0.00298386	2	Mitochondrial import and chaperones
P54071;D6RIL6;D3YVY3;A0A087WPT4;A0A087WRS9;O88844	Idh2	Isocitrate dehydrogenase [NADP], mitochondrial	-0.14	0.04	0.05	0.35	0.39	0.14	0.42	0.46	0.000287906	5	Pyruvate and aminoacid metabolism
P54869;Q8JZK9	Hmgcs2	Hydroxymethylglutaryl-CoA synthase, mitochondrial	0.29	-2.9	-2.23	-2.22	-2.67	-3.97	-3.04	-2.72	0.0121328	4	Ubiquinone biosynthesis
P56135;F8WHP8	Atp5j2	ATP synthase subunit f, mitochondrial	0.05	-1.26	-0.62	0.43	0.82	0.94	0.47	0.17	0.0164344	2	OXPHOS
P56213	Gfer	FAD-linked sulfhydryl oxidase ALR	0.53	0.35	0.57	1.03	1.17	0.89	0.54	0.64	0.00100956	2	Other
P56379	Mp68	6.8 kDa mitochondrial proteolipid	-1.03	-1.32	-1.86	0.01	-0.2	0.12	0.17	-0.06	0.020906	2	OXPHOS
P56380	Nudt2	Bis(5-nucleosyl)-tetraphosphatase [asymmetrical]	-0.12	0.4	0.62	0.43	0.54	0.14	0.55	0.5	0.00598254	1	Other
P56382	Atp5e	ATP synthase subunit epsilon, mitochondrial	0.65	-0.17	-0.27	0.65	0.98	0.91	0.72	0.3	0.0315295	2	OXPHOS
P56391	Cox6b1	Cytochrome c oxidase subunit 6B1	0.22	-0.26	-0.34	0.35	0.41	0.36	0.5	0.09	0.00145091	2	OXPHOS
P56392	Cox7a1	Cytochrome c oxidase subunit 7A1, mitochondrial	-1.03	-1.22	-2.01	-0.13	-0.16	0.02	0.52	0.22	0.0108967	2	OXPHOS
P56394	Cox17	Cytochrome c oxidase copper chaperone	0.56	-1.86	-1.13	0.24	0.76	0.29	0.68	-0.69	0.0260315	2	Mitochondrial carriers or transport
P56480	Atp5b	ATP synthase subunit beta, mitochondrial	-0.21	0.02	0.06	-0.14	-0.31	-0.12	-0.27	0.01	0.0324102	3	OXPHOS
P58059;D3YVZ9	Mrps21	28S ribosomal protein S21, mitochondrial	0.45	-0.99	-0.74	-0.2	0.01	-1.12	-0.54	-0.6	0.0282012	4	Mitochondrial ribosome
P58064	Mrps6	28S ribosomal protein S6, mitochondrial	0.22	-0.86	-0.8	-0.49	-0.36	-0.91	-0.57	-0.53	1.37675e-05	4	Mitochondrial ribosome
P58281-2;P58281;H7BX01;E0CXD1;F6U775;P58682	Opa1	Dynamin-like 120 kDa protein, mitochondrial;Dynamin-like 120 kDa protein, form S1	-0.24	-0.05	0.01	-0.33	-0.26	-0.11	-0.13	0.04	0.0105415	1	Mitochondrial morphology
P61922;P61922-2;F7C9G3;Q3TUE8;F6RN86	Abat	4-aminobutyrate aminotransferase, mitochondrial	-0.89	1.66	1.58	1.54	1.86	2.67	1.66	2.67	1.63523e-05	1	Other
P62073	Timm10	Mitochondrial import inner membrane translocase subunit Tim10	0.53	-0.18	-0.08	0.48	0.52	0.26	0.47	0.21	0.0221372	2	Mitochondrial import and chaperones
P67778;Q5SQG5	Phb	Prohibitin	-0.3	-0.22	-0.13	-0.63	-0.92	-0.48	-0.68	-0.44	0.000207877	3	Other
P85094	Isoc2a	Isochorismatase domain-containing protein 2A, mitochondrial	-0.58	0.69	0.53	0.52	0.67	1.1	0.87	1.01	1.37675e-05	1	Unknown
P97478;Q3TYT1	Coq7	Ubiquinone biosynthesis protein COQ7 homolog	-0.5	-0.1	0.21	-0.24	-0.15	-0.18	-0.27	-0.13	0.0266201	1	Ubiquinone biosynthesis
P99028;Q9D2Q7	Uqcrh	Cytochrome b-c1 complex subunit 6, mitochondrial	0.28	-0.28	-0.34	0.47	0.46	0.11	0.72	0.14	0.00152505	2	OXPHOS
P99029-2;P99029;H3BJQ7;G3UZJ4	Prdx5	Peroxiredoxin-5, mitochondrial	-0.08	0.23	0.29	0.22	0.39	0.41	0.28	0.53	0.00281562	1	Degradation and stress response
Q06185;Q8BTB6	Atp5i	ATP synthase subunit e, mitochondrial	0.34	-0.07	-0.13	0.32	0.59	0.49	0.42	0.22	0.00927896	2	OXPHOS
Q07417;F6RAZ3	Acads	Short-chain specific acyl-CoA dehydrogenase, mitochondrial	-0.35	0.17	0.24	-0.06	-0.21	-0.04	-0.17	0.1	0.0496615	1	Lipid and acetyl CoA metabolism
Q14C51	Ptcd3	Pentatricopeptide repeat domain-containing protein 3, mitochondrial	-0.13	-0.62	-0.5	-0.52	-0.81	-0.82	-0.89	-0.73	0.00535431	4	Mitochondrial ribosome
Q14CH7	Aars2	Alanine--tRNA ligase, mitochondrial	-0.19	-0.52	-0.36	-0.95	-0.55	-0.58	-0.59	-0.29	0.00197559	5	Mitochondrial transcription and mtRNA metabolism
Q2TPA8;B1AX78;B1AX77	Hsdl2	Hydroxysteroid dehydrogenase-like protein 2	-0.08	-0.39	-0.26	-0.49	-0.53	-0.36	-0.5	-0.38	0.000592247	4	Unknown
Q3TBW2;A2A715	Mrpl10	39S ribosomal protein L10, mitochondrial	-0.46	-0.81	-0.89	-1.33	-1.49	-1.18	-1.33	-1.2	4.35031e-06	4	Mitochondrial ribosome
Q3TC72	Fahd2	Fumarylacetoacetate hydrolase domain-containing protein 2A	-0.25	0.26	0.43	0.36	0.37	0.55	0.18	0.56	0.00121795	1	Unknown
Q3TL44	Nlrx1	NLR family member X1	-0.34	0.58	0.61	-0.01	-0.05	0.01	0.29	0.4	0.00123871	1	Other
Q3TLP5;Q3TLP5-2;F6YTG0;Q3TLP5-3;F6Z5N5;E0CXC8	Echdc2	Enoyl-CoA hydratase domain-containing protein 2, mitochondrial	-0.22	0.68	0.73	0.71	0.74	0.75	0.73	1.06	1.37675e-05	1	Unknown
Q3U2A8;F6YJY2;F7A8L1;F6Z939	Vars2	Valine--tRNA ligase, mitochondrial	-0.24	0.21	0.17	-0.03	-0.24	0.05	-0.3	-0.06	0.036844	1	Mitochondrial transcription and mtRNA metabolism
Q3U3J1;P50136	Bckdha	2-oxoisovalerate dehydrogenase subunit alpha, mitochondrial	-0.47	0.68	0.67	0.4	0.28	0.47	0.46	0.56	0.000347147	1	Pyruvate and aminoacid metabolism
Q3U4F0;Q91V61;Q91V61-2	Sfxn3	Sideroflexin-3	0.32	-1.31	-2.27	-1.59	-1.59	-1.11	-0.44	-1.1	0.00787526	5	Unknown
Q3U8Y1;Q9DCA2	Mrps11	28S ribosomal protein S11, mitochondrial	0.26	-0.58	-0.53	-0.6	-0.5	-0.61	-0.59	-0.54	0.000224524	4	Mitochondrial ribosome
Q3UFY8	Trmt10c	Mitochondrial ribonuclease P protein 1	-0.03	-0.26	-0.08	-0.36	-0.39	-0.21	-0.33	-0.44	0.0499171	5	Mitochondrial transcription and mtRNA metabolism
Q3UIU2;A2AP32	Ndufb6	NADH dehydrogenase [ubiquinone] 1 beta subcomplex subunit 6	-0.14	0.05	0.12	0.32	0.01	-0.43	-0.25	0.2	0.021224	4	OXPHOS
Q3ULD5	Mccc2	Methylcrotonoyl-CoA carboxylase beta chain, mitochondrial	-0.35	0.65	0.73	0.65	0.59	0.65	0.72	0.9	6.43657e-05	1	Pyruvate and aminoacid metabolism
Q3ULU4;Q8CH40;A2ACU7;Q8CH41;A2ACT8;A0A0G2JE11;A0A0G2JDN4;A2ACU1;F6WJF1	Nudt6	Nucleoside diphosphate-linked moiety X motif 6	-0.59	-0.16	0.51	-0.19	-0.07	0.58	0.23	0.64	0.0129085	1	Unknown
Q3UNZ8;A0A0A6YWV6;Q3UNZ8-2;A0A0A6YWZ0;A0A0A6YXW5		Quinone oxidoreductase-like protein 2	0.03	-0.96	-1.85	-0.82	-1.17	-1.36	-1.28	-1	0.00218264	4	Unknown
Q3URS9-2;Q3URS9	Ccdc51	Coiled-coil domain-containing protein 51	-0.29	0.1	0.17	-0.48	-0.6	-0.21	-0.39	-0.09	0.00108867	3	Other
Q3UUI3	Them4	Acyl-coenzyme A thioesterase THEM4	-0.4	0	0	0.04	-0.23	0.19	-0.21	0.24	0.00897575	1	Lipid and acetyl CoA metabolism
Q3UW66;Q99J99	Mpst	Sulfurtransferase;3-mercaptopyruvate sulfurtransferase	-0.15	-0.28	-0.18	-0.44	-0.51	-0.43	-0.62	0.02	0.00163556	3	Other
Q3V384;F6VT60;E9Q4K2;F6RBS7	Lace1	Lactation elevated protein 1	-0.05	0.02	0.05	-0.26	-0.39	-0.35	-0.42	-0.19	0.00677863	4	Unknown
Q505D7	Opa3	Optic atrophy 3 protein homolog	-0.11	-0.26	0.12	0.21	0.3	-0.18	-0.19	0.11	0.0275938	4	Unknown
Q544X6;P22315	Fech	Ferrochelatase;Ferrochelatase, mitochondrial	-0.25	0.81	0.83	0.62	0.7	0.45	0.71	0.92	3.04902e-05	1	Other
Q59J78	Ndufaf2	Mimitin, mitochondrial	0.06	-0.21	-0.16	-0.22	-0.09	0.3	-0.23	-0.1	0.0499171	5	OXPHOS assembly and biogenesis
Q5M8N4-2;Q5M8N4	Sdr39u1	Epimerase family protein SDR39U1	-0.39	0.8	0.89	0.37	0.28	0.37	0.35	0.71	0.000673026	1	Unknown
Q5RL20;Q99N89	Mrpl43	39S ribosomal protein L43, mitochondrial	0.19	-0.58	-0.35	-0.33	-0.37	-0.59	-0.55	-0.57	0.00229222	4	Mitochondrial ribosome
Q5U5I3;Q99N85;D3Z603	Mrps18a	28S ribosomal protein S18a, mitochondrial	0.32	-0.73	-0.59	-0.64	-0.41	-0.74	-0.26	-0.6	0.00278131	4	Mitochondrial ribosome
Q5XJF6;P53026;D6RE43	Rpl10a	Ribosomal protein;60S ribosomal protein L10a	0.29	-1.31	-1.25	-1.47	-2.18	-1.36	-2.08	-1.87	0.000455337	4	Other
Q60649;E9PY58;D3Z7V2;D3YZF1	Clpb	Caseinolytic peptidase B protein homolog	-0.12	0.06	0.33	0.07	0.14	-0.08	-0.31	0.18	0.0409269	1	Other
Q60930;D3YZT5;D3YUN8	Vdac2	Voltage-dependent anion-selective channel protein 2	0.19	-0.35	-0.32	-0.09	-0.29	-0.54	-0.61	-0.38	0.0340317	4	Mitochondrial carriers or transport
Q60936;F7B1B6;A0A0A6YXD9;E0CYD3;E0CYT4;E0CYG7;E0CZ05;E0CXT4;E0CXR6;E0CYC1;E0CXR1;E0CXI5;F6T0A8	Adck3	Chaperone activity of bc1 complex-like, mitochondrial	-0.11	0.2	0.22	0.29	0.28	0.33	0.18	0.3	0.00200356	1	Ubiquinone biosynthesis
Q61425	Hadh	Hydroxyacyl-coenzyme A dehydrogenase, mitochondrial	-0.25	0.27	0.25	0.12	0.11	0.29	0.06	0.29	0.0338369	1	Lipid and acetyl CoA metabolism
Q61578	Fdxr	NADPH:adrenodoxin oxidoreductase, mitochondrial	-0.2	0.42	0.48	0.26	0.35	0.59	0.28	0.59	0.000329621	1	Other
Q61733	Mrps31	28S ribosomal protein S31, mitochondrial	-0.08	-0.5	-0.54	-0.76	-0.78	-0.38	-0.55	-0.71	1.37675e-05	4	Mitochondrial ribosome
Q61941;Q8C9V5;Q8BGK0;E9Q8F4	Nnt	NAD(P) transhydrogenase, mitochondrial	0.03	1	1.13	1.25	1.51	0.68	0.66	1.32	0.000274598	1	Other
Q64433	Hspe1	10 kDa heat shock protein, mitochondrial	0.25	0.3	0.42	0.62	0.56	0.64	0.31	0.38	0.0274245	2	Degradation and stress response
Q64445	Cox8a	Cytochrome c oxidase subunit 8A, mitochondrial	0.03	-3.02	-1.64	-1.25	-2.19	-2.4	-3.12	-2.17	0.0074437	4	OXPHOS
Q64521;A2AQR0	Gpd2	Glycerol-3-phosphate dehydrogenase, mitochondrial	0.07	1.34	0.42	-0.3	-0.14	-0.63	-0.26	-0.1	0.0260315	3	Pyruvate and aminoacid metabolism
Q66GT5	Ptpmt1	Phosphatidylglycerophosphatase and protein-tyrosine phosphatase 1	-0.25	-0.43	-0.48	-0.64	-0.69	-0.67	-1.07	-0.53	0.00152505	4	Lipid and acetyl CoA metabolism
Q6P3A8;Q6P3A8-2	Bckdhb	2-oxoisovalerate dehydrogenase subunit beta, mitochondrial	-0.11	0.71	0.86	0.72	0.42	0.27	0.56	0.54	0.00390817	1	Pyruvate and aminoacid metabolism
Q6P8I6;Q5SRC5	Cox11	Cytochrome c oxidase assembly protein COX11, mitochondrial	-0.23	-0.52	-0.56	-0.74	-1.07	-1.24	-0.48	-0.64	0.00209787	4	OXPHOS assembly and biogenesis
Q6P8J7;P30275;B0R0E9;B0R0F0;A2ARP5	Ckmt2	Creatine kinase S-type, mitochondrial	-0.04	0.2	0.33	0.4	0.6	0.58	0.29	0.51	0.00464087	1	Other
Q6P8N8;Q9JHS4;F7BB92	Clpx	ATP-dependent Clp protease ATP-binding subunit clpX-like, mitochondrial	-0.27	-0.42	-0.38	-0.75	-0.75	-0.68	-0.46	-0.59	0.000281974	4	Degradation and stress response
Q6PB66;F6V2A3	Lrpprc	Leucine-rich PPR motif-containing protein, mitochondrial	-0.17	-0.35	-0.22	-0.44	-0.66	-0.78	-0.76	-0.53	0.000842476	4	Mitochondrial transcription and mtRNA metabolism
Q6XPS7	Tha1		-0.34	0.33	0.5	0.4	0.31	0.37	0.19	0.44	0.00123871	1	Unknown
Q71RI9-2;Q71RI9;A0A0G2JGE1;D6RJ70	Ccbl2	Kynurenine--oxoglutarate transaminase 3	-0.38	1.43	1.58	1.3	1.21	1.12	1.32	1.68	1.71944e-06	1	Pyruvate and aminoacid metabolism
Q76LV0;O70325-2;O70325;S4R1E5;Q91XR9	Gpx4	Glutathione peroxidase;Phospholipid hydroperoxide glutathione peroxidase, mitochondrial;Phospholipid hydroperoxide glutathione peroxidase, nuclear	-0.32	0.63	0.66	0.5	0.48	0.3	0.53	0.6	4.49232e-05	1	Degradation and stress response
Q78IK2	Usmg5	Up-regulated during skeletal muscle growth protein 5	-0.73	-1.17	-1.38	0.03	-0.09	-0.34	-0.26	-0.24	0.0211611	2	OXPHOS
Q78IK4;B1AV14	Apool	MICOS complex subunit Mic27	-0.02	-0.14	-0.1	-0.19	-0.3	-0.06	-0.15	-0.06	0.0366855	5	Mitochondrial morphology
Q78J03	Msrb2	Methionine-R-sulfoxide reductase B2, mitochondrial	0.12	0.26	0.23	0.39	0.47	0.53	0.51	0.35	0.0442644	2	Degradation and stress response
Q7TMG8;O55126;A0A0G2JEV1	Gbas	Protein NipSnap homolog 2	-0.35	0.32	0.48	0.09	-0.15	0	0.26	0.53	0.00503661	1	Unknown
Q7TNG8	Ldhd	Probable D-lactate dehydrogenase, mitochondrial	-0.38	0.98	0.89	0.63	0.6	0.84	0.51	0.6	0.00390987	1	Other
Q7TNS2	Minos1	MICOS complex subunit Mic10	0.11	-0.47	-0.78	0.37	-0.19	0.08	-0.25	-0.54	0.00656012	2	Mitochondrial morphology
Q7TSQ8;D6RD07;D3Z443	Pdpr	Pyruvate dehydrogenase phosphatase regulatory subunit, mitochondrial	-0.48	0.36	0.45	-0.03	-0.15	-0.28	-0.11	0.25	0.00712127	1	Pyruvate and aminoacid metabolism
Q80X68	Csl	Citrate synthase	0.46	1.42	-0.23	1.89	1.55	0.65	-1.39	0.3	0.0386162	4	Unknown
Q80X85	Mrps7	28S ribosomal protein S7, mitochondrial	-0.19	-0.81	-0.66	-0.65	-0.67	-0.63	-0.61	-0.8	0.00197559	4	Mitochondrial ribosome
Q80XN0;D3Z2Y8	Bdh1	D-beta-hydroxybutyrate dehydrogenase, mitochondrial	-1.34	7.8	8.11	8.86	8.87	10.21	8.87	9.25	1.71944e-06	1	Lipid and acetyl CoA metabolism
Q80Y14	Glrx5	Glutaredoxin-related protein 5, mitochondrial	-0.12	-0.33	-0.29	-0.53	-0.36	-0.05	-0.18	-0.26	0.0466071	5	Iron sulphur cluster and heme biogenesis
Q80ZS3	Mrps26	28S ribosomal protein S26, mitochondrial	0.14	-0.82	-0.65	-0.52	-0.68	-0.57	-0.44	-0.43	3.70907e-05	4	Mitochondrial ribosome
Q8BFP9	Pdk1	[Pyruvate dehydrogenase (acetyl-transferring)] kinase isozyme 1, mitochondrial	-0.32	0.51	0.5	0.27	0.11	0.06	0.11	0.66	0.00158887	1	Pyruvate and aminoacid metabolism
Q8BGB8;B7ZCV4;D6RJJ8	Coq4	Ubiquinone biosynthesis protein COQ4 homolog, mitochondrial	-0.16	-0.12	0.6	-1.64	-0.5	-0.46	-0.67	-0.32	0.0234476	5	Ubiquinone biosynthesis
Q8BGC4	Zadh2	Zinc-binding alcohol dehydrogenase domain-containing protein 2	-0.17	0.4	0.32	0.38	0.39	0.02	0	0.26	0.000516772	1	Other
Q8BGT5;D6RFQ8;Q8QZR5	Gpt2	Alanine aminotransferase 2	-0.23	-0.27	0.05	-0.73	-2.27	-1.83	-1.47	-1.28	0.0100669	4	Pyruvate and aminoacid metabolism
Q8BH04;Q9Z2V4	Pck2	Phosphoenolpyruvate carboxykinase [GTP], mitochondrial	0.44	-0.56	-1.26	-1.4	-0.86	-3.02	-0.98	-2.12	0.00464087	4	Pyruvate and aminoacid metabolism
Q8BH55;A2AUG7	Thnsl1	Threonine synthase-like 1	0.02	0.63	0.69	0.35	0.41	0.08	0.03	0.39	0.0380022	1	Unknown
Q8BH95;F6T930	Echs1	Enoyl-CoA hydratase, mitochondrial	-0.15	0.41	0.6	0.56	0.68	0.73	0.63	0.67	0.000205796	1	Lipid and acetyl CoA metabolism
Q8BJU9	Mtrf1l	Peptide chain release factor 1-like, mitochondrial	-0.34	0.01	-0.48	-0.66	-0.68	-0.18	-2.9	-0.38	0.00324425	3	Other mitochondrial protein synthesis factors
Q8BJZ4	Mrps35	28S ribosomal protein S35, mitochondrial	0.17	-0.59	-0.57	-0.4	-0.52	-0.76	-0.47	-0.76	0.000100675	4	Mitochondrial ribosome
Q8BK72	Mrps27	28S ribosomal protein S27, mitochondrial	-0.28	-0.58	-0.39	-0.68	-0.86	-0.76	-0.95	-0.66	1.6699e-05	4	Mitochondrial ribosome
Q8BMD8	Slc25a24	Calcium-binding mitochondrial carrier protein SCaMC-1	-0.14	-1.9	-1.67	-1.86	-0.84	-0.72	-0.25	-1.38	0.0338369	5	Mitochondrial carriers or transport
Q8BMF3;E9PZP7;Q99KE1	Me3	NADP-dependent malic enzyme, mitochondrial;Malic enzyme	-0.47	0.27	0.42	0	-0.12	-0.21	-0.18	0.24	0.00205105	1	Pyruvate and aminoacid metabolism
Q8BTE5;A0A0A6YXB8	Cebpzos		1.18	-0.17	-0.08	2.09	2.86	0.32	1.74	0.62	0.002797	2	Unknown
Q8BTX9	Hsdl1	Inactive hydroxysteroid dehydrogenase-like protein 1	1.2	0.79	1.24	1.19	1.34	-1.13	0.07	0.81	0.00528266	4	Unknown
Q8BU88	Mrpl22	39S ribosomal protein L22, mitochondrial	-0.26	-0.65	-0.47	-0.95	-1.02	-0.83	-0.91	-0.88	9.61937e-06	4	Mitochondrial ribosome
Q8BUY5	Timmdc1	Complex I assembly factor TIMMDC1, mitochondrial	-0.34	0.55	0.82	0.5	0.28	-0.11	0.11	0.64	0.0331088	1	OXPHOS assembly and biogenesis
Q8BW75;E9Q3X6;E9PVL9	Maob	Amine oxidase [flavin-containing] B	-0.1	1.18	1.37	1.28	1.2	1.05	1.19	1.31	1.63523e-05	1	Other
Q8BWF0	Aldh5a1	Succinate-semialdehyde dehydrogenase, mitochondrial	-0.12	0.29	0.31	0.31	0.28	0.27	-0.06	0.25	0.0193697	1	Other
Q8BWM0	Ptges2	Prostaglandin E synthase 2;Prostaglandin E synthase 2 truncated form	-0.4	-0.16	-0.11	-0.7	-0.7	-0.59	-0.42	-0.34	2.36855e-05	3	Lipid and acetyl CoA metabolism
Q8BX10-2;Q8BX10;A0A0G2JG95;F6YJC6	Pgam5	Serine/threonine-protein phosphatase PGAM5, mitochondrial	-0.11	-1.51	-1.16	-2.24	-2.28	-2.51	-2.14	-2.46	6.44174e-06	4	Other
Q8BXN7	Ppm1k	Protein phosphatase 1K, mitochondrial	-0.55	0.28	0.63	0.42	0.45	0.22	0.41	0.08	0.00101895	1	Other
Q8BYM8	Cars2	Probable cysteine--tRNA ligase, mitochondrial	-0.62	0.45	0.69	0.06	-0.09	0.17	0.06	0.49	1.6699e-05	1	Mitochondrial transcription and mtRNA metabolism
Q8C3X2;Q8C3X2-2	Ccdc90b	Coiled-coil domain-containing protein 90B, mitochondrial	-0.35	0.11	-0.13	-0.26	-0.28	0.03	-0.22	0.03	0.0355328	1	Other
Q8C3X4;G3UWY0;Q8C3X4-2;F6ZM03	Guf1	Translation factor Guf1, mitochondrial	-0.31	0.02	0.11	-0.39	-0.37	-0.2	-0.42	-0.09	0.0293192	3	Other mitochondrial protein synthesis factors
Q8C5H8-2;Q8C5H8-3;Q8C5H8;Z4YK42;Q8C5H8-4;A0A087WQI8	Nadk2	NAD kinase 2, mitochondrial	-0.46	-0.04	-0.03	-0.41	-0.47	-0.49	-0.32	-0.03	0.00927896	1	Other
Q8CAK1;B2FDE8	Iba57	Putative transferase CAF17 homolog, mitochondrial	-0.15	-0.04	0.24	0.31	0.27	0.36	0.1	0.37	0.0161971	1	Iron sulphur cluster and heme biogenesis
Q8CC21;Q8CC21-2;F7BCD5	Ttc19	Tetratricopeptide repeat protein 19, mitochondrial	-0.3	-0.07	0.45	-0.35	-0.33	-1.13	-0.03	-0.06	0.00787855	3	OXPHOS assembly and biogenesis
Q8CC88;Q8CC88-3	Vwa8	von Willebrand factor A domain-containing protein 8	-0.41	-0.09	0.05	-0.35	-0.48	-0.13	-0.44	-0.18	0.030644	1	Unknown
Q8CG76	Akr7a2	Aflatoxin B1 aldehyde reductase member 2	-0.21	0.66	0.67	0.42	0.47	0.42	0.46	0.71	0.000179898	1	Other
Q8CGK3	Lonp1	Lon protease homolog, mitochondrial	-0.24	0.09	0.22	-0.22	-0.33	-0.22	-0.23	-0.04	0.00464087	3	Degradation and stress response
Q8CHT0	Aldh4a1	Delta-1-pyrroline-5-carboxylate dehydrogenase, mitochondrial	-0.28	1.09	1.08	1	1.04	0.99	0.96	1.21	1.16106e-05	1	Pyruvate and aminoacid metabolism
Q8JZM0	Tfb1m	Dimethyladenosine transferase 1, mitochondrial	-0.54	-0.34	0.11	-0.65	-1.19	-0.84	-1.08	-0.37	0.000179898	3	Mitochondrial transcription and mtRNA metabolism
Q8JZU0	Nudt13	Nucleoside diphosphate-linked moiety X motif 13	-0.33	0.13	0.8	0.32	-0.26	0.67	0.17	0.2	0.0128397	1	Other
Q8K009;D3Z6B9;Q8R0Y6	Aldh1l2	Mitochondrial 10-formyltetrahydrofolate dehydrogenase	-0.21	-0.74	-0.81	-1.23	-1.15	-1.82	-1.02	-1.3	1.18934e-06	4	Mitochondrial 1C pathway
Q8K0Z7	Taco1	Translational activator of cytochrome c oxidase 1	-0.11	-0.42	-0.36	-0.42	-0.26	-0.12	-0.51	-0.42	0.0266002	5	Mitochondrial transcription and mtRNA metabolism
Q8K199;F8WHQ0;D6RJ47;D6RD08;D3YZZ0	Cmc2	COX assembly mitochondrial protein 2 homolog	0.37	-0.9	-0.9	0.42	0.59	0.32	0.66	-0.38	8.71949e-06	2	OXPHOS assembly and biogenesis
Q8K1R3;Q8K1R3-2	Pnpt1	Polyribonucleotide nucleotidyltransferase 1, mitochondrial	-0.24	0.19	0.36	0.09	0.03	-0.26	-0.37	-0.01	0.043282	1	Mitochondrial transcription and mtRNA metabolism
Q8K1Z0;F6SFF5	Coq9	Ubiquinone biosynthesis protein COQ9, mitochondrial	-0.14	0.38	0.51	0.25	0.42	0.63	0.58	0.55	0.00240446	1	Ubiquinone biosynthesis
Q8K2C6	Sirt5	NAD-dependent protein deacylase sirtuin-5, mitochondrial	-0.24	0.01	0.14	0.19	0.22	0.39	0.22	0.33	0.0312396	1	Other
Q8K2M0;Q8K2M0-2	Mrpl38	39S ribosomal protein L38, mitochondrial	0.06	-0.79	-0.69	-0.53	-0.85	-1.19	-1	-0.73	6.44174e-06	4	Mitochondrial ribosome
Q8K2Q5;B1AXC8;Q3TFT3;B1AXC7;B1AXC5	Chchd7	Coiled-coil-helix-coiled-coil-helix domain-containing protein 7	0.31	0.02	0.05	0.55	0.49	0.12	0.22	0.05	0.0288175	2	Other
Q8K2Y7	Mrpl47	39S ribosomal protein L47, mitochondrial	-0.02	-0.24	-0.29	-0.67	-0.67	-0.78	-0.73	-0.55	0.000308787	4	Mitochondrial ribosome
Q8K370	Acad10	Acyl-CoA dehydrogenase family member 10	-0.69	-1.87	-1.95	0.01	1.37	3.43	3.49	2.07	0.0384725	2	Lipid and acetyl CoA metabolism
Q8K3A0;F6UL52;F6WN43	Hscb	Iron-sulfur cluster co-chaperone protein HscB, mitochondrial	-0.15	0.71	0.76	0.47	0.42	0.98	0.4	0.99	0.000128408	1	Iron sulphur cluster and heme biogenesis
Q8K411-2;Q8K411;Q8K411-3	Pitrm1	Presequence protease, mitochondrial	-0.23	-0.25	-0.22	-0.34	-0.35	-0.51	-0.54	-0.28	0.00276476	3	Mitochondrial import and chaperones
Q8K4F5;D3YYK0	Abhd11	Alpha/beta hydrolase domain-containing protein 11	-0.69	0.46	0.52	-0.4	-0.44	0.49	0.02	0.31	0.0056177	1	Unknown
Q8K4Z3	Apoa1bp	NAD(P)H-hydrate epimerase	-0.15	0.12	0.35	0.35	0.29	0.36	0.37	0.32	0.00986147	1	Other
Q8QZS1;E0CX19	Hibch	3-hydroxyisobutyryl-CoA hydrolase, mitochondrial	-0.41	0.28	0.28	0.04	-0.07	0.32	0.08	0.34	0.00130367	1	Other
Q8R035;Q8R035-2;A2A6T4;D6RHR8	Ict1	Peptidyl-tRNA hydrolase ICT1, mitochondrial	0.08	-0.5	-0.56	-0.72	-0.69	-0.62	-0.71	-0.55	4.7249e-05	4	Mitochondrial ribosome
Q8R0F8	Fahd1	Acylpyruvase FAHD1, mitochondrial	-0.07	-0.1	-0.26	-0.23	-0.2	-0.37	-0.52	-0.47	0.0133444	4	Other
Q8R104;Q8R104-2;D3YTK6;D3YVQ5;D3YWD6	Sirt3	NAD-dependent protein deacetylase sirtuin-3	-0.39	-0.33	0.49	0.12	-0.24	1.04	0.38	0.37	0.0196298	1	Other
Q8R127;J3QNN5;F6S0R8	Sccpdh	Saccharopine dehydrogenase-like oxidoreductase	0.01	-0.31	-0.32	-0.49	-0.54	-0.57	-0.55	-0.32	0.016716	4	Unknown
Q8R1I1	Uqcr10	Cytochrome b-c1 complex subunit 9	-0.38	-0.02	-0.25	0.37	0.16	-0.01	-0.38	-0.06	0.0282627	4	OXPHOS
Q8R1S0;D3YW66;D6RG57;F6ZE40	Coq6	Ubiquinone biosynthesis monooxygenase COQ6	-0.49	-0.01	0.07	-0.19	-0.54	-0.3	-0.58	-0.1	0.0137234	3	Ubiquinone biosynthesis
Q8R2K3;Q9CYR0;D3Z3Y3	Ssbp1	Single-stranded DNA-binding protein;Single-stranded DNA-binding protein, mitochondrial	-0.07	0.48	0.3	-0.01	-0.13	0.63	0.11	0.1	0.033115	1	Mitochondrial DNA maintenance and replication
Q8R2L5;Q8BTZ9	Mrps18c	28S ribosomal protein S18c, mitochondrial	0.37	-0.24	-0.04	-1.57	0.02	-0.24	-0.55	-0.7	0.0282012	5	Mitochondrial ribosome
Q8R2Y8	Ptrh2	Peptidyl-tRNA hydrolase 2, mitochondrial	-0.21	-0.25	-0.41	-0.71	-0.61	-0.5	-0.67	-0.43	0.0135965	3	Mitochondrial transcription and mtRNA metabolism
Q8R5L1;O35658	C1qbp	Complement component 1 Q subcomponent-binding protein, mitochondrial	-0.52	0	-0.05	-0.58	-0.69	-0.06	-0.54	-0.26	0.00201514	1	Other
Q8VDC0	Lars2	Probable leucine--tRNA ligase, mitochondrial	-0.14	-0.88	-0.87	-0.28	-0.46	-0.56	-0.68	-0.41	0.00042136	2	Mitochondrial transcription and mtRNA metabolism
Q8VDK1-2;Q8VDK1;D3YY53;D3Z3I3;D3Z2Y2	Nit1	Nitrilase homolog 1	-0.34	0.36	0.55	0.37	0.41	0.2	0.23	0.73	0.0154661	1	Apoptosis
Q8VDT9	Mrpl50	39S ribosomal protein L50, mitochondrial	0.19	-0.29	-0.33	-0.71	-0.69	-0.41	-0.5	-0.63	0.000431007	4	Mitochondrial ribosome
Q8VE22;Q3TI14;F7ARZ1;A7M7Q8;Q5SXC9	Mrps23	28S ribosomal protein S23, mitochondrial	0.17	-0.64	-0.44	-0.58	-0.42	-0.57	-0.48	-0.78	6.66425e-05	4	Mitochondrial ribosome
Q8VEA4	Chchd4	Mitochondrial intermembrane space import and assembly protein 40	0.55	-0.27	-0.51	0.45	0.15	0	0.01	-0.16	0.0248437	2	Mitochondrial import and chaperones
Q91V16	Lyrm5	LYR motif-containing protein 5	0.42	0.46	0.47	1.09	1.34	0.34	1.09	1.16	0.00647249	5	Other
Q91VA6;F6SQH7	Poldip2	Polymerase delta-interacting protein 2	0.17	0.04	0.26	-0.28	-0.38	-0.58	-0.39	-0.21	0.025492	4	Unknown
Q91VM9;D3Z636;Q91VM9-2;G8JL76;D3Z096	Ppa2	Inorganic pyrophosphatase 2, mitochondrial	-0.29	-0.29	-0.22	-0.39	-0.41	-0.53	-0.38	-0.09	0.00586424	3	Unknown
Q91VN4;E9Q4M4	Chchd6	MICOS complex subunit Mic25	0.44	0.21	-0.02	0.14	0.37	-0.11	0.13	-0.1	0.0315295	4	Mitochondrial morphology
Q91VT4;D3Z6C4	Cbr4	Carbonyl reductase family member 4	-0.42	0.34	0.36	0.11	0.17	0.32	0.34	0.46	0.000463121	1	Lipid and acetyl CoA metabolism
Q91WK1	Spryd4	SPRY domain-containing protein 4	-0.26	-0.49	-0.42	-0.96	-0.93	-0.81	-1.1	-0.81	5.60602e-06	4	Other
Q91WK5	Gcsh	Glycine cleavage system H protein, mitochondrial	0.12	-2.21	-0.16	0.73	0.57	0.94	0.65	0.91	4.0197e-05	2	Pyruvate and aminoacid metabolism
Q91WM2	Cecr5	Cat eye syndrome critical region protein 5 homolog	-0.42	0.08	0.18	-0.57	-0.87	0.17	-0.55	-0.03	0.00207469	1	Unknown
Q91XH5;Q64105;G3UXX3;G3UZ79	Spr	Sepiapterin reductase	-0.31	1.05	1.21	1	1.07	1.19	1.06	1.34	5.60602e-06	1	Other
Q91YJ5;Q5M6W7;F6RR02;Q5M6W8	Mtif2	Translation initiation factor IF-2, mitochondrial	-0.12	-0.25	-0.17	-0.53	-0.2	0.1	-0.42	-0.26	0.0216954	5	Other mitochondrial protein synthesis factors
Q91YP0	L2hgdh	L-2-hydroxyglutarate dehydrogenase, mitochondrial	-0.25	0.75	0.8	0.57	0.63	0.46	0.58	0.75	6.44174e-06	1	Other
Q91YP2	Nln	Neurolysin, mitochondrial	-0.5	-1.16	-1.65	-1.2	-1.78	-0.79	-2.77	-1.11	0.00726746	3	Other
Q91Z53;D6REG4;B1AXQ0	Grhpr	Glyoxylate reductase/hydroxypyruvate reductase	-0.32	-0.28	-0.37	-0.52	-0.55	-0.29	-0.77	-0.39	0.0237198	3	Other
Q91ZA3;H3BL62;D3YWM4;H3BK61;D3YZC0;H3BJR0;H3BKW6	Pcca	Propionyl-CoA carboxylase alpha chain, mitochondrial	-0.29	0.72	0.77	0.54	0.58	0.6	0.48	0.73	4.0197e-05	1	Other
Q91ZE0	Tmlhe	Trimethyllysine dioxygenase, mitochondrial	-0.07	-0.31	-0.15	-0.59	-0.88	-0.87	-0.64	-0.53	0.000544764	4	Other
Q921G7;Q6PF96	Etfdh	Electron transfer flavoprotein-ubiquinone oxidoreductase, mitochondrial	-0.15	-0.12	-0.13	-0.01	0.05	0.03	0.2	0.22	0.0225359	5	Other
Q921H8;H3BJZ9;H3BKL5;Q8VCH0;H3BKA1;H3BJC1	Acaa1a;Acaa1b	3-ketoacyl-CoA thiolase A, peroxisomal;3-ketoacyl-CoA thiolase B, peroxisomal	0.08	-0.33	-0.6	-1.89	-1.23	0.26	-0.52	-0.88	0.00270468	5	Lipid and acetyl CoA metabolism
Q921S7	Mrpl37	39S ribosomal protein L37, mitochondrial	-0.25	-0.52	-0.56	-0.71	-0.95	-1.33	-1.09	-0.95	0.000298112	4	Mitochondrial ribosome
Q922B1	Macrod1	O-acetyl-ADP-ribose deacetylase MACROD1	-0.05	0.47	0.4	0.62	0.83	0.25	0.68	0.61	0.000347147	5	Other
Q922H2	Pdk3	[Pyruvate dehydrogenase (acetyl-transferring)] kinase isozyme 3, mitochondrial	0.33	-4.42	-1.02	-0.66	-1.61	-1.62	-1.71	-2.19	0.000200282	2	Pyruvate and aminoacid metabolism
Q922Q4;Q922W5;A2ABZ3;A2ABZ0;A2ABZ2	Pycr2	Pyrroline-5-carboxylate reductase 2	0.31	-0.87	-1.88	-2	-2.49	-2.91	-0.38	-1.7	0.00137139	4	Pyruvate and aminoacid metabolism
Q924D0;D3Z792	Rtn4ip1	Reticulon-4-interacting protein 1, mitochondrial	-0.32	0.29	0.44	0.29	0.06	0.11	-0.04	0.2	0.0282012	1	Unknown
Q924L1-3;Q924L1-2;Q924L1	Letmd1	LETM1 domain-containing protein 1	-0.36	2.96	1.26	-0.83	-0.38	-1.46	-0.47	-0.68	0.00515752	3	Other
Q924T2	Mrps2	28S ribosomal protein S2, mitochondrial	-0.17	-0.58	-0.56	-0.47	-0.91	-0.94	-0.8	-0.72	0.000257885	4	Mitochondrial ribosome
Q925I1;Q925I1-2;H3BK90;H3BKI6;V9GWS5;V9GWS6	Atad3	ATPase family AAA domain-containing protein 3	0.03	-0.34	-0.38	-0.55	-0.54	-0.83	-0.83	-0.7	2.79923e-06	4	Other
Q99JB2;A2AG39;F6WI02;A2AG41	Stoml2	Stomatin-like protein 2, mitochondrial	-0.22	-0.38	-0.49	-0.98	-0.97	-0.41	-0.8	-0.78	1.27494e-05	5	Other
Q99JR6;Q3V3C7;Q3V3F1;A0A087WSM7	Nmnat3	Nicotinamide mononucleotide adenylyltransferase 3	-0.45	0.59	0.62	0.17	-0.01	0.36	0.37	0.83	0.000938515	1	Other
Q99KI0	Aco2	Aconitate hydratase, mitochondrial	-0.24	0.03	0.08	0.04	0.05	0.23	0.11	0.23	0.00668404	1	Pyruvate and aminoacid metabolism
Q99KK9;G5E823;Q61035	Hars2	Probable histidine--tRNA ligase, mitochondrial	-0.3	0.04	0.26	-0.3	-0.41	-0.67	-0.48	-0.41	0.00747756	3	Mitochondrial transcription and mtRNA metabolism
Q99L13	Hibadh	3-hydroxyisobutyrate dehydrogenase, mitochondrial	-0.14	-0.03	0.06	-0.41	-0.6	-0.15	-0.45	-0.33	0.000358562	3	Pyruvate and aminoacid metabolism
Q99LB2	Dhrs4	Dehydrogenase/reductase SDR family member 4	-0.14	0.32	0.44	0.25	0.34	0.32	0.09	0.44	0.00201362	1	Other
Q99LB7;A2AH52;A2AH53	Sardh	Sarcosine dehydrogenase, mitochondrial	-0.34	-1.19	-1.31	-1.6	-1.22	-1.66	-0.53	-1.48	0.00996096	4	Mitochondrial 1C pathway
Q99LC3;A0A087WR38	Ndufa10	NADH dehydrogenase [ubiquinone] 1 alpha subcomplex subunit 10, mitochondrial	-0.24	0.03	0.16	-0.23	-0.53	-0.23	-0.4	-0.13	0.0162976	3	OXPHOS
Q99LC5	Etfa	Electron transfer flavoprotein subunit alpha, mitochondrial	0.09	0.26	0.41	0.41	0.48	0.54	0.45	0.54	0.00123871	1	Other
Q99LX0;A2A813;A2A815;A2A817;A2A816	Park7	Protein DJ-1	-0.07	-0.11	0.06	0.3	0.41	0.39	0.16	0.1	0.0234426	2	Other
Q99LY9;B1ARW4	Ndufs5	NADH dehydrogenase [ubiquinone] iron-sulfur protein 5;NADH dehydrogenase [ubiquinone] iron-sulfur protein 5, N-terminally processed	0.31	-0.79	-1.02	0.58	0.9	0.29	0.47	0.18	0.000104608	2	OXPHOS
Q99MN9;E9Q1J7;D3YZC1;A0A087WQV1	Pccb	Propionyl-CoA carboxylase beta chain, mitochondrial	-0.41	0.55	0.56	0.36	0.37	0.4	0.32	0.74	5.83715e-05	1	Other
Q99MR8;A0A0G2JFQ5;A0A0G2JF64	Mccc1	Methylcrotonoyl-CoA carboxylase subunit alpha, mitochondrial	-0.27	0.78	0.82	0.71	0.69	0.59	0.57	0.84	7.28308e-05	1	Pyruvate and aminoacid metabolism
Q99N15;A2AFQ2;O08756	Hsd17b10	3-hydroxyacyl-CoA dehydrogenase type-2	-0.25	0.36	0.44	0.2	0.07	-0.02	-0.2	0.29	0.0152817	1	Mitochondrial transcription and mtRNA metabolism
Q99N84;G3UYQ9;G3UYX8;G3UX79;Q99N84-2	Mrps18b	28S ribosomal protein S18b, mitochondrial	0.26	-0.74	-1.05	-0.4	-0.34	-0.13	-0.03	-0.48	0.00142066	5	Mitochondrial ribosome
Q99N87;B2FDG7	Mrps5	28S ribosomal protein S5, mitochondrial	0	-0.55	-0.5	-0.65	-0.7	-0.71	-0.9	-0.93	2.79923e-06	4	Mitochondrial ribosome
Q99N91	Mrpl34	39S ribosomal protein L34, mitochondrial	0.01	-0.72	-0.34	-0.93	-1.73	-0.63	-0.73	-0.8	0.00927896	5	Mitochondrial ribosome
Q99N92	Mrpl27	39S ribosomal protein L27, mitochondrial	0.06	-0.55	-0.6	-0.61	-0.59	-0.59	-0.33	-0.59	0.000286898	4	Mitochondrial ribosome
Q99N93	Mrpl16	39S ribosomal protein L16, mitochondrial	0.02	-0.62	-0.57	-0.58	-0.96	-0.98	-0.98	-0.68	2.79923e-06	4	Mitochondrial ribosome
Q99N94;Q3UK02	Mrpl9	39S ribosomal protein L9, mitochondrial	-0.14	-0.43	-0.57	-0.89	-0.94	-0.93	-0.9	-0.89	2.79923e-06	4	Mitochondrial ribosome
Q99N95;D3Z456;F6W7C7	Mrpl3	39S ribosomal protein L3, mitochondrial	-0.12	-0.7	-0.71	-0.68	-0.71	-0.76	-0.65	-0.89	2.95725e-05	4	Mitochondrial ribosome
Q99N96;Q9D3F3	Mrpl1	39S ribosomal protein L1, mitochondrial	0.09	-0.54	-0.46	-0.67	-0.65	-0.62	-0.62	-0.64	6.17048e-05	4	Mitochondrial ribosome
Q99NB1	Acss1	Acetyl-coenzyme A synthetase 2-like, mitochondrial	-0.1	0.58	0.62	0.38	0.25	-0.02	0.2	0.48	0.00318163	1	Other
Q9CPP6;D3YTQ8	Ndufa5	NADH dehydrogenase [ubiquinone] 1 alpha subcomplex subunit 5	-0.15	0.19	0.17	-0.18	-0.02	0.43	0.21	0.12	0.030644	1	OXPHOS
Q9CPQ3	Tomm22	Mitochondrial import receptor subunit TOM22 homolog	-0.3	-0.15	-0.06	-0.35	-0.66	-0.79	-0.81	-0.34	0.0237198	3	Mitochondrial import and chaperones
Q9CPR5	Mrpl15	39S ribosomal protein L15, mitochondrial	-0.43	-0.7	-0.79	-1.15	-1.26	-0.74	-0.94	-0.86	5.78934e-05	5	Mitochondrial ribosome
Q9CPS6;F8WH96;E9Q7F8	Hint3	Histidine triad nucleotide-binding protein 3	-0.37	0.49	0.38	0.5	0.46	0.36	0.77	0.92	0.0260315	1	Unknown
Q9CPV3	Mrpl42	39S ribosomal protein L42, mitochondrial	0	-0.83	-0.7	-0.73	-0.73	-0.59	-0.67	-0.86	0.00361607	4	Mitochondrial ribosome
Q9CPV4;E9Q197;Q9CPV4-2;Q9CPV4-3;F6ZTG3;E9Q055;E9Q2R6;F7BB55	Glod4	Glyoxalase domain-containing protein 4	-0.35	0.72	0.71	0.2	0.18	0.6	0.39	0.6	0.000207877	1	Other
Q9CPW3	Mrpl54	39S ribosomal protein L54, mitochondrial	0.47	0.1	-0.5	0.06	0.14	-1.22	-0.86	-0.5	0.00345656	4	Mitochondrial ribosome
Q9CPX7	Mrps16	28S ribosomal protein S16, mitochondrial	0.36	-0.49	-0.37	-0.18	-0.3	0.02	-0.37	-0.39	0.00801633	4	Mitochondrial ribosome
Q9CPY7;Q9CPY7-2;A0A0G2JEM7	Lap3	Cytosol aminopeptidase	-0.31	-0.25	-0.22	-0.54	-0.63	-0.43	-0.64	-0.36	0.000838277	3	Other
Q9CPZ8	Cmc1	COX assembly mitochondrial protein homolog	0.12	-0.67	-1.38	0.31	0.58	1.15	0.97	0.19	0.00528266	2	OXPHOS assembly and biogenesis
Q9CQ06;A0A0A6YXP0	Mrpl24	39S ribosomal protein L24, mitochondrial	0	-0.62	-0.55	-0.63	-0.69	-0.78	-0.63	-0.77	0.000130976	4	Mitochondrial ribosome
Q9CQ40	Mrpl49	39S ribosomal protein L49, mitochondrial	0.2	-0.51	-0.51	-0.76	-0.87	-0.45	-0.52	-0.56	9.13445e-05	4	Mitochondrial ribosome
Q9CQ62	Decr1	2,4-dienoyl-CoA reductase, mitochondrial	-0.33	0.19	0.12	-0.12	-0.13	0.12	-0.02	0.2	0.0236513	1	Lipid and acetyl CoA metabolism
Q9CQ75	Ndufa2	NADH dehydrogenase [ubiquinone] 1 alpha subcomplex subunit 2	0.12	-0.05	-0.01	0.01	0.35	0.22	0.35	0.25	0.0292055	2	OXPHOS
Q9CQ92;G3X9U9;D3YZ32	Fis1	Mitochondrial fission 1 protein	0.52	-0.1	0.17	0.42	0.4	-0.09	-0.09	0.4	0.00465913	4	Mitochondrial morphology
Q9CQE3;D3Z198;D3YWF8	Mrps17	28S ribosomal protein S17, mitochondrial	-0.23	-0.84	-0.9	-0.96	-1.08	-0.87	-0.79	-0.8	7.24558e-06	4	Mitochondrial ribosome
Q9CQF0	Mrpl11	39S ribosomal protein L11, mitochondrial	0.36	-0.53	-0.5	-0.25	-0.34	-0.56	-0.73	-0.48	3.88067e-05	4	Mitochondrial ribosome
Q9CQF8	Mrpl57	Ribosomal protein 63, mitochondrial	0.14	-0.73	-0.48	-0.7	-0.78	-0.51	-1.04	-0.71	1.99843e-05	4	Mitochondrial ribosome
Q9CQJ1	Higd2a	HIG1 domain family member 2A	-1.03	0.59	-0.34	-0.96	-1.49	-1.32	-3.16	-1.49	0.00654513	3	OXPHOS
Q9CQL5	Mrpl18	39S ribosomal protein L18, mitochondrial	-0.13	-0.5	-0.69	-0.43	-0.96	-1.1	-0.74	-0.87	0.0076345	4	Mitochondrial ribosome
Q9CQN1	Trap1	Heat shock protein 75 kDa, mitochondrial	-0.27	-0.24	-0.12	-0.64	-0.75	-0.77	-0.56	-0.37	3.04902e-05	3	Mitochondrial import and chaperones
Q9CQN7;F7CXS7;A0A0A6YXF9	Mrpl41;Gm6434	39S ribosomal protein L41, mitochondrial	0.09	-0.67	-0.58	-0.92	-0.74	-0.64	-0.79	-0.71	6.66425e-05	4	Mitochondrial ribosome
Q9CQP0;Q8R0E2	Mrpl33	39S ribosomal protein L33, mitochondrial	-0.33	-0.7	-0.79	-1.41	-1.11	-0.5	-0.67	-0.69	0.00699275	5	Mitochondrial ribosome
Q9CQV1;D6RI93	Pam16	Mitochondrial import inner membrane translocase subunit TIM16	-0.27	-0.16	-0.12	-0.62	-0.62	-0.48	-0.46	-0.23	0.00324425	3	Mitochondrial import and chaperones
Q9CQV5	Mrps24	28S ribosomal protein S24, mitochondrial	-0.41	-0.6	-0.74	-1.01	-1.17	-0.83	-0.83	-1.05	0.0027433	5	Mitochondrial ribosome
Q9CQV7;D3Z5K6;G3X8S1;Q9CQV7-3;Q9CQV7-2	Dnajc19	Mitochondrial import inner membrane translocase subunit TIM14	0.16	-0.44	-0.55	0.05	0.01	-0.5	-0.38	-0.19	0.00746669	4	Mitochondrial import and chaperones
Q9CQY9	Ndufc1	NADH dehydrogenase [ubiquinone] 1 subunit C1, mitochondrial	-2.67	-1.95	-1.41	-0.34	-1.62	-3.53	-5.66	-0.95	0.0171521	4	OXPHOS
Q9CR10;H3BK04	Oxld1	Oxidoreductase-like domain-containing protein 1	-0.58	0.11	0.16	-0.58	-0.15	0.41	-0.13	0.4	0.0441138	1	Other
Q9CR59	Gadd45gip1	Growth arrest and DNA damage-inducible proteins-interacting protein 1	0.18	-0.87	-0.94	-0.81	-0.75	-0.55	-0.73	-0.73	0.00186158	4	Mitochondrial ribosome
Q9CR61	Ndufb7	NADH dehydrogenase [ubiquinone] 1 beta subcomplex subunit 7	0.01	-0.38	-0.5	0.23	0.15	-0.07	-0.09	-0.17	0.0110206	2	OXPHOS
Q9CR62	Slc25a11	Mitochondrial 2-oxoglutarate/malate carrier protein	-0.36	0.28	0.49	0.83	0.59	0.35	0.13	0.66	0.00373444	1	Mitochondrial carriers or transport
Q9CR98	Fam136a	Protein FAM136A	0.01	-0.33	-0.18	0.4	0.39	0.09	0.47	0.04	0.0260059	2	Unknown
Q9CRA7	Atp5s	ATP synthase subunit s, mitochondrial	-0.44	0.18	0.36	-0.01	-0.17	-0.27	-0.3	0.23	0.0479502	1	OXPHOS
Q9CRB8	Mtfp1	Mitochondrial fission process protein 1	-0.12	0.49	0.65	0.97	0.57	0.15	0.32	0.68	0.00537893	1	Mitochondrial morphology
Q9CRD0;Q9CRD0-2	Ociad1	OCIA domain-containing protein 1	0.04	-0.18	-0.28	-0.43	-0.4	-0.48	-0.46	-0.3	0.00183629	4	Other
Q9CWE0;D3YW54;D6RCX5;D3Z0X8;Q9CWE0-2	Mtfr1l	Mitochondrial fission regulator 1-like	0.46	-0.09	0.15	-0.17	-0.32	-0.27	-0.13	-0.09	5.28378e-05	4	Mitochondrial morphology
Q9CXJ4;D3Z492;F6ZFC5;D3Z1J6	Abcb8	ATP-binding cassette sub-family B member 8, mitochondrial	0.01	0.99	0.97	1.1	1.22	0.8	0.43	1.15	0.0176209	1	Unknown
Q9CXT8;D3Z1T9	Pmpcb	Mitochondrial-processing peptidase subunit beta	-0.17	-0.31	-0.29	-0.26	-0.39	-0.39	-0.52	-0.38	0.0162018	4	Mitochondrial import and chaperones
Q9CXU4;Q9WTQ8	Timm23	Mitochondrial import inner membrane translocase subunit Tim23	-0.03	-0.17	-0.07	-0.15	-0.62	-0.63	-1.08	-0.48	0.00042136	4	Mitochondrial import and chaperones
Q9CXV1	Sdhd	Succinate dehydrogenase [ubiquinone] cytochrome b small subunit, mitochondrial	-0.61	-0.6	-1.17	1.41	1.33	-0.31	-0.12	-0.46	0.0132536	2	OXPHOS
Q9CXW2	Mrps22	28S ribosomal protein S22, mitochondrial	0.16	-0.49	-0.41	-0.55	-0.64	-0.69	-0.74	-0.66	3.06024e-05	4	Mitochondrial ribosome
Q9CY16	Mrps28	28S ribosomal protein S28, mitochondrial	0.13	-0.59	-0.41	-0.48	-0.35	-0.58	-1.03	-0.47	0.000393303	4	Mitochondrial ribosome
Q9CY73;Q9CY73-2	Mrpl44	39S ribosomal protein L44, mitochondrial	0.07	-0.41	-0.34	-0.5	-0.67	-0.85	-0.87	-0.68	0.000431007	4	Mitochondrial ribosome
Q9CYW4	Hdhd3	Haloacid dehalogenase-like hydrolase domain-containing protein 3	-0.57	-0.32	-0.12	-0.7	-0.93	-0.12	-0.51	-0.51	0.0499171	1	Unknown
Q9CZ83;Q9CZ83-2	Mrpl55	39S ribosomal protein L55, mitochondrial	0.37	-0.57	-0.86	-0.33	-0.37	-0.79	-1.31	-0.96	6.44174e-06	4	Mitochondrial ribosome
Q9CZD3	Gars	Glycine--tRNA ligase	-0.1	-0.02	-0.08	-0.36	-1.12	-0.28	-1.28	-0.34	0.0154591	3	Mitochondrial transcription and mtRNA metabolism
Q9CZL5;P61458	Pcbd2	Pterin-4-alpha-carbinolamine dehydratase 2	-0.25	0.14	0.16	0.1	0.19	0.55	0.61	0.55	0.00562454	5	Other
Q9CZN7;G3UZ26;G3UYY1;P50431	Shmt2	Serine hydroxymethyltransferase	-0.03	-0.25	-0.2	-0.54	-0.64	-0.7	-0.56	-0.62	5.83715e-05	4	Mitochondrial 1C pathway
Q9CZN8	Qrsl1	Glutamyl-tRNA(Gln) amidotransferase subunit A, mitochondrial	-0.3	-0.21	0.03	-0.51	-0.42	-0.55	-0.44	-0.22	0.00127101	3	Mitochondrial transcription and mtRNA metabolism
Q9CZP5	Bcs1l	Mitochondrial chaperone BCS1	-0.24	0.22	0.5	0.2	-0.41	-0.87	-0.5	0.01	0.0403769	3	OXPHOS assembly and biogenesis
Q9CZR8;Q9CX33;D3Z4M7	Tsfm	Elongation factor Ts, mitochondrial	-0.26	-0.28	-0.29	-0.53	-0.49	-0.21	-0.55	-0.39	0.000186788	3	Other mitochondrial protein synthesis factors
Q9CZS1;G3UYH1;G3UWP3;Q9JHW9;P24549;O35945	Aldh1b1	Aldehyde dehydrogenase X, mitochondrial	-0.15	-1.44	-1.57	-2.58	-2.55	-2.72	-2.23	-2.67	5.26354e-07	4	Other
Q9CZU6	Cs	Citrate synthase, mitochondrial	-0.11	-0.08	-0.01	0.24	-0.03	-0.18	-0.33	-0.03	0.0250368	4	Pyruvate and aminoacid metabolism
Q9CZW5	Tomm70a	Mitochondrial import receptor subunit TOM70	0.06	-0.39	-0.37	-0.4	-0.45	-0.22	-0.27	-0.35	0.00231029	4	Mitochondrial import and chaperones
Q9D0D3	Mtpap	Poly(A) RNA polymerase, mitochondrial	-0.28	-0.05	-0.02	-0.55	-0.79	-0.4	-0.92	-0.47	0.0380022	3	Mitochondrial transcription and mtRNA metabolism
Q9D0G0	Mrps30	28S ribosomal protein S30, mitochondrial	-0.14	-0.85	-0.66	-0.78	-1.04	-0.87	-1.06	-0.78	6.44174e-06	4	Mitochondrial ribosome
Q9D0Q7;F6QAU7	Mrpl45	39S ribosomal protein L45, mitochondrial	0.09	-0.89	-0.59	-0.24	-0.38	-0.96	-1.05	-1.02	1.63523e-05	4	Mitochondrial ribosome
Q9D125	Mrps25	28S ribosomal protein S25, mitochondrial	0	-0.59	-0.51	-0.88	-0.98	-0.66	-0.92	-0.8	1.28286e-05	4	Mitochondrial ribosome
Q9D172	D10Jhu81e	ES1 protein homolog, mitochondrial	0.05	0.31	0.4	0.53	0.7	0.58	0.57	0.76	3.11769e-05	1	Unknown
Q9D1B9;F6U4U1	Mrpl28	39S ribosomal protein L28, mitochondrial	-0.06	-0.57	-0.57	-0.7	-0.8	-0.71	-0.61	-0.8	0.000200282	4	Mitochondrial ribosome
Q9D1H6;A2AJX3	Ndufaf4	NADH dehydrogenase [ubiquinone] 1 alpha subcomplex assembly factor 4	-0.14	0.44	0.55	0.27	0.02	-0.32	0.2	0.35	0.0491267	1	OXPHOS assembly and biogenesis
Q9D1H8	Mrpl53	39S ribosomal protein L53, mitochondrial	0.17	-0.61	-0.78	-0.83	-0.74	-0.7	-0.67	-0.76	0.000275632	4	Mitochondrial ribosome
Q9D1I6	Mrpl14	39S ribosomal protein L14, mitochondrial	0.36	-0.71	-0.56	-0.51	-0.57	-0.86	-0.69	-0.91	6.44174e-06	4	Mitochondrial ribosome
Q9D1L0;D3Z5B1;B2RPU8	Chchd2;Zbed5	Coiled-coil-helix-coiled-coil-helix domain-containing protein 2, mitochondrial	0.72	-1.02	-1.06	0.22	0.37	-0.02	-0.32	-0.29	0.00152505	2	Unknown
Q9D1N9;Q9D1N9-2	Mrpl21	39S ribosomal protein L21, mitochondrial	-0.03	-0.64	-0.71	-0.79	-0.96	-0.8	-1.41	-0.91	1.27494e-05	4	Mitochondrial ribosome
Q9D1P0;F7CXG9;G5E909	Mrpl13	39S ribosomal protein L13, mitochondrial	0.02	-0.6	-0.58	-0.69	-0.76	-0.83	-0.84	-0.87	1.63523e-05	4	Mitochondrial ribosome
Q9D1R9;A0A0G2JEY6;A0A0G2JGY8;D3YWC0	Rpl34	60S ribosomal protein L34	1.22	-1.29	-1.43	-1.42	-1.1	-1.86	-1.27	-1.81	0.0110182	4	Other
Q9D273;Q9D273-2;D3Z1G7	Mmab	Cob(I)yrinic acid a,c-diamide adenosyltransferase, mitochondrial	0.13	1.03	1.07	1.17	1.4	1.14	1.16	1.54	8.92237e-06	1	Other
Q9D2R8;Q8R2K5	Mrps33	28S ribosomal protein S33, mitochondrial	-0.01	-1.01	-0.99	-0.53	-0.8	-0.83	-0.74	-0.7	0.000200282	4	Mitochondrial ribosome
Q9D338	Mrpl19	39S ribosomal protein L19, mitochondrial	-0.18	-0.73	-0.58	-1	-1.09	-1.09	-1.1	-0.98	5.26354e-07	4	Mitochondrial ribosome
Q9D404;D3Z6F9	Oxsm	3-oxoacyl-[acyl-carrier-protein] synthase, mitochondrial	-0.18	0.55	0.35	0.4	0.42	0.35	0.15	0.18	0.0150867	1	Lipid and acetyl CoA metabolism
Q9D6U8	Fam162a	Protein FAM162A	0.34	-0.18	-0.07	0.24	0.32	-0.19	-0.22	-0.1	0.00586424	4	Unknown
Q9D6Y7-2;Q9D6Y7;Q9D6Y7-3;Q9D6Y7-4	Msra	Mitochondrial peptide methionine sulfoxide reductase	-0.01	0.45	0.52	0.38	0.62	0.57	0.45	0.67	0.000374527	1	Degradation and stress response
Q9D7B6;D3YTT4	Acad8	Isobutyryl-CoA dehydrogenase, mitochondrial	-0.37	0.04	0.08	0.01	-0.19	0.03	-0.12	0.16	0.0366855	1	Pyruvate and aminoacid metabolism
Q9D7J9	Echdc3	Enoyl-CoA hydratase domain-containing protein 3, mitochondrial	-0.34	0.4	0.59	0.36	0.29	0.42	0.45	0.72	3.11769e-05	1	Unknown
Q9D7N3	Mrps9	28S ribosomal protein S9, mitochondrial	-0.13	-0.62	-0.48	-0.6	-0.7	-0.63	-0.6	-0.72	0.000122529	4	Mitochondrial ribosome
Q9D7N6;A0A0A6YXW4	Mrpl30	39S ribosomal protein L30, mitochondrial	0.59	-0.61	-0.56	-0.4	-0.33	-1.26	-0.32	-0.9	0.00304205	4	Mitochondrial ribosome
Q9D880	Timm50	Mitochondrial import inner membrane translocase subunit TIM50	-0.34	-0.09	-0.17	-0.55	-0.43	-0.36	-0.26	-0.34	0.00216693	3	Mitochondrial import and chaperones
Q9D881;P19536;A0A0A6YVR0;F7C106	Cox5b	Cytochrome c oxidase subunit 5B, mitochondrial	0.28	-0.23	-0.39	0.36	0.65	0.58	0.43	0.02	0.01323	2	OXPHOS
Q9D8P4;H3BJT9;H3BIZ3;Q9D8P4-2	Mrpl17	39S ribosomal protein L17, mitochondrial	-0.19	-0.62	-0.79	-0.71	-0.65	-1.26	-1.22	-1.03	0.000593035	4	Mitochondrial ribosome
Q9D8S4	Rexo2	Oligoribonuclease, mitochondrial	-1.12	0.64	0.73	0.58	0.09	0.56	-1.97	-0.38	0.0126528	1	Mitochondrial transcription and mtRNA metabolism
Q9D8T7;Q9D8T7-2;F8WHU8;F7DE82	Slirp	SRA stem-loop-interacting RNA-binding protein, mitochondrial	0.16	-0.52	-0.5	-0.48	-0.29	-0.54	-0.15	-0.41	0.00327362	4	Mitochondrial transcription and mtRNA metabolism
Q9D8Z2	Triap1	TP53-regulated inhibitor of apoptosis 1	0.75	0.32	0.81	0.99	1.2	0.2	-0.01	-0.48	0.0337927	5	Apoptosis
Q9DA03;D6RD13	Lyrm7	Complex III assembly factor LYRM7	0.41	-0.49	0.41	0.42	0.59	0.74	0.87	-1.52	0.0288494	5	OXPHOS assembly and biogenesis
Q9DB15	Mrpl12	39S ribosomal protein L12, mitochondrial	0.22	-0.78	-0.6	-0.62	-0.5	-0.9	-0.72	-0.79	3.52383e-05	4	Mitochondrial ribosome
Q9DBF1-2;Q9DBF1;G3UYR8;G3UY72;E9Q1H3;E9Q1G1	Aldh7a1	Alpha-aminoadipic semialdehyde dehydrogenase	-0.32	0.16	0.17	0.14	0.28	0.26	0.23	0.53	0.0133256	1	Pyruvate and aminoacid metabolism
Q9DBL1;E9Q5L3	Acadsb	Short/branched chain specific acyl-CoA dehydrogenase, mitochondrial	-0.37	0.66	0.72	0.5	0.43	0.62	0.38	0.77	2.36152e-05	1	Lipid and acetyl CoA metabolism
Q9DC61;A2AIW9	Pmpca	Mitochondrial-processing peptidase subunit alpha	-0.2	-0.34	-0.32	-0.24	-0.49	-0.07	-0.43	-0.36	0.0190417	5	Mitochondrial import and chaperones
Q9DC71	Mrps15	28S ribosomal protein S15, mitochondrial	0.24	-0.68	-0.24	-0.39	-0.35	-0.55	-0.25	-0.49	0.000592247	4	Mitochondrial ribosome
Q9DCI9	Mrpl32	39S ribosomal protein L32, mitochondrial	0.4	-0.67	-0.73	-0.26	-0.62	-1.26	-0.6	-0.73	0.00113725	4	Mitochondrial ribosome
Q9DCJ5	Ndufa8	NADH dehydrogenase [ubiquinone] 1 alpha subcomplex subunit 8	0.12	-0.15	-0.04	0.3	0.33	0	0.25	-0.05	0.0205865	2	OXPHOS
Q9DCM0	Ethe1	Persulfide dioxygenase ETHE1, mitochondrial	-0.17	0.32	0.41	0.49	0.52	0.83	0.59	0.78	2.36855e-05	1	Other
Q9DCM2	Gstk1	Glutathione S-transferase kappa 1	-0.42	1.27	1.36	1.23	1.11	0.91	0.96	1.36	2.79923e-06	1	Degradation and stress response
Q9DCS3;A2A845	Mecr	Trans-2-enoyl-CoA reductase, mitochondrial	-0.17	0.1	0.1	-0.28	-0.23	-0.29	-0.23	-0.03	0.0203507	3	Lipid and acetyl CoA metabolism
Q9DCT2	Ndufs3	NADH dehydrogenase [ubiquinone] iron-sulfur protein 3, mitochondrial	-0.32	-0.02	0.05	-0.08	-0.19	-0.1	-0.21	0.1	0.0242305	1	OXPHOS
Q9DCU6	Mrpl4	39S ribosomal protein L4, mitochondrial	0	-0.38	-0.38	-0.58	-0.73	-1.03	-1.17	-0.78	0.000593035	4	Mitochondrial ribosome
Q9DCV4;A2AGJ2	Rmdn1	Regulator of microtubule dynamics protein 1	-0.41	0.08	0.21	-0.53	-0.39	-0.5	-0.41	-0.08	0.00340142	3	Unknown
Q9DCW4	Etfb	Electron transfer flavoprotein subunit beta	0.11	0.19	0.22	0.42	0.47	0.44	0.26	0.38	0.00186158	1	Other
Q9DCW5;P43024	Cox6a1	Cytochrome c oxidase subunit 6A, mitochondrial;Cytochrome c oxidase subunit 6A1, mitochondrial	-0.02	-0.23	-0.4	-0.71	-0.93	-1.14	-1.17	-0.88	0.000130976	4	OXPHOS
Q9DCZ4-2;Q9DCZ4;Q9DCZ4-3	Apoo	Apolipoprotein O	-0.26	-0.39	-0.08	0.14	-0.32	-0.63	-0.3	-0.23	0.0424184	4	Mitochondrial morphology
Q9EP89	Lactb	Serine beta-lactamase-like protein LACTB, mitochondrial	-0.25	-0.38	-0.14	-0.49	-0.65	-0.5	-0.72	-0.28	0.00608851	3	Unknown
Q9EQ20	Aldh6a1	Methylmalonate-semialdehyde dehydrogenase [acylating], mitochondrial	-0.21	0.93	0.93	0.74	0.6	0.56	0.48	0.88	0.000249622	1	Pyruvate and aminoacid metabolism
Q9EQI8;REV__Q9ERK0	Mrpl46	39S ribosomal protein L46, mitochondrial	-0.19	-0.6	-0.58	-0.86	-1.09	-0.99	-1.05	-0.85	2.79923e-06	4	Mitochondrial ribosome
Q9ESW4;Q9ESW4-2	Agk	Acylglycerol kinase, mitochondrial	0	-0.37	-0.35	-0.4	-0.66	-0.78	-0.41	-0.36	5.78934e-05	4	Lipid and acetyl CoA metabolism
Q9JHI5	Ivd	Isovaleryl-CoA dehydrogenase, mitochondrial	-0.32	0.7	0.71	0.64	0.62	0.67	0.52	0.98	3.28016e-05	1	Pyruvate and aminoacid metabolism
Q9JHW2	Nit2	Omega-amidase NIT2	-0.26	0.58	0.51	0.32	0.21	0.62	0.28	0.57	0.000271442	1	Other
Q9JIK9	Mrps34	28S ribosomal protein S34, mitochondrial	-0.11	-0.58	-0.6	-0.81	-0.79	-0.81	-1.03	-0.59	8.41941e-06	4	Mitochondrial ribosome
Q9JIY5;D3YX27;F6TCV0;F6XUR8;D3YX28;S4R1B3;S4R1A8;A2RT60	Htra2	Serine protease HTRA2, mitochondrial	-0.38	0.13	0.46	-0.27	-0.12	-0.37	-0.49	0.28	0.043282	1	Apoptosis
Q9JK42	Pdk2	[Pyruvate dehydrogenase (acetyl-transferring)] kinase isozyme 2, mitochondrial	-0.44	0.38	0.31	0.31	0.02	-0.34	-0.16	0.37	0.00268506	1	Pyruvate and aminoacid metabolism
Q9JKF7	Mrpl39	39S ribosomal protein L39, mitochondrial	0.11	-0.76	-0.66	-0.63	-0.73	-0.84	-0.96	-0.66	1.18934e-06	4	Mitochondrial ribosome
Q9JLR9	Higd1a	HIG1 domain family member 1A, mitochondrial	-1.25	-0.54	-0.32	-0.02	-0.34	-0.11	-0.42	-0.26	0.0108012	1	OXPHOS
Q9JLZ3;F6RT60;F6R307;Q9JLZ3-3;E9Q6L3;E9QMT1;Q9JLZ3-2	Auh	Methylglutaconyl-CoA hydratase, mitochondrial	-0.12	0.51	0.6	0.72	0.84	0.76	0.53	0.85	0.000108058	1	Pyruvate and aminoacid metabolism
Q9QX60-2;Q9QX60;Q504N4	Dguok	Deoxyguanosine kinase, mitochondrial	-0.31	0.44	0.47	0.04	-0.18	-0.01	-0.2	0.39	0.0056177	1	Mitochondrial nucleotide synthesis
Q9QXX4;A0A0G2JGT3;A0A0G2JES2	Slc25a13	Calcium-binding mitochondrial carrier protein Aralar2	-0.32	0.57	0.46	0.29	0.14	0.44	0.21	0.54	0.00345167	1	Mitochondrial carriers or transport
Q9QYR9;O55137;Q91YQ6;Q32Q92-2;Q32Q92;Q8BWN8;Q9QYR7-2;Q6Q2Z6;Q9QYR7	Acot2;Acot1	Acyl-coenzyme A thioesterase 2, mitochondrial;Acyl-coenzyme A thioesterase 1	-0.41	-0.13	-0.01	-0.69	-0.88	-0.35	-0.41	-0.22	0.000292517	3	Lipid and acetyl CoA metabolism
Q9QZ23	Nfu1	NFU1 iron-sulfur cluster scaffold homolog, mitochondrial	0.46	-0.12	-0.08	0.44	0.44	0.24	0.05	0.27	0.0306599	2	Iron sulphur cluster and heme biogenesis
Q9QZH6;J3KMM6	Ecsit	Evolutionarily conserved signaling intermediate in Toll pathway, mitochondrial	0	-0.37	-0.54	-0.34	-0.36	-0.57	-0.48	-0.45	0.00330253	4	OXPHOS assembly and biogenesis
Q9R0X4;Q32MW3	Acot9;Acot10	Acyl-coenzyme A thioesterase 9, mitochondrial;Acyl-coenzyme A thioesterase 10, mitochondrial	-0.17	-0.16	-0.05	0	-0.2	-0.44	-0.69	-0.35	0.0171122	4	Lipid and acetyl CoA metabolism
Q9R112;F6ZKZ3;H3BLH2	Sqrdl	Sulfide:quinone oxidoreductase, mitochondrial	-0.19	1.16	1.17	0.96	0.89	0.85	1.02	1.32	1.33135e-06	1	Other
Q9WU79;F6PYI8;F6YFQ5;F6XMC0;E9PUR5	Prodh	Proline dehydrogenase 1, mitochondrial	-0.21	0.01	-0.01	-0.34	-0.55	-0.24	-0.44	-0.53	0.00123871	3	Pyruvate and aminoacid metabolism
Q9WUR9;F6TEU8;A2ARF6;A2ARF5	Ak4	Adenylate kinase 4, mitochondrial	-0.16	1.03	1.09	0.96	1.16	1.04	0.98	1.26	1.25649e-05	1	Mitochondrial nucleotide synthesis
Q9WV98	Timm9	Mitochondrial import inner membrane translocase subunit Tim9	0.47	-0.1	-0.23	0.24	0.33	0.35	0.11	0.01	0.0351267	2	Mitochondrial import and chaperones
Q9Z0V8;D3Z1K5;D3Z1Z0	Timm17a	Mitochondrial import inner membrane translocase subunit Tim17-A	0.16	0.03	-0.01	-2.08	-2.15	-0.39	-0.44	-0.77	0.0260315	5	Mitochondrial import and chaperones
Q9Z2I8	Suclg2	Succinyl-CoA ligase [GDP-forming] subunit beta, mitochondrial	-0.17	0.79	0.77	0.61	0.78	0.9	0.72	1.03	8.20465e-06	1	Pyruvate and aminoacid metabolism
Q9Z2Y8;Q80ZV3	Prosc	Proline synthase co-transcribed bacterial homolog protein	-0.04	0.31	0.49	0.62	1.01	0.97	0.78	1.04	0.000128408	1	Other
V9GX21;H3BLL2;Q811I0;H3BJP9;H3BK16;H3BLD0;H3BKR0	Atpaf1	ATP synthase mitochondrial F1 complex assembly factor 1	-0.08	0.55	0.65	0.36	0.38	-0.06	-0.04	0.34	0.00455188	1	OXPHOS assembly and biogenesis
V9GXI7;Q9CQL4;V9GX65	Mrpl20	39S ribosomal protein L20, mitochondrial	-0.07	-1.02	-0.8	-0.96	-1	-0.83	-0.97	-0.91	0.00245115	4	Mitochondrial ribosome
Z4YKM2;B2RWE3;B1AR13	Cisd3	CDGSH iron-sulfur domain-containing protein 3, mitochondrial	0.19	-0.07	0.04	0.73	0.8	0.43	0.43	0.14	0.00415335	2	Iron sulphur cluster and heme biogenesis

## Sheet: C_Z-score and clustering
Protein.IDs	Gene names	Protein names	Week.4	Week.8	Week.9	Week.12	Week.14	Week.18	Week.19	Week.23	Cluster	Manual category.annotation
A0A087WQY7;A2AMZ4		Uncharacterized protein C17orf89 homolog	0.834194	-1.42227	-0.803701	1.11298	1.13912	0.459569	-0.751428	-0.568472	2	OXPHOS assembly and biogenesis
A0A087WRE7;Q8R0N6;Q8R0N6-2	Adhfe1	Hydroxyacid-oxoacid transhydrogenase, mitochondrial	1.12975	1.16298	1.19621	-0.431964	-0.697788	-1.09652	-0.99684	-0.265824	4	Other
A0A0A0MQ68;Q60759;D3Z4I2	Gcdh	Glutaryl-CoA dehydrogenase, mitochondrial	-1.87532	0.700053	0.781811	0.168626	-0.444559	-0.771591	0.209505	1.23148	1	Pyruvate and aminoacid metabolism
A0A0A0MQ70;Q5SWT3	Slc25a35	Solute carrier family 25 member 35	-1.66256	1.51903	1.07647	0.478433	-0.227256	-0.442551	-0.466472	-0.275099	1	Mitochondrial carriers or transport
A0A0G2JGJ1;Q8BVI4;D3YWR7;A0A0G2JGY0;D3Z1A1;D3Z099	Qdpr	Dihydropteridine reductase	-1.67858	0.978802	0.907938	-0.438468	-1.11167	0.73078	-0.0487186	0.659916	1	Other
A2ADF7;A2ADF7-2	Slc25a34	Solute carrier family 25 member 34	0.589223	0.146969	-0.500233	1.06384	0.869677	0.513716	-1.9025	-0.780687	4	Mitochondrial carriers or transport
A2AIL4	Ndufaf6	NADH dehydrogenase (ubiquinone) complex I, assembly factor 6	1.20202	0.356642	0.673657	0.0924627	-0.330224	-1.70396	-1.12276	0.832164	3	OXPHOS assembly and biogenesis
A2AKU9	Atp5c1	ATP synthase subunit gamma	-0.123943	-0.973838	-0.548891	1.19812	1.85915	-0.123943	-0.643323	-0.643323	2	Other
A2AQ17;Q9CWX2	Ndufaf1	Complex I intermediate-associated protein 30, mitochondrial	1.4926	0.508715	0.82177	-0.117396	-0.564617	-1.86156	-0.162118	-0.117396	4	OXPHOS assembly and biogenesis
B1AWZ5;Q9CQE1	Nipsnap3b	Protein NipSnap homolog 3B	1.77456	0.0863302	-0.251317	-0.35875	0.546758	-1.66329	0.47002	-0.604311	4	Unknown
B1AXP6-2;B1AXP6;B1AXP6-3;B1AXP6-4	Tomm5	Mitochondrial import receptor subunit TOM5 homolog	1.03572	-1.39438	-0.867373	1.21139	0.91861	0.18665	-0.164691	-0.92593	2	Mitochondrial import and chaperones
B1B1D8;Q9D773;B1B1D7	Mrpl2	39S ribosomal protein L2, mitochondrial	2.01776	0.0903474	0.0903474	-1.4034	-0.776988	0.427644	-0.0542084	-0.391505	4	Mitochondrial ribosome
B7ZMP1;B7ZMP1-2;E9Q1R1	Xpnpep3	Probable Xaa-Pro aminopeptidase 3	0.5174	1.18501	1.1316	-0.711007	-1.67237	-0.55078	-0.417258	0.5174	3	Pyruvate and aminoacid metabolism
D3Z7C0;Q9Z2Q5	Mrpl40	39S ribosomal protein L40, mitochondrial	2.37733	-0.572385	-0.207182	-0.263367	-0.40383	-0.122905	0.0456503	-0.853309	4	Mitochondrial ribosome
D3Z7P3-2;F6U529;F6RDM4;Q571F8	Gls	Glutaminase kidney isoform, mitochondrial	0.507611	-2.23832	-0.0725159	0.565624	-0.51728	0.681649	0.759	0.314236	2	Pyruvate and aminoacid metabolism
D3Z7P3;D3Z7P4;F7B327	Gls	Glutaminase kidney isoform, mitochondrial	1.48879	1.17536	0.817158	-0.257461	-1.01865	-0.749994	-0.660443	-0.79477	4	Pyruvate and aminoacid metabolism
D3Z7X0;D3Z2B3;F6RGT6	Acad12		-2.39785	0.452902	0.360942	0.103455	0.011495	0.34255	0.287374	0.839133	1	Lipid and acetyl CoA metabolism
E0CYB9;Q6PCP5;Q6PCP5-3;F7CTF8;E0CYI3;Q6PCP5-4;F7BC60	Mff	Mitochondrial fission factor	1.98013	-0.76159	-0.71807	-1.2403	0.587512	-0.195837	0.152318	0.195837	4	Mitochondrial morphology
E9PV44;O35143	Atpif1	ATPase inhibitor, mitochondrial	1.21799	-1.23645	-1.32872	0.350634	1.38408	0.129181	-0.129181	-0.387543	2	Other
E9PZS8;Q61387;F7B257	Cox7a2l	Cytochrome c oxidase subunit 7A-related protein, mitochondrial	0.432968	0.880662	1.30479	-0.721613	-1.85263	-0.462421	0.00883607	0.409405	3	OXPHOS assembly and biogenesis
E9Q179;Q8C5Q4;D3YUN1;D3YV30	Grsf1	G-rich sequence factor 1	0.839789	1.03065	1.22151	-0.839789	-0.763445	0.0381722	-1.56506	0.0381722	3	Mitochondrial transcription and mtRNA metabolism
E9Q3H6	Coq10a		-2.28085	0.363614	0.385651	0.121205	-0.209354	0.0110186	0.517875	1.09084	1	Ubiquinone biosynthesis
E9Q4A5;Q3TL26	Gm1818;Tfb2m	Dimethyladenosine transferase 2, mitochondrial	-1.01141	0.88375	0.636327	-1.49573	-1.05879	0.783728	0.525776	0.736349	1	Mitochondrial transcription and mtRNA metabolism
E9QJS0;G5E8U8;G5E8U5;Q80ZK0;D3Z6K5	Mrps10	28S ribosomal protein S10, mitochondrial	1.63518	0.612896	0.859001	-0.939458	-0.541904	-1.26129	0.253204	-0.617629	4	Mitochondrial ribosome
E9QMK9;Q8BH86;Q8BH86-2;F7CUW7	9030617O03Rik	UPF0317 protein C14orf159 homolog, mitochondrial	-2.27769	0.791488	0.874439	0.0172814	0.127882	-0.286871	0.238483	0.514986	1	Unknown
E9QN44;Q8CIM3;A0A087WR78	D2hgdh	D-2-hydroxyglutarate dehydrogenase, mitochondrial	-0.602975	-1.13004	-0.617297	-0.605839	-0.539956	1.25894	0.777709	1.45946	5	Pyruvate and aminoacid metabolism
E9QPQ8;Q8JZS9;D3Z6C8	Mrpl48	39S ribosomal protein L48, mitochondrial	1.59703	-0.813579	0.135596	0.843711	0.512253	-1.50663	-0.723181	-0.0451988	4	Mitochondrial ribosome
G3X9M0;Q9ER88;Q9ER88-2;G3UWZ6;G3UWJ4;G3UZC0;G3UWM7;G3UWR5;G3UYM6	Dap3	28S ribosomal protein S29, mitochondrial	2.09463	0.165762	0.527424	-0.155716	-1.07996	-0.95941	-0.396824	-0.1959	4	Mitochondrial ribosome
G5E895;D3Z494;S4R2G9;P45377	Akr1b10		-1.23823	1.22246	1.19091	-0.0394342	-0.638834	-1.11205	-0.291813	0.906987	1	Other
G5E8R3;E9QPD7;Q05920	Pcx;Pc	Pyruvate carboxylase;Pyruvate carboxylase, mitochondrial	-2.13298	1.25075	0.756982	-0.274111	0.08895	-0.0707969	-0.0853194	0.466533	1	Pyruvate and aminoacid metabolism
G5E8T9;Q99KB8;E9PYA3;Q99KB8-2;E9Q2H8;D3YWI0;D3YUX8;D3YV58	Hagh	Hydroxyacylglutathione hydrolase, mitochondrial	1.86889	0.123724	0.566528	0.149772	0.149772	-0.631646	-1.46516	-0.761882	4	Degradation and stress response
H7BX88;P47934;B7ZDD7;F7BF80;A2AWJ5;B7ZDD8;A2AWE5	Crat	Carnitine O-acetyltransferase	-1.1149	0.940554	1.3443	0.243168	-0.270696	-1.37183	-0.601037	0.83044	1	Lipid and acetyl CoA metabolism
J3QMM7;K3W4M4;Q9CZ42-3;Q9CZ42;Q9CZ42-2;J3QN06;J3QPU6	Carkd	ATP-dependent (S)-NAD(P)H-hydrate dehydratase	-1.16147	1.0402	1.11483	-0.750993	-1.34806	0.704347	-0.228563	0.629715	1	Other
J3QMN4;D3Z0K8;J3QMQ8;Q9JLT4-2;Q9JLT4-4;Q9JLT4;Q9JLT4-3	Txnrd2	Thioredoxin reductase 2, mitochondrial	-1.43995	0.910989	1.57709	-0.382028	-0.538757	-0.382028	-0.57794	0.832625	1	Degradation and stress response
O08600	Endog	Endonuclease G, mitochondrial	0.78622	0.861098	1.42268	-0.935976	-1.38524	-0.78622	-0.299512	0.336951	3	Mitochondrial DNA maintenance and replication
O08749	Dld	Dihydrolipoyl dehydrogenase, mitochondrial	-2.08935	-0.157003	-0.350237	0.229466	1.09902	1.09902	0.0362315	0.132849	1	Pyruvate and aminoacid metabolism
O09174	Amacr	Alpha-methylacyl-CoA racemase	-0.81443	1.17853	1.40848	-0.776104	-1.04439	0.603636	-0.891082	0.335353	1	Lipid and acetyl CoA metabolism
O35129;F6QPR1;F6Q8V7	Phb2	Prohibitin-2	1.31356	0.462872	1.3636	-0.137611	-1.18846	-0.888214	-0.988294	0.0625503	4	Other
O35435;E9Q1V3;F6TCT7;D3YZY5;F6ZQJ5	Dhodh	Dihydroorotate dehydrogenase (quinone), mitochondrial	0.268638	0.729162	1.24085	-0.908254	-1.36878	-0.908254	-0.191885	1.13852	3	Mitochondrial nucleotide synthesis
O35855;O88374;D3Z7C8;D3Z3D7	Bcat2	Branched-chain-amino-acid aminotransferase, mitochondrial;Branched-chain-amino-acid aminotransferase	-2.35346	0.274905	0.650386	0.301725	-0.020115	0.0871651	0.140805	0.918586	1	Pyruvate and aminoacid metabolism
O35857;F7C189	Timm44	Mitochondrial import inner membrane translocase subunit TIM44	1.19699	0.846038	0.846038	-0.00626695	-0.307081	-0.758301	-1.86128	0.0438686	4	Mitochondrial import and chaperones
O35972	Mrpl23	39S ribosomal protein L23, mitochondrial	1.34012	0.641589	0.763074	-0.330286	-1.54513	0.611218	-0.391028	-1.08956	5	Mitochondrial ribosome
O55003	Bnip3	BCL2/adenovirus E1B 19 kDa protein-interacting protein 3	-1.09052	0.974618	1.48037	-0.87979	-1.00623	0.637453	-0.542625	0.426725	1	Apoptosis
O55028;D3Z7R0	Bckdk	[3-methyl-2-oxobutanoate dehydrogenase [lipoamide]] kinase, mitochondrial	-1.75713	0.754631	0.446169	-0.391086	-1.09614	0.402103	1.19529	0.446169	1	Pyruvate and aminoacid metabolism
O70571	Pdk4	[Pyruvate dehydrogenase (acetyl-transferring)] kinase isozyme 4, mitochondrial	-1.66057	0.679566	1.27887	0.00891819	-0.66173	-0.690268	1.10764	-0.0624274	1	Pyruvate and aminoacid metabolism
O88696	Clpp	ATP-dependent Clp protease proteolytic subunit, mitochondrial	-1.01184	1.0901	1.31371	-0.430451	-1.01184	0.955936	-0.967117	0.061493	1	Degradation and stress response
O88986;E9PWY6	Gcat	2-amino-3-ketobutyrate coenzyme A ligase, mitochondrial	-2.3709	-0.106885	0.145752	0.233203	0.233203	0.398388	0.699609	0.767626	1	Pyruvate and aminoacid metabolism
P08228	Sod1	Superoxide dismutase [Cu-Zn]	-2.10582	0.127521	0.899539	-0.368776	-0.0103395	0.0723767	0.127521	1.25798	1	Degradation and stress response
P08249;A0A0G2JF23;A0A0G2JGY4	Mdh2	Malate dehydrogenase, mitochondrial	0.241021	-1.62689	-0.90383	1.0846	1.50638	-0.0602553	-0.120511	-0.120511	2	Pyruvate and aminoacid metabolism
P09103;E9Q8G8	P4hb	Protein disulfide-isomerase	2.05522	-0.0889447	0.224141	-1.23692	-0.221769	-0.639216	0.556201	-0.648704	4	Other
P11352;A0A0A6YY34;A0A0A6YVV2	Gpx1	Glutathione peroxidase 1	0.140335	0.85477	1.82436	-0.650646	-0.676161	-1.41611	-0.165851	0.0893043	3	Degradation and stress response
P12787	Cox5a	Cytochrome c oxidase subunit 5A, mitochondrial	-1.2316	0.604603	-0.0671781	-1.14203	-0.694173	1.67945	0.694173	0.156749	1	OXPHOS
P14152;B1ATQ3	Mdh1	Malate dehydrogenase, cytoplasmic	1.18051	-0.226056	-0.572117	-0.951668	-0.918178	0.209311	1.78333	-0.505137	5	Pyruvate and aminoacid metabolism
P16332	Mut	Methylmalonyl-CoA mutase, mitochondrial	-2.24465	0.439479	0.666307	-0.467832	0.0236279	0.439479	0.212651	0.930939	1	Pyruvate and aminoacid metabolism
P16858;S4R1W1;A0A0A0MQF6;S4R257;D3YYI5;S4R1N5;V9GX06;S4R1W8;S4R2G5;Q64467;V9GXA7;V9GXK0	Gapdh;Gm3839;Gm7293	Glyceraldehyde-3-phosphate dehydrogenase	1.96249	-0.997812	-0.408698	0.0331377	-0.114141	-1.01254	0.902081	-0.364514	4	Pyruvate and aminoacid metabolism
P17665;B8JJA9	Cox7c	Cytochrome c oxidase subunit 7C, mitochondrial	-1.06037	-1.38192	-1.12162	0.715844	0.486162	1.0374	0.715844	0.608659	2	OXPHOS
P17710-3;G3UVV4;P17710-4;P17710;P17710-2;D3YYR4;D3Z365;D3Z105;B4YB29;F6QD41	Hk1	Hexokinase-1	1.95312	0.352398	0.830227	-0.483801	-0.436018	-1.12887	-0.746607	-0.340453	4	Pyruvate and aminoacid metabolism
P17751;H7BXC3	Tpi1	Triosephosphate isomerase	-0.665446	-0.317175	-0.864458	-0.366928	-0.366928	0.876896	2.12072	-0.416681	5	Pyruvate and aminoacid metabolism
P20108	Prdx3	Thioredoxin-dependent peroxide reductase, mitochondrial	-1.22441	0.222151	0.718116	1.25541	0.511464	-0.687118	-1.4724	0.676785	1	Degradation and stress response
P24270;A2AL20	Cat	Catalase	1.06435	0.521675	0.0565282	-1.44228	-1.09342	0.741327	1.01266	-0.860844	5	Degradation and stress response
P26443;F7CFA5	Glud1	Glutamate dehydrogenase 1, mitochondrial	-1.74914	0.403647	1.00164	-0.433547	-0.732545	-0.0747495	0.164449	1.42024	1	Pyruvate and aminoacid metabolism
P34914;P34914-2	Ephx2	Bifunctional epoxide hydrolase 2;Cytosolic epoxide hydrolase 2;Lipid-phosphate phosphatase	1.26184	0.730538	0.934884	0.321845	-0.822494	-0.291193	-1.72162	-0.413801	4	Other
P36552	Cpox	Oxygen-dependent coproporphyrinogen-III oxidase, mitochondrial	0.673722	0.336861	1.38955	-0.547399	-1.13691	-1.0948	-0.715829	1.0948	3	Iron sulphur cluster and heme biogenesis
P38060;V9GXD2;V9GWZ9;D3YVU9;Q8JZS7	Hmgcl	Hydroxymethylglutaryl-CoA lyase, mitochondrial	0.894059	0.761606	0.761606	-0.960286	-0.430473	-0.562926	-1.55633	1.09274	3	Lipid and acetyl CoA metabolism
P40630-2;P40630;D3Z0F3	Tfam	Transcription factor A, mitochondrial	-1.67661	0.490716	0.245358	-1.1859	-0.286251	1.34947	0.449823	0.613396	1	Mitochondrial DNA maintenance and replication
P42125	Eci1	Enoyl-CoA delta isomerase 1, mitochondrial	-1.68825	0.0625279	0.712818	1.113	0.362662	0.412684	-1.38812	0.412684	1	Lipid and acetyl CoA metabolism
P43023	Cox6a2	Cytochrome c oxidase subunit 6A2, mitochondrial	-1.33595	-1.13803	-0.940114	0.761987	0.999489	0.445317	1.11824	0.0890634	2	OXPHOS
P45952;D6RFD7	Acadm	Medium-chain specific acyl-CoA dehydrogenase, mitochondrial	-2.06319	0.068773	0.412638	0.206319	0.481411	0.137546	-0.618957	1.37546	1	Lipid and acetyl CoA metabolism
P47738;A0A0G2JEU1;A0A0G2JF60;A0A0G2JFQ0;D3YYF3	Aldh2	Aldehyde dehydrogenase, mitochondrial	-2.15619	0.922755	0.663086	-0.227211	-0.0788283	-0.41269	0.663086	0.62599	1	Other
P48771	Cox7a2	Cytochrome c oxidase subunit 7A2, mitochondrial	1.21533	-0.62409	-0.273724	-0.142336	-1.71898	-0.361315	0.689784	1.21533	5	OXPHOS
P50171;P50171-2;G3UX44	Hsd17b8;H2-Ke6	Estradiol 17-beta-dehydrogenase 8	-2.10681	0.249192	0.0679615	0.203885	0.928807	0.385115	-0.702269	0.974115	1	Other
P51660	Hsd17b4	Peroxisomal multifunctional enzyme type 2;(3R)-hydroxyacyl-CoA dehydrogenase;Enoyl-CoA hydratase 2	1.03237	-0.723327	-0.956225	-0.56209	-0.974141	0.315756	1.76689	0.100773	5	Lipid and acetyl CoA metabolism
P51881	Slc25a5	ADP/ATP translocase 2;ADP/ATP translocase 2, N-terminally processed	1.35304	-0.571984	-1.01379	1.35304	0.21696	0.469422	-1.10847	-0.698215	2	Mitochondrial carriers or transport
P53395;A0A0G2JGU0	Dbt	Lipoamide acyltransferase component of branched-chain alpha-keto acid dehydrogenase complex, mitochondrial	-2.2674	0.494278	0.776722	0.274599	-0.0706111	0.0863025	-0.227525	0.933636	1	Pyruvate and aminoacid metabolism
P53702;G3UXK7	Hccs	Cytochrome c-type heme lyase	1.78023	0.793598	0.622009	-0.664906	-1.00808	-1.00808	0.0643458	-0.579112	4	OXPHOS assembly and biogenesis
P53986	Slc16a1	Monocarboxylate transporter 1	0.826936	-1.41215	-0.85965	0.434369	-0.510701	0.608843	-0.627018	1.53937	2	Mitochondrial import and chaperones
P54071;D6RIL6;D3YVY3;A0A087WPT4;A0A087WRS9;O88844	Idh2	Isocitrate dehydrogenase [NADP], mitochondrial	-1.6042	-0.787929	-0.74258	0.617872	0.799266	-0.334445	0.935311	1.1167	5	Pyruvate and aminoacid metabolism
P54869;Q8JZK9	Hmgcs2	Hydroxymethylglutaryl-CoA synthase, mitochondrial	2.21358	-0.380109	0.164646	0.172777	-0.193104	-1.25009	-0.493939	-0.233757	4	Ubiquinone biosynthesis
P56135;F8WHP8	Atp5j2	ATP synthase subunit f, mitochondrial	-0.101259	-1.86992	-1.00584	0.411786	0.938333	1.10035	0.465791	0.0607554	2	OXPHOS
P56213	Gfer	FAD-linked sulfhydryl oxidase ALR	-0.653141	-1.28863	-0.511922	1.11211	1.60637	0.617836	-0.617836	-0.264787	2	Other
P56379	Mp68	6.8 kDa mitochondrial proteolipid	-0.658655	-1.03411	-1.73322	0.687785	0.415908	0.830197	0.89493	0.597159	2	OXPHOS
P56380	Nudt2	Bis(5-nucleosyl)-tetraphosphatase [asymmetrical]	-2.01126	0.070044	0.950598	0.19012	0.630396	-0.97061	0.670422	0.470296	1	Other
P56382	Atp5e	ATP synthase subunit epsilon, mitochondrial	0.377788	-1.35528	-1.56663	0.377788	1.07524	0.927298	0.525733	-0.361937	2	OXPHOS
P56391	Cox6b1	Cytochrome c oxidase subunit 6B1	0.17135	-1.35885	-1.61388	0.585779	0.777054	0.617658	1.06397	-0.243078	2	OXPHOS
P56392	Cox7a1	Cytochrome c oxidase subunit 7A1, mitochondrial	-0.648157	-0.869549	-1.79008	0.400546	0.365589	0.57533	1.15794	0.808375	2	OXPHOS
P56394	Cox17	Cytochrome c oxidase copper chaperone	0.727935	-1.77523	-1.02014	0.396938	0.934808	0.448656	0.852059	-0.565022	2	Mitochondrial carriers or transport
P56480	Atp5b	ATP synthase subunit beta, mitochondrial	-0.645687	1.0044	1.29137	-0.143486	-1.36312	0	-1.07615	0.932659	3	OXPHOS
P58059;D3YVZ9	Mrps21	28S ribosomal protein S21, mitochondrial	1.74172	-0.995605	-0.520376	0.506119	0.905312	-1.24272	-0.140193	-0.254248	4	Mitochondrial ribosome
P58064	Mrps6	28S ribosomal protein S6, mitochondrial	2.08908	-0.88941	-0.723939	0.130998	0.48952	-1.0273	-0.0896305	0.020684	4	Mitochondrial ribosome
P58281-2;P58281;H7BX01;E0CXD1;F6U775;P58682	Opa1	Dynamin-like 120 kDa protein, mitochondrial;Dynamin-like 120 kDa protein, form S1	-0.797699	0.628774	1.07924	-1.4734	-0.947854	0.178309	0.0281541	1.30447	1	Mitochondrial morphology
P61922;P61922-2;F7C9G3;Q3TUE8;F6RN86	Abat	4-aminobutyrate aminotransferase, mitochondrial	-2.24495	0.0598805	-0.012428	-0.0485823	0.240652	0.972776	0.0598805	0.972776	1	Other
P62073	Timm10	Mitochondrial import inner membrane translocase subunit Tim10	0.911423	-1.63877	-1.27958	0.731833	0.875505	-0.058367	0.695914	-0.237958	2	Mitochondrial import and chaperones
P67778;Q5SQG5	Phb	Prohibitin	0.668292	0.973797	1.31749	-0.591916	-1.69937	-0.0190941	-0.782857	0.133658	3	Other
P85094	Isoc2a	Isochorismatase domain-containing protein 2A, mitochondrial	-2.26275	0.170006	-0.136484	-0.155639	0.131695	0.955385	0.514806	0.782985	1	Unknown
P97478;Q3TYT1	Coq7	Ubiquinone biosynthesis protein COQ7 homolog	-1.66433	0.353039	1.9165	-0.353039	0.100868	-0.0504342	-0.504342	0.201737	1	Ubiquinone biosynthesis
P99028;Q9D2Q7	Uqcrh	Cytochrome b-c1 complex subunit 6, mitochondrial	0.230634	-1.28884	-1.45164	0.746169	0.719035	-0.230634	1.4245	-0.149234	2	OXPHOS
P99029-2;P99029;H3BJQ7;G3UZJ4	Prdx5	Peroxiredoxin-5, mitochondrial	-2.01911	-0.298356	0.0346926	-0.353864	0.589774	0.70079	-0.0208156	1.36689	1	Degradation and stress response
Q06185;Q8BTB6	Atp5i	ATP synthase subunit e, mitochondrial	0.263672	-1.33789	-1.57227	0.185547	1.24024	0.849611	0.576173	-0.205079	2	OXPHOS
Q07417;F6RAZ3	Acads	Short-chain specific acyl-CoA dehydrogenase, mitochondrial	-1.53796	1.04185	1.38913	-0.0992234	-0.843399	-3.4425e-17	-0.644952	0.694564	1	Lipid and acetyl CoA metabolism
Q14C51	Ptcd3	Pentatricopeptide repeat domain-containing protein 3, mitochondrial	2.0187	0.0304326	0.517354	0.436201	-0.740527	-0.781104	-1.06514	-0.415912	4	Mitochondrial ribosome
Q14CH7	Aars2	Alanine--tRNA ligase, mitochondrial	1.34734	-0.0697825	0.617307	-1.91633	-0.198612	-0.327441	-0.370384	0.917908	5	Mitochondrial transcription and mtRNA metabolism
Q2TPA8;B1AX78;B1AX77	Hsdl2	Hydroxysteroid dehydrogenase-like protein 2	1.98312	-0.109705	0.767932	-0.784809	-1.05485	0.0928269	-0.85232	-0.042194	4	Unknown
Q3TBW2;A2A715	Mrpl10	39S ribosomal protein L10, mitochondrial	1.84033	0.811804	0.576712	-0.716298	-1.18648	-0.275499	-0.716298	-0.334272	4	Mitochondrial ribosome
Q3TC72	Fahd2	Fumarylacetoacetate hydrolase domain-containing protein 2A	-2.14344	-0.182625	0.47098	0.201848	0.240296	0.932348	-0.490203	0.970795	1	Unknown
Q3TL44	Nlrx1	NLR family member X1	-1.56314	1.16957	1.25868	-0.582929	-0.701743	-0.523523	0.308173	0.63491	1	Other
Q3TLP5;Q3TLP5-2;F6YTG0;Q3TLP5-3;F6Z5N5;E0CXC8	Echdc2	Enoyl-CoA hydratase domain-containing protein 2, mitochondrial	-2.34209	0.087744	0.222735	0.168739	0.249733	0.276731	0.222735	1.11367	1	Unknown
Q3U2A8;F6YJY2;F7A8L1;F6Z939	Vars2	Valine--tRNA ligase, mitochondrial	-0.958077	1.37238	1.16523	0.12947	-0.958077	0.543774	-1.2688	-0.025894	1	Mitochondrial transcription and mtRNA metabolism
Q3U3J1;P50136	Bckdha	2-oxoisovalerate dehydrogenase subunit alpha, mitochondrial	-2.30599	0.809298	0.782208	0.0507927	-0.274281	0.240419	0.21333	0.484224	1	Pyruvate and aminoacid metabolism
Q3U4F0;Q91V61;Q91V61-2	Sfxn3	Sideroflexin-3	1.85055	-0.220795	-1.44073	-0.576609	-0.576609	0.0333576	0.88477	0.0460652	5	Unknown
Q3U8Y1;Q9DCA2	Mrps11	28S ribosomal protein S11, mitochondrial	2.45397	-0.404033	-0.233914	-0.472081	-0.131842	-0.506105	-0.438057	-0.267938	4	Mitochondrial ribosome
Q3UFY8	Trmt10c	Mitochondrial ribonuclease P protein 1	1.57805	0.0169683	1.23869	-0.661764	-0.865384	0.356335	-0.458144	-1.20475	5	Mitochondrial transcription and mtRNA metabolism
Q3UIU2;A2AP32	Ndufb6	NADH dehydrogenase [ubiquinone] 1 beta subcomplex subunit 6	-0.507539	0.26392	0.548142	1.3602	0.101508	-1.68503	-0.954172	0.872966	4	OXPHOS
Q3ULD5	Mccc2	Methylcrotonoyl-CoA carboxylase beta chain, mitochondrial	-2.40009	0.215812	0.425084	0.215812	0.0588578	0.215812	0.398925	0.869788	1	Pyruvate and aminoacid metabolism
Q3ULU4;Q8CH40;A2ACU7;Q8CH41;A2ACT8;A0A0G2JE11;A0A0G2JDN4;A2ACU1;F6WJF1	Nudt6	Nucleoside diphosphate-linked moiety X motif 6	-1.60743	-0.632198	0.887344	-0.700237	-0.42808	1.0461	0.252312	1.18218	1	Unknown
Q3UNZ8;A0A0A6YWV6;Q3UNZ8-2;A0A0A6YWZ0;A0A0A6YXW5		Quinone oxidoreductase-like protein 2	2.00621	0.16931	-1.48204	0.429073	-0.220335	-0.572871	-0.424435	0.0950919	4	Unknown
Q3URS9-2;Q3URS9	Ccdc51	Coiled-coil domain-containing protein 51	-0.243731	1.19106	1.44859	-0.942733	-1.38421	0.0505857	-0.611627	0.492061	3	Other
Q3UUI3	Them4	Acyl-coenzyme A thioesterase THEM4	-1.6166	0.211357	0.211357	0.394152	-0.839716	1.07963	-0.748318	1.30813	1	Lipid and acetyl CoA metabolism
Q3UW66;Q99J99	Mpst	Sulfurtransferase;3-mercaptopyruvate sulfurtransferase	0.814952	0.205204	0.674241	-0.545256	-0.873582	-0.498352	-1.38952	1.61232	3	Other
Q3V384;F6VT60;E9Q4K2;F6RBS7	Lace1	Lactation elevated protein 1	0.796587	1.17145	1.33211	-0.328006	-1.02418	-0.809975	-1.18484	0.0468581	4	Unknown
Q505D7	Opa3	Optic atrophy 3 protein homolog	-0.523725	-1.23789	0.571336	0.999838	1.42834	-0.857004	-0.904615	0.523725	4	Unknown
Q544X6;P22315	Fech	Ferrochelatase;Ferrochelatase, mitochondrial	-2.28371	0.568405	0.622218	0.0571768	0.272431	-0.400238	0.299337	0.864379	1	Other
Q59J78	Ndufaf2	Mimitin, mitochondrial	0.779435	-0.710458	-0.434552	-0.76564	-0.0482836	2.10378	-0.820821	-0.103465	5	OXPHOS assembly and biogenesis
Q5M8N4-2;Q5M8N4	Sdr39u1	Epimerase family protein SDR39U1	-2.01783	0.937514	1.16103	-0.130383	-0.353896	-0.130383	-0.180052	0.714	1	Unknown
Q5RL20;Q99N89	Mrpl43	39S ribosomal protein L43, mitochondrial	2.23861	-0.714246	0.167776	0.244473	0.0910783	-0.752594	-0.599199	-0.675897	4	Mitochondrial ribosome
Q5U5I3;Q99N85;D3Z603	Mrps18a	28S ribosomal protein S18a, mitochondrial	2.20062	-0.776063	-0.379173	-0.520919	0.131116	-0.804413	0.556356	-0.407522	4	Mitochondrial ribosome
Q5XJF6;P53026;D6RE43	Rpl10a	Ribosomal protein;60S ribosomal protein L10a	2.19059	0.121251	0.198851	-0.0856837	-1.00395	0.0565836	-0.87462	-0.603019	4	Other
Q60649;E9PY58;D3Z7V2;D3YZF1	Clpb	Caseinolytic peptidase B protein homolog	-0.77264	0.131914	1.48875	0.182167	0.533938	-0.571628	-1.72745	0.73495	1	Other
Q60930;D3YZT5;D3YUN8	Vdac2	Voltage-dependent anion-selective channel protein 2	1.93349	-0.202745	-0.0840649	0.825814	0.0346149	-0.954384	-1.2313	-0.321425	4	Mitochondrial carriers or transport
Q60936;F7B1B6;A0A0A6YXD9;E0CYD3;E0CYT4;E0CYG7;E0CZ05;E0CXT4;E0CXR6;E0CYC1;E0CXR1;E0CXI5;F6T0A8	Adck3	Chaperone activity of bc1 complex-like, mitochondrial	-2.29391	-0.0803315	0.0624801	0.562321	0.490915	0.847944	-0.223143	0.633727	1	Ubiquinone biosynthesis
Q61425	Hadh	Hydroxyacyl-coenzyme A dehydrogenase, mitochondrial	-2.14789	0.697724	0.588277	-0.123128	-0.177851	0.80717	-0.451468	0.80717	1	Lipid and acetyl CoA metabolism
Q61578	Fdxr	NADPH:adrenodoxin oxidoreductase, mitochondrial	-2.14875	0.290105	0.526123	-0.339276	0.0147511	0.958823	-0.260603	0.958823	1	Other
Q61733	Mrps31	28S ribosomal protein S31, mitochondrial	1.97993	0.162289	-0.0108193	-0.962916	-1.04947	0.681615	-0.0540964	-0.74653	4	Mitochondrial ribosome
Q61941;Q8C9V5;Q8BGK0;E9Q8F4	Nnt	NAD(P) transhydrogenase, mitochondrial	-1.93196	0.110548	0.384287	0.636968	1.18444	-0.563269	-0.605383	0.784366	1	Other
Q64433	Hspe1	10 kDa heat shock protein, mitochondrial	-1.2116	-0.884143	-0.0982382	1.2116	0.818651	1.34259	-0.818651	-0.360207	2	Degradation and stress response
Q64445	Cox8a	Cytochrome c oxidase subunit 8A, mitochondrial	1.95505	-1.0264	0.322583	0.703817	-0.215055	-0.420335	-1.12415	-0.195505	4	OXPHOS
Q64521;A2AQR0	Gpd2	Glycerol-3-phosphate dehydrogenase, mitochondrial	0.0331953	2.1411	0.614113	-0.580918	-0.315355	-1.12864	-0.514527	-0.248965	3	Pyruvate and aminoacid metabolism
Q66GT5	Ptpmt1	Phosphatidylglycerophosphatase and protein-tyrosine phosphatase 1	1.43253	0.685125	0.477512	-0.186852	-0.394466	-0.311421	-1.97233	0.269898	4	Lipid and acetyl CoA metabolism
Q6P3A8;Q6P3A8-2	Bckdhb	2-oxoisovalerate dehydrogenase subunit beta, mitochondrial	-1.97649	0.696865	1.18589	0.729466	-0.248589	-0.737617	0.207837	0.142633	1	Pyruvate and aminoacid metabolism
Q6P8I6;Q5SRC5	Cox11	Cytochrome c oxidase assembly protein COX11, mitochondrial	1.38709	0.503011	0.381069	-0.16767	-1.17369	-1.69195	0.624954	0.137185	4	OXPHOS assembly and biogenesis
Q6P8J7;P30275;B0R0E9;B0R0F0;A2ARP5	Ckmt2	Creatine kinase S-type, mitochondrial	-1.86066	-0.740765	-0.134154	0.192482	1.12573	1.03241	-0.320804	0.705769	1	Other
Q6P8N8;Q9JHS4;F7BB92	Clpx	ATP-dependent Clp protease ATP-binding subunit clpX-like, mitochondrial	1.47718	0.648856	0.869743	-1.17346	-1.17346	-0.78691	0.427969	-0.289914	4	Degradation and stress response
Q6PB66;F6V2A3	Lrpprc	Leucine-rich PPR motif-containing protein, mitochondrial	1.35935	0.591718	1.14612	0.207901	-0.730319	-1.24208	-1.15678	-0.175916	4	Mitochondrial transcription and mtRNA metabolism
Q6XPS7	Tha1		-2.31928	0.207415	0.848517	0.471399	0.131992	0.358263	-0.320551	0.622246	1	Unknown
Q71RI9-2;Q71RI9;A0A0G2JGE1;D6RJ70	Ccbl2	Kynurenine--oxoglutarate transaminase 3	-2.37219	0.420437	0.651871	0.219862	0.0810017	-0.0578583	0.250719	0.80616	1	Pyruvate and aminoacid metabolism
Q76LV0;O70325-2;O70325;S4R1E5;Q91XR9	Gpx4	Glutathione peroxidase;Phospholipid hydroperoxide glutathione peroxidase, mitochondrial;Phospholipid hydroperoxide glutathione peroxidase, nuclear	-2.31813	0.647828	0.74149	0.24196	0.179519	-0.382453	0.335622	0.554166	1	Degradation and stress response
Q78IK2	Usmg5	Up-regulated during skeletal muscle growth protein 5	-0.401255	-1.25211	-1.6582	1.0684	0.83635	0.352911	0.507611	0.546286	2	OXPHOS
Q78IK4;B1AV14	Apool	MICOS complex subunit Mic27	1.20458	-0.140067	0.308148	-0.700336	-1.93293	0.756363	-0.252121	0.756363	5	Mitochondrial morphology
Q78J03	Msrb2	Methionine-R-sulfoxide reductase B2, mitochondrial	-1.62814	-0.668395	-0.874055	0.222798	0.771225	1.18255	1.04544	-0.051415	2	Degradation and stress response
Q7TMG8;O55126;A0A0G2JEV1	Gbas	Protein NipSnap homolog 2	-1.61978	0.561631	1.08256	-0.18721	-0.96861	-0.480235	0.366281	1.24536	1	Unknown
Q7TNG8	Ldhd	Probable D-lactate dehydrogenase, mitochondrial	-2.27756	0.936431	0.72374	0.109299	0.0384025	0.605578	-0.174288	0.0384025	1	Other
Q7TNS2	Minos1	MICOS complex subunit Mic10	0.832463	-0.682293	-1.4919	1.51149	0.0489684	0.754113	-0.10773	-0.865108	2	Mitochondrial morphology
Q7TSQ8;D6RD07;D3Z443	Pdpr	Pyruvate dehydrogenase phosphatase regulatory subunit, mitochondrial	-1.48126	1.10421	1.38122	-0.0961856	-0.465538	-0.86567	-0.342421	0.765637	1	Pyruvate and aminoacid metabolism
Q80X68	Csl	Citrate synthase	-0.113438	0.784712	-0.758984	1.22443	0.906336	0.0643206	-1.84425	-0.26313	4	Unknown
Q80X85	Mrps7	28S ribosomal protein S7, mitochondrial	2.2782	-0.950333	-0.169237	-0.117164	-0.22131	-0.0130183	0.0911278	-0.89826	4	Mitochondrial ribosome
Q80XN0;D3Z2Y8	Bdh1	D-beta-hydroxybutyrate dehydrogenase, mitochondrial	-2.4265	0.0601949	0.144536	0.348587	0.351307	0.715878	0.351307	0.454693	1	Lipid and acetyl CoA metabolism
Q80Y14	Glrx5	Glutaredoxin-related protein 5, mitochondrial	0.963309	-0.431828	-0.166088	-1.76053	-0.631133	1.42835	0.564698	0.0332175	5	Iron sulphur cluster and heme biogenesis
Q80ZS3	Mrps26	28S ribosomal protein S26, mitochondrial	2.20924	-1.12415	-0.533864	-0.0824667	-0.638032	-0.256081	0.195316	0.230039	4	Mitochondrial ribosome
Q8BFP9	Pdk1	[Pyruvate dehydrogenase (acetyl-transferring)] kinase isozyme 1, mitochondrial	-1.76606	0.863233	0.831554	0.102954	-0.403898	-0.562289	-0.403898	1.33841	1	Pyruvate and aminoacid metabolism
Q8BGB8;B7ZCV4;D6RJJ8	Coq4	Ubiquinone biosynthesis protein COQ4 homolog, mitochondrial	0.395726	0.459361	1.60478	-1.95875	-0.145166	-0.0815315	-0.415612	0.141189	5	Ubiquinone biosynthesis
Q8BGC4	Zadh2	Zinc-binding alcohol dehydrogenase domain-containing protein 2	-1.68931	0.913143	0.547886	0.821828	0.867486	-0.821828	-0.913143	0.273943	1	Other
Q8BGT5;D6RFQ8;Q8QZR5	Gpt2	Alanine aminotransferase 2	0.924602	0.876803	1.25919	0.327121	-1.51312	-0.987337	-0.557151	-0.330108	4	Pyruvate and aminoacid metabolism
Q8BH04;Q9Z2V4	Pck2	Phosphoenolpyruvate carboxykinase [GTP], mitochondrial	1.60775	0.639225	-0.0387409	-0.174334	0.348668	-1.74334	0.232445	-0.87167	4	Pyruvate and aminoacid metabolism
Q8BH55;A2AUG7	Thnsl1	Threonine synthase-like 1	-1.16668	1.16668	1.3962	0.0956298	0.325141	-0.937172	-1.12843	0.248638	1	Unknown
Q8BH95;F6T930	Echs1	Enoyl-CoA hydratase, mitochondrial	-2.32829	-0.371304	0.292675	0.15289	0.572245	0.746976	0.397514	0.537299	1	Lipid and acetyl CoA metabolism
Q8BJU9	Mtrf1l	Peptide chain release factor 1-like, mitochondrial	0.393591	0.774925	0.241058	0.0449429	0.0231524	0.567915	-2.3956	0.35001	3	Other mitochondrial protein synthesis factors
Q8BJZ4	Mrps35	28S ribosomal protein S35, mitochondrial	2.23253	-0.348037	-0.280127	0.297104	-0.110353	-0.925268	0.0594209	-0.925268	4	Mitochondrial ribosome
Q8BK72	Mrps27	28S ribosomal protein S27, mitochondrial	1.61761	0.288067	1.13011	-0.155113	-0.952837	-0.509657	-1.3517	-0.066477	4	Mitochondrial ribosome
Q8BMD8	Slc25a24	Calcium-binding mitochondrial carrier protein SCaMC-1	1.35507	-1.14223	-0.815881	-1.08548	0.361826	0.532097	1.19899	-0.404393	5	Mitochondrial carriers or transport
Q8BMF3;E9PZP7;Q99KE1	Me3	NADP-dependent malic enzyme, mitochondrial;Malic enzyme	-1.56028	0.929439	1.43411	0.021028	-0.38271	-0.685514	-0.584579	0.828505	1	Pyruvate and aminoacid metabolism
Q8BTE5;A0A0A6YXB8	Cebpzos		0.100833	-1.13667	-1.05417	0.934999	1.64083	-0.687499	0.614166	-0.412499	2	Unknown
Q8BTX9	Hsdl1	Inactive hydroxysteroid dehydrogenase-like protein 1	0.607581	0.120328	0.655118	0.595697	0.77396	-2.16144	-0.735336	0.144096	4	Unknown
Q8BU88	Mrpl22	39S ribosomal protein L22, mitochondrial	1.8375	0.363721	1.04393	-0.769955	-1.03448	-0.316485	-0.618798	-0.505431	4	Mitochondrial ribosome
Q8BUY5	Timmdc1	Complex I assembly factor TIMMDC1, mitochondrial	-1.62848	0.614224	1.29459	0.488229	-0.0661472	-1.0489	-0.494529	0.841014	1	OXPHOS assembly and biogenesis
Q8BW75;E9Q3X6;E9PVL9	Maob	Amine oxidase [flavin-containing] B	-2.42359	0.250716	0.647683	0.459646	0.292502	-0.020893	0.271609	0.522325	1	Other
Q8BWF0	Aldh5a1	Succinate-semialdehyde dehydrogenase, mitochondrial	-1.77397	0.562827	0.676818	0.676818	0.505832	0.448837	-1.432	0.334847	1	Other
Q8BWM0	Ptges2	Prostaglandin E synthase 2;Prostaglandin E synthase 2 truncated form	0.121986	1.18659	1.40838	-1.20877	-1.20877	-0.720825	0.0332689	0.388137	3	Lipid and acetyl CoA metabolism
Q8BX10-2;Q8BX10;A0A0G2JG95;F6YJC6	Pgam5	Serine/threonine-protein phosphatase PGAM5, mitochondrial	2.03622	0.350657	0.772047	-0.528243	-0.576402	-0.853315	-0.407846	-0.793117	4	Other
Q8BXN7	Ppm1k	Protein phosphatase 1K, mitochondrial	-2.19903	0.104055	1.07523	0.492527	0.57577	-0.0624329	0.464779	-0.450905	1	Other
Q8BYM8	Cars2	Probable cysteine--tRNA ligase, mitochondrial	-1.8911	0.732532	1.32101	-0.223744	-0.591543	0.0459748	-0.223744	0.830612	1	Mitochondrial transcription and mtRNA metabolism
Q8C3X2;Q8C3X2-2	Ccdc90b	Coiled-coil domain-containing protein 90B, mitochondrial	-1.26493	1.42579	0.0219352	-0.738484	-0.855471	0.957835	-0.504509	0.957835	1	Other
Q8C3X4;G3UWY0;Q8C3X4-2;F6ZM03	Guf1	Translation factor Guf1, mitochondrial	-0.517102	1.12766	1.57623	-0.915831	-0.816149	0.0311507	-1.06535	0.579404	3	Other mitochondrial protein synthesis factors
Q8C5H8-2;Q8C5H8-3;Q8C5H8;Z4YK42;Q8C5H8-4;A0A087WQI8	Nadk2	NAD kinase 2, mitochondrial	-0.844397	1.13964	1.18688	-0.608202	-0.891636	-0.986113	-0.183051	1.18688	1	Other
Q8CAK1;B2FDE8	Iba57	Putative transferase CAF17 homolog, mitochondrial	-1.72277	-1.15283	0.297923	0.660613	0.453362	0.919677	-0.427455	0.97149	1	Iron sulphur cluster and heme biogenesis
Q8CC21;Q8CC21-2;F7BCD5	Ttc19	Tetratricopeptide repeat protein 19, mitochondrial	-0.162338	0.352666	1.51702	-0.274296	-0.229513	-2.02083	0.442232	0.375057	3	OXPHOS assembly and biogenesis
Q8CC88;Q8CC88-3	Vwa8	von Willebrand factor A domain-containing protein 8	-0.811698	0.85066	1.57794	-0.500006	-1.17534	0.642865	-0.967544	0.383121	1	Unknown
Q8CG76	Akr7a2	Aflatoxin B1 aldehyde reductase member 2	-2.2581	0.718485	0.752699	-0.102641	0.0684271	-0.102641	0.0342136	0.889553	1	Other
Q8CGK3	Lonp1	Lon protease homolog, mitochondrial	-0.620126	1.10317	1.78205	-0.515684	-1.09012	-0.515684	-0.567905	0.424297	3	Degradation and stress response
Q8CHT0	Aldh4a1	Delta-1-pyrroline-5-carboxylate dehydrogenase, mitochondrial	-2.44184	0.426602	0.405665	0.238164	0.321915	0.217227	0.154414	0.677853	1	Pyruvate and aminoacid metabolism
Q8JZM0	Tfb1m	Dimethyladenosine transferase 1, mitochondrial	0.170509	0.640879	1.69921	-0.0881943	-1.35819	-0.535046	-1.09949	0.570323	3	Mitochondrial transcription and mtRNA metabolism
Q8JZU0	Nudt13	Nucleoside diphosphate-linked moiety X motif 13	-1.37331	-0.208844	1.48722	0.27213	-1.19611	1.15814	-0.107586	-0.031643	1	Other
Q8K009;D3Z6B9;Q8R0Y6	Aldh1l2	Mitochondrial 10-formyltetrahydrofolate dehydrogenase	1.74973	0.62566	0.477198	-0.413572	-0.243901	-1.66489	0.0318132	-0.562033	4	Mitochondrial 1C pathway
Q8K0Z7	Taco1	Translational activator of cytochrome c oxidase 1	1.46188	-0.62172	-0.218442	-0.62172	0.453688	1.39467	-1.22664	-0.62172	5	Mitochondrial transcription and mtRNA metabolism
Q8K199;F8WHQ0;D6RJ47;D6RD08;D3YZZ0	Cmc2	COX assembly mitochondrial protein 2 homolog	0.534412	-1.41869	-1.41869	0.611306	0.872745	0.457518	0.980396	-0.618995	2	OXPHOS assembly and biogenesis
Q8K1R3;Q8K1R3-2	Pnpt1	Polyribonucleotide nucleotidyltransferase 1, mitochondrial	-0.861036	0.871107	1.55591	0.468283	0.226588	-0.941601	-1.38471	0.0654589	1	Mitochondrial transcription and mtRNA metabolism
Q8K1Z0;F6SFF5	Coq9	Ubiquinone biosynthesis protein COQ9, mitochondrial	-2.15679	-0.070221	0.451421	-0.591863	0.0902842	0.932937	0.732305	0.611926	1	Ubiquinone biosynthesis
Q8K2C6	Sirt5	NAD-dependent protein deacylase sirtuin-5, mitochondrial	-2.01374	-0.747238	-0.0886553	0.164646	0.316626	1.17785	0.316626	0.873888	1	Other
Q8K2M0;Q8K2M0-2	Mrpl38	39S ribosomal protein L38, mitochondrial	2.0858	-0.201851	0.0672838	0.4979	-0.363333	-1.27839	-0.767035	-0.0403703	4	Mitochondrial ribosome
Q8K2Q5;B1AXC8;Q3TFT3;B1AXC7;B1AXC5	Chchd7	Coiled-coil-helix-coiled-coil-helix domain-containing protein 7	0.406324	-1.00065	-0.8551	1.57072	1.27962	-0.515486	-0.0303227	-0.8551	2	Other
Q8K2Y7	Mrpl47	39S ribosomal protein L47, mitochondrial	1.71624	0.91925	0.738117	-0.638494	-0.638494	-1.03699	-0.855853	-0.203775	4	Mitochondrial ribosome
Q8K370	Acad10	Acyl-CoA dehydrogenase family member 10	-0.649377	-1.18805	-1.22457	-0.329824	0.291021	1.23142	1.25881	0.610574	2	Lipid and acetyl CoA metabolism
Q8K3A0;F6UL52;F6WN43	Hscb	Iron-sulfur cluster co-chaperone protein HscB, mitochondrial	-1.93101	0.367494	0.501128	-0.27395	-0.407584	1.08912	-0.461037	1.11584	1	Iron sulphur cluster and heme biogenesis
Q8K411-2;Q8K411;Q8K411-3	Pitrm1	Presequence protease, mitochondrial	0.888882	0.727267	0.96969	0	-0.0808075	-1.37373	-1.61615	0.484845	3	Mitochondrial import and chaperones
Q8K4F5;D3YYK0	Abhd11	Alpha/beta hydrolase domain-containing protein 11	-1.49563	0.880844	1.00483	-0.896343	-0.979003	0.942839	-0.0284143	0.57087	1	Unknown
Q8K4Z3	Apoa1bp	NAD(P)H-hydrate epimerase	-2.21415	-0.724254	0.544915	0.544915	0.213827	0.600096	0.655277	0.379371	1	Other
Q8QZS1;E0CX19	Hibch	3-hydroxyisobutyryl-CoA hydrolase, mitochondrial	-2.01143	0.670476	0.670476	-0.26236	-0.689911	0.825949	-0.106888	0.903686	1	Other
Q8R035;Q8R035-2;A2A6T4;D6RHR8	Ict1	Peptidyl-tRNA hydrolase ICT1, mitochondrial	2.35267	0.129373	-0.100623	-0.713946	-0.598948	-0.330619	-0.675613	-0.0622906	4	Mitochondrial ribosome
Q8R0F8	Fahd1	Acylpyruvase FAHD1, mitochondrial	1.26768	1.0844	0.106913	0.290191	0.47347	-0.565109	-1.4815	-1.17604	4	Other
Q8R104;Q8R104-2;D3YTK6;D3YVQ5;D3YWD6	Sirt3	NAD-dependent protein deacetylase sirtuin-3	-1.16462	-1.04203	0.633388	-0.122591	-0.858139	1.75714	0.408638	0.388206	1	Other
Q8R127;J3QNN5;F6S0R8	Sccpdh	Saccharopine dehydrogenase-like oxidoreductase	2.03048	0.390723	0.339481	-0.531639	-0.787851	-0.941578	-0.839094	0.339481	4	Unknown
Q8R1I1	Uqcr10	Cytochrome b-c1 complex subunit 9	-1.1824	0.19627	-0.68455	1.68983	0.885606	0.234566	-1.1824	0.0430836	4	OXPHOS
Q8R1S0;D3YW66;D6RG57;F6ZE40	Coq6	Ubiquinone biosynthesis monooxygenase COQ6	-0.890764	1.03088	1.35116	0.310266	-1.09094	-0.130112	-1.25107	0.670575	3	Ubiquinone biosynthesis
Q8R2K3;Q9CYR0;D3Z3Y3	Ssbp1	Single-stranded DNA-binding protein;Single-stranded DNA-binding protein, mitochondrial	-0.909822	1.12227	0.45722	-0.68814	-1.1315	1.67647	-0.244775	-0.281722	1	Mitochondrial DNA maintenance and replication
Q8R2L5;Q8BTZ9	Mrps18c	28S ribosomal protein S18c, mitochondrial	1.25548	0.218805	0.558697	-2.04148	0.660665	0.218805	-0.308027	-0.562946	5	Mitochondrial ribosome
Q8R2Y8	Ptrh2	Peptidyl-tRNA hydrolase 2, mitochondrial	1.42683	1.21044	0.344874	-1.27806	-0.737083	-0.142007	-1.06167	0.236678	3	Mitochondrial transcription and mtRNA metabolism
Q8R5L1;O35658	C1qbp	Complement component 1 Q subcomponent-binding protein, mitochondrial	-0.658939	1.21859	1.03805	-0.875576	-1.27274	1.00195	-0.731151	0.279823	1	Other
Q8VDC0	Lars2	Probable leucine--tRNA ligase, mitochondrial	1.4851	-1.29711	-1.25952	0.958736	0.281981	-0.0939937	-0.545163	0.469968	2	Mitochondrial transcription and mtRNA metabolism
Q8VDK1-2;Q8VDK1;D3YY53;D3Z3I3;D3Z2Y2	Nit1	Nitrilase homolog 1	-2.08078	0.147206	0.751944	0.179034	0.306348	-0.362047	-0.266562	1.32485	1	Apoptosis
Q8VDT9	Mrpl50	39S ribosomal protein L50, mitochondrial	2.07971	0.446563	0.310468	-0.982439	-0.914391	0.0382768	-0.267938	-0.710248	4	Mitochondrial ribosome
Q8VE22;Q3TI14;F7ARZ1;A7M7Q8;Q5SXC9	Mrps23	28S ribosomal protein S23, mitochondrial	2.2536	-0.609798	0.0972142	-0.397694	0.167915	-0.362344	-0.0441883	-1.10471	4	Mitochondrial ribosome
Q8VEA4	Chchd4	Mitochondrial intermembrane space import and assembly protein 40	1.47352	-0.838992	-1.51583	1.19151	0.345467	-0.0775539	-0.0493525	-0.528776	2	Mitochondrial import and chaperones
Q91V16	Lyrm5	LYR motif-containing protein 5	-0.92039	-0.822542	-0.798079	0.718577	1.33013	-1.11609	0.718577	0.889813	5	Other
Q91VA6;F6SQH7	Poldip2	Polymerase delta-interacting protein 2	1.14767	0.71046	1.45035	-0.36574	-0.702053	-1.37468	-0.735684	-0.130321	4	Unknown
Q91VM9;D3Z636;Q91VM9-2;G8JL76;D3Z096	Ppa2	Inorganic pyrophosphatase 2, mitochondrial	0.261707	0.261707	0.78512	-0.486027	-0.635574	-1.53285	-0.411253	1.75717	3	Unknown
Q91VN4;E9Q4M4	Chchd6	MICOS complex subunit Mic25	1.50262	0.378709	-0.745202	0.0366493	1.16056	-1.18499	-0.0122164	-1.13613	4	Mitochondrial morphology
Q91VT4;D3Z6C4	Cbr4	Carbonyl reductase family member 4	-2.26952	0.468314	0.540362	-0.360241	-0.144097	0.396265	0.468314	0.900603	1	Lipid and acetyl CoA metabolism
Q91WK1	Spryd4	SPRY domain-containing protein 4	1.55814	0.783281	1.01911	-0.800125	-0.699057	-0.294783	-1.27178	-0.294783	4	Other
Q91WK5	Gcsh	Glycine cleavage system H protein, mitochondrial	-0.0707056	-2.30452	-0.339147	0.514113	0.360718	0.715445	0.437416	0.686683	2	Pyruvate and aminoacid metabolism
Q91WM2	Cecr5	Cat eye syndrome critical region protein 5 homolog	-0.42107	0.826544	1.07607	-0.795354	-1.54392	1.05112	-0.74545	0.552069	1	Unknown
Q91XH5;Q64105;G3UXX3;G3UZ79	Spr	Sepiapterin reductase	-2.41841	0.18935	0.496145	0.0934766	0.227699	0.457796	0.208525	0.745416	1	Other
Q91YJ5;Q5M6W7;F6RR02;Q5M6W8	Mtif2	Translation initiation factor IF-2, mitochondrial	0.585309	-0.0986476	0.322249	-1.57179	0.164413	1.74277	-0.993053	-0.15126	5	Other mitochondrial protein synthesis factors
Q91YP0	L2hgdh	L-2-hydroxyglutarate dehydrogenase, mitochondrial	-2.33044	0.633554	0.781754	0.100035	0.277875	-0.226005	0.129675	0.633554	1	Other
Q91YP2	Nln	Neurolysin, mitochondrial	1.24098	0.299546	-0.399395	0.24249	-0.584828	0.827318	-1.99697	0.370867	3	Other
Q91Z53;D6REG4;B1AXQ0	Grhpr	Glyoxylate reductase/hydroxypyruvate reductase	0.692632	0.930956	0.394726	-0.498993	-0.677736	0.871375	-1.98852	0.275563	3	Other
Q91ZA3;H3BL62;D3YWM4;H3BK61;D3YZC0;H3BJR0;H3BKW6	Pcca	Propionyl-CoA carboxylase alpha chain, mitochondrial	-2.36347	0.59728	0.743851	0.0696216	0.186879	0.245508	-0.106264	0.626594	1	Other
Q91ZE0	Tmlhe	Trimethyllysine dioxygenase, mitochondrial	1.42402	0.638352	1.16213	-0.278256	-1.2276	-1.19486	-0.441936	-0.0818401	4	Other
Q921G7;Q6PF96	Etfdh	Electron transfer flavoprotein-ubiquinone oxidoreductase, mitochondrial	-1.12159	-0.91292	-0.982476	-0.147806	0.269529	0.130417	1.31287	1.45198	5	Other
Q921H8;H3BJZ9;H3BKL5;Q8VCH0;H3BKA1;H3BJC1	Acaa1a;Acaa1b	3-ketoacyl-CoA thiolase A, peroxisomal;3-ketoacyl-CoA thiolase B, peroxisomal	1.02999	0.442448	0.0555299	-1.79308	-0.847279	1.28794	0.170172	-0.345719	5	Lipid and acetyl CoA metabolism
Q921S7	Mrpl37	39S ribosomal protein L37, mitochondrial	1.55814	0.786219	0.67186	0.243013	-0.443141	-1.52955	-0.843398	-0.443141	4	Mitochondrial ribosome
Q922B1	Macrod1	O-acetyl-ADP-ribose deacetylase MACROD1	-1.89614	-0.0225195	-0.274738	0.517949	1.2746	-0.815207	0.734136	0.481918	5	Other
Q922H2	Pdk3	[Pyruvate dehydrogenase (acetyl-transferring)] kinase isozyme 3, mitochondrial	1.41153	-2.04009	0.430545	0.692142	0.00181665	-0.00544994	-0.0708492	-0.419645	2	Pyruvate and aminoacid metabolism
Q922Q4;Q922W5;A2ABZ3;A2ABZ0;A2ABZ2	Pycr2	Pyrroline-5-carboxylate reductase 2	1.65014	0.56838	-0.35753	-0.467539	-0.916743	-1.30177	1.01758	-0.192516	4	Pyruvate and aminoacid metabolism
Q924D0;D3Z792	Rtn4ip1	Reticulon-4-interacting protein 1, mitochondrial	-1.90389	0.684127	1.32052	0.684127	-0.291682	-0.0795497	-0.715947	0.302289	1	Unknown
Q924L1-3;Q924L1-2;Q924L1	Letmd1	LETM1 domain-containing protein 1	-0.256933	2.0801	0.883427	-0.587778	-0.271012	-1.03125	-0.334365	-0.482189	3	Other
Q924T2	Mrps2	28S ribosomal protein S2, mitochondrial	1.85904	0.250161	0.328644	0.681813	-1.04479	-1.16252	-0.613141	-0.299213	4	Mitochondrial ribosome
Q925I1;Q925I1-2;H3BK90;H3BKI6;V9GWS5;V9GWS6	Atad3	ATPase family AAA domain-containing protein 3	1.90146	0.616456	0.477537	-0.112872	-0.0781424	-1.08531	-1.08531	-0.633821	4	Other
Q99JB2;A2AG39;F6WI02;A2AG41	Stoml2	Stomatin-like protein 2, mitochondrial	1.41022	0.858205	0.478697	-1.21184	-1.17734	0.754703	-0.590825	-0.521823	5	Other
Q99JR6;Q3V3C7;Q3V3F1;A0A087WSM7	Nmnat3	Nicotinamide mononucleotide adenylyltransferase 3	-1.87456	0.690629	0.764625	-0.345315	-0.78929	0.123327	0.147992	1.2826	1	Other
Q99KI0	Aco2	Aconitate hydratase, mitochondrial	-2.07973	-0.246172	0.0933757	-0.178263	-0.110353	1.11202	0.297104	1.11202	1	Pyruvate and aminoacid metabolism
Q99KK9;G5E823;Q61035	Hars2	Probable histidine--tRNA ligase, mitochondrial	-0.0545759	1.08732	1.82619	-0.0545759	-0.424013	-1.29723	-0.659109	-0.424013	3	Mitochondrial transcription and mtRNA metabolism
Q99L13	Hibadh	3-hydroxyisobutyrate dehydrogenase, mitochondrial	0.512055	0.996579	1.39301	-0.677233	-1.51414	0.468007	-0.853424	-0.324852	3	Pyruvate and aminoacid metabolism
Q99LB2	Dhrs4	Dehydrogenase/reductase SDR family member 4	-2.03398	0.319808	0.933839	-0.0383769	0.422146	0.319808	-0.857085	0.933839	1	Other
Q99LB7;A2AH52;A2AH53	Sardh	Sarcosine dehydrogenase, mitochondrial	1.70599	-0.0490374	-0.296806	-0.895578	-0.110979	-1.01946	1.31369	-0.64781	4	Mitochondrial 1C pathway
Q99LC3;A0A087WR38	Ndufa10	NADH dehydrogenase [ubiquinone] 1 alpha subcomplex subunit 10, mitochondrial	-0.198633	1.02722	1.61744	-0.153231	-1.51529	-0.153231	-0.925062	0.300787	3	OXPHOS
Q99LC5	Etfa	Electron transfer flavoprotein subunit alpha, mitochondrial	-2.00927	-0.898454	0.0816777	0.0816777	0.539073	0.931125	0.343046	0.931125	1	Other
Q99LX0;A2A813;A2A815;A2A817;A2A816	Park7	Protein DJ-1	-1.13684	-1.33894	-0.479997	0.732628	1.28841	1.18736	0.025263	-0.277893	2	Other
Q99LY9;B1ARW4	Ndufs5	NADH dehydrogenase [ubiquinone] iron-sulfur protein 5;NADH dehydrogenase [ubiquinone] iron-sulfur protein 5, N-terminally processed	0.291216	-1.35154	-1.69503	0.694439	1.17233	0.261348	0.530163	0.0970721	2	OXPHOS
Q99MN9;E9Q1J7;D3YZC1;A0A087WQV1	Pccb	Propionyl-CoA carboxylase beta chain, mitochondrial	-2.25796	0.552596	0.581873	-0.00365958	0.0256171	0.113447	-0.120766	1.10885	1	Other
Q99MR8;A0A0G2JFQ5;A0A0G2JF64	Mccc1	Methylcrotonoyl-CoA carboxylase subunit alpha, mitochondrial	-2.38099	0.521813	0.632396	0.328293	0.273002	-0.00345572	-0.0587472	0.687687	1	Pyruvate and aminoacid metabolism
Q99N15;A2AFQ2;O08756	Hsd17b10	3-hydroxyacyl-CoA dehydrogenase type-2	-1.41525	0.974514	1.28793	0.347691	-0.161603	-0.514191	-1.21937	0.700279	1	Mitochondrial transcription and mtRNA metabolism
Q99N84;G3UYQ9;G3UYX8;G3UX79;Q99N84-2	Mrps18b	28S ribosomal protein S18b, mitochondrial	1.51729	-0.915241	-1.66933	-0.0881794	0.0577727	0.568605	0.811858	-0.282782	5	Mitochondrial ribosome
Q99N87;B2FDG7	Mrps5	28S ribosomal protein S5, mitochondrial	2.12059	0.231806	0.403514	-0.11161	-0.283318	-0.31766	-0.97015	-1.07317	4	Mitochondrial ribosome
Q99N91	Mrpl34	39S ribosomal protein L34, mitochondrial	1.48555	0.027464	0.78647	-0.391987	-1.98989	0.207229	0.00749019	-0.132327	5	Mitochondrial ribosome
Q99N92	Mrpl27	39S ribosomal protein L27, mitochondrial	2.27711	-0.319221	-0.532035	-0.574598	-0.489473	-0.489473	0.617161	-0.489473	4	Mitochondrial ribosome
Q99N93	Mrpl16	39S ribosomal protein L16, mitochondrial	2.07251	0.146693	0.297147	0.267056	-0.876396	-0.936578	-0.936578	-0.0338522	4	Mitochondrial ribosome
Q99N94;Q3UK02	Mrpl9	39S ribosomal protein L9, mitochondrial	1.91163	0.941177	0.47268	-0.59817	-0.76549	-0.732026	-0.631634	-0.59817	4	Mitochondrial ribosome
Q99N95;D3Z456;F6W7C7	Mrpl3	39S ribosomal protein L3, mitochondrial	2.34436	-0.209122	-0.253147	-0.12107	-0.253147	-0.473275	0.0110064	-1.04561	4	Mitochondrial ribosome
Q99N96;Q9D3F3	Mrpl1	39S ribosomal protein L1, mitochondrial	2.38231	-0.103579	0.21209	-0.616541	-0.537624	-0.419248	-0.419248	-0.498165	4	Mitochondrial ribosome
Q99NB1	Acss1	Acetyl-coenzyme A synthetase 2-like, mitochondrial	-1.50028	1.05819	1.20869	0.3057	-0.18342	-1.19928	-0.371542	0.681945	1	Other
Q9CPP6;D3YTQ8	Ndufa5	NADH dehydrogenase [ubiquinone] 1 alpha subcomplex subunit 5	-1.2107	0.460925	0.362594	-1.35819	-0.571547	1.64089	0.559256	0.116768	1	OXPHOS
Q9CPQ3	Tomm22	Mitochondrial import receptor subunit TOM22 homolog	0.462892	0.98692	1.30134	0.288215	-0.794776	-1.24893	-1.3188	0.323151	3	Mitochondrial import and chaperones
Q9CPR5	Mrpl15	39S ribosomal protein L15, mitochondrial	1.63683	0.606055	0.262465	-1.1119	-1.53184	0.453348	-0.310186	-0.00477209	5	Mitochondrial ribosome
Q9CPS6;F8WH96;E9Q7F8	Hint3	Histidine triad nucleotide-binding protein 3	-2.12715	0.134796	-0.154522	0.161098	0.055891	-0.207125	0.871242	1.26577	1	Unknown
Q9CPV3	Mrpl42	39S ribosomal protein L42, mitochondrial	2.34971	-0.703533	-0.225314	-0.335673	-0.335673	0.179332	-0.114956	-0.813891	4	Mitochondrial ribosome
Q9CPV4;E9Q197;Q9CPV4-2;Q9CPV4-3;F6ZTG3;E9Q055;E9Q2R6;F7BB55	Glod4	Glyoxalase domain-containing protein 4	-2.00978	0.931026	0.903542	-0.49815	-0.553119	0.601216	0.0240486	0.601216	1	Other
Q9CPW3	Mrpl54	39S ribosomal protein L54, mitochondrial	1.31936	0.675983	-0.367335	0.606428	0.745537	-1.61932	-0.993325	-0.367335	4	Mitochondrial ribosome
Q9CPX7	Mrps16	28S ribosomal protein S16, mitochondrial	2.05395	-0.982322	-0.553672	0.125023	-0.303627	0.839439	-0.553672	-0.625114	4	Mitochondrial ribosome
Q9CPY7;Q9CPY7-2;A0A0G2JEM7	Lap3	Cytosol aminopeptidase	0.680081	1.04279	1.22415	-0.710307	-1.25437	-0.0453387	-1.31482	0.377823	3	Other
Q9CPZ8	Cmc1	COX assembly mitochondrial protein homolog	-0.0463241	-0.990739	-1.83952	0.180814	0.503588	1.185	0.969818	0.0373582	2	OXPHOS assembly and biogenesis
Q9CQ06;A0A0A6YXP0	Mrpl24	39S ribosomal protein L24, mitochondrial	2.34985	-0.145922	0.135859	-0.186177	-0.427703	-0.789993	-0.186177	-0.749738	4	Mitochondrial ribosome
Q9CQ40	Mrpl49	39S ribosomal protein L49, mitochondrial	2.20388	-0.039496	-0.039496	-0.829417	-1.17698	0.150085	-0.0710929	-0.19748	4	Mitochondrial ribosome
Q9CQ62	Decr1	2,4-dienoyl-CoA reductase, mitochondrial	-1.78256	0.994762	0.620892	-0.660949	-0.714359	0.620892	-0.126849	1.04817	1	Lipid and acetyl CoA metabolism
Q9CQ75	Ndufa2	NADH dehydrogenase [ubiquinone] 1 alpha subcomplex subunit 2	-0.21778	-1.27557	-1.02668	-0.902231	1.21335	0.404448	1.21335	0.591117	2	OXPHOS
Q9CQ92;G3X9U9;D3YZ32	Fis1	Mitochondrial fission 1 protein	1.19557	-1.14832	-0.127591	0.817525	0.741916	-1.11051	-1.11051	0.741916	4	Mitochondrial morphology
Q9CQE3;D3Z198;D3YWF8	Mrps17	28S ribosomal protein S17, mitochondrial	2.2957	-0.123958	-0.361957	-0.599956	-1.07595	-0.242957	0.0743747	0.0347082	4	Mitochondrial ribosome
Q9CQF0	Mrpl11	39S ribosomal protein L11, mitochondrial	2.23048	-0.456663	-0.366085	0.388729	0.116996	-0.547241	-1.06051	-0.3057	4	Mitochondrial ribosome
Q9CQF8	Mrpl57	Ribosomal protein 63, mitochondrial	2.14609	-0.372761	0.351047	-0.285904	-0.517522	0.26419	-1.27028	-0.314856	4	Mitochondrial ribosome
Q9CQJ1	Higd2a	HIG1 domain family member 2A	0.112009	1.62413	0.756062	0.177348	-0.317359	-0.15868	-1.87615	-0.317359	3	OXPHOS
Q9CQL5	Mrpl18	39S ribosomal protein L18, mitochondrial	1.74139	0.56456	-0.0397577	0.787203	-0.898525	-1.34381	-0.198789	-0.612269	4	Mitochondrial ribosome
Q9CQN1	Trap1	Heat shock protein 75 kDa, mitochondrial	0.786225	0.907182	1.39101	-0.705586	-1.1491	-1.22974	-0.383032	0.383032	3	Mitochondrial import and chaperones
Q9CQN7;F7CXS7;A0A0A6YXF9	Mrpl41;Gm6434	39S ribosomal protein L41, mitochondrial	2.32997	-0.164083	0.131266	-0.984495	-0.393798	-0.065633	-0.557881	-0.295349	4	Mitochondrial ribosome
Q9CQP0;Q8R0E2	Mrpl33	39S ribosomal protein L33, mitochondrial	1.3056	0.220045	-0.044009	-1.86305	-0.982868	0.806832	0.308063	0.249384	5	Mitochondrial ribosome
Q9CQV1;D6RI93	Pam16	Mitochondrial import inner membrane translocase subunit TIM16	0.498755	1.04738	1.24689	-1.24689	-1.24689	-0.54863	-0.448879	0.698257	3	Mitochondrial import and chaperones
Q9CQV5	Mrps24	28S ribosomal protein S24, mitochondrial	1.68715	0.923915	0.361532	-0.723064	-1.36579	0	0	-0.883745	5	Mitochondrial ribosome
Q9CQV7;D3Z5K6;G3X8S1;Q9CQV7-3;Q9CQV7-2	Dnajc19	Mitochondrial import inner membrane translocase subunit TIM14	1.41521	-0.762037	-1.1612	1.01605	0.870899	-0.979761	-0.544312	0.14515	4	Mitochondrial import and chaperones
Q9CQY9	Ndufc1	NADH dehydrogenase [ubiquinone] 1 subunit C1, mitochondrial	-0.239033	0.18723	0.506927	1.1404	0.3826	-0.74818	-2.00921	0.779262	4	OXPHOS
Q9CR10;H3BK04	Oxld1	Oxidoreductase-like domain-containing protein 1	-1.37367	0.397978	0.526358	-1.37367	-0.269598	1.16826	-0.218246	1.14258	1	Other
Q9CR59	Gadd45gip1	Growth arrest and DNA damage-inducible proteins-interacting protein 1	2.34118	-0.620554	-0.818003	-0.451312	-0.28207	0.28207	-0.225656	-0.225656	4	Mitochondrial ribosome
Q9CR61	Ndufb7	NADH dehydrogenase [ubiquinone] 1 beta subcomplex subunit 7	0.4551	-1.12258	-1.60802	1.34507	1.02145	0.131473	0.0505666	-0.27306	2	OXPHOS
Q9CR62	Slc25a11	Mitochondrial 2-oxoglutarate/malate carrier protein	-1.97719	-0.246726	0.321082	1.24039	0.591467	-0.0574568	-0.652304	0.780736	1	Mitochondrial carriers or transport
Q9CR98	Fam136a	Protein FAM136A	-0.350214	-1.52624	-1.00741	0.998759	0.96417	-0.0735017	1.24088	-0.246447	2	Unknown
Q9CRA7	Atp5s	ATP synthase subunit s, mitochondrial	-1.34811	0.808866	1.43508	0.147857	-0.408782	-0.756681	-0.861051	0.982816	1	OXPHOS
Q9CRB8	Mtfp1	Mitochondrial fission process protein 1	-1.7165	0.0771874	0.547663	1.48861	0.312425	-0.922573	-0.422693	0.635877	1	Mitochondrial morphology
Q9CRD0;Q9CRD0-2	Ociad1	OCIA domain-containing protein 1	2.00755	0.750153	0.178608	-0.67871	-0.507246	-0.964483	-0.850174	0.0642988	4	Other
Q9CWE0;D3YW54;D6RCX5;D3Z0X8;Q9CWE0-2	Mtfr1l	Mitochondrial fission regulator 1-like	2.0526	-0.128907	0.823022	-0.446217	-1.04117	-0.842854	-0.287562	-0.128907	4	Mitochondrial morphology
Q9CXJ4;D3Z492;F6ZFC5;D3Z1J6	Abcb8	ATP-binding cassette sub-family B member 8, mitochondrial	-1.98476	0.376473	0.328284	0.64151	0.930641	-0.0813181	-0.972806	0.761981	1	Unknown
Q9CXT8;D3Z1T9	Pmpcb	Mitochondrial-processing peptidase subunit beta	1.60183	0.272905	0.462752	0.747522	-0.486483	-0.486483	-1.72049	-0.391559	4	Mitochondrial import and chaperones
Q9CXU4;Q9WTQ8	Timm23	Mitochondrial import inner membrane translocase subunit Tim23	1.02474	0.640888	0.915065	0.695723	-0.592907	-0.620325	-1.85412	-0.20906	4	Mitochondrial import and chaperones
Q9CXV1	Sdhd	Succinate dehydrogenase [ubiquinone] cytochrome b small subunit, mitochondrial	-0.580347	-0.569674	-1.17804	1.57561	1.49022	-0.260156	-0.0573676	-0.420251	2	OXPHOS
Q9CXW2	Mrps22	28S ribosomal protein S22, mitochondrial	2.2914	0.043234	0.319932	-0.164289	-0.475574	-0.64851	-0.821446	-0.544748	4	Mitochondrial ribosome
Q9CY16	Mrps28	28S ribosomal protein S28, mitochondrial	1.88104	-0.366842	0.195129	-0.0234155	0.382453	-0.335622	-1.74055	0.00780515	4	Mitochondrial ribosome
Q9CY73;Q9CY73-2	Mrpl44	39S ribosomal protein L44, mitochondrial	1.94127	0.391482	0.617492	0.100897	-0.447985	-1.02915	-1.09373	-0.480272	4	Mitochondrial ribosome
Q9CYW4	Hdhd3	Haloacid dehalogenase-like hydrolase domain-containing protein 3	-0.349378	0.546463	1.26314	-0.815215	-1.63939	1.26314	-0.134376	-0.134376	1	Unknown
Q9CZ83;Q9CZ83-2	Mrpl55	39S ribosomal protein L55, mitochondrial	1.91516	0.0640029	-0.5071	0.53664	0.457867	-0.369248	-1.39329	-0.704032	4	Mitochondrial ribosome
Q9CZD3	Gars	Glycine--tRNA ligase	0.719875	0.885601	0.761306	0.181263	-1.39314	0.34699	-1.72459	0.222695	3	Mitochondrial transcription and mtRNA metabolism
Q9CZL5;P61458	Pcbd2	Pterin-4-alpha-carbinolamine dehydratase 2	-1.72118	-0.395233	-0.327236	-0.531228	-0.22524	0.998708	1.2027	0.998708	5	Other
Q9CZN7;G3UZ26;G3UYY1;P50431	Shmt2	Serine hydroxymethyltransferase	1.67183	0.780187	0.982833	-0.395159	-0.800451	-1.04363	-0.476218	-0.719393	4	Mitochondrial 1C pathway
Q9CZN8	Qrsl1	Glutamyl-tRNA(Gln) amidotransferase subunit A, mitochondrial	0.143256	0.612095	1.86233	-0.950701	-0.481862	-1.15907	-0.586049	0.560002	3	Mitochondrial transcription and mtRNA metabolism
Q9CZP5	Bcs1l	Mitochondrial chaperone BCS1	-0.230143	0.79025	1.41136	0.745885	-0.607245	-1.62764	-0.806887	0.324418	3	OXPHOS assembly and biogenesis
Q9CZR8;Q9CX33;D3Z4M7	Tsfm	Elongation factor Ts, mitochondrial	0.86127	0.711484	0.636591	-1.16084	-0.86127	1.23574	-1.31063	-0.11234	3	Other mitochondrial protein synthesis factors
Q9CZS1;G3UYH1;G3UWP3;Q9JHW9;P24549;O35945	Aldh1b1	Aldehyde dehydrogenase X, mitochondrial	2.05963	0.61467	0.469053	-0.662275	-0.628672	-0.819093	-0.270231	-0.763087	4	Other
Q9CZU6	Cs	Citrate synthase, mitochondrial	-0.26971	-0.084766	0.34677	1.88797	0.223474	-0.701246	-1.62597	0.223474	4	Pyruvate and aminoacid metabolism
Q9CZW5	Tomm70a	Mitochondrial import receptor subunit TOM70	2.20743	-0.561472	-0.43841	-0.623003	-0.930659	0.484558	0.176902	-0.315347	4	Mitochondrial import and chaperones
Q9D0D3	Mtpap	Poly(A) RNA polymerase, mitochondrial	0.482828	1.19928	1.29273	-0.358227	-1.10583	0.109026	-1.51079	-0.109026	3	Mitochondrial transcription and mtRNA metabolism
Q9D0G0	Mrps30	28S ribosomal protein S30, mitochondrial	2.19252	-0.268648	0.389973	-0.0259982	-0.92727	-0.337977	-0.996599	-0.0259982	4	Mitochondrial ribosome
Q9D0Q7;F6QAU7	Mrpl45	39S ribosomal protein L45, mitochondrial	1.71096	-0.617848	0.0950535	0.926772	0.594085	-0.784192	-0.998062	-0.926772	4	Mitochondrial ribosome
Q9D125	Mrps25	28S ribosomal protein S25, mitochondrial	2.10999	0.24498	0.497863	-0.67172	-0.987824	0.0237078	-0.798162	-0.418837	4	Mitochondrial ribosome
Q9D172	D10Jhu81e	ES1 protein homolog, mitochondrial	-1.91032	-0.775043	-0.382063	0.185574	0.927868	0.403895	0.360231	1.18985	1	Unknown
Q9D1B9;F6U4U1	Mrpl28	39S ribosomal protein L28, mitochondrial	2.28217	0.13672	0.13672	-0.41016	-0.830836	-0.452227	-0.0315507	-0.830836	4	Mitochondrial ribosome
Q9D1H6;A2AJX3	Ndufaf4	NADH dehydrogenase [ubiquinone] 1 alpha subcomplex assembly factor 4	-1.04643	0.903548	1.27337	0.332001	-0.508509	-1.6516	0.0966586	0.600965	1	OXPHOS assembly and biogenesis
Q9D1H8	Mrpl53	39S ribosomal protein L53, mitochondrial	2.41993	0.0154136	-0.508648	-0.662783	-0.385339	-0.262031	-0.169549	-0.446993	4	Mitochondrial ribosome
Q9D1I6	Mrpl14	39S ribosomal protein L14, mitochondrial	2.31053	-0.387715	-0.00945646	0.11663	-0.0346737	-0.765973	-0.33728	-0.892059	4	Mitochondrial ribosome
Q9D1L0;D3Z5B1;B2RPU8	Chchd2;Zbed5	Coiled-coil-helix-coiled-coil-helix domain-containing protein 2, mitochondrial	1.4127	-1.33378	-1.39692	0.623482	0.860247	0.244657	-0.228873	-0.18152	2	Unknown
Q9D1N9;Q9D1N9-2	Mrpl21	39S ribosomal protein L21, mitochondrial	1.95496	0.367572	0.185413	-0.02277	-0.465158	-0.0487928	-1.63618	-0.335044	4	Mitochondrial ribosome
Q9D1P0;F7CXG9;G5E909	Mrpl13	39S ribosomal protein L13, mitochondrial	2.29291	0.151133	0.220223	-0.15977	-0.401583	-0.643397	-0.677942	-0.781576	4	Mitochondrial ribosome
Q9D1R9;A0A0G2JEY6;A0A0G2JGY8;D3YWC0	Rpl34	60S ribosomal protein L34	2.3852	-0.173284	-0.315988	-0.305795	0.0203863	-0.754295	-0.152898	-0.703329	4	Other
Q9D273;Q9D273-2;D3Z1G7	Mmab	Cob(I)yrinic acid a,c-diamide adenosyltransferase, mitochondrial	-2.25971	-0.118932	-0.0237864	0.214078	0.761165	0.142719	0.190291	1.09418	1	Other
Q9D2R8;Q8R2K5	Mrps33	28S ribosomal protein S33, mitochondrial	2.16486	-0.966945	-0.904309	0.536322	-0.309266	-0.40322	-0.121358	0.00391476	4	Mitochondrial ribosome
Q9D338	Mrpl19	39S ribosomal protein L19, mitochondrial	2.02376	0.346822	0.80417	-0.476404	-0.750812	-0.750812	-0.781302	-0.415424	4	Mitochondrial ribosome
Q9D404;D3Z6F9	Oxsm	3-oxoacyl-[acyl-carrier-protein] synthase, mitochondrial	-2.03111	1.20979	0.32187	0.54385	0.632642	0.32187	-0.566048	-0.43286	1	Lipid and acetyl CoA metabolism
Q9D6U8	Fam162a	Protein FAM162A	1.34084	-0.821137	-0.363795	0.925078	1.25769	-0.862713	-0.987443	-0.488524	4	Unknown
Q9D6Y7-2;Q9D6Y7;Q9D6Y7-3;Q9D6Y7-4	Msra	Mitochondrial peptide methionine sulfoxide reductase	-2.20568	-0.0295668	0.301581	-0.360715	0.77465	0.538116	-0.0295668	1.01118	1	Degradation and stress response
Q9D7B6;D3YTT4	Acad8	Isobutyryl-CoA dehydrogenase, mitochondrial	-1.89544	0.49573	0.729015	0.320767	-0.845657	0.437409	-0.437409	1.19558	1	Pyruvate and aminoacid metabolism
Q9D7J9	Echdc3	Enoyl-CoA hydratase domain-containing protein 3, mitochondrial	-2.23245	0.123362	0.728231	-0.00397941	-0.226826	0.187032	0.282538	1.14209	1	Unknown
Q9D7N3	Mrps9	28S ribosomal protein S9, mitochondrial	2.28358	-0.318639	0.424852	-0.212426	-0.743492	-0.371746	-0.212426	-0.849705	4	Mitochondrial ribosome
Q9D7N6;A0A0A6YXW4	Mrpl30	39S ribosomal protein L30, mitochondrial	1.98653	-0.254444	-0.16107	0.137726	0.26845	-1.4683	0.287124	-0.796012	4	Mitochondrial ribosome
Q9D880	Timm50	Mitochondrial import inner membrane translocase subunit TIM50	-0.155609	1.57338	1.0201	-1.60796	-0.778046	-0.293928	0.397668	-0.155609	3	Mitochondrial import and chaperones
Q9D881;P19536;A0A0A6YVR0;F7C106	Cox5b	Cytochrome c oxidase subunit 5B, mitochondrial	0.178951	-1.17312	-1.5973	0.391041	1.15987	0.974289	0.57662	-0.510342	2	OXPHOS
Q9D8P4;H3BJT9;H3BIZ3;Q9D8P4-2	Mrpl17	39S ribosomal protein L17, mitochondrial	1.7496	0.533717	0.0530182	0.279229	0.448888	-1.27597	-1.16287	-0.625615	4	Mitochondrial ribosome
Q9D8S4	Rexo2	Oligoribonuclease, mitochondrial	-1.0271	0.760482	0.851892	0.699542	0.201864	0.679228	-1.89041	-0.2755	1	Mitochondrial transcription and mtRNA metabolism
Q9D8T7;Q9D8T7-2;F8WHU8;F7DE82	Slirp	SRA stem-loop-interacting RNA-binding protein, mitochondrial	2.06841	-0.737612	-0.655082	-0.572552	0.211483	-0.820142	0.789193	-0.283697	4	Mitochondrial transcription and mtRNA metabolism
Q9D8Z2	Triap1	TP53-regulated inhibitor of apoptosis 1	0.492145	-0.270458	0.598555	0.917784	1.29022	-0.483278	-0.855712	-1.68926	5	Apoptosis
Q9DA03;D6RD13	Lyrm7	Complex III assembly factor LYRM7	0.289707	-0.837801	0.289707	0.302235	0.515209	0.703127	0.865989	-2.12817	5	OXPHOS assembly and biogenesis
Q9DB15	Mrpl12	39S ribosomal protein L12, mitochondrial	2.30803	-0.554644	-0.0393618	-0.0966154	0.246906	-0.898165	-0.382883	-0.583271	4	Mitochondrial ribosome
Q9DBF1-2;Q9DBF1;G3UYR8;G3UY72;E9Q1H3;E9Q1G1	Aldh7a1	Alpha-aminoadipic semialdehyde dehydrogenase	-2.11416	-0.0896277	-0.04745	-0.173983	0.416505	0.33215	0.205617	1.47095	1	Pyruvate and aminoacid metabolism
Q9DBL1;E9Q5L3	Acadsb	Short/branched chain specific acyl-CoA dehydrogenase, mitochondrial	-2.29112	0.539289	0.704167	0.0996139	-0.092744	0.42937	-0.230143	0.841566	1	Lipid and acetyl CoA metabolism
Q9DC61;A2AIW9	Pmpca	Mitochondrial-processing peptidase subunit alpha	0.795779	-0.252777	-0.102983	0.496192	-1.37623	1.76944	-0.926848	-0.40257	5	Mitochondrial import and chaperones
Q9DC71	Mrps15	28S ribosomal protein S15, mitochondrial	2.08511	-1.22945	0.355775	-0.184643	-0.0405314	-0.761089	0.319748	-0.544922	4	Mitochondrial ribosome
Q9DCI9	Mrpl32	39S ribosomal protein L32, mitochondrial	2.02014	-0.23441	-0.360833	0.629483	-0.129057	-1.47757	-0.0869161	-0.360833	4	Mitochondrial ribosome
Q9DCJ5	Ndufa8	NADH dehydrogenase [ubiquinone] 1 alpha subcomplex subunit 8	0.137859	-1.35102	-0.744441	1.13045	1.29588	-0.523866	0.854728	-0.799584	2	OXPHOS
Q9DCM0	Ethe1	Persulfide dioxygenase ETHE1, mitochondrial	-2.0594	-0.485746	-0.196707	0.0602165	0.156563	1.15214	0.381371	0.991565	1	Other
Q9DCM2	Gstk1	Glutathione S-transferase kappa 1	-2.36969	0.506272	0.65943	0.438202	0.233991	-0.10636	-0.0212719	0.65943	1	Degradation and stress response
Q9DCS3;A2A845	Mecr	Trans-2-enoyl-CoA reductase, mitochondrial	-0.253405	1.40525	1.40525	-0.929153	-0.621995	-0.990584	-0.621995	0.606637	3	Lipid and acetyl CoA metabolism
Q9DCT2	Ndufs3	NADH dehydrogenase [ubiquinone] iron-sulfur protein 3, mitochondrial	-1.5948	0.54348	1.04241	0.115824	-0.668214	-0.0267285	-0.810766	1.39879	1	OXPHOS
Q9DCU6	Mrpl4	39S ribosomal protein L4, mitochondrial	1.66309	0.661942	0.661942	0.135023	-0.260166	-1.05054	-1.41939	-0.391896	4	Mitochondrial ribosome
Q9DCV4;A2AGJ2	Rmdn1	Regulator of microtubule dynamics protein 1	-0.551941	1.17895	1.63816	-0.975831	-0.481292	-0.869859	-0.551941	0.613758	3	Unknown
Q9DCW4	Etfb	Electron transfer flavoprotein subunit beta	-1.50911	-0.909218	-0.684257	0.815484	1.19042	0.965458	-0.384309	0.515536	1	Other
Q9DCW5;P43024	Cox6a1	Cytochrome c oxidase subunit 6A, mitochondrial;Cytochrome c oxidase subunit 6A1, mitochondrial	1.56038	1.06763	0.668733	-0.0586608	-0.574876	-1.06763	-1.13802	-0.457554	4	OXPHOS
Q9DCZ4-2;Q9DCZ4;Q9DCZ4-3	Apoo	Apolipoprotein O	-0.00557199	-0.585059	0.796795	1.77747	-0.273028	-1.65488	-0.183876	0.128156	4	Mitochondrial morphology
Q9EP89	Lactb	Serine beta-lactamase-like protein LACTB, mitochondrial	0.877517	0.23027	1.42519	-0.3174	-1.11401	-0.367188	-1.46253	0.728152	3	Unknown
Q9EQ20	Aldh6a1	Methylmalonate-semialdehyde dehydrogenase [acylating], mitochondrial	-2.19442	0.842473	0.842473	0.336323	-0.0366292	-0.143187	-0.356303	0.709275	1	Pyruvate and aminoacid metabolism
Q9EQI8;REV__Q9ERK0	Mrpl46	39S ribosomal protein L46, mitochondrial	1.93163	0.580724	0.646622	-0.275947	-1.03377	-0.704282	-0.901976	-0.242998	4	Mitochondrial ribosome
Q9ESW4;Q9ESW4-2	Agk	Acylglycerol kinase, mitochondrial	1.79844	0.199826	0.286237	0.0702092	-1.05314	-1.57161	0.0270035	0.243032	4	Lipid and acetyl CoA metabolism
Q9JHI5	Ivd	Isovaleryl-CoA dehydrogenase, mitochondrial	-2.32252	0.354283	0.380526	0.196824	0.144338	0.275554	-0.118094	1.08909	1	Pyruvate and aminoacid metabolism
Q9JHW2	Nit2	Omega-amidase NIT2	-2.10129	0.774608	0.534951	-0.115549	-0.492155	0.911556	-0.252497	0.740372	1	Other
Q9JIK9	Mrps34	28S ribosomal protein S34, mitochondrial	2.04417	0.313071	0.239407	-0.534063	-0.460399	-0.534063	-1.34436	0.276239	4	Mitochondrial ribosome
Q9JIY5;D3YX27;F6TCV0;F6XUR8;D3YX28;S4R1B3;S4R1A8;A2RT60	Htra2	Serine protease HTRA2, mitochondrial	-0.821064	0.648209	1.59891	-0.504162	-0.0720232	-0.792255	-1.13797	1.08035	1	Apoptosis
Q9JK42	Pdk2	[Pyruvate dehydrogenase (acetyl-transferring)] kinase isozyme 2, mitochondrial	-1.48341	0.967766	0.75852	0.75852	-0.10836	-1.18449	-0.646423	0.937874	1	Pyruvate and aminoacid metabolism
Q9JKF7	Mrpl39	39S ribosomal protein L39, mitochondrial	2.32907	-0.368155	-0.0581298	0.0348779	-0.275148	-0.616176	-0.988207	-0.0581298	4	Mitochondrial ribosome
Q9JLR9	Higd1a	HIG1 domain family member 1A, mitochondrial	-2.22888	-0.350536	0.231486	1.02515	0.178575	0.787052	-0.0330694	0.390219	1	OXPHOS
Q9JLZ3;F6RT60;F6R307;Q9JLZ3-3;E9Q6L3;E9QMT1;Q9JLZ3-2	Auh	Methylglutaconyl-CoA hydratase, mitochondrial	-2.2495	-0.242867	0.0437957	0.426012	0.808229	0.553418	-0.179164	0.84008	1	Pyruvate and aminoacid metabolism
Q9QX60-2;Q9QX60;Q504N4	Dguok	Deoxyguanosine kinase, mitochondrial	-1.24617	1.15031	1.24617	-0.127813	-0.830782	-0.287578	-0.894688	0.990548	1	Mitochondrial nucleotide synthesis
Q9QXX4;A0A0G2JGT3;A0A0G2JES2	Slc25a13	Calcium-binding mitochondrial carrier protein Aralar2	-2.09959	0.957483	0.579642	-0.00429365	-0.519531	0.510944	-0.279087	0.854436	1	Mitochondrial carriers or transport
Q9QYR9;O55137;Q91YQ6;Q32Q92-2;Q32Q92;Q8BWN8;Q9QYR7-2;Q6Q2Z6;Q9QYR7	Acot2;Acot1	Acyl-coenzyme A thioesterase 2, mitochondrial;Acyl-coenzyme A thioesterase 1	-0.0786179	0.899739	1.31903	-1.05697	-1.72086	0.13103	-0.0786179	0.585267	3	Lipid and acetyl CoA metabolism
Q9QZ23	Nfu1	NFU1 iron-sulfur cluster scaffold homolog, mitochondrial	1.04675	-1.40624	-1.23706	0.962161	0.962161	0.116305	-0.687258	0.243184	2	Iron sulphur cluster and heme biogenesis
Q9QZH6;J3KMM6	Ecsit	Evolutionarily conserved signaling intermediate in Toll pathway, mitochondrial	2.18055	0.105171	-0.848382	0.273446	0.161263	-1.01666	-0.511834	-0.34356	4	OXPHOS assembly and biogenesis
Q9R0X4;Q32MW3	Acot9;Acot10	Acyl-coenzyme A thioesterase 9, mitochondrial;Acyl-coenzyme A thioesterase 10, mitochondrial	0.38651	0.430683	0.916582	1.13744	0.253993	-0.80615	-1.91047	-0.408597	4	Lipid and acetyl CoA metabolism
Q9R112;F6ZKZ3;H3BLH2	Sqrdl	Sulfide:quinone oxidoreductase, mitochondrial	-2.32951	0.562296	0.583717	0.13388	-0.0160656	-0.101749	0.262405	0.905029	1	Other
Q9WU79;F6PYI8;F6YFQ5;F6XMC0;E9PUR5	Prodh	Proline dehydrogenase 1, mitochondrial	0.364085	1.38121	1.28874	-0.236944	-1.20784	0.225386	-0.699273	-1.11537	3	Pyruvate and aminoacid metabolism
Q9WUR9;F6TEU8;A2ARF6;A2ARF5	Ak4	Adenylate kinase 4, mitochondrial	-2.41478	0.24595	0.380104	0.0894363	0.536618	0.268309	0.134154	0.760209	1	Mitochondrial nucleotide synthesis
Q9WV98	Timm9	Mitochondrial import inner membrane translocase subunit Tim9	1.33102	-1.02148	-1.55801	0.381765	0.753212	0.835756	-0.15477	-0.567489	2	Mitochondrial import and chaperones
Q9Z0V8;D3Z1K5;D3Z1Z0	Timm17a	Mitochondrial import inner membrane translocase subunit Tim17-A	0.941657	0.80034	0.756858	-1.49333	-1.56943	0.343779	0.289427	-0.0692994	5	Mitochondrial import and chaperones
Q9Z2I8	Suclg2	Succinyl-CoA ligase [GDP-forming] subunit beta, mitochondrial	-2.32845	0.305202	0.250334	-0.188608	0.277768	0.606974	0.113165	0.963615	1	Pyruvate and aminoacid metabolism
Q9Z2Y8;Q80ZV3	Prosc	Proline synthase co-transcribed bacterial homolog protein	-1.80178	-0.884512	-0.412772	-0.0720714	0.950031	0.8452	0.347253	1.02865	1	Other
V9GX21;H3BLL2;Q811I0;H3BJP9;H3BK16;H3BLD0;H3BKR0	Atpaf1	ATP synthase mitochondrial F1 complex assembly factor 1	-1.19507	1.00316	1.35209	0.340203	0.409989	-1.12529	-1.0555	0.270418	1	OXPHOS assembly and biogenesis
V9GXI7;Q9CQL4;V9GX65	Mrpl20	39S ribosomal protein L20, mitochondrial	2.39649	-0.639063	0.0639063	-0.447344	-0.575157	-0.0319531	-0.479297	-0.287578	4	Mitochondrial ribosome
Z4YKM2;B2RWE3;B1AR13	Cisd3	CDGSH iron-sulfur domain-containing protein 3, mitochondrial	-0.462355	-1.28432	-0.936566	1.2448	1.4661	0.296382	0.296382	-0.620425	2	Iron sulphur cluster and heme biogenesis
