# Supplementary material for: Transcriptomic and proteomic landscape of mitochondrial dysfunction reveals secondary coenzyme Q deficiency in mammals
Source: eLife. 2017 Nov 14;6:e30952. doi: 10.7554/eLife.30952 (PMC5703644; doi:10.7554/eLife.30952)
Supplement: Supplementary file 4. [file elife-30952-supp4.xlsx]

## Sheet: Description tab content
Analysis of total cellular transcriptome from heart of Tfam, Twnk, Polrmt, Lrpprc and Mterf4 conditional knockout and control mouse strains at different ages - Kühl et al.
This spreadsheet contains tabs with following datasets:
A_N biological replicates: Number of biological replicates per genotype and mouse strain
B-F: Differentially expressed genes per knockout line: Differential expression (DE) analysis of RNA-Seq data from hearts of Twnk Tfam, Polrmt, Lrpprc and Mterf4 conditional knockouts (padj<0.05)
G: Differentially expressed genes in control (L/L) mice: DE analysis of RNA-Seq data from hearts of control (L/L) mice at different ages (padj<0.05)
Below are descriptions for the columns in each tab
gene_id:	Ensemble gene identifier
Gene name:	Entrez Gene name
baseMean	Mean of normalized counts of all samples
logFC:	log2 fold-change of L/L	cre / L/L per mouse strain (A-E) or of x age/ 4 weeks (F)
lfcSE	Standard error of the logFC estimate
stat	Wald statistic
pvalue	Wald test p-value
padj:	Benjamini-Hochberg corrected p value
Manual category annotation:	Manual functional category

## Sheet: A_N biological replicates
Mouse strain	L/L	L/L, cre
Twnk	5	3
Tfam	3	5
Polrmt	4	4
Lrpprc	4	4
Mterf4	5	3

## Sheet: B_Twnk_DESeq2
gene_id	gene_name	baseMean	logFC	lfcSE	stat	pvalue	padj
ENSMUSG00000000001	Gnai3	1431.9	0.72585	0.20306	3.57456	0.000350817	0.00260051
ENSMUSG00000000085	Scmh1	913.945	-0.782562	0.196876	-3.97489	7.04123e-05	0.000631723
ENSMUSG00000000088	Cox5a	10642.7	-0.541018	0.100255	-5.39641	6.79861e-08	1.24027e-06
ENSMUSG00000000120	Ngfr	73.3245	1.39408	0.394554	3.53331	0.000410396	0.00299586
ENSMUSG00000000148	Brat1	532.078	0.381681	0.139513	2.7358	0.00622288	0.0301501
ENSMUSG00000000168	Dlat	13202.6	-0.605282	0.120457	-5.02487	5.03762e-07	7.72776e-06
ENSMUSG00000000171	Sdhd	10971.5	-0.679681	0.156214	-4.35096	1.35544e-05	0.000147761
ENSMUSG00000000253	Gmpr	2095.8	-0.850649	0.211709	-4.01801	5.86908e-05	0.000536844
ENSMUSG00000000266	Mid2	1412.04	0.64876	0.102278	6.34311	2.25179e-10	6.55085e-09
ENSMUSG00000000278	Scpep1	1055.88	1.41291	0.242212	5.83339	5.43123e-09	1.23623e-07
ENSMUSG00000000290	Itgb2	423.247	0.925993	0.228299	4.05606	4.99074e-05	0.000464936
ENSMUSG00000000301	Pemt	47.472	1.18345	0.292051	4.05222	5.07341e-05	0.000471298
ENSMUSG00000000308	Ckmt1	64.4981	1.58205	0.557637	2.83706	0.00455316	0.0233184
ENSMUSG00000000340	Dbt	2472.49	-1.22096	0.158935	-7.68213	1.56463e-14	8.91884e-13
ENSMUSG00000000365	Rnf17	71.6009	1.35954	0.26273	5.17466	2.28327e-07	3.72636e-06
ENSMUSG00000000386	Mx1	64.5355	1.74593	0.323669	5.39417	6.88407e-08	1.25238e-06
ENSMUSG00000000392	Fap	247.542	0.68592	0.166614	4.11683	3.84117e-05	0.000370659
ENSMUSG00000000399	Ndufa9	9764.05	-0.716273	0.153798	-4.65724	3.20481e-06	4.09525e-05
ENSMUSG00000000441	Raf1	4184.58	-0.569462	0.0948805	-6.00188	1.95045e-09	4.83093e-08
ENSMUSG00000000563	Atp5f1	23692.7	-0.51106	0.139601	-3.66087	0.000251364	0.00194696
ENSMUSG00000000605	Clcn4-2	3342.3	-0.397868	0.130774	-3.04242	0.00234688	0.0134285
ENSMUSG00000000628	Hk2	13948.9	-0.691782	0.163854	-4.22193	2.42216e-05	0.000247965
ENSMUSG00000000682	Cd52	132.733	1.12932	0.400374	2.82065	0.00479262	0.0243042
ENSMUSG00000000693	Loxl3	663.882	1.56729	0.214581	7.30397	2.79406e-13	1.3177e-11
ENSMUSG00000000738	Spg7	3038.62	-0.580429	0.126042	-4.60506	4.12354e-06	5.11308e-05
ENSMUSG00000000753	Serpinf1	2003.75	1.40044	0.240812	5.81549	6.04558e-09	1.36345e-07
ENSMUSG00000000805	Car4	270.013	-0.916009	0.321833	-2.84623	0.00442406	0.0228416
ENSMUSG00000000838	Fmr1	903.07	0.845501	0.108707	7.77781	7.37896e-15	4.37092e-13
ENSMUSG00000000889	Dbh	90.823	-2.28779	0.325475	-7.02907	2.07908e-12	8.66573e-11
ENSMUSG00000000915	Hip1r	1268.3	0.33344	0.0894305	3.72848	0.000192641	0.00154822
ENSMUSG00000000957	Mmp14	833.796	0.952455	0.27758	3.43128	0.000600739	0.0041731
ENSMUSG00000000959	Oxa1l	2424.76	-0.384891	0.121106	-3.17814	0.00148223	0.00907863
ENSMUSG00000001020	S100a4	171.611	0.762553	0.295254	2.58271	0.00980289	0.0436261
ENSMUSG00000001027	Scn4a	1168.1	-2.8523	0.330983	-8.61765	6.83436e-18	5.60019e-16
ENSMUSG00000001056	Nhp2	482.01	1.48877	0.134028	11.1079	1.14795e-28	2.19181e-26
ENSMUSG00000001062	Vps9d1	814.251	-0.407253	0.143181	-2.84432	0.00445069	0.0229364
ENSMUSG00000001098	Kctd10	2044.97	0.405096	0.129362	3.13149	0.00173924	0.0103837
ENSMUSG00000001119	Col6a1	6153.49	0.773973	0.159607	4.84925	1.2393e-06	1.75339e-05
ENSMUSG00000001131	Timp1	399.313	3.03819	0.303911	9.997	1.5708e-23	2.11585e-21
ENSMUSG00000001143	Lman2l	512.434	-0.783871	0.225365	-3.47823	0.00050473	0.00359248
ENSMUSG00000001151	Pcnt	5089.93	-1.15054	0.178459	-6.44708	1.14023e-10	3.49824e-09
ENSMUSG00000001228	Uhrf1	125.892	1.39052	0.298857	4.65278	3.27487e-06	4.17933e-05
ENSMUSG00000001248	Gramd1a	1486.53	0.320861	0.113784	2.81991	0.00480377	0.0243482
ENSMUSG00000001281	Itgb7	78.4551	0.798227	0.304848	2.61844	0.00883317	0.0403047
ENSMUSG00000001323	Srr	836.391	0.793839	0.279414	2.84108	0.00449609	0.0230922
ENSMUSG00000001380	Hars	1412.72	0.781123	0.143115	5.45801	4.81507e-08	9.07892e-07
ENSMUSG00000001416	Cct3	4718.92	0.617471	0.133309	4.63189	3.62338e-06	4.56193e-05
ENSMUSG00000001424	Snd1	4075.71	0.520694	0.125089	4.1626	3.14647e-05	0.000313151
ENSMUSG00000001472	Tcf25	6616.58	0.522007	0.0751557	6.94568	3.76651e-12	1.50248e-10
ENSMUSG00000001482	Def8	1335.67	0.807853	0.152366	5.30204	1.14514e-07	1.99458e-06
ENSMUSG00000001493	Meox1	736.502	1.53357	0.499935	3.06754	0.00215829	0.0124545
ENSMUSG00000001506	Col1a1	4414.79	1.37001	0.41803	3.27731	0.00104802	0.00679314
ENSMUSG00000001508	Sgca	2924.35	-0.887136	0.111225	-7.97603	1.51118e-15	9.68043e-14
ENSMUSG00000001517	Foxm1	63.7665	1.02316	0.309734	3.30335	0.000955381	0.00627217
ENSMUSG00000001520	Nrip2	249.584	1.25164	0.280134	4.46802	7.89453e-06	9.21388e-05
ENSMUSG00000001542	Ell2	1048.34	1.10483	0.190257	5.80702	6.35956e-09	1.42934e-07
ENSMUSG00000001604	Tcea3	1922.56	-1.43405	0.199294	-7.19568	6.21499e-13	2.82926e-11
ENSMUSG00000001627	Ifrd1	1997.27	1.29587	0.243663	5.31828	1.04753e-07	1.8377e-06
ENSMUSG00000001632	Brpf1	1014.75	-0.217285	0.0794529	-2.73477	0.00624239	0.0302222
ENSMUSG00000001642	Akr1b3	3578.19	-0.830793	0.167501	-4.95994	7.0516e-07	1.05058e-05
ENSMUSG00000001663	Gstt1	378.319	-0.768656	0.238659	-3.22073	0.00127865	0.00803125
ENSMUSG00000001666	Ddt	564.731	-0.958483	0.316131	-3.03192	0.00243005	0.0138159
ENSMUSG00000001674	Ddx18	838.328	0.55817	0.137736	4.05247	5.06792e-05	0.00047101
ENSMUSG00000001750	Tcirg1	611.409	0.504761	0.107155	4.71058	2.47016e-06	3.23854e-05
ENSMUSG00000001751	Naglu	439.138	1.42229	0.357411	3.97942	6.90843e-05	0.000620654
ENSMUSG00000001755	Coasy	573.397	0.386944	0.136272	2.83949	0.00451854	0.0231833
ENSMUSG00000001763	Tspan33	60.7331	-1.04421	0.334473	-3.12196	0.0017965	0.0106834
ENSMUSG00000001773	Folh1	5.76834	-2.22519	0.598866	-3.71568	0.000202659	0.00162144
ENSMUSG00000001785	Pwp1	749.629	0.584992	0.158474	3.69141	0.00022301	0.0017564
ENSMUSG00000001829	Clpb	2692.93	0.430937	0.110294	3.90716	9.33886e-05	0.000815171
ENSMUSG00000001833	2007-09-01	5634.36	0.260287	0.0669481	3.88789	0.000101119	0.000873733
ENSMUSG00000001870	Ltbp1	2959.11	-0.92647	0.135361	-6.84442	7.67846e-12	2.85453e-10
ENSMUSG00000001909	Trmt1	983.633	0.409996	0.11171	3.67018	0.000242379	0.00188181
ENSMUSG00000001942	Siae	414.777	-0.742152	0.241692	-3.07065	0.00213592	0.0123653
ENSMUSG00000001962	Fam50a	491.358	0.680705	0.18503	3.67889	0.000234249	0.00182445
ENSMUSG00000001964	Emd	786.626	0.371204	0.14092	2.63414	0.00843497	0.0388483
ENSMUSG00000001983	Taco1	760.87	-0.894159	0.202688	-4.41151	1.02651e-05	0.00011562
ENSMUSG00000001995	Sipa1l2	3058.69	-0.695318	0.210298	-3.30635	0.000945198	0.00621889
ENSMUSG00000002007	Srpk3	804.269	-1.42453	0.183408	-7.76703	8.03468e-15	4.73084e-13
ENSMUSG00000002010	Idh3g	11630.3	-0.515901	0.136306	-3.78489	0.00015378	0.00126431
ENSMUSG00000002012	Pnck	175.437	-0.873789	0.212844	-4.10531	4.03779e-05	0.000386974
ENSMUSG00000002014	Ssr4	641.193	0.518015	0.140442	3.68846	0.000225615	0.00177478
ENSMUSG00000002020	Ltbp2	1323.01	2.81501	0.420548	6.69366	2.1765e-11	7.56239e-10
ENSMUSG00000002031	Ift46	509	0.592167	0.147406	4.01724	5.88829e-05	0.00053835
ENSMUSG00000002032	Tmem25	324.584	-1.60575	0.201502	-7.96888	1.60125e-15	1.0191e-13
ENSMUSG00000002043	Trappc6a	355.837	1.07208	0.259924	4.1246	3.71387e-05	0.000360676
ENSMUSG00000002055	Spag5	136.543	2.83525	0.357889	7.92216	2.33412e-15	1.45723e-13
ENSMUSG00000002059	Rab34	315.789	0.698005	0.168029	4.15406	3.26621e-05	0.000323431
ENSMUSG00000002083	Bbc3	79.673	1.62939	0.465279	3.50196	0.000461855	0.00332218
ENSMUSG00000002108	Nr1h3	472.072	-0.357525	0.130243	-2.74507	0.00604989	0.0294498
ENSMUSG00000002111	Spi1	140.593	1.17638	0.348887	3.3718	0.000746775	0.0050312
ENSMUSG00000002147	Stat6	2241.75	0.292635	0.105533	2.77292	0.00555563	0.0274377
ENSMUSG00000002204	Napsa	23.6796	1.6921	0.406425	4.16338	3.13571e-05	0.000312237
ENSMUSG00000002233	Rhoc	1578.1	1.59465	0.198655	8.02724	9.96907e-16	6.60107e-14
ENSMUSG00000002257	Def6	118.068	0.558391	0.178282	3.13207	0.00173581	0.0103664
ENSMUSG00000002266	Zim1	86.0084	-1.40102	0.364355	-3.8452	0.000120452	0.00102546
ENSMUSG00000002279	Lmf1	983.911	-0.466511	0.144077	-3.23794	0.00120397	0.00762063
ENSMUSG00000002280	Narfl	1329.2	-0.676313	0.158928	-4.25547	2.08612e-05	0.000217213
ENSMUSG00000002289	Angptl4	520.253	1.34696	0.36275	3.7132	0.000204654	0.00163408
ENSMUSG00000002297	Dbf4	107.211	1.22449	0.274138	4.4667	7.94352e-06	9.26006e-05
ENSMUSG00000002319	Ipo4	1967.68	1.22225	0.176326	6.93172	4.15757e-12	1.64182e-10
ENSMUSG00000002326	Gmpr2	285.838	0.583329	0.168882	3.45406	0.000552209	0.00387987
ENSMUSG00000002332	Dhrs1	964.182	-0.459172	0.175941	-2.6098	0.0090594	0.041108
ENSMUSG00000002346	Slc25a42	978.5	-1.68046	0.315219	-5.33109	9.76239e-08	1.72495e-06
ENSMUSG00000002379	Ndufa11	5024.14	-0.316419	0.116334	-2.71993	0.0065295	0.0313518
ENSMUSG00000002416	Ndufb2	3069.53	-0.73305	0.135091	-5.42636	5.75165e-08	1.06408e-06
ENSMUSG00000002458	Rgs19	197.633	0.905188	0.20189	4.48357	7.34035e-06	8.61309e-05
ENSMUSG00000002489	Tiam1	591.017	0.838038	0.24769	3.38341	0.000715905	0.00484814
ENSMUSG00000002500	Rpl3l	2578.64	-2.846	0.267381	-10.644	1.85974e-26	3.15291e-24
ENSMUSG00000002565	Scin	243.406	-0.79077	0.30231	-2.61576	0.00890287	0.0405475
ENSMUSG00000002580	Mien1	571.044	0.382141	0.14377	2.65801	0.00786031	0.0366219
ENSMUSG00000002625	Akap8l	1430.69	-0.415558	0.109413	-3.79805	0.000145837	0.00120658
ENSMUSG00000002658	Gtf2f1	834.977	0.479386	0.0890449	5.38364	7.2994e-08	1.31939e-06
ENSMUSG00000002661	Alkbh7	786.888	-1.37141	0.212697	-6.44768	1.13572e-10	3.48985e-09
ENSMUSG00000002688	Prkd1	359.078	-0.433882	0.138094	-3.14192	0.00167843	0.0100898
ENSMUSG00000002699	Lcp2	178.779	1.26456	0.293037	4.31535	1.59348e-05	0.000171149
ENSMUSG00000002741	Ykt6	1696.76	1.25246	0.347759	3.60153	0.000316348	0.00237092
ENSMUSG00000002763	Pex6	1208.9	-0.657631	0.18511	-3.55265	0.000381366	0.00280267
ENSMUSG00000002768	Mea1	693.878	0.930715	0.207496	4.48546	7.27557e-06	8.54217e-05
ENSMUSG00000002769	Gnmt	45.854	-1.55983	0.364582	-4.27841	1.8823e-05	0.000198804
ENSMUSG00000002781	Tmem143	2065.14	-1.22888	0.213718	-5.74998	8.92536e-09	1.93738e-07
ENSMUSG00000002820	Atg4d	1212.35	-0.568532	0.20543	-2.76753	0.00564836	0.0278188
ENSMUSG00000002831	Plin4	11706.9	-0.566248	0.144731	-3.91243	9.13735e-05	0.000799711
ENSMUSG00000002835	Chaf1a	135.57	1.19206	0.199471	5.97608	2.28577e-09	5.57026e-08
ENSMUSG00000002847	Pla1a	615.468	0.983503	0.261871	3.75568	0.000172868	0.00140888
ENSMUSG00000002897	Il17ra	376.524	1.58865	0.234526	6.77388	1.25375e-11	4.56596e-10
ENSMUSG00000002908	Kcnn1	538.626	-0.421745	0.131793	-3.20006	0.00137397	0.00853192
ENSMUSG00000002910	Arrdc2	227.39	-0.750345	0.279154	-2.68792	0.00718985	0.0339241
ENSMUSG00000002944	Cd36	48527.3	-0.522015	0.164575	-3.17189	0.00151448	0.009241
ENSMUSG00000002963	Pnkp	757.122	0.50416	0.130203	3.87209	0.000107904	0.000926255
ENSMUSG00000002983	Relb	413.136	0.806029	0.168797	4.77513	1.79588e-06	2.43068e-05
ENSMUSG00000002985	Apoe	11084.6	0.653655	0.23376	2.79626	0.00516975	0.0258457
ENSMUSG00000003072	Atp5d	4076.17	-0.490196	0.1455	-3.36905	0.000754274	0.00507651
ENSMUSG00000003154	Foxj2	1560.54	-0.709428	0.217358	-3.26387	0.00109903	0.00707246
ENSMUSG00000003161	Sri	787.869	0.857032	0.186209	4.60254	4.17372e-06	5.14933e-05
ENSMUSG00000003200	Sh3gl1	656.948	0.564899	0.220838	2.55798	0.0105284	0.0462167
ENSMUSG00000003228	Grk5	1599.54	1.22676	0.230527	5.32157	1.02873e-07	1.80634e-06
ENSMUSG00000003282	Plag1	385.967	-0.565804	0.14772	-3.83025	0.000128014	0.00107863
ENSMUSG00000003283	Hck	132.137	1.71256	0.233647	7.32969	2.30678e-13	1.10917e-11
ENSMUSG00000003316	Glg1	5149.37	-0.339917	0.109183	-3.11327	0.00185026	0.0109567
ENSMUSG00000003344	Btbd2	913.583	-0.883259	0.312886	-2.82294	0.00475854	0.0241438
ENSMUSG00000003346	Abhd17a	794.056	0.440128	0.124102	3.54651	0.00039037	0.00286456
ENSMUSG00000003348	Mob3a	435.792	0.702999	0.170866	4.11432	3.88316e-05	0.000373794
ENSMUSG00000003352	Cacnb3	202.6	0.750745	0.276894	2.71131	0.00670189	0.0319901
ENSMUSG00000003355	Fkbp11	72.5727	0.894925	0.282019	3.17327	0.00150731	0.0092058
ENSMUSG00000003363	Pld3	1148.32	0.837769	0.149809	5.59223	2.24171e-08	4.45757e-07
ENSMUSG00000003411	Rab3b	64.801	-2.34578	0.484806	-4.83861	1.30753e-06	1.83409e-05
ENSMUSG00000003423	Pih1d1	787.074	0.431074	0.133361	3.23239	0.00122761	0.00776025
ENSMUSG00000003429	Rps11	3614.59	0.686508	0.116486	5.89347	3.78171e-09	8.85371e-08
ENSMUSG00000003435	Supt5	4070.88	0.466765	0.0834059	5.59631	2.18967e-08	4.38067e-07
ENSMUSG00000003444	Med29	292.913	-1.59626	0.366141	-4.35969	1.30248e-05	0.000142858
ENSMUSG00000003464	Pex19	1932.91	-0.433912	0.118916	-3.6489	0.000263363	0.00202871
ENSMUSG00000003469	Phyhip	579.083	-1.54522	0.330838	-4.67064	3.0026e-06	3.86953e-05
ENSMUSG00000003476	Crhr2	660.86	-1.92134	0.351576	-5.46494	4.63064e-08	8.75635e-07
ENSMUSG00000003477	Inmt	379.778	-1.62752	0.489674	-3.32368	0.000888384	0.00587457
ENSMUSG00000003500	Impdh1	669.356	0.611789	0.13234	4.62286	3.78489e-06	4.741e-05
ENSMUSG00000003526	Prodh	594.929	-0.573833	0.176064	-3.25922	0.00111718	0.00715882
ENSMUSG00000003559	As3mt	1235.99	-1.19861	0.204423	-5.86339	4.53516e-09	1.04772e-07
ENSMUSG00000003585	Sec14l2	54.7157	1.05145	0.307049	3.42437	0.000616234	0.0042642
ENSMUSG00000003617	Cp	5445.95	0.261977	0.0794943	3.29555	0.000982299	0.00642217
ENSMUSG00000003644	Rps6ka1	334.236	0.589033	0.190161	3.09756	0.00195123	0.0114409
ENSMUSG00000003762	Adck4	392.107	1.17963	0.280738	4.20187	2.64715e-05	0.000267654
ENSMUSG00000003779	Kif20a	148.544	0.916716	0.197615	4.63891	3.50248e-06	4.43528e-05
ENSMUSG00000003809	Gcdh	1519.72	-1.46068	0.178503	-8.18294	2.77003e-16	1.93175e-14
ENSMUSG00000003810	Mast2	6178.22	-0.487014	0.150856	-3.22834	0.00124512	0.00786587
ENSMUSG00000003848	Nob1	536.748	0.645631	0.177825	3.63072	0.000282636	0.00215105
ENSMUSG00000003849	Nqo1	1813.08	1.22429	0.349635	3.50162	0.000462431	0.00332389
ENSMUSG00000003873	Bax	557.895	1.47863	0.122833	12.0377	2.25097e-33	5.60348e-31
ENSMUSG00000003923	Tfam	1408.39	-0.282944	0.109362	-2.58722	0.00967544	0.0431859
ENSMUSG00000003934	Efnb3	1470.43	-2.90418	0.411417	-7.05896	1.67748e-12	7.06409e-11
ENSMUSG00000003955	Fam162a	1176.82	0.633031	0.144285	4.38737	1.14731e-05	0.000127981
ENSMUSG00000003974	Grm3	6.91049	-2.772	0.590017	-4.69816	2.62511e-06	3.42344e-05
ENSMUSG00000004035	Gstm7	599.352	-1.47846	0.263615	-5.60843	2.04174e-08	4.10981e-07
ENSMUSG00000004040	Stat3	4444.44	0.392322	0.136581	2.87245	0.00407299	0.021303
ENSMUSG00000004043	Stat5a	1015.85	-0.535446	0.144348	-3.70942	0.000207735	0.00165197
ENSMUSG00000004056	Akt2	4592.89	-0.51815	0.168001	-3.0842	0.00204102	0.0118824
ENSMUSG00000004099	Dnmt1	1391.77	0.379291	0.0922614	4.11105	3.93859e-05	0.000378574
ENSMUSG00000004100	Ppan	306.337	0.571513	0.209468	2.7284	0.00636421	0.0307289
ENSMUSG00000004127	Trmt10a	138.039	1.31504	0.228405	5.75748	8.53765e-09	1.86557e-07
ENSMUSG00000004151	Etv1	453.286	-0.854526	0.195326	-4.37488	1.215e-05	0.000134464
ENSMUSG00000004187	Kifc2	227.051	-1.21059	0.211766	-5.71666	1.08636e-08	2.31466e-07
ENSMUSG00000004207	Psap	29208.1	-0.425968	0.111294	-3.82742	0.000129495	0.00108831
ENSMUSG00000004266	Ptpn6	290.93	1.15651	0.232097	4.98288	6.26449e-07	9.44042e-06
ENSMUSG00000004267	Eno2	101.743	1.09669	0.375035	2.92425	0.00345291	0.0186041
ENSMUSG00000004270	Lpcat3	920.702	-0.430004	0.116717	-3.68416	0.000229458	0.00179639
ENSMUSG00000004317	Clcn5	466.958	0.943986	0.209316	4.50986	6.48694e-06	7.6897e-05
ENSMUSG00000004319	Clcn3	2409	-0.509401	0.157928	-3.22552	0.00125744	0.00792842
ENSMUSG00000004356	Utp20	1721.04	0.656128	0.12403	5.29006	1.22274e-07	2.10564e-06
ENSMUSG00000004393	Ddx56	900.865	0.627111	0.130688	4.79853	1.59835e-06	2.19812e-05
ENSMUSG00000004394	Tmed4	1904.83	-0.92378	0.284622	-3.24564	0.00117187	0.00744428
ENSMUSG00000004446	Bid	160.634	1.94391	0.283847	6.84843	7.46654e-12	2.781e-10
ENSMUSG00000004473	Clec11a	113.009	0.914787	0.31904	2.86731	0.0041398	0.0215836
ENSMUSG00000004535	Tax1bp1	5270.95	0.258012	0.0813028	3.17347	0.00150629	0.00920244
ENSMUSG00000004558	Ndrg2	33557.2	-0.493209	0.193167	-2.55328	0.0106713	0.0466669
ENSMUSG00000004562	Arhgef40	2133.79	0.687535	0.193595	3.55141	0.000383166	0.00281484
ENSMUSG00000004565	Pnpla6	642.31	0.387621	0.121253	3.19678	0.00138971	0.00861872
ENSMUSG00000004567	Mcoln1	700.565	0.351627	0.130076	2.70324	0.00686678	0.0326425
ENSMUSG00000004610	Etfb	8329.35	-0.884419	0.228667	-3.86772	0.000109858	0.000942204
ENSMUSG00000004626	Stxbp2	165.795	1.06486	0.358084	2.97378	0.00294158	0.016227
ENSMUSG00000004633	Chn2	133.153	0.872777	0.297134	2.93731	0.00331068	0.0179558
ENSMUSG00000004665	Cnn2	1894.58	0.88569	0.285993	3.0969	0.00195559	0.0114562
ENSMUSG00000004667	Polr2e	1562.21	0.585114	0.16573	3.53052	0.000414746	0.00302313
ENSMUSG00000004677	Myo9b	3177.11	0.71863	0.105011	6.84339	7.73389e-12	2.86971e-10
ENSMUSG00000004709	Cd244	38.3265	1.04422	0.401687	2.59958	0.00933388	0.0420623
ENSMUSG00000004730	Adgre1	1112.7	1.3245	0.246214	5.37946	7.47087e-08	1.34791e-06
ENSMUSG00000004748	Mtfp1	2262.08	-1.93229	0.364864	-5.29593	1.18412e-07	2.04811e-06
ENSMUSG00000004789	Dlst	8729.56	-0.611483	0.106087	-5.76396	8.21612e-09	1.80569e-07
ENSMUSG00000004846	Plod3	1516.05	0.525573	0.117252	4.48243	7.37991e-06	8.64404e-05
ENSMUSG00000004849	Ap1s1	573.794	1.30566	0.334479	3.90358	9.47812e-05	0.000826227
ENSMUSG00000004895	Prcc	904.733	-0.674299	0.13907	-4.84863	1.24317e-06	1.75759e-05
ENSMUSG00000004929	Thop1	773.631	0.85839	0.155615	5.5161	3.46597e-08	6.73534e-07
ENSMUSG00000004939	Nmrk2	6358.24	3.08728	0.309497	9.97516	1.95782e-23	2.58406e-21
ENSMUSG00000004945	Tmem242	550.338	-0.496157	0.168932	-2.93702	0.00331383	0.017963
ENSMUSG00000004951	Hspb1	5742.25	1.31952	0.304274	4.33663	1.44687e-05	0.000156945
ENSMUSG00000004980	Hnrnpa2b1	7921.22	-0.372768	0.135865	-2.74367	0.00607561	0.0295503
ENSMUSG00000005043	Sgsh	440.064	0.589877	0.205149	2.87536	0.00403572	0.021157
ENSMUSG00000005045	Chd5	75.2565	1.32853	0.314601	4.22291	2.41164e-05	0.000247146
ENSMUSG00000005054	Cstb	570.247	2.05667	0.202059	10.1786	2.47155e-24	3.52214e-22
ENSMUSG00000005078	Jkamp	420.705	-0.388345	0.136638	-2.84214	0.00448115	0.0230456
ENSMUSG00000005087	Cd44	574.964	0.723412	0.277829	2.6038	0.00921962	0.0416524
ENSMUSG00000005103	Wdr1	7223.32	0.602842	0.12512	4.81812	1.4492e-06	2.0075e-05
ENSMUSG00000005124	Wisp1	482.505	1.82502	0.387703	4.70728	2.51048e-06	3.28703e-05
ENSMUSG00000005125	Ndrg1	1681.84	0.931265	0.201753	4.61587	3.91451e-06	4.8847e-05
ENSMUSG00000005142	Man2b1	2167.33	0.444067	0.0944327	4.70247	2.57037e-06	3.36096e-05
ENSMUSG00000005161	Prdx2	7712.36	-0.451976	0.139444	-3.24127	0.00118998	0.0075491
ENSMUSG00000005204	Senp3	1097.51	0.394739	0.104208	3.788	0.000151866	0.00125015
ENSMUSG00000005220	Corin	7648.99	-0.885632	0.155126	-5.70909	1.13579e-08	2.40435e-07
ENSMUSG00000005233	Spc25	40.9837	1.30802	0.411258	3.18054	0.00147001	0.00901722
ENSMUSG00000005251	Ripk4	12.1374	-1.4343	0.470289	-3.04983	0.00228969	0.0131434
ENSMUSG00000005268	Prlr	540.356	-2.04923	0.376502	-5.44283	5.24416e-08	9.83142e-07
ENSMUSG00000005354	Txn2	3106.48	-0.462703	0.119442	-3.87389	0.000107113	0.00092107
ENSMUSG00000005360	Slc1a3	247.171	1.51502	0.322214	4.70191	2.57743e-06	3.36637e-05
ENSMUSG00000005371	Fbxo11	1410.17	-0.478915	0.182968	-2.61748	0.0088581	0.040381
ENSMUSG00000005373	Mlxipl	549.447	-1.78971	0.219869	-8.13986	3.95749e-16	2.75011e-14
ENSMUSG00000005410	Mcm5	206.249	0.893684	0.158906	5.62399	1.866e-08	3.77927e-07
ENSMUSG00000005413	Hmox1	1028.08	3.3877	0.242795	13.9529	3.01995e-44	1.18781e-41
ENSMUSG00000005447	Pafah1b3	68.2953	1.28139	0.412668	3.10513	0.00190198	0.0111888
ENSMUSG00000005469	Prkaca	5823.49	-0.894865	0.212154	-4.218	2.46476e-05	0.000251802
ENSMUSG00000005481	Ddx39	1036.25	0.739748	0.135159	5.47317	4.42053e-08	8.39944e-07
ENSMUSG00000005510	Ndufs3	5644.77	-0.912002	0.175368	-5.2005	1.98758e-07	3.27642e-06
ENSMUSG00000005514	Por	1836.34	0.662471	0.178631	3.70859	0.000208416	0.00165671
ENSMUSG00000005533	Igf1r	1727.92	0.916626	0.23018	3.98221	6.82776e-05	0.000614248
ENSMUSG00000005580	Adcy9	1214.99	-0.728611	0.142696	-5.10605	3.28961e-07	5.21301e-06
ENSMUSG00000005611	Mrvi1	930.168	-0.894474	0.312727	-2.86024	0.00423315	0.0220235
ENSMUSG00000005625	Psmd4	2621.74	0.484982	0.108881	4.45425	8.41879e-06	9.7105e-05
ENSMUSG00000005628	Tmod4	376.528	-2.06946	0.293292	-7.05598	1.71384e-12	7.2018e-11
ENSMUSG00000005656	Snx6	1071.38	0.303646	0.088468	3.43227	0.00059856	0.00416094
ENSMUSG00000005667	Mthfd2	1859.08	5.0264	0.272407	18.4518	5.04657e-76	4.72599e-73
ENSMUSG00000005672	Kit	317.175	0.365565	0.140872	2.59501	0.0094587	0.0424885
ENSMUSG00000005674	Tomm40l	1774.49	-0.69184	0.268984	-2.57205	0.0101098	0.0446742
ENSMUSG00000005699	Pard6a	185.173	0.832505	0.301796	2.7585	0.00580673	0.0284421
ENSMUSG00000005732	Ranbp1	645.13	0.548112	0.181393	3.02169	0.00251371	0.0142176
ENSMUSG00000005802	Slc30a4	1486.63	1.01082	0.324806	3.11209	0.0018577	0.0109908
ENSMUSG00000005803	Sqrdl	1571.93	-0.486919	0.185035	-2.6315	0.008501	0.03907
ENSMUSG00000005836	Gata6	774.024	-0.915498	0.193201	-4.73859	2.15215e-06	2.84628e-05
ENSMUSG00000005846	Rsl1d1	2024.07	0.550826	0.123394	4.46398	8.04521e-06	9.3509e-05
ENSMUSG00000005882	Uqcc1	4591.79	-0.889771	0.212778	-4.18169	2.89356e-05	0.000289887
ENSMUSG00000005886	Ncoa2	3210.01	-0.48032	0.133291	-3.60353	0.000313922	0.00235813
ENSMUSG00000005947	Itgae	46.8852	2.71633	0.336303	8.07705	6.63512e-16	4.46871e-14
ENSMUSG00000005958	Ephb3	415.037	-0.519352	0.198539	-2.61587	0.00890002	0.0405475
ENSMUSG00000005968	Tuft1	71.2928	1.46507	0.427985	3.42318	0.00061892	0.00427978
ENSMUSG00000005980	Dnase1	166.867	-0.596972	0.210854	-2.83121	0.0046372	0.0236502
ENSMUSG00000006057	Atp5g1	14804.9	-0.468232	0.133163	-3.51623	0.000437728	0.00317652
ENSMUSG00000006095	Tbcb	1167.84	0.872164	0.142847	6.10557	1.02433e-09	2.6471e-08
ENSMUSG00000006191	Cdkal1	1252.82	-0.367855	0.10621	-3.46348	0.000533243	0.00376679
ENSMUSG00000006276	Eps15l1	1824.86	-0.430008	0.15673	-2.74362	0.00607655	0.0295503
ENSMUSG00000006281	Tep1	1350.03	0.594947	0.204238	2.91301	0.00357964	0.0191453
ENSMUSG00000006288	Ttc5	448.755	0.359871	0.141018	2.55196	0.0107119	0.0468133
ENSMUSG00000006301	Tmbim1	2870.06	2.01296	0.194551	10.3467	4.33303e-25	6.65729e-23
ENSMUSG00000006304	Arpc2	3303.07	0.753726	0.100591	7.49297	6.73329e-14	3.55005e-12
ENSMUSG00000006356	Crip2	18193.6	-0.964031	0.125652	-7.67221	1.69056e-14	9.55358e-13
ENSMUSG00000006373	Pgrmc1	1015.68	0.636736	0.18758	3.39449	0.000687576	0.0046902
ENSMUSG00000006378	Gcat	360.27	-1.33532	0.17288	-7.724	1.12739e-14	6.55953e-13
ENSMUSG00000006390	Elovl1	645.547	1.28508	0.195086	6.58726	4.48006e-11	1.48826e-09
ENSMUSG00000006392	Med8	481.981	0.706907	0.189042	3.73942	0.000184442	0.00148718
ENSMUSG00000006395	Hyi	137.598	0.956332	0.327875	2.91676	0.0035369	0.0189631
ENSMUSG00000006398	Cdc20	78.6328	1.28752	0.302344	4.25845	2.05847e-05	0.000214872
ENSMUSG00000006442	Srm	299.668	1.09378	0.185205	5.9058	3.5093e-09	8.24538e-08
ENSMUSG00000006476	Nsmf	688.219	0.801492	0.200334	4.00079	6.31321e-05	0.000572673
ENSMUSG00000006498	Ptbp1	1660.4	0.474154	0.164851	2.87625	0.00402429	0.021106
ENSMUSG00000006522	Itih3	23.8958	1.14765	0.403511	2.84416	0.00445293	0.0229364
ENSMUSG00000006542	Prkag3	106.592	-0.74258	0.290498	-2.55623	0.0105813	0.0463662
ENSMUSG00000006576	Slc4a3	9062.8	-0.957447	0.145654	-6.57341	4.91746e-11	1.6226e-09
ENSMUSG00000006585	Cdt1	45.8067	1.19489	0.281757	4.24086	2.22664e-05	0.000229743
ENSMUSG00000006587	Snai3	98.8594	-2.22819	0.477115	-4.67013	3.01002e-06	3.87402e-05
ENSMUSG00000006589	Aprt	453.197	0.855185	0.145756	5.86724	4.431e-09	1.02759e-07
ENSMUSG00000006599	Gtf2h1	1128.46	0.94944	0.114722	8.27601	1.27367e-16	9.17508e-15
ENSMUSG00000006641	Slc5a6	437.275	-0.761425	0.195713	-3.89052	0.000100028	0.000865825
ENSMUSG00000006675	P4htm	363.464	-1.16059	0.150558	-7.70857	1.27237e-14	7.35954e-13
ENSMUSG00000006699	Cdc42	2730.71	0.609369	0.0725841	8.39535	4.64502e-17	3.43417e-15
ENSMUSG00000006715	Gmnn	563.177	-1.274	0.171921	-7.41039	1.25925e-13	6.31748e-12
ENSMUSG00000006731	B4galnt1	134.825	0.884243	0.30436	2.90525	0.00366956	0.0195465
ENSMUSG00000006740	Kif5b	10132.7	0.623451	0.194332	3.20817	0.00133583	0.00832926
ENSMUSG00000006763	Saal1	251.453	0.581557	0.179837	3.2338	0.00122156	0.00772447
ENSMUSG00000006784	Ttc25	32.6022	1.19363	0.469265	2.54362	0.0109709	0.0477542
ENSMUSG00000006818	Sod2	10032.5	-1.03016	0.321618	-3.20307	0.0013597	0.00845663
ENSMUSG00000006850	Tmco6	153.377	0.587422	0.222512	2.63996	0.00829156	0.0382954
ENSMUSG00000006931	P3h4	496.731	-0.499847	0.158975	-3.14418	0.00166553	0.0100381
ENSMUSG00000006941	Eif1b	401.912	-1.03691	0.321817	-3.22206	0.00127274	0.00799927
ENSMUSG00000006958	Chrd	110.196	-1.10663	0.280425	-3.94627	7.93771e-05	0.000705391
ENSMUSG00000007029	Vars	1699.32	1.35997	0.220085	6.17928	6.4393e-10	1.73236e-08
ENSMUSG00000007030	Vwa7	504.839	-1.34067	0.2175	-6.164	7.09304e-10	1.89013e-08
ENSMUSG00000007033	Hspa1l	114.783	-1.90901	0.612515	-3.11667	0.00182906	0.0108442
ENSMUSG00000007041	Clic1	1215.2	0.911928	0.215001	4.24152	2.22015e-05	0.000229206
ENSMUSG00000007097	Atp1a2	25867.2	-1.29237	0.162916	-7.93275	2.14339e-15	1.35102e-13
ENSMUSG00000007122	Casq1	260.829	-1.95645	0.333006	-5.87512	4.22538e-09	9.81066e-08
ENSMUSG00000007279	Scube2	576.013	-0.891791	0.245338	-3.63495	0.000278032	0.00212506
ENSMUSG00000007594	Hapln4	11.9309	1.82081	0.530375	3.43306	0.00059682	0.00415472
ENSMUSG00000007617	Homer1	1143.78	-0.855723	0.119575	-7.15638	8.2835e-13	3.70235e-11
ENSMUSG00000007646	Rad51c	73.6196	1.29294	0.315678	4.09577	4.2077e-05	0.000400748
ENSMUSG00000007682	Dio2	548.265	2.08252	0.401806	5.18289	2.18472e-07	3.57444e-06
ENSMUSG00000007739	Cct4	4622.23	0.504158	0.0927613	5.435	5.47957e-08	1.02337e-06
ENSMUSG00000007783	Cpt1c	179.928	0.765537	0.231886	3.30135	0.000962195	0.00631172
ENSMUSG00000007833	Aldh16a1	768.372	0.746274	0.168002	4.44204	8.91089e-06	0.000102241
ENSMUSG00000007867	Ift43	483.128	0.683237	0.141953	4.81312	1.48589e-06	2.0492e-05
ENSMUSG00000007877	Tcap	628.347	-2.38422	0.567329	-4.20254	2.6394e-05	0.000267146
ENSMUSG00000007888	Crlf1	140.511	3.48621	0.452349	7.70691	1.28905e-14	7.43418e-13
ENSMUSG00000007891	Ctsd	52116.6	0.944156	0.140931	6.69943	2.09237e-11	7.28293e-10
ENSMUSG00000007892	Rplp1	1408.21	0.753416	0.123735	6.08896	1.13645e-09	2.91769e-08
ENSMUSG00000007950	Abhd8	532.635	-0.930556	0.162867	-5.71359	1.10618e-08	2.3518e-07
ENSMUSG00000008136	Fhl2	31721.3	-0.98842	0.169058	-5.84662	5.01659e-09	1.14717e-07
ENSMUSG00000008153	Clstn3	35.8626	-1.65301	0.580147	-2.8493	0.00438158	0.0226815
ENSMUSG00000008167	Fbxw9	165.152	1.17812	0.279449	4.21587	2.48817e-05	0.000253689
ENSMUSG00000008373	Prpf31	744.344	0.46497	0.161238	2.88375	0.00392968	0.0207132
ENSMUSG00000008461	Fut1	10.1193	2.73001	0.603957	4.52021	6.17793e-06	7.35732e-05
ENSMUSG00000008475	Arpc5	573.424	1.38374	0.384026	3.60324	0.000314272	0.00235986
ENSMUSG00000008496	Pou2f2	72.3678	1.31605	0.379944	3.46379	0.000532632	0.00376383
ENSMUSG00000008658	Rbfox1	748.955	-2.9363	0.290533	-10.1066	5.16349e-24	7.3054e-22
ENSMUSG00000008682	Rpl10	6317.13	0.703779	0.149681	4.70187	2.57793e-06	3.36637e-05
ENSMUSG00000008855	Hdac5	3090.58	-0.50677	0.101871	-4.97461	6.53804e-07	9.81505e-06
ENSMUSG00000008976	Gabpa	2171	-0.344471	0.108305	-3.18056	0.0014699	0.00901722
ENSMUSG00000009210	2310007L24Rik	64.4772	-1.65819	0.338463	-4.89918	9.62389e-07	1.40195e-05
ENSMUSG00000009216	Fam163b	59.1205	1.75644	0.45684	3.84476	0.000120672	0.00102644
ENSMUSG00000009291	Pttg1ip	2172.08	-1.05917	0.41024	-2.58182	0.00982802	0.0437184
ENSMUSG00000009292	Trpm2	54.7325	1.07649	0.35852	3.00259	0.00267691	0.0149749
ENSMUSG00000009293	Ube2g2	1120.81	-1.09948	0.38268	-2.87312	0.00406437	0.0212749
ENSMUSG00000009376	Met	221.862	1.06638	0.284936	3.74253	0.000182175	0.00147374
ENSMUSG00000009406	Elk1	469.359	-0.465868	0.139999	-3.32766	0.000875777	0.00580878
ENSMUSG00000009487	Otog	8.81918	1.62622	0.58997	2.75645	0.00584332	0.0285929
ENSMUSG00000009545	Kcnq1	1156.71	-0.74465	0.159778	-4.66053	3.15391e-06	4.04334e-05
ENSMUSG00000009575	Cbx5	3231.07	-2.17436	0.204194	-10.6485	1.7715e-26	3.02942e-24
ENSMUSG00000009596	Taf7l	7.74767	2.60662	0.61254	4.25544	2.08642e-05	0.000217213
ENSMUSG00000009614	Sardh	399.506	0.830746	0.279996	2.967	0.00300723	0.0165381
ENSMUSG00000009640	Dmap1	552.695	0.411816	0.147308	2.7956	0.00518028	0.025883
ENSMUSG00000009687	Fxyd5	694.484	1.00082	0.224027	4.4674	7.91775e-06	9.2355e-05
ENSMUSG00000009863	Sdhb	17576.3	-0.766509	0.156689	-4.89191	9.98598e-07	1.45147e-05
ENSMUSG00000009905	Kdsr	438.497	0.590335	0.142586	4.1402	3.47007e-05	0.000341212
ENSMUSG00000009927	Rps25	5693.13	0.367355	0.123431	2.97619	0.00291849	0.0161222
ENSMUSG00000010048	Ifrd2	1118.59	0.512557	0.154449	3.31862	0.000904646	0.00597608
ENSMUSG00000010051	Hyal1	403.194	1.05493	0.298048	3.53948	0.000400924	0.00293392
ENSMUSG00000010064	Slc38a3	1971.09	-0.930806	0.202644	-4.59332	4.36256e-06	5.34876e-05
ENSMUSG00000010066	Cacna2d2	334.284	-2.37924	0.413177	-5.7584	8.4915e-09	1.85755e-07
ENSMUSG00000010080	Epn3	655.759	-0.560707	0.20591	-2.72307	0.00646789	0.0311072
ENSMUSG00000010095	Slc3a2	1969.71	1.94188	0.252442	7.69238	1.44418e-14	8.28027e-13
ENSMUSG00000010122	Slc47a1	1910.47	-0.960305	0.139648	-6.87662	6.12902e-12	2.30907e-10
ENSMUSG00000010154	Spire2	11.73	1.78394	0.471941	3.78001	0.000156824	0.00128719
ENSMUSG00000010175	Prox1	4494.83	-0.663379	0.119292	-5.56096	2.68288e-08	5.30266e-07
ENSMUSG00000010277	2610507B11Rik	18604.8	-0.436106	0.109079	-3.99807	6.38603e-05	0.000578745
ENSMUSG00000010362	Rdm1	534.893	-0.838926	0.251569	-3.33477	0.000853697	0.00568149
ENSMUSG00000010517	Faf1	3467.69	0.254071	0.0911179	2.78838	0.00529725	0.0263936
ENSMUSG00000010663	Fads1	687.421	-0.43225	0.165105	-2.61803	0.00884394	0.0403444
ENSMUSG00000010755	Cars	1272.42	1.8044	0.166244	10.854	1.90937e-27	3.4136e-25
ENSMUSG00000010936	Vac14	778.53	0.48475	0.182636	2.65418	0.00795017	0.0369181
ENSMUSG00000011034	Slc5a1	15.3371	-2.3085	0.497897	-4.63649	3.54367e-06	4.47412e-05
ENSMUSG00000011114	Tbrg1	1183.51	0.652163	0.165412	3.94267	8.05811e-05	0.000714154
ENSMUSG00000011171	Vipr2	48.4575	-1.1915	0.346415	-3.4395	0.000582796	0.00406716
ENSMUSG00000011179	Odc1	2906.17	1.15542	0.215905	5.35152	8.72165e-08	1.55786e-06
ENSMUSG00000011254	Thg1l	205.446	0.829781	0.186338	4.45309	8.46433e-06	9.74588e-05
ENSMUSG00000011263	Exoc3l2	57.7904	1.47845	0.384535	3.84478	0.000120659	0.00102644
ENSMUSG00000011305	Plin5	1999.89	-1.13571	0.192091	-5.91231	3.37334e-09	7.98315e-08
ENSMUSG00000011658	Fuz	409.61	-0.772883	0.197202	-3.91924	8.88296e-05	0.000780573
ENSMUSG00000011751	Sptbn4	48.0441	1.11948	0.319318	3.50585	0.000455158	0.00328335
ENSMUSG00000011752	Pgam1	1858.82	1.11428	0.336965	3.30682	0.000943627	0.0062139
ENSMUSG00000011831	Evi5	1186.82	0.392832	0.119362	3.29111	0.000997934	0.00651357
ENSMUSG00000012017	Scarf2	280.505	0.655549	0.210476	3.11461	0.0018419	0.0109138
ENSMUSG00000012422	Tmem167	518.868	-1.50233	0.374596	-4.01053	6.05816e-05	0.000552084
ENSMUSG00000012443	Kif11	147.84	1.23982	0.26999	4.5921	4.38803e-06	5.37664e-05
ENSMUSG00000012819	Cdh23	700.612	-1.02837	0.219033	-4.69506	2.66532e-06	3.46898e-05
ENSMUSG00000012848	Rps5	6893.37	0.593738	0.124244	4.77881	1.76336e-06	2.40281e-05
ENSMUSG00000013033	Adgrl1	1060.63	-0.706235	0.261793	-2.69769	0.00698233	0.0331198
ENSMUSG00000013089	Etv5	1313.98	1.85842	0.252124	7.37106	1.69272e-13	8.38516e-12
ENSMUSG00000013160	Atp6v0d1	843.319	0.709695	0.157008	4.52012	6.18036e-06	7.35732e-05
ENSMUSG00000013236	Ptprs	2995.42	-0.436597	0.154295	-2.82962	0.00466038	0.0237377
ENSMUSG00000013418	B4galnt2	139.763	4.52372	0.337478	13.4045	5.69303e-41	1.8354e-38
ENSMUSG00000013584	Aldh1a2	360.3	1.37859	0.272504	5.05897	4.2153e-07	6.56359e-06
ENSMUSG00000013593	Ndufs2	23419.3	-0.729272	0.165267	-4.41268	1.02099e-05	0.000115064
ENSMUSG00000013736	Trnt1	1100.5	0.701751	0.150962	4.64852	3.34319e-06	4.25273e-05
ENSMUSG00000013787	Ehmt2	2355.84	0.512349	0.0803717	6.37474	1.83275e-10	5.42814e-09
ENSMUSG00000013936	Myl2	170721	-1.11211	0.202311	-5.49705	3.86193e-08	7.40054e-07
ENSMUSG00000014164	Klhl3	227.455	-1.2598	0.190144	-6.62554	3.45992e-11	1.16312e-09
ENSMUSG00000014303	Glis2	289.909	-0.743523	0.28799	-2.58177	0.0098295	0.0437184
ENSMUSG00000014313	Cox6c	12697.4	-1.03466	0.223593	-4.62742	3.70243e-06	4.64955e-05
ENSMUSG00000014361	Mertk	574.064	-0.475155	0.163763	-2.90149	0.00371397	0.0197349
ENSMUSG00000014402	Tsg101	1559.84	0.273577	0.0928093	2.94774	0.00320108	0.0174722
ENSMUSG00000014426	Map3k4	3036.58	-0.382876	0.131851	-2.90386	0.00368591	0.0196078
ENSMUSG00000014453	Blk	243.572	0.662208	0.225002	2.94312	0.00324921	0.0176907
ENSMUSG00000014503	Pkd2l2	321.808	-0.921379	0.209896	-4.38969	1.1351e-05	0.000126762
ENSMUSG00000014551	Mrps25	1383.65	-0.758845	0.235414	-3.22345	0.00126655	0.00797566
ENSMUSG00000014602	Kif1a	347.59	1.24582	0.335108	3.71765	0.000201082	0.00161013
ENSMUSG00000014606	Slc25a11	7600.22	-1.0713	0.146104	-7.33244	2.26e-13	1.08934e-11
ENSMUSG00000014633	Cmc2	319.342	-0.678297	0.205775	-3.29631	0.000979649	0.00640911
ENSMUSG00000014769	Psmb1	2085.69	0.65275	0.13401	4.87091	1.11086e-06	1.59297e-05
ENSMUSG00000014771	Pdcd2	177.214	0.989689	0.231371	4.27749	1.89008e-05	0.000199519
ENSMUSG00000014786	Slc9a5	85.9891	0.521167	0.205915	2.53098	0.0113744	0.0491624
ENSMUSG00000014813	Stc1	222.159	1.71256	0.327216	5.23373	1.66127e-07	2.77339e-06
ENSMUSG00000014846	Tppp3	490.493	-1.10586	0.35099	-3.15068	0.00162889	0.00984445
ENSMUSG00000014850	Msh3	631.186	-0.624679	0.218065	-2.86464	0.00417479	0.0217487
ENSMUSG00000015016	Acsf3	824.027	-0.247946	0.0944837	-2.62422	0.00868488	0.0397572
ENSMUSG00000015027	Galns	295.927	0.874958	0.198953	4.39781	1.09348e-05	0.000122463
ENSMUSG00000015053	Gata2	420.547	-0.455079	0.139511	-3.26197	0.00110643	0.00710263
ENSMUSG00000015083	C8g	56.8545	-1.3311	0.325663	-4.08735	4.36335e-05	0.000414139
ENSMUSG00000015087	Rabl6	2263.02	-0.350548	0.101305	-3.46031	0.000539562	0.00380051
ENSMUSG00000015112	Slc25a13	4266.15	-0.624022	0.131134	-4.75865	1.94893e-06	2.60378e-05
ENSMUSG00000015126	Tsr3	258.171	0.488251	0.167558	2.91392	0.00356922	0.0191049
ENSMUSG00000015134	Aldh1a3	123.358	1.01468	0.337852	3.00334	0.00267037	0.0149489
ENSMUSG00000015143	Actn1	1339.42	0.903185	0.303496	2.97594	0.00292093	0.0161311
ENSMUSG00000015217	Hmgb3	1025.57	-0.884492	0.247578	-3.57258	0.000353479	0.0026163
ENSMUSG00000015247	Nipsnap3b	224.623	1.09349	0.273885	3.99254	6.53697e-05	0.00059052
ENSMUSG00000015290	Ubl4	869.414	1.49377	0.342807	4.35746	1.31583e-05	0.000143921
ENSMUSG00000015335	Zdhhc12	86.0182	0.979769	0.302322	3.24081	0.00119189	0.00755635
ENSMUSG00000015337	Endog	656.839	-1.99128	0.340386	-5.85007	4.91363e-09	1.12756e-07
ENSMUSG00000015340	Cybb	755.117	1.12718	0.266581	4.22827	2.35496e-05	0.000241968
ENSMUSG00000015354	Pcolce2	807.353	0.674476	0.211578	3.18784	0.00143342	0.00882583
ENSMUSG00000015365	Mov10l1	1142.37	-1.45048	0.188083	-7.71189	1.23964e-14	7.19135e-13
ENSMUSG00000015405	Ace2	167.328	1.49825	0.203295	7.36985	1.7082e-13	8.44059e-12
ENSMUSG00000015451	C4a	237.85	1.44854	0.368686	3.92894	8.53216e-05	0.000752437
ENSMUSG00000015474	Ppt2	792.06	-0.788308	0.093094	-8.46787	2.49926e-17	1.90505e-15
ENSMUSG00000015476	Prrt1	36.4698	-1.61124	0.43577	-3.69747	0.000217763	0.0017192
ENSMUSG00000015478	Rnf5	224.705	-0.563656	0.211752	-2.66187	0.00777082	0.0363168
ENSMUSG00000015568	Lpl	74253.7	-1.61961	0.319942	-5.06219	4.1447e-07	6.46389e-06
ENSMUSG00000015597	Zfp318	845.213	-0.536718	0.184588	-2.90765	0.00364153	0.0194234
ENSMUSG00000015652	Steap1	40.3446	4.5197	0.450887	10.024	1.19528e-23	1.63239e-21
ENSMUSG00000015653	Steap2	173.155	1.80847	0.335145	5.39608	6.81126e-08	1.24143e-06
ENSMUSG00000015659	Serac1	569.107	-0.502849	0.187119	-2.68732	0.00720284	0.0339772
ENSMUSG00000015668	Pdzd11	295.946	0.434508	0.170721	2.54514	0.0109235	0.0475905
ENSMUSG00000015714	Cers2	1596.69	0.795574	0.195853	4.0621	4.86324e-05	0.000454998
ENSMUSG00000015745	Plekho1	1648.91	1.46531	0.301907	4.85353	1.21285e-06	1.72465e-05
ENSMUSG00000015759	Cnih1	939.205	-0.856908	0.300346	-2.85307	0.00432991	0.0224557
ENSMUSG00000015837	Sqstm1	25046.9	2.14333	0.149617	14.3254	1.51862e-46	6.3543e-44
ENSMUSG00000015843	Rxrg	1288.8	-1.07174	0.203286	-5.27206	1.34897e-07	2.29625e-06
ENSMUSG00000015846	Rxra	1432.66	-1.03236	0.378526	-2.72732	0.00638514	0.0308024
ENSMUSG00000015850	Adamtsl4	1087.45	-0.75567	0.2731	-2.76701	0.00565736	0.0278492
ENSMUSG00000015852	Fcrls	499.601	1.59255	0.261736	6.08456	1.16813e-09	2.99511e-08
ENSMUSG00000015880	Ncapg	47.1874	1.24782	0.383947	3.24998	0.00115415	0.00736216
ENSMUSG00000015889	Lta4h	1186.53	0.449728	0.14529	3.09538	0.00196559	0.0115046
ENSMUSG00000015932	Dstn	6152.48	0.814935	0.320193	2.54513	0.0109236	0.0475905
ENSMUSG00000015947	Fcgr1	113.769	0.930562	0.290179	3.20686	0.00134192	0.00836456
ENSMUSG00000015950	Ncf1	193.458	1.16036	0.34598	3.35384	0.000796985	0.00534021
ENSMUSG00000015961	Adss	458.116	0.688262	0.201594	3.4141	0.000639925	0.00439873
ENSMUSG00000015971	Actr8	1165.26	-0.375333	0.124994	-3.00281	0.00267502	0.0149707
ENSMUSG00000015980	Lrrc27	228.597	0.979563	0.184807	5.30047	1.15506e-07	2.00489e-06
ENSMUSG00000015981	Stk32c	47.7639	1.29148	0.28504	4.53089	5.87354e-06	7.0133e-05
ENSMUSG00000016024	Lbp	419.242	1.21357	0.209265	5.7992	6.66307e-09	1.48735e-07
ENSMUSG00000016028	Celsr1	469.884	-0.876627	0.278634	-3.14616	0.00165427	0.00998555
ENSMUSG00000016128	Stard13	2086.99	-0.738649	0.131133	-5.63281	1.77297e-08	3.59826e-07
ENSMUSG00000016194	Hsd11b1	409.041	-1.4163	0.202546	-6.99248	2.70065e-12	1.10879e-10
ENSMUSG00000016239	Lonrf3	159.198	1.13722	0.331873	3.42668	0.000610998	0.00423244
ENSMUSG00000016252	Atp5e	3847.15	-0.660363	0.246783	-2.67588	0.00745326	0.0350492
ENSMUSG00000016256	Ctsz	1234.93	1.17639	0.236138	4.98182	6.29906e-07	9.47798e-06
ENSMUSG00000016319	Slc25a5	6640.67	0.726521	0.20314	3.57645	0.000348287	0.00258371
ENSMUSG00000016349	Eef1a2	22751.6	-0.661383	0.130115	-5.08306	3.71407e-07	5.84327e-06
ENSMUSG00000016382	Pls3	2420.24	0.910943	0.203224	4.48246	7.37859e-06	8.64404e-05
ENSMUSG00000016386	Mpped2	195.988	-0.917484	0.256714	-3.57396	0.00035162	0.00260549
ENSMUSG00000016427	Ndufa1	1858.34	-0.732143	0.136893	-5.34827	8.87968e-08	1.58464e-06
ENSMUSG00000016477	E2f3	537.297	0.769826	0.150901	5.10152	3.36943e-07	5.32234e-06
ENSMUSG00000016487	Ppfibp1	5858.87	1.20653	0.105087	11.4812	1.63964e-30	3.54342e-28
ENSMUSG00000016494	Cd34	3044.55	0.467512	0.139374	3.35438	0.000795444	0.00533534
ENSMUSG00000016526	Dyrk3	14.0484	1.6162	0.50815	3.18055	0.00146995	0.00901722
ENSMUSG00000016534	Lamp2	4501.94	0.401989	0.122584	3.27929	0.00104069	0.0067523
ENSMUSG00000016541	Atxn10	2733.09	1.25919	0.197973	6.3604	2.0123e-10	5.90656e-09
ENSMUSG00000016554	Eif3d	2434.58	0.785053	0.121972	6.43635	1.22381e-10	3.73719e-09
ENSMUSG00000016757	Ttll12	364.564	0.577538	0.180945	3.19178	0.00141397	0.00873068
ENSMUSG00000016758	Bik	147.392	-0.842258	0.183683	-4.58538	4.53151e-06	5.53864e-05
ENSMUSG00000016921	Srsf6	2205.35	0.739444	0.154905	4.77354	1.81015e-06	2.44495e-05
ENSMUSG00000017132	Cyth1	1447.19	-0.864508	0.135307	-6.38925	1.66703e-10	4.96723e-09
ENSMUSG00000017146	Brca1	83.7934	1.65821	0.312207	5.31125	1.08878e-07	1.90667e-06
ENSMUSG00000017167	Cntnap1	235.604	-0.581532	0.184969	-3.14394	0.00166692	0.0100419
ENSMUSG00000017204	Gsdma	12.0503	2.56978	0.571764	4.49447	6.97419e-06	8.21776e-05
ENSMUSG00000017288	Vps53	1106.89	0.467768	0.107382	4.3561	1.32398e-05	0.000144652
ENSMUSG00000017291	Taok1	8728.5	-1.33038	0.305127	-4.36009	1.3001e-05	0.000142678
ENSMUSG00000017390	Aldoc	13.3397	1.63242	0.461875	3.53432	0.000408825	0.00298661
ENSMUSG00000017404	Rpl19	5890.24	0.592006	0.0828353	7.14678	8.88376e-13	3.95267e-11
ENSMUSG00000017417	Plxdc1	155.482	-0.617069	0.221117	-2.79069	0.0052596	0.0262393
ENSMUSG00000017428	Psmd11	1734.64	0.718211	0.263406	2.72662	0.00639857	0.0308418
ENSMUSG00000017485	Top2b	5027.17	0.236597	0.0842324	2.80886	0.00497176	0.0250255
ENSMUSG00000017491	Rarb	574.942	-0.7118	0.25841	-2.75454	0.00587746	0.0287385
ENSMUSG00000017550	Atad5	205.257	0.658472	0.192897	3.41359	0.000641129	0.00440239
ENSMUSG00000017631	Abr	1060.17	-0.547887	0.144553	-3.79021	0.000150522	0.0012396
ENSMUSG00000017664	Slc35c2	660.061	0.583385	0.142581	4.0916	4.28398e-05	0.000407196
ENSMUSG00000017677	Wsb1	720.634	0.828269	0.183061	4.52454	6.05278e-06	7.21855e-05
ENSMUSG00000017692	Rhbdl3	516.949	-1.8097	0.235421	-7.68709	1.50521e-14	8.60506e-13
ENSMUSG00000017697	Ada	104.888	1.30871	0.228463	5.72833	1.01426e-08	2.18472e-07
ENSMUSG00000017713	Tha1	237.453	-0.980874	0.260225	-3.76933	0.000163685	0.00133792
ENSMUSG00000017724	Etv4	36.9075	2.0431	0.3953	5.16847	2.36016e-07	3.83277e-06
ENSMUSG00000017737	Mmp9	57.899	-1.23604	0.412165	-2.9989	0.00270958	0.0151339
ENSMUSG00000017756	Slc12a7	6494.05	-0.509627	0.175508	-2.90372	0.00368752	0.0196078
ENSMUSG00000017760	Ctsa	4629.71	0.488965	0.115418	4.23648	2.27047e-05	0.000233897
ENSMUSG00000017765	Slc12a4	2668.23	0.864512	0.120204	7.19206	6.38192e-13	2.88521e-11
ENSMUSG00000017767	Spata25	21.0926	-1.91852	0.413608	-4.63851	3.50926e-06	4.441e-05
ENSMUSG00000017774	Myo1c	8608.9	1.37482	0.11018	12.4779	9.85298e-36	2.80824e-33
ENSMUSG00000017778	Cox7c	6028.75	-0.65435	0.127527	-5.13106	2.88114e-07	4.59907e-06
ENSMUSG00000017817	Jph2	8556.17	-0.459128	0.159316	-2.88187	0.00395327	0.0207985
ENSMUSG00000017830	Dhx58	102.754	0.8879	0.323618	2.74367	0.00607569	0.0295503
ENSMUSG00000017861	Mybl2	29.9757	1.52749	0.340323	4.48835	7.17764e-06	8.43727e-05
ENSMUSG00000017929	B4galt5	855.348	1.00362	0.392515	2.55689	0.0105613	0.0463201
ENSMUSG00000017969	Ptgis	751.077	0.660045	0.227155	2.90571	0.00366426	0.0195235
ENSMUSG00000017999	Ddx27	840.527	1.04042	0.114707	9.07029	1.18703e-19	1.16721e-17
ENSMUSG00000018008	Cyth4	523.178	1.04139	0.207097	5.0285	4.9432e-07	7.60071e-06
ENSMUSG00000018040	Rrp7a	1381.21	0.629258	0.111542	5.64143	1.6864e-08	3.44499e-07
ENSMUSG00000018042	Cyb5r3	3262.12	1.29912	0.319671	4.06391	4.82566e-05	0.000451912
ENSMUSG00000018068	Ints2	671.867	0.292643	0.111896	2.6153	0.00891478	0.0405923
ENSMUSG00000018143	Mafk	2053.48	1.25889	0.36945	3.40746	0.000655694	0.0044883
ENSMUSG00000018171	Vmp1	1262.33	0.580303	0.110427	5.25507	1.47965e-07	2.49877e-06
ENSMUSG00000018189	Uchl5	479.767	0.667504	0.221109	3.0189	0.00253696	0.0143203
ENSMUSG00000018217	Pmp22	1096.46	1.13303	0.43501	2.6046	0.00919812	0.0415952
ENSMUSG00000018263	Tbx5	923.141	-0.865752	0.335477	-2.58066	0.00986117	0.0437765
ENSMUSG00000018293	Pfn1	3914.31	1.23993	0.277813	4.46319	8.07487e-06	9.36876e-05
ENSMUSG00000018326	Ywhab	755.679	0.548393	0.135017	4.06166	4.87253e-05	0.00045565
ENSMUSG00000018340	Anxa6	7340.72	-0.283201	0.0743426	-3.8094	0.000139305	0.00115936
ENSMUSG00000018341	Il12rb2	322.39	-0.809847	0.150714	-5.37341	7.72593e-08	1.3901e-06
ENSMUSG00000018379	Srsf1	2621.51	-0.524124	0.113825	-4.60463	4.13192e-06	5.12025e-05
ENSMUSG00000018395	Kif3a	661.268	0.710825	0.166697	4.26419	2.00632e-05	0.000210209
ENSMUSG00000018411	Mapt	1281.63	-0.339302	0.106686	-3.18037	0.00147085	0.00901954
ENSMUSG00000018425	Dhx40	1101.05	0.465116	0.0925666	5.02466	5.04313e-07	7.73018e-06
ENSMUSG00000018428	Akap1	6467.47	-0.579222	0.166314	-3.4827	0.000496391	0.00353826
ENSMUSG00000018442	Derl2	704.855	-0.690753	0.21123	-3.27015	0.00107492	0.00694006
ENSMUSG00000018474	Chd3	1784.79	0.338988	0.122597	2.76506	0.00569116	0.0279736
ENSMUSG00000018501	Ncor1	9198.37	-0.285076	0.0872355	-3.26789	0.00108352	0.00699095
ENSMUSG00000018507	Trpv2	218.069	0.582007	0.223921	2.59916	0.00934533	0.0420947
ENSMUSG00000018509	Cenpv	258.617	-0.895022	0.228668	-3.91408	9.07509e-05	0.000795462
ENSMUSG00000018548	Trim37	780.262	0.330894	0.117467	2.8169	0.00484898	0.0245126
ENSMUSG00000018554	Ybx2	334.196	-2.01835	0.200326	-10.0753	7.10319e-24	9.83742e-22
ENSMUSG00000018566	Slc2a4	6773.32	-1.14138	0.151623	-7.52776	5.16174e-14	2.76596e-12
ENSMUSG00000018574	Acadvl	28103.5	-0.681925	0.17527	-3.89072	9.99458e-05	0.000865493
ENSMUSG00000018585	Atox1	684.738	0.414236	0.162159	2.55451	0.0106339	0.0465345
ENSMUSG00000018593	Sparc	11835	1.52784	0.21491	7.10922	1.16697e-12	5.08862e-11
ENSMUSG00000018661	Cog1	1267.96	0.356295	0.130853	2.72287	0.00647171	0.031118
ENSMUSG00000018669	Cdk5rap3	544.171	0.556374	0.181341	3.0681	0.00215422	0.012442
ENSMUSG00000018677	Slc25a39	4481.94	0.953785	0.142954	6.67197	2.524e-11	8.73891e-10
ENSMUSG00000018697	Aatf	636.909	0.673931	0.162992	4.13475	3.55338e-05	0.000348012
ENSMUSG00000018707	Dync1h1	39622.5	0.713705	0.123823	5.76393	8.2177e-09	1.80569e-07
ENSMUSG00000018761	Mpdu1	278.323	0.573103	0.16386	3.49752	0.000469601	0.00336804
ENSMUSG00000018770	Atp5g3	13624.7	-0.690873	0.162468	-4.25236	2.1153e-05	0.000219754
ENSMUSG00000018774	Cd68	346.257	1.07373	0.230801	4.6522	3.28416e-06	4.18606e-05
ENSMUSG00000018796	Acsl1	22579.6	-0.949239	0.196456	-4.83182	1.35287e-06	1.88558e-05
ENSMUSG00000018800	Abca5	819.164	0.370231	0.0970001	3.81681	0.00013519	0.00112893
ENSMUSG00000018821	Avpi1	293.966	1.2169	0.372927	3.26312	0.00110194	0.00708657
ENSMUSG00000018822	Sfrp5	236.871	-3.4345	0.456083	-7.53042	5.05768e-14	2.7176e-12
ENSMUSG00000018845	Unc45b	6789.16	-0.972937	0.140452	-6.92721	4.2923e-12	1.68488e-10
ENSMUSG00000018848	Rars	1916.39	1.2596	0.121398	10.3758	3.19646e-25	4.94973e-23
ENSMUSG00000018861	Fdxr	358.527	0.611863	0.203309	3.00952	0.00261665	0.014711
ENSMUSG00000018893	Mb	101936	-1.21079	0.177977	-6.80307	1.02412e-11	3.73662e-10
ENSMUSG00000018900	Slc22a5	780.789	-0.850666	0.199355	-4.2671	1.98027e-05	0.000208257
ENSMUSG00000018920	Cxcl16	519.698	1.10834	0.189041	5.86297	4.54674e-09	1.04826e-07
ENSMUSG00000019054	Fis1	1617.45	-0.789526	0.215654	-3.66108	0.000251154	0.0019461
ENSMUSG00000019055	Plod1	3767.52	0.596976	0.199053	2.99908	0.00270793	0.0151293
ENSMUSG00000019179	Mdh2	17321.1	-0.434046	0.170024	-2.55285	0.0106845	0.0467146
ENSMUSG00000019194	Scn1b	591.198	1.24752	0.185393	6.72909	1.70728e-11	6.02791e-10
ENSMUSG00000019210	Atp6v1e1	1928.16	0.301369	0.113258	2.6609	0.0077933	0.03637
ENSMUSG00000019433	Gipc1	709.769	0.649818	0.254713	2.55118	0.0107358	0.0468763
ENSMUSG00000019464	Ptger1	1281.86	0.624965	0.141721	4.40983	1.03454e-05	0.000116458
ENSMUSG00000019478	Rab4a	306.034	-0.576848	0.113723	-5.07242	3.92797e-07	6.14538e-06
ENSMUSG00000019487	Trip10	2085.08	-0.743261	0.11791	-6.30365	2.90723e-10	8.29806e-09
ENSMUSG00000019528	Gyg	4302.69	1.50967	0.275117	5.48737	4.07961e-08	7.78173e-07
ENSMUSG00000019558	Slc6a8	4173.73	0.931566	0.233423	3.99089	6.58259e-05	0.000593822
ENSMUSG00000019710	Mrpl24	1692.14	0.541031	0.0945185	5.72408	1.03996e-08	2.23029e-07
ENSMUSG00000019726	Lyst	2195.18	0.752549	0.116964	6.43403	1.24265e-10	3.77712e-09
ENSMUSG00000019731	Slc35e1	1076.26	-0.629928	0.182061	-3.45998	0.000540223	0.00380244
ENSMUSG00000019763	Rmnd1	1698.52	-0.590708	0.147908	-3.99375	6.50361e-05	0.000588046
ENSMUSG00000019774	Mtrf1l	251.1	-0.685528	0.198043	-3.46151	0.000537161	0.00378903
ENSMUSG00000019775	Rgs17	94.7713	-1.44758	0.244263	-5.92631	3.09819e-09	7.38533e-08
ENSMUSG00000019787	Trdn	8946.36	-0.755674	0.140381	-5.38303	7.32407e-08	1.32264e-06
ENSMUSG00000019791	Hint3	693.302	-0.933975	0.231897	-4.02755	5.63622e-05	0.000518195
ENSMUSG00000019808	Adat2	75.3705	0.829929	0.286226	2.89956	0.00373685	0.0198351
ENSMUSG00000019814	Ltv1	653.22	0.847932	0.111922	7.5761	3.56104e-14	1.94532e-12
ENSMUSG00000019820	Utrn	15251.2	0.159761	0.061881	2.58174	0.00983031	0.0437184
ENSMUSG00000019823	Mical1	1085.19	1.40596	0.119039	11.8109	3.42806e-32	8.12244e-30
ENSMUSG00000019828	Grm1	1370.55	-0.929367	0.170878	-5.43878	5.3646e-08	1.00381e-06
ENSMUSG00000019845	Tube1	52.3527	0.96296	0.26997	3.56692	0.000361205	0.00266746
ENSMUSG00000019848	Popdc3	564.367	0.666954	0.120922	5.51558	3.47628e-08	6.74872e-07
ENSMUSG00000019849	Prep	1183.61	0.646207	0.115616	5.58927	2.28021e-08	4.52957e-07
ENSMUSG00000019850	Tnfaip3	318.088	0.635378	0.21927	2.8977	0.00375905	0.0199367
ENSMUSG00000019851	Perp	459.479	0.633538	0.192914	3.28405	0.00102328	0.00665033
ENSMUSG00000019852	Arfgef3	127.54	2.5637	0.357564	7.16992	7.50397e-13	3.36157e-11
ENSMUSG00000019854	Reps1	1199.32	0.364909	0.115361	3.1632	0.00156043	0.00947144
ENSMUSG00000019856	Fam184a	86.2918	0.744346	0.222555	3.34455	0.000824159	0.0055054
ENSMUSG00000019863	Qrsl1	807.508	-0.773099	0.185948	-4.1576	3.21605e-05	0.000319267
ENSMUSG00000019864	Rtn4ip1	1164.01	-1.17597	0.261672	-4.49406	6.98796e-06	8.22905e-05
ENSMUSG00000019866	Aim1	409.389	-0.419723	0.139564	-3.00738	0.0026351	0.0147936
ENSMUSG00000019868	Vta1	635.573	0.57431	0.168939	3.39952	0.000675038	0.00461108
ENSMUSG00000019873	Reep3	2303.83	0.711961	0.0694168	10.2563	1.10849e-24	1.62683e-22
ENSMUSG00000019874	Fabp7	28.9612	-1.11837	0.345127	-3.24047	0.00119331	0.00756291
ENSMUSG00000019880	Rspo3	22.2512	-1.39759	0.523968	-2.66733	0.0076457	0.0358256
ENSMUSG00000019883	Echdc1	297.619	-0.435801	0.172224	-2.53043	0.0113922	0.0492178
ENSMUSG00000019889	Ptprk	1922.32	0.591114	0.0801253	7.37737	1.61445e-13	8.01762e-12
ENSMUSG00000019907	Ppp1r12a	3958.01	0.375404	0.100556	3.73328	0.000188999	0.00152081
ENSMUSG00000019942	Cdk1	68.2196	1.87146	0.384405	4.86847	1.12464e-06	1.60852e-05
ENSMUSG00000019944	Rhobtb1	2707.67	-0.780338	0.296337	-2.63328	0.00845656	0.0389175
ENSMUSG00000019945	1700040L02Rik	259.687	-1.93651	0.258599	-7.48848	6.96773e-14	3.66383e-12
ENSMUSG00000019951	Uhrf1bp1l	2163.9	0.523081	0.135052	3.87318	0.000107426	0.000923359
ENSMUSG00000019979	Apaf1	792.813	0.511187	0.147493	3.46583	0.000528596	0.00373934
ENSMUSG00000019986	Ahi1	248.639	0.656772	0.241916	2.71488	0.00663005	0.0317551
ENSMUSG00000019997	Ctgf	4131.13	1.19745	0.227135	5.27196	1.34977e-07	2.29625e-06
ENSMUSG00000019998	Stx7	1673.3	0.351819	0.114405	3.0752	0.00210363	0.0122036
ENSMUSG00000020024	Cep83	856.174	0.740585	0.117389	6.30882	2.81171e-10	8.03707e-09
ENSMUSG00000020029	Nudt4	3517.51	-2.04647	0.484863	-4.22072	2.43528e-05	0.000249179
ENSMUSG00000020032	Nuak1	842.997	-1.46624	0.418406	-3.50434	0.000457735	0.00329737
ENSMUSG00000020034	Tcp11l2	2844.58	-0.94289	0.203308	-4.63773	3.52251e-06	4.4549e-05
ENSMUSG00000020051	Pah	10.1161	-3.22017	0.593592	-5.42489	5.79889e-08	1.0698e-06
ENSMUSG00000020053	Igf1	771.311	-1.06395	0.318852	-3.3368	0.000847496	0.00564595
ENSMUSG00000020056	Ccdc53	506.399	0.408253	0.147333	2.77095	0.0055893	0.0275902
ENSMUSG00000020072	Pbld2	95.6061	-0.903659	0.282913	-3.19412	0.00140258	0.00868486
ENSMUSG00000020075	Ddx21	2363.38	0.426964	0.115728	3.68937	0.000224813	0.00176934
ENSMUSG00000020076	Ddx50	1808.29	0.433844	0.112347	3.86164	0.000112627	0.000963427
ENSMUSG00000020099	Unc5b	1447.63	0.958338	0.246842	3.88239	0.000103434	0.000892163
ENSMUSG00000020111	Micu1	785.078	0.447367	0.0978999	4.56964	4.88573e-06	5.92738e-05
ENSMUSG00000020114	Cand1	2713.96	0.550544	0.198113	2.77894	0.00545374	0.0270432
ENSMUSG00000020115	Tbk1	988.391	0.30354	0.11802	2.57193	0.0101134	0.0446742
ENSMUSG00000020121	Srgap1	240.469	0.829024	0.235801	3.51578	0.000438463	0.0031795
ENSMUSG00000020123	Avpr1a	45.7541	-1.09659	0.391549	-2.80064	0.00510018	0.0255607
ENSMUSG00000020135	Apc2	443.825	-0.604087	0.178127	-3.39132	0.000695558	0.00472662
ENSMUSG00000020142	Slc1a4	374.662	2.3117	0.226219	10.2189	1.63205e-24	2.35999e-22
ENSMUSG00000020143	Dock2	544.751	0.970875	0.195663	4.96197	6.97812e-07	1.042e-05
ENSMUSG00000020153	Ndufs7	6539.65	-0.862487	0.113016	-7.63156	2.31923e-14	1.29207e-12
ENSMUSG00000020160	Meis1	1218.35	-0.611014	0.142159	-4.29809	1.72273e-05	0.000183726
ENSMUSG00000020163	Uqcr11	4913.86	-1.13394	0.192814	-5.88101	4.07783e-09	9.48812e-08
ENSMUSG00000020173	Cobl	302.338	0.761504	0.246614	3.08784	0.00201616	0.0117725
ENSMUSG00000020181	Nav3	1191.21	0.494292	0.158893	3.11085	0.0018655	0.0110304
ENSMUSG00000020182	Ddc	70.1782	-1.92551	0.483001	-3.98655	6.70402e-05	0.000604126
ENSMUSG00000020183	Cpm	427.511	1.14154	0.310279	3.67909	0.000234072	0.00182379
ENSMUSG00000020185	E2f7	65.356	0.776754	0.275821	2.81615	0.00486026	0.0245414
ENSMUSG00000020193	Zpbp	46.2303	-1.00273	0.334533	-2.99739	0.00272301	0.0152003
ENSMUSG00000020198	Ap3d1	4461.07	0.378311	0.107397	3.52254	0.000427433	0.00310984
ENSMUSG00000020216	Jsrp1	21.4627	1.17038	0.42672	2.74275	0.00609271	0.0296143
ENSMUSG00000020218	Wif1	203.263	-1.0895	0.397122	-2.74349	0.00607891	0.0295545
ENSMUSG00000020224	Llph	406.572	0.965301	0.1414	6.82673	8.6872e-12	3.21132e-10
ENSMUSG00000020230	Prmt2	657.889	1.09386	0.142529	7.6747	1.65809e-14	9.39713e-13
ENSMUSG00000020241	Col6a2	3946.29	0.628911	0.17526	3.58845	0.000332651	0.00248176
ENSMUSG00000020250	Txnrd1	3771.1	1.57015	0.127378	12.3267	6.50389e-35	1.77647e-32
ENSMUSG00000020256	Aldh1l2	1474.38	1.64817	0.22515	7.32032	2.47373e-13	1.17225e-11
ENSMUSG00000020257	Wdr82	1448.41	-0.778431	0.306499	-2.53975	0.0110931	0.04819
ENSMUSG00000020263	Appl2	2252.48	-0.563772	0.154301	-3.65371	0.000258482	0.00199737
ENSMUSG00000020264	Slc36a2	586.792	-2.08566	0.339457	-6.14412	8.04089e-10	2.12258e-08
ENSMUSG00000020271	Fbxw11	2361.31	0.413645	0.0989325	4.18108	2.90131e-05	0.000290515
ENSMUSG00000020273	Papolg	659.693	-0.351589	0.113522	-3.0971	0.00195422	0.0114516
ENSMUSG00000020277	Pfkl	5689.01	0.548497	0.132059	4.15344	3.27519e-05	0.000324157
ENSMUSG00000020309	Chac2	221.761	-0.882965	0.292253	-3.02124	0.00251746	0.0142306
ENSMUSG00000020319	Wdpcp	318.496	1.07243	0.159322	6.73124	1.68227e-11	5.96099e-10
ENSMUSG00000020321	Mdh1	56334.2	-0.808025	0.143549	-5.62892	1.81344e-08	3.67661e-07
ENSMUSG00000020325	Fstl3	316.627	1.76561	0.334466	5.27889	1.29966e-07	2.2206e-06
ENSMUSG00000020330	Hmmr	59.2118	1.95352	0.328108	5.95388	2.61854e-09	6.32632e-08
ENSMUSG00000020333	Acsl6	645.272	-2.03636	0.245668	-8.28908	1.14132e-16	8.25189e-15
ENSMUSG00000020334	Slc22a4	464.991	2.04104	0.329143	6.20109	5.60747e-10	1.52949e-08
ENSMUSG00000020358	Hnrnpab	2490.23	0.6362	0.0925559	6.87368	6.25678e-12	2.3482e-10
ENSMUSG00000020361	Hspa4	7684.36	0.589188	0.163581	3.6018	0.000316019	0.00236936
ENSMUSG00000020372	Gnb2l1	8022.39	0.617952	0.09571	6.45651	1.07148e-10	3.31837e-09
ENSMUSG00000020375	Rufy1	1278.79	-0.344048	0.117739	-2.92211	0.00347666	0.0187064
ENSMUSG00000020380	Rad50	882.897	0.549613	0.112637	4.87949	1.06361e-06	1.53801e-05
ENSMUSG00000020386	Sar1b	1238.56	-0.56404	0.147694	-3.81898	0.000134007	0.00112144
ENSMUSG00000020390	Ube2b	1588.8	-0.372164	0.123567	-3.01184	0.00259666	0.0146237
ENSMUSG00000020392	Cdkn2aipnl	233.719	-2.25397	0.41049	-5.49093	3.99821e-08	7.63387e-07
ENSMUSG00000020393	Kremen1	5037.04	-1.05452	0.283252	-3.72289	0.000196959	0.00157904
ENSMUSG00000020399	Havcr2	52.5027	1.48543	0.54298	2.7357	0.00622478	0.0301518
ENSMUSG00000020400	Tnip1	1658.19	0.867613	0.196335	4.41905	9.91377e-06	0.000112048
ENSMUSG00000020407	Upp1	229.425	2.01822	0.360764	5.59429	2.21525e-08	4.41837e-07
ENSMUSG00000020412	Ascc2	872.691	1.01376	0.250627	4.04487	5.23518e-05	0.000484495
ENSMUSG00000020415	Pttg1	1479.15	-0.788353	0.242598	-3.24962	0.00115558	0.0073665
ENSMUSG00000020422	Tns3	1758.79	0.40868	0.155613	2.62626	0.00863295	0.0395747
ENSMUSG00000020430	Pes1	1131.54	0.709784	0.128365	5.52944	3.21251e-08	6.27381e-07
ENSMUSG00000020431	Adcy1	910.716	-2.42183	0.398275	-6.08079	1.19591e-09	3.06193e-08
ENSMUSG00000020437	Myo1g	194.16	0.873918	0.227354	3.84387	0.000121112	0.00102974
ENSMUSG00000020439	Smtn	4749.5	-1.12647	0.132746	-8.48588	2.14086e-17	1.64462e-15
ENSMUSG00000020440	Arf5	1112.85	-0.633572	0.220549	-2.8727	0.00406974	0.0212974
ENSMUSG00000020444	Guk1	1341.56	-0.712983	0.178155	-4.00203	6.28013e-05	0.000569935
ENSMUSG00000020456	Ogdh	51498.8	-0.606326	0.206285	-2.93926	0.00328999	0.017883
ENSMUSG00000020457	Drg1	995.075	0.439518	0.10671	4.11883	3.80808e-05	0.000368198
ENSMUSG00000020458	Rtn4	9618.22	2.81223	0.153173	18.3598	2.7537e-75	2.35454e-72
ENSMUSG00000020459	Mtif2	1446.29	-0.676793	0.138817	-4.87543	1.08571e-06	1.56307e-05
ENSMUSG00000020467	Efemp1	497.506	-1.55562	0.34884	-4.45942	8.21835e-06	9.5296e-05
ENSMUSG00000020469	Myl7	10379.6	-1.64623	0.611195	-2.69346	0.00707141	0.0334777
ENSMUSG00000020475	Pgam2	2491.04	-0.735928	0.122417	-6.01164	1.83653e-09	4.5545e-08
ENSMUSG00000020476	Dbnl	850.526	0.751992	0.147618	5.09418	3.50253e-07	5.52372e-06
ENSMUSG00000020482	Ccdc117	496.738	-1.27584	0.383543	-3.32645	0.000879604	0.0058263
ENSMUSG00000020493	Prr11	38.6456	1.01246	0.372435	2.7185	0.00655789	0.0314632
ENSMUSG00000020496	Rnf187	2358.47	-1.47705	0.349702	-4.22373	2.40292e-05	0.00024638
ENSMUSG00000020534	Shmt1	422.827	0.589676	0.19446	3.03237	0.00242638	0.013807
ENSMUSG00000020537	Drg2	1056.59	0.547007	0.208694	2.6211	0.00876468	0.0400479
ENSMUSG00000020542	Myocd	2331.89	-0.918856	0.138592	-6.62993	3.35855e-11	1.13292e-09
ENSMUSG00000020549	Elac2	999.818	0.530317	0.145647	3.64113	0.000271447	0.0020812
ENSMUSG00000020572	Nampt	6057.8	-0.712974	0.220963	-3.22666	0.00125244	0.00790196
ENSMUSG00000020573	Pik3cg	238.984	0.988944	0.269028	3.67599	0.000236925	0.00184311
ENSMUSG00000020577	Tspan13	949.047	-1.01422	0.324208	-3.1283	0.00175818	0.0104872
ENSMUSG00000020593	Lpin1	8646.71	-1.41074	0.152798	-9.23271	2.63862e-20	2.78985e-18
ENSMUSG00000020598	Nrcam	65.2878	2.17722	0.238033	9.14668	5.87098e-20	6.01348e-18
ENSMUSG00000020604	Arsg	150.896	1.00206	0.173048	5.79067	7.01068e-09	1.55788e-07
ENSMUSG00000020607	Fam84a	54.1661	-1.13393	0.407176	-2.78487	0.00535498	0.0266408
ENSMUSG00000020612	Prkar1a	13198	1.19904	0.230938	5.19205	2.0799e-07	3.4143e-06
ENSMUSG00000020620	Abca8b	1842.08	0.511964	0.108053	4.73807	2.15764e-06	2.85162e-05
ENSMUSG00000020621	Rdh14	559.709	-1.77353	0.545421	-3.25167	0.00114731	0.00733253
ENSMUSG00000020623	Map2k6	158.62	-1.05586	0.24202	-4.36268	1.28477e-05	0.000141231
ENSMUSG00000020627	Klhl29	109.112	2.27026	0.392383	5.78583	7.21572e-09	1.59623e-07
ENSMUSG00000020629	Adi1	492.672	-1.00715	0.305529	-3.2964	0.000979318	0.00640907
ENSMUSG00000020647	Ncoa1	2476.91	-0.43127	0.140347	-3.07289	0.00211996	0.0122874
ENSMUSG00000020657	Dnajc27	581.701	-1.33411	0.317407	-4.20315	2.63221e-05	0.000266555
ENSMUSG00000020661	Dnmt3a	3325.54	-0.651802	0.0943805	-6.90611	4.9814e-12	1.92087e-10
ENSMUSG00000020664	Dld	8039.89	-0.461715	0.119475	-3.86453	0.000111302	0.000953754
ENSMUSG00000020676	Ccl11	73.4354	-1.71437	0.354103	-4.84143	1.2891e-06	1.81212e-05
ENSMUSG00000020680	Taf15	567.749	0.718418	0.200806	3.57768	0.000346662	0.0025736
ENSMUSG00000020681	Ace	3632.68	0.883333	0.208076	4.24525	2.18351e-05	0.000226005
ENSMUSG00000020684	Rasl10b	1234.23	-1.31334	0.45798	-2.86768	0.00413491	0.0215703
ENSMUSG00000020695	Mrc2	1640.13	1.13019	0.198155	5.70358	1.1732e-08	2.47555e-07
ENSMUSG00000020706	Ftsj3	1650.87	0.724918	0.151976	4.76994	1.84282e-06	2.48055e-05
ENSMUSG00000020715	Ern1	1156.51	0.810179	0.258197	3.13784	0.00170199	0.0101985
ENSMUSG00000020721	Helz	2196.53	-0.647496	0.225403	-2.87262	0.00407088	0.0212977
ENSMUSG00000020728	Cep112	158.95	-1.11494	0.181604	-6.13941	8.28308e-10	2.18066e-08
ENSMUSG00000020736	Nt5c	187.353	0.976113	0.291018	3.35414	0.000796131	0.00533812
ENSMUSG00000020743	Mif4gd	754.692	-0.808807	0.15084	-5.36201	8.22989e-08	1.47538e-06
ENSMUSG00000020744	Slc25a19	768.339	-0.851984	0.281004	-3.03193	0.00242999	0.0138159
ENSMUSG00000020747	2310067B10Rik	3528.08	-1.15403	0.200583	-5.75338	8.74774e-09	1.90513e-07
ENSMUSG00000020766	Galk1	397.403	0.647296	0.147606	4.3853	1.15826e-05	0.000129056
ENSMUSG00000020773	Trim47	1073.16	1.71616	0.258465	6.63981	3.14097e-11	1.06501e-09
ENSMUSG00000020781	Tsen54	334.888	0.858948	0.204226	4.20588	2.60072e-05	0.000263774
ENSMUSG00000020785	Camkk1	94.0403	0.749551	0.279607	2.68073	0.00734623	0.0346038
ENSMUSG00000020790	Ankfy1	2286.72	0.496519	0.145292	3.41738	0.000632278	0.00435988
ENSMUSG00000020803	Txndc17	1133.84	0.792998	0.222525	3.56363	0.000365758	0.00269805
ENSMUSG00000020808	Fam64a	39.7589	1.44031	0.314639	4.57765	4.70223e-06	5.7224e-05
ENSMUSG00000020812	1810032O08Rik	104.844	1.04521	0.277863	3.76159	0.000168836	0.0013783
ENSMUSG00000020814	Mxra7	581.42	0.956658	0.197866	4.83489	1.3322e-06	1.86132e-05
ENSMUSG00000020846	Fam101b	1190.89	-1.86651	0.516956	-3.61059	0.000305503	0.00230068
ENSMUSG00000020847	Rph3al	107.552	-1.05541	0.312032	-3.38238	0.000718603	0.00486306
ENSMUSG00000020865	Abcc3	170.506	0.821235	0.204765	4.01062	6.05584e-05	0.000552084
ENSMUSG00000020866	Cacna1g	791.245	-0.832387	0.230339	-3.61375	0.000301794	0.00227922
ENSMUSG00000020867	Spata20	8.712	-2.00552	0.518225	-3.86998	0.000108846	0.000933926
ENSMUSG00000020869	Lrrc59	1863.69	0.98471	0.131934	7.46368	8.41388e-14	4.34298e-12
ENSMUSG00000020873	Slc35b1	939.836	0.51612	0.128373	4.02048	5.80788e-05	0.00053174
ENSMUSG00000020877	Scrn2	356.087	-0.38525	0.141417	-2.72422	0.00644542	0.0310295
ENSMUSG00000020882	Cacnb1	492.615	1.92827	0.178016	10.832	2.42807e-27	4.2616e-25
ENSMUSG00000020888	Dvl2	332.863	-0.697719	0.269653	-2.58747	0.0096683	0.0431638
ENSMUSG00000020897	Aurkb	35.3897	1.67138	0.376671	4.43725	9.11175e-06	0.000104242
ENSMUSG00000020900	Myh10	2773.87	0.49317	0.11211	4.39897	1.08766e-05	0.000122019
ENSMUSG00000020901	Pik3r5	152.437	1.40746	0.346841	4.05792	4.95108e-05	0.000462117
ENSMUSG00000020903	Stx8	719.35	0.468483	0.137172	3.4153	0.000637127	0.00438409
ENSMUSG00000020914	Top2a	386.887	1.82223	0.226675	8.03895	9.06125e-16	6.04063e-14
ENSMUSG00000020919	Stat5b	3115.21	-0.675355	0.163597	-4.12816	3.65673e-05	0.000356183
ENSMUSG00000020926	Adam11	310.089	-1.6093	0.297567	-5.40821	6.36562e-08	1.16778e-06
ENSMUSG00000020936	Nmt1	3601.3	0.758877	0.10675	7.10891	1.16966e-12	5.08908e-11
ENSMUSG00000020937	Plcd3	602.185	0.715628	0.218523	3.27484	0.00105722	0.00684372
ENSMUSG00000020952	Scfd1	1075.64	0.465207	0.0877819	5.29957	1.16074e-07	2.01297e-06
ENSMUSG00000020961	Ston2	279.075	-0.905907	0.221821	-4.08395	4.4276e-05	0.000419427
ENSMUSG00000020963	Tshr	12.3937	-1.71992	0.611437	-2.81291	0.00490952	0.0247502
ENSMUSG00000020988	L2hgdh	1591.81	-0.783541	0.159171	-4.92265	8.53804e-07	1.25399e-05
ENSMUSG00000020993	Trappc6b	769.195	-0.598634	0.23067	-2.5952	0.00945365	0.0424756
ENSMUSG00000021013	Ttc8	187.398	0.434748	0.1533	2.83594	0.00456917	0.0233819
ENSMUSG00000021022	Ppp2r3c	571.367	0.579717	0.122938	4.71553	2.41087e-06	3.16503e-05
ENSMUSG00000021033	Gstz1	1129.82	-1.5213	0.204327	-7.44541	9.66455e-14	4.9367e-12
ENSMUSG00000021036	Sptlc2	1278.39	0.707681	0.114988	6.1544	7.53645e-10	2.00016e-08
ENSMUSG00000021044	Adck1	906.803	-0.351646	0.123734	-2.84197	0.00448364	0.0230524
ENSMUSG00000021047	Nova1	143.847	-0.941904	0.221647	-4.24957	2.14181e-05	0.000222274
ENSMUSG00000021048	Mthfd1	1499.31	0.310509	0.0987493	3.14442	0.00166416	0.0100329
ENSMUSG00000021055	Esr2	8.89096	-2.34987	0.581235	-4.04289	5.27954e-05	0.000488141
ENSMUSG00000021061	Sptb	8637.93	-0.716787	0.179434	-3.9947	6.47767e-05	0.00058624
ENSMUSG00000021068	Nin	2862.46	0.890627	0.106236	8.38346	5.13961e-17	3.7856e-15
ENSMUSG00000021076	Actr10	1690.07	0.305881	0.118863	2.57338	0.0100709	0.0445368
ENSMUSG00000021091	Serpina3n	1198.15	2.64352	0.226715	11.6601	2.03837e-31	4.55529e-29
ENSMUSG00000021097	Clmn	135.585	-1.21028	0.260333	-4.64898	3.33581e-06	4.24608e-05
ENSMUSG00000021103	Mnat1	647.793	0.596546	0.13261	4.4985	6.84345e-06	8.08794e-05
ENSMUSG00000021109	Hif1a	7219.41	1.75891	0.196938	8.93132	4.20957e-19	3.78817e-17
ENSMUSG00000021111	Papola	3266.65	0.317763	0.0989746	3.21055	0.0013248	0.00827622
ENSMUSG00000021116	Eif2s1	1629.04	0.878453	0.255139	3.44303	0.000575225	0.00402576
ENSMUSG00000021131	Erh	447.082	0.519796	0.140219	3.70702	0.000209709	0.00166565
ENSMUSG00000021143	Pacs2	2067.77	-0.432504	0.139377	-3.10312	0.00191493	0.0112583
ENSMUSG00000021149	Gtpbp4	1542.39	0.726153	0.161121	4.50688	6.57884e-06	7.78456e-05
ENSMUSG00000021175	Cdca7l	16.4002	1.20145	0.473708	2.53627	0.0112039	0.0486072
ENSMUSG00000021176	Efcab11	6.88122	1.57839	0.612633	2.57641	0.00998322	0.04421
ENSMUSG00000021177	Tdp1	265.87	0.549485	0.2156	2.54863	0.0108146	0.0471782
ENSMUSG00000021178	Psmc1	3294.4	0.432194	0.0998216	4.32967	1.49335e-05	0.000161541
ENSMUSG00000021180	Rps6ka5	560.608	-1.05884	0.298262	-3.55004	0.000385179	0.00282858
ENSMUSG00000021185	9030617O03Rik	1697.61	-1.07034	0.195888	-5.46402	4.65483e-08	8.79365e-07
ENSMUSG00000021186	Fbln5	1298.45	0.812553	0.226612	3.58565	0.000336238	0.00250282
ENSMUSG00000021188	Trip11	6183.36	-0.293213	0.0865983	-3.3859	0.000709454	0.00480823
ENSMUSG00000021196	Pfkp	6378.28	2.29778	0.163114	14.0869	4.5714e-45	1.87294e-42
ENSMUSG00000021200	Asb2	12576.7	-1.5484	0.132042	-11.7266	9.31627e-32	2.13039e-29
ENSMUSG00000021203	Otub2	482.052	1.21994	0.43413	2.81008	0.00495286	0.0249495
ENSMUSG00000021213	Akr1c13	46.8934	0.721082	0.267385	2.69679	0.00700116	0.033201
ENSMUSG00000021218	Gdi2	6898.91	0.445257	0.0918603	4.84711	1.25275e-06	1.76743e-05
ENSMUSG00000021219	Rgs6	543.243	-0.813293	0.209126	-3.889	0.000100657	0.000870882
ENSMUSG00000021221	Dpf3	396.049	-1.19618	0.241309	-4.95704	7.15764e-07	1.06396e-05
ENSMUSG00000021222	Dcaf4	398.569	-0.688833	0.187614	-3.67154	0.000241096	0.00187407
ENSMUSG00000021223	Papln	1053.57	0.83557	0.213775	3.90864	9.28155e-05	0.000810529
ENSMUSG00000021228	Acot3	29.6662	-1.92911	0.421543	-4.5763	4.73271e-06	5.75238e-05
ENSMUSG00000021236	Entpd5	5554.82	-1.05265	0.195121	-5.39487	6.8575e-08	1.2487e-06
ENSMUSG00000021238	Aldh6a1	7554.39	-1.29048	0.150173	-8.59331	8.45017e-18	6.7829e-16
ENSMUSG00000021242	Npc2	2011.36	0.845587	0.263398	3.2103	0.00132595	0.00827871
ENSMUSG00000021243	Fcf1	452.487	0.659386	0.168467	3.91403	9.07666e-05	0.000795462
ENSMUSG00000021253	Tgfb3	1121.86	0.877274	0.321823	2.72596	0.00641157	0.0308968
ENSMUSG00000021260	Hhipl1	99.6593	1.45773	0.349925	4.16584	3.1021e-05	0.000309204
ENSMUSG00000021262	Evl	367.423	0.496957	0.146255	3.39788	0.000679097	0.0046372
ENSMUSG00000021265	Slc25a29	144.928	-1.11975	0.43032	-2.60214	0.00926448	0.0418185
ENSMUSG00000021266	Wars	2207.99	1.11428	0.127411	8.74551	2.22005e-18	1.93184e-16
ENSMUSG00000021270	Hsp90aa1	11287.3	1.17168	0.225417	5.19782	2.01636e-07	3.31276e-06
ENSMUSG00000021271	Zfp839	500.914	-0.409132	0.128563	-3.18234	0.0014609	0.00897254
ENSMUSG00000021273	Fdft1	951.503	-0.897929	0.205138	-4.3772	1.20213e-05	0.000133189
ENSMUSG00000021282	Eif5	6973.71	0.669232	0.142726	4.68892	2.74647e-06	3.55811e-05
ENSMUSG00000021286	Zfyve21	487.882	-1.28878	0.228665	-5.63611	1.73937e-08	3.54472e-07
ENSMUSG00000021288	Klc1	3416.45	0.429292	0.0687875	6.24084	4.35219e-10	1.20211e-08
ENSMUSG00000021290	2010107E04Rik	2163.4	-0.538938	0.13837	-3.8949	9.82393e-05	0.000853722
ENSMUSG00000021298	Gpr132	36.3144	2.16175	0.398373	5.42645	5.74867e-08	1.06408e-06
ENSMUSG00000021311	Mtr	2801.81	-0.856144	0.139921	-6.11875	9.43116e-10	2.4566e-08
ENSMUSG00000021313	Ryr2	166401	-1.5987	0.130304	-12.269	1.32861e-34	3.57923e-32
ENSMUSG00000021314	Amph	96.3672	-0.854126	0.282321	-3.02538	0.00248323	0.0140695
ENSMUSG00000021322	Aoah	137.768	1.3389	0.280334	4.7761	1.78723e-06	2.42398e-05
ENSMUSG00000021326	Trim27	533.38	0.48377	0.177871	2.71977	0.00653268	0.0313575
ENSMUSG00000021338	Lrrc16a	361.97	0.564956	0.183184	3.08409	0.00204173	0.011883
ENSMUSG00000021340	Gpld1	666.76	-0.298861	0.111005	-2.69233	0.00709548	0.0335636
ENSMUSG00000021361	Tmem14c	770.1	-0.446428	0.130648	-3.41702	0.000633098	0.00436401
ENSMUSG00000021371	Mcur1	1825.13	-1.00338	0.313112	-3.20455	0.00135272	0.00842123
ENSMUSG00000021374	Nup153	2590.87	0.360863	0.099046	3.64339	0.000269072	0.00206702
ENSMUSG00000021375	Kif13a	7188.9	-0.438174	0.137687	-3.18239	0.00146064	0.00897254
ENSMUSG00000021384	Susd3	40.1704	1.86145	0.428536	4.34373	1.40081e-05	0.000152369
ENSMUSG00000021388	Aspn	1070.41	0.454892	0.135626	3.35402	0.000796457	0.00533849
ENSMUSG00000021395	Spin1	1047.44	-0.930798	0.362604	-2.56698	0.0102589	0.0452053
ENSMUSG00000021403	Serpinb9b	17.0569	1.49164	0.537701	2.7741	0.00553548	0.0273795
ENSMUSG00000021411	Pxdc1	278.536	-0.802871	0.308335	-2.60389	0.00921712	0.0416507
ENSMUSG00000021423	Ly86	163.328	1.4642	0.264372	5.53839	3.05257e-08	5.97927e-07
ENSMUSG00000021432	Slc35b3	193.737	0.668035	0.225337	2.96461	0.00303068	0.0166531
ENSMUSG00000021451	Sema4d	721.571	-0.693157	0.129178	-5.3659	8.05484e-08	1.44663e-06
ENSMUSG00000021453	Gadd45g	162.418	1.50775	0.260199	5.79459	6.84903e-09	1.52368e-07
ENSMUSG00000021456	Fbp2	311.799	-1.19044	0.373959	-3.18335	0.00145582	0.00894694
ENSMUSG00000021457	Syk	2008.74	0.351961	0.102234	3.44272	0.0005759	0.00402905
ENSMUSG00000021458	2010111I01Rik	2956.63	0.404792	0.13015	3.11019	0.00186966	0.011045
ENSMUSG00000021477	Ctsl	8005.79	1.76085	0.181721	9.68987	3.32941e-22	4.01694e-20
ENSMUSG00000021485	Mxd3	29.2012	1.22278	0.341664	3.57889	0.000345061	0.00256364
ENSMUSG00000021520	Uqcrb	4954.32	-0.682211	0.137922	-4.94636	7.5613e-07	1.12058e-05
ENSMUSG00000021536	Adcy2	21.6699	1.14412	0.401645	2.84858	0.00439147	0.0227154
ENSMUSG00000021537	Cetn3	727.578	0.57095	0.212165	2.69107	0.00712228	0.0336537
ENSMUSG00000021557	Agtpbp1	5658.44	-0.884603	0.132018	-6.70061	2.07544e-11	7.23682e-10
ENSMUSG00000021559	Dapk1	2631.91	-0.383134	0.106884	-3.58458	0.000337615	0.00251212
ENSMUSG00000021569	Trip13	29.8949	1.50433	0.467218	3.21976	0.001283	0.00805345
ENSMUSG00000021573	Tppp	959.485	-1.69507	0.432974	-3.91496	9.04209e-05	0.000793493
ENSMUSG00000021577	Sdha	30905.5	-0.86525	0.137809	-6.27861	3.41616e-10	9.63876e-09
ENSMUSG00000021578	Ccdc127	4225.16	-1.17187	0.173061	-6.7714	1.2754e-11	4.62766e-10
ENSMUSG00000021579	Lrrc14b	372.971	-2.59775	0.454167	-5.71982	1.06639e-08	2.27952e-07
ENSMUSG00000021585	Cast	6542.28	0.428236	0.0692588	6.18312	6.2846e-10	1.70473e-08
ENSMUSG00000021595	Nsun2	1893.72	0.442303	0.152138	2.90726	0.0036461	0.0194426
ENSMUSG00000021597	Ankrd32	1449.47	-0.808444	0.181489	-4.45451	8.40861e-06	9.70444e-05
ENSMUSG00000021604	Irx4	512.693	-1.34278	0.278698	-4.81807	1.44953e-06	2.0075e-05
ENSMUSG00000021606	Ndufs6	3037.17	-1.10248	0.304171	-3.62454	0.000289472	0.00219968
ENSMUSG00000021614	Vcan	2864.92	1.31245	0.190549	6.88774	5.66844e-12	2.15204e-10
ENSMUSG00000021622	Ckmt2	49958.6	-0.971006	0.180278	-5.38616	7.19775e-08	1.30342e-06
ENSMUSG00000021643	Serf1	115.107	0.85477	0.21158	4.03995	5.34637e-05	0.000493623
ENSMUSG00000021646	Mccc2	1843.8	-1.48263	0.135864	-10.9126	1.00366e-27	1.82758e-25
ENSMUSG00000021650	Ptcd2	823.18	-0.434506	0.165478	-2.62577	0.00864539	0.0396133
ENSMUSG00000021660	Btf3	3470.43	0.98636	0.191649	5.14669	2.65124e-07	4.25975e-06
ENSMUSG00000021662	Arhgef28	634.913	0.610416	0.139389	4.37923	1.19097e-05	0.000132251
ENSMUSG00000021665	Hexb	1100.79	0.968426	0.185074	5.23265	1.67096e-07	2.78719e-06
ENSMUSG00000021668	Polk	448.905	0.626586	0.153457	4.08314	4.44312e-05	0.000420506
ENSMUSG00000021678	F2rl1	38.5218	1.10916	0.346349	3.20244	0.00136269	0.00847252
ENSMUSG00000021686	Ap3b1	1839.81	0.465137	0.0975016	4.77056	1.83714e-06	2.4763e-05
ENSMUSG00000021690	Jmy	3040.98	-1.60455	0.237908	-6.74442	1.53638e-11	5.49353e-10
ENSMUSG00000021696	Elovl7	58.2757	2.03986	0.472843	4.31404	1.603e-05	0.000171889
ENSMUSG00000021699	Pde4d	1534.67	-0.719055	0.174112	-4.12983	3.63025e-05	0.000354305
ENSMUSG00000021701	Plk2	2141.8	1.45651	0.133523	10.9083	1.05196e-27	1.89798e-25
ENSMUSG00000021702	Thbs4	478.283	2.18243	0.31537	6.92023	4.50913e-12	1.75597e-10
ENSMUSG00000021706	Zfyve16	1918.78	0.413283	0.100104	4.12853	3.65086e-05	0.00035614
ENSMUSG00000021710	Nln	681.892	0.707038	0.164604	4.29539	1.74385e-05	0.000185777
ENSMUSG00000021716	Srek1ip1	657.327	-1.00277	0.335476	-2.98908	0.00279815	0.0155491
ENSMUSG00000021720	Rnf180	44.0036	1.10695	0.285516	3.877	0.000105751	0.000910951
ENSMUSG00000021751	Acox2	341.899	5.28489	0.35842	14.745	3.31431e-49	1.55188e-46
ENSMUSG00000021752	Kctd6	432.144	1.36524	0.400365	3.41	0.000649623	0.00445294
ENSMUSG00000021756	Il6st	7007.5	0.823604	0.0951723	8.65382	4.98059e-18	4.16801e-16
ENSMUSG00000021759	Ppap2a	1210.4	0.858899	0.123502	6.95453	3.53744e-12	1.42556e-10
ENSMUSG00000021763	BC067074	307.391	-0.770295	0.224903	-3.42502	0.000614762	0.00425551
ENSMUSG00000021764	Ndufs4	5005.17	-0.60753	0.17374	-3.49678	0.000470903	0.00337492
ENSMUSG00000021767	Kat6b	1653.46	-0.377016	0.114028	-3.30635	0.000945193	0.00621889
ENSMUSG00000021772	Nkiras1	1105.44	-0.729771	0.147417	-4.95039	7.4063e-07	1.09926e-05
ENSMUSG00000021773	Comtd1	258.605	1.95974	0.227491	8.6146	7.01842e-18	5.72715e-16
ENSMUSG00000021792	Fam213a	374.135	-0.45356	0.170669	-2.65755	0.00787119	0.0366552
ENSMUSG00000021799	Opn4	92.0638	-2.32319	0.323847	-7.17373	7.29798e-13	3.28426e-11
ENSMUSG00000021806	Nid2	1250.86	0.427867	0.165769	2.5811	0.00984862	0.0437428
ENSMUSG00000021814	Anxa7	3787.51	0.942587	0.0901023	10.4613	1.3006e-25	2.04621e-23
ENSMUSG00000021831	Ero1l	2554.41	2.3841	0.211475	11.2737	1.77004e-29	3.62599e-27
ENSMUSG00000021832	Psmc6	2792.01	0.460064	0.141489	3.25158	0.00114764	0.00733253
ENSMUSG00000021843	Ktn1	14618.2	-0.404416	0.103062	-3.92401	8.70876e-05	0.000767323
ENSMUSG00000021866	Anxa11	1057.06	-0.464066	0.162491	-2.85595	0.00429085	0.0222825
ENSMUSG00000021871	Pnp	727.289	0.38566	0.117416	3.28456	0.00102143	0.00664267
ENSMUSG00000021877	Arf4	1906.84	1.09246	0.338555	3.22683	0.00125171	0.0079005
ENSMUSG00000021886	Gpr65	75.5435	1.42956	0.564853	2.53085	0.0113785	0.0491695
ENSMUSG00000021898	Asb14	2010.42	-1.71576	0.282814	-6.06674	1.30535e-09	3.30387e-08
ENSMUSG00000021901	Bap1	1648.56	-0.375961	0.127837	-2.94095	0.00327207	0.0178004
ENSMUSG00000021913	Ogdhl	5179.67	-1.60636	0.221689	-7.246	4.29268e-13	1.98635e-11
ENSMUSG00000021930	Spryd7	881.661	-0.956136	0.363692	-2.62897	0.00856434	0.0393244
ENSMUSG00000021932	Rnaseh2b	321.346	0.590351	0.197527	2.9887	0.00280163	0.0155641
ENSMUSG00000021944	Gata4	2813.47	0.343836	0.133494	2.57566	0.010005	0.0442951
ENSMUSG00000021948	Prkcd	875.958	1.0417	0.142264	7.32229	2.43775e-13	1.16079e-11
ENSMUSG00000021951	N6amt2	455.358	-0.649674	0.235763	-2.75563	0.005858	0.0286576
ENSMUSG00000021969	Zdhhc20	938.819	0.535445	0.120132	4.45715	8.30573e-06	9.60826e-05
ENSMUSG00000021981	Cab39l	868.789	-0.909218	0.118656	-7.66262	1.82176e-14	1.02362e-12
ENSMUSG00000021991	Cacna2d3	80.4762	-1.96944	0.445402	-4.42172	9.7917e-06	0.000110924
ENSMUSG00000021993	Mipep	2288.12	-0.508114	0.145655	-3.48847	0.000485789	0.00347148
ENSMUSG00000021994	Wnt5a	469.809	-1.25204	0.237318	-5.27577	1.322e-07	2.25485e-06
ENSMUSG00000021996	Esd	4187.85	2.22157	0.115387	19.2532	1.32696e-82	2.17467e-79
ENSMUSG00000021998	Lcp1	1882.79	1.29682	0.245017	5.29278	1.20472e-07	2.07825e-06
ENSMUSG00000022008	Gpalpp1	1500.06	0.390368	0.111546	3.4996	0.00046596	0.00334559
ENSMUSG00000022021	Diap3	89.101	1.30634	0.349088	3.74214	0.000182457	0.0014748
ENSMUSG00000022023	Wbp4	844.354	-0.504382	0.127741	-3.94848	7.86493e-05	0.000700327
ENSMUSG00000022024	Sugt1	1334.33	1.01855	0.163584	6.22648	4.77037e-10	1.31025e-08
ENSMUSG00000022032	Scara5	883.721	-1.38699	0.323729	-4.28442	1.83216e-05	0.000194134
ENSMUSG00000022033	Pbk	28.0044	1.7781	0.373286	4.76336	1.90392e-06	2.55406e-05
ENSMUSG00000022034	Esco2	32.0037	1.22216	0.467225	2.61578	0.0089023	0.0405475
ENSMUSG00000022037	Clu	16217.9	-1.01294	0.219682	-4.61093	4.00872e-06	4.98643e-05
ENSMUSG00000022040	Ephx2	6783.86	-0.859758	0.155087	-5.5437	2.96145e-08	5.81817e-07
ENSMUSG00000022066	Gm21685	1836.32	-0.677794	0.127306	-5.32413	1.01437e-07	1.7848e-06
ENSMUSG00000022074	Tnfrsf10b	188.907	1.02429	0.177639	5.76616	8.10959e-09	1.78593e-07
ENSMUSG00000022090	Pdlim2	245.707	0.912658	0.321369	2.8399	0.00451273	0.0231596
ENSMUSG00000022110	Sucla2	16270.1	-0.791151	0.181481	-4.35942	1.30406e-05	0.000142952
ENSMUSG00000022111	Uchl3	746.211	1.02098	0.154083	6.62617	3.44507e-11	1.16011e-09
ENSMUSG00000022114	Spry2	217.908	-2.09027	0.546527	-3.82464	0.000130965	0.00109832
ENSMUSG00000022125	Cln5	283.078	0.640194	0.243901	2.62482	0.0086696	0.0397057
ENSMUSG00000022129	Dct	74.3301	-0.882149	0.337902	-2.61066	0.00903674	0.0410431
ENSMUSG00000022131	Gpr180	707.097	-0.48867	0.132521	-3.68751	0.000226461	0.00178001
ENSMUSG00000022146	Osmr	1613.41	0.827125	0.170518	4.85067	1.23045e-06	1.74337e-05
ENSMUSG00000022148	Fyb	297.729	1.63686	0.31742	5.15677	2.51245e-07	4.04667e-06
ENSMUSG00000022150	Dab2	1977.59	0.582056	0.174824	3.32938	0.000870399	0.00578091
ENSMUSG00000022159	Rab2b	286.117	0.90348	0.140377	6.43608	1.226e-10	3.73805e-09
ENSMUSG00000022180	Slc7a8	176.538	0.738034	0.24203	3.04934	0.00229341	0.013157
ENSMUSG00000022186	Oxct1	34877.6	-0.738357	0.148671	-4.96637	6.82173e-07	1.02098e-05
ENSMUSG00000022197	Pdzd2	4659.3	-0.747371	0.231913	-3.22264	0.00127016	0.00798818
ENSMUSG00000022201	Zfr	4478.77	0.366798	0.103831	3.53265	0.00041141	0.00300104
ENSMUSG00000022204	Ngdn	756.813	0.609001	0.125352	4.85833	1.18379e-06	1.68943e-05
ENSMUSG00000022208	Jph4	13.8875	2.03123	0.51444	3.94843	7.86648e-05	0.000700327
ENSMUSG00000022210	Dhrs4	1284.26	-0.786485	0.220385	-3.56868	0.000358784	0.00265317
ENSMUSG00000022214	Dcaf11	2985.94	-0.816168	0.177287	-4.60365	4.15146e-06	5.13407e-05
ENSMUSG00000022215	Fitm1	1633.53	-1.58069	0.490841	-3.22037	0.00128027	0.00803891
ENSMUSG00000022216	Psme1	2374.41	-0.60303	0.213355	-2.82641	0.00470733	0.0239272
ENSMUSG00000022217	Emc9	235.214	-0.944634	0.363249	-2.60051	0.0093085	0.0419961
ENSMUSG00000022223	Sdr39u1	1394.53	-0.534345	0.174773	-3.05736	0.00223297	0.0128553
ENSMUSG00000022231	Sema5a	808.625	-0.501562	0.163469	-3.06824	0.00215321	0.012442
ENSMUSG00000022234	Cct5	5468.04	0.645889	0.122168	5.28689	1.24413e-07	2.13686e-06
ENSMUSG00000022235	Cmbl	454.454	-0.932532	0.311015	-2.99835	0.00271441	0.0151566
ENSMUSG00000022241	Tars	1793.27	1.36209	0.156216	8.71932	2.79886e-18	2.42478e-16
ENSMUSG00000022244	Amacr	836.07	-0.935973	0.330227	-2.83433	0.00459214	0.023463
ENSMUSG00000022246	Rai14	537.924	1.29206	0.21416	6.03316	1.60786e-09	4.00256e-08
ENSMUSG00000022247	Brix1	502.738	0.409558	0.157245	2.60459	0.00919849	0.0415952
ENSMUSG00000022255	Mtdh	3201.04	1.02712	0.113083	9.08287	1.05753e-19	1.04509e-17
ENSMUSG00000022257	Laptm4b	1321.55	-0.86169	0.313899	-2.74512	0.00604889	0.0294498
ENSMUSG00000022265	Ank	2959.92	-0.617026	0.15577	-3.96113	7.45973e-05	0.000667135
ENSMUSG00000022286	Grhl2	114.768	-1.50668	0.452234	-3.33164	0.000863352	0.00574186
ENSMUSG00000022292	Rrm2b	1575.13	-0.338689	0.108914	-3.1097	0.00187277	0.0110567
ENSMUSG00000022295	Atp6v1c1	1825.65	0.477172	0.175321	2.72171	0.00649456	0.0312126
ENSMUSG00000022300	Dcaf13	687.356	0.61925	0.0998261	6.20328	5.52975e-10	1.51039e-08
ENSMUSG00000022306	Zfpm2	1072.24	-0.817907	0.295713	-2.76588	0.00567686	0.0279151
ENSMUSG00000022309	Angpt1	1848.31	-1.97598	0.347059	-5.6935	1.24462e-08	2.60946e-07
ENSMUSG00000022322	Shcbp1	30.0206	1.71093	0.344191	4.97087	6.66515e-07	9.99823e-06
ENSMUSG00000022324	Matn2	1397.56	0.719836	0.181848	3.95846	7.54351e-05	0.000674014
ENSMUSG00000022325	Pop1	250.045	0.615224	0.204673	3.00588	0.0026481	0.0148538
ENSMUSG00000022332	Khdrbs3	1180.09	-0.67001	0.187381	-3.57565	0.000349361	0.0025907
ENSMUSG00000022339	Ebag9	499.052	-0.383777	0.130312	-2.94506	0.00322891	0.0175899
ENSMUSG00000022346	Myc	230.869	2.31674	0.340108	6.81179	9.63892e-12	3.54979e-10
ENSMUSG00000022347	A1bg	38.5733	-1.73996	0.363609	-4.78524	1.70782e-06	2.33886e-05
ENSMUSG00000022350	E430025E21Rik	2041.29	0.424123	0.0807826	5.25017	1.5196e-07	2.55641e-06
ENSMUSG00000022351	Sqle	123.462	0.85851	0.323627	2.65278	0.00798325	0.0370455
ENSMUSG00000022353	Mtss1	1537.49	-0.729714	0.127064	-5.74287	9.30874e-09	2.01614e-07
ENSMUSG00000022354	Ndufb9	6786.11	-0.52836	0.166267	-3.17779	0.00148403	0.00908055
ENSMUSG00000022357	Klhl38	323.207	-1.27554	0.389153	-3.27773	0.00104645	0.00678517
ENSMUSG00000022360	Atad2	499.585	0.849581	0.11173	7.60387	2.87414e-14	1.58772e-12
ENSMUSG00000022361	Zhx1	1479.71	-0.281011	0.108743	-2.58417	0.00976136	0.0434806
ENSMUSG00000022364	Tbc1d31	349.588	0.628764	0.179166	3.50939	0.000449132	0.00324729
ENSMUSG00000022365	Derl1	2691.19	0.585417	0.226781	2.58142	0.00983955	0.0437397
ENSMUSG00000022369	Mtbp	227.18	1.42886	0.240349	5.94491	2.76608e-09	6.66638e-08
ENSMUSG00000022370	Mrpl13	1347.58	0.369478	0.130184	2.83813	0.00453786	0.0232582
ENSMUSG00000022371	Col14a1	2898.3	1.36822	0.335648	4.07636	4.57458e-05	0.000431688
ENSMUSG00000022372	Sla	170.253	1.14659	0.301098	3.80803	0.000140078	0.0011653
ENSMUSG00000022376	Adcy8	47.4717	-3.46324	0.352379	-9.82818	8.51472e-23	1.08033e-20
ENSMUSG00000022383	Ppara	1158.72	-1.40215	0.18858	-7.43531	1.04321e-13	5.28758e-12
ENSMUSG00000022385	Gtse1	50.7325	2.10018	0.354063	5.93167	2.99875e-09	7.17439e-08
ENSMUSG00000022391	Rangap1	1568.99	1.13628	0.223866	5.07572	3.86028e-07	6.05393e-06
ENSMUSG00000022425	Enpp2	607.034	-1.25238	0.287349	-4.3584	1.31019e-05	0.000143545
ENSMUSG00000022426	Josd1	964.6	-1.03938	0.305412	-3.40322	0.000665965	0.00455385
ENSMUSG00000022427	Tomm22	692.95	-0.342097	0.124926	-2.7384	0.00617393	0.0299646
ENSMUSG00000022442	Ttll1	915.077	-1.34617	0.155913	-8.6341	5.91901e-18	4.89089e-16
ENSMUSG00000022443	Myh9	12936.9	0.597378	0.216639	2.75748	0.00582483	0.0285166
ENSMUSG00000022449	Adamts20	217.271	4.1932	0.268586	15.6121	6.0208e-55	3.383e-52
ENSMUSG00000022451	Twf1	845.155	1.04517	0.30397	3.4384	0.000585163	0.00408223
ENSMUSG00000022453	Naga	711.477	0.45401	0.128959	3.52058	0.000430603	0.00313059
ENSMUSG00000022462	Slc38a2	5895.1	1.30385	0.243172	5.36184	8.23787e-08	1.47546e-06
ENSMUSG00000022471	Xrcc6	1158.2	0.771602	0.134728	5.7271	1.02162e-08	2.19815e-07
ENSMUSG00000022474	Pmm1	1093.57	3.01909	0.122997	24.5461	4.76136e-133	3.12123e-129
ENSMUSG00000022477	Aco2	80041.5	-0.264736	0.091206	-2.90261	0.00370065	0.0196694
ENSMUSG00000022479	Vdr	64.9106	-1.71146	0.501275	-3.41422	0.00063965	0.00439838
ENSMUSG00000022488	Nckap1l	800.529	1.20015	0.225086	5.33194	9.717e-08	1.71848e-06
ENSMUSG00000022489	Pde1b	177.174	0.992182	0.156526	6.33878	2.31585e-10	6.72725e-09
ENSMUSG00000022490	Ppp1r1a	57.3187	-1.47929	0.326055	-4.53693	5.70778e-06	6.8403e-05
ENSMUSG00000022498	Txndc11	822.379	-0.263311	0.103253	-2.55016	0.0107673	0.0469927
ENSMUSG00000022503	Nubp1	392.318	0.865599	0.16596	5.21572	1.83103e-07	3.03241e-06
ENSMUSG00000022504	Ciita	252.995	0.54432	0.159502	3.41263	0.000643395	0.0044164
ENSMUSG00000022512	Cldn1	19.8973	1.16394	0.433705	2.68373	0.00728068	0.0343362
ENSMUSG00000022516	Nudt16l1	198.492	-0.916873	0.322015	-2.8473	0.00440914	0.0227765
ENSMUSG00000022517	Mgrn1	4385.22	-0.818054	0.0855915	-9.55766	1.20453e-21	1.39343e-19
ENSMUSG00000022519	Srl	33913.2	-0.534835	0.119145	-4.48896	7.15713e-06	8.41818e-05
ENSMUSG00000022526	Zfp251	333.099	-0.943811	0.282544	-3.3404	0.000836579	0.005577
ENSMUSG00000022533	Atp13a3	3826.42	0.696991	0.131795	5.28843	1.2337e-07	2.12102e-06
ENSMUSG00000022538	Lsg1	739.519	0.577599	0.14469	3.99198	6.55244e-05	0.0005914
ENSMUSG00000022540	Rogdi	349.833	-0.593323	0.215826	-2.74908	0.00597624	0.0291417
ENSMUSG00000022546	Gpt	649.693	-2.07062	0.12373	-16.735	7.28753e-63	5.11845e-60
ENSMUSG00000022548	Apod	241.035	1.07335	0.180977	5.93087	3.01335e-09	7.20054e-08
ENSMUSG00000022550	Adck5	180.969	0.412675	0.163401	2.52553	0.0115524	0.0497896
ENSMUSG00000022551	Cyc1	11320.9	-0.544943	0.147018	-3.70665	0.000210022	0.00166745
ENSMUSG00000022557	Bop1	1063.49	1.15874	0.194048	5.9714	2.35231e-09	5.71871e-08
ENSMUSG00000022558	Mroh1	2420.73	0.584783	0.180562	3.23869	0.0012008	0.007603
ENSMUSG00000022562	Oplah	2615.3	-0.874784	0.104471	-8.37344	5.59614e-17	4.10648e-15
ENSMUSG00000022568	Scrib	1386.31	0.345758	0.12359	2.79761	0.00514823	0.0257556
ENSMUSG00000022570	Tsta3	390.343	0.665268	0.1529	4.351	1.35518e-05	0.000147761
ENSMUSG00000022574	Naprt	333.937	-0.808612	0.119805	-6.74942	1.48434e-11	5.32681e-10
ENSMUSG00000022594	Lynx1	6686.17	-2.91868	0.434888	-6.71135	1.92828e-11	6.75962e-10
ENSMUSG00000022595	Lypd2	30.0667	-2.5419	0.509857	-4.98553	6.17938e-07	9.32645e-06
ENSMUSG00000022607	Ptk2	2345.32	0.337538	0.090016	3.74976	0.000177005	0.00143783
ENSMUSG00000022613	Miox	9.00691	1.61071	0.581711	2.76892	0.00562426	0.027721
ENSMUSG00000022639	5330426P16Rik	434.187	1.20295	0.342854	3.50864	0.000450408	0.00325532
ENSMUSG00000022659	Gcsam	21.8319	1.5322	0.469869	3.2609	0.00111058	0.00712121
ENSMUSG00000022663	Atg3	609.961	0.527778	0.112509	4.69097	2.71912e-06	3.52733e-05
ENSMUSG00000022665	Ccdc80	5897.42	0.679105	0.211066	3.21751	0.0012931	0.00811429
ENSMUSG00000022667	Cd200r1	38.3097	1.21669	0.363021	3.35158	0.000803515	0.00537663
ENSMUSG00000022673	Mcm4	406.544	0.340302	0.122148	2.78599	0.00533646	0.0265621
ENSMUSG00000022685	Parn	552.864	0.569911	0.154134	3.69751	0.000217727	0.0017192
ENSMUSG00000022686	B3gnt5	95.5927	2.01196	0.50858	3.95604	7.62023e-05	0.000679943
ENSMUSG00000022707	Gbe1	3082.25	1.3934	0.117774	11.8312	2.69387e-32	6.46068e-30
ENSMUSG00000022722	Arl6	183.001	0.711734	0.245361	2.90076	0.00372257	0.0197699
ENSMUSG00000022748	Cmss1	611.327	-1.55563	0.171674	-9.06152	1.28651e-19	1.25873e-17
ENSMUSG00000022750	Klhl22	1062.73	0.697894	0.108177	6.45142	1.1081e-10	3.41566e-09
ENSMUSG00000022751	Nit2	491.999	-0.625713	0.141642	-4.41757	9.98169e-06	0.000112687
ENSMUSG00000022752	Tomm70a	2708.12	0.484328	0.180112	2.68904	0.00716586	0.0338271
ENSMUSG00000022754	Tmem45a	282.014	1.45098	0.31845	4.55639	5.20392e-06	6.29012e-05
ENSMUSG00000022756	Slc7a4	63.6897	-1.16866	0.278648	-4.19406	2.74008e-05	0.000276057
ENSMUSG00000022758	P2rx6	113.588	-1.77128	0.372035	-4.76105	1.92592e-06	2.58005e-05
ENSMUSG00000022761	Lztr1	1427.21	0.626071	0.151731	4.12619	3.68818e-05	0.000358713
ENSMUSG00000022769	Sdf2l1	172.365	0.478856	0.188253	2.54368	0.0109691	0.0477542
ENSMUSG00000022788	Fgd4	1547.51	-0.848357	0.160418	-5.28841	1.23383e-07	2.12102e-06
ENSMUSG00000022816	Fstl1	8955.99	1.65532	0.228917	7.23108	4.79163e-13	2.20169e-11
ENSMUSG00000022817	Itgb5	4993.98	0.968251	0.14591	6.63597	3.22383e-11	1.08934e-09
ENSMUSG00000022820	Ndufb4	4105.46	-0.948875	0.157639	-6.0193	1.75174e-09	4.34971e-08
ENSMUSG00000022831	Hcls1	433.448	0.924148	0.173021	5.34125	9.23067e-08	1.63714e-06
ENSMUSG00000022841	Ap2m1	2801.34	0.575892	0.151444	3.80267	0.000143143	0.00118678
ENSMUSG00000022842	Ece2	189.206	0.632331	0.203229	3.11142	0.00186189	0.0110123
ENSMUSG00000022843	Clcn2	146.745	-0.74669	0.211795	-3.52553	0.000422631	0.00307718
ENSMUSG00000022849	Hspbap1	136.412	0.642836	0.164846	3.89962	9.63423e-05	0.000839092
ENSMUSG00000022853	Ehhadh	439.782	-0.860528	0.248239	-3.46653	0.000527226	0.00373432
ENSMUSG00000022876	Samsn1	32.1803	1.44034	0.414488	3.47498	0.000510894	0.00363241
ENSMUSG00000022883	Robo1	250.26	0.923544	0.264933	3.48595	0.000490387	0.00349893
ENSMUSG00000022887	Masp1	437.102	0.824325	0.183569	4.49054	7.10424e-06	8.36098e-05
ENSMUSG00000022890	Atp5j	6667.72	-0.720484	0.141869	-5.07851	3.80402e-07	5.98001e-06
ENSMUSG00000022892	App	6007.83	0.589039	0.181801	3.24002	0.0011952	0.00757
ENSMUSG00000022894	Adamts5	1288.59	-0.930294	0.275413	-3.37781	0.000730652	0.00493441
ENSMUSG00000022898	Dscr3	1152.97	0.852134	0.298206	2.85754	0.00426941	0.0221888
ENSMUSG00000022901	Cd86	176.118	1.22358	0.169517	7.21804	5.27408e-13	2.41209e-11
ENSMUSG00000022945	Chaf1b	42.6888	1.13104	0.305653	3.7004	0.000215259	0.00170285
ENSMUSG00000022952	Runx1	257.801	0.905433	0.283037	3.19899	0.00137909	0.00855828
ENSMUSG00000022956	Atp5o	17827.1	-0.686815	0.143422	-4.78878	1.678e-06	2.29962e-05
ENSMUSG00000022961	Son	19353.4	-0.233456	0.0748818	-3.11766	0.00182292	0.0108209
ENSMUSG00000022971	Ifnar2	942.095	0.304629	0.120261	2.53307	0.0113068	0.0489454
ENSMUSG00000022994	Adcy6	7948.06	-0.649877	0.196711	-3.30372	0.000954108	0.00626913
ENSMUSG00000022995	Enah	6062.87	1.56081	0.222355	7.01946	2.22731e-12	9.26051e-11
ENSMUSG00000023015	Racgap1	105.168	1.16563	0.263012	4.43187	9.34211e-06	0.000106444
ENSMUSG00000023017	Asic1	141.087	-0.711877	0.228937	-3.10949	0.00187408	0.0110611
ENSMUSG00000023018	Smarcd1	793.056	-0.734205	0.189246	-3.87962	0.000104618	0.000901977
ENSMUSG00000023031	Cela1	33.1981	2.23238	0.434297	5.14021	2.74428e-07	4.39845e-06
ENSMUSG00000023043	Krt18	152.682	1.7533	0.518196	3.38347	0.000715767	0.00484814
ENSMUSG00000023045	Soat2	63.4993	4.26861	0.457351	9.33334	1.02589e-20	1.12084e-18
ENSMUSG00000023048	Prr13	621.797	0.723989	0.17997	4.02283	5.7504e-05	0.000527214
ENSMUSG00000023055	Calcoco1	3654.98	-0.57041	0.129215	-4.41443	1.01278e-05	0.00011427
ENSMUSG00000023067	Cdkn1a	784.783	1.70291	0.392277	4.34109	1.41777e-05	0.000154129
ENSMUSG00000023070	Rgn	12.6916	-1.5206	0.531058	-2.86335	0.00419188	0.0218204
ENSMUSG00000023072	Cep89	481.723	0.430988	0.121976	3.5334	0.000410254	0.00299586
ENSMUSG00000023074	Mospd1	603.144	0.773591	0.102389	7.55538	4.17632e-14	2.26882e-12
ENSMUSG00000023088	Abcc1	2866.81	0.687901	0.134027	5.13256	2.85822e-07	4.56619e-06
ENSMUSG00000023092	Fhl1	4220.39	1.68766	0.278139	6.06768	1.29774e-09	3.28883e-08
ENSMUSG00000023094	Msrb2	994.419	-1.53969	0.456771	-3.37082	0.00074946	0.00504756
ENSMUSG00000023104	Rfc2	636.164	0.430323	0.118307	3.63734	0.000275472	0.00210713
ENSMUSG00000023153	Tmem52	12.0456	-1.59794	0.562806	-2.83924	0.00452211	0.0231956
ENSMUSG00000023169	Slc38a1	1564.81	1.80917	0.371431	4.87082	1.11134e-06	1.59297e-05
ENSMUSG00000023176	Cpn2	120.499	-2.286	0.363089	-6.29596	3.055e-10	8.65701e-09
ENSMUSG00000023206	Il15ra	513.687	-0.863973	0.294043	-2.93826	0.00330064	0.0179211
ENSMUSG00000023224	Serping1	4921.76	0.677598	0.212234	3.1927	0.00140951	0.00870856
ENSMUSG00000023232	Serinc2	30.5668	1.50896	0.414843	3.63742	0.000275384	0.00210713
ENSMUSG00000023259	Slc26a6	380.54	-1.12248	0.187343	-5.99157	2.07824e-09	5.10244e-08
ENSMUSG00000023266	Frs3	188.276	-0.791699	0.200668	-3.94531	7.96959e-05	0.000707265
ENSMUSG00000023267	Gabrr2	46.7386	-1.84934	0.451148	-4.0992	4.14589e-05	0.000396176
ENSMUSG00000023307	2005-03-01	1333.38	0.419498	0.129231	3.24611	0.00116992	0.00743741
ENSMUSG00000023336	Wfdc1	269.433	-1.21589	0.333806	-3.64251	0.000269987	0.00207324
ENSMUSG00000023349	Clec4n	75.3669	1.79127	0.351939	5.08973	3.58579e-07	5.64596e-06
ENSMUSG00000023367	Tmem176a	326.58	0.746534	0.21722	3.43677	0.000588705	0.00410403
ENSMUSG00000023473	Celsr3	171.381	-1.73426	0.302848	-5.7265	1.02527e-08	2.20359e-07
ENSMUSG00000023495	Pcbp4	1623.4	0.541809	0.114001	4.75267	2.00743e-06	2.67286e-05
ENSMUSG00000023800	Tiam2	536.377	0.786254	0.260435	3.01901	0.00253605	0.0143192
ENSMUSG00000023805	Synj2	2539.89	-0.35161	0.137312	-2.56066	0.0104474	0.0459123
ENSMUSG00000023806	Rsph3b	1441.08	1.04923	0.213854	4.90631	9.28044e-07	1.36099e-05
ENSMUSG00000023809	Rps6ka2	1822.29	-1.07769	0.268811	-4.00912	6.09459e-05	0.000554633
ENSMUSG00000023828	Slc22a3	228.95	-2.89943	0.309273	-9.37498	6.91868e-21	7.64398e-19
ENSMUSG00000023829	Slc22a1	54.9951	-1.94945	0.425965	-4.57655	4.72701e-06	5.749e-05
ENSMUSG00000023832	Acat2	230.788	-1.06917	0.381796	-2.80038	0.00510425	0.0255746
ENSMUSG00000023868	Pde10a	181.575	0.510797	0.199934	2.55483	0.010624	0.0465119
ENSMUSG00000023883	Phf10	2805.91	1.39019	0.135186	10.2835	8.36129e-25	1.24571e-22
ENSMUSG00000023905	Tnfrsf12a	745.374	1.53207	0.28651	5.34735	8.92505e-08	1.58986e-06
ENSMUSG00000023913	Pla2g7	314.641	1.00463	0.299726	3.35181	0.000802854	0.00537404
ENSMUSG00000023921	Mut	4086.74	-1.28908	0.17601	-7.32389	2.40879e-13	1.15259e-11
ENSMUSG00000023932	Cdc5l	1325.65	-0.378881	0.138307	-2.73943	0.00615458	0.0298781
ENSMUSG00000023935	Spats1	19.0359	1.03929	0.377623	2.75219	0.00591983	0.0289169
ENSMUSG00000023938	Aars2	1129.4	-0.388332	0.110637	-3.50995	0.000448183	0.00324162
ENSMUSG00000023942	Slc29a1	2213.58	-0.510051	0.106792	-4.77612	1.78713e-06	2.42398e-05
ENSMUSG00000023947	Nfkbie	104.023	0.568293	0.200287	2.8374	0.00454832	0.0232996
ENSMUSG00000023959	Clic5	3477.43	0.634522	0.224057	2.83197	0.00462629	0.0236007
ENSMUSG00000023961	Enpp4	1060.29	-0.87263	0.233216	-3.74173	0.000182761	0.00147605
ENSMUSG00000023968	Crip3	12.442	-1.32208	0.48111	-2.74798	0.00599629	0.0292178
ENSMUSG00000023972	Ptk7	321.047	0.725231	0.279825	2.59173	0.0095494	0.0427884
ENSMUSG00000023977	Ubr2	6284.46	-0.412718	0.150379	-2.74453	0.00605982	0.0294908
ENSMUSG00000023980	Taf8	414.63	-0.794798	0.25573	-3.10796	0.00188384	0.011102
ENSMUSG00000023990	Tfeb	714.821	-0.700451	0.2686	-2.60778	0.00911311	0.0413047
ENSMUSG00000023992	Trem2	116.798	1.62121	0.381939	4.24468	2.18906e-05	0.00022646
ENSMUSG00000023999	Kif6	170.785	-1.28486	0.348686	-3.68486	0.000228832	0.00179224
ENSMUSG00000024007	Ppil1	638.251	-0.85588	0.20409	-4.19364	2.7451e-05	0.000276422
ENSMUSG00000024008	Cpne5	127.482	-3.02016	0.407085	-7.41897	1.18031e-13	5.9518e-12
ENSMUSG00000024011	Pi16	2412.69	0.927771	0.267538	3.46781	0.000524711	0.00371988
ENSMUSG00000024013	Fgd2	223.005	1.01574	0.265077	3.83189	0.000127161	0.00107256
ENSMUSG00000024027	Glp1r	12.783	-1.91654	0.59136	-3.2409	0.00119155	0.00755635
ENSMUSG00000024038	Ndufv3	2938.18	-0.752446	0.150039	-5.01499	5.30368e-07	8.098e-06
ENSMUSG00000024039	Cbs	22.2017	-1.43978	0.483613	-2.97713	0.00290964	0.0160869
ENSMUSG00000024044	Epb4.1l3	485.153	-1.59051	0.229624	-6.9266	4.3108e-12	1.68877e-10
ENSMUSG00000024045	Akap8	1965.57	-0.368024	0.107558	-3.42162	0.000622489	0.00429841
ENSMUSG00000024052	Lpin2	579.807	0.658296	0.174231	3.77829	0.000157908	0.00129392
ENSMUSG00000024056	Ndc80	31.0097	1.5585	0.444948	3.50267	0.000460628	0.00331578
ENSMUSG00000024059	Clip4	4978.83	-0.440131	0.117256	-3.7536	0.000174316	0.00142009
ENSMUSG00000024066	Xdh	3993.07	-0.493525	0.150667	-3.27561	0.00105436	0.00682972
ENSMUSG00000024077	Strn	3501.53	0.813238	0.316636	2.56837	0.0102178	0.0450646
ENSMUSG00000024078	Ttc27	598.325	0.588608	0.128726	4.57257	4.81782e-06	5.84859e-05
ENSMUSG00000024091	Vapa	1674.39	0.65764	0.152336	4.31703	1.58139e-05	0.000169944
ENSMUSG00000024096	Ralbp1	2330.04	0.306555	0.106631	2.87492	0.00404132	0.0211712
ENSMUSG00000024098	Twsg1	2128.19	-1.6637	0.435273	-3.82219	0.000132271	0.00110786
ENSMUSG00000024099	Ndufv2	12083.6	-0.664131	0.138938	-4.78006	1.75245e-06	2.39e-05
ENSMUSG00000024104	Fam21	2244.77	0.445184	0.0853098	5.21843	1.80443e-07	2.99459e-06
ENSMUSG00000024112	Cacna1h	1076.18	-1.73612	0.365732	-4.74698	2.06475e-06	2.74175e-05
ENSMUSG00000024127	Prepl	2291.16	-0.952616	0.167762	-5.67838	1.35979e-08	2.8328e-07
ENSMUSG00000024132	Eci1	4404.38	-1.12916	0.236301	-4.77847	1.76634e-06	2.40394e-05
ENSMUSG00000024136	Dnase1l2	84.5784	-0.856072	0.196335	-4.36026	1.29907e-05	0.000142644
ENSMUSG00000024151	Msh2	670.129	-0.640151	0.139765	-4.58021	4.64517e-06	5.66699e-05
ENSMUSG00000024170	Telo2	745.37	0.364707	0.116912	3.1195	0.00181159	0.0107569
ENSMUSG00000024175	Tekt4	12.4854	-2.10857	0.607217	-3.47251	0.000515618	0.0036607
ENSMUSG00000024181	Mrpl28	1751.68	-0.864481	0.163051	-5.30189	1.14608e-07	1.99458e-06
ENSMUSG00000024186	Rgs11	48.3675	1.59711	0.295737	5.40045	6.64721e-08	1.21717e-06
ENSMUSG00000024193	Phf1	673.469	-0.465935	0.156579	-2.97572	0.00292297	0.0161379
ENSMUSG00000024197	Plin3	3077.52	-0.651857	0.171701	-3.79647	0.000146774	0.00121289
ENSMUSG00000024206	Rfx2	124.252	-0.597985	0.23109	-2.58767	0.00966266	0.0431583
ENSMUSG00000024213	Nudt3	1564.95	-0.653096	0.198111	-3.29662	0.000978554	0.00640621
ENSMUSG00000024219	Anks1	2088.43	-0.981761	0.149045	-6.58701	4.48765e-11	1.48826e-09
ENSMUSG00000024231	Cul2	2086.47	0.671916	0.126064	5.32998	9.82235e-08	1.73399e-06
ENSMUSG00000024269	Tpgs2	595.546	-0.997217	0.220661	-4.51923	6.20654e-06	7.37955e-05
ENSMUSG00000024270	Slc39a6	432.723	1.09159	0.191435	5.70213	1.1832e-08	2.49398e-07
ENSMUSG00000024287	Thoc1	1050.65	0.386977	0.0988416	3.91512	9.03579e-05	0.000793294
ENSMUSG00000024294	Mib1	4638.97	0.60696	0.224981	2.69783	0.00697939	0.0331138
ENSMUSG00000024300	Myo1f	363.306	1.22214	0.166212	7.35288	1.93975e-13	9.48934e-12
ENSMUSG00000024312	Wdr46	419.781	0.936568	0.223729	4.18616	2.83712e-05	0.000284522
ENSMUSG00000024331	Dsc2	2002.45	-0.931864	0.167687	-5.55717	2.7419e-08	5.41387e-07
ENSMUSG00000024349	Tmem173	293.498	0.815076	0.192113	4.24268	2.20868e-05	0.00022837
ENSMUSG00000024353	Mzb1	29.2151	-1.36158	0.413755	-3.29077	0.000999122	0.00651915
ENSMUSG00000024357	Sil1	792.841	0.387152	0.144679	2.67594	0.00745191	0.0350492
ENSMUSG00000024359	Hspa9	28482.7	0.797057	0.126042	6.32375	2.55294e-10	7.36161e-09
ENSMUSG00000024366	Gfra3	80.3322	-0.787159	0.301947	-2.60695	0.00913538	0.0413669
ENSMUSG00000024369	Nelfe	442.967	0.859243	0.143296	5.9963	2.01865e-09	4.97477e-08
ENSMUSG00000024381	Bin1	405.67	0.552968	0.150101	3.68397	0.000229625	0.00179698
ENSMUSG00000024410	3110002H16Rik	1031.17	-0.432292	0.145332	-2.97451	0.0029346	0.016193
ENSMUSG00000024411	Aqp4	246.678	-2.4307	0.467003	-5.20488	1.94119e-07	3.20532e-06
ENSMUSG00000024420	Zfp521	1435.29	-0.529968	0.140956	-3.75981	0.000170042	0.00138757
ENSMUSG00000024421	Lama3	531.651	0.652081	0.176168	3.70148	0.000214346	0.001697
ENSMUSG00000024423	Impact	1401.58	0.95165	0.308712	3.08265	0.00205167	0.0119303
ENSMUSG00000024425	Ndfip1	1725.72	0.359306	0.108469	3.31252	0.000924587	0.0061037
ENSMUSG00000024430	Cabyr	59.2262	-0.729418	0.279441	-2.61028	0.00904693	0.0410647
ENSMUSG00000024436	Mrps18b	934.775	0.98464	0.216191	4.55449	5.25136e-06	6.33578e-05
ENSMUSG00000024442	0610009O20Rik	3570.91	-1.18541	0.161909	-7.3215	2.45211e-13	1.16481e-11
ENSMUSG00000024454	Hdac3	1170.17	-0.413843	0.151739	-2.72734	0.00638472	0.0308024
ENSMUSG00000024471	Myot	1078.98	-2.22504	0.259623	-8.57027	1.03243e-17	8.25355e-16
ENSMUSG00000024480	Ap3s1	356.191	0.561887	0.136317	4.1219	3.75756e-05	0.0003642
ENSMUSG00000024481	Lvrn	102.366	-2.17898	0.360406	-6.04589	1.48584e-09	3.7271e-08
ENSMUSG00000024493	Lars	5125.4	1.70758	0.118638	14.3932	5.70987e-47	2.49534e-44
ENSMUSG00000024501	Dpysl3	2341.41	1.2876	0.249774	5.15506	2.53555e-07	4.07719e-06
ENSMUSG00000024505	Dtwd2	95.5734	-0.731329	0.221302	-3.30466	0.000950903	0.00625433
ENSMUSG00000024511	Rab27b	92.9447	-0.984937	0.282469	-3.48689	0.000488671	0.00348954
ENSMUSG00000024513	Mbd2	1958.35	0.630476	0.144284	4.36968	1.24431e-05	0.000137398
ENSMUSG00000024521	Pmaip1	32.0008	1.99607	0.525772	3.79645	0.000146785	0.00121289
ENSMUSG00000024525	Impa2	266.161	-0.700081	0.152102	-4.60272	4.17012e-06	5.14812e-05
ENSMUSG00000024527	Afg3l2	4795.88	0.569655	0.16394	3.47477	0.000511284	0.00363386
ENSMUSG00000024529	Lox	238.308	1.53136	0.266982	5.73583	9.70348e-09	2.09242e-07
ENSMUSG00000024533	Spire1	675.35	1.7695	0.289128	6.12014	9.34931e-10	2.43851e-08
ENSMUSG00000024537	Psmg2	524.294	0.726037	0.229563	3.16269	0.0015632	0.0094824
ENSMUSG00000024538	Ppic	411.504	0.667463	0.178064	3.74844	0.00017794	0.00144482
ENSMUSG00000024542	Cep192	797.5	0.601329	0.0942855	6.37775	1.79711e-10	5.3306e-09
ENSMUSG00000024548	Setbp1	1274.33	-1.53248	0.235119	-6.51791	7.12945e-11	2.28724e-09
ENSMUSG00000024556	Me2	401.117	0.558127	0.154542	3.61149	0.000304442	0.00229569
ENSMUSG00000024566	Atp9b	1654.81	0.347665	0.132391	2.62605	0.00863811	0.0395892
ENSMUSG00000024570	Rbfa	564.876	-0.430294	0.164939	-2.60881	0.00908577	0.0412087
ENSMUSG00000024576	Csnk1a1	4618.33	0.384346	0.084378	4.55505	5.23736e-06	6.32427e-05
ENSMUSG00000024581	Napg	1026.94	0.407742	0.0887486	4.59435	4.34096e-06	5.32874e-05
ENSMUSG00000024587	Nars	4306.57	1.85178	0.108816	17.0175	6.09278e-65	4.60848e-62
ENSMUSG00000024588	Fech	2657.26	-0.809942	0.146675	-5.52201	3.35148e-08	6.53361e-07
ENSMUSG00000024597	Slc12a2	2127.26	0.475448	0.0984299	4.83032	1.36313e-06	1.89853e-05
ENSMUSG00000024598	Fbn2	342.06	0.983222	0.306927	3.20345	0.00135794	0.00844835
ENSMUSG00000024601	Isoc1	587.133	-0.917143	0.139075	-6.59461	4.26384e-11	1.41883e-09
ENSMUSG00000024608	Rps14	6180.54	0.395831	0.0832093	4.75706	1.96437e-06	2.62085e-05
ENSMUSG00000024610	Cd74	2229.92	0.727112	0.239314	3.03833	0.00237897	0.0135805
ENSMUSG00000024617	Camk2a	356.273	-1.15752	0.411095	-2.8157	0.00486714	0.0245681
ENSMUSG00000024621	Csf1r	3616.16	0.952475	0.190755	4.99318	5.93919e-07	8.99847e-06
ENSMUSG00000024639	Gnaq	832.488	1.10866	0.347554	3.1899	0.00142324	0.00877492
ENSMUSG00000024640	Psat1	654.334	3.79553	0.254598	14.9079	2.9268e-50	1.43896e-47
ENSMUSG00000024642	Tle4	725.604	-0.28037	0.109736	-2.55494	0.0106206	0.0465075
ENSMUSG00000024644	Cndp2	644.431	0.560977	0.191777	2.92515	0.00344288	0.0185602
ENSMUSG00000024654	Asrgl1	2010.91	-0.486012	0.112569	-4.31746	1.57836e-05	0.00016971
ENSMUSG00000024659	Anxa1	1085.43	0.835808	0.20428	4.09149	4.28606e-05	0.000407197
ENSMUSG00000024660	Incenp	193.381	0.915076	0.214514	4.26581	1.99179e-05	0.000208909
ENSMUSG00000024664	Fads3	2216	1.46099	0.135564	10.7771	4.41353e-27	7.61372e-25
ENSMUSG00000024672	Ms4a7	219.612	1.9023	0.23709	8.02355	1.02733e-15	6.757e-14
ENSMUSG00000024675	Ms4a4c	22.7583	1.30324	0.379884	3.43064	0.000602158	0.00418003
ENSMUSG00000024677	Ms4a6b	226.114	0.896624	0.300129	2.98746	0.00281305	0.0156084
ENSMUSG00000024679	Ms4a6d	147.483	1.47733	0.313567	4.71137	2.46056e-06	3.22811e-05
ENSMUSG00000024696	Lpxn	72.3082	1.66312	0.284319	5.8495	4.93051e-09	1.13011e-07
ENSMUSG00000024725	Ostf1	1023.82	0.516034	0.197982	2.60647	0.00914818	0.0414064
ENSMUSG00000024727	Trpm6	50.3551	1.11226	0.319076	3.48588	0.000490519	0.00349893
ENSMUSG00000024735	Prpf19	6404.56	-0.681457	0.188271	-3.61955	0.000295121	0.00223914
ENSMUSG00000024737	Slc15a3	167.668	0.818202	0.221774	3.68934	0.000224833	0.00176934
ENSMUSG00000024740	Ddb1	10749.5	0.509462	0.0688555	7.399	1.37214e-13	6.84885e-12
ENSMUSG00000024743	Syt7	1196.26	-1.25347	0.191282	-6.55301	5.63894e-11	1.84518e-09
ENSMUSG00000024776	Stambpl1	219.038	0.999261	0.320168	3.12105	0.00180205	0.0107099
ENSMUSG00000024780	Cdc37l1	1732.87	-0.448185	0.150997	-2.96817	0.00299578	0.0164889
ENSMUSG00000024782	Ak3	1653.89	-0.877233	0.212495	-4.12825	3.65532e-05	0.000356183
ENSMUSG00000024795	Kif20b	93.876	1.30574	0.298187	4.37892	1.19269e-05	0.000132292
ENSMUSG00000024803	Ankrd1	52183	2.11278	0.20733	10.1904	2.18858e-24	3.14165e-22
ENSMUSG00000024805	Pcgf5	1307.28	1.15187	0.128239	8.98221	2.65381e-19	2.52125e-17
ENSMUSG00000024812	Tjp2	1706.01	0.397001	0.0969119	4.09651	4.19426e-05	0.000400021
ENSMUSG00000024835	Coro1b	1298.82	0.903642	0.158632	5.69647	1.22311e-08	2.56983e-07
ENSMUSG00000024866	Acy3	538.083	-0.688138	0.156347	-4.40134	1.07586e-05	0.000120764
ENSMUSG00000024867	Pip5k1b	1038.74	-0.203151	0.0801877	-2.53345	0.0112946	0.0489141
ENSMUSG00000024869	Nudt8	1337.46	-0.968292	0.251034	-3.85721	0.000114687	0.0009785
ENSMUSG00000024871	Doc2g	4017.31	-1.43142	0.169802	-8.42996	3.45782e-17	2.61544e-15
ENSMUSG00000024883	Rin1	223.842	2.03766	0.308973	6.59495	4.25397e-11	1.41794e-09
ENSMUSG00000024891	Slc29a2	221.182	-0.714415	0.214481	-3.3309	0.00086565	0.00575325
ENSMUSG00000024892	Pcx	1435.08	-0.656402	0.230835	-2.8436	0.00446073	0.0229668
ENSMUSG00000024909	Efemp2	386.553	0.606697	0.202207	3.00038	0.00269647	0.0150778
ENSMUSG00000024911	Fibp	711.359	0.517721	0.112454	4.60385	4.14742e-06	5.13298e-05
ENSMUSG00000024924	Vldlr	11773.6	-1.06113	0.300349	-3.53297	0.000410912	0.00299851
ENSMUSG00000024935	Slc1a1	157.585	-0.779351	0.261945	-2.97525	0.00292749	0.0161583
ENSMUSG00000024943	Smc5	1647.57	0.224126	0.0698306	3.20957	0.00132933	0.00829398
ENSMUSG00000024948	Map4k2	1282.48	-0.550142	0.168101	-3.27269	0.00106531	0.00688505
ENSMUSG00000024952	Rps6ka4	789.28	0.591417	0.121279	4.87651	1.07982e-06	1.55687e-05
ENSMUSG00000024953	Prdx5	6095.95	-0.840768	0.24967	-3.36752	0.000758479	0.00510306
ENSMUSG00000024955	Esrra	3486.48	-0.344985	0.116074	-2.97212	0.00295749	0.0163056
ENSMUSG00000024962	Vegfb	1395.92	-1.00208	0.193236	-5.18577	2.15122e-07	3.52256e-06
ENSMUSG00000024965	Fermt3	329.093	0.62385	0.239787	2.60168	0.00927688	0.041863
ENSMUSG00000024981	Acsl5	1160.71	0.909454	0.121573	7.48074	7.39063e-14	3.85528e-12
ENSMUSG00000024985	Tcf7l2	310.483	-0.568669	0.187333	-3.0356	0.00240055	0.0136838
ENSMUSG00000024989	Cep55	41.5776	1.67812	0.350867	4.78278	1.72888e-06	2.3644e-05
ENSMUSG00000024991	Eif3a	11122.6	0.966916	0.115909	8.34203	7.3026e-17	5.319e-15
ENSMUSG00000024999	Noc3l	660.157	0.602787	0.154085	3.91203	9.15231e-05	0.000800665
ENSMUSG00000025001	Hells	116.322	0.805546	0.237801	3.38747	0.000705394	0.00478685
ENSMUSG00000025007	Aldh18a1	1870.64	2.81983	0.181826	15.5084	3.0431e-54	1.61745e-51
ENSMUSG00000025013	Tll2	26.0641	-1.94344	0.531853	-3.65409	0.000258091	0.00199513
ENSMUSG00000025017	Pik3ap1	240.208	1.43317	0.278971	5.13733	2.78668e-07	4.46277e-06
ENSMUSG00000025027	Xpnpep1	1571.9	0.423407	0.104368	4.05688	4.97317e-05	0.000463518
ENSMUSG00000025036	Sfxn2	223.049	-0.786374	0.242224	-3.24648	0.00116842	0.00743147
ENSMUSG00000025037	Maoa	3594.75	4.84673	0.230362	21.0396	2.84868e-98	6.22468e-95
ENSMUSG00000025044	Msr1	252.465	1.19904	0.303826	3.94648	7.93084e-05	0.000705391
ENSMUSG00000025050	Pcgf6	204.487	1.50595	0.247282	6.09001	1.12903e-09	2.90242e-08
ENSMUSG00000025059	Gyk	2070.32	0.53032	0.204731	2.59033	0.00958836	0.0429141
ENSMUSG00000025064	Col17a1	72.3534	-0.831284	0.329121	-2.52577	0.0115444	0.0497658
ENSMUSG00000025068	Gsto1	4215.09	0.943081	0.301767	3.1252	0.00177683	0.0105889
ENSMUSG00000025081	Tdrd1	3.69759	1.63427	0.607019	2.69229	0.00709638	0.0335636
ENSMUSG00000025083	Afap1l2	278.392	0.488505	0.19152	2.55068	0.0107513	0.0469336
ENSMUSG00000025085	Ablim1	6679.21	-0.891692	0.206344	-4.32138	1.55054e-05	0.000167084
ENSMUSG00000025089	Gfra1	360.123	-1.30378	0.283487	-4.59909	4.24339e-06	5.22545e-05
ENSMUSG00000025130	P4hb	9248.92	0.40676	0.0774598	5.25124	1.51078e-07	2.5448e-06
ENSMUSG00000025133	Ints4	1957.74	0.345439	0.102218	3.37943	0.000726369	0.00491055
ENSMUSG00000025135	Anapc11	724.624	-0.62438	0.194421	-3.21148	0.00132053	0.00825898
ENSMUSG00000025137	Pcyt2	862.979	-0.58589	0.190996	-3.06756	0.00215818	0.0124545
ENSMUSG00000025140	Pycr1	224.299	3.666	0.271544	13.5006	1.55104e-41	5.16997e-39
ENSMUSG00000025141	Myadml2	840.92	-0.902826	0.201743	-4.47513	7.63638e-06	8.9338e-05
ENSMUSG00000025142	Aspscr1	989.87	0.921685	0.107138	8.60275	7.78292e-18	6.27291e-16
ENSMUSG00000025147	Mob2	450.618	-0.509819	0.192603	-2.64699	0.00812106	0.0375874
ENSMUSG00000025157	Zdhhc16	268.225	0.500936	0.177689	2.81918	0.00481466	0.0243971
ENSMUSG00000025161	Slc16a3	333.626	1.953	0.237761	8.21413	2.13702e-16	1.51721e-14
ENSMUSG00000025169	Ogfod3	266.132	-0.623581	0.174667	-3.57011	0.000356832	0.00264013
ENSMUSG00000025170	Rab40b	138.076	-0.690837	0.184679	-3.74074	0.000183479	0.00148071
ENSMUSG00000025175	Fn3k	319.598	-0.836545	0.256384	-3.26286	0.00110295	0.00709075
ENSMUSG00000025184	R3hcc1l	1120.65	-0.722074	0.143178	-5.04318	4.57864e-07	7.09562e-06
ENSMUSG00000025185	Loxl4	237.711	2.01187	0.30294	6.64114	3.11261e-11	1.05721e-09
ENSMUSG00000025188	Hps1	185.126	0.910564	0.285368	3.19084	0.00141859	0.00875367
ENSMUSG00000025193	Cutc	257.48	-0.756705	0.272844	-2.7734	0.00554739	0.0274246
ENSMUSG00000025202	Scd3	14.5748	1.3726	0.467199	2.93794	0.00330397	0.0179343
ENSMUSG00000025204	Ndufb8	10330.3	-0.732426	0.151481	-4.83511	1.33073e-06	1.86131e-05
ENSMUSG00000025221	Kcnip2	1846.67	-1.56298	0.331193	-4.71924	2.36728e-06	3.11196e-05
ENSMUSG00000025225	Nfkb2	1083.54	0.564824	0.154896	3.64648	0.000265856	0.00204551
ENSMUSG00000025232	Hexa	2513.39	0.943664	0.160464	5.88085	4.08164e-09	9.48812e-08
ENSMUSG00000025239	Limd1	1677.42	-1.25409	0.0975544	-12.8553	8.03646e-38	2.43146e-35
ENSMUSG00000025241	Fyco1	18852.4	-1.31893	0.259915	-5.07447	3.88582e-07	6.08428e-06
ENSMUSG00000025245	Lztfl1	644.36	-0.393438	0.109425	-3.5955	0.00032377	0.00242286
ENSMUSG00000025260	Hsd17b10	1739.55	-0.595429	0.200539	-2.96915	0.0029863	0.0164413
ENSMUSG00000025265	Fgd1	290.942	-0.558912	0.161429	-3.46228	0.000535623	0.00378089
ENSMUSG00000025269	Apex2	551.506	-0.689892	0.200988	-3.43251	0.000598022	0.00416013
ENSMUSG00000025271	Pfkfb1	488.862	-2.66656	0.309684	-8.61057	7.26951e-18	5.90752e-16
ENSMUSG00000025287	Acot9	1193.55	1.22508	0.101254	12.0991	1.06732e-33	2.69102e-31
ENSMUSG00000025290	Rps24	7284.79	0.723628	0.102463	7.06232	1.63748e-12	6.91045e-11
ENSMUSG00000025314	Ptprj	1188.18	0.494015	0.194451	2.54055	0.0110677	0.0481116
ENSMUSG00000025323	Sp4	615.015	-0.562642	0.218032	-2.58055	0.00986437	0.0437808
ENSMUSG00000025326	Ube3a	4195.34	-0.279307	0.108833	-2.56638	0.0102766	0.045263
ENSMUSG00000025330	Padi4	35.3619	2.00094	0.391409	5.11216	3.18495e-07	5.05939e-06
ENSMUSG00000025348	Itga7	6272.1	-0.528465	0.143613	-3.67979	0.000233428	0.0018195
ENSMUSG00000025351	Cd63	1186.43	1.4634	0.162125	9.02635	1.77493e-19	1.71949e-17
ENSMUSG00000025354	Dnajc14	1745.13	0.482713	0.15061	3.20505	0.00135037	0.00840925
ENSMUSG00000025355	Mmp19	241.956	0.837055	0.263386	3.17805	0.00148267	0.00907863
ENSMUSG00000025362	Rps26	2366.31	0.86192	0.0947973	9.09224	9.70179e-20	9.63614e-18
ENSMUSG00000025364	Pa2g4	1903.4	0.597512	0.172187	3.47014	0.000520193	0.00369051
ENSMUSG00000025366	Esyt1	1604.84	0.450345	0.160476	2.80631	0.00501131	0.0251795
ENSMUSG00000025386	Pde6g	21.4576	-1.33209	0.445114	-2.9927	0.00276526	0.0153925
ENSMUSG00000025393	Atp5b	157641	-0.392798	0.124736	-3.14903	0.00163813	0.00989416
ENSMUSG00000025403	Shmt2	2063.12	1.65518	0.255909	6.46786	9.9399e-11	3.09301e-09
ENSMUSG00000025408	Ddit3	1191.27	1.96407	0.163865	11.9859	4.21289e-33	1.02285e-30
ENSMUSG00000025410	Dctn2	4143.69	0.68992	0.158767	4.3455	1.3896e-05	0.000151317
ENSMUSG00000025421	Hdhd2	1483.31	-0.273911	0.105752	-2.59012	0.00959428	0.0429309
ENSMUSG00000025428	Atp5a1	127772	-0.593924	0.188699	-3.14747	0.00164687	0.00994395
ENSMUSG00000025429	Pstpip2	275.03	-0.584139	0.206599	-2.8274	0.00469277	0.0238655
ENSMUSG00000025432	Avil	511.176	3.39334	0.180392	18.8109	6.14649e-79	7.1104e-76
ENSMUSG00000025453	Nnt	24902.4	-0.940083	0.115629	-8.13017	4.28686e-16	2.95808e-14
ENSMUSG00000025465	Echs1	5771.4	-0.83507	0.135087	-6.18173	6.34016e-10	1.71049e-08
ENSMUSG00000025466	Fuom	458.01	-0.330258	0.109888	-3.00541	0.00265226	0.014873
ENSMUSG00000025473	Adam8	78.5723	1.27434	0.330218	3.8591	0.000113804	0.000971383
ENSMUSG00000025475	Adgra1	18.0636	2.00419	0.60017	3.33937	0.000839691	0.00559585
ENSMUSG00000025478	Dpysl4	314.124	-1.02284	0.222447	-4.59813	4.26298e-06	5.2463e-05
ENSMUSG00000025481	Urah	10.6938	-2.07519	0.528932	-3.92336	8.73225e-05	0.00076836
ENSMUSG00000025485	Ric8	776.769	0.561659	0.15134	3.71123	0.000206257	0.00164382
ENSMUSG00000025487	Psmd13	1844.81	0.62458	0.131166	4.76177	1.91905e-06	2.5726e-05
ENSMUSG00000025499	Hras	1042.16	0.388337	0.122838	3.16138	0.00157025	0.00952223
ENSMUSG00000025503	Taldo1	2571.65	0.814988	0.196437	4.14885	3.34153e-05	0.000330057
ENSMUSG00000025507	Pidd1	49.534	1.04947	0.343515	3.05511	0.00224979	0.0129445
ENSMUSG00000025511	Tspan4	684.797	1.30088	0.145654	8.9313	4.21037e-19	3.78817e-17
ENSMUSG00000025521	Tmem192	370.908	0.465345	0.11685	3.9824	6.82217e-05	0.000614026
ENSMUSG00000025533	Asl	257.188	1.12749	0.256333	4.39855	1.08977e-05	0.000122186
ENSMUSG00000025537	Phkg1	863.53	-2.40492	0.263792	-9.11672	7.74324e-20	7.76931e-18
ENSMUSG00000025558	Dock9	4315.65	-0.246319	0.0776116	-3.17374	0.00150486	0.00919657
ENSMUSG00000025571	Tnrc6c	3186.85	-0.494798	0.174991	-2.82756	0.00469047	0.02386
ENSMUSG00000025586	Cpeb1	1285.6	1.93982	0.134657	14.4056	4.7707e-47	2.13228e-44
ENSMUSG00000025613	Cct8	4847.24	0.61417	0.121181	5.06819	4.01608e-07	6.27325e-06
ENSMUSG00000025616	Usp16	1889.21	0.587532	0.105963	5.54471	2.94448e-08	5.79641e-07
ENSMUSG00000025647	Shisa5	762.587	0.516905	0.172564	2.99544	0.00274048	0.0152772
ENSMUSG00000025651	Uqcrc1	30981.1	-0.845692	0.134224	-6.30061	2.96477e-10	8.45004e-09
ENSMUSG00000025656	Arhgef9	666.919	-0.823095	0.142189	-5.78873	7.09219e-09	1.57243e-07
ENSMUSG00000025665	Rps6ka6	44.7453	-1.49622	0.481699	-3.10613	0.00189555	0.011161
ENSMUSG00000025701	Alox5	547.096	-0.724672	0.207346	-3.495	0.00047407	0.00339514
ENSMUSG00000025727	A930017K11Rik	7.76105	-2.54929	0.572821	-4.45042	8.57045e-06	9.86228e-05
ENSMUSG00000025728	Pigq	1223.59	0.809844	0.169554	4.77633	1.78522e-06	2.42398e-05
ENSMUSG00000025733	Rhot2	2953.4	-1.24126	0.280803	-4.42039	9.8521e-06	0.000111415
ENSMUSG00000025745	Hadha	46526.7	-0.704215	0.198585	-3.54616	0.000390893	0.00286733
ENSMUSG00000025746	Il6	24.3885	3.31254	0.525797	6.30005	2.97558e-10	8.45633e-09
ENSMUSG00000025747	Tyms	146.952	0.760478	0.290586	2.61705	0.00886934	0.0404228
ENSMUSG00000025754	Agbl1	7.16171	-1.61689	0.591824	-2.73204	0.00629439	0.0304515
ENSMUSG00000025757	Hspa4l	2318.68	0.411514	0.0938499	4.38481	1.16088e-05	0.000129201
ENSMUSG00000025758	Plk4	151.746	0.942915	0.240606	3.91892	8.89474e-05	0.000781259
ENSMUSG00000025780	Itih5	1365.71	1.16524	0.167694	6.94858	3.68977e-12	1.47486e-10
ENSMUSG00000025781	Atp5c1	27991.8	-0.506866	0.164891	-3.07395	0.00211247	0.0122512
ENSMUSG00000025784	Clec3b	66.0034	-1.2736	0.503171	-2.53116	0.0113687	0.0491485
ENSMUSG00000025790	Slco3a1	2343.63	-0.580532	0.177322	-3.2739	0.00106075	0.00685984
ENSMUSG00000025791	Pgm2	9638.22	0.727726	0.141417	5.14596	2.66155e-07	4.27282e-06
ENSMUSG00000025792	Slc25a10	258.551	-0.633587	0.187609	-3.37717	0.000732357	0.00494422
ENSMUSG00000025793	Hgs	1221.37	0.693501	0.188341	3.68216	0.000231267	0.00180767
ENSMUSG00000025794	Rpl14	4448.1	0.402867	0.0909458	4.42974	9.4345e-06	0.000107218
ENSMUSG00000025804	Ccr1	81.8455	1.40537	0.38126	3.68613	0.000227693	0.00178806
ENSMUSG00000025809	Itgb1	15441.4	0.551614	0.0941249	5.86044	4.61638e-09	1.06306e-07
ENSMUSG00000025813	Homer2	2015.49	-1.34462	0.370237	-3.63178	0.000281476	0.00214471
ENSMUSG00000025815	Dhtkd1	226.982	-1.20364	0.201715	-5.96702	2.41626e-09	5.86644e-08
ENSMUSG00000025817	Nudt5	673.587	1.10574	0.141096	7.83678	4.62253e-15	2.78855e-13
ENSMUSG00000025855	Prkar1b	95.5826	0.876223	0.302252	2.89898	0.00374381	0.0198666
ENSMUSG00000025873	Faf2	850.807	-0.576508	0.150561	-3.82906	0.000128633	0.00108339
ENSMUSG00000025875	Tspan17	460.586	1.55044	0.157165	9.86504	5.90115e-23	7.63501e-21
ENSMUSG00000025885	Myo5b	2245.48	-0.367348	0.139041	-2.642	0.00824181	0.0380745
ENSMUSG00000025887	Casp12	430.971	0.44294	0.151239	2.92874	0.00340335	0.0183774
ENSMUSG00000025893	Kbtbd3	276.284	-0.786726	0.297175	-2.64735	0.00811254	0.0375568
ENSMUSG00000025898	Cwf19l2	984.051	-0.263741	0.0995201	-2.65012	0.00804621	0.0372848
ENSMUSG00000025900	Rp1	132.17	-4.00536	0.476915	-8.39848	4.52293e-17	3.36344e-15
ENSMUSG00000025902	Sox17	144.422	1.63117	0.234015	6.97036	3.16125e-12	1.28184e-10
ENSMUSG00000025909	Sntg1	34.9709	-1.1067	0.436777	-2.5338	0.0112834	0.0488767
ENSMUSG00000025911	Adhfe1	1885.79	-1.47612	0.201278	-7.33374	2.23817e-13	1.08147e-11
ENSMUSG00000025912	Mybl1	242.799	2.98976	0.220115	13.5827	5.0741e-42	1.81431e-39
ENSMUSG00000025916	Ppp1r42	5.45603	-1.93639	0.599436	-3.23035	0.00123639	0.00781328
ENSMUSG00000025936	Gm4956	29.3033	-1.65111	0.479917	-3.4404	0.000580851	0.00405647
ENSMUSG00000025938	Slco5a1	1034.08	-1.01416	0.265626	-3.818	0.000134537	0.00112419
ENSMUSG00000025949	Pikfyve	1819.93	0.410995	0.113784	3.61208	0.000303756	0.00229139
ENSMUSG00000025958	Creb1	1601.81	-0.914224	0.352981	-2.59001	0.0095974	0.042935
ENSMUSG00000025968	Ndufs1	22086.9	-0.940811	0.167413	-5.61968	1.91307e-08	3.87063e-07
ENSMUSG00000025993	Slc40a1	935.99	-0.821182	0.190461	-4.31156	1.62109e-05	0.000173357
ENSMUSG00000025995	Wdr75	1044.93	0.998398	0.175043	5.70371	1.17224e-08	2.47555e-07
ENSMUSG00000025997	Ikzf2	477.538	-0.947815	0.340004	-2.78766	0.005309	0.0264455
ENSMUSG00000026000	Lancl1	1134.8	0.539146	0.133015	4.05329	5.05029e-05	0.000469816
ENSMUSG00000026003	Acadl	14942.3	-0.4399	0.16993	-2.58871	0.0096335	0.0430672
ENSMUSG00000026004	Kansl1l	1555.06	-0.712996	0.117711	-6.05718	1.38532e-09	3.48386e-08
ENSMUSG00000026005	Rpe	540.941	0.520958	0.18628	2.79664	0.00516367	0.0258262
ENSMUSG00000026011	Ctla4	62.1867	-1.92348	0.372211	-5.16771	2.36983e-07	3.84531e-06
ENSMUSG00000026012	Cd28	150.965	-1.70974	0.272036	-6.28499	3.27877e-10	9.27774e-09
ENSMUSG00000026019	Wdr12	724.789	0.754946	0.144245	5.23376	1.66092e-07	2.77339e-06
ENSMUSG00000026020	Nop58	1167.96	1.08578	0.196888	5.51472	3.49337e-08	6.77522e-07
ENSMUSG00000026021	Sumo1	986.311	-0.854109	0.32047	-2.66517	0.00769485	0.0360302
ENSMUSG00000026032	Ndufb3	2933.54	-0.700014	0.124069	-5.64213	1.67961e-08	3.44075e-07
ENSMUSG00000026037	Orc2	792.249	0.560254	0.106115	5.27968	1.29412e-07	2.21691e-06
ENSMUSG00000026039	Sgol2a	499.831	-0.920699	0.265609	-3.46637	0.00052753	0.00373432
ENSMUSG00000026042	Col5a2	6196.91	1.69467	0.263339	6.43532	1.23213e-10	3.75093e-09
ENSMUSG00000026043	Col3a1	34935.5	1.50983	0.265494	5.68684	1.29408e-08	2.70451e-07
ENSMUSG00000026047	Kdelc1	470.827	0.501293	0.17909	2.79911	0.00512429	0.0256619
ENSMUSG00000026062	Slc9a2	223.646	-1.80592	0.259752	-6.9525	3.58871e-12	1.44326e-10
ENSMUSG00000026069	Il1rl1	78.1878	0.841344	0.279625	3.00883	0.00262255	0.0147357
ENSMUSG00000026087	Mrpl30	3050.99	-0.581466	0.132876	-4.37601	1.20874e-05	0.000133846
ENSMUSG00000026096	Osgepl1	1613.33	-1.08393	0.207055	-5.23498	1.64999e-07	2.75925e-06
ENSMUSG00000026098	Pms1	336.119	-0.759319	0.208466	-3.64241	0.0002701	0.00207329
ENSMUSG00000026107	Nabp1	2372.95	1.25538	0.205002	6.12376	9.13954e-10	2.38696e-08
ENSMUSG00000026114	Cnga3	113.498	-1.64295	0.360526	-4.55708	5.18706e-06	6.2736e-05
ENSMUSG00000026123	Plekhb2	1105.08	-0.404173	0.120899	-3.34306	0.000828588	0.00553311
ENSMUSG00000026142	Rhbdd1	954.637	0.991246	0.344364	2.87848	0.00399597	0.0209852
ENSMUSG00000026155	Smap1	409.277	0.534704	0.194647	2.74705	0.00601337	0.0292938
ENSMUSG00000026159	Agfg1	1247.3	0.349328	0.131555	2.65536	0.00792231	0.0368393
ENSMUSG00000026163	Sphkap	246.08	-1.85736	0.541318	-3.43119	0.000600946	0.0041731
ENSMUSG00000026176	Ctdsp1	1340.94	-0.648423	0.251447	-2.57876	0.00991547	0.0439778
ENSMUSG00000026177	Slc11a1	206.661	0.931365	0.192321	4.84276	1.2805e-06	1.8026e-05
ENSMUSG00000026187	Xrcc5	1058.67	0.309567	0.121179	2.55463	0.0106299	0.0465276
ENSMUSG00000026192	Atic	1451.63	1.06976	0.141729	7.54797	4.42099e-14	2.39513e-12
ENSMUSG00000026193	Fn1	4367.4	1.3992	0.395873	3.53447	0.000408592	0.00298602
ENSMUSG00000026197	Zfand2b	295.042	0.900888	0.178934	5.03474	4.78497e-07	7.38628e-06
ENSMUSG00000026200	Glb1l	172.264	0.744526	0.280712	2.65228	0.0079951	0.0370917
ENSMUSG00000026202	Tuba4a	14861.9	-0.831655	0.260383	-3.19397	0.0014033	0.00868656
ENSMUSG00000026208	Des	73599.7	0.771087	0.147024	5.24464	1.56585e-07	2.62523e-06
ENSMUSG00000026211	Obsl1	3318.86	-1.07792	0.167819	-6.42308	1.3354e-10	4.02792e-09
ENSMUSG00000026213	Stk11ip	550.424	0.436633	0.143945	3.03334	0.00241866	0.0137751
ENSMUSG00000026229	Psmd1	5249.2	0.253943	0.0985128	2.57777	0.00994404	0.0440747
ENSMUSG00000026234	Ncl	4854.75	0.811093	0.167126	4.85317	1.21504e-06	1.72651e-05
ENSMUSG00000026235	Epha4	3521.61	-2.00951	0.244584	-8.21603	2.10348e-16	1.4988e-14
ENSMUSG00000026245	Farsb	1735.88	0.661471	0.102621	6.44579	1.15e-10	3.52274e-09
ENSMUSG00000026249	Serpine2	1304.65	0.458241	0.161725	2.83346	0.00460468	0.0235026
ENSMUSG00000026259	Ngef	56.4394	1.80546	0.400049	4.51311	6.38834e-06	7.58654e-05
ENSMUSG00000026260	Ndufa10	17196.6	-0.713444	0.137681	-5.18188	2.19664e-07	3.59095e-06
ENSMUSG00000026276	2002-09-01	6550.36	0.633281	0.162634	3.8939	9.86446e-05	0.000856866
ENSMUSG00000026283	Ing5	709.405	-0.965261	0.372427	-2.59181	0.00954721	0.0427884
ENSMUSG00000026288	Inpp5d	840.656	0.77185	0.136317	5.66217	1.49472e-08	3.08448e-07
ENSMUSG00000026304	Rab17	25.4941	-1.94647	0.392274	-4.96201	6.97676e-07	1.042e-05
ENSMUSG00000026305	Lrrfip1	3761.71	0.575792	0.164929	3.49116	0.000480935	0.00343934
ENSMUSG00000026308	Klhl30	1343.7	-1.03369	0.279057	-3.70424	0.000212028	0.00168145
ENSMUSG00000026313	Hdac4	1291.19	-0.671902	0.169615	-3.96133	7.45343e-05	0.000666876
ENSMUSG00000026321	Tnfrsf11a	246.513	0.984948	0.270071	3.64699	0.00026533	0.00204226
ENSMUSG00000026333	Gin1	216.786	-0.509312	0.199796	-2.54916	0.0107984	0.047118
ENSMUSG00000026341	Actr3	3660.29	0.623205	0.190432	3.27258	0.0010657	0.00688505
ENSMUSG00000026343	Gpr39	84.9304	2.04009	0.553461	3.68607	0.000227748	0.00178806
ENSMUSG00000026347	Tmem163	196.105	-1.94389	0.490711	-3.96138	7.45182e-05	0.000666876
ENSMUSG00000026355	Mcm6	505.507	0.688256	0.130502	5.2739	1.33556e-07	2.27601e-06
ENSMUSG00000026360	Rgs2	973.114	-1.40788	0.210816	-6.67821	2.41871e-11	8.38914e-10
ENSMUSG00000026380	Tfcp2l1	503.114	4.57361	0.484483	9.44019	3.72119e-21	4.15801e-19
ENSMUSG00000026385	Dbi	2555.8	-0.687948	0.129571	-5.30942	1.09977e-07	1.91908e-06
ENSMUSG00000026395	Ptprc	983.2	0.760729	0.254438	2.98984	0.00279121	0.015515
ENSMUSG00000026407	Cacna1s	481.641	-1.3321	0.205789	-6.47311	9.60038e-11	2.99209e-09
ENSMUSG00000026409	Pfkfb2	3571.6	-0.572211	0.11451	-4.99704	5.82175e-07	8.84097e-06
ENSMUSG00000026414	Tnnt2	149086	-0.864128	0.0939121	-9.20146	3.53126e-20	3.67438e-18
ENSMUSG00000026415	Fcamr	39.0535	-1.58466	0.610567	-2.59539	0.00944828	0.0424611
ENSMUSG00000026426	Arl8a	535.534	0.94881	0.321945	2.94711	0.00320755	0.0174978
ENSMUSG00000026452	Syt2	76.51	-1.4944	0.247597	-6.03562	1.58354e-09	3.95202e-08
ENSMUSG00000026456	Cyb5r1	3139.44	3.0923	0.1853	16.6881	1.60092e-62	1.08565e-59
ENSMUSG00000026458	Ppfia4	179.803	1.10932	0.281382	3.9424	8.06689e-05	0.00071461
ENSMUSG00000026478	Lamc1	13022.7	0.657541	0.200526	3.27909	0.00104144	0.00675495
ENSMUSG00000026479	Lamc2	345.219	1.74144	0.305475	5.70077	1.19268e-08	2.51127e-07
ENSMUSG00000026483	Fam129a	3493.27	1.78792	0.371419	4.81376	1.4812e-06	2.0456e-05
ENSMUSG00000026489	Adck3	16741.6	-1.37157	0.19733	-6.95062	3.63683e-12	1.45666e-10
ENSMUSG00000026494	Kif26b	492.851	0.754048	0.25489	2.95833	0.00309309	0.0169675
ENSMUSG00000026495	Efcab2	452.253	-1.36809	0.146725	-9.32419	1.1184e-20	1.21516e-18
ENSMUSG00000026509	Capn2	3655.43	0.458897	0.125729	3.64989	0.000262357	0.00202254
ENSMUSG00000026510	Trp53bp2	757.036	-0.42222	0.162435	-2.59931	0.00934111	0.0420853
ENSMUSG00000026525	Opn3	114.69	0.643558	0.167572	3.84048	0.000122795	0.0010418
ENSMUSG00000026526	Fh1	11532.3	-0.723159	0.156577	-4.61857	3.86402e-06	4.83088e-05
ENSMUSG00000026532	Spta1	2725.03	0.936701	0.164634	5.68958	1.27352e-08	2.66721e-07
ENSMUSG00000026536	Mnda	400.865	0.547725	0.115892	4.72618	2.28781e-06	3.01354e-05
ENSMUSG00000026548	Slamf9	175.801	1.4017	0.298747	4.69193	2.7064e-06	3.51314e-05
ENSMUSG00000026553	Copa	9532.94	0.249188	0.0772385	3.22622	0.00125437	0.00791164
ENSMUSG00000026558	Uck2	4813.47	2.42868	0.199859	12.152	5.59934e-34	1.43009e-31
ENSMUSG00000026568	Mpc2	5773.6	-0.874526	0.16932	-5.16492	2.40537e-07	3.89654e-06
ENSMUSG00000026571	Dcaf6	3279.72	-0.412091	0.107637	-3.82854	0.000128908	0.0010843
ENSMUSG00000026576	Atp1b1	7280	0.721128	0.153134	4.70913	2.48779e-06	3.25949e-05
ENSMUSG00000026578	Ccdc181	378.244	0.44975	0.168812	2.6642	0.00771713	0.0361206
ENSMUSG00000026580	Selp	50.4239	1.24257	0.438902	2.8311	0.00463884	0.0236524
ENSMUSG00000026582	Sele	87.0897	1.73085	0.285735	6.05753	1.38226e-09	3.4806e-08
ENSMUSG00000026586	Prrx1	2184.87	-0.309284	0.116112	-2.66367	0.00772923	0.0361396
ENSMUSG00000026600	Soat1	567.108	1.21929	0.416033	2.93075	0.00338143	0.018274
ENSMUSG00000026605	Cenpf	1421.03	-1.62089	0.359326	-4.51093	6.45447e-06	7.65583e-05
ENSMUSG00000026615	Eprs	14716.7	2.01181	0.107337	18.7429	2.2116e-78	2.28912e-75
ENSMUSG00000026622	Nek2	49.526	1.61762	0.319867	5.05717	4.25533e-07	6.62068e-06
ENSMUSG00000026623	Lpgat1	2365.63	-1.03636	0.378855	-2.73551	0.00622843	0.0301621
ENSMUSG00000026639	Lamb3	388.605	-1.00609	0.236484	-4.25436	2.09643e-05	0.00021814
ENSMUSG00000026656	Fcgr2b	279.462	1.09979	0.230251	4.77647	1.78403e-06	2.42398e-05
ENSMUSG00000026664	Phyh	9427.32	-1.0064	0.129516	-7.77041	7.82304e-15	4.62006e-13
ENSMUSG00000026669	Mcm10	37.5843	1.02704	0.363099	2.82854	0.00467606	0.0238052
ENSMUSG00000026672	Optn	3565.7	0.619003	0.159719	3.87558	0.000106372	0.000915101
ENSMUSG00000026675	Hsd17b7	816.367	-0.487659	0.182309	-2.6749	0.00747513	0.0351353
ENSMUSG00000026678	Rgs5	8297.77	-1.56186	0.529078	-2.95205	0.00315673	0.0172493
ENSMUSG00000026683	Nuf2	35.6716	1.96145	0.45767	4.28574	1.82136e-05	0.000193302
ENSMUSG00000026688	Mgst3	4708.64	-1.08558	0.165853	-6.54544	5.93195e-11	1.92622e-09
ENSMUSG00000026705	Klhl20	801.973	0.339744	0.108033	3.14483	0.00166186	0.0100221
ENSMUSG00000026712	Mrc1	2970.89	0.668518	0.203717	3.2816	0.0010322	0.00670384
ENSMUSG00000026726	Cubn	182.463	-0.881147	0.266817	-3.30243	0.000958493	0.00628953
ENSMUSG00000026727	Rsu1	1033.9	0.488639	0.104432	4.67903	2.88242e-06	3.71953e-05
ENSMUSG00000026730	Pter	334.902	0.474513	0.16645	2.85079	0.00436104	0.0225982
ENSMUSG00000026764	Kif5c	292.157	1.48897	0.251567	5.91878	3.24335e-09	7.69406e-08
ENSMUSG00000026767	Fam188a	535.492	0.637003	0.200314	3.18002	0.00147265	0.00902779
ENSMUSG00000026770	Il2ra	37.4431	-1.30063	0.339305	-3.83322	0.000126479	0.00106759
ENSMUSG00000026779	Mastl	96.2269	0.963497	0.275208	3.50098	0.000463559	0.00333078
ENSMUSG00000026784	Pdss1	508.795	-0.461375	0.151105	-3.05334	0.00226308	0.0130133
ENSMUSG00000026786	Apbb1ip	142.464	1.11463	0.27036	4.12277	3.74342e-05	0.000363008
ENSMUSG00000026791	Slc2a8	446.495	-0.527614	0.199951	-2.63871	0.0083221	0.0384274
ENSMUSG00000026806	Ddx31	281.791	0.483367	0.159556	3.02946	0.00244995	0.013906
ENSMUSG00000026811	St6galnac6	1968.42	-0.622839	0.139492	-4.46505	8.00518e-06	9.31537e-05
ENSMUSG00000026812	Tsc1	1963.36	-0.527494	0.18879	-2.79407	0.00520493	0.0259863
ENSMUSG00000026817	Ak1	8001.08	-0.948832	0.0994112	-9.54452	1.36741e-21	1.57261e-19
ENSMUSG00000026822	Lcn2	144.63	1.35326	0.221569	6.10762	1.01129e-09	2.62376e-08
ENSMUSG00000026824	Kcnj3	3301.4	-2.08288	0.550658	-3.78253	0.000155242	0.0012758
ENSMUSG00000026828	Galnt5	6.0147	-1.9294	0.603859	-3.19512	0.00139775	0.0086604
ENSMUSG00000026832	Cytip	97.1076	1.17562	0.378199	3.10848	0.00188055	0.011086
ENSMUSG00000026841	Fibcd1	137.538	5.28214	0.463255	11.4022	4.07528e-30	8.61768e-28
ENSMUSG00000026843	Fubp3	685.124	0.313635	0.120155	2.61024	0.00904777	0.0410647
ENSMUSG00000026853	Crat	11244.9	-0.942338	0.15432	-6.10641	1.01897e-09	2.63671e-08
ENSMUSG00000026854	Usp20	2331.62	0.451479	0.124849	3.61619	0.000298973	0.00226225
ENSMUSG00000026858	Fam73b	2495.49	-1.02877	0.140484	-7.32305	2.42404e-13	1.15707e-11
ENSMUSG00000026860	Sh3glb2	1331.95	-0.588127	0.15319	-3.83919	0.000123441	0.00104593
ENSMUSG00000026875	Traf1	78.1934	0.763617	0.24731	3.08769	0.00201718	0.011775
ENSMUSG00000026885	Ttll11	115.668	0.894447	0.194295	4.60355	4.15352e-06	5.13407e-05
ENSMUSG00000026888	Grb14	3627.21	-1.06183	0.206811	-5.1343	2.83198e-07	4.52795e-06
ENSMUSG00000026904	Slc4a10	24.4617	1.93782	0.410464	4.72103	2.34648e-06	3.08668e-05
ENSMUSG00000026914	Psmd14	1566.33	0.493104	0.151288	3.25938	0.00111656	0.00715719
ENSMUSG00000026917	Wdr5	940.174	-0.708578	0.263254	-2.69162	0.00711069	0.0336151
ENSMUSG00000026922	Agpat2	1013.22	-0.757808	0.159371	-4.75498	1.98462e-06	2.64607e-05
ENSMUSG00000026928	Card9	88.9478	0.591345	0.228763	2.58497	0.00973867	0.043409
ENSMUSG00000026930	Gpsm1	2382.92	-0.756807	0.202692	-3.73378	0.000188626	0.00151843
ENSMUSG00000026941	Mamdc4	195.472	-0.626557	0.160943	-3.89304	9.89962e-05	0.000859161
ENSMUSG00000026950	Neb	2122.04	-1.15063	0.326925	-3.51955	0.000432279	0.00314045
ENSMUSG00000026955	Sapcd2	15.8814	1.45535	0.546367	2.66368	0.00772913	0.0361396
ENSMUSG00000026956	Uap1l1	456.053	1.34042	0.201429	6.65459	2.84097e-11	9.69974e-10
ENSMUSG00000026958	Dpp7	257.376	0.933547	0.220653	4.23084	2.32822e-05	0.000239596
ENSMUSG00000026971	Itgb6	1209.39	-1.98307	0.338859	-5.8522	4.85106e-09	1.1145e-07
ENSMUSG00000026972	Arrdc1	136.562	0.655532	0.232067	2.82476	0.00473165	0.024026
ENSMUSG00000026979	Psd4	130.427	0.807269	0.229756	3.51359	0.000442087	0.00320342
ENSMUSG00000026981	Il1rn	12.8065	1.56992	0.500515	3.13661	0.00170913	0.0102226
ENSMUSG00000026986	Hnmt	280.772	-2.3676	0.307768	-7.69282	1.43927e-14	8.27622e-13
ENSMUSG00000026994	Galnt3	10.6381	3.23967	0.572694	5.6569	1.54133e-08	3.17069e-07
ENSMUSG00000027002	Nckap1	5178.32	0.465268	0.100141	4.64615	3.38194e-06	4.29924e-05
ENSMUSG00000027004	Frzb	591.448	2.23072	0.360376	6.18998	6.01714e-10	1.63444e-08
ENSMUSG00000027010	Slc25a12	7502.26	-0.625276	0.122102	-5.12092	3.04045e-07	4.83765e-06
ENSMUSG00000027011	Ube2e3	685.632	-0.390784	0.106161	-3.68104	0.000232287	0.0018142
ENSMUSG00000027012	Dync1i2	2469.06	0.263952	0.104417	2.52787	0.0114757	0.0495239
ENSMUSG00000027016	Zfp385b	536.945	1.83265	0.152698	12.0017	3.47869e-33	8.55148e-31
ENSMUSG00000027022	Xirp2	105374	1.63984	0.18271	8.9751	2.83106e-19	2.66391e-17
ENSMUSG00000027030	Stk39	2906.33	-0.314059	0.113164	-2.77526	0.00551581	0.027289
ENSMUSG00000027067	Ssrp1	1900.57	0.255184	0.0817661	3.1209	0.001803	0.0107123
ENSMUSG00000027068	Dhrs9	54.2492	1.92759	0.593023	3.25045	0.00115224	0.00735716
ENSMUSG00000027082	Tfpi	2014.98	-0.737838	0.154552	-4.77406	1.8055e-06	2.44034e-05
ENSMUSG00000027087	Itgav	2558.72	0.59971	0.22625	2.65065	0.00803362	0.037244
ENSMUSG00000027091	Zc3h15	1256.1	0.405532	0.100885	4.01974	5.82619e-05	0.000533169
ENSMUSG00000027115	Kif18a	90.262	0.930773	0.233482	3.98648	6.70603e-05	0.000604126
ENSMUSG00000027122	Arl14ep	647.795	0.632336	0.109004	5.80103	6.59092e-09	1.4746e-07
ENSMUSG00000027160	Ccdc34	148.2	0.740107	0.217989	3.39516	0.000685892	0.00468034
ENSMUSG00000027165	B230118H07Rik	1042.93	-0.396099	0.147056	-2.69352	0.00707019	0.0334777
ENSMUSG00000027177	Hipk3	14238.6	-0.644343	0.234336	-2.74966	0.00596572	0.0291121
ENSMUSG00000027180	Fbxo3	2153.88	-0.49717	0.122875	-4.04613	5.20711e-05	0.000482124
ENSMUSG00000027185	Nat10	950.642	0.343268	0.104448	3.28649	0.00101445	0.00660601
ENSMUSG00000027187	Cat	10460.3	0.696002	0.161111	4.32003	1.5601e-05	0.000168023
ENSMUSG00000027188	Pamr1	332.923	1.55254	0.283895	5.4687	4.53336e-08	8.58894e-07
ENSMUSG00000027194	Ttc17	1699.66	-0.487242	0.109929	-4.43235	9.32118e-06	0.000106267
ENSMUSG00000027199	Gatm	161.5	0.978286	0.250934	3.89857	9.67607e-05	0.000842362
ENSMUSG00000027201	Myef2	436.95	0.590934	0.149497	3.9528	7.72414e-05	0.000688902
ENSMUSG00000027203	Dut	343.029	-0.947471	0.333304	-2.84266	0.00447384	0.02302
ENSMUSG00000027204	Fbn1	17331.1	1.6227	0.162666	9.97563	1.94852e-23	2.58406e-21
ENSMUSG00000027207	Galk2	489.904	0.953573	0.186919	5.10154	3.36907e-07	5.32234e-06
ENSMUSG00000027209	Fam227b	80.1444	4.39216	0.398591	11.0192	3.08735e-28	5.78247e-26
ENSMUSG00000027210	Meis2	1344.26	-0.516041	0.129197	-3.99421	6.4909e-05	0.000587167
ENSMUSG00000027222	Pex16	540.619	0.387583	0.14327	2.70527	0.00682494	0.0324981
ENSMUSG00000027227	Sord	3980.57	-1.28689	0.306314	-4.20123	2.65472e-05	0.000268283
ENSMUSG00000027247	Arhgap1	1364.48	0.909116	0.165159	5.50451	3.70205e-08	7.1377e-07
ENSMUSG00000027253	Lrp4	1101.84	-0.79479	0.159199	-4.99242	5.96283e-07	9.02732e-06
ENSMUSG00000027254	Map1a	1702.31	2.24441	0.324679	6.9127	4.75529e-12	1.84453e-10
ENSMUSG00000027257	Pacsin3	4942.16	0.260125	0.0958766	2.71312	0.00666525	0.0318849
ENSMUSG00000027263	Tubgcp4	887.335	0.861725	0.144425	5.96657	2.42289e-09	5.87529e-08
ENSMUSG00000027274	Mkks	1537.92	-0.580354	0.152538	-3.80464	0.00014201	0.00117888
ENSMUSG00000027281	Slx4ip	157.901	0.448469	0.173264	2.58836	0.00964345	0.0430921
ENSMUSG00000027288	Zfp106	35849.6	-0.895309	0.215465	-4.15524	3.24947e-05	0.000322259
ENSMUSG00000027298	Tyro3	195.103	1.03592	0.259289	3.99524	6.46293e-05	0.000585174
ENSMUSG00000027303	Ptpra	1942.45	0.520599	0.0940424	5.53579	3.09836e-08	6.05689e-07
ENSMUSG00000027304	Rtf1	1330.6	-0.383106	0.141595	-2.70565	0.00681702	0.0324688
ENSMUSG00000027305	Ndufaf1	1068.76	-0.599726	0.157603	-3.8053	0.000141635	0.00117627
ENSMUSG00000027316	Gfra4	91.9141	-1.61046	0.330633	-4.87084	1.11123e-06	1.59297e-05
ENSMUSG00000027322	Siglec1	422.308	0.877549	0.279737	3.13704	0.0017066	0.0102121
ENSMUSG00000027326	Casc5	96.7742	1.52063	0.234913	6.47315	9.59824e-11	2.99209e-09
ENSMUSG00000027331	Knstrn	46.677	1.37579	0.413761	3.32508	0.000883944	0.00585111
ENSMUSG00000027332	Ivd	11244.7	-2.05872	0.151155	-13.62	3.04763e-42	1.1099e-39
ENSMUSG00000027339	Rassf2	693.843	0.547128	0.211303	2.58931	0.00961695	0.0430127
ENSMUSG00000027342	Pcna	1111.23	0.601911	0.109288	5.50759	3.63784e-08	7.03458e-07
ENSMUSG00000027346	Gpcpd1	5890.9	-1.30999	0.220126	-5.95109	2.66365e-09	6.42741e-08
ENSMUSG00000027363	Usp8	2091.28	0.240236	0.09372	2.56334	0.0103672	0.0456007
ENSMUSG00000027367	Stard7	2369.11	-0.871206	0.211578	-4.11766	3.82739e-05	0.000369693
ENSMUSG00000027371	Fahd2a	632.197	-0.806081	0.196897	-4.09391	4.24157e-05	0.00040336
ENSMUSG00000027379	Bub1	34.5292	1.27056	0.363391	3.49641	0.00047157	0.00337847
ENSMUSG00000027381	Bcl2l11	473.025	-0.823781	0.260317	-3.16453	0.00155336	0.0094329
ENSMUSG00000027397	Slc20a1	1181.62	0.554599	0.194269	2.8548	0.00430644	0.0223458
ENSMUSG00000027398	Il1b	86.8948	1.54368	0.534671	2.88716	0.00388741	0.0205345
ENSMUSG00000027405	Nop56	1010.86	0.705047	0.162874	4.32879	1.49932e-05	0.000162098
ENSMUSG00000027406	Idh3b	16859.1	-0.916433	0.160502	-5.7098	1.13107e-08	2.39695e-07
ENSMUSG00000027411	Vps16	965.879	0.39486	0.0889254	4.44035	8.98114e-06	0.000102987
ENSMUSG00000027429	Sec23b	792.635	0.588212	0.142481	4.12836	3.65356e-05	0.000356183
ENSMUSG00000027433	Xrn2	2019.54	0.329145	0.0883513	3.72541	0.000194996	0.00156458
ENSMUSG00000027438	Napb	307.803	0.612011	0.210207	2.91146	0.0035974	0.0192193
ENSMUSG00000027452	Acss1	9478.69	-0.934949	0.315404	-2.96429	0.00303384	0.0166658
ENSMUSG00000027455	Nsfl1c	1190.23	0.398592	0.1538	2.59162	0.00955239	0.0427921
ENSMUSG00000027469	Tpx2	129.195	1.80155	0.249076	7.23291	4.72752e-13	2.17732e-11
ENSMUSG00000027479	Mapre1	3490.59	0.843787	0.107086	7.87951	3.28671e-15	2.01989e-13
ENSMUSG00000027488	Snta1	2848.62	0.548725	0.148602	3.69258	0.000221991	0.00174952
ENSMUSG00000027490	E2f1	39.2194	1.22432	0.335269	3.65175	0.000260455	0.00201104
ENSMUSG00000027496	Aurka	53.724	0.881937	0.235803	3.74014	0.000183915	0.00148354
ENSMUSG00000027506	Tpd52	924.797	0.969433	0.117525	8.24874	1.60073e-16	1.14891e-14
ENSMUSG00000027509	Rae1	793.842	0.725313	0.128753	5.63337	1.76717e-08	3.5902e-07
ENSMUSG00000027514	Zbp1	66.3873	0.728207	0.269194	2.70514	0.00682754	0.0324981
ENSMUSG00000027522	Stx16	1340.41	0.300335	0.0935603	3.21007	0.00132702	0.00828217
ENSMUSG00000027525	Phactr3	22.1381	-1.14408	0.407852	-2.80514	0.00502952	0.025258
ENSMUSG00000027534	Snx16	245.857	-0.464705	0.176507	-2.63278	0.0084688	0.0389577
ENSMUSG00000027536	Chmp4c	1079.1	-1.51481	0.360967	-4.19653	2.71032e-05	0.00027348
ENSMUSG00000027546	Atp9a	3271.76	0.359057	0.0632781	5.67426	1.3929e-08	2.89563e-07
ENSMUSG00000027555	Car13	72.883	0.934411	0.367845	2.54023	0.0110779	0.0481453
ENSMUSG00000027559	Car3	582.692	-1.67029	0.583801	-2.86106	0.00422221	0.0219725
ENSMUSG00000027566	Psma7	1922.68	0.398623	0.149915	2.659	0.00783727	0.0365318
ENSMUSG00000027589	Pcmtd2	1011.55	-0.692718	0.14634	-4.73363	2.20542e-06	2.9089e-05
ENSMUSG00000027597	Ahcy	830.507	0.948758	0.136286	6.96153	3.36589e-12	1.36201e-10
ENSMUSG00000027610	Gss	887.148	1.53278	0.20919	7.32721	2.34995e-13	1.12717e-11
ENSMUSG00000027613	Eif6	1161.64	1.15259	0.156788	7.35128	1.9632e-13	9.58023e-12
ENSMUSG00000027615	Hps3	958.079	0.558956	0.116876	4.78248	1.73147e-06	2.3663e-05
ENSMUSG00000027618	Nfs1	3133.31	-0.823493	0.16298	-5.05273	4.35532e-07	6.77089e-06
ENSMUSG00000027635	Dsn1	71.2614	1.19275	0.367681	3.24397	0.00117875	0.00748267
ENSMUSG00000027637	1110008F13Rik	1179.99	0.435405	0.148293	2.93611	0.00332359	0.018006
ENSMUSG00000027641	Rbl1	242.911	0.566247	0.140331	4.03507	5.45849e-05	0.00050256
ENSMUSG00000027642	Rpn2	3823.17	0.247372	0.0625164	3.95692	7.59226e-05	0.000677755
ENSMUSG00000027646	Src	303.165	0.399029	0.144474	2.76195	0.00574575	0.0281856
ENSMUSG00000027649	Ctnnbl1	541.006	0.378657	0.11882	3.1868	0.00143856	0.00885189
ENSMUSG00000027650	Tti1	1231.71	-0.539201	0.104827	-5.14372	2.69346e-07	4.32052e-06
ENSMUSG00000027654	Fam83d	16.3246	1.92951	0.514209	3.75238	0.000175161	0.0014258
ENSMUSG00000027656	Wisp2	822.469	2.07441	0.248251	8.35612	6.48122e-17	4.73828e-15
ENSMUSG00000027663	Zmat3	738.911	1.27851	0.210936	6.06111	1.35187e-09	3.40843e-08
ENSMUSG00000027668	Mfn1	10100.7	-0.593218	0.126045	-4.7064	2.52131e-06	3.29901e-05
ENSMUSG00000027673	Ndufb5	6597.45	-0.648416	0.152951	-4.23937	2.24152e-05	0.000231157
ENSMUSG00000027679	Dnajc19	972.769	-0.662165	0.116829	-5.66782	1.44623e-08	3.00016e-07
ENSMUSG00000027692	Tnik	1502.35	-0.730789	0.132739	-5.50545	3.68236e-08	7.11368e-07
ENSMUSG00000027699	Ect2	71.2004	1.12122	0.247194	4.5358	5.73866e-06	6.86057e-05
ENSMUSG00000027709	Mccc1	1947.96	-1.00575	0.169267	-5.94178	2.81951e-09	6.77855e-08
ENSMUSG00000027712	Anxa5	4313.91	0.950165	0.144009	6.59795	4.16868e-11	1.39187e-09
ENSMUSG00000027714	Exosc9	788.144	0.614383	0.144307	4.25748	2.06746e-05	0.000215696
ENSMUSG00000027715	Ccna2	120.253	1.49397	0.326292	4.57863	4.6802e-06	5.70266e-05
ENSMUSG00000027716	Trpc3	646.612	-0.528905	0.200858	-2.63322	0.00845792	0.0389175
ENSMUSG00000027737	Slc7a11	798.184	5.81352	0.416565	13.9559	2.89752e-44	1.16291e-41
ENSMUSG00000027750	Postn	7316.1	2.60552	0.200585	12.9896	1.40164e-38	4.37534e-36
ENSMUSG00000027765	P2ry1	504.833	-1.31289	0.402227	-3.26406	0.00109828	0.00706998
ENSMUSG00000027774	Gfm1	6482.87	-0.486643	0.132167	-3.68203	0.000231381	0.00180785
ENSMUSG00000027777	Schip1	2644.95	-0.694368	0.162766	-4.26605	1.98968e-05	0.0002088
ENSMUSG00000027787	Nmd3	742.762	0.610523	0.155079	3.93685	8.25587e-05	0.000730364
ENSMUSG00000027804	Ppid	1526.62	0.367521	0.131561	2.79354	0.00521352	0.0260226
ENSMUSG00000027808	Serp1	1643.73	0.959716	0.152938	6.27521	3.49156e-10	9.82332e-09
ENSMUSG00000027809	Etfdh	18620.6	-1.17288	0.21609	-5.42776	5.70669e-08	1.05987e-06
ENSMUSG00000027810	Eif2a	1641.72	0.288549	0.0878628	3.28409	0.00102311	0.00665033
ENSMUSG00000027820	Mme	325.298	-2.10315	0.40734	-5.16314	2.42845e-07	3.92423e-06
ENSMUSG00000027832	Ptx3	59.4793	2.11882	0.485407	4.36503	1.27104e-05	0.000139878
ENSMUSG00000027835	Pdcd10	549.155	0.52131	0.141807	3.67619	0.000236746	0.00184244
ENSMUSG00000027840	Wnt2b	147.947	-1.03007	0.266013	-3.87226	0.000107832	0.000926033
ENSMUSG00000027865	Gdap2	463.215	0.412644	0.159137	2.59301	0.00951395	0.0426685
ENSMUSG00000027868	Tbx15	44.8002	1.56551	0.468514	3.34142	0.000833498	0.00556098
ENSMUSG00000027884	Clcc1	1365.48	-0.371036	0.12051	-3.0789	0.0020777	0.0120673
ENSMUSG00000027889	Ampd2	350.604	0.564069	0.21709	2.59832	0.00936823	0.0421592
ENSMUSG00000027931	Npr1	944.158	-0.499689	0.145491	-3.43451	0.000593626	0.00413541
ENSMUSG00000027940	Tpm3	2188.09	0.478592	0.146549	3.26576	0.0010917	0.00703916
ENSMUSG00000027944	Hax1	911.98	1.16994	0.215409	5.43124	5.59638e-08	1.04321e-06
ENSMUSG00000027952	Pmvk	295.408	-0.753522	0.272438	-2.76585	0.00567754	0.0279151
ENSMUSG00000027955	Fam198b	4927.77	2.09032	0.166513	12.5535	3.80426e-36	1.10022e-33
ENSMUSG00000027956	Tmem144	2015.87	1.58541	0.129609	12.2322	2.09179e-34	5.48494e-32
ENSMUSG00000027961	Lrrc39	2869.16	-0.74793	0.185191	-4.0387	5.3748e-05	0.00049555
ENSMUSG00000027981	Rnpc3	730.03	-0.297908	0.0869319	-3.42691	0.000610485	0.00423037
ENSMUSG00000027983	Cyp2u1	1328.35	-0.443892	0.103907	-4.272	1.93727e-05	0.000204172
ENSMUSG00000027984	Hadh	10101.2	-1.30223	0.300035	-4.34024	1.42324e-05	0.000154638
ENSMUSG00000027995	Tlr2	304.28	1.40193	0.166504	8.4198	3.77113e-17	2.83065e-15
ENSMUSG00000027996	Sfrp2	420.287	1.72482	0.531356	3.24607	0.00117011	0.00743741
ENSMUSG00000028007	Snx7	386.717	0.799703	0.149723	5.34122	9.2321e-08	1.63714e-06
ENSMUSG00000028010	Gar1	83.881	0.943944	0.265686	3.55285	0.000381077	0.0028016
ENSMUSG00000028013	Ppa2	1965.48	-0.960078	0.20972	-4.5779	4.69671e-06	5.71922e-05
ENSMUSG00000028017	Egf	372.01	-2.03628	0.360025	-5.65594	1.54993e-08	3.18505e-07
ENSMUSG00000028018	Gstcd	109.725	0.92623	0.248312	3.7301	0.0001914	0.00153887
ENSMUSG00000028028	Alpk1	389.667	0.63668	0.179185	3.5532	0.000380575	0.00279895
ENSMUSG00000028032	Papss1	535.913	0.277448	0.105718	2.62442	0.00867974	0.0397429
ENSMUSG00000028033	Kcnq5	46.3735	1.04691	0.401985	2.60435	0.00920493	0.0416148
ENSMUSG00000028034	Fubp1	2951.96	0.297732	0.107257	2.77588	0.00550525	0.0272436
ENSMUSG00000028047	Thbs3	458.983	0.747914	0.237283	3.15199	0.00162161	0.00981549
ENSMUSG00000028048	Gba	607.795	0.638478	0.147132	4.33949	1.42813e-05	0.000155084
ENSMUSG00000028053	Ash1l	7670.23	-0.384289	0.104419	-3.68024	0.000233011	0.00181769
ENSMUSG00000028059	Arhgef2	3212.12	1.41792	0.194757	7.28045	3.32703e-13	1.55046e-11
ENSMUSG00000028063	Lmna	4323.32	0.972863	0.211758	4.59423	4.34352e-06	5.32874e-05
ENSMUSG00000028068	Iqgap3	130.324	1.63424	0.396018	4.12667	3.68061e-05	0.000358154
ENSMUSG00000028080	Lrba	4696.93	-0.343523	0.0769657	-4.46333	8.06959e-06	9.36816e-05
ENSMUSG00000028082	Sh3d19	1313.45	0.505778	0.173392	2.91697	0.00353454	0.0189608
ENSMUSG00000028086	Fbxw7	2513.42	-1.16466	0.211639	-5.50306	3.73257e-08	7.18246e-07
ENSMUSG00000028088	Fmo5	461.965	-0.744185	0.26515	-2.80665	0.00500593	0.0251653
ENSMUSG00000028089	Chd1l	831.011	0.39947	0.0938618	4.25594	2.08174e-05	0.00021707
ENSMUSG00000028099	Polr3c	602.144	0.332878	0.127316	2.61459	0.00893354	0.0406494
ENSMUSG00000028106	Rprd2	1876.47	-0.336584	0.108628	-3.0985	0.00194503	0.0114114
ENSMUSG00000028111	Ctsk	309.915	1.10102	0.302931	3.63456	0.00027845	0.0021266
ENSMUSG00000028124	Gclm	1057.43	1.46053	0.363016	4.02332	5.73838e-05	0.000526358
ENSMUSG00000028125	Abca4	157.013	-1.82187	0.306868	-5.93699	2.903e-09	6.95377e-08
ENSMUSG00000028126	Pip5k1a	1021.54	0.401073	0.0976413	4.10762	3.99755e-05	0.000383679
ENSMUSG00000028127	Abcd3	4171.27	-0.52907	0.147273	-3.59244	0.000327595	0.00244961
ENSMUSG00000028132	Tmem56	229.571	-1.52514	0.261597	-5.83011	5.53905e-09	1.25786e-07
ENSMUSG00000028152	Tspan5	263.594	0.659698	0.234129	2.81767	0.00483739	0.0244681
ENSMUSG00000028158	Mttp	472.456	0.926655	0.19147	4.8397	1.30036e-06	1.82533e-05
ENSMUSG00000028173	Wls	2617.59	0.404921	0.148252	2.73131	0.00630831	0.0305039
ENSMUSG00000028175	Depdc1a	16.2729	1.70139	0.535358	3.17803	0.00148279	0.00907863
ENSMUSG00000028179	Cth	182.056	2.0949	0.319954	6.54749	5.85114e-11	1.91144e-09
ENSMUSG00000028184	Adgrl2	2427.79	-0.436947	0.15141	-2.88586	0.00390344	0.020597
ENSMUSG00000028194	Ddah1	393.054	1.24703	0.32201	3.87263	0.000107668	0.000925032
ENSMUSG00000028229	Rmdn1	952.526	-0.417016	0.126372	-3.29991	0.000967171	0.00633802
ENSMUSG00000028234	Rps20	3993	0.480143	0.136562	3.51594	0.000438193	0.00317871
ENSMUSG00000028245	Nsmaf	2834.52	-0.546298	0.124071	-4.4031	1.06713e-05	0.000119853
ENSMUSG00000028252	Ccnc	473.246	0.366047	0.128624	2.84586	0.00442923	0.0228503
ENSMUSG00000028259	Fhl5	4.3255	-1.84057	0.608731	-3.02362	0.00249772	0.0141434
ENSMUSG00000028271	Gtf2b	605.6	0.668059	0.156695	4.26344	2.01304e-05	0.000210801
ENSMUSG00000028289	Epha7	434.13	-0.903007	0.232064	-3.8912	9.97491e-05	0.000864551
ENSMUSG00000028307	Aldob	289.026	-4.73527	0.347041	-13.6447	2.17112e-42	8.05609e-40
ENSMUSG00000028309	Rnf20	2184.41	0.280079	0.0952372	2.94086	0.00327304	0.0178008
ENSMUSG00000028312	Smc2	344.348	0.998888	0.150339	6.64423	3.04816e-11	1.03711e-09
ENSMUSG00000028318	Polr1e	662.078	0.617203	0.203552	3.03216	0.00242809	0.0138128
ENSMUSG00000028328	Tmod1	7854.37	-1.18112	0.284699	-4.14866	3.34425e-05	0.000330161
ENSMUSG00000028330	Ncbp1	1011.23	0.337668	0.0901803	3.74437	0.000180849	0.00146602
ENSMUSG00000028333	Anp32b	537.25	0.920453	0.182321	5.04853	4.45228e-07	6.91069e-06
ENSMUSG00000028334	Nans	470.496	1.02816	0.177595	5.78931	7.06742e-09	1.56871e-07
ENSMUSG00000028337	Coro2a	58.3499	1.73509	0.31486	5.51068	3.57454e-08	6.91899e-07
ENSMUSG00000028339	Col15a1	5912.08	0.859721	0.158354	5.42909	5.66406e-08	1.05482e-06
ENSMUSG00000028345	Tex10	579.911	0.563119	0.1849	3.04553	0.00232272	0.0133135
ENSMUSG00000028347	Tmeff1	321.773	1.41631	0.2407	5.88411	4.002e-09	9.34718e-08
ENSMUSG00000028354	Fmn2	14.2496	-1.36234	0.478253	-2.84858	0.00439153	0.0227154
ENSMUSG00000028364	Tnc	803.565	3.78968	0.1779	21.3024	1.07937e-100	2.65335e-97
ENSMUSG00000028369	Svep1	6012.59	2.45246	0.286237	8.56794	1.05351e-17	8.38798e-16
ENSMUSG00000028370	Pappa	428.657	2.3011	0.237604	9.6846	3.50576e-22	4.20392e-20
ENSMUSG00000028373	Astn2	89.9481	0.897454	0.210188	4.26976	1.95679e-05	0.000206008
ENSMUSG00000028383	Hsdl2	6769.45	-0.894761	0.22068	-4.05456	5.02285e-05	0.000467706
ENSMUSG00000028389	Zfp37	206.176	0.769902	0.245396	3.13738	0.00170465	0.0102082
ENSMUSG00000028393	Alad	924.932	-0.763986	0.160552	-4.7585	1.95039e-06	2.60396e-05
ENSMUSG00000028402	Mpdz	5639.49	-0.408606	0.111996	-3.64841	0.00026387	0.00203182
ENSMUSG00000028407	Toporsos	191.197	-0.669265	0.207656	-3.22296	0.00126874	0.00798691
ENSMUSG00000028427	Aqp7	754.474	-0.546318	0.164554	-3.31999	0.000900196	0.00594868
ENSMUSG00000028434	Epb4.1l4b	124.66	-0.662178	0.240795	-2.74996	0.00596025	0.0290999
ENSMUSG00000028443	Nudt2	252.518	-1.21224	0.459546	-2.63792	0.00834174	0.038482
ENSMUSG00000028444	Cntfr	71.462	-1.7218	0.408303	-4.21697	2.47603e-05	0.000252692
ENSMUSG00000028447	Dctn3	999.894	0.638614	0.103866	6.14841	7.82641e-10	2.07215e-08
ENSMUSG00000028452	Vcp	13298.7	0.266311	0.0906683	2.9372	0.00331191	0.0179576
ENSMUSG00000028458	Tesk1	870.415	-0.657429	0.242382	-2.71236	0.00668056	0.0319193
ENSMUSG00000028459	Cd72	205.361	1.46143	0.412223	3.54525	0.000392246	0.0028751
ENSMUSG00000028463	Car9	47.365	0.948867	0.360715	2.63052	0.00852551	0.0391644
ENSMUSG00000028465	Tln1	14263	0.636308	0.167777	3.79258	0.000149088	0.00122945
ENSMUSG00000028466	Creb3	619.034	0.667136	0.19923	3.34857	0.000812304	0.00542806
ENSMUSG00000028487	Bnc2	187.287	0.603128	0.228619	2.63814	0.00833619	0.0384654
ENSMUSG00000028488	Sh3gl2	61.8626	-1.36852	0.420115	-3.25748	0.00112406	0.00719118
ENSMUSG00000028494	Plin2	2185.72	0.648575	0.160065	4.05195	5.07925e-05	0.000471617
ENSMUSG00000028495	Rps6	4660	0.322655	0.12339	2.61492	0.00892496	0.0406215
ENSMUSG00000028514	Usp24	10649.4	0.194523	0.0656291	2.96397	0.00303698	0.0166784
ENSMUSG00000028524	Sgip1	83.4893	-0.620145	0.237387	-2.61238	0.00899149	0.0408564
ENSMUSG00000028538	St3gal3	1172.22	-0.564394	0.149051	-3.78658	0.000152736	0.00125625
ENSMUSG00000028542	Slc6a9	360.741	3.04513	0.277106	10.989	4.31499e-28	8.00552e-26
ENSMUSG00000028556	Dock7	1641.8	0.377447	0.121197	3.11433	0.00184365	0.0109209
ENSMUSG00000028559	Osbpl9	4208.84	0.535259	0.100349	5.33399	9.60775e-08	1.70222e-06
ENSMUSG00000028572	Hook1	837.299	-1.09209	0.122279	-8.93109	4.21849e-19	3.78817e-17
ENSMUSG00000028577	Plaa	2070.78	0.602758	0.0982043	6.13779	8.36763e-10	2.19973e-08
ENSMUSG00000028581	Laptm5	804.675	1.06237	0.185649	5.72247	1.04984e-08	2.24904e-07
ENSMUSG00000028582	Cc2d1b	1058.79	0.478513	0.1049	4.56163	5.07591e-06	6.14294e-05
ENSMUSG00000028599	Tnfrsf1b	673.177	0.966186	0.244864	3.9458	7.95334e-05	0.000706141
ENSMUSG00000028600	Podn	890.188	-1.33408	0.384605	-3.4687	0.00052299	0.00370902
ENSMUSG00000028601	Echdc2	941.084	-0.777778	0.178067	-4.36788	1.25457e-05	0.000138298
ENSMUSG00000028607	Cpt2	6005.13	-1.23461	0.139612	-8.84314	9.30682e-19	8.2445e-17
ENSMUSG00000028613	Lrp8	118.459	2.25774	0.411992	5.48006	4.25172e-08	8.08649e-07
ENSMUSG00000028614	Ndc1	825.534	-0.390445	0.132614	-2.94421	0.00323779	0.0176334
ENSMUSG00000028626	Col9a2	36.5054	2.30164	0.427119	5.38876	7.09438e-08	1.28588e-06
ENSMUSG00000028633	Ctps	2172.05	1.14661	0.188158	6.09388	1.10203e-09	2.83672e-08
ENSMUSG00000028645	Slc2a1	1437.85	2.55221	0.285169	8.9498	3.56128e-19	3.27272e-17
ENSMUSG00000028654	Mycl	25.2219	1.19745	0.465002	2.57514	0.01002	0.0443512
ENSMUSG00000028656	Cap1	2606.29	0.768895	0.184563	4.16602	3.09958e-05	0.000309109
ENSMUSG00000028672	Hmgcl	1095.6	-0.565139	0.159693	-3.53891	0.000401784	0.00293845
ENSMUSG00000028673	Fuca1	864.402	0.553304	0.207326	2.66876	0.00761315	0.0357148
ENSMUSG00000028678	Kif2c	26.2705	1.6168	0.504703	3.20347	0.00135784	0.00844835
ENSMUSG00000028681	Ptch2	91.424	1.09293	0.372942	2.93055	0.00338364	0.018281
ENSMUSG00000028683	Eif2b3	591.87	0.817161	0.165067	4.95048	7.40298e-07	1.09926e-05
ENSMUSG00000028684	Urod	1392.36	-0.434622	0.166771	-2.6061	0.00915806	0.0414409
ENSMUSG00000028692	Akr1a1	5320.92	0.655923	0.0932791	7.03184	2.03832e-12	8.52884e-11
ENSMUSG00000028708	Mknk1	843.709	0.798603	0.173811	4.59468	4.33419e-06	5.32393e-05
ENSMUSG00000028718	Stil	33.7482	1.46157	0.305752	4.78024	1.75082e-06	2.38942e-05
ENSMUSG00000028729	Ebna1bp2	787.673	0.62693	0.156521	4.0054	6.19126e-05	0.000562649
ENSMUSG00000028737	Aldh4a1	3453.97	-1.67697	0.211081	-7.94469	1.94683e-15	1.23504e-13
ENSMUSG00000028741	Mrto4	551.708	0.935646	0.215763	4.33645	1.448e-05	0.000156981
ENSMUSG00000028750	Pla2g2c	9.94069	-1.66408	0.508116	-3.275	0.0010566	0.00684199
ENSMUSG00000028756	Pink1	10618.5	-1.23725	0.137791	-8.97919	2.72767e-19	2.57896e-17
ENSMUSG00000028757	Ddost	1983.93	0.569492	0.144168	3.9502	7.80847e-05	0.000696108
ENSMUSG00000028766	Alpl	1575.2	0.667778	0.208947	3.19592	0.00139387	0.0086391
ENSMUSG00000028771	Ptpn12	1373.47	0.685845	0.156565	4.38058	1.18361e-05	0.000131657
ENSMUSG00000028772	Zcchc17	402.047	-0.581842	0.204285	-2.84818	0.00439697	0.0227256
ENSMUSG00000028782	Adgrb2	104.004	-1.35206	0.288111	-4.69286	2.69414e-06	3.50184e-05
ENSMUSG00000028792	Ak2	1250.2	0.638396	0.120429	5.301	1.15167e-07	2.00254e-06
ENSMUSG00000028793	Rnf19b	732.703	0.579214	0.204271	2.83552	0.00457518	0.0233885
ENSMUSG00000028797	Tmem234	768.618	1.11406	0.169796	6.56119	5.33815e-11	1.75259e-09
ENSMUSG00000028798	Eif3i	2595.42	0.381123	0.139921	2.72385	0.00645268	0.0310569
ENSMUSG00000028800	Hdac1	424.122	0.600438	0.139348	4.30891	1.64063e-05	0.000175256
ENSMUSG00000028811	Yars	1883.26	1.63455	0.0947543	17.2504	1.11105e-66	8.73998e-64
ENSMUSG00000028821	Syf2	1280.69	-0.709955	0.120092	-5.91174	3.38502e-09	7.99158e-08
ENSMUSG00000028832	Stmn1	274.901	1.62571	0.236674	6.86895	6.4674e-12	2.42263e-10
ENSMUSG00000028834	Trim63	3717.81	-0.701183	0.146934	-4.77211	1.82309e-06	2.46073e-05
ENSMUSG00000028841	Cnksr1	274.689	1.10792	0.226117	4.89976	9.59541e-07	1.39988e-05
ENSMUSG00000028847	Trappc3	1123.09	0.555572	0.137606	4.03742	5.4042e-05	0.000497988
ENSMUSG00000028849	Map7d1	4240.66	-0.670691	0.263256	-2.54768	0.0108442	0.0472971
ENSMUSG00000028861	Mrps15	875.038	-0.6658	0.181998	-3.65828	0.000253916	0.00196595
ENSMUSG00000028873	Cdca8	33.044	1.43264	0.386758	3.70422	0.000212041	0.00168145
ENSMUSG00000028874	Fgr	35.7441	1.4019	0.356023	3.93766	8.22785e-05	0.000728213
ENSMUSG00000028889	Yrdc	370.485	0.60949	0.23688	2.57299	0.0100825	0.0445677
ENSMUSG00000028893	Sesn2	525.355	2.7254	0.236827	11.508	1.20233e-30	2.62723e-28
ENSMUSG00000028894	Inpp5b	660.635	0.780483	0.130428	5.98402	2.17696e-09	5.31826e-08
ENSMUSG00000028901	Gmeb1	397.591	-0.825275	0.31198	-2.64528	0.00816228	0.0377515
ENSMUSG00000028909	Ptpru	262.802	-1.16484	0.280506	-4.15266	3.28637e-05	0.000324936
ENSMUSG00000028919	Arhgef19	736.733	-1.61713	0.160494	-10.076	7.05744e-24	9.83742e-22
ENSMUSG00000028932	Psmc2	2641.9	0.656089	0.121517	5.39915	6.69591e-08	1.22495e-06
ENSMUSG00000028936	Rpl22	1542.21	0.443064	0.136921	3.23591	0.00121257	0.00767009
ENSMUSG00000028937	Acot7	873.019	-0.478125	0.135879	-3.51876	0.000433563	0.00314861
ENSMUSG00000028949	Smarcd3	1569.49	0.322355	0.122868	2.62359	0.00870079	0.0398115
ENSMUSG00000028959	Fastk	5166.09	-0.614786	0.122565	-5.01598	5.27646e-07	8.0627e-06
ENSMUSG00000028961	Pgd	823.407	0.987977	0.202733	4.87329	1.09757e-06	1.57784e-05
ENSMUSG00000028965	Tnfrsf9	8.3238	1.75436	0.558383	3.14186	0.00167876	0.0100898
ENSMUSG00000028972	Car6	5.01024	2.36212	0.609478	3.87565	0.000106339	0.000915101
ENSMUSG00000028973	Abcb8	2491.17	-0.790107	0.121558	-6.49985	8.0402e-11	2.55442e-09
ENSMUSG00000028974	Dffa	728.027	-0.472076	0.171021	-2.76035	0.00577402	0.0283101
ENSMUSG00000028980	H6pd	989.726	-1.04974	0.362695	-2.89428	0.00380032	0.0201231
ENSMUSG00000028982	Slc25a33	461.753	0.780595	0.25656	3.04254	0.00234591	0.0134268
ENSMUSG00000028989	Angptl7	266.411	0.899355	0.283448	3.17291	0.00150918	0.00921436
ENSMUSG00000029003	Mad2l2	169.89	0.690393	0.242847	2.84291	0.0044704	0.0230083
ENSMUSG00000029014	Dnajc2	1274.01	1.15536	0.102944	11.2231	3.13901e-29	6.23553e-27
ENSMUSG00000029019	Nppb	14097.2	2.45083	0.356127	6.88189	5.90643e-12	2.23377e-10
ENSMUSG00000029020	Mfn2	27039.7	-0.42938	0.126559	-3.39271	0.000692044	0.00470925
ENSMUSG00000029027	Dffb	152.739	-0.533604	0.167302	-3.18946	0.0014254	0.00878194
ENSMUSG00000029034	Cpsf3l	686.889	0.450268	0.114525	3.93162	8.43752e-05	0.000744759
ENSMUSG00000029038	Ssu72	1014.87	0.572792	0.123025	4.65588	3.22593e-06	4.11955e-05
ENSMUSG00000029047	Pex10	413.218	-0.708227	0.142113	-4.98354	6.24326e-07	9.41564e-06
ENSMUSG00000029056	Pank4	1592.8	-0.869312	0.155058	-5.60635	2.06635e-08	4.14979e-07
ENSMUSG00000029060	Mib2	1421.64	0.892001	0.142515	6.25898	3.87492e-10	1.08522e-08
ENSMUSG00000029061	Mmp23	349.152	0.692506	0.238906	2.89865	0.0037477	0.0198819
ENSMUSG00000029064	Gnb1	2722.24	0.507041	0.10124	5.0083	5.49117e-07	8.37126e-06
ENSMUSG00000029093	Sorcs2	864.093	-1.3309	0.173602	-7.66636	1.76948e-14	9.97094e-13
ENSMUSG00000029095	Ablim2	738.094	-0.590029	0.165941	-3.55565	0.00037705	0.00277406
ENSMUSG00000029102	Hgfac	23.1082	-1.34944	0.426039	-3.16742	0.001538	0.00935552
ENSMUSG00000029108	Pcdh7	3848.9	-0.877695	0.208789	-4.20374	2.62539e-05	0.000266001
ENSMUSG00000029111	Nelfa	556.368	-0.446537	0.109024	-4.09575	4.208e-05	0.000400748
ENSMUSG00000029119	Man2b2	1397.4	1.02278	0.0971665	10.526	6.55551e-26	1.06546e-23
ENSMUSG00000029134	Plb1	43.8215	-1.52876	0.39073	-3.91258	9.1317e-05	0.000799573
ENSMUSG00000029146	Snx17	1422.2	0.3035	0.106804	2.84167	0.00448784	0.0230619
ENSMUSG00000029151	Slc30a3	12.0488	1.614	0.612208	2.63635	0.00838025	0.0386385
ENSMUSG00000029153	Ociad2	134.738	-1.37467	0.338154	-4.06521	4.79886e-05	0.00044983
ENSMUSG00000029155	Spata18	22.9755	1.54905	0.480049	3.22687	0.00125154	0.0079005
ENSMUSG00000029158	Yipf7	1890.12	-1.55327	0.259619	-5.98289	2.19219e-09	5.34884e-08
ENSMUSG00000029161	Cgref1	61.5221	1.98061	0.379683	5.2165	1.82339e-07	3.02351e-06
ENSMUSG00000029162	Khk	210.725	-0.969939	0.14732	-6.58389	4.58297e-11	1.51732e-09
ENSMUSG00000029163	Emilin1	1826.73	1.23168	0.193563	6.3632	1.97589e-10	5.81704e-09
ENSMUSG00000029167	Ppargc1a	3204.27	-0.950087	0.194198	-4.89236	9.96364e-07	1.4493e-05
ENSMUSG00000029171	Pgm1	262.146	0.599	0.162533	3.68541	0.000228332	0.00178971
ENSMUSG00000029175	Slc35f6	1803.04	-1.00338	0.295845	-3.39158	0.000694902	0.00472379
ENSMUSG00000029177	Cenpa	676.845	-0.584934	0.149152	-3.92172	8.79179e-05	0.000772907
ENSMUSG00000029186	Pi4k2b	211.355	0.907399	0.277967	3.26442	0.0010969	0.0070657
ENSMUSG00000029189	Sel1l3	61.2004	-1.72151	0.30007	-5.73704	9.63428e-09	2.07978e-07
ENSMUSG00000029201	Ugdh	658.281	0.516429	0.190592	2.70961	0.00673632	0.0321467
ENSMUSG00000029223	Uchl1	1120.92	3.42077	0.178885	19.1228	1.63183e-81	2.46859e-78
ENSMUSG00000029254	Stap1	63.7642	1.09112	0.344334	3.16878	0.00153082	0.00932046
ENSMUSG00000029265	Dr1	1053.63	0.590928	0.0831803	7.10419	1.2103e-12	5.21969e-11
ENSMUSG00000029272	Sult1e1	5.99859	-1.73329	0.61051	-2.83908	0.00452435	0.023201
ENSMUSG00000029283	Cdc7	71.5587	0.735387	0.23971	3.06782	0.00215628	0.0124502
ENSMUSG00000029287	Tgfbr3	2863.87	-0.600009	0.206584	-2.90443	0.00367927	0.0195829
ENSMUSG00000029304	Spp1	47.1159	1.56333	0.334732	4.67039	3.00632e-06	3.8718e-05
ENSMUSG00000029312	Klhl8	535.083	-0.662191	0.207475	-3.19166	0.00141459	0.00873173
ENSMUSG00000029319	Coq2	1947.55	-0.872594	0.300067	-2.90799	0.00363755	0.0194075
ENSMUSG00000029335	Bmp3	107.803	-1.9242	0.557222	-3.4532	0.000553982	0.00388816
ENSMUSG00000029343	Crybb1	30.4412	-2.63358	0.404759	-6.50655	7.68988e-11	2.45104e-09
ENSMUSG00000029359	Tesc	1391.99	-0.663406	0.179193	-3.70219	0.000213746	0.0016936
ENSMUSG00000029360	Gm9754	58.3823	-0.782672	0.271021	-2.88787	0.00387866	0.0204992
ENSMUSG00000029363	Rfc5	192.752	0.830061	0.311581	2.66403	0.00772107	0.0361252
ENSMUSG00000029366	Dck	200.312	0.570566	0.188153	3.03245	0.00242575	0.013807
ENSMUSG00000029377	Ereg	44.3188	2.10341	0.481779	4.36593	1.26585e-05	0.000139386
ENSMUSG00000029392	Rilpl1	3640.56	-0.727582	0.112502	-6.4673	9.97712e-11	3.09968e-09
ENSMUSG00000029402	Snrnp35	53.2565	-1.04291	0.367369	-2.83888	0.00452723	0.0232097
ENSMUSG00000029405	G3bp2	1449.95	-0.54268	0.206925	-2.6226	0.00872626	0.0399095
ENSMUSG00000029408	Abcb9	441.518	-0.678697	0.135461	-5.01029	5.43476e-07	8.2917e-06
ENSMUSG00000029414	Kntc1	72.8817	1.70005	0.264743	6.42151	1.34928e-10	4.06356e-09
ENSMUSG00000029417	Cxcl9	143.984	-1.02237	0.400644	-2.55181	0.0107164	0.0468225
ENSMUSG00000029428	Stx2	626.687	0.57366	0.225442	2.5446	0.0109403	0.047642
ENSMUSG00000029430	Ran	3598.59	1.20772	0.248485	4.86034	1.17182e-06	1.67357e-05
ENSMUSG00000029432	Gbas	16329.4	-1.22815	0.166761	-7.36475	1.77485e-13	8.74794e-12
ENSMUSG00000029438	Bcl7a	592.165	-0.53295	0.199601	-2.67008	0.00758324	0.0355924
ENSMUSG00000029446	Psph	314.951	1.64464	0.189305	8.6878	3.69511e-18	3.17327e-16
ENSMUSG00000029447	Cct6a	2876.3	0.424056	0.165478	2.56261	0.0103889	0.045676
ENSMUSG00000029455	Aldh2	5445.02	-0.915069	0.154688	-5.91556	3.30745e-09	7.83667e-08
ENSMUSG00000029456	Acad10	511.004	-0.578938	0.150842	-3.83803	0.000124025	0.00105042
ENSMUSG00000029465	Arpc3	2259.24	0.725132	0.092923	7.80358	6.01755e-15	3.60796e-13
ENSMUSG00000029467	Atp2a2	344565	-1.48353	0.182948	-8.109	5.104e-16	3.48525e-14
ENSMUSG00000029468	P2rx7	365.916	0.879075	0.27878	3.15329	0.00161442	0.00977801
ENSMUSG00000029469	Ift81	1137.08	-0.723843	0.270326	-2.67767	0.00741369	0.0348965
ENSMUSG00000029480	Dhx37	973.191	1.1546	0.283359	4.07469	4.60761e-05	0.000434388
ENSMUSG00000029484	Anxa3	1366.59	1.28693	0.165227	7.78886	6.76164e-15	4.02953e-13
ENSMUSG00000029499	Pxmp2	865.876	-1.93267	0.184336	-10.4845	1.01799e-25	1.62744e-23
ENSMUSG00000029507	Pus1	475.252	0.809036	0.169407	4.77569	1.79089e-06	2.42559e-05
ENSMUSG00000029513	Prkab1	768.481	-0.755332	0.200162	-3.7736	0.000160909	0.00131687
ENSMUSG00000029516	Cit	120.455	0.837816	0.296009	2.83037	0.00464943	0.0236941
ENSMUSG00000029521	Chek2	187.459	0.389357	0.152557	2.55221	0.0107043	0.0467906
ENSMUSG00000029524	Sirt4	281.919	-0.452465	0.179077	-2.52665	0.0115155	0.0496739
ENSMUSG00000029530	Ccr9	60.3817	-1.09412	0.315055	-3.4728	0.000515058	0.00365805
ENSMUSG00000029545	Acads	4592.2	-1.32612	0.233279	-5.6847	1.31041e-08	2.73572e-07
ENSMUSG00000029553	Tfec	20.6374	1.38733	0.422937	3.28024	0.00103719	0.00673183
ENSMUSG00000029557	Ftsj2	246.258	-1.23267	0.339618	-3.62957	0.000283894	0.00215979
ENSMUSG00000029560	Snx8	634.063	0.822077	0.149557	5.49674	3.86873e-08	7.40102e-07
ENSMUSG00000029570	Lfng	275.609	0.761208	0.240058	3.17093	0.00151954	0.00926325
ENSMUSG00000029575	Mmab	1004.38	-0.803642	0.298295	-2.69412	0.00705745	0.0334358
ENSMUSG00000029580	Actb	21207.2	0.577534	0.141773	4.07365	4.62818e-05	0.000436118
ENSMUSG00000029591	Ung	308.009	-1.13744	0.400495	-2.84009	0.00451003	0.0231517
ENSMUSG00000029596	Sdsl	341.093	1.30888	0.174407	7.50474	6.15509e-14	3.25392e-12
ENSMUSG00000029597	Sds	60.3271	-2.32081	0.487668	-4.75899	1.94566e-06	2.60118e-05
ENSMUSG00000029599	Ddx54	1337.38	0.66266	0.143573	4.61548	3.92179e-06	4.89067e-05
ENSMUSG00000029602	Rasal1	20.5182	2.86765	0.566409	5.06285	4.13025e-07	6.44647e-06
ENSMUSG00000029614	Rpl6	7954.77	0.584224	0.110937	5.26626	1.39229e-07	2.36246e-06
ENSMUSG00000029617	Ccz1	1115.81	0.651881	0.163773	3.98039	6.88018e-05	0.000618399
ENSMUSG00000029622	Arpc1b	2204.99	0.808709	0.162153	4.98732	6.12216e-07	9.2543e-06
ENSMUSG00000029623	Pdap1	1642.86	0.542475	0.174434	3.10991	0.00187143	0.0110521
ENSMUSG00000029632	Ndufa4	9009.91	-1.18068	0.317681	-3.71656	0.000201951	0.00161643
ENSMUSG00000029635	Cdk8	1203.13	0.367512	0.101851	3.60831	0.000308199	0.00231957
ENSMUSG00000029650	Slc46a3	304.563	-0.750692	0.280303	-2.67814	0.00740312	0.0348635
ENSMUSG00000029651	Mtus2	1913.12	-0.988082	0.179612	-5.50121	3.77204e-08	7.25131e-07
ENSMUSG00000029659	Medag	662.116	-1.05764	0.305584	-3.46105	0.000538065	0.00379269
ENSMUSG00000029661	Col1a2	10719.8	1.27787	0.285362	4.47806	7.53257e-06	8.81759e-05
ENSMUSG00000029664	Tfpi2	44.6047	0.753196	0.29372	2.56433	0.0103375	0.0454804
ENSMUSG00000029673	Auts2	751.648	-0.973066	0.239215	-4.06774	4.74712e-05	0.000445617
ENSMUSG00000029675	Eln	5692.56	1.85101	0.375794	4.92559	8.4106e-07	1.23805e-05
ENSMUSG00000029683	Lmod2	9100.02	-0.457703	0.127039	-3.60286	0.00031473	0.00236149
ENSMUSG00000029685	Asb15	1307.81	-2.35498	0.330308	-7.12966	1.00617e-12	4.42668e-11
ENSMUSG00000029714	Gigyf1	1019.2	-0.374776	0.14308	-2.61934	0.00880998	0.0402268
ENSMUSG00000029718	Pcolce	2218.19	0.79524	0.206728	3.84679	0.000119677	0.00102019
ENSMUSG00000029723	Tsc22d4	3352.36	-0.637699	0.150787	-4.22914	2.34583e-05	0.000241282
ENSMUSG00000029725	Ppp1r35	95.2307	0.682014	0.251732	2.70928	0.0067429	0.0321703
ENSMUSG00000029727	Cyp3a13	48.5967	-1.92095	0.432841	-4.43799	9.08014e-06	0.000104062
ENSMUSG00000029752	Asns	2178.27	5.36074	0.211869	25.3021	3.02508e-141	2.97456e-137
ENSMUSG00000029762	Akr1b8	286.822	1.43166	0.310746	4.60717	4.08189e-06	5.07129e-05
ENSMUSG00000029767	Calu	9025.06	0.552092	0.20293	2.7206	0.00651629	0.0313018
ENSMUSG00000029769	Ccdc136	220.898	1.79442	0.243953	7.3556	1.90069e-13	9.32145e-12
ENSMUSG00000029771	Irf5	292.482	0.824725	0.157653	5.23126	1.68358e-07	2.80588e-06
ENSMUSG00000029777	Gars	6893.78	2.70425	0.131296	20.5966	2.94189e-94	5.78552e-91
ENSMUSG00000029780	Nt5c3	1093.32	-0.664587	0.174562	-3.80716	0.000140573	0.00116843
ENSMUSG00000029782	Tmem209	730.365	0.646652	0.218209	2.96345	0.00304207	0.0167017
ENSMUSG00000029802	Abcg2	969.827	0.530058	0.123373	4.29638	1.73607e-05	0.000185049
ENSMUSG00000029816	Gpnmb	473.344	2.85072	0.290107	9.82646	8.6609e-23	1.0914e-20
ENSMUSG00000029826	Zc3hav1	1475.62	0.43067	0.129653	3.32173	0.000894627	0.00591386
ENSMUSG00000029838	Ptn	208.385	1.37972	0.307769	4.48297	7.36105e-06	8.63222e-05
ENSMUSG00000029843	Slc13a4	104.533	2.39301	0.350333	6.83067	8.45217e-12	3.13033e-10
ENSMUSG00000029860	Zyx	2138.95	0.878648	0.234305	3.75002	0.00017682	0.00143783
ENSMUSG00000029862	Clcn1	361.441	-3.18438	0.398274	-7.99547	1.29083e-15	8.35051e-14
ENSMUSG00000029864	Gstk1	1051.61	-2.30903	0.196994	-11.7213	9.91053e-32	2.24023e-29
ENSMUSG00000029993	Nfu1	1015.9	0.727091	0.0976547	7.44553	9.6558e-14	4.9367e-12
ENSMUSG00000029994	Anxa4	990.982	1.14355	0.258066	4.43121	9.37056e-06	0.000106644
ENSMUSG00000030007	Cct7	4673.07	0.363469	0.131408	2.76595	0.00567566	0.0279151
ENSMUSG00000030022	Adamts9	2847.93	0.585604	0.198203	2.95457	0.00313105	0.0171519
ENSMUSG00000030029	Lrig1	2008.39	-0.77572	0.139671	-5.55389	2.79374e-08	5.5107e-07
ENSMUSG00000030058	Copg1	3228.97	0.384629	0.101383	3.7938	0.000148359	0.00122435
ENSMUSG00000030059	Tmf1	3097.28	0.293992	0.0873284	3.36651	0.00076127	0.00512009
ENSMUSG00000030061	Uba3	2393	0.792857	0.133533	5.93752	2.89364e-09	6.9398e-08
ENSMUSG00000030077	Chl1	154.899	-0.567801	0.223846	-2.53657	0.0111944	0.0485764
ENSMUSG00000030079	Ruvbl1	645.893	0.533754	0.167926	3.17852	0.0014803	0.00907188
ENSMUSG00000030086	Chchd6	273.712	1.34339	0.165737	8.10555	5.25056e-16	3.57292e-14
ENSMUSG00000030087	Klf15	1380.41	-1.5161	0.261426	-5.79935	6.65732e-09	1.48735e-07
ENSMUSG00000030088	Aldh1l1	186.296	-1.25721	0.309094	-4.06741	4.75385e-05	0.000446037
ENSMUSG00000030095	Tmem43	1437.76	0.837407	0.157053	5.33201	9.71296e-08	1.71848e-06
ENSMUSG00000030098	Grip2	831.215	-0.604077	0.228289	-2.6461	0.00814256	0.037678
ENSMUSG00000030102	Itpr1	5788.14	-0.223903	0.0777227	-2.8808	0.00396673	0.0208638
ENSMUSG00000030110	Ret	280.091	-1.31724	0.30874	-4.2665	1.98566e-05	0.000208601
ENSMUSG00000030111	A2m	79.7821	-1.83862	0.489986	-3.75239	0.00017516	0.0014258
ENSMUSG00000030116	Mfap5	976.696	1.98579	0.347124	5.7207	1.06084e-08	2.27013e-07
ENSMUSG00000030124	Lag3	18.6396	1.23602	0.438511	2.81867	0.00482232	0.0244108
ENSMUSG00000030134	Rasgef1a	83.1816	2.36803	0.247231	9.57822	9.87352e-22	1.14895e-19
ENSMUSG00000030137	Tuba8	3653.96	-0.823795	0.17928	-4.59503	4.32694e-06	5.31834e-05
ENSMUSG00000030138	Bms1	1824.57	0.312386	0.116798	2.67459	0.00748214	0.0351598
ENSMUSG00000030148	Clec4a2	90.0781	1.02299	0.255396	4.0055	6.1887e-05	0.000562649
ENSMUSG00000030165	Klrd1	5.28503	1.55682	0.581957	2.67514	0.0074699	0.0351191
ENSMUSG00000030168	Adipor2	2061.4	-0.391512	0.143393	-2.73034	0.00632682	0.0305784
ENSMUSG00000030172	Erc1	3624.82	-0.98043	0.166716	-5.88085	4.08162e-09	9.48812e-08
ENSMUSG00000030187	Klra2	35.9008	1.4286	0.508452	2.8097	0.00495882	0.0249732
ENSMUSG00000030203	Dusp16	848.896	-0.728053	0.234655	-3.10265	0.00191796	0.011266
ENSMUSG00000030214	Plbd1	1203.77	-0.584777	0.204147	-2.86449	0.00417675	0.0217532
ENSMUSG00000030217	Art4	612.898	-0.921433	0.337644	-2.72901	0.00635257	0.0306802
ENSMUSG00000030225	Dera	218.347	1.29844	0.194647	6.67073	2.54527e-11	8.78163e-10
ENSMUSG00000030231	Plekha5	1400.19	-0.652795	0.102341	-6.3786	1.78714e-10	5.30905e-09
ENSMUSG00000030232	Aebp2	1155.88	0.372196	0.107631	3.45808	0.000544034	0.0038279
ENSMUSG00000030246	Ldhb	18724.6	-1.14453	0.163807	-6.98706	2.80711e-12	1.14295e-10
ENSMUSG00000030249	Abcc9	19354.9	-0.940629	0.180372	-5.21493	1.83891e-07	3.04155e-06
[truncated: 2,575 more rows]

## Sheet: C_Tfam_DESeq2
gene_id	gene_name	baseMean	logFC	lfcSE	stat	pvalue	padj
ENSMUSG00000000085	Scmh1	993.397	-0.74216	0.191384	-3.87786	0.00010538	0.000947614
ENSMUSG00000000120	Ngfr	72.8534	1.45034	0.441681	3.28369	0.00102458	0.00679734
ENSMUSG00000000142	Axin2	177.642	-0.722728	0.264637	-2.73101	0.006314	0.0309122
ENSMUSG00000000171	Sdhd	13495.5	-0.427236	0.149652	-2.85486	0.00430554	0.0227071
ENSMUSG00000000223	Drp2	82.2045	1.21651	0.380368	3.19824	0.00138268	0.00877828
ENSMUSG00000000253	Gmpr	2339.66	-0.975299	0.178679	-5.4584	4.80448e-08	9.15361e-07
ENSMUSG00000000266	Mid2	2543.08	1.14764	0.165688	6.92651	4.31346e-12	1.45196e-10
ENSMUSG00000000278	Scpep1	2112.75	1.84763	0.234672	7.87325	3.45539e-15	1.68667e-13
ENSMUSG00000000295	Hddc2	160.665	0.901559	0.184734	4.88032	1.05916e-06	1.5465e-05
ENSMUSG00000000301	Pemt	103.971	2.03996	0.375644	5.43057	5.61728e-08	1.05519e-06
ENSMUSG00000000308	Ckmt1	218.255	3.42009	0.502348	6.8082	9.88246e-12	3.18237e-10
ENSMUSG00000000317	Bcl6b	794.248	-0.932871	0.280788	-3.32234	0.000892664	0.00604001
ENSMUSG00000000326	Comt	3318.83	0.761752	0.232925	3.27037	0.00107406	0.00708113
ENSMUSG00000000339	Rtca	954.176	1.05907	0.208804	5.07204	3.93565e-07	6.24167e-06
ENSMUSG00000000340	Dbt	2418.02	-1.21976	0.229693	-5.3104	1.09384e-07	1.96284e-06
ENSMUSG00000000346	Dazap2	7900.74	0.500125	0.173427	2.88379	0.00392925	0.0211393
ENSMUSG00000000355	Mcts1	562.851	0.635071	0.164827	3.85296	0.000116698	0.00103273
ENSMUSG00000000359	Rem1	168.305	-1.16855	0.273086	-4.27907	1.87679e-05	0.000202867
ENSMUSG00000000365	Rnf17	141.466	1.93114	0.340335	5.67423	1.39316e-08	2.91446e-07
ENSMUSG00000000399	Ndufa9	12021.9	-0.399473	0.134665	-2.96642	0.00301287	0.0169217
ENSMUSG00000000420	Galnt1	4465.28	-0.499348	0.183856	-2.71598	0.00660798	0.0320525
ENSMUSG00000000440	Pparg	604.488	0.492663	0.187516	2.62732	0.00860609	0.0398282
ENSMUSG00000000441	Raf1	4714.82	-0.451465	0.101727	-4.43802	9.07917e-06	0.000105899
ENSMUSG00000000538	Tom1l2	3570.88	-0.690133	0.25415	-2.71545	0.00661849	0.032088
ENSMUSG00000000605	Clcn4-2	3382.1	-0.710067	0.199353	-3.56185	0.000368248	0.00280265
ENSMUSG00000000693	Loxl3	849.671	1.03866	0.193952	5.35523	8.54489e-08	1.56269e-06
ENSMUSG00000000753	Serpinf1	2484.44	1.23288	0.175514	7.0244	2.14986e-12	7.58006e-11
ENSMUSG00000000792	Slc5a5	16.9972	1.4393	0.561842	2.56176	0.0104143	0.0462442
ENSMUSG00000000804	Usp32	2903.07	0.542676	0.121694	4.45934	8.22134e-06	9.71358e-05
ENSMUSG00000000811	Txnrd3	1108.35	0.537414	0.170261	3.15641	0.00159722	0.00990827
ENSMUSG00000000838	Fmr1	1432.53	0.996224	0.166733	5.97497	2.30129e-09	5.42521e-08
ENSMUSG00000000889	Dbh	87.8667	-2.58005	0.428247	-6.02468	1.69449e-09	4.08592e-08
ENSMUSG00000000957	Mmp14	1025	0.999813	0.214962	4.65111	3.3015e-06	4.32342e-05
ENSMUSG00000001025	S100a6	924.141	1.00853	0.38612	2.61196	0.00900259	0.0412257
ENSMUSG00000001027	Scn4a	943.583	-3.32435	0.350845	-9.47527	2.66059e-21	2.33087e-19
ENSMUSG00000001029	Icam2	601.947	-0.600634	0.193724	-3.10046	0.00193218	0.0116197
ENSMUSG00000001036	Epn2	1617.29	-0.701798	0.214603	-3.27021	0.00107467	0.00708278
ENSMUSG00000001056	Nhp2	836.878	1.82261	0.223524	8.15401	3.52053e-16	1.9457e-14
ENSMUSG00000001065	Zfp276	612.645	-0.634398	0.136805	-4.63726	3.53061e-06	4.58157e-05
ENSMUSG00000001098	Kctd10	2913.62	0.620778	0.122197	5.08015	3.77143e-07	6.00495e-06
ENSMUSG00000001131	Timp1	444.567	2.42193	0.451831	5.36026	8.31024e-08	1.52674e-06
ENSMUSG00000001151	Pcnt	4908.7	-1.01512	0.205032	-4.95103	7.3821e-07	1.11605e-05
ENSMUSG00000001248	Gramd1a	2280.57	0.437469	0.139129	3.14434	0.00166459	0.0102754
ENSMUSG00000001313	Rnd2	107.108	1.45096	0.38291	3.78929	0.000151079	0.00128812
ENSMUSG00000001323	Srr	1147.35	0.840883	0.175702	4.78584	1.70276e-06	2.38054e-05
ENSMUSG00000001380	Hars	2623.86	1.19036	0.14981	7.94581	1.92928e-15	9.5805e-14
ENSMUSG00000001416	Cct3	7809.01	0.981875	0.18889	5.19813	2.01302e-07	3.39372e-06
ENSMUSG00000001424	Snd1	7096.93	1.15517	0.144875	7.9736	1.54113e-15	7.7684e-14
ENSMUSG00000001440	Kpnb1	9415.56	0.597922	0.229019	2.6108	0.00903319	0.041347
ENSMUSG00000001445	Mrpl10	1784.75	1.42307	0.328535	4.33156	1.48058e-05	0.000163926
ENSMUSG00000001472	Tcf25	11628.2	0.974766	0.134558	7.24421	4.34978e-13	1.65904e-11
ENSMUSG00000001473	Tubb6	462.416	0.950246	0.298967	3.17844	0.00148072	0.00930937
ENSMUSG00000001482	Def8	3358.65	1.32002	0.198301	6.65664	2.80165e-11	8.49045e-10
ENSMUSG00000001506	Col1a1	6290.26	1.22854	0.425972	2.88408	0.00392561	0.0211254
ENSMUSG00000001508	Sgca	3522.09	-0.710002	0.180754	-3.928	8.56545e-05	0.000786813
ENSMUSG00000001520	Nrip2	437.955	1.32457	0.170871	7.75188	9.05431e-15	4.28414e-13
ENSMUSG00000001524	Gtf2h4	520.686	0.471218	0.163708	2.87841	0.00399681	0.0214396
ENSMUSG00000001542	Ell2	1942.86	1.45127	0.244103	5.94532	2.75923e-09	6.37125e-08
ENSMUSG00000001558	Klhl10	27.7151	-1.28812	0.410551	-3.13755	0.00170369	0.0104556
ENSMUSG00000001604	Tcea3	1775.62	-1.29936	0.173701	-7.48043	7.40803e-14	3.13819e-12
ENSMUSG00000001627	Ifrd1	2572.4	1.16616	0.217587	5.3595	8.34523e-08	1.53177e-06
ENSMUSG00000001642	Akr1b3	3625.77	-1.08241	0.118478	-9.13593	6.48458e-20	5.06201e-18
ENSMUSG00000001663	Gstt1	368.547	-1.35583	0.291637	-4.64903	3.33495e-06	4.36152e-05
ENSMUSG00000001674	Ddx18	1197.31	0.525615	0.163629	3.21224	0.00131702	0.00843079
ENSMUSG00000001707	Eef1e1	557.096	0.8832	0.224887	3.92731	8.59019e-05	0.000788725
ENSMUSG00000001741	Il16	494.3	-0.71537	0.206788	-3.45943	0.000541322	0.00392341
ENSMUSG00000001755	Coasy	967.25	0.654831	0.248579	2.63429	0.00843123	0.0391998
ENSMUSG00000001763	Tspan33	78.8847	-1.07378	0.374621	-2.8663	0.00415303	0.0220665
ENSMUSG00000001785	Pwp1	1114.43	0.416285	0.143624	2.89843	0.00375031	0.0203455
ENSMUSG00000001802	Lrp3	455.201	-0.695184	0.205022	-3.39078	0.000696942	0.00489334
ENSMUSG00000001827	Folr1	23.272	1.82068	0.596301	3.05328	0.00226351	0.0132624
ENSMUSG00000001829	Clpb	4023.36	0.656341	0.20537	3.1959	0.00139394	0.00883575
ENSMUSG00000001833	2007-09-01	7963.15	0.381213	0.139306	2.73652	0.00620923	0.0305542
ENSMUSG00000001844	Zdhhc4	839.649	0.668904	0.143653	4.65639	3.21801e-06	4.22234e-05
ENSMUSG00000001870	Ltbp1	2782.75	-1.13739	0.197781	-5.75077	8.88399e-09	1.90417e-07
ENSMUSG00000001891	Ugp2	11969.3	0.624972	0.16243	3.84764	0.000119263	0.00105218
ENSMUSG00000001909	Trmt1	1411.38	0.537767	0.101324	5.3074	1.11198e-07	1.98651e-06
ENSMUSG00000001924	Uba1	14554.8	0.417988	0.101699	4.11005	3.95577e-05	0.000398597
ENSMUSG00000001930	Vwf	8047.15	0.668287	0.223046	2.99618	0.00273382	0.0155724
ENSMUSG00000001942	Siae	479.263	-1.02166	0.361648	-2.82501	0.00472791	0.0244863
ENSMUSG00000001962	Fam50a	741.33	0.993897	0.193797	5.12854	2.91998e-07	4.74722e-06
ENSMUSG00000001964	Emd	1140.53	0.788382	0.260514	3.02625	0.00247605	0.0143402
ENSMUSG00000001999	Blvra	651.489	0.734304	0.168284	4.36347	1.28013e-05	0.000143957
ENSMUSG00000002007	Srpk3	801.116	-1.97855	0.216222	-9.15052	5.6659e-20	4.45762e-18
ENSMUSG00000002014	Ssr4	1107.78	0.722109	0.205021	3.52212	0.000428117	0.0032108
ENSMUSG00000002020	Ltbp2	2300.91	3.21779	0.317587	10.132	3.98532e-24	4.54281e-22
ENSMUSG00000002032	Tmem25	287.046	-2.08341	0.327116	-6.36903	1.90221e-10	5.20386e-09
ENSMUSG00000002043	Trappc6a	597.72	0.877309	0.305389	2.87276	0.00406905	0.0217459
ENSMUSG00000002055	Spag5	392.118	2.81553	0.236417	11.9091	1.06082e-32	1.93473e-30
ENSMUSG00000002059	Rab34	435.769	0.588478	0.215821	2.7267	0.00639714	0.0312033
ENSMUSG00000002083	Bbc3	93.7811	1.09811	0.415017	2.64595	0.00814618	0.0381397
ENSMUSG00000002104	Rapsn	408.098	-0.723927	0.160765	-4.503	6.69995e-06	8.13647e-05
ENSMUSG00000002107	Celf2	3372.69	0.31425	0.10664	2.94683	0.0032105	0.0178765
ENSMUSG00000002147	Stat6	3330.21	0.553197	0.150843	3.66737	0.000245062	0.00196736
ENSMUSG00000002222	Rmnd5a	5137.11	-1.02109	0.283772	-3.59826	0.000320355	0.00247667
ENSMUSG00000002233	Rhoc	2947.52	1.17943	0.146455	8.05322	8.06467e-16	4.32603e-14
ENSMUSG00000002266	Zim1	75.5168	-0.83364	0.323724	-2.57515	0.0100195	0.0449372
ENSMUSG00000002279	Lmf1	1052.55	-0.489765	0.171162	-2.8614	0.00421771	0.0223261
ENSMUSG00000002289	Angptl4	750.485	2.10352	0.537468	3.91376	9.08691e-05	0.000829775
ENSMUSG00000002308	Cd320	462.028	-0.685314	0.240217	-2.85289	0.00433238	0.0228246
ENSMUSG00000002319	Ipo4	4098.55	1.67763	0.197808	8.4811	2.23066e-17	1.3855e-15
ENSMUSG00000002326	Gmpr2	399.16	0.583327	0.20641	2.82606	0.00471241	0.0244233
ENSMUSG00000002343	Armc6	337.22	1.08152	0.285002	3.79478	0.000147777	0.00126534
ENSMUSG00000002345	2310045N01Rik	437.368	0.708523	0.204335	3.46746	0.000525399	0.00382736
ENSMUSG00000002346	Slc25a42	633.568	-1.54916	0.222455	-6.96391	3.30964e-12	1.13695e-10
ENSMUSG00000002384	Bmp8b	19.8221	-1.19238	0.458859	-2.59858	0.00936094	0.0426042
ENSMUSG00000002409	Dyrk1b	542.664	-0.850051	0.287082	-2.96101	0.00306634	0.0171595
ENSMUSG00000002416	Ndufb2	3497.4	-0.470394	0.106584	-4.41337	1.01772e-05	0.000117274
ENSMUSG00000002455	Prpf6	2935.92	0.438087	0.128201	3.4172	0.000632686	0.00449626
ENSMUSG00000002458	Rgs19	240.11	0.958385	0.297631	3.22004	0.00128171	0.00823889
ENSMUSG00000002489	Tiam1	780.509	0.659777	0.14112	4.67528	2.93546e-06	3.8975e-05
ENSMUSG00000002500	Rpl3l	2138.33	-4.18308	0.162641	-25.7197	7.03044e-146	7.05223e-142
ENSMUSG00000002524	Puf60	3031.97	0.613627	0.167523	3.66295	0.00024933	0.00199376
ENSMUSG00000002546	Golga2	6424.84	0.637354	0.224071	2.84443	0.00444903	0.0233107
ENSMUSG00000002550	Uck1	1052.43	0.588738	0.20001	2.94355	0.00324474	0.0180383
ENSMUSG00000002565	Scin	196.562	-1.22351	0.326371	-3.74885	0.000177648	0.00148375
ENSMUSG00000002635	Pdcd2l	686.971	0.598931	0.124674	4.80398	1.5554e-06	2.19595e-05
ENSMUSG00000002658	Gtf2f1	1256.54	0.756002	0.14399	5.2504	1.51771e-07	2.63166e-06
ENSMUSG00000002661	Alkbh7	832.442	-0.833901	0.238002	-3.50375	0.00045875	0.00341628
ENSMUSG00000002781	Tmem143	2126.37	-0.863871	0.202296	-4.27032	1.95191e-05	0.000210534
ENSMUSG00000002835	Chaf1a	222.347	1.02548	0.174978	5.86063	4.61112e-09	1.02787e-07
ENSMUSG00000002897	Il17ra	797.493	1.84086	0.195844	9.39964	5.47498e-21	4.6542e-19
ENSMUSG00000002963	Pnkp	1267.97	0.729318	0.13972	5.21985	1.79069e-07	3.06004e-06
ENSMUSG00000002981	Clptm1	6420.56	0.494074	0.126943	3.89209	9.93849e-05	0.000898135
ENSMUSG00000002983	Relb	509.185	0.422591	0.161251	2.6207	0.0087749	0.0404601
ENSMUSG00000002985	Apoe	16088.8	0.6319	0.189877	3.32795	0.00087487	0.00594165
ENSMUSG00000003032	Klf4	1036.41	0.648142	0.203011	3.19264	0.00140978	0.00892206
ENSMUSG00000003037	Rab8a	1286.33	1.0199	0.367064	2.77853	0.00546061	0.027553
ENSMUSG00000003131	Pafah1b2	955.077	0.820477	0.232306	3.53189	0.000412606	0.00310608
ENSMUSG00000003161	Sri	1541.03	1.32982	0.154766	8.59245	8.5135e-18	5.50961e-16
ENSMUSG00000003190	Bcl2l12	255.176	-0.571688	0.204699	-2.79282	0.00522505	0.0265783
ENSMUSG00000003200	Sh3gl1	955.481	0.908985	0.248618	3.65616	0.000256024	0.00204028
ENSMUSG00000003228	Grk5	2139.97	1.38085	0.226395	6.09931	1.06528e-09	2.64175e-08
ENSMUSG00000003234	Abcf3	3058.3	0.525974	0.111865	4.70187	2.57791e-06	3.47802e-05
ENSMUSG00000003235	Eif2b5	4002.34	0.77349	0.139109	5.56033	2.69262e-08	5.39985e-07
ENSMUSG00000003269	Cyth2	1390.53	0.549377	0.0944341	5.81756	5.97117e-09	1.31209e-07
ENSMUSG00000003271	Sult2b1	6.02814	2.32478	0.67982	3.4197	0.000626896	0.00445828
ENSMUSG00000003344	Btbd2	1093.26	-0.814789	0.252037	-3.23281	0.00122579	0.00791476
ENSMUSG00000003346	Abhd17a	1166.73	0.73704	0.137192	5.37232	7.77282e-08	1.43194e-06
ENSMUSG00000003352	Cacnb3	236.18	0.762567	0.247254	3.08414	0.00204143	0.012189
ENSMUSG00000003355	Fkbp11	123.454	1.01061	0.282673	3.57521	0.00034995	0.00267864
ENSMUSG00000003363	Pld3	1984.55	0.953126	0.17283	5.51483	3.49126e-08	6.82666e-07
ENSMUSG00000003379	Cd79a	60.1092	-1.57335	0.413795	-3.80225	0.000143388	0.00123514
ENSMUSG00000003402	Prkcsh	1849.3	0.393917	0.109696	3.591	0.000329411	0.00253886
ENSMUSG00000003420	Fcgrt	2985.54	-0.555959	0.173135	-3.21112	0.00132216	0.00845562
ENSMUSG00000003423	Pih1d1	1189.57	0.654953	0.129022	5.07629	3.84873e-07	6.11832e-06
ENSMUSG00000003429	Rps11	6009.13	0.731823	0.16127	4.53788	5.68234e-06	7.0283e-05
ENSMUSG00000003435	Supt5	7268.33	0.801118	0.1321	6.06446	1.32401e-09	3.24723e-08
ENSMUSG00000003438	Timm50	1594.1	0.562987	0.213919	2.63177	0.00849406	0.0394514
ENSMUSG00000003444	Med29	356.525	-1.34448	0.375892	-3.57676	0.000347884	0.00266384
ENSMUSG00000003469	Phyhip	559.331	-1.55223	0.265567	-5.84497	5.06646e-09	1.12528e-07
ENSMUSG00000003476	Crhr2	619.63	-2.61443	0.227815	-11.4761	1.73882e-30	2.76859e-28
ENSMUSG00000003526	Prodh	907.651	-0.758803	0.169955	-4.46474	8.01666e-06	9.51095e-05
ENSMUSG00000003528	Slc25a1	405.03	1.14163	0.322852	3.53608	0.000406107	0.0030606
ENSMUSG00000003531	Dgcr6	390.412	0.728827	0.275272	2.64766	0.00810511	0.0379917
ENSMUSG00000003549	Ercc1	981.747	0.460805	0.0999876	4.60862	4.05351e-06	5.18708e-05
ENSMUSG00000003559	As3mt	1445.11	-1.01774	0.171008	-5.95146	2.65759e-09	6.18521e-08
ENSMUSG00000003585	Sec14l2	95.192	1.31303	0.336396	3.90324	9.49129e-05	0.000861213
ENSMUSG00000003746	Man1a	3087.69	0.255171	0.0933876	2.73239	0.00628774	0.0308271
ENSMUSG00000003762	Adck4	1106.61	1.94764	0.195301	9.97251	2.01092e-23	2.19256e-21
ENSMUSG00000003808	Farsa	1013	0.386789	0.144194	2.68242	0.00730907	0.0348549
ENSMUSG00000003809	Gcdh	1440.46	-1.44276	0.180021	-8.01439	1.10681e-15	5.7976e-14
ENSMUSG00000003849	Nqo1	6822.24	2.16432	0.38167	5.67066	1.42249e-08	2.96345e-07
ENSMUSG00000003865	Gys1	5093.55	0.77832	0.199521	3.90094	9.58208e-05	0.000868665
ENSMUSG00000003873	Bax	974.621	1.42866	0.171789	8.31632	9.07334e-17	5.30698e-15
ENSMUSG00000003923	Tfam	976.735	-0.825658	0.304905	-2.70792	0.00677063	0.0326677
ENSMUSG00000003934	Efnb3	903.033	-4.725	0.197409	-23.9351	1.32047e-126	8.83041e-123
ENSMUSG00000003949	Hlf	717.44	-2.60653	0.286346	-9.10273	8.80863e-20	6.84957e-18
ENSMUSG00000003970	Rpl8	11000.2	0.603178	0.21799	2.767	0.00565747	0.028255
ENSMUSG00000004035	Gstm7	627.501	-1.2377	0.371636	-3.33041	0.000867169	0.00589934
ENSMUSG00000004043	Stat5a	1265.54	-0.753096	0.159132	-4.73251	2.21757e-06	3.03886e-05
ENSMUSG00000004070	Hmox2	2303.46	0.533204	0.163714	3.25692	0.00112628	0.00738172
ENSMUSG00000004105	Angptl2	2641.02	-0.66021	0.248273	-2.65921	0.00783246	0.0369381
ENSMUSG00000004127	Trmt10a	191.903	1.05733	0.26606	3.97402	7.06702e-05	0.00066594
ENSMUSG00000004187	Kifc2	218.989	-1.09072	0.309045	-3.52933	0.00041661	0.00313504
ENSMUSG00000004221	Ikbkg	1279.86	0.431025	0.129037	3.34034	0.000836771	0.0057158
ENSMUSG00000004356	Utp20	2238.96	0.367168	0.143126	2.56534	0.0103074	0.0458813
ENSMUSG00000004393	Ddx56	1445.06	0.877521	0.130926	6.70241	2.05013e-11	6.26979e-10
ENSMUSG00000004415	Col26a1	58.4612	2.11694	0.376486	5.62289	1.87794e-08	3.8405e-07
ENSMUSG00000004446	Bid	459.652	2.34663	0.291027	8.06328	7.42765e-16	4.00574e-14
ENSMUSG00000004535	Tax1bp1	7719.48	0.512912	0.139552	3.67542	0.000237463	0.0019183
ENSMUSG00000004561	Mettl17	482.577	-0.492427	0.16434	-2.99639	0.00273193	0.0155705
ENSMUSG00000004565	Pnpla6	951.587	0.4448	0.169476	2.62457	0.00867596	0.0401053
ENSMUSG00000004567	Mcoln1	1092.08	0.513086	0.127678	4.0186	5.85451e-05	0.000563054
ENSMUSG00000004610	Etfb	9799.32	-0.574719	0.164449	-3.49482	0.000474387	0.00351705
ENSMUSG00000004626	Stxbp2	337.728	0.940509	0.238143	3.94934	7.83666e-05	0.000726857
ENSMUSG00000004667	Polr2e	2878.18	0.886869	0.197116	4.49923	6.81999e-06	8.24233e-05
ENSMUSG00000004748	Mtfp1	2353.98	-1.68931	0.234643	-7.19947	6.04475e-13	2.26673e-11
ENSMUSG00000004771	Rab11a	1612.04	0.577242	0.151728	3.80446	0.000142115	0.00122636
ENSMUSG00000004788	Eif2b2	984.686	0.721064	0.133571	5.39835	6.72576e-08	1.24882e-06
ENSMUSG00000004789	Dlst	11153.7	-0.495361	0.154554	-3.20511	0.00135013	0.008607
ENSMUSG00000004791	Pgf	212.971	-1.1027	0.211608	-5.21105	1.87777e-07	3.19432e-06
ENSMUSG00000004849	Ap1s1	1300.33	1.64561	0.227871	7.2217	5.13432e-13	1.94348e-11
ENSMUSG00000004880	Lbr	1421.46	-0.483194	0.17845	-2.70773	0.00677448	0.0326784
ENSMUSG00000004896	Rrnad1	445.364	-0.67823	0.215741	-3.14373	0.00166809	0.0102907
ENSMUSG00000004929	Thop1	1403.02	1.14302	0.184818	6.18457	6.22735e-10	1.59965e-08
ENSMUSG00000004937	Sgta	2345.24	0.794714	0.199689	3.97975	6.89876e-05	0.000652844
ENSMUSG00000004939	Nmrk2	14073.7	3.02266	0.50083	6.03531	1.58654e-09	3.83946e-08
ENSMUSG00000004951	Hspb1	10202.8	2.17116	0.423562	5.12596	2.96021e-07	4.80483e-06
ENSMUSG00000004952	Rasa4	342.239	-0.603833	0.190385	-3.17164	0.00151583	0.0094923
ENSMUSG00000004961	Syt5	28.0658	1.37747	0.464549	2.96517	0.00302513	0.0169715
ENSMUSG00000004980	Hnrnpa2b1	7622.87	-0.52205	0.107845	-4.84075	1.29353e-06	1.85761e-05
ENSMUSG00000005045	Chd5	94.2952	1.84616	0.374088	4.93509	8.01131e-07	1.20212e-05
ENSMUSG00000005054	Cstb	1148.74	2.17137	0.286864	7.56933	3.75147e-14	1.65048e-12
ENSMUSG00000005057	Sh2b2	76.7925	1.22323	0.376465	3.24926	0.00115707	0.00754166
ENSMUSG00000005089	Slc1a2	137.916	1.8544	0.431956	4.29304	1.76242e-05	0.000191848
ENSMUSG00000005103	Wdr1	12400.9	1.12002	0.17307	6.47149	9.70413e-11	2.7459e-09
ENSMUSG00000005124	Wisp1	1499.29	2.88895	0.37458	7.71249	1.23386e-14	5.71677e-13
ENSMUSG00000005125	Ndrg1	2451.29	0.895088	0.112221	7.97614	1.50982e-15	7.64899e-14
ENSMUSG00000005142	Man2b1	3528.16	0.465591	0.175435	2.65393	0.00795598	0.0373976
ENSMUSG00000005161	Prdx2	9165.36	-0.334323	0.11507	-2.90538	0.00366808	0.0199807
ENSMUSG00000005198	Polr2a	2690.3	0.967839	0.28143	3.439	0.000583857	0.00419833
ENSMUSG00000005204	Senp3	1820.85	0.349058	0.135906	2.56838	0.0102176	0.0455726
ENSMUSG00000005233	Spc25	74.8461	1.25016	0.308815	4.04825	5.1601e-05	0.000504247
ENSMUSG00000005262	Ufd1l	2221.63	0.685898	0.19651	3.49039	0.000482311	0.00356506
ENSMUSG00000005268	Prlr	449.128	-1.68742	0.440324	-3.83222	0.00012699	0.00111058
ENSMUSG00000005312	Ubqln1	3873.23	0.853743	0.204693	4.17085	3.03463e-05	0.00031398
ENSMUSG00000005360	Slc1a3	337.145	1.78245	0.337728	5.27777	1.30769e-07	2.30534e-06
ENSMUSG00000005373	Mlxipl	477.795	-2.11097	0.445958	-4.73356	2.20616e-06	3.02529e-05
ENSMUSG00000005413	Hmox1	2474.21	3.31578	0.280019	11.8413	2.38755e-32	4.23885e-30
ENSMUSG00000005417	Mprip	13990.4	0.422531	0.133956	3.15425	0.00160913	0.00997295
ENSMUSG00000005447	Pafah1b3	152.377	1.56191	0.394005	3.96419	7.36459e-05	0.000689256
ENSMUSG00000005481	Ddx39	1922.14	1.00395	0.217704	4.61155	3.99682e-06	5.12687e-05
ENSMUSG00000005510	Ndufs3	6991.15	-0.653636	0.159966	-4.0861	4.3869e-05	0.000436341
ENSMUSG00000005514	Por	3621.27	1.44641	0.209014	6.92017	4.51098e-12	1.5159e-10
ENSMUSG00000005533	Igf1r	2960.77	1.2373	0.184783	6.69598	2.14227e-11	6.53166e-10
ENSMUSG00000005575	Ube2m	3865.83	0.495369	0.133918	3.69905	0.000216405	0.00176557
ENSMUSG00000005580	Adcy9	1518.25	-0.92607	0.207525	-4.46246	8.10246e-06	9.60139e-05
ENSMUSG00000005611	Mrvi1	969.549	-0.922992	0.246242	-3.74831	0.000178028	0.00148631
ENSMUSG00000005615	Pcyt1a	3830.38	-0.999328	0.240977	-4.14699	3.3688e-05	0.000344997
ENSMUSG00000005625	Psmd4	4750.24	0.913294	0.17357	5.26183	1.42625e-07	2.48596e-06
ENSMUSG00000005628	Tmod4	348.127	-2.50138	0.200129	-12.4988	7.57448e-36	1.56659e-33
ENSMUSG00000005656	Snx6	1538.34	0.911648	0.250269	3.64267	0.000269826	0.00213456
ENSMUSG00000005667	Mthfd2	5951.43	5.54144	0.344722	16.0751	3.81439e-58	2.31892e-55
ENSMUSG00000005672	Kit	416.841	-0.846847	0.23075	-3.66997	0.000242579	0.00195081
ENSMUSG00000005677	Nr1i3	278.68	-1.05214	0.39663	-2.65269	0.00798543	0.0375009
ENSMUSG00000005683	Cs	36557.1	-0.880081	0.259949	-3.38559	0.000710259	0.00497528
ENSMUSG00000005732	Ranbp1	870.387	0.490684	0.189055	2.59546	0.00944655	0.0429354
ENSMUSG00000005763	Cd247	49.9872	-1.25407	0.402902	-3.1126	0.00185445	0.0112229
ENSMUSG00000005802	Slc30a4	2739.03	1.47469	0.428914	3.4382	0.000585602	0.00420635
ENSMUSG00000005803	Sqrdl	1610.63	-0.371435	0.146417	-2.53683	0.011186	0.0489667
ENSMUSG00000005804	Bloc1s6	1207.96	1.02815	0.329202	3.12315	0.00178927	0.0109008
ENSMUSG00000005846	Rsl1d1	3447.73	0.942969	0.171226	5.50717	3.64644e-08	7.09553e-07
ENSMUSG00000005873	Reep5	5023.53	-1.81641	0.363827	-4.99252	5.9597e-07	9.19719e-06
ENSMUSG00000005881	Ergic3	1766.54	0.467265	0.181466	2.57495	0.0100255	0.0449457
ENSMUSG00000005882	Uqcc1	4859.94	-0.886902	0.118886	-7.46013	8.64355e-14	3.63537e-12
ENSMUSG00000005897	Nr2c1	555.741	0.822278	0.271322	3.03064	0.00244038	0.0141623
ENSMUSG00000005947	Itgae	44.4937	1.07153	0.418988	2.55743	0.0105448	0.0467253
ENSMUSG00000005958	Ephb3	420.51	-0.686001	0.230008	-2.98251	0.00285894	0.0161761
ENSMUSG00000005980	Dnase1	167.822	-1.16075	0.213377	-5.43992	5.33033e-08	1.00789e-06
ENSMUSG00000006095	Tbcb	2208.77	1.24658	0.119095	10.4671	1.2232e-25	1.54753e-23
ENSMUSG00000006154	Eps8l1	167.382	-1.27213	0.379983	-3.34785	0.000814404	0.00558202
ENSMUSG00000006273	Atp6v1b2	4143.83	0.706152	0.238751	2.9577	0.00309945	0.0173206
ENSMUSG00000006281	Tep1	2315.07	1.06599	0.192155	5.54754	2.89717e-08	5.76046e-07
ENSMUSG00000006289	Osgep	1123.48	-0.413979	0.131287	-3.15323	0.00161474	0.0100015
ENSMUSG00000006301	Tmbim1	7571.03	2.19535	0.297497	7.37939	1.59015e-13	6.41885e-12
ENSMUSG00000006304	Arpc2	5621.76	0.937936	0.163065	5.75193	8.82307e-09	1.8951e-07
ENSMUSG00000006333	Rps9	8556.41	0.458096	0.175231	2.61424	0.00894253	0.0409881
ENSMUSG00000006378	Gcat	300.478	-1.37695	0.257996	-5.33709	9.44487e-08	1.71478e-06
ENSMUSG00000006386	Tek	3314.15	-0.265555	0.103119	-2.57523	0.0100174	0.0449372
ENSMUSG00000006390	Elovl1	1376.19	1.41096	0.24281	5.81098	6.21086e-09	1.36177e-07
ENSMUSG00000006392	Med8	874.314	0.874794	0.213974	4.08833	4.34492e-05	0.000433025
ENSMUSG00000006395	Hyi	188.022	1.15533	0.416355	2.77487	0.0055223	0.0277692
ENSMUSG00000006442	Srm	526.452	0.980528	0.257922	3.80165	0.000143735	0.0012366
ENSMUSG00000006456	Rbm14	662.46	-0.576588	0.222115	-2.59589	0.00943454	0.0429002
ENSMUSG00000006463	Zdhhc24	186.061	0.944758	0.239781	3.94008	8.14528e-05	0.000753044
ENSMUSG00000006522	Itih3	34.6988	1.60451	0.475016	3.37781	0.000730666	0.00509157
ENSMUSG00000006542	Prkag3	115.924	-1.13115	0.381447	-2.96542	0.00302274	0.0169629
ENSMUSG00000006575	Rundc3a	106.317	1.59205	0.37728	4.21981	2.44507e-05	0.000258992
ENSMUSG00000006576	Slc4a3	11121.1	-0.571395	0.224657	-2.54341	0.0109777	0.0482549
ENSMUSG00000006586	Runx1t1	312.743	-0.480329	0.175165	-2.74215	0.0061038	0.0301219
ENSMUSG00000006587	Snai3	86.1407	-2.56696	0.426215	-6.02268	1.71551e-09	4.13164e-08
ENSMUSG00000006589	Aprt	879.9	1.3339	0.141185	9.4479	3.4569e-21	3.00227e-19
ENSMUSG00000006599	Gtf2h1	2001.3	1.05431	0.150961	6.984	2.86896e-12	9.99254e-11
ENSMUSG00000006675	P4htm	398.252	-1.2355	0.241342	-5.11928	3.06698e-07	4.96207e-06
ENSMUSG00000006699	Cdc42	4526.25	0.67185	0.148466	4.5253	6.03109e-06	7.40035e-05
ENSMUSG00000006715	Gmnn	666.677	-0.792155	0.271095	-2.92206	0.00347724	0.0191124
ENSMUSG00000006717	Acot13	1814.24	-0.434051	0.145144	-2.99048	0.00278541	0.0158303
ENSMUSG00000006732	Mettl1	377.806	0.619785	0.227188	2.72807	0.0063707	0.0311071
ENSMUSG00000006736	Tspan31	2169.6	0.509695	0.135652	3.75737	0.000171707	0.00144013
ENSMUSG00000006740	Kif5b	14924	1.02544	0.136155	7.53142	5.01911e-14	2.1608e-12
ENSMUSG00000006763	Saal1	333.854	0.691153	0.257986	2.67903	0.00738354	0.0351682
ENSMUSG00000006906	Stambp	238.742	0.951682	0.232262	4.09745	4.17729e-05	0.000418606
ENSMUSG00000006931	P3h4	600.267	-0.580566	0.142519	-4.0736	4.6291e-05	0.000457709
ENSMUSG00000006958	Chrd	144.712	-1.16027	0.235134	-4.9345	8.03553e-07	1.20485e-05
ENSMUSG00000007029	Vars	3873.52	1.99309	0.275089	7.24526	4.31624e-13	1.64938e-11
ENSMUSG00000007030	Vwa7	550.585	-1.20565	0.373793	-3.22544	0.00125779	0.00809811
ENSMUSG00000007041	Clic1	1986.29	0.891182	0.233375	3.81867	0.000134172	0.00116628
ENSMUSG00000007097	Atp1a2	27873.7	-1.88111	0.245265	-7.66971	1.72391e-14	7.93599e-13
ENSMUSG00000007107	Atp1a4	56.3397	-1.76701	0.674401	-2.62012	0.00878977	0.0405008
ENSMUSG00000007122	Casq1	323.704	-1.36251	0.43367	-3.14182	0.001679	0.0103357
ENSMUSG00000007411	Mark3	3394.71	0.335369	0.116546	2.87758	0.00400742	0.0214793
ENSMUSG00000007458	M6pr	2090.35	0.752862	0.261951	2.87405	0.00405239	0.021674
ENSMUSG00000007564	Ppp2r1a	8178.64	0.389852	0.104189	3.74176	0.000182733	0.00152125
ENSMUSG00000007594	Hapln4	68.053	3.51107	0.498718	7.04019	1.91983e-12	6.80487e-11
ENSMUSG00000007617	Homer1	1190.22	-0.741261	0.267971	-2.7662	0.00567142	0.0283035
ENSMUSG00000007646	Rad51c	143.796	1.63529	0.300784	5.43675	5.42602e-08	1.02405e-06
ENSMUSG00000007655	Cav1	4319.38	-1.21795	0.214969	-5.6657	1.46427e-08	3.04089e-07
ENSMUSG00000007659	Bcl2l1	2053.4	1.07216	0.269808	3.97379	7.07386e-05	0.000666272
ENSMUSG00000007739	Cct4	6997.04	0.766212	0.149449	5.1269	2.94558e-07	4.78496e-06
ENSMUSG00000007783	Cpt1c	207.026	0.541236	0.178651	3.02958	0.00244898	0.0141998
ENSMUSG00000007833	Aldh16a1	1298.31	0.91377	0.162108	5.6368	1.73239e-08	3.5683e-07
ENSMUSG00000007850	Hnrnph1	3550.35	-0.692925	0.187	-3.70548	0.000210989	0.00172434
ENSMUSG00000007867	Ift43	799.29	0.947666	0.263804	3.59232	0.000327752	0.00252704
ENSMUSG00000007877	Tcap	150.743	-2.35562	0.36283	-6.49236	8.45014e-11	2.41147e-09
ENSMUSG00000007888	Crlf1	155.138	3.02401	0.395155	7.6527	1.96802e-14	8.97328e-13
ENSMUSG00000007891	Ctsd	106637	2.00484	0.215611	9.29844	1.42528e-20	1.16235e-18
ENSMUSG00000007950	Abhd8	629.176	-1.14169	0.133994	-8.52044	1.58949e-17	9.96514e-16
ENSMUSG00000007989	Fzd3	243.501	0.524476	0.189118	2.77328	0.00554949	0.0278753
ENSMUSG00000008036	Ap2s1	902.736	0.660951	0.213885	3.09022	0.00200009	0.0119671
ENSMUSG00000008136	Fhl2	30725.1	-2.02579	0.203013	-9.97865	1.89025e-23	2.07225e-21
ENSMUSG00000008140	Emc10	1737.48	0.742982	0.21032	3.53263	0.000411443	0.00309848
ENSMUSG00000008167	Fbxw9	347.561	1.76065	0.323398	5.44422	5.20326e-08	9.87586e-07
ENSMUSG00000008373	Prpf31	1154.79	0.436798	0.156558	2.79	0.00527078	0.026777
ENSMUSG00000008461	Fut1	18.7234	3.74759	0.632926	5.92106	3.19865e-09	7.28392e-08
ENSMUSG00000008475	Arpc5	1544.13	1.35888	0.441422	3.07841	0.00208108	0.0124027
ENSMUSG00000008658	Rbfox1	947.175	-3.27166	0.30717	-10.651	1.72552e-26	2.29255e-24
ENSMUSG00000008682	Rpl10	10539.4	0.881661	0.264945	3.32771	0.000875618	0.00594276
ENSMUSG00000008683	Rps15a	4732.7	0.669387	0.200157	3.34431	0.000824886	0.00565
ENSMUSG00000008892	Vdac3	8669.58	0.692209	0.148155	4.6722	2.9799e-06	3.94605e-05
ENSMUSG00000009108	Gnat2	28.3444	0.976552	0.38531	2.53446	0.0112622	0.0492033
ENSMUSG00000009185	Ccl8	76.9256	2.466	0.404854	6.09109	1.12143e-09	2.77754e-08
ENSMUSG00000009210	2310007L24Rik	60.6774	-2.3003	0.387255	-5.94001	2.85003e-09	6.55703e-08
ENSMUSG00000009214	Tmem8c	6.51039	2.14693	0.683454	3.14129	0.00168206	0.0103482
ENSMUSG00000009216	Fam163b	139.843	2.22358	0.508163	4.37573	1.21028e-05	0.000137256
ENSMUSG00000009376	Met	327.045	1.37116	0.290936	4.71292	2.44193e-06	3.3191e-05
ENSMUSG00000009406	Elk1	546.201	-0.567913	0.132653	-4.28121	1.85882e-05	0.000201142
ENSMUSG00000009487	Otog	39.8356	2.07507	0.54203	3.82834	0.000129011	0.00112483
ENSMUSG00000009535	Rnmt	1034.58	0.532569	0.17044	3.12468	0.00178	0.0108476
ENSMUSG00000009545	Kcnq1	1170.53	-0.855619	0.164722	-5.19433	2.05455e-07	3.44923e-06
ENSMUSG00000009596	Taf7l	29.7457	3.00942	0.553595	5.43613	5.44497e-08	1.02666e-06
ENSMUSG00000009614	Sardh	626.731	1.27629	0.136537	9.34763	8.9634e-21	7.43073e-19
ENSMUSG00000009621	Vav2	967.937	-0.697509	0.167006	-4.17654	2.95974e-05	0.000306706
ENSMUSG00000009640	Dmap1	854.441	0.543593	0.133614	4.06839	4.73384e-05	0.000466914
ENSMUSG00000009654	Oit3	24.7321	1.57286	0.591105	2.66088	0.00779372	0.0367727
ENSMUSG00000009670	Tex11	31.951	1.52248	0.573412	2.65513	0.0079278	0.0373001
ENSMUSG00000009905	Kdsr	680.355	0.644858	0.154646	4.1699	3.04731e-05	0.000314805
ENSMUSG00000009927	Rps25	8699.25	0.626715	0.155395	4.03305	5.50575e-05	0.000534358
ENSMUSG00000010048	Ifrd2	1542.82	0.545258	0.197161	2.76555	0.00568277	0.0283531
ENSMUSG00000010051	Hyal1	878.885	1.58379	0.212134	7.466	8.26684e-14	3.48423e-12
ENSMUSG00000010064	Slc38a3	2346.19	-0.81926	0.191355	-4.28137	1.85743e-05	0.0002011
ENSMUSG00000010095	Slc3a2	3697.72	1.92592	0.27451	7.01585	2.28557e-12	8.0303e-11
ENSMUSG00000010110	Stx5a	1119.57	0.483531	0.182289	2.65256	0.00798851	0.0375065
ENSMUSG00000010122	Slc47a1	2107.12	-1.01132	0.174248	-5.80392	6.47831e-09	1.41886e-07
ENSMUSG00000010277	2610507B11Rik	23381.3	-0.45535	0.180017	-2.52948	0.0114233	0.0497308
ENSMUSG00000010290	AI597479	1109.53	-1.14924	0.396769	-2.89651	0.00377341	0.0204324
ENSMUSG00000010362	Rdm1	476.816	-1.27149	0.178021	-7.14235	9.17506e-13	3.38987e-11
ENSMUSG00000010461	Eya4	72.5999	1.39619	0.397375	3.51354	0.000442184	0.00330764
ENSMUSG00000010517	Faf1	5537.8	0.517972	0.138664	3.73546	0.000187372	0.00155564
ENSMUSG00000010751	Tnfrsf22	54.8776	1.58458	0.617021	2.56812	0.0102252	0.0455864
ENSMUSG00000010755	Cars	2776.77	2.06115	0.120136	17.1568	5.58934e-66	4.87536e-63
ENSMUSG00000010936	Vac14	1297.48	0.474954	0.176262	2.6946	0.0070473	0.0337752
ENSMUSG00000011034	Slc5a1	11.8955	-2.4421	0.540437	-4.51876	6.22035e-06	7.60468e-05
ENSMUSG00000011096	Akt1s1	1731.96	1.12226	0.140779	7.97184	1.56331e-15	7.84077e-14
ENSMUSG00000011114	Tbrg1	2142.65	1.15634	0.163432	7.07538	1.49043e-12	5.37786e-11
ENSMUSG00000011148	Adssl1	4857.36	0.895994	0.287575	3.11569	0.00183517	0.0111379
ENSMUSG00000011179	Odc1	5137.13	1.41544	0.206457	6.85587	7.08776e-12	2.32344e-10
ENSMUSG00000011263	Exoc3l2	99.1329	1.11986	0.412763	2.7131	0.0066658	0.0322628
ENSMUSG00000011305	Plin5	2127.68	-0.733905	0.227262	-3.22933	0.00124081	0.00799905
ENSMUSG00000011658	Fuz	391.706	-1.02341	0.216409	-4.72903	2.25601e-06	3.08942e-05
ENSMUSG00000011751	Sptbn4	123.701	1.93226	0.418646	4.61551	3.92139e-06	5.04624e-05
ENSMUSG00000011752	Pgam1	3998.3	1.53018	0.424084	3.60819	0.000308337	0.00239669
ENSMUSG00000011831	Evi5	2222.51	0.853018	0.255232	3.34213	0.000831389	0.00568678
ENSMUSG00000012422	Tmem167	596.233	1.72144	0.520872	3.30492	0.000950029	0.0063659
ENSMUSG00000012535	Tnpo3	4993.32	0.415284	0.140514	2.95546	0.00312198	0.0174417
ENSMUSG00000012819	Cdh23	692.524	-1.22746	0.328788	-3.73327	0.000189009	0.00156755
ENSMUSG00000012848	Rps5	10605.9	0.852499	0.143355	5.94679	2.73456e-09	6.34963e-08
ENSMUSG00000013089	Etv5	1591.1	1.40184	0.342655	4.09112	4.29301e-05	0.000428703
ENSMUSG00000013160	Atp6v0d1	1375.84	0.958501	0.161565	5.93259	2.98187e-09	6.84465e-08
ENSMUSG00000013236	Ptprs	3271.98	-0.740787	0.205121	-3.61147	0.000304469	0.00237214
ENSMUSG00000013418	B4galnt2	245.099	5.23553	0.356067	14.7038	6.09671e-49	2.44625e-46
ENSMUSG00000013593	Ndufs2	26292.5	-0.598685	0.148601	-4.0288	5.60627e-05	0.000543521
ENSMUSG00000013662	Atad1	2415.02	-1.06143	0.278197	-3.81537	0.000135979	0.00117994
ENSMUSG00000013736	Trnt1	1867.02	1.05554	0.195024	5.41234	6.22063e-08	1.16091e-06
ENSMUSG00000013787	Ehmt2	3369.98	0.474475	0.139219	3.40812	0.000654126	0.00462732
ENSMUSG00000013878	Rnf170	892.733	-0.77129	0.303466	-2.54161	0.0110345	0.0484406
ENSMUSG00000013936	Myl2	181757	-1.05494	0.193229	-5.4595	4.77474e-08	9.10559e-07
ENSMUSG00000014294	Ndufa2	4793.78	-0.522226	0.112584	-4.63856	3.50842e-06	4.55572e-05
ENSMUSG00000014313	Cox6c	14183.9	-0.655354	0.240313	-2.72708	0.00638971	0.0311823
ENSMUSG00000014349	Ube2z	2382.46	1.44102	0.437372	3.29472	0.000985202	0.00657085
ENSMUSG00000014353	Tmem87b	2287.53	0.346931	0.0873751	3.9706	7.1693e-05	0.000674087
ENSMUSG00000014355	Anapc1	7649.92	0.511764	0.141677	3.61219	0.000303623	0.00236647
ENSMUSG00000014402	Tsg101	2456.8	0.556021	0.153206	3.62924	0.000284253	0.00223022
ENSMUSG00000014444	Piezo1	3328.61	0.992381	0.287191	3.45547	0.000549328	0.0039714
ENSMUSG00000014453	Blk	350.72	0.784093	0.219655	3.56967	0.000357437	0.00273073
ENSMUSG00000014470	Rnf166	655.979	-0.342865	0.131063	-2.61603	0.00889593	0.040841
ENSMUSG00000014496	Ankrd28	2520.78	0.74934	0.230178	3.25548	0.00113202	0.00740968
ENSMUSG00000014503	Pkd2l2	318.93	-1.21165	0.240314	-5.04195	4.60818e-07	7.2226e-06
ENSMUSG00000014551	Mrps25	1836.82	-0.698366	0.246644	-2.83147	0.00463343	0.0240569
ENSMUSG00000014554	Dguok	564.939	-0.729011	0.188238	-3.87282	0.000107584	0.000964388
ENSMUSG00000014599	Csf1	2453.94	-1.04854	0.258652	-4.05385	5.03805e-05	0.000494488
ENSMUSG00000014602	Kif1a	566.97	2.01047	0.238525	8.42875	3.49385e-17	2.11763e-15
ENSMUSG00000014606	Slc25a11	9529.53	-0.545117	0.175155	-3.11219	0.00185704	0.0112352
ENSMUSG00000014769	Psmb1	4056.28	0.861229	0.227098	3.79233	0.000149243	0.00127572
ENSMUSG00000014771	Pdcd2	283.696	1.06705	0.191777	5.56401	2.63643e-08	5.2945e-07
ENSMUSG00000014813	Stc1	421.722	1.70848	0.383993	4.44925	8.61715e-06	0.00010111
ENSMUSG00000014837	4931428F04Rik	263.442	0.989622	0.35389	2.79641	0.0051673	0.0263313
ENSMUSG00000014850	Msh3	681.006	-0.988536	0.174966	-5.64989	1.60552e-08	3.31379e-07
ENSMUSG00000015016	Acsf3	1131.05	0.54366	0.114668	4.74118	2.12476e-06	2.92768e-05
ENSMUSG00000015027	Galns	596.877	1.4051	0.178455	7.87371	3.44282e-15	1.68463e-13
ENSMUSG00000015083	C8g	66.001	-1.41089	0.301579	-4.67835	2.89197e-06	3.84995e-05
ENSMUSG00000015087	Rabl6	2815.55	-0.385659	0.101826	-3.78743	0.000152212	0.00129723
ENSMUSG00000015112	Slc25a13	4694.24	-0.613441	0.193275	-3.17393	0.0015039	0.00942555
ENSMUSG00000015126	Tsr3	417.343	0.827259	0.161563	5.12034	3.04992e-07	4.94244e-06
ENSMUSG00000015143	Actn1	1506.5	0.640722	0.242517	2.64196	0.00824268	0.0385106
ENSMUSG00000015149	Sirt2	2999.78	0.789504	0.209976	3.75998	0.000169929	0.0014282
ENSMUSG00000015214	Mtmr1	2242.89	0.420727	0.145161	2.89835	0.00375127	0.0203455
ENSMUSG00000015217	Hmgb3	1060.11	-1.07824	0.267753	-4.027	5.64926e-05	0.000546986
ENSMUSG00000015247	Nipsnap3b	482.413	1.63332	0.27756	5.88456	3.99117e-09	8.95647e-08
ENSMUSG00000015291	Gdi1	2876.51	0.444152	0.114369	3.88351	0.000102961	0.000929193
ENSMUSG00000015335	Zdhhc12	170.806	0.853433	0.286859	2.9751	0.00292897	0.0165059
ENSMUSG00000015357	Clpx	6549.68	0.900723	0.149401	6.02891	1.65071e-09	3.98514e-08
ENSMUSG00000015365	Mov10l1	1097.52	-1.5858	0.271426	-5.84249	5.14277e-09	1.14005e-07
ENSMUSG00000015405	Ace2	360.621	1.7597	0.215722	8.15726	3.42704e-16	1.89926e-14
ENSMUSG00000015451	C4a	296.926	1.32348	0.299001	4.42633	9.58492e-06	0.000111023
ENSMUSG00000015474	Ppt2	880.564	-0.568458	0.130992	-4.33964	1.42716e-05	0.000158536
ENSMUSG00000015476	Prrt1	35.0501	1.16225	0.450482	2.58	0.00987989	0.0444418
ENSMUSG00000015501	Hivep2	3289.76	-0.785092	0.129956	-6.0412	1.52968e-09	3.7153e-08
ENSMUSG00000015536	Mocs2	827.476	0.711404	0.176883	4.0219	5.77303e-05	0.00055682
ENSMUSG00000015568	Lpl	104030	-1.40559	0.267299	-5.25851	1.45226e-07	2.5269e-06
ENSMUSG00000015652	Steap1	104.335	4.93957	0.544077	9.07881	1.09764e-19	8.50228e-18
ENSMUSG00000015653	Steap2	440.091	2.58099	0.17367	14.8615	5.85898e-50	2.44881e-47
ENSMUSG00000015659	Serac1	626.166	-0.68426	0.218608	-3.13007	0.00174764	0.0106796
ENSMUSG00000015671	Psma2	3605.3	0.508431	0.182985	2.77853	0.00546055	0.027553
ENSMUSG00000015672	Mrpl32	388.998	0.651701	0.164994	3.94984	7.82024e-05	0.000726005
ENSMUSG00000015714	Cers2	2399.18	0.891433	0.217952	4.09004	4.31302e-05	0.000430272
ENSMUSG00000015745	Plekho1	4190.87	1.56291	0.239357	6.5296	6.59477e-11	1.90366e-09
ENSMUSG00000015766	Eps8	1554.26	0.698221	0.133548	5.22822	1.71147e-07	2.93215e-06
ENSMUSG00000015837	Sqstm1	57756.1	2.44261	0.116074	21.0436	2.6197e-98	4.77786e-95
ENSMUSG00000015839	Nfe2l2	4080.24	0.378105	0.14065	2.68827	0.00718229	0.0343156
ENSMUSG00000015843	Rxrg	1489.87	-0.847337	0.321519	-2.63542	0.00840339	0.0391248
ENSMUSG00000015850	Adamtsl4	1387.91	-0.725847	0.265489	-2.734	0.00625695	0.0306961
ENSMUSG00000015869	Prpsap1	1040.19	1.05344	0.287455	3.66472	0.000247614	0.00198151
ENSMUSG00000015889	Lta4h	1753.99	0.577689	0.214256	2.69625	0.0070124	0.033632
ENSMUSG00000015932	Dstn	8965.99	1.37058	0.315808	4.33992	1.42537e-05	0.000158426
ENSMUSG00000015957	Wnt11	119.995	-0.942625	0.241174	-3.90848	9.28787e-05	0.000846585
ENSMUSG00000015966	Il17rb	74.9403	-1.11517	0.291628	-3.82396	0.000131327	0.00114402
ENSMUSG00000015980	Lrrc27	358.217	0.776406	0.245104	3.16766	0.00153672	0.00959233
ENSMUSG00000016024	Lbp	540.291	0.94085	0.236974	3.97026	7.17936e-05	0.000674516
ENSMUSG00000016128	Stard13	1949.94	-0.875301	0.168458	-5.19597	2.03654e-07	3.4276e-06
ENSMUSG00000016239	Lonrf3	213.139	1.84143	0.241442	7.6268	2.40647e-14	1.08981e-12
ENSMUSG00000016252	Atp5e	3457.11	-0.792309	0.236572	-3.34913	0.000810668	0.00556021
ENSMUSG00000016256	Ctsz	2042.79	0.852073	0.282542	3.01574	0.00256356	0.014783
ENSMUSG00000016308	Ube2a	1077.69	0.659477	0.237461	2.7772	0.00548296	0.0276172
ENSMUSG00000016319	Slc25a5	12812.5	1.40952	0.145777	9.66901	4.08289e-22	3.86372e-20
ENSMUSG00000016327	Atp1b4	16.9931	1.74449	0.568468	3.06875	0.00214953	0.0127322
ENSMUSG00000016349	Eef1a2	20908	-0.459324	0.13853	-3.31571	0.000914107	0.00616431
ENSMUSG00000016386	Mpped2	243.515	-1.33149	0.217973	-6.10851	1.00568e-09	2.50946e-08
ENSMUSG00000016477	E2f3	887.777	1.08973	0.159593	6.82822	8.59747e-12	2.78647e-10
ENSMUSG00000016487	Ppfibp1	12017.8	1.92307	0.135593	14.1827	1.17263e-45	4.20094e-43
ENSMUSG00000016495	Plgrkt	818.475	0.435514	0.150026	2.90293	0.0036969	0.0201159
ENSMUSG00000016496	Cd274	385.338	-0.658307	0.204712	-3.21578	0.00130092	0.00834102
ENSMUSG00000016503	Gtf3a	746.693	0.621833	0.128029	4.85698	1.19187e-06	1.72645e-05
ENSMUSG00000016534	Lamp2	6071.27	0.419832	0.124493	3.37234	0.000745325	0.00517753
ENSMUSG00000016541	Atxn10	8082.39	2.48798	0.167945	14.8143	1.18435e-49	4.84906e-47
ENSMUSG00000016554	Eif3d	4179.21	1.23715	0.140014	8.8359	9.92927e-19	7.19137e-17
ENSMUSG00000016624	Phf21b	94.0225	-1.1577	0.312189	-3.70832	0.00020864	0.0017095
ENSMUSG00000016756	Cmah	195.415	-1.7247	0.463013	-3.72496	0.00019535	0.0016148
ENSMUSG00000016757	Ttll12	521.958	0.658377	0.234218	2.81096	0.00493946	0.0253636
ENSMUSG00000016758	Bik	134.883	-0.673139	0.239296	-2.813	0.00490821	0.0252289
ENSMUSG00000016833	Mrps18c	794.765	0.709615	0.211765	3.35096	0.000805316	0.00552917
ENSMUSG00000017167	Cntnap1	227.444	-1.08174	0.307748	-3.51502	0.000439729	0.00329173
ENSMUSG00000017188	Coa3	528.869	0.393489	0.152645	2.5778	0.00994305	0.0446958
ENSMUSG00000017204	Gsdma	40.9288	4.1698	0.567493	7.34776	2.01562e-13	7.9289e-12
ENSMUSG00000017288	Vps53	1964.06	1.18277	0.178333	6.63237	3.30348e-11	9.89171e-10
ENSMUSG00000017344	Vtn	961.651	-1.3175	0.152331	-8.64892	5.19892e-18	3.45366e-16
ENSMUSG00000017390	Aldoc	42.7049	1.61772	0.594366	2.72175	0.00649368	0.0315711
ENSMUSG00000017404	Rpl19	9348.33	0.901965	0.165453	5.4515	4.99462e-08	9.49782e-07
ENSMUSG00000017405	Nek8	273.68	0.694151	0.195926	3.54292	0.000395716	0.00299015
ENSMUSG00000017428	Psmd11	2893.71	0.91844	0.15968	5.75175	8.83221e-09	1.8951e-07
ENSMUSG00000017491	Rarb	630.914	-1.10608	0.244023	-4.53267	5.82439e-06	7.18493e-05
ENSMUSG00000017493	Igfbp4	4219.07	0.440207	0.126443	3.48145	0.000498699	0.00366614
ENSMUSG00000017631	Abr	1094.66	-0.50865	0.183775	-2.76779	0.00564384	0.0282224
ENSMUSG00000017664	Slc35c2	1179.76	1.01885	0.132915	7.66545	1.78207e-14	8.16252e-13
ENSMUSG00000017692	Rhbdl3	330.477	-2.15038	0.246726	-8.71565	2.89089e-18	1.966e-16
ENSMUSG00000017697	Ada	198.848	1.36816	0.276946	4.94017	7.80559e-07	1.17564e-05
ENSMUSG00000017713	Tha1	224.833	-0.962043	0.266042	-3.61613	0.000299042	0.00233348
ENSMUSG00000017724	Etv4	47.0223	1.34984	0.387843	3.48038	0.000500699	0.0036768
ENSMUSG00000017740	Slc12a5	71.1137	-1.1872	0.361255	-3.28632	0.00101505	0.00674748
ENSMUSG00000017754	Pltp	836.581	-0.776386	0.150275	-5.16644	2.38593e-07	3.95265e-06
ENSMUSG00000017756	Slc12a7	6786.66	-0.744997	0.218263	-3.4133	0.000641814	0.00454664
ENSMUSG00000017760	Ctsa	7094.22	0.511529	0.0969533	5.27603	1.32011e-07	2.32113e-06
ENSMUSG00000017764	Zswim1	106.909	-1.80015	0.550287	-3.27129	0.00107058	0.0070676
ENSMUSG00000017765	Slc12a4	4282.12	0.917999	0.121895	7.53104	5.03387e-14	2.16251e-12
ENSMUSG00000017767	Spata25	19.3949	-1.4371	0.444272	-3.23472	0.0012176	0.00787933
ENSMUSG00000017774	Myo1c	20559	1.76256	0.12644	13.9398	3.62713e-44	1.21279e-41
ENSMUSG00000017778	Cox7c	7664.64	-0.351735	0.123787	-2.84146	0.00449077	0.023468
ENSMUSG00000017929	B4galt5	1367.45	0.899761	0.335244	2.6839	0.00727687	0.0347179
ENSMUSG00000017999	Ddx27	1385.03	1.27811	0.145657	8.77478	1.71242e-18	1.19287e-16
ENSMUSG00000018040	Rrp7a	2090.1	0.803859	0.132436	6.06978	1.28083e-09	3.15288e-08
ENSMUSG00000018042	Cyb5r3	6822.33	1.36191	0.162931	8.3588	6.33573e-17	3.71659e-15
ENSMUSG00000018171	Vmp1	2362.22	1.23028	0.249511	4.93078	8.19004e-07	1.22527e-05
ENSMUSG00000018189	Uchl5	745.638	0.719178	0.145186	4.95348	7.28965e-07	1.10457e-05
ENSMUSG00000018286	Psmb6	3547.85	0.58357	0.176454	3.30721	0.000942296	0.00632464
ENSMUSG00000018293	Pfn1	7695.24	1.31387	0.182034	7.21771	5.28685e-13	1.9937e-11
ENSMUSG00000018341	Il12rb2	305.081	-1.06216	0.195922	-5.42134	5.9155e-08	1.10706e-06
ENSMUSG00000018372	Cep95	548.845	-0.366465	0.132317	-2.7696	0.0056126	0.0281078
ENSMUSG00000018379	Srsf1	2993.85	-0.417578	0.142143	-2.93773	0.0033063	0.0182982
ENSMUSG00000018387	Shroom1	101.528	1.29216	0.421211	3.06773	0.0021569	0.0127683
ENSMUSG00000018395	Kif3a	752.57	0.551869	0.184094	2.99775	0.00271979	0.0155189
ENSMUSG00000018417	Myo1b	2006.15	-0.648338	0.130337	-4.97432	6.54783e-07	9.99811e-06
ENSMUSG00000018433	Nol11	1700.41	0.504495	0.131139	3.84702	0.000119564	0.00105391
ENSMUSG00000018509	Cenpv	271.199	-0.990368	0.345986	-2.86245	0.0042038	0.02227
ENSMUSG00000018554	Ybx2	303.952	-1.79248	0.43795	-4.09289	4.26028e-05	0.000425858
ENSMUSG00000018559	Ctdnep1	653.952	-0.627083	0.179709	-3.48944	0.000484033	0.00357536
ENSMUSG00000018565	Elp5	1389.22	0.558069	0.138858	4.019	5.84461e-05	0.000562641
ENSMUSG00000018566	Slc2a4	8297.55	-0.958417	0.273249	-3.50749	0.000452362	0.00337121
ENSMUSG00000018593	Sparc	25363.7	0.551505	0.214292	2.57361	0.0100643	0.0450591
ENSMUSG00000018595	Glra4	17.1409	-1.34803	0.531038	-2.53848	0.0111335	0.0488006
ENSMUSG00000018651	Tada2a	309.73	-0.556597	0.203408	-2.73636	0.00621227	0.0305542
ENSMUSG00000018661	Cog1	1892.48	0.61447	0.174361	3.52413	0.000424869	0.00319001
ENSMUSG00000018669	Cdk5rap3	1030.19	0.977549	0.163678	5.97237	2.33826e-09	5.5059e-08
ENSMUSG00000018677	Slc25a39	9888.73	1.59719	0.182863	8.73436	2.45043e-18	1.68358e-16
ENSMUSG00000018697	Aatf	878.207	0.643818	0.17134	3.75754	0.000171592	0.00143976
ENSMUSG00000018707	Dync1h1	70121.8	0.963275	0.182429	5.28029	1.28982e-07	2.27584e-06
ENSMUSG00000018727	Cpsf4l	25.3925	-1.25557	0.448913	-2.7969	0.0051595	0.0263042
ENSMUSG00000018733	Pex12	278.772	-0.960778	0.157449	-6.10214	1.04661e-09	2.60833e-08
ENSMUSG00000018740	Slc25a35	471.875	-0.748986	0.2642	-2.83491	0.00458379	0.0238486
ENSMUSG00000018761	Mpdu1	459.725	1.07833	0.165881	6.50063	7.99829e-11	2.28904e-09
ENSMUSG00000018796	Acsl1	26726.5	-0.983805	0.225679	-4.35932	1.3047e-05	0.000146392
ENSMUSG00000018800	Abca5	1098.59	0.783231	0.134454	5.82526	5.70229e-09	1.25576e-07
ENSMUSG00000018821	Avpi1	796.11	2.46182	0.31821	7.73648	1.02211e-14	4.81352e-13
ENSMUSG00000018841	Rad51d	397.017	-0.587963	0.176588	-3.32958	0.000869785	0.00591513
ENSMUSG00000018845	Unc45b	7443.36	-0.693285	0.180321	-3.84473	0.000120684	0.00106284
ENSMUSG00000018848	Rars	4063.12	1.71555	0.228487	7.50832	5.98909e-14	2.55102e-12
ENSMUSG00000018861	Fdxr	800.342	1.3194	0.156647	8.42275	3.67737e-17	2.22215e-15
ENSMUSG00000018893	Mb	90341.8	-1.37447	0.224775	-6.1149	9.66182e-10	2.42294e-08
ENSMUSG00000019139	Isyna1	494.458	-0.55667	0.173135	-3.21523	0.00130341	0.00835163
ENSMUSG00000019143	Hars2	850.362	-0.683504	0.217185	-3.14711	0.00164893	0.0101881
ENSMUSG00000019194	Scn1b	1065.06	0.792247	0.267279	2.96412	0.00303549	0.0170249
ENSMUSG00000019210	Atp6v1e1	3263.75	0.772175	0.174305	4.43001	9.42287e-06	0.000109526
ENSMUSG00000019235	Rps6kl1	114.257	-1.25497	0.259238	-4.841	1.29189e-06	1.85658e-05
ENSMUSG00000019261	Map1s	641.66	0.828942	0.326487	2.53897	0.0111179	0.0487428
ENSMUSG00000019297	Nop9	941.526	0.887418	0.198298	4.47517	7.63504e-06	9.12294e-05
ENSMUSG00000019302	Atp6v0a1	3817.66	0.667033	0.236381	2.82186	0.00477466	0.0246689
ENSMUSG00000019362	D8Ertd738e	1572.2	2.48789	0.509302	4.8849	1.03482e-06	1.51427e-05
ENSMUSG00000019428	Fkbp8	5542.7	0.634978	0.165592	3.83459	0.000125776	0.00110044
ENSMUSG00000019433	Gipc1	1029.61	1.05136	0.141159	7.44811	9.46835e-14	3.93924e-12
ENSMUSG00000019467	Arhgef25	782.485	-0.448634	0.144311	-3.1088	0.00187847	0.0113478
ENSMUSG00000019487	Trip10	2294.71	-1.05245	0.16981	-6.19784	5.72447e-10	1.47236e-08
ENSMUSG00000019528	Gyg	9147.62	1.8416	0.252064	7.30607	2.75059e-13	1.06943e-11
ENSMUSG00000019578	Ubxn6	2645.65	0.508188	0.127724	3.97881	6.92613e-05	0.000654816
ENSMUSG00000019689	1110001J03Rik	210.389	-3.98086	0.662829	-6.00586	1.90321e-09	4.54009e-08
ENSMUSG00000019710	Mrpl24	2490.97	0.528798	0.115247	4.58839	4.46672e-06	5.66503e-05
ENSMUSG00000019726	Lyst	3021.07	0.6585	0.164956	3.99197	6.55264e-05	0.000623324
ENSMUSG00000019761	Krt10	44.0737	-0.974065	0.311571	-3.1263	0.0017702	0.0107944
ENSMUSG00000019762	Iyd	14.7568	1.67298	0.644168	2.59711	0.00940109	0.0427578
ENSMUSG00000019763	Rmnd1	1862.47	-0.646224	0.224973	-2.87245	0.00407297	0.021755
ENSMUSG00000019768	Esr1	166.353	0.950638	0.348175	2.73035	0.00632675	0.0309428
ENSMUSG00000019787	Trdn	10568.4	-0.451657	0.178538	-2.52975	0.0114144	0.0497251
ENSMUSG00000019794	Katna1	845.551	0.353973	0.137481	2.5747	0.0100326	0.0449531
ENSMUSG00000019796	Lrp11	263.264	0.878322	0.297488	2.95247	0.00315245	0.0175875
ENSMUSG00000019797	1700021F05Rik	1880.97	0.61501	0.23039	2.66943	0.00759812	0.0359683
ENSMUSG00000019809	Pex3	1301.23	0.553323	0.150189	3.68418	0.000229443	0.00186134
ENSMUSG00000019810	Fuca2	4302	-0.631167	0.199913	-3.15721	0.00159289	0.00988902
ENSMUSG00000019814	Ltv1	1037.52	1.15988	0.163981	7.07329	1.51303e-12	5.43985e-11
ENSMUSG00000019823	Mical1	2999.82	2.39915	0.2044	11.7375	8.18553e-32	1.41567e-29
ENSMUSG00000019832	Rab32	169.968	1.11701	0.322694	3.4615	0.000537177	0.00390183
ENSMUSG00000019838	Slc16a10	880.398	-1.52331	0.235227	-6.47592	9.42345e-11	2.67024e-09
ENSMUSG00000019846	Lama4	7708.17	-0.45654	0.17085	-2.67217	0.00753633	0.0357686
ENSMUSG00000019848	Popdc3	910.787	0.721245	0.214123	3.36837	0.000756149	0.00523821
ENSMUSG00000019849	Prep	1849.78	0.582409	0.212951	2.73494	0.00623914	0.0306338
ENSMUSG00000019851	Perp	869.717	1.11569	0.231748	4.81423	1.47766e-06	2.09503e-05
ENSMUSG00000019852	Arfgef3	348.877	4.26093	0.327071	13.0276	8.52902e-39	2.03702e-36
ENSMUSG00000019853	Hebp2	106.602	2.82706	0.469951	6.01565	1.7917e-09	4.30996e-08
ENSMUSG00000019854	Reps1	2044.72	0.77499	0.169872	4.56219	5.06224e-06	6.3395e-05
ENSMUSG00000019856	Fam184a	179.653	1.58876	0.235077	6.75846	1.39464e-11	4.3786e-10
ENSMUSG00000019863	Qrsl1	896.1	-0.470569	0.169409	-2.7777	0.00547444	0.027584
ENSMUSG00000019864	Rtn4ip1	908.882	-1.14107	0.237719	-4.80008	1.58606e-06	2.23295e-05
ENSMUSG00000019866	Aim1	403.325	-0.486918	0.146953	-3.31343	0.000921587	0.00621058
ENSMUSG00000019889	Ptprk	3235.64	0.761319	0.191741	3.97056	7.17028e-05	0.000674087
ENSMUSG00000019893	Ros1	4.61649	1.9734	0.684171	2.88436	0.00392208	0.0211121
ENSMUSG00000019907	Ppp1r12a	4800.66	0.487804	0.140427	3.47371	0.000513312	0.00375702
ENSMUSG00000019917	2010-09-01	1073.82	0.565898	0.205149	2.75847	0.00580732	0.0288811
ENSMUSG00000019923	Zwint	3781.06	1.74599	0.353682	4.93662	7.9488e-07	1.19363e-05
ENSMUSG00000019933	Mrln	14.4772	-1.97014	0.632834	-3.1132	0.00185069	0.0112036
ENSMUSG00000019943	Atp2b1	4618.12	-0.420347	0.154442	-2.72171	0.00649456	0.0315711
ENSMUSG00000019944	Rhobtb1	4445.59	-1.35141	0.269491	-5.01467	5.31249e-07	8.27478e-06
ENSMUSG00000019945	1700040L02Rik	239.78	-2.11406	0.243975	-8.66506	4.51292e-18	3.02803e-16
ENSMUSG00000019951	Uhrf1bp1l	3160.66	0.795355	0.164646	4.83068	1.36065e-06	1.94426e-05
ENSMUSG00000019961	Tmpo	1752.51	-0.762404	0.268741	-2.83694	0.00455477	0.0237283
ENSMUSG00000019969	Psen1	998.769	0.351262	0.129999	2.70202	0.00689187	0.0331729
ENSMUSG00000019970	Sgk1	3920.14	1.29308	0.276216	4.68141	2.84907e-06	3.808e-05
ENSMUSG00000019986	Ahi1	321.581	0.722917	0.211881	3.4119	0.000645119	0.00456682
ENSMUSG00000019990	Pde7b	618.819	-1.24844	0.156598	-7.97227	1.55788e-15	7.83311e-14
ENSMUSG00000019997	Ctgf	8080.73	1.97991	0.408476	4.84707	1.25295e-06	1.8045e-05
ENSMUSG00000020015	Cdk17	1410.73	-0.415294	0.150073	-2.76728	0.00565256	0.0282468
ENSMUSG00000020024	Cep83	1407.07	0.675251	0.125086	5.39829	6.72779e-08	1.24882e-06
ENSMUSG00000020029	Nudt4	3722.62	-2.95393	0.404926	-7.29499	2.98675e-13	1.15676e-11
ENSMUSG00000020034	Tcp11l2	2841.91	-1.2214	0.148137	-8.24507	1.65064e-16	9.48855e-15
ENSMUSG00000020038	Cry1	494.15	0.384727	0.130338	2.95176	0.00315971	0.017623
ENSMUSG00000020075	Ddx21	3739.33	0.807407	0.152867	5.28177	1.27943e-07	2.2615e-06
ENSMUSG00000020076	Ddx50	2872.64	0.783197	0.15431	5.07547	3.86547e-07	6.14007e-06
ENSMUSG00000020078	Vps26a	5100.42	0.942834	0.131442	7.17299	7.33782e-13	2.73119e-11
ENSMUSG00000020089	Ppa1	1821.89	0.820806	0.236677	3.46805	0.000524248	0.00382037
ENSMUSG00000020092	Pald1	1320.39	-0.537879	0.206878	-2.59999	0.00932273	0.0424785
ENSMUSG00000020098	Pcbd1	90.91	1.54897	0.389539	3.97643	6.9959e-05	0.000660168
ENSMUSG00000020099	Unc5b	2118.23	0.822311	0.200609	4.09907	4.14817e-05	0.000415913
ENSMUSG00000020101	4632428N05Rik	1305.6	-1.51452	0.251117	-6.03114	1.62808e-09	3.93526e-08
ENSMUSG00000020111	Micu1	1194.61	0.648611	0.134384	4.82654	1.38923e-06	1.97946e-05
ENSMUSG00000020114	Cand1	3691.25	0.628917	0.204777	3.07123	0.00213182	0.012646
ENSMUSG00000020121	Srgap1	455.023	1.27668	0.251112	5.08409	3.69395e-07	5.89094e-06
ENSMUSG00000020123	Avpr1a	56.5982	-0.980012	0.351798	-2.78572	0.00534085	0.0270781
ENSMUSG00000020133	2310011J03Rik	123.204	-2.47873	0.648924	-3.81976	0.000133583	0.00116166
ENSMUSG00000020135	Apc2	420.436	-1.21373	0.400335	-3.03179	0.00243105	0.0141163
ENSMUSG00000020137	Thap2	225.661	-1.25398	0.365918	-3.42695	0.000610403	0.00436108
ENSMUSG00000020142	Slc1a4	588.06	2.00308	0.376858	5.31521	1.06536e-07	1.91517e-06
ENSMUSG00000020150	Gamt	122.991	-1.06487	0.379392	-2.80677	0.00500403	0.0256426
ENSMUSG00000020153	Ndufs7	7814.27	-0.640119	0.177573	-3.60482	0.000312374	0.00242431
ENSMUSG00000020156	Mum1	970.54	-0.625573	0.172886	-3.61842	0.000296403	0.00231469
ENSMUSG00000020163	Uqcr11	4829.28	-0.995645	0.125579	-7.92843	2.21929e-15	1.09663e-13
ENSMUSG00000020173	Cobl	555.718	1.10197	0.221532	4.9743	6.54846e-07	9.99811e-06
ENSMUSG00000020182	Ddc	155.453	-2.05433	0.395326	-5.19653	2.03043e-07	3.42018e-06
ENSMUSG00000020186	Csrp2	936.748	0.787528	0.292982	2.68798	0.00718864	0.0343377
ENSMUSG00000020191	4930415F15Rik	13.5029	1.57913	0.620179	2.54625	0.0108887	0.0479134
ENSMUSG00000020198	Ap3d1	6388.04	0.644241	0.147544	4.36644	1.26286e-05	0.000142415
ENSMUSG00000020205	Phlda1	406.102	1.02775	0.379082	2.71116	0.00670492	0.0323896
ENSMUSG00000020216	Jsrp1	30.5855	1.13085	0.432018	2.61759	0.0088553	0.0407349
ENSMUSG00000020219	Timm13	1421.95	0.954397	0.289067	3.30165	0.00096119	0.00643208
ENSMUSG00000020224	Llph	579.039	1.09039	0.334871	3.25616	0.00112931	0.00739918
ENSMUSG00000020230	Prmt2	1144.86	1.38697	0.128306	10.8099	3.09149e-27	4.16252e-25
ENSMUSG00000020232	Hmg20b	1440.69	0.370053	0.120463	3.07191	0.00212692	0.0126281
ENSMUSG00000020246	Hcfc2	1810.22	0.573793	0.150612	3.80974	0.000139111	0.00120451
ENSMUSG00000020250	Txnrd1	7138.6	1.94752	0.17214	11.3136	1.12389e-29	1.68265e-27
ENSMUSG00000020255	D10Wsu102e	254.218	-1.4082	0.468928	-3.00301	0.00267325	0.0152838
ENSMUSG00000020256	Aldh1l2	2399.29	1.90679	0.274667	6.94221	3.86006e-12	1.30812e-10
ENSMUSG00000020257	Wdr82	1680.37	-0.911633	0.321495	-2.83561	0.00457386	0.0238092
ENSMUSG00000020264	Slc36a2	519.908	-2.07925	0.544229	-3.82054	0.000133158	0.00115846
ENSMUSG00000020271	Fbxw11	3404.89	0.482739	0.121903	3.96003	7.49388e-05	0.000698292
ENSMUSG00000020284	1810043G02Rik	331.404	-0.582274	0.158825	-3.66613	0.000246247	0.00197228
ENSMUSG00000020287	Mpg	245.46	0.611625	0.19259	3.17578	0.00149435	0.00938035
ENSMUSG00000020319	Wdpcp	600.113	1.4908	0.186151	8.00859	1.16032e-15	6.01812e-14
ENSMUSG00000020321	Mdh1	66409.1	-0.489433	0.158575	-3.08644	0.00202569	0.0121023
ENSMUSG00000020325	Fstl3	491.972	1.77054	0.377037	4.69594	2.65384e-06	3.55891e-05
ENSMUSG00000020334	Slc22a4	1703.65	3.36282	0.248525	13.5311	1.02494e-41	2.70557e-39
ENSMUSG00000020335	Zfp354b	107.83	-1.11687	0.402771	-2.77298	0.00555456	0.0278898
ENSMUSG00000020340	Cyfip2	3567.25	1.74726	0.481168	3.63129	0.00028201	0.00221537
ENSMUSG00000020358	Hnrnpab	3867.15	0.758092	0.128189	5.91386	3.3418e-09	7.60127e-08
ENSMUSG00000020361	Hspa4	11760.1	0.633778	0.124973	5.0713	3.95104e-07	6.26013e-06
ENSMUSG00000020364	Zfp354a	150.642	-0.658059	0.180538	-3.645	0.000267396	0.00211973
ENSMUSG00000020372	Gnb2l1	12901.6	0.738027	0.185471	3.9792	6.91484e-05	0.000654057
ENSMUSG00000020380	Rad50	1296.2	0.582158	0.167594	3.47362	0.000513495	0.00375702
ENSMUSG00000020389	Cdkl3	291.871	0.728447	0.211407	3.44571	0.000569559	0.00410287
ENSMUSG00000020390	Ube2b	1857.95	-0.685851	0.227604	-3.01336	0.00258375	0.014868
ENSMUSG00000020400	Tnip1	3860.67	1.53734	0.197224	7.79488	6.44688e-15	3.09419e-13
ENSMUSG00000020407	Upp1	501.665	2.15344	0.190826	11.2848	1.55989e-29	2.30107e-27
ENSMUSG00000020412	Ascc2	1510.07	1.7219	0.147228	11.6955	1.34403e-31	2.24699e-29
ENSMUSG00000020423	Btg2	1097.53	1.88442	0.596836	3.15735	0.00159212	0.00988888
ENSMUSG00000020424	Gatsl3	285.989	0.760178	0.217627	3.49303	0.000477567	0.00353671
ENSMUSG00000020427	Igfbp3	1645.44	0.780977	0.275627	2.83346	0.00460476	0.0239328
ENSMUSG00000020430	Pes1	2002.48	1.05853	0.157805	6.70784	1.97529e-11	6.06864e-10
ENSMUSG00000020431	Adcy1	553.121	-1.82946	0.488119	-3.74797	0.00017827	0.00148709
ENSMUSG00000020439	Smtn	4812.32	-1.14287	0.313547	-3.64497	0.000267423	0.00211973
ENSMUSG00000020444	Guk1	1619.45	-0.736656	0.193537	-3.80627	0.000141077	0.00121937
ENSMUSG00000020451	Limk2	1903.81	1.09178	0.114759	9.51367	1.84055e-21	1.64112e-19
ENSMUSG00000020453	Patz1	324.19	-1.05111	0.325147	-3.23273	0.00122615	0.00791476
ENSMUSG00000020457	Drg1	1597.24	0.870835	0.14783	5.89077	3.84392e-09	8.64536e-08
ENSMUSG00000020458	Rtn4	24289.8	3.21331	0.213125	15.0771	2.29052e-51	1.02116e-48
ENSMUSG00000020459	Mtif2	1647.63	-0.504345	0.131164	-3.84513	0.000120487	0.00106158
ENSMUSG00000020460	Rps27a	2804.78	1.15122	0.221673	5.1933	2.066e-07	3.46266e-06
ENSMUSG00000020462	Cfap36	703.194	1.05387	0.15694	6.71508	1.87964e-11	5.78365e-10
ENSMUSG00000020475	Pgam2	3052.13	-0.707915	0.231577	-3.05693	0.00223613	0.0131289
ENSMUSG00000020476	Dbnl	1325.83	0.81285	0.119931	6.77764	1.22157e-11	3.89619e-10
ENSMUSG00000020486	2004-09-01	1060.86	-0.545459	0.146596	-3.72082	0.000198576	0.00163943
ENSMUSG00000020513	Tubd1	240.812	-0.490638	0.171381	-2.86284	0.00419857	0.0222482
ENSMUSG00000020521	Rnft1	1543.33	0.73578	0.126	5.83951	5.23531e-09	1.158e-07
ENSMUSG00000020525	Ppm1d	411.49	-0.431942	0.165791	-2.60534	0.0091784	0.0419351
ENSMUSG00000020532	Acaca	3836.14	1.54175	0.18402	8.37814	5.37693e-17	3.1634e-15
ENSMUSG00000020534	Shmt1	847.092	1.02482	0.25478	4.02236	5.76176e-05	0.000556268
ENSMUSG00000020537	Drg2	1970.65	0.875991	0.241108	3.63319	0.00027994	0.00220155
ENSMUSG00000020541	Tom1l1	1149.88	0.624664	0.219066	2.85149	0.0043515	0.0229122
ENSMUSG00000020542	Myocd	2275.55	-0.732709	0.195086	-3.75582	0.000172772	0.00144785
ENSMUSG00000020546	Stxbp4	513.749	-0.595757	0.181371	-3.28473	0.00102079	0.0067744
ENSMUSG00000020547	Bzw2	6538.68	0.497177	0.182763	2.72033	0.0065217	0.0316953
ENSMUSG00000020549	Elac2	1680.12	0.82262	0.14701	5.59567	2.19769e-08	4.44905e-07
ENSMUSG00000020593	Lpin1	7983.15	-1.70022	0.271541	-6.26138	3.81579e-10	1.00199e-08
ENSMUSG00000020598	Nrcam	218.871	4.30596	0.360195	11.9545	6.14814e-33	1.15275e-30
ENSMUSG00000020604	Arsg	260.816	1.31414	0.227896	5.7664	8.09838e-09	1.74887e-07
ENSMUSG00000020608	Smc6	3110.97	0.313329	0.114704	2.73164	0.00630199	0.0308819
ENSMUSG00000020610	Amz2	1816.29	-0.530638	0.173399	-3.06021	0.0022118	0.0130082
ENSMUSG00000020612	Prkar1a	20053.4	1.10125	0.200856	5.48279	4.18667e-08	8.06075e-07
ENSMUSG00000020623	Map2k6	169.892	-1.47483	0.342034	-4.31192	1.61843e-05	0.00017762
ENSMUSG00000020627	Klhl29	126.567	0.950288	0.233516	4.06948	4.71181e-05	0.000465427
ENSMUSG00000020638	Cmpk2	410.678	-0.811907	0.260716	-3.11415	0.00184477	0.0111812
ENSMUSG00000020641	Rsad2	676.991	-1.35705	0.328683	-4.12875	3.64733e-05	0.000370307
ENSMUSG00000020644	Id2	433.923	0.738425	0.279346	2.64341	0.00820763	0.0384095
ENSMUSG00000020656	Grhl1	80.8895	1.37917	0.32499	4.24372	2.19846e-05	0.000235355
ENSMUSG00000020659	Cbll1	234.653	-1.27814	0.423026	-3.02141	0.00251602	0.0145339
ENSMUSG00000020661	Dnmt3a	3295.89	-0.935414	0.318351	-2.93831	0.00330003	0.0182837
ENSMUSG00000020674	Pxdn	4372.94	-1.01507	0.230888	-4.39637	1.10079e-05	0.000125978
ENSMUSG00000020676	Ccl11	76.424	-2.59755	0.557379	-4.6603	3.15749e-06	4.15654e-05
ENSMUSG00000020677	Ddx52	1066.79	0.624421	0.189844	3.28912	0.001005	0.00669175
ENSMUSG00000020680	Taf15	676.044	0.514441	0.195729	2.62833	0.00858055	0.0397375
ENSMUSG00000020681	Ace	5218.99	0.699083	0.184435	3.7904	0.000150407	0.00128348
ENSMUSG00000020684	Rasl10b	1629.08	-1.3272	0.302902	-4.38163	1.17797e-05	0.000133895
ENSMUSG00000020694	Tlk2	2420.87	0.505692	0.149918	3.37312	0.000743203	0.00516637
ENSMUSG00000020695	Mrc2	2108.97	0.659522	0.165708	3.98001	6.89119e-05	0.000652435
ENSMUSG00000020697	Lig3	1558.23	0.304312	0.106257	2.86393	0.00418416	0.0222012
ENSMUSG00000020706	Ftsj3	2358.64	0.758962	0.156328	4.85492	1.20434e-06	1.742e-05
ENSMUSG00000020708	Psmc5	3402.86	0.323362	0.124143	2.60474	0.00919429	0.0419886
ENSMUSG00000020715	Ern1	1913.98	0.993847	0.175524	5.66218	1.49458e-08	3.09436e-07
ENSMUSG00000020716	Nf1	6448.09	0.350375	0.121956	2.87296	0.00406649	0.0217436
ENSMUSG00000020719	Ddx5	18356.9	-0.256104	0.100617	-2.54534	0.010917	0.0480195
ENSMUSG00000020728	Cep112	149.109	-0.97008	0.294573	-3.29318	0.000990628	0.00659826
ENSMUSG00000020732	Rab37	76.749	0.77706	0.286514	2.71212	0.00668552	0.0323115
ENSMUSG00000020734	Grin2c	378.71	1.85712	0.440155	4.21923	2.45134e-05	0.000259484
ENSMUSG00000020736	Nt5c	416.572	0.862976	0.248383	3.47437	0.000512047	0.00375052
ENSMUSG00000020737	Hn1	2399.88	1.08815	0.332911	3.26859	0.00108084	0.00711181
ENSMUSG00000020743	Mif4gd	737.135	-0.918049	0.139387	-6.58635	4.50772e-11	1.32796e-09
ENSMUSG00000020744	Slc25a19	866.392	-0.637522	0.236795	-2.6923	0.00709614	0.0339525
ENSMUSG00000020747	2310067B10Rik	3399.08	-0.975691	0.252801	-3.85953	0.000113606	0.00100848
ENSMUSG00000020766	Galk1	671.447	0.821522	0.182819	4.49363	7.0019e-06	8.42876e-05
ENSMUSG00000020773	Trim47	1603.68	1.56757	0.354986	4.41586	1.00611e-05	0.00011607
ENSMUSG00000020774	Aspa	110.158	-0.910837	0.347799	-2.61886	0.00882245	0.0406141
ENSMUSG00000020777	Acox1	15576.4	0.597085	0.230409	2.59142	0.00955821	0.0433251
ENSMUSG00000020781	Tsen54	585.35	1.04236	0.216679	4.81064	1.50449e-06	2.12857e-05
ENSMUSG00000020782	Llgl2	1026.08	0.863168	0.205787	4.19448	2.73497e-05	0.000285925
ENSMUSG00000020788	Atp2a3	1381.63	0.826511	0.202867	4.07416	4.61808e-05	0.000456844
ENSMUSG00000020790	Ankfy1	3363.19	0.518291	0.172912	2.99743	0.00272267	0.0155276
ENSMUSG00000020803	Txndc17	1826.12	1.20686	0.308821	3.90797	9.3076e-05	0.000847997
ENSMUSG00000020811	Wscd1	304.094	-0.84405	0.189707	-4.44922	8.61817e-06	0.00010111
ENSMUSG00000020823	Sec14l1	4401.48	-0.327476	0.118711	-2.75861	0.00580486	0.0288811
ENSMUSG00000020826	Nos2	340.909	-1.31995	0.344209	-3.83473	0.000125703	0.00110028
ENSMUSG00000020834	Dhrs13	241.741	0.872177	0.311045	2.80403	0.00504687	0.0258226
ENSMUSG00000020849	Ywhae	3559.84	-0.606519	0.222161	-2.73008	0.00633189	0.030955
ENSMUSG00000020866	Cacna1g	748.533	-1.08509	0.293754	-3.69388	0.000220862	0.00179973
ENSMUSG00000020869	Lrrc59	2957.07	0.955935	0.298689	3.20043	0.00137221	0.00871729
ENSMUSG00000020873	Slc35b1	1472.43	0.696885	0.175047	3.98114	6.85868e-05	0.000649664
ENSMUSG00000020875	Hoxb9	3.60801	1.97006	0.683754	2.88124	0.00396113	0.0212766
ENSMUSG00000020878	Lrrc46	16.2683	1.29186	0.493482	2.61784	0.00884879	0.040726
ENSMUSG00000020882	Cacnb1	2179.07	3.05409	0.195865	15.5929	8.13991e-55	4.18725e-52
ENSMUSG00000020889	Nr1d1	2052.86	-0.908319	0.196443	-4.62384	3.76703e-06	4.86321e-05
ENSMUSG00000020898	Ctc1	1260.32	0.578225	0.157468	3.67201	0.00024065	0.00193893
ENSMUSG00000020900	Myh10	3901.17	0.614018	0.167915	3.65673	0.000255458	0.00203696
ENSMUSG00000020902	Ntn1	2063.53	-1.64937	0.395541	-4.16993	3.047e-05	0.000314805
ENSMUSG00000020903	Stx8	1098.48	1.08202	0.155322	6.96633	3.25314e-12	1.12331e-10
ENSMUSG00000020919	Stat5b	3366.9	-1.0367	0.250778	-4.13393	3.56617e-05	0.000362802
ENSMUSG00000020926	Adam11	208.341	-1.92242	0.253424	-7.58582	3.30399e-14	1.46002e-12
ENSMUSG00000020936	Nmt1	6113.76	1.03242	0.13248	7.79302	6.5426e-15	3.11776e-13
ENSMUSG00000020937	Plcd3	1151.44	1.29343	0.280968	4.60349	4.15466e-06	5.30765e-05
ENSMUSG00000020952	Scfd1	1909.64	0.841858	0.155528	5.41291	6.20084e-08	1.1583e-06
ENSMUSG00000020961	Ston2	219.681	-1.37712	0.313045	-4.39909	1.08704e-05	0.000124618
ENSMUSG00000020988	L2hgdh	1846.13	-0.527939	0.11506	-4.58837	4.46719e-06	5.66503e-05
ENSMUSG00000020994	Pnn	1312.6	-1.07641	0.348317	-3.09031	0.00199947	0.011967
ENSMUSG00000021003	Galc	538.693	0.70087	0.18396	3.80989	0.000139027	0.0012043
ENSMUSG00000021013	Ttc8	220.494	0.652807	0.220312	2.9631	0.00304555	0.0170622
ENSMUSG00000021022	Ppp2r3c	883.005	0.743605	0.164064	4.53241	5.83137e-06	7.18606e-05
ENSMUSG00000021024	Psma6	3358.1	0.594	0.132626	4.47876	7.50791e-06	8.9871e-05
ENSMUSG00000021027	Ralgapa1	8217.74	-0.356608	0.1085	-3.28671	0.00101364	0.00674033
ENSMUSG00000021036	Sptlc2	2031.6	0.644677	0.132294	4.87306	1.09885e-06	1.60095e-05
ENSMUSG00000021047	Nova1	96.3434	-1.07468	0.238709	-4.50207	6.72935e-06	8.15736e-05
ENSMUSG00000021048	Mthfd1	2229.06	0.465329	0.125168	3.71763	0.000201099	0.00165686
ENSMUSG00000021057	Akap5	233.235	-1.90384	0.586303	-3.24719	0.00116552	0.00758682
ENSMUSG00000021068	Nin	4231.83	1.09067	0.12895	8.45808	2.71817e-17	1.66764e-15
ENSMUSG00000021069	Pygl	635.845	1.91784	0.194093	9.88103	5.03135e-23	5.22999e-21
ENSMUSG00000021070	Bdkrb2	24.7648	1.61601	0.494397	3.26865	0.00108061	0.00711181
ENSMUSG00000021076	Actr10	2551.82	0.621641	0.198502	3.13166	0.00173819	0.0106315
ENSMUSG00000021079	Timm9	624.576	0.528631	0.170681	3.09718	0.00195372	0.0117142
ENSMUSG00000021091	Serpina3n	2148.6	2.76827	0.384787	7.19429	6.27882e-13	2.35011e-11
ENSMUSG00000021103	Mnat1	1073.32	1.27693	0.128749	9.91796	3.47802e-23	3.69186e-21
ENSMUSG00000021109	Hif1a	16632	2.33966	0.166508	14.0514	7.55784e-45	2.6601e-42
ENSMUSG00000021115	Vrk1	583.929	0.692933	0.163831	4.22956	2.34154e-05	0.000248945
ENSMUSG00000021116	Eif2s1	3117.03	1.45465	0.227017	6.40766	1.47771e-10	4.10039e-09
ENSMUSG00000021149	Gtpbp4	2676.56	1.08172	0.174308	6.2058	5.44206e-10	1.40876e-08
ENSMUSG00000021178	Psmc1	5625.14	0.834347	0.156551	5.32957	9.84469e-08	1.77452e-06
ENSMUSG00000021180	Rps6ka5	585.358	-1.18605	0.226935	-5.22637	1.72868e-07	2.95911e-06
ENSMUSG00000021182	Ccdc88c	845.064	-0.75718	0.287398	-2.6346	0.00842355	0.0391823
ENSMUSG00000021185	9030617O03Rik	1818.62	-1.10414	0.202361	-5.45628	4.86201e-08	9.25442e-07
ENSMUSG00000021186	Fbln5	2056.05	1.33806	0.276606	4.83744	1.31524e-06	1.88474e-05
ENSMUSG00000021196	Pfkp	13270.5	2.33675	0.275811	8.4723	2.40585e-17	1.48511e-15
ENSMUSG00000021200	Asb2	12761.4	-0.942685	0.365264	-2.58083	0.00985627	0.0443753
ENSMUSG00000021203	Otub2	1484.5	2.12434	0.189152	11.2309	2.87576e-29	4.15062e-27
ENSMUSG00000021214	Akr1c18	6.00775	2.48399	0.6747	3.68162	0.000231761	0.00187719
ENSMUSG00000021218	Gdi2	10833.2	0.729907	0.167274	4.36353	1.2798e-05	0.000143957
ENSMUSG00000021221	Dpf3	452.98	-1.05661	0.257207	-4.10802	3.99059e-05	0.000401702
ENSMUSG00000021222	Dcaf4	450.817	-0.741965	0.183392	-4.04578	5.21487e-05	0.000509103
ENSMUSG00000021228	Acot3	33.3569	-2.04197	0.471525	-4.33057	1.48725e-05	0.000164482
ENSMUSG00000021236	Entpd5	7190.32	-0.772106	0.206111	-3.74607	0.000179629	0.00149719
ENSMUSG00000021238	Aldh6a1	8282.06	-0.893528	0.164805	-5.42172	5.90293e-08	1.10574e-06
ENSMUSG00000021242	Npc2	2868.39	1.47509	0.413057	3.57114	0.000355431	0.00271644
ENSMUSG00000021243	Fcf1	769.411	1.04308	0.163937	6.36271	1.98224e-10	5.40322e-09
ENSMUSG00000021255	Esrrb	1056.96	-0.897889	0.192601	-4.66192	3.1327e-06	4.12932e-05
ENSMUSG00000021260	Hhipl1	186.445	1.14882	0.313996	3.65872	0.000253483	0.00202363
ENSMUSG00000021266	Wars	4784.41	1.77996	0.208063	8.55488	1.17993e-17	7.51487e-16
ENSMUSG00000021268	Meg3	602.802	-0.607134	0.230734	-2.63131	0.00850558	0.0394815
ENSMUSG00000021270	Hsp90aa1	17895.9	1.29803	0.330632	3.9259	8.64052e-05	0.000792984
ENSMUSG00000021273	Fdft1	1229.14	-0.827536	0.230251	-3.59406	0.000325561	0.00251304
ENSMUSG00000021277	Traf3	1389.76	-0.721648	0.263802	-2.73556	0.00622734	0.0306007
ENSMUSG00000021282	Eif5	10162.2	0.744026	0.222711	3.34077	0.000835471	0.00570886
ENSMUSG00000021286	Zfyve21	514.791	-1.13504	0.250126	-4.53788	5.6823e-06	7.0283e-05
ENSMUSG00000021288	Klc1	5076.05	0.482497	0.129308	3.73138	0.000190433	0.00157805
ENSMUSG00000021298	Gpr132	45.5223	1.2698	0.383168	3.31395	0.000919868	0.00620107
ENSMUSG00000021311	Mtr	3396.59	-0.771195	0.125638	-6.13824	8.34389e-10	2.11625e-08
ENSMUSG00000021313	Ryr2	143358	-1.88874	0.201398	-9.37816	6.71317e-21	5.61165e-19
ENSMUSG00000021327	Zkscan3	2106.38	-0.836289	0.258604	-3.23386	0.0012213	0.00789588
ENSMUSG00000021338	Lrrc16a	486.177	0.538181	0.207021	2.59965	0.00933189	0.0425105
ENSMUSG00000021357	Exoc2	2133.84	0.826949	0.157576	5.24792	1.53824e-07	2.66266e-06
ENSMUSG00000021361	Tmem14c	934.595	-0.400685	0.126397	-3.17005	0.00152414	0.00953453
ENSMUSG00000021367	Edn1	379.519	1.51193	0.287586	5.25734	1.46158e-07	2.54091e-06
ENSMUSG00000021368	Tbc1d7	861.348	0.419756	0.151576	2.76929	0.00561794	0.0281276
ENSMUSG00000021374	Nup153	3988.06	0.531059	0.167902	3.16291	0.001562	0.00972892
ENSMUSG00000021375	Kif13a	8680.79	-0.503753	0.179208	-2.811	0.00493874	0.0253636
ENSMUSG00000021385	Ippk	523.427	0.580989	0.197128	2.94727	0.00320596	0.0178611
ENSMUSG00000021390	Ogn	3250.59	-0.638455	0.181565	-3.5164	0.000437443	0.00327584
ENSMUSG00000021403	Serpinb9b	168.382	3.79662	0.603336	6.29271	3.11963e-10	8.26763e-09
ENSMUSG00000021427	Ssr1	3221.83	0.839969	0.292999	2.8668	0.00414648	0.022042
ENSMUSG00000021451	Sema4d	772.83	-0.808929	0.161422	-5.01128	5.40689e-07	8.40876e-06
ENSMUSG00000021453	Gadd45g	229.353	1.51541	0.271095	5.58997	2.27105e-08	4.59293e-07
ENSMUSG00000021456	Fbp2	336.031	-2.16287	0.231855	-9.32853	1.0735e-20	8.82645e-19
ENSMUSG00000021457	Syk	2139.5	0.549022	0.211508	2.59575	0.00943852	0.0429086
ENSMUSG00000021460	Auh	1777.91	-0.684485	0.265692	-2.57624	0.00998815	0.0448483
ENSMUSG00000021474	Sfxn1	756.182	0.629441	0.186765	3.37023	0.000751068	0.00521021
ENSMUSG00000021477	Ctsl	26781.3	2.57566	0.187977	13.702	9.87913e-43	3.04916e-40
ENSMUSG00000021497	Txndc15	955.084	-0.395703	0.133082	-2.97339	0.00294532	0.0165887
ENSMUSG00000021520	Uqcrb	6202.88	-0.405053	0.126265	-3.20796	0.0013368	0.00853835
ENSMUSG00000021537	Cetn3	1102.68	0.515744	0.157108	3.28274	0.00102802	0.00681792
ENSMUSG00000021546	Hnrnpk	10161.6	0.5328	0.1798	2.9633	0.00304361	0.0170561
ENSMUSG00000021557	Agtpbp1	6977.98	-1.34679	0.111571	-12.0712	1.5002e-33	2.83935e-31
ENSMUSG00000021569	Trip13	46.5002	1.59707	0.499566	3.19691	0.00138907	0.00881196
ENSMUSG00000021573	Tppp	658.067	-1.31885	0.473037	-2.78804	0.00530277	0.0269259
ENSMUSG00000021576	Pdcd6	1729.87	0.668267	0.129419	5.16358	2.42268e-07	4.00478e-06
ENSMUSG00000021577	Sdha	35101.4	-0.641321	0.179725	-3.56834	0.000359248	0.00274248
ENSMUSG00000021578	Ccdc127	3377.55	-1.03122	0.290395	-3.55109	0.00038364	0.00290437
ENSMUSG00000021583	Erap1	1774.46	-0.691995	0.15496	-4.46562	7.98366e-06	9.47741e-05
ENSMUSG00000021585	Cast	10124.5	0.751471	0.139115	5.40179	6.59806e-08	1.23021e-06
ENSMUSG00000021595	Nsun2	2991.73	0.705443	0.182855	3.85794	0.000114347	0.00101394
ENSMUSG00000021597	Ankrd32	1622.57	-0.525702	0.168351	-3.12266	0.00179226	0.0109157
ENSMUSG00000021598	Med10	244.19	1.09603	0.379377	2.88902	0.00386439	0.0208519
ENSMUSG00000021604	Irx4	591.511	-1.1443	0.417005	-2.74409	0.00606787	0.0299763
ENSMUSG00000021606	Ndufs6	4213	-0.737136	0.209126	-3.52485	0.000423724	0.00318261
ENSMUSG00000021610	Clptm1l	2857.89	0.562883	0.144059	3.9073	9.33327e-05	0.00084995
ENSMUSG00000021622	Ckmt2	55288.1	-0.816185	0.212341	-3.84375	0.00012117	0.00106619
ENSMUSG00000021624	Cd180	80.195	-1.04413	0.38384	-2.72023	0.00652371	0.0316974
ENSMUSG00000021635	Rad17	1500.46	0.394615	0.127771	3.08845	0.00201203	0.0120314
ENSMUSG00000021638	Ocln	67.4697	0.892864	0.330207	2.70396	0.00685191	0.0330123
ENSMUSG00000021639	Gtf2h2	669.044	0.535373	0.170693	3.13647	0.00170996	0.0104813
ENSMUSG00000021643	Serf1	186.519	1.04705	0.253058	4.1376	3.5095e-05	0.000357399
ENSMUSG00000021645	Smn1	286.194	0.469258	0.173753	2.70072	0.00691905	0.0332479
ENSMUSG00000021646	Mccc2	1710.92	-1.23686	0.181958	-6.79748	1.06467e-11	3.4175e-10
ENSMUSG00000021660	Btf3	6559.49	1.38662	0.136051	10.1919	2.15472e-24	2.52795e-22
ENSMUSG00000021661	Ankra2	584.436	0.497818	0.196397	2.53475	0.0112527	0.0491901
ENSMUSG00000021686	Ap3b1	2871.72	0.584833	0.137457	4.25465	2.09372e-05	0.000224982
ENSMUSG00000021696	Elovl7	152.488	3.20044	0.267819	11.95	6.49279e-33	1.2061e-30
ENSMUSG00000021700	Rab3c	11.5181	1.90849	0.649336	2.93914	0.00329127	0.0182553
ENSMUSG00000021701	Plk2	3382.72	1.11596	0.199753	5.58671	2.31412e-08	4.66591e-07
ENSMUSG00000021702	Thbs4	705.78	2.25979	0.240538	9.39472	5.73713e-21	4.85647e-19
ENSMUSG00000021703	Serinc5	1108.8	-1.03516	0.349701	-2.96013	0.0030751	0.0172038
ENSMUSG00000021706	Zfyve16	2567.55	0.548097	0.150198	3.64915	0.000263106	0.00209047
ENSMUSG00000021710	Nln	1426.17	1.13125	0.141751	7.98053	1.45709e-15	7.40054e-14
ENSMUSG00000021715	Cwc27	979.227	0.533611	0.172038	3.1017	0.0019241	0.0115816
ENSMUSG00000021725	Parp8	1176.37	0.453941	0.160798	2.82305	0.00475696	0.0246091
ENSMUSG00000021730	Hcn1	122.771	-2.10046	0.534606	-3.92898	8.53053e-05	0.000784324
ENSMUSG00000021732	Fgf10	18.8342	-1.26712	0.488679	-2.59295	0.00951571	0.0431881
ENSMUSG00000021737	Psmd6	3193.79	0.420408	0.161079	2.60995	0.00905566	0.0414215
ENSMUSG00000021747	4930452B06Rik	97.9702	-1.20838	0.280848	-4.30262	1.68788e-05	0.000184234
ENSMUSG00000021748	Pdhb	17694.2	0.574233	0.123254	4.65895	3.17828e-06	4.18072e-05
ENSMUSG00000021751	Acox2	1808.74	6.22683	0.277524	22.4371	1.71022e-111	4.90148e-108
ENSMUSG00000021752	Kctd6	809.515	1.43428	0.390818	3.66994	0.000242612	0.00195081
ENSMUSG00000021758	Ddx4	29.1386	1.31556	0.404036	3.25604	0.00112979	0.00739991
ENSMUSG00000021759	Ppap2a	1977.57	1.17872	0.131714	8.94902	3.58643e-19	2.67475e-17
ENSMUSG00000021764	Ndufs4	6086.29	-0.477712	0.104633	-4.5656	4.98076e-06	6.24915e-05
ENSMUSG00000021765	Fst	84.3317	1.21104	0.465078	2.60395	0.00921549	0.0420758
ENSMUSG00000021767	Kat6b	1671.94	-0.571699	0.1838	-3.11045	0.00186804	0.0112915
ENSMUSG00000021768	Dusp13	19.504	1.53173	0.508198	3.01403	0.002578	0.0148492
ENSMUSG00000021773	Comtd1	441.286	3.17512	0.30508	10.4075	2.29151e-25	2.82039e-23
ENSMUSG00000021775	Nr1d2	3891.63	-1.12153	0.147257	-7.61614	2.61366e-14	1.17568e-12
ENSMUSG00000021782	Dlg5	1068.93	0.640089	0.209176	3.06005	0.002213	0.0130082
ENSMUSG00000021799	Opn4	76.7564	-1.56542	0.352101	-4.44594	8.75076e-06	0.000102485
ENSMUSG00000021809	Nudt13	534.491	-0.863408	0.210868	-4.09454	4.23012e-05	0.000423265
ENSMUSG00000021810	Ecd	1980.88	0.573009	0.174429	3.28506	0.00101959	0.00677093
ENSMUSG00000021814	Anxa7	6766.94	1.31527	0.208019	6.32282	2.56833e-10	6.87929e-09
ENSMUSG00000021831	Ero1l	3751.07	2.15012	0.17576	12.2333	2.06474e-34	3.98297e-32
ENSMUSG00000021832	Psmc6	4419.23	0.766665	0.18147	4.22476	2.39198e-05	0.000254038
ENSMUSG00000021843	Ktn1	15481.6	-0.454356	0.148463	-3.06039	0.00221048	0.0130049
ENSMUSG00000021850	1700011H14Rik	18.0592	-1.15541	0.423951	-2.72533	0.00642363	0.0313021
ENSMUSG00000021870	Slmap	9727.29	0.539833	0.197522	2.73303	0.00627547	0.0307745
ENSMUSG00000021874	4933413J09Rik	72.187	-1.32242	0.35116	-3.76586	0.00016598	0.00139853
ENSMUSG00000021879	Dnah12	48.3764	1.35971	0.455897	2.98249	0.00285916	0.0161761
ENSMUSG00000021892	Sh3bp5	1645.09	0.715131	0.267871	2.66968	0.00759231	0.0359492
ENSMUSG00000021898	Asb14	1832.43	-2.21671	0.199473	-11.1128	1.08652e-28	1.53506e-26
ENSMUSG00000021904	Sema3g	1565.54	0.595769	0.20563	2.89729	0.00376405	0.0203927
ENSMUSG00000021913	Ogdhl	4601.57	-1.52164	0.415056	-3.66611	0.000246265	0.00197228
ENSMUSG00000021918	Nek4	384.482	0.498743	0.149835	3.32861	0.000872814	0.00593372
ENSMUSG00000021929	Kpna3	4282.26	0.448676	0.156306	2.8705	0.00409821	0.0218634
ENSMUSG00000021944	Gata4	4520.39	0.820843	0.188335	4.35841	1.3101e-05	0.000146796
ENSMUSG00000021948	Prkcd	1376.97	1.16882	0.153077	7.6355	2.24953e-14	1.02104e-12
ENSMUSG00000021952	Xpo4	1715.32	0.39875	0.0944342	4.22252	2.41589e-05	0.000256171
ENSMUSG00000021957	Tkt	2348.13	0.61795	0.196633	3.14265	0.00167424	0.0103128
ENSMUSG00000021967	Mrpl57	1086.07	0.426078	0.145325	2.93189	0.00336905	0.0185993
ENSMUSG00000021983	Atp8a2	723.058	0.913206	0.28245	3.23316	0.00122427	0.00790769
ENSMUSG00000021991	Cacna2d3	32.7284	-1.30463	0.459676	-2.83815	0.00453752	0.0236569
ENSMUSG00000021993	Mipep	2510.78	-0.407019	0.128106	-3.17721	0.00148699	0.00934292
ENSMUSG00000021994	Wnt5a	347.391	-1.22153	0.40858	-2.98969	0.00279264	0.0158502
ENSMUSG00000021996	Esd	12554.9	2.92938	0.229342	12.773	2.3218e-37	5.11867e-35
ENSMUSG00000022003	Slc25a30	303.33	0.672186	0.185719	3.61936	0.000295328	0.00230809
ENSMUSG00000022008	Gpalpp1	2324.36	0.612875	0.14516	4.22205	2.4209e-05	0.000256567
ENSMUSG00000022009	Nufip1	447.14	0.689645	0.240823	2.8637	0.00418726	0.0222117
ENSMUSG00000022013	Dnajc15	1663.67	0.820761	0.153185	5.35797	8.41618e-08	1.54197e-06
ENSMUSG00000022018	Rgcc	891.515	0.93864	0.2539	3.69689	0.000218257	0.00177923
ENSMUSG00000022024	Sugt1	2598.58	1.55722	0.167082	9.32009	1.16245e-20	9.51882e-19
ENSMUSG00000022025	Lect1	41.7314	-1.21244	0.335939	-3.60912	0.00030724	0.00238909
ENSMUSG00000022032	Scara5	716.503	-1.3386	0.351692	-3.80618	0.000141131	0.00121937
ENSMUSG00000022035	Ccdc25	749.973	-0.892655	0.320897	-2.78175	0.0054067	0.0273429
ENSMUSG00000022037	Clu	16212.7	-0.849116	0.328697	-2.58328	0.00978656	0.0440813
ENSMUSG00000022041	Chrna2	65.6328	-1.00141	0.389443	-2.5714	0.0101289	0.0453081
ENSMUSG00000022053	Ebf2	400.343	-0.807232	0.248254	-3.25165	0.00114739	0.00749388
ENSMUSG00000022066	Gm21685	2094.27	-0.581954	0.190533	-3.05436	0.00225543	0.0132228
ENSMUSG00000022074	Tnfrsf10b	316.158	1.00271	0.208747	4.80348	1.55932e-06	2.19994e-05
ENSMUSG00000022089	Bin3	558.399	0.910469	0.184337	4.93917	7.84556e-07	1.18078e-05
ENSMUSG00000022091	Sorbs3	2485.6	1.07247	0.191154	5.61048	2.0177e-08	4.11792e-07
ENSMUSG00000022092	Ppp3cc	1824.11	0.640912	0.162009	3.95602	7.6209e-05	0.000709468
ENSMUSG00000022102	Dok2	115.132	-0.910411	0.315464	-2.88594	0.0039025	0.0210292
ENSMUSG00000022103	Gfra2	49.1214	-1.18428	0.425393	-2.78396	0.0053699	0.0271979
ENSMUSG00000022110	Sucla2	20320.1	-0.472908	0.164467	-2.8754	0.00403517	0.0216107
ENSMUSG00000022111	Uchl3	1810.19	1.7553	0.169768	10.3394	4.67395e-25	5.7176e-23
ENSMUSG00000022120	Rnf219	231.788	-0.550369	0.209336	-2.62911	0.00856082	0.0396645
ENSMUSG00000022122	Ednrb	1675.27	1.24912	0.151762	8.23082	1.85935e-16	1.05973e-14
ENSMUSG00000022125	Cln5	426.773	1.00958	0.234198	4.3108	1.62668e-05	0.000178331
ENSMUSG00000022131	Gpr180	792.269	-0.56643	0.137328	-4.12464	3.71309e-05	0.000376032
ENSMUSG00000022159	Rab2b	432.95	0.676299	0.178213	3.79488	0.000147713	0.00126534
ENSMUSG00000022175	Lrp10	3408.65	0.603626	0.210759	2.86407	0.00418241	0.0221978
ENSMUSG00000022180	Slc7a8	247.251	0.971138	0.261158	3.71859	0.000200339	0.00165195
ENSMUSG00000022184	Fbxo4	411.375	0.639101	0.222301	2.87494	0.00404101	0.0216362
ENSMUSG00000022186	Oxct1	37986.4	-0.844506	0.115297	-7.32462	2.39577e-13	9.35096e-12
ENSMUSG00000022193	Psmb5	2486.08	1.1943	0.331412	3.60366	0.000313767	0.0024323
ENSMUSG00000022197	Pdzd2	4766.7	-1.00463	0.273977	-3.66684	0.000245564	0.0019706
ENSMUSG00000022201	Zfr	7353.72	0.792614	0.13486	5.87731	4.16987e-09	9.3366e-08
ENSMUSG00000022204	Ngdn	1204.29	0.899823	0.140691	6.39576	1.59751e-10	4.40843e-09
ENSMUSG00000022205	Sub1	1731.68	0.551695	0.217981	2.53093	0.0113761	0.0495821
ENSMUSG00000022208	Jph4	34.673	2.56584	0.46738	5.48984	4.02306e-08	7.79813e-07
ENSMUSG00000022210	Dhrs4	1331.41	-0.883134	0.27183	-3.24884	0.00115876	0.00754771
ENSMUSG00000022214	Dcaf11	3251.42	-0.735242	0.193337	-3.80291	0.000143006	0.00123239
ENSMUSG00000022215	Fitm1	1326.49	-2.39051	0.436521	-5.47628	4.34365e-08	8.33898e-07
ENSMUSG00000022216	Psme1	2717.88	-0.574002	0.179376	-3.2	0.00137428	0.00872768
ENSMUSG00000022223	Sdr39u1	1671.1	-0.764924	0.174495	-4.38365	1.16709e-05	0.000132884
ENSMUSG00000022234	Cct5	8652.18	1.04003	0.169574	6.13321	8.61227e-10	2.17333e-08
ENSMUSG00000022235	Cmbl	592.708	-0.909348	0.314257	-2.89365	0.00380798	0.0205863
ENSMUSG00000022236	Ropn1l	18.9918	1.86291	0.466322	3.99489	6.47233e-05	0.000617611
ENSMUSG00000022241	Tars	3409.37	1.56228	0.166028	9.40979	4.97148e-21	4.2623e-19
ENSMUSG00000022244	Amacr	1010.8	-0.727943	0.168055	-4.33156	1.48056e-05	0.000163926
ENSMUSG00000022246	Rai14	884.241	1.13383	0.148355	7.64269	2.12726e-14	9.67734e-13
ENSMUSG00000022253	Nadk2	2576.96	-0.742061	0.243088	-3.05265	0.0022683	0.0132866
ENSMUSG00000022255	Mtdh	4891.41	1.27889	0.134023	9.54225	1.39764e-21	1.25737e-19
ENSMUSG00000022265	Ank	3766.98	-1.17114	0.237359	-4.93405	8.05427e-07	1.20676e-05
ENSMUSG00000022286	Grhl2	99.2099	-1.80621	0.486854	-3.70996	0.000207293	0.00170091
ENSMUSG00000022295	Atp6v1c1	2297.04	0.812634	0.173659	4.67947	2.87623e-06	3.83153e-05
ENSMUSG00000022300	Dcaf13	1110.39	0.906134	0.185084	4.89579	9.79093e-07	1.44113e-05
ENSMUSG00000022309	Angpt1	1124.65	-1.68039	0.409841	-4.1001	4.12973e-05	0.000414668
ENSMUSG00000022312	Eif3h	4027.15	0.667677	0.102139	6.53694	6.27905e-11	1.81775e-09
ENSMUSG00000022322	Shcbp1	44.8025	1.40328	0.460498	3.04731	0.00230902	0.0134974
ENSMUSG00000022332	Khdrbs3	1270.35	-0.964958	0.175045	-5.51261	3.53545e-08	6.89964e-07
ENSMUSG00000022336	Eif3e	4250.31	0.525986	0.168138	3.12831	0.00175815	0.0107308
ENSMUSG00000022338	Eny2	585.283	1.0676	0.255988	4.1705	3.03931e-05	0.000314303
ENSMUSG00000022346	Myc	414.707	2.51732	0.294393	8.55088	1.22151e-17	7.73061e-16
ENSMUSG00000022347	A1bg	27.5285	-1.25576	0.488973	-2.56815	0.0102242	0.0455864
ENSMUSG00000022350	E430025E21Rik	3294.41	0.609013	0.134364	4.53258	5.82688e-06	7.18493e-05
ENSMUSG00000022353	Mtss1	1589.91	-0.683557	0.151031	-4.52593	6.01319e-06	7.3829e-05
ENSMUSG00000022354	Ndufb9	8532.11	-0.341648	0.117736	-2.90182	0.00371001	0.0201634
ENSMUSG00000022357	Klhl38	390.42	-1.78881	0.316474	-5.65231	1.58306e-08	3.27078e-07
ENSMUSG00000022364	Tbc1d31	469.885	0.375265	0.143366	2.61752	0.00885708	0.0407349
ENSMUSG00000022365	Derl1	4613.15	1.04701	0.294826	3.55128	0.000383358	0.00290333
ENSMUSG00000022369	Mtbp	394.832	1.70201	0.283149	6.01101	1.84375e-09	4.414e-08
ENSMUSG00000022371	Col14a1	3429.72	1.03283	0.275953	3.74279	0.000181988	0.00151621
ENSMUSG00000022375	Lrrc6	11.8048	2.39098	0.61573	3.88316	0.000103107	0.000930096
ENSMUSG00000022376	Adcy8	39.1549	-2.34754	0.49933	-4.70139	2.58402e-06	3.48391e-05
ENSMUSG00000022383	Ppara	1171.35	-1.11937	0.174362	-6.41983	1.36424e-10	3.80129e-09
ENSMUSG00000022389	Tef	2886.36	-1.38567	0.351282	-3.9446	7.99327e-05	0.000740698
ENSMUSG00000022391	Rangap1	2784.93	1.23797	0.164146	7.54184	4.63386e-14	2.00787e-12
ENSMUSG00000022403	St13	4425.62	0.884679	0.213685	4.14012	3.47129e-05	0.000354407
ENSMUSG00000022415	Syngr1	1917.48	0.420301	0.137388	3.05923	0.0022191	0.0130391
ENSMUSG00000022425	Enpp2	533.45	-0.91403	0.298355	-3.06356	0.00218717	0.0129018
ENSMUSG00000022442	Ttll1	1044.57	-1.62146	0.210059	-7.71909	1.17167e-14	5.46651e-13
ENSMUSG00000022449	Adamts20	483.061	3.5347	0.324245	10.9013	1.13573e-27	1.57139e-25
ENSMUSG00000022453	Naga	1160.87	0.70122	0.159955	4.38385	1.16601e-05	0.000132836
ENSMUSG00000022456	2003-09-01	99.0849	1.06719	0.36617	2.91448	0.0035628	0.0195079
ENSMUSG00000022462	Slc38a2	7923.31	0.82167	0.262645	3.12844	0.00175735	0.0107291
ENSMUSG00000022471	Xrcc6	1995.42	1.18593	0.141535	8.37908	5.33439e-17	3.14761e-15
ENSMUSG00000022474	Pmm1	3577	4.22814	0.219166	19.2919	6.27905e-83	8.39802e-80
ENSMUSG00000022487	Gtsf1	19.0425	1.99081	0.632642	3.14682	0.00165055	0.010195
ENSMUSG00000022489	Pde1b	175.945	0.775761	0.254049	3.0536	0.00226117	0.0132526
ENSMUSG00000022503	Nubp1	506.478	1.03867	0.24662	4.21163	2.53534e-05	0.000267283
ENSMUSG00000022515	Anks3	610.727	-0.524493	0.1546	-3.39258	0.000692368	0.00486695
ENSMUSG00000022529	Zfp263	352.404	0.546395	0.166462	3.2824	0.00102928	0.00682402
ENSMUSG00000022533	Atp13a3	6116.02	1.05363	0.143217	7.35683	1.88327e-13	7.51137e-12
ENSMUSG00000022537	Tmem44	605.666	-0.578822	0.228156	-2.53696	0.0111821	0.0489602
ENSMUSG00000022538	Lsg1	1235.39	0.783141	0.141152	5.54823	2.88578e-08	5.7435e-07
ENSMUSG00000022546	Gpt	754.229	-1.73295	0.234334	-7.39523	1.41159e-13	5.73266e-12
ENSMUSG00000022548	Apod	500.686	2.12502	0.285318	7.4479	9.48387e-14	3.93924e-12
ENSMUSG00000022550	Adck5	294.675	0.547986	0.204034	2.68576	0.0072364	0.0345412
ENSMUSG00000022555	Dgat1	1368.48	1.08118	0.163381	6.61755	3.65202e-11	1.08704e-09
ENSMUSG00000022557	Bop1	2146.56	1.38584	0.123042	11.2632	1.99496e-29	2.92138e-27
ENSMUSG00000022558	Mroh1	5115.88	1.3053	0.205065	6.36527	1.94943e-10	5.32101e-09
ENSMUSG00000022560	Slc52a2	328.552	0.687508	0.264188	2.60235	0.00925878	0.0422639
ENSMUSG00000022561	Gpaa1	967.766	0.452838	0.118947	3.80705	0.000140633	0.00121664
ENSMUSG00000022564	Grina	3185.17	1.0427	0.164416	6.34182	2.27064e-10	6.1559e-09
ENSMUSG00000022570	Tsta3	735.473	0.983898	0.163574	6.015	1.79884e-09	4.31818e-08
ENSMUSG00000022574	Naprt	403.778	-1.58201	0.212498	-7.44479	9.70971e-14	4.00815e-12
ENSMUSG00000022579	Gpihbp1	2599.55	0.615012	0.188101	3.26958	0.00107707	0.00709398
ENSMUSG00000022596	Slurp1	23.5815	-1.29372	0.494397	-2.61676	0.0088769	0.0407805
ENSMUSG00000022598	Psca	52.8857	3.01983	0.57131	5.2858	1.25156e-07	2.21614e-06
ENSMUSG00000022613	Miox	10.7264	1.44707	0.56935	2.54161	0.0110343	0.0484406
ENSMUSG00000022614	Lmf2	1111.88	0.559727	0.16911	3.30984	0.000933485	0.00628231
ENSMUSG00000022619	Mapk8ip2	29.0406	2.09459	0.604226	3.46657	0.000527143	0.00383867
ENSMUSG00000022620	Arsa	772.267	0.441782	0.166478	2.6537	0.00796154	0.0374149
ENSMUSG00000022634	Yaf2	530.08	1.02232	0.292787	3.49167	0.000480004	0.00355083
ENSMUSG00000022639	5330426P16Rik	494.803	1.30648	0.355263	3.6775	0.000235533	0.00190381
ENSMUSG00000022663	Atg3	971.222	0.433527	0.154104	2.81322	0.00490487	0.0252182
ENSMUSG00000022674	Ube2v2	237.502	-0.815721	0.310298	-2.62883	0.00856799	0.0396885
ENSMUSG00000022685	Parn	861.306	0.772063	0.196358	3.93191	8.42723e-05	0.000776706
ENSMUSG00000022686	B3gnt5	185.175	1.41692	0.522419	2.71222	0.00668337	0.0323089
ENSMUSG00000022698	Naa50	563.82	0.525448	0.20783	2.52826	0.0114628	0.0498519
ENSMUSG00000022707	Gbe1	8123.88	2.41266	0.176379	13.6789	1.35817e-42	4.12843e-40
ENSMUSG00000022722	Arl6	297.806	0.722711	0.262967	2.7483	0.00599052	0.0296599
ENSMUSG00000022723	Crybg3	4966.62	0.723052	0.186721	3.87237	0.000107782	0.000964896
ENSMUSG00000022748	Cmss1	556.683	-1.9044	0.155824	-12.2215	2.38561e-34	4.55811e-32
ENSMUSG00000022750	Klhl22	2165.94	1.13498	0.235455	4.82035	1.43303e-06	2.03629e-05
ENSMUSG00000022751	Nit2	549.896	-0.674311	0.141353	-4.77041	1.83854e-06	2.55612e-05
ENSMUSG00000022752	Tomm70a	4198.06	0.599379	0.220031	2.72407	0.00644831	0.0313995
ENSMUSG00000022754	Tmem45a	326.49	1.43095	0.293602	4.87378	1.09485e-06	1.59628e-05
ENSMUSG00000022756	Slc7a4	62.327	-1.13854	0.38983	-2.92062	0.00349336	0.0191805
ENSMUSG00000022758	P2rx6	81.4364	-2.56485	0.369644	-6.93871	3.95693e-12	1.33418e-10
ENSMUSG00000022761	Lztr1	2586.24	1.0526	0.202733	5.19202	2.0802e-07	3.48355e-06
ENSMUSG00000022771	Ppil2	2282.92	0.42527	0.130735	3.25291	0.00114229	0.00746712
ENSMUSG00000022772	Senp5	985.847	0.486297	0.126986	3.82952	0.000128393	0.00112021
ENSMUSG00000022788	Fgd4	1728.69	-1.25236	0.285268	-4.39013	1.13281e-05	0.000129274
ENSMUSG00000022808	Snx4	2012.3	1.07562	0.18194	5.91193	3.3813e-09	7.68241e-08
ENSMUSG00000022817	Itgb5	8653.4	1.28665	0.184732	6.96495	3.28524e-12	1.13072e-10
ENSMUSG00000022820	Ndufb4	4556.82	-0.950645	0.171896	-5.53034	3.19616e-08	6.28642e-07
ENSMUSG00000022827	Rabl3	307.423	0.590236	0.174485	3.38273	0.000717686	0.00501505
ENSMUSG00000022837	Iqcb1	503.789	0.436163	0.142494	3.06093	0.00220651	0.0129854
ENSMUSG00000022841	Ap2m1	5999.04	1.4438	0.141112	10.2316	1.43078e-24	1.70859e-22
ENSMUSG00000022843	Clcn2	182.739	-0.935139	0.23554	-3.97019	7.18157e-05	0.000674516
ENSMUSG00000022848	Dirc2	1861.21	-0.87218	0.302058	-2.88746	0.00388361	0.02095
ENSMUSG00000022853	Ehhadh	517.854	-0.625427	0.20778	-3.01005	0.00261204	0.0149893
ENSMUSG00000022863	Btg3	429.736	0.703928	0.255758	2.75232	0.00591749	0.0293417
ENSMUSG00000022868	Ahsg	377.199	1.52161	0.431844	3.52352	0.000425859	0.00319626
ENSMUSG00000022871	Fetub	45.2717	1.22107	0.461997	2.64303	0.00821681	0.0384435
ENSMUSG00000022881	Rfc4	286.571	0.774694	0.184161	4.20661	2.59236e-05	0.000272434
ENSMUSG00000022890	Atp5j	7329.24	-0.759304	0.134034	-5.66503	1.46998e-08	3.04657e-07
ENSMUSG00000022892	App	9897.69	0.841369	0.206789	4.06873	4.72708e-05	0.000466476
ENSMUSG00000022893	Adamts1	3275	0.923798	0.234722	3.93571	8.295e-05	0.000765828
ENSMUSG00000022897	Dyrk1a	4244.49	0.829059	0.245977	3.37048	0.000750373	0.00520841
ENSMUSG00000022913	Psmg1	639.156	0.81674	0.158592	5.14993	2.6058e-07	4.27783e-06
ENSMUSG00000022945	Chaf1b	77.366	1.29825	0.407456	3.18624	0.00144135	0.00909606
ENSMUSG00000022951	Rcan1	1366.67	0.856192	0.262304	3.26412	0.00109804	0.00721075
ENSMUSG00000022956	Atp5o	22843.8	-0.421871	0.15034	-2.80611	0.00501438	0.0256825
ENSMUSG00000022962	Gart	2767.31	0.426632	0.109316	3.90273	9.51129e-05	0.000862638
ENSMUSG00000022965	Ifngr2	8499.47	-0.360148	0.131621	-2.73626	0.0062142	0.0305561
ENSMUSG00000022982	Sod1	5482.31	0.460779	0.146339	3.1487	0.00163998	0.0101422
ENSMUSG00000022992	Kansl2	2515.92	0.494304	0.178635	2.76711	0.00565552	0.0282522
ENSMUSG00000022995	Enah	11441.9	2.0333	0.200515	10.1404	3.65712e-24	4.21662e-22
ENSMUSG00000023004	Tuba1b	7395.67	1.17864	0.379235	3.10795	0.0018839	0.0113737
ENSMUSG00000023010	Tmbim6	8385.8	1.08198	0.335256	3.22732	0.00124955	0.00805282
ENSMUSG00000023017	Asic1	137.434	-0.667092	0.237293	-2.81126	0.00493472	0.0253522
ENSMUSG00000023019	Gpd1	3399.68	0.962492	0.344548	2.79349	0.00521428	0.026537
ENSMUSG00000023031	Cela1	91.0307	2.68804	0.439933	6.11012	9.95583e-10	2.48735e-08
ENSMUSG00000023034	Nr4a1	1278.35	1.41981	0.504838	2.81241	0.00491722	0.0252688
ENSMUSG00000023043	Krt18	381.626	3.37214	0.386554	8.72361	2.6948e-18	1.83888e-16
ENSMUSG00000023045	Soat2	233.339	5.00606	0.384758	13.0109	1.06055e-38	2.47405e-36
ENSMUSG00000023046	Igfbp6	426.655	-1.04803	0.291429	-3.59618	0.000322925	0.00249461
ENSMUSG00000023047	Amhr2	21.7622	1.90936	0.534648	3.57124	0.000355294	0.00271643
ENSMUSG00000023048	Prr13	821.39	1.47555	0.224809	6.5636	5.2525e-11	1.53385e-09
ENSMUSG00000023051	Tarbp2	838.863	0.300835	0.114084	2.63697	0.00836501	0.0389888
ENSMUSG00000023067	Cdkn1a	1036.48	2.24472	0.557731	4.02474	5.70377e-05	0.000551466
ENSMUSG00000023070	Rgn	13.943	-1.55921	0.564971	-2.7598	0.00578376	0.0287996
ENSMUSG00000023072	Cep89	718.245	0.734158	0.120653	6.08485	1.16602e-09	2.87732e-08
ENSMUSG00000023074	Mospd1	1363.24	1.30156	0.177471	7.3339	2.23542e-13	8.77632e-12
ENSMUSG00000023078	Cxcl13	70.8736	2.29337	0.613479	3.7383	0.00018527	0.001541
ENSMUSG00000023079	Gtf2ird1	996.122	0.572412	0.194794	2.93855	0.00329747	0.0182796
ENSMUSG00000023088	Abcc1	4560	0.422439	0.151915	2.78077	0.00542309	0.0274119
ENSMUSG00000023092	Fhl1	7378.37	1.44295	0.307789	4.68813	2.75717e-06	3.69008e-05
ENSMUSG00000023094	Msrb2	1051.7	-1.4761	0.410727	-3.59387	0.000325801	0.00251393
ENSMUSG00000023106	Denr	1717.29	0.655351	0.135659	4.83085	1.35951e-06	1.94401e-05
ENSMUSG00000023110	Prmt5	1575.65	0.449123	0.130601	3.43889	0.000584105	0.00419861
ENSMUSG00000023151	Lrrc69	22.8176	-1.10009	0.39256	-2.80235	0.00507317	0.0259373
ENSMUSG00000023169	Slc38a1	4083.63	1.8054	0.369026	4.89235	9.96408e-07	1.46339e-05
ENSMUSG00000023176	Cpn2	119.18	-3.9694	0.480193	-8.26626	1.38226e-16	8.01468e-15
ENSMUSG00000023191	P3h3	741.544	0.397907	0.15186	2.62021	0.00878745	0.0404994
ENSMUSG00000023259	Slc26a6	411.711	-1.25122	0.255989	-4.88777	1.01987e-06	1.49456e-05
ENSMUSG00000023266	Frs3	175.96	-0.853131	0.334659	-2.54925	0.0107954	0.0475578
ENSMUSG00000023267	Gabrr2	45.7276	-2.34728	0.46337	-5.06567	4.06961e-07	6.4287e-06
ENSMUSG00000023307	2005-03-01	2227.23	0.610405	0.151539	4.02805	5.62423e-05	0.000544826
ENSMUSG00000023336	Wfdc1	372.805	-2.22824	0.343534	-6.48622	8.80173e-11	2.50468e-09
ENSMUSG00000023348	Trip6	625.551	0.525162	0.136857	3.8373	0.000124396	0.00109075
ENSMUSG00000023349	Clec4n	119.455	0.85491	0.284928	3.00044	0.00269591	0.0154001
ENSMUSG00000023439	Gnb3	583.54	1.16142	0.322066	3.60614	0.000310781	0.00241368
ENSMUSG00000023473	Celsr3	132.789	-2.61687	0.317995	-8.22929	1.88328e-16	1.07032e-14
ENSMUSG00000023495	Pcbp4	2719.99	0.630565	0.209261	3.0133	0.00258422	0.014868
ENSMUSG00000023800	Tiam2	678.525	0.779532	0.281645	2.76778	0.00564392	0.0282224
ENSMUSG00000023828	Slc22a3	119.902	-2.8893	0.277144	-10.4253	1.90146e-25	2.35476e-23
ENSMUSG00000023829	Slc22a1	38.7235	-2.79616	0.470275	-5.94579	2.75119e-09	6.36613e-08
ENSMUSG00000023883	Phf10	6051.16	1.83647	0.181887	10.0968	5.70984e-24	6.39949e-22
ENSMUSG00000023886	Smoc2	2193.94	-1.16301	0.283708	-4.09934	4.14336e-05	0.000415828
ENSMUSG00000023905	Tnfrsf12a	1336.1	1.87405	0.383341	4.88874	1.01485e-06	1.4883e-05
ENSMUSG00000023913	Pla2g7	548.311	1.24096	0.338534	3.66569	0.000246676	0.00197479
ENSMUSG00000023915	Tnfrsf21	670.315	-0.524351	0.187619	-2.79477	0.00519374	0.0264392
ENSMUSG00000023921	Mut	3858.93	-1.05358	0.18949	-5.56005	2.69697e-08	5.39985e-07
ENSMUSG00000023935	Spats1	33.4394	1.45512	0.37193	3.91235	9.14033e-05	0.000834273
ENSMUSG00000023942	Slc29a1	2378.75	-0.611734	0.13609	-4.49507	6.95462e-06	8.38108e-05
ENSMUSG00000023952	Gtpbp2	3840.46	0.713319	0.219479	3.25006	0.00115382	0.00752291
ENSMUSG00000023959	Clic5	5010.51	1.3013	0.190722	6.82303	8.91396e-12	2.88438e-10
ENSMUSG00000023961	Enpp4	985.854	-0.831942	0.302606	-2.74926	0.00597297	0.0295876
ENSMUSG00000023968	Crip3	14.0021	-1.5645	0.559663	-2.79544	0.00518296	0.026391
ENSMUSG00000023972	Ptk7	535.621	0.787791	0.19816	3.97553	7.02222e-05	0.000662029
ENSMUSG00000023995	Tspo2	15.9737	-1.74385	0.658183	-2.6495	0.00806119	0.0378103
ENSMUSG00000024033	Rsph1	24.4406	1.58767	0.558229	2.84412	0.00445343	0.0233276
ENSMUSG00000024043	Arhgap28	270.191	-0.70263	0.275686	-2.54866	0.0108138	0.0476014
ENSMUSG00000024044	Epb4.1l3	444.744	-1.85999	0.22562	-8.24392	1.66657e-16	9.55277e-15
ENSMUSG00000024048	Myl12a	18628.2	0.844174	0.251318	3.35899	0.000782277	0.005395
ENSMUSG00000024052	Lpin2	965.837	0.578589	0.158811	3.64325	0.00026922	0.00213229
ENSMUSG00000024055	Cyp4f13	420.567	0.554046	0.167417	3.30939	0.000935005	0.00628497
ENSMUSG00000024059	Clip4	5236.23	-0.9248	0.129404	-7.14659	8.8958e-13	3.29276e-11
ENSMUSG00000024063	Lbh	1964.74	-1.35606	0.265453	-5.10845	3.24808e-07	5.23397e-06
ENSMUSG00000024077	Strn	7801.79	1.84784	0.312782	5.90777	3.46771e-09	7.86093e-08
ENSMUSG00000024078	Ttc27	844.824	0.789438	0.187976	4.19968	2.67297e-05	0.000280027
ENSMUSG00000024091	Vapa	2755.65	0.80534	0.112631	7.15023	8.66312e-13	3.21256e-11
ENSMUSG00000024095	Hnrnpll	1852.67	0.533232	0.171978	3.10058	0.00193144	0.0116188
ENSMUSG00000024096	Ralbp1	3134.74	0.420653	0.0894599	4.70214	2.57451e-06	3.47576e-05
ENSMUSG00000024099	Ndufv2	15239.3	-0.411363	0.145765	-2.8221	0.00477106	0.0246566
ENSMUSG00000024101	Wash1	1039.3	0.407465	0.157191	2.59216	0.00953746	0.0432506
ENSMUSG00000024104	Fam21	3520.43	0.655271	0.0849113	7.71713	1.18977e-14	5.53811e-13
ENSMUSG00000024121	Atp6v0c	7105.29	1.14189	0.405221	2.81795	0.00483313	0.0249068
ENSMUSG00000024127	Prepl	2614.83	-0.80937	0.153402	-5.27615	1.31923e-07	2.32113e-06
ENSMUSG00000024132	Eci1	4650.39	-1.16911	0.165988	-7.04334	1.87682e-12	6.66421e-11
ENSMUSG00000024140	Epas1	7549.27	-0.812717	0.307523	-2.64278	0.00822278	0.0384535
ENSMUSG00000024151	Msh2	720.053	-0.551137	0.174362	-3.16088	0.00157292	0.00978476
ENSMUSG00000024168	Tmem204	510.055	-1.14584	0.382279	-2.99741	0.00272287	0.0155276
ENSMUSG00000024181	Mrpl28	2024.29	-0.640782	0.105639	-6.06577	1.31321e-09	3.22468e-08
ENSMUSG00000024186	Rgs11	42.2676	1.31729	0.469115	2.80802	0.00498469	0.0255566
ENSMUSG00000024206	Rfx2	132.43	-0.672398	0.263346	-2.55329	0.0106712	0.0471449
ENSMUSG00000024219	Anks1	2153.99	-0.950316	0.213519	-4.45073	8.55779e-06	0.000100694
ENSMUSG00000024222	Fkbp5	1987.43	1.76324	0.384548	4.58523	4.53483e-06	5.74355e-05
ENSMUSG00000024231	Cul2	3522.16	0.820958	0.161447	5.08499	3.67644e-07	5.87235e-06
ENSMUSG00000024235	Map3k8	283.728	-0.634361	0.232317	-2.73058	0.00632225	0.0309283
ENSMUSG00000024240	Epc1	1428.26	-0.444395	0.152892	-2.90659	0.0036539	0.0199137
ENSMUSG00000024247	Pkdcc	999.918	-0.81227	0.313389	-2.59189	0.00954498	0.0432749
ENSMUSG00000024269	Tpgs2	573.69	-1.10203	0.198805	-5.54327	2.96876e-08	5.8737e-07
ENSMUSG00000024270	Slc39a6	567.634	1.09901	0.181299	6.06183	1.34579e-09	3.29662e-08
ENSMUSG00000024274	Zscan30	27.6387	-1.20144	0.413997	-2.90205	0.00370732	0.0201562
ENSMUSG00000024287	Thoc1	1451.68	0.52606	0.139573	3.76908	0.000163852	0.00138409
ENSMUSG00000024298	Zfp871	671.116	-1.12803	0.297971	-3.78569	0.000153282	0.00130469
ENSMUSG00000024309	Pfdn6	1222.06	0.70344	0.262807	2.67664	0.00743648	0.0353784
ENSMUSG00000024312	Wdr46	723.915	1.40773	0.20178	6.97656	3.02487e-12	1.05173e-10
ENSMUSG00000024327	Slc39a7	3001.51	0.867033	0.199859	4.33823	1.43636e-05	0.000159471
ENSMUSG00000024330	Col11a2	134.25	-1.12163	0.295568	-3.79482	0.00014775	0.00126534
ENSMUSG00000024331	Dsc2	2098.52	-1.00041	0.135135	-7.40301	1.33134e-13	5.41772e-12
ENSMUSG00000024357	Sil1	1178.64	0.899452	0.122152	7.36338	1.79309e-13	7.18024e-12
ENSMUSG00000024359	Hspa9	62077.6	1.32946	0.194401	6.83875	7.98853e-12	2.60172e-10
ENSMUSG00000024360	Etf1	6104.41	0.893897	0.261193	3.42236	0.00062081	0.00442283
ENSMUSG00000024366	Gfra3	70.1513	-0.70776	0.27488	-2.57479	0.01003	0.0449531
ENSMUSG00000024369	Nelfe	756.349	1.40283	0.176099	7.96617	1.63661e-15	8.18796e-14
ENSMUSG00000024371	C2	199.341	1.05994	0.284161	3.73006	0.000191436	0.0015844
ENSMUSG00000024378	Stard4	259.561	-1.36301	0.289528	-4.70769	2.50534e-06	3.39838e-05
ENSMUSG00000024381	Bin1	696.058	0.706396	0.150905	4.68107	2.85383e-06	3.81182e-05
ENSMUSG00000024410	3110002H16Rik	1479.76	-0.595528	0.163563	-3.64097	0.000271613	0.00214278
ENSMUSG00000024411	Aqp4	311.177	-3.78875	0.467741	-8.1001	5.4913e-16	2.98554e-14
ENSMUSG00000024413	Npc1	2444.27	-0.526825	0.132703	-3.96995	7.18879e-05	0.000674563
ENSMUSG00000024420	Zfp521	1590.75	-0.528402	0.130228	-4.05752	4.95962e-05	0.000487506
ENSMUSG00000024421	Lama3	689.601	0.921504	0.225124	4.09331	4.25256e-05	0.000425299
ENSMUSG00000024423	Impact	2259.65	0.709805	0.154509	4.59395	4.34933e-06	5.53657e-05
ENSMUSG00000024425	Ndfip1	2523.26	0.676295	0.159096	4.25086	2.12951e-05	0.000228706
ENSMUSG00000024431	Nr3c1	5675.07	-0.646508	0.188586	-3.42819	0.000607618	0.00434737
ENSMUSG00000024436	Mrps18b	1835.76	1.07571	0.260834	4.1241	3.72192e-05	0.000376546
ENSMUSG00000024442	0610009O20Rik	4014.97	-0.945089	0.262523	-3.60002	0.000318196	0.00246188
ENSMUSG00000024451	Arap3	3265.33	-0.653338	0.181318	-3.60327	0.000314242	0.00243504
ENSMUSG00000024456	Diap1	2515.02	0.856303	0.183668	4.66224	3.12789e-06	4.12569e-05
ENSMUSG00000024471	Myot	576.249	-3.47987	0.370504	-9.39225	5.87309e-21	4.95067e-19
ENSMUSG00000024480	Ap3s1	415.934	0.673829	0.155928	4.32143	1.55024e-05	0.000171073
ENSMUSG00000024481	Lvrn	88.1	-1.79893	0.467003	-3.85208	0.000117117	0.00103598
ENSMUSG00000024493	Lars	10337.8	2.00318	0.168439	11.8926	1.29254e-32	2.33612e-30
ENSMUSG00000024501	Dpysl3	5116.49	1.48769	0.382572	3.88866	0.000100798	0.000910087
ENSMUSG00000024513	Mbd2	3318.13	0.891184	0.171544	5.19508	2.04629e-07	3.43824e-06
ENSMUSG00000024521	Pmaip1	37.3677	1.66732	0.509124	3.27488	0.00105707	0.00699204
ENSMUSG00000024525	Impa2	301.273	-0.547752	0.208572	-2.6262	0.00863449	0.039932
ENSMUSG00000024526	Cidea	1384.32	1.36117	0.178721	7.61619	2.6128e-14	1.17568e-12
ENSMUSG00000024527	Afg3l2	10606.3	1.11995	0.230282	4.86336	1.15408e-06	1.67654e-05
ENSMUSG00000024529	Lox	724.887	2.16211	0.43432	4.97815	6.41953e-07	9.8387e-06
ENSMUSG00000024533	Spire1	1334.19	2.03099	0.287988	7.05233	1.75946e-12	6.25857e-11
ENSMUSG00000024537	Psmg2	971.741	0.93793	0.187359	5.00605	5.55569e-07	8.63349e-06
ENSMUSG00000024538	Ppic	708.222	0.777081	0.256659	3.02767	0.00246444	0.0142771
ENSMUSG00000024539	Ptpn2	939.464	0.403282	0.140381	2.87276	0.00406909	0.0217459
ENSMUSG00000024548	Setbp1	1384.05	-1.19759	0.242327	-4.94205	7.73036e-07	1.16519e-05
ENSMUSG00000024556	Me2	687.69	0.787425	0.147086	5.35348	8.6277e-08	1.57497e-06
ENSMUSG00000024566	Atp9b	2098.79	0.383521	0.093268	4.11203	3.92194e-05	0.000395586
ENSMUSG00000024576	Csnk1a1	6744.05	0.504302	0.121442	4.15261	3.28702e-05	0.000337829
ENSMUSG00000024583	Txnl1	3079.82	0.708978	0.177984	3.98338	6.79407e-05	0.000644761
ENSMUSG00000024587	Nars	10370.3	2.25984	0.163068	13.8583	1.13339e-43	3.72756e-41
ENSMUSG00000024588	Fech	3617.1	-0.476864	0.188257	-2.53305	0.0113076	0.0493588
ENSMUSG00000024593	Megf10	137.256	1.07885	0.414896	2.60029	0.00931438	0.0424501
ENSMUSG00000024598	Fbn2	823.745	1.85072	0.45327	4.08304	4.44505e-05	0.000441687
ENSMUSG00000024601	Isoc1	574.612	-0.795495	0.112063	-7.09865	1.2598e-12	4.59528e-11
ENSMUSG00000024603	Dctn4	1806.9	0.455133	0.11334	4.01564	5.92837e-05	0.000569612
ENSMUSG00000024608	Rps14	9663.91	0.644394	0.160407	4.01725	5.888e-05	0.000566004
ENSMUSG00000024617	Camk2a	223.063	-1.72899	0.23731	-7.28579	3.19802e-13	1.2362e-11
ENSMUSG00000024639	Gnaq	676.742	-0.584706	0.210717	-2.77484	0.00552284	0.0277692
ENSMUSG00000024640	Psat1	2226.44	4.32541	0.314951	13.7336	6.38992e-43	2.00304e-40
ENSMUSG00000024645	Timm21	491.956	-0.920176	0.256502	-3.5874	0.000333992	0.00256923
ENSMUSG00000024664	Fads3	4154.31	1.67361	0.190285	8.79528	1.42692e-18	1.00799e-16
ENSMUSG00000024666	Tmem138	154.537	0.710346	0.254962	2.78609	0.00533485	0.0270682
ENSMUSG00000024677	Ms4a6b	450.184	0.956366	0.281466	3.39781	0.00067928	0.00478838
ENSMUSG00000024679	Ms4a6d	239.629	1.3829	0.344706	4.01182	6.02531e-05	0.00057782
ENSMUSG00000024713	Pcsk5	544.82	1.24962	0.128982	9.68829	3.38153e-22	3.21517e-20
ENSMUSG00000024725	Ostf1	1905.08	0.779216	0.165791	4.69998	2.6019e-06	3.49861e-05
ENSMUSG00000024726	2410127L17Rik	1288.63	-0.327865	0.107052	-3.06267	0.00219368	0.012925
ENSMUSG00000024727	Trpm6	58.532	1.14318	0.380024	3.00818	0.00262815	0.0150732
ENSMUSG00000024732	Ccdc86	341.929	1.13245	0.338473	3.34577	0.000820558	0.00562228
ENSMUSG00000024735	Prpf19	7342.52	-0.506784	0.150234	-3.37329	0.000742745	0.00516514
ENSMUSG00000024740	Ddb1	19089.3	0.910118	0.120249	7.56861	3.77248e-14	1.65609e-12
ENSMUSG00000024743	Syt7	1463.66	-0.959935	0.245899	-3.90377	9.47039e-05	0.000860095
ENSMUSG00000024754	Tmem2	2291.59	0.527715	0.187764	2.81053	0.00494599	0.0253776
ENSMUSG00000024767	Otub1	1979.98	0.66278	0.149471	4.43418	9.24238e-06	0.000107615
ENSMUSG00000024776	Stambpl1	370.302	1.07246	0.203614	5.26711	1.38585e-07	2.42821e-06
ENSMUSG00000024792	Zfpl1	489.701	0.47987	0.169243	2.83539	0.00457691	0.023819
ENSMUSG00000024803	Ankrd1	88736.4	2.34235	0.171352	13.6698	1.53769e-42	4.47088e-40
ENSMUSG00000024805	Pcgf5	2394.8	1.47449	0.174606	8.44465	3.04949e-17	1.85391e-15
ENSMUSG00000024812	Tjp2	2400.91	0.461781	0.161528	2.85883	0.00425201	0.0224602
ENSMUSG00000024830	Rps6kb2	735.417	0.548614	0.173275	3.16615	0.00154469	0.00963305
ENSMUSG00000024835	Coro1b	2018.32	0.653458	0.148407	4.40313	1.06698e-05	0.000122529
ENSMUSG00000024841	Eif1ad	1832.67	0.985267	0.276171	3.5676	0.000360265	0.00274919
ENSMUSG00000024843	Chka	664.472	0.985086	0.294681	3.34289	0.000829108	0.00567311
ENSMUSG00000024846	Cst6	167.258	1.26344	0.21036	6.00611	1.90029e-09	4.53852e-08
ENSMUSG00000024847	Aip	1004.88	0.60959	0.197872	3.08073	0.00206495	0.0123111
ENSMUSG00000024862	Klc2	3371.51	0.508644	0.165062	3.08154	0.0020593	0.0122811
ENSMUSG00000024871	Doc2g	4470.06	-1.30834	0.260658	-5.01937	5.18424e-07	8.08757e-06
ENSMUSG00000024873	Cnih2	47.1484	-0.817704	0.314407	-2.60078	0.00930113	0.0424089
ENSMUSG00000024883	Rin1	350.934	1.64204	0.234929	6.98949	2.75891e-12	9.62594e-11
ENSMUSG00000024891	Slc29a2	287.951	-0.921279	0.219298	-4.20105	2.65684e-05	0.000278483
ENSMUSG00000024903	Lao1	17.0979	1.55132	0.559299	2.77368	0.00554266	0.0278549
ENSMUSG00000024910	Ctsw	54.9702	-0.928134	0.270977	-3.42514	0.000614476	0.00438705
ENSMUSG00000024911	Fibp	1267.75	0.995489	0.157987	6.30109	2.95553e-10	7.85349e-09
ENSMUSG00000024914	Drap1	4321.6	0.438479	0.171989	2.54946	0.0107889	0.0475404
ENSMUSG00000024924	Vldlr	13352.7	-0.655317	0.24124	-2.71645	0.00659865	0.0320305
ENSMUSG00000024940	Ltbp3	1873.36	1.02312	0.37416	2.73445	0.00624852	0.0306723
ENSMUSG00000024942	Capn1	1468.85	0.348841	0.118827	2.93571	0.00332787	0.0183922
ENSMUSG00000024943	Smc5	2308.99	0.431464	0.116114	3.71588	0.000202501	0.00166772
ENSMUSG00000024948	Map4k2	1483.32	-0.834434	0.218142	-3.82518	0.000130675	0.00113884
ENSMUSG00000024952	Rps6ka4	1214.8	0.621767	0.134434	4.62509	3.74438e-06	4.8402e-05
ENSMUSG00000024957	Kcnk4	9.64639	-1.45855	0.553561	-2.63486	0.0084173	0.0391656
ENSMUSG00000024960	Plcb3	1217.2	-0.373018	0.10866	-3.43289	0.000597174	0.00428181
ENSMUSG00000024962	Vegfb	1482.57	-0.688199	0.238455	-2.88607	0.00390084	0.021026
ENSMUSG00000024974	Smc3	2111.92	-0.324007	0.120181	-2.696	0.0070177	0.0336494
ENSMUSG00000024981	Acsl5	1486.15	0.628473	0.201685	3.11611	0.00183254	0.0111306
ENSMUSG00000024983	Vti1a	358.073	0.449375	0.173692	2.58719	0.00967609	0.0436673
ENSMUSG00000024990	Rbp4	23.3758	1.50371	0.482783	3.11467	0.00184148	0.011168
ENSMUSG00000024991	Eif3a	17095.2	1.18243	0.169656	6.96959	3.17864e-12	1.10138e-10
ENSMUSG00000024999	Noc3l	818.701	0.601635	0.135271	4.44761	8.68297e-06	0.000101751
ENSMUSG00000025007	Aldh18a1	4097.03	3.11324	0.180664	17.2322	1.52277e-66	1.38863e-63
ENSMUSG00000025013	Tll2	37.5033	-3.6119	0.53404	-6.76336	1.3483e-11	4.2464e-10
ENSMUSG00000025025	Mxi1	1035.04	-1.7225	0.1871	-9.20634	3.37445e-20	2.67582e-18
ENSMUSG00000025027	Xpnpep1	2547.09	0.638833	0.128668	4.96498	6.87093e-07	1.0427e-05
ENSMUSG00000025036	Sfxn2	251.003	-0.590267	0.194006	-3.04252	0.00234603	0.013682
ENSMUSG00000025037	Maoa	16804.3	5.72707	0.32425	17.6625	8.15271e-70	8.17798e-67
ENSMUSG00000025050	Pcgf6	389.145	1.50286	0.177751	8.45485	2.79455e-17	1.70928e-15
ENSMUSG00000025059	Gyk	3469.07	0.975341	0.250511	3.89341	9.88442e-05	0.000894458
ENSMUSG00000025064	Col17a1	74.1608	-0.879517	0.299804	-2.93364	0.00335013	0.0185102
ENSMUSG00000025068	Gsto1	10452.3	2.50463	0.236784	10.5777	3.78088e-26	4.99026e-24
ENSMUSG00000025078	Nhlrc2	1656.69	0.444492	0.164663	2.69941	0.00694633	0.033347
ENSMUSG00000025081	Tdrd1	6.83566	1.74443	0.673381	2.59055	0.00958221	0.0434045
ENSMUSG00000025085	Ablim1	7481.49	-0.623957	0.242845	-2.56936	0.0101886	0.0455041
ENSMUSG00000025089	Gfra1	279.015	-1.73898	0.244463	-7.11346	1.13166e-12	4.14293e-11
ENSMUSG00000025092	Hspa12a	1457.86	-1.5164	0.226099	-6.7068	1.98936e-11	6.10253e-10
ENSMUSG00000025102	3110040N11Rik	405.516	0.716033	0.180715	3.96223	7.42543e-05	0.000693524
ENSMUSG00000025133	Ints4	3264.1	0.701311	0.16071	4.36384	1.27802e-05	0.000143881
ENSMUSG00000025140	Pycr1	541.763	4.11755	0.26342	15.6311	4.46823e-55	2.35899e-52
ENSMUSG00000025141	Myadml2	896.679	-0.631345	0.201163	-3.13847	0.00169831	0.0104354
ENSMUSG00000025142	Aspscr1	2052.96	1.33098	0.161759	8.22815	1.90125e-16	1.07748e-14
ENSMUSG00000025155	Dus1l	1287.7	0.513542	0.143498	3.57873	0.000345264	0.00264681
ENSMUSG00000025161	Slc16a3	479.094	2.42013	0.24564	9.85237	6.69442e-23	6.81744e-21
ENSMUSG00000025162	Csnk1d	1811.35	0.492464	0.184294	2.67217	0.0075363	0.0357686
ENSMUSG00000025175	Fn3k	329.953	-1.36978	0.35605	-3.84716	0.000119497	0.00105378
ENSMUSG00000025184	R3hcc1l	1202.09	-0.731035	0.140705	-5.19552	2.04146e-07	3.433e-06
ENSMUSG00000025185	Loxl4	484.808	1.80596	0.242232	7.45549	8.95361e-14	3.75005e-12
ENSMUSG00000025194	Abcc2	18.0126	1.69093	0.518767	3.25952	0.00111599	0.00731879
ENSMUSG00000025204	Ndufb8	12477.6	-0.600904	0.137235	-4.37864	1.19421e-05	0.000135664
ENSMUSG00000025207	Sema4g	32.1868	-0.973711	0.354152	-2.74942	0.00597014	0.0295809
ENSMUSG00000025209	Peo1	479.943	-1.18349	0.382068	-3.09758	0.00195106	0.0117052
ENSMUSG00000025221	Kcnip2	2061.61	-1.57723	0.406892	-3.87628	0.000106065	0.000953353
ENSMUSG00000025228	Actr1a	3102.4	0.523982	0.147765	3.54606	0.000391041	0.00295929
ENSMUSG00000025232	Hexa	3621.69	0.657852	0.124998	5.26292	1.41788e-07	2.47352e-06
ENSMUSG00000025237	Parp6	914.277	-0.439356	0.167559	-2.6221	0.00873891	0.0403312
ENSMUSG00000025240	Sacm1l	3168.13	0.468576	0.137142	3.41672	0.000633796	0.00450096
ENSMUSG00000025241	Fyco1	18545.8	-1.28075	0.343538	-3.7281	0.000192929	0.0015961
ENSMUSG00000025246	Tbl1x	4265.67	1.14128	0.130294	8.75931	1.96455e-18	1.35906e-16
ENSMUSG00000025257	Ribc1	58.2713	0.870221	0.324644	2.68054	0.00735028	0.0350181
ENSMUSG00000025268	Maged2	1916.09	0.714732	0.204776	3.49031	0.000482461	0.00356506
ENSMUSG00000025269	Apex2	561.533	-1.10911	0.231828	-4.78418	1.71687e-06	2.3986e-05
ENSMUSG00000025271	Pfkfb1	352.732	-2.43028	0.319741	-7.60077	2.94363e-14	1.31526e-12
ENSMUSG00000025277	Abhd6	419.056	1.57032	0.320253	4.90337	9.42079e-07	1.39278e-05
ENSMUSG00000025283	Sat1	1330.63	0.758624	0.267054	2.84071	0.00450136	0.023505
ENSMUSG00000025287	Acot9	2454.75	1.7331	0.196243	8.83142	1.03357e-18	7.45878e-17
ENSMUSG00000025290	Rps24	11390.2	0.923719	0.126934	7.27714	3.40976e-13	1.31551e-11
ENSMUSG00000025330	Padi4	69.7627	1.93043	0.373079	5.17432	2.28746e-07	3.80207e-06
ENSMUSG00000025332	Kdm5c	3889.56	0.461549	0.152956	3.01753	0.00254846	0.0147044
ENSMUSG00000025340	Rabgef1	789.893	0.47981	0.167027	2.87265	0.00407043	0.0217473
ENSMUSG00000025351	Cd63	2711.61	1.80747	0.245718	7.35585	1.89721e-13	7.55195e-12
ENSMUSG00000025362	Rps26	3914.64	0.872864	0.168701	5.17402	2.29113e-07	3.80502e-06
ENSMUSG00000025364	Pa2g4	3193.78	0.981944	0.222927	4.40478	1.0589e-05	0.00012171
ENSMUSG00000025366	Esyt1	2280.19	0.457204	0.118709	3.85146	0.000117414	0.00103815
ENSMUSG00000025372	Baiap2	475.978	0.740358	0.230166	3.21663	0.00129707	0.00832168
ENSMUSG00000025386	Pde6g	18.6232	-1.82761	0.486514	-3.75654	0.000172282	0.00144435
ENSMUSG00000025403	Shmt2	5313.93	2.23089	0.278505	8.01026	1.14463e-15	5.96458e-14
ENSMUSG00000025408	Ddit3	2387.87	1.65944	0.220739	7.51768	5.57565e-14	2.37997e-12
ENSMUSG00000025410	Dctn2	7911.45	1.07724	0.200046	5.38497	7.24553e-08	1.33972e-06
ENSMUSG00000025432	Avil	1864.92	4.73056	0.299309	15.8049	2.87622e-56	1.60285e-53
ENSMUSG00000025453	Nnt	27723.1	-0.756103	0.20763	-3.64159	0.000270957	0.00214027
ENSMUSG00000025464	Paox	255.042	0.656847	0.24792	2.64944	0.00806262	0.0378103
ENSMUSG00000025473	Adam8	119.45	1.3694	0.387047	3.53807	0.00040307	0.00304
ENSMUSG00000025474	Tubgcp2	1837.27	0.528218	0.157082	3.3627	0.000771838	0.00533033
ENSMUSG00000025475	Adgra1	19.9287	2.34103	0.605018	3.86936	0.000109121	0.000974706
ENSMUSG00000025478	Dpysl4	396.469	-0.61111	0.188851	-3.23594	0.00121242	0.00785394
ENSMUSG00000025481	Urah	14.2094	-3.17818	0.604857	-5.25444	1.48479e-07	2.57904e-06
ENSMUSG00000025485	Ric8	1620.2	1.1258	0.213338	5.27709	1.31253e-07	2.31184e-06
ENSMUSG00000025487	Psmd13	3372.26	1.00328	0.19054	5.26545	1.3985e-07	2.44738e-06
ENSMUSG00000025499	Hras	1697.84	0.435584	0.147829	2.94655	0.00321342	0.0178878
ENSMUSG00000025503	Taldo1	5852.56	1.43893	0.283531	5.07504	3.87409e-07	6.14889e-06
ENSMUSG00000025521	Tmem192	690.587	0.968787	0.226712	4.27321	1.92677e-05	0.000208046
ENSMUSG00000025529	Zfp711	46.7001	-0.944045	0.353423	-2.67115	0.00755919	0.0358601
ENSMUSG00000025533	Asl	418.855	1.4256	0.14779	9.64612	5.10531e-22	4.78611e-20
ENSMUSG00000025537	Phkg1	760.653	-3.56265	0.340374	-10.4669	1.22649e-25	1.54753e-23
ENSMUSG00000025558	Dock9	4876.45	-0.446638	0.134963	-3.30933	0.000935204	0.00628497
ENSMUSG00000025572	Tmc6	758.345	0.860087	0.188332	4.56686	4.95092e-06	6.22148e-05
ENSMUSG00000025586	Cpeb1	2139.63	1.73769	0.171608	10.1259	4.23929e-24	4.80501e-22
ENSMUSG00000025591	Tma16	350.88	1.20594	0.315907	3.8174	0.000134864	0.00117178
ENSMUSG00000025607	Copg2	3544.98	0.950491	0.175035	5.43028	5.62642e-08	1.05591e-06
ENSMUSG00000025612	Bach1	1632.38	-0.364228	0.138047	-2.63843	0.00832899	0.0388505
ENSMUSG00000025613	Cct8	8085.88	0.938859	0.132441	7.08889	1.35195e-12	4.90466e-11
ENSMUSG00000025616	Usp16	3109.61	0.901246	0.168933	5.33494	9.55739e-08	1.73051e-06
ENSMUSG00000025630	Hprt	1561.77	0.983063	0.197828	4.96927	6.72061e-07	1.02298e-05
ENSMUSG00000025651	Uqcrc1	39458.9	-0.470896	0.114959	-4.09622	4.19953e-05	0.000420414
ENSMUSG00000025656	Arhgef9	696.732	-0.724448	0.248949	-2.91003	0.00361396	0.0197449
ENSMUSG00000025701	Alox5	832.704	-0.769392	0.181374	-4.24201	2.21527e-05	0.000236902
ENSMUSG00000025722	Wdr73	427.558	1.30672	0.218436	5.98213	2.20232e-09	5.20411e-08
ENSMUSG00000025724	Sec11a	829.822	0.6353	0.24634	2.57895	0.00991009	0.0445677
ENSMUSG00000025726	Slc28a1	15.0498	1.75732	0.554914	3.16684	0.00154105	0.00961333
ENSMUSG00000025727	A930017K11Rik	8.45367	-3.0338	0.681101	-4.45426	8.41825e-06	9.92285e-05
ENSMUSG00000025728	Pigq	1898.71	0.659407	0.187929	3.5088	0.000450126	0.00335954
ENSMUSG00000025730	Rab40c	292.276	-0.506082	0.191494	-2.64282	0.00822194	0.0384535
ENSMUSG00000025733	Rhot2	3137.32	-0.455591	0.170585	-2.67075	0.0075681	0.0358794
ENSMUSG00000025746	Il6	19.1984	1.75728	0.650636	2.70087	0.00691581	0.0332479
ENSMUSG00000025757	Hspa4l	3630.01	0.648629	0.148744	4.36072	1.29638e-05	0.00014554
ENSMUSG00000025758	Plk4	243.377	0.900598	0.212816	4.2318	2.31824e-05	0.00024686
ENSMUSG00000025759	Mfsd8	614.528	-0.51695	0.16592	-3.11566	0.00183534	0.0111379
ENSMUSG00000025762	Larp1b	4648.39	1.01869	0.226172	4.50406	6.66673e-06	8.11577e-05
ENSMUSG00000025764	Jade1	1570.57	-0.548039	0.157441	-3.48093	0.000499682	0.00367067
ENSMUSG00000025766	D3Ertd751e	377.993	-2.51291	0.36618	-6.8625	6.76656e-12	2.23274e-10
ENSMUSG00000025784	Clec3b	145.407	-1.55456	0.410885	-3.78344	0.000154675	0.00131543
ENSMUSG00000025791	Pgm2	23244	1.74545	0.173432	10.0641	7.95797e-24	8.8696e-22
ENSMUSG00000025793	Hgs	2320.63	1.23178	0.222485	5.53646	3.08653e-08	6.08869e-07
ENSMUSG00000025794	Rpl14	6776.72	0.670673	0.156546	4.28418	1.83411e-05	0.000198682
ENSMUSG00000025810	Nrp1	7643.35	-0.612619	0.130535	-4.69313	2.6905e-06	3.60567e-05
ENSMUSG00000025815	Dhtkd1	210.917	-1.12944	0.252584	-4.47154	7.7658e-06	9.24614e-05
ENSMUSG00000025817	Nudt5	1189.6	0.93139	0.232063	4.01353	5.98175e-05	0.000574191
ENSMUSG00000025855	Prkar1b	130.761	1.04464	0.272328	3.83596	0.000125074	0.00109574
ENSMUSG00000025857	Dnaaf5	850.59	1.00484	0.273743	3.67073	0.000241861	0.00194712
ENSMUSG00000025858	Get4	1337.57	1.1801	0.262258	4.49978	6.80254e-06	8.23517e-05
ENSMUSG00000025867	Cplx2	246.939	0.530787	0.199364	2.66239	0.0077587	0.0366161
ENSMUSG00000025869	Nop16	412.027	1.14541	0.395786	2.89402	0.00380349	0.0205676
ENSMUSG00000025875	Tspan17	794.532	1.93831	0.197263	9.82601	8.6999e-23	8.72687e-21
ENSMUSG00000025893	Kbtbd3	319.944	-1.55008	0.142986	-10.8407	2.20667e-27	2.99123e-25
ENSMUSG00000025898	Cwf19l2	1180.52	-0.281714	0.110346	-2.55301	0.0106797	0.0471718
ENSMUSG00000025900	Rp1	92.5869	-3.11702	0.595795	-5.2317	1.67962e-07	2.88498e-06
ENSMUSG00000025902	Sox17	272.785	1.39327	0.350683	3.97302	7.09664e-05	0.000668103
ENSMUSG00000025911	Adhfe1	2628.99	-0.858878	0.163278	-5.26023	1.43875e-07	2.50557e-06
ENSMUSG00000025912	Mybl1	461.516	2.78246	0.184796	15.057	3.10695e-51	1.35504e-48
ENSMUSG00000025916	Ppp1r42	4.91958	-1.87255	0.643662	-2.9092	0.0036235	0.0197701
ENSMUSG00000025917	Cops5	2761.88	0.517935	0.165183	3.13552	0.00171547	0.0105119
ENSMUSG00000025938	Slco5a1	1123.72	-1.57788	0.282431	-5.58679	2.31308e-08	4.66591e-07
ENSMUSG00000025949	Pikfyve	2477.58	0.457452	0.170938	2.67613	0.0074477	0.0354066
ENSMUSG00000025959	Klf7	1811.67	0.975946	0.336238	2.90255	0.00370142	0.0201295
ENSMUSG00000025967	Eef1b2	4739.42	0.474587	0.160211	2.96226	0.00305393	0.0171044
ENSMUSG00000025968	Ndufs1	24137	-0.803374	0.128587	-6.24772	4.16475e-10	1.08652e-08
ENSMUSG00000025969	Nrp2	3227.61	-0.865886	0.311171	-2.78267	0.00539141	0.0272793
ENSMUSG00000025978	Rftn2	295.504	-0.795448	0.252891	-3.14542	0.00165847	0.0102407
ENSMUSG00000025979	Mob4	1271.11	-0.835995	0.116343	-7.18559	6.69186e-13	2.50004e-11
ENSMUSG00000025980	Hspd1	20900.5	0.759241	0.143027	5.30837	1.10608e-07	1.98177e-06
ENSMUSG00000025993	Slc40a1	968.013	-0.753592	0.230703	-3.2665	0.00108884	0.00715741
ENSMUSG00000025995	Wdr75	1895.8	1.3836	0.163432	8.46591	2.54169e-17	1.56415e-15
ENSMUSG00000026000	Lancl1	1904.46	0.923266	0.155914	5.92162	3.18786e-09	7.27179e-08
ENSMUSG00000026004	Kansl1l	1517.24	-0.891759	0.149994	-5.94529	2.75975e-09	6.37125e-08
ENSMUSG00000026011	Ctla4	64.3116	-2.9705	0.43485	-6.83111	8.42625e-12	2.73539e-10
ENSMUSG00000026012	Cd28	138.85	-1.50165	0.294415	-5.10045	3.38854e-07	5.44719e-06
ENSMUSG00000026019	Wdr12	1126.27	0.999785	0.170132	5.87654	4.18927e-09	9.36958e-08
ENSMUSG00000026020	Nop58	1676.42	1.12127	0.22641	4.95238	7.33127e-07	1.11004e-05
ENSMUSG00000026021	Sumo1	980.881	-1.14125	0.375412	-3.04	0.0023658	0.0137733
ENSMUSG00000026032	Ndufb3	3428.28	-0.496128	0.126608	-3.91861	8.90602e-05	0.00081474
ENSMUSG00000026037	Orc2	1245.52	1.09814	0.160233	6.85339	7.21209e-12	2.36034e-10
ENSMUSG00000026039	Sgol2a	521.993	-0.766045	0.170253	-4.49946	6.81262e-06	8.23839e-05
ENSMUSG00000026042	Col5a2	9004.61	1.50857	0.315726	4.7781	1.76963e-06	2.46715e-05
ENSMUSG00000026043	Col3a1	40690.2	0.937759	0.354275	2.64698	0.00812141	0.0380504
ENSMUSG00000026049	Tex30	144.714	0.540724	0.187072	2.89047	0.00384672	0.0207733
ENSMUSG00000026062	Slc9a2	179.182	-1.68856	0.512729	-3.29329	0.000990238	0.00659786
ENSMUSG00000026068	Il18rap	48.8647	1.4793	0.535101	2.76453	0.00570053	0.0284205
ENSMUSG00000026073	Il1r2	15.6768	2.06348	0.637578	3.23644	0.0012103	0.00784779
ENSMUSG00000026078	Pdcl3	1781.47	0.581936	0.173464	3.35478	0.000794272	0.00546832
ENSMUSG00000026082	Rev1	1037.47	-0.464309	0.138861	-3.3437	0.000826684	0.00566039
ENSMUSG00000026087	Mrpl30	3565.95	-0.618065	0.118016	-5.23715	1.63075e-07	2.80825e-06
ENSMUSG00000026096	Osgepl1	1769.06	-1.07132	0.214558	-4.99313	5.94093e-07	9.17528e-06
ENSMUSG00000026098	Pms1	369.18	-0.902637	0.192033	-4.70044	2.59604e-06	3.49307e-05
ENSMUSG00000026107	Nabp1	4770.27	1.89679	0.205879	9.2131	3.16844e-20	2.52243e-18
ENSMUSG00000026114	Cnga3	78.6872	-2.21054	0.444167	-4.97682	6.46382e-07	9.89147e-06
ENSMUSG00000026123	Plekhb2	1095.14	-0.580934	0.2002	-2.90177	0.00371067	0.0201634
ENSMUSG00000026142	Rhbdd1	1450.77	1.2652	0.468467	2.70072	0.00691892	0.0332479
ENSMUSG00000026153	Fam135a	2538.37	0.493256	0.135952	3.62816	0.000285445	0.00223783
ENSMUSG00000026155	Smap1	567.316	0.654527	0.172239	3.8001	0.000144636	0.00124269
ENSMUSG00000026159	Agfg1	1985.7	0.529549	0.169695	3.1206	0.00180485	0.0109824
ENSMUSG00000026170	Cyp27a1	1396.16	0.573456	0.206267	2.78017	0.00543312	0.0274557
ENSMUSG00000026171	Rnf25	668.84	0.493885	0.193151	2.55699	0.0105581	0.0467692
ENSMUSG00000026172	Bcs1l	664.467	-0.482155	0.138822	-3.47318	0.000514334	0.00376041
ENSMUSG00000026175	Vil1	38.8573	1.66583	0.393022	4.23851	2.25008e-05	0.000240368
ENSMUSG00000026187	Xrcc5	1607.28	0.996298	0.151762	6.56488	5.20756e-11	1.52294e-09
ENSMUSG00000026192	Atic	2286	1.07797	0.20308	5.30812	1.10764e-07	1.98177e-06
ENSMUSG00000026193	Fn1	7281.3	1.34796	0.310572	4.34025	1.4232e-05	0.000158426
ENSMUSG00000026197	Zfand2b	518.472	1.02889	0.227221	4.52813	5.95078e-06	7.31075e-05
ENSMUSG00000026202	Tuba4a	16029.2	-0.980321	0.292501	-3.35152	0.000803697	0.00551995
ENSMUSG00000026208	Des	101880	0.700797	0.129819	5.39826	6.72901e-08	1.24882e-06
ENSMUSG00000026209	Dnpep	3246.03	0.563608	0.140448	4.01293	5.99699e-05	0.000575378
ENSMUSG00000026211	Obsl1	3635.02	-0.80563	0.215309	-3.74175	0.000182745	0.00152125
ENSMUSG00000026222	Sp100	1294.92	-0.555789	0.167119	-3.3257	0.000881974	0.00597372
ENSMUSG00000026229	Psmd1	7994.17	0.469229	0.143295	3.27456	0.00105827	0.00699652
ENSMUSG00000026234	Ncl	6091.02	1.04079	0.16255	6.4029	1.52458e-10	4.21876e-09
ENSMUSG00000026235	Epha4	2586.44	-1.84885	0.26779	-6.90412	5.05146e-12	1.68904e-10
ENSMUSG00000026245	Farsb	2991.45	1.02039	0.219483	4.64907	3.33437e-06	4.36152e-05
ENSMUSG00000026254	Eif4e2	2468.33	0.459608	0.132383	3.4718	0.000516972	0.00377557
ENSMUSG00000026255	Efhd1	126.012	-1.26202	0.270599	-4.66382	3.104e-06	4.09687e-05
ENSMUSG00000026259	Ngef	45.8645	1.11961	0.402311	2.78294	0.0053868	0.0272629
ENSMUSG00000026260	Ndufa10	21619.3	-0.365175	0.128831	-2.83453	0.00458936	0.0238713
ENSMUSG00000026275	Ppp1r7	1676.76	0.618621	0.149465	4.1389	3.48973e-05	0.000355928
ENSMUSG00000026276	2002-09-01	11134.1	0.929808	0.2196	4.2341	2.29473e-05	0.000244487
ENSMUSG00000026278	Bok	251.69	1.13534	0.383132	2.9633	0.00304355	0.0170561
ENSMUSG00000026279	Thap4	1691.52	0.568778	0.175543	3.24011	0.00119485	0.00776516
ENSMUSG00000026285	Pdcd1	5.04978	2.31779	0.678444	3.41633	0.000634719	0.00450592
ENSMUSG00000026303	Mlph	55.6833	1.78471	0.43025	4.14807	3.35295e-05	0.000343901
ENSMUSG00000026305	Lrrfip1	5428.5	0.877002	0.172115	5.09545	3.47914e-07	5.57942e-06
ENSMUSG00000026307	Scly	636.685	-0.541973	0.176937	-3.06308	0.0021907	0.012915
ENSMUSG00000026308	Klhl30	1768.35	-1.06601	0.293904	-3.62708	0.000286645	0.00224548
ENSMUSG00000026313	Hdac4	1777.37	-1.27825	0.203628	-6.27737	3.44341e-10	9.10167e-09
ENSMUSG00000026335	Pam	84234.2	0.908596	0.273039	3.32771	0.000875626	0.00594276
ENSMUSG00000026341	Actr3	5993.06	0.986852	0.287168	3.4365	0.000589286	0.0042313
ENSMUSG00000026343	Gpr39	108.503	1.83676	0.495645	3.70579	0.000210735	0.00172351
ENSMUSG00000026348	Acmsd	24.8682	-1.51505	0.503151	-3.01112	0.00260288	0.0149473
ENSMUSG00000026360	Rgs2	661.623	-1.72525	0.442436	-3.89944	9.6416e-05	0.000873272
ENSMUSG00000026365	Cfh	19182.3	0.653942	0.252691	2.58791	0.0096561	0.0436289
ENSMUSG00000026380	Tfcp2l1	1540.14	5.96343	0.33248	17.9362	6.15425e-72	6.85925e-69
ENSMUSG00000026389	Steap3	481.056	-1.18263	0.198958	-5.94411	2.77963e-09	6.40976e-08
ENSMUSG00000026409	Pfkfb2	4281.92	-0.852404	0.20752	-4.10757	3.99849e-05	0.000402296
ENSMUSG00000026427	Eif2d	1971.69	0.553183	0.136994	4.03802	5.39047e-05	0.000523951
ENSMUSG00000026429	Ube2t	85.9329	-1.24185	0.342044	-3.63066	0.000282698	0.00221976
ENSMUSG00000026452	Syt2	70.9337	-0.845531	0.311449	-2.71483	0.00663097	0.0321407
ENSMUSG00000026456	Cyb5r1	7303.42	3.23836	0.23778	13.6191	3.08167e-42	8.58672e-40
ENSMUSG00000026457	Adipor1	7688.76	-0.474981	0.151676	-3.13155	0.00173887	0.0106325
ENSMUSG00000026458	Ppfia4	502.3	1.94328	0.274363	7.08291	1.4116e-12	5.11182e-11
ENSMUSG00000026473	Glul	25725.4	0.847549	0.232586	3.64403	0.000268403	0.00212666
ENSMUSG00000026478	Lamc1	19470.9	0.899991	0.208401	4.31856	1.57053e-05	0.00017312
ENSMUSG00000026479	Lamc2	911.23	1.86648	0.194925	9.57539	1.01473e-21	9.25341e-20
ENSMUSG00000026483	Fam129a	5953.96	1.72195	0.387917	4.43896	9.03951e-06	0.000105498
ENSMUSG00000026489	Adck3	16504.2	-1.21973	0.317825	-3.83774	0.000124171	0.00108943
ENSMUSG00000026490	Cdc42bpa	4799.15	0.330694	0.106	3.11974	0.00181008	0.0110075
ENSMUSG00000026494	Kif26b	1025.4	1.55095	0.262641	5.90522	3.52182e-09	7.95661e-08
ENSMUSG00000026495	Efcab2	431.429	-1.00173	0.223232	-4.48739	7.21002e-06	8.65634e-05
ENSMUSG00000026516	Nvl	1573.24	0.525579	0.183189	2.86905	0.00411713	0.0219353
ENSMUSG00000026526	Fh1	13436.7	-0.457458	0.127018	-3.60152	0.000316362	0.00244863
ENSMUSG00000026532	Spta1	4918.91	1.10645	0.215388	5.137	2.79157e-07	4.54951e-06
ENSMUSG00000026546	Cfap45	52.9941	0.929527	0.365381	2.544	0.0109592	0.0481948
ENSMUSG00000026553	Copa	14296.4	0.550096	0.0952483	5.77539	7.67769e-09	1.66159e-07
ENSMUSG00000026558	Uck2	7560.25	2.04368	0.312386	6.54215	6.0639e-11	1.76055e-09
ENSMUSG00000026566	Mpzl1	244.909	0.994466	0.316487	3.1422	0.00167682	0.0103255
ENSMUSG00000026568	Mpc2	6944.77	-0.619503	0.164815	-3.75877	0.000170747	0.00143448
ENSMUSG00000026571	Dcaf6	4319.6	-0.436544	0.143313	-3.04609	0.00231835	0.0135442
ENSMUSG00000026576	Atp1b1	13367.9	1.19189	0.176524	6.75199	1.45828e-11	4.56412e-10
ENSMUSG00000026577	Blzf1	1011.45	0.677677	0.144967	4.6747	2.94384e-06	3.90345e-05
ENSMUSG00000026578	Ccdc181	571.42	0.866098	0.23565	3.67536	0.000237516	0.0019183
ENSMUSG00000026580	Selp	105.114	1.86899	0.48223	3.87572	0.000106311	0.000954707
ENSMUSG00000026584	Scyl3	639.101	0.591462	0.188695	3.13449	0.00172153	0.0105458
ENSMUSG00000026589	Sec16b	322.685	0.57503	0.200663	2.86565	0.00416154	0.0220928
ENSMUSG00000026594	Ralgps2	439.309	-0.604444	0.220373	-2.74282	0.00609148	0.0300781
ENSMUSG00000026600	Soat1	983.27	1.32614	0.307003	4.31964	1.56282e-05	0.000172365
ENSMUSG00000026603	Smyd2	4346.93	0.693772	0.204459	3.39321	0.000690783	0.00486092
ENSMUSG00000026605	Cenpf	1011.15	-2.64251	0.450019	-5.87198	4.30608e-09	9.62011e-08
ENSMUSG00000026608	Kctd3	1134.1	0.739955	0.169471	4.36626	1.26394e-05	0.000142456
ENSMUSG00000026609	Ush2a	20.5228	-1.35331	0.439843	-3.07679	0.0020924	0.0124563
ENSMUSG00000026610	Esrrg	924.585	-1.04859	0.270175	-3.88114	0.000103967	0.00093701
ENSMUSG00000026615	Eprs	34953.5	2.5006	0.1461	17.1157	1.13429e-65	9.10248e-63
ENSMUSG00000026639	Lamb3	529.304	-1.0468	0.328925	-3.1825	0.0014601	0.00919989
ENSMUSG00000026650	Meig1	25.7602	-2.1813	0.513305	-4.24951	2.14236e-05	0.000229963
ENSMUSG00000026662	Sephs1	992.628	0.427421	0.141693	3.01654	0.00255681	0.0147483
ENSMUSG00000026664	Phyh	10144.2	-0.858259	0.175702	-4.88474	1.03566e-06	1.51439e-05
ENSMUSG00000026672	Optn	8338.14	1.29643	0.195817	6.62062	3.57704e-11	1.06631e-09
ENSMUSG00000026675	Hsd17b7	1074.61	-0.638999	0.22484	-2.84201	0.00448295	0.0234394
ENSMUSG00000026676	Ccdc3	111.791	-1.24936	0.417197	-2.99465	0.00274759	0.0156464
ENSMUSG00000026688	Mgst3	4980.32	-1.02177	0.186334	-5.48357	4.16837e-08	8.03322e-07
ENSMUSG00000026698	Pigc	292.535	1.4183	0.467492	3.03386	0.0024145	0.0140283
ENSMUSG00000026718	Stam	2253.62	1.11504	0.239058	4.66431	3.09651e-06	4.09238e-05
ENSMUSG00000026726	Cubn	175.471	-1.33461	0.39729	-3.35927	0.000781487	0.0053914
ENSMUSG00000026727	Rsu1	1675.58	0.791602	0.242367	3.26613	0.00109028	0.00716452
ENSMUSG00000026730	Pter	611.113	0.881702	0.188882	4.66801	3.04138e-06	4.02481e-05
ENSMUSG00000026755	Arpc5l	2826.4	0.465516	0.150903	3.08487	0.00203642	0.0121627
ENSMUSG00000026764	Kif5c	286.78	1.17885	0.267307	4.41009	1.03329e-05	0.000118932
ENSMUSG00000026767	Fam188a	793.382	0.856173	0.225782	3.79204	0.000149413	0.00127663
ENSMUSG00000026770	Il2ra	51.1444	-1.47805	0.396254	-3.73007	0.00019143	0.0015844
ENSMUSG00000026775	Yme1l1	6312.9	0.438113	0.170421	2.57077	0.0101474	0.0453528
ENSMUSG00000026778	Prkcq	176.481	-0.955118	0.283383	-3.37042	0.000750549	0.00520841
ENSMUSG00000026799	Med27	655.716	0.451025	0.149666	3.01353	0.00258226	0.0148652
ENSMUSG00000026811	St6galnac6	2194.52	-0.551252	0.172622	-3.1934	0.00140607	0.00890742
ENSMUSG00000026822	Lcn2	774.13	3.14638	0.441657	7.12403	1.04815e-12	3.8513e-11
ENSMUSG00000026824	Kcnj3	2207.1	-2.43098	0.661043	-3.6775	0.000235531	0.00190381
ENSMUSG00000026841	Fibcd1	271.625	5.5798	0.53484	10.4326	1.75918e-25	2.19209e-23
ENSMUSG00000026853	Crat	13126.5	-0.665451	0.152025	-4.37723	1.20195e-05	0.000136388
ENSMUSG00000026854	Usp20	4631.65	1.09746	0.161798	6.7829	1.17789e-11	3.76886e-10
ENSMUSG00000026860	Sh3glb2	1472.49	-0.453421	0.117567	-3.8567	0.000114929	0.00101843
ENSMUSG00000026869	Psmd5	1267.35	0.753667	0.218304	3.45237	0.000555678	0.00401274
ENSMUSG00000026870	Cutal	28.129	-1.40484	0.498998	-2.81533	0.00487268	0.0250848
ENSMUSG00000026872	Zeb2	4377.38	0.354668	0.126691	2.79948	0.0051185	0.0261224
ENSMUSG00000026879	Gsn	48015.9	-0.539577	0.178453	-3.02363	0.00249764	0.0144444
ENSMUSG00000026885	Ttll11	176.884	1.06504	0.231613	4.59835	4.25859e-06	5.42794e-05
ENSMUSG00000026888	Grb14	3286.93	-1.28025	0.225516	-5.67699	1.37082e-08	2.87672e-07
ENSMUSG00000026904	Slc4a10	38.4376	2.21992	0.547848	4.05207	5.07669e-05	0.000497664
ENSMUSG00000026914	Psmd14	2770.59	0.853214	0.119934	7.11404	1.12692e-12	4.13314e-11
ENSMUSG00000026925	Inpp5e	1084.89	-0.684364	0.181749	-3.76544	0.000166258	0.00140028
ENSMUSG00000026930	Gpsm1	3237.94	-0.707255	0.201514	-3.5097	0.000448606	0.00335068
ENSMUSG00000026941	Mamdc4	188.63	-1.15523	0.26147	-4.41821	9.95199e-06	0.000114877
ENSMUSG00000026950	Neb	2064.47	-1.11084	0.29529	-3.76185	0.000168661	0.00141873
ENSMUSG00000026956	Uap1l1	910.458	1.57141	0.173937	9.03436	1.64959e-19	1.25357e-17
ENSMUSG00000026960	Arl6ip6	230.99	-1.03621	0.359994	-2.87842	0.00399674	0.0214396
ENSMUSG00000026971	Itgb6	794.943	-3.15891	0.39447	-8.00799	1.16599e-15	6.02891e-14
ENSMUSG00000026980	Ly75	153.258	-0.640405	0.232157	-2.75849	0.00580685	0.0288811
ENSMUSG00000026986	Hnmt	163.278	-2.10592	0.311018	-6.77106	1.27844e-11	4.05823e-10
ENSMUSG00000026988	Wdsub1	690.798	-0.575465	0.161087	-3.57239	0.000353736	0.00270555
ENSMUSG00000026991	Pkp4	7825.2	0.916876	0.176833	5.18497	2.16049e-07	3.60896e-06
ENSMUSG00000026994	Galnt3	19.0252	1.591	0.507207	3.13678	0.00170813	0.0104732
ENSMUSG00000027002	Nckap1	8168.39	0.594538	0.127181	4.67474	2.94326e-06	3.90345e-05
ENSMUSG00000027004	Frzb	935.221	1.43352	0.363504	3.94361	8.0263e-05	0.000743415
ENSMUSG00000027016	Zfp385b	1224.25	2.12659	0.250632	8.48491	2.15891e-17	1.34509e-15
ENSMUSG00000027022	Xirp2	156546	1.63295	0.185943	8.78196	1.60648e-18	1.1269e-16
ENSMUSG00000027035	Cers6	720.253	2.25189	0.302399	7.44674	9.56741e-14	3.95756e-12
ENSMUSG00000027067	Ssrp1	2557.39	0.415448	0.122792	3.38335	0.000716086	0.00500736
ENSMUSG00000027068	Dhrs9	98.9095	3.42509	0.508875	6.73072	1.68822e-11	5.21945e-10
ENSMUSG00000027074	Slc43a3	3949.54	0.514325	0.20331	2.52976	0.0114141	0.0497251
ENSMUSG00000027082	Tfpi	2321.37	-0.917401	0.19882	-4.61423	3.94562e-06	5.07417e-05
ENSMUSG00000027086	Fastkd1	1064.67	-0.669125	0.136199	-4.91286	8.97592e-07	1.3329e-05
ENSMUSG00000027091	Zc3h15	1785.16	0.631252	0.119439	5.28514	1.2561e-07	2.2222e-06
ENSMUSG00000027107	Chrna1	39.4757	2.64493	0.46656	5.669	1.43636e-08	2.98923e-07
ENSMUSG00000027177	Hipk3	13631.8	-0.749489	0.181827	-4.12198	3.75622e-05	0.000379634
ENSMUSG00000027180	Fbxo3	2954.87	-0.636851	0.159452	-3.99398	6.49721e-05	0.000618931
ENSMUSG00000027187	Cat	19545	0.952067	0.202403	4.70381	2.55348e-06	3.45668e-05
ENSMUSG00000027189	Trim44	1743.28	-1.347	0.411929	-3.26997	0.00107558	0.00708646
ENSMUSG00000027194	Ttc17	1971.32	-0.457162	0.151883	-3.00996	0.00261286	0.0149898
ENSMUSG00000027203	Dut	350.167	-1.44816	0.243425	-5.94912	2.69584e-09	6.26696e-08
ENSMUSG00000027204	Fbn1	23151.8	1.30725	0.219376	5.95896	2.53844e-09	5.94237e-08
ENSMUSG00000027206	Cops2	2944.95	0.670296	0.166379	4.02872	5.60806e-05	0.000543521
ENSMUSG00000027207	Galk2	887.747	1.38472	0.167722	8.25602	1.50609e-16	8.68254e-15
ENSMUSG00000027209	Fam227b	283.087	5.25145	0.386111	13.6009	3.9564e-42	1.0873e-39
ENSMUSG00000027219	Slc28a2	1786.34	-1.16614	0.133212	-8.75395	2.0601e-18	1.42027e-16
ENSMUSG00000027221	Chst1	75.5865	-0.735363	0.254205	-2.89279	0.00381834	0.0206367
ENSMUSG00000027222	Pex16	926.537	0.843926	0.166554	5.06698	4.04177e-07	6.38976e-06
ENSMUSG00000027227	Sord	4363.81	-1.82713	0.379099	-4.81967	1.43793e-06	2.0416e-05
ENSMUSG00000027247	Arhgap1	2610.74	1.46578	0.180481	8.12153	4.6036e-16	2.50971e-14
ENSMUSG00000027253	Lrp4	1248.45	-0.889309	0.155216	-5.72948	1.00738e-08	2.15001e-07
ENSMUSG00000027254	Map1a	10058.2	3.89638	0.442618	8.80302	1.33182e-18	9.4748e-17
ENSMUSG00000027257	Pacsin3	8221.28	0.589314	0.171899	3.42826	0.00060746	0.00434737
ENSMUSG00000027259	Adal	477.296	-0.646994	0.221817	-2.91679	0.00353648	0.0193903
ENSMUSG00000027263	Tubgcp4	1499.64	1.07389	0.142478	7.53722	4.80087e-14	2.07575e-12
ENSMUSG00000027272	Ubr1	4113.27	0.345251	0.116494	2.96368	0.00303986	0.0170446
ENSMUSG00000027274	Mkks	1617.43	-0.419267	0.156331	-2.68192	0.00732001	0.0348905
ENSMUSG00000027288	Zfp106	35300.7	-0.830453	0.182952	-4.53918	5.64732e-06	6.99793e-05
ENSMUSG00000027298	Tyro3	292.573	1.39708	0.225242	6.20259	5.55398e-10	1.43218e-08
ENSMUSG00000027303	Ptpra	2607.04	0.476013	0.0914785	5.20355	1.95522e-07	3.30739e-06
ENSMUSG00000027314	Dll4	704.817	-0.811636	0.291539	-2.78397	0.00536973	0.0271979
ENSMUSG00000027316	Gfra4	71.0365	-2.68419	0.371816	-7.21914	5.23171e-13	1.97662e-11
ENSMUSG00000027332	Ivd	10300.8	-2.03755	0.152102	-13.396	6.38178e-41	1.64143e-38
ENSMUSG00000027342	Pcna	1685.37	0.532796	0.207253	2.57075	0.010148	0.0453528
ENSMUSG00000027346	Gpcpd1	7031.57	-1.66737	0.242596	-6.87304	6.28459e-12	2.0909e-10
ENSMUSG00000027353	Mcm8	268.417	0.737288	0.215518	3.421	0.000623919	0.00444025
ENSMUSG00000027360	Hdc	173.841	1.36567	0.260758	5.2373	1.62942e-07	2.80825e-06
ENSMUSG00000027363	Usp8	3026.27	0.537353	0.14645	3.66919	0.000243322	0.00195418
ENSMUSG00000027364	Usp50	46.9113	-1.08716	0.410836	-2.64621	0.00813994	0.0381283
ENSMUSG00000027367	Stard7	2381.35	-0.489408	0.168459	-2.90521	0.0036701	0.0199837
ENSMUSG00000027405	Nop56	1450.88	0.411694	0.15691	2.62377	0.00869628	0.04019
ENSMUSG00000027406	Idh3b	18862	-0.767874	0.118004	-6.50716	7.65835e-11	2.19802e-09
ENSMUSG00000027411	Vps16	1481.84	0.645387	0.148067	4.35875	1.30805e-05	0.000146686
ENSMUSG00000027429	Sec23b	1358.56	0.71587	0.150786	4.74759	2.05859e-06	2.84432e-05
ENSMUSG00000027430	Dtd1	637.345	0.645153	0.152085	4.24204	2.21492e-05	0.000236902
ENSMUSG00000027435	Cd93	559.139	-0.992505	0.376399	-2.63684	0.00836813	0.0389888
ENSMUSG00000027455	Nsfl1c	1697.56	0.68241	0.150584	4.53175	5.84978e-06	7.1999e-05
ENSMUSG00000027460	Angpt4	76.4543	1.85521	0.465305	3.98708	6.68916e-05	0.000635409
ENSMUSG00000027479	Mapre1	6285.54	1.22443	0.141758	8.63749	5.74613e-18	3.80458e-16
ENSMUSG00000027488	Snta1	4759.81	0.976896	0.179768	5.43421	5.50399e-08	1.03682e-06
ENSMUSG00000027498	Cstf1	1353.93	0.719787	0.191674	3.75526	0.000173159	0.00145049
ENSMUSG00000027500	Stmn2	140.278	-0.634806	0.246401	-2.57631	0.00998599	0.0448483
ENSMUSG00000027502	Rtfdc1	1371.23	0.983797	0.282849	3.47817	0.000504843	0.00370317
ENSMUSG00000027506	Tpd52	1589.71	1.04328	0.167509	6.22819	4.7184e-10	1.22776e-08
ENSMUSG00000027509	Rae1	1290.55	0.847742	0.14641	5.79019	7.03085e-09	1.53318e-07
ENSMUSG00000027510	Rbm38	2440.88	-0.950452	0.321802	-2.95354	0.00314157	0.0175365
ENSMUSG00000027520	Zdbf2	89.8051	1.22238	0.415835	2.93959	0.00328646	0.0182387
ENSMUSG00000027546	Atp9a	4555.91	0.493613	0.113129	4.36328	1.28125e-05	0.000144002
ENSMUSG00000027566	Psma7	3303.32	0.574387	0.187908	3.05675	0.00223749	0.013133
ENSMUSG00000027589	Pcmtd2	1222.28	-0.921952	0.242342	-3.80434	0.000142185	0.00122636
ENSMUSG00000027593	Raly	3036.48	0.282528	0.104925	2.69267	0.00708833	0.0339232
ENSMUSG00000027597	Ahcy	1700.98	1.47922	0.30633	4.82883	1.37336e-06	1.96102e-05
ENSMUSG00000027598	Itch	3366.97	0.491207	0.159594	3.07786	0.00208493	0.0124192
ENSMUSG00000027603	Ggt7	108.93	0.702891	0.257269	2.73213	0.00629268	0.0308438
ENSMUSG00000027610	Gss	2368.23	2.35627	0.237727	9.91164	3.70516e-23	3.89178e-21
ENSMUSG00000027612	Mmp24	38.6666	-1.04027	0.392922	-2.64752	0.00810852	0.0379988
ENSMUSG00000027613	Eif6	2441.79	1.39572	0.184605	7.56057	4.01295e-14	1.75398e-12
ENSMUSG00000027615	Hps3	1488.47	0.697935	0.160556	4.34699	1.3802e-05	0.000154088
ENSMUSG00000027624	Epb4.1l1	837.936	0.697593	0.190476	3.66238	0.000249887	0.00199731
ENSMUSG00000027635	Dsn1	134.261	1.13539	0.31065	3.65487	0.000257309	0.00204841
ENSMUSG00000027637	1110008F13Rik	2044.53	0.831034	0.186465	4.45678	8.31997e-06	9.82433e-05
ENSMUSG00000027646	Src	451.136	0.926793	0.277721	3.33714	0.000846452	0.00577603
ENSMUSG00000027649	Ctnnbl1	782.266	0.538655	0.132293	4.07167	4.6677e-05	0.000461297
ENSMUSG00000027650	Tti1	1626.28	-0.550862	0.120794	-4.56035	5.10672e-06	6.39121e-05
ENSMUSG00000027656	Wisp2	1855.68	1.93851	0.312693	6.19941	5.66759e-10	1.45961e-08
ENSMUSG00000027679	Dnajc19	1071.71	-0.714302	0.161351	-4.42701	9.55499e-06	0.000110741
ENSMUSG00000027706	Sec62	3580.63	0.368407	0.135255	2.7238	0.00645363	0.0314178
ENSMUSG00000027709	Mccc1	1811.27	-1.21968	0.220323	-5.53588	3.09664e-08	6.10263e-07
ENSMUSG00000027712	Anxa5	5950.35	0.96837	0.180244	5.37256	7.76251e-08	1.43136e-06
ENSMUSG00000027714	Exosc9	1208.47	0.714668	0.17316	4.12721	3.6719e-05	0.000372048
ENSMUSG00000027716	Trpc3	592.195	-1.29051	0.230622	-5.59576	2.19662e-08	4.44905e-07
ENSMUSG00000027737	Slc7a11	2498.8	6.64666	0.315109	21.0932	9.18641e-99	1.84298e-95
ENSMUSG00000027746	Ufm1	1421.15	0.742482	0.286101	2.59518	0.00945419	0.0429604
ENSMUSG00000027750	Postn	9845.91	1.96694	0.288563	6.81632	9.34032e-12	3.01263e-10
ENSMUSG00000027762	Sucnr1	25.809	1.73511	0.462314	3.7531	0.000174663	0.00146126
ENSMUSG00000027765	P2ry1	631.664	-2.52202	0.51421	-4.90464	9.35983e-07	1.38479e-05
ENSMUSG00000027775	Mfsd1	1726.87	1.08052	0.216217	4.99738	5.81156e-07	8.99626e-06
ENSMUSG00000027787	Nmd3	1094.55	0.620742	0.182166	3.40757	0.000655444	0.00463338
ENSMUSG00000027799	Nbea	4578.81	0.32875	0.124918	2.63173	0.00849517	0.0394514
ENSMUSG00000027804	Ppid	2047.47	0.423327	0.128519	3.2939	0.000988089	0.00658573
ENSMUSG00000027808	Serp1	2747.49	1.05024	0.248417	4.22774	2.36053e-05	0.000250832
ENSMUSG00000027809	Etfdh	19364.2	-0.57475	0.190377	-3.01901	0.00253602	0.0146411
ENSMUSG00000027810	Eif2a	2174.81	0.376118	0.141556	2.65702	0.00788337	0.0371259
ENSMUSG00000027820	Mme	282.729	-2.85926	0.331247	-8.63181	6.03881e-18	3.98522e-16
ENSMUSG00000027824	Vmn2r1	33.1745	4.2178	0.583925	7.22319	5.07838e-13	1.92595e-11
ENSMUSG00000027831	Veph1	6.77635	1.75659	0.671797	2.61477	0.00892885	0.0409535
ENSMUSG00000027832	Ptx3	56.2499	1.19738	0.401181	2.98463	0.00283924	0.0160767
ENSMUSG00000027835	Pdcd10	800.307	0.700103	0.184739	3.78969	0.000150836	0.00128659
ENSMUSG00000027840	Wnt2b	144.082	-0.714361	0.237792	-3.00414	0.00266332	0.01524
ENSMUSG00000027854	Sike1	1561	1.02621	0.378159	2.7137	0.00665365	0.032219
ENSMUSG00000027865	Gdap2	784.732	0.605845	0.206146	2.93891	0.00329368	0.0182636
ENSMUSG00000027868	Tbx15	88.1895	2.52124	0.361992	6.96492	3.28585e-12	1.13072e-10
ENSMUSG00000027871	Hsd3b1	18.1391	1.76581	0.539806	3.27119	0.00107095	0.0070676
ENSMUSG00000027887	Sypl2	34.9227	-1.44106	0.418138	-3.44637	0.000568168	0.00409727
ENSMUSG00000027890	Gstm4	382.568	0.655858	0.16434	3.99086	6.5834e-05	0.000625953
ENSMUSG00000027900	Dram2	2207.47	-0.471081	0.179157	-2.62942	0.00855301	0.0396466
ENSMUSG00000027908	Tchhl1	78.5572	3.1285	0.621553	5.03336	4.81954e-07	7.5421e-06
ENSMUSG00000027944	Hax1	1648.73	1.63201	0.17258	9.45654	3.18292e-21	2.77634e-19
ENSMUSG00000027953	Slc50a1	653.402	0.474172	0.175398	2.7034	0.00686331	0.0330513
ENSMUSG00000027955	Fam198b	8074.52	1.95384	0.179611	10.8781	1.46519e-27	1.99964e-25
ENSMUSG00000027956	Tmem144	6489.43	2.83143	0.213277	13.2758	3.19724e-40	8.01789e-38
ENSMUSG00000027984	Hadh	9261.58	-0.618134	0.226073	-2.73423	0.0062527	0.0306853
ENSMUSG00000027996	Sfrp2	535.901	2.06445	0.334941	6.16363	7.1094e-10	1.81462e-08
ENSMUSG00000027998	Plrg1	1414.63	0.40694	0.139049	2.92659	0.00342698	0.0188733
ENSMUSG00000027999	Pla2g12a	2006.28	1.27075	0.419448	3.02959	0.00244888	0.0141998
ENSMUSG00000028003	Lrat	48.9667	-2.98165	0.413166	-7.21659	5.33084e-13	2.00652e-11
ENSMUSG00000028007	Snx7	563.683	0.744264	0.165519	4.49654	6.90673e-06	8.33712e-05
ENSMUSG00000028013	Ppa2	1814.95	-0.960959	0.187931	-5.11335	3.1649e-07	5.10814e-06
ENSMUSG00000028017	Egf	403.153	-2.63458	0.293121	-8.98803	2.51702e-19	1.89126e-17
ENSMUSG00000028019	Pdgfc	197.879	0.688511	0.225759	3.04976	0.00229022	0.0133994
ENSMUSG00000028024	Enpep	685.939	-0.61036	0.203071	-3.00565	0.00265017	0.0151734
ENSMUSG00000028029	Aimp1	2218.73	0.644846	0.185095	3.48386	0.000494244	0.0036414
ENSMUSG00000028042	Zbtb7b	1722.65	0.930194	0.299768	3.10305	0.0019154	0.0115326
ENSMUSG00000028048	Gba	977.84	0.694034	0.199858	3.47263	0.000515382	0.0037667
ENSMUSG00000028053	Ash1l	8289.48	-0.344608	0.112152	-3.07268	0.00212146	0.0126031
ENSMUSG00000028059	Arhgef2	5583.01	1.32115	0.256201	5.15669	2.51355e-07	4.14354e-06
ENSMUSG00000028063	Lmna	7537.31	1.23086	0.198364	6.20504	5.46843e-10	1.41376e-08
ENSMUSG00000028070	Apoa1bp	1688.39	0.731304	0.287752	2.54144	0.0110397	0.0484529
ENSMUSG00000028086	Fbxw7	2304.47	-1.33436	0.261082	-5.11088	3.20662e-07	5.17133e-06
ENSMUSG00000028089	Chd1l	1388.28	0.655341	0.102166	6.41446	1.4132e-10	3.92683e-09
ENSMUSG00000028108	Ecm1	1674.43	0.676566	0.206838	3.27099	0.00107171	0.0070683
ENSMUSG00000028111	Ctsk	522.926	1.52084	0.23428	6.49155	8.49572e-11	2.42104e-09
ENSMUSG00000028124	Gclm	2150.64	1.78369	0.379703	4.69759	2.63244e-06	3.53494e-05
ENSMUSG00000028125	Abca4	154.133	-1.97297	0.234698	-8.40641	4.22763e-17	2.50931e-15
ENSMUSG00000028126	Pip5k1a	1321.71	0.731486	0.260262	2.81058	0.00494525	0.0253776
ENSMUSG00000028128	F3	785.967	-0.595556	0.181697	-3.27775	0.0010464	0.00693109
ENSMUSG00000028132	Tmem56	164.042	-1.0883	0.340025	-3.20065	0.00137119	0.00871358
ENSMUSG00000028138	Adh5	4307.13	0.649919	0.128159	5.07118	3.95354e-07	6.26013e-06
ENSMUSG00000028141	Oaz3	14.3274	-1.94532	0.680064	-2.86049	0.00422985	0.0223726
ENSMUSG00000028145	Them4	813.371	1.05604	0.381086	2.77113	0.00558614	0.0280103
ENSMUSG00000028156	Eif4e	1479.28	-0.461798	0.132993	-3.47233	0.000515952	0.00376949
ENSMUSG00000028158	Mttp	1192.62	1.8683	0.286624	6.51829	7.11121e-11	2.04685e-09
ENSMUSG00000028173	Wls	3578.59	0.779475	0.137431	5.67175	1.41346e-08	2.95077e-07
ENSMUSG00000028177	1810013D15Rik	7.25446	-1.85491	0.584847	-3.17161	0.00151597	0.0094923
ENSMUSG00000028179	Cth	315.632	2.08758	0.402891	5.1815	2.20107e-07	3.67369e-06
ENSMUSG00000028184	Adgrl2	2505.05	-0.767578	0.189196	-4.05705	4.96969e-05	0.000488257
ENSMUSG00000028195	Cyr61	3381.28	1.08423	0.268085	4.04434	5.24708e-05	0.000511999
ENSMUSG00000028207	Asph	9314.31	-0.64379	0.200083	-3.21762	0.00129259	0.00829821
ENSMUSG00000028211	Trp53inp1	1063.22	1.45864	0.461669	3.15949	0.00158043	0.00982846
ENSMUSG00000028234	Rps20	5441.47	0.687339	0.22897	3.00188	0.00268319	0.0153319
ENSMUSG00000028245	Nsmaf	3237.89	-0.644055	0.124354	-5.17921	2.22826e-07	3.71599e-06
ENSMUSG00000028246	Faxc	71.6905	1.06362	0.385976	2.75568	0.00585709	0.0291142
ENSMUSG00000028268	Gbp3	765.33	-1.06022	0.198667	-5.33665	9.46777e-08	1.71738e-06
ENSMUSG00000028270	Gbp2	929.271	-0.907942	0.21837	-4.15782	3.21294e-05	0.000330602
ENSMUSG00000028271	Gtf2b	1183.8	0.834357	0.133507	6.24954	4.1165e-10	1.07673e-08
ENSMUSG00000028273	Pdlim5	27360.1	0.557882	0.168955	3.30196	0.000960103	0.00642696
ENSMUSG00000028292	Rars2	1123.2	0.70142	0.163114	4.30018	1.70658e-05	0.000186073
ENSMUSG00000028300	3110043O21Rik	1270.48	-0.480042	0.126331	-3.79988	0.000144765	0.00124327
ENSMUSG00000028307	Aldob	98.0576	-4.56691	0.40203	-11.3596	6.64187e-30	1.00946e-27
ENSMUSG00000028312	Smc2	465.467	0.718383	0.283324	2.53555	0.0112269	0.0491029
ENSMUSG00000028318	Polr1e	1241.54	1.10162	0.227778	4.8364	1.32209e-06	1.8932e-05
ENSMUSG00000028330	Ncbp1	1698.72	0.652635	0.195587	3.33679	0.000847515	0.00578131
ENSMUSG00000028334	Nans	731.493	1.08251	0.234272	4.62076	3.82344e-06	4.92968e-05
ENSMUSG00000028345	Tex10	864.776	0.863435	0.183222	4.71251	2.44684e-06	3.32353e-05
ENSMUSG00000028347	Tmeff1	837.872	1.62596	0.199974	8.13087	4.26218e-16	2.34268e-14
ENSMUSG00000028364	Tnc	846.026	2.36282	0.375345	6.29506	3.07289e-10	8.15453e-09
ENSMUSG00000028367	Txn1	2366.66	0.975203	0.258853	3.7674	0.000164954	0.00139163
ENSMUSG00000028369	Svep1	11124.4	2.31674	0.197804	11.7123	1.10242e-31	1.8743e-29
ENSMUSG00000028370	Pappa	812.447	2.92664	0.212819	13.7518	4.96963e-43	1.58255e-40
ENSMUSG00000028373	Astn2	154.21	1.02339	0.371788	2.75261	0.00591225	0.029323
ENSMUSG00000028383	Hsdl2	7967.48	-0.574072	0.194938	-2.94489	0.00323069	0.0179739
ENSMUSG00000028391	Wdr31	29.6659	1.42155	0.450094	3.15834	0.00158671	0.00986447
ENSMUSG00000028393	Alad	1154.68	-0.707329	0.14549	-4.86169	1.16389e-06	1.68714e-05
ENSMUSG00000028402	Mpdz	5871.27	-0.689797	0.178649	-3.86118	0.000112839	0.00100345
ENSMUSG00000028407	Toporsos	205.016	-1.27029	0.252409	-5.03266	4.83716e-07	7.56376e-06
ENSMUSG00000028409	Smu1	2382.98	0.379309	0.127872	2.96632	0.00301392	0.0169228
ENSMUSG00000028419	Chmp5	1344.41	0.781038	0.221347	3.52857	0.00041781	0.00314172
ENSMUSG00000028420	Tmem38b	909.398	0.878044	0.18403	4.77121	1.83121e-06	2.54946e-05
ENSMUSG00000028426	Rad23b	7732.3	0.755212	0.26823	2.81554	0.00486956	0.0250752
ENSMUSG00000028427	Aqp7	653.415	-0.721875	0.284425	-2.53802	0.0111483	0.0488547
ENSMUSG00000028438	Kif24	185.876	-0.641984	0.223883	-2.8675	0.00413731	0.0220108
ENSMUSG00000028447	Dctn3	1757.85	0.849565	0.153227	5.5445	2.94802e-08	5.83842e-07
ENSMUSG00000028451	1700022I11Rik	980.97	0.758155	0.195286	3.88228	0.000103482	0.000933063
ENSMUSG00000028452	Vcp	21306.4	0.704419	0.153464	4.59013	4.42976e-06	5.62468e-05
ENSMUSG00000028455	Stoml2	2458.57	0.376019	0.116107	3.23856	0.00120134	0.00779722
ENSMUSG00000028465	Tln1	21464.2	0.652364	0.145947	4.46987	7.82658e-06	9.30194e-05
ENSMUSG00000028466	Creb3	1017.65	0.640622	0.237296	2.69968	0.00694069	0.033328
ENSMUSG00000028467	Gba2	768.684	-0.57941	0.137329	-4.21915	2.4523e-05	0.000259484
ENSMUSG00000028470	Hint2	1216.13	-0.480992	0.187111	-2.57062	0.0101518	0.0453597
ENSMUSG00000028494	Plin2	3067.52	0.8548	0.234739	3.64149	0.000271068	0.00214027
ENSMUSG00000028495	Rps6	7037.05	0.482171	0.154186	3.1272	0.0017648	0.0107681
ENSMUSG00000028520	4921539E11Rik	40.7522	4.5881	0.605593	7.57621	3.55794e-14	1.56878e-12
ENSMUSG00000028522	Mier1	1633.3	-0.684551	0.215546	-3.17589	0.00149376	0.00938035
ENSMUSG00000028542	Slc6a9	926.351	3.68655	0.233755	15.771	4.92537e-56	2.67062e-53
ENSMUSG00000028550	Atg4c	249.998	-0.55512	0.185998	-2.98455	0.00283998	0.0160767
ENSMUSG00000028553	Angptl3	84.7111	-0.936246	0.228296	-4.10101	4.11353e-05	0.000413455
ENSMUSG00000028555	Ttc39a	107.978	-1.24526	0.30726	-4.05279	5.06113e-05	0.00049651
ENSMUSG00000028556	Dock7	2155.25	0.465897	0.144883	3.21568	0.00130136	0.00834116
ENSMUSG00000028559	Osbpl9	6467.95	0.867818	0.138881	6.24866	4.1398e-10	1.08142e-08
ENSMUSG00000028572	Hook1	893.699	-0.940913	0.171402	-5.4895	4.03064e-08	7.80234e-07
ENSMUSG00000028576	Ift74	366.491	1.20788	0.270103	4.47193	7.75177e-06	9.23492e-05
ENSMUSG00000028577	Plaa	3670.38	0.79231	0.151434	5.23204	1.67651e-07	2.8821e-06
ENSMUSG00000028582	Cc2d1b	1651.12	0.585134	0.137113	4.26755	1.97631e-05	0.000212937
ENSMUSG00000028591	Pramef12	8.23103	1.92515	0.638585	3.01471	0.00257225	0.0148288
ENSMUSG00000028597	Gpx7	241.222	1.18376	0.426962	2.77252	0.00556238	0.0279121
ENSMUSG00000028603	Scp2	6468.74	-1.02968	0.244347	-4.214	2.50886e-05	0.000264909
ENSMUSG00000028607	Cpt2	5715.91	-1.04002	0.199906	-5.20253	1.96592e-07	3.31989e-06
ENSMUSG00000028613	Lrp8	202.237	2.83461	0.471919	6.00655	1.89508e-09	4.53148e-08
ENSMUSG00000028621	Cyb5rl	263.792	-0.739096	0.213752	-3.45773	0.000544755	0.00394402
ENSMUSG00000028626	Col9a2	129.421	2.9207	0.371199	7.86828	3.59542e-15	1.75076e-13
ENSMUSG00000028630	Dyrk2	144.552	-1.68132	0.595939	-2.8213	0.00478288	0.0246986
ENSMUSG00000028633	Ctps	3923.33	1.22551	0.215549	5.68554	1.30401e-08	2.74512e-07
ENSMUSG00000028645	Slc2a1	2945.88	2.56847	0.203251	12.6369	1.32136e-36	2.88142e-34
ENSMUSG00000028653	Trit1	428.921	0.969073	0.178112	5.44081	5.30402e-08	1.00386e-06
ENSMUSG00000028655	Mfsd2a	6.18091	2.20751	0.682457	3.23465	0.00121791	0.00787933
ENSMUSG00000028657	Ppt1	1368.06	-0.705275	0.250977	-2.81011	0.00495242	0.0254041
ENSMUSG00000028673	Fuca1	1344.59	0.584095	0.205251	2.84576	0.0044306	0.0232444
ENSMUSG00000028683	Eif2b3	1107.5	1.33348	0.191755	6.9541	3.54811e-12	1.21207e-10
ENSMUSG00000028690	Mmachc	705.131	-0.576678	0.137071	-4.20713	2.58633e-05	0.000272087
ENSMUSG00000028692	Akr1a1	9203.16	1.06207	0.191651	5.54172	2.99513e-08	5.92004e-07
ENSMUSG00000028696	Ipp	414.061	-0.444122	0.165501	-2.68349	0.00728575	0.034752
ENSMUSG00000028701	Lurap1	151.974	-1.87519	0.538693	-3.48101	0.000499532	0.00367067
ENSMUSG00000028708	Mknk1	1274.18	0.576686	0.193812	2.9755	0.00292515	0.0164936
ENSMUSG00000028729	Ebna1bp2	1275.58	0.734243	0.108014	6.79764	1.06344e-11	3.4175e-10
ENSMUSG00000028737	Aldh4a1	2739.12	-1.28851	0.335333	-3.84249	0.000121794	0.00107074
ENSMUSG00000028741	Mrto4	900.778	1.19874	0.121485	9.86738	5.765e-23	5.93115e-21
ENSMUSG00000028743	Akr7a5	769.323	-0.94691	0.225105	-4.20652	2.59328e-05	0.000272434
ENSMUSG00000028750	Pla2g2c	13.2381	-1.75672	0.5994	-2.93079	0.00338101	0.0186448
ENSMUSG00000028756	Pink1	11785.4	-1.11942	0.214655	-5.21498	1.8384e-07	3.13828e-06
ENSMUSG00000028771	Ptpn12	2102.67	0.87524	0.209127	4.18521	2.84898e-05	0.000296299
ENSMUSG00000028772	Zcchc17	478.576	-0.731133	0.168613	-4.33617	1.44986e-05	0.00016079
ENSMUSG00000028782	Adgrb2	94.4043	-1.08128	0.313208	-3.45229	0.000555848	0.00401274
ENSMUSG00000028792	Ak2	2075.17	0.643047	0.141245	4.55269	5.29645e-06	6.61627e-05
ENSMUSG00000028793	Rnf19b	1272.03	0.918195	0.207146	4.4326	9.31049e-06	0.000108345
ENSMUSG00000028798	Eif3i	4062.49	0.664031	0.115312	5.75854	8.48442e-09	1.82438e-07
ENSMUSG00000028800	Hdac1	520.694	0.406176	0.159777	2.54214	0.0110178	0.0483884
ENSMUSG00000028807	Zbtb8a	189.334	-0.630243	0.241417	-2.6106	0.00903833	0.0413516
ENSMUSG00000028811	Yars	3941.38	1.94217	0.109785	17.6906	4.95306e-70	5.22991e-67
ENSMUSG00000028825	Rhd	300.719	1.31206	0.249019	5.26894	1.37213e-07	2.40838e-06
ENSMUSG00000028832	Stmn1	390.934	0.800014	0.232161	3.44595	0.000569061	0.00410223
ENSMUSG00000028841	Cnksr1	544.867	1.91444	0.291173	6.57492	4.86805e-11	1.42991e-09
ENSMUSG00000028847	Trappc3	1702.41	0.996435	0.22128	4.50305	6.69839e-06	8.13647e-05
ENSMUSG00000028848	Gpn2	264.824	0.558239	0.174228	3.20407	0.00135498	0.00863244
ENSMUSG00000028849	Map7d1	4716.4	-0.677473	0.260658	-2.59909	0.00934713	0.0425606
ENSMUSG00000028851	Nudc	2367.19	0.334027	0.122442	2.72804	0.00637118	0.0311071
ENSMUSG00000028857	Tmem222	916.366	1.34792	0.399983	3.36995	0.000751826	0.00521367
ENSMUSG00000028860	Sytl1	76.4098	1.61912	0.354541	4.56679	4.9525e-06	6.22148e-05
ENSMUSG00000028861	Mrps15	947.316	-0.750329	0.178374	-4.20649	2.59371e-05	0.000272434
ENSMUSG00000028862	Map3k6	1283.1	1.58012	0.273151	5.78481	7.25945e-09	1.5796e-07
ENSMUSG00000028869	Gnl2	2123.54	0.590981	0.150291	3.93223	8.4161e-05	0.000776293
ENSMUSG00000028879	Stx12	1905.38	1.23103	0.388368	3.16976	0.00152567	0.00954114
ENSMUSG00000028882	Ppp1r8	865.77	0.632827	0.200553	3.15541	0.00160273	0.00993632
ENSMUSG00000028883	Sema3a	164.798	-0.873164	0.322819	-2.70481	0.00683433	0.0329434
ENSMUSG00000028889	Yrdc	565.698	0.75595	0.16765	4.50909	6.51072e-06	7.94031e-05
ENSMUSG00000028893	Sesn2	1301.32	3.24016	0.34896	9.28519	1.61422e-20	1.31111e-18
ENSMUSG00000028894	Inpp5b	1064.61	0.76451	0.156093	4.89778	9.69236e-07	1.42891e-05
ENSMUSG00000028907	Utp11l	645.157	0.374256	0.147658	2.53462	0.011257	0.0491915
ENSMUSG00000028917	Plekhm2	6084.76	0.432491	0.168205	2.57121	0.0101343	0.0453218
ENSMUSG00000028919	Arhgef19	721.788	-1.12794	0.360852	-3.12576	0.00177346	0.010811
ENSMUSG00000028920	Fbxo42	1312.07	0.463203	0.171908	2.69448	0.00704995	0.0337798
ENSMUSG00000028932	Psmc2	5023.52	1.249	0.14255	8.76184	1.92088e-18	1.33345e-16
ENSMUSG00000028943	Espn	69.7663	-1.14584	0.347122	-3.30099	0.00096346	0.00644513
ENSMUSG00000028944	Prkag2	1462.56	0.785787	0.305304	2.57379	0.0100593	0.0450466
ENSMUSG00000028949	Smarcd3	2572.24	0.751792	0.151092	4.97571	6.50079e-07	9.94046e-06
ENSMUSG00000028953	Abcf2	3434.91	0.610802	0.16625	3.67399	0.000238792	0.00192705
ENSMUSG00000028957	Per3	2341.86	-1.47962	0.38917	-3.802	0.000143533	0.00123587
ENSMUSG00000028959	Fastk	7061.67	-0.546627	0.111679	-4.89464	9.84883e-07	1.44753e-05
ENSMUSG00000028960	Ube4b	3331.15	0.663327	0.18971	3.49653	0.000471356	0.00350105
ENSMUSG00000028961	Pgd	1305.98	1.4261	0.239559	5.95304	2.63204e-09	6.13287e-08
ENSMUSG00000028962	Slc4a2	2235.67	0.46227	0.158766	2.91164	0.00359541	0.0196575
ENSMUSG00000028972	Car6	25.1421	3.38899	0.658293	5.14815	2.63074e-07	4.31191e-06
ENSMUSG00000028973	Abcb8	2645.22	-0.839033	0.18427	-4.55328	5.28169e-06	6.60195e-05
ENSMUSG00000028975	Pex14	945.777	0.595468	0.206365	2.8855	0.00390789	0.0210484
ENSMUSG00000028991	Mtor	9417.86	0.620576	0.23107	2.68567	0.00723855	0.0345432
ENSMUSG00000029009	Mthfr	1394.19	0.888575	0.272169	3.26479	0.00109546	0.00719621
ENSMUSG00000029014	Dnajc2	2215.75	1.23303	0.154596	7.9758	1.51394e-15	7.65052e-14
ENSMUSG00000029017	Pmpcb	8420.24	0.364787	0.137129	2.66017	0.00781004	0.036841
ENSMUSG00000029019	Nppb	28513.9	2.64358	0.41848	6.31709	2.66543e-10	7.12034e-09
ENSMUSG00000029027	Dffb	153.294	-0.908228	0.286886	-3.16582	0.00154646	0.00964108
ENSMUSG00000029029	Wrap73	462.255	-0.428858	0.147022	-2.91696	0.00353461	0.0193853
ENSMUSG00000029034	Cpsf3l	1046.09	0.425406	0.1338	3.17941	0.00147573	0.00928691
ENSMUSG00000029036	Atad3a	2408.57	0.910726	0.235563	3.86617	0.000110556	0.000986204
ENSMUSG00000029038	Ssu72	1871.19	0.967226	0.253797	3.81102	0.000138393	0.00119985
ENSMUSG00000029050	Ski	2996.72	0.760109	0.290727	2.61451	0.00893559	0.040975
ENSMUSG00000029056	Pank4	1630.74	-1.01252	0.20882	-4.84879	1.24219e-06	1.79159e-05
ENSMUSG00000029059	Fam213b	1418.21	-0.897834	0.230488	-3.89535	9.8055e-05	0.000887717
ENSMUSG00000029060	Mib2	2436.97	1.17141	0.145859	8.0311	9.66015e-16	5.08667e-14
ENSMUSG00000029061	Mmp23	460.415	0.62121	0.204742	3.03412	0.00241241	0.0140243
ENSMUSG00000029064	Gnb1	3928.55	0.543775	0.199615	2.72411	0.00644742	0.0313995
ENSMUSG00000029076	Sdf4	3873.9	0.614326	0.209778	2.92846	0.00340649	0.018775
ENSMUSG00000029093	Sorcs2	773.084	-1.88616	0.331793	-5.68475	1.31006e-08	2.75498e-07
ENSMUSG00000029094	Afap1	2423.94	0.468885	0.173625	2.70056	0.0069222	0.0332551
ENSMUSG00000029108	Pcdh7	3557.69	-0.952558	0.358857	-2.65442	0.00794451	0.0373564
ENSMUSG00000029110	Rnf4	2419.63	1.00217	0.281272	3.56298	0.000366669	0.00279275
ENSMUSG00000029119	Man2b2	2741.67	1.27932	0.122194	10.4696	1.19106e-25	1.52197e-23
ENSMUSG00000029130	Rnf32	46.4671	-1.55567	0.613747	-2.5347	0.0112542	0.0491901
ENSMUSG00000029131	Dnajb6	2719.12	0.818983	0.121157	6.75969	1.38284e-11	4.34836e-10
ENSMUSG00000029145	Eif2b4	1949.97	0.353874	0.11364	3.114	0.00184567	0.0111833
ENSMUSG00000029146	Snx17	2236.99	0.388437	0.132967	2.9213	0.00348575	0.0191487
ENSMUSG00000029147	Ppm1g	1402.83	0.436451	0.128385	3.39954	0.000674993	0.0047615
ENSMUSG00000029151	Slc30a3	21.2319	1.95483	0.550242	3.55268	0.00038133	0.00288906
ENSMUSG00000029153	Ociad2	118.761	-1.76811	0.399516	-4.42564	9.61571e-06	0.000111252
ENSMUSG00000029158	Yipf7	1958.81	-2.25546	0.114126	-19.7628	6.22524e-87	8.92077e-84
ENSMUSG00000029161	Cgref1	126.751	1.30946	0.393723	3.32585	0.000881494	0.00597331
ENSMUSG00000029162	Khk	212.374	-1.10388	0.263312	-4.1923	2.76144e-05	0.000287942
ENSMUSG00000029163	Emilin1	1985.23	0.748586	0.233881	3.20072	0.00137086	0.00871358
ENSMUSG00000029167	Ppargc1a	3503.38	-0.654512	0.243	-2.69346	0.00707146	0.0338667
ENSMUSG00000029176	Anapc4	3008.36	0.462678	0.165646	2.79316	0.00521952	0.0265569
ENSMUSG00000029177	Cenpa	637.714	-0.934945	0.25851	-3.61667	0.000298416	0.0023295
ENSMUSG00000029178	Klf3	1843.71	-0.850457	0.266613	-3.18985	0.00142346	0.00899728
ENSMUSG00000029186	Pi4k2b	287.736	1.12749	0.200736	5.61675	1.94588e-08	3.97537e-07
ENSMUSG00000029189	Sel1l3	53.8836	-2.68446	0.319752	-8.39544	4.64148e-17	2.74682e-15
ENSMUSG00000029190	D5Ertd579e	7809.98	-0.566248	0.154589	-3.66293	0.000249345	0.00199376
ENSMUSG00000029198	Grpel1	5807.31	0.687057	0.157968	4.34933	1.36552e-05	0.000152703
ENSMUSG00000029204	Rhoh	59.4383	-1.14526	0.403673	-2.83709	0.00455269	0.0237237
ENSMUSG00000029223	Uchl1	4075.27	4.33943	0.326317	13.2982	2.37115e-40	6.02153e-38
ENSMUSG00000029238	Clock	4601.98	0.524637	0.183426	2.86022	0.00423352	0.0223861
ENSMUSG00000029247	Paics	6629.46	0.569126	0.206749	2.75273	0.00590999	0.0293191
ENSMUSG00000029287	Tgfbr3	3685.76	-0.913327	0.214015	-4.26759	1.97599e-05	0.000212937
ENSMUSG00000029312	Klhl8	508.685	-0.668495	0.209852	-3.18556	0.00144477	0.00911188
ENSMUSG00000029321	Slc10a6	254.651	0.823929	0.227665	3.61905	0.00029569	0.00231002
ENSMUSG00000029322	Plac8	42.35	1.24318	0.486412	2.55581	0.0105941	0.0468935
ENSMUSG00000029338	Antxr2	6981.84	-0.889694	0.284297	-3.12945	0.00175132	0.0106989
ENSMUSG00000029343	Crybb1	22.7713	-2.61005	0.611776	-4.26635	1.98693e-05	0.000213966
ENSMUSG00000029363	Rfc5	321.124	0.942049	0.266384	3.53643	0.000405575	0.00305774
ENSMUSG00000029370	Rassf6	9.53281	2.38467	0.634597	3.75777	0.000171434	0.00143949
ENSMUSG00000029376	Mthfd2l	270.153	-0.618014	0.220347	-2.80473	0.00503583	0.0257792
ENSMUSG00000029377	Ereg	53.1192	3.09358	0.477214	6.4826	9.01556e-11	2.5619e-09
ENSMUSG00000029381	Shroom3	3311.16	1.17091	0.398851	2.93571	0.00332781	0.0183922
ENSMUSG00000029392	Rilpl1	4153.48	-0.864431	0.229397	-3.76828	0.000164377	0.00138794
ENSMUSG00000029402	Snrnp35	89.6625	-1.76271	0.407295	-4.32784	1.50581e-05	0.000166352
ENSMUSG00000029403	Cdkl2	306.178	0.698317	0.253116	2.75888	0.00580005	0.0288665
ENSMUSG00000029407	Uso1	2174.35	0.848034	0.262872	3.22604	0.00125517	0.00808646
ENSMUSG00000029417	Cxcl9	188.203	-1.77668	0.187357	-9.48283	2.47488e-21	2.17768e-19
ENSMUSG00000029430	Ran	6512.88	0.9681	0.334017	2.89836	0.00375122	0.0203455
ENSMUSG00000029432	Gbas	17822.1	-0.73029	0.182522	-4.0011	6.30499e-05	0.000602623
ENSMUSG00000029434	Vps33a	1389.39	0.44896	0.168154	2.66994	0.00758657	0.0359311
ENSMUSG00000029438	Bcl7a	608.554	-1.08506	0.345877	-3.13714	0.00170606	0.0104638
ENSMUSG00000029446	Psph	793.268	2.122	0.309008	6.86714	6.5501e-12	2.17204e-10
ENSMUSG00000029447	Cct6a	4313.73	0.734601	0.131057	5.60521	2.08006e-08	4.24086e-07
ENSMUSG00000029452	Tmem116	467.117	1.13847	0.237838	4.78673	1.69521e-06	2.37165e-05
ENSMUSG00000029456	Acad10	527.959	-0.67726	0.195703	-3.46064	0.000538886	0.00391141
ENSMUSG00000029463	Fam216a	312.962	0.495811	0.195768	2.53265	0.0113205	0.0494043
ENSMUSG00000029465	Arpc3	3390.19	0.737142	0.158248	4.65814	3.19075e-06	4.19206e-05
ENSMUSG00000029466	Anapc7	1826.09	0.858546	0.162868	5.27141	1.35383e-07	2.37833e-06
ENSMUSG00000029467	Atp2a2	327866	-1.60486	0.151739	-10.5765	3.83103e-26	5.0234e-24
ENSMUSG00000029469	Ift81	1206.25	-0.84769	0.226169	-3.74803	0.000178228	0.00148709
ENSMUSG00000029470	P2rx4	905.566	1.02782	0.197507	5.20395	1.951e-07	3.30582e-06
ENSMUSG00000029472	Anapc5	7599.95	-0.389522	0.0812543	-4.79386	1.63602e-06	2.29523e-05
ENSMUSG00000029480	Dhx37	2345.38	2.17218	0.312232	6.95694	3.47752e-12	1.19055e-10
ENSMUSG00000029482	Aacs	598.36	1.53872	0.234903	6.55045	5.73634e-11	1.66786e-09
ENSMUSG00000029484	Anxa3	2831.77	1.64691	0.164828	9.99166	1.65782e-23	1.82743e-21
ENSMUSG00000029491	Pde6b	20.3822	-1.34959	0.462885	-2.9156	0.00355002	0.0194485
ENSMUSG00000029499	Pxmp2	701.336	-1.99624	0.335296	-5.95365	2.62234e-09	6.11738e-08
ENSMUSG00000029507	Pus1	710.148	0.803704	0.201193	3.99469	6.47782e-05	0.000617672
ENSMUSG00000029534	St7	881.789	0.496011	0.147769	3.35666	0.000788913	0.00543329
ENSMUSG00000029560	Snx8	1178.82	1.18542	0.161298	7.34928	1.99271e-13	7.85419e-12
ENSMUSG00000029575	Mmab	1069.79	-0.901947	0.267482	-3.37199	0.000746262	0.00518225
ENSMUSG00000029591	Ung	396.708	-2.1364	0.321234	-6.65059	2.91919e-11	8.83329e-10
ENSMUSG00000029592	Usp30	793.365	0.624488	0.132847	4.70079	2.59155e-06	3.48938e-05
ENSMUSG00000029594	Rbm19	1035.9	0.564	0.215126	2.62172	0.00874863	0.0403669
ENSMUSG00000029596	Sdsl	489.213	1.12333	0.162638	6.90693	4.95266e-12	1.65877e-10
ENSMUSG00000029597	Sds	44.4609	-1.57707	0.566959	-2.78162	0.00540877	0.0273464
ENSMUSG00000029598	Plbd2	1729.77	1.11042	0.226389	4.90491	9.34724e-07	1.38394e-05
ENSMUSG00000029599	Ddx54	1880.07	0.705299	0.146317	4.82033	1.43318e-06	2.03629e-05
ENSMUSG00000029602	Rasal1	55.0051	3.85795	0.573375	6.72851	1.71415e-11	5.29065e-10
ENSMUSG00000029605	Oas1b	124.263	-0.796579	0.289895	-2.74782	0.00599935	0.02969
ENSMUSG00000029610	Aimp2	972.649	0.862815	0.173163	4.98269	6.27061e-07	9.63255e-06
ENSMUSG00000029613	Eif2ak1	1864.72	0.506933	0.190934	2.65501	0.00793055	0.0373043
ENSMUSG00000029614	Rpl6	11860.5	0.623682	0.177117	3.5213	0.000429436	0.00321949
ENSMUSG00000029617	Ccz1	2141.6	1.08069	0.214298	5.04292	4.58493e-07	7.1974e-06
ENSMUSG00000029623	Pdap1	2575.03	0.641728	0.12392	5.17855	2.23623e-07	3.72618e-06
ENSMUSG00000029632	Ndufa4	8421.4	-0.359046	0.124261	-2.88945	0.00385921	0.0208351
ENSMUSG00000029650	Slc46a3	325.427	-0.965059	0.264187	-3.65294	0.000259252	0.00206148
ENSMUSG00000029651	Mtus2	1858.83	-1.05981	0.144883	-7.3149	2.57578e-13	1.00341e-11
ENSMUSG00000029661	Col1a2	17811.5	1.4371	0.239712	5.99511	2.03344e-09	4.83351e-08
ENSMUSG00000029673	Auts2	735.242	-0.645051	0.242893	-2.6557	0.00791447	0.0372548
ENSMUSG00000029675	Eln	11247.2	2.59879	0.313618	8.28648	1.16647e-16	6.80285e-15
ENSMUSG00000029683	Lmod2	11004.7	-0.683199	0.240098	-2.84551	0.00443409	0.0232566
ENSMUSG00000029685	Asb15	1062.51	-2.97858	0.289688	-10.282	8.49338e-25	1.02647e-22
ENSMUSG00000029713	Gnb2	3994.75	0.467705	0.135446	3.45308	0.00055422	0.00400388
ENSMUSG00000029716	Tfr2	12.4186	1.67224	0.555368	3.01105	0.00260343	0.0149473
ENSMUSG00000029727	Cyp3a13	55.7068	-2.95037	0.478044	-6.17175	6.7539e-10	1.7327e-08
ENSMUSG00000029752	Asns	7641.95	6.02366	0.262226	22.9712	9.04039e-117	3.62737e-113
ENSMUSG00000029759	Pon3	776.647	0.973681	0.20556	4.73672	2.17205e-06	2.98259e-05
ENSMUSG00000029762	Akr1b8	561.755	1.70173	0.186198	9.13933	6.28432e-20	4.92485e-18
ENSMUSG00000029769	Ccdc136	439.773	2.60864	0.24401	10.6907	1.12515e-26	1.50486e-24
ENSMUSG00000029776	Hibadh	5700.7	-0.964511	0.285707	-3.37588	0.00073581	0.00512397
ENSMUSG00000029777	Gars	21309.4	3.38244	0.197691	17.1097	1.25603e-65	9.69171e-63
ENSMUSG00000029802	Abcg2	1767.01	0.935894	0.153436	6.09957	1.06356e-09	2.64073e-08
ENSMUSG00000029811	Aoc1	7.5109	2.69042	0.66945	4.01885	5.8483e-05	0.000562727
ENSMUSG00000029816	Gpnmb	947.944	3.61818	0.278803	12.9775	1.6411e-38	3.78433e-36
ENSMUSG00000029821	Dfna5	747.117	0.78535	0.152501	5.14979	2.60781e-07	4.27783e-06
ENSMUSG00000029832	Nfe2l3	242.054	-0.703681	0.165354	-4.2556	2.08492e-05	0.000224157
ENSMUSG00000029838	Ptn	217.075	1.04705	0.404518	2.58839	0.00964244	0.0435985
ENSMUSG00000029843	Slc13a4	186.057	2.72448	0.273354	9.96683	2.12907e-23	2.30883e-21
ENSMUSG00000029860	Zyx	3014.86	0.81542	0.259834	3.13823	0.00169973	0.0104377
ENSMUSG00000029862	Clcn1	243.068	-4.14229	0.347413	-11.9232	8.955e-33	1.64821e-30
ENSMUSG00000029864	Gstk1	800.343	-2.51366	0.189795	-13.244	4.88432e-40	1.20974e-37
ENSMUSG00000029993	Nfu1	1831.02	0.849344	0.133701	6.35255	2.11779e-10	5.75707e-09
ENSMUSG00000029994	Anxa4	1938.46	1.56878	0.284264	5.51876	3.41404e-08	6.68871e-07
ENSMUSG00000030029	Lrig1	1995.51	-0.923849	0.266973	-3.46046	0.000539251	0.00391219
ENSMUSG00000030031	Kbtbd8	98.9638	-1.0799	0.287156	-3.76066	0.000169464	0.00142489
ENSMUSG00000030035	Wbp1	545.19	-1.16804	0.260988	-4.47546	7.62482e-06	9.11615e-05
ENSMUSG00000030057	Cnbp	4943.36	0.330167	0.109813	3.00662	0.00264169	0.0151379
ENSMUSG00000030058	Copg1	4867.22	0.693581	0.122259	5.67304	1.4029e-08	2.93176e-07
ENSMUSG00000030059	Tmf1	4639.62	0.431169	0.120607	3.575	0.000350233	0.00267978
ENSMUSG00000030061	Uba3	5615.13	1.50055	0.176055	8.52315	1.55272e-17	9.76508e-16
ENSMUSG00000030079	Ruvbl1	1039.6	0.940671	0.117644	7.99594	1.28592e-15	6.58117e-14
ENSMUSG00000030082	Sec61a1	3398.79	1.08841	0.375984	2.89483	0.00379369	0.0205201
ENSMUSG00000030086	Chchd6	578.913	1.68488	0.170714	9.86964	5.63672e-23	5.82907e-21
ENSMUSG00000030091	Nup210	332.962	-0.871248	0.240603	-3.6211	0.000293348	0.0022944
ENSMUSG00000030095	Tmem43	1731.13	0.855585	0.336676	2.54127	0.011045	0.0484656
ENSMUSG00000030102	Itpr1	5871.67	-0.461735	0.127252	-3.6285	0.000285074	0.00223579
ENSMUSG00000030103	Bhlhe40	1845.29	-1.33986	0.437852	-3.06008	0.00221278	0.0130082
ENSMUSG00000030110	Ret	308.367	-2.24917	0.332204	-6.77045	1.28386e-11	4.069e-10
ENSMUSG00000030116	Mfap5	1262.83	1.0274	0.303572	3.38437	0.000713406	0.00499558
ENSMUSG00000030123	Plxnd1	5822.33	-0.665468	0.253972	-2.62024	0.00878674	0.0404994
ENSMUSG00000030134	Rasgef1a	259.448	3.48747	0.364971	9.55547	1.2303e-21	1.11181e-19
ENSMUSG00000030137	Tuba8	4275.55	-0.767783	0.283841	-2.70498	0.00683091	0.0329348
ENSMUSG00000030138	Bms1	2470.81	0.404542	0.127306	3.17771	0.00148446	0.00932993
ENSMUSG00000030142	Clec4e	11.6768	2.68301	0.617246	4.34675	1.38169e-05	0.000154169
ENSMUSG00000030144	Clec4d	56.3363	2.22303	0.550367	4.03918	5.36383e-05	0.000521615
ENSMUSG00000030161	Gabarapl1	934.415	0.825871	0.187743	4.39894	1.08781e-05	0.000124636
ENSMUSG00000030162	Olr1	35.537	2.06533	0.521129	3.96319	7.39549e-05	0.000691677
ENSMUSG00000030168	Adipor2	3156.94	0.422371	0.160643	2.62925	0.00855738	0.0396577
ENSMUSG00000030170	Wnt5b	181.598	0.545117	0.211499	2.5774	0.00995455	0.0447375
ENSMUSG00000030172	Erc1	3510.94	-1.26809	0.083407	-15.2036	3.34743e-52	1.52627e-49
ENSMUSG00000030188	Magohb	158.459	0.814331	0.210326	3.87175	0.000108055	0.000966907
ENSMUSG00000030200	Bcl2l14	6.21356	2.54057	0.672897	3.77557	0.000159644	0.0013531
ENSMUSG00000030207	8430419L09Rik	446.292	0.457993	0.174128	2.63021	0.00853323	0.0395732
ENSMUSG00000030213	Atf7ip	6158.63	-0.38397	0.146164	-2.62699	0.00861434	0.0398514
ENSMUSG00000030214	Plbd1	1408.78	-0.683364	0.189019	-3.61532	0.000299975	0.00233894
ENSMUSG00000030225	Dera	608.703	2.3005	0.217643	10.57	4.10296e-26	5.31056e-24
ENSMUSG00000030231	Plekha5	1502.92	-0.491756	0.172175	-2.85614	0.00428822	0.0226277
ENSMUSG00000030232	Aebp2	1685.86	0.683822	0.223871	3.05453	0.00225414	0.0132191
ENSMUSG00000030246	Ldhb	20790.6	-0.89627	0.234798	-3.81719	0.000134978	0.00117226
ENSMUSG00000030249	Abcc9	20598.8	-1.31698	0.199534	-6.60028	4.10371e-11	1.21608e-09
ENSMUSG00000030254	Rad18	221.291	1.44474	0.204204	7.07496	1.49496e-12	5.38453e-11
ENSMUSG00000030259	Rassf8	2551.18	0.701867	0.273674	2.56461	0.0103293	0.0459687
ENSMUSG00000030264	Thumpd3	1277.02	0.895437	0.177079	5.0567	4.26566e-07	6.71197e-06
ENSMUSG00000030268	Bcat1	855.742	3.54051	0.345069	10.2603	1.06377e-24	1.27792e-22
ENSMUSG00000030269	Mtmr14	1020.24	0.514629	0.180768	2.84691	0.00441463	0.0231667
ENSMUSG00000030281	Il17rc	370.969	0.590652	0.193076	3.05917	0.00221955	0.0130391
ENSMUSG00000030283	St8sia1	31.4307	1.99728	0.470888	4.24152	2.22013e-05	0.000237295
ENSMUSG00000030287	Itpr2	3568.75	-0.410272	0.153938	-2.66517	0.00769485	0.0363575
ENSMUSG00000030298	Sec13	2521.38	0.496961	0.128061	3.88067	0.00010417	0.000938419
ENSMUSG00000030314	Atg7	1270.55	0.486657	0.179943	2.70451	0.00684057	0.0329655
ENSMUSG00000030316	Tamm41	425.547	0.46366	0.162842	2.8473	0.00440911	0.0231438
ENSMUSG00000030339	Ltbr	2032.13	1.01478	0.151411	6.70215	2.05369e-11	6.2711e-10
ENSMUSG00000030351	Tspan11	60.7195	-0.91672	0.301539	-3.04014	0.00236467	0.0137707
ENSMUSG00000030357	Fkbp4	7118.93	-2.20571	0.222444	-9.91581	3.55356e-23	3.75218e-21
ENSMUSG00000030380	Mzf1	51.7083	-1.20859	0.287376	-4.20563	2.6036e-05	0.000273146
ENSMUSG00000030386	Zfp606	603.828	-1.34024	0.310629	-4.3146	1.59891e-05	0.00017567
ENSMUSG00000030399	Ckm	47295.4	-1.02472	0.229943	-4.45642	8.33415e-06	9.83528e-05
ENSMUSG00000030401	Rtn2	1411.16	-1.77692	0.302166	-5.88059	4.08795e-09	9.16339e-08
ENSMUSG00000030403	Vasp	1990.99	1.35554	0.144376	9.389	6.05732e-21	5.0846e-19
ENSMUSG00000030417	Pdcd5	1239.42	0.495854	0.192816	2.57165	0.0101216	0.0452855
ENSMUSG00000030421	Uri1	1202.3	0.738084	0.261491	2.8226	0.00476362	0.0246372
ENSMUSG00000030433	Sbk2	274.6	-1.57707	0.599236	-2.6318	0.00849347	0.0394514
ENSMUSG00000030465	Psd3	3609.18	-0.81258	0.27436	-2.96173	0.0030592	0.0171244
ENSMUSG00000030471	Zdhhc13	943.568	0.550077	0.151288	3.63595	0.000276954	0.00218174
ENSMUSG00000030486	Zfp108	115.036	-0.76984	0.303529	-2.53629	0.0112033	0.0490209
[truncated: 2,628 more rows]

## Sheet: D_Polrmt_DESeq2
gene_id	gene_name	baseMean	logFC	lfcSE	stat	pvalue	padj
ENSMUSG00000000085	Scmh1	1009.23	-0.385357	0.107386	-3.5885	0.000332582	0.00210168
ENSMUSG00000000120	Ngfr	101.419	2.24212	0.378628	5.92171	3.1862e-09	5.36251e-08
ENSMUSG00000000126	Wnt9a	261.423	0.781108	0.277666	2.81313	0.00490624	0.0213169
ENSMUSG00000000142	Axin2	186.408	-1.16947	0.350086	-3.34051	0.000836251	0.0046837
ENSMUSG00000000148	Brat1	668.804	0.57862	0.147177	3.93145	8.44368e-05	0.000620767
ENSMUSG00000000149	Gna12	6455.92	0.403238	0.0996223	4.04767	5.17299e-05	0.000401447
ENSMUSG00000000183	Fgf6	49.5705	1.34466	0.411969	3.26397	0.00109862	0.00592059
ENSMUSG00000000253	Gmpr	2801.73	-1.13715	0.156768	-7.25374	4.05426e-13	1.05782e-11
ENSMUSG00000000266	Mid2	1747.62	0.62778	0.0788056	7.96619	1.6364e-15	5.57782e-14
ENSMUSG00000000275	Trim25	1408.74	-0.840121	0.249989	-3.36063	0.00077766	0.00439444
ENSMUSG00000000278	Scpep1	1511.01	1.67595	0.165792	10.1087	5.05296e-24	3.6151e-22
ENSMUSG00000000290	Itgb2	293.825	-0.613648	0.175507	-3.49643	0.000471537	0.00283384
ENSMUSG00000000295	Hddc2	134.455	0.737241	0.206245	3.57459	0.000350774	0.00220062
ENSMUSG00000000296	Tpd52l1	131.367	0.529202	0.209239	2.52918	0.011433	0.0431471
ENSMUSG00000000301	Pemt	81.9004	1.71493	0.297752	5.7596	8.43156e-09	1.33579e-07
ENSMUSG00000000305	Cdh4	246.969	3.37812	0.244148	13.8364	1.53754e-43	2.85601e-41
ENSMUSG00000000318	Clec10a	90.9296	-1.10372	0.313018	-3.52606	0.000421786	0.00256994
ENSMUSG00000000325	Arvcf	1113.08	0.618754	0.149071	4.15073	3.31418e-05	0.000267659
ENSMUSG00000000326	Comt	2716.27	1.02409	0.118922	8.61148	7.2126e-18	3.20249e-16
ENSMUSG00000000340	Dbt	2492.94	-0.658359	0.132652	-4.96306	6.93923e-07	7.91541e-06
ENSMUSG00000000355	Mcts1	506.243	0.699908	0.159728	4.38188	1.17661e-05	0.000105225
ENSMUSG00000000365	Rnf17	62.9359	2.08617	0.409481	5.09466	3.49362e-07	4.188e-06
ENSMUSG00000000374	Trappc10	3305.7	0.252119	0.0937377	2.68962	0.00715329	0.0291259
ENSMUSG00000000384	Tbrg4	2481.99	0.44944	0.106688	4.21265	2.52394e-05	0.000209779
ENSMUSG00000000439	Mkrn2	1865.4	0.377786	0.101669	3.71584	0.000202531	0.00135828
ENSMUSG00000000530	Acvrl1	1056.6	-0.51852	0.170163	-3.04719	0.0023099	0.011194
ENSMUSG00000000532	Acvr1b	862.107	-0.998434	0.257971	-3.87034	0.000108685	0.000772667
ENSMUSG00000000552	Zfp385a	149.711	-0.874343	0.230341	-3.79586	0.000147132	0.00101776
ENSMUSG00000000555	Itga5	3892.61	0.842432	0.140985	5.97531	2.2965e-09	3.95049e-08
ENSMUSG00000000561	Wdr77	1139.27	0.833892	0.18633	4.47535	7.62877e-06	7.13111e-05
ENSMUSG00000000567	Sox9	99.8685	0.98856	0.335057	2.95042	0.00317338	0.0146626
ENSMUSG00000000693	Loxl3	689.634	0.998232	0.204204	4.8884	1.01658e-06	1.11924e-05
ENSMUSG00000000732	Icosl	396.453	-0.81589	0.261249	-3.12304	0.00178995	0.00895586
ENSMUSG00000000740	Rpl13	6459.74	0.646679	0.176823	3.65721	0.000254974	0.00166317
ENSMUSG00000000753	Serpinf1	2015.26	0.564631	0.175891	3.21011	0.00132682	0.00691305
ENSMUSG00000000804	Usp32	2181.47	0.340972	0.0867735	3.92944	8.51429e-05	0.000625349
ENSMUSG00000000805	Car4	530.136	-0.755316	0.177815	-4.24775	2.15929e-05	0.000182619
ENSMUSG00000000811	Txnrd3	1154.9	0.406578	0.097429	4.17307	3.00521e-05	0.000244954
ENSMUSG00000000838	Fmr1	1135.94	0.713217	0.213131	3.34638	0.00081875	0.00460734
ENSMUSG00000000889	Dbh	100.353	-2.67595	0.304031	-8.80158	1.34908e-18	6.50351e-17
ENSMUSG00000000915	Hip1r	1826.95	0.656337	0.114173	5.74863	8.99721e-09	1.41985e-07
ENSMUSG00000000934	Top1mt	222.287	0.527959	0.131806	4.00556	6.18706e-05	0.000471216
ENSMUSG00000001018	Snapin	1097.02	-0.891953	0.337475	-2.64302	0.00821702	0.0326985
ENSMUSG00000001020	S100a4	156.993	0.80067	0.275185	2.90957	0.00361925	0.0164339
ENSMUSG00000001027	Scn4a	717.849	-2.7866	0.318989	-8.73572	2.4211e-18	1.1269e-16
ENSMUSG00000001036	Epn2	1420.34	-0.290181	0.109246	-2.65622	0.00790232	0.0316723
ENSMUSG00000001039	B9d1	118.581	-0.575804	0.195461	-2.94587	0.00322047	0.0148463
ENSMUSG00000001053	N4bp3	791.416	0.940748	0.275614	3.41328	0.000641854	0.00370774
ENSMUSG00000001056	Nhp2	758.016	2.1012	0.268497	7.82579	5.04476e-15	1.62645e-13
ENSMUSG00000001098	Kctd10	2331.1	0.437618	0.089502	4.88948	1.01105e-06	1.11496e-05
ENSMUSG00000001123	Lgals9	1039.12	-0.611156	0.218376	-2.79864	0.00513189	0.0220934
ENSMUSG00000001128	Cfp	292.057	-1.1123	0.167524	-6.63966	3.14415e-11	6.6243e-10
ENSMUSG00000001131	Timp1	236.55	1.71363	0.387284	4.42475	9.65547e-06	8.82593e-05
ENSMUSG00000001134	Uxt	470.578	0.516349	0.168541	3.06363	0.00218666	0.010658
ENSMUSG00000001151	Pcnt	5362.49	-1.30453	0.131747	-9.90179	4.08881e-23	2.84488e-21
ENSMUSG00000001156	Mxd1	371.95	-0.837859	0.131213	-6.38548	1.70859e-10	3.33274e-09
ENSMUSG00000001211	Agpat3	6182.19	0.427204	0.15983	2.67287	0.00752059	0.0304052
ENSMUSG00000001225	Slc26a3	35.4169	-1.86215	0.478653	-3.89039	0.000100084	0.000718583
ENSMUSG00000001281	Itgb7	52.2382	-0.670278	0.267674	-2.50408	0.0122769	0.0457689
ENSMUSG00000001305	Rrp15	371.481	0.607713	0.141396	4.29796	1.72381e-05	0.000149026
ENSMUSG00000001313	Rnd2	103.343	1.10209	0.288757	3.81668	0.00013526	0.000944674
ENSMUSG00000001333	Sync	1130.53	0.487919	0.151568	3.21914	0.00128575	0.00673722
ENSMUSG00000001349	Cnn1	269.221	1.03929	0.355529	2.92322	0.00346429	0.0158404
ENSMUSG00000001376	Ccdc132	1287.74	0.258876	0.100188	2.58391	0.0097687	0.0378105
ENSMUSG00000001380	Hars	2011.57	0.93876	0.177337	5.29365	1.19898e-07	1.57943e-06
ENSMUSG00000001383	Zmat2	869.613	1.0897	0.291256	3.74137	0.000183019	0.00123974
ENSMUSG00000001416	Cct3	6156.29	1.06593	0.112299	9.49185	2.26964e-21	1.36766e-19
ENSMUSG00000001418	Glmp	961.19	0.355695	0.115532	3.07877	0.0020786	0.0101902
ENSMUSG00000001420	Tmem79	30.4509	-0.807836	0.31451	-2.56855	0.0102124	0.0392504
ENSMUSG00000001424	Snd1	5339.71	1.00171	0.0919305	10.8964	1.19948e-27	1.07937e-25
ENSMUSG00000001436	Slc19a1	179.026	1.0233	0.336906	3.03733	0.00238684	0.0114848
ENSMUSG00000001441	Npepps	2159.77	-0.55352	0.103379	-5.35426	8.59057e-08	1.15724e-06
ENSMUSG00000001467	Cyp51	647.075	0.814165	0.123592	6.58754	4.47161e-11	9.21962e-10
ENSMUSG00000001472	Tcf25	8747.04	0.817282	0.114449	7.14104	9.26265e-13	2.32393e-11
ENSMUSG00000001473	Tubb6	645.499	0.563429	0.19292	2.92053	0.00349438	0.0159492
ENSMUSG00000001482	Def8	2460.4	1.16378	0.262657	4.43082	9.38764e-06	8.62006e-05
ENSMUSG00000001494	Sost	90.4866	1.58758	0.380128	4.17643	2.96116e-05	0.000241752
ENSMUSG00000001507	Itga3	971.745	0.497021	0.115601	4.29945	1.71224e-05	0.000148343
ENSMUSG00000001520	Nrip2	370.606	1.09462	0.254111	4.30765	1.64997e-05	0.000143316
ENSMUSG00000001542	Ell2	1545.68	1.57555	0.182686	8.62436	6.44515e-18	2.88068e-16
ENSMUSG00000001588	Acap1	63.7081	-0.874525	0.28731	-3.04384	0.00233581	0.0112952
ENSMUSG00000001604	Tcea3	1822.3	-1.09321	0.156282	-6.99513	2.65004e-12	6.31983e-11
ENSMUSG00000001627	Ifrd1	2661.47	1.31372	0.239993	5.47398	4.40043e-08	6.22656e-07
ENSMUSG00000001632	Brpf1	1321.96	-0.456072	0.0848633	-5.37419	7.69259e-08	1.04391e-06
ENSMUSG00000001642	Akr1b3	3649.89	-0.489432	0.117502	-4.16532	3.10912e-05	0.00025261
ENSMUSG00000001663	Gstt1	338.572	-1.5223	0.26983	-5.64169	1.68385e-08	2.53667e-07
ENSMUSG00000001665	Gstt3	110.68	-0.918732	0.176394	-5.20841	1.90462e-07	2.40868e-06
ENSMUSG00000001666	Ddt	773.103	-0.491034	0.190305	-2.58025	0.00987292	0.038141
ENSMUSG00000001670	Tat	14.183	-2.28768	0.598324	-3.82349	0.000131577	0.000921174
ENSMUSG00000001674	Ddx18	944.961	0.797508	0.13567	5.87827	4.14577e-09	6.86903e-08
ENSMUSG00000001700	Gramd3	753.878	0.732058	0.256237	2.85695	0.00427728	0.018946
ENSMUSG00000001707	Eef1e1	459.633	1.44718	0.155418	9.31155	1.25986e-20	7.18544e-19
ENSMUSG00000001729	Akt1	7587.83	0.446098	0.101994	4.37375	1.22128e-05	0.000108883
ENSMUSG00000001741	Il16	429.22	-0.622602	0.210464	-2.95823	0.00309407	0.0143498
ENSMUSG00000001768	Rin2	1401.71	-0.781234	0.164011	-4.76331	1.90447e-06	1.99482e-05
ENSMUSG00000001783	Rtcb	3175.21	0.590829	0.152932	3.86333	0.00011185	0.000793138
ENSMUSG00000001785	Pwp1	995.241	0.807654	0.141873	5.69281	1.24967e-08	1.92999e-07
ENSMUSG00000001794	Capns1	5960.41	0.489399	0.147713	3.31318	0.000922403	0.00509832
ENSMUSG00000001802	Lrp3	429.67	-1.45636	0.210808	-6.90844	4.90004e-12	1.13027e-10
ENSMUSG00000001829	Clpb	3331.35	0.960451	0.154842	6.20277	5.54778e-10	1.03146e-08
ENSMUSG00000001833	2007-09-01	6330.65	0.458944	0.0881407	5.20695	1.91967e-07	2.42467e-06
ENSMUSG00000001844	Zdhhc4	719.85	0.504207	0.140943	3.57737	0.000347068	0.00217962
ENSMUSG00000001870	Ltbp1	3340.08	-1.43859	0.116519	-12.3464	5.09651e-35	6.61468e-33
ENSMUSG00000001891	Ugp2	12729.7	1.72125	0.149512	11.5125	1.14136e-30	1.22921e-28
ENSMUSG00000001909	Trmt1	1292.07	0.789689	0.0879983	8.97392	2.86154e-19	1.45572e-17
ENSMUSG00000001911	Nfix	1188.3	-0.738743	0.159278	-4.63806	3.51692e-06	3.51466e-05
ENSMUSG00000001918	Slc1a5	1209.29	-1.17052	0.180099	-6.49928	8.07079e-11	1.61511e-09
ENSMUSG00000001924	Uba1	12795.3	0.385603	0.0812719	4.74461	2.08909e-06	2.16912e-05
ENSMUSG00000001942	Siae	415.857	-0.856478	0.284614	-3.00926	0.00261881	0.0124351
ENSMUSG00000001962	Fam50a	547.151	0.55366	0.153323	3.61107	0.000304933	0.00194579
ENSMUSG00000001964	Emd	904.416	0.547874	0.100174	5.46921	4.52055e-08	6.37823e-07
ENSMUSG00000001983	Taco1	678.408	-0.51435	0.202211	-2.54363	0.0109707	0.0416848
ENSMUSG00000001995	Sipa1l2	3588.75	-0.655929	0.221994	-2.95472	0.00312953	0.0144883
ENSMUSG00000001999	Blvra	579.414	0.695822	0.192499	3.61468	0.000300722	0.00192194
ENSMUSG00000002007	Srpk3	933.684	-1.10362	0.267058	-4.1325	3.58837e-05	0.000286716
ENSMUSG00000002012	Pnck	125.999	-1.04112	0.241764	-4.30635	1.65971e-05	0.000144038
ENSMUSG00000002014	Ssr4	897.904	0.598912	0.126522	4.73365	2.20523e-06	2.28385e-05
ENSMUSG00000002020	Ltbp2	1457.43	1.95981	0.418982	4.67756	2.90309e-06	2.9552e-05
ENSMUSG00000002031	Ift46	551.614	0.521279	0.169168	3.08143	0.00206009	0.0101166
ENSMUSG00000002032	Tmem25	352.401	-1.4037	0.240448	-5.83786	5.28751e-09	8.64053e-08
ENSMUSG00000002043	Trappc6a	450.301	0.825721	0.241836	3.41439	0.000639249	0.0036948
ENSMUSG00000002055	Spag5	347.965	1.98964	0.257868	7.71576	1.20263e-14	3.71749e-13
ENSMUSG00000002083	Bbc3	77.1371	1.72455	0.416659	4.139	3.48815e-05	0.000279812
ENSMUSG00000002100	Mybpc3	235385	0.77983	0.101712	7.66705	1.75993e-14	5.31047e-13
ENSMUSG00000002102	Psmc3	6637.75	0.399317	0.115375	3.46103	0.000538104	0.00318009
ENSMUSG00000002107	Celf2	3162.46	0.410507	0.117842	3.48353	0.000494856	0.00295208
ENSMUSG00000002109	Ddb2	177.546	-0.617043	0.170154	-3.62637	0.000287431	0.00185161
ENSMUSG00000002111	Spi1	145.907	-0.601593	0.227374	-2.64583	0.00814903	0.0324598
ENSMUSG00000002129	Sf3a1	1415.69	-0.518434	0.122595	-4.22883	2.34914e-05	0.000196949
ENSMUSG00000002147	Stat6	2763.26	0.609077	0.0807103	7.54646	4.47239e-14	1.28443e-12
ENSMUSG00000002221	Paxip1	1004.38	-0.361486	0.123255	-2.93284	0.00335882	0.0154069
ENSMUSG00000002233	Rhoc	2148.66	1.50704	0.223866	6.73188	1.67485e-11	3.6307e-10
ENSMUSG00000002249	Tead3	447.818	-0.480234	0.165674	-2.89866	0.00374763	0.0169484
ENSMUSG00000002279	Lmf1	1102.71	-0.530578	0.173122	-3.06476	0.00217842	0.0106229
ENSMUSG00000002319	Ipo4	2679.61	1.47776	0.118479	12.4728	1.05122e-35	1.41894e-33
ENSMUSG00000002325	Irf9	948.257	-0.61342	0.112535	-5.45094	5.01033e-08	7.01066e-07
ENSMUSG00000002343	Armc6	378.498	0.650039	0.144628	4.49456	6.97145e-06	6.55483e-05
ENSMUSG00000002346	Slc25a42	594.078	-1.27331	0.143432	-8.87748	6.83947e-19	3.39409e-17
ENSMUSG00000002372	Ranbp3	1893.3	0.549461	0.186807	2.94132	0.00326812	0.0150386
ENSMUSG00000002395	Use1	1903.46	0.397153	0.148698	2.67087	0.00756556	0.0305687
ENSMUSG00000002409	Dyrk1b	584.062	-1.06762	0.14477	-7.37459	1.64851e-13	4.48621e-12
ENSMUSG00000002455	Prpf6	2289.9	0.43733	0.124234	3.52022	0.000431184	0.00261932
ENSMUSG00000002458	Rgs19	193.304	0.777837	0.293921	2.64642	0.00813499	0.0324231
ENSMUSG00000002500	Rpl3l	2200.28	-3.37426	0.295464	-11.4202	3.3148e-30	3.45952e-28
ENSMUSG00000002504	Slc9a3r2	1590.68	-0.708376	0.217774	-3.25281	0.00114272	0.00611593
ENSMUSG00000002524	Puf60	2674.66	0.600933	0.142587	4.21451	2.50319e-05	0.000208397
ENSMUSG00000002588	Pon1	9.50535	-2.21483	0.631391	-3.50786	0.000451727	0.00273019
ENSMUSG00000002635	Pdcd2l	559.42	0.404182	0.155301	2.60257	0.00925274	0.0361242
ENSMUSG00000002658	Gtf2f1	973.877	0.657216	0.122006	5.38674	7.17454e-08	9.80844e-07
ENSMUSG00000002679	Med6	252.895	-0.439353	0.141388	-3.10743	0.00188721	0.0093883
ENSMUSG00000002688	Prkd1	315.407	-0.566798	0.136625	-4.14857	3.3456e-05	0.000269848
ENSMUSG00000002718	Cse1l	2746.11	0.248014	0.076688	3.23407	0.00122041	0.00646511
ENSMUSG00000002748	Baz1b	5161	-0.568363	0.146848	-3.87042	0.000108647	0.000772667
ENSMUSG00000002763	Pex6	1242.91	-0.293112	0.111364	-2.63202	0.00848797	0.0336313
ENSMUSG00000002768	Mea1	807.153	0.628163	0.139723	4.49578	6.93163e-06	6.52766e-05
ENSMUSG00000002778	Kdelr1	1635	0.350112	0.0740144	4.73033	2.24161e-06	2.3156e-05
ENSMUSG00000002781	Tmem143	1880.37	-0.655388	0.10592	-6.18759	6.1092e-10	1.12756e-08
ENSMUSG00000002791	Pdxk-ps	7.26657	-2.15303	0.582893	-3.6937	0.000221013	0.00146381
ENSMUSG00000002808	Epdr1	1057.43	0.892713	0.327986	2.7218	0.00649271	0.0268775
ENSMUSG00000002812	Flii	7539.93	0.363288	0.107874	3.3677	0.000757979	0.00429882
ENSMUSG00000002825	Qtrt1	286.515	0.900312	0.179458	5.01683	5.25297e-07	6.13361e-06
ENSMUSG00000002831	Plin4	18433.7	-0.737747	0.11684	-6.31416	2.71633e-10	5.19335e-09
ENSMUSG00000002833	Hdgfrp2	1680.9	0.311418	0.115895	2.68708	0.00720806	0.0293232
ENSMUSG00000002844	Adprh	614.526	0.408563	0.106945	3.8203	0.000133288	0.000932508
ENSMUSG00000002897	Il17ra	355.639	0.962242	0.356575	2.69857	0.00696384	0.0284612
ENSMUSG00000002910	Arrdc2	954.863	-3.11544	0.202439	-15.3895	1.92515e-53	5.33953e-51
ENSMUSG00000002963	Pnkp	908.184	0.56858	0.107878	5.27056	1.36005e-07	1.77429e-06
ENSMUSG00000002981	Clptm1	5600.45	0.367799	0.0941867	3.905	9.42248e-05	0.000682809
ENSMUSG00000002983	Relb	341.898	0.912866	0.186874	4.88493	1.03465e-06	1.13727e-05
ENSMUSG00000002997	Prkar2b	213.115	-1.56472	0.419455	-3.73037	0.0001912	0.00128783
ENSMUSG00000003033	Ap1m1	1485.97	0.709144	0.201165	3.52519	0.000423177	0.00257686
ENSMUSG00000003037	Rab8a	822.508	1.24261	0.265632	4.67794	2.89775e-06	2.95124e-05
ENSMUSG00000003070	Efna2	26.0633	-1.36173	0.417224	-3.2638	0.0010993	0.00592273
ENSMUSG00000003123	Lipe	1649.53	-0.650827	0.168158	-3.87034	0.000108686	0.000772667
ENSMUSG00000003161	Sri	1278.28	0.886319	0.215928	4.10469	4.04849e-05	0.000320445
ENSMUSG00000003190	Bcl2l12	281.747	-0.538205	0.211654	-2.54285	0.0109952	0.0417516
ENSMUSG00000003228	Grk5	1166.39	1.42138	0.188452	7.54241	4.61354e-14	1.32122e-12
ENSMUSG00000003234	Abcf3	2393.89	0.63697	0.114961	5.54075	3.01182e-08	4.36508e-07
ENSMUSG00000003235	Eif2b5	3251.59	0.854594	0.108401	7.88367	3.17913e-15	1.04493e-13
ENSMUSG00000003269	Cyth2	1236.71	0.486695	0.090594	5.37227	7.77532e-08	1.05373e-06
ENSMUSG00000003316	Glg1	6363.72	-0.304279	0.0791835	-3.8427	0.000121687	0.000854591
ENSMUSG00000003344	Btbd2	1173.63	-0.658695	0.227049	-2.90111	0.00371843	0.0168239
ENSMUSG00000003348	Mob3a	410.665	0.604431	0.184462	3.27672	0.00105021	0.00571144
ENSMUSG00000003355	Fkbp11	90.1716	1.52348	0.256141	5.94781	2.71752e-09	4.61203e-08
ENSMUSG00000003363	Pld3	1254.37	0.456847	0.130103	3.51142	0.000445713	0.00269669
ENSMUSG00000003420	Fcgrt	2808.68	-0.439147	0.174072	-2.52279	0.0116428	0.0437695
ENSMUSG00000003423	Pih1d1	950.964	0.772403	0.114768	6.73013	1.6951e-11	3.66674e-10
ENSMUSG00000003429	Rps11	5131.64	0.883321	0.0958816	9.21263	3.18243e-20	1.73212e-18
ENSMUSG00000003435	Supt5	4793.65	0.544216	0.128458	4.23651	2.27018e-05	0.000191041
ENSMUSG00000003438	Timm50	1558.46	0.746709	0.160673	4.64737	3.3619e-06	3.37641e-05
ENSMUSG00000003469	Phyhip	693.827	-1.22128	0.408644	-2.98861	0.00280253	0.0132114
ENSMUSG00000003476	Crhr2	567.023	-1.85946	0.35382	-5.25537	1.47725e-07	1.90508e-06
ENSMUSG00000003477	Inmt	184.172	-3.81435	0.402307	-9.48119	2.51396e-21	1.51039e-19
ENSMUSG00000003500	Impdh1	852.961	0.562764	0.136399	4.12586	3.69344e-05	0.000294414
ENSMUSG00000003526	Prodh	1237.66	-1.07898	0.177621	-6.07464	1.24269e-09	2.22072e-08
ENSMUSG00000003559	As3mt	1444.99	-0.994658	0.187573	-5.30277	1.14056e-07	1.50737e-06
ENSMUSG00000003604	Aven	435.109	0.553311	0.194202	2.84915	0.00438361	0.0193538
ENSMUSG00000003762	Adck4	611.319	1.3638	0.183134	7.44701	9.54794e-14	2.65546e-12
ENSMUSG00000003809	Gcdh	1386.77	-1.23843	0.117241	-10.5631	4.42014e-26	3.57979e-24
ENSMUSG00000003813	Rad23a	2013.71	0.422218	0.0973711	4.33618	1.44983e-05	0.000127574
ENSMUSG00000003848	Nob1	775.331	0.86261	0.187719	4.59523	4.3227e-06	4.22402e-05
ENSMUSG00000003849	Nqo1	2908.91	1.73766	0.316367	5.49256	3.96143e-08	5.65236e-07
ENSMUSG00000003863	Ppfia3	27.6793	-1.44497	0.394657	-3.66132	0.000250914	0.00164038
ENSMUSG00000003865	Gys1	3966.43	0.597765	0.146518	4.0798	4.50752e-05	0.000353736
ENSMUSG00000003868	Ruvbl2	1075.79	0.485575	0.124071	3.91367	9.09035e-05	0.000662297
ENSMUSG00000003873	Bax	750.209	1.22242	0.125252	9.75964	1.67741e-22	1.10268e-20
ENSMUSG00000003923	Tfam	1768.43	0.452651	0.0905976	4.99628	5.84471e-07	6.7699e-06
ENSMUSG00000003934	Efnb3	866.321	-3.57747	0.426264	-8.39262	4.75437e-17	1.92523e-15
ENSMUSG00000003948	Mmd	1139.41	-0.600766	0.229942	-2.61269	0.00898338	0.035272
ENSMUSG00000003949	Hlf	1088.48	-2.61852	0.460089	-5.69135	1.26043e-08	1.94363e-07
ENSMUSG00000003955	Fam162a	1204.43	0.541424	0.135348	4.00023	6.32803e-05	0.000479864
ENSMUSG00000003970	Rpl8	10121.1	0.472516	0.141881	3.33037	0.000867292	0.00482817
ENSMUSG00000003992	Ssbp2	1465.17	0.497562	0.118654	4.19338	2.7483e-05	0.000226015
ENSMUSG00000004035	Gstm7	510.66	-1.10173	0.318786	-3.45601	0.000548227	0.00323519
ENSMUSG00000004043	Stat5a	1272.27	-0.70469	0.150528	-4.68145	2.84852e-06	2.90913e-05
ENSMUSG00000004070	Hmox2	2125.84	0.749115	0.107672	6.95738	3.46651e-12	8.11403e-11
ENSMUSG00000004100	Ppan	363.054	0.609568	0.158467	3.84667	0.000119736	0.000842356
ENSMUSG00000004105	Angptl2	3037.65	-0.656368	0.156438	-4.1957	2.72025e-05	0.000224134
ENSMUSG00000004110	Cacna1e	44.0477	-1.37932	0.410432	-3.36066	0.000777568	0.00439444
ENSMUSG00000004127	Trmt10a	180.435	1.35227	0.197342	6.8524	7.26218e-12	1.63921e-10
ENSMUSG00000004151	Etv1	397.334	-0.916104	0.236117	-3.87987	0.000104513	0.000747992
ENSMUSG00000004187	Kifc2	287.242	-0.979134	0.197825	-4.9495	7.4406e-07	8.41619e-06
ENSMUSG00000004264	Phb2	6061.49	0.561033	0.0906553	6.18864	6.06854e-10	1.12107e-08
ENSMUSG00000004328	Hif3a	157.451	-1.7563	0.265309	-6.61982	3.59631e-11	7.49891e-10
ENSMUSG00000004356	Utp20	2079.01	0.637504	0.102537	6.21733	5.05693e-10	9.41929e-09
ENSMUSG00000004360	9330159F19Rik	66.4833	-1.30617	0.343922	-3.79786	0.00014595	0.00101046
ENSMUSG00000004393	Ddx56	1266.8	0.938888	0.111103	8.45063	2.89727e-17	1.20951e-15
ENSMUSG00000004394	Tmed4	1738.19	-1.12761	0.131805	-8.55511	1.17757e-17	5.13842e-16
ENSMUSG00000004415	Col26a1	163.627	1.96006	0.334298	5.86322	4.53985e-09	7.4609e-08
ENSMUSG00000004446	Bid	211.294	2.50481	0.278325	8.99961	2.26516e-19	1.16403e-17
ENSMUSG00000004460	Dnajb11	1565.51	0.599909	0.178799	3.35521	0.000793039	0.00447385
ENSMUSG00000004535	Tax1bp1	5751.17	0.457279	0.102619	4.45608	8.34737e-06	7.75272e-05
ENSMUSG00000004562	Arhgef40	2491.99	0.426211	0.149594	2.84912	0.00438408	0.0193538
ENSMUSG00000004567	Mcoln1	851.271	0.337974	0.11417	2.96028	0.00307365	0.0142898
ENSMUSG00000004591	Pkn2	3858.94	0.216112	0.0763194	2.83167	0.00463052	0.0202624
ENSMUSG00000004626	Stxbp2	169.39	0.774235	0.221862	3.48971	0.000483546	0.00289227
ENSMUSG00000004655	Aqp1	5126.77	-1.27895	0.465694	-2.74633	0.0060267	0.0252269
ENSMUSG00000004667	Polr2e	2273.04	0.864832	0.124763	6.93178	4.15587e-12	9.63847e-11
ENSMUSG00000004677	Myo9b	4676.59	0.547972	0.156942	3.49155	0.000480219	0.00287659
ENSMUSG00000004748	Mtfp1	2549.16	-1.42184	0.177934	-7.99084	1.34027e-15	4.64664e-14
ENSMUSG00000004788	Eif2b2	836.839	0.595459	0.158449	3.75806	0.000171239	0.00116697
ENSMUSG00000004791	Pgf	170.901	-1.27516	0.263793	-4.83395	1.33852e-06	1.44616e-05
ENSMUSG00000004849	Ap1s1	720.524	0.82915	0.305414	2.71484	0.00663087	0.0273488
ENSMUSG00000004880	Lbr	1557.99	-0.385359	0.129758	-2.96983	0.00297969	0.0139169
ENSMUSG00000004891	Nes	2381.57	-0.952085	0.376629	-2.52791	0.0114742	0.0432637
ENSMUSG00000004895	Prcc	1089.13	-0.497497	0.16901	-2.9436	0.00324418	0.0149454
ENSMUSG00000004929	Thop1	1191.64	1.11545	0.0979221	11.3911	4.6288e-30	4.7816e-28
ENSMUSG00000004931	Apba3	2903.17	0.295749	0.0923308	3.20315	0.00135935	0.00706074
ENSMUSG00000004937	Sgta	1751.79	0.679206	0.136338	4.98177	6.3004e-07	7.26448e-06
ENSMUSG00000004939	Nmrk2	19934.8	4.59931	0.188572	24.3902	2.17302e-131	4.88857e-128
ENSMUSG00000004951	Hspb1	6486.45	1.4274	0.371341	3.84392	0.000121086	0.00085067
ENSMUSG00000004961	Syt5	31.8803	1.31939	0.378269	3.48797	0.000486703	0.00290687
ENSMUSG00000004994	Ccdc130	269.163	0.918678	0.278455	3.2992	0.000969602	0.00533176
ENSMUSG00000005045	Chd5	68.1963	1.3026	0.295903	4.40213	1.07192e-05	9.70627e-05
ENSMUSG00000005054	Cstb	656.831	1.70202	0.246688	6.89949	5.21895e-12	1.19941e-10
ENSMUSG00000005078	Jkamp	496.223	-0.344351	0.126573	-2.72058	0.00651678	0.0269496
ENSMUSG00000005089	Slc1a2	52.5963	1.79628	0.362962	4.94894	7.46202e-07	8.431e-06
ENSMUSG00000005103	Wdr1	10018.3	1.19863	0.120669	9.93317	2.98603e-23	2.08627e-21
ENSMUSG00000005150	Wdr83	990.199	0.651034	0.17749	3.66801	0.000244444	0.00160482
ENSMUSG00000005220	Corin	8964.68	-0.562303	0.177137	-3.17439	0.00150152	0.00769264
ENSMUSG00000005251	Ripk4	15.109	-1.16387	0.453185	-2.56819	0.0102231	0.0392766
ENSMUSG00000005312	Ubqln1	2191.42	0.535614	0.176922	3.0274	0.00246665	0.0118189
ENSMUSG00000005373	Mlxipl	781.05	-1.47307	0.285004	-5.16858	2.35873e-07	2.91203e-06
ENSMUSG00000005378	Wbscr22	502.507	0.707821	0.144625	4.89419	9.8711e-07	1.08975e-05
ENSMUSG00000005413	Hmox1	1326.37	2.65985	0.32162	8.27016	1.33782e-16	5.13981e-15
ENSMUSG00000005417	Mprip	11338	0.379787	0.118148	3.21449	0.00130676	0.00683316
ENSMUSG00000005447	Pafah1b3	89.9163	1.45265	0.332119	4.37388	1.22057e-05	0.000108867
ENSMUSG00000005469	Prkaca	8188.52	-0.421435	0.0980874	-4.29652	1.73499e-05	0.000149929
ENSMUSG00000005481	Ddx39	1398.41	0.745171	0.119075	6.25801	3.89914e-10	7.35064e-09
ENSMUSG00000005501	Usp40	2348.99	0.374103	0.0705674	5.30136	1.14945e-07	1.51714e-06
ENSMUSG00000005510	Ndufs3	6997.25	-0.372534	0.14995	-2.48439	0.0129772	0.0479908
ENSMUSG00000005514	Por	2934.07	1.08998	0.17061	6.38872	1.67275e-10	3.26914e-09
ENSMUSG00000005533	Igf1r	2533.74	1.28969	0.168624	7.64834	2.03586e-14	6.11574e-13
ENSMUSG00000005534	Insr	7899.89	0.345672	0.0992603	3.48248	0.000496795	0.00296127
ENSMUSG00000005575	Ube2m	3397.07	0.527987	0.102093	5.17162	2.32072e-07	2.87035e-06
ENSMUSG00000005580	Adcy9	1657.9	-1.03565	0.0895692	-11.5625	6.3807e-31	6.90856e-29
ENSMUSG00000005609	Ctr9	1550.55	0.439772	0.143091	3.07338	0.0021165	0.0103484
ENSMUSG00000005611	Mrvi1	841.605	-0.742735	0.16844	-4.40948	1.03617e-05	9.41624e-05
ENSMUSG00000005621	Zfp592	2059.87	-0.57136	0.189187	-3.02008	0.00252705	0.0120616
ENSMUSG00000005625	Psmd4	3458.87	0.723736	0.0891183	8.12107	4.62081e-16	1.68572e-14
ENSMUSG00000005628	Tmod4	244.939	-2.00865	0.22783	-8.81644	1.18161e-18	5.73717e-17
ENSMUSG00000005667	Mthfd2	4015.74	5.62802	0.255173	22.0557	8.41833e-108	1.06529e-104
ENSMUSG00000005686	Ampd3	1678.99	-0.607602	0.11027	-5.51014	3.58548e-08	5.15591e-07
ENSMUSG00000005696	Sh2d1a	3.72961	-1.64886	0.621094	-2.65476	0.00793645	0.0317756
ENSMUSG00000005698	Ctcf	1633.79	-0.462956	0.106324	-4.35419	1.33561e-05	0.000118242
ENSMUSG00000005732	Ranbp1	880.855	0.608052	0.163371	3.72191	0.000197721	0.00132911
ENSMUSG00000005779	Psmb4	4130.88	0.323501	0.100535	3.2178	0.00129178	0.00676531
ENSMUSG00000005803	Sqrdl	1081.06	-1.05649	0.156504	-6.75054	1.473e-11	3.21378e-10
ENSMUSG00000005804	Bloc1s6	804.251	0.695568	0.274385	2.53501	0.0112445	0.0425467
ENSMUSG00000005813	Metap1	1200.09	0.428927	0.131818	3.25394	0.00113815	0.00609632
ENSMUSG00000005836	Gata6	901.886	-0.587484	0.210917	-2.78539	0.00534641	0.0228528
ENSMUSG00000005846	Rsl1d1	2623.15	0.887941	0.146417	6.06445	1.32407e-09	2.35989e-08
ENSMUSG00000005873	Reep5	3804.03	-1.00464	0.34767	-2.88963	0.00385699	0.0173462
ENSMUSG00000005881	Ergic3	1419.66	0.479008	0.0915982	5.22945	1.70018e-07	2.1732e-06
ENSMUSG00000005883	Spo11	5.51843	-1.74577	0.622676	-2.80365	0.00505277	0.021811
ENSMUSG00000005886	Ncoa2	3619.42	-0.390821	0.10867	-3.5964	0.000322654	0.00204725
ENSMUSG00000005897	Nr2c1	547.517	0.680281	0.235137	2.89312	0.00381433	0.0171881
ENSMUSG00000005980	Dnase1	190.625	-0.516471	0.200317	-2.57827	0.00992964	0.0383235
ENSMUSG00000006005	Tpr	12804.6	0.271748	0.0951928	2.85471	0.00430764	0.0190596
ENSMUSG00000006095	Tbcb	1477.39	1.10035	0.133439	8.24609	1.63655e-16	6.22844e-15
ENSMUSG00000006154	Eps8l1	214.852	-1.11196	0.427813	-2.59918	0.00934461	0.0364337
ENSMUSG00000006218	Fam131c	21.8219	2.31585	0.44543	5.19913	2.00221e-07	2.51638e-06
ENSMUSG00000006221	Hspb7	50973.8	0.976962	0.115996	8.42237	3.68952e-17	1.51833e-15
ENSMUSG00000006262	Mob1b	637.026	0.404402	0.120422	3.35821	0.000784481	0.00443175
ENSMUSG00000006281	Tep1	1696.07	0.43165	0.162867	2.65032	0.00804162	0.0321332
ENSMUSG00000006288	Ttc5	601.874	0.452871	0.133006	3.40488	0.000661926	0.00380956
ENSMUSG00000006301	Tmbim1	5256.61	2.02745	0.269032	7.5361	4.84235e-14	1.38479e-12
ENSMUSG00000006304	Arpc2	4081.25	0.77696	0.111262	6.98318	2.88572e-12	6.8256e-11
ENSMUSG00000006315	Tmem147	2005.32	0.544497	0.169119	3.21961	0.00128367	0.0067298
ENSMUSG00000006333	Rps9	7947.97	0.356599	0.123826	2.87983	0.00397892	0.0178194
ENSMUSG00000006344	Ggt5	493.153	-0.607072	0.17121	-3.54578	0.00039146	0.00241422
ENSMUSG00000006356	Crip2	18324	-0.683285	0.114947	-5.94437	2.77526e-09	4.70216e-08
ENSMUSG00000006362	Cbfa2t3	300.292	-0.720896	0.278358	-2.58982	0.00960259	0.0372602
ENSMUSG00000006369	Fbln1	2522.29	-1.25338	0.14039	-8.92783	4.34431e-19	2.16648e-17
ENSMUSG00000006373	Pgrmc1	997.648	0.694219	0.231917	2.99339	0.00275893	0.0130301
ENSMUSG00000006378	Gcat	283.823	-0.623402	0.197915	-3.14984	0.0016336	0.00827507
ENSMUSG00000006390	Elovl1	993.467	1.33828	0.200072	6.68899	2.24711e-11	4.79423e-10
ENSMUSG00000006392	Med8	659.104	0.728616	0.183362	3.97364	7.07812e-05	0.000531568
ENSMUSG00000006403	Adamts4	175.451	2.88853	0.387953	7.44557	9.65244e-14	2.68084e-12
ENSMUSG00000006442	Srm	468.146	1.14243	0.14183	8.05492	7.95331e-16	2.83505e-14
ENSMUSG00000006462	A530013C23Rik	120.731	-0.586085	0.235332	-2.49045	0.012758	0.047327
ENSMUSG00000006517	Mvd	246.567	0.883184	0.247534	3.56792	0.00035982	0.00224301
ENSMUSG00000006567	Atp7b	8.06324	1.43429	0.569426	2.51883	0.0117745	0.0441889
ENSMUSG00000006575	Rundc3a	61.2417	0.988199	0.283308	3.48807	0.000486521	0.00290664
ENSMUSG00000006576	Slc4a3	10947.3	-0.361602	0.103148	-3.50567	0.000455463	0.00274948
ENSMUSG00000006586	Runx1t1	386.545	-1.03124	0.221228	-4.66145	3.13995e-06	3.16764e-05
ENSMUSG00000006587	Snai3	126.241	-1.25199	0.477105	-2.62414	0.00868691	0.0343523
ENSMUSG00000006589	Aprt	720.793	1.78457	0.112263	15.8963	6.71773e-57	2.22974e-54
ENSMUSG00000006599	Gtf2h1	1437.56	1.01706	0.195561	5.20076	1.98479e-07	2.49758e-06
ENSMUSG00000006638	Abhd1	46.171	-1.38952	0.370439	-3.75101	0.000176125	0.00119826
ENSMUSG00000006641	Slc5a6	545.904	-0.349326	0.134671	-2.59392	0.00948885	0.0368966
ENSMUSG00000006675	P4htm	378.516	-0.955	0.162231	-5.88667	3.94066e-09	6.5668e-08
ENSMUSG00000006676	Usp19	5507.52	-0.293774	0.0723456	-4.0607	4.89261e-05	0.00038159
ENSMUSG00000006699	Cdc42	3400.45	0.474087	0.0827918	5.72626	1.0267e-08	1.60771e-07
ENSMUSG00000006732	Mettl1	366.266	1.14053	0.195625	5.83022	5.53557e-09	9.00954e-08
ENSMUSG00000006740	Kif5b	10797.1	1.13471	0.118291	9.59253	8.59489e-22	5.38764e-20
ENSMUSG00000006763	Saal1	247.798	0.661227	0.176042	3.75608	0.000172596	0.00117543
ENSMUSG00000006782	Cnp	289.035	-0.717068	0.237764	-3.01588	0.00256233	0.0121983
ENSMUSG00000006906	Stambp	160.877	0.563888	0.221057	2.55088	0.0107452	0.040987
ENSMUSG00000006931	P3h4	563.588	-0.700304	0.171278	-4.08869	4.33818e-05	0.000341638
ENSMUSG00000006958	Chrd	169.32	-1.59487	0.216334	-7.37225	1.67773e-13	4.55961e-12
ENSMUSG00000006998	Psmd2	9356.23	0.381074	0.134423	2.83488	0.00458424	0.0200816
ENSMUSG00000007029	Vars	2549.35	1.43892	0.216227	6.65466	2.83958e-11	6.0202e-10
ENSMUSG00000007036	Abhd16a	1786.6	0.391244	0.112633	3.47362	0.000513495	0.0030529
ENSMUSG00000007041	Clic1	1785.07	0.574082	0.162773	3.52688	0.000420484	0.00256354
ENSMUSG00000007097	Atp1a2	33551.9	-1.21095	0.186074	-6.50788	7.622e-11	1.52946e-09
ENSMUSG00000007107	Atp1a4	11.5817	1.93892	0.628679	3.08412	0.00204158	0.0100476
ENSMUSG00000007122	Casq1	660.655	-0.870315	0.309707	-2.81013	0.00495218	0.0214337
ENSMUSG00000007279	Scube2	773.242	0.695325	0.147761	4.70575	2.52938e-06	2.59041e-05
ENSMUSG00000007411	Mark3	3211.95	0.258846	0.0805132	3.21495	0.00130466	0.00682395
ENSMUSG00000007589	Tinf2	425.893	0.400722	0.140162	2.859	0.00424981	0.0188325
ENSMUSG00000007594	Hapln4	13.4445	3.14392	0.534766	5.87905	4.12628e-09	6.85917e-08
ENSMUSG00000007613	Tgfbr1	947.683	-0.783464	0.223843	-3.50006	0.000465155	0.00279798
ENSMUSG00000007617	Homer1	1283.53	-0.664933	0.229797	-2.89357	0.00380887	0.0171679
ENSMUSG00000007646	Rad51c	95.329	0.971068	0.294472	3.29765	0.000974963	0.00535485
ENSMUSG00000007682	Dio2	600.126	2.73722	0.414412	6.60507	3.97323e-11	8.25086e-10
ENSMUSG00000007721	Ccdc124	899.458	0.401637	0.127987	3.13812	0.00170034	0.00856813
ENSMUSG00000007739	Cct4	6138.47	0.90408	0.107848	8.3829	5.16383e-17	2.07857e-15
ENSMUSG00000007833	Aldh16a1	927.479	0.741027	0.155212	4.7743	1.80333e-06	1.90068e-05
ENSMUSG00000007867	Ift43	573.498	0.705901	0.122814	5.74772	9.04524e-09	1.42632e-07
ENSMUSG00000007888	Crlf1	71.6921	3.04891	0.474761	6.42198	1.34512e-10	2.64671e-09
ENSMUSG00000007891	Ctsd	61677.4	1.50111	0.118515	12.6659	9.13102e-37	1.32054e-34
ENSMUSG00000007892	Rplp1	1864.41	0.947911	0.0935347	10.1343	3.89053e-24	2.81327e-22
ENSMUSG00000007946	Phox2a	15.0287	-1.50902	0.519993	-2.90201	0.00370781	0.0167909
ENSMUSG00000007950	Abhd8	631.031	-0.989833	0.143617	-6.89215	5.49555e-12	1.26012e-10
ENSMUSG00000007989	Fzd3	164.007	0.627342	0.196011	3.20054	0.00137169	0.00711586
ENSMUSG00000008136	Fhl2	36432.4	-1.68264	0.177105	-9.50079	2.08303e-21	1.26273e-19
ENSMUSG00000008167	Fbxw9	236.164	0.861242	0.209933	4.10247	4.08771e-05	0.000323296
ENSMUSG00000008206	Cers4	1484.21	-0.413062	0.142416	-2.90039	0.00372701	0.016859
ENSMUSG00000008348	Ubc	17017.3	0.760764	0.131229	5.79724	6.7417e-09	1.08247e-07
ENSMUSG00000008373	Prpf31	965.331	0.417297	0.142847	2.9213	0.00348576	0.0159207
ENSMUSG00000008461	Fut1	26.256	4.84728	0.558536	8.67854	4.00897e-18	1.83227e-16
ENSMUSG00000008475	Arpc5	1055.78	2.41561	0.259501	9.3087	1.29408e-20	7.35989e-19
ENSMUSG00000008540	Mgst1	728.383	-1.65423	0.245669	-6.7336	1.65521e-11	3.59196e-10
ENSMUSG00000008604	Ubqln4	3075.96	0.926545	0.188093	4.926	8.39288e-07	9.39224e-06
ENSMUSG00000008658	Rbfox1	681.33	-2.64262	0.288764	-9.15148	5.61568e-20	3.03202e-18
ENSMUSG00000008668	Rps18	6460.07	0.476176	0.0995457	4.78349	1.72276e-06	1.82335e-05
ENSMUSG00000008682	Rpl10	8022.14	1.00237	0.152926	6.55463	5.57806e-11	1.13392e-09
ENSMUSG00000008683	Rps15a	4006.94	0.67456	0.160519	4.20236	2.64141e-05	0.000218377
ENSMUSG00000008730	Hipk1	8057.86	-0.373429	0.0667654	-5.59315	2.22984e-08	3.30752e-07
ENSMUSG00000008845	Cd163	1113.99	-1.25227	0.251841	-4.97248	6.6101e-07	7.57412e-06
ENSMUSG00000008855	Hdac5	3503.4	-0.323152	0.0691569	-4.67274	2.97209e-06	3.01483e-05
ENSMUSG00000008859	Rala	1263.67	0.815144	0.300498	2.71265	0.00667481	0.027502
ENSMUSG00000008932	Slc1a7	34.7337	-1.79934	0.434325	-4.14285	3.43015e-05	0.000275706
ENSMUSG00000008976	Gabpa	2162.1	-0.241104	0.0916316	-2.63123	0.00850762	0.0336894
ENSMUSG00000008999	Bmp7	138.306	1.33228	0.366622	3.63393	0.000279136	0.00180334
ENSMUSG00000009013	Dynll1	923.493	1.08781	0.29828	3.64694	0.000265381	0.00172217
ENSMUSG00000009090	Ap1b1	3658.11	0.418905	0.0861727	4.86122	1.16664e-06	1.27131e-05
ENSMUSG00000009210	2310007L24Rik	53.8695	-1.46911	0.290061	-5.06485	4.08732e-07	4.84803e-06
ENSMUSG00000009216	Fam163b	136.318	1.4721	0.213698	6.8887	5.63059e-12	1.28816e-10
ENSMUSG00000009281	Rarres2	600.579	-0.671397	0.219221	-3.06265	0.00219389	0.0106881
ENSMUSG00000009376	Met	319.928	1.44382	0.231021	6.24974	4.11149e-10	7.73656e-09
ENSMUSG00000009378	Slc16a12	319.206	-0.749493	0.15307	-4.89641	9.76031e-07	1.0787e-05
ENSMUSG00000009406	Elk1	595.099	-0.632952	0.238563	-2.65319	0.0079736	0.0319117
ENSMUSG00000009487	Otog	16.1926	2.8456	0.490673	5.79938	6.65589e-09	1.06954e-07
ENSMUSG00000009545	Kcnq1	1402.88	-0.323617	0.115729	-2.79634	0.00516854	0.0222282
ENSMUSG00000009566	Fpgs	366.08	0.734954	0.228047	3.22281	0.00126939	0.00667046
ENSMUSG00000009569	Mkl2	2760.52	-0.530632	0.126472	-4.19564	2.72101e-05	0.000224134
ENSMUSG00000009585	Apobec3	407.465	-0.742707	0.170652	-4.35217	1.34799e-05	0.000119131
ENSMUSG00000009596	Taf7l	17.4013	3.61918	0.574582	6.29881	2.99935e-10	5.70214e-09
ENSMUSG00000009614	Sardh	545.509	0.573367	0.161362	3.5533	0.000380435	0.002357
ENSMUSG00000009621	Vav2	817.839	-0.55136	0.187153	-2.94603	0.00321882	0.014842
ENSMUSG00000009640	Dmap1	760.517	0.592048	0.143059	4.13848	3.49617e-05	0.000280344
ENSMUSG00000009670	Tex11	13.7375	1.52822	0.540628	2.82676	0.00470218	0.0205227
ENSMUSG00000009687	Fxyd5	592.002	0.530248	0.177682	2.98425	0.00284275	0.0133761
ENSMUSG00000009739	Pou6f1	554.871	0.414011	0.124489	3.32567	0.000882048	0.00489686
ENSMUSG00000009876	Cox4i2	218.373	-0.615409	0.191546	-3.21285	0.00131423	0.00686334
ENSMUSG00000009894	Snap47	1093.81	0.548779	0.199347	2.75288	0.00590733	0.024799
ENSMUSG00000009927	Rps25	7517.43	0.716149	0.102525	6.98511	2.8463e-12	6.74023e-11
ENSMUSG00000010047	Hyal2	924.148	0.489183	0.187779	2.6051	0.00918485	0.0358799
ENSMUSG00000010048	Ifrd2	1541.08	0.644228	0.130093	4.95204	7.34378e-07	8.32528e-06
ENSMUSG00000010051	Hyal1	620.705	1.42162	0.323601	4.39313	1.11731e-05	0.000100722
ENSMUSG00000010064	Slc38a3	2464.61	-1.14542	0.136907	-8.36635	5.94305e-17	2.36868e-15
ENSMUSG00000010095	Slc3a2	2927.45	1.99613	0.193089	10.3379	4.74907e-25	3.61483e-23
ENSMUSG00000010175	Prox1	4154.75	0.601807	0.162799	3.69662	0.000218488	0.00144993
ENSMUSG00000010358	Ifi35	493.529	-0.497681	0.15125	-3.29046	0.00100024	0.00547345
ENSMUSG00000010362	Rdm1	430.852	-1.16064	0.164556	-7.05318	1.74876e-12	4.25056e-11
ENSMUSG00000010517	Faf1	4361.69	0.709285	0.0900184	7.87934	3.29127e-15	1.08004e-13
ENSMUSG00000010554	Mettl16	1007.54	-0.843262	0.183349	-4.59921	4.24088e-06	4.16215e-05
ENSMUSG00000010608	Rbm25	4755.72	0.271394	0.0878845	3.08808	0.00201457	0.00994368
ENSMUSG00000010660	Plcd1	908.466	-0.413722	0.102198	-4.04823	5.16055e-05	0.000400635
ENSMUSG00000010755	Cars	2132.39	2.44261	0.0955185	25.5721	3.11692e-144	1.26217e-140
ENSMUSG00000010803	Gabra1	18.1927	-2.05526	0.489975	-4.19464	2.73311e-05	0.00022504
ENSMUSG00000010830	Kdelr3	344.555	0.955945	0.273794	3.49148	0.000480355	0.00287659
ENSMUSG00000010936	Vac14	1041.69	0.437325	0.15228	2.87185	0.00408079	0.0182031
ENSMUSG00000011096	Akt1s1	1266.27	0.744476	0.177562	4.19277	2.75569e-05	0.00022653
ENSMUSG00000011114	Tbrg1	1668.44	0.86013	0.136856	6.28494	3.27989e-10	6.22381e-09
ENSMUSG00000011148	Adssl1	4446.59	1.53408	0.176141	8.7094	3.05494e-18	1.40896e-16
ENSMUSG00000011171	Vipr2	47.0173	-1.0026	0.390325	-2.56863	0.0102103	0.0392496
ENSMUSG00000011179	Odc1	3934.88	1.42372	0.0984442	14.4622	2.09915e-47	4.52143e-45
ENSMUSG00000011254	Thg1l	205.058	0.650422	0.212566	3.05986	0.00221438	0.0107775
ENSMUSG00000011256	Adam19	3203.91	1.88692	0.136289	13.845	1.36424e-43	2.55757e-41
ENSMUSG00000011257	Pabpc4	9347.94	0.660036	0.134101	4.92195	8.5688e-07	9.56408e-06
ENSMUSG00000011263	Exoc3l2	72.3179	1.64583	0.406396	4.04982	5.12574e-05	0.000398085
ENSMUSG00000011427	Zfp790	376.069	-1.41129	0.401348	-3.51638	0.000437479	0.00265198
ENSMUSG00000011658	Fuz	384.071	-0.810037	0.163179	-4.96409	6.90245e-07	7.88291e-06
ENSMUSG00000011751	Sptbn4	163.538	2.8838	0.401077	7.19014	6.47265e-13	1.65261e-11
ENSMUSG00000011752	Pgam1	1601.15	1.44774	0.135475	10.6864	1.17844e-26	9.94163e-25
ENSMUSG00000011831	Evi5	1661.93	0.843862	0.157402	5.36121	8.26673e-08	1.11659e-06
ENSMUSG00000011832	Evi5l	1077.19	0.40541	0.13269	3.05531	0.00224831	0.0109296
ENSMUSG00000012296	Tjap1	1223.97	0.849215	0.198375	4.28085	1.8618e-05	0.000159526
ENSMUSG00000012405	Rpl15	3858.89	0.709218	0.21932	3.23371	0.00122194	0.00646981
ENSMUSG00000012535	Tnpo3	3964.83	0.426108	0.103411	4.12052	3.78021e-05	0.000300738
ENSMUSG00000012705	Retn	55.2643	-1.62325	0.640521	-2.53426	0.0112684	0.0426055
ENSMUSG00000012819	Cdh23	692.965	-0.882097	0.227136	-3.88357	0.000102934	0.000737211
ENSMUSG00000012848	Rps5	9293.69	1.15476	0.117492	9.82834	8.50053e-23	5.71795e-21
ENSMUSG00000013089	Etv5	2073	1.66628	0.218844	7.61398	2.65774e-14	7.8442e-13
ENSMUSG00000013160	Atp6v0d1	999.538	0.638717	0.138699	4.60507	4.12321e-06	4.05453e-05
ENSMUSG00000013236	Ptprs	3197.39	-0.690567	0.157592	-4.38201	1.17591e-05	0.000105209
ENSMUSG00000013275	Slc41a1	2938.15	-0.994168	0.208603	-4.76584	1.88065e-06	1.976e-05
ENSMUSG00000013418	B4galnt2	131.944	3.60719	0.311744	11.571	5.7793e-31	6.32505e-29
ENSMUSG00000013483	Card14	14.2291	-1.58014	0.531776	-2.97145	0.00296398	0.0138467
ENSMUSG00000013495	Tmem175	571.073	-0.581845	0.16831	-3.45699	0.000546244	0.00322537
ENSMUSG00000013593	Ndufs2	25419.1	-0.385764	0.0946376	-4.07623	4.57727e-05	0.000358237
ENSMUSG00000013646	Sh3bp5l	879.633	0.363518	0.140188	2.59307	0.00951222	0.0369662
ENSMUSG00000013736	Trnt1	1497.98	1.14227	0.221398	5.15936	2.47796e-07	3.05178e-06
ENSMUSG00000013787	Ehmt2	2847.27	0.348838	0.0758909	4.59658	4.29492e-06	4.20317e-05
ENSMUSG00000013858	Tmem259	2620.29	0.523453	0.0980665	5.33774	9.41143e-08	1.25695e-06
ENSMUSG00000014158	Trpv4	193.712	-0.671833	0.215547	-3.11688	0.00182776	0.00913294
ENSMUSG00000014164	Klhl3	245.392	-1.04612	0.296582	-3.52726	0.00041989	0.0025607
ENSMUSG00000014349	Ube2z	1320.27	0.995011	0.394157	2.5244	0.0115895	0.0436156
ENSMUSG00000014361	Mertk	696.898	-0.492735	0.166529	-2.95886	0.00308777	0.0143324
ENSMUSG00000014402	Tsg101	1973.42	0.293961	0.0856026	3.43402	0.000594707	0.00347806
ENSMUSG00000014444	Piezo1	2893.69	0.729621	0.215154	3.39116	0.000695968	0.00398508
ENSMUSG00000014453	Blk	260.797	1.05111	0.208936	5.03079	4.88464e-07	5.73662e-06
ENSMUSG00000014496	Ankrd28	1979.81	0.748118	0.184836	4.04748	5.17726e-05	0.000401625
ENSMUSG00000014503	Pkd2l2	287.095	-1.01539	0.126072	-8.05407	8.00848e-16	2.8497e-14
ENSMUSG00000014554	Dguok	558.504	-0.428584	0.138261	-3.09982	0.00193637	0.00959276
ENSMUSG00000014599	Csf1	2305.25	-0.803585	0.262562	-3.06056	0.00220924	0.0107551
ENSMUSG00000014602	Kif1a	372.675	1.98292	0.247659	8.00664	1.17886e-15	4.11523e-14
ENSMUSG00000014668	Chfr	918.387	0.302158	0.109069	2.77033	0.0055999	0.0237547
ENSMUSG00000014769	Psmb1	3089.94	0.650448	0.189387	3.43449	0.000593659	0.00347293
ENSMUSG00000014771	Pdcd2	189.354	1.18151	0.192417	6.14035	8.23392e-10	1.49384e-08
ENSMUSG00000014776	Nol3	1859.59	0.927679	0.21632	4.28846	1.79918e-05	0.000154947
ENSMUSG00000014778	Fhod1	595.623	-0.273941	0.101188	-2.70726	0.00678413	0.0278617
ENSMUSG00000014813	Stc1	346.371	1.1838	0.255738	4.62895	3.67519e-06	3.65479e-05
ENSMUSG00000014846	Tppp3	461.561	-0.905648	0.350447	-2.58427	0.0097586	0.0377787
ENSMUSG00000014856	Tmem208	452.729	0.570874	0.174155	3.27796	0.00104561	0.00568947
ENSMUSG00000014905	Dnajb9	319.92	0.713341	0.191829	3.71864	0.000200301	0.00134555
ENSMUSG00000014956	Ppp1cb	12543.5	0.285689	0.0797095	3.58413	0.000338207	0.00212992
ENSMUSG00000015002	Efr3a	3324.63	0.307852	0.124706	2.46862	0.0135634	0.0497859
ENSMUSG00000015023	Ddx19a	897.383	0.443027	0.172634	2.56628	0.0102795	0.0394858
ENSMUSG00000015027	Galns	399.334	1.37417	0.161949	8.48521	2.15335e-17	9.08308e-16
ENSMUSG00000015053	Gata2	494.346	-0.639144	0.203761	-3.13673	0.00170844	0.00859825
ENSMUSG00000015083	C8g	51.3513	-0.889566	0.278922	-3.1893	0.00142619	0.00736634
ENSMUSG00000015090	Ptgds	4250.24	1.96877	0.231312	8.51132	1.71966e-17	7.3611e-16
ENSMUSG00000015126	Tsr3	322.526	0.631758	0.155322	4.06742	4.75364e-05	0.000371323
ENSMUSG00000015149	Sirt2	2189.18	0.724152	0.141441	5.11982	3.05822e-07	3.72113e-06
ENSMUSG00000015176	Nolc1	1433.29	0.568413	0.0889985	6.38677	1.69426e-10	3.30797e-09
ENSMUSG00000015202	Cnksr3	1045.92	1.25832	0.145451	8.65116	5.09788e-18	2.31428e-16
ENSMUSG00000015214	Mtmr1	1874.91	0.432071	0.107903	4.00426	6.22115e-05	0.000472999
ENSMUSG00000015243	Abca1	4871.65	-1.02572	0.164305	-6.24278	4.29854e-10	8.08101e-09
ENSMUSG00000015247	Nipsnap3b	283.901	1.73493	0.212907	8.14878	3.67623e-16	1.35826e-14
ENSMUSG00000015316	Slamf1	22.3006	-1.84943	0.461149	-4.01049	6.05927e-05	0.000462602
ENSMUSG00000015335	Zdhhc12	129.918	0.890265	0.277802	3.20467	0.00135217	0.00702525
ENSMUSG00000015355	Cd48	99.1428	-0.588483	0.228455	-2.57593	0.00999707	0.0385177
ENSMUSG00000015357	Clpx	4414.88	0.643132	0.14515	4.43082	9.38768e-06	8.62006e-05
ENSMUSG00000015365	Mov10l1	901.613	-1.62533	0.203719	-7.97828	1.4839e-15	5.09231e-14
ENSMUSG00000015396	Cd83	143.66	-1.0011	0.196576	-5.09267	3.53051e-07	4.22471e-06
ENSMUSG00000015405	Ace2	252.44	2.64	0.246021	10.7308	7.29851e-27	6.28821e-25
ENSMUSG00000015501	Hivep2	3896.19	-0.946352	0.216081	-4.37963	1.18884e-05	0.000106271
ENSMUSG00000015522	Arnt	1674.2	0.235623	0.0936574	2.51579	0.0118765	0.0444725
ENSMUSG00000015536	Mocs2	737.541	0.454774	0.145682	3.12169	0.00179815	0.00899166
ENSMUSG00000015568	Lpl	61153.2	-1.23635	0.343733	-3.59684	0.000322103	0.00204439
ENSMUSG00000015627	Gata5	39.3214	-1.40235	0.47588	-2.94685	0.00321024	0.0148058
ENSMUSG00000015647	Lama5	8815.51	-0.68946	0.144507	-4.77113	1.83194e-06	1.92582e-05
ENSMUSG00000015652	Steap1	46.3023	3.94548	0.531972	7.41671	1.20067e-13	3.30749e-12
ENSMUSG00000015653	Steap2	279.475	1.6088	0.319962	5.02811	4.95343e-07	5.81067e-06
ENSMUSG00000015656	Hspa8	72492.5	0.977456	0.143982	6.78872	1.13133e-11	2.4925e-10
ENSMUSG00000015672	Mrpl32	344.172	0.481851	0.14932	3.22697	0.00125107	0.00660332
ENSMUSG00000015711	Prune	1570.73	0.715094	0.231949	3.08298	0.00204939	0.0100738
ENSMUSG00000015745	Plekho1	3242.96	2.01312	0.236992	8.49446	1.98859e-17	8.4232e-16
ENSMUSG00000015747	Vps45	445.078	0.497144	0.137708	3.61014	0.000306035	0.00195159
ENSMUSG00000015766	Eps8	1251.71	0.546734	0.198846	2.74953	0.005968	0.0250122
ENSMUSG00000015829	Tnr	58.3794	-1.07688	0.278138	-3.87176	0.000108053	0.000769795
ENSMUSG00000015837	Sqstm1	30651	2.18556	0.196356	11.1306	8.90416e-29	8.7093e-27
ENSMUSG00000015843	Rxrg	1395.38	-0.638007	0.206653	-3.08734	0.00201959	0.00995908
ENSMUSG00000015846	Rxra	1667.8	-1.403	0.345742	-4.05793	4.95096e-05	0.000385843
ENSMUSG00000015850	Adamtsl4	1720.33	-1.26324	0.146383	-8.62969	6.15212e-18	2.75579e-16
ENSMUSG00000015869	Prpsap1	638.201	1.05096	0.201714	5.21015	1.88693e-07	2.38929e-06
ENSMUSG00000015882	Lcorl	454.96	-0.557667	0.170494	-3.27089	0.0010721	0.00581018
ENSMUSG00000015889	Lta4h	1327.51	0.360806	0.0930367	3.8781	0.000105274	0.000752378
ENSMUSG00000015932	Dstn	7316.42	0.434459	0.115256	3.76952	0.000163563	0.00112184
ENSMUSG00000015937	H2afy	1232.13	-0.405596	0.14834	-2.73423	0.00625263	0.0260595
ENSMUSG00000015944	Gatsl2	1001.53	-0.655416	0.204946	-3.198	0.00138385	0.00716963
ENSMUSG00000015950	Ncf1	227.28	-1.22172	0.247085	-4.94454	7.63245e-07	8.60915e-06
ENSMUSG00000015968	Cacna1d	312.523	-0.824369	0.196554	-4.19411	2.73945e-05	0.00022547
ENSMUSG00000015970	Chdh	49.3182	-1.39878	0.439523	-3.18249	0.00146012	0.00750714
ENSMUSG00000015980	Lrrc27	248.263	0.79833	0.224789	3.55147	0.000383086	0.00237113
ENSMUSG00000016018	Skiv2l2	1969.48	0.388177	0.090712	4.27923	1.87542e-05	0.000160489
ENSMUSG00000016128	Stard13	1912.35	-1.05244	0.0841858	-12.5014	7.3321e-36	1.00306e-33
ENSMUSG00000016150	Tenm1	14.1151	-1.93369	0.607853	-3.18118	0.00146675	0.00753545
ENSMUSG00000016194	Hsd11b1	282.107	-1.18584	0.273694	-4.33272	1.47278e-05	0.000129424
ENSMUSG00000016206	H2-M3	153.24	-0.497673	0.143535	-3.46727	0.000525778	0.0031127
ENSMUSG00000016239	Lonrf3	218.533	1.32929	0.30618	4.34153	1.41491e-05	0.000124664
ENSMUSG00000016255	Tubb1	37.2046	-1.86791	0.435149	-4.29257	1.76613e-05	0.00015236
ENSMUSG00000016257	Slmo2	1945.92	0.985646	0.291961	3.37596	0.000735597	0.0041836
ENSMUSG00000016319	Slc25a5	11908.6	1.35205	0.175724	7.69419	1.42398e-14	4.34206e-13
ENSMUSG00000016327	Atp1b4	13.9623	1.40011	0.563051	2.48665	0.0128953	0.0477401
ENSMUSG00000016386	Mpped2	173.88	-1.0478	0.297481	-3.52226	0.000427891	0.00260243
ENSMUSG00000016427	Ndufa1	2208.75	-0.461152	0.0954999	-4.82882	1.37342e-06	1.47913e-05
ENSMUSG00000016477	E2f3	712.822	1.42422	0.196925	7.23229	4.74915e-13	1.22805e-11
ENSMUSG00000016487	Ppfibp1	7643.25	1.89358	0.147023	12.8794	5.8759e-38	9.01282e-36
ENSMUSG00000016503	Gtf3a	638.357	0.547477	0.127312	4.30027	1.70589e-05	0.000147856
ENSMUSG00000016534	Lamp2	4988.21	0.316282	0.0870484	3.63341	0.000279701	0.00180526
ENSMUSG00000016541	Atxn10	3878.9	1.57777	0.257228	6.13373	8.58434e-10	1.55324e-08
ENSMUSG00000016552	Foxred2	78.4181	-1.12192	0.279885	-4.00849	6.11092e-05	0.000466018
ENSMUSG00000016554	Eif3d	3322.49	1.07244	0.0836345	12.8229	1.22085e-37	1.831e-35
ENSMUSG00000016559	H3f3b	2072.22	0.737239	0.226883	3.24942	0.00115639	0.00617931
ENSMUSG00000016619	Nup50	784.687	-0.586139	0.161868	-3.62108	0.000293371	0.00188275
ENSMUSG00000016664	Pacsin2	8590.03	0.979661	0.274353	3.57081	0.000355882	0.00222599
ENSMUSG00000016757	Ttll12	404.546	0.613549	0.159176	3.85453	0.000115954	0.000818309
ENSMUSG00000016933	Plcg1	4311.59	-0.29093	0.0765394	-3.80105	0.000144084	0.000998813
ENSMUSG00000017132	Cyth1	1801.34	-0.477044	0.172514	-2.76525	0.00568797	0.0240427
ENSMUSG00000017144	Rnd3	1130.93	1.09293	0.303349	3.60288	0.000314716	0.00200442
ENSMUSG00000017167	Cntnap1	266.48	-0.774097	0.185949	-4.16295	3.14165e-05	0.000255048
ENSMUSG00000017188	Coa3	508.803	0.654275	0.176656	3.70367	0.000212502	0.00141624
ENSMUSG00000017204	Gsdma	14.632	3.79603	0.606032	6.26374	3.75845e-10	7.10526e-09
ENSMUSG00000017210	Med24	2319.71	0.324981	0.0820226	3.96209	7.42967e-05	0.000555087
ENSMUSG00000017264	Exosc10	2240.73	0.244838	0.0792493	3.08946	0.00200519	0.00990462
ENSMUSG00000017288	Vps53	1263.88	0.746486	0.133793	5.5794	2.41355e-08	3.54624e-07
ENSMUSG00000017344	Vtn	830.282	-1.12679	0.111371	-10.1174	4.62593e-24	3.32132e-22
ENSMUSG00000017390	Aldoc	17.0752	1.38792	0.469042	2.95906	0.00308579	0.0143309
ENSMUSG00000017404	Rpl19	7451.78	0.919924	0.13968	6.58595	4.51976e-11	9.30201e-10
ENSMUSG00000017418	Arl5b	971.071	-1.27665	0.401391	-3.18056	0.00146991	0.00754977
ENSMUSG00000017428	Psmd11	2055.59	1.12032	0.141496	7.91768	2.41977e-15	8.11145e-14
ENSMUSG00000017485	Top2b	5939.02	0.247768	0.0614644	4.03108	5.55218e-05	0.000428084
ENSMUSG00000017491	Rarb	662.254	-1.03592	0.243383	-4.25633	2.07808e-05	0.000176415
ENSMUSG00000017615	Tnfaip1	2203.22	1.12609	0.338365	3.32803	0.000874638	0.00486238
ENSMUSG00000017631	Abr	1057.84	-0.760728	0.115355	-6.59469	4.26157e-11	8.8045e-10
ENSMUSG00000017664	Slc35c2	837.635	0.824207	0.136763	6.02654	1.67508e-09	2.92879e-08
ENSMUSG00000017677	Wsb1	973.131	0.946863	0.204637	4.62705	3.70913e-06	3.68492e-05
ENSMUSG00000017692	Rhbdl3	463.605	-2.18159	0.20646	-10.5667	4.25413e-26	3.47312e-24
ENSMUSG00000017724	Etv4	75.9081	0.995053	0.330233	3.01318	0.00258525	0.0122959
ENSMUSG00000017754	Pltp	766.674	-0.737679	0.173995	-4.23965	2.23866e-05	0.000188701
ENSMUSG00000017760	Ctsa	5074.55	0.442086	0.156681	2.82157	0.00477885	0.020817
ENSMUSG00000017765	Slc12a4	4630.59	0.964732	0.0897784	10.7457	6.20887e-27	5.37227e-25
ENSMUSG00000017774	Myo1c	14510.6	1.28961	0.149122	8.64804	5.23912e-18	2.37307e-16
ENSMUSG00000017858	Ift52	692.866	0.835506	0.185587	4.50196	6.73295e-06	6.36127e-05
ENSMUSG00000017929	B4galt5	1234.82	1.39358	0.352302	3.95565	7.63262e-05	0.000567735
ENSMUSG00000017978	Cadps2	130.995	-0.797135	0.173951	-4.58253	4.59383e-06	4.46097e-05
ENSMUSG00000017999	Ddx27	1036.79	1.26615	0.0924105	13.7013	9.9705e-43	1.75542e-40
ENSMUSG00000018008	Cyth4	449.597	-0.588518	0.220115	-2.67368	0.00750232	0.0303435
ENSMUSG00000018012	Rac3	35.8519	-1.72934	0.298094	-5.80133	6.57913e-09	1.05804e-07
ENSMUSG00000018040	Rrp7a	1738.95	0.587585	0.0861978	6.81671	9.31502e-12	2.0794e-10
ENSMUSG00000018042	Cyb5r3	4283.65	1.03186	0.257869	4.00148	6.29464e-05	0.000477689
ENSMUSG00000018143	Mafk	2547.47	1.32703	0.185565	7.15129	8.59689e-13	2.16494e-11
ENSMUSG00000018167	Stard3	706.08	-0.516846	0.11961	-4.3211	1.55254e-05	0.00013561
ENSMUSG00000018171	Vmp1	1385.07	0.71918	0.202467	3.55209	0.000382191	0.00236715
ENSMUSG00000018189	Uchl5	587.255	0.636019	0.219037	2.90371	0.00368773	0.0167149
ENSMUSG00000018196	Glrx2	376.788	0.85555	0.235579	3.63169	0.000281573	0.00181618
ENSMUSG00000018239	Zcchc10	72.0543	0.641044	0.211436	3.03186	0.00243052	0.0116724
ENSMUSG00000018263	Tbx5	866.186	-0.657324	0.204129	-3.22014	0.00128126	0.00672063
ENSMUSG00000018286	Psmb6	2932.66	0.503159	0.101394	4.96243	6.96165e-07	7.93205e-06
ENSMUSG00000018293	Pfn1	5011.02	0.761944	0.308478	2.47001	0.0135109	0.0496289
ENSMUSG00000018334	Ksr1	654.693	-0.643818	0.17269	-3.72817	0.000192877	0.00129827
ENSMUSG00000018339	Gpx3	2181.87	1.11566	0.379878	2.93688	0.00331527	0.0152278
ENSMUSG00000018363	Smurf2	2066.7	0.53272	0.161454	3.29952	0.000968498	0.00532714
ENSMUSG00000018395	Kif3a	800.689	0.871063	0.126428	6.8898	5.58723e-12	1.27969e-10
ENSMUSG00000018401	Mtmr4	1395.47	-0.389484	0.128171	-3.03879	0.00237527	0.0114478
ENSMUSG00000018417	Myo1b	2006.25	-0.382809	0.147032	-2.60359	0.0092254	0.0360244
ENSMUSG00000018425	Dhx40	1105.68	0.448473	0.140572	3.19035	0.00142099	0.00734887
ENSMUSG00000018428	Akap1	6386.58	0.511299	0.107489	4.75677	1.96716e-06	2.05411e-05
ENSMUSG00000018433	Nol11	1460.22	0.522981	0.0969139	5.39634	6.80122e-08	9.33589e-07
ENSMUSG00000018481	Appbp2	1420.56	-0.820233	0.280895	-2.92007	0.00349954	0.015962
ENSMUSG00000018500	Adora2b	44.7691	-1.54477	0.263402	-5.86471	4.49922e-09	7.40014e-08
ENSMUSG00000018501	Ncor1	9508.37	-0.167547	0.0638511	-2.62403	0.00868951	0.0343559
ENSMUSG00000018554	Ybx2	355.743	-1.22641	0.262106	-4.67904	2.88217e-06	2.93686e-05
ENSMUSG00000018565	Elp5	1291.77	0.598093	0.116736	5.12349	2.99931e-07	3.65605e-06
ENSMUSG00000018661	Cog1	1400.06	0.496425	0.103947	4.77576	1.79033e-06	1.88796e-05
ENSMUSG00000018669	Cdk5rap3	680.122	0.894108	0.138492	6.45601	1.07498e-10	2.12966e-09
ENSMUSG00000018677	Slc25a39	5624.75	1.29876	0.126254	10.2869	8.07054e-25	6.02968e-23
ENSMUSG00000018697	Aatf	676.11	0.804766	0.177884	4.5241	6.06532e-06	5.77903e-05
ENSMUSG00000018707	Dync1h1	49646.4	0.666217	0.123734	5.38426	7.27441e-08	9.92486e-07
ENSMUSG00000018761	Mpdu1	368.468	0.520527	0.134562	3.8683	0.000109595	0.000778042
ENSMUSG00000018796	Acsl1	28881.2	-0.531091	0.211666	-2.5091	0.012104	0.045224
ENSMUSG00000018800	Abca5	858.528	0.840922	0.105376	7.98023	1.46064e-15	5.02099e-14
ENSMUSG00000018820	Zfyve27	698.171	0.529722	0.180173	2.94008	0.00328131	0.0150855
ENSMUSG00000018822	Sfrp5	75.3491	-2.24376	0.351777	-6.37836	1.79e-10	3.46815e-09
ENSMUSG00000018848	Rars	2731.82	1.57071	0.135627	11.5811	5.13801e-31	5.65376e-29
ENSMUSG00000018861	Fdxr	514.913	1.32662	0.126495	10.4875	9.8562e-26	7.85663e-24
ENSMUSG00000018893	Mb	91707.5	-0.642996	0.120354	-5.34252	9.16619e-08	1.22906e-06
ENSMUSG00000018900	Slc22a5	1093.5	-0.669147	0.111197	-6.01766	1.7696e-09	3.08076e-08
ENSMUSG00000018923	Med11	101.231	-0.832686	0.212936	-3.9105	9.2107e-05	0.000669619
ENSMUSG00000018927	Ccl6	319.07	-1.28162	0.428191	-2.99311	0.00276153	0.0130393
ENSMUSG00000018974	Sart3	997.448	-0.277141	0.108756	-2.5483	0.0108251	0.0412448
ENSMUSG00000019122	Ccl9	307.834	-1.15678	0.353702	-3.27049	0.00107361	0.0058113
ENSMUSG00000019124	Scrn1	863.519	-1.48493	0.249432	-5.95326	2.6285e-09	4.47973e-08
ENSMUSG00000019139	Isyna1	501.244	-0.562487	0.163251	-3.44554	0.000569924	0.00335054
ENSMUSG00000019143	Hars2	873.957	-0.458954	0.139763	-3.28381	0.00102414	0.00558613
ENSMUSG00000019194	Scn1b	659.239	1.31517	0.164148	8.0121	1.12768e-15	3.94336e-14
ENSMUSG00000019210	Atp6v1e1	2311.8	0.519157	0.121101	4.28698	1.81116e-05	0.000155765
ENSMUSG00000019235	Rps6kl1	156.605	-1.25163	0.179038	-6.99091	2.73117e-12	6.498e-11
ENSMUSG00000019297	Nop9	726.815	1.02056	0.211289	4.83016	1.36426e-06	1.47083e-05
ENSMUSG00000019326	Aoc3	697.297	-0.697596	0.235723	-2.95939	0.00308246	0.0143266
ENSMUSG00000019373	Cops3	2843.92	0.532063	0.155323	3.42553	0.00061361	0.00356902
ENSMUSG00000019428	Fkbp8	4462.21	0.410359	0.124643	3.29227	0.000993816	0.00544274
ENSMUSG00000019432	Ddx39b	3055.68	0.26725	0.0956139	2.7951	0.00518838	0.0223082
ENSMUSG00000019433	Gipc1	864.322	0.556888	0.159055	3.50122	0.000463133	0.00278866
ENSMUSG00000019464	Ptger1	1726.59	0.742647	0.129183	5.74881	8.98725e-09	1.41938e-07
ENSMUSG00000019467	Arhgef25	739.206	-0.506033	0.102494	-4.93719	7.92581e-07	8.90467e-06
ENSMUSG00000019470	Xab2	1092.03	0.300592	0.0985822	3.04915	0.00229489	0.0111292
ENSMUSG00000019478	Rab4a	270.387	-0.41588	0.157587	-2.63905	0.00831376	0.0330445
ENSMUSG00000019487	Trip10	2399.22	-0.703815	0.202937	-3.46815	0.000524057	0.00310433
ENSMUSG00000019494	Cops6	1714.31	0.518262	0.15486	3.34666	0.000817917	0.00460394
ENSMUSG00000019528	Gyg	4832.56	1.45845	0.190932	7.63861	2.19586e-14	6.55747e-13
ENSMUSG00000019558	Slc6a8	4376.75	1.1964	0.299333	3.99689	6.41795e-05	0.000486136
ENSMUSG00000019564	Arid3a	180.633	-0.459952	0.184184	-2.49724	0.0125163	0.0465414
ENSMUSG00000019577	Pdk4	6319.32	1.38949	0.324806	4.27789	1.88673e-05	0.000161388
ENSMUSG00000019578	Ubxn6	2121.77	0.437473	0.136211	3.21174	0.00131935	0.00687942
ENSMUSG00000019710	Mrpl24	2152.35	0.685896	0.117921	5.81659	6.00598e-09	9.72047e-08
ENSMUSG00000019726	Lyst	2472.7	0.305913	0.104722	2.9212	0.00348682	0.0159219
ENSMUSG00000019775	Rgs17	141.208	-1.51513	0.342737	-4.42068	9.83914e-06	8.96548e-05
ENSMUSG00000019787	Trdn	9787.63	-0.417847	0.105827	-3.9484	7.86746e-05	0.000584131
ENSMUSG00000019792	Trmt11	328.797	0.425951	0.160041	2.66151	0.00777906	0.0313001
ENSMUSG00000019794	Katna1	702.02	0.354391	0.0918399	3.85879	0.000113949	0.000805842
ENSMUSG00000019797	1700021F05Rik	1694.08	0.677161	0.221953	3.05093	0.00228136	0.0110716
ENSMUSG00000019802	Sec63	1811.97	0.665491	0.152446	4.36542	1.26876e-05	0.000112719
ENSMUSG00000019809	Pex3	1029.09	0.52719	0.123035	4.28488	1.82837e-05	0.000156927
ENSMUSG00000019810	Fuca2	4410.91	-0.844108	0.166649	-5.06517	4.08034e-07	4.84543e-06
ENSMUSG00000019814	Ltv1	855.946	1.29096	0.138937	9.29169	1.51862e-20	8.51731e-19
ENSMUSG00000019820	Utrn	16251.1	0.318993	0.0886756	3.5973	0.000321537	0.00204144
ENSMUSG00000019823	Mical1	1604.47	1.94606	0.199114	9.77361	1.46146e-22	9.66999e-21
ENSMUSG00000019828	Grm1	673.998	0.762632	0.124054	6.14759	7.86683e-10	1.43108e-08
ENSMUSG00000019838	Slc16a10	807.783	-1.32463	0.267081	-4.95967	7.06131e-07	8.03131e-06
ENSMUSG00000019848	Popdc3	852.931	1.47204	0.141402	10.4103	2.22459e-25	1.72572e-23
ENSMUSG00000019849	Prep	1497.88	0.651403	0.1566	4.15966	3.18719e-05	0.000258124
ENSMUSG00000019851	Perp	783.007	0.915357	0.130595	7.00911	2.39833e-12	5.75343e-11
ENSMUSG00000019852	Arfgef3	235.759	3.098	0.28028	11.0532	2.11476e-28	2.01969e-26
ENSMUSG00000019853	Hebp2	105.153	1.93387	0.357028	5.41657	6.07532e-08	8.38654e-07
ENSMUSG00000019854	Reps1	1488.35	0.871867	0.13666	6.37982	1.77301e-10	3.44182e-09
ENSMUSG00000019856	Fam184a	139.515	1.19719	0.233173	5.13433	2.83146e-07	3.46186e-06
ENSMUSG00000019866	Aim1	327.083	-1.1537	0.134928	-8.55046	1.22594e-17	5.33797e-16
ENSMUSG00000019868	Vta1	770.89	0.732984	0.192842	3.80096	0.000144135	0.000998813
ENSMUSG00000019874	Fabp7	23.2634	1.48291	0.558382	2.65573	0.00791359	0.0317029
ENSMUSG00000019889	Ptprk	2460.18	0.665354	0.136052	4.89044	1.00612e-06	1.11013e-05
ENSMUSG00000019890	Nts	57.4194	0.82255	0.323284	2.54436	0.0109479	0.0416502
ENSMUSG00000019907	Ppp1r12a	4590.35	0.734324	0.0791045	9.28297	1.64817e-20	9.16774e-19
ENSMUSG00000019917	2010-09-01	835.206	0.600045	0.111443	5.38432	7.27199e-08	9.92486e-07
ENSMUSG00000019923	Zwint	2338.79	1.04112	0.299406	3.47729	0.00050651	0.00301361
ENSMUSG00000019936	Epyc	50.3466	-1.1951	0.330213	-3.61918	0.000295541	0.00189337
ENSMUSG00000019944	Rhobtb1	6766.9	-1.98897	0.294112	-6.76261	1.35525e-11	2.96007e-10
ENSMUSG00000019945	1700040L02Rik	270.183	-1.75336	0.303249	-5.78191	7.38589e-09	1.18028e-07
ENSMUSG00000019969	Psen1	925.601	0.296412	0.0949124	3.12301	0.00179011	0.00895586
ENSMUSG00000019977	Hbs1l	3311.99	0.388884	0.134311	2.8954	0.0037867	0.0170946
ENSMUSG00000019978	Epb4.1l2	2772.92	-0.399	0.147761	-2.7003	0.00692769	0.0283535
ENSMUSG00000019986	Ahi1	281.473	0.412832	0.152412	2.70865	0.00675567	0.0277561
ENSMUSG00000019990	Pde7b	585.068	-0.805703	0.141548	-5.6921	1.25488e-08	1.93655e-07
ENSMUSG00000019997	Ctgf	3988.29	1.35777	0.321947	4.21737	2.47173e-05	0.000206032
ENSMUSG00000019998	Stx7	1808.93	0.483313	0.122999	3.92942	8.51527e-05	0.000625349
ENSMUSG00000020019	Ntn4	525.816	-0.645908	0.127754	-5.05586	4.28454e-07	5.07008e-06
ENSMUSG00000020024	Cep83	1193.92	0.788488	0.0841033	9.37523	6.9028e-21	4.05104e-19
ENSMUSG00000020034	Tcp11l2	2634.5	-0.799898	0.172541	-4.63598	3.55248e-06	3.54495e-05
ENSMUSG00000020056	Ccdc53	573.299	0.508205	0.113411	4.48111	7.42566e-06	6.95409e-05
ENSMUSG00000020057	Dram1	220.192	-0.613164	0.186323	-3.29086	0.000998817	0.00546716
ENSMUSG00000020061	Mybpc1	8.0591	-2.35962	0.564872	-4.17728	2.95022e-05	0.000241054
ENSMUSG00000020064	Herc4	2018.38	0.246079	0.0944015	2.60672	0.00914129	0.035765
ENSMUSG00000020075	Ddx21	2701.92	0.620243	0.10365	5.98402	2.17693e-09	3.74799e-08
ENSMUSG00000020076	Ddx50	2302.45	0.863617	0.112621	7.66836	1.74211e-14	5.27244e-13
ENSMUSG00000020078	Vps26a	3348.08	0.943258	0.283331	3.32917	0.000871039	0.00484503
ENSMUSG00000020089	Ppa1	1368.96	0.709353	0.199891	3.5487	0.000387143	0.00239246
ENSMUSG00000020092	Pald1	1405.25	-0.674706	0.17701	-3.81169	0.000138022	0.000960979
ENSMUSG00000020098	Pcbd1	55.4019	1.63692	0.387518	4.2241	2.39893e-05	0.000200459
ENSMUSG00000020099	Unc5b	1774.58	0.872253	0.250818	3.47763	0.000505864	0.00301154
ENSMUSG00000020111	Micu1	1017.22	0.792135	0.117803	6.72423	1.76524e-11	3.81033e-10
ENSMUSG00000020114	Cand1	2686.39	0.356138	0.132026	2.69749	0.0069864	0.0285312
ENSMUSG00000020116	Pno1	1008.3	1.07345	0.298705	3.59367	0.000326047	0.00206487
ENSMUSG00000020121	Srgap1	436.262	0.984587	0.284855	3.45645	0.000547347	0.00323095
ENSMUSG00000020123	Avpr1a	60.4037	-1.45436	0.376578	-3.86204	0.000112443	0.00079575
ENSMUSG00000020124	Usp15	4192.48	0.416121	0.0876494	4.74755	2.05891e-06	2.14012e-05
ENSMUSG00000020130	Tbc1d15	535.27	0.496879	0.126742	3.92041	8.83992e-05	0.000646611
ENSMUSG00000020133	2310011J03Rik	109.98	-2.20437	0.60025	-3.67242	0.000240264	0.00157943
ENSMUSG00000020134	Peli1	564.74	-1.07582	0.203738	-5.28041	1.28894e-07	1.68913e-06
ENSMUSG00000020142	Slc1a4	553.356	2.01365	0.270107	7.45499	8.98723e-14	2.51332e-12
ENSMUSG00000020143	Dock2	451.347	-0.606181	0.206861	-2.93038	0.00338545	0.0155145
ENSMUSG00000020150	Gamt	110.825	-0.896687	0.285664	-3.13896	0.00169548	0.00855005
ENSMUSG00000020156	Mum1	877.602	-0.525563	0.107014	-4.91118	9.05321e-07	1.00718e-05
ENSMUSG00000020163	Uqcr11	5492.7	-0.694842	0.144329	-4.8143	1.47716e-06	1.58244e-05
ENSMUSG00000020169	Best3	124.759	1.29373	0.247551	5.22613	1.73098e-07	2.20978e-06
ENSMUSG00000020173	Cobl	374.557	0.948586	0.133828	7.08811	1.35953e-12	3.34871e-11
ENSMUSG00000020182	Ddc	237.921	-1.57427	0.168757	-9.32865	1.07231e-20	6.16794e-19
ENSMUSG00000020190	Mknk2	5848.7	0.304428	0.122157	2.49211	0.0126987	0.0471416
ENSMUSG00000020193	Zpbp	51.3933	-0.829763	0.260141	-3.18966	0.00142438	0.00735887
ENSMUSG00000020198	Ap3d1	5085.49	0.483144	0.0878689	5.49846	3.83114e-08	5.48967e-07
ENSMUSG00000020205	Phlda1	343.718	0.532232	0.19478	2.73247	0.00628608	0.026172
ENSMUSG00000020216	Jsrp1	23.1214	1.34806	0.438413	3.07487	0.00210597	0.0103044
ENSMUSG00000020218	Wif1	229.179	-1.1868	0.228407	-5.19598	2.03641e-07	2.55301e-06
ENSMUSG00000020224	Llph	417.023	0.704628	0.225035	3.13119	0.001741	0.00874039
ENSMUSG00000020227	Irak3	262.808	-0.639174	0.164132	-3.89427	9.84946e-05	0.000709871
ENSMUSG00000020230	Prmt2	773.911	1.06839	0.0959059	11.14	8.01345e-29	7.95335e-27
ENSMUSG00000020232	Hmg20b	1426.03	0.505846	0.13011	3.88782	0.000101147	0.0007257
ENSMUSG00000020234	4930404N11Rik	24.9352	-0.9089	0.367084	-2.476	0.0132863	0.048911
ENSMUSG00000020246	Hcfc2	1372.7	0.637237	0.0752042	8.47342	2.38287e-17	1.00095e-15
ENSMUSG00000020250	Txnrd1	4736.3	1.77059	0.184688	9.58689	9.07808e-22	5.6555e-20
ENSMUSG00000020251	Glt8d2	191.826	-1.01894	0.331431	-3.07437	0.00210946	0.010319
ENSMUSG00000020256	Aldh1l2	1786.37	1.47655	0.186965	7.89747	2.84629e-15	9.47841e-14
ENSMUSG00000020264	Slc36a2	666.914	-2.48928	0.232532	-10.7051	9.63056e-27	8.22743e-25
ENSMUSG00000020265	Sumo3	993.315	-1.14019	0.387913	-2.9393	0.00328951	0.0151164
ENSMUSG00000020271	Fbxw11	2988.23	0.610379	0.0883573	6.90807	4.91292e-12	1.13144e-10
ENSMUSG00000020277	Pfkl	5976.97	0.460487	0.112898	4.07878	4.52717e-05	0.000354889
ENSMUSG00000020280	Pus10	603.081	0.464026	0.132584	3.49986	0.000465502	0.00279923
ENSMUSG00000020295	Hbq1a	8.35926	-1.55985	0.546258	-2.85553	0.00429652	0.0190229
ENSMUSG00000020307	Cdc34	2947.9	0.685923	0.210487	3.25875	0.00111906	0.00600905
ENSMUSG00000020312	Shc2	159.101	-0.745606	0.242012	-3.08086	0.00206402	0.010131
ENSMUSG00000020319	Wdpcp	367.69	0.546732	0.156955	3.48337	0.000495152	0.00295297
ENSMUSG00000020325	Fstl3	343.036	1.52065	0.346192	4.39251	1.1205e-05	0.00010092
ENSMUSG00000020328	Nudcd2	491.236	0.960064	0.217149	4.42122	9.81471e-06	8.94725e-05
ENSMUSG00000020329	Polrmt	1092.31	-1.1602	0.100872	-11.5016	1.29453e-30	1.36512e-28
ENSMUSG00000020333	Acsl6	219.788	-1.68332	0.354851	-4.74372	2.09831e-06	2.17757e-05
ENSMUSG00000020334	Slc22a4	605.743	2.12829	0.188985	11.2617	2.02778e-29	2.04261e-27
ENSMUSG00000020340	Cyfip2	12153.2	0.305107	0.0946147	3.22473	0.0012609	0.00663967
ENSMUSG00000020358	Hnrnpab	3102.29	0.567258	0.0774534	7.32386	2.40936e-13	6.43566e-12
ENSMUSG00000020361	Hspa4	10303.3	0.882626	0.158154	5.58081	2.39399e-08	3.52005e-07
ENSMUSG00000020363	Gfpt2	583.977	-0.552003	0.199635	-2.76506	0.00569117	0.0240512
ENSMUSG00000020372	Gnb2l1	11910.9	0.880658	0.0976146	9.02178	1.8506e-19	9.63215e-18
ENSMUSG00000020377	Ltc4s	56.4076	-1.2475	0.39669	-3.14477	0.00166216	0.00840504
ENSMUSG00000020380	Rad50	918.961	0.312993	0.123619	2.53191	0.0113442	0.042844
ENSMUSG00000020387	Jade2	1184.13	-1.09596	0.163066	-6.72094	1.8056e-11	3.88501e-10
ENSMUSG00000020388	Pdlim4	447.527	-1.24231	0.25329	-4.90467	9.35847e-07	1.03768e-05
ENSMUSG00000020389	Cdkl3	237.119	0.967394	0.193153	5.00843	5.48748e-07	6.39269e-06
ENSMUSG00000020400	Tnip1	2501.84	2.00575	0.145331	13.8013	2.5028e-43	4.56524e-41
ENSMUSG00000020407	Upp1	462.888	2.80102	0.132895	21.077	1.29346e-98	1.24708e-95
ENSMUSG00000020409	Slu7	1521.05	0.260715	0.0948821	2.74777	0.00600014	0.0251417
ENSMUSG00000020411	Nipal4	17.9106	1.28309	0.396613	3.23513	0.00121588	0.00644615
ENSMUSG00000020412	Ascc2	993.685	1.13078	0.225144	5.02247	5.10121e-07	5.96673e-06
ENSMUSG00000020413	Hus1	417.289	1.09124	0.320994	3.39957	0.00067491	0.00387327
ENSMUSG00000020424	Gatsl3	217.016	-0.70601	0.218871	-3.22569	0.0012567	0.00662272
ENSMUSG00000020430	Pes1	1557.56	0.888049	0.155025	5.72842	1.01369e-08	1.58979e-07
ENSMUSG00000020431	Adcy1	491.905	-1.28943	0.28951	-4.45384	8.43466e-06	7.82661e-05
ENSMUSG00000020435	Osbp2	1355.08	0.789502	0.159778	4.94123	7.76314e-07	8.74195e-06
ENSMUSG00000020437	Myo1g	165.321	-1.05152	0.174006	-6.04301	1.51263e-09	2.66083e-08
ENSMUSG00000020439	Smtn	5922.88	-1.00893	0.174942	-5.7672	8.06008e-09	1.28095e-07
ENSMUSG00000020444	Guk1	1284.28	0.510707	0.184642	2.76593	0.00567607	0.0239974
ENSMUSG00000020448	Rnf185	908.465	1.21278	0.459165	2.64128	0.00825936	0.0328541
ENSMUSG00000020451	Limk2	1521.61	0.787721	0.145279	5.42214	5.88889e-08	8.14429e-07
ENSMUSG00000020457	Drg1	1405.8	0.858857	0.147426	5.82568	5.68796e-09	9.23529e-08
ENSMUSG00000020458	Rtn4	10943.5	2.30184	0.207324	11.1026	1.21844e-28	1.18604e-26
ENSMUSG00000020460	Rps27a	2085.33	0.877365	0.106238	8.25851	1.47502e-16	5.6455e-15
ENSMUSG00000020467	Efemp1	250.093	-1.90186	0.412526	-4.61029	4.02107e-06	3.96371e-05
ENSMUSG00000020471	Pold2	882.808	0.549537	0.134627	4.08193	4.46631e-05	0.000350909
ENSMUSG00000020476	Dbnl	1033.85	0.727495	0.0792678	9.17769	4.4045e-20	2.39083e-18
ENSMUSG00000020515	Cnot8	970.019	-0.587166	0.226499	-2.59236	0.00953212	0.0370293
ENSMUSG00000020521	Rnft1	1329.92	1.03179	0.0983085	10.4955	9.06405e-26	7.25375e-24
ENSMUSG00000020534	Shmt1	774.048	1.88178	0.116779	16.114	2.03353e-58	7.62462e-56
ENSMUSG00000020537	Drg2	1177.08	0.575787	0.159201	3.61674	0.000298342	0.00190794
ENSMUSG00000020542	Myocd	2141.23	-0.934147	0.148767	-6.27924	3.40228e-10	6.43794e-09
ENSMUSG00000020546	Stxbp4	509.468	-0.66487	0.167161	-3.97742	6.96657e-05	0.000523968
ENSMUSG00000020549	Elac2	1467.94	0.974895	0.100979	9.65439	4.70944e-22	3.01747e-20
ENSMUSG00000020564	Atxn7l1	512.377	-0.567589	0.1791	-3.16912	0.00152899	0.00781556
ENSMUSG00000020570	Sypl	1084.05	0.669174	0.126794	5.27763	1.30865e-07	1.71385e-06
ENSMUSG00000020572	Nampt	6048.01	-0.838886	0.292868	-2.86439	0.00417817	0.0185679
ENSMUSG00000020576	Nbas	3218.18	0.200108	0.0706043	2.83422	0.00459374	0.0201188
ENSMUSG00000020585	Laptm4a	9950.64	0.330243	0.0847098	3.89852	9.67834e-05	0.000699099
ENSMUSG00000020593	Lpin1	7310.94	-1.52608	0.31158	-4.89787	9.68818e-07	1.07131e-05
ENSMUSG00000020594	Pum2	3798.42	0.302945	0.10549	2.87178	0.00408169	0.0182031
ENSMUSG00000020598	Nrcam	101.972	2.61848	0.335348	7.80825	5.79866e-15	1.85768e-13
ENSMUSG00000020604	Arsg	210.503	0.97388	0.204838	4.75439	1.99045e-06	2.07629e-05
ENSMUSG00000020610	Amz2	1696.53	-0.302228	0.10689	-2.82748	0.0046916	0.0204865
ENSMUSG00000020612	Prkar1a	16825.6	1.94887	0.272806	7.1438	9.07839e-13	2.28336e-11
ENSMUSG00000020621	Rdh14	774.386	-1.44628	0.393237	-3.67788	0.000235182	0.00154853
ENSMUSG00000020623	Map2k6	212.319	-1.01038	0.298793	-3.38155	0.000720774	0.00411085
ENSMUSG00000020630	Rnaseh1	301.864	0.462187	0.156274	2.95755	0.00310097	0.0143706
ENSMUSG00000020648	Dus4l	203.884	0.628057	0.235131	2.67109	0.00756046	0.0305542
ENSMUSG00000020651	Slc26a4	6.30959	-2.88785	0.612213	-4.71706	2.39273e-06	2.46919e-05
ENSMUSG00000020656	Grhl1	74.4451	1.51971	0.419541	3.62232	0.000291971	0.00187668
ENSMUSG00000020661	Dnmt3a	4994.49	-0.919323	0.270354	-3.40044	0.000672785	0.00386326
ENSMUSG00000020674	Pxdn	5848.48	-0.86249	0.20132	-4.28416	1.83427e-05	0.000157366
ENSMUSG00000020676	Ccl11	35.8691	-2.98939	0.349969	-8.54188	1.32057e-17	5.73769e-16
ENSMUSG00000020677	Ddx52	890.405	0.4482	0.125986	3.55755	0.000374328	0.00232201
ENSMUSG00000020680	Taf15	684.92	0.764626	0.15719	4.86435	1.14831e-06	1.25268e-05
ENSMUSG00000020681	Ace	5155.15	0.541496	0.180335	3.00273	0.00267574	0.0126756
ENSMUSG00000020691	Mettl2	342.097	0.583375	0.140181	4.16157	3.16063e-05	0.000256314
ENSMUSG00000020692	Nle1	286.96	0.859746	0.240754	3.57106	0.000355537	0.00222499
ENSMUSG00000020694	Tlk2	2243.14	0.585383	0.129917	4.50582	6.61186e-06	6.2527e-05
ENSMUSG00000020696	Rffl	346.234	-0.533706	0.139852	-3.81621	0.000135517	0.000945816
ENSMUSG00000020697	Lig3	1467.98	0.42653	0.0814503	5.23668	1.63488e-07	2.09503e-06
[truncated: 4,714 more rows]

## Sheet: E_Lrpprc_DESeq2
gene_id	gene_name	baseMean	logFC	lfcSE	stat	pvalue	padj
[truncated: 4,421 more rows]

## Sheet: F_Mterf4_DESeq2
gene_id	gene_name	baseMean	logFC	lfcSE	stat	pvalue	padj
[truncated: 5,703 more rows]

[truncated: 1 more sheets: G_Log2FC controls]
