# Supplementary material for: Transcriptomic and proteomic landscape of mitochondrial dysfunction reveals secondary coenzyme Q deficiency in mammals
Source: eLife. 2017 Nov 14;6:e30952. doi: 10.7554/eLife.30952 (PMC5703644; doi:10.7554/eLife.30952)
Supplement: Supplementary file 5. [file elife-30952-supp5.xlsx]

## Sheet: Description tab content
Summary statistics of transcript levels by qRT-PCR and metabolomics determinations - Kühl et al.
This spreadsheet contains tabs with following datasets:
A_ qRT_PCR: number of biological replicates (n), p values of variance test and t test, type of t test used
B_ Metabolomics: number of biological replicates (n), p values of variance test and t test, type of t test used
C_ CS activity: number of biological replicates (n), p values of variance test and t test, type of t test used

## Sheet: A_qRT_PCR
Number of biological replicates and p values of qRT-PCR and metabolomic analyses
Strain genotype (n)	Gene	Variance test p value	Type of t test	t test p value
Twnk L/L (4-5) L/L, cre (3)	Atf4	5.00848e-12	two-tailed unequal variance	0.000247202
	Myc	3.05863e-10	two-tailed unequal variance	1.77711e-08
	Coq2	0.476714	two-tailed equal variance	0.00440603
	Coq4	0.529776	two-tailed equal variance	0.109791
	Coq5	0.141877	two-tailed equal variance	0.0554349
	Coq7	0.431208	two-tailed equal variance	0.00295646
	Coq8a	0.580987	two-tailed equal variance	0.000137516
	Coq8b	0.517368	two-tailed equal variance	0.000101752
	Fdps	0.823216	two-tailed equal variance	0.0320396
	Gabpa	2.61491e-05	two-tailed unequal variance	0.000634471
	Hmgcr	0.47431	two-tailed equal variance	0.775684
	Hmgcs1	0.0143928	two-tailed unequal variance	0.0940521
	Nrf1	0.217502	two-tailed equal variance	0.00826348
	Pdss1	0.427239	two-tailed equal variance	0.0518705
	Pdss2	0.837153	two-tailed equal variance	0.00732768
	Pgc1a	4.78275e-06	two-tailed unequal variance	1.68012e-06
	Twnk (Twinkle/Peo)	5.70926e-08	two-tailed unequal variance	1.4021e-13
Tfam L/L (3) L/L, cre (5)	Atf4	0.0308444	two-tailed unequal variance	0.00157382
	Myc	0.34314	two-tailed equal variance	0.000620601
	Coq2	0.601372	two-tailed equal variance	0.00502628
	Coq4	0.677933	two-tailed equal variance	0.84867
	Coq5	0.676261	two-tailed equal variance	0.314559
	Coq7	0.833948	two-tailed equal variance	0.171554
	Coq8a	0.821351	two-tailed equal variance	0.0198317
	Coq8b	0.0211433	two-tailed unequal variance	0.00119776
	Fdps	0.187598	two-tailed equal variance	0.0039937
	Gabpa	0.258836	two-tailed equal variance	0.930109
	Hmgcr	0.422189	two-tailed equal variance	0.775684
	Hmgcs1	0.844286	two-tailed equal variance	0.381495
	Nrf1	0.102318	two-tailed equal variance	0.23701
	Pdss1	0.401785	two-tailed equal variance	0.705755
	Pdss2	0.997205	two-tailed equal variance	0.411464
	Pgc1a	0.20955	two-tailed equal variance	0.542862
	Tfam	0.000882883	two-tailed unequal variance	0.278264
Polrmt L/L (4) L/L, cre (4)	Atf4	0.0220021	two-tailed unequal variance	0.0122108
	Myc	0.000135467	two-tailed unequal variance	0.0444435
	Coq2	0.443073	two-tailed equal variance	0.878148
	Coq4	0.167983	two-tailed unequal variance	0.00177647
	Coq5	0.190543	two-tailed equal variance	0.00802719
	Coq7	0.295917	two-tailed equal variance	0.0130315
	Coq8a	0.015502	two-tailed unequal variance	0.165397
	Coq8b	0.00139051	two-tailed unequal variance	0.0142034
	Fdps	0.00688342	two-tailed unequal variance	0.00438083
	Gabpa	0.984638	two-tailed equal variance	0.523412
	Hmgcr	0.351997	two-tailed equal variance	8.38871e-05
	Hmgcs1	0.0762215	two-tailed equal variance	0.00102321
	Nrf1	0.718848	two-tailed equal variance	0.914952
	Pdss1	0.134743	two-tailed equal variance	0.000298827
	Pdss2	0.113901	two-tailed equal variance	0.0324193
	Pgc1a	0.0420993	two-tailed unequal variance	0.457661
	Polrmt	0.000281871	two-tailed unequal variance	0.00451857
Lrpprc L/L (4) L/L, cre (4)	Atf4	2.11138e-07	two-tailed unequal variance	4.52709e-08
	Myc	7.11581e-08	two-tailed unequal variance	1.53227e-09
	Coq2	0.308992	two-tailed equal variance	0.0213178
	Coq4	0.309316	two-tailed equal variance	0.134811
	Coq5	0.835017	two-tailed equal variance	0.870935
	Coq7	0.736764	two-tailed equal variance	0.904264
	Coq8a	0.107285	two-tailed equal variance	0.00349995
	Coq8b	0.00453337	two-tailed unequal variance	0.0122596
	Fdps	0.209288	two-tailed equal variance	0.0406407
	Gabpa	0.940261	two-tailed equal variance	0.357984
	Hmgcr	0.229476	two-tailed equal variance	0.15328
	Hmgcs1	0.371443	two-tailed equal variance	0.45428
	Lrpprc	3.00081e-11	two-tailed unequal variance	4.0884e-09
	Nrf1	0.0173946	two-tailed unequal variance	0.840049
	Pdss1	0.936918	two-tailed equal variance	0.179525
	Pdss2	0.0487042	two-tailed unequal variance	0.347975
	Pgc1a	0.387307	two-tailed equal variance	0.0369216
Mterf4 L/L (4) L/L, cre (3-4)	Atf4	6.48673e-06	two-tailed unequal variance	0.0155552
	Myc	0.00317411	two-tailed unequal variance	0.00345616
	Coq2	0.510663	two-tailed equal variance	0.0850093
	Coq4	0.320968	two-tailed equal variance	0.84496
	Coq5	0.658316	two-tailed equal variance	0.781211
	Coq7	0.963467	two-tailed equal variance	0.655211
	Coq8a	0.46859	two-tailed equal variance	0.00723891
	Coq8b	0.530593	two-tailed equal variance	4.30849e-06
	Fdps	0.298903	two-tailed equal variance	0.0117243
	Gabpa	0.131879	two-tailed equal variance	0.367383
	Hmgcr	0.369753	two-tailed equal variance	0.00645416
	Hmgcs1	0.237923	two-tailed equal variance	0.0508463
	Mterf4	0.0134475	two-tailed unequal variance	0.00134177
	Nrf1	0.945436	two-tailed equal variance	0.0264249
	Pdss1	0.740129	two-tailed equal variance	0.0511372
	Pdss2	0.375839	two-tailed equal variance	0.827905
	Pgc1a	0.345554	two-tailed equal variance	0.785328

## Sheet: B_Metabolomics
Strain genotype (n)	Metabolite	Variance test p value	Type of t test	t test p value
Twnk L/L (4) L/L, cre (4)	Coenzyme Q9	0.173424	two-tailed equal variance	0.052188
	Coenzyme Q10	0.077982	two-tailed equal variance	0.547985
	Glutamate	0.490569	two-tailed equal variance	0.0685811
	Glycine	0.028732	two-tailed unequal variance	0.000142
	Serine	0.160851	two-tailed equal variance	0.000331
	Sarcosine	0.158607	two-tailed equal variance	0.000574
	Proline	0.0354412	two-tailed unequal variance	0.0117276
Tfam L/L (3-4) L/L, cre (4)	Coenzyme Q9	0.327249	two-tailed equal variance	0.064628
	Coenzyme Q10	0.280922	two-tailed equal variance	0.275604
	Glutamate	0.510703	two-tailed equal variance	0.00528496
	Glycine	0.227431	two-tailed equal variance	0.000145
	Serine	0.562971	two-tailed equal variance	0.002323
	Sarcosine	0.415324	two-tailed equal variance	0.000348
	Proline	0.653045	two-tailed equal variance	0.000429656
Polrmt L/L (4) L/L, cre (4-5)	Coenzyme Q9	0.013283	two-tailed unequal variance	0.289569
	Coenzyme Q10	0.455987	two-tailed equal variance	0.898201
	Glutamate	0.683587	two-tailed equal variance	0.0122252
	Glycine	0.047945	two-tailed unequal variance	0.000186
	Serine	0.024556	two-tailed unequal variance	0.001005
	Sarcosine	0.157346	two-tailed equal variance	2.22e-06
	Proline	0.014713	two-tailed unequal variance	0.00161677
Lrpprc L/L (4) L/L, cre (4)	Coenzyme Q9	0.49348	two-tailed equal variance	0.032864
	Coenzyme Q10	0.235664	two-tailed equal variance	0.344274
	Glutamate	0.533861	two-tailed equal variance	0.100754
	Glycine	0.165157	two-tailed equal variance	2.9e-05
	Serine	0.547816	two-tailed equal variance	0.001255
	Sarcosine	0.139967	two-tailed equal variance	3.58e-05
	Proline	0.00179688	two-tailed unequal variance	0.0263336
Mterf4 L/L (4-5) L/L, cre (4-5)	Coenzyme Q9	0.397484	two-tailed equal variance	0.017042
	Coenzyme Q10	0.76031	two-tailed equal variance	0.562745
	Glutamate	0.00407845	two-tailed unequal variance	0.00159458
	Glycine	0.004078	two-tailed unequal variance	0.001595
	Serine	0.227489	two-tailed equal variance	0.00071
	Sarcosine	0.019861	two-tailed unequal variance	0.005375
	Proline	0.087772	two-tailed equal variance	0.00260237

## Sheet: C_CS activity
Strain genotype (n)	Variance test p value	Type of t test	t test p value
Twnk L/L (6) L/L, cre (4)	0.919632	two-tailed equal variance	0.442856
Tfam L/L (4) L/L cre (4)	0.580646	two-tailed equal variance	0.0263427
Polrmt L/L (4) L/L cre (4)	0.0724941	two-tailed equal variance	0.558016
Lrpprc L/L (4) L/L cre (4)	0.812145	two-tailed equal variance	0.780473
Mterf4 L/L (4) L/L cre (4)	0.177843	two-tailed equal variance	0.000731088
