# Supplementary material for: Transcriptomic and proteomic landscape of mitochondrial dysfunction reveals secondary coenzyme Q deficiency in mammals
Source: eLife. 2017 Nov 14;6:e30952. doi: 10.7554/eLife.30952 (PMC5703644; doi:10.7554/eLife.30952)
Supplement: Supplementary file 6. [file elife-30952-supp6.xlsx]

## Sheet: Description
iRegulon analysis of RNA-Seq data of total RNA from hearts of end-stage conditional knockout mice - Kühl et al.
This spreadsheet contains the results table from iRegulon on the significantly changed transcripts (adj <0.05) in Twnk, Tfam, Polrmt, Lrpprc and Mterf4 knockout mouse strains.
Gene nomenclature was change to human HGNC nomenclature for the analysis
Species and nomenclature	Homo sapiens, HGNC symbols
Motif collection	10K (9713 PWMs)
Track collection	1120 ChIP-seq tracks (ENCODE raw signals)
Minimum NEScore	3
Rank threshold for visualization	5000
ROC threshold for AUC calculation (%)	0.03
Minimum identity between orthologous genes	0
Maximum false discovery rate (FDR) on motif similarity	0.001
Motif rankings database	20kb centered around TSS (7 species)
Track rankings database	20kb centered around TSS (ChIP-seq-derived)
Number of valid nodes	1650
iRegulon version	iRegulon v1.3 (build: 2015-02-12)

## Sheet: iRegulon analysis
# Rank	Motif id	AUC	NES	ClusterCode	Transcription factor	Target genes
1	swissregulon-NFE2.p2	0.0352041	5.01091	M1	NFE2,NFE2L2,BACH1,MAFK,NFE2L1,MAFG,JUND,JUNB,FOSB,FOSL1,FOS,JUN,FOSL2,BATF,SPI1,BACH2,MAFF,MAFA,MAF,MAFB,NFE2L3	HMOX1,PSMD11,PPL,HTATIP2,IL6,PSMA3,SLC2A1,RHBDL3,TUBA4A,GCLC,SLC38A3,SYT2,KLC1,GADD45A,POLR3G,LRP1B,HSPA9,CTGF,ITGBL1,ANO4,RHOC,CLIP4,PADI4,CLCF1,SPHK1,RHOD,EREG,SQSTM1,ENO1,PSMA5,COL12A1,RPL36A,ALDOA,LAMA3,AHNAK2,UCK2,DTHD1,CADM4,MVP,RASAL1,TMBIM1,ADRA1A,FBLN2,VAPA,CPEB1,EIF5,VAT1L,ADAMTSL4,LMNA,HECTD2,CTSD,TG,TTLL7,ADCK4,SLC7A5,CLIC1,ABHD4,ENO3,SLC3A2,CNKSR1,MAPK10,ABCB8,DENND4A,SNED1,RALGPS1,C…
2	homer-M00001	0.0351042	4.97971	M2		RCC2,SHMT2,EIF4EBP1,CHD5,PYCR1,FGF21,SERPINF1,TRIM66,SLC38A1,DDIT3,TARS,SLC38A2,SLC7A11,GARS,BCAT1,SLC6A9,GPC1,NUPR1,ALDH1L2,MTHFD2,EPRS,ASS1,YARS,MARS,SLC38A3,KCNJ2,MTHFD1L,SARS,ATF5,INPP5B,RHBDD1,LIX1,SESN2,ETV5,MET,AKAP7,ARHGEF2,ENPP2,SLC1A4,ASB15,WARS,SPRED2,PHLDB2,PALMD,FAM129A,GDF15,STAMBPL1,IGFBP7,MAP1B,RTN4,RP1,SORBS2,ALDOB,SPTAN1,HECTD2,PXK,KCNJ3,NCAM1,SLC7A3,WWP2,PIP5K1A,SLCO5A1,FLNC,IL…
3	taipale-NNATGAYGCAATN-ATF4-DBD	0.0346771	4.84631	M2	ATF4,ATF3,CEBPB	RCC2,PYCR1,SHMT2,CHD5,SLC38A2,TRIM66,EIF4EBP1,SARS,GARS,PDAP1,DDIT3,SLC38A1,GPC1,ATF5,PXK,ALDH1L2,SLC1A4,SLC6A9,FGF21,PAK3,LIX1,INPP5B,TARS,YARS,DGAT2,WARS,SLC38A3,CXCL9,MET,EPRS,BCAT1,ASS1,PHGDH,KCNV2,RHBDD1,NUPR1,BCL11B,GDF15,KCNJ2,PIK3R1,HAX1,SERPINF1,KCNJ3,OTUB2,XPOT,AARS,ALDOB,PHLDB2,PALMD,FBXW7,DLG2,MTHFD2,PSMD14,ASB15,ARHGEF2,HSPA9,HNMT,IARS,ETV5,SLCO5A1,CPN2,SORBS2,MTHFD1L,TCEA1,SESN2,FHL…
4	taipale-NGGATGATGCAATM-Atf4-DBD	0.0340163	4.6399	M2	ATF4,CEBPB	TRIM66,PYCR1,PDAP1,RCC2,SHMT2,CHD5,SLC38A2,GARS,SARS,SLC1A4,FGF21,SLC38A1,DDIT3,PAK3,LIX1,ATF5,WWP2,PIK3R1,SLC6A9,SLC38A3,ASS1,PXK,YARS,EPRS,WARS,INPP5B,KCNJ2,GDF15,TARS,SERPINF1,PALMD,CXCL9,PHLDB2,MSTO1,ALDH1L2,ALDOB,PSMD14,KCNV2,HAX1,MET,ASB15,NUPR1,IGFBP7,RHBDD1,TCEA1,OPCML,GPC1,CARS,KCNJ3,BCAT1,TRDN,RTN4,OTUB2,HARS,SORBS2,CPN2,BCL11B,SPRED2,P2RY1,NIN,CSNK1G3,PHGDH,ZW10,MARS,SLCO5A1,STC1,DGAT2…
5	yetfasco-966	0.033346	4.43051	M1	JUNB,JUND,JUN,FOSL1,FOS,BATF,FOSL2,BACH2,SPI1,BACH1,FOSB,NFE2,ARNT,TGIF2LY,TGIF2,TGIF2LX,TGIF1,SRF	LMNA,ADCK4,FLNC,LAMC2,MPV17,PPL,DTHD1,SNED1,SLC2A1,HMOX1,RTN4,MRVI1,LGALS3,FCHSD1,SH3RF2,TRIM47,TNFRSF12A,COL12A1,EIF5,GFRA1,LAMA3,IFRD1,LTBP2,HOOK2,HTATIP2,LIFR,SBK2,FGF1,AUTS2,ANXA5,ANO4,FAM160A1,ITGBL1,PALLD,EIF3D,CADM4,PDE1B,ATP1B1,GAS2L3,CCDC88A,GLCE,UPP1,BEND4,FHL2,MKNK1,PLEKHA5,MGST3,SLC12A4,FADS3,PKN1,MVP,CLIP4,RASEF,TRIM54,OPN4,VAT1L,IL6,NCKAP5,TEX264,VASP,AHCY,NME1,KIF26B,GCLC,ERC2,ME2,…
6	factorbook-NFE2	0.0329146	4.29578	M1	NFE2,BACH1,MAFG,NFE2L1,NFE2L2,MAFK,MAFF,MAF,NFE2L3,MAFB,BACH2,FOSL1,JUND,JUN,FOS,JUNB,FOSB	HMOX1,CTGF,IFRD1,VCP,GCLC,SQSTM1,IL6,SYT2,UCHL1,ANO4,RBFOX1,FLNC,ATP1B1,SEL1L3,MAPK10,RAB3GAP2,LRP1B,ASPSCR1,HTATIP2,GTF2H1,ENO1,MVP,PIR,TTLL7,PSMA3,NPLOC4,HECTD2,HSPA9,SLC24A2,RPL36A,RHBDL3,EPHX1,TBC1D4,CPEB1,ATP6V1A,ANXA7,CTSD,POLR3G,SH2D6,PSMD11,RBM20,FGF1,IL15,MAP1B,PLA2G4A,UCK2,LMNA,ABHD4,PQLC1,RTN4,SLC7A11,EIF5,SLC2A1,NLN,VPS8,KCTD6,PSMA5,KIF5C,CLTC,TG,ALDOA,ETFA,CDH23,NRCAM,CACNB2,FKBP15,V…
7	swissregulon-BACH2.p2	0.0321455	4.05552	M1	BACH2,BACH1,FOSB,FOS,JUND,JUN,JUNB,FOSL1,BATF,FOSL2,SPI1,NFE2,ARNT,SRF	HTATIP2,PPL,HMOX1,FLNC,MPV17,LMNA,RTN4,ADCK4,HOOK2,LAMA3,EREG,PSMD11,SLC2A1,EIF5,MRVI1,TNFRSF12A,LAMC2,RHBDL3,COL12A1,ABCB8,ERC2,RHOD,ATP1B1,SNED1,CADM4,HGS,ABCE1,SPRED2,PDE1B,EIF3D,DYNC1H1,TMBIM1,SLC38A3,AHNAK2,SBK2,TRIM47,TUBB3,PLEKHA5,SYT2,LGALS3,LRRC15,ACTC1,LIFR,FAM160A1,SLC4A3,TYRO3,ANO4,CAST,PTPRS,LSG1,ALDOA,WDR61,MMP15,NRCAM,IFRD1,GLCE,CLTC,GADD45A,UNC5B,RBFOX1,TIAM2,ARPC3,ELF4,VAT1L,ASCC…
8	swissregulon-TP53.p2	0.0316557	3.90254	M3	TP53,HIC1,TP63,TCF4,TAL2,MITF,HAND1,TFEB,MYF6,MXD4,MAX,MXD3,MYOG,TCF3,TAL1,MYF5,NHLH1,USF2,HAND2,MYC,MXI1,ARID5B,MXD1,BHLHE41,TCF12,MYCN,ZBTB14,SMAD3,NKX2-1,NR3C1	BAX,PA2G4,VAPA,INPP5B,RIC8B,CFL1,JARID2,SLC12A4,MRPL24,PLK2,EIF2S2,UFSP2,AHCY,STRN,KCNJ3,PPFIBP1,PLCXD2,LIMCH1,RTN2,WBSCR27,FYCO1,SLC38A3,ALDH4A1,NTM,KLC1,PRKAR1A,PLEKHH1,SORCS2,ZYX,PCK2,RPS19,PPIB,OSBPL2,COL12A1,FKBP4,RHOD,TTLL1,CCBE1,SLC6A9,PTER,KCNQ1,IGFBP7,FHL2,KIF1A,CTF1,PPARA,L3MBTL3,TMEM150C,TNNI3K,SCN4B,SH2D6,PSAT1,GPC1,CPEB3,GCNT1,FAT1,CROCC,ART3,MYL3,PTPRS,ETV4,PHLDB2,RCC2,ASS1,SPRED2,D…
9	jaspar-MA0099.1	0.0316143	3.8896	M1	FOS,FOSB,FOSL1,JUND,JUNB,BATF,FOSL2,JUN,ARNT	RTN4,HMOX1,HTATIP2,PPL,HOOK2,LAMC2,MPV17,FLNC,SBK2,LMNA,PSMD11,EIF5,PFKP,LAMA3,ADCK4,COL12A1,FAM160A1,ITGBL1,FHL2,TNFRSF12A,EREG,OCIAD2,SPRED2,DTHD1,ANXA5,SNED1,TIAM2,FGF1,PLCD3,FCHSD1,LGALS3,MRVI1,MYO1C,ISM1,AHNAK2,PALLD,ASB5,DHRS9,SH3RF2,ADCK3,SLC2A1,ANXA7,UPP1,INHBA,RHOC,ATXN10,ANO4,LIFR,TRIM54,ENO3,EIF4EBP1,FBXO10,TEX264,IFRD1,ERC2,RHOD,PAPPA,RBFOX1,ABCB8,CADM4,LTBP2,SLC4A3,TJP1,CLCF1,GAS2L3,…
10	transfac_pro-M02263	0.0315644	3.874	M1	NFE2L2,MAFG,NFE2L1,NFE2,BACH1,FOSL1,FOSL2,FOSB,JUND,FOS,JUNB,JUN	HMOX1,FCHSD1,GCLC,IL6,SYT2,VCP,PSMD11,SEL1L3,UCHL1,SQSTM1,PRKCD,HTATIP2,CTGF,TUBA4A,PSMA5,UCK2,AHCY,MAP1B,POLR3G,RPL36A,PSMA3,LRP1B,ATP1B1,CLCF1,TTLL7,ANO4,FLNC,HSPA9,FBLN2,LPIN1,FGF1,RHBDL3,RASAL1,CLTC,KIF5C,VPS8,MBD2,OPN4,MAPK10,FHL2,KLC1,RBFOX1,SLC19A2,SLC2A1,PTPRS,NRCAM,DTHD1,PALLD,SNAP91,CGREF1,KCNIP2,LMNA,ENO1,GSR,EPHX1,CDH23,SH2D6,KIF1A,MET,TBC1D4,UPP1,CNKSR1,HECTD2,SRPX2,PLCXD2,SH3RF2,CD2…
11	jaspar-PF0007.1	0.0309312	3.67622	M1	JUN,ARNT,FOSL2,FOSL1,BATF,JUNB,FOS,JUND,SPI1,JDP2,FOSB	FLNC,HMOX1,RTN4,HOOK2,PPL,HTATIP2,ADCK4,LAMA3,MPV17,EIF5,SBK2,ATXN10,LMNA,PSMD11,LAMC2,EREG,RHOD,ABCB8,KLC1,MRVI1,FCHSD1,SLC2A1,FAM160A1,DTHD1,HGS,ITGBL1,LGALS3,VAT1L,OCIAD2,SNED1,SPRED2,PDE1B,RHBDL3,SLC38A2,RPS6KA4,SH3RF2,ENO3,COL12A1,PFKP,RASAL1,TNFRSF12A,ANXA5,VAPA,FHL2,LRRC15,AHNAK2,MET,TMEM35,ARHGEF2,PPFIBP1,BCL11B,HSP90AA1,SNAP91,TEX264,GPC1,EIF4EBP1,ERC2,RGS2,GCLC,INHBA,TMBIM1,CD63,GCNT1,F…
12	factorbook-AP1	0.0308377	3.64702	M1	FOS,JUNB,FOSL1,JUN,BATF,JUND,FOSL2,SPI1,ARNT,BACH2,FOSB,BACH1,JDP2,NFE2	LMNA,PPL,HTATIP2,FLNC,ADCK4,SPRED2,SBK2,MPV17,HMOX1,LAMC2,LAMA3,RTN4,SLC2A1,HOOK2,MRVI1,EIF5,TNFRSF12A,COL12A1,SNED1,FAM160A1,LGALS3,PSMD11,FHL2,EREG,LTBP2,ERC2,TEX264,PDE1B,PLCD3,TRIM47,VAT1L,CADM4,DTHD1,RHBDL3,ABCB8,FCHSD1,HGS,LONRF3,LIFR,UPP1,TUBB3,TMBIM1,ABHD4,TNC,IFRD1,AHNAK2,SNAP91,OCIAD2,ITGBL1,SH3RF2,PTPRS,AHCY,AUTS2,RHOD,LPIN1,PITPNC1,SLC38A2,ANO4,CCDC88A,GPC1,EIF4EBP1,SHC4,DHX32,MMP15,A…
13	factorbook-MEF2	0.0307134	3.60819	M4	MEF2C,MEF2A,MEF2D,MEF2B,MEF2BNB-MEF2B	PLXNB1,SERPINE1,RNF207,NRN1,KTN1,MYO1C,PALLD,KY,LTBP2,RBFOX1,CKM,ARHGEF9,SEMA6C,SPHK1,FBXW7,RASGRP2,SMARCD3,SEL1L3,CTGF,RPL29,CACNG6,HFE2,MRVI1,TRDN,DGKH,PHKG1,E2F3,SLC16A3,LIMCH1,CMYA5,PINK1,BCL11B,SOX6,SLC24A2,ADRA1A,MYLK3,CUL2,ADAMTSL4,RPL23,DNMT3A,PIP5K1A,FGF1,MOSPD1,ASB10,DUSP10,ARHGEF2,ETV4,MTUS2,WFDC1,DBH,PTPRS,ACTC1,SLC29A1,SLC26A6,ASB15,PDE1B,CTLA4,SDHC,DUSP4,MYL3,ARHGAP26,TCEA3,L3MBTL3,…
14	transfac_pro-M01267	0.0306624	3.59226	M1	FOSL1,FOS,JUN,FOSB,JUNB,JUND,FOSL2,BATF,BACH2,SPI1,NFE2L2	HTATIP2,RTN4,FLNC,HMOX1,PPL,LAMA3,ADCK4,MPV17,HOOK2,LAMC2,PSMD11,COL12A1,EIF5,SPRED2,FHL2,CLCF1,PFKP,SBK2,EREG,CAST,AHNAK2,FAM160A1,FGF1,DTHD1,TIAM2,ATXN10,OCIAD2,ITGBL1,ANXA5,MRVI1,RHOD,LTBP2,ABCB8,UPP1,LGALS3,FCHSD1,RHBDL3,VAT1L,SLC38A2,SH3RF2,ASB5,TEX264,LMNA,RBFOX1,PTPRS
15	swissregulon-FOSL2.p2	0.0306518	3.58894	M1	FOSL2,FOSB,JUN,FOSL1,JUND,JUNB,FOS,BATF,BACH2,SOX4,ZNF333,SPI1,MYBL2,MYBL1,MYB,SNAPC4	FLNC,LAMA3,PSMD11,HMOX1,HOOK2,PPL,MPV17,EIF5,ERC2,SBK2,EREG,LMNA,SNED1,ADCK4,TNFRSF12A,COL12A1,FAM160A1,LAMC2,RTN4,SLC2A1,PDE1B,RHOD,RHBDL3,HTATIP2,ADCK3,SLC38A3,DHRS9,FHL2,GLCE,MRVI1,PLCXD2,ANO4,KCTD6,FCHSD1,FBN1,FAM184A,RHOC,LGALS3,LRRC52,LONRF3,GPC1,TUBB3,KCNIP2,NRCAM,SLC2A12,TMBIM1,EIF3D,DENND4A,SYT2,TNIP1,CD276,LIFR,L3MBTL3,TMEM150C,FBXO10,TYRO3,STARD13,SPRED2,CACNB2,ADCY8,MET,HGS,GRK5,VAPA,…
16	jaspar-PF0083.1	0.0305902	3.5697	M5		GCNT1,SLC38A3,SLC29A1,KIF26B,RTN4,STARD13,KCNV2,FIGN,ABCA5,DRD2,PCGF5,ELF4,CACNB2,CUX2,ASH1L,LYST,PHLDB2,THOP1,PALMD,RHBDL2,PIK3R1,NINJ1,PLCXD2,ELN,SBNO2,ITGB5,SCMH1,CPXM2,ELOVL7,FBLN2,RBFOX1,SFRP2,AHCY,FHL1,MAPK10,RGS13,FGF1,SORBS2,FAM198B,L3MBTL3,DHRS9,ST14,FHL2,RET,SPTAN1,MAP2K6,IGF1R,EEFSEC,PDPR,TGFB2,LIMCH1,DCTD,NRCAM,FAT1,SOX6,SELENBP1,COG1,SBK2,PPARA,METAP1D,ATP1B1,KCNN2,PHYHIP,PALLD,BCL11…
17	transfac_pro-M03552	0.0305753	3.56505	M1	JUND,FOSL1,JUNB,FOSL2,FOS,JUN,FOSB,BATF,SPI1,BACH2	RTN4,FLNC,HTATIP2,HMOX1,LAMA3,ADCK4,HOOK2,SPRED2,PPL,FHL2,SBK2,EIF5,ASB5,LAMC2,RHOC,PSMD11,MPV17,MRVI1,FAM160A1,OCIAD2,EREG,LMNA,ITGBL1,PFKP,CD276,ABCB8,FCHSD1,ATXN10,VAPA,AHNAK2,DTHD1,PLCXD2,COL12A1,RHOD,CLCF1,SLC38A2,AKAP2,SPTBN4,FAM184A,CAST,SLC2A1,RHBDL3,HGS,LGALS3,FGF1,RBFOX1,ANGPT1,LTBP2,MKNK1,TNFRSF12A,ANXA5,KLC1,ASH1L,PHLDB1,TIAM2,TUBB2A,MET,KCNIP2,UPP1,QSOX2,VAT1L,SLC38A3,SLC3A2,RPS6KA4,…
18	homer-M00557	0.0305615	3.56074	M1	ARNT,BATF,SPI1,JUNB,FOSL1,JUN,JUND,FOS,FOSL2	HTATIP2,FLNC,HMOX1,LAMA3,FHL2,PPL,ADCK4,ABCB8,FCHSD1,RTN4,ITGBL1,SH3RF2,HOOK2,INHBA,EIF5,LAMC2,MRVI1,SLC38A2,PFKP,FAM160A1,OCIAD2,KLC1,RHOD,RHBDL3,LRRC15,PSMD11,MPV17,ASCC2,RHOC,PLEKHA5,MVP,COL12A1,GCNT1,KIF26B,EIF4EBP1,ASB5,AHNAK2,PLCXD2,VAT1L,DRD2,ISM1,ANXA5,FAT1,DES,CLIP4,TTC1,SPRED2,DENND4A,SPG21,LIFR,HGS,PALLD,ATXN10,HOOK1,ANGPT1,RBFOX1,TYRO3,EREG,LPIN1,IGF1R,CLCF1,SLC3A2,GSTA2,TNNI3K,GPC1,C…
19	homer-M01814	0.0304308	3.51992	M1	JUN,JUNB,FOSL2,FOS,FOSL1,BATF,JUND,BACH2,NFE2,NFE2L2,BACH1,SPI1,FOSB,JDP2	HMOX1,PPL,MPV17,HOOK2,SBK2,DTHD1,LMNA,ITGBL1,MRVI1,FLNC,LGALS3,EIF5,ADCK4,HGS,PLCD3,RTN4,SNED1,LAMC2,TNFRSF12A,TFPI,ANXA5,ENO3,GPNMB,RHBDL3,DHRS9,RHOD,ASB5,EREG,TIAM2,VAT1L,CLIP4,AHCY,LIFR,ADCK3,FAM184A,SYT2,ALDOA,MET,GCNT1,COL12A1,FGF1,GCLC,SORBS2,MVP,LAMA3,UPP1,FGD4,RHOC,STAT6,STARD13,FHL2,MGST3,GAS2L3,TRIM47,AHNAK2,PALLD,SCN4A,ACAA2,SORCS2,CD63,HTATIP2,PFKP,CLCF1,LARS,PAPPA,STAMBPL1,PTPRS,SPRE…
20	swissregulon-FOS_FOS_B-L1__JUN_B-D_.p2	0.0304021	3.51096	M1	JUND,FOS,FOSL1,FOSB,JUNB,FOSL2,BATF,JUN	PPL,LMNA,MPV17,HMOX1,SBK2,HOOK2,RTN4,PSMD11,EREG,COL12A1,LAMC2,TNFRSF12A,ITGBL1,FLNC,SLC2A1,MRVI1,EIF5,HTATIP2,SPRED2,ENO3,ANXA5,SNED1,PLCD3,LAMA3,DTHD1,OCIAD2,CADM4,ADCK4,PFKP,LIFR,ERC2,LGALS3,IFRD1,FHL2,PDE1B,RHBDL3,FAM160A1,TEX264,RHOD,FGF1,RBFOX1,HGS,TIAM2,ERICH1,EEF1A1,STAT6,TMBIM1,TRIP10,LRRC15,GADD45A,TRIM47,ANXA7,ACTC1,DHRS9,SLC4A3,CHD6,PKN1,MET,YRDC,ELF4,SOX6,TFPI,PLEKHA5,ASB5,ATP2A2,PAL…
21	transfac_public-M00037	0.0301025	3.41738	M1	NFE2,NFE2L2,BACH1,MAFK,NFE2L1,MAFG,FOSL1,FOS,JUN,JUND,FOSB,JUNB,MAFB,NFE2L3,MAF,BACH2,MAFF,BATF,SPI1,FOSL2,MAFA	HMOX1,PSMD11,HTATIP2,RHOC,SLC38A3,DENND4A,RHBDL3,PPL,COL12A1,AHCY,PSMA3,POLR3G,GADD45A,ADAMTSL4,SYT2,DTHD1,IL6,SQSTM1,GCLC,SLC2A1,TUBA4A,ANO4,MRVI1,CTGF,PFKP,LRP1B,KLC1,KCNG2,CLCF1,CLIP4,TG,ALDOA,VAT1L,ADCK4,VAPA,AHNAK2,ABCB8,ASB15,ITGBL1,PADI4,KIF26B,FAM160A1,PALLD,TNNI3K,AP1S1,AKR1A1,CADM4,MVP,RPL36A,SLC7A5,RTN4,CPEB1,FBLN2,STARD13,HSPA9,DES,GSTA1,FCHSD1,SH3RF2,LYST,HDAC4,ST14,QSOX2,LMNA,ENO1,P…
22	homer-M00096	0.0300292	3.39448	M1	JUN,SPI1,FOSL2,JUNB,BATF,FOS,JUND,FOSL1,ARNT,FOSB,BACH2,JDP2,NFE2,BACH1,NFATC1,SRF	HTATIP2,RTN4,PPL,ADCK4,MPV17,FLNC,HMOX1,LMNA,SPRED2,HOOK2,EIF5,SLC2A1,MRVI1,ITGBL1,LAMA3,LAMC2,RHBDL3,FAM160A1,VAT1L,ANXA5,PSMD11,COL12A1,TNFRSF12A,DTHD1,LGALS3,EREG,AHNAK2,SLC38A2,FCHSD1,FHL2,ABCB8,SNED1,AHCY,GAS2L3,OCIAD2,HGS,IFRD1,ATP1B1,RHOD,LIFR,CADM4,UPP1,PAPPA,FAM184A,AP1S1,TEX264,RHOC,RASAL1,PLEKHA5,TMBIM1,ARHGEF2,PDE1B,EIF4EBP1,GADD45A,KLC1,SH3RF2,SHC4,PLCD3,RIN1,CAST,SNAP91,ASCC2,CLIP4,…
23	transfac_public-M00199	0.0300218	3.39216	M1	JUN,FOSL1,JUNB,FOS,JUND,FOSB,FOSL2,BATF,SPI1,ARNT,NFE2,BACH1	HTATIP2,FLNC,HMOX1,LAMA3,ADCK4,PPL,RTN4,HOOK2,LAMC2,FHL2,PSMD11,ITGBL1,EIF5,FAM160A1,PFKP,MPV17,FCHSD1,COL12A1,SPRED2,ASB5,ATXN10,SH3RF2,RHBDL3,SBK2,RHOD,CLCF1,PXMP2,EREG,HGS,ISM1,OCIAD2,MRVI1,RHOC,FGF1,AHNAK2
24	homer-M00483	0.0299772	3.37822	M6	MEIS1,MEIS3	DDIT3,LMF1,PDE4A,PCBP4,AP2M1,CUX2,GFRA1,SPTBN4,PKN1,GPR22,LYST,ZYG11B,PPIC,FAM160A1,SLC16A3,HOOK2,FIGN,FIBCD1,LIMCH1,MPDZ,SLC25A42,MAPK10,STARD13,ARHGAP20,CC2D1B,TIAM2,STAMBPL1,PWP1,PLCXD2,NOVA1,CDH23
25	transfac_public-M00038	0.029923	3.3613	M1	BACH2,FOS,JUND,FOSL2,JUNB,JUN,BATF,FOSL1,BACH1,SPI1,FOSB,NFE2,JDP2,ARNT,SRF,TGIF2LY,TGIF2LX,TGIF2,TGIF1	LMNA,FLNC,HMOX1,PPL,SPRED2,LTBP2,SBK2,KCNJ3,RHBDL3,ATP1B1,LIFR,CLTC,SELP,TNFRSF12A,TRIM47,PAPPA,LGALS3,NDUFS2,EREG,AHNAK2,UPP1,GPC1,CACNB2,PTPRS,WNT2B,HTATIP2,RTN4,SYT2,DYNC1H1,FHL2,DUSP4,PITPNC1,STARD13,RPS14,FAM184A,PPFIBP1,CCDC88A,CUX2,ASB10,OPRD1,DSTN,SHC4,PODXL2,HOOK2,CD28,ELF4,ABCE1,ASB2,ARHGEF2,PDPR,LPIN1,EIF5,SQSTM1,AP1S1,ANGPT1,NME1,MRVI1,LAMA3,RHOC,OPN4,FHL1,ANXA5,QSOX2,PHLDB1,LONRF3,IG…
26	taipale-TSAAGGTCAN-ESRRG-full	0.0298667	3.34371	M7	ESRRG,ESRRA,ESRRB,NR5A1,NR5A2,RORA	ATP1B1,CADM4,TBC1D10C,KCNN2,CACNB2,SYT2,STARD13,HSPE1,AFG3L2,PDPR,GBAS,ALDOA,CAMK2B,PDE1B,RIC8B,ADCY1,SLC4A3,DNMT3A,MGST3,SLC38A3,PHLDB2,PAPPA,KLF12,RBFOX1,WNT2B,PPFIBP1,NRCAM,SDHA,RYR2,SOX6,FOXN3,ADCY8,SLC25A5,CPEB3,LIFR,SPHK1,DHRS9,ATP6AP2,ENAH,LPIN1,B4GALT5,EPHX1,NINJ1,CUX2,STRN,HSPA9,SHISA6,TTLL7,DUSP10,CTNNA3,ERC2,MAP1B,FHOD3,SCMH1,MRPL42,PLEKHH1,STAMBPL1,COL4A1,TRIM66,RTN4,RPS7,SLC4A10,SBK1…
27	flyfactorsurvey-kay_Jra_SANGER_5_FBgn0001297	0.0298529	3.3394	M1	FOSL1,FOSB,FOSL2,FOS,JUN,SPI1,BATF,JUND,JUNB,ARNT,NFE2,BACH2,JDP2,SRF	HTATIP2,MPV17,HMOX1,RTN4,LMNA,PPL,SPRED2,ADCK4,ITGBL1,LGALS3,HOOK2,MRVI1,SLC2A1,TNFRSF12A,COL12A1,EIF5,RHBDL3,PLCD3,PSMD11,AHNAK2,ATP1B1,AP1S1,PAPPA,AHCY,FGF1,IFRD1,DTHD1,CADM4,CLCF1,LTBP2,SNED1,VAT1L,CLIP4,METAP1D,STAMBPL1,TNC,FLNC,ANXA5,SLC38A2,PHLDB1,PLEKHA5,TRIM47,KIF5C,GADD45A,STARD13,ABCB8,NUP93,GAS2L3,PDAP1,RIN1,FHL2,ANXA7,NRIP3,HGS,LAMC2,ARPC3,TIAM2,CAST,PLA2G4A,LIFR,EIF4EBP1,DYNC1H1,DHX3…
28	taipale-NATGASTCATN-NFE2-DBD	0.0297987	3.32247	M1	NFE2,JDP2,BACH1,JUN,JUND,SPI1,FOSL1,BATF,JUNB,FOSL2,FOS,BACH2,SRF	MPV17,SPRED2,LTBP2,MRVI1,AHNAK2,PPL,PLEKHA5,RIN1,SH3RF2,LGALS3,GAS2L3,DYNC1H1,SHC4,PLA2G4A,STAMBPL1,ARHGEF9,RTN4,KCNJ3,LMNA,TTLL7,FNIP2,FGF1,ATP1B1,TNC,ALOX5,STARD13,ITGBL1,ABCE1,LRIG1,CD28,UPP1,FAM184A,KIF5C,LYST,AP1S1,GFRA1,INTU,TRIM47,ADCK4,RANGAP1,CLTC,ANXA5,QSOX2,RGS13,WDFY1
29	taipale-NTCAAGGTCAN-ESRRA-DBD	0.0297987	3.32247	M7	ESRRA,ESRRG,NR5A2,ESRRB,NR5A1,PPARGC1A,NR0B1,NR6A1	ATP1B1,CADM4,STARD13,TBC1D10C,ALDOA,RIC8B,AFG3L2,CACNB2,KCNN2,HSPE1,ADCY1,PHLDB2,GBAS,CPEB3,DNMT3A,KLF12,PDE1B,FHOD3,SLC4A3,PDPR,RBFOX1,SLC25A5,RYR2,SOX6,MGST3,SLC38A3,CAMK2B,PAPPA,ADCY8,RTN4,CUX2,DHRS9,MAP1B,SYT2,TTLL7,HSPA9,LPIN1,SPHK1,SDHA,PLEKHH1,WNT2B,DYNC1H1,B4GALT5,STAMBPL1,ENAH,DLG2,SLC4A10,SNTA1
30	jaspar-PF0032.1	0.0297573	3.30953	M1	NFE2,MAFF,MAFK,BACH1,MAFG,NFE2L2,NFE2L1,DBP,MAF	HMOX1,PSMD11,LAMA3,SLC2A1,XPOT,KLC1,HTATIP2,RASAL1,ENO3,GCLC,MET,IL6,ATXN10,ADCK4,EIF5,AHNAK2,PSMA3,ARHGEF2,SPHK1,CLCF1,SQSTM1,ALDOA,SLC12A4,DENND4A,POLR3G,CPEB1,ENO1,CTGF,SYT2,PPL,PSMA5,TUBB2A,PIR,LRP1B,TG,SLC3A2,FLNC,ABHD4,VAPA,TUBA4A,TMBIM1,KLHL31,HSPA9,ETV5,SH3TC2,RHBDL3,RBFOX1,AP2M1,NRCAM,ASB15,ALDOB,RPL36A,ANO4,CPNE2,ADAP1,PLCL2,CSNK1G3,LMNA,PTPRS,HGS,ADCK3,LPIN1,TTC1,FGF1,LRRC52,CC2D1B,SBN…
31	yetfasco-979	0.0295118	3.23287	M3		MAP1A,ADAM9,PPAP2A,ADCK4,SBK1,GPR22,CAMK2B,WWP2,PINK1,BEND4,FGFR3,SLC4A3,GCNT1,PTPRS,MAPK10,LRRC52,ADCY8,GAS2L3,MFAP4,EIF4EBP1,FHL1,ENO1,CKM,SYT2,MMP15,OGDHL,ATR,DGKH,PTPN12,RPL13A,DPYSL3,PTER,TTLL7,CSNK1G3,MORN4,CDH23,NOVA1,EPHA6,DUSP4,ATP2A2,SPTAN1,TET1,TBX15
32	yetfasco-1781	0.0294566	3.21562	M1	JUN,JUNB,BATF,FOS,FOSL1,FOSL2,JUND,FOSB,BACH2,SPI1,ARNT,SRF	RTN4,HTATIP2,PPL,LMNA,MPV17,LGALS3,DTHD1,HMOX1,SPRED2,HOOK2,ANXA5,TNFRSF12A,AHCY,PLCD3,RHBDL3,SLC2A1,PFKP,MRVI1,PSMD11,UPP1,ITGBL1,LIFR,FAM184A,ASCC2,FLNC,ATP1B1,IFRD1,GADD45A,SNED1,PXK,TIAM2,PAPPA,OCIAD2,ASB2,SLC38A2,FBLN2,ADCK3,GPNMB,CADM4,ABCB8,AHNAK2,RBFOX1,PHLDB1,EIF5,EIF4EBP1,SBK2,STAT6,FHL2,DHRS9,FGF1,HSPA4,ERICH1,AP1S1,CDH23,OPN4,ADCK4,ENO3,PTPRS,CLIP4,AKAP2,LONRF3,PTPN12,DLG2,KLHL32,LPIN…
33	homer-M01747	0.0292675	3.15655	M1		HMOX1,PPL,HOOK2,MPV17,DTHD1,SBK2,LMNA,SPTBN4,CAMK2A,MRVI1,EIF5,LGALS3,GPNMB,SNED1,ITGBL1,FBXW7,FLNC,HGS,EREG,RHOC,SORBS2,VAT1L,ALDOA,CD63,ADCK4,UPP1,MVP,RHBDL3,FIGN,DHRS9,LARS,SPHK1,PICALM,AHNAK2,ENO3,TIAM2,SCN4A,GCNT1,TFPI,CLIP4,MGST3,PLCD3,FHL1,PTPRS,FAM184A,STARD13,DDIT3,GBA,SERPINE1,WDR61,TNFRSF12A,KCTD6,HTATIP2,OPN4,AHCY,SYT2,LRP8,GALK2,MET,SPRED2,FHL2,CILP,ENAH,FGF1,GCLC,ITGB6,DRD2,STAT6,RH…
34	yetfasco-678	0.0291698	3.12602	M6	RFX2,RFX1,RFX3,RFX4,RFX6,RFX8,RFX5,RFXANK,RFXAP	CACNA1G,CAMK2A,VAT1,MAP1A,HAPLN4,DNMT3A,EFNB3,RASGEF1A,MAPK10,KCNH2,OSBPL2,FOXN3,CNGA3,PHYHIP,PHLDB1,NT5C1A,COL16A1,CPXM2,CACNB1,PGM2,RIN1,DBN1,SMARCD3,KIF5A,TRAF7,PBXIP1,ADAM11,AP1S1,LINGO3,HOOK2,FBXW7,SORBS2,OPCML,FNIP2,SH2D6,PLXNB1,CAMK2B,FHAD1,ALDOA,EFCAB2,KLHL38,TRIM66,IDH2,SOX6,NTM,ADAMTS20,CHD5,DIXDC1,ARHGEF2,FHL1,TUBB3,HNRNPAB,CCT2,KCNIP2,HOMER1,SNTA1,POLR1E,ELN,HDAC4,CDH23,EML1,TEX264,DE…
35	yetfasco-1428	0.0291453	3.11839	M4	MEF2BNB-MEF2B,MEF2C,MEF2B,MEF2D,MEF2A	PALLD,DGKH,RNF207,SEMA6C,MYO1C,DNMT3A,TCEA3,ARHGAP26,KY,CCDC155,DLG2,MTUS2,CKM,ASB15,MGST3,ATP1A2,SESN2,PICALM,COL12A1,LARS,RHPN2,MTTP,HFE2,TUBA4A,ART3,MYLK3,GADD45A,IFT81,VPS16,ARHGEF2,GAL3ST3,SORBS2,HTATIP2,DMXL2,RXRG,SNAI3,TTLL7,DUSP4,PLCL2,SOX6,CLCN1,HHATL,DIXDC1,DENND4B,PIK3R1,L3MBTL3,FBXW7,KTN1,ABCA12,NOVA1,GCNT1,GPR22,RPL27A,IGF1R,TRDN,PHYHIP,ITPR1,SEL1L3,ABCC9,DPYSL3,LRRC52,RAI14,LIFR,CAC…
36	homer-M00131	0.0291283	3.11308	M1	NFE2L2,BACH1,NFE2,NFE2L1,MAFG,MAFK,MAFF,BACH2,MAFB,NFE2L3,MAF	HMOX1,PSMD11,SYT2,RPL36A,CTGF,SQSTM1,IL6,PSMA3,ENO1,TUBA4A,HSPA9,SLC2A1,POLR3G,GCLC,RHBDL3,LRP1B,KLC1,ABHD4,CLCF1,ANO4,HTATIP2,CLIP4,VCP,SRPX2,IFRD1,GADD45A,KIF5C,CPEB1,CTSD,GTF2H1,TTLL7,MAP1B,ALDOA,RBFOX1,HECTD2,TG,UCK2,RASAL1,PADI4,MVP,SPHK1,FBLN2,METAP1D,UCHL1,VAT1L,EPHX1,DENND4A,DTHD1,CADM4,PALLD,SH2D6,FGF1,LMNA,ETFA,MAPK10,SH3TC2,ST14,ADAMTSL4,TBC1D4,PSMA5,DUSP4,PTPRS,SLC7A5,RAB3GAP2,ATP1B1,…
37	transfac_pro-M00442	0.0291166	3.10943	M3	MYC,MAX,MXI1,USF1,ARNT2,BHLHE40,ARNT,CREB3L1,USF2,ATF3,MYCN,CREB3,CREB3L2	SRM,FKBP11,ODC1,SEL1L3,SLC38A2,PALLD,CTHRC1,ATF5,ATXN10,AMDHD2,ANXA5,TARS,MYL3,SCFD1,AUTS2,TMEM45A,UTP18,METAP1D,SLC35C2,ABCA5,TBX15,PTPRS,BEND4,CACNA1G,ARFGAP3,CAMK2B,HELT,XPOT,OGDHL,SORBS2,RTN4R,DCLK3,CD63,GDPD5,NOP58,PPP1R1B,SPHK1,ZC3H15,NRCAM,OSBPL2,EPHA6,MDGA1,NOVA1,CKM,KCNV2,PRKCD,CPEB1,HSPE1,STARD13,FAM184A,TLL2,DCTD,TNIP1,WWP2,SBNO2,SLC4A3,IGF1R,ARHGAP20,MOSPD1,ALDOA,MAP1A,PLCXD2,EEF1A1,T…
38	transfac_public-M00517	0.0289881	3.06927	M1	JUN,JUNB,FOSL1,JUND,FOSB,FOS,BACH2,BATF,FOSL2,SPI1,NFE2,ARNT,MAFA,BACH1,MAFK	HTATIP2,RTN4,HMOX1,PSMD11,FLNC,PPL,ADCK4,RHOC,FAM160A1,SLC2A1,MPV17,SPRED2,LMNA,COL12A1,DENND4A,LAMA3,FHL2,AHNAK2,RHBDL3,LGALS3,FAM184A,EIF5,GADD45A,OCIAD2,HOOK2,SLC38A3,MRVI1,NDUFS2,ASCC2,EREG,FCHSD1,ACTC1,TEX264,UPP1,EIF4EBP1,DTHD1,TNFRSF12A,PHLDB1,ANXA7,TIAM2,EIF3D,LPIN1,KIF13A,CLCF1,PLEKHA5,AHCY,PXMP2,ABCB8,SLC38A2,NCKAP5,APOD,ERN1,ARHGEF2,GFRA1,STARD13,DHRS9,KLC1,ITGBL1,MVP,TMEM144,PXK,CD276…
39	tfdimers-MD00033	0.0288032	3.01153	M6	YY1,ATF2,ATF1,CREB1,CREM,ATF3,ATF7,MEIS1,NR1H4	FREM1,RBFOX1,STARD13,DNMT3A,KCNIP2,ADAM11,NRCAM,RHBDL3,L3MBTL3,MET,ERN1,CC2D1B,LRRC15,MVP,FAM78A,SORBS2,ATP13A3,SRM,COBLL1,MAP3K13,SLC4A3,PHYHIP,NT5E,MPDZ,LRIG1,RHBDD1,PRKCD,FBN1,PAK3,EML1,SLC7A11,PDE1B,DUSP10,KY,MPP6,TCP11L2,RAB3GAP2,EPHX1,PWP1,FOXN3,LIX1,SEMA6C,SLC1A4,AHCY,FBLN2,SFRP2,DLG2,DCLK3,TRIM66,FAM184A,TMEM150C,TCEA3,MACROD1,PALMD,SPRED2,CTNNA3,SLC38A2,COBL,DRD2,PITPNC1,NCAM1,ITPR1,FGF1…
40	taipale-SAAGGTCANNTSAAGGTCA-ESRRA-DBD	0.0287852	3.00589	M7	ESRRA,ESRRG,RARG,RARA,RORA,NR5A2,NR5A1,ESRRB,NR6A1,RXRA	ALDOA,CAMK2B,SLC2A1,FBLN2,ATP1A2,PLCXD2,PDE4A,TRDN,STAT5A,STAMBPL1,LIFR,CADM4,ELL2,CMYA5,COBL,KCNV2,FHL1,ARHGEF9,GCNT1,PALLD,TIAM2,P4HTM,ATP1B1,WDR61,FOXN3,RASGEF1A,PLA2G5,CCDC136,DUSP4,SYT2,SLC25A5,DDC,FGD4,PCBP4,LYST,PPP1R1B,KCNJ3,PTPRS,APP,ISM1,FHAD1,ITPR1,TTLL7,SGCG,KIF26B,PHLDB2,PLCL2,PAK3,FGF1,ADCY9,SLC25A39,INPP5B,SSTR3,HHATL,RYR2,ADCY8,NINJ1,P2RY1,MYOT,RAB3IP,DENND4A,ABCA12,ELF4,LINGO3,RB…
# Rank	Track id	AUC	NES	ClusterCode	Transcription factor	Target genes
1	wgEncodeSydhTfbsK562CmycStdPk.narrowPeak.gz	0.0431751	4.73114	T1	MYC	IARS,UCHL3,PREPL,EIF3B,METAP1D,XPOT,YARS,LARS,RPSA,RPF2,ASS1,NOP58,EIF3D,RPS24,HMOX1,EIF4EBP1,THOC5,WDR43,UBR5,TTLL12,ANGPTL6,GDI2,SLC6A9,GNL3,NOC4L,MSTO1,QSOX2,MTHFD1L,RPL36A,THOP1,EIF4A1,BCAT1,ATIC,DDX18,ALDH1L2,RBM3,PES1,RPS6,HSPE1,DDX21,NME1,PUS1,SUGT1,ATF4,RNF207,ATP1A2,GARS,RPL3,NCL,RSL1D1,DDX56,RPL14,RPL10A,RPS8,MTHFD2,RUVBL1,NOC2L,ASNS,KLHL17,RPL35,IPO4,NPM1,RPL10,MRTO4,RANBP1,SLC25A39,CC…
2	lcbTfbs_mcf7_p53	0.0426344	4.61952	T2	TP53	EEF1A1,RPS14,RPL11,RPL37,EIF5A,SLC25A5,RPS6,HSP90AA1,CFL1,RPL3,RPS11,RPL30,KRT18,NME1,CTSD,RPS8,RPS25,RPS23,EIF3D,RPL10,RPS12,RPL32,RPS19,RPSA,GNB2L1,ENO3,RPS24,RBM3,RPL27A,ALDOA,MYL6,RPL4,CD63,NQO1,RPL23,CCT5,NCL,RPL6,RPL38,RPS20,RPL13A,RPS10,ENO1,MIF,RPL26,RPS5,PGK1,NARS,RPL31,RPS27L,RPL34,RPL12,EIF2B3,PPIB,NPM1,PPIP5K2,CCT6A,COX6A1,RPS7,ECH1,RPL35,PSMD8,NDUFV1,PSMD4,SHMT2,PGAM1,PLP2,SLC3A2,FBL…
3	wgEncodeSydhTfbsK562CmycIfng6hStdPk.narrowPeak.gz	0.040073	4.0908	T1	MYC	DYNC1H1,IARS,DDX21,GDI2,EIF3B,DDX18,THOC5,ABCC4,ABCE1,RPL36A,METAP1D,MTHFD1L,NCL,GTPBP4,TBCD,ALDH18A1,NPM1,UCHL3,LONP1,ODC1,DGKH,RRP12,NDUFS1,DDX39,RBM3,HMOX1,SMTN,KCNIP2,WDR43,SUGT1,RPF2,RPS11,MRTO4,EIF3D,QSOX2,TMBIM1,CCT3,PWP1,SRM,NARS,HSPA9,RECQL4,RPL35,RPL10,HSPE1,RPL29,UTP14A,PTPRS,TTLL12,NOP58,FKBP4,CCT4,RNF126,GRK4,RNH1,DDX56,RENBP,RPS23,WDR36,RUVBL1,NOP56,ANGPTL6,PEMT,RPL24,MSTO1,RPS6,EIF…
4	wgEncodeSydhTfbsK562CmycIfna30StdPk.narrowPeak.gz	0.0394589	3.96404	T1	MYC	ASPSCR1,IARS,THOC5,BOP1,NPM1,PUS1,NOP58,IGSF8,MTHFD1L,NOC4L,RBM3,GNL3,EIF3B,DDX39,RPSA,UBR5,THOP1,RPF2,UCHL3,NSUN2,DDX21,ANGPTL6,PRKAR1B,CILP,WDR43,RPL10,MRTO4,RUVBL1,METAP1D,GTPBP4,GALK2,RPS12,EIF4EBP1,GDI2,ODC1,RSL1D1,ATIC,NME1,RPL36A,DDX18,ABCC4,RPL7,WDR36,RANBP1,RPS24,MSTO1,HMOX1,RPL5,WDR74,CCT3,SLC3A2,HSPE1,NCL,FAH,DDX54,PWP1,RRP12,ENO1,RNH1,PEMT,NARS,RPS11,RPL10A,TAF4B,LONP1,SERPINF1,FARSB,…
5	GSM1208654_batch1_chrom1_LoVo_MYC_PassedQC_peaks_hg19	0.0394281	3.95768	T1	MYC	RPL4,TXNRD1,CCT3,SLC3A2,DDX21,SLC38A1,RPL10,NME1,PWP1,ABCE1,NPM1,IARS,EIF4EBP1,EIF3B,EEF1A1,TRAF7,GNL3,CCT2,METAP1D,CCT5,RBM3,TARS,THOP1,FARSB,EIF2S1,NOP58,PKP2,NCL,MTHFD1,IFRD2,DPH5,WDR12,GAS5,PA2G4,HSPA9,MYBBP1A,EIF2A,RPL27,RPS11,PPP2R3C,RUVBL1,CELSR3,HSPE1,RPL5,RPS8,WDR74,MPHOSPH10,MCEE,PPFIBP1,ATF5,ADHFE1,EXOSC5,BCKDHA,LGALS3,SLC7A11,WDR36,POLR3G,CACNB1,RPL19,RPL23,XPOT,GNB2L1,RPL36A,HMOX1,RP…
6	wgEncodeSydhTfbsK562CmycIfna6hStdPk.narrowPeak.gz	0.0379333	3.64913	T1	MYC	IARS,UCHL3,MTHFD1L,NARS,CTU2,ABCC4,NOC4L,NOP58,GNL3,NOC2L,RNF207,KLHL17,NOP14,GRK4,PUS1,THOP1,RPF2,METAP1D,ANGPTL6,LONP1,MACROD1,BOP1,DYNC1H1,RPL10,HMOX1,PREPL,RSL1D1,EIF3B,RPL36A,DDX39,MRTO4,NCL,DDX21,NME1,THOC5,LARS,GTPBP4,EIF4A1,AP3S1,ALDH18A1,NPM1,ASPSCR1,RANBP1,ATP6V1A,RBM3,COMTD1,XPOT,SLC25A39,QSOX2,ODC1,ENO1,SCMH1,AKR1A1,GALNS,WDR43,KHK,ABCE1,WDR36,RUVBL1,GDI2,ATIC,GARS,NDUFS1,TBL3,POLR1E,…
7	wgEncodeHaibTfbsSknshMaxV0422111PkRep2.broadPeak.gz	0.0372672	3.51163	T3	MAX	WDR36,DDX21,WDR43,EXOSC5,BCKDHA,IARS,EIF3B,RBBP4,NPM1,CELSR3,RHBDD1,ENO1,NCL,HSPE1,CENPF,LONP1,DCAF13,IPO4,GDI2,GNL3,EIF4EBP1,WBSCR27,EIF5A2,GSR,RRP12,NOP58,GTPBP4,MYBBP1A,IPO7,DDX50,RPS13,EPHX1,KIF26B,PRKAR1B,SLC39A6,MRPL24,NME1,SERPINE1,PUS1,PWP1,WDR74,UTP14A,MTHFD2,EIF2B3,NOP56,LTV1,DNAJC2,RPS5,PSMC2,POLR3G,RPL36A,MME,SLC25A26,AKR1A1,GAS5,UTP18,RPS6KA5,DPH5,ATF5,MRPS18B,CLTC,RPL10,THOC5,HSPA9,…
8	wgEncodeHaibTfbsGm12878Taf1Pcr1xPkRep1.broadPeak.gz	0.0366245	3.37896	T4	TAF1	GNB2L1,RPL31,RPS6,RPL11,RPS7,CALM2,RPL6,RPS8,RPL26,CLTC,RPL5,RPL29,RPL12,DDX50,RPL4,RPL38,RPS10,RPL3,SLC3A2,RPL10A,NMT1,RPL37,RPS28,MRPS18B,RPL35,RPS5,RPSA,RPL13A,MPDU1,ATF4,RPS24,GTF2B,RPL23,HSPA4,MPHOSPH10,MCEE,RPL7,RPL24,PSMD8,RPS11,NPM1,AP3S1,CCT4,RPL27A,RSL1D1,RPS26,CAPZA1,EIF3A,EEF1A1,RPS14,EIF3D,EIF4A1,LLPH,RPL18A,ASH1L,TRAF7,RPL32,MNAT1,GAS5,ITPR1,RPL34,TAF15,RPS12,RPL19,CACNB1,NOP58,NCL,…
9	wgEncodeHaibTfbsGm12891Taf1Pcr1xPkRep1.broadPeak.gz	0.0363451	3.32128	T4	TAF1	RPL10A,NMT1,RPS10,RPL4,DDX50,RPL3,RPL31,RPL38,RPL5,GAS5,RPS24,RPS6,RPL11,RPS8,CLTC,GNB2L1,RPS7,RPL26,RPL37,RPS5,RPL23,HSPA4,CALM2,RPSA,MPDU1,RPL29,RPL24,RPL6,EIF3A,ATF4,RPS26,SLC3A2,RPS28,RPL12,RPL35,RPL7,EIF3D,RPL27A,AP3S1,GTF2B,SUGT1,RPL10,RSL1D1,RPL27,RPL36A,WDR75,CAPZA1,RPL32,PSMD8,MNAT1,EIF5,CCT4,EIF4A1,RPS11,MRPS18B,GADD45A,RPS14,WDR74,ZC3H15,RBM34,MPHOSPH10,MCEE,UBA3,EEF1A1,RPL13A,XRCC5
10	wgEncodeHaibTfbsA549Taf1V0422111Etoh02PkRep2.broadPeak.gz	0.035117	3.06778	T4	TAF1	SLC3A2,RPS6,RPL4,RPS7,RPL27,RPS26,RPL31,MPDU1,NMT1,CALM2,RPL13A,NOP56,PGD,ITPR1,GNB2L1,PSMD8,CLTC,RPL37,RPSA,RPL23,RPL6,TXNRD1,CCT4,RPL38,RPL27A,RPL11,RPL26,RPL19,CACNB1,GAS5,RPS5,TRAF7,NPM1,PPIP5K2,RPL3,RPS14,RPL29,EIF3A,RPL7,EEF1A1,CCDC88A,MNAT1,RPL12,POR,TTC17,RPL35,PLK2,RPS8,RPL10,NOP58,RBM34,CCT2,RPS23,RPS10,EFCAB2,RPL10A
11	wgEncodeHaibTfbsGm12892Taf1V0416102PkRep2.broadPeak.gz	0.0349374	3.03072	T4	TAF1	RPS7,RPS6,RPL31,GNB2L1,RPL5,RPL11,RPL12,RPS8,RPL29,RPL10A,RPS28,SLC3A2,RPL6,EIF3A,CALM2,RPS24,RPL35,RPL3,RPL4,MNAT1,RPL38,RPL26,RPS10,CLTC,RPSA,NMT1,EIF3D,ATF4,RPS5,CCT4,RPL37,MPDU1,PSMD8,RPS14,NCL,GNL3,NOP56,ASH1L,HIF1A,RPL18A,RPS26,DDX54,GADD45A,NPM1,CAPZA1,GTF2B,MPHOSPH10,MCEE,RPL23,ENO1,HDAC4,TAF15,RSL1D1,RPL24,RPS23,DDX50,RPL27A,ATR,RPL7,HSPA4,GDI2,NDUFS2,ASNA1,RPL27,GAS5,RPL10,RPL13A,GPX4,P…
12	wgEncodeHaibTfbsGm12892Taf1V0416102PkRep1.broadPeak.gz	0.0348333	3.00922	T4	TAF1	RPL4,SLC3A2,RPL31,RPL6,RPS6,RPS8,GNB2L1,RPL3,RPL26,RPL5,RPL11,CLTC,RPS7,RPS24,RPS28,RPL29,MPDU1,RPS10,RPS5,CALM2,RPL12,RPL38,RPS26,RPL10A,CCT4,RPSA,CAPZA1,HSPA4,EIF3D,RPL37,RPL7,EIF3A,MNAT1,RPL24,RPS23,DDX50,RPL35,GTF2B,RPS14,GADD45A,ATF4,PSMD8,NMT1,SUGT1,RPS11,RPL23,ASH1L,RPL27A,ATR,NOP56,NCL,MRPS18B,TAF15,GDI2,RPL27,ENO1,RPL13A,RPL10,RPL34,RPL18A,EEF1A1,RSL1D1,GAS5,RPL32,DDX1,TRAF7,RPL36A,ITPR1…
