# Supplementary figures and images for: Transcriptomic and proteomic landscape of mitochondrial dysfunction reveals secondary coenzyme Q deficiency in mammals
Source: eLife journal article supplement (doi:10.7554/elife.30952), 2017-11-13

# Figure 2 - Supplement 1

**A**

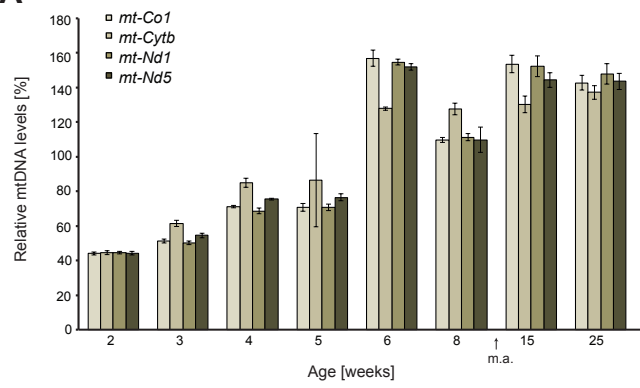

**B**

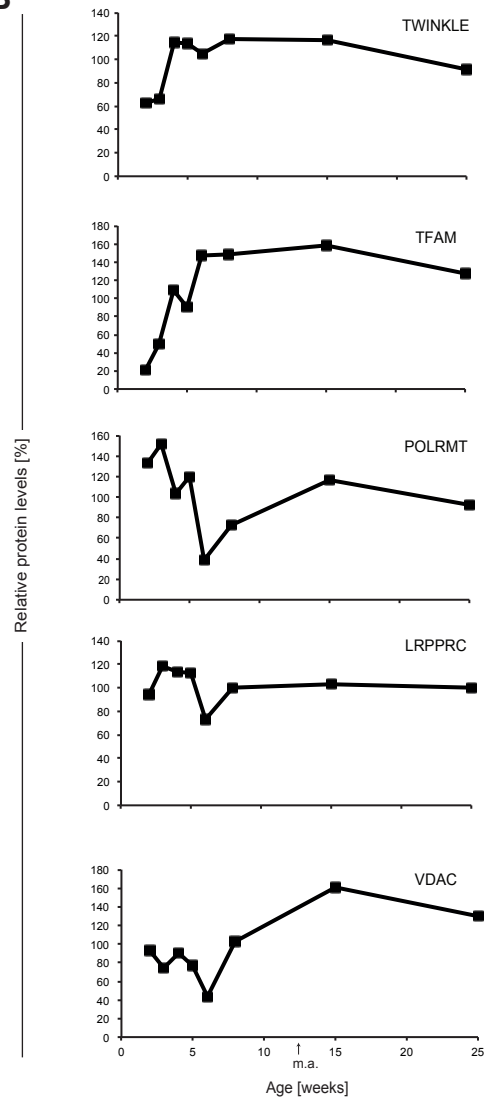

**C**

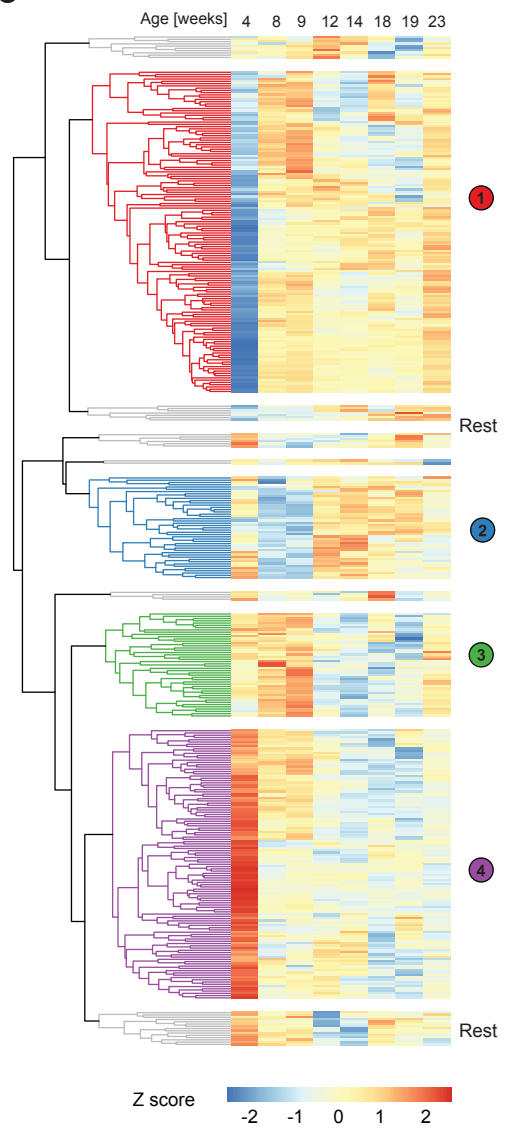

Supplement: supp [file elife-30952-supp-v1.zip]

Figure 3 - Supplement 1

A

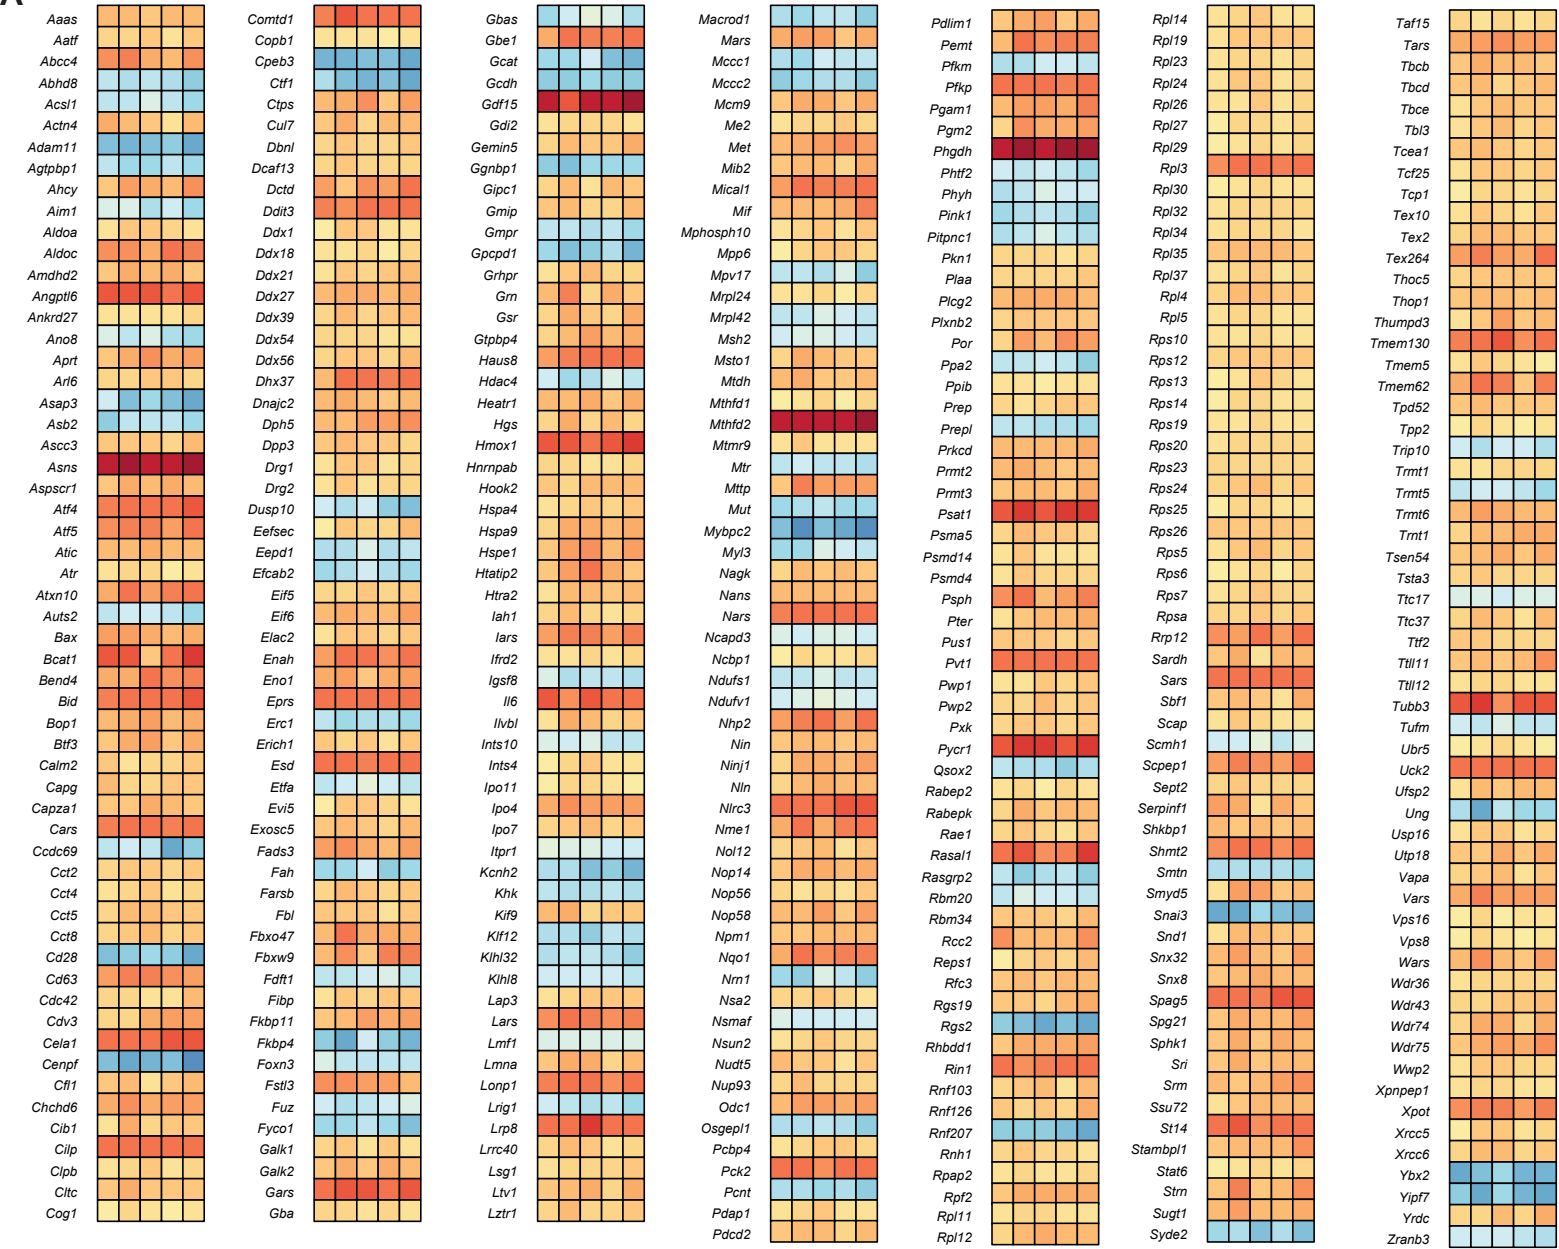

B

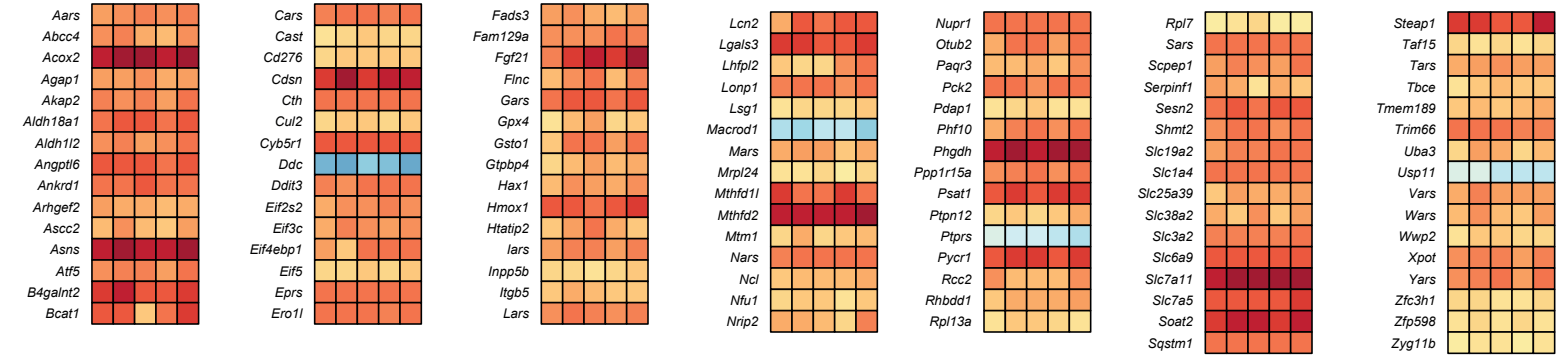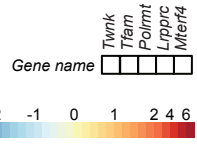

Supplement: supp [file elife-30952-supp-v1.zip]

Figure 4 - Supplement 2

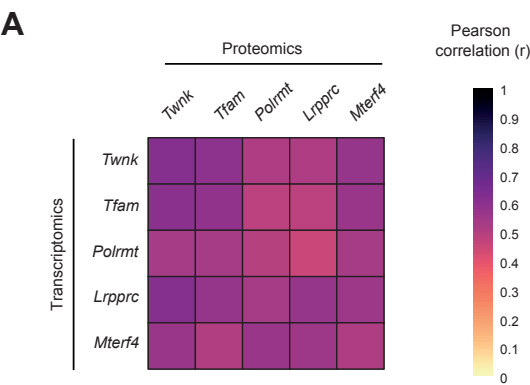

Supplement: supp [file elife-30952-supp-v1.zip]

Figure 5 - Supplement 2

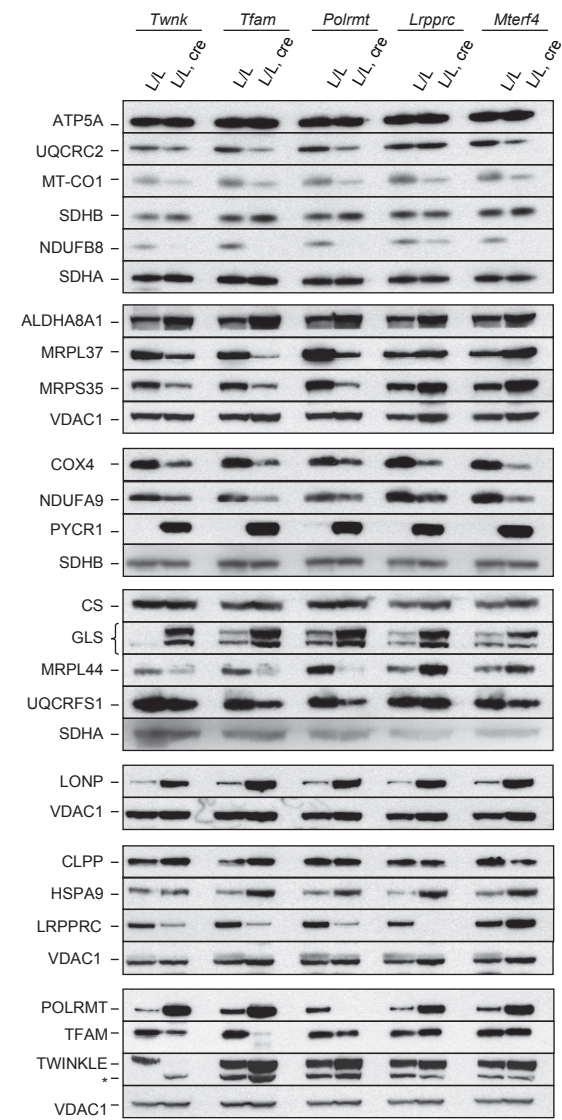

Supplement: supp [file elife-30952-supp-v1.zip]

Figure 8 - Supplement 1

A Transcript levels

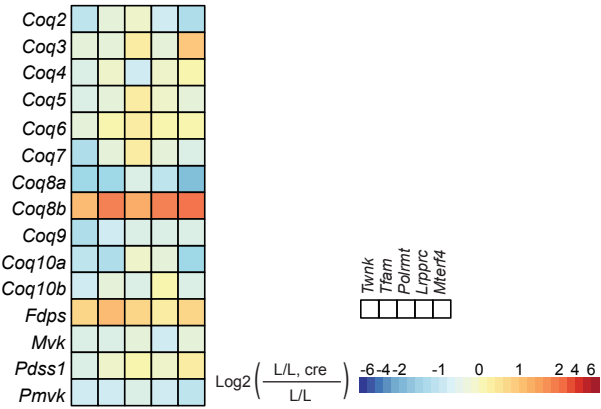

B

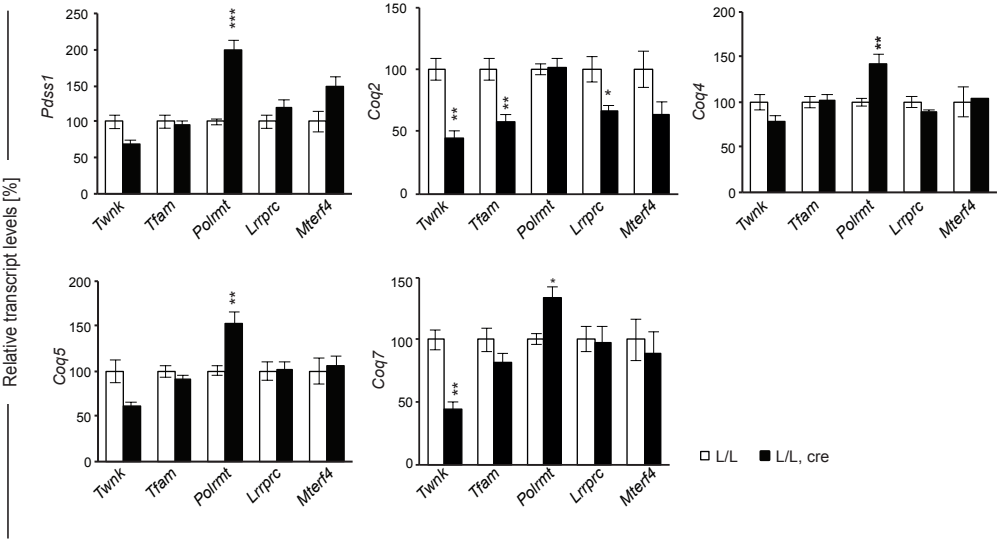

Supplement: supp [file elife-30952-supp-v1.zip]

**Figure 1 - Supplement 3**

**A**

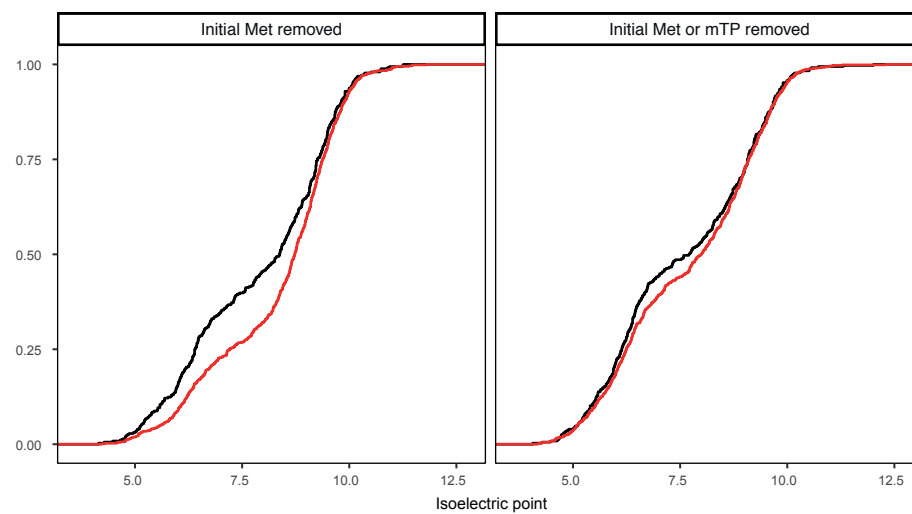

**B**

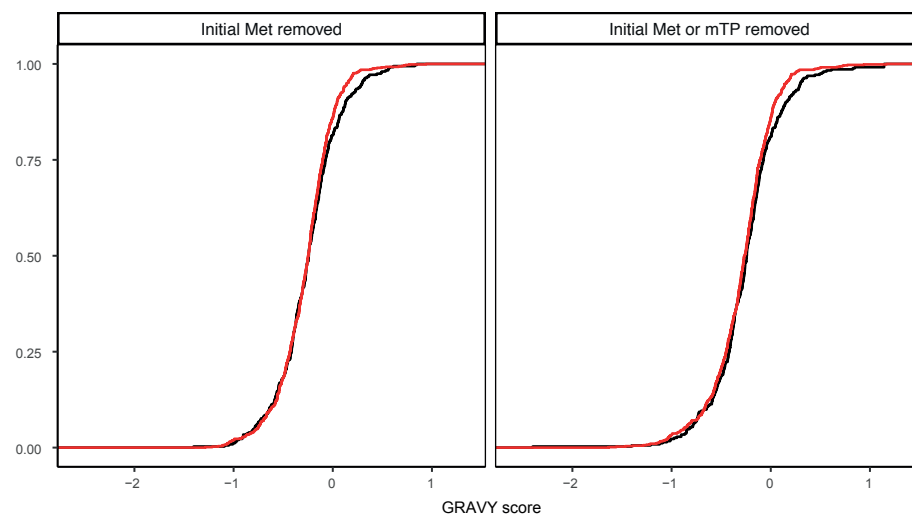

**C**

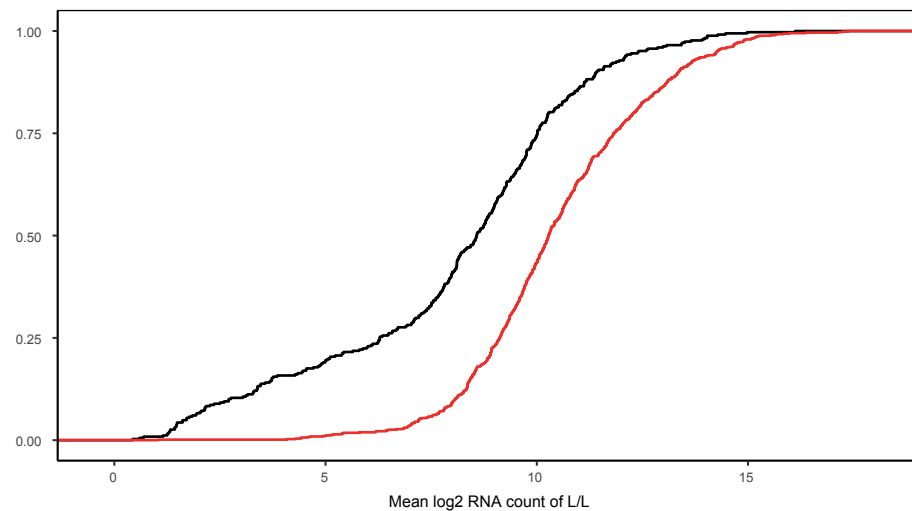

Supplement: supp [file elife-30952-supp-v1.zip]

### Figure 6 - Supplement 1

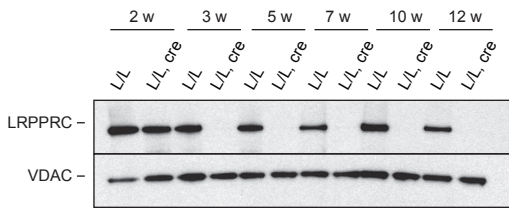

Supplement: supp [file elife-30952-supp-v1.zip]

Figure 1 - Supplement 1

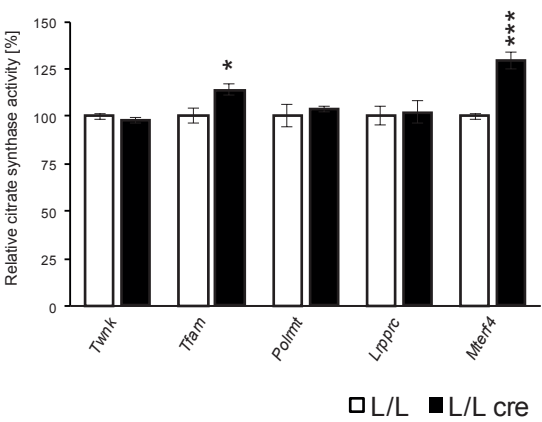

Supplement: supp [file elife-30952-supp-v1.zip]

**Figure 1 - Supplement 4**

**A**

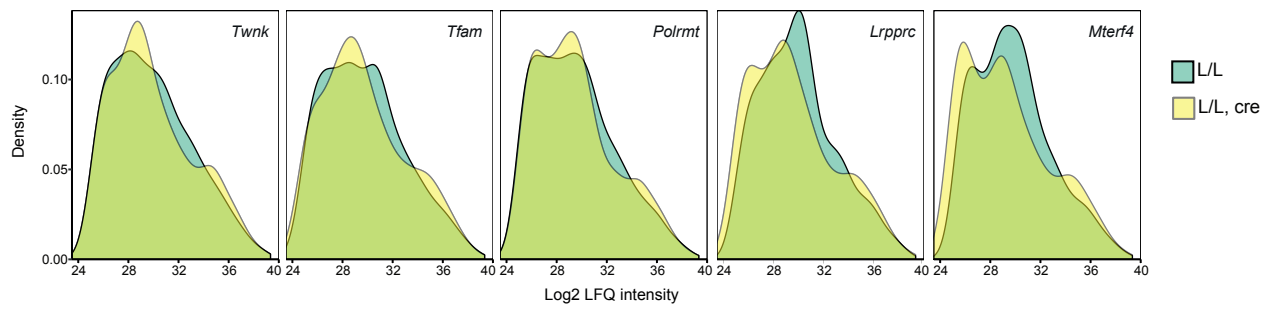

**B**

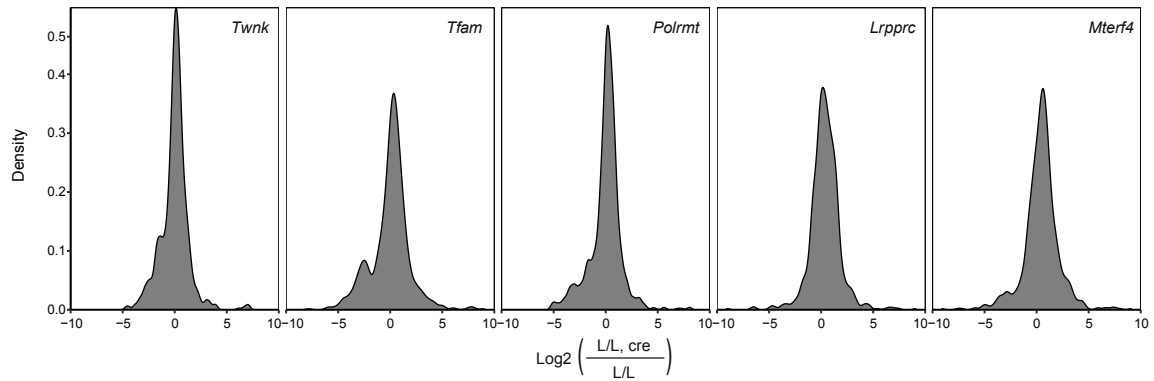

**C**

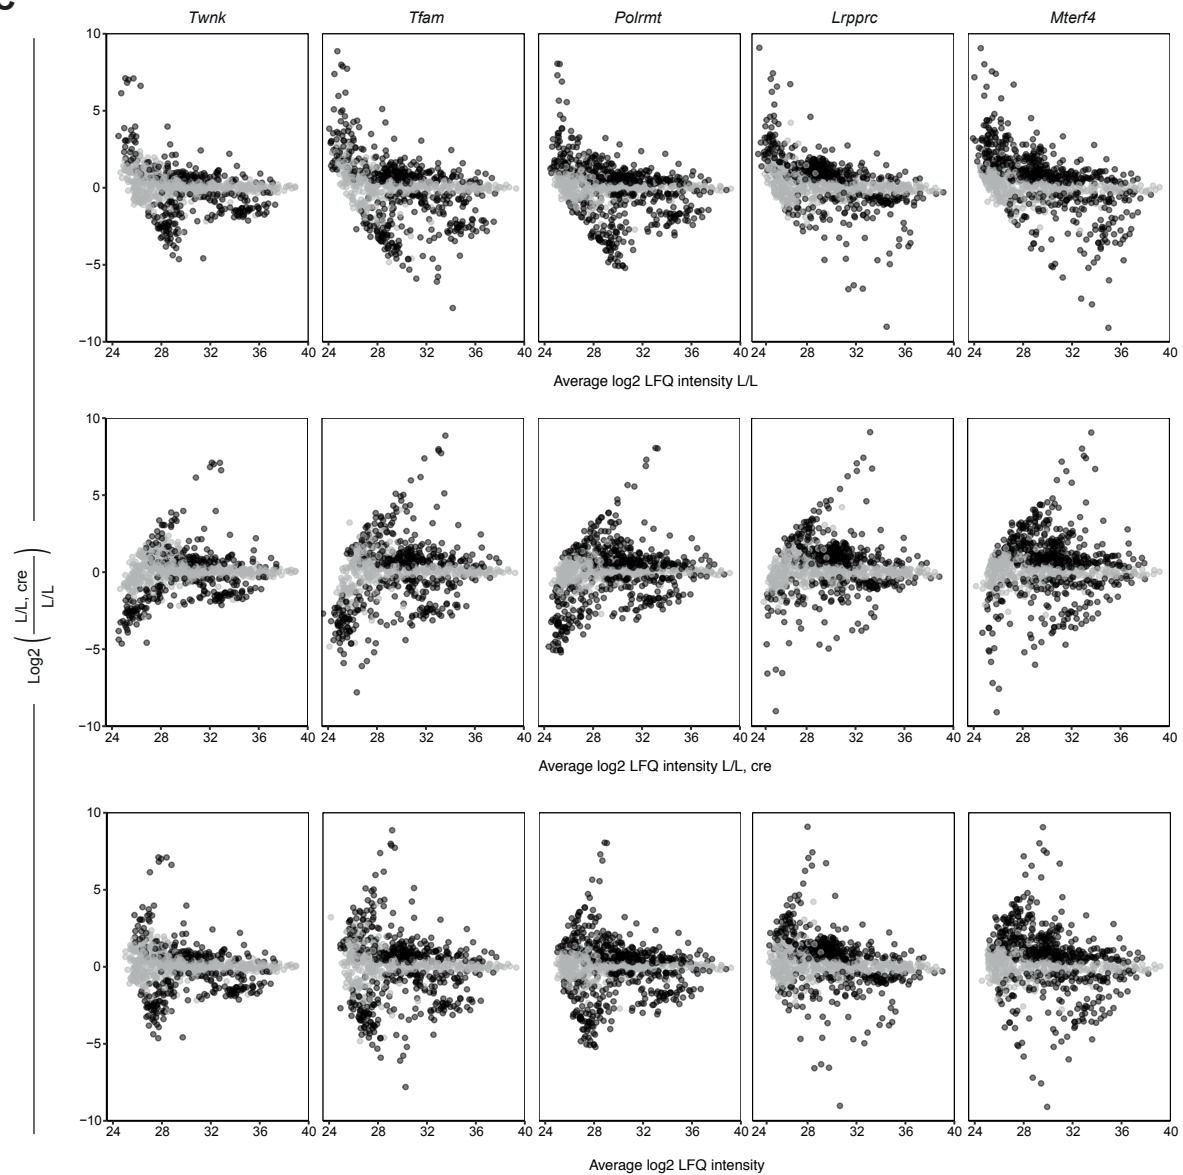

Supplement: supp [file elife-30952-supp-v1.zip]

# Figure 1 - Supplement 2

**A**

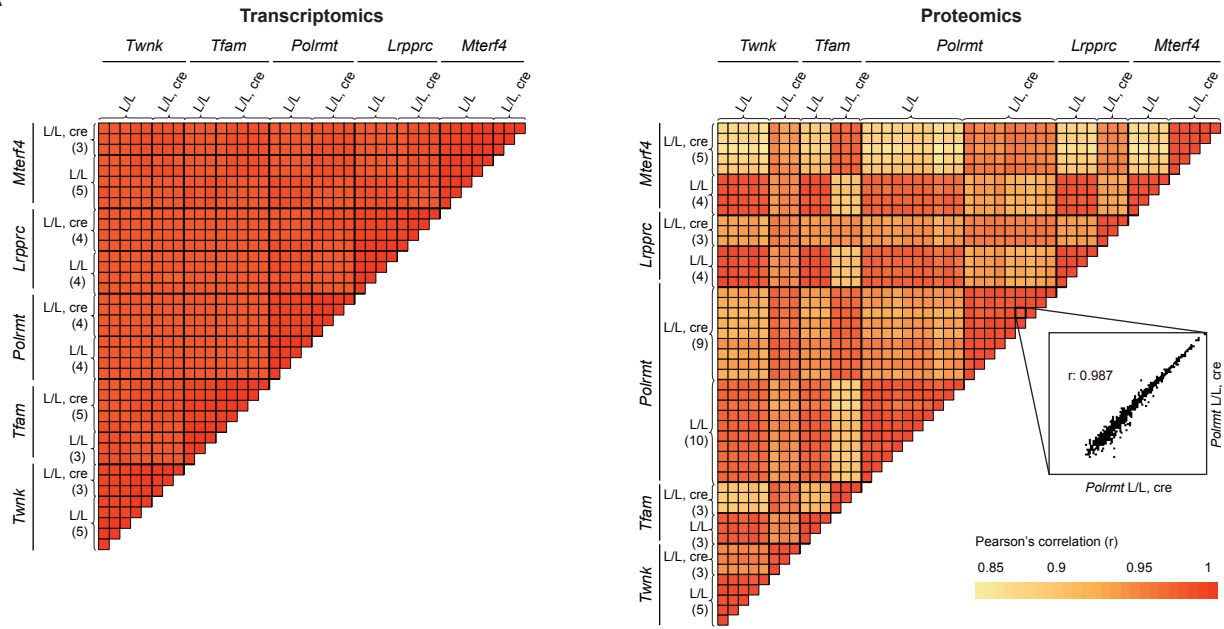

**B**

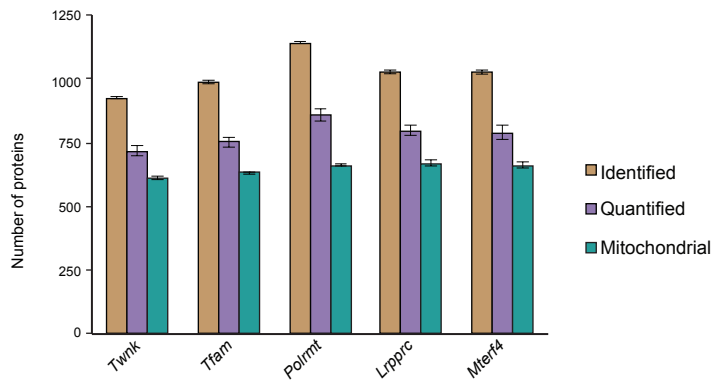

Supplement: supp [file elife-30952-supp-v1.zip]
